# Supplementary material for: Transcriptomic analysis suggests candidate genes for hygienic behavior in African-derived Apis mellifera honeybees
Source: Springer Nature journal article supplement (doi:10.1007/s13592-020-00834-6), 2021-01-26
Supplement: MOESM1 [file 13592_2020_834_MOESM1_ESM.pdf]

**Supplementary Table 1.** Relationship between bees collected for transcriptomic studies. Three queen bees originated both NA and HA bees. NA bees were represented by 4 individuals derived from queen 7, one individual derived from queen 15, and one individual derived from queen 2. For the HA bees, 2 individuals derived from queen 15, 2 individuals derived from queen 7, and one individual derived from queen 2. \*This sample was not included in the final analysis due to low read counts.

| <b>Group</b> | <b>Bee</b> | <b>Queen</b> | <b>Hive</b> | <b>Obs. Hive</b> |
|--------------|------------|--------------|-------------|------------------|
| NA (n=6)     | #18 (NA1)  | 7            | 3           | A                |
|              | #19 (NA2)  | 7            | 3           | A                |
|              | #20 (NA3)  | 2            | 7           | B                |
|              | #27 (NA4)  | 7            | 3           | A                |
|              | #28 (NA5)  | 7            | 3           | A                |
|              | #35 (NA6)  | 15           | 55          | C                |
| HA (n=5)     | #14 (HA1)  | 2            | 7           | B                |
|              | #15 (HA2)  | 15           | 55          | C                |
|              | #16 (HA3)* | 15           | 55          | C                |
|              | #24 (HA4)  | 7            | 3           | A                |
|              | #29 (HA5)  | 7            | 3           | A                |
