# Supplementary material for: Transcriptomic analysis suggests candidate genes for hygienic behavior in African-derived Apis mellifera honeybees
Source: Springer Nature journal article supplement (doi:10.1007/s13592-020-00834-6), 2021-01-26
Supplement: MOESM2 [file 13592_2020_834_MOESM2_ESM.pdf]

**Supplementary Table 2.** Presence of virus sequences in transcriptomic data in studied AHB. The AHB sequences submitted to RNA-seq analysis were searched for viral sequences. The virus sequences used are presented in the "Virus" column and their presence in each sample of bee (NA and HA) is shown in the other columns, where the "+" signal represents the virus presence and the "-" their absence.

|                                         | <b>NA1</b> | <b>NA2</b> | <b>NA3</b> | <b>NA4</b> | <b>NA5</b> | <b>NA6</b> | <b>HA7</b> | <b>HA8</b> | <b>HA9</b> | <b>HA10</b> | <b>HA11</b> |
|-----------------------------------------|------------|------------|------------|------------|------------|------------|------------|------------|------------|-------------|-------------|
| BQCV__NC_003784__Black_queen_cell_virus | +          | -          | -          | -          | -          | -          | -          | +          | +          | -           | -           |
| DWV-A__MG831200.1                       | +          | -          | -          | +          | -          | -          | +          | +          | -          | -           | +           |
| IAPV__NC_009025.1                       | +          | -          | -          | +          | +          | -          | +          | +          | -          | -           | -           |
| VDV1__MN249174-Varroa = DWV-B           | +          | +          | +          | +          | -          | -          | +          | +          | +          | +           | -           |
|                                         | NA bees    |            |            |            |            |            | HA bees    |            |            |             |             |
