# Supplementary material for: Transcriptomic analysis suggests candidate genes for hygienic behavior in African-derived Apis mellifera honeybees
Source: Springer Nature journal article supplement (doi:10.1007/s13592-020-00834-6), 2021-01-26
Supplement: MOESM3 [file 13592_2020_834_MOESM3_ESM.pdf]

**Supplementary Table 3.** Differentially expressed genes between bees with hygienic behavior (HA) and control group (NA).

| Gene name    | Fold change | P-value | Gene description                                               |
|--------------|-------------|---------|----------------------------------------------------------------|
| LOC726783    | -30.29      | 9.4E-06 | vitellogenin                                                   |
| LOC408544    | -15.27      | 7.5E-06 | lysyl oxidase homolog 4                                        |
| LOC724899    | -15.11      | 3.1E-07 | lysozyme                                                       |
| LOC409715    | -13.83      | 1.4E-05 | bumetanide-sensitive sodium-(potassium)-chloride cotransporter |
| LOC408864    | -7.31       | 7.0E-05 | waprin-Phi 1                                                   |
| LOC552578    | 4.53        | 1.3E-04 | uncharacterized protein LOC552578                              |
| LOC726294    | 4.59        | 4.0E-05 | orcokinin peptides precursor                                   |
| LOC726262    | 5.42        | 2.0E-05 | adenylate cyclase type 8-like                                  |
| LOC725646    | 5.74        | 9.6E-05 | N-acetylneuraminase lyase-like                                 |
| LOC413558    | 5.85        | 9.5E-05 | photoreceptor-specific nuclear receptor                        |
| LOC725164    | 5.98        | 3.9E-05 | serine-rich adhesin for platelets-like                         |
| LOC724114    | 7.61        | 9.0E-05 | uncharacterized protein                                        |
| LOC409060    | 7.65        | 2.0E-04 | golgin subfamily A member 6-like protein 22                    |
| LOC725381    | 8.05        | 6.3E-05 | uncharacterized protein LOC725381                              |
| LOC409781    | 8.83        | 7.7E-05 | uncharacterized protein LOC409781                              |
| TpnCI        | 8.88        | 5.2E-06 | troponin C type I                                              |
| LOC727110    | 9.68        | 1.8E-04 | major royal jelly protein 1                                    |
| LOC551259    | 10.15       | 5.2E-05 | titin                                                          |
| LOC113218812 | 10.32       | 1.9E-06 | protein anoxia up-regulated-like                               |
| LOC726421    | 11.78       | 3.2E-05 | membrane metallo-endopeptidase-like 1                          |
| LOC551176    | 12.15       | 4.3E-05 | actin, clone 205-like                                          |
| LOC410058    | 12.29       | 1.4E-05 | myosin light chain alkali                                      |
| LOC409709    | 12.97       | 3.0E-05 | putative glucosylceramidase 4                                  |
| Apid1        | 14.26       | 1.1E-04 | apidaecins type 14 precursor                                   |
| LOC100576555 | 14.45       | 2.0E-04 | cytochrome b561 domain-containing protein 2-like               |
| LOC100578822 | 14.98       | 4.5E-09 | uncharacterized protein LOC100578822                           |
| LOC408414    | 16.01       | 8.4E-07 | tropomyosin-1                                                  |
| LOC409821    | 17.56       | 2.8E-06 | twitchin                                                       |
| LOC113218867 | 17.86       | 8.0E-06 | paramyosin, short form-like                                    |
| LOC409881    | 18.34       | 2.5E-05 | myosin regulatory light chain 2                                |
| LOC409787    | 19.53       | 2.1E-05 | paramyosin, long form-like                                     |
| LOC413936    | 20.15       | 7.3E-05 | uncharacterized protein LOC413936                              |
| LOC100576703 | 20.51       | 3.5E-05 | sarcalumenin                                                   |
| LOC725114    | 20.59       | 5.2E-05 | chymotrypsin inhibitor                                         |
| TpnCIIIa     | 20.72       | 1.8E-08 | troponin C type IIIa                                           |
| Mrjp6        | 22.80       | 2.9E-06 | major royal jelly protein 6 precursor                          |
| CSP1         | 23.00       | 4.4E-06 | chemosensory protein 1 precursor                               |
| LOC409805    | 23.58       | 2.1E-07 | uncharacterized protein LOC409805                              |
| LOC409843    | 25.58       | 1.5E-07 | myosin heavy chain, muscle                                     |
| LOC552829    | 27.11       | 2.0E-04 | phospholipase B1, membrane-associated-like                     |
| LOC411285    | 31.14       | 5.5E-08 | muscle LIM protein Mlp84B-like                                 |
| LOC406142    | 34.96       | 5.5E-06 | hymenoptaecin preproprotein                                    |

|           |        |         |                                   |
|-----------|--------|---------|-----------------------------------|
| LOC408972 | 40.05  | 4.3E-09 | muscle-specific protein 20        |
| TpnT      | 41.72  | 2.7E-08 | troponin T, skeletal muscle       |
| Melt      | 42.54  | 2.9E-06 | melittin precursor                |
| TpnI      | 49.16  | 4.4E-10 | troponin I                        |
| LOC406114 | 72.92  | 5.8E-08 | alpha-amylase precursor           |
| LOC408608 | 111.05 | 1.0E-05 | uncharacterized protein LOC408608 |
| LOC408532 | 728.87 | 2.7E-05 | myophilin                         |

---
