# Supplementary material for: Transcriptomic analysis suggests candidate genes for hygienic behavior in African-derived Apis mellifera honeybees
Source: Springer Nature journal article supplement (doi:10.1007/s13592-020-00834-6), 2021-01-26
Supplement: MOESM4 [file 13592_2020_834_MOESM4_ESM.pdf]

**Supplementary Table 4. List of all SNPs found in variant calling analysis of bees presenting hygienic activity (HA) or with no hygienic activity (NA).** SNP calling was performed with reads from 10 African-derived honeybees individuals (NA, n=6 and HA, n=4) mapped against the Amel\_HAV3.1 reference genome (Wallberg et al. 2019) by CLC Genomics Workbench software (Qiagen Bioinformatics). We described 156,735 SNPs with coverage >7 and average quality >40. Position column reflects the region at which the variant is located in the genome. Type column refers to the type of variant, here all of them are single-nucleotide variant (SNV), which Length is one nucleotide. Reference shows the reference sequence at the position of the variant and the Allele is the allele sequence of the variant. Zygosity refers to zygosity of the variant called, as determined by the variant caller (This will be either 'Homozygous', where there is only one variant called at that position or 'Heterozygous' where more than one variant was called at that position)

| Chromosome  | Position | Type | Length | Reference | Allele | Zygosity     |
|-------------|----------|------|--------|-----------|--------|--------------|
| NC_037638.1 | 11666    | SNV  | 1      | C         | A      | Heterozygous |
| NC_037638.1 | 11681    | SNV  | 1      | C         | T      | Homozygous   |
| NC_037638.1 | 13188    | SNV  | 1      | G         | A      | Heterozygous |
| NC_037638.1 | 13191    | SNV  | 1      | G         | C      | Heterozygous |
| NC_037638.1 | 13193    | SNV  | 1      | T         | A      | Heterozygous |
| NC_037638.1 | 14449    | SNV  | 1      | G         | A      | Heterozygous |
| NC_037638.1 | 15835    | SNV  | 1      | G         | A      | Homozygous   |
| NC_037638.1 | 15842    | SNV  | 1      | G         | A      | Homozygous   |
| NC_037638.1 | 15907    | SNV  | 1      | A         | G      | Homozygous   |
| NC_037638.1 | 15913    | SNV  | 1      | T         | C      | Homozygous   |
| NC_037638.1 | 16021    | SNV  | 1      | C         | G      | Homozygous   |
| NC_037638.1 | 17399    | SNV  | 1      | T         | A      | Heterozygous |
| NC_037638.1 | 20810    | SNV  | 1      | A         | T      | Heterozygous |
| NC_037638.1 | 21148    | SNV  | 1      | C         | T      | Homozygous   |
| NC_037638.1 | 21949    | SNV  | 1      | T         | C      | Homozygous   |
| NC_037638.1 | 22088    | SNV  | 1      | T         | C      | Homozygous   |
| NC_037638.1 | 22109    | SNV  | 1      | T         | C      | Heterozygous |
| NC_037638.1 | 22193    | SNV  | 1      | C         | T      | Homozygous   |
| NC_037638.1 | 24655    | SNV  | 1      | G         | A      | Homozygous   |
| NC_037638.1 | 29572    | SNV  | 1      | A         | G      | Heterozygous |
| NC_037638.1 | 32428    | SNV  | 1      | A         | T      | Heterozygous |
| NC_037638.1 | 34486    | SNV  | 1      | T         | A      | Homozygous   |
| NC_037638.1 | 34508    | SNV  | 1      | A         | G      | Heterozygous |
| NC_037638.1 | 36583    | SNV  | 1      | C         | A      | Homozygous   |
| NC_037638.1 | 38186    | SNV  | 1      | T         | A      | Heterozygous |
| NC_037638.1 | 38215    | SNV  | 1      | T         | C      | Heterozygous |
| NC_037638.1 | 38947    | SNV  | 1      | T         | C      | Homozygous   |
| NC_037638.1 | 39001    | SNV  | 1      | C         | T      | Heterozygous |
| NC_037638.1 | 44224    | SNV  | 1      | A         | T      | Homozygous   |
| NC_037638.1 | 44301    | SNV  | 1      | A         | T      | Homozygous   |
| NC_037638.1 | 44732    | SNV  | 1      | A         | C      | Homozygous   |
| NC_037638.1 | 45097    | SNV  | 1      | G         | A      | Homozygous   |
| NC_037638.1 | 46688    | SNV  | 1      | A         | G      | Heterozygous |
| NC_037638.1 | 46693    | SNV  | 1      | C         | T      | Heterozygous |
| NC_037638.1 | 58381    | SNV  | 1      | T         | C      | Homozygous   |
| NC_037638.1 | 59720    | SNV  | 1      | T         | A      | Homozygous   |
| NC_037638.1 | 59725    | SNV  | 1      | T         | G      | Homozygous   |

|             |        |     |   |   |   |              |
|-------------|--------|-----|---|---|---|--------------|
| NC_037638.1 | 59745  | SNV | 1 | T | G | Heterozygous |
| NC_037638.1 | 59749  | SNV | 1 | T | C | Heterozygous |
| NC_037638.1 | 59752  | SNV | 1 | C | T | Homozygous   |
| NC_037638.1 | 60846  | SNV | 1 | T | C | Heterozygous |
| NC_037638.1 | 60875  | SNV | 1 | T | G | Heterozygous |
| NC_037638.1 | 61641  | SNV | 1 | A | C | Homozygous   |
| NC_037638.1 | 61681  | SNV | 1 | C | A | Homozygous   |
| NC_037638.1 | 63595  | SNV | 1 | C | A | Heterozygous |
| NC_037638.1 | 63609  | SNV | 1 | C | T | Heterozygous |
| NC_037638.1 | 63649  | SNV | 1 | C | T | Heterozygous |
| NC_037638.1 | 70785  | SNV | 1 | T | C | Homozygous   |
| NC_037638.1 | 70789  | SNV | 1 | T | C | Homozygous   |
| NC_037638.1 | 70792  | SNV | 1 | C | T | Homozygous   |
| NC_037638.1 | 70794  | SNV | 1 | T | C | Homozygous   |
| NC_037638.1 | 71314  | SNV | 1 | G | A | Homozygous   |
| NC_037638.1 | 72827  | SNV | 1 | T | C | Heterozygous |
| NC_037638.1 | 72851  | SNV | 1 | C | T | Heterozygous |
| NC_037638.1 | 72866  | SNV | 1 | T | C | Heterozygous |
| NC_037638.1 | 72873  | SNV | 1 | T | C | Heterozygous |
| NC_037638.1 | 72949  | SNV | 1 | A | T | Heterozygous |
| NC_037638.1 | 72954  | SNV | 1 | A | T | Homozygous   |
| NC_037638.1 | 75430  | SNV | 1 | A | G | Homozygous   |
| NC_037638.1 | 75474  | SNV | 1 | A | T | Homozygous   |
| NC_037638.1 | 75486  | SNV | 1 | A | T | Homozygous   |
| NC_037638.1 | 75493  | SNV | 1 | G | A | Homozygous   |
| NC_037638.1 | 75497  | SNV | 1 | G | A | Homozygous   |
| NC_037638.1 | 77500  | SNV | 1 | T | C | Heterozygous |
| NC_037638.1 | 78421  | SNV | 1 | C | T | Homozygous   |
| NC_037638.1 | 78438  | SNV | 1 | A | G | Homozygous   |
| NC_037638.1 | 78449  | SNV | 1 | G | A | Homozygous   |
| NC_037638.1 | 78454  | SNV | 1 | C | T | Homozygous   |
| NC_037638.1 | 78457  | SNV | 1 | C | T | Homozygous   |
| NC_037638.1 | 78460  | SNV | 1 | C | T | Homozygous   |
| NC_037638.1 | 79293  | SNV | 1 | T | C | Homozygous   |
| NC_037638.1 | 91298  | SNV | 1 | T | C | Homozygous   |
| NC_037638.1 | 91323  | SNV | 1 | G | C | Homozygous   |
| NC_037638.1 | 96912  | SNV | 1 | A | G | Homozygous   |
| NC_037638.1 | 97374  | SNV | 1 | A | G | Homozygous   |
| NC_037638.1 | 97400  | SNV | 1 | T | C | Homozygous   |
| NC_037638.1 | 99960  | SNV | 1 | G | A | Heterozygous |
| NC_037638.1 | 99963  | SNV | 1 | T | C | Homozygous   |
| NC_037638.1 | 99967  | SNV | 1 | C | A | Homozygous   |
| NC_037638.1 | 101947 | SNV | 1 | T | A | Homozygous   |
| NC_037638.1 | 102095 | SNV | 1 | A | G | Heterozygous |
| NC_037638.1 | 102132 | SNV | 1 | G | A | Heterozygous |
| NC_037638.1 | 102189 | SNV | 1 | T | A | Heterozygous |
| NC_037638.1 | 102198 | SNV | 1 | T | A | Heterozygous |
| NC_037638.1 | 102465 | SNV | 1 | A | G | Homozygous   |
| NC_037638.1 | 102509 | SNV | 1 | A | G | Homozygous   |
| NC_037638.1 | 102618 | SNV | 1 | G | A | Homozygous   |
| NC_037638.1 | 102649 | SNV | 1 | A | G | Homozygous   |

|             |        |     |   |   |   |              |
|-------------|--------|-----|---|---|---|--------------|
| NC_037638.1 | 102699 | SNV | 1 | T | C | Homozygous   |
| NC_037638.1 | 102717 | SNV | 1 | T | C | Homozygous   |
| NC_037638.1 | 102783 | SNV | 1 | T | C | Homozygous   |
| NC_037638.1 | 103016 | SNV | 1 | G | A | Heterozygous |
| NC_037638.1 | 104814 | SNV | 1 | T | A | Heterozygous |
| NC_037638.1 | 104821 | SNV | 1 | A | G | Homozygous   |
| NC_037638.1 | 104826 | SNV | 1 | A | G | Homozygous   |
| NC_037638.1 | 104861 | SNV | 1 | G | A | Homozygous   |
| NC_037638.1 | 104870 | SNV | 1 | T | A | Heterozygous |
| NC_037638.1 | 107502 | SNV | 1 | T | A | Homozygous   |
| NC_037638.1 | 107810 | SNV | 1 | T | G | Heterozygous |
| NC_037638.1 | 108460 | SNV | 1 | T | C | Homozygous   |
| NC_037638.1 | 108917 | SNV | 1 | T | C | Heterozygous |
| NC_037638.1 | 108928 | SNV | 1 | T | C | Homozygous   |
| NC_037638.1 | 109002 | SNV | 1 | T | C | Homozygous   |
| NC_037638.1 | 109315 | SNV | 1 | A | G | Heterozygous |
| NC_037638.1 | 109375 | SNV | 1 | A | T | Heterozygous |
| NC_037638.1 | 110923 | SNV | 1 | T | A | Heterozygous |
| NC_037638.1 | 110994 | SNV | 1 | C | G | Homozygous   |
| NC_037638.1 | 111141 | SNV | 1 | A | G | Heterozygous |
| NC_037638.1 | 111142 | SNV | 1 | A | G | Heterozygous |
| NC_037638.1 | 111279 | SNV | 1 | C | T | Homozygous   |
| NC_037638.1 | 111503 | SNV | 1 | A | G | Homozygous   |
| NC_037638.1 | 113583 | SNV | 1 | A | T | Heterozygous |
| NC_037638.1 | 113654 | SNV | 1 | G | C | Heterozygous |
| NC_037638.1 | 113749 | SNV | 1 | T | C | Homozygous   |
| NC_037638.1 | 113798 | SNV | 1 | G | T | Heterozygous |
| NC_037638.1 | 113898 | SNV | 1 | A | G | Heterozygous |
| NC_037638.1 | 114143 | SNV | 1 | A | G | Heterozygous |
| NC_037638.1 | 120252 | SNV | 1 | G | A | Heterozygous |
| NC_037638.1 | 120375 | SNV | 1 | C | T | Homozygous   |
| NC_037638.1 | 121211 | SNV | 1 | T | A | Homozygous   |
| NC_037638.1 | 122046 | SNV | 1 | G | C | Heterozygous |
| NC_037638.1 | 122256 | SNV | 1 | C | T | Heterozygous |
| NC_037638.1 | 124770 | SNV | 1 | A | T | Homozygous   |
| NC_037638.1 | 129847 | SNV | 1 | G | T | Homozygous   |
| NC_037638.1 | 129852 | SNV | 1 | A | T | Heterozygous |
| NC_037638.1 | 129856 | SNV | 1 | G | T | Heterozygous |
| NC_037638.1 | 129979 | SNV | 1 | T | C | Homozygous   |
| NC_037638.1 | 130006 | SNV | 1 | A | C | Homozygous   |
| NC_037638.1 | 130015 | SNV | 1 | T | C | Heterozygous |
| NC_037638.1 | 130023 | SNV | 1 | C | T | Heterozygous |
| NC_037638.1 | 130032 | SNV | 1 | T | G | Homozygous   |
| NC_037638.1 | 130037 | SNV | 1 | G | T | Homozygous   |
| NC_037638.1 | 130124 | SNV | 1 | A | G | Homozygous   |
| NC_037638.1 | 130417 | SNV | 1 | A | C | Homozygous   |
| NC_037638.1 | 130553 | SNV | 1 | T | C | Homozygous   |
| NC_037638.1 | 130579 | SNV | 1 | T | C | Heterozygous |
| NC_037638.1 | 130888 | SNV | 1 | T | C | Heterozygous |
| NC_037638.1 | 132730 | SNV | 1 | T | C | Homozygous   |
| NC_037638.1 | 135860 | SNV | 1 | A | G | Heterozygous |

|             |        |     |   |   |   |              |
|-------------|--------|-----|---|---|---|--------------|
| NC_037638.1 | 135923 | SNV | 1 | G | A | Homozygous   |
| NC_037638.1 | 136541 | SNV | 1 | A | C | Heterozygous |
| NC_037638.1 | 136579 | SNV | 1 | G | A | Homozygous   |
| NC_037638.1 | 136874 | SNV | 1 | C | T | Homozygous   |
| NC_037638.1 | 137052 | SNV | 1 | T | C | Heterozygous |
| NC_037638.1 | 137074 | SNV | 1 | T | A | Homozygous   |
| NC_037638.1 | 137305 | SNV | 1 | G | A | Heterozygous |
| NC_037638.1 | 137322 | SNV | 1 | G | A | Homozygous   |
| NC_037638.1 | 137331 | SNV | 1 | A | G | Heterozygous |
| NC_037638.1 | 141043 | SNV | 1 | T | C | Heterozygous |
| NC_037638.1 | 141061 | SNV | 1 | T | C | Heterozygous |
| NC_037638.1 | 142244 | SNV | 1 | A | T | Homozygous   |
| NC_037638.1 | 142286 | SNV | 1 | A | T | Heterozygous |
| NC_037638.1 | 150098 | SNV | 1 | C | T | Homozygous   |
| NC_037638.1 | 150111 | SNV | 1 | G | A | Homozygous   |
| NC_037638.1 | 163007 | SNV | 1 | A | G | Homozygous   |
| NC_037638.1 | 163025 | SNV | 1 | T | A | Homozygous   |
| NC_037638.1 | 163027 | SNV | 1 | T | G | Homozygous   |
| NC_037638.1 | 167664 | SNV | 1 | G | A | Homozygous   |
| NC_037638.1 | 167669 | SNV | 1 | A | G | Homozygous   |
| NC_037638.1 | 167671 | SNV | 1 | A | T | Homozygous   |
| NC_037638.1 | 167679 | SNV | 1 | A | G | Homozygous   |
| NC_037638.1 | 167683 | SNV | 1 | A | G | Homozygous   |
| NC_037638.1 | 167690 | SNV | 1 | G | A | Homozygous   |
| NC_037638.1 | 167695 | SNV | 1 | A | G | Homozygous   |
| NC_037638.1 | 167697 | SNV | 1 | A | G | Homozygous   |
| NC_037638.1 | 167703 | SNV | 1 | A | C | Homozygous   |
| NC_037638.1 | 167705 | SNV | 1 | A | T | Homozygous   |
| NC_037638.1 | 167709 | SNV | 1 | A | G | Homozygous   |
| NC_037638.1 | 167715 | SNV | 1 | A | C | Homozygous   |
| NC_037638.1 | 167718 | SNV | 1 | G | A | Homozygous   |
| NC_037638.1 | 168489 | SNV | 1 | A | T | Homozygous   |
| NC_037638.1 | 169134 | SNV | 1 | G | T | Homozygous   |
| NC_037638.1 | 169467 | SNV | 1 | G | T | Heterozygous |
| NC_037638.1 | 170605 | SNV | 1 | C | A | Heterozygous |
| NC_037638.1 | 170618 | SNV | 1 | G | A | Heterozygous |
| NC_037638.1 | 178824 | SNV | 1 | T | C | Homozygous   |
| NC_037638.1 | 178828 | SNV | 1 | C | T | Homozygous   |
| NC_037638.1 | 182047 | SNV | 1 | A | G | Homozygous   |
| NC_037638.1 | 182205 | SNV | 1 | C | T | Homozygous   |
| NC_037638.1 | 182451 | SNV | 1 | T | C | Heterozygous |
| NC_037638.1 | 182483 | SNV | 1 | T | C | Heterozygous |
| NC_037638.1 | 182532 | SNV | 1 | A | G | Homozygous   |
| NC_037638.1 | 182554 | SNV | 1 | G | A | Homozygous   |
| NC_037638.1 | 183016 | SNV | 1 | G | A | Heterozygous |
| NC_037638.1 | 183478 | SNV | 1 | T | C | Heterozygous |
| NC_037638.1 | 186053 | SNV | 1 | G | A | Homozygous   |
| NC_037638.1 | 186061 | SNV | 1 | G | A | Homozygous   |
| NC_037638.1 | 186077 | SNV | 1 | G | A | Homozygous   |
| NC_037638.1 | 187431 | SNV | 1 | A | T | Homozygous   |
| NC_037638.1 | 187450 | SNV | 1 | G | A | Heterozygous |

|             |        |     |   |   |   |              |
|-------------|--------|-----|---|---|---|--------------|
| NC_037638.1 | 189388 | SNV | 1 | C | T | Heterozygous |
| NC_037638.1 | 204994 | SNV | 1 | C | T | Heterozygous |
| NC_037638.1 | 205388 | SNV | 1 | C | T | Homozygous   |
| NC_037638.1 | 224533 | SNV | 1 | T | C | Heterozygous |
| NC_037638.1 | 224535 | SNV | 1 | G | C | Heterozygous |
| NC_037638.1 | 224535 | SNV | 1 | G | T | Heterozygous |
| NC_037638.1 | 224539 | SNV | 1 | C | T | Heterozygous |
| NC_037638.1 | 227121 | SNV | 1 | A | T | Heterozygous |
| NC_037638.1 | 228309 | SNV | 1 | G | C | Heterozygous |
| NC_037638.1 | 228315 | SNV | 1 | G | C | Homozygous   |
| NC_037638.1 | 228320 | SNV | 1 | A | T | Homozygous   |
| NC_037638.1 | 228329 | SNV | 1 | G | C | Heterozygous |
| NC_037638.1 | 228343 | SNV | 1 | G | C | Heterozygous |
| NC_037638.1 | 228365 | SNV | 1 | A | C | Heterozygous |
| NC_037638.1 | 228373 | SNV | 1 | A | G | Homozygous   |
| NC_037638.1 | 228380 | SNV | 1 | G | A | Homozygous   |
| NC_037638.1 | 228399 | SNV | 1 | G | C | Heterozygous |
| NC_037638.1 | 228401 | SNV | 1 | A | G | Heterozygous |
| NC_037638.1 | 231982 | SNV | 1 | A | T | Homozygous   |
| NC_037638.1 | 231990 | SNV | 1 | A | G | Homozygous   |
| NC_037638.1 | 231996 | SNV | 1 | A | G | Homozygous   |
| NC_037638.1 | 232005 | SNV | 1 | G | T | Heterozygous |
| NC_037638.1 | 232421 | SNV | 1 | G | A | Homozygous   |
| NC_037638.1 | 232428 | SNV | 1 | A | G | Homozygous   |
| NC_037638.1 | 232434 | SNV | 1 | A | G | Homozygous   |
| NC_037638.1 | 232437 | SNV | 1 | A | G | Homozygous   |
| NC_037638.1 | 232440 | SNV | 1 | A | G | Homozygous   |
| NC_037638.1 | 232443 | SNV | 1 | A | G | Homozygous   |
| NC_037638.1 | 232456 | SNV | 1 | C | A | Homozygous   |
| NC_037638.1 | 233423 | SNV | 1 | G | A | Heterozygous |
| NC_037638.1 | 233425 | SNV | 1 | T | A | Heterozygous |
| NC_037638.1 | 233430 | SNV | 1 | A | G | Heterozygous |
| NC_037638.1 | 233433 | SNV | 1 | G | C | Heterozygous |
| NC_037638.1 | 233436 | SNV | 1 | A | G | Heterozygous |
| NC_037638.1 | 233441 | SNV | 1 | A | C | Heterozygous |
| NC_037638.1 | 233462 | SNV | 1 | G | A | Heterozygous |
| NC_037638.1 | 233467 | SNV | 1 | T | C | Heterozygous |
| NC_037638.1 | 237066 | SNV | 1 | T | G | Homozygous   |
| NC_037638.1 | 237071 | SNV | 1 | T | G | Homozygous   |
| NC_037638.1 | 237089 | SNV | 1 | G | A | Heterozygous |
| NC_037638.1 | 242280 | SNV | 1 | A | T | Heterozygous |
| NC_037638.1 | 242282 | SNV | 1 | C | T | Heterozygous |
| NC_037638.1 | 242284 | SNV | 1 | G | T | Heterozygous |
| NC_037638.1 | 242291 | SNV | 1 | G | T | Heterozygous |
| NC_037638.1 | 242302 | SNV | 1 | A | T | Heterozygous |
| NC_037638.1 | 242304 | SNV | 1 | T | G | Heterozygous |
| NC_037638.1 | 242963 | SNV | 1 | T | C | Homozygous   |
| NC_037638.1 | 244284 | SNV | 1 | C | T | Heterozygous |
| NC_037638.1 | 251660 | SNV | 1 | A | G | Homozygous   |
| NC_037638.1 | 252659 | SNV | 1 | G | A | Heterozygous |
| NC_037638.1 | 252698 | SNV | 1 | G | A | Homozygous   |

|             |        |     |   |   |   |              |
|-------------|--------|-----|---|---|---|--------------|
| NC_037638.1 | 257043 | SNV | 1 | A | G | Homozygous   |
| NC_037638.1 | 257231 | SNV | 1 | G | A | Heterozygous |
| NC_037638.1 | 257486 | SNV | 1 | A | G | Heterozygous |
| NC_037638.1 | 257561 | SNV | 1 | T | A | Heterozygous |
| NC_037638.1 | 258486 | SNV | 1 | C | G | Homozygous   |
| NC_037638.1 | 258774 | SNV | 1 | A | G | Homozygous   |
| NC_037638.1 | 258795 | SNV | 1 | C | T | Homozygous   |
| NC_037638.1 | 258919 | SNV | 1 | A | G | Homozygous   |
| NC_037638.1 | 259580 | SNV | 1 | G | A | Heterozygous |
| NC_037638.1 | 259673 | SNV | 1 | A | G | Homozygous   |
| NC_037638.1 | 259724 | SNV | 1 | A | G | Homozygous   |
| NC_037638.1 | 259973 | SNV | 1 | C | G | Homozygous   |
| NC_037638.1 | 260100 | SNV | 1 | C | T | Heterozygous |
| NC_037638.1 | 260489 | SNV | 1 | C | G | Heterozygous |
| NC_037638.1 | 264630 | SNV | 1 | T | C | Heterozygous |
| NC_037638.1 | 264696 | SNV | 1 | G | A | Heterozygous |
| NC_037638.1 | 264702 | SNV | 1 | A | G | Homozygous   |
| NC_037638.1 | 264928 | SNV | 1 | T | C | Homozygous   |
| NC_037638.1 | 271876 | SNV | 1 | G | C | Heterozygous |
| NC_037638.1 | 271879 | SNV | 1 | G | A | Heterozygous |
| NC_037638.1 | 271883 | SNV | 1 | G | A | Heterozygous |
| NC_037638.1 | 271905 | SNV | 1 | A | C | Heterozygous |
| NC_037638.1 | 271955 | SNV | 1 | A | T | Homozygous   |
| NC_037638.1 | 288752 | SNV | 1 | T | G | Heterozygous |
| NC_037638.1 | 297389 | SNV | 1 | T | G | Homozygous   |
| NC_037638.1 | 297400 | SNV | 1 | T | G | Homozygous   |
| NC_037638.1 | 297403 | SNV | 1 | T | G | Homozygous   |
| NC_037638.1 | 297406 | SNV | 1 | T | G | Homozygous   |
| NC_037638.1 | 297433 | SNV | 1 | T | C | Homozygous   |
| NC_037638.1 | 300583 | SNV | 1 | A | G | Heterozygous |
| NC_037638.1 | 300756 | SNV | 1 | A | G | Heterozygous |
| NC_037638.1 | 300761 | SNV | 1 | A | G | Heterozygous |
| NC_037638.1 | 300793 | SNV | 1 | C | T | Heterozygous |
| NC_037638.1 | 300803 | SNV | 1 | C | T | Heterozygous |
| NC_037638.1 | 312620 | SNV | 1 | G | A | Homozygous   |
| NC_037638.1 | 312627 | SNV | 1 | G | A | Heterozygous |
| NC_037638.1 | 312699 | SNV | 1 | G | A | Heterozygous |
| NC_037638.1 | 312891 | SNV | 1 | G | T | Heterozygous |
| NC_037638.1 | 312895 | SNV | 1 | G | A | Heterozygous |
| NC_037638.1 | 312898 | SNV | 1 | A | G | Heterozygous |
| NC_037638.1 | 313048 | SNV | 1 | C | G | Heterozygous |
| NC_037638.1 | 316299 | SNV | 1 | G | T | Heterozygous |
| NC_037638.1 | 316418 | SNV | 1 | T | C | Homozygous   |
| NC_037638.1 | 344353 | SNV | 1 | A | T | Homozygous   |
| NC_037638.1 | 344366 | SNV | 1 | C | T | Homozygous   |
| NC_037638.1 | 344382 | SNV | 1 | T | C | Heterozygous |
| NC_037638.1 | 345103 | SNV | 1 | A | G | Heterozygous |
| NC_037638.1 | 345312 | SNV | 1 | T | C | Heterozygous |
| NC_037638.1 | 345317 | SNV | 1 | C | T | Heterozygous |
| NC_037638.1 | 352521 | SNV | 1 | G | A | Heterozygous |
| NC_037638.1 | 352524 | SNV | 1 | A | G | Heterozygous |

|             |        |     |   |   |   |              |
|-------------|--------|-----|---|---|---|--------------|
| NC_037638.1 | 352588 | SNV | 1 | T | A | Heterozygous |
| NC_037638.1 | 352595 | SNV | 1 | G | A | Heterozygous |
| NC_037638.1 | 352597 | SNV | 1 | G | A | Heterozygous |
| NC_037638.1 | 352724 | SNV | 1 | G | A | Homozygous   |
| NC_037638.1 | 352937 | SNV | 1 | C | G | Homozygous   |
| NC_037638.1 | 353095 | SNV | 1 | G | A | Homozygous   |
| NC_037638.1 | 353116 | SNV | 1 | A | G | Homozygous   |
| NC_037638.1 | 353118 | SNV | 1 | G | A | Homozygous   |
| NC_037638.1 | 365489 | SNV | 1 | A | C | Homozygous   |
| NC_037638.1 | 365493 | SNV | 1 | G | T | Heterozygous |
| NC_037638.1 | 365558 | SNV | 1 | G | A | Heterozygous |
| NC_037638.1 | 365582 | SNV | 1 | A | G | Heterozygous |
| NC_037638.1 | 365582 | SNV | 1 | A | T | Heterozygous |
| NC_037638.1 | 365604 | SNV | 1 | A | G | Homozygous   |
| NC_037638.1 | 365624 | SNV | 1 | A | G | Homozygous   |
| NC_037638.1 | 365699 | SNV | 1 | G | A | Heterozygous |
| NC_037638.1 | 368411 | SNV | 1 | C | T | Heterozygous |
| NC_037638.1 | 369163 | SNV | 1 | G | T | Heterozygous |
| NC_037638.1 | 369256 | SNV | 1 | G | A | Heterozygous |
| NC_037638.1 | 369258 | SNV | 1 | G | A | Heterozygous |
| NC_037638.1 | 369273 | SNV | 1 | A | G | Heterozygous |
| NC_037638.1 | 369291 | SNV | 1 | G | A | Heterozygous |
| NC_037638.1 | 369391 | SNV | 1 | C | A | Heterozygous |
| NC_037638.1 | 369753 | SNV | 1 | T | A | Heterozygous |
| NC_037638.1 | 369786 | SNV | 1 | C | T | Heterozygous |
| NC_037638.1 | 369836 | SNV | 1 | C | T | Heterozygous |
| NC_037638.1 | 369855 | SNV | 1 | C | T | Heterozygous |
| NC_037638.1 | 369907 | SNV | 1 | T | G | Homozygous   |
| NC_037638.1 | 369938 | SNV | 1 | T | C | Homozygous   |
| NC_037638.1 | 370077 | SNV | 1 | G | A | Homozygous   |
| NC_037638.1 | 370149 | SNV | 1 | A | G | Homozygous   |
| NC_037638.1 | 370166 | SNV | 1 | A | G | Homozygous   |
| NC_037638.1 | 379703 | SNV | 1 | G | A | Heterozygous |
| NC_037638.1 | 390236 | SNV | 1 | A | G | Homozygous   |
| NC_037638.1 | 390248 | SNV | 1 | A | G | Homozygous   |
| NC_037638.1 | 390692 | SNV | 1 | G | A | Heterozygous |
| NC_037638.1 | 390703 | SNV | 1 | T | C | Homozygous   |
| NC_037638.1 | 390768 | SNV | 1 | T | C | Homozygous   |
| NC_037638.1 | 390822 | SNV | 1 | T | C | Homozygous   |
| NC_037638.1 | 390837 | SNV | 1 | A | G | Homozygous   |
| NC_037638.1 | 390972 | SNV | 1 | A | T | Homozygous   |
| NC_037638.1 | 392631 | SNV | 1 | A | G | Homozygous   |
| NC_037638.1 | 392850 | SNV | 1 | C | T | Homozygous   |
| NC_037638.1 | 392858 | SNV | 1 | G | A | Heterozygous |
| NC_037638.1 | 392861 | SNV | 1 | C | T | Heterozygous |
| NC_037638.1 | 392894 | SNV | 1 | C | G | Heterozygous |
| NC_037638.1 | 392901 | SNV | 1 | A | G | Homozygous   |
| NC_037638.1 | 393399 | SNV | 1 | A | C | Homozygous   |
| NC_037638.1 | 393401 | SNV | 1 | G | A | Homozygous   |
| NC_037638.1 | 393424 | SNV | 1 | T | A | Heterozygous |
| NC_037638.1 | 393444 | SNV | 1 | A | G | Homozygous   |

|             |        |     |   |   |   |              |
|-------------|--------|-----|---|---|---|--------------|
| NC_037638.1 | 393550 | SNV | 1 | G | C | Heterozygous |
| NC_037638.1 | 393571 | SNV | 1 | A | G | Homozygous   |
| NC_037638.1 | 393573 | SNV | 1 | T | C | Homozygous   |
| NC_037638.1 | 393603 | SNV | 1 | C | T | Homozygous   |
| NC_037638.1 | 393718 | SNV | 1 | G | A | Heterozygous |
| NC_037638.1 | 393838 | SNV | 1 | C | T | Homozygous   |
| NC_037638.1 | 401870 | SNV | 1 | T | C | Homozygous   |
| NC_037638.1 | 401894 | SNV | 1 | A | G | Homozygous   |
| NC_037638.1 | 401945 | SNV | 1 | A | G | Heterozygous |
| NC_037638.1 | 401949 | SNV | 1 | A | G | Homozygous   |
| NC_037638.1 | 401977 | SNV | 1 | G | A | Heterozygous |
| NC_037638.1 | 402108 | SNV | 1 | A | G | Heterozygous |
| NC_037638.1 | 402118 | SNV | 1 | T | C | Homozygous   |
| NC_037638.1 | 402130 | SNV | 1 | C | T | Homozygous   |
| NC_037638.1 | 402146 | SNV | 1 | C | T | Heterozygous |
| NC_037638.1 | 402363 | SNV | 1 | C | A | Homozygous   |
| NC_037638.1 | 402378 | SNV | 1 | G | A | Homozygous   |
| NC_037638.1 | 402397 | SNV | 1 | A | T | Homozygous   |
| NC_037638.1 | 402399 | SNV | 1 | A | T | Heterozygous |
| NC_037638.1 | 402660 | SNV | 1 | T | C | Heterozygous |
| NC_037638.1 | 402769 | SNV | 1 | C | T | Heterozygous |
| NC_037638.1 | 408799 | SNV | 1 | A | G | Homozygous   |
| NC_037638.1 | 414958 | SNV | 1 | T | C | Homozygous   |
| NC_037638.1 | 415007 | SNV | 1 | T | C | Heterozygous |
| NC_037638.1 | 415093 | SNV | 1 | G | A | Heterozygous |
| NC_037638.1 | 415114 | SNV | 1 | A | G | Homozygous   |
| NC_037638.1 | 418642 | SNV | 1 | C | T | Heterozygous |
| NC_037638.1 | 418648 | SNV | 1 | C | T | Heterozygous |
| NC_037638.1 | 418654 | SNV | 1 | G | A | Heterozygous |
| NC_037638.1 | 420239 | SNV | 1 | A | G | Homozygous   |
| NC_037638.1 | 420393 | SNV | 1 | T | C | Homozygous   |
| NC_037638.1 | 421110 | SNV | 1 | C | T | Homozygous   |
| NC_037638.1 | 421140 | SNV | 1 | C | T | Heterozygous |
| NC_037638.1 | 421545 | SNV | 1 | A | T | Heterozygous |
| NC_037638.1 | 422010 | SNV | 1 | C | T | Homozygous   |
| NC_037638.1 | 422112 | SNV | 1 | G | A | Homozygous   |
| NC_037638.1 | 422204 | SNV | 1 | G | A | Homozygous   |
| NC_037638.1 | 422328 | SNV | 1 | A | T | Homozygous   |
| NC_037638.1 | 422401 | SNV | 1 | A | G | Homozygous   |
| NC_037638.1 | 422409 | SNV | 1 | A | G | Homozygous   |
| NC_037638.1 | 427063 | SNV | 1 | C | T | Heterozygous |
| NC_037638.1 | 427312 | SNV | 1 | A | G | Homozygous   |
| NC_037638.1 | 430229 | SNV | 1 | C | T | Homozygous   |
| NC_037638.1 | 452851 | SNV | 1 | T | C | Homozygous   |
| NC_037638.1 | 452875 | SNV | 1 | A | G | Homozygous   |
| NC_037638.1 | 455239 | SNV | 1 | T | C | Homozygous   |
| NC_037638.1 | 455371 | SNV | 1 | G | A | Homozygous   |
| NC_037638.1 | 455412 | SNV | 1 | G | A | Heterozygous |
| NC_037638.1 | 455526 | SNV | 1 | T | C | Homozygous   |
| NC_037638.1 | 455628 | SNV | 1 | G | A | Heterozygous |
| NC_037638.1 | 456834 | SNV | 1 | C | T | Homozygous   |



|             |        |     |   |   |   |              |
|-------------|--------|-----|---|---|---|--------------|
| NC_037638.1 | 456842 | SNV | 1 | C | T | Heterozygous |
| NC_037638.1 | 456846 | SNV | 1 | C | T | Heterozygous |
| NC_037638.1 | 456851 | SNV | 1 | T | C | Homozygous   |
| NC_037638.1 | 456899 | SNV | 1 | A | G | Homozygous   |
| NC_037638.1 | 457033 | SNV | 1 | G | T | Heterozygous |
| NC_037638.1 | 457068 | SNV | 1 | G | A | Heterozygous |
| NC_037638.1 | 457162 | SNV | 1 | A | G | Heterozygous |
| NC_037638.1 | 457163 | SNV | 1 | C | T | Heterozygous |
| NC_037638.1 | 457211 | SNV | 1 | T | C | Homozygous   |
| NC_037638.1 | 466370 | SNV | 1 | T | C | Homozygous   |
| NC_037638.1 | 466454 | SNV | 1 | G | A | Homozygous   |
| NC_037638.1 | 466462 | SNV | 1 | A | G | Homozygous   |
| NC_037638.1 | 479785 | SNV | 1 | G | C | Homozygous   |
| NC_037638.1 | 482137 | SNV | 1 | C | T | Heterozygous |
| NC_037638.1 | 484540 | SNV | 1 | C | T | Homozygous   |
| NC_037638.1 | 484794 | SNV | 1 | C | G | Heterozygous |
| NC_037638.1 | 485013 | SNV | 1 | G | A | Homozygous   |
| NC_037638.1 | 650102 | SNV | 1 | G | C | Heterozygous |
| NC_037638.1 | 650300 | SNV | 1 | A | G | Homozygous   |
| NC_037638.1 | 650364 | SNV | 1 | A | G | Homozygous   |
| NC_037638.1 | 650878 | SNV | 1 | T | A | Heterozygous |
| NC_037638.1 | 650880 | SNV | 1 | A | T | Heterozygous |
| NC_037638.1 | 650884 | SNV | 1 | C | T | Homozygous   |
| NC_037638.1 | 650914 | SNV | 1 | T | C | Homozygous   |
| NC_037638.1 | 650916 | SNV | 1 | T | C | Homozygous   |
| NC_037638.1 | 650921 | SNV | 1 | C | T | Homozygous   |
| NC_037638.1 | 651786 | SNV | 1 | C | A | Heterozygous |
| NC_037638.1 | 653392 | SNV | 1 | A | G | Heterozygous |
| NC_037638.1 | 653395 | SNV | 1 | A | G | Homozygous   |
| NC_037638.1 | 653404 | SNV | 1 | A | G | Heterozygous |
| NC_037638.1 | 653407 | SNV | 1 | G | A | Heterozygous |
| NC_037638.1 | 653410 | SNV | 1 | G | A | Heterozygous |
| NC_037638.1 | 653413 | SNV | 1 | G | T | Heterozygous |
| NC_037638.1 | 653416 | SNV | 1 | A | G | Heterozygous |
| NC_037638.1 | 653472 | SNV | 1 | T | A | Homozygous   |
| NC_037638.1 | 653478 | SNV | 1 | T | A | Heterozygous |
| NC_037638.1 | 654050 | SNV | 1 | A | G | Homozygous   |
| NC_037638.1 | 654153 | SNV | 1 | C | G | Homozygous   |
| NC_037638.1 | 654249 | SNV | 1 | T | C | Heterozygous |
| NC_037638.1 | 654253 | SNV | 1 | C | T | Heterozygous |
| NC_037638.1 | 654516 | SNV | 1 | G | C | Heterozygous |
| NC_037638.1 | 654653 | SNV | 1 | A | G | Heterozygous |
| NC_037638.1 | 654657 | SNV | 1 | G | C | Heterozygous |
| NC_037638.1 | 654667 | SNV | 1 | A | G | Homozygous   |
| NC_037638.1 | 654676 | SNV | 1 | G | A | Heterozygous |
| NC_037638.1 | 654697 | SNV | 1 | T | C | Homozygous   |
| NC_037638.1 | 656561 | SNV | 1 | C | G | Heterozygous |
| NC_037638.1 | 656564 | SNV | 1 | T | G | Homozygous   |
| NC_037638.1 | 656567 | SNV | 1 | T | A | Homozygous   |
| NC_037638.1 | 656570 | SNV | 1 | T | G | Homozygous   |
| NC_037638.1 | 656573 | SNV | 1 | T | G | Heterozygous |

|             |        |     |   |   |   |              |
|-------------|--------|-----|---|---|---|--------------|
| NC_037638.1 | 656576 | SNV | 1 | T | G | Homozygous   |
| NC_037638.1 | 656640 | SNV | 1 | C | T | Homozygous   |
| NC_037638.1 | 656649 | SNV | 1 | C | T | Homozygous   |
| NC_037638.1 | 667021 | SNV | 1 | T | G | Heterozygous |
| NC_037638.1 | 668222 | SNV | 1 | T | A | Heterozygous |
| NC_037638.1 | 689330 | SNV | 1 | G | A | Homozygous   |
| NC_037638.1 | 695381 | SNV | 1 | T | C | Homozygous   |
| NC_037638.1 | 695423 | SNV | 1 | T | C | Homozygous   |
| NC_037638.1 | 695573 | SNV | 1 | G | A | Homozygous   |
| NC_037638.1 | 705661 | SNV | 1 | A | G | Homozygous   |
| NC_037638.1 | 817874 | SNV | 1 | A | C | Homozygous   |
| NC_037638.1 | 818237 | SNV | 1 | A | G | Homozygous   |
| NC_037638.1 | 818411 | SNV | 1 | G | A | Homozygous   |
| NC_037638.1 | 818420 | SNV | 1 | G | T | Heterozygous |
| NC_037638.1 | 818423 | SNV | 1 | C | T | Heterozygous |
| NC_037638.1 | 818447 | SNV | 1 | T | C | Homozygous   |
| NC_037638.1 | 818681 | SNV | 1 | G | C | Heterozygous |
| NC_037638.1 | 818813 | SNV | 1 | T | A | Homozygous   |
| NC_037638.1 | 820340 | SNV | 1 | A | G | Homozygous   |
| NC_037638.1 | 820510 | SNV | 1 | T | G | Homozygous   |
| NC_037638.1 | 820575 | SNV | 1 | A | G | Heterozygous |
| NC_037638.1 | 822210 | SNV | 1 | G | A | Heterozygous |
| NC_037638.1 | 822293 | SNV | 1 | G | A | Homozygous   |
| NC_037638.1 | 822301 | SNV | 1 | C | T | Homozygous   |
| NC_037638.1 | 822375 | SNV | 1 | T | A | Homozygous   |
| NC_037638.1 | 822418 | SNV | 1 | C | T | Heterozygous |
| NC_037638.1 | 822652 | SNV | 1 | T | C | Heterozygous |
| NC_037638.1 | 823036 | SNV | 1 | A | G | Homozygous   |
| NC_037638.1 | 823126 | SNV | 1 | C | T | Heterozygous |
| NC_037638.1 | 823234 | SNV | 1 | T | C | Homozygous   |
| NC_037638.1 | 823554 | SNV | 1 | T | C | Heterozygous |
| NC_037638.1 | 823557 | SNV | 1 | G | A | Homozygous   |
| NC_037638.1 | 823636 | SNV | 1 | T | C | Heterozygous |
| NC_037638.1 | 823876 | SNV | 1 | T | A | Heterozygous |
| NC_037638.1 | 823994 | SNV | 1 | C | T | Homozygous   |
| NC_037638.1 | 823999 | SNV | 1 | C | T | Heterozygous |
| NC_037638.1 | 868403 | SNV | 1 | T | C | Heterozygous |
| NC_037638.1 | 870037 | SNV | 1 | T | A | Homozygous   |
| NC_037638.1 | 870048 | SNV | 1 | G | A | Heterozygous |
| NC_037638.1 | 870061 | SNV | 1 | A | G | Heterozygous |
| NC_037638.1 | 870068 | SNV | 1 | C | G | Heterozygous |
| NC_037638.1 | 870068 | SNV | 1 | C | T | Heterozygous |
| NC_037638.1 | 870073 | SNV | 1 | A | G | Heterozygous |
| NC_037638.1 | 870076 | SNV | 1 | T | A | Heterozygous |
| NC_037638.1 | 870079 | SNV | 1 | T | A | Heterozygous |
| NC_037638.1 | 870994 | SNV | 1 | T | A | Homozygous   |
| NC_037638.1 | 871017 | SNV | 1 | C | T | Homozygous   |
| NC_037638.1 | 871023 | SNV | 1 | T | A | Homozygous   |
| NC_037638.1 | 871031 | SNV | 1 | G | T | Homozygous   |
| NC_037638.1 | 872580 | SNV | 1 | T | A | Homozygous   |
| NC_037638.1 | 872623 | SNV | 1 | T | A | Heterozygous |

|             |        |     |   |   |   |              |
|-------------|--------|-----|---|---|---|--------------|
| NC_037638.1 | 872677 | SNV | 1 | A | G | Heterozygous |
| NC_037638.1 | 872882 | SNV | 1 | A | G | Homozygous   |
| NC_037638.1 | 872905 | SNV | 1 | C | G | Heterozygous |
| NC_037638.1 | 873329 | SNV | 1 | A | G | Homozygous   |
| NC_037638.1 | 873550 | SNV | 1 | G | A | Heterozygous |
| NC_037638.1 | 873689 | SNV | 1 | A | G | Homozygous   |
| NC_037638.1 | 873754 | SNV | 1 | T | C | Homozygous   |
| NC_037638.1 | 899460 | SNV | 1 | A | C | Homozygous   |
| NC_037638.1 | 920509 | SNV | 1 | A | G | Heterozygous |
| NC_037638.1 | 920525 | SNV | 1 | G | C | Homozygous   |
| NC_037638.1 | 921129 | SNV | 1 | T | G | Homozygous   |
| NC_037638.1 | 921167 | SNV | 1 | T | G | Heterozygous |
| NC_037638.1 | 921216 | SNV | 1 | C | T | Homozygous   |
| NC_037638.1 | 921222 | SNV | 1 | A | C | Heterozygous |
| NC_037638.1 | 921224 | SNV | 1 | C | G | Heterozygous |
| NC_037638.1 | 923042 | SNV | 1 | T | C | Homozygous   |
| NC_037638.1 | 923063 | SNV | 1 | G | A | Homozygous   |
| NC_037638.1 | 923067 | SNV | 1 | A | G | Homozygous   |
| NC_037638.1 | 923069 | SNV | 1 | T | A | Homozygous   |
| NC_037638.1 | 923072 | SNV | 1 | T | C | Heterozygous |
| NC_037638.1 | 923075 | SNV | 1 | C | T | Homozygous   |
| NC_037638.1 | 923084 | SNV | 1 | C | T | Homozygous   |
| NC_037638.1 | 923088 | SNV | 1 | C | T | Homozygous   |
| NC_037638.1 | 923098 | SNV | 1 | C | T | Homozygous   |
| NC_037638.1 | 923104 | SNV | 1 | C | T | Homozygous   |
| NC_037638.1 | 923149 | SNV | 1 | A | T | Homozygous   |
| NC_037638.1 | 923152 | SNV | 1 | A | T | Homozygous   |
| NC_037638.1 | 923165 | SNV | 1 | T | C | Homozygous   |
| NC_037638.1 | 923173 | SNV | 1 | C | T | Homozygous   |
| NC_037638.1 | 923185 | SNV | 1 | T | A | Homozygous   |
| NC_037638.1 | 923203 | SNV | 1 | C | T | Homozygous   |
| NC_037638.1 | 923212 | SNV | 1 | C | T | Homozygous   |
| NC_037638.1 | 923227 | SNV | 1 | A | T | Homozygous   |
| NC_037638.1 | 923230 | SNV | 1 | C | T | Homozygous   |
| NC_037638.1 | 923240 | SNV | 1 | G | A | Homozygous   |
| NC_037638.1 | 923311 | SNV | 1 | T | C | Heterozygous |
| NC_037638.1 | 923314 | SNV | 1 | G | A | Homozygous   |
| NC_037638.1 | 923649 | SNV | 1 | C | G | Heterozygous |
| NC_037638.1 | 923660 | SNV | 1 | G | A | Homozygous   |
| NC_037638.1 | 923777 | SNV | 1 | A | G | Homozygous   |
| NC_037638.1 | 923812 | SNV | 1 | T | A | Homozygous   |
| NC_037638.1 | 924041 | SNV | 1 | A | G | Homozygous   |
| NC_037638.1 | 928365 | SNV | 1 | C | T | Homozygous   |
| NC_037638.1 | 928378 | SNV | 1 | C | A | Homozygous   |
| NC_037638.1 | 928399 | SNV | 1 | T | C | Homozygous   |
| NC_037638.1 | 947916 | SNV | 1 | T | C | Homozygous   |
| NC_037638.1 | 948077 | SNV | 1 | C | T | Homozygous   |
| NC_037638.1 | 948086 | SNV | 1 | C | T | Homozygous   |
| NC_037638.1 | 948093 | SNV | 1 | A | G | Homozygous   |
| NC_037638.1 | 948101 | SNV | 1 | A | T | Homozygous   |
| NC_037638.1 | 948104 | SNV | 1 | C | T | Homozygous   |

|             |         |     |   |   |   |              |
|-------------|---------|-----|---|---|---|--------------|
| NC_037638.1 | 950034  | SNV | 1 | T | C | Heterozygous |
| NC_037638.1 | 950038  | SNV | 1 | G | A | Heterozygous |
| NC_037638.1 | 950177  | SNV | 1 | G | A | Heterozygous |
| NC_037638.1 | 950215  | SNV | 1 | G | A | Heterozygous |
| NC_037638.1 | 950217  | SNV | 1 | G | A | Heterozygous |
| NC_037638.1 | 950227  | SNV | 1 | C | G | Heterozygous |
| NC_037638.1 | 950514  | SNV | 1 | G | A | Homozygous   |
| NC_037638.1 | 950517  | SNV | 1 | G | C | Homozygous   |
| NC_037638.1 | 950520  | SNV | 1 | A | T | Homozygous   |
| NC_037638.1 | 950533  | SNV | 1 | G | A | Heterozygous |
| NC_037638.1 | 950537  | SNV | 1 | T | C | Homozygous   |
| NC_037638.1 | 950571  | SNV | 1 | C | T | Homozygous   |
| NC_037638.1 | 950574  | SNV | 1 | G | A | Homozygous   |
| NC_037638.1 | 950650  | SNV | 1 | G | A | Homozygous   |
| NC_037638.1 | 950658  | SNV | 1 | G | A | Heterozygous |
| NC_037638.1 | 950671  | SNV | 1 | G | A | Homozygous   |
| NC_037638.1 | 950723  | SNV | 1 | G | A | Homozygous   |
| NC_037638.1 | 950727  | SNV | 1 | G | A | Heterozygous |
| NC_037638.1 | 950745  | SNV | 1 | T | C | Homozygous   |
| NC_037638.1 | 951175  | SNV | 1 | C | T | Heterozygous |
| NC_037638.1 | 954387  | SNV | 1 | T | C | Heterozygous |
| NC_037638.1 | 954391  | SNV | 1 | G | A | Heterozygous |
| NC_037638.1 | 954455  | SNV | 1 | G | C | Heterozygous |
| NC_037638.1 | 954491  | SNV | 1 | G | A | Heterozygous |
| NC_037638.1 | 954501  | SNV | 1 | C | T | Heterozygous |
| NC_037638.1 | 955878  | SNV | 1 | C | A | Homozygous   |
| NC_037638.1 | 955881  | SNV | 1 | A | C | Homozygous   |
| NC_037638.1 | 955884  | SNV | 1 | A | T | Homozygous   |
| NC_037638.1 | 955903  | SNV | 1 | A | T | Homozygous   |
| NC_037638.1 | 955905  | SNV | 1 | T | A | Homozygous   |
| NC_037638.1 | 955914  | SNV | 1 | G | T | Homozygous   |
| NC_037638.1 | 971971  | SNV | 1 | A | G | Homozygous   |
| NC_037638.1 | 995778  | SNV | 1 | G | A | Heterozygous |
| NC_037638.1 | 995830  | SNV | 1 | T | C | Homozygous   |
| NC_037638.1 | 996079  | SNV | 1 | A | G | Homozygous   |
| NC_037638.1 | 996451  | SNV | 1 | A | T | Heterozygous |
| NC_037638.1 | 997141  | SNV | 1 | A | G | Homozygous   |
| NC_037638.1 | 998835  | SNV | 1 | A | G | Homozygous   |
| NC_037638.1 | 999705  | SNV | 1 | T | G | Heterozygous |
| NC_037638.1 | 1000556 | SNV | 1 | T | C | Homozygous   |
| NC_037638.1 | 1001447 | SNV | 1 | C | T | Heterozygous |
| NC_037638.1 | 1005818 | SNV | 1 | A | G | Heterozygous |
| NC_037638.1 | 1017442 | SNV | 1 | G | A | Homozygous   |
| NC_037638.1 | 1017531 | SNV | 1 | T | A | Homozygous   |
| NC_037638.1 | 1017785 | SNV | 1 | G | A | Heterozygous |
| NC_037638.1 | 1017996 | SNV | 1 | T | A | Heterozygous |
| NC_037638.1 | 1018011 | SNV | 1 | C | T | Homozygous   |
| NC_037638.1 | 1020728 | SNV | 1 | A | G | Heterozygous |
| NC_037638.1 | 1020795 | SNV | 1 | C | T | Heterozygous |
| NC_037638.1 | 1020973 | SNV | 1 | G | A | Heterozygous |
| NC_037638.1 | 1021069 | SNV | 1 | G | A | Homozygous   |

|             |         |     |   |   |   |              |
|-------------|---------|-----|---|---|---|--------------|
| NC_037638.1 | 1021100 | SNV | 1 | A | G | Heterozygous |
| NC_037638.1 | 1021281 | SNV | 1 | A | G | Homozygous   |
| NC_037638.1 | 1021315 | SNV | 1 | A | C | Heterozygous |
| NC_037638.1 | 1022465 | SNV | 1 | C | T | Heterozygous |
| NC_037638.1 | 1024483 | SNV | 1 | A | G | Heterozygous |
| NC_037638.1 | 1025546 | SNV | 1 | A | G | Heterozygous |
| NC_037638.1 | 1025554 | SNV | 1 | G | A | Heterozygous |
| NC_037638.1 | 1025556 | SNV | 1 | G | A | Heterozygous |
| NC_037638.1 | 1026012 | SNV | 1 | A | G | Homozygous   |
| NC_037638.1 | 1026045 | SNV | 1 | C | T | Heterozygous |
| NC_037638.1 | 1026077 | SNV | 1 | T | C | Heterozygous |
| NC_037638.1 | 1031367 | SNV | 1 | A | G | Homozygous   |
| NC_037638.1 | 1032189 | SNV | 1 | G | A | Homozygous   |
| NC_037638.1 | 1032493 | SNV | 1 | A | G | Homozygous   |
| NC_037638.1 | 1032568 | SNV | 1 | A | T | Homozygous   |
| NC_037638.1 | 1032778 | SNV | 1 | C | G | Homozygous   |
| NC_037638.1 | 1032847 | SNV | 1 | T | A | Homozygous   |
| NC_037638.1 | 1032849 | SNV | 1 | C | T | Homozygous   |
| NC_037638.1 | 1032851 | SNV | 1 | C | A | Homozygous   |
| NC_037638.1 | 1032853 | SNV | 1 | G | C | Homozygous   |
| NC_037638.1 | 1033624 | SNV | 1 | G | A | Homozygous   |
| NC_037638.1 | 1034110 | SNV | 1 | T | C | Homozygous   |
| NC_037638.1 | 1034113 | SNV | 1 | T | C | Homozygous   |
| NC_037638.1 | 1034320 | SNV | 1 | C | T | Homozygous   |
| NC_037638.1 | 1034948 | SNV | 1 | T | A | Heterozygous |
| NC_037638.1 | 1034950 | SNV | 1 | T | G | Heterozygous |
| NC_037638.1 | 1034953 | SNV | 1 | T | A | Heterozygous |
| NC_037638.1 | 1035936 | SNV | 1 | G | T | Homozygous   |
| NC_037638.1 | 1036094 | SNV | 1 | T | C | Homozygous   |
| NC_037638.1 | 1037035 | SNV | 1 | T | C | Heterozygous |
| NC_037638.1 | 1037062 | SNV | 1 | A | G | Heterozygous |
| NC_037638.1 | 1037288 | SNV | 1 | G | A | Heterozygous |
| NC_037638.1 | 1037530 | SNV | 1 | T | C | Homozygous   |
| NC_037638.1 | 1037561 | SNV | 1 | T | C | Homozygous   |
| NC_037638.1 | 1038241 | SNV | 1 | G | C | Heterozygous |
| NC_037638.1 | 1038247 | SNV | 1 | T | C | Homozygous   |
| NC_037638.1 | 1038266 | SNV | 1 | T | C | Homozygous   |
| NC_037638.1 | 1038396 | SNV | 1 | C | T | Heterozygous |
| NC_037638.1 | 1039683 | SNV | 1 | G | A | Heterozygous |
| NC_037638.1 | 1039754 | SNV | 1 | A | G | Homozygous   |
| NC_037638.1 | 1043514 | SNV | 1 | T | C | Homozygous   |
| NC_037638.1 | 1044559 | SNV | 1 | G | T | Homozygous   |
| NC_037638.1 | 1044907 | SNV | 1 | G | A | Homozygous   |
| NC_037638.1 | 1045027 | SNV | 1 | T | C | Homozygous   |
| NC_037638.1 | 1045607 | SNV | 1 | T | C | Homozygous   |
| NC_037638.1 | 1051450 | SNV | 1 | T | C | Homozygous   |
| NC_037638.1 | 1051523 | SNV | 1 | G | A | Heterozygous |
| NC_037638.1 | 1051974 | SNV | 1 | T | C | Homozygous   |
| NC_037638.1 | 1052085 | SNV | 1 | C | A | Homozygous   |
| NC_037638.1 | 1052538 | SNV | 1 | C | T | Homozygous   |
| NC_037638.1 | 1052544 | SNV | 1 | G | A | Homozygous   |

|             |         |     |   |   |   |              |
|-------------|---------|-----|---|---|---|--------------|
| NC_037638.1 | 1052547 | SNV | 1 | A | C | Homozygous   |
| NC_037638.1 | 1052549 | SNV | 1 | G | T | Homozygous   |
| NC_037638.1 | 1056857 | SNV | 1 | T | G | Heterozygous |
| NC_037638.1 | 1059048 | SNV | 1 | A | G | Homozygous   |
| NC_037638.1 | 1063904 | SNV | 1 | G | A | Heterozygous |
| NC_037638.1 | 1063910 | SNV | 1 | T | C | Homozygous   |
| NC_037638.1 | 1063916 | SNV | 1 | G | A | Homozygous   |
| NC_037638.1 | 1064018 | SNV | 1 | T | C | Homozygous   |
| NC_037638.1 | 1064086 | SNV | 1 | C | T | Homozygous   |
| NC_037638.1 | 1064101 | SNV | 1 | A | G | Homozygous   |
| NC_037638.1 | 1064105 | SNV | 1 | C | T | Heterozygous |
| NC_037638.1 | 1064293 | SNV | 1 | A | C | Homozygous   |
| NC_037638.1 | 1064408 | SNV | 1 | C | A | Heterozygous |
| NC_037638.1 | 1064462 | SNV | 1 | C | T | Heterozygous |
| NC_037638.1 | 1064493 | SNV | 1 | C | T | Homozygous   |
| NC_037638.1 | 1069982 | SNV | 1 | C | T | Homozygous   |
| NC_037638.1 | 1070044 | SNV | 1 | A | G | Homozygous   |
| NC_037638.1 | 1070053 | SNV | 1 | T | C | Homozygous   |
| NC_037638.1 | 1070057 | SNV | 1 | T | C | Homozygous   |
| NC_037638.1 | 1070061 | SNV | 1 | C | T | Homozygous   |
| NC_037638.1 | 1070090 | SNV | 1 | C | T | Heterozygous |
| NC_037638.1 | 1073799 | SNV | 1 | G | A | Homozygous   |
| NC_037638.1 | 1073894 | SNV | 1 | T | C | Homozygous   |
| NC_037638.1 | 1073949 | SNV | 1 | T | C | Homozygous   |
| NC_037638.1 | 1074019 | SNV | 1 | A | G | Heterozygous |
| NC_037638.1 | 1076713 | SNV | 1 | C | T | Heterozygous |
| NC_037638.1 | 1076728 | SNV | 1 | A | G | Homozygous   |
| NC_037638.1 | 1076734 | SNV | 1 | T | C | Homozygous   |
| NC_037638.1 | 1076736 | SNV | 1 | G | A | Homozygous   |
| NC_037638.1 | 1085942 | SNV | 1 | A | G | Heterozygous |
| NC_037638.1 | 1085957 | SNV | 1 | T | G | Homozygous   |
| NC_037638.1 | 1085967 | SNV | 1 | G | A | Heterozygous |
| NC_037638.1 | 1086004 | SNV | 1 | T | G | Homozygous   |
| NC_037638.1 | 1086013 | SNV | 1 | G | A | Homozygous   |
| NC_037638.1 | 1086090 | SNV | 1 | G | A | Homozygous   |
| NC_037638.1 | 1086094 | SNV | 1 | A | T | Homozygous   |
| NC_037638.1 | 1086100 | SNV | 1 | G | A | Homozygous   |
| NC_037638.1 | 1086135 | SNV | 1 | G | A | Heterozygous |
| NC_037638.1 | 1086156 | SNV | 1 | A | G | Homozygous   |
| NC_037638.1 | 1086174 | SNV | 1 | T | G | Homozygous   |
| NC_037638.1 | 1086176 | SNV | 1 | T | G | Homozygous   |
| NC_037638.1 | 1088342 | SNV | 1 | C | T | Heterozygous |
| NC_037638.1 | 1088499 | SNV | 1 | C | T | Homozygous   |
| NC_037638.1 | 1119798 | SNV | 1 | C | T | Homozygous   |
| NC_037638.1 | 1138345 | SNV | 1 | C | T | Homozygous   |
| NC_037638.1 | 1138554 | SNV | 1 | A | G | Homozygous   |
| NC_037638.1 | 1138702 | SNV | 1 | C | G | Heterozygous |
| NC_037638.1 | 1138713 | SNV | 1 | T | C | Heterozygous |
| NC_037638.1 | 1138785 | SNV | 1 | T | G | Heterozygous |
| NC_037638.1 | 1138850 | SNV | 1 | A | C | Homozygous   |
| NC_037638.1 | 1138875 | SNV | 1 | C | T | Heterozygous |

|             |         |     |   |   |   |              |
|-------------|---------|-----|---|---|---|--------------|
| NC_037638.1 | 1138885 | SNV | 1 | A | G | Homozygous   |
| NC_037638.1 | 1138926 | SNV | 1 | C | T | Heterozygous |
| NC_037638.1 | 1138956 | SNV | 1 | T | C | Heterozygous |
| NC_037638.1 | 1139028 | SNV | 1 | C | T | Heterozygous |
| NC_037638.1 | 1139032 | SNV | 1 | A | G | Homozygous   |
| NC_037638.1 | 1139263 | SNV | 1 | T | C | Homozygous   |
| NC_037638.1 | 1139355 | SNV | 1 | C | T | Heterozygous |
| NC_037638.1 | 1139378 | SNV | 1 | C | T | Heterozygous |
| NC_037638.1 | 1139382 | SNV | 1 | G | T | Heterozygous |
| NC_037638.1 | 1139407 | SNV | 1 | T | A | Homozygous   |
| NC_037638.1 | 1139409 | SNV | 1 | C | G | Heterozygous |
| NC_037638.1 | 1139512 | SNV | 1 | T | C | Heterozygous |
| NC_037638.1 | 1147741 | SNV | 1 | G | T | Heterozygous |
| NC_037638.1 | 1149376 | SNV | 1 | A | G | Homozygous   |
| NC_037638.1 | 1149383 | SNV | 1 | T | C | Homozygous   |
| NC_037638.1 | 1149385 | SNV | 1 | A | C | Heterozygous |
| NC_037638.1 | 1149404 | SNV | 1 | T | C | Homozygous   |
| NC_037638.1 | 1149489 | SNV | 1 | T | C | Homozygous   |
| NC_037638.1 | 1149550 | SNV | 1 | T | C | Heterozygous |
| NC_037638.1 | 1149555 | SNV | 1 | G | A | Heterozygous |
| NC_037638.1 | 1149586 | SNV | 1 | T | C | Heterozygous |
| NC_037638.1 | 1149627 | SNV | 1 | A | G | Homozygous   |
| NC_037638.1 | 1149700 | SNV | 1 | T | C | Homozygous   |
| NC_037638.1 | 1150003 | SNV | 1 | G | C | Heterozygous |
| NC_037638.1 | 1158218 | SNV | 1 | G | C | Homozygous   |
| NC_037638.1 | 1160546 | SNV | 1 | G | A | Homozygous   |
| NC_037638.1 | 1160776 | SNV | 1 | T | A | Homozygous   |
| NC_037638.1 | 1164480 | SNV | 1 | A | T | Heterozygous |
| NC_037638.1 | 1164502 | SNV | 1 | A | G | Homozygous   |
| NC_037638.1 | 1166477 | SNV | 1 | C | G | Heterozygous |
| NC_037638.1 | 1166920 | SNV | 1 | G | A | Homozygous   |
| NC_037638.1 | 1167105 | SNV | 1 | T | G | Homozygous   |
| NC_037638.1 | 1169194 | SNV | 1 | C | T | Heterozygous |
| NC_037638.1 | 1169200 | SNV | 1 | C | T | Heterozygous |
| NC_037638.1 | 1169205 | SNV | 1 | C | T | Heterozygous |
| NC_037638.1 | 1169209 | SNV | 1 | T | C | Heterozygous |
| NC_037638.1 | 1169217 | SNV | 1 | C | A | Heterozygous |
| NC_037638.1 | 1169227 | SNV | 1 | T | C | Heterozygous |
| NC_037638.1 | 1169232 | SNV | 1 | C | A | Heterozygous |
| NC_037638.1 | 1169236 | SNV | 1 | T | C | Heterozygous |
| NC_037638.1 | 1170613 | SNV | 1 | T | C | Heterozygous |
| NC_037638.1 | 1170652 | SNV | 1 | T | C | Homozygous   |
| NC_037638.1 | 1170696 | SNV | 1 | C | T | Heterozygous |
| NC_037638.1 | 1182558 | SNV | 1 | T | C | Homozygous   |
| NC_037638.1 | 1182599 | SNV | 1 | C | T | Homozygous   |
| NC_037638.1 | 1187703 | SNV | 1 | G | A | Homozygous   |
| NC_037638.1 | 1197172 | SNV | 1 | A | C | Heterozygous |
| NC_037638.1 | 1197180 | SNV | 1 | T | C | Heterozygous |
| NC_037638.1 | 1197182 | SNV | 1 | C | T | Heterozygous |
| NC_037638.1 | 1197184 | SNV | 1 | T | C | Heterozygous |
| NC_037638.1 | 1204386 | SNV | 1 | G | C | Heterozygous |

|             |         |     |   |   |   |              |
|-------------|---------|-----|---|---|---|--------------|
| NC_037638.1 | 1204408 | SNV | 1 | A | G | Homozygous   |
| NC_037638.1 | 1204414 | SNV | 1 | C | T | Homozygous   |
| NC_037638.1 | 1204419 | SNV | 1 | C | T | Homozygous   |
| NC_037638.1 | 1212085 | SNV | 1 | C | T | Heterozygous |
| NC_037638.1 | 1212087 | SNV | 1 | C | T | Heterozygous |
| NC_037638.1 | 1212092 | SNV | 1 | T | A | Heterozygous |
| NC_037638.1 | 1212097 | SNV | 1 | C | T | Heterozygous |
| NC_037638.1 | 1229125 | SNV | 1 | C | T | Heterozygous |
| NC_037638.1 | 1260596 | SNV | 1 | G | A | Homozygous   |
| NC_037638.1 | 1266432 | SNV | 1 | C | T | Heterozygous |
| NC_037638.1 | 1266437 | SNV | 1 | A | T | Homozygous   |
| NC_037638.1 | 1266445 | SNV | 1 | C | G | Heterozygous |
| NC_037638.1 | 1268445 | SNV | 1 | G | A | Homozygous   |
| NC_037638.1 | 1268448 | SNV | 1 | A | G | Heterozygous |
| NC_037638.1 | 1268794 | SNV | 1 | T | C | Homozygous   |
| NC_037638.1 | 1272827 | SNV | 1 | T | G | Homozygous   |
| NC_037638.1 | 1272835 | SNV | 1 | T | C | Homozygous   |
| NC_037638.1 | 1272847 | SNV | 1 | T | G | Homozygous   |
| NC_037638.1 | 1272892 | SNV | 1 | T | G | Homozygous   |
| NC_037638.1 | 1272896 | SNV | 1 | A | T | Homozygous   |
| NC_037638.1 | 1272905 | SNV | 1 | A | T | Homozygous   |
| NC_037638.1 | 1272908 | SNV | 1 | A | G | Homozygous   |
| NC_037638.1 | 1272910 | SNV | 1 | A | T | Homozygous   |
| NC_037638.1 | 1272944 | SNV | 1 | A | G | Homozygous   |
| NC_037638.1 | 1272947 | SNV | 1 | A | T | Homozygous   |
| NC_037638.1 | 1272988 | SNV | 1 | T | A | Heterozygous |
| NC_037638.1 | 1273009 | SNV | 1 | T | A | Homozygous   |
| NC_037638.1 | 1273012 | SNV | 1 | T | G | Homozygous   |
| NC_037638.1 | 1273015 | SNV | 1 | T | A | Homozygous   |
| NC_037638.1 | 1273156 | SNV | 1 | T | A | Homozygous   |
| NC_037638.1 | 1273164 | SNV | 1 | T | A | Heterozygous |
| NC_037638.1 | 1275299 | SNV | 1 | C | T | Heterozygous |
| NC_037638.1 | 1275317 | SNV | 1 | C | T | Heterozygous |
| NC_037638.1 | 1275409 | SNV | 1 | C | G | Heterozygous |
| NC_037638.1 | 1275466 | SNV | 1 | A | G | Heterozygous |
| NC_037638.1 | 1275471 | SNV | 1 | G | A | Heterozygous |
| NC_037638.1 | 1275480 | SNV | 1 | A | G | Homozygous   |
| NC_037638.1 | 1275482 | SNV | 1 | A | T | Homozygous   |
| NC_037638.1 | 1275484 | SNV | 1 | A | G | Homozygous   |
| NC_037638.1 | 1275486 | SNV | 1 | A | G | Homozygous   |
| NC_037638.1 | 1275491 | SNV | 1 | G | A | Homozygous   |
| NC_037638.1 | 1275525 | SNV | 1 | C | T | Homozygous   |
| NC_037638.1 | 1275531 | SNV | 1 | G | A | Homozygous   |
| NC_037638.1 | 1275537 | SNV | 1 | C | T | Heterozygous |
| NC_037638.1 | 1324809 | SNV | 1 | G | C | Heterozygous |
| NC_037638.1 | 1325308 | SNV | 1 | G | A | Heterozygous |
| NC_037638.1 | 1325342 | SNV | 1 | T | G | Homozygous   |
| NC_037638.1 | 1325355 | SNV | 1 | T | G | Heterozygous |
| NC_037638.1 | 1334836 | SNV | 1 | C | T | Heterozygous |
| NC_037638.1 | 1334844 | SNV | 1 | C | T | Heterozygous |
| NC_037638.1 | 1334869 | SNV | 1 | G | A | Homozygous   |



|             |         |     |   |   |   |              |
|-------------|---------|-----|---|---|---|--------------|
| NC_037638.1 | 1335773 | SNV | 1 | T | C | Homozygous   |
| NC_037638.1 | 1335776 | SNV | 1 | C | G | Heterozygous |
| NC_037638.1 | 1335789 | SNV | 1 | C | T | Homozygous   |
| NC_037638.1 | 1335821 | SNV | 1 | T | C | Homozygous   |
| NC_037638.1 | 1335846 | SNV | 1 | C | T | Homozygous   |
| NC_037638.1 | 1335866 | SNV | 1 | G | A | Heterozygous |
| NC_037638.1 | 1374919 | SNV | 1 | C | T | Heterozygous |
| NC_037638.1 | 1374930 | SNV | 1 | C | T | Heterozygous |
| NC_037638.1 | 1374938 | SNV | 1 | C | T | Homozygous   |
| NC_037638.1 | 1374975 | SNV | 1 | C | T | Heterozygous |
| NC_037638.1 | 1374982 | SNV | 1 | T | C | Heterozygous |
| NC_037638.1 | 1375109 | SNV | 1 | C | A | Homozygous   |
| NC_037638.1 | 1375121 | SNV | 1 | C | T | Homozygous   |
| NC_037638.1 | 1375124 | SNV | 1 | C | G | Homozygous   |
| NC_037638.1 | 1375163 | SNV | 1 | C | T | Heterozygous |
| NC_037638.1 | 1408909 | SNV | 1 | T | A | Heterozygous |
| NC_037638.1 | 1408911 | SNV | 1 | T | A | Heterozygous |
| NC_037638.1 | 1426932 | SNV | 1 | T | C | Heterozygous |
| NC_037638.1 | 1426938 | SNV | 1 | T | C | Heterozygous |
| NC_037638.1 | 1432114 | SNV | 1 | G | T | Homozygous   |
| NC_037638.1 | 1432124 | SNV | 1 | C | T | Homozygous   |
| NC_037638.1 | 1432127 | SNV | 1 | T | C | Homozygous   |
| NC_037638.1 | 1432138 | SNV | 1 | T | G | Homozygous   |
| NC_037638.1 | 1432144 | SNV | 1 | A | G | Homozygous   |
| NC_037638.1 | 1432156 | SNV | 1 | C | T | Homozygous   |
| NC_037638.1 | 1449502 | SNV | 1 | C | T | Heterozygous |
| NC_037638.1 | 1449513 | SNV | 1 | A | C | Heterozygous |
| NC_037638.1 | 1449536 | SNV | 1 | C | T | Heterozygous |
| NC_037638.1 | 1449793 | SNV | 1 | G | A | Homozygous   |
| NC_037638.1 | 1450073 | SNV | 1 | A | G | Homozygous   |
| NC_037638.1 | 1450094 | SNV | 1 | T | A | Heterozygous |
| NC_037638.1 | 1450153 | SNV | 1 | T | A | Homozygous   |
| NC_037638.1 | 1450156 | SNV | 1 | T | C | Homozygous   |
| NC_037638.1 | 1450162 | SNV | 1 | T | C | Heterozygous |
| NC_037638.1 | 1450428 | SNV | 1 | G | A | Heterozygous |
| NC_037638.1 | 1450517 | SNV | 1 | C | G | Homozygous   |
| NC_037638.1 | 1450607 | SNV | 1 | T | G | Heterozygous |
| NC_037638.1 | 1450609 | SNV | 1 | T | C | Homozygous   |
| NC_037638.1 | 1456496 | SNV | 1 | G | A | Heterozygous |
| NC_037638.1 | 1462974 | SNV | 1 | A | G | Heterozygous |
| NC_037638.1 | 1462984 | SNV | 1 | G | A | Heterozygous |
| NC_037638.1 | 1463006 | SNV | 1 | C | G | Homozygous   |
| NC_037638.1 | 1463018 | SNV | 1 | C | T | Homozygous   |
| NC_037638.1 | 1463035 | SNV | 1 | T | C | Homozygous   |
| NC_037638.1 | 1463344 | SNV | 1 | G | A | Homozygous   |
| NC_037638.1 | 1463350 | SNV | 1 | C | G | Homozygous   |
| NC_037638.1 | 1463354 | SNV | 1 | A | G | Homozygous   |
| NC_037638.1 | 1493761 | SNV | 1 | C | T | Heterozygous |
| NC_037638.1 | 1506252 | SNV | 1 | C | T | Heterozygous |
| NC_037638.1 | 1506279 | SNV | 1 | C | A | Homozygous   |
| NC_037638.1 | 1506284 | SNV | 1 | T | G | Homozygous   |

|             |         |     |   |   |   |              |
|-------------|---------|-----|---|---|---|--------------|
| NC_037638.1 | 1506290 | SNV | 1 | T | A | Homozygous   |
| NC_037638.1 | 1506292 | SNV | 1 | T | A | Homozygous   |
| NC_037638.1 | 1506295 | SNV | 1 | T | A | Homozygous   |
| NC_037638.1 | 1506299 | SNV | 1 | C | A | Homozygous   |
| NC_037638.1 | 1506306 | SNV | 1 | T | A | Homozygous   |
| NC_037638.1 | 1506346 | SNV | 1 | C | T | Heterozygous |
| NC_037638.1 | 1506352 | SNV | 1 | C | T | Heterozygous |
| NC_037638.1 | 1506396 | SNV | 1 | C | T | Homozygous   |
| NC_037638.1 | 1506486 | SNV | 1 | T | C | Heterozygous |
| NC_037638.1 | 1506609 | SNV | 1 | A | G | Homozygous   |
| NC_037638.1 | 1506703 | SNV | 1 | A | G | Heterozygous |
| NC_037638.1 | 1506706 | SNV | 1 | A | G | Homozygous   |
| NC_037638.1 | 1506829 | SNV | 1 | T | C | Homozygous   |
| NC_037638.1 | 1506846 | SNV | 1 | A | G | Homozygous   |
| NC_037638.1 | 1506857 | SNV | 1 | C | T | Heterozygous |
| NC_037638.1 | 1506890 | SNV | 1 | C | T | Homozygous   |
| NC_037638.1 | 1506897 | SNV | 1 | G | A | Heterozygous |
| NC_037638.1 | 1513053 | SNV | 1 | A | G | Homozygous   |
| NC_037638.1 | 1513061 | SNV | 1 | C | G | Homozygous   |
| NC_037638.1 | 1513076 | SNV | 1 | T | C | Homozygous   |
| NC_037638.1 | 1521968 | SNV | 1 | A | G | Heterozygous |
| NC_037638.1 | 1522538 | SNV | 1 | C | T | Heterozygous |
| NC_037638.1 | 1522566 | SNV | 1 | C | T | Homozygous   |
| NC_037638.1 | 1522631 | SNV | 1 | C | G | Heterozygous |
| NC_037638.1 | 1522854 | SNV | 1 | C | G | Heterozygous |
| NC_037638.1 | 1526817 | SNV | 1 | A | G | Heterozygous |
| NC_037638.1 | 1526928 | SNV | 1 | T | C | Homozygous   |
| NC_037638.1 | 1533004 | SNV | 1 | A | T | Homozygous   |
| NC_037638.1 | 1533031 | SNV | 1 | T | G | Homozygous   |
| NC_037638.1 | 1533043 | SNV | 1 | T | C | Homozygous   |
| NC_037638.1 | 1559909 | SNV | 1 | T | C | Homozygous   |
| NC_037638.1 | 1559913 | SNV | 1 | C | T | Homozygous   |
| NC_037638.1 | 1564151 | SNV | 1 | G | A | Heterozygous |
| NC_037638.1 | 1578545 | SNV | 1 | G | C | Homozygous   |
| NC_037638.1 | 1578554 | SNV | 1 | G | A | Heterozygous |
| NC_037638.1 | 1591287 | SNV | 1 | A | G | Homozygous   |
| NC_037638.1 | 1591305 | SNV | 1 | T | A | Homozygous   |
| NC_037638.1 | 1591317 | SNV | 1 | C | T | Heterozygous |
| NC_037638.1 | 1599244 | SNV | 1 | C | T | Homozygous   |
| NC_037638.1 | 1599255 | SNV | 1 | T | C | Homozygous   |
| NC_037638.1 | 1599257 | SNV | 1 | T | C | Homozygous   |
| NC_037638.1 | 1599272 | SNV | 1 | T | C | Homozygous   |
| NC_037638.1 | 1599274 | SNV | 1 | T | C | Homozygous   |
| NC_037638.1 | 1599276 | SNV | 1 | G | A | Homozygous   |
| NC_037638.1 | 1604396 | SNV | 1 | T | C | Homozygous   |
| NC_037638.1 | 1604408 | SNV | 1 | T | C | Homozygous   |
| NC_037638.1 | 1607638 | SNV | 1 | G | T | Heterozygous |
| NC_037638.1 | 1614940 | SNV | 1 | C | G | Heterozygous |
| NC_037638.1 | 1615265 | SNV | 1 | G | A | Homozygous   |
| NC_037638.1 | 1619743 | SNV | 1 | C | G | Heterozygous |
| NC_037638.1 | 1620137 | SNV | 1 | C | A | Homozygous   |

|             |         |     |   |   |   |              |
|-------------|---------|-----|---|---|---|--------------|
| NC_037638.1 | 1620218 | SNV | 1 | C | T | Homozygous   |
| NC_037638.1 | 1620313 | SNV | 1 | G | A | Heterozygous |
| NC_037638.1 | 1620477 | SNV | 1 | G | A | Heterozygous |
| NC_037638.1 | 1620647 | SNV | 1 | A | G | Homozygous   |
| NC_037638.1 | 1620673 | SNV | 1 | C | T | Homozygous   |
| NC_037638.1 | 1620707 | SNV | 1 | A | G | Heterozygous |
| NC_037638.1 | 1620729 | SNV | 1 | G | A | Heterozygous |
| NC_037638.1 | 1621249 | SNV | 1 | C | T | Homozygous   |
| NC_037638.1 | 1626498 | SNV | 1 | C | A | Heterozygous |
| NC_037638.1 | 1632047 | SNV | 1 | G | C | Heterozygous |
| NC_037638.1 | 1633588 | SNV | 1 | T | A | Heterozygous |
| NC_037638.1 | 1633609 | SNV | 1 | A | G | Heterozygous |
| NC_037638.1 | 1633650 | SNV | 1 | A | T | Homozygous   |
| NC_037638.1 | 1643276 | SNV | 1 | G | C | Homozygous   |
| NC_037638.1 | 1651590 | SNV | 1 | T | C | Heterozygous |
| NC_037638.1 | 1651663 | SNV | 1 | G | A | Heterozygous |
| NC_037638.1 | 1651723 | SNV | 1 | A | C | Heterozygous |
| NC_037638.1 | 1651742 | SNV | 1 | A | C | Homozygous   |
| NC_037638.1 | 1651744 | SNV | 1 | A | T | Homozygous   |
| NC_037638.1 | 1652590 | SNV | 1 | A | G | Homozygous   |
| NC_037638.1 | 1653328 | SNV | 1 | C | A | Homozygous   |
| NC_037638.1 | 1653330 | SNV | 1 | G | T | Homozygous   |
| NC_037638.1 | 1653592 | SNV | 1 | G | A | Homozygous   |
| NC_037638.1 | 1654353 | SNV | 1 | A | T | Heterozygous |
| NC_037638.1 | 1660164 | SNV | 1 | A | C | Homozygous   |
| NC_037638.1 | 1660198 | SNV | 1 | T | C | Heterozygous |
| NC_037638.1 | 1660236 | SNV | 1 | C | T | Homozygous   |
| NC_037638.1 | 1660818 | SNV | 1 | A | G | Heterozygous |
| NC_037638.1 | 1661495 | SNV | 1 | T | C | Heterozygous |
| NC_037638.1 | 1661534 | SNV | 1 | G | A | Heterozygous |
| NC_037638.1 | 1661602 | SNV | 1 | T | C | Homozygous   |
| NC_037638.1 | 1661655 | SNV | 1 | T | C | Heterozygous |
| NC_037638.1 | 1661696 | SNV | 1 | A | G | Homozygous   |
| NC_037638.1 | 1661714 | SNV | 1 | G | A | Heterozygous |
| NC_037638.1 | 1661819 | SNV | 1 | C | T | Heterozygous |
| NC_037638.1 | 1661904 | SNV | 1 | A | G | Homozygous   |
| NC_037638.1 | 1661906 | SNV | 1 | C | A | Homozygous   |
| NC_037638.1 | 1661920 | SNV | 1 | T | C | Heterozygous |
| NC_037638.1 | 1666750 | SNV | 1 | T | C | Homozygous   |
| NC_037638.1 | 1668638 | SNV | 1 | C | G | Homozygous   |
| NC_037638.1 | 1669370 | SNV | 1 | C | T | Homozygous   |
| NC_037638.1 | 1669929 | SNV | 1 | A | G | Homozygous   |
| NC_037638.1 | 1671376 | SNV | 1 | T | C | Heterozygous |
| NC_037638.1 | 1671493 | SNV | 1 | T | C | Homozygous   |
| NC_037638.1 | 1671695 | SNV | 1 | C | T | Heterozygous |
| NC_037638.1 | 1671699 | SNV | 1 | A | G | Heterozygous |
| NC_037638.1 | 1672375 | SNV | 1 | T | C | Homozygous   |
| NC_037638.1 | 1672575 | SNV | 1 | A | G | Homozygous   |
| NC_037638.1 | 1674000 | SNV | 1 | A | G | Homozygous   |
| NC_037638.1 | 1674169 | SNV | 1 | T | C | Homozygous   |
| NC_037638.1 | 1674271 | SNV | 1 | G | A | Heterozygous |

|             |         |     |   |   |   |              |
|-------------|---------|-----|---|---|---|--------------|
| NC_037638.1 | 1674276 | SNV | 1 | T | G | Homozygous   |
| NC_037638.1 | 1674279 | SNV | 1 | G | A | Heterozygous |
| NC_037638.1 | 1681279 | SNV | 1 | T | C | Homozygous   |
| NC_037638.1 | 1682140 | SNV | 1 | T | C | Homozygous   |
| NC_037638.1 | 1683148 | SNV | 1 | G | A | Homozygous   |
| NC_037638.1 | 1683309 | SNV | 1 | T | A | Homozygous   |
| NC_037638.1 | 1683311 | SNV | 1 | T | A | Homozygous   |
| NC_037638.1 | 1683313 | SNV | 1 | T | G | Homozygous   |
| NC_037638.1 | 1683423 | SNV | 1 | G | T | Homozygous   |
| NC_037638.1 | 1683522 | SNV | 1 | A | T | Homozygous   |
| NC_037638.1 | 1684284 | SNV | 1 | C | T | Heterozygous |
| NC_037638.1 | 1685626 | SNV | 1 | T | A | Homozygous   |
| NC_037638.1 | 1686951 | SNV | 1 | A | T | Homozygous   |
| NC_037638.1 | 1687254 | SNV | 1 | T | C | Homozygous   |
| NC_037638.1 | 1688440 | SNV | 1 | T | C | Heterozygous |
| NC_037638.1 | 1688451 | SNV | 1 | T | C | Heterozygous |
| NC_037638.1 | 1688472 | SNV | 1 | T | C | Heterozygous |
| NC_037638.1 | 1688478 | SNV | 1 | T | C | Heterozygous |
| NC_037638.1 | 1689018 | SNV | 1 | A | G | Homozygous   |
| NC_037638.1 | 1689771 | SNV | 1 | A | G | Heterozygous |
| NC_037638.1 | 1689798 | SNV | 1 | C | T | Heterozygous |
| NC_037638.1 | 1690335 | SNV | 1 | T | C | Heterozygous |
| NC_037638.1 | 1690362 | SNV | 1 | A | G | Homozygous   |
| NC_037638.1 | 1690512 | SNV | 1 | A | C | Homozygous   |
| NC_037638.1 | 1716191 | SNV | 1 | T | C | Heterozygous |
| NC_037638.1 | 1716200 | SNV | 1 | C | T | Heterozygous |
| NC_037638.1 | 1716211 | SNV | 1 | G | A | Heterozygous |
| NC_037638.1 | 1717515 | SNV | 1 | T | A | Heterozygous |
| NC_037638.1 | 1717552 | SNV | 1 | C | T | Heterozygous |
| NC_037638.1 | 1717560 | SNV | 1 | A | G | Homozygous   |
| NC_037638.1 | 1717630 | SNV | 1 | G | A | Heterozygous |
| NC_037638.1 | 1717689 | SNV | 1 | A | G | Heterozygous |
| NC_037638.1 | 1717691 | SNV | 1 | A | G | Heterozygous |
| NC_037638.1 | 1720162 | SNV | 1 | A | G | Heterozygous |
| NC_037638.1 | 1725079 | SNV | 1 | G | A | Homozygous   |
| NC_037638.1 | 1725146 | SNV | 1 | T | C | Homozygous   |
| NC_037638.1 | 1725312 | SNV | 1 | T | C | Homozygous   |
| NC_037638.1 | 1725362 | SNV | 1 | T | C | Homozygous   |
| NC_037638.1 | 1725415 | SNV | 1 | C | T | Homozygous   |
| NC_037638.1 | 1728689 | SNV | 1 | C | T | Homozygous   |
| NC_037638.1 | 1728720 | SNV | 1 | A | G | Homozygous   |
| NC_037638.1 | 1728854 | SNV | 1 | A | G | Homozygous   |
| NC_037638.1 | 1728909 | SNV | 1 | G | A | Heterozygous |
| NC_037638.1 | 1728922 | SNV | 1 | T | C | Homozygous   |
| NC_037638.1 | 1728955 | SNV | 1 | G | A | Heterozygous |
| NC_037638.1 | 1729138 | SNV | 1 | T | A | Heterozygous |
| NC_037638.1 | 1729152 | SNV | 1 | T | C | Homozygous   |
| NC_037638.1 | 1729453 | SNV | 1 | G | A | Homozygous   |
| NC_037638.1 | 1730243 | SNV | 1 | C | T | Homozygous   |
| NC_037638.1 | 1730513 | SNV | 1 | T | C | Homozygous   |
| NC_037638.1 | 1730555 | SNV | 1 | T | C | Homozygous   |

|             |         |     |   |   |   |              |
|-------------|---------|-----|---|---|---|--------------|
| NC_037638.1 | 1730696 | SNV | 1 | G | A | Heterozygous |
| NC_037638.1 | 1730743 | SNV | 1 | A | G | Homozygous   |
| NC_037638.1 | 1730780 | SNV | 1 | A | G | Heterozygous |
| NC_037638.1 | 1730874 | SNV | 1 | C | G | Heterozygous |
| NC_037638.1 | 1732700 | SNV | 1 | G | A | Heterozygous |
| NC_037638.1 | 1733411 | SNV | 1 | T | G | Homozygous   |
| NC_037638.1 | 1733465 | SNV | 1 | T | A | Heterozygous |
| NC_037638.1 | 1733500 | SNV | 1 | T | C | Heterozygous |
| NC_037638.1 | 1733528 | SNV | 1 | T | C | Heterozygous |
| NC_037638.1 | 1733531 | SNV | 1 | T | C | Heterozygous |
| NC_037638.1 | 1733566 | SNV | 1 | A | T | Heterozygous |
| NC_037638.1 | 1733571 | SNV | 1 | G | C | Heterozygous |
| NC_037638.1 | 1733618 | SNV | 1 | A | T | Heterozygous |
| NC_037638.1 | 1733628 | SNV | 1 | A | G | Heterozygous |
| NC_037638.1 | 1733641 | SNV | 1 | A | G | Heterozygous |
| NC_037638.1 | 1734466 | SNV | 1 | T | A | Homozygous   |
| NC_037638.1 | 1734470 | SNV | 1 | A | T | Homozygous   |
| NC_037638.1 | 1734494 | SNV | 1 | T | C | Homozygous   |
| NC_037638.1 | 1734647 | SNV | 1 | A | G | Heterozygous |
| NC_037638.1 | 1734727 | SNV | 1 | G | C | Heterozygous |
| NC_037638.1 | 1734799 | SNV | 1 | T | C | Homozygous   |
| NC_037638.1 | 1734908 | SNV | 1 | C | A | Heterozygous |
| NC_037638.1 | 1734917 | SNV | 1 | A | C | Homozygous   |
| NC_037638.1 | 1735136 | SNV | 1 | T | C | Homozygous   |
| NC_037638.1 | 1735499 | SNV | 1 | G | A | Heterozygous |
| NC_037638.1 | 1735505 | SNV | 1 | A | G | Homozygous   |
| NC_037638.1 | 1735659 | SNV | 1 | A | G | Homozygous   |
| NC_037638.1 | 1736136 | SNV | 1 | T | C | Homozygous   |
| NC_037638.1 | 1736706 | SNV | 1 | G | A | Heterozygous |
| NC_037638.1 | 1737166 | SNV | 1 | A | G | Heterozygous |
| NC_037638.1 | 1737238 | SNV | 1 | A | G | Heterozygous |
| NC_037638.1 | 1737269 | SNV | 1 | A | G | Homozygous   |
| NC_037638.1 | 1737299 | SNV | 1 | G | A | Homozygous   |
| NC_037638.1 | 1737338 | SNV | 1 | T | C | Homozygous   |
| NC_037638.1 | 1737895 | SNV | 1 | T | C | Homozygous   |
| NC_037638.1 | 1737902 | SNV | 1 | C | T | Heterozygous |
| NC_037638.1 | 1737967 | SNV | 1 | C | T | Homozygous   |
| NC_037638.1 | 1738132 | SNV | 1 | C | T | Heterozygous |
| NC_037638.1 | 1738193 | SNV | 1 | T | C | Homozygous   |
| NC_037638.1 | 1738195 | SNV | 1 | G | A | Homozygous   |
| NC_037638.1 | 1738230 | SNV | 1 | A | G | Homozygous   |
| NC_037638.1 | 1738322 | SNV | 1 | T | C | Homozygous   |
| NC_037638.1 | 1738413 | SNV | 1 | A | G | Heterozygous |
| NC_037638.1 | 1738453 | SNV | 1 | C | T | Heterozygous |
| NC_037638.1 | 1738454 | SNV | 1 | G | A | Heterozygous |
| NC_037638.1 | 1738463 | SNV | 1 | T | C | Homozygous   |
| NC_037638.1 | 1738503 | SNV | 1 | G | A | Homozygous   |
| NC_037638.1 | 1738535 | SNV | 1 | G | A | Homozygous   |
| NC_037638.1 | 1738569 | SNV | 1 | T | A | Heterozygous |
| NC_037638.1 | 1738571 | SNV | 1 | G | A | Heterozygous |
| NC_037638.1 | 1739011 | SNV | 1 | A | G | Homozygous   |

|             |         |     |   |   |   |              |
|-------------|---------|-----|---|---|---|--------------|
| NC_037638.1 | 1739350 | SNV | 1 | G | A | Heterozygous |
| NC_037638.1 | 1739396 | SNV | 1 | C | T | Homozygous   |
| NC_037638.1 | 1739410 | SNV | 1 | C | G | Homozygous   |
| NC_037638.1 | 1744788 | SNV | 1 | C | T | Heterozygous |
| NC_037638.1 | 1744790 | SNV | 1 | C | T | Heterozygous |
| NC_037638.1 | 1749390 | SNV | 1 | C | T | Heterozygous |
| NC_037638.1 | 1749408 | SNV | 1 | C | A | Heterozygous |
| NC_037638.1 | 1749441 | SNV | 1 | T | C | Heterozygous |
| NC_037638.1 | 1749447 | SNV | 1 | T | C | Heterozygous |
| NC_037638.1 | 1749478 | SNV | 1 | G | A | Homozygous   |
| NC_037638.1 | 1749515 | SNV | 1 | T | C | Homozygous   |
| NC_037638.1 | 1749538 | SNV | 1 | C | T | Homozygous   |
| NC_037638.1 | 1749560 | SNV | 1 | C | A | Heterozygous |
| NC_037638.1 | 1749634 | SNV | 1 | T | C | Homozygous   |
| NC_037638.1 | 1749641 | SNV | 1 | T | C | Homozygous   |
| NC_037638.1 | 1749655 | SNV | 1 | T | A | Heterozygous |
| NC_037638.1 | 1749659 | SNV | 1 | C | A | Heterozygous |
| NC_037638.1 | 1749670 | SNV | 1 | C | A | Heterozygous |
| NC_037638.1 | 1749684 | SNV | 1 | T | A | Heterozygous |
| NC_037638.1 | 1749687 | SNV | 1 | C | A | Heterozygous |
| NC_037638.1 | 1749720 | SNV | 1 | C | T | Homozygous   |
| NC_037638.1 | 1755532 | SNV | 1 | T | C | Homozygous   |
| NC_037638.1 | 1755538 | SNV | 1 | T | C | Homozygous   |
| NC_037638.1 | 1755541 | SNV | 1 | A | G | Homozygous   |
| NC_037638.1 | 1755544 | SNV | 1 | T | C | Homozygous   |
| NC_037638.1 | 1755546 | SNV | 1 | T | C | Homozygous   |
| NC_037638.1 | 1784138 | SNV | 1 | T | C | Heterozygous |
| NC_037638.1 | 1784150 | SNV | 1 | T | C | Heterozygous |
| NC_037638.1 | 1784157 | SNV | 1 | G | C | Heterozygous |
| NC_037638.1 | 1784179 | SNV | 1 | C | T | Heterozygous |
| NC_037638.1 | 1784302 | SNV | 1 | T | C | Heterozygous |
| NC_037638.1 | 1784415 | SNV | 1 | T | C | Heterozygous |
| NC_037638.1 | 1784445 | SNV | 1 | T | C | Homozygous   |
| NC_037638.1 | 1784936 | SNV | 1 | T | C | Heterozygous |
| NC_037638.1 | 1785080 | SNV | 1 | T | G | Homozygous   |
| NC_037638.1 | 1785112 | SNV | 1 | A | G | Homozygous   |
| NC_037638.1 | 1785263 | SNV | 1 | T | A | Homozygous   |
| NC_037638.1 | 1785335 | SNV | 1 | T | C | Homozygous   |
| NC_037638.1 | 1785571 | SNV | 1 | A | G | Homozygous   |
| NC_037638.1 | 1785602 | SNV | 1 | G | A | Heterozygous |
| NC_037638.1 | 1785684 | SNV | 1 | A | G | Heterozygous |
| NC_037638.1 | 1785767 | SNV | 1 | T | C | Heterozygous |
| NC_037638.1 | 1785773 | SNV | 1 | G | T | Heterozygous |
| NC_037638.1 | 1785785 | SNV | 1 | T | C | Homozygous   |
| NC_037638.1 | 1785796 | SNV | 1 | T | C | Heterozygous |
| NC_037638.1 | 1785800 | SNV | 1 | A | G | Homozygous   |
| NC_037638.1 | 1785819 | SNV | 1 | A | G | Heterozygous |
| NC_037638.1 | 1786149 | SNV | 1 | A | G | Homozygous   |
| NC_037638.1 | 1786285 | SNV | 1 | C | T | Heterozygous |
| NC_037638.1 | 1786377 | SNV | 1 | G | A | Homozygous   |
| NC_037638.1 | 1786381 | SNV | 1 | C | G | Heterozygous |

|             |         |     |   |   |   |              |
|-------------|---------|-----|---|---|---|--------------|
| NC_037638.1 | 1786502 | SNV | 1 | C | G | Homozygous   |
| NC_037638.1 | 1786736 | SNV | 1 | C | G | Homozygous   |
| NC_037638.1 | 1786867 | SNV | 1 | T | C | Homozygous   |
| NC_037638.1 | 1787375 | SNV | 1 | C | A | Heterozygous |
| NC_037638.1 | 1787375 | SNV | 1 | C | G | Heterozygous |
| NC_037638.1 | 1787383 | SNV | 1 | T | A | Heterozygous |
| NC_037638.1 | 1787521 | SNV | 1 | A | G | Homozygous   |
| NC_037638.1 | 1787601 | SNV | 1 | A | G | Heterozygous |
| NC_037638.1 | 1787611 | SNV | 1 | A | G | Homozygous   |
| NC_037638.1 | 1787983 | SNV | 1 | C | T | Homozygous   |
| NC_037638.1 | 1788029 | SNV | 1 | T | C | Heterozygous |
| NC_037638.1 | 1788114 | SNV | 1 | A | G | Heterozygous |
| NC_037638.1 | 1788164 | SNV | 1 | C | T | Homozygous   |
| NC_037638.1 | 1788364 | SNV | 1 | T | C | Homozygous   |
| NC_037638.1 | 1803518 | SNV | 1 | T | C | Homozygous   |
| NC_037638.1 | 1803535 | SNV | 1 | G | A | Heterozygous |
| NC_037638.1 | 1812043 | SNV | 1 | T | A | Homozygous   |
| NC_037638.1 | 1812498 | SNV | 1 | G | C | Heterozygous |
| NC_037638.1 | 1812947 | SNV | 1 | T | C | Homozygous   |
| NC_037638.1 | 1812950 | SNV | 1 | T | C | Homozygous   |
| NC_037638.1 | 1812976 | SNV | 1 | T | C | Homozygous   |
| NC_037638.1 | 1813001 | SNV | 1 | T | C | Homozygous   |
| NC_037638.1 | 1813012 | SNV | 1 | T | C | Homozygous   |
| NC_037638.1 | 1813017 | SNV | 1 | T | C | Homozygous   |
| NC_037638.1 | 1815560 | SNV | 1 | G | A | Heterozygous |
| NC_037638.1 | 1816704 | SNV | 1 | C | T | Heterozygous |
| NC_037638.1 | 1817453 | SNV | 1 | A | G | Homozygous   |
| NC_037638.1 | 1817793 | SNV | 1 | A | T | Heterozygous |
| NC_037638.1 | 1818683 | SNV | 1 | A | G | Homozygous   |
| NC_037638.1 | 1820478 | SNV | 1 | A | C | Homozygous   |
| NC_037638.1 | 1820505 | SNV | 1 | T | A | Homozygous   |
| NC_037638.1 | 1820509 | SNV | 1 | A | T | Homozygous   |
| NC_037638.1 | 1820511 | SNV | 1 | A | T | Homozygous   |
| NC_037638.1 | 1820517 | SNV | 1 | T | A | Homozygous   |
| NC_037638.1 | 1825470 | SNV | 1 | T | C | Homozygous   |
| NC_037638.1 | 1828970 | SNV | 1 | T | C | Homozygous   |
| NC_037638.1 | 1829446 | SNV | 1 | A | T | Homozygous   |
| NC_037638.1 | 1829452 | SNV | 1 | C | T | Homozygous   |
| NC_037638.1 | 1830963 | SNV | 1 | A | G | Homozygous   |
| NC_037638.1 | 1831947 | SNV | 1 | A | C | Homozygous   |
| NC_037638.1 | 1831950 | SNV | 1 | T | G | Homozygous   |
| NC_037638.1 | 1831953 | SNV | 1 | C | G | Homozygous   |
| NC_037638.1 | 1832152 | SNV | 1 | A | G | Heterozygous |
| NC_037638.1 | 1832601 | SNV | 1 | A | G | Homozygous   |
| NC_037638.1 | 1832759 | SNV | 1 | A | G | Homozygous   |
| NC_037638.1 | 1832954 | SNV | 1 | C | T | Heterozygous |
| NC_037638.1 | 1839252 | SNV | 1 | A | C | Heterozygous |
| NC_037638.1 | 1840201 | SNV | 1 | A | G | Heterozygous |
| NC_037638.1 | 1840374 | SNV | 1 | T | C | Heterozygous |
| NC_037638.1 | 1840581 | SNV | 1 | C | T | Homozygous   |
| NC_037638.1 | 1843526 | SNV | 1 | C | T | Homozygous   |

|             |         |     |   |   |   |              |
|-------------|---------|-----|---|---|---|--------------|
| NC_037638.1 | 1844172 | SNV | 1 | C | A | Homozygous   |
| NC_037638.1 | 1849674 | SNV | 1 | C | T | Heterozygous |
| NC_037638.1 | 1853257 | SNV | 1 | T | C | Heterozygous |
| NC_037638.1 | 1853317 | SNV | 1 | A | G | Heterozygous |
| NC_037638.1 | 1853468 | SNV | 1 | A | G | Heterozygous |
| NC_037638.1 | 1853598 | SNV | 1 | C | T | Homozygous   |
| NC_037638.1 | 1853705 | SNV | 1 | C | A | Homozygous   |
| NC_037638.1 | 1853753 | SNV | 1 | A | G | Homozygous   |
| NC_037638.1 | 1863001 | SNV | 1 | G | A | Homozygous   |
| NC_037638.1 | 1863362 | SNV | 1 | T | C | Homozygous   |
| NC_037638.1 | 1863528 | SNV | 1 | T | A | Homozygous   |
| NC_037638.1 | 1864498 | SNV | 1 | T | C | Homozygous   |
| NC_037638.1 | 1865318 | SNV | 1 | T | A | Homozygous   |
| NC_037638.1 | 1865383 | SNV | 1 | A | G | Homozygous   |
| NC_037638.1 | 1865982 | SNV | 1 | C | T | Heterozygous |
| NC_037638.1 | 1865986 | SNV | 1 | C | T | Heterozygous |
| NC_037638.1 | 1865998 | SNV | 1 | C | T | Homozygous   |
| NC_037638.1 | 1866011 | SNV | 1 | C | T | Homozygous   |
| NC_037638.1 | 1866117 | SNV | 1 | G | A | Heterozygous |
| NC_037638.1 | 1866160 | SNV | 1 | T | C | Homozygous   |
| NC_037638.1 | 1866174 | SNV | 1 | T | C | Homozygous   |
| NC_037638.1 | 1866218 | SNV | 1 | A | G | Homozygous   |
| NC_037638.1 | 1866252 | SNV | 1 | C | T | Heterozygous |
| NC_037638.1 | 1870335 | SNV | 1 | C | T | Heterozygous |
| NC_037638.1 | 1871642 | SNV | 1 | T | A | Homozygous   |
| NC_037638.1 | 1871649 | SNV | 1 | A | T | Homozygous   |
| NC_037638.1 | 1874648 | SNV | 1 | T | C | Heterozygous |
| NC_037638.1 | 1874655 | SNV | 1 | T | C | Heterozygous |
| NC_037638.1 | 1874685 | SNV | 1 | T | C | Heterozygous |
| NC_037638.1 | 1875813 | SNV | 1 | C | T | Heterozygous |
| NC_037638.1 | 1875847 | SNV | 1 | A | G | Heterozygous |
| NC_037638.1 | 1875855 | SNV | 1 | T | C | Heterozygous |
| NC_037638.1 | 1875877 | SNV | 1 | C | T | Homozygous   |
| NC_037638.1 | 1875896 | SNV | 1 | A | C | Homozygous   |
| NC_037638.1 | 1876058 | SNV | 1 | G | A | Homozygous   |
| NC_037638.1 | 1877185 | SNV | 1 | A | G | Homozygous   |
| NC_037638.1 | 1877187 | SNV | 1 | G | A | Homozygous   |
| NC_037638.1 | 1877193 | SNV | 1 | G | A | Homozygous   |
| NC_037638.1 | 1877296 | SNV | 1 | A | G | Homozygous   |
| NC_037638.1 | 1877304 | SNV | 1 | G | A | Homozygous   |
| NC_037638.1 | 1877313 | SNV | 1 | A | T | Homozygous   |
| NC_037638.1 | 1877317 | SNV | 1 | C | G | Homozygous   |
| NC_037638.1 | 1877415 | SNV | 1 | A | G | Homozygous   |
| NC_037638.1 | 1877440 | SNV | 1 | A | G | Homozygous   |
| NC_037638.1 | 1879062 | SNV | 1 | A | G | Homozygous   |
| NC_037638.1 | 1879071 | SNV | 1 | T | C | Homozygous   |
| NC_037638.1 | 1879102 | SNV | 1 | T | C | Homozygous   |
| NC_037638.1 | 1879110 | SNV | 1 | A | T | Homozygous   |
| NC_037638.1 | 1879735 | SNV | 1 | A | G | Heterozygous |
| NC_037638.1 | 1880160 | SNV | 1 | A | G | Homozygous   |
| NC_037638.1 | 1880215 | SNV | 1 | A | T | Heterozygous |



|             |         |     |   |   |   |              |
|-------------|---------|-----|---|---|---|--------------|
| NC_037638.1 | 1884635 | SNV | 1 | C | T | Homozygous   |
| NC_037638.1 | 1884641 | SNV | 1 | C | T | Heterozygous |
| NC_037638.1 | 1884644 | SNV | 1 | C | T | Heterozygous |
| NC_037638.1 | 1884648 | SNV | 1 | C | T | Heterozygous |
| NC_037638.1 | 1884662 | SNV | 1 | C | T | Heterozygous |
| NC_037638.1 | 1884677 | SNV | 1 | C | T | Homozygous   |
| NC_037638.1 | 1884692 | SNV | 1 | C | G | Heterozygous |
| NC_037638.1 | 1884716 | SNV | 1 | C | T | Heterozygous |
| NC_037638.1 | 1895427 | SNV | 1 | A | C | Heterozygous |
| NC_037638.1 | 1895436 | SNV | 1 | T | C | Heterozygous |
| NC_037638.1 | 1895443 | SNV | 1 | C | T | Heterozygous |
| NC_037638.1 | 1895455 | SNV | 1 | T | C | Heterozygous |
| NC_037638.1 | 1895462 | SNV | 1 | T | C | Heterozygous |
| NC_037638.1 | 1895468 | SNV | 1 | C | T | Heterozygous |
| NC_037638.1 | 1895471 | SNV | 1 | T | A | Heterozygous |
| NC_037638.1 | 1914152 | SNV | 1 | A | C | Homozygous   |
| NC_037638.1 | 1914158 | SNV | 1 | A | G | Homozygous   |
| NC_037638.1 | 1914184 | SNV | 1 | T | G | Homozygous   |
| NC_037638.1 | 1916307 | SNV | 1 | T | C | Homozygous   |
| NC_037638.1 | 1916331 | SNV | 1 | T | C | Homozygous   |
| NC_037638.1 | 1916335 | SNV | 1 | T | C | Homozygous   |
| NC_037638.1 | 1916351 | SNV | 1 | G | T | Heterozygous |
| NC_037638.1 | 1936338 | SNV | 1 | A | C | Heterozygous |
| NC_037638.1 | 1936470 | SNV | 1 | T | C | Homozygous   |
| NC_037638.1 | 1936582 | SNV | 1 | A | G | Homozygous   |
| NC_037638.1 | 1936937 | SNV | 1 | G | A | Heterozygous |
| NC_037638.1 | 1936998 | SNV | 1 | C | T | Homozygous   |
| NC_037638.1 | 1937076 | SNV | 1 | C | T | Homozygous   |
| NC_037638.1 | 1937103 | SNV | 1 | A | G | Homozygous   |
| NC_037638.1 | 1937106 | SNV | 1 | G | A | Homozygous   |
| NC_037638.1 | 1937728 | SNV | 1 | G | A | Heterozygous |
| NC_037638.1 | 1938300 | SNV | 1 | A | G | Homozygous   |
| NC_037638.1 | 1948430 | SNV | 1 | T | C | Homozygous   |
| NC_037638.1 | 1948586 | SNV | 1 | T | C | Homozygous   |
| NC_037638.1 | 1960350 | SNV | 1 | G | C | Homozygous   |
| NC_037638.1 | 1960451 | SNV | 1 | G | A | Heterozygous |
| NC_037638.1 | 1961167 | SNV | 1 | T | C | Homozygous   |
| NC_037638.1 | 1962199 | SNV | 1 | T | C | Homozygous   |
| NC_037638.1 | 1962526 | SNV | 1 | C | T | Homozygous   |
| NC_037638.1 | 1962531 | SNV | 1 | G | A | Heterozygous |
| NC_037638.1 | 1963167 | SNV | 1 | A | G | Homozygous   |
| NC_037638.1 | 1966821 | SNV | 1 | A | C | Homozygous   |
| NC_037638.1 | 1966827 | SNV | 1 | A | T | Homozygous   |
| NC_037638.1 | 1966852 | SNV | 1 | T | C | Homozygous   |
| NC_037638.1 | 1967733 | SNV | 1 | T | C | Homozygous   |
| NC_037638.1 | 1968044 | SNV | 1 | C | T | Heterozygous |
| NC_037638.1 | 1968195 | SNV | 1 | T | G | Heterozygous |
| NC_037638.1 | 1968273 | SNV | 1 | C | G | Homozygous   |
| NC_037638.1 | 1969403 | SNV | 1 | C | T | Homozygous   |
| NC_037638.1 | 1969491 | SNV | 1 | G | T | Heterozygous |
| NC_037638.1 | 1969566 | SNV | 1 | A | G | Heterozygous |

|             |         |     |   |   |   |              |
|-------------|---------|-----|---|---|---|--------------|
| NC_037638.1 | 1970112 | SNV | 1 | G | A | Heterozygous |
| NC_037638.1 | 1970255 | SNV | 1 | C | T | Homozygous   |
| NC_037638.1 | 1970342 | SNV | 1 | C | T | Heterozygous |
| NC_037638.1 | 1970419 | SNV | 1 | A | T | Heterozygous |
| NC_037638.1 | 1970424 | SNV | 1 | T | C | Heterozygous |
| NC_037638.1 | 1970447 | SNV | 1 | C | T | Heterozygous |
| NC_037638.1 | 1970571 | SNV | 1 | A | C | Homozygous   |
| NC_037638.1 | 1970575 | SNV | 1 | T | A | Homozygous   |
| NC_037638.1 | 1970581 | SNV | 1 | C | T | Homozygous   |
| NC_037638.1 | 1970658 | SNV | 1 | A | G | Homozygous   |
| NC_037638.1 | 1970679 | SNV | 1 | T | C | Heterozygous |
| NC_037638.1 | 1970795 | SNV | 1 | T | C | Homozygous   |
| NC_037638.1 | 1971001 | SNV | 1 | C | T | Heterozygous |
| NC_037638.1 | 1971069 | SNV | 1 | C | T | Homozygous   |
| NC_037638.1 | 1971462 | SNV | 1 | A | G | Homozygous   |
| NC_037638.1 | 1972236 | SNV | 1 | T | C | Heterozygous |
| NC_037638.1 | 1972322 | SNV | 1 | C | A | Heterozygous |
| NC_037638.1 | 1972335 | SNV | 1 | C | T | Heterozygous |
| NC_037638.1 | 1976314 | SNV | 1 | C | G | Homozygous   |
| NC_037638.1 | 1976397 | SNV | 1 | G | A | Heterozygous |
| NC_037638.1 | 1977165 | SNV | 1 | G | A | Heterozygous |
| NC_037638.1 | 1977300 | SNV | 1 | G | C | Heterozygous |
| NC_037638.1 | 1978282 | SNV | 1 | C | T | Heterozygous |
| NC_037638.1 | 1978612 | SNV | 1 | A | G | Homozygous   |
| NC_037638.1 | 1978633 | SNV | 1 | G | C | Heterozygous |
| NC_037638.1 | 1995131 | SNV | 1 | T | C | Heterozygous |
| NC_037638.1 | 2005241 | SNV | 1 | G | T | Heterozygous |
| NC_037638.1 | 2005891 | SNV | 1 | C | T | Homozygous   |
| NC_037638.1 | 2007327 | SNV | 1 | T | C | Homozygous   |
| NC_037638.1 | 2007368 | SNV | 1 | C | T | Heterozygous |
| NC_037638.1 | 2007897 | SNV | 1 | A | G | Heterozygous |
| NC_037638.1 | 2007900 | SNV | 1 | T | C | Heterozygous |
| NC_037638.1 | 2008261 | SNV | 1 | T | C | Homozygous   |
| NC_037638.1 | 2008288 | SNV | 1 | A | G | Homozygous   |
| NC_037638.1 | 2008357 | SNV | 1 | C | A | Homozygous   |
| NC_037638.1 | 2021191 | SNV | 1 | G | A | Heterozygous |
| NC_037638.1 | 2021314 | SNV | 1 | T | C | Homozygous   |
| NC_037638.1 | 2043926 | SNV | 1 | G | C | Homozygous   |
| NC_037638.1 | 2046836 | SNV | 1 | A | T | Heterozygous |
| NC_037638.1 | 2046864 | SNV | 1 | A | T | Heterozygous |
| NC_037638.1 | 2046924 | SNV | 1 | T | C | Homozygous   |
| NC_037638.1 | 2047453 | SNV | 1 | T | A | Heterozygous |
| NC_037638.1 | 2047514 | SNV | 1 | A | G | Heterozygous |
| NC_037638.1 | 2047696 | SNV | 1 | G | T | Homozygous   |
| NC_037638.1 | 2047797 | SNV | 1 | A | G | Homozygous   |
| NC_037638.1 | 2047837 | SNV | 1 | A | G | Homozygous   |
| NC_037638.1 | 2050890 | SNV | 1 | T | G | Heterozygous |
| NC_037638.1 | 2051846 | SNV | 1 | A | T | Homozygous   |
| NC_037638.1 | 2051874 | SNV | 1 | T | C | Heterozygous |
| NC_037638.1 | 2055184 | SNV | 1 | C | T | Heterozygous |
| NC_037638.1 | 2059113 | SNV | 1 | A | G | Heterozygous |

|             |         |     |   |   |   |              |
|-------------|---------|-----|---|---|---|--------------|
| NC_037638.1 | 2059404 | SNV | 1 | G | A | Heterozygous |
| NC_037638.1 | 2060850 | SNV | 1 | T | A | Heterozygous |
| NC_037638.1 | 2060961 | SNV | 1 | A | G | Homozygous   |
| NC_037638.1 | 2062588 | SNV | 1 | A | G | Homozygous   |
| NC_037638.1 | 2063577 | SNV | 1 | T | C | Homozygous   |
| NC_037638.1 | 2070689 | SNV | 1 | G | A | Homozygous   |
| NC_037638.1 | 2078087 | SNV | 1 | T | C | Homozygous   |
| NC_037638.1 | 2078465 | SNV | 1 | G | A | Heterozygous |
| NC_037638.1 | 2078522 | SNV | 1 | A | G | Heterozygous |
| NC_037638.1 | 2078525 | SNV | 1 | T | A | Heterozygous |
| NC_037638.1 | 2078529 | SNV | 1 | T | A | Homozygous   |
| NC_037638.1 | 2078553 | SNV | 1 | A | T | Homozygous   |
| NC_037638.1 | 2079017 | SNV | 1 | G | A | Homozygous   |
| NC_037638.1 | 2079685 | SNV | 1 | T | C | Heterozygous |
| NC_037638.1 | 2080670 | SNV | 1 | G | T | Homozygous   |
| NC_037638.1 | 2090007 | SNV | 1 | G | A | Heterozygous |
| NC_037638.1 | 2090705 | SNV | 1 | T | A | Heterozygous |
| NC_037638.1 | 2090715 | SNV | 1 | T | A | Heterozygous |
| NC_037638.1 | 2090717 | SNV | 1 | T | A | Heterozygous |
| NC_037638.1 | 2090720 | SNV | 1 | A | T | Heterozygous |
| NC_037638.1 | 2090892 | SNV | 1 | T | C | Homozygous   |
| NC_037638.1 | 2090894 | SNV | 1 | T | A | Homozygous   |
| NC_037638.1 | 2090896 | SNV | 1 | G | C | Homozygous   |
| NC_037638.1 | 2090922 | SNV | 1 | G | A | Homozygous   |
| NC_037638.1 | 2093747 | SNV | 1 | C | T | Homozygous   |
| NC_037638.1 | 2096444 | SNV | 1 | T | A | Heterozygous |
| NC_037638.1 | 2096451 | SNV | 1 | T | A | Heterozygous |
| NC_037638.1 | 2096453 | SNV | 1 | T | G | Heterozygous |
| NC_037638.1 | 2096464 | SNV | 1 | A | T | Heterozygous |
| NC_037638.1 | 2099644 | SNV | 1 | T | C | Homozygous   |
| NC_037638.1 | 2099879 | SNV | 1 | T | C | Homozygous   |
| NC_037638.1 | 2100039 | SNV | 1 | T | A | Heterozygous |
| NC_037638.1 | 2100041 | SNV | 1 | T | A | Heterozygous |
| NC_037638.1 | 2101531 | SNV | 1 | T | C | Homozygous   |
| NC_037638.1 | 2101533 | SNV | 1 | G | T | Homozygous   |
| NC_037638.1 | 2101535 | SNV | 1 | T | G | Homozygous   |
| NC_037638.1 | 2101703 | SNV | 1 | G | A | Homozygous   |
| NC_037638.1 | 2101762 | SNV | 1 | T | C | Homozygous   |
| NC_037638.1 | 2101764 | SNV | 1 | G | A | Homozygous   |
| NC_037638.1 | 2102124 | SNV | 1 | A | G | Heterozygous |
| NC_037638.1 | 2102454 | SNV | 1 | A | T | Homozygous   |
| NC_037638.1 | 2102465 | SNV | 1 | A | T | Homozygous   |
| NC_037638.1 | 2102468 | SNV | 1 | T | A | Homozygous   |
| NC_037638.1 | 2103836 | SNV | 1 | G | A | Homozygous   |
| NC_037638.1 | 2103873 | SNV | 1 | A | G | Homozygous   |
| NC_037638.1 | 2103880 | SNV | 1 | A | T | Homozygous   |
| NC_037638.1 | 2103886 | SNV | 1 | A | T | Homozygous   |
| NC_037638.1 | 2104554 | SNV | 1 | G | A | Homozygous   |
| NC_037638.1 | 2105032 | SNV | 1 | C | G | Homozygous   |
| NC_037638.1 | 2105034 | SNV | 1 | T | G | Homozygous   |
| NC_037638.1 | 2105536 | SNV | 1 | G | A | Homozygous   |

|             |         |     |   |   |   |              |
|-------------|---------|-----|---|---|---|--------------|
| NC_037638.1 | 2107103 | SNV | 1 | T | C | Homozygous   |
| NC_037638.1 | 2107136 | SNV | 1 | T | C | Heterozygous |
| NC_037638.1 | 2107162 | SNV | 1 | T | C | Heterozygous |
| NC_037638.1 | 2107165 | SNV | 1 | T | C | Heterozygous |
| NC_037638.1 | 2110333 | SNV | 1 | A | G | Homozygous   |
| NC_037638.1 | 2113633 | SNV | 1 | A | C | Heterozygous |
| NC_037638.1 | 2113635 | SNV | 1 | C | G | Heterozygous |
| NC_037638.1 | 2113638 | SNV | 1 | T | A | Heterozygous |
| NC_037638.1 | 2119653 | SNV | 1 | A | G | Heterozygous |
| NC_037638.1 | 2119668 | SNV | 1 | T | C | Heterozygous |
| NC_037638.1 | 2119988 | SNV | 1 | A | G | Homozygous   |
| NC_037638.1 | 2120096 | SNV | 1 | C | T | Heterozygous |
| NC_037638.1 | 2120135 | SNV | 1 | C | T | Heterozygous |
| NC_037638.1 | 2120399 | SNV | 1 | T | A | Homozygous   |
| NC_037638.1 | 2120402 | SNV | 1 | T | A | Homozygous   |
| NC_037638.1 | 2120405 | SNV | 1 | A | T | Homozygous   |
| NC_037638.1 | 2120411 | SNV | 1 | T | A | Homozygous   |
| NC_037638.1 | 2120414 | SNV | 1 | C | A | Homozygous   |
| NC_037638.1 | 2126283 | SNV | 1 | C | T | Heterozygous |
| NC_037638.1 | 2131941 | SNV | 1 | A | C | Heterozygous |
| NC_037638.1 | 2131960 | SNV | 1 | G | A | Heterozygous |
| NC_037638.1 | 2132044 | SNV | 1 | T | C | Homozygous   |
| NC_037638.1 | 2132124 | SNV | 1 | A | G | Homozygous   |
| NC_037638.1 | 2136033 | SNV | 1 | G | A | Heterozygous |
| NC_037638.1 | 2137026 | SNV | 1 | A | T | Heterozygous |
| NC_037638.1 | 2144654 | SNV | 1 | T | A | Homozygous   |
| NC_037638.1 | 2144674 | SNV | 1 | T | C | Homozygous   |
| NC_037638.1 | 2150199 | SNV | 1 | G | A | Heterozygous |
| NC_037638.1 | 2150292 | SNV | 1 | A | C | Heterozygous |
| NC_037638.1 | 2150294 | SNV | 1 | C | A | Heterozygous |
| NC_037638.1 | 2150314 | SNV | 1 | A | G | Heterozygous |
| NC_037638.1 | 2150447 | SNV | 1 | T | A | Heterozygous |
| NC_037638.1 | 2150786 | SNV | 1 | A | G | Heterozygous |
| NC_037638.1 | 2155210 | SNV | 1 | T | G | Heterozygous |
| NC_037638.1 | 2155216 | SNV | 1 | T | A | Heterozygous |
| NC_037638.1 | 2155218 | SNV | 1 | T | A | Heterozygous |
| NC_037638.1 | 2155780 | SNV | 1 | A | G | Homozygous   |
| NC_037638.1 | 2155903 | SNV | 1 | T | C | Homozygous   |
| NC_037638.1 | 2156138 | SNV | 1 | A | G | Homozygous   |
| NC_037638.1 | 2156347 | SNV | 1 | A | G | Homozygous   |
| NC_037638.1 | 2157325 | SNV | 1 | A | T | Homozygous   |
| NC_037638.1 | 2158496 | SNV | 1 | G | A | Homozygous   |
| NC_037638.1 | 2158498 | SNV | 1 | G | A | Homozygous   |
| NC_037638.1 | 2158502 | SNV | 1 | A | G | Heterozygous |
| NC_037638.1 | 2158511 | SNV | 1 | T | C | Homozygous   |
| NC_037638.1 | 2161313 | SNV | 1 | T | C | Heterozygous |
| NC_037638.1 | 2175264 | SNV | 1 | T | A | Homozygous   |
| NC_037638.1 | 2175271 | SNV | 1 | A | T | Heterozygous |
| NC_037638.1 | 2175273 | SNV | 1 | A | C | Heterozygous |
| NC_037638.1 | 2181217 | SNV | 1 | A | T | Homozygous   |
| NC_037638.1 | 2181221 | SNV | 1 | T | A | Homozygous   |

|             |         |     |   |   |   |              |
|-------------|---------|-----|---|---|---|--------------|
| NC_037638.1 | 2181236 | SNV | 1 | G | T | Homozygous   |
| NC_037638.1 | 2182275 | SNV | 1 | A | G | Homozygous   |
| NC_037638.1 | 2183700 | SNV | 1 | A | T | Heterozygous |
| NC_037638.1 | 2183703 | SNV | 1 | T | A | Heterozygous |
| NC_037638.1 | 2183707 | SNV | 1 | G | T | Heterozygous |
| NC_037638.1 | 2183727 | SNV | 1 | G | A | Homozygous   |
| NC_037638.1 | 2183729 | SNV | 1 | A | G | Homozygous   |
| NC_037638.1 | 2183733 | SNV | 1 | A | T | Homozygous   |
| NC_037638.1 | 2183737 | SNV | 1 | C | T | Homozygous   |
| NC_037638.1 | 2183740 | SNV | 1 | T | G | Heterozygous |
| NC_037638.1 | 2183744 | SNV | 1 | T | A | Homozygous   |
| NC_037638.1 | 2183750 | SNV | 1 | T | A | Homozygous   |
| NC_037638.1 | 2187305 | SNV | 1 | A | T | Homozygous   |
| NC_037638.1 | 2187915 | SNV | 1 | T | C | Heterozygous |
| NC_037638.1 | 2188529 | SNV | 1 | A | T | Heterozygous |
| NC_037638.1 | 2192554 | SNV | 1 | A | T | Homozygous   |
| NC_037638.1 | 2192572 | SNV | 1 | A | T | Homozygous   |
| NC_037638.1 | 2192574 | SNV | 1 | T | A | Homozygous   |
| NC_037638.1 | 2193042 | SNV | 1 | C | T | Homozygous   |
| NC_037638.1 | 2193053 | SNV | 1 | C | A | Heterozygous |
| NC_037638.1 | 2193163 | SNV | 1 | C | T | Homozygous   |
| NC_037638.1 | 2196785 | SNV | 1 | C | T | Homozygous   |
| NC_037638.1 | 2196869 | SNV | 1 | A | G | Homozygous   |
| NC_037638.1 | 2196898 | SNV | 1 | A | T | Homozygous   |
| NC_037638.1 | 2196902 | SNV | 1 | A | G | Homozygous   |
| NC_037638.1 | 2196909 | SNV | 1 | A | G | Homozygous   |
| NC_037638.1 | 2196914 | SNV | 1 | A | T | Homozygous   |
| NC_037638.1 | 2198193 | SNV | 1 | A | G | Homozygous   |
| NC_037638.1 | 2198305 | SNV | 1 | T | C | Homozygous   |
| NC_037638.1 | 2198497 | SNV | 1 | G | A | Heterozygous |
| NC_037638.1 | 2201063 | SNV | 1 | T | C | Homozygous   |
| NC_037638.1 | 2201103 | SNV | 1 | T | C | Heterozygous |
| NC_037638.1 | 2201588 | SNV | 1 | A | G | Homozygous   |
| NC_037638.1 | 2201946 | SNV | 1 | A | T | Heterozygous |
| NC_037638.1 | 2202148 | SNV | 1 | A | G | Heterozygous |
| NC_037638.1 | 2202300 | SNV | 1 | T | C | Heterozygous |
| NC_037638.1 | 2202542 | SNV | 1 | A | C | Homozygous   |
| NC_037638.1 | 2202616 | SNV | 1 | T | G | Heterozygous |
| NC_037638.1 | 2202975 | SNV | 1 | A | G | Homozygous   |
| NC_037638.1 | 2203198 | SNV | 1 | G | A | Heterozygous |
| NC_037638.1 | 2203379 | SNV | 1 | T | C | Homozygous   |
| NC_037638.1 | 2203803 | SNV | 1 | C | T | Heterozygous |
| NC_037638.1 | 2204630 | SNV | 1 | T | C | Homozygous   |
| NC_037638.1 | 2204826 | SNV | 1 | T | C | Heterozygous |
| NC_037638.1 | 2204828 | SNV | 1 | A | T | Heterozygous |
| NC_037638.1 | 2205373 | SNV | 1 | T | C | Homozygous   |
| NC_037638.1 | 2205466 | SNV | 1 | G | A | Homozygous   |
| NC_037638.1 | 2205581 | SNV | 1 | G | A | Heterozygous |
| NC_037638.1 | 2206540 | SNV | 1 | C | T | Heterozygous |
| NC_037638.1 | 2208062 | SNV | 1 | C | G | Homozygous   |
| NC_037638.1 | 2208065 | SNV | 1 | A | C | Homozygous   |

|             |         |     |   |   |   |              |
|-------------|---------|-----|---|---|---|--------------|
| NC_037638.1 | 2208071 | SNV | 1 | A | T | Homozygous   |
| NC_037638.1 | 2208594 | SNV | 1 | G | A | Homozygous   |
| NC_037638.1 | 2209117 | SNV | 1 | C | A | Homozygous   |
| NC_037638.1 | 2210177 | SNV | 1 | A | G | Homozygous   |
| NC_037638.1 | 2212495 | SNV | 1 | C | G | Heterozygous |
| NC_037638.1 | 2212824 | SNV | 1 | C | G | Homozygous   |
| NC_037638.1 | 2213120 | SNV | 1 | A | G | Homozygous   |
| NC_037638.1 | 2214421 | SNV | 1 | C | A | Homozygous   |
| NC_037638.1 | 2217571 | SNV | 1 | C | T | Heterozygous |
| NC_037638.1 | 2218093 | SNV | 1 | C | T | Heterozygous |
| NC_037638.1 | 2223926 | SNV | 1 | C | T | Homozygous   |
| NC_037638.1 | 2228083 | SNV | 1 | T | A | Homozygous   |
| NC_037638.1 | 2231644 | SNV | 1 | A | T | Homozygous   |
| NC_037638.1 | 2231668 | SNV | 1 | A | T | Homozygous   |
| NC_037638.1 | 2231681 | SNV | 1 | A | T | Homozygous   |
| NC_037638.1 | 2231684 | SNV | 1 | A | T | Homozygous   |
| NC_037638.1 | 2231689 | SNV | 1 | A | T | Homozygous   |
| NC_037638.1 | 2233568 | SNV | 1 | C | A | Homozygous   |
| NC_037638.1 | 2233570 | SNV | 1 | A | T | Homozygous   |
| NC_037638.1 | 2233588 | SNV | 1 | A | G | Homozygous   |
| NC_037638.1 | 2233603 | SNV | 1 | T | C | Homozygous   |
| NC_037638.1 | 2233621 | SNV | 1 | C | T | Heterozygous |
| NC_037638.1 | 2233623 | SNV | 1 | A | G | Heterozygous |
| NC_037638.1 | 2233630 | SNV | 1 | A | T | Heterozygous |
| NC_037638.1 | 2233634 | SNV | 1 | T | C | Homozygous   |
| NC_037638.1 | 2233636 | SNV | 1 | A | T | Homozygous   |
| NC_037638.1 | 2233652 | SNV | 1 | T | C | Heterozygous |
| NC_037638.1 | 2233663 | SNV | 1 | T | A | Heterozygous |
| NC_037638.1 | 2233670 | SNV | 1 | G | C | Heterozygous |
| NC_037638.1 | 2233681 | SNV | 1 | T | A | Heterozygous |
| NC_037638.1 | 2233684 | SNV | 1 | T | G | Heterozygous |
| NC_037638.1 | 2236039 | SNV | 1 | G | A | Homozygous   |
| NC_037638.1 | 2236580 | SNV | 1 | T | C | Homozygous   |
| NC_037638.1 | 2236652 | SNV | 1 | T | C | Homozygous   |
| NC_037638.1 | 2236655 | SNV | 1 | C | T | Homozygous   |
| NC_037638.1 | 2236664 | SNV | 1 | G | T | Homozygous   |
| NC_037638.1 | 2236676 | SNV | 1 | A | G | Homozygous   |
| NC_037638.1 | 2236680 | SNV | 1 | A | C | Homozygous   |
| NC_037638.1 | 2236682 | SNV | 1 | A | T | Homozygous   |
| NC_037638.1 | 2236685 | SNV | 1 | A | G | Homozygous   |
| NC_037638.1 | 2236688 | SNV | 1 | A | C | Homozygous   |
| NC_037638.1 | 2236691 | SNV | 1 | A | G | Heterozygous |
| NC_037638.1 | 2236694 | SNV | 1 | G | T | Homozygous   |
| NC_037638.1 | 2237987 | SNV | 1 | T | A | Homozygous   |
| NC_037638.1 | 2237991 | SNV | 1 | A | C | Homozygous   |
| NC_037638.1 | 2242588 | SNV | 1 | A | T | Homozygous   |
| NC_037638.1 | 2251537 | SNV | 1 | C | T | Homozygous   |
| NC_037638.1 | 2251652 | SNV | 1 | T | C | Homozygous   |
| NC_037638.1 | 2253486 | SNV | 1 | C | T | Heterozygous |
| NC_037638.1 | 2256779 | SNV | 1 | T | A | Homozygous   |
| NC_037638.1 | 2256784 | SNV | 1 | A | C | Homozygous   |

|             |         |     |   |   |   |              |
|-------------|---------|-----|---|---|---|--------------|
| NC_037638.1 | 2256788 | SNV | 1 | A | T | Homozygous   |
| NC_037638.1 | 2258791 | SNV | 1 | T | C | Homozygous   |
| NC_037638.1 | 2262538 | SNV | 1 | G | A | Homozygous   |
| NC_037638.1 | 2262664 | SNV | 1 | A | G | Homozygous   |
| NC_037638.1 | 2263294 | SNV | 1 | A | G | Homozygous   |
| NC_037638.1 | 2263300 | SNV | 1 | A | G | Heterozygous |
| NC_037638.1 | 2263656 | SNV | 1 | G | A | Homozygous   |
| NC_037638.1 | 2263875 | SNV | 1 | T | C | Homozygous   |
| NC_037638.1 | 2264858 | SNV | 1 | A | G | Heterozygous |
| NC_037638.1 | 2265048 | SNV | 1 | A | G | Homozygous   |
| NC_037638.1 | 2265320 | SNV | 1 | A | G | Homozygous   |
| NC_037638.1 | 2265356 | SNV | 1 | T | C | Homozygous   |
| NC_037638.1 | 2265491 | SNV | 1 | A | C | Heterozygous |
| NC_037638.1 | 2267242 | SNV | 1 | T | C | Homozygous   |
| NC_037638.1 | 2267445 | SNV | 1 | T | A | Heterozygous |
| NC_037638.1 | 2267454 | SNV | 1 | T | A | Homozygous   |
| NC_037638.1 | 2268069 | SNV | 1 | C | T | Homozygous   |
| NC_037638.1 | 2268071 | SNV | 1 | A | G | Homozygous   |
| NC_037638.1 | 2268313 | SNV | 1 | T | C | Heterozygous |
| NC_037638.1 | 2268328 | SNV | 1 | A | G | Homozygous   |
| NC_037638.1 | 2268430 | SNV | 1 | T | C | Homozygous   |
| NC_037638.1 | 2268548 | SNV | 1 | A | G | Homozygous   |
| NC_037638.1 | 2278771 | SNV | 1 | C | T | Heterozygous |
| NC_037638.1 | 2278774 | SNV | 1 | G | C | Heterozygous |
| NC_037638.1 | 2278900 | SNV | 1 | A | G | Heterozygous |
| NC_037638.1 | 2278913 | SNV | 1 | C | T | Heterozygous |
| NC_037638.1 | 2278958 | SNV | 1 | G | A | Heterozygous |
| NC_037638.1 | 2279069 | SNV | 1 | A | G | Homozygous   |
| NC_037638.1 | 2279197 | SNV | 1 | A | G | Heterozygous |
| NC_037638.1 | 2279302 | SNV | 1 | C | T | Heterozygous |
| NC_037638.1 | 2279311 | SNV | 1 | T | C | Homozygous   |
| NC_037638.1 | 2279317 | SNV | 1 | C | T | Homozygous   |
| NC_037638.1 | 2282581 | SNV | 1 | C | T | Homozygous   |
| NC_037638.1 | 2282784 | SNV | 1 | A | G | Homozygous   |
| NC_037638.1 | 2299150 | SNV | 1 | T | C | Heterozygous |
| NC_037638.1 | 2299179 | SNV | 1 | T | A | Homozygous   |
| NC_037638.1 | 2299335 | SNV | 1 | G | A | Heterozygous |
| NC_037638.1 | 2303281 | SNV | 1 | G | A | Homozygous   |
| NC_037638.1 | 2304131 | SNV | 1 | T | A | Homozygous   |
| NC_037638.1 | 2304179 | SNV | 1 | A | T | Homozygous   |
| NC_037638.1 | 2304245 | SNV | 1 | G | A | Homozygous   |
| NC_037638.1 | 2304299 | SNV | 1 | A | G | Homozygous   |
| NC_037638.1 | 2304335 | SNV | 1 | T | A | Homozygous   |
| NC_037638.1 | 2304371 | SNV | 1 | A | G | Homozygous   |
| NC_037638.1 | 2304462 | SNV | 1 | A | G | Homozygous   |
| NC_037638.1 | 2304480 | SNV | 1 | A | T | Homozygous   |
| NC_037638.1 | 2304492 | SNV | 1 | T | A | Homozygous   |
| NC_037638.1 | 2304501 | SNV | 1 | A | T | Homozygous   |
| NC_037638.1 | 2304507 | SNV | 1 | G | A | Homozygous   |
| NC_037638.1 | 2304531 | SNV | 1 | A | G | Homozygous   |
| NC_037638.1 | 2304943 | SNV | 1 | G | A | Heterozygous |

|             |         |     |   |   |   |              |
|-------------|---------|-----|---|---|---|--------------|
| NC_037638.1 | 2304948 | SNV | 1 | A | C | Homozygous   |
| NC_037638.1 | 2304950 | SNV | 1 | A | G | Homozygous   |
| NC_037638.1 | 2304959 | SNV | 1 | A | G | Homozygous   |
| NC_037638.1 | 2304962 | SNV | 1 | C | A | Homozygous   |
| NC_037638.1 | 2323031 | SNV | 1 | A | T | Homozygous   |
| NC_037638.1 | 2323037 | SNV | 1 | T | A | Homozygous   |
| NC_037638.1 | 2323061 | SNV | 1 | G | T | Homozygous   |
| NC_037638.1 | 2323139 | SNV | 1 | G | T | Homozygous   |
| NC_037638.1 | 2334162 | SNV | 1 | T | A | Homozygous   |
| NC_037638.1 | 2334165 | SNV | 1 | A | G | Homozygous   |
| NC_037638.1 | 2334201 | SNV | 1 | A | G | Homozygous   |
| NC_037638.1 | 2334207 | SNV | 1 | A | G | Homozygous   |
| NC_037638.1 | 2348899 | SNV | 1 | C | T | Heterozygous |
| NC_037638.1 | 2359284 | SNV | 1 | C | T | Homozygous   |
| NC_037638.1 | 2359319 | SNV | 1 | G | A | Homozygous   |
| NC_037638.1 | 2359363 | SNV | 1 | T | A | Homozygous   |
| NC_037638.1 | 2359365 | SNV | 1 | C | A | Homozygous   |
| NC_037638.1 | 2359367 | SNV | 1 | A | T | Homozygous   |
| NC_037638.1 | 2359373 | SNV | 1 | A | G | Homozygous   |
| NC_037638.1 | 2360242 | SNV | 1 | C | T | Heterozygous |
| NC_037638.1 | 2360987 | SNV | 1 | C | T | Heterozygous |
| NC_037638.1 | 2372716 | SNV | 1 | C | T | Heterozygous |
| NC_037638.1 | 2372809 | SNV | 1 | A | G | Homozygous   |
| NC_037638.1 | 2372813 | SNV | 1 | T | C | Homozygous   |
| NC_037638.1 | 2372822 | SNV | 1 | T | G | Heterozygous |
| NC_037638.1 | 2377471 | SNV | 1 | C | T | Homozygous   |
| NC_037638.1 | 2377482 | SNV | 1 | G | T | Heterozygous |
| NC_037638.1 | 2377518 | SNV | 1 | C | T | Homozygous   |
| NC_037638.1 | 2377521 | SNV | 1 | G | A | Homozygous   |
| NC_037638.1 | 2377526 | SNV | 1 | C | G | Homozygous   |
| NC_037638.1 | 2377534 | SNV | 1 | A | G | Homozygous   |
| NC_037638.1 | 2377548 | SNV | 1 | A | G | Homozygous   |
| NC_037638.1 | 2380626 | SNV | 1 | T | A | Homozygous   |
| NC_037638.1 | 2380637 | SNV | 1 | G | T | Homozygous   |
| NC_037638.1 | 2380639 | SNV | 1 | G | A | Homozygous   |
| NC_037638.1 | 2380667 | SNV | 1 | C | A | Homozygous   |
| NC_037638.1 | 2380670 | SNV | 1 | A | C | Homozygous   |
| NC_037638.1 | 2461557 | SNV | 1 | C | A | Heterozygous |
| NC_037638.1 | 2462693 | SNV | 1 | T | C | Homozygous   |
| NC_037638.1 | 2463582 | SNV | 1 | C | T | Homozygous   |
| NC_037638.1 | 2463585 | SNV | 1 | T | A | Homozygous   |
| NC_037638.1 | 2463587 | SNV | 1 | T | G | Homozygous   |
| NC_037638.1 | 2463592 | SNV | 1 | G | A | Homozygous   |
| NC_037638.1 | 2464003 | SNV | 1 | T | A | Heterozygous |
| NC_037638.1 | 2472189 | SNV | 1 | T | C | Homozygous   |
| NC_037638.1 | 2472523 | SNV | 1 | G | A | Homozygous   |
| NC_037638.1 | 2477156 | SNV | 1 | C | A | Heterozygous |
| NC_037638.1 | 2477174 | SNV | 1 | T | G | Heterozygous |
| NC_037638.1 | 2477180 | SNV | 1 | A | G | Heterozygous |
| NC_037638.1 | 2477183 | SNV | 1 | A | G | Heterozygous |
| NC_037638.1 | 2477731 | SNV | 1 | T | C | Homozygous   |



|             |         |     |   |   |   |              |
|-------------|---------|-----|---|---|---|--------------|
| NC_037638.1 | 2479903 | SNV | 1 | T | A | Heterozygous |
| NC_037638.1 | 2479906 | SNV | 1 | A | T | Heterozygous |
| NC_037638.1 | 2479910 | SNV | 1 | A | T | Heterozygous |
| NC_037638.1 | 2479916 | SNV | 1 | A | T | Heterozygous |
| NC_037638.1 | 2480171 | SNV | 1 | A | C | Heterozygous |
| NC_037638.1 | 2480636 | SNV | 1 | A | T | Homozygous   |
| NC_037638.1 | 2484965 | SNV | 1 | T | A | Homozygous   |
| NC_037638.1 | 2485062 | SNV | 1 | C | T | Heterozygous |
| NC_037638.1 | 2485217 | SNV | 1 | A | G | Homozygous   |
| NC_037638.1 | 2485513 | SNV | 1 | A | G | Homozygous   |
| NC_037638.1 | 2486706 | SNV | 1 | C | A | Heterozygous |
| NC_037638.1 | 2486709 | SNV | 1 | A | G | Heterozygous |
| NC_037638.1 | 2486713 | SNV | 1 | T | A | Heterozygous |
| NC_037638.1 | 2490517 | SNV | 1 | C | T | Heterozygous |
| NC_037638.1 | 2490710 | SNV | 1 | A | T | Homozygous   |
| NC_037638.1 | 2490722 | SNV | 1 | C | A | Homozygous   |
| NC_037638.1 | 2490726 | SNV | 1 | T | A | Homozygous   |
| NC_037638.1 | 2493630 | SNV | 1 | A | T | Homozygous   |
| NC_037638.1 | 2500255 | SNV | 1 | C | T | Heterozygous |
| NC_037638.1 | 2501005 | SNV | 1 | G | T | Heterozygous |
| NC_037638.1 | 2501007 | SNV | 1 | A | T | Heterozygous |
| NC_037638.1 | 2504353 | SNV | 1 | A | T | Heterozygous |
| NC_037638.1 | 2504525 | SNV | 1 | T | C | Homozygous   |
| NC_037638.1 | 2504611 | SNV | 1 | G | A | Homozygous   |
| NC_037638.1 | 2505804 | SNV | 1 | A | T | Homozygous   |
| NC_037638.1 | 2505808 | SNV | 1 | C | G | Homozygous   |
| NC_037638.1 | 2509349 | SNV | 1 | C | T | Homozygous   |
| NC_037638.1 | 2511805 | SNV | 1 | G | A | Homozygous   |
| NC_037638.1 | 2511871 | SNV | 1 | T | A | Homozygous   |
| NC_037638.1 | 2511876 | SNV | 1 | T | C | Homozygous   |
| NC_037638.1 | 2513656 | SNV | 1 | G | A | Homozygous   |
| NC_037638.1 | 2514912 | SNV | 1 | T | A | Homozygous   |
| NC_037638.1 | 2515279 | SNV | 1 | C | T | Homozygous   |
| NC_037638.1 | 2515473 | SNV | 1 | G | T | Homozygous   |
| NC_037638.1 | 2515666 | SNV | 1 | A | G | Homozygous   |
| NC_037638.1 | 2522229 | SNV | 1 | A | G | Homozygous   |
| NC_037638.1 | 2529976 | SNV | 1 | G | A | Homozygous   |
| NC_037638.1 | 2529979 | SNV | 1 | G | A | Homozygous   |
| NC_037638.1 | 2529985 | SNV | 1 | G | A | Heterozygous |
| NC_037638.1 | 2530001 | SNV | 1 | A | T | Homozygous   |
| NC_037638.1 | 2530005 | SNV | 1 | C | G | Heterozygous |
| NC_037638.1 | 2530043 | SNV | 1 | T | C | Heterozygous |
| NC_037638.1 | 2530526 | SNV | 1 | A | G | Homozygous   |
| NC_037638.1 | 2534504 | SNV | 1 | T | G | Homozygous   |
| NC_037638.1 | 2534528 | SNV | 1 | A | G | Heterozygous |
| NC_037638.1 | 2534535 | SNV | 1 | T | C | Heterozygous |
| NC_037638.1 | 2534596 | SNV | 1 | A | G | Heterozygous |
| NC_037638.1 | 2534614 | SNV | 1 | A | G | Homozygous   |
| NC_037638.1 | 2534634 | SNV | 1 | A | C | Homozygous   |
| NC_037638.1 | 2534638 | SNV | 1 | T | C | Homozygous   |
| NC_037638.1 | 2534640 | SNV | 1 | A | G | Homozygous   |

|             |         |     |   |   |   |              |
|-------------|---------|-----|---|---|---|--------------|
| NC_037638.1 | 2534666 | SNV | 1 | T | C | Homozygous   |
| NC_037638.1 | 2534894 | SNV | 1 | A | G | Homozygous   |
| NC_037638.1 | 2535198 | SNV | 1 | C | T | Heterozygous |
| NC_037638.1 | 2535210 | SNV | 1 | A | C | Homozygous   |
| NC_037638.1 | 2535212 | SNV | 1 | A | T | Homozygous   |
| NC_037638.1 | 2535638 | SNV | 1 | A | G | Homozygous   |
| NC_037638.1 | 2535694 | SNV | 1 | C | T | Heterozygous |
| NC_037638.1 | 2535870 | SNV | 1 | A | G | Homozygous   |
| NC_037638.1 | 2535880 | SNV | 1 | A | G | Homozygous   |
| NC_037638.1 | 2536358 | SNV | 1 | T | C | Homozygous   |
| NC_037638.1 | 2536412 | SNV | 1 | G | A | Heterozygous |
| NC_037638.1 | 2536429 | SNV | 1 | T | C | Heterozygous |
| NC_037638.1 | 2536431 | SNV | 1 | T | C | Heterozygous |
| NC_037638.1 | 2536451 | SNV | 1 | C | T | Homozygous   |
| NC_037638.1 | 2536460 | SNV | 1 | T | G | Heterozygous |
| NC_037638.1 | 2536642 | SNV | 1 | T | C | Homozygous   |
| NC_037638.1 | 2536652 | SNV | 1 | A | G | Homozygous   |
| NC_037638.1 | 2536838 | SNV | 1 | C | T | Heterozygous |
| NC_037638.1 | 2537108 | SNV | 1 | A | G | Homozygous   |
| NC_037638.1 | 2537127 | SNV | 1 | C | A | Heterozygous |
| NC_037638.1 | 2537129 | SNV | 1 | A | C | Heterozygous |
| NC_037638.1 | 2537136 | SNV | 1 | A | G | Heterozygous |
| NC_037638.1 | 2537157 | SNV | 1 | A | C | Heterozygous |
| NC_037638.1 | 2537481 | SNV | 1 | G | A | Homozygous   |
| NC_037638.1 | 2537642 | SNV | 1 | A | G | Homozygous   |
| NC_037638.1 | 2537726 | SNV | 1 | A | G | Heterozygous |
| NC_037638.1 | 2537760 | SNV | 1 | A | G | Homozygous   |
| NC_037638.1 | 2537931 | SNV | 1 | G | A | Heterozygous |
| NC_037638.1 | 2537956 | SNV | 1 | C | T | Homozygous   |
| NC_037638.1 | 2537983 | SNV | 1 | C | T | Homozygous   |
| NC_037638.1 | 2538017 | SNV | 1 | A | C | Homozygous   |
| NC_037638.1 | 2538153 | SNV | 1 | A | G | Homozygous   |
| NC_037638.1 | 2538164 | SNV | 1 | T | G | Homozygous   |
| NC_037638.1 | 2538219 | SNV | 1 | C | T | Homozygous   |
| NC_037638.1 | 2538358 | SNV | 1 | G | A | Heterozygous |
| NC_037638.1 | 2538481 | SNV | 1 | A | T | Homozygous   |
| NC_037638.1 | 2538606 | SNV | 1 | C | T | Homozygous   |
| NC_037638.1 | 2538649 | SNV | 1 | C | T | Heterozygous |
| NC_037638.1 | 2538972 | SNV | 1 | A | G | Homozygous   |
| NC_037638.1 | 2539014 | SNV | 1 | T | C | Heterozygous |
| NC_037638.1 | 2539027 | SNV | 1 | C | G | Heterozygous |
| NC_037638.1 | 2553700 | SNV | 1 | C | A | Homozygous   |
| NC_037638.1 | 2553725 | SNV | 1 | A | G | Homozygous   |
| NC_037638.1 | 2557757 | SNV | 1 | C | A | Homozygous   |
| NC_037638.1 | 2564089 | SNV | 1 | T | C | Homozygous   |
| NC_037638.1 | 2599011 | SNV | 1 | A | C | Homozygous   |
| NC_037638.1 | 2599022 | SNV | 1 | T | C | Homozygous   |
| NC_037638.1 | 2647560 | SNV | 1 | G | A | Homozygous   |
| NC_037638.1 | 2647621 | SNV | 1 | C | T | Heterozygous |
| NC_037638.1 | 2647831 | SNV | 1 | G | A | Heterozygous |
| NC_037638.1 | 2680389 | SNV | 1 | A | G | Homozygous   |

|             |         |     |   |   |   |              |
|-------------|---------|-----|---|---|---|--------------|
| NC_037638.1 | 2681653 | SNV | 1 | G | A | Heterozygous |
| NC_037638.1 | 2681759 | SNV | 1 | G | A | Heterozygous |
| NC_037638.1 | 2681998 | SNV | 1 | G | C | Heterozygous |
| NC_037638.1 | 2682025 | SNV | 1 | A | G | Heterozygous |
| NC_037638.1 | 2686583 | SNV | 1 | C | T | Homozygous   |
| NC_037638.1 | 2686587 | SNV | 1 | T | G | Homozygous   |
| NC_037638.1 | 2686616 | SNV | 1 | A | T | Homozygous   |
| NC_037638.1 | 2694919 | SNV | 1 | C | T | Heterozygous |
| NC_037638.1 | 2694930 | SNV | 1 | T | G | Heterozygous |
| NC_037638.1 | 2694934 | SNV | 1 | T | G | Heterozygous |
| NC_037638.1 | 2694937 | SNV | 1 | C | T | Heterozygous |
| NC_037638.1 | 2694991 | SNV | 1 | C | T | Heterozygous |
| NC_037638.1 | 2695338 | SNV | 1 | A | G | Homozygous   |
| NC_037638.1 | 2695479 | SNV | 1 | A | G | Homozygous   |
| NC_037638.1 | 2695918 | SNV | 1 | C | T | Heterozygous |
| NC_037638.1 | 2696048 | SNV | 1 | G | C | Heterozygous |
| NC_037638.1 | 2696244 | SNV | 1 | T | C | Homozygous   |
| NC_037638.1 | 2696322 | SNV | 1 | G | C | Heterozygous |
| NC_037638.1 | 2696409 | SNV | 1 | A | G | Heterozygous |
| NC_037638.1 | 2696413 | SNV | 1 | A | G | Heterozygous |
| NC_037638.1 | 2696530 | SNV | 1 | T | C | Homozygous   |
| NC_037638.1 | 2696718 | SNV | 1 | A | T | Heterozygous |
| NC_037638.1 | 2719187 | SNV | 1 | C | T | Homozygous   |
| NC_037638.1 | 2719199 | SNV | 1 | A | G | Homozygous   |
| NC_037638.1 | 2719207 | SNV | 1 | A | G | Homozygous   |
| NC_037638.1 | 2719209 | SNV | 1 | A | G | Homozygous   |
| NC_037638.1 | 2719222 | SNV | 1 | T | A | Heterozygous |
| NC_037638.1 | 2719224 | SNV | 1 | A | T | Heterozygous |
| NC_037638.1 | 2719301 | SNV | 1 | G | A | Heterozygous |
| NC_037638.1 | 2719311 | SNV | 1 | A | T | Homozygous   |
| NC_037638.1 | 2719318 | SNV | 1 | C | T | Homozygous   |
| NC_037638.1 | 2719400 | SNV | 1 | A | T | Homozygous   |
| NC_037638.1 | 2719402 | SNV | 1 | T | A | Heterozygous |
| NC_037638.1 | 2733826 | SNV | 1 | A | G | Homozygous   |
| NC_037638.1 | 2733891 | SNV | 1 | A | C | Homozygous   |
| NC_037638.1 | 2748681 | SNV | 1 | C | A | Homozygous   |
| NC_037638.1 | 2748736 | SNV | 1 | G | A | Heterozygous |
| NC_037638.1 | 2748894 | SNV | 1 | T | C | Heterozygous |
| NC_037638.1 | 2762432 | SNV | 1 | C | A | Homozygous   |
| NC_037638.1 | 2762436 | SNV | 1 | T | C | Homozygous   |
| NC_037638.1 | 2762438 | SNV | 1 | T | A | Homozygous   |
| NC_037638.1 | 2763989 | SNV | 1 | G | A | Homozygous   |
| NC_037638.1 | 2763994 | SNV | 1 | A | G | Heterozygous |
| NC_037638.1 | 2764003 | SNV | 1 | G | A | Heterozygous |
| NC_037638.1 | 2764007 | SNV | 1 | G | A | Homozygous   |
| NC_037638.1 | 2767625 | SNV | 1 | T | C | Heterozygous |
| NC_037638.1 | 2767786 | SNV | 1 | T | G | Heterozygous |
| NC_037638.1 | 2767802 | SNV | 1 | A | T | Homozygous   |
| NC_037638.1 | 2767827 | SNV | 1 | G | C | Homozygous   |
| NC_037638.1 | 2767831 | SNV | 1 | A | G | Homozygous   |
| NC_037638.1 | 2767859 | SNV | 1 | C | A | Homozygous   |

|             |         |     |   |   |   |              |
|-------------|---------|-----|---|---|---|--------------|
| NC_037638.1 | 2767862 | SNV | 1 | A | C | Heterozygous |
| NC_037638.1 | 2767863 | SNV | 1 | T | C | Heterozygous |
| NC_037638.1 | 2767872 | SNV | 1 | T | C | Homozygous   |
| NC_037638.1 | 2767880 | SNV | 1 | C | T | Heterozygous |
| NC_037638.1 | 2767887 | SNV | 1 | A | G | Homozygous   |
| NC_037638.1 | 2767903 | SNV | 1 | A | G | Homozygous   |
| NC_037638.1 | 2767998 | SNV | 1 | G | A | Heterozygous |
| NC_037638.1 | 2768008 | SNV | 1 | G | A | Heterozygous |
| NC_037638.1 | 2768012 | SNV | 1 | T | C | Homozygous   |
| NC_037638.1 | 2768015 | SNV | 1 | C | T | Homozygous   |
| NC_037638.1 | 2768018 | SNV | 1 | G | T | Heterozygous |
| NC_037638.1 | 2768024 | SNV | 1 | A | C | Heterozygous |
| NC_037638.1 | 2768031 | SNV | 1 | C | T | Homozygous   |
| NC_037638.1 | 2768046 | SNV | 1 | C | T | Homozygous   |
| NC_037638.1 | 2768083 | SNV | 1 | G | C | Homozygous   |
| NC_037638.1 | 2771591 | SNV | 1 | C | A | Homozygous   |
| NC_037638.1 | 2771717 | SNV | 1 | G | A | Heterozygous |
| NC_037638.1 | 2771843 | SNV | 1 | T | C | Homozygous   |
| NC_037638.1 | 2771847 | SNV | 1 | G | A | Heterozygous |
| NC_037638.1 | 2771901 | SNV | 1 | G | A | Homozygous   |
| NC_037638.1 | 2771923 | SNV | 1 | G | A | Heterozygous |
| NC_037638.1 | 2771925 | SNV | 1 | G | A | Heterozygous |
| NC_037638.1 | 2772023 | SNV | 1 | A | G | Heterozygous |
| NC_037638.1 | 2772099 | SNV | 1 | T | G | Homozygous   |
| NC_037638.1 | 2772456 | SNV | 1 | A | G | Homozygous   |
| NC_037638.1 | 2778120 | SNV | 1 | T | C | Homozygous   |
| NC_037638.1 | 2778130 | SNV | 1 | T | C | Homozygous   |
| NC_037638.1 | 2778132 | SNV | 1 | G | A | Homozygous   |
| NC_037638.1 | 2778146 | SNV | 1 | C | A | Homozygous   |
| NC_037638.1 | 2778178 | SNV | 1 | G | C | Heterozygous |
| NC_037638.1 | 2778665 | SNV | 1 | A | G | Homozygous   |
| NC_037638.1 | 2778987 | SNV | 1 | C | T | Heterozygous |
| NC_037638.1 | 2780404 | SNV | 1 | C | T | Homozygous   |
| NC_037638.1 | 2780406 | SNV | 1 | G | A | Homozygous   |
| NC_037638.1 | 2790351 | SNV | 1 | T | C | Homozygous   |
| NC_037638.1 | 2808317 | SNV | 1 | T | C | Homozygous   |
| NC_037638.1 | 2808325 | SNV | 1 | A | G | Heterozygous |
| NC_037638.1 | 2808332 | SNV | 1 | A | T | Heterozygous |
| NC_037638.1 | 2808337 | SNV | 1 | A | T | Heterozygous |
| NC_037638.1 | 2808343 | SNV | 1 | T | A | Heterozygous |
| NC_037638.1 | 2808356 | SNV | 1 | T | A | Homozygous   |
| NC_037638.1 | 2808358 | SNV | 1 | A | T | Homozygous   |
| NC_037638.1 | 2808362 | SNV | 1 | A | T | Homozygous   |
| NC_037638.1 | 2808366 | SNV | 1 | T | A | Homozygous   |
| NC_037638.1 | 2815460 | SNV | 1 | G | T | Homozygous   |
| NC_037638.1 | 2815463 | SNV | 1 | C | A | Homozygous   |
| NC_037638.1 | 2815467 | SNV | 1 | T | A | Homozygous   |
| NC_037638.1 | 2815872 | SNV | 1 | C | T | Heterozygous |
| NC_037638.1 | 2815877 | SNV | 1 | C | A | Homozygous   |
| NC_037638.1 | 2815879 | SNV | 1 | T | C | Heterozygous |
| NC_037638.1 | 2815910 | SNV | 1 | C | T | Heterozygous |

|             |         |     |   |   |   |              |
|-------------|---------|-----|---|---|---|--------------|
| NC_037638.1 | 2815998 | SNV | 1 | T | C | Homozygous   |
| NC_037638.1 | 2822198 | SNV | 1 | T | C | Heterozygous |
| NC_037638.1 | 2822328 | SNV | 1 | G | A | Homozygous   |
| NC_037638.1 | 2822341 | SNV | 1 | A | G | Heterozygous |
| NC_037638.1 | 2830708 | SNV | 1 | C | A | Homozygous   |
| NC_037638.1 | 2830736 | SNV | 1 | C | T | Heterozygous |
| NC_037638.1 | 2830738 | SNV | 1 | C | T | Homozygous   |
| NC_037638.1 | 2836137 | SNV | 1 | G | A | Heterozygous |
| NC_037638.1 | 2836183 | SNV | 1 | A | G | Heterozygous |
| NC_037638.1 | 2836193 | SNV | 1 | C | G | Homozygous   |
| NC_037638.1 | 2836301 | SNV | 1 | A | G | Homozygous   |
| NC_037638.1 | 2852873 | SNV | 1 | T | C | Homozygous   |
| NC_037638.1 | 2852875 | SNV | 1 | T | A | Homozygous   |
| NC_037638.1 | 2852883 | SNV | 1 | G | A | Homozygous   |
| NC_037638.1 | 2852885 | SNV | 1 | G | C | Homozygous   |
| NC_037638.1 | 2852887 | SNV | 1 | G | A | Homozygous   |
| NC_037638.1 | 2867466 | SNV | 1 | C | T | Heterozygous |
| NC_037638.1 | 2867513 | SNV | 1 | A | C | Homozygous   |
| NC_037638.1 | 2867516 | SNV | 1 | G | A | Homozygous   |
| NC_037638.1 | 2867539 | SNV | 1 | A | G | Homozygous   |
| NC_037638.1 | 2868129 | SNV | 1 | C | G | Homozygous   |
| NC_037638.1 | 2868137 | SNV | 1 | C | T | Homozygous   |
| NC_037638.1 | 2868161 | SNV | 1 | T | G | Heterozygous |
| NC_037638.1 | 2868194 | SNV | 1 | A | C | Heterozygous |
| NC_037638.1 | 2868197 | SNV | 1 | A | G | Heterozygous |
| NC_037638.1 | 2868215 | SNV | 1 | T | C | Homozygous   |
| NC_037638.1 | 2868221 | SNV | 1 | C | T | Heterozygous |
| NC_037638.1 | 2868277 | SNV | 1 | G | A | Heterozygous |
| NC_037638.1 | 2868283 | SNV | 1 | T | C | Heterozygous |
| NC_037638.1 | 2868292 | SNV | 1 | C | T | Homozygous   |
| NC_037638.1 | 2868295 | SNV | 1 | A | G | Heterozygous |
| NC_037638.1 | 2868306 | SNV | 1 | C | G | Homozygous   |
| NC_037638.1 | 2868323 | SNV | 1 | A | G | Heterozygous |
| NC_037638.1 | 2868338 | SNV | 1 | G | A | Heterozygous |
| NC_037638.1 | 2868349 | SNV | 1 | A | C | Heterozygous |
| NC_037638.1 | 2868358 | SNV | 1 | A | G | Heterozygous |
| NC_037638.1 | 2868675 | SNV | 1 | A | C | Homozygous   |
| NC_037638.1 | 2868749 | SNV | 1 | A | G | Heterozygous |
| NC_037638.1 | 2868976 | SNV | 1 | C | T | Heterozygous |
| NC_037638.1 | 2869048 | SNV | 1 | A | G | Homozygous   |
| NC_037638.1 | 2869100 | SNV | 1 | G | A | Heterozygous |
| NC_037638.1 | 2869108 | SNV | 1 | T | C | Heterozygous |
| NC_037638.1 | 2869120 | SNV | 1 | G | A | Heterozygous |
| NC_037638.1 | 2869124 | SNV | 1 | G | A | Homozygous   |
| NC_037638.1 | 2869127 | SNV | 1 | T | C | Homozygous   |
| NC_037638.1 | 2869189 | SNV | 1 | C | G | Heterozygous |
| NC_037638.1 | 2869189 | SNV | 1 | C | T | Heterozygous |
| NC_037638.1 | 2873972 | SNV | 1 | G | A | Heterozygous |
| NC_037638.1 | 2907358 | SNV | 1 | C | T | Homozygous   |
| NC_037638.1 | 2907392 | SNV | 1 | T | C | Homozygous   |
| NC_037638.1 | 2914284 | SNV | 1 | T | G | Homozygous   |

|             |         |     |   |   |   |              |
|-------------|---------|-----|---|---|---|--------------|
| NC_037638.1 | 2932511 | SNV | 1 | A | G | Homozygous   |
| NC_037638.1 | 2932574 | SNV | 1 | A | G | Homozygous   |
| NC_037638.1 | 2932728 | SNV | 1 | A | G | Homozygous   |
| NC_037638.1 | 2932764 | SNV | 1 | T | A | Homozygous   |
| NC_037638.1 | 2932831 | SNV | 1 | A | G | Homozygous   |
| NC_037638.1 | 2932865 | SNV | 1 | G | A | Heterozygous |
| NC_037638.1 | 2933037 | SNV | 1 | T | C | Homozygous   |
| NC_037638.1 | 2933041 | SNV | 1 | A | G | Homozygous   |
| NC_037638.1 | 2933051 | SNV | 1 | G | A | Homozygous   |
| NC_037638.1 | 2945725 | SNV | 1 | T | C | Homozygous   |
| NC_037638.1 | 2945782 | SNV | 1 | A | G | Heterozygous |
| NC_037638.1 | 2945852 | SNV | 1 | C | T | Heterozygous |
| NC_037638.1 | 2969401 | SNV | 1 | A | G | Homozygous   |
| NC_037638.1 | 2969428 | SNV | 1 | G | A | Heterozygous |
| NC_037638.1 | 2996978 | SNV | 1 | G | A | Heterozygous |
| NC_037638.1 | 2996986 | SNV | 1 | A | G | Homozygous   |
| NC_037638.1 | 2997034 | SNV | 1 | G | A | Homozygous   |
| NC_037638.1 | 2997052 | SNV | 1 | T | C | Homozygous   |
| NC_037638.1 | 2997060 | SNV | 1 | T | C | Heterozygous |
| NC_037638.1 | 2997062 | SNV | 1 | G | A | Heterozygous |
| NC_037638.1 | 2997083 | SNV | 1 | A | G | Heterozygous |
| NC_037638.1 | 2997168 | SNV | 1 | G | A | Heterozygous |
| NC_037638.1 | 2997257 | SNV | 1 | C | A | Heterozygous |
| NC_037638.1 | 2997308 | SNV | 1 | A | G | Heterozygous |
| NC_037638.1 | 2997428 | SNV | 1 | A | G | Homozygous   |
| NC_037638.1 | 2997519 | SNV | 1 | A | G | Homozygous   |
| NC_037638.1 | 2997703 | SNV | 1 | A | G | Heterozygous |
| NC_037638.1 | 2997706 | SNV | 1 | A | G | Heterozygous |
| NC_037638.1 | 2997707 | SNV | 1 | A | T | Heterozygous |
| NC_037638.1 | 2997710 | SNV | 1 | T | A | Homozygous   |
| NC_037638.1 | 3015718 | SNV | 1 | T | C | Homozygous   |
| NC_037638.1 | 3015764 | SNV | 1 | T | A | Heterozygous |
| NC_037638.1 | 3024792 | SNV | 1 | C | T | Heterozygous |
| NC_037638.1 | 3024838 | SNV | 1 | A | G | Homozygous   |
| NC_037638.1 | 3024849 | SNV | 1 | A | G | Homozygous   |
| NC_037638.1 | 3055418 | SNV | 1 | G | A | Homozygous   |
| NC_037638.1 | 3055420 | SNV | 1 | G | A | Homozygous   |
| NC_037638.1 | 3059348 | SNV | 1 | G | A | Homozygous   |
| NC_037638.1 | 3059370 | SNV | 1 | A | G | Heterozygous |
| NC_037638.1 | 3059385 | SNV | 1 | A | G | Heterozygous |
| NC_037638.1 | 3059475 | SNV | 1 | A | G | Homozygous   |
| NC_037638.1 | 3059483 | SNV | 1 | T | G | Homozygous   |
| NC_037638.1 | 3059553 | SNV | 1 | A | G | Heterozygous |
| NC_037638.1 | 3061059 | SNV | 1 | C | T | Heterozygous |
| NC_037638.1 | 3061091 | SNV | 1 | A | G | Heterozygous |
| NC_037638.1 | 3072807 | SNV | 1 | C | T | Homozygous   |
| NC_037638.1 | 3072810 | SNV | 1 | T | A | Homozygous   |
| NC_037638.1 | 3072836 | SNV | 1 | A | C | Homozygous   |
| NC_037638.1 | 3081997 | SNV | 1 | T | C | Heterozygous |
| NC_037638.1 | 3082001 | SNV | 1 | A | T | Heterozygous |
| NC_037638.1 | 3082006 | SNV | 1 | C | T | Heterozygous |

|             |         |     |   |   |   |              |
|-------------|---------|-----|---|---|---|--------------|
| NC_037638.1 | 3082008 | SNV | 1 | A | T | Heterozygous |
| NC_037638.1 | 3082010 | SNV | 1 | C | G | Heterozygous |
| NC_037638.1 | 3085981 | SNV | 1 | T | C | Homozygous   |
| NC_037638.1 | 3086117 | SNV | 1 | G | A | Heterozygous |
| NC_037638.1 | 3086127 | SNV | 1 | G | A | Heterozygous |
| NC_037638.1 | 3086206 | SNV | 1 | A | T | Heterozygous |
| NC_037638.1 | 3086397 | SNV | 1 | C | G | Homozygous   |
| NC_037638.1 | 3087388 | SNV | 1 | A | G | Heterozygous |
| NC_037638.1 | 3087407 | SNV | 1 | G | A | Heterozygous |
| NC_037638.1 | 3087434 | SNV | 1 | C | T | Heterozygous |
| NC_037638.1 | 3087641 | SNV | 1 | A | G | Homozygous   |
| NC_037638.1 | 3088114 | SNV | 1 | G | T | Homozygous   |
| NC_037638.1 | 3088972 | SNV | 1 | T | C | Homozygous   |
| NC_037638.1 | 3088977 | SNV | 1 | C | A | Homozygous   |
| NC_037638.1 | 3088981 | SNV | 1 | T | C | Homozygous   |
| NC_037638.1 | 3088983 | SNV | 1 | G | A | Heterozygous |
| NC_037638.1 | 3088995 | SNV | 1 | T | C | Homozygous   |
| NC_037638.1 | 3090004 | SNV | 1 | G | A | Heterozygous |
| NC_037638.1 | 3090158 | SNV | 1 | T | C | Homozygous   |
| NC_037638.1 | 3090166 | SNV | 1 | T | C | Homozygous   |
| NC_037638.1 | 3090546 | SNV | 1 | T | C | Heterozygous |
| NC_037638.1 | 3090585 | SNV | 1 | A | T | Heterozygous |
| NC_037638.1 | 3090612 | SNV | 1 | A | T | Homozygous   |
| NC_037638.1 | 3090625 | SNV | 1 | C | T | Heterozygous |
| NC_037638.1 | 3090669 | SNV | 1 | T | G | Heterozygous |
| NC_037638.1 | 3090672 | SNV | 1 | C | T | Homozygous   |
| NC_037638.1 | 3090705 | SNV | 1 | C | T | Heterozygous |
| NC_037638.1 | 3090740 | SNV | 1 | A | T | Heterozygous |
| NC_037638.1 | 3091388 | SNV | 1 | T | A | Heterozygous |
| NC_037638.1 | 3091729 | SNV | 1 | C | T | Heterozygous |
| NC_037638.1 | 3092203 | SNV | 1 | T | C | Homozygous   |
| NC_037638.1 | 3094580 | SNV | 1 | T | A | Heterozygous |
| NC_037638.1 | 3094585 | SNV | 1 | A | T | Heterozygous |
| NC_037638.1 | 3096110 | SNV | 1 | T | C | Heterozygous |
| NC_037638.1 | 3096508 | SNV | 1 | T | C | Heterozygous |
| NC_037638.1 | 3096522 | SNV | 1 | T | C | Heterozygous |
| NC_037638.1 | 3096530 | SNV | 1 | T | C | Heterozygous |
| NC_037638.1 | 3096627 | SNV | 1 | T | C | Heterozygous |
| NC_037638.1 | 3101520 | SNV | 1 | A | T | Homozygous   |
| NC_037638.1 | 3101824 | SNV | 1 | G | C | Heterozygous |
| NC_037638.1 | 3101877 | SNV | 1 | A | G | Homozygous   |
| NC_037638.1 | 3102307 | SNV | 1 | A | G | Heterozygous |
| NC_037638.1 | 3103462 | SNV | 1 | A | G | Homozygous   |
| NC_037638.1 | 3103489 | SNV | 1 | A | G | Homozygous   |
| NC_037638.1 | 3104069 | SNV | 1 | C | T | Heterozygous |
| NC_037638.1 | 3104099 | SNV | 1 | T | C | Heterozygous |
| NC_037638.1 | 3104315 | SNV | 1 | G | A | Homozygous   |
| NC_037638.1 | 3104355 | SNV | 1 | G | A | Heterozygous |
| NC_037638.1 | 3104370 | SNV | 1 | T | A | Heterozygous |
| NC_037638.1 | 3104381 | SNV | 1 | A | G | Heterozygous |
| NC_037638.1 | 3104863 | SNV | 1 | G | A | Heterozygous |

|             |         |     |   |   |   |              |
|-------------|---------|-----|---|---|---|--------------|
| NC_037638.1 | 3104874 | SNV | 1 | C | T | Homozygous   |
| NC_037638.1 | 3104882 | SNV | 1 | A | T | Homozygous   |
| NC_037638.1 | 3104936 | SNV | 1 | T | C | Heterozygous |
| NC_037638.1 | 3104970 | SNV | 1 | T | C | Heterozygous |
| NC_037638.1 | 3105019 | SNV | 1 | G | T | Homozygous   |
| NC_037638.1 | 3105106 | SNV | 1 | G | A | Heterozygous |
| NC_037638.1 | 3105112 | SNV | 1 | C | T | Heterozygous |
| NC_037638.1 | 3105671 | SNV | 1 | A | G | Heterozygous |
| NC_037638.1 | 3105716 | SNV | 1 | C | A | Heterozygous |
| NC_037638.1 | 3105943 | SNV | 1 | C | T | Heterozygous |
| NC_037638.1 | 3106138 | SNV | 1 | A | G | Heterozygous |
| NC_037638.1 | 3106150 | SNV | 1 | T | C | Heterozygous |
| NC_037638.1 | 3106152 | SNV | 1 | A | G | Heterozygous |
| NC_037638.1 | 3106183 | SNV | 1 | T | C | Homozygous   |
| NC_037638.1 | 3106261 | SNV | 1 | T | C | Homozygous   |
| NC_037638.1 | 3106549 | SNV | 1 | G | A | Homozygous   |
| NC_037638.1 | 3106561 | SNV | 1 | C | T | Homozygous   |
| NC_037638.1 | 3106584 | SNV | 1 | C | A | Heterozygous |
| NC_037638.1 | 3106794 | SNV | 1 | G | A | Heterozygous |
| NC_037638.1 | 3106827 | SNV | 1 | T | C | Homozygous   |
| NC_037638.1 | 3106928 | SNV | 1 | T | A | Homozygous   |
| NC_037638.1 | 3106940 | SNV | 1 | A | T | Heterozygous |
| NC_037638.1 | 3107288 | SNV | 1 | C | T | Homozygous   |
| NC_037638.1 | 3107355 | SNV | 1 | C | A | Heterozygous |
| NC_037638.1 | 3107357 | SNV | 1 | T | A | Heterozygous |
| NC_037638.1 | 3107364 | SNV | 1 | G | A | Heterozygous |
| NC_037638.1 | 3107367 | SNV | 1 | T | A | Heterozygous |
| NC_037638.1 | 3107394 | SNV | 1 | G | A | Homozygous   |
| NC_037638.1 | 3107438 | SNV | 1 | A | T | Heterozygous |
| NC_037638.1 | 3107540 | SNV | 1 | C | T | Heterozygous |
| NC_037638.1 | 3107821 | SNV | 1 | C | A | Homozygous   |
| NC_037638.1 | 3108176 | SNV | 1 | G | A | Heterozygous |
| NC_037638.1 | 3108535 | SNV | 1 | T | C | Heterozygous |
| NC_037638.1 | 3108669 | SNV | 1 | A | G | Heterozygous |
| NC_037638.1 | 3108710 | SNV | 1 | G | A | Heterozygous |
| NC_037638.1 | 3108757 | SNV | 1 | C | G | Homozygous   |
| NC_037638.1 | 3111390 | SNV | 1 | T | A | Heterozygous |
| NC_037638.1 | 3111402 | SNV | 1 | C | T | Homozygous   |
| NC_037638.1 | 3111412 | SNV | 1 | C | T | Homozygous   |
| NC_037638.1 | 3111418 | SNV | 1 | T | A | Heterozygous |
| NC_037638.1 | 3111481 | SNV | 1 | C | T | Heterozygous |
| NC_037638.1 | 3113207 | SNV | 1 | A | T | Heterozygous |
| NC_037638.1 | 3113351 | SNV | 1 | C | T | Heterozygous |
| NC_037638.1 | 3113438 | SNV | 1 | A | G | Heterozygous |
| NC_037638.1 | 3113665 | SNV | 1 | A | G | Heterozygous |
| NC_037638.1 | 3113811 | SNV | 1 | T | C | Homozygous   |
| NC_037638.1 | 3113816 | SNV | 1 | T | C | Homozygous   |
| NC_037638.1 | 3114034 | SNV | 1 | T | C | Heterozygous |
| NC_037638.1 | 3114293 | SNV | 1 | T | G | Homozygous   |
| NC_037638.1 | 3114631 | SNV | 1 | G | C | Heterozygous |
| NC_037638.1 | 3116531 | SNV | 1 | A | G | Homozygous   |



|             |         |     |   |   |   |              |
|-------------|---------|-----|---|---|---|--------------|
| NC_037638.1 | 3116543 | SNV | 1 | A | G | Homozygous   |
| NC_037638.1 | 3118353 | SNV | 1 | T | C | Homozygous   |
| NC_037638.1 | 3118370 | SNV | 1 | C | T | Heterozygous |
| NC_037638.1 | 3118446 | SNV | 1 | T | C | Homozygous   |
| NC_037638.1 | 3118467 | SNV | 1 | C | T | Heterozygous |
| NC_037638.1 | 3118597 | SNV | 1 | T | C | Homozygous   |
| NC_037638.1 | 3118630 | SNV | 1 | C | T | Heterozygous |
| NC_037638.1 | 3118894 | SNV | 1 | A | G | Heterozygous |
| NC_037638.1 | 3119246 | SNV | 1 | A | G | Homozygous   |
| NC_037638.1 | 3163856 | SNV | 1 | T | A | Heterozygous |
| NC_037638.1 | 3163966 | SNV | 1 | A | G | Homozygous   |
| NC_037638.1 | 3165838 | SNV | 1 | A | G | Homozygous   |
| NC_037638.1 | 3165966 | SNV | 1 | T | G | Heterozygous |
| NC_037638.1 | 3168421 | SNV | 1 | A | G | Homozygous   |
| NC_037638.1 | 3168675 | SNV | 1 | G | A | Heterozygous |
| NC_037638.1 | 3169757 | SNV | 1 | T | C | Homozygous   |
| NC_037638.1 | 3170584 | SNV | 1 | G | A | Heterozygous |
| NC_037638.1 | 3170731 | SNV | 1 | T | C | Homozygous   |
| NC_037638.1 | 3171103 | SNV | 1 | A | G | Homozygous   |
| NC_037638.1 | 3171673 | SNV | 1 | A | G | Homozygous   |
| NC_037638.1 | 3171716 | SNV | 1 | A | G | Homozygous   |
| NC_037638.1 | 3171771 | SNV | 1 | T | G | Homozygous   |
| NC_037638.1 | 3174836 | SNV | 1 | G | T | Homozygous   |
| NC_037638.1 | 3177653 | SNV | 1 | G | A | Heterozygous |
| NC_037638.1 | 3178835 | SNV | 1 | C | T | Heterozygous |
| NC_037638.1 | 3178905 | SNV | 1 | G | A | Heterozygous |
| NC_037638.1 | 3178952 | SNV | 1 | G | A | Heterozygous |
| NC_037638.1 | 3179623 | SNV | 1 | A | G | Heterozygous |
| NC_037638.1 | 3191470 | SNV | 1 | A | T | Homozygous   |
| NC_037638.1 | 3191515 | SNV | 1 | C | T | Homozygous   |
| NC_037638.1 | 3191632 | SNV | 1 | G | T | Homozygous   |
| NC_037638.1 | 3193092 | SNV | 1 | C | A | Homozygous   |
| NC_037638.1 | 3193980 | SNV | 1 | C | T | Heterozygous |
| NC_037638.1 | 3194206 | SNV | 1 | G | A | Homozygous   |
| NC_037638.1 | 3195312 | SNV | 1 | G | A | Heterozygous |
| NC_037638.1 | 3203967 | SNV | 1 | T | C | Homozygous   |
| NC_037638.1 | 3204027 | SNV | 1 | A | G | Homozygous   |
| NC_037638.1 | 3204182 | SNV | 1 | G | A | Homozygous   |
| NC_037638.1 | 3204357 | SNV | 1 | T | C | Homozygous   |
| NC_037638.1 | 3204523 | SNV | 1 | A | G | Homozygous   |
| NC_037638.1 | 3204560 | SNV | 1 | G | C | Heterozygous |
| NC_037638.1 | 3204600 | SNV | 1 | A | G | Heterozygous |
| NC_037638.1 | 3212340 | SNV | 1 | T | C | Homozygous   |
| NC_037638.1 | 3212550 | SNV | 1 | A | T | Homozygous   |
| NC_037638.1 | 3212573 | SNV | 1 | G | A | Homozygous   |
| NC_037638.1 | 3212577 | SNV | 1 | T | G | Homozygous   |
| NC_037638.1 | 3212579 | SNV | 1 | A | G | Homozygous   |
| NC_037638.1 | 3213037 | SNV | 1 | G | A | Homozygous   |
| NC_037638.1 | 3213045 | SNV | 1 | A | G | Heterozygous |
| NC_037638.1 | 3213384 | SNV | 1 | G | A | Homozygous   |
| NC_037638.1 | 3213465 | SNV | 1 | G | A | Heterozygous |

|             |         |     |   |   |   |              |
|-------------|---------|-----|---|---|---|--------------|
| NC_037638.1 | 3213571 | SNV | 1 | C | T | Heterozygous |
| NC_037638.1 | 3213621 | SNV | 1 | A | G | Homozygous   |
| NC_037638.1 | 3213627 | SNV | 1 | G | A | Homozygous   |
| NC_037638.1 | 3213630 | SNV | 1 | C | A | Homozygous   |
| NC_037638.1 | 3213646 | SNV | 1 | T | C | Homozygous   |
| NC_037638.1 | 3213652 | SNV | 1 | A | G | Homozygous   |
| NC_037638.1 | 3213711 | SNV | 1 | A | G | Homozygous   |
| NC_037638.1 | 3213776 | SNV | 1 | A | T | Homozygous   |
| NC_037638.1 | 3213876 | SNV | 1 | C | T | Heterozygous |
| NC_037638.1 | 3213915 | SNV | 1 | T | C | Heterozygous |
| NC_037638.1 | 3213952 | SNV | 1 | T | C | Heterozygous |
| NC_037638.1 | 3213992 | SNV | 1 | A | G | Heterozygous |
| NC_037638.1 | 3214056 | SNV | 1 | T | C | Heterozygous |
| NC_037638.1 | 3214068 | SNV | 1 | A | C | Homozygous   |
| NC_037638.1 | 3214152 | SNV | 1 | C | T | Heterozygous |
| NC_037638.1 | 3214158 | SNV | 1 | A | G | Heterozygous |
| NC_037638.1 | 3214159 | SNV | 1 | C | T | Heterozygous |
| NC_037638.1 | 3214393 | SNV | 1 | A | G | Homozygous   |
| NC_037638.1 | 3214461 | SNV | 1 | A | G | Heterozygous |
| NC_037638.1 | 3214629 | SNV | 1 | C | T | Homozygous   |
| NC_037638.1 | 3214678 | SNV | 1 | C | T | Heterozygous |
| NC_037638.1 | 3214680 | SNV | 1 | A | C | Heterozygous |
| NC_037638.1 | 3214701 | SNV | 1 | A | G | Heterozygous |
| NC_037638.1 | 3214793 | SNV | 1 | C | T | Heterozygous |
| NC_037638.1 | 3214824 | SNV | 1 | T | G | Homozygous   |
| NC_037638.1 | 3214898 | SNV | 1 | C | T | Heterozygous |
| NC_037638.1 | 3214907 | SNV | 1 | G | A | Heterozygous |
| NC_037638.1 | 3214930 | SNV | 1 | G | C | Homozygous   |
| NC_037638.1 | 3215034 | SNV | 1 | A | G | Homozygous   |
| NC_037638.1 | 3215077 | SNV | 1 | T | C | Homozygous   |
| NC_037638.1 | 3215161 | SNV | 1 | G | C | Homozygous   |
| NC_037638.1 | 3215168 | SNV | 1 | C | T | Homozygous   |
| NC_037638.1 | 3215298 | SNV | 1 | A | G | Homozygous   |
| NC_037638.1 | 3215312 | SNV | 1 | C | A | Homozygous   |
| NC_037638.1 | 3215319 | SNV | 1 | C | A | Homozygous   |
| NC_037638.1 | 3215403 | SNV | 1 | T | C | Heterozygous |
| NC_037638.1 | 3215459 | SNV | 1 | G | A | Heterozygous |
| NC_037638.1 | 3215500 | SNV | 1 | A | G | Heterozygous |
| NC_037638.1 | 3215537 | SNV | 1 | T | C | Homozygous   |
| NC_037638.1 | 3215556 | SNV | 1 | T | A | Heterozygous |
| NC_037638.1 | 3215603 | SNV | 1 | A | C | Heterozygous |
| NC_037638.1 | 3215637 | SNV | 1 | A | G | Heterozygous |
| NC_037638.1 | 3215716 | SNV | 1 | T | C | Homozygous   |
| NC_037638.1 | 3217055 | SNV | 1 | C | T | Homozygous   |
| NC_037638.1 | 3217247 | SNV | 1 | C | T | Homozygous   |
| NC_037638.1 | 3217665 | SNV | 1 | T | C | Homozygous   |
| NC_037638.1 | 3217668 | SNV | 1 | C | T | Homozygous   |
| NC_037638.1 | 3217720 | SNV | 1 | G | A | Heterozygous |
| NC_037638.1 | 3217879 | SNV | 1 | G | A | Homozygous   |
| NC_037638.1 | 3217899 | SNV | 1 | G | A | Homozygous   |
| NC_037638.1 | 3217925 | SNV | 1 | A | T | Heterozygous |

|             |         |     |   |   |   |              |
|-------------|---------|-----|---|---|---|--------------|
| NC_037638.1 | 3227974 | SNV | 1 | C | T | Heterozygous |
| NC_037638.1 | 3228070 | SNV | 1 | G | A | Homozygous   |
| NC_037638.1 | 3238879 | SNV | 1 | G | T | Homozygous   |
| NC_037638.1 | 3238892 | SNV | 1 | A | G | Homozygous   |
| NC_037638.1 | 3245819 | SNV | 1 | T | A | Homozygous   |
| NC_037638.1 | 3245827 | SNV | 1 | G | T | Homozygous   |
| NC_037638.1 | 3245833 | SNV | 1 | T | A | Homozygous   |
| NC_037638.1 | 3245851 | SNV | 1 | C | T | Homozygous   |
| NC_037638.1 | 3245862 | SNV | 1 | A | T | Homozygous   |
| NC_037638.1 | 3245864 | SNV | 1 | T | C | Homozygous   |
| NC_037638.1 | 3245873 | SNV | 1 | T | G | Homozygous   |
| NC_037638.1 | 3253855 | SNV | 1 | C | T | Homozygous   |
| NC_037638.1 | 3253874 | SNV | 1 | G | A | Homozygous   |
| NC_037638.1 | 3255966 | SNV | 1 | C | A | Heterozygous |
| NC_037638.1 | 3255969 | SNV | 1 | T | C | Heterozygous |
| NC_037638.1 | 3256044 | SNV | 1 | A | G | Homozygous   |
| NC_037638.1 | 3256162 | SNV | 1 | G | A | Homozygous   |
| NC_037638.1 | 3256573 | SNV | 1 | G | A | Heterozygous |
| NC_037638.1 | 3257967 | SNV | 1 | A | T | Homozygous   |
| NC_037638.1 | 3257991 | SNV | 1 | C | T | Heterozygous |
| NC_037638.1 | 3258040 | SNV | 1 | T | C | Homozygous   |
| NC_037638.1 | 3258407 | SNV | 1 | A | G | Heterozygous |
| NC_037638.1 | 3258508 | SNV | 1 | C | T | Homozygous   |
| NC_037638.1 | 3259022 | SNV | 1 | C | G | Homozygous   |
| NC_037638.1 | 3259585 | SNV | 1 | G | C | Heterozygous |
| NC_037638.1 | 3261383 | SNV | 1 | T | C | Homozygous   |
| NC_037638.1 | 3261760 | SNV | 1 | T | C | Heterozygous |
| NC_037638.1 | 3261790 | SNV | 1 | A | G | Heterozygous |
| NC_037638.1 | 3262114 | SNV | 1 | G | A | Heterozygous |
| NC_037638.1 | 3262269 | SNV | 1 | A | G | Homozygous   |
| NC_037638.1 | 3262481 | SNV | 1 | G | A | Homozygous   |
| NC_037638.1 | 3262484 | SNV | 1 | C | T | Heterozygous |
| NC_037638.1 | 3267329 | SNV | 1 | G | A | Heterozygous |
| NC_037638.1 | 3268265 | SNV | 1 | C | T | Heterozygous |
| NC_037638.1 | 3268533 | SNV | 1 | T | C | Heterozygous |
| NC_037638.1 | 3268716 | SNV | 1 | A | C | Homozygous   |
| NC_037638.1 | 3268864 | SNV | 1 | T | C | Heterozygous |
| NC_037638.1 | 3268867 | SNV | 1 | A | T | Homozygous   |
| NC_037638.1 | 3268960 | SNV | 1 | G | A | Homozygous   |
| NC_037638.1 | 3269035 | SNV | 1 | G | T | Heterozygous |
| NC_037638.1 | 3269068 | SNV | 1 | A | G | Heterozygous |
| NC_037638.1 | 3269094 | SNV | 1 | A | T | Heterozygous |
| NC_037638.1 | 3269107 | SNV | 1 | T | C | Heterozygous |
| NC_037638.1 | 3269363 | SNV | 1 | G | A | Homozygous   |
| NC_037638.1 | 3269577 | SNV | 1 | A | G | Homozygous   |
| NC_037638.1 | 3270302 | SNV | 1 | G | A | Heterozygous |
| NC_037638.1 | 3279108 | SNV | 1 | G | A | Heterozygous |
| NC_037638.1 | 3290057 | SNV | 1 | G | A | Heterozygous |
| NC_037638.1 | 3291708 | SNV | 1 | C | T | Homozygous   |
| NC_037638.1 | 3293441 | SNV | 1 | G | A | Heterozygous |
| NC_037638.1 | 3294232 | SNV | 1 | G | A | Heterozygous |

|             |         |     |   |   |   |              |
|-------------|---------|-----|---|---|---|--------------|
| NC_037638.1 | 3294624 | SNV | 1 | T | C | Heterozygous |
| NC_037638.1 | 3294626 | SNV | 1 | C | T | Heterozygous |
| NC_037638.1 | 3295776 | SNV | 1 | T | C | Homozygous   |
| NC_037638.1 | 3295786 | SNV | 1 | G | A | Homozygous   |
| NC_037638.1 | 3297790 | SNV | 1 | A | G | Heterozygous |
| NC_037638.1 | 3297913 | SNV | 1 | A | G | Heterozygous |
| NC_037638.1 | 3297981 | SNV | 1 | T | G | Heterozygous |
| NC_037638.1 | 3303278 | SNV | 1 | A | T | Homozygous   |
| NC_037638.1 | 3304060 | SNV | 1 | G | C | Homozygous   |
| NC_037638.1 | 3304662 | SNV | 1 | T | G | Homozygous   |
| NC_037638.1 | 3304666 | SNV | 1 | A | G | Homozygous   |
| NC_037638.1 | 3304670 | SNV | 1 | A | G | Homozygous   |
| NC_037638.1 | 3304682 | SNV | 1 | T | C | Homozygous   |
| NC_037638.1 | 3305022 | SNV | 1 | C | A | Homozygous   |
| NC_037638.1 | 3306051 | SNV | 1 | A | C | Homozygous   |
| NC_037638.1 | 3313207 | SNV | 1 | G | A | Homozygous   |
| NC_037638.1 | 3313215 | SNV | 1 | T | A | Homozygous   |
| NC_037638.1 | 3313228 | SNV | 1 | A | G | Homozygous   |
| NC_037638.1 | 3313237 | SNV | 1 | A | G | Homozygous   |
| NC_037638.1 | 3313318 | SNV | 1 | G | A | Heterozygous |
| NC_037638.1 | 3313331 | SNV | 1 | A | G | Heterozygous |
| NC_037638.1 | 3313337 | SNV | 1 | G | A | Heterozygous |
| NC_037638.1 | 3313348 | SNV | 1 | G | A | Homozygous   |
| NC_037638.1 | 3319948 | SNV | 1 | T | C | Homozygous   |
| NC_037638.1 | 3319970 | SNV | 1 | T | G | Heterozygous |
| NC_037638.1 | 3319974 | SNV | 1 | G | C | Homozygous   |
| NC_037638.1 | 3319984 | SNV | 1 | G | T | Homozygous   |
| NC_037638.1 | 3319986 | SNV | 1 | G | T | Homozygous   |
| NC_037638.1 | 3319990 | SNV | 1 | G | A | Homozygous   |
| NC_037638.1 | 3319998 | SNV | 1 | A | G | Homozygous   |
| NC_037638.1 | 3320000 | SNV | 1 | T | G | Homozygous   |
| NC_037638.1 | 3328446 | SNV | 1 | A | G | Homozygous   |
| NC_037638.1 | 3328556 | SNV | 1 | G | T | Homozygous   |
| NC_037638.1 | 3340500 | SNV | 1 | G | T | Homozygous   |
| NC_037638.1 | 3340508 | SNV | 1 | A | C | Homozygous   |
| NC_037638.1 | 3353921 | SNV | 1 | A | G | Homozygous   |
| NC_037638.1 | 3357353 | SNV | 1 | A | G | Heterozygous |
| NC_037638.1 | 3357712 | SNV | 1 | T | C | Heterozygous |
| NC_037638.1 | 3357754 | SNV | 1 | C | G | Homozygous   |
| NC_037638.1 | 3357895 | SNV | 1 | T | C | Heterozygous |
| NC_037638.1 | 3357904 | SNV | 1 | T | C | Heterozygous |
| NC_037638.1 | 3357907 | SNV | 1 | A | C | Heterozygous |
| NC_037638.1 | 3357907 | SNV | 1 | A | T | Heterozygous |
| NC_037638.1 | 3357934 | SNV | 1 | T | C | Homozygous   |
| NC_037638.1 | 3357946 | SNV | 1 | C | T | Homozygous   |
| NC_037638.1 | 3357948 | SNV | 1 | G | A | Homozygous   |
| NC_037638.1 | 3357956 | SNV | 1 | G | C | Homozygous   |
| NC_037638.1 | 3357958 | SNV | 1 | A | G | Homozygous   |
| NC_037638.1 | 3357968 | SNV | 1 | C | T | Heterozygous |
| NC_037638.1 | 3358007 | SNV | 1 | C | T | Heterozygous |
| NC_037638.1 | 3369288 | SNV | 1 | A | G | Homozygous   |

|             |         |     |   |   |   |              |
|-------------|---------|-----|---|---|---|--------------|
| NC_037638.1 | 3369290 | SNV | 1 | A | G | Homozygous   |
| NC_037638.1 | 3369317 | SNV | 1 | A | G | Heterozygous |
| NC_037638.1 | 3370660 | SNV | 1 | A | C | Homozygous   |
| NC_037638.1 | 3370701 | SNV | 1 | C | T | Heterozygous |
| NC_037638.1 | 3370744 | SNV | 1 | C | T | Homozygous   |
| NC_037638.1 | 3370847 | SNV | 1 | A | T | Homozygous   |
| NC_037638.1 | 3370969 | SNV | 1 | G | A | Heterozygous |
| NC_037638.1 | 3370985 | SNV | 1 | C | A | Heterozygous |
| NC_037638.1 | 3371031 | SNV | 1 | T | G | Homozygous   |
| NC_037638.1 | 3371036 | SNV | 1 | T | C | Heterozygous |
| NC_037638.1 | 3371042 | SNV | 1 | C | T | Heterozygous |
| NC_037638.1 | 3371167 | SNV | 1 | T | C | Heterozygous |
| NC_037638.1 | 3371526 | SNV | 1 | C | T | Heterozygous |
| NC_037638.1 | 3371582 | SNV | 1 | T | C | Homozygous   |
| NC_037638.1 | 3371640 | SNV | 1 | G | A | Heterozygous |
| NC_037638.1 | 3371673 | SNV | 1 | T | C | Homozygous   |
| NC_037638.1 | 3371955 | SNV | 1 | A | G | Homozygous   |
| NC_037638.1 | 3372013 | SNV | 1 | T | C | Homozygous   |
| NC_037638.1 | 3372110 | SNV | 1 | T | C | Heterozygous |
| NC_037638.1 | 3372157 | SNV | 1 | A | G | Homozygous   |
| NC_037638.1 | 3372178 | SNV | 1 | T | C | Heterozygous |
| NC_037638.1 | 3372189 | SNV | 1 | G | A | Heterozygous |
| NC_037638.1 | 3372194 | SNV | 1 | A | G | Heterozygous |
| NC_037638.1 | 3372209 | SNV | 1 | T | C | Heterozygous |
| NC_037638.1 | 3372225 | SNV | 1 | G | A | Heterozygous |
| NC_037638.1 | 3372260 | SNV | 1 | T | G | Homozygous   |
| NC_037638.1 | 3372287 | SNV | 1 | C | A | Heterozygous |
| NC_037638.1 | 3372296 | SNV | 1 | G | A | Homozygous   |
| NC_037638.1 | 3372304 | SNV | 1 | G | A | Heterozygous |
| NC_037638.1 | 3372309 | SNV | 1 | A | G | Homozygous   |
| NC_037638.1 | 3372313 | SNV | 1 | G | A | Homozygous   |
| NC_037638.1 | 3372344 | SNV | 1 | C | A | Homozygous   |
| NC_037638.1 | 3372348 | SNV | 1 | A | G | Homozygous   |
| NC_037638.1 | 3372446 | SNV | 1 | C | G | Heterozygous |
| NC_037638.1 | 3372948 | SNV | 1 | T | A | Homozygous   |
| NC_037638.1 | 3372980 | SNV | 1 | C | T | Homozygous   |
| NC_037638.1 | 3372991 | SNV | 1 | T | A | Homozygous   |
| NC_037638.1 | 3409462 | SNV | 1 | C | T | Homozygous   |
| NC_037638.1 | 3409468 | SNV | 1 | A | G | Homozygous   |
| NC_037638.1 | 3409471 | SNV | 1 | A | T | Homozygous   |
| NC_037638.1 | 3409525 | SNV | 1 | A | C | Homozygous   |
| NC_037638.1 | 3409528 | SNV | 1 | A | G | Homozygous   |
| NC_037638.1 | 3409538 | SNV | 1 | G | A | Homozygous   |
| NC_037638.1 | 3409561 | SNV | 1 | C | T | Homozygous   |
| NC_037638.1 | 3409615 | SNV | 1 | T | C | Homozygous   |
| NC_037638.1 | 3413786 | SNV | 1 | A | G | Homozygous   |
| NC_037638.1 | 3424862 | SNV | 1 | C | T | Homozygous   |
| NC_037638.1 | 3424890 | SNV | 1 | G | T | Heterozygous |
| NC_037638.1 | 3425009 | SNV | 1 | T | C | Homozygous   |
| NC_037638.1 | 3425081 | SNV | 1 | G | A | Homozygous   |
| NC_037638.1 | 3425084 | SNV | 1 | G | A | Homozygous   |

|             |         |     |   |   |   |              |
|-------------|---------|-----|---|---|---|--------------|
| NC_037638.1 | 3425134 | SNV | 1 | T | G | Heterozygous |
| NC_037638.1 | 3425137 | SNV | 1 | G | A | Homozygous   |
| NC_037638.1 | 3432339 | SNV | 1 | T | C | Heterozygous |
| NC_037638.1 | 3448829 | SNV | 1 | C | A | Homozygous   |
| NC_037638.1 | 3462986 | SNV | 1 | C | T | Heterozygous |
| NC_037638.1 | 3463014 | SNV | 1 | C | T | Heterozygous |
| NC_037638.1 | 3463017 | SNV | 1 | C | T | Homozygous   |
| NC_037638.1 | 3463019 | SNV | 1 | C | T | Homozygous   |
| NC_037638.1 | 3463080 | SNV | 1 | T | C | Heterozygous |
| NC_037638.1 | 3468383 | SNV | 1 | C | T | Homozygous   |
| NC_037638.1 | 3468393 | SNV | 1 | C | T | Homozygous   |
| NC_037638.1 | 3519080 | SNV | 1 | C | T | Homozygous   |
| NC_037638.1 | 3519290 | SNV | 1 | A | G | Heterozygous |
| NC_037638.1 | 3519309 | SNV | 1 | T | G | Homozygous   |
| NC_037638.1 | 3520329 | SNV | 1 | T | C | Homozygous   |
| NC_037638.1 | 3520347 | SNV | 1 | T | C | Homozygous   |
| NC_037638.1 | 3520354 | SNV | 1 | T | C | Homozygous   |
| NC_037638.1 | 3520644 | SNV | 1 | C | G | Homozygous   |
| NC_037638.1 | 3524161 | SNV | 1 | G | A | Homozygous   |
| NC_037638.1 | 3524163 | SNV | 1 | G | A | Homozygous   |
| NC_037638.1 | 3524244 | SNV | 1 | G | A | Homozygous   |
| NC_037638.1 | 3524336 | SNV | 1 | A | G | Homozygous   |
| NC_037638.1 | 3524422 | SNV | 1 | C | T | Heterozygous |
| NC_037638.1 | 3524438 | SNV | 1 | T | C | Homozygous   |
| NC_037638.1 | 3529182 | SNV | 1 | G | C | Homozygous   |
| NC_037638.1 | 3529225 | SNV | 1 | C | T | Heterozygous |
| NC_037638.1 | 3538583 | SNV | 1 | G | A | Heterozygous |
| NC_037638.1 | 3544212 | SNV | 1 | C | T | Heterozygous |
| NC_037638.1 | 3544257 | SNV | 1 | C | T | Heterozygous |
| NC_037638.1 | 3553214 | SNV | 1 | T | C | Homozygous   |
| NC_037638.1 | 3553642 | SNV | 1 | A | G | Heterozygous |
| NC_037638.1 | 3553645 | SNV | 1 | G | A | Heterozygous |
| NC_037638.1 | 3563772 | SNV | 1 | C | T | Homozygous   |
| NC_037638.1 | 3564204 | SNV | 1 | G | A | Heterozygous |
| NC_037638.1 | 3564215 | SNV | 1 | A | G | Heterozygous |
| NC_037638.1 | 3564248 | SNV | 1 | C | T | Homozygous   |
| NC_037638.1 | 3564272 | SNV | 1 | A | G | Homozygous   |
| NC_037638.1 | 3565369 | SNV | 1 | C | T | Homozygous   |
| NC_037638.1 | 3565372 | SNV | 1 | T | C | Heterozygous |
| NC_037638.1 | 3565402 | SNV | 1 | A | G | Heterozygous |
| NC_037638.1 | 3570350 | SNV | 1 | T | C | Homozygous   |
| NC_037638.1 | 3570360 | SNV | 1 | T | C | Homozygous   |
| NC_037638.1 | 3587620 | SNV | 1 | T | A | Heterozygous |
| NC_037638.1 | 3587634 | SNV | 1 | G | A | Homozygous   |
| NC_037638.1 | 3587638 | SNV | 1 | C | T | Homozygous   |
| NC_037638.1 | 3587677 | SNV | 1 | T | A | Homozygous   |
| NC_037638.1 | 3587685 | SNV | 1 | T | A | Homozygous   |
| NC_037638.1 | 3587689 | SNV | 1 | A | C | Heterozygous |
| NC_037638.1 | 3587696 | SNV | 1 | T | C | Heterozygous |
| NC_037638.1 | 3590616 | SNV | 1 | A | G | Heterozygous |
| NC_037638.1 | 3590635 | SNV | 1 | G | A | Heterozygous |

|             |         |     |   |   |   |              |
|-------------|---------|-----|---|---|---|--------------|
| NC_037638.1 | 3590640 | SNV | 1 | A | G | Homozygous   |
| NC_037638.1 | 3593641 | SNV | 1 | A | G | Homozygous   |
| NC_037638.1 | 3593657 | SNV | 1 | C | T | Homozygous   |
| NC_037638.1 | 3593696 | SNV | 1 | C | T | Homozygous   |
| NC_037638.1 | 3601952 | SNV | 1 | A | T | Homozygous   |
| NC_037638.1 | 3601954 | SNV | 1 | A | T | Homozygous   |
| NC_037638.1 | 3601956 | SNV | 1 | T | A | Homozygous   |
| NC_037638.1 | 3601966 | SNV | 1 | A | T | Homozygous   |
| NC_037638.1 | 3601978 | SNV | 1 | A | G | Heterozygous |
| NC_037638.1 | 3601986 | SNV | 1 | G | C | Homozygous   |
| NC_037638.1 | 3601991 | SNV | 1 | T | C | Homozygous   |
| NC_037638.1 | 3602080 | SNV | 1 | T | C | Homozygous   |
| NC_037638.1 | 3602092 | SNV | 1 | T | C | Heterozygous |
| NC_037638.1 | 3602106 | SNV | 1 | T | A | Heterozygous |
| NC_037638.1 | 3602151 | SNV | 1 | C | A | Homozygous   |
| NC_037638.1 | 3602162 | SNV | 1 | T | A | Homozygous   |
| NC_037638.1 | 3602180 | SNV | 1 | T | A | Heterozygous |
| NC_037638.1 | 3602185 | SNV | 1 | T | G | Heterozygous |
| NC_037638.1 | 3639598 | SNV | 1 | A | G | Homozygous   |
| NC_037638.1 | 3639605 | SNV | 1 | C | T | Homozygous   |
| NC_037638.1 | 3646683 | SNV | 1 | C | T | Heterozygous |
| NC_037638.1 | 3646701 | SNV | 1 | G | A | Heterozygous |
| NC_037638.1 | 3646765 | SNV | 1 | G | A | Homozygous   |
| NC_037638.1 | 3646805 | SNV | 1 | A | C | Homozygous   |
| NC_037638.1 | 3646816 | SNV | 1 | A | G | Heterozygous |
| NC_037638.1 | 3664004 | SNV | 1 | C | T | Heterozygous |
| NC_037638.1 | 3667862 | SNV | 1 | C | T | Heterozygous |
| NC_037638.1 | 3669815 | SNV | 1 | T | C | Homozygous   |
| NC_037638.1 | 3669885 | SNV | 1 | G | A | Homozygous   |
| NC_037638.1 | 3669949 | SNV | 1 | G | A | Heterozygous |
| NC_037638.1 | 3669994 | SNV | 1 | T | C | Homozygous   |
| NC_037638.1 | 3669996 | SNV | 1 | C | G | Heterozygous |
| NC_037638.1 | 3670022 | SNV | 1 | G | T | Heterozygous |
| NC_037638.1 | 3670037 | SNV | 1 | T | C | Homozygous   |
| NC_037638.1 | 3670040 | SNV | 1 | A | G | Homozygous   |
| NC_037638.1 | 3670048 | SNV | 1 | G | A | Homozygous   |
| NC_037638.1 | 3670060 | SNV | 1 | G | A | Homozygous   |
| NC_037638.1 | 3670067 | SNV | 1 | G | A | Heterozygous |
| NC_037638.1 | 3670073 | SNV | 1 | A | G | Heterozygous |
| NC_037638.1 | 3670076 | SNV | 1 | T | A | Heterozygous |
| NC_037638.1 | 3670092 | SNV | 1 | G | C | Heterozygous |
| NC_037638.1 | 3670115 | SNV | 1 | A | T | Heterozygous |
| NC_037638.1 | 3670199 | SNV | 1 | C | T | Homozygous   |
| NC_037638.1 | 3670216 | SNV | 1 | A | G | Homozygous   |
| NC_037638.1 | 3670552 | SNV | 1 | T | C | Homozygous   |
| NC_037638.1 | 3670573 | SNV | 1 | C | T | Heterozygous |
| NC_037638.1 | 3670601 | SNV | 1 | A | G | Homozygous   |
| NC_037638.1 | 3670613 | SNV | 1 | G | A | Heterozygous |
| NC_037638.1 | 3670616 | SNV | 1 | G | A | Homozygous   |
| NC_037638.1 | 3670618 | SNV | 1 | G | A | Heterozygous |
| NC_037638.1 | 3670636 | SNV | 1 | T | A | Homozygous   |

|             |         |     |   |   |   |              |
|-------------|---------|-----|---|---|---|--------------|
| NC_037638.1 | 3670643 | SNV | 1 | G | C | Homozygous   |
| NC_037638.1 | 3670645 | SNV | 1 | G | A | Homozygous   |
| NC_037638.1 | 3670651 | SNV | 1 | A | G | Heterozygous |
| NC_037638.1 | 3670689 | SNV | 1 | T | C | Homozygous   |
| NC_037638.1 | 3670729 | SNV | 1 | G | A | Heterozygous |
| NC_037638.1 | 3670737 | SNV | 1 | A | G | Homozygous   |
| NC_037638.1 | 3670739 | SNV | 1 | A | G | Homozygous   |
| NC_037638.1 | 3670805 | SNV | 1 | T | C | Homozygous   |
| NC_037638.1 | 3670811 | SNV | 1 | G | A | Homozygous   |
| NC_037638.1 | 3670873 | SNV | 1 | G | T | Heterozygous |
| NC_037638.1 | 3670894 | SNV | 1 | C | G | Homozygous   |
| NC_037638.1 | 3670896 | SNV | 1 | T | C | Heterozygous |
| NC_037638.1 | 3670959 | SNV | 1 | C | A | Heterozygous |
| NC_037638.1 | 3670959 | SNV | 1 | C | G | Heterozygous |
| NC_037638.1 | 3670962 | SNV | 1 | G | A | Heterozygous |
| NC_037638.1 | 3670974 | SNV | 1 | A | G | Homozygous   |
| NC_037638.1 | 3670982 | SNV | 1 | G | A | Heterozygous |
| NC_037638.1 | 3671008 | SNV | 1 | T | C | Heterozygous |
| NC_037638.1 | 3671014 | SNV | 1 | G | A | Heterozygous |
| NC_037638.1 | 3671033 | SNV | 1 | C | T | Homozygous   |
| NC_037638.1 | 3671049 | SNV | 1 | A | G | Homozygous   |
| NC_037638.1 | 3671071 | SNV | 1 | G | A | Heterozygous |
| NC_037638.1 | 3671094 | SNV | 1 | G | A | Heterozygous |
| NC_037638.1 | 3671123 | SNV | 1 | C | T | Homozygous   |
| NC_037638.1 | 3671129 | SNV | 1 | C | T | Homozygous   |
| NC_037638.1 | 3671185 | SNV | 1 | A | G | Homozygous   |
| NC_037638.1 | 3671194 | SNV | 1 | A | G | Homozygous   |
| NC_037638.1 | 3671205 | SNV | 1 | G | A | Heterozygous |
| NC_037638.1 | 3671226 | SNV | 1 | C | T | Heterozygous |
| NC_037638.1 | 3671251 | SNV | 1 | C | T | Homozygous   |
| NC_037638.1 | 3671279 | SNV | 1 | C | T | Heterozygous |
| NC_037638.1 | 3671281 | SNV | 1 | C | T | Heterozygous |
| NC_037638.1 | 3671286 | SNV | 1 | T | C | Heterozygous |
| NC_037638.1 | 3671319 | SNV | 1 | A | G | Homozygous   |
| NC_037638.1 | 3671328 | SNV | 1 | G | A | Heterozygous |
| NC_037638.1 | 3671341 | SNV | 1 | C | T | Heterozygous |
| NC_037638.1 | 3671350 | SNV | 1 | A | G | Heterozygous |
| NC_037638.1 | 3671359 | SNV | 1 | G | A | Heterozygous |
| NC_037638.1 | 3671369 | SNV | 1 | G | A | Heterozygous |
| NC_037638.1 | 3671369 | SNV | 1 | G | C | Heterozygous |
| NC_037638.1 | 3671372 | SNV | 1 | G | A | Heterozygous |
| NC_037638.1 | 3671382 | SNV | 1 | G | A | Heterozygous |
| NC_037638.1 | 3678341 | SNV | 1 | A | C | Homozygous   |
| NC_037638.1 | 3678349 | SNV | 1 | G | A | Homozygous   |
| NC_037638.1 | 3678355 | SNV | 1 | A | G | Homozygous   |
| NC_037638.1 | 3678373 | SNV | 1 | C | T | Homozygous   |
| NC_037638.1 | 3678508 | SNV | 1 | C | T | Heterozygous |
| NC_037638.1 | 3678545 | SNV | 1 | T | A | Heterozygous |
| NC_037638.1 | 3708584 | SNV | 1 | G | A | Heterozygous |
| NC_037638.1 | 3708589 | SNV | 1 | C | A | Homozygous   |
| NC_037638.1 | 3708621 | SNV | 1 | A | G | Heterozygous |



|             |         |     |   |   |   |              |
|-------------|---------|-----|---|---|---|--------------|
| NC_037638.1 | 3708630 | SNV | 1 | G | A | Homozygous   |
| NC_037638.1 | 3708640 | SNV | 1 | C | T | Homozygous   |
| NC_037638.1 | 3708669 | SNV | 1 | G | A | Homozygous   |
| NC_037638.1 | 3708672 | SNV | 1 | G | A | Homozygous   |
| NC_037638.1 | 3708711 | SNV | 1 | G | A | Homozygous   |
| NC_037638.1 | 3708717 | SNV | 1 | A | G | Heterozygous |
| NC_037638.1 | 3708741 | SNV | 1 | G | A | Homozygous   |
| NC_037638.1 | 3708758 | SNV | 1 | A | G | Heterozygous |
| NC_037638.1 | 3708771 | SNV | 1 | C | T | Homozygous   |
| NC_037638.1 | 3708866 | SNV | 1 | A | G | Heterozygous |
| NC_037638.1 | 3708900 | SNV | 1 | G | A | Homozygous   |
| NC_037638.1 | 3708909 | SNV | 1 | A | T | Heterozygous |
| NC_037638.1 | 3715555 | SNV | 1 | C | T | Homozygous   |
| NC_037638.1 | 3715557 | SNV | 1 | C | T | Homozygous   |
| NC_037638.1 | 3715594 | SNV | 1 | C | T | Homozygous   |
| NC_037638.1 | 3715599 | SNV | 1 | G | A | Homozygous   |
| NC_037638.1 | 3715610 | SNV | 1 | C | T | Homozygous   |
| NC_037638.1 | 3715613 | SNV | 1 | G | T | Homozygous   |
| NC_037638.1 | 3715628 | SNV | 1 | T | C | Homozygous   |
| NC_037638.1 | 3715660 | SNV | 1 | C | T | Homozygous   |
| NC_037638.1 | 3715666 | SNV | 1 | C | T | Homozygous   |
| NC_037638.1 | 3715694 | SNV | 1 | T | C | Homozygous   |
| NC_037638.1 | 3715755 | SNV | 1 | C | T | Heterozygous |
| NC_037638.1 | 3715778 | SNV | 1 | C | G | Heterozygous |
| NC_037638.1 | 3715785 | SNV | 1 | T | C | Heterozygous |
| NC_037638.1 | 3715826 | SNV | 1 | C | T | Heterozygous |
| NC_037638.1 | 3715833 | SNV | 1 | C | T | Heterozygous |
| NC_037638.1 | 3715852 | SNV | 1 | C | T | Heterozygous |
| NC_037638.1 | 3715919 | SNV | 1 | G | T | Homozygous   |
| NC_037638.1 | 3715923 | SNV | 1 | T | A | Homozygous   |
| NC_037638.1 | 3715936 | SNV | 1 | C | T | Homozygous   |
| NC_037638.1 | 3715939 | SNV | 1 | T | C | Homozygous   |
| NC_037638.1 | 3715958 | SNV | 1 | C | T | Homozygous   |
| NC_037638.1 | 3716024 | SNV | 1 | G | C | Homozygous   |
| NC_037638.1 | 3716033 | SNV | 1 | C | T | Heterozygous |
| NC_037638.1 | 3716043 | SNV | 1 | T | C | Heterozygous |
| NC_037638.1 | 3716075 | SNV | 1 | T | C | Homozygous   |
| NC_037638.1 | 3716138 | SNV | 1 | C | T | Heterozygous |
| NC_037638.1 | 3716168 | SNV | 1 | T | A | Heterozygous |
| NC_037638.1 | 3716239 | SNV | 1 | T | C | Heterozygous |
| NC_037638.1 | 3716250 | SNV | 1 | T | C | Heterozygous |
| NC_037638.1 | 3716258 | SNV | 1 | A | G | Heterozygous |
| NC_037638.1 | 3716260 | SNV | 1 | T | C | Heterozygous |
| NC_037638.1 | 3716277 | SNV | 1 | T | C | Heterozygous |
| NC_037638.1 | 3716289 | SNV | 1 | G | C | Heterozygous |
| NC_037638.1 | 3716325 | SNV | 1 | G | T | Homozygous   |
| NC_037638.1 | 3716379 | SNV | 1 | T | C | Homozygous   |
| NC_037638.1 | 3716385 | SNV | 1 | G | T | Homozygous   |
| NC_037638.1 | 3716389 | SNV | 1 | T | C | Homozygous   |
| NC_037638.1 | 3716391 | SNV | 1 | C | T | Heterozygous |
| NC_037638.1 | 3716418 | SNV | 1 | C | T | Heterozygous |

|             |         |     |   |   |   |              |
|-------------|---------|-----|---|---|---|--------------|
| NC_037638.1 | 3716452 | SNV | 1 | C | T | Heterozygous |
| NC_037638.1 | 3716456 | SNV | 1 | C | A | Heterozygous |
| NC_037638.1 | 3716465 | SNV | 1 | C | T | Heterozygous |
| NC_037638.1 | 3716480 | SNV | 1 | T | A | Heterozygous |
| NC_037638.1 | 3716484 | SNV | 1 | C | T | Heterozygous |
| NC_037638.1 | 3716502 | SNV | 1 | C | T | Heterozygous |
| NC_037638.1 | 3716510 | SNV | 1 | C | A | Heterozygous |
| NC_037638.1 | 3716662 | SNV | 1 | T | C | Heterozygous |
| NC_037638.1 | 3716696 | SNV | 1 | T | C | Homozygous   |
| NC_037638.1 | 3716708 | SNV | 1 | G | A | Homozygous   |
| NC_037638.1 | 3716716 | SNV | 1 | T | C | Homozygous   |
| NC_037638.1 | 3716720 | SNV | 1 | T | C | Homozygous   |
| NC_037638.1 | 3716722 | SNV | 1 | C | T | Heterozygous |
| NC_037638.1 | 3716724 | SNV | 1 | A | C | Homozygous   |
| NC_037638.1 | 3716726 | SNV | 1 | T | C | Homozygous   |
| NC_037638.1 | 3716748 | SNV | 1 | T | C | Heterozygous |
| NC_037638.1 | 3718516 | SNV | 1 | C | T | Heterozygous |
| NC_037638.1 | 3718521 | SNV | 1 | T | C | Homozygous   |
| NC_037638.1 | 3725526 | SNV | 1 | T | A | Heterozygous |
| NC_037638.1 | 3725535 | SNV | 1 | G | C | Homozygous   |
| NC_037638.1 | 3725539 | SNV | 1 | G | A | Homozygous   |
| NC_037638.1 | 3725541 | SNV | 1 | G | A | Heterozygous |
| NC_037638.1 | 3725568 | SNV | 1 | C | T | Homozygous   |
| NC_037638.1 | 3745953 | SNV | 1 | A | T | Homozygous   |
| NC_037638.1 | 3746089 | SNV | 1 | A | G | Heterozygous |
| NC_037638.1 | 3746091 | SNV | 1 | G | A | Heterozygous |
| NC_037638.1 | 3746398 | SNV | 1 | G | A | Heterozygous |
| NC_037638.1 | 3746419 | SNV | 1 | A | G | Homozygous   |
| NC_037638.1 | 3746531 | SNV | 1 | G | A | Homozygous   |
| NC_037638.1 | 3747845 | SNV | 1 | T | C | Heterozygous |
| NC_037638.1 | 3747848 | SNV | 1 | C | T | Heterozygous |
| NC_037638.1 | 3747852 | SNV | 1 | A | T | Homozygous   |
| NC_037638.1 | 3747873 | SNV | 1 | T | A | Homozygous   |
| NC_037638.1 | 3969514 | SNV | 1 | C | T | Homozygous   |
| NC_037638.1 | 3969523 | SNV | 1 | T | C | Homozygous   |
| NC_037638.1 | 3969564 | SNV | 1 | T | C | Heterozygous |
| NC_037638.1 | 3969568 | SNV | 1 | T | C | Homozygous   |
| NC_037638.1 | 3969570 | SNV | 1 | G | T | Homozygous   |
| NC_037638.1 | 3969587 | SNV | 1 | G | C | Homozygous   |
| NC_037638.1 | 3969592 | SNV | 1 | T | C | Homozygous   |
| NC_037638.1 | 3975016 | SNV | 1 | A | C | Homozygous   |
| NC_037638.1 | 3975022 | SNV | 1 | A | C | Heterozygous |
| NC_037638.1 | 3975032 | SNV | 1 | A | C | Heterozygous |
| NC_037638.1 | 3975049 | SNV | 1 | G | A | Heterozygous |
| NC_037638.1 | 3975060 | SNV | 1 | A | C | Heterozygous |
| NC_037638.1 | 3976159 | SNV | 1 | C | T | Homozygous   |
| NC_037638.1 | 3976168 | SNV | 1 | C | T | Homozygous   |
| NC_037638.1 | 3976260 | SNV | 1 | T | C | Heterozygous |
| NC_037638.1 | 3976264 | SNV | 1 | T | C | Homozygous   |
| NC_037638.1 | 3976269 | SNV | 1 | C | T | Homozygous   |
| NC_037638.1 | 3976279 | SNV | 1 | C | T | Homozygous   |

|             |         |     |   |   |   |              |
|-------------|---------|-----|---|---|---|--------------|
| NC_037638.1 | 3976282 | SNV | 1 | T | G | Homozygous   |
| NC_037638.1 | 3976287 | SNV | 1 | C | T | Homozygous   |
| NC_037638.1 | 3976337 | SNV | 1 | C | T | Homozygous   |
| NC_037638.1 | 3976354 | SNV | 1 | T | G | Homozygous   |
| NC_037638.1 | 3993449 | SNV | 1 | T | G | Homozygous   |
| NC_037638.1 | 3993517 | SNV | 1 | G | A | Heterozygous |
| NC_037638.1 | 3993531 | SNV | 1 | T | G | Homozygous   |
| NC_037638.1 | 3993553 | SNV | 1 | A | T | Homozygous   |
| NC_037638.1 | 3993559 | SNV | 1 | G | A | Heterozygous |
| NC_037638.1 | 3993563 | SNV | 1 | A | G | Homozygous   |
| NC_037638.1 | 3993625 | SNV | 1 | T | G | Homozygous   |
| NC_037638.1 | 3993787 | SNV | 1 | T | G | Homozygous   |
| NC_037638.1 | 3994032 | SNV | 1 | A | G | Homozygous   |
| NC_037638.1 | 3994062 | SNV | 1 | G | A | Heterozygous |
| NC_037638.1 | 3994068 | SNV | 1 | G | C | Homozygous   |
| NC_037638.1 | 3994158 | SNV | 1 | G | C | Heterozygous |
| NC_037638.1 | 3994160 | SNV | 1 | A | G | Homozygous   |
| NC_037638.1 | 3997629 | SNV | 1 | G | T | Homozygous   |
| NC_037638.1 | 3998133 | SNV | 1 | G | A | Heterozygous |
| NC_037638.1 | 3998561 | SNV | 1 | A | C | Homozygous   |
| NC_037638.1 | 3998576 | SNV | 1 | T | C | Homozygous   |
| NC_037638.1 | 3998582 | SNV | 1 | G | A | Homozygous   |
| NC_037638.1 | 3998712 | SNV | 1 | C | T | Homozygous   |
| NC_037638.1 | 4000874 | SNV | 1 | T | G | Heterozygous |
| NC_037638.1 | 4006175 | SNV | 1 | C | T | Heterozygous |
| NC_037638.1 | 4019475 | SNV | 1 | A | G | Heterozygous |
| NC_037638.1 | 4019481 | SNV | 1 | T | C | Heterozygous |
| NC_037638.1 | 4019528 | SNV | 1 | A | C | Homozygous   |
| NC_037638.1 | 4019545 | SNV | 1 | G | A | Heterozygous |
| NC_037638.1 | 4032264 | SNV | 1 | A | G | Heterozygous |
| NC_037638.1 | 4032400 | SNV | 1 | T | C | Heterozygous |
| NC_037638.1 | 4040347 | SNV | 1 | T | A | Heterozygous |
| NC_037638.1 | 4040363 | SNV | 1 | G | A | Heterozygous |
| NC_037638.1 | 4040389 | SNV | 1 | A | C | Heterozygous |
| NC_037638.1 | 4040649 | SNV | 1 | A | G | Homozygous   |
| NC_037638.1 | 4040665 | SNV | 1 | A | G | Homozygous   |
| NC_037638.1 | 4040708 | SNV | 1 | T | A | Heterozygous |
| NC_037638.1 | 4040739 | SNV | 1 | T | C | Homozygous   |
| NC_037638.1 | 4040770 | SNV | 1 | G | A | Heterozygous |
| NC_037638.1 | 4040803 | SNV | 1 | A | C | Homozygous   |
| NC_037638.1 | 4040824 | SNV | 1 | A | T | Homozygous   |
| NC_037638.1 | 4040828 | SNV | 1 | A | G | Homozygous   |
| NC_037638.1 | 4040831 | SNV | 1 | G | A | Heterozygous |
| NC_037638.1 | 4040876 | SNV | 1 | G | A | Homozygous   |
| NC_037638.1 | 4040879 | SNV | 1 | T | C | Homozygous   |
| NC_037638.1 | 4046673 | SNV | 1 | T | C | Homozygous   |
| NC_037638.1 | 4046676 | SNV | 1 | G | A | Homozygous   |
| NC_037638.1 | 4049883 | SNV | 1 | A | T | Homozygous   |
| NC_037638.1 | 4049885 | SNV | 1 | G | A | Homozygous   |
| NC_037638.1 | 4049891 | SNV | 1 | C | A | Homozygous   |
| NC_037638.1 | 4050996 | SNV | 1 | T | A | Heterozygous |

|             |         |     |   |   |   |              |
|-------------|---------|-----|---|---|---|--------------|
| NC_037638.1 | 4051028 | SNV | 1 | T | A | Heterozygous |
| NC_037638.1 | 4051036 | SNV | 1 | T | A | Heterozygous |
| NC_037638.1 | 4051062 | SNV | 1 | T | C | Heterozygous |
| NC_037638.1 | 4051064 | SNV | 1 | A | G | Heterozygous |
| NC_037638.1 | 4051072 | SNV | 1 | A | G | Heterozygous |
| NC_037638.1 | 4051080 | SNV | 1 | A | T | Heterozygous |
| NC_037638.1 | 4051088 | SNV | 1 | A | G | Heterozygous |
| NC_037638.1 | 4051096 | SNV | 1 | A | T | Heterozygous |
| NC_037638.1 | 4051133 | SNV | 1 | T | C | Heterozygous |
| NC_037638.1 | 4051235 | SNV | 1 | G | A | Heterozygous |
| NC_037638.1 | 4051284 | SNV | 1 | A | G | Homozygous   |
| NC_037638.1 | 4051614 | SNV | 1 | C | T | Homozygous   |
| NC_037638.1 | 4051642 | SNV | 1 | A | G | Heterozygous |
| NC_037638.1 | 4051812 | SNV | 1 | C | T | Heterozygous |
| NC_037638.1 | 4053344 | SNV | 1 | T | C | Homozygous   |
| NC_037638.1 | 4053346 | SNV | 1 | A | G | Homozygous   |
| NC_037638.1 | 4053398 | SNV | 1 | A | G | Homozygous   |
| NC_037638.1 | 4057423 | SNV | 1 | A | G | Homozygous   |
| NC_037638.1 | 4057606 | SNV | 1 | T | C | Homozygous   |
| NC_037638.1 | 4058450 | SNV | 1 | C | T | Heterozygous |
| NC_037638.1 | 4061247 | SNV | 1 | C | T | Homozygous   |
| NC_037638.1 | 4061252 | SNV | 1 | G | A | Heterozygous |
| NC_037638.1 | 4062668 | SNV | 1 | T | A | Homozygous   |
| NC_037638.1 | 4062673 | SNV | 1 | A | T | Homozygous   |
| NC_037638.1 | 4068170 | SNV | 1 | A | G | Heterozygous |
| NC_037638.1 | 4068181 | SNV | 1 | A | G | Heterozygous |
| NC_037638.1 | 4068191 | SNV | 1 | A | C | Heterozygous |
| NC_037638.1 | 4072769 | SNV | 1 | G | T | Heterozygous |
| NC_037638.1 | 4079541 | SNV | 1 | A | G | Heterozygous |
| NC_037638.1 | 4079549 | SNV | 1 | A | C | Homozygous   |
| NC_037638.1 | 4079553 | SNV | 1 | A | C | Heterozygous |
| NC_037638.1 | 4081492 | SNV | 1 | T | C | Homozygous   |
| NC_037638.1 | 4081662 | SNV | 1 | G | A | Heterozygous |
| NC_037638.1 | 4081778 | SNV | 1 | C | G | Homozygous   |
| NC_037638.1 | 4084931 | SNV | 1 | A | G | Homozygous   |
| NC_037638.1 | 4084988 | SNV | 1 | G | A | Homozygous   |
| NC_037638.1 | 4085147 | SNV | 1 | A | T | Heterozygous |
| NC_037638.1 | 4085442 | SNV | 1 | G | C | Homozygous   |
| NC_037638.1 | 4085444 | SNV | 1 | G | A | Homozygous   |
| NC_037638.1 | 4085476 | SNV | 1 | A | G | Heterozygous |
| NC_037638.1 | 4085546 | SNV | 1 | G | A | Heterozygous |
| NC_037638.1 | 4085561 | SNV | 1 | C | T | Homozygous   |
| NC_037638.1 | 4085576 | SNV | 1 | A | G | Heterozygous |
| NC_037638.1 | 4085580 | SNV | 1 | T | C | Heterozygous |
| NC_037638.1 | 4085584 | SNV | 1 | T | C | Heterozygous |
| NC_037638.1 | 4098086 | SNV | 1 | G | A | Heterozygous |
| NC_037638.1 | 4126719 | SNV | 1 | C | G | Homozygous   |
| NC_037638.1 | 4134915 | SNV | 1 | G | A | Homozygous   |
| NC_037638.1 | 4147721 | SNV | 1 | C | T | Homozygous   |
| NC_037638.1 | 4147893 | SNV | 1 | C | T | Homozygous   |
| NC_037638.1 | 4147896 | SNV | 1 | T | C | Heterozygous |

|             |         |     |   |   |   |              |
|-------------|---------|-----|---|---|---|--------------|
| NC_037638.1 | 4157448 | SNV | 1 | T | A | Homozygous   |
| NC_037638.1 | 4157456 | SNV | 1 | A | T | Homozygous   |
| NC_037638.1 | 4157461 | SNV | 1 | T | A | Homozygous   |
| NC_037638.1 | 4157467 | SNV | 1 | A | C | Homozygous   |
| NC_037638.1 | 4158295 | SNV | 1 | T | A | Homozygous   |
| NC_037638.1 | 4158299 | SNV | 1 | A | G | Homozygous   |
| NC_037638.1 | 4160597 | SNV | 1 | T | C | Heterozygous |
| NC_037638.1 | 4160772 | SNV | 1 | A | G | Heterozygous |
| NC_037638.1 | 4160984 | SNV | 1 | C | T | Homozygous   |
| NC_037638.1 | 4161022 | SNV | 1 | A | G | Homozygous   |
| NC_037638.1 | 4161080 | SNV | 1 | A | G | Homozygous   |
| NC_037638.1 | 4162385 | SNV | 1 | A | G | Heterozygous |
| NC_037638.1 | 4162386 | SNV | 1 | G | T | Heterozygous |
| NC_037638.1 | 4162409 | SNV | 1 | G | T | Heterozygous |
| NC_037638.1 | 4162412 | SNV | 1 | A | T | Heterozygous |
| NC_037638.1 | 4162416 | SNV | 1 | G | C | Heterozygous |
| NC_037638.1 | 4162434 | SNV | 1 | G | T | Homozygous   |
| NC_037638.1 | 4162437 | SNV | 1 | G | C | Heterozygous |
| NC_037638.1 | 4166833 | SNV | 1 | A | G | Homozygous   |
| NC_037638.1 | 4166835 | SNV | 1 | A | G | Homozygous   |
| NC_037638.1 | 4166868 | SNV | 1 | A | T | Homozygous   |
| NC_037638.1 | 4167206 | SNV | 1 | A | G | Homozygous   |
| NC_037638.1 | 4176759 | SNV | 1 | G | A | Heterozygous |
| NC_037638.1 | 4176778 | SNV | 1 | G | T | Heterozygous |
| NC_037638.1 | 4176848 | SNV | 1 | T | C | Heterozygous |
| NC_037638.1 | 4176852 | SNV | 1 | C | T | Heterozygous |
| NC_037638.1 | 4176880 | SNV | 1 | G | C | Homozygous   |
| NC_037638.1 | 4176903 | SNV | 1 | C | T | Heterozygous |
| NC_037638.1 | 4176961 | SNV | 1 | G | A | Heterozygous |
| NC_037638.1 | 4176976 | SNV | 1 | C | T | Heterozygous |
| NC_037638.1 | 4176998 | SNV | 1 | T | C | Heterozygous |
| NC_037638.1 | 4177004 | SNV | 1 | C | T | Heterozygous |
| NC_037638.1 | 4177006 | SNV | 1 | A | C | Heterozygous |
| NC_037638.1 | 4177094 | SNV | 1 | G | A | Heterozygous |
| NC_037638.1 | 4177097 | SNV | 1 | G | A | Heterozygous |
| NC_037638.1 | 4186214 | SNV | 1 | C | G | Heterozygous |
| NC_037638.1 | 4186215 | SNV | 1 | A | G | Heterozygous |
| NC_037638.1 | 4186216 | SNV | 1 | G | A | Heterozygous |
| NC_037638.1 | 4186218 | SNV | 1 | C | G | Heterozygous |
| NC_037638.1 | 4186221 | SNV | 1 | A | G | Heterozygous |
| NC_037638.1 | 4186234 | SNV | 1 | C | A | Heterozygous |
| NC_037638.1 | 4186234 | SNV | 1 | C | G | Heterozygous |
| NC_037638.1 | 4186296 | SNV | 1 | G | C | Heterozygous |
| NC_037638.1 | 4186304 | SNV | 1 | G | C | Heterozygous |
| NC_037638.1 | 4190138 | SNV | 1 | G | T | Homozygous   |
| NC_037638.1 | 4192540 | SNV | 1 | A | T | Homozygous   |
| NC_037638.1 | 4192571 | SNV | 1 | T | A | Homozygous   |
| NC_037638.1 | 4192575 | SNV | 1 | T | G | Homozygous   |
| NC_037638.1 | 4192595 | SNV | 1 | G | A | Homozygous   |
| NC_037638.1 | 4201379 | SNV | 1 | G | A | Homozygous   |
| NC_037638.1 | 4201393 | SNV | 1 | A | T | Homozygous   |

|             |         |     |   |   |   |              |
|-------------|---------|-----|---|---|---|--------------|
| NC_037638.1 | 4201462 | SNV | 1 | T | A | Heterozygous |
| NC_037638.1 | 4201493 | SNV | 1 | G | T | Heterozygous |
| NC_037638.1 | 4201718 | SNV | 1 | A | G | Heterozygous |
| NC_037638.1 | 4201826 | SNV | 1 | T | C | Homozygous   |
| NC_037638.1 | 4202519 | SNV | 1 | G | A | Heterozygous |
| NC_037638.1 | 4203225 | SNV | 1 | A | G | Homozygous   |
| NC_037638.1 | 4203234 | SNV | 1 | C | G | Homozygous   |
| NC_037638.1 | 4203353 | SNV | 1 | A | G | Homozygous   |
| NC_037638.1 | 4203423 | SNV | 1 | G | A | Homozygous   |
| NC_037638.1 | 4219906 | SNV | 1 | T | C | Heterozygous |
| NC_037638.1 | 4220221 | SNV | 1 | A | G | Heterozygous |
| NC_037638.1 | 4220221 | SNV | 1 | A | T | Heterozygous |
| NC_037638.1 | 4227063 | SNV | 1 | A | T | Homozygous   |
| NC_037638.1 | 4227182 | SNV | 1 | G | T | Heterozygous |
| NC_037638.1 | 4227265 | SNV | 1 | A | C | Homozygous   |
| NC_037638.1 | 4227327 | SNV | 1 | C | T | Heterozygous |
| NC_037638.1 | 4227384 | SNV | 1 | T | C | Homozygous   |
| NC_037638.1 | 4227398 | SNV | 1 | G | A | Heterozygous |
| NC_037638.1 | 4227410 | SNV | 1 | A | G | Heterozygous |
| NC_037638.1 | 4227421 | SNV | 1 | A | G | Heterozygous |
| NC_037638.1 | 4227433 | SNV | 1 | A | G | Homozygous   |
| NC_037638.1 | 4227467 | SNV | 1 | T | C | Homozygous   |
| NC_037638.1 | 4246029 | SNV | 1 | C | T | Heterozygous |
| NC_037638.1 | 4252570 | SNV | 1 | T | A | Homozygous   |
| NC_037638.1 | 4252577 | SNV | 1 | C | T | Homozygous   |
| NC_037638.1 | 4252613 | SNV | 1 | A | T | Homozygous   |
| NC_037638.1 | 4252616 | SNV | 1 | C | A | Homozygous   |
| NC_037638.1 | 4253760 | SNV | 1 | A | C | Heterozygous |
| NC_037638.1 | 4253764 | SNV | 1 | A | C | Heterozygous |
| NC_037638.1 | 4253771 | SNV | 1 | T | A | Heterozygous |
| NC_037638.1 | 4257737 | SNV | 1 | C | T | Heterozygous |
| NC_037638.1 | 4257740 | SNV | 1 | G | T | Homozygous   |
| NC_037638.1 | 4257744 | SNV | 1 | G | T | Homozygous   |
| NC_037638.1 | 4257747 | SNV | 1 | C | A | Homozygous   |
| NC_037638.1 | 4257771 | SNV | 1 | C | T | Homozygous   |
| NC_037638.1 | 4263819 | SNV | 1 | T | C | Heterozygous |
| NC_037638.1 | 4263826 | SNV | 1 | T | C | Homozygous   |
| NC_037638.1 | 4264476 | SNV | 1 | A | C | Heterozygous |
| NC_037638.1 | 4264489 | SNV | 1 | C | T | Heterozygous |
| NC_037638.1 | 4265151 | SNV | 1 | A | T | Homozygous   |
| NC_037638.1 | 4265157 | SNV | 1 | C | T | Homozygous   |
| NC_037638.1 | 4265201 | SNV | 1 | T | G | Homozygous   |
| NC_037638.1 | 4265304 | SNV | 1 | G | A | Homozygous   |
| NC_037638.1 | 4265308 | SNV | 1 | C | T | Homozygous   |
| NC_037638.1 | 4265314 | SNV | 1 | G | A | Homozygous   |
| NC_037638.1 | 4265345 | SNV | 1 | C | T | Homozygous   |
| NC_037638.1 | 4268941 | SNV | 1 | A | G | Homozygous   |
| NC_037638.1 | 4270166 | SNV | 1 | A | G | Homozygous   |
| NC_037638.1 | 4270200 | SNV | 1 | C | T | Heterozygous |
| NC_037638.1 | 4270391 | SNV | 1 | T | C | Homozygous   |
| NC_037638.1 | 4270664 | SNV | 1 | C | T | Heterozygous |

|             |         |     |   |   |   |              |
|-------------|---------|-----|---|---|---|--------------|
| NC_037638.1 | 4270711 | SNV | 1 | G | A | Homozygous   |
| NC_037638.1 | 4271661 | SNV | 1 | A | G | Homozygous   |
| NC_037638.1 | 4272363 | SNV | 1 | T | C | Homozygous   |
| NC_037638.1 | 4274139 | SNV | 1 | T | C | Homozygous   |
| NC_037638.1 | 4274155 | SNV | 1 | A | C | Homozygous   |
| NC_037638.1 | 4274495 | SNV | 1 | A | G | Homozygous   |
| NC_037638.1 | 4274684 | SNV | 1 | G | A | Heterozygous |
| NC_037638.1 | 4275019 | SNV | 1 | A | G | Homozygous   |
| NC_037638.1 | 4276045 | SNV | 1 | T | C | Homozygous   |
| NC_037638.1 | 4276080 | SNV | 1 | T | C | Homozygous   |
| NC_037638.1 | 4276101 | SNV | 1 | C | T | Heterozygous |
| NC_037638.1 | 4276109 | SNV | 1 | C | T | Heterozygous |
| NC_037638.1 | 4280870 | SNV | 1 | A | T | Heterozygous |
| NC_037638.1 | 4280873 | SNV | 1 | G | A | Homozygous   |
| NC_037638.1 | 4280885 | SNV | 1 | G | A | Heterozygous |
| NC_037638.1 | 4280894 | SNV | 1 | A | T | Heterozygous |
| NC_037638.1 | 4290273 | SNV | 1 | A | T | Homozygous   |
| NC_037638.1 | 4290288 | SNV | 1 | A | T | Homozygous   |
| NC_037638.1 | 4297176 | SNV | 1 | G | A | Heterozygous |
| NC_037638.1 | 4299805 | SNV | 1 | A | G | Homozygous   |
| NC_037638.1 | 4299808 | SNV | 1 | G | A | Homozygous   |
| NC_037638.1 | 4299811 | SNV | 1 | G | A | Homozygous   |
| NC_037638.1 | 4299827 | SNV | 1 | G | A | Homozygous   |
| NC_037638.1 | 4299832 | SNV | 1 | G | A | Homozygous   |
| NC_037638.1 | 4305149 | SNV | 1 | C | A | Heterozygous |
| NC_037638.1 | 4305162 | SNV | 1 | A | G | Heterozygous |
| NC_037638.1 | 4305410 | SNV | 1 | A | G | Heterozygous |
| NC_037638.1 | 4305690 | SNV | 1 | G | A | Heterozygous |
| NC_037638.1 | 4305847 | SNV | 1 | A | G | Homozygous   |
| NC_037638.1 | 4305988 | SNV | 1 | C | T | Heterozygous |
| NC_037638.1 | 4316442 | SNV | 1 | G | T | Homozygous   |
| NC_037638.1 | 4320058 | SNV | 1 | C | A | Homozygous   |
| NC_037638.1 | 4321675 | SNV | 1 | C | A | Homozygous   |
| NC_037638.1 | 4321687 | SNV | 1 | T | A | Heterozygous |
| NC_037638.1 | 4321714 | SNV | 1 | C | T | Homozygous   |
| NC_037638.1 | 4321726 | SNV | 1 | G | T | Homozygous   |
| NC_037638.1 | 4321729 | SNV | 1 | T | C | Homozygous   |
| NC_037638.1 | 4321736 | SNV | 1 | A | T | Homozygous   |
| NC_037638.1 | 4321740 | SNV | 1 | T | C | Homozygous   |
| NC_037638.1 | 4321768 | SNV | 1 | T | C | Homozygous   |
| NC_037638.1 | 4324348 | SNV | 1 | G | A | Homozygous   |
| NC_037638.1 | 4336832 | SNV | 1 | G | A | Heterozygous |
| NC_037638.1 | 4347261 | SNV | 1 | T | G | Heterozygous |
| NC_037638.1 | 4347328 | SNV | 1 | A | T | Heterozygous |
| NC_037638.1 | 4351999 | SNV | 1 | G | C | Homozygous   |
| NC_037638.1 | 4352025 | SNV | 1 | T | G | Homozygous   |
| NC_037638.1 | 4352031 | SNV | 1 | A | T | Homozygous   |
| NC_037638.1 | 4356437 | SNV | 1 | C | T | Heterozygous |
| NC_037638.1 | 4356442 | SNV | 1 | T | C | Heterozygous |
| NC_037638.1 | 4356540 | SNV | 1 | A | G | Homozygous   |
| NC_037638.1 | 4356543 | SNV | 1 | G | A | Heterozygous |

|             |         |     |   |   |   |              |
|-------------|---------|-----|---|---|---|--------------|
| NC_037638.1 | 4356623 | SNV | 1 | A | G | Homozygous   |
| NC_037638.1 | 4356751 | SNV | 1 | T | C | Homozygous   |
| NC_037638.1 | 4356863 | SNV | 1 | T | C | Heterozygous |
| NC_037638.1 | 4357000 | SNV | 1 | T | A | Heterozygous |
| NC_037638.1 | 4357188 | SNV | 1 | C | T | Heterozygous |
| NC_037638.1 | 4357215 | SNV | 1 | T | A | Heterozygous |
| NC_037638.1 | 4357266 | SNV | 1 | C | A | Heterozygous |
| NC_037638.1 | 4357370 | SNV | 1 | T | C | Homozygous   |
| NC_037638.1 | 4357408 | SNV | 1 | T | C | Heterozygous |
| NC_037638.1 | 4358643 | SNV | 1 | G | A | Heterozygous |
| NC_037638.1 | 4358646 | SNV | 1 | T | G | Heterozygous |
| NC_037638.1 | 4358885 | SNV | 1 | A | C | Heterozygous |
| NC_037638.1 | 4358891 | SNV | 1 | C | G | Homozygous   |
| NC_037638.1 | 4358966 | SNV | 1 | G | A | Heterozygous |
| NC_037638.1 | 4360841 | SNV | 1 | C | A | Heterozygous |
| NC_037638.1 | 4360841 | SNV | 1 | C | G | Heterozygous |
| NC_037638.1 | 4360863 | SNV | 1 | A | G | Homozygous   |
| NC_037638.1 | 4360942 | SNV | 1 | A | G | Homozygous   |
| NC_037638.1 | 4360953 | SNV | 1 | C | T | Homozygous   |
| NC_037638.1 | 4361867 | SNV | 1 | C | T | Homozygous   |
| NC_037638.1 | 4361942 | SNV | 1 | A | G | Homozygous   |
| NC_037638.1 | 4362011 | SNV | 1 | A | G | Homozygous   |
| NC_037638.1 | 4362195 | SNV | 1 | G | C | Homozygous   |
| NC_037638.1 | 4362197 | SNV | 1 | C | A | Homozygous   |
| NC_037638.1 | 4362311 | SNV | 1 | T | C | Heterozygous |
| NC_037638.1 | 4362898 | SNV | 1 | C | G | Heterozygous |
| NC_037638.1 | 4365288 | SNV | 1 | C | G | Heterozygous |
| NC_037638.1 | 4365460 | SNV | 1 | A | G | Homozygous   |
| NC_037638.1 | 4370671 | SNV | 1 | A | G | Homozygous   |
| NC_037638.1 | 4370675 | SNV | 1 | G | T | Homozygous   |
| NC_037638.1 | 4370679 | SNV | 1 | T | G | Homozygous   |
| NC_037638.1 | 4370688 | SNV | 1 | C | A | Homozygous   |
| NC_037638.1 | 4370695 | SNV | 1 | A | G | Homozygous   |
| NC_037638.1 | 4370714 | SNV | 1 | C | A | Homozygous   |
| NC_037638.1 | 4370716 | SNV | 1 | A | T | Homozygous   |
| NC_037638.1 | 4370718 | SNV | 1 | C | A | Homozygous   |
| NC_037638.1 | 4370720 | SNV | 1 | A | G | Homozygous   |
| NC_037638.1 | 4370722 | SNV | 1 | T | A | Heterozygous |
| NC_037638.1 | 4370726 | SNV | 1 | C | A | Heterozygous |
| NC_037638.1 | 4376165 | SNV | 1 | A | G | Homozygous   |
| NC_037638.1 | 4376209 | SNV | 1 | C | A | Homozygous   |
| NC_037638.1 | 4376347 | SNV | 1 | G | A | Homozygous   |
| NC_037638.1 | 4376349 | SNV | 1 | A | T | Homozygous   |
| NC_037638.1 | 4376795 | SNV | 1 | T | C | Heterozygous |
| NC_037638.1 | 4382099 | SNV | 1 | C | T | Heterozygous |
| NC_037638.1 | 4382742 | SNV | 1 | A | G | Heterozygous |
| NC_037638.1 | 4382755 | SNV | 1 | T | C | Homozygous   |
| NC_037638.1 | 4382820 | SNV | 1 | T | C | Homozygous   |
| NC_037638.1 | 4383856 | SNV | 1 | C | T | Homozygous   |
| NC_037638.1 | 4385474 | SNV | 1 | T | C | Homozygous   |
| NC_037638.1 | 4394992 | SNV | 1 | A | C | Homozygous   |



|             |         |     |   |   |   |              |
|-------------|---------|-----|---|---|---|--------------|
| NC_037638.1 | 4395255 | SNV | 1 | T | C | Heterozygous |
| NC_037638.1 | 4395385 | SNV | 1 | G | T | Heterozygous |
| NC_037638.1 | 4399665 | SNV | 1 | T | C | Homozygous   |
| NC_037638.1 | 4399830 | SNV | 1 | G | A | Heterozygous |
| NC_037638.1 | 4399859 | SNV | 1 | G | C | Heterozygous |
| NC_037638.1 | 4399878 | SNV | 1 | G | A | Heterozygous |
| NC_037638.1 | 4401729 | SNV | 1 | C | T | Homozygous   |
| NC_037638.1 | 4401734 | SNV | 1 | T | C | Homozygous   |
| NC_037638.1 | 4401987 | SNV | 1 | T | C | Homozygous   |
| NC_037638.1 | 4402230 | SNV | 1 | T | C | Heterozygous |
| NC_037638.1 | 4403044 | SNV | 1 | A | G | Heterozygous |
| NC_037638.1 | 4403092 | SNV | 1 | T | C | Homozygous   |
| NC_037638.1 | 4403399 | SNV | 1 | C | T | Homozygous   |
| NC_037638.1 | 4403632 | SNV | 1 | T | A | Heterozygous |
| NC_037638.1 | 4404365 | SNV | 1 | A | T | Homozygous   |
| NC_037638.1 | 4406338 | SNV | 1 | T | A | Heterozygous |
| NC_037638.1 | 4406531 | SNV | 1 | G | A | Homozygous   |
| NC_037638.1 | 4406650 | SNV | 1 | A | G | Homozygous   |
| NC_037638.1 | 4406713 | SNV | 1 | A | G | Heterozygous |
| NC_037638.1 | 4406835 | SNV | 1 | C | T | Homozygous   |
| NC_037638.1 | 4406838 | SNV | 1 | A | G | Homozygous   |
| NC_037638.1 | 4406899 | SNV | 1 | G | A | Homozygous   |
| NC_037638.1 | 4407168 | SNV | 1 | G | A | Homozygous   |
| NC_037638.1 | 4407694 | SNV | 1 | G | A | Homozygous   |
| NC_037638.1 | 4408048 | SNV | 1 | G | A | Heterozygous |
| NC_037638.1 | 4408990 | SNV | 1 | C | T | Homozygous   |
| NC_037638.1 | 4412275 | SNV | 1 | A | T | Homozygous   |
| NC_037638.1 | 4412277 | SNV | 1 | T | C | Homozygous   |
| NC_037638.1 | 4412292 | SNV | 1 | G | T | Homozygous   |
| NC_037638.1 | 4412295 | SNV | 1 | G | T | Homozygous   |
| NC_037638.1 | 4412299 | SNV | 1 | C | A | Homozygous   |
| NC_037638.1 | 4413558 | SNV | 1 | C | T | Heterozygous |
| NC_037638.1 | 4417771 | SNV | 1 | A | G | Homozygous   |
| NC_037638.1 | 4418276 | SNV | 1 | A | T | Heterozygous |
| NC_037638.1 | 4418316 | SNV | 1 | T | A | Heterozygous |
| NC_037638.1 | 4418444 | SNV | 1 | C | T | Homozygous   |
| NC_037638.1 | 4418530 | SNV | 1 | T | C | Homozygous   |
| NC_037638.1 | 4418762 | SNV | 1 | T | G | Heterozygous |
| NC_037638.1 | 4419099 | SNV | 1 | T | C | Heterozygous |
| NC_037638.1 | 4419135 | SNV | 1 | A | T | Heterozygous |
| NC_037638.1 | 4419220 | SNV | 1 | G | A | Homozygous   |
| NC_037638.1 | 4420773 | SNV | 1 | T | C | Homozygous   |
| NC_037638.1 | 4420845 | SNV | 1 | C | T | Heterozygous |
| NC_037638.1 | 4420911 | SNV | 1 | A | G | Heterozygous |
| NC_037638.1 | 4424678 | SNV | 1 | G | A | Homozygous   |
| NC_037638.1 | 4424909 | SNV | 1 | A | G | Heterozygous |
| NC_037638.1 | 4424921 | SNV | 1 | T | C | Homozygous   |
| NC_037638.1 | 4424942 | SNV | 1 | T | C | Heterozygous |
| NC_037638.1 | 4424966 | SNV | 1 | T | C | Homozygous   |
| NC_037638.1 | 4429384 | SNV | 1 | A | G | Homozygous   |
| NC_037638.1 | 4429392 | SNV | 1 | G | A | Homozygous   |

|             |         |     |   |   |   |              |
|-------------|---------|-----|---|---|---|--------------|
| NC_037638.1 | 4429394 | SNV | 1 | G | A | Homozygous   |
| NC_037638.1 | 4429396 | SNV | 1 | G | A | Homozygous   |
| NC_037638.1 | 4429859 | SNV | 1 | G | A | Heterozygous |
| NC_037638.1 | 4429877 | SNV | 1 | G | A | Heterozygous |
| NC_037638.1 | 4429879 | SNV | 1 | G | T | Heterozygous |
| NC_037638.1 | 4429885 | SNV | 1 | G | T | Heterozygous |
| NC_037638.1 | 4432972 | SNV | 1 | A | G | Homozygous   |
| NC_037638.1 | 4439569 | SNV | 1 | A | T | Heterozygous |
| NC_037638.1 | 4439786 | SNV | 1 | T | C | Homozygous   |
| NC_037638.1 | 4444252 | SNV | 1 | A | G | Homozygous   |
| NC_037638.1 | 4444345 | SNV | 1 | A | G | Homozygous   |
| NC_037638.1 | 4444411 | SNV | 1 | G | T | Heterozygous |
| NC_037638.1 | 4444557 | SNV | 1 | G | A | Heterozygous |
| NC_037638.1 | 4444614 | SNV | 1 | A | G | Homozygous   |
| NC_037638.1 | 4459796 | SNV | 1 | G | A | Homozygous   |
| NC_037638.1 | 4459804 | SNV | 1 | G | A | Homozygous   |
| NC_037638.1 | 4459820 | SNV | 1 | G | A | Homozygous   |
| NC_037638.1 | 4459866 | SNV | 1 | G | A | Homozygous   |
| NC_037638.1 | 4481827 | SNV | 1 | C | T | Heterozygous |
| NC_037638.1 | 4482128 | SNV | 1 | A | G | Heterozygous |
| NC_037638.1 | 4482400 | SNV | 1 | A | T | Heterozygous |
| NC_037638.1 | 4482442 | SNV | 1 | T | C | Homozygous   |
| NC_037638.1 | 4483113 | SNV | 1 | A | T | Homozygous   |
| NC_037638.1 | 4484968 | SNV | 1 | G | A | Homozygous   |
| NC_037638.1 | 4485104 | SNV | 1 | A | C | Homozygous   |
| NC_037638.1 | 4485305 | SNV | 1 | T | C | Homozygous   |
| NC_037638.1 | 4486595 | SNV | 1 | G | A | Heterozygous |
| NC_037638.1 | 4486640 | SNV | 1 | T | C | Homozygous   |
| NC_037638.1 | 4489959 | SNV | 1 | A | G | Heterozygous |
| NC_037638.1 | 4490183 | SNV | 1 | C | T | Heterozygous |
| NC_037638.1 | 4490199 | SNV | 1 | A | C | Heterozygous |
| NC_037638.1 | 4490202 | SNV | 1 | G | A | Heterozygous |
| NC_037638.1 | 4490202 | SNV | 1 | G | C | Heterozygous |
| NC_037638.1 | 4490364 | SNV | 1 | A | G | Homozygous   |
| NC_037638.1 | 4490406 | SNV | 1 | A | G | Homozygous   |
| NC_037638.1 | 4490448 | SNV | 1 | C | T | Heterozygous |
| NC_037638.1 | 4490547 | SNV | 1 | A | G | Homozygous   |
| NC_037638.1 | 4490746 | SNV | 1 | G | A | Heterozygous |
| NC_037638.1 | 4497627 | SNV | 1 | C | A | Homozygous   |
| NC_037638.1 | 4497986 | SNV | 1 | T | G | Homozygous   |
| NC_037638.1 | 4497989 | SNV | 1 | C | A | Homozygous   |
| NC_037638.1 | 4500318 | SNV | 1 | A | G | Homozygous   |
| NC_037638.1 | 4500329 | SNV | 1 | T | C | Homozygous   |
| NC_037638.1 | 4500352 | SNV | 1 | T | A | Homozygous   |
| NC_037638.1 | 4500356 | SNV | 1 | A | T | Homozygous   |
| NC_037638.1 | 4500361 | SNV | 1 | T | A | Homozygous   |
| NC_037638.1 | 4500369 | SNV | 1 | A | T | Homozygous   |
| NC_037638.1 | 4508114 | SNV | 1 | G | T | Homozygous   |
| NC_037638.1 | 4508470 | SNV | 1 | T | C | Homozygous   |
| NC_037638.1 | 4508968 | SNV | 1 | G | A | Homozygous   |
| NC_037638.1 | 4508970 | SNV | 1 | A | G | Homozygous   |

|             |         |     |   |   |   |              |
|-------------|---------|-----|---|---|---|--------------|
| NC_037638.1 | 4509508 | SNV | 1 | T | G | Homozygous   |
| NC_037638.1 | 4509597 | SNV | 1 | G | A | Homozygous   |
| NC_037638.1 | 4509810 | SNV | 1 | G | A | Homozygous   |
| NC_037638.1 | 4509814 | SNV | 1 | A | G | Homozygous   |
| NC_037638.1 | 4509816 | SNV | 1 | A | G | Homozygous   |
| NC_037638.1 | 4509848 | SNV | 1 | T | A | Homozygous   |
| NC_037638.1 | 4510411 | SNV | 1 | T | C | Homozygous   |
| NC_037638.1 | 4515971 | SNV | 1 | T | A | Homozygous   |
| NC_037638.1 | 4515999 | SNV | 1 | G | A | Homozygous   |
| NC_037638.1 | 4516016 | SNV | 1 | A | G | Homozygous   |
| NC_037638.1 | 4516547 | SNV | 1 | C | T | Homozygous   |
| NC_037638.1 | 4516776 | SNV | 1 | A | T | Heterozygous |
| NC_037638.1 | 4517949 | SNV | 1 | G | A | Homozygous   |
| NC_037638.1 | 4518018 | SNV | 1 | T | C | Homozygous   |
| NC_037638.1 | 4518105 | SNV | 1 | T | C | Homozygous   |
| NC_037638.1 | 4518559 | SNV | 1 | G | A | Heterozygous |
| NC_037638.1 | 4518575 | SNV | 1 | G | A | Heterozygous |
| NC_037638.1 | 4519728 | SNV | 1 | C | T | Homozygous   |
| NC_037638.1 | 4519893 | SNV | 1 | G | A | Homozygous   |
| NC_037638.1 | 4520385 | SNV | 1 | T | C | Heterozygous |
| NC_037638.1 | 4521492 | SNV | 1 | T | C | Heterozygous |
| NC_037638.1 | 4521556 | SNV | 1 | A | T | Heterozygous |
| NC_037638.1 | 4522035 | SNV | 1 | T | C | Heterozygous |
| NC_037638.1 | 4523233 | SNV | 1 | T | C | Homozygous   |
| NC_037638.1 | 4523457 | SNV | 1 | A | G | Heterozygous |
| NC_037638.1 | 4523515 | SNV | 1 | A | G | Homozygous   |
| NC_037638.1 | 4523561 | SNV | 1 | T | C | Homozygous   |
| NC_037638.1 | 4523897 | SNV | 1 | C | T | Heterozygous |
| NC_037638.1 | 4523941 | SNV | 1 | G | A | Homozygous   |
| NC_037638.1 | 4524070 | SNV | 1 | G | A | Heterozygous |
| NC_037638.1 | 4524184 | SNV | 1 | A | G | Homozygous   |
| NC_037638.1 | 4524613 | SNV | 1 | C | T | Homozygous   |
| NC_037638.1 | 4525620 | SNV | 1 | A | G | Homozygous   |
| NC_037638.1 | 4526480 | SNV | 1 | G | A | Homozygous   |
| NC_037638.1 | 4526978 | SNV | 1 | T | C | Heterozygous |
| NC_037638.1 | 4526996 | SNV | 1 | T | C | Homozygous   |
| NC_037638.1 | 4527119 | SNV | 1 | T | G | Homozygous   |
| NC_037638.1 | 4527121 | SNV | 1 | G | A | Homozygous   |
| NC_037638.1 | 4527648 | SNV | 1 | A | G | Homozygous   |
| NC_037638.1 | 4528298 | SNV | 1 | G | A | Heterozygous |
| NC_037638.1 | 4528378 | SNV | 1 | G | A | Homozygous   |
| NC_037638.1 | 4528380 | SNV | 1 | A | G | Homozygous   |
| NC_037638.1 | 4528595 | SNV | 1 | C | T | Heterozygous |
| NC_037638.1 | 4528684 | SNV | 1 | T | C | Homozygous   |
| NC_037638.1 | 4528736 | SNV | 1 | G | A | Heterozygous |
| NC_037638.1 | 4529057 | SNV | 1 | C | A | Heterozygous |
| NC_037638.1 | 4529309 | SNV | 1 | G | T | Homozygous   |
| NC_037638.1 | 4529689 | SNV | 1 | G | T | Homozygous   |
| NC_037638.1 | 4529782 | SNV | 1 | A | G | Homozygous   |
| NC_037638.1 | 4534430 | SNV | 1 | G | A | Homozygous   |
| NC_037638.1 | 4534773 | SNV | 1 | G | A | Homozygous   |

|             |         |     |   |   |   |              |
|-------------|---------|-----|---|---|---|--------------|
| NC_037638.1 | 4534989 | SNV | 1 | G | A | Homozygous   |
| NC_037638.1 | 4536823 | SNV | 1 | A | C | Homozygous   |
| NC_037638.1 | 4537846 | SNV | 1 | A | G | Homozygous   |
| NC_037638.1 | 4537851 | SNV | 1 | A | T | Homozygous   |
| NC_037638.1 | 4538175 | SNV | 1 | G | A | Homozygous   |
| NC_037638.1 | 4538234 | SNV | 1 | T | C | Homozygous   |
| NC_037638.1 | 4538490 | SNV | 1 | C | T | Homozygous   |
| NC_037638.1 | 4539064 | SNV | 1 | T | C | Homozygous   |
| NC_037638.1 | 4546741 | SNV | 1 | A | G | Homozygous   |
| NC_037638.1 | 4547337 | SNV | 1 | T | A | Homozygous   |
| NC_037638.1 | 4547341 | SNV | 1 | A | T | Homozygous   |
| NC_037638.1 | 4547347 | SNV | 1 | T | C | Homozygous   |
| NC_037638.1 | 4547356 | SNV | 1 | A | G | Homozygous   |
| NC_037638.1 | 4547364 | SNV | 1 | A | T | Homozygous   |
| NC_037638.1 | 4547507 | SNV | 1 | G | T | Heterozygous |
| NC_037638.1 | 4547511 | SNV | 1 | G | A | Heterozygous |
| NC_037638.1 | 4547513 | SNV | 1 | T | G | Heterozygous |
| NC_037638.1 | 4550691 | SNV | 1 | C | T | Heterozygous |
| NC_037638.1 | 4551177 | SNV | 1 | C | T | Homozygous   |
| NC_037638.1 | 4551481 | SNV | 1 | C | T | Heterozygous |
| NC_037638.1 | 4551557 | SNV | 1 | T | A | Heterozygous |
| NC_037638.1 | 4551721 | SNV | 1 | A | T | Heterozygous |
| NC_037638.1 | 4551731 | SNV | 1 | C | T | Heterozygous |
| NC_037638.1 | 4553655 | SNV | 1 | G | A | Heterozygous |
| NC_037638.1 | 4554699 | SNV | 1 | C | T | Homozygous   |
| NC_037638.1 | 4555380 | SNV | 1 | A | G | Homozygous   |
| NC_037638.1 | 4557987 | SNV | 1 | T | A | Homozygous   |
| NC_037638.1 | 4557989 | SNV | 1 | A | T | Homozygous   |
| NC_037638.1 | 4557993 | SNV | 1 | T | C | Homozygous   |
| NC_037638.1 | 4557995 | SNV | 1 | T | A | Homozygous   |
| NC_037638.1 | 4559027 | SNV | 1 | C | T | Homozygous   |
| NC_037638.1 | 4559119 | SNV | 1 | A | G | Homozygous   |
| NC_037638.1 | 4560438 | SNV | 1 | T | C | Homozygous   |
| NC_037638.1 | 4560440 | SNV | 1 | G | A | Homozygous   |
| NC_037638.1 | 4561583 | SNV | 1 | T | C | Homozygous   |
| NC_037638.1 | 4561895 | SNV | 1 | A | T | Homozygous   |
| NC_037638.1 | 4562538 | SNV | 1 | A | T | Homozygous   |
| NC_037638.1 | 4562713 | SNV | 1 | A | G | Homozygous   |
| NC_037638.1 | 4565379 | SNV | 1 | G | T | Homozygous   |
| NC_037638.1 | 4566498 | SNV | 1 | C | G | Heterozygous |
| NC_037638.1 | 4569831 | SNV | 1 | T | G | Homozygous   |
| NC_037638.1 | 4574973 | SNV | 1 | A | G | Homozygous   |
| NC_037638.1 | 4576097 | SNV | 1 | T | C | Homozygous   |
| NC_037638.1 | 4576462 | SNV | 1 | T | C | Homozygous   |
| NC_037638.1 | 4577738 | SNV | 1 | C | G | Homozygous   |
| NC_037638.1 | 4578659 | SNV | 1 | T | C | Homozygous   |
| NC_037638.1 | 4578698 | SNV | 1 | T | A | Homozygous   |
| NC_037638.1 | 4585053 | SNV | 1 | G | A | Homozygous   |
| NC_037638.1 | 4585945 | SNV | 1 | G | T | Heterozygous |
| NC_037638.1 | 4586207 | SNV | 1 | T | A | Homozygous   |
| NC_037638.1 | 4586210 | SNV | 1 | T | G | Homozygous   |

|             |         |     |   |   |   |              |
|-------------|---------|-----|---|---|---|--------------|
| NC_037638.1 | 4586213 | SNV | 1 | T | G | Homozygous   |
| NC_037638.1 | 4586416 | SNV | 1 | T | A | Homozygous   |
| NC_037638.1 | 4586989 | SNV | 1 | A | G | Heterozygous |
| NC_037638.1 | 4587460 | SNV | 1 | T | C | Homozygous   |
| NC_037638.1 | 4588363 | SNV | 1 | T | C | Homozygous   |
| NC_037638.1 | 4592228 | SNV | 1 | T | G | Homozygous   |
| NC_037638.1 | 4592238 | SNV | 1 | G | C | Homozygous   |
| NC_037638.1 | 4593097 | SNV | 1 | A | C | Homozygous   |
| NC_037638.1 | 4594323 | SNV | 1 | C | T | Heterozygous |
| NC_037638.1 | 4597138 | SNV | 1 | G | A | Homozygous   |
| NC_037638.1 | 4600572 | SNV | 1 | G | C | Heterozygous |
| NC_037638.1 | 4610094 | SNV | 1 | G | C | Homozygous   |
| NC_037638.1 | 4610096 | SNV | 1 | T | C | Homozygous   |
| NC_037638.1 | 4610123 | SNV | 1 | G | A | Heterozygous |
| NC_037638.1 | 4610846 | SNV | 1 | T | C | Homozygous   |
| NC_037638.1 | 4610888 | SNV | 1 | G | A | Homozygous   |
| NC_037638.1 | 4612787 | SNV | 1 | G | T | Homozygous   |
| NC_037638.1 | 4622051 | SNV | 1 | A | T | Homozygous   |
| NC_037638.1 | 4622065 | SNV | 1 | A | T | Homozygous   |
| NC_037638.1 | 4622175 | SNV | 1 | C | T | Homozygous   |
| NC_037638.1 | 4627166 | SNV | 1 | C | T | Heterozygous |
| NC_037638.1 | 4627193 | SNV | 1 | C | A | Heterozygous |
| NC_037638.1 | 4627205 | SNV | 1 | C | T | Heterozygous |
| NC_037638.1 | 4628246 | SNV | 1 | A | G | Heterozygous |
| NC_037638.1 | 4628547 | SNV | 1 | C | T | Heterozygous |
| NC_037638.1 | 4629073 | SNV | 1 | A | C | Homozygous   |
| NC_037638.1 | 4631799 | SNV | 1 | A | G | Heterozygous |
| NC_037638.1 | 4632131 | SNV | 1 | C | T | Homozygous   |
| NC_037638.1 | 4632556 | SNV | 1 | T | A | Heterozygous |
| NC_037638.1 | 4634729 | SNV | 1 | A | G | Homozygous   |
| NC_037638.1 | 4635086 | SNV | 1 | T | A | Homozygous   |
| NC_037638.1 | 4635091 | SNV | 1 | A | C | Homozygous   |
| NC_037638.1 | 4636531 | SNV | 1 | G | T | Homozygous   |
| NC_037638.1 | 4637846 | SNV | 1 | A | T | Homozygous   |
| NC_037638.1 | 4638028 | SNV | 1 | A | G | Homozygous   |
| NC_037638.1 | 4642523 | SNV | 1 | G | T | Homozygous   |
| NC_037638.1 | 4642819 | SNV | 1 | A | G | Homozygous   |
| NC_037638.1 | 4662838 | SNV | 1 | T | C | Homozygous   |
| NC_037638.1 | 4666335 | SNV | 1 | A | T | Homozygous   |
| NC_037638.1 | 4666338 | SNV | 1 | T | C | Heterozygous |
| NC_037638.1 | 4666345 | SNV | 1 | C | T | Heterozygous |
| NC_037638.1 | 4666370 | SNV | 1 | T | C | Heterozygous |
| NC_037638.1 | 4695263 | SNV | 1 | A | C | Homozygous   |
| NC_037638.1 | 4695279 | SNV | 1 | A | C | Homozygous   |
| NC_037638.1 | 4695296 | SNV | 1 | G | C | Homozygous   |
| NC_037638.1 | 4719080 | SNV | 1 | G | A | Homozygous   |
| NC_037638.1 | 4719411 | SNV | 1 | G | T | Homozygous   |
| NC_037638.1 | 4719415 | SNV | 1 | G | A | Homozygous   |
| NC_037638.1 | 4719872 | SNV | 1 | A | G | Homozygous   |
| NC_037638.1 | 4719958 | SNV | 1 | T | A | Homozygous   |
| NC_037638.1 | 4719989 | SNV | 1 | A | T | Homozygous   |

|             |         |     |   |   |   |              |
|-------------|---------|-----|---|---|---|--------------|
| NC_037638.1 | 4719995 | SNV | 1 | A | T | Homozygous   |
| NC_037638.1 | 4720586 | SNV | 1 | G | A | Homozygous   |
| NC_037638.1 | 4721252 | SNV | 1 | C | T | Heterozygous |
| NC_037638.1 | 4723603 | SNV | 1 | G | A | Heterozygous |
| NC_037638.1 | 4723820 | SNV | 1 | G | A | Homozygous   |
| NC_037638.1 | 4726915 | SNV | 1 | A | G | Homozygous   |
| NC_037638.1 | 4740436 | SNV | 1 | A | G | Homozygous   |
| NC_037638.1 | 4740448 | SNV | 1 | A | G | Homozygous   |
| NC_037638.1 | 4740491 | SNV | 1 | T | C | Homozygous   |
| NC_037638.1 | 4740524 | SNV | 1 | G | A | Homozygous   |
| NC_037638.1 | 4740545 | SNV | 1 | G | A | Heterozygous |
| NC_037638.1 | 4740812 | SNV | 1 | C | T | Homozygous   |
| NC_037638.1 | 4741722 | SNV | 1 | C | T | Homozygous   |
| NC_037638.1 | 4741730 | SNV | 1 | C | A | Heterozygous |
| NC_037638.1 | 4741734 | SNV | 1 | C | A | Heterozygous |
| NC_037638.1 | 4752825 | SNV | 1 | A | G | Homozygous   |
| NC_037638.1 | 4753496 | SNV | 1 | A | G | Homozygous   |
| NC_037638.1 | 4765161 | SNV | 1 | A | T | Homozygous   |
| NC_037638.1 | 4766265 | SNV | 1 | T | C | Homozygous   |
| NC_037638.1 | 4766278 | SNV | 1 | T | A | Homozygous   |
| NC_037638.1 | 4766512 | SNV | 1 | C | T | Homozygous   |
| NC_037638.1 | 4777239 | SNV | 1 | C | A | Heterozygous |
| NC_037638.1 | 4777261 | SNV | 1 | C | A | Heterozygous |
| NC_037638.1 | 4777264 | SNV | 1 | C | A | Heterozygous |
| NC_037638.1 | 4777278 | SNV | 1 | G | A | Heterozygous |
| NC_037638.1 | 4777482 | SNV | 1 | A | G | Homozygous   |
| NC_037638.1 | 4782253 | SNV | 1 | A | G | Homozygous   |
| NC_037638.1 | 4785299 | SNV | 1 | C | T | Heterozygous |
| NC_037638.1 | 4785584 | SNV | 1 | G | A | Heterozygous |
| NC_037638.1 | 4785614 | SNV | 1 | C | T | Heterozygous |
| NC_037638.1 | 4785617 | SNV | 1 | C | T | Heterozygous |
| NC_037638.1 | 4786199 | SNV | 1 | C | A | Homozygous   |
| NC_037638.1 | 4786431 | SNV | 1 | A | G | Heterozygous |
| NC_037638.1 | 4786578 | SNV | 1 | T | C | Heterozygous |
| NC_037638.1 | 4791750 | SNV | 1 | T | A | Heterozygous |
| NC_037638.1 | 4791752 | SNV | 1 | A | T | Heterozygous |
| NC_037638.1 | 4791777 | SNV | 1 | A | C | Homozygous   |
| NC_037638.1 | 4791779 | SNV | 1 | A | C | Homozygous   |
| NC_037638.1 | 4791786 | SNV | 1 | T | A | Homozygous   |
| NC_037638.1 | 4801761 | SNV | 1 | C | T | Homozygous   |
| NC_037638.1 | 4801765 | SNV | 1 | T | A | Homozygous   |
| NC_037638.1 | 4801771 | SNV | 1 | A | C | Homozygous   |
| NC_037638.1 | 4801779 | SNV | 1 | A | C | Homozygous   |
| NC_037638.1 | 4801811 | SNV | 1 | C | G | Homozygous   |
| NC_037638.1 | 4803157 | SNV | 1 | T | A | Homozygous   |
| NC_037638.1 | 4803166 | SNV | 1 | T | C | Homozygous   |
| NC_037638.1 | 4803169 | SNV | 1 | T | A | Homozygous   |
| NC_037638.1 | 4803173 | SNV | 1 | T | C | Homozygous   |
| NC_037638.1 | 4803175 | SNV | 1 | G | T | Homozygous   |
| NC_037638.1 | 4803178 | SNV | 1 | C | T | Homozygous   |
| NC_037638.1 | 4803190 | SNV | 1 | C | A | Homozygous   |

|             |         |     |   |   |   |              |
|-------------|---------|-----|---|---|---|--------------|
| NC_037638.1 | 4803193 | SNV | 1 | A | C | Homozygous   |
| NC_037638.1 | 4803205 | SNV | 1 | T | C | Homozygous   |
| NC_037638.1 | 4803214 | SNV | 1 | A | G | Homozygous   |
| NC_037638.1 | 4803217 | SNV | 1 | A | G | Homozygous   |
| NC_037638.1 | 4803223 | SNV | 1 | C | A | Homozygous   |
| NC_037638.1 | 4805851 | SNV | 1 | A | G | Homozygous   |
| NC_037638.1 | 4806255 | SNV | 1 | T | C | Heterozygous |
| NC_037638.1 | 4806513 | SNV | 1 | C | G | Heterozygous |
| NC_037638.1 | 4806559 | SNV | 1 | T | C | Homozygous   |
| NC_037638.1 | 4806562 | SNV | 1 | T | A | Homozygous   |
| NC_037638.1 | 4807081 | SNV | 1 | C | T | Homozygous   |
| NC_037638.1 | 4808880 | SNV | 1 | T | G | Homozygous   |
| NC_037638.1 | 4808884 | SNV | 1 | A | G | Homozygous   |
| NC_037638.1 | 4810991 | SNV | 1 | A | T | Homozygous   |
| NC_037638.1 | 4810997 | SNV | 1 | T | G | Homozygous   |
| NC_037638.1 | 4811516 | SNV | 1 | T | C | Homozygous   |
| NC_037638.1 | 4811607 | SNV | 1 | A | G | Heterozygous |
| NC_037638.1 | 4811653 | SNV | 1 | T | C | Heterozygous |
| NC_037638.1 | 4812991 | SNV | 1 | T | G | Homozygous   |
| NC_037638.1 | 4813012 | SNV | 1 | A | G | Homozygous   |
| NC_037638.1 | 4813014 | SNV | 1 | A | T | Homozygous   |
| NC_037638.1 | 4813300 | SNV | 1 | A | T | Homozygous   |
| NC_037638.1 | 4813302 | SNV | 1 | T | A | Homozygous   |
| NC_037638.1 | 4813313 | SNV | 1 | A | T | Homozygous   |
| NC_037638.1 | 4813315 | SNV | 1 | T | A | Homozygous   |
| NC_037638.1 | 4813325 | SNV | 1 | G | A | Homozygous   |
| NC_037638.1 | 4813331 | SNV | 1 | A | C | Homozygous   |
| NC_037638.1 | 4813683 | SNV | 1 | T | A | Heterozygous |
| NC_037638.1 | 4813686 | SNV | 1 | T | G | Heterozygous |
| NC_037638.1 | 4813689 | SNV | 1 | T | A | Heterozygous |
| NC_037638.1 | 4813710 | SNV | 1 | G | A | Heterozygous |
| NC_037638.1 | 4813716 | SNV | 1 | G | A | Homozygous   |
| NC_037638.1 | 4813719 | SNV | 1 | T | A | Heterozygous |
| NC_037638.1 | 4814579 | SNV | 1 | T | C | Homozygous   |
| NC_037638.1 | 4815290 | SNV | 1 | A | T | Heterozygous |
| NC_037638.1 | 4815294 | SNV | 1 | T | A | Heterozygous |
| NC_037638.1 | 4815357 | SNV | 1 | T | A | Homozygous   |
| NC_037638.1 | 4815707 | SNV | 1 | A | G | Homozygous   |
| NC_037638.1 | 4815847 | SNV | 1 | A | T | Homozygous   |
| NC_037638.1 | 4816033 | SNV | 1 | C | T | Homozygous   |
| NC_037638.1 | 4816149 | SNV | 1 | G | A | Homozygous   |
| NC_037638.1 | 4818123 | SNV | 1 | T | C | Heterozygous |
| NC_037638.1 | 4818478 | SNV | 1 | C | G | Homozygous   |
| NC_037638.1 | 4819041 | SNV | 1 | C | T | Homozygous   |
| NC_037638.1 | 4819355 | SNV | 1 | G | A | Homozygous   |
| NC_037638.1 | 4820209 | SNV | 1 | G | A | Heterozygous |
| NC_037638.1 | 4820673 | SNV | 1 | G | A | Homozygous   |
| NC_037638.1 | 4821305 | SNV | 1 | C | T | Heterozygous |
| NC_037638.1 | 4825529 | SNV | 1 | A | T | Homozygous   |
| NC_037638.1 | 4825728 | SNV | 1 | C | T | Homozygous   |
| NC_037638.1 | 4826125 | SNV | 1 | C | T | Heterozygous |

|             |         |     |   |   |   |              |
|-------------|---------|-----|---|---|---|--------------|
| NC_037638.1 | 4826229 | SNV | 1 | T | C | Heterozygous |
| NC_037638.1 | 4826278 | SNV | 1 | A | G | Homozygous   |
| NC_037638.1 | 4826287 | SNV | 1 | T | C | Homozygous   |
| NC_037638.1 | 4826835 | SNV | 1 | C | T | Homozygous   |
| NC_037638.1 | 4829900 | SNV | 1 | G | A | Heterozygous |
| NC_037638.1 | 4829902 | SNV | 1 | G | A | Heterozygous |
| NC_037638.1 | 4833219 | SNV | 1 | T | C | Homozygous   |
| NC_037638.1 | 4833376 | SNV | 1 | A | G | Homozygous   |
| NC_037638.1 | 4833769 | SNV | 1 | G | A | Heterozygous |
| NC_037638.1 | 4834570 | SNV | 1 | T | C | Homozygous   |
| NC_037638.1 | 4834584 | SNV | 1 | T | C | Homozygous   |
| NC_037638.1 | 4834721 | SNV | 1 | C | T | Homozygous   |
| NC_037638.1 | 4834986 | SNV | 1 | G | A | Homozygous   |
| NC_037638.1 | 4835645 | SNV | 1 | A | G | Homozygous   |
| NC_037638.1 | 4835671 | SNV | 1 | C | A | Heterozygous |
| NC_037638.1 | 4835722 | SNV | 1 | G | A | Heterozygous |
| NC_037638.1 | 4835846 | SNV | 1 | C | T | Heterozygous |
| NC_037638.1 | 4836435 | SNV | 1 | G | T | Homozygous   |
| NC_037638.1 | 4841016 | SNV | 1 | T | C | Homozygous   |
| NC_037638.1 | 4842791 | SNV | 1 | A | T | Homozygous   |
| NC_037638.1 | 4842804 | SNV | 1 | T | C | Homozygous   |
| NC_037638.1 | 4844445 | SNV | 1 | G | T | Heterozygous |
| NC_037638.1 | 4844603 | SNV | 1 | A | C | Heterozygous |
| NC_037638.1 | 4864995 | SNV | 1 | T | C | Homozygous   |
| NC_037638.1 | 4865685 | SNV | 1 | G | T | Heterozygous |
| NC_037638.1 | 4865687 | SNV | 1 | G | T | Heterozygous |
| NC_037638.1 | 4865942 | SNV | 1 | T | C | Heterozygous |
| NC_037638.1 | 4865998 | SNV | 1 | T | C | Homozygous   |
| NC_037638.1 | 4866059 | SNV | 1 | A | G | Homozygous   |
| NC_037638.1 | 4870007 | SNV | 1 | T | C | Homozygous   |
| NC_037638.1 | 4879084 | SNV | 1 | T | A | Homozygous   |
| NC_037638.1 | 4879093 | SNV | 1 | A | C | Homozygous   |
| NC_037638.1 | 4884739 | SNV | 1 | T | A | Heterozygous |
| NC_037638.1 | 4884745 | SNV | 1 | T | A | Heterozygous |
| NC_037638.1 | 4884762 | SNV | 1 | A | G | Heterozygous |
| NC_037638.1 | 4885311 | SNV | 1 | G | C | Heterozygous |
| NC_037638.1 | 4885315 | SNV | 1 | G | C | Heterozygous |
| NC_037638.1 | 4885325 | SNV | 1 | G | C | Heterozygous |
| NC_037638.1 | 4885331 | SNV | 1 | A | G | Heterozygous |
| NC_037638.1 | 4900830 | SNV | 1 | A | G | Homozygous   |
| NC_037638.1 | 4902699 | SNV | 1 | A | C | Homozygous   |
| NC_037638.1 | 4902732 | SNV | 1 | A | C | Homozygous   |
| NC_037638.1 | 4902734 | SNV | 1 | A | C | Homozygous   |
| NC_037638.1 | 4926145 | SNV | 1 | G | T | Heterozygous |
| NC_037638.1 | 4926611 | SNV | 1 | C | T | Homozygous   |
| NC_037638.1 | 4927097 | SNV | 1 | G | A | Heterozygous |
| NC_037638.1 | 4931082 | SNV | 1 | T | C | Homozygous   |
| NC_037638.1 | 4935039 | SNV | 1 | A | G | Heterozygous |
| NC_037638.1 | 4935039 | SNV | 1 | A | T | Heterozygous |
| NC_037638.1 | 4935136 | SNV | 1 | A | C | Homozygous   |
| NC_037638.1 | 4935140 | SNV | 1 | T | C | Homozygous   |



|             |         |     |   |   |   |              |
|-------------|---------|-----|---|---|---|--------------|
| NC_037638.1 | 4935293 | SNV | 1 | G | C | Heterozygous |
| NC_037638.1 | 4939186 | SNV | 1 | T | C | Homozygous   |
| NC_037638.1 | 4939232 | SNV | 1 | T | C | Homozygous   |
| NC_037638.1 | 4956536 | SNV | 1 | T | C | Homozygous   |
| NC_037638.1 | 4956569 | SNV | 1 | T | C | Homozygous   |
| NC_037638.1 | 4957245 | SNV | 1 | G | C | Heterozygous |
| NC_037638.1 | 4957293 | SNV | 1 | C | G | Homozygous   |
| NC_037638.1 | 4965615 | SNV | 1 | T | G | Homozygous   |
| NC_037638.1 | 4965650 | SNV | 1 | T | A | Homozygous   |
| NC_037638.1 | 4965654 | SNV | 1 | T | A | Homozygous   |
| NC_037638.1 | 4965657 | SNV | 1 | T | A | Homozygous   |
| NC_037638.1 | 4965660 | SNV | 1 | T | A | Homozygous   |
| NC_037638.1 | 4977314 | SNV | 1 | A | C | Homozygous   |
| NC_037638.1 | 4977322 | SNV | 1 | C | A | Homozygous   |
| NC_037638.1 | 4977341 | SNV | 1 | C | A | Homozygous   |
| NC_037638.1 | 4977344 | SNV | 1 | A | G | Homozygous   |
| NC_037638.1 | 4994676 | SNV | 1 | C | T | Heterozygous |
| NC_037638.1 | 4995460 | SNV | 1 | A | T | Homozygous   |
| NC_037638.1 | 4995506 | SNV | 1 | A | G | Homozygous   |
| NC_037638.1 | 4995566 | SNV | 1 | G | A | Homozygous   |
| NC_037638.1 | 4995573 | SNV | 1 | A | G | Homozygous   |
| NC_037638.1 | 4995592 | SNV | 1 | A | G | Homozygous   |
| NC_037638.1 | 4995956 | SNV | 1 | C | A | Homozygous   |
| NC_037638.1 | 4995983 | SNV | 1 | A | T | Heterozygous |
| NC_037638.1 | 4996040 | SNV | 1 | A | T | Heterozygous |
| NC_037638.1 | 4996056 | SNV | 1 | A | T | Heterozygous |
| NC_037638.1 | 4996416 | SNV | 1 | T | C | Heterozygous |
| NC_037638.1 | 4996419 | SNV | 1 | G | A | Heterozygous |
| NC_037638.1 | 4996928 | SNV | 1 | A | G | Heterozygous |
| NC_037638.1 | 4996931 | SNV | 1 | A | G | Homozygous   |
| NC_037638.1 | 4996958 | SNV | 1 | A | C | Homozygous   |
| NC_037638.1 | 4996964 | SNV | 1 | A | T | Homozygous   |
| NC_037638.1 | 4997097 | SNV | 1 | G | A | Homozygous   |
| NC_037638.1 | 4997109 | SNV | 1 | T | A | Homozygous   |
| NC_037638.1 | 4997835 | SNV | 1 | A | G | Homozygous   |
| NC_037638.1 | 4997940 | SNV | 1 | C | A | Heterozygous |
| NC_037638.1 | 4997945 | SNV | 1 | T | A | Homozygous   |
| NC_037638.1 | 5000653 | SNV | 1 | C | G | Heterozygous |
| NC_037638.1 | 5021885 | SNV | 1 | G | A | Heterozygous |
| NC_037638.1 | 5026693 | SNV | 1 | A | G | Homozygous   |
| NC_037638.1 | 5027226 | SNV | 1 | T | C | Homozygous   |
| NC_037638.1 | 5031112 | SNV | 1 | A | G | Homozygous   |
| NC_037638.1 | 5031839 | SNV | 1 | G | A | Heterozygous |
| NC_037638.1 | 5032676 | SNV | 1 | G | A | Heterozygous |
| NC_037638.1 | 5034104 | SNV | 1 | A | G | Homozygous   |
| NC_037638.1 | 5038033 | SNV | 1 | T | C | Heterozygous |
| NC_037638.1 | 5038098 | SNV | 1 | A | G | Homozygous   |
| NC_037638.1 | 5038250 | SNV | 1 | T | C | Homozygous   |
| NC_037638.1 | 5038614 | SNV | 1 | T | C | Heterozygous |
| NC_037638.1 | 5039096 | SNV | 1 | C | T | Heterozygous |
| NC_037638.1 | 5039372 | SNV | 1 | C | T | Homozygous   |

|             |         |     |   |   |   |              |
|-------------|---------|-----|---|---|---|--------------|
| NC_037638.1 | 5039615 | SNV | 1 | T | C | Heterozygous |
| NC_037638.1 | 5039630 | SNV | 1 | A | G | Homozygous   |
| NC_037638.1 | 5041808 | SNV | 1 | A | G | Homozygous   |
| NC_037638.1 | 5042277 | SNV | 1 | C | T | Homozygous   |
| NC_037638.1 | 5042618 | SNV | 1 | A | T | Homozygous   |
| NC_037638.1 | 5043020 | SNV | 1 | C | T | Heterozygous |
| NC_037638.1 | 5043304 | SNV | 1 | T | C | Homozygous   |
| NC_037638.1 | 5047913 | SNV | 1 | G | A | Heterozygous |
| NC_037638.1 | 5053195 | SNV | 1 | T | C | Homozygous   |
| NC_037638.1 | 5059035 | SNV | 1 | C | T | Homozygous   |
| NC_037638.1 | 5060822 | SNV | 1 | G | A | Heterozygous |
| NC_037638.1 | 5061079 | SNV | 1 | G | A | Heterozygous |
| NC_037638.1 | 5061916 | SNV | 1 | G | A | Heterozygous |
| NC_037638.1 | 5063657 | SNV | 1 | C | T | Homozygous   |
| NC_037638.1 | 5064982 | SNV | 1 | A | G | Homozygous   |
| NC_037638.1 | 5065207 | SNV | 1 | A | G | Homozygous   |
| NC_037638.1 | 5065598 | SNV | 1 | A | G | Homozygous   |
| NC_037638.1 | 5065638 | SNV | 1 | G | A | Heterozygous |
| NC_037638.1 | 5065676 | SNV | 1 | G | A | Homozygous   |
| NC_037638.1 | 5065691 | SNV | 1 | A | G | Homozygous   |
| NC_037638.1 | 5065700 | SNV | 1 | G | A | Heterozygous |
| NC_037638.1 | 5065756 | SNV | 1 | C | T | Heterozygous |
| NC_037638.1 | 5066564 | SNV | 1 | G | A | Homozygous   |
| NC_037638.1 | 5066591 | SNV | 1 | A | G | Heterozygous |
| NC_037638.1 | 5066686 | SNV | 1 | G | T | Homozygous   |
| NC_037638.1 | 5066999 | SNV | 1 | T | A | Homozygous   |
| NC_037638.1 | 5067753 | SNV | 1 | G | A | Homozygous   |
| NC_037638.1 | 5076137 | SNV | 1 | T | C | Homozygous   |
| NC_037638.1 | 5076213 | SNV | 1 | C | T | Homozygous   |
| NC_037638.1 | 5076593 | SNV | 1 | T | C | Homozygous   |
| NC_037638.1 | 5076651 | SNV | 1 | C | T | Heterozygous |
| NC_037638.1 | 5076689 | SNV | 1 | A | G | Homozygous   |
| NC_037638.1 | 5076824 | SNV | 1 | T | C | Homozygous   |
| NC_037638.1 | 5077619 | SNV | 1 | G | A | Homozygous   |
| NC_037638.1 | 5082118 | SNV | 1 | A | G | Homozygous   |
| NC_037638.1 | 5111921 | SNV | 1 | T | C | Homozygous   |
| NC_037638.1 | 5111938 | SNV | 1 | T | C | Homozygous   |
| NC_037638.1 | 5111977 | SNV | 1 | G | A | Heterozygous |
| NC_037638.1 | 5112074 | SNV | 1 | A | G | Homozygous   |
| NC_037638.1 | 5112078 | SNV | 1 | C | A | Heterozygous |
| NC_037638.1 | 5112221 | SNV | 1 | A | G | Homozygous   |
| NC_037638.1 | 5112227 | SNV | 1 | C | T | Heterozygous |
| NC_037638.1 | 5112761 | SNV | 1 | T | C | Homozygous   |
| NC_037638.1 | 5113758 | SNV | 1 | T | C | Homozygous   |
| NC_037638.1 | 5116187 | SNV | 1 | G | T | Homozygous   |
| NC_037638.1 | 5117263 | SNV | 1 | G | A | Homozygous   |
| NC_037638.1 | 5118986 | SNV | 1 | A | G | Homozygous   |
| NC_037638.1 | 5127980 | SNV | 1 | G | A | Homozygous   |
| NC_037638.1 | 5134704 | SNV | 1 | C | T | Heterozygous |
| NC_037638.1 | 5135089 | SNV | 1 | G | A | Homozygous   |
| NC_037638.1 | 5135109 | SNV | 1 | T | A | Heterozygous |

|             |         |     |   |   |   |              |
|-------------|---------|-----|---|---|---|--------------|
| NC_037638.1 | 5138558 | SNV | 1 | A | G | Homozygous   |
| NC_037638.1 | 5138562 | SNV | 1 | A | G | Homozygous   |
| NC_037638.1 | 5139264 | SNV | 1 | T | A | Homozygous   |
| NC_037638.1 | 5139270 | SNV | 1 | C | T | Homozygous   |
| NC_037638.1 | 5139273 | SNV | 1 | T | G | Homozygous   |
| NC_037638.1 | 5139284 | SNV | 1 | T | C | Homozygous   |
| NC_037638.1 | 5139295 | SNV | 1 | C | A | Homozygous   |
| NC_037638.1 | 5139934 | SNV | 1 | A | G | Heterozygous |
| NC_037638.1 | 5141614 | SNV | 1 | A | G | Homozygous   |
| NC_037638.1 | 5151035 | SNV | 1 | A | C | Homozygous   |
| NC_037638.1 | 5151039 | SNV | 1 | T | A | Homozygous   |
| NC_037638.1 | 5151041 | SNV | 1 | A | C | Homozygous   |
| NC_037638.1 | 5151046 | SNV | 1 | T | C | Homozygous   |
| NC_037638.1 | 5151049 | SNV | 1 | T | G | Homozygous   |
| NC_037638.1 | 5151060 | SNV | 1 | A | C | Homozygous   |
| NC_037638.1 | 5158995 | SNV | 1 | T | C | Homozygous   |
| NC_037638.1 | 5161178 | SNV | 1 | G | A | Heterozygous |
| NC_037638.1 | 5161287 | SNV | 1 | G | C | Homozygous   |
| NC_037638.1 | 5161296 | SNV | 1 | C | G | Homozygous   |
| NC_037638.1 | 5161312 | SNV | 1 | T | C | Homozygous   |
| NC_037638.1 | 5161314 | SNV | 1 | C | T | Homozygous   |
| NC_037638.1 | 5168003 | SNV | 1 | T | C | Heterozygous |
| NC_037638.1 | 5168005 | SNV | 1 | C | T | Heterozygous |
| NC_037638.1 | 5168012 | SNV | 1 | T | C | Homozygous   |
| NC_037638.1 | 5168018 | SNV | 1 | T | C | Heterozygous |
| NC_037638.1 | 5168040 | SNV | 1 | T | C | Homozygous   |
| NC_037638.1 | 5168057 | SNV | 1 | C | T | Heterozygous |
| NC_037638.1 | 5169104 | SNV | 1 | T | C | Heterozygous |
| NC_037638.1 | 5169124 | SNV | 1 | T | G | Homozygous   |
| NC_037638.1 | 5169167 | SNV | 1 | T | C | Homozygous   |
| NC_037638.1 | 5169184 | SNV | 1 | T | C | Heterozygous |
| NC_037638.1 | 5169200 | SNV | 1 | A | G | Heterozygous |
| NC_037638.1 | 5169210 | SNV | 1 | T | C | Homozygous   |
| NC_037638.1 | 5169215 | SNV | 1 | G | C | Homozygous   |
| NC_037638.1 | 5169218 | SNV | 1 | G | A | Homozygous   |
| NC_037638.1 | 5169235 | SNV | 1 | A | G | Homozygous   |
| NC_037638.1 | 5170468 | SNV | 1 | G | A | Homozygous   |
| NC_037638.1 | 5170752 | SNV | 1 | G | A | Heterozygous |
| NC_037638.1 | 5175438 | SNV | 1 | C | G | Homozygous   |
| NC_037638.1 | 5175453 | SNV | 1 | C | A | Homozygous   |
| NC_037638.1 | 5175889 | SNV | 1 | G | A | Homozygous   |
| NC_037638.1 | 5219284 | SNV | 1 | A | G | Homozygous   |
| NC_037638.1 | 5219290 | SNV | 1 | C | T | Homozygous   |
| NC_037638.1 | 5219292 | SNV | 1 | C | T | Heterozygous |
| NC_037638.1 | 5219323 | SNV | 1 | A | G | Heterozygous |
| NC_037638.1 | 5219385 | SNV | 1 | C | G | Heterozygous |
| NC_037638.1 | 5227544 | SNV | 1 | G | A | Heterozygous |
| NC_037638.1 | 5227696 | SNV | 1 | T | A | Heterozygous |
| NC_037638.1 | 5227766 | SNV | 1 | A | G | Homozygous   |
| NC_037638.1 | 5230242 | SNV | 1 | T | G | Homozygous   |
| NC_037638.1 | 5230246 | SNV | 1 | A | T | Homozygous   |

|             |         |     |   |   |   |              |
|-------------|---------|-----|---|---|---|--------------|
| NC_037638.1 | 5230253 | SNV | 1 | G | A | Homozygous   |
| NC_037638.1 | 5230255 | SNV | 1 | T | A | Homozygous   |
| NC_037638.1 | 5230289 | SNV | 1 | A | T | Homozygous   |
| NC_037638.1 | 5230652 | SNV | 1 | T | G | Homozygous   |
| NC_037638.1 | 5230654 | SNV | 1 | T | A | Homozygous   |
| NC_037638.1 | 5230810 | SNV | 1 | T | C | Homozygous   |
| NC_037638.1 | 5230936 | SNV | 1 | T | C | Homozygous   |
| NC_037638.1 | 5237551 | SNV | 1 | G | A | Heterozygous |
| NC_037638.1 | 5264118 | SNV | 1 | T | C | Homozygous   |
| NC_037638.1 | 5271860 | SNV | 1 | G | A | Homozygous   |
| NC_037638.1 | 5272498 | SNV | 1 | G | T | Homozygous   |
| NC_037638.1 | 5272514 | SNV | 1 | A | G | Heterozygous |
| NC_037638.1 | 5272666 | SNV | 1 | A | G | Homozygous   |
| NC_037638.1 | 5272698 | SNV | 1 | G | A | Homozygous   |
| NC_037638.1 | 5272712 | SNV | 1 | T | G | Homozygous   |
| NC_037638.1 | 5272759 | SNV | 1 | G | A | Heterozygous |
| NC_037638.1 | 5278452 | SNV | 1 | T | A | Homozygous   |
| NC_037638.1 | 5278471 | SNV | 1 | C | T | Homozygous   |
| NC_037638.1 | 5281002 | SNV | 1 | C | G | Homozygous   |
| NC_037638.1 | 5281005 | SNV | 1 | C | T | Homozygous   |
| NC_037638.1 | 5281213 | SNV | 1 | A | G | Homozygous   |
| NC_037638.1 | 5284505 | SNV | 1 | A | T | Heterozygous |
| NC_037638.1 | 5292790 | SNV | 1 | A | G | Homozygous   |
| NC_037638.1 | 5298147 | SNV | 1 | C | T | Heterozygous |
| NC_037638.1 | 5298193 | SNV | 1 | A | T | Homozygous   |
| NC_037638.1 | 5298206 | SNV | 1 | C | T | Homozygous   |
| NC_037638.1 | 5298264 | SNV | 1 | G | A | Homozygous   |
| NC_037638.1 | 5298309 | SNV | 1 | G | A | Heterozygous |
| NC_037638.1 | 5298313 | SNV | 1 | A | G | Heterozygous |
| NC_037638.1 | 5298317 | SNV | 1 | G | A | Heterozygous |
| NC_037638.1 | 5299968 | SNV | 1 | T | C | Homozygous   |
| NC_037638.1 | 5300023 | SNV | 1 | G | A | Homozygous   |
| NC_037638.1 | 5301507 | SNV | 1 | A | C | Heterozygous |
| NC_037638.1 | 5301721 | SNV | 1 | T | G | Homozygous   |
| NC_037638.1 | 5302286 | SNV | 1 | C | G | Heterozygous |
| NC_037638.1 | 5302374 | SNV | 1 | G | A | Heterozygous |
| NC_037638.1 | 5302395 | SNV | 1 | T | C | Heterozygous |
| NC_037638.1 | 5302534 | SNV | 1 | T | C | Homozygous   |
| NC_037638.1 | 5302588 | SNV | 1 | A | G | Heterozygous |
| NC_037638.1 | 5302624 | SNV | 1 | T | C | Homozygous   |
| NC_037638.1 | 5302964 | SNV | 1 | T | A | Heterozygous |
| NC_037638.1 | 5303076 | SNV | 1 | A | G | Heterozygous |
| NC_037638.1 | 5307398 | SNV | 1 | T | C | Homozygous   |
| NC_037638.1 | 5307488 | SNV | 1 | A | C | Homozygous   |
| NC_037638.1 | 5308057 | SNV | 1 | A | T | Heterozygous |
| NC_037638.1 | 5309014 | SNV | 1 | A | G | Homozygous   |
| NC_037638.1 | 5309351 | SNV | 1 | C | A | Homozygous   |
| NC_037638.1 | 5309355 | SNV | 1 | T | C | Heterozygous |
| NC_037638.1 | 5310690 | SNV | 1 | T | C | Homozygous   |
| NC_037638.1 | 5310868 | SNV | 1 | T | C | Homozygous   |
| NC_037638.1 | 5313271 | SNV | 1 | C | T | Heterozygous |

|             |         |     |   |   |   |              |
|-------------|---------|-----|---|---|---|--------------|
| NC_037638.1 | 5316286 | SNV | 1 | A | G | Homozygous   |
| NC_037638.1 | 5316290 | SNV | 1 | T | A | Homozygous   |
| NC_037638.1 | 5316296 | SNV | 1 | G | C | Homozygous   |
| NC_037638.1 | 5316308 | SNV | 1 | T | G | Homozygous   |
| NC_037638.1 | 5316310 | SNV | 1 | T | A | Homozygous   |
| NC_037638.1 | 5318602 | SNV | 1 | G | A | Homozygous   |
| NC_037638.1 | 5319527 | SNV | 1 | T | C | Homozygous   |
| NC_037638.1 | 5320091 | SNV | 1 | A | C | Heterozygous |
| NC_037638.1 | 5320472 | SNV | 1 | T | C | Heterozygous |
| NC_037638.1 | 5320603 | SNV | 1 | G | C | Homozygous   |
| NC_037638.1 | 5320643 | SNV | 1 | T | G | Heterozygous |
| NC_037638.1 | 5320646 | SNV | 1 | G | A | Heterozygous |
| NC_037638.1 | 5320689 | SNV | 1 | A | T | Heterozygous |
| NC_037638.1 | 5320694 | SNV | 1 | A | G | Homozygous   |
| NC_037638.1 | 5320718 | SNV | 1 | C | T | Heterozygous |
| NC_037638.1 | 5320819 | SNV | 1 | G | A | Homozygous   |
| NC_037638.1 | 5320907 | SNV | 1 | A | C | Heterozygous |
| NC_037638.1 | 5320920 | SNV | 1 | T | C | Homozygous   |
| NC_037638.1 | 5320939 | SNV | 1 | G | A | Homozygous   |
| NC_037638.1 | 5322430 | SNV | 1 | G | T | Homozygous   |
| NC_037638.1 | 5322782 | SNV | 1 | T | C | Homozygous   |
| NC_037638.1 | 5324752 | SNV | 1 | G | A | Homozygous   |
| NC_037638.1 | 5324931 | SNV | 1 | C | T | Homozygous   |
| NC_037638.1 | 5325216 | SNV | 1 | T | G | Homozygous   |
| NC_037638.1 | 5325224 | SNV | 1 | G | T | Homozygous   |
| NC_037638.1 | 5325579 | SNV | 1 | G | T | Homozygous   |
| NC_037638.1 | 5325582 | SNV | 1 | T | C | Homozygous   |
| NC_037638.1 | 5325767 | SNV | 1 | A | G | Homozygous   |
| NC_037638.1 | 5329249 | SNV | 1 | G | A | Homozygous   |
| NC_037638.1 | 5329436 | SNV | 1 | T | A | Homozygous   |
| NC_037638.1 | 5336762 | SNV | 1 | A | G | Homozygous   |
| NC_037638.1 | 5336786 | SNV | 1 | A | G | Heterozygous |
| NC_037638.1 | 5347489 | SNV | 1 | C | T | Heterozygous |
| NC_037638.1 | 5352366 | SNV | 1 | G | A | Homozygous   |
| NC_037638.1 | 5353221 | SNV | 1 | G | A | Heterozygous |
| NC_037638.1 | 5353862 | SNV | 1 | T | A | Homozygous   |
| NC_037638.1 | 5354542 | SNV | 1 | A | G | Homozygous   |
| NC_037638.1 | 5354935 | SNV | 1 | G | A | Homozygous   |
| NC_037638.1 | 5354966 | SNV | 1 | T | C | Homozygous   |
| NC_037638.1 | 5354992 | SNV | 1 | G | A | Homozygous   |
| NC_037638.1 | 5355001 | SNV | 1 | T | C | Homozygous   |
| NC_037638.1 | 5355055 | SNV | 1 | G | A | Homozygous   |
| NC_037638.1 | 5355182 | SNV | 1 | T | A | Heterozygous |
| NC_037638.1 | 5355184 | SNV | 1 | T | C | Heterozygous |
| NC_037638.1 | 5355298 | SNV | 1 | A | T | Homozygous   |
| NC_037638.1 | 5355525 | SNV | 1 | A | G | Homozygous   |
| NC_037638.1 | 5355756 | SNV | 1 | A | G | Homozygous   |
| NC_037638.1 | 5357253 | SNV | 1 | C | T | Heterozygous |
| NC_037638.1 | 5357265 | SNV | 1 | C | T | Homozygous   |
| NC_037638.1 | 5357610 | SNV | 1 | G | A | Heterozygous |
| NC_037638.1 | 5357685 | SNV | 1 | G | A | Heterozygous |

|             |         |     |   |   |   |              |
|-------------|---------|-----|---|---|---|--------------|
| NC_037638.1 | 5357739 | SNV | 1 | G | A | Homozygous   |
| NC_037638.1 | 5358072 | SNV | 1 | T | C | Heterozygous |
| NC_037638.1 | 5358195 | SNV | 1 | G | A | Heterozygous |
| NC_037638.1 | 5358384 | SNV | 1 | C | G | Homozygous   |
| NC_037638.1 | 5358497 | SNV | 1 | G | A | Heterozygous |
| NC_037638.1 | 5358921 | SNV | 1 | T | G | Homozygous   |
| NC_037638.1 | 5360146 | SNV | 1 | A | C | Homozygous   |
| NC_037638.1 | 5360153 | SNV | 1 | T | C | Homozygous   |
| NC_037638.1 | 5360917 | SNV | 1 | T | C | Homozygous   |
| NC_037638.1 | 5362700 | SNV | 1 | A | G | Homozygous   |
| NC_037638.1 | 5363217 | SNV | 1 | T | C | Homozygous   |
| NC_037638.1 | 5364141 | SNV | 1 | T | C | Homozygous   |
| NC_037638.1 | 5364147 | SNV | 1 | C | T | Homozygous   |
| NC_037638.1 | 5364241 | SNV | 1 | G | A | Heterozygous |
| NC_037638.1 | 5365077 | SNV | 1 | G | A | Homozygous   |
| NC_037638.1 | 5373629 | SNV | 1 | G | A | Homozygous   |
| NC_037638.1 | 5373633 | SNV | 1 | G | C | Heterozygous |
| NC_037638.1 | 5373637 | SNV | 1 | G | A | Heterozygous |
| NC_037638.1 | 5373748 | SNV | 1 | T | C | Homozygous   |
| NC_037638.1 | 5373768 | SNV | 1 | G | T | Homozygous   |
| NC_037638.1 | 5376352 | SNV | 1 | A | G | Heterozygous |
| NC_037638.1 | 5376390 | SNV | 1 | C | T | Homozygous   |
| NC_037638.1 | 5377327 | SNV | 1 | G | A | Homozygous   |
| NC_037638.1 | 5377344 | SNV | 1 | G | A | Heterozygous |
| NC_037638.1 | 5377362 | SNV | 1 | G | C | Heterozygous |
| NC_037638.1 | 5377611 | SNV | 1 | T | C | Homozygous   |
| NC_037638.1 | 5377662 | SNV | 1 | G | A | Homozygous   |
| NC_037638.1 | 5377789 | SNV | 1 | C | G | Homozygous   |
| NC_037638.1 | 5378148 | SNV | 1 | C | T | Heterozygous |
| NC_037638.1 | 5378199 | SNV | 1 | C | A | Heterozygous |
| NC_037638.1 | 5378222 | SNV | 1 | G | A | Heterozygous |
| NC_037638.1 | 5378229 | SNV | 1 | T | A | Heterozygous |
| NC_037638.1 | 5378231 | SNV | 1 | A | T | Heterozygous |
| NC_037638.1 | 5378246 | SNV | 1 | A | T | Heterozygous |
| NC_037638.1 | 5378267 | SNV | 1 | G | C | Heterozygous |
| NC_037638.1 | 5378407 | SNV | 1 | A | T | Homozygous   |
| NC_037638.1 | 5378481 | SNV | 1 | T | C | Homozygous   |
| NC_037638.1 | 5378505 | SNV | 1 | A | G | Heterozygous |
| NC_037638.1 | 5378508 | SNV | 1 | G | A | Heterozygous |
| NC_037638.1 | 5378520 | SNV | 1 | C | T | Heterozygous |
| NC_037638.1 | 5378583 | SNV | 1 | G | A | Homozygous   |
| NC_037638.1 | 5378724 | SNV | 1 | T | C | Heterozygous |
| NC_037638.1 | 5378741 | SNV | 1 | T | C | Homozygous   |
| NC_037638.1 | 5378806 | SNV | 1 | C | G | Homozygous   |
| NC_037638.1 | 5378839 | SNV | 1 | C | T | Heterozygous |
| NC_037638.1 | 5378847 | SNV | 1 | C | T | Heterozygous |
| NC_037638.1 | 5378874 | SNV | 1 | T | C | Homozygous   |
| NC_037638.1 | 5378912 | SNV | 1 | G | C | Heterozygous |
| NC_037638.1 | 5379291 | SNV | 1 | T | C | Homozygous   |
| NC_037638.1 | 5379307 | SNV | 1 | A | G | Homozygous   |
| NC_037638.1 | 5379345 | SNV | 1 | G | A | Homozygous   |

|             |         |     |   |   |   |              |
|-------------|---------|-----|---|---|---|--------------|
| NC_037638.1 | 5379603 | SNV | 1 | T | A | Homozygous   |
| NC_037638.1 | 5379607 | SNV | 1 | G | A | Homozygous   |
| NC_037638.1 | 5379611 | SNV | 1 | C | G | Homozygous   |
| NC_037638.1 | 5380008 | SNV | 1 | G | A | Homozygous   |
| NC_037638.1 | 5380754 | SNV | 1 | G | A | Heterozygous |
| NC_037638.1 | 5382502 | SNV | 1 | T | C | Homozygous   |
| NC_037638.1 | 5382575 | SNV | 1 | C | T | Heterozygous |
| NC_037638.1 | 5382592 | SNV | 1 | C | G | Heterozygous |
| NC_037638.1 | 5382748 | SNV | 1 | T | C | Homozygous   |
| NC_037638.1 | 5382760 | SNV | 1 | A | G | Homozygous   |
| NC_037638.1 | 5382771 | SNV | 1 | T | G | Homozygous   |
| NC_037638.1 | 5383151 | SNV | 1 | A | G | Homozygous   |
| NC_037638.1 | 5383154 | SNV | 1 | G | A | Homozygous   |
| NC_037638.1 | 5383177 | SNV | 1 | G | A | Homozygous   |
| NC_037638.1 | 5384237 | SNV | 1 | T | C | Homozygous   |
| NC_037638.1 | 5384264 | SNV | 1 | C | A | Homozygous   |
| NC_037638.1 | 5384696 | SNV | 1 | T | C | Homozygous   |
| NC_037638.1 | 5384809 | SNV | 1 | C | T | Homozygous   |
| NC_037638.1 | 5385428 | SNV | 1 | G | A | Heterozygous |
| NC_037638.1 | 5393253 | SNV | 1 | A | C | Homozygous   |
| NC_037638.1 | 5393255 | SNV | 1 | C | A | Homozygous   |
| NC_037638.1 | 5393275 | SNV | 1 | A | G | Homozygous   |
| NC_037638.1 | 5393341 | SNV | 1 | C | T | Homozygous   |
| NC_037638.1 | 5396619 | SNV | 1 | G | A | Homozygous   |
| NC_037638.1 | 5396670 | SNV | 1 | A | G | Homozygous   |
| NC_037638.1 | 5396684 | SNV | 1 | C | T | Homozygous   |
| NC_037638.1 | 5396937 | SNV | 1 | C | G | Homozygous   |
| NC_037638.1 | 5397215 | SNV | 1 | C | T | Homozygous   |
| NC_037638.1 | 5412767 | SNV | 1 | G | C | Heterozygous |
| NC_037638.1 | 5412770 | SNV | 1 | G | A | Heterozygous |
| NC_037638.1 | 5412772 | SNV | 1 | G | T | Homozygous   |
| NC_037638.1 | 5412782 | SNV | 1 | A | G | Heterozygous |
| NC_037638.1 | 5436863 | SNV | 1 | G | A | Homozygous   |
| NC_037638.1 | 5444595 | SNV | 1 | G | A | Heterozygous |
| NC_037638.1 | 5445261 | SNV | 1 | A | G | Homozygous   |
| NC_037638.1 | 5445825 | SNV | 1 | G | A | Homozygous   |
| NC_037638.1 | 5446866 | SNV | 1 | T | C | Homozygous   |
| NC_037638.1 | 5448443 | SNV | 1 | T | C | Homozygous   |
| NC_037638.1 | 5448697 | SNV | 1 | C | A | Homozygous   |
| NC_037638.1 | 5449075 | SNV | 1 | C | T | Homozygous   |
| NC_037638.1 | 5449179 | SNV | 1 | A | T | Homozygous   |
| NC_037638.1 | 5451058 | SNV | 1 | A | T | Heterozygous |
| NC_037638.1 | 5451979 | SNV | 1 | A | G | Homozygous   |
| NC_037638.1 | 5453252 | SNV | 1 | G | A | Heterozygous |
| NC_037638.1 | 5455551 | SNV | 1 | T | A | Heterozygous |
| NC_037638.1 | 5455563 | SNV | 1 | C | T | Heterozygous |
| NC_037638.1 | 5455566 | SNV | 1 | T | A | Heterozygous |
| NC_037638.1 | 5455570 | SNV | 1 | A | T | Heterozygous |
| NC_037638.1 | 5455925 | SNV | 1 | A | T | Homozygous   |
| NC_037638.1 | 5455929 | SNV | 1 | G | T | Homozygous   |
| NC_037638.1 | 5455935 | SNV | 1 | G | C | Homozygous   |

|             |         |     |   |   |   |              |
|-------------|---------|-----|---|---|---|--------------|
| NC_037638.1 | 5455941 | SNV | 1 | C | T | Homozygous   |
| NC_037638.1 | 5455964 | SNV | 1 | T | A | Homozygous   |
| NC_037638.1 | 5455969 | SNV | 1 | A | T | Homozygous   |
| NC_037638.1 | 5457919 | SNV | 1 | G | A | Heterozygous |
| NC_037638.1 | 5458489 | SNV | 1 | G | A | Heterozygous |
| NC_037638.1 | 5458635 | SNV | 1 | G | A | Homozygous   |
| NC_037638.1 | 5459285 | SNV | 1 | T | C | Heterozygous |
| NC_037638.1 | 5459909 | SNV | 1 | A | G | Homozygous   |
| NC_037638.1 | 5459927 | SNV | 1 | A | G | Heterozygous |
| NC_037638.1 | 5459953 | SNV | 1 | G | T | Homozygous   |
| NC_037638.1 | 5468186 | SNV | 1 | C | T | Heterozygous |
| NC_037638.1 | 5469176 | SNV | 1 | T | C | Homozygous   |
| NC_037638.1 | 5469614 | SNV | 1 | G | C | Homozygous   |
| NC_037638.1 | 5469617 | SNV | 1 | A | G | Homozygous   |
| NC_037638.1 | 5470177 | SNV | 1 | A | G | Heterozygous |
| NC_037638.1 | 5471260 | SNV | 1 | G | A | Heterozygous |
| NC_037638.1 | 5487678 | SNV | 1 | A | T | Homozygous   |
| NC_037638.1 | 5489140 | SNV | 1 | A | G | Homozygous   |
| NC_037638.1 | 5491813 | SNV | 1 | C | T | Heterozygous |
| NC_037638.1 | 5492099 | SNV | 1 | G | A | Homozygous   |
| NC_037638.1 | 5493415 | SNV | 1 | C | T | Homozygous   |
| NC_037638.1 | 5493707 | SNV | 1 | T | C | Homozygous   |
| NC_037638.1 | 5493740 | SNV | 1 | T | C | Homozygous   |
| NC_037638.1 | 5493791 | SNV | 1 | G | A | Heterozygous |
| NC_037638.1 | 5494937 | SNV | 1 | A | G | Heterozygous |
| NC_037638.1 | 5495657 | SNV | 1 | A | T | Homozygous   |
| NC_037638.1 | 5495746 | SNV | 1 | G | C | Homozygous   |
| NC_037638.1 | 5495752 | SNV | 1 | C | G | Heterozygous |
| NC_037638.1 | 5495762 | SNV | 1 | G | T | Homozygous   |
| NC_037638.1 | 5495773 | SNV | 1 | T | C | Heterozygous |
| NC_037638.1 | 5495778 | SNV | 1 | G | T | Homozygous   |
| NC_037638.1 | 5495780 | SNV | 1 | C | G | Heterozygous |
| NC_037638.1 | 5495794 | SNV | 1 | G | T | Homozygous   |
| NC_037638.1 | 5495800 | SNV | 1 | C | T | Homozygous   |
| NC_037638.1 | 5495803 | SNV | 1 | T | A | Homozygous   |
| NC_037638.1 | 5495806 | SNV | 1 | C | T | Homozygous   |
| NC_037638.1 | 5495827 | SNV | 1 | G | C | Homozygous   |
| NC_037638.1 | 5495899 | SNV | 1 | G | T | Homozygous   |
| NC_037638.1 | 5495901 | SNV | 1 | C | T | Heterozygous |
| NC_037638.1 | 5495946 | SNV | 1 | C | G | Heterozygous |
| NC_037638.1 | 5495950 | SNV | 1 | G | A | Heterozygous |
| NC_037638.1 | 5495970 | SNV | 1 | G | T | Heterozygous |
| NC_037638.1 | 5495979 | SNV | 1 | T | A | Heterozygous |
| NC_037638.1 | 5495994 | SNV | 1 | G | C | Heterozygous |
| NC_037638.1 | 5496003 | SNV | 1 | T | C | Heterozygous |
| NC_037638.1 | 5496014 | SNV | 1 | C | G | Heterozygous |
| NC_037638.1 | 5496053 | SNV | 1 | C | A | Heterozygous |
| NC_037638.1 | 5496057 | SNV | 1 | C | A | Homozygous   |
| NC_037638.1 | 5496118 | SNV | 1 | T | A | Homozygous   |
| NC_037638.1 | 5496142 | SNV | 1 | G | C | Homozygous   |
| NC_037638.1 | 5496151 | SNV | 1 | T | C | Heterozygous |



|             |         |     |   |   |   |              |
|-------------|---------|-----|---|---|---|--------------|
| NC_037638.1 | 5496155 | SNV | 1 | T | C | Heterozygous |
| NC_037638.1 | 5496174 | SNV | 1 | G | C | Homozygous   |
| NC_037638.1 | 5496180 | SNV | 1 | C | G | Heterozygous |
| NC_037638.1 | 5496184 | SNV | 1 | C | G | Heterozygous |
| NC_037638.1 | 5496190 | SNV | 1 | G | C | Homozygous   |
| NC_037638.1 | 5496204 | SNV | 1 | C | G | Homozygous   |
| NC_037638.1 | 5496238 | SNV | 1 | G | C | Homozygous   |
| NC_037638.1 | 5496242 | SNV | 1 | C | G | Homozygous   |
| NC_037638.1 | 5496258 | SNV | 1 | C | G | Heterozygous |
| NC_037638.1 | 5496274 | SNV | 1 | C | T | Heterozygous |
| NC_037638.1 | 5496286 | SNV | 1 | G | C | Homozygous   |
| NC_037638.1 | 5496326 | SNV | 1 | G | C | Homozygous   |
| NC_037638.1 | 5496340 | SNV | 1 | C | G | Heterozygous |
| NC_037638.1 | 5496342 | SNV | 1 | G | C | Homozygous   |
| NC_037638.1 | 5496344 | SNV | 1 | C | T | Heterozygous |
| NC_037638.1 | 5496354 | SNV | 1 | C | G | Heterozygous |
| NC_037638.1 | 5496356 | SNV | 1 | C | G | Heterozygous |
| NC_037638.1 | 5496358 | SNV | 1 | G | C | Heterozygous |
| NC_037638.1 | 5496360 | SNV | 1 | C | T | Homozygous   |
| NC_037638.1 | 5496370 | SNV | 1 | C | G | Homozygous   |
| NC_037638.1 | 5496375 | SNV | 1 | T | C | Heterozygous |
| NC_037638.1 | 5496382 | SNV | 1 | G | C | Homozygous   |
| NC_037638.1 | 5496384 | SNV | 1 | C | T | Heterozygous |
| NC_037638.1 | 5496386 | SNV | 1 | C | T | Heterozygous |
| NC_037638.1 | 5496390 | SNV | 1 | G | C | Heterozygous |
| NC_037638.1 | 5496396 | SNV | 1 | C | G | Homozygous   |
| NC_037638.1 | 5496422 | SNV | 1 | C | A | Heterozygous |
| NC_037638.1 | 5496426 | SNV | 1 | G | A | Heterozygous |
| NC_037638.1 | 5496430 | SNV | 1 | C | G | Heterozygous |
| NC_037638.1 | 5496442 | SNV | 1 | G | T | Homozygous   |
| NC_037638.1 | 5496454 | SNV | 1 | C | A | Heterozygous |
| NC_037638.1 | 5496454 | SNV | 1 | C | G | Heterozygous |
| NC_037638.1 | 5496462 | SNV | 1 | C | G | Homozygous   |
| NC_037638.1 | 5496656 | SNV | 1 | C | G | Heterozygous |
| NC_037638.1 | 5496658 | SNV | 1 | G | T | Heterozygous |
| NC_037638.1 | 5496691 | SNV | 1 | G | C | Homozygous   |
| NC_037638.1 | 5496695 | SNV | 1 | C | G | Homozygous   |
| NC_037638.1 | 5496705 | SNV | 1 | C | T | Homozygous   |
| NC_037638.1 | 5496711 | SNV | 1 | C | G | Homozygous   |
| NC_037638.1 | 5496727 | SNV | 1 | C | T | Homozygous   |
| NC_037638.1 | 5496745 | SNV | 1 | C | G | Homozygous   |
| NC_037638.1 | 5496747 | SNV | 1 | G | C | Homozygous   |
| NC_037638.1 | 5497674 | SNV | 1 | C | G | Heterozygous |
| NC_037638.1 | 5497690 | SNV | 1 | C | G | Homozygous   |
| NC_037638.1 | 5497694 | SNV | 1 | G | A | Heterozygous |
| NC_037638.1 | 5497694 | SNV | 1 | G | T | Heterozygous |
| NC_037638.1 | 5497696 | SNV | 1 | C | T | Heterozygous |
| NC_037638.1 | 5497724 | SNV | 1 | C | G | Homozygous   |
| NC_037638.1 | 5497742 | SNV | 1 | C | G | Homozygous   |
| NC_037638.1 | 5497745 | SNV | 1 | T | C | Homozygous   |
| NC_037638.1 | 5497748 | SNV | 1 | C | A | Homozygous   |

|             |         |     |   |   |   |              |
|-------------|---------|-----|---|---|---|--------------|
| NC_037638.1 | 5497756 | SNV | 1 | C | G | Homozygous   |
| NC_037638.1 | 5497768 | SNV | 1 | G | T | Homozygous   |
| NC_037638.1 | 5497792 | SNV | 1 | G | C | Homozygous   |
| NC_037638.1 | 5497813 | SNV | 1 | T | C | Heterozygous |
| NC_037638.1 | 5497820 | SNV | 1 | C | G | Homozygous   |
| NC_037638.1 | 5497828 | SNV | 1 | C | G | Homozygous   |
| NC_037638.1 | 5497830 | SNV | 1 | C | T | Homozygous   |
| NC_037638.1 | 5497832 | SNV | 1 | G | C | Homozygous   |
| NC_037638.1 | 5497873 | SNV | 1 | G | C | Homozygous   |
| NC_037638.1 | 5497877 | SNV | 1 | G | T | Homozygous   |
| NC_037638.1 | 5497881 | SNV | 1 | G | C | Homozygous   |
| NC_037638.1 | 5497905 | SNV | 1 | G | C | Homozygous   |
| NC_037638.1 | 5497909 | SNV | 1 | G | C | Homozygous   |
| NC_037638.1 | 5497956 | SNV | 1 | T | C | Homozygous   |
| NC_037638.1 | 5497961 | SNV | 1 | G | C | Homozygous   |
| NC_037638.1 | 5497963 | SNV | 1 | C | G | Homozygous   |
| NC_037638.1 | 5497967 | SNV | 1 | C | T | Homozygous   |
| NC_037638.1 | 5497969 | SNV | 1 | G | C | Homozygous   |
| NC_037638.1 | 5497983 | SNV | 1 | C | T | Homozygous   |
| NC_037638.1 | 5498005 | SNV | 1 | G | C | Heterozygous |
| NC_037638.1 | 5498005 | SNV | 1 | G | T | Heterozygous |
| NC_037638.1 | 5498009 | SNV | 1 | G | C | Heterozygous |
| NC_037638.1 | 5498021 | SNV | 1 | G | C | Heterozygous |
| NC_037638.1 | 5498025 | SNV | 1 | G | C | Homozygous   |
| NC_037638.1 | 5498035 | SNV | 1 | C | G | Homozygous   |
| NC_037638.1 | 5498056 | SNV | 1 | G | C | Homozygous   |
| NC_037638.1 | 5498064 | SNV | 1 | G | C | Heterozygous |
| NC_037638.1 | 5498065 | SNV | 1 | T | C | Heterozygous |
| NC_037638.1 | 5498069 | SNV | 1 | T | C | Heterozygous |
| NC_037638.1 | 5498080 | SNV | 1 | G | C | Heterozygous |
| NC_037638.1 | 5498088 | SNV | 1 | G | C | Heterozygous |
| NC_037638.1 | 5498096 | SNV | 1 | G | C | Heterozygous |
| NC_037638.1 | 5498100 | SNV | 1 | G | C | Homozygous   |
| NC_037638.1 | 5498109 | SNV | 1 | T | C | Homozygous   |
| NC_037638.1 | 5498112 | SNV | 1 | G | T | Homozygous   |
| NC_037638.1 | 5498118 | SNV | 1 | C | T | Homozygous   |
| NC_037638.1 | 5498120 | SNV | 1 | G | C | Homozygous   |
| NC_037638.1 | 5498192 | SNV | 1 | C | T | Homozygous   |
| NC_037638.1 | 5498202 | SNV | 1 | G | C | Homozygous   |
| NC_037638.1 | 5498210 | SNV | 1 | G | C | Heterozygous |
| NC_037638.1 | 5498218 | SNV | 1 | G | C | Heterozygous |
| NC_037638.1 | 5498238 | SNV | 1 | C | G | Heterozygous |
| NC_037638.1 | 5498250 | SNV | 1 | G | T | Homozygous   |
| NC_037638.1 | 5498254 | SNV | 1 | G | C | Homozygous   |
| NC_037638.1 | 5498260 | SNV | 1 | G | C | Heterozygous |
| NC_037638.1 | 5498268 | SNV | 1 | G | C | Homozygous   |
| NC_037638.1 | 5498270 | SNV | 1 | C | T | Heterozygous |
| NC_037638.1 | 5498300 | SNV | 1 | G | T | Heterozygous |
| NC_037638.1 | 5498302 | SNV | 1 | C | T | Heterozygous |
| NC_037638.1 | 5498312 | SNV | 1 | G | C | Heterozygous |
| NC_037638.1 | 5498324 | SNV | 1 | G | C | Heterozygous |

|             |         |     |   |   |   |              |
|-------------|---------|-----|---|---|---|--------------|
| NC_037638.1 | 5498328 | SNV | 1 | G | C | Heterozygous |
| NC_037638.1 | 5498336 | SNV | 1 | G | T | Homozygous   |
| NC_037638.1 | 5498352 | SNV | 1 | G | C | Heterozygous |
| NC_037638.1 | 5498354 | SNV | 1 | C | T | Heterozygous |
| NC_037638.1 | 5498380 | SNV | 1 | G | T | Homozygous   |
| NC_037638.1 | 5498408 | SNV | 1 | G | C | Homozygous   |
| NC_037638.1 | 5498416 | SNV | 1 | C | T | Homozygous   |
| NC_037638.1 | 5498420 | SNV | 1 | G | C | Homozygous   |
| NC_037638.1 | 5498432 | SNV | 1 | G | C | Homozygous   |
| NC_037638.1 | 5498434 | SNV | 1 | C | T | Homozygous   |
| NC_037638.1 | 5498472 | SNV | 1 | G | T | Homozygous   |
| NC_037638.1 | 5498476 | SNV | 1 | C | T | Homozygous   |
| NC_037638.1 | 5498484 | SNV | 1 | G | C | Homozygous   |
| NC_037638.1 | 5498486 | SNV | 1 | C | G | Homozygous   |
| NC_037638.1 | 5498490 | SNV | 1 | C | T | Homozygous   |
| NC_037638.1 | 5498500 | SNV | 1 | G | C | Homozygous   |
| NC_037638.1 | 5498505 | SNV | 1 | T | C | Homozygous   |
| NC_037638.1 | 5498508 | SNV | 1 | G | C | Homozygous   |
| NC_037638.1 | 5498513 | SNV | 1 | T | C | Homozygous   |
| NC_037638.1 | 5498522 | SNV | 1 | C | G | Heterozygous |
| NC_037638.1 | 5498526 | SNV | 1 | C | G | Heterozygous |
| NC_037638.1 | 5498536 | SNV | 1 | G | T | Heterozygous |
| NC_037638.1 | 5498560 | SNV | 1 | G | T | Heterozygous |
| NC_037638.1 | 5498568 | SNV | 1 | G | C | Homozygous   |
| NC_037638.1 | 5498570 | SNV | 1 | C | G | Heterozygous |
| NC_037638.1 | 5498572 | SNV | 1 | G | C | Homozygous   |
| NC_037638.1 | 5498576 | SNV | 1 | G | T | Homozygous   |
| NC_037638.1 | 5498580 | SNV | 1 | G | C | Homozygous   |
| NC_037638.1 | 5498588 | SNV | 1 | G | C | Heterozygous |
| NC_037638.1 | 5498610 | SNV | 1 | G | C | Homozygous   |
| NC_037638.1 | 5498654 | SNV | 1 | T | C | Heterozygous |
| NC_037638.1 | 5498657 | SNV | 1 | G | C | Heterozygous |
| NC_037638.1 | 5498669 | SNV | 1 | G | C | Heterozygous |
| NC_037638.1 | 5498669 | SNV | 1 | G | T | Heterozygous |
| NC_037638.1 | 5498673 | SNV | 1 | C | G | Heterozygous |
| NC_037638.1 | 5498697 | SNV | 1 | G | C | Heterozygous |
| NC_037638.1 | 5498705 | SNV | 1 | G | T | Heterozygous |
| NC_037638.1 | 5498709 | SNV | 1 | G | T | Homozygous   |
| NC_037638.1 | 5498711 | SNV | 1 | C | T | Heterozygous |
| NC_037638.1 | 5498715 | SNV | 1 | C | G | Heterozygous |
| NC_037638.1 | 5498717 | SNV | 1 | G | C | Heterozygous |
| NC_037638.1 | 5498737 | SNV | 1 | G | C | Homozygous   |
| NC_037638.1 | 5498745 | SNV | 1 | G | C | Heterozygous |
| NC_037638.1 | 5498757 | SNV | 1 | G | C | Heterozygous |
| NC_037638.1 | 5498773 | SNV | 1 | G | C | Homozygous   |
| NC_037638.1 | 5498809 | SNV | 1 | G | C | Homozygous   |
| NC_037638.1 | 5498811 | SNV | 1 | C | G | Heterozygous |
| NC_037638.1 | 5498817 | SNV | 1 | G | C | Heterozygous |
| NC_037638.1 | 5498825 | SNV | 1 | G | C | Homozygous   |
| NC_037638.1 | 5498829 | SNV | 1 | G | C | Heterozygous |
| NC_037638.1 | 5498843 | SNV | 1 | C | T | Heterozygous |

|             |         |     |   |   |   |              |
|-------------|---------|-----|---|---|---|--------------|
| NC_037638.1 | 5498845 | SNV | 1 | G | C | Homozygous   |
| NC_037638.1 | 5498847 | SNV | 1 | C | G | Heterozygous |
| NC_037638.1 | 5498857 | SNV | 1 | T | G | Heterozygous |
| NC_037638.1 | 5498868 | SNV | 1 | G | C | Heterozygous |
| NC_037638.1 | 5498868 | SNV | 1 | G | T | Heterozygous |
| NC_037638.1 | 5498872 | SNV | 1 | G | T | Homozygous   |
| NC_037638.1 | 5498874 | SNV | 1 | C | T | Homozygous   |
| NC_037638.1 | 5498878 | SNV | 1 | C | G | Heterozygous |
| NC_037638.1 | 5498900 | SNV | 1 | G | C | Homozygous   |
| NC_037638.1 | 5498916 | SNV | 1 | G | C | Homozygous   |
| NC_037638.1 | 5498924 | SNV | 1 | G | T | Homozygous   |
| NC_037638.1 | 5498928 | SNV | 1 | C | T | Heterozygous |
| NC_037638.1 | 5498936 | SNV | 1 | G | C | Homozygous   |
| NC_037638.1 | 5498938 | SNV | 1 | C | G | Heterozygous |
| NC_037638.1 | 5498942 | SNV | 1 | C | T | Heterozygous |
| NC_037638.1 | 5498944 | SNV | 1 | G | C | Heterozygous |
| NC_037638.1 | 5498947 | SNV | 1 | T | C | Heterozygous |
| NC_037638.1 | 5498952 | SNV | 1 | G | C | Heterozygous |
| NC_037638.1 | 5498962 | SNV | 1 | C | T | Heterozygous |
| NC_037638.1 | 5498965 | SNV | 1 | T | C | Heterozygous |
| NC_037638.1 | 5500338 | SNV | 1 | C | T | Heterozygous |
| NC_037638.1 | 5500392 | SNV | 1 | C | G | Heterozygous |
| NC_037638.1 | 5501086 | SNV | 1 | G | A | Homozygous   |
| NC_037638.1 | 5501090 | SNV | 1 | G | A | Homozygous   |
| NC_037638.1 | 5501094 | SNV | 1 | G | A | Homozygous   |
| NC_037638.1 | 5501132 | SNV | 1 | C | T | Heterozygous |
| NC_037638.1 | 5501136 | SNV | 1 | C | T | Heterozygous |
| NC_037638.1 | 5501171 | SNV | 1 | T | C | Homozygous   |
| NC_037638.1 | 5501176 | SNV | 1 | C | T | Homozygous   |
| NC_037638.1 | 5501179 | SNV | 1 | T | A | Homozygous   |
| NC_037638.1 | 5501183 | SNV | 1 | T | A | Homozygous   |
| NC_037638.1 | 5501187 | SNV | 1 | T | G | Homozygous   |
| NC_037638.1 | 5501191 | SNV | 1 | T | A | Heterozygous |
| NC_037638.1 | 5501230 | SNV | 1 | G | C | Heterozygous |
| NC_037638.1 | 5501231 | SNV | 1 | T | C | Heterozygous |
| NC_037638.1 | 5501234 | SNV | 1 | G | T | Heterozygous |
| NC_037638.1 | 5501238 | SNV | 1 | G | T | Heterozygous |
| NC_037638.1 | 5501246 | SNV | 1 | G | C | Homozygous   |
| NC_037638.1 | 5501250 | SNV | 1 | G | C | Homozygous   |
| NC_037638.1 | 5501254 | SNV | 1 | G | C | Homozygous   |
| NC_037638.1 | 5501471 | SNV | 1 | T | C | Homozygous   |
| NC_037638.1 | 5501473 | SNV | 1 | T | C | Homozygous   |
| NC_037638.1 | 5501475 | SNV | 1 | T | A | Homozygous   |
| NC_037638.1 | 5501477 | SNV | 1 | T | C | Homozygous   |
| NC_037638.1 | 5501486 | SNV | 1 | C | T | Homozygous   |
| NC_037638.1 | 5501491 | SNV | 1 | T | C | Homozygous   |
| NC_037638.1 | 5501497 | SNV | 1 | T | C | Homozygous   |
| NC_037638.1 | 5501513 | SNV | 1 | C | T | Homozygous   |
| NC_037638.1 | 5501515 | SNV | 1 | G | C | Homozygous   |
| NC_037638.1 | 5501537 | SNV | 1 | C | G | Homozygous   |
| NC_037638.1 | 5501813 | SNV | 1 | G | A | Homozygous   |

|             |         |     |   |   |   |              |
|-------------|---------|-----|---|---|---|--------------|
| NC_037638.1 | 5501824 | SNV | 1 | T | C | Homozygous   |
| NC_037638.1 | 5501826 | SNV | 1 | T | C | Homozygous   |
| NC_037638.1 | 5501829 | SNV | 1 | G | A | Homozygous   |
| NC_037638.1 | 5501831 | SNV | 1 | C | T | Homozygous   |
| NC_037638.1 | 5501834 | SNV | 1 | T | A | Homozygous   |
| NC_037638.1 | 5501838 | SNV | 1 | T | A | Homozygous   |
| NC_037638.1 | 5501842 | SNV | 1 | T | G | Homozygous   |
| NC_037638.1 | 5501846 | SNV | 1 | T | A | Heterozygous |
| NC_037638.1 | 5501884 | SNV | 1 | T | C | Homozygous   |
| NC_037638.1 | 5501886 | SNV | 1 | T | C | Homozygous   |
| NC_037638.1 | 5501889 | SNV | 1 | G | A | Heterozygous |
| NC_037638.1 | 5501891 | SNV | 1 | C | T | Homozygous   |
| NC_037638.1 | 5501894 | SNV | 1 | T | A | Heterozygous |
| NC_037638.1 | 5501898 | SNV | 1 | T | A | Heterozygous |
| NC_037638.1 | 5501902 | SNV | 1 | T | G | Heterozygous |
| NC_037638.1 | 5501906 | SNV | 1 | T | A | Heterozygous |
| NC_037638.1 | 5503192 | SNV | 1 | C | T | Heterozygous |
| NC_037638.1 | 5503217 | SNV | 1 | G | A | Homozygous   |
| NC_037638.1 | 5503228 | SNV | 1 | T | C | Homozygous   |
| NC_037638.1 | 5503230 | SNV | 1 | T | C | Homozygous   |
| NC_037638.1 | 5503236 | SNV | 1 | C | T | Homozygous   |
| NC_037638.1 | 5503239 | SNV | 1 | T | A | Homozygous   |
| NC_037638.1 | 5503243 | SNV | 1 | T | A | Homozygous   |
| NC_037638.1 | 5503252 | SNV | 1 | T | A | Homozygous   |
| NC_037638.1 | 5503296 | SNV | 1 | G | T | Heterozygous |
| NC_037638.1 | 5503299 | SNV | 1 | T | C | Heterozygous |
| NC_037638.1 | 5503300 | SNV | 1 | G | T | Heterozygous |
| NC_037638.1 | 5503303 | SNV | 1 | T | C | Heterozygous |
| NC_037638.1 | 5503411 | SNV | 1 | T | A | Homozygous   |
| NC_037638.1 | 5503414 | SNV | 1 | C | T | Homozygous   |
| NC_037638.1 | 5503416 | SNV | 1 | G | A | Homozygous   |
| NC_037638.1 | 5503426 | SNV | 1 | T | C | Homozygous   |
| NC_037638.1 | 5503429 | SNV | 1 | G | A | Homozygous   |
| NC_037638.1 | 5503433 | SNV | 1 | G | A | Homozygous   |
| NC_037638.1 | 5503531 | SNV | 1 | G | A | Heterozygous |
| NC_037638.1 | 5503535 | SNV | 1 | G | A | Homozygous   |
| NC_037638.1 | 5503539 | SNV | 1 | G | A | Heterozygous |
| NC_037638.1 | 5503579 | SNV | 1 | C | T | Homozygous   |
| NC_037638.1 | 5503586 | SNV | 1 | C | A | Heterozygous |
| NC_037638.1 | 5503592 | SNV | 1 | G | C | Heterozygous |
| NC_037638.1 | 5503594 | SNV | 1 | C | A | Heterozygous |
| NC_037638.1 | 5503598 | SNV | 1 | C | T | Heterozygous |
| NC_037638.1 | 5503603 | SNV | 1 | T | C | Homozygous   |
| NC_037638.1 | 5503609 | SNV | 1 | T | C | Homozygous   |
| NC_037638.1 | 5504033 | SNV | 1 | G | A | Heterozygous |
| NC_037638.1 | 5504040 | SNV | 1 | T | C | Heterozygous |
| NC_037638.1 | 5504042 | SNV | 1 | T | C | Heterozygous |
| NC_037638.1 | 5504044 | SNV | 1 | T | C | Heterozygous |
| NC_037638.1 | 5504046 | SNV | 1 | T | C | Heterozygous |
| NC_037638.1 | 5504047 | SNV | 1 | C | T | Heterozygous |
| NC_037638.1 | 5504049 | SNV | 1 | G | A | Heterozygous |

|             |         |     |   |   |   |              |
|-------------|---------|-----|---|---|---|--------------|
| NC_037638.1 | 5504050 | SNV | 1 | T | A | Heterozygous |
| NC_037638.1 | 5504051 | SNV | 1 | C | T | Heterozygous |
| NC_037638.1 | 5504054 | SNV | 1 | T | A | Homozygous   |
| NC_037638.1 | 5504058 | SNV | 1 | T | A | Heterozygous |
| NC_037638.1 | 5504058 | SNV | 1 | T | G | Heterozygous |
| NC_037638.1 | 5504062 | SNV | 1 | T | G | Homozygous   |
| NC_037638.1 | 5504066 | SNV | 1 | T | A | Homozygous   |
| NC_037638.1 | 5504112 | SNV | 1 | T | C | Homozygous   |
| NC_037638.1 | 5504184 | SNV | 1 | G | T | Homozygous   |
| NC_037638.1 | 5504187 | SNV | 1 | T | C | Homozygous   |
| NC_037638.1 | 5504502 | SNV | 1 | G | C | Homozygous   |
| NC_037638.1 | 5504510 | SNV | 1 | G | C | Homozygous   |
| NC_037638.1 | 5504512 | SNV | 1 | C | G | Homozygous   |
| NC_037638.1 | 5504516 | SNV | 1 | C | G | Homozygous   |
| NC_037638.1 | 5504518 | SNV | 1 | G | A | Homozygous   |
| NC_037638.1 | 5504534 | SNV | 1 | G | C | Homozygous   |
| NC_037638.1 | 5504538 | SNV | 1 | G | C | Homozygous   |
| NC_037638.1 | 5504543 | SNV | 1 | T | C | Homozygous   |
| NC_037638.1 | 5504549 | SNV | 1 | T | C | Homozygous   |
| NC_037638.1 | 5509135 | SNV | 1 | C | T | Heterozygous |
| NC_037638.1 | 5509334 | SNV | 1 | C | A | Homozygous   |
| NC_037638.1 | 5511158 | SNV | 1 | C | T | Heterozygous |
| NC_037638.1 | 5511203 | SNV | 1 | G | A | Homozygous   |
| NC_037638.1 | 5517729 | SNV | 1 | T | C | Homozygous   |
| NC_037638.1 | 5517840 | SNV | 1 | G | A | Homozygous   |
| NC_037638.1 | 5517842 | SNV | 1 | A | C | Homozygous   |
| NC_037638.1 | 5521913 | SNV | 1 | G | C | Homozygous   |
| NC_037638.1 | 5522209 | SNV | 1 | A | G | Homozygous   |
| NC_037638.1 | 5526787 | SNV | 1 | A | G | Heterozygous |
| NC_037638.1 | 5526790 | SNV | 1 | A | G | Heterozygous |
| NC_037638.1 | 5532331 | SNV | 1 | T | C | Homozygous   |
| NC_037638.1 | 5532642 | SNV | 1 | A | G | Homozygous   |
| NC_037638.1 | 5534876 | SNV | 1 | T | A | Homozygous   |
| NC_037638.1 | 5535068 | SNV | 1 | T | C | Homozygous   |
| NC_037638.1 | 5535668 | SNV | 1 | C | T | Heterozygous |
| NC_037638.1 | 5535746 | SNV | 1 | T | C | Homozygous   |
| NC_037638.1 | 5538949 | SNV | 1 | C | T | Homozygous   |
| NC_037638.1 | 5538953 | SNV | 1 | G | T | Homozygous   |
| NC_037638.1 | 5538963 | SNV | 1 | C | G | Homozygous   |
| NC_037638.1 | 5538982 | SNV | 1 | A | G | Homozygous   |
| NC_037638.1 | 5538985 | SNV | 1 | T | C | Homozygous   |
| NC_037638.1 | 5538987 | SNV | 1 | C | G | Homozygous   |
| NC_037638.1 | 5538993 | SNV | 1 | A | T | Homozygous   |
| NC_037638.1 | 5550157 | SNV | 1 | A | G | Homozygous   |
| NC_037638.1 | 5550176 | SNV | 1 | T | A | Homozygous   |
| NC_037638.1 | 5550182 | SNV | 1 | A | C | Homozygous   |
| NC_037638.1 | 5552027 | SNV | 1 | C | A | Homozygous   |
| NC_037638.1 | 5552111 | SNV | 1 | C | A | Heterozygous |
| NC_037638.1 | 5552141 | SNV | 1 | T | A | Heterozygous |
| NC_037638.1 | 5552147 | SNV | 1 | C | A | Heterozygous |
| NC_037638.1 | 5552160 | SNV | 1 | A | G | Homozygous   |

|             |         |     |   |   |   |              |
|-------------|---------|-----|---|---|---|--------------|
| NC_037638.1 | 5552165 | SNV | 1 | A | T | Heterozygous |
| NC_037638.1 | 5562956 | SNV | 1 | T | A | Homozygous   |
| NC_037638.1 | 5562975 | SNV | 1 | A | C | Homozygous   |
| NC_037638.1 | 5562977 | SNV | 1 | C | T | Homozygous   |
| NC_037638.1 | 5562985 | SNV | 1 | T | A | Homozygous   |
| NC_037638.1 | 5562989 | SNV | 1 | G | A | Homozygous   |
| NC_037638.1 | 5562997 | SNV | 1 | A | T | Homozygous   |
| NC_037638.1 | 5565406 | SNV | 1 | T | A | Homozygous   |
| NC_037638.1 | 5565412 | SNV | 1 | A | G | Homozygous   |
| NC_037638.1 | 5574644 | SNV | 1 | G | A | Heterozygous |
| NC_037638.1 | 5574646 | SNV | 1 | G | A | Homozygous   |
| NC_037638.1 | 5575664 | SNV | 1 | T | A | Homozygous   |
| NC_037638.1 | 5575666 | SNV | 1 | C | A | Heterozygous |
| NC_037638.1 | 5575666 | SNV | 1 | C | G | Heterozygous |
| NC_037638.1 | 5575669 | SNV | 1 | G | A | Homozygous   |
| NC_037638.1 | 5575702 | SNV | 1 | A | G | Heterozygous |
| NC_037638.1 | 5575706 | SNV | 1 | T | A | Homozygous   |
| NC_037638.1 | 5575713 | SNV | 1 | T | A | Homozygous   |
| NC_037638.1 | 5575715 | SNV | 1 | T | A | Homozygous   |
| NC_037638.1 | 5576010 | SNV | 1 | T | C | Homozygous   |
| NC_037638.1 | 5576033 | SNV | 1 | C | T | Homozygous   |
| NC_037638.1 | 5576051 | SNV | 1 | A | G | Homozygous   |
| NC_037638.1 | 5576484 | SNV | 1 | C | T | Homozygous   |
| NC_037638.1 | 5576496 | SNV | 1 | G | T | Homozygous   |
| NC_037638.1 | 5577073 | SNV | 1 | C | T | Homozygous   |
| NC_037638.1 | 5577084 | SNV | 1 | T | G | Heterozygous |
| NC_037638.1 | 5577087 | SNV | 1 | C | T | Homozygous   |
| NC_037638.1 | 5585687 | SNV | 1 | C | T | Heterozygous |
| NC_037638.1 | 5590985 | SNV | 1 | A | G | Homozygous   |
| NC_037638.1 | 5602696 | SNV | 1 | A | G | Homozygous   |
| NC_037638.1 | 5609314 | SNV | 1 | G | A | Heterozygous |
| NC_037638.1 | 5610639 | SNV | 1 | A | T | Homozygous   |
| NC_037638.1 | 5610696 | SNV | 1 | G | A | Heterozygous |
| NC_037638.1 | 5614787 | SNV | 1 | T | C | Homozygous   |
| NC_037638.1 | 5614792 | SNV | 1 | T | C | Heterozygous |
| NC_037638.1 | 5614829 | SNV | 1 | G | A | Heterozygous |
| NC_037638.1 | 5616460 | SNV | 1 | A | G | Homozygous   |
| NC_037638.1 | 5616466 | SNV | 1 | T | C | Homozygous   |
| NC_037638.1 | 5625404 | SNV | 1 | T | G | Homozygous   |
| NC_037638.1 | 5625870 | SNV | 1 | C | A | Heterozygous |
| NC_037638.1 | 5625872 | SNV | 1 | G | T | Heterozygous |
| NC_037638.1 | 5626131 | SNV | 1 | A | G | Heterozygous |
| NC_037638.1 | 5626281 | SNV | 1 | G | A | Heterozygous |
| NC_037638.1 | 5626306 | SNV | 1 | A | T | Homozygous   |
| NC_037638.1 | 5632051 | SNV | 1 | T | C | Heterozygous |
| NC_037638.1 | 5632093 | SNV | 1 | T | C | Homozygous   |
| NC_037638.1 | 5632530 | SNV | 1 | A | G | Homozygous   |
| NC_037638.1 | 5632535 | SNV | 1 | T | A | Homozygous   |
| NC_037638.1 | 5632841 | SNV | 1 | A | G | Homozygous   |
| NC_037638.1 | 5633976 | SNV | 1 | T | C | Homozygous   |
| NC_037638.1 | 5633978 | SNV | 1 | A | T | Homozygous   |

|             |         |     |   |   |   |              |
|-------------|---------|-----|---|---|---|--------------|
| NC_037638.1 | 5633986 | SNV | 1 | A | T | Homozygous   |
| NC_037638.1 | 5634005 | SNV | 1 | G | A | Homozygous   |
| NC_037638.1 | 5634015 | SNV | 1 | T | A | Homozygous   |
| NC_037638.1 | 5634041 | SNV | 1 | G | A | Homozygous   |
| NC_037638.1 | 5634047 | SNV | 1 | A | G | Homozygous   |
| NC_037638.1 | 5634056 | SNV | 1 | A | G | Heterozygous |
| NC_037638.1 | 5634159 | SNV | 1 | C | T | Heterozygous |
| NC_037638.1 | 5634162 | SNV | 1 | T | A | Heterozygous |
| NC_037638.1 | 5634200 | SNV | 1 | A | G | Heterozygous |
| NC_037638.1 | 5634227 | SNV | 1 | C | T | Homozygous   |
| NC_037638.1 | 5634319 | SNV | 1 | A | C | Homozygous   |
| NC_037638.1 | 5634325 | SNV | 1 | T | C | Heterozygous |
| NC_037638.1 | 5634335 | SNV | 1 | T | C | Homozygous   |
| NC_037638.1 | 5634337 | SNV | 1 | T | A | Heterozygous |
| NC_037638.1 | 5634343 | SNV | 1 | G | A | Homozygous   |
| NC_037638.1 | 5634359 | SNV | 1 | C | A | Heterozygous |
| NC_037638.1 | 5634488 | SNV | 1 | G | A | Heterozygous |
| NC_037638.1 | 5634502 | SNV | 1 | G | T | Homozygous   |
| NC_037638.1 | 5634510 | SNV | 1 | T | C | Homozygous   |
| NC_037638.1 | 5634568 | SNV | 1 | A | G | Homozygous   |
| NC_037638.1 | 5634589 | SNV | 1 | A | G | Heterozygous |
| NC_037638.1 | 5635056 | SNV | 1 | A | G | Homozygous   |
| NC_037638.1 | 5636383 | SNV | 1 | C | T | Heterozygous |
| NC_037638.1 | 5636522 | SNV | 1 | C | A | Heterozygous |
| NC_037638.1 | 5637415 | SNV | 1 | T | C | Heterozygous |
| NC_037638.1 | 5637550 | SNV | 1 | A | T | Heterozygous |
| NC_037638.1 | 5637552 | SNV | 1 | T | G | Heterozygous |
| NC_037638.1 | 5637558 | SNV | 1 | C | T | Heterozygous |
| NC_037638.1 | 5637569 | SNV | 1 | T | A | Heterozygous |
| NC_037638.1 | 5637574 | SNV | 1 | A | G | Heterozygous |
| NC_037638.1 | 5637579 | SNV | 1 | G | C | Heterozygous |
| NC_037638.1 | 5639305 | SNV | 1 | A | T | Homozygous   |
| NC_037638.1 | 5639307 | SNV | 1 | T | G | Homozygous   |
| NC_037638.1 | 5640661 | SNV | 1 | C | T | Homozygous   |
| NC_037638.1 | 5640753 | SNV | 1 | A | C | Homozygous   |
| NC_037638.1 | 5641118 | SNV | 1 | C | T | Homozygous   |
| NC_037638.1 | 5641120 | SNV | 1 | A | T | Homozygous   |
| NC_037638.1 | 5648714 | SNV | 1 | G | C | Homozygous   |
| NC_037638.1 | 5649513 | SNV | 1 | G | A | Heterozygous |
| NC_037638.1 | 5651555 | SNV | 1 | C | T | Homozygous   |
| NC_037638.1 | 5651747 | SNV | 1 | A | T | Homozygous   |
| NC_037638.1 | 5658380 | SNV | 1 | G | A | Heterozygous |
| NC_037638.1 | 5689114 | SNV | 1 | G | A | Homozygous   |
| NC_037638.1 | 5691980 | SNV | 1 | G | T | Homozygous   |
| NC_037638.1 | 5691982 | SNV | 1 | C | G | Homozygous   |
| NC_037638.1 | 5692013 | SNV | 1 | T | A | Homozygous   |
| NC_037638.1 | 5694038 | SNV | 1 | C | G | Heterozygous |
| NC_037638.1 | 5695800 | SNV | 1 | A | G | Homozygous   |
| NC_037638.1 | 5723947 | SNV | 1 | G | A | Heterozygous |
| NC_037638.1 | 5728883 | SNV | 1 | T | C | Homozygous   |
| NC_037638.1 | 5728953 | SNV | 1 | A | G | Heterozygous |



|             |         |     |   |   |   |              |
|-------------|---------|-----|---|---|---|--------------|
| NC_037638.1 | 5737877 | SNV | 1 | C | A | Heterozygous |
| NC_037638.1 | 5740636 | SNV | 1 | G | A | Homozygous   |
| NC_037638.1 | 5740659 | SNV | 1 | T | G | Homozygous   |
| NC_037638.1 | 5740687 | SNV | 1 | G | A | Homozygous   |
| NC_037638.1 | 5740690 | SNV | 1 | G | A | Homozygous   |
| NC_037638.1 | 5740692 | SNV | 1 | C | T | Homozygous   |
| NC_037638.1 | 5740708 | SNV | 1 | A | G | Homozygous   |
| NC_037638.1 | 5740714 | SNV | 1 | T | C | Homozygous   |
| NC_037638.1 | 5740717 | SNV | 1 | T | C | Homozygous   |
| NC_037638.1 | 5740719 | SNV | 1 | T | C | Homozygous   |
| NC_037638.1 | 5740742 | SNV | 1 | T | C | Heterozygous |
| NC_037638.1 | 5740753 | SNV | 1 | A | G | Heterozygous |
| NC_037638.1 | 5740762 | SNV | 1 | A | G | Heterozygous |
| NC_037638.1 | 5740765 | SNV | 1 | A | G | Heterozygous |
| NC_037638.1 | 5740767 | SNV | 1 | A | G | Heterozygous |
| NC_037638.1 | 5740770 | SNV | 1 | A | T | Heterozygous |
| NC_037638.1 | 5740774 | SNV | 1 | T | C | Homozygous   |
| NC_037638.1 | 5740800 | SNV | 1 | A | G | Heterozygous |
| NC_037638.1 | 5740803 | SNV | 1 | C | T | Heterozygous |
| NC_037638.1 | 5740805 | SNV | 1 | A | T | Heterozygous |
| NC_037638.1 | 5740816 | SNV | 1 | T | G | Homozygous   |
| NC_037638.1 | 5740826 | SNV | 1 | G | A | Heterozygous |
| NC_037638.1 | 5740828 | SNV | 1 | G | A | Heterozygous |
| NC_037638.1 | 5740854 | SNV | 1 | T | C | Homozygous   |
| NC_037638.1 | 5740856 | SNV | 1 | T | C | Heterozygous |
| NC_037638.1 | 5740875 | SNV | 1 | T | C | Heterozygous |
| NC_037638.1 | 5740903 | SNV | 1 | G | C | Heterozygous |
| NC_037638.1 | 5740913 | SNV | 1 | T | C | Homozygous   |
| NC_037638.1 | 5740916 | SNV | 1 | C | T | Heterozygous |
| NC_037638.1 | 5740920 | SNV | 1 | T | C | Heterozygous |
| NC_037638.1 | 5740926 | SNV | 1 | A | C | Homozygous   |
| NC_037638.1 | 5740966 | SNV | 1 | T | C | Heterozygous |
| NC_037638.1 | 5741007 | SNV | 1 | A | C | Heterozygous |
| NC_037638.1 | 5741011 | SNV | 1 | T | A | Heterozygous |
| NC_037638.1 | 5741012 | SNV | 1 | G | A | Heterozygous |
| NC_037638.1 | 5741028 | SNV | 1 | T | C | Heterozygous |
| NC_037638.1 | 5741039 | SNV | 1 | G | C | Heterozygous |
| NC_037638.1 | 5741046 | SNV | 1 | T | C | Homozygous   |
| NC_037638.1 | 5741065 | SNV | 1 | T | C | Heterozygous |
| NC_037638.1 | 5741115 | SNV | 1 | C | T | Heterozygous |
| NC_037638.1 | 5741143 | SNV | 1 | T | C | Heterozygous |
| NC_037638.1 | 5741146 | SNV | 1 | T | A | Heterozygous |
| NC_037638.1 | 5741148 | SNV | 1 | A | G | Heterozygous |
| NC_037638.1 | 5741153 | SNV | 1 | T | C | Heterozygous |
| NC_037638.1 | 5741180 | SNV | 1 | A | T | Homozygous   |
| NC_037638.1 | 5741202 | SNV | 1 | T | C | Homozygous   |
| NC_037638.1 | 5741285 | SNV | 1 | T | A | Homozygous   |
| NC_037638.1 | 5741398 | SNV | 1 | C | A | Heterozygous |
| NC_037638.1 | 5742253 | SNV | 1 | T | A | Heterozygous |
| NC_037638.1 | 5742256 | SNV | 1 | A | T | Heterozygous |
| NC_037638.1 | 5742276 | SNV | 1 | T | A | Heterozygous |

|             |         |     |   |   |   |              |
|-------------|---------|-----|---|---|---|--------------|
| NC_037638.1 | 5742283 | SNV | 1 | A | G | Heterozygous |
| NC_037638.1 | 5742302 | SNV | 1 | G | A | Heterozygous |
| NC_037638.1 | 5742309 | SNV | 1 | C | T | Homozygous   |
| NC_037638.1 | 5742423 | SNV | 1 | T | C | Homozygous   |
| NC_037638.1 | 5742486 | SNV | 1 | T | C | Homozygous   |
| NC_037638.1 | 5742574 | SNV | 1 | C | T | Heterozygous |
| NC_037638.1 | 5742639 | SNV | 1 | T | C | Homozygous   |
| NC_037638.1 | 5742672 | SNV | 1 | G | A | Heterozygous |
| NC_037638.1 | 5742763 | SNV | 1 | A | G | Homozygous   |
| NC_037638.1 | 5742785 | SNV | 1 | C | T | Homozygous   |
| NC_037638.1 | 5742798 | SNV | 1 | C | G | Heterozygous |
| NC_037638.1 | 5742801 | SNV | 1 | T | G | Heterozygous |
| NC_037638.1 | 5742818 | SNV | 1 | C | G | Heterozygous |
| NC_037638.1 | 5742916 | SNV | 1 | C | T | Homozygous   |
| NC_037638.1 | 5743088 | SNV | 1 | C | A | Homozygous   |
| NC_037638.1 | 5743118 | SNV | 1 | G | A | Heterozygous |
| NC_037638.1 | 5743199 | SNV | 1 | T | C | Homozygous   |
| NC_037638.1 | 5745670 | SNV | 1 | A | G | Homozygous   |
| NC_037638.1 | 5745686 | SNV | 1 | C | T | Heterozygous |
| NC_037638.1 | 5745744 | SNV | 1 | C | G | Heterozygous |
| NC_037638.1 | 5762279 | SNV | 1 | G | A | Homozygous   |
| NC_037638.1 | 5762289 | SNV | 1 | A | G | Heterozygous |
| NC_037638.1 | 5766127 | SNV | 1 | G | C | Heterozygous |
| NC_037638.1 | 5766174 | SNV | 1 | G | T | Heterozygous |
| NC_037638.1 | 5766189 | SNV | 1 | C | A | Heterozygous |
| NC_037638.1 | 5766192 | SNV | 1 | T | C | Homozygous   |
| NC_037638.1 | 5766220 | SNV | 1 | A | G | Heterozygous |
| NC_037638.1 | 5766234 | SNV | 1 | A | G | Homozygous   |
| NC_037638.1 | 5766272 | SNV | 1 | A | G | Homozygous   |
| NC_037638.1 | 5766361 | SNV | 1 | G | A | Homozygous   |
| NC_037638.1 | 5770572 | SNV | 1 | A | G | Homozygous   |
| NC_037638.1 | 5770960 | SNV | 1 | C | A | Heterozygous |
| NC_037638.1 | 5770963 | SNV | 1 | T | A | Homozygous   |
| NC_037638.1 | 5775480 | SNV | 1 | T | C | Heterozygous |
| NC_037638.1 | 5775706 | SNV | 1 | A | G | Homozygous   |
| NC_037638.1 | 5775777 | SNV | 1 | G | A | Heterozygous |
| NC_037638.1 | 5776234 | SNV | 1 | T | C | Homozygous   |
| NC_037638.1 | 5777156 | SNV | 1 | A | G | Homozygous   |
| NC_037638.1 | 5777178 | SNV | 1 | A | G | Heterozygous |
| NC_037638.1 | 5777554 | SNV | 1 | A | G | Homozygous   |
| NC_037638.1 | 5781023 | SNV | 1 | A | G | Heterozygous |
| NC_037638.1 | 5783113 | SNV | 1 | T | C | Homozygous   |
| NC_037638.1 | 5784850 | SNV | 1 | T | C | Homozygous   |
| NC_037638.1 | 5784875 | SNV | 1 | C | T | Heterozygous |
| NC_037638.1 | 5784929 | SNV | 1 | T | C | Homozygous   |
| NC_037638.1 | 5784974 | SNV | 1 | G | A | Heterozygous |
| NC_037638.1 | 5786555 | SNV | 1 | T | C | Heterozygous |
| NC_037638.1 | 5795938 | SNV | 1 | C | A | Homozygous   |
| NC_037638.1 | 5795940 | SNV | 1 | C | T | Homozygous   |
| NC_037638.1 | 5795943 | SNV | 1 | T | C | Homozygous   |
| NC_037638.1 | 5800443 | SNV | 1 | G | A | Homozygous   |

|             |         |     |   |   |   |              |
|-------------|---------|-----|---|---|---|--------------|
| NC_037638.1 | 5801565 | SNV | 1 | C | T | Heterozygous |
| NC_037638.1 | 5801610 | SNV | 1 | T | C | Homozygous   |
| NC_037638.1 | 5802742 | SNV | 1 | T | C | Homozygous   |
| NC_037638.1 | 5802850 | SNV | 1 | T | C | Homozygous   |
| NC_037638.1 | 5819807 | SNV | 1 | C | T | Homozygous   |
| NC_037638.1 | 5820016 | SNV | 1 | C | A | Homozygous   |
| NC_037638.1 | 5820402 | SNV | 1 | G | C | Heterozygous |
| NC_037638.1 | 5820416 | SNV | 1 | A | G | Homozygous   |
| NC_037638.1 | 5820451 | SNV | 1 | A | G | Homozygous   |
| NC_037638.1 | 5820772 | SNV | 1 | T | C | Heterozygous |
| NC_037638.1 | 5820783 | SNV | 1 | T | C | Heterozygous |
| NC_037638.1 | 5820790 | SNV | 1 | C | T | Heterozygous |
| NC_037638.1 | 5820793 | SNV | 1 | C | T | Heterozygous |
| NC_037638.1 | 5820813 | SNV | 1 | C | T | Heterozygous |
| NC_037638.1 | 5820818 | SNV | 1 | T | G | Heterozygous |
| NC_037638.1 | 5825202 | SNV | 1 | G | T | Heterozygous |
| NC_037638.1 | 5830796 | SNV | 1 | G | C | Heterozygous |
| NC_037638.1 | 5831342 | SNV | 1 | C | T | Heterozygous |
| NC_037638.1 | 5831671 | SNV | 1 | C | A | Heterozygous |
| NC_037638.1 | 5831703 | SNV | 1 | T | C | Heterozygous |
| NC_037638.1 | 5831887 | SNV | 1 | C | G | Heterozygous |
| NC_037638.1 | 5845432 | SNV | 1 | A | G | Homozygous   |
| NC_037638.1 | 5845434 | SNV | 1 | A | G | Homozygous   |
| NC_037638.1 | 5853460 | SNV | 1 | C | T | Homozygous   |
| NC_037638.1 | 5853469 | SNV | 1 | A | T | Homozygous   |
| NC_037638.1 | 5853592 | SNV | 1 | C | T | Homozygous   |
| NC_037638.1 | 5853736 | SNV | 1 | T | C | Homozygous   |
| NC_037638.1 | 5853804 | SNV | 1 | A | G | Heterozygous |
| NC_037638.1 | 5853813 | SNV | 1 | G | A | Homozygous   |
| NC_037638.1 | 5853843 | SNV | 1 | A | G | Heterozygous |
| NC_037638.1 | 5853853 | SNV | 1 | T | C | Homozygous   |
| NC_037638.1 | 5853935 | SNV | 1 | C | T | Homozygous   |
| NC_037638.1 | 5853983 | SNV | 1 | A | G | Heterozygous |
| NC_037638.1 | 5854010 | SNV | 1 | T | C | Homozygous   |
| NC_037638.1 | 5854038 | SNV | 1 | G | A | Heterozygous |
| NC_037638.1 | 5854069 | SNV | 1 | C | A | Heterozygous |
| NC_037638.1 | 5854109 | SNV | 1 | T | C | Heterozygous |
| NC_037638.1 | 5861379 | SNV | 1 | G | A | Homozygous   |
| NC_037638.1 | 5861717 | SNV | 1 | G | A | Homozygous   |
| NC_037638.1 | 5861788 | SNV | 1 | C | T | Homozygous   |
| NC_037638.1 | 5861817 | SNV | 1 | G | A | Homozygous   |
| NC_037638.1 | 5861838 | SNV | 1 | A | G | Homozygous   |
| NC_037638.1 | 5861840 | SNV | 1 | A | T | Homozygous   |
| NC_037638.1 | 5861857 | SNV | 1 | T | C | Homozygous   |
| NC_037638.1 | 5861910 | SNV | 1 | T | C | Homozygous   |
| NC_037638.1 | 5861944 | SNV | 1 | T | C | Homozygous   |
| NC_037638.1 | 5861946 | SNV | 1 | G | A | Heterozygous |
| NC_037638.1 | 5861953 | SNV | 1 | C | T | Homozygous   |
| NC_037638.1 | 5862084 | SNV | 1 | T | C | Heterozygous |
| NC_037638.1 | 5862091 | SNV | 1 | A | G | Heterozygous |
| NC_037638.1 | 5862099 | SNV | 1 | G | A | Heterozygous |

|             |         |     |   |   |   |              |
|-------------|---------|-----|---|---|---|--------------|
| NC_037638.1 | 5862129 | SNV | 1 | C | T | Heterozygous |
| NC_037638.1 | 5862139 | SNV | 1 | C | G | Homozygous   |
| NC_037638.1 | 5862202 | SNV | 1 | G | A | Heterozygous |
| NC_037638.1 | 5862246 | SNV | 1 | T | G | Homozygous   |
| NC_037638.1 | 5862254 | SNV | 1 | A | T | Homozygous   |
| NC_037638.1 | 5877464 | SNV | 1 | C | T | Heterozygous |
| NC_037638.1 | 5877476 | SNV | 1 | C | G | Heterozygous |
| NC_037638.1 | 5878211 | SNV | 1 | A | G | Homozygous   |
| NC_037638.1 | 5881196 | SNV | 1 | T | A | Heterozygous |
| NC_037638.1 | 5881208 | SNV | 1 | G | A | Homozygous   |
| NC_037638.1 | 5906010 | SNV | 1 | C | G | Homozygous   |
| NC_037638.1 | 5908758 | SNV | 1 | T | C | Homozygous   |
| NC_037638.1 | 5908772 | SNV | 1 | C | T | Heterozygous |
| NC_037638.1 | 5913869 | SNV | 1 | G | C | Heterozygous |
| NC_037638.1 | 5913888 | SNV | 1 | A | G | Homozygous   |
| NC_037638.1 | 5915606 | SNV | 1 | C | G | Homozygous   |
| NC_037638.1 | 5915609 | SNV | 1 | A | C | Homozygous   |
| NC_037638.1 | 5915611 | SNV | 1 | C | A | Homozygous   |
| NC_037638.1 | 5915613 | SNV | 1 | G | A | Homozygous   |
| NC_037638.1 | 5915618 | SNV | 1 | A | G | Homozygous   |
| NC_037638.1 | 5915621 | SNV | 1 | C | T | Homozygous   |
| NC_037638.1 | 5915719 | SNV | 1 | C | T | Homozygous   |
| NC_037638.1 | 5915769 | SNV | 1 | T | C | Homozygous   |
| NC_037638.1 | 5915846 | SNV | 1 | T | C | Homozygous   |
| NC_037638.1 | 5916551 | SNV | 1 | G | C | Homozygous   |
| NC_037638.1 | 5916554 | SNV | 1 | T | A | Homozygous   |
| NC_037638.1 | 5916556 | SNV | 1 | G | T | Homozygous   |
| NC_037638.1 | 5916587 | SNV | 1 | T | C | Homozygous   |
| NC_037638.1 | 5916599 | SNV | 1 | G | C | Heterozygous |
| NC_037638.1 | 5919275 | SNV | 1 | C | A | Heterozygous |
| NC_037638.1 | 5919300 | SNV | 1 | G | T | Heterozygous |
| NC_037638.1 | 5919303 | SNV | 1 | A | G | Heterozygous |
| NC_037638.1 | 5919309 | SNV | 1 | G | A | Homozygous   |
| NC_037638.1 | 5920145 | SNV | 1 | G | A | Heterozygous |
| NC_037638.1 | 5920153 | SNV | 1 | T | C | Homozygous   |
| NC_037638.1 | 5920201 | SNV | 1 | A | G | Heterozygous |
| NC_037638.1 | 5920358 | SNV | 1 | G | A | Heterozygous |
| NC_037638.1 | 5921414 | SNV | 1 | A | T | Homozygous   |
| NC_037638.1 | 5921416 | SNV | 1 | A | T | Homozygous   |
| NC_037638.1 | 5921423 | SNV | 1 | T | G | Homozygous   |
| NC_037638.1 | 5921429 | SNV | 1 | A | T | Homozygous   |
| NC_037638.1 | 5922716 | SNV | 1 | C | T | Homozygous   |
| NC_037638.1 | 5923147 | SNV | 1 | A | G | Homozygous   |
| NC_037638.1 | 5924197 | SNV | 1 | A | C | Heterozygous |
| NC_037638.1 | 5924457 | SNV | 1 | A | T | Homozygous   |
| NC_037638.1 | 5924517 | SNV | 1 | T | G | Heterozygous |
| NC_037638.1 | 5924790 | SNV | 1 | G | T | Homozygous   |
| NC_037638.1 | 5924829 | SNV | 1 | T | C | Heterozygous |
| NC_037638.1 | 5926712 | SNV | 1 | C | T | Homozygous   |
| NC_037638.1 | 5926949 | SNV | 1 | G | A | Heterozygous |
| NC_037638.1 | 5927005 | SNV | 1 | G | A | Heterozygous |

|             |         |     |   |   |   |              |
|-------------|---------|-----|---|---|---|--------------|
| NC_037638.1 | 5929759 | SNV | 1 | T | C | Homozygous   |
| NC_037638.1 | 5929938 | SNV | 1 | T | C | Heterozygous |
| NC_037638.1 | 5930150 | SNV | 1 | C | T | Heterozygous |
| NC_037638.1 | 5930194 | SNV | 1 | G | A | Homozygous   |
| NC_037638.1 | 5930204 | SNV | 1 | A | G | Homozygous   |
| NC_037638.1 | 5930252 | SNV | 1 | A | G | Homozygous   |
| NC_037638.1 | 5930269 | SNV | 1 | A | G | Homozygous   |
| NC_037638.1 | 5930290 | SNV | 1 | A | G | Homozygous   |
| NC_037638.1 | 5930579 | SNV | 1 | G | A | Heterozygous |
| NC_037638.1 | 5930767 | SNV | 1 | A | G | Heterozygous |
| NC_037638.1 | 5930953 | SNV | 1 | G | A | Homozygous   |
| NC_037638.1 | 5930987 | SNV | 1 | A | G | Heterozygous |
| NC_037638.1 | 5931068 | SNV | 1 | A | G | Homozygous   |
| NC_037638.1 | 5931098 | SNV | 1 | T | C | Homozygous   |
| NC_037638.1 | 5931130 | SNV | 1 | G | A | Heterozygous |
| NC_037638.1 | 5931162 | SNV | 1 | G | T | Homozygous   |
| NC_037638.1 | 5931215 | SNV | 1 | A | C | Heterozygous |
| NC_037638.1 | 5931277 | SNV | 1 | T | A | Heterozygous |
| NC_037638.1 | 5931581 | SNV | 1 | T | C | Heterozygous |
| NC_037638.1 | 5931875 | SNV | 1 | A | G | Homozygous   |
| NC_037638.1 | 5931910 | SNV | 1 | C | T | Homozygous   |
| NC_037638.1 | 5932071 | SNV | 1 | G | A | Homozygous   |
| NC_037638.1 | 5932104 | SNV | 1 | T | C | Homozygous   |
| NC_037638.1 | 5932393 | SNV | 1 | A | G | Homozygous   |
| NC_037638.1 | 5932601 | SNV | 1 | T | C | Heterozygous |
| NC_037638.1 | 5932604 | SNV | 1 | A | T | Homozygous   |
| NC_037638.1 | 5932859 | SNV | 1 | A | G | Heterozygous |
| NC_037638.1 | 5932872 | SNV | 1 | T | A | Heterozygous |
| NC_037638.1 | 5937246 | SNV | 1 | T | C | Homozygous   |
| NC_037638.1 | 5937330 | SNV | 1 | C | T | Heterozygous |
| NC_037638.1 | 5942925 | SNV | 1 | A | G | Heterozygous |
| NC_037638.1 | 5943141 | SNV | 1 | T | C | Homozygous   |
| NC_037638.1 | 5943149 | SNV | 1 | A | G | Heterozygous |
| NC_037638.1 | 5946126 | SNV | 1 | G | C | Heterozygous |
| NC_037638.1 | 5950435 | SNV | 1 | G | A | Homozygous   |
| NC_037638.1 | 5950674 | SNV | 1 | T | A | Heterozygous |
| NC_037638.1 | 5950687 | SNV | 1 | C | T | Homozygous   |
| NC_037638.1 | 5953714 | SNV | 1 | T | C | Homozygous   |
| NC_037638.1 | 5953797 | SNV | 1 | G | A | Heterozygous |
| NC_037638.1 | 5955425 | SNV | 1 | A | G | Heterozygous |
| NC_037638.1 | 5955441 | SNV | 1 | T | C | Homozygous   |
| NC_037638.1 | 5955601 | SNV | 1 | T | A | Homozygous   |
| NC_037638.1 | 5966368 | SNV | 1 | C | T | Heterozygous |
| NC_037638.1 | 5966898 | SNV | 1 | G | A | Homozygous   |
| NC_037638.1 | 5966900 | SNV | 1 | A | G | Heterozygous |
| NC_037638.1 | 5971812 | SNV | 1 | A | G | Homozygous   |
| NC_037638.1 | 5972043 | SNV | 1 | G | A | Heterozygous |
| NC_037638.1 | 5972252 | SNV | 1 | A | T | Homozygous   |
| NC_037638.1 | 5974621 | SNV | 1 | T | C | Heterozygous |
| NC_037638.1 | 5974944 | SNV | 1 | C | A | Heterozygous |
| NC_037638.1 | 5975443 | SNV | 1 | T | A | Homozygous   |

|             |         |     |   |   |   |              |
|-------------|---------|-----|---|---|---|--------------|
| NC_037638.1 | 5975896 | SNV | 1 | G | A | Homozygous   |
| NC_037638.1 | 5977218 | SNV | 1 | T | C | Homozygous   |
| NC_037638.1 | 5977263 | SNV | 1 | G | A | Homozygous   |
| NC_037638.1 | 5977329 | SNV | 1 | G | A | Heterozygous |
| NC_037638.1 | 5977338 | SNV | 1 | G | A | Heterozygous |
| NC_037638.1 | 5977431 | SNV | 1 | A | G | Heterozygous |
| NC_037638.1 | 5977539 | SNV | 1 | C | T | Homozygous   |
| NC_037638.1 | 5977631 | SNV | 1 | C | T | Homozygous   |
| NC_037638.1 | 5977670 | SNV | 1 | G | C | Homozygous   |
| NC_037638.1 | 5977742 | SNV | 1 | A | G | Homozygous   |
| NC_037638.1 | 5977814 | SNV | 1 | G | A | Heterozygous |
| NC_037638.1 | 5978152 | SNV | 1 | C | G | Heterozygous |
| NC_037638.1 | 5978183 | SNV | 1 | A | G | Homozygous   |
| NC_037638.1 | 5978358 | SNV | 1 | C | T | Homozygous   |
| NC_037638.1 | 5978361 | SNV | 1 | C | A | Homozygous   |
| NC_037638.1 | 5978368 | SNV | 1 | A | T | Homozygous   |
| NC_037638.1 | 5978610 | SNV | 1 | T | C | Homozygous   |
| NC_037638.1 | 5978793 | SNV | 1 | T | C | Heterozygous |
| NC_037638.1 | 5978810 | SNV | 1 | G | A | Heterozygous |
| NC_037638.1 | 5978931 | SNV | 1 | T | C | Homozygous   |
| NC_037638.1 | 5979026 | SNV | 1 | A | G | Homozygous   |
| NC_037638.1 | 5979159 | SNV | 1 | G | A | Homozygous   |
| NC_037638.1 | 5979467 | SNV | 1 | G | A | Homozygous   |
| NC_037638.1 | 5979836 | SNV | 1 | T | C | Homozygous   |
| NC_037638.1 | 5979965 | SNV | 1 | G | T | Heterozygous |
| NC_037638.1 | 5979974 | SNV | 1 | A | C | Heterozygous |
| NC_037638.1 | 5979999 | SNV | 1 | A | T | Heterozygous |
| NC_037638.1 | 5980003 | SNV | 1 | G | T | Heterozygous |
| NC_037638.1 | 5980029 | SNV | 1 | C | A | Heterozygous |
| NC_037638.1 | 5980032 | SNV | 1 | A | T | Heterozygous |
| NC_037638.1 | 5980071 | SNV | 1 | T | C | Homozygous   |
| NC_037638.1 | 5980110 | SNV | 1 | A | G | Homozygous   |
| NC_037638.1 | 5980131 | SNV | 1 | A | G | Heterozygous |
| NC_037638.1 | 5980303 | SNV | 1 | G | A | Heterozygous |
| NC_037638.1 | 5980924 | SNV | 1 | A | G | Heterozygous |
| NC_037638.1 | 5981026 | SNV | 1 | C | T | Homozygous   |
| NC_037638.1 | 5981140 | SNV | 1 | G | A | Homozygous   |
| NC_037638.1 | 5986417 | SNV | 1 | A | G | Heterozygous |
| NC_037638.1 | 5986420 | SNV | 1 | G | A | Heterozygous |
| NC_037638.1 | 5986967 | SNV | 1 | G | A | Heterozygous |
| NC_037638.1 | 5987372 | SNV | 1 | T | C | Heterozygous |
| NC_037638.1 | 5989236 | SNV | 1 | C | T | Homozygous   |
| NC_037638.1 | 5989249 | SNV | 1 | A | T | Homozygous   |
| NC_037638.1 | 5989532 | SNV | 1 | A | G | Heterozygous |
| NC_037638.1 | 5989868 | SNV | 1 | T | C | Homozygous   |
| NC_037638.1 | 5989901 | SNV | 1 | G | A | Homozygous   |
| NC_037638.1 | 5990418 | SNV | 1 | A | T | Heterozygous |
| NC_037638.1 | 5990471 | SNV | 1 | T | A | Homozygous   |
| NC_037638.1 | 5990564 | SNV | 1 | G | A | Homozygous   |
| NC_037638.1 | 5990964 | SNV | 1 | T | C | Heterozygous |
| NC_037638.1 | 5991432 | SNV | 1 | A | G | Heterozygous |

|             |         |     |   |   |   |              |
|-------------|---------|-----|---|---|---|--------------|
| NC_037638.1 | 5992495 | SNV | 1 | A | G | Heterozygous |
| NC_037638.1 | 5992660 | SNV | 1 | C | T | Heterozygous |
| NC_037638.1 | 5992666 | SNV | 1 | G | A | Heterozygous |
| NC_037638.1 | 5995457 | SNV | 1 | A | G | Homozygous   |
| NC_037638.1 | 6001367 | SNV | 1 | C | T | Heterozygous |
| NC_037638.1 | 6017714 | SNV | 1 | G | A | Heterozygous |
| NC_037638.1 | 6018304 | SNV | 1 | A | G | Homozygous   |
| NC_037638.1 | 6018311 | SNV | 1 | C | T | Homozygous   |
| NC_037638.1 | 6025285 | SNV | 1 | G | A | Homozygous   |
| NC_037638.1 | 6025869 | SNV | 1 | A | C | Homozygous   |
| NC_037638.1 | 6025872 | SNV | 1 | A | T | Homozygous   |
| NC_037638.1 | 6027072 | SNV | 1 | A | G | Homozygous   |
| NC_037638.1 | 6033534 | SNV | 1 | T | C | Homozygous   |
| NC_037638.1 | 6034641 | SNV | 1 | C | T | Homozygous   |
| NC_037638.1 | 6035570 | SNV | 1 | C | T | Homozygous   |
| NC_037638.1 | 6037144 | SNV | 1 | C | T | Homozygous   |
| NC_037638.1 | 6042032 | SNV | 1 | T | C | Homozygous   |
| NC_037638.1 | 6042071 | SNV | 1 | C | T | Heterozygous |
| NC_037638.1 | 6042074 | SNV | 1 | G | A | Homozygous   |
| NC_037638.1 | 6043329 | SNV | 1 | C | T | Homozygous   |
| NC_037638.1 | 6043793 | SNV | 1 | T | A | Homozygous   |
| NC_037638.1 | 6043845 | SNV | 1 | G | A | Homozygous   |
| NC_037638.1 | 6044512 | SNV | 1 | G | A | Homozygous   |
| NC_037638.1 | 6044734 | SNV | 1 | A | G | Homozygous   |
| NC_037638.1 | 6044752 | SNV | 1 | T | C | Homozygous   |
| NC_037638.1 | 6047459 | SNV | 1 | G | C | Homozygous   |
| NC_037638.1 | 6049280 | SNV | 1 | G | A | Heterozygous |
| NC_037638.1 | 6049428 | SNV | 1 | G | A | Heterozygous |
| NC_037638.1 | 6050004 | SNV | 1 | A | G | Homozygous   |
| NC_037638.1 | 6061583 | SNV | 1 | A | G | Homozygous   |
| NC_037638.1 | 6062066 | SNV | 1 | A | C | Homozygous   |
| NC_037638.1 | 6062075 | SNV | 1 | A | C | Homozygous   |
| NC_037638.1 | 6062081 | SNV | 1 | T | A | Homozygous   |
| NC_037638.1 | 6062087 | SNV | 1 | A | G | Homozygous   |
| NC_037638.1 | 6062105 | SNV | 1 | A | T | Heterozygous |
| NC_037638.1 | 6062108 | SNV | 1 | C | T | Heterozygous |
| NC_037638.1 | 6062111 | SNV | 1 | G | A | Heterozygous |
| NC_037638.1 | 6062114 | SNV | 1 | A | G | Heterozygous |
| NC_037638.1 | 6062123 | SNV | 1 | G | A | Heterozygous |
| NC_037638.1 | 6062129 | SNV | 1 | C | T | Heterozygous |
| NC_037638.1 | 6062132 | SNV | 1 | A | T | Heterozygous |
| NC_037638.1 | 6062138 | SNV | 1 | C | A | Heterozygous |
| NC_037638.1 | 6062399 | SNV | 1 | A | G | Heterozygous |
| NC_037638.1 | 6062402 | SNV | 1 | C | T | Homozygous   |
| NC_037638.1 | 6062405 | SNV | 1 | T | G | Homozygous   |
| NC_037638.1 | 6062409 | SNV | 1 | T | C | Homozygous   |
| NC_037638.1 | 6062411 | SNV | 1 | A | T | Homozygous   |
| NC_037638.1 | 6062415 | SNV | 1 | A | T | Homozygous   |
| NC_037638.1 | 6062421 | SNV | 1 | A | G | Homozygous   |
| NC_037638.1 | 6062423 | SNV | 1 | T | G | Homozygous   |
| NC_037638.1 | 6062427 | SNV | 1 | C | T | Homozygous   |

|             |         |     |   |   |   |              |
|-------------|---------|-----|---|---|---|--------------|
| NC_037638.1 | 6062429 | SNV | 1 | A | G | Homozygous   |
| NC_037638.1 | 6062432 | SNV | 1 | C | T | Homozygous   |
| NC_037638.1 | 6062435 | SNV | 1 | A | C | Homozygous   |
| NC_037638.1 | 6062438 | SNV | 1 | C | T | Homozygous   |
| NC_037638.1 | 6062444 | SNV | 1 | C | T | Homozygous   |
| NC_037638.1 | 6062447 | SNV | 1 | T | C | Homozygous   |
| NC_037638.1 | 6062453 | SNV | 1 | C | T | Homozygous   |
| NC_037638.1 | 6062457 | SNV | 1 | C | T | Homozygous   |
| NC_037638.1 | 6062460 | SNV | 1 | C | A | Homozygous   |
| NC_037638.1 | 6062462 | SNV | 1 | T | G | Homozygous   |
| NC_037638.1 | 6062465 | SNV | 1 | C | T | Homozygous   |
| NC_037638.1 | 6062483 | SNV | 1 | A | T | Homozygous   |
| NC_037638.1 | 6062489 | SNV | 1 | T | A | Homozygous   |
| NC_037638.1 | 6062492 | SNV | 1 | A | G | Homozygous   |
| NC_037638.1 | 6063098 | SNV | 1 | T | A | Heterozygous |
| NC_037638.1 | 6063131 | SNV | 1 | C | A | Heterozygous |
| NC_037638.1 | 6063895 | SNV | 1 | G | A | Heterozygous |
| NC_037638.1 | 6069463 | SNV | 1 | C | T | Homozygous   |
| NC_037638.1 | 6072317 | SNV | 1 | G | A | Homozygous   |
| NC_037638.1 | 6076224 | SNV | 1 | A | G | Homozygous   |
| NC_037638.1 | 6086311 | SNV | 1 | G | A | Homozygous   |
| NC_037638.1 | 6086314 | SNV | 1 | A | T | Heterozygous |
| NC_037638.1 | 6087697 | SNV | 1 | A | G | Homozygous   |
| NC_037638.1 | 6114478 | SNV | 1 | T | C | Heterozygous |
| NC_037638.1 | 6114484 | SNV | 1 | T | C | Heterozygous |
| NC_037638.1 | 6114486 | SNV | 1 | T | C | Heterozygous |
| NC_037638.1 | 6114494 | SNV | 1 | T | G | Heterozygous |
| NC_037638.1 | 6114510 | SNV | 1 | T | C | Heterozygous |
| NC_037638.1 | 6120784 | SNV | 1 | T | C | Homozygous   |
| NC_037638.1 | 6120787 | SNV | 1 | A | T | Heterozygous |
| NC_037638.1 | 6120789 | SNV | 1 | A | T | Homozygous   |
| NC_037638.1 | 6120791 | SNV | 1 | T | C | Heterozygous |
| NC_037638.1 | 6120797 | SNV | 1 | A | T | Homozygous   |
| NC_037638.1 | 6120800 | SNV | 1 | T | G | Heterozygous |
| NC_037638.1 | 6120802 | SNV | 1 | A | T | Homozygous   |
| NC_037638.1 | 6120839 | SNV | 1 | G | A | Heterozygous |
| NC_037638.1 | 6120859 | SNV | 1 | G | A | Homozygous   |
| NC_037638.1 | 6127452 | SNV | 1 | C | T | Heterozygous |
| NC_037638.1 | 6127688 | SNV | 1 | T | A | Homozygous   |
| NC_037638.1 | 6127751 | SNV | 1 | G | A | Heterozygous |
| NC_037638.1 | 6127761 | SNV | 1 | T | C | Homozygous   |
| NC_037638.1 | 6129041 | SNV | 1 | T | C | Homozygous   |
| NC_037638.1 | 6129581 | SNV | 1 | G | A | Homozygous   |
| NC_037638.1 | 6129592 | SNV | 1 | G | A | Heterozygous |
| NC_037638.1 | 6130530 | SNV | 1 | G | A | Heterozygous |
| NC_037638.1 | 6130613 | SNV | 1 | C | T | Heterozygous |
| NC_037638.1 | 6137442 | SNV | 1 | T | C | Heterozygous |
| NC_037638.1 | 6137636 | SNV | 1 | T | C | Heterozygous |
| NC_037638.1 | 6137647 | SNV | 1 | G | A | Heterozygous |
| NC_037638.1 | 6137675 | SNV | 1 | A | G | Heterozygous |
| NC_037638.1 | 6137834 | SNV | 1 | T | C | Homozygous   |



|             |         |     |   |   |   |              |
|-------------|---------|-----|---|---|---|--------------|
| NC_037638.1 | 6137876 | SNV | 1 | T | G | Homozygous   |
| NC_037638.1 | 6138321 | SNV | 1 | A | T | Homozygous   |
| NC_037638.1 | 6138337 | SNV | 1 | A | G | Homozygous   |
| NC_037638.1 | 6138366 | SNV | 1 | C | T | Homozygous   |
| NC_037638.1 | 6138490 | SNV | 1 | A | G | Heterozygous |
| NC_037638.1 | 6138540 | SNV | 1 | G | T | Heterozygous |
| NC_037638.1 | 6139307 | SNV | 1 | T | C | Homozygous   |
| NC_037638.1 | 6139703 | SNV | 1 | T | C | Heterozygous |
| NC_037638.1 | 6139941 | SNV | 1 | G | A | Heterozygous |
| NC_037638.1 | 6139950 | SNV | 1 | C | T | Heterozygous |
| NC_037638.1 | 6146909 | SNV | 1 | C | T | Heterozygous |
| NC_037638.1 | 6147189 | SNV | 1 | G | A | Homozygous   |
| NC_037638.1 | 6147191 | SNV | 1 | G | A | Homozygous   |
| NC_037638.1 | 6150290 | SNV | 1 | A | C | Homozygous   |
| NC_037638.1 | 6150293 | SNV | 1 | T | C | Homozygous   |
| NC_037638.1 | 6150693 | SNV | 1 | T | C | Heterozygous |
| NC_037638.1 | 6150784 | SNV | 1 | G | C | Homozygous   |
| NC_037638.1 | 6157154 | SNV | 1 | T | C | Homozygous   |
| NC_037638.1 | 6157461 | SNV | 1 | C | G | Homozygous   |
| NC_037638.1 | 6157475 | SNV | 1 | A | G | Homozygous   |
| NC_037638.1 | 6157661 | SNV | 1 | T | C | Homozygous   |
| NC_037638.1 | 6157683 | SNV | 1 | A | G | Homozygous   |
| NC_037638.1 | 6170231 | SNV | 1 | C | T | Heterozygous |
| NC_037638.1 | 6178156 | SNV | 1 | G | A | Homozygous   |
| NC_037638.1 | 6182401 | SNV | 1 | G | A | Heterozygous |
| NC_037638.1 | 6183550 | SNV | 1 | A | G | Homozygous   |
| NC_037638.1 | 6183621 | SNV | 1 | A | G | Homozygous   |
| NC_037638.1 | 6183697 | SNV | 1 | G | A | Homozygous   |
| NC_037638.1 | 6196750 | SNV | 1 | G | A | Heterozygous |
| NC_037638.1 | 6196753 | SNV | 1 | G | C | Homozygous   |
| NC_037638.1 | 6196800 | SNV | 1 | A | G | Homozygous   |
| NC_037638.1 | 6206484 | SNV | 1 | T | C | Homozygous   |
| NC_037638.1 | 6206486 | SNV | 1 | G | C | Homozygous   |
| NC_037638.1 | 6214811 | SNV | 1 | A | T | Heterozygous |
| NC_037638.1 | 6219014 | SNV | 1 | G | C | Heterozygous |
| NC_037638.1 | 6226187 | SNV | 1 | A | G | Heterozygous |
| NC_037638.1 | 6226408 | SNV | 1 | A | G | Homozygous   |
| NC_037638.1 | 6226459 | SNV | 1 | A | G | Homozygous   |
| NC_037638.1 | 6226520 | SNV | 1 | T | C | Heterozygous |
| NC_037638.1 | 6226529 | SNV | 1 | C | T | Heterozygous |
| NC_037638.1 | 6243037 | SNV | 1 | G | A | Heterozygous |
| NC_037638.1 | 6243218 | SNV | 1 | A | G | Homozygous   |
| NC_037638.1 | 6254345 | SNV | 1 | A | G | Heterozygous |
| NC_037638.1 | 6254364 | SNV | 1 | T | C | Heterozygous |
| NC_037638.1 | 6254385 | SNV | 1 | T | C | Homozygous   |
| NC_037638.1 | 6254487 | SNV | 1 | A | G | Homozygous   |
| NC_037638.1 | 6254502 | SNV | 1 | A | G | Homozygous   |
| NC_037638.1 | 6254590 | SNV | 1 | A | G | Homozygous   |
| NC_037638.1 | 6258959 | SNV | 1 | T | A | Heterozygous |
| NC_037638.1 | 6258963 | SNV | 1 | T | A | Heterozygous |
| NC_037638.1 | 6258967 | SNV | 1 | A | T | Homozygous   |

|             |         |     |   |   |   |              |
|-------------|---------|-----|---|---|---|--------------|
| NC_037638.1 | 6259332 | SNV | 1 | A | G | Homozygous   |
| NC_037638.1 | 6260243 | SNV | 1 | C | T | Homozygous   |
| NC_037638.1 | 6269113 | SNV | 1 | G | A | Heterozygous |
| NC_037638.1 | 6269128 | SNV | 1 | G | C | Homozygous   |
| NC_037638.1 | 6269208 | SNV | 1 | G | C | Heterozygous |
| NC_037638.1 | 6269274 | SNV | 1 | G | A | Heterozygous |
| NC_037638.1 | 6269361 | SNV | 1 | T | C | Homozygous   |
| NC_037638.1 | 6269402 | SNV | 1 | C | T | Homozygous   |
| NC_037638.1 | 6269954 | SNV | 1 | T | C | Homozygous   |
| NC_037638.1 | 6272433 | SNV | 1 | G | A | Heterozygous |
| NC_037638.1 | 6272478 | SNV | 1 | A | T | Homozygous   |
| NC_037638.1 | 6273712 | SNV | 1 | G | A | Heterozygous |
| NC_037638.1 | 6273775 | SNV | 1 | G | A | Homozygous   |
| NC_037638.1 | 6273790 | SNV | 1 | G | A | Homozygous   |
| NC_037638.1 | 6274400 | SNV | 1 | C | T | Heterozygous |
| NC_037638.1 | 6275538 | SNV | 1 | T | C | Heterozygous |
| NC_037638.1 | 6277217 | SNV | 1 | A | G | Homozygous   |
| NC_037638.1 | 6278075 | SNV | 1 | T | G | Homozygous   |
| NC_037638.1 | 6278742 | SNV | 1 | A | G | Homozygous   |
| NC_037638.1 | 6280872 | SNV | 1 | T | C | Homozygous   |
| NC_037638.1 | 6281679 | SNV | 1 | C | A | Homozygous   |
| NC_037638.1 | 6281914 | SNV | 1 | C | T | Homozygous   |
| NC_037638.1 | 6283189 | SNV | 1 | T | A | Heterozygous |
| NC_037638.1 | 6284191 | SNV | 1 | T | C | Heterozygous |
| NC_037638.1 | 6286888 | SNV | 1 | A | T | Homozygous   |
| NC_037638.1 | 6286890 | SNV | 1 | A | C | Homozygous   |
| NC_037638.1 | 6286899 | SNV | 1 | A | T | Homozygous   |
| NC_037638.1 | 6286902 | SNV | 1 | C | G | Homozygous   |
| NC_037638.1 | 6286908 | SNV | 1 | T | C | Homozygous   |
| NC_037638.1 | 6286917 | SNV | 1 | A | G | Homozygous   |
| NC_037638.1 | 6295476 | SNV | 1 | G | A | Heterozygous |
| NC_037638.1 | 6295876 | SNV | 1 | A | T | Heterozygous |
| NC_037638.1 | 6295900 | SNV | 1 | A | C | Heterozygous |
| NC_037638.1 | 6296786 | SNV | 1 | A | G | Homozygous   |
| NC_037638.1 | 6296798 | SNV | 1 | C | G | Heterozygous |
| NC_037638.1 | 6296826 | SNV | 1 | A | G | Heterozygous |
| NC_037638.1 | 6296934 | SNV | 1 | G | A | Homozygous   |
| NC_037638.1 | 6296985 | SNV | 1 | A | T | Heterozygous |
| NC_037638.1 | 6297008 | SNV | 1 | A | G | Homozygous   |
| NC_037638.1 | 6297743 | SNV | 1 | C | T | Homozygous   |
| NC_037638.1 | 6298359 | SNV | 1 | C | T | Heterozygous |
| NC_037638.1 | 6298452 | SNV | 1 | C | G | Heterozygous |
| NC_037638.1 | 6300179 | SNV | 1 | T | C | Heterozygous |
| NC_037638.1 | 6300227 | SNV | 1 | A | G | Heterozygous |
| NC_037638.1 | 6300395 | SNV | 1 | A | G | Heterozygous |
| NC_037638.1 | 6301543 | SNV | 1 | C | T | Heterozygous |
| NC_037638.1 | 6301560 | SNV | 1 | G | A | Heterozygous |
| NC_037638.1 | 6302347 | SNV | 1 | T | G | Homozygous   |
| NC_037638.1 | 6302797 | SNV | 1 | A | G | Homozygous   |
| NC_037638.1 | 6302801 | SNV | 1 | C | T | Heterozygous |
| NC_037638.1 | 6302822 | SNV | 1 | A | G | Homozygous   |

|             |         |     |   |   |   |              |
|-------------|---------|-----|---|---|---|--------------|
| NC_037638.1 | 6302925 | SNV | 1 | C | T | Homozygous   |
| NC_037638.1 | 6306243 | SNV | 1 | T | C | Homozygous   |
| NC_037638.1 | 6306250 | SNV | 1 | A | G | Homozygous   |
| NC_037638.1 | 6306272 | SNV | 1 | G | T | Homozygous   |
| NC_037638.1 | 6307212 | SNV | 1 | A | T | Homozygous   |
| NC_037638.1 | 6307219 | SNV | 1 | G | A | Homozygous   |
| NC_037638.1 | 6308689 | SNV | 1 | T | A | Homozygous   |
| NC_037638.1 | 6309937 | SNV | 1 | T | C | Homozygous   |
| NC_037638.1 | 6309979 | SNV | 1 | G | A | Homozygous   |
| NC_037638.1 | 6310142 | SNV | 1 | T | C | Heterozygous |
| NC_037638.1 | 6310314 | SNV | 1 | A | G | Homozygous   |
| NC_037638.1 | 6310380 | SNV | 1 | C | T | Homozygous   |
| NC_037638.1 | 6310579 | SNV | 1 | T | C | Heterozygous |
| NC_037638.1 | 6310808 | SNV | 1 | G | A | Homozygous   |
| NC_037638.1 | 6310816 | SNV | 1 | G | A | Heterozygous |
| NC_037638.1 | 6310845 | SNV | 1 | A | C | Heterozygous |
| NC_037638.1 | 6312247 | SNV | 1 | A | G | Homozygous   |
| NC_037638.1 | 6312259 | SNV | 1 | G | C | Homozygous   |
| NC_037638.1 | 6312323 | SNV | 1 | C | T | Heterozygous |
| NC_037638.1 | 6312351 | SNV | 1 | T | C | Homozygous   |
| NC_037638.1 | 6320505 | SNV | 1 | A | T | Heterozygous |
| NC_037638.1 | 6320507 | SNV | 1 | T | C | Heterozygous |
| NC_037638.1 | 6320509 | SNV | 1 | C | A | Heterozygous |
| NC_037638.1 | 6320509 | SNV | 1 | C | T | Heterozygous |
| NC_037638.1 | 6320513 | SNV | 1 | T | G | Heterozygous |
| NC_037638.1 | 6320518 | SNV | 1 | A | C | Heterozygous |
| NC_037638.1 | 6320518 | SNV | 1 | A | T | Heterozygous |
| NC_037638.1 | 6320523 | SNV | 1 | T | G | Heterozygous |
| NC_037638.1 | 6320525 | SNV | 1 | T | G | Heterozygous |
| NC_037638.1 | 6320534 | SNV | 1 | A | T | Heterozygous |
| NC_037638.1 | 6322932 | SNV | 1 | G | C | Heterozygous |
| NC_037638.1 | 6322948 | SNV | 1 | A | G | Heterozygous |
| NC_037638.1 | 6322949 | SNV | 1 | G | A | Heterozygous |
| NC_037638.1 | 6323090 | SNV | 1 | A | G | Homozygous   |
| NC_037638.1 | 6323270 | SNV | 1 | G | A | Homozygous   |
| NC_037638.1 | 6351570 | SNV | 1 | G | C | Homozygous   |
| NC_037638.1 | 6354712 | SNV | 1 | C | T | Heterozygous |
| NC_037638.1 | 6354759 | SNV | 1 | A | G | Heterozygous |
| NC_037638.1 | 6354763 | SNV | 1 | T | C | Homozygous   |
| NC_037638.1 | 6354801 | SNV | 1 | G | C | Heterozygous |
| NC_037638.1 | 6354894 | SNV | 1 | T | C | Homozygous   |
| NC_037638.1 | 6354928 | SNV | 1 | C | T | Homozygous   |
| NC_037638.1 | 6355005 | SNV | 1 | T | C | Heterozygous |
| NC_037638.1 | 6355039 | SNV | 1 | G | A | Heterozygous |
| NC_037638.1 | 6355061 | SNV | 1 | A | G | Heterozygous |
| NC_037638.1 | 6355254 | SNV | 1 | C | T | Heterozygous |
| NC_037638.1 | 6355432 | SNV | 1 | T | C | Heterozygous |
| NC_037638.1 | 6355456 | SNV | 1 | C | T | Heterozygous |
| NC_037638.1 | 6355584 | SNV | 1 | T | G | Homozygous   |
| NC_037638.1 | 6356635 | SNV | 1 | G | A | Heterozygous |
| NC_037638.1 | 6368893 | SNV | 1 | C | T | Homozygous   |

|             |         |     |   |   |   |              |
|-------------|---------|-----|---|---|---|--------------|
| NC_037638.1 | 6368900 | SNV | 1 | A | T | Homozygous   |
| NC_037638.1 | 6373125 | SNV | 1 | C | A | Heterozygous |
| NC_037638.1 | 6373257 | SNV | 1 | C | T | Heterozygous |
| NC_037638.1 | 6373396 | SNV | 1 | C | T | Homozygous   |
| NC_037638.1 | 6373498 | SNV | 1 | G | A | Heterozygous |
| NC_037638.1 | 6373813 | SNV | 1 | T | C | Heterozygous |
| NC_037638.1 | 6374875 | SNV | 1 | T | C | Homozygous   |
| NC_037638.1 | 6374900 | SNV | 1 | G | C | Heterozygous |
| NC_037638.1 | 6375656 | SNV | 1 | G | A | Homozygous   |
| NC_037638.1 | 6375764 | SNV | 1 | A | G | Homozygous   |
| NC_037638.1 | 6376490 | SNV | 1 | A | G | Heterozygous |
| NC_037638.1 | 6376595 | SNV | 1 | A | T | Heterozygous |
| NC_037638.1 | 6376616 | SNV | 1 | A | G | Heterozygous |
| NC_037638.1 | 6377103 | SNV | 1 | G | T | Homozygous   |
| NC_037638.1 | 6377140 | SNV | 1 | A | G | Homozygous   |
| NC_037638.1 | 6377167 | SNV | 1 | T | C | Homozygous   |
| NC_037638.1 | 6378690 | SNV | 1 | C | T | Heterozygous |
| NC_037638.1 | 6380561 | SNV | 1 | G | A | Homozygous   |
| NC_037638.1 | 6391383 | SNV | 1 | G | A | Homozygous   |
| NC_037638.1 | 6391509 | SNV | 1 | G | C | Homozygous   |
| NC_037638.1 | 6391561 | SNV | 1 | C | G | Homozygous   |
| NC_037638.1 | 6391785 | SNV | 1 | A | C | Homozygous   |
| NC_037638.1 | 6391815 | SNV | 1 | C | T | Homozygous   |
| NC_037638.1 | 6391939 | SNV | 1 | G | A | Heterozygous |
| NC_037638.1 | 6391965 | SNV | 1 | A | G | Homozygous   |
| NC_037638.1 | 6392001 | SNV | 1 | C | T | Heterozygous |
| NC_037638.1 | 6392204 | SNV | 1 | G | A | Heterozygous |
| NC_037638.1 | 6392326 | SNV | 1 | C | T | Heterozygous |
| NC_037638.1 | 6392330 | SNV | 1 | A | G | Homozygous   |
| NC_037638.1 | 6392384 | SNV | 1 | C | T | Heterozygous |
| NC_037638.1 | 6392453 | SNV | 1 | G | T | Heterozygous |
| NC_037638.1 | 6392455 | SNV | 1 | C | T | Homozygous   |
| NC_037638.1 | 6392457 | SNV | 1 | A | G | Homozygous   |
| NC_037638.1 | 6392550 | SNV | 1 | T | C | Heterozygous |
| NC_037638.1 | 6394067 | SNV | 1 | A | T | Homozygous   |
| NC_037638.1 | 6394081 | SNV | 1 | G | A | Heterozygous |
| NC_037638.1 | 6394095 | SNV | 1 | A | C | Homozygous   |
| NC_037638.1 | 6394295 | SNV | 1 | C | T | Heterozygous |
| NC_037638.1 | 6394410 | SNV | 1 | C | T | Heterozygous |
| NC_037638.1 | 6394501 | SNV | 1 | A | G | Heterozygous |
| NC_037638.1 | 6394521 | SNV | 1 | G | C | Homozygous   |
| NC_037638.1 | 6394541 | SNV | 1 | C | T | Heterozygous |
| NC_037638.1 | 6394731 | SNV | 1 | T | C | Homozygous   |
| NC_037638.1 | 6394746 | SNV | 1 | G | A | Heterozygous |
| NC_037638.1 | 6394762 | SNV | 1 | T | C | Heterozygous |
| NC_037638.1 | 6394798 | SNV | 1 | A | G | Heterozygous |
| NC_037638.1 | 6394814 | SNV | 1 | A | G | Heterozygous |
| NC_037638.1 | 6394826 | SNV | 1 | C | T | Heterozygous |
| NC_037638.1 | 6394918 | SNV | 1 | C | T | Heterozygous |
| NC_037638.1 | 6402929 | SNV | 1 | G | A | Heterozygous |
| NC_037638.1 | 6403013 | SNV | 1 | C | T | Homozygous   |

|             |         |     |   |   |   |              |
|-------------|---------|-----|---|---|---|--------------|
| NC_037638.1 | 6403064 | SNV | 1 | T | C | Heterozygous |
| NC_037638.1 | 6403142 | SNV | 1 | A | G | Heterozygous |
| NC_037638.1 | 6403682 | SNV | 1 | G | A | Homozygous   |
| NC_037638.1 | 6403705 | SNV | 1 | A | C | Heterozygous |
| NC_037638.1 | 6403782 | SNV | 1 | A | G | Heterozygous |
| NC_037638.1 | 6403812 | SNV | 1 | C | T | Homozygous   |
| NC_037638.1 | 6404613 | SNV | 1 | T | A | Homozygous   |
| NC_037638.1 | 6404680 | SNV | 1 | G | A | Homozygous   |
| NC_037638.1 | 6404982 | SNV | 1 | T | C | Homozygous   |
| NC_037638.1 | 6405774 | SNV | 1 | C | G | Homozygous   |
| NC_037638.1 | 6406559 | SNV | 1 | C | T | Homozygous   |
| NC_037638.1 | 6420587 | SNV | 1 | T | C | Homozygous   |
| NC_037638.1 | 6421021 | SNV | 1 | C | A | Heterozygous |
| NC_037638.1 | 6421031 | SNV | 1 | T | A | Heterozygous |
| NC_037638.1 | 6421091 | SNV | 1 | G | A | Homozygous   |
| NC_037638.1 | 6424711 | SNV | 1 | A | T | Homozygous   |
| NC_037638.1 | 6424714 | SNV | 1 | G | T | Homozygous   |
| NC_037638.1 | 6424895 | SNV | 1 | A | G | Homozygous   |
| NC_037638.1 | 6426109 | SNV | 1 | G | A | Homozygous   |
| NC_037638.1 | 6426193 | SNV | 1 | C | T | Heterozygous |
| NC_037638.1 | 6428848 | SNV | 1 | G | A | Heterozygous |
| NC_037638.1 | 6428876 | SNV | 1 | A | T | Heterozygous |
| NC_037638.1 | 6431841 | SNV | 1 | T | C | Homozygous   |
| NC_037638.1 | 6431892 | SNV | 1 | T | C | Heterozygous |
| NC_037638.1 | 6431967 | SNV | 1 | A | G | Homozygous   |
| NC_037638.1 | 6432001 | SNV | 1 | C | T | Homozygous   |
| NC_037638.1 | 6432043 | SNV | 1 | C | T | Homozygous   |
| NC_037638.1 | 6432343 | SNV | 1 | G | A | Heterozygous |
| NC_037638.1 | 6432346 | SNV | 1 | A | G | Homozygous   |
| NC_037638.1 | 6432374 | SNV | 1 | A | G | Heterozygous |
| NC_037638.1 | 6432384 | SNV | 1 | C | T | Homozygous   |
| NC_037638.1 | 6432417 | SNV | 1 | T | C | Homozygous   |
| NC_037638.1 | 6432473 | SNV | 1 | C | T | Heterozygous |
| NC_037638.1 | 6432601 | SNV | 1 | A | G | Homozygous   |
| NC_037638.1 | 6436131 | SNV | 1 | C | T | Heterozygous |
| NC_037638.1 | 6436198 | SNV | 1 | A | G | Homozygous   |
| NC_037638.1 | 6436269 | SNV | 1 | A | G | Homozygous   |
| NC_037638.1 | 6436275 | SNV | 1 | G | A | Homozygous   |
| NC_037638.1 | 6437114 | SNV | 1 | T | C | Homozygous   |
| NC_037638.1 | 6437476 | SNV | 1 | C | T | Homozygous   |
| NC_037638.1 | 6437610 | SNV | 1 | A | G | Homozygous   |
| NC_037638.1 | 6438177 | SNV | 1 | C | T | Homozygous   |
| NC_037638.1 | 6438340 | SNV | 1 | T | C | Homozygous   |
| NC_037638.1 | 6438376 | SNV | 1 | C | T | Homozygous   |
| NC_037638.1 | 6438378 | SNV | 1 | G | A | Homozygous   |
| NC_037638.1 | 6440350 | SNV | 1 | T | G | Homozygous   |
| NC_037638.1 | 6440359 | SNV | 1 | T | A | Homozygous   |
| NC_037638.1 | 6440382 | SNV | 1 | A | C | Homozygous   |
| NC_037638.1 | 6451305 | SNV | 1 | A | G | Homozygous   |
| NC_037638.1 | 6451320 | SNV | 1 | C | T | Homozygous   |
| NC_037638.1 | 6451329 | SNV | 1 | T | C | Homozygous   |

|             |         |     |   |   |   |              |
|-------------|---------|-----|---|---|---|--------------|
| NC_037638.1 | 6462389 | SNV | 1 | C | T | Homozygous   |
| NC_037638.1 | 6462660 | SNV | 1 | T | G | Heterozygous |
| NC_037638.1 | 6462662 | SNV | 1 | C | G | Heterozygous |
| NC_037638.1 | 6481556 | SNV | 1 | A | T | Heterozygous |
| NC_037638.1 | 6483826 | SNV | 1 | G | A | Heterozygous |
| NC_037638.1 | 6485265 | SNV | 1 | A | C | Homozygous   |
| NC_037638.1 | 6485271 | SNV | 1 | T | G | Homozygous   |
| NC_037638.1 | 6485277 | SNV | 1 | C | G | Homozygous   |
| NC_037638.1 | 6485279 | SNV | 1 | G | A | Homozygous   |
| NC_037638.1 | 6491191 | SNV | 1 | C | T | Homozygous   |
| NC_037638.1 | 6491537 | SNV | 1 | T | A | Heterozygous |
| NC_037638.1 | 6491597 | SNV | 1 | G | T | Homozygous   |
| NC_037638.1 | 6491605 | SNV | 1 | C | A | Heterozygous |
| NC_037638.1 | 6491612 | SNV | 1 | G | T | Heterozygous |
| NC_037638.1 | 6503479 | SNV | 1 | A | C | Heterozygous |
| NC_037638.1 | 6503580 | SNV | 1 | T | A | Homozygous   |
| NC_037638.1 | 6503650 | SNV | 1 | A | G | Homozygous   |
| NC_037638.1 | 6503778 | SNV | 1 | G | A | Heterozygous |
| NC_037638.1 | 6503806 | SNV | 1 | A | G | Homozygous   |
| NC_037638.1 | 6503864 | SNV | 1 | G | A | Heterozygous |
| NC_037638.1 | 6504851 | SNV | 1 | C | T | Homozygous   |
| NC_037638.1 | 6504870 | SNV | 1 | T | C | Homozygous   |
| NC_037638.1 | 6504971 | SNV | 1 | A | G | Homozygous   |
| NC_037638.1 | 6505786 | SNV | 1 | C | T | Heterozygous |
| NC_037638.1 | 6505796 | SNV | 1 | T | A | Heterozygous |
| NC_037638.1 | 6505820 | SNV | 1 | C | G | Homozygous   |
| NC_037638.1 | 6507108 | SNV | 1 | G | A | Heterozygous |
| NC_037638.1 | 6507591 | SNV | 1 | A | G | Homozygous   |
| NC_037638.1 | 6507618 | SNV | 1 | A | G | Homozygous   |
| NC_037638.1 | 6508350 | SNV | 1 | C | T | Heterozygous |
| NC_037638.1 | 6508635 | SNV | 1 | G | C | Homozygous   |
| NC_037638.1 | 6508766 | SNV | 1 | C | T | Heterozygous |
| NC_037638.1 | 6508778 | SNV | 1 | C | T | Heterozygous |
| NC_037638.1 | 6508833 | SNV | 1 | C | T | Homozygous   |
| NC_037638.1 | 6508845 | SNV | 1 | C | T | Homozygous   |
| NC_037638.1 | 6508850 | SNV | 1 | C | T | Heterozygous |
| NC_037638.1 | 6508858 | SNV | 1 | C | T | Heterozygous |
| NC_037638.1 | 6508887 | SNV | 1 | T | C | Heterozygous |
| NC_037638.1 | 6508908 | SNV | 1 | C | T | Homozygous   |
| NC_037638.1 | 6508933 | SNV | 1 | G | A | Heterozygous |
| NC_037638.1 | 6508995 | SNV | 1 | C | A | Heterozygous |
| NC_037638.1 | 6509688 | SNV | 1 | C | G | Homozygous   |
| NC_037638.1 | 6509690 | SNV | 1 | T | C | Homozygous   |
| NC_037638.1 | 6509709 | SNV | 1 | T | C | Heterozygous |
| NC_037638.1 | 6510417 | SNV | 1 | C | T | Heterozygous |
| NC_037638.1 | 6510777 | SNV | 1 | A | G | Homozygous   |
| NC_037638.1 | 6510807 | SNV | 1 | T | C | Homozygous   |
| NC_037638.1 | 6510828 | SNV | 1 | T | C | Homozygous   |
| NC_037638.1 | 6511363 | SNV | 1 | A | C | Homozygous   |
| NC_037638.1 | 6511895 | SNV | 1 | A | G | Homozygous   |
| NC_037638.1 | 6514140 | SNV | 1 | G | A | Heterozygous |

|             |         |     |   |   |   |              |
|-------------|---------|-----|---|---|---|--------------|
| NC_037638.1 | 6522495 | SNV | 1 | A | T | Homozygous   |
| NC_037638.1 | 6522497 | SNV | 1 | T | C | Homozygous   |
| NC_037638.1 | 6522505 | SNV | 1 | T | A | Homozygous   |
| NC_037638.1 | 6525853 | SNV | 1 | G | A | Homozygous   |
| NC_037638.1 | 6528488 | SNV | 1 | A | T | Heterozygous |
| NC_037638.1 | 6528491 | SNV | 1 | A | T | Homozygous   |
| NC_037638.1 | 6530004 | SNV | 1 | A | T | Heterozygous |
| NC_037638.1 | 6531382 | SNV | 1 | A | G | Homozygous   |
| NC_037638.1 | 6531388 | SNV | 1 | T | C | Heterozygous |
| NC_037638.1 | 6531421 | SNV | 1 | A | G | Heterozygous |
| NC_037638.1 | 6531605 | SNV | 1 | T | A | Homozygous   |
| NC_037638.1 | 6531628 | SNV | 1 | A | T | Homozygous   |
| NC_037638.1 | 6531635 | SNV | 1 | T | G | Homozygous   |
| NC_037638.1 | 6531655 | SNV | 1 | A | G | Homozygous   |
| NC_037638.1 | 6531659 | SNV | 1 | A | G | Homozygous   |
| NC_037638.1 | 6531663 | SNV | 1 | A | T | Homozygous   |
| NC_037638.1 | 6532105 | SNV | 1 | A | G | Homozygous   |
| NC_037638.1 | 6534660 | SNV | 1 | T | A | Homozygous   |
| NC_037638.1 | 6537838 | SNV | 1 | A | C | Homozygous   |
| NC_037638.1 | 6537874 | SNV | 1 | T | C | Homozygous   |
| NC_037638.1 | 6538716 | SNV | 1 | G | A | Homozygous   |
| NC_037638.1 | 6538867 | SNV | 1 | A | G | Homozygous   |
| NC_037638.1 | 6539176 | SNV | 1 | G | A | Heterozygous |
| NC_037638.1 | 6539217 | SNV | 1 | T | C | Homozygous   |
| NC_037638.1 | 6540410 | SNV | 1 | C | T | Heterozygous |
| NC_037638.1 | 6548717 | SNV | 1 | A | G | Homozygous   |
| NC_037638.1 | 6549085 | SNV | 1 | A | T | Heterozygous |
| NC_037638.1 | 6549094 | SNV | 1 | A | C | Heterozygous |
| NC_037638.1 | 6549096 | SNV | 1 | G | A | Heterozygous |
| NC_037638.1 | 6550500 | SNV | 1 | G | T | Heterozygous |
| NC_037638.1 | 6551118 | SNV | 1 | C | T | Heterozygous |
| NC_037638.1 | 6553484 | SNV | 1 | A | G | Homozygous   |
| NC_037638.1 | 6558380 | SNV | 1 | T | G | Heterozygous |
| NC_037638.1 | 6564887 | SNV | 1 | A | G | Homozygous   |
| NC_037638.1 | 6565460 | SNV | 1 | C | G | Homozygous   |
| NC_037638.1 | 6565462 | SNV | 1 | A | G | Homozygous   |
| NC_037638.1 | 6565828 | SNV | 1 | C | G | Homozygous   |
| NC_037638.1 | 6566079 | SNV | 1 | C | T | Homozygous   |
| NC_037638.1 | 6567408 | SNV | 1 | T | C | Homozygous   |
| NC_037638.1 | 6570795 | SNV | 1 | A | C | Heterozygous |
| NC_037638.1 | 6576257 | SNV | 1 | G | A | Homozygous   |
| NC_037638.1 | 6576305 | SNV | 1 | G | C | Homozygous   |
| NC_037638.1 | 6580373 | SNV | 1 | T | C | Homozygous   |
| NC_037638.1 | 6580771 | SNV | 1 | A | T | Heterozygous |
| NC_037638.1 | 6581277 | SNV | 1 | A | C | Homozygous   |
| NC_037638.1 | 6581364 | SNV | 1 | T | A | Homozygous   |
| NC_037638.1 | 6581367 | SNV | 1 | G | T | Homozygous   |
| NC_037638.1 | 6581538 | SNV | 1 | T | A | Homozygous   |
| NC_037638.1 | 6582547 | SNV | 1 | A | T | Homozygous   |
| NC_037638.1 | 6582578 | SNV | 1 | A | T | Homozygous   |
| NC_037638.1 | 6582596 | SNV | 1 | T | A | Heterozygous |

|             |         |     |   |   |   |              |
|-------------|---------|-----|---|---|---|--------------|
| NC_037638.1 | 6583253 | SNV | 1 | T | G | Homozygous   |
| NC_037638.1 | 6583901 | SNV | 1 | C | T | Heterozygous |
| NC_037638.1 | 6593396 | SNV | 1 | C | T | Heterozygous |
| NC_037638.1 | 6593494 | SNV | 1 | C | T | Heterozygous |
| NC_037638.1 | 6600228 | SNV | 1 | C | T | Homozygous   |
| NC_037638.1 | 6602888 | SNV | 1 | A | G | Homozygous   |
| NC_037638.1 | 6603081 | SNV | 1 | A | G | Homozygous   |
| NC_037638.1 | 6603140 | SNV | 1 | C | T | Homozygous   |
| NC_037638.1 | 6603296 | SNV | 1 | T | G | Homozygous   |
| NC_037638.1 | 6603695 | SNV | 1 | A | T | Heterozygous |
| NC_037638.1 | 6603798 | SNV | 1 | A | G | Homozygous   |
| NC_037638.1 | 6604046 | SNV | 1 | C | T | Homozygous   |
| NC_037638.1 | 6610565 | SNV | 1 | T | A | Homozygous   |
| NC_037638.1 | 6610577 | SNV | 1 | T | A | Homozygous   |
| NC_037638.1 | 6610726 | SNV | 1 | C | T | Homozygous   |
| NC_037638.1 | 6611562 | SNV | 1 | A | C | Heterozygous |
| NC_037638.1 | 6611695 | SNV | 1 | A | T | Homozygous   |
| NC_037638.1 | 6612734 | SNV | 1 | A | G | Homozygous   |
| NC_037638.1 | 6612745 | SNV | 1 | C | T | Heterozygous |
| NC_037638.1 | 6612796 | SNV | 1 | G | A | Homozygous   |
| NC_037638.1 | 6617778 | SNV | 1 | A | G | Heterozygous |
| NC_037638.1 | 6617783 | SNV | 1 | A | G | Heterozygous |
| NC_037638.1 | 6619896 | SNV | 1 | A | T | Homozygous   |
| NC_037638.1 | 6619914 | SNV | 1 | T | A | Homozygous   |
| NC_037638.1 | 6619918 | SNV | 1 | A | T | Homozygous   |
| NC_037638.1 | 6619925 | SNV | 1 | T | C | Homozygous   |
| NC_037638.1 | 6619933 | SNV | 1 | A | C | Homozygous   |
| NC_037638.1 | 6619935 | SNV | 1 | A | T | Homozygous   |
| NC_037638.1 | 6619938 | SNV | 1 | T | A | Homozygous   |
| NC_037638.1 | 6622602 | SNV | 1 | G | A | Homozygous   |
| NC_037638.1 | 6623118 | SNV | 1 | T | G | Homozygous   |
| NC_037638.1 | 6623129 | SNV | 1 | A | C | Homozygous   |
| NC_037638.1 | 6623132 | SNV | 1 | T | C | Homozygous   |
| NC_037638.1 | 6624812 | SNV | 1 | A | T | Homozygous   |
| NC_037638.1 | 6624817 | SNV | 1 | T | C | Homozygous   |
| NC_037638.1 | 6624824 | SNV | 1 | A | T | Homozygous   |
| NC_037638.1 | 6625079 | SNV | 1 | C | T | Homozygous   |
| NC_037638.1 | 6626949 | SNV | 1 | A | G | Homozygous   |
| NC_037638.1 | 6627023 | SNV | 1 | G | C | Homozygous   |
| NC_037638.1 | 6627092 | SNV | 1 | T | G | Homozygous   |
| NC_037638.1 | 6627095 | SNV | 1 | A | T | Homozygous   |
| NC_037638.1 | 6629422 | SNV | 1 | T | A | Homozygous   |
| NC_037638.1 | 6630808 | SNV | 1 | A | G | Homozygous   |
| NC_037638.1 | 6634668 | SNV | 1 | C | A | Homozygous   |
| NC_037638.1 | 6634817 | SNV | 1 | A | G | Homozygous   |
| NC_037638.1 | 6635245 | SNV | 1 | C | T | Heterozygous |
| NC_037638.1 | 6635531 | SNV | 1 | T | A | Homozygous   |
| NC_037638.1 | 6635550 | SNV | 1 | G | A | Heterozygous |
| NC_037638.1 | 6635571 | SNV | 1 | G | A | Heterozygous |
| NC_037638.1 | 6635579 | SNV | 1 | C | T | Heterozygous |
| NC_037638.1 | 6635594 | SNV | 1 | G | A | Homozygous   |



|             |         |     |   |   |   |              |
|-------------|---------|-----|---|---|---|--------------|
| NC_037638.1 | 6635662 | SNV | 1 | G | A | Heterozygous |
| NC_037638.1 | 6635878 | SNV | 1 | G | A | Heterozygous |
| NC_037638.1 | 6635906 | SNV | 1 | A | G | Homozygous   |
| NC_037638.1 | 6636015 | SNV | 1 | A | G | Homozygous   |
| NC_037638.1 | 6636036 | SNV | 1 | A | G | Homozygous   |
| NC_037638.1 | 6636178 | SNV | 1 | A | G | Homozygous   |
| NC_037638.1 | 6636402 | SNV | 1 | C | T | Heterozygous |
| NC_037638.1 | 6636405 | SNV | 1 | C | T | Heterozygous |
| NC_037638.1 | 6636530 | SNV | 1 | C | T | Homozygous   |
| NC_037638.1 | 6636539 | SNV | 1 | G | A | Homozygous   |
| NC_037638.1 | 6636571 | SNV | 1 | G | T | Homozygous   |
| NC_037638.1 | 6636614 | SNV | 1 | T | C | Heterozygous |
| NC_037638.1 | 6636739 | SNV | 1 | G | A | Heterozygous |
| NC_037638.1 | 6636848 | SNV | 1 | C | T | Heterozygous |
| NC_037638.1 | 6636855 | SNV | 1 | C | G | Homozygous   |
| NC_037638.1 | 6636986 | SNV | 1 | T | A | Heterozygous |
| NC_037638.1 | 6637028 | SNV | 1 | T | C | Homozygous   |
| NC_037638.1 | 6637163 | SNV | 1 | C | G | Heterozygous |
| NC_037638.1 | 6637182 | SNV | 1 | G | A | Heterozygous |
| NC_037638.1 | 6637332 | SNV | 1 | G | A | Heterozygous |
| NC_037638.1 | 6637992 | SNV | 1 | C | T | Heterozygous |
| NC_037638.1 | 6638462 | SNV | 1 | T | C | Homozygous   |
| NC_037638.1 | 6638468 | SNV | 1 | C | T | Heterozygous |
| NC_037638.1 | 6640606 | SNV | 1 | C | T | Heterozygous |
| NC_037638.1 | 6641128 | SNV | 1 | G | A | Heterozygous |
| NC_037638.1 | 6641164 | SNV | 1 | C | A | Heterozygous |
| NC_037638.1 | 6646288 | SNV | 1 | G | A | Heterozygous |
| NC_037638.1 | 6646291 | SNV | 1 | A | C | Heterozygous |
| NC_037638.1 | 6646296 | SNV | 1 | A | G | Heterozygous |
| NC_037638.1 | 6646372 | SNV | 1 | G | A | Homozygous   |
| NC_037638.1 | 6648402 | SNV | 1 | A | C | Heterozygous |
| NC_037638.1 | 6649137 | SNV | 1 | T | C | Homozygous   |
| NC_037638.1 | 6649593 | SNV | 1 | G | A | Heterozygous |
| NC_037638.1 | 6649630 | SNV | 1 | A | G | Homozygous   |
| NC_037638.1 | 6657953 | SNV | 1 | C | A | Homozygous   |
| NC_037638.1 | 6657956 | SNV | 1 | T | C | Homozygous   |
| NC_037638.1 | 6657963 | SNV | 1 | A | T | Heterozygous |
| NC_037638.1 | 6657966 | SNV | 1 | A | T | Homozygous   |
| NC_037638.1 | 6657970 | SNV | 1 | T | C | Heterozygous |
| NC_037638.1 | 6661579 | SNV | 1 | C | A | Heterozygous |
| NC_037638.1 | 6661811 | SNV | 1 | T | C | Homozygous   |
| NC_037638.1 | 6661815 | SNV | 1 | T | C | Homozygous   |
| NC_037638.1 | 6661819 | SNV | 1 | T | C | Homozygous   |
| NC_037638.1 | 6683699 | SNV | 1 | G | A | Heterozygous |
| NC_037638.1 | 6683741 | SNV | 1 | T | C | Heterozygous |
| NC_037638.1 | 6683743 | SNV | 1 | T | C | Homozygous   |
| NC_037638.1 | 6692106 | SNV | 1 | T | C | Heterozygous |
| NC_037638.1 | 6692141 | SNV | 1 | G | A | Heterozygous |
| NC_037638.1 | 6692165 | SNV | 1 | A | G | Heterozygous |
| NC_037638.1 | 6692247 | SNV | 1 | A | G | Homozygous   |
| NC_037638.1 | 6697105 | SNV | 1 | C | T | Heterozygous |

|             |         |     |   |   |   |              |
|-------------|---------|-----|---|---|---|--------------|
| NC_037638.1 | 6697108 | SNV | 1 | T | G | Heterozygous |
| NC_037638.1 | 6697289 | SNV | 1 | G | A | Heterozygous |
| NC_037638.1 | 6697556 | SNV | 1 | C | T | Heterozygous |
| NC_037638.1 | 6709525 | SNV | 1 | T | A | Heterozygous |
| NC_037638.1 | 6709568 | SNV | 1 | T | C | Homozygous   |
| NC_037638.1 | 6709571 | SNV | 1 | T | A | Homozygous   |
| NC_037638.1 | 6709574 | SNV | 1 | A | T | Homozygous   |
| NC_037638.1 | 6709995 | SNV | 1 | C | T | Heterozygous |
| NC_037638.1 | 6710080 | SNV | 1 | T | C | Heterozygous |
| NC_037638.1 | 6710182 | SNV | 1 | C | T | Homozygous   |
| NC_037638.1 | 6710982 | SNV | 1 | A | G | Homozygous   |
| NC_037638.1 | 6711189 | SNV | 1 | G | A | Heterozygous |
| NC_037638.1 | 6713225 | SNV | 1 | A | G | Heterozygous |
| NC_037638.1 | 6714874 | SNV | 1 | T | C | Heterozygous |
| NC_037638.1 | 6715073 | SNV | 1 | T | C | Homozygous   |
| NC_037638.1 | 6715391 | SNV | 1 | C | T | Heterozygous |
| NC_037638.1 | 6715394 | SNV | 1 | A | G | Homozygous   |
| NC_037638.1 | 6720316 | SNV | 1 | G | A | Homozygous   |
| NC_037638.1 | 6720339 | SNV | 1 | C | G | Homozygous   |
| NC_037638.1 | 6721246 | SNV | 1 | C | T | Heterozygous |
| NC_037638.1 | 6724122 | SNV | 1 | T | C | Homozygous   |
| NC_037638.1 | 6724216 | SNV | 1 | A | G | Heterozygous |
| NC_037638.1 | 6724241 | SNV | 1 | G | A | Heterozygous |
| NC_037638.1 | 6724253 | SNV | 1 | A | G | Homozygous   |
| NC_037638.1 | 6727493 | SNV | 1 | C | T | Heterozygous |
| NC_037638.1 | 6732649 | SNV | 1 | C | T | Homozygous   |
| NC_037638.1 | 6733800 | SNV | 1 | C | T | Heterozygous |
| NC_037638.1 | 6733824 | SNV | 1 | A | C | Homozygous   |
| NC_037638.1 | 6733827 | SNV | 1 | G | A | Heterozygous |
| NC_037638.1 | 6745490 | SNV | 1 | C | T | Heterozygous |
| NC_037638.1 | 6745501 | SNV | 1 | T | A | Heterozygous |
| NC_037638.1 | 6745517 | SNV | 1 | T | A | Heterozygous |
| NC_037638.1 | 6745519 | SNV | 1 | T | A | Homozygous   |
| NC_037638.1 | 6745521 | SNV | 1 | T | A | Heterozygous |
| NC_037638.1 | 6745524 | SNV | 1 | C | A | Heterozygous |
| NC_037638.1 | 6745552 | SNV | 1 | A | C | Heterozygous |
| NC_037638.1 | 6745577 | SNV | 1 | T | C | Heterozygous |
| NC_037638.1 | 6745579 | SNV | 1 | T | G | Heterozygous |
| NC_037638.1 | 6746728 | SNV | 1 | T | A | Homozygous   |
| NC_037638.1 | 6746751 | SNV | 1 | A | G | Homozygous   |
| NC_037638.1 | 6746774 | SNV | 1 | T | A | Homozygous   |
| NC_037638.1 | 6746779 | SNV | 1 | T | A | Homozygous   |
| NC_037638.1 | 6746783 | SNV | 1 | T | A | Homozygous   |
| NC_037638.1 | 6750904 | SNV | 1 | T | C | Homozygous   |
| NC_037638.1 | 6750906 | SNV | 1 | C | T | Heterozygous |
| NC_037638.1 | 6750914 | SNV | 1 | T | C | Heterozygous |
| NC_037638.1 | 6751282 | SNV | 1 | A | G | Heterozygous |
| NC_037638.1 | 6751525 | SNV | 1 | T | C | Homozygous   |
| NC_037638.1 | 6751875 | SNV | 1 | A | T | Homozygous   |
| NC_037638.1 | 6752048 | SNV | 1 | T | G | Homozygous   |
| NC_037638.1 | 6752053 | SNV | 1 | G | A | Heterozygous |

|             |         |     |   |   |   |              |
|-------------|---------|-----|---|---|---|--------------|
| NC_037638.1 | 6752073 | SNV | 1 | T | C | Heterozygous |
| NC_037638.1 | 6752092 | SNV | 1 | T | C | Homozygous   |
| NC_037638.1 | 6752189 | SNV | 1 | G | A | Heterozygous |
| NC_037638.1 | 6752198 | SNV | 1 | A | G | Homozygous   |
| NC_037638.1 | 6752224 | SNV | 1 | C | T | Heterozygous |
| NC_037638.1 | 6752267 | SNV | 1 | A | C | Homozygous   |
| NC_037638.1 | 6752317 | SNV | 1 | C | T | Heterozygous |
| NC_037638.1 | 6752354 | SNV | 1 | G | A | Heterozygous |
| NC_037638.1 | 6752500 | SNV | 1 | T | A | Heterozygous |
| NC_037638.1 | 6752502 | SNV | 1 | T | A | Heterozygous |
| NC_037638.1 | 6752573 | SNV | 1 | A | G | Homozygous   |
| NC_037638.1 | 6752789 | SNV | 1 | A | G | Heterozygous |
| NC_037638.1 | 6752799 | SNV | 1 | T | C | Homozygous   |
| NC_037638.1 | 6753056 | SNV | 1 | T | A | Heterozygous |
| NC_037638.1 | 6754777 | SNV | 1 | G | A | Homozygous   |
| NC_037638.1 | 6754779 | SNV | 1 | T | A | Homozygous   |
| NC_037638.1 | 6754800 | SNV | 1 | A | T | Homozygous   |
| NC_037638.1 | 6754808 | SNV | 1 | A | T | Homozygous   |
| NC_037638.1 | 6754816 | SNV | 1 | G | T | Homozygous   |
| NC_037638.1 | 6759931 | SNV | 1 | T | C | Heterozygous |
| NC_037638.1 | 6760015 | SNV | 1 | C | T | Heterozygous |
| NC_037638.1 | 6760634 | SNV | 1 | T | A | Heterozygous |
| NC_037638.1 | 6760638 | SNV | 1 | T | G | Heterozygous |
| NC_037638.1 | 6760640 | SNV | 1 | T | G | Heterozygous |
| NC_037638.1 | 6762088 | SNV | 1 | G | A | Heterozygous |
| NC_037638.1 | 6764695 | SNV | 1 | G | A | Homozygous   |
| NC_037638.1 | 6765984 | SNV | 1 | T | C | Homozygous   |
| NC_037638.1 | 6766365 | SNV | 1 | A | C | Homozygous   |
| NC_037638.1 | 6766418 | SNV | 1 | A | G | Heterozygous |
| NC_037638.1 | 6766482 | SNV | 1 | A | G | Homozygous   |
| NC_037638.1 | 6766488 | SNV | 1 | T | G | Homozygous   |
| NC_037638.1 | 6766543 | SNV | 1 | T | C | Homozygous   |
| NC_037638.1 | 6766889 | SNV | 1 | G | A | Homozygous   |
| NC_037638.1 | 6767096 | SNV | 1 | G | T | Homozygous   |
| NC_037638.1 | 6767213 | SNV | 1 | T | C | Heterozygous |
| NC_037638.1 | 6767275 | SNV | 1 | C | T | Heterozygous |
| NC_037638.1 | 6767295 | SNV | 1 | T | C | Homozygous   |
| NC_037638.1 | 6767409 | SNV | 1 | T | C | Homozygous   |
| NC_037638.1 | 6768361 | SNV | 1 | T | C | Heterozygous |
| NC_037638.1 | 6768455 | SNV | 1 | T | C | Homozygous   |
| NC_037638.1 | 6768516 | SNV | 1 | A | G | Homozygous   |
| NC_037638.1 | 6768565 | SNV | 1 | G | A | Homozygous   |
| NC_037638.1 | 6768606 | SNV | 1 | C | T | Homozygous   |
| NC_037638.1 | 6768722 | SNV | 1 | G | A | Homozygous   |
| NC_037638.1 | 6768731 | SNV | 1 | T | C | Homozygous   |
| NC_037638.1 | 6768947 | SNV | 1 | C | T | Heterozygous |
| NC_037638.1 | 6769029 | SNV | 1 | A | G | Heterozygous |
| NC_037638.1 | 6769221 | SNV | 1 | A | T | Heterozygous |
| NC_037638.1 | 6770050 | SNV | 1 | C | A | Heterozygous |
| NC_037638.1 | 6771310 | SNV | 1 | A | T | Homozygous   |
| NC_037638.1 | 6771319 | SNV | 1 | A | G | Homozygous   |

|             |         |     |   |   |   |              |
|-------------|---------|-----|---|---|---|--------------|
| NC_037638.1 | 6771394 | SNV | 1 | A | G | Homozygous   |
| NC_037638.1 | 6771480 | SNV | 1 | G | C | Heterozygous |
| NC_037638.1 | 6772233 | SNV | 1 | C | T | Heterozygous |
| NC_037638.1 | 6772391 | SNV | 1 | T | C | Heterozygous |
| NC_037638.1 | 6772400 | SNV | 1 | T | C | Heterozygous |
| NC_037638.1 | 6772421 | SNV | 1 | T | A | Heterozygous |
| NC_037638.1 | 6772704 | SNV | 1 | T | C | Heterozygous |
| NC_037638.1 | 6772709 | SNV | 1 | C | G | Heterozygous |
| NC_037638.1 | 6774879 | SNV | 1 | G | A | Heterozygous |
| NC_037638.1 | 6775166 | SNV | 1 | T | C | Homozygous   |
| NC_037638.1 | 6775194 | SNV | 1 | T | C | Homozygous   |
| NC_037638.1 | 6775929 | SNV | 1 | G | A | Heterozygous |
| NC_037638.1 | 6776345 | SNV | 1 | C | T | Homozygous   |
| NC_037638.1 | 6776371 | SNV | 1 | G | A | Homozygous   |
| NC_037638.1 | 6776764 | SNV | 1 | A | G | Homozygous   |
| NC_037638.1 | 6777336 | SNV | 1 | A | G | Homozygous   |
| NC_037638.1 | 6777343 | SNV | 1 | C | T | Homozygous   |
| NC_037638.1 | 6777368 | SNV | 1 | G | A | Heterozygous |
| NC_037638.1 | 6777372 | SNV | 1 | A | G | Homozygous   |
| NC_037638.1 | 6777396 | SNV | 1 | T | C | Heterozygous |
| NC_037638.1 | 6777488 | SNV | 1 | G | A | Heterozygous |
| NC_037638.1 | 6777879 | SNV | 1 | T | C | Heterozygous |
| NC_037638.1 | 6778524 | SNV | 1 | A | G | Homozygous   |
| NC_037638.1 | 6778550 | SNV | 1 | T | C | Homozygous   |
| NC_037638.1 | 6778583 | SNV | 1 | G | A | Heterozygous |
| NC_037638.1 | 6778721 | SNV | 1 | C | A | Heterozygous |
| NC_037638.1 | 6783202 | SNV | 1 | T | C | Homozygous   |
| NC_037638.1 | 6783292 | SNV | 1 | A | G | Homozygous   |
| NC_037638.1 | 6783359 | SNV | 1 | C | T | Homozygous   |
| NC_037638.1 | 6783678 | SNV | 1 | C | G | Homozygous   |
| NC_037638.1 | 6783681 | SNV | 1 | A | T | Homozygous   |
| NC_037638.1 | 6788456 | SNV | 1 | G | A | Homozygous   |
| NC_037638.1 | 6788460 | SNV | 1 | G | A | Homozygous   |
| NC_037638.1 | 6788464 | SNV | 1 | G | C | Homozygous   |
| NC_037638.1 | 6788484 | SNV | 1 | T | G | Homozygous   |
| NC_037638.1 | 6788491 | SNV | 1 | A | G | Homozygous   |
| NC_037638.1 | 6788775 | SNV | 1 | C | T | Heterozygous |
| NC_037638.1 | 6788781 | SNV | 1 | C | T | Heterozygous |
| NC_037638.1 | 6788793 | SNV | 1 | C | T | Heterozygous |
| NC_037638.1 | 6788799 | SNV | 1 | C | T | Heterozygous |
| NC_037638.1 | 6789259 | SNV | 1 | G | A | Heterozygous |
| NC_037638.1 | 6789509 | SNV | 1 | T | C | Homozygous   |
| NC_037638.1 | 6789543 | SNV | 1 | G | T | Heterozygous |
| NC_037638.1 | 6789612 | SNV | 1 | C | T | Homozygous   |
| NC_037638.1 | 6789673 | SNV | 1 | G | A | Heterozygous |
| NC_037638.1 | 6793333 | SNV | 1 | G | C | Heterozygous |
| NC_037638.1 | 6793335 | SNV | 1 | C | T | Heterozygous |
| NC_037638.1 | 6801583 | SNV | 1 | G | A | Homozygous   |
| NC_037638.1 | 6804128 | SNV | 1 | T | C | Homozygous   |
| NC_037638.1 | 6804956 | SNV | 1 | A | G | Heterozygous |
| NC_037638.1 | 6805014 | SNV | 1 | A | G | Heterozygous |

|             |         |     |   |   |   |              |
|-------------|---------|-----|---|---|---|--------------|
| NC_037638.1 | 6805050 | SNV | 1 | T | C | Homozygous   |
| NC_037638.1 | 6805053 | SNV | 1 | G | A | Homozygous   |
| NC_037638.1 | 6805069 | SNV | 1 | A | G | Heterozygous |
| NC_037638.1 | 6805091 | SNV | 1 | T | C | Homozygous   |
| NC_037638.1 | 6805496 | SNV | 1 | C | T | Heterozygous |
| NC_037638.1 | 6806957 | SNV | 1 | T | C | Homozygous   |
| NC_037638.1 | 6807076 | SNV | 1 | G | A | Homozygous   |
| NC_037638.1 | 6808629 | SNV | 1 | G | A | Heterozygous |
| NC_037638.1 | 6808805 | SNV | 1 | T | C | Homozygous   |
| NC_037638.1 | 6808810 | SNV | 1 | C | T | Homozygous   |
| NC_037638.1 | 6808817 | SNV | 1 | C | A | Homozygous   |
| NC_037638.1 | 6808929 | SNV | 1 | T | C | Homozygous   |
| NC_037638.1 | 6808963 | SNV | 1 | C | T | Heterozygous |
| NC_037638.1 | 6808970 | SNV | 1 | A | G | Homozygous   |
| NC_037638.1 | 6808975 | SNV | 1 | C | T | Heterozygous |
| NC_037638.1 | 6808988 | SNV | 1 | A | G | Homozygous   |
| NC_037638.1 | 6809050 | SNV | 1 | A | G | Heterozygous |
| NC_037638.1 | 6809099 | SNV | 1 | C | T | Heterozygous |
| NC_037638.1 | 6809107 | SNV | 1 | G | A | Heterozygous |
| NC_037638.1 | 6809388 | SNV | 1 | T | C | Homozygous   |
| NC_037638.1 | 6809487 | SNV | 1 | A | T | Heterozygous |
| NC_037638.1 | 6809729 | SNV | 1 | T | C | Heterozygous |
| NC_037638.1 | 6810104 | SNV | 1 | A | G | Homozygous   |
| NC_037638.1 | 6810560 | SNV | 1 | T | A | Homozygous   |
| NC_037638.1 | 6810901 | SNV | 1 | G | A | Homozygous   |
| NC_037638.1 | 6811099 | SNV | 1 | T | C | Homozygous   |
| NC_037638.1 | 6816212 | SNV | 1 | C | T | Heterozygous |
| NC_037638.1 | 6816563 | SNV | 1 | C | T | Homozygous   |
| NC_037638.1 | 6816570 | SNV | 1 | G | A | Heterozygous |
| NC_037638.1 | 6822812 | SNV | 1 | C | G | Homozygous   |
| NC_037638.1 | 6824435 | SNV | 1 | C | T | Heterozygous |
| NC_037638.1 | 6824461 | SNV | 1 | C | A | Homozygous   |
| NC_037638.1 | 6824598 | SNV | 1 | A | G | Homozygous   |
| NC_037638.1 | 6824600 | SNV | 1 | A | G | Homozygous   |
| NC_037638.1 | 6824615 | SNV | 1 | T | C | Homozygous   |
| NC_037638.1 | 6824618 | SNV | 1 | G | A | Homozygous   |
| NC_037638.1 | 6825576 | SNV | 1 | T | C | Heterozygous |
| NC_037638.1 | 6836463 | SNV | 1 | A | G | Homozygous   |
| NC_037638.1 | 6836476 | SNV | 1 | G | A | Heterozygous |
| NC_037638.1 | 6844033 | SNV | 1 | T | C | Homozygous   |
| NC_037638.1 | 6845039 | SNV | 1 | C | G | Heterozygous |
| NC_037638.1 | 6845042 | SNV | 1 | T | A | Heterozygous |
| NC_037638.1 | 6845521 | SNV | 1 | G | A | Heterozygous |
| NC_037638.1 | 6845833 | SNV | 1 | C | T | Heterozygous |
| NC_037638.1 | 6845842 | SNV | 1 | T | C | Heterozygous |
| NC_037638.1 | 6853387 | SNV | 1 | G | A | Heterozygous |
| NC_037638.1 | 6853387 | SNV | 1 | G | T | Heterozygous |
| NC_037638.1 | 6853389 | SNV | 1 | T | A | Heterozygous |
| NC_037638.1 | 6853419 | SNV | 1 | A | T | Homozygous   |
| NC_037638.1 | 6861178 | SNV | 1 | A | G | Homozygous   |
| NC_037638.1 | 6861199 | SNV | 1 | T | A | Homozygous   |

|             |         |     |   |   |   |              |
|-------------|---------|-----|---|---|---|--------------|
| NC_037638.1 | 6861203 | SNV | 1 | A | C | Homozygous   |
| NC_037638.1 | 6861205 | SNV | 1 | C | A | Homozygous   |
| NC_037638.1 | 6861207 | SNV | 1 | T | C | Homozygous   |
| NC_037638.1 | 6869738 | SNV | 1 | T | C | Homozygous   |
| NC_037638.1 | 6869759 | SNV | 1 | G | A | Homozygous   |
| NC_037638.1 | 6869872 | SNV | 1 | T | A | Heterozygous |
| NC_037638.1 | 6869874 | SNV | 1 | A | G | Heterozygous |
| NC_037638.1 | 6869984 | SNV | 1 | A | G | Homozygous   |
| NC_037638.1 | 6870148 | SNV | 1 | T | A | Heterozygous |
| NC_037638.1 | 6870351 | SNV | 1 | A | G | Homozygous   |
| NC_037638.1 | 6870378 | SNV | 1 | C | T | Homozygous   |
| NC_037638.1 | 6870382 | SNV | 1 | T | G | Heterozygous |
| NC_037638.1 | 6880678 | SNV | 1 | T | C | Heterozygous |
| NC_037638.1 | 6880770 | SNV | 1 | G | A | Homozygous   |
| NC_037638.1 | 6880915 | SNV | 1 | T | C | Homozygous   |
| NC_037638.1 | 6880930 | SNV | 1 | A | G | Homozygous   |
| NC_037638.1 | 6881136 | SNV | 1 | G | A | Heterozygous |
| NC_037638.1 | 6888595 | SNV | 1 | G | T | Heterozygous |
| NC_037638.1 | 6888599 | SNV | 1 | T | C | Heterozygous |
| NC_037638.1 | 6895781 | SNV | 1 | G | A | Homozygous   |
| NC_037638.1 | 6895783 | SNV | 1 | G | A | Homozygous   |
| NC_037638.1 | 6895812 | SNV | 1 | C | T | Homozygous   |
| NC_037638.1 | 6895814 | SNV | 1 | C | T | Homozygous   |
| NC_037638.1 | 6907020 | SNV | 1 | G | A | Heterozygous |
| NC_037638.1 | 6907272 | SNV | 1 | A | G | Homozygous   |
| NC_037638.1 | 6907285 | SNV | 1 | C | G | Homozygous   |
| NC_037638.1 | 6908145 | SNV | 1 | A | G | Heterozygous |
| NC_037638.1 | 6908271 | SNV | 1 | G | A | Heterozygous |
| NC_037638.1 | 6908532 | SNV | 1 | T | C | Homozygous   |
| NC_037638.1 | 6908595 | SNV | 1 | A | G | Homozygous   |
| NC_037638.1 | 6908640 | SNV | 1 | T | G | Homozygous   |
| NC_037638.1 | 6913525 | SNV | 1 | A | G | Homozygous   |
| NC_037638.1 | 6913563 | SNV | 1 | C | T | Heterozygous |
| NC_037638.1 | 6915215 | SNV | 1 | G | A | Heterozygous |
| NC_037638.1 | 6915350 | SNV | 1 | A | G | Heterozygous |
| NC_037638.1 | 6915377 | SNV | 1 | T | C | Heterozygous |
| NC_037638.1 | 6915386 | SNV | 1 | A | G | Heterozygous |
| NC_037638.1 | 6919175 | SNV | 1 | A | C | Homozygous   |
| NC_037638.1 | 6928947 | SNV | 1 | T | C | Heterozygous |
| NC_037638.1 | 6928959 | SNV | 1 | G | A | Heterozygous |
| NC_037638.1 | 6928962 | SNV | 1 | T | C | Homozygous   |
| NC_037638.1 | 6928967 | SNV | 1 | T | C | Homozygous   |
| NC_037638.1 | 6928972 | SNV | 1 | T | C | Heterozygous |
| NC_037638.1 | 6928974 | SNV | 1 | A | G | Homozygous   |
| NC_037638.1 | 6928987 | SNV | 1 | C | T | Heterozygous |
| NC_037638.1 | 6928994 | SNV | 1 | G | A | Heterozygous |
| NC_037638.1 | 6928997 | SNV | 1 | A | C | Homozygous   |
| NC_037638.1 | 6928999 | SNV | 1 | G | A | Heterozygous |
| NC_037638.1 | 6929002 | SNV | 1 | T | C | Homozygous   |
| NC_037638.1 | 6929004 | SNV | 1 | A | G | Heterozygous |
| NC_037638.1 | 6929036 | SNV | 1 | G | A | Heterozygous |

|             |         |     |   |   |   |              |
|-------------|---------|-----|---|---|---|--------------|
| NC_037638.1 | 6932005 | SNV | 1 | T | C | Heterozygous |
| NC_037638.1 | 6932470 | SNV | 1 | A | G | Heterozygous |
| NC_037638.1 | 6932672 | SNV | 1 | A | C | Heterozygous |
| NC_037638.1 | 6932890 | SNV | 1 | A | C | Heterozygous |
| NC_037638.1 | 6932982 | SNV | 1 | T | C | Homozygous   |
| NC_037638.1 | 6933066 | SNV | 1 | C | A | Heterozygous |
| NC_037638.1 | 6933630 | SNV | 1 | C | G | Homozygous   |
| NC_037638.1 | 6933635 | SNV | 1 | A | G | Heterozygous |
| NC_037638.1 | 6933882 | SNV | 1 | G | A | Heterozygous |
| NC_037638.1 | 6933954 | SNV | 1 | C | T | Heterozygous |
| NC_037638.1 | 6933957 | SNV | 1 | T | C | Homozygous   |
| NC_037638.1 | 6933960 | SNV | 1 | T | C | Homozygous   |
| NC_037638.1 | 6934324 | SNV | 1 | C | T | Homozygous   |
| NC_037638.1 | 6934326 | SNV | 1 | T | G | Homozygous   |
| NC_037638.1 | 6934328 | SNV | 1 | G | T | Homozygous   |
| NC_037638.1 | 6934335 | SNV | 1 | C | A | Homozygous   |
| NC_037638.1 | 6934989 | SNV | 1 | A | G | Heterozygous |
| NC_037638.1 | 6935067 | SNV | 1 | T | C | Homozygous   |
| NC_037638.1 | 6944014 | SNV | 1 | G | A | Homozygous   |
| NC_037638.1 | 6944378 | SNV | 1 | T | C | Homozygous   |
| NC_037638.1 | 6944397 | SNV | 1 | T | C | Homozygous   |
| NC_037638.1 | 6944542 | SNV | 1 | G | A | Heterozygous |
| NC_037638.1 | 6944663 | SNV | 1 | C | T | Heterozygous |
| NC_037638.1 | 6945004 | SNV | 1 | A | G | Heterozygous |
| NC_037638.1 | 6945171 | SNV | 1 | C | A | Homozygous   |
| NC_037638.1 | 6945714 | SNV | 1 | T | C | Heterozygous |
| NC_037638.1 | 6948629 | SNV | 1 | C | T | Homozygous   |
| NC_037638.1 | 6948893 | SNV | 1 | A | G | Homozygous   |
| NC_037638.1 | 6949256 | SNV | 1 | T | C | Heterozygous |
| NC_037638.1 | 6949260 | SNV | 1 | T | C | Heterozygous |
| NC_037638.1 | 6949490 | SNV | 1 | A | G | Heterozygous |
| NC_037638.1 | 6949510 | SNV | 1 | A | G | Homozygous   |
| NC_037638.1 | 6949561 | SNV | 1 | G | A | Homozygous   |
| NC_037638.1 | 6949725 | SNV | 1 | C | T | Heterozygous |
| NC_037638.1 | 6950386 | SNV | 1 | C | T | Heterozygous |
| NC_037638.1 | 6950794 | SNV | 1 | G | A | Heterozygous |
| NC_037638.1 | 6951319 | SNV | 1 | A | G | Homozygous   |
| NC_037638.1 | 6951370 | SNV | 1 | G | A | Heterozygous |
| NC_037638.1 | 6951569 | SNV | 1 | A | G | Homozygous   |
| NC_037638.1 | 6951594 | SNV | 1 | A | T | Heterozygous |
| NC_037638.1 | 6951765 | SNV | 1 | C | A | Heterozygous |
| NC_037638.1 | 6951771 | SNV | 1 | T | A | Heterozygous |
| NC_037638.1 | 6951771 | SNV | 1 | T | C | Heterozygous |
| NC_037638.1 | 6952101 | SNV | 1 | C | T | Homozygous   |
| NC_037638.1 | 6952104 | SNV | 1 | C | T | Homozygous   |
| NC_037638.1 | 6952134 | SNV | 1 | A | T | Homozygous   |
| NC_037638.1 | 6952138 | SNV | 1 | G | T | Homozygous   |
| NC_037638.1 | 6952146 | SNV | 1 | G | T | Homozygous   |
| NC_037638.1 | 6952150 | SNV | 1 | G | T | Heterozygous |
| NC_037638.1 | 6952447 | SNV | 1 | T | C | Homozygous   |
| NC_037638.1 | 6952475 | SNV | 1 | A | G | Heterozygous |

|             |         |     |   |   |   |              |
|-------------|---------|-----|---|---|---|--------------|
| NC_037638.1 | 6952642 | SNV | 1 | G | A | Homozygous   |
| NC_037638.1 | 6953005 | SNV | 1 | T | G | Heterozygous |
| NC_037638.1 | 6953099 | SNV | 1 | A | G | Homozygous   |
| NC_037638.1 | 6953416 | SNV | 1 | G | A | Homozygous   |
| NC_037638.1 | 6953486 | SNV | 1 | G | A | Heterozygous |
| NC_037638.1 | 6953876 | SNV | 1 | A | G | Homozygous   |
| NC_037638.1 | 6954164 | SNV | 1 | A | T | Homozygous   |
| NC_037638.1 | 6955069 | SNV | 1 | T | C | Heterozygous |
| NC_037638.1 | 6955207 | SNV | 1 | A | G | Heterozygous |
| NC_037638.1 | 6956219 | SNV | 1 | T | C | Heterozygous |
| NC_037638.1 | 6956250 | SNV | 1 | C | T | Heterozygous |
| NC_037638.1 | 6957223 | SNV | 1 | G | A | Homozygous   |
| NC_037638.1 | 6957336 | SNV | 1 | G | A | Homozygous   |
| NC_037638.1 | 6957355 | SNV | 1 | G | C | Heterozygous |
| NC_037638.1 | 6957386 | SNV | 1 | T | C | Homozygous   |
| NC_037638.1 | 6957489 | SNV | 1 | G | A | Heterozygous |
| NC_037638.1 | 6957555 | SNV | 1 | C | T | Heterozygous |
| NC_037638.1 | 6957940 | SNV | 1 | T | A | Homozygous   |
| NC_037638.1 | 6958937 | SNV | 1 | T | G | Heterozygous |
| NC_037638.1 | 6959065 | SNV | 1 | G | A | Homozygous   |
| NC_037638.1 | 6959147 | SNV | 1 | G | A | Heterozygous |
| NC_037638.1 | 6959278 | SNV | 1 | T | A | Heterozygous |
| NC_037638.1 | 6959333 | SNV | 1 | A | G | Homozygous   |
| NC_037638.1 | 6959414 | SNV | 1 | G | A | Heterozygous |
| NC_037638.1 | 6959900 | SNV | 1 | A | G | Heterozygous |
| NC_037638.1 | 6959914 | SNV | 1 | T | C | Homozygous   |
| NC_037638.1 | 6959918 | SNV | 1 | C | T | Heterozygous |
| NC_037638.1 | 6960053 | SNV | 1 | C | T | Homozygous   |
| NC_037638.1 | 6960730 | SNV | 1 | T | C | Homozygous   |
| NC_037638.1 | 6963077 | SNV | 1 | T | C | Heterozygous |
| NC_037638.1 | 6963095 | SNV | 1 | T | A | Heterozygous |
| NC_037638.1 | 6964801 | SNV | 1 | T | C | Homozygous   |
| NC_037638.1 | 6964913 | SNV | 1 | A | G | Homozygous   |
| NC_037638.1 | 6968598 | SNV | 1 | A | C | Homozygous   |
| NC_037638.1 | 6968606 | SNV | 1 | A | C | Homozygous   |
| NC_037638.1 | 6968636 | SNV | 1 | A | G | Heterozygous |
| NC_037638.1 | 6968643 | SNV | 1 | G | A | Heterozygous |
| NC_037638.1 | 6969438 | SNV | 1 | G | A | Heterozygous |
| NC_037638.1 | 6969450 | SNV | 1 | C | T | Heterozygous |
| NC_037638.1 | 6969456 | SNV | 1 | T | C | Heterozygous |
| NC_037638.1 | 6969459 | SNV | 1 | T | C | Homozygous   |
| NC_037638.1 | 6969480 | SNV | 1 | T | C | Heterozygous |
| NC_037638.1 | 6969667 | SNV | 1 | G | C | Homozygous   |
| NC_037638.1 | 6969670 | SNV | 1 | A | T | Homozygous   |
| NC_037638.1 | 6978349 | SNV | 1 | A | G | Homozygous   |
| NC_037638.1 | 6992223 | SNV | 1 | A | T | Homozygous   |
| NC_037638.1 | 6992226 | SNV | 1 | A | T | Homozygous   |
| NC_037638.1 | 6992245 | SNV | 1 | T | C | Homozygous   |
| NC_037638.1 | 6992247 | SNV | 1 | A | G | Homozygous   |
| NC_037638.1 | 6992276 | SNV | 1 | T | A | Homozygous   |
| NC_037638.1 | 6992283 | SNV | 1 | T | A | Homozygous   |



|             |         |     |   |   |   |              |
|-------------|---------|-----|---|---|---|--------------|
| NC_037638.1 | 6993535 | SNV | 1 | C | A | Homozygous   |
| NC_037638.1 | 6995800 | SNV | 1 | A | G | Homozygous   |
| NC_037638.1 | 6995830 | SNV | 1 | G | A | Heterozygous |
| NC_037638.1 | 6996485 | SNV | 1 | T | C | Homozygous   |
| NC_037638.1 | 6996513 | SNV | 1 | T | C | Heterozygous |
| NC_037638.1 | 6996720 | SNV | 1 | A | G | Homozygous   |
| NC_037638.1 | 6996856 | SNV | 1 | G | C | Homozygous   |
| NC_037638.1 | 6996858 | SNV | 1 | A | G | Homozygous   |
| NC_037638.1 | 6996861 | SNV | 1 | C | A | Homozygous   |
| NC_037638.1 | 6996944 | SNV | 1 | A | G | Homozygous   |
| NC_037638.1 | 6997070 | SNV | 1 | C | T | Homozygous   |
| NC_037638.1 | 6997598 | SNV | 1 | A | G | Heterozygous |
| NC_037638.1 | 6997853 | SNV | 1 | A | T | Heterozygous |
| NC_037638.1 | 6998261 | SNV | 1 | T | C | Heterozygous |
| NC_037638.1 | 6998344 | SNV | 1 | A | G | Heterozygous |
| NC_037638.1 | 7000404 | SNV | 1 | A | G | Homozygous   |
| NC_037638.1 | 7000453 | SNV | 1 | G | A | Homozygous   |
| NC_037638.1 | 7000756 | SNV | 1 | A | G | Heterozygous |
| NC_037638.1 | 7000758 | SNV | 1 | A | G | Heterozygous |
| NC_037638.1 | 7000760 | SNV | 1 | A | G | Heterozygous |
| NC_037638.1 | 7000776 | SNV | 1 | G | A | Heterozygous |
| NC_037638.1 | 7000778 | SNV | 1 | G | A | Heterozygous |
| NC_037638.1 | 7001403 | SNV | 1 | C | A | Heterozygous |
| NC_037638.1 | 7001854 | SNV | 1 | C | T | Heterozygous |
| NC_037638.1 | 7002156 | SNV | 1 | C | T | Heterozygous |
| NC_037638.1 | 7002297 | SNV | 1 | C | T | Homozygous   |
| NC_037638.1 | 7002408 | SNV | 1 | A | G | Homozygous   |
| NC_037638.1 | 7002542 | SNV | 1 | C | A | Homozygous   |
| NC_037638.1 | 7002575 | SNV | 1 | G | A | Heterozygous |
| NC_037638.1 | 7002613 | SNV | 1 | A | T | Homozygous   |
| NC_037638.1 | 7002748 | SNV | 1 | G | A | Heterozygous |
| NC_037638.1 | 7002750 | SNV | 1 | G | A | Heterozygous |
| NC_037638.1 | 7002799 | SNV | 1 | A | G | Homozygous   |
| NC_037638.1 | 7002803 | SNV | 1 | T | A | Homozygous   |
| NC_037638.1 | 7003318 | SNV | 1 | G | A | Heterozygous |
| NC_037638.1 | 7003411 | SNV | 1 | A | G | Heterozygous |
| NC_037638.1 | 7003449 | SNV | 1 | C | T | Heterozygous |
| NC_037638.1 | 7003461 | SNV | 1 | G | A | Heterozygous |
| NC_037638.1 | 7003469 | SNV | 1 | T | C | Heterozygous |
| NC_037638.1 | 7003475 | SNV | 1 | A | G | Heterozygous |
| NC_037638.1 | 7004026 | SNV | 1 | G | A | Heterozygous |
| NC_037638.1 | 7004260 | SNV | 1 | A | G | Homozygous   |
| NC_037638.1 | 7004555 | SNV | 1 | C | T | Homozygous   |
| NC_037638.1 | 7004648 | SNV | 1 | T | G | Heterozygous |
| NC_037638.1 | 7004852 | SNV | 1 | G | A | Heterozygous |
| NC_037638.1 | 7005225 | SNV | 1 | G | A | Homozygous   |
| NC_037638.1 | 7005539 | SNV | 1 | T | A | Homozygous   |
| NC_037638.1 | 7005903 | SNV | 1 | G | A | Homozygous   |
| NC_037638.1 | 7008253 | SNV | 1 | T | A | Heterozygous |
| NC_037638.1 | 7008348 | SNV | 1 | T | A | Homozygous   |
| NC_037638.1 | 7008362 | SNV | 1 | A | G | Heterozygous |

|             |         |     |   |   |   |              |
|-------------|---------|-----|---|---|---|--------------|
| NC_037638.1 | 7008578 | SNV | 1 | C | T | Heterozygous |
| NC_037638.1 | 7008595 | SNV | 1 | T | A | Heterozygous |
| NC_037638.1 | 7008597 | SNV | 1 | G | A | Heterozygous |
| NC_037638.1 | 7009941 | SNV | 1 | C | G | Heterozygous |
| NC_037638.1 | 7009944 | SNV | 1 | C | T | Heterozygous |
| NC_037638.1 | 7010727 | SNV | 1 | T | G | Heterozygous |
| NC_037638.1 | 7010754 | SNV | 1 | A | T | Heterozygous |
| NC_037638.1 | 7010867 | SNV | 1 | T | C | Heterozygous |
| NC_037638.1 | 7011053 | SNV | 1 | G | A | Heterozygous |
| NC_037638.1 | 7011111 | SNV | 1 | T | C | Homozygous   |
| NC_037638.1 | 7011132 | SNV | 1 | T | C | Homozygous   |
| NC_037638.1 | 7011603 | SNV | 1 | A | T | Heterozygous |
| NC_037638.1 | 7012206 | SNV | 1 | T | C | Heterozygous |
| NC_037638.1 | 7013314 | SNV | 1 | T | C | Heterozygous |
| NC_037638.1 | 7014214 | SNV | 1 | T | C | Homozygous   |
| NC_037638.1 | 7014222 | SNV | 1 | G | A | Heterozygous |
| NC_037638.1 | 7014284 | SNV | 1 | T | C | Heterozygous |
| NC_037638.1 | 7014286 | SNV | 1 | T | A | Homozygous   |
| NC_037638.1 | 7014467 | SNV | 1 | C | T | Homozygous   |
| NC_037638.1 | 7014501 | SNV | 1 | T | A | Homozygous   |
| NC_037638.1 | 7015920 | SNV | 1 | C | T | Heterozygous |
| NC_037638.1 | 7015947 | SNV | 1 | C | T | Heterozygous |
| NC_037638.1 | 7017925 | SNV | 1 | A | T | Homozygous   |
| NC_037638.1 | 7017930 | SNV | 1 | A | T | Homozygous   |
| NC_037638.1 | 7017933 | SNV | 1 | A | C | Homozygous   |
| NC_037638.1 | 7017942 | SNV | 1 | T | A | Heterozygous |
| NC_037638.1 | 7017949 | SNV | 1 | T | A | Homozygous   |
| NC_037638.1 | 7017952 | SNV | 1 | A | C | Homozygous   |
| NC_037638.1 | 7017991 | SNV | 1 | A | T | Heterozygous |
| NC_037638.1 | 7017999 | SNV | 1 | A | T | Homozygous   |
| NC_037638.1 | 7018004 | SNV | 1 | T | C | Homozygous   |
| NC_037638.1 | 7018006 | SNV | 1 | A | T | Heterozygous |
| NC_037638.1 | 7019955 | SNV | 1 | A | G | Homozygous   |
| NC_037638.1 | 7019995 | SNV | 1 | G | A | Homozygous   |
| NC_037638.1 | 7021650 | SNV | 1 | G | A | Homozygous   |
| NC_037638.1 | 7023354 | SNV | 1 | T | C | Homozygous   |
| NC_037638.1 | 7023457 | SNV | 1 | G | A | Homozygous   |
| NC_037638.1 | 7023474 | SNV | 1 | C | G | Heterozygous |
| NC_037638.1 | 7023521 | SNV | 1 | G | A | Homozygous   |
| NC_037638.1 | 7023524 | SNV | 1 | G | A | Homozygous   |
| NC_037638.1 | 7023544 | SNV | 1 | T | A | Heterozygous |
| NC_037638.1 | 7024059 | SNV | 1 | C | T | Homozygous   |
| NC_037638.1 | 7024111 | SNV | 1 | G | A | Homozygous   |
| NC_037638.1 | 7024124 | SNV | 1 | A | G | Homozygous   |
| NC_037638.1 | 7024130 | SNV | 1 | A | G | Homozygous   |
| NC_037638.1 | 7029139 | SNV | 1 | G | A | Heterozygous |
| NC_037638.1 | 7029177 | SNV | 1 | T | C | Heterozygous |
| NC_037638.1 | 7029190 | SNV | 1 | T | A | Heterozygous |
| NC_037638.1 | 7029641 | SNV | 1 | T | A | Heterozygous |
| NC_037638.1 | 7029768 | SNV | 1 | T | C | Heterozygous |
| NC_037638.1 | 7029977 | SNV | 1 | T | C | Homozygous   |

|             |         |     |   |   |   |              |
|-------------|---------|-----|---|---|---|--------------|
| NC_037638.1 | 7030365 | SNV | 1 | T | C | Homozygous   |
| NC_037638.1 | 7031330 | SNV | 1 | A | T | Heterozygous |
| NC_037638.1 | 7031884 | SNV | 1 | G | A | Heterozygous |
| NC_037638.1 | 7031907 | SNV | 1 | G | C | Heterozygous |
| NC_037638.1 | 7032997 | SNV | 1 | C | G | Heterozygous |
| NC_037638.1 | 7033085 | SNV | 1 | A | G | Homozygous   |
| NC_037638.1 | 7033194 | SNV | 1 | A | G | Homozygous   |
| NC_037638.1 | 7039035 | SNV | 1 | A | C | Homozygous   |
| NC_037638.1 | 7039048 | SNV | 1 | T | C | Homozygous   |
| NC_037638.1 | 7039068 | SNV | 1 | C | T | Heterozygous |
| NC_037638.1 | 7050808 | SNV | 1 | A | G | Homozygous   |
| NC_037638.1 | 7054400 | SNV | 1 | G | A | Homozygous   |
| NC_037638.1 | 7054868 | SNV | 1 | G | A | Heterozygous |
| NC_037638.1 | 7055275 | SNV | 1 | A | T | Homozygous   |
| NC_037638.1 | 7055600 | SNV | 1 | C | A | Heterozygous |
| NC_037638.1 | 7056141 | SNV | 1 | C | T | Homozygous   |
| NC_037638.1 | 7058463 | SNV | 1 | C | T | Heterozygous |
| NC_037638.1 | 7058594 | SNV | 1 | T | C | Homozygous   |
| NC_037638.1 | 7060417 | SNV | 1 | C | T | Homozygous   |
| NC_037638.1 | 7060515 | SNV | 1 | C | T | Homozygous   |
| NC_037638.1 | 7060814 | SNV | 1 | T | C | Homozygous   |
| NC_037638.1 | 7061299 | SNV | 1 | T | A | Homozygous   |
| NC_037638.1 | 7061304 | SNV | 1 | A | T | Heterozygous |
| NC_037638.1 | 7067985 | SNV | 1 | T | C | Homozygous   |
| NC_037638.1 | 7067988 | SNV | 1 | C | T | Homozygous   |
| NC_037638.1 | 7074256 | SNV | 1 | C | T | Homozygous   |
| NC_037638.1 | 7083654 | SNV | 1 | A | G | Homozygous   |
| NC_037638.1 | 7084152 | SNV | 1 | T | C | Homozygous   |
| NC_037638.1 | 7086036 | SNV | 1 | T | A | Homozygous   |
| NC_037638.1 | 7086090 | SNV | 1 | T | C | Homozygous   |
| NC_037638.1 | 7087665 | SNV | 1 | G | A | Heterozygous |
| NC_037638.1 | 7088517 | SNV | 1 | T | C | Homozygous   |
| NC_037638.1 | 7091168 | SNV | 1 | T | C | Heterozygous |
| NC_037638.1 | 7091236 | SNV | 1 | C | T | Heterozygous |
| NC_037638.1 | 7094119 | SNV | 1 | A | G | Homozygous   |
| NC_037638.1 | 7097300 | SNV | 1 | C | T | Homozygous   |
| NC_037638.1 | 7097378 | SNV | 1 | C | T | Homozygous   |
| NC_037638.1 | 7097387 | SNV | 1 | A | T | Homozygous   |
| NC_037638.1 | 7097515 | SNV | 1 | A | G | Homozygous   |
| NC_037638.1 | 7104339 | SNV | 1 | T | A | Homozygous   |
| NC_037638.1 | 7104360 | SNV | 1 | A | G | Homozygous   |
| NC_037638.1 | 7104365 | SNV | 1 | T | A | Homozygous   |
| NC_037638.1 | 7104375 | SNV | 1 | A | T | Homozygous   |
| NC_037638.1 | 7104381 | SNV | 1 | T | A | Homozygous   |
| NC_037638.1 | 7104471 | SNV | 1 | A | T | Homozygous   |
| NC_037638.1 | 7104473 | SNV | 1 | A | C | Heterozygous |
| NC_037638.1 | 7104612 | SNV | 1 | A | G | Homozygous   |
| NC_037638.1 | 7130366 | SNV | 1 | A | G | Heterozygous |
| NC_037638.1 | 7130372 | SNV | 1 | G | A | Heterozygous |
| NC_037638.1 | 7130378 | SNV | 1 | A | G | Heterozygous |
| NC_037638.1 | 7130599 | SNV | 1 | C | T | Homozygous   |

|             |         |     |   |   |   |              |
|-------------|---------|-----|---|---|---|--------------|
| NC_037638.1 | 7139212 | SNV | 1 | A | T | Homozygous   |
| NC_037638.1 | 7139228 | SNV | 1 | A | T | Homozygous   |
| NC_037638.1 | 7139232 | SNV | 1 | A | T | Homozygous   |
| NC_037638.1 | 7139234 | SNV | 1 | T | A | Homozygous   |
| NC_037638.1 | 7139237 | SNV | 1 | C | A | Homozygous   |
| NC_037638.1 | 7147735 | SNV | 1 | A | T | Heterozygous |
| NC_037638.1 | 7147740 | SNV | 1 | T | G | Homozygous   |
| NC_037638.1 | 7147742 | SNV | 1 | A | T | Homozygous   |
| NC_037638.1 | 7147748 | SNV | 1 | A | C | Homozygous   |
| NC_037638.1 | 7148955 | SNV | 1 | G | A | Heterozygous |
| NC_037638.1 | 7149000 | SNV | 1 | A | G | Homozygous   |
| NC_037638.1 | 7149047 | SNV | 1 | G | A | Heterozygous |
| NC_037638.1 | 7149050 | SNV | 1 | C | A | Heterozygous |
| NC_037638.1 | 7149650 | SNV | 1 | C | T | Homozygous   |
| NC_037638.1 | 7150189 | SNV | 1 | T | C | Homozygous   |
| NC_037638.1 | 7150375 | SNV | 1 | A | G | Heterozygous |
| NC_037638.1 | 7150471 | SNV | 1 | G | A | Homozygous   |
| NC_037638.1 | 7153627 | SNV | 1 | T | C | Heterozygous |
| NC_037638.1 | 7153732 | SNV | 1 | C | T | Homozygous   |
| NC_037638.1 | 7153765 | SNV | 1 | C | G | Homozygous   |
| NC_037638.1 | 7154449 | SNV | 1 | T | C | Heterozygous |
| NC_037638.1 | 7154452 | SNV | 1 | C | T | Heterozygous |
| NC_037638.1 | 7154465 | SNV | 1 | A | T | Homozygous   |
| NC_037638.1 | 7154575 | SNV | 1 | G | A | Homozygous   |
| NC_037638.1 | 7154675 | SNV | 1 | C | T | Homozygous   |
| NC_037638.1 | 7154684 | SNV | 1 | T | C | Homozygous   |
| NC_037638.1 | 7154720 | SNV | 1 | C | G | Heterozygous |
| NC_037638.1 | 7154781 | SNV | 1 | A | C | Homozygous   |
| NC_037638.1 | 7154925 | SNV | 1 | T | C | Homozygous   |
| NC_037638.1 | 7155289 | SNV | 1 | T | C | Homozygous   |
| NC_037638.1 | 7155491 | SNV | 1 | T | C | Homozygous   |
| NC_037638.1 | 7155624 | SNV | 1 | A | G | Heterozygous |
| NC_037638.1 | 7155732 | SNV | 1 | T | C | Heterozygous |
| NC_037638.1 | 7155756 | SNV | 1 | A | G | Homozygous   |
| NC_037638.1 | 7156285 | SNV | 1 | A | G | Heterozygous |
| NC_037638.1 | 7157896 | SNV | 1 | T | C | Heterozygous |
| NC_037638.1 | 7159094 | SNV | 1 | A | G | Heterozygous |
| NC_037638.1 | 7159390 | SNV | 1 | A | G | Heterozygous |
| NC_037638.1 | 7161448 | SNV | 1 | G | A | Heterozygous |
| NC_037638.1 | 7161499 | SNV | 1 | G | C | Heterozygous |
| NC_037638.1 | 7161916 | SNV | 1 | A | G | Heterozygous |
| NC_037638.1 | 7161955 | SNV | 1 | T | C | Heterozygous |
| NC_037638.1 | 7161972 | SNV | 1 | C | T | Heterozygous |
| NC_037638.1 | 7161996 | SNV | 1 | C | T | Homozygous   |
| NC_037638.1 | 7162045 | SNV | 1 | A | G | Heterozygous |
| NC_037638.1 | 7162116 | SNV | 1 | G | A | Homozygous   |
| NC_037638.1 | 7162159 | SNV | 1 | T | C | Homozygous   |
| NC_037638.1 | 7162816 | SNV | 1 | G | T | Homozygous   |
| NC_037638.1 | 7162819 | SNV | 1 | G | C | Homozygous   |
| NC_037638.1 | 7162861 | SNV | 1 | C | T | Heterozygous |
| NC_037638.1 | 7163008 | SNV | 1 | C | A | Heterozygous |

|             |         |     |   |   |   |              |
|-------------|---------|-----|---|---|---|--------------|
| NC_037638.1 | 7163178 | SNV | 1 | A | T | Homozygous   |
| NC_037638.1 | 7163569 | SNV | 1 | A | G | Heterozygous |
| NC_037638.1 | 7163600 | SNV | 1 | C | T | Heterozygous |
| NC_037638.1 | 7163998 | SNV | 1 | C | T | Heterozygous |
| NC_037638.1 | 7164366 | SNV | 1 | T | C | Heterozygous |
| NC_037638.1 | 7165903 | SNV | 1 | T | C | Homozygous   |
| NC_037638.1 | 7184991 | SNV | 1 | T | C | Homozygous   |
| NC_037638.1 | 7185029 | SNV | 1 | C | T | Homozygous   |
| NC_037638.1 | 7185398 | SNV | 1 | C | T | Heterozygous |
| NC_037638.1 | 7185464 | SNV | 1 | T | C | Heterozygous |
| NC_037638.1 | 7220692 | SNV | 1 | C | T | Heterozygous |
| NC_037638.1 | 7220695 | SNV | 1 | G | A | Heterozygous |
| NC_037638.1 | 7220697 | SNV | 1 | G | A | Heterozygous |
| NC_037638.1 | 7231259 | SNV | 1 | T | A | Heterozygous |
| NC_037638.1 | 7231270 | SNV | 1 | C | T | Homozygous   |
| NC_037638.1 | 7231300 | SNV | 1 | C | T | Homozygous   |
| NC_037638.1 | 7231319 | SNV | 1 | A | G | Homozygous   |
| NC_037638.1 | 7231324 | SNV | 1 | C | T | Homozygous   |
| NC_037638.1 | 7231333 | SNV | 1 | C | T | Homozygous   |
| NC_037638.1 | 7231337 | SNV | 1 | T | C | Homozygous   |
| NC_037638.1 | 7239474 | SNV | 1 | C | T | Heterozygous |
| NC_037638.1 | 7239511 | SNV | 1 | G | A | Homozygous   |
| NC_037638.1 | 7239531 | SNV | 1 | A | G | Heterozygous |
| NC_037638.1 | 7266872 | SNV | 1 | T | A | Heterozygous |
| NC_037638.1 | 7268234 | SNV | 1 | C | G | Homozygous   |
| NC_037638.1 | 7271104 | SNV | 1 | G | A | Heterozygous |
| NC_037638.1 | 7271106 | SNV | 1 | G | A | Heterozygous |
| NC_037638.1 | 7271110 | SNV | 1 | G | A | Heterozygous |
| NC_037638.1 | 7271127 | SNV | 1 | A | G | Heterozygous |
| NC_037638.1 | 7271133 | SNV | 1 | A | G | Heterozygous |
| NC_037638.1 | 7271135 | SNV | 1 | A | G | Heterozygous |
| NC_037638.1 | 7276133 | SNV | 1 | C | T | Homozygous   |
| NC_037638.1 | 7276213 | SNV | 1 | C | G | Homozygous   |
| NC_037638.1 | 7276336 | SNV | 1 | T | C | Homozygous   |
| NC_037638.1 | 7276463 | SNV | 1 | A | T | Homozygous   |
| NC_037638.1 | 7276473 | SNV | 1 | C | T | Homozygous   |
| NC_037638.1 | 7282460 | SNV | 1 | G | C | Homozygous   |
| NC_037638.1 | 7282945 | SNV | 1 | C | T | Heterozygous |
| NC_037638.1 | 7282957 | SNV | 1 | C | T | Homozygous   |
| NC_037638.1 | 7283000 | SNV | 1 | G | A | Heterozygous |
| NC_037638.1 | 7283024 | SNV | 1 | C | T | Homozygous   |
| NC_037638.1 | 7283083 | SNV | 1 | C | A | Heterozygous |
| NC_037638.1 | 7283087 | SNV | 1 | C | T | Heterozygous |
| NC_037638.1 | 7283103 | SNV | 1 | A | G | Homozygous   |
| NC_037638.1 | 7283110 | SNV | 1 | C | T | Homozygous   |
| NC_037638.1 | 7283150 | SNV | 1 | A | G | Homozygous   |
| NC_037638.1 | 7283254 | SNV | 1 | C | T | Homozygous   |
| NC_037638.1 | 7283528 | SNV | 1 | C | T | Heterozygous |
| NC_037638.1 | 7285772 | SNV | 1 | T | C | Homozygous   |
| NC_037638.1 | 7285794 | SNV | 1 | T | C | Heterozygous |
| NC_037638.1 | 7285992 | SNV | 1 | A | T | Heterozygous |

|             |         |     |   |   |   |              |
|-------------|---------|-----|---|---|---|--------------|
| NC_037638.1 | 7286172 | SNV | 1 | T | A | Heterozygous |
| NC_037638.1 | 7286179 | SNV | 1 | C | T | Homozygous   |
| NC_037638.1 | 7303660 | SNV | 1 | A | C | Homozygous   |
| NC_037638.1 | 7303665 | SNV | 1 | G | A | Heterozygous |
| NC_037638.1 | 7303690 | SNV | 1 | G | A | Heterozygous |
| NC_037638.1 | 7303696 | SNV | 1 | A | G | Heterozygous |
| NC_037638.1 | 7303698 | SNV | 1 | A | G | Heterozygous |
| NC_037638.1 | 7303704 | SNV | 1 | A | T | Heterozygous |
| NC_037638.1 | 7319855 | SNV | 1 | T | G | Homozygous   |
| NC_037638.1 | 7319857 | SNV | 1 | G | A | Homozygous   |
| NC_037638.1 | 7319859 | SNV | 1 | G | A | Homozygous   |
| NC_037638.1 | 7320060 | SNV | 1 | T | C | Homozygous   |
| NC_037638.1 | 7320090 | SNV | 1 | A | G | Heterozygous |
| NC_037638.1 | 7321078 | SNV | 1 | T | G | Heterozygous |
| NC_037638.1 | 7321090 | SNV | 1 | T | G | Heterozygous |
| NC_037638.1 | 7321111 | SNV | 1 | T | G | Heterozygous |
| NC_037638.1 | 7330346 | SNV | 1 | G | A | Homozygous   |
| NC_037638.1 | 7330348 | SNV | 1 | G | A | Homozygous   |
| NC_037638.1 | 7334899 | SNV | 1 | A | G | Heterozygous |
| NC_037638.1 | 7334901 | SNV | 1 | A | G | Heterozygous |
| NC_037638.1 | 7334904 | SNV | 1 | G | A | Heterozygous |
| NC_037638.1 | 7334935 | SNV | 1 | A | G | Heterozygous |
| NC_037638.1 | 7334938 | SNV | 1 | A | G | Homozygous   |
| NC_037638.1 | 7334941 | SNV | 1 | A | G | Heterozygous |
| NC_037638.1 | 7339004 | SNV | 1 | A | T | Homozygous   |
| NC_037638.1 | 7339008 | SNV | 1 | A | T | Heterozygous |
| NC_037638.1 | 7375879 | SNV | 1 | C | T | Heterozygous |
| NC_037638.1 | 7384305 | SNV | 1 | G | C | Homozygous   |
| NC_037638.1 | 7384450 | SNV | 1 | C | T | Homozygous   |
| NC_037638.1 | 7388023 | SNV | 1 | T | G | Homozygous   |
| NC_037638.1 | 7388048 | SNV | 1 | G | C | Heterozygous |
| NC_037638.1 | 7388057 | SNV | 1 | T | C | Homozygous   |
| NC_037638.1 | 7388065 | SNV | 1 | T | C | Homozygous   |
| NC_037638.1 | 7388071 | SNV | 1 | C | G | Heterozygous |
| NC_037638.1 | 7388367 | SNV | 1 | C | A | Heterozygous |
| NC_037638.1 | 7388369 | SNV | 1 | C | A | Heterozygous |
| NC_037638.1 | 7388371 | SNV | 1 | C | T | Heterozygous |
| NC_037638.1 | 7388373 | SNV | 1 | A | C | Heterozygous |
| NC_037638.1 | 7388375 | SNV | 1 | A | T | Heterozygous |
| NC_037638.1 | 7388383 | SNV | 1 | T | G | Heterozygous |
| NC_037638.1 | 7388390 | SNV | 1 | C | T | Heterozygous |
| NC_037638.1 | 7388594 | SNV | 1 | A | T | Homozygous   |
| NC_037638.1 | 7388598 | SNV | 1 | T | C | Homozygous   |
| NC_037638.1 | 7414648 | SNV | 1 | G | A | Homozygous   |
| NC_037638.1 | 7426141 | SNV | 1 | T | C | Homozygous   |
| NC_037638.1 | 7426193 | SNV | 1 | T | C | Heterozygous |
| NC_037638.1 | 7426201 | SNV | 1 | T | C | Homozygous   |
| NC_037638.1 | 7426205 | SNV | 1 | T | C | Homozygous   |
| NC_037638.1 | 7426287 | SNV | 1 | T | C | Homozygous   |
| NC_037638.1 | 7426291 | SNV | 1 | C | T | Homozygous   |
| NC_037638.1 | 7437234 | SNV | 1 | G | A | Homozygous   |

|             |         |     |   |   |   |              |
|-------------|---------|-----|---|---|---|--------------|
| NC_037638.1 | 7437238 | SNV | 1 | C | G | Homozygous   |
| NC_037638.1 | 7437241 | SNV | 1 | C | A | Homozygous   |
| NC_037638.1 | 7437243 | SNV | 1 | A | T | Homozygous   |
| NC_037638.1 | 7437246 | SNV | 1 | G | A | Homozygous   |
| NC_037638.1 | 7437250 | SNV | 1 | G | A | Homozygous   |
| NC_037638.1 | 7437252 | SNV | 1 | G | T | Homozygous   |
| NC_037638.1 | 7437264 | SNV | 1 | T | A | Homozygous   |
| NC_037638.1 | 7449557 | SNV | 1 | T | C | Heterozygous |
| NC_037638.1 | 7449827 | SNV | 1 | C | T | Heterozygous |
| NC_037638.1 | 7449843 | SNV | 1 | C | T | Heterozygous |
| NC_037638.1 | 7449958 | SNV | 1 | C | T | Heterozygous |
| NC_037638.1 | 7458494 | SNV | 1 | C | T | Homozygous   |
| NC_037638.1 | 7458501 | SNV | 1 | C | T | Homozygous   |
| NC_037638.1 | 7458526 | SNV | 1 | C | T | Heterozygous |
| NC_037638.1 | 7459936 | SNV | 1 | T | C | Homozygous   |
| NC_037638.1 | 7460377 | SNV | 1 | T | C | Heterozygous |
| NC_037638.1 | 7460783 | SNV | 1 | A | C | Homozygous   |
| NC_037638.1 | 7463072 | SNV | 1 | C | G | Heterozygous |
| NC_037638.1 | 7463262 | SNV | 1 | G | A | Heterozygous |
| NC_037638.1 | 7469725 | SNV | 1 | T | C | Homozygous   |
| NC_037638.1 | 7471399 | SNV | 1 | C | T | Homozygous   |
| NC_037638.1 | 7495232 | SNV | 1 | C | G | Heterozygous |
| NC_037638.1 | 7495487 | SNV | 1 | G | A | Heterozygous |
| NC_037638.1 | 7495616 | SNV | 1 | T | C | Homozygous   |
| NC_037638.1 | 7496041 | SNV | 1 | C | A | Heterozygous |
| NC_037638.1 | 7496047 | SNV | 1 | C | T | Heterozygous |
| NC_037638.1 | 7496092 | SNV | 1 | C | T | Heterozygous |
| NC_037638.1 | 7496154 | SNV | 1 | G | A | Heterozygous |
| NC_037638.1 | 7522568 | SNV | 1 | T | C | Homozygous   |
| NC_037638.1 | 7522686 | SNV | 1 | C | T | Homozygous   |
| NC_037638.1 | 7522712 | SNV | 1 | C | T | Heterozygous |
| NC_037638.1 | 7524229 | SNV | 1 | G | A | Homozygous   |
| NC_037638.1 | 7524419 | SNV | 1 | G | A | Heterozygous |
| NC_037638.1 | 7524426 | SNV | 1 | A | G | Heterozygous |
| NC_037638.1 | 7524430 | SNV | 1 | G | A | Heterozygous |
| NC_037638.1 | 7524697 | SNV | 1 | T | C | Homozygous   |
| NC_037638.1 | 7524969 | SNV | 1 | C | T | Heterozygous |
| NC_037638.1 | 7525062 | SNV | 1 | T | C | Homozygous   |
| NC_037638.1 | 7525065 | SNV | 1 | A | G | Heterozygous |
| NC_037638.1 | 7525109 | SNV | 1 | A | T | Homozygous   |
| NC_037638.1 | 7525189 | SNV | 1 | T | C | Heterozygous |
| NC_037638.1 | 7525193 | SNV | 1 | C | A | Heterozygous |
| NC_037638.1 | 7525269 | SNV | 1 | A | G | Homozygous   |
| NC_037638.1 | 7525288 | SNV | 1 | T | C | Homozygous   |
| NC_037638.1 | 7536476 | SNV | 1 | G | A | Heterozygous |
| NC_037638.1 | 7536480 | SNV | 1 | G | C | Homozygous   |
| NC_037638.1 | 7553566 | SNV | 1 | T | C | Heterozygous |
| NC_037638.1 | 7553648 | SNV | 1 | A | G | Homozygous   |
| NC_037638.1 | 7553724 | SNV | 1 | A | G | Homozygous   |
| NC_037638.1 | 7553751 | SNV | 1 | T | C | Homozygous   |
| NC_037638.1 | 7553753 | SNV | 1 | T | C | Homozygous   |

|             |         |     |   |   |   |              |
|-------------|---------|-----|---|---|---|--------------|
| NC_037638.1 | 7553755 | SNV | 1 | T | C | Homozygous   |
| NC_037638.1 | 7553848 | SNV | 1 | T | C | Heterozygous |
| NC_037638.1 | 7553851 | SNV | 1 | C | T | Homozygous   |
| NC_037638.1 | 7554055 | SNV | 1 | C | G | Homozygous   |
| NC_037638.1 | 7604888 | SNV | 1 | T | C | Heterozygous |
| NC_037638.1 | 7616304 | SNV | 1 | C | T | Heterozygous |
| NC_037638.1 | 7617555 | SNV | 1 | T | C | Homozygous   |
| NC_037638.1 | 7620564 | SNV | 1 | T | C | Homozygous   |
| NC_037638.1 | 7622586 | SNV | 1 | T | C | Homozygous   |
| NC_037638.1 | 7633082 | SNV | 1 | C | T | Homozygous   |
| NC_037638.1 | 7640133 | SNV | 1 | G | A | Heterozygous |
| NC_037638.1 | 7645320 | SNV | 1 | C | T | Heterozygous |
| NC_037638.1 | 7645335 | SNV | 1 | C | G | Heterozygous |
| NC_037638.1 | 7645370 | SNV | 1 | G | A | Heterozygous |
| NC_037638.1 | 7645389 | SNV | 1 | C | T | Heterozygous |
| NC_037638.1 | 7645401 | SNV | 1 | T | C | Heterozygous |
| NC_037638.1 | 7645412 | SNV | 1 | C | T | Heterozygous |
| NC_037638.1 | 7663235 | SNV | 1 | G | T | Heterozygous |
| NC_037638.1 | 7663259 | SNV | 1 | C | T | Heterozygous |
| NC_037638.1 | 7663274 | SNV | 1 | C | T | Homozygous   |
| NC_037638.1 | 7663338 | SNV | 1 | C | T | Heterozygous |
| NC_037638.1 | 7668897 | SNV | 1 | T | C | Heterozygous |
| NC_037638.1 | 7668918 | SNV | 1 | C | T | Homozygous   |
| NC_037638.1 | 7682967 | SNV | 1 | T | C | Homozygous   |
| NC_037638.1 | 7683048 | SNV | 1 | C | G | Homozygous   |
| NC_037638.1 | 7683050 | SNV | 1 | C | T | Homozygous   |
| NC_037638.1 | 7683082 | SNV | 1 | T | G | Homozygous   |
| NC_037638.1 | 7688427 | SNV | 1 | A | G | Homozygous   |
| NC_037638.1 | 7690844 | SNV | 1 | C | T | Heterozygous |
| NC_037638.1 | 7690872 | SNV | 1 | T | C | Homozygous   |
| NC_037638.1 | 7704100 | SNV | 1 | T | C | Homozygous   |
| NC_037638.1 | 7704659 | SNV | 1 | A | G | Heterozygous |
| NC_037638.1 | 7704702 | SNV | 1 | A | G | Homozygous   |
| NC_037638.1 | 7705600 | SNV | 1 | T | C | Homozygous   |
| NC_037638.1 | 7705605 | SNV | 1 | T | G | Homozygous   |
| NC_037638.1 | 7705671 | SNV | 1 | C | T | Homozygous   |
| NC_037638.1 | 7706972 | SNV | 1 | A | G | Heterozygous |
| NC_037638.1 | 7706976 | SNV | 1 | G | A | Heterozygous |
| NC_037638.1 | 7711092 | SNV | 1 | T | G | Homozygous   |
| NC_037638.1 | 7780864 | SNV | 1 | G | T | Heterozygous |
| NC_037638.1 | 7781018 | SNV | 1 | A | G | Homozygous   |
| NC_037638.1 | 7781066 | SNV | 1 | G | A | Heterozygous |
| NC_037638.1 | 7781114 | SNV | 1 | C | T | Heterozygous |
| NC_037638.1 | 7781250 | SNV | 1 | A | G | Homozygous   |
| NC_037638.1 | 7781868 | SNV | 1 | T | C | Homozygous   |
| NC_037638.1 | 7904866 | SNV | 1 | T | C | Homozygous   |
| NC_037638.1 | 7904894 | SNV | 1 | A | G | Homozygous   |
| NC_037638.1 | 7905039 | SNV | 1 | A | G | Heterozygous |
| NC_037638.1 | 7905058 | SNV | 1 | C | T | Heterozygous |
| NC_037638.1 | 7905151 | SNV | 1 | T | C | Heterozygous |
| NC_037638.1 | 7906633 | SNV | 1 | C | T | Homozygous   |



|             |         |     |   |   |   |              |
|-------------|---------|-----|---|---|---|--------------|
| NC_037638.1 | 7906647 | SNV | 1 | T | A | Homozygous   |
| NC_037638.1 | 7910825 | SNV | 1 | T | G | Homozygous   |
| NC_037638.1 | 7910852 | SNV | 1 | A | G | Homozygous   |
| NC_037638.1 | 7910865 | SNV | 1 | G | T | Homozygous   |
| NC_037638.1 | 7910872 | SNV | 1 | T | A | Homozygous   |
| NC_037638.1 | 7911448 | SNV | 1 | G | C | Heterozygous |
| NC_037638.1 | 7911454 | SNV | 1 | A | C | Heterozygous |
| NC_037638.1 | 7912319 | SNV | 1 | T | C | Heterozygous |
| NC_037638.1 | 7912327 | SNV | 1 | T | C | Heterozygous |
| NC_037638.1 | 7917179 | SNV | 1 | T | C | Homozygous   |
| NC_037638.1 | 7921907 | SNV | 1 | A | T | Homozygous   |
| NC_037638.1 | 7921910 | SNV | 1 | G | A | Homozygous   |
| NC_037638.1 | 7921915 | SNV | 1 | C | A | Homozygous   |
| NC_037638.1 | 7927967 | SNV | 1 | A | T | Heterozygous |
| NC_037638.1 | 7933333 | SNV | 1 | A | C | Homozygous   |
| NC_037638.1 | 7933359 | SNV | 1 | A | G | Homozygous   |
| NC_037638.1 | 7936016 | SNV | 1 | A | T | Heterozygous |
| NC_037638.1 | 7936076 | SNV | 1 | T | C | Homozygous   |
| NC_037638.1 | 7936291 | SNV | 1 | A | G | Homozygous   |
| NC_037638.1 | 7936493 | SNV | 1 | G | A | Heterozygous |
| NC_037638.1 | 7936802 | SNV | 1 | T | C | Homozygous   |
| NC_037638.1 | 7967121 | SNV | 1 | C | T | Homozygous   |
| NC_037638.1 | 7967128 | SNV | 1 | T | G | Homozygous   |
| NC_037638.1 | 7967136 | SNV | 1 | A | C | Homozygous   |
| NC_037638.1 | 7967314 | SNV | 1 | T | G | Homozygous   |
| NC_037638.1 | 7967320 | SNV | 1 | T | C | Homozygous   |
| NC_037638.1 | 7967325 | SNV | 1 | A | T | Homozygous   |
| NC_037638.1 | 7967850 | SNV | 1 | G | A | Homozygous   |
| NC_037638.1 | 7968378 | SNV | 1 | C | T | Heterozygous |
| NC_037638.1 | 7969713 | SNV | 1 | A | G | Homozygous   |
| NC_037638.1 | 7969715 | SNV | 1 | G | T | Heterozygous |
| NC_037638.1 | 7975131 | SNV | 1 | T | A | Homozygous   |
| NC_037638.1 | 7992583 | SNV | 1 | T | A | Homozygous   |
| NC_037638.1 | 7992589 | SNV | 1 | A | T | Homozygous   |
| NC_037638.1 | 7992601 | SNV | 1 | G | T | Homozygous   |
| NC_037638.1 | 7992605 | SNV | 1 | T | C | Homozygous   |
| NC_037638.1 | 8001925 | SNV | 1 | G | A | Homozygous   |
| NC_037638.1 | 8001927 | SNV | 1 | G | A | Homozygous   |
| NC_037638.1 | 8001929 | SNV | 1 | G | A | Homozygous   |
| NC_037638.1 | 8001933 | SNV | 1 | G | A | Homozygous   |
| NC_037638.1 | 8001939 | SNV | 1 | T | G | Homozygous   |
| NC_037638.1 | 8002728 | SNV | 1 | T | C | Homozygous   |
| NC_037638.1 | 8002738 | SNV | 1 | A | G | Heterozygous |
| NC_037638.1 | 8002772 | SNV | 1 | T | C | Heterozygous |
| NC_037638.1 | 8003282 | SNV | 1 | T | C | Heterozygous |
| NC_037638.1 | 8003293 | SNV | 1 | G | A | Homozygous   |
| NC_037638.1 | 8008641 | SNV | 1 | G | A | Heterozygous |
| NC_037638.1 | 8008646 | SNV | 1 | C | A | Heterozygous |
| NC_037638.1 | 8008653 | SNV | 1 | C | G | Homozygous   |
| NC_037638.1 | 8010969 | SNV | 1 | C | T | Heterozygous |
| NC_037638.1 | 8011083 | SNV | 1 | A | G | Heterozygous |

|             |         |     |   |   |   |              |
|-------------|---------|-----|---|---|---|--------------|
| NC_037638.1 | 8011100 | SNV | 1 | A | G | Homozygous   |
| NC_037638.1 | 8011114 | SNV | 1 | G | T | Homozygous   |
| NC_037638.1 | 8011154 | SNV | 1 | T | C | Homozygous   |
| NC_037638.1 | 8011278 | SNV | 1 | C | T | Homozygous   |
| NC_037638.1 | 8011468 | SNV | 1 | G | C | Heterozygous |
| NC_037638.1 | 8011812 | SNV | 1 | G | A | Heterozygous |
| NC_037638.1 | 8011814 | SNV | 1 | C | T | Heterozygous |
| NC_037638.1 | 8013024 | SNV | 1 | G | A | Heterozygous |
| NC_037638.1 | 8020072 | SNV | 1 | A | G | Homozygous   |
| NC_037638.1 | 8020084 | SNV | 1 | T | C | Homozygous   |
| NC_037638.1 | 8020136 | SNV | 1 | G | A | Homozygous   |
| NC_037638.1 | 8051917 | SNV | 1 | A | G | Heterozygous |
| NC_037638.1 | 8067833 | SNV | 1 | A | G | Heterozygous |
| NC_037638.1 | 8067886 | SNV | 1 | A | G | Homozygous   |
| NC_037638.1 | 8067888 | SNV | 1 | A | T | Homozygous   |
| NC_037638.1 | 8079677 | SNV | 1 | T | C | Homozygous   |
| NC_037638.1 | 8079689 | SNV | 1 | C | T | Homozygous   |
| NC_037638.1 | 8079691 | SNV | 1 | T | C | Homozygous   |
| NC_037638.1 | 8085131 | SNV | 1 | G | A | Homozygous   |
| NC_037638.1 | 8085133 | SNV | 1 | A | T | Homozygous   |
| NC_037638.1 | 8085140 | SNV | 1 | T | C | Heterozygous |
| NC_037638.1 | 8085147 | SNV | 1 | C | T | Homozygous   |
| NC_037638.1 | 8085150 | SNV | 1 | C | T | Heterozygous |
| NC_037638.1 | 8085241 | SNV | 1 | G | T | Homozygous   |
| NC_037638.1 | 8085248 | SNV | 1 | C | T | Heterozygous |
| NC_037638.1 | 8085263 | SNV | 1 | C | T | Heterozygous |
| NC_037638.1 | 8111859 | SNV | 1 | G | C | Homozygous   |
| NC_037638.1 | 8111864 | SNV | 1 | G | T | Homozygous   |
| NC_037638.1 | 8111866 | SNV | 1 | A | G | Homozygous   |
| NC_037638.1 | 8111869 | SNV | 1 | G | T | Homozygous   |
| NC_037638.1 | 8115490 | SNV | 1 | C | T | Heterozygous |
| NC_037638.1 | 8115593 | SNV | 1 | A | G | Homozygous   |
| NC_037638.1 | 8115638 | SNV | 1 | A | G | Homozygous   |
| NC_037638.1 | 8117363 | SNV | 1 | C | G | Homozygous   |
| NC_037638.1 | 8117367 | SNV | 1 | C | G | Homozygous   |
| NC_037638.1 | 8133560 | SNV | 1 | G | A | Homozygous   |
| NC_037638.1 | 8133804 | SNV | 1 | A | G | Homozygous   |
| NC_037638.1 | 8140324 | SNV | 1 | T | C | Homozygous   |
| NC_037638.1 | 8140337 | SNV | 1 | C | T | Homozygous   |
| NC_037638.1 | 8144382 | SNV | 1 | A | G | Homozygous   |
| NC_037638.1 | 8144405 | SNV | 1 | G | A | Homozygous   |
| NC_037638.1 | 8144440 | SNV | 1 | T | C | Homozygous   |
| NC_037638.1 | 8147594 | SNV | 1 | G | A | Heterozygous |
| NC_037638.1 | 8147689 | SNV | 1 | A | G | Homozygous   |
| NC_037638.1 | 8147694 | SNV | 1 | T | A | Homozygous   |
| NC_037638.1 | 8167592 | SNV | 1 | T | A | Homozygous   |
| NC_037638.1 | 8168177 | SNV | 1 | C | T | Homozygous   |
| NC_037638.1 | 8168505 | SNV | 1 | G | A | Heterozygous |
| NC_037638.1 | 8169166 | SNV | 1 | T | G | Homozygous   |
| NC_037638.1 | 8169399 | SNV | 1 | A | G | Homozygous   |
| NC_037638.1 | 8169576 | SNV | 1 | T | A | Homozygous   |

|             |         |     |   |   |   |              |
|-------------|---------|-----|---|---|---|--------------|
| NC_037638.1 | 8169579 | SNV | 1 | G | A | Homozygous   |
| NC_037638.1 | 8169694 | SNV | 1 | T | C | Heterozygous |
| NC_037638.1 | 8170040 | SNV | 1 | C | A | Heterozygous |
| NC_037638.1 | 8170245 | SNV | 1 | G | A | Heterozygous |
| NC_037638.1 | 8177903 | SNV | 1 | A | G | Homozygous   |
| NC_037638.1 | 8178365 | SNV | 1 | T | A | Heterozygous |
| NC_037638.1 | 8180338 | SNV | 1 | G | T | Homozygous   |
| NC_037638.1 | 8180492 | SNV | 1 | G | T | Heterozygous |
| NC_037638.1 | 8180524 | SNV | 1 | A | G | Homozygous   |
| NC_037638.1 | 8180555 | SNV | 1 | C | A | Homozygous   |
| NC_037638.1 | 8180597 | SNV | 1 | C | T | Homozygous   |
| NC_037638.1 | 8180705 | SNV | 1 | C | T | Homozygous   |
| NC_037638.1 | 8180777 | SNV | 1 | C | T | Homozygous   |
| NC_037638.1 | 8180858 | SNV | 1 | C | T | Heterozygous |
| NC_037638.1 | 8180918 | SNV | 1 | C | T | Homozygous   |
| NC_037638.1 | 8181143 | SNV | 1 | A | G | Homozygous   |
| NC_037638.1 | 8181545 | SNV | 1 | G | A | Homozygous   |
| NC_037638.1 | 8181555 | SNV | 1 | T | C | Homozygous   |
| NC_037638.1 | 8181584 | SNV | 1 | T | C | Homozygous   |
| NC_037638.1 | 8181682 | SNV | 1 | C | T | Heterozygous |
| NC_037638.1 | 8181700 | SNV | 1 | T | C | Homozygous   |
| NC_037638.1 | 8181712 | SNV | 1 | G | A | Heterozygous |
| NC_037638.1 | 8181784 | SNV | 1 | C | A | Heterozygous |
| NC_037638.1 | 8181812 | SNV | 1 | G | A | Homozygous   |
| NC_037638.1 | 8181853 | SNV | 1 | G | T | Homozygous   |
| NC_037638.1 | 8181871 | SNV | 1 | A | G | Homozygous   |
| NC_037638.1 | 8181967 | SNV | 1 | C | T | Heterozygous |
| NC_037638.1 | 8181970 | SNV | 1 | C | T | Heterozygous |
| NC_037638.1 | 8182003 | SNV | 1 | G | A | Heterozygous |
| NC_037638.1 | 8182075 | SNV | 1 | T | C | Homozygous   |
| NC_037638.1 | 8182118 | SNV | 1 | T | C | Homozygous   |
| NC_037638.1 | 8182171 | SNV | 1 | C | T | Heterozygous |
| NC_037638.1 | 8182381 | SNV | 1 | A | T | Homozygous   |
| NC_037638.1 | 8182383 | SNV | 1 | C | T | Homozygous   |
| NC_037638.1 | 8183234 | SNV | 1 | C | T | Heterozygous |
| NC_037638.1 | 8183351 | SNV | 1 | C | T | Homozygous   |
| NC_037638.1 | 8183545 | SNV | 1 | T | C | Heterozygous |
| NC_037638.1 | 8183791 | SNV | 1 | T | C | Homozygous   |
| NC_037638.1 | 8183906 | SNV | 1 | C | T | Heterozygous |
| NC_037638.1 | 8184601 | SNV | 1 | G | A | Homozygous   |
| NC_037638.1 | 8184604 | SNV | 1 | C | T | Homozygous   |
| NC_037638.1 | 8184723 | SNV | 1 | G | A | Homozygous   |
| NC_037638.1 | 8184796 | SNV | 1 | A | G | Homozygous   |
| NC_037638.1 | 8185096 | SNV | 1 | G | A | Homozygous   |
| NC_037638.1 | 8185846 | SNV | 1 | T | G | Heterozygous |
| NC_037638.1 | 8185889 | SNV | 1 | G | T | Heterozygous |
| NC_037638.1 | 8186169 | SNV | 1 | A | C | Homozygous   |
| NC_037638.1 | 8186221 | SNV | 1 | C | T | Homozygous   |
| NC_037638.1 | 8186226 | SNV | 1 | G | A | Homozygous   |
| NC_037638.1 | 8186815 | SNV | 1 | C | T | Homozygous   |
| NC_037638.1 | 8186845 | SNV | 1 | G | C | Homozygous   |

|             |         |     |   |   |   |              |
|-------------|---------|-----|---|---|---|--------------|
| NC_037638.1 | 8186989 | SNV | 1 | G | A | Homozygous   |
| NC_037638.1 | 8186995 | SNV | 1 | G | C | Heterozygous |
| NC_037638.1 | 8187016 | SNV | 1 | T | A | Heterozygous |
| NC_037638.1 | 8187020 | SNV | 1 | G | A | Heterozygous |
| NC_037638.1 | 8187056 | SNV | 1 | C | G | Heterozygous |
| NC_037638.1 | 8187069 | SNV | 1 | A | G | Homozygous   |
| NC_037638.1 | 8187257 | SNV | 1 | A | G | Homozygous   |
| NC_037638.1 | 8187267 | SNV | 1 | T | C | Homozygous   |
| NC_037638.1 | 8187273 | SNV | 1 | A | T | Homozygous   |
| NC_037638.1 | 8187280 | SNV | 1 | C | A | Heterozygous |
| NC_037638.1 | 8187283 | SNV | 1 | T | A | Homozygous   |
| NC_037638.1 | 8187386 | SNV | 1 | G | A | Homozygous   |
| NC_037638.1 | 8187736 | SNV | 1 | A | T | Heterozygous |
| NC_037638.1 | 8187838 | SNV | 1 | A | G | Homozygous   |
| NC_037638.1 | 8187857 | SNV | 1 | A | G | Heterozygous |
| NC_037638.1 | 8187955 | SNV | 1 | T | C | Homozygous   |
| NC_037638.1 | 8192316 | SNV | 1 | G | A | Homozygous   |
| NC_037638.1 | 8193319 | SNV | 1 | G | A | Homozygous   |
| NC_037638.1 | 8193330 | SNV | 1 | C | G | Homozygous   |
| NC_037638.1 | 8193346 | SNV | 1 | C | T | Homozygous   |
| NC_037638.1 | 8193350 | SNV | 1 | T | C | Homozygous   |
| NC_037638.1 | 8193355 | SNV | 1 | G | A | Homozygous   |
| NC_037638.1 | 8193953 | SNV | 1 | A | G | Homozygous   |
| NC_037638.1 | 8194065 | SNV | 1 | C | T | Heterozygous |
| NC_037638.1 | 8194197 | SNV | 1 | A | G | Homozygous   |
| NC_037638.1 | 8194394 | SNV | 1 | T | C | Homozygous   |
| NC_037638.1 | 8195332 | SNV | 1 | C | T | Heterozygous |
| NC_037638.1 | 8214911 | SNV | 1 | A | G | Homozygous   |
| NC_037638.1 | 8214927 | SNV | 1 | A | G | Heterozygous |
| NC_037638.1 | 8248337 | SNV | 1 | G | A | Heterozygous |
| NC_037638.1 | 8248356 | SNV | 1 | C | G | Heterozygous |
| NC_037638.1 | 8248489 | SNV | 1 | C | A | Heterozygous |
| NC_037638.1 | 8248492 | SNV | 1 | T | C | Heterozygous |
| NC_037638.1 | 8248856 | SNV | 1 | C | T | Homozygous   |
| NC_037638.1 | 8274321 | SNV | 1 | T | C | Homozygous   |
| NC_037638.1 | 8278307 | SNV | 1 | A | T | Heterozygous |
| NC_037638.1 | 8278312 | SNV | 1 | A | T | Heterozygous |
| NC_037638.1 | 8278317 | SNV | 1 | A | T | Heterozygous |
| NC_037638.1 | 8278322 | SNV | 1 | A | T | Heterozygous |
| NC_037638.1 | 8282619 | SNV | 1 | A | G | Heterozygous |
| NC_037638.1 | 8284224 | SNV | 1 | A | C | Homozygous   |
| NC_037638.1 | 8284227 | SNV | 1 | T | A | Heterozygous |
| NC_037638.1 | 8285019 | SNV | 1 | G | A | Homozygous   |
| NC_037638.1 | 8285138 | SNV | 1 | A | G | Homozygous   |
| NC_037638.1 | 8285177 | SNV | 1 | T | G | Homozygous   |
| NC_037638.1 | 8287062 | SNV | 1 | A | G | Heterozygous |
| NC_037638.1 | 8287078 | SNV | 1 | G | A | Homozygous   |
| NC_037638.1 | 8287119 | SNV | 1 | G | A | Homozygous   |
| NC_037638.1 | 8287136 | SNV | 1 | G | A | Homozygous   |
| NC_037638.1 | 8287148 | SNV | 1 | C | T | Homozygous   |
| NC_037638.1 | 8287196 | SNV | 1 | G | A | Heterozygous |

|             |         |     |   |   |   |              |
|-------------|---------|-----|---|---|---|--------------|
| NC_037638.1 | 8287565 | SNV | 1 | T | C | Homozygous   |
| NC_037638.1 | 8290298 | SNV | 1 | C | T | Homozygous   |
| NC_037638.1 | 8290346 | SNV | 1 | C | A | Homozygous   |
| NC_037638.1 | 8290351 | SNV | 1 | C | T | Heterozygous |
| NC_037638.1 | 8290356 | SNV | 1 | C | T | Homozygous   |
| NC_037638.1 | 8298698 | SNV | 1 | A | G | Heterozygous |
| NC_037638.1 | 8298702 | SNV | 1 | G | A | Heterozygous |
| NC_037638.1 | 8299012 | SNV | 1 | T | G | Homozygous   |
| NC_037638.1 | 8299014 | SNV | 1 | C | G | Homozygous   |
| NC_037638.1 | 8299018 | SNV | 1 | T | C | Homozygous   |
| NC_037638.1 | 8299023 | SNV | 1 | T | C | Homozygous   |
| NC_037638.1 | 8299025 | SNV | 1 | G | T | Homozygous   |
| NC_037638.1 | 8299032 | SNV | 1 | G | A | Homozygous   |
| NC_037638.1 | 8299054 | SNV | 1 | A | G | Homozygous   |
| NC_037638.1 | 8299785 | SNV | 1 | A | G | Heterozygous |
| NC_037638.1 | 8299839 | SNV | 1 | C | T | Homozygous   |
| NC_037638.1 | 8309884 | SNV | 1 | T | G | Homozygous   |
| NC_037638.1 | 8309886 | SNV | 1 | G | A | Heterozygous |
| NC_037638.1 | 8310054 | SNV | 1 | C | A | Homozygous   |
| NC_037638.1 | 8310072 | SNV | 1 | T | C | Homozygous   |
| NC_037638.1 | 8310182 | SNV | 1 | G | A | Heterozygous |
| NC_037638.1 | 8310184 | SNV | 1 | A | G | Heterozygous |
| NC_037638.1 | 8310190 | SNV | 1 | G | A | Homozygous   |
| NC_037638.1 | 8310205 | SNV | 1 | A | G | Homozygous   |
| NC_037638.1 | 8317525 | SNV | 1 | T | C | Homozygous   |
| NC_037638.1 | 8318524 | SNV | 1 | G | A | Heterozygous |
| NC_037638.1 | 8318526 | SNV | 1 | A | C | Heterozygous |
| NC_037638.1 | 8318528 | SNV | 1 | A | G | Homozygous   |
| NC_037638.1 | 8336402 | SNV | 1 | T | C | Homozygous   |
| NC_037638.1 | 8336648 | SNV | 1 | T | C | Homozygous   |
| NC_037638.1 | 8336889 | SNV | 1 | A | G | Homozygous   |
| NC_037638.1 | 8337215 | SNV | 1 | C | T | Heterozygous |
| NC_037638.1 | 8337470 | SNV | 1 | T | A | Homozygous   |
| NC_037638.1 | 8341780 | SNV | 1 | C | T | Heterozygous |
| NC_037638.1 | 8341809 | SNV | 1 | G | A | Heterozygous |
| NC_037638.1 | 8341899 | SNV | 1 | A | G | Heterozygous |
| NC_037638.1 | 8341902 | SNV | 1 | T | G | Heterozygous |
| NC_037638.1 | 8342100 | SNV | 1 | C | T | Heterozygous |
| NC_037638.1 | 8342243 | SNV | 1 | G | A | Heterozygous |
| NC_037638.1 | 8342252 | SNV | 1 | C | G | Homozygous   |
| NC_037638.1 | 8342409 | SNV | 1 | A | G | Homozygous   |
| NC_037638.1 | 8342418 | SNV | 1 | G | A | Heterozygous |
| NC_037638.1 | 8342670 | SNV | 1 | A | G | Homozygous   |
| NC_037638.1 | 8342736 | SNV | 1 | A | T | Heterozygous |
| NC_037638.1 | 8342892 | SNV | 1 | T | G | Heterozygous |
| NC_037638.1 | 8342979 | SNV | 1 | A | G | Homozygous   |
| NC_037638.1 | 8343378 | SNV | 1 | A | G | Homozygous   |
| NC_037638.1 | 8343510 | SNV | 1 | G | A | Heterozygous |
| NC_037638.1 | 8344211 | SNV | 1 | C | A | Heterozygous |
| NC_037638.1 | 8345579 | SNV | 1 | A | G | Homozygous   |
| NC_037638.1 | 8345597 | SNV | 1 | T | G | Homozygous   |

|             |         |     |   |   |   |              |
|-------------|---------|-----|---|---|---|--------------|
| NC_037638.1 | 8345602 | SNV | 1 | A | T | Homozygous   |
| NC_037638.1 | 8356222 | SNV | 1 | A | T | Homozygous   |
| NC_037638.1 | 8377495 | SNV | 1 | T | C | Heterozygous |
| NC_037638.1 | 8377534 | SNV | 1 | A | G | Homozygous   |
| NC_037638.1 | 8379202 | SNV | 1 | A | G | Homozygous   |
| NC_037638.1 | 8379229 | SNV | 1 | C | A | Heterozygous |
| NC_037638.1 | 8379284 | SNV | 1 | T | G | Heterozygous |
| NC_037638.1 | 8380700 | SNV | 1 | T | A | Heterozygous |
| NC_037638.1 | 8380710 | SNV | 1 | G | A | Homozygous   |
| NC_037638.1 | 8380724 | SNV | 1 | G | A | Homozygous   |
| NC_037638.1 | 8387795 | SNV | 1 | A | G | Heterozygous |
| NC_037638.1 | 8395659 | SNV | 1 | C | T | Heterozygous |
| NC_037638.1 | 8399411 | SNV | 1 | A | G | Homozygous   |
| NC_037638.1 | 8399414 | SNV | 1 | G | A | Heterozygous |
| NC_037638.1 | 8400760 | SNV | 1 | T | G | Heterozygous |
| NC_037638.1 | 8400772 | SNV | 1 | T | C | Heterozygous |
| NC_037638.1 | 8400776 | SNV | 1 | T | G | Heterozygous |
| NC_037638.1 | 8400782 | SNV | 1 | T | A | Heterozygous |
| NC_037638.1 | 8403720 | SNV | 1 | C | T | Heterozygous |
| NC_037638.1 | 8403749 | SNV | 1 | T | C | Homozygous   |
| NC_037638.1 | 8403845 | SNV | 1 | G | C | Homozygous   |
| NC_037638.1 | 8444864 | SNV | 1 | T | A | Homozygous   |
| NC_037638.1 | 8444867 | SNV | 1 | A | T | Homozygous   |
| NC_037638.1 | 8444892 | SNV | 1 | G | T | Homozygous   |
| NC_037638.1 | 8444898 | SNV | 1 | C | T | Homozygous   |
| NC_037638.1 | 8451906 | SNV | 1 | T | C | Heterozygous |
| NC_037638.1 | 8451969 | SNV | 1 | G | A | Homozygous   |
| NC_037638.1 | 8451977 | SNV | 1 | G | A | Homozygous   |
| NC_037638.1 | 8451989 | SNV | 1 | G | A | Homozygous   |
| NC_037638.1 | 8452020 | SNV | 1 | A | G | Heterozygous |
| NC_037638.1 | 8452027 | SNV | 1 | C | G | Homozygous   |
| NC_037638.1 | 8452048 | SNV | 1 | G | A | Homozygous   |
| NC_037638.1 | 8492073 | SNV | 1 | C | T | Homozygous   |
| NC_037638.1 | 8492077 | SNV | 1 | T | C | Homozygous   |
| NC_037638.1 | 8493930 | SNV | 1 | A | G | Homozygous   |
| NC_037638.1 | 8493940 | SNV | 1 | T | G | Homozygous   |
| NC_037638.1 | 8494001 | SNV | 1 | C | G | Heterozygous |
| NC_037638.1 | 8494054 | SNV | 1 | G | A | Heterozygous |
| NC_037638.1 | 8494121 | SNV | 1 | G | A | Homozygous   |
| NC_037638.1 | 8494125 | SNV | 1 | A | G | Heterozygous |
| NC_037638.1 | 8494276 | SNV | 1 | C | T | Homozygous   |
| NC_037638.1 | 8494357 | SNV | 1 | G | A | Homozygous   |
| NC_037638.1 | 8496841 | SNV | 1 | G | A | Heterozygous |
| NC_037638.1 | 8509164 | SNV | 1 | A | G | Homozygous   |
| NC_037638.1 | 8509172 | SNV | 1 | C | T | Homozygous   |
| NC_037638.1 | 8509175 | SNV | 1 | A | G | Homozygous   |
| NC_037638.1 | 8509185 | SNV | 1 | C | T | Heterozygous |
| NC_037638.1 | 8509366 | SNV | 1 | G | A | Heterozygous |
| NC_037638.1 | 8509577 | SNV | 1 | T | C | Homozygous   |
| NC_037638.1 | 8509589 | SNV | 1 | G | A | Homozygous   |
| NC_037638.1 | 8514373 | SNV | 1 | C | G | Heterozygous |

|             |         |     |   |   |   |              |
|-------------|---------|-----|---|---|---|--------------|
| NC_037638.1 | 8514379 | SNV | 1 | A | G | Homozygous   |
| NC_037638.1 | 8514381 | SNV | 1 | A | G | Homozygous   |
| NC_037638.1 | 8522329 | SNV | 1 | C | T | Heterozygous |
| NC_037638.1 | 8529402 | SNV | 1 | G | A | Homozygous   |
| NC_037638.1 | 8529727 | SNV | 1 | C | G | Homozygous   |
| NC_037638.1 | 8529824 | SNV | 1 | A | G | Heterozygous |
| NC_037638.1 | 8529956 | SNV | 1 | A | G | Heterozygous |
| NC_037638.1 | 8529985 | SNV | 1 | A | G | Heterozygous |
| NC_037638.1 | 8530446 | SNV | 1 | T | A | Homozygous   |
| NC_037638.1 | 8530949 | SNV | 1 | G | A | Homozygous   |
| NC_037638.1 | 8531689 | SNV | 1 | A | T | Heterozygous |
| NC_037638.1 | 8531948 | SNV | 1 | C | T | Heterozygous |
| NC_037638.1 | 8532380 | SNV | 1 | A | T | Heterozygous |
| NC_037638.1 | 8532743 | SNV | 1 | A | C | Homozygous   |
| NC_037638.1 | 8534274 | SNV | 1 | G | A | Homozygous   |
| NC_037638.1 | 8534409 | SNV | 1 | C | T | Homozygous   |
| NC_037638.1 | 8534460 | SNV | 1 | A | G | Homozygous   |
| NC_037638.1 | 8535269 | SNV | 1 | C | T | Heterozygous |
| NC_037638.1 | 8536002 | SNV | 1 | A | G | Homozygous   |
| NC_037638.1 | 8536194 | SNV | 1 | A | G | Homozygous   |
| NC_037638.1 | 8536199 | SNV | 1 | G | A | Homozygous   |
| NC_037638.1 | 8536263 | SNV | 1 | C | T | Homozygous   |
| NC_037638.1 | 8536267 | SNV | 1 | C | A | Homozygous   |
| NC_037638.1 | 8536658 | SNV | 1 | A | G | Heterozygous |
| NC_037638.1 | 8536847 | SNV | 1 | A | G | Homozygous   |
| NC_037638.1 | 8536937 | SNV | 1 | G | A | Heterozygous |
| NC_037638.1 | 8537098 | SNV | 1 | G | A | Homozygous   |
| NC_037638.1 | 8537101 | SNV | 1 | A | C | Homozygous   |
| NC_037638.1 | 8537110 | SNV | 1 | A | G | Homozygous   |
| NC_037638.1 | 8537112 | SNV | 1 | A | G | Homozygous   |
| NC_037638.1 | 8537151 | SNV | 1 | A | G | Homozygous   |
| NC_037638.1 | 8537369 | SNV | 1 | C | G | Homozygous   |
| NC_037638.1 | 8537404 | SNV | 1 | C | T | Heterozygous |
| NC_037638.1 | 8538090 | SNV | 1 | T | C | Heterozygous |
| NC_037638.1 | 8538166 | SNV | 1 | C | T | Heterozygous |
| NC_037638.1 | 8538205 | SNV | 1 | C | T | Heterozygous |
| NC_037638.1 | 8538325 | SNV | 1 | T | C | Homozygous   |
| NC_037638.1 | 8538335 | SNV | 1 | T | C | Homozygous   |
| NC_037638.1 | 8538409 | SNV | 1 | T | C | Homozygous   |
| NC_037638.1 | 8538461 | SNV | 1 | C | A | Heterozygous |
| NC_037638.1 | 8538462 | SNV | 1 | T | C | Heterozygous |
| NC_037638.1 | 8538477 | SNV | 1 | A | G | Homozygous   |
| NC_037638.1 | 8538493 | SNV | 1 | C | T | Heterozygous |
| NC_037638.1 | 8538532 | SNV | 1 | T | C | Homozygous   |
| NC_037638.1 | 8538556 | SNV | 1 | G | C | Homozygous   |
| NC_037638.1 | 8538799 | SNV | 1 | T | C | Heterozygous |
| NC_037638.1 | 8540399 | SNV | 1 | T | C | Heterozygous |
| NC_037638.1 | 8540402 | SNV | 1 | T | C | Homozygous   |
| NC_037638.1 | 8540408 | SNV | 1 | C | T | Heterozygous |
| NC_037638.1 | 8540411 | SNV | 1 | C | T | Heterozygous |
| NC_037638.1 | 8540423 | SNV | 1 | C | T | Homozygous   |

|             |         |     |   |   |   |              |
|-------------|---------|-----|---|---|---|--------------|
| NC_037638.1 | 8540477 | SNV | 1 | G | T | Heterozygous |
| NC_037638.1 | 8540576 | SNV | 1 | T | C | Homozygous   |
| NC_037638.1 | 8566992 | SNV | 1 | A | G | Homozygous   |
| NC_037638.1 | 8568537 | SNV | 1 | G | A | Heterozygous |
| NC_037638.1 | 8568819 | SNV | 1 | G | A | Heterozygous |
| NC_037638.1 | 8568865 | SNV | 1 | A | G | Homozygous   |
| NC_037638.1 | 8568943 | SNV | 1 | A | G | Homozygous   |
| NC_037638.1 | 8569030 | SNV | 1 | A | G | Homozygous   |
| NC_037638.1 | 8569093 | SNV | 1 | A | T | Heterozygous |
| NC_037638.1 | 8569097 | SNV | 1 | T | C | Homozygous   |
| NC_037638.1 | 8569107 | SNV | 1 | G | A | Heterozygous |
| NC_037638.1 | 8569136 | SNV | 1 | C | T | Heterozygous |
| NC_037638.1 | 8569141 | SNV | 1 | C | G | Homozygous   |
| NC_037638.1 | 8569449 | SNV | 1 | T | C | Heterozygous |
| NC_037638.1 | 8569471 | SNV | 1 | T | C | Homozygous   |
| NC_037638.1 | 8569494 | SNV | 1 | C | T | Homozygous   |
| NC_037638.1 | 8569498 | SNV | 1 | G | A | Homozygous   |
| NC_037638.1 | 8569505 | SNV | 1 | G | A | Heterozygous |
| NC_037638.1 | 8569534 | SNV | 1 | C | T | Heterozygous |
| NC_037638.1 | 8569567 | SNV | 1 | T | C | Heterozygous |
| NC_037638.1 | 8569602 | SNV | 1 | C | T | Homozygous   |
| NC_037638.1 | 8569604 | SNV | 1 | T | C | Heterozygous |
| NC_037638.1 | 8589417 | SNV | 1 | C | G | Homozygous   |
| NC_037638.1 | 8589422 | SNV | 1 | A | C | Heterozygous |
| NC_037638.1 | 8589442 | SNV | 1 | A | G | Heterozygous |
| NC_037638.1 | 8589464 | SNV | 1 | C | A | Heterozygous |
| NC_037638.1 | 8610799 | SNV | 1 | C | T | Heterozygous |
| NC_037638.1 | 8610863 | SNV | 1 | A | G | Homozygous   |
| NC_037638.1 | 8611020 | SNV | 1 | G | C | Homozygous   |
| NC_037638.1 | 8611032 | SNV | 1 | T | G | Homozygous   |
| NC_037638.1 | 8611068 | SNV | 1 | C | T | Homozygous   |
| NC_037638.1 | 8625992 | SNV | 1 | A | G | Homozygous   |
| NC_037638.1 | 8626040 | SNV | 1 | A | G | Homozygous   |
| NC_037638.1 | 8633265 | SNV | 1 | C | T | Homozygous   |
| NC_037638.1 | 8633333 | SNV | 1 | T | C | Heterozygous |
| NC_037638.1 | 8633345 | SNV | 1 | A | G | Homozygous   |
| NC_037638.1 | 8633682 | SNV | 1 | A | G | Homozygous   |
| NC_037638.1 | 8633699 | SNV | 1 | G | A | Heterozygous |
| NC_037638.1 | 8633785 | SNV | 1 | A | G | Homozygous   |
| NC_037638.1 | 8633944 | SNV | 1 | G | A | Heterozygous |
| NC_037638.1 | 8634056 | SNV | 1 | G | C | Heterozygous |
| NC_037638.1 | 8634066 | SNV | 1 | G | A | Homozygous   |
| NC_037638.1 | 8637593 | SNV | 1 | A | T | Homozygous   |
| NC_037638.1 | 8637683 | SNV | 1 | A | G | Heterozygous |
| NC_037638.1 | 8641987 | SNV | 1 | G | A | Heterozygous |
| NC_037638.1 | 8641998 | SNV | 1 | A | G | Heterozygous |
| NC_037638.1 | 8642002 | SNV | 1 | A | G | Heterozygous |
| NC_037638.1 | 8642147 | SNV | 1 | A | G | Homozygous   |
| NC_037638.1 | 8642373 | SNV | 1 | A | G | Homozygous   |
| NC_037638.1 | 8642516 | SNV | 1 | T | G | Homozygous   |
| NC_037638.1 | 8642581 | SNV | 1 | C | T | Homozygous   |



|             |         |     |   |   |   |              |
|-------------|---------|-----|---|---|---|--------------|
| NC_037638.1 | 8643841 | SNV | 1 | G | C | Homozygous   |
| NC_037638.1 | 8643843 | SNV | 1 | A | C | Homozygous   |
| NC_037638.1 | 8643846 | SNV | 1 | T | A | Homozygous   |
| NC_037638.1 | 8643849 | SNV | 1 | C | T | Homozygous   |
| NC_037638.1 | 8643857 | SNV | 1 | A | C | Homozygous   |
| NC_037638.1 | 8643860 | SNV | 1 | T | A | Homozygous   |
| NC_037638.1 | 8656937 | SNV | 1 | T | C | Homozygous   |
| NC_037638.1 | 8672391 | SNV | 1 | C | A | Homozygous   |
| NC_037638.1 | 8672424 | SNV | 1 | A | G | Homozygous   |
| NC_037638.1 | 8672463 | SNV | 1 | T | C | Homozygous   |
| NC_037638.1 | 8672594 | SNV | 1 | T | C | Heterozygous |
| NC_037638.1 | 8674617 | SNV | 1 | A | T | Heterozygous |
| NC_037638.1 | 8674656 | SNV | 1 | C | T | Homozygous   |
| NC_037638.1 | 8674679 | SNV | 1 | T | C | Heterozygous |
| NC_037638.1 | 8674706 | SNV | 1 | T | G | Heterozygous |
| NC_037638.1 | 8674728 | SNV | 1 | G | A | Heterozygous |
| NC_037638.1 | 8674737 | SNV | 1 | G | A | Heterozygous |
| NC_037638.1 | 8674747 | SNV | 1 | T | C | Homozygous   |
| NC_037638.1 | 8674786 | SNV | 1 | A | G | Homozygous   |
| NC_037638.1 | 8675383 | SNV | 1 | A | G | Homozygous   |
| NC_037638.1 | 8675497 | SNV | 1 | T | A | Heterozygous |
| NC_037638.1 | 8675547 | SNV | 1 | C | T | Homozygous   |
| NC_037638.1 | 8675587 | SNV | 1 | G | A | Homozygous   |
| NC_037638.1 | 8675614 | SNV | 1 | G | C | Heterozygous |
| NC_037638.1 | 8675652 | SNV | 1 | C | T | Homozygous   |
| NC_037638.1 | 8675671 | SNV | 1 | T | G | Heterozygous |
| NC_037638.1 | 8675716 | SNV | 1 | G | A | Heterozygous |
| NC_037638.1 | 8675735 | SNV | 1 | A | G | Heterozygous |
| NC_037638.1 | 8675850 | SNV | 1 | C | T | Heterozygous |
| NC_037638.1 | 8675997 | SNV | 1 | A | G | Heterozygous |
| NC_037638.1 | 8678810 | SNV | 1 | T | C | Homozygous   |
| NC_037638.1 | 8678897 | SNV | 1 | C | T | Homozygous   |
| NC_037638.1 | 8679133 | SNV | 1 | A | T | Homozygous   |
| NC_037638.1 | 8680214 | SNV | 1 | T | C | Homozygous   |
| NC_037638.1 | 8680550 | SNV | 1 | A | G | Homozygous   |
| NC_037638.1 | 8680552 | SNV | 1 | G | A | Homozygous   |
| NC_037638.1 | 8680559 | SNV | 1 | G | A | Homozygous   |
| NC_037638.1 | 8680561 | SNV | 1 | A | G | Homozygous   |
| NC_037638.1 | 8684756 | SNV | 1 | G | A | Heterozygous |
| NC_037638.1 | 8693335 | SNV | 1 | G | A | Homozygous   |
| NC_037638.1 | 8695553 | SNV | 1 | T | C | Homozygous   |
| NC_037638.1 | 8695566 | SNV | 1 | T | A | Heterozygous |
| NC_037638.1 | 8695741 | SNV | 1 | G | A | Heterozygous |
| NC_037638.1 | 8695805 | SNV | 1 | A | G | Homozygous   |
| NC_037638.1 | 8695811 | SNV | 1 | A | G | Homozygous   |
| NC_037638.1 | 8695893 | SNV | 1 | G | A | Homozygous   |
| NC_037638.1 | 8699872 | SNV | 1 | T | C | Homozygous   |
| NC_037638.1 | 8699889 | SNV | 1 | T | C | Homozygous   |
| NC_037638.1 | 8700055 | SNV | 1 | T | C | Homozygous   |
| NC_037638.1 | 8700206 | SNV | 1 | C | T | Heterozygous |
| NC_037638.1 | 8700214 | SNV | 1 | C | T | Homozygous   |

|             |         |     |   |   |   |              |
|-------------|---------|-----|---|---|---|--------------|
| NC_037638.1 | 8715433 | SNV | 1 | T | C | Homozygous   |
| NC_037638.1 | 8715456 | SNV | 1 | T | G | Heterozygous |
| NC_037638.1 | 8715505 | SNV | 1 | T | C | Homozygous   |
| NC_037638.1 | 8715754 | SNV | 1 | T | C | Homozygous   |
| NC_037638.1 | 8715799 | SNV | 1 | G | A | Homozygous   |
| NC_037638.1 | 8715801 | SNV | 1 | A | G | Heterozygous |
| NC_037638.1 | 8715806 | SNV | 1 | A | C | Homozygous   |
| NC_037638.1 | 8716003 | SNV | 1 | T | C | Heterozygous |
| NC_037638.1 | 8717776 | SNV | 1 | C | T | Heterozygous |
| NC_037638.1 | 8718100 | SNV | 1 | A | G | Homozygous   |
| NC_037638.1 | 8718813 | SNV | 1 | A | G | Homozygous   |
| NC_037638.1 | 8718931 | SNV | 1 | T | C | Homozygous   |
| NC_037638.1 | 8719013 | SNV | 1 | G | C | Homozygous   |
| NC_037638.1 | 8723892 | SNV | 1 | G | A | Heterozygous |
| NC_037638.1 | 8723908 | SNV | 1 | C | T | Heterozygous |
| NC_037638.1 | 8725272 | SNV | 1 | T | C | Homozygous   |
| NC_037638.1 | 8725361 | SNV | 1 | C | T | Heterozygous |
| NC_037638.1 | 8725488 | SNV | 1 | T | C | Homozygous   |
| NC_037638.1 | 8725624 | SNV | 1 | T | C | Homozygous   |
| NC_037638.1 | 8725646 | SNV | 1 | A | T | Heterozygous |
| NC_037638.1 | 8731187 | SNV | 1 | A | G | Homozygous   |
| NC_037638.1 | 8731191 | SNV | 1 | T | C | Homozygous   |
| NC_037638.1 | 8734872 | SNV | 1 | G | A | Heterozygous |
| NC_037638.1 | 8738720 | SNV | 1 | A | T | Homozygous   |
| NC_037638.1 | 8741890 | SNV | 1 | A | G | Homozygous   |
| NC_037638.1 | 8741892 | SNV | 1 | C | G | Heterozygous |
| NC_037638.1 | 8741929 | SNV | 1 | C | T | Homozygous   |
| NC_037638.1 | 8741947 | SNV | 1 | T | A | Heterozygous |
| NC_037638.1 | 8742813 | SNV | 1 | A | G | Homozygous   |
| NC_037638.1 | 8751801 | SNV | 1 | G | A | Heterozygous |
| NC_037638.1 | 8754111 | SNV | 1 | A | G | Homozygous   |
| NC_037638.1 | 8754401 | SNV | 1 | G | A | Heterozygous |
| NC_037638.1 | 8754451 | SNV | 1 | G | A | Heterozygous |
| NC_037638.1 | 8773867 | SNV | 1 | C | T | Heterozygous |
| NC_037638.1 | 8777945 | SNV | 1 | G | A | Heterozygous |
| NC_037638.1 | 8778701 | SNV | 1 | C | G | Homozygous   |
| NC_037638.1 | 8778717 | SNV | 1 | T | C | Homozygous   |
| NC_037638.1 | 8778755 | SNV | 1 | C | T | Heterozygous |
| NC_037638.1 | 8779014 | SNV | 1 | T | C | Heterozygous |
| NC_037638.1 | 8783862 | SNV | 1 | G | A | Heterozygous |
| NC_037638.1 | 8786673 | SNV | 1 | T | C | Homozygous   |
| NC_037638.1 | 8798113 | SNV | 1 | A | G | Heterozygous |
| NC_037638.1 | 8798114 | SNV | 1 | G | A | Heterozygous |
| NC_037638.1 | 8798190 | SNV | 1 | A | G | Homozygous   |
| NC_037638.1 | 8798624 | SNV | 1 | C | T | Homozygous   |
| NC_037638.1 | 8811843 | SNV | 1 | C | T | Homozygous   |
| NC_037638.1 | 8811851 | SNV | 1 | T | C | Heterozygous |
| NC_037638.1 | 8811893 | SNV | 1 | C | T | Heterozygous |
| NC_037638.1 | 8828323 | SNV | 1 | T | C | Homozygous   |
| NC_037638.1 | 8828348 | SNV | 1 | G | A | Homozygous   |
| NC_037638.1 | 8828611 | SNV | 1 | C | T | Homozygous   |

|             |         |     |   |   |   |              |
|-------------|---------|-----|---|---|---|--------------|
| NC_037638.1 | 8836260 | SNV | 1 | C | A | Homozygous   |
| NC_037638.1 | 8839557 | SNV | 1 | C | T | Homozygous   |
| NC_037638.1 | 8839562 | SNV | 1 | C | T | Homozygous   |
| NC_037638.1 | 8839955 | SNV | 1 | G | A | Homozygous   |
| NC_037638.1 | 8847357 | SNV | 1 | T | C | Heterozygous |
| NC_037638.1 | 8847388 | SNV | 1 | A | G | Heterozygous |
| NC_037638.1 | 8847417 | SNV | 1 | T | C | Homozygous   |
| NC_037638.1 | 8847431 | SNV | 1 | G | A | Heterozygous |
| NC_037638.1 | 8847469 | SNV | 1 | G | A | Heterozygous |
| NC_037638.1 | 8847482 | SNV | 1 | G | A | Homozygous   |
| NC_037638.1 | 8847588 | SNV | 1 | G | A | Heterozygous |
| NC_037638.1 | 8847619 | SNV | 1 | C | T | Heterozygous |
| NC_037638.1 | 8847665 | SNV | 1 | C | T | Homozygous   |
| NC_037638.1 | 8848472 | SNV | 1 | T | C | Heterozygous |
| NC_037638.1 | 8848510 | SNV | 1 | C | G | Homozygous   |
| NC_037638.1 | 8863337 | SNV | 1 | T | C | Homozygous   |
| NC_037638.1 | 8863516 | SNV | 1 | G | A | Heterozygous |
| NC_037638.1 | 8864633 | SNV | 1 | G | A | Heterozygous |
| NC_037638.1 | 8864670 | SNV | 1 | G | A | Heterozygous |
| NC_037638.1 | 8864678 | SNV | 1 | A | G | Homozygous   |
| NC_037638.1 | 8864684 | SNV | 1 | G | A | Heterozygous |
| NC_037638.1 | 8864947 | SNV | 1 | C | T | Heterozygous |
| NC_037638.1 | 8875404 | SNV | 1 | A | G | Homozygous   |
| NC_037638.1 | 8875803 | SNV | 1 | A | C | Homozygous   |
| NC_037638.1 | 8875964 | SNV | 1 | G | A | Homozygous   |
| NC_037638.1 | 8875978 | SNV | 1 | G | C | Heterozygous |
| NC_037638.1 | 8875984 | SNV | 1 | A | G | Heterozygous |
| NC_037638.1 | 8876137 | SNV | 1 | C | T | Homozygous   |
| NC_037638.1 | 8876271 | SNV | 1 | C | T | Heterozygous |
| NC_037638.1 | 8876373 | SNV | 1 | T | C | Homozygous   |
| NC_037638.1 | 8883551 | SNV | 1 | G | C | Homozygous   |
| NC_037638.1 | 8883553 | SNV | 1 | G | C | Homozygous   |
| NC_037638.1 | 8883558 | SNV | 1 | G | A | Homozygous   |
| NC_037638.1 | 8883560 | SNV | 1 | A | C | Homozygous   |
| NC_037638.1 | 8883575 | SNV | 1 | G | A | Heterozygous |
| NC_037638.1 | 8883893 | SNV | 1 | G | A | Heterozygous |
| NC_037638.1 | 8883912 | SNV | 1 | C | T | Heterozygous |
| NC_037638.1 | 8883920 | SNV | 1 | A | G | Homozygous   |
| NC_037638.1 | 8884065 | SNV | 1 | C | T | Heterozygous |
| NC_037638.1 | 8884256 | SNV | 1 | G | A | Homozygous   |
| NC_037638.1 | 8890808 | SNV | 1 | C | T | Heterozygous |
| NC_037638.1 | 8890851 | SNV | 1 | T | C | Heterozygous |
| NC_037638.1 | 8890857 | SNV | 1 | T | C | Heterozygous |
| NC_037638.1 | 8890862 | SNV | 1 | C | T | Heterozygous |
| NC_037638.1 | 8891057 | SNV | 1 | T | C | Homozygous   |
| NC_037638.1 | 8891200 | SNV | 1 | T | C | Homozygous   |
| NC_037638.1 | 8891550 | SNV | 1 | C | T | Heterozygous |
| NC_037638.1 | 8891594 | SNV | 1 | A | G | Homozygous   |
| NC_037638.1 | 8891606 | SNV | 1 | T | C | Homozygous   |
| NC_037638.1 | 8891657 | SNV | 1 | C | T | Heterozygous |
| NC_037638.1 | 8891673 | SNV | 1 | T | C | Heterozygous |

|             |         |     |   |   |   |              |
|-------------|---------|-----|---|---|---|--------------|
| NC_037638.1 | 8891750 | SNV | 1 | C | T | Homozygous   |
| NC_037638.1 | 8891755 | SNV | 1 | T | C | Homozygous   |
| NC_037638.1 | 8893502 | SNV | 1 | C | T | Homozygous   |
| NC_037638.1 | 8893826 | SNV | 1 | C | G | Homozygous   |
| NC_037638.1 | 8893860 | SNV | 1 | A | G | Heterozygous |
| NC_037638.1 | 8894065 | SNV | 1 | G | C | Heterozygous |
| NC_037638.1 | 8894101 | SNV | 1 | A | G | Homozygous   |
| NC_037638.1 | 8894320 | SNV | 1 | G | A | Heterozygous |
| NC_037638.1 | 8894396 | SNV | 1 | A | G | Homozygous   |
| NC_037638.1 | 8894418 | SNV | 1 | T | C | Heterozygous |
| NC_037638.1 | 8894422 | SNV | 1 | G | C | Homozygous   |
| NC_037638.1 | 8899089 | SNV | 1 | T | C | Heterozygous |
| NC_037638.1 | 8899098 | SNV | 1 | G | T | Homozygous   |
| NC_037638.1 | 8899212 | SNV | 1 | C | T | Heterozygous |
| NC_037638.1 | 8899255 | SNV | 1 | G | C | Homozygous   |
| NC_037638.1 | 8899297 | SNV | 1 | G | A | Heterozygous |
| NC_037638.1 | 8923460 | SNV | 1 | T | C | Heterozygous |
| NC_037638.1 | 8923463 | SNV | 1 | T | C | Heterozygous |
| NC_037638.1 | 8923517 | SNV | 1 | T | C | Homozygous   |
| NC_037638.1 | 8925919 | SNV | 1 | G | C | Heterozygous |
| NC_037638.1 | 8926624 | SNV | 1 | T | C | Homozygous   |
| NC_037638.1 | 8937460 | SNV | 1 | G | A | Heterozygous |
| NC_037638.1 | 8937470 | SNV | 1 | A | G | Heterozygous |
| NC_037638.1 | 8937487 | SNV | 1 | G | A | Heterozygous |
| NC_037638.1 | 8937499 | SNV | 1 | C | A | Homozygous   |
| NC_037638.1 | 8937504 | SNV | 1 | G | A | Heterozygous |
| NC_037638.1 | 8937509 | SNV | 1 | G | A | Heterozygous |
| NC_037638.1 | 8943249 | SNV | 1 | C | G | Homozygous   |
| NC_037638.1 | 8943328 | SNV | 1 | C | T | Heterozygous |
| NC_037638.1 | 8950863 | SNV | 1 | C | T | Homozygous   |
| NC_037638.1 | 8958626 | SNV | 1 | C | T | Homozygous   |
| NC_037638.1 | 8958630 | SNV | 1 | T | C | Homozygous   |
| NC_037638.1 | 8958660 | SNV | 1 | A | G | Homozygous   |
| NC_037638.1 | 8986505 | SNV | 1 | C | T | Homozygous   |
| NC_037638.1 | 8995040 | SNV | 1 | C | G | Homozygous   |
| NC_037638.1 | 9000253 | SNV | 1 | T | A | Homozygous   |
| NC_037638.1 | 9000259 | SNV | 1 | A | C | Homozygous   |
| NC_037638.1 | 9000271 | SNV | 1 | A | T | Homozygous   |
| NC_037638.1 | 9000284 | SNV | 1 | C | T | Homozygous   |
| NC_037638.1 | 9045545 | SNV | 1 | A | G | Heterozygous |
| NC_037638.1 | 9045579 | SNV | 1 | C | G | Homozygous   |
| NC_037638.1 | 9045600 | SNV | 1 | C | G | Homozygous   |
| NC_037638.1 | 9045610 | SNV | 1 | C | G | Homozygous   |
| NC_037638.1 | 9045620 | SNV | 1 | C | G | Homozygous   |
| NC_037638.1 | 9045630 | SNV | 1 | C | G | Heterozygous |
| NC_037638.1 | 9045636 | SNV | 1 | G | C | Homozygous   |
| NC_037638.1 | 9045665 | SNV | 1 | A | G | Heterozygous |
| NC_037638.1 | 9045670 | SNV | 1 | C | G | Heterozygous |
| NC_037638.1 | 9045690 | SNV | 1 | C | A | Heterozygous |
| NC_037638.1 | 9045690 | SNV | 1 | C | G | Heterozygous |
| NC_037638.1 | 9045695 | SNV | 1 | A | G | Heterozygous |

|             |         |     |   |   |   |              |
|-------------|---------|-----|---|---|---|--------------|
| NC_037638.1 | 9045700 | SNV | 1 | C | A | Homozygous   |
| NC_037638.1 | 9045705 | SNV | 1 | A | G | Heterozygous |
| NC_037638.1 | 9057457 | SNV | 1 | G | T | Heterozygous |
| NC_037638.1 | 9057463 | SNV | 1 | A | T | Heterozygous |
| NC_037638.1 | 9057471 | SNV | 1 | A | C | Heterozygous |
| NC_037638.1 | 9057476 | SNV | 1 | G | A | Heterozygous |
| NC_037638.1 | 9057566 | SNV | 1 | G | A | Heterozygous |
| NC_037638.1 | 9057763 | SNV | 1 | T | C | Homozygous   |
| NC_037638.1 | 9058190 | SNV | 1 | A | T | Homozygous   |
| NC_037638.1 | 9058196 | SNV | 1 | T | G | Homozygous   |
| NC_037638.1 | 9058200 | SNV | 1 | A | G | Homozygous   |
| NC_037638.1 | 9059360 | SNV | 1 | C | T | Homozygous   |
| NC_037638.1 | 9059362 | SNV | 1 | A | T | Homozygous   |
| NC_037638.1 | 9062806 | SNV | 1 | A | T | Heterozygous |
| NC_037638.1 | 9062861 | SNV | 1 | C | T | Heterozygous |
| NC_037638.1 | 9062878 | SNV | 1 | A | G | Homozygous   |
| NC_037638.1 | 9062880 | SNV | 1 | A | G | Homozygous   |
| NC_037638.1 | 9062914 | SNV | 1 | T | A | Homozygous   |
| NC_037638.1 | 9062919 | SNV | 1 | T | C | Homozygous   |
| NC_037638.1 | 9062923 | SNV | 1 | T | C | Homozygous   |
| NC_037638.1 | 9064051 | SNV | 1 | A | G | Homozygous   |
| NC_037638.1 | 9064069 | SNV | 1 | T | A | Homozygous   |
| NC_037638.1 | 9065067 | SNV | 1 | A | G | Homozygous   |
| NC_037638.1 | 9067433 | SNV | 1 | A | G | Homozygous   |
| NC_037638.1 | 9068395 | SNV | 1 | T | G | Homozygous   |
| NC_037638.1 | 9068611 | SNV | 1 | C | G | Homozygous   |
| NC_037638.1 | 9068794 | SNV | 1 | G | A | Heterozygous |
| NC_037638.1 | 9069961 | SNV | 1 | T | C | Heterozygous |
| NC_037638.1 | 9076100 | SNV | 1 | T | G | Homozygous   |
| NC_037638.1 | 9076105 | SNV | 1 | C | A | Homozygous   |
| NC_037638.1 | 9084091 | SNV | 1 | C | A | Homozygous   |
| NC_037638.1 | 9087751 | SNV | 1 | T | A | Homozygous   |
| NC_037638.1 | 9087765 | SNV | 1 | T | A | Homozygous   |
| NC_037638.1 | 9087767 | SNV | 1 | T | A | Homozygous   |
| NC_037638.1 | 9087828 | SNV | 1 | A | T | Homozygous   |
| NC_037638.1 | 9088216 | SNV | 1 | A | T | Homozygous   |
| NC_037638.1 | 9088225 | SNV | 1 | A | T | Homozygous   |
| NC_037638.1 | 9088246 | SNV | 1 | G | A | Homozygous   |
| NC_037638.1 | 9089029 | SNV | 1 | A | C | Heterozygous |
| NC_037638.1 | 9089032 | SNV | 1 | A | G | Heterozygous |
| NC_037638.1 | 9089034 | SNV | 1 | G | C | Heterozygous |
| NC_037638.1 | 9092450 | SNV | 1 | T | C | Homozygous   |
| NC_037638.1 | 9092631 | SNV | 1 | A | T | Heterozygous |
| NC_037638.1 | 9092633 | SNV | 1 | A | T | Heterozygous |
| NC_037638.1 | 9092640 | SNV | 1 | A | T | Heterozygous |
| NC_037638.1 | 9092649 | SNV | 1 | T | A | Heterozygous |
| NC_037638.1 | 9092654 | SNV | 1 | T | G | Heterozygous |
| NC_037638.1 | 9092664 | SNV | 1 | T | A | Heterozygous |
| NC_037638.1 | 9097266 | SNV | 1 | T | G | Homozygous   |
| NC_037638.1 | 9097293 | SNV | 1 | A | G | Homozygous   |
| NC_037638.1 | 9098890 | SNV | 1 | C | T | Homozygous   |

|             |         |     |   |   |   |              |
|-------------|---------|-----|---|---|---|--------------|
| NC_037638.1 | 9099028 | SNV | 1 | G | A | Homozygous   |
| NC_037638.1 | 9103630 | SNV | 1 | A | G | Homozygous   |
| NC_037638.1 | 9104577 | SNV | 1 | T | C | Homozygous   |
| NC_037638.1 | 9107539 | SNV | 1 | A | G | Homozygous   |
| NC_037638.1 | 9107638 | SNV | 1 | A | G | Homozygous   |
| NC_037638.1 | 9107642 | SNV | 1 | T | C | Homozygous   |
| NC_037638.1 | 9107644 | SNV | 1 | A | T | Heterozygous |
| NC_037638.1 | 9107657 | SNV | 1 | A | C | Heterozygous |
| NC_037638.1 | 9107674 | SNV | 1 | T | A | Homozygous   |
| NC_037638.1 | 9107683 | SNV | 1 | A | G | Heterozygous |
| NC_037638.1 | 9108809 | SNV | 1 | A | C | Homozygous   |
| NC_037638.1 | 9108812 | SNV | 1 | C | A | Homozygous   |
| NC_037638.1 | 9109930 | SNV | 1 | C | T | Heterozygous |
| NC_037638.1 | 9116936 | SNV | 1 | G | T | Homozygous   |
| NC_037638.1 | 9118004 | SNV | 1 | A | G | Homozygous   |
| NC_037638.1 | 9120889 | SNV | 1 | T | C | Homozygous   |
| NC_037638.1 | 9123497 | SNV | 1 | T | G | Homozygous   |
| NC_037638.1 | 9127082 | SNV | 1 | A | C | Heterozygous |
| NC_037638.1 | 9127088 | SNV | 1 | G | A | Heterozygous |
| NC_037638.1 | 9127107 | SNV | 1 | T | A | Homozygous   |
| NC_037638.1 | 9127111 | SNV | 1 | T | A | Homozygous   |
| NC_037638.1 | 9138491 | SNV | 1 | T | C | Homozygous   |
| NC_037638.1 | 9144603 | SNV | 1 | T | C | Homozygous   |
| NC_037638.1 | 9145996 | SNV | 1 | A | G | Homozygous   |
| NC_037638.1 | 9146080 | SNV | 1 | C | T | Homozygous   |
| NC_037638.1 | 9147098 | SNV | 1 | G | T | Homozygous   |
| NC_037638.1 | 9147116 | SNV | 1 | A | G | Homozygous   |
| NC_037638.1 | 9147250 | SNV | 1 | C | T | Heterozygous |
| NC_037638.1 | 9147275 | SNV | 1 | G | A | Heterozygous |
| NC_037638.1 | 9147320 | SNV | 1 | T | C | Homozygous   |
| NC_037638.1 | 9147388 | SNV | 1 | C | T | Heterozygous |
| NC_037638.1 | 9148419 | SNV | 1 | G | A | Heterozygous |
| NC_037638.1 | 9148569 | SNV | 1 | C | G | Homozygous   |
| NC_037638.1 | 9149917 | SNV | 1 | C | T | Heterozygous |
| NC_037638.1 | 9166534 | SNV | 1 | T | G | Homozygous   |
| NC_037638.1 | 9176100 | SNV | 1 | A | G | Homozygous   |
| NC_037638.1 | 9176183 | SNV | 1 | G | A | Homozygous   |
| NC_037638.1 | 9176260 | SNV | 1 | T | C | Heterozygous |
| NC_037638.1 | 9176262 | SNV | 1 | T | C | Heterozygous |
| NC_037638.1 | 9176264 | SNV | 1 | T | C | Heterozygous |
| NC_037638.1 | 9176272 | SNV | 1 | A | T | Heterozygous |
| NC_037638.1 | 9176283 | SNV | 1 | A | T | Heterozygous |
| NC_037638.1 | 9176284 | SNV | 1 | T | A | Heterozygous |
| NC_037638.1 | 9176287 | SNV | 1 | A | T | Heterozygous |
| NC_037638.1 | 9176290 | SNV | 1 | T | A | Heterozygous |
| NC_037638.1 | 9176295 | SNV | 1 | A | G | Heterozygous |
| NC_037638.1 | 9176299 | SNV | 1 | A | T | Heterozygous |
| NC_037638.1 | 9176306 | SNV | 1 | T | G | Heterozygous |
| NC_037638.1 | 9176326 | SNV | 1 | A | T | Heterozygous |
| NC_037638.1 | 9176338 | SNV | 1 | A | G | Homozygous   |
| NC_037638.1 | 9176381 | SNV | 1 | G | A | Heterozygous |

|             |         |     |   |   |   |              |
|-------------|---------|-----|---|---|---|--------------|
| NC_037638.1 | 9179431 | SNV | 1 | G | A | Heterozygous |
| NC_037638.1 | 9179873 | SNV | 1 | A | G | Homozygous   |
| NC_037638.1 | 9182667 | SNV | 1 | G | A | Heterozygous |
| NC_037638.1 | 9186373 | SNV | 1 | A | G | Homozygous   |
| NC_037638.1 | 9186384 | SNV | 1 | A | T | Heterozygous |
| NC_037638.1 | 9190614 | SNV | 1 | A | C | Heterozygous |
| NC_037638.1 | 9199360 | SNV | 1 | G | A | Heterozygous |
| NC_037638.1 | 9206741 | SNV | 1 | C | T | Homozygous   |
| NC_037638.1 | 9206743 | SNV | 1 | T | C | Homozygous   |
| NC_037638.1 | 9206793 | SNV | 1 | C | G | Homozygous   |
| NC_037638.1 | 9218088 | SNV | 1 | G | A | Heterozygous |
| NC_037638.1 | 9218121 | SNV | 1 | G | A | Homozygous   |
| NC_037638.1 | 9218123 | SNV | 1 | G | C | Homozygous   |
| NC_037638.1 | 9218131 | SNV | 1 | G | T | Heterozygous |
| NC_037638.1 | 9218133 | SNV | 1 | G | A | Homozygous   |
| NC_037638.1 | 9218141 | SNV | 1 | T | A | Homozygous   |
| NC_037638.1 | 9231839 | SNV | 1 | G | T | Heterozygous |
| NC_037638.1 | 9233161 | SNV | 1 | T | C | Homozygous   |
| NC_037638.1 | 9233175 | SNV | 1 | A | G | Homozygous   |
| NC_037638.1 | 9233240 | SNV | 1 | C | T | Heterozygous |
| NC_037638.1 | 9233339 | SNV | 1 | C | T | Heterozygous |
| NC_037638.1 | 9233458 | SNV | 1 | T | C | Heterozygous |
| NC_037638.1 | 9233561 | SNV | 1 | A | G | Heterozygous |
| NC_037638.1 | 9233730 | SNV | 1 | C | T | Homozygous   |
| NC_037638.1 | 9233754 | SNV | 1 | A | G | Homozygous   |
| NC_037638.1 | 9234092 | SNV | 1 | T | C | Heterozygous |
| NC_037638.1 | 9236212 | SNV | 1 | C | G | Heterozygous |
| NC_037638.1 | 9236251 | SNV | 1 | A | G | Homozygous   |
| NC_037638.1 | 9236257 | SNV | 1 | G | A | Heterozygous |
| NC_037638.1 | 9236267 | SNV | 1 | C | T | Homozygous   |
| NC_037638.1 | 9238969 | SNV | 1 | G | A | Heterozygous |
| NC_037638.1 | 9239073 | SNV | 1 | T | A | Heterozygous |
| NC_037638.1 | 9239077 | SNV | 1 | G | A | Heterozygous |
| NC_037638.1 | 9239099 | SNV | 1 | T | C | Heterozygous |
| NC_037638.1 | 9239103 | SNV | 1 | G | A | Heterozygous |
| NC_037638.1 | 9239105 | SNV | 1 | A | G | Heterozygous |
| NC_037638.1 | 9239123 | SNV | 1 | A | G | Homozygous   |
| NC_037638.1 | 9239126 | SNV | 1 | G | A | Heterozygous |
| NC_037638.1 | 9239200 | SNV | 1 | T | C | Homozygous   |
| NC_037638.1 | 9253083 | SNV | 1 | G | C | Heterozygous |
| NC_037638.1 | 9253195 | SNV | 1 | A | G | Homozygous   |
| NC_037638.1 | 9253418 | SNV | 1 | A | G | Homozygous   |
| NC_037638.1 | 9253638 | SNV | 1 | A | T | Homozygous   |
| NC_037638.1 | 9253775 | SNV | 1 | G | A | Homozygous   |
| NC_037638.1 | 9253805 | SNV | 1 | A | G | Heterozygous |
| NC_037638.1 | 9253850 | SNV | 1 | T | C | Homozygous   |
| NC_037638.1 | 9257060 | SNV | 1 | A | G | Homozygous   |
| NC_037638.1 | 9257063 | SNV | 1 | G | C | Homozygous   |
| NC_037638.1 | 9258505 | SNV | 1 | C | T | Homozygous   |
| NC_037638.1 | 9258717 | SNV | 1 | T | C | Homozygous   |
| NC_037638.1 | 9261929 | SNV | 1 | A | G | Homozygous   |

|             |         |     |   |   |   |              |
|-------------|---------|-----|---|---|---|--------------|
| NC_037638.1 | 9274482 | SNV | 1 | G | C | Homozygous   |
| NC_037638.1 | 9276765 | SNV | 1 | T | C | Homozygous   |
| NC_037638.1 | 9287524 | SNV | 1 | C | T | Homozygous   |
| NC_037638.1 | 9306808 | SNV | 1 | T | C | Homozygous   |
| NC_037638.1 | 9306963 | SNV | 1 | C | T | Homozygous   |
| NC_037638.1 | 9309239 | SNV | 1 | G | T | Homozygous   |
| NC_037638.1 | 9309247 | SNV | 1 | T | A | Homozygous   |
| NC_037638.1 | 9309252 | SNV | 1 | G | T | Homozygous   |
| NC_037638.1 | 9309259 | SNV | 1 | G | T | Homozygous   |
| NC_037638.1 | 9309271 | SNV | 1 | T | A | Homozygous   |
| NC_037638.1 | 9309288 | SNV | 1 | C | G | Homozygous   |
| NC_037638.1 | 9309292 | SNV | 1 | A | G | Homozygous   |
| NC_037638.1 | 9313332 | SNV | 1 | T | C | Homozygous   |
| NC_037638.1 | 9313472 | SNV | 1 | G | A | Homozygous   |
| NC_037638.1 | 9314557 | SNV | 1 | A | C | Homozygous   |
| NC_037638.1 | 9314571 | SNV | 1 | G | A | Homozygous   |
| NC_037638.1 | 9314589 | SNV | 1 | T | A | Homozygous   |
| NC_037638.1 | 9315251 | SNV | 1 | A | T | Homozygous   |
| NC_037638.1 | 9315306 | SNV | 1 | A | T | Heterozygous |
| NC_037638.1 | 9315343 | SNV | 1 | C | T | Homozygous   |
| NC_037638.1 | 9315362 | SNV | 1 | G | T | Heterozygous |
| NC_037638.1 | 9315726 | SNV | 1 | G | A | Homozygous   |
| NC_037638.1 | 9315728 | SNV | 1 | A | G | Homozygous   |
| NC_037638.1 | 9316006 | SNV | 1 | T | C | Homozygous   |
| NC_037638.1 | 9318494 | SNV | 1 | A | T | Heterozygous |
| NC_037638.1 | 9329995 | SNV | 1 | A | T | Homozygous   |
| NC_037638.1 | 9330006 | SNV | 1 | T | A | Heterozygous |
| NC_037638.1 | 9330009 | SNV | 1 | A | C | Homozygous   |
| NC_037638.1 | 9332118 | SNV | 1 | A | T | Homozygous   |
| NC_037638.1 | 9333708 | SNV | 1 | T | C | Homozygous   |
| NC_037638.1 | 9342814 | SNV | 1 | T | C | Heterozygous |
| NC_037638.1 | 9342818 | SNV | 1 | T | A | Homozygous   |
| NC_037638.1 | 9342828 | SNV | 1 | T | C | Heterozygous |
| NC_037638.1 | 9342830 | SNV | 1 | T | C | Heterozygous |
| NC_037638.1 | 9343097 | SNV | 1 | G | A | Homozygous   |
| NC_037638.1 | 9343173 | SNV | 1 | G | C | Homozygous   |
| NC_037638.1 | 9344514 | SNV | 1 | C | T | Heterozygous |
| NC_037638.1 | 9369095 | SNV | 1 | C | T | Homozygous   |
| NC_037638.1 | 9369101 | SNV | 1 | G | T | Homozygous   |
| NC_037638.1 | 9369105 | SNV | 1 | C | T | Homozygous   |
| NC_037638.1 | 9369132 | SNV | 1 | T | A | Homozygous   |
| NC_037638.1 | 9389558 | SNV | 1 | C | T | Heterozygous |
| NC_037638.1 | 9395012 | SNV | 1 | T | C | Homozygous   |
| NC_037638.1 | 9416684 | SNV | 1 | A | G | Homozygous   |
| NC_037638.1 | 9420695 | SNV | 1 | A | G | Heterozygous |
| NC_037638.1 | 9479895 | SNV | 1 | C | A | Heterozygous |
| NC_037638.1 | 9479974 | SNV | 1 | T | C | Heterozygous |
| NC_037638.1 | 9483146 | SNV | 1 | C | T | Heterozygous |
| NC_037638.1 | 9483695 | SNV | 1 | G | A | Homozygous   |
| NC_037638.1 | 9484109 | SNV | 1 | C | T | Homozygous   |
| NC_037638.1 | 9488896 | SNV | 1 | T | C | Homozygous   |



|             |         |     |   |   |   |              |
|-------------|---------|-----|---|---|---|--------------|
| NC_037638.1 | 9496874 | SNV | 1 | G | A | Heterozygous |
| NC_037638.1 | 9496975 | SNV | 1 | T | C | Homozygous   |
| NC_037638.1 | 9496986 | SNV | 1 | C | T | Heterozygous |
| NC_037638.1 | 9497102 | SNV | 1 | C | T | Heterozygous |
| NC_037638.1 | 9497243 | SNV | 1 | A | G | Heterozygous |
| NC_037638.1 | 9497814 | SNV | 1 | C | T | Homozygous   |
| NC_037638.1 | 9497832 | SNV | 1 | T | C | Heterozygous |
| NC_037638.1 | 9517314 | SNV | 1 | C | G | Homozygous   |
| NC_037638.1 | 9517345 | SNV | 1 | T | C | Heterozygous |
| NC_037638.1 | 9517385 | SNV | 1 | T | C | Heterozygous |
| NC_037638.1 | 9517411 | SNV | 1 | G | A | Homozygous   |
| NC_037638.1 | 9517467 | SNV | 1 | T | C | Homozygous   |
| NC_037638.1 | 9517529 | SNV | 1 | C | T | Heterozygous |
| NC_037638.1 | 9517533 | SNV | 1 | G | A | Heterozygous |
| NC_037638.1 | 9517579 | SNV | 1 | T | C | Homozygous   |
| NC_037638.1 | 9517593 | SNV | 1 | G | A | Homozygous   |
| NC_037638.1 | 9517649 | SNV | 1 | C | T | Heterozygous |
| NC_037638.1 | 9517777 | SNV | 1 | C | T | Heterozygous |
| NC_037638.1 | 9545240 | SNV | 1 | G | A | Homozygous   |
| NC_037638.1 | 9545284 | SNV | 1 | T | C | Homozygous   |
| NC_037638.1 | 9545355 | SNV | 1 | C | T | Heterozygous |
| NC_037638.1 | 9545361 | SNV | 1 | C | T | Heterozygous |
| NC_037638.1 | 9545364 | SNV | 1 | G | C | Homozygous   |
| NC_037638.1 | 9545378 | SNV | 1 | A | G | Homozygous   |
| NC_037638.1 | 9545493 | SNV | 1 | T | C | Homozygous   |
| NC_037638.1 | 9545513 | SNV | 1 | G | A | Homozygous   |
| NC_037638.1 | 9545556 | SNV | 1 | T | A | Heterozygous |
| NC_037638.1 | 9545578 | SNV | 1 | A | G | Heterozygous |
| NC_037638.1 | 9555187 | SNV | 1 | G | A | Heterozygous |
| NC_037638.1 | 9565640 | SNV | 1 | G | A | Homozygous   |
| NC_037638.1 | 9565743 | SNV | 1 | G | A | Heterozygous |
| NC_037638.1 | 9565746 | SNV | 1 | A | G | Heterozygous |
| NC_037638.1 | 9565749 | SNV | 1 | G | C | Heterozygous |
| NC_037638.1 | 9566118 | SNV | 1 | T | C | Homozygous   |
| NC_037638.1 | 9566134 | SNV | 1 | G | C | Homozygous   |
| NC_037638.1 | 9595060 | SNV | 1 | C | T | Homozygous   |
| NC_037638.1 | 9595085 | SNV | 1 | T | C | Homozygous   |
| NC_037638.1 | 9601679 | SNV | 1 | G | T | Heterozygous |
| NC_037638.1 | 9601721 | SNV | 1 | T | C | Heterozygous |
| NC_037638.1 | 9601769 | SNV | 1 | A | G | Homozygous   |
| NC_037638.1 | 9601784 | SNV | 1 | T | A | Homozygous   |
| NC_037638.1 | 9603401 | SNV | 1 | T | G | Heterozygous |
| NC_037638.1 | 9603415 | SNV | 1 | C | T | Heterozygous |
| NC_037638.1 | 9603420 | SNV | 1 | T | C | Heterozygous |
| NC_037638.1 | 9603428 | SNV | 1 | A | T | Heterozygous |
| NC_037638.1 | 9603677 | SNV | 1 | C | A | Homozygous   |
| NC_037638.1 | 9612345 | SNV | 1 | A | G | Homozygous   |
| NC_037638.1 | 9612354 | SNV | 1 | A | G | Homozygous   |
| NC_037638.1 | 9612357 | SNV | 1 | A | G | Homozygous   |
| NC_037638.1 | 9612365 | SNV | 1 | A | G | Homozygous   |
| NC_037638.1 | 9628516 | SNV | 1 | C | T | Homozygous   |

|             |          |     |   |   |   |              |
|-------------|----------|-----|---|---|---|--------------|
| NC_037638.1 | 9628523  | SNV | 1 | T | C | Homozygous   |
| NC_037638.1 | 9628547  | SNV | 1 | T | G | Homozygous   |
| NC_037638.1 | 9635676  | SNV | 1 | A | G | Homozygous   |
| NC_037638.1 | 9635819  | SNV | 1 | A | G | Heterozygous |
| NC_037638.1 | 9733605  | SNV | 1 | G | A | Homozygous   |
| NC_037638.1 | 9733862  | SNV | 1 | C | T | Heterozygous |
| NC_037638.1 | 9733869  | SNV | 1 | A | G | Homozygous   |
| NC_037638.1 | 9733880  | SNV | 1 | T | C | Homozygous   |
| NC_037638.1 | 9733885  | SNV | 1 | G | A | Homozygous   |
| NC_037638.1 | 9733900  | SNV | 1 | A | G | Homozygous   |
| NC_037638.1 | 9734064  | SNV | 1 | C | A | Heterozygous |
| NC_037638.1 | 9734067  | SNV | 1 | A | T | Heterozygous |
| NC_037638.1 | 9734142  | SNV | 1 | A | G | Homozygous   |
| NC_037638.1 | 9734146  | SNV | 1 | T | A | Homozygous   |
| NC_037638.1 | 9734476  | SNV | 1 | A | G | Homozygous   |
| NC_037638.1 | 9734592  | SNV | 1 | T | C | Homozygous   |
| NC_037638.1 | 9734723  | SNV | 1 | A | C | Homozygous   |
| NC_037638.1 | 9734725  | SNV | 1 | T | G | Homozygous   |
| NC_037638.1 | 9736173  | SNV | 1 | A | G | Homozygous   |
| NC_037638.1 | 9736233  | SNV | 1 | A | G | Homozygous   |
| NC_037638.1 | 9736269  | SNV | 1 | A | G | Homozygous   |
| NC_037638.1 | 9750179  | SNV | 1 | T | C | Homozygous   |
| NC_037638.1 | 9757370  | SNV | 1 | T | C | Homozygous   |
| NC_037638.1 | 9757486  | SNV | 1 | G | A | Heterozygous |
| NC_037638.1 | 9757587  | SNV | 1 | A | G | Homozygous   |
| NC_037638.1 | 9757684  | SNV | 1 | G | A | Heterozygous |
| NC_037638.1 | 9757695  | SNV | 1 | T | C | Homozygous   |
| NC_037638.1 | 9757792  | SNV | 1 | A | G | Homozygous   |
| NC_037638.1 | 9759694  | SNV | 1 | A | G | Homozygous   |
| NC_037638.1 | 9759722  | SNV | 1 | A | G | Homozygous   |
| NC_037638.1 | 9759726  | SNV | 1 | G | A | Homozygous   |
| NC_037638.1 | 9761750  | SNV | 1 | C | T | Heterozygous |
| NC_037638.1 | 9761758  | SNV | 1 | G | A | Heterozygous |
| NC_037638.1 | 9761772  | SNV | 1 | T | C | Homozygous   |
| NC_037638.1 | 9761907  | SNV | 1 | A | G | Heterozygous |
| NC_037638.1 | 9762081  | SNV | 1 | A | C | Homozygous   |
| NC_037638.1 | 9762556  | SNV | 1 | A | G | Homozygous   |
| NC_037638.1 | 9762708  | SNV | 1 | C | T | Homozygous   |
| NC_037638.1 | 9774328  | SNV | 1 | A | G | Homozygous   |
| NC_037638.1 | 9774345  | SNV | 1 | C | T | Heterozygous |
| NC_037638.1 | 9775690  | SNV | 1 | T | C | Homozygous   |
| NC_037638.1 | 9775722  | SNV | 1 | A | G | Homozygous   |
| NC_037638.1 | 9810446  | SNV | 1 | T | A | Homozygous   |
| NC_037638.1 | 9810450  | SNV | 1 | C | T | Homozygous   |
| NC_037638.1 | 9810452  | SNV | 1 | A | T | Homozygous   |
| NC_037638.1 | 9810465  | SNV | 1 | T | A | Homozygous   |
| NC_037638.1 | 9951097  | SNV | 1 | T | C | Homozygous   |
| NC_037638.1 | 9991465  | SNV | 1 | A | G | Homozygous   |
| NC_037638.1 | 10013631 | SNV | 1 | A | G | Heterozygous |
| NC_037638.1 | 10013657 | SNV | 1 | G | C | Homozygous   |
| NC_037638.1 | 10013763 | SNV | 1 | G | A | Heterozygous |

|             |          |     |   |   |   |              |
|-------------|----------|-----|---|---|---|--------------|
| NC_037638.1 | 10013803 | SNV | 1 | G | C | Homozygous   |
| NC_037638.1 | 10013916 | SNV | 1 | G | A | Homozygous   |
| NC_037638.1 | 10017113 | SNV | 1 | C | T | Heterozygous |
| NC_037638.1 | 10017181 | SNV | 1 | T | C | Homozygous   |
| NC_037638.1 | 10017246 | SNV | 1 | T | A | Homozygous   |
| NC_037638.1 | 10017256 | SNV | 1 | C | T | Heterozygous |
| NC_037638.1 | 10017342 | SNV | 1 | C | G | Heterozygous |
| NC_037638.1 | 10017379 | SNV | 1 | G | A | Heterozygous |
| NC_037638.1 | 10017391 | SNV | 1 | A | G | Heterozygous |
| NC_037638.1 | 10028934 | SNV | 1 | T | C | Homozygous   |
| NC_037638.1 | 10028999 | SNV | 1 | G | A | Homozygous   |
| NC_037638.1 | 10029126 | SNV | 1 | G | A | Heterozygous |
| NC_037638.1 | 10029486 | SNV | 1 | G | A | Heterozygous |
| NC_037638.1 | 10029548 | SNV | 1 | G | A | Heterozygous |
| NC_037638.1 | 10029740 | SNV | 1 | A | G | Homozygous   |
| NC_037638.1 | 10030312 | SNV | 1 | G | A | Heterozygous |
| NC_037638.1 | 10030329 | SNV | 1 | G | A | Homozygous   |
| NC_037638.1 | 10030333 | SNV | 1 | T | A | Heterozygous |
| NC_037638.1 | 10035611 | SNV | 1 | T | C | Homozygous   |
| NC_037638.1 | 10072058 | SNV | 1 | A | T | Homozygous   |
| NC_037638.1 | 10080674 | SNV | 1 | T | C | Homozygous   |
| NC_037638.1 | 10080759 | SNV | 1 | G | A | Heterozygous |
| NC_037638.1 | 10086791 | SNV | 1 | T | C | Heterozygous |
| NC_037638.1 | 10089093 | SNV | 1 | G | A | Homozygous   |
| NC_037638.1 | 10089131 | SNV | 1 | C | T | Heterozygous |
| NC_037638.1 | 10089164 | SNV | 1 | A | C | Homozygous   |
| NC_037638.1 | 10089207 | SNV | 1 | C | T | Heterozygous |
| NC_037638.1 | 10089209 | SNV | 1 | A | G | Homozygous   |
| NC_037638.1 | 10089216 | SNV | 1 | G | A | Homozygous   |
| NC_037638.1 | 10089407 | SNV | 1 | A | G | Homozygous   |
| NC_037638.1 | 10089418 | SNV | 1 | G | A | Heterozygous |
| NC_037638.1 | 10090316 | SNV | 1 | A | T | Homozygous   |
| NC_037638.1 | 10090323 | SNV | 1 | C | T | Homozygous   |
| NC_037638.1 | 10090356 | SNV | 1 | T | C | Homozygous   |
| NC_037638.1 | 10090365 | SNV | 1 | A | C | Homozygous   |
| NC_037638.1 | 10096337 | SNV | 1 | C | T | Homozygous   |
| NC_037638.1 | 10096339 | SNV | 1 | C | T | Homozygous   |
| NC_037638.1 | 10097390 | SNV | 1 | A | T | Homozygous   |
| NC_037638.1 | 10097430 | SNV | 1 | A | T | Homozygous   |
| NC_037638.1 | 10097433 | SNV | 1 | A | T | Homozygous   |
| NC_037638.1 | 10107916 | SNV | 1 | A | G | Heterozygous |
| NC_037638.1 | 10107932 | SNV | 1 | C | T | Homozygous   |
| NC_037638.1 | 10108018 | SNV | 1 | A | T | Homozygous   |
| NC_037638.1 | 10108031 | SNV | 1 | G | C | Heterozygous |
| NC_037638.1 | 10108061 | SNV | 1 | A | G | Homozygous   |
| NC_037638.1 | 10108064 | SNV | 1 | G | C | Homozygous   |
| NC_037638.1 | 10108091 | SNV | 1 | G | C | Heterozygous |
| NC_037638.1 | 10108176 | SNV | 1 | A | G | Heterozygous |
| NC_037638.1 | 10108360 | SNV | 1 | C | T | Heterozygous |
| NC_037638.1 | 10108362 | SNV | 1 | T | C | Homozygous   |
| NC_037638.1 | 10122600 | SNV | 1 | A | G | Heterozygous |

|             |          |     |   |   |   |              |
|-------------|----------|-----|---|---|---|--------------|
| NC_037638.1 | 10122614 | SNV | 1 | A | G | Heterozygous |
| NC_037638.1 | 10122648 | SNV | 1 | A | G | Heterozygous |
| NC_037638.1 | 10122859 | SNV | 1 | G | A | Heterozygous |
| NC_037638.1 | 10136687 | SNV | 1 | C | A | Heterozygous |
| NC_037638.1 | 10137597 | SNV | 1 | T | A | Heterozygous |
| NC_037638.1 | 10137610 | SNV | 1 | T | C | Homozygous   |
| NC_037638.1 | 10137711 | SNV | 1 | T | C | Homozygous   |
| NC_037638.1 | 10137956 | SNV | 1 | C | T | Heterozygous |
| NC_037638.1 | 10164915 | SNV | 1 | G | A | Heterozygous |
| NC_037638.1 | 10168007 | SNV | 1 | T | C | Homozygous   |
| NC_037638.1 | 10168032 | SNV | 1 | T | C | Homozygous   |
| NC_037638.1 | 10172569 | SNV | 1 | C | T | Homozygous   |
| NC_037638.1 | 10178374 | SNV | 1 | T | A | Homozygous   |
| NC_037638.1 | 10178377 | SNV | 1 | T | A | Homozygous   |
| NC_037638.1 | 10178383 | SNV | 1 | T | A | Homozygous   |
| NC_037638.1 | 10178386 | SNV | 1 | G | C | Homozygous   |
| NC_037638.1 | 10178388 | SNV | 1 | A | G | Homozygous   |
| NC_037638.1 | 10178395 | SNV | 1 | C | A | Homozygous   |
| NC_037638.1 | 10178401 | SNV | 1 | T | A | Heterozygous |
| NC_037638.1 | 10178403 | SNV | 1 | C | T | Homozygous   |
| NC_037638.1 | 10179703 | SNV | 1 | A | G | Homozygous   |
| NC_037638.1 | 10179705 | SNV | 1 | T | G | Homozygous   |
| NC_037638.1 | 10179709 | SNV | 1 | A | C | Homozygous   |
| NC_037638.1 | 10179728 | SNV | 1 | A | C | Homozygous   |
| NC_037638.1 | 10179733 | SNV | 1 | G | T | Homozygous   |
| NC_037638.1 | 10182519 | SNV | 1 | C | G | Homozygous   |
| NC_037638.1 | 10182600 | SNV | 1 | A | G | Homozygous   |
| NC_037638.1 | 10183038 | SNV | 1 | T | C | Homozygous   |
| NC_037638.1 | 10184051 | SNV | 1 | T | A | Homozygous   |
| NC_037638.1 | 10202328 | SNV | 1 | T | C | Heterozygous |
| NC_037638.1 | 10202342 | SNV | 1 | T | G | Homozygous   |
| NC_037638.1 | 10210975 | SNV | 1 | C | T | Heterozygous |
| NC_037638.1 | 10210994 | SNV | 1 | G | T | Homozygous   |
| NC_037638.1 | 10211480 | SNV | 1 | G | T | Homozygous   |
| NC_037638.1 | 10211585 | SNV | 1 | G | A | Heterozygous |
| NC_037638.1 | 10211591 | SNV | 1 | C | T | Homozygous   |
| NC_037638.1 | 10211779 | SNV | 1 | T | C | Homozygous   |
| NC_037638.1 | 10211808 | SNV | 1 | G | A | Homozygous   |
| NC_037638.1 | 10227840 | SNV | 1 | T | G | Heterozygous |
| NC_037638.1 | 10228343 | SNV | 1 | T | G | Homozygous   |
| NC_037638.1 | 10229398 | SNV | 1 | A | T | Homozygous   |
| NC_037638.1 | 10229581 | SNV | 1 | G | T | Homozygous   |
| NC_037638.1 | 10230855 | SNV | 1 | G | A | Heterozygous |
| NC_037638.1 | 10231246 | SNV | 1 | T | C | Homozygous   |
| NC_037638.1 | 10231427 | SNV | 1 | C | T | Heterozygous |
| NC_037638.1 | 10231433 | SNV | 1 | T | C | Homozygous   |
| NC_037638.1 | 10233558 | SNV | 1 | T | A | Homozygous   |
| NC_037638.1 | 10233565 | SNV | 1 | C | T | Homozygous   |
| NC_037638.1 | 10233575 | SNV | 1 | C | T | Heterozygous |
| NC_037638.1 | 10233588 | SNV | 1 | A | T | Homozygous   |
| NC_037638.1 | 10233592 | SNV | 1 | T | A | Homozygous   |

|             |          |     |   |   |   |              |
|-------------|----------|-----|---|---|---|--------------|
| NC_037638.1 | 10233635 | SNV | 1 | T | A | Heterozygous |
| NC_037638.1 | 10233892 | SNV | 1 | T | C | Homozygous   |
| NC_037638.1 | 10234104 | SNV | 1 | A | G | Homozygous   |
| NC_037638.1 | 10234730 | SNV | 1 | C | T | Heterozygous |
| NC_037638.1 | 10234738 | SNV | 1 | T | C | Homozygous   |
| NC_037638.1 | 10235405 | SNV | 1 | G | A | Homozygous   |
| NC_037638.1 | 10236555 | SNV | 1 | C | T | Heterozygous |
| NC_037638.1 | 10236595 | SNV | 1 | A | T | Homozygous   |
| NC_037638.1 | 10237320 | SNV | 1 | C | G | Homozygous   |
| NC_037638.1 | 10237580 | SNV | 1 | C | T | Homozygous   |
| NC_037638.1 | 10237932 | SNV | 1 | C | T | Heterozygous |
| NC_037638.1 | 10237935 | SNV | 1 | C | T | Heterozygous |
| NC_037638.1 | 10237953 | SNV | 1 | T | C | Heterozygous |
| NC_037638.1 | 10238000 | SNV | 1 | G | T | Heterozygous |
| NC_037638.1 | 10238236 | SNV | 1 | A | G | Homozygous   |
| NC_037638.1 | 10238405 | SNV | 1 | T | C | Heterozygous |
| NC_037638.1 | 10238514 | SNV | 1 | C | G | Heterozygous |
| NC_037638.1 | 10238591 | SNV | 1 | T | C | Heterozygous |
| NC_037638.1 | 10238598 | SNV | 1 | T | C | Heterozygous |
| NC_037638.1 | 10238651 | SNV | 1 | T | C | Homozygous   |
| NC_037638.1 | 10239126 | SNV | 1 | A | G | Homozygous   |
| NC_037638.1 | 10239529 | SNV | 1 | G | A | Heterozygous |
| NC_037638.1 | 10239601 | SNV | 1 | T | G | Homozygous   |
| NC_037638.1 | 10241842 | SNV | 1 | T | C | Homozygous   |
| NC_037638.1 | 10243176 | SNV | 1 | C | G | Heterozygous |
| NC_037638.1 | 10244026 | SNV | 1 | T | C | Homozygous   |
| NC_037638.1 | 10244138 | SNV | 1 | T | G | Heterozygous |
| NC_037638.1 | 10244181 | SNV | 1 | C | T | Homozygous   |
| NC_037638.1 | 10244294 | SNV | 1 | G | A | Homozygous   |
| NC_037638.1 | 10244352 | SNV | 1 | G | A | Homozygous   |
| NC_037638.1 | 10245849 | SNV | 1 | G | A | Heterozygous |
| NC_037638.1 | 10245868 | SNV | 1 | G | A | Heterozygous |
| NC_037638.1 | 10246896 | SNV | 1 | A | G | Heterozygous |
| NC_037638.1 | 10246917 | SNV | 1 | A | G | Homozygous   |
| NC_037638.1 | 10247073 | SNV | 1 | A | G | Homozygous   |
| NC_037638.1 | 10250597 | SNV | 1 | G | T | Homozygous   |
| NC_037638.1 | 10250742 | SNV | 1 | G | A | Heterozygous |
| NC_037638.1 | 10250840 | SNV | 1 | A | T | Homozygous   |
| NC_037638.1 | 10250842 | SNV | 1 | A | C | Homozygous   |
| NC_037638.1 | 10250860 | SNV | 1 | C | A | Heterozygous |
| NC_037638.1 | 10250873 | SNV | 1 | T | G | Heterozygous |
| NC_037638.1 | 10250881 | SNV | 1 | T | G | Heterozygous |
| NC_037638.1 | 10250883 | SNV | 1 | A | G | Heterozygous |
| NC_037638.1 | 10252642 | SNV | 1 | A | G | Homozygous   |
| NC_037638.1 | 10252651 | SNV | 1 | G | A | Heterozygous |
| NC_037638.1 | 10252654 | SNV | 1 | A | G | Heterozygous |
| NC_037638.1 | 10252656 | SNV | 1 | C | A | Heterozygous |
| NC_037638.1 | 10252663 | SNV | 1 | G | A | Heterozygous |
| NC_037638.1 | 10257164 | SNV | 1 | C | T | Heterozygous |
| NC_037638.1 | 10257190 | SNV | 1 | C | T | Heterozygous |
| NC_037638.1 | 10257193 | SNV | 1 | G | T | Heterozygous |

|             |          |     |   |   |   |              |
|-------------|----------|-----|---|---|---|--------------|
| NC_037638.1 | 10257205 | SNV | 1 | T | A | Heterozygous |
| NC_037638.1 | 10257207 | SNV | 1 | G | T | Heterozygous |
| NC_037638.1 | 10257212 | SNV | 1 | T | C | Homozygous   |
| NC_037638.1 | 10257225 | SNV | 1 | G | A | Heterozygous |
| NC_037638.1 | 10257228 | SNV | 1 | T | C | Heterozygous |
| NC_037638.1 | 10257261 | SNV | 1 | A | G | Homozygous   |
| NC_037638.1 | 10257268 | SNV | 1 | A | G | Homozygous   |
| NC_037638.1 | 10257456 | SNV | 1 | A | G | Homozygous   |
| NC_037638.1 | 10257490 | SNV | 1 | C | T | Homozygous   |
| NC_037638.1 | 10266755 | SNV | 1 | G | A | Heterozygous |
| NC_037638.1 | 10266815 | SNV | 1 | A | G | Heterozygous |
| NC_037638.1 | 10267234 | SNV | 1 | T | C | Heterozygous |
| NC_037638.1 | 10267469 | SNV | 1 | C | T | Heterozygous |
| NC_037638.1 | 10267504 | SNV | 1 | C | T | Heterozygous |
| NC_037638.1 | 10267506 | SNV | 1 | A | T | Homozygous   |
| NC_037638.1 | 10267511 | SNV | 1 | T | C | Heterozygous |
| NC_037638.1 | 10267520 | SNV | 1 | C | T | Homozygous   |
| NC_037638.1 | 10268006 | SNV | 1 | G | A | Heterozygous |
| NC_037638.1 | 10268045 | SNV | 1 | T | C | Heterozygous |
| NC_037638.1 | 10275481 | SNV | 1 | G | A | Heterozygous |
| NC_037638.1 | 10275488 | SNV | 1 | T | G | Homozygous   |
| NC_037638.1 | 10275499 | SNV | 1 | T | C | Heterozygous |
| NC_037638.1 | 10275932 | SNV | 1 | C | G | Heterozygous |
| NC_037638.1 | 10276045 | SNV | 1 | A | G | Heterozygous |
| NC_037638.1 | 10276052 | SNV | 1 | A | G | Homozygous   |
| NC_037638.1 | 10276136 | SNV | 1 | T | C | Homozygous   |
| NC_037638.1 | 10276148 | SNV | 1 | T | C | Heterozygous |
| NC_037638.1 | 10276791 | SNV | 1 | G | A | Homozygous   |
| NC_037638.1 | 10281534 | SNV | 1 | A | T | Homozygous   |
| NC_037638.1 | 10281539 | SNV | 1 | C | T | Homozygous   |
| NC_037638.1 | 10281557 | SNV | 1 | C | A | Homozygous   |
| NC_037638.1 | 10281706 | SNV | 1 | G | C | Homozygous   |
| NC_037638.1 | 10281877 | SNV | 1 | C | T | Homozygous   |
| NC_037638.1 | 10281897 | SNV | 1 | T | C | Homozygous   |
| NC_037638.1 | 10285572 | SNV | 1 | C | G | Homozygous   |
| NC_037638.1 | 10285579 | SNV | 1 | C | T | Homozygous   |
| NC_037638.1 | 10285599 | SNV | 1 | A | G | Homozygous   |
| NC_037638.1 | 10285602 | SNV | 1 | A | G | Homozygous   |
| NC_037638.1 | 10285612 | SNV | 1 | G | A | Homozygous   |
| NC_037638.1 | 10285619 | SNV | 1 | A | G | Homozygous   |
| NC_037638.1 | 10286457 | SNV | 1 | T | C | Homozygous   |
| NC_037638.1 | 10286467 | SNV | 1 | G | T | Homozygous   |
| NC_037638.1 | 10290374 | SNV | 1 | G | A | Homozygous   |
| NC_037638.1 | 10290415 | SNV | 1 | A | G | Homozygous   |
| NC_037638.1 | 10290432 | SNV | 1 | A | G | Homozygous   |
| NC_037638.1 | 10290439 | SNV | 1 | A | G | Homozygous   |
| NC_037638.1 | 10290502 | SNV | 1 | G | A | Heterozygous |
| NC_037638.1 | 10290569 | SNV | 1 | A | G | Heterozygous |
| NC_037638.1 | 10292247 | SNV | 1 | C | T | Heterozygous |
| NC_037638.1 | 10292302 | SNV | 1 | T | C | Homozygous   |
| NC_037638.1 | 10292363 | SNV | 1 | C | T | Homozygous   |

|             |          |     |   |   |   |              |
|-------------|----------|-----|---|---|---|--------------|
| NC_037638.1 | 10297386 | SNV | 1 | G | A | Heterozygous |
| NC_037638.1 | 10297428 | SNV | 1 | G | A | Heterozygous |
| NC_037638.1 | 10297442 | SNV | 1 | C | T | Heterozygous |
| NC_037638.1 | 10297697 | SNV | 1 | C | T | Homozygous   |
| NC_037638.1 | 10297730 | SNV | 1 | T | C | Homozygous   |
| NC_037638.1 | 10298429 | SNV | 1 | C | T | Heterozygous |
| NC_037638.1 | 10299074 | SNV | 1 | C | T | Homozygous   |
| NC_037638.1 | 10299085 | SNV | 1 | C | T | Heterozygous |
| NC_037638.1 | 10299135 | SNV | 1 | A | C | Homozygous   |
| NC_037638.1 | 10299216 | SNV | 1 | A | G | Homozygous   |
| NC_037638.1 | 10299279 | SNV | 1 | T | C | Homozygous   |
| NC_037638.1 | 10299283 | SNV | 1 | C | T | Heterozygous |
| NC_037638.1 | 10300717 | SNV | 1 | A | G | Homozygous   |
| NC_037638.1 | 10300720 | SNV | 1 | T | C | Homozygous   |
| NC_037638.1 | 10301301 | SNV | 1 | C | T | Homozygous   |
| NC_037638.1 | 10301605 | SNV | 1 | A | G | Homozygous   |
| NC_037638.1 | 10301643 | SNV | 1 | A | G | Homozygous   |
| NC_037638.1 | 10301655 | SNV | 1 | A | G | Homozygous   |
| NC_037638.1 | 10301770 | SNV | 1 | A | G | Homozygous   |
| NC_037638.1 | 10301791 | SNV | 1 | G | A | Heterozygous |
| NC_037638.1 | 10301829 | SNV | 1 | G | A | Heterozygous |
| NC_037638.1 | 10301955 | SNV | 1 | G | T | Homozygous   |
| NC_037638.1 | 10302080 | SNV | 1 | C | T | Heterozygous |
| NC_037638.1 | 10302113 | SNV | 1 | G | A | Homozygous   |
| NC_037638.1 | 10302136 | SNV | 1 | A | G | Heterozygous |
| NC_037638.1 | 10302190 | SNV | 1 | T | C | Homozygous   |
| NC_037638.1 | 10302194 | SNV | 1 | A | T | Heterozygous |
| NC_037638.1 | 10302200 | SNV | 1 | T | C | Homozygous   |
| NC_037638.1 | 10302233 | SNV | 1 | C | T | Heterozygous |
| NC_037638.1 | 10302345 | SNV | 1 | T | G | Heterozygous |
| NC_037638.1 | 10302356 | SNV | 1 | G | A | Heterozygous |
| NC_037638.1 | 10302384 | SNV | 1 | T | C | Heterozygous |
| NC_037638.1 | 10302386 | SNV | 1 | T | C | Homozygous   |
| NC_037638.1 | 10302444 | SNV | 1 | G | C | Heterozygous |
| NC_037638.1 | 10302475 | SNV | 1 | T | C | Homozygous   |
| NC_037638.1 | 10302480 | SNV | 1 | A | G | Homozygous   |
| NC_037638.1 | 10302526 | SNV | 1 | G | A | Homozygous   |
| NC_037638.1 | 10302554 | SNV | 1 | T | C | Heterozygous |
| NC_037638.1 | 10302622 | SNV | 1 | G | C | Homozygous   |
| NC_037638.1 | 10302635 | SNV | 1 | T | C | Homozygous   |
| NC_037638.1 | 10302646 | SNV | 1 | T | C | Heterozygous |
| NC_037638.1 | 10302667 | SNV | 1 | G | A | Homozygous   |
| NC_037638.1 | 10302711 | SNV | 1 | C | T | Heterozygous |
| NC_037638.1 | 10302723 | SNV | 1 | T | C | Heterozygous |
| NC_037638.1 | 10302738 | SNV | 1 | C | T | Homozygous   |
| NC_037638.1 | 10302762 | SNV | 1 | A | G | Heterozygous |
| NC_037638.1 | 10302772 | SNV | 1 | A | G | Homozygous   |
| NC_037638.1 | 10302919 | SNV | 1 | C | A | Heterozygous |
| NC_037638.1 | 10307587 | SNV | 1 | A | G | Heterozygous |
| NC_037638.1 | 10307587 | SNV | 1 | A | T | Heterozygous |
| NC_037638.1 | 10307590 | SNV | 1 | A | G | Homozygous   |

|             |          |     |   |   |   |              |
|-------------|----------|-----|---|---|---|--------------|
| NC_037638.1 | 10307607 | SNV | 1 | C | T | Heterozygous |
| NC_037638.1 | 10328217 | SNV | 1 | C | T | Homozygous   |
| NC_037638.1 | 10328248 | SNV | 1 | C | T | Homozygous   |
| NC_037638.1 | 10332252 | SNV | 1 | C | T | Heterozygous |
| NC_037638.1 | 10332475 | SNV | 1 | C | T | Heterozygous |
| NC_037638.1 | 10334900 | SNV | 1 | A | G | Heterozygous |
| NC_037638.1 | 10334907 | SNV | 1 | T | C | Heterozygous |
| NC_037638.1 | 10334912 | SNV | 1 | A | T | Heterozygous |
| NC_037638.1 | 10334915 | SNV | 1 | A | G | Heterozygous |
| NC_037638.1 | 10334921 | SNV | 1 | A | G | Heterozygous |
| NC_037638.1 | 10334932 | SNV | 1 | T | C | Heterozygous |
| NC_037638.1 | 10336548 | SNV | 1 | C | T | Homozygous   |
| NC_037638.1 | 10336727 | SNV | 1 | C | T | Heterozygous |
| NC_037638.1 | 10337912 | SNV | 1 | G | A | Homozygous   |
| NC_037638.1 | 10341187 | SNV | 1 | T | C | Homozygous   |
| NC_037638.1 | 10341245 | SNV | 1 | T | C | Homozygous   |
| NC_037638.1 | 10341252 | SNV | 1 | T | C | Homozygous   |
| NC_037638.1 | 10341967 | SNV | 1 | A | T | Heterozygous |
| NC_037638.1 | 10342027 | SNV | 1 | C | T | Heterozygous |
| NC_037638.1 | 10342032 | SNV | 1 | T | C | Heterozygous |
| NC_037638.1 | 10346365 | SNV | 1 | C | T | Heterozygous |
| NC_037638.1 | 10346434 | SNV | 1 | T | C | Heterozygous |
| NC_037638.1 | 10348993 | SNV | 1 | T | C | Heterozygous |
| NC_037638.1 | 10348996 | SNV | 1 | T | C | Heterozygous |
| NC_037638.1 | 10349251 | SNV | 1 | C | T | Heterozygous |
| NC_037638.1 | 10349289 | SNV | 1 | A | G | Homozygous   |
| NC_037638.1 | 10349312 | SNV | 1 | T | C | Homozygous   |
| NC_037638.1 | 10349771 | SNV | 1 | C | G | Homozygous   |
| NC_037638.1 | 10351626 | SNV | 1 | G | C | Homozygous   |
| NC_037638.1 | 10356955 | SNV | 1 | C | A | Homozygous   |
| NC_037638.1 | 10356987 | SNV | 1 | A | G | Homozygous   |
| NC_037638.1 | 10357000 | SNV | 1 | G | A | Heterozygous |
| NC_037638.1 | 10358358 | SNV | 1 | A | G | Homozygous   |
| NC_037638.1 | 10358365 | SNV | 1 | T | A | Homozygous   |
| NC_037638.1 | 10358374 | SNV | 1 | G | C | Heterozygous |
| NC_037638.1 | 10362531 | SNV | 1 | A | G | Heterozygous |
| NC_037638.1 | 10362543 | SNV | 1 | A | G | Heterozygous |
| NC_037638.1 | 10362545 | SNV | 1 | A | G | Heterozygous |
| NC_037638.1 | 10362769 | SNV | 1 | C | T | Homozygous   |
| NC_037638.1 | 10362780 | SNV | 1 | A | T | Heterozygous |
| NC_037638.1 | 10362785 | SNV | 1 | C | T | Heterozygous |
| NC_037638.1 | 10362787 | SNV | 1 | A | T | Heterozygous |
| NC_037638.1 | 10369524 | SNV | 1 | G | A | Heterozygous |
| NC_037638.1 | 10369527 | SNV | 1 | G | A | Homozygous   |
| NC_037638.1 | 10369548 | SNV | 1 | T | G | Homozygous   |
| NC_037638.1 | 10385546 | SNV | 1 | G | A | Homozygous   |
| NC_037638.1 | 10385620 | SNV | 1 | C | T | Homozygous   |
| NC_037638.1 | 10405786 | SNV | 1 | T | C | Homozygous   |
| NC_037638.1 | 10406110 | SNV | 1 | C | T | Heterozygous |
| NC_037638.1 | 10406143 | SNV | 1 | C | T | Homozygous   |
| NC_037638.1 | 10407357 | SNV | 1 | A | G | Homozygous   |



|             |          |     |   |   |   |              |
|-------------|----------|-----|---|---|---|--------------|
| NC_037638.1 | 10407397 | SNV | 1 | G | A | Homozygous   |
| NC_037638.1 | 10408480 | SNV | 1 | T | A | Homozygous   |
| NC_037638.1 | 10408482 | SNV | 1 | G | T | Homozygous   |
| NC_037638.1 | 10408489 | SNV | 1 | C | G | Homozygous   |
| NC_037638.1 | 10408506 | SNV | 1 | G | C | Homozygous   |
| NC_037638.1 | 10408516 | SNV | 1 | T | G | Homozygous   |
| NC_037638.1 | 10408518 | SNV | 1 | G | T | Homozygous   |
| NC_037638.1 | 10414964 | SNV | 1 | G | T | Homozygous   |
| NC_037638.1 | 10414970 | SNV | 1 | A | G | Homozygous   |
| NC_037638.1 | 10417879 | SNV | 1 | C | A | Homozygous   |
| NC_037638.1 | 10417918 | SNV | 1 | G | A | Homozygous   |
| NC_037638.1 | 10417920 | SNV | 1 | G | A | Homozygous   |
| NC_037638.1 | 10423060 | SNV | 1 | C | T | Homozygous   |
| NC_037638.1 | 10435201 | SNV | 1 | C | T | Homozygous   |
| NC_037638.1 | 10435214 | SNV | 1 | A | T | Homozygous   |
| NC_037638.1 | 10451825 | SNV | 1 | A | G | Homozygous   |
| NC_037638.1 | 10455405 | SNV | 1 | A | T | Heterozygous |
| NC_037638.1 | 10455835 | SNV | 1 | C | T | Heterozygous |
| NC_037638.1 | 10455863 | SNV | 1 | A | G | Heterozygous |
| NC_037638.1 | 10455921 | SNV | 1 | G | A | Homozygous   |
| NC_037638.1 | 10456495 | SNV | 1 | T | C | Heterozygous |
| NC_037638.1 | 10456501 | SNV | 1 | T | A | Heterozygous |
| NC_037638.1 | 10456506 | SNV | 1 | A | G | Heterozygous |
| NC_037638.1 | 10456982 | SNV | 1 | G | C | Heterozygous |
| NC_037638.1 | 10457028 | SNV | 1 | C | T | Heterozygous |
| NC_037638.1 | 10457224 | SNV | 1 | A | G | Homozygous   |
| NC_037638.1 | 10458304 | SNV | 1 | A | G | Homozygous   |
| NC_037638.1 | 10458495 | SNV | 1 | G | A | Homozygous   |
| NC_037638.1 | 10458577 | SNV | 1 | A | T | Heterozygous |
| NC_037638.1 | 10458586 | SNV | 1 | G | A | Heterozygous |
| NC_037638.1 | 10458611 | SNV | 1 | T | C | Heterozygous |
| NC_037638.1 | 10458912 | SNV | 1 | A | G | Homozygous   |
| NC_037638.1 | 10459912 | SNV | 1 | A | G | Homozygous   |
| NC_037638.1 | 10464341 | SNV | 1 | G | A | Heterozygous |
| NC_037638.1 | 10464714 | SNV | 1 | G | A | Heterozygous |
| NC_037638.1 | 10464777 | SNV | 1 | C | T | Heterozygous |
| NC_037638.1 | 10464807 | SNV | 1 | C | G | Homozygous   |
| NC_037638.1 | 10464837 | SNV | 1 | A | G | Homozygous   |
| NC_037638.1 | 10465651 | SNV | 1 | G | C | Heterozygous |
| NC_037638.1 | 10468179 | SNV | 1 | C | T | Heterozygous |
| NC_037638.1 | 10468239 | SNV | 1 | G | C | Heterozygous |
| NC_037638.1 | 10468242 | SNV | 1 | G | A | Heterozygous |
| NC_037638.1 | 10468715 | SNV | 1 | T | C | Homozygous   |
| NC_037638.1 | 10468900 | SNV | 1 | T | A | Homozygous   |
| NC_037638.1 | 10469178 | SNV | 1 | A | C | Homozygous   |
| NC_037638.1 | 10469618 | SNV | 1 | T | C | Homozygous   |
| NC_037638.1 | 10470497 | SNV | 1 | G | A | Heterozygous |
| NC_037638.1 | 10470643 | SNV | 1 | G | A | Heterozygous |
| NC_037638.1 | 10470905 | SNV | 1 | T | C | Homozygous   |
| NC_037638.1 | 10471200 | SNV | 1 | C | T | Homozygous   |
| NC_037638.1 | 10471702 | SNV | 1 | C | T | Heterozygous |

|             |          |     |   |   |   |              |
|-------------|----------|-----|---|---|---|--------------|
| NC_037638.1 | 10473863 | SNV | 1 | T | G | Heterozygous |
| NC_037638.1 | 10473886 | SNV | 1 | A | C | Heterozygous |
| NC_037638.1 | 10473951 | SNV | 1 | A | C | Homozygous   |
| NC_037638.1 | 10474071 | SNV | 1 | A | G | Homozygous   |
| NC_037638.1 | 10474116 | SNV | 1 | G | A | Heterozygous |
| NC_037638.1 | 10474791 | SNV | 1 | T | A | Homozygous   |
| NC_037638.1 | 10475562 | SNV | 1 | A | T | Heterozygous |
| NC_037638.1 | 10475640 | SNV | 1 | T | C | Heterozygous |
| NC_037638.1 | 10475673 | SNV | 1 | T | A | Homozygous   |
| NC_037638.1 | 10475908 | SNV | 1 | G | A | Homozygous   |
| NC_037638.1 | 10478798 | SNV | 1 | G | A | Homozygous   |
| NC_037638.1 | 10478863 | SNV | 1 | T | C | Heterozygous |
| NC_037638.1 | 10479332 | SNV | 1 | A | G | Homozygous   |
| NC_037638.1 | 10479594 | SNV | 1 | A | G | Heterozygous |
| NC_037638.1 | 10479993 | SNV | 1 | A | G | Homozygous   |
| NC_037638.1 | 10480553 | SNV | 1 | T | C | Homozygous   |
| NC_037638.1 | 10480640 | SNV | 1 | G | A | Heterozygous |
| NC_037638.1 | 10485281 | SNV | 1 | C | T | Heterozygous |
| NC_037638.1 | 10485360 | SNV | 1 | A | G | Homozygous   |
| NC_037638.1 | 10493483 | SNV | 1 | A | G | Homozygous   |
| NC_037638.1 | 10493577 | SNV | 1 | G | A | Homozygous   |
| NC_037638.1 | 10493586 | SNV | 1 | G | A | Homozygous   |
| NC_037638.1 | 10493959 | SNV | 1 | G | A | Heterozygous |
| NC_037638.1 | 10554041 | SNV | 1 | G | A | Heterozygous |
| NC_037638.1 | 10554126 | SNV | 1 | A | G | Heterozygous |
| NC_037638.1 | 10554346 | SNV | 1 | C | T | Heterozygous |
| NC_037638.1 | 10568155 | SNV | 1 | C | T | Homozygous   |
| NC_037638.1 | 10568164 | SNV | 1 | T | C | Heterozygous |
| NC_037638.1 | 10568194 | SNV | 1 | T | C | Homozygous   |
| NC_037638.1 | 10568200 | SNV | 1 | T | C | Heterozygous |
| NC_037638.1 | 10570821 | SNV | 1 | T | C | Homozygous   |
| NC_037638.1 | 10570895 | SNV | 1 | A | G | Homozygous   |
| NC_037638.1 | 10570920 | SNV | 1 | T | C | Homozygous   |
| NC_037638.1 | 10570975 | SNV | 1 | C | G | Heterozygous |
| NC_037638.1 | 10571185 | SNV | 1 | G | A | Heterozygous |
| NC_037638.1 | 10571274 | SNV | 1 | A | G | Heterozygous |
| NC_037638.1 | 10571332 | SNV | 1 | C | T | Heterozygous |
| NC_037638.1 | 10571376 | SNV | 1 | A | G | Homozygous   |
| NC_037638.1 | 10571425 | SNV | 1 | T | C | Heterozygous |
| NC_037638.1 | 10571435 | SNV | 1 | A | G | Homozygous   |
| NC_037638.1 | 10571461 | SNV | 1 | T | C | Heterozygous |
| NC_037638.1 | 10571489 | SNV | 1 | T | A | Heterozygous |
| NC_037638.1 | 10571490 | SNV | 1 | A | G | Heterozygous |
| NC_037638.1 | 10571576 | SNV | 1 | T | C | Homozygous   |
| NC_037638.1 | 10571607 | SNV | 1 | A | C | Heterozygous |
| NC_037638.1 | 10571611 | SNV | 1 | A | C | Heterozygous |
| NC_037638.1 | 10571613 | SNV | 1 | T | A | Heterozygous |
| NC_037638.1 | 10571677 | SNV | 1 | T | C | Homozygous   |
| NC_037638.1 | 10572129 | SNV | 1 | C | T | Heterozygous |
| NC_037638.1 | 10572141 | SNV | 1 | G | A | Heterozygous |
| NC_037638.1 | 10572146 | SNV | 1 | G | A | Heterozygous |

|             |          |     |   |   |   |              |
|-------------|----------|-----|---|---|---|--------------|
| NC_037638.1 | 10574095 | SNV | 1 | T | A | Homozygous   |
| NC_037638.1 | 10574141 | SNV | 1 | A | G | Heterozygous |
| NC_037638.1 | 10574592 | SNV | 1 | T | C | Homozygous   |
| NC_037638.1 | 10574600 | SNV | 1 | T | C | Homozygous   |
| NC_037638.1 | 10574604 | SNV | 1 | C | T | Homozygous   |
| NC_037638.1 | 10575925 | SNV | 1 | T | C | Homozygous   |
| NC_037638.1 | 10575928 | SNV | 1 | A | G | Heterozygous |
| NC_037638.1 | 10576245 | SNV | 1 | T | C | Heterozygous |
| NC_037638.1 | 10576730 | SNV | 1 | G | A | Heterozygous |
| NC_037638.1 | 10576740 | SNV | 1 | A | G | Homozygous   |
| NC_037638.1 | 10576760 | SNV | 1 | C | T | Homozygous   |
| NC_037638.1 | 10576778 | SNV | 1 | G | A | Homozygous   |
| NC_037638.1 | 10576851 | SNV | 1 | C | T | Homozygous   |
| NC_037638.1 | 10576898 | SNV | 1 | T | C | Homozygous   |
| NC_037638.1 | 10577595 | SNV | 1 | A | G | Homozygous   |
| NC_037638.1 | 10577643 | SNV | 1 | T | C | Homozygous   |
| NC_037638.1 | 10577750 | SNV | 1 | G | A | Heterozygous |
| NC_037638.1 | 10577765 | SNV | 1 | A | G | Heterozygous |
| NC_037638.1 | 10577771 | SNV | 1 | A | G | Heterozygous |
| NC_037638.1 | 10577777 | SNV | 1 | T | C | Heterozygous |
| NC_037638.1 | 10577833 | SNV | 1 | T | G | Homozygous   |
| NC_037638.1 | 10578602 | SNV | 1 | G | A | Heterozygous |
| NC_037638.1 | 10580392 | SNV | 1 | C | G | Homozygous   |
| NC_037638.1 | 10582309 | SNV | 1 | A | G | Homozygous   |
| NC_037638.1 | 10582327 | SNV | 1 | G | A | Heterozygous |
| NC_037638.1 | 10582367 | SNV | 1 | T | C | Homozygous   |
| NC_037638.1 | 10582673 | SNV | 1 | A | G | Homozygous   |
| NC_037638.1 | 10582911 | SNV | 1 | T | C | Homozygous   |
| NC_037638.1 | 10582949 | SNV | 1 | C | T | Heterozygous |
| NC_037638.1 | 10586197 | SNV | 1 | T | G | Homozygous   |
| NC_037638.1 | 10586199 | SNV | 1 | A | C | Homozygous   |
| NC_037638.1 | 10586202 | SNV | 1 | G | C | Homozygous   |
| NC_037638.1 | 10588224 | SNV | 1 | G | A | Heterozygous |
| NC_037638.1 | 10588610 | SNV | 1 | G | A | Homozygous   |
| NC_037638.1 | 10591939 | SNV | 1 | A | G | Heterozygous |
| NC_037638.1 | 10591957 | SNV | 1 | A | G | Heterozygous |
| NC_037638.1 | 10591974 | SNV | 1 | G | A | Heterozygous |
| NC_037638.1 | 10629140 | SNV | 1 | T | A | Heterozygous |
| NC_037638.1 | 10630695 | SNV | 1 | A | G | Homozygous   |
| NC_037638.1 | 10648859 | SNV | 1 | C | G | Heterozygous |
| NC_037638.1 | 10649295 | SNV | 1 | T | C | Homozygous   |
| NC_037638.1 | 10649339 | SNV | 1 | T | G | Heterozygous |
| NC_037638.1 | 10649384 | SNV | 1 | A | G | Heterozygous |
| NC_037638.1 | 10649443 | SNV | 1 | A | G | Heterozygous |
| NC_037638.1 | 10682502 | SNV | 1 | G | A | Homozygous   |
| NC_037638.1 | 10682505 | SNV | 1 | T | C | Homozygous   |
| NC_037638.1 | 10682511 | SNV | 1 | A | G | Homozygous   |
| NC_037638.1 | 10707566 | SNV | 1 | G | A | Heterozygous |
| NC_037638.1 | 10707571 | SNV | 1 | G | A | Heterozygous |
| NC_037638.1 | 10710080 | SNV | 1 | C | T | Homozygous   |
| NC_037638.1 | 10716827 | SNV | 1 | A | C | Homozygous   |

|             |          |     |   |   |   |              |
|-------------|----------|-----|---|---|---|--------------|
| NC_037638.1 | 10717266 | SNV | 1 | A | G | Heterozygous |
| NC_037638.1 | 10720157 | SNV | 1 | G | A | Heterozygous |
| NC_037638.1 | 10720703 | SNV | 1 | G | A | Heterozygous |
| NC_037638.1 | 10722888 | SNV | 1 | G | A | Heterozygous |
| NC_037638.1 | 10723092 | SNV | 1 | C | T | Heterozygous |
| NC_037638.1 | 10724821 | SNV | 1 | A | G | Homozygous   |
| NC_037638.1 | 10728029 | SNV | 1 | A | G | Homozygous   |
| NC_037638.1 | 10728151 | SNV | 1 | T | G | Homozygous   |
| NC_037638.1 | 10728154 | SNV | 1 | A | C | Homozygous   |
| NC_037638.1 | 10728320 | SNV | 1 | T | C | Homozygous   |
| NC_037638.1 | 10728422 | SNV | 1 | G | T | Homozygous   |
| NC_037638.1 | 10730673 | SNV | 1 | G | A | Homozygous   |
| NC_037638.1 | 10734156 | SNV | 1 | T | G | Homozygous   |
| NC_037638.1 | 10737469 | SNV | 1 | G | A | Homozygous   |
| NC_037638.1 | 10737546 | SNV | 1 | G | A | Homozygous   |
| NC_037638.1 | 10737764 | SNV | 1 | G | A | Homozygous   |
| NC_037638.1 | 10738044 | SNV | 1 | A | G | Heterozygous |
| NC_037638.1 | 10738866 | SNV | 1 | A | G | Homozygous   |
| NC_037638.1 | 10739650 | SNV | 1 | T | C | Homozygous   |
| NC_037638.1 | 10739768 | SNV | 1 | A | G | Homozygous   |
| NC_037638.1 | 10741332 | SNV | 1 | C | T | Heterozygous |
| NC_037638.1 | 10744929 | SNV | 1 | C | A | Homozygous   |
| NC_037638.1 | 10744943 | SNV | 1 | C | T | Homozygous   |
| NC_037638.1 | 10747339 | SNV | 1 | A | C | Homozygous   |
| NC_037638.1 | 10747603 | SNV | 1 | A | T | Heterozygous |
| NC_037638.1 | 10747650 | SNV | 1 | T | C | Heterozygous |
| NC_037638.1 | 10747709 | SNV | 1 | G | A | Homozygous   |
| NC_037638.1 | 10747981 | SNV | 1 | A | G | Homozygous   |
| NC_037638.1 | 10748015 | SNV | 1 | C | T | Heterozygous |
| NC_037638.1 | 10749181 | SNV | 1 | T | A | Homozygous   |
| NC_037638.1 | 10749185 | SNV | 1 | T | C | Homozygous   |
| NC_037638.1 | 10749223 | SNV | 1 | G | C | Homozygous   |
| NC_037638.1 | 10759871 | SNV | 1 | G | A | Homozygous   |
| NC_037638.1 | 10759937 | SNV | 1 | G | A | Homozygous   |
| NC_037638.1 | 10767393 | SNV | 1 | T | A | Homozygous   |
| NC_037638.1 | 10771191 | SNV | 1 | A | G | Heterozygous |
| NC_037638.1 | 10773284 | SNV | 1 | G | A | Homozygous   |
| NC_037638.1 | 10773286 | SNV | 1 | G | T | Homozygous   |
| NC_037638.1 | 10773290 | SNV | 1 | T | G | Homozygous   |
| NC_037638.1 | 10780637 | SNV | 1 | C | T | Heterozygous |
| NC_037638.1 | 10780896 | SNV | 1 | T | C | Heterozygous |
| NC_037638.1 | 10782792 | SNV | 1 | A | G | Heterozygous |
| NC_037638.1 | 10784260 | SNV | 1 | C | T | Homozygous   |
| NC_037638.1 | 10784263 | SNV | 1 | G | C | Homozygous   |
| NC_037638.1 | 10784265 | SNV | 1 | A | C | Homozygous   |
| NC_037638.1 | 10784268 | SNV | 1 | A | C | Homozygous   |
| NC_037638.1 | 10784272 | SNV | 1 | A | C | Homozygous   |
| NC_037638.1 | 10784435 | SNV | 1 | T | C | Homozygous   |
| NC_037638.1 | 10784909 | SNV | 1 | T | C | Homozygous   |
| NC_037638.1 | 10786913 | SNV | 1 | G | T | Homozygous   |
| NC_037638.1 | 10786931 | SNV | 1 | A | T | Heterozygous |

|             |          |     |   |   |   |              |
|-------------|----------|-----|---|---|---|--------------|
| NC_037638.1 | 10786943 | SNV | 1 | T | A | Heterozygous |
| NC_037638.1 | 10786946 | SNV | 1 | A | T | Heterozygous |
| NC_037638.1 | 10787056 | SNV | 1 | T | A | Homozygous   |
| NC_037638.1 | 10787597 | SNV | 1 | T | A | Heterozygous |
| NC_037638.1 | 10788887 | SNV | 1 | G | A | Homozygous   |
| NC_037638.1 | 10790015 | SNV | 1 | G | A | Heterozygous |
| NC_037638.1 | 10790976 | SNV | 1 | A | T | Heterozygous |
| NC_037638.1 | 10790984 | SNV | 1 | A | G | Heterozygous |
| NC_037638.1 | 10791543 | SNV | 1 | T | A | Homozygous   |
| NC_037638.1 | 10800005 | SNV | 1 | T | A | Homozygous   |
| NC_037638.1 | 10800007 | SNV | 1 | A | C | Homozygous   |
| NC_037638.1 | 10800070 | SNV | 1 | T | G | Homozygous   |
| NC_037638.1 | 10800931 | SNV | 1 | A | G | Homozygous   |
| NC_037638.1 | 10802499 | SNV | 1 | C | T | Heterozygous |
| NC_037638.1 | 10802516 | SNV | 1 | G | T | Heterozygous |
| NC_037638.1 | 10802632 | SNV | 1 | T | G | Heterozygous |
| NC_037638.1 | 10802936 | SNV | 1 | C | G | Homozygous   |
| NC_037638.1 | 10803534 | SNV | 1 | A | T | Homozygous   |
| NC_037638.1 | 10803536 | SNV | 1 | A | C | Homozygous   |
| NC_037638.1 | 10803631 | SNV | 1 | G | T | Heterozygous |
| NC_037638.1 | 10803633 | SNV | 1 | A | C | Heterozygous |
| NC_037638.1 | 10809553 | SNV | 1 | G | A | Homozygous   |
| NC_037638.1 | 10809616 | SNV | 1 | G | T | Homozygous   |
| NC_037638.1 | 10812442 | SNV | 1 | T | C | Homozygous   |
| NC_037638.1 | 10813447 | SNV | 1 | G | A | Homozygous   |
| NC_037638.1 | 10813451 | SNV | 1 | A | T | Homozygous   |
| NC_037638.1 | 10813569 | SNV | 1 | G | A | Homozygous   |
| NC_037638.1 | 10813964 | SNV | 1 | G | A | Homozygous   |
| NC_037638.1 | 10813969 | SNV | 1 | C | G | Homozygous   |
| NC_037638.1 | 10813972 | SNV | 1 | A | T | Homozygous   |
| NC_037638.1 | 10814285 | SNV | 1 | G | T | Homozygous   |
| NC_037638.1 | 10815219 | SNV | 1 | T | A | Homozygous   |
| NC_037638.1 | 10815920 | SNV | 1 | G | A | Heterozygous |
| NC_037638.1 | 10815925 | SNV | 1 | T | C | Heterozygous |
| NC_037638.1 | 10815991 | SNV | 1 | C | T | Heterozygous |
| NC_037638.1 | 10816822 | SNV | 1 | A | T | Homozygous   |
| NC_037638.1 | 10817482 | SNV | 1 | A | G | Homozygous   |
| NC_037638.1 | 10817935 | SNV | 1 | T | C | Heterozygous |
| NC_037638.1 | 10822070 | SNV | 1 | C | G | Homozygous   |
| NC_037638.1 | 10822073 | SNV | 1 | G | A | Homozygous   |
| NC_037638.1 | 10822082 | SNV | 1 | C | A | Homozygous   |
| NC_037638.1 | 10822090 | SNV | 1 | G | A | Homozygous   |
| NC_037638.1 | 10822092 | SNV | 1 | T | C | Homozygous   |
| NC_037638.1 | 10822094 | SNV | 1 | C | A | Heterozygous |
| NC_037638.1 | 10822103 | SNV | 1 | A | G | Homozygous   |
| NC_037638.1 | 10830405 | SNV | 1 | G | A | Heterozygous |
| NC_037638.1 | 10834055 | SNV | 1 | C | T | Homozygous   |
| NC_037638.1 | 10834721 | SNV | 1 | A | T | Homozygous   |
| NC_037638.1 | 10834744 | SNV | 1 | T | A | Homozygous   |
| NC_037638.1 | 10834756 | SNV | 1 | A | T | Homozygous   |
| NC_037638.1 | 10834758 | SNV | 1 | A | T | Homozygous   |

|             |          |     |   |   |   |              |
|-------------|----------|-----|---|---|---|--------------|
| NC_037638.1 | 10834767 | SNV | 1 | A | T | Homozygous   |
| NC_037638.1 | 10834769 | SNV | 1 | A | C | Homozygous   |
| NC_037638.1 | 10834782 | SNV | 1 | A | C | Homozygous   |
| NC_037638.1 | 10834787 | SNV | 1 | A | G | Homozygous   |
| NC_037638.1 | 10834923 | SNV | 1 | T | A | Heterozygous |
| NC_037638.1 | 10834925 | SNV | 1 | A | G | Heterozygous |
| NC_037638.1 | 10834929 | SNV | 1 | A | C | Heterozygous |
| NC_037638.1 | 10834944 | SNV | 1 | G | A | Homozygous   |
| NC_037638.1 | 10834953 | SNV | 1 | A | G | Heterozygous |
| NC_037638.1 | 10834956 | SNV | 1 | A | G | Heterozygous |
| NC_037638.1 | 10834959 | SNV | 1 | A | G | Heterozygous |
| NC_037638.1 | 10834965 | SNV | 1 | T | C | Heterozygous |
| NC_037638.1 | 10834968 | SNV | 1 | T | C | Heterozygous |
| NC_037638.1 | 10834974 | SNV | 1 | C | A | Heterozygous |
| NC_037638.1 | 10834977 | SNV | 1 | T | C | Heterozygous |
| NC_037638.1 | 10834980 | SNV | 1 | T | C | Heterozygous |
| NC_037638.1 | 10834983 | SNV | 1 | A | T | Heterozygous |
| NC_037638.1 | 10835001 | SNV | 1 | T | A | Heterozygous |
| NC_037638.1 | 10835007 | SNV | 1 | T | G | Heterozygous |
| NC_037638.1 | 10835010 | SNV | 1 | T | A | Heterozygous |
| NC_037638.1 | 10835022 | SNV | 1 | C | T | Heterozygous |
| NC_037638.1 | 10835270 | SNV | 1 | G | T | Heterozygous |
| NC_037638.1 | 10835273 | SNV | 1 | T | A | Heterozygous |
| NC_037638.1 | 10835276 | SNV | 1 | T | A | Heterozygous |
| NC_037638.1 | 10835282 | SNV | 1 | T | G | Heterozygous |
| NC_037638.1 | 10835285 | SNV | 1 | A | G | Heterozygous |
| NC_037638.1 | 10835288 | SNV | 1 | T | C | Heterozygous |
| NC_037638.1 | 10835294 | SNV | 1 | A | T | Heterozygous |
| NC_037638.1 | 10835303 | SNV | 1 | A | T | Heterozygous |
| NC_037638.1 | 10835306 | SNV | 1 | T | C | Heterozygous |
| NC_037638.1 | 10835312 | SNV | 1 | T | A | Heterozygous |
| NC_037638.1 | 10835315 | SNV | 1 | T | C | Heterozygous |
| NC_037638.1 | 10835336 | SNV | 1 | T | C | Heterozygous |
| NC_037638.1 | 10835339 | SNV | 1 | G | A | Heterozygous |
| NC_037638.1 | 10835345 | SNV | 1 | A | G | Heterozygous |
| NC_037638.1 | 10835351 | SNV | 1 | G | A | Heterozygous |
| NC_037638.1 | 10835359 | SNV | 1 | T | A | Homozygous   |
| NC_037638.1 | 10837293 | SNV | 1 | T | C | Homozygous   |
| NC_037638.1 | 10837721 | SNV | 1 | T | C | Heterozygous |
| NC_037638.1 | 10837730 | SNV | 1 | T | A | Heterozygous |
| NC_037638.1 | 10837754 | SNV | 1 | T | G | Heterozygous |
| NC_037638.1 | 10837757 | SNV | 1 | C | T | Homozygous   |
| NC_037638.1 | 10837759 | SNV | 1 | A | G | Heterozygous |
| NC_037638.1 | 10837766 | SNV | 1 | T | C | Heterozygous |
| NC_037638.1 | 10837769 | SNV | 1 | G | C | Heterozygous |
| NC_037638.1 | 10837778 | SNV | 1 | T | G | Heterozygous |
| NC_037638.1 | 10837781 | SNV | 1 | G | A | Heterozygous |
| NC_037638.1 | 10837783 | SNV | 1 | T | G | Heterozygous |
| NC_037638.1 | 10837793 | SNV | 1 | T | C | Heterozygous |
| NC_037638.1 | 10837796 | SNV | 1 | A | C | Heterozygous |
| NC_037638.1 | 10837799 | SNV | 1 | A | G | Heterozygous |

|             |          |     |   |   |   |              |
|-------------|----------|-----|---|---|---|--------------|
| NC_037638.1 | 10837817 | SNV | 1 | A | T | Heterozygous |
| NC_037638.1 | 10837835 | SNV | 1 | T | C | Heterozygous |
| NC_037638.1 | 10837841 | SNV | 1 | A | G | Heterozygous |
| NC_037638.1 | 10837856 | SNV | 1 | A | T | Heterozygous |
| NC_037638.1 | 10837859 | SNV | 1 | T | A | Heterozygous |
| NC_037638.1 | 10838060 | SNV | 1 | A | G | Heterozygous |
| NC_037638.1 | 10838302 | SNV | 1 | A | C | Heterozygous |
| NC_037638.1 | 10838304 | SNV | 1 | G | T | Heterozygous |
| NC_037638.1 | 10838329 | SNV | 1 | T | C | Heterozygous |
| NC_037638.1 | 10838332 | SNV | 1 | T | C | Heterozygous |
| NC_037638.1 | 10838341 | SNV | 1 | A | G | Heterozygous |
| NC_037638.1 | 10838344 | SNV | 1 | A | C | Heterozygous |
| NC_037638.1 | 10838347 | SNV | 1 | A | C | Heterozygous |
| NC_037638.1 | 10838350 | SNV | 1 | G | C | Heterozygous |
| NC_037638.1 | 10838353 | SNV | 1 | A | G | Heterozygous |
| NC_037638.1 | 10838356 | SNV | 1 | T | C | Heterozygous |
| NC_037638.1 | 10838362 | SNV | 1 | A | G | Heterozygous |
| NC_037638.1 | 10838371 | SNV | 1 | T | A | Heterozygous |
| NC_037638.1 | 10839569 | SNV | 1 | G | A | Homozygous   |
| NC_037638.1 | 10841178 | SNV | 1 | T | C | Heterozygous |
| NC_037638.1 | 10848177 | SNV | 1 | T | C | Homozygous   |
| NC_037638.1 | 10848500 | SNV | 1 | T | C | Homozygous   |
| NC_037638.1 | 10852570 | SNV | 1 | C | T | Homozygous   |
| NC_037638.1 | 10852572 | SNV | 1 | A | T | Homozygous   |
| NC_037638.1 | 10852906 | SNV | 1 | C | T | Homozygous   |
| NC_037638.1 | 10852916 | SNV | 1 | T | A | Homozygous   |
| NC_037638.1 | 10852920 | SNV | 1 | G | A | Homozygous   |
| NC_037638.1 | 10852931 | SNV | 1 | T | A | Homozygous   |
| NC_037638.1 | 10852933 | SNV | 1 | T | A | Homozygous   |
| NC_037638.1 | 10853306 | SNV | 1 | C | T | Homozygous   |
| NC_037638.1 | 10854584 | SNV | 1 | G | T | Heterozygous |
| NC_037638.1 | 10856226 | SNV | 1 | T | C | Homozygous   |
| NC_037638.1 | 10856241 | SNV | 1 | T | C | Homozygous   |
| NC_037638.1 | 10858702 | SNV | 1 | C | T | Heterozygous |
| NC_037638.1 | 10858990 | SNV | 1 | A | T | Homozygous   |
| NC_037638.1 | 10859905 | SNV | 1 | T | C | Homozygous   |
| NC_037638.1 | 10867127 | SNV | 1 | C | T | Heterozygous |
| NC_037638.1 | 10867409 | SNV | 1 | A | G | Heterozygous |
| NC_037638.1 | 10867513 | SNV | 1 | T | C | Heterozygous |
| NC_037638.1 | 10868006 | SNV | 1 | T | C | Homozygous   |
| NC_037638.1 | 10868495 | SNV | 1 | A | C | Heterozygous |
| NC_037638.1 | 10868680 | SNV | 1 | A | T | Homozygous   |
| NC_037638.1 | 10868684 | SNV | 1 | C | T | Heterozygous |
| NC_037638.1 | 10868923 | SNV | 1 | T | C | Heterozygous |
| NC_037638.1 | 10868963 | SNV | 1 | A | G | Homozygous   |
| NC_037638.1 | 10869161 | SNV | 1 | A | G | Heterozygous |
| NC_037638.1 | 10869258 | SNV | 1 | C | T | Homozygous   |
| NC_037638.1 | 10869261 | SNV | 1 | A | G | Heterozygous |
| NC_037638.1 | 10869265 | SNV | 1 | T | C | Homozygous   |
| NC_037638.1 | 10869280 | SNV | 1 | G | C | Heterozygous |
| NC_037638.1 | 10869283 | SNV | 1 | T | C | Heterozygous |

|             |          |     |   |   |   |              |
|-------------|----------|-----|---|---|---|--------------|
| NC_037638.1 | 10869297 | SNV | 1 | C | T | Heterozygous |
| NC_037638.1 | 10869323 | SNV | 1 | A | G | Heterozygous |
| NC_037638.1 | 10869617 | SNV | 1 | G | A | Homozygous   |
| NC_037638.1 | 10869666 | SNV | 1 | G | A | Homozygous   |
| NC_037638.1 | 10869769 | SNV | 1 | C | T | Homozygous   |
| NC_037638.1 | 10869847 | SNV | 1 | A | G | Homozygous   |
| NC_037638.1 | 10869940 | SNV | 1 | G | A | Homozygous   |
| NC_037638.1 | 10870108 | SNV | 1 | G | C | Heterozygous |
| NC_037638.1 | 10870234 | SNV | 1 | C | T | Heterozygous |
| NC_037638.1 | 10870250 | SNV | 1 | A | G | Homozygous   |
| NC_037638.1 | 10870272 | SNV | 1 | C | A | Homozygous   |
| NC_037638.1 | 10870522 | SNV | 1 | C | T | Heterozygous |
| NC_037638.1 | 10870563 | SNV | 1 | C | T | Heterozygous |
| NC_037638.1 | 10870695 | SNV | 1 | A | G | Heterozygous |
| NC_037638.1 | 10871149 | SNV | 1 | G | A | Homozygous   |
| NC_037638.1 | 10871208 | SNV | 1 | A | G | Homozygous   |
| NC_037638.1 | 10871345 | SNV | 1 | A | T | Heterozygous |
| NC_037638.1 | 10871377 | SNV | 1 | C | T | Heterozygous |
| NC_037638.1 | 10871453 | SNV | 1 | A | G | Heterozygous |
| NC_037638.1 | 10871879 | SNV | 1 | A | G | Homozygous   |
| NC_037638.1 | 10872162 | SNV | 1 | G | C | Heterozygous |
| NC_037638.1 | 10872310 | SNV | 1 | A | G | Homozygous   |
| NC_037638.1 | 10872312 | SNV | 1 | A | T | Homozygous   |
| NC_037638.1 | 10872314 | SNV | 1 | A | T | Homozygous   |
| NC_037638.1 | 10872317 | SNV | 1 | C | A | Homozygous   |
| NC_037638.1 | 10872737 | SNV | 1 | A | T | Heterozygous |
| NC_037638.1 | 10872739 | SNV | 1 | T | G | Heterozygous |
| NC_037638.1 | 10873207 | SNV | 1 | A | G | Heterozygous |
| NC_037638.1 | 10874969 | SNV | 1 | A | G | Heterozygous |
| NC_037638.1 | 10874993 | SNV | 1 | A | G | Heterozygous |
| NC_037638.1 | 10875063 | SNV | 1 | T | C | Heterozygous |
| NC_037638.1 | 10875079 | SNV | 1 | A | C | Homozygous   |
| NC_037638.1 | 10875121 | SNV | 1 | T | C | Homozygous   |
| NC_037638.1 | 10876403 | SNV | 1 | A | G | Homozygous   |
| NC_037638.1 | 10877285 | SNV | 1 | A | C | Homozygous   |
| NC_037638.1 | 10877296 | SNV | 1 | T | A | Homozygous   |
| NC_037638.1 | 10877687 | SNV | 1 | T | C | Homozygous   |
| NC_037638.1 | 10877784 | SNV | 1 | T | C | Heterozygous |
| NC_037638.1 | 10877920 | SNV | 1 | A | G | Heterozygous |
| NC_037638.1 | 10878427 | SNV | 1 | A | G | Homozygous   |
| NC_037638.1 | 10878893 | SNV | 1 | T | C | Homozygous   |
| NC_037638.1 | 10879000 | SNV | 1 | G | T | Homozygous   |
| NC_037638.1 | 10879008 | SNV | 1 | C | T | Homozygous   |
| NC_037638.1 | 10879405 | SNV | 1 | A | G | Homozygous   |
| NC_037638.1 | 10879877 | SNV | 1 | A | G | Homozygous   |
| NC_037638.1 | 10881566 | SNV | 1 | A | G | Heterozygous |
| NC_037638.1 | 10881584 | SNV | 1 | C | T | Heterozygous |
| NC_037638.1 | 10882522 | SNV | 1 | A | G | Heterozygous |
| NC_037638.1 | 10882545 | SNV | 1 | A | G | Homozygous   |
| NC_037638.1 | 10882624 | SNV | 1 | G | A | Homozygous   |
| NC_037638.1 | 10882917 | SNV | 1 | T | C | Heterozygous |



|             |          |     |   |   |   |              |
|-------------|----------|-----|---|---|---|--------------|
| NC_037638.1 | 10882994 | SNV | 1 | A | G | Homozygous   |
| NC_037638.1 | 10883043 | SNV | 1 | T | C | Homozygous   |
| NC_037638.1 | 10883204 | SNV | 1 | T | A | Heterozygous |
| NC_037638.1 | 10883704 | SNV | 1 | A | T | Heterozygous |
| NC_037638.1 | 10883716 | SNV | 1 | T | C | Homozygous   |
| NC_037638.1 | 10886709 | SNV | 1 | C | T | Heterozygous |
| NC_037638.1 | 10886716 | SNV | 1 | A | G | Heterozygous |
| NC_037638.1 | 10886724 | SNV | 1 | A | C | Heterozygous |
| NC_037638.1 | 10886747 | SNV | 1 | A | T | Heterozygous |
| NC_037638.1 | 10886752 | SNV | 1 | G | T | Heterozygous |
| NC_037638.1 | 10886782 | SNV | 1 | G | A | Heterozygous |
| NC_037638.1 | 10886906 | SNV | 1 | A | G | Heterozygous |
| NC_037638.1 | 10887000 | SNV | 1 | A | G | Homozygous   |
| NC_037638.1 | 10888498 | SNV | 1 | A | G | Homozygous   |
| NC_037638.1 | 10889846 | SNV | 1 | A | G | Homozygous   |
| NC_037638.1 | 10889979 | SNV | 1 | C | T | Heterozygous |
| NC_037638.1 | 10890192 | SNV | 1 | C | T | Homozygous   |
| NC_037638.1 | 10890351 | SNV | 1 | G | T | Homozygous   |
| NC_037638.1 | 10891633 | SNV | 1 | G | A | Heterozygous |
| NC_037638.1 | 10891638 | SNV | 1 | G | A | Homozygous   |
| NC_037638.1 | 10891663 | SNV | 1 | G | A | Heterozygous |
| NC_037638.1 | 10891668 | SNV | 1 | G | A | Homozygous   |
| NC_037638.1 | 10891678 | SNV | 1 | G | A | Homozygous   |
| NC_037638.1 | 10891683 | SNV | 1 | G | A | Homozygous   |
| NC_037638.1 | 10891686 | SNV | 1 | T | A | Heterozygous |
| NC_037638.1 | 10891688 | SNV | 1 | G | A | Homozygous   |
| NC_037638.1 | 10891693 | SNV | 1 | G | A | Homozygous   |
| NC_037638.1 | 10891703 | SNV | 1 | G | A | Homozygous   |
| NC_037638.1 | 10891708 | SNV | 1 | G | A | Homozygous   |
| NC_037638.1 | 10891713 | SNV | 1 | G | A | Homozygous   |
| NC_037638.1 | 10891718 | SNV | 1 | T | A | Homozygous   |
| NC_037638.1 | 10891723 | SNV | 1 | T | A | Heterozygous |
| NC_037638.1 | 10897184 | SNV | 1 | T | C | Heterozygous |
| NC_037638.1 | 10897496 | SNV | 1 | C | T | Homozygous   |
| NC_037638.1 | 10897505 | SNV | 1 | A | G | Homozygous   |
| NC_037638.1 | 10897574 | SNV | 1 | G | T | Heterozygous |
| NC_037638.1 | 10897706 | SNV | 1 | T | C | Homozygous   |
| NC_037638.1 | 10897733 | SNV | 1 | G | A | Homozygous   |
| NC_037638.1 | 10898441 | SNV | 1 | A | G | Heterozygous |
| NC_037638.1 | 10898468 | SNV | 1 | T | C | Homozygous   |
| NC_037638.1 | 10898898 | SNV | 1 | C | T | Heterozygous |
| NC_037638.1 | 10899290 | SNV | 1 | C | T | Heterozygous |
| NC_037638.1 | 10899595 | SNV | 1 | T | C | Heterozygous |
| NC_037638.1 | 10900043 | SNV | 1 | T | C | Homozygous   |
| NC_037638.1 | 10900151 | SNV | 1 | A | G | Homozygous   |
| NC_037638.1 | 10901614 | SNV | 1 | T | C | Homozygous   |
| NC_037638.1 | 10901694 | SNV | 1 | A | G | Heterozygous |
| NC_037638.1 | 10901700 | SNV | 1 | C | T | Heterozygous |
| NC_037638.1 | 10901718 | SNV | 1 | T | C | Homozygous   |
| NC_037638.1 | 10902086 | SNV | 1 | T | C | Heterozygous |
| NC_037638.1 | 10902707 | SNV | 1 | G | A | Heterozygous |

|             |          |     |   |   |   |              |
|-------------|----------|-----|---|---|---|--------------|
| NC_037638.1 | 10902877 | SNV | 1 | T | C | Heterozygous |
| NC_037638.1 | 10902896 | SNV | 1 | C | T | Heterozygous |
| NC_037638.1 | 10904631 | SNV | 1 | A | G | Homozygous   |
| NC_037638.1 | 10905011 | SNV | 1 | A | G | Homozygous   |
| NC_037638.1 | 10905299 | SNV | 1 | A | G | Homozygous   |
| NC_037638.1 | 10908251 | SNV | 1 | G | A | Heterozygous |
| NC_037638.1 | 10909341 | SNV | 1 | T | C | Heterozygous |
| NC_037638.1 | 10910535 | SNV | 1 | C | T | Heterozygous |
| NC_037638.1 | 10910570 | SNV | 1 | T | C | Homozygous   |
| NC_037638.1 | 10910577 | SNV | 1 | T | C | Homozygous   |
| NC_037638.1 | 10910583 | SNV | 1 | A | C | Heterozygous |
| NC_037638.1 | 10910679 | SNV | 1 | A | T | Heterozygous |
| NC_037638.1 | 10910691 | SNV | 1 | G | A | Heterozygous |
| NC_037638.1 | 10910722 | SNV | 1 | C | T | Heterozygous |
| NC_037638.1 | 10910911 | SNV | 1 | T | C | Homozygous   |
| NC_037638.1 | 10911002 | SNV | 1 | T | C | Homozygous   |
| NC_037638.1 | 10911047 | SNV | 1 | A | G | Heterozygous |
| NC_037638.1 | 10911238 | SNV | 1 | T | G | Heterozygous |
| NC_037638.1 | 10911411 | SNV | 1 | C | T | Heterozygous |
| NC_037638.1 | 10911568 | SNV | 1 | A | G | Homozygous   |
| NC_037638.1 | 10914581 | SNV | 1 | A | G | Homozygous   |
| NC_037638.1 | 10914599 | SNV | 1 | T | C | Homozygous   |
| NC_037638.1 | 10915723 | SNV | 1 | G | A | Heterozygous |
| NC_037638.1 | 10915841 | SNV | 1 | C | T | Heterozygous |
| NC_037638.1 | 10916157 | SNV | 1 | C | A | Homozygous   |
| NC_037638.1 | 10916288 | SNV | 1 | T | C | Heterozygous |
| NC_037638.1 | 10916480 | SNV | 1 | C | T | Homozygous   |
| NC_037638.1 | 10916891 | SNV | 1 | C | A | Heterozygous |
| NC_037638.1 | 10919069 | SNV | 1 | T | C | Heterozygous |
| NC_037638.1 | 10919873 | SNV | 1 | A | G | Heterozygous |
| NC_037638.1 | 10919876 | SNV | 1 | G | A | Heterozygous |
| NC_037638.1 | 10925768 | SNV | 1 | A | G | Heterozygous |
| NC_037638.1 | 10925774 | SNV | 1 | C | T | Homozygous   |
| NC_037638.1 | 10926682 | SNV | 1 | G | A | Homozygous   |
| NC_037638.1 | 10926800 | SNV | 1 | A | G | Homozygous   |
| NC_037638.1 | 10926873 | SNV | 1 | T | C | Homozygous   |
| NC_037638.1 | 10926997 | SNV | 1 | G | A | Homozygous   |
| NC_037638.1 | 10929909 | SNV | 1 | C | T | Heterozygous |
| NC_037638.1 | 10930424 | SNV | 1 | C | T | Heterozygous |
| NC_037638.1 | 10930432 | SNV | 1 | C | T | Heterozygous |
| NC_037638.1 | 10930433 | SNV | 1 | A | C | Heterozygous |
| NC_037638.1 | 10930534 | SNV | 1 | C | G | Heterozygous |
| NC_037638.1 | 10930541 | SNV | 1 | G | A | Heterozygous |
| NC_037638.1 | 10931418 | SNV | 1 | G | A | Homozygous   |
| NC_037638.1 | 10931427 | SNV | 1 | T | C | Homozygous   |
| NC_037638.1 | 10931978 | SNV | 1 | T | C | Homozygous   |
| NC_037638.1 | 10932370 | SNV | 1 | C | T | Homozygous   |
| NC_037638.1 | 10932952 | SNV | 1 | C | T | Homozygous   |
| NC_037638.1 | 10933162 | SNV | 1 | T | C | Homozygous   |
| NC_037638.1 | 10933166 | SNV | 1 | A | G | Heterozygous |
| NC_037638.1 | 10933172 | SNV | 1 | T | C | Homozygous   |

|             |          |     |   |   |   |              |
|-------------|----------|-----|---|---|---|--------------|
| NC_037638.1 | 10933198 | SNV | 1 | G | A | Heterozygous |
| NC_037638.1 | 10933449 | SNV | 1 | A | G | Heterozygous |
| NC_037638.1 | 10933475 | SNV | 1 | A | T | Heterozygous |
| NC_037638.1 | 10933910 | SNV | 1 | T | A | Homozygous   |
| NC_037638.1 | 10934139 | SNV | 1 | A | G | Homozygous   |
| NC_037638.1 | 10934240 | SNV | 1 | T | C | Heterozygous |
| NC_037638.1 | 10934717 | SNV | 1 | C | T | Heterozygous |
| NC_037638.1 | 10935982 | SNV | 1 | A | G | Homozygous   |
| NC_037638.1 | 10936625 | SNV | 1 | A | G | Homozygous   |
| NC_037638.1 | 10938951 | SNV | 1 | A | G | Homozygous   |
| NC_037638.1 | 10939562 | SNV | 1 | G | A | Heterozygous |
| NC_037638.1 | 10940364 | SNV | 1 | G | A | Homozygous   |
| NC_037638.1 | 10940412 | SNV | 1 | G | T | Heterozygous |
| NC_037638.1 | 10940732 | SNV | 1 | T | C | Homozygous   |
| NC_037638.1 | 10940960 | SNV | 1 | G | T | Homozygous   |
| NC_037638.1 | 10940965 | SNV | 1 | A | C | Homozygous   |
| NC_037638.1 | 10941397 | SNV | 1 | T | A | Homozygous   |
| NC_037638.1 | 10941400 | SNV | 1 | C | T | Homozygous   |
| NC_037638.1 | 10941491 | SNV | 1 | G | A | Heterozygous |
| NC_037638.1 | 10941494 | SNV | 1 | C | T | Heterozygous |
| NC_037638.1 | 10941616 | SNV | 1 | G | A | Homozygous   |
| NC_037638.1 | 10942229 | SNV | 1 | T | C | Homozygous   |
| NC_037638.1 | 10942475 | SNV | 1 | A | G | Heterozygous |
| NC_037638.1 | 10942546 | SNV | 1 | A | G | Heterozygous |
| NC_037638.1 | 10943724 | SNV | 1 | C | T | Heterozygous |
| NC_037638.1 | 10943729 | SNV | 1 | G | A | Heterozygous |
| NC_037638.1 | 10943752 | SNV | 1 | A | G | Heterozygous |
| NC_037638.1 | 10943756 | SNV | 1 | G | A | Heterozygous |
| NC_037638.1 | 10943760 | SNV | 1 | T | C | Heterozygous |
| NC_037638.1 | 10943792 | SNV | 1 | A | G | Heterozygous |
| NC_037638.1 | 10943827 | SNV | 1 | T | G | Heterozygous |
| NC_037638.1 | 10943831 | SNV | 1 | A | G | Heterozygous |
| NC_037638.1 | 10943839 | SNV | 1 | G | T | Heterozygous |
| NC_037638.1 | 10943843 | SNV | 1 | A | G | Heterozygous |
| NC_037638.1 | 10946771 | SNV | 1 | T | A | Homozygous   |
| NC_037638.1 | 10947105 | SNV | 1 | G | A | Homozygous   |
| NC_037638.1 | 10947108 | SNV | 1 | T | C | Homozygous   |
| NC_037638.1 | 10947376 | SNV | 1 | A | C | Homozygous   |
| NC_037638.1 | 10947608 | SNV | 1 | A | C | Homozygous   |
| NC_037638.1 | 10947901 | SNV | 1 | G | C | Homozygous   |
| NC_037638.1 | 10948266 | SNV | 1 | A | G | Homozygous   |
| NC_037638.1 | 10948289 | SNV | 1 | G | C | Heterozygous |
| NC_037638.1 | 10948327 | SNV | 1 | C | T | Homozygous   |
| NC_037638.1 | 10948418 | SNV | 1 | A | G | Homozygous   |
| NC_037638.1 | 10949214 | SNV | 1 | C | A | Heterozygous |
| NC_037638.1 | 10949502 | SNV | 1 | T | C | Homozygous   |
| NC_037638.1 | 10949845 | SNV | 1 | G | A | Heterozygous |
| NC_037638.1 | 10951374 | SNV | 1 | T | C | Heterozygous |
| NC_037638.1 | 10951380 | SNV | 1 | T | C | Heterozygous |
| NC_037638.1 | 10951386 | SNV | 1 | C | T | Heterozygous |
| NC_037638.1 | 10951548 | SNV | 1 | G | A | Heterozygous |

|             |          |     |   |   |   |              |
|-------------|----------|-----|---|---|---|--------------|
| NC_037638.1 | 10952127 | SNV | 1 | T | C | Homozygous   |
| NC_037638.1 | 10954110 | SNV | 1 | T | C | Heterozygous |
| NC_037638.1 | 10954298 | SNV | 1 | G | A | Heterozygous |
| NC_037638.1 | 10955961 | SNV | 1 | G | A | Heterozygous |
| NC_037638.1 | 10956057 | SNV | 1 | G | A | Heterozygous |
| NC_037638.1 | 10956847 | SNV | 1 | A | G | Homozygous   |
| NC_037638.1 | 10957330 | SNV | 1 | G | A | Homozygous   |
| NC_037638.1 | 10957346 | SNV | 1 | C | A | Homozygous   |
| NC_037638.1 | 10957365 | SNV | 1 | A | G | Heterozygous |
| NC_037638.1 | 10957371 | SNV | 1 | T | C | Homozygous   |
| NC_037638.1 | 10957523 | SNV | 1 | C | T | Homozygous   |
| NC_037638.1 | 10957529 | SNV | 1 | C | T | Heterozygous |
| NC_037638.1 | 10961811 | SNV | 1 | C | T | Homozygous   |
| NC_037638.1 | 10965343 | SNV | 1 | A | G | Heterozygous |
| NC_037638.1 | 10965470 | SNV | 1 | G | C | Homozygous   |
| NC_037638.1 | 10965477 | SNV | 1 | A | T | Homozygous   |
| NC_037638.1 | 10966254 | SNV | 1 | A | C | Heterozygous |
| NC_037638.1 | 10967095 | SNV | 1 | G | T | Homozygous   |
| NC_037638.1 | 10967735 | SNV | 1 | C | T | Homozygous   |
| NC_037638.1 | 10967741 | SNV | 1 | A | G | Homozygous   |
| NC_037638.1 | 10967758 | SNV | 1 | A | G | Homozygous   |
| NC_037638.1 | 10968010 | SNV | 1 | T | C | Homozygous   |
| NC_037638.1 | 10968023 | SNV | 1 | C | T | Heterozygous |
| NC_037638.1 | 10968174 | SNV | 1 | A | G | Heterozygous |
| NC_037638.1 | 10968176 | SNV | 1 | T | A | Heterozygous |
| NC_037638.1 | 10968179 | SNV | 1 | G | C | Heterozygous |
| NC_037638.1 | 10969136 | SNV | 1 | G | A | Homozygous   |
| NC_037638.1 | 10971295 | SNV | 1 | G | A | Homozygous   |
| NC_037638.1 | 10971309 | SNV | 1 | T | C | Heterozygous |
| NC_037638.1 | 10971603 | SNV | 1 | C | G | Heterozygous |
| NC_037638.1 | 10971761 | SNV | 1 | C | T | Homozygous   |
| NC_037638.1 | 10971778 | SNV | 1 | A | T | Homozygous   |
| NC_037638.1 | 10971789 | SNV | 1 | T | A | Heterozygous |
| NC_037638.1 | 10971793 | SNV | 1 | G | A | Heterozygous |
| NC_037638.1 | 10971919 | SNV | 1 | T | C | Heterozygous |
| NC_037638.1 | 10971977 | SNV | 1 | A | G | Homozygous   |
| NC_037638.1 | 10972032 | SNV | 1 | A | G | Heterozygous |
| NC_037638.1 | 10972034 | SNV | 1 | T | C | Heterozygous |
| NC_037638.1 | 10972043 | SNV | 1 | C | T | Heterozygous |
| NC_037638.1 | 10972084 | SNV | 1 | C | A | Homozygous   |
| NC_037638.1 | 10972097 | SNV | 1 | A | G | Homozygous   |
| NC_037638.1 | 10972217 | SNV | 1 | T | C | Homozygous   |
| NC_037638.1 | 10972247 | SNV | 1 | T | A | Homozygous   |
| NC_037638.1 | 10972351 | SNV | 1 | G | A | Heterozygous |
| NC_037638.1 | 10972354 | SNV | 1 | T | A | Heterozygous |
| NC_037638.1 | 10972367 | SNV | 1 | T | C | Heterozygous |
| NC_037638.1 | 10973464 | SNV | 1 | C | T | Homozygous   |
| NC_037638.1 | 10973466 | SNV | 1 | C | T | Homozygous   |
| NC_037638.1 | 10973689 | SNV | 1 | G | T | Heterozygous |
| NC_037638.1 | 10973713 | SNV | 1 | T | C | Heterozygous |
| NC_037638.1 | 10974100 | SNV | 1 | G | C | Heterozygous |

|             |          |     |   |   |   |              |
|-------------|----------|-----|---|---|---|--------------|
| NC_037638.1 | 10975628 | SNV | 1 | A | G | Homozygous   |
| NC_037638.1 | 10982617 | SNV | 1 | T | A | Heterozygous |
| NC_037638.1 | 10982619 | SNV | 1 | G | A | Heterozygous |
| NC_037638.1 | 10982625 | SNV | 1 | G | A | Heterozygous |
| NC_037638.1 | 10989487 | SNV | 1 | A | G | Homozygous   |
| NC_037638.1 | 10989543 | SNV | 1 | T | C | Homozygous   |
| NC_037638.1 | 10990462 | SNV | 1 | G | C | Homozygous   |
| NC_037638.1 | 10990496 | SNV | 1 | A | G | Homozygous   |
| NC_037638.1 | 10991873 | SNV | 1 | T | G | Homozygous   |
| NC_037638.1 | 10991905 | SNV | 1 | A | G | Homozygous   |
| NC_037638.1 | 10991911 | SNV | 1 | T | G | Homozygous   |
| NC_037638.1 | 10996330 | SNV | 1 | G | C | Homozygous   |
| NC_037638.1 | 10996879 | SNV | 1 | A | G | Heterozygous |
| NC_037638.1 | 10997063 | SNV | 1 | A | G | Heterozygous |
| NC_037638.1 | 10997065 | SNV | 1 | T | C | Heterozygous |
| NC_037638.1 | 10997134 | SNV | 1 | A | G | Heterozygous |
| NC_037638.1 | 10997782 | SNV | 1 | C | T | Heterozygous |
| NC_037638.1 | 11002173 | SNV | 1 | A | T | Homozygous   |
| NC_037638.1 | 11002175 | SNV | 1 | T | C | Homozygous   |
| NC_037638.1 | 11002188 | SNV | 1 | A | G | Homozygous   |
| NC_037638.1 | 11040486 | SNV | 1 | T | A | Homozygous   |
| NC_037638.1 | 11040518 | SNV | 1 | T | C | Homozygous   |
| NC_037638.1 | 11040531 | SNV | 1 | A | G | Homozygous   |
| NC_037638.1 | 11040712 | SNV | 1 | T | G | Heterozygous |
| NC_037638.1 | 11040724 | SNV | 1 | C | T | Homozygous   |
| NC_037638.1 | 11040849 | SNV | 1 | T | C | Homozygous   |
| NC_037638.1 | 11041027 | SNV | 1 | C | T | Heterozygous |
| NC_037638.1 | 11041233 | SNV | 1 | G | A | Heterozygous |
| NC_037638.1 | 11041241 | SNV | 1 | G | A | Homozygous   |
| NC_037638.1 | 11041290 | SNV | 1 | T | C | Homozygous   |
| NC_037638.1 | 11041338 | SNV | 1 | C | T | Homozygous   |
| NC_037638.1 | 11045450 | SNV | 1 | A | G | Homozygous   |
| NC_037638.1 | 11045576 | SNV | 1 | T | A | Heterozygous |
| NC_037638.1 | 11071827 | SNV | 1 | G | A | Heterozygous |
| NC_037638.1 | 11072364 | SNV | 1 | T | C | Homozygous   |
| NC_037638.1 | 11072394 | SNV | 1 | T | A | Heterozygous |
| NC_037638.1 | 11072395 | SNV | 1 | T | G | Heterozygous |
| NC_037638.1 | 11072400 | SNV | 1 | A | G | Heterozygous |
| NC_037638.1 | 11072404 | SNV | 1 | T | C | Heterozygous |
| NC_037638.1 | 11072970 | SNV | 1 | T | C | Homozygous   |
| NC_037638.1 | 11073098 | SNV | 1 | A | T | Homozygous   |
| NC_037638.1 | 11073101 | SNV | 1 | T | A | Homozygous   |
| NC_037638.1 | 11073108 | SNV | 1 | A | T | Homozygous   |
| NC_037638.1 | 11073132 | SNV | 1 | T | A | Homozygous   |
| NC_037638.1 | 11073134 | SNV | 1 | T | A | Homozygous   |
| NC_037638.1 | 11074363 | SNV | 1 | A | G | Homozygous   |
| NC_037638.1 | 11074388 | SNV | 1 | A | G | Heterozygous |
| NC_037638.1 | 11074444 | SNV | 1 | T | C | Homozygous   |
| NC_037638.1 | 11074487 | SNV | 1 | G | C | Homozygous   |
| NC_037638.1 | 11074490 | SNV | 1 | A | C | Homozygous   |
| NC_037638.1 | 11074493 | SNV | 1 | T | A | Homozygous   |

|             |          |     |   |   |   |              |
|-------------|----------|-----|---|---|---|--------------|
| NC_037638.1 | 11074496 | SNV | 1 | T | G | Homozygous   |
| NC_037638.1 | 11074577 | SNV | 1 | G | A | Heterozygous |
| NC_037638.1 | 11074935 | SNV | 1 | G | C | Homozygous   |
| NC_037638.1 | 11075746 | SNV | 1 | G | A | Heterozygous |
| NC_037638.1 | 11075763 | SNV | 1 | T | C | Homozygous   |
| NC_037638.1 | 11076253 | SNV | 1 | A | G | Heterozygous |
| NC_037638.1 | 11076448 | SNV | 1 | A | G | Heterozygous |
| NC_037638.1 | 11076496 | SNV | 1 | T | C | Homozygous   |
| NC_037638.1 | 11076607 | SNV | 1 | A | G | Homozygous   |
| NC_037638.1 | 11076616 | SNV | 1 | T | C | Homozygous   |
| NC_037638.1 | 11076661 | SNV | 1 | A | G | Homozygous   |
| NC_037638.1 | 11076724 | SNV | 1 | T | C | Homozygous   |
| NC_037638.1 | 11076733 | SNV | 1 | A | G | Heterozygous |
| NC_037638.1 | 11076829 | SNV | 1 | C | T | Heterozygous |
| NC_037638.1 | 11076883 | SNV | 1 | C | T | Homozygous   |
| NC_037638.1 | 11079416 | SNV | 1 | A | G | Heterozygous |
| NC_037638.1 | 11081821 | SNV | 1 | A | G | Heterozygous |
| NC_037638.1 | 11081824 | SNV | 1 | G | A | Heterozygous |
| NC_037638.1 | 11088572 | SNV | 1 | T | G | Heterozygous |
| NC_037638.1 | 11088577 | SNV | 1 | C | T | Heterozygous |
| NC_037638.1 | 11088581 | SNV | 1 | C | A | Heterozygous |
| NC_037638.1 | 11093763 | SNV | 1 | C | T | Heterozygous |
| NC_037638.1 | 11093792 | SNV | 1 | A | G | Homozygous   |
| NC_037638.1 | 11093832 | SNV | 1 | A | G | Homozygous   |
| NC_037638.1 | 11093834 | SNV | 1 | A | G | Homozygous   |
| NC_037638.1 | 11101108 | SNV | 1 | C | T | Homozygous   |
| NC_037638.1 | 11101163 | SNV | 1 | C | T | Homozygous   |
| NC_037638.1 | 11101316 | SNV | 1 | T | C | Heterozygous |
| NC_037638.1 | 11101584 | SNV | 1 | C | T | Homozygous   |
| NC_037638.1 | 11101587 | SNV | 1 | G | A | Homozygous   |
| NC_037638.1 | 11101615 | SNV | 1 | C | T | Homozygous   |
| NC_037638.1 | 11103573 | SNV | 1 | A | T | Homozygous   |
| NC_037638.1 | 11103622 | SNV | 1 | C | T | Heterozygous |
| NC_037638.1 | 11104920 | SNV | 1 | G | A | Heterozygous |
| NC_037638.1 | 11106828 | SNV | 1 | A | G | Heterozygous |
| NC_037638.1 | 11106831 | SNV | 1 | C | T | Heterozygous |
| NC_037638.1 | 11109134 | SNV | 1 | G | C | Heterozygous |
| NC_037638.1 | 11109536 | SNV | 1 | G | A | Heterozygous |
| NC_037638.1 | 11109770 | SNV | 1 | G | C | Heterozygous |
| NC_037638.1 | 11109831 | SNV | 1 | A | T | Heterozygous |
| NC_037638.1 | 11113079 | SNV | 1 | T | C | Heterozygous |
| NC_037638.1 | 11113271 | SNV | 1 | A | T | Heterozygous |
| NC_037638.1 | 11113299 | SNV | 1 | G | A | Heterozygous |
| NC_037638.1 | 11113334 | SNV | 1 | T | C | Homozygous   |
| NC_037638.1 | 11113336 | SNV | 1 | T | C | Homozygous   |
| NC_037638.1 | 11113354 | SNV | 1 | T | G | Heterozygous |
| NC_037638.1 | 11113382 | SNV | 1 | C | T | Homozygous   |
| NC_037638.1 | 11114197 | SNV | 1 | A | T | Heterozygous |
| NC_037638.1 | 11114347 | SNV | 1 | C | T | Heterozygous |
| NC_037638.1 | 11114799 | SNV | 1 | T | C | Homozygous   |
| NC_037638.1 | 11114912 | SNV | 1 | A | G | Homozygous   |

|             |          |     |   |   |   |              |
|-------------|----------|-----|---|---|---|--------------|
| NC_037638.1 | 11115441 | SNV | 1 | T | C | Heterozygous |
| NC_037638.1 | 11119774 | SNV | 1 | G | A | Homozygous   |
| NC_037638.1 | 11122672 | SNV | 1 | G | T | Homozygous   |
| NC_037638.1 | 11125637 | SNV | 1 | A | T | Homozygous   |
| NC_037638.1 | 11125704 | SNV | 1 | T | A | Homozygous   |
| NC_037638.1 | 11126016 | SNV | 1 | G | T | Heterozygous |
| NC_037638.1 | 11126018 | SNV | 1 | A | C | Heterozygous |
| NC_037638.1 | 11126020 | SNV | 1 | A | C | Heterozygous |
| NC_037638.1 | 11126025 | SNV | 1 | A | G | Homozygous   |
| NC_037638.1 | 11126090 | SNV | 1 | C | T | Homozygous   |
| NC_037638.1 | 11126094 | SNV | 1 | T | C | Homozygous   |
| NC_037638.1 | 11126096 | SNV | 1 | C | A | Homozygous   |
| NC_037638.1 | 11126940 | SNV | 1 | C | T | Heterozygous |
| NC_037638.1 | 11129173 | SNV | 1 | G | A | Heterozygous |
| NC_037638.1 | 11129231 | SNV | 1 | A | G | Homozygous   |
| NC_037638.1 | 11130047 | SNV | 1 | A | G | Homozygous   |
| NC_037638.1 | 11132022 | SNV | 1 | G | A | Heterozygous |
| NC_037638.1 | 11132636 | SNV | 1 | G | A | Heterozygous |
| NC_037638.1 | 11132788 | SNV | 1 | A | G | Homozygous   |
| NC_037638.1 | 11132833 | SNV | 1 | G | A | Heterozygous |
| NC_037638.1 | 11132887 | SNV | 1 | T | C | Heterozygous |
| NC_037638.1 | 11132903 | SNV | 1 | G | A | Homozygous   |
| NC_037638.1 | 11136184 | SNV | 1 | A | G | Homozygous   |
| NC_037638.1 | 11137389 | SNV | 1 | G | A | Heterozygous |
| NC_037638.1 | 11137935 | SNV | 1 | A | G | Heterozygous |
| NC_037638.1 | 11139821 | SNV | 1 | T | C | Homozygous   |
| NC_037638.1 | 11141101 | SNV | 1 | C | T | Heterozygous |
| NC_037638.1 | 11159511 | SNV | 1 | C | G | Heterozygous |
| NC_037638.1 | 11161164 | SNV | 1 | C | A | Homozygous   |
| NC_037638.1 | 11161167 | SNV | 1 | G | A | Homozygous   |
| NC_037638.1 | 11164974 | SNV | 1 | T | A | Homozygous   |
| NC_037638.1 | 11164981 | SNV | 1 | G | A | Homozygous   |
| NC_037638.1 | 11164987 | SNV | 1 | G | A | Homozygous   |
| NC_037638.1 | 11165008 | SNV | 1 | T | C | Homozygous   |
| NC_037638.1 | 11165025 | SNV | 1 | G | A | Heterozygous |
| NC_037638.1 | 11165037 | SNV | 1 | A | T | Heterozygous |
| NC_037638.1 | 11168869 | SNV | 1 | A | T | Heterozygous |
| NC_037638.1 | 11175388 | SNV | 1 | A | G | Homozygous   |
| NC_037638.1 | 11176558 | SNV | 1 | A | T | Homozygous   |
| NC_037638.1 | 11176760 | SNV | 1 | T | C | Homozygous   |
| NC_037638.1 | 11176890 | SNV | 1 | T | C | Homozygous   |
| NC_037638.1 | 11177011 | SNV | 1 | G | A | Heterozygous |
| NC_037638.1 | 11177240 | SNV | 1 | G | C | Homozygous   |
| NC_037638.1 | 11177427 | SNV | 1 | G | A | Homozygous   |
| NC_037638.1 | 11177598 | SNV | 1 | T | C | Homozygous   |
| NC_037638.1 | 11178179 | SNV | 1 | C | T | Heterozygous |
| NC_037638.1 | 11178245 | SNV | 1 | C | T | Homozygous   |
| NC_037638.1 | 11178284 | SNV | 1 | T | C | Homozygous   |
| NC_037638.1 | 11178403 | SNV | 1 | C | A | Heterozygous |
| NC_037638.1 | 11178497 | SNV | 1 | C | T | Homozygous   |
| NC_037638.1 | 11178624 | SNV | 1 | C | T | Heterozygous |

|             |          |     |   |   |   |              |
|-------------|----------|-----|---|---|---|--------------|
| NC_037638.1 | 11178685 | SNV | 1 | C | T | Heterozygous |
| NC_037638.1 | 11178688 | SNV | 1 | T | C | Heterozygous |
| NC_037638.1 | 11179820 | SNV | 1 | A | C | Homozygous   |
| NC_037638.1 | 11180145 | SNV | 1 | G | A | Heterozygous |
| NC_037638.1 | 11180625 | SNV | 1 | A | G | Homozygous   |
| NC_037638.1 | 11180930 | SNV | 1 | A | G | Homozygous   |
| NC_037638.1 | 11181510 | SNV | 1 | G | T | Heterozygous |
| NC_037638.1 | 11181513 | SNV | 1 | A | G | Heterozygous |
| NC_037638.1 | 11181610 | SNV | 1 | C | A | Homozygous   |
| NC_037638.1 | 11181637 | SNV | 1 | C | T | Heterozygous |
| NC_037638.1 | 11181711 | SNV | 1 | G | A | Homozygous   |
| NC_037638.1 | 11181714 | SNV | 1 | C | T | Homozygous   |
| NC_037638.1 | 11181865 | SNV | 1 | G | A | Heterozygous |
| NC_037638.1 | 11181945 | SNV | 1 | C | T | Heterozygous |
| NC_037638.1 | 11182028 | SNV | 1 | T | C | Homozygous   |
| NC_037638.1 | 11182035 | SNV | 1 | C | T | Heterozygous |
| NC_037638.1 | 11182558 | SNV | 1 | A | G | Heterozygous |
| NC_037638.1 | 11183864 | SNV | 1 | C | T | Homozygous   |
| NC_037638.1 | 11183868 | SNV | 1 | C | T | Homozygous   |
| NC_037638.1 | 11183872 | SNV | 1 | A | G | Homozygous   |
| NC_037638.1 | 11183883 | SNV | 1 | G | A | Homozygous   |
| NC_037638.1 | 11183914 | SNV | 1 | C | A | Homozygous   |
| NC_037638.1 | 11183936 | SNV | 1 | G | A | Homozygous   |
| NC_037638.1 | 11183942 | SNV | 1 | T | A | Homozygous   |
| NC_037638.1 | 11184412 | SNV | 1 | C | T | Heterozygous |
| NC_037638.1 | 11184490 | SNV | 1 | G | A | Heterozygous |
| NC_037638.1 | 11186084 | SNV | 1 | A | G | Homozygous   |
| NC_037638.1 | 11186175 | SNV | 1 | T | C | Heterozygous |
| NC_037638.1 | 11186199 | SNV | 1 | T | C | Heterozygous |
| NC_037638.1 | 11186201 | SNV | 1 | T | C | Heterozygous |
| NC_037638.1 | 11186207 | SNV | 1 | C | T | Heterozygous |
| NC_037638.1 | 11186211 | SNV | 1 | C | T | Heterozygous |
| NC_037638.1 | 11186262 | SNV | 1 | A | G | Heterozygous |
| NC_037638.1 | 11187769 | SNV | 1 | T | A | Homozygous   |
| NC_037638.1 | 11187772 | SNV | 1 | A | T | Homozygous   |
| NC_037638.1 | 11187780 | SNV | 1 | A | G | Homozygous   |
| NC_037638.1 | 11187788 | SNV | 1 | T | C | Homozygous   |
| NC_037638.1 | 11187791 | SNV | 1 | A | T | Homozygous   |
| NC_037638.1 | 11187812 | SNV | 1 | T | A | Homozygous   |
| NC_037638.1 | 11205631 | SNV | 1 | T | C | Homozygous   |
| NC_037638.1 | 11205700 | SNV | 1 | A | G | Homozygous   |
| NC_037638.1 | 11205949 | SNV | 1 | T | C | Homozygous   |
| NC_037638.1 | 11206228 | SNV | 1 | A | G | Homozygous   |
| NC_037638.1 | 11207148 | SNV | 1 | A | G | Homozygous   |
| NC_037638.1 | 11207164 | SNV | 1 | A | G | Homozygous   |
| NC_037638.1 | 11214436 | SNV | 1 | G | A | Heterozygous |
| NC_037638.1 | 11214492 | SNV | 1 | C | T | Homozygous   |
| NC_037638.1 | 11215115 | SNV | 1 | A | C | Homozygous   |
| NC_037638.1 | 11215128 | SNV | 1 | T | A | Homozygous   |
| NC_037638.1 | 11230347 | SNV | 1 | T | C | Homozygous   |
| NC_037638.1 | 11230350 | SNV | 1 | T | C | Homozygous   |



|             |          |     |   |   |   |              |
|-------------|----------|-----|---|---|---|--------------|
| NC_037638.1 | 11230422 | SNV | 1 | C | T | Heterozygous |
| NC_037638.1 | 11230455 | SNV | 1 | C | T | Homozygous   |
| NC_037638.1 | 11230521 | SNV | 1 | C | G | Homozygous   |
| NC_037638.1 | 11230539 | SNV | 1 | T | C | Homozygous   |
| NC_037638.1 | 11230563 | SNV | 1 | T | C | Homozygous   |
| NC_037638.1 | 11230809 | SNV | 1 | G | A | Heterozygous |
| NC_037638.1 | 11240164 | SNV | 1 | T | C | Heterozygous |
| NC_037638.1 | 11241808 | SNV | 1 | G | A | Heterozygous |
| NC_037638.1 | 11243541 | SNV | 1 | T | C | Heterozygous |
| NC_037638.1 | 11244338 | SNV | 1 | G | A | Heterozygous |
| NC_037638.1 | 11244359 | SNV | 1 | T | C | Heterozygous |
| NC_037638.1 | 11244369 | SNV | 1 | A | G | Homozygous   |
| NC_037638.1 | 11244422 | SNV | 1 | T | A | Homozygous   |
| NC_037638.1 | 11244427 | SNV | 1 | G | A | Heterozygous |
| NC_037638.1 | 11244431 | SNV | 1 | G | A | Heterozygous |
| NC_037638.1 | 11244444 | SNV | 1 | C | T | Heterozygous |
| NC_037638.1 | 11244454 | SNV | 1 | A | T | Homozygous   |
| NC_037638.1 | 11244466 | SNV | 1 | A | C | Homozygous   |
| NC_037638.1 | 11244484 | SNV | 1 | A | G | Homozygous   |
| NC_037638.1 | 11244551 | SNV | 1 | G | C | Heterozygous |
| NC_037638.1 | 11244822 | SNV | 1 | T | C | Homozygous   |
| NC_037638.1 | 11244998 | SNV | 1 | C | T | Heterozygous |
| NC_037638.1 | 11245077 | SNV | 1 | T | C | Homozygous   |
| NC_037638.1 | 11253189 | SNV | 1 | G | A | Heterozygous |
| NC_037638.1 | 11257116 | SNV | 1 | A | G | Heterozygous |
| NC_037638.1 | 11261281 | SNV | 1 | T | A | Heterozygous |
| NC_037638.1 | 11267972 | SNV | 1 | A | G | Homozygous   |
| NC_037638.1 | 11267981 | SNV | 1 | T | C | Heterozygous |
| NC_037638.1 | 11267996 | SNV | 1 | G | T | Heterozygous |
| NC_037638.1 | 11268488 | SNV | 1 | G | C | Heterozygous |
| NC_037638.1 | 11269147 | SNV | 1 | A | G | Homozygous   |
| NC_037638.1 | 11294433 | SNV | 1 | A | G | Heterozygous |
| NC_037638.1 | 11294457 | SNV | 1 | C | A | Heterozygous |
| NC_037638.1 | 11297532 | SNV | 1 | A | G | Homozygous   |
| NC_037638.1 | 11299079 | SNV | 1 | A | T | Heterozygous |
| NC_037638.1 | 11299907 | SNV | 1 | T | C | Homozygous   |
| NC_037638.1 | 11300162 | SNV | 1 | C | A | Heterozygous |
| NC_037638.1 | 11300164 | SNV | 1 | G | A | Heterozygous |
| NC_037638.1 | 11301246 | SNV | 1 | C | T | Heterozygous |
| NC_037638.1 | 11302673 | SNV | 1 | A | G | Homozygous   |
| NC_037638.1 | 11303820 | SNV | 1 | A | G | Heterozygous |
| NC_037638.1 | 11303860 | SNV | 1 | T | C | Homozygous   |
| NC_037638.1 | 11304096 | SNV | 1 | T | C | Homozygous   |
| NC_037638.1 | 11304544 | SNV | 1 | G | A | Homozygous   |
| NC_037638.1 | 11304656 | SNV | 1 | T | C | Homozygous   |
| NC_037638.1 | 11305133 | SNV | 1 | A | G | Homozygous   |
| NC_037638.1 | 11305874 | SNV | 1 | T | C | Heterozygous |
| NC_037638.1 | 11310633 | SNV | 1 | A | G | Heterozygous |
| NC_037638.1 | 11314555 | SNV | 1 | G | A | Heterozygous |
| NC_037638.1 | 11315664 | SNV | 1 | A | T | Heterozygous |
| NC_037638.1 | 11315738 | SNV | 1 | A | G | Heterozygous |

|             |          |     |   |   |   |              |
|-------------|----------|-----|---|---|---|--------------|
| NC_037638.1 | 11315770 | SNV | 1 | G | A | Heterozygous |
| NC_037638.1 | 11316899 | SNV | 1 | T | C | Homozygous   |
| NC_037638.1 | 11316988 | SNV | 1 | T | C | Homozygous   |
| NC_037638.1 | 11316995 | SNV | 1 | T | C | Homozygous   |
| NC_037638.1 | 11317046 | SNV | 1 | T | C | Heterozygous |
| NC_037638.1 | 11317090 | SNV | 1 | A | G | Homozygous   |
| NC_037638.1 | 11318602 | SNV | 1 | C | T | Heterozygous |
| NC_037638.1 | 11320054 | SNV | 1 | G | A | Homozygous   |
| NC_037638.1 | 11320534 | SNV | 1 | A | G | Homozygous   |
| NC_037638.1 | 11320599 | SNV | 1 | A | G | Homozygous   |
| NC_037638.1 | 11320885 | SNV | 1 | A | G | Homozygous   |
| NC_037638.1 | 11320887 | SNV | 1 | A | G | Homozygous   |
| NC_037638.1 | 11321989 | SNV | 1 | G | A | Heterozygous |
| NC_037638.1 | 11323807 | SNV | 1 | A | T | Homozygous   |
| NC_037638.1 | 11323834 | SNV | 1 | A | G | Homozygous   |
| NC_037638.1 | 11324889 | SNV | 1 | G | A | Heterozygous |
| NC_037638.1 | 11325445 | SNV | 1 | A | G | Homozygous   |
| NC_037638.1 | 11326313 | SNV | 1 | A | G | Homozygous   |
| NC_037638.1 | 11326417 | SNV | 1 | T | C | Homozygous   |
| NC_037638.1 | 11326458 | SNV | 1 | A | G | Homozygous   |
| NC_037638.1 | 11326476 | SNV | 1 | T | C | Homozygous   |
| NC_037638.1 | 11326677 | SNV | 1 | A | G | Homozygous   |
| NC_037638.1 | 11326744 | SNV | 1 | G | A | Heterozygous |
| NC_037638.1 | 11326769 | SNV | 1 | A | G | Heterozygous |
| NC_037638.1 | 11326774 | SNV | 1 | T | C | Homozygous   |
| NC_037638.1 | 11326789 | SNV | 1 | T | A | Homozygous   |
| NC_037638.1 | 11326964 | SNV | 1 | A | G | Heterozygous |
| NC_037638.1 | 11329571 | SNV | 1 | A | C | Homozygous   |
| NC_037638.1 | 11329578 | SNV | 1 | A | T | Homozygous   |
| NC_037638.1 | 11329582 | SNV | 1 | A | G | Homozygous   |
| NC_037638.1 | 11329586 | SNV | 1 | C | A | Homozygous   |
| NC_037638.1 | 11335312 | SNV | 1 | A | C | Heterozygous |
| NC_037638.1 | 11337824 | SNV | 1 | T | A | Homozygous   |
| NC_037638.1 | 11345521 | SNV | 1 | T | C | Homozygous   |
| NC_037638.1 | 11345590 | SNV | 1 | A | G | Homozygous   |
| NC_037638.1 | 11345692 | SNV | 1 | A | G | Homozygous   |
| NC_037638.1 | 11345736 | SNV | 1 | T | C | Homozygous   |
| NC_037638.1 | 11346588 | SNV | 1 | G | C | Homozygous   |
| NC_037638.1 | 11351620 | SNV | 1 | T | C | Homozygous   |
| NC_037638.1 | 11354867 | SNV | 1 | T | G | Homozygous   |
| NC_037638.1 | 11354870 | SNV | 1 | A | T | Homozygous   |
| NC_037638.1 | 11354879 | SNV | 1 | C | T | Homozygous   |
| NC_037638.1 | 11354885 | SNV | 1 | A | G | Homozygous   |
| NC_037638.1 | 11354889 | SNV | 1 | A | G | Homozygous   |
| NC_037638.1 | 11354893 | SNV | 1 | T | A | Homozygous   |
| NC_037638.1 | 11354899 | SNV | 1 | G | T | Homozygous   |
| NC_037638.1 | 11354903 | SNV | 1 | A | C | Homozygous   |
| NC_037638.1 | 11356010 | SNV | 1 | T | C | Homozygous   |
| NC_037638.1 | 11356163 | SNV | 1 | G | A | Homozygous   |
| NC_037638.1 | 11359556 | SNV | 1 | T | C | Homozygous   |
| NC_037638.1 | 11360137 | SNV | 1 | G | A | Heterozygous |

|             |          |     |   |   |   |              |
|-------------|----------|-----|---|---|---|--------------|
| NC_037638.1 | 11360386 | SNV | 1 | G | C | Homozygous   |
| NC_037638.1 | 11360432 | SNV | 1 | G | A | Heterozygous |
| NC_037638.1 | 11360438 | SNV | 1 | C | T | Heterozygous |
| NC_037638.1 | 11360445 | SNV | 1 | T | G | Heterozygous |
| NC_037638.1 | 11361019 | SNV | 1 | T | A | Heterozygous |
| NC_037638.1 | 11361021 | SNV | 1 | C | A | Heterozygous |
| NC_037638.1 | 11361026 | SNV | 1 | T | A | Homozygous   |
| NC_037638.1 | 11361028 | SNV | 1 | C | A | Homozygous   |
| NC_037638.1 | 11361078 | SNV | 1 | C | T | Homozygous   |
| NC_037638.1 | 11361275 | SNV | 1 | T | C | Homozygous   |
| NC_037638.1 | 11361964 | SNV | 1 | T | C | Homozygous   |
| NC_037638.1 | 11362102 | SNV | 1 | T | G | Homozygous   |
| NC_037638.1 | 11364196 | SNV | 1 | G | A | Homozygous   |
| NC_037638.1 | 11364249 | SNV | 1 | A | G | Homozygous   |
| NC_037638.1 | 11364537 | SNV | 1 | C | T | Heterozygous |
| NC_037638.1 | 11365040 | SNV | 1 | C | T | Homozygous   |
| NC_037638.1 | 11372356 | SNV | 1 | G | T | Homozygous   |
| NC_037638.1 | 11372361 | SNV | 1 | A | T | Homozygous   |
| NC_037638.1 | 11372365 | SNV | 1 | A | T | Homozygous   |
| NC_037638.1 | 11372368 | SNV | 1 | T | A | Homozygous   |
| NC_037638.1 | 11372370 | SNV | 1 | T | G | Homozygous   |
| NC_037638.1 | 11372386 | SNV | 1 | T | C | Homozygous   |
| NC_037638.1 | 11372406 | SNV | 1 | A | C | Homozygous   |
| NC_037638.1 | 11374850 | SNV | 1 | G | C | Heterozygous |
| NC_037638.1 | 11374896 | SNV | 1 | T | C | Heterozygous |
| NC_037638.1 | 11379061 | SNV | 1 | C | A | Homozygous   |
| NC_037638.1 | 11379063 | SNV | 1 | G | T | Homozygous   |
| NC_037638.1 | 11379090 | SNV | 1 | T | G | Homozygous   |
| NC_037638.1 | 11379096 | SNV | 1 | T | G | Homozygous   |
| NC_037638.1 | 11380540 | SNV | 1 | A | G | Homozygous   |
| NC_037638.1 | 11394928 | SNV | 1 | G | A | Heterozygous |
| NC_037638.1 | 11394934 | SNV | 1 | T | A | Homozygous   |
| NC_037638.1 | 11415832 | SNV | 1 | A | G | Heterozygous |
| NC_037638.1 | 11415854 | SNV | 1 | A | G | Homozygous   |
| NC_037638.1 | 11415878 | SNV | 1 | A | G | Homozygous   |
| NC_037638.1 | 11427616 | SNV | 1 | C | T | Heterozygous |
| NC_037638.1 | 11427691 | SNV | 1 | C | T | Heterozygous |
| NC_037638.1 | 11427943 | SNV | 1 | C | T | Heterozygous |
| NC_037638.1 | 11438665 | SNV | 1 | C | A | Heterozygous |
| NC_037638.1 | 11438742 | SNV | 1 | T | C | Homozygous   |
| NC_037638.1 | 11442030 | SNV | 1 | A | G | Homozygous   |
| NC_037638.1 | 11442051 | SNV | 1 | T | C | Heterozygous |
| NC_037638.1 | 11442055 | SNV | 1 | A | C | Heterozygous |
| NC_037638.1 | 11447495 | SNV | 1 | C | T | Homozygous   |
| NC_037638.1 | 11447593 | SNV | 1 | T | C | Homozygous   |
| NC_037638.1 | 11447611 | SNV | 1 | A | G | Homozygous   |
| NC_037638.1 | 11447907 | SNV | 1 | A | G | Homozygous   |
| NC_037638.1 | 11447958 | SNV | 1 | C | G | Homozygous   |
| NC_037638.1 | 11449767 | SNV | 1 | G | C | Homozygous   |
| NC_037638.1 | 11449859 | SNV | 1 | C | T | Homozygous   |
| NC_037638.1 | 11451952 | SNV | 1 | C | T | Heterozygous |

|             |          |     |   |   |   |              |
|-------------|----------|-----|---|---|---|--------------|
| NC_037638.1 | 11451977 | SNV | 1 | C | T | Heterozygous |
| NC_037638.1 | 11452250 | SNV | 1 | C | T | Heterozygous |
| NC_037638.1 | 11452822 | SNV | 1 | T | C | Homozygous   |
| NC_037638.1 | 11452960 | SNV | 1 | A | C | Homozygous   |
| NC_037638.1 | 11453213 | SNV | 1 | C | T | Homozygous   |
| NC_037638.1 | 11453224 | SNV | 1 | T | C | Homozygous   |
| NC_037638.1 | 11453904 | SNV | 1 | G | C | Homozygous   |
| NC_037638.1 | 11468717 | SNV | 1 | C | T | Heterozygous |
| NC_037638.1 | 11468745 | SNV | 1 | T | A | Homozygous   |
| NC_037638.1 | 11468754 | SNV | 1 | T | C | Heterozygous |
| NC_037638.1 | 11468757 | SNV | 1 | T | C | Heterozygous |
| NC_037638.1 | 11474731 | SNV | 1 | G | A | Heterozygous |
| NC_037638.1 | 11480694 | SNV | 1 | C | T | Homozygous   |
| NC_037638.1 | 11480703 | SNV | 1 | T | C | Homozygous   |
| NC_037638.1 | 11481194 | SNV | 1 | G | A | Homozygous   |
| NC_037638.1 | 11481212 | SNV | 1 | A | G | Homozygous   |
| NC_037638.1 | 11481268 | SNV | 1 | C | T | Heterozygous |
| NC_037638.1 | 11481918 | SNV | 1 | A | G | Homozygous   |
| NC_037638.1 | 11482057 | SNV | 1 | A | G | Homozygous   |
| NC_037638.1 | 11484545 | SNV | 1 | A | C | Homozygous   |
| NC_037638.1 | 11484556 | SNV | 1 | T | G | Homozygous   |
| NC_037638.1 | 11485930 | SNV | 1 | C | T | Homozygous   |
| NC_037638.1 | 11486305 | SNV | 1 | C | T | Homozygous   |
| NC_037638.1 | 11486347 | SNV | 1 | T | C | Homozygous   |
| NC_037638.1 | 11507083 | SNV | 1 | G | A | Homozygous   |
| NC_037638.1 | 11510569 | SNV | 1 | G | A | Homozygous   |
| NC_037638.1 | 11510572 | SNV | 1 | T | A | Heterozygous |
| NC_037638.1 | 11510596 | SNV | 1 | A | T | Heterozygous |
| NC_037638.1 | 11511509 | SNV | 1 | T | C | Homozygous   |
| NC_037638.1 | 11517391 | SNV | 1 | A | G | Heterozygous |
| NC_037638.1 | 11517415 | SNV | 1 | C | T | Heterozygous |
| NC_037638.1 | 11517573 | SNV | 1 | A | C | Homozygous   |
| NC_037638.1 | 11517639 | SNV | 1 | T | A | Homozygous   |
| NC_037638.1 | 11517651 | SNV | 1 | T | G | Homozygous   |
| NC_037638.1 | 11517770 | SNV | 1 | A | C | Heterozygous |
| NC_037638.1 | 11517825 | SNV | 1 | C | T | Heterozygous |
| NC_037638.1 | 11517880 | SNV | 1 | A | T | Homozygous   |
| NC_037638.1 | 11518147 | SNV | 1 | G | A | Heterozygous |
| NC_037638.1 | 11518282 | SNV | 1 | C | T | Heterozygous |
| NC_037638.1 | 11518284 | SNV | 1 | A | G | Heterozygous |
| NC_037638.1 | 11518290 | SNV | 1 | T | A | Heterozygous |
| NC_037638.1 | 11518327 | SNV | 1 | G | A | Homozygous   |
| NC_037638.1 | 11519135 | SNV | 1 | A | T | Homozygous   |
| NC_037638.1 | 11523878 | SNV | 1 | C | T | Heterozygous |
| NC_037638.1 | 11523893 | SNV | 1 | A | G | Homozygous   |
| NC_037638.1 | 11523943 | SNV | 1 | A | G | Homozygous   |
| NC_037638.1 | 11523992 | SNV | 1 | C | T | Homozygous   |
| NC_037638.1 | 11524060 | SNV | 1 | T | C | Homozygous   |
| NC_037638.1 | 11527706 | SNV | 1 | T | A | Homozygous   |
| NC_037638.1 | 11527713 | SNV | 1 | A | G | Homozygous   |
| NC_037638.1 | 11528567 | SNV | 1 | T | C | Heterozygous |

|             |          |     |   |   |   |              |
|-------------|----------|-----|---|---|---|--------------|
| NC_037638.1 | 11532280 | SNV | 1 | T | C | Homozygous   |
| NC_037638.1 | 11533777 | SNV | 1 | G | A | Homozygous   |
| NC_037638.1 | 11538702 | SNV | 1 | T | C | Homozygous   |
| NC_037638.1 | 11538709 | SNV | 1 | A | T | Homozygous   |
| NC_037638.1 | 11543330 | SNV | 1 | C | A | Homozygous   |
| NC_037638.1 | 11543341 | SNV | 1 | T | G | Homozygous   |
| NC_037638.1 | 11543343 | SNV | 1 | T | A | Homozygous   |
| NC_037638.1 | 11543346 | SNV | 1 | A | T | Homozygous   |
| NC_037638.1 | 11543351 | SNV | 1 | C | T | Homozygous   |
| NC_037638.1 | 11545653 | SNV | 1 | C | T | Heterozygous |
| NC_037638.1 | 11551331 | SNV | 1 | A | G | Homozygous   |
| NC_037638.1 | 11552597 | SNV | 1 | C | A | Heterozygous |
| NC_037638.1 | 11552645 | SNV | 1 | A | G | Homozygous   |
| NC_037638.1 | 11554523 | SNV | 1 | T | C | Homozygous   |
| NC_037638.1 | 11554552 | SNV | 1 | T | A | Heterozygous |
| NC_037638.1 | 11554559 | SNV | 1 | T | A | Heterozygous |
| NC_037638.1 | 11554567 | SNV | 1 | A | T | Heterozygous |
| NC_037638.1 | 11554576 | SNV | 1 | T | A | Heterozygous |
| NC_037638.1 | 11554588 | SNV | 1 | T | C | Heterozygous |
| NC_037638.1 | 11554592 | SNV | 1 | T | C | Heterozygous |
| NC_037638.1 | 11554596 | SNV | 1 | T | C | Heterozygous |
| NC_037638.1 | 11554597 | SNV | 1 | A | G | Heterozygous |
| NC_037638.1 | 11554599 | SNV | 1 | A | G | Heterozygous |
| NC_037638.1 | 11556182 | SNV | 1 | C | T | Heterozygous |
| NC_037638.1 | 11561907 | SNV | 1 | A | G | Homozygous   |
| NC_037638.1 | 11561980 | SNV | 1 | T | C | Homozygous   |
| NC_037638.1 | 11581731 | SNV | 1 | C | T | Heterozygous |
| NC_037638.1 | 11584284 | SNV | 1 | C | T | Heterozygous |
| NC_037638.1 | 11584404 | SNV | 1 | C | T | Homozygous   |
| NC_037638.1 | 11584923 | SNV | 1 | A | G | Heterozygous |
| NC_037638.1 | 11592456 | SNV | 1 | C | A | Homozygous   |
| NC_037638.1 | 11611989 | SNV | 1 | G | A | Homozygous   |
| NC_037638.1 | 11614919 | SNV | 1 | C | T | Homozygous   |
| NC_037638.1 | 11616276 | SNV | 1 | A | G | Homozygous   |
| NC_037638.1 | 11619328 | SNV | 1 | T | C | Homozygous   |
| NC_037638.1 | 11621669 | SNV | 1 | T | G | Homozygous   |
| NC_037638.1 | 11621671 | SNV | 1 | A | C | Homozygous   |
| NC_037638.1 | 11621702 | SNV | 1 | C | G | Homozygous   |
| NC_037638.1 | 11622068 | SNV | 1 | T | C | Homozygous   |
| NC_037638.1 | 11622070 | SNV | 1 | T | C | Homozygous   |
| NC_037638.1 | 11622077 | SNV | 1 | A | G | Homozygous   |
| NC_037638.1 | 11622085 | SNV | 1 | A | T | Homozygous   |
| NC_037638.1 | 11622100 | SNV | 1 | G | T | Homozygous   |
| NC_037638.1 | 11630422 | SNV | 1 | T | C | Homozygous   |
| NC_037638.1 | 11630475 | SNV | 1 | A | T | Heterozygous |
| NC_037638.1 | 11639788 | SNV | 1 | A | G | Homozygous   |
| NC_037638.1 | 11639794 | SNV | 1 | A | G | Homozygous   |
| NC_037638.1 | 11641610 | SNV | 1 | A | T | Homozygous   |
| NC_037638.1 | 11641615 | SNV | 1 | T | G | Homozygous   |
| NC_037638.1 | 11641627 | SNV | 1 | A | G | Homozygous   |
| NC_037638.1 | 11641630 | SNV | 1 | G | A | Homozygous   |

|             |          |     |   |   |   |              |
|-------------|----------|-----|---|---|---|--------------|
| NC_037638.1 | 11641632 | SNV | 1 | A | G | Homozygous   |
| NC_037638.1 | 11641634 | SNV | 1 | A | T | Homozygous   |
| NC_037638.1 | 11642026 | SNV | 1 | A | G | Heterozygous |
| NC_037638.1 | 11642031 | SNV | 1 | T | C | Heterozygous |
| NC_037638.1 | 11642037 | SNV | 1 | T | C | Heterozygous |
| NC_037638.1 | 11642042 | SNV | 1 | A | G | Heterozygous |
| NC_037638.1 | 11642044 | SNV | 1 | T | G | Heterozygous |
| NC_037638.1 | 11642047 | SNV | 1 | T | C | Heterozygous |
| NC_037638.1 | 11642050 | SNV | 1 | A | T | Heterozygous |
| NC_037638.1 | 11642057 | SNV | 1 | T | G | Heterozygous |
| NC_037638.1 | 11642066 | SNV | 1 | A | G | Heterozygous |
| NC_037638.1 | 11642071 | SNV | 1 | T | C | Homozygous   |
| NC_037638.1 | 11642074 | SNV | 1 | T | A | Heterozygous |
| NC_037638.1 | 11642086 | SNV | 1 | T | C | Heterozygous |
| NC_037638.1 | 11646636 | SNV | 1 | A | G | Homozygous   |
| NC_037638.1 | 11647516 | SNV | 1 | A | C | Homozygous   |
| NC_037638.1 | 11647523 | SNV | 1 | T | G | Homozygous   |
| NC_037638.1 | 11647576 | SNV | 1 | T | G | Homozygous   |
| NC_037638.1 | 11647578 | SNV | 1 | T | G | Homozygous   |
| NC_037638.1 | 11647585 | SNV | 1 | G | A | Homozygous   |
| NC_037638.1 | 11647695 | SNV | 1 | T | A | Homozygous   |
| NC_037638.1 | 11647699 | SNV | 1 | T | A | Homozygous   |
| NC_037638.1 | 11647928 | SNV | 1 | G | A | Homozygous   |
| NC_037638.1 | 11648039 | SNV | 1 | T | C | Heterozygous |
| NC_037638.1 | 11648041 | SNV | 1 | G | A | Heterozygous |
| NC_037638.1 | 11648362 | SNV | 1 | T | A | Homozygous   |
| NC_037638.1 | 11653587 | SNV | 1 | G | A | Homozygous   |
| NC_037638.1 | 11653589 | SNV | 1 | A | G | Homozygous   |
| NC_037638.1 | 11656500 | SNV | 1 | T | C | Homozygous   |
| NC_037638.1 | 11656790 | SNV | 1 | G | C | Homozygous   |
| NC_037638.1 | 11668350 | SNV | 1 | G | A | Homozygous   |
| NC_037638.1 | 11668593 | SNV | 1 | G | A | Homozygous   |
| NC_037638.1 | 11668860 | SNV | 1 | A | G | Heterozygous |
| NC_037638.1 | 11671581 | SNV | 1 | A | G | Homozygous   |
| NC_037638.1 | 11671811 | SNV | 1 | T | A | Heterozygous |
| NC_037638.1 | 11676034 | SNV | 1 | T | C | Homozygous   |
| NC_037638.1 | 11679313 | SNV | 1 | A | G | Homozygous   |
| NC_037638.1 | 11685421 | SNV | 1 | G | T | Homozygous   |
| NC_037638.1 | 11685742 | SNV | 1 | A | G | Homozygous   |
| NC_037638.1 | 11685997 | SNV | 1 | G | A | Homozygous   |
| NC_037638.1 | 11687096 | SNV | 1 | A | T | Homozygous   |
| NC_037638.1 | 11687099 | SNV | 1 | T | C | Homozygous   |
| NC_037638.1 | 11687103 | SNV | 1 | A | G | Homozygous   |
| NC_037638.1 | 11687412 | SNV | 1 | T | A | Homozygous   |
| NC_037638.1 | 11687563 | SNV | 1 | G | T | Homozygous   |
| NC_037638.1 | 11687572 | SNV | 1 | A | T | Homozygous   |
| NC_037638.1 | 11688478 | SNV | 1 | G | A | Homozygous   |
| NC_037638.1 | 11688710 | SNV | 1 | G | T | Homozygous   |
| NC_037638.1 | 11688884 | SNV | 1 | C | T | Homozygous   |
| NC_037638.1 | 11689451 | SNV | 1 | G | A | Homozygous   |
| NC_037638.1 | 11689778 | SNV | 1 | G | A | Heterozygous |

|             |          |     |   |   |   |              |
|-------------|----------|-----|---|---|---|--------------|
| NC_037638.1 | 11689795 | SNV | 1 | G | A | Homozygous   |
| NC_037638.1 | 11695290 | SNV | 1 | T | A | Homozygous   |
| NC_037638.1 | 11702696 | SNV | 1 | T | A | Homozygous   |
| NC_037638.1 | 11702702 | SNV | 1 | A | C | Homozygous   |
| NC_037638.1 | 11702710 | SNV | 1 | A | T | Homozygous   |
| NC_037638.1 | 11702779 | SNV | 1 | T | C | Homozygous   |
| NC_037638.1 | 11702782 | SNV | 1 | C | A | Homozygous   |
| NC_037638.1 | 11708999 | SNV | 1 | A | T | Heterozygous |
| NC_037638.1 | 11710168 | SNV | 1 | A | G | Heterozygous |
| NC_037638.1 | 11710579 | SNV | 1 | C | T | Heterozygous |
| NC_037638.1 | 11710763 | SNV | 1 | T | G | Heterozygous |
| NC_037638.1 | 11710824 | SNV | 1 | G | A | Heterozygous |
| NC_037638.1 | 11714804 | SNV | 1 | G | A | Heterozygous |
| NC_037638.1 | 11715109 | SNV | 1 | T | A | Homozygous   |
| NC_037638.1 | 11715111 | SNV | 1 | C | T | Homozygous   |
| NC_037638.1 | 11715116 | SNV | 1 | A | T | Homozygous   |
| NC_037638.1 | 11717706 | SNV | 1 | A | G | Heterozygous |
| NC_037638.1 | 11718650 | SNV | 1 | T | C | Heterozygous |
| NC_037638.1 | 11725188 | SNV | 1 | T | C | Homozygous   |
| NC_037638.1 | 11725190 | SNV | 1 | T | A | Homozygous   |
| NC_037638.1 | 11725886 | SNV | 1 | A | G | Homozygous   |
| NC_037638.1 | 11725954 | SNV | 1 | T | C | Homozygous   |
| NC_037638.1 | 11727086 | SNV | 1 | G | A | Heterozygous |
| NC_037638.1 | 11727127 | SNV | 1 | T | A | Heterozygous |
| NC_037638.1 | 11727308 | SNV | 1 | A | G | Homozygous   |
| NC_037638.1 | 11727667 | SNV | 1 | T | C | Homozygous   |
| NC_037638.1 | 11728299 | SNV | 1 | A | G | Homozygous   |
| NC_037638.1 | 11731381 | SNV | 1 | A | T | Homozygous   |
| NC_037638.1 | 11731459 | SNV | 1 | C | T | Homozygous   |
| NC_037638.1 | 11731465 | SNV | 1 | A | G | Homozygous   |
| NC_037638.1 | 11733383 | SNV | 1 | A | G | Homozygous   |
| NC_037638.1 | 11733410 | SNV | 1 | A | G | Homozygous   |
| NC_037638.1 | 11733602 | SNV | 1 | T | C | Homozygous   |
| NC_037638.1 | 11736649 | SNV | 1 | C | T | Homozygous   |
| NC_037638.1 | 11736945 | SNV | 1 | C | T | Homozygous   |
| NC_037638.1 | 11741571 | SNV | 1 | T | A | Heterozygous |
| NC_037638.1 | 11741573 | SNV | 1 | T | C | Heterozygous |
| NC_037638.1 | 11741587 | SNV | 1 | T | A | Heterozygous |
| NC_037638.1 | 11743076 | SNV | 1 | A | G | Homozygous   |
| NC_037638.1 | 11753401 | SNV | 1 | C | T | Heterozygous |
| NC_037638.1 | 11753920 | SNV | 1 | A | G | Homozygous   |
| NC_037638.1 | 11753931 | SNV | 1 | T | C | Homozygous   |
| NC_037638.1 | 11753939 | SNV | 1 | T | C | Heterozygous |
| NC_037638.1 | 11753947 | SNV | 1 | T | C | Heterozygous |
| NC_037638.1 | 11753968 | SNV | 1 | A | G | Heterozygous |
| NC_037638.1 | 11775818 | SNV | 1 | C | T | Heterozygous |
| NC_037638.1 | 11775855 | SNV | 1 | T | C | Heterozygous |
| NC_037638.1 | 11775959 | SNV | 1 | T | C | Homozygous   |
| NC_037638.1 | 11776037 | SNV | 1 | A | G | Homozygous   |
| NC_037638.1 | 11776306 | SNV | 1 | G | A | Heterozygous |
| NC_037638.1 | 11781065 | SNV | 1 | G | A | Homozygous   |

|             |          |     |   |   |   |              |
|-------------|----------|-----|---|---|---|--------------|
| NC_037638.1 | 11781070 | SNV | 1 | G | A | Homozygous   |
| NC_037638.1 | 11781098 | SNV | 1 | A | G | Homozygous   |
| NC_037638.1 | 11781101 | SNV | 1 | G | C | Homozygous   |
| NC_037638.1 | 11789306 | SNV | 1 | C | T | Heterozygous |
| NC_037638.1 | 11789965 | SNV | 1 | G | C | Heterozygous |
| NC_037638.1 | 11790013 | SNV | 1 | A | G | Homozygous   |
| NC_037638.1 | 11790070 | SNV | 1 | A | G | Homozygous   |
| NC_037638.1 | 11790088 | SNV | 1 | A | C | Heterozygous |
| NC_037638.1 | 11790091 | SNV | 1 | C | T | Homozygous   |
| NC_037638.1 | 11790228 | SNV | 1 | A | T | Heterozygous |
| NC_037638.1 | 11791273 | SNV | 1 | G | A | Heterozygous |
| NC_037638.1 | 11791277 | SNV | 1 | T | G | Homozygous   |
| NC_037638.1 | 11791433 | SNV | 1 | A | G | Heterozygous |
| NC_037638.1 | 11794371 | SNV | 1 | A | G | Homozygous   |
| NC_037638.1 | 11794505 | SNV | 1 | C | A | Heterozygous |
| NC_037638.1 | 11794507 | SNV | 1 | G | A | Heterozygous |
| NC_037638.1 | 11794513 | SNV | 1 | T | A | Heterozygous |
| NC_037638.1 | 11822719 | SNV | 1 | C | T | Homozygous   |
| NC_037638.1 | 11823067 | SNV | 1 | T | C | Heterozygous |
| NC_037638.1 | 11826095 | SNV | 1 | C | T | Homozygous   |
| NC_037638.1 | 11830229 | SNV | 1 | T | C | Homozygous   |
| NC_037638.1 | 11831077 | SNV | 1 | C | A | Heterozygous |
| NC_037638.1 | 11832043 | SNV | 1 | A | C | Homozygous   |
| NC_037638.1 | 11832045 | SNV | 1 | T | G | Homozygous   |
| NC_037638.1 | 11832047 | SNV | 1 | A | C | Homozygous   |
| NC_037638.1 | 11832056 | SNV | 1 | T | A | Homozygous   |
| NC_037638.1 | 11835490 | SNV | 1 | A | G | Homozygous   |
| NC_037638.1 | 11837101 | SNV | 1 | A | G | Homozygous   |
| NC_037638.1 | 11839491 | SNV | 1 | G | T | Heterozygous |
| NC_037638.1 | 11839557 | SNV | 1 | T | A | Heterozygous |
| NC_037638.1 | 11840800 | SNV | 1 | T | C | Homozygous   |
| NC_037638.1 | 11849310 | SNV | 1 | G | A | Heterozygous |
| NC_037638.1 | 11850909 | SNV | 1 | T | C | Homozygous   |
| NC_037638.1 | 11851303 | SNV | 1 | T | A | Homozygous   |
| NC_037638.1 | 11851576 | SNV | 1 | G | A | Homozygous   |
| NC_037638.1 | 11852070 | SNV | 1 | T | C | Homozygous   |
| NC_037638.1 | 11852073 | SNV | 1 | T | A | Homozygous   |
| NC_037638.1 | 11858142 | SNV | 1 | C | T | Heterozygous |
| NC_037638.1 | 11862998 | SNV | 1 | G | T | Homozygous   |
| NC_037638.1 | 11863002 | SNV | 1 | A | T | Homozygous   |
| NC_037638.1 | 11863678 | SNV | 1 | G | A | Heterozygous |
| NC_037638.1 | 11863692 | SNV | 1 | A | G | Homozygous   |
| NC_037638.1 | 11867067 | SNV | 1 | A | T | Homozygous   |
| NC_037638.1 | 11873377 | SNV | 1 | A | C | Homozygous   |
| NC_037638.1 | 11873534 | SNV | 1 | T | C | Heterozygous |
| NC_037638.1 | 11873576 | SNV | 1 | C | T | Homozygous   |
| NC_037638.1 | 11874182 | SNV | 1 | T | C | Homozygous   |
| NC_037638.1 | 11874584 | SNV | 1 | T | C | Heterozygous |
| NC_037638.1 | 11880418 | SNV | 1 | A | G | Heterozygous |
| NC_037638.1 | 11884449 | SNV | 1 | G | A | Heterozygous |
| NC_037638.1 | 11884616 | SNV | 1 | A | G | Homozygous   |



|             |          |     |   |   |   |              |
|-------------|----------|-----|---|---|---|--------------|
| NC_037638.1 | 11884964 | SNV | 1 | T | C | Homozygous   |
| NC_037638.1 | 11886658 | SNV | 1 | T | C | Homozygous   |
| NC_037638.1 | 11886667 | SNV | 1 | A | G | Homozygous   |
| NC_037638.1 | 11886673 | SNV | 1 | A | G | Homozygous   |
| NC_037638.1 | 11886677 | SNV | 1 | A | C | Homozygous   |
| NC_037638.1 | 11886679 | SNV | 1 | G | T | Homozygous   |
| NC_037638.1 | 11886683 | SNV | 1 | T | C | Homozygous   |
| NC_037638.1 | 11886685 | SNV | 1 | A | C | Homozygous   |
| NC_037638.1 | 11886703 | SNV | 1 | A | T | Homozygous   |
| NC_037638.1 | 11886706 | SNV | 1 | G | T | Homozygous   |
| NC_037638.1 | 11886712 | SNV | 1 | A | G | Homozygous   |
| NC_037638.1 | 11886715 | SNV | 1 | C | T | Homozygous   |
| NC_037638.1 | 11886718 | SNV | 1 | A | C | Homozygous   |
| NC_037638.1 | 11886733 | SNV | 1 | A | C | Heterozygous |
| NC_037638.1 | 11886739 | SNV | 1 | A | G | Heterozygous |
| NC_037638.1 | 11886742 | SNV | 1 | G | A | Heterozygous |
| NC_037638.1 | 11886751 | SNV | 1 | T | C | Heterozygous |
| NC_037638.1 | 11886757 | SNV | 1 | A | C | Heterozygous |
| NC_037638.1 | 11886763 | SNV | 1 | T | C | Homozygous   |
| NC_037638.1 | 11886766 | SNV | 1 | T | A | Heterozygous |
| NC_037638.1 | 11886769 | SNV | 1 | A | T | Heterozygous |
| NC_037638.1 | 11887171 | SNV | 1 | G | A | Homozygous   |
| NC_037638.1 | 11887240 | SNV | 1 | A | G | Heterozygous |
| NC_037638.1 | 11887252 | SNV | 1 | A | G | Homozygous   |
| NC_037638.1 | 11887261 | SNV | 1 | T | G | Heterozygous |
| NC_037638.1 | 11887274 | SNV | 1 | C | T | Homozygous   |
| NC_037638.1 | 11887276 | SNV | 1 | T | G | Homozygous   |
| NC_037638.1 | 11887280 | SNV | 1 | A | G | Homozygous   |
| NC_037638.1 | 11896847 | SNV | 1 | C | T | Homozygous   |
| NC_037638.1 | 11897841 | SNV | 1 | C | T | Heterozygous |
| NC_037638.1 | 11897847 | SNV | 1 | C | T | Heterozygous |
| NC_037638.1 | 11897865 | SNV | 1 | A | G | Homozygous   |
| NC_037638.1 | 11898053 | SNV | 1 | G | A | Heterozygous |
| NC_037638.1 | 11898076 | SNV | 1 | G | A | Heterozygous |
| NC_037638.1 | 11898094 | SNV | 1 | A | G | Homozygous   |
| NC_037638.1 | 11898118 | SNV | 1 | A | G | Homozygous   |
| NC_037638.1 | 11902274 | SNV | 1 | T | C | Homozygous   |
| NC_037638.1 | 11905243 | SNV | 1 | T | C | Homozygous   |
| NC_037638.1 | 11906313 | SNV | 1 | G | A | Homozygous   |
| NC_037638.1 | 11906324 | SNV | 1 | T | C | Homozygous   |
| NC_037638.1 | 11906330 | SNV | 1 | T | C | Homozygous   |
| NC_037638.1 | 11910468 | SNV | 1 | A | G | Heterozygous |
| NC_037638.1 | 11910518 | SNV | 1 | A | G | Heterozygous |
| NC_037638.1 | 11910522 | SNV | 1 | A | G | Homozygous   |
| NC_037638.1 | 11910556 | SNV | 1 | A | G | Homozygous   |
| NC_037638.1 | 11910570 | SNV | 1 | T | G | Heterozygous |
| NC_037638.1 | 11910587 | SNV | 1 | C | T | Heterozygous |
| NC_037638.1 | 11914762 | SNV | 1 | A | G | Homozygous   |
| NC_037638.1 | 11918517 | SNV | 1 | G | T | Heterozygous |
| NC_037638.1 | 11918521 | SNV | 1 | A | G | Heterozygous |
| NC_037638.1 | 11918583 | SNV | 1 | A | G | Homozygous   |

|             |          |     |   |   |   |              |
|-------------|----------|-----|---|---|---|--------------|
| NC_037638.1 | 11919087 | SNV | 1 | C | T | Homozygous   |
| NC_037638.1 | 11920802 | SNV | 1 | G | A | Heterozygous |
| NC_037638.1 | 11920849 | SNV | 1 | A | C | Heterozygous |
| NC_037638.1 | 11920863 | SNV | 1 | G | A | Homozygous   |
| NC_037638.1 | 11924624 | SNV | 1 | A | T | Heterozygous |
| NC_037638.1 | 11927602 | SNV | 1 | C | T | Homozygous   |
| NC_037638.1 | 11929371 | SNV | 1 | C | T | Heterozygous |
| NC_037638.1 | 11929663 | SNV | 1 | A | G | Homozygous   |
| NC_037638.1 | 11933715 | SNV | 1 | A | G | Homozygous   |
| NC_037638.1 | 11933810 | SNV | 1 | A | G | Homozygous   |
| NC_037638.1 | 11936313 | SNV | 1 | A | G | Homozygous   |
| NC_037638.1 | 11937140 | SNV | 1 | G | A | Homozygous   |
| NC_037638.1 | 11937150 | SNV | 1 | T | C | Heterozygous |
| NC_037638.1 | 11937160 | SNV | 1 | C | T | Homozygous   |
| NC_037638.1 | 11942854 | SNV | 1 | G | A | Homozygous   |
| NC_037638.1 | 11944479 | SNV | 1 | G | A | Heterozygous |
| NC_037638.1 | 11946139 | SNV | 1 | A | G | Heterozygous |
| NC_037638.1 | 11950091 | SNV | 1 | G | A | Homozygous   |
| NC_037638.1 | 11950382 | SNV | 1 | A | G | Homozygous   |
| NC_037638.1 | 11950681 | SNV | 1 | C | T | Heterozygous |
| NC_037638.1 | 11950697 | SNV | 1 | G | A | Heterozygous |
| NC_037638.1 | 11951072 | SNV | 1 | T | C | Homozygous   |
| NC_037638.1 | 11959914 | SNV | 1 | G | A | Heterozygous |
| NC_037638.1 | 11960549 | SNV | 1 | C | T | Homozygous   |
| NC_037638.1 | 11960722 | SNV | 1 | T | C | Homozygous   |
| NC_037638.1 | 11960784 | SNV | 1 | A | G | Homozygous   |
| NC_037638.1 | 11961458 | SNV | 1 | G | A | Heterozygous |
| NC_037638.1 | 11962054 | SNV | 1 | G | A | Heterozygous |
| NC_037638.1 | 11962059 | SNV | 1 | G | A | Heterozygous |
| NC_037638.1 | 11962140 | SNV | 1 | C | T | Homozygous   |
| NC_037638.1 | 11962196 | SNV | 1 | T | C | Homozygous   |
| NC_037638.1 | 11962256 | SNV | 1 | G | A | Heterozygous |
| NC_037638.1 | 11966993 | SNV | 1 | T | C | Homozygous   |
| NC_037638.1 | 11967204 | SNV | 1 | A | G | Heterozygous |
| NC_037638.1 | 11967257 | SNV | 1 | T | C | Heterozygous |
| NC_037638.1 | 11967292 | SNV | 1 | A | G | Homozygous   |
| NC_037638.1 | 11967464 | SNV | 1 | T | C | Heterozygous |
| NC_037638.1 | 11967474 | SNV | 1 | A | T | Heterozygous |
| NC_037638.1 | 11967481 | SNV | 1 | A | T | Heterozygous |
| NC_037638.1 | 11967483 | SNV | 1 | A | C | Heterozygous |
| NC_037638.1 | 11967486 | SNV | 1 | T | C | Heterozygous |
| NC_037638.1 | 11967497 | SNV | 1 | C | T | Homozygous   |
| NC_037638.1 | 11967510 | SNV | 1 | T | A | Homozygous   |
| NC_037638.1 | 11967564 | SNV | 1 | G | A | Heterozygous |
| NC_037638.1 | 11967592 | SNV | 1 | T | G | Heterozygous |
| NC_037638.1 | 11967730 | SNV | 1 | T | C | Homozygous   |
| NC_037638.1 | 11967743 | SNV | 1 | A | G | Heterozygous |
| NC_037638.1 | 11967893 | SNV | 1 | T | C | Homozygous   |
| NC_037638.1 | 11971084 | SNV | 1 | C | G | Homozygous   |
| NC_037638.1 | 11971134 | SNV | 1 | T | C | Homozygous   |
| NC_037638.1 | 11971162 | SNV | 1 | A | G | Homozygous   |

|             |          |     |   |   |   |              |
|-------------|----------|-----|---|---|---|--------------|
| NC_037638.1 | 11971180 | SNV | 1 | A | G | Homozygous   |
| NC_037638.1 | 11971496 | SNV | 1 | G | A | Homozygous   |
| NC_037638.1 | 11992451 | SNV | 1 | G | A | Homozygous   |
| NC_037638.1 | 11998725 | SNV | 1 | A | G | Homozygous   |
| NC_037638.1 | 11998783 | SNV | 1 | A | G | Homozygous   |
| NC_037638.1 | 11998834 | SNV | 1 | A | G | Heterozygous |
| NC_037638.1 | 11999058 | SNV | 1 | T | C | Homozygous   |
| NC_037638.1 | 12004333 | SNV | 1 | T | C | Homozygous   |
| NC_037638.1 | 12008565 | SNV | 1 | A | C | Homozygous   |
| NC_037638.1 | 12008577 | SNV | 1 | A | G | Homozygous   |
| NC_037638.1 | 12008595 | SNV | 1 | G | A | Homozygous   |
| NC_037638.1 | 12008603 | SNV | 1 | A | T | Homozygous   |
| NC_037638.1 | 12016355 | SNV | 1 | T | C | Homozygous   |
| NC_037638.1 | 12017529 | SNV | 1 | A | T | Heterozygous |
| NC_037638.1 | 12018392 | SNV | 1 | C | A | Heterozygous |
| NC_037638.1 | 12018462 | SNV | 1 | T | C | Homozygous   |
| NC_037638.1 | 12018690 | SNV | 1 | A | G | Homozygous   |
| NC_037638.1 | 12019647 | SNV | 1 | C | T | Heterozygous |
| NC_037638.1 | 12020264 | SNV | 1 | A | T | Heterozygous |
| NC_037638.1 | 12052810 | SNV | 1 | A | T | Homozygous   |
| NC_037638.1 | 12054670 | SNV | 1 | A | C | Heterozygous |
| NC_037638.1 | 12054673 | SNV | 1 | A | G | Heterozygous |
| NC_037638.1 | 12055844 | SNV | 1 | T | A | Heterozygous |
| NC_037638.1 | 12056148 | SNV | 1 | G | A | Heterozygous |
| NC_037638.1 | 12057537 | SNV | 1 | A | G | Homozygous   |
| NC_037638.1 | 12059275 | SNV | 1 | G | T | Homozygous   |
| NC_037638.1 | 12064730 | SNV | 1 | A | T | Homozygous   |
| NC_037638.1 | 12064749 | SNV | 1 | A | T | Homozygous   |
| NC_037638.1 | 12064755 | SNV | 1 | T | A | Homozygous   |
| NC_037638.1 | 12064757 | SNV | 1 | A | C | Homozygous   |
| NC_037638.1 | 12074136 | SNV | 1 | C | T | Homozygous   |
| NC_037638.1 | 12074252 | SNV | 1 | T | C | Homozygous   |
| NC_037638.1 | 12074406 | SNV | 1 | A | G | Homozygous   |
| NC_037638.1 | 12074448 | SNV | 1 | A | G | Homozygous   |
| NC_037638.1 | 12074639 | SNV | 1 | G | A | Homozygous   |
| NC_037638.1 | 12074650 | SNV | 1 | T | C | Homozygous   |
| NC_037638.1 | 12082606 | SNV | 1 | G | A | Homozygous   |
| NC_037638.1 | 12082634 | SNV | 1 | C | T | Homozygous   |
| NC_037638.1 | 12082639 | SNV | 1 | T | C | Heterozygous |
| NC_037638.1 | 12082641 | SNV | 1 | C | T | Homozygous   |
| NC_037638.1 | 12087184 | SNV | 1 | C | T | Homozygous   |
| NC_037638.1 | 12087558 | SNV | 1 | G | A | Heterozygous |
| NC_037638.1 | 12087617 | SNV | 1 | T | A | Homozygous   |
| NC_037638.1 | 12087622 | SNV | 1 | T | C | Homozygous   |
| NC_037638.1 | 12087645 | SNV | 1 | T | G | Heterozygous |
| NC_037638.1 | 12088313 | SNV | 1 | C | A | Homozygous   |
| NC_037638.1 | 12088321 | SNV | 1 | C | A | Homozygous   |
| NC_037638.1 | 12099161 | SNV | 1 | A | T | Homozygous   |
| NC_037638.1 | 12100191 | SNV | 1 | A | T | Homozygous   |
| NC_037638.1 | 12107219 | SNV | 1 | A | T | Homozygous   |
| NC_037638.1 | 12107230 | SNV | 1 | T | C | Homozygous   |

|             |          |     |   |   |   |              |
|-------------|----------|-----|---|---|---|--------------|
| NC_037638.1 | 12107245 | SNV | 1 | G | T | Homozygous   |
| NC_037638.1 | 12107906 | SNV | 1 | T | C | Homozygous   |
| NC_037638.1 | 12108988 | SNV | 1 | T | C | Heterozygous |
| NC_037638.1 | 12109020 | SNV | 1 | T | C | Homozygous   |
| NC_037638.1 | 12112788 | SNV | 1 | A | G | Homozygous   |
| NC_037638.1 | 12112871 | SNV | 1 | C | T | Homozygous   |
| NC_037638.1 | 12112907 | SNV | 1 | A | C | Homozygous   |
| NC_037638.1 | 12112909 | SNV | 1 | C | T | Homozygous   |
| NC_037638.1 | 12112978 | SNV | 1 | T | C | Heterozygous |
| NC_037638.1 | 12113013 | SNV | 1 | C | T | Heterozygous |
| NC_037638.1 | 12119476 | SNV | 1 | C | G | Homozygous   |
| NC_037638.1 | 12119484 | SNV | 1 | T | C | Heterozygous |
| NC_037638.1 | 12119487 | SNV | 1 | C | T | Homozygous   |
| NC_037638.1 | 12119530 | SNV | 1 | G | C | Homozygous   |
| NC_037638.1 | 12120886 | SNV | 1 | G | C | Heterozygous |
| NC_037638.1 | 12120932 | SNV | 1 | C | T | Heterozygous |
| NC_037638.1 | 12120951 | SNV | 1 | G | T | Homozygous   |
| NC_037638.1 | 12120954 | SNV | 1 | G | C | Homozygous   |
| NC_037638.1 | 12120958 | SNV | 1 | T | C | Heterozygous |
| NC_037638.1 | 12120962 | SNV | 1 | A | C | Homozygous   |
| NC_037638.1 | 12123299 | SNV | 1 | C | T | Homozygous   |
| NC_037638.1 | 12123418 | SNV | 1 | T | C | Heterozygous |
| NC_037638.1 | 12123626 | SNV | 1 | C | T | Homozygous   |
| NC_037638.1 | 12150781 | SNV | 1 | T | A | Heterozygous |
| NC_037638.1 | 12150831 | SNV | 1 | T | A | Heterozygous |
| NC_037638.1 | 12150834 | SNV | 1 | T | A | Heterozygous |
| NC_037638.1 | 12150842 | SNV | 1 | T | A | Heterozygous |
| NC_037638.1 | 12155129 | SNV | 1 | C | G | Heterozygous |
| NC_037638.1 | 12155167 | SNV | 1 | A | T | Homozygous   |
| NC_037638.1 | 12155503 | SNV | 1 | G | A | Heterozygous |
| NC_037638.1 | 12172390 | SNV | 1 | C | T | Heterozygous |
| NC_037638.1 | 12172601 | SNV | 1 | G | A | Heterozygous |
| NC_037638.1 | 12174389 | SNV | 1 | A | G | Homozygous   |
| NC_037638.1 | 12174420 | SNV | 1 | C | T | Heterozygous |
| NC_037638.1 | 12174452 | SNV | 1 | A | G | Homozygous   |
| NC_037638.1 | 12174730 | SNV | 1 | C | G | Homozygous   |
| NC_037638.1 | 12174777 | SNV | 1 | A | G | Homozygous   |
| NC_037638.1 | 12180161 | SNV | 1 | G | A | Homozygous   |
| NC_037638.1 | 12180176 | SNV | 1 | A | G | Heterozygous |
| NC_037638.1 | 12180759 | SNV | 1 | C | T | Homozygous   |
| NC_037638.1 | 12183932 | SNV | 1 | A | C | Heterozygous |
| NC_037638.1 | 12183986 | SNV | 1 | T | C | Homozygous   |
| NC_037638.1 | 12183989 | SNV | 1 | C | T | Homozygous   |
| NC_037638.1 | 12188511 | SNV | 1 | G | T | Homozygous   |
| NC_037638.1 | 12188546 | SNV | 1 | C | T | Homozygous   |
| NC_037638.1 | 12188556 | SNV | 1 | C | T | Heterozygous |
| NC_037638.1 | 12188563 | SNV | 1 | T | G | Heterozygous |
| NC_037638.1 | 12191852 | SNV | 1 | T | C | Homozygous   |
| NC_037638.1 | 12191861 | SNV | 1 | T | C | Homozygous   |
| NC_037638.1 | 12191886 | SNV | 1 | C | T | Heterozygous |
| NC_037638.1 | 12193633 | SNV | 1 | G | A | Homozygous   |

|             |          |     |   |   |   |              |
|-------------|----------|-----|---|---|---|--------------|
| NC_037638.1 | 12193645 | SNV | 1 | C | T | Homozygous   |
| NC_037638.1 | 12193656 | SNV | 1 | G | A | Heterozygous |
| NC_037638.1 | 12193676 | SNV | 1 | T | C | Heterozygous |
| NC_037638.1 | 12193686 | SNV | 1 | T | C | Heterozygous |
| NC_037638.1 | 12193694 | SNV | 1 | A | G | Heterozygous |
| NC_037638.1 | 12193796 | SNV | 1 | A | T | Heterozygous |
| NC_037638.1 | 12194045 | SNV | 1 | A | G | Heterozygous |
| NC_037638.1 | 12194426 | SNV | 1 | T | C | Heterozygous |
| NC_037638.1 | 12194435 | SNV | 1 | C | T | Heterozygous |
| NC_037638.1 | 12194651 | SNV | 1 | G | A | Heterozygous |
| NC_037638.1 | 12194675 | SNV | 1 | A | G | Heterozygous |
| NC_037638.1 | 12194975 | SNV | 1 | C | T | Heterozygous |
| NC_037638.1 | 12194999 | SNV | 1 | G | A | Homozygous   |
| NC_037638.1 | 12195131 | SNV | 1 | C | T | Homozygous   |
| NC_037638.1 | 12195668 | SNV | 1 | T | C | Heterozygous |
| NC_037638.1 | 12196460 | SNV | 1 | C | T | Heterozygous |
| NC_037638.1 | 12202606 | SNV | 1 | A | G | Heterozygous |
| NC_037638.1 | 12202623 | SNV | 1 | G | C | Homozygous   |
| NC_037638.1 | 12205389 | SNV | 1 | C | T | Heterozygous |
| NC_037638.1 | 12205398 | SNV | 1 | G | A | Homozygous   |
| NC_037638.1 | 12205556 | SNV | 1 | T | C | Homozygous   |
| NC_037638.1 | 12205558 | SNV | 1 | C | T | Homozygous   |
| NC_037638.1 | 12205671 | SNV | 1 | A | G | Homozygous   |
| NC_037638.1 | 12205685 | SNV | 1 | T | C | Homozygous   |
| NC_037638.1 | 12205746 | SNV | 1 | T | C | Homozygous   |
| NC_037638.1 | 12205757 | SNV | 1 | G | A | Homozygous   |
| NC_037638.1 | 12205767 | SNV | 1 | T | C | Homozygous   |
| NC_037638.1 | 12205772 | SNV | 1 | G | A | Homozygous   |
| NC_037638.1 | 12205806 | SNV | 1 | C | T | Homozygous   |
| NC_037638.1 | 12205859 | SNV | 1 | G | A | Homozygous   |
| NC_037638.1 | 12205868 | SNV | 1 | A | T | Homozygous   |
| NC_037638.1 | 12206045 | SNV | 1 | T | C | Homozygous   |
| NC_037638.1 | 12206119 | SNV | 1 | A | T | Homozygous   |
| NC_037638.1 | 12206555 | SNV | 1 | T | C | Homozygous   |
| NC_037638.1 | 12206585 | SNV | 1 | C | T | Homozygous   |
| NC_037638.1 | 12206697 | SNV | 1 | T | C | Homozygous   |
| NC_037638.1 | 12207739 | SNV | 1 | T | C | Homozygous   |
| NC_037638.1 | 12207783 | SNV | 1 | G | A | Homozygous   |
| NC_037638.1 | 12208099 | SNV | 1 | A | G | Heterozygous |
| NC_037638.1 | 12208111 | SNV | 1 | C | T | Heterozygous |
| NC_037638.1 | 12209546 | SNV | 1 | A | T | Homozygous   |
| NC_037638.1 | 12209708 | SNV | 1 | C | T | Heterozygous |
| NC_037638.1 | 12211640 | SNV | 1 | G | A | Heterozygous |
| NC_037638.1 | 12211644 | SNV | 1 | C | T | Homozygous   |
| NC_037638.1 | 12211656 | SNV | 1 | G | T | Homozygous   |
| NC_037638.1 | 12211702 | SNV | 1 | T | C | Homozygous   |
| NC_037638.1 | 12211732 | SNV | 1 | A | T | Homozygous   |
| NC_037638.1 | 12211793 | SNV | 1 | T | C | Homozygous   |
| NC_037638.1 | 12211838 | SNV | 1 | C | T | Heterozygous |
| NC_037638.1 | 12212359 | SNV | 1 | A | G | Homozygous   |
| NC_037638.1 | 12212404 | SNV | 1 | A | G | Heterozygous |

|             |          |     |   |   |   |              |
|-------------|----------|-----|---|---|---|--------------|
| NC_037638.1 | 12212416 | SNV | 1 | C | T | Heterozygous |
| NC_037638.1 | 12213995 | SNV | 1 | T | C | Homozygous   |
| NC_037638.1 | 12214049 | SNV | 1 | A | G | Homozygous   |
| NC_037638.1 | 12214107 | SNV | 1 | G | A | Homozygous   |
| NC_037638.1 | 12214246 | SNV | 1 | G | T | Homozygous   |
| NC_037638.1 | 12215491 | SNV | 1 | C | T | Homozygous   |
| NC_037638.1 | 12217817 | SNV | 1 | T | A | Homozygous   |
| NC_037638.1 | 12218675 | SNV | 1 | C | G | Homozygous   |
| NC_037638.1 | 12220740 | SNV | 1 | A | G | Homozygous   |
| NC_037638.1 | 12220882 | SNV | 1 | C | T | Homozygous   |
| NC_037638.1 | 12220942 | SNV | 1 | T | C | Homozygous   |
| NC_037638.1 | 12220950 | SNV | 1 | T | C | Homozygous   |
| NC_037638.1 | 12220974 | SNV | 1 | G | A | Heterozygous |
| NC_037638.1 | 12221055 | SNV | 1 | C | T | Homozygous   |
| NC_037638.1 | 12231364 | SNV | 1 | G | A | Heterozygous |
| NC_037638.1 | 12231460 | SNV | 1 | G | A | Homozygous   |
| NC_037638.1 | 12231502 | SNV | 1 | A | G | Homozygous   |
| NC_037638.1 | 12231902 | SNV | 1 | T | C | Homozygous   |
| NC_037638.1 | 12231944 | SNV | 1 | T | C | Heterozygous |
| NC_037638.1 | 12232777 | SNV | 1 | A | T | Homozygous   |
| NC_037638.1 | 12232780 | SNV | 1 | G | C | Homozygous   |
| NC_037638.1 | 12232783 | SNV | 1 | T | C | Homozygous   |
| NC_037638.1 | 12232799 | SNV | 1 | G | A | Homozygous   |
| NC_037638.1 | 12232803 | SNV | 1 | G | T | Homozygous   |
| NC_037638.1 | 12232806 | SNV | 1 | T | A | Homozygous   |
| NC_037638.1 | 12239433 | SNV | 1 | T | A | Homozygous   |
| NC_037638.1 | 12239437 | SNV | 1 | T | A | Homozygous   |
| NC_037638.1 | 12239447 | SNV | 1 | G | C | Homozygous   |
| NC_037638.1 | 12239475 | SNV | 1 | A | G | Homozygous   |
| NC_037638.1 | 12240969 | SNV | 1 | T | C | Homozygous   |
| NC_037638.1 | 12242157 | SNV | 1 | G | A | Heterozygous |
| NC_037638.1 | 12242185 | SNV | 1 | G | A | Heterozygous |
| NC_037638.1 | 12242199 | SNV | 1 | A | G | Homozygous   |
| NC_037638.1 | 12242221 | SNV | 1 | G | A | Homozygous   |
| NC_037638.1 | 12242231 | SNV | 1 | T | C | Homozygous   |
| NC_037638.1 | 12242245 | SNV | 1 | G | A | Heterozygous |
| NC_037638.1 | 12242263 | SNV | 1 | C | T | Heterozygous |
| NC_037638.1 | 12242287 | SNV | 1 | A | G | Heterozygous |
| NC_037638.1 | 12243127 | SNV | 1 | A | C | Homozygous   |
| NC_037638.1 | 12243156 | SNV | 1 | C | T | Homozygous   |
| NC_037638.1 | 12243195 | SNV | 1 | T | C | Homozygous   |
| NC_037638.1 | 12243213 | SNV | 1 | T | C | Heterozygous |
| NC_037638.1 | 12243228 | SNV | 1 | T | C | Homozygous   |
| NC_037638.1 | 12243251 | SNV | 1 | C | T | Heterozygous |
| NC_037638.1 | 12243253 | SNV | 1 | A | G | Heterozygous |
| NC_037638.1 | 12243939 | SNV | 1 | T | C | Homozygous   |
| NC_037638.1 | 12244851 | SNV | 1 | A | G | Homozygous   |
| NC_037638.1 | 12244859 | SNV | 1 | T | C | Homozygous   |
| NC_037638.1 | 12244919 | SNV | 1 | A | G | Heterozygous |
| NC_037638.1 | 12245002 | SNV | 1 | A | C | Heterozygous |
| NC_037638.1 | 12245006 | SNV | 1 | T | C | Heterozygous |

|             |          |     |   |   |   |              |
|-------------|----------|-----|---|---|---|--------------|
| NC_037638.1 | 12245040 | SNV | 1 | T | C | Heterozygous |
| NC_037638.1 | 12245063 | SNV | 1 | T | C | Heterozygous |
| NC_037638.1 | 12245209 | SNV | 1 | T | C | Homozygous   |
| NC_037638.1 | 12245265 | SNV | 1 | A | C | Homozygous   |
| NC_037638.1 | 12245267 | SNV | 1 | G | A | Heterozygous |
| NC_037638.1 | 12245308 | SNV | 1 | G | A | Heterozygous |
| NC_037638.1 | 12266099 | SNV | 1 | A | G | Homozygous   |
| NC_037638.1 | 12266108 | SNV | 1 | T | G | Homozygous   |
| NC_037638.1 | 12266140 | SNV | 1 | T | A | Homozygous   |
| NC_037638.1 | 12282599 | SNV | 1 | T | C | Heterozygous |
| NC_037638.1 | 12282604 | SNV | 1 | G | A | Homozygous   |
| NC_037638.1 | 12282608 | SNV | 1 | C | T | Heterozygous |
| NC_037638.1 | 12282613 | SNV | 1 | T | A | Heterozygous |
| NC_037638.1 | 12282627 | SNV | 1 | C | T | Heterozygous |
| NC_037638.1 | 12287420 | SNV | 1 | G | A | Homozygous   |
| NC_037638.1 | 12293365 | SNV | 1 | A | T | Homozygous   |
| NC_037638.1 | 12293368 | SNV | 1 | G | T | Homozygous   |
| NC_037638.1 | 12293370 | SNV | 1 | A | C | Homozygous   |
| NC_037638.1 | 12293374 | SNV | 1 | T | C | Homozygous   |
| NC_037638.1 | 12293381 | SNV | 1 | T | G | Homozygous   |
| NC_037638.1 | 12293384 | SNV | 1 | A | T | Homozygous   |
| NC_037638.1 | 12293392 | SNV | 1 | C | G | Homozygous   |
| NC_037638.1 | 12293589 | SNV | 1 | T | G | Homozygous   |
| NC_037638.1 | 12293602 | SNV | 1 | A | C | Homozygous   |
| NC_037638.1 | 12293606 | SNV | 1 | A | C | Homozygous   |
| NC_037638.1 | 12293615 | SNV | 1 | A | C | Homozygous   |
| NC_037638.1 | 12293619 | SNV | 1 | A | G | Homozygous   |
| NC_037638.1 | 12298756 | SNV | 1 | A | C | Heterozygous |
| NC_037638.1 | 12298758 | SNV | 1 | T | A | Heterozygous |
| NC_037638.1 | 12298760 | SNV | 1 | G | A | Heterozygous |
| NC_037638.1 | 12298763 | SNV | 1 | T | A | Heterozygous |
| NC_037638.1 | 12298772 | SNV | 1 | T | G | Heterozygous |
| NC_037638.1 | 12298774 | SNV | 1 | T | G | Heterozygous |
| NC_037638.1 | 12298778 | SNV | 1 | A | T | Heterozygous |
| NC_037638.1 | 12298785 | SNV | 1 | A | C | Heterozygous |
| NC_037638.1 | 12298787 | SNV | 1 | T | C | Heterozygous |
| NC_037638.1 | 12298803 | SNV | 1 | T | A | Heterozygous |
| NC_037638.1 | 12300061 | SNV | 1 | A | G | Heterozygous |
| NC_037638.1 | 12300072 | SNV | 1 | A | G | Heterozygous |
| NC_037638.1 | 12300090 | SNV | 1 | A | G | Heterozygous |
| NC_037638.1 | 12300093 | SNV | 1 | A | G | Heterozygous |
| NC_037638.1 | 12300231 | SNV | 1 | T | C | Homozygous   |
| NC_037638.1 | 12300233 | SNV | 1 | A | G | Heterozygous |
| NC_037638.1 | 12300592 | SNV | 1 | C | A | Homozygous   |
| NC_037638.1 | 12300611 | SNV | 1 | A | G | Homozygous   |
| NC_037638.1 | 12302312 | SNV | 1 | A | G | Homozygous   |
| NC_037638.1 | 12302315 | SNV | 1 | T | C | Homozygous   |
| NC_037638.1 | 12302539 | SNV | 1 | G | A | Heterozygous |
| NC_037638.1 | 12302936 | SNV | 1 | C | G | Homozygous   |
| NC_037638.1 | 12305230 | SNV | 1 | T | C | Homozygous   |
| NC_037638.1 | 12308190 | SNV | 1 | T | C | Homozygous   |

|             |          |     |   |   |   |              |
|-------------|----------|-----|---|---|---|--------------|
| NC_037638.1 | 12308459 | SNV | 1 | C | T | Heterozygous |
| NC_037638.1 | 12308856 | SNV | 1 | A | G | Homozygous   |
| NC_037638.1 | 12309266 | SNV | 1 | T | C | Homozygous   |
| NC_037638.1 | 12309885 | SNV | 1 | T | A | Heterozygous |
| NC_037638.1 | 12310262 | SNV | 1 | A | G | Heterozygous |
| NC_037638.1 | 12310374 | SNV | 1 | T | A | Heterozygous |
| NC_037638.1 | 12310462 | SNV | 1 | C | T | Heterozygous |
| NC_037638.1 | 12310578 | SNV | 1 | G | A | Heterozygous |
| NC_037638.1 | 12310821 | SNV | 1 | T | C | Heterozygous |
| NC_037638.1 | 12311008 | SNV | 1 | T | C | Homozygous   |
| NC_037638.1 | 12311811 | SNV | 1 | C | T | Homozygous   |
| NC_037638.1 | 12311829 | SNV | 1 | C | T | Homozygous   |
| NC_037638.1 | 12312056 | SNV | 1 | T | C | Homozygous   |
| NC_037638.1 | 12312662 | SNV | 1 | T | C | Homozygous   |
| NC_037638.1 | 12312667 | SNV | 1 | T | A | Homozygous   |
| NC_037638.1 | 12312669 | SNV | 1 | T | G | Homozygous   |
| NC_037638.1 | 12312938 | SNV | 1 | T | C | Homozygous   |
| NC_037638.1 | 12313001 | SNV | 1 | C | T | Homozygous   |
| NC_037638.1 | 12313170 | SNV | 1 | C | G | Homozygous   |
| NC_037638.1 | 12313569 | SNV | 1 | G | T | Heterozygous |
| NC_037638.1 | 12313647 | SNV | 1 | C | G | Heterozygous |
| NC_037638.1 | 12313652 | SNV | 1 | T | C | Homozygous   |
| NC_037638.1 | 12313687 | SNV | 1 | A | G | Heterozygous |
| NC_037638.1 | 12313794 | SNV | 1 | C | T | Heterozygous |
| NC_037638.1 | 12315142 | SNV | 1 | A | G | Homozygous   |
| NC_037638.1 | 12315183 | SNV | 1 | T | A | Heterozygous |
| NC_037638.1 | 12318028 | SNV | 1 | A | G | Homozygous   |
| NC_037638.1 | 12318117 | SNV | 1 | T | C | Homozygous   |
| NC_037638.1 | 12318237 | SNV | 1 | A | G | Homozygous   |
| NC_037638.1 | 12318282 | SNV | 1 | A | G | Homozygous   |
| NC_037638.1 | 12318357 | SNV | 1 | T | G | Heterozygous |
| NC_037638.1 | 12318362 | SNV | 1 | C | T | Heterozygous |
| NC_037638.1 | 12318399 | SNV | 1 | C | T | Heterozygous |
| NC_037638.1 | 12318417 | SNV | 1 | A | T | Homozygous   |
| NC_037638.1 | 12318728 | SNV | 1 | T | C | Homozygous   |
| NC_037638.1 | 12319085 | SNV | 1 | A | C | Heterozygous |
| NC_037638.1 | 12319088 | SNV | 1 | T | A | Homozygous   |
| NC_037638.1 | 12319092 | SNV | 1 | G | A | Homozygous   |
| NC_037638.1 | 12319104 | SNV | 1 | A | T | Homozygous   |
| NC_037638.1 | 12320312 | SNV | 1 | A | G | Homozygous   |
| NC_037638.1 | 12325297 | SNV | 1 | A | G | Heterozygous |
| NC_037638.1 | 12325437 | SNV | 1 | A | G | Heterozygous |
| NC_037638.1 | 12325611 | SNV | 1 | G | A | Heterozygous |
| NC_037638.1 | 12329012 | SNV | 1 | T | A | Heterozygous |
| NC_037638.1 | 12329015 | SNV | 1 | G | A | Homozygous   |
| NC_037638.1 | 12329046 | SNV | 1 | A | G | Heterozygous |
| NC_037638.1 | 12335278 | SNV | 1 | T | A | Heterozygous |
| NC_037638.1 | 12335440 | SNV | 1 | G | A | Heterozygous |
| NC_037638.1 | 12335454 | SNV | 1 | T | C | Homozygous   |
| NC_037638.1 | 12348661 | SNV | 1 | T | C | Homozygous   |
| NC_037638.1 | 12350337 | SNV | 1 | T | A | Heterozygous |



|             |          |     |   |   |   |              |
|-------------|----------|-----|---|---|---|--------------|
| NC_037638.1 | 12351300 | SNV | 1 | A | G | Heterozygous |
| NC_037638.1 | 12351519 | SNV | 1 | T | C | Homozygous   |
| NC_037638.1 | 12351999 | SNV | 1 | C | T | Heterozygous |
| NC_037638.1 | 12352099 | SNV | 1 | T | C | Homozygous   |
| NC_037638.1 | 12352159 | SNV | 1 | G | A | Homozygous   |
| NC_037638.1 | 12352164 | SNV | 1 | C | T | Homozygous   |
| NC_037638.1 | 12352558 | SNV | 1 | G | A | Heterozygous |
| NC_037638.1 | 12352560 | SNV | 1 | A | G | Homozygous   |
| NC_037638.1 | 12352589 | SNV | 1 | G | A | Heterozygous |
| NC_037638.1 | 12352655 | SNV | 1 | T | A | Homozygous   |
| NC_037638.1 | 12352677 | SNV | 1 | A | G | Homozygous   |
| NC_037638.1 | 12352683 | SNV | 1 | A | C | Homozygous   |
| NC_037638.1 | 12353153 | SNV | 1 | A | C | Homozygous   |
| NC_037638.1 | 12354154 | SNV | 1 | G | A | Heterozygous |
| NC_037638.1 | 12356324 | SNV | 1 | A | C | Homozygous   |
| NC_037638.1 | 12356826 | SNV | 1 | A | T | Homozygous   |
| NC_037638.1 | 12357894 | SNV | 1 | T | C | Heterozygous |
| NC_037638.1 | 12359252 | SNV | 1 | T | C | Homozygous   |
| NC_037638.1 | 12364890 | SNV | 1 | A | C | Heterozygous |
| NC_037638.1 | 12366556 | SNV | 1 | A | G | Homozygous   |
| NC_037638.1 | 12372623 | SNV | 1 | G | A | Heterozygous |
| NC_037638.1 | 12372773 | SNV | 1 | A | G | Homozygous   |
| NC_037638.1 | 12372853 | SNV | 1 | T | A | Homozygous   |
| NC_037638.1 | 12375441 | SNV | 1 | G | A | Heterozygous |
| NC_037638.1 | 12375462 | SNV | 1 | C | T | Heterozygous |
| NC_037638.1 | 12375465 | SNV | 1 | G | A | Heterozygous |
| NC_037638.1 | 12375468 | SNV | 1 | G | A | Homozygous   |
| NC_037638.1 | 12375498 | SNV | 1 | G | A | Homozygous   |
| NC_037638.1 | 12375548 | SNV | 1 | G | A | Homozygous   |
| NC_037638.1 | 12375692 | SNV | 1 | T | C | Heterozygous |
| NC_037638.1 | 12375705 | SNV | 1 | G | A | Homozygous   |
| NC_037638.1 | 12375755 | SNV | 1 | G | A | Homozygous   |
| NC_037638.1 | 12377272 | SNV | 1 | T | C | Homozygous   |
| NC_037638.1 | 12377284 | SNV | 1 | G | A | Heterozygous |
| NC_037638.1 | 12381533 | SNV | 1 | T | C | Homozygous   |
| NC_037638.1 | 12381562 | SNV | 1 | A | G | Homozygous   |
| NC_037638.1 | 12388752 | SNV | 1 | G | A | Heterozygous |
| NC_037638.1 | 12390333 | SNV | 1 | C | T | Heterozygous |
| NC_037638.1 | 12390738 | SNV | 1 | A | G | Heterozygous |
| NC_037638.1 | 12390741 | SNV | 1 | A | G | Homozygous   |
| NC_037638.1 | 12390747 | SNV | 1 | G | A | Heterozygous |
| NC_037638.1 | 12390762 | SNV | 1 | G | A | Heterozygous |
| NC_037638.1 | 12390765 | SNV | 1 | A | G | Heterozygous |
| NC_037638.1 | 12391101 | SNV | 1 | G | C | Heterozygous |
| NC_037638.1 | 12391215 | SNV | 1 | A | G | Heterozygous |
| NC_037638.1 | 12391341 | SNV | 1 | T | C | Homozygous   |
| NC_037638.1 | 12392311 | SNV | 1 | G | A | Heterozygous |
| NC_037638.1 | 12398449 | SNV | 1 | T | C | Heterozygous |
| NC_037638.1 | 12399729 | SNV | 1 | G | A | Homozygous   |
| NC_037638.1 | 12401229 | SNV | 1 | T | A | Heterozygous |
| NC_037638.1 | 12402094 | SNV | 1 | C | A | Homozygous   |

|             |          |     |   |   |   |              |
|-------------|----------|-----|---|---|---|--------------|
| NC_037638.1 | 12413917 | SNV | 1 | T | C | Heterozygous |
| NC_037638.1 | 12414296 | SNV | 1 | G | A | Homozygous   |
| NC_037638.1 | 12414995 | SNV | 1 | A | T | Homozygous   |
| NC_037638.1 | 12415127 | SNV | 1 | G | A | Homozygous   |
| NC_037638.1 | 12415262 | SNV | 1 | T | A | Homozygous   |
| NC_037638.1 | 12415264 | SNV | 1 | G | A | Homozygous   |
| NC_037638.1 | 12415813 | SNV | 1 | T | A | Homozygous   |
| NC_037638.1 | 12417101 | SNV | 1 | G | T | Heterozygous |
| NC_037638.1 | 12417358 | SNV | 1 | A | T | Homozygous   |
| NC_037638.1 | 12417377 | SNV | 1 | A | T | Heterozygous |
| NC_037638.1 | 12417381 | SNV | 1 | T | A | Homozygous   |
| NC_037638.1 | 12417390 | SNV | 1 | A | G | Heterozygous |
| NC_037638.1 | 12417396 | SNV | 1 | T | G | Homozygous   |
| NC_037638.1 | 12417827 | SNV | 1 | T | C | Homozygous   |
| NC_037638.1 | 12418037 | SNV | 1 | G | A | Homozygous   |
| NC_037638.1 | 12419544 | SNV | 1 | C | T | Heterozygous |
| NC_037638.1 | 12419547 | SNV | 1 | A | T | Heterozygous |
| NC_037638.1 | 12419583 | SNV | 1 | A | T | Heterozygous |
| NC_037638.1 | 12419625 | SNV | 1 | A | T | Heterozygous |
| NC_037638.1 | 12419627 | SNV | 1 | G | C | Heterozygous |
| NC_037638.1 | 12419637 | SNV | 1 | T | C | Heterozygous |
| NC_037638.1 | 12419655 | SNV | 1 | C | A | Heterozygous |
| NC_037638.1 | 12419655 | SNV | 1 | C | T | Heterozygous |
| NC_037638.1 | 12419661 | SNV | 1 | A | T | Heterozygous |
| NC_037638.1 | 12419663 | SNV | 1 | G | C | Heterozygous |
| NC_037638.1 | 12419852 | SNV | 1 | G | A | Homozygous   |
| NC_037638.1 | 12420990 | SNV | 1 | T | C | Homozygous   |
| NC_037638.1 | 12420992 | SNV | 1 | C | A | Homozygous   |
| NC_037638.1 | 12421632 | SNV | 1 | G | C | Homozygous   |
| NC_037638.1 | 12434910 | SNV | 1 | G | A | Heterozygous |
| NC_037638.1 | 12435135 | SNV | 1 | T | A | Heterozygous |
| NC_037638.1 | 12437198 | SNV | 1 | T | C | Homozygous   |
| NC_037638.1 | 12437200 | SNV | 1 | T | C | Homozygous   |
| NC_037638.1 | 12437220 | SNV | 1 | T | C | Heterozygous |
| NC_037638.1 | 12437363 | SNV | 1 | A | G | Homozygous   |
| NC_037638.1 | 12437470 | SNV | 1 | G | A | Heterozygous |
| NC_037638.1 | 12437486 | SNV | 1 | T | C | Heterozygous |
| NC_037638.1 | 12441576 | SNV | 1 | A | G | Heterozygous |
| NC_037638.1 | 12441581 | SNV | 1 | A | G | Homozygous   |
| NC_037638.1 | 12441638 | SNV | 1 | A | G | Homozygous   |
| NC_037638.1 | 12441792 | SNV | 1 | C | T | Homozygous   |
| NC_037638.1 | 12441796 | SNV | 1 | G | A | Homozygous   |
| NC_037638.1 | 12442184 | SNV | 1 | A | G | Homozygous   |
| NC_037638.1 | 12442195 | SNV | 1 | C | G | Heterozygous |
| NC_037638.1 | 12461788 | SNV | 1 | G | A | Homozygous   |
| NC_037638.1 | 12461842 | SNV | 1 | A | G | Homozygous   |
| NC_037638.1 | 12461874 | SNV | 1 | A | G | Heterozygous |
| NC_037638.1 | 12462102 | SNV | 1 | C | T | Homozygous   |
| NC_037638.1 | 12462104 | SNV | 1 | G | A | Homozygous   |
| NC_037638.1 | 12462130 | SNV | 1 | C | T | Heterozygous |
| NC_037638.1 | 12469155 | SNV | 1 | A | G | Heterozygous |

|             |          |     |   |   |   |              |
|-------------|----------|-----|---|---|---|--------------|
| NC_037638.1 | 12469172 | SNV | 1 | C | T | Homozygous   |
| NC_037638.1 | 12475433 | SNV | 1 | C | T | Heterozygous |
| NC_037638.1 | 12475456 | SNV | 1 | G | A | Heterozygous |
| NC_037638.1 | 12478704 | SNV | 1 | A | G | Homozygous   |
| NC_037638.1 | 12478992 | SNV | 1 | C | A | Heterozygous |
| NC_037638.1 | 12481807 | SNV | 1 | G | A | Heterozygous |
| NC_037638.1 | 12481982 | SNV | 1 | G | A | Homozygous   |
| NC_037638.1 | 12482405 | SNV | 1 | G | A | Homozygous   |
| NC_037638.1 | 12482767 | SNV | 1 | A | G | Heterozygous |
| NC_037638.1 | 12482776 | SNV | 1 | C | A | Heterozygous |
| NC_037638.1 | 12483008 | SNV | 1 | A | G | Heterozygous |
| NC_037638.1 | 12483619 | SNV | 1 | A | G | Heterozygous |
| NC_037638.1 | 12483627 | SNV | 1 | A | G | Homozygous   |
| NC_037638.1 | 12483719 | SNV | 1 | T | C | Heterozygous |
| NC_037638.1 | 12483778 | SNV | 1 | T | C | Homozygous   |
| NC_037638.1 | 12483796 | SNV | 1 | A | G | Homozygous   |
| NC_037638.1 | 12484425 | SNV | 1 | G | A | Heterozygous |
| NC_037638.1 | 12484502 | SNV | 1 | T | C | Homozygous   |
| NC_037638.1 | 12484504 | SNV | 1 | C | T | Homozygous   |
| NC_037638.1 | 12494673 | SNV | 1 | T | A | Heterozygous |
| NC_037638.1 | 12496015 | SNV | 1 | T | A | Heterozygous |
| NC_037638.1 | 12496564 | SNV | 1 | C | G | Heterozygous |
| NC_037638.1 | 12496613 | SNV | 1 | T | C | Homozygous   |
| NC_037638.1 | 12496648 | SNV | 1 | T | C | Heterozygous |
| NC_037638.1 | 12497146 | SNV | 1 | A | G | Homozygous   |
| NC_037638.1 | 12497333 | SNV | 1 | A | G | Homozygous   |
| NC_037638.1 | 12497435 | SNV | 1 | C | T | Homozygous   |
| NC_037638.1 | 12497703 | SNV | 1 | A | T | Homozygous   |
| NC_037638.1 | 12497705 | SNV | 1 | T | A | Heterozygous |
| NC_037638.1 | 12497728 | SNV | 1 | T | A | Homozygous   |
| NC_037638.1 | 12497732 | SNV | 1 | T | C | Heterozygous |
| NC_037638.1 | 12497981 | SNV | 1 | A | G | Homozygous   |
| NC_037638.1 | 12498054 | SNV | 1 | A | G | Homozygous   |
| NC_037638.1 | 12498120 | SNV | 1 | T | C | Homozygous   |
| NC_037638.1 | 12498879 | SNV | 1 | A | C | Homozygous   |
| NC_037638.1 | 12498958 | SNV | 1 | C | T | Heterozygous |
| NC_037638.1 | 12499536 | SNV | 1 | A | G | Homozygous   |
| NC_037638.1 | 12499544 | SNV | 1 | T | C | Homozygous   |
| NC_037638.1 | 12499577 | SNV | 1 | T | A | Heterozygous |
| NC_037638.1 | 12499609 | SNV | 1 | C | T | Heterozygous |
| NC_037638.1 | 12499622 | SNV | 1 | T | A | Homozygous   |
| NC_037638.1 | 12499631 | SNV | 1 | T | C | Homozygous   |
| NC_037638.1 | 12500225 | SNV | 1 | T | C | Homozygous   |
| NC_037638.1 | 12500313 | SNV | 1 | T | C | Heterozygous |
| NC_037638.1 | 12500410 | SNV | 1 | G | A | Heterozygous |
| NC_037638.1 | 12500833 | SNV | 1 | T | C | Heterozygous |
| NC_037638.1 | 12500962 | SNV | 1 | A | G | Homozygous   |
| NC_037638.1 | 12501217 | SNV | 1 | G | A | Heterozygous |
| NC_037638.1 | 12501296 | SNV | 1 | G | A | Homozygous   |
| NC_037638.1 | 12501325 | SNV | 1 | C | T | Homozygous   |
| NC_037638.1 | 12501327 | SNV | 1 | C | A | Homozygous   |

|             |          |     |   |   |   |              |
|-------------|----------|-----|---|---|---|--------------|
| NC_037638.1 | 12501543 | SNV | 1 | A | T | Heterozygous |
| NC_037638.1 | 12501892 | SNV | 1 | C | A | Homozygous   |
| NC_037638.1 | 12501899 | SNV | 1 | C | T | Heterozygous |
| NC_037638.1 | 12501913 | SNV | 1 | A | G | Heterozygous |
| NC_037638.1 | 12501944 | SNV | 1 | C | T | Heterozygous |
| NC_037638.1 | 12502428 | SNV | 1 | T | A | Heterozygous |
| NC_037638.1 | 12504927 | SNV | 1 | A | G | Homozygous   |
| NC_037638.1 | 12505792 | SNV | 1 | C | T | Heterozygous |
| NC_037638.1 | 12505859 | SNV | 1 | G | A | Heterozygous |
| NC_037638.1 | 12507100 | SNV | 1 | A | G | Homozygous   |
| NC_037638.1 | 12507190 | SNV | 1 | A | T | Homozygous   |
| NC_037638.1 | 12507457 | SNV | 1 | C | A | Homozygous   |
| NC_037638.1 | 12507644 | SNV | 1 | T | C | Heterozygous |
| NC_037638.1 | 12507851 | SNV | 1 | G | A | Heterozygous |
| NC_037638.1 | 12507853 | SNV | 1 | G | A | Heterozygous |
| NC_037638.1 | 12507946 | SNV | 1 | T | C | Heterozygous |
| NC_037638.1 | 12507979 | SNV | 1 | T | C | Homozygous   |
| NC_037638.1 | 12508000 | SNV | 1 | T | C | Heterozygous |
| NC_037638.1 | 12508003 | SNV | 1 | A | T | Heterozygous |
| NC_037638.1 | 12508039 | SNV | 1 | A | G | Heterozygous |
| NC_037638.1 | 12508043 | SNV | 1 | T | C | Homozygous   |
| NC_037638.1 | 12508075 | SNV | 1 | T | C | Homozygous   |
| NC_037638.1 | 12508079 | SNV | 1 | T | A | Homozygous   |
| NC_037638.1 | 12508660 | SNV | 1 | C | T | Homozygous   |
| NC_037638.1 | 12508793 | SNV | 1 | G | T | Heterozygous |
| NC_037638.1 | 12508866 | SNV | 1 | G | A | Heterozygous |
| NC_037638.1 | 12509399 | SNV | 1 | T | C | Homozygous   |
| NC_037638.1 | 12511127 | SNV | 1 | A | G | Heterozygous |
| NC_037638.1 | 12511130 | SNV | 1 | C | T | Heterozygous |
| NC_037638.1 | 12511135 | SNV | 1 | G | C | Heterozygous |
| NC_037638.1 | 12511192 | SNV | 1 | A | G | Homozygous   |
| NC_037638.1 | 12511604 | SNV | 1 | A | G | Heterozygous |
| NC_037638.1 | 12511838 | SNV | 1 | T | C | Homozygous   |
| NC_037638.1 | 12511850 | SNV | 1 | G | A | Heterozygous |
| NC_037638.1 | 12511947 | SNV | 1 | G | A | Heterozygous |
| NC_037638.1 | 12512214 | SNV | 1 | G | A | Homozygous   |
| NC_037638.1 | 12512410 | SNV | 1 | A | G | Homozygous   |
| NC_037638.1 | 12512510 | SNV | 1 | G | T | Homozygous   |
| NC_037638.1 | 12512635 | SNV | 1 | A | G | Homozygous   |
| NC_037638.1 | 12512746 | SNV | 1 | G | A | Heterozygous |
| NC_037638.1 | 12512790 | SNV | 1 | T | C | Homozygous   |
| NC_037638.1 | 12512806 | SNV | 1 | C | T | Homozygous   |
| NC_037638.1 | 12512826 | SNV | 1 | T | C | Heterozygous |
| NC_037638.1 | 12512861 | SNV | 1 | A | G | Heterozygous |
| NC_037638.1 | 12512865 | SNV | 1 | C | T | Heterozygous |
| NC_037638.1 | 12512889 | SNV | 1 | T | C | Homozygous   |
| NC_037638.1 | 12512997 | SNV | 1 | A | G | Heterozygous |
| NC_037638.1 | 12513065 | SNV | 1 | G | A | Homozygous   |
| NC_037638.1 | 12516957 | SNV | 1 | G | A | Heterozygous |
| NC_037638.1 | 12517460 | SNV | 1 | A | G | Homozygous   |
| NC_037638.1 | 12518680 | SNV | 1 | C | A | Heterozygous |

|             |          |     |   |   |   |              |
|-------------|----------|-----|---|---|---|--------------|
| NC_037638.1 | 12518889 | SNV | 1 | T | A | Homozygous   |
| NC_037638.1 | 12518891 | SNV | 1 | T | C | Homozygous   |
| NC_037638.1 | 12518945 | SNV | 1 | T | C | Homozygous   |
| NC_037638.1 | 12518975 | SNV | 1 | A | G | Homozygous   |
| NC_037638.1 | 12518982 | SNV | 1 | T | C | Homozygous   |
| NC_037638.1 | 12519137 | SNV | 1 | T | G | Homozygous   |
| NC_037638.1 | 12519162 | SNV | 1 | A | G | Heterozygous |
| NC_037638.1 | 12519171 | SNV | 1 | T | C | Homozygous   |
| NC_037638.1 | 12519471 | SNV | 1 | C | A | Homozygous   |
| NC_037638.1 | 12520597 | SNV | 1 | C | T | Heterozygous |
| NC_037638.1 | 12520735 | SNV | 1 | G | C | Heterozygous |
| NC_037638.1 | 12520735 | SNV | 1 | G | T | Heterozygous |
| NC_037638.1 | 12520765 | SNV | 1 | C | T | Heterozygous |
| NC_037638.1 | 12521104 | SNV | 1 | T | C | Homozygous   |
| NC_037638.1 | 12521361 | SNV | 1 | T | G | Heterozygous |
| NC_037638.1 | 12521433 | SNV | 1 | G | A | Heterozygous |
| NC_037638.1 | 12521446 | SNV | 1 | A | G | Heterozygous |
| NC_037638.1 | 12521454 | SNV | 1 | A | G | Heterozygous |
| NC_037638.1 | 12521463 | SNV | 1 | C | T | Heterozygous |
| NC_037638.1 | 12522022 | SNV | 1 | T | C | Heterozygous |
| NC_037638.1 | 12522088 | SNV | 1 | G | A | Heterozygous |
| NC_037638.1 | 12522198 | SNV | 1 | C | T | Heterozygous |
| NC_037638.1 | 12522203 | SNV | 1 | T | G | Homozygous   |
| NC_037638.1 | 12522548 | SNV | 1 | T | C | Homozygous   |
| NC_037638.1 | 12522591 | SNV | 1 | A | G | Homozygous   |
| NC_037638.1 | 12522635 | SNV | 1 | G | A | Homozygous   |
| NC_037638.1 | 12522669 | SNV | 1 | T | C | Homozygous   |
| NC_037638.1 | 12530371 | SNV | 1 | T | C | Homozygous   |
| NC_037638.1 | 12531720 | SNV | 1 | C | T | Heterozygous |
| NC_037638.1 | 12531970 | SNV | 1 | G | A | Heterozygous |
| NC_037638.1 | 12539641 | SNV | 1 | C | T | Heterozygous |
| NC_037638.1 | 12539728 | SNV | 1 | T | C | Heterozygous |
| NC_037638.1 | 12551135 | SNV | 1 | C | T | Homozygous   |
| NC_037638.1 | 12551154 | SNV | 1 | T | C | Heterozygous |
| NC_037638.1 | 12551312 | SNV | 1 | A | C | Heterozygous |
| NC_037638.1 | 12590258 | SNV | 1 | A | G | Homozygous   |
| NC_037638.1 | 12590291 | SNV | 1 | C | T | Homozygous   |
| NC_037638.1 | 12590402 | SNV | 1 | T | G | Homozygous   |
| NC_037638.1 | 12590429 | SNV | 1 | A | G | Homozygous   |
| NC_037638.1 | 12590431 | SNV | 1 | T | C | Homozygous   |
| NC_037638.1 | 12590621 | SNV | 1 | T | C | Heterozygous |
| NC_037638.1 | 12591049 | SNV | 1 | A | G | Homozygous   |
| NC_037638.1 | 12591462 | SNV | 1 | A | T | Homozygous   |
| NC_037638.1 | 12591472 | SNV | 1 | C | A | Homozygous   |
| NC_037638.1 | 12591793 | SNV | 1 | C | T | Homozygous   |
| NC_037638.1 | 12594186 | SNV | 1 | C | T | Homozygous   |
| NC_037638.1 | 12596237 | SNV | 1 | T | C | Heterozygous |
| NC_037638.1 | 12596240 | SNV | 1 | A | G | Heterozygous |
| NC_037638.1 | 12596261 | SNV | 1 | C | T | Homozygous   |
| NC_037638.1 | 12596265 | SNV | 1 | T | C | Heterozygous |
| NC_037638.1 | 12596270 | SNV | 1 | T | C | Heterozygous |

|             |          |     |   |   |   |              |
|-------------|----------|-----|---|---|---|--------------|
| NC_037638.1 | 12596273 | SNV | 1 | T | C | Homozygous   |
| NC_037638.1 | 12596282 | SNV | 1 | G | A | Heterozygous |
| NC_037638.1 | 12596285 | SNV | 1 | T | C | Heterozygous |
| NC_037638.1 | 12600646 | SNV | 1 | A | G | Homozygous   |
| NC_037638.1 | 12602191 | SNV | 1 | G | A | Homozygous   |
| NC_037638.1 | 12602853 | SNV | 1 | T | C | Homozygous   |
| NC_037638.1 | 12603608 | SNV | 1 | T | C | Homozygous   |
| NC_037638.1 | 12603612 | SNV | 1 | T | A | Homozygous   |
| NC_037638.1 | 12607166 | SNV | 1 | A | G | Heterozygous |
| NC_037638.1 | 12608089 | SNV | 1 | T | C | Homozygous   |
| NC_037638.1 | 12608528 | SNV | 1 | A | G | Homozygous   |
| NC_037638.1 | 12609928 | SNV | 1 | C | T | Homozygous   |
| NC_037638.1 | 12639947 | SNV | 1 | A | T | Homozygous   |
| NC_037638.1 | 12639970 | SNV | 1 | T | C | Homozygous   |
| NC_037638.1 | 12639976 | SNV | 1 | T | A | Homozygous   |
| NC_037638.1 | 12639986 | SNV | 1 | T | A | Homozygous   |
| NC_037638.1 | 12639989 | SNV | 1 | T | A | Homozygous   |
| NC_037638.1 | 12646935 | SNV | 1 | G | A | Heterozygous |
| NC_037638.1 | 12646957 | SNV | 1 | C | T | Heterozygous |
| NC_037638.1 | 12646969 | SNV | 1 | T | A | Heterozygous |
| NC_037638.1 | 12646971 | SNV | 1 | T | G | Heterozygous |
| NC_037638.1 | 12646998 | SNV | 1 | A | G | Homozygous   |
| NC_037638.1 | 12648091 | SNV | 1 | T | C | Homozygous   |
| NC_037638.1 | 12648125 | SNV | 1 | A | C | Homozygous   |
| NC_037638.1 | 12649983 | SNV | 1 | A | G | Homozygous   |
| NC_037638.1 | 12649986 | SNV | 1 | T | C | Homozygous   |
| NC_037638.1 | 12649989 | SNV | 1 | A | G | Homozygous   |
| NC_037638.1 | 12649994 | SNV | 1 | A | C | Homozygous   |
| NC_037638.1 | 12649999 | SNV | 1 | G | A | Homozygous   |
| NC_037638.1 | 12650025 | SNV | 1 | A | G | Homozygous   |
| NC_037638.1 | 12659207 | SNV | 1 | C | A | Homozygous   |
| NC_037638.1 | 12659310 | SNV | 1 | G | A | Heterozygous |
| NC_037638.1 | 12659355 | SNV | 1 | G | A | Heterozygous |
| NC_037638.1 | 12669667 | SNV | 1 | T | C | Heterozygous |
| NC_037638.1 | 12688623 | SNV | 1 | G | A | Heterozygous |
| NC_037638.1 | 12688683 | SNV | 1 | T | C | Heterozygous |
| NC_037638.1 | 12688685 | SNV | 1 | T | A | Heterozygous |
| NC_037638.1 | 12688719 | SNV | 1 | G | A | Homozygous   |
| NC_037638.1 | 12688824 | SNV | 1 | G | A | Homozygous   |
| NC_037638.1 | 12691332 | SNV | 1 | A | T | Homozygous   |
| NC_037638.1 | 12691343 | SNV | 1 | T | A | Homozygous   |
| NC_037638.1 | 12691347 | SNV | 1 | A | T | Homozygous   |
| NC_037638.1 | 12691353 | SNV | 1 | T | A | Homozygous   |
| NC_037638.1 | 12691357 | SNV | 1 | A | C | Homozygous   |
| NC_037638.1 | 12695688 | SNV | 1 | A | G | Heterozygous |
| NC_037638.1 | 12695694 | SNV | 1 | A | T | Heterozygous |
| NC_037638.1 | 12695699 | SNV | 1 | T | G | Heterozygous |
| NC_037638.1 | 12695737 | SNV | 1 | A | T | Homozygous   |
| NC_037638.1 | 12695746 | SNV | 1 | A | C | Homozygous   |
| NC_037638.1 | 12696209 | SNV | 1 | A | T | Homozygous   |
| NC_037638.1 | 12696211 | SNV | 1 | T | G | Homozygous   |

|             |          |     |   |   |   |              |
|-------------|----------|-----|---|---|---|--------------|
| NC_037638.1 | 12696215 | SNV | 1 | A | T | Homozygous   |
| NC_037638.1 | 12696220 | SNV | 1 | C | T | Homozygous   |
| NC_037638.1 | 12712366 | SNV | 1 | C | T | Homozygous   |
| NC_037638.1 | 12715369 | SNV | 1 | C | A | Homozygous   |
| NC_037638.1 | 12736992 | SNV | 1 | C | T | Heterozygous |
| NC_037638.1 | 12737229 | SNV | 1 | T | C | Homozygous   |
| NC_037638.1 | 12753514 | SNV | 1 | G | T | Homozygous   |
| NC_037638.1 | 12753529 | SNV | 1 | A | C | Heterozygous |
| NC_037638.1 | 12753536 | SNV | 1 | T | A | Homozygous   |
| NC_037638.1 | 12753543 | SNV | 1 | T | A | Heterozygous |
| NC_037638.1 | 12753551 | SNV | 1 | T | A | Heterozygous |
| NC_037638.1 | 12753553 | SNV | 1 | T | A | Heterozygous |
| NC_037638.1 | 12753553 | SNV | 1 | T | C | Heterozygous |
| NC_037638.1 | 12768262 | SNV | 1 | A | G | Homozygous   |
| NC_037638.1 | 12768276 | SNV | 1 | A | T | Homozygous   |
| NC_037638.1 | 12770951 | SNV | 1 | C | A | Homozygous   |
| NC_037638.1 | 12770957 | SNV | 1 | C | G | Heterozygous |
| NC_037638.1 | 12770962 | SNV | 1 | T | C | Heterozygous |
| NC_037638.1 | 12770964 | SNV | 1 | T | C | Heterozygous |
| NC_037638.1 | 12770965 | SNV | 1 | C | G | Heterozygous |
| NC_037638.1 | 12770968 | SNV | 1 | T | A | Heterozygous |
| NC_037638.1 | 12770972 | SNV | 1 | T | G | Homozygous   |
| NC_037638.1 | 12770974 | SNV | 1 | T | G | Homozygous   |
| NC_037638.1 | 12770983 | SNV | 1 | C | A | Homozygous   |
| NC_037638.1 | 12770987 | SNV | 1 | C | T | Homozygous   |
| NC_037638.1 | 12778445 | SNV | 1 | A | T | Heterozygous |
| NC_037638.1 | 12778463 | SNV | 1 | T | C | Heterozygous |
| NC_037638.1 | 12778465 | SNV | 1 | A | G | Homozygous   |
| NC_037638.1 | 12778467 | SNV | 1 | A | T | Homozygous   |
| NC_037638.1 | 12778496 | SNV | 1 | G | T | Heterozygous |
| NC_037638.1 | 12782673 | SNV | 1 | C | T | Homozygous   |
| NC_037638.1 | 12782704 | SNV | 1 | A | C | Homozygous   |
| NC_037638.1 | 12782717 | SNV | 1 | G | A | Heterozygous |
| NC_037638.1 | 12782723 | SNV | 1 | G | A | Heterozygous |
| NC_037638.1 | 12782750 | SNV | 1 | A | G | Homozygous   |
| NC_037638.1 | 12782795 | SNV | 1 | G | A | Heterozygous |
| NC_037638.1 | 12782858 | SNV | 1 | A | G | Heterozygous |
| NC_037638.1 | 12783377 | SNV | 1 | T | A | Heterozygous |
| NC_037638.1 | 12783417 | SNV | 1 | T | C | Homozygous   |
| NC_037638.1 | 12783673 | SNV | 1 | A | G | Homozygous   |
| NC_037638.1 | 12783705 | SNV | 1 | C | T | Heterozygous |
| NC_037638.1 | 12783721 | SNV | 1 | G | A | Heterozygous |
| NC_037638.1 | 12783724 | SNV | 1 | G | A | Homozygous   |
| NC_037638.1 | 12783740 | SNV | 1 | A | G | Homozygous   |
| NC_037638.1 | 12783748 | SNV | 1 | T | C | Heterozygous |
| NC_037638.1 | 12783758 | SNV | 1 | G | C | Homozygous   |
| NC_037638.1 | 12783831 | SNV | 1 | C | T | Heterozygous |
| NC_037638.1 | 12783880 | SNV | 1 | G | A | Heterozygous |
| NC_037638.1 | 12784448 | SNV | 1 | G | C | Heterozygous |
| NC_037638.1 | 12784463 | SNV | 1 | G | A | Heterozygous |
| NC_037638.1 | 12784840 | SNV | 1 | C | T | Heterozygous |

|             |          |     |   |   |   |              |
|-------------|----------|-----|---|---|---|--------------|
| NC_037638.1 | 12784923 | SNV | 1 | C | T | Homozygous   |
| NC_037638.1 | 12784940 | SNV | 1 | A | G | Homozygous   |
| NC_037638.1 | 12794102 | SNV | 1 | T | C | Homozygous   |
| NC_037638.1 | 12794193 | SNV | 1 | A | G | Homozygous   |
| NC_037638.1 | 12794222 | SNV | 1 | G | C | Homozygous   |
| NC_037638.1 | 12794283 | SNV | 1 | A | G | Homozygous   |
| NC_037638.1 | 12794713 | SNV | 1 | G | A | Heterozygous |
| NC_037638.1 | 12794772 | SNV | 1 | A | G | Homozygous   |
| NC_037638.1 | 12794813 | SNV | 1 | G | C | Heterozygous |
| NC_037638.1 | 12797969 | SNV | 1 | T | C | Heterozygous |
| NC_037638.1 | 12797976 | SNV | 1 | C | A | Heterozygous |
| NC_037638.1 | 12798001 | SNV | 1 | G | A | Heterozygous |
| NC_037638.1 | 12798004 | SNV | 1 | G | A | Heterozygous |
| NC_037638.1 | 12798007 | SNV | 1 | G | A | Heterozygous |
| NC_037638.1 | 12798709 | SNV | 1 | T | C | Heterozygous |
| NC_037638.1 | 12798724 | SNV | 1 | C | T | Heterozygous |
| NC_037638.1 | 12798726 | SNV | 1 | C | T | Heterozygous |
| NC_037638.1 | 12805306 | SNV | 1 | T | A | Heterozygous |
| NC_037638.1 | 12805338 | SNV | 1 | C | T | Homozygous   |
| NC_037638.1 | 12805364 | SNV | 1 | T | C | Homozygous   |
| NC_037638.1 | 12805471 | SNV | 1 | A | G | Homozygous   |
| NC_037638.1 | 12805541 | SNV | 1 | A | G | Homozygous   |
| NC_037638.1 | 12805625 | SNV | 1 | T | C | Homozygous   |
| NC_037638.1 | 12819921 | SNV | 1 | A | C | Homozygous   |
| NC_037638.1 | 12819923 | SNV | 1 | A | T | Homozygous   |
| NC_037638.1 | 12820056 | SNV | 1 | A | T | Homozygous   |
| NC_037638.1 | 12820087 | SNV | 1 | A | C | Homozygous   |
| NC_037638.1 | 12820089 | SNV | 1 | A | T | Homozygous   |
| NC_037638.1 | 12835965 | SNV | 1 | T | A | Homozygous   |
| NC_037638.1 | 12835972 | SNV | 1 | T | C | Homozygous   |
| NC_037638.1 | 12835975 | SNV | 1 | A | C | Homozygous   |
| NC_037638.1 | 12835977 | SNV | 1 | T | A | Homozygous   |
| NC_037638.1 | 12835986 | SNV | 1 | A | T | Homozygous   |
| NC_037638.1 | 12835988 | SNV | 1 | A | G | Homozygous   |
| NC_037638.1 | 12835995 | SNV | 1 | A | G | Homozygous   |
| NC_037638.1 | 12845671 | SNV | 1 | G | A | Homozygous   |
| NC_037638.1 | 12845715 | SNV | 1 | A | G | Homozygous   |
| NC_037638.1 | 12846172 | SNV | 1 | A | G | Heterozygous |
| NC_037638.1 | 12862439 | SNV | 1 | G | C | Heterozygous |
| NC_037638.1 | 12874492 | SNV | 1 | T | C | Heterozygous |
| NC_037638.1 | 12874496 | SNV | 1 | A | T | Heterozygous |
| NC_037638.1 | 12874514 | SNV | 1 | A | T | Heterozygous |
| NC_037638.1 | 12874520 | SNV | 1 | T | A | Homozygous   |
| NC_037638.1 | 12874527 | SNV | 1 | A | T | Heterozygous |
| NC_037638.1 | 12874542 | SNV | 1 | T | A | Homozygous   |
| NC_037638.1 | 12874553 | SNV | 1 | C | T | Homozygous   |
| NC_037638.1 | 12880928 | SNV | 1 | G | A | Homozygous   |
| NC_037638.1 | 12880971 | SNV | 1 | A | G | Heterozygous |
| NC_037638.1 | 12889670 | SNV | 1 | T | A | Heterozygous |
| NC_037638.1 | 12889781 | SNV | 1 | A | G | Heterozygous |
| NC_037638.1 | 12889977 | SNV | 1 | A | G | Homozygous   |



|             |          |     |   |   |   |              |
|-------------|----------|-----|---|---|---|--------------|
| NC_037638.1 | 12896822 | SNV | 1 | C | T | Heterozygous |
| NC_037638.1 | 12898575 | SNV | 1 | T | C | Homozygous   |
| NC_037638.1 | 12898685 | SNV | 1 | G | A | Homozygous   |
| NC_037638.1 | 12905300 | SNV | 1 | T | G | Homozygous   |
| NC_037638.1 | 12905307 | SNV | 1 | T | C | Heterozygous |
| NC_037638.1 | 12905330 | SNV | 1 | T | A | Heterozygous |
| NC_037638.1 | 12905344 | SNV | 1 | A | G | Heterozygous |
| NC_037638.1 | 12905344 | SNV | 1 | A | T | Heterozygous |
| NC_037638.1 | 12909542 | SNV | 1 | G | A | Heterozygous |
| NC_037638.1 | 12909555 | SNV | 1 | T | G | Heterozygous |
| NC_037638.1 | 12909559 | SNV | 1 | C | T | Homozygous   |
| NC_037638.1 | 12909562 | SNV | 1 | T | C | Homozygous   |
| NC_037638.1 | 12909586 | SNV | 1 | A | T | Heterozygous |
| NC_037638.1 | 12909593 | SNV | 1 | G | A | Heterozygous |
| NC_037638.1 | 12909603 | SNV | 1 | T | C | Homozygous   |
| NC_037638.1 | 12909611 | SNV | 1 | G | T | Homozygous   |
| NC_037638.1 | 12909625 | SNV | 1 | T | C | Homozygous   |
| NC_037638.1 | 12909636 | SNV | 1 | T | C | Heterozygous |
| NC_037638.1 | 12909638 | SNV | 1 | G | A | Heterozygous |
| NC_037638.1 | 12909765 | SNV | 1 | A | G | Heterozygous |
| NC_037638.1 | 12910084 | SNV | 1 | G | A | Heterozygous |
| NC_037638.1 | 12910090 | SNV | 1 | A | G | Heterozygous |
| NC_037638.1 | 12910106 | SNV | 1 | A | G | Heterozygous |
| NC_037638.1 | 12910117 | SNV | 1 | A | G | Homozygous   |
| NC_037638.1 | 12914248 | SNV | 1 | T | A | Homozygous   |
| NC_037638.1 | 12935271 | SNV | 1 | A | G | Homozygous   |
| NC_037638.1 | 12935423 | SNV | 1 | C | T | Heterozygous |
| NC_037638.1 | 12940077 | SNV | 1 | G | A | Homozygous   |
| NC_037638.1 | 12952558 | SNV | 1 | G | T | Heterozygous |
| NC_037638.1 | 12952851 | SNV | 1 | G | A | Homozygous   |
| NC_037638.1 | 12952859 | SNV | 1 | A | G | Heterozygous |
| NC_037638.1 | 12952882 | SNV | 1 | G | A | Heterozygous |
| NC_037638.1 | 12978263 | SNV | 1 | T | A | Heterozygous |
| NC_037638.1 | 12978267 | SNV | 1 | A | G | Homozygous   |
| NC_037638.1 | 12978269 | SNV | 1 | A | G | Homozygous   |
| NC_037638.1 | 12978273 | SNV | 1 | C | G | Homozygous   |
| NC_037638.1 | 13021373 | SNV | 1 | C | T | Heterozygous |
| NC_037638.1 | 13021694 | SNV | 1 | A | G | Heterozygous |
| NC_037638.1 | 13021870 | SNV | 1 | A | T | Homozygous   |
| NC_037638.1 | 13022038 | SNV | 1 | A | G | Homozygous   |
| NC_037638.1 | 13022105 | SNV | 1 | A | T | Heterozygous |
| NC_037638.1 | 13022128 | SNV | 1 | T | C | Homozygous   |
| NC_037638.1 | 13025354 | SNV | 1 | T | C | Homozygous   |
| NC_037638.1 | 13025981 | SNV | 1 | T | C | Homozygous   |
| NC_037638.1 | 13025991 | SNV | 1 | C | T | Homozygous   |
| NC_037638.1 | 13026125 | SNV | 1 | C | A | Heterozygous |
| NC_037638.1 | 13026347 | SNV | 1 | A | G | Homozygous   |
| NC_037638.1 | 13026443 | SNV | 1 | T | G | Homozygous   |
| NC_037638.1 | 13026757 | SNV | 1 | T | G | Homozygous   |
| NC_037638.1 | 13027020 | SNV | 1 | G | T | Heterozygous |
| NC_037638.1 | 13027029 | SNV | 1 | A | G | Heterozygous |

|             |          |     |   |   |   |              |
|-------------|----------|-----|---|---|---|--------------|
| NC_037638.1 | 13027031 | SNV | 1 | A | T | Heterozygous |
| NC_037638.1 | 13027034 | SNV | 1 | G | T | Heterozygous |
| NC_037638.1 | 13027037 | SNV | 1 | G | T | Heterozygous |
| NC_037638.1 | 13027042 | SNV | 1 | A | T | Heterozygous |
| NC_037638.1 | 13027049 | SNV | 1 | A | G | Heterozygous |
| NC_037638.1 | 13027055 | SNV | 1 | T | A | Heterozygous |
| NC_037638.1 | 13027679 | SNV | 1 | C | T | Homozygous   |
| NC_037638.1 | 13027839 | SNV | 1 | C | G | Heterozygous |
| NC_037638.1 | 13028172 | SNV | 1 | A | G | Homozygous   |
| NC_037638.1 | 13029402 | SNV | 1 | T | G | Heterozygous |
| NC_037638.1 | 13101391 | SNV | 1 | A | G | Heterozygous |
| NC_037638.1 | 13101399 | SNV | 1 | A | C | Heterozygous |
| NC_037638.1 | 13101407 | SNV | 1 | G | A | Heterozygous |
| NC_037638.1 | 13101415 | SNV | 1 | G | A | Heterozygous |
| NC_037638.1 | 13101865 | SNV | 1 | T | A | Homozygous   |
| NC_037638.1 | 13102930 | SNV | 1 | A | G | Heterozygous |
| NC_037638.1 | 13103325 | SNV | 1 | C | T | Heterozygous |
| NC_037638.1 | 13104640 | SNV | 1 | T | C | Homozygous   |
| NC_037638.1 | 13104751 | SNV | 1 | A | T | Heterozygous |
| NC_037638.1 | 13104918 | SNV | 1 | A | G | Heterozygous |
| NC_037638.1 | 13104924 | SNV | 1 | A | C | Heterozygous |
| NC_037638.1 | 13104955 | SNV | 1 | A | G | Homozygous   |
| NC_037638.1 | 13104960 | SNV | 1 | T | C | Homozygous   |
| NC_037638.1 | 13104963 | SNV | 1 | C | G | Homozygous   |
| NC_037638.1 | 13106274 | SNV | 1 | T | G | Heterozygous |
| NC_037638.1 | 13106277 | SNV | 1 | C | A | Heterozygous |
| NC_037638.1 | 13106286 | SNV | 1 | T | C | Heterozygous |
| NC_037638.1 | 13106288 | SNV | 1 | T | C | Heterozygous |
| NC_037638.1 | 13106291 | SNV | 1 | T | G | Heterozygous |
| NC_037638.1 | 13106293 | SNV | 1 | T | G | Heterozygous |
| NC_037638.1 | 13106326 | SNV | 1 | T | G | Heterozygous |
| NC_037638.1 | 13116474 | SNV | 1 | A | C | Heterozygous |
| NC_037638.1 | 13116476 | SNV | 1 | A | G | Heterozygous |
| NC_037638.1 | 13116488 | SNV | 1 | A | G | Heterozygous |
| NC_037638.1 | 13116490 | SNV | 1 | A | G | Heterozygous |
| NC_037638.1 | 13116496 | SNV | 1 | A | G | Heterozygous |
| NC_037638.1 | 13116514 | SNV | 1 | T | A | Homozygous   |
| NC_037638.1 | 13116522 | SNV | 1 | A | T | Homozygous   |
| NC_037638.1 | 13116524 | SNV | 1 | A | T | Homozygous   |
| NC_037638.1 | 13116526 | SNV | 1 | A | G | Homozygous   |
| NC_037638.1 | 13116528 | SNV | 1 | A | G | Homozygous   |
| NC_037638.1 | 13116555 | SNV | 1 | T | C | Homozygous   |
| NC_037638.1 | 13116558 | SNV | 1 | G | A | Homozygous   |
| NC_037638.1 | 13118553 | SNV | 1 | T | C | Homozygous   |
| NC_037638.1 | 13118556 | SNV | 1 | C | T | Homozygous   |
| NC_037638.1 | 13118576 | SNV | 1 | T | C | Heterozygous |
| NC_037638.1 | 13118580 | SNV | 1 | C | T | Homozygous   |
| NC_037638.1 | 13118582 | SNV | 1 | T | C | Heterozygous |
| NC_037638.1 | 13124743 | SNV | 1 | G | T | Homozygous   |
| NC_037638.1 | 13124746 | SNV | 1 | G | T | Homozygous   |
| NC_037638.1 | 13124748 | SNV | 1 | A | T | Homozygous   |

|             |          |     |   |   |   |              |
|-------------|----------|-----|---|---|---|--------------|
| NC_037638.1 | 13124760 | SNV | 1 | T | A | Heterozygous |
| NC_037638.1 | 13124795 | SNV | 1 | A | T | Homozygous   |
| NC_037638.1 | 13201284 | SNV | 1 | G | A | Heterozygous |
| NC_037638.1 | 13215745 | SNV | 1 | T | G | Homozygous   |
| NC_037638.1 | 13215750 | SNV | 1 | T | A | Homozygous   |
| NC_037638.1 | 13215760 | SNV | 1 | T | A | Homozygous   |
| NC_037638.1 | 13215768 | SNV | 1 | A | G | Homozygous   |
| NC_037638.1 | 13215791 | SNV | 1 | A | T | Homozygous   |
| NC_037638.1 | 13218739 | SNV | 1 | C | G | Homozygous   |
| NC_037638.1 | 13218744 | SNV | 1 | G | T | Homozygous   |
| NC_037638.1 | 13218754 | SNV | 1 | T | C | Homozygous   |
| NC_037638.1 | 13218761 | SNV | 1 | T | C | Homozygous   |
| NC_037638.1 | 13218763 | SNV | 1 | G | A | Homozygous   |
| NC_037638.1 | 13218986 | SNV | 1 | T | G | Homozygous   |
| NC_037638.1 | 13218992 | SNV | 1 | T | A | Homozygous   |
| NC_037638.1 | 13218996 | SNV | 1 | A | C | Homozygous   |
| NC_037638.1 | 13234768 | SNV | 1 | T | A | Heterozygous |
| NC_037638.1 | 13234770 | SNV | 1 | C | A | Heterozygous |
| NC_037638.1 | 13234774 | SNV | 1 | A | G | Heterozygous |
| NC_037638.1 | 13247357 | SNV | 1 | A | T | Homozygous   |
| NC_037638.1 | 13247373 | SNV | 1 | A | G | Homozygous   |
| NC_037638.1 | 13247375 | SNV | 1 | A | G | Homozygous   |
| NC_037638.1 | 13247382 | SNV | 1 | A | G | Homozygous   |
| NC_037638.1 | 13247412 | SNV | 1 | T | C | Homozygous   |
| NC_037638.1 | 13253944 | SNV | 1 | T | G | Homozygous   |
| NC_037638.1 | 13253961 | SNV | 1 | T | G | Homozygous   |
| NC_037638.1 | 13253968 | SNV | 1 | A | G | Homozygous   |
| NC_037638.1 | 13255578 | SNV | 1 | A | C | Homozygous   |
| NC_037638.1 | 13255580 | SNV | 1 | G | T | Homozygous   |
| NC_037638.1 | 13255588 | SNV | 1 | G | A | Homozygous   |
| NC_037638.1 | 13266719 | SNV | 1 | A | C | Homozygous   |
| NC_037638.1 | 13266750 | SNV | 1 | A | G | Homozygous   |
| NC_037638.1 | 13266761 | SNV | 1 | T | C | Homozygous   |
| NC_037638.1 | 13269136 | SNV | 1 | A | T | Homozygous   |
| NC_037638.1 | 13269155 | SNV | 1 | G | T | Homozygous   |
| NC_037638.1 | 13269157 | SNV | 1 | A | T | Homozygous   |
| NC_037638.1 | 13281464 | SNV | 1 | G | C | Homozygous   |
| NC_037638.1 | 13281475 | SNV | 1 | A | C | Homozygous   |
| NC_037638.1 | 13281480 | SNV | 1 | A | C | Homozygous   |
| NC_037638.1 | 13303569 | SNV | 1 | T | C | Homozygous   |
| NC_037638.1 | 13400401 | SNV | 1 | G | A | Heterozygous |
| NC_037638.1 | 13400471 | SNV | 1 | G | A | Heterozygous |
| NC_037638.1 | 13400523 | SNV | 1 | T | C | Heterozygous |
| NC_037638.1 | 13400529 | SNV | 1 | C | T | Heterozygous |
| NC_037638.1 | 13401159 | SNV | 1 | C | T | Homozygous   |
| NC_037638.1 | 13401255 | SNV | 1 | A | G | Homozygous   |
| NC_037638.1 | 13401468 | SNV | 1 | T | C | Homozygous   |
| NC_037638.1 | 13402204 | SNV | 1 | A | G | Homozygous   |
| NC_037638.1 | 13402906 | SNV | 1 | C | T | Heterozygous |
| NC_037638.1 | 13403070 | SNV | 1 | T | C | Homozygous   |
| NC_037638.1 | 13404697 | SNV | 1 | T | C | Homozygous   |

|             |          |     |   |   |   |              |
|-------------|----------|-----|---|---|---|--------------|
| NC_037638.1 | 13404883 | SNV | 1 | T | C | Homozygous   |
| NC_037638.1 | 13405442 | SNV | 1 | T | C | Homozygous   |
| NC_037638.1 | 13405923 | SNV | 1 | A | G | Heterozygous |
| NC_037638.1 | 13406035 | SNV | 1 | T | C | Homozygous   |
| NC_037638.1 | 13406079 | SNV | 1 | A | G | Homozygous   |
| NC_037638.1 | 13406209 | SNV | 1 | C | T | Heterozygous |
| NC_037638.1 | 13406802 | SNV | 1 | T | C | Heterozygous |
| NC_037638.1 | 13406806 | SNV | 1 | C | A | Heterozygous |
| NC_037638.1 | 13406814 | SNV | 1 | C | A | Heterozygous |
| NC_037638.1 | 13406839 | SNV | 1 | G | T | Heterozygous |
| NC_037638.1 | 13406842 | SNV | 1 | T | C | Heterozygous |
| NC_037638.1 | 13406856 | SNV | 1 | T | C | Homozygous   |
| NC_037638.1 | 13407068 | SNV | 1 | T | C | Heterozygous |
| NC_037638.1 | 13407758 | SNV | 1 | T | C | Homozygous   |
| NC_037638.1 | 13407762 | SNV | 1 | T | C | Homozygous   |
| NC_037638.1 | 13408311 | SNV | 1 | G | A | Heterozygous |
| NC_037638.1 | 13408919 | SNV | 1 | T | C | Homozygous   |
| NC_037638.1 | 13409849 | SNV | 1 | T | C | Homozygous   |
| NC_037638.1 | 13410122 | SNV | 1 | A | G | Homozygous   |
| NC_037638.1 | 13436745 | SNV | 1 | T | C | Heterozygous |
| NC_037638.1 | 13436798 | SNV | 1 | A | G | Homozygous   |
| NC_037638.1 | 13436847 | SNV | 1 | C | G | Heterozygous |
| NC_037638.1 | 13441817 | SNV | 1 | T | G | Homozygous   |
| NC_037638.1 | 13441836 | SNV | 1 | C | A | Homozygous   |
| NC_037638.1 | 13441841 | SNV | 1 | T | C | Homozygous   |
| NC_037638.1 | 13441843 | SNV | 1 | A | T | Homozygous   |
| NC_037638.1 | 13441848 | SNV | 1 | A | T | Homozygous   |
| NC_037638.1 | 13444459 | SNV | 1 | G | C | Homozygous   |
| NC_037638.1 | 13444495 | SNV | 1 | C | G | Homozygous   |
| NC_037638.1 | 13444507 | SNV | 1 | A | G | Heterozygous |
| NC_037638.1 | 13449864 | SNV | 1 | A | T | Homozygous   |
| NC_037638.1 | 13449868 | SNV | 1 | G | T | Homozygous   |
| NC_037638.1 | 13449876 | SNV | 1 | T | G | Homozygous   |
| NC_037638.1 | 13449879 | SNV | 1 | A | T | Homozygous   |
| NC_037638.1 | 13449882 | SNV | 1 | A | T | Homozygous   |
| NC_037638.1 | 13458537 | SNV | 1 | T | G | Heterozygous |
| NC_037638.1 | 13458541 | SNV | 1 | A | G | Heterozygous |
| NC_037638.1 | 13458545 | SNV | 1 | C | T | Heterozygous |
| NC_037638.1 | 13458548 | SNV | 1 | T | C | Heterozygous |
| NC_037638.1 | 13458554 | SNV | 1 | G | T | Heterozygous |
| NC_037638.1 | 13464770 | SNV | 1 | A | T | Homozygous   |
| NC_037638.1 | 13464803 | SNV | 1 | T | G | Homozygous   |
| NC_037638.1 | 13464805 | SNV | 1 | T | G | Homozygous   |
| NC_037638.1 | 13464807 | SNV | 1 | T | G | Homozygous   |
| NC_037638.1 | 13464813 | SNV | 1 | T | G | Homozygous   |
| NC_037638.1 | 13464819 | SNV | 1 | T | G | Homozygous   |
| NC_037638.1 | 13466841 | SNV | 1 | A | T | Homozygous   |
| NC_037638.1 | 13466843 | SNV | 1 | T | C | Homozygous   |
| NC_037638.1 | 13466848 | SNV | 1 | T | A | Homozygous   |
| NC_037638.1 | 13466855 | SNV | 1 | C | T | Homozygous   |
| NC_037638.1 | 13469315 | SNV | 1 | T | C | Homozygous   |

|             |          |     |   |   |   |              |
|-------------|----------|-----|---|---|---|--------------|
| NC_037638.1 | 13469317 | SNV | 1 | T | G | Homozygous   |
| NC_037638.1 | 13469319 | SNV | 1 | A | T | Homozygous   |
| NC_037638.1 | 13469322 | SNV | 1 | C | T | Homozygous   |
| NC_037638.1 | 13469324 | SNV | 1 | T | A | Homozygous   |
| NC_037638.1 | 13469350 | SNV | 1 | T | C | Homozygous   |
| NC_037638.1 | 13473865 | SNV | 1 | A | C | Heterozygous |
| NC_037638.1 | 13473889 | SNV | 1 | A | G | Heterozygous |
| NC_037638.1 | 13473893 | SNV | 1 | A | C | Heterozygous |
| NC_037638.1 | 13490464 | SNV | 1 | A | T | Homozygous   |
| NC_037638.1 | 13490496 | SNV | 1 | A | G | Homozygous   |
| NC_037638.1 | 13506735 | SNV | 1 | C | A | Homozygous   |
| NC_037638.1 | 13506742 | SNV | 1 | C | G | Homozygous   |
| NC_037638.1 | 13506755 | SNV | 1 | C | G | Homozygous   |
| NC_037638.1 | 13506783 | SNV | 1 | G | C | Homozygous   |
| NC_037638.1 | 13516301 | SNV | 1 | T | A | Heterozygous |
| NC_037638.1 | 13519124 | SNV | 1 | A | C | Homozygous   |
| NC_037638.1 | 13519128 | SNV | 1 | T | C | Homozygous   |
| NC_037638.1 | 13519136 | SNV | 1 | A | G | Homozygous   |
| NC_037638.1 | 13519138 | SNV | 1 | T | C | Homozygous   |
| NC_037638.1 | 13519166 | SNV | 1 | T | G | Homozygous   |
| NC_037638.1 | 13539826 | SNV | 1 | T | C | Homozygous   |
| NC_037638.1 | 13539833 | SNV | 1 | C | T | Homozygous   |
| NC_037638.1 | 13541911 | SNV | 1 | T | A | Homozygous   |
| NC_037638.1 | 13541922 | SNV | 1 | A | G | Homozygous   |
| NC_037638.1 | 13541932 | SNV | 1 | A | G | Homozygous   |
| NC_037638.1 | 13541936 | SNV | 1 | A | G | Homozygous   |
| NC_037638.1 | 13541938 | SNV | 1 | A | T | Homozygous   |
| NC_037638.1 | 13560362 | SNV | 1 | G | C | Homozygous   |
| NC_037638.1 | 13560384 | SNV | 1 | A | C | Heterozygous |
| NC_037638.1 | 13560390 | SNV | 1 | A | C | Heterozygous |
| NC_037638.1 | 13560392 | SNV | 1 | A | C | Heterozygous |
| NC_037638.1 | 13560406 | SNV | 1 | A | C | Heterozygous |
| NC_037638.1 | 13560413 | SNV | 1 | G | A | Heterozygous |
| NC_037638.1 | 13560420 | SNV | 1 | A | T | Homozygous   |
| NC_037638.1 | 13560431 | SNV | 1 | A | G | Homozygous   |
| NC_037638.1 | 13560433 | SNV | 1 | A | G | Homozygous   |
| NC_037638.1 | 13562844 | SNV | 1 | A | T | Heterozygous |
| NC_037638.1 | 13562846 | SNV | 1 | A | T | Heterozygous |
| NC_037638.1 | 13562848 | SNV | 1 | A | T | Heterozygous |
| NC_037638.1 | 13579175 | SNV | 1 | A | T | Heterozygous |
| NC_037638.1 | 13579176 | SNV | 1 | A | T | Heterozygous |
| NC_037638.1 | 13579177 | SNV | 1 | A | T | Heterozygous |
| NC_037638.1 | 13592570 | SNV | 1 | T | C | Homozygous   |
| NC_037638.1 | 13592700 | SNV | 1 | A | G | Heterozygous |
| NC_037638.1 | 13606701 | SNV | 1 | A | T | Homozygous   |
| NC_037638.1 | 13606717 | SNV | 1 | A | T | Homozygous   |
| NC_037638.1 | 13606720 | SNV | 1 | T | G | Heterozygous |
| NC_037638.1 | 13606723 | SNV | 1 | A | T | Heterozygous |
| NC_037638.1 | 13617452 | SNV | 1 | T | C | Homozygous   |
| NC_037638.1 | 13617462 | SNV | 1 | T | C | Homozygous   |
| NC_037638.1 | 13617465 | SNV | 1 | A | G | Homozygous   |

|             |          |     |   |   |   |              |
|-------------|----------|-----|---|---|---|--------------|
| NC_037638.1 | 13617960 | SNV | 1 | T | A | Homozygous   |
| NC_037638.1 | 13617985 | SNV | 1 | A | G | Homozygous   |
| NC_037638.1 | 13617987 | SNV | 1 | A | G | Homozygous   |
| NC_037638.1 | 13617990 | SNV | 1 | T | A | Homozygous   |
| NC_037638.1 | 13622634 | SNV | 1 | C | T | Homozygous   |
| NC_037638.1 | 13623708 | SNV | 1 | T | C | Homozygous   |
| NC_037638.1 | 13623773 | SNV | 1 | G | A | Heterozygous |
| NC_037638.1 | 13623803 | SNV | 1 | A | G | Heterozygous |
| NC_037638.1 | 13623930 | SNV | 1 | A | T | Heterozygous |
| NC_037638.1 | 13623933 | SNV | 1 | G | T | Heterozygous |
| NC_037638.1 | 13624120 | SNV | 1 | A | G | Homozygous   |
| NC_037638.1 | 13627457 | SNV | 1 | T | A | Homozygous   |
| NC_037638.1 | 13627479 | SNV | 1 | A | G | Homozygous   |
| NC_037638.1 | 13627497 | SNV | 1 | T | C | Homozygous   |
| NC_037638.1 | 13634070 | SNV | 1 | T | G | Homozygous   |
| NC_037638.1 | 13634085 | SNV | 1 | A | T | Homozygous   |
| NC_037638.1 | 13634110 | SNV | 1 | A | T | Homozygous   |
| NC_037638.1 | 13643012 | SNV | 1 | T | G | Homozygous   |
| NC_037638.1 | 13643018 | SNV | 1 | A | T | Homozygous   |
| NC_037638.1 | 13643022 | SNV | 1 | T | A | Homozygous   |
| NC_037638.1 | 13643026 | SNV | 1 | C | A | Homozygous   |
| NC_037638.1 | 13643028 | SNV | 1 | A | T | Homozygous   |
| NC_037638.1 | 13643046 | SNV | 1 | C | T | Homozygous   |
| NC_037638.1 | 13643048 | SNV | 1 | T | A | Homozygous   |
| NC_037638.1 | 13643069 | SNV | 1 | A | T | Homozygous   |
| NC_037638.1 | 13648617 | SNV | 1 | C | T | Homozygous   |
| NC_037638.1 | 13648623 | SNV | 1 | A | G | Homozygous   |
| NC_037638.1 | 13648639 | SNV | 1 | A | G | Homozygous   |
| NC_037638.1 | 13648647 | SNV | 1 | T | G | Homozygous   |
| NC_037638.1 | 13648649 | SNV | 1 | T | C | Homozygous   |
| NC_037638.1 | 13674664 | SNV | 1 | G | A | Homozygous   |
| NC_037638.1 | 13674679 | SNV | 1 | T | A | Homozygous   |
| NC_037638.1 | 13674700 | SNV | 1 | T | C | Homozygous   |
| NC_037638.1 | 13674719 | SNV | 1 | T | G | Homozygous   |
| NC_037638.1 | 13674749 | SNV | 1 | T | A | Homozygous   |
| NC_037638.1 | 13674761 | SNV | 1 | T | G | Homozygous   |
| NC_037638.1 | 13674764 | SNV | 1 | T | C | Homozygous   |
| NC_037638.1 | 13674767 | SNV | 1 | T | C | Homozygous   |
| NC_037638.1 | 13692152 | SNV | 1 | T | C | Homozygous   |
| NC_037638.1 | 13692157 | SNV | 1 | C | G | Homozygous   |
| NC_037638.1 | 13692188 | SNV | 1 | T | C | Heterozygous |
| NC_037638.1 | 13692190 | SNV | 1 | T | C | Heterozygous |
| NC_037638.1 | 13693095 | SNV | 1 | C | A | Homozygous   |
| NC_037638.1 | 13693109 | SNV | 1 | T | A | Heterozygous |
| NC_037638.1 | 13693114 | SNV | 1 | A | C | Heterozygous |
| NC_037638.1 | 13693118 | SNV | 1 | A | T | Homozygous   |
| NC_037638.1 | 13693161 | SNV | 1 | C | T | Heterozygous |
| NC_037638.1 | 13693164 | SNV | 1 | A | G | Heterozygous |
| NC_037638.1 | 13693176 | SNV | 1 | C | T | Homozygous   |
| NC_037638.1 | 13693190 | SNV | 1 | T | C | Homozygous   |
| NC_037638.1 | 13698537 | SNV | 1 | T | C | Homozygous   |

|             |          |     |   |   |   |              |
|-------------|----------|-----|---|---|---|--------------|
| NC_037638.1 | 13704657 | SNV | 1 | T | A | Heterozygous |
| NC_037638.1 | 13704663 | SNV | 1 | T | A | Heterozygous |
| NC_037638.1 | 13704668 | SNV | 1 | A | T | Heterozygous |
| NC_037638.1 | 13704674 | SNV | 1 | A | T | Homozygous   |
| NC_037638.1 | 13704694 | SNV | 1 | A | T | Heterozygous |
| NC_037638.1 | 13727491 | SNV | 1 | T | C | Homozygous   |
| NC_037638.1 | 13727520 | SNV | 1 | T | A | Homozygous   |
| NC_037638.1 | 13736792 | SNV | 1 | T | C | Homozygous   |
| NC_037638.1 | 13736822 | SNV | 1 | A | T | Homozygous   |
| NC_037638.1 | 13736827 | SNV | 1 | A | G | Heterozygous |
| NC_037638.1 | 13736839 | SNV | 1 | C | T | Homozygous   |
| NC_037638.1 | 13744512 | SNV | 1 | T | C | Heterozygous |
| NC_037638.1 | 13744528 | SNV | 1 | T | C | Heterozygous |
| NC_037638.1 | 13754704 | SNV | 1 | G | T | Homozygous   |
| NC_037638.1 | 13754708 | SNV | 1 | T | G | Homozygous   |
| NC_037638.1 | 13756072 | SNV | 1 | T | C | Homozygous   |
| NC_037638.1 | 13756076 | SNV | 1 | A | C | Homozygous   |
| NC_037638.1 | 13758594 | SNV | 1 | G | T | Homozygous   |
| NC_037638.1 | 13773316 | SNV | 1 | A | G | Homozygous   |
| NC_037638.1 | 13773327 | SNV | 1 | A | G | Heterozygous |
| NC_037638.1 | 13773394 | SNV | 1 | T | C | Heterozygous |
| NC_037638.1 | 13773440 | SNV | 1 | T | C | Heterozygous |
| NC_037638.1 | 13792052 | SNV | 1 | A | T | Homozygous   |
| NC_037638.1 | 13797236 | SNV | 1 | G | A | Homozygous   |
| NC_037638.1 | 13797238 | SNV | 1 | G | A | Heterozygous |
| NC_037638.1 | 13798058 | SNV | 1 | A | G | Homozygous   |
| NC_037638.1 | 13798140 | SNV | 1 | G | A | Homozygous   |
| NC_037638.1 | 13799857 | SNV | 1 | A | C | Heterozygous |
| NC_037638.1 | 13799864 | SNV | 1 | G | A | Heterozygous |
| NC_037638.1 | 13799875 | SNV | 1 | A | G | Heterozygous |
| NC_037638.1 | 13799892 | SNV | 1 | A | G | Heterozygous |
| NC_037638.1 | 13802915 | SNV | 1 | T | A | Heterozygous |
| NC_037638.1 | 13809675 | SNV | 1 | T | A | Heterozygous |
| NC_037638.1 | 13812891 | SNV | 1 | A | G | Heterozygous |
| NC_037638.1 | 13812897 | SNV | 1 | T | G | Homozygous   |
| NC_037638.1 | 13815304 | SNV | 1 | A | C | Homozygous   |
| NC_037638.1 | 13815327 | SNV | 1 | A | T | Homozygous   |
| NC_037638.1 | 13815340 | SNV | 1 | A | C | Homozygous   |
| NC_037638.1 | 13820521 | SNV | 1 | A | T | Homozygous   |
| NC_037638.1 | 13820566 | SNV | 1 | T | G | Heterozygous |
| NC_037638.1 | 13820570 | SNV | 1 | T | A | Heterozygous |
| NC_037638.1 | 13822169 | SNV | 1 | T | C | Homozygous   |
| NC_037638.1 | 13822171 | SNV | 1 | G | A | Heterozygous |
| NC_037638.1 | 13822244 | SNV | 1 | C | T | Homozygous   |
| NC_037638.1 | 13822793 | SNV | 1 | A | G | Homozygous   |
| NC_037638.1 | 13822810 | SNV | 1 | A | G | Heterozygous |
| NC_037638.1 | 13822849 | SNV | 1 | A | T | Heterozygous |
| NC_037638.1 | 13855048 | SNV | 1 | A | T | Homozygous   |
| NC_037638.1 | 13855050 | SNV | 1 | A | T | Homozygous   |
| NC_037638.1 | 13855052 | SNV | 1 | A | G | Homozygous   |
| NC_037638.1 | 13864992 | SNV | 1 | G | C | Homozygous   |

|             |          |     |   |   |   |              |
|-------------|----------|-----|---|---|---|--------------|
| NC_037638.1 | 13865225 | SNV | 1 | G | A | Homozygous   |
| NC_037638.1 | 13865243 | SNV | 1 | G | T | Homozygous   |
| NC_037638.1 | 13870045 | SNV | 1 | T | C | Homozygous   |
| NC_037638.1 | 14009181 | SNV | 1 | A | C | Heterozygous |
| NC_037638.1 | 14009199 | SNV | 1 | A | T | Homozygous   |
| NC_037638.1 | 14009215 | SNV | 1 | T | C | Heterozygous |
| NC_037638.1 | 14009219 | SNV | 1 | T | A | Heterozygous |
| NC_037638.1 | 14009451 | SNV | 1 | A | G | Homozygous   |
| NC_037638.1 | 14010272 | SNV | 1 | G | A | Heterozygous |
| NC_037638.1 | 14010493 | SNV | 1 | G | A | Homozygous   |
| NC_037638.1 | 14012261 | SNV | 1 | C | A | Heterozygous |
| NC_037638.1 | 14012316 | SNV | 1 | G | A | Heterozygous |
| NC_037638.1 | 14012323 | SNV | 1 | T | A | Homozygous   |
| NC_037638.1 | 14013864 | SNV | 1 | T | C | Heterozygous |
| NC_037638.1 | 14015267 | SNV | 1 | G | A | Heterozygous |
| NC_037638.1 | 14015658 | SNV | 1 | T | C | Homozygous   |
| NC_037638.1 | 14015871 | SNV | 1 | A | G | Homozygous   |
| NC_037638.1 | 14016483 | SNV | 1 | T | C | Homozygous   |
| NC_037638.1 | 14016958 | SNV | 1 | A | G | Heterozygous |
| NC_037638.1 | 14017096 | SNV | 1 | A | G | Heterozygous |
| NC_037638.1 | 14020564 | SNV | 1 | T | C | Homozygous   |
| NC_037638.1 | 14020694 | SNV | 1 | T | G | Homozygous   |
| NC_037638.1 | 14022685 | SNV | 1 | C | A | Homozygous   |
| NC_037638.1 | 14022691 | SNV | 1 | G | A | Homozygous   |
| NC_037638.1 | 14022695 | SNV | 1 | T | G | Homozygous   |
| NC_037638.1 | 14022700 | SNV | 1 | A | T | Homozygous   |
| NC_037638.1 | 14022730 | SNV | 1 | A | T | Homozygous   |
| NC_037638.1 | 14022733 | SNV | 1 | T | A | Homozygous   |
| NC_037638.1 | 14022737 | SNV | 1 | A | G | Homozygous   |
| NC_037638.1 | 14022739 | SNV | 1 | A | G | Homozygous   |
| NC_037638.1 | 14022769 | SNV | 1 | A | T | Heterozygous |
| NC_037638.1 | 14024545 | SNV | 1 | A | G | Homozygous   |
| NC_037638.1 | 14024636 | SNV | 1 | A | G | Homozygous   |
| NC_037638.1 | 14027221 | SNV | 1 | A | T | Heterozygous |
| NC_037638.1 | 14027244 | SNV | 1 | A | G | Homozygous   |
| NC_037638.1 | 14027250 | SNV | 1 | G | A | Homozygous   |
| NC_037638.1 | 14027253 | SNV | 1 | T | A | Homozygous   |
| NC_037638.1 | 14027262 | SNV | 1 | C | A | Homozygous   |
| NC_037638.1 | 14032752 | SNV | 1 | T | G | Homozygous   |
| NC_037638.1 | 14039631 | SNV | 1 | G | C | Homozygous   |
| NC_037638.1 | 14040672 | SNV | 1 | A | G | Homozygous   |
| NC_037638.1 | 14041052 | SNV | 1 | T | A | Homozygous   |
| NC_037638.1 | 14041221 | SNV | 1 | T | A | Heterozygous |
| NC_037638.1 | 14045593 | SNV | 1 | G | C | Homozygous   |
| NC_037638.1 | 14045687 | SNV | 1 | G | A | Homozygous   |
| NC_037638.1 | 14046725 | SNV | 1 | A | G | Homozygous   |
| NC_037638.1 | 14054501 | SNV | 1 | A | T | Homozygous   |
| NC_037638.1 | 14054504 | SNV | 1 | A | T | Homozygous   |
| NC_037638.1 | 14054506 | SNV | 1 | T | A | Homozygous   |
| NC_037638.1 | 14056552 | SNV | 1 | G | C | Homozygous   |
| NC_037638.1 | 14056559 | SNV | 1 | G | A | Homozygous   |



|             |          |     |   |   |   |              |
|-------------|----------|-----|---|---|---|--------------|
| NC_037638.1 | 14056563 | SNV | 1 | T | A | Homozygous   |
| NC_037638.1 | 14056567 | SNV | 1 | T | A | Homozygous   |
| NC_037638.1 | 14057578 | SNV | 1 | T | C | Homozygous   |
| NC_037638.1 | 14057595 | SNV | 1 | T | C | Heterozygous |
| NC_037638.1 | 14058814 | SNV | 1 | G | T | Homozygous   |
| NC_037638.1 | 14059754 | SNV | 1 | G | A | Heterozygous |
| NC_037638.1 | 14064931 | SNV | 1 | T | C | Homozygous   |
| NC_037638.1 | 14069595 | SNV | 1 | T | G | Homozygous   |
| NC_037638.1 | 14073360 | SNV | 1 | G | C | Heterozygous |
| NC_037638.1 | 14073720 | SNV | 1 | T | C | Heterozygous |
| NC_037638.1 | 14073721 | SNV | 1 | A | T | Heterozygous |
| NC_037638.1 | 14075776 | SNV | 1 | T | C | Homozygous   |
| NC_037638.1 | 14075816 | SNV | 1 | C | T | Homozygous   |
| NC_037638.1 | 14075860 | SNV | 1 | T | G | Homozygous   |
| NC_037638.1 | 14075890 | SNV | 1 | C | T | Heterozygous |
| NC_037638.1 | 14075987 | SNV | 1 | C | G | Heterozygous |
| NC_037638.1 | 14076099 | SNV | 1 | C | T | Homozygous   |
| NC_037638.1 | 14080410 | SNV | 1 | A | G | Homozygous   |
| NC_037638.1 | 14080562 | SNV | 1 | T | C | Homozygous   |
| NC_037638.1 | 14081144 | SNV | 1 | A | G | Homozygous   |
| NC_037638.1 | 14081375 | SNV | 1 | A | G | Homozygous   |
| NC_037638.1 | 14082188 | SNV | 1 | G | T | Homozygous   |
| NC_037638.1 | 14082193 | SNV | 1 | A | T | Homozygous   |
| NC_037638.1 | 14082248 | SNV | 1 | T | A | Homozygous   |
| NC_037638.1 | 14082253 | SNV | 1 | A | C | Homozygous   |
| NC_037638.1 | 14082267 | SNV | 1 | A | C | Homozygous   |
| NC_037638.1 | 14083389 | SNV | 1 | T | A | Homozygous   |
| NC_037638.1 | 14084583 | SNV | 1 | C | T | Homozygous   |
| NC_037638.1 | 14085227 | SNV | 1 | T | C | Homozygous   |
| NC_037638.1 | 14085929 | SNV | 1 | A | G | Homozygous   |
| NC_037638.1 | 14085967 | SNV | 1 | A | G | Homozygous   |
| NC_037638.1 | 14088491 | SNV | 1 | A | T | Homozygous   |
| NC_037638.1 | 14088514 | SNV | 1 | A | G | Homozygous   |
| NC_037638.1 | 14088525 | SNV | 1 | T | A | Homozygous   |
| NC_037638.1 | 14088527 | SNV | 1 | C | A | Homozygous   |
| NC_037638.1 | 14092840 | SNV | 1 | T | C | Homozygous   |
| NC_037638.1 | 14098683 | SNV | 1 | T | G | Homozygous   |
| NC_037638.1 | 14098688 | SNV | 1 | C | A | Homozygous   |
| NC_037638.1 | 14098692 | SNV | 1 | G | T | Homozygous   |
| NC_037638.1 | 14098696 | SNV | 1 | T | C | Homozygous   |
| NC_037638.1 | 14098698 | SNV | 1 | A | T | Homozygous   |
| NC_037638.1 | 14098706 | SNV | 1 | T | A | Homozygous   |
| NC_037638.1 | 14101370 | SNV | 1 | C | T | Heterozygous |
| NC_037638.1 | 14101373 | SNV | 1 | A | G | Heterozygous |
| NC_037638.1 | 14110958 | SNV | 1 | G | A | Homozygous   |
| NC_037638.1 | 14111269 | SNV | 1 | C | T | Heterozygous |
| NC_037638.1 | 14111277 | SNV | 1 | G | C | Homozygous   |
| NC_037638.1 | 14115818 | SNV | 1 | G | A | Homozygous   |
| NC_037638.1 | 14116232 | SNV | 1 | T | A | Heterozygous |
| NC_037638.1 | 14116237 | SNV | 1 | A | G | Heterozygous |
| NC_037638.1 | 14116291 | SNV | 1 | G | A | Heterozygous |

|             |          |     |   |   |   |              |
|-------------|----------|-----|---|---|---|--------------|
| NC_037638.1 | 14116297 | SNV | 1 | G | A | Heterozygous |
| NC_037638.1 | 14116302 | SNV | 1 | A | G | Heterozygous |
| NC_037638.1 | 14116318 | SNV | 1 | A | G | Heterozygous |
| NC_037638.1 | 14116327 | SNV | 1 | A | G | Homozygous   |
| NC_037638.1 | 14116331 | SNV | 1 | T | C | Homozygous   |
| NC_037638.1 | 14116336 | SNV | 1 | A | G | Homozygous   |
| NC_037638.1 | 14116339 | SNV | 1 | A | G | Homozygous   |
| NC_037638.1 | 14116345 | SNV | 1 | G | A | Homozygous   |
| NC_037638.1 | 14116366 | SNV | 1 | G | A | Heterozygous |
| NC_037638.1 | 14116381 | SNV | 1 | G | A | Heterozygous |
| NC_037638.1 | 14116405 | SNV | 1 | G | A | Heterozygous |
| NC_037638.1 | 14116428 | SNV | 1 | G | A | Homozygous   |
| NC_037638.1 | 14116430 | SNV | 1 | T | C | Homozygous   |
| NC_037638.1 | 14116432 | SNV | 1 | G | A | Heterozygous |
| NC_037638.1 | 14116456 | SNV | 1 | G | A | Homozygous   |
| NC_037638.1 | 14116458 | SNV | 1 | G | A | Homozygous   |
| NC_037638.1 | 14116462 | SNV | 1 | G | A | Homozygous   |
| NC_037638.1 | 14116467 | SNV | 1 | A | T | Homozygous   |
| NC_037638.1 | 14116472 | SNV | 1 | T | C | Homozygous   |
| NC_037638.1 | 14116481 | SNV | 1 | T | C | Heterozygous |
| NC_037638.1 | 14116483 | SNV | 1 | G | A | Heterozygous |
| NC_037638.1 | 14116563 | SNV | 1 | G | A | Heterozygous |
| NC_037638.1 | 14116620 | SNV | 1 | G | A | Heterozygous |
| NC_037638.1 | 14116998 | SNV | 1 | T | C | Heterozygous |
| NC_037638.1 | 14117002 | SNV | 1 | A | T | Heterozygous |
| NC_037638.1 | 14117004 | SNV | 1 | T | C | Heterozygous |
| NC_037638.1 | 14117007 | SNV | 1 | T | C | Heterozygous |
| NC_037638.1 | 14117050 | SNV | 1 | G | A | Heterozygous |
| NC_037638.1 | 14117059 | SNV | 1 | G | A | Heterozygous |
| NC_037638.1 | 14117065 | SNV | 1 | G | A | Heterozygous |
| NC_037638.1 | 14117068 | SNV | 1 | G | A | Heterozygous |
| NC_037638.1 | 14117083 | SNV | 1 | G | C | Heterozygous |
| NC_037638.1 | 14117086 | SNV | 1 | G | A | Heterozygous |
| NC_037638.1 | 14117092 | SNV | 1 | G | A | Heterozygous |
| NC_037638.1 | 14117098 | SNV | 1 | G | A | Homozygous   |
| NC_037638.1 | 14117100 | SNV | 1 | A | T | Heterozygous |
| NC_037638.1 | 14117113 | SNV | 1 | G | T | Heterozygous |
| NC_037638.1 | 14117116 | SNV | 1 | G | A | Heterozygous |
| NC_037638.1 | 14117119 | SNV | 1 | G | A | Heterozygous |
| NC_037638.1 | 14117125 | SNV | 1 | A | G | Heterozygous |
| NC_037638.1 | 14117163 | SNV | 1 | T | C | Heterozygous |
| NC_037638.1 | 14117310 | SNV | 1 | G | A | Heterozygous |
| NC_037638.1 | 14117313 | SNV | 1 | G | A | Heterozygous |
| NC_037638.1 | 14117316 | SNV | 1 | G | C | Heterozygous |
| NC_037638.1 | 14117319 | SNV | 1 | G | A | Heterozygous |
| NC_037638.1 | 14117325 | SNV | 1 | G | A | Heterozygous |
| NC_037638.1 | 14117325 | SNV | 1 | G | T | Heterozygous |
| NC_037638.1 | 14117331 | SNV | 1 | G | A | Heterozygous |
| NC_037638.1 | 14117348 | SNV | 1 | G | T | Heterozygous |
| NC_037638.1 | 14117351 | SNV | 1 | G | A | Heterozygous |
| NC_037638.1 | 14117354 | SNV | 1 | G | A | Heterozygous |

|             |          |     |   |   |   |              |
|-------------|----------|-----|---|---|---|--------------|
| NC_037638.1 | 14117362 | SNV | 1 | A | G | Heterozygous |
| NC_037638.1 | 14117734 | SNV | 1 | G | A | Homozygous   |
| NC_037638.1 | 14117737 | SNV | 1 | G | A | Homozygous   |
| NC_037638.1 | 14117740 | SNV | 1 | G | C | Homozygous   |
| NC_037638.1 | 14117747 | SNV | 1 | T | C | Homozygous   |
| NC_037638.1 | 14117750 | SNV | 1 | T | A | Homozygous   |
| NC_037638.1 | 14119145 | SNV | 1 | T | C | Homozygous   |
| NC_037638.1 | 14119147 | SNV | 1 | G | T | Homozygous   |
| NC_037638.1 | 14119149 | SNV | 1 | A | T | Homozygous   |
| NC_037638.1 | 14119153 | SNV | 1 | G | C | Homozygous   |
| NC_037638.1 | 14119165 | SNV | 1 | G | A | Homozygous   |
| NC_037638.1 | 14119461 | SNV | 1 | A | G | Heterozygous |
| NC_037638.1 | 14119477 | SNV | 1 | G | T | Heterozygous |
| NC_037638.1 | 14119495 | SNV | 1 | G | A | Heterozygous |
| NC_037638.1 | 14119498 | SNV | 1 | G | A | Heterozygous |
| NC_037638.1 | 14120360 | SNV | 1 | A | T | Homozygous   |
| NC_037638.1 | 14122764 | SNV | 1 | T | C | Homozygous   |
| NC_037638.1 | 14122773 | SNV | 1 | A | G | Heterozygous |
| NC_037638.1 | 14122784 | SNV | 1 | T | C | Homozygous   |
| NC_037638.1 | 14123890 | SNV | 1 | G | A | Heterozygous |
| NC_037638.1 | 14124207 | SNV | 1 | A | G | Heterozygous |
| NC_037638.1 | 14124220 | SNV | 1 | T | A | Heterozygous |
| NC_037638.1 | 14124222 | SNV | 1 | T | A | Heterozygous |
| NC_037638.1 | 14124258 | SNV | 1 | G | A | Homozygous   |
| NC_037638.1 | 14124916 | SNV | 1 | G | A | Heterozygous |
| NC_037638.1 | 14124923 | SNV | 1 | C | T | Heterozygous |
| NC_037638.1 | 14124933 | SNV | 1 | G | A | Heterozygous |
| NC_037638.1 | 14124940 | SNV | 1 | A | C | Heterozygous |
| NC_037638.1 | 14125406 | SNV | 1 | A | G | Heterozygous |
| NC_037638.1 | 14125462 | SNV | 1 | A | G | Heterozygous |
| NC_037638.1 | 14128569 | SNV | 1 | A | G | Homozygous   |
| NC_037638.1 | 14129520 | SNV | 1 | A | G | Heterozygous |
| NC_037638.1 | 14129638 | SNV | 1 | A | G | Homozygous   |
| NC_037638.1 | 14134396 | SNV | 1 | T | C | Homozygous   |
| NC_037638.1 | 14134998 | SNV | 1 | C | T | Heterozygous |
| NC_037638.1 | 14135152 | SNV | 1 | A | G | Homozygous   |
| NC_037638.1 | 14135305 | SNV | 1 | G | A | Heterozygous |
| NC_037638.1 | 14135311 | SNV | 1 | A | G | Heterozygous |
| NC_037638.1 | 14135456 | SNV | 1 | G | A | Heterozygous |
| NC_037638.1 | 14135459 | SNV | 1 | G | A | Heterozygous |
| NC_037638.1 | 14135840 | SNV | 1 | G | T | Homozygous   |
| NC_037638.1 | 14135924 | SNV | 1 | T | G | Homozygous   |
| NC_037638.1 | 14136016 | SNV | 1 | A | T | Homozygous   |
| NC_037638.1 | 14136021 | SNV | 1 | A | T | Homozygous   |
| NC_037638.1 | 14136070 | SNV | 1 | A | T | Heterozygous |
| NC_037638.1 | 14136088 | SNV | 1 | T | A | Heterozygous |
| NC_037638.1 | 14136108 | SNV | 1 | T | A | Heterozygous |
| NC_037638.1 | 14136204 | SNV | 1 | A | C | Homozygous   |
| NC_037638.1 | 14136832 | SNV | 1 | G | A | Homozygous   |
| NC_037638.1 | 14137063 | SNV | 1 | G | A | Heterozygous |
| NC_037638.1 | 14137237 | SNV | 1 | A | G | Homozygous   |

|             |          |     |   |   |   |              |
|-------------|----------|-----|---|---|---|--------------|
| NC_037638.1 | 14138191 | SNV | 1 | T | G | Homozygous   |
| NC_037638.1 | 14140183 | SNV | 1 | C | T | Homozygous   |
| NC_037638.1 | 14140754 | SNV | 1 | A | T | Homozygous   |
| NC_037638.1 | 14140760 | SNV | 1 | T | C | Homozygous   |
| NC_037638.1 | 14140943 | SNV | 1 | T | A | Homozygous   |
| NC_037638.1 | 14142765 | SNV | 1 | T | A | Heterozygous |
| NC_037638.1 | 14142770 | SNV | 1 | T | A | Heterozygous |
| NC_037638.1 | 14142781 | SNV | 1 | T | A | Heterozygous |
| NC_037638.1 | 14142792 | SNV | 1 | T | C | Heterozygous |
| NC_037638.1 | 14149231 | SNV | 1 | C | G | Homozygous   |
| NC_037638.1 | 14153002 | SNV | 1 | A | T | Homozygous   |
| NC_037638.1 | 14153031 | SNV | 1 | C | A | Homozygous   |
| NC_037638.1 | 14164800 | SNV | 1 | C | T | Homozygous   |
| NC_037638.1 | 14165320 | SNV | 1 | G | C | Heterozygous |
| NC_037638.1 | 14165521 | SNV | 1 | G | A | Homozygous   |
| NC_037638.1 | 14165540 | SNV | 1 | A | G | Homozygous   |
| NC_037638.1 | 14165630 | SNV | 1 | C | T | Homozygous   |
| NC_037638.1 | 14165684 | SNV | 1 | T | C | Homozygous   |
| NC_037638.1 | 14165701 | SNV | 1 | G | A | Homozygous   |
| NC_037638.1 | 14166041 | SNV | 1 | C | T | Homozygous   |
| NC_037638.1 | 14167503 | SNV | 1 | T | C | Heterozygous |
| NC_037638.1 | 14167676 | SNV | 1 | G | A | Homozygous   |
| NC_037638.1 | 14168904 | SNV | 1 | G | A | Homozygous   |
| NC_037638.1 | 14168908 | SNV | 1 | G | A | Homozygous   |
| NC_037638.1 | 14169655 | SNV | 1 | T | C | Heterozygous |
| NC_037638.1 | 14171740 | SNV | 1 | A | G | Homozygous   |
| NC_037638.1 | 14174261 | SNV | 1 | T | A | Homozygous   |
| NC_037638.1 | 14174289 | SNV | 1 | G | A | Homozygous   |
| NC_037638.1 | 14174298 | SNV | 1 | A | G | Homozygous   |
| NC_037638.1 | 14174305 | SNV | 1 | A | T | Homozygous   |
| NC_037638.1 | 14174314 | SNV | 1 | A | C | Homozygous   |
| NC_037638.1 | 14174316 | SNV | 1 | A | G | Homozygous   |
| NC_037638.1 | 14174319 | SNV | 1 | G | A | Homozygous   |
| NC_037638.1 | 14174322 | SNV | 1 | G | A | Homozygous   |
| NC_037638.1 | 14174328 | SNV | 1 | G | A | Homozygous   |
| NC_037638.1 | 14174594 | SNV | 1 | G | C | Homozygous   |
| NC_037638.1 | 14174601 | SNV | 1 | C | T | Homozygous   |
| NC_037638.1 | 14174806 | SNV | 1 | A | C | Homozygous   |
| NC_037638.1 | 14174950 | SNV | 1 | T | G | Homozygous   |
| NC_037638.1 | 14176915 | SNV | 1 | A | G | Heterozygous |
| NC_037638.1 | 14177092 | SNV | 1 | T | A | Homozygous   |
| NC_037638.1 | 14177765 | SNV | 1 | A | G | Homozygous   |
| NC_037638.1 | 14177842 | SNV | 1 | G | C | Homozygous   |
| NC_037638.1 | 14178098 | SNV | 1 | G | A | Homozygous   |
| NC_037638.1 | 14178124 | SNV | 1 | C | T | Heterozygous |
| NC_037638.1 | 14178499 | SNV | 1 | C | T | Heterozygous |
| NC_037638.1 | 14178864 | SNV | 1 | A | G | Heterozygous |
| NC_037638.1 | 14179354 | SNV | 1 | A | G | Homozygous   |
| NC_037638.1 | 14179366 | SNV | 1 | A | G | Homozygous   |
| NC_037638.1 | 14179414 | SNV | 1 | G | A | Heterozygous |
| NC_037638.1 | 14179432 | SNV | 1 | A | G | Heterozygous |

|             |          |     |   |   |   |              |
|-------------|----------|-----|---|---|---|--------------|
| NC_037638.1 | 14179436 | SNV | 1 | A | G | Heterozygous |
| NC_037638.1 | 14180078 | SNV | 1 | A | G | Homozygous   |
| NC_037638.1 | 14180177 | SNV | 1 | C | T | Homozygous   |
| NC_037638.1 | 14180377 | SNV | 1 | G | A | Heterozygous |
| NC_037638.1 | 14180384 | SNV | 1 | A | G | Homozygous   |
| NC_037638.1 | 14181154 | SNV | 1 | G | T | Homozygous   |
| NC_037638.1 | 14181758 | SNV | 1 | G | A | Heterozygous |
| NC_037638.1 | 14182603 | SNV | 1 | C | T | Heterozygous |
| NC_037638.1 | 14188526 | SNV | 1 | A | G | Homozygous   |
| NC_037638.1 | 14188533 | SNV | 1 | T | C | Heterozygous |
| NC_037638.1 | 14188536 | SNV | 1 | C | A | Heterozygous |
| NC_037638.1 | 14188575 | SNV | 1 | G | A | Homozygous   |
| NC_037638.1 | 14188578 | SNV | 1 | T | C | Homozygous   |
| NC_037638.1 | 14188581 | SNV | 1 | G | A | Homozygous   |
| NC_037638.1 | 14188584 | SNV | 1 | A | T | Homozygous   |
| NC_037638.1 | 14188586 | SNV | 1 | T | C | Homozygous   |
| NC_037638.1 | 14188589 | SNV | 1 | T | C | Homozygous   |
| NC_037638.1 | 14188612 | SNV | 1 | C | T | Homozygous   |
| NC_037638.1 | 14188631 | SNV | 1 | C | T | Homozygous   |
| NC_037638.1 | 14188635 | SNV | 1 | A | G | Homozygous   |
| NC_037638.1 | 14188673 | SNV | 1 | A | G | Homozygous   |
| NC_037638.1 | 14188708 | SNV | 1 | C | T | Homozygous   |
| NC_037638.1 | 14188762 | SNV | 1 | G | C | Homozygous   |
| NC_037638.1 | 14188834 | SNV | 1 | G | A | Heterozygous |
| NC_037638.1 | 14189481 | SNV | 1 | A | G | Heterozygous |
| NC_037638.1 | 14189489 | SNV | 1 | A | G | Heterozygous |
| NC_037638.1 | 14189492 | SNV | 1 | C | T | Heterozygous |
| NC_037638.1 | 14189503 | SNV | 1 | C | T | Homozygous   |
| NC_037638.1 | 14189505 | SNV | 1 | G | A | Homozygous   |
| NC_037638.1 | 14189513 | SNV | 1 | G | C | Homozygous   |
| NC_037638.1 | 14189524 | SNV | 1 | T | C | Homozygous   |
| NC_037638.1 | 14189532 | SNV | 1 | G | T | Homozygous   |
| NC_037638.1 | 14190796 | SNV | 1 | G | A | Heterozygous |
| NC_037638.1 | 14190917 | SNV | 1 | A | G | Homozygous   |
| NC_037638.1 | 14190920 | SNV | 1 | A | G | Homozygous   |
| NC_037638.1 | 14191107 | SNV | 1 | T | G | Heterozygous |
| NC_037638.1 | 14191141 | SNV | 1 | G | A | Heterozygous |
| NC_037638.1 | 14191437 | SNV | 1 | C | T | Homozygous   |
| NC_037638.1 | 14194070 | SNV | 1 | A | T | Homozygous   |
| NC_037638.1 | 14194072 | SNV | 1 | A | T | Heterozygous |
| NC_037638.1 | 14194093 | SNV | 1 | A | T | Heterozygous |
| NC_037638.1 | 14198610 | SNV | 1 | C | A | Heterozygous |
| NC_037638.1 | 14199397 | SNV | 1 | A | G | Heterozygous |
| NC_037638.1 | 14199468 | SNV | 1 | C | T | Heterozygous |
| NC_037638.1 | 14199568 | SNV | 1 | A | G | Homozygous   |
| NC_037638.1 | 14199583 | SNV | 1 | T | C | Homozygous   |
| NC_037638.1 | 14199700 | SNV | 1 | A | G | Homozygous   |
| NC_037638.1 | 14200086 | SNV | 1 | C | T | Heterozygous |
| NC_037638.1 | 14200092 | SNV | 1 | G | A | Heterozygous |
| NC_037638.1 | 14200234 | SNV | 1 | T | C | Heterozygous |
| NC_037638.1 | 14200274 | SNV | 1 | G | A | Heterozygous |

|             |          |     |   |   |   |              |
|-------------|----------|-----|---|---|---|--------------|
| NC_037638.1 | 14200289 | SNV | 1 | C | T | Heterozygous |
| NC_037638.1 | 14212505 | SNV | 1 | G | A | Heterozygous |
| NC_037638.1 | 14212551 | SNV | 1 | T | C | Homozygous   |
| NC_037638.1 | 14212555 | SNV | 1 | T | G | Homozygous   |
| NC_037638.1 | 14212557 | SNV | 1 | C | A | Homozygous   |
| NC_037638.1 | 14212590 | SNV | 1 | C | T | Homozygous   |
| NC_037638.1 | 14214071 | SNV | 1 | T | C | Heterozygous |
| NC_037638.1 | 14216372 | SNV | 1 | C | A | Homozygous   |
| NC_037638.1 | 14233956 | SNV | 1 | A | T | Homozygous   |
| NC_037638.1 | 14237131 | SNV | 1 | T | C | Homozygous   |
| NC_037638.1 | 14237164 | SNV | 1 | T | C | Homozygous   |
| NC_037638.1 | 14241649 | SNV | 1 | C | G | Heterozygous |
| NC_037638.1 | 14241731 | SNV | 1 | C | T | Heterozygous |
| NC_037638.1 | 14241776 | SNV | 1 | G | C | Homozygous   |
| NC_037638.1 | 14242316 | SNV | 1 | G | C | Heterozygous |
| NC_037638.1 | 14242689 | SNV | 1 | A | T | Homozygous   |
| NC_037638.1 | 14242696 | SNV | 1 | G | C | Heterozygous |
| NC_037638.1 | 14242990 | SNV | 1 | T | C | Homozygous   |
| NC_037638.1 | 14243119 | SNV | 1 | T | C | Homozygous   |
| NC_037638.1 | 14243134 | SNV | 1 | T | C | Homozygous   |
| NC_037638.1 | 14243210 | SNV | 1 | A | G | Heterozygous |
| NC_037638.1 | 14246274 | SNV | 1 | C | G | Heterozygous |
| NC_037638.1 | 14246396 | SNV | 1 | G | A | Heterozygous |
| NC_037638.1 | 14246447 | SNV | 1 | G | A | Homozygous   |
| NC_037638.1 | 14246452 | SNV | 1 | T | C | Homozygous   |
| NC_037638.1 | 14246566 | SNV | 1 | A | G | Homozygous   |
| NC_037638.1 | 14246586 | SNV | 1 | C | T | Heterozygous |
| NC_037638.1 | 14246723 | SNV | 1 | A | G | Heterozygous |
| NC_037638.1 | 14246969 | SNV | 1 | T | C | Heterozygous |
| NC_037638.1 | 14247016 | SNV | 1 | C | T | Heterozygous |
| NC_037638.1 | 14247226 | SNV | 1 | T | C | Heterozygous |
| NC_037638.1 | 14247278 | SNV | 1 | G | A | Homozygous   |
| NC_037638.1 | 14247281 | SNV | 1 | T | C | Homozygous   |
| NC_037638.1 | 14247311 | SNV | 1 | C | T | Heterozygous |
| NC_037638.1 | 14247350 | SNV | 1 | G | C | Homozygous   |
| NC_037638.1 | 14247490 | SNV | 1 | T | C | Heterozygous |
| NC_037638.1 | 14247769 | SNV | 1 | T | C | Homozygous   |
| NC_037638.1 | 14249751 | SNV | 1 | C | G | Heterozygous |
| NC_037638.1 | 14250835 | SNV | 1 | C | T | Homozygous   |
| NC_037638.1 | 14252124 | SNV | 1 | T | C | Homozygous   |
| NC_037638.1 | 14253098 | SNV | 1 | C | T | Heterozygous |
| NC_037638.1 | 14253261 | SNV | 1 | A | G | Homozygous   |
| NC_037638.1 | 14253409 | SNV | 1 | A | G | Homozygous   |
| NC_037638.1 | 14253643 | SNV | 1 | A | G | Homozygous   |
| NC_037638.1 | 14255205 | SNV | 1 | A | G | Homozygous   |
| NC_037638.1 | 14255207 | SNV | 1 | A | T | Homozygous   |
| NC_037638.1 | 14255214 | SNV | 1 | T | C | Homozygous   |
| NC_037638.1 | 14255665 | SNV | 1 | A | G | Homozygous   |
| NC_037638.1 | 14255981 | SNV | 1 | T | C | Heterozygous |
| NC_037638.1 | 14258987 | SNV | 1 | A | G | Homozygous   |
| NC_037638.1 | 14260352 | SNV | 1 | A | G | Homozygous   |

|             |          |     |   |   |   |              |
|-------------|----------|-----|---|---|---|--------------|
| NC_037638.1 | 14260556 | SNV | 1 | A | T | Homozygous   |
| NC_037638.1 | 14260562 | SNV | 1 | A | T | Heterozygous |
| NC_037638.1 | 14263589 | SNV | 1 | C | G | Homozygous   |
| NC_037638.1 | 14263597 | SNV | 1 | C | T | Heterozygous |
| NC_037638.1 | 14263604 | SNV | 1 | C | T | Homozygous   |
| NC_037638.1 | 14266832 | SNV | 1 | A | G | Homozygous   |
| NC_037638.1 | 14266835 | SNV | 1 | A | G | Homozygous   |
| NC_037638.1 | 14267890 | SNV | 1 | A | G | Homozygous   |
| NC_037638.1 | 14268058 | SNV | 1 | T | A | Heterozygous |
| NC_037638.1 | 14268061 | SNV | 1 | C | A | Heterozygous |
| NC_037638.1 | 14268085 | SNV | 1 | T | C | Homozygous   |
| NC_037638.1 | 14268697 | SNV | 1 | A | G | Homozygous   |
| NC_037638.1 | 14269443 | SNV | 1 | G | A | Homozygous   |
| NC_037638.1 | 14270129 | SNV | 1 | G | A | Homozygous   |
| NC_037638.1 | 14270231 | SNV | 1 | A | T | Homozygous   |
| NC_037638.1 | 14271627 | SNV | 1 | T | C | Heterozygous |
| NC_037638.1 | 14271852 | SNV | 1 | T | C | Heterozygous |
| NC_037638.1 | 14272242 | SNV | 1 | C | T | Homozygous   |
| NC_037638.1 | 14272250 | SNV | 1 | A | T | Heterozygous |
| NC_037638.1 | 14272255 | SNV | 1 | C | T | Heterozygous |
| NC_037638.1 | 14272257 | SNV | 1 | C | T | Heterozygous |
| NC_037638.1 | 14272583 | SNV | 1 | T | C | Homozygous   |
| NC_037638.1 | 14272802 | SNV | 1 | T | C | Homozygous   |
| NC_037638.1 | 14274058 | SNV | 1 | T | C | Homozygous   |
| NC_037638.1 | 14274097 | SNV | 1 | A | T | Heterozygous |
| NC_037638.1 | 14274220 | SNV | 1 | A | G | Homozygous   |
| NC_037638.1 | 14275656 | SNV | 1 | A | G | Homozygous   |
| NC_037638.1 | 14275679 | SNV | 1 | A | G | Homozygous   |
| NC_037638.1 | 14275747 | SNV | 1 | T | C | Homozygous   |
| NC_037638.1 | 14275811 | SNV | 1 | A | T | Heterozygous |
| NC_037638.1 | 14275858 | SNV | 1 | A | G | Homozygous   |
| NC_037638.1 | 14275864 | SNV | 1 | G | A | Heterozygous |
| NC_037638.1 | 14276793 | SNV | 1 | G | A | Heterozygous |
| NC_037638.1 | 14278674 | SNV | 1 | A | G | Heterozygous |
| NC_037638.1 | 14278764 | SNV | 1 | A | G | Homozygous   |
| NC_037638.1 | 14278791 | SNV | 1 | G | A | Homozygous   |
| NC_037638.1 | 14278839 | SNV | 1 | C | G | Heterozygous |
| NC_037638.1 | 14278894 | SNV | 1 | A | G | Homozygous   |
| NC_037638.1 | 14279180 | SNV | 1 | G | A | Homozygous   |
| NC_037638.1 | 14279183 | SNV | 1 | C | G | Heterozygous |
| NC_037638.1 | 14279296 | SNV | 1 | G | A | Heterozygous |
| NC_037638.1 | 14279858 | SNV | 1 | G | A | Heterozygous |
| NC_037638.1 | 14279901 | SNV | 1 | A | G | Homozygous   |
| NC_037638.1 | 14279952 | SNV | 1 | A | G | Homozygous   |
| NC_037638.1 | 14280134 | SNV | 1 | T | C | Homozygous   |
| NC_037638.1 | 14280424 | SNV | 1 | A | G | Homozygous   |
| NC_037638.1 | 14280436 | SNV | 1 | G | A | Heterozygous |
| NC_037638.1 | 14280800 | SNV | 1 | T | C | Homozygous   |
| NC_037638.1 | 14280824 | SNV | 1 | A | G | Homozygous   |
| NC_037638.1 | 14282148 | SNV | 1 | C | T | Homozygous   |
| NC_037638.1 | 14282153 | SNV | 1 | G | A | Heterozygous |

|             |          |     |   |   |   |              |
|-------------|----------|-----|---|---|---|--------------|
| NC_037638.1 | 14282290 | SNV | 1 | G | A | Homozygous   |
| NC_037638.1 | 14282298 | SNV | 1 | C | T | Homozygous   |
| NC_037638.1 | 14282768 | SNV | 1 | G | A | Heterozygous |
| NC_037638.1 | 14282974 | SNV | 1 | A | T | Heterozygous |
| NC_037638.1 | 14282978 | SNV | 1 | A | G | Heterozygous |
| NC_037638.1 | 14282980 | SNV | 1 | C | T | Heterozygous |
| NC_037638.1 | 14283298 | SNV | 1 | C | T | Heterozygous |
| NC_037638.1 | 14283561 | SNV | 1 | G | A | Heterozygous |
| NC_037638.1 | 14283759 | SNV | 1 | C | T | Homozygous   |
| NC_037638.1 | 14283843 | SNV | 1 | T | C | Homozygous   |
| NC_037638.1 | 14283897 | SNV | 1 | G | A | Heterozygous |
| NC_037638.1 | 14284025 | SNV | 1 | A | T | Homozygous   |
| NC_037638.1 | 14284030 | SNV | 1 | A | T | Homozygous   |
| NC_037638.1 | 14284041 | SNV | 1 | C | T | Homozygous   |
| NC_037638.1 | 14284453 | SNV | 1 | T | C | Homozygous   |
| NC_037638.1 | 14284455 | SNV | 1 | T | C | Heterozygous |
| NC_037638.1 | 14284466 | SNV | 1 | C | T | Homozygous   |
| NC_037638.1 | 14284471 | SNV | 1 | A | G | Homozygous   |
| NC_037638.1 | 14284553 | SNV | 1 | G | A | Heterozygous |
| NC_037638.1 | 14284590 | SNV | 1 | G | A | Homozygous   |
| NC_037638.1 | 14284602 | SNV | 1 | G | A | Heterozygous |
| NC_037638.1 | 14284607 | SNV | 1 | C | T | Heterozygous |
| NC_037638.1 | 14284653 | SNV | 1 | T | A | Heterozygous |
| NC_037638.1 | 14284672 | SNV | 1 | A | T | Heterozygous |
| NC_037638.1 | 14284692 | SNV | 1 | T | C | Heterozygous |
| NC_037638.1 | 14284752 | SNV | 1 | T | C | Homozygous   |
| NC_037638.1 | 14284794 | SNV | 1 | G | A | Heterozygous |
| NC_037638.1 | 14284880 | SNV | 1 | C | T | Homozygous   |
| NC_037638.1 | 14285243 | SNV | 1 | G | T | Homozygous   |
| NC_037638.1 | 14285261 | SNV | 1 | A | G | Homozygous   |
| NC_037638.1 | 14285410 | SNV | 1 | A | G | Homozygous   |
| NC_037638.1 | 14285461 | SNV | 1 | C | T | Homozygous   |
| NC_037638.1 | 14286906 | SNV | 1 | T | C | Homozygous   |
| NC_037638.1 | 14287019 | SNV | 1 | G | C | Homozygous   |
| NC_037638.1 | 14287627 | SNV | 1 | G | A | Heterozygous |
| NC_037638.1 | 14287840 | SNV | 1 | G | A | Homozygous   |
| NC_037638.1 | 14288374 | SNV | 1 | G | A | Heterozygous |
| NC_037638.1 | 14288759 | SNV | 1 | C | G | Homozygous   |
| NC_037638.1 | 14288814 | SNV | 1 | T | C | Homozygous   |
| NC_037638.1 | 14288950 | SNV | 1 | T | C | Heterozygous |
| NC_037638.1 | 14289409 | SNV | 1 | A | T | Heterozygous |
| NC_037638.1 | 14289628 | SNV | 1 | C | A | Homozygous   |
| NC_037638.1 | 14289872 | SNV | 1 | C | T | Heterozygous |
| NC_037638.1 | 14291946 | SNV | 1 | C | T | Heterozygous |
| NC_037638.1 | 14291983 | SNV | 1 | C | T | Heterozygous |
| NC_037638.1 | 14292042 | SNV | 1 | A | G | Heterozygous |
| NC_037638.1 | 14292273 | SNV | 1 | T | C | Homozygous   |
| NC_037638.1 | 14292404 | SNV | 1 | C | T | Heterozygous |
| NC_037638.1 | 14292454 | SNV | 1 | T | C | Homozygous   |
| NC_037638.1 | 14292691 | SNV | 1 | C | T | Heterozygous |
| NC_037638.1 | 14293949 | SNV | 1 | A | G | Homozygous   |



|             |          |     |   |   |   |              |
|-------------|----------|-----|---|---|---|--------------|
| NC_037638.1 | 14293964 | SNV | 1 | A | G | Homozygous   |
| NC_037638.1 | 14294853 | SNV | 1 | G | C | Homozygous   |
| NC_037638.1 | 14294887 | SNV | 1 | A | G | Homozygous   |
| NC_037638.1 | 14294977 | SNV | 1 | A | G | Heterozygous |
| NC_037638.1 | 14295092 | SNV | 1 | A | T | Heterozygous |
| NC_037638.1 | 14296204 | SNV | 1 | A | G | Homozygous   |
| NC_037638.1 | 14296869 | SNV | 1 | G | A | Homozygous   |
| NC_037638.1 | 14297683 | SNV | 1 | C | T | Homozygous   |
| NC_037638.1 | 14301012 | SNV | 1 | T | G | Homozygous   |
| NC_037638.1 | 14301034 | SNV | 1 | T | C | Homozygous   |
| NC_037638.1 | 14301395 | SNV | 1 | T | C | Heterozygous |
| NC_037638.1 | 14301653 | SNV | 1 | T | G | Homozygous   |
| NC_037638.1 | 14301914 | SNV | 1 | T | C | Homozygous   |
| NC_037638.1 | 14304283 | SNV | 1 | C | T | Heterozygous |
| NC_037638.1 | 14304526 | SNV | 1 | T | C | Homozygous   |
| NC_037638.1 | 14305339 | SNV | 1 | G | C | Homozygous   |
| NC_037638.1 | 14306477 | SNV | 1 | A | T | Heterozygous |
| NC_037638.1 | 14306498 | SNV | 1 | A | T | Heterozygous |
| NC_037638.1 | 14308560 | SNV | 1 | T | C | Homozygous   |
| NC_037638.1 | 14315914 | SNV | 1 | T | C | Heterozygous |
| NC_037638.1 | 14318359 | SNV | 1 | A | G | Homozygous   |
| NC_037638.1 | 14318366 | SNV | 1 | A | T | Homozygous   |
| NC_037638.1 | 14318529 | SNV | 1 | G | A | Homozygous   |
| NC_037638.1 | 14321164 | SNV | 1 | C | G | Homozygous   |
| NC_037638.1 | 14321166 | SNV | 1 | T | G | Homozygous   |
| NC_037638.1 | 14321243 | SNV | 1 | C | G | Homozygous   |
| NC_037638.1 | 14326368 | SNV | 1 | C | G | Homozygous   |
| NC_037638.1 | 14326379 | SNV | 1 | A | T | Homozygous   |
| NC_037638.1 | 14326381 | SNV | 1 | A | G | Homozygous   |
| NC_037638.1 | 14326383 | SNV | 1 | A | G | Homozygous   |
| NC_037638.1 | 14326385 | SNV | 1 | A | T | Homozygous   |
| NC_037638.1 | 14326391 | SNV | 1 | T | A | Homozygous   |
| NC_037638.1 | 14330810 | SNV | 1 | G | A | Heterozygous |
| NC_037638.1 | 14335824 | SNV | 1 | G | A | Heterozygous |
| NC_037638.1 | 14337648 | SNV | 1 | C | T | Heterozygous |
| NC_037638.1 | 14337995 | SNV | 1 | C | T | Heterozygous |
| NC_037638.1 | 14341180 | SNV | 1 | G | C | Homozygous   |
| NC_037638.1 | 14341199 | SNV | 1 | T | C | Homozygous   |
| NC_037638.1 | 14341399 | SNV | 1 | C | T | Heterozygous |
| NC_037638.1 | 14341715 | SNV | 1 | G | A | Homozygous   |
| NC_037638.1 | 14341852 | SNV | 1 | A | G | Homozygous   |
| NC_037638.1 | 14341894 | SNV | 1 | G | A | Homozygous   |
| NC_037638.1 | 14343692 | SNV | 1 | C | T | Heterozygous |
| NC_037638.1 | 14343779 | SNV | 1 | A | G | Heterozygous |
| NC_037638.1 | 14344021 | SNV | 1 | C | T | Homozygous   |
| NC_037638.1 | 14347477 | SNV | 1 | A | T | Heterozygous |
| NC_037638.1 | 14347484 | SNV | 1 | T | A | Heterozygous |
| NC_037638.1 | 14347487 | SNV | 1 | T | A | Heterozygous |
| NC_037638.1 | 14350838 | SNV | 1 | A | G | Homozygous   |
| NC_037638.1 | 14353669 | SNV | 1 | C | A | Homozygous   |
| NC_037638.1 | 14357013 | SNV | 1 | T | C | Homozygous   |

|             |          |     |   |   |   |              |
|-------------|----------|-----|---|---|---|--------------|
| NC_037638.1 | 14357015 | SNV | 1 | A | T | Homozygous   |
| NC_037638.1 | 14357405 | SNV | 1 | T | A | Heterozygous |
| NC_037638.1 | 14357801 | SNV | 1 | G | A | Homozygous   |
| NC_037638.1 | 14358788 | SNV | 1 | T | C | Homozygous   |
| NC_037638.1 | 14360853 | SNV | 1 | T | C | Homozygous   |
| NC_037638.1 | 14361755 | SNV | 1 | G | A | Heterozygous |
| NC_037638.1 | 14362652 | SNV | 1 | A | G | Heterozygous |
| NC_037638.1 | 14363059 | SNV | 1 | C | T | Homozygous   |
| NC_037638.1 | 14363774 | SNV | 1 | C | T | Heterozygous |
| NC_037638.1 | 14367547 | SNV | 1 | T | C | Homozygous   |
| NC_037638.1 | 14368848 | SNV | 1 | C | T | Homozygous   |
| NC_037638.1 | 14368909 | SNV | 1 | A | G | Homozygous   |
| NC_037638.1 | 14369434 | SNV | 1 | A | G | Heterozygous |
| NC_037638.1 | 14370262 | SNV | 1 | A | T | Heterozygous |
| NC_037638.1 | 14370277 | SNV | 1 | A | C | Heterozygous |
| NC_037638.1 | 14370397 | SNV | 1 | C | T | Homozygous   |
| NC_037638.1 | 14370543 | SNV | 1 | C | A | Heterozygous |
| NC_037638.1 | 14370669 | SNV | 1 | A | G | Homozygous   |
| NC_037638.1 | 14375169 | SNV | 1 | T | G | Heterozygous |
| NC_037638.1 | 14375438 | SNV | 1 | T | C | Homozygous   |
| NC_037638.1 | 14375809 | SNV | 1 | A | G | Heterozygous |
| NC_037638.1 | 14375814 | SNV | 1 | T | G | Heterozygous |
| NC_037638.1 | 14375825 | SNV | 1 | T | C | Heterozygous |
| NC_037638.1 | 14379522 | SNV | 1 | T | A | Homozygous   |
| NC_037638.1 | 14379533 | SNV | 1 | G | A | Homozygous   |
| NC_037638.1 | 14380847 | SNV | 1 | A | G | Heterozygous |
| NC_037638.1 | 14381276 | SNV | 1 | A | C | Homozygous   |
| NC_037638.1 | 14381849 | SNV | 1 | T | A | Heterozygous |
| NC_037638.1 | 14382683 | SNV | 1 | G | A | Heterozygous |
| NC_037638.1 | 14383156 | SNV | 1 | A | G | Heterozygous |
| NC_037638.1 | 14383179 | SNV | 1 | C | A | Homozygous   |
| NC_037638.1 | 14383325 | SNV | 1 | A | C | Heterozygous |
| NC_037638.1 | 14383381 | SNV | 1 | G | C | Heterozygous |
| NC_037638.1 | 14384528 | SNV | 1 | A | G | Homozygous   |
| NC_037638.1 | 14384912 | SNV | 1 | A | G | Homozygous   |
| NC_037638.1 | 14385053 | SNV | 1 | T | C | Homozygous   |
| NC_037638.1 | 14385064 | SNV | 1 | A | T | Homozygous   |
| NC_037638.1 | 14385077 | SNV | 1 | T | C | Homozygous   |
| NC_037638.1 | 14385085 | SNV | 1 | T | A | Homozygous   |
| NC_037638.1 | 14385088 | SNV | 1 | C | T | Homozygous   |
| NC_037638.1 | 14385129 | SNV | 1 | T | A | Heterozygous |
| NC_037638.1 | 14385868 | SNV | 1 | T | C | Homozygous   |
| NC_037638.1 | 14385921 | SNV | 1 | A | G | Homozygous   |
| NC_037638.1 | 14386142 | SNV | 1 | G | A | Heterozygous |
| NC_037638.1 | 14386743 | SNV | 1 | A | C | Heterozygous |
| NC_037638.1 | 14386748 | SNV | 1 | T | C | Heterozygous |
| NC_037638.1 | 14386750 | SNV | 1 | T | C | Heterozygous |
| NC_037638.1 | 14386754 | SNV | 1 | T | C | Heterozygous |
| NC_037638.1 | 14386756 | SNV | 1 | T | C | Heterozygous |
| NC_037638.1 | 14386758 | SNV | 1 | T | C | Heterozygous |
| NC_037638.1 | 14386760 | SNV | 1 | T | C | Heterozygous |

|             |          |     |   |   |   |              |
|-------------|----------|-----|---|---|---|--------------|
| NC_037638.1 | 14386780 | SNV | 1 | T | C | Heterozygous |
| NC_037638.1 | 14386782 | SNV | 1 | T | C | Heterozygous |
| NC_037638.1 | 14386784 | SNV | 1 | T | C | Heterozygous |
| NC_037638.1 | 14386788 | SNV | 1 | T | C | Heterozygous |
| NC_037638.1 | 14386790 | SNV | 1 | T | C | Heterozygous |
| NC_037638.1 | 14387657 | SNV | 1 | T | G | Homozygous   |
| NC_037638.1 | 14390921 | SNV | 1 | A | T | Homozygous   |
| NC_037638.1 | 14391802 | SNV | 1 | G | A | Heterozygous |
| NC_037638.1 | 14394205 | SNV | 1 | T | C | Homozygous   |
| NC_037638.1 | 14402508 | SNV | 1 | A | G | Homozygous   |
| NC_037638.1 | 14402540 | SNV | 1 | C | T | Heterozygous |
| NC_037638.1 | 14408566 | SNV | 1 | A | G | Homozygous   |
| NC_037638.1 | 14408652 | SNV | 1 | T | C | Heterozygous |
| NC_037638.1 | 14408952 | SNV | 1 | A | G | Homozygous   |
| NC_037638.1 | 14409354 | SNV | 1 | G | A | Heterozygous |
| NC_037638.1 | 14409396 | SNV | 1 | T | A | Homozygous   |
| NC_037638.1 | 14413044 | SNV | 1 | A | G | Homozygous   |
| NC_037638.1 | 14413068 | SNV | 1 | C | T | Homozygous   |
| NC_037638.1 | 14413080 | SNV | 1 | A | G | Homozygous   |
| NC_037638.1 | 14413083 | SNV | 1 | C | T | Homozygous   |
| NC_037638.1 | 14413085 | SNV | 1 | A | G | Heterozygous |
| NC_037638.1 | 14413093 | SNV | 1 | C | T | Homozygous   |
| NC_037638.1 | 14413095 | SNV | 1 | T | G | Homozygous   |
| NC_037638.1 | 14413103 | SNV | 1 | C | T | Homozygous   |
| NC_037638.1 | 14413105 | SNV | 1 | A | G | Homozygous   |
| NC_037638.1 | 14413108 | SNV | 1 | C | T | Homozygous   |
| NC_037638.1 | 14413113 | SNV | 1 | C | T | Homozygous   |
| NC_037638.1 | 14413128 | SNV | 1 | C | T | Homozygous   |
| NC_037638.1 | 14413135 | SNV | 1 | A | G | Homozygous   |
| NC_037638.1 | 14413138 | SNV | 1 | C | T | Homozygous   |
| NC_037638.1 | 14413158 | SNV | 1 | A | T | Heterozygous |
| NC_037638.1 | 14417420 | SNV | 1 | C | T | Homozygous   |
| NC_037638.1 | 14420399 | SNV | 1 | T | A | Heterozygous |
| NC_037638.1 | 14421333 | SNV | 1 | C | T | Homozygous   |
| NC_037638.1 | 14421335 | SNV | 1 | T | C | Heterozygous |
| NC_037638.1 | 14423149 | SNV | 1 | C | A | Heterozygous |
| NC_037638.1 | 14427380 | SNV | 1 | A | G | Heterozygous |
| NC_037638.1 | 14427989 | SNV | 1 | C | T | Heterozygous |
| NC_037638.1 | 14428135 | SNV | 1 | C | G | Homozygous   |
| NC_037638.1 | 14428137 | SNV | 1 | G | T | Homozygous   |
| NC_037638.1 | 14431668 | SNV | 1 | G | A | Homozygous   |
| NC_037638.1 | 14432319 | SNV | 1 | G | A | Homozygous   |
| NC_037638.1 | 14432728 | SNV | 1 | C | T | Heterozygous |
| NC_037638.1 | 14435044 | SNV | 1 | T | C | Homozygous   |
| NC_037638.1 | 14435318 | SNV | 1 | T | C | Homozygous   |
| NC_037638.1 | 14435571 | SNV | 1 | C | T | Homozygous   |
| NC_037638.1 | 14435573 | SNV | 1 | A | C | Heterozygous |
| NC_037638.1 | 14435693 | SNV | 1 | A | T | Heterozygous |
| NC_037638.1 | 14466562 | SNV | 1 | T | C | Homozygous   |
| NC_037638.1 | 14466634 | SNV | 1 | C | T | Heterozygous |
| NC_037638.1 | 14466722 | SNV | 1 | T | C | Heterozygous |

|             |          |     |   |   |   |              |
|-------------|----------|-----|---|---|---|--------------|
| NC_037638.1 | 14466954 | SNV | 1 | A | T | Homozygous   |
| NC_037638.1 | 14467322 | SNV | 1 | A | G | Heterozygous |
| NC_037638.1 | 14467433 | SNV | 1 | A | T | Heterozygous |
| NC_037638.1 | 14468105 | SNV | 1 | C | T | Heterozygous |
| NC_037638.1 | 14468469 | SNV | 1 | T | C | Homozygous   |
| NC_037638.1 | 14468494 | SNV | 1 | A | T | Heterozygous |
| NC_037638.1 | 14468497 | SNV | 1 | C | T | Heterozygous |
| NC_037638.1 | 14469443 | SNV | 1 | T | C | Homozygous   |
| NC_037638.1 | 14484899 | SNV | 1 | A | G | Homozygous   |
| NC_037638.1 | 14485349 | SNV | 1 | G | A | Homozygous   |
| NC_037638.1 | 14485576 | SNV | 1 | T | C | Homozygous   |
| NC_037638.1 | 14485633 | SNV | 1 | G | A | Heterozygous |
| NC_037638.1 | 14485776 | SNV | 1 | A | G | Heterozygous |
| NC_037638.1 | 14485787 | SNV | 1 | C | T | Homozygous   |
| NC_037638.1 | 14485809 | SNV | 1 | T | A | Homozygous   |
| NC_037638.1 | 14485874 | SNV | 1 | T | C | Homozygous   |
| NC_037638.1 | 14485894 | SNV | 1 | T | C | Homozygous   |
| NC_037638.1 | 14486206 | SNV | 1 | C | T | Heterozygous |
| NC_037638.1 | 14494781 | SNV | 1 | A | G | Heterozygous |
| NC_037638.1 | 14494796 | SNV | 1 | T | C | Heterozygous |
| NC_037638.1 | 14494801 | SNV | 1 | A | C | Heterozygous |
| NC_037638.1 | 14523614 | SNV | 1 | G | A | Homozygous   |
| NC_037638.1 | 14523616 | SNV | 1 | G | T | Homozygous   |
| NC_037638.1 | 14523619 | SNV | 1 | G | T | Homozygous   |
| NC_037638.1 | 14523622 | SNV | 1 | G | T | Homozygous   |
| NC_037638.1 | 14539744 | SNV | 1 | A | G | Homozygous   |
| NC_037638.1 | 14539824 | SNV | 1 | A | T | Homozygous   |
| NC_037638.1 | 14547676 | SNV | 1 | T | A | Homozygous   |
| NC_037638.1 | 14547730 | SNV | 1 | T | A | Homozygous   |
| NC_037638.1 | 14547735 | SNV | 1 | A | C | Homozygous   |
| NC_037638.1 | 14569142 | SNV | 1 | A | G | Heterozygous |
| NC_037638.1 | 14581750 | SNV | 1 | G | A | Heterozygous |
| NC_037638.1 | 14581892 | SNV | 1 | T | C | Homozygous   |
| NC_037638.1 | 14587258 | SNV | 1 | C | T | Homozygous   |
| NC_037638.1 | 14588019 | SNV | 1 | T | C | Homozygous   |
| NC_037638.1 | 14588021 | SNV | 1 | T | C | Homozygous   |
| NC_037638.1 | 14588047 | SNV | 1 | T | C | Homozygous   |
| NC_037638.1 | 14588412 | SNV | 1 | G | T | Homozygous   |
| NC_037638.1 | 14588424 | SNV | 1 | C | T | Homozygous   |
| NC_037638.1 | 14588428 | SNV | 1 | A | G | Homozygous   |
| NC_037638.1 | 14591916 | SNV | 1 | A | G | Heterozygous |
| NC_037638.1 | 14591924 | SNV | 1 | A | G | Homozygous   |
| NC_037638.1 | 14591935 | SNV | 1 | A | G | Homozygous   |
| NC_037638.1 | 14592033 | SNV | 1 | T | C | Homozygous   |
| NC_037638.1 | 14592110 | SNV | 1 | T | C | Homozygous   |
| NC_037638.1 | 14592123 | SNV | 1 | A | G | Homozygous   |
| NC_037638.1 | 14592128 | SNV | 1 | G | T | Heterozygous |
| NC_037638.1 | 14593268 | SNV | 1 | T | C | Homozygous   |
| NC_037638.1 | 14593280 | SNV | 1 | A | T | Homozygous   |
| NC_037638.1 | 14607998 | SNV | 1 | C | T | Heterozygous |
| NC_037638.1 | 14608019 | SNV | 1 | T | C | Heterozygous |

|             |          |     |   |   |   |              |
|-------------|----------|-----|---|---|---|--------------|
| NC_037638.1 | 14614442 | SNV | 1 | C | T | Homozygous   |
| NC_037638.1 | 14614444 | SNV | 1 | T | C | Homozygous   |
| NC_037638.1 | 14614465 | SNV | 1 | C | T | Homozygous   |
| NC_037638.1 | 14614471 | SNV | 1 | C | T | Homozygous   |
| NC_037638.1 | 14614608 | SNV | 1 | A | G | Homozygous   |
| NC_037638.1 | 14614634 | SNV | 1 | T | C | Homozygous   |
| NC_037638.1 | 14614705 | SNV | 1 | A | G | Homozygous   |
| NC_037638.1 | 14614885 | SNV | 1 | T | C | Homozygous   |
| NC_037638.1 | 14614920 | SNV | 1 | A | G | Homozygous   |
| NC_037638.1 | 14614947 | SNV | 1 | T | C | Heterozygous |
| NC_037638.1 | 14615957 | SNV | 1 | A | T | Homozygous   |
| NC_037638.1 | 14615964 | SNV | 1 | A | G | Homozygous   |
| NC_037638.1 | 14615977 | SNV | 1 | A | C | Homozygous   |
| NC_037638.1 | 14615983 | SNV | 1 | A | G | Homozygous   |
| NC_037638.1 | 14636677 | SNV | 1 | A | T | Homozygous   |
| NC_037638.1 | 14636707 | SNV | 1 | T | C | Homozygous   |
| NC_037638.1 | 14636709 | SNV | 1 | T | G | Homozygous   |
| NC_037638.1 | 14636712 | SNV | 1 | T | A | Homozygous   |
| NC_037638.1 | 14644588 | SNV | 1 | C | T | Heterozygous |
| NC_037638.1 | 14644600 | SNV | 1 | T | C | Homozygous   |
| NC_037638.1 | 14651350 | SNV | 1 | C | T | Heterozygous |
| NC_037638.1 | 14651354 | SNV | 1 | C | T | Heterozygous |
| NC_037638.1 | 14651366 | SNV | 1 | C | T | Heterozygous |
| NC_037638.1 | 14651368 | SNV | 1 | C | T | Heterozygous |
| NC_037638.1 | 14651381 | SNV | 1 | T | C | Heterozygous |
| NC_037638.1 | 14651384 | SNV | 1 | T | C | Heterozygous |
| NC_037638.1 | 14652239 | SNV | 1 | C | T | Heterozygous |
| NC_037638.1 | 14652252 | SNV | 1 | G | C | Homozygous   |
| NC_037638.1 | 14652263 | SNV | 1 | T | C | Homozygous   |
| NC_037638.1 | 14652343 | SNV | 1 | A | G | Homozygous   |
| NC_037638.1 | 14652350 | SNV | 1 | G | A | Homozygous   |
| NC_037638.1 | 14652387 | SNV | 1 | C | G | Homozygous   |
| NC_037638.1 | 14652424 | SNV | 1 | T | C | Homozygous   |
| NC_037638.1 | 14652539 | SNV | 1 | A | G | Homozygous   |
| NC_037638.1 | 14652591 | SNV | 1 | G | A | Homozygous   |
| NC_037638.1 | 14652648 | SNV | 1 | T | C | Homozygous   |
| NC_037638.1 | 14652696 | SNV | 1 | A | G | Homozygous   |
| NC_037638.1 | 14657202 | SNV | 1 | C | T | Homozygous   |
| NC_037638.1 | 14658675 | SNV | 1 | A | T | Homozygous   |
| NC_037638.1 | 14658684 | SNV | 1 | A | G | Homozygous   |
| NC_037638.1 | 14658707 | SNV | 1 | C | T | Homozygous   |
| NC_037638.1 | 14658711 | SNV | 1 | T | A | Homozygous   |
| NC_037638.1 | 14661382 | SNV | 1 | T | A | Heterozygous |
| NC_037638.1 | 14661386 | SNV | 1 | G | A | Heterozygous |
| NC_037638.1 | 14661388 | SNV | 1 | G | C | Heterozygous |
| NC_037638.1 | 14661392 | SNV | 1 | G | A | Heterozygous |
| NC_037638.1 | 14661394 | SNV | 1 | G | T | Heterozygous |
| NC_037638.1 | 14678213 | SNV | 1 | G | A | Heterozygous |
| NC_037638.1 | 14679385 | SNV | 1 | A | T | Homozygous   |
| NC_037638.1 | 14679392 | SNV | 1 | T | A | Homozygous   |
| NC_037638.1 | 14679400 | SNV | 1 | C | T | Homozygous   |

|             |          |     |   |   |   |              |
|-------------|----------|-----|---|---|---|--------------|
| NC_037638.1 | 14679404 | SNV | 1 | C | A | Homozygous   |
| NC_037638.1 | 14679407 | SNV | 1 | G | A | Homozygous   |
| NC_037638.1 | 14683939 | SNV | 1 | T | C | Heterozygous |
| NC_037638.1 | 14683945 | SNV | 1 | A | T | Heterozygous |
| NC_037638.1 | 14683961 | SNV | 1 | G | A | Homozygous   |
| NC_037638.1 | 14684204 | SNV | 1 | A | T | Homozygous   |
| NC_037638.1 | 14684239 | SNV | 1 | G | A | Homozygous   |
| NC_037638.1 | 14684382 | SNV | 1 | A | T | Homozygous   |
| NC_037638.1 | 14684404 | SNV | 1 | G | C | Homozygous   |
| NC_037638.1 | 14684511 | SNV | 1 | T | C | Heterozygous |
| NC_037638.1 | 14684515 | SNV | 1 | A | G | Heterozygous |
| NC_037638.1 | 14687563 | SNV | 1 | T | C | Homozygous   |
| NC_037638.1 | 14687612 | SNV | 1 | T | C | Heterozygous |
| NC_037638.1 | 14687672 | SNV | 1 | T | C | Heterozygous |
| NC_037638.1 | 14687675 | SNV | 1 | A | G | Heterozygous |
| NC_037638.1 | 14687684 | SNV | 1 | C | T | Heterozygous |
| NC_037638.1 | 14687735 | SNV | 1 | T | C | Homozygous   |
| NC_037638.1 | 14687745 | SNV | 1 | C | T | Homozygous   |
| NC_037638.1 | 14687751 | SNV | 1 | C | T | Homozygous   |
| NC_037638.1 | 14687770 | SNV | 1 | T | C | Heterozygous |
| NC_037638.1 | 14687770 | SNV | 1 | T | G | Heterozygous |
| NC_037638.1 | 14687775 | SNV | 1 | G | A | Heterozygous |
| NC_037638.1 | 14687784 | SNV | 1 | T | A | Heterozygous |
| NC_037638.1 | 14687815 | SNV | 1 | C | G | Homozygous   |
| NC_037638.1 | 14689399 | SNV | 1 | A | G | Homozygous   |
| NC_037638.1 | 14689421 | SNV | 1 | C | T | Homozygous   |
| NC_037638.1 | 14689424 | SNV | 1 | C | T | Homozygous   |
| NC_037638.1 | 14689435 | SNV | 1 | A | C | Homozygous   |
| NC_037638.1 | 14689440 | SNV | 1 | C | T | Homozygous   |
| NC_037638.1 | 14689443 | SNV | 1 | G | A | Homozygous   |
| NC_037638.1 | 14689448 | SNV | 1 | C | T | Homozygous   |
| NC_037638.1 | 14689451 | SNV | 1 | C | A | Homozygous   |
| NC_037638.1 | 14689457 | SNV | 1 | C | T | Homozygous   |
| NC_037638.1 | 14691226 | SNV | 1 | C | T | Heterozygous |
| NC_037638.1 | 14691294 | SNV | 1 | T | A | Heterozygous |
| NC_037638.1 | 14691630 | SNV | 1 | G | A | Heterozygous |
| NC_037638.1 | 14691642 | SNV | 1 | A | C | Heterozygous |
| NC_037638.1 | 14696743 | SNV | 1 | G | T | Homozygous   |
| NC_037638.1 | 14708480 | SNV | 1 | T | C | Homozygous   |
| NC_037638.1 | 14708482 | SNV | 1 | A | G | Homozygous   |
| NC_037638.1 | 14722133 | SNV | 1 | T | C | Homozygous   |
| NC_037638.1 | 14726073 | SNV | 1 | T | C | Homozygous   |
| NC_037638.1 | 14730675 | SNV | 1 | C | T | Heterozygous |
| NC_037638.1 | 14733495 | SNV | 1 | T | C | Homozygous   |
| NC_037638.1 | 14733687 | SNV | 1 | G | A | Homozygous   |
| NC_037638.1 | 14733775 | SNV | 1 | C | T | Homozygous   |
| NC_037638.1 | 14733813 | SNV | 1 | T | C | Homozygous   |
| NC_037638.1 | 14734119 | SNV | 1 | C | T | Heterozygous |
| NC_037638.1 | 14735092 | SNV | 1 | A | G | Homozygous   |
| NC_037638.1 | 14736251 | SNV | 1 | T | G | Heterozygous |
| NC_037638.1 | 14736257 | SNV | 1 | T | G | Heterozygous |

|             |          |     |   |   |   |              |
|-------------|----------|-----|---|---|---|--------------|
| NC_037638.1 | 14736471 | SNV | 1 | C | G | Heterozygous |
| NC_037638.1 | 14737175 | SNV | 1 | C | T | Heterozygous |
| NC_037638.1 | 14742620 | SNV | 1 | A | G | Homozygous   |
| NC_037638.1 | 14743092 | SNV | 1 | A | G | Homozygous   |
| NC_037638.1 | 14743376 | SNV | 1 | T | C | Homozygous   |
| NC_037638.1 | 14743387 | SNV | 1 | A | G | Heterozygous |
| NC_037638.1 | 14743512 | SNV | 1 | T | C | Homozygous   |
| NC_037638.1 | 14743830 | SNV | 1 | A | G | Homozygous   |
| NC_037638.1 | 14744264 | SNV | 1 | C | T | Heterozygous |
| NC_037638.1 | 14749449 | SNV | 1 | A | G | Homozygous   |
| NC_037638.1 | 14749490 | SNV | 1 | A | G | Heterozygous |
| NC_037638.1 | 14755742 | SNV | 1 | T | A | Homozygous   |
| NC_037638.1 | 14760571 | SNV | 1 | A | G | Heterozygous |
| NC_037638.1 | 14762223 | SNV | 1 | C | T | Heterozygous |
| NC_037638.1 | 14765711 | SNV | 1 | C | G | Homozygous   |
| NC_037638.1 | 14770336 | SNV | 1 | G | A | Homozygous   |
| NC_037638.1 | 14770947 | SNV | 1 | A | G | Homozygous   |
| NC_037638.1 | 14771767 | SNV | 1 | C | T | Heterozygous |
| NC_037638.1 | 14771985 | SNV | 1 | T | A | Heterozygous |
| NC_037638.1 | 14781047 | SNV | 1 | A | G | Heterozygous |
| NC_037638.1 | 14782599 | SNV | 1 | T | C | Homozygous   |
| NC_037638.1 | 14782605 | SNV | 1 | T | A | Homozygous   |
| NC_037638.1 | 14789847 | SNV | 1 | C | T | Homozygous   |
| NC_037638.1 | 14789856 | SNV | 1 | C | T | Homozygous   |
| NC_037638.1 | 14789860 | SNV | 1 | T | G | Homozygous   |
| NC_037638.1 | 14789862 | SNV | 1 | T | C | Homozygous   |
| NC_037638.1 | 14789883 | SNV | 1 | C | T | Homozygous   |
| NC_037638.1 | 14789889 | SNV | 1 | T | A | Homozygous   |
| NC_037638.1 | 14791638 | SNV | 1 | C | T | Homozygous   |
| NC_037638.1 | 14791644 | SNV | 1 | A | T | Homozygous   |
| NC_037638.1 | 14791646 | SNV | 1 | A | G | Homozygous   |
| NC_037638.1 | 14791648 | SNV | 1 | C | T | Homozygous   |
| NC_037638.1 | 14791659 | SNV | 1 | C | T | Homozygous   |
| NC_037638.1 | 14791668 | SNV | 1 | A | G | Homozygous   |
| NC_037638.1 | 14791670 | SNV | 1 | G | T | Homozygous   |
| NC_037638.1 | 14791672 | SNV | 1 | T | G | Homozygous   |
| NC_037638.1 | 14791697 | SNV | 1 | A | C | Homozygous   |
| NC_037638.1 | 14791700 | SNV | 1 | T | G | Homozygous   |
| NC_037638.1 | 14792334 | SNV | 1 | A | T | Homozygous   |
| NC_037638.1 | 14792336 | SNV | 1 | A | G | Homozygous   |
| NC_037638.1 | 14792360 | SNV | 1 | A | G | Heterozygous |
| NC_037638.1 | 14792364 | SNV | 1 | A | C | Heterozygous |
| NC_037638.1 | 14792371 | SNV | 1 | T | C | Heterozygous |
| NC_037638.1 | 14792401 | SNV | 1 | T | A | Homozygous   |
| NC_037638.1 | 14792403 | SNV | 1 | C | A | Homozygous   |
| NC_037638.1 | 14794608 | SNV | 1 | G | A | Homozygous   |
| NC_037638.1 | 14798322 | SNV | 1 | T | C | Heterozygous |
| NC_037638.1 | 14798330 | SNV | 1 | T | A | Heterozygous |
| NC_037638.1 | 14798386 | SNV | 1 | T | A | Homozygous   |
| NC_037638.1 | 14798391 | SNV | 1 | T | G | Homozygous   |
| NC_037638.1 | 14801359 | SNV | 1 | C | T | Homozygous   |

|             |          |     |   |   |   |              |
|-------------|----------|-----|---|---|---|--------------|
| NC_037638.1 | 14801822 | SNV | 1 | G | A | Homozygous   |
| NC_037638.1 | 14802003 | SNV | 1 | T | C | Homozygous   |
| NC_037638.1 | 14802310 | SNV | 1 | G | T | Homozygous   |
| NC_037638.1 | 14803305 | SNV | 1 | C | A | Homozygous   |
| NC_037638.1 | 14803596 | SNV | 1 | C | T | Homozygous   |
| NC_037638.1 | 14806257 | SNV | 1 | G | A | Homozygous   |
| NC_037638.1 | 14806267 | SNV | 1 | A | T | Homozygous   |
| NC_037638.1 | 14806373 | SNV | 1 | C | A | Homozygous   |
| NC_037638.1 | 14806615 | SNV | 1 | A | G | Homozygous   |
| NC_037638.1 | 14807290 | SNV | 1 | G | A | Homozygous   |
| NC_037638.1 | 14807793 | SNV | 1 | A | G | Homozygous   |
| NC_037638.1 | 14809311 | SNV | 1 | T | A | Homozygous   |
| NC_037638.1 | 14809322 | SNV | 1 | T | A | Homozygous   |
| NC_037638.1 | 14809345 | SNV | 1 | A | T | Homozygous   |
| NC_037638.1 | 14813307 | SNV | 1 | T | A | Homozygous   |
| NC_037638.1 | 14813310 | SNV | 1 | A | C | Homozygous   |
| NC_037638.1 | 14813315 | SNV | 1 | T | C | Homozygous   |
| NC_037638.1 | 14816400 | SNV | 1 | G | A | Homozygous   |
| NC_037638.1 | 14816556 | SNV | 1 | T | C | Homozygous   |
| NC_037638.1 | 14817281 | SNV | 1 | A | G | Homozygous   |
| NC_037638.1 | 14817576 | SNV | 1 | G | A | Homozygous   |
| NC_037638.1 | 14820490 | SNV | 1 | T | A | Homozygous   |
| NC_037638.1 | 14820492 | SNV | 1 | G | A | Homozygous   |
| NC_037638.1 | 14822106 | SNV | 1 | T | A | Heterozygous |
| NC_037638.1 | 14822691 | SNV | 1 | G | T | Homozygous   |
| NC_037638.1 | 14838037 | SNV | 1 | A | G | Homozygous   |
| NC_037638.1 | 14842747 | SNV | 1 | A | G | Homozygous   |
| NC_037638.1 | 14844964 | SNV | 1 | C | T | Homozygous   |
| NC_037638.1 | 14845685 | SNV | 1 | G | A | Homozygous   |
| NC_037638.1 | 14846880 | SNV | 1 | C | T | Homozygous   |
| NC_037638.1 | 14847185 | SNV | 1 | A | C | Homozygous   |
| NC_037638.1 | 14847190 | SNV | 1 | A | T | Homozygous   |
| NC_037638.1 | 14847214 | SNV | 1 | A | T | Homozygous   |
| NC_037638.1 | 14847217 | SNV | 1 | T | C | Homozygous   |
| NC_037638.1 | 14847221 | SNV | 1 | A | G | Homozygous   |
| NC_037638.1 | 14847501 | SNV | 1 | C | A | Homozygous   |
| NC_037638.1 | 14848848 | SNV | 1 | T | A | Homozygous   |
| NC_037638.1 | 14848852 | SNV | 1 | C | T | Homozygous   |
| NC_037638.1 | 14848856 | SNV | 1 | T | A | Homozygous   |
| NC_037638.1 | 14848860 | SNV | 1 | T | G | Homozygous   |
| NC_037638.1 | 14858320 | SNV | 1 | T | C | Homozygous   |
| NC_037638.1 | 14858723 | SNV | 1 | A | T | Homozygous   |
| NC_037638.1 | 14859080 | SNV | 1 | T | C | Homozygous   |
| NC_037638.1 | 14865235 | SNV | 1 | A | G | Homozygous   |
| NC_037638.1 | 14884611 | SNV | 1 | G | A | Heterozygous |
| NC_037638.1 | 14891730 | SNV | 1 | T | C | Heterozygous |
| NC_037638.1 | 14894702 | SNV | 1 | T | A | Homozygous   |
| NC_037638.1 | 14898207 | SNV | 1 | A | T | Heterozygous |
| NC_037638.1 | 14898659 | SNV | 1 | C | T | Heterozygous |
| NC_037638.1 | 14905834 | SNV | 1 | C | G | Heterozygous |
| NC_037638.1 | 14906134 | SNV | 1 | A | T | Homozygous   |



|             |          |     |   |   |   |              |
|-------------|----------|-----|---|---|---|--------------|
| NC_037638.1 | 14906155 | SNV | 1 | G | A | Heterozygous |
| NC_037638.1 | 14906376 | SNV | 1 | G | A | Heterozygous |
| NC_037638.1 | 14906388 | SNV | 1 | T | C | Heterozygous |
| NC_037638.1 | 14907529 | SNV | 1 | A | G | Homozygous   |
| NC_037638.1 | 14914568 | SNV | 1 | C | T | Heterozygous |
| NC_037638.1 | 14914635 | SNV | 1 | T | C | Homozygous   |
| NC_037638.1 | 14914751 | SNV | 1 | C | G | Heterozygous |
| NC_037638.1 | 14914823 | SNV | 1 | G | A | Heterozygous |
| NC_037638.1 | 14916201 | SNV | 1 | T | A | Heterozygous |
| NC_037638.1 | 14916257 | SNV | 1 | G | A | Homozygous   |
| NC_037638.1 | 14916263 | SNV | 1 | G | A | Homozygous   |
| NC_037638.1 | 14916266 | SNV | 1 | G | A | Heterozygous |
| NC_037638.1 | 14917714 | SNV | 1 | A | T | Homozygous   |
| NC_037638.1 | 14920959 | SNV | 1 | A | G | Homozygous   |
| NC_037638.1 | 14923878 | SNV | 1 | T | C | Homozygous   |
| NC_037638.1 | 14924667 | SNV | 1 | A | G | Homozygous   |
| NC_037638.1 | 14932199 | SNV | 1 | A | G | Homozygous   |
| NC_037638.1 | 14932418 | SNV | 1 | T | C | Homozygous   |
| NC_037638.1 | 14932794 | SNV | 1 | A | G | Homozygous   |
| NC_037638.1 | 14932866 | SNV | 1 | T | C | Homozygous   |
| NC_037638.1 | 14937766 | SNV | 1 | A | C | Heterozygous |
| NC_037638.1 | 14938263 | SNV | 1 | T | C | Heterozygous |
| NC_037638.1 | 14939008 | SNV | 1 | T | C | Heterozygous |
| NC_037638.1 | 14939023 | SNV | 1 | C | T | Heterozygous |
| NC_037638.1 | 14939139 | SNV | 1 | T | C | Heterozygous |
| NC_037638.1 | 14939451 | SNV | 1 | C | T | Homozygous   |
| NC_037638.1 | 14939742 | SNV | 1 | A | G | Heterozygous |
| NC_037638.1 | 14940037 | SNV | 1 | A | G | Homozygous   |
| NC_037638.1 | 14940284 | SNV | 1 | A | G | Homozygous   |
| NC_037638.1 | 14940413 | SNV | 1 | A | G | Homozygous   |
| NC_037638.1 | 14944723 | SNV | 1 | T | G | Homozygous   |
| NC_037638.1 | 14944931 | SNV | 1 | G | A | Heterozygous |
| NC_037638.1 | 14944933 | SNV | 1 | T | A | Heterozygous |
| NC_037638.1 | 14945004 | SNV | 1 | A | G | Homozygous   |
| NC_037638.1 | 14945006 | SNV | 1 | G | A | Heterozygous |
| NC_037638.1 | 14945370 | SNV | 1 | G | A | Heterozygous |
| NC_037638.1 | 14945740 | SNV | 1 | A | G | Homozygous   |
| NC_037638.1 | 14950000 | SNV | 1 | A | C | Homozygous   |
| NC_037638.1 | 14950054 | SNV | 1 | C | G | Homozygous   |
| NC_037638.1 | 14950056 | SNV | 1 | T | A | Homozygous   |
| NC_037638.1 | 14954411 | SNV | 1 | T | C | Homozygous   |
| NC_037638.1 | 14955154 | SNV | 1 | T | G | Homozygous   |
| NC_037638.1 | 14955242 | SNV | 1 | A | G | Heterozygous |
| NC_037638.1 | 14955371 | SNV | 1 | G | A | Heterozygous |
| NC_037638.1 | 14956570 | SNV | 1 | T | C | Heterozygous |
| NC_037638.1 | 14956737 | SNV | 1 | G | A | Homozygous   |
| NC_037638.1 | 14956919 | SNV | 1 | G | A | Heterozygous |
| NC_037638.1 | 14956928 | SNV | 1 | C | T | Heterozygous |
| NC_037638.1 | 14956963 | SNV | 1 | A | G | Homozygous   |
| NC_037638.1 | 14957817 | SNV | 1 | C | T | Heterozygous |
| NC_037638.1 | 14957827 | SNV | 1 | T | C | Heterozygous |

|             |          |     |   |   |   |              |
|-------------|----------|-----|---|---|---|--------------|
| NC_037638.1 | 14957830 | SNV | 1 | A | G | Heterozygous |
| NC_037638.1 | 14958288 | SNV | 1 | T | C | Homozygous   |
| NC_037638.1 | 14958354 | SNV | 1 | A | G | Homozygous   |
| NC_037638.1 | 14960494 | SNV | 1 | G | A | Heterozygous |
| NC_037638.1 | 14961604 | SNV | 1 | C | T | Homozygous   |
| NC_037638.1 | 14961614 | SNV | 1 | G | C | Homozygous   |
| NC_037638.1 | 14961745 | SNV | 1 | C | T | Heterozygous |
| NC_037638.1 | 14961756 | SNV | 1 | C | T | Heterozygous |
| NC_037638.1 | 14961774 | SNV | 1 | T | C | Homozygous   |
| NC_037638.1 | 14962111 | SNV | 1 | T | C | Heterozygous |
| NC_037638.1 | 14962259 | SNV | 1 | T | C | Heterozygous |
| NC_037638.1 | 14962297 | SNV | 1 | T | C | Heterozygous |
| NC_037638.1 | 14962562 | SNV | 1 | A | G | Heterozygous |
| NC_037638.1 | 14962685 | SNV | 1 | A | T | Heterozygous |
| NC_037638.1 | 14964363 | SNV | 1 | C | T | Homozygous   |
| NC_037638.1 | 14965086 | SNV | 1 | A | T | Homozygous   |
| NC_037638.1 | 14965109 | SNV | 1 | C | T | Homozygous   |
| NC_037638.1 | 14965163 | SNV | 1 | G | A | Heterozygous |
| NC_037638.1 | 14966111 | SNV | 1 | G | A | Heterozygous |
| NC_037638.1 | 14966619 | SNV | 1 | T | A | Homozygous   |
| NC_037638.1 | 14966634 | SNV | 1 | T | G | Heterozygous |
| NC_037638.1 | 14966640 | SNV | 1 | T | A | Heterozygous |
| NC_037638.1 | 14966644 | SNV | 1 | A | G | Heterozygous |
| NC_037638.1 | 14967402 | SNV | 1 | A | G | Homozygous   |
| NC_037638.1 | 14967836 | SNV | 1 | G | A | Heterozygous |
| NC_037638.1 | 14973083 | SNV | 1 | C | T | Heterozygous |
| NC_037638.1 | 14973581 | SNV | 1 | C | T | Heterozygous |
| NC_037638.1 | 14973809 | SNV | 1 | T | C | Heterozygous |
| NC_037638.1 | 14975518 | SNV | 1 | T | A | Homozygous   |
| NC_037638.1 | 14984390 | SNV | 1 | C | T | Homozygous   |
| NC_037638.1 | 14984648 | SNV | 1 | A | G | Homozygous   |
| NC_037638.1 | 14985154 | SNV | 1 | A | T | Homozygous   |
| NC_037638.1 | 14986947 | SNV | 1 | A | G | Homozygous   |
| NC_037638.1 | 14987284 | SNV | 1 | A | G | Homozygous   |
| NC_037638.1 | 14987552 | SNV | 1 | A | C | Homozygous   |
| NC_037638.1 | 14987983 | SNV | 1 | A | T | Homozygous   |
| NC_037638.1 | 14987989 | SNV | 1 | G | A | Homozygous   |
| NC_037638.1 | 14988622 | SNV | 1 | C | T | Homozygous   |
| NC_037638.1 | 14989887 | SNV | 1 | G | A | Homozygous   |
| NC_037638.1 | 14989903 | SNV | 1 | C | T | Homozygous   |
| NC_037638.1 | 14989995 | SNV | 1 | T | C | Homozygous   |
| NC_037638.1 | 14990012 | SNV | 1 | C | T | Heterozygous |
| NC_037638.1 | 14990092 | SNV | 1 | A | G | Heterozygous |
| NC_037638.1 | 14990152 | SNV | 1 | T | C | Homozygous   |
| NC_037638.1 | 14990180 | SNV | 1 | G | A | Homozygous   |
| NC_037638.1 | 14990261 | SNV | 1 | T | A | Homozygous   |
| NC_037638.1 | 14991382 | SNV | 1 | A | G | Heterozygous |
| NC_037638.1 | 14991940 | SNV | 1 | C | T | Homozygous   |
| NC_037638.1 | 14993202 | SNV | 1 | A | G | Heterozygous |
| NC_037638.1 | 14993212 | SNV | 1 | A | C | Heterozygous |
| NC_037638.1 | 14993222 | SNV | 1 | C | A | Homozygous   |

|             |          |     |   |   |   |              |
|-------------|----------|-----|---|---|---|--------------|
| NC_037638.1 | 14993225 | SNV | 1 | A | G | Heterozygous |
| NC_037638.1 | 14993599 | SNV | 1 | C | T | Homozygous   |
| NC_037638.1 | 14998372 | SNV | 1 | T | C | Homozygous   |
| NC_037638.1 | 14998588 | SNV | 1 | G | A | Heterozygous |
| NC_037638.1 | 14999156 | SNV | 1 | T | C | Homozygous   |
| NC_037638.1 | 15000882 | SNV | 1 | C | T | Heterozygous |
| NC_037638.1 | 15035292 | SNV | 1 | A | T | Heterozygous |
| NC_037638.1 | 15043817 | SNV | 1 | T | A | Homozygous   |
| NC_037638.1 | 15043849 | SNV | 1 | C | T | Heterozygous |
| NC_037638.1 | 15069724 | SNV | 1 | G | A | Heterozygous |
| NC_037638.1 | 15069729 | SNV | 1 | A | T | Heterozygous |
| NC_037638.1 | 15078867 | SNV | 1 | A | T | Heterozygous |
| NC_037638.1 | 15087165 | SNV | 1 | G | A | Heterozygous |
| NC_037638.1 | 15087345 | SNV | 1 | T | A | Homozygous   |
| NC_037638.1 | 15087347 | SNV | 1 | T | A | Homozygous   |
| NC_037638.1 | 15087382 | SNV | 1 | A | G | Homozygous   |
| NC_037638.1 | 15091386 | SNV | 1 | A | G | Homozygous   |
| NC_037638.1 | 15093806 | SNV | 1 | C | A | Homozygous   |
| NC_037638.1 | 15094442 | SNV | 1 | A | G | Homozygous   |
| NC_037638.1 | 15096936 | SNV | 1 | T | A | Heterozygous |
| NC_037638.1 | 15096950 | SNV | 1 | A | G | Homozygous   |
| NC_037638.1 | 15097178 | SNV | 1 | C | T | Heterozygous |
| NC_037638.1 | 15102927 | SNV | 1 | A | G | Homozygous   |
| NC_037638.1 | 15102996 | SNV | 1 | A | T | Homozygous   |
| NC_037638.1 | 15102998 | SNV | 1 | T | A | Homozygous   |
| NC_037638.1 | 15103150 | SNV | 1 | T | A | Homozygous   |
| NC_037638.1 | 15103437 | SNV | 1 | G | A | Homozygous   |
| NC_037638.1 | 15105318 | SNV | 1 | T | C | Heterozygous |
| NC_037638.1 | 15106736 | SNV | 1 | C | T | Homozygous   |
| NC_037638.1 | 15108936 | SNV | 1 | T | C | Homozygous   |
| NC_037638.1 | 15109048 | SNV | 1 | T | G | Heterozygous |
| NC_037638.1 | 15115844 | SNV | 1 | A | G | Homozygous   |
| NC_037638.1 | 15115914 | SNV | 1 | T | C | Homozygous   |
| NC_037638.1 | 15115953 | SNV | 1 | A | G | Homozygous   |
| NC_037638.1 | 15116315 | SNV | 1 | T | C | Homozygous   |
| NC_037638.1 | 15116435 | SNV | 1 | C | T | Heterozygous |
| NC_037638.1 | 15116528 | SNV | 1 | C | T | Homozygous   |
| NC_037638.1 | 15116851 | SNV | 1 | C | T | Heterozygous |
| NC_037638.1 | 15116913 | SNV | 1 | A | G | Homozygous   |
| NC_037638.1 | 15117239 | SNV | 1 | A | G | Homozygous   |
| NC_037638.1 | 15117266 | SNV | 1 | A | G | Heterozygous |
| NC_037638.1 | 15117372 | SNV | 1 | C | T | Heterozygous |
| NC_037638.1 | 15118845 | SNV | 1 | T | A | Heterozygous |
| NC_037638.1 | 15119149 | SNV | 1 | T | C | Homozygous   |
| NC_037638.1 | 15119404 | SNV | 1 | A | T | Homozygous   |
| NC_037638.1 | 15119425 | SNV | 1 | A | T | Homozygous   |
| NC_037638.1 | 15119442 | SNV | 1 | T | A | Homozygous   |
| NC_037638.1 | 15119446 | SNV | 1 | G | T | Homozygous   |
| NC_037638.1 | 15119806 | SNV | 1 | T | C | Heterozygous |
| NC_037638.1 | 15120137 | SNV | 1 | G | A | Heterozygous |
| NC_037638.1 | 15121307 | SNV | 1 | A | G | Homozygous   |

|             |          |     |   |   |   |              |
|-------------|----------|-----|---|---|---|--------------|
| NC_037638.1 | 15121611 | SNV | 1 | C | T | Heterozygous |
| NC_037638.1 | 15129495 | SNV | 1 | G | T | Homozygous   |
| NC_037638.1 | 15130418 | SNV | 1 | T | C | Homozygous   |
| NC_037638.1 | 15133136 | SNV | 1 | T | C | Homozygous   |
| NC_037638.1 | 15136164 | SNV | 1 | T | C | Homozygous   |
| NC_037638.1 | 15136587 | SNV | 1 | T | C | Homozygous   |
| NC_037638.1 | 15141821 | SNV | 1 | A | G | Heterozygous |
| NC_037638.1 | 15142511 | SNV | 1 | G | A | Homozygous   |
| NC_037638.1 | 15142669 | SNV | 1 | T | A | Homozygous   |
| NC_037638.1 | 15142725 | SNV | 1 | A | G | Homozygous   |
| NC_037638.1 | 15142831 | SNV | 1 | G | A | Heterozygous |
| NC_037638.1 | 15142925 | SNV | 1 | T | C | Homozygous   |
| NC_037638.1 | 15142995 | SNV | 1 | T | C | Homozygous   |
| NC_037638.1 | 15143007 | SNV | 1 | T | C | Homozygous   |
| NC_037638.1 | 15143012 | SNV | 1 | C | T | Homozygous   |
| NC_037638.1 | 15143060 | SNV | 1 | T | C | Homozygous   |
| NC_037638.1 | 15145318 | SNV | 1 | T | A | Homozygous   |
| NC_037638.1 | 15145399 | SNV | 1 | G | A | Heterozygous |
| NC_037638.1 | 15145403 | SNV | 1 | T | C | Homozygous   |
| NC_037638.1 | 15145990 | SNV | 1 | A | G | Homozygous   |
| NC_037638.1 | 15146169 | SNV | 1 | A | T | Homozygous   |
| NC_037638.1 | 15146495 | SNV | 1 | G | A | Homozygous   |
| NC_037638.1 | 15148276 | SNV | 1 | T | G | Homozygous   |
| NC_037638.1 | 15148281 | SNV | 1 | T | C | Homozygous   |
| NC_037638.1 | 15150584 | SNV | 1 | C | T | Heterozygous |
| NC_037638.1 | 15150689 | SNV | 1 | G | T | Homozygous   |
| NC_037638.1 | 15152334 | SNV | 1 | G | A | Homozygous   |
| NC_037638.1 | 15152569 | SNV | 1 | T | C | Homozygous   |
| NC_037638.1 | 15152572 | SNV | 1 | T | A | Homozygous   |
| NC_037638.1 | 15152630 | SNV | 1 | T | C | Heterozygous |
| NC_037638.1 | 15152933 | SNV | 1 | C | T | Heterozygous |
| NC_037638.1 | 15153059 | SNV | 1 | G | A | Heterozygous |
| NC_037638.1 | 15158726 | SNV | 1 | A | C | Heterozygous |
| NC_037638.1 | 15158759 | SNV | 1 | T | C | Homozygous   |
| NC_037638.1 | 15159847 | SNV | 1 | G | A | Heterozygous |
| NC_037638.1 | 15160138 | SNV | 1 | T | C | Heterozygous |
| NC_037638.1 | 15161377 | SNV | 1 | A | G | Homozygous   |
| NC_037638.1 | 15165471 | SNV | 1 | C | T | Homozygous   |
| NC_037638.1 | 15168322 | SNV | 1 | T | A | Heterozygous |
| NC_037638.1 | 15168326 | SNV | 1 | T | A | Heterozygous |
| NC_037638.1 | 15168334 | SNV | 1 | T | A | Heterozygous |
| NC_037638.1 | 15168337 | SNV | 1 | A | C | Heterozygous |
| NC_037638.1 | 15169413 | SNV | 1 | T | A | Homozygous   |
| NC_037638.1 | 15169429 | SNV | 1 | T | C | Homozygous   |
| NC_037638.1 | 15169948 | SNV | 1 | T | C | Homozygous   |
| NC_037638.1 | 15169981 | SNV | 1 | A | G | Homozygous   |
| NC_037638.1 | 15174085 | SNV | 1 | T | A | Homozygous   |
| NC_037638.1 | 15174229 | SNV | 1 | G | A | Heterozygous |
| NC_037638.1 | 15175221 | SNV | 1 | C | T | Heterozygous |
| NC_037638.1 | 15175428 | SNV | 1 | C | T | Homozygous   |
| NC_037638.1 | 15176890 | SNV | 1 | T | A | Homozygous   |

|             |          |     |   |   |   |              |
|-------------|----------|-----|---|---|---|--------------|
| NC_037638.1 | 15177577 | SNV | 1 | A | G | Homozygous   |
| NC_037638.1 | 15178930 | SNV | 1 | T | A | Homozygous   |
| NC_037638.1 | 15178938 | SNV | 1 | T | A | Homozygous   |
| NC_037638.1 | 15178942 | SNV | 1 | T | A | Homozygous   |
| NC_037638.1 | 15178948 | SNV | 1 | A | G | Homozygous   |
| NC_037638.1 | 15178954 | SNV | 1 | G | T | Homozygous   |
| NC_037638.1 | 15178983 | SNV | 1 | A | T | Homozygous   |
| NC_037638.1 | 15178986 | SNV | 1 | A | G | Homozygous   |
| NC_037638.1 | 15178992 | SNV | 1 | A | C | Homozygous   |
| NC_037638.1 | 15188252 | SNV | 1 | A | G | Homozygous   |
| NC_037638.1 | 15188255 | SNV | 1 | G | T | Homozygous   |
| NC_037638.1 | 15188258 | SNV | 1 | T | C | Heterozygous |
| NC_037638.1 | 15188261 | SNV | 1 | T | C | Heterozygous |
| NC_037638.1 | 15188264 | SNV | 1 | C | T | Heterozygous |
| NC_037638.1 | 15188267 | SNV | 1 | T | C | Heterozygous |
| NC_037638.1 | 15188270 | SNV | 1 | T | C | Heterozygous |
| NC_037638.1 | 15188273 | SNV | 1 | G | T | Homozygous   |
| NC_037638.1 | 15188276 | SNV | 1 | T | C | Heterozygous |
| NC_037638.1 | 15188276 | SNV | 1 | T | G | Heterozygous |
| NC_037638.1 | 15188282 | SNV | 1 | G | C | Heterozygous |
| NC_037638.1 | 15188285 | SNV | 1 | A | C | Heterozygous |
| NC_037638.1 | 15188285 | SNV | 1 | A | T | Heterozygous |
| NC_037638.1 | 15188288 | SNV | 1 | T | A | Heterozygous |
| NC_037638.1 | 15188288 | SNV | 1 | T | C | Heterozygous |
| NC_037638.1 | 15188292 | SNV | 1 | A | C | Heterozygous |
| NC_037638.1 | 15188294 | SNV | 1 | G | C | Homozygous   |
| NC_037638.1 | 15188303 | SNV | 1 | A | C | Homozygous   |
| NC_037638.1 | 15188312 | SNV | 1 | A | G | Homozygous   |
| NC_037638.1 | 15188330 | SNV | 1 | T | A | Heterozygous |
| NC_037638.1 | 15188330 | SNV | 1 | T | G | Heterozygous |
| NC_037638.1 | 15188333 | SNV | 1 | T | C | Heterozygous |
| NC_037638.1 | 15188340 | SNV | 1 | C | A | Heterozygous |
| NC_037638.1 | 15188342 | SNV | 1 | C | A | Heterozygous |
| NC_037638.1 | 15188342 | SNV | 1 | C | G | Heterozygous |
| NC_037638.1 | 15188345 | SNV | 1 | C | T | Homozygous   |
| NC_037638.1 | 15188348 | SNV | 1 | T | C | Homozygous   |
| NC_037638.1 | 15188354 | SNV | 1 | A | G | Homozygous   |
| NC_037638.1 | 15188364 | SNV | 1 | A | G | Homozygous   |
| NC_037638.1 | 15188366 | SNV | 1 | A | T | Homozygous   |
| NC_037638.1 | 15188372 | SNV | 1 | T | C | Homozygous   |
| NC_037638.1 | 15188378 | SNV | 1 | A | C | Homozygous   |
| NC_037638.1 | 15188384 | SNV | 1 | A | G | Homozygous   |
| NC_037638.1 | 15189428 | SNV | 1 | A | G | Heterozygous |
| NC_037638.1 | 15189431 | SNV | 1 | A | C | Heterozygous |
| NC_037638.1 | 15189433 | SNV | 1 | G | T | Heterozygous |
| NC_037638.1 | 15189437 | SNV | 1 | T | C | Heterozygous |
| NC_037638.1 | 15189440 | SNV | 1 | C | T | Heterozygous |
| NC_037638.1 | 15189443 | SNV | 1 | T | C | Heterozygous |
| NC_037638.1 | 15189446 | SNV | 1 | C | G | Heterozygous |
| NC_037638.1 | 15189470 | SNV | 1 | C | A | Heterozygous |
| NC_037638.1 | 15189473 | SNV | 1 | T | A | Heterozygous |

|             |          |     |   |   |   |              |
|-------------|----------|-----|---|---|---|--------------|
| NC_037638.1 | 15189497 | SNV | 1 | G | A | Heterozygous |
| NC_037638.1 | 15189503 | SNV | 1 | A | G | Heterozygous |
| NC_037638.1 | 15189509 | SNV | 1 | T | A | Heterozygous |
| NC_037638.1 | 15189518 | SNV | 1 | G | A | Heterozygous |
| NC_037638.1 | 15189524 | SNV | 1 | A | G | Heterozygous |
| NC_037638.1 | 15189527 | SNV | 1 | T | C | Heterozygous |
| NC_037638.1 | 15189542 | SNV | 1 | C | G | Heterozygous |
| NC_037638.1 | 15189544 | SNV | 1 | A | G | Heterozygous |
| NC_037638.1 | 15189566 | SNV | 1 | A | G | Homozygous   |
| NC_037638.1 | 15189569 | SNV | 1 | T | A | Homozygous   |
| NC_037638.1 | 15189571 | SNV | 1 | A | G | Homozygous   |
| NC_037638.1 | 15189584 | SNV | 1 | T | C | Heterozygous |
| NC_037638.1 | 15189587 | SNV | 1 | A | G | Heterozygous |
| NC_037638.1 | 15189590 | SNV | 1 | A | G | Homozygous   |
| NC_037638.1 | 15189593 | SNV | 1 | G | A | Homozygous   |
| NC_037638.1 | 15189599 | SNV | 1 | A | T | Homozygous   |
| NC_037638.1 | 15189611 | SNV | 1 | A | G | Homozygous   |
| NC_037638.1 | 15189617 | SNV | 1 | T | C | Homozygous   |
| NC_037638.1 | 15189620 | SNV | 1 | T | G | Heterozygous |
| NC_037638.1 | 15189623 | SNV | 1 | T | C | Heterozygous |
| NC_037638.1 | 15189632 | SNV | 1 | A | T | Heterozygous |
| NC_037638.1 | 15189635 | SNV | 1 | T | C | Homozygous   |
| NC_037638.1 | 15189644 | SNV | 1 | A | G | Heterozygous |
| NC_037638.1 | 15189653 | SNV | 1 | T | C | Homozygous   |
| NC_037638.1 | 15189656 | SNV | 1 | T | C | Homozygous   |
| NC_037638.1 | 15189659 | SNV | 1 | T | C | Homozygous   |
| NC_037638.1 | 15189662 | SNV | 1 | A | G | Heterozygous |
| NC_037638.1 | 15189665 | SNV | 1 | A | C | Homozygous   |
| NC_037638.1 | 15189667 | SNV | 1 | G | T | Homozygous   |
| NC_037638.1 | 15189671 | SNV | 1 | T | G | Homozygous   |
| NC_037638.1 | 15189683 | SNV | 1 | T | A | Heterozygous |
| NC_037638.1 | 15189689 | SNV | 1 | T | A | Homozygous   |
| NC_037638.1 | 15189692 | SNV | 1 | T | C | Homozygous   |
| NC_037638.1 | 15189695 | SNV | 1 | T | G | Homozygous   |
| NC_037638.1 | 15189713 | SNV | 1 | A | C | Homozygous   |
| NC_037638.1 | 15189715 | SNV | 1 | T | A | Homozygous   |
| NC_037638.1 | 15190056 | SNV | 1 | C | T | Heterozygous |
| NC_037638.1 | 15190108 | SNV | 1 | G | A | Homozygous   |
| NC_037638.1 | 15190492 | SNV | 1 | T | C | Heterozygous |
| NC_037638.1 | 15195221 | SNV | 1 | T | G | Homozygous   |
| NC_037638.1 | 15195230 | SNV | 1 | A | G | Homozygous   |
| NC_037638.1 | 15195233 | SNV | 1 | T | C | Homozygous   |
| NC_037638.1 | 15195239 | SNV | 1 | A | G | Homozygous   |
| NC_037638.1 | 15195242 | SNV | 1 | T | G | Homozygous   |
| NC_037638.1 | 15195248 | SNV | 1 | T | G | Homozygous   |
| NC_037638.1 | 15195254 | SNV | 1 | T | G | Homozygous   |
| NC_037638.1 | 15195263 | SNV | 1 | T | C | Homozygous   |
| NC_037638.1 | 15195266 | SNV | 1 | T | C | Homozygous   |
| NC_037638.1 | 15195272 | SNV | 1 | A | G | Homozygous   |
| NC_037638.1 | 15195275 | SNV | 1 | T | G | Homozygous   |
| NC_037638.1 | 15195277 | SNV | 1 | A | G | Homozygous   |

|             |          |     |   |   |   |              |
|-------------|----------|-----|---|---|---|--------------|
| NC_037638.1 | 15195284 | SNV | 1 | T | G | Homozygous   |
| NC_037638.1 | 15195305 | SNV | 1 | T | G | Homozygous   |
| NC_037638.1 | 15195311 | SNV | 1 | T | C | Homozygous   |
| NC_037638.1 | 15195314 | SNV | 1 | T | A | Homozygous   |
| NC_037638.1 | 15195317 | SNV | 1 | T | C | Homozygous   |
| NC_037638.1 | 15195323 | SNV | 1 | A | T | Homozygous   |
| NC_037638.1 | 15195326 | SNV | 1 | A | G | Homozygous   |
| NC_037638.1 | 15195329 | SNV | 1 | T | C | Heterozygous |
| NC_037638.1 | 15195332 | SNV | 1 | G | C | Heterozygous |
| NC_037638.1 | 15195335 | SNV | 1 | A | G | Heterozygous |
| NC_037638.1 | 15195338 | SNV | 1 | T | A | Heterozygous |
| NC_037638.1 | 15195341 | SNV | 1 | T | C | Homozygous   |
| NC_037638.1 | 15195344 | SNV | 1 | A | G | Heterozygous |
| NC_037638.1 | 15195347 | SNV | 1 | A | G | Homozygous   |
| NC_037638.1 | 15195350 | SNV | 1 | A | G | Homozygous   |
| NC_037638.1 | 15195353 | SNV | 1 | T | A | Heterozygous |
| NC_037638.1 | 15195353 | SNV | 1 | T | G | Heterozygous |
| NC_037638.1 | 15195356 | SNV | 1 | A | G | Heterozygous |
| NC_037638.1 | 15195359 | SNV | 1 | T | C | Homozygous   |
| NC_037638.1 | 15195362 | SNV | 1 | T | C | Homozygous   |
| NC_037638.1 | 15195365 | SNV | 1 | T | A | Homozygous   |
| NC_037638.1 | 15195373 | SNV | 1 | T | G | Homozygous   |
| NC_037638.1 | 15195380 | SNV | 1 | A | T | Homozygous   |
| NC_037638.1 | 15195398 | SNV | 1 | T | C | Homozygous   |
| NC_037638.1 | 15195404 | SNV | 1 | A | T | Homozygous   |
| NC_037638.1 | 15195407 | SNV | 1 | T | C | Homozygous   |
| NC_037638.1 | 15195416 | SNV | 1 | T | C | Homozygous   |
| NC_037638.1 | 15195421 | SNV | 1 | T | A | Homozygous   |
| NC_037638.1 | 15195724 | SNV | 1 | T | C | Homozygous   |
| NC_037638.1 | 15195730 | SNV | 1 | T | A | Heterozygous |
| NC_037638.1 | 15195730 | SNV | 1 | T | G | Heterozygous |
| NC_037638.1 | 15195733 | SNV | 1 | A | G | Homozygous   |
| NC_037638.1 | 15195757 | SNV | 1 | T | A | Homozygous   |
| NC_037638.1 | 15195760 | SNV | 1 | T | A | Homozygous   |
| NC_037638.1 | 15195766 | SNV | 1 | A | T | Homozygous   |
| NC_037638.1 | 15195772 | SNV | 1 | A | G | Homozygous   |
| NC_037638.1 | 15195781 | SNV | 1 | A | C | Heterozygous |
| NC_037638.1 | 15195781 | SNV | 1 | A | T | Heterozygous |
| NC_037638.1 | 15195787 | SNV | 1 | A | C | Homozygous   |
| NC_037638.1 | 15195790 | SNV | 1 | A | G | Homozygous   |
| NC_037638.1 | 15195796 | SNV | 1 | G | A | Homozygous   |
| NC_037638.1 | 15195817 | SNV | 1 | A | T | Homozygous   |
| NC_037638.1 | 15195820 | SNV | 1 | A | T | Homozygous   |
| NC_037638.1 | 15195823 | SNV | 1 | A | T | Heterozygous |
| NC_037638.1 | 15195826 | SNV | 1 | A | G | Homozygous   |
| NC_037638.1 | 15195832 | SNV | 1 | A | G | Homozygous   |
| NC_037638.1 | 15195835 | SNV | 1 | A | T | Heterozygous |
| NC_037638.1 | 15195841 | SNV | 1 | T | C | Heterozygous |
| NC_037638.1 | 15195847 | SNV | 1 | T | C | Heterozygous |
| NC_037638.1 | 15195871 | SNV | 1 | A | G | Homozygous   |
| NC_037638.1 | 15195874 | SNV | 1 | T | C | Heterozygous |

|             |          |     |   |   |   |              |
|-------------|----------|-----|---|---|---|--------------|
| NC_037638.1 | 15195875 | SNV | 1 | C | A | Heterozygous |
| NC_037638.1 | 15195877 | SNV | 1 | A | G | Heterozygous |
| NC_037638.1 | 15195879 | SNV | 1 | G | A | Homozygous   |
| NC_037638.1 | 15195883 | SNV | 1 | T | C | Homozygous   |
| NC_037638.1 | 15195886 | SNV | 1 | A | G | Heterozygous |
| NC_037638.1 | 15195889 | SNV | 1 | A | G | Homozygous   |
| NC_037638.1 | 15195892 | SNV | 1 | T | C | Homozygous   |
| NC_037638.1 | 15195895 | SNV | 1 | C | A | Heterozygous |
| NC_037638.1 | 15195898 | SNV | 1 | A | G | Homozygous   |
| NC_037638.1 | 15195907 | SNV | 1 | T | C | Homozygous   |
| NC_037638.1 | 15195910 | SNV | 1 | T | C | Homozygous   |
| NC_037638.1 | 15195916 | SNV | 1 | A | C | Homozygous   |
| NC_037638.1 | 15195919 | SNV | 1 | T | C | Heterozygous |
| NC_037638.1 | 15195928 | SNV | 1 | A | T | Homozygous   |
| NC_037638.1 | 15195931 | SNV | 1 | C | T | Homozygous   |
| NC_037638.1 | 15195952 | SNV | 1 | T | C | Homozygous   |
| NC_037638.1 | 15195955 | SNV | 1 | T | C | Homozygous   |
| NC_037638.1 | 15195958 | SNV | 1 | A | G | Homozygous   |
| NC_037638.1 | 15195965 | SNV | 1 | C | T | Heterozygous |
| NC_037638.1 | 15195970 | SNV | 1 | T | G | Heterozygous |
| NC_037638.1 | 15195973 | SNV | 1 | T | C | Heterozygous |
| NC_037638.1 | 15195976 | SNV | 1 | A | G | Heterozygous |
| NC_037638.1 | 15195985 | SNV | 1 | A | T | Heterozygous |
| NC_037638.1 | 15195989 | SNV | 1 | A | C | Heterozygous |
| NC_037638.1 | 15195991 | SNV | 1 | G | T | Heterozygous |
| NC_037638.1 | 15195994 | SNV | 1 | A | G | Homozygous   |
| NC_037638.1 | 15196000 | SNV | 1 | A | G | Homozygous   |
| NC_037638.1 | 15196012 | SNV | 1 | A | G | Heterozygous |
| NC_037638.1 | 15196021 | SNV | 1 | A | G | Heterozygous |
| NC_037638.1 | 15196030 | SNV | 1 | A | G | Heterozygous |
| NC_037638.1 | 15196042 | SNV | 1 | A | T | Heterozygous |
| NC_037638.1 | 15196060 | SNV | 1 | T | C | Heterozygous |
| NC_037638.1 | 15196063 | SNV | 1 | T | A | Heterozygous |
| NC_037638.1 | 15196069 | SNV | 1 | A | C | Heterozygous |
| NC_037638.1 | 15196072 | SNV | 1 | T | C | Heterozygous |
| NC_037638.1 | 15196075 | SNV | 1 | T | C | Heterozygous |
| NC_037638.1 | 15196078 | SNV | 1 | T | C | Heterozygous |
| NC_037638.1 | 15196084 | SNV | 1 | A | T | Heterozygous |
| NC_037638.1 | 15196087 | SNV | 1 | A | G | Heterozygous |
| NC_037638.1 | 15196093 | SNV | 1 | A | T | Heterozygous |
| NC_037638.1 | 15196099 | SNV | 1 | A | T | Heterozygous |
| NC_037638.1 | 15198618 | SNV | 1 | G | A | Homozygous   |
| NC_037638.1 | 15198734 | SNV | 1 | G | T | Homozygous   |
| NC_037638.1 | 15199025 | SNV | 1 | A | G | Homozygous   |
| NC_037638.1 | 15199104 | SNV | 1 | A | G | Homozygous   |
| NC_037638.1 | 15199110 | SNV | 1 | A | G | Homozygous   |
| NC_037638.1 | 15199113 | SNV | 1 | A | C | Homozygous   |
| NC_037638.1 | 15199227 | SNV | 1 | T | A | Homozygous   |
| NC_037638.1 | 15199477 | SNV | 1 | T | G | Homozygous   |
| NC_037638.1 | 15199600 | SNV | 1 | G | A | Heterozygous |
| NC_037638.1 | 15203458 | SNV | 1 | G | T | Heterozygous |



|             |          |     |   |   |   |              |
|-------------|----------|-----|---|---|---|--------------|
| NC_037638.1 | 15203467 | SNV | 1 | T | A | Heterozygous |
| NC_037638.1 | 15205056 | SNV | 1 | A | C | Homozygous   |
| NC_037638.1 | 15205632 | SNV | 1 | A | G | Homozygous   |
| NC_037638.1 | 15206204 | SNV | 1 | G | T | Homozygous   |
| NC_037638.1 | 15206207 | SNV | 1 | T | A | Homozygous   |
| NC_037638.1 | 15206605 | SNV | 1 | G | A | Homozygous   |
| NC_037638.1 | 15211608 | SNV | 1 | A | G | Heterozygous |
| NC_037638.1 | 15211621 | SNV | 1 | C | T | Heterozygous |
| NC_037638.1 | 15212229 | SNV | 1 | C | T | Homozygous   |
| NC_037638.1 | 15212610 | SNV | 1 | A | C | Homozygous   |
| NC_037638.1 | 15212658 | SNV | 1 | A | G | Homozygous   |
| NC_037638.1 | 15266186 | SNV | 1 | A | G | Homozygous   |
| NC_037638.1 | 15266204 | SNV | 1 | A | C | Heterozygous |
| NC_037638.1 | 15285782 | SNV | 1 | T | C | Homozygous   |
| NC_037638.1 | 15285792 | SNV | 1 | T | A | Homozygous   |
| NC_037638.1 | 15285814 | SNV | 1 | A | T | Homozygous   |
| NC_037638.1 | 15285817 | SNV | 1 | T | A | Homozygous   |
| NC_037638.1 | 15285827 | SNV | 1 | G | A | Homozygous   |
| NC_037638.1 | 15326115 | SNV | 1 | T | G | Homozygous   |
| NC_037638.1 | 15326117 | SNV | 1 | T | A | Heterozygous |
| NC_037638.1 | 15326145 | SNV | 1 | T | C | Homozygous   |
| NC_037638.1 | 15393505 | SNV | 1 | G | C | Heterozygous |
| NC_037638.1 | 15485010 | SNV | 1 | C | T | Heterozygous |
| NC_037638.1 | 15485071 | SNV | 1 | G | C | Homozygous   |
| NC_037638.1 | 15561128 | SNV | 1 | A | G | Homozygous   |
| NC_037638.1 | 15561133 | SNV | 1 | T | A | Heterozygous |
| NC_037638.1 | 15561180 | SNV | 1 | C | T | Homozygous   |
| NC_037638.1 | 15561198 | SNV | 1 | C | T | Heterozygous |
| NC_037638.1 | 15561344 | SNV | 1 | C | T | Homozygous   |
| NC_037638.1 | 15614411 | SNV | 1 | A | G | Homozygous   |
| NC_037638.1 | 15615151 | SNV | 1 | T | A | Homozygous   |
| NC_037638.1 | 15618689 | SNV | 1 | C | T | Heterozygous |
| NC_037638.1 | 15618875 | SNV | 1 | G | A | Heterozygous |
| NC_037638.1 | 15619295 | SNV | 1 | T | C | Homozygous   |
| NC_037638.1 | 15619991 | SNV | 1 | G | A | Homozygous   |
| NC_037638.1 | 15620026 | SNV | 1 | G | A | Homozygous   |
| NC_037638.1 | 15620037 | SNV | 1 | A | G | Homozygous   |
| NC_037638.1 | 15620356 | SNV | 1 | T | C | Homozygous   |
| NC_037638.1 | 15620360 | SNV | 1 | T | C | Heterozygous |
| NC_037638.1 | 15620724 | SNV | 1 | A | T | Heterozygous |
| NC_037638.1 | 15620730 | SNV | 1 | C | T | Homozygous   |
| NC_037638.1 | 15620833 | SNV | 1 | C | T | Heterozygous |
| NC_037638.1 | 15622031 | SNV | 1 | A | T | Homozygous   |
| NC_037638.1 | 15622173 | SNV | 1 | G | A | Homozygous   |
| NC_037638.1 | 15622222 | SNV | 1 | C | G | Homozygous   |
| NC_037638.1 | 15622267 | SNV | 1 | A | G | Homozygous   |
| NC_037638.1 | 15632137 | SNV | 1 | T | C | Homozygous   |
| NC_037638.1 | 15632259 | SNV | 1 | C | T | Homozygous   |
| NC_037638.1 | 15632345 | SNV | 1 | T | C | Homozygous   |
| NC_037638.1 | 15632625 | SNV | 1 | A | G | Heterozygous |
| NC_037638.1 | 15632667 | SNV | 1 | A | G | Heterozygous |

|             |          |     |   |   |   |              |
|-------------|----------|-----|---|---|---|--------------|
| NC_037638.1 | 15639145 | SNV | 1 | A | G | Heterozygous |
| NC_037638.1 | 15639186 | SNV | 1 | T | C | Homozygous   |
| NC_037638.1 | 15639570 | SNV | 1 | C | T | Homozygous   |
| NC_037638.1 | 15639572 | SNV | 1 | T | C | Homozygous   |
| NC_037638.1 | 15640622 | SNV | 1 | T | A | Homozygous   |
| NC_037638.1 | 15644201 | SNV | 1 | C | G | Homozygous   |
| NC_037638.1 | 15644562 | SNV | 1 | G | A | Homozygous   |
| NC_037638.1 | 15644781 | SNV | 1 | T | C | Homozygous   |
| NC_037638.1 | 15645002 | SNV | 1 | T | C | Homozygous   |
| NC_037638.1 | 15645282 | SNV | 1 | T | C | Homozygous   |
| NC_037638.1 | 15645681 | SNV | 1 | A | G | Homozygous   |
| NC_037638.1 | 15645879 | SNV | 1 | A | G | Homozygous   |
| NC_037638.1 | 15655014 | SNV | 1 | A | G | Homozygous   |
| NC_037638.1 | 15655017 | SNV | 1 | A | G | Homozygous   |
| NC_037638.1 | 15655019 | SNV | 1 | A | G | Homozygous   |
| NC_037638.1 | 15655202 | SNV | 1 | A | G | Homozygous   |
| NC_037638.1 | 15655828 | SNV | 1 | G | C | Homozygous   |
| NC_037638.1 | 15656072 | SNV | 1 | T | C | Homozygous   |
| NC_037638.1 | 15656162 | SNV | 1 | G | A | Heterozygous |
| NC_037638.1 | 15656171 | SNV | 1 | G | A | Heterozygous |
| NC_037638.1 | 15656871 | SNV | 1 | T | C | Homozygous   |
| NC_037638.1 | 15657950 | SNV | 1 | A | C | Heterozygous |
| NC_037638.1 | 15658042 | SNV | 1 | A | T | Heterozygous |
| NC_037638.1 | 15658063 | SNV | 1 | T | C | Homozygous   |
| NC_037638.1 | 15665682 | SNV | 1 | T | G | Homozygous   |
| NC_037638.1 | 15665711 | SNV | 1 | G | C | Homozygous   |
| NC_037638.1 | 15672796 | SNV | 1 | C | T | Homozygous   |
| NC_037638.1 | 15672831 | SNV | 1 | G | A | Heterozygous |
| NC_037638.1 | 15672975 | SNV | 1 | A | G | Heterozygous |
| NC_037638.1 | 15672976 | SNV | 1 | A | G | Heterozygous |
| NC_037638.1 | 15673005 | SNV | 1 | G | C | Homozygous   |
| NC_037638.1 | 15673011 | SNV | 1 | G | A | Homozygous   |
| NC_037638.1 | 15673300 | SNV | 1 | C | T | Heterozygous |
| NC_037638.1 | 15673352 | SNV | 1 | C | G | Heterozygous |
| NC_037638.1 | 15673453 | SNV | 1 | G | A | Heterozygous |
| NC_037638.1 | 15673459 | SNV | 1 | A | G | Heterozygous |
| NC_037638.1 | 15689102 | SNV | 1 | G | A | Heterozygous |
| NC_037638.1 | 15689395 | SNV | 1 | C | T | Heterozygous |
| NC_037638.1 | 15689560 | SNV | 1 | T | C | Homozygous   |
| NC_037638.1 | 15694771 | SNV | 1 | G | A | Heterozygous |
| NC_037638.1 | 15694983 | SNV | 1 | G | A | Homozygous   |
| NC_037638.1 | 15695541 | SNV | 1 | A | T | Homozygous   |
| NC_037638.1 | 15695555 | SNV | 1 | T | G | Homozygous   |
| NC_037638.1 | 15695588 | SNV | 1 | C | T | Heterozygous |
| NC_037638.1 | 15695590 | SNV | 1 | C | T | Heterozygous |
| NC_037638.1 | 15699862 | SNV | 1 | T | C | Homozygous   |
| NC_037638.1 | 15699883 | SNV | 1 | G | T | Homozygous   |
| NC_037638.1 | 15702422 | SNV | 1 | G | C | Homozygous   |
| NC_037638.1 | 15702433 | SNV | 1 | C | T | Homozygous   |
| NC_037638.1 | 15702442 | SNV | 1 | T | C | Homozygous   |
| NC_037638.1 | 15702447 | SNV | 1 | A | T | Homozygous   |

|             |          |     |   |   |   |              |
|-------------|----------|-----|---|---|---|--------------|
| NC_037638.1 | 15702459 | SNV | 1 | C | G | Homozygous   |
| NC_037638.1 | 15702461 | SNV | 1 | T | A | Homozygous   |
| NC_037638.1 | 15712657 | SNV | 1 | T | G | Heterozygous |
| NC_037638.1 | 15713045 | SNV | 1 | C | T | Homozygous   |
| NC_037638.1 | 15713296 | SNV | 1 | G | T | Homozygous   |
| NC_037638.1 | 15713749 | SNV | 1 | C | G | Heterozygous |
| NC_037638.1 | 15714059 | SNV | 1 | C | T | Heterozygous |
| NC_037638.1 | 15714555 | SNV | 1 | C | T | Homozygous   |
| NC_037638.1 | 15714877 | SNV | 1 | A | G | Homozygous   |
| NC_037638.1 | 15714890 | SNV | 1 | T | G | Homozygous   |
| NC_037638.1 | 15715048 | SNV | 1 | T | C | Heterozygous |
| NC_037638.1 | 15715067 | SNV | 1 | G | A | Homozygous   |
| NC_037638.1 | 15715100 | SNV | 1 | G | A | Heterozygous |
| NC_037638.1 | 15715365 | SNV | 1 | A | G | Homozygous   |
| NC_037638.1 | 15715711 | SNV | 1 | A | G | Heterozygous |
| NC_037638.1 | 15715784 | SNV | 1 | A | G | Homozygous   |
| NC_037638.1 | 15716195 | SNV | 1 | G | A | Homozygous   |
| NC_037638.1 | 15716211 | SNV | 1 | C | T | Homozygous   |
| NC_037638.1 | 15716224 | SNV | 1 | C | T | Heterozygous |
| NC_037638.1 | 15716879 | SNV | 1 | G | A | Heterozygous |
| NC_037638.1 | 15716900 | SNV | 1 | A | G | Heterozygous |
| NC_037638.1 | 15716908 | SNV | 1 | C | T | Homozygous   |
| NC_037638.1 | 15717267 | SNV | 1 | A | T | Homozygous   |
| NC_037638.1 | 15718554 | SNV | 1 | G | C | Homozygous   |
| NC_037638.1 | 15719289 | SNV | 1 | G | A | Heterozygous |
| NC_037638.1 | 15719484 | SNV | 1 | A | G | Homozygous   |
| NC_037638.1 | 15719578 | SNV | 1 | A | G | Homozygous   |
| NC_037638.1 | 15720110 | SNV | 1 | C | T | Homozygous   |
| NC_037638.1 | 15725535 | SNV | 1 | A | G | Homozygous   |
| NC_037638.1 | 15726474 | SNV | 1 | G | A | Homozygous   |
| NC_037638.1 | 15726478 | SNV | 1 | T | C | Homozygous   |
| NC_037638.1 | 15726483 | SNV | 1 | T | G | Homozygous   |
| NC_037638.1 | 15728329 | SNV | 1 | T | G | Homozygous   |
| NC_037638.1 | 15728335 | SNV | 1 | G | A | Homozygous   |
| NC_037638.1 | 15730161 | SNV | 1 | A | T | Homozygous   |
| NC_037638.1 | 15730249 | SNV | 1 | A | G | Homozygous   |
| NC_037638.1 | 15732918 | SNV | 1 | A | T | Heterozygous |
| NC_037638.1 | 15732924 | SNV | 1 | G | C | Homozygous   |
| NC_037638.1 | 15738565 | SNV | 1 | A | G | Heterozygous |
| NC_037638.1 | 15738585 | SNV | 1 | A | T | Heterozygous |
| NC_037638.1 | 15739868 | SNV | 1 | A | G | Homozygous   |
| NC_037638.1 | 15740136 | SNV | 1 | A | G | Homozygous   |
| NC_037638.1 | 15742431 | SNV | 1 | T | A | Heterozygous |
| NC_037638.1 | 15742566 | SNV | 1 | G | A | Homozygous   |
| NC_037638.1 | 15743602 | SNV | 1 | A | G | Homozygous   |
| NC_037638.1 | 15743866 | SNV | 1 | T | C | Homozygous   |
| NC_037638.1 | 15748839 | SNV | 1 | C | T | Homozygous   |
| NC_037638.1 | 15749858 | SNV | 1 | T | C | Homozygous   |
| NC_037638.1 | 15749880 | SNV | 1 | G | A | Homozygous   |
| NC_037638.1 | 15757490 | SNV | 1 | A | T | Heterozygous |
| NC_037638.1 | 15757526 | SNV | 1 | G | A | Heterozygous |

|             |          |     |   |   |   |              |
|-------------|----------|-----|---|---|---|--------------|
| NC_037638.1 | 15757529 | SNV | 1 | T | C | Heterozygous |
| NC_037638.1 | 15762342 | SNV | 1 | C | T | Heterozygous |
| NC_037638.1 | 15762663 | SNV | 1 | G | T | Heterozygous |
| NC_037638.1 | 15762703 | SNV | 1 | G | A | Heterozygous |
| NC_037638.1 | 15766871 | SNV | 1 | T | C | Heterozygous |
| NC_037638.1 | 15766873 | SNV | 1 | T | C | Homozygous   |
| NC_037638.1 | 15767104 | SNV | 1 | A | G | Homozygous   |
| NC_037638.1 | 15767220 | SNV | 1 | C | T | Heterozygous |
| NC_037638.1 | 15767237 | SNV | 1 | A | C | Homozygous   |
| NC_037638.1 | 15767354 | SNV | 1 | G | A | Heterozygous |
| NC_037638.1 | 15768269 | SNV | 1 | A | G | Homozygous   |
| NC_037638.1 | 15768519 | SNV | 1 | A | T | Heterozygous |
| NC_037638.1 | 15768562 | SNV | 1 | G | A | Heterozygous |
| NC_037638.1 | 15769076 | SNV | 1 | G | A | Heterozygous |
| NC_037638.1 | 15769131 | SNV | 1 | T | C | Homozygous   |
| NC_037638.1 | 15769134 | SNV | 1 | A | G | Homozygous   |
| NC_037638.1 | 15769327 | SNV | 1 | C | T | Heterozygous |
| NC_037638.1 | 15769417 | SNV | 1 | T | C | Heterozygous |
| NC_037638.1 | 15769504 | SNV | 1 | T | A | Homozygous   |
| NC_037638.1 | 15770045 | SNV | 1 | C | T | Heterozygous |
| NC_037638.1 | 15770081 | SNV | 1 | G | A | Heterozygous |
| NC_037638.1 | 15770430 | SNV | 1 | T | G | Heterozygous |
| NC_037638.1 | 15770573 | SNV | 1 | G | T | Heterozygous |
| NC_037638.1 | 15770576 | SNV | 1 | G | A | Heterozygous |
| NC_037638.1 | 15770808 | SNV | 1 | G | C | Homozygous   |
| NC_037638.1 | 15772023 | SNV | 1 | T | A | Heterozygous |
| NC_037638.1 | 15772108 | SNV | 1 | A | G | Homozygous   |
| NC_037638.1 | 15772209 | SNV | 1 | G | T | Homozygous   |
| NC_037638.1 | 15772216 | SNV | 1 | C | T | Homozygous   |
| NC_037638.1 | 15772963 | SNV | 1 | A | G | Homozygous   |
| NC_037638.1 | 15773002 | SNV | 1 | A | G | Homozygous   |
| NC_037638.1 | 15773458 | SNV | 1 | T | C | Homozygous   |
| NC_037638.1 | 15773650 | SNV | 1 | T | C | Homozygous   |
| NC_037638.1 | 15773738 | SNV | 1 | C | A | Heterozygous |
| NC_037638.1 | 15773804 | SNV | 1 | A | C | Heterozygous |
| NC_037638.1 | 15773804 | SNV | 1 | A | T | Heterozygous |
| NC_037638.1 | 15774076 | SNV | 1 | T | C | Homozygous   |
| NC_037638.1 | 15774247 | SNV | 1 | A | G | Homozygous   |
| NC_037638.1 | 15774540 | SNV | 1 | A | G | Homozygous   |
| NC_037638.1 | 15774619 | SNV | 1 | C | T | Homozygous   |
| NC_037638.1 | 15774671 | SNV | 1 | G | C | Homozygous   |
| NC_037638.1 | 15787972 | SNV | 1 | T | C | Homozygous   |
| NC_037638.1 | 15788021 | SNV | 1 | T | C | Heterozygous |
| NC_037638.1 | 15788031 | SNV | 1 | C | T | Homozygous   |
| NC_037638.1 | 15808577 | SNV | 1 | T | C | Homozygous   |
| NC_037638.1 | 15808904 | SNV | 1 | T | G | Homozygous   |
| NC_037638.1 | 15808907 | SNV | 1 | A | G | Homozygous   |
| NC_037638.1 | 15811436 | SNV | 1 | A | G | Heterozygous |
| NC_037638.1 | 15811438 | SNV | 1 | A | G | Heterozygous |
| NC_037638.1 | 15811475 | SNV | 1 | T | A | Homozygous   |
| NC_037638.1 | 15811478 | SNV | 1 | G | C | Homozygous   |

|             |          |     |   |   |   |              |
|-------------|----------|-----|---|---|---|--------------|
| NC_037638.1 | 15820482 | SNV | 1 | G | A | Heterozygous |
| NC_037638.1 | 15820968 | SNV | 1 | A | G | Homozygous   |
| NC_037638.1 | 15821034 | SNV | 1 | G | A | Homozygous   |
| NC_037638.1 | 15821040 | SNV | 1 | G | T | Homozygous   |
| NC_037638.1 | 15821101 | SNV | 1 | A | G | Homozygous   |
| NC_037638.1 | 15821124 | SNV | 1 | A | G | Heterozygous |
| NC_037638.1 | 15821143 | SNV | 1 | A | G | Homozygous   |
| NC_037638.1 | 15842343 | SNV | 1 | G | A | Homozygous   |
| NC_037638.1 | 15842348 | SNV | 1 | G | A | Heterozygous |
| NC_037638.1 | 15848316 | SNV | 1 | G | A | Homozygous   |
| NC_037638.1 | 15859200 | SNV | 1 | T | C | Homozygous   |
| NC_037638.1 | 15859207 | SNV | 1 | T | G | Homozygous   |
| NC_037638.1 | 15859221 | SNV | 1 | C | T | Heterozygous |
| NC_037638.1 | 15859227 | SNV | 1 | T | C | Heterozygous |
| NC_037638.1 | 15859237 | SNV | 1 | C | T | Heterozygous |
| NC_037638.1 | 15861593 | SNV | 1 | C | T | Heterozygous |
| NC_037638.1 | 15861671 | SNV | 1 | G | A | Heterozygous |
| NC_037638.1 | 15861721 | SNV | 1 | C | A | Homozygous   |
| NC_037638.1 | 15861794 | SNV | 1 | G | A | Heterozygous |
| NC_037638.1 | 15861822 | SNV | 1 | G | A | Heterozygous |
| NC_037638.1 | 15867499 | SNV | 1 | T | G | Heterozygous |
| NC_037638.1 | 15867655 | SNV | 1 | C | T | Heterozygous |
| NC_037638.1 | 15867892 | SNV | 1 | A | G | Heterozygous |
| NC_037638.1 | 15869842 | SNV | 1 | A | G | Homozygous   |
| NC_037638.1 | 15869881 | SNV | 1 | G | C | Homozygous   |
| NC_037638.1 | 15869974 | SNV | 1 | T | C | Homozygous   |
| NC_037638.1 | 15870028 | SNV | 1 | T | C | Homozygous   |
| NC_037638.1 | 15870052 | SNV | 1 | T | A | Homozygous   |
| NC_037638.1 | 15870083 | SNV | 1 | A | G | Homozygous   |
| NC_037638.1 | 15870469 | SNV | 1 | T | C | Heterozygous |
| NC_037638.1 | 15870896 | SNV | 1 | A | G | Homozygous   |
| NC_037638.1 | 15871918 | SNV | 1 | G | A | Heterozygous |
| NC_037638.1 | 15872204 | SNV | 1 | T | C | Heterozygous |
| NC_037638.1 | 15872593 | SNV | 1 | C | T | Heterozygous |
| NC_037638.1 | 15872935 | SNV | 1 | A | G | Homozygous   |
| NC_037638.1 | 15873303 | SNV | 1 | G | A | Homozygous   |
| NC_037638.1 | 15873375 | SNV | 1 | C | T | Homozygous   |
| NC_037638.1 | 15873441 | SNV | 1 | G | T | Homozygous   |
| NC_037638.1 | 15873825 | SNV | 1 | A | G | Homozygous   |
| NC_037638.1 | 15873956 | SNV | 1 | A | T | Homozygous   |
| NC_037638.1 | 15873964 | SNV | 1 | A | T | Homozygous   |
| NC_037638.1 | 15876688 | SNV | 1 | C | T | Homozygous   |
| NC_037638.1 | 15876883 | SNV | 1 | A | C | Heterozygous |
| NC_037638.1 | 15876892 | SNV | 1 | A | C | Heterozygous |
| NC_037638.1 | 15876894 | SNV | 1 | G | A | Heterozygous |
| NC_037638.1 | 15876898 | SNV | 1 | A | C | Heterozygous |
| NC_037638.1 | 15876904 | SNV | 1 | G | C | Homozygous   |
| NC_037638.1 | 15876907 | SNV | 1 | T | A | Homozygous   |
| NC_037638.1 | 15876910 | SNV | 1 | T | C | Heterozygous |
| NC_037638.1 | 15876913 | SNV | 1 | G | C | Heterozygous |
| NC_037638.1 | 15876916 | SNV | 1 | A | G | Homozygous   |

|             |          |     |   |   |   |              |
|-------------|----------|-----|---|---|---|--------------|
| NC_037638.1 | 15876919 | SNV | 1 | A | T | Heterozygous |
| NC_037638.1 | 15876922 | SNV | 1 | T | C | Heterozygous |
| NC_037638.1 | 15876925 | SNV | 1 | G | A | Heterozygous |
| NC_037638.1 | 15876931 | SNV | 1 | A | G | Heterozygous |
| NC_037638.1 | 15876934 | SNV | 1 | A | G | Heterozygous |
| NC_037638.1 | 15876937 | SNV | 1 | C | A | Heterozygous |
| NC_037638.1 | 15876939 | SNV | 1 | A | G | Homozygous   |
| NC_037638.1 | 15876949 | SNV | 1 | A | G | Homozygous   |
| NC_037638.1 | 15876952 | SNV | 1 | A | C | Homozygous   |
| NC_037638.1 | 15876954 | SNV | 1 | G | T | Homozygous   |
| NC_037638.1 | 15876958 | SNV | 1 | T | G | Homozygous   |
| NC_037638.1 | 15876961 | SNV | 1 | T | A | Heterozygous |
| NC_037638.1 | 15876982 | SNV | 1 | T | G | Homozygous   |
| NC_037638.1 | 15876997 | SNV | 1 | G | A | Homozygous   |
| NC_037638.1 | 15877002 | SNV | 1 | T | A | Homozygous   |
| NC_037638.1 | 15877006 | SNV | 1 | A | T | Homozygous   |
| NC_037638.1 | 15877297 | SNV | 1 | G | A | Heterozygous |
| NC_037638.1 | 15877661 | SNV | 1 | G | A | Heterozygous |
| NC_037638.1 | 15880113 | SNV | 1 | T | C | Homozygous   |
| NC_037638.1 | 15880121 | SNV | 1 | A | T | Homozygous   |
| NC_037638.1 | 15880140 | SNV | 1 | T | G | Heterozygous |
| NC_037638.1 | 15880143 | SNV | 1 | T | C | Homozygous   |
| NC_037638.1 | 15880146 | SNV | 1 | T | C | Homozygous   |
| NC_037638.1 | 15880149 | SNV | 1 | T | C | Homozygous   |
| NC_037638.1 | 15880155 | SNV | 1 | A | G | Homozygous   |
| NC_037638.1 | 15880158 | SNV | 1 | T | C | Heterozygous |
| NC_037638.1 | 15880164 | SNV | 1 | T | C | Homozygous   |
| NC_037638.1 | 15880167 | SNV | 1 | A | G | Homozygous   |
| NC_037638.1 | 15880170 | SNV | 1 | C | T | Heterozygous |
| NC_037638.1 | 15880174 | SNV | 1 | A | G | Homozygous   |
| NC_037638.1 | 15880176 | SNV | 1 | C | G | Heterozygous |
| NC_037638.1 | 15880197 | SNV | 1 | T | C | Heterozygous |
| NC_037638.1 | 15887409 | SNV | 1 | A | G | Homozygous   |
| NC_037638.1 | 15887460 | SNV | 1 | G | A | Homozygous   |
| NC_037638.1 | 15889924 | SNV | 1 | C | G | Homozygous   |
| NC_037638.1 | 15889927 | SNV | 1 | C | A | Homozygous   |
| NC_037638.1 | 15889933 | SNV | 1 | A | C | Homozygous   |
| NC_037638.1 | 15889936 | SNV | 1 | A | G | Homozygous   |
| NC_037638.1 | 15889954 | SNV | 1 | A | T | Homozygous   |
| NC_037638.1 | 15889960 | SNV | 1 | T | G | Homozygous   |
| NC_037638.1 | 15889964 | SNV | 1 | T | C | Homozygous   |
| NC_037638.1 | 15889969 | SNV | 1 | A | T | Homozygous   |
| NC_037638.1 | 15889972 | SNV | 1 | T | A | Homozygous   |
| NC_037638.1 | 15889978 | SNV | 1 | G | C | Homozygous   |
| NC_037638.1 | 15889985 | SNV | 1 | T | C | Homozygous   |
| NC_037638.1 | 15889987 | SNV | 1 | G | C | Homozygous   |
| NC_037638.1 | 15889996 | SNV | 1 | A | G | Homozygous   |
| NC_037638.1 | 15890002 | SNV | 1 | A | G | Homozygous   |
| NC_037638.1 | 15890014 | SNV | 1 | A | G | Homozygous   |
| NC_037638.1 | 15890020 | SNV | 1 | A | T | Homozygous   |
| NC_037638.1 | 15890023 | SNV | 1 | C | T | Homozygous   |

|             |          |     |   |   |   |              |
|-------------|----------|-----|---|---|---|--------------|
| NC_037638.1 | 15890026 | SNV | 1 | A | G | Homozygous   |
| NC_037638.1 | 15892732 | SNV | 1 | C | T | Homozygous   |
| NC_037638.1 | 15895267 | SNV | 1 | G | C | Heterozygous |
| NC_037638.1 | 15895290 | SNV | 1 | T | C | Homozygous   |
| NC_037638.1 | 15895319 | SNV | 1 | G | A | Homozygous   |
| NC_037638.1 | 15897198 | SNV | 1 | G | A | Heterozygous |
| NC_037638.1 | 15897234 | SNV | 1 | A | G | Homozygous   |
| NC_037638.1 | 15897393 | SNV | 1 | A | G | Homozygous   |
| NC_037638.1 | 15897405 | SNV | 1 | C | T | Heterozygous |
| NC_037638.1 | 15897655 | SNV | 1 | T | C | Heterozygous |
| NC_037638.1 | 15898110 | SNV | 1 | A | G | Heterozygous |
| NC_037638.1 | 15898155 | SNV | 1 | A | T | Homozygous   |
| NC_037638.1 | 15898185 | SNV | 1 | C | G | Homozygous   |
| NC_037638.1 | 15898196 | SNV | 1 | T | C | Homozygous   |
| NC_037638.1 | 15898285 | SNV | 1 | G | A | Heterozygous |
| NC_037638.1 | 15898320 | SNV | 1 | C | A | Heterozygous |
| NC_037638.1 | 15900075 | SNV | 1 | T | C | Homozygous   |
| NC_037638.1 | 15900483 | SNV | 1 | G | C | Homozygous   |
| NC_037638.1 | 15900564 | SNV | 1 | A | G | Homozygous   |
| NC_037638.1 | 15900580 | SNV | 1 | A | G | Homozygous   |
| NC_037638.1 | 15900848 | SNV | 1 | T | C | Homozygous   |
| NC_037638.1 | 15900985 | SNV | 1 | T | C | Heterozygous |
| NC_037638.1 | 15901425 | SNV | 1 | T | C | Homozygous   |
| NC_037638.1 | 15901470 | SNV | 1 | A | G | Heterozygous |
| NC_037638.1 | 15901535 | SNV | 1 | G | A | Heterozygous |
| NC_037638.1 | 15902135 | SNV | 1 | A | G | Heterozygous |
| NC_037638.1 | 15902191 | SNV | 1 | A | G | Homozygous   |
| NC_037638.1 | 15902205 | SNV | 1 | G | A | Heterozygous |
| NC_037638.1 | 15902242 | SNV | 1 | G | A | Heterozygous |
| NC_037638.1 | 15902253 | SNV | 1 | G | A | Heterozygous |
| NC_037638.1 | 15902260 | SNV | 1 | A | G | Homozygous   |
| NC_037638.1 | 15902271 | SNV | 1 | A | T | Heterozygous |
| NC_037638.1 | 15902301 | SNV | 1 | A | G | Heterozygous |
| NC_037638.1 | 15902329 | SNV | 1 | A | G | Homozygous   |
| NC_037638.1 | 15902452 | SNV | 1 | T | C | Homozygous   |
| NC_037638.1 | 15902587 | SNV | 1 | T | A | Homozygous   |
| NC_037638.1 | 15902791 | SNV | 1 | T | C | Homozygous   |
| NC_037638.1 | 15902794 | SNV | 1 | C | T | Homozygous   |
| NC_037638.1 | 15902801 | SNV | 1 | A | G | Homozygous   |
| NC_037638.1 | 15902803 | SNV | 1 | T | A | Homozygous   |
| NC_037638.1 | 15902811 | SNV | 1 | G | A | Homozygous   |
| NC_037638.1 | 15902827 | SNV | 1 | T | C | Homozygous   |
| NC_037638.1 | 15902844 | SNV | 1 | T | C | Homozygous   |
| NC_037638.1 | 15902915 | SNV | 1 | T | G | Homozygous   |
| NC_037638.1 | 15902975 | SNV | 1 | A | G | Homozygous   |
| NC_037638.1 | 15903168 | SNV | 1 | G | A | Heterozygous |
| NC_037638.1 | 15903327 | SNV | 1 | G | A | Heterozygous |
| NC_037638.1 | 15903463 | SNV | 1 | T | C | Homozygous   |
| NC_037638.1 | 15903860 | SNV | 1 | A | G | Heterozygous |
| NC_037638.1 | 15903903 | SNV | 1 | A | G | Heterozygous |
| NC_037638.1 | 15903976 | SNV | 1 | A | G | Homozygous   |

|             |          |     |   |   |   |              |
|-------------|----------|-----|---|---|---|--------------|
| NC_037638.1 | 15904011 | SNV | 1 | A | G | Homozygous   |
| NC_037638.1 | 15904257 | SNV | 1 | T | C | Homozygous   |
| NC_037638.1 | 15904285 | SNV | 1 | T | C | Homozygous   |
| NC_037638.1 | 15904606 | SNV | 1 | A | G | Heterozygous |
| NC_037638.1 | 15904659 | SNV | 1 | C | T | Homozygous   |
| NC_037638.1 | 15904662 | SNV | 1 | A | C | Homozygous   |
| NC_037638.1 | 15904668 | SNV | 1 | T | C | Homozygous   |
| NC_037638.1 | 15904754 | SNV | 1 | C | T | Heterozygous |
| NC_037638.1 | 15905614 | SNV | 1 | A | G | Heterozygous |
| NC_037638.1 | 15905696 | SNV | 1 | G | A | Homozygous   |
| NC_037638.1 | 15905704 | SNV | 1 | T | A | Homozygous   |
| NC_037638.1 | 15905753 | SNV | 1 | C | T | Homozygous   |
| NC_037638.1 | 15906117 | SNV | 1 | A | G | Homozygous   |
| NC_037638.1 | 15906231 | SNV | 1 | A | G | Heterozygous |
| NC_037638.1 | 15906243 | SNV | 1 | T | C | Homozygous   |
| NC_037638.1 | 15906443 | SNV | 1 | A | G | Homozygous   |
| NC_037638.1 | 15906757 | SNV | 1 | T | C | Homozygous   |
| NC_037638.1 | 15907019 | SNV | 1 | A | G | Homozygous   |
| NC_037638.1 | 15907051 | SNV | 1 | T | C | Heterozygous |
| NC_037638.1 | 15907602 | SNV | 1 | A | G | Homozygous   |
| NC_037638.1 | 15907679 | SNV | 1 | A | T | Homozygous   |
| NC_037638.1 | 15908160 | SNV | 1 | G | A | Homozygous   |
| NC_037638.1 | 15908642 | SNV | 1 | A | T | Homozygous   |
| NC_037638.1 | 15908652 | SNV | 1 | A | G | Homozygous   |
| NC_037638.1 | 15908654 | SNV | 1 | C | G | Homozygous   |
| NC_037638.1 | 15908659 | SNV | 1 | C | A | Homozygous   |
| NC_037638.1 | 15940058 | SNV | 1 | T | C | Homozygous   |
| NC_037638.1 | 15940350 | SNV | 1 | A | G | Homozygous   |
| NC_037638.1 | 15940376 | SNV | 1 | G | A | Heterozygous |
| NC_037638.1 | 15940477 | SNV | 1 | G | A | Homozygous   |
| NC_037638.1 | 15940537 | SNV | 1 | G | A | Heterozygous |
| NC_037638.1 | 15940665 | SNV | 1 | T | A | Homozygous   |
| NC_037638.1 | 15940671 | SNV | 1 | C | T | Homozygous   |
| NC_037638.1 | 15940706 | SNV | 1 | A | T | Homozygous   |
| NC_037638.1 | 15940708 | SNV | 1 | G | A | Homozygous   |
| NC_037638.1 | 15940726 | SNV | 1 | G | A | Heterozygous |
| NC_037638.1 | 15941102 | SNV | 1 | G | A | Homozygous   |
| NC_037638.1 | 15941248 | SNV | 1 | G | A | Homozygous   |
| NC_037638.1 | 15941666 | SNV | 1 | T | C | Homozygous   |
| NC_037638.1 | 15941682 | SNV | 1 | G | A | Homozygous   |
| NC_037638.1 | 15941718 | SNV | 1 | C | A | Heterozygous |
| NC_037638.1 | 15941789 | SNV | 1 | G | A | Homozygous   |
| NC_037638.1 | 15941795 | SNV | 1 | G | T | Heterozygous |
| NC_037638.1 | 15941847 | SNV | 1 | G | A | Homozygous   |
| NC_037638.1 | 15941879 | SNV | 1 | C | T | Homozygous   |
| NC_037638.1 | 15943263 | SNV | 1 | T | C | Homozygous   |
| NC_037638.1 | 15943341 | SNV | 1 | G | A | Heterozygous |
| NC_037638.1 | 15945368 | SNV | 1 | A | T | Heterozygous |
| NC_037638.1 | 15945374 | SNV | 1 | G | A | Heterozygous |
| NC_037638.1 | 15945402 | SNV | 1 | T | C | Homozygous   |
| NC_037638.1 | 15946615 | SNV | 1 | C | T | Homozygous   |



|             |          |     |   |   |   |              |
|-------------|----------|-----|---|---|---|--------------|
| NC_037638.1 | 15946631 | SNV | 1 | G | C | Heterozygous |
| NC_037638.1 | 15946690 | SNV | 1 | T | C | Homozygous   |
| NC_037638.1 | 15947023 | SNV | 1 | T | A | Homozygous   |
| NC_037638.1 | 15947063 | SNV | 1 | G | A | Heterozygous |
| NC_037638.1 | 15947065 | SNV | 1 | G | C | Heterozygous |
| NC_037638.1 | 15948204 | SNV | 1 | T | C | Homozygous   |
| NC_037638.1 | 15956349 | SNV | 1 | A | G | Heterozygous |
| NC_037638.1 | 15956398 | SNV | 1 | G | A | Heterozygous |
| NC_037638.1 | 15956522 | SNV | 1 | T | C | Homozygous   |
| NC_037638.1 | 15958507 | SNV | 1 | C | T | Homozygous   |
| NC_037638.1 | 15958513 | SNV | 1 | A | G | Homozygous   |
| NC_037638.1 | 15959038 | SNV | 1 | A | C | Heterozygous |
| NC_037638.1 | 15959051 | SNV | 1 | A | G | Heterozygous |
| NC_037638.1 | 15959096 | SNV | 1 | G | A | Heterozygous |
| NC_037638.1 | 15959146 | SNV | 1 | T | G | Heterozygous |
| NC_037638.1 | 15959158 | SNV | 1 | C | T | Heterozygous |
| NC_037638.1 | 15959165 | SNV | 1 | A | C | Heterozygous |
| NC_037638.1 | 15960567 | SNV | 1 | T | C | Homozygous   |
| NC_037638.1 | 15960784 | SNV | 1 | C | T | Homozygous   |
| NC_037638.1 | 15960834 | SNV | 1 | T | C | Heterozygous |
| NC_037638.1 | 15961280 | SNV | 1 | A | G | Homozygous   |
| NC_037638.1 | 15961329 | SNV | 1 | T | C | Homozygous   |
| NC_037638.1 | 15961600 | SNV | 1 | T | C | Homozygous   |
| NC_037638.1 | 15961608 | SNV | 1 | T | C | Homozygous   |
| NC_037638.1 | 15961726 | SNV | 1 | C | T | Heterozygous |
| NC_037638.1 | 15961858 | SNV | 1 | A | G | Heterozygous |
| NC_037638.1 | 15963844 | SNV | 1 | A | G | Homozygous   |
| NC_037638.1 | 15963904 | SNV | 1 | T | C | Heterozygous |
| NC_037638.1 | 15963948 | SNV | 1 | T | A | Heterozygous |
| NC_037638.1 | 15963957 | SNV | 1 | T | G | Homozygous   |
| NC_037638.1 | 15963961 | SNV | 1 | G | A | Homozygous   |
| NC_037638.1 | 15963982 | SNV | 1 | C | G | Homozygous   |
| NC_037638.1 | 15964640 | SNV | 1 | A | G | Homozygous   |
| NC_037638.1 | 15964654 | SNV | 1 | A | G | Homozygous   |
| NC_037638.1 | 15964709 | SNV | 1 | G | C | Homozygous   |
| NC_037638.1 | 15964727 | SNV | 1 | G | A | Heterozygous |
| NC_037638.1 | 15964824 | SNV | 1 | A | G | Homozygous   |
| NC_037638.1 | 15965021 | SNV | 1 | A | G | Homozygous   |
| NC_037638.1 | 15965192 | SNV | 1 | G | A | Homozygous   |
| NC_037638.1 | 15965277 | SNV | 1 | A | G | Heterozygous |
| NC_037638.1 | 15965279 | SNV | 1 | T | C | Heterozygous |
| NC_037638.1 | 15965283 | SNV | 1 | C | T | Homozygous   |
| NC_037638.1 | 15965480 | SNV | 1 | C | T | Heterozygous |
| NC_037638.1 | 15974045 | SNV | 1 | A | G | Homozygous   |
| NC_037638.1 | 15974149 | SNV | 1 | A | G | Heterozygous |
| NC_037638.1 | 15974164 | SNV | 1 | G | A | Homozygous   |
| NC_037638.1 | 15974177 | SNV | 1 | A | G | Homozygous   |
| NC_037638.1 | 15974180 | SNV | 1 | A | G | Homozygous   |
| NC_037638.1 | 15974193 | SNV | 1 | A | G | Homozygous   |
| NC_037638.1 | 15974219 | SNV | 1 | T | C | Homozygous   |
| NC_037638.1 | 15976044 | SNV | 1 | A | G | Heterozygous |

|             |          |     |   |   |   |              |
|-------------|----------|-----|---|---|---|--------------|
| NC_037638.1 | 15976369 | SNV | 1 | G | A | Homozygous   |
| NC_037638.1 | 15983432 | SNV | 1 | A | T | Homozygous   |
| NC_037638.1 | 15983462 | SNV | 1 | G | A | Homozygous   |
| NC_037638.1 | 15983466 | SNV | 1 | T | C | Homozygous   |
| NC_037638.1 | 15983472 | SNV | 1 | C | T | Homozygous   |
| NC_037638.1 | 15983483 | SNV | 1 | G | A | Homozygous   |
| NC_037638.1 | 15983495 | SNV | 1 | A | T | Heterozygous |
| NC_037638.1 | 15983524 | SNV | 1 | G | A | Homozygous   |
| NC_037638.1 | 15983735 | SNV | 1 | G | A | Heterozygous |
| NC_037638.1 | 15983777 | SNV | 1 | G | A | Homozygous   |
| NC_037638.1 | 15983854 | SNV | 1 | T | C | Homozygous   |
| NC_037638.1 | 15983873 | SNV | 1 | G | A | Heterozygous |
| NC_037638.1 | 15985607 | SNV | 1 | G | A | Heterozygous |
| NC_037638.1 | 15986075 | SNV | 1 | C | T | Homozygous   |
| NC_037638.1 | 15986187 | SNV | 1 | T | C | Heterozygous |
| NC_037638.1 | 15986533 | SNV | 1 | G | A | Homozygous   |
| NC_037638.1 | 15986795 | SNV | 1 | G | A | Heterozygous |
| NC_037638.1 | 15986890 | SNV | 1 | C | T | Homozygous   |
| NC_037638.1 | 15986901 | SNV | 1 | G | A | Heterozygous |
| NC_037638.1 | 15987030 | SNV | 1 | G | A | Heterozygous |
| NC_037638.1 | 15990534 | SNV | 1 | C | T | Homozygous   |
| NC_037638.1 | 15990621 | SNV | 1 | G | A | Homozygous   |
| NC_037638.1 | 15990734 | SNV | 1 | G | A | Heterozygous |
| NC_037638.1 | 15990958 | SNV | 1 | G | A | Homozygous   |
| NC_037638.1 | 15990994 | SNV | 1 | A | G | Homozygous   |
| NC_037638.1 | 15991015 | SNV | 1 | C | G | Homozygous   |
| NC_037638.1 | 15991039 | SNV | 1 | A | G | Heterozygous |
| NC_037638.1 | 15991044 | SNV | 1 | A | G | Homozygous   |
| NC_037638.1 | 15991066 | SNV | 1 | T | A | Homozygous   |
| NC_037638.1 | 15991089 | SNV | 1 | C | T | Heterozygous |
| NC_037638.1 | 15991281 | SNV | 1 | G | A | Heterozygous |
| NC_037638.1 | 15991295 | SNV | 1 | A | C | Heterozygous |
| NC_037638.1 | 15991512 | SNV | 1 | C | G | Homozygous   |
| NC_037638.1 | 15991515 | SNV | 1 | C | A | Heterozygous |
| NC_037638.1 | 15991515 | SNV | 1 | C | G | Heterozygous |
| NC_037638.1 | 15991524 | SNV | 1 | G | C | Heterozygous |
| NC_037638.1 | 15991527 | SNV | 1 | G | C | Heterozygous |
| NC_037638.1 | 15994805 | SNV | 1 | A | G | Homozygous   |
| NC_037638.1 | 15994858 | SNV | 1 | G | A | Homozygous   |
| NC_037638.1 | 15994865 | SNV | 1 | G | A | Homozygous   |
| NC_037638.1 | 15994949 | SNV | 1 | G | C | Homozygous   |
| NC_037638.1 | 15995035 | SNV | 1 | A | G | Homozygous   |
| NC_037638.1 | 15995209 | SNV | 1 | C | T | Heterozygous |
| NC_037638.1 | 15998190 | SNV | 1 | T | A | Heterozygous |
| NC_037638.1 | 16001697 | SNV | 1 | T | C | Homozygous   |
| NC_037638.1 | 16001711 | SNV | 1 | T | C | Heterozygous |
| NC_037638.1 | 16001750 | SNV | 1 | A | G | Heterozygous |
| NC_037638.1 | 16001828 | SNV | 1 | C | T | Homozygous   |
| NC_037638.1 | 16005666 | SNV | 1 | C | T | Heterozygous |
| NC_037638.1 | 16005704 | SNV | 1 | C | G | Homozygous   |
| NC_037638.1 | 16005865 | SNV | 1 | T | C | Heterozygous |

|             |          |     |   |   |   |              |
|-------------|----------|-----|---|---|---|--------------|
| NC_037638.1 | 16005870 | SNV | 1 | T | C | Heterozygous |
| NC_037638.1 | 16005879 | SNV | 1 | T | C | Heterozygous |
| NC_037638.1 | 16005881 | SNV | 1 | T | C | Heterozygous |
| NC_037638.1 | 16005882 | SNV | 1 | T | G | Heterozygous |
| NC_037638.1 | 16006266 | SNV | 1 | T | C | Heterozygous |
| NC_037638.1 | 16006274 | SNV | 1 | A | C | Homozygous   |
| NC_037638.1 | 16006278 | SNV | 1 | C | A | Homozygous   |
| NC_037638.1 | 16006766 | SNV | 1 | T | C | Homozygous   |
| NC_037638.1 | 16010983 | SNV | 1 | A | G | Homozygous   |
| NC_037638.1 | 16010985 | SNV | 1 | T | C | Heterozygous |
| NC_037638.1 | 16010991 | SNV | 1 | T | C | Homozygous   |
| NC_037638.1 | 16011006 | SNV | 1 | G | A | Heterozygous |
| NC_037638.1 | 16011786 | SNV | 1 | C | T | Homozygous   |
| NC_037638.1 | 16011831 | SNV | 1 | G | C | Homozygous   |
| NC_037638.1 | 16012044 | SNV | 1 | A | G | Homozygous   |
| NC_037638.1 | 16012104 | SNV | 1 | A | C | Homozygous   |
| NC_037638.1 | 16012349 | SNV | 1 | A | G | Heterozygous |
| NC_037638.1 | 16012357 | SNV | 1 | G | A | Heterozygous |
| NC_037638.1 | 16032463 | SNV | 1 | T | C | Homozygous   |
| NC_037638.1 | 16033315 | SNV | 1 | T | G | Heterozygous |
| NC_037638.1 | 16033682 | SNV | 1 | C | G | Heterozygous |
| NC_037638.1 | 16033710 | SNV | 1 | T | G | Homozygous   |
| NC_037638.1 | 16033786 | SNV | 1 | A | T | Heterozygous |
| NC_037638.1 | 16033865 | SNV | 1 | T | A | Homozygous   |
| NC_037638.1 | 16034058 | SNV | 1 | G | A | Heterozygous |
| NC_037638.1 | 16034321 | SNV | 1 | C | G | Heterozygous |
| NC_037638.1 | 16034569 | SNV | 1 | T | C | Homozygous   |
| NC_037638.1 | 16038293 | SNV | 1 | G | A | Heterozygous |
| NC_037638.1 | 16038517 | SNV | 1 | G | A | Heterozygous |
| NC_037638.1 | 16038519 | SNV | 1 | G | T | Heterozygous |
| NC_037638.1 | 16038521 | SNV | 1 | G | T | Heterozygous |
| NC_037638.1 | 16038646 | SNV | 1 | C | A | Homozygous   |
| NC_037638.1 | 16038687 | SNV | 1 | G | A | Heterozygous |
| NC_037638.1 | 16041000 | SNV | 1 | G | C | Heterozygous |
| NC_037638.1 | 16041130 | SNV | 1 | A | G | Homozygous   |
| NC_037638.1 | 16041169 | SNV | 1 | G | C | Homozygous   |
| NC_037638.1 | 16041415 | SNV | 1 | G | A | Heterozygous |
| NC_037638.1 | 16041442 | SNV | 1 | T | C | Homozygous   |
| NC_037638.1 | 16041447 | SNV | 1 | T | A | Heterozygous |
| NC_037638.1 | 16041505 | SNV | 1 | C | T | Heterozygous |
| NC_037638.1 | 16041616 | SNV | 1 | T | C | Homozygous   |
| NC_037638.1 | 16041623 | SNV | 1 | T | C | Heterozygous |
| NC_037638.1 | 16041634 | SNV | 1 | T | C | Homozygous   |
| NC_037638.1 | 16041681 | SNV | 1 | C | T | Heterozygous |
| NC_037638.1 | 16041687 | SNV | 1 | G | A | Heterozygous |
| NC_037638.1 | 16041760 | SNV | 1 | A | G | Heterozygous |
| NC_037638.1 | 16041771 | SNV | 1 | G | A | Homozygous   |
| NC_037638.1 | 16048119 | SNV | 1 | T | C | Homozygous   |
| NC_037638.1 | 16048329 | SNV | 1 | T | C | Homozygous   |
| NC_037638.1 | 16048600 | SNV | 1 | T | C | Homozygous   |
| NC_037638.1 | 16048754 | SNV | 1 | C | T | Heterozygous |

|             |          |     |   |   |   |              |
|-------------|----------|-----|---|---|---|--------------|
| NC_037638.1 | 16048758 | SNV | 1 | T | C | Heterozygous |
| NC_037638.1 | 16048996 | SNV | 1 | C | T | Heterozygous |
| NC_037638.1 | 16049090 | SNV | 1 | T | A | Heterozygous |
| NC_037638.1 | 16049248 | SNV | 1 | T | C | Heterozygous |
| NC_037638.1 | 16067867 | SNV | 1 | G | A | Heterozygous |
| NC_037638.1 | 16067875 | SNV | 1 | A | T | Heterozygous |
| NC_037638.1 | 16067878 | SNV | 1 | A | T | Heterozygous |
| NC_037638.1 | 16067879 | SNV | 1 | A | T | Heterozygous |
| NC_037638.1 | 16067882 | SNV | 1 | G | A | Heterozygous |
| NC_037638.1 | 16067882 | SNV | 1 | G | T | Heterozygous |
| NC_037638.1 | 16067884 | SNV | 1 | A | T | Heterozygous |
| NC_037638.1 | 16067890 | SNV | 1 | G | T | Heterozygous |
| NC_037638.1 | 16071563 | SNV | 1 | C | T | Heterozygous |
| NC_037638.1 | 16071579 | SNV | 1 | A | G | Homozygous   |
| NC_037638.1 | 16084055 | SNV | 1 | G | T | Heterozygous |
| NC_037638.1 | 16084073 | SNV | 1 | T | C | Heterozygous |
| NC_037638.1 | 16084085 | SNV | 1 | C | T | Homozygous   |
| NC_037638.1 | 16084506 | SNV | 1 | T | C | Homozygous   |
| NC_037638.1 | 16084587 | SNV | 1 | G | A | Heterozygous |
| NC_037638.1 | 16085068 | SNV | 1 | A | G | Homozygous   |
| NC_037638.1 | 16085098 | SNV | 1 | A | G | Homozygous   |
| NC_037638.1 | 16085146 | SNV | 1 | T | C | Heterozygous |
| NC_037638.1 | 16085484 | SNV | 1 | A | T | Homozygous   |
| NC_037638.1 | 16085491 | SNV | 1 | G | A | Homozygous   |
| NC_037638.1 | 16085560 | SNV | 1 | A | G | Homozygous   |
| NC_037638.1 | 16085577 | SNV | 1 | T | C | Homozygous   |
| NC_037638.1 | 16085579 | SNV | 1 | T | C | Homozygous   |
| NC_037638.1 | 16085696 | SNV | 1 | C | T | Homozygous   |
| NC_037638.1 | 16085703 | SNV | 1 | G | A | Homozygous   |
| NC_037638.1 | 16086278 | SNV | 1 | A | G | Homozygous   |
| NC_037638.1 | 16086338 | SNV | 1 | C | T | Heterozygous |
| NC_037638.1 | 16086418 | SNV | 1 | C | G | Heterozygous |
| NC_037638.1 | 16086426 | SNV | 1 | G | A | Heterozygous |
| NC_037638.1 | 16086688 | SNV | 1 | T | C | Homozygous   |
| NC_037638.1 | 16086723 | SNV | 1 | A | G | Heterozygous |
| NC_037638.1 | 16086844 | SNV | 1 | T | C | Homozygous   |
| NC_037638.1 | 16086854 | SNV | 1 | C | T | Heterozygous |
| NC_037638.1 | 16086942 | SNV | 1 | G | A | Homozygous   |
| NC_037638.1 | 16086969 | SNV | 1 | A | G | Homozygous   |
| NC_037638.1 | 16087410 | SNV | 1 | C | T | Heterozygous |
| NC_037638.1 | 16087461 | SNV | 1 | G | A | Heterozygous |
| NC_037638.1 | 16087866 | SNV | 1 | T | C | Homozygous   |
| NC_037638.1 | 16088079 | SNV | 1 | T | C | Homozygous   |
| NC_037638.1 | 16088126 | SNV | 1 | A | G | Homozygous   |
| NC_037638.1 | 16088477 | SNV | 1 | C | T | Homozygous   |
| NC_037638.1 | 16088479 | SNV | 1 | T | G | Heterozygous |
| NC_037638.1 | 16088494 | SNV | 1 | T | C | Homozygous   |
| NC_037638.1 | 16088524 | SNV | 1 | T | C | Homozygous   |
| NC_037638.1 | 16088720 | SNV | 1 | T | C | Homozygous   |
| NC_037638.1 | 16088849 | SNV | 1 | G | C | Homozygous   |
| NC_037638.1 | 16089039 | SNV | 1 | A | G | Homozygous   |

|             |          |     |   |   |   |              |
|-------------|----------|-----|---|---|---|--------------|
| NC_037638.1 | 16089138 | SNV | 1 | C | T | Homozygous   |
| NC_037638.1 | 16097062 | SNV | 1 | T | C | Homozygous   |
| NC_037638.1 | 16097081 | SNV | 1 | C | T | Homozygous   |
| NC_037638.1 | 16097403 | SNV | 1 | C | T | Heterozygous |
| NC_037638.1 | 16097461 | SNV | 1 | A | G | Homozygous   |
| NC_037638.1 | 16097488 | SNV | 1 | G | A | Homozygous   |
| NC_037638.1 | 16102302 | SNV | 1 | T | C | Homozygous   |
| NC_037638.1 | 16102314 | SNV | 1 | T | C | Heterozygous |
| NC_037638.1 | 16107183 | SNV | 1 | C | T | Homozygous   |
| NC_037638.1 | 16107185 | SNV | 1 | C | T | Homozygous   |
| NC_037638.1 | 16107206 | SNV | 1 | T | C | Homozygous   |
| NC_037638.1 | 16107235 | SNV | 1 | A | G | Homozygous   |
| NC_037638.1 | 16109660 | SNV | 1 | T | G | Heterozygous |
| NC_037638.1 | 16109663 | SNV | 1 | G | C | Heterozygous |
| NC_037638.1 | 16109667 | SNV | 1 | T | G | Heterozygous |
| NC_037638.1 | 16128869 | SNV | 1 | A | G | Homozygous   |
| NC_037638.1 | 16129056 | SNV | 1 | A | G | Homozygous   |
| NC_037638.1 | 16129062 | SNV | 1 | G | A | Homozygous   |
| NC_037638.1 | 16129076 | SNV | 1 | A | G | Heterozygous |
| NC_037638.1 | 16129084 | SNV | 1 | G | A | Heterozygous |
| NC_037638.1 | 16129086 | SNV | 1 | G | A | Heterozygous |
| NC_037638.1 | 16130110 | SNV | 1 | A | G | Homozygous   |
| NC_037638.1 | 16130116 | SNV | 1 | G | A | Homozygous   |
| NC_037638.1 | 16130165 | SNV | 1 | C | T | Homozygous   |
| NC_037638.1 | 16130169 | SNV | 1 | A | G | Homozygous   |
| NC_037638.1 | 16130201 | SNV | 1 | A | G | Heterozygous |
| NC_037638.1 | 16130366 | SNV | 1 | A | G | Homozygous   |
| NC_037638.1 | 16132217 | SNV | 1 | A | G | Heterozygous |
| NC_037638.1 | 16132227 | SNV | 1 | G | A | Heterozygous |
| NC_037638.1 | 16132261 | SNV | 1 | T | C | Heterozygous |
| NC_037638.1 | 16132311 | SNV | 1 | T | C | Homozygous   |
| NC_037638.1 | 16132525 | SNV | 1 | T | C | Homozygous   |
| NC_037638.1 | 16132794 | SNV | 1 | T | C | Homozygous   |
| NC_037638.1 | 16132800 | SNV | 1 | T | C | Homozygous   |
| NC_037638.1 | 16132809 | SNV | 1 | C | G | Homozygous   |
| NC_037638.1 | 16132917 | SNV | 1 | A | G | Homozygous   |
| NC_037638.1 | 16132929 | SNV | 1 | C | T | Homozygous   |
| NC_037638.1 | 16133169 | SNV | 1 | C | T | Homozygous   |
| NC_037638.1 | 16133469 | SNV | 1 | T | C | Homozygous   |
| NC_037638.1 | 16133601 | SNV | 1 | T | A | Homozygous   |
| NC_037638.1 | 16133630 | SNV | 1 | T | C | Homozygous   |
| NC_037638.1 | 16133633 | SNV | 1 | A | G | Homozygous   |
| NC_037638.1 | 16133656 | SNV | 1 | A | G | Homozygous   |
| NC_037638.1 | 16133727 | SNV | 1 | C | T | Homozygous   |
| NC_037638.1 | 16133874 | SNV | 1 | G | C | Homozygous   |
| NC_037638.1 | 16134426 | SNV | 1 | A | G | Heterozygous |
| NC_037638.1 | 16134446 | SNV | 1 | C | T | Heterozygous |
| NC_037638.1 | 16135109 | SNV | 1 | G | A | Heterozygous |
| NC_037638.1 | 16135316 | SNV | 1 | C | A | Heterozygous |
| NC_037638.1 | 16135475 | SNV | 1 | A | G | Homozygous   |
| NC_037638.1 | 16135542 | SNV | 1 | A | T | Heterozygous |

|             |          |     |   |   |   |              |
|-------------|----------|-----|---|---|---|--------------|
| NC_037638.1 | 16135727 | SNV | 1 | A | G | Homozygous   |
| NC_037638.1 | 16135805 | SNV | 1 | G | A | Homozygous   |
| NC_037638.1 | 16137536 | SNV | 1 | A | G | Homozygous   |
| NC_037638.1 | 16137577 | SNV | 1 | T | C | Homozygous   |
| NC_037638.1 | 16137691 | SNV | 1 | A | G | Homozygous   |
| NC_037638.1 | 16137926 | SNV | 1 | T | C | Homozygous   |
| NC_037638.1 | 16137985 | SNV | 1 | A | G | Homozygous   |
| NC_037638.1 | 16137994 | SNV | 1 | A | G | Homozygous   |
| NC_037638.1 | 16138016 | SNV | 1 | G | A | Heterozygous |
| NC_037638.1 | 16138028 | SNV | 1 | T | C | Homozygous   |
| NC_037638.1 | 16138051 | SNV | 1 | A | G | Homozygous   |
| NC_037638.1 | 16138056 | SNV | 1 | A | G | Homozygous   |
| NC_037638.1 | 16138141 | SNV | 1 | C | A | Homozygous   |
| NC_037638.1 | 16138519 | SNV | 1 | A | G | Homozygous   |
| NC_037638.1 | 16138559 | SNV | 1 | A | G | Homozygous   |
| NC_037638.1 | 16139117 | SNV | 1 | T | C | Homozygous   |
| NC_037638.1 | 16139203 | SNV | 1 | A | G | Homozygous   |
| NC_037638.1 | 16139230 | SNV | 1 | C | T | Heterozygous |
| NC_037638.1 | 16139235 | SNV | 1 | T | C | Heterozygous |
| NC_037638.1 | 16139255 | SNV | 1 | T | C | Homozygous   |
| NC_037638.1 | 16139287 | SNV | 1 | A | G | Homozygous   |
| NC_037638.1 | 16139300 | SNV | 1 | T | C | Heterozygous |
| NC_037638.1 | 16139493 | SNV | 1 | C | T | Homozygous   |
| NC_037638.1 | 16139644 | SNV | 1 | A | G | Homozygous   |
| NC_037638.1 | 16139648 | SNV | 1 | A | G | Heterozygous |
| NC_037638.1 | 16139752 | SNV | 1 | C | A | Homozygous   |
| NC_037638.1 | 16139772 | SNV | 1 | T | A | Homozygous   |
| NC_037638.1 | 16140018 | SNV | 1 | C | T | Heterozygous |
| NC_037638.1 | 16140426 | SNV | 1 | A | G | Homozygous   |
| NC_037638.1 | 16140556 | SNV | 1 | G | A | Heterozygous |
| NC_037638.1 | 16141206 | SNV | 1 | G | C | Homozygous   |
| NC_037638.1 | 16141546 | SNV | 1 | T | A | Heterozygous |
| NC_037638.1 | 16141554 | SNV | 1 | A | T | Heterozygous |
| NC_037638.1 | 16141930 | SNV | 1 | A | G | Heterozygous |
| NC_037638.1 | 16142046 | SNV | 1 | A | G | Homozygous   |
| NC_037638.1 | 16142071 | SNV | 1 | C | A | Homozygous   |
| NC_037638.1 | 16142107 | SNV | 1 | A | G | Homozygous   |
| NC_037638.1 | 16142120 | SNV | 1 | C | T | Homozygous   |
| NC_037638.1 | 16142242 | SNV | 1 | A | G | Heterozygous |
| NC_037638.1 | 16142308 | SNV | 1 | T | C | Homozygous   |
| NC_037638.1 | 16142348 | SNV | 1 | T | C | Homozygous   |
| NC_037638.1 | 16142562 | SNV | 1 | T | C | Homozygous   |
| NC_037638.1 | 16142599 | SNV | 1 | A | G | Heterozygous |
| NC_037638.1 | 16148487 | SNV | 1 | T | C | Homozygous   |
| NC_037638.1 | 16148503 | SNV | 1 | A | G | Homozygous   |
| NC_037638.1 | 16148568 | SNV | 1 | C | G | Homozygous   |
| NC_037638.1 | 16160885 | SNV | 1 | T | C | Homozygous   |
| NC_037638.1 | 16160940 | SNV | 1 | A | G | Homozygous   |
| NC_037638.1 | 16162041 | SNV | 1 | T | C | Heterozygous |
| NC_037638.1 | 16170254 | SNV | 1 | A | G | Homozygous   |
| NC_037638.1 | 16170258 | SNV | 1 | A | G | Homozygous   |

|             |          |     |   |   |   |              |
|-------------|----------|-----|---|---|---|--------------|
| NC_037638.1 | 16170392 | SNV | 1 | T | C | Homozygous   |
| NC_037638.1 | 16170457 | SNV | 1 | T | A | Homozygous   |
| NC_037638.1 | 16170528 | SNV | 1 | T | C | Heterozygous |
| NC_037638.1 | 16170715 | SNV | 1 | G | A | Heterozygous |
| NC_037638.1 | 16170767 | SNV | 1 | C | T | Heterozygous |
| NC_037638.1 | 16170828 | SNV | 1 | T | C | Homozygous   |
| NC_037638.1 | 16171329 | SNV | 1 | C | T | Heterozygous |
| NC_037638.1 | 16171383 | SNV | 1 | T | C | Homozygous   |
| NC_037638.1 | 16171428 | SNV | 1 | T | A | Homozygous   |
| NC_037638.1 | 16171626 | SNV | 1 | A | T | Heterozygous |
| NC_037638.1 | 16172421 | SNV | 1 | A | G | Homozygous   |
| NC_037638.1 | 16172587 | SNV | 1 | G | A | Homozygous   |
| NC_037638.1 | 16173117 | SNV | 1 | A | G | Heterozygous |
| NC_037638.1 | 16173186 | SNV | 1 | A | G | Heterozygous |
| NC_037638.1 | 16177484 | SNV | 1 | A | G | Homozygous   |
| NC_037638.1 | 16177621 | SNV | 1 | A | G | Homozygous   |
| NC_037638.1 | 16178070 | SNV | 1 | A | G | Heterozygous |
| NC_037638.1 | 16178147 | SNV | 1 | T | G | Heterozygous |
| NC_037638.1 | 16178155 | SNV | 1 | A | T | Heterozygous |
| NC_037638.1 | 16201437 | SNV | 1 | C | T | Homozygous   |
| NC_037638.1 | 16225696 | SNV | 1 | G | C | Homozygous   |
| NC_037638.1 | 16225706 | SNV | 1 | A | T | Heterozygous |
| NC_037638.1 | 16225712 | SNV | 1 | A | C | Heterozygous |
| NC_037638.1 | 16228142 | SNV | 1 | A | T | Heterozygous |
| NC_037638.1 | 16228338 | SNV | 1 | T | C | Homozygous   |
| NC_037638.1 | 16228353 | SNV | 1 | C | T | Heterozygous |
| NC_037638.1 | 16233964 | SNV | 1 | C | T | Homozygous   |
| NC_037638.1 | 16235404 | SNV | 1 | T | G | Heterozygous |
| NC_037638.1 | 16238739 | SNV | 1 | G | A | Homozygous   |
| NC_037638.1 | 16238776 | SNV | 1 | G | A | Homozygous   |
| NC_037638.1 | 16304584 | SNV | 1 | C | T | Heterozygous |
| NC_037638.1 | 16304610 | SNV | 1 | G | C | Heterozygous |
| NC_037638.1 | 16304653 | SNV | 1 | C | T | Heterozygous |
| NC_037638.1 | 16304660 | SNV | 1 | C | T | Heterozygous |
| NC_037638.1 | 16304711 | SNV | 1 | G | A | Heterozygous |
| NC_037638.1 | 16307284 | SNV | 1 | A | G | Homozygous   |
| NC_037638.1 | 16307329 | SNV | 1 | T | C | Homozygous   |
| NC_037638.1 | 16307470 | SNV | 1 | T | C | Homozygous   |
| NC_037638.1 | 16307487 | SNV | 1 | T | C | Heterozygous |
| NC_037638.1 | 16310341 | SNV | 1 | C | A | Homozygous   |
| NC_037638.1 | 16310344 | SNV | 1 | G | C | Homozygous   |
| NC_037638.1 | 16310352 | SNV | 1 | A | G | Homozygous   |
| NC_037638.1 | 16326044 | SNV | 1 | T | C | Homozygous   |
| NC_037638.1 | 16326047 | SNV | 1 | A | G | Homozygous   |
| NC_037638.1 | 16348118 | SNV | 1 | T | C | Homozygous   |
| NC_037638.1 | 16348152 | SNV | 1 | C | T | Heterozygous |
| NC_037638.1 | 16378564 | SNV | 1 | A | T | Heterozygous |
| NC_037638.1 | 16393527 | SNV | 1 | A | T | Homozygous   |
| NC_037638.1 | 16393534 | SNV | 1 | T | A | Homozygous   |
| NC_037638.1 | 16393537 | SNV | 1 | G | A | Homozygous   |
| NC_037638.1 | 16393554 | SNV | 1 | C | G | Homozygous   |

|             |          |     |   |   |   |              |
|-------------|----------|-----|---|---|---|--------------|
| NC_037638.1 | 16434715 | SNV | 1 | G | A | Heterozygous |
| NC_037638.1 | 16435656 | SNV | 1 | C | T | Homozygous   |
| NC_037638.1 | 16435659 | SNV | 1 | C | T | Homozygous   |
| NC_037638.1 | 16435661 | SNV | 1 | C | A | Homozygous   |
| NC_037638.1 | 16435685 | SNV | 1 | C | T | Homozygous   |
| NC_037638.1 | 16435700 | SNV | 1 | T | C | Homozygous   |
| NC_037638.1 | 16436034 | SNV | 1 | C | G | Heterozygous |
| NC_037638.1 | 16436141 | SNV | 1 | G | A | Heterozygous |
| NC_037638.1 | 16436143 | SNV | 1 | G | A | Heterozygous |
| NC_037638.1 | 16436158 | SNV | 1 | T | G | Homozygous   |
| NC_037638.1 | 16436203 | SNV | 1 | G | A | Heterozygous |
| NC_037638.1 | 16441911 | SNV | 1 | T | C | Homozygous   |
| NC_037638.1 | 16442492 | SNV | 1 | C | T | Homozygous   |
| NC_037638.1 | 16443972 | SNV | 1 | A | G | Homozygous   |
| NC_037638.1 | 16457764 | SNV | 1 | T | A | Homozygous   |
| NC_037638.1 | 16457768 | SNV | 1 | T | G | Homozygous   |
| NC_037638.1 | 16457774 | SNV | 1 | G | A | Homozygous   |
| NC_037638.1 | 16457776 | SNV | 1 | A | T | Homozygous   |
| NC_037638.1 | 16457790 | SNV | 1 | G | T | Homozygous   |
| NC_037638.1 | 16460652 | SNV | 1 | T | C | Homozygous   |
| NC_037638.1 | 16460927 | SNV | 1 | C | T | Homozygous   |
| NC_037638.1 | 16460956 | SNV | 1 | C | T | Homozygous   |
| NC_037638.1 | 16461026 | SNV | 1 | A | T | Heterozygous |
| NC_037638.1 | 16461029 | SNV | 1 | C | T | Homozygous   |
| NC_037638.1 | 16465076 | SNV | 1 | A | G | Homozygous   |
| NC_037638.1 | 16465169 | SNV | 1 | A | G | Homozygous   |
| NC_037638.1 | 16465287 | SNV | 1 | T | C | Heterozygous |
| NC_037638.1 | 16465357 | SNV | 1 | C | G | Homozygous   |
| NC_037638.1 | 16536984 | SNV | 1 | T | G | Heterozygous |
| NC_037638.1 | 16536987 | SNV | 1 | T | C | Heterozygous |
| NC_037638.1 | 16536998 | SNV | 1 | T | C | Heterozygous |
| NC_037638.1 | 16537002 | SNV | 1 | T | C | Heterozygous |
| NC_037638.1 | 16537005 | SNV | 1 | C | T | Heterozygous |
| NC_037638.1 | 16537325 | SNV | 1 | A | T | Heterozygous |
| NC_037638.1 | 16540041 | SNV | 1 | A | G | Heterozygous |
| NC_037638.1 | 16570450 | SNV | 1 | A | C | Homozygous   |
| NC_037638.1 | 16570471 | SNV | 1 | G | C | Homozygous   |
| NC_037638.1 | 16570489 | SNV | 1 | T | G | Homozygous   |
| NC_037638.1 | 16591394 | SNV | 1 | C | T | Heterozygous |
| NC_037638.1 | 16591448 | SNV | 1 | C | T | Heterozygous |
| NC_037638.1 | 16591449 | SNV | 1 | A | G | Heterozygous |
| NC_037638.1 | 16591512 | SNV | 1 | A | G | Heterozygous |
| NC_037638.1 | 16592159 | SNV | 1 | C | T | Heterozygous |
| NC_037638.1 | 16597560 | SNV | 1 | T | G | Homozygous   |
| NC_037638.1 | 16609890 | SNV | 1 | G | A | Heterozygous |
| NC_037638.1 | 16619746 | SNV | 1 | A | C | Homozygous   |
| NC_037638.1 | 16619750 | SNV | 1 | A | T | Homozygous   |
| NC_037638.1 | 16619785 | SNV | 1 | G | A | Homozygous   |
| NC_037638.1 | 16633325 | SNV | 1 | T | C | Homozygous   |
| NC_037638.1 | 16633328 | SNV | 1 | C | T | Heterozygous |
| NC_037638.1 | 16633372 | SNV | 1 | C | A | Homozygous   |



|             |          |     |   |   |   |              |
|-------------|----------|-----|---|---|---|--------------|
| NC_037638.1 | 16650789 | SNV | 1 | C | T | Heterozygous |
| NC_037638.1 | 16650869 | SNV | 1 | T | C | Heterozygous |
| NC_037638.1 | 16654531 | SNV | 1 | C | T | Homozygous   |
| NC_037638.1 | 16654547 | SNV | 1 | A | G | Homozygous   |
| NC_037638.1 | 16654583 | SNV | 1 | T | C | Homozygous   |
| NC_037638.1 | 16655326 | SNV | 1 | C | G | Homozygous   |
| NC_037638.1 | 16655510 | SNV | 1 | C | A | Heterozygous |
| NC_037638.1 | 16655512 | SNV | 1 | T | C | Heterozygous |
| NC_037638.1 | 16655651 | SNV | 1 | A | G | Homozygous   |
| NC_037638.1 | 16655694 | SNV | 1 | T | C | Homozygous   |
| NC_037638.1 | 16655823 | SNV | 1 | C | T | Heterozygous |
| NC_037638.1 | 16656539 | SNV | 1 | G | A | Homozygous   |
| NC_037638.1 | 16690369 | SNV | 1 | C | T | Homozygous   |
| NC_037638.1 | 16692489 | SNV | 1 | A | G | Homozygous   |
| NC_037638.1 | 16693186 | SNV | 1 | T | C | Homozygous   |
| NC_037638.1 | 16693498 | SNV | 1 | T | C | Heterozygous |
| NC_037638.1 | 16693624 | SNV | 1 | T | C | Homozygous   |
| NC_037638.1 | 16693709 | SNV | 1 | T | A | Homozygous   |
| NC_037638.1 | 16694299 | SNV | 1 | C | T | Heterozygous |
| NC_037638.1 | 16695095 | SNV | 1 | G | A | Heterozygous |
| NC_037638.1 | 16695104 | SNV | 1 | A | G | Homozygous   |
| NC_037638.1 | 16695107 | SNV | 1 | C | A | Homozygous   |
| NC_037638.1 | 16695133 | SNV | 1 | G | A | Homozygous   |
| NC_037638.1 | 16705146 | SNV | 1 | A | G | Heterozygous |
| NC_037638.1 | 16708323 | SNV | 1 | T | C | Homozygous   |
| NC_037638.1 | 16713426 | SNV | 1 | G | T | Heterozygous |
| NC_037638.1 | 16714263 | SNV | 1 | A | G | Homozygous   |
| NC_037638.1 | 16714678 | SNV | 1 | T | C | Homozygous   |
| NC_037638.1 | 16718032 | SNV | 1 | A | T | Heterozygous |
| NC_037638.1 | 16726957 | SNV | 1 | G | A | Heterozygous |
| NC_037638.1 | 16726968 | SNV | 1 | A | C | Heterozygous |
| NC_037638.1 | 16740835 | SNV | 1 | G | A | Homozygous   |
| NC_037638.1 | 16740841 | SNV | 1 | G | C | Homozygous   |
| NC_037638.1 | 16740844 | SNV | 1 | G | T | Homozygous   |
| NC_037638.1 | 16740849 | SNV | 1 | A | G | Homozygous   |
| NC_037638.1 | 16740859 | SNV | 1 | A | T | Homozygous   |
| NC_037638.1 | 16744434 | SNV | 1 | C | T | Homozygous   |
| NC_037638.1 | 16744440 | SNV | 1 | C | T | Homozygous   |
| NC_037638.1 | 16744465 | SNV | 1 | A | T | Homozygous   |
| NC_037638.1 | 16744468 | SNV | 1 | A | G | Homozygous   |
| NC_037638.1 | 16755495 | SNV | 1 | A | G | Homozygous   |
| NC_037638.1 | 16756124 | SNV | 1 | A | G | Homozygous   |
| NC_037638.1 | 16757109 | SNV | 1 | T | C | Homozygous   |
| NC_037638.1 | 16757139 | SNV | 1 | T | A | Heterozygous |
| NC_037638.1 | 16758966 | SNV | 1 | G | A | Homozygous   |
| NC_037638.1 | 16759074 | SNV | 1 | A | G | Homozygous   |
| NC_037638.1 | 16771927 | SNV | 1 | C | T | Heterozygous |
| NC_037638.1 | 16773159 | SNV | 1 | A | G | Heterozygous |
| NC_037638.1 | 16773274 | SNV | 1 | G | A | Heterozygous |
| NC_037638.1 | 16773286 | SNV | 1 | C | T | Heterozygous |
| NC_037638.1 | 16773319 | SNV | 1 | A | T | Heterozygous |

|             |          |     |   |   |   |              |
|-------------|----------|-----|---|---|---|--------------|
| NC_037638.1 | 16773465 | SNV | 1 | G | A | Homozygous   |
| NC_037638.1 | 16773650 | SNV | 1 | T | C | Homozygous   |
| NC_037638.1 | 16773675 | SNV | 1 | A | G | Homozygous   |
| NC_037638.1 | 16773942 | SNV | 1 | T | C | Heterozygous |
| NC_037638.1 | 16773992 | SNV | 1 | T | C | Homozygous   |
| NC_037638.1 | 16774280 | SNV | 1 | A | T | Homozygous   |
| NC_037638.1 | 16774339 | SNV | 1 | T | C | Homozygous   |
| NC_037638.1 | 16774344 | SNV | 1 | G | A | Homozygous   |
| NC_037638.1 | 16774362 | SNV | 1 | C | T | Homozygous   |
| NC_037638.1 | 16774382 | SNV | 1 | A | G | Homozygous   |
| NC_037638.1 | 16774779 | SNV | 1 | G | C | Homozygous   |
| NC_037638.1 | 16774785 | SNV | 1 | C | A | Homozygous   |
| NC_037638.1 | 16775163 | SNV | 1 | T | C | Homozygous   |
| NC_037638.1 | 16778760 | SNV | 1 | T | C | Homozygous   |
| NC_037638.1 | 16778823 | SNV | 1 | A | G | Homozygous   |
| NC_037638.1 | 16778954 | SNV | 1 | A | G | Homozygous   |
| NC_037638.1 | 16780733 | SNV | 1 | T | C | Homozygous   |
| NC_037638.1 | 16785226 | SNV | 1 | T | G | Homozygous   |
| NC_037638.1 | 16785256 | SNV | 1 | A | G | Homozygous   |
| NC_037638.1 | 16785363 | SNV | 1 | T | C | Homozygous   |
| NC_037638.1 | 16786096 | SNV | 1 | T | C | Homozygous   |
| NC_037638.1 | 16786655 | SNV | 1 | C | T | Homozygous   |
| NC_037638.1 | 16786676 | SNV | 1 | T | C | Heterozygous |
| NC_037638.1 | 16786745 | SNV | 1 | A | G | Homozygous   |
| NC_037638.1 | 16786793 | SNV | 1 | A | G | Heterozygous |
| NC_037638.1 | 16787793 | SNV | 1 | T | C | Heterozygous |
| NC_037638.1 | 16787796 | SNV | 1 | G | A | Heterozygous |
| NC_037638.1 | 16787898 | SNV | 1 | T | C | Homozygous   |
| NC_037638.1 | 16787916 | SNV | 1 | A | G | Homozygous   |
| NC_037638.1 | 16788291 | SNV | 1 | A | G | Homozygous   |
| NC_037638.1 | 16788912 | SNV | 1 | G | C | Homozygous   |
| NC_037638.1 | 16788966 | SNV | 1 | T | C | Homozygous   |
| NC_037638.1 | 16789404 | SNV | 1 | A | T | Heterozygous |
| NC_037638.1 | 16789426 | SNV | 1 | T | A | Heterozygous |
| NC_037638.1 | 16789562 | SNV | 1 | A | G | Heterozygous |
| NC_037638.1 | 16789579 | SNV | 1 | A | G | Heterozygous |
| NC_037638.1 | 16790900 | SNV | 1 | A | G | Homozygous   |
| NC_037638.1 | 16791644 | SNV | 1 | C | T | Heterozygous |
| NC_037638.1 | 16791646 | SNV | 1 | C | T | Homozygous   |
| NC_037638.1 | 16791834 | SNV | 1 | T | C | Heterozygous |
| NC_037638.1 | 16795117 | SNV | 1 | G | A | Homozygous   |
| NC_037638.1 | 16795236 | SNV | 1 | A | G | Homozygous   |
| NC_037638.1 | 16795332 | SNV | 1 | G | A | Homozygous   |
| NC_037638.1 | 16795819 | SNV | 1 | T | A | Heterozygous |
| NC_037638.1 | 16796584 | SNV | 1 | T | G | Homozygous   |
| NC_037638.1 | 16796691 | SNV | 1 | T | C | Homozygous   |
| NC_037638.1 | 16796750 | SNV | 1 | T | G | Heterozygous |
| NC_037638.1 | 16796815 | SNV | 1 | A | T | Homozygous   |
| NC_037638.1 | 16797114 | SNV | 1 | C | A | Heterozygous |
| NC_037638.1 | 16797527 | SNV | 1 | A | G | Heterozygous |
| NC_037638.1 | 16797710 | SNV | 1 | G | C | Homozygous   |

|             |          |     |   |   |   |              |
|-------------|----------|-----|---|---|---|--------------|
| NC_037638.1 | 16798028 | SNV | 1 | A | C | Homozygous   |
| NC_037638.1 | 16798773 | SNV | 1 | T | C | Heterozygous |
| NC_037638.1 | 16798791 | SNV | 1 | C | T | Homozygous   |
| NC_037638.1 | 16798857 | SNV | 1 | A | G | Homozygous   |
| NC_037638.1 | 16798875 | SNV | 1 | A | T | Heterozygous |
| NC_037638.1 | 16799013 | SNV | 1 | C | G | Heterozygous |
| NC_037638.1 | 16799022 | SNV | 1 | C | T | Homozygous   |
| NC_037638.1 | 16799660 | SNV | 1 | T | A | Homozygous   |
| NC_037638.1 | 16812814 | SNV | 1 | T | C | Homozygous   |
| NC_037638.1 | 16833616 | SNV | 1 | G | A | Heterozygous |
| NC_037638.1 | 16833619 | SNV | 1 | C | T | Heterozygous |
| NC_037638.1 | 16833681 | SNV | 1 | C | T | Homozygous   |
| NC_037638.1 | 16858213 | SNV | 1 | C | T | Heterozygous |
| NC_037638.1 | 16858283 | SNV | 1 | C | T | Heterozygous |
| NC_037638.1 | 16858437 | SNV | 1 | C | T | Heterozygous |
| NC_037638.1 | 16858490 | SNV | 1 | T | C | Homozygous   |
| NC_037638.1 | 16858589 | SNV | 1 | A | G | Homozygous   |
| NC_037638.1 | 16858648 | SNV | 1 | A | G | Homozygous   |
| NC_037638.1 | 16858809 | SNV | 1 | A | G | Homozygous   |
| NC_037638.1 | 16873280 | SNV | 1 | T | C | Heterozygous |
| NC_037638.1 | 16873297 | SNV | 1 | C | T | Heterozygous |
| NC_037638.1 | 16873309 | SNV | 1 | G | A | Heterozygous |
| NC_037638.1 | 16882130 | SNV | 1 | T | C | Heterozygous |
| NC_037638.1 | 16895736 | SNV | 1 | T | A | Homozygous   |
| NC_037638.1 | 16895741 | SNV | 1 | T | G | Homozygous   |
| NC_037638.1 | 16895744 | SNV | 1 | A | T | Homozygous   |
| NC_037638.1 | 16895747 | SNV | 1 | C | T | Homozygous   |
| NC_037638.1 | 16999467 | SNV | 1 | T | C | Heterozygous |
| NC_037638.1 | 16999471 | SNV | 1 | C | T | Heterozygous |
| NC_037638.1 | 16999792 | SNV | 1 | A | G | Homozygous   |
| NC_037638.1 | 16999797 | SNV | 1 | T | G | Heterozygous |
| NC_037638.1 | 17003395 | SNV | 1 | A | G | Heterozygous |
| NC_037638.1 | 17003398 | SNV | 1 | A | G | Heterozygous |
| NC_037638.1 | 17003400 | SNV | 1 | A | G | Heterozygous |
| NC_037638.1 | 17004285 | SNV | 1 | G | A | Heterozygous |
| NC_037638.1 | 17005951 | SNV | 1 | C | T | Heterozygous |
| NC_037638.1 | 17005959 | SNV | 1 | T | C | Homozygous   |
| NC_037638.1 | 17006069 | SNV | 1 | A | G | Homozygous   |
| NC_037638.1 | 17006936 | SNV | 1 | C | A | Heterozygous |
| NC_037638.1 | 17006956 | SNV | 1 | G | A | Homozygous   |
| NC_037638.1 | 17006960 | SNV | 1 | A | T | Heterozygous |
| NC_037638.1 | 17007520 | SNV | 1 | A | G | Heterozygous |
| NC_037638.1 | 17009807 | SNV | 1 | A | C | Homozygous   |
| NC_037638.1 | 17009809 | SNV | 1 | T | A | Homozygous   |
| NC_037638.1 | 17009813 | SNV | 1 | A | T | Homozygous   |
| NC_037638.1 | 17009817 | SNV | 1 | A | C | Homozygous   |
| NC_037638.1 | 17083286 | SNV | 1 | G | A | Heterozygous |
| NC_037638.1 | 17095405 | SNV | 1 | A | G | Heterozygous |
| NC_037638.1 | 17095855 | SNV | 1 | A | G | Homozygous   |
| NC_037638.1 | 17095915 | SNV | 1 | C | T | Heterozygous |
| NC_037638.1 | 17096118 | SNV | 1 | G | T | Heterozygous |

|             |          |     |   |   |   |              |
|-------------|----------|-----|---|---|---|--------------|
| NC_037638.1 | 17096124 | SNV | 1 | T | C | Heterozygous |
| NC_037638.1 | 17096151 | SNV | 1 | C | T | Heterozygous |
| NC_037638.1 | 17102587 | SNV | 1 | A | G | Homozygous   |
| NC_037638.1 | 17102981 | SNV | 1 | A | G | Homozygous   |
| NC_037638.1 | 17102990 | SNV | 1 | C | T | Homozygous   |
| NC_037638.1 | 17127044 | SNV | 1 | A | T | Heterozygous |
| NC_037638.1 | 17127047 | SNV | 1 | T | A | Homozygous   |
| NC_037638.1 | 17127052 | SNV | 1 | T | A | Homozygous   |
| NC_037638.1 | 17127059 | SNV | 1 | G | A | Homozygous   |
| NC_037638.1 | 17127063 | SNV | 1 | G | T | Homozygous   |
| NC_037638.1 | 17133698 | SNV | 1 | T | A | Homozygous   |
| NC_037638.1 | 17146361 | SNV | 1 | C | T | Heterozygous |
| NC_037638.1 | 17146446 | SNV | 1 | T | C | Homozygous   |
| NC_037638.1 | 17155270 | SNV | 1 | A | T | Homozygous   |
| NC_037638.1 | 17155274 | SNV | 1 | T | C | Heterozygous |
| NC_037638.1 | 17155522 | SNV | 1 | A | T | Heterozygous |
| NC_037638.1 | 17155526 | SNV | 1 | A | T | Heterozygous |
| NC_037638.1 | 17155572 | SNV | 1 | A | G | Homozygous   |
| NC_037638.1 | 17155587 | SNV | 1 | G | A | Homozygous   |
| NC_037638.1 | 17155592 | SNV | 1 | T | C | Homozygous   |
| NC_037638.1 | 17155598 | SNV | 1 | G | A | Homozygous   |
| NC_037638.1 | 17169158 | SNV | 1 | T | C | Homozygous   |
| NC_037638.1 | 17169431 | SNV | 1 | T | C | Heterozygous |
| NC_037638.1 | 17169472 | SNV | 1 | T | C | Heterozygous |
| NC_037638.1 | 17169521 | SNV | 1 | T | C | Heterozygous |
| NC_037638.1 | 17169663 | SNV | 1 | A | G | Homozygous   |
| NC_037638.1 | 17169776 | SNV | 1 | T | A | Heterozygous |
| NC_037638.1 | 17169802 | SNV | 1 | T | A | Homozygous   |
| NC_037638.1 | 17169869 | SNV | 1 | C | G | Homozygous   |
| NC_037638.1 | 17170056 | SNV | 1 | C | T | Heterozygous |
| NC_037638.1 | 17170065 | SNV | 1 | A | G | Homozygous   |
| NC_037638.1 | 17186893 | SNV | 1 | A | T | Homozygous   |
| NC_037638.1 | 17186926 | SNV | 1 | T | C | Heterozygous |
| NC_037638.1 | 17186953 | SNV | 1 | A | C | Homozygous   |
| NC_037638.1 | 17186995 | SNV | 1 | T | A | Homozygous   |
| NC_037638.1 | 17187157 | SNV | 1 | T | C | Homozygous   |
| NC_037638.1 | 17190365 | SNV | 1 | G | A | Homozygous   |
| NC_037638.1 | 17197222 | SNV | 1 | T | C | Homozygous   |
| NC_037638.1 | 17228087 | SNV | 1 | T | A | Homozygous   |
| NC_037638.1 | 17228089 | SNV | 1 | G | T | Homozygous   |
| NC_037638.1 | 17228103 | SNV | 1 | T | A | Homozygous   |
| NC_037638.1 | 17228125 | SNV | 1 | T | G | Homozygous   |
| NC_037638.1 | 17252085 | SNV | 1 | A | T | Homozygous   |
| NC_037638.1 | 17252088 | SNV | 1 | C | T | Homozygous   |
| NC_037638.1 | 17252090 | SNV | 1 | G | C | Homozygous   |
| NC_037638.1 | 17252095 | SNV | 1 | G | A | Homozygous   |
| NC_037638.1 | 17262768 | SNV | 1 | C | A | Homozygous   |
| NC_037638.1 | 17262800 | SNV | 1 | C | T | Homozygous   |
| NC_037638.1 | 17263256 | SNV | 1 | A | G | Homozygous   |
| NC_037638.1 | 17310832 | SNV | 1 | G | A | Heterozygous |
| NC_037638.1 | 17310855 | SNV | 1 | T | C | Homozygous   |

|             |          |     |   |   |   |              |
|-------------|----------|-----|---|---|---|--------------|
| NC_037638.1 | 17310913 | SNV | 1 | T | C | Heterozygous |
| NC_037638.1 | 17311018 | SNV | 1 | T | C | Homozygous   |
| NC_037638.1 | 17311062 | SNV | 1 | G | C | Homozygous   |
| NC_037638.1 | 17311096 | SNV | 1 | A | T | Heterozygous |
| NC_037638.1 | 17311113 | SNV | 1 | T | C | Homozygous   |
| NC_037638.1 | 17311124 | SNV | 1 | A | G | Heterozygous |
| NC_037638.1 | 17311155 | SNV | 1 | A | G | Heterozygous |
| NC_037638.1 | 17311199 | SNV | 1 | A | T | Heterozygous |
| NC_037638.1 | 17311238 | SNV | 1 | T | C | Homozygous   |
| NC_037638.1 | 17311249 | SNV | 1 | T | C | Homozygous   |
| NC_037638.1 | 17311265 | SNV | 1 | G | A | Heterozygous |
| NC_037638.1 | 17311436 | SNV | 1 | C | T | Heterozygous |
| NC_037638.1 | 17323662 | SNV | 1 | T | C | Heterozygous |
| NC_037638.1 | 17334800 | SNV | 1 | T | C | Homozygous   |
| NC_037638.1 | 17334827 | SNV | 1 | A | T | Homozygous   |
| NC_037638.1 | 17334830 | SNV | 1 | A | G | Homozygous   |
| NC_037638.1 | 17334834 | SNV | 1 | T | C | Homozygous   |
| NC_037638.1 | 17334846 | SNV | 1 | A | T | Homozygous   |
| NC_037638.1 | 17334851 | SNV | 1 | T | A | Homozygous   |
| NC_037638.1 | 17336223 | SNV | 1 | C | T | Heterozygous |
| NC_037638.1 | 17336236 | SNV | 1 | T | C | Heterozygous |
| NC_037638.1 | 17336252 | SNV | 1 | G | T | Homozygous   |
| NC_037638.1 | 17336275 | SNV | 1 | T | C | Homozygous   |
| NC_037638.1 | 17339105 | SNV | 1 | C | T | Heterozygous |
| NC_037638.1 | 17342856 | SNV | 1 | C | A | Homozygous   |
| NC_037638.1 | 17342919 | SNV | 1 | T | G | Homozygous   |
| NC_037638.1 | 17342930 | SNV | 1 | A | T | Homozygous   |
| NC_037638.1 | 17359236 | SNV | 1 | T | A | Homozygous   |
| NC_037638.1 | 17359245 | SNV | 1 | A | T | Homozygous   |
| NC_037638.1 | 17371076 | SNV | 1 | A | T | Homozygous   |
| NC_037638.1 | 17371157 | SNV | 1 | G | T | Heterozygous |
| NC_037638.1 | 17371259 | SNV | 1 | A | G | Heterozygous |
| NC_037638.1 | 17371264 | SNV | 1 | G | A | Homozygous   |
| NC_037638.1 | 17374222 | SNV | 1 | T | A | Homozygous   |
| NC_037638.1 | 17374228 | SNV | 1 | T | G | Homozygous   |
| NC_037638.1 | 17374260 | SNV | 1 | T | G | Homozygous   |
| NC_037638.1 | 17393704 | SNV | 1 | G | A | Homozygous   |
| NC_037638.1 | 17393720 | SNV | 1 | T | C | Homozygous   |
| NC_037638.1 | 17393723 | SNV | 1 | A | T | Homozygous   |
| NC_037638.1 | 17458556 | SNV | 1 | T | C | Heterozygous |
| NC_037638.1 | 17458581 | SNV | 1 | G | A | Homozygous   |
| NC_037638.1 | 17462584 | SNV | 1 | G | A | Heterozygous |
| NC_037638.1 | 17463106 | SNV | 1 | A | G | Homozygous   |
| NC_037638.1 | 17470364 | SNV | 1 | C | G | Heterozygous |
| NC_037638.1 | 17470466 | SNV | 1 | G | T | Homozygous   |
| NC_037638.1 | 17470469 | SNV | 1 | G | C | Heterozygous |
| NC_037638.1 | 17471283 | SNV | 1 | C | T | Homozygous   |
| NC_037638.1 | 17471404 | SNV | 1 | A | G | Homozygous   |
| NC_037638.1 | 17475592 | SNV | 1 | C | T | Homozygous   |
| NC_037638.1 | 17475619 | SNV | 1 | G | A | Homozygous   |
| NC_037638.1 | 17475625 | SNV | 1 | G | A | Homozygous   |

|             |          |     |   |   |   |              |
|-------------|----------|-----|---|---|---|--------------|
| NC_037638.1 | 17475629 | SNV | 1 | T | C | Homozygous   |
| NC_037638.1 | 17475654 | SNV | 1 | T | C | Homozygous   |
| NC_037638.1 | 17475672 | SNV | 1 | C | T | Heterozygous |
| NC_037638.1 | 17475690 | SNV | 1 | T | G | Heterozygous |
| NC_037638.1 | 17475736 | SNV | 1 | T | C | Homozygous   |
| NC_037638.1 | 17475866 | SNV | 1 | T | C | Homozygous   |
| NC_037638.1 | 17555079 | SNV | 1 | A | G | Homozygous   |
| NC_037638.1 | 17555127 | SNV | 1 | A | G | Heterozygous |
| NC_037638.1 | 17555129 | SNV | 1 | G | T | Heterozygous |
| NC_037638.1 | 17555177 | SNV | 1 | C | G | Homozygous   |
| NC_037638.1 | 17555187 | SNV | 1 | T | A | Homozygous   |
| NC_037638.1 | 17560482 | SNV | 1 | A | G | Heterozygous |
| NC_037638.1 | 17560916 | SNV | 1 | C | T | Homozygous   |
| NC_037638.1 | 17563009 | SNV | 1 | A | G | Homozygous   |
| NC_037638.1 | 17572199 | SNV | 1 | C | T | Heterozygous |
| NC_037638.1 | 17572286 | SNV | 1 | G | A | Heterozygous |
| NC_037638.1 | 17572329 | SNV | 1 | C | G | Heterozygous |
| NC_037638.1 | 17579907 | SNV | 1 | T | A | Heterozygous |
| NC_037638.1 | 17580072 | SNV | 1 | G | A | Heterozygous |
| NC_037638.1 | 17580794 | SNV | 1 | A | G | Heterozygous |
| NC_037638.1 | 17580795 | SNV | 1 | A | G | Heterozygous |
| NC_037638.1 | 17581682 | SNV | 1 | A | C | Heterozygous |
| NC_037638.1 | 17581684 | SNV | 1 | A | T | Heterozygous |
| NC_037638.1 | 17581686 | SNV | 1 | G | A | Heterozygous |
| NC_037638.1 | 17582233 | SNV | 1 | A | G | Heterozygous |
| NC_037638.1 | 17582353 | SNV | 1 | T | C | Homozygous   |
| NC_037638.1 | 17582608 | SNV | 1 | G | A | Heterozygous |
| NC_037638.1 | 17582857 | SNV | 1 | C | T | Homozygous   |
| NC_037638.1 | 17582915 | SNV | 1 | C | T | Heterozygous |
| NC_037638.1 | 17583240 | SNV | 1 | A | G | Homozygous   |
| NC_037638.1 | 17583646 | SNV | 1 | T | C | Homozygous   |
| NC_037638.1 | 17583674 | SNV | 1 | A | G | Homozygous   |
| NC_037638.1 | 17584809 | SNV | 1 | T | C | Heterozygous |
| NC_037638.1 | 17584954 | SNV | 1 | T | C | Homozygous   |
| NC_037638.1 | 17585442 | SNV | 1 | T | C | Homozygous   |
| NC_037638.1 | 17585849 | SNV | 1 | A | G | Homozygous   |
| NC_037638.1 | 17586728 | SNV | 1 | A | T | Heterozygous |
| NC_037638.1 | 17586735 | SNV | 1 | G | A | Heterozygous |
| NC_037638.1 | 17586821 | SNV | 1 | A | G | Homozygous   |
| NC_037638.1 | 17586838 | SNV | 1 | G | A | Homozygous   |
| NC_037638.1 | 17586856 | SNV | 1 | G | A | Heterozygous |
| NC_037638.1 | 17586856 | SNV | 1 | G | T | Heterozygous |
| NC_037638.1 | 17587140 | SNV | 1 | T | C | Homozygous   |
| NC_037638.1 | 17590460 | SNV | 1 | C | T | Heterozygous |
| NC_037638.1 | 17590477 | SNV | 1 | T | C | Homozygous   |
| NC_037638.1 | 17590914 | SNV | 1 | C | T | Heterozygous |
| NC_037638.1 | 17591864 | SNV | 1 | A | C | Homozygous   |
| NC_037638.1 | 17591876 | SNV | 1 | A | C | Heterozygous |
| NC_037638.1 | 17592304 | SNV | 1 | G | A | Heterozygous |
| NC_037638.1 | 17592369 | SNV | 1 | C | T | Heterozygous |
| NC_037638.1 | 17603413 | SNV | 1 | T | C | Heterozygous |

|             |          |     |   |   |   |              |
|-------------|----------|-----|---|---|---|--------------|
| NC_037638.1 | 17604839 | SNV | 1 | G | A | Heterozygous |
| NC_037638.1 | 17606371 | SNV | 1 | T | C | Homozygous   |
| NC_037638.1 | 17606377 | SNV | 1 | C | T | Heterozygous |
| NC_037638.1 | 17607131 | SNV | 1 | A | G | Homozygous   |
| NC_037638.1 | 17607527 | SNV | 1 | A | T | Homozygous   |
| NC_037638.1 | 17637712 | SNV | 1 | A | G | Heterozygous |
| NC_037638.1 | 17637715 | SNV | 1 | T | A | Heterozygous |
| NC_037638.1 | 17637717 | SNV | 1 | C | T | Heterozygous |
| NC_037638.1 | 17637724 | SNV | 1 | T | A | Heterozygous |
| NC_037638.1 | 17637730 | SNV | 1 | A | T | Heterozygous |
| NC_037638.1 | 17637771 | SNV | 1 | A | T | Heterozygous |
| NC_037638.1 | 17672218 | SNV | 1 | A | C | Homozygous   |
| NC_037638.1 | 17672222 | SNV | 1 | A | C | Homozygous   |
| NC_037638.1 | 17706423 | SNV | 1 | C | G | Homozygous   |
| NC_037638.1 | 17706455 | SNV | 1 | C | T | Heterozygous |
| NC_037638.1 | 17706473 | SNV | 1 | C | T | Homozygous   |
| NC_037638.1 | 17706476 | SNV | 1 | C | T | Homozygous   |
| NC_037638.1 | 17707646 | SNV | 1 | C | G | Heterozygous |
| NC_037638.1 | 17707649 | SNV | 1 | C | A | Heterozygous |
| NC_037638.1 | 17707688 | SNV | 1 | C | A | Heterozygous |
| NC_037638.1 | 17731136 | SNV | 1 | A | T | Homozygous   |
| NC_037638.1 | 17731160 | SNV | 1 | G | A | Homozygous   |
| NC_037638.1 | 17731164 | SNV | 1 | A | C | Homozygous   |
| NC_037638.1 | 17731171 | SNV | 1 | G | A | Homozygous   |
| NC_037638.1 | 17731178 | SNV | 1 | A | T | Homozygous   |
| NC_037638.1 | 17755423 | SNV | 1 | T | G | Homozygous   |
| NC_037638.1 | 17755449 | SNV | 1 | C | T | Homozygous   |
| NC_037638.1 | 17755454 | SNV | 1 | C | T | Homozygous   |
| NC_037638.1 | 17755456 | SNV | 1 | C | G | Homozygous   |
| NC_037638.1 | 17755460 | SNV | 1 | T | G | Heterozygous |
| NC_037638.1 | 17757790 | SNV | 1 | G | C | Homozygous   |
| NC_037638.1 | 17888456 | SNV | 1 | G | A | Homozygous   |
| NC_037638.1 | 17891473 | SNV | 1 | C | T | Heterozygous |
| NC_037638.1 | 17891630 | SNV | 1 | A | G | Heterozygous |
| NC_037638.1 | 17891718 | SNV | 1 | C | T | Heterozygous |
| NC_037638.1 | 17891744 | SNV | 1 | C | T | Heterozygous |
| NC_037638.1 | 17893367 | SNV | 1 | T | A | Heterozygous |
| NC_037638.1 | 17893369 | SNV | 1 | C | A | Heterozygous |
| NC_037638.1 | 17893378 | SNV | 1 | A | G | Heterozygous |
| NC_037638.1 | 17895353 | SNV | 1 | A | C | Homozygous   |
| NC_037638.1 | 17936396 | SNV | 1 | G | A | Homozygous   |
| NC_037638.1 | 17936573 | SNV | 1 | C | T | Homozygous   |
| NC_037638.1 | 17936616 | SNV | 1 | G | T | Heterozygous |
| NC_037638.1 | 17936622 | SNV | 1 | A | T | Heterozygous |
| NC_037638.1 | 17936750 | SNV | 1 | A | G | Homozygous   |
| NC_037638.1 | 17980605 | SNV | 1 | A | C | Homozygous   |
| NC_037638.1 | 17980691 | SNV | 1 | T | C | Homozygous   |
| NC_037638.1 | 17980769 | SNV | 1 | G | A | Homozygous   |
| NC_037638.1 | 17983464 | SNV | 1 | G | T | Heterozygous |
| NC_037638.1 | 17983547 | SNV | 1 | C | T | Heterozygous |
| NC_037638.1 | 18006487 | SNV | 1 | A | C | Homozygous   |

|             |          |     |   |   |   |              |
|-------------|----------|-----|---|---|---|--------------|
| NC_037638.1 | 18016832 | SNV | 1 | G | A | Heterozygous |
| NC_037638.1 | 18022843 | SNV | 1 | C | T | Heterozygous |
| NC_037638.1 | 18022991 | SNV | 1 | G | A | Homozygous   |
| NC_037638.1 | 18023246 | SNV | 1 | C | T | Heterozygous |
| NC_037638.1 | 18023253 | SNV | 1 | C | T | Heterozygous |
| NC_037638.1 | 18023272 | SNV | 1 | C | T | Heterozygous |
| NC_037638.1 | 18028869 | SNV | 1 | G | A | Homozygous   |
| NC_037638.1 | 18036046 | SNV | 1 | G | A | Homozygous   |
| NC_037638.1 | 18036067 | SNV | 1 | C | T | Heterozygous |
| NC_037638.1 | 18037190 | SNV | 1 | A | G | Heterozygous |
| NC_037638.1 | 18037217 | SNV | 1 | A | C | Heterozygous |
| NC_037638.1 | 18041482 | SNV | 1 | A | T | Homozygous   |
| NC_037638.1 | 18043598 | SNV | 1 | C | T | Heterozygous |
| NC_037638.1 | 18062733 | SNV | 1 | A | T | Homozygous   |
| NC_037638.1 | 18062735 | SNV | 1 | A | G | Homozygous   |
| NC_037638.1 | 18062737 | SNV | 1 | A | T | Homozygous   |
| NC_037638.1 | 18096586 | SNV | 1 | A | T | Homozygous   |
| NC_037638.1 | 18096592 | SNV | 1 | A | G | Heterozygous |
| NC_037638.1 | 18096594 | SNV | 1 | G | A | Homozygous   |
| NC_037638.1 | 18125039 | SNV | 1 | A | G | Heterozygous |
| NC_037638.1 | 18168051 | SNV | 1 | A | G | Heterozygous |
| NC_037638.1 | 18168260 | SNV | 1 | G | T | Homozygous   |
| NC_037638.1 | 18168262 | SNV | 1 | A | T | Homozygous   |
| NC_037638.1 | 18183181 | SNV | 1 | C | T | Heterozygous |
| NC_037638.1 | 18300113 | SNV | 1 | C | T | Heterozygous |
| NC_037638.1 | 18300254 | SNV | 1 | T | C | Homozygous   |
| NC_037638.1 | 18300510 | SNV | 1 | T | C | Homozygous   |
| NC_037638.1 | 18300636 | SNV | 1 | C | T | Heterozygous |
| NC_037638.1 | 18300858 | SNV | 1 | T | C | Homozygous   |
| NC_037638.1 | 18302096 | SNV | 1 | G | A | Homozygous   |
| NC_037638.1 | 18305823 | SNV | 1 | T | C | Homozygous   |
| NC_037638.1 | 18317835 | SNV | 1 | A | C | Homozygous   |
| NC_037638.1 | 18318396 | SNV | 1 | T | C | Homozygous   |
| NC_037638.1 | 18318602 | SNV | 1 | A | G | Heterozygous |
| NC_037638.1 | 18318908 | SNV | 1 | G | A | Homozygous   |
| NC_037638.1 | 18318957 | SNV | 1 | T | C | Homozygous   |
| NC_037638.1 | 18320040 | SNV | 1 | T | A | Heterozygous |
| NC_037638.1 | 18320043 | SNV | 1 | A | G | Homozygous   |
| NC_037638.1 | 18320067 | SNV | 1 | T | C | Homozygous   |
| NC_037638.1 | 18320187 | SNV | 1 | C | T | Homozygous   |
| NC_037638.1 | 18320196 | SNV | 1 | A | G | Homozygous   |
| NC_037638.1 | 18320225 | SNV | 1 | T | A | Homozygous   |
| NC_037638.1 | 18320783 | SNV | 1 | C | T | Heterozygous |
| NC_037638.1 | 18320838 | SNV | 1 | T | C | Heterozygous |
| NC_037638.1 | 18322317 | SNV | 1 | C | T | Homozygous   |
| NC_037638.1 | 18322320 | SNV | 1 | C | T | Heterozygous |
| NC_037638.1 | 18322342 | SNV | 1 | C | T | Heterozygous |
| NC_037638.1 | 18322380 | SNV | 1 | T | C | Homozygous   |
| NC_037638.1 | 18324712 | SNV | 1 | G | A | Heterozygous |
| NC_037638.1 | 18324721 | SNV | 1 | A | G | Heterozygous |
| NC_037638.1 | 18325957 | SNV | 1 | T | C | Heterozygous |



|             |          |     |   |   |   |              |
|-------------|----------|-----|---|---|---|--------------|
| NC_037638.1 | 18325993 | SNV | 1 | G | A | Homozygous   |
| NC_037638.1 | 18326311 | SNV | 1 | T | C | Homozygous   |
| NC_037638.1 | 18326341 | SNV | 1 | A | G | Homozygous   |
| NC_037638.1 | 18326365 | SNV | 1 | C | T | Homozygous   |
| NC_037638.1 | 18326377 | SNV | 1 | T | C | Homozygous   |
| NC_037638.1 | 18326423 | SNV | 1 | A | G | Homozygous   |
| NC_037638.1 | 18326515 | SNV | 1 | G | A | Heterozygous |
| NC_037638.1 | 18326530 | SNV | 1 | C | T | Homozygous   |
| NC_037638.1 | 18326581 | SNV | 1 | A | G | Heterozygous |
| NC_037638.1 | 18326605 | SNV | 1 | T | C | Homozygous   |
| NC_037638.1 | 18326614 | SNV | 1 | A | G | Homozygous   |
| NC_037638.1 | 18327238 | SNV | 1 | C | T | Homozygous   |
| NC_037638.1 | 18327241 | SNV | 1 | T | C | Homozygous   |
| NC_037638.1 | 18327256 | SNV | 1 | A | G | Homozygous   |
| NC_037638.1 | 18327295 | SNV | 1 | G | A | Heterozygous |
| NC_037638.1 | 18327367 | SNV | 1 | A | G | Homozygous   |
| NC_037638.1 | 18328483 | SNV | 1 | T | C | Homozygous   |
| NC_037638.1 | 18328540 | SNV | 1 | G | A | Heterozygous |
| NC_037638.1 | 18328828 | SNV | 1 | C | A | Heterozygous |
| NC_037638.1 | 18328933 | SNV | 1 | T | C | Homozygous   |
| NC_037638.1 | 18328960 | SNV | 1 | A | G | Homozygous   |
| NC_037638.1 | 18329098 | SNV | 1 | T | C | Homozygous   |
| NC_037638.1 | 18329110 | SNV | 1 | A | G | Homozygous   |
| NC_037638.1 | 18329227 | SNV | 1 | G | A | Heterozygous |
| NC_037638.1 | 18329284 | SNV | 1 | G | A | Heterozygous |
| NC_037638.1 | 18329344 | SNV | 1 | A | G | Homozygous   |
| NC_037638.1 | 18329488 | SNV | 1 | A | G | Homozygous   |
| NC_037638.1 | 18329560 | SNV | 1 | A | G | Homozygous   |
| NC_037638.1 | 18329584 | SNV | 1 | C | T | Homozygous   |
| NC_037638.1 | 18330618 | SNV | 1 | G | A | Heterozygous |
| NC_037638.1 | 18330639 | SNV | 1 | A | G | Heterozygous |
| NC_037638.1 | 18330708 | SNV | 1 | G | A | Homozygous   |
| NC_037638.1 | 18330939 | SNV | 1 | C | T | Heterozygous |
| NC_037638.1 | 18330954 | SNV | 1 | A | G | Homozygous   |
| NC_037638.1 | 18331155 | SNV | 1 | C | T | Heterozygous |
| NC_037638.1 | 18333374 | SNV | 1 | C | T | Homozygous   |
| NC_037638.1 | 18333854 | SNV | 1 | T | C | Homozygous   |
| NC_037638.1 | 18334016 | SNV | 1 | A | C | Homozygous   |
| NC_037638.1 | 18334415 | SNV | 1 | T | C | Homozygous   |
| NC_037638.1 | 18335066 | SNV | 1 | T | C | Homozygous   |
| NC_037638.1 | 18335372 | SNV | 1 | A | G | Heterozygous |
| NC_037638.1 | 18335375 | SNV | 1 | T | C | Heterozygous |
| NC_037638.1 | 18335378 | SNV | 1 | T | C | Homozygous   |
| NC_037638.1 | 18336252 | SNV | 1 | C | A | Homozygous   |
| NC_037638.1 | 18336444 | SNV | 1 | G | A | Heterozygous |
| NC_037638.1 | 18336459 | SNV | 1 | A | G | Homozygous   |
| NC_037638.1 | 18336729 | SNV | 1 | C | T | Heterozygous |
| NC_037638.1 | 18336735 | SNV | 1 | G | A | Heterozygous |
| NC_037638.1 | 18337515 | SNV | 1 | A | G | Homozygous   |
| NC_037638.1 | 18337890 | SNV | 1 | G | A | Heterozygous |
| NC_037638.1 | 18338017 | SNV | 1 | C | T | Heterozygous |

|             |          |     |   |   |   |              |
|-------------|----------|-----|---|---|---|--------------|
| NC_037638.1 | 18338056 | SNV | 1 | T | C | Homozygous   |
| NC_037638.1 | 18338112 | SNV | 1 | A | G | Homozygous   |
| NC_037638.1 | 18338144 | SNV | 1 | A | G | Homozygous   |
| NC_037638.1 | 18338160 | SNV | 1 | A | G | Homozygous   |
| NC_037638.1 | 18338238 | SNV | 1 | T | C | Heterozygous |
| NC_037638.1 | 18338643 | SNV | 1 | A | G | Heterozygous |
| NC_037638.1 | 18338647 | SNV | 1 | T | C | Homozygous   |
| NC_037638.1 | 18338664 | SNV | 1 | T | C | Homozygous   |
| NC_037638.1 | 18338673 | SNV | 1 | C | T | Homozygous   |
| NC_037638.1 | 18338783 | SNV | 1 | G | A | Heterozygous |
| NC_037638.1 | 18338796 | SNV | 1 | T | C | Heterozygous |
| NC_037638.1 | 18338819 | SNV | 1 | C | T | Heterozygous |
| NC_037638.1 | 18338842 | SNV | 1 | T | C | Homozygous   |
| NC_037638.1 | 18338904 | SNV | 1 | T | C | Homozygous   |
| NC_037638.1 | 18338928 | SNV | 1 | T | C | Homozygous   |
| NC_037638.1 | 18339126 | SNV | 1 | C | T | Heterozygous |
| NC_037638.1 | 18339213 | SNV | 1 | G | A | Heterozygous |
| NC_037638.1 | 18339886 | SNV | 1 | C | T | Heterozygous |
| NC_037638.1 | 18340096 | SNV | 1 | G | A | Heterozygous |
| NC_037638.1 | 18340288 | SNV | 1 | C | G | Homozygous   |
| NC_037638.1 | 18340340 | SNV | 1 | T | C | Homozygous   |
| NC_037638.1 | 18340384 | SNV | 1 | A | G | Heterozygous |
| NC_037638.1 | 18340639 | SNV | 1 | C | T | Heterozygous |
| NC_037638.1 | 18341075 | SNV | 1 | A | T | Homozygous   |
| NC_037638.1 | 18341597 | SNV | 1 | C | T | Heterozygous |
| NC_037638.1 | 18341953 | SNV | 1 | C | A | Homozygous   |
| NC_037638.1 | 18341976 | SNV | 1 | A | G | Homozygous   |
| NC_037638.1 | 18342036 | SNV | 1 | A | G | Homozygous   |
| NC_037638.1 | 18342204 | SNV | 1 | G | A | Heterozygous |
| NC_037638.1 | 18342210 | SNV | 1 | T | C | Heterozygous |
| NC_037638.1 | 18342345 | SNV | 1 | A | G | Heterozygous |
| NC_037638.1 | 18342598 | SNV | 1 | T | C | Homozygous   |
| NC_037638.1 | 18343125 | SNV | 1 | G | A | Heterozygous |
| NC_037638.1 | 18343134 | SNV | 1 | A | G | Heterozygous |
| NC_037638.1 | 18343290 | SNV | 1 | C | G | Homozygous   |
| NC_037638.1 | 18346863 | SNV | 1 | A | G | Homozygous   |
| NC_037638.1 | 18346986 | SNV | 1 | G | A | Homozygous   |
| NC_037638.1 | 18346993 | SNV | 1 | C | T | Homozygous   |
| NC_037638.1 | 18348028 | SNV | 1 | A | T | Homozygous   |
| NC_037638.1 | 18348368 | SNV | 1 | T | C | Homozygous   |
| NC_037638.1 | 18348734 | SNV | 1 | G | C | Heterozygous |
| NC_037638.1 | 18348968 | SNV | 1 | A | G | Heterozygous |
| NC_037638.1 | 18349089 | SNV | 1 | A | G | Homozygous   |
| NC_037638.1 | 18349106 | SNV | 1 | C | A | Homozygous   |
| NC_037638.1 | 18349205 | SNV | 1 | T | C | Homozygous   |
| NC_037638.1 | 18349247 | SNV | 1 | C | T | Heterozygous |
| NC_037638.1 | 18349297 | SNV | 1 | G | A | Heterozygous |
| NC_037638.1 | 18349395 | SNV | 1 | G | T | Homozygous   |
| NC_037638.1 | 18349418 | SNV | 1 | C | T | Heterozygous |
| NC_037638.1 | 18349725 | SNV | 1 | A | T | Homozygous   |
| NC_037638.1 | 18349727 | SNV | 1 | T | A | Homozygous   |

|             |          |     |   |   |   |              |
|-------------|----------|-----|---|---|---|--------------|
| NC_037638.1 | 18349903 | SNV | 1 | G | A | Heterozygous |
| NC_037638.1 | 18356624 | SNV | 1 | C | A | Homozygous   |
| NC_037638.1 | 18357669 | SNV | 1 | A | G | Heterozygous |
| NC_037638.1 | 18358672 | SNV | 1 | T | G | Homozygous   |
| NC_037638.1 | 18358682 | SNV | 1 | T | G | Homozygous   |
| NC_037638.1 | 18358690 | SNV | 1 | A | T | Heterozygous |
| NC_037638.1 | 18358696 | SNV | 1 | T | G | Heterozygous |
| NC_037638.1 | 18358725 | SNV | 1 | G | T | Heterozygous |
| NC_037638.1 | 18360680 | SNV | 1 | A | G | Heterozygous |
| NC_037638.1 | 18361049 | SNV | 1 | A | G | Heterozygous |
| NC_037638.1 | 18361094 | SNV | 1 | C | T | Heterozygous |
| NC_037638.1 | 18361331 | SNV | 1 | A | G | Homozygous   |
| NC_037638.1 | 18361347 | SNV | 1 | C | T | Heterozygous |
| NC_037638.1 | 18361360 | SNV | 1 | A | G | Homozygous   |
| NC_037638.1 | 18361761 | SNV | 1 | T | A | Homozygous   |
| NC_037638.1 | 18361770 | SNV | 1 | C | T | Homozygous   |
| NC_037638.1 | 18361974 | SNV | 1 | A | G | Homozygous   |
| NC_037638.1 | 18361996 | SNV | 1 | C | A | Homozygous   |
| NC_037638.1 | 18362074 | SNV | 1 | G | A | Homozygous   |
| NC_037638.1 | 18362184 | SNV | 1 | C | T | Heterozygous |
| NC_037638.1 | 18362194 | SNV | 1 | A | G | Heterozygous |
| NC_037638.1 | 18362880 | SNV | 1 | C | T | Heterozygous |
| NC_037638.1 | 18363015 | SNV | 1 | C | A | Homozygous   |
| NC_037638.1 | 18363024 | SNV | 1 | T | C | Homozygous   |
| NC_037638.1 | 18363081 | SNV | 1 | C | T | Heterozygous |
| NC_037638.1 | 18363105 | SNV | 1 | C | G | Heterozygous |
| NC_037638.1 | 18363175 | SNV | 1 | T | C | Homozygous   |
| NC_037638.1 | 18363190 | SNV | 1 | C | T | Heterozygous |
| NC_037638.1 | 18363226 | SNV | 1 | C | T | Homozygous   |
| NC_037638.1 | 18363581 | SNV | 1 | C | T | Heterozygous |
| NC_037638.1 | 18363648 | SNV | 1 | A | G | Heterozygous |
| NC_037638.1 | 18363651 | SNV | 1 | T | C | Homozygous   |
| NC_037638.1 | 18363678 | SNV | 1 | A | G | Heterozygous |
| NC_037638.1 | 18363686 | SNV | 1 | C | T | Homozygous   |
| NC_037638.1 | 18363796 | SNV | 1 | A | G | Homozygous   |
| NC_037638.1 | 18363819 | SNV | 1 | G | A | Heterozygous |
| NC_037638.1 | 18363828 | SNV | 1 | T | C | Homozygous   |
| NC_037638.1 | 18363831 | SNV | 1 | C | T | Heterozygous |
| NC_037638.1 | 18364002 | SNV | 1 | T | C | Heterozygous |
| NC_037638.1 | 18364098 | SNV | 1 | A | G | Homozygous   |
| NC_037638.1 | 18364161 | SNV | 1 | A | G | Homozygous   |
| NC_037638.1 | 18364165 | SNV | 1 | A | G | Homozygous   |
| NC_037638.1 | 18364374 | SNV | 1 | A | G | Heterozygous |
| NC_037638.1 | 18364407 | SNV | 1 | A | G | Homozygous   |
| NC_037638.1 | 18364588 | SNV | 1 | C | T | Homozygous   |
| NC_037638.1 | 18364830 | SNV | 1 | G | A | Homozygous   |
| NC_037638.1 | 18364837 | SNV | 1 | C | T | Homozygous   |
| NC_037638.1 | 18364839 | SNV | 1 | A | G | Homozygous   |
| NC_037638.1 | 18364958 | SNV | 1 | C | T | Heterozygous |
| NC_037638.1 | 18365017 | SNV | 1 | T | C | Homozygous   |
| NC_037638.1 | 18365062 | SNV | 1 | A | G | Homozygous   |

|             |          |     |   |   |   |              |
|-------------|----------|-----|---|---|---|--------------|
| NC_037638.1 | 18365148 | SNV | 1 | G | A | Heterozygous |
| NC_037638.1 | 18365174 | SNV | 1 | G | C | Homozygous   |
| NC_037638.1 | 18365182 | SNV | 1 | C | G | Homozygous   |
| NC_037638.1 | 18365191 | SNV | 1 | A | C | Homozygous   |
| NC_037638.1 | 18365193 | SNV | 1 | A | G | Homozygous   |
| NC_037638.1 | 18365377 | SNV | 1 | C | T | Heterozygous |
| NC_037638.1 | 18365450 | SNV | 1 | G | A | Heterozygous |
| NC_037638.1 | 18365570 | SNV | 1 | T | C | Homozygous   |
| NC_037638.1 | 18365612 | SNV | 1 | A | G | Homozygous   |
| NC_037638.1 | 18365812 | SNV | 1 | C | T | Heterozygous |
| NC_037638.1 | 18365850 | SNV | 1 | C | T | Heterozygous |
| NC_037638.1 | 18365917 | SNV | 1 | A | C | Heterozygous |
| NC_037638.1 | 18365945 | SNV | 1 | C | T | Heterozygous |
| NC_037638.1 | 18365980 | SNV | 1 | A | T | Heterozygous |
| NC_037638.1 | 18366139 | SNV | 1 | C | T | Heterozygous |
| NC_037638.1 | 18366153 | SNV | 1 | T | C | Homozygous   |
| NC_037638.1 | 18366174 | SNV | 1 | A | G | Homozygous   |
| NC_037638.1 | 18366234 | SNV | 1 | A | T | Heterozygous |
| NC_037638.1 | 18366347 | SNV | 1 | T | C | Homozygous   |
| NC_037638.1 | 18366828 | SNV | 1 | G | A | Homozygous   |
| NC_037638.1 | 18366866 | SNV | 1 | G | A | Homozygous   |
| NC_037638.1 | 18366889 | SNV | 1 | G | A | Heterozygous |
| NC_037638.1 | 18366926 | SNV | 1 | A | G | Heterozygous |
| NC_037638.1 | 18366984 | SNV | 1 | G | A | Heterozygous |
| NC_037638.1 | 18367049 | SNV | 1 | T | C | Heterozygous |
| NC_037638.1 | 18367159 | SNV | 1 | A | G | Homozygous   |
| NC_037638.1 | 18367178 | SNV | 1 | C | T | Homozygous   |
| NC_037638.1 | 18367245 | SNV | 1 | T | C | Homozygous   |
| NC_037638.1 | 18367266 | SNV | 1 | G | A | Homozygous   |
| NC_037638.1 | 18367279 | SNV | 1 | A | G | Homozygous   |
| NC_037638.1 | 18367818 | SNV | 1 | T | C | Heterozygous |
| NC_037638.1 | 18368208 | SNV | 1 | A | G | Heterozygous |
| NC_037638.1 | 18368218 | SNV | 1 | G | A | Heterozygous |
| NC_037638.1 | 18368233 | SNV | 1 | A | G | Heterozygous |
| NC_037638.1 | 18368247 | SNV | 1 | G | A | Heterozygous |
| NC_037638.1 | 18368394 | SNV | 1 | G | A | Homozygous   |
| NC_037638.1 | 18368583 | SNV | 1 | T | C | Homozygous   |
| NC_037638.1 | 18368635 | SNV | 1 | G | A | Heterozygous |
| NC_037638.1 | 18368898 | SNV | 1 | G | A | Heterozygous |
| NC_037638.1 | 18369018 | SNV | 1 | C | T | Heterozygous |
| NC_037638.1 | 18369074 | SNV | 1 | G | A | Heterozygous |
| NC_037638.1 | 18369135 | SNV | 1 | G | A | Homozygous   |
| NC_037638.1 | 18369330 | SNV | 1 | A | T | Heterozygous |
| NC_037638.1 | 18369377 | SNV | 1 | A | T | Heterozygous |
| NC_037638.1 | 18369606 | SNV | 1 | G | A | Heterozygous |
| NC_037638.1 | 18369634 | SNV | 1 | C | G | Homozygous   |
| NC_037638.1 | 18369642 | SNV | 1 | T | A | Homozygous   |
| NC_037638.1 | 18369681 | SNV | 1 | G | A | Heterozygous |
| NC_037638.1 | 18369705 | SNV | 1 | G | A | Heterozygous |
| NC_037638.1 | 18369986 | SNV | 1 | T | C | Heterozygous |
| NC_037638.1 | 18370022 | SNV | 1 | T | C | Heterozygous |

|             |          |     |   |   |   |              |
|-------------|----------|-----|---|---|---|--------------|
| NC_037638.1 | 18370090 | SNV | 1 | T | C | Heterozygous |
| NC_037638.1 | 18370126 | SNV | 1 | C | T | Homozygous   |
| NC_037638.1 | 18370176 | SNV | 1 | A | G | Homozygous   |
| NC_037638.1 | 18370219 | SNV | 1 | G | A | Homozygous   |
| NC_037638.1 | 18370222 | SNV | 1 | C | T | Homozygous   |
| NC_037638.1 | 18370294 | SNV | 1 | G | A | Heterozygous |
| NC_037638.1 | 18370482 | SNV | 1 | G | A | Heterozygous |
| NC_037638.1 | 18370503 | SNV | 1 | G | A | Heterozygous |
| NC_037638.1 | 18370510 | SNV | 1 | A | G | Homozygous   |
| NC_037638.1 | 18370571 | SNV | 1 | T | C | Heterozygous |
| NC_037638.1 | 18370646 | SNV | 1 | T | C | Homozygous   |
| NC_037638.1 | 18370659 | SNV | 1 | C | T | Heterozygous |
| NC_037638.1 | 18370898 | SNV | 1 | C | T | Homozygous   |
| NC_037638.1 | 18371067 | SNV | 1 | G | A | Heterozygous |
| NC_037638.1 | 18371103 | SNV | 1 | G | A | Heterozygous |
| NC_037638.1 | 18371112 | SNV | 1 | T | C | Homozygous   |
| NC_037638.1 | 18371152 | SNV | 1 | A | G | Homozygous   |
| NC_037638.1 | 18371262 | SNV | 1 | A | G | Homozygous   |
| NC_037638.1 | 18371334 | SNV | 1 | T | G | Homozygous   |
| NC_037638.1 | 18371342 | SNV | 1 | A | G | Heterozygous |
| NC_037638.1 | 18371358 | SNV | 1 | G | A | Heterozygous |
| NC_037638.1 | 18371418 | SNV | 1 | A | G | Homozygous   |
| NC_037638.1 | 18371677 | SNV | 1 | A | G | Heterozygous |
| NC_037638.1 | 18371695 | SNV | 1 | G | A | Homozygous   |
| NC_037638.1 | 18371772 | SNV | 1 | C | T | Heterozygous |
| NC_037638.1 | 18371905 | SNV | 1 | A | G | Homozygous   |
| NC_037638.1 | 18372331 | SNV | 1 | A | G | Heterozygous |
| NC_037638.1 | 18372411 | SNV | 1 | A | G | Homozygous   |
| NC_037638.1 | 18372418 | SNV | 1 | T | C | Homozygous   |
| NC_037638.1 | 18372521 | SNV | 1 | T | A | Homozygous   |
| NC_037638.1 | 18373011 | SNV | 1 | A | T | Homozygous   |
| NC_037638.1 | 18373031 | SNV | 1 | T | C | Homozygous   |
| NC_037638.1 | 18373087 | SNV | 1 | A | G | Homozygous   |
| NC_037638.1 | 18373356 | SNV | 1 | T | C | Homozygous   |
| NC_037638.1 | 18373453 | SNV | 1 | T | C | Homozygous   |
| NC_037638.1 | 18373492 | SNV | 1 | T | C | Homozygous   |
| NC_037638.1 | 18373807 | SNV | 1 | T | C | Heterozygous |
| NC_037638.1 | 18373812 | SNV | 1 | G | T | Homozygous   |
| NC_037638.1 | 18373879 | SNV | 1 | G | A | Heterozygous |
| NC_037638.1 | 18374223 | SNV | 1 | A | G | Homozygous   |
| NC_037638.1 | 18374231 | SNV | 1 | T | C | Homozygous   |
| NC_037638.1 | 18374296 | SNV | 1 | A | G | Homozygous   |
| NC_037638.1 | 18374323 | SNV | 1 | T | C | Homozygous   |
| NC_037638.1 | 18374355 | SNV | 1 | A | G | Heterozygous |
| NC_037638.1 | 18374376 | SNV | 1 | A | G | Homozygous   |
| NC_037638.1 | 18374384 | SNV | 1 | C | T | Heterozygous |
| NC_037638.1 | 18374450 | SNV | 1 | T | C | Heterozygous |
| NC_037638.1 | 18374456 | SNV | 1 | C | T | Heterozygous |
| NC_037638.1 | 18374471 | SNV | 1 | T | C | Heterozygous |
| NC_037638.1 | 18374480 | SNV | 1 | T | C | Homozygous   |
| NC_037638.1 | 18374601 | SNV | 1 | A | G | Heterozygous |

|             |          |     |   |   |   |              |
|-------------|----------|-----|---|---|---|--------------|
| NC_037638.1 | 18374650 | SNV | 1 | A | G | Homozygous   |
| NC_037638.1 | 18374718 | SNV | 1 | C | T | Homozygous   |
| NC_037638.1 | 18374799 | SNV | 1 | C | T | Heterozygous |
| NC_037638.1 | 18375117 | SNV | 1 | G | A | Heterozygous |
| NC_037638.1 | 18375381 | SNV | 1 | C | T | Heterozygous |
| NC_037638.1 | 18375501 | SNV | 1 | A | T | Heterozygous |
| NC_037638.1 | 18377169 | SNV | 1 | T | C | Homozygous   |
| NC_037638.1 | 18377392 | SNV | 1 | T | C | Homozygous   |
| NC_037638.1 | 18377428 | SNV | 1 | A | G | Homozygous   |
| NC_037638.1 | 18377608 | SNV | 1 | A | G | Heterozygous |
| NC_037638.1 | 18378012 | SNV | 1 | G | A | Heterozygous |
| NC_037638.1 | 18378442 | SNV | 1 | A | G | Homozygous   |
| NC_037638.1 | 18378571 | SNV | 1 | G | A | Homozygous   |
| NC_037638.1 | 18379218 | SNV | 1 | A | G | Heterozygous |
| NC_037638.1 | 18379357 | SNV | 1 | A | G | Homozygous   |
| NC_037638.1 | 18380007 | SNV | 1 | C | T | Heterozygous |
| NC_037638.1 | 18380117 | SNV | 1 | C | T | Heterozygous |
| NC_037638.1 | 18380915 | SNV | 1 | T | A | Heterozygous |
| NC_037638.1 | 18381281 | SNV | 1 | G | T | Heterozygous |
| NC_037638.1 | 18381290 | SNV | 1 | G | A | Homozygous   |
| NC_037638.1 | 18381437 | SNV | 1 | A | C | Heterozygous |
| NC_037638.1 | 18381611 | SNV | 1 | A | G | Homozygous   |
| NC_037638.1 | 18381821 | SNV | 1 | C | T | Heterozygous |
| NC_037638.1 | 18381968 | SNV | 1 | A | G | Homozygous   |
| NC_037638.1 | 18382002 | SNV | 1 | G | A | Heterozygous |
| NC_037638.1 | 18382006 | SNV | 1 | T | C | Homozygous   |
| NC_037638.1 | 18382520 | SNV | 1 | A | G | Heterozygous |
| NC_037638.1 | 18382562 | SNV | 1 | A | G | Homozygous   |
| NC_037638.1 | 18382859 | SNV | 1 | A | G | Homozygous   |
| NC_037638.1 | 18382993 | SNV | 1 | C | T | Homozygous   |
| NC_037638.1 | 18383135 | SNV | 1 | A | G | Homozygous   |
| NC_037638.1 | 18384110 | SNV | 1 | C | T | Heterozygous |
| NC_037638.1 | 18384273 | SNV | 1 | G | A | Heterozygous |
| NC_037638.1 | 18384282 | SNV | 1 | G | A | Heterozygous |
| NC_037638.1 | 18384812 | SNV | 1 | T | C | Heterozygous |
| NC_037638.1 | 18384938 | SNV | 1 | A | G | Homozygous   |
| NC_037638.1 | 18385191 | SNV | 1 | G | A | Heterozygous |
| NC_037638.1 | 18385331 | SNV | 1 | C | G | Heterozygous |
| NC_037638.1 | 18385625 | SNV | 1 | A | G | Heterozygous |
| NC_037638.1 | 18385682 | SNV | 1 | A | G | Homozygous   |
| NC_037638.1 | 18385806 | SNV | 1 | G | C | Homozygous   |
| NC_037638.1 | 18385931 | SNV | 1 | C | G | Heterozygous |
| NC_037638.1 | 18385934 | SNV | 1 | T | C | Heterozygous |
| NC_037638.1 | 18386072 | SNV | 1 | C | G | Heterozygous |
| NC_037638.1 | 18386147 | SNV | 1 | A | G | Heterozygous |
| NC_037638.1 | 18386423 | SNV | 1 | G | A | Heterozygous |
| NC_037638.1 | 18387010 | SNV | 1 | A | G | Homozygous   |
| NC_037638.1 | 18387388 | SNV | 1 | A | G | Homozygous   |
| NC_037638.1 | 18387690 | SNV | 1 | G | A | Homozygous   |
| NC_037638.1 | 18387771 | SNV | 1 | T | C | Homozygous   |
| NC_037638.1 | 18388320 | SNV | 1 | G | A | Homozygous   |

|             |          |     |   |   |   |              |
|-------------|----------|-----|---|---|---|--------------|
| NC_037638.1 | 18388695 | SNV | 1 | G | A | Heterozygous |
| NC_037638.1 | 18401601 | SNV | 1 | A | G | Homozygous   |
| NC_037638.1 | 18401841 | SNV | 1 | T | C | Homozygous   |
| NC_037638.1 | 18401925 | SNV | 1 | G | C | Heterozygous |
| NC_037638.1 | 18402126 | SNV | 1 | G | C | Homozygous   |
| NC_037638.1 | 18402136 | SNV | 1 | C | T | Homozygous   |
| NC_037638.1 | 18402336 | SNV | 1 | T | C | Homozygous   |
| NC_037638.1 | 18402379 | SNV | 1 | T | C | Homozygous   |
| NC_037638.1 | 18402477 | SNV | 1 | C | T | Homozygous   |
| NC_037638.1 | 18402726 | SNV | 1 | T | C | Homozygous   |
| NC_037638.1 | 18402748 | SNV | 1 | T | C | Homozygous   |
| NC_037638.1 | 18403057 | SNV | 1 | T | C | Homozygous   |
| NC_037638.1 | 18403176 | SNV | 1 | A | C | Homozygous   |
| NC_037638.1 | 18403344 | SNV | 1 | A | G | Homozygous   |
| NC_037638.1 | 18403353 | SNV | 1 | C | G | Homozygous   |
| NC_037638.1 | 18403629 | SNV | 1 | A | G | Heterozygous |
| NC_037638.1 | 18403734 | SNV | 1 | G | A | Heterozygous |
| NC_037638.1 | 18403825 | SNV | 1 | T | C | Homozygous   |
| NC_037638.1 | 18403965 | SNV | 1 | G | C | Heterozygous |
| NC_037638.1 | 18404118 | SNV | 1 | G | A | Homozygous   |
| NC_037638.1 | 18404253 | SNV | 1 | T | C | Homozygous   |
| NC_037638.1 | 18404262 | SNV | 1 | T | C | Heterozygous |
| NC_037638.1 | 18404271 | SNV | 1 | A | G | Heterozygous |
| NC_037638.1 | 18404306 | SNV | 1 | G | A | Homozygous   |
| NC_037638.1 | 18404467 | SNV | 1 | T | C | Heterozygous |
| NC_037638.1 | 18405190 | SNV | 1 | G | A | Heterozygous |
| NC_037638.1 | 18405325 | SNV | 1 | T | C | Heterozygous |
| NC_037638.1 | 18407298 | SNV | 1 | C | T | Homozygous   |
| NC_037638.1 | 18407364 | SNV | 1 | A | G | Homozygous   |
| NC_037638.1 | 18407383 | SNV | 1 | A | T | Heterozygous |
| NC_037638.1 | 18407386 | SNV | 1 | A | G | Homozygous   |
| NC_037638.1 | 18408228 | SNV | 1 | C | T | Homozygous   |
| NC_037638.1 | 18409396 | SNV | 1 | A | G | Heterozygous |
| NC_037638.1 | 18409403 | SNV | 1 | A | T | Heterozygous |
| NC_037638.1 | 18409433 | SNV | 1 | T | C | Heterozygous |
| NC_037638.1 | 18409435 | SNV | 1 | T | A | Heterozygous |
| NC_037638.1 | 18409438 | SNV | 1 | C | G | Heterozygous |
| NC_037638.1 | 18409442 | SNV | 1 | C | A | Homozygous   |
| NC_037638.1 | 18409673 | SNV | 1 | T | C | Homozygous   |
| NC_037638.1 | 18409897 | SNV | 1 | C | A | Heterozygous |
| NC_037638.1 | 18410169 | SNV | 1 | C | T | Heterozygous |
| NC_037638.1 | 18410200 | SNV | 1 | G | A | Heterozygous |
| NC_037638.1 | 18415591 | SNV | 1 | T | G | Heterozygous |
| NC_037638.1 | 18415834 | SNV | 1 | G | C | Heterozygous |
| NC_037638.1 | 18422055 | SNV | 1 | C | T | Heterozygous |
| NC_037638.1 | 18422430 | SNV | 1 | G | T | Heterozygous |
| NC_037638.1 | 18422472 | SNV | 1 | C | G | Heterozygous |
| NC_037638.1 | 18422481 | SNV | 1 | G | T | Heterozygous |
| NC_037638.1 | 18422588 | SNV | 1 | C | T | Homozygous   |
| NC_037638.1 | 18422614 | SNV | 1 | C | T | Heterozygous |
| NC_037638.1 | 18422652 | SNV | 1 | A | G | Homozygous   |

|             |          |     |   |   |   |              |
|-------------|----------|-----|---|---|---|--------------|
| NC_037638.1 | 18422738 | SNV | 1 | A | G | Homozygous   |
| NC_037638.1 | 18422815 | SNV | 1 | G | A | Heterozygous |
| NC_037638.1 | 18422823 | SNV | 1 | A | G | Homozygous   |
| NC_037638.1 | 18422847 | SNV | 1 | C | A | Heterozygous |
| NC_037638.1 | 18422892 | SNV | 1 | T | C | Heterozygous |
| NC_037638.1 | 18423501 | SNV | 1 | T | C | Heterozygous |
| NC_037638.1 | 18423563 | SNV | 1 | A | G | Heterozygous |
| NC_037638.1 | 18424984 | SNV | 1 | C | T | Heterozygous |
| NC_037638.1 | 18424992 | SNV | 1 | G | A | Heterozygous |
| NC_037638.1 | 18425020 | SNV | 1 | C | G | Heterozygous |
| NC_037638.1 | 18425025 | SNV | 1 | G | A | Heterozygous |
| NC_037638.1 | 18428221 | SNV | 1 | T | C | Homozygous   |
| NC_037638.1 | 18428434 | SNV | 1 | G | A | Heterozygous |
| NC_037638.1 | 18430160 | SNV | 1 | A | G | Homozygous   |
| NC_037638.1 | 18430728 | SNV | 1 | T | C | Homozygous   |
| NC_037638.1 | 18431215 | SNV | 1 | A | G | Homozygous   |
| NC_037638.1 | 18431531 | SNV | 1 | A | G | Heterozygous |
| NC_037638.1 | 18434129 | SNV | 1 | A | C | Heterozygous |
| NC_037638.1 | 18434165 | SNV | 1 | T | A | Homozygous   |
| NC_037638.1 | 18434177 | SNV | 1 | A | C | Heterozygous |
| NC_037638.1 | 18434179 | SNV | 1 | A | T | Homozygous   |
| NC_037638.1 | 18434188 | SNV | 1 | A | T | Heterozygous |
| NC_037638.1 | 18434683 | SNV | 1 | A | T | Homozygous   |
| NC_037638.1 | 18434689 | SNV | 1 | T | C | Heterozygous |
| NC_037638.1 | 18434697 | SNV | 1 | T | A | Homozygous   |
| NC_037638.1 | 18434710 | SNV | 1 | A | C | Homozygous   |
| NC_037638.1 | 18434713 | SNV | 1 | T | G | Homozygous   |
| NC_037638.1 | 18434716 | SNV | 1 | A | T | Homozygous   |
| NC_037638.1 | 18434739 | SNV | 1 | A | G | Homozygous   |
| NC_037638.1 | 18438726 | SNV | 1 | G | A | Heterozygous |
| NC_037638.1 | 18438773 | SNV | 1 | G | A | Homozygous   |
| NC_037638.1 | 18441937 | SNV | 1 | T | A | Homozygous   |
| NC_037638.1 | 18441939 | SNV | 1 | A | T | Homozygous   |
| NC_037638.1 | 18448092 | SNV | 1 | A | T | Homozygous   |
| NC_037638.1 | 18448094 | SNV | 1 | A | T | Homozygous   |
| NC_037638.1 | 18448099 | SNV | 1 | T | A | Homozygous   |
| NC_037638.1 | 18448123 | SNV | 1 | A | G | Homozygous   |
| NC_037638.1 | 18448127 | SNV | 1 | T | G | Homozygous   |
| NC_037638.1 | 18448130 | SNV | 1 | T | A | Homozygous   |
| NC_037638.1 | 18450965 | SNV | 1 | C | T | Homozygous   |
| NC_037638.1 | 18467219 | SNV | 1 | T | C | Homozygous   |
| NC_037638.1 | 18467300 | SNV | 1 | A | G | Heterozygous |
| NC_037638.1 | 18506354 | SNV | 1 | A | G | Heterozygous |
| NC_037638.1 | 18506359 | SNV | 1 | C | T | Heterozygous |
| NC_037638.1 | 18506449 | SNV | 1 | A | G | Heterozygous |
| NC_037638.1 | 18533634 | SNV | 1 | C | T | Homozygous   |
| NC_037638.1 | 18533667 | SNV | 1 | C | T | Homozygous   |
| NC_037638.1 | 18541356 | SNV | 1 | C | T | Homozygous   |
| NC_037638.1 | 18543230 | SNV | 1 | G | A | Heterozygous |
| NC_037638.1 | 18545562 | SNV | 1 | G | A | Homozygous   |
| NC_037638.1 | 18545565 | SNV | 1 | A | T | Homozygous   |



|             |          |     |   |   |   |              |
|-------------|----------|-----|---|---|---|--------------|
| NC_037638.1 | 18545669 | SNV | 1 | C | T | Homozygous   |
| NC_037638.1 | 18564511 | SNV | 1 | G | T | Heterozygous |
| NC_037638.1 | 18575204 | SNV | 1 | C | T | Homozygous   |
| NC_037638.1 | 18576215 | SNV | 1 | C | T | Homozygous   |
| NC_037638.1 | 18580570 | SNV | 1 | T | A | Heterozygous |
| NC_037638.1 | 18580596 | SNV | 1 | T | A | Heterozygous |
| NC_037638.1 | 18580599 | SNV | 1 | T | A | Heterozygous |
| NC_037638.1 | 18580602 | SNV | 1 | A | T | Heterozygous |
| NC_037638.1 | 18584669 | SNV | 1 | A | C | Heterozygous |
| NC_037638.1 | 18589301 | SNV | 1 | T | C | Homozygous   |
| NC_037638.1 | 18589325 | SNV | 1 | A | G | Homozygous   |
| NC_037638.1 | 18591876 | SNV | 1 | A | G | Homozygous   |
| NC_037638.1 | 18592104 | SNV | 1 | A | G | Heterozygous |
| NC_037638.1 | 18592107 | SNV | 1 | C | T | Heterozygous |
| NC_037638.1 | 18592565 | SNV | 1 | G | A | Homozygous   |
| NC_037638.1 | 18592963 | SNV | 1 | T | C | Homozygous   |
| NC_037638.1 | 18593078 | SNV | 1 | A | G | Heterozygous |
| NC_037638.1 | 18593101 | SNV | 1 | C | T | Heterozygous |
| NC_037638.1 | 18593136 | SNV | 1 | G | A | Homozygous   |
| NC_037638.1 | 18593307 | SNV | 1 | C | T | Heterozygous |
| NC_037638.1 | 18593358 | SNV | 1 | A | G | Homozygous   |
| NC_037638.1 | 18594066 | SNV | 1 | G | A | Heterozygous |
| NC_037638.1 | 18594357 | SNV | 1 | C | T | Heterozygous |
| NC_037638.1 | 18595071 | SNV | 1 | C | T | Heterozygous |
| NC_037638.1 | 18595090 | SNV | 1 | G | A | Homozygous   |
| NC_037638.1 | 18595215 | SNV | 1 | C | T | Heterozygous |
| NC_037638.1 | 18598390 | SNV | 1 | T | C | Homozygous   |
| NC_037638.1 | 18598402 | SNV | 1 | C | T | Homozygous   |
| NC_037638.1 | 18598404 | SNV | 1 | C | A | Homozygous   |
| NC_037638.1 | 18598408 | SNV | 1 | C | A | Homozygous   |
| NC_037638.1 | 18599525 | SNV | 1 | G | A | Heterozygous |
| NC_037638.1 | 18599535 | SNV | 1 | A | T | Homozygous   |
| NC_037638.1 | 18599537 | SNV | 1 | A | T | Homozygous   |
| NC_037638.1 | 18601500 | SNV | 1 | A | T | Heterozygous |
| NC_037638.1 | 18601504 | SNV | 1 | G | T | Heterozygous |
| NC_037638.1 | 18601613 | SNV | 1 | T | C | Homozygous   |
| NC_037638.1 | 18601770 | SNV | 1 | C | T | Heterozygous |
| NC_037638.1 | 18601785 | SNV | 1 | A | G | Homozygous   |
| NC_037638.1 | 18618734 | SNV | 1 | A | G | Homozygous   |
| NC_037638.1 | 18626892 | SNV | 1 | A | T | Heterozygous |
| NC_037638.1 | 18626970 | SNV | 1 | C | T | Heterozygous |
| NC_037638.1 | 18627366 | SNV | 1 | C | T | Homozygous   |
| NC_037638.1 | 18627387 | SNV | 1 | C | T | Homozygous   |
| NC_037638.1 | 18627479 | SNV | 1 | A | G | Heterozygous |
| NC_037638.1 | 18627581 | SNV | 1 | T | C | Homozygous   |
| NC_037638.1 | 18627797 | SNV | 1 | C | T | Homozygous   |
| NC_037638.1 | 18627831 | SNV | 1 | G | A | Homozygous   |
| NC_037638.1 | 18633428 | SNV | 1 | T | C | Homozygous   |
| NC_037638.1 | 18633513 | SNV | 1 | A | G | Homozygous   |
| NC_037638.1 | 18633528 | SNV | 1 | C | T | Homozygous   |
| NC_037638.1 | 18633553 | SNV | 1 | T | C | Homozygous   |

|             |          |     |   |   |   |              |
|-------------|----------|-----|---|---|---|--------------|
| NC_037638.1 | 18633573 | SNV | 1 | C | T | Homozygous   |
| NC_037638.1 | 18633671 | SNV | 1 | T | C | Homozygous   |
| NC_037638.1 | 18633712 | SNV | 1 | C | T | Homozygous   |
| NC_037638.1 | 18633724 | SNV | 1 | C | T | Heterozygous |
| NC_037638.1 | 18633898 | SNV | 1 | T | C | Homozygous   |
| NC_037638.1 | 18634102 | SNV | 1 | A | C | Heterozygous |
| NC_037638.1 | 18634124 | SNV | 1 | C | G | Homozygous   |
| NC_037638.1 | 18639355 | SNV | 1 | C | T | Homozygous   |
| NC_037638.1 | 18642488 | SNV | 1 | T | G | Homozygous   |
| NC_037638.1 | 18642700 | SNV | 1 | T | C | Homozygous   |
| NC_037638.1 | 18644423 | SNV | 1 | G | A | Homozygous   |
| NC_037638.1 | 18644475 | SNV | 1 | T | C | Heterozygous |
| NC_037638.1 | 18644568 | SNV | 1 | T | C | Homozygous   |
| NC_037638.1 | 18644642 | SNV | 1 | A | G | Homozygous   |
| NC_037638.1 | 18644682 | SNV | 1 | T | C | Homozygous   |
| NC_037638.1 | 18644690 | SNV | 1 | C | G | Homozygous   |
| NC_037638.1 | 18644695 | SNV | 1 | T | C | Homozygous   |
| NC_037638.1 | 18644749 | SNV | 1 | G | A | Homozygous   |
| NC_037638.1 | 18644800 | SNV | 1 | G | C | Homozygous   |
| NC_037638.1 | 18644808 | SNV | 1 | A | G | Homozygous   |
| NC_037638.1 | 18644811 | SNV | 1 | T | C | Homozygous   |
| NC_037638.1 | 18644880 | SNV | 1 | G | T | Homozygous   |
| NC_037638.1 | 18645192 | SNV | 1 | T | C | Homozygous   |
| NC_037638.1 | 18645273 | SNV | 1 | T | C | Homozygous   |
| NC_037638.1 | 18645991 | SNV | 1 | C | T | Homozygous   |
| NC_037638.1 | 18649081 | SNV | 1 | A | T | Heterozygous |
| NC_037638.1 | 18649083 | SNV | 1 | G | A | Heterozygous |
| NC_037638.1 | 18649085 | SNV | 1 | A | G | Heterozygous |
| NC_037638.1 | 18649087 | SNV | 1 | G | A | Homozygous   |
| NC_037638.1 | 18649102 | SNV | 1 | G | A | Homozygous   |
| NC_037638.1 | 18649111 | SNV | 1 | G | A | Homozygous   |
| NC_037638.1 | 18649113 | SNV | 1 | A | T | Homozygous   |
| NC_037638.1 | 18649639 | SNV | 1 | C | T | Homozygous   |
| NC_037638.1 | 18649775 | SNV | 1 | A | G | Homozygous   |
| NC_037638.1 | 18657316 | SNV | 1 | G | A | Homozygous   |
| NC_037638.1 | 18664728 | SNV | 1 | T | G | Heterozygous |
| NC_037638.1 | 18669770 | SNV | 1 | A | G | Homozygous   |
| NC_037638.1 | 18669866 | SNV | 1 | G | A | Heterozygous |
| NC_037638.1 | 18669947 | SNV | 1 | A | G | Homozygous   |
| NC_037638.1 | 18669960 | SNV | 1 | A | G | Homozygous   |
| NC_037638.1 | 18670009 | SNV | 1 | A | G | Homozygous   |
| NC_037638.1 | 18670027 | SNV | 1 | A | G | Homozygous   |
| NC_037638.1 | 18670075 | SNV | 1 | G | A | Heterozygous |
| NC_037638.1 | 18670107 | SNV | 1 | C | T | Heterozygous |
| NC_037638.1 | 18670112 | SNV | 1 | T | C | Heterozygous |
| NC_037638.1 | 18670135 | SNV | 1 | C | T | Heterozygous |
| NC_037638.1 | 18670146 | SNV | 1 | C | T | Heterozygous |
| NC_037638.1 | 18706358 | SNV | 1 | T | C | Heterozygous |
| NC_037638.1 | 18706370 | SNV | 1 | C | T | Homozygous   |
| NC_037638.1 | 18712552 | SNV | 1 | T | C | Heterozygous |
| NC_037638.1 | 18712560 | SNV | 1 | C | T | Homozygous   |

|             |          |     |   |   |   |              |
|-------------|----------|-----|---|---|---|--------------|
| NC_037638.1 | 18712636 | SNV | 1 | A | G | Homozygous   |
| NC_037638.1 | 18712762 | SNV | 1 | G | A | Heterozygous |
| NC_037638.1 | 18712834 | SNV | 1 | T | G | Homozygous   |
| NC_037638.1 | 18712881 | SNV | 1 | C | G | Homozygous   |
| NC_037638.1 | 18713010 | SNV | 1 | A | C | Homozygous   |
| NC_037638.1 | 18713038 | SNV | 1 | A | G | Homozygous   |
| NC_037638.1 | 18719268 | SNV | 1 | T | C | Homozygous   |
| NC_037638.1 | 18719469 | SNV | 1 | T | C | Homozygous   |
| NC_037638.1 | 18719560 | SNV | 1 | A | G | Homozygous   |
| NC_037638.1 | 18719567 | SNV | 1 | G | A | Heterozygous |
| NC_037638.1 | 18719655 | SNV | 1 | A | G | Homozygous   |
| NC_037638.1 | 18719838 | SNV | 1 | C | T | Heterozygous |
| NC_037638.1 | 18720143 | SNV | 1 | T | C | Heterozygous |
| NC_037638.1 | 18720173 | SNV | 1 | A | G | Homozygous   |
| NC_037638.1 | 18720175 | SNV | 1 | C | T | Homozygous   |
| NC_037638.1 | 18720263 | SNV | 1 | A | G | Homozygous   |
| NC_037638.1 | 18720414 | SNV | 1 | A | G | Heterozygous |
| NC_037638.1 | 18720448 | SNV | 1 | T | C | Homozygous   |
| NC_037638.1 | 18733901 | SNV | 1 | G | A | Heterozygous |
| NC_037638.1 | 18733906 | SNV | 1 | G | A | Homozygous   |
| NC_037638.1 | 18733947 | SNV | 1 | T | C | Heterozygous |
| NC_037638.1 | 18734061 | SNV | 1 | A | T | Heterozygous |
| NC_037638.1 | 18734738 | SNV | 1 | G | A | Heterozygous |
| NC_037638.1 | 18734741 | SNV | 1 | A | T | Heterozygous |
| NC_037638.1 | 18734751 | SNV | 1 | A | G | Heterozygous |
| NC_037638.1 | 18734753 | SNV | 1 | A | G | Heterozygous |
| NC_037638.1 | 18742701 | SNV | 1 | C | A | Heterozygous |
| NC_037638.1 | 18742832 | SNV | 1 | C | T | Heterozygous |
| NC_037638.1 | 18742844 | SNV | 1 | G | C | Homozygous   |
| NC_037638.1 | 18742860 | SNV | 1 | T | C | Homozygous   |
| NC_037638.1 | 18743049 | SNV | 1 | T | C | Heterozygous |
| NC_037638.1 | 18748668 | SNV | 1 | T | C | Heterozygous |
| NC_037638.1 | 18749123 | SNV | 1 | T | C | Heterozygous |
| NC_037638.1 | 18749353 | SNV | 1 | T | C | Heterozygous |
| NC_037638.1 | 18749355 | SNV | 1 | C | T | Heterozygous |
| NC_037638.1 | 18749406 | SNV | 1 | T | C | Heterozygous |
| NC_037638.1 | 18749717 | SNV | 1 | G | A | Heterozygous |
| NC_037638.1 | 18751102 | SNV | 1 | A | G | Homozygous   |
| NC_037638.1 | 18751194 | SNV | 1 | C | T | Heterozygous |
| NC_037638.1 | 18870616 | SNV | 1 | A | T | Homozygous   |
| NC_037638.1 | 18883779 | SNV | 1 | C | T | Homozygous   |
| NC_037638.1 | 18883783 | SNV | 1 | T | G | Homozygous   |
| NC_037638.1 | 18883923 | SNV | 1 | G | A | Heterozygous |
| NC_037638.1 | 18883979 | SNV | 1 | A | G | Homozygous   |
| NC_037638.1 | 18887224 | SNV | 1 | A | G | Homozygous   |
| NC_037638.1 | 18887271 | SNV | 1 | A | G | Homozygous   |
| NC_037638.1 | 18887372 | SNV | 1 | A | G | Homozygous   |
| NC_037638.1 | 18887428 | SNV | 1 | C | G | Heterozygous |
| NC_037638.1 | 18887489 | SNV | 1 | C | T | Heterozygous |
| NC_037638.1 | 18887826 | SNV | 1 | T | C | Heterozygous |
| NC_037638.1 | 18888154 | SNV | 1 | G | T | Homozygous   |

|             |          |     |   |   |   |              |
|-------------|----------|-----|---|---|---|--------------|
| NC_037638.1 | 18888956 | SNV | 1 | A | G | Homozygous   |
| NC_037638.1 | 18890898 | SNV | 1 | G | A | Heterozygous |
| NC_037638.1 | 18894208 | SNV | 1 | C | A | Homozygous   |
| NC_037638.1 | 18894222 | SNV | 1 | G | A | Homozygous   |
| NC_037638.1 | 18894227 | SNV | 1 | T | A | Homozygous   |
| NC_037638.1 | 18895585 | SNV | 1 | G | A | Homozygous   |
| NC_037638.1 | 18895661 | SNV | 1 | G | T | Heterozygous |
| NC_037638.1 | 18895670 | SNV | 1 | A | T | Heterozygous |
| NC_037638.1 | 18906032 | SNV | 1 | G | C | Heterozygous |
| NC_037638.1 | 18907600 | SNV | 1 | C | G | Heterozygous |
| NC_037638.1 | 18907602 | SNV | 1 | C | A | Heterozygous |
| NC_037638.1 | 18907992 | SNV | 1 | C | A | Heterozygous |
| NC_037638.1 | 18908032 | SNV | 1 | G | A | Heterozygous |
| NC_037638.1 | 18908116 | SNV | 1 | T | G | Homozygous   |
| NC_037638.1 | 18908133 | SNV | 1 | G | A | Homozygous   |
| NC_037638.1 | 18908187 | SNV | 1 | A | G | Homozygous   |
| NC_037638.1 | 18908336 | SNV | 1 | A | G | Homozygous   |
| NC_037638.1 | 18909127 | SNV | 1 | T | C | Homozygous   |
| NC_037638.1 | 18909979 | SNV | 1 | A | G | Heterozygous |
| NC_037638.1 | 18910028 | SNV | 1 | C | T | Homozygous   |
| NC_037638.1 | 18910081 | SNV | 1 | A | G | Homozygous   |
| NC_037638.1 | 18910823 | SNV | 1 | C | T | Heterozygous |
| NC_037638.1 | 18910842 | SNV | 1 | T | C | Homozygous   |
| NC_037638.1 | 18911063 | SNV | 1 | G | A | Homozygous   |
| NC_037638.1 | 18911213 | SNV | 1 | A | G | Heterozygous |
| NC_037638.1 | 18913078 | SNV | 1 | C | T | Heterozygous |
| NC_037638.1 | 18921898 | SNV | 1 | G | A | Heterozygous |
| NC_037638.1 | 18922433 | SNV | 1 | C | T | Heterozygous |
| NC_037638.1 | 18923015 | SNV | 1 | C | G | Homozygous   |
| NC_037638.1 | 18923149 | SNV | 1 | T | C | Homozygous   |
| NC_037638.1 | 18923458 | SNV | 1 | A | G | Homozygous   |
| NC_037638.1 | 18923534 | SNV | 1 | T | C | Heterozygous |
| NC_037638.1 | 18923697 | SNV | 1 | G | A | Heterozygous |
| NC_037638.1 | 18923731 | SNV | 1 | T | C | Homozygous   |
| NC_037638.1 | 18923884 | SNV | 1 | G | A | Heterozygous |
| NC_037638.1 | 18923903 | SNV | 1 | T | C | Homozygous   |
| NC_037638.1 | 18923982 | SNV | 1 | T | A | Heterozygous |
| NC_037638.1 | 18924365 | SNV | 1 | A | G | Heterozygous |
| NC_037638.1 | 18924453 | SNV | 1 | T | C | Heterozygous |
| NC_037638.1 | 18924544 | SNV | 1 | G | A | Heterozygous |
| NC_037638.1 | 18924661 | SNV | 1 | C | T | Homozygous   |
| NC_037638.1 | 18924690 | SNV | 1 | C | T | Heterozygous |
| NC_037638.1 | 18924702 | SNV | 1 | A | G | Homozygous   |
| NC_037638.1 | 18924786 | SNV | 1 | G | A | Homozygous   |
| NC_037638.1 | 18924804 | SNV | 1 | T | A | Homozygous   |
| NC_037638.1 | 18924896 | SNV | 1 | C | T | Heterozygous |
| NC_037638.1 | 18934276 | SNV | 1 | G | T | Heterozygous |
| NC_037638.1 | 18951302 | SNV | 1 | A | G | Homozygous   |
| NC_037638.1 | 18951321 | SNV | 1 | G | A | Homozygous   |
| NC_037638.1 | 18951367 | SNV | 1 | A | G | Homozygous   |
| NC_037638.1 | 18970174 | SNV | 1 | G | A | Homozygous   |

|             |          |     |   |   |   |              |
|-------------|----------|-----|---|---|---|--------------|
| NC_037638.1 | 18970177 | SNV | 1 | C | A | Homozygous   |
| NC_037638.1 | 18977983 | SNV | 1 | A | G | Homozygous   |
| NC_037638.1 | 18983300 | SNV | 1 | A | G | Homozygous   |
| NC_037638.1 | 18983326 | SNV | 1 | C | T | Homozygous   |
| NC_037638.1 | 18983333 | SNV | 1 | C | G | Heterozygous |
| NC_037638.1 | 19009602 | SNV | 1 | A | G | Heterozygous |
| NC_037638.1 | 19012083 | SNV | 1 | G | A | Heterozygous |
| NC_037638.1 | 19012677 | SNV | 1 | T | C | Homozygous   |
| NC_037638.1 | 19018777 | SNV | 1 | G | A | Heterozygous |
| NC_037638.1 | 19034404 | SNV | 1 | T | C | Heterozygous |
| NC_037638.1 | 19052722 | SNV | 1 | C | G | Heterozygous |
| NC_037638.1 | 19052766 | SNV | 1 | A | G | Heterozygous |
| NC_037638.1 | 19052799 | SNV | 1 | A | G | Heterozygous |
| NC_037638.1 | 19052856 | SNV | 1 | A | G | Heterozygous |
| NC_037638.1 | 19052905 | SNV | 1 | A | G | Heterozygous |
| NC_037638.1 | 19053008 | SNV | 1 | G | A | Homozygous   |
| NC_037638.1 | 19063977 | SNV | 1 | C | T | Heterozygous |
| NC_037638.1 | 19064103 | SNV | 1 | G | A | Heterozygous |
| NC_037638.1 | 19064317 | SNV | 1 | C | A | Homozygous   |
| NC_037638.1 | 19098476 | SNV | 1 | A | G | Homozygous   |
| NC_037638.1 | 19099862 | SNV | 1 | G | A | Homozygous   |
| NC_037638.1 | 19099868 | SNV | 1 | A | C | Heterozygous |
| NC_037638.1 | 19099873 | SNV | 1 | A | G | Heterozygous |
| NC_037638.1 | 19100203 | SNV | 1 | A | G | Homozygous   |
| NC_037638.1 | 19100226 | SNV | 1 | T | C | Heterozygous |
| NC_037638.1 | 19100232 | SNV | 1 | G | A | Heterozygous |
| NC_037638.1 | 19115780 | SNV | 1 | C | T | Heterozygous |
| NC_037638.1 | 19115801 | SNV | 1 | T | C | Heterozygous |
| NC_037638.1 | 19115817 | SNV | 1 | A | T | Homozygous   |
| NC_037638.1 | 19116192 | SNV | 1 | G | T | Heterozygous |
| NC_037638.1 | 19116625 | SNV | 1 | C | G | Homozygous   |
| NC_037638.1 | 19116629 | SNV | 1 | C | T | Homozygous   |
| NC_037638.1 | 19116710 | SNV | 1 | G | A | Homozygous   |
| NC_037638.1 | 19121944 | SNV | 1 | A | G | Homozygous   |
| NC_037638.1 | 19121960 | SNV | 1 | G | A | Homozygous   |
| NC_037638.1 | 19123846 | SNV | 1 | G | T | Homozygous   |
| NC_037638.1 | 19128424 | SNV | 1 | A | G | Homozygous   |
| NC_037638.1 | 19128469 | SNV | 1 | T | C | Homozygous   |
| NC_037638.1 | 19129417 | SNV | 1 | A | G | Heterozygous |
| NC_037638.1 | 19129466 | SNV | 1 | G | A | Heterozygous |
| NC_037638.1 | 19129620 | SNV | 1 | T | C | Heterozygous |
| NC_037638.1 | 19129647 | SNV | 1 | C | T | Heterozygous |
| NC_037638.1 | 19129726 | SNV | 1 | A | G | Homozygous   |
| NC_037638.1 | 19129784 | SNV | 1 | T | C | Homozygous   |
| NC_037638.1 | 19134354 | SNV | 1 | C | T | Heterozygous |
| NC_037638.1 | 19136853 | SNV | 1 | T | C | Homozygous   |
| NC_037638.1 | 19137289 | SNV | 1 | A | T | Homozygous   |
| NC_037638.1 | 19140799 | SNV | 1 | G | A | Heterozygous |
| NC_037638.1 | 19152821 | SNV | 1 | C | T | Homozygous   |
| NC_037638.1 | 19152823 | SNV | 1 | C | T | Homozygous   |
| NC_037638.1 | 19152831 | SNV | 1 | T | C | Homozygous   |

|             |          |     |   |   |   |              |
|-------------|----------|-----|---|---|---|--------------|
| NC_037638.1 | 19160963 | SNV | 1 | G | A | Homozygous   |
| NC_037638.1 | 19160967 | SNV | 1 | G | A | Homozygous   |
| NC_037638.1 | 19160989 | SNV | 1 | C | T | Homozygous   |
| NC_037638.1 | 19160997 | SNV | 1 | A | G | Homozygous   |
| NC_037638.1 | 19161000 | SNV | 1 | G | A | Homozygous   |
| NC_037638.1 | 19161004 | SNV | 1 | C | T | Homozygous   |
| NC_037638.1 | 19161008 | SNV | 1 | C | T | Homozygous   |
| NC_037638.1 | 19161059 | SNV | 1 | A | G | Heterozygous |
| NC_037638.1 | 19161143 | SNV | 1 | C | T | Heterozygous |
| NC_037638.1 | 19161150 | SNV | 1 | T | A | Heterozygous |
| NC_037638.1 | 19161154 | SNV | 1 | G | A | Heterozygous |
| NC_037638.1 | 19161160 | SNV | 1 | T | A | Heterozygous |
| NC_037638.1 | 19161694 | SNV | 1 | T | C | Homozygous   |
| NC_037638.1 | 19161974 | SNV | 1 | C | T | Homozygous   |
| NC_037638.1 | 19162203 | SNV | 1 | G | C | Heterozygous |
| NC_037638.1 | 19164148 | SNV | 1 | A | G | Heterozygous |
| NC_037638.1 | 19164247 | SNV | 1 | T | C | Homozygous   |
| NC_037638.1 | 19164254 | SNV | 1 | A | G | Homozygous   |
| NC_037638.1 | 19164389 | SNV | 1 | A | G | Homozygous   |
| NC_037638.1 | 19168951 | SNV | 1 | A | G | Homozygous   |
| NC_037638.1 | 19171471 | SNV | 1 | T | C | Homozygous   |
| NC_037638.1 | 19171502 | SNV | 1 | T | C | Homozygous   |
| NC_037638.1 | 19172588 | SNV | 1 | T | C | Homozygous   |
| NC_037638.1 | 19172609 | SNV | 1 | T | C | Homozygous   |
| NC_037638.1 | 19172957 | SNV | 1 | A | G | Homozygous   |
| NC_037638.1 | 19173149 | SNV | 1 | T | C | Homozygous   |
| NC_037638.1 | 19173257 | SNV | 1 | T | C | Homozygous   |
| NC_037638.1 | 19173265 | SNV | 1 | A | G | Heterozygous |
| NC_037638.1 | 19173271 | SNV | 1 | A | G | Homozygous   |
| NC_037638.1 | 19173274 | SNV | 1 | T | C | Homozygous   |
| NC_037638.1 | 19173278 | SNV | 1 | A | G | Heterozygous |
| NC_037638.1 | 19173732 | SNV | 1 | A | G | Homozygous   |
| NC_037638.1 | 19174716 | SNV | 1 | G | C | Homozygous   |
| NC_037638.1 | 19174977 | SNV | 1 | A | G | Homozygous   |
| NC_037638.1 | 19174985 | SNV | 1 | A | G | Homozygous   |
| NC_037638.1 | 19175006 | SNV | 1 | C | T | Heterozygous |
| NC_037638.1 | 19175394 | SNV | 1 | C | T | Heterozygous |
| NC_037638.1 | 19175398 | SNV | 1 | G | A | Heterozygous |
| NC_037638.1 | 19175429 | SNV | 1 | G | A | Heterozygous |
| NC_037638.1 | 19175500 | SNV | 1 | A | G | Heterozygous |
| NC_037638.1 | 19175508 | SNV | 1 | G | A | Homozygous   |
| NC_037638.1 | 19175516 | SNV | 1 | G | A | Heterozygous |
| NC_037638.1 | 19175518 | SNV | 1 | T | C | Homozygous   |
| NC_037638.1 | 19178362 | SNV | 1 | T | C | Homozygous   |
| NC_037638.1 | 19181527 | SNV | 1 | C | T | Homozygous   |
| NC_037638.1 | 19181531 | SNV | 1 | C | A | Heterozygous |
| NC_037638.1 | 19181549 | SNV | 1 | C | T | Homozygous   |
| NC_037638.1 | 19181579 | SNV | 1 | C | A | Homozygous   |
| NC_037638.1 | 19181583 | SNV | 1 | A | C | Homozygous   |
| NC_037638.1 | 19181586 | SNV | 1 | C | G | Homozygous   |
| NC_037638.1 | 19181589 | SNV | 1 | T | C | Homozygous   |

|             |          |     |   |   |   |              |
|-------------|----------|-----|---|---|---|--------------|
| NC_037638.1 | 19181601 | SNV | 1 | C | T | Heterozygous |
| NC_037638.1 | 19181691 | SNV | 1 | C | T | Homozygous   |
| NC_037638.1 | 19185988 | SNV | 1 | T | C | Homozygous   |
| NC_037638.1 | 19186149 | SNV | 1 | G | C | Homozygous   |
| NC_037638.1 | 19190313 | SNV | 1 | T | C | Homozygous   |
| NC_037638.1 | 19190335 | SNV | 1 | T | C | Heterozygous |
| NC_037638.1 | 19190446 | SNV | 1 | C | T | Homozygous   |
| NC_037638.1 | 19190460 | SNV | 1 | C | G | Homozygous   |
| NC_037638.1 | 19190486 | SNV | 1 | G | A | Heterozygous |
| NC_037638.1 | 19190503 | SNV | 1 | A | G | Homozygous   |
| NC_037638.1 | 19191599 | SNV | 1 | A | G | Heterozygous |
| NC_037638.1 | 19191700 | SNV | 1 | A | G | Homozygous   |
| NC_037638.1 | 19191801 | SNV | 1 | A | C | Heterozygous |
| NC_037638.1 | 19191845 | SNV | 1 | C | T | Homozygous   |
| NC_037638.1 | 19191856 | SNV | 1 | A | G | Homozygous   |
| NC_037638.1 | 19191994 | SNV | 1 | T | C | Homozygous   |
| NC_037638.1 | 19192395 | SNV | 1 | A | G | Homozygous   |
| NC_037638.1 | 19192456 | SNV | 1 | C | T | Heterozygous |
| NC_037638.1 | 19192468 | SNV | 1 | T | A | Homozygous   |
| NC_037638.1 | 19192504 | SNV | 1 | A | G | Homozygous   |
| NC_037638.1 | 19192516 | SNV | 1 | G | A | Heterozygous |
| NC_037638.1 | 19192533 | SNV | 1 | G | A | Heterozygous |
| NC_037638.1 | 19192561 | SNV | 1 | C | T | Homozygous   |
| NC_037638.1 | 19192564 | SNV | 1 | A | T | Homozygous   |
| NC_037638.1 | 19192649 | SNV | 1 | C | T | Heterozygous |
| NC_037638.1 | 19192677 | SNV | 1 | G | A | Homozygous   |
| NC_037638.1 | 19192755 | SNV | 1 | A | G | Homozygous   |
| NC_037638.1 | 19192857 | SNV | 1 | T | C | Heterozygous |
| NC_037638.1 | 19192874 | SNV | 1 | T | C | Heterozygous |
| NC_037638.1 | 19193307 | SNV | 1 | T | C | Heterozygous |
| NC_037638.1 | 19193726 | SNV | 1 | T | C | Heterozygous |
| NC_037638.1 | 19194750 | SNV | 1 | T | C | Heterozygous |
| NC_037638.1 | 19194787 | SNV | 1 | G | A | Heterozygous |
| NC_037638.1 | 19194834 | SNV | 1 | G | A | Heterozygous |
| NC_037638.1 | 19194989 | SNV | 1 | A | C | Heterozygous |
| NC_037638.1 | 19195165 | SNV | 1 | A | G | Homozygous   |
| NC_037638.1 | 19195331 | SNV | 1 | T | C | Heterozygous |
| NC_037638.1 | 19195563 | SNV | 1 | G | A | Heterozygous |
| NC_037638.1 | 19195647 | SNV | 1 | A | G | Homozygous   |
| NC_037638.1 | 19195719 | SNV | 1 | T | C | Homozygous   |
| NC_037638.1 | 19195727 | SNV | 1 | A | G | Heterozygous |
| NC_037638.1 | 19195757 | SNV | 1 | A | G | Homozygous   |
| NC_037638.1 | 19195772 | SNV | 1 | T | G | Heterozygous |
| NC_037638.1 | 19196127 | SNV | 1 | C | G | Heterozygous |
| NC_037638.1 | 19196182 | SNV | 1 | T | C | Homozygous   |
| NC_037638.1 | 19196356 | SNV | 1 | T | C | Heterozygous |
| NC_037638.1 | 19196405 | SNV | 1 | A | G | Homozygous   |
| NC_037638.1 | 19196497 | SNV | 1 | A | G | Homozygous   |
| NC_037638.1 | 19196737 | SNV | 1 | C | T | Heterozygous |
| NC_037638.1 | 19196740 | SNV | 1 | C | T | Heterozygous |
| NC_037638.1 | 19196788 | SNV | 1 | C | T | Homozygous   |

|             |          |     |   |   |   |              |
|-------------|----------|-----|---|---|---|--------------|
| NC_037638.1 | 19196809 | SNV | 1 | T | C | Homozygous   |
| NC_037638.1 | 19196925 | SNV | 1 | C | T | Heterozygous |
| NC_037638.1 | 19197135 | SNV | 1 | T | C | Heterozygous |
| NC_037638.1 | 19197137 | SNV | 1 | A | G | Heterozygous |
| NC_037638.1 | 19197217 | SNV | 1 | G | A | Heterozygous |
| NC_037638.1 | 19197227 | SNV | 1 | T | C | Heterozygous |
| NC_037638.1 | 19197240 | SNV | 1 | C | T | Heterozygous |
| NC_037638.1 | 19197243 | SNV | 1 | A | G | Heterozygous |
| NC_037638.1 | 19197263 | SNV | 1 | C | T | Heterozygous |
| NC_037638.1 | 19197381 | SNV | 1 | T | A | Heterozygous |
| NC_037638.1 | 19197403 | SNV | 1 | A | T | Homozygous   |
| NC_037638.1 | 19197409 | SNV | 1 | A | G | Homozygous   |
| NC_037638.1 | 19197472 | SNV | 1 | T | C | Homozygous   |
| NC_037638.1 | 19197488 | SNV | 1 | A | T | Homozygous   |
| NC_037638.1 | 19197520 | SNV | 1 | A | C | Homozygous   |
| NC_037638.1 | 19197530 | SNV | 1 | G | A | Heterozygous |
| NC_037638.1 | 19197533 | SNV | 1 | G | A | Heterozygous |
| NC_037638.1 | 19197555 | SNV | 1 | C | G | Heterozygous |
| NC_037638.1 | 19197573 | SNV | 1 | G | A | Heterozygous |
| NC_037638.1 | 19197607 | SNV | 1 | T | G | Heterozygous |
| NC_037638.1 | 19197633 | SNV | 1 | G | A | Homozygous   |
| NC_037638.1 | 19197646 | SNV | 1 | T | A | Homozygous   |
| NC_037638.1 | 19197686 | SNV | 1 | T | C | Heterozygous |
| NC_037638.1 | 19198088 | SNV | 1 | T | C | Heterozygous |
| NC_037638.1 | 19198091 | SNV | 1 | T | C | Heterozygous |
| NC_037638.1 | 19198105 | SNV | 1 | T | C | Heterozygous |
| NC_037638.1 | 19198222 | SNV | 1 | A | G | Heterozygous |
| NC_037638.1 | 19198334 | SNV | 1 | A | G | Homozygous   |
| NC_037638.1 | 19198885 | SNV | 1 | T | C | Heterozygous |
| NC_037638.1 | 19199014 | SNV | 1 | C | G | Homozygous   |
| NC_037638.1 | 19199157 | SNV | 1 | T | C | Homozygous   |
| NC_037638.1 | 19199373 | SNV | 1 | C | T | Homozygous   |
| NC_037638.1 | 19199539 | SNV | 1 | A | G | Homozygous   |
| NC_037638.1 | 19199583 | SNV | 1 | A | G | Homozygous   |
| NC_037638.1 | 19199620 | SNV | 1 | G | A | Homozygous   |
| NC_037638.1 | 19199645 | SNV | 1 | A | G | Heterozygous |
| NC_037638.1 | 19199953 | SNV | 1 | G | A | Heterozygous |
| NC_037638.1 | 19200622 | SNV | 1 | A | G | Homozygous   |
| NC_037638.1 | 19200625 | SNV | 1 | T | C | Homozygous   |
| NC_037638.1 | 19200702 | SNV | 1 | C | T | Heterozygous |
| NC_037638.1 | 19200736 | SNV | 1 | C | T | Heterozygous |
| NC_037638.1 | 19200758 | SNV | 1 | G | A | Heterozygous |
| NC_037638.1 | 19200765 | SNV | 1 | C | T | Heterozygous |
| NC_037638.1 | 19200794 | SNV | 1 | C | T | Heterozygous |
| NC_037638.1 | 19200906 | SNV | 1 | G | A | Heterozygous |
| NC_037638.1 | 19200944 | SNV | 1 | A | G | Homozygous   |
| NC_037638.1 | 19201114 | SNV | 1 | C | T | Homozygous   |
| NC_037638.1 | 19201127 | SNV | 1 | C | A | Heterozygous |
| NC_037638.1 | 19201133 | SNV | 1 | G | C | Heterozygous |
| NC_037638.1 | 19201254 | SNV | 1 | T | C | Heterozygous |
| NC_037638.1 | 19201309 | SNV | 1 | G | T | Homozygous   |



|             |          |     |   |   |   |              |
|-------------|----------|-----|---|---|---|--------------|
| NC_037638.1 | 19201595 | SNV | 1 | G | A | Heterozygous |
| NC_037638.1 | 19201894 | SNV | 1 | C | G | Heterozygous |
| NC_037638.1 | 19201922 | SNV | 1 | C | T | Heterozygous |
| NC_037638.1 | 19201931 | SNV | 1 | T | C | Heterozygous |
| NC_037638.1 | 19201994 | SNV | 1 | A | G | Heterozygous |
| NC_037638.1 | 19204666 | SNV | 1 | A | T | Homozygous   |
| NC_037638.1 | 19204671 | SNV | 1 | G | A | Heterozygous |
| NC_037638.1 | 19205899 | SNV | 1 | A | G | Homozygous   |
| NC_037638.1 | 19205929 | SNV | 1 | A | G | Heterozygous |
| NC_037638.1 | 19205965 | SNV | 1 | T | C | Homozygous   |
| NC_037638.1 | 19206054 | SNV | 1 | A | G | Homozygous   |
| NC_037638.1 | 19206081 | SNV | 1 | T | G | Heterozygous |
| NC_037638.1 | 19206101 | SNV | 1 | A | G | Heterozygous |
| NC_037638.1 | 19206360 | SNV | 1 | T | C | Homozygous   |
| NC_037638.1 | 19206770 | SNV | 1 | A | G | Homozygous   |
| NC_037638.1 | 19206887 | SNV | 1 | G | C | Heterozygous |
| NC_037638.1 | 19206897 | SNV | 1 | T | A | Homozygous   |
| NC_037638.1 | 19206904 | SNV | 1 | A | G | Homozygous   |
| NC_037638.1 | 19206913 | SNV | 1 | G | A | Homozygous   |
| NC_037638.1 | 19206915 | SNV | 1 | T | C | Homozygous   |
| NC_037638.1 | 19206929 | SNV | 1 | T | C | Homozygous   |
| NC_037638.1 | 19206933 | SNV | 1 | G | C | Homozygous   |
| NC_037638.1 | 19206935 | SNV | 1 | G | A | Homozygous   |
| NC_037638.1 | 19206958 | SNV | 1 | G | A | Heterozygous |
| NC_037638.1 | 19206965 | SNV | 1 | G | A | Heterozygous |
| NC_037638.1 | 19206983 | SNV | 1 | C | T | Heterozygous |
| NC_037638.1 | 19206989 | SNV | 1 | C | T | Homozygous   |
| NC_037638.1 | 19207337 | SNV | 1 | A | G | Homozygous   |
| NC_037638.1 | 19207553 | SNV | 1 | G | C | Heterozygous |
| NC_037638.1 | 19207599 | SNV | 1 | C | T | Homozygous   |
| NC_037638.1 | 19207602 | SNV | 1 | T | C | Heterozygous |
| NC_037638.1 | 19207642 | SNV | 1 | T | C | Homozygous   |
| NC_037638.1 | 19207660 | SNV | 1 | T | C | Homozygous   |
| NC_037638.1 | 19207797 | SNV | 1 | A | G | Heterozygous |
| NC_037638.1 | 19207840 | SNV | 1 | T | C | Homozygous   |
| NC_037638.1 | 19207847 | SNV | 1 | C | T | Heterozygous |
| NC_037638.1 | 19207887 | SNV | 1 | T | C | Homozygous   |
| NC_037638.1 | 19207951 | SNV | 1 | T | C | Homozygous   |
| NC_037638.1 | 19208066 | SNV | 1 | T | C | Homozygous   |
| NC_037638.1 | 19208851 | SNV | 1 | C | T | Heterozygous |
| NC_037638.1 | 19209088 | SNV | 1 | A | G | Homozygous   |
| NC_037638.1 | 19209172 | SNV | 1 | C | T | Homozygous   |
| NC_037638.1 | 19209527 | SNV | 1 | G | A | Heterozygous |
| NC_037638.1 | 19209580 | SNV | 1 | A | G | Heterozygous |
| NC_037638.1 | 19209671 | SNV | 1 | C | T | Heterozygous |
| NC_037638.1 | 19209740 | SNV | 1 | T | C | Homozygous   |
| NC_037638.1 | 19212674 | SNV | 1 | T | C | Heterozygous |
| NC_037638.1 | 19212677 | SNV | 1 | T | C | Heterozygous |
| NC_037638.1 | 19212794 | SNV | 1 | G | C | Homozygous   |
| NC_037638.1 | 19212851 | SNV | 1 | G | A | Heterozygous |
| NC_037638.1 | 19212909 | SNV | 1 | G | T | Homozygous   |

|             |          |     |   |   |   |              |
|-------------|----------|-----|---|---|---|--------------|
| NC_037638.1 | 19213003 | SNV | 1 | T | C | Heterozygous |
| NC_037638.1 | 19213377 | SNV | 1 | C | G | Homozygous   |
| NC_037638.1 | 19213406 | SNV | 1 | A | G | Homozygous   |
| NC_037638.1 | 19213572 | SNV | 1 | T | G | Heterozygous |
| NC_037638.1 | 19213989 | SNV | 1 | A | G | Homozygous   |
| NC_037638.1 | 19213992 | SNV | 1 | T | C | Homozygous   |
| NC_037638.1 | 19214194 | SNV | 1 | C | T | Homozygous   |
| NC_037638.1 | 19214264 | SNV | 1 | C | T | Heterozygous |
| NC_037638.1 | 19214351 | SNV | 1 | C | T | Heterozygous |
| NC_037638.1 | 19215079 | SNV | 1 | A | T | Homozygous   |
| NC_037638.1 | 19217182 | SNV | 1 | T | C | Homozygous   |
| NC_037638.1 | 19217198 | SNV | 1 | A | T | Homozygous   |
| NC_037638.1 | 19217258 | SNV | 1 | C | T | Heterozygous |
| NC_037638.1 | 19217268 | SNV | 1 | T | G | Homozygous   |
| NC_037638.1 | 19217305 | SNV | 1 | A | G | Heterozygous |
| NC_037638.1 | 19217373 | SNV | 1 | A | G | Homozygous   |
| NC_037638.1 | 19217936 | SNV | 1 | T | C | Homozygous   |
| NC_037638.1 | 19218317 | SNV | 1 | G | A | Homozygous   |
| NC_037638.1 | 19218332 | SNV | 1 | A | G | Heterozygous |
| NC_037638.1 | 19218419 | SNV | 1 | T | C | Homozygous   |
| NC_037638.1 | 19218443 | SNV | 1 | T | C | Homozygous   |
| NC_037638.1 | 19218932 | SNV | 1 | T | C | Heterozygous |
| NC_037638.1 | 19218940 | SNV | 1 | T | G | Homozygous   |
| NC_037638.1 | 19218976 | SNV | 1 | G | C | Heterozygous |
| NC_037638.1 | 19218986 | SNV | 1 | A | G | Homozygous   |
| NC_037638.1 | 19219036 | SNV | 1 | T | C | Homozygous   |
| NC_037638.1 | 19219106 | SNV | 1 | G | A | Homozygous   |
| NC_037638.1 | 19219117 | SNV | 1 | T | C | Homozygous   |
| NC_037638.1 | 19219122 | SNV | 1 | A | G | Heterozygous |
| NC_037638.1 | 19219340 | SNV | 1 | A | G | Homozygous   |
| NC_037638.1 | 19219347 | SNV | 1 | G | C | Heterozygous |
| NC_037638.1 | 19219409 | SNV | 1 | A | G | Homozygous   |
| NC_037638.1 | 19220066 | SNV | 1 | A | G | Homozygous   |
| NC_037638.1 | 19222250 | SNV | 1 | T | C | Heterozygous |
| NC_037638.1 | 19222286 | SNV | 1 | T | C | Homozygous   |
| NC_037638.1 | 19222351 | SNV | 1 | A | G | Homozygous   |
| NC_037638.1 | 19222355 | SNV | 1 | T | C | Homozygous   |
| NC_037638.1 | 19222403 | SNV | 1 | C | G | Heterozygous |
| NC_037638.1 | 19222735 | SNV | 1 | A | G | Homozygous   |
| NC_037638.1 | 19222853 | SNV | 1 | T | C | Heterozygous |
| NC_037638.1 | 19222864 | SNV | 1 | T | C | Heterozygous |
| NC_037638.1 | 19222870 | SNV | 1 | T | A | Heterozygous |
| NC_037638.1 | 19222924 | SNV | 1 | G | A | Homozygous   |
| NC_037638.1 | 19222927 | SNV | 1 | C | T | Heterozygous |
| NC_037638.1 | 19222928 | SNV | 1 | A | G | Heterozygous |
| NC_037638.1 | 19222936 | SNV | 1 | G | A | Homozygous   |
| NC_037638.1 | 19223251 | SNV | 1 | A | G | Homozygous   |
| NC_037638.1 | 19223256 | SNV | 1 | G | T | Heterozygous |
| NC_037638.1 | 19223276 | SNV | 1 | G | A | Heterozygous |
| NC_037638.1 | 19223325 | SNV | 1 | A | G | Homozygous   |
| NC_037638.1 | 19223363 | SNV | 1 | G | A | Homozygous   |

|             |          |     |   |   |   |              |
|-------------|----------|-----|---|---|---|--------------|
| NC_037638.1 | 19223404 | SNV | 1 | C | T | Heterozygous |
| NC_037638.1 | 19223442 | SNV | 1 | T | C | Homozygous   |
| NC_037638.1 | 19223655 | SNV | 1 | T | C | Homozygous   |
| NC_037638.1 | 19223766 | SNV | 1 | A | C | Homozygous   |
| NC_037638.1 | 19223775 | SNV | 1 | A | C | Homozygous   |
| NC_037638.1 | 19223777 | SNV | 1 | A | G | Heterozygous |
| NC_037638.1 | 19223783 | SNV | 1 | C | G | Heterozygous |
| NC_037638.1 | 19223785 | SNV | 1 | G | T | Heterozygous |
| NC_037638.1 | 19223845 | SNV | 1 | T | C | Homozygous   |
| NC_037638.1 | 19223848 | SNV | 1 | G | C | Heterozygous |
| NC_037638.1 | 19223888 | SNV | 1 | A | C | Heterozygous |
| NC_037638.1 | 19226072 | SNV | 1 | A | G | Heterozygous |
| NC_037638.1 | 19228543 | SNV | 1 | A | T | Heterozygous |
| NC_037638.1 | 19228551 | SNV | 1 | G | T | Heterozygous |
| NC_037638.1 | 19228554 | SNV | 1 | G | C | Heterozygous |
| NC_037638.1 | 19228558 | SNV | 1 | T | C | Heterozygous |
| NC_037638.1 | 19228569 | SNV | 1 | G | C | Heterozygous |
| NC_037638.1 | 19228581 | SNV | 1 | G | C | Heterozygous |
| NC_037638.1 | 19228584 | SNV | 1 | G | A | Heterozygous |
| NC_037638.1 | 19233617 | SNV | 1 | G | C | Heterozygous |
| NC_037638.1 | 19233620 | SNV | 1 | A | C | Heterozygous |
| NC_037638.1 | 19233631 | SNV | 1 | G | T | Heterozygous |
| NC_037638.1 | 19238728 | SNV | 1 | G | A | Homozygous   |
| NC_037638.1 | 19251946 | SNV | 1 | A | G | Homozygous   |
| NC_037638.1 | 19252048 | SNV | 1 | T | C | Homozygous   |
| NC_037638.1 | 19252056 | SNV | 1 | T | C | Heterozygous |
| NC_037638.1 | 19252109 | SNV | 1 | C | T | Heterozygous |
| NC_037638.1 | 19252127 | SNV | 1 | A | G | Homozygous   |
| NC_037638.1 | 19252338 | SNV | 1 | C | T | Homozygous   |
| NC_037638.1 | 19252436 | SNV | 1 | G | A | Heterozygous |
| NC_037638.1 | 19252477 | SNV | 1 | G | A | Heterozygous |
| NC_037638.1 | 19252482 | SNV | 1 | A | G | Heterozygous |
| NC_037638.1 | 19252486 | SNV | 1 | G | T | Heterozygous |
| NC_037638.1 | 19252493 | SNV | 1 | T | C | Homozygous   |
| NC_037638.1 | 19252551 | SNV | 1 | C | T | Homozygous   |
| NC_037638.1 | 19252585 | SNV | 1 | A | G | Heterozygous |
| NC_037638.1 | 19257682 | SNV | 1 | C | T | Homozygous   |
| NC_037638.1 | 19257708 | SNV | 1 | G | A | Heterozygous |
| NC_037638.1 | 19257789 | SNV | 1 | A | G | Heterozygous |
| NC_037638.1 | 19257847 | SNV | 1 | T | C | Homozygous   |
| NC_037638.1 | 19257887 | SNV | 1 | A | G | Homozygous   |
| NC_037638.1 | 19257928 | SNV | 1 | A | G | Homozygous   |
| NC_037638.1 | 19258034 | SNV | 1 | A | T | Heterozygous |
| NC_037638.1 | 19258133 | SNV | 1 | T | C | Homozygous   |
| NC_037638.1 | 19258305 | SNV | 1 | G | A | Heterozygous |
| NC_037638.1 | 19259887 | SNV | 1 | T | C | Homozygous   |
| NC_037638.1 | 19287260 | SNV | 1 | C | T | Heterozygous |
| NC_037638.1 | 19287301 | SNV | 1 | A | G | Heterozygous |
| NC_037638.1 | 19287435 | SNV | 1 | A | G | Homozygous   |
| NC_037638.1 | 19287458 | SNV | 1 | T | C | Homozygous   |
| NC_037638.1 | 19287563 | SNV | 1 | T | C | Homozygous   |

|             |          |     |   |   |   |              |
|-------------|----------|-----|---|---|---|--------------|
| NC_037638.1 | 19287568 | SNV | 1 | G | A | Heterozygous |
| NC_037638.1 | 19287665 | SNV | 1 | T | C | Homozygous   |
| NC_037638.1 | 19287935 | SNV | 1 | A | G | Heterozygous |
| NC_037638.1 | 19289104 | SNV | 1 | G | A | Heterozygous |
| NC_037638.1 | 19289297 | SNV | 1 | G | A | Heterozygous |
| NC_037638.1 | 19289332 | SNV | 1 | A | G | Homozygous   |
| NC_037638.1 | 19289337 | SNV | 1 | A | G | Homozygous   |
| NC_037638.1 | 19289353 | SNV | 1 | T | C | Homozygous   |
| NC_037638.1 | 19292060 | SNV | 1 | A | T | Heterozygous |
| NC_037638.1 | 19292127 | SNV | 1 | T | C | Homozygous   |
| NC_037638.1 | 19293804 | SNV | 1 | A | G | Homozygous   |
| NC_037638.1 | 19293875 | SNV | 1 | A | G | Homozygous   |
| NC_037638.1 | 19293981 | SNV | 1 | C | T | Homozygous   |
| NC_037638.1 | 19294031 | SNV | 1 | T | C | Homozygous   |
| NC_037638.1 | 19295270 | SNV | 1 | T | C | Heterozygous |
| NC_037638.1 | 19295272 | SNV | 1 | C | T | Heterozygous |
| NC_037638.1 | 19295318 | SNV | 1 | T | C | Homozygous   |
| NC_037638.1 | 19295329 | SNV | 1 | C | T | Homozygous   |
| NC_037638.1 | 19295331 | SNV | 1 | T | C | Homozygous   |
| NC_037638.1 | 19295333 | SNV | 1 | T | C | Homozygous   |
| NC_037638.1 | 19300097 | SNV | 1 | G | A | Heterozygous |
| NC_037638.1 | 19302658 | SNV | 1 | G | A | Heterozygous |
| NC_037638.1 | 19308200 | SNV | 1 | C | T | Heterozygous |
| NC_037638.1 | 19309714 | SNV | 1 | A | C | Homozygous   |
| NC_037638.1 | 19309720 | SNV | 1 | T | G | Homozygous   |
| NC_037638.1 | 19314920 | SNV | 1 | C | T | Homozygous   |
| NC_037638.1 | 19314924 | SNV | 1 | A | T | Heterozygous |
| NC_037638.1 | 19314926 | SNV | 1 | A | T | Heterozygous |
| NC_037638.1 | 19314933 | SNV | 1 | G | T | Heterozygous |
| NC_037638.1 | 19314939 | SNV | 1 | G | T | Heterozygous |
| NC_037638.1 | 19317814 | SNV | 1 | G | A | Homozygous   |
| NC_037638.1 | 19317816 | SNV | 1 | A | G | Homozygous   |
| NC_037638.1 | 19317888 | SNV | 1 | A | G | Homozygous   |
| NC_037638.1 | 19317897 | SNV | 1 | C | T | Homozygous   |
| NC_037638.1 | 19318011 | SNV | 1 | G | C | Homozygous   |
| NC_037638.1 | 19324536 | SNV | 1 | T | C | Homozygous   |
| NC_037638.1 | 19324707 | SNV | 1 | A | G | Homozygous   |
| NC_037638.1 | 19324729 | SNV | 1 | T | G | Homozygous   |
| NC_037638.1 | 19324893 | SNV | 1 | A | G | Homozygous   |
| NC_037638.1 | 19324979 | SNV | 1 | G | A | Heterozygous |
| NC_037638.1 | 19325050 | SNV | 1 | T | C | Heterozygous |
| NC_037638.1 | 19337259 | SNV | 1 | A | C | Homozygous   |
| NC_037638.1 | 19337299 | SNV | 1 | C | T | Homozygous   |
| NC_037638.1 | 19346806 | SNV | 1 | T | C | Heterozygous |
| NC_037638.1 | 19346827 | SNV | 1 | C | T | Heterozygous |
| NC_037638.1 | 19346912 | SNV | 1 | C | T | Heterozygous |
| NC_037638.1 | 19350392 | SNV | 1 | C | T | Heterozygous |
| NC_037638.1 | 19354036 | SNV | 1 | G | T | Heterozygous |
| NC_037638.1 | 19354110 | SNV | 1 | C | A | Homozygous   |
| NC_037638.1 | 19354253 | SNV | 1 | A | G | Heterozygous |
| NC_037638.1 | 19354333 | SNV | 1 | A | G | Heterozygous |

|             |          |     |   |   |   |              |
|-------------|----------|-----|---|---|---|--------------|
| NC_037638.1 | 19355094 | SNV | 1 | G | A | Heterozygous |
| NC_037638.1 | 19355521 | SNV | 1 | G | A | Heterozygous |
| NC_037638.1 | 19355525 | SNV | 1 | T | A | Homozygous   |
| NC_037638.1 | 19355690 | SNV | 1 | A | G | Homozygous   |
| NC_037638.1 | 19355699 | SNV | 1 | A | G | Homozygous   |
| NC_037638.1 | 19355792 | SNV | 1 | A | G | Homozygous   |
| NC_037638.1 | 19355911 | SNV | 1 | A | T | Homozygous   |
| NC_037638.1 | 19356703 | SNV | 1 | A | G | Homozygous   |
| NC_037638.1 | 19356712 | SNV | 1 | A | G | Homozygous   |
| NC_037638.1 | 19357230 | SNV | 1 | C | T | Heterozygous |
| NC_037638.1 | 19361117 | SNV | 1 | G | A | Homozygous   |
| NC_037638.1 | 19361239 | SNV | 1 | A | G | Homozygous   |
| NC_037638.1 | 19361625 | SNV | 1 | A | G | Homozygous   |
| NC_037638.1 | 19361806 | SNV | 1 | A | G | Homozygous   |
| NC_037638.1 | 19361947 | SNV | 1 | C | T | Homozygous   |
| NC_037638.1 | 19362144 | SNV | 1 | C | A | Heterozygous |
| NC_037638.1 | 19362168 | SNV | 1 | G | A | Heterozygous |
| NC_037638.1 | 19362214 | SNV | 1 | T | C | Homozygous   |
| NC_037638.1 | 19362230 | SNV | 1 | A | T | Heterozygous |
| NC_037638.1 | 19362334 | SNV | 1 | A | T | Homozygous   |
| NC_037638.1 | 19362339 | SNV | 1 | T | C | Heterozygous |
| NC_037638.1 | 19362553 | SNV | 1 | T | A | Homozygous   |
| NC_037638.1 | 19362717 | SNV | 1 | G | A | Homozygous   |
| NC_037638.1 | 19363676 | SNV | 1 | T | C | Homozygous   |
| NC_037638.1 | 19363715 | SNV | 1 | C | G | Heterozygous |
| NC_037638.1 | 19367623 | SNV | 1 | T | C | Heterozygous |
| NC_037638.1 | 19367831 | SNV | 1 | T | C | Heterozygous |
| NC_037638.1 | 19367871 | SNV | 1 | C | T | Heterozygous |
| NC_037638.1 | 19367876 | SNV | 1 | G | A | Heterozygous |
| NC_037638.1 | 19371633 | SNV | 1 | C | T | Homozygous   |
| NC_037638.1 | 19372177 | SNV | 1 | C | T | Homozygous   |
| NC_037638.1 | 19373077 | SNV | 1 | C | T | Homozygous   |
| NC_037638.1 | 19373503 | SNV | 1 | A | G | Homozygous   |
| NC_037638.1 | 19373596 | SNV | 1 | T | A | Heterozygous |
| NC_037638.1 | 19373836 | SNV | 1 | T | A | Heterozygous |
| NC_037638.1 | 19373857 | SNV | 1 | G | A | Heterozygous |
| NC_037638.1 | 19394465 | SNV | 1 | T | C | Heterozygous |
| NC_037638.1 | 19394682 | SNV | 1 | T | C | Homozygous   |
| NC_037638.1 | 19394892 | SNV | 1 | C | T | Homozygous   |
| NC_037638.1 | 19395007 | SNV | 1 | C | T | Homozygous   |
| NC_037638.1 | 19395013 | SNV | 1 | C | T | Heterozygous |
| NC_037638.1 | 19395022 | SNV | 1 | A | G | Heterozygous |
| NC_037638.1 | 19395025 | SNV | 1 | C | T | Homozygous   |
| NC_037638.1 | 19395238 | SNV | 1 | G | A | Homozygous   |
| NC_037638.1 | 19395240 | SNV | 1 | G | A | Homozygous   |
| NC_037638.1 | 19395254 | SNV | 1 | G | A | Homozygous   |
| NC_037638.1 | 19395295 | SNV | 1 | G | A | Heterozygous |
| NC_037638.1 | 19395307 | SNV | 1 | T | A | Homozygous   |
| NC_037638.1 | 19396119 | SNV | 1 | T | C | Homozygous   |
| NC_037638.1 | 19396202 | SNV | 1 | C | G | Heterozygous |
| NC_037638.1 | 19396631 | SNV | 1 | A | G | Heterozygous |

|             |          |     |   |   |   |              |
|-------------|----------|-----|---|---|---|--------------|
| NC_037638.1 | 19396641 | SNV | 1 | C | T | Homozygous   |
| NC_037638.1 | 19397166 | SNV | 1 | A | T | Homozygous   |
| NC_037638.1 | 19397736 | SNV | 1 | T | C | Heterozygous |
| NC_037638.1 | 19397748 | SNV | 1 | C | T | Heterozygous |
| NC_037638.1 | 19398345 | SNV | 1 | T | C | Homozygous   |
| NC_037638.1 | 19398403 | SNV | 1 | G | A | Heterozygous |
| NC_037638.1 | 19399605 | SNV | 1 | C | T | Heterozygous |
| NC_037638.1 | 19400321 | SNV | 1 | C | T | Heterozygous |
| NC_037638.1 | 19400508 | SNV | 1 | T | A | Heterozygous |
| NC_037638.1 | 19400660 | SNV | 1 | A | G | Homozygous   |
| NC_037638.1 | 19401329 | SNV | 1 | G | A | Heterozygous |
| NC_037638.1 | 19401614 | SNV | 1 | A | G | Heterozygous |
| NC_037638.1 | 19401728 | SNV | 1 | T | C | Heterozygous |
| NC_037638.1 | 19401889 | SNV | 1 | A | C | Homozygous   |
| NC_037638.1 | 19402002 | SNV | 1 | C | T | Heterozygous |
| NC_037638.1 | 19402050 | SNV | 1 | A | C | Homozygous   |
| NC_037638.1 | 19402052 | SNV | 1 | G | A | Heterozygous |
| NC_037638.1 | 19402056 | SNV | 1 | G | C | Heterozygous |
| NC_037638.1 | 19402440 | SNV | 1 | T | C | Homozygous   |
| NC_037638.1 | 19402543 | SNV | 1 | A | G | Homozygous   |
| NC_037638.1 | 19403770 | SNV | 1 | A | G | Heterozygous |
| NC_037638.1 | 19404099 | SNV | 1 | C | T | Heterozygous |
| NC_037638.1 | 19404497 | SNV | 1 | T | G | Homozygous   |
| NC_037638.1 | 19404903 | SNV | 1 | G | A | Heterozygous |
| NC_037638.1 | 19405431 | SNV | 1 | G | A | Heterozygous |
| NC_037638.1 | 19405436 | SNV | 1 | T | A | Heterozygous |
| NC_037638.1 | 19405441 | SNV | 1 | A | T | Heterozygous |
| NC_037638.1 | 19405444 | SNV | 1 | A | G | Heterozygous |
| NC_037638.1 | 19405447 | SNV | 1 | A | C | Homozygous   |
| NC_037638.1 | 19405458 | SNV | 1 | T | A | Homozygous   |
| NC_037638.1 | 19405852 | SNV | 1 | T | G | Homozygous   |
| NC_037638.1 | 19405860 | SNV | 1 | A | T | Homozygous   |
| NC_037638.1 | 19407403 | SNV | 1 | A | C | Homozygous   |
| NC_037638.1 | 19407421 | SNV | 1 | G | A | Heterozygous |
| NC_037638.1 | 19408158 | SNV | 1 | C | G | Heterozygous |
| NC_037638.1 | 19408747 | SNV | 1 | C | A | Homozygous   |
| NC_037638.1 | 19408962 | SNV | 1 | T | G | Homozygous   |
| NC_037638.1 | 19410157 | SNV | 1 | T | G | Homozygous   |
| NC_037638.1 | 19410583 | SNV | 1 | C | G | Homozygous   |
| NC_037638.1 | 19413600 | SNV | 1 | G | A | Homozygous   |
| NC_037638.1 | 19413608 | SNV | 1 | G | C | Homozygous   |
| NC_037638.1 | 19413998 | SNV | 1 | G | A | Heterozygous |
| NC_037638.1 | 19414735 | SNV | 1 | A | G | Homozygous   |
| NC_037638.1 | 19416984 | SNV | 1 | A | G | Homozygous   |
| NC_037638.1 | 19418170 | SNV | 1 | A | G | Homozygous   |
| NC_037638.1 | 19418216 | SNV | 1 | G | C | Homozygous   |
| NC_037638.1 | 19418295 | SNV | 1 | G | A | Heterozygous |
| NC_037638.1 | 19418666 | SNV | 1 | G | A | Homozygous   |
| NC_037638.1 | 19419018 | SNV | 1 | T | C | Homozygous   |
| NC_037638.1 | 19419884 | SNV | 1 | G | T | Heterozygous |
| NC_037638.1 | 19420326 | SNV | 1 | G | A | Homozygous   |

|             |          |     |   |   |   |              |
|-------------|----------|-----|---|---|---|--------------|
| NC_037638.1 | 19422332 | SNV | 1 | T | C | Heterozygous |
| NC_037638.1 | 19422528 | SNV | 1 | G | A | Heterozygous |
| NC_037638.1 | 19422557 | SNV | 1 | A | G | Heterozygous |
| NC_037638.1 | 19422850 | SNV | 1 | A | G | Heterozygous |
| NC_037638.1 | 19423366 | SNV | 1 | T | G | Homozygous   |
| NC_037638.1 | 19423389 | SNV | 1 | G | C | Homozygous   |
| NC_037638.1 | 19423394 | SNV | 1 | T | C | Heterozygous |
| NC_037638.1 | 19423429 | SNV | 1 | T | C | Homozygous   |
| NC_037638.1 | 19423458 | SNV | 1 | T | C | Homozygous   |
| NC_037638.1 | 19423506 | SNV | 1 | T | C | Homozygous   |
| NC_037638.1 | 19423518 | SNV | 1 | T | C | Homozygous   |
| NC_037638.1 | 19423529 | SNV | 1 | G | A | Heterozygous |
| NC_037638.1 | 19423617 | SNV | 1 | A | G | Homozygous   |
| NC_037638.1 | 19423628 | SNV | 1 | G | A | Heterozygous |
| NC_037638.1 | 19423696 | SNV | 1 | G | A | Heterozygous |
| NC_037638.1 | 19423914 | SNV | 1 | C | T | Homozygous   |
| NC_037638.1 | 19423985 | SNV | 1 | G | A | Homozygous   |
| NC_037638.1 | 19424537 | SNV | 1 | C | T | Heterozygous |
| NC_037638.1 | 19426875 | SNV | 1 | T | C | Homozygous   |
| NC_037638.1 | 19427122 | SNV | 1 | C | T | Homozygous   |
| NC_037638.1 | 19427133 | SNV | 1 | A | G | Homozygous   |
| NC_037638.1 | 19427150 | SNV | 1 | T | C | Homozygous   |
| NC_037638.1 | 19429336 | SNV | 1 | A | G | Homozygous   |
| NC_037638.1 | 19429401 | SNV | 1 | A | G | Heterozygous |
| NC_037638.1 | 19429425 | SNV | 1 | T | C | Homozygous   |
| NC_037638.1 | 19430304 | SNV | 1 | A | G | Heterozygous |
| NC_037638.1 | 19430486 | SNV | 1 | C | T | Homozygous   |
| NC_037638.1 | 19430489 | SNV | 1 | C | A | Homozygous   |
| NC_037638.1 | 19430604 | SNV | 1 | T | C | Heterozygous |
| NC_037638.1 | 19430761 | SNV | 1 | T | A | Heterozygous |
| NC_037638.1 | 19430821 | SNV | 1 | A | G | Homozygous   |
| NC_037638.1 | 19431815 | SNV | 1 | C | T | Heterozygous |
| NC_037638.1 | 19431831 | SNV | 1 | A | G | Heterozygous |
| NC_037638.1 | 19432340 | SNV | 1 | G | A | Heterozygous |
| NC_037638.1 | 19432481 | SNV | 1 | C | G | Heterozygous |
| NC_037638.1 | 19433304 | SNV | 1 | T | C | Homozygous   |
| NC_037638.1 | 19433392 | SNV | 1 | T | C | Homozygous   |
| NC_037638.1 | 19433471 | SNV | 1 | C | T | Heterozygous |
| NC_037638.1 | 19433583 | SNV | 1 | A | G | Homozygous   |
| NC_037638.1 | 19437422 | SNV | 1 | C | T | Homozygous   |
| NC_037638.1 | 19437426 | SNV | 1 | A | T | Homozygous   |
| NC_037638.1 | 19437429 | SNV | 1 | T | G | Homozygous   |
| NC_037638.1 | 19437433 | SNV | 1 | T | C | Heterozygous |
| NC_037638.1 | 19437435 | SNV | 1 | T | C | Homozygous   |
| NC_037638.1 | 19437438 | SNV | 1 | A | G | Heterozygous |
| NC_037638.1 | 19439726 | SNV | 1 | T | G | Heterozygous |
| NC_037638.1 | 19440391 | SNV | 1 | A | G | Heterozygous |
| NC_037638.1 | 19440394 | SNV | 1 | T | A | Heterozygous |
| NC_037638.1 | 19440401 | SNV | 1 | A | G | Heterozygous |
| NC_037638.1 | 19440412 | SNV | 1 | T | A | Heterozygous |
| NC_037638.1 | 19440922 | SNV | 1 | G | A | Homozygous   |

|             |          |     |   |   |   |              |
|-------------|----------|-----|---|---|---|--------------|
| NC_037638.1 | 19442141 | SNV | 1 | T | G | Homozygous   |
| NC_037638.1 | 19442669 | SNV | 1 | T | C | Homozygous   |
| NC_037638.1 | 19443041 | SNV | 1 | A | G | Homozygous   |
| NC_037638.1 | 19444131 | SNV | 1 | C | T | Heterozygous |
| NC_037638.1 | 19444184 | SNV | 1 | T | C | Homozygous   |
| NC_037638.1 | 19444359 | SNV | 1 | T | C | Homozygous   |
| NC_037638.1 | 19445455 | SNV | 1 | C | T | Heterozygous |
| NC_037638.1 | 19445457 | SNV | 1 | A | G | Homozygous   |
| NC_037638.1 | 19448127 | SNV | 1 | T | C | Homozygous   |
| NC_037638.1 | 19448309 | SNV | 1 | C | T | Homozygous   |
| NC_037638.1 | 19449548 | SNV | 1 | C | T | Heterozygous |
| NC_037638.1 | 19450214 | SNV | 1 | G | A | Heterozygous |
| NC_037638.1 | 19450236 | SNV | 1 | C | T | Heterozygous |
| NC_037638.1 | 19450256 | SNV | 1 | G | A | Heterozygous |
| NC_037638.1 | 19450280 | SNV | 1 | A | G | Heterozygous |
| NC_037638.1 | 19450527 | SNV | 1 | C | T | Heterozygous |
| NC_037638.1 | 19450907 | SNV | 1 | A | G | Homozygous   |
| NC_037638.1 | 19451207 | SNV | 1 | A | G | Homozygous   |
| NC_037638.1 | 19451209 | SNV | 1 | C | T | Homozygous   |
| NC_037638.1 | 19454356 | SNV | 1 | A | G | Homozygous   |
| NC_037638.1 | 19455411 | SNV | 1 | A | G | Homozygous   |
| NC_037638.1 | 19455873 | SNV | 1 | C | G | Heterozygous |
| NC_037638.1 | 19457342 | SNV | 1 | G | A | Homozygous   |
| NC_037638.1 | 19457479 | SNV | 1 | C | T | Homozygous   |
| NC_037638.1 | 19457488 | SNV | 1 | C | G | Homozygous   |
| NC_037638.1 | 19457509 | SNV | 1 | A | G | Heterozygous |
| NC_037638.1 | 19459880 | SNV | 1 | C | T | Homozygous   |
| NC_037638.1 | 19462517 | SNV | 1 | T | G | Heterozygous |
| NC_037638.1 | 19462558 | SNV | 1 | A | G | Homozygous   |
| NC_037638.1 | 19463408 | SNV | 1 | A | T | Homozygous   |
| NC_037638.1 | 19463473 | SNV | 1 | C | G | Homozygous   |
| NC_037638.1 | 19464226 | SNV | 1 | G | A | Homozygous   |
| NC_037638.1 | 19464264 | SNV | 1 | T | C | Heterozygous |
| NC_037638.1 | 19464910 | SNV | 1 | G | A | Homozygous   |
| NC_037638.1 | 19465310 | SNV | 1 | C | G | Homozygous   |
| NC_037638.1 | 19465706 | SNV | 1 | A | C | Homozygous   |
| NC_037638.1 | 19488001 | SNV | 1 | C | T | Homozygous   |
| NC_037638.1 | 19488025 | SNV | 1 | T | C | Homozygous   |
| NC_037638.1 | 19488820 | SNV | 1 | C | T | Homozygous   |
| NC_037638.1 | 19495010 | SNV | 1 | T | C | Heterozygous |
| NC_037638.1 | 19495023 | SNV | 1 | T | C | Homozygous   |
| NC_037638.1 | 19503193 | SNV | 1 | T | A | Heterozygous |
| NC_037638.1 | 19503284 | SNV | 1 | C | T | Heterozygous |
| NC_037638.1 | 19503413 | SNV | 1 | C | T | Heterozygous |
| NC_037638.1 | 19517340 | SNV | 1 | A | G | Homozygous   |
| NC_037638.1 | 19521381 | SNV | 1 | T | A | Heterozygous |
| NC_037638.1 | 19522586 | SNV | 1 | C | A | Homozygous   |
| NC_037638.1 | 19533773 | SNV | 1 | G | A | Homozygous   |
| NC_037638.1 | 19533777 | SNV | 1 | G | A | Heterozygous |
| NC_037638.1 | 19533811 | SNV | 1 | T | A | Homozygous   |
| NC_037638.1 | 19556863 | SNV | 1 | G | A | Heterozygous |



|             |          |     |   |   |   |              |
|-------------|----------|-----|---|---|---|--------------|
| NC_037638.1 | 19557127 | SNV | 1 | T | A | Homozygous   |
| NC_037638.1 | 19557180 | SNV | 1 | A | G | Homozygous   |
| NC_037638.1 | 19557907 | SNV | 1 | A | G | Homozygous   |
| NC_037638.1 | 19558028 | SNV | 1 | T | G | Homozygous   |
| NC_037638.1 | 19558052 | SNV | 1 | C | G | Homozygous   |
| NC_037638.1 | 19558340 | SNV | 1 | T | C | Homozygous   |
| NC_037638.1 | 19558498 | SNV | 1 | T | C | Homozygous   |
| NC_037638.1 | 19558538 | SNV | 1 | T | C | Heterozygous |
| NC_037638.1 | 19558802 | SNV | 1 | T | C | Heterozygous |
| NC_037638.1 | 19559109 | SNV | 1 | T | C | Homozygous   |
| NC_037638.1 | 19559186 | SNV | 1 | C | T | Heterozygous |
| NC_037638.1 | 19559597 | SNV | 1 | T | C | Homozygous   |
| NC_037638.1 | 19559611 | SNV | 1 | T | C | Homozygous   |
| NC_037638.1 | 19559622 | SNV | 1 | C | T | Heterozygous |
| NC_037638.1 | 19560166 | SNV | 1 | G | A | Heterozygous |
| NC_037638.1 | 19560272 | SNV | 1 | C | G | Heterozygous |
| NC_037638.1 | 19560277 | SNV | 1 | T | G | Heterozygous |
| NC_037638.1 | 19560355 | SNV | 1 | G | T | Homozygous   |
| NC_037638.1 | 19560512 | SNV | 1 | A | T | Homozygous   |
| NC_037638.1 | 19560708 | SNV | 1 | A | G | Homozygous   |
| NC_037638.1 | 19560741 | SNV | 1 | G | A | Homozygous   |
| NC_037638.1 | 19562363 | SNV | 1 | A | G | Homozygous   |
| NC_037638.1 | 19562498 | SNV | 1 | C | T | Heterozygous |
| NC_037638.1 | 19563074 | SNV | 1 | A | T | Homozygous   |
| NC_037638.1 | 19563103 | SNV | 1 | A | G | Homozygous   |
| NC_037638.1 | 19563335 | SNV | 1 | C | G | Heterozygous |
| NC_037638.1 | 19563399 | SNV | 1 | C | A | Homozygous   |
| NC_037638.1 | 19563401 | SNV | 1 | A | G | Homozygous   |
| NC_037638.1 | 19563414 | SNV | 1 | C | T | Homozygous   |
| NC_037638.1 | 19563440 | SNV | 1 | C | T | Heterozygous |
| NC_037638.1 | 19563454 | SNV | 1 | A | G | Homozygous   |
| NC_037638.1 | 19563488 | SNV | 1 | T | C | Homozygous   |
| NC_037638.1 | 19563689 | SNV | 1 | T | C | Homozygous   |
| NC_037638.1 | 19563794 | SNV | 1 | A | T | Homozygous   |
| NC_037638.1 | 19564045 | SNV | 1 | C | T | Homozygous   |
| NC_037638.1 | 19564171 | SNV | 1 | A | G | Homozygous   |
| NC_037638.1 | 19564512 | SNV | 1 | G | A | Heterozygous |
| NC_037638.1 | 19566156 | SNV | 1 | A | G | Heterozygous |
| NC_037638.1 | 19566426 | SNV | 1 | G | C | Heterozygous |
| NC_037638.1 | 19566543 | SNV | 1 | T | C | Homozygous   |
| NC_037638.1 | 19566564 | SNV | 1 | C | G | Heterozygous |
| NC_037638.1 | 19566601 | SNV | 1 | T | C | Homozygous   |
| NC_037638.1 | 19566634 | SNV | 1 | T | C | Homozygous   |
| NC_037638.1 | 19568157 | SNV | 1 | C | T | Homozygous   |
| NC_037638.1 | 19568648 | SNV | 1 | A | G | Homozygous   |
| NC_037638.1 | 19569272 | SNV | 1 | A | G | Homozygous   |
| NC_037638.1 | 19569717 | SNV | 1 | T | G | Homozygous   |
| NC_037638.1 | 19585422 | SNV | 1 | A | G | Homozygous   |
| NC_037638.1 | 19587496 | SNV | 1 | T | C | Homozygous   |
| NC_037638.1 | 19588247 | SNV | 1 | T | C | Homozygous   |
| NC_037638.1 | 19588398 | SNV | 1 | G | A | Heterozygous |

|             |          |     |   |   |   |              |
|-------------|----------|-----|---|---|---|--------------|
| NC_037638.1 | 19588519 | SNV | 1 | A | G | Homozygous   |
| NC_037638.1 | 19588557 | SNV | 1 | T | C | Heterozygous |
| NC_037638.1 | 19588854 | SNV | 1 | C | A | Homozygous   |
| NC_037638.1 | 19591521 | SNV | 1 | C | A | Homozygous   |
| NC_037638.1 | 19594466 | SNV | 1 | A | G | Heterozygous |
| NC_037638.1 | 19596303 | SNV | 1 | G | A | Heterozygous |
| NC_037638.1 | 19596332 | SNV | 1 | T | C | Homozygous   |
| NC_037638.1 | 19596771 | SNV | 1 | T | C | Heterozygous |
| NC_037638.1 | 19598517 | SNV | 1 | A | G | Heterozygous |
| NC_037638.1 | 19599054 | SNV | 1 | C | T | Heterozygous |
| NC_037638.1 | 19599345 | SNV | 1 | A | G | Heterozygous |
| NC_037638.1 | 19599460 | SNV | 1 | T | C | Heterozygous |
| NC_037638.1 | 19599808 | SNV | 1 | T | C | Homozygous   |
| NC_037638.1 | 19599846 | SNV | 1 | T | C | Homozygous   |
| NC_037638.1 | 19600395 | SNV | 1 | G | A | Homozygous   |
| NC_037638.1 | 19600453 | SNV | 1 | G | A | Heterozygous |
| NC_037638.1 | 19601197 | SNV | 1 | T | C | Homozygous   |
| NC_037638.1 | 19601994 | SNV | 1 | A | G | Homozygous   |
| NC_037638.1 | 19602117 | SNV | 1 | T | C | Homozygous   |
| NC_037638.1 | 19602379 | SNV | 1 | G | A | Heterozygous |
| NC_037638.1 | 19602555 | SNV | 1 | T | C | Homozygous   |
| NC_037638.1 | 19602664 | SNV | 1 | T | C | Homozygous   |
| NC_037638.1 | 19602708 | SNV | 1 | T | C | Heterozygous |
| NC_037638.1 | 19603532 | SNV | 1 | A | T | Homozygous   |
| NC_037638.1 | 19604696 | SNV | 1 | C | T | Heterozygous |
| NC_037638.1 | 19605061 | SNV | 1 | A | G | Heterozygous |
| NC_037638.1 | 19606413 | SNV | 1 | T | C | Homozygous   |
| NC_037638.1 | 19607252 | SNV | 1 | T | C | Homozygous   |
| NC_037638.1 | 19607786 | SNV | 1 | T | C | Heterozygous |
| NC_037638.1 | 19608060 | SNV | 1 | A | G | Homozygous   |
| NC_037638.1 | 19608324 | SNV | 1 | T | C | Homozygous   |
| NC_037638.1 | 19608363 | SNV | 1 | T | C | Homozygous   |
| NC_037638.1 | 19608384 | SNV | 1 | C | T | Heterozygous |
| NC_037638.1 | 19611397 | SNV | 1 | G | A | Heterozygous |
| NC_037638.1 | 19612518 | SNV | 1 | T | C | Heterozygous |
| NC_037638.1 | 19666665 | SNV | 1 | A | T | Homozygous   |
| NC_037638.1 | 19666675 | SNV | 1 | T | C | Homozygous   |
| NC_037638.1 | 19666680 | SNV | 1 | T | C | Homozygous   |
| NC_037638.1 | 19666683 | SNV | 1 | T | C | Heterozygous |
| NC_037638.1 | 19666689 | SNV | 1 | T | A | Homozygous   |
| NC_037638.1 | 19666694 | SNV | 1 | C | T | Homozygous   |
| NC_037638.1 | 19666729 | SNV | 1 | A | T | Homozygous   |
| NC_037638.1 | 19673447 | SNV | 1 | C | G | Homozygous   |
| NC_037638.1 | 19673452 | SNV | 1 | T | G | Homozygous   |
| NC_037638.1 | 19673491 | SNV | 1 | A | G | Heterozygous |
| NC_037638.1 | 19673498 | SNV | 1 | C | A | Homozygous   |
| NC_037638.1 | 19704645 | SNV | 1 | C | A | Heterozygous |
| NC_037638.1 | 19704651 | SNV | 1 | G | A | Heterozygous |
| NC_037638.1 | 19704654 | SNV | 1 | C | G | Heterozygous |
| NC_037638.1 | 19704658 | SNV | 1 | T | C | Heterozygous |
| NC_037638.1 | 19709938 | SNV | 1 | A | T | Homozygous   |

|             |          |     |   |   |   |              |
|-------------|----------|-----|---|---|---|--------------|
| NC_037638.1 | 19709941 | SNV | 1 | G | A | Homozygous   |
| NC_037638.1 | 19738231 | SNV | 1 | A | G | Heterozygous |
| NC_037638.1 | 19739233 | SNV | 1 | G | A | Heterozygous |
| NC_037638.1 | 19739235 | SNV | 1 | G | A | Heterozygous |
| NC_037638.1 | 19740467 | SNV | 1 | T | C | Heterozygous |
| NC_037638.1 | 19740472 | SNV | 1 | G | T | Heterozygous |
| NC_037638.1 | 19746459 | SNV | 1 | C | A | Heterozygous |
| NC_037638.1 | 19748877 | SNV | 1 | A | G | Homozygous   |
| NC_037638.1 | 19748882 | SNV | 1 | G | A | Homozygous   |
| NC_037638.1 | 19748885 | SNV | 1 | A | C | Homozygous   |
| NC_037638.1 | 19751733 | SNV | 1 | A | G | Heterozygous |
| NC_037638.1 | 19752315 | SNV | 1 | G | T | Heterozygous |
| NC_037638.1 | 19752318 | SNV | 1 | A | C | Heterozygous |
| NC_037638.1 | 19764398 | SNV | 1 | T | C | Heterozygous |
| NC_037638.1 | 19765637 | SNV | 1 | C | T | Heterozygous |
| NC_037638.1 | 19768656 | SNV | 1 | G | T | Homozygous   |
| NC_037638.1 | 19769292 | SNV | 1 | T | C | Homozygous   |
| NC_037638.1 | 19769310 | SNV | 1 | T | C | Homozygous   |
| NC_037638.1 | 19769316 | SNV | 1 | A | G | Homozygous   |
| NC_037638.1 | 19769343 | SNV | 1 | C | T | Homozygous   |
| NC_037638.1 | 19769367 | SNV | 1 | A | G | Heterozygous |
| NC_037638.1 | 19771216 | SNV | 1 | A | G | Homozygous   |
| NC_037638.1 | 19771355 | SNV | 1 | T | C | Homozygous   |
| NC_037638.1 | 19771444 | SNV | 1 | A | G | Heterozygous |
| NC_037638.1 | 19771488 | SNV | 1 | T | C | Heterozygous |
| NC_037638.1 | 19771645 | SNV | 1 | T | C | Heterozygous |
| NC_037638.1 | 19772114 | SNV | 1 | T | C | Homozygous   |
| NC_037638.1 | 19773138 | SNV | 1 | T | C | Homozygous   |
| NC_037638.1 | 19777933 | SNV | 1 | C | T | Homozygous   |
| NC_037638.1 | 19778196 | SNV | 1 | C | G | Heterozygous |
| NC_037638.1 | 19778250 | SNV | 1 | C | T | Heterozygous |
| NC_037638.1 | 19778254 | SNV | 1 | A | C | Heterozygous |
| NC_037638.1 | 19778258 | SNV | 1 | C | T | Heterozygous |
| NC_037638.1 | 19782384 | SNV | 1 | G | A | Heterozygous |
| NC_037638.1 | 19782873 | SNV | 1 | T | C | Homozygous   |
| NC_037638.1 | 19782951 | SNV | 1 | T | A | Homozygous   |
| NC_037638.1 | 19782977 | SNV | 1 | G | C | Heterozygous |
| NC_037638.1 | 19783179 | SNV | 1 | G | A | Homozygous   |
| NC_037638.1 | 19783250 | SNV | 1 | T | G | Homozygous   |
| NC_037638.1 | 19783257 | SNV | 1 | T | A | Homozygous   |
| NC_037638.1 | 19783259 | SNV | 1 | G | A | Homozygous   |
| NC_037638.1 | 19783607 | SNV | 1 | T | C | Homozygous   |
| NC_037638.1 | 19783761 | SNV | 1 | C | G | Heterozygous |
| NC_037638.1 | 19784272 | SNV | 1 | G | A | Homozygous   |
| NC_037638.1 | 19786032 | SNV | 1 | G | A | Heterozygous |
| NC_037638.1 | 19786378 | SNV | 1 | C | T | Homozygous   |
| NC_037638.1 | 19786403 | SNV | 1 | T | C | Homozygous   |
| NC_037638.1 | 19786592 | SNV | 1 | C | A | Homozygous   |
| NC_037638.1 | 19786892 | SNV | 1 | T | C | Heterozygous |
| NC_037638.1 | 19787499 | SNV | 1 | C | T | Homozygous   |
| NC_037638.1 | 19787952 | SNV | 1 | C | T | Homozygous   |

|             |          |     |   |   |   |              |
|-------------|----------|-----|---|---|---|--------------|
| NC_037638.1 | 19788386 | SNV | 1 | A | G | Homozygous   |
| NC_037638.1 | 19788649 | SNV | 1 | C | A | Homozygous   |
| NC_037638.1 | 19789564 | SNV | 1 | G | A | Heterozygous |
| NC_037638.1 | 19790474 | SNV | 1 | A | G | Homozygous   |
| NC_037638.1 | 19792329 | SNV | 1 | A | T | Homozygous   |
| NC_037638.1 | 19792513 | SNV | 1 | A | G | Homozygous   |
| NC_037638.1 | 19795327 | SNV | 1 | G | A | Homozygous   |
| NC_037638.1 | 19795421 | SNV | 1 | T | C | Homozygous   |
| NC_037638.1 | 19795423 | SNV | 1 | T | C | Homozygous   |
| NC_037638.1 | 19795985 | SNV | 1 | T | G | Homozygous   |
| NC_037638.1 | 19800705 | SNV | 1 | A | G | Heterozygous |
| NC_037638.1 | 19809654 | SNV | 1 | T | C | Homozygous   |
| NC_037638.1 | 19809663 | SNV | 1 | C | T | Homozygous   |
| NC_037638.1 | 19809669 | SNV | 1 | C | T | Homozygous   |
| NC_037638.1 | 19810299 | SNV | 1 | G | A | Heterozygous |
| NC_037638.1 | 19810449 | SNV | 1 | C | T | Homozygous   |
| NC_037638.1 | 19810451 | SNV | 1 | C | T | Homozygous   |
| NC_037638.1 | 19812700 | SNV | 1 | A | G | Heterozygous |
| NC_037638.1 | 19818616 | SNV | 1 | C | T | Homozygous   |
| NC_037638.1 | 19821966 | SNV | 1 | C | T | Heterozygous |
| NC_037638.1 | 19827393 | SNV | 1 | T | C | Homozygous   |
| NC_037638.1 | 19827416 | SNV | 1 | T | C | Homozygous   |
| NC_037638.1 | 19828289 | SNV | 1 | C | G | Heterozygous |
| NC_037638.1 | 19828396 | SNV | 1 | C | A | Heterozygous |
| NC_037638.1 | 19828426 | SNV | 1 | A | G | Homozygous   |
| NC_037638.1 | 19832921 | SNV | 1 | C | G | Homozygous   |
| NC_037638.1 | 19833011 | SNV | 1 | A | G | Heterozygous |
| NC_037638.1 | 19836989 | SNV | 1 | C | T | Heterozygous |
| NC_037638.1 | 19837222 | SNV | 1 | T | C | Homozygous   |
| NC_037638.1 | 19837287 | SNV | 1 | C | T | Heterozygous |
| NC_037638.1 | 19837492 | SNV | 1 | A | G | Heterozygous |
| NC_037638.1 | 19837507 | SNV | 1 | G | A | Heterozygous |
| NC_037638.1 | 19837831 | SNV | 1 | C | G | Heterozygous |
| NC_037638.1 | 19840909 | SNV | 1 | A | G | Homozygous   |
| NC_037638.1 | 19840914 | SNV | 1 | C | G | Homozygous   |
| NC_037638.1 | 19840932 | SNV | 1 | A | G | Homozygous   |
| NC_037638.1 | 19840949 | SNV | 1 | A | T | Heterozygous |
| NC_037638.1 | 19840964 | SNV | 1 | A | G | Homozygous   |
| NC_037638.1 | 19841036 | SNV | 1 | T | C | Heterozygous |
| NC_037638.1 | 19843506 | SNV | 1 | A | G | Homozygous   |
| NC_037638.1 | 19852300 | SNV | 1 | A | G | Homozygous   |
| NC_037638.1 | 19856871 | SNV | 1 | A | G | Heterozygous |
| NC_037638.1 | 19863306 | SNV | 1 | A | G | Homozygous   |
| NC_037638.1 | 19863334 | SNV | 1 | G | A | Homozygous   |
| NC_037638.1 | 19863355 | SNV | 1 | T | C | Homozygous   |
| NC_037638.1 | 19863455 | SNV | 1 | A | G | Homozygous   |
| NC_037638.1 | 19863473 | SNV | 1 | G | C | Homozygous   |
| NC_037638.1 | 19863669 | SNV | 1 | A | G | Homozygous   |
| NC_037638.1 | 19863761 | SNV | 1 | G | A | Heterozygous |
| NC_037638.1 | 19863837 | SNV | 1 | G | A | Heterozygous |
| NC_037638.1 | 19863910 | SNV | 1 | A | G | Homozygous   |

|             |          |     |   |   |   |              |
|-------------|----------|-----|---|---|---|--------------|
| NC_037638.1 | 19863954 | SNV | 1 | G | C | Homozygous   |
| NC_037638.1 | 19865937 | SNV | 1 | G | C | Homozygous   |
| NC_037638.1 | 19865941 | SNV | 1 | T | G | Homozygous   |
| NC_037638.1 | 19865960 | SNV | 1 | C | G | Homozygous   |
| NC_037638.1 | 19873885 | SNV | 1 | A | T | Homozygous   |
| NC_037638.1 | 19873888 | SNV | 1 | G | A | Homozygous   |
| NC_037638.1 | 19873891 | SNV | 1 | A | C | Homozygous   |
| NC_037638.1 | 19891990 | SNV | 1 | A | G | Homozygous   |
| NC_037638.1 | 19891994 | SNV | 1 | T | C | Homozygous   |
| NC_037638.1 | 19892409 | SNV | 1 | A | G | Heterozygous |
| NC_037638.1 | 19892442 | SNV | 1 | A | G | Heterozygous |
| NC_037638.1 | 19892448 | SNV | 1 | G | A | Heterozygous |
| NC_037638.1 | 19892753 | SNV | 1 | T | G | Homozygous   |
| NC_037638.1 | 19892775 | SNV | 1 | A | G | Heterozygous |
| NC_037638.1 | 19892816 | SNV | 1 | T | C | Homozygous   |
| NC_037638.1 | 19892833 | SNV | 1 | C | T | Heterozygous |
| NC_037638.1 | 19893207 | SNV | 1 | G | A | Homozygous   |
| NC_037638.1 | 19893243 | SNV | 1 | A | T | Heterozygous |
| NC_037638.1 | 19893510 | SNV | 1 | A | G | Homozygous   |
| NC_037638.1 | 19893532 | SNV | 1 | C | T | Heterozygous |
| NC_037638.1 | 19893702 | SNV | 1 | A | T | Heterozygous |
| NC_037638.1 | 19893705 | SNV | 1 | T | A | Heterozygous |
| NC_037638.1 | 19893711 | SNV | 1 | T | A | Heterozygous |
| NC_037638.1 | 19899964 | SNV | 1 | C | T | Homozygous   |
| NC_037638.1 | 19899975 | SNV | 1 | A | G | Homozygous   |
| NC_037638.1 | 19899983 | SNV | 1 | A | G | Homozygous   |
| NC_037638.1 | 19899985 | SNV | 1 | A | G | Heterozygous |
| NC_037638.1 | 19908521 | SNV | 1 | A | G | Homozygous   |
| NC_037638.1 | 19914757 | SNV | 1 | A | C | Heterozygous |
| NC_037638.1 | 19919964 | SNV | 1 | T | G | Homozygous   |
| NC_037638.1 | 19919978 | SNV | 1 | T | C | Homozygous   |
| NC_037638.1 | 19919991 | SNV | 1 | C | T | Homozygous   |
| NC_037638.1 | 19919993 | SNV | 1 | C | G | Homozygous   |
| NC_037638.1 | 19919995 | SNV | 1 | C | T | Homozygous   |
| NC_037638.1 | 19920001 | SNV | 1 | C | G | Homozygous   |
| NC_037638.1 | 19928221 | SNV | 1 | G | A | Homozygous   |
| NC_037638.1 | 19928225 | SNV | 1 | A | G | Homozygous   |
| NC_037638.1 | 19928271 | SNV | 1 | T | C | Heterozygous |
| NC_037638.1 | 19928284 | SNV | 1 | T | C | Heterozygous |
| NC_037638.1 | 19928402 | SNV | 1 | G | C | Homozygous   |
| NC_037638.1 | 19938335 | SNV | 1 | C | A | Heterozygous |
| NC_037638.1 | 19938349 | SNV | 1 | A | G | Homozygous   |
| NC_037638.1 | 19941959 | SNV | 1 | T | A | Homozygous   |
| NC_037638.1 | 19941984 | SNV | 1 | A | T | Homozygous   |
| NC_037638.1 | 19941998 | SNV | 1 | T | A | Homozygous   |
| NC_037638.1 | 19945676 | SNV | 1 | T | C | Homozygous   |
| NC_037638.1 | 19946891 | SNV | 1 | C | T | Homozygous   |
| NC_037638.1 | 19946922 | SNV | 1 | G | T | Homozygous   |
| NC_037638.1 | 19946924 | SNV | 1 | T | C | Homozygous   |
| NC_037638.1 | 19946932 | SNV | 1 | G | T | Homozygous   |
| NC_037638.1 | 19951255 | SNV | 1 | A | G | Heterozygous |

|             |          |     |   |   |   |              |
|-------------|----------|-----|---|---|---|--------------|
| NC_037638.1 | 19952055 | SNV | 1 | T | C | Heterozygous |
| NC_037638.1 | 19952404 | SNV | 1 | T | C | Heterozygous |
| NC_037638.1 | 19952426 | SNV | 1 | A | G | Homozygous   |
| NC_037638.1 | 19952452 | SNV | 1 | A | G | Homozygous   |
| NC_037638.1 | 19952454 | SNV | 1 | G | A | Homozygous   |
| NC_037638.1 | 19952460 | SNV | 1 | G | A | Homozygous   |
| NC_037638.1 | 19952476 | SNV | 1 | G | A | Homozygous   |
| NC_037638.1 | 19952509 | SNV | 1 | T | C | Heterozygous |
| NC_037638.1 | 19952520 | SNV | 1 | A | G | Heterozygous |
| NC_037638.1 | 19952796 | SNV | 1 | C | T | Homozygous   |
| NC_037638.1 | 19952798 | SNV | 1 | T | A | Homozygous   |
| NC_037638.1 | 19952881 | SNV | 1 | A | G | Heterozygous |
| NC_037638.1 | 19953156 | SNV | 1 | A | G | Heterozygous |
| NC_037638.1 | 19953174 | SNV | 1 | T | A | Heterozygous |
| NC_037638.1 | 19953177 | SNV | 1 | G | A | Heterozygous |
| NC_037638.1 | 19953179 | SNV | 1 | A | G | Heterozygous |
| NC_037638.1 | 19953480 | SNV | 1 | C | G | Homozygous   |
| NC_037638.1 | 19953644 | SNV | 1 | G | A | Heterozygous |
| NC_037638.1 | 19953972 | SNV | 1 | A | G | Homozygous   |
| NC_037638.1 | 19953995 | SNV | 1 | C | T | Heterozygous |
| NC_037638.1 | 19954072 | SNV | 1 | A | G | Homozygous   |
| NC_037638.1 | 19954111 | SNV | 1 | G | A | Heterozygous |
| NC_037638.1 | 19954147 | SNV | 1 | T | A | Heterozygous |
| NC_037638.1 | 19954152 | SNV | 1 | A | G | Heterozygous |
| NC_037638.1 | 19954442 | SNV | 1 | T | C | Homozygous   |
| NC_037638.1 | 19954936 | SNV | 1 | C | T | Heterozygous |
| NC_037638.1 | 19955093 | SNV | 1 | G | A | Homozygous   |
| NC_037638.1 | 19955230 | SNV | 1 | A | C | Heterozygous |
| NC_037638.1 | 19955437 | SNV | 1 | C | T | Homozygous   |
| NC_037638.1 | 19955453 | SNV | 1 | A | G | Homozygous   |
| NC_037638.1 | 19955501 | SNV | 1 | A | G | Homozygous   |
| NC_037638.1 | 19955901 | SNV | 1 | C | T | Heterozygous |
| NC_037638.1 | 19955926 | SNV | 1 | G | A | Heterozygous |
| NC_037638.1 | 19955938 | SNV | 1 | G | A | Heterozygous |
| NC_037638.1 | 19956002 | SNV | 1 | G | A | Heterozygous |
| NC_037638.1 | 19956416 | SNV | 1 | A | G | Homozygous   |
| NC_037638.1 | 19956468 | SNV | 1 | T | C | Heterozygous |
| NC_037638.1 | 19956480 | SNV | 1 | T | C | Heterozygous |
| NC_037638.1 | 19956484 | SNV | 1 | A | T | Heterozygous |
| NC_037638.1 | 19956488 | SNV | 1 | T | C | Heterozygous |
| NC_037638.1 | 19957278 | SNV | 1 | A | G | Heterozygous |
| NC_037638.1 | 19957387 | SNV | 1 | A | G | Homozygous   |
| NC_037638.1 | 19957991 | SNV | 1 | A | G | Heterozygous |
| NC_037638.1 | 19958132 | SNV | 1 | G | A | Homozygous   |
| NC_037638.1 | 19958141 | SNV | 1 | A | C | Homozygous   |
| NC_037638.1 | 19958143 | SNV | 1 | G | C | Homozygous   |
| NC_037638.1 | 19958960 | SNV | 1 | T | G | Homozygous   |
| NC_037638.1 | 19959404 | SNV | 1 | C | T | Homozygous   |
| NC_037638.1 | 19959813 | SNV | 1 | G | A | Homozygous   |
| NC_037638.1 | 19959914 | SNV | 1 | A | G | Homozygous   |
| NC_037638.1 | 19959974 | SNV | 1 | T | C | Homozygous   |

|             |          |     |   |   |   |              |
|-------------|----------|-----|---|---|---|--------------|
| NC_037638.1 | 19960175 | SNV | 1 | G | A | Heterozygous |
| NC_037638.1 | 19960209 | SNV | 1 | A | G | Homozygous   |
| NC_037638.1 | 19960282 | SNV | 1 | A | G | Homozygous   |
| NC_037638.1 | 19960295 | SNV | 1 | T | G | Homozygous   |
| NC_037638.1 | 19960314 | SNV | 1 | C | A | Heterozygous |
| NC_037638.1 | 19960324 | SNV | 1 | G | A | Heterozygous |
| NC_037638.1 | 19960886 | SNV | 1 | G | A | Heterozygous |
| NC_037638.1 | 19960890 | SNV | 1 | A | G | Heterozygous |
| NC_037638.1 | 19960898 | SNV | 1 | T | C | Homozygous   |
| NC_037638.1 | 19961036 | SNV | 1 | A | G | Homozygous   |
| NC_037638.1 | 19961089 | SNV | 1 | C | T | Heterozygous |
| NC_037638.1 | 19961298 | SNV | 1 | T | C | Heterozygous |
| NC_037638.1 | 19962731 | SNV | 1 | G | A | Heterozygous |
| NC_037638.1 | 19962734 | SNV | 1 | G | A | Heterozygous |
| NC_037638.1 | 19962736 | SNV | 1 | C | G | Heterozygous |
| NC_037638.1 | 19962801 | SNV | 1 | G | A | Heterozygous |
| NC_037638.1 | 19963880 | SNV | 1 | T | C | Homozygous   |
| NC_037638.1 | 19963935 | SNV | 1 | A | T | Homozygous   |
| NC_037638.1 | 19964710 | SNV | 1 | T | G | Heterozygous |
| NC_037638.1 | 19964713 | SNV | 1 | C | T | Heterozygous |
| NC_037638.1 | 19964726 | SNV | 1 | T | G | Heterozygous |
| NC_037638.1 | 19964732 | SNV | 1 | T | A | Heterozygous |
| NC_037638.1 | 20002426 | SNV | 1 | C | T | Heterozygous |
| NC_037638.1 | 20004378 | SNV | 1 | T | C | Homozygous   |
| NC_037638.1 | 20004398 | SNV | 1 | T | C | Homozygous   |
| NC_037638.1 | 20007881 | SNV | 1 | C | T | Heterozygous |
| NC_037638.1 | 20009540 | SNV | 1 | A | T | Heterozygous |
| NC_037638.1 | 20010092 | SNV | 1 | G | C | Homozygous   |
| NC_037638.1 | 20010293 | SNV | 1 | G | T | Heterozygous |
| NC_037638.1 | 20010300 | SNV | 1 | A | G | Homozygous   |
| NC_037638.1 | 20010399 | SNV | 1 | T | C | Homozygous   |
| NC_037638.1 | 20010446 | SNV | 1 | G | A | Homozygous   |
| NC_037638.1 | 20010664 | SNV | 1 | T | C | Homozygous   |
| NC_037638.1 | 20011242 | SNV | 1 | T | C | Homozygous   |
| NC_037638.1 | 20011247 | SNV | 1 | A | C | Homozygous   |
| NC_037638.1 | 20015695 | SNV | 1 | T | A | Homozygous   |
| NC_037638.1 | 20016917 | SNV | 1 | A | G | Heterozygous |
| NC_037638.1 | 20016919 | SNV | 1 | C | G | Heterozygous |
| NC_037638.1 | 20018639 | SNV | 1 | G | A | Heterozygous |
| NC_037638.1 | 20027654 | SNV | 1 | T | C | Homozygous   |
| NC_037638.1 | 20027687 | SNV | 1 | T | C | Heterozygous |
| NC_037638.1 | 20027918 | SNV | 1 | A | G | Homozygous   |
| NC_037638.1 | 20027949 | SNV | 1 | T | C | Homozygous   |
| NC_037638.1 | 20030206 | SNV | 1 | G | C | Homozygous   |
| NC_037638.1 | 20030214 | SNV | 1 | G | A | Homozygous   |
| NC_037638.1 | 20038776 | SNV | 1 | A | T | Homozygous   |
| NC_037638.1 | 20038786 | SNV | 1 | T | A | Homozygous   |
| NC_037638.1 | 20038796 | SNV | 1 | G | A | Heterozygous |
| NC_037638.1 | 20038801 | SNV | 1 | A | G | Homozygous   |
| NC_037638.1 | 20038805 | SNV | 1 | G | A | Homozygous   |
| NC_037638.1 | 20038828 | SNV | 1 | C | T | Homozygous   |

|             |          |     |   |   |   |              |
|-------------|----------|-----|---|---|---|--------------|
| NC_037638.1 | 20038835 | SNV | 1 | G | A | Homozygous   |
| NC_037638.1 | 20038840 | SNV | 1 | G | T | Homozygous   |
| NC_037638.1 | 20073329 | SNV | 1 | T | A | Heterozygous |
| NC_037638.1 | 20078135 | SNV | 1 | T | A | Homozygous   |
| NC_037638.1 | 20078169 | SNV | 1 | T | C | Homozygous   |
| NC_037638.1 | 20097105 | SNV | 1 | G | A | Heterozygous |
| NC_037638.1 | 20097114 | SNV | 1 | A | G | Homozygous   |
| NC_037638.1 | 20097120 | SNV | 1 | C | G | Heterozygous |
| NC_037638.1 | 20097183 | SNV | 1 | C | G | Heterozygous |
| NC_037638.1 | 20097738 | SNV | 1 | T | A | Heterozygous |
| NC_037638.1 | 20100321 | SNV | 1 | A | G | Homozygous   |
| NC_037638.1 | 20101063 | SNV | 1 | C | T | Homozygous   |
| NC_037638.1 | 20102267 | SNV | 1 | T | C | Heterozygous |
| NC_037638.1 | 20102315 | SNV | 1 | A | G | Homozygous   |
| NC_037638.1 | 20104162 | SNV | 1 | A | G | Homozygous   |
| NC_037638.1 | 20104312 | SNV | 1 | T | C | Homozygous   |
| NC_037638.1 | 20104395 | SNV | 1 | T | C | Heterozygous |
| NC_037638.1 | 20107284 | SNV | 1 | A | T | Homozygous   |
| NC_037638.1 | 20107714 | SNV | 1 | A | G | Homozygous   |
| NC_037638.1 | 20111550 | SNV | 1 | C | A | Homozygous   |
| NC_037638.1 | 20112045 | SNV | 1 | C | T | Homozygous   |
| NC_037638.1 | 20112443 | SNV | 1 | C | T | Homozygous   |
| NC_037638.1 | 20112905 | SNV | 1 | C | T | Homozygous   |
| NC_037638.1 | 20113034 | SNV | 1 | A | G | Homozygous   |
| NC_037638.1 | 20114457 | SNV | 1 | C | T | Heterozygous |
| NC_037638.1 | 20114748 | SNV | 1 | T | A | Heterozygous |
| NC_037638.1 | 20114763 | SNV | 1 | T | G | Homozygous   |
| NC_037638.1 | 20114772 | SNV | 1 | A | G | Homozygous   |
| NC_037638.1 | 20114778 | SNV | 1 | T | C | Homozygous   |
| NC_037638.1 | 20114784 | SNV | 1 | A | C | Homozygous   |
| NC_037638.1 | 20114791 | SNV | 1 | T | C | Homozygous   |
| NC_037638.1 | 20114799 | SNV | 1 | T | A | Homozygous   |
| NC_037638.1 | 20114805 | SNV | 1 | A | G | Homozygous   |
| NC_037638.1 | 20114808 | SNV | 1 | A | G | Homozygous   |
| NC_037638.1 | 20114814 | SNV | 1 | T | C | Homozygous   |
| NC_037638.1 | 20114835 | SNV | 1 | A | G | Homozygous   |
| NC_037638.1 | 20114845 | SNV | 1 | G | C | Homozygous   |
| NC_037638.1 | 20114847 | SNV | 1 | A | G | Homozygous   |
| NC_037638.1 | 20114853 | SNV | 1 | A | G | Homozygous   |
| NC_037638.1 | 20114858 | SNV | 1 | T | A | Heterozygous |
| NC_037638.1 | 20114862 | SNV | 1 | A | T | Heterozygous |
| NC_037638.1 | 20114868 | SNV | 1 | A | G | Heterozygous |
| NC_037638.1 | 20115530 | SNV | 1 | A | T | Heterozygous |
| NC_037638.1 | 20119426 | SNV | 1 | A | T | Heterozygous |
| NC_037638.1 | 20119486 | SNV | 1 | G | A | Heterozygous |
| NC_037638.1 | 20120405 | SNV | 1 | C | T | Heterozygous |
| NC_037638.1 | 20120489 | SNV | 1 | C | T | Heterozygous |
| NC_037638.1 | 20120684 | SNV | 1 | C | T | Homozygous   |
| NC_037638.1 | 20120796 | SNV | 1 | T | C | Homozygous   |
| NC_037638.1 | 20123452 | SNV | 1 | C | T | Heterozygous |
| NC_037638.1 | 20123468 | SNV | 1 | T | C | Heterozygous |



|             |          |     |   |   |   |              |
|-------------|----------|-----|---|---|---|--------------|
| NC_037638.1 | 20123470 | SNV | 1 | C | T | Heterozygous |
| NC_037638.1 | 20123524 | SNV | 1 | A | G | Homozygous   |
| NC_037638.1 | 20123746 | SNV | 1 | C | T | Heterozygous |
| NC_037638.1 | 20123782 | SNV | 1 | A | C | Heterozygous |
| NC_037638.1 | 20123785 | SNV | 1 | T | C | Heterozygous |
| NC_037638.1 | 20125146 | SNV | 1 | A | T | Homozygous   |
| NC_037638.1 | 20125171 | SNV | 1 | C | T | Homozygous   |
| NC_037638.1 | 20134232 | SNV | 1 | G | A | Heterozygous |
| NC_037638.1 | 20134888 | SNV | 1 | A | G | Homozygous   |
| NC_037638.1 | 20139142 | SNV | 1 | G | T | Homozygous   |
| NC_037638.1 | 20139425 | SNV | 1 | T | C | Homozygous   |
| NC_037638.1 | 20139448 | SNV | 1 | A | T | Heterozygous |
| NC_037638.1 | 20139494 | SNV | 1 | T | C | Homozygous   |
| NC_037638.1 | 20139609 | SNV | 1 | A | T | Homozygous   |
| NC_037638.1 | 20139613 | SNV | 1 | C | T | Homozygous   |
| NC_037638.1 | 20139704 | SNV | 1 | C | T | Homozygous   |
| NC_037638.1 | 20140120 | SNV | 1 | T | C | Homozygous   |
| NC_037638.1 | 20142714 | SNV | 1 | C | T | Homozygous   |
| NC_037638.1 | 20144049 | SNV | 1 | T | C | Homozygous   |
| NC_037638.1 | 20150501 | SNV | 1 | A | G | Homozygous   |
| NC_037638.1 | 20150521 | SNV | 1 | A | G | Heterozygous |
| NC_037638.1 | 20150523 | SNV | 1 | G | A | Homozygous   |
| NC_037638.1 | 20150556 | SNV | 1 | G | A | Heterozygous |
| NC_037638.1 | 20150611 | SNV | 1 | T | C | Homozygous   |
| NC_037638.1 | 20155408 | SNV | 1 | C | T | Heterozygous |
| NC_037638.1 | 20165253 | SNV | 1 | A | G | Homozygous   |
| NC_037638.1 | 20177725 | SNV | 1 | G | A | Heterozygous |
| NC_037638.1 | 20202247 | SNV | 1 | A | G | Homozygous   |
| NC_037638.1 | 20203596 | SNV | 1 | C | T | Heterozygous |
| NC_037638.1 | 20203599 | SNV | 1 | T | C | Heterozygous |
| NC_037638.1 | 20203619 | SNV | 1 | C | T | Heterozygous |
| NC_037638.1 | 20203625 | SNV | 1 | T | C | Heterozygous |
| NC_037638.1 | 20207727 | SNV | 1 | T | C | Heterozygous |
| NC_037638.1 | 20207763 | SNV | 1 | G | A | Homozygous   |
| NC_037638.1 | 20207804 | SNV | 1 | G | A | Heterozygous |
| NC_037638.1 | 20213774 | SNV | 1 | T | C | Homozygous   |
| NC_037638.1 | 20213783 | SNV | 1 | A | G | Homozygous   |
| NC_037638.1 | 20222101 | SNV | 1 | A | G | Homozygous   |
| NC_037638.1 | 20222116 | SNV | 1 | G | A | Heterozygous |
| NC_037638.1 | 20222194 | SNV | 1 | T | C | Homozygous   |
| NC_037638.1 | 20222401 | SNV | 1 | A | G | Homozygous   |
| NC_037638.1 | 20227240 | SNV | 1 | T | C | Homozygous   |
| NC_037638.1 | 20261297 | SNV | 1 | T | C | Homozygous   |
| NC_037638.1 | 20261327 | SNV | 1 | T | G | Homozygous   |
| NC_037638.1 | 20266489 | SNV | 1 | A | T | Homozygous   |
| NC_037638.1 | 20268524 | SNV | 1 | T | A | Homozygous   |
| NC_037638.1 | 20268534 | SNV | 1 | C | G | Homozygous   |
| NC_037638.1 | 20268779 | SNV | 1 | C | A | Homozygous   |
| NC_037638.1 | 20269314 | SNV | 1 | T | C | Homozygous   |
| NC_037638.1 | 20270251 | SNV | 1 | T | A | Homozygous   |
| NC_037638.1 | 20270525 | SNV | 1 | A | T | Homozygous   |

|             |          |     |   |   |   |              |
|-------------|----------|-----|---|---|---|--------------|
| NC_037638.1 | 20271583 | SNV | 1 | T | A | Homozygous   |
| NC_037638.1 | 20272955 | SNV | 1 | C | T | Homozygous   |
| NC_037638.1 | 20275300 | SNV | 1 | G | A | Heterozygous |
| NC_037638.1 | 20275344 | SNV | 1 | T | C | Homozygous   |
| NC_037638.1 | 20275443 | SNV | 1 | T | C | Heterozygous |
| NC_037638.1 | 20276386 | SNV | 1 | T | C | Homozygous   |
| NC_037638.1 | 20276770 | SNV | 1 | G | A | Homozygous   |
| NC_037638.1 | 20276908 | SNV | 1 | C | T | Heterozygous |
| NC_037638.1 | 20277194 | SNV | 1 | T | C | Homozygous   |
| NC_037638.1 | 20277209 | SNV | 1 | C | T | Homozygous   |
| NC_037638.1 | 20279750 | SNV | 1 | T | G | Homozygous   |
| NC_037638.1 | 20280170 | SNV | 1 | A | G | Homozygous   |
| NC_037638.1 | 20280397 | SNV | 1 | T | C | Homozygous   |
| NC_037638.1 | 20280428 | SNV | 1 | A | G | Heterozygous |
| NC_037638.1 | 20280436 | SNV | 1 | G | A | Heterozygous |
| NC_037638.1 | 20280440 | SNV | 1 | G | A | Homozygous   |
| NC_037638.1 | 20280509 | SNV | 1 | T | C | Heterozygous |
| NC_037638.1 | 20280565 | SNV | 1 | T | C | Homozygous   |
| NC_037638.1 | 20280597 | SNV | 1 | T | C | Heterozygous |
| NC_037638.1 | 20280612 | SNV | 1 | G | A | Homozygous   |
| NC_037638.1 | 20281014 | SNV | 1 | T | C | Heterozygous |
| NC_037638.1 | 20281049 | SNV | 1 | G | A | Heterozygous |
| NC_037638.1 | 20281136 | SNV | 1 | C | T | Heterozygous |
| NC_037638.1 | 20281645 | SNV | 1 | G | A | Homozygous   |
| NC_037638.1 | 20281707 | SNV | 1 | A | G | Homozygous   |
| NC_037638.1 | 20281796 | SNV | 1 | A | G | Homozygous   |
| NC_037638.1 | 20281978 | SNV | 1 | G | A | Heterozygous |
| NC_037638.1 | 20281994 | SNV | 1 | A | G | Heterozygous |
| NC_037638.1 | 20282015 | SNV | 1 | T | C | Homozygous   |
| NC_037638.1 | 20282061 | SNV | 1 | G | A | Heterozygous |
| NC_037638.1 | 20282344 | SNV | 1 | A | G | Homozygous   |
| NC_037638.1 | 20282419 | SNV | 1 | T | C | Heterozygous |
| NC_037638.1 | 20282446 | SNV | 1 | G | A | Heterozygous |
| NC_037638.1 | 20282851 | SNV | 1 | T | A | Homozygous   |
| NC_037638.1 | 20282853 | SNV | 1 | T | C | Homozygous   |
| NC_037638.1 | 20283001 | SNV | 1 | T | C | Heterozygous |
| NC_037638.1 | 20283183 | SNV | 1 | G | A | Homozygous   |
| NC_037638.1 | 20284419 | SNV | 1 | T | C | Homozygous   |
| NC_037638.1 | 20285009 | SNV | 1 | C | G | Homozygous   |
| NC_037638.1 | 20285036 | SNV | 1 | A | T | Homozygous   |
| NC_037638.1 | 20285544 | SNV | 1 | A | G | Homozygous   |
| NC_037638.1 | 20285809 | SNV | 1 | T | C | Homozygous   |
| NC_037638.1 | 20285832 | SNV | 1 | C | T | Heterozygous |
| NC_037638.1 | 20285838 | SNV | 1 | C | T | Heterozygous |
| NC_037638.1 | 20285933 | SNV | 1 | A | G | Homozygous   |
| NC_037638.1 | 20285941 | SNV | 1 | T | C | Homozygous   |
| NC_037638.1 | 20285964 | SNV | 1 | A | G | Homozygous   |
| NC_037638.1 | 20286019 | SNV | 1 | A | C | Heterozygous |
| NC_037638.1 | 20286068 | SNV | 1 | C | T | Heterozygous |
| NC_037638.1 | 20286076 | SNV | 1 | T | C | Homozygous   |
| NC_037638.1 | 20286104 | SNV | 1 | G | C | Homozygous   |

|             |          |     |   |   |   |              |
|-------------|----------|-----|---|---|---|--------------|
| NC_037638.1 | 20286115 | SNV | 1 | T | C | Heterozygous |
| NC_037638.1 | 20286127 | SNV | 1 | T | C | Heterozygous |
| NC_037638.1 | 20286133 | SNV | 1 | T | C | Heterozygous |
| NC_037638.1 | 20286140 | SNV | 1 | C | T | Homozygous   |
| NC_037638.1 | 20286148 | SNV | 1 | T | C | Heterozygous |
| NC_037638.1 | 20286154 | SNV | 1 | C | T | Homozygous   |
| NC_037638.1 | 20286157 | SNV | 1 | C | T | Heterozygous |
| NC_037638.1 | 20286164 | SNV | 1 | T | C | Homozygous   |
| NC_037638.1 | 20286172 | SNV | 1 | T | C | Heterozygous |
| NC_037638.1 | 20286190 | SNV | 1 | C | T | Homozygous   |
| NC_037638.1 | 20286196 | SNV | 1 | C | T | Heterozygous |
| NC_037638.1 | 20286199 | SNV | 1 | C | T | Homozygous   |
| NC_037638.1 | 20286208 | SNV | 1 | A | G | Homozygous   |
| NC_037638.1 | 20286325 | SNV | 1 | A | G | Heterozygous |
| NC_037638.1 | 20286354 | SNV | 1 | T | C | Heterozygous |
| NC_037638.1 | 20286538 | SNV | 1 | A | G | Homozygous   |
| NC_037638.1 | 20286617 | SNV | 1 | A | G | Homozygous   |
| NC_037638.1 | 20287264 | SNV | 1 | C | T | Heterozygous |
| NC_037638.1 | 20287265 | SNV | 1 | A | T | Heterozygous |
| NC_037638.1 | 20287278 | SNV | 1 | T | A | Heterozygous |
| NC_037638.1 | 20287283 | SNV | 1 | G | T | Heterozygous |
| NC_037638.1 | 20287696 | SNV | 1 | T | A | Homozygous   |
| NC_037638.1 | 20287698 | SNV | 1 | T | C | Heterozygous |
| NC_037638.1 | 20287947 | SNV | 1 | C | T | Homozygous   |
| NC_037638.1 | 20288043 | SNV | 1 | T | C | Homozygous   |
| NC_037638.1 | 20288201 | SNV | 1 | G | A | Heterozygous |
| NC_037638.1 | 20288268 | SNV | 1 | A | G | Homozygous   |
| NC_037638.1 | 20289922 | SNV | 1 | A | G | Homozygous   |
| NC_037638.1 | 20292397 | SNV | 1 | A | G | Homozygous   |
| NC_037638.1 | 20292404 | SNV | 1 | G | T | Homozygous   |
| NC_037638.1 | 20293016 | SNV | 1 | A | G | Homozygous   |
| NC_037638.1 | 20293085 | SNV | 1 | G | A | Heterozygous |
| NC_037638.1 | 20293411 | SNV | 1 | T | C | Heterozygous |
| NC_037638.1 | 20293419 | SNV | 1 | G | A | Homozygous   |
| NC_037638.1 | 20293465 | SNV | 1 | T | C | Homozygous   |
| NC_037638.1 | 20293479 | SNV | 1 | G | A | Heterozygous |
| NC_037638.1 | 20293499 | SNV | 1 | G | A | Homozygous   |
| NC_037638.1 | 20293505 | SNV | 1 | G | T | Heterozygous |
| NC_037638.1 | 20293508 | SNV | 1 | G | A | Heterozygous |
| NC_037638.1 | 20293539 | SNV | 1 | A | G | Heterozygous |
| NC_037638.1 | 20293544 | SNV | 1 | A | G | Homozygous   |
| NC_037638.1 | 20293593 | SNV | 1 | A | T | Homozygous   |
| NC_037638.1 | 20294659 | SNV | 1 | A | G | Homozygous   |
| NC_037638.1 | 20294755 | SNV | 1 | C | G | Homozygous   |
| NC_037638.1 | 20298207 | SNV | 1 | G | A | Heterozygous |
| NC_037638.1 | 20298213 | SNV | 1 | G | A | Homozygous   |
| NC_037638.1 | 20298215 | SNV | 1 | G | A | Heterozygous |
| NC_037638.1 | 20298238 | SNV | 1 | A | C | Heterozygous |
| NC_037638.1 | 20298247 | SNV | 1 | G | A | Heterozygous |
| NC_037638.1 | 20310397 | SNV | 1 | G | A | Homozygous   |
| NC_037638.1 | 20310401 | SNV | 1 | G | A | Heterozygous |

|             |          |     |   |   |   |              |
|-------------|----------|-----|---|---|---|--------------|
| NC_037638.1 | 20312048 | SNV | 1 | T | C | Homozygous   |
| NC_037638.1 | 20312429 | SNV | 1 | C | T | Heterozygous |
| NC_037638.1 | 20319941 | SNV | 1 | T | C | Heterozygous |
| NC_037638.1 | 20324497 | SNV | 1 | A | G | Homozygous   |
| NC_037638.1 | 20324608 | SNV | 1 | T | C | Heterozygous |
| NC_037638.1 | 20324623 | SNV | 1 | C | G | Homozygous   |
| NC_037638.1 | 20324629 | SNV | 1 | G | A | Homozygous   |
| NC_037638.1 | 20324973 | SNV | 1 | A | C | Heterozygous |
| NC_037638.1 | 20325016 | SNV | 1 | C | T | Homozygous   |
| NC_037638.1 | 20325024 | SNV | 1 | G | A | Homozygous   |
| NC_037638.1 | 20327775 | SNV | 1 | C | T | Homozygous   |
| NC_037638.1 | 20327888 | SNV | 1 | T | C | Homozygous   |
| NC_037638.1 | 20327891 | SNV | 1 | C | T | Homozygous   |
| NC_037638.1 | 20327921 | SNV | 1 | A | G | Homozygous   |
| NC_037638.1 | 20333444 | SNV | 1 | A | G | Homozygous   |
| NC_037638.1 | 20349697 | SNV | 1 | T | G | Homozygous   |
| NC_037638.1 | 20349699 | SNV | 1 | G | A | Homozygous   |
| NC_037638.1 | 20349706 | SNV | 1 | T | G | Homozygous   |
| NC_037638.1 | 20349712 | SNV | 1 | T | A | Homozygous   |
| NC_037638.1 | 20349716 | SNV | 1 | G | T | Homozygous   |
| NC_037638.1 | 20349719 | SNV | 1 | T | A | Homozygous   |
| NC_037638.1 | 20349725 | SNV | 1 | G | A | Homozygous   |
| NC_037638.1 | 20349735 | SNV | 1 | A | G | Homozygous   |
| NC_037638.1 | 20349737 | SNV | 1 | A | G | Homozygous   |
| NC_037638.1 | 20349741 | SNV | 1 | G | A | Homozygous   |
| NC_037638.1 | 20354413 | SNV | 1 | T | G | Heterozygous |
| NC_037638.1 | 20354415 | SNV | 1 | T | C | Homozygous   |
| NC_037638.1 | 20356071 | SNV | 1 | C | T | Heterozygous |
| NC_037638.1 | 20356217 | SNV | 1 | T | C | Heterozygous |
| NC_037638.1 | 20356854 | SNV | 1 | G | A | Heterozygous |
| NC_037638.1 | 20356894 | SNV | 1 | A | G | Homozygous   |
| NC_037638.1 | 20357054 | SNV | 1 | A | G | Heterozygous |
| NC_037638.1 | 20360582 | SNV | 1 | A | G | Heterozygous |
| NC_037638.1 | 20360644 | SNV | 1 | A | C | Homozygous   |
| NC_037638.1 | 20366342 | SNV | 1 | G | A | Homozygous   |
| NC_037638.1 | 20366647 | SNV | 1 | A | G | Homozygous   |
| NC_037638.1 | 20366685 | SNV | 1 | G | A | Homozygous   |
| NC_037638.1 | 20366845 | SNV | 1 | T | C | Homozygous   |
| NC_037638.1 | 20366903 | SNV | 1 | A | G | Homozygous   |
| NC_037638.1 | 20370613 | SNV | 1 | T | C | Heterozygous |
| NC_037638.1 | 20370623 | SNV | 1 | C | G | Heterozygous |
| NC_037638.1 | 20370631 | SNV | 1 | T | G | Heterozygous |
| NC_037638.1 | 20382111 | SNV | 1 | A | G | Homozygous   |
| NC_037638.1 | 20382903 | SNV | 1 | G | A | Homozygous   |
| NC_037638.1 | 20382940 | SNV | 1 | C | T | Heterozygous |
| NC_037638.1 | 20383297 | SNV | 1 | G | A | Homozygous   |
| NC_037638.1 | 20416722 | SNV | 1 | A | C | Heterozygous |
| NC_037638.1 | 20416724 | SNV | 1 | A | C | Heterozygous |
| NC_037638.1 | 20416730 | SNV | 1 | A | T | Heterozygous |
| NC_037638.1 | 20419206 | SNV | 1 | A | G | Heterozygous |
| NC_037638.1 | 20419249 | SNV | 1 | C | T | Heterozygous |

|             |          |     |   |   |   |              |
|-------------|----------|-----|---|---|---|--------------|
| NC_037638.1 | 20423250 | SNV | 1 | G | T | Heterozygous |
| NC_037638.1 | 20434661 | SNV | 1 | C | T | Homozygous   |
| NC_037638.1 | 20437037 | SNV | 1 | G | A | Homozygous   |
| NC_037638.1 | 20439127 | SNV | 1 | T | C | Homozygous   |
| NC_037638.1 | 20439218 | SNV | 1 | G | A | Heterozygous |
| NC_037638.1 | 20439263 | SNV | 1 | A | G | Homozygous   |
| NC_037638.1 | 20439866 | SNV | 1 | C | T | Heterozygous |
| NC_037638.1 | 20440932 | SNV | 1 | C | T | Heterozygous |
| NC_037638.1 | 20443348 | SNV | 1 | G | A | Heterozygous |
| NC_037638.1 | 20443503 | SNV | 1 | C | G | Homozygous   |
| NC_037638.1 | 20444605 | SNV | 1 | C | T | Heterozygous |
| NC_037638.1 | 20444609 | SNV | 1 | A | T | Homozygous   |
| NC_037638.1 | 20444664 | SNV | 1 | C | A | Homozygous   |
| NC_037638.1 | 20444667 | SNV | 1 | C | T | Homozygous   |
| NC_037638.1 | 20444670 | SNV | 1 | C | T | Homozygous   |
| NC_037638.1 | 20444672 | SNV | 1 | T | A | Heterozygous |
| NC_037638.1 | 20444684 | SNV | 1 | T | C | Heterozygous |
| NC_037638.1 | 20444808 | SNV | 1 | C | A | Heterozygous |
| NC_037638.1 | 20446040 | SNV | 1 | C | G | Heterozygous |
| NC_037638.1 | 20447642 | SNV | 1 | A | G | Heterozygous |
| NC_037638.1 | 20453078 | SNV | 1 | A | G | Homozygous   |
| NC_037638.1 | 20453352 | SNV | 1 | G | A | Homozygous   |
| NC_037638.1 | 20454230 | SNV | 1 | C | T | Heterozygous |
| NC_037638.1 | 20459084 | SNV | 1 | C | T | Homozygous   |
| NC_037638.1 | 20488008 | SNV | 1 | A | G | Homozygous   |
| NC_037638.1 | 20488219 | SNV | 1 | C | T | Heterozygous |
| NC_037638.1 | 20488266 | SNV | 1 | C | T | Heterozygous |
| NC_037638.1 | 20488326 | SNV | 1 | G | A | Heterozygous |
| NC_037638.1 | 20488328 | SNV | 1 | G | A | Heterozygous |
| NC_037638.1 | 20488440 | SNV | 1 | G | A | Homozygous   |
| NC_037638.1 | 20499034 | SNV | 1 | C | A | Homozygous   |
| NC_037638.1 | 20499079 | SNV | 1 | A | G | Homozygous   |
| NC_037638.1 | 20499081 | SNV | 1 | G | A | Heterozygous |
| NC_037638.1 | 20499150 | SNV | 1 | G | A | Heterozygous |
| NC_037638.1 | 20499505 | SNV | 1 | T | C | Heterozygous |
| NC_037638.1 | 20499604 | SNV | 1 | G | A | Heterozygous |
| NC_037638.1 | 20499857 | SNV | 1 | T | C | Heterozygous |
| NC_037638.1 | 20500021 | SNV | 1 | C | T | Heterozygous |
| NC_037638.1 | 20500041 | SNV | 1 | G | A | Heterozygous |
| NC_037638.1 | 20500087 | SNV | 1 | A | G | Homozygous   |
| NC_037638.1 | 20500509 | SNV | 1 | A | G | Homozygous   |
| NC_037638.1 | 20500516 | SNV | 1 | G | C | Heterozygous |
| NC_037638.1 | 20500689 | SNV | 1 | A | G | Homozygous   |
| NC_037638.1 | 20501829 | SNV | 1 | A | G | Homozygous   |
| NC_037638.1 | 20501868 | SNV | 1 | G | A | Heterozygous |
| NC_037638.1 | 20509564 | SNV | 1 | T | C | Homozygous   |
| NC_037638.1 | 20509692 | SNV | 1 | C | G | Heterozygous |
| NC_037638.1 | 20516575 | SNV | 1 | G | A | Homozygous   |
| NC_037638.1 | 20516591 | SNV | 1 | C | T | Heterozygous |
| NC_037638.1 | 20518036 | SNV | 1 | A | T | Heterozygous |
| NC_037638.1 | 20518059 | SNV | 1 | G | A | Homozygous   |

|             |          |     |   |   |   |              |
|-------------|----------|-----|---|---|---|--------------|
| NC_037638.1 | 20520925 | SNV | 1 | G | A | Homozygous   |
| NC_037638.1 | 20520931 | SNV | 1 | G | A | Heterozygous |
| NC_037638.1 | 20521239 | SNV | 1 | A | G | Homozygous   |
| NC_037638.1 | 20521264 | SNV | 1 | T | C | Homozygous   |
| NC_037638.1 | 20532206 | SNV | 1 | A | G | Homozygous   |
| NC_037638.1 | 20532230 | SNV | 1 | A | G | Homozygous   |
| NC_037638.1 | 20532881 | SNV | 1 | C | T | Heterozygous |
| NC_037638.1 | 20532953 | SNV | 1 | A | G | Homozygous   |
| NC_037638.1 | 20534116 | SNV | 1 | G | T | Heterozygous |
| NC_037638.1 | 20534118 | SNV | 1 | A | T | Heterozygous |
| NC_037638.1 | 20538801 | SNV | 1 | T | G | Heterozygous |
| NC_037638.1 | 20538864 | SNV | 1 | A | G | Homozygous   |
| NC_037638.1 | 20542465 | SNV | 1 | T | C | Homozygous   |
| NC_037638.1 | 20544448 | SNV | 1 | T | C | Homozygous   |
| NC_037638.1 | 20545306 | SNV | 1 | G | A | Homozygous   |
| NC_037638.1 | 20548095 | SNV | 1 | G | A | Heterozygous |
| NC_037638.1 | 20548098 | SNV | 1 | A | T | Heterozygous |
| NC_037638.1 | 20548776 | SNV | 1 | A | G | Homozygous   |
| NC_037638.1 | 20550178 | SNV | 1 | A | C | Homozygous   |
| NC_037638.1 | 20551017 | SNV | 1 | C | T | Homozygous   |
| NC_037638.1 | 20556092 | SNV | 1 | T | A | Homozygous   |
| NC_037638.1 | 20556094 | SNV | 1 | G | T | Homozygous   |
| NC_037638.1 | 20556128 | SNV | 1 | T | A | Homozygous   |
| NC_037638.1 | 20556131 | SNV | 1 | G | A | Homozygous   |
| NC_037638.1 | 20556134 | SNV | 1 | T | G | Homozygous   |
| NC_037638.1 | 20558654 | SNV | 1 | T | A | Homozygous   |
| NC_037638.1 | 20558668 | SNV | 1 | A | T | Homozygous   |
| NC_037638.1 | 20558670 | SNV | 1 | A | T | Homozygous   |
| NC_037638.1 | 20558676 | SNV | 1 | T | C | Homozygous   |
| NC_037638.1 | 20558681 | SNV | 1 | A | T | Homozygous   |
| NC_037638.1 | 20558683 | SNV | 1 | A | T | Homozygous   |
| NC_037638.1 | 20558694 | SNV | 1 | A | T | Homozygous   |
| NC_037638.1 | 20558718 | SNV | 1 | T | C | Homozygous   |
| NC_037638.1 | 20558721 | SNV | 1 | A | T | Homozygous   |
| NC_037638.1 | 20558933 | SNV | 1 | G | T | Heterozygous |
| NC_037638.1 | 20560905 | SNV | 1 | C | T | Homozygous   |
| NC_037638.1 | 20561564 | SNV | 1 | C | T | Homozygous   |
| NC_037638.1 | 20562126 | SNV | 1 | A | C | Heterozygous |
| NC_037638.1 | 20562129 | SNV | 1 | A | T | Heterozygous |
| NC_037638.1 | 20563168 | SNV | 1 | G | A | Homozygous   |
| NC_037638.1 | 20564823 | SNV | 1 | C | T | Homozygous   |
| NC_037638.1 | 20565117 | SNV | 1 | A | G | Heterozygous |
| NC_037638.1 | 20568941 | SNV | 1 | G | A | Homozygous   |
| NC_037638.1 | 20575681 | SNV | 1 | G | A | Homozygous   |
| NC_037638.1 | 20576824 | SNV | 1 | A | C | Heterozygous |
| NC_037638.1 | 20576826 | SNV | 1 | A | T | Heterozygous |
| NC_037638.1 | 20576829 | SNV | 1 | A | T | Heterozygous |
| NC_037638.1 | 20577662 | SNV | 1 | T | A | Homozygous   |
| NC_037638.1 | 20581437 | SNV | 1 | G | C | Homozygous   |
| NC_037638.1 | 20581446 | SNV | 1 | A | T | Heterozygous |
| NC_037638.1 | 20581466 | SNV | 1 | A | G | Heterozygous |

|             |          |     |   |   |   |              |
|-------------|----------|-----|---|---|---|--------------|
| NC_037638.1 | 20581468 | SNV | 1 | A | T | Heterozygous |
| NC_037638.1 | 20581496 | SNV | 1 | A | G | Heterozygous |
| NC_037638.1 | 20581524 | SNV | 1 | T | C | Heterozygous |
| NC_037638.1 | 20588853 | SNV | 1 | T | A | Homozygous   |
| NC_037638.1 | 20588857 | SNV | 1 | T | A | Homozygous   |
| NC_037638.1 | 20588859 | SNV | 1 | A | G | Homozygous   |
| NC_037638.1 | 20589040 | SNV | 1 | T | A | Homozygous   |
| NC_037638.1 | 20589057 | SNV | 1 | T | G | Homozygous   |
| NC_037638.1 | 20589061 | SNV | 1 | A | G | Homozygous   |
| NC_037638.1 | 20589064 | SNV | 1 | A | G | Homozygous   |
| NC_037638.1 | 20589067 | SNV | 1 | C | G | Homozygous   |
| NC_037638.1 | 20589069 | SNV | 1 | A | G | Homozygous   |
| NC_037638.1 | 20589073 | SNV | 1 | C | A | Homozygous   |
| NC_037638.1 | 20589079 | SNV | 1 | G | T | Homozygous   |
| NC_037638.1 | 20589082 | SNV | 1 | A | T | Homozygous   |
| NC_037638.1 | 20589085 | SNV | 1 | T | C | Homozygous   |
| NC_037638.1 | 20589088 | SNV | 1 | A | G | Homozygous   |
| NC_037638.1 | 20589097 | SNV | 1 | A | T | Homozygous   |
| NC_037638.1 | 20589106 | SNV | 1 | A | G | Heterozygous |
| NC_037638.1 | 20589109 | SNV | 1 | T | C | Heterozygous |
| NC_037638.1 | 20589111 | SNV | 1 | G | T | Heterozygous |
| NC_037638.1 | 20589115 | SNV | 1 | T | C | Heterozygous |
| NC_037638.1 | 20589117 | SNV | 1 | C | T | Heterozygous |
| NC_037638.1 | 20589124 | SNV | 1 | T | A | Heterozygous |
| NC_037638.1 | 20589127 | SNV | 1 | T | C | Heterozygous |
| NC_037638.1 | 20591999 | SNV | 1 | G | A | Homozygous   |
| NC_037638.1 | 20594098 | SNV | 1 | G | T | Homozygous   |
| NC_037638.1 | 20594111 | SNV | 1 | G | T | Homozygous   |
| NC_037638.1 | 20595694 | SNV | 1 | T | C | Homozygous   |
| NC_037638.1 | 20602505 | SNV | 1 | T | A | Homozygous   |
| NC_037638.1 | 20602512 | SNV | 1 | C | T | Homozygous   |
| NC_037638.1 | 20602542 | SNV | 1 | T | A | Homozygous   |
| NC_037638.1 | 20602554 | SNV | 1 | T | A | Homozygous   |
| NC_037638.1 | 20604052 | SNV | 1 | T | A | Homozygous   |
| NC_037638.1 | 20604055 | SNV | 1 | T | A | Homozygous   |
| NC_037638.1 | 20604077 | SNV | 1 | G | A | Homozygous   |
| NC_037638.1 | 20607140 | SNV | 1 | A | G | Homozygous   |
| NC_037638.1 | 20609091 | SNV | 1 | C | T | Homozygous   |
| NC_037638.1 | 20609118 | SNV | 1 | T | C | Homozygous   |
| NC_037638.1 | 20609285 | SNV | 1 | C | A | Heterozygous |
| NC_037638.1 | 20610025 | SNV | 1 | C | T | Homozygous   |
| NC_037638.1 | 20611056 | SNV | 1 | A | T | Homozygous   |
| NC_037638.1 | 20611436 | SNV | 1 | T | A | Heterozygous |
| NC_037638.1 | 20611441 | SNV | 1 | A | T | Heterozygous |
| NC_037638.1 | 20611446 | SNV | 1 | T | C | Heterozygous |
| NC_037638.1 | 20618429 | SNV | 1 | C | A | Homozygous   |
| NC_037638.1 | 20618432 | SNV | 1 | T | C | Homozygous   |
| NC_037638.1 | 20618434 | SNV | 1 | G | T | Homozygous   |
| NC_037638.1 | 20618437 | SNV | 1 | A | C | Homozygous   |
| NC_037638.1 | 20618570 | SNV | 1 | G | A | Heterozygous |
| NC_037638.1 | 20619494 | SNV | 1 | G | A | Heterozygous |

|             |          |     |   |   |   |              |
|-------------|----------|-----|---|---|---|--------------|
| NC_037638.1 | 20621313 | SNV | 1 | A | G | Homozygous   |
| NC_037638.1 | 20622548 | SNV | 1 | T | A | Homozygous   |
| NC_037638.1 | 20622553 | SNV | 1 | T | G | Homozygous   |
| NC_037638.1 | 20622555 | SNV | 1 | T | A | Homozygous   |
| NC_037638.1 | 20622559 | SNV | 1 | A | C | Homozygous   |
| NC_037638.1 | 20622572 | SNV | 1 | A | T | Homozygous   |
| NC_037638.1 | 20622605 | SNV | 1 | T | A | Homozygous   |
| NC_037638.1 | 20622608 | SNV | 1 | A | C | Homozygous   |
| NC_037638.1 | 20624880 | SNV | 1 | A | T | Homozygous   |
| NC_037638.1 | 20624882 | SNV | 1 | T | A | Homozygous   |
| NC_037638.1 | 20624884 | SNV | 1 | T | A | Homozygous   |
| NC_037638.1 | 20624896 | SNV | 1 | A | T | Homozygous   |
| NC_037638.1 | 20625064 | SNV | 1 | A | C | Homozygous   |
| NC_037638.1 | 20625066 | SNV | 1 | G | A | Homozygous   |
| NC_037638.1 | 20625073 | SNV | 1 | T | A | Homozygous   |
| NC_037638.1 | 20625076 | SNV | 1 | A | C | Homozygous   |
| NC_037638.1 | 20626880 | SNV | 1 | G | A | Homozygous   |
| NC_037638.1 | 20626937 | SNV | 1 | T | A | Homozygous   |
| NC_037638.1 | 20627090 | SNV | 1 | C | A | Homozygous   |
| NC_037638.1 | 20627142 | SNV | 1 | A | C | Homozygous   |
| NC_037638.1 | 20627144 | SNV | 1 | T | A | Homozygous   |
| NC_037638.1 | 20629832 | SNV | 1 | A | T | Homozygous   |
| NC_037638.1 | 20631884 | SNV | 1 | A | G | Homozygous   |
| NC_037638.1 | 20636441 | SNV | 1 | C | T | Homozygous   |
| NC_037638.1 | 20638191 | SNV | 1 | T | C | Homozygous   |
| NC_037638.1 | 20640029 | SNV | 1 | T | C | Homozygous   |
| NC_037638.1 | 20641410 | SNV | 1 | C | A | Homozygous   |
| NC_037638.1 | 20644669 | SNV | 1 | A | T | Homozygous   |
| NC_037638.1 | 20645333 | SNV | 1 | G | T | Homozygous   |
| NC_037638.1 | 20645425 | SNV | 1 | G | A | Homozygous   |
| NC_037638.1 | 20649524 | SNV | 1 | G | A | Homozygous   |
| NC_037638.1 | 20649962 | SNV | 1 | A | G | Homozygous   |
| NC_037638.1 | 20650120 | SNV | 1 | C | A | Heterozygous |
| NC_037638.1 | 20650124 | SNV | 1 | T | A | Heterozygous |
| NC_037638.1 | 20650152 | SNV | 1 | C | A | Heterozygous |
| NC_037638.1 | 20650156 | SNV | 1 | G | A | Heterozygous |
| NC_037638.1 | 20650158 | SNV | 1 | G | A | Heterozygous |
| NC_037638.1 | 20650160 | SNV | 1 | C | A | Heterozygous |
| NC_037638.1 | 20650163 | SNV | 1 | C | A | Homozygous   |
| NC_037638.1 | 20653087 | SNV | 1 | A | G | Homozygous   |
| NC_037638.1 | 20653933 | SNV | 1 | G | A | Homozygous   |
| NC_037638.1 | 20655941 | SNV | 1 | C | T | Homozygous   |
| NC_037638.1 | 20660233 | SNV | 1 | C | T | Homozygous   |
| NC_037638.1 | 20660235 | SNV | 1 | C | A | Homozygous   |
| NC_037638.1 | 20660240 | SNV | 1 | G | A | Homozygous   |
| NC_037638.1 | 20660270 | SNV | 1 | A | C | Homozygous   |
| NC_037638.1 | 20660272 | SNV | 1 | T | A | Homozygous   |
| NC_037638.1 | 20660278 | SNV | 1 | A | T | Homozygous   |
| NC_037638.1 | 20660280 | SNV | 1 | T | C | Homozygous   |
| NC_037638.1 | 20660830 | SNV | 1 | G | A | Homozygous   |
| NC_037638.1 | 20663007 | SNV | 1 | A | T | Homozygous   |



|             |          |     |   |   |   |              |
|-------------|----------|-----|---|---|---|--------------|
| NC_037638.1 | 20663158 | SNV | 1 | T | A | Homozygous   |
| NC_037638.1 | 20663182 | SNV | 1 | A | G | Homozygous   |
| NC_037638.1 | 20664148 | SNV | 1 | A | G | Homozygous   |
| NC_037638.1 | 20668721 | SNV | 1 | A | G | Homozygous   |
| NC_037638.1 | 20671879 | SNV | 1 | C | G | Homozygous   |
| NC_037638.1 | 20671897 | SNV | 1 | A | T | Homozygous   |
| NC_037638.1 | 20671907 | SNV | 1 | T | A | Homozygous   |
| NC_037638.1 | 20671910 | SNV | 1 | T | A | Homozygous   |
| NC_037638.1 | 20671917 | SNV | 1 | A | T | Homozygous   |
| NC_037638.1 | 20672457 | SNV | 1 | T | A | Homozygous   |
| NC_037638.1 | 20672700 | SNV | 1 | A | T | Heterozygous |
| NC_037638.1 | 20672913 | SNV | 1 | A | G | Homozygous   |
| NC_037638.1 | 20673793 | SNV | 1 | T | C | Homozygous   |
| NC_037638.1 | 20673814 | SNV | 1 | T | A | Homozygous   |
| NC_037638.1 | 20675301 | SNV | 1 | T | C | Heterozygous |
| NC_037638.1 | 20675311 | SNV | 1 | A | T | Heterozygous |
| NC_037638.1 | 20679557 | SNV | 1 | C | T | Homozygous   |
| NC_037638.1 | 20680844 | SNV | 1 | A | T | Homozygous   |
| NC_037638.1 | 20680882 | SNV | 1 | C | T | Homozygous   |
| NC_037638.1 | 20697881 | SNV | 1 | T | C | Homozygous   |
| NC_037638.1 | 20697937 | SNV | 1 | A | G | Homozygous   |
| NC_037638.1 | 20698004 | SNV | 1 | T | C | Homozygous   |
| NC_037638.1 | 20698806 | SNV | 1 | C | T | Heterozygous |
| NC_037638.1 | 20698947 | SNV | 1 | A | G | Heterozygous |
| NC_037638.1 | 20699033 | SNV | 1 | T | C | Heterozygous |
| NC_037638.1 | 20699047 | SNV | 1 | C | T | Homozygous   |
| NC_037638.1 | 20699053 | SNV | 1 | C | T | Heterozygous |
| NC_037638.1 | 20699188 | SNV | 1 | C | T | Homozygous   |
| NC_037638.1 | 20699253 | SNV | 1 | C | T | Heterozygous |
| NC_037638.1 | 20699307 | SNV | 1 | G | A | Homozygous   |
| NC_037638.1 | 20699420 | SNV | 1 | A | G | Heterozygous |
| NC_037638.1 | 20699582 | SNV | 1 | A | T | Homozygous   |
| NC_037638.1 | 20699586 | SNV | 1 | A | T | Homozygous   |
| NC_037638.1 | 20699589 | SNV | 1 | A | G | Heterozygous |
| NC_037638.1 | 20699597 | SNV | 1 | G | A | Homozygous   |
| NC_037638.1 | 20699911 | SNV | 1 | T | C | Homozygous   |
| NC_037638.1 | 20700313 | SNV | 1 | G | C | Homozygous   |
| NC_037638.1 | 20707030 | SNV | 1 | T | C | Homozygous   |
| NC_037638.1 | 20707036 | SNV | 1 | A | G | Homozygous   |
| NC_037638.1 | 20707063 | SNV | 1 | C | G | Heterozygous |
| NC_037638.1 | 20707340 | SNV | 1 | T | C | Homozygous   |
| NC_037638.1 | 20707554 | SNV | 1 | T | C | Homozygous   |
| NC_037638.1 | 20707796 | SNV | 1 | T | C | Heterozygous |
| NC_037638.1 | 20707816 | SNV | 1 | C | T | Heterozygous |
| NC_037638.1 | 20707845 | SNV | 1 | A | C | Homozygous   |
| NC_037638.1 | 20711664 | SNV | 1 | G | A | Heterozygous |
| NC_037638.1 | 20711666 | SNV | 1 | T | A | Heterozygous |
| NC_037638.1 | 20711682 | SNV | 1 | T | A | Heterozygous |
| NC_037638.1 | 20713092 | SNV | 1 | G | T | Heterozygous |
| NC_037638.1 | 20713099 | SNV | 1 | A | G | Homozygous   |
| NC_037638.1 | 20713257 | SNV | 1 | G | A | Homozygous   |

|             |          |     |   |   |   |              |
|-------------|----------|-----|---|---|---|--------------|
| NC_037638.1 | 20713266 | SNV | 1 | T | A | Heterozygous |
| NC_037638.1 | 20713271 | SNV | 1 | C | G | Homozygous   |
| NC_037638.1 | 20713280 | SNV | 1 | G | A | Heterozygous |
| NC_037638.1 | 20714677 | SNV | 1 | A | T | Homozygous   |
| NC_037638.1 | 20714679 | SNV | 1 | A | C | Homozygous   |
| NC_037638.1 | 20718236 | SNV | 1 | C | T | Homozygous   |
| NC_037638.1 | 20718238 | SNV | 1 | C | T | Homozygous   |
| NC_037638.1 | 20718279 | SNV | 1 | C | G | Homozygous   |
| NC_037638.1 | 20718283 | SNV | 1 | T | C | Heterozygous |
| NC_037638.1 | 20718285 | SNV | 1 | C | T | Heterozygous |
| NC_037638.1 | 20718553 | SNV | 1 | G | A | Homozygous   |
| NC_037638.1 | 20718758 | SNV | 1 | C | T | Homozygous   |
| NC_037638.1 | 20718768 | SNV | 1 | C | T | Homozygous   |
| NC_037638.1 | 20718801 | SNV | 1 | G | A | Homozygous   |
| NC_037638.1 | 20731888 | SNV | 1 | T | C | Homozygous   |
| NC_037638.1 | 20747421 | SNV | 1 | G | C | Homozygous   |
| NC_037638.1 | 20747563 | SNV | 1 | T | C | Homozygous   |
| NC_037638.1 | 20747815 | SNV | 1 | G | A | Homozygous   |
| NC_037638.1 | 20747909 | SNV | 1 | A | G | Homozygous   |
| NC_037638.1 | 20747981 | SNV | 1 | A | G | Homozygous   |
| NC_037638.1 | 20748054 | SNV | 1 | G | T | Homozygous   |
| NC_037638.1 | 20748092 | SNV | 1 | T | C | Homozygous   |
| NC_037638.1 | 20748096 | SNV | 1 | A | C | Homozygous   |
| NC_037638.1 | 20748102 | SNV | 1 | C | T | Homozygous   |
| NC_037638.1 | 20748105 | SNV | 1 | T | C | Homozygous   |
| NC_037638.1 | 20748437 | SNV | 1 | T | G | Homozygous   |
| NC_037638.1 | 20748441 | SNV | 1 | T | C | Homozygous   |
| NC_037638.1 | 20753945 | SNV | 1 | T | A | Homozygous   |
| NC_037638.1 | 20753947 | SNV | 1 | T | A | Heterozygous |
| NC_037638.1 | 20754233 | SNV | 1 | A | G | Homozygous   |
| NC_037638.1 | 20754299 | SNV | 1 | A | G | Heterozygous |
| NC_037638.1 | 20754304 | SNV | 1 | A | G | Homozygous   |
| NC_037638.1 | 20754380 | SNV | 1 | A | T | Homozygous   |
| NC_037638.1 | 20757202 | SNV | 1 | T | A | Homozygous   |
| NC_037638.1 | 20757206 | SNV | 1 | T | C | Homozygous   |
| NC_037638.1 | 20757211 | SNV | 1 | T | G | Homozygous   |
| NC_037638.1 | 20757220 | SNV | 1 | T | A | Homozygous   |
| NC_037638.1 | 20757237 | SNV | 1 | A | T | Homozygous   |
| NC_037638.1 | 20759483 | SNV | 1 | C | G | Homozygous   |
| NC_037638.1 | 20759954 | SNV | 1 | T | C | Homozygous   |
| NC_037638.1 | 20760230 | SNV | 1 | C | T | Heterozygous |
| NC_037638.1 | 20760516 | SNV | 1 | G | A | Heterozygous |
| NC_037638.1 | 20760677 | SNV | 1 | T | C | Homozygous   |
| NC_037638.1 | 20766183 | SNV | 1 | A | G | Homozygous   |
| NC_037638.1 | 20780181 | SNV | 1 | A | G | Homozygous   |
| NC_037638.1 | 20781192 | SNV | 1 | A | G | Homozygous   |
| NC_037638.1 | 20781325 | SNV | 1 | T | C | Homozygous   |
| NC_037638.1 | 20786115 | SNV | 1 | G | A | Homozygous   |
| NC_037638.1 | 20786430 | SNV | 1 | G | A | Homozygous   |
| NC_037638.1 | 20786434 | SNV | 1 | G | A | Heterozygous |
| NC_037638.1 | 20786512 | SNV | 1 | C | G | Homozygous   |

|             |          |     |   |   |   |              |
|-------------|----------|-----|---|---|---|--------------|
| NC_037638.1 | 20786516 | SNV | 1 | G | A | Homozygous   |
| NC_037638.1 | 20801222 | SNV | 1 | T | C | Homozygous   |
| NC_037638.1 | 20801229 | SNV | 1 | C | T | Heterozygous |
| NC_037638.1 | 20801316 | SNV | 1 | C | T | Heterozygous |
| NC_037638.1 | 20815857 | SNV | 1 | G | T | Heterozygous |
| NC_037638.1 | 20815864 | SNV | 1 | C | T | Heterozygous |
| NC_037638.1 | 20815902 | SNV | 1 | A | G | Homozygous   |
| NC_037638.1 | 20819618 | SNV | 1 | C | T | Homozygous   |
| NC_037638.1 | 20819625 | SNV | 1 | T | C | Homozygous   |
| NC_037638.1 | 20822589 | SNV | 1 | G | C | Heterozygous |
| NC_037638.1 | 20822589 | SNV | 1 | G | T | Heterozygous |
| NC_037638.1 | 20822608 | SNV | 1 | A | G | Heterozygous |
| NC_037638.1 | 20822734 | SNV | 1 | A | T | Heterozygous |
| NC_037638.1 | 20823147 | SNV | 1 | C | T | Heterozygous |
| NC_037638.1 | 20823164 | SNV | 1 | G | C | Heterozygous |
| NC_037638.1 | 20828763 | SNV | 1 | G | A | Heterozygous |
| NC_037638.1 | 20828782 | SNV | 1 | C | T | Heterozygous |
| NC_037638.1 | 20828857 | SNV | 1 | G | C | Homozygous   |
| NC_037638.1 | 20828881 | SNV | 1 | G | A | Heterozygous |
| NC_037638.1 | 20839660 | SNV | 1 | A | G | Heterozygous |
| NC_037638.1 | 20839662 | SNV | 1 | A | G | Heterozygous |
| NC_037638.1 | 20839664 | SNV | 1 | G | A | Homozygous   |
| NC_037638.1 | 20839668 | SNV | 1 | G | A | Homozygous   |
| NC_037638.1 | 20848968 | SNV | 1 | G | A | Heterozygous |
| NC_037638.1 | 20848978 | SNV | 1 | A | T | Homozygous   |
| NC_037638.1 | 20848984 | SNV | 1 | A | T | Homozygous   |
| NC_037638.1 | 20848992 | SNV | 1 | A | T | Heterozygous |
| NC_037638.1 | 20848998 | SNV | 1 | A | C | Homozygous   |
| NC_037638.1 | 20849001 | SNV | 1 | G | A | Heterozygous |
| NC_037638.1 | 20849003 | SNV | 1 | G | A | Heterozygous |
| NC_037638.1 | 20849009 | SNV | 1 | G | A | Homozygous   |
| NC_037638.1 | 20849019 | SNV | 1 | G | T | Homozygous   |
| NC_037638.1 | 20849027 | SNV | 1 | G | T | Heterozygous |
| NC_037638.1 | 20859186 | SNV | 1 | C | T | Heterozygous |
| NC_037638.1 | 20859198 | SNV | 1 | A | G | Homozygous   |
| NC_037638.1 | 20859201 | SNV | 1 | A | G | Homozygous   |
| NC_037638.1 | 20864195 | SNV | 1 | A | G | Homozygous   |
| NC_037638.1 | 20864198 | SNV | 1 | T | A | Heterozygous |
| NC_037638.1 | 20864202 | SNV | 1 | T | A | Heterozygous |
| NC_037638.1 | 20864207 | SNV | 1 | C | A | Heterozygous |
| NC_037638.1 | 20864209 | SNV | 1 | C | A | Heterozygous |
| NC_037638.1 | 20864248 | SNV | 1 | G | A | Heterozygous |
| NC_037638.1 | 20864268 | SNV | 1 | G | A | Homozygous   |
| NC_037638.1 | 20872145 | SNV | 1 | G | C | Homozygous   |
| NC_037638.1 | 20872161 | SNV | 1 | C | A | Heterozygous |
| NC_037638.1 | 20872184 | SNV | 1 | A | C | Heterozygous |
| NC_037638.1 | 20872230 | SNV | 1 | A | T | Homozygous   |
| NC_037638.1 | 20872234 | SNV | 1 | C | A | Homozygous   |
| NC_037638.1 | 20872245 | SNV | 1 | T | C | Homozygous   |
| NC_037638.1 | 20872254 | SNV | 1 | A | G | Homozygous   |
| NC_037638.1 | 20872265 | SNV | 1 | A | C | Homozygous   |

|             |          |     |   |   |   |              |
|-------------|----------|-----|---|---|---|--------------|
| NC_037638.1 | 20872267 | SNV | 1 | C | T | Homozygous   |
| NC_037638.1 | 20872281 | SNV | 1 | A | C | Homozygous   |
| NC_037638.1 | 20872285 | SNV | 1 | C | T | Homozygous   |
| NC_037638.1 | 20872710 | SNV | 1 | A | C | Heterozygous |
| NC_037638.1 | 20872841 | SNV | 1 | T | A | Homozygous   |
| NC_037638.1 | 20872872 | SNV | 1 | A | G | Homozygous   |
| NC_037638.1 | 20872912 | SNV | 1 | T | C | Homozygous   |
| NC_037638.1 | 20879765 | SNV | 1 | C | T | Heterozygous |
| NC_037638.1 | 20879772 | SNV | 1 | T | C | Homozygous   |
| NC_037638.1 | 20879805 | SNV | 1 | T | C | Heterozygous |
| NC_037638.1 | 20879818 | SNV | 1 | A | G | Homozygous   |
| NC_037638.1 | 20879856 | SNV | 1 | T | C | Heterozygous |
| NC_037638.1 | 20879875 | SNV | 1 | C | G | Homozygous   |
| NC_037638.1 | 20880956 | SNV | 1 | T | C | Homozygous   |
| NC_037638.1 | 20880961 | SNV | 1 | A | G | Heterozygous |
| NC_037638.1 | 20880963 | SNV | 1 | G | T | Heterozygous |
| NC_037638.1 | 20881073 | SNV | 1 | T | C | Heterozygous |
| NC_037638.1 | 20881076 | SNV | 1 | C | T | Heterozygous |
| NC_037638.1 | 20881560 | SNV | 1 | T | C | Homozygous   |
| NC_037638.1 | 20883089 | SNV | 1 | T | A | Heterozygous |
| NC_037638.1 | 20889685 | SNV | 1 | A | G | Homozygous   |
| NC_037638.1 | 20889745 | SNV | 1 | A | G | Homozygous   |
| NC_037638.1 | 20889771 | SNV | 1 | C | T | Heterozygous |
| NC_037638.1 | 20889785 | SNV | 1 | A | G | Homozygous   |
| NC_037638.1 | 20901759 | SNV | 1 | T | C | Homozygous   |
| NC_037638.1 | 20901768 | SNV | 1 | C | T | Homozygous   |
| NC_037638.1 | 20901798 | SNV | 1 | C | A | Homozygous   |
| NC_037638.1 | 20902658 | SNV | 1 | A | T | Homozygous   |
| NC_037638.1 | 20902753 | SNV | 1 | G | A | Homozygous   |
| NC_037638.1 | 20902856 | SNV | 1 | T | C | Homozygous   |
| NC_037638.1 | 20903196 | SNV | 1 | T | C | Heterozygous |
| NC_037638.1 | 20903711 | SNV | 1 | G | C | Heterozygous |
| NC_037638.1 | 20903759 | SNV | 1 | T | G | Heterozygous |
| NC_037638.1 | 20903832 | SNV | 1 | C | T | Heterozygous |
| NC_037638.1 | 20903963 | SNV | 1 | A | G | Heterozygous |
| NC_037638.1 | 20905322 | SNV | 1 | G | A | Heterozygous |
| NC_037638.1 | 20905325 | SNV | 1 | G | A | Homozygous   |
| NC_037638.1 | 20905341 | SNV | 1 | C | T | Homozygous   |
| NC_037638.1 | 20906527 | SNV | 1 | G | C | Heterozygous |
| NC_037638.1 | 20906773 | SNV | 1 | C | T | Homozygous   |
| NC_037638.1 | 20906777 | SNV | 1 | C | T | Heterozygous |
| NC_037638.1 | 20907122 | SNV | 1 | C | T | Heterozygous |
| NC_037638.1 | 20917752 | SNV | 1 | G | A | Homozygous   |
| NC_037638.1 | 20923763 | SNV | 1 | C | T | Homozygous   |
| NC_037638.1 | 20923997 | SNV | 1 | A | G | Homozygous   |
| NC_037638.1 | 20924097 | SNV | 1 | G | A | Homozygous   |
| NC_037638.1 | 20924129 | SNV | 1 | C | G | Heterozygous |
| NC_037638.1 | 20924323 | SNV | 1 | A | G | Heterozygous |
| NC_037638.1 | 20924326 | SNV | 1 | T | C | Homozygous   |
| NC_037638.1 | 20924719 | SNV | 1 | T | A | Homozygous   |
| NC_037638.1 | 20924816 | SNV | 1 | C | T | Homozygous   |

|             |          |     |   |   |   |              |
|-------------|----------|-----|---|---|---|--------------|
| NC_037638.1 | 20925125 | SNV | 1 | T | C | Heterozygous |
| NC_037638.1 | 20925132 | SNV | 1 | G | A | Heterozygous |
| NC_037638.1 | 20925146 | SNV | 1 | T | C | Heterozygous |
| NC_037638.1 | 20925218 | SNV | 1 | T | C | Heterozygous |
| NC_037638.1 | 20925230 | SNV | 1 | C | T | Homozygous   |
| NC_037638.1 | 20925317 | SNV | 1 | A | G | Heterozygous |
| NC_037638.1 | 20925324 | SNV | 1 | T | C | Homozygous   |
| NC_037638.1 | 20925398 | SNV | 1 | A | G | Heterozygous |
| NC_037638.1 | 20925627 | SNV | 1 | T | C | Homozygous   |
| NC_037638.1 | 20925735 | SNV | 1 | T | C | Homozygous   |
| NC_037638.1 | 20925831 | SNV | 1 | G | A | Heterozygous |
| NC_037638.1 | 20925864 | SNV | 1 | T | C | Heterozygous |
| NC_037638.1 | 20925910 | SNV | 1 | T | A | Heterozygous |
| NC_037638.1 | 20938283 | SNV | 1 | G | A | Homozygous   |
| NC_037638.1 | 20938295 | SNV | 1 | T | G | Homozygous   |
| NC_037638.1 | 20938300 | SNV | 1 | G | A | Homozygous   |
| NC_037638.1 | 20938303 | SNV | 1 | A | G | Homozygous   |
| NC_037638.1 | 20951036 | SNV | 1 | C | T | Heterozygous |
| NC_037638.1 | 20951163 | SNV | 1 | C | G | Homozygous   |
| NC_037638.1 | 20951165 | SNV | 1 | T | C | Heterozygous |
| NC_037638.1 | 20951421 | SNV | 1 | T | C | Heterozygous |
| NC_037638.1 | 20951421 | SNV | 1 | T | G | Heterozygous |
| NC_037638.1 | 20961954 | SNV | 1 | C | A | Heterozygous |
| NC_037638.1 | 20967135 | SNV | 1 | T | C | Homozygous   |
| NC_037638.1 | 20967165 | SNV | 1 | T | C | Heterozygous |
| NC_037638.1 | 20968338 | SNV | 1 | G | A | Heterozygous |
| NC_037638.1 | 20968341 | SNV | 1 | G | A | Homozygous   |
| NC_037638.1 | 20975153 | SNV | 1 | C | G | Homozygous   |
| NC_037638.1 | 20975175 | SNV | 1 | C | T | Heterozygous |
| NC_037638.1 | 20976573 | SNV | 1 | G | A | Homozygous   |
| NC_037638.1 | 20976619 | SNV | 1 | T | C | Heterozygous |
| NC_037638.1 | 20976902 | SNV | 1 | G | A | Heterozygous |
| NC_037638.1 | 20987801 | SNV | 1 | C | T | Heterozygous |
| NC_037638.1 | 20995887 | SNV | 1 | A | T | Homozygous   |
| NC_037638.1 | 20996070 | SNV | 1 | G | A | Homozygous   |
| NC_037638.1 | 20996320 | SNV | 1 | T | C | Heterozygous |
| NC_037638.1 | 20996354 | SNV | 1 | G | A | Heterozygous |
| NC_037638.1 | 20996590 | SNV | 1 | G | C | Homozygous   |
| NC_037638.1 | 20996714 | SNV | 1 | A | G | Homozygous   |
| NC_037638.1 | 20996909 | SNV | 1 | G | A | Heterozygous |
| NC_037638.1 | 20996923 | SNV | 1 | C | T | Heterozygous |
| NC_037638.1 | 20997438 | SNV | 1 | G | A | Heterozygous |
| NC_037638.1 | 20997457 | SNV | 1 | A | G | Heterozygous |
| NC_037638.1 | 21003620 | SNV | 1 | A | T | Homozygous   |
| NC_037638.1 | 21003684 | SNV | 1 | G | A | Homozygous   |
| NC_037638.1 | 21003727 | SNV | 1 | T | C | Homozygous   |
| NC_037638.1 | 21003732 | SNV | 1 | A | G | Homozygous   |
| NC_037638.1 | 21003753 | SNV | 1 | T | C | Homozygous   |
| NC_037638.1 | 21004380 | SNV | 1 | T | A | Homozygous   |
| NC_037638.1 | 21004383 | SNV | 1 | G | A | Homozygous   |
| NC_037638.1 | 21004436 | SNV | 1 | G | A | Homozygous   |

|             |          |     |   |   |   |              |
|-------------|----------|-----|---|---|---|--------------|
| NC_037638.1 | 21015178 | SNV | 1 | T | C | Homozygous   |
| NC_037638.1 | 21015180 | SNV | 1 | T | C | Homozygous   |
| NC_037638.1 | 21017275 | SNV | 1 | T | C | Homozygous   |
| NC_037638.1 | 21020682 | SNV | 1 | A | G | Homozygous   |
| NC_037638.1 | 21020703 | SNV | 1 | A | G | Heterozygous |
| NC_037638.1 | 21021186 | SNV | 1 | T | A | Homozygous   |
| NC_037638.1 | 21021193 | SNV | 1 | T | A | Homozygous   |
| NC_037638.1 | 21021569 | SNV | 1 | C | A | Homozygous   |
| NC_037638.1 | 21022765 | SNV | 1 | T | C | Homozygous   |
| NC_037638.1 | 21029126 | SNV | 1 | C | T | Homozygous   |
| NC_037638.1 | 21029205 | SNV | 1 | C | T | Heterozygous |
| NC_037638.1 | 21030275 | SNV | 1 | C | T | Homozygous   |
| NC_037638.1 | 21030287 | SNV | 1 | A | G | Homozygous   |
| NC_037638.1 | 21030290 | SNV | 1 | A | T | Homozygous   |
| NC_037638.1 | 21030293 | SNV | 1 | G | C | Homozygous   |
| NC_037638.1 | 21030296 | SNV | 1 | G | T | Homozygous   |
| NC_037638.1 | 21043486 | SNV | 1 | T | C | Homozygous   |
| NC_037638.1 | 21043600 | SNV | 1 | T | A | Homozygous   |
| NC_037638.1 | 21043606 | SNV | 1 | T | C | Homozygous   |
| NC_037638.1 | 21046086 | SNV | 1 | C | T | Heterozygous |
| NC_037638.1 | 21046134 | SNV | 1 | A | T | Homozygous   |
| NC_037638.1 | 21052555 | SNV | 1 | G | A | Heterozygous |
| NC_037638.1 | 21052666 | SNV | 1 | T | C | Heterozygous |
| NC_037638.1 | 21052668 | SNV | 1 | A | T | Heterozygous |
| NC_037638.1 | 21052671 | SNV | 1 | T | G | Heterozygous |
| NC_037638.1 | 21052684 | SNV | 1 | A | G | Heterozygous |
| NC_037638.1 | 21052691 | SNV | 1 | T | C | Heterozygous |
| NC_037638.1 | 21052692 | SNV | 1 | T | G | Heterozygous |
| NC_037638.1 | 21052694 | SNV | 1 | A | T | Heterozygous |
| NC_037638.1 | 21052730 | SNV | 1 | G | A | Homozygous   |
| NC_037638.1 | 21055255 | SNV | 1 | T | C | Homozygous   |
| NC_037638.1 | 21057771 | SNV | 1 | T | C | Homozygous   |
| NC_037638.1 | 21057778 | SNV | 1 | T | A | Homozygous   |
| NC_037638.1 | 21057809 | SNV | 1 | A | T | Homozygous   |
| NC_037638.1 | 21060321 | SNV | 1 | A | G | Homozygous   |
| NC_037638.1 | 21085117 | SNV | 1 | A | G | Heterozygous |
| NC_037638.1 | 21085119 | SNV | 1 | T | G | Heterozygous |
| NC_037638.1 | 21085123 | SNV | 1 | G | T | Heterozygous |
| NC_037638.1 | 21085139 | SNV | 1 | G | A | Heterozygous |
| NC_037638.1 | 21094195 | SNV | 1 | C | T | Homozygous   |
| NC_037638.1 | 21094252 | SNV | 1 | G | A | Homozygous   |
| NC_037638.1 | 21103117 | SNV | 1 | A | T | Heterozygous |
| NC_037638.1 | 21103375 | SNV | 1 | T | C | Homozygous   |
| NC_037638.1 | 21124846 | SNV | 1 | T | C | Homozygous   |
| NC_037638.1 | 21124867 | SNV | 1 | G | A | Homozygous   |
| NC_037638.1 | 21124897 | SNV | 1 | T | C | Homozygous   |
| NC_037638.1 | 21124909 | SNV | 1 | T | C | Homozygous   |
| NC_037638.1 | 21128217 | SNV | 1 | A | G | Homozygous   |
| NC_037638.1 | 21129248 | SNV | 1 | A | G | Heterozygous |
| NC_037638.1 | 21129256 | SNV | 1 | T | G | Homozygous   |
| NC_037638.1 | 21129294 | SNV | 1 | G | T | Heterozygous |

|             |          |     |   |   |   |              |
|-------------|----------|-----|---|---|---|--------------|
| NC_037638.1 | 21129296 | SNV | 1 | G | A | Heterozygous |
| NC_037638.1 | 21129335 | SNV | 1 | A | G | Homozygous   |
| NC_037638.1 | 21129344 | SNV | 1 | T | C | Homozygous   |
| NC_037638.1 | 21132155 | SNV | 1 | T | C | Heterozygous |
| NC_037638.1 | 21132400 | SNV | 1 | G | A | Homozygous   |
| NC_037638.1 | 21145202 | SNV | 1 | A | T | Homozygous   |
| NC_037638.1 | 21145208 | SNV | 1 | G | C | Homozygous   |
| NC_037638.1 | 21145235 | SNV | 1 | G | C | Homozygous   |
| NC_037638.1 | 21145237 | SNV | 1 | G | C | Homozygous   |
| NC_037638.1 | 21145241 | SNV | 1 | A | C | Homozygous   |
| NC_037638.1 | 21145768 | SNV | 1 | T | G | Heterozygous |
| NC_037638.1 | 21145781 | SNV | 1 | G | A | Heterozygous |
| NC_037638.1 | 21145929 | SNV | 1 | T | C | Homozygous   |
| NC_037638.1 | 21150020 | SNV | 1 | G | A | Heterozygous |
| NC_037638.1 | 21150378 | SNV | 1 | T | C | Homozygous   |
| NC_037638.1 | 21150393 | SNV | 1 | A | G | Heterozygous |
| NC_037638.1 | 21155872 | SNV | 1 | A | G | Heterozygous |
| NC_037638.1 | 21155880 | SNV | 1 | G | A | Heterozygous |
| NC_037638.1 | 21155883 | SNV | 1 | T | A | Heterozygous |
| NC_037638.1 | 21185057 | SNV | 1 | G | A | Heterozygous |
| NC_037638.1 | 21185165 | SNV | 1 | G | C | Homozygous   |
| NC_037638.1 | 21185173 | SNV | 1 | G | A | Homozygous   |
| NC_037638.1 | 21185204 | SNV | 1 | T | G | Heterozygous |
| NC_037638.1 | 21185226 | SNV | 1 | G | A | Heterozygous |
| NC_037638.1 | 21185313 | SNV | 1 | G | A | Homozygous   |
| NC_037638.1 | 21185473 | SNV | 1 | G | A | Homozygous   |
| NC_037638.1 | 21185476 | SNV | 1 | G | A | Homozygous   |
| NC_037638.1 | 21185604 | SNV | 1 | T | C | Homozygous   |
| NC_037638.1 | 21185712 | SNV | 1 | T | C | Homozygous   |
| NC_037638.1 | 21185858 | SNV | 1 | A | G | Homozygous   |
| NC_037638.1 | 21185880 | SNV | 1 | T | C | Homozygous   |
| NC_037638.1 | 21185885 | SNV | 1 | A | G | Homozygous   |
| NC_037638.1 | 21185926 | SNV | 1 | G | T | Homozygous   |
| NC_037638.1 | 21186029 | SNV | 1 | T | C | Homozygous   |
| NC_037638.1 | 21186052 | SNV | 1 | T | C | Homozygous   |
| NC_037638.1 | 21186670 | SNV | 1 | T | C | Homozygous   |
| NC_037638.1 | 21187204 | SNV | 1 | C | T | Heterozygous |
| NC_037638.1 | 21187281 | SNV | 1 | G | C | Heterozygous |
| NC_037638.1 | 21190731 | SNV | 1 | C | T | Heterozygous |
| NC_037638.1 | 21190751 | SNV | 1 | T | G | Heterozygous |
| NC_037638.1 | 21190792 | SNV | 1 | C | T | Heterozygous |
| NC_037638.1 | 21190843 | SNV | 1 | T | C | Homozygous   |
| NC_037638.1 | 21190855 | SNV | 1 | C | T | Heterozygous |
| NC_037638.1 | 21190907 | SNV | 1 | T | C | Homozygous   |
| NC_037638.1 | 21194209 | SNV | 1 | A | G | Homozygous   |
| NC_037638.1 | 21200578 | SNV | 1 | G | A | Heterozygous |
| NC_037638.1 | 21214823 | SNV | 1 | G | A | Homozygous   |
| NC_037638.1 | 21221358 | SNV | 1 | G | A | Homozygous   |
| NC_037638.1 | 21222747 | SNV | 1 | G | A | Homozygous   |
| NC_037638.1 | 21223491 | SNV | 1 | G | A | Homozygous   |
| NC_037638.1 | 21223631 | SNV | 1 | C | G | Homozygous   |

|             |          |     |   |   |   |              |
|-------------|----------|-----|---|---|---|--------------|
| NC_037638.1 | 21231646 | SNV | 1 | A | G | Heterozygous |
| NC_037638.1 | 21232545 | SNV | 1 | G | A | Homozygous   |
| NC_037638.1 | 21235066 | SNV | 1 | A | G | Heterozygous |
| NC_037638.1 | 21235150 | SNV | 1 | T | C | Homozygous   |
| NC_037638.1 | 21239195 | SNV | 1 | C | G | Homozygous   |
| NC_037638.1 | 21239204 | SNV | 1 | T | A | Homozygous   |
| NC_037638.1 | 21239214 | SNV | 1 | T | A | Heterozygous |
| NC_037638.1 | 21239223 | SNV | 1 | C | A | Heterozygous |
| NC_037638.1 | 21241396 | SNV | 1 | C | T | Heterozygous |
| NC_037638.1 | 21249899 | SNV | 1 | A | T | Homozygous   |
| NC_037638.1 | 21251352 | SNV | 1 | A | G | Heterozygous |
| NC_037638.1 | 21257394 | SNV | 1 | C | T | Homozygous   |
| NC_037638.1 | 21257404 | SNV | 1 | T | C | Homozygous   |
| NC_037638.1 | 21262682 | SNV | 1 | T | C | Heterozygous |
| NC_037638.1 | 21262686 | SNV | 1 | T | C | Heterozygous |
| NC_037638.1 | 21262690 | SNV | 1 | T | C | Heterozygous |
| NC_037638.1 | 21262694 | SNV | 1 | T | C | Heterozygous |
| NC_037638.1 | 21262725 | SNV | 1 | C | T | Heterozygous |
| NC_037638.1 | 21269845 | SNV | 1 | A | G | Homozygous   |
| NC_037638.1 | 21270359 | SNV | 1 | G | C | Heterozygous |
| NC_037638.1 | 21274143 | SNV | 1 | A | G | Homozygous   |
| NC_037638.1 | 21274591 | SNV | 1 | T | C | Homozygous   |
| NC_037638.1 | 21274847 | SNV | 1 | T | C | Homozygous   |
| NC_037638.1 | 21274852 | SNV | 1 | A | G | Homozygous   |
| NC_037638.1 | 21274877 | SNV | 1 | A | G | Heterozygous |
| NC_037638.1 | 21277861 | SNV | 1 | T | A | Homozygous   |
| NC_037638.1 | 21277863 | SNV | 1 | T | A | Homozygous   |
| NC_037638.1 | 21277866 | SNV | 1 | C | G | Heterozygous |
| NC_037638.1 | 21303187 | SNV | 1 | G | A | Homozygous   |
| NC_037638.1 | 21303213 | SNV | 1 | T | C | Homozygous   |
| NC_037638.1 | 21303231 | SNV | 1 | A | G | Heterozygous |
| NC_037638.1 | 21303275 | SNV | 1 | T | C | Homozygous   |
| NC_037638.1 | 21303281 | SNV | 1 | C | G | Heterozygous |
| NC_037638.1 | 21303415 | SNV | 1 | A | G | Heterozygous |
| NC_037638.1 | 21303427 | SNV | 1 | A | G | Heterozygous |
| NC_037638.1 | 21305450 | SNV | 1 | C | T | Heterozygous |
| NC_037638.1 | 21305459 | SNV | 1 | C | T | Heterozygous |
| NC_037638.1 | 21305471 | SNV | 1 | T | C | Heterozygous |
| NC_037638.1 | 21305483 | SNV | 1 | C | T | Heterozygous |
| NC_037638.1 | 21305488 | SNV | 1 | T | A | Heterozygous |
| NC_037638.1 | 21308781 | SNV | 1 | A | C | Homozygous   |
| NC_037638.1 | 21308783 | SNV | 1 | C | T | Homozygous   |
| NC_037638.1 | 21308995 | SNV | 1 | A | T | Homozygous   |
| NC_037638.1 | 21308997 | SNV | 1 | T | A | Homozygous   |
| NC_037638.1 | 21309001 | SNV | 1 | A | C | Homozygous   |
| NC_037638.1 | 21309030 | SNV | 1 | T | A | Homozygous   |
| NC_037638.1 | 21309033 | SNV | 1 | T | C | Homozygous   |
| NC_037638.1 | 21312106 | SNV | 1 | A | G | Heterozygous |
| NC_037638.1 | 21312417 | SNV | 1 | C | G | Homozygous   |
| NC_037638.1 | 21312459 | SNV | 1 | C | G | Homozygous   |
| NC_037638.1 | 21312706 | SNV | 1 | A | G | Heterozygous |



|             |          |     |   |   |   |              |
|-------------|----------|-----|---|---|---|--------------|
| NC_037638.1 | 21312792 | SNV | 1 | A | G | Homozygous   |
| NC_037638.1 | 21312796 | SNV | 1 | A | G | Homozygous   |
| NC_037638.1 | 21312839 | SNV | 1 | T | C | Heterozygous |
| NC_037638.1 | 21312855 | SNV | 1 | A | G | Homozygous   |
| NC_037638.1 | 21312857 | SNV | 1 | A | G | Heterozygous |
| NC_037638.1 | 21312883 | SNV | 1 | T | A | Homozygous   |
| NC_037638.1 | 21312895 | SNV | 1 | T | C | Homozygous   |
| NC_037638.1 | 21312908 | SNV | 1 | C | T | Heterozygous |
| NC_037638.1 | 21312979 | SNV | 1 | A | G | Homozygous   |
| NC_037638.1 | 21312983 | SNV | 1 | A | G | Homozygous   |
| NC_037638.1 | 21313025 | SNV | 1 | C | T | Heterozygous |
| NC_037638.1 | 21313030 | SNV | 1 | G | A | Homozygous   |
| NC_037638.1 | 21313065 | SNV | 1 | G | A | Heterozygous |
| NC_037638.1 | 21313472 | SNV | 1 | G | A | Heterozygous |
| NC_037638.1 | 21321287 | SNV | 1 | T | C | Homozygous   |
| NC_037638.1 | 21321293 | SNV | 1 | G | A | Homozygous   |
| NC_037638.1 | 21321300 | SNV | 1 | A | T | Homozygous   |
| NC_037638.1 | 21321477 | SNV | 1 | A | G | Heterozygous |
| NC_037638.1 | 21321612 | SNV | 1 | A | G | Homozygous   |
| NC_037638.1 | 21321615 | SNV | 1 | A | G | Homozygous   |
| NC_037638.1 | 21322086 | SNV | 1 | T | C | Homozygous   |
| NC_037638.1 | 21322114 | SNV | 1 | T | C | Heterozygous |
| NC_037638.1 | 21322160 | SNV | 1 | A | C | Heterozygous |
| NC_037638.1 | 21324443 | SNV | 1 | A | G | Homozygous   |
| NC_037638.1 | 21325816 | SNV | 1 | C | G | Heterozygous |
| NC_037638.1 | 21334407 | SNV | 1 | C | G | Heterozygous |
| NC_037638.1 | 21334450 | SNV | 1 | G | A | Heterozygous |
| NC_037638.1 | 21334693 | SNV | 1 | G | A | Homozygous   |
| NC_037638.1 | 21336506 | SNV | 1 | A | G | Homozygous   |
| NC_037638.1 | 21336570 | SNV | 1 | A | G | Homozygous   |
| NC_037638.1 | 21336576 | SNV | 1 | C | T | Homozygous   |
| NC_037638.1 | 21336625 | SNV | 1 | A | G | Homozygous   |
| NC_037638.1 | 21336633 | SNV | 1 | A | G | Homozygous   |
| NC_037638.1 | 21336635 | SNV | 1 | T | G | Heterozygous |
| NC_037638.1 | 21336644 | SNV | 1 | G | A | Heterozygous |
| NC_037638.1 | 21336701 | SNV | 1 | C | G | Heterozygous |
| NC_037638.1 | 21337077 | SNV | 1 | C | T | Heterozygous |
| NC_037638.1 | 21364785 | SNV | 1 | G | C | Heterozygous |
| NC_037638.1 | 21377509 | SNV | 1 | A | G | Heterozygous |
| NC_037638.1 | 21377515 | SNV | 1 | G | A | Heterozygous |
| NC_037638.1 | 21377551 | SNV | 1 | G | A | Heterozygous |
| NC_037638.1 | 21378008 | SNV | 1 | G | A | Homozygous   |
| NC_037638.1 | 21378048 | SNV | 1 | T | C | Heterozygous |
| NC_037638.1 | 21378147 | SNV | 1 | C | T | Homozygous   |
| NC_037638.1 | 21378289 | SNV | 1 | G | T | Homozygous   |
| NC_037638.1 | 21378304 | SNV | 1 | G | C | Homozygous   |
| NC_037638.1 | 21378326 | SNV | 1 | C | T | Homozygous   |
| NC_037638.1 | 21378386 | SNV | 1 | A | G | Homozygous   |
| NC_037638.1 | 21378426 | SNV | 1 | G | A | Heterozygous |
| NC_037638.1 | 21378850 | SNV | 1 | G | A | Homozygous   |
| NC_037638.1 | 21378867 | SNV | 1 | G | A | Homozygous   |

|             |          |     |   |   |   |              |
|-------------|----------|-----|---|---|---|--------------|
| NC_037638.1 | 21392596 | SNV | 1 | A | G | Homozygous   |
| NC_037638.1 | 21402049 | SNV | 1 | A | G | Homozygous   |
| NC_037638.1 | 21402055 | SNV | 1 | T | C | Heterozygous |
| NC_037638.1 | 21402235 | SNV | 1 | A | G | Heterozygous |
| NC_037638.1 | 21404712 | SNV | 1 | C | T | Homozygous   |
| NC_037638.1 | 21404717 | SNV | 1 | C | T | Homozygous   |
| NC_037638.1 | 21433452 | SNV | 1 | G | A | Heterozygous |
| NC_037638.1 | 21462671 | SNV | 1 | A | T | Heterozygous |
| NC_037638.1 | 21462700 | SNV | 1 | A | T | Homozygous   |
| NC_037638.1 | 21462715 | SNV | 1 | A | G | Homozygous   |
| NC_037638.1 | 21462732 | SNV | 1 | A | G | Homozygous   |
| NC_037638.1 | 21462735 | SNV | 1 | A | G | Homozygous   |
| NC_037638.1 | 21462740 | SNV | 1 | T | G | Heterozygous |
| NC_037638.1 | 21462748 | SNV | 1 | T | A | Heterozygous |
| NC_037638.1 | 21462781 | SNV | 1 | T | C | Heterozygous |
| NC_037638.1 | 21462786 | SNV | 1 | A | G | Homozygous   |
| NC_037638.1 | 21462874 | SNV | 1 | G | A | Homozygous   |
| NC_037638.1 | 21464897 | SNV | 1 | G | A | Homozygous   |
| NC_037638.1 | 21465756 | SNV | 1 | C | G | Homozygous   |
| NC_037638.1 | 21465758 | SNV | 1 | G | T | Homozygous   |
| NC_037638.1 | 21466258 | SNV | 1 | A | G | Heterozygous |
| NC_037638.1 | 21466697 | SNV | 1 | C | T | Heterozygous |
| NC_037638.1 | 21466742 | SNV | 1 | G | A | Homozygous   |
| NC_037638.1 | 21467021 | SNV | 1 | A | G | Homozygous   |
| NC_037638.1 | 21467929 | SNV | 1 | C | A | Homozygous   |
| NC_037638.1 | 21468081 | SNV | 1 | T | C | Homozygous   |
| NC_037638.1 | 21468097 | SNV | 1 | A | G | Homozygous   |
| NC_037638.1 | 21468336 | SNV | 1 | T | C | Heterozygous |
| NC_037638.1 | 21468364 | SNV | 1 | C | A | Homozygous   |
| NC_037638.1 | 21468366 | SNV | 1 | A | G | Homozygous   |
| NC_037638.1 | 21468406 | SNV | 1 | A | G | Homozygous   |
| NC_037638.1 | 21468436 | SNV | 1 | C | T | Heterozygous |
| NC_037638.1 | 21468693 | SNV | 1 | T | C | Homozygous   |
| NC_037638.1 | 21468742 | SNV | 1 | C | T | Heterozygous |
| NC_037638.1 | 21468789 | SNV | 1 | G | A | Homozygous   |
| NC_037638.1 | 21469400 | SNV | 1 | A | G | Heterozygous |
| NC_037638.1 | 21469421 | SNV | 1 | A | T | Homozygous   |
| NC_037638.1 | 21469623 | SNV | 1 | C | A | Heterozygous |
| NC_037638.1 | 21474844 | SNV | 1 | G | A | Homozygous   |
| NC_037638.1 | 21474868 | SNV | 1 | G | A | Homozygous   |
| NC_037638.1 | 21474878 | SNV | 1 | A | G | Homozygous   |
| NC_037638.1 | 21475630 | SNV | 1 | A | G | Homozygous   |
| NC_037638.1 | 21475653 | SNV | 1 | T | G | Homozygous   |
| NC_037638.1 | 21482285 | SNV | 1 | T | G | Homozygous   |
| NC_037638.1 | 21484416 | SNV | 1 | T | C | Homozygous   |
| NC_037638.1 | 21484420 | SNV | 1 | T | G | Homozygous   |
| NC_037638.1 | 21484423 | SNV | 1 | G | A | Homozygous   |
| NC_037638.1 | 21485218 | SNV | 1 | G | A | Heterozygous |
| NC_037638.1 | 21485539 | SNV | 1 | G | A | Heterozygous |
| NC_037638.1 | 21486015 | SNV | 1 | A | T | Homozygous   |
| NC_037638.1 | 21486071 | SNV | 1 | A | T | Homozygous   |

|             |          |     |   |   |   |              |
|-------------|----------|-----|---|---|---|--------------|
| NC_037638.1 | 21488738 | SNV | 1 | C | A | Homozygous   |
| NC_037638.1 | 21496727 | SNV | 1 | T | C | Homozygous   |
| NC_037638.1 | 21504218 | SNV | 1 | G | A | Heterozygous |
| NC_037638.1 | 21504891 | SNV | 1 | T | C | Homozygous   |
| NC_037638.1 | 21505107 | SNV | 1 | A | G | Homozygous   |
| NC_037638.1 | 21505157 | SNV | 1 | T | C | Homozygous   |
| NC_037638.1 | 21505235 | SNV | 1 | C | A | Homozygous   |
| NC_037638.1 | 21505250 | SNV | 1 | G | A | Homozygous   |
| NC_037638.1 | 21505329 | SNV | 1 | C | T | Homozygous   |
| NC_037638.1 | 21506223 | SNV | 1 | A | G | Homozygous   |
| NC_037638.1 | 21506796 | SNV | 1 | G | A | Homozygous   |
| NC_037638.1 | 21506813 | SNV | 1 | G | A | Heterozygous |
| NC_037638.1 | 21506931 | SNV | 1 | C | T | Heterozygous |
| NC_037638.1 | 21507050 | SNV | 1 | G | A | Homozygous   |
| NC_037638.1 | 21507170 | SNV | 1 | A | G | Heterozygous |
| NC_037638.1 | 21513871 | SNV | 1 | A | G | Homozygous   |
| NC_037638.1 | 21513877 | SNV | 1 | A | T | Homozygous   |
| NC_037638.1 | 21513879 | SNV | 1 | G | A | Homozygous   |
| NC_037638.1 | 21513918 | SNV | 1 | G | T | Homozygous   |
| NC_037638.1 | 21514016 | SNV | 1 | C | T | Heterozygous |
| NC_037638.1 | 21516609 | SNV | 1 | C | G | Heterozygous |
| NC_037638.1 | 21516637 | SNV | 1 | G | A | Homozygous   |
| NC_037638.1 | 21516654 | SNV | 1 | C | T | Homozygous   |
| NC_037638.1 | 21516683 | SNV | 1 | T | C | Homozygous   |
| NC_037638.1 | 21516832 | SNV | 1 | G | A | Heterozygous |
| NC_037638.1 | 21519393 | SNV | 1 | G | T | Homozygous   |
| NC_037638.1 | 21519422 | SNV | 1 | A | G | Homozygous   |
| NC_037638.1 | 21528354 | SNV | 1 | C | A | Homozygous   |
| NC_037638.1 | 21528392 | SNV | 1 | C | T | Homozygous   |
| NC_037638.1 | 21528433 | SNV | 1 | C | T | Heterozygous |
| NC_037638.1 | 21528440 | SNV | 1 | G | A | Homozygous   |
| NC_037638.1 | 21528444 | SNV | 1 | T | C | Homozygous   |
| NC_037638.1 | 21528469 | SNV | 1 | C | T | Homozygous   |
| NC_037638.1 | 21529216 | SNV | 1 | C | G | Homozygous   |
| NC_037638.1 | 21529354 | SNV | 1 | T | G | Heterozygous |
| NC_037638.1 | 21529531 | SNV | 1 | A | G | Heterozygous |
| NC_037638.1 | 21529537 | SNV | 1 | T | C | Homozygous   |
| NC_037638.1 | 21529649 | SNV | 1 | C | T | Heterozygous |
| NC_037638.1 | 21529867 | SNV | 1 | T | C | Homozygous   |
| NC_037638.1 | 21530867 | SNV | 1 | C | T | Heterozygous |
| NC_037638.1 | 21531112 | SNV | 1 | C | G | Homozygous   |
| NC_037638.1 | 21531273 | SNV | 1 | G | A | Heterozygous |
| NC_037638.1 | 21531423 | SNV | 1 | C | T | Heterozygous |
| NC_037638.1 | 21531463 | SNV | 1 | A | G | Homozygous   |
| NC_037638.1 | 21531492 | SNV | 1 | A | G | Homozygous   |
| NC_037638.1 | 21531644 | SNV | 1 | C | T | Heterozygous |
| NC_037638.1 | 21531646 | SNV | 1 | T | C | Homozygous   |
| NC_037638.1 | 21546544 | SNV | 1 | A | G | Homozygous   |
| NC_037638.1 | 21546938 | SNV | 1 | A | G | Homozygous   |
| NC_037638.1 | 21547141 | SNV | 1 | A | G | Homozygous   |
| NC_037638.1 | 21547177 | SNV | 1 | T | C | Homozygous   |

|             |          |     |   |   |   |              |
|-------------|----------|-----|---|---|---|--------------|
| NC_037638.1 | 21547240 | SNV | 1 | T | C | Heterozygous |
| NC_037638.1 | 21547244 | SNV | 1 | G | A | Heterozygous |
| NC_037638.1 | 21547265 | SNV | 1 | T | C | Heterozygous |
| NC_037638.1 | 21547339 | SNV | 1 | G | A | Homozygous   |
| NC_037638.1 | 21547395 | SNV | 1 | T | C | Homozygous   |
| NC_037638.1 | 21547937 | SNV | 1 | C | G | Heterozygous |
| NC_037638.1 | 21547941 | SNV | 1 | C | G | Heterozygous |
| NC_037638.1 | 21547943 | SNV | 1 | T | C | Heterozygous |
| NC_037638.1 | 21547949 | SNV | 1 | C | T | Heterozygous |
| NC_037638.1 | 21547981 | SNV | 1 | T | A | Homozygous   |
| NC_037638.1 | 21547983 | SNV | 1 | T | G | Homozygous   |
| NC_037638.1 | 21547987 | SNV | 1 | C | T | Homozygous   |
| NC_037638.1 | 21547996 | SNV | 1 | G | A | Homozygous   |
| NC_037638.1 | 21548492 | SNV | 1 | T | C | Heterozygous |
| NC_037638.1 | 21548754 | SNV | 1 | C | T | Homozygous   |
| NC_037638.1 | 21548933 | SNV | 1 | G | A | Homozygous   |
| NC_037638.1 | 21550913 | SNV | 1 | G | C | Homozygous   |
| NC_037638.1 | 21557015 | SNV | 1 | T | C | Homozygous   |
| NC_037638.1 | 21557026 | SNV | 1 | T | A | Heterozygous |
| NC_037638.1 | 21557062 | SNV | 1 | T | G | Heterozygous |
| NC_037638.1 | 21558510 | SNV | 1 | T | C | Homozygous   |
| NC_037638.1 | 21558570 | SNV | 1 | T | C | Homozygous   |
| NC_037638.1 | 21558598 | SNV | 1 | C | T | Homozygous   |
| NC_037638.1 | 21563763 | SNV | 1 | G | C | Homozygous   |
| NC_037638.1 | 21563888 | SNV | 1 | A | G | Heterozygous |
| NC_037638.1 | 21563892 | SNV | 1 | A | G | Heterozygous |
| NC_037638.1 | 21563904 | SNV | 1 | A | G | Heterozygous |
| NC_037638.1 | 21563916 | SNV | 1 | A | G | Heterozygous |
| NC_037638.1 | 21564834 | SNV | 1 | G | A | Heterozygous |
| NC_037638.1 | 21564841 | SNV | 1 | A | G | Heterozygous |
| NC_037638.1 | 21565003 | SNV | 1 | A | C | Homozygous   |
| NC_037638.1 | 21565007 | SNV | 1 | T | A | Homozygous   |
| NC_037638.1 | 21565034 | SNV | 1 | T | C | Homozygous   |
| NC_037638.1 | 21565960 | SNV | 1 | G | A | Homozygous   |
| NC_037638.1 | 21565998 | SNV | 1 | A | G | Heterozygous |
| NC_037638.1 | 21566008 | SNV | 1 | A | G | Homozygous   |
| NC_037638.1 | 21569499 | SNV | 1 | C | T | Heterozygous |
| NC_037638.1 | 21569514 | SNV | 1 | C | A | Heterozygous |
| NC_037638.1 | 21569519 | SNV | 1 | C | T | Homozygous   |
| NC_037638.1 | 21569677 | SNV | 1 | G | A | Heterozygous |
| NC_037638.1 | 21569761 | SNV | 1 | C | T | Heterozygous |
| NC_037638.1 | 21570248 | SNV | 1 | T | C | Homozygous   |
| NC_037638.1 | 21570253 | SNV | 1 | G | A | Homozygous   |
| NC_037638.1 | 21574729 | SNV | 1 | G | A | Heterozygous |
| NC_037638.1 | 21574754 | SNV | 1 | C | T | Homozygous   |
| NC_037638.1 | 21574790 | SNV | 1 | T | C | Heterozygous |
| NC_037638.1 | 21574991 | SNV | 1 | C | T | Heterozygous |
| NC_037638.1 | 21574994 | SNV | 1 | T | C | Heterozygous |
| NC_037638.1 | 21575147 | SNV | 1 | A | G | Homozygous   |
| NC_037638.1 | 21575453 | SNV | 1 | A | G | Heterozygous |
| NC_037638.1 | 21575582 | SNV | 1 | T | C | Homozygous   |

|             |          |     |   |   |   |              |
|-------------|----------|-----|---|---|---|--------------|
| NC_037638.1 | 21575682 | SNV | 1 | G | C | Homozygous   |
| NC_037638.1 | 21575693 | SNV | 1 | A | G | Homozygous   |
| NC_037638.1 | 21575723 | SNV | 1 | C | T | Homozygous   |
| NC_037638.1 | 21575730 | SNV | 1 | C | T | Heterozygous |
| NC_037638.1 | 21585317 | SNV | 1 | G | A | Heterozygous |
| NC_037638.1 | 21594409 | SNV | 1 | T | G | Homozygous   |
| NC_037638.1 | 21594412 | SNV | 1 | C | A | Homozygous   |
| NC_037638.1 | 21594431 | SNV | 1 | T | A | Homozygous   |
| NC_037638.1 | 21597386 | SNV | 1 | A | G | Homozygous   |
| NC_037638.1 | 21597402 | SNV | 1 | A | G | Homozygous   |
| NC_037638.1 | 21597844 | SNV | 1 | T | C | Homozygous   |
| NC_037638.1 | 21621141 | SNV | 1 | G | C | Homozygous   |
| NC_037638.1 | 21625896 | SNV | 1 | T | C | Homozygous   |
| NC_037638.1 | 21625933 | SNV | 1 | C | T | Heterozygous |
| NC_037638.1 | 21625998 | SNV | 1 | G | A | Homozygous   |
| NC_037638.1 | 21626016 | SNV | 1 | T | C | Homozygous   |
| NC_037638.1 | 21626028 | SNV | 1 | G | C | Heterozygous |
| NC_037638.1 | 21641749 | SNV | 1 | T | C | Homozygous   |
| NC_037638.1 | 21641952 | SNV | 1 | T | C | Homozygous   |
| NC_037638.1 | 21642279 | SNV | 1 | A | G | Homozygous   |
| NC_037638.1 | 21642316 | SNV | 1 | C | T | Homozygous   |
| NC_037638.1 | 21642319 | SNV | 1 | A | G | Heterozygous |
| NC_037638.1 | 21642323 | SNV | 1 | G | T | Heterozygous |
| NC_037638.1 | 21642979 | SNV | 1 | A | C | Homozygous   |
| NC_037638.1 | 21643557 | SNV | 1 | G | A | Homozygous   |
| NC_037638.1 | 21643576 | SNV | 1 | A | G | Homozygous   |
| NC_037638.1 | 21643628 | SNV | 1 | G | A | Homozygous   |
| NC_037638.1 | 21656547 | SNV | 1 | G | T | Homozygous   |
| NC_037638.1 | 21656567 | SNV | 1 | G | A | Heterozygous |
| NC_037638.1 | 21672722 | SNV | 1 | A | G | Homozygous   |
| NC_037638.1 | 21689098 | SNV | 1 | C | T | Heterozygous |
| NC_037638.1 | 21689228 | SNV | 1 | T | A | Homozygous   |
| NC_037638.1 | 21689857 | SNV | 1 | A | G | Heterozygous |
| NC_037638.1 | 21696274 | SNV | 1 | G | A | Heterozygous |
| NC_037638.1 | 21696276 | SNV | 1 | C | A | Heterozygous |
| NC_037638.1 | 21697246 | SNV | 1 | T | C | Homozygous   |
| NC_037638.1 | 21700635 | SNV | 1 | A | G | Heterozygous |
| NC_037638.1 | 21700696 | SNV | 1 | T | A | Homozygous   |
| NC_037638.1 | 21701889 | SNV | 1 | T | C | Homozygous   |
| NC_037638.1 | 21702268 | SNV | 1 | C | T | Heterozygous |
| NC_037638.1 | 21702685 | SNV | 1 | C | T | Heterozygous |
| NC_037638.1 | 21704423 | SNV | 1 | C | A | Heterozygous |
| NC_037638.1 | 21706862 | SNV | 1 | G | A | Homozygous   |
| NC_037638.1 | 21708674 | SNV | 1 | A | G | Homozygous   |
| NC_037638.1 | 21715775 | SNV | 1 | T | C | Homozygous   |
| NC_037638.1 | 21715843 | SNV | 1 | T | C | Homozygous   |
| NC_037638.1 | 21719313 | SNV | 1 | C | T | Homozygous   |
| NC_037638.1 | 21724784 | SNV | 1 | G | T | Homozygous   |
| NC_037638.1 | 21724803 | SNV | 1 | T | G | Homozygous   |
| NC_037638.1 | 21724832 | SNV | 1 | T | A | Homozygous   |
| NC_037638.1 | 21726741 | SNV | 1 | G | A | Homozygous   |

|             |          |     |   |   |   |              |
|-------------|----------|-----|---|---|---|--------------|
| NC_037638.1 | 21730380 | SNV | 1 | A | T | Homozygous   |
| NC_037638.1 | 21730402 | SNV | 1 | C | A | Homozygous   |
| NC_037638.1 | 21730415 | SNV | 1 | T | A | Homozygous   |
| NC_037638.1 | 21730418 | SNV | 1 | A | T | Homozygous   |
| NC_037638.1 | 21731122 | SNV | 1 | T | C | Heterozygous |
| NC_037638.1 | 21731945 | SNV | 1 | C | T | Homozygous   |
| NC_037638.1 | 21732604 | SNV | 1 | G | A | Heterozygous |
| NC_037638.1 | 21733392 | SNV | 1 | A | T | Heterozygous |
| NC_037638.1 | 21733404 | SNV | 1 | A | G | Heterozygous |
| NC_037638.1 | 21733410 | SNV | 1 | T | C | Heterozygous |
| NC_037638.1 | 21740920 | SNV | 1 | T | C | Heterozygous |
| NC_037638.1 | 21741329 | SNV | 1 | C | T | Heterozygous |
| NC_037638.1 | 21741334 | SNV | 1 | T | C | Heterozygous |
| NC_037638.1 | 21741412 | SNV | 1 | A | G | Heterozygous |
| NC_037638.1 | 21741855 | SNV | 1 | A | G | Heterozygous |
| NC_037638.1 | 21741870 | SNV | 1 | G | A | Heterozygous |
| NC_037638.1 | 21741872 | SNV | 1 | G | A | Heterozygous |
| NC_037638.1 | 21742624 | SNV | 1 | C | T | Homozygous   |
| NC_037638.1 | 21742711 | SNV | 1 | T | C | Homozygous   |
| NC_037638.1 | 21742891 | SNV | 1 | C | T | Homozygous   |
| NC_037638.1 | 21742930 | SNV | 1 | T | C | Heterozygous |
| NC_037638.1 | 21742932 | SNV | 1 | C | T | Heterozygous |
| NC_037638.1 | 21743000 | SNV | 1 | T | C | Heterozygous |
| NC_037638.1 | 21743002 | SNV | 1 | T | C | Homozygous   |
| NC_037638.1 | 21743052 | SNV | 1 | C | T | Heterozygous |
| NC_037638.1 | 21743166 | SNV | 1 | T | C | Heterozygous |
| NC_037638.1 | 21743359 | SNV | 1 | T | C | Homozygous   |
| NC_037638.1 | 21743606 | SNV | 1 | C | T | Heterozygous |
| NC_037638.1 | 21743637 | SNV | 1 | A | G | Heterozygous |
| NC_037638.1 | 21743731 | SNV | 1 | T | C | Heterozygous |
| NC_037638.1 | 21744491 | SNV | 1 | A | G | Homozygous   |
| NC_037638.1 | 21744495 | SNV | 1 | A | G | Homozygous   |
| NC_037638.1 | 21744573 | SNV | 1 | T | G | Homozygous   |
| NC_037638.1 | 21745004 | SNV | 1 | T | C | Heterozygous |
| NC_037638.1 | 21746675 | SNV | 1 | T | C | Heterozygous |
| NC_037638.1 | 21746677 | SNV | 1 | T | C | Heterozygous |
| NC_037638.1 | 21747019 | SNV | 1 | C | T | Homozygous   |
| NC_037638.1 | 21747021 | SNV | 1 | C | T | Homozygous   |
| NC_037638.1 | 21747029 | SNV | 1 | A | T | Homozygous   |
| NC_037638.1 | 21747069 | SNV | 1 | C | T | Homozygous   |
| NC_037638.1 | 21747081 | SNV | 1 | C | T | Heterozygous |
| NC_037638.1 | 21747515 | SNV | 1 | T | C | Homozygous   |
| NC_037638.1 | 21747533 | SNV | 1 | A | G | Homozygous   |
| NC_037638.1 | 21747543 | SNV | 1 | G | T | Heterozygous |
| NC_037638.1 | 21747558 | SNV | 1 | G | A | Heterozygous |
| NC_037638.1 | 21747610 | SNV | 1 | C | T | Heterozygous |
| NC_037638.1 | 21748033 | SNV | 1 | G | A | Heterozygous |
| NC_037638.1 | 21750650 | SNV | 1 | T | C | Heterozygous |
| NC_037638.1 | 21750737 | SNV | 1 | C | T | Heterozygous |
| NC_037638.1 | 21750740 | SNV | 1 | A | C | Homozygous   |
| NC_037638.1 | 21750744 | SNV | 1 | G | A | Homozygous   |

|             |          |     |   |   |   |              |
|-------------|----------|-----|---|---|---|--------------|
| NC_037638.1 | 21752143 | SNV | 1 | C | T | Heterozygous |
| NC_037638.1 | 21752879 | SNV | 1 | T | C | Homozygous   |
| NC_037638.1 | 21753374 | SNV | 1 | A | G | Heterozygous |
| NC_037638.1 | 21753384 | SNV | 1 | T | C | Heterozygous |
| NC_037638.1 | 21754329 | SNV | 1 | C | T | Heterozygous |
| NC_037638.1 | 21754881 | SNV | 1 | T | C | Heterozygous |
| NC_037638.1 | 21754984 | SNV | 1 | G | A | Homozygous   |
| NC_037638.1 | 21755278 | SNV | 1 | C | T | Homozygous   |
| NC_037638.1 | 21755396 | SNV | 1 | T | C | Homozygous   |
| NC_037638.1 | 21755438 | SNV | 1 | C | T | Homozygous   |
| NC_037638.1 | 21764523 | SNV | 1 | A | G | Homozygous   |
| NC_037638.1 | 21764536 | SNV | 1 | G | A | Heterozygous |
| NC_037638.1 | 21764584 | SNV | 1 | G | A | Heterozygous |
| NC_037638.1 | 21764586 | SNV | 1 | A | G | Heterozygous |
| NC_037638.1 | 21766362 | SNV | 1 | A | T | Homozygous   |
| NC_037638.1 | 21768835 | SNV | 1 | T | C | Homozygous   |
| NC_037638.1 | 21769042 | SNV | 1 | T | C | Homozygous   |
| NC_037638.1 | 21769440 | SNV | 1 | A | T | Homozygous   |
| NC_037638.1 | 21769730 | SNV | 1 | T | C | Heterozygous |
| NC_037638.1 | 21769762 | SNV | 1 | A | G | Homozygous   |
| NC_037638.1 | 21769909 | SNV | 1 | G | C | Homozygous   |
| NC_037638.1 | 21769913 | SNV | 1 | A | G | Heterozygous |
| NC_037638.1 | 21769915 | SNV | 1 | A | C | Heterozygous |
| NC_037638.1 | 21769921 | SNV | 1 | A | C | Heterozygous |
| NC_037638.1 | 21769924 | SNV | 1 | T | C | Heterozygous |
| NC_037638.1 | 21784220 | SNV | 1 | G | A | Homozygous   |
| NC_037638.1 | 21784229 | SNV | 1 | G | A | Homozygous   |
| NC_037638.1 | 21784317 | SNV | 1 | G | A | Heterozygous |
| NC_037638.1 | 21784577 | SNV | 1 | T | C | Heterozygous |
| NC_037638.1 | 21784638 | SNV | 1 | T | C | Heterozygous |
| NC_037638.1 | 21785064 | SNV | 1 | C | T | Heterozygous |
| NC_037638.1 | 21785086 | SNV | 1 | C | T | Heterozygous |
| NC_037638.1 | 21785137 | SNV | 1 | C | A | Homozygous   |
| NC_037638.1 | 21785211 | SNV | 1 | G | A | Homozygous   |
| NC_037638.1 | 21785469 | SNV | 1 | G | A | Homozygous   |
| NC_037638.1 | 21786115 | SNV | 1 | A | T | Homozygous   |
| NC_037638.1 | 21786136 | SNV | 1 | G | A | Homozygous   |
| NC_037638.1 | 21786168 | SNV | 1 | C | G | Heterozygous |
| NC_037638.1 | 21786228 | SNV | 1 | G | A | Homozygous   |
| NC_037638.1 | 21787335 | SNV | 1 | G | A | Heterozygous |
| NC_037638.1 | 21788874 | SNV | 1 | G | A | Homozygous   |
| NC_037638.1 | 21788928 | SNV | 1 | T | C | Homozygous   |
| NC_037638.1 | 21789871 | SNV | 1 | C | G | Homozygous   |
| NC_037638.1 | 21789877 | SNV | 1 | G | A | Heterozygous |
| NC_037638.1 | 21789888 | SNV | 1 | G | A | Heterozygous |
| NC_037638.1 | 21790683 | SNV | 1 | G | A | Heterozygous |
| NC_037638.1 | 21790839 | SNV | 1 | A | G | Homozygous   |
| NC_037638.1 | 21790931 | SNV | 1 | T | C | Homozygous   |
| NC_037638.1 | 21795545 | SNV | 1 | G | C | Homozygous   |
| NC_037638.1 | 21796112 | SNV | 1 | T | C | Heterozygous |
| NC_037638.1 | 21797724 | SNV | 1 | G | C | Homozygous   |

|             |          |     |   |   |   |              |
|-------------|----------|-----|---|---|---|--------------|
| NC_037638.1 | 21797726 | SNV | 1 | C | T | Homozygous   |
| NC_037638.1 | 21797856 | SNV | 1 | C | T | Heterozygous |
| NC_037638.1 | 21798086 | SNV | 1 | A | G | Heterozygous |
| NC_037638.1 | 21798181 | SNV | 1 | C | T | Homozygous   |
| NC_037638.1 | 21804447 | SNV | 1 | C | T | Homozygous   |
| NC_037638.1 | 21804450 | SNV | 1 | T | A | Homozygous   |
| NC_037638.1 | 21804455 | SNV | 1 | C | G | Homozygous   |
| NC_037638.1 | 21805328 | SNV | 1 | A | G | Homozygous   |
| NC_037638.1 | 21814880 | SNV | 1 | G | A | Heterozygous |
| NC_037638.1 | 21815098 | SNV | 1 | G | A | Homozygous   |
| NC_037638.1 | 21815253 | SNV | 1 | G | A | Homozygous   |
| NC_037638.1 | 21815255 | SNV | 1 | T | C | Homozygous   |
| NC_037638.1 | 21815637 | SNV | 1 | C | T | Homozygous   |
| NC_037638.1 | 21815858 | SNV | 1 | C | T | Homozygous   |
| NC_037638.1 | 21815916 | SNV | 1 | C | T | Homozygous   |
| NC_037638.1 | 21816150 | SNV | 1 | G | T | Homozygous   |
| NC_037638.1 | 21816213 | SNV | 1 | T | C | Homozygous   |
| NC_037638.1 | 21816217 | SNV | 1 | C | T | Heterozygous |
| NC_037638.1 | 21816219 | SNV | 1 | T | C | Heterozygous |
| NC_037638.1 | 21816223 | SNV | 1 | C | T | Homozygous   |
| NC_037638.1 | 21817204 | SNV | 1 | C | T | Homozygous   |
| NC_037638.1 | 21817314 | SNV | 1 | C | T | Heterozygous |
| NC_037638.1 | 21817594 | SNV | 1 | A | T | Homozygous   |
| NC_037638.1 | 21817784 | SNV | 1 | C | T | Heterozygous |
| NC_037638.1 | 21818099 | SNV | 1 | T | A | Heterozygous |
| NC_037638.1 | 21818179 | SNV | 1 | A | G | Homozygous   |
| NC_037638.1 | 21818288 | SNV | 1 | C | T | Heterozygous |
| NC_037638.1 | 21818319 | SNV | 1 | C | A | Heterozygous |
| NC_037638.1 | 21818333 | SNV | 1 | A | G | Heterozygous |
| NC_037638.1 | 21818337 | SNV | 1 | T | G | Homozygous   |
| NC_037638.1 | 21818385 | SNV | 1 | G | A | Homozygous   |
| NC_037638.1 | 21818500 | SNV | 1 | G | A | Homozygous   |
| NC_037638.1 | 21818714 | SNV | 1 | C | T | Heterozygous |
| NC_037638.1 | 21818727 | SNV | 1 | T | C | Homozygous   |
| NC_037638.1 | 21818950 | SNV | 1 | G | A | Heterozygous |
| NC_037638.1 | 21818993 | SNV | 1 | T | C | Heterozygous |
| NC_037638.1 | 21819000 | SNV | 1 | T | A | Heterozygous |
| NC_037638.1 | 21819246 | SNV | 1 | G | A | Heterozygous |
| NC_037638.1 | 21819350 | SNV | 1 | T | C | Homozygous   |
| NC_037638.1 | 21819824 | SNV | 1 | A | G | Homozygous   |
| NC_037638.1 | 21819880 | SNV | 1 | G | A | Homozygous   |
| NC_037638.1 | 21819985 | SNV | 1 | A | G | Homozygous   |
| NC_037638.1 | 21820042 | SNV | 1 | T | C | Homozygous   |
| NC_037638.1 | 21820047 | SNV | 1 | C | T | Heterozygous |
| NC_037638.1 | 21820228 | SNV | 1 | C | T | Heterozygous |
| NC_037638.1 | 21820645 | SNV | 1 | G | C | Homozygous   |
| NC_037638.1 | 21820666 | SNV | 1 | T | C | Homozygous   |
| NC_037638.1 | 21820980 | SNV | 1 | A | G | Heterozygous |
| NC_037638.1 | 21821015 | SNV | 1 | T | C | Homozygous   |
| NC_037638.1 | 21821053 | SNV | 1 | A | G | Homozygous   |
| NC_037638.1 | 21821201 | SNV | 1 | T | C | Heterozygous |



|             |          |     |   |   |   |              |
|-------------|----------|-----|---|---|---|--------------|
| NC_037638.1 | 21821362 | SNV | 1 | T | C | Homozygous   |
| NC_037638.1 | 21821555 | SNV | 1 | A | G | Heterozygous |
| NC_037638.1 | 21826112 | SNV | 1 | A | G | Heterozygous |
| NC_037638.1 | 21827810 | SNV | 1 | C | G | Homozygous   |
| NC_037638.1 | 21827884 | SNV | 1 | G | A | Homozygous   |
| NC_037638.1 | 21827923 | SNV | 1 | A | G | Homozygous   |
| NC_037638.1 | 21828316 | SNV | 1 | C | A | Homozygous   |
| NC_037638.1 | 21828319 | SNV | 1 | C | A | Homozygous   |
| NC_037638.1 | 21828325 | SNV | 1 | G | A | Homozygous   |
| NC_037638.1 | 21828328 | SNV | 1 | G | C | Homozygous   |
| NC_037638.1 | 21828335 | SNV | 1 | G | T | Heterozygous |
| NC_037638.1 | 21828343 | SNV | 1 | A | G | Heterozygous |
| NC_037638.1 | 21828632 | SNV | 1 | C | T | Heterozygous |
| NC_037638.1 | 21828635 | SNV | 1 | C | T | Homozygous   |
| NC_037638.1 | 21828649 | SNV | 1 | T | C | Homozygous   |
| NC_037638.1 | 21828729 | SNV | 1 | T | C | Homozygous   |
| NC_037638.1 | 21829189 | SNV | 1 | G | A | Heterozygous |
| NC_037638.1 | 21829283 | SNV | 1 | T | G | Homozygous   |
| NC_037638.1 | 21829297 | SNV | 1 | A | T | Heterozygous |
| NC_037638.1 | 21829329 | SNV | 1 | A | G | Heterozygous |
| NC_037638.1 | 21829332 | SNV | 1 | A | G | Heterozygous |
| NC_037638.1 | 21829769 | SNV | 1 | A | G | Homozygous   |
| NC_037638.1 | 21830664 | SNV | 1 | T | A | Heterozygous |
| NC_037638.1 | 21830670 | SNV | 1 | T | A | Heterozygous |
| NC_037638.1 | 21832067 | SNV | 1 | T | A | Heterozygous |
| NC_037638.1 | 21832069 | SNV | 1 | G | A | Heterozygous |
| NC_037638.1 | 21832077 | SNV | 1 | A | G | Homozygous   |
| NC_037638.1 | 21832085 | SNV | 1 | G | A | Homozygous   |
| NC_037638.1 | 21832635 | SNV | 1 | C | T | Heterozygous |
| NC_037638.1 | 21832759 | SNV | 1 | G | A | Homozygous   |
| NC_037638.1 | 21832991 | SNV | 1 | G | A | Heterozygous |
| NC_037638.1 | 21832998 | SNV | 1 | C | T | Homozygous   |
| NC_037638.1 | 21833007 | SNV | 1 | A | G | Homozygous   |
| NC_037638.1 | 21833754 | SNV | 1 | G | A | Homozygous   |
| NC_037638.1 | 21833756 | SNV | 1 | G | A | Heterozygous |
| NC_037638.1 | 21833758 | SNV | 1 | G | A | Heterozygous |
| NC_037638.1 | 21833773 | SNV | 1 | A | G | Heterozygous |
| NC_037638.1 | 21833777 | SNV | 1 | G | C | Homozygous   |
| NC_037638.1 | 21833828 | SNV | 1 | T | G | Heterozygous |
| NC_037638.1 | 21833846 | SNV | 1 | C | T | Heterozygous |
| NC_037638.1 | 21833957 | SNV | 1 | C | A | Heterozygous |
| NC_037638.1 | 21834158 | SNV | 1 | C | T | Homozygous   |
| NC_037638.1 | 21834191 | SNV | 1 | T | C | Heterozygous |
| NC_037638.1 | 21840512 | SNV | 1 | T | C | Homozygous   |
| NC_037638.1 | 21840550 | SNV | 1 | T | C | Heterozygous |
| NC_037638.1 | 21840638 | SNV | 1 | A | G | Homozygous   |
| NC_037638.1 | 21840773 | SNV | 1 | C | T | Homozygous   |
| NC_037638.1 | 21840788 | SNV | 1 | C | G | Heterozygous |
| NC_037638.1 | 21840854 | SNV | 1 | A | G | Heterozygous |
| NC_037638.1 | 21849216 | SNV | 1 | G | A | Heterozygous |
| NC_037638.1 | 21849263 | SNV | 1 | T | C | Heterozygous |

|             |          |     |   |   |   |              |
|-------------|----------|-----|---|---|---|--------------|
| NC_037638.1 | 21849397 | SNV | 1 | C | T | Homozygous   |
| NC_037638.1 | 21850307 | SNV | 1 | C | T | Homozygous   |
| NC_037638.1 | 21850765 | SNV | 1 | A | C | Heterozygous |
| NC_037638.1 | 21850794 | SNV | 1 | G | A | Heterozygous |
| NC_037638.1 | 21850800 | SNV | 1 | G | A | Heterozygous |
| NC_037638.1 | 21852742 | SNV | 1 | C | T | Heterozygous |
| NC_037638.1 | 21852790 | SNV | 1 | A | C | Heterozygous |
| NC_037638.1 | 21852797 | SNV | 1 | A | G | Heterozygous |
| NC_037638.1 | 21852839 | SNV | 1 | A | G | Heterozygous |
| NC_037638.1 | 21853097 | SNV | 1 | C | T | Homozygous   |
| NC_037638.1 | 21853127 | SNV | 1 | T | C | Homozygous   |
| NC_037638.1 | 21853152 | SNV | 1 | C | T | Homozygous   |
| NC_037638.1 | 21853173 | SNV | 1 | C | T | Homozygous   |
| NC_037638.1 | 21853180 | SNV | 1 | T | A | Heterozygous |
| NC_037638.1 | 21853184 | SNV | 1 | T | A | Homozygous   |
| NC_037638.1 | 21853186 | SNV | 1 | T | A | Heterozygous |
| NC_037638.1 | 21853192 | SNV | 1 | A | T | Homozygous   |
| NC_037638.1 | 21853194 | SNV | 1 | A | T | Homozygous   |
| NC_037638.1 | 21853502 | SNV | 1 | A | G | Homozygous   |
| NC_037638.1 | 21853576 | SNV | 1 | C | T | Heterozygous |
| NC_037638.1 | 21868886 | SNV | 1 | T | C | Homozygous   |
| NC_037638.1 | 21868930 | SNV | 1 | T | G | Homozygous   |
| NC_037638.1 | 21871189 | SNV | 1 | A | T | Homozygous   |
| NC_037638.1 | 21871204 | SNV | 1 | A | C | Homozygous   |
| NC_037638.1 | 21871206 | SNV | 1 | G | T | Homozygous   |
| NC_037638.1 | 21871208 | SNV | 1 | A | G | Homozygous   |
| NC_037638.1 | 21871210 | SNV | 1 | A | G | Homozygous   |
| NC_037638.1 | 21881364 | SNV | 1 | T | C | Homozygous   |
| NC_037638.1 | 21881408 | SNV | 1 | A | T | Homozygous   |
| NC_037638.1 | 21882147 | SNV | 1 | C | T | Heterozygous |
| NC_037638.1 | 21887017 | SNV | 1 | G | A | Heterozygous |
| NC_037638.1 | 21887182 | SNV | 1 | A | G | Homozygous   |
| NC_037638.1 | 21887184 | SNV | 1 | A | G | Heterozygous |
| NC_037638.1 | 21887527 | SNV | 1 | T | C | Homozygous   |
| NC_037638.1 | 21887544 | SNV | 1 | A | G | Homozygous   |
| NC_037638.1 | 21888002 | SNV | 1 | T | C | Heterozygous |
| NC_037638.1 | 21888021 | SNV | 1 | T | C | Heterozygous |
| NC_037638.1 | 21888024 | SNV | 1 | C | T | Homozygous   |
| NC_037638.1 | 21888308 | SNV | 1 | T | C | Homozygous   |
| NC_037638.1 | 21888718 | SNV | 1 | A | G | Homozygous   |
| NC_037638.1 | 21888856 | SNV | 1 | A | G | Homozygous   |
| NC_037638.1 | 21888929 | SNV | 1 | T | A | Homozygous   |
| NC_037638.1 | 21894599 | SNV | 1 | T | C | Homozygous   |
| NC_037638.1 | 21894690 | SNV | 1 | T | C | Homozygous   |
| NC_037638.1 | 21894715 | SNV | 1 | T | A | Homozygous   |
| NC_037638.1 | 21894724 | SNV | 1 | G | A | Homozygous   |
| NC_037638.1 | 21894794 | SNV | 1 | T | C | Homozygous   |
| NC_037638.1 | 21894862 | SNV | 1 | G | A | Heterozygous |
| NC_037638.1 | 21894866 | SNV | 1 | A | G | Homozygous   |
| NC_037638.1 | 21894905 | SNV | 1 | T | C | Homozygous   |
| NC_037638.1 | 21894961 | SNV | 1 | A | G | Heterozygous |

|             |          |     |   |   |   |              |
|-------------|----------|-----|---|---|---|--------------|
| NC_037638.1 | 21894965 | SNV | 1 | C | T | Heterozygous |
| NC_037638.1 | 21903790 | SNV | 1 | G | C | Homozygous   |
| NC_037638.1 | 21903825 | SNV | 1 | G | C | Homozygous   |
| NC_037638.1 | 21903830 | SNV | 1 | A | G | Homozygous   |
| NC_037638.1 | 21905732 | SNV | 1 | A | C | Homozygous   |
| NC_037638.1 | 21905742 | SNV | 1 | G | A | Homozygous   |
| NC_037638.1 | 21905867 | SNV | 1 | C | G | Heterozygous |
| NC_037638.1 | 21905916 | SNV | 1 | A | G | Homozygous   |
| NC_037638.1 | 21905972 | SNV | 1 | T | C | Homozygous   |
| NC_037638.1 | 21905988 | SNV | 1 | T | C | Heterozygous |
| NC_037638.1 | 21906007 | SNV | 1 | C | T | Heterozygous |
| NC_037638.1 | 21906012 | SNV | 1 | C | T | Heterozygous |
| NC_037638.1 | 21906039 | SNV | 1 | C | T | Homozygous   |
| NC_037638.1 | 21906068 | SNV | 1 | C | T | Heterozygous |
| NC_037638.1 | 21906083 | SNV | 1 | T | G | Heterozygous |
| NC_037638.1 | 21906097 | SNV | 1 | T | C | Heterozygous |
| NC_037638.1 | 21906322 | SNV | 1 | G | A | Heterozygous |
| NC_037638.1 | 21906324 | SNV | 1 | T | C | Heterozygous |
| NC_037638.1 | 21906628 | SNV | 1 | T | C | Homozygous   |
| NC_037638.1 | 21910615 | SNV | 1 | A | T | Homozygous   |
| NC_037638.1 | 21910633 | SNV | 1 | A | G | Homozygous   |
| NC_037638.1 | 21910635 | SNV | 1 | G | T | Homozygous   |
| NC_037638.1 | 21910645 | SNV | 1 | A | G | Homozygous   |
| NC_037638.1 | 21911669 | SNV | 1 | T | A | Homozygous   |
| NC_037638.1 | 21911698 | SNV | 1 | G | A | Homozygous   |
| NC_037638.1 | 21911700 | SNV | 1 | G | A | Homozygous   |
| NC_037638.1 | 21913615 | SNV | 1 | A | G | Homozygous   |
| NC_037638.1 | 21913623 | SNV | 1 | C | T | Heterozygous |
| NC_037638.1 | 21913627 | SNV | 1 | C | T | Heterozygous |
| NC_037638.1 | 21913641 | SNV | 1 | C | T | Heterozygous |
| NC_037638.1 | 21913727 | SNV | 1 | C | T | Heterozygous |
| NC_037638.1 | 21913731 | SNV | 1 | T | C | Heterozygous |
| NC_037638.1 | 21913788 | SNV | 1 | G | C | Homozygous   |
| NC_037638.1 | 21913833 | SNV | 1 | C | T | Heterozygous |
| NC_037638.1 | 21913857 | SNV | 1 | T | C | Homozygous   |
| NC_037638.1 | 21913887 | SNV | 1 | T | C | Homozygous   |
| NC_037638.1 | 21913939 | SNV | 1 | C | G | Homozygous   |
| NC_037638.1 | 21914141 | SNV | 1 | A | G | Homozygous   |
| NC_037638.1 | 21914777 | SNV | 1 | A | G | Homozygous   |
| NC_037638.1 | 21914795 | SNV | 1 | C | T | Homozygous   |
| NC_037638.1 | 21919722 | SNV | 1 | T | C | Homozygous   |
| NC_037638.1 | 21919730 | SNV | 1 | T | C | Heterozygous |
| NC_037638.1 | 21919738 | SNV | 1 | T | G | Homozygous   |
| NC_037638.1 | 21920228 | SNV | 1 | C | T | Heterozygous |
| NC_037638.1 | 21920230 | SNV | 1 | C | T | Heterozygous |
| NC_037638.1 | 21920235 | SNV | 1 | C | T | Homozygous   |
| NC_037638.1 | 21920238 | SNV | 1 | C | T | Homozygous   |
| NC_037638.1 | 21920334 | SNV | 1 | C | T | Heterozygous |
| NC_037638.1 | 21920338 | SNV | 1 | T | C | Heterozygous |
| NC_037638.1 | 21920346 | SNV | 1 | T | C | Heterozygous |
| NC_037638.1 | 21920351 | SNV | 1 | G | A | Heterozygous |

|             |          |     |   |   |   |              |
|-------------|----------|-----|---|---|---|--------------|
| NC_037638.1 | 21927516 | SNV | 1 | C | T | Homozygous   |
| NC_037638.1 | 21927716 | SNV | 1 | C | A | Heterozygous |
| NC_037638.1 | 21933040 | SNV | 1 | T | C | Homozygous   |
| NC_037638.1 | 21933570 | SNV | 1 | T | C | Heterozygous |
| NC_037638.1 | 21933626 | SNV | 1 | A | G | Heterozygous |
| NC_037638.1 | 21933661 | SNV | 1 | A | G | Homozygous   |
| NC_037638.1 | 21933854 | SNV | 1 | A | G | Heterozygous |
| NC_037638.1 | 21933869 | SNV | 1 | A | G | Heterozygous |
| NC_037638.1 | 21934072 | SNV | 1 | C | T | Heterozygous |
| NC_037638.1 | 21934609 | SNV | 1 | T | G | Homozygous   |
| NC_037638.1 | 21934649 | SNV | 1 | T | A | Homozygous   |
| NC_037638.1 | 21934751 | SNV | 1 | G | A | Homozygous   |
| NC_037638.1 | 21937021 | SNV | 1 | C | T | Homozygous   |
| NC_037638.1 | 21937081 | SNV | 1 | G | A | Heterozygous |
| NC_037638.1 | 21937101 | SNV | 1 | G | T | Homozygous   |
| NC_037638.1 | 21937245 | SNV | 1 | A | G | Homozygous   |
| NC_037638.1 | 21937301 | SNV | 1 | C | G | Homozygous   |
| NC_037638.1 | 21937303 | SNV | 1 | T | C | Homozygous   |
| NC_037638.1 | 21937338 | SNV | 1 | G | A | Heterozygous |
| NC_037638.1 | 21937443 | SNV | 1 | T | C | Homozygous   |
| NC_037638.1 | 21939438 | SNV | 1 | C | T | Heterozygous |
| NC_037638.1 | 21939500 | SNV | 1 | G | A | Heterozygous |
| NC_037638.1 | 21939661 | SNV | 1 | A | G | Homozygous   |
| NC_037638.1 | 21939720 | SNV | 1 | T | C | Homozygous   |
| NC_037638.1 | 21943831 | SNV | 1 | A | G | Homozygous   |
| NC_037638.1 | 21943868 | SNV | 1 | C | T | Heterozygous |
| NC_037638.1 | 21944058 | SNV | 1 | C | T | Homozygous   |
| NC_037638.1 | 21946622 | SNV | 1 | C | T | Heterozygous |
| NC_037638.1 | 21946667 | SNV | 1 | C | T | Heterozygous |
| NC_037638.1 | 21946710 | SNV | 1 | A | C | Heterozygous |
| NC_037638.1 | 21946760 | SNV | 1 | C | T | Homozygous   |
| NC_037638.1 | 21946790 | SNV | 1 | A | G | Homozygous   |
| NC_037638.1 | 21946793 | SNV | 1 | G | A | Homozygous   |
| NC_037638.1 | 21951938 | SNV | 1 | G | A | Heterozygous |
| NC_037638.1 | 21951957 | SNV | 1 | G | A | Heterozygous |
| NC_037638.1 | 21952005 | SNV | 1 | C | G | Heterozygous |
| NC_037638.1 | 21952326 | SNV | 1 | A | T | Heterozygous |
| NC_037638.1 | 21952331 | SNV | 1 | A | G | Homozygous   |
| NC_037638.1 | 21952365 | SNV | 1 | G | T | Homozygous   |
| NC_037638.1 | 21955525 | SNV | 1 | G | A | Heterozygous |
| NC_037638.1 | 21955639 | SNV | 1 | T | C | Homozygous   |
| NC_037638.1 | 21955702 | SNV | 1 | C | T | Homozygous   |
| NC_037638.1 | 21955707 | SNV | 1 | T | C | Homozygous   |
| NC_037638.1 | 21955712 | SNV | 1 | C | T | Homozygous   |
| NC_037638.1 | 21955733 | SNV | 1 | G | A | Heterozygous |
| NC_037638.1 | 21955744 | SNV | 1 | T | C | Homozygous   |
| NC_037638.1 | 21955768 | SNV | 1 | C | T | Heterozygous |
| NC_037638.1 | 21964660 | SNV | 1 | C | T | Homozygous   |
| NC_037638.1 | 21964694 | SNV | 1 | C | T | Homozygous   |
| NC_037638.1 | 21964925 | SNV | 1 | C | T | Heterozygous |
| NC_037638.1 | 21965095 | SNV | 1 | T | G | Homozygous   |

|             |          |     |   |   |   |              |
|-------------|----------|-----|---|---|---|--------------|
| NC_037638.1 | 21965097 | SNV | 1 | A | G | Homozygous   |
| NC_037638.1 | 21967860 | SNV | 1 | C | T | Heterozygous |
| NC_037638.1 | 21967976 | SNV | 1 | T | C | Homozygous   |
| NC_037638.1 | 21968017 | SNV | 1 | A | G | Homozygous   |
| NC_037638.1 | 21985899 | SNV | 1 | C | T | Homozygous   |
| NC_037638.1 | 21985952 | SNV | 1 | A | G | Homozygous   |
| NC_037638.1 | 21989116 | SNV | 1 | G | C | Homozygous   |
| NC_037638.1 | 21989138 | SNV | 1 | C | T | Heterozygous |
| NC_037638.1 | 21989170 | SNV | 1 | A | G | Homozygous   |
| NC_037638.1 | 21989274 | SNV | 1 | C | T | Heterozygous |
| NC_037638.1 | 21989362 | SNV | 1 | G | A | Heterozygous |
| NC_037638.1 | 21989395 | SNV | 1 | G | A | Heterozygous |
| NC_037638.1 | 21989401 | SNV | 1 | A | C | Heterozygous |
| NC_037638.1 | 21996334 | SNV | 1 | C | T | Homozygous   |
| NC_037638.1 | 21996336 | SNV | 1 | T | C | Heterozygous |
| NC_037638.1 | 21996425 | SNV | 1 | T | C | Homozygous   |
| NC_037638.1 | 21999819 | SNV | 1 | C | T | Homozygous   |
| NC_037638.1 | 21999824 | SNV | 1 | T | A | Homozygous   |
| NC_037638.1 | 21999826 | SNV | 1 | T | A | Homozygous   |
| NC_037638.1 | 21999837 | SNV | 1 | A | T | Homozygous   |
| NC_037638.1 | 21999862 | SNV | 1 | A | T | Homozygous   |
| NC_037638.1 | 21999878 | SNV | 1 | T | G | Homozygous   |
| NC_037638.1 | 22000363 | SNV | 1 | T | G | Heterozygous |
| NC_037638.1 | 22000376 | SNV | 1 | C | T | Heterozygous |
| NC_037638.1 | 22005077 | SNV | 1 | G | T | Homozygous   |
| NC_037638.1 | 22005079 | SNV | 1 | A | T | Homozygous   |
| NC_037638.1 | 22005083 | SNV | 1 | A | T | Homozygous   |
| NC_037638.1 | 22005090 | SNV | 1 | G | T | Homozygous   |
| NC_037638.1 | 22005094 | SNV | 1 | C | G | Homozygous   |
| NC_037638.1 | 22022655 | SNV | 1 | A | G | Homozygous   |
| NC_037638.1 | 22022659 | SNV | 1 | G | A | Heterozygous |
| NC_037638.1 | 22029467 | SNV | 1 | G | A | Heterozygous |
| NC_037638.1 | 22029489 | SNV | 1 | A | G | Heterozygous |
| NC_037638.1 | 22031098 | SNV | 1 | A | G | Homozygous   |
| NC_037638.1 | 22031116 | SNV | 1 | G | A | Heterozygous |
| NC_037638.1 | 22031204 | SNV | 1 | T | C | Homozygous   |
| NC_037638.1 | 22033614 | SNV | 1 | A | G | Homozygous   |
| NC_037638.1 | 22033650 | SNV | 1 | T | C | Homozygous   |
| NC_037638.1 | 22033742 | SNV | 1 | C | T | Heterozygous |
| NC_037638.1 | 22033814 | SNV | 1 | T | C | Homozygous   |
| NC_037638.1 | 22033877 | SNV | 1 | T | C | Heterozygous |
| NC_037638.1 | 22034309 | SNV | 1 | C | T | Heterozygous |
| NC_037638.1 | 22034318 | SNV | 1 | C | T | Heterozygous |
| NC_037638.1 | 22038758 | SNV | 1 | C | T | Heterozygous |
| NC_037638.1 | 22038909 | SNV | 1 | C | T | Heterozygous |
| NC_037638.1 | 22038917 | SNV | 1 | C | T | Heterozygous |
| NC_037638.1 | 22039523 | SNV | 1 | G | A | Homozygous   |
| NC_037638.1 | 22042378 | SNV | 1 | T | C | Heterozygous |
| NC_037638.1 | 22042683 | SNV | 1 | T | C | Homozygous   |
| NC_037638.1 | 22043074 | SNV | 1 | A | G | Homozygous   |
| NC_037638.1 | 22043100 | SNV | 1 | A | G | Homozygous   |

|             |          |     |   |   |   |              |
|-------------|----------|-----|---|---|---|--------------|
| NC_037638.1 | 22043109 | SNV | 1 | A | G | Homozygous   |
| NC_037638.1 | 22043155 | SNV | 1 | C | G | Heterozygous |
| NC_037638.1 | 22043243 | SNV | 1 | A | G | Homozygous   |
| NC_037638.1 | 22043387 | SNV | 1 | T | C | Homozygous   |
| NC_037638.1 | 22043461 | SNV | 1 | T | C | Homozygous   |
| NC_037638.1 | 22043537 | SNV | 1 | C | G | Homozygous   |
| NC_037638.1 | 22043558 | SNV | 1 | T | C | Homozygous   |
| NC_037638.1 | 22043716 | SNV | 1 | G | A | Homozygous   |
| NC_037638.1 | 22043792 | SNV | 1 | A | G | Homozygous   |
| NC_037638.1 | 22046710 | SNV | 1 | C | T | Heterozygous |
| NC_037638.1 | 22046755 | SNV | 1 | G | A | Homozygous   |
| NC_037638.1 | 22046762 | SNV | 1 | T | C | Homozygous   |
| NC_037638.1 | 22047071 | SNV | 1 | T | C | Homozygous   |
| NC_037638.1 | 22047429 | SNV | 1 | T | C | Homozygous   |
| NC_037638.1 | 22047563 | SNV | 1 | G | C | Heterozygous |
| NC_037638.1 | 22050503 | SNV | 1 | G | A | Heterozygous |
| NC_037638.1 | 22050542 | SNV | 1 | G | A | Homozygous   |
| NC_037638.1 | 22050554 | SNV | 1 | A | G | Heterozygous |
| NC_037638.1 | 22050947 | SNV | 1 | C | A | Heterozygous |
| NC_037638.1 | 22052599 | SNV | 1 | T | G | Homozygous   |
| NC_037638.1 | 22053534 | SNV | 1 | T | C | Homozygous   |
| NC_037638.1 | 22053554 | SNV | 1 | A | G | Homozygous   |
| NC_037638.1 | 22053747 | SNV | 1 | G | A | Heterozygous |
| NC_037638.1 | 22055384 | SNV | 1 | G | A | Homozygous   |
| NC_037638.1 | 22057134 | SNV | 1 | G | C | Homozygous   |
| NC_037638.1 | 22057367 | SNV | 1 | T | C | Heterozygous |
| NC_037638.1 | 22057507 | SNV | 1 | A | G | Homozygous   |
| NC_037638.1 | 22057569 | SNV | 1 | G | T | Heterozygous |
| NC_037638.1 | 22057789 | SNV | 1 | C | T | Heterozygous |
| NC_037638.1 | 22057826 | SNV | 1 | T | C | Homozygous   |
| NC_037638.1 | 22057828 | SNV | 1 | C | T | Heterozygous |
| NC_037638.1 | 22057852 | SNV | 1 | A | G | Homozygous   |
| NC_037638.1 | 22062428 | SNV | 1 | T | G | Heterozygous |
| NC_037638.1 | 22062441 | SNV | 1 | T | G | Heterozygous |
| NC_037638.1 | 22063448 | SNV | 1 | T | C | Homozygous   |
| NC_037638.1 | 22063721 | SNV | 1 | A | T | Heterozygous |
| NC_037638.1 | 22063725 | SNV | 1 | C | T | Heterozygous |
| NC_037638.1 | 22063731 | SNV | 1 | C | T | Heterozygous |
| NC_037638.1 | 22063738 | SNV | 1 | T | C | Heterozygous |
| NC_037638.1 | 22069718 | SNV | 1 | G | A | Heterozygous |
| NC_037638.1 | 22069794 | SNV | 1 | T | C | Heterozygous |
| NC_037638.1 | 22069826 | SNV | 1 | A | T | Homozygous   |
| NC_037638.1 | 22085888 | SNV | 1 | C | G | Heterozygous |
| NC_037638.1 | 22085908 | SNV | 1 | G | A | Homozygous   |
| NC_037638.1 | 22085931 | SNV | 1 | C | T | Heterozygous |
| NC_037638.1 | 22085939 | SNV | 1 | A | G | Heterozygous |
| NC_037638.1 | 22085969 | SNV | 1 | T | A | Homozygous   |
| NC_037638.1 | 22085996 | SNV | 1 | A | G | Homozygous   |
| NC_037638.1 | 22099060 | SNV | 1 | A | G | Homozygous   |
| NC_037638.1 | 22099086 | SNV | 1 | A | C | Homozygous   |
| NC_037638.1 | 22117185 | SNV | 1 | C | T | Homozygous   |

|             |          |     |   |   |   |              |
|-------------|----------|-----|---|---|---|--------------|
| NC_037638.1 | 22117190 | SNV | 1 | G | A | Heterozygous |
| NC_037638.1 | 22117314 | SNV | 1 | A | G | Heterozygous |
| NC_037638.1 | 22117564 | SNV | 1 | C | T | Heterozygous |
| NC_037638.1 | 22117749 | SNV | 1 | C | G | Heterozygous |
| NC_037638.1 | 22133773 | SNV | 1 | C | T | Heterozygous |
| NC_037638.1 | 22133930 | SNV | 1 | C | T | Heterozygous |
| NC_037638.1 | 22133970 | SNV | 1 | T | C | Homozygous   |
| NC_037638.1 | 22133998 | SNV | 1 | G | C | Homozygous   |
| NC_037638.1 | 22134016 | SNV | 1 | T | C | Homozygous   |
| NC_037638.1 | 22141049 | SNV | 1 | C | T | Heterozygous |
| NC_037638.1 | 22141055 | SNV | 1 | T | C | Heterozygous |
| NC_037638.1 | 22153838 | SNV | 1 | A | G | Heterozygous |
| NC_037638.1 | 22166843 | SNV | 1 | T | C | Heterozygous |
| NC_037638.1 | 22208280 | SNV | 1 | A | C | Homozygous   |
| NC_037638.1 | 22208297 | SNV | 1 | G | A | Homozygous   |
| NC_037638.1 | 22208300 | SNV | 1 | A | G | Homozygous   |
| NC_037638.1 | 22217240 | SNV | 1 | C | T | Homozygous   |
| NC_037638.1 | 22217261 | SNV | 1 | A | C | Homozygous   |
| NC_037638.1 | 22217265 | SNV | 1 | A | T | Homozygous   |
| NC_037638.1 | 22217269 | SNV | 1 | C | A | Homozygous   |
| NC_037638.1 | 22217273 | SNV | 1 | C | T | Heterozygous |
| NC_037638.1 | 22217275 | SNV | 1 | C | T | Homozygous   |
| NC_037638.1 | 22217278 | SNV | 1 | T | A | Homozygous   |
| NC_037638.1 | 22217286 | SNV | 1 | T | C | Homozygous   |
| NC_037638.1 | 22217288 | SNV | 1 | T | A | Homozygous   |
| NC_037638.1 | 22217291 | SNV | 1 | C | A | Homozygous   |
| NC_037638.1 | 22217297 | SNV | 1 | C | T | Homozygous   |
| NC_037638.1 | 22239977 | SNV | 1 | C | T | Heterozygous |
| NC_037638.1 | 22263768 | SNV | 1 | T | A | Heterozygous |
| NC_037638.1 | 22263790 | SNV | 1 | A | G | Heterozygous |
| NC_037638.1 | 22263798 | SNV | 1 | A | G | Homozygous   |
| NC_037638.1 | 22263832 | SNV | 1 | T | C | Heterozygous |
| NC_037638.1 | 22263843 | SNV | 1 | A | G | Heterozygous |
| NC_037638.1 | 22263847 | SNV | 1 | A | G | Heterozygous |
| NC_037638.1 | 22263855 | SNV | 1 | A | G | Homozygous   |
| NC_037638.1 | 22273666 | SNV | 1 | C | G | Heterozygous |
| NC_037638.1 | 22273672 | SNV | 1 | C | G | Heterozygous |
| NC_037638.1 | 22273684 | SNV | 1 | G | A | Heterozygous |
| NC_037638.1 | 22273708 | SNV | 1 | G | A | Homozygous   |
| NC_037638.1 | 22273711 | SNV | 1 | C | A | Homozygous   |
| NC_037638.1 | 22273714 | SNV | 1 | T | A | Homozygous   |
| NC_037638.1 | 22274923 | SNV | 1 | G | T | Heterozygous |
| NC_037638.1 | 22274928 | SNV | 1 | C | G | Heterozygous |
| NC_037638.1 | 22274928 | SNV | 1 | C | T | Heterozygous |
| NC_037638.1 | 22274931 | SNV | 1 | G | A | Heterozygous |
| NC_037638.1 | 22274962 | SNV | 1 | A | T | Homozygous   |
| NC_037638.1 | 22274967 | SNV | 1 | A | T | Heterozygous |
| NC_037638.1 | 22274973 | SNV | 1 | A | G | Homozygous   |
| NC_037638.1 | 22274976 | SNV | 1 | G | A | Heterozygous |
| NC_037638.1 | 22281382 | SNV | 1 | C | A | Heterozygous |
| NC_037638.1 | 22286190 | SNV | 1 | T | C | Homozygous   |

|             |          |     |   |   |   |              |
|-------------|----------|-----|---|---|---|--------------|
| NC_037638.1 | 22286256 | SNV | 1 | A | G | Homozygous   |
| NC_037638.1 | 22286260 | SNV | 1 | A | G | Heterozygous |
| NC_037638.1 | 22288169 | SNV | 1 | A | G | Heterozygous |
| NC_037638.1 | 22288175 | SNV | 1 | A | G | Heterozygous |
| NC_037638.1 | 22294580 | SNV | 1 | A | G | Heterozygous |
| NC_037638.1 | 22294582 | SNV | 1 | T | A | Heterozygous |
| NC_037638.1 | 22294591 | SNV | 1 | C | A | Homozygous   |
| NC_037638.1 | 22300396 | SNV | 1 | C | T | Heterozygous |
| NC_037638.1 | 22303876 | SNV | 1 | G | A | Heterozygous |
| NC_037638.1 | 22322896 | SNV | 1 | C | T | Heterozygous |
| NC_037638.1 | 22322921 | SNV | 1 | A | T | Heterozygous |
| NC_037638.1 | 22326873 | SNV | 1 | G | C | Heterozygous |
| NC_037638.1 | 22326873 | SNV | 1 | G | T | Heterozygous |
| NC_037638.1 | 22328271 | SNV | 1 | T | G | Heterozygous |
| NC_037638.1 | 22328278 | SNV | 1 | T | C | Heterozygous |
| NC_037638.1 | 22344699 | SNV | 1 | A | G | Homozygous   |
| NC_037638.1 | 22344786 | SNV | 1 | G | A | Heterozygous |
| NC_037638.1 | 22344873 | SNV | 1 | T | C | Heterozygous |
| NC_037638.1 | 22344971 | SNV | 1 | A | G | Homozygous   |
| NC_037638.1 | 22350164 | SNV | 1 | T | A | Homozygous   |
| NC_037638.1 | 22353559 | SNV | 1 | C | T | Homozygous   |
| NC_037638.1 | 22353568 | SNV | 1 | A | G | Homozygous   |
| NC_037638.1 | 22356880 | SNV | 1 | C | A | Homozygous   |
| NC_037638.1 | 22356916 | SNV | 1 | G | A | Heterozygous |
| NC_037638.1 | 22356920 | SNV | 1 | G | A | Homozygous   |
| NC_037638.1 | 22373094 | SNV | 1 | G | C | Homozygous   |
| NC_037638.1 | 22373104 | SNV | 1 | G | A | Homozygous   |
| NC_037638.1 | 22373107 | SNV | 1 | G | C | Homozygous   |
| NC_037638.1 | 22373110 | SNV | 1 | G | C | Homozygous   |
| NC_037638.1 | 22381868 | SNV | 1 | T | A | Homozygous   |
| NC_037638.1 | 22381870 | SNV | 1 | T | A | Homozygous   |
| NC_037638.1 | 22381909 | SNV | 1 | G | A | Homozygous   |
| NC_037638.1 | 22381911 | SNV | 1 | G | T | Homozygous   |
| NC_037638.1 | 22565936 | SNV | 1 | T | G | Homozygous   |
| NC_037638.1 | 22565976 | SNV | 1 | T | G | Homozygous   |
| NC_037638.1 | 22581297 | SNV | 1 | A | G | Heterozygous |
| NC_037638.1 | 22581568 | SNV | 1 | A | G | Homozygous   |
| NC_037638.1 | 22581573 | SNV | 1 | C | T | Heterozygous |
| NC_037638.1 | 22583697 | SNV | 1 | A | T | Heterozygous |
| NC_037638.1 | 22584576 | SNV | 1 | A | T | Homozygous   |
| NC_037638.1 | 22585854 | SNV | 1 | G | C | Heterozygous |
| NC_037638.1 | 22589057 | SNV | 1 | C | T | Homozygous   |
| NC_037638.1 | 22589599 | SNV | 1 | C | T | Homozygous   |
| NC_037638.1 | 22589940 | SNV | 1 | T | C | Homozygous   |
| NC_037638.1 | 22593982 | SNV | 1 | T | C | Homozygous   |
| NC_037638.1 | 22594012 | SNV | 1 | T | G | Homozygous   |
| NC_037638.1 | 22594020 | SNV | 1 | T | A | Homozygous   |
| NC_037638.1 | 22594022 | SNV | 1 | C | A | Homozygous   |
| NC_037638.1 | 22595733 | SNV | 1 | A | T | Homozygous   |
| NC_037638.1 | 22601428 | SNV | 1 | A | G | Homozygous   |
| NC_037638.1 | 22601432 | SNV | 1 | T | G | Homozygous   |



|             |          |     |   |   |   |              |
|-------------|----------|-----|---|---|---|--------------|
| NC_037638.1 | 22601454 | SNV | 1 | T | A | Heterozygous |
| NC_037638.1 | 22601454 | SNV | 1 | T | G | Heterozygous |
| NC_037638.1 | 22601469 | SNV | 1 | C | T | Homozygous   |
| NC_037638.1 | 22605058 | SNV | 1 | C | G | Homozygous   |
| NC_037638.1 | 22605157 | SNV | 1 | T | C | Homozygous   |
| NC_037638.1 | 22605948 | SNV | 1 | A | C | Homozygous   |
| NC_037638.1 | 22605989 | SNV | 1 | T | A | Homozygous   |
| NC_037638.1 | 22605992 | SNV | 1 | T | G | Homozygous   |
| NC_037638.1 | 22606683 | SNV | 1 | T | C | Heterozygous |
| NC_037638.1 | 22607790 | SNV | 1 | G | A | Heterozygous |
| NC_037638.1 | 22608324 | SNV | 1 | A | C | Homozygous   |
| NC_037638.1 | 22608458 | SNV | 1 | G | C | Homozygous   |
| NC_037638.1 | 22608681 | SNV | 1 | C | A | Homozygous   |
| NC_037638.1 | 22608838 | SNV | 1 | T | C | Heterozygous |
| NC_037638.1 | 22609519 | SNV | 1 | A | C | Homozygous   |
| NC_037638.1 | 22609543 | SNV | 1 | G | A | Homozygous   |
| NC_037638.1 | 22609641 | SNV | 1 | T | C | Homozygous   |
| NC_037638.1 | 22609661 | SNV | 1 | A | T | Homozygous   |
| NC_037638.1 | 22628914 | SNV | 1 | A | T | Homozygous   |
| NC_037638.1 | 22628954 | SNV | 1 | A | T | Heterozygous |
| NC_037638.1 | 22628968 | SNV | 1 | C | T | Homozygous   |
| NC_037638.1 | 22628973 | SNV | 1 | T | A | Heterozygous |
| NC_037638.1 | 22628975 | SNV | 1 | A | T | Homozygous   |
| NC_037638.1 | 22632359 | SNV | 1 | G | A | Homozygous   |
| NC_037638.1 | 22632412 | SNV | 1 | A | G | Homozygous   |
| NC_037638.1 | 22637626 | SNV | 1 | G | A | Heterozygous |
| NC_037638.1 | 22637654 | SNV | 1 | T | C | Heterozygous |
| NC_037638.1 | 22637670 | SNV | 1 | G | A | Heterozygous |
| NC_037638.1 | 22637673 | SNV | 1 | C | T | Heterozygous |
| NC_037638.1 | 22637683 | SNV | 1 | G | T | Heterozygous |
| NC_037638.1 | 22637808 | SNV | 1 | A | G | Homozygous   |
| NC_037638.1 | 22638342 | SNV | 1 | A | G | Homozygous   |
| NC_037638.1 | 22638980 | SNV | 1 | C | G | Homozygous   |
| NC_037638.1 | 22638982 | SNV | 1 | A | G | Homozygous   |
| NC_037638.1 | 22638993 | SNV | 1 | A | G | Homozygous   |
| NC_037638.1 | 22639157 | SNV | 1 | T | C | Homozygous   |
| NC_037638.1 | 22639236 | SNV | 1 | A | G | Homozygous   |
| NC_037638.1 | 22722767 | SNV | 1 | G | A | Homozygous   |
| NC_037638.1 | 22725246 | SNV | 1 | C | T | Homozygous   |
| NC_037638.1 | 22725308 | SNV | 1 | T | C | Homozygous   |
| NC_037638.1 | 22751253 | SNV | 1 | A | G | Heterozygous |
| NC_037638.1 | 22752201 | SNV | 1 | T | G | Homozygous   |
| NC_037638.1 | 22752207 | SNV | 1 | A | T | Homozygous   |
| NC_037638.1 | 22752213 | SNV | 1 | G | A | Homozygous   |
| NC_037638.1 | 22766098 | SNV | 1 | T | G | Heterozygous |
| NC_037638.1 | 22766136 | SNV | 1 | C | T | Homozygous   |
| NC_037638.1 | 22766138 | SNV | 1 | C | T | Homozygous   |
| NC_037638.1 | 22766154 | SNV | 1 | C | T | Heterozygous |
| NC_037638.1 | 22766156 | SNV | 1 | A | T | Heterozygous |
| NC_037638.1 | 22766160 | SNV | 1 | G | T | Homozygous   |
| NC_037638.1 | 22766163 | SNV | 1 | A | T | Heterozygous |

|             |          |     |   |   |   |              |
|-------------|----------|-----|---|---|---|--------------|
| NC_037638.1 | 22766166 | SNV | 1 | G | T | Homozygous   |
| NC_037638.1 | 22766171 | SNV | 1 | G | T | Homozygous   |
| NC_037638.1 | 22766173 | SNV | 1 | A | C | Heterozygous |
| NC_037638.1 | 22766181 | SNV | 1 | A | T | Homozygous   |
| NC_037638.1 | 22766183 | SNV | 1 | A | T | Heterozygous |
| NC_037638.1 | 22766187 | SNV | 1 | A | T | Heterozygous |
| NC_037638.1 | 22768813 | SNV | 1 | G | C | Heterozygous |
| NC_037638.1 | 22768875 | SNV | 1 | G | A | Heterozygous |
| NC_037638.1 | 22769311 | SNV | 1 | G | A | Heterozygous |
| NC_037638.1 | 22770577 | SNV | 1 | C | T | Homozygous   |
| NC_037638.1 | 22777032 | SNV | 1 | G | C | Homozygous   |
| NC_037638.1 | 22777059 | SNV | 1 | T | C | Homozygous   |
| NC_037638.1 | 22778118 | SNV | 1 | C | T | Heterozygous |
| NC_037638.1 | 22778403 | SNV | 1 | C | T | Homozygous   |
| NC_037638.1 | 22778566 | SNV | 1 | T | C | Homozygous   |
| NC_037638.1 | 22778924 | SNV | 1 | T | G | Homozygous   |
| NC_037638.1 | 22778944 | SNV | 1 | C | A | Homozygous   |
| NC_037638.1 | 22778953 | SNV | 1 | T | C | Homozygous   |
| NC_037638.1 | 22778955 | SNV | 1 | G | T | Homozygous   |
| NC_037638.1 | 22780492 | SNV | 1 | G | A | Homozygous   |
| NC_037638.1 | 22780967 | SNV | 1 | A | G | Homozygous   |
| NC_037638.1 | 22781309 | SNV | 1 | C | T | Homozygous   |
| NC_037638.1 | 22781320 | SNV | 1 | G | A | Homozygous   |
| NC_037638.1 | 22781694 | SNV | 1 | T | A | Homozygous   |
| NC_037638.1 | 22783181 | SNV | 1 | C | T | Homozygous   |
| NC_037638.1 | 22785060 | SNV | 1 | A | G | Homozygous   |
| NC_037638.1 | 22785432 | SNV | 1 | T | C | Homozygous   |
| NC_037638.1 | 22785451 | SNV | 1 | C | T | Homozygous   |
| NC_037638.1 | 22787587 | SNV | 1 | C | T | Homozygous   |
| NC_037638.1 | 22788845 | SNV | 1 | G | A | Heterozygous |
| NC_037638.1 | 22788945 | SNV | 1 | T | A | Homozygous   |
| NC_037638.1 | 22791188 | SNV | 1 | A | G | Homozygous   |
| NC_037638.1 | 22791213 | SNV | 1 | T | A | Heterozygous |
| NC_037638.1 | 22791992 | SNV | 1 | C | T | Homozygous   |
| NC_037638.1 | 22793238 | SNV | 1 | T | A | Homozygous   |
| NC_037638.1 | 22793244 | SNV | 1 | A | G | Homozygous   |
| NC_037638.1 | 22800852 | SNV | 1 | C | T | Homozygous   |
| NC_037638.1 | 22802125 | SNV | 1 | T | C | Homozygous   |
| NC_037638.1 | 22802465 | SNV | 1 | A | G | Homozygous   |
| NC_037638.1 | 22802652 | SNV | 1 | T | A | Homozygous   |
| NC_037638.1 | 22804983 | SNV | 1 | T | G | Heterozygous |
| NC_037638.1 | 22805169 | SNV | 1 | A | C | Homozygous   |
| NC_037638.1 | 22805930 | SNV | 1 | G | A | Homozygous   |
| NC_037638.1 | 22805938 | SNV | 1 | A | T | Homozygous   |
| NC_037638.1 | 22805955 | SNV | 1 | T | C | Homozygous   |
| NC_037638.1 | 22805972 | SNV | 1 | A | C | Homozygous   |
| NC_037638.1 | 22809087 | SNV | 1 | T | C | Homozygous   |
| NC_037638.1 | 22810188 | SNV | 1 | G | T | Homozygous   |
| NC_037638.1 | 22810198 | SNV | 1 | A | T | Homozygous   |
| NC_037638.1 | 22810200 | SNV | 1 | G | C | Homozygous   |
| NC_037638.1 | 22810209 | SNV | 1 | A | T | Homozygous   |

|             |          |     |   |   |   |              |
|-------------|----------|-----|---|---|---|--------------|
| NC_037638.1 | 22813079 | SNV | 1 | T | A | Heterozygous |
| NC_037638.1 | 22816748 | SNV | 1 | A | G | Heterozygous |
| NC_037638.1 | 22817968 | SNV | 1 | A | T | Homozygous   |
| NC_037638.1 | 22817971 | SNV | 1 | C | G | Homozygous   |
| NC_037638.1 | 22818309 | SNV | 1 | A | G | Homozygous   |
| NC_037638.1 | 22828111 | SNV | 1 | A | G | Homozygous   |
| NC_037638.1 | 22828258 | SNV | 1 | A | T | Homozygous   |
| NC_037638.1 | 22828260 | SNV | 1 | A | G | Homozygous   |
| NC_037638.1 | 22828985 | SNV | 1 | T | C | Homozygous   |
| NC_037638.1 | 22860378 | SNV | 1 | T | C | Homozygous   |
| NC_037638.1 | 22860386 | SNV | 1 | C | T | Homozygous   |
| NC_037638.1 | 22860406 | SNV | 1 | C | T | Homozygous   |
| NC_037638.1 | 22860408 | SNV | 1 | T | C | Homozygous   |
| NC_037638.1 | 22860640 | SNV | 1 | T | C | Homozygous   |
| NC_037638.1 | 22860643 | SNV | 1 | A | G | Homozygous   |
| NC_037638.1 | 22860881 | SNV | 1 | T | C | Homozygous   |
| NC_037638.1 | 22861146 | SNV | 1 | A | C | Heterozygous |
| NC_037638.1 | 22861191 | SNV | 1 | G | A | Heterozygous |
| NC_037638.1 | 22862982 | SNV | 1 | T | C | Homozygous   |
| NC_037638.1 | 22864774 | SNV | 1 | C | T | Heterozygous |
| NC_037638.1 | 22864879 | SNV | 1 | T | G | Heterozygous |
| NC_037638.1 | 22870142 | SNV | 1 | C | T | Homozygous   |
| NC_037638.1 | 22870358 | SNV | 1 | T | C | Homozygous   |
| NC_037638.1 | 22870370 | SNV | 1 | C | T | Heterozygous |
| NC_037638.1 | 22870452 | SNV | 1 | T | C | Homozygous   |
| NC_037638.1 | 22870454 | SNV | 1 | T | C | Heterozygous |
| NC_037638.1 | 22870489 | SNV | 1 | T | A | Heterozygous |
| NC_037638.1 | 22870534 | SNV | 1 | C | T | Homozygous   |
| NC_037638.1 | 22870629 | SNV | 1 | T | C | Homozygous   |
| NC_037638.1 | 22870642 | SNV | 1 | A | G | Homozygous   |
| NC_037638.1 | 22878750 | SNV | 1 | A | G | Heterozygous |
| NC_037638.1 | 22878953 | SNV | 1 | G | C | Homozygous   |
| NC_037638.1 | 22879002 | SNV | 1 | T | C | Homozygous   |
| NC_037638.1 | 22879329 | SNV | 1 | T | A | Homozygous   |
| NC_037638.1 | 22879360 | SNV | 1 | C | T | Heterozygous |
| NC_037638.1 | 22889513 | SNV | 1 | G | A | Homozygous   |
| NC_037638.1 | 22889645 | SNV | 1 | G | T | Heterozygous |
| NC_037638.1 | 22889674 | SNV | 1 | C | T | Heterozygous |
| NC_037638.1 | 22893452 | SNV | 1 | T | C | Homozygous   |
| NC_037638.1 | 22893542 | SNV | 1 | G | A | Heterozygous |
| NC_037638.1 | 22893584 | SNV | 1 | T | C | Homozygous   |
| NC_037638.1 | 22893596 | SNV | 1 | C | G | Homozygous   |
| NC_037638.1 | 22893610 | SNV | 1 | T | C | Homozygous   |
| NC_037638.1 | 22893617 | SNV | 1 | G | A | Homozygous   |
| NC_037638.1 | 22893652 | SNV | 1 | T | A | Heterozygous |
| NC_037638.1 | 22893696 | SNV | 1 | G | T | Heterozygous |
| NC_037638.1 | 22893699 | SNV | 1 | G | T | Heterozygous |
| NC_037638.1 | 22893833 | SNV | 1 | G | T | Heterozygous |
| NC_037638.1 | 22893836 | SNV | 1 | G | T | Heterozygous |
| NC_037638.1 | 22893861 | SNV | 1 | T | C | Heterozygous |
| NC_037638.1 | 22893878 | SNV | 1 | G | A | Heterozygous |

|             |          |     |   |   |   |              |
|-------------|----------|-----|---|---|---|--------------|
| NC_037638.1 | 22893941 | SNV | 1 | G | A | Homozygous   |
| NC_037638.1 | 22894006 | SNV | 1 | A | G | Homozygous   |
| NC_037638.1 | 22894651 | SNV | 1 | G | A | Heterozygous |
| NC_037638.1 | 22894842 | SNV | 1 | C | T | Homozygous   |
| NC_037638.1 | 22894862 | SNV | 1 | T | C | Heterozygous |
| NC_037638.1 | 22900758 | SNV | 1 | A | G | Homozygous   |
| NC_037638.1 | 22900779 | SNV | 1 | T | C | Homozygous   |
| NC_037638.1 | 22921947 | SNV | 1 | A | T | Heterozygous |
| NC_037638.1 | 22924858 | SNV | 1 | T | A | Heterozygous |
| NC_037638.1 | 22940115 | SNV | 1 | T | C | Heterozygous |
| NC_037638.1 | 22940216 | SNV | 1 | G | A | Heterozygous |
| NC_037638.1 | 22940254 | SNV | 1 | C | T | Homozygous   |
| NC_037638.1 | 22940297 | SNV | 1 | T | C | Heterozygous |
| NC_037638.1 | 22940325 | SNV | 1 | C | T | Heterozygous |
| NC_037638.1 | 22940334 | SNV | 1 | A | T | Heterozygous |
| NC_037638.1 | 22940351 | SNV | 1 | C | T | Homozygous   |
| NC_037638.1 | 22962648 | SNV | 1 | T | C | Homozygous   |
| NC_037638.1 | 22962679 | SNV | 1 | A | G | Homozygous   |
| NC_037638.1 | 22962712 | SNV | 1 | C | G | Homozygous   |
| NC_037638.1 | 22963986 | SNV | 1 | G | A | Heterozygous |
| NC_037638.1 | 22964508 | SNV | 1 | T | C | Homozygous   |
| NC_037638.1 | 22967120 | SNV | 1 | C | A | Homozygous   |
| NC_037638.1 | 22967477 | SNV | 1 | C | T | Heterozygous |
| NC_037638.1 | 22967497 | SNV | 1 | G | A | Heterozygous |
| NC_037638.1 | 22967531 | SNV | 1 | G | A | Homozygous   |
| NC_037638.1 | 22969133 | SNV | 1 | A | T | Homozygous   |
| NC_037638.1 | 22969591 | SNV | 1 | A | T | Heterozygous |
| NC_037638.1 | 22969593 | SNV | 1 | A | G | Heterozygous |
| NC_037638.1 | 22974774 | SNV | 1 | G | A | Heterozygous |
| NC_037638.1 | 22974807 | SNV | 1 | G | C | Homozygous   |
| NC_037638.1 | 22974811 | SNV | 1 | G | A | Homozygous   |
| NC_037638.1 | 22976125 | SNV | 1 | T | C | Homozygous   |
| NC_037638.1 | 22976274 | SNV | 1 | A | G | Homozygous   |
| NC_037638.1 | 22976345 | SNV | 1 | A | G | Homozygous   |
| NC_037638.1 | 22976591 | SNV | 1 | T | G | Heterozygous |
| NC_037638.1 | 22976594 | SNV | 1 | A | T | Heterozygous |
| NC_037638.1 | 22976636 | SNV | 1 | G | A | Homozygous   |
| NC_037638.1 | 22976682 | SNV | 1 | C | T | Heterozygous |
| NC_037638.1 | 22976829 | SNV | 1 | G | A | Heterozygous |
| NC_037638.1 | 22976884 | SNV | 1 | T | C | Homozygous   |
| NC_037638.1 | 22976982 | SNV | 1 | G | C | Heterozygous |
| NC_037638.1 | 22977009 | SNV | 1 | G | A | Heterozygous |
| NC_037638.1 | 22977037 | SNV | 1 | G | C | Homozygous   |
| NC_037638.1 | 22978943 | SNV | 1 | T | C | Homozygous   |
| NC_037638.1 | 22978947 | SNV | 1 | T | C | Homozygous   |
| NC_037638.1 | 22978952 | SNV | 1 | A | C | Heterozygous |
| NC_037638.1 | 22978978 | SNV | 1 | T | C | Homozygous   |
| NC_037638.1 | 22978983 | SNV | 1 | T | C | Homozygous   |
| NC_037638.1 | 22979335 | SNV | 1 | T | A | Heterozygous |
| NC_037638.1 | 22980360 | SNV | 1 | T | C | Homozygous   |
| NC_037638.1 | 22980466 | SNV | 1 | A | G | Homozygous   |

|             |          |     |   |   |   |              |
|-------------|----------|-----|---|---|---|--------------|
| NC_037638.1 | 22980502 | SNV | 1 | G | A | Homozygous   |
| NC_037638.1 | 22980515 | SNV | 1 | G | A | Homozygous   |
| NC_037638.1 | 22980551 | SNV | 1 | G | A | Homozygous   |
| NC_037638.1 | 22980677 | SNV | 1 | T | C | Homozygous   |
| NC_037638.1 | 22980766 | SNV | 1 | C | T | Heterozygous |
| NC_037638.1 | 22987471 | SNV | 1 | G | A | Homozygous   |
| NC_037638.1 | 22987516 | SNV | 1 | A | T | Homozygous   |
| NC_037638.1 | 23008196 | SNV | 1 | A | G | Homozygous   |
| NC_037638.1 | 23008308 | SNV | 1 | G | A | Heterozygous |
| NC_037638.1 | 23008415 | SNV | 1 | G | A | Heterozygous |
| NC_037638.1 | 23008499 | SNV | 1 | C | G | Heterozygous |
| NC_037638.1 | 23008672 | SNV | 1 | T | C | Homozygous   |
| NC_037638.1 | 23008693 | SNV | 1 | A | G | Homozygous   |
| NC_037638.1 | 23008858 | SNV | 1 | T | C | Homozygous   |
| NC_037638.1 | 23009521 | SNV | 1 | G | A | Homozygous   |
| NC_037638.1 | 23010022 | SNV | 1 | A | G | Heterozygous |
| NC_037638.1 | 23010024 | SNV | 1 | C | T | Heterozygous |
| NC_037638.1 | 23010058 | SNV | 1 | G | A | Heterozygous |
| NC_037638.1 | 23010097 | SNV | 1 | T | C | Heterozygous |
| NC_037638.1 | 23018692 | SNV | 1 | T | A | Homozygous   |
| NC_037638.1 | 23031857 | SNV | 1 | A | C | Homozygous   |
| NC_037638.1 | 23032314 | SNV | 1 | T | C | Homozygous   |
| NC_037638.1 | 23032431 | SNV | 1 | A | G | Heterozygous |
| NC_037638.1 | 23032573 | SNV | 1 | T | C | Homozygous   |
| NC_037638.1 | 23035474 | SNV | 1 | G | C | Homozygous   |
| NC_037638.1 | 23035484 | SNV | 1 | A | C | Homozygous   |
| NC_037638.1 | 23059120 | SNV | 1 | C | G | Homozygous   |
| NC_037638.1 | 23059243 | SNV | 1 | A | G | Homozygous   |
| NC_037638.1 | 23059282 | SNV | 1 | C | T | Heterozygous |
| NC_037638.1 | 23068003 | SNV | 1 | G | A | Heterozygous |
| NC_037638.1 | 23068094 | SNV | 1 | G | A | Heterozygous |
| NC_037638.1 | 23068352 | SNV | 1 | A | G | Homozygous   |
| NC_037638.1 | 23069090 | SNV | 1 | A | G | Heterozygous |
| NC_037638.1 | 23069117 | SNV | 1 | A | G | Heterozygous |
| NC_037638.1 | 23077204 | SNV | 1 | T | C | Homozygous   |
| NC_037638.1 | 23078364 | SNV | 1 | A | G | Homozygous   |
| NC_037638.1 | 23078381 | SNV | 1 | T | C | Homozygous   |
| NC_037638.1 | 23079675 | SNV | 1 | G | A | Homozygous   |
| NC_037638.1 | 23079688 | SNV | 1 | G | A | Homozygous   |
| NC_037638.1 | 23079696 | SNV | 1 | G | T | Homozygous   |
| NC_037638.1 | 23083845 | SNV | 1 | T | C | Homozygous   |
| NC_037638.1 | 23096307 | SNV | 1 | G | A | Heterozygous |
| NC_037638.1 | 23096315 | SNV | 1 | A | G | Heterozygous |
| NC_037638.1 | 23096601 | SNV | 1 | A | C | Heterozygous |
| NC_037638.1 | 23096666 | SNV | 1 | A | G | Homozygous   |
| NC_037638.1 | 23100492 | SNV | 1 | A | G | Homozygous   |
| NC_037638.1 | 23100653 | SNV | 1 | C | T | Heterozygous |
| NC_037638.1 | 23106826 | SNV | 1 | C | T | Heterozygous |
| NC_037638.1 | 23106843 | SNV | 1 | C | T | Homozygous   |
| NC_037638.1 | 23106910 | SNV | 1 | C | G | Heterozygous |
| NC_037638.1 | 23106919 | SNV | 1 | T | C | Heterozygous |

|             |          |     |   |   |   |              |
|-------------|----------|-----|---|---|---|--------------|
| NC_037638.1 | 23106982 | SNV | 1 | T | C | Homozygous   |
| NC_037638.1 | 23107395 | SNV | 1 | C | A | Heterozygous |
| NC_037638.1 | 23108143 | SNV | 1 | A | G | Heterozygous |
| NC_037638.1 | 23108268 | SNV | 1 | C | T | Homozygous   |
| NC_037638.1 | 23108359 | SNV | 1 | C | T | Homozygous   |
| NC_037638.1 | 23108683 | SNV | 1 | G | A | Homozygous   |
| NC_037638.1 | 23108734 | SNV | 1 | G | A | Heterozygous |
| NC_037638.1 | 23108842 | SNV | 1 | T | C | Homozygous   |
| NC_037638.1 | 23108862 | SNV | 1 | A | T | Heterozygous |
| NC_037638.1 | 23108872 | SNV | 1 | A | G | Homozygous   |
| NC_037638.1 | 23108876 | SNV | 1 | G | A | Heterozygous |
| NC_037638.1 | 23109592 | SNV | 1 | C | T | Heterozygous |
| NC_037638.1 | 23109741 | SNV | 1 | G | A | Heterozygous |
| NC_037638.1 | 23109805 | SNV | 1 | G | C | Homozygous   |
| NC_037638.1 | 23110152 | SNV | 1 | G | A | Heterozygous |
| NC_037638.1 | 23113903 | SNV | 1 | C | T | Homozygous   |
| NC_037638.1 | 23113916 | SNV | 1 | T | C | Heterozygous |
| NC_037638.1 | 23114905 | SNV | 1 | G | A | Heterozygous |
| NC_037638.1 | 23115278 | SNV | 1 | T | C | Heterozygous |
| NC_037638.1 | 23115466 | SNV | 1 | G | T | Homozygous   |
| NC_037638.1 | 23115490 | SNV | 1 | T | C | Homozygous   |
| NC_037638.1 | 23115561 | SNV | 1 | G | A | Heterozygous |
| NC_037638.1 | 23115686 | SNV | 1 | T | C | Homozygous   |
| NC_037638.1 | 23116125 | SNV | 1 | C | T | Heterozygous |
| NC_037638.1 | 23116355 | SNV | 1 | T | C | Heterozygous |
| NC_037638.1 | 23116511 | SNV | 1 | A | T | Homozygous   |
| NC_037638.1 | 23116532 | SNV | 1 | T | C | Heterozygous |
| NC_037638.1 | 23116572 | SNV | 1 | A | C | Heterozygous |
| NC_037638.1 | 23116574 | SNV | 1 | C | A | Heterozygous |
| NC_037638.1 | 23116775 | SNV | 1 | G | A | Heterozygous |
| NC_037638.1 | 23116836 | SNV | 1 | G | A | Heterozygous |
| NC_037638.1 | 23117387 | SNV | 1 | T | C | Homozygous   |
| NC_037638.1 | 23117418 | SNV | 1 | C | T | Heterozygous |
| NC_037638.1 | 23117430 | SNV | 1 | A | G | Homozygous   |
| NC_037638.1 | 23117432 | SNV | 1 | G | A | Heterozygous |
| NC_037638.1 | 23117473 | SNV | 1 | C | T | Homozygous   |
| NC_037638.1 | 23117706 | SNV | 1 | C | T | Homozygous   |
| NC_037638.1 | 23121913 | SNV | 1 | C | G | Homozygous   |
| NC_037638.1 | 23121918 | SNV | 1 | T | G | Homozygous   |
| NC_037638.1 | 23122654 | SNV | 1 | T | C | Heterozygous |
| NC_037638.1 | 23122665 | SNV | 1 | T | C | Heterozygous |
| NC_037638.1 | 23122668 | SNV | 1 | C | T | Heterozygous |
| NC_037638.1 | 23132306 | SNV | 1 | G | C | Homozygous   |
| NC_037638.1 | 23132336 | SNV | 1 | T | C | Homozygous   |
| NC_037638.1 | 23132430 | SNV | 1 | C | T | Heterozygous |
| NC_037638.1 | 23132505 | SNV | 1 | G | A | Homozygous   |
| NC_037638.1 | 23132530 | SNV | 1 | T | C | Homozygous   |
| NC_037638.1 | 23199930 | SNV | 1 | A | C | Heterozygous |
| NC_037638.1 | 23201105 | SNV | 1 | C | T | Heterozygous |
| NC_037638.1 | 23201117 | SNV | 1 | T | A | Heterozygous |
| NC_037638.1 | 23201136 | SNV | 1 | A | C | Heterozygous |

|             |          |     |   |   |   |              |
|-------------|----------|-----|---|---|---|--------------|
| NC_037638.1 | 23201284 | SNV | 1 | G | A | Homozygous   |
| NC_037638.1 | 23202207 | SNV | 1 | A | G | Homozygous   |
| NC_037638.1 | 23202529 | SNV | 1 | T | C | Homozygous   |
| NC_037638.1 | 23202937 | SNV | 1 | T | C | Heterozygous |
| NC_037638.1 | 23202952 | SNV | 1 | C | T | Homozygous   |
| NC_037638.1 | 23203151 | SNV | 1 | G | A | Homozygous   |
| NC_037638.1 | 23203187 | SNV | 1 | G | A | Heterozygous |
| NC_037638.1 | 23203198 | SNV | 1 | C | T | Homozygous   |
| NC_037638.1 | 23203372 | SNV | 1 | T | A | Heterozygous |
| NC_037638.1 | 23203839 | SNV | 1 | A | C | Heterozygous |
| NC_037638.1 | 23203841 | SNV | 1 | C | T | Heterozygous |
| NC_037638.1 | 23204056 | SNV | 1 | A | G | Homozygous   |
| NC_037638.1 | 23204309 | SNV | 1 | A | T | Heterozygous |
| NC_037638.1 | 23204573 | SNV | 1 | C | T | Homozygous   |
| NC_037638.1 | 23204803 | SNV | 1 | C | T | Heterozygous |
| NC_037638.1 | 23205097 | SNV | 1 | C | T | Homozygous   |
| NC_037638.1 | 23205521 | SNV | 1 | T | A | Homozygous   |
| NC_037638.1 | 23205524 | SNV | 1 | C | T | Homozygous   |
| NC_037638.1 | 23206946 | SNV | 1 | T | A | Homozygous   |
| NC_037638.1 | 23207032 | SNV | 1 | A | T | Homozygous   |
| NC_037638.1 | 23207162 | SNV | 1 | T | C | Homozygous   |
| NC_037638.1 | 23207232 | SNV | 1 | G | A | Homozygous   |
| NC_037638.1 | 23207259 | SNV | 1 | C | T | Homozygous   |
| NC_037638.1 | 23207333 | SNV | 1 | A | G | Homozygous   |
| NC_037638.1 | 23207970 | SNV | 1 | A | G | Homozygous   |
| NC_037638.1 | 23208188 | SNV | 1 | G | A | Homozygous   |
| NC_037638.1 | 23208629 | SNV | 1 | G | A | Heterozygous |
| NC_037638.1 | 23210099 | SNV | 1 | A | G | Homozygous   |
| NC_037638.1 | 23210195 | SNV | 1 | T | C | Homozygous   |
| NC_037638.1 | 23210347 | SNV | 1 | G | A | Heterozygous |
| NC_037638.1 | 23210377 | SNV | 1 | A | G | Heterozygous |
| NC_037638.1 | 23210454 | SNV | 1 | A | G | Homozygous   |
| NC_037638.1 | 23210518 | SNV | 1 | C | G | Heterozygous |
| NC_037638.1 | 23210534 | SNV | 1 | C | T | Heterozygous |
| NC_037638.1 | 23212097 | SNV | 1 | T | A | Homozygous   |
| NC_037638.1 | 23212138 | SNV | 1 | G | A | Heterozygous |
| NC_037638.1 | 23212144 | SNV | 1 | G | A | Heterozygous |
| NC_037638.1 | 23212174 | SNV | 1 | T | C | Homozygous   |
| NC_037638.1 | 23212216 | SNV | 1 | T | A | Heterozygous |
| NC_037638.1 | 23212218 | SNV | 1 | C | T | Heterozygous |
| NC_037638.1 | 23212642 | SNV | 1 | A | G | Heterozygous |
| NC_037638.1 | 23213233 | SNV | 1 | T | C | Homozygous   |
| NC_037638.1 | 23213298 | SNV | 1 | C | T | Homozygous   |
| NC_037638.1 | 23213513 | SNV | 1 | T | C | Homozygous   |
| NC_037638.1 | 23216807 | SNV | 1 | A | G | Homozygous   |
| NC_037638.1 | 23220538 | SNV | 1 | G | A | Heterozygous |
| NC_037638.1 | 23220557 | SNV | 1 | T | C | Homozygous   |
| NC_037638.1 | 23220572 | SNV | 1 | T | C | Homozygous   |
| NC_037638.1 | 23220576 | SNV | 1 | C | A | Homozygous   |
| NC_037638.1 | 23220582 | SNV | 1 | T | A | Homozygous   |
| NC_037638.1 | 23220605 | SNV | 1 | A | T | Homozygous   |

|             |          |     |   |   |   |              |
|-------------|----------|-----|---|---|---|--------------|
| NC_037638.1 | 23220624 | SNV | 1 | C | A | Heterozygous |
| NC_037638.1 | 23220635 | SNV | 1 | T | A | Heterozygous |
| NC_037638.1 | 23220666 | SNV | 1 | C | T | Heterozygous |
| NC_037638.1 | 23223037 | SNV | 1 | G | A | Homozygous   |
| NC_037638.1 | 23223076 | SNV | 1 | A | G | Homozygous   |
| NC_037638.1 | 23223086 | SNV | 1 | G | A | Homozygous   |
| NC_037638.1 | 23223090 | SNV | 1 | G | A | Homozygous   |
| NC_037638.1 | 23223684 | SNV | 1 | G | A | Homozygous   |
| NC_037638.1 | 23223693 | SNV | 1 | A | C | Homozygous   |
| NC_037638.1 | 23223697 | SNV | 1 | A | G | Homozygous   |
| NC_037638.1 | 23224406 | SNV | 1 | C | T | Homozygous   |
| NC_037638.1 | 23224574 | SNV | 1 | T | C | Homozygous   |
| NC_037638.1 | 23224856 | SNV | 1 | G | A | Heterozygous |
| NC_037638.1 | 23228677 | SNV | 1 | A | G | Homozygous   |
| NC_037638.1 | 23229090 | SNV | 1 | G | A | Heterozygous |
| NC_037638.1 | 23229641 | SNV | 1 | C | T | Homozygous   |
| NC_037638.1 | 23229953 | SNV | 1 | A | G | Homozygous   |
| NC_037638.1 | 23230117 | SNV | 1 | T | C | Heterozygous |
| NC_037638.1 | 23230139 | SNV | 1 | T | C | Heterozygous |
| NC_037638.1 | 23230187 | SNV | 1 | G | A | Heterozygous |
| NC_037638.1 | 23230230 | SNV | 1 | T | C | Homozygous   |
| NC_037638.1 | 23230524 | SNV | 1 | C | T | Homozygous   |
| NC_037638.1 | 23230561 | SNV | 1 | A | G | Homozygous   |
| NC_037638.1 | 23230888 | SNV | 1 | T | C | Homozygous   |
| NC_037638.1 | 23231441 | SNV | 1 | C | T | Heterozygous |
| NC_037638.1 | 23231784 | SNV | 1 | C | T | Heterozygous |
| NC_037638.1 | 23231817 | SNV | 1 | T | C | Heterozygous |
| NC_037638.1 | 23231880 | SNV | 1 | G | A | Homozygous   |
| NC_037638.1 | 23231913 | SNV | 1 | C | T | Heterozygous |
| NC_037638.1 | 23232184 | SNV | 1 | C | T | Homozygous   |
| NC_037638.1 | 23232337 | SNV | 1 | T | C | Heterozygous |
| NC_037638.1 | 23232903 | SNV | 1 | A | G | Homozygous   |
| NC_037638.1 | 23233832 | SNV | 1 | A | G | Heterozygous |
| NC_037638.1 | 23233931 | SNV | 1 | A | C | Homozygous   |
| NC_037638.1 | 23240343 | SNV | 1 | T | C | Homozygous   |
| NC_037638.1 | 23240453 | SNV | 1 | C | T | Homozygous   |
| NC_037638.1 | 23240522 | SNV | 1 | G | C | Homozygous   |
| NC_037638.1 | 23240619 | SNV | 1 | C | T | Homozygous   |
| NC_037638.1 | 23240661 | SNV | 1 | G | A | Heterozygous |
| NC_037638.1 | 23244038 | SNV | 1 | A | G | Homozygous   |
| NC_037638.1 | 23244776 | SNV | 1 | T | C | Heterozygous |
| NC_037638.1 | 23244786 | SNV | 1 | T | G | Heterozygous |
| NC_037638.1 | 23258435 | SNV | 1 | A | G | Homozygous   |
| NC_037638.1 | 23258623 | SNV | 1 | T | C | Heterozygous |
| NC_037638.1 | 23258943 | SNV | 1 | T | C | Homozygous   |
| NC_037638.1 | 23260488 | SNV | 1 | A | G | Homozygous   |
| NC_037638.1 | 23265222 | SNV | 1 | A | C | Homozygous   |
| NC_037638.1 | 23265235 | SNV | 1 | T | A | Homozygous   |
| NC_037638.1 | 23269405 | SNV | 1 | T | C | Homozygous   |
| NC_037638.1 | 23269460 | SNV | 1 | T | C | Heterozygous |
| NC_037638.1 | 23269466 | SNV | 1 | G | A | Heterozygous |



|             |          |     |   |   |   |              |
|-------------|----------|-----|---|---|---|--------------|
| NC_037638.1 | 23269480 | SNV | 1 | C | T | Homozygous   |
| NC_037638.1 | 23269865 | SNV | 1 | T | C | Homozygous   |
| NC_037638.1 | 23270109 | SNV | 1 | G | A | Homozygous   |
| NC_037638.1 | 23270126 | SNV | 1 | C | T | Heterozygous |
| NC_037638.1 | 23271905 | SNV | 1 | G | A | Homozygous   |
| NC_037638.1 | 23271923 | SNV | 1 | A | G | Heterozygous |
| NC_037638.1 | 23271967 | SNV | 1 | T | C | Homozygous   |
| NC_037638.1 | 23272220 | SNV | 1 | A | G | Homozygous   |
| NC_037638.1 | 23272234 | SNV | 1 | T | G | Homozygous   |
| NC_037638.1 | 23272317 | SNV | 1 | G | A | Homozygous   |
| NC_037638.1 | 23273035 | SNV | 1 | C | T | Heterozygous |
| NC_037638.1 | 23273084 | SNV | 1 | G | A | Heterozygous |
| NC_037638.1 | 23273213 | SNV | 1 | T | C | Homozygous   |
| NC_037638.1 | 23273422 | SNV | 1 | G | C | Heterozygous |
| NC_037638.1 | 23273599 | SNV | 1 | A | G | Homozygous   |
| NC_037638.1 | 23273698 | SNV | 1 | G | A | Heterozygous |
| NC_037638.1 | 23273898 | SNV | 1 | T | C | Homozygous   |
| NC_037638.1 | 23275277 | SNV | 1 | C | G | Homozygous   |
| NC_037638.1 | 23275286 | SNV | 1 | T | A | Homozygous   |
| NC_037638.1 | 23285112 | SNV | 1 | T | C | Homozygous   |
| NC_037638.1 | 23285375 | SNV | 1 | T | C | Homozygous   |
| NC_037638.1 | 23285560 | SNV | 1 | G | A | Heterozygous |
| NC_037638.1 | 23285562 | SNV | 1 | T | C | Homozygous   |
| NC_037638.1 | 23285812 | SNV | 1 | T | C | Homozygous   |
| NC_037638.1 | 23285833 | SNV | 1 | G | C | Homozygous   |
| NC_037638.1 | 23285887 | SNV | 1 | C | T | Heterozygous |
| NC_037638.1 | 23285972 | SNV | 1 | C | T | Homozygous   |
| NC_037638.1 | 23286127 | SNV | 1 | T | C | Heterozygous |
| NC_037638.1 | 23286485 | SNV | 1 | C | T | Heterozygous |
| NC_037638.1 | 23286523 | SNV | 1 | A | G | Homozygous   |
| NC_037638.1 | 23286558 | SNV | 1 | C | T | Heterozygous |
| NC_037638.1 | 23286626 | SNV | 1 | G | A | Homozygous   |
| NC_037638.1 | 23293796 | SNV | 1 | A | G | Homozygous   |
| NC_037638.1 | 23293880 | SNV | 1 | C | T | Heterozygous |
| NC_037638.1 | 23293956 | SNV | 1 | T | C | Homozygous   |
| NC_037638.1 | 23294100 | SNV | 1 | G | A | Heterozygous |
| NC_037638.1 | 23294125 | SNV | 1 | A | G | Homozygous   |
| NC_037638.1 | 23294265 | SNV | 1 | T | C | Heterozygous |
| NC_037638.1 | 23295725 | SNV | 1 | A | G | Homozygous   |
| NC_037638.1 | 23298438 | SNV | 1 | T | C | Homozygous   |
| NC_037638.1 | 23298510 | SNV | 1 | T | C | Heterozygous |
| NC_037638.1 | 23298592 | SNV | 1 | A | G | Homozygous   |
| NC_037638.1 | 23298785 | SNV | 1 | G | A | Heterozygous |
| NC_037638.1 | 23298808 | SNV | 1 | G | A | Homozygous   |
| NC_037638.1 | 23298973 | SNV | 1 | T | C | Homozygous   |
| NC_037638.1 | 23299080 | SNV | 1 | T | C | Homozygous   |
| NC_037638.1 | 23300692 | SNV | 1 | T | C | Homozygous   |
| NC_037638.1 | 23300763 | SNV | 1 | G | A | Homozygous   |
| NC_037638.1 | 23300786 | SNV | 1 | G | A | Homozygous   |
| NC_037638.1 | 23300854 | SNV | 1 | G | A | Heterozygous |
| NC_037638.1 | 23300904 | SNV | 1 | C | T | Homozygous   |

|             |          |     |   |   |   |              |
|-------------|----------|-----|---|---|---|--------------|
| NC_037638.1 | 23301100 | SNV | 1 | T | C | Homozygous   |
| NC_037638.1 | 23301253 | SNV | 1 | T | C | Heterozygous |
| NC_037638.1 | 23301302 | SNV | 1 | C | T | Heterozygous |
| NC_037638.1 | 23301493 | SNV | 1 | C | G | Heterozygous |
| NC_037638.1 | 23301518 | SNV | 1 | A | G | Heterozygous |
| NC_037638.1 | 23301891 | SNV | 1 | C | G | Homozygous   |
| NC_037638.1 | 23302100 | SNV | 1 | A | G | Homozygous   |
| NC_037638.1 | 23302377 | SNV | 1 | C | T | Heterozygous |
| NC_037638.1 | 23302503 | SNV | 1 | A | G | Homozygous   |
| NC_037638.1 | 23302658 | SNV | 1 | A | G | Homozygous   |
| NC_037638.1 | 23302793 | SNV | 1 | A | G | Homozygous   |
| NC_037638.1 | 23303266 | SNV | 1 | A | G | Homozygous   |
| NC_037638.1 | 23303603 | SNV | 1 | C | T | Homozygous   |
| NC_037638.1 | 23303624 | SNV | 1 | T | C | Homozygous   |
| NC_037638.1 | 23303658 | SNV | 1 | C | T | Heterozygous |
| NC_037638.1 | 23303802 | SNV | 1 | A | G | Heterozygous |
| NC_037638.1 | 23303811 | SNV | 1 | T | C | Homozygous   |
| NC_037638.1 | 23303822 | SNV | 1 | T | C | Homozygous   |
| NC_037638.1 | 23303884 | SNV | 1 | T | G | Heterozygous |
| NC_037638.1 | 23304127 | SNV | 1 | C | T | Homozygous   |
| NC_037638.1 | 23304274 | SNV | 1 | A | G | Homozygous   |
| NC_037638.1 | 23304304 | SNV | 1 | A | T | Homozygous   |
| NC_037638.1 | 23304350 | SNV | 1 | T | C | Heterozygous |
| NC_037638.1 | 23304452 | SNV | 1 | G | A | Homozygous   |
| NC_037638.1 | 23304481 | SNV | 1 | A | G | Homozygous   |
| NC_037638.1 | 23304488 | SNV | 1 | G | A | Heterozygous |
| NC_037638.1 | 23304491 | SNV | 1 | C | T | Heterozygous |
| NC_037638.1 | 23304495 | SNV | 1 | T | C | Homozygous   |
| NC_037638.1 | 23304509 | SNV | 1 | G | C | Heterozygous |
| NC_037638.1 | 23304522 | SNV | 1 | A | G | Homozygous   |
| NC_037638.1 | 23304578 | SNV | 1 | G | A | Heterozygous |
| NC_037638.1 | 23304643 | SNV | 1 | T | C | Homozygous   |
| NC_037638.1 | 23305153 | SNV | 1 | C | T | Homozygous   |
| NC_037638.1 | 23305420 | SNV | 1 | G | A | Heterozygous |
| NC_037638.1 | 23305849 | SNV | 1 | G | A | Homozygous   |
| NC_037638.1 | 23305946 | SNV | 1 | T | G | Homozygous   |
| NC_037638.1 | 23305963 | SNV | 1 | C | T | Homozygous   |
| NC_037638.1 | 23305966 | SNV | 1 | C | T | Homozygous   |
| NC_037638.1 | 23305981 | SNV | 1 | C | T | Heterozygous |
| NC_037638.1 | 23305984 | SNV | 1 | G | T | Heterozygous |
| NC_037638.1 | 23306484 | SNV | 1 | T | C | Heterozygous |
| NC_037638.1 | 23306497 | SNV | 1 | T | C | Homozygous   |
| NC_037638.1 | 23306512 | SNV | 1 | T | G | Homozygous   |
| NC_037638.1 | 23306698 | SNV | 1 | G | C | Heterozygous |
| NC_037638.1 | 23307891 | SNV | 1 | T | C | Homozygous   |
| NC_037638.1 | 23311089 | SNV | 1 | T | G | Homozygous   |
| NC_037638.1 | 23318349 | SNV | 1 | A | G | Heterozygous |
| NC_037638.1 | 23318393 | SNV | 1 | T | A | Heterozygous |
| NC_037638.1 | 23318540 | SNV | 1 | A | G | Homozygous   |
| NC_037638.1 | 23318776 | SNV | 1 | A | G | Homozygous   |
| NC_037638.1 | 23318930 | SNV | 1 | A | G | Homozygous   |

|             |          |     |   |   |   |              |
|-------------|----------|-----|---|---|---|--------------|
| NC_037638.1 | 23318965 | SNV | 1 | T | C | Homozygous   |
| NC_037638.1 | 23329577 | SNV | 1 | G | A | Heterozygous |
| NC_037638.1 | 23332852 | SNV | 1 | G | A | Heterozygous |
| NC_037638.1 | 23333040 | SNV | 1 | T | C | Homozygous   |
| NC_037638.1 | 23333058 | SNV | 1 | G | A | Homozygous   |
| NC_037638.1 | 23335844 | SNV | 1 | T | A | Heterozygous |
| NC_037638.1 | 23349818 | SNV | 1 | C | T | Homozygous   |
| NC_037638.1 | 23349923 | SNV | 1 | A | G | Homozygous   |
| NC_037638.1 | 23354959 | SNV | 1 | A | G | Homozygous   |
| NC_037638.1 | 23354993 | SNV | 1 | C | G | Homozygous   |
| NC_037638.1 | 23355397 | SNV | 1 | C | G | Homozygous   |
| NC_037638.1 | 23355461 | SNV | 1 | G | A | Heterozygous |
| NC_037638.1 | 23355533 | SNV | 1 | G | C | Heterozygous |
| NC_037638.1 | 23365065 | SNV | 1 | C | A | Homozygous   |
| NC_037638.1 | 23365105 | SNV | 1 | A | G | Homozygous   |
| NC_037638.1 | 23374467 | SNV | 1 | A | T | Homozygous   |
| NC_037638.1 | 23374505 | SNV | 1 | G | C | Heterozygous |
| NC_037638.1 | 23374985 | SNV | 1 | T | C | Homozygous   |
| NC_037638.1 | 23375003 | SNV | 1 | A | G | Homozygous   |
| NC_037638.1 | 23375015 | SNV | 1 | A | G | Homozygous   |
| NC_037638.1 | 23375309 | SNV | 1 | G | A | Heterozygous |
| NC_037638.1 | 23382659 | SNV | 1 | A | G | Homozygous   |
| NC_037638.1 | 23382691 | SNV | 1 | G | A | Homozygous   |
| NC_037638.1 | 23448874 | SNV | 1 | A | T | Heterozygous |
| NC_037638.1 | 23454745 | SNV | 1 | A | G | Heterozygous |
| NC_037638.1 | 23454766 | SNV | 1 | A | G | Heterozygous |
| NC_037638.1 | 23454972 | SNV | 1 | G | A | Heterozygous |
| NC_037638.1 | 23455007 | SNV | 1 | T | C | Heterozygous |
| NC_037638.1 | 23455141 | SNV | 1 | T | C | Homozygous   |
| NC_037638.1 | 23455144 | SNV | 1 | C | T | Heterozygous |
| NC_037638.1 | 23455368 | SNV | 1 | C | G | Heterozygous |
| NC_037638.1 | 23455446 | SNV | 1 | A | C | Homozygous   |
| NC_037638.1 | 23455500 | SNV | 1 | C | T | Homozygous   |
| NC_037638.1 | 23456385 | SNV | 1 | G | A | Heterozygous |
| NC_037638.1 | 23456431 | SNV | 1 | C | A | Homozygous   |
| NC_037638.1 | 23456698 | SNV | 1 | C | T | Heterozygous |
| NC_037638.1 | 23456922 | SNV | 1 | A | G | Homozygous   |
| NC_037638.1 | 23456979 | SNV | 1 | T | C | Homozygous   |
| NC_037638.1 | 23457109 | SNV | 1 | C | A | Heterozygous |
| NC_037638.1 | 23457118 | SNV | 1 | A | C | Homozygous   |
| NC_037638.1 | 23457133 | SNV | 1 | C | T | Heterozygous |
| NC_037638.1 | 23457196 | SNV | 1 | C | T | Homozygous   |
| NC_037638.1 | 23457235 | SNV | 1 | T | C | Homozygous   |
| NC_037638.1 | 23457253 | SNV | 1 | G | A | Heterozygous |
| NC_037638.1 | 23457728 | SNV | 1 | T | C | Heterozygous |
| NC_037638.1 | 23457821 | SNV | 1 | C | T | Homozygous   |
| NC_037638.1 | 23457893 | SNV | 1 | G | A | Heterozygous |
| NC_037638.1 | 23462418 | SNV | 1 | C | A | Homozygous   |
| NC_037638.1 | 23463029 | SNV | 1 | C | T | Heterozygous |
| NC_037638.1 | 23463041 | SNV | 1 | T | A | Homozygous   |
| NC_037638.1 | 23463213 | SNV | 1 | C | T | Heterozygous |

|             |          |     |   |   |   |              |
|-------------|----------|-----|---|---|---|--------------|
| NC_037638.1 | 23463224 | SNV | 1 | C | T | Homozygous   |
| NC_037638.1 | 23463774 | SNV | 1 | A | G | Homozygous   |
| NC_037638.1 | 23465292 | SNV | 1 | G | A | Homozygous   |
| NC_037638.1 | 23465721 | SNV | 1 | T | C | Heterozygous |
| NC_037638.1 | 23465735 | SNV | 1 | G | A | Homozygous   |
| NC_037638.1 | 23465737 | SNV | 1 | T | C | Heterozygous |
| NC_037638.1 | 23465751 | SNV | 1 | T | C | Homozygous   |
| NC_037638.1 | 23465800 | SNV | 1 | A | C | Homozygous   |
| NC_037638.1 | 23465858 | SNV | 1 | G | A | Homozygous   |
| NC_037638.1 | 23465863 | SNV | 1 | C | A | Heterozygous |
| NC_037638.1 | 23465871 | SNV | 1 | G | A | Heterozygous |
| NC_037638.1 | 23465874 | SNV | 1 | T | C | Homozygous   |
| NC_037638.1 | 23465877 | SNV | 1 | A | G | Homozygous   |
| NC_037638.1 | 23465907 | SNV | 1 | G | A | Heterozygous |
| NC_037638.1 | 23465960 | SNV | 1 | A | G | Homozygous   |
| NC_037638.1 | 23466010 | SNV | 1 | G | A | Heterozygous |
| NC_037638.1 | 23466146 | SNV | 1 | T | C | Homozygous   |
| NC_037638.1 | 23466199 | SNV | 1 | C | T | Heterozygous |
| NC_037638.1 | 23466441 | SNV | 1 | A | G | Homozygous   |
| NC_037638.1 | 23466526 | SNV | 1 | T | C | Homozygous   |
| NC_037638.1 | 23466722 | SNV | 1 | T | C | Homozygous   |
| NC_037638.1 | 23466751 | SNV | 1 | C | T | Homozygous   |
| NC_037638.1 | 23466776 | SNV | 1 | C | T | Homozygous   |
| NC_037638.1 | 23466908 | SNV | 1 | G | A | Homozygous   |
| NC_037638.1 | 23466959 | SNV | 1 | T | C | Homozygous   |
| NC_037638.1 | 23467053 | SNV | 1 | C | T | Homozygous   |
| NC_037638.1 | 23467092 | SNV | 1 | A | G | Heterozygous |
| NC_037638.1 | 23467897 | SNV | 1 | G | A | Heterozygous |
| NC_037638.1 | 23467898 | SNV | 1 | G | A | Heterozygous |
| NC_037638.1 | 23469175 | SNV | 1 | G | A | Heterozygous |
| NC_037638.1 | 23469223 | SNV | 1 | A | G | Homozygous   |
| NC_037638.1 | 23469229 | SNV | 1 | A | T | Heterozygous |
| NC_037638.1 | 23469306 | SNV | 1 | A | G | Homozygous   |
| NC_037638.1 | 23469321 | SNV | 1 | T | C | Homozygous   |
| NC_037638.1 | 23469339 | SNV | 1 | T | C | Heterozygous |
| NC_037638.1 | 23469352 | SNV | 1 | G | A | Homozygous   |
| NC_037638.1 | 23469476 | SNV | 1 | C | T | Heterozygous |
| NC_037638.1 | 23469556 | SNV | 1 | G | A | Heterozygous |
| NC_037638.1 | 23469650 | SNV | 1 | A | T | Heterozygous |
| NC_037638.1 | 23469984 | SNV | 1 | T | C | Heterozygous |
| NC_037638.1 | 23470466 | SNV | 1 | G | A | Homozygous   |
| NC_037638.1 | 23470609 | SNV | 1 | C | T | Homozygous   |
| NC_037638.1 | 23470611 | SNV | 1 | C | T | Heterozygous |
| NC_037638.1 | 23470775 | SNV | 1 | A | G | Homozygous   |
| NC_037638.1 | 23470793 | SNV | 1 | T | C | Heterozygous |
| NC_037638.1 | 23470806 | SNV | 1 | A | G | Homozygous   |
| NC_037638.1 | 23471111 | SNV | 1 | A | C | Heterozygous |
| NC_037638.1 | 23471163 | SNV | 1 | A | T | Heterozygous |
| NC_037638.1 | 23472648 | SNV | 1 | A | T | Heterozygous |
| NC_037638.1 | 23473706 | SNV | 1 | C | T | Homozygous   |
| NC_037638.1 | 23473849 | SNV | 1 | A | T | Homozygous   |

|             |          |     |   |   |   |              |
|-------------|----------|-----|---|---|---|--------------|
| NC_037638.1 | 23477863 | SNV | 1 | T | C | Homozygous   |
| NC_037638.1 | 23477931 | SNV | 1 | G | C | Homozygous   |
| NC_037638.1 | 23477955 | SNV | 1 | G | A | Homozygous   |
| NC_037638.1 | 23477961 | SNV | 1 | A | C | Homozygous   |
| NC_037638.1 | 23478012 | SNV | 1 | T | C | Homozygous   |
| NC_037638.1 | 23478017 | SNV | 1 | T | C | Heterozygous |
| NC_037638.1 | 23480531 | SNV | 1 | C | T | Homozygous   |
| NC_037638.1 | 23483918 | SNV | 1 | G | A | Homozygous   |
| NC_037638.1 | 23491862 | SNV | 1 | C | T | Homozygous   |
| NC_037638.1 | 23491938 | SNV | 1 | C | T | Heterozygous |
| NC_037638.1 | 23492196 | SNV | 1 | A | T | Heterozygous |
| NC_037638.1 | 23494712 | SNV | 1 | G | A | Heterozygous |
| NC_037638.1 | 23496562 | SNV | 1 | A | G | Homozygous   |
| NC_037638.1 | 23496585 | SNV | 1 | G | A | Homozygous   |
| NC_037638.1 | 23496608 | SNV | 1 | A | G | Heterozygous |
| NC_037638.1 | 23496640 | SNV | 1 | C | T | Heterozygous |
| NC_037638.1 | 23496644 | SNV | 1 | C | T | Homozygous   |
| NC_037638.1 | 23511547 | SNV | 1 | C | T | Heterozygous |
| NC_037638.1 | 23511556 | SNV | 1 | C | T | Heterozygous |
| NC_037638.1 | 23511622 | SNV | 1 | G | A | Homozygous   |
| NC_037638.1 | 23511712 | SNV | 1 | T | C | Homozygous   |
| NC_037638.1 | 23511738 | SNV | 1 | T | C | Homozygous   |
| NC_037638.1 | 23511777 | SNV | 1 | T | C | Homozygous   |
| NC_037638.1 | 23511780 | SNV | 1 | C | T | Homozygous   |
| NC_037638.1 | 23511791 | SNV | 1 | A | G | Homozygous   |
| NC_037638.1 | 23514074 | SNV | 1 | C | T | Heterozygous |
| NC_037638.1 | 23514616 | SNV | 1 | T | C | Homozygous   |
| NC_037638.1 | 23514887 | SNV | 1 | T | C | Homozygous   |
| NC_037638.1 | 23520550 | SNV | 1 | G | A | Homozygous   |
| NC_037638.1 | 23520593 | SNV | 1 | C | T | Heterozygous |
| NC_037638.1 | 23538056 | SNV | 1 | A | T | Homozygous   |
| NC_037638.1 | 23538061 | SNV | 1 | A | T | Homozygous   |
| NC_037638.1 | 23538072 | SNV | 1 | A | T | Heterozygous |
| NC_037638.1 | 23538087 | SNV | 1 | C | G | Homozygous   |
| NC_037638.1 | 23538213 | SNV | 1 | C | T | Homozygous   |
| NC_037638.1 | 23538282 | SNV | 1 | A | G | Homozygous   |
| NC_037638.1 | 23538296 | SNV | 1 | G | T | Homozygous   |
| NC_037638.1 | 23538407 | SNV | 1 | G | A | Homozygous   |
| NC_037638.1 | 23539532 | SNV | 1 | T | C | Homozygous   |
| NC_037638.1 | 23544313 | SNV | 1 | T | C | Heterozygous |
| NC_037638.1 | 23544425 | SNV | 1 | C | T | Homozygous   |
| NC_037638.1 | 23560894 | SNV | 1 | C | T | Homozygous   |
| NC_037638.1 | 23560900 | SNV | 1 | C | T | Homozygous   |
| NC_037638.1 | 23563722 | SNV | 1 | G | A | Heterozygous |
| NC_037638.1 | 23563732 | SNV | 1 | A | G | Heterozygous |
| NC_037638.1 | 23563740 | SNV | 1 | A | G | Heterozygous |
| NC_037638.1 | 23563745 | SNV | 1 | G | A | Heterozygous |
| NC_037638.1 | 23563771 | SNV | 1 | G | A | Heterozygous |
| NC_037638.1 | 23576390 | SNV | 1 | T | C | Homozygous   |
| NC_037638.1 | 23576404 | SNV | 1 | C | G | Homozygous   |
| NC_037638.1 | 23576543 | SNV | 1 | T | C | Homozygous   |

|             |          |     |   |   |   |              |
|-------------|----------|-----|---|---|---|--------------|
| NC_037638.1 | 23576545 | SNV | 1 | T | C | Homozygous   |
| NC_037638.1 | 23576558 | SNV | 1 | A | T | Heterozygous |
| NC_037638.1 | 23576568 | SNV | 1 | T | C | Homozygous   |
| NC_037638.1 | 23576573 | SNV | 1 | A | G | Homozygous   |
| NC_037638.1 | 23576580 | SNV | 1 | C | A | Homozygous   |
| NC_037638.1 | 23584298 | SNV | 1 | C | G | Homozygous   |
| NC_037638.1 | 23584331 | SNV | 1 | C | T | Homozygous   |
| NC_037638.1 | 23584366 | SNV | 1 | G | A | Homozygous   |
| NC_037638.1 | 23584382 | SNV | 1 | C | A | Homozygous   |
| NC_037638.1 | 23584387 | SNV | 1 | C | T | Homozygous   |
| NC_037638.1 | 23599728 | SNV | 1 | G | A | Homozygous   |
| NC_037638.1 | 23601873 | SNV | 1 | T | C | Heterozygous |
| NC_037638.1 | 23609805 | SNV | 1 | T | C | Heterozygous |
| NC_037638.1 | 23611047 | SNV | 1 | C | T | Heterozygous |
| NC_037638.1 | 23611102 | SNV | 1 | A | G | Heterozygous |
| NC_037638.1 | 23611234 | SNV | 1 | A | G | Homozygous   |
| NC_037638.1 | 23611250 | SNV | 1 | A | G | Homozygous   |
| NC_037638.1 | 23615185 | SNV | 1 | C | T | Homozygous   |
| NC_037638.1 | 23615193 | SNV | 1 | C | T | Heterozygous |
| NC_037638.1 | 23615358 | SNV | 1 | A | G | Heterozygous |
| NC_037638.1 | 23615413 | SNV | 1 | C | G | Homozygous   |
| NC_037638.1 | 23615650 | SNV | 1 | A | T | Homozygous   |
| NC_037638.1 | 23615741 | SNV | 1 | T | C | Homozygous   |
| NC_037638.1 | 23617210 | SNV | 1 | G | A | Heterozygous |
| NC_037638.1 | 23618570 | SNV | 1 | A | G | Homozygous   |
| NC_037638.1 | 23618573 | SNV | 1 | T | G | Homozygous   |
| NC_037638.1 | 23618595 | SNV | 1 | T | C | Heterozygous |
| NC_037638.1 | 23618615 | SNV | 1 | G | A | Heterozygous |
| NC_037638.1 | 23618616 | SNV | 1 | T | C | Heterozygous |
| NC_037638.1 | 23618622 | SNV | 1 | C | T | Homozygous   |
| NC_037638.1 | 23618626 | SNV | 1 | C | G | Homozygous   |
| NC_037638.1 | 23618633 | SNV | 1 | G | A | Heterozygous |
| NC_037638.1 | 23620566 | SNV | 1 | T | C | Homozygous   |
| NC_037638.1 | 23631609 | SNV | 1 | G | T | Homozygous   |
| NC_037638.1 | 23631632 | SNV | 1 | G | A | Heterozygous |
| NC_037638.1 | 23631652 | SNV | 1 | T | C | Homozygous   |
| NC_037638.1 | 23631704 | SNV | 1 | A | C | Heterozygous |
| NC_037638.1 | 23673807 | SNV | 1 | G | A | Heterozygous |
| NC_037638.1 | 23673825 | SNV | 1 | T | G | Homozygous   |
| NC_037638.1 | 23673880 | SNV | 1 | T | C | Homozygous   |
| NC_037638.1 | 23673915 | SNV | 1 | A | G | Heterozygous |
| NC_037638.1 | 23674111 | SNV | 1 | T | C | Homozygous   |
| NC_037638.1 | 23674282 | SNV | 1 | T | C | Homozygous   |
| NC_037638.1 | 23674403 | SNV | 1 | T | C | Homozygous   |
| NC_037638.1 | 23674499 | SNV | 1 | C | T | Homozygous   |
| NC_037638.1 | 23674749 | SNV | 1 | T | C | Homozygous   |
| NC_037638.1 | 23675077 | SNV | 1 | G | A | Homozygous   |
| NC_037638.1 | 23675084 | SNV | 1 | A | T | Heterozygous |
| NC_037638.1 | 23675090 | SNV | 1 | G | A | Homozygous   |
| NC_037638.1 | 23675096 | SNV | 1 | C | A | Homozygous   |
| NC_037638.1 | 23676255 | SNV | 1 | G | A | Heterozygous |

|             |          |     |   |   |   |              |
|-------------|----------|-----|---|---|---|--------------|
| NC_037638.1 | 23678140 | SNV | 1 | A | G | Homozygous   |
| NC_037638.1 | 23678144 | SNV | 1 | G | T | Homozygous   |
| NC_037638.1 | 23678371 | SNV | 1 | C | T | Heterozygous |
| NC_037638.1 | 23719554 | SNV | 1 | C | A | Heterozygous |
| NC_037638.1 | 23719569 | SNV | 1 | A | G | Heterozygous |
| NC_037638.1 | 23751644 | SNV | 1 | A | G | Homozygous   |
| NC_037638.1 | 23751647 | SNV | 1 | A | T | Homozygous   |
| NC_037638.1 | 23751679 | SNV | 1 | C | G | Homozygous   |
| NC_037638.1 | 23751682 | SNV | 1 | C | T | Homozygous   |
| NC_037638.1 | 23754124 | SNV | 1 | A | G | Homozygous   |
| NC_037638.1 | 23755509 | SNV | 1 | T | C | Homozygous   |
| NC_037638.1 | 23756600 | SNV | 1 | T | C | Heterozygous |
| NC_037638.1 | 23787049 | SNV | 1 | A | G | Homozygous   |
| NC_037638.1 | 23787059 | SNV | 1 | A | G | Heterozygous |
| NC_037638.1 | 23787061 | SNV | 1 | A | T | Heterozygous |
| NC_037638.1 | 23787065 | SNV | 1 | T | A | Homozygous   |
| NC_037638.1 | 23787068 | SNV | 1 | G | A | Heterozygous |
| NC_037638.1 | 23787071 | SNV | 1 | A | C | Heterozygous |
| NC_037638.1 | 23800775 | SNV | 1 | G | A | Heterozygous |
| NC_037638.1 | 23800912 | SNV | 1 | T | C | Homozygous   |
| NC_037638.1 | 23801639 | SNV | 1 | A | G | Homozygous   |
| NC_037638.1 | 23801896 | SNV | 1 | C | T | Heterozygous |
| NC_037638.1 | 23801956 | SNV | 1 | C | T | Homozygous   |
| NC_037638.1 | 23801959 | SNV | 1 | C | A | Homozygous   |
| NC_037638.1 | 23802115 | SNV | 1 | T | C | Homozygous   |
| NC_037638.1 | 23803479 | SNV | 1 | A | G | Homozygous   |
| NC_037638.1 | 23810357 | SNV | 1 | T | C | Heterozygous |
| NC_037638.1 | 23810537 | SNV | 1 | T | C | Heterozygous |
| NC_037638.1 | 23810757 | SNV | 1 | C | T | Heterozygous |
| NC_037638.1 | 23810763 | SNV | 1 | A | G | Homozygous   |
| NC_037638.1 | 23810765 | SNV | 1 | G | A | Heterozygous |
| NC_037638.1 | 23810877 | SNV | 1 | A | G | Homozygous   |
| NC_037638.1 | 23811203 | SNV | 1 | G | A | Homozygous   |
| NC_037638.1 | 23811239 | SNV | 1 | A | G | Homozygous   |
| NC_037638.1 | 23811567 | SNV | 1 | A | C | Homozygous   |
| NC_037638.1 | 23813287 | SNV | 1 | A | G | Heterozygous |
| NC_037638.1 | 23813422 | SNV | 1 | T | C | Homozygous   |
| NC_037638.1 | 23813604 | SNV | 1 | C | T | Heterozygous |
| NC_037638.1 | 23813855 | SNV | 1 | A | G | Homozygous   |
| NC_037638.1 | 23814609 | SNV | 1 | T | G | Homozygous   |
| NC_037638.1 | 23814824 | SNV | 1 | T | C | Homozygous   |
| NC_037638.1 | 23814850 | SNV | 1 | C | T | Heterozygous |
| NC_037638.1 | 23814853 | SNV | 1 | C | T | Homozygous   |
| NC_037638.1 | 23815764 | SNV | 1 | A | G | Homozygous   |
| NC_037638.1 | 23823877 | SNV | 1 | C | T | Heterozygous |
| NC_037638.1 | 23823991 | SNV | 1 | A | G | Heterozygous |
| NC_037638.1 | 23827350 | SNV | 1 | A | G | Homozygous   |
| NC_037638.1 | 23827375 | SNV | 1 | T | C | Homozygous   |
| NC_037638.1 | 23827446 | SNV | 1 | A | G | Homozygous   |
| NC_037638.1 | 23842248 | SNV | 1 | G | A | Heterozygous |
| NC_037638.1 | 23842257 | SNV | 1 | T | A | Homozygous   |

|             |          |     |   |   |   |              |
|-------------|----------|-----|---|---|---|--------------|
| NC_037638.1 | 23842286 | SNV | 1 | G | A | Heterozygous |
| NC_037638.1 | 23846111 | SNV | 1 | T | A | Heterozygous |
| NC_037638.1 | 23848659 | SNV | 1 | C | T | Heterozygous |
| NC_037638.1 | 23848747 | SNV | 1 | C | T | Heterozygous |
| NC_037638.1 | 23848950 | SNV | 1 | C | T | Heterozygous |
| NC_037638.1 | 23850709 | SNV | 1 | A | G | Heterozygous |
| NC_037638.1 | 23850714 | SNV | 1 | A | G | Heterozygous |
| NC_037638.1 | 23850736 | SNV | 1 | G | C | Heterozygous |
| NC_037638.1 | 23850744 | SNV | 1 | A | C | Heterozygous |
| NC_037638.1 | 23850749 | SNV | 1 | G | T | Heterozygous |
| NC_037638.1 | 23850770 | SNV | 1 | A | G | Heterozygous |
| NC_037638.1 | 23850793 | SNV | 1 | A | T | Homozygous   |
| NC_037638.1 | 23850860 | SNV | 1 | C | T | Heterozygous |
| NC_037638.1 | 23864024 | SNV | 1 | A | C | Heterozygous |
| NC_037638.1 | 23864045 | SNV | 1 | A | C | Heterozygous |
| NC_037638.1 | 23864051 | SNV | 1 | A | C | Heterozygous |
| NC_037638.1 | 23864063 | SNV | 1 | A | C | Heterozygous |
| NC_037638.1 | 23864066 | SNV | 1 | C | A | Homozygous   |
| NC_037638.1 | 23864109 | SNV | 1 | G | A | Homozygous   |
| NC_037638.1 | 23871407 | SNV | 1 | G | A | Homozygous   |
| NC_037638.1 | 23874986 | SNV | 1 | T | C | Homozygous   |
| NC_037638.1 | 23878632 | SNV | 1 | T | C | Heterozygous |
| NC_037638.1 | 23878652 | SNV | 1 | C | T | Heterozygous |
| NC_037638.1 | 23878908 | SNV | 1 | A | G | Homozygous   |
| NC_037638.1 | 23878956 | SNV | 1 | C | T | Heterozygous |
| NC_037638.1 | 23878964 | SNV | 1 | T | C | Heterozygous |
| NC_037638.1 | 23878998 | SNV | 1 | T | C | Homozygous   |
| NC_037638.1 | 23879013 | SNV | 1 | A | G | Heterozygous |
| NC_037638.1 | 23879037 | SNV | 1 | T | C | Heterozygous |
| NC_037638.1 | 23879057 | SNV | 1 | T | C | Homozygous   |
| NC_037638.1 | 23879655 | SNV | 1 | G | C | Heterozygous |
| NC_037638.1 | 23879678 | SNV | 1 | C | T | Homozygous   |
| NC_037638.1 | 23879727 | SNV | 1 | A | G | Homozygous   |
| NC_037638.1 | 23879742 | SNV | 1 | T | G | Heterozygous |
| NC_037638.1 | 23879747 | SNV | 1 | A | T | Heterozygous |
| NC_037638.1 | 23879755 | SNV | 1 | C | T | Heterozygous |
| NC_037638.1 | 23879828 | SNV | 1 | C | A | Homozygous   |
| NC_037638.1 | 23879875 | SNV | 1 | C | T | Heterozygous |
| NC_037638.1 | 23879914 | SNV | 1 | G | A | Heterozygous |
| NC_037638.1 | 23879985 | SNV | 1 | A | G | Homozygous   |
| NC_037638.1 | 23880222 | SNV | 1 | C | T | Homozygous   |
| NC_037638.1 | 23887659 | SNV | 1 | A | T | Homozygous   |
| NC_037638.1 | 23887662 | SNV | 1 | C | G | Homozygous   |
| NC_037638.1 | 23887665 | SNV | 1 | A | T | Homozygous   |
| NC_037638.1 | 23887670 | SNV | 1 | C | T | Homozygous   |
| NC_037638.1 | 23887673 | SNV | 1 | T | C | Homozygous   |
| NC_037638.1 | 23887678 | SNV | 1 | A | T | Homozygous   |
| NC_037638.1 | 23887680 | SNV | 1 | A | C | Homozygous   |
| NC_037638.1 | 23889872 | SNV | 1 | C | T | Heterozygous |
| NC_037638.1 | 23889996 | SNV | 1 | A | G | Homozygous   |
| NC_037638.1 | 23890064 | SNV | 1 | C | G | Heterozygous |



|             |          |     |   |   |   |              |
|-------------|----------|-----|---|---|---|--------------|
| NC_037638.1 | 23890405 | SNV | 1 | C | T | Homozygous   |
| NC_037638.1 | 23900319 | SNV | 1 | T | A | Homozygous   |
| NC_037638.1 | 23900330 | SNV | 1 | A | G | Homozygous   |
| NC_037638.1 | 23900332 | SNV | 1 | A | T | Homozygous   |
| NC_037638.1 | 23900355 | SNV | 1 | A | T | Homozygous   |
| NC_037638.1 | 23900357 | SNV | 1 | A | T | Homozygous   |
| NC_037638.1 | 23900363 | SNV | 1 | A | C | Homozygous   |
| NC_037638.1 | 23908986 | SNV | 1 | G | A | Homozygous   |
| NC_037638.1 | 23908992 | SNV | 1 | G | A | Heterozygous |
| NC_037638.1 | 23908995 | SNV | 1 | C | A | Homozygous   |
| NC_037638.1 | 23908997 | SNV | 1 | A | T | Heterozygous |
| NC_037638.1 | 23908999 | SNV | 1 | T | A | Homozygous   |
| NC_037638.1 | 23909012 | SNV | 1 | A | G | Heterozygous |
| NC_037638.1 | 23909014 | SNV | 1 | A | G | Heterozygous |
| NC_037638.1 | 23909020 | SNV | 1 | A | G | Heterozygous |
| NC_037638.1 | 23913906 | SNV | 1 | C | T | Heterozygous |
| NC_037638.1 | 23913910 | SNV | 1 | T | C | Heterozygous |
| NC_037638.1 | 23913980 | SNV | 1 | C | T | Homozygous   |
| NC_037638.1 | 23925126 | SNV | 1 | A | G | Heterozygous |
| NC_037638.1 | 23927450 | SNV | 1 | G | A | Homozygous   |
| NC_037638.1 | 23927487 | SNV | 1 | C | T | Heterozygous |
| NC_037638.1 | 23927494 | SNV | 1 | C | T | Heterozygous |
| NC_037638.1 | 23927689 | SNV | 1 | T | C | Homozygous   |
| NC_037638.1 | 23927696 | SNV | 1 | C | T | Homozygous   |
| NC_037638.1 | 23927701 | SNV | 1 | C | T | Heterozygous |
| NC_037638.1 | 23927924 | SNV | 1 | G | C | Homozygous   |
| NC_037638.1 | 23927979 | SNV | 1 | T | C | Homozygous   |
| NC_037638.1 | 23929593 | SNV | 1 | T | C | Homozygous   |
| NC_037638.1 | 23929743 | SNV | 1 | A | G | Homozygous   |
| NC_037638.1 | 23929806 | SNV | 1 | T | A | Heterozygous |
| NC_037638.1 | 23929808 | SNV | 1 | C | T | Heterozygous |
| NC_037638.1 | 23929813 | SNV | 1 | A | G | Heterozygous |
| NC_037638.1 | 23929861 | SNV | 1 | T | C | Homozygous   |
| NC_037638.1 | 23939604 | SNV | 1 | A | T | Heterozygous |
| NC_037638.1 | 23939606 | SNV | 1 | A | T | Heterozygous |
| NC_037638.1 | 23939649 | SNV | 1 | A | C | Heterozygous |
| NC_037638.1 | 23939668 | SNV | 1 | A | C | Heterozygous |
| NC_037638.1 | 23939734 | SNV | 1 | A | G | Heterozygous |
| NC_037638.1 | 23939741 | SNV | 1 | T | C | Heterozygous |
| NC_037638.1 | 23939747 | SNV | 1 | T | C | Heterozygous |
| NC_037638.1 | 23939765 | SNV | 1 | T | C | Heterozygous |
| NC_037638.1 | 23955055 | SNV | 1 | A | T | Homozygous   |
| NC_037638.1 | 23955058 | SNV | 1 | G | A | Homozygous   |
| NC_037638.1 | 23955062 | SNV | 1 | G | C | Homozygous   |
| NC_037638.1 | 23955066 | SNV | 1 | A | C | Homozygous   |
| NC_037638.1 | 23955091 | SNV | 1 | C | T | Homozygous   |
| NC_037638.1 | 23955097 | SNV | 1 | A | C | Homozygous   |
| NC_037638.1 | 23962928 | SNV | 1 | G | C | Homozygous   |
| NC_037638.1 | 23963436 | SNV | 1 | A | G | Homozygous   |
| NC_037638.1 | 23963540 | SNV | 1 | T | A | Heterozygous |
| NC_037638.1 | 23963557 | SNV | 1 | T | C | Heterozygous |

|             |          |     |   |   |   |              |
|-------------|----------|-----|---|---|---|--------------|
| NC_037638.1 | 23964408 | SNV | 1 | C | G | Homozygous   |
| NC_037638.1 | 23964532 | SNV | 1 | A | C | Heterozygous |
| NC_037638.1 | 23964585 | SNV | 1 | A | G | Heterozygous |
| NC_037638.1 | 23965247 | SNV | 1 | A | G | Heterozygous |
| NC_037638.1 | 23965253 | SNV | 1 | C | A | Heterozygous |
| NC_037638.1 | 23965256 | SNV | 1 | A | T | Heterozygous |
| NC_037638.1 | 23965504 | SNV | 1 | G | A | Homozygous   |
| NC_037638.1 | 23965515 | SNV | 1 | A | G | Homozygous   |
| NC_037638.1 | 23965572 | SNV | 1 | G | A | Heterozygous |
| NC_037638.1 | 23965576 | SNV | 1 | G | A | Heterozygous |
| NC_037638.1 | 23965628 | SNV | 1 | G | A | Heterozygous |
| NC_037638.1 | 23965672 | SNV | 1 | T | C | Homozygous   |
| NC_037638.1 | 23965678 | SNV | 1 | T | G | Homozygous   |
| NC_037638.1 | 23966205 | SNV | 1 | A | G | Homozygous   |
| NC_037638.1 | 23966302 | SNV | 1 | C | T | Heterozygous |
| NC_037638.1 | 23966482 | SNV | 1 | C | T | Heterozygous |
| NC_037638.1 | 23966524 | SNV | 1 | C | A | Heterozygous |
| NC_037638.1 | 23966537 | SNV | 1 | A | G | Homozygous   |
| NC_037638.1 | 23966653 | SNV | 1 | T | A | Homozygous   |
| NC_037638.1 | 23966815 | SNV | 1 | A | C | Heterozygous |
| NC_037638.1 | 23966819 | SNV | 1 | A | T | Heterozygous |
| NC_037638.1 | 23966841 | SNV | 1 | A | G | Homozygous   |
| NC_037638.1 | 23966846 | SNV | 1 | T | C | Homozygous   |
| NC_037638.1 | 23966858 | SNV | 1 | C | T | Homozygous   |
| NC_037638.1 | 23967106 | SNV | 1 | T | C | Heterozygous |
| NC_037638.1 | 23967110 | SNV | 1 | T | C | Heterozygous |
| NC_037638.1 | 23967112 | SNV | 1 | T | C | Heterozygous |
| NC_037638.1 | 23969966 | SNV | 1 | G | T | Homozygous   |
| NC_037638.1 | 23970011 | SNV | 1 | A | G | Homozygous   |
| NC_037638.1 | 23980221 | SNV | 1 | G | T | Homozygous   |
| NC_037638.1 | 23980257 | SNV | 1 | A | G | Homozygous   |
| NC_037638.1 | 23981129 | SNV | 1 | G | A | Homozygous   |
| NC_037638.1 | 23981203 | SNV | 1 | C | T | Homozygous   |
| NC_037638.1 | 23981250 | SNV | 1 | G | T | Homozygous   |
| NC_037638.1 | 23981290 | SNV | 1 | C | T | Homozygous   |
| NC_037638.1 | 23986704 | SNV | 1 | C | T | Heterozygous |
| NC_037638.1 | 23986751 | SNV | 1 | T | C | Homozygous   |
| NC_037638.1 | 23986759 | SNV | 1 | G | C | Heterozygous |
| NC_037638.1 | 23986966 | SNV | 1 | C | T | Homozygous   |
| NC_037638.1 | 23986993 | SNV | 1 | A | G | Homozygous   |
| NC_037638.1 | 23987081 | SNV | 1 | A | G | Homozygous   |
| NC_037638.1 | 23987136 | SNV | 1 | A | G | Heterozygous |
| NC_037638.1 | 23987145 | SNV | 1 | A | G | Heterozygous |
| NC_037638.1 | 24015074 | SNV | 1 | C | T | Heterozygous |
| NC_037638.1 | 24019184 | SNV | 1 | A | C | Homozygous   |
| NC_037638.1 | 24021638 | SNV | 1 | T | C | Homozygous   |
| NC_037638.1 | 24025597 | SNV | 1 | A | G | Homozygous   |
| NC_037638.1 | 24025733 | SNV | 1 | C | T | Homozygous   |
| NC_037638.1 | 24028756 | SNV | 1 | T | C | Homozygous   |
| NC_037638.1 | 24033950 | SNV | 1 | G | A | Homozygous   |
| NC_037638.1 | 24033960 | SNV | 1 | T | G | Homozygous   |

|             |          |     |   |   |   |              |
|-------------|----------|-----|---|---|---|--------------|
| NC_037638.1 | 24033962 | SNV | 1 | T | G | Homozygous   |
| NC_037638.1 | 24033987 | SNV | 1 | G | T | Homozygous   |
| NC_037638.1 | 24041969 | SNV | 1 | C | T | Heterozygous |
| NC_037638.1 | 24042092 | SNV | 1 | C | T | Heterozygous |
| NC_037638.1 | 24042111 | SNV | 1 | T | C | Homozygous   |
| NC_037638.1 | 24042146 | SNV | 1 | A | G | Homozygous   |
| NC_037638.1 | 24042149 | SNV | 1 | C | T | Homozygous   |
| NC_037638.1 | 24042179 | SNV | 1 | T | C | Homozygous   |
| NC_037638.1 | 24042360 | SNV | 1 | G | A | Heterozygous |
| NC_037638.1 | 24042448 | SNV | 1 | C | T | Homozygous   |
| NC_037638.1 | 24042469 | SNV | 1 | T | C | Homozygous   |
| NC_037638.1 | 24043088 | SNV | 1 | C | T | Heterozygous |
| NC_037638.1 | 24046489 | SNV | 1 | A | T | Homozygous   |
| NC_037638.1 | 24050667 | SNV | 1 | T | C | Homozygous   |
| NC_037638.1 | 24050856 | SNV | 1 | G | A | Heterozygous |
| NC_037638.1 | 24061517 | SNV | 1 | A | G | Heterozygous |
| NC_037638.1 | 24062282 | SNV | 1 | A | G | Homozygous   |
| NC_037638.1 | 24062309 | SNV | 1 | A | T | Homozygous   |
| NC_037638.1 | 24062356 | SNV | 1 | C | T | Homozygous   |
| NC_037638.1 | 24062369 | SNV | 1 | C | G | Homozygous   |
| NC_037638.1 | 24062377 | SNV | 1 | A | G | Homozygous   |
| NC_037638.1 | 24062381 | SNV | 1 | A | G | Homozygous   |
| NC_037638.1 | 24062388 | SNV | 1 | A | G | Homozygous   |
| NC_037638.1 | 24077668 | SNV | 1 | C | A | Homozygous   |
| NC_037638.1 | 24077696 | SNV | 1 | A | T | Homozygous   |
| NC_037638.1 | 24077699 | SNV | 1 | A | C | Homozygous   |
| NC_037638.1 | 24077703 | SNV | 1 | G | A | Homozygous   |
| NC_037638.1 | 24077707 | SNV | 1 | G | A | Homozygous   |
| NC_037638.1 | 24079754 | SNV | 1 | C | T | Homozygous   |
| NC_037638.1 | 24080004 | SNV | 1 | C | T | Homozygous   |
| NC_037638.1 | 24087276 | SNV | 1 | G | A | Homozygous   |
| NC_037638.1 | 24087325 | SNV | 1 | C | T | Homozygous   |
| NC_037638.1 | 24089881 | SNV | 1 | G | A | Homozygous   |
| NC_037638.1 | 24092223 | SNV | 1 | C | T | Homozygous   |
| NC_037638.1 | 24092424 | SNV | 1 | A | G | Homozygous   |
| NC_037638.1 | 24092457 | SNV | 1 | C | T | Homozygous   |
| NC_037638.1 | 24095921 | SNV | 1 | T | C | Homozygous   |
| NC_037638.1 | 24097904 | SNV | 1 | T | C | Heterozygous |
| NC_037638.1 | 24100656 | SNV | 1 | G | A | Homozygous   |
| NC_037638.1 | 24103272 | SNV | 1 | C | T | Homozygous   |
| NC_037638.1 | 24103275 | SNV | 1 | T | G | Homozygous   |
| NC_037638.1 | 24103280 | SNV | 1 | T | G | Homozygous   |
| NC_037638.1 | 24107658 | SNV | 1 | A | T | Homozygous   |
| NC_037638.1 | 24107662 | SNV | 1 | A | T | Homozygous   |
| NC_037638.1 | 24107664 | SNV | 1 | T | A | Homozygous   |
| NC_037638.1 | 24107670 | SNV | 1 | A | T | Heterozygous |
| NC_037638.1 | 24107671 | SNV | 1 | T | C | Heterozygous |
| NC_037638.1 | 24107672 | SNV | 1 | A | T | Heterozygous |
| NC_037638.1 | 24107675 | SNV | 1 | A | G | Heterozygous |
| NC_037638.1 | 24107987 | SNV | 1 | C | T | Homozygous   |
| NC_037638.1 | 24108136 | SNV | 1 | A | G | Homozygous   |

|             |          |     |   |   |   |              |
|-------------|----------|-----|---|---|---|--------------|
| NC_037638.1 | 24108304 | SNV | 1 | C | G | Heterozygous |
| NC_037638.1 | 24108337 | SNV | 1 | C | T | Heterozygous |
| NC_037638.1 | 24108695 | SNV | 1 | A | G | Homozygous   |
| NC_037638.1 | 24108698 | SNV | 1 | T | A | Homozygous   |
| NC_037638.1 | 24108704 | SNV | 1 | T | C | Homozygous   |
| NC_037638.1 | 24108715 | SNV | 1 | A | T | Homozygous   |
| NC_037638.1 | 24108717 | SNV | 1 | G | A | Homozygous   |
| NC_037638.1 | 24108719 | SNV | 1 | A | T | Homozygous   |
| NC_037638.1 | 24109010 | SNV | 1 | G | A | Homozygous   |
| NC_037638.1 | 24109032 | SNV | 1 | C | A | Homozygous   |
| NC_037638.1 | 24109035 | SNV | 1 | A | G | Homozygous   |
| NC_037638.1 | 24109045 | SNV | 1 | T | C | Homozygous   |
| NC_037638.1 | 24109047 | SNV | 1 | G | A | Homozygous   |
| NC_037638.1 | 24109049 | SNV | 1 | T | G | Homozygous   |
| NC_037638.1 | 24109054 | SNV | 1 | G | A | Homozygous   |
| NC_037638.1 | 24109603 | SNV | 1 | G | A | Homozygous   |
| NC_037638.1 | 24109726 | SNV | 1 | A | G | Heterozygous |
| NC_037638.1 | 24109907 | SNV | 1 | T | C | Heterozygous |
| NC_037638.1 | 24110268 | SNV | 1 | A | T | Homozygous   |
| NC_037638.1 | 24110270 | SNV | 1 | A | T | Homozygous   |
| NC_037638.1 | 24110275 | SNV | 1 | T | C | Homozygous   |
| NC_037638.1 | 24110277 | SNV | 1 | C | T | Homozygous   |
| NC_037638.1 | 24112132 | SNV | 1 | A | C | Homozygous   |
| NC_037638.1 | 24120518 | SNV | 1 | A | G | Homozygous   |
| NC_037638.1 | 24121043 | SNV | 1 | G | T | Heterozygous |
| NC_037638.1 | 24121049 | SNV | 1 | A | C | Heterozygous |
| NC_037638.1 | 24121061 | SNV | 1 | T | C | Heterozygous |
| NC_037638.1 | 24121076 | SNV | 1 | A | G | Heterozygous |
| NC_037638.1 | 24121082 | SNV | 1 | A | C | Heterozygous |
| NC_037638.1 | 24121103 | SNV | 1 | T | G | Homozygous   |
| NC_037638.1 | 24121106 | SNV | 1 | T | G | Homozygous   |
| NC_037638.1 | 24121109 | SNV | 1 | T | C | Homozygous   |
| NC_037638.1 | 24121118 | SNV | 1 | A | G | Homozygous   |
| NC_037638.1 | 24121121 | SNV | 1 | A | G | Homozygous   |
| NC_037638.1 | 24121127 | SNV | 1 | G | A | Homozygous   |
| NC_037638.1 | 24121130 | SNV | 1 | T | G | Homozygous   |
| NC_037638.1 | 24121136 | SNV | 1 | A | G | Homozygous   |
| NC_037638.1 | 24121139 | SNV | 1 | A | C | Heterozygous |
| NC_037638.1 | 24121139 | SNV | 1 | A | T | Heterozygous |
| NC_037638.1 | 24121142 | SNV | 1 | A | G | Homozygous   |
| NC_037638.1 | 24121148 | SNV | 1 | T | A | Homozygous   |
| NC_037638.1 | 24121151 | SNV | 1 | A | T | Homozygous   |
| NC_037638.1 | 24121154 | SNV | 1 | T | A | Homozygous   |
| NC_037638.1 | 24121163 | SNV | 1 | T | C | Homozygous   |
| NC_037638.1 | 24121176 | SNV | 1 | T | G | Homozygous   |
| NC_037638.1 | 24125149 | SNV | 1 | T | A | Homozygous   |
| NC_037638.1 | 24128556 | SNV | 1 | C | T | Heterozygous |
| NC_037638.1 | 24128727 | SNV | 1 | A | G | Homozygous   |
| NC_037638.1 | 24128745 | SNV | 1 | T | C | Homozygous   |
| NC_037638.1 | 24129614 | SNV | 1 | G | A | Heterozygous |
| NC_037638.1 | 24130736 | SNV | 1 | G | C | Homozygous   |

|             |          |     |   |   |   |              |
|-------------|----------|-----|---|---|---|--------------|
| NC_037638.1 | 24130793 | SNV | 1 | A | G | Homozygous   |
| NC_037638.1 | 24134234 | SNV | 1 | C | G | Homozygous   |
| NC_037638.1 | 24140691 | SNV | 1 | C | T | Homozygous   |
| NC_037638.1 | 24140876 | SNV | 1 | G | A | Heterozygous |
| NC_037638.1 | 24140884 | SNV | 1 | T | A | Heterozygous |
| NC_037638.1 | 24142574 | SNV | 1 | G | A | Homozygous   |
| NC_037638.1 | 24142577 | SNV | 1 | A | C | Homozygous   |
| NC_037638.1 | 24142580 | SNV | 1 | G | A | Homozygous   |
| NC_037638.1 | 24142583 | SNV | 1 | G | A | Homozygous   |
| NC_037638.1 | 24142589 | SNV | 1 | C | T | Homozygous   |
| NC_037638.1 | 24142601 | SNV | 1 | T | A | Homozygous   |
| NC_037638.1 | 24142623 | SNV | 1 | T | C | Homozygous   |
| NC_037638.1 | 24142625 | SNV | 1 | G | A | Homozygous   |
| NC_037638.1 | 24142627 | SNV | 1 | C | T | Homozygous   |
| NC_037638.1 | 24148869 | SNV | 1 | A | T | Heterozygous |
| NC_037638.1 | 24148955 | SNV | 1 | G | T | Homozygous   |
| NC_037638.1 | 24148961 | SNV | 1 | A | G | Homozygous   |
| NC_037638.1 | 24148964 | SNV | 1 | T | G | Homozygous   |
| NC_037638.1 | 24148967 | SNV | 1 | A | G | Homozygous   |
| NC_037638.1 | 24149055 | SNV | 1 | T | C | Homozygous   |
| NC_037638.1 | 24149097 | SNV | 1 | C | T | Heterozygous |
| NC_037638.1 | 24149099 | SNV | 1 | C | T | Heterozygous |
| NC_037638.1 | 24149102 | SNV | 1 | C | T | Homozygous   |
| NC_037638.1 | 24149105 | SNV | 1 | C | T | Heterozygous |
| NC_037638.1 | 24149108 | SNV | 1 | C | T | Homozygous   |
| NC_037638.1 | 24149112 | SNV | 1 | C | A | Heterozygous |
| NC_037638.1 | 24149115 | SNV | 1 | C | A | Heterozygous |
| NC_037638.1 | 24149118 | SNV | 1 | C | A | Heterozygous |
| NC_037638.1 | 24149121 | SNV | 1 | T | A | Homozygous   |
| NC_037638.1 | 24149124 | SNV | 1 | C | A | Heterozygous |
| NC_037638.1 | 24149141 | SNV | 1 | T | C | Heterozygous |
| NC_037638.1 | 24149152 | SNV | 1 | A | T | Homozygous   |
| NC_037638.1 | 24149159 | SNV | 1 | T | A | Homozygous   |
| NC_037638.1 | 24149192 | SNV | 1 | T | A | Homozygous   |
| NC_037638.1 | 24149230 | SNV | 1 | T | C | Homozygous   |
| NC_037638.1 | 24149233 | SNV | 1 | T | C | Homozygous   |
| NC_037638.1 | 24149236 | SNV | 1 | T | C | Homozygous   |
| NC_037638.1 | 24149245 | SNV | 1 | T | C | Heterozygous |
| NC_037638.1 | 24149255 | SNV | 1 | A | C | Heterozygous |
| NC_037638.1 | 24149264 | SNV | 1 | A | T | Heterozygous |
| NC_037638.1 | 24149270 | SNV | 1 | A | T | Heterozygous |
| NC_037638.1 | 24153080 | SNV | 1 | G | A | Homozygous   |
| NC_037638.1 | 24153479 | SNV | 1 | C | A | Homozygous   |
| NC_037638.1 | 24154493 | SNV | 1 | T | C | Homozygous   |
| NC_037638.1 | 24155033 | SNV | 1 | T | A | Heterozygous |
| NC_037638.1 | 24155051 | SNV | 1 | A | G | Homozygous   |
| NC_037638.1 | 24155249 | SNV | 1 | A | C | Homozygous   |
| NC_037638.1 | 24155252 | SNV | 1 | T | A | Homozygous   |
| NC_037638.1 | 24156017 | SNV | 1 | T | G | Homozygous   |
| NC_037638.1 | 24163859 | SNV | 1 | G | A | Homozygous   |
| NC_037638.1 | 24166836 | SNV | 1 | T | A | Heterozygous |

|             |          |     |   |   |   |              |
|-------------|----------|-----|---|---|---|--------------|
| NC_037638.1 | 24166839 | SNV | 1 | T | C | Heterozygous |
| NC_037638.1 | 24166841 | SNV | 1 | T | A | Heterozygous |
| NC_037638.1 | 24166846 | SNV | 1 | T | A | Heterozygous |
| NC_037638.1 | 24168042 | SNV | 1 | C | T | Homozygous   |
| NC_037638.1 | 24171014 | SNV | 1 | A | C | Heterozygous |
| NC_037638.1 | 24171119 | SNV | 1 | A | G | Homozygous   |
| NC_037638.1 | 24172854 | SNV | 1 | T | C | Heterozygous |
| NC_037638.1 | 24173260 | SNV | 1 | C | T | Homozygous   |
| NC_037638.1 | 24173275 | SNV | 1 | T | C | Homozygous   |
| NC_037638.1 | 24173281 | SNV | 1 | T | A | Homozygous   |
| NC_037638.1 | 24173678 | SNV | 1 | T | C | Homozygous   |
| NC_037638.1 | 24173681 | SNV | 1 | C | T | Homozygous   |
| NC_037638.1 | 24173690 | SNV | 1 | G | A | Homozygous   |
| NC_037638.1 | 24174335 | SNV | 1 | T | C | Heterozygous |
| NC_037638.1 | 24176800 | SNV | 1 | A | G | Heterozygous |
| NC_037638.1 | 24176939 | SNV | 1 | A | G | Homozygous   |
| NC_037638.1 | 24178760 | SNV | 1 | C | A | Homozygous   |
| NC_037638.1 | 24178832 | SNV | 1 | A | C | Homozygous   |
| NC_037638.1 | 24180865 | SNV | 1 | C | T | Homozygous   |
| NC_037638.1 | 24182098 | SNV | 1 | A | T | Heterozygous |
| NC_037638.1 | 24185888 | SNV | 1 | A | C | Homozygous   |
| NC_037638.1 | 24186371 | SNV | 1 | T | G | Homozygous   |
| NC_037638.1 | 24186378 | SNV | 1 | C | T | Homozygous   |
| NC_037638.1 | 24186406 | SNV | 1 | T | G | Homozygous   |
| NC_037638.1 | 24186881 | SNV | 1 | C | A | Homozygous   |
| NC_037638.1 | 24186885 | SNV | 1 | A | T | Homozygous   |
| NC_037638.1 | 24186889 | SNV | 1 | A | G | Homozygous   |
| NC_037638.1 | 24186988 | SNV | 1 | A | G | Homozygous   |
| NC_037638.1 | 24186992 | SNV | 1 | T | C | Homozygous   |
| NC_037638.1 | 24186996 | SNV | 1 | T | C | Homozygous   |
| NC_037638.1 | 24187002 | SNV | 1 | G | A | Homozygous   |
| NC_037638.1 | 24187004 | SNV | 1 | T | G | Homozygous   |
| NC_037638.1 | 24187011 | SNV | 1 | G | A | Homozygous   |
| NC_037638.1 | 24187016 | SNV | 1 | A | G | Homozygous   |
| NC_037638.1 | 24187040 | SNV | 1 | A | T | Homozygous   |
| NC_037638.1 | 24187049 | SNV | 1 | C | T | Homozygous   |
| NC_037638.1 | 24187055 | SNV | 1 | T | G | Homozygous   |
| NC_037638.1 | 24187058 | SNV | 1 | C | T | Homozygous   |
| NC_037638.1 | 24187063 | SNV | 1 | A | G | Homozygous   |
| NC_037638.1 | 24187078 | SNV | 1 | T | A | Homozygous   |
| NC_037638.1 | 24187083 | SNV | 1 | A | G | Homozygous   |
| NC_037638.1 | 24187249 | SNV | 1 | A | G | Homozygous   |
| NC_037638.1 | 24188305 | SNV | 1 | T | A | Homozygous   |
| NC_037638.1 | 24188646 | SNV | 1 | A | T | Heterozygous |
| NC_037638.1 | 24188648 | SNV | 1 | A | G | Heterozygous |
| NC_037638.1 | 24188651 | SNV | 1 | A | T | Heterozygous |
| NC_037638.1 | 24188963 | SNV | 1 | C | T | Heterozygous |
| NC_037638.1 | 24193936 | SNV | 1 | C | T | Homozygous   |
| NC_037638.1 | 24193938 | SNV | 1 | T | A | Homozygous   |
| NC_037638.1 | 24197980 | SNV | 1 | G | C | Heterozygous |
| NC_037638.1 | 24198720 | SNV | 1 | T | C | Homozygous   |

|             |          |     |   |   |   |              |
|-------------|----------|-----|---|---|---|--------------|
| NC_037638.1 | 24198725 | SNV | 1 | T | A | Homozygous   |
| NC_037638.1 | 24198734 | SNV | 1 | T | A | Homozygous   |
| NC_037638.1 | 24199892 | SNV | 1 | T | C | Heterozygous |
| NC_037638.1 | 24200590 | SNV | 1 | A | T | Heterozygous |
| NC_037638.1 | 24200595 | SNV | 1 | A | T | Heterozygous |
| NC_037638.1 | 24201128 | SNV | 1 | T | C | Homozygous   |
| NC_037638.1 | 24203939 | SNV | 1 | T | C | Homozygous   |
| NC_037638.1 | 24203988 | SNV | 1 | G | A | Heterozygous |
| NC_037638.1 | 24204015 | SNV | 1 | A | G | Homozygous   |
| NC_037638.1 | 24204134 | SNV | 1 | G | A | Heterozygous |
| NC_037638.1 | 24204266 | SNV | 1 | A | G | Heterozygous |
| NC_037638.1 | 24204293 | SNV | 1 | A | G | Homozygous   |
| NC_037638.1 | 24204360 | SNV | 1 | A | G | Homozygous   |
| NC_037638.1 | 24204507 | SNV | 1 | T | C | Homozygous   |
| NC_037638.1 | 24204752 | SNV | 1 | T | C | Homozygous   |
| NC_037638.1 | 24205410 | SNV | 1 | A | T | Homozygous   |
| NC_037638.1 | 24205665 | SNV | 1 | A | G | Homozygous   |
| NC_037638.1 | 24205743 | SNV | 1 | G | A | Heterozygous |
| NC_037638.1 | 24206344 | SNV | 1 | G | A | Heterozygous |
| NC_037638.1 | 24206378 | SNV | 1 | G | A | Heterozygous |
| NC_037638.1 | 24206614 | SNV | 1 | T | C | Homozygous   |
| NC_037638.1 | 24206775 | SNV | 1 | G | A | Homozygous   |
| NC_037638.1 | 24206850 | SNV | 1 | A | G | Homozygous   |
| NC_037638.1 | 24206861 | SNV | 1 | T | C | Homozygous   |
| NC_037638.1 | 24206865 | SNV | 1 | A | C | Homozygous   |
| NC_037638.1 | 24206868 | SNV | 1 | C | T | Homozygous   |
| NC_037638.1 | 24206874 | SNV | 1 | G | A | Heterozygous |
| NC_037638.1 | 24212423 | SNV | 1 | G | A | Heterozygous |
| NC_037638.1 | 24212442 | SNV | 1 | C | T | Heterozygous |
| NC_037638.1 | 24212741 | SNV | 1 | G | A | Heterozygous |
| NC_037638.1 | 24220591 | SNV | 1 | T | C | Heterozygous |
| NC_037638.1 | 24221186 | SNV | 1 | T | C | Heterozygous |
| NC_037638.1 | 24221254 | SNV | 1 | G | A | Homozygous   |
| NC_037638.1 | 24221390 | SNV | 1 | G | C | Heterozygous |
| NC_037638.1 | 24221502 | SNV | 1 | A | G | Heterozygous |
| NC_037638.1 | 24221511 | SNV | 1 | T | C | Heterozygous |
| NC_037638.1 | 24221799 | SNV | 1 | C | T | Heterozygous |
| NC_037638.1 | 24222044 | SNV | 1 | G | T | Homozygous   |
| NC_037638.1 | 24222223 | SNV | 1 | T | C | Homozygous   |
| NC_037638.1 | 24222545 | SNV | 1 | T | A | Heterozygous |
| NC_037638.1 | 24222590 | SNV | 1 | A | G | Homozygous   |
| NC_037638.1 | 24222919 | SNV | 1 | T | C | Homozygous   |
| NC_037638.1 | 24227040 | SNV | 1 | T | C | Homozygous   |
| NC_037638.1 | 24227044 | SNV | 1 | G | A | Heterozygous |
| NC_037638.1 | 24227154 | SNV | 1 | G | T | Heterozygous |
| NC_037638.1 | 24227383 | SNV | 1 | G | A | Homozygous   |
| NC_037638.1 | 24228114 | SNV | 1 | T | A | Heterozygous |
| NC_037638.1 | 24228207 | SNV | 1 | T | C | Homozygous   |
| NC_037638.1 | 24228209 | SNV | 1 | C | T | Homozygous   |
| NC_037638.1 | 24228265 | SNV | 1 | T | C | Homozygous   |
| NC_037638.1 | 24230465 | SNV | 1 | C | A | Homozygous   |

|             |          |     |   |   |   |              |
|-------------|----------|-----|---|---|---|--------------|
| NC_037638.1 | 24230651 | SNV | 1 | A | G | Homozygous   |
| NC_037638.1 | 24230670 | SNV | 1 | A | G | Homozygous   |
| NC_037638.1 | 24231119 | SNV | 1 | C | G | Heterozygous |
| NC_037638.1 | 24231689 | SNV | 1 | G | A | Homozygous   |
| NC_037638.1 | 24231799 | SNV | 1 | C | T | Homozygous   |
| NC_037638.1 | 24232236 | SNV | 1 | T | C | Heterozygous |
| NC_037638.1 | 24232587 | SNV | 1 | C | T | Heterozygous |
| NC_037638.1 | 24233934 | SNV | 1 | A | G | Homozygous   |
| NC_037638.1 | 24234490 | SNV | 1 | A | G | Homozygous   |
| NC_037638.1 | 24234902 | SNV | 1 | A | G | Homozygous   |
| NC_037638.1 | 24235227 | SNV | 1 | T | C | Homozygous   |
| NC_037638.1 | 24235418 | SNV | 1 | A | G | Homozygous   |
| NC_037638.1 | 24235424 | SNV | 1 | T | A | Homozygous   |
| NC_037638.1 | 24235433 | SNV | 1 | A | C | Homozygous   |
| NC_037638.1 | 24235437 | SNV | 1 | T | A | Homozygous   |
| NC_037638.1 | 24235599 | SNV | 1 | A | G | Homozygous   |
| NC_037638.1 | 24236169 | SNV | 1 | A | G | Homozygous   |
| NC_037638.1 | 24236389 | SNV | 1 | C | T | Homozygous   |
| NC_037638.1 | 24238856 | SNV | 1 | A | C | Homozygous   |
| NC_037638.1 | 24238908 | SNV | 1 | G | A | Homozygous   |
| NC_037638.1 | 24238959 | SNV | 1 | C | T | Homozygous   |
| NC_037638.1 | 24239739 | SNV | 1 | A | G | Heterozygous |
| NC_037638.1 | 24239743 | SNV | 1 | C | G | Heterozygous |
| NC_037638.1 | 24239751 | SNV | 1 | T | A | Heterozygous |
| NC_037638.1 | 24239768 | SNV | 1 | A | T | Heterozygous |
| NC_037638.1 | 24239991 | SNV | 1 | T | C | Homozygous   |
| NC_037638.1 | 24243535 | SNV | 1 | C | A | Homozygous   |
| NC_037638.1 | 24244127 | SNV | 1 | T | A | Heterozygous |
| NC_037638.1 | 24244141 | SNV | 1 | T | G | Homozygous   |
| NC_037638.1 | 24244143 | SNV | 1 | G | A | Homozygous   |
| NC_037638.1 | 24245819 | SNV | 1 | T | A | Homozygous   |
| NC_037638.1 | 24250308 | SNV | 1 | A | G | Heterozygous |
| NC_037638.1 | 24250315 | SNV | 1 | C | T | Heterozygous |
| NC_037638.1 | 24251458 | SNV | 1 | A | G | Homozygous   |
| NC_037638.1 | 24252016 | SNV | 1 | C | T | Homozygous   |
| NC_037638.1 | 24252406 | SNV | 1 | C | G | Homozygous   |
| NC_037638.1 | 24253300 | SNV | 1 | A | G | Homozygous   |
| NC_037638.1 | 24255010 | SNV | 1 | G | A | Heterozygous |
| NC_037638.1 | 24256459 | SNV | 1 | A | G | Homozygous   |
| NC_037638.1 | 24257560 | SNV | 1 | A | G | Homozygous   |
| NC_037638.1 | 24258071 | SNV | 1 | C | T | Homozygous   |
| NC_037638.1 | 24258339 | SNV | 1 | G | A | Homozygous   |
| NC_037638.1 | 24258547 | SNV | 1 | A | T | Heterozygous |
| NC_037638.1 | 24258553 | SNV | 1 | T | A | Heterozygous |
| NC_037638.1 | 24260378 | SNV | 1 | C | T | Heterozygous |
| NC_037638.1 | 24261167 | SNV | 1 | A | G | Homozygous   |
| NC_037638.1 | 24263929 | SNV | 1 | A | G | Homozygous   |
| NC_037638.1 | 24265060 | SNV | 1 | A | G | Homozygous   |
| NC_037638.1 | 24265481 | SNV | 1 | G | A | Homozygous   |
| NC_037638.1 | 24266106 | SNV | 1 | G | A | Heterozygous |
| NC_037638.1 | 24268053 | SNV | 1 | A | G | Homozygous   |



|             |          |     |   |   |   |              |
|-------------|----------|-----|---|---|---|--------------|
| NC_037638.1 | 24268189 | SNV | 1 | C | A | Homozygous   |
| NC_037638.1 | 24268193 | SNV | 1 | T | A | Homozygous   |
| NC_037638.1 | 24268211 | SNV | 1 | T | G | Homozygous   |
| NC_037638.1 | 24268218 | SNV | 1 | A | G | Homozygous   |
| NC_037638.1 | 24268222 | SNV | 1 | T | A | Homozygous   |
| NC_037638.1 | 24268662 | SNV | 1 | G | A | Homozygous   |
| NC_037638.1 | 24269403 | SNV | 1 | G | A | Homozygous   |
| NC_037638.1 | 24269977 | SNV | 1 | T | A | Homozygous   |
| NC_037638.1 | 24270162 | SNV | 1 | G | A | Homozygous   |
| NC_037638.1 | 24272212 | SNV | 1 | T | C | Homozygous   |
| NC_037638.1 | 24279618 | SNV | 1 | A | C | Homozygous   |
| NC_037638.1 | 24279653 | SNV | 1 | A | C | Homozygous   |
| NC_037638.1 | 24279656 | SNV | 1 | A | T | Homozygous   |
| NC_037638.1 | 24280400 | SNV | 1 | A | G | Homozygous   |
| NC_037638.1 | 24281312 | SNV | 1 | A | G | Homozygous   |
| NC_037638.1 | 24281328 | SNV | 1 | T | A | Homozygous   |
| NC_037638.1 | 24281932 | SNV | 1 | C | T | Heterozygous |
| NC_037638.1 | 24282258 | SNV | 1 | T | A | Homozygous   |
| NC_037638.1 | 24282260 | SNV | 1 | A | C | Homozygous   |
| NC_037638.1 | 24282666 | SNV | 1 | A | G | Homozygous   |
| NC_037638.1 | 24286579 | SNV | 1 | C | T | Heterozygous |
| NC_037638.1 | 24286595 | SNV | 1 | T | A | Heterozygous |
| NC_037638.1 | 24286597 | SNV | 1 | T | C | Heterozygous |
| NC_037638.1 | 24290820 | SNV | 1 | A | C | Heterozygous |
| NC_037638.1 | 24293233 | SNV | 1 | C | T | Heterozygous |
| NC_037638.1 | 24293242 | SNV | 1 | C | T | Homozygous   |
| NC_037638.1 | 24293249 | SNV | 1 | G | A | Homozygous   |
| NC_037638.1 | 24293308 | SNV | 1 | T | A | Heterozygous |
| NC_037638.1 | 24293321 | SNV | 1 | T | C | Homozygous   |
| NC_037638.1 | 24293323 | SNV | 1 | G | A | Heterozygous |
| NC_037638.1 | 24293472 | SNV | 1 | C | T | Heterozygous |
| NC_037638.1 | 24293480 | SNV | 1 | T | A | Homozygous   |
| NC_037638.1 | 24293484 | SNV | 1 | A | C | Homozygous   |
| NC_037638.1 | 24293590 | SNV | 1 | G | C | Homozygous   |
| NC_037638.1 | 24293654 | SNV | 1 | C | T | Homozygous   |
| NC_037638.1 | 24293801 | SNV | 1 | G | A | Heterozygous |
| NC_037638.1 | 24293817 | SNV | 1 | T | G | Homozygous   |
| NC_037638.1 | 24293821 | SNV | 1 | T | G | Homozygous   |
| NC_037638.1 | 24293823 | SNV | 1 | G | A | Homozygous   |
| NC_037638.1 | 24293958 | SNV | 1 | G | A | Homozygous   |
| NC_037638.1 | 24294083 | SNV | 1 | A | G | Homozygous   |
| NC_037638.1 | 24294132 | SNV | 1 | C | T | Heterozygous |
| NC_037638.1 | 24294304 | SNV | 1 | T | C | Heterozygous |
| NC_037638.1 | 24294378 | SNV | 1 | G | T | Homozygous   |
| NC_037638.1 | 24294380 | SNV | 1 | A | G | Homozygous   |
| NC_037638.1 | 24294397 | SNV | 1 | G | A | Homozygous   |
| NC_037638.1 | 24294477 | SNV | 1 | C | T | Homozygous   |
| NC_037638.1 | 24294505 | SNV | 1 | T | C | Homozygous   |
| NC_037638.1 | 24294550 | SNV | 1 | C | A | Heterozygous |
| NC_037638.1 | 24294622 | SNV | 1 | A | G | Homozygous   |
| NC_037638.1 | 24294672 | SNV | 1 | T | C | Heterozygous |

|             |          |     |   |   |   |              |
|-------------|----------|-----|---|---|---|--------------|
| NC_037638.1 | 24296426 | SNV | 1 | A | G | Homozygous   |
| NC_037638.1 | 24296430 | SNV | 1 | A | G | Homozygous   |
| NC_037638.1 | 24296432 | SNV | 1 | A | G | Heterozygous |
| NC_037638.1 | 24296448 | SNV | 1 | T | C | Heterozygous |
| NC_037638.1 | 24296963 | SNV | 1 | A | G | Homozygous   |
| NC_037638.1 | 24297032 | SNV | 1 | G | A | Heterozygous |
| NC_037638.1 | 24297037 | SNV | 1 | A | G | Heterozygous |
| NC_037638.1 | 24297146 | SNV | 1 | A | G | Homozygous   |
| NC_037638.1 | 24297157 | SNV | 1 | A | G | Homozygous   |
| NC_037638.1 | 24297661 | SNV | 1 | G | A | Homozygous   |
| NC_037638.1 | 24303404 | SNV | 1 | A | G | Homozygous   |
| NC_037638.1 | 24303436 | SNV | 1 | T | A | Homozygous   |
| NC_037638.1 | 24306987 | SNV | 1 | C | T | Homozygous   |
| NC_037638.1 | 24307041 | SNV | 1 | C | A | Heterozygous |
| NC_037638.1 | 24307044 | SNV | 1 | T | A | Heterozygous |
| NC_037638.1 | 24307069 | SNV | 1 | G | A | Heterozygous |
| NC_037638.1 | 24312385 | SNV | 1 | G | A | Homozygous   |
| NC_037638.1 | 24312574 | SNV | 1 | C | T | Heterozygous |
| NC_037638.1 | 24312613 | SNV | 1 | A | G | Heterozygous |
| NC_037638.1 | 24312636 | SNV | 1 | C | T | Heterozygous |
| NC_037638.1 | 24312638 | SNV | 1 | T | C | Homozygous   |
| NC_037638.1 | 24312645 | SNV | 1 | T | C | Homozygous   |
| NC_037638.1 | 24312807 | SNV | 1 | G | A | Heterozygous |
| NC_037638.1 | 24313818 | SNV | 1 | A | T | Homozygous   |
| NC_037638.1 | 24313827 | SNV | 1 | T | G | Homozygous   |
| NC_037638.1 | 24313833 | SNV | 1 | T | A | Homozygous   |
| NC_037638.1 | 24316807 | SNV | 1 | G | A | Homozygous   |
| NC_037638.1 | 24316809 | SNV | 1 | G | A | Homozygous   |
| NC_037638.1 | 24316819 | SNV | 1 | C | T | Homozygous   |
| NC_037638.1 | 24316821 | SNV | 1 | G | A | Homozygous   |
| NC_037638.1 | 24326997 | SNV | 1 | A | G | Homozygous   |
| NC_037638.1 | 24327033 | SNV | 1 | T | C | Homozygous   |
| NC_037638.1 | 24327193 | SNV | 1 | G | A | Heterozygous |
| NC_037638.1 | 24329717 | SNV | 1 | T | C | Homozygous   |
| NC_037638.1 | 24334866 | SNV | 1 | T | A | Heterozygous |
| NC_037638.1 | 24334874 | SNV | 1 | T | C | Heterozygous |
| NC_037638.1 | 24334910 | SNV | 1 | G | A | Homozygous   |
| NC_037638.1 | 24335010 | SNV | 1 | A | G | Homozygous   |
| NC_037638.1 | 24335013 | SNV | 1 | T | C | Heterozygous |
| NC_037638.1 | 24335072 | SNV | 1 | T | A | Homozygous   |
| NC_037638.1 | 24335074 | SNV | 1 | A | G | Heterozygous |
| NC_037638.1 | 24335305 | SNV | 1 | T | C | Homozygous   |
| NC_037638.1 | 24335633 | SNV | 1 | T | A | Heterozygous |
| NC_037638.1 | 24335652 | SNV | 1 | T | C | Homozygous   |
| NC_037638.1 | 24335656 | SNV | 1 | A | C | Homozygous   |
| NC_037638.1 | 24335773 | SNV | 1 | C | A | Heterozygous |
| NC_037638.1 | 24335787 | SNV | 1 | A | G | Heterozygous |
| NC_037638.1 | 24335801 | SNV | 1 | C | T | Heterozygous |
| NC_037638.1 | 24335810 | SNV | 1 | T | C | Homozygous   |
| NC_037638.1 | 24335821 | SNV | 1 | A | G | Homozygous   |
| NC_037638.1 | 24335823 | SNV | 1 | G | A | Homozygous   |

|             |          |     |   |   |   |              |
|-------------|----------|-----|---|---|---|--------------|
| NC_037638.1 | 24336155 | SNV | 1 | G | A | Heterozygous |
| NC_037638.1 | 24336182 | SNV | 1 | T | C | Homozygous   |
| NC_037638.1 | 24336244 | SNV | 1 | T | C | Heterozygous |
| NC_037638.1 | 24336350 | SNV | 1 | C | T | Heterozygous |
| NC_037638.1 | 24336355 | SNV | 1 | C | T | Homozygous   |
| NC_037638.1 | 24343751 | SNV | 1 | C | T | Homozygous   |
| NC_037638.1 | 24346199 | SNV | 1 | G | A | Heterozygous |
| NC_037638.1 | 24346314 | SNV | 1 | A | G | Homozygous   |
| NC_037638.1 | 24346349 | SNV | 1 | T | C | Homozygous   |
| NC_037638.1 | 24346360 | SNV | 1 | G | C | Homozygous   |
| NC_037638.1 | 24346374 | SNV | 1 | T | C | Homozygous   |
| NC_037638.1 | 24346409 | SNV | 1 | C | T | Heterozygous |
| NC_037638.1 | 24346419 | SNV | 1 | C | T | Homozygous   |
| NC_037638.1 | 24346457 | SNV | 1 | T | C | Heterozygous |
| NC_037638.1 | 24346483 | SNV | 1 | T | C | Homozygous   |
| NC_037638.1 | 24346597 | SNV | 1 | C | T | Heterozygous |
| NC_037638.1 | 24347733 | SNV | 1 | A | G | Heterozygous |
| NC_037638.1 | 24347800 | SNV | 1 | G | A | Homozygous   |
| NC_037638.1 | 24347811 | SNV | 1 | T | C | Homozygous   |
| NC_037638.1 | 24351423 | SNV | 1 | G | A | Heterozygous |
| NC_037638.1 | 24351452 | SNV | 1 | A | G | Homozygous   |
| NC_037638.1 | 24351458 | SNV | 1 | C | G | Heterozygous |
| NC_037638.1 | 24351481 | SNV | 1 | A | G | Heterozygous |
| NC_037638.1 | 24351619 | SNV | 1 | A | G | Heterozygous |
| NC_037638.1 | 24351685 | SNV | 1 | C | G | Homozygous   |
| NC_037638.1 | 24351703 | SNV | 1 | A | G | Homozygous   |
| NC_037638.1 | 24351705 | SNV | 1 | A | G | Homozygous   |
| NC_037638.1 | 24351971 | SNV | 1 | T | A | Homozygous   |
| NC_037638.1 | 24352003 | SNV | 1 | C | T | Heterozygous |
| NC_037638.1 | 24352174 | SNV | 1 | C | T | Heterozygous |
| NC_037638.1 | 24352224 | SNV | 1 | A | G | Heterozygous |
| NC_037638.1 | 24352226 | SNV | 1 | G | A | Homozygous   |
| NC_037638.1 | 24360445 | SNV | 1 | C | T | Homozygous   |
| NC_037638.1 | 24368867 | SNV | 1 | C | T | Heterozygous |
| NC_037638.1 | 24368898 | SNV | 1 | G | T | Heterozygous |
| NC_037638.1 | 24368919 | SNV | 1 | T | G | Homozygous   |
| NC_037638.1 | 24368932 | SNV | 1 | G | C | Homozygous   |
| NC_037638.1 | 24368944 | SNV | 1 | C | T | Homozygous   |
| NC_037638.1 | 24368948 | SNV | 1 | T | C | Homozygous   |
| NC_037638.1 | 24373243 | SNV | 1 | T | C | Homozygous   |
| NC_037638.1 | 24373301 | SNV | 1 | T | C | Homozygous   |
| NC_037638.1 | 24373349 | SNV | 1 | C | T | Heterozygous |
| NC_037638.1 | 24373357 | SNV | 1 | C | T | Homozygous   |
| NC_037638.1 | 24373403 | SNV | 1 | C | T | Heterozygous |
| NC_037638.1 | 24373620 | SNV | 1 | A | G | Homozygous   |
| NC_037638.1 | 24373687 | SNV | 1 | C | A | Heterozygous |
| NC_037638.1 | 24373721 | SNV | 1 | C | T | Heterozygous |
| NC_037638.1 | 24373730 | SNV | 1 | C | T | Heterozygous |
| NC_037638.1 | 24373883 | SNV | 1 | T | C | Homozygous   |
| NC_037638.1 | 24373949 | SNV | 1 | C | T | Heterozygous |
| NC_037638.1 | 24374188 | SNV | 1 | A | G | Homozygous   |

|             |          |     |   |   |   |              |
|-------------|----------|-----|---|---|---|--------------|
| NC_037638.1 | 24374223 | SNV | 1 | G | C | Homozygous   |
| NC_037638.1 | 24382510 | SNV | 1 | A | G | Heterozygous |
| NC_037638.1 | 24382536 | SNV | 1 | A | C | Heterozygous |
| NC_037638.1 | 24382541 | SNV | 1 | A | C | Heterozygous |
| NC_037638.1 | 24396297 | SNV | 1 | C | T | Homozygous   |
| NC_037638.1 | 24396353 | SNV | 1 | A | G | Homozygous   |
| NC_037638.1 | 24396988 | SNV | 1 | T | C | Homozygous   |
| NC_037638.1 | 24397309 | SNV | 1 | C | T | Heterozygous |
| NC_037638.1 | 24397513 | SNV | 1 | A | G | Homozygous   |
| NC_037638.1 | 24397563 | SNV | 1 | A | G | Homozygous   |
| NC_037638.1 | 24397637 | SNV | 1 | T | C | Homozygous   |
| NC_037638.1 | 24399677 | SNV | 1 | G | A | Heterozygous |
| NC_037638.1 | 24399712 | SNV | 1 | A | T | Homozygous   |
| NC_037638.1 | 24399718 | SNV | 1 | A | T | Homozygous   |
| NC_037638.1 | 24399721 | SNV | 1 | T | A | Heterozygous |
| NC_037638.1 | 24399741 | SNV | 1 | C | T | Homozygous   |
| NC_037638.1 | 24399743 | SNV | 1 | A | T | Homozygous   |
| NC_037638.1 | 24399758 | SNV | 1 | A | T | Homozygous   |
| NC_037638.1 | 24403266 | SNV | 1 | T | C | Homozygous   |
| NC_037638.1 | 24403497 | SNV | 1 | C | T | Heterozygous |
| NC_037638.1 | 24403506 | SNV | 1 | A | G | Heterozygous |
| NC_037638.1 | 24403623 | SNV | 1 | A | G | Homozygous   |
| NC_037638.1 | 24403722 | SNV | 1 | G | A | Homozygous   |
| NC_037638.1 | 24403743 | SNV | 1 | G | A | Heterozygous |
| NC_037638.1 | 24403803 | SNV | 1 | G | A | Homozygous   |
| NC_037638.1 | 24404088 | SNV | 1 | T | C | Homozygous   |
| NC_037638.1 | 24404636 | SNV | 1 | A | G | Homozygous   |
| NC_037638.1 | 24404690 | SNV | 1 | A | G | Heterozygous |
| NC_037638.1 | 24404869 | SNV | 1 | C | T | Homozygous   |
| NC_037638.1 | 24404900 | SNV | 1 | A | G | Homozygous   |
| NC_037638.1 | 24407323 | SNV | 1 | C | T | Homozygous   |
| NC_037638.1 | 24407702 | SNV | 1 | T | C | Heterozygous |
| NC_037638.1 | 24408417 | SNV | 1 | C | A | Homozygous   |
| NC_037638.1 | 24408880 | SNV | 1 | A | G | Homozygous   |
| NC_037638.1 | 24408939 | SNV | 1 | T | A | Homozygous   |
| NC_037638.1 | 24409364 | SNV | 1 | A | G | Homozygous   |
| NC_037638.1 | 24409471 | SNV | 1 | A | G | Heterozygous |
| NC_037638.1 | 24409479 | SNV | 1 | A | G | Heterozygous |
| NC_037638.1 | 24409754 | SNV | 1 | A | G | Heterozygous |
| NC_037638.1 | 24409775 | SNV | 1 | T | A | Heterozygous |
| NC_037638.1 | 24409782 | SNV | 1 | A | G | Homozygous   |
| NC_037638.1 | 24409790 | SNV | 1 | A | T | Heterozygous |
| NC_037638.1 | 24409931 | SNV | 1 | A | G | Heterozygous |
| NC_037638.1 | 24409951 | SNV | 1 | A | C | Heterozygous |
| NC_037638.1 | 24410184 | SNV | 1 | G | T | Heterozygous |
| NC_037638.1 | 24410192 | SNV | 1 | G | T | Homozygous   |
| NC_037638.1 | 24410220 | SNV | 1 | A | G | Heterozygous |
| NC_037638.1 | 24410583 | SNV | 1 | A | G | Heterozygous |
| NC_037638.1 | 24410583 | SNV | 1 | A | T | Heterozygous |
| NC_037638.1 | 24410587 | SNV | 1 | G | T | Heterozygous |
| NC_037638.1 | 24410589 | SNV | 1 | G | T | Heterozygous |

|             |          |     |   |   |   |              |
|-------------|----------|-----|---|---|---|--------------|
| NC_037638.1 | 24410595 | SNV | 1 | A | G | Heterozygous |
| NC_037638.1 | 24410595 | SNV | 1 | A | T | Heterozygous |
| NC_037638.1 | 24410603 | SNV | 1 | G | A | Homozygous   |
| NC_037638.1 | 24412003 | SNV | 1 | A | G | Homozygous   |
| NC_037638.1 | 24412016 | SNV | 1 | T | C | Homozygous   |
| NC_037638.1 | 24412116 | SNV | 1 | T | G | Heterozygous |
| NC_037638.1 | 24412274 | SNV | 1 | A | G | Heterozygous |
| NC_037638.1 | 24412354 | SNV | 1 | A | T | Homozygous   |
| NC_037638.1 | 24412364 | SNV | 1 | C | T | Heterozygous |
| NC_037638.1 | 24412465 | SNV | 1 | A | G | Homozygous   |
| NC_037638.1 | 24413592 | SNV | 1 | G | T | Heterozygous |
| NC_037638.1 | 24413954 | SNV | 1 | A | G | Heterozygous |
| NC_037638.1 | 24413995 | SNV | 1 | C | T | Heterozygous |
| NC_037638.1 | 24414040 | SNV | 1 | C | T | Heterozygous |
| NC_037638.1 | 24415078 | SNV | 1 | C | T | Homozygous   |
| NC_037638.1 | 24415476 | SNV | 1 | T | G | Heterozygous |
| NC_037638.1 | 24415495 | SNV | 1 | C | T | Homozygous   |
| NC_037638.1 | 24415613 | SNV | 1 | C | T | Homozygous   |
| NC_037638.1 | 24415770 | SNV | 1 | T | C | Homozygous   |
| NC_037638.1 | 24415994 | SNV | 1 | T | A | Heterozygous |
| NC_037638.1 | 24416415 | SNV | 1 | C | T | Homozygous   |
| NC_037638.1 | 24417052 | SNV | 1 | C | T | Heterozygous |
| NC_037638.1 | 24417712 | SNV | 1 | A | G | Homozygous   |
| NC_037638.1 | 24418131 | SNV | 1 | A | G | Heterozygous |
| NC_037638.1 | 24418153 | SNV | 1 | A | G | Homozygous   |
| NC_037638.1 | 24418184 | SNV | 1 | C | A | Heterozygous |
| NC_037638.1 | 24418389 | SNV | 1 | C | G | Heterozygous |
| NC_037638.1 | 24418767 | SNV | 1 | T | C | Homozygous   |
| NC_037638.1 | 24418798 | SNV | 1 | G | A | Homozygous   |
| NC_037638.1 | 24419041 | SNV | 1 | T | C | Homozygous   |
| NC_037638.1 | 24419819 | SNV | 1 | C | T | Homozygous   |
| NC_037638.1 | 24420571 | SNV | 1 | T | C | Heterozygous |
| NC_037638.1 | 24420749 | SNV | 1 | G | A | Heterozygous |
| NC_037638.1 | 24421024 | SNV | 1 | T | C | Homozygous   |
| NC_037638.1 | 24421199 | SNV | 1 | G | A | Homozygous   |
| NC_037638.1 | 24421297 | SNV | 1 | A | G | Homozygous   |
| NC_037638.1 | 24421361 | SNV | 1 | C | T | Heterozygous |
| NC_037638.1 | 24421378 | SNV | 1 | C | G | Homozygous   |
| NC_037638.1 | 24421597 | SNV | 1 | C | T | Homozygous   |
| NC_037638.1 | 24421635 | SNV | 1 | A | G | Homozygous   |
| NC_037638.1 | 24421648 | SNV | 1 | T | A | Heterozygous |
| NC_037638.1 | 24421650 | SNV | 1 | G | A | Heterozygous |
| NC_037638.1 | 24422073 | SNV | 1 | G | A | Heterozygous |
| NC_037638.1 | 24433634 | SNV | 1 | T | C | Homozygous   |
| NC_037638.1 | 24433681 | SNV | 1 | C | G | Homozygous   |
| NC_037638.1 | 24433730 | SNV | 1 | C | T | Heterozygous |
| NC_037638.1 | 24447145 | SNV | 1 | T | C | Heterozygous |
| NC_037638.1 | 24447165 | SNV | 1 | C | G | Homozygous   |
| NC_037638.1 | 24447233 | SNV | 1 | T | C | Heterozygous |
| NC_037638.1 | 24447237 | SNV | 1 | C | T | Homozygous   |
| NC_037638.1 | 24447294 | SNV | 1 | G | A | Heterozygous |

|             |          |     |   |   |   |              |
|-------------|----------|-----|---|---|---|--------------|
| NC_037638.1 | 24447297 | SNV | 1 | G | A | Heterozygous |
| NC_037638.1 | 24447300 | SNV | 1 | G | A | Homozygous   |
| NC_037638.1 | 24449820 | SNV | 1 | C | T | Heterozygous |
| NC_037638.1 | 24449915 | SNV | 1 | G | C | Heterozygous |
| NC_037638.1 | 24449925 | SNV | 1 | C | T | Heterozygous |
| NC_037638.1 | 24458513 | SNV | 1 | C | T | Heterozygous |
| NC_037638.1 | 24458516 | SNV | 1 | C | A | Homozygous   |
| NC_037638.1 | 24458520 | SNV | 1 | A | T | Homozygous   |
| NC_037638.1 | 24458631 | SNV | 1 | C | T | Heterozygous |
| NC_037638.1 | 24460724 | SNV | 1 | C | T | Homozygous   |
| NC_037638.1 | 24460731 | SNV | 1 | T | C | Homozygous   |
| NC_037638.1 | 24461340 | SNV | 1 | A | G | Homozygous   |
| NC_037638.1 | 24461373 | SNV | 1 | A | G | Heterozygous |
| NC_037638.1 | 24461679 | SNV | 1 | C | T | Heterozygous |
| NC_037638.1 | 24461814 | SNV | 1 | G | A | Homozygous   |
| NC_037638.1 | 24463347 | SNV | 1 | A | G | Homozygous   |
| NC_037638.1 | 24463353 | SNV | 1 | C | G | Homozygous   |
| NC_037638.1 | 24463650 | SNV | 1 | T | C | Homozygous   |
| NC_037638.1 | 24463663 | SNV | 1 | A | T | Heterozygous |
| NC_037638.1 | 24463784 | SNV | 1 | T | C | Homozygous   |
| NC_037638.1 | 24464512 | SNV | 1 | C | T | Homozygous   |
| NC_037638.1 | 24464552 | SNV | 1 | A | T | Heterozygous |
| NC_037638.1 | 24471380 | SNV | 1 | A | G | Heterozygous |
| NC_037638.1 | 24471406 | SNV | 1 | A | G | Homozygous   |
| NC_037638.1 | 24473022 | SNV | 1 | C | T | Homozygous   |
| NC_037638.1 | 24473034 | SNV | 1 | C | G | Homozygous   |
| NC_037638.1 | 24473040 | SNV | 1 | G | T | Homozygous   |
| NC_037638.1 | 24473043 | SNV | 1 | G | C | Homozygous   |
| NC_037638.1 | 24487062 | SNV | 1 | C | T | Heterozygous |
| NC_037638.1 | 24487216 | SNV | 1 | T | C | Heterozygous |
| NC_037638.1 | 24489855 | SNV | 1 | G | A | Heterozygous |
| NC_037638.1 | 24489859 | SNV | 1 | A | G | Heterozygous |
| NC_037638.1 | 24489866 | SNV | 1 | C | T | Heterozygous |
| NC_037638.1 | 24490280 | SNV | 1 | A | G | Heterozygous |
| NC_037638.1 | 24490317 | SNV | 1 | A | G | Homozygous   |
| NC_037638.1 | 24490714 | SNV | 1 | A | G | Heterozygous |
| NC_037638.1 | 24490756 | SNV | 1 | G | A | Heterozygous |
| NC_037638.1 | 24490768 | SNV | 1 | T | A | Heterozygous |
| NC_037638.1 | 24492793 | SNV | 1 | T | C | Homozygous   |
| NC_037638.1 | 24494562 | SNV | 1 | A | G | Homozygous   |
| NC_037638.1 | 24494606 | SNV | 1 | T | C | Homozygous   |
| NC_037638.1 | 24494781 | SNV | 1 | A | G | Homozygous   |
| NC_037638.1 | 24494802 | SNV | 1 | A | G | Homozygous   |
| NC_037638.1 | 24495150 | SNV | 1 | C | A | Homozygous   |
| NC_037638.1 | 24495154 | SNV | 1 | A | G | Homozygous   |
| NC_037638.1 | 24495157 | SNV | 1 | G | A | Homozygous   |
| NC_037638.1 | 24495183 | SNV | 1 | A | C | Homozygous   |
| NC_037638.1 | 24495186 | SNV | 1 | A | G | Homozygous   |
| NC_037638.1 | 24497545 | SNV | 1 | T | C | Homozygous   |
| NC_037638.1 | 24513502 | SNV | 1 | C | G | Homozygous   |
| NC_037638.1 | 24527253 | SNV | 1 | G | A | Heterozygous |

|             |          |     |   |   |   |              |
|-------------|----------|-----|---|---|---|--------------|
| NC_037638.1 | 24527529 | SNV | 1 | T | C | Heterozygous |
| NC_037638.1 | 24527832 | SNV | 1 | C | A | Homozygous   |
| NC_037638.1 | 24527841 | SNV | 1 | A | G | Heterozygous |
| NC_037638.1 | 24527855 | SNV | 1 | G | A | Heterozygous |
| NC_037638.1 | 24527857 | SNV | 1 | A | G | Heterozygous |
| NC_037638.1 | 24527886 | SNV | 1 | G | A | Heterozygous |
| NC_037638.1 | 24527891 | SNV | 1 | G | A | Heterozygous |
| NC_037638.1 | 24538674 | SNV | 1 | A | G | Homozygous   |
| NC_037638.1 | 24538698 | SNV | 1 | A | G | Heterozygous |
| NC_037638.1 | 24538823 | SNV | 1 | C | T | Homozygous   |
| NC_037638.1 | 24538867 | SNV | 1 | T | C | Homozygous   |
| NC_037638.1 | 24539274 | SNV | 1 | C | A | Homozygous   |
| NC_037638.1 | 24539280 | SNV | 1 | T | C | Homozygous   |
| NC_037638.1 | 24539393 | SNV | 1 | A | G | Heterozygous |
| NC_037638.1 | 24543025 | SNV | 1 | A | G | Homozygous   |
| NC_037638.1 | 24543055 | SNV | 1 | G | A | Homozygous   |
| NC_037638.1 | 24543193 | SNV | 1 | A | G | Homozygous   |
| NC_037638.1 | 24543981 | SNV | 1 | T | C | Homozygous   |
| NC_037638.1 | 24544711 | SNV | 1 | C | T | Homozygous   |
| NC_037638.1 | 24544720 | SNV | 1 | C | T | Homozygous   |
| NC_037638.1 | 24544723 | SNV | 1 | C | T | Homozygous   |
| NC_037638.1 | 24544726 | SNV | 1 | T | C | Homozygous   |
| NC_037638.1 | 24545455 | SNV | 1 | A | G | Homozygous   |
| NC_037638.1 | 24545500 | SNV | 1 | A | G | Homozygous   |
| NC_037638.1 | 24545639 | SNV | 1 | A | G | Heterozygous |
| NC_037638.1 | 24545756 | SNV | 1 | A | G | Homozygous   |
| NC_037638.1 | 24545933 | SNV | 1 | G | A | Heterozygous |
| NC_037638.1 | 24546715 | SNV | 1 | G | A | Homozygous   |
| NC_037638.1 | 24548041 | SNV | 1 | C | G | Homozygous   |
| NC_037638.1 | 24548332 | SNV | 1 | T | G | Heterozygous |
| NC_037638.1 | 24548396 | SNV | 1 | G | A | Heterozygous |
| NC_037638.1 | 24548759 | SNV | 1 | C | G | Homozygous   |
| NC_037638.1 | 24548774 | SNV | 1 | A | G | Homozygous   |
| NC_037638.1 | 24548995 | SNV | 1 | T | C | Heterozygous |
| NC_037638.1 | 24578090 | SNV | 1 | A | G | Heterozygous |
| NC_037638.1 | 24578329 | SNV | 1 | A | C | Heterozygous |
| NC_037638.1 | 24583462 | SNV | 1 | C | T | Heterozygous |
| NC_037638.1 | 24586074 | SNV | 1 | A | G | Homozygous   |
| NC_037638.1 | 24586245 | SNV | 1 | C | T | Homozygous   |
| NC_037638.1 | 24586258 | SNV | 1 | T | C | Homozygous   |
| NC_037638.1 | 24587119 | SNV | 1 | T | C | Heterozygous |
| NC_037638.1 | 24587351 | SNV | 1 | T | C | Homozygous   |
| NC_037638.1 | 24587359 | SNV | 1 | A | G | Homozygous   |
| NC_037638.1 | 24587516 | SNV | 1 | G | A | Heterozygous |
| NC_037638.1 | 24588191 | SNV | 1 | G | C | Homozygous   |
| NC_037638.1 | 24588213 | SNV | 1 | T | C | Homozygous   |
| NC_037638.1 | 24589862 | SNV | 1 | C | G | Heterozygous |
| NC_037638.1 | 24592481 | SNV | 1 | C | T | Heterozygous |
| NC_037638.1 | 24592751 | SNV | 1 | A | G | Homozygous   |
| NC_037638.1 | 24592798 | SNV | 1 | G | A | Heterozygous |
| NC_037638.1 | 24593594 | SNV | 1 | G | A | Homozygous   |

|             |          |     |   |   |   |              |
|-------------|----------|-----|---|---|---|--------------|
| NC_037638.1 | 24593841 | SNV | 1 | C | T | Homozygous   |
| NC_037638.1 | 24593871 | SNV | 1 | C | T | Heterozygous |
| NC_037638.1 | 24594168 | SNV | 1 | G | A | Homozygous   |
| NC_037638.1 | 24596132 | SNV | 1 | G | A | Heterozygous |
| NC_037638.1 | 24596270 | SNV | 1 | A | G | Homozygous   |
| NC_037638.1 | 24596349 | SNV | 1 | C | T | Homozygous   |
| NC_037638.1 | 24596451 | SNV | 1 | C | T | Heterozygous |
| NC_037638.1 | 24596841 | SNV | 1 | G | A | Homozygous   |
| NC_037638.1 | 24596846 | SNV | 1 | T | A | Homozygous   |
| NC_037638.1 | 24596853 | SNV | 1 | C | A | Homozygous   |
| NC_037638.1 | 24596857 | SNV | 1 | G | A | Homozygous   |
| NC_037638.1 | 24596865 | SNV | 1 | G | A | Homozygous   |
| NC_037638.1 | 24596910 | SNV | 1 | A | G | Homozygous   |
| NC_037638.1 | 24600078 | SNV | 1 | A | G | Homozygous   |
| NC_037638.1 | 24600094 | SNV | 1 | A | G | Homozygous   |
| NC_037638.1 | 24600140 | SNV | 1 | A | G | Homozygous   |
| NC_037638.1 | 24600203 | SNV | 1 | C | A | Heterozygous |
| NC_037638.1 | 24600216 | SNV | 1 | G | A | Homozygous   |
| NC_037638.1 | 24600371 | SNV | 1 | T | C | Homozygous   |
| NC_037638.1 | 24602372 | SNV | 1 | A | G | Homozygous   |
| NC_037638.1 | 24603256 | SNV | 1 | C | T | Heterozygous |
| NC_037638.1 | 24603346 | SNV | 1 | G | A | Heterozygous |
| NC_037638.1 | 24604371 | SNV | 1 | T | C | Heterozygous |
| NC_037638.1 | 24605240 | SNV | 1 | C | T | Heterozygous |
| NC_037638.1 | 24605290 | SNV | 1 | T | C | Homozygous   |
| NC_037638.1 | 24605329 | SNV | 1 | T | C | Homozygous   |
| NC_037638.1 | 24605408 | SNV | 1 | A | G | Heterozygous |
| NC_037638.1 | 24605527 | SNV | 1 | C | G | Heterozygous |
| NC_037638.1 | 24605531 | SNV | 1 | A | G | Heterozygous |
| NC_037638.1 | 24605539 | SNV | 1 | A | G | Heterozygous |
| NC_037638.1 | 24605541 | SNV | 1 | G | T | Heterozygous |
| NC_037638.1 | 24605568 | SNV | 1 | A | G | Heterozygous |
| NC_037638.1 | 24605572 | SNV | 1 | T | C | Homozygous   |
| NC_037638.1 | 24605823 | SNV | 1 | T | C | Homozygous   |
| NC_037638.1 | 24605883 | SNV | 1 | T | C | Heterozygous |
| NC_037638.1 | 24606253 | SNV | 1 | A | G | Homozygous   |
| NC_037638.1 | 24606257 | SNV | 1 | A | G | Homozygous   |
| NC_037638.1 | 24606260 | SNV | 1 | G | T | Homozygous   |
| NC_037638.1 | 24606267 | SNV | 1 | C | T | Heterozygous |
| NC_037638.1 | 24606279 | SNV | 1 | C | G | Heterozygous |
| NC_037638.1 | 24606351 | SNV | 1 | C | T | Heterozygous |
| NC_037638.1 | 24606358 | SNV | 1 | A | G | Homozygous   |
| NC_037638.1 | 24606625 | SNV | 1 | A | G | Heterozygous |
| NC_037638.1 | 24606928 | SNV | 1 | C | T | Heterozygous |
| NC_037638.1 | 24607051 | SNV | 1 | G | A | Heterozygous |
| NC_037638.1 | 24607055 | SNV | 1 | T | C | Homozygous   |
| NC_037638.1 | 24607140 | SNV | 1 | A | G | Heterozygous |
| NC_037638.1 | 24607322 | SNV | 1 | T | C | Homozygous   |
| NC_037638.1 | 24607345 | SNV | 1 | T | C | Heterozygous |
| NC_037638.1 | 24607391 | SNV | 1 | A | G | Heterozygous |
| NC_037638.1 | 24607454 | SNV | 1 | T | G | Homozygous   |



|             |          |     |   |   |   |              |
|-------------|----------|-----|---|---|---|--------------|
| NC_037638.1 | 24607594 | SNV | 1 | A | G | Homozygous   |
| NC_037638.1 | 24608255 | SNV | 1 | G | A | Heterozygous |
| NC_037638.1 | 24608333 | SNV | 1 | G | A | Heterozygous |
| NC_037638.1 | 24608351 | SNV | 1 | A | G | Homozygous   |
| NC_037638.1 | 24608377 | SNV | 1 | G | A | Homozygous   |
| NC_037638.1 | 24608390 | SNV | 1 | G | A | Homozygous   |
| NC_037638.1 | 24608433 | SNV | 1 | A | G | Homozygous   |
| NC_037638.1 | 24608446 | SNV | 1 | A | G | Homozygous   |
| NC_037638.1 | 24608457 | SNV | 1 | C | G | Homozygous   |
| NC_037638.1 | 24608461 | SNV | 1 | G | A | Homozygous   |
| NC_037638.1 | 24608476 | SNV | 1 | G | A | Homozygous   |
| NC_037638.1 | 24608490 | SNV | 1 | A | G | Homozygous   |
| NC_037638.1 | 24608534 | SNV | 1 | C | T | Heterozygous |
| NC_037638.1 | 24608536 | SNV | 1 | G | C | Heterozygous |
| NC_037638.1 | 24608540 | SNV | 1 | C | T | Heterozygous |
| NC_037638.1 | 24608594 | SNV | 1 | C | T | Homozygous   |
| NC_037638.1 | 24608635 | SNV | 1 | C | T | Homozygous   |
| NC_037638.1 | 24608647 | SNV | 1 | A | G | Homozygous   |
| NC_037638.1 | 24608761 | SNV | 1 | C | T | Homozygous   |
| NC_037638.1 | 24608915 | SNV | 1 | C | A | Homozygous   |
| NC_037638.1 | 24608947 | SNV | 1 | C | T | Heterozygous |
| NC_037638.1 | 24609242 | SNV | 1 | T | C | Homozygous   |
| NC_037638.1 | 24609268 | SNV | 1 | C | T | Homozygous   |
| NC_037638.1 | 24609298 | SNV | 1 | G | A | Heterozygous |
| NC_037638.1 | 24609327 | SNV | 1 | A | G | Heterozygous |
| NC_037638.1 | 24609367 | SNV | 1 | G | A | Heterozygous |
| NC_037638.1 | 24609392 | SNV | 1 | G | A | Heterozygous |
| NC_037638.1 | 24609438 | SNV | 1 | C | T | Homozygous   |
| NC_037638.1 | 24609711 | SNV | 1 | G | A | Heterozygous |
| NC_037638.1 | 24612662 | SNV | 1 | T | A | Homozygous   |
| NC_037638.1 | 24612664 | SNV | 1 | A | G | Homozygous   |
| NC_037638.1 | 24612791 | SNV | 1 | T | C | Homozygous   |
| NC_037638.1 | 24613433 | SNV | 1 | G | C | Heterozygous |
| NC_037638.1 | 24613514 | SNV | 1 | A | G | Homozygous   |
| NC_037638.1 | 24614192 | SNV | 1 | A | G | Homozygous   |
| NC_037638.1 | 24614605 | SNV | 1 | A | G | Heterozygous |
| NC_037638.1 | 24614723 | SNV | 1 | C | A | Heterozygous |
| NC_037638.1 | 24625349 | SNV | 1 | A | T | Homozygous   |
| NC_037638.1 | 24627495 | SNV | 1 | T | C | Heterozygous |
| NC_037638.1 | 24627787 | SNV | 1 | A | G | Homozygous   |
| NC_037638.1 | 24629103 | SNV | 1 | A | T | Heterozygous |
| NC_037638.1 | 24629104 | SNV | 1 | A | T | Heterozygous |
| NC_037638.1 | 24629106 | SNV | 1 | A | T | Homozygous   |
| NC_037638.1 | 24630355 | SNV | 1 | G | A | Homozygous   |
| NC_037638.1 | 24631081 | SNV | 1 | G | A | Homozygous   |
| NC_037638.1 | 24633826 | SNV | 1 | A | G | Heterozygous |
| NC_037638.1 | 24633855 | SNV | 1 | A | G | Homozygous   |
| NC_037638.1 | 24633876 | SNV | 1 | T | C | Homozygous   |
| NC_037638.1 | 24638032 | SNV | 1 | A | G | Heterozygous |
| NC_037638.1 | 24638069 | SNV | 1 | T | C | Heterozygous |
| NC_037638.1 | 24638073 | SNV | 1 | T | C | Heterozygous |

|             |          |     |   |   |   |              |
|-------------|----------|-----|---|---|---|--------------|
| NC_037638.1 | 24649085 | SNV | 1 | A | G | Heterozygous |
| NC_037638.1 | 24649089 | SNV | 1 | C | G | Heterozygous |
| NC_037638.1 | 24649398 | SNV | 1 | C | A | Homozygous   |
| NC_037638.1 | 24651024 | SNV | 1 | G | A | Heterozygous |
| NC_037638.1 | 24651488 | SNV | 1 | G | A | Homozygous   |
| NC_037638.1 | 24656347 | SNV | 1 | T | G | Heterozygous |
| NC_037638.1 | 24656670 | SNV | 1 | G | A | Homozygous   |
| NC_037638.1 | 24661458 | SNV | 1 | T | C | Homozygous   |
| NC_037638.1 | 24670742 | SNV | 1 | T | C | Homozygous   |
| NC_037638.1 | 24672504 | SNV | 1 | A | G | Homozygous   |
| NC_037638.1 | 24672855 | SNV | 1 | A | C | Homozygous   |
| NC_037638.1 | 24704622 | SNV | 1 | G | T | Homozygous   |
| NC_037638.1 | 24704639 | SNV | 1 | T | C | Homozygous   |
| NC_037638.1 | 24705896 | SNV | 1 | C | T | Homozygous   |
| NC_037638.1 | 24717217 | SNV | 1 | G | A | Homozygous   |
| NC_037638.1 | 24717227 | SNV | 1 | C | T | Homozygous   |
| NC_037638.1 | 24717244 | SNV | 1 | G | A | Homozygous   |
| NC_037638.1 | 24719535 | SNV | 1 | G | T | Homozygous   |
| NC_037638.1 | 24719582 | SNV | 1 | C | T | Heterozygous |
| NC_037638.1 | 24721610 | SNV | 1 | A | C | Homozygous   |
| NC_037638.1 | 24721651 | SNV | 1 | C | T | Homozygous   |
| NC_037638.1 | 24721847 | SNV | 1 | T | C | Heterozygous |
| NC_037638.1 | 24721906 | SNV | 1 | A | G | Homozygous   |
| NC_037638.1 | 24726220 | SNV | 1 | C | T | Heterozygous |
| NC_037638.1 | 24726330 | SNV | 1 | A | G | Homozygous   |
| NC_037638.1 | 24726451 | SNV | 1 | G | T | Homozygous   |
| NC_037638.1 | 24726484 | SNV | 1 | C | T | Heterozygous |
| NC_037638.1 | 24726497 | SNV | 1 | T | C | Homozygous   |
| NC_037638.1 | 24726504 | SNV | 1 | T | C | Homozygous   |
| NC_037638.1 | 24726527 | SNV | 1 | T | C | Homozygous   |
| NC_037638.1 | 24729740 | SNV | 1 | A | T | Heterozygous |
| NC_037638.1 | 24729845 | SNV | 1 | C | T | Homozygous   |
| NC_037638.1 | 24729901 | SNV | 1 | G | C | Heterozygous |
| NC_037638.1 | 24730122 | SNV | 1 | T | C | Homozygous   |
| NC_037638.1 | 24730160 | SNV | 1 | T | C | Homozygous   |
| NC_037638.1 | 24730192 | SNV | 1 | G | A | Homozygous   |
| NC_037638.1 | 24730207 | SNV | 1 | A | C | Heterozygous |
| NC_037638.1 | 24730234 | SNV | 1 | G | A | Homozygous   |
| NC_037638.1 | 24730274 | SNV | 1 | C | T | Heterozygous |
| NC_037638.1 | 24730276 | SNV | 1 | T | C | Homozygous   |
| NC_037638.1 | 24730498 | SNV | 1 | T | C | Homozygous   |
| NC_037638.1 | 24730542 | SNV | 1 | C | T | Homozygous   |
| NC_037638.1 | 24730553 | SNV | 1 | C | T | Heterozygous |
| NC_037638.1 | 24730559 | SNV | 1 | C | T | Heterozygous |
| NC_037638.1 | 24730664 | SNV | 1 | A | G | Heterozygous |
| NC_037638.1 | 24730704 | SNV | 1 | T | C | Homozygous   |
| NC_037638.1 | 24730712 | SNV | 1 | T | C | Heterozygous |
| NC_037638.1 | 24730723 | SNV | 1 | T | A | Heterozygous |
| NC_037638.1 | 24730770 | SNV | 1 | A | G | Homozygous   |
| NC_037638.1 | 24730804 | SNV | 1 | G | A | Heterozygous |
| NC_037638.1 | 24778889 | SNV | 1 | G | T | Homozygous   |

|             |          |     |   |   |   |              |
|-------------|----------|-----|---|---|---|--------------|
| NC_037638.1 | 24790760 | SNV | 1 | G | T | Homozygous   |
| NC_037638.1 | 24793236 | SNV | 1 | C | T | Heterozygous |
| NC_037638.1 | 24793247 | SNV | 1 | G | A | Homozygous   |
| NC_037638.1 | 24793249 | SNV | 1 | A | C | Homozygous   |
| NC_037638.1 | 24793279 | SNV | 1 | G | A | Homozygous   |
| NC_037638.1 | 24797535 | SNV | 1 | G | T | Heterozygous |
| NC_037638.1 | 24798299 | SNV | 1 | A | G | Homozygous   |
| NC_037638.1 | 24798328 | SNV | 1 | A | G | Homozygous   |
| NC_037638.1 | 24798390 | SNV | 1 | G | A | Homozygous   |
| NC_037638.1 | 24798425 | SNV | 1 | A | G | Heterozygous |
| NC_037638.1 | 24798454 | SNV | 1 | G | T | Homozygous   |
| NC_037638.1 | 24798457 | SNV | 1 | C | T | Homozygous   |
| NC_037638.1 | 24798470 | SNV | 1 | A | G | Homozygous   |
| NC_037638.1 | 24798474 | SNV | 1 | C | A | Homozygous   |
| NC_037638.1 | 24798557 | SNV | 1 | A | T | Homozygous   |
| NC_037638.1 | 24798563 | SNV | 1 | A | T | Homozygous   |
| NC_037638.1 | 24798569 | SNV | 1 | G | A | Homozygous   |
| NC_037638.1 | 24798620 | SNV | 1 | T | A | Homozygous   |
| NC_037638.1 | 24798635 | SNV | 1 | G | A | Homozygous   |
| NC_037638.1 | 24798647 | SNV | 1 | A | T | Homozygous   |
| NC_037638.1 | 24798653 | SNV | 1 | A | T | Homozygous   |
| NC_037638.1 | 24800193 | SNV | 1 | A | T | Homozygous   |
| NC_037638.1 | 24807898 | SNV | 1 | C | T | Homozygous   |
| NC_037638.1 | 24807943 | SNV | 1 | A | G | Heterozygous |
| NC_037638.1 | 24807947 | SNV | 1 | G | T | Homozygous   |
| NC_037638.1 | 24808019 | SNV | 1 | A | G | Homozygous   |
| NC_037638.1 | 24823411 | SNV | 1 | G | A | Homozygous   |
| NC_037638.1 | 24823515 | SNV | 1 | G | A | Heterozygous |
| NC_037638.1 | 24824099 | SNV | 1 | T | A | Homozygous   |
| NC_037638.1 | 24824107 | SNV | 1 | G | A | Heterozygous |
| NC_037638.1 | 24824109 | SNV | 1 | G | A | Homozygous   |
| NC_037638.1 | 24824638 | SNV | 1 | C | G | Homozygous   |
| NC_037638.1 | 24824646 | SNV | 1 | G | A | Heterozygous |
| NC_037638.1 | 24824664 | SNV | 1 | A | G | Homozygous   |
| NC_037638.1 | 24824690 | SNV | 1 | A | G | Heterozygous |
| NC_037638.1 | 24829422 | SNV | 1 | C | T | Heterozygous |
| NC_037638.1 | 24829424 | SNV | 1 | C | T | Heterozygous |
| NC_037638.1 | 24829439 | SNV | 1 | C | T | Heterozygous |
| NC_037638.1 | 24829918 | SNV | 1 | G | A | Heterozygous |
| NC_037638.1 | 24829970 | SNV | 1 | T | C | Heterozygous |
| NC_037638.1 | 24829973 | SNV | 1 | C | T | Heterozygous |
| NC_037638.1 | 24829988 | SNV | 1 | G | A | Heterozygous |
| NC_037638.1 | 24834287 | SNV | 1 | C | T | Homozygous   |
| NC_037638.1 | 24834621 | SNV | 1 | T | C | Heterozygous |
| NC_037638.1 | 24847004 | SNV | 1 | C | T | Homozygous   |
| NC_037638.1 | 24847182 | SNV | 1 | T | C | Homozygous   |
| NC_037638.1 | 24847301 | SNV | 1 | A | T | Homozygous   |
| NC_037638.1 | 24847325 | SNV | 1 | C | T | Homozygous   |
| NC_037638.1 | 24847330 | SNV | 1 | T | G | Heterozygous |
| NC_037638.1 | 24847335 | SNV | 1 | C | T | Heterozygous |
| NC_037638.1 | 24847340 | SNV | 1 | C | T | Homozygous   |

|             |          |     |   |   |   |              |
|-------------|----------|-----|---|---|---|--------------|
| NC_037638.1 | 24847350 | SNV | 1 | A | T | Homozygous   |
| NC_037638.1 | 24851751 | SNV | 1 | A | G | Heterozygous |
| NC_037638.1 | 24851787 | SNV | 1 | T | C | Homozygous   |
| NC_037638.1 | 24851813 | SNV | 1 | T | C | Homozygous   |
| NC_037638.1 | 24851819 | SNV | 1 | G | A | Homozygous   |
| NC_037638.1 | 24851821 | SNV | 1 | C | T | Homozygous   |
| NC_037638.1 | 24851828 | SNV | 1 | C | T | Heterozygous |
| NC_037638.1 | 24851834 | SNV | 1 | C | T | Homozygous   |
| NC_037638.1 | 24860256 | SNV | 1 | T | G | Homozygous   |
| NC_037638.1 | 24860286 | SNV | 1 | A | T | Homozygous   |
| NC_037638.1 | 24860486 | SNV | 1 | T | G | Heterozygous |
| NC_037638.1 | 24873398 | SNV | 1 | G | A | Heterozygous |
| NC_037638.1 | 24873781 | SNV | 1 | T | C | Heterozygous |
| NC_037638.1 | 24873807 | SNV | 1 | T | C | Homozygous   |
| NC_037638.1 | 24873880 | SNV | 1 | T | C | Homozygous   |
| NC_037638.1 | 24873999 | SNV | 1 | A | G | Homozygous   |
| NC_037638.1 | 24874062 | SNV | 1 | G | A | Heterozygous |
| NC_037638.1 | 24874079 | SNV | 1 | A | G | Heterozygous |
| NC_037638.1 | 24874088 | SNV | 1 | T | C | Homozygous   |
| NC_037638.1 | 24874103 | SNV | 1 | A | G | Homozygous   |
| NC_037638.1 | 24874111 | SNV | 1 | T | C | Homozygous   |
| NC_037638.1 | 24874124 | SNV | 1 | T | C | Homozygous   |
| NC_037638.1 | 24874160 | SNV | 1 | A | G | Homozygous   |
| NC_037638.1 | 24874177 | SNV | 1 | G | A | Homozygous   |
| NC_037638.1 | 24874247 | SNV | 1 | C | T | Homozygous   |
| NC_037638.1 | 24874293 | SNV | 1 | T | C | Heterozygous |
| NC_037638.1 | 24874508 | SNV | 1 | C | G | Heterozygous |
| NC_037638.1 | 24874544 | SNV | 1 | C | T | Homozygous   |
| NC_037638.1 | 24874589 | SNV | 1 | G | A | Homozygous   |
| NC_037638.1 | 24874591 | SNV | 1 | C | T | Homozygous   |
| NC_037638.1 | 24874822 | SNV | 1 | A | G | Heterozygous |
| NC_037638.1 | 24874854 | SNV | 1 | C | T | Heterozygous |
| NC_037638.1 | 24874868 | SNV | 1 | T | C | Homozygous   |
| NC_037638.1 | 24874882 | SNV | 1 | C | T | Homozygous   |
| NC_037638.1 | 24874885 | SNV | 1 | T | C | Homozygous   |
| NC_037638.1 | 24874895 | SNV | 1 | T | C | Homozygous   |
| NC_037638.1 | 24874911 | SNV | 1 | C | T | Heterozygous |
| NC_037638.1 | 24874913 | SNV | 1 | T | C | Homozygous   |
| NC_037638.1 | 24874932 | SNV | 1 | T | C | Homozygous   |
| NC_037638.1 | 24874947 | SNV | 1 | T | A | Heterozygous |
| NC_037638.1 | 24874954 | SNV | 1 | G | A | Homozygous   |
| NC_037638.1 | 24874959 | SNV | 1 | T | C | Heterozygous |
| NC_037638.1 | 24874961 | SNV | 1 | C | T | Heterozygous |
| NC_037638.1 | 24875039 | SNV | 1 | G | A | Homozygous   |
| NC_037638.1 | 24875041 | SNV | 1 | A | G | Homozygous   |
| NC_037638.1 | 24875107 | SNV | 1 | C | T | Homozygous   |
| NC_037638.1 | 24875125 | SNV | 1 | G | A | Homozygous   |
| NC_037638.1 | 24875141 | SNV | 1 | T | C | Homozygous   |
| NC_037638.1 | 24875152 | SNV | 1 | C | T | Heterozygous |
| NC_037638.1 | 24875242 | SNV | 1 | A | G | Homozygous   |
| NC_037638.1 | 24875305 | SNV | 1 | G | A | Heterozygous |

|             |          |     |   |   |   |              |
|-------------|----------|-----|---|---|---|--------------|
| NC_037638.1 | 24875452 | SNV | 1 | A | T | Homozygous   |
| NC_037638.1 | 24875480 | SNV | 1 | C | T | Homozygous   |
| NC_037638.1 | 24875568 | SNV | 1 | T | C | Homozygous   |
| NC_037638.1 | 24875668 | SNV | 1 | A | G | Homozygous   |
| NC_037638.1 | 24875742 | SNV | 1 | T | C | Homozygous   |
| NC_037638.1 | 24876180 | SNV | 1 | T | C | Homozygous   |
| NC_037638.1 | 24876190 | SNV | 1 | T | A | Homozygous   |
| NC_037638.1 | 24876262 | SNV | 1 | A | G | Homozygous   |
| NC_037638.1 | 24876274 | SNV | 1 | G | A | Homozygous   |
| NC_037638.1 | 24876276 | SNV | 1 | G | A | Heterozygous |
| NC_037638.1 | 24876281 | SNV | 1 | G | A | Homozygous   |
| NC_037638.1 | 24876294 | SNV | 1 | C | A | Homozygous   |
| NC_037638.1 | 24876319 | SNV | 1 | A | G | Homozygous   |
| NC_037638.1 | 24876358 | SNV | 1 | G | A | Heterozygous |
| NC_037638.1 | 24876561 | SNV | 1 | G | A | Heterozygous |
| NC_037638.1 | 24876579 | SNV | 1 | C | G | Homozygous   |
| NC_037638.1 | 24876909 | SNV | 1 | C | G | Homozygous   |
| NC_037638.1 | 24883105 | SNV | 1 | G | A | Homozygous   |
| NC_037638.1 | 24883499 | SNV | 1 | G | A | Heterozygous |
| NC_037638.1 | 24883551 | SNV | 1 | C | T | Homozygous   |
| NC_037638.1 | 24883559 | SNV | 1 | C | G | Homozygous   |
| NC_037638.1 | 24883565 | SNV | 1 | T | C | Homozygous   |
| NC_037638.1 | 24883568 | SNV | 1 | C | T | Homozygous   |
| NC_037638.1 | 24883604 | SNV | 1 | A | G | Homozygous   |
| NC_037638.1 | 24883656 | SNV | 1 | G | A | Heterozygous |
| NC_037638.1 | 24883707 | SNV | 1 | C | G | Homozygous   |
| NC_037638.1 | 24883745 | SNV | 1 | T | C | Homozygous   |
| NC_037638.1 | 24883783 | SNV | 1 | G | A | Heterozygous |
| NC_037638.1 | 24883798 | SNV | 1 | C | T | Heterozygous |
| NC_037638.1 | 24883799 | SNV | 1 | T | C | Heterozygous |
| NC_037638.1 | 24883809 | SNV | 1 | A | G | Homozygous   |
| NC_037638.1 | 24883873 | SNV | 1 | A | G | Homozygous   |
| NC_037638.1 | 24883898 | SNV | 1 | T | C | Homozygous   |
| NC_037638.1 | 24883906 | SNV | 1 | C | T | Heterozygous |
| NC_037638.1 | 24883910 | SNV | 1 | T | G | Homozygous   |
| NC_037638.1 | 24883979 | SNV | 1 | A | G | Homozygous   |
| NC_037638.1 | 24884114 | SNV | 1 | T | C | Homozygous   |
| NC_037638.1 | 24884127 | SNV | 1 | A | G | Homozygous   |
| NC_037638.1 | 24884173 | SNV | 1 | T | C | Homozygous   |
| NC_037638.1 | 24884275 | SNV | 1 | T | C | Heterozygous |
| NC_037638.1 | 24884338 | SNV | 1 | A | G | Heterozygous |
| NC_037638.1 | 24884340 | SNV | 1 | C | T | Heterozygous |
| NC_037638.1 | 24884361 | SNV | 1 | A | G | Homozygous   |
| NC_037638.1 | 24884410 | SNV | 1 | C | T | Homozygous   |
| NC_037638.1 | 24884433 | SNV | 1 | A | G | Homozygous   |
| NC_037638.1 | 24884453 | SNV | 1 | T | G | Homozygous   |
| NC_037638.1 | 24884465 | SNV | 1 | T | C | Homozygous   |
| NC_037638.1 | 24884647 | SNV | 1 | G | A | Homozygous   |
| NC_037638.1 | 24884672 | SNV | 1 | T | A | Heterozygous |
| NC_037638.1 | 24884674 | SNV | 1 | G | T | Heterozygous |
| NC_037638.1 | 24897927 | SNV | 1 | A | T | Heterozygous |

|             |          |     |   |   |   |              |
|-------------|----------|-----|---|---|---|--------------|
| NC_037638.1 | 24897965 | SNV | 1 | T | C | Homozygous   |
| NC_037638.1 | 24898004 | SNV | 1 | T | C | Heterozygous |
| NC_037638.1 | 24915435 | SNV | 1 | A | G | Homozygous   |
| NC_037638.1 | 24919081 | SNV | 1 | C | G | Homozygous   |
| NC_037638.1 | 24920355 | SNV | 1 | C | T | Homozygous   |
| NC_037638.1 | 24920629 | SNV | 1 | G | A | Heterozygous |
| NC_037638.1 | 24920707 | SNV | 1 | T | C | Homozygous   |
| NC_037638.1 | 24923258 | SNV | 1 | T | C | Homozygous   |
| NC_037638.1 | 24923580 | SNV | 1 | A | G | Homozygous   |
| NC_037638.1 | 24926816 | SNV | 1 | C | A | Heterozygous |
| NC_037638.1 | 24926819 | SNV | 1 | C | T | Heterozygous |
| NC_037638.1 | 24927195 | SNV | 1 | C | G | Heterozygous |
| NC_037638.1 | 24927198 | SNV | 1 | G | T | Heterozygous |
| NC_037638.1 | 24927201 | SNV | 1 | C | G | Heterozygous |
| NC_037638.1 | 24927204 | SNV | 1 | C | G | Heterozygous |
| NC_037638.1 | 24927214 | SNV | 1 | T | C | Heterozygous |
| NC_037638.1 | 24927216 | SNV | 1 | G | T | Heterozygous |
| NC_037638.1 | 24927218 | SNV | 1 | G | T | Heterozygous |
| NC_037638.1 | 24927219 | SNV | 1 | C | G | Heterozygous |
| NC_037638.1 | 24927221 | SNV | 1 | G | A | Heterozygous |
| NC_037638.1 | 24927223 | SNV | 1 | T | A | Heterozygous |
| NC_037638.1 | 24927230 | SNV | 1 | G | T | Heterozygous |
| NC_037638.1 | 24927232 | SNV | 1 | C | T | Homozygous   |
| NC_037638.1 | 24927234 | SNV | 1 | C | G | Homozygous   |
| NC_037638.1 | 24927237 | SNV | 1 | T | C | Heterozygous |
| NC_037638.1 | 24927239 | SNV | 1 | G | A | Heterozygous |
| NC_037638.1 | 24927243 | SNV | 1 | C | T | Heterozygous |
| NC_037638.1 | 24927259 | SNV | 1 | T | A | Homozygous   |
| NC_037638.1 | 24927261 | SNV | 1 | G | T | Homozygous   |
| NC_037638.1 | 24927264 | SNV | 1 | G | C | Homozygous   |
| NC_037638.1 | 24927267 | SNV | 1 | G | C | Homozygous   |
| NC_037638.1 | 24943394 | SNV | 1 | T | G | Homozygous   |
| NC_037638.1 | 24943396 | SNV | 1 | C | T | Homozygous   |
| NC_037638.1 | 24943402 | SNV | 1 | T | C | Homozygous   |
| NC_037638.1 | 24943418 | SNV | 1 | T | A | Homozygous   |
| NC_037638.1 | 24943420 | SNV | 1 | T | C | Homozygous   |
| NC_037638.1 | 24943424 | SNV | 1 | C | T | Homozygous   |
| NC_037638.1 | 24961025 | SNV | 1 | G | A | Heterozygous |
| NC_037638.1 | 24961109 | SNV | 1 | T | A | Homozygous   |
| NC_037638.1 | 24961236 | SNV | 1 | C | T | Heterozygous |
| NC_037638.1 | 24961853 | SNV | 1 | T | C | Homozygous   |
| NC_037638.1 | 24961970 | SNV | 1 | G | T | Homozygous   |
| NC_037638.1 | 24962423 | SNV | 1 | C | T | Homozygous   |
| NC_037638.1 | 24962427 | SNV | 1 | T | C | Heterozygous |
| NC_037638.1 | 24962908 | SNV | 1 | A | G | Heterozygous |
| NC_037638.1 | 24962915 | SNV | 1 | G | C | Heterozygous |
| NC_037638.1 | 24972065 | SNV | 1 | A | G | Homozygous   |
| NC_037638.1 | 24973102 | SNV | 1 | C | T | Heterozygous |
| NC_037638.1 | 24975706 | SNV | 1 | A | T | Homozygous   |
| NC_037638.1 | 24977735 | SNV | 1 | G | A | Homozygous   |
| NC_037638.1 | 24977753 | SNV | 1 | T | C | Homozygous   |

|             |          |     |   |   |   |              |
|-------------|----------|-----|---|---|---|--------------|
| NC_037638.1 | 24978075 | SNV | 1 | C | G | Heterozygous |
| NC_037638.1 | 24980983 | SNV | 1 | G | A | Homozygous   |
| NC_037638.1 | 24981047 | SNV | 1 | T | C | Homozygous   |
| NC_037638.1 | 24983604 | SNV | 1 | T | C | Homozygous   |
| NC_037638.1 | 24984432 | SNV | 1 | A | G | Homozygous   |
| NC_037638.1 | 24986219 | SNV | 1 | A | T | Heterozygous |
| NC_037638.1 | 24986270 | SNV | 1 | G | T | Homozygous   |
| NC_037638.1 | 24992853 | SNV | 1 | G | A | Heterozygous |
| NC_037638.1 | 24995776 | SNV | 1 | A | T | Homozygous   |
| NC_037638.1 | 24995778 | SNV | 1 | G | T | Homozygous   |
| NC_037638.1 | 24995781 | SNV | 1 | G | A | Homozygous   |
| NC_037638.1 | 24995788 | SNV | 1 | C | T | Homozygous   |
| NC_037638.1 | 24995818 | SNV | 1 | G | T | Homozygous   |
| NC_037638.1 | 24995821 | SNV | 1 | T | C | Heterozygous |
| NC_037638.1 | 24996100 | SNV | 1 | A | T | Heterozygous |
| NC_037638.1 | 24996110 | SNV | 1 | T | C | Heterozygous |
| NC_037638.1 | 24996114 | SNV | 1 | C | T | Heterozygous |
| NC_037638.1 | 25002136 | SNV | 1 | G | A | Heterozygous |
| NC_037638.1 | 25004588 | SNV | 1 | G | T | Heterozygous |
| NC_037638.1 | 25004598 | SNV | 1 | T | C | Heterozygous |
| NC_037638.1 | 25004843 | SNV | 1 | T | C | Homozygous   |
| NC_037638.1 | 25004887 | SNV | 1 | C | T | Heterozygous |
| NC_037638.1 | 25004903 | SNV | 1 | A | G | Homozygous   |
| NC_037638.1 | 25010399 | SNV | 1 | A | G | Heterozygous |
| NC_037638.1 | 25010416 | SNV | 1 | A | G | Homozygous   |
| NC_037638.1 | 25017437 | SNV | 1 | A | T | Homozygous   |
| NC_037638.1 | 25017447 | SNV | 1 | G | T | Homozygous   |
| NC_037638.1 | 25018113 | SNV | 1 | T | C | Homozygous   |
| NC_037638.1 | 25018116 | SNV | 1 | G | A | Homozygous   |
| NC_037638.1 | 25021853 | SNV | 1 | A | G | Homozygous   |
| NC_037638.1 | 25028327 | SNV | 1 | A | G | Homozygous   |
| NC_037638.1 | 25038067 | SNV | 1 | C | T | Heterozygous |
| NC_037638.1 | 25038350 | SNV | 1 | G | A | Homozygous   |
| NC_037638.1 | 25038353 | SNV | 1 | G | A | Homozygous   |
| NC_037638.1 | 25046863 | SNV | 1 | A | G | Homozygous   |
| NC_037638.1 | 25049390 | SNV | 1 | T | A | Heterozygous |
| NC_037638.1 | 25049398 | SNV | 1 | C | A | Heterozygous |
| NC_037638.1 | 25049404 | SNV | 1 | T | C | Heterozygous |
| NC_037638.1 | 25049917 | SNV | 1 | C | T | Homozygous   |
| NC_037638.1 | 25052227 | SNV | 1 | G | T | Homozygous   |
| NC_037638.1 | 25052230 | SNV | 1 | T | C | Homozygous   |
| NC_037638.1 | 25053667 | SNV | 1 | G | A | Homozygous   |
| NC_037638.1 | 25054782 | SNV | 1 | C | T | Homozygous   |
| NC_037638.1 | 25062468 | SNV | 1 | A | C | Homozygous   |
| NC_037638.1 | 25065615 | SNV | 1 | A | G | Heterozygous |
| NC_037638.1 | 25066860 | SNV | 1 | T | C | Homozygous   |
| NC_037638.1 | 25066997 | SNV | 1 | A | T | Homozygous   |
| NC_037638.1 | 25069927 | SNV | 1 | A | C | Homozygous   |
| NC_037638.1 | 25070283 | SNV | 1 | A | G | Homozygous   |
| NC_037638.1 | 25076848 | SNV | 1 | A | G | Homozygous   |
| NC_037638.1 | 25080391 | SNV | 1 | A | G | Homozygous   |

|             |          |     |   |   |   |              |
|-------------|----------|-----|---|---|---|--------------|
| NC_037638.1 | 25084105 | SNV | 1 | A | G | Homozygous   |
| NC_037638.1 | 25084285 | SNV | 1 | T | G | Heterozygous |
| NC_037638.1 | 25087731 | SNV | 1 | T | G | Homozygous   |
| NC_037638.1 | 25087874 | SNV | 1 | A | G | Homozygous   |
| NC_037638.1 | 25088472 | SNV | 1 | C | A | Homozygous   |
| NC_037638.1 | 25090844 | SNV | 1 | T | C | Heterozygous |
| NC_037638.1 | 25093421 | SNV | 1 | C | G | Homozygous   |
| NC_037638.1 | 25093449 | SNV | 1 | T | C | Homozygous   |
| NC_037638.1 | 25093676 | SNV | 1 | A | C | Homozygous   |
| NC_037638.1 | 25094171 | SNV | 1 | A | C | Homozygous   |
| NC_037638.1 | 25094903 | SNV | 1 | C | T | Homozygous   |
| NC_037638.1 | 25095163 | SNV | 1 | C | A | Homozygous   |
| NC_037638.1 | 25095166 | SNV | 1 | A | C | Homozygous   |
| NC_037638.1 | 25095488 | SNV | 1 | C | A | Homozygous   |
| NC_037638.1 | 25095496 | SNV | 1 | A | T | Homozygous   |
| NC_037638.1 | 25095505 | SNV | 1 | T | G | Homozygous   |
| NC_037638.1 | 25095507 | SNV | 1 | G | A | Homozygous   |
| NC_037638.1 | 25095511 | SNV | 1 | T | A | Homozygous   |
| NC_037638.1 | 25098394 | SNV | 1 | A | T | Heterozygous |
| NC_037638.1 | 25099741 | SNV | 1 | C | T | Heterozygous |
| NC_037638.1 | 25113376 | SNV | 1 | A | G | Homozygous   |
| NC_037638.1 | 25116807 | SNV | 1 | C | T | Homozygous   |
| NC_037638.1 | 25118581 | SNV | 1 | G | T | Homozygous   |
| NC_037638.1 | 25119333 | SNV | 1 | C | T | Homozygous   |
| NC_037638.1 | 25119347 | SNV | 1 | G | C | Homozygous   |
| NC_037638.1 | 25120603 | SNV | 1 | C | A | Homozygous   |
| NC_037638.1 | 25120605 | SNV | 1 | T | C | Homozygous   |
| NC_037638.1 | 25121665 | SNV | 1 | G | T | Heterozygous |
| NC_037638.1 | 25121668 | SNV | 1 | A | T | Heterozygous |
| NC_037638.1 | 25124533 | SNV | 1 | T | G | Heterozygous |
| NC_037638.1 | 25125027 | SNV | 1 | T | C | Homozygous   |
| NC_037638.1 | 25126497 | SNV | 1 | T | C | Homozygous   |
| NC_037638.1 | 25126500 | SNV | 1 | T | A | Homozygous   |
| NC_037638.1 | 25126504 | SNV | 1 | T | A | Homozygous   |
| NC_037638.1 | 25126512 | SNV | 1 | A | C | Homozygous   |
| NC_037638.1 | 25126549 | SNV | 1 | T | A | Homozygous   |
| NC_037638.1 | 25127325 | SNV | 1 | A | G | Homozygous   |
| NC_037638.1 | 25128241 | SNV | 1 | C | A | Heterozygous |
| NC_037638.1 | 25128244 | SNV | 1 | T | A | Heterozygous |
| NC_037638.1 | 25128254 | SNV | 1 | T | A | Homozygous   |
| NC_037638.1 | 25128999 | SNV | 1 | G | A | Homozygous   |
| NC_037638.1 | 25130169 | SNV | 1 | T | G | Homozygous   |
| NC_037638.1 | 25132608 | SNV | 1 | C | T | Homozygous   |
| NC_037638.1 | 25132610 | SNV | 1 | G | T | Homozygous   |
| NC_037638.1 | 25132613 | SNV | 1 | G | T | Heterozygous |
| NC_037638.1 | 25133572 | SNV | 1 | T | C | Homozygous   |
| NC_037638.1 | 25134698 | SNV | 1 | G | A | Heterozygous |
| NC_037638.1 | 25136050 | SNV | 1 | T | C | Homozygous   |
| NC_037638.1 | 25136530 | SNV | 1 | A | C | Homozygous   |
| NC_037638.1 | 25138749 | SNV | 1 | G | T | Homozygous   |
| NC_037638.1 | 25139454 | SNV | 1 | C | T | Homozygous   |



|             |          |     |   |   |   |              |
|-------------|----------|-----|---|---|---|--------------|
| NC_037638.1 | 25139746 | SNV | 1 | T | C | Homozygous   |
| NC_037638.1 | 25140995 | SNV | 1 | A | G | Homozygous   |
| NC_037638.1 | 25142415 | SNV | 1 | A | T | Heterozygous |
| NC_037638.1 | 25142449 | SNV | 1 | A | G | Heterozygous |
| NC_037638.1 | 25142454 | SNV | 1 | T | C | Heterozygous |
| NC_037638.1 | 25142458 | SNV | 1 | T | C | Heterozygous |
| NC_037638.1 | 25142461 | SNV | 1 | T | A | Homozygous   |
| NC_037638.1 | 25142464 | SNV | 1 | T | A | Heterozygous |
| NC_037638.1 | 25146888 | SNV | 1 | G | A | Heterozygous |
| NC_037638.1 | 25147649 | SNV | 1 | T | C | Homozygous   |
| NC_037638.1 | 25148179 | SNV | 1 | G | A | Homozygous   |
| NC_037638.1 | 25150245 | SNV | 1 | G | A | Homozygous   |
| NC_037638.1 | 25150487 | SNV | 1 | G | A | Homozygous   |
| NC_037638.1 | 25150559 | SNV | 1 | T | A | Homozygous   |
| NC_037638.1 | 25150998 | SNV | 1 | T | C | Homozygous   |
| NC_037638.1 | 25151530 | SNV | 1 | T | C | Homozygous   |
| NC_037638.1 | 25155655 | SNV | 1 | C | T | Homozygous   |
| NC_037638.1 | 25155759 | SNV | 1 | T | A | Heterozygous |
| NC_037638.1 | 25155942 | SNV | 1 | T | A | Heterozygous |
| NC_037638.1 | 25155944 | SNV | 1 | C | A | Heterozygous |
| NC_037638.1 | 25155944 | SNV | 1 | C | T | Heterozygous |
| NC_037638.1 | 25155950 | SNV | 1 | T | A | Heterozygous |
| NC_037638.1 | 25155952 | SNV | 1 | T | A | Heterozygous |
| NC_037638.1 | 25155956 | SNV | 1 | T | A | Heterozygous |
| NC_037638.1 | 25155998 | SNV | 1 | A | T | Heterozygous |
| NC_037638.1 | 25155999 | SNV | 1 | C | T | Heterozygous |
| NC_037638.1 | 25156002 | SNV | 1 | T | G | Homozygous   |
| NC_037638.1 | 25156007 | SNV | 1 | T | C | Homozygous   |
| NC_037638.1 | 25156039 | SNV | 1 | A | G | Homozygous   |
| NC_037638.1 | 25162822 | SNV | 1 | A | G | Homozygous   |
| NC_037638.1 | 25163271 | SNV | 1 | G | A | Homozygous   |
| NC_037638.1 | 25167837 | SNV | 1 | A | T | Heterozygous |
| NC_037638.1 | 25167847 | SNV | 1 | C | T | Heterozygous |
| NC_037638.1 | 25167857 | SNV | 1 | T | G | Heterozygous |
| NC_037638.1 | 25173143 | SNV | 1 | G | A | Homozygous   |
| NC_037638.1 | 25246911 | SNV | 1 | T | A | Heterozygous |
| NC_037638.1 | 25249952 | SNV | 1 | T | A | Homozygous   |
| NC_037638.1 | 25249955 | SNV | 1 | G | A | Homozygous   |
| NC_037638.1 | 25251717 | SNV | 1 | A | G | Heterozygous |
| NC_037638.1 | 25252033 | SNV | 1 | C | T | Heterozygous |
| NC_037638.1 | 25252185 | SNV | 1 | A | G | Homozygous   |
| NC_037638.1 | 25255265 | SNV | 1 | G | A | Heterozygous |
| NC_037638.1 | 25255432 | SNV | 1 | T | C | Homozygous   |
| NC_037638.1 | 25264113 | SNV | 1 | A | G | Homozygous   |
| NC_037638.1 | 25269487 | SNV | 1 | A | G | Homozygous   |
| NC_037638.1 | 25272493 | SNV | 1 | G | A | Homozygous   |
| NC_037638.1 | 25272497 | SNV | 1 | G | T | Homozygous   |
| NC_037638.1 | 25274693 | SNV | 1 | T | C | Homozygous   |
| NC_037638.1 | 25274696 | SNV | 1 | C | A | Homozygous   |
| NC_037638.1 | 25274711 | SNV | 1 | T | A | Homozygous   |
| NC_037638.1 | 25274724 | SNV | 1 | T | A | Homozygous   |

|             |          |     |   |   |   |              |
|-------------|----------|-----|---|---|---|--------------|
| NC_037638.1 | 25274727 | SNV | 1 | A | C | Homozygous   |
| NC_037638.1 | 25274751 | SNV | 1 | A | G | Homozygous   |
| NC_037638.1 | 25274759 | SNV | 1 | A | G | Heterozygous |
| NC_037638.1 | 25278757 | SNV | 1 | C | T | Heterozygous |
| NC_037638.1 | 25279503 | SNV | 1 | G | A | Heterozygous |
| NC_037638.1 | 25280581 | SNV | 1 | C | T | Homozygous   |
| NC_037638.1 | 25280584 | SNV | 1 | C | T | Heterozygous |
| NC_037638.1 | 25281792 | SNV | 1 | T | C | Homozygous   |
| NC_037638.1 | 25281802 | SNV | 1 | A | T | Homozygous   |
| NC_037638.1 | 25281805 | SNV | 1 | A | T | Homozygous   |
| NC_037638.1 | 25281961 | SNV | 1 | G | C | Homozygous   |
| NC_037638.1 | 25281976 | SNV | 1 | C | G | Heterozygous |
| NC_037638.1 | 25282051 | SNV | 1 | T | C | Homozygous   |
| NC_037638.1 | 25282083 | SNV | 1 | T | C | Homozygous   |
| NC_037638.1 | 25304118 | SNV | 1 | T | A | Heterozygous |
| NC_037638.1 | 25304118 | SNV | 1 | T | G | Heterozygous |
| NC_037638.1 | 25304123 | SNV | 1 | C | T | Homozygous   |
| NC_037638.1 | 25304127 | SNV | 1 | A | T | Homozygous   |
| NC_037638.1 | 25304158 | SNV | 1 | A | G | Homozygous   |
| NC_037638.1 | 25306063 | SNV | 1 | T | C | Homozygous   |
| NC_037638.1 | 25306141 | SNV | 1 | A | T | Homozygous   |
| NC_037638.1 | 25306685 | SNV | 1 | C | T | Homozygous   |
| NC_037638.1 | 25310018 | SNV | 1 | A | G | Homozygous   |
| NC_037638.1 | 25310909 | SNV | 1 | T | C | Homozygous   |
| NC_037638.1 | 25312246 | SNV | 1 | G | A | Heterozygous |
| NC_037638.1 | 25315303 | SNV | 1 | C | T | Homozygous   |
| NC_037638.1 | 25324462 | SNV | 1 | T | G | Homozygous   |
| NC_037638.1 | 25324466 | SNV | 1 | A | C | Homozygous   |
| NC_037638.1 | 25324916 | SNV | 1 | A | G | Heterozygous |
| NC_037638.1 | 25324952 | SNV | 1 | G | C | Homozygous   |
| NC_037638.1 | 25324954 | SNV | 1 | G | T | Homozygous   |
| NC_037638.1 | 25327909 | SNV | 1 | A | G | Homozygous   |
| NC_037638.1 | 25328806 | SNV | 1 | A | T | Homozygous   |
| NC_037638.1 | 25328809 | SNV | 1 | C | T | Homozygous   |
| NC_037638.1 | 25328958 | SNV | 1 | T | A | Heterozygous |
| NC_037638.1 | 25338181 | SNV | 1 | A | T | Homozygous   |
| NC_037638.1 | 25338189 | SNV | 1 | A | T | Homozygous   |
| NC_037638.1 | 25342732 | SNV | 1 | T | A | Homozygous   |
| NC_037638.1 | 25342735 | SNV | 1 | A | T | Homozygous   |
| NC_037638.1 | 25342737 | SNV | 1 | T | G | Homozygous   |
| NC_037638.1 | 25342854 | SNV | 1 | T | A | Homozygous   |
| NC_037638.1 | 25342856 | SNV | 1 | T | C | Homozygous   |
| NC_037638.1 | 25347260 | SNV | 1 | G | A | Heterozygous |
| NC_037638.1 | 25347565 | SNV | 1 | A | C | Homozygous   |
| NC_037638.1 | 25347705 | SNV | 1 | G | A | Heterozygous |
| NC_037638.1 | 25356533 | SNV | 1 | T | C | Heterozygous |
| NC_037638.1 | 25356545 | SNV | 1 | T | C | Homozygous   |
| NC_037638.1 | 25356551 | SNV | 1 | T | G | Heterozygous |
| NC_037638.1 | 25356556 | SNV | 1 | C | T | Heterozygous |
| NC_037638.1 | 25356561 | SNV | 1 | T | C | Heterozygous |
| NC_037638.1 | 25356574 | SNV | 1 | T | C | Heterozygous |

|             |          |     |   |   |   |              |
|-------------|----------|-----|---|---|---|--------------|
| NC_037638.1 | 25356602 | SNV | 1 | C | T | Heterozygous |
| NC_037638.1 | 25361380 | SNV | 1 | A | G | Homozygous   |
| NC_037638.1 | 25373991 | SNV | 1 | C | A | Homozygous   |
| NC_037638.1 | 25377103 | SNV | 1 | G | T | Homozygous   |
| NC_037638.1 | 25377106 | SNV | 1 | G | C | Homozygous   |
| NC_037638.1 | 25377108 | SNV | 1 | T | C | Homozygous   |
| NC_037638.1 | 25377111 | SNV | 1 | T | C | Homozygous   |
| NC_037638.1 | 25377123 | SNV | 1 | T | C | Homozygous   |
| NC_037638.1 | 25377125 | SNV | 1 | C | T | Homozygous   |
| NC_037638.1 | 25385228 | SNV | 1 | C | T | Homozygous   |
| NC_037638.1 | 25385237 | SNV | 1 | C | T | Homozygous   |
| NC_037638.1 | 25385241 | SNV | 1 | G | A | Homozygous   |
| NC_037638.1 | 25385244 | SNV | 1 | G | A | Homozygous   |
| NC_037638.1 | 25385250 | SNV | 1 | G | A | Homozygous   |
| NC_037638.1 | 25385863 | SNV | 1 | A | G | Homozygous   |
| NC_037638.1 | 25385890 | SNV | 1 | A | G | Homozygous   |
| NC_037638.1 | 25385904 | SNV | 1 | G | A | Heterozygous |
| NC_037638.1 | 25386025 | SNV | 1 | T | A | Homozygous   |
| NC_037638.1 | 25387284 | SNV | 1 | A | G | Heterozygous |
| NC_037638.1 | 25403551 | SNV | 1 | T | A | Homozygous   |
| NC_037638.1 | 25410045 | SNV | 1 | A | G | Homozygous   |
| NC_037638.1 | 25410086 | SNV | 1 | A | G | Homozygous   |
| NC_037638.1 | 25425198 | SNV | 1 | T | G | Homozygous   |
| NC_037638.1 | 25425210 | SNV | 1 | T | C | Homozygous   |
| NC_037638.1 | 25425242 | SNV | 1 | C | T | Homozygous   |
| NC_037638.1 | 25445945 | SNV | 1 | T | C | Homozygous   |
| NC_037638.1 | 25445948 | SNV | 1 | G | A | Homozygous   |
| NC_037638.1 | 25447125 | SNV | 1 | T | A | Heterozygous |
| NC_037638.1 | 25447178 | SNV | 1 | T | C | Heterozygous |
| NC_037638.1 | 25449312 | SNV | 1 | T | C | Homozygous   |
| NC_037638.1 | 25453561 | SNV | 1 | T | C | Homozygous   |
| NC_037638.1 | 25453803 | SNV | 1 | T | A | Homozygous   |
| NC_037638.1 | 25453829 | SNV | 1 | T | A | Homozygous   |
| NC_037638.1 | 25453831 | SNV | 1 | A | C | Homozygous   |
| NC_037638.1 | 25453833 | SNV | 1 | T | C | Homozygous   |
| NC_037638.1 | 25453852 | SNV | 1 | A | G | Homozygous   |
| NC_037638.1 | 25453856 | SNV | 1 | G | T | Homozygous   |
| NC_037638.1 | 25454035 | SNV | 1 | T | A | Heterozygous |
| NC_037638.1 | 25454036 | SNV | 1 | A | T | Heterozygous |
| NC_037638.1 | 25455656 | SNV | 1 | A | G | Homozygous   |
| NC_037638.1 | 25455669 | SNV | 1 | T | C | Heterozygous |
| NC_037638.1 | 25455689 | SNV | 1 | G | A | Heterozygous |
| NC_037638.1 | 25455749 | SNV | 1 | A | G | Heterozygous |
| NC_037638.1 | 25459325 | SNV | 1 | A | G | Homozygous   |
| NC_037638.1 | 25459373 | SNV | 1 | A | G | Heterozygous |
| NC_037638.1 | 25459391 | SNV | 1 | T | C | Homozygous   |
| NC_037638.1 | 25459666 | SNV | 1 | C | T | Homozygous   |
| NC_037638.1 | 25459909 | SNV | 1 | G | A | Heterozygous |
| NC_037638.1 | 25460449 | SNV | 1 | C | G | Homozygous   |
| NC_037638.1 | 25460472 | SNV | 1 | G | A | Heterozygous |
| NC_037638.1 | 25460749 | SNV | 1 | A | G | Homozygous   |

|             |          |     |   |   |   |              |
|-------------|----------|-----|---|---|---|--------------|
| NC_037638.1 | 25460839 | SNV | 1 | C | T | Homozygous   |
| NC_037638.1 | 25466376 | SNV | 1 | T | C | Homozygous   |
| NC_037638.1 | 25474994 | SNV | 1 | T | C | Heterozygous |
| NC_037638.1 | 25483577 | SNV | 1 | C | T | Heterozygous |
| NC_037638.1 | 25483598 | SNV | 1 | G | A | Heterozygous |
| NC_037638.1 | 25489572 | SNV | 1 | G | A | Homozygous   |
| NC_037638.1 | 25489782 | SNV | 1 | T | C | Heterozygous |
| NC_037638.1 | 25495707 | SNV | 1 | C | T | Heterozygous |
| NC_037638.1 | 25499213 | SNV | 1 | T | C | Heterozygous |
| NC_037638.1 | 25499250 | SNV | 1 | G | A | Heterozygous |
| NC_037638.1 | 25499259 | SNV | 1 | T | C | Homozygous   |
| NC_037638.1 | 25499262 | SNV | 1 | T | C | Heterozygous |
| NC_037638.1 | 25499275 | SNV | 1 | T | C | Heterozygous |
| NC_037638.1 | 25499290 | SNV | 1 | C | T | Heterozygous |
| NC_037638.1 | 25499885 | SNV | 1 | C | T | Homozygous   |
| NC_037638.1 | 25499894 | SNV | 1 | T | C | Homozygous   |
| NC_037638.1 | 25499897 | SNV | 1 | C | T | Homozygous   |
| NC_037638.1 | 25499919 | SNV | 1 | A | C | Homozygous   |
| NC_037638.1 | 25507483 | SNV | 1 | G | A | Homozygous   |
| NC_037638.1 | 25510074 | SNV | 1 | T | C | Heterozygous |
| NC_037638.1 | 25510079 | SNV | 1 | C | T | Heterozygous |
| NC_037638.1 | 25510101 | SNV | 1 | T | C | Heterozygous |
| NC_037638.1 | 25510112 | SNV | 1 | T | A | Heterozygous |
| NC_037638.1 | 25510558 | SNV | 1 | G | A | Homozygous   |
| NC_037638.1 | 25510566 | SNV | 1 | G | A | Homozygous   |
| NC_037638.1 | 25512441 | SNV | 1 | T | C | Heterozygous |
| NC_037638.1 | 25512448 | SNV | 1 | T | A | Homozygous   |
| NC_037638.1 | 25521210 | SNV | 1 | G | A | Homozygous   |
| NC_037638.1 | 25527917 | SNV | 1 | T | C | Heterozygous |
| NC_037638.1 | 25527928 | SNV | 1 | A | G | Heterozygous |
| NC_037638.1 | 25527932 | SNV | 1 | A | G | Heterozygous |
| NC_037638.1 | 25527934 | SNV | 1 | A | T | Heterozygous |
| NC_037638.1 | 25527940 | SNV | 1 | A | G | Homozygous   |
| NC_037638.1 | 25528080 | SNV | 1 | T | C | Heterozygous |
| NC_037638.1 | 25528127 | SNV | 1 | A | G | Homozygous   |
| NC_037638.1 | 25530069 | SNV | 1 | G | A | Heterozygous |
| NC_037638.1 | 25530140 | SNV | 1 | A | G | Heterozygous |
| NC_037638.1 | 25530147 | SNV | 1 | A | T | Heterozygous |
| NC_037638.1 | 25530444 | SNV | 1 | G | A | Homozygous   |
| NC_037638.1 | 25530499 | SNV | 1 | T | C | Heterozygous |
| NC_037638.1 | 25539344 | SNV | 1 | T | A | Heterozygous |
| NC_037638.1 | 25539345 | SNV | 1 | A | T | Heterozygous |
| NC_037638.1 | 25539346 | SNV | 1 | T | C | Heterozygous |
| NC_037638.1 | 25539351 | SNV | 1 | T | A | Heterozygous |
| NC_037638.1 | 25539368 | SNV | 1 | A | T | Heterozygous |
| NC_037638.1 | 25539371 | SNV | 1 | A | T | Heterozygous |
| NC_037638.1 | 25539373 | SNV | 1 | T | A | Heterozygous |
| NC_037638.1 | 25539381 | SNV | 1 | A | T | Heterozygous |
| NC_037638.1 | 25541277 | SNV | 1 | T | A | Homozygous   |
| NC_037638.1 | 25541281 | SNV | 1 | C | T | Homozygous   |
| NC_037638.1 | 25541284 | SNV | 1 | T | G | Heterozygous |

|             |          |     |   |   |   |              |
|-------------|----------|-----|---|---|---|--------------|
| NC_037638.1 | 25541286 | SNV | 1 | C | G | Heterozygous |
| NC_037638.1 | 25541291 | SNV | 1 | C | T | Homozygous   |
| NC_037638.1 | 25541295 | SNV | 1 | T | C | Heterozygous |
| NC_037638.1 | 25541309 | SNV | 1 | T | A | Heterozygous |
| NC_037638.1 | 25541312 | SNV | 1 | T | A | Heterozygous |
| NC_037638.1 | 25541314 | SNV | 1 | T | C | Heterozygous |
| NC_037638.1 | 25541344 | SNV | 1 | G | T | Homozygous   |
| NC_037638.1 | 25546708 | SNV | 1 | A | T | Homozygous   |
| NC_037638.1 | 25546710 | SNV | 1 | G | A | Homozygous   |
| NC_037638.1 | 25546712 | SNV | 1 | A | G | Homozygous   |
| NC_037638.1 | 25546721 | SNV | 1 | G | A | Homozygous   |
| NC_037638.1 | 25546740 | SNV | 1 | G | A | Homozygous   |
| NC_037638.1 | 25546744 | SNV | 1 | A | T | Homozygous   |
| NC_037638.1 | 25550260 | SNV | 1 | A | G | Heterozygous |
| NC_037638.1 | 25550334 | SNV | 1 | G | A | Heterozygous |
| NC_037638.1 | 25571005 | SNV | 1 | C | G | Heterozygous |
| NC_037638.1 | 25577317 | SNV | 1 | A | G | Homozygous   |
| NC_037638.1 | 25639787 | SNV | 1 | T | G | Heterozygous |
| NC_037638.1 | 25639843 | SNV | 1 | T | C | Homozygous   |
| NC_037638.1 | 25640030 | SNV | 1 | C | A | Homozygous   |
| NC_037638.1 | 25640158 | SNV | 1 | A | G | Homozygous   |
| NC_037638.1 | 25640349 | SNV | 1 | C | T | Heterozygous |
| NC_037638.1 | 25640450 | SNV | 1 | C | T | Heterozygous |
| NC_037638.1 | 25640459 | SNV | 1 | C | T | Heterozygous |
| NC_037638.1 | 25640483 | SNV | 1 | G | A | Heterozygous |
| NC_037638.1 | 25640626 | SNV | 1 | G | C | Heterozygous |
| NC_037638.1 | 25640812 | SNV | 1 | G | C | Homozygous   |
| NC_037638.1 | 25641316 | SNV | 1 | C | G | Heterozygous |
| NC_037638.1 | 25650540 | SNV | 1 | C | T | Homozygous   |
| NC_037638.1 | 25650543 | SNV | 1 | G | A | Homozygous   |
| NC_037638.1 | 25650556 | SNV | 1 | A | G | Homozygous   |
| NC_037638.1 | 25650565 | SNV | 1 | G | T | Homozygous   |
| NC_037638.1 | 25650569 | SNV | 1 | A | G | Homozygous   |
| NC_037638.1 | 25668431 | SNV | 1 | T | C | Heterozygous |
| NC_037638.1 | 25681588 | SNV | 1 | C | T | Heterozygous |
| NC_037638.1 | 25695083 | SNV | 1 | G | A | Homozygous   |
| NC_037638.1 | 25695097 | SNV | 1 | T | C | Homozygous   |
| NC_037638.1 | 25695148 | SNV | 1 | T | A | Heterozygous |
| NC_037638.1 | 25695152 | SNV | 1 | A | G | Homozygous   |
| NC_037638.1 | 25695170 | SNV | 1 | T | C | Homozygous   |
| NC_037638.1 | 25695218 | SNV | 1 | G | A | Homozygous   |
| NC_037638.1 | 25695565 | SNV | 1 | C | T | Heterozygous |
| NC_037638.1 | 25699481 | SNV | 1 | G | A | Heterozygous |
| NC_037638.1 | 25699495 | SNV | 1 | G | C | Homozygous   |
| NC_037638.1 | 25699667 | SNV | 1 | T | C | Homozygous   |
| NC_037638.1 | 25699679 | SNV | 1 | T | C | Homozygous   |
| NC_037638.1 | 25699716 | SNV | 1 | G | A | Heterozygous |
| NC_037638.1 | 25699767 | SNV | 1 | G | C | Homozygous   |
| NC_037638.1 | 25699780 | SNV | 1 | C | T | Heterozygous |
| NC_037638.1 | 25699787 | SNV | 1 | C | T | Heterozygous |
| NC_037638.1 | 25699794 | SNV | 1 | A | G | Homozygous   |

|             |          |     |   |   |   |              |
|-------------|----------|-----|---|---|---|--------------|
| NC_037638.1 | 25699829 | SNV | 1 | C | G | Heterozygous |
| NC_037638.1 | 25699855 | SNV | 1 | G | A | Homozygous   |
| NC_037638.1 | 25699875 | SNV | 1 | G | A | Homozygous   |
| NC_037638.1 | 25699900 | SNV | 1 | T | C | Homozygous   |
| NC_037638.1 | 25706460 | SNV | 1 | G | A | Homozygous   |
| NC_037638.1 | 25706465 | SNV | 1 | A | G | Homozygous   |
| NC_037638.1 | 25706486 | SNV | 1 | G | A | Homozygous   |
| NC_037638.1 | 25706492 | SNV | 1 | A | G | Homozygous   |
| NC_037638.1 | 25706511 | SNV | 1 | G | A | Heterozygous |
| NC_037638.1 | 25706512 | SNV | 1 | G | A | Heterozygous |
| NC_037638.1 | 25708376 | SNV | 1 | T | C | Homozygous   |
| NC_037638.1 | 25709062 | SNV | 1 | G | T | Homozygous   |
| NC_037638.1 | 25709064 | SNV | 1 | A | G | Homozygous   |
| NC_037638.1 | 25709112 | SNV | 1 | A | T | Heterozygous |
| NC_037638.1 | 25709832 | SNV | 1 | T | A | Heterozygous |
| NC_037638.1 | 25710450 | SNV | 1 | G | T | Heterozygous |
| NC_037638.1 | 25710492 | SNV | 1 | G | A | Heterozygous |
| NC_037638.1 | 25710902 | SNV | 1 | T | C | Heterozygous |
| NC_037638.1 | 25711054 | SNV | 1 | T | C | Homozygous   |
| NC_037638.1 | 25711087 | SNV | 1 | T | C | Homozygous   |
| NC_037638.1 | 25714284 | SNV | 1 | T | C | Homozygous   |
| NC_037638.1 | 25714336 | SNV | 1 | G | A | Homozygous   |
| NC_037638.1 | 25714744 | SNV | 1 | G | A | Homozygous   |
| NC_037638.1 | 25714759 | SNV | 1 | C | T | Heterozygous |
| NC_037638.1 | 25714770 | SNV | 1 | G | C | Heterozygous |
| NC_037638.1 | 25714829 | SNV | 1 | C | T | Homozygous   |
| NC_037638.1 | 25715058 | SNV | 1 | G | A | Homozygous   |
| NC_037638.1 | 25716834 | SNV | 1 | G | A | Heterozygous |
| NC_037638.1 | 25729589 | SNV | 1 | C | G | Heterozygous |
| NC_037638.1 | 25753397 | SNV | 1 | C | T | Heterozygous |
| NC_037638.1 | 25753507 | SNV | 1 | T | C | Heterozygous |
| NC_037638.1 | 25753841 | SNV | 1 | G | C | Heterozygous |
| NC_037638.1 | 25754906 | SNV | 1 | A | G | Homozygous   |
| NC_037638.1 | 25776980 | SNV | 1 | C | G | Heterozygous |
| NC_037638.1 | 25777137 | SNV | 1 | T | C | Homozygous   |
| NC_037638.1 | 25777173 | SNV | 1 | C | G | Homozygous   |
| NC_037638.1 | 25777272 | SNV | 1 | T | C | Homozygous   |
| NC_037638.1 | 25777325 | SNV | 1 | C | G | Homozygous   |
| NC_037638.1 | 25777340 | SNV | 1 | G | A | Heterozygous |
| NC_037638.1 | 25777398 | SNV | 1 | G | A | Heterozygous |
| NC_037638.1 | 25777735 | SNV | 1 | T | C | Homozygous   |
| NC_037638.1 | 25778115 | SNV | 1 | T | C | Homozygous   |
| NC_037638.1 | 25778126 | SNV | 1 | C | T | Homozygous   |
| NC_037638.1 | 25778132 | SNV | 1 | T | C | Heterozygous |
| NC_037638.1 | 25778175 | SNV | 1 | G | A | Homozygous   |
| NC_037638.1 | 25778185 | SNV | 1 | C | G | Heterozygous |
| NC_037638.1 | 25787791 | SNV | 1 | A | G | Homozygous   |
| NC_037638.1 | 25787808 | SNV | 1 | C | T | Heterozygous |
| NC_037638.1 | 25787921 | SNV | 1 | G | A | Homozygous   |
| NC_037638.1 | 25804108 | SNV | 1 | C | T | Heterozygous |
| NC_037638.1 | 25804111 | SNV | 1 | G | T | Heterozygous |

|             |          |     |   |   |   |              |
|-------------|----------|-----|---|---|---|--------------|
| NC_037638.1 | 25805429 | SNV | 1 | G | A | Heterozygous |
| NC_037638.1 | 25808973 | SNV | 1 | C | T | Homozygous   |
| NC_037638.1 | 25828380 | SNV | 1 | A | G | Homozygous   |
| NC_037638.1 | 25828388 | SNV | 1 | T | C | Homozygous   |
| NC_037638.1 | 25830589 | SNV | 1 | G | A | Homozygous   |
| NC_037638.1 | 25832498 | SNV | 1 | G | A | Heterozygous |
| NC_037638.1 | 25832763 | SNV | 1 | C | T | Heterozygous |
| NC_037638.1 | 25833017 | SNV | 1 | G | A | Homozygous   |
| NC_037638.1 | 25834937 | SNV | 1 | T | C | Heterozygous |
| NC_037638.1 | 25834962 | SNV | 1 | T | C | Homozygous   |
| NC_037638.1 | 25835025 | SNV | 1 | C | T | Homozygous   |
| NC_037638.1 | 25835501 | SNV | 1 | C | A | Heterozygous |
| NC_037638.1 | 25835533 | SNV | 1 | G | A | Heterozygous |
| NC_037638.1 | 25835562 | SNV | 1 | G | A | Homozygous   |
| NC_037638.1 | 25836179 | SNV | 1 | A | G | Homozygous   |
| NC_037638.1 | 25839081 | SNV | 1 | A | G | Homozygous   |
| NC_037638.1 | 25839840 | SNV | 1 | G | A | Homozygous   |
| NC_037638.1 | 25840719 | SNV | 1 | A | T | Homozygous   |
| NC_037638.1 | 25840726 | SNV | 1 | T | A | Homozygous   |
| NC_037638.1 | 25840757 | SNV | 1 | C | A | Homozygous   |
| NC_037638.1 | 25844418 | SNV | 1 | C | A | Homozygous   |
| NC_037638.1 | 25844439 | SNV | 1 | T | A | Homozygous   |
| NC_037638.1 | 25844443 | SNV | 1 | T | G | Homozygous   |
| NC_037638.1 | 25844465 | SNV | 1 | C | T | Homozygous   |
| NC_037638.1 | 25844467 | SNV | 1 | A | T | Homozygous   |
| NC_037638.1 | 25844477 | SNV | 1 | C | T | Homozygous   |
| NC_037638.1 | 25847159 | SNV | 1 | G | C | Homozygous   |
| NC_037638.1 | 25847179 | SNV | 1 | G | A | Heterozygous |
| NC_037638.1 | 25847197 | SNV | 1 | A | G | Heterozygous |
| NC_037638.1 | 25847200 | SNV | 1 | A | C | Heterozygous |
| NC_037638.1 | 25847209 | SNV | 1 | C | A | Heterozygous |
| NC_037638.1 | 25847233 | SNV | 1 | A | C | Homozygous   |
| NC_037638.1 | 25847239 | SNV | 1 | A | C | Homozygous   |
| NC_037638.1 | 25847242 | SNV | 1 | A | T | Homozygous   |
| NC_037638.1 | 25847245 | SNV | 1 | G | C | Homozygous   |
| NC_037638.1 | 25847251 | SNV | 1 | A | G | Homozygous   |
| NC_037638.1 | 25847257 | SNV | 1 | T | G | Homozygous   |
| NC_037638.1 | 25847263 | SNV | 1 | T | C | Heterozygous |
| NC_037638.1 | 25847266 | SNV | 1 | A | G | Homozygous   |
| NC_037638.1 | 25847269 | SNV | 1 | T | C | Homozygous   |
| NC_037638.1 | 25847272 | SNV | 1 | A | G | Heterozygous |
| NC_037638.1 | 25847281 | SNV | 1 | T | C | Homozygous   |
| NC_037638.1 | 25847287 | SNV | 1 | A | G | Heterozygous |
| NC_037638.1 | 25847290 | SNV | 1 | T | C | Homozygous   |
| NC_037638.1 | 25847293 | SNV | 1 | A | G | Heterozygous |
| NC_037638.1 | 25847297 | SNV | 1 | C | G | Homozygous   |
| NC_037638.1 | 25847299 | SNV | 1 | T | C | Homozygous   |
| NC_037638.1 | 25847320 | SNV | 1 | A | G | Homozygous   |
| NC_037638.1 | 25847323 | SNV | 1 | T | A | Heterozygous |
| NC_037638.1 | 25847326 | SNV | 1 | A | G | Heterozygous |
| NC_037638.1 | 25847344 | SNV | 1 | A | T | Heterozygous |

|             |          |     |   |   |   |              |
|-------------|----------|-----|---|---|---|--------------|
| NC_037638.1 | 25847350 | SNV | 1 | T | C | Heterozygous |
| NC_037638.1 | 25847353 | SNV | 1 | T | C | Heterozygous |
| NC_037638.1 | 25847371 | SNV | 1 | A | C | Heterozygous |
| NC_037638.1 | 25847374 | SNV | 1 | T | C | Heterozygous |
| NC_037638.1 | 25847377 | SNV | 1 | T | C | Heterozygous |
| NC_037638.1 | 25847398 | SNV | 1 | A | T | Heterozygous |
| NC_037638.1 | 25847419 | SNV | 1 | A | G | Heterozygous |
| NC_037638.1 | 25847449 | SNV | 1 | A | G | Heterozygous |
| NC_037638.1 | 25847470 | SNV | 1 | A | T | Heterozygous |
| NC_037638.1 | 25847479 | SNV | 1 | T | G | Heterozygous |
| NC_037638.1 | 25847482 | SNV | 1 | A | G | Heterozygous |
| NC_037638.1 | 25847485 | SNV | 1 | T | G | Heterozygous |
| NC_037638.1 | 25847491 | SNV | 1 | T | C | Homozygous   |
| NC_037638.1 | 25847494 | SNV | 1 | A | G | Heterozygous |
| NC_037638.1 | 25847497 | SNV | 1 | T | C | Homozygous   |
| NC_037638.1 | 25847500 | SNV | 1 | A | G | Homozygous   |
| NC_037638.1 | 25847509 | SNV | 1 | T | C | Homozygous   |
| NC_037638.1 | 25847512 | SNV | 1 | T | A | Homozygous   |
| NC_037638.1 | 25847515 | SNV | 1 | T | G | Homozygous   |
| NC_037638.1 | 25847518 | SNV | 1 | T | C | Homozygous   |
| NC_037638.1 | 25847525 | SNV | 1 | C | G | Homozygous   |
| NC_037638.1 | 25847527 | SNV | 1 | A | C | Homozygous   |
| NC_037638.1 | 25847533 | SNV | 1 | C | T | Homozygous   |
| NC_037638.1 | 25847551 | SNV | 1 | T | A | Homozygous   |
| NC_037638.1 | 25847554 | SNV | 1 | A | G | Homozygous   |
| NC_037638.1 | 25847563 | SNV | 1 | A | G | Homozygous   |
| NC_037638.1 | 25847566 | SNV | 1 | A | C | Homozygous   |
| NC_037638.1 | 25847570 | SNV | 1 | T | G | Homozygous   |
| NC_037638.1 | 25847572 | SNV | 1 | A | T | Homozygous   |
| NC_037638.1 | 25847575 | SNV | 1 | T | C | Homozygous   |
| NC_037638.1 | 25847578 | SNV | 1 | T | C | Homozygous   |
| NC_037638.1 | 25847581 | SNV | 1 | T | C | Homozygous   |
| NC_037638.1 | 25847584 | SNV | 1 | T | C | Homozygous   |
| NC_037638.1 | 25847590 | SNV | 1 | A | G | Heterozygous |
| NC_037638.1 | 25847593 | SNV | 1 | A | G | Heterozygous |
| NC_037638.1 | 25847596 | SNV | 1 | T | A | Heterozygous |
| NC_037638.1 | 25847602 | SNV | 1 | T | G | Heterozygous |
| NC_037638.1 | 25847611 | SNV | 1 | A | G | Heterozygous |
| NC_037638.1 | 25847615 | SNV | 1 | A | C | Heterozygous |
| NC_037638.1 | 25847617 | SNV | 1 | A | T | Heterozygous |
| NC_037638.1 | 25847740 | SNV | 1 | C | T | Heterozygous |
| NC_037638.1 | 25847944 | SNV | 1 | G | A | Heterozygous |
| NC_037638.1 | 25850177 | SNV | 1 | A | G | Heterozygous |
| NC_037638.1 | 25850201 | SNV | 1 | A | G | Heterozygous |
| NC_037638.1 | 25850222 | SNV | 1 | A | C | Heterozygous |
| NC_037638.1 | 25850237 | SNV | 1 | T | C | Homozygous   |
| NC_037638.1 | 25850240 | SNV | 1 | T | C | Heterozygous |
| NC_037638.1 | 25850246 | SNV | 1 | A | G | Heterozygous |
| NC_037638.1 | 25850255 | SNV | 1 | T | C | Homozygous   |
| NC_037638.1 | 25850261 | SNV | 1 | T | C | Heterozygous |
| NC_037638.1 | 25850270 | SNV | 1 | A | G | Homozygous   |



|             |          |     |   |   |   |              |
|-------------|----------|-----|---|---|---|--------------|
| NC_037638.1 | 25850417 | SNV | 1 | C | T | Heterozygous |
| NC_037638.1 | 25850535 | SNV | 1 | C | T | Heterozygous |
| NC_037638.1 | 25850636 | SNV | 1 | A | G | Heterozygous |
| NC_037638.1 | 25850642 | SNV | 1 | A | G | Heterozygous |
| NC_037638.1 | 25850648 | SNV | 1 | T | C | Heterozygous |
| NC_037638.1 | 25850651 | SNV | 1 | T | C | Heterozygous |
| NC_037638.1 | 25850657 | SNV | 1 | A | G | Heterozygous |
| NC_037638.1 | 25850675 | SNV | 1 | A | G | Heterozygous |
| NC_037638.1 | 25850684 | SNV | 1 | A | C | Heterozygous |
| NC_037638.1 | 25850693 | SNV | 1 | T | C | Heterozygous |
| NC_037638.1 | 25850696 | SNV | 1 | T | C | Heterozygous |
| NC_037638.1 | 25850702 | SNV | 1 | A | G | Heterozygous |
| NC_037638.1 | 25850708 | SNV | 1 | T | A | Heterozygous |
| NC_037638.1 | 25850711 | SNV | 1 | T | C | Heterozygous |
| NC_037638.1 | 25851194 | SNV | 1 | A | T | Heterozygous |
| NC_037638.1 | 25851215 | SNV | 1 | A | G | Heterozygous |
| NC_037638.1 | 25851469 | SNV | 1 | T | G | Heterozygous |
| NC_037638.1 | 25851554 | SNV | 1 | A | G | Heterozygous |
| NC_037638.1 | 25857512 | SNV | 1 | C | G | Heterozygous |
| NC_037638.1 | 25857786 | SNV | 1 | G | A | Heterozygous |
| NC_037638.1 | 25857793 | SNV | 1 | A | C | Heterozygous |
| NC_037638.1 | 25874625 | SNV | 1 | G | A | Homozygous   |
| NC_037638.1 | 25879396 | SNV | 1 | C | G | Heterozygous |
| NC_037638.1 | 25886820 | SNV | 1 | T | C | Homozygous   |
| NC_037638.1 | 25886827 | SNV | 1 | C | T | Homozygous   |
| NC_037638.1 | 25886830 | SNV | 1 | C | T | Homozygous   |
| NC_037638.1 | 25888452 | SNV | 1 | A | C | Homozygous   |
| NC_037638.1 | 25888981 | SNV | 1 | A | G | Homozygous   |
| NC_037638.1 | 25889586 | SNV | 1 | T | G | Heterozygous |
| NC_037638.1 | 25889613 | SNV | 1 | T | C | Homozygous   |
| NC_037638.1 | 25889658 | SNV | 1 | A | G | Homozygous   |
| NC_037638.1 | 25890423 | SNV | 1 | A | G | Heterozygous |
| NC_037638.1 | 25890513 | SNV | 1 | A | G | Heterozygous |
| NC_037638.1 | 25890600 | SNV | 1 | A | T | Homozygous   |
| NC_037638.1 | 25890741 | SNV | 1 | A | C | Heterozygous |
| NC_037638.1 | 25890784 | SNV | 1 | G | A | Heterozygous |
| NC_037638.1 | 25890799 | SNV | 1 | A | C | Heterozygous |
| NC_037638.1 | 25890823 | SNV | 1 | G | A | Heterozygous |
| NC_037638.1 | 25890825 | SNV | 1 | C | T | Heterozygous |
| NC_037638.1 | 25890923 | SNV | 1 | A | G | Heterozygous |
| NC_037638.1 | 25891729 | SNV | 1 | T | C | Homozygous   |
| NC_037638.1 | 25891821 | SNV | 1 | A | C | Homozygous   |
| NC_037638.1 | 25891874 | SNV | 1 | A | G | Homozygous   |
| NC_037638.1 | 25891896 | SNV | 1 | T | G | Homozygous   |
| NC_037638.1 | 25892000 | SNV | 1 | T | C | Homozygous   |
| NC_037638.1 | 25892029 | SNV | 1 | G | A | Heterozygous |
| NC_037638.1 | 25892098 | SNV | 1 | G | A | Heterozygous |
| NC_037638.1 | 25892158 | SNV | 1 | A | G | Heterozygous |
| NC_037638.1 | 25892293 | SNV | 1 | A | C | Homozygous   |
| NC_037638.1 | 25892509 | SNV | 1 | G | C | Homozygous   |
| NC_037638.1 | 25892627 | SNV | 1 | A | G | Homozygous   |

|             |          |     |   |   |   |              |
|-------------|----------|-----|---|---|---|--------------|
| NC_037638.1 | 25892629 | SNV | 1 | T | C | Homozygous   |
| NC_037638.1 | 25892659 | SNV | 1 | T | A | Homozygous   |
| NC_037638.1 | 25892711 | SNV | 1 | A | T | Heterozygous |
| NC_037638.1 | 25892719 | SNV | 1 | A | G | Homozygous   |
| NC_037638.1 | 25892803 | SNV | 1 | G | T | Heterozygous |
| NC_037638.1 | 25893109 | SNV | 1 | G | C | Heterozygous |
| NC_037638.1 | 25893127 | SNV | 1 | T | C | Homozygous   |
| NC_037638.1 | 25893146 | SNV | 1 | A | C | Heterozygous |
| NC_037638.1 | 25893205 | SNV | 1 | C | T | Heterozygous |
| NC_037638.1 | 25893226 | SNV | 1 | T | A | Heterozygous |
| NC_037638.1 | 25893589 | SNV | 1 | G | A | Homozygous   |
| NC_037638.1 | 25894858 | SNV | 1 | A | G | Homozygous   |
| NC_037638.1 | 25894864 | SNV | 1 | T | A | Heterozygous |
| NC_037638.1 | 25894969 | SNV | 1 | G | A | Heterozygous |
| NC_037638.1 | 25896731 | SNV | 1 | A | C | Homozygous   |
| NC_037638.1 | 25896733 | SNV | 1 | A | T | Homozygous   |
| NC_037638.1 | 25896738 | SNV | 1 | C | T | Homozygous   |
| NC_037638.1 | 25905598 | SNV | 1 | G | T | Homozygous   |
| NC_037638.1 | 25905682 | SNV | 1 | A | G | Homozygous   |
| NC_037638.1 | 25906958 | SNV | 1 | G | C | Homozygous   |
| NC_037638.1 | 25907659 | SNV | 1 | C | T | Homozygous   |
| NC_037638.1 | 25907661 | SNV | 1 | A | T | Homozygous   |
| NC_037638.1 | 25907734 | SNV | 1 | T | C | Homozygous   |
| NC_037638.1 | 25907738 | SNV | 1 | T | C | Homozygous   |
| NC_037638.1 | 25907898 | SNV | 1 | C | T | Heterozygous |
| NC_037638.1 | 25907923 | SNV | 1 | G | T | Heterozygous |
| NC_037638.1 | 25908131 | SNV | 1 | C | T | Homozygous   |
| NC_037638.1 | 25916017 | SNV | 1 | T | A | Homozygous   |
| NC_037638.1 | 25916032 | SNV | 1 | T | G | Homozygous   |
| NC_037638.1 | 25916040 | SNV | 1 | A | T | Homozygous   |
| NC_037638.1 | 25916068 | SNV | 1 | A | T | Homozygous   |
| NC_037638.1 | 25925217 | SNV | 1 | A | G | Heterozygous |
| NC_037638.1 | 25925236 | SNV | 1 | A | G | Heterozygous |
| NC_037638.1 | 25925242 | SNV | 1 | A | G | Heterozygous |
| NC_037638.1 | 25925245 | SNV | 1 | A | G | Heterozygous |
| NC_037638.1 | 25928024 | SNV | 1 | C | T | Heterozygous |
| NC_037638.1 | 25928140 | SNV | 1 | A | T | Homozygous   |
| NC_037638.1 | 25928150 | SNV | 1 | T | C | Homozygous   |
| NC_037638.1 | 25928157 | SNV | 1 | A | T | Homozygous   |
| NC_037638.1 | 25928252 | SNV | 1 | C | T | Heterozygous |
| NC_037638.1 | 25928499 | SNV | 1 | C | T | Heterozygous |
| NC_037638.1 | 25928653 | SNV | 1 | A | T | Heterozygous |
| NC_037638.1 | 25928739 | SNV | 1 | C | T | Heterozygous |
| NC_037638.1 | 25929977 | SNV | 1 | A | G | Heterozygous |
| NC_037638.1 | 25929980 | SNV | 1 | A | G | Heterozygous |
| NC_037638.1 | 25931745 | SNV | 1 | T | C | Heterozygous |
| NC_037638.1 | 25933612 | SNV | 1 | T | C | Heterozygous |
| NC_037638.1 | 25937472 | SNV | 1 | A | G | Homozygous   |
| NC_037638.1 | 25937484 | SNV | 1 | A | T | Heterozygous |
| NC_037638.1 | 25937486 | SNV | 1 | T | C | Heterozygous |
| NC_037638.1 | 25937984 | SNV | 1 | G | T | Homozygous   |

|             |          |     |   |   |   |              |
|-------------|----------|-----|---|---|---|--------------|
| NC_037638.1 | 25939332 | SNV | 1 | T | C | Homozygous   |
| NC_037638.1 | 25939624 | SNV | 1 | T | A | Heterozygous |
| NC_037638.1 | 25939985 | SNV | 1 | T | C | Homozygous   |
| NC_037638.1 | 25944808 | SNV | 1 | T | C | Homozygous   |
| NC_037638.1 | 25954051 | SNV | 1 | C | T | Heterozygous |
| NC_037638.1 | 25954055 | SNV | 1 | T | G | Homozygous   |
| NC_037638.1 | 25954083 | SNV | 1 | C | A | Homozygous   |
| NC_037638.1 | 25954181 | SNV | 1 | A | G | Homozygous   |
| NC_037638.1 | 25957493 | SNV | 1 | C | T | Homozygous   |
| NC_037638.1 | 25957506 | SNV | 1 | G | A | Heterozygous |
| NC_037638.1 | 25973862 | SNV | 1 | T | C | Homozygous   |
| NC_037638.1 | 25973868 | SNV | 1 | A | T | Heterozygous |
| NC_037638.1 | 25973873 | SNV | 1 | C | T | Homozygous   |
| NC_037638.1 | 25973898 | SNV | 1 | A | C | Homozygous   |
| NC_037638.1 | 25974394 | SNV | 1 | C | T | Heterozygous |
| NC_037638.1 | 25974399 | SNV | 1 | T | G | Heterozygous |
| NC_037638.1 | 25977267 | SNV | 1 | T | C | Heterozygous |
| NC_037638.1 | 25977291 | SNV | 1 | C | T | Heterozygous |
| NC_037638.1 | 25977401 | SNV | 1 | G | A | Heterozygous |
| NC_037638.1 | 25977565 | SNV | 1 | C | T | Heterozygous |
| NC_037638.1 | 25983315 | SNV | 1 | G | A | Heterozygous |
| NC_037638.1 | 25983386 | SNV | 1 | A | C | Heterozygous |
| NC_037638.1 | 25983390 | SNV | 1 | G | A | Heterozygous |
| NC_037638.1 | 25983397 | SNV | 1 | G | A | Homozygous   |
| NC_037638.1 | 25983399 | SNV | 1 | G | A | Homozygous   |
| NC_037638.1 | 25983412 | SNV | 1 | G | A | Heterozygous |
| NC_037638.1 | 25986426 | SNV | 1 | T | C | Homozygous   |
| NC_037638.1 | 25990402 | SNV | 1 | A | G | Homozygous   |
| NC_037638.1 | 25991913 | SNV | 1 | T | G | Homozygous   |
| NC_037638.1 | 25991923 | SNV | 1 | A | G | Heterozygous |
| NC_037638.1 | 25991942 | SNV | 1 | T | C | Heterozygous |
| NC_037638.1 | 25991946 | SNV | 1 | T | C | Heterozygous |
| NC_037638.1 | 25991956 | SNV | 1 | T | A | Homozygous   |
| NC_037638.1 | 25991992 | SNV | 1 | A | G | Homozygous   |
| NC_037638.1 | 25992005 | SNV | 1 | A | G | Homozygous   |
| NC_037638.1 | 25992062 | SNV | 1 | C | T | Heterozygous |
| NC_037638.1 | 25992067 | SNV | 1 | A | G | Homozygous   |
| NC_037638.1 | 25992122 | SNV | 1 | G | A | Homozygous   |
| NC_037638.1 | 25995360 | SNV | 1 | A | G | Homozygous   |
| NC_037638.1 | 26016377 | SNV | 1 | A | G | Homozygous   |
| NC_037638.1 | 26019335 | SNV | 1 | G | A | Homozygous   |
| NC_037638.1 | 26019398 | SNV | 1 | T | C | Homozygous   |
| NC_037638.1 | 26020032 | SNV | 1 | A | T | Heterozygous |
| NC_037638.1 | 26039693 | SNV | 1 | T | C | Homozygous   |
| NC_037638.1 | 26039697 | SNV | 1 | C | T | Homozygous   |
| NC_037638.1 | 26040175 | SNV | 1 | A | G | Heterozygous |
| NC_037638.1 | 26040235 | SNV | 1 | A | G | Heterozygous |
| NC_037638.1 | 26046308 | SNV | 1 | G | A | Homozygous   |
| NC_037638.1 | 26046424 | SNV | 1 | G | A | Heterozygous |
| NC_037638.1 | 26046496 | SNV | 1 | C | T | Homozygous   |
| NC_037638.1 | 26046537 | SNV | 1 | A | G | Homozygous   |

|             |          |     |   |   |   |              |
|-------------|----------|-----|---|---|---|--------------|
| NC_037638.1 | 26046658 | SNV | 1 | G | A | Heterozygous |
| NC_037638.1 | 26046660 | SNV | 1 | A | G | Heterozygous |
| NC_037638.1 | 26046664 | SNV | 1 | A | G | Heterozygous |
| NC_037638.1 | 26046802 | SNV | 1 | A | G | Homozygous   |
| NC_037638.1 | 26047072 | SNV | 1 | T | C | Homozygous   |
| NC_037638.1 | 26047789 | SNV | 1 | A | G | Homozygous   |
| NC_037638.1 | 26051109 | SNV | 1 | G | T | Homozygous   |
| NC_037638.1 | 26051441 | SNV | 1 | T | G | Heterozygous |
| NC_037638.1 | 26051597 | SNV | 1 | C | T | Heterozygous |
| NC_037638.1 | 26051599 | SNV | 1 | T | C | Homozygous   |
| NC_037638.1 | 26051967 | SNV | 1 | A | G | Homozygous   |
| NC_037638.1 | 26052071 | SNV | 1 | A | C | Homozygous   |
| NC_037638.1 | 26052209 | SNV | 1 | G | A | Homozygous   |
| NC_037638.1 | 26055863 | SNV | 1 | T | C | Homozygous   |
| NC_037638.1 | 26055872 | SNV | 1 | A | G | Homozygous   |
| NC_037638.1 | 26056278 | SNV | 1 | A | T | Homozygous   |
| NC_037638.1 | 26056379 | SNV | 1 | T | C | Homozygous   |
| NC_037638.1 | 26056601 | SNV | 1 | A | G | Heterozygous |
| NC_037638.1 | 26056607 | SNV | 1 | G | C | Heterozygous |
| NC_037638.1 | 26056657 | SNV | 1 | A | G | Homozygous   |
| NC_037638.1 | 26056669 | SNV | 1 | G | A | Heterozygous |
| NC_037638.1 | 26056712 | SNV | 1 | G | T | Homozygous   |
| NC_037638.1 | 26057247 | SNV | 1 | G | A | Heterozygous |
| NC_037638.1 | 26057290 | SNV | 1 | T | C | Homozygous   |
| NC_037638.1 | 26057304 | SNV | 1 | A | G | Heterozygous |
| NC_037638.1 | 26058651 | SNV | 1 | G | A | Heterozygous |
| NC_037638.1 | 26058667 | SNV | 1 | T | G | Homozygous   |
| NC_037638.1 | 26058687 | SNV | 1 | G | A | Homozygous   |
| NC_037638.1 | 26059240 | SNV | 1 | A | G | Homozygous   |
| NC_037638.1 | 26059252 | SNV | 1 | T | C | Homozygous   |
| NC_037638.1 | 26061832 | SNV | 1 | G | C | Heterozygous |
| NC_037638.1 | 26061854 | SNV | 1 | C | T | Homozygous   |
| NC_037638.1 | 26061935 | SNV | 1 | C | T | Heterozygous |
| NC_037638.1 | 26061936 | SNV | 1 | C | G | Heterozygous |
| NC_037638.1 | 26061979 | SNV | 1 | A | T | Homozygous   |
| NC_037638.1 | 26061981 | SNV | 1 | C | T | Heterozygous |
| NC_037638.1 | 26061986 | SNV | 1 | G | A | Homozygous   |
| NC_037638.1 | 26062017 | SNV | 1 | A | G | Heterozygous |
| NC_037638.1 | 26062051 | SNV | 1 | A | G | Homozygous   |
| NC_037638.1 | 26062098 | SNV | 1 | G | A | Heterozygous |
| NC_037638.1 | 26062129 | SNV | 1 | T | C | Homozygous   |
| NC_037638.1 | 26062158 | SNV | 1 | A | G | Homozygous   |
| NC_037638.1 | 26062196 | SNV | 1 | A | G | Homozygous   |
| NC_037638.1 | 26062215 | SNV | 1 | G | A | Heterozygous |
| NC_037638.1 | 26062308 | SNV | 1 | C | T | Heterozygous |
| NC_037638.1 | 26062321 | SNV | 1 | T | C | Homozygous   |
| NC_037638.1 | 26062490 | SNV | 1 | G | C | Heterozygous |
| NC_037638.1 | 26062973 | SNV | 1 | A | T | Heterozygous |
| NC_037638.1 | 26063807 | SNV | 1 | C | T | Homozygous   |
| NC_037638.1 | 26063829 | SNV | 1 | G | A | Homozygous   |
| NC_037638.1 | 26063835 | SNV | 1 | G | A | Homozygous   |

|             |          |     |   |   |   |              |
|-------------|----------|-----|---|---|---|--------------|
| NC_037638.1 | 26064341 | SNV | 1 | T | C | Homozygous   |
| NC_037638.1 | 26065402 | SNV | 1 | C | A | Heterozygous |
| NC_037638.1 | 26065404 | SNV | 1 | C | A | Heterozygous |
| NC_037638.1 | 26065410 | SNV | 1 | C | A | Heterozygous |
| NC_037638.1 | 26065412 | SNV | 1 | C | A | Heterozygous |
| NC_037638.1 | 26065417 | SNV | 1 | T | G | Heterozygous |
| NC_037638.1 | 26065421 | SNV | 1 | C | T | Heterozygous |
| NC_037638.1 | 26068157 | SNV | 1 | A | G | Heterozygous |
| NC_037638.1 | 26071195 | SNV | 1 | G | C | Homozygous   |
| NC_037638.1 | 26074241 | SNV | 1 | A | G | Homozygous   |
| NC_037638.1 | 26074331 | SNV | 1 | C | T | Heterozygous |
| NC_037638.1 | 26074482 | SNV | 1 | C | T | Heterozygous |
| NC_037638.1 | 26074928 | SNV | 1 | T | C | Homozygous   |
| NC_037638.1 | 26074977 | SNV | 1 | G | A | Homozygous   |
| NC_037638.1 | 26075006 | SNV | 1 | A | G | Heterozygous |
| NC_037638.1 | 26075154 | SNV | 1 | A | G | Homozygous   |
| NC_037638.1 | 26075339 | SNV | 1 | G | A | Homozygous   |
| NC_037638.1 | 26075684 | SNV | 1 | C | T | Homozygous   |
| NC_037638.1 | 26076295 | SNV | 1 | T | C | Heterozygous |
| NC_037638.1 | 26076308 | SNV | 1 | T | C | Homozygous   |
| NC_037638.1 | 26076440 | SNV | 1 | A | G | Homozygous   |
| NC_037638.1 | 26079089 | SNV | 1 | G | A | Heterozygous |
| NC_037638.1 | 26081868 | SNV | 1 | T | C | Homozygous   |
| NC_037638.1 | 26082225 | SNV | 1 | C | T | Homozygous   |
| NC_037638.1 | 26082231 | SNV | 1 | T | C | Homozygous   |
| NC_037638.1 | 26082423 | SNV | 1 | C | T | Heterozygous |
| NC_037638.1 | 26082439 | SNV | 1 | G | A | Heterozygous |
| NC_037638.1 | 26082453 | SNV | 1 | G | A | Homozygous   |
| NC_037638.1 | 26082468 | SNV | 1 | C | T | Heterozygous |
| NC_037638.1 | 26082485 | SNV | 1 | C | T | Homozygous   |
| NC_037638.1 | 26082730 | SNV | 1 | T | A | Heterozygous |
| NC_037638.1 | 26082732 | SNV | 1 | A | G | Heterozygous |
| NC_037638.1 | 26082752 | SNV | 1 | T | C | Heterozygous |
| NC_037638.1 | 26083010 | SNV | 1 | T | C | Homozygous   |
| NC_037638.1 | 26083030 | SNV | 1 | T | C | Homozygous   |
| NC_037638.1 | 26083032 | SNV | 1 | A | G | Heterozygous |
| NC_037638.1 | 26083039 | SNV | 1 | C | T | Heterozygous |
| NC_037638.1 | 26083105 | SNV | 1 | G | A | Homozygous   |
| NC_037638.1 | 26083108 | SNV | 1 | C | G | Homozygous   |
| NC_037638.1 | 26083112 | SNV | 1 | C | T | Homozygous   |
| NC_037638.1 | 26083114 | SNV | 1 | C | T | Homozygous   |
| NC_037638.1 | 26083117 | SNV | 1 | C | T | Homozygous   |
| NC_037638.1 | 26083225 | SNV | 1 | G | A | Heterozygous |
| NC_037638.1 | 26083376 | SNV | 1 | A | G | Heterozygous |
| NC_037638.1 | 26083594 | SNV | 1 | T | C | Homozygous   |
| NC_037638.1 | 26083651 | SNV | 1 | A | G | Homozygous   |
| NC_037638.1 | 26083665 | SNV | 1 | T | C | Homozygous   |
| NC_037638.1 | 26084499 | SNV | 1 | G | T | Heterozygous |
| NC_037638.1 | 26084568 | SNV | 1 | C | G | Homozygous   |
| NC_037638.1 | 26084580 | SNV | 1 | G | A | Homozygous   |
| NC_037638.1 | 26084702 | SNV | 1 | A | G | Homozygous   |

|             |          |     |   |   |   |              |
|-------------|----------|-----|---|---|---|--------------|
| NC_037638.1 | 26085114 | SNV | 1 | T | C | Homozygous   |
| NC_037638.1 | 26085266 | SNV | 1 | T | C | Homozygous   |
| NC_037638.1 | 26085289 | SNV | 1 | G | A | Heterozygous |
| NC_037638.1 | 26085324 | SNV | 1 | A | G | Heterozygous |
| NC_037638.1 | 26085652 | SNV | 1 | A | T | Heterozygous |
| NC_037638.1 | 26085845 | SNV | 1 | C | T | Homozygous   |
| NC_037638.1 | 26085848 | SNV | 1 | T | A | Homozygous   |
| NC_037638.1 | 26086185 | SNV | 1 | A | G | Heterozygous |
| NC_037638.1 | 26086852 | SNV | 1 | T | A | Heterozygous |
| NC_037638.1 | 26087210 | SNV | 1 | G | A | Heterozygous |
| NC_037638.1 | 26087249 | SNV | 1 | T | C | Heterozygous |
| NC_037638.1 | 26087309 | SNV | 1 | A | T | Heterozygous |
| NC_037638.1 | 26087567 | SNV | 1 | G | C | Homozygous   |
| NC_037638.1 | 26087594 | SNV | 1 | T | C | Heterozygous |
| NC_037638.1 | 26087617 | SNV | 1 | A | G | Homozygous   |
| NC_037638.1 | 26087633 | SNV | 1 | G | C | Homozygous   |
| NC_037638.1 | 26088366 | SNV | 1 | C | T | Homozygous   |
| NC_037638.1 | 26088413 | SNV | 1 | T | C | Homozygous   |
| NC_037638.1 | 26088794 | SNV | 1 | T | C | Homozygous   |
| NC_037638.1 | 26088877 | SNV | 1 | T | C | Heterozygous |
| NC_037638.1 | 26089116 | SNV | 1 | G | A | Heterozygous |
| NC_037638.1 | 26089256 | SNV | 1 | G | A | Heterozygous |
| NC_037638.1 | 26089272 | SNV | 1 | A | G | Homozygous   |
| NC_037638.1 | 26089312 | SNV | 1 | G | A | Heterozygous |
| NC_037638.1 | 26093956 | SNV | 1 | C | T | Heterozygous |
| NC_037638.1 | 26094388 | SNV | 1 | T | C | Heterozygous |
| NC_037638.1 | 26094670 | SNV | 1 | A | G | Homozygous   |
| NC_037638.1 | 26095129 | SNV | 1 | A | G | Homozygous   |
| NC_037638.1 | 26095285 | SNV | 1 | C | T | Heterozygous |
| NC_037638.1 | 26097143 | SNV | 1 | A | G | Homozygous   |
| NC_037638.1 | 26103059 | SNV | 1 | C | T | Heterozygous |
| NC_037638.1 | 26103371 | SNV | 1 | T | C | Homozygous   |
| NC_037638.1 | 26103551 | SNV | 1 | A | G | Homozygous   |
| NC_037638.1 | 26105880 | SNV | 1 | T | C | Heterozygous |
| NC_037638.1 | 26105898 | SNV | 1 | C | T | Heterozygous |
| NC_037638.1 | 26105956 | SNV | 1 | C | T | Heterozygous |
| NC_037638.1 | 26105964 | SNV | 1 | A | G | Homozygous   |
| NC_037638.1 | 26105976 | SNV | 1 | A | T | Heterozygous |
| NC_037638.1 | 26105983 | SNV | 1 | A | T | Homozygous   |
| NC_037638.1 | 26105996 | SNV | 1 | T | C | Heterozygous |
| NC_037638.1 | 26105998 | SNV | 1 | A | T | Heterozygous |
| NC_037638.1 | 26106037 | SNV | 1 | C | T | Homozygous   |
| NC_037638.1 | 26115145 | SNV | 1 | T | C | Homozygous   |
| NC_037638.1 | 26115301 | SNV | 1 | T | C | Homozygous   |
| NC_037638.1 | 26115436 | SNV | 1 | A | G | Homozygous   |
| NC_037638.1 | 26115660 | SNV | 1 | G | A | Homozygous   |
| NC_037638.1 | 26115695 | SNV | 1 | C | T | Heterozygous |
| NC_037638.1 | 26119215 | SNV | 1 | C | T | Homozygous   |
| NC_037638.1 | 26119218 | SNV | 1 | G | C | Homozygous   |
| NC_037638.1 | 26119233 | SNV | 1 | T | C | Homozygous   |
| NC_037638.1 | 26119264 | SNV | 1 | G | A | Homozygous   |

|             |          |     |   |   |   |              |
|-------------|----------|-----|---|---|---|--------------|
| NC_037638.1 | 26119461 | SNV | 1 | C | T | Homozygous   |
| NC_037638.1 | 26119463 | SNV | 1 | A | T | Homozygous   |
| NC_037638.1 | 26119475 | SNV | 1 | T | C | Heterozygous |
| NC_037638.1 | 26119478 | SNV | 1 | C | T | Heterozygous |
| NC_037638.1 | 26119723 | SNV | 1 | C | G | Homozygous   |
| NC_037638.1 | 26119884 | SNV | 1 | A | G | Heterozygous |
| NC_037638.1 | 26119950 | SNV | 1 | C | T | Heterozygous |
| NC_037638.1 | 26121849 | SNV | 1 | G | A | Homozygous   |
| NC_037638.1 | 26121883 | SNV | 1 | C | T | Homozygous   |
| NC_037638.1 | 26121902 | SNV | 1 | T | C | Homozygous   |
| NC_037638.1 | 26137972 | SNV | 1 | C | G | Homozygous   |
| NC_037638.1 | 26138655 | SNV | 1 | T | C | Homozygous   |
| NC_037638.1 | 26138721 | SNV | 1 | A | G | Heterozygous |
| NC_037638.1 | 26138744 | SNV | 1 | G | A | Heterozygous |
| NC_037638.1 | 26138871 | SNV | 1 | T | C | Homozygous   |
| NC_037638.1 | 26138884 | SNV | 1 | T | C | Homozygous   |
| NC_037638.1 | 26143147 | SNV | 1 | G | A | Homozygous   |
| NC_037638.1 | 26143495 | SNV | 1 | T | C | Homozygous   |
| NC_037638.1 | 26143539 | SNV | 1 | T | C | Homozygous   |
| NC_037638.1 | 26143603 | SNV | 1 | C | T | Heterozygous |
| NC_037638.1 | 26143722 | SNV | 1 | T | C | Homozygous   |
| NC_037638.1 | 26157154 | SNV | 1 | A | G | Homozygous   |
| NC_037638.1 | 26157161 | SNV | 1 | C | T | Homozygous   |
| NC_037638.1 | 26159952 | SNV | 1 | G | A | Heterozygous |
| NC_037638.1 | 26159965 | SNV | 1 | A | C | Homozygous   |
| NC_037638.1 | 26162248 | SNV | 1 | C | T | Homozygous   |
| NC_037638.1 | 26162258 | SNV | 1 | C | T | Heterozygous |
| NC_037638.1 | 26162546 | SNV | 1 | A | G | Homozygous   |
| NC_037638.1 | 26162652 | SNV | 1 | A | G | Heterozygous |
| NC_037638.1 | 26162653 | SNV | 1 | T | A | Heterozygous |
| NC_037638.1 | 26162697 | SNV | 1 | G | T | Heterozygous |
| NC_037638.1 | 26173954 | SNV | 1 | A | G | Heterozygous |
| NC_037638.1 | 26173980 | SNV | 1 | C | A | Homozygous   |
| NC_037638.1 | 26173988 | SNV | 1 | G | C | Homozygous   |
| NC_037638.1 | 26177453 | SNV | 1 | G | C | Homozygous   |
| NC_037638.1 | 26177458 | SNV | 1 | A | C | Heterozygous |
| NC_037638.1 | 26177537 | SNV | 1 | G | A | Heterozygous |
| NC_037638.1 | 26180227 | SNV | 1 | G | T | Heterozygous |
| NC_037638.1 | 26180263 | SNV | 1 | A | T | Heterozygous |
| NC_037638.1 | 26180315 | SNV | 1 | A | G | Heterozygous |
| NC_037638.1 | 26180371 | SNV | 1 | C | T | Homozygous   |
| NC_037638.1 | 26180376 | SNV | 1 | T | C | Homozygous   |
| NC_037638.1 | 26180838 | SNV | 1 | T | C | Homozygous   |
| NC_037638.1 | 26180849 | SNV | 1 | A | G | Homozygous   |
| NC_037638.1 | 26181050 | SNV | 1 | G | A | Heterozygous |
| NC_037638.1 | 26185071 | SNV | 1 | T | C | Homozygous   |
| NC_037638.1 | 26185122 | SNV | 1 | T | C | Homozygous   |
| NC_037638.1 | 26185170 | SNV | 1 | A | G | Homozygous   |
| NC_037638.1 | 26186040 | SNV | 1 | T | C | Heterozygous |
| NC_037638.1 | 26186043 | SNV | 1 | T | C | Heterozygous |
| NC_037638.1 | 26186046 | SNV | 1 | A | G | Heterozygous |

|             |          |     |   |   |   |              |
|-------------|----------|-----|---|---|---|--------------|
| NC_037638.1 | 26186049 | SNV | 1 | T | C | Heterozygous |
| NC_037638.1 | 26186052 | SNV | 1 | T | C | Heterozygous |
| NC_037638.1 | 26186055 | SNV | 1 | A | G | Heterozygous |
| NC_037638.1 | 26186060 | SNV | 1 | A | T | Heterozygous |
| NC_037638.1 | 26186082 | SNV | 1 | A | T | Heterozygous |
| NC_037638.1 | 26186085 | SNV | 1 | T | A | Heterozygous |
| NC_037638.1 | 26186094 | SNV | 1 | T | C | Heterozygous |
| NC_037638.1 | 26186097 | SNV | 1 | A | G | Heterozygous |
| NC_037638.1 | 26186100 | SNV | 1 | T | C | Heterozygous |
| NC_037638.1 | 26186103 | SNV | 1 | G | A | Heterozygous |
| NC_037638.1 | 26186124 | SNV | 1 | T | A | Heterozygous |
| NC_037638.1 | 26186127 | SNV | 1 | A | G | Heterozygous |
| NC_037638.1 | 26186190 | SNV | 1 | C | T | Heterozygous |
| NC_037638.1 | 26191122 | SNV | 1 | T | C | Heterozygous |
| NC_037638.1 | 26194413 | SNV | 1 | T | G | Homozygous   |
| NC_037638.1 | 26194425 | SNV | 1 | T | A | Homozygous   |
| NC_037638.1 | 26194483 | SNV | 1 | C | T | Heterozygous |
| NC_037638.1 | 26197235 | SNV | 1 | A | T | Homozygous   |
| NC_037638.1 | 26198136 | SNV | 1 | C | G | Homozygous   |
| NC_037638.1 | 26198353 | SNV | 1 | A | G | Homozygous   |
| NC_037638.1 | 26199076 | SNV | 1 | A | G | Heterozygous |
| NC_037638.1 | 26199445 | SNV | 1 | T | C | Homozygous   |
| NC_037638.1 | 26199504 | SNV | 1 | A | G | Homozygous   |
| NC_037638.1 | 26200470 | SNV | 1 | A | C | Homozygous   |
| NC_037638.1 | 26200472 | SNV | 1 | T | C | Homozygous   |
| NC_037638.1 | 26200478 | SNV | 1 | C | T | Homozygous   |
| NC_037638.1 | 26200484 | SNV | 1 | G | A | Homozygous   |
| NC_037638.1 | 26200490 | SNV | 1 | A | T | Homozygous   |
| NC_037638.1 | 26200492 | SNV | 1 | A | G | Homozygous   |
| NC_037638.1 | 26200521 | SNV | 1 | A | T | Homozygous   |
| NC_037638.1 | 26200524 | SNV | 1 | T | A | Homozygous   |
| NC_037638.1 | 26200910 | SNV | 1 | G | A | Heterozygous |
| NC_037638.1 | 26200915 | SNV | 1 | A | G | Homozygous   |
| NC_037638.1 | 26200973 | SNV | 1 | A | G | Heterozygous |
| NC_037638.1 | 26201448 | SNV | 1 | G | T | Heterozygous |
| NC_037638.1 | 26203434 | SNV | 1 | T | C | Homozygous   |
| NC_037638.1 | 26207910 | SNV | 1 | T | C | Homozygous   |
| NC_037638.1 | 26208006 | SNV | 1 | A | G | Homozygous   |
| NC_037638.1 | 26208787 | SNV | 1 | A | G | Homozygous   |
| NC_037638.1 | 26209456 | SNV | 1 | G | A | Heterozygous |
| NC_037638.1 | 26210387 | SNV | 1 | G | C | Homozygous   |
| NC_037638.1 | 26210399 | SNV | 1 | G | A | Heterozygous |
| NC_037638.1 | 26210741 | SNV | 1 | C | G | Homozygous   |
| NC_037638.1 | 26211225 | SNV | 1 | A | G | Heterozygous |
| NC_037638.1 | 26211386 | SNV | 1 | A | G | Homozygous   |
| NC_037638.1 | 26211416 | SNV | 1 | A | G | Heterozygous |
| NC_037638.1 | 26211425 | SNV | 1 | C | T | Homozygous   |
| NC_037638.1 | 26211441 | SNV | 1 | T | C | Homozygous   |
| NC_037638.1 | 26212195 | SNV | 1 | G | A | Heterozygous |
| NC_037638.1 | 26212414 | SNV | 1 | T | C | Heterozygous |
| NC_037638.1 | 26212774 | SNV | 1 | T | C | Homozygous   |



|             |          |     |   |   |   |              |
|-------------|----------|-----|---|---|---|--------------|
| NC_037638.1 | 26212827 | SNV | 1 | T | C | Heterozygous |
| NC_037638.1 | 26227599 | SNV | 1 | G | A | Homozygous   |
| NC_037638.1 | 26227605 | SNV | 1 | G | A | Homozygous   |
| NC_037638.1 | 26247946 | SNV | 1 | G | A | Heterozygous |
| NC_037638.1 | 26247949 | SNV | 1 | A | G | Heterozygous |
| NC_037638.1 | 26248957 | SNV | 1 | G | A | Homozygous   |
| NC_037638.1 | 26248962 | SNV | 1 | T | C | Homozygous   |
| NC_037638.1 | 26297679 | SNV | 1 | T | C | Heterozygous |
| NC_037638.1 | 26297811 | SNV | 1 | A | G | Homozygous   |
| NC_037638.1 | 26303193 | SNV | 1 | T | G | Heterozygous |
| NC_037638.1 | 26303195 | SNV | 1 | T | C | Homozygous   |
| NC_037638.1 | 26303198 | SNV | 1 | A | G | Heterozygous |
| NC_037638.1 | 26349966 | SNV | 1 | A | G | Homozygous   |
| NC_037638.1 | 26349983 | SNV | 1 | C | G | Homozygous   |
| NC_037638.1 | 26350773 | SNV | 1 | A | T | Heterozygous |
| NC_037638.1 | 26351005 | SNV | 1 | A | G | Homozygous   |
| NC_037638.1 | 26351420 | SNV | 1 | T | C | Homozygous   |
| NC_037638.1 | 26358574 | SNV | 1 | G | A | Heterozygous |
| NC_037638.1 | 26361804 | SNV | 1 | G | A | Homozygous   |
| NC_037638.1 | 26361818 | SNV | 1 | A | G | Heterozygous |
| NC_037638.1 | 26366022 | SNV | 1 | T | A | Homozygous   |
| NC_037638.1 | 26366033 | SNV | 1 | G | A | Heterozygous |
| NC_037638.1 | 26366036 | SNV | 1 | C | T | Heterozygous |
| NC_037638.1 | 26366041 | SNV | 1 | A | G | Heterozygous |
| NC_037638.1 | 26373473 | SNV | 1 | T | C | Heterozygous |
| NC_037638.1 | 26373476 | SNV | 1 | A | T | Homozygous   |
| NC_037638.1 | 26373864 | SNV | 1 | T | C | Homozygous   |
| NC_037638.1 | 26374114 | SNV | 1 | A | G | Homozygous   |
| NC_037638.1 | 26374122 | SNV | 1 | A | G | Homozygous   |
| NC_037638.1 | 26395392 | SNV | 1 | T | G | Heterozygous |
| NC_037638.1 | 26395396 | SNV | 1 | C | G | Heterozygous |
| NC_037638.1 | 26395483 | SNV | 1 | C | T | Homozygous   |
| NC_037638.1 | 26395521 | SNV | 1 | G | A | Heterozygous |
| NC_037638.1 | 26397856 | SNV | 1 | T | C | Heterozygous |
| NC_037638.1 | 26397899 | SNV | 1 | G | T | Homozygous   |
| NC_037638.1 | 26397904 | SNV | 1 | G | C | Homozygous   |
| NC_037638.1 | 26397906 | SNV | 1 | T | A | Homozygous   |
| NC_037638.1 | 26397910 | SNV | 1 | C | G | Homozygous   |
| NC_037638.1 | 26399062 | SNV | 1 | A | G | Homozygous   |
| NC_037638.1 | 26399196 | SNV | 1 | C | T | Heterozygous |
| NC_037638.1 | 26399219 | SNV | 1 | T | C | Heterozygous |
| NC_037638.1 | 26399233 | SNV | 1 | G | C | Homozygous   |
| NC_037638.1 | 26399931 | SNV | 1 | C | T | Homozygous   |
| NC_037638.1 | 26399979 | SNV | 1 | C | G | Heterozygous |
| NC_037638.1 | 26409597 | SNV | 1 | A | G | Homozygous   |
| NC_037638.1 | 26409599 | SNV | 1 | A | G | Homozygous   |
| NC_037638.1 | 26409667 | SNV | 1 | A | G | Homozygous   |
| NC_037638.1 | 26409669 | SNV | 1 | A | G | Homozygous   |
| NC_037638.1 | 26409677 | SNV | 1 | A | T | Homozygous   |
| NC_037638.1 | 26412338 | SNV | 1 | C | T | Heterozygous |
| NC_037638.1 | 26412340 | SNV | 1 | A | G | Heterozygous |

|             |          |     |   |   |   |              |
|-------------|----------|-----|---|---|---|--------------|
| NC_037638.1 | 26412371 | SNV | 1 | G | A | Heterozygous |
| NC_037638.1 | 26428718 | SNV | 1 | T | C | Homozygous   |
| NC_037638.1 | 26428762 | SNV | 1 | A | G | Homozygous   |
| NC_037638.1 | 26428794 | SNV | 1 | A | G | Homozygous   |
| NC_037638.1 | 26428827 | SNV | 1 | A | G | Heterozygous |
| NC_037638.1 | 26428834 | SNV | 1 | G | A | Homozygous   |
| NC_037638.1 | 26428934 | SNV | 1 | C | T | Homozygous   |
| NC_037638.1 | 26437346 | SNV | 1 | G | A | Heterozygous |
| NC_037638.1 | 26437635 | SNV | 1 | G | A | Heterozygous |
| NC_037638.1 | 26437678 | SNV | 1 | G | A | Heterozygous |
| NC_037638.1 | 26437691 | SNV | 1 | A | G | Heterozygous |
| NC_037638.1 | 26437693 | SNV | 1 | G | A | Heterozygous |
| NC_037638.1 | 26437701 | SNV | 1 | G | A | Heterozygous |
| NC_037638.1 | 26446204 | SNV | 1 | A | G | Heterozygous |
| NC_037638.1 | 26446298 | SNV | 1 | T | C | Homozygous   |
| NC_037638.1 | 26450205 | SNV | 1 | G | A | Heterozygous |
| NC_037638.1 | 26450385 | SNV | 1 | C | A | Heterozygous |
| NC_037638.1 | 26451612 | SNV | 1 | T | A | Heterozygous |
| NC_037638.1 | 26460579 | SNV | 1 | T | A | Homozygous   |
| NC_037638.1 | 26460628 | SNV | 1 | G | A | Homozygous   |
| NC_037638.1 | 26460944 | SNV | 1 | C | T | Heterozygous |
| NC_037638.1 | 26469301 | SNV | 1 | G | T | Heterozygous |
| NC_037638.1 | 26469308 | SNV | 1 | A | T | Homozygous   |
| NC_037638.1 | 26473591 | SNV | 1 | G | A | Heterozygous |
| NC_037638.1 | 26473603 | SNV | 1 | G | A | Heterozygous |
| NC_037638.1 | 26473606 | SNV | 1 | G | A | Heterozygous |
| NC_037638.1 | 26473608 | SNV | 1 | A | G | Heterozygous |
| NC_037638.1 | 26473614 | SNV | 1 | G | C | Homozygous   |
| NC_037638.1 | 26473636 | SNV | 1 | G | A | Homozygous   |
| NC_037638.1 | 26473657 | SNV | 1 | G | A | Heterozygous |
| NC_037638.1 | 26473659 | SNV | 1 | G | A | Heterozygous |
| NC_037638.1 | 26492607 | SNV | 1 | A | G | Homozygous   |
| NC_037638.1 | 26493751 | SNV | 1 | G | A | Heterozygous |
| NC_037638.1 | 26493779 | SNV | 1 | A | G | Homozygous   |
| NC_037638.1 | 26493800 | SNV | 1 | G | A | Homozygous   |
| NC_037638.1 | 26494681 | SNV | 1 | A | G | Heterozygous |
| NC_037638.1 | 26494684 | SNV | 1 | A | G | Heterozygous |
| NC_037638.1 | 26494688 | SNV | 1 | A | G | Homozygous   |
| NC_037638.1 | 26494690 | SNV | 1 | A | G | Heterozygous |
| NC_037638.1 | 26494700 | SNV | 1 | A | G | Heterozygous |
| NC_037638.1 | 26494702 | SNV | 1 | A | G | Heterozygous |
| NC_037638.1 | 26495590 | SNV | 1 | C | T | Homozygous   |
| NC_037638.1 | 26495616 | SNV | 1 | A | G | Homozygous   |
| NC_037638.1 | 26495620 | SNV | 1 | A | G | Homozygous   |
| NC_037638.1 | 26495635 | SNV | 1 | A | G | Heterozygous |
| NC_037638.1 | 26495652 | SNV | 1 | A | G | Heterozygous |
| NC_037638.1 | 26495678 | SNV | 1 | C | T | Heterozygous |
| NC_037638.1 | 26495683 | SNV | 1 | A | G | Homozygous   |
| NC_037638.1 | 26495687 | SNV | 1 | G | A | Heterozygous |
| NC_037638.1 | 26495689 | SNV | 1 | C | T | Heterozygous |
| NC_037638.1 | 26518628 | SNV | 1 | T | C | Heterozygous |

|             |          |     |   |   |   |              |
|-------------|----------|-----|---|---|---|--------------|
| NC_037638.1 | 26518631 | SNV | 1 | G | C | Homozygous   |
| NC_037638.1 | 26518633 | SNV | 1 | T | C | Homozygous   |
| NC_037638.1 | 26518635 | SNV | 1 | C | T | Heterozygous |
| NC_037638.1 | 26523758 | SNV | 1 | G | A | Heterozygous |
| NC_037638.1 | 26527377 | SNV | 1 | T | C | Homozygous   |
| NC_037638.1 | 26529046 | SNV | 1 | T | C | Homozygous   |
| NC_037638.1 | 26529056 | SNV | 1 | G | A | Homozygous   |
| NC_037638.1 | 26529237 | SNV | 1 | C | T | Homozygous   |
| NC_037638.1 | 26529306 | SNV | 1 | A | C | Heterozygous |
| NC_037638.1 | 26529476 | SNV | 1 | A | C | Homozygous   |
| NC_037638.1 | 26532455 | SNV | 1 | T | A | Heterozygous |
| NC_037638.1 | 26537776 | SNV | 1 | T | C | Homozygous   |
| NC_037638.1 | 26550616 | SNV | 1 | G | A | Homozygous   |
| NC_037638.1 | 26550761 | SNV | 1 | G | A | Heterozygous |
| NC_037638.1 | 26550839 | SNV | 1 | C | A | Heterozygous |
| NC_037638.1 | 26551045 | SNV | 1 | C | A | Heterozygous |
| NC_037638.1 | 26551047 | SNV | 1 | T | C | Homozygous   |
| NC_037638.1 | 26564934 | SNV | 1 | A | G | Homozygous   |
| NC_037638.1 | 26565000 | SNV | 1 | G | A | Heterozygous |
| NC_037638.1 | 26565007 | SNV | 1 | A | G | Homozygous   |
| NC_037638.1 | 26565010 | SNV | 1 | G | A | Heterozygous |
| NC_037638.1 | 26565021 | SNV | 1 | C | T | Heterozygous |
| NC_037638.1 | 26575374 | SNV | 1 | T | C | Homozygous   |
| NC_037638.1 | 26575412 | SNV | 1 | T | A | Homozygous   |
| NC_037638.1 | 26576038 | SNV | 1 | C | T | Heterozygous |
| NC_037638.1 | 26576041 | SNV | 1 | G | A | Heterozygous |
| NC_037638.1 | 26576048 | SNV | 1 | A | G | Heterozygous |
| NC_037638.1 | 26576069 | SNV | 1 | C | T | Heterozygous |
| NC_037638.1 | 26576074 | SNV | 1 | G | A | Heterozygous |
| NC_037638.1 | 26576079 | SNV | 1 | C | T | Homozygous   |
| NC_037638.1 | 26584827 | SNV | 1 | T | C | Homozygous   |
| NC_037638.1 | 26584934 | SNV | 1 | A | G | Homozygous   |
| NC_037638.1 | 26584936 | SNV | 1 | T | C | Homozygous   |
| NC_037638.1 | 26585064 | SNV | 1 | A | G | Heterozygous |
| NC_037638.1 | 26585226 | SNV | 1 | A | G | Homozygous   |
| NC_037638.1 | 26585261 | SNV | 1 | A | G | Homozygous   |
| NC_037638.1 | 26585287 | SNV | 1 | A | G | Homozygous   |
| NC_037638.1 | 26585458 | SNV | 1 | T | C | Homozygous   |
| NC_037638.1 | 26588093 | SNV | 1 | C | G | Homozygous   |
| NC_037638.1 | 26588142 | SNV | 1 | T | C | Heterozygous |
| NC_037638.1 | 26588159 | SNV | 1 | G | A | Heterozygous |
| NC_037638.1 | 26588283 | SNV | 1 | G | A | Heterozygous |
| NC_037638.1 | 26588316 | SNV | 1 | G | A | Homozygous   |
| NC_037638.1 | 26588415 | SNV | 1 | T | C | Homozygous   |
| NC_037638.1 | 26588419 | SNV | 1 | T | G | Homozygous   |
| NC_037638.1 | 26588435 | SNV | 1 | C | G | Heterozygous |
| NC_037638.1 | 26603349 | SNV | 1 | T | A | Homozygous   |
| NC_037638.1 | 26603360 | SNV | 1 | T | C | Homozygous   |
| NC_037638.1 | 26603362 | SNV | 1 | C | T | Homozygous   |
| NC_037638.1 | 26603381 | SNV | 1 | G | A | Homozygous   |
| NC_037638.1 | 26603396 | SNV | 1 | G | T | Heterozygous |

|             |          |     |   |   |   |              |
|-------------|----------|-----|---|---|---|--------------|
| NC_037638.1 | 26603429 | SNV | 1 | A | G | Homozygous   |
| NC_037638.1 | 26603434 | SNV | 1 | A | G | Homozygous   |
| NC_037638.1 | 26603445 | SNV | 1 | T | C | Homozygous   |
| NC_037638.1 | 26603461 | SNV | 1 | G | A | Homozygous   |
| NC_037638.1 | 26603469 | SNV | 1 | C | G | Homozygous   |
| NC_037638.1 | 26603491 | SNV | 1 | A | G | Heterozygous |
| NC_037638.1 | 26603504 | SNV | 1 | C | G | Heterozygous |
| NC_037638.1 | 26603521 | SNV | 1 | T | A | Heterozygous |
| NC_037638.1 | 26603544 | SNV | 1 | A | G | Homozygous   |
| NC_037638.1 | 26603550 | SNV | 1 | C | G | Heterozygous |
| NC_037638.1 | 26603557 | SNV | 1 | A | G | Homozygous   |
| NC_037638.1 | 26603608 | SNV | 1 | G | A | Heterozygous |
| NC_037638.1 | 26603804 | SNV | 1 | T | C | Homozygous   |
| NC_037638.1 | 26605946 | SNV | 1 | T | A | Homozygous   |
| NC_037638.1 | 26605978 | SNV | 1 | C | T | Heterozygous |
| NC_037638.1 | 26606140 | SNV | 1 | T | C | Homozygous   |
| NC_037638.1 | 26606177 | SNV | 1 | G | A | Heterozygous |
| NC_037638.1 | 26606228 | SNV | 1 | T | C | Homozygous   |
| NC_037638.1 | 26606249 | SNV | 1 | G | A | Heterozygous |
| NC_037638.1 | 26606279 | SNV | 1 | A | G | Homozygous   |
| NC_037638.1 | 26606396 | SNV | 1 | A | G | Homozygous   |
| NC_037638.1 | 26606554 | SNV | 1 | A | G | Homozygous   |
| NC_037638.1 | 26606693 | SNV | 1 | T | C | Homozygous   |
| NC_037638.1 | 26606990 | SNV | 1 | T | C | Heterozygous |
| NC_037638.1 | 26606997 | SNV | 1 | C | T | Heterozygous |
| NC_037638.1 | 26607000 | SNV | 1 | T | C | Heterozygous |
| NC_037638.1 | 26607003 | SNV | 1 | T | C | Homozygous   |
| NC_037638.1 | 26607006 | SNV | 1 | C | T | Heterozygous |
| NC_037638.1 | 26614422 | SNV | 1 | T | C | Homozygous   |
| NC_037638.1 | 26614488 | SNV | 1 | G | A | Heterozygous |
| NC_037638.1 | 26618571 | SNV | 1 | A | G | Heterozygous |
| NC_037638.1 | 26618633 | SNV | 1 | G | T | Homozygous   |
| NC_037638.1 | 26618635 | SNV | 1 | C | T | Heterozygous |
| NC_037638.1 | 26618709 | SNV | 1 | T | C | Homozygous   |
| NC_037638.1 | 26619091 | SNV | 1 | G | A | Heterozygous |
| NC_037638.1 | 26619096 | SNV | 1 | T | A | Homozygous   |
| NC_037638.1 | 26619763 | SNV | 1 | C | T | Heterozygous |
| NC_037638.1 | 26619800 | SNV | 1 | G | C | Homozygous   |
| NC_037638.1 | 26619808 | SNV | 1 | T | C | Homozygous   |
| NC_037638.1 | 26619867 | SNV | 1 | T | C | Homozygous   |
| NC_037638.1 | 26619888 | SNV | 1 | T | C | Homozygous   |
| NC_037638.1 | 26619934 | SNV | 1 | T | C | Homozygous   |
| NC_037638.1 | 26627213 | SNV | 1 | A | G | Heterozygous |
| NC_037638.1 | 26627222 | SNV | 1 | A | G | Heterozygous |
| NC_037638.1 | 26627245 | SNV | 1 | A | G | Homozygous   |
| NC_037638.1 | 26627265 | SNV | 1 | T | A | Homozygous   |
| NC_037638.1 | 26627272 | SNV | 1 | A | T | Heterozygous |
| NC_037638.1 | 26627274 | SNV | 1 | T | C | Heterozygous |
| NC_037638.1 | 26627410 | SNV | 1 | G | A | Homozygous   |
| NC_037638.1 | 26630699 | SNV | 1 | T | C | Homozygous   |
| NC_037638.1 | 26630888 | SNV | 1 | A | G | Heterozygous |

|             |          |     |   |   |   |              |
|-------------|----------|-----|---|---|---|--------------|
| NC_037638.1 | 26630892 | SNV | 1 | G | C | Heterozygous |
| NC_037638.1 | 26637823 | SNV | 1 | G | A | Heterozygous |
| NC_037638.1 | 26638864 | SNV | 1 | A | C | Homozygous   |
| NC_037638.1 | 26638893 | SNV | 1 | G | A | Homozygous   |
| NC_037638.1 | 26638953 | SNV | 1 | T | C | Homozygous   |
| NC_037638.1 | 26638965 | SNV | 1 | A | T | Homozygous   |
| NC_037638.1 | 26643992 | SNV | 1 | C | T | Homozygous   |
| NC_037638.1 | 26644004 | SNV | 1 | C | T | Homozygous   |
| NC_037638.1 | 26644008 | SNV | 1 | A | C | Homozygous   |
| NC_037638.1 | 26644011 | SNV | 1 | A | G | Homozygous   |
| NC_037638.1 | 26651665 | SNV | 1 | C | G | Homozygous   |
| NC_037638.1 | 26651683 | SNV | 1 | T | A | Homozygous   |
| NC_037638.1 | 26652627 | SNV | 1 | G | A | Heterozygous |
| NC_037638.1 | 26652655 | SNV | 1 | C | T | Homozygous   |
| NC_037638.1 | 26652751 | SNV | 1 | T | C | Homozygous   |
| NC_037638.1 | 26653263 | SNV | 1 | C | T | Heterozygous |
| NC_037638.1 | 26653275 | SNV | 1 | A | G | Homozygous   |
| NC_037638.1 | 26653305 | SNV | 1 | C | T | Homozygous   |
| NC_037638.1 | 26653323 | SNV | 1 | T | C | Homozygous   |
| NC_037638.1 | 26653485 | SNV | 1 | T | C | Homozygous   |
| NC_037638.1 | 26653514 | SNV | 1 | G | A | Heterozygous |
| NC_037638.1 | 26653535 | SNV | 1 | C | T | Heterozygous |
| NC_037638.1 | 26653587 | SNV | 1 | C | T | Homozygous   |
| NC_037638.1 | 26658454 | SNV | 1 | A | G | Heterozygous |
| NC_037638.1 | 26658474 | SNV | 1 | G | A | Heterozygous |
| NC_037638.1 | 26658663 | SNV | 1 | G | A | Homozygous   |
| NC_037638.1 | 26658697 | SNV | 1 | A | G | Heterozygous |
| NC_037638.1 | 26671049 | SNV | 1 | G | C | Heterozygous |
| NC_037638.1 | 26676136 | SNV | 1 | A | G | Heterozygous |
| NC_037638.1 | 26676145 | SNV | 1 | G | A | Heterozygous |
| NC_037638.1 | 26676146 | SNV | 1 | T | C | Heterozygous |
| NC_037638.1 | 26676173 | SNV | 1 | G | A | Heterozygous |
| NC_037638.1 | 26676413 | SNV | 1 | G | A | Heterozygous |
| NC_037638.1 | 26676565 | SNV | 1 | C | T | Homozygous   |
| NC_037638.1 | 26676578 | SNV | 1 | T | G | Homozygous   |
| NC_037638.1 | 26676594 | SNV | 1 | T | C | Heterozygous |
| NC_037638.1 | 26680589 | SNV | 1 | G | A | Heterozygous |
| NC_037638.1 | 26680592 | SNV | 1 | A | G | Heterozygous |
| NC_037638.1 | 26680597 | SNV | 1 | A | G | Heterozygous |
| NC_037638.1 | 26681303 | SNV | 1 | C | T | Heterozygous |
| NC_037638.1 | 26688597 | SNV | 1 | T | C | Heterozygous |
| NC_037638.1 | 26688601 | SNV | 1 | C | T | Heterozygous |
| NC_037638.1 | 26698290 | SNV | 1 | T | C | Heterozygous |
| NC_037638.1 | 26698300 | SNV | 1 | T | C | Heterozygous |
| NC_037638.1 | 26698654 | SNV | 1 | G | A | Homozygous   |
| NC_037638.1 | 26698657 | SNV | 1 | C | T | Homozygous   |
| NC_037638.1 | 26698696 | SNV | 1 | T | C | Heterozygous |
| NC_037638.1 | 26698698 | SNV | 1 | T | C | Heterozygous |
| NC_037638.1 | 26701825 | SNV | 1 | T | G | Heterozygous |
| NC_037638.1 | 26706892 | SNV | 1 | C | G | Heterozygous |
| NC_037638.1 | 26706921 | SNV | 1 | A | G | Homozygous   |

|             |          |     |   |   |   |              |
|-------------|----------|-----|---|---|---|--------------|
| NC_037638.1 | 26706947 | SNV | 1 | C | T | Heterozygous |
| NC_037638.1 | 26707030 | SNV | 1 | G | A | Homozygous   |
| NC_037638.1 | 26707060 | SNV | 1 | A | G | Homozygous   |
| NC_037638.1 | 26707085 | SNV | 1 | C | A | Homozygous   |
| NC_037638.1 | 26707094 | SNV | 1 | A | G | Heterozygous |
| NC_037638.1 | 26707117 | SNV | 1 | A | G | Homozygous   |
| NC_037638.1 | 26707159 | SNV | 1 | A | C | Homozygous   |
| NC_037638.1 | 26707177 | SNV | 1 | G | A | Heterozygous |
| NC_037638.1 | 26707311 | SNV | 1 | G | A | Homozygous   |
| NC_037638.1 | 26710403 | SNV | 1 | A | G | Heterozygous |
| NC_037638.1 | 26710406 | SNV | 1 | A | G | Homozygous   |
| NC_037638.1 | 26710447 | SNV | 1 | G | A | Homozygous   |
| NC_037638.1 | 26711614 | SNV | 1 | A | G | Homozygous   |
| NC_037638.1 | 26712644 | SNV | 1 | G | C | Heterozygous |
| NC_037638.1 | 26712678 | SNV | 1 | A | G | Heterozygous |
| NC_037638.1 | 26712685 | SNV | 1 | C | T | Heterozygous |
| NC_037638.1 | 26712806 | SNV | 1 | C | T | Heterozygous |
| NC_037638.1 | 26713054 | SNV | 1 | G | A | Homozygous   |
| NC_037638.1 | 26713328 | SNV | 1 | A | G | Heterozygous |
| NC_037638.1 | 26713580 | SNV | 1 | T | A | Heterozygous |
| NC_037638.1 | 26713594 | SNV | 1 | G | A | Heterozygous |
| NC_037638.1 | 26713596 | SNV | 1 | T | G | Heterozygous |
| NC_037638.1 | 26717079 | SNV | 1 | C | T | Heterozygous |
| NC_037638.1 | 26717131 | SNV | 1 | A | T | Homozygous   |
| NC_037638.1 | 26717956 | SNV | 1 | G | A | Heterozygous |
| NC_037638.1 | 26717996 | SNV | 1 | T | G | Heterozygous |
| NC_037638.1 | 26718073 | SNV | 1 | A | G | Homozygous   |
| NC_037638.1 | 26718300 | SNV | 1 | A | T | Homozygous   |
| NC_037638.1 | 26718318 | SNV | 1 | C | T | Heterozygous |
| NC_037638.1 | 26718324 | SNV | 1 | C | T | Heterozygous |
| NC_037638.1 | 26718326 | SNV | 1 | C | T | Homozygous   |
| NC_037638.1 | 26718328 | SNV | 1 | C | T | Homozygous   |
| NC_037638.1 | 26718362 | SNV | 1 | A | G | Homozygous   |
| NC_037638.1 | 26718376 | SNV | 1 | A | G | Homozygous   |
| NC_037638.1 | 26718426 | SNV | 1 | A | G | Homozygous   |
| NC_037638.1 | 26718428 | SNV | 1 | A | G | Homozygous   |
| NC_037638.1 | 26718434 | SNV | 1 | A | T | Homozygous   |
| NC_037638.1 | 26718436 | SNV | 1 | A | T | Homozygous   |
| NC_037638.1 | 26718539 | SNV | 1 | T | C | Heterozygous |
| NC_037638.1 | 26718541 | SNV | 1 | T | C | Heterozygous |
| NC_037638.1 | 26718543 | SNV | 1 | T | C | Heterozygous |
| NC_037638.1 | 26718553 | SNV | 1 | T | C | Homozygous   |
| NC_037638.1 | 26718557 | SNV | 1 | C | T | Homozygous   |
| NC_037638.1 | 26718593 | SNV | 1 | G | A | Homozygous   |
| NC_037638.1 | 26718604 | SNV | 1 | T | A | Homozygous   |
| NC_037638.1 | 26718606 | SNV | 1 | A | G | Homozygous   |
| NC_037638.1 | 26718610 | SNV | 1 | T | C | Homozygous   |
| NC_037638.1 | 26718620 | SNV | 1 | T | C | Homozygous   |
| NC_037638.1 | 26718632 | SNV | 1 | G | A | Homozygous   |
| NC_037638.1 | 26718658 | SNV | 1 | C | G | Homozygous   |
| NC_037638.1 | 26718719 | SNV | 1 | T | C | Heterozygous |

|             |          |     |   |   |   |              |
|-------------|----------|-----|---|---|---|--------------|
| NC_037638.1 | 26718723 | SNV | 1 | C | A | Heterozygous |
| NC_037638.1 | 26718751 | SNV | 1 | T | C | Homozygous   |
| NC_037638.1 | 26718763 | SNV | 1 | A | T | Homozygous   |
| NC_037638.1 | 26718938 | SNV | 1 | C | A | Heterozygous |
| NC_037638.1 | 26718993 | SNV | 1 | T | C | Homozygous   |
| NC_037638.1 | 26719017 | SNV | 1 | G | A | Heterozygous |
| NC_037638.1 | 26719117 | SNV | 1 | G | A | Heterozygous |
| NC_037638.1 | 26730409 | SNV | 1 | T | C | Homozygous   |
| NC_037638.1 | 26730411 | SNV | 1 | T | C | Homozygous   |
| NC_037638.1 | 26730447 | SNV | 1 | G | A | Heterozygous |
| NC_037638.1 | 26730579 | SNV | 1 | T | C | Homozygous   |
| NC_037638.1 | 26730625 | SNV | 1 | A | G | Heterozygous |
| NC_037638.1 | 26730788 | SNV | 1 | G | A | Homozygous   |
| NC_037638.1 | 26731002 | SNV | 1 | T | C | Heterozygous |
| NC_037638.1 | 26731207 | SNV | 1 | T | G | Homozygous   |
| NC_037638.1 | 26743757 | SNV | 1 | G | A | Heterozygous |
| NC_037638.1 | 26744037 | SNV | 1 | A | T | Heterozygous |
| NC_037638.1 | 26744501 | SNV | 1 | T | C | Heterozygous |
| NC_037638.1 | 26744503 | SNV | 1 | T | C | Heterozygous |
| NC_037638.1 | 26744818 | SNV | 1 | C | A | Heterozygous |
| NC_037638.1 | 26744832 | SNV | 1 | A | G | Heterozygous |
| NC_037638.1 | 26744921 | SNV | 1 | C | T | Heterozygous |
| NC_037638.1 | 26744983 | SNV | 1 | G | T | Heterozygous |
| NC_037638.1 | 26744986 | SNV | 1 | A | G | Heterozygous |
| NC_037638.1 | 26745017 | SNV | 1 | G | A | Heterozygous |
| NC_037638.1 | 26745282 | SNV | 1 | A | G | Homozygous   |
| NC_037638.1 | 26746463 | SNV | 1 | A | C | Homozygous   |
| NC_037638.1 | 26746527 | SNV | 1 | G | C | Homozygous   |
| NC_037638.1 | 26746599 | SNV | 1 | A | G | Homozygous   |
| NC_037638.1 | 26746872 | SNV | 1 | A | G | Homozygous   |
| NC_037638.1 | 26746876 | SNV | 1 | G | A | Heterozygous |
| NC_037638.1 | 26746878 | SNV | 1 | G | A | Heterozygous |
| NC_037638.1 | 26749985 | SNV | 1 | T | C | Homozygous   |
| NC_037638.1 | 26750085 | SNV | 1 | A | C | Heterozygous |
| NC_037638.1 | 26752601 | SNV | 1 | T | A | Heterozygous |
| NC_037638.1 | 26753961 | SNV | 1 | A | T | Heterozygous |
| NC_037638.1 | 26753966 | SNV | 1 | A | T | Heterozygous |
| NC_037638.1 | 26753974 | SNV | 1 | T | A | Heterozygous |
| NC_037638.1 | 26753980 | SNV | 1 | A | T | Heterozygous |
| NC_037638.1 | 26760928 | SNV | 1 | C | T | Homozygous   |
| NC_037638.1 | 26760957 | SNV | 1 | T | C | Homozygous   |
| NC_037638.1 | 26785346 | SNV | 1 | G | A | Homozygous   |
| NC_037638.1 | 26785623 | SNV | 1 | G | A | Homozygous   |
| NC_037638.1 | 26785636 | SNV | 1 | G | A | Homozygous   |
| NC_037638.1 | 26785668 | SNV | 1 | G | A | Homozygous   |
| NC_037638.1 | 26785680 | SNV | 1 | G | A | Heterozygous |
| NC_037638.1 | 26785688 | SNV | 1 | C | T | Heterozygous |
| NC_037638.1 | 26785699 | SNV | 1 | C | T | Heterozygous |
| NC_037638.1 | 26790276 | SNV | 1 | T | G | Homozygous   |
| NC_037638.1 | 26790283 | SNV | 1 | T | A | Homozygous   |
| NC_037638.1 | 26793811 | SNV | 1 | T | C | Heterozygous |

|             |          |     |   |   |   |              |
|-------------|----------|-----|---|---|---|--------------|
| NC_037638.1 | 26793819 | SNV | 1 | T | C | Heterozygous |
| NC_037638.1 | 26793826 | SNV | 1 | A | T | Heterozygous |
| NC_037638.1 | 26793895 | SNV | 1 | C | T | Heterozygous |
| NC_037638.1 | 26793901 | SNV | 1 | C | T | Heterozygous |
| NC_037638.1 | 26793940 | SNV | 1 | C | T | Homozygous   |
| NC_037638.1 | 26795190 | SNV | 1 | T | C | Homozygous   |
| NC_037638.1 | 26795262 | SNV | 1 | G | C | Heterozygous |
| NC_037638.1 | 26795433 | SNV | 1 | C | A | Heterozygous |
| NC_037638.1 | 26795436 | SNV | 1 | C | T | Homozygous   |
| NC_037638.1 | 26796021 | SNV | 1 | T | C | Heterozygous |
| NC_037638.1 | 26796109 | SNV | 1 | C | G | Homozygous   |
| NC_037638.1 | 26796172 | SNV | 1 | A | G | Homozygous   |
| NC_037638.1 | 26796180 | SNV | 1 | T | C | Homozygous   |
| NC_037638.1 | 26798327 | SNV | 1 | C | T | Homozygous   |
| NC_037638.1 | 26798344 | SNV | 1 | T | C | Homozygous   |
| NC_037638.1 | 26798351 | SNV | 1 | T | C | Homozygous   |
| NC_037638.1 | 26798376 | SNV | 1 | A | T | Homozygous   |
| NC_037638.1 | 26798380 | SNV | 1 | C | T | Heterozygous |
| NC_037638.1 | 26798382 | SNV | 1 | C | A | Heterozygous |
| NC_037638.1 | 26809972 | SNV | 1 | T | C | Homozygous   |
| NC_037638.1 | 26811827 | SNV | 1 | C | T | Homozygous   |
| NC_037638.1 | 26811833 | SNV | 1 | C | T | Homozygous   |
| NC_037638.1 | 26811836 | SNV | 1 | T | A | Homozygous   |
| NC_037638.1 | 26811838 | SNV | 1 | T | A | Homozygous   |
| NC_037638.1 | 26811840 | SNV | 1 | T | C | Homozygous   |
| NC_037638.1 | 26811845 | SNV | 1 | C | T | Homozygous   |
| NC_037638.1 | 26813244 | SNV | 1 | C | T | Heterozygous |
| NC_037638.1 | 26813258 | SNV | 1 | T | C | Heterozygous |
| NC_037638.1 | 26814405 | SNV | 1 | A | G | Heterozygous |
| NC_037638.1 | 26814586 | SNV | 1 | T | C | Homozygous   |
| NC_037638.1 | 26814791 | SNV | 1 | A | G | Heterozygous |
| NC_037638.1 | 26814796 | SNV | 1 | A | C | Heterozygous |
| NC_037638.1 | 26814796 | SNV | 1 | A | G | Heterozygous |
| NC_037638.1 | 26815210 | SNV | 1 | A | G | Heterozygous |
| NC_037638.1 | 26828362 | SNV | 1 | T | C | Heterozygous |
| NC_037638.1 | 26832738 | SNV | 1 | G | A | Heterozygous |
| NC_037638.1 | 26834018 | SNV | 1 | G | A | Heterozygous |
| NC_037638.1 | 26834174 | SNV | 1 | C | T | Homozygous   |
| NC_037638.1 | 26834468 | SNV | 1 | G | A | Heterozygous |
| NC_037638.1 | 26836228 | SNV | 1 | G | A | Homozygous   |
| NC_037638.1 | 26837536 | SNV | 1 | T | C | Heterozygous |
| NC_037638.1 | 26837548 | SNV | 1 | A | T | Heterozygous |
| NC_037638.1 | 26840896 | SNV | 1 | A | C | Homozygous   |
| NC_037638.1 | 26840903 | SNV | 1 | T | A | Homozygous   |
| NC_037638.1 | 26840911 | SNV | 1 | T | A | Homozygous   |
| NC_037638.1 | 26844115 | SNV | 1 | T | A | Homozygous   |
| NC_037638.1 | 26844118 | SNV | 1 | G | A | Homozygous   |
| NC_037638.1 | 26844821 | SNV | 1 | G | T | Homozygous   |
| NC_037638.1 | 26844972 | SNV | 1 | A | G | Heterozygous |
| NC_037638.1 | 26844975 | SNV | 1 | A | G | Homozygous   |
| NC_037638.1 | 26844987 | SNV | 1 | T | C | Heterozygous |



|             |          |     |   |   |   |              |
|-------------|----------|-----|---|---|---|--------------|
| NC_037638.1 | 26844993 | SNV | 1 | T | C | Homozygous   |
| NC_037638.1 | 26844999 | SNV | 1 | A | T | Homozygous   |
| NC_037638.1 | 26845005 | SNV | 1 | T | C | Homozygous   |
| NC_037638.1 | 26845012 | SNV | 1 | T | G | Heterozygous |
| NC_037638.1 | 26845017 | SNV | 1 | A | G | Heterozygous |
| NC_037638.1 | 26845020 | SNV | 1 | A | G | Heterozygous |
| NC_037638.1 | 26845020 | SNV | 1 | A | T | Heterozygous |
| NC_037638.1 | 26845023 | SNV | 1 | A | G | Heterozygous |
| NC_037638.1 | 26845026 | SNV | 1 | T | C | Heterozygous |
| NC_037638.1 | 26845053 | SNV | 1 | A | T | Homozygous   |
| NC_037638.1 | 26845056 | SNV | 1 | T | C | Heterozygous |
| NC_037638.1 | 26845059 | SNV | 1 | C | T | Homozygous   |
| NC_037638.1 | 26845069 | SNV | 1 | G | A | Heterozygous |
| NC_037638.1 | 26845071 | SNV | 1 | A | T | Heterozygous |
| NC_037638.1 | 26845074 | SNV | 1 | T | C | Heterozygous |
| NC_037638.1 | 26845086 | SNV | 1 | A | T | Homozygous   |
| NC_037638.1 | 26845501 | SNV | 1 | T | G | Homozygous   |
| NC_037638.1 | 26845815 | SNV | 1 | G | A | Heterozygous |
| NC_037638.1 | 26845857 | SNV | 1 | T | C | Heterozygous |
| NC_037638.1 | 26846061 | SNV | 1 | T | A | Homozygous   |
| NC_037638.1 | 26846317 | SNV | 1 | G | C | Homozygous   |
| NC_037638.1 | 26846446 | SNV | 1 | A | T | Heterozygous |
| NC_037638.1 | 26846467 | SNV | 1 | A | T | Heterozygous |
| NC_037638.1 | 26846470 | SNV | 1 | A | G | Heterozygous |
| NC_037638.1 | 26846473 | SNV | 1 | A | T | Heterozygous |
| NC_037638.1 | 26846497 | SNV | 1 | T | C | Heterozygous |
| NC_037638.1 | 26846503 | SNV | 1 | C | G | Heterozygous |
| NC_037638.1 | 26846515 | SNV | 1 | A | C | Heterozygous |
| NC_037638.1 | 26846523 | SNV | 1 | G | A | Heterozygous |
| NC_037638.1 | 26846527 | SNV | 1 | T | C | Heterozygous |
| NC_037638.1 | 26849648 | SNV | 1 | T | C | Homozygous   |
| NC_037638.1 | 26849764 | SNV | 1 | G | T | Homozygous   |
| NC_037638.1 | 26850204 | SNV | 1 | G | T | Heterozygous |
| NC_037638.1 | 26850560 | SNV | 1 | G | T | Homozygous   |
| NC_037638.1 | 26850708 | SNV | 1 | T | A | Heterozygous |
| NC_037638.1 | 26850714 | SNV | 1 | T | C | Heterozygous |
| NC_037638.1 | 26850762 | SNV | 1 | C | T | Heterozygous |
| NC_037638.1 | 26850939 | SNV | 1 | A | C | Homozygous   |
| NC_037638.1 | 26851130 | SNV | 1 | G | C | Homozygous   |
| NC_037638.1 | 26851201 | SNV | 1 | T | A | Homozygous   |
| NC_037638.1 | 26851349 | SNV | 1 | T | A | Homozygous   |
| NC_037638.1 | 26859256 | SNV | 1 | T | C | Homozygous   |
| NC_037638.1 | 26859258 | SNV | 1 | C | T | Heterozygous |
| NC_037638.1 | 26859285 | SNV | 1 | T | C | Homozygous   |
| NC_037638.1 | 26859294 | SNV | 1 | A | G | Homozygous   |
| NC_037638.1 | 26859422 | SNV | 1 | A | G | Homozygous   |
| NC_037638.1 | 26859438 | SNV | 1 | T | C | Homozygous   |
| NC_037638.1 | 26859526 | SNV | 1 | A | T | Homozygous   |
| NC_037638.1 | 26859617 | SNV | 1 | T | C | Heterozygous |
| NC_037638.1 | 26859622 | SNV | 1 | T | C | Homozygous   |
| NC_037638.1 | 26859705 | SNV | 1 | C | A | Homozygous   |

|             |          |     |   |   |   |              |
|-------------|----------|-----|---|---|---|--------------|
| NC_037638.1 | 26859715 | SNV | 1 | G | A | Homozygous   |
| NC_037638.1 | 26859842 | SNV | 1 | A | T | Homozygous   |
| NC_037638.1 | 26859864 | SNV | 1 | T | C | Homozygous   |
| NC_037638.1 | 26859880 | SNV | 1 | A | G | Homozygous   |
| NC_037638.1 | 26859900 | SNV | 1 | C | T | Homozygous   |
| NC_037638.1 | 26859977 | SNV | 1 | T | G | Heterozygous |
| NC_037638.1 | 26859981 | SNV | 1 | C | T | Heterozygous |
| NC_037638.1 | 26860013 | SNV | 1 | A | C | Heterozygous |
| NC_037638.1 | 26860335 | SNV | 1 | A | G | Homozygous   |
| NC_037638.1 | 26860630 | SNV | 1 | A | G | Homozygous   |
| NC_037638.1 | 26860862 | SNV | 1 | C | A | Homozygous   |
| NC_037638.1 | 26865984 | SNV | 1 | C | T | Heterozygous |
| NC_037638.1 | 26866846 | SNV | 1 | T | C | Homozygous   |
| NC_037638.1 | 26866858 | SNV | 1 | T | C | Homozygous   |
| NC_037638.1 | 26866911 | SNV | 1 | A | G | Heterozygous |
| NC_037638.1 | 26869115 | SNV | 1 | A | G | Heterozygous |
| NC_037638.1 | 26869119 | SNV | 1 | G | C | Heterozygous |
| NC_037638.1 | 26869152 | SNV | 1 | A | G | Heterozygous |
| NC_037638.1 | 26869318 | SNV | 1 | A | G | Heterozygous |
| NC_037638.1 | 26871841 | SNV | 1 | C | G | Homozygous   |
| NC_037638.1 | 26881753 | SNV | 1 | G | A | Homozygous   |
| NC_037638.1 | 26892237 | SNV | 1 | G | C | Heterozygous |
| NC_037638.1 | 26971811 | SNV | 1 | G | A | Homozygous   |
| NC_037638.1 | 26971828 | SNV | 1 | C | T | Homozygous   |
| NC_037638.1 | 26971848 | SNV | 1 | A | G | Homozygous   |
| NC_037638.1 | 26971852 | SNV | 1 | A | G | Homozygous   |
| NC_037638.1 | 26971858 | SNV | 1 | A | C | Homozygous   |
| NC_037638.1 | 26972684 | SNV | 1 | A | G | Heterozygous |
| NC_037638.1 | 26972691 | SNV | 1 | A | G | Heterozygous |
| NC_037638.1 | 26972693 | SNV | 1 | T | C | Homozygous   |
| NC_037638.1 | 26972701 | SNV | 1 | C | T | Heterozygous |
| NC_037638.1 | 26972702 | SNV | 1 | A | T | Heterozygous |
| NC_037638.1 | 26972710 | SNV | 1 | C | T | Heterozygous |
| NC_037638.1 | 26972712 | SNV | 1 | A | C | Homozygous   |
| NC_037638.1 | 26972715 | SNV | 1 | T | C | Homozygous   |
| NC_037638.1 | 26972725 | SNV | 1 | C | T | Heterozygous |
| NC_037638.1 | 26972730 | SNV | 1 | T | C | Homozygous   |
| NC_037638.1 | 26972734 | SNV | 1 | C | G | Homozygous   |
| NC_037638.1 | 26972747 | SNV | 1 | G | A | Heterozygous |
| NC_037638.1 | 26972755 | SNV | 1 | C | T | Heterozygous |
| NC_037638.1 | 26972772 | SNV | 1 | T | C | Homozygous   |
| NC_037638.1 | 26972788 | SNV | 1 | T | C | Homozygous   |
| NC_037638.1 | 27022078 | SNV | 1 | A | G | Homozygous   |
| NC_037638.1 | 27022080 | SNV | 1 | G | A | Homozygous   |
| NC_037638.1 | 27023071 | SNV | 1 | T | A | Homozygous   |
| NC_037638.1 | 27023075 | SNV | 1 | G | T | Homozygous   |
| NC_037638.1 | 27028702 | SNV | 1 | G | A | Heterozygous |
| NC_037638.1 | 27028708 | SNV | 1 | T | C | Heterozygous |
| NC_037638.1 | 27028740 | SNV | 1 | A | G | Heterozygous |
| NC_037638.1 | 27030077 | SNV | 1 | T | A | Heterozygous |
| NC_037638.1 | 27031341 | SNV | 1 | T | C | Heterozygous |

|             |          |     |   |   |   |              |
|-------------|----------|-----|---|---|---|--------------|
| NC_037638.1 | 27031344 | SNV | 1 | T | C | Heterozygous |
| NC_037638.1 | 27031347 | SNV | 1 | T | C | Heterozygous |
| NC_037638.1 | 27031350 | SNV | 1 | T | C | Heterozygous |
| NC_037638.1 | 27031356 | SNV | 1 | T | C | Heterozygous |
| NC_037638.1 | 27031546 | SNV | 1 | T | C | Homozygous   |
| NC_037638.1 | 27031644 | SNV | 1 | C | A | Homozygous   |
| NC_037638.1 | 27031790 | SNV | 1 | A | G | Heterozygous |
| NC_037638.1 | 27031839 | SNV | 1 | G | A | Heterozygous |
| NC_037638.1 | 27031930 | SNV | 1 | T | C | Homozygous   |
| NC_037638.1 | 27032157 | SNV | 1 | T | C | Homozygous   |
| NC_037638.1 | 27032396 | SNV | 1 | C | T | Heterozygous |
| NC_037638.1 | 27032433 | SNV | 1 | T | C | Homozygous   |
| NC_037638.1 | 27032504 | SNV | 1 | T | C | Homozygous   |
| NC_037638.1 | 27032543 | SNV | 1 | G | A | Homozygous   |
| NC_037638.1 | 27032562 | SNV | 1 | G | A | Homozygous   |
| NC_037638.1 | 27032566 | SNV | 1 | C | G | Homozygous   |
| NC_037638.1 | 27032583 | SNV | 1 | G | C | Heterozygous |
| NC_037638.1 | 27032590 | SNV | 1 | A | C | Heterozygous |
| NC_037638.1 | 27032590 | SNV | 1 | A | G | Heterozygous |
| NC_037638.1 | 27032599 | SNV | 1 | G | A | Heterozygous |
| NC_037638.1 | 27032604 | SNV | 1 | A | T | Heterozygous |
| NC_037638.1 | 27032608 | SNV | 1 | A | C | Heterozygous |
| NC_037638.1 | 27032662 | SNV | 1 | A | G | Homozygous   |
| NC_037638.1 | 27106901 | SNV | 1 | A | C | Homozygous   |
| NC_037638.1 | 27106914 | SNV | 1 | T | C | Homozygous   |
| NC_037638.1 | 27106921 | SNV | 1 | C | T | Homozygous   |
| NC_037638.1 | 27153594 | SNV | 1 | T | C | Homozygous   |
| NC_037638.1 | 27153702 | SNV | 1 | A | C | Heterozygous |
| NC_037638.1 | 27157837 | SNV | 1 | G | A | Homozygous   |
| NC_037638.1 | 27157874 | SNV | 1 | T | C | Homozygous   |
| NC_037638.1 | 27159958 | SNV | 1 | C | A | Heterozygous |
| NC_037638.1 | 27195454 | SNV | 1 | G | A | Heterozygous |
| NC_037638.1 | 27268910 | SNV | 1 | T | C | Homozygous   |
| NC_037638.1 | 27268919 | SNV | 1 | A | G | Homozygous   |
| NC_037638.1 | 27269288 | SNV | 1 | T | C | Homozygous   |
| NC_037638.1 | 27269426 | SNV | 1 | T | C | Heterozygous |
| NC_037638.1 | 27269451 | SNV | 1 | G | A | Homozygous   |
| NC_037638.1 | 27270895 | SNV | 1 | T | C | Homozygous   |
| NC_037638.1 | 27270911 | SNV | 1 | G | A | Homozygous   |
| NC_037638.1 | 27270926 | SNV | 1 | A | G | Homozygous   |
| NC_037638.1 | 27271045 | SNV | 1 | T | A | Homozygous   |
| NC_037638.1 | 27271277 | SNV | 1 | C | G | Heterozygous |
| NC_037638.1 | 27271620 | SNV | 1 | G | C | Homozygous   |
| NC_037638.1 | 27277192 | SNV | 1 | G | A | Heterozygous |
| NC_037638.1 | 27277223 | SNV | 1 | G | A | Heterozygous |
| NC_037638.1 | 27282597 | SNV | 1 | A | G | Homozygous   |
| NC_037638.1 | 27282650 | SNV | 1 | G | A | Homozygous   |
| NC_037638.1 | 27282653 | SNV | 1 | A | G | Heterozygous |
| NC_037638.1 | 27282917 | SNV | 1 | T | C | Homozygous   |
| NC_037638.1 | 27282945 | SNV | 1 | G | A | Homozygous   |
| NC_037638.1 | 27283004 | SNV | 1 | G | A | Heterozygous |

|             |          |     |   |   |   |              |
|-------------|----------|-----|---|---|---|--------------|
| NC_037638.1 | 27283179 | SNV | 1 | A | G | Heterozygous |
| NC_037638.1 | 27288601 | SNV | 1 | G | A | Heterozygous |
| NC_037638.1 | 27298926 | SNV | 1 | A | G | Heterozygous |
| NC_037638.1 | 27298939 | SNV | 1 | A | G | Heterozygous |
| NC_037638.1 | 27298947 | SNV | 1 | G | A | Homozygous   |
| NC_037638.1 | 27298951 | SNV | 1 | G | T | Homozygous   |
| NC_037638.1 | 27298972 | SNV | 1 | A | T | Heterozygous |
| NC_037638.1 | 27298974 | SNV | 1 | A | G | Heterozygous |
| NC_037638.1 | 27308405 | SNV | 1 | T | G | Heterozygous |
| NC_037638.1 | 27308412 | SNV | 1 | C | T | Heterozygous |
| NC_037638.1 | 27308417 | SNV | 1 | T | G | Heterozygous |
| NC_037638.1 | 27308438 | SNV | 1 | T | G | Homozygous   |
| NC_037638.1 | 27312257 | SNV | 1 | A | G | Homozygous   |
| NC_037638.1 | 27334734 | SNV | 1 | A | G | Homozygous   |
| NC_037638.1 | 27335578 | SNV | 1 | T | G | Heterozygous |
| NC_037638.1 | 27335913 | SNV | 1 | T | A | Heterozygous |
| NC_037638.1 | 27336025 | SNV | 1 | G | C | Homozygous   |
| NC_037638.1 | 27336121 | SNV | 1 | A | G | Homozygous   |
| NC_037638.1 | 27336452 | SNV | 1 | A | C | Heterozygous |
| NC_037638.1 | 27336626 | SNV | 1 | C | T | Heterozygous |
| NC_037638.1 | 27336850 | SNV | 1 | G | T | Heterozygous |
| NC_037638.1 | 27336874 | SNV | 1 | A | T | Heterozygous |
| NC_037638.1 | 27337627 | SNV | 1 | A | T | Homozygous   |
| NC_037638.1 | 27337650 | SNV | 1 | C | T | Homozygous   |
| NC_037638.1 | 27337652 | SNV | 1 | C | T | Homozygous   |
| NC_037638.1 | 27337655 | SNV | 1 | C | T | Homozygous   |
| NC_037638.1 | 27337938 | SNV | 1 | C | G | Heterozygous |
| NC_037638.1 | 27337942 | SNV | 1 | T | G | Heterozygous |
| NC_037638.1 | 27337950 | SNV | 1 | C | T | Heterozygous |
| NC_037638.1 | 27338489 | SNV | 1 | C | T | Homozygous   |
| NC_037638.1 | 27338579 | SNV | 1 | T | C | Homozygous   |
| NC_037638.1 | 27339016 | SNV | 1 | A | G | Heterozygous |
| NC_037638.1 | 27339022 | SNV | 1 | A | G | Homozygous   |
| NC_037638.1 | 27339455 | SNV | 1 | C | A | Homozygous   |
| NC_037638.1 | 27339931 | SNV | 1 | A | G | Homozygous   |
| NC_037638.1 | 27340446 | SNV | 1 | A | T | Heterozygous |
| NC_037638.1 | 27364300 | SNV | 1 | T | A | Homozygous   |
| NC_037638.1 | 27364428 | SNV | 1 | T | A | Heterozygous |
| NC_037638.1 | 27364438 | SNV | 1 | G | A | Heterozygous |
| NC_037638.1 | 27364515 | SNV | 1 | G | A | Heterozygous |
| NC_037638.1 | 27364584 | SNV | 1 | A | G | Heterozygous |
| NC_037638.1 | 27365010 | SNV | 1 | A | G | Homozygous   |
| NC_037638.1 | 27365119 | SNV | 1 | T | C | Homozygous   |
| NC_037638.1 | 27365122 | SNV | 1 | G | A | Heterozygous |
| NC_037638.1 | 27365132 | SNV | 1 | G | T | Heterozygous |
| NC_037638.1 | 27365135 | SNV | 1 | A | C | Homozygous   |
| NC_037638.1 | 27366814 | SNV | 1 | C | T | Heterozygous |
| NC_037638.1 | 27366818 | SNV | 1 | C | T | Heterozygous |
| NC_037638.1 | 27366820 | SNV | 1 | A | G | Heterozygous |
| NC_037638.1 | 27366832 | SNV | 1 | C | T | Heterozygous |
| NC_037638.1 | 27366837 | SNV | 1 | C | T | Homozygous   |

|             |          |     |   |   |   |              |
|-------------|----------|-----|---|---|---|--------------|
| NC_037638.1 | 27366907 | SNV | 1 | A | G | Homozygous   |
| NC_037638.1 | 27386472 | SNV | 1 | C | T | Heterozygous |
| NC_037638.1 | 27390757 | SNV | 1 | G | A | Homozygous   |
| NC_037638.1 | 27390793 | SNV | 1 | T | A | Heterozygous |
| NC_037638.1 | 27390820 | SNV | 1 | A | T | Homozygous   |
| NC_037638.1 | 27390829 | SNV | 1 | A | G | Homozygous   |
| NC_037638.1 | 27390841 | SNV | 1 | G | A | Homozygous   |
| NC_037638.1 | 27390843 | SNV | 1 | A | G | Heterozygous |
| NC_037638.1 | 27390846 | SNV | 1 | G | A | Heterozygous |
| NC_037638.1 | 27390853 | SNV | 1 | G | A | Homozygous   |
| NC_037638.1 | 27390859 | SNV | 1 | T | A | Homozygous   |
| NC_037638.1 | 27390873 | SNV | 1 | G | A | Homozygous   |
| NC_037638.1 | 27390884 | SNV | 1 | T | G | Homozygous   |
| NC_037638.1 | 27391245 | SNV | 1 | T | A | Heterozygous |
| NC_037638.1 | 27391293 | SNV | 1 | A | G | Heterozygous |
| NC_037638.1 | 27392937 | SNV | 1 | T | A | Heterozygous |
| NC_037638.1 | 27412731 | SNV | 1 | G | A | Homozygous   |
| NC_037638.1 | 27412734 | SNV | 1 | G | T | Homozygous   |
| NC_037638.1 | 27439463 | SNV | 1 | A | G | Homozygous   |
| NC_037638.1 | 27439622 | SNV | 1 | T | C | Heterozygous |
| NC_037638.1 | 27439684 | SNV | 1 | T | C | Heterozygous |
| NC_037638.1 | 27439705 | SNV | 1 | C | T | Homozygous   |
| NC_037638.1 | 27439741 | SNV | 1 | T | C | Homozygous   |
| NC_037638.1 | 27466804 | SNV | 1 | A | G | Homozygous   |
| NC_037638.1 | 27467964 | SNV | 1 | A | T | Homozygous   |
| NC_037638.1 | 27469917 | SNV | 1 | A | G | Heterozygous |
| NC_037638.1 | 27471959 | SNV | 1 | C | T | Homozygous   |
| NC_037638.1 | 27473057 | SNV | 1 | T | C | Heterozygous |
| NC_037638.1 | 27473459 | SNV | 1 | C | T | Heterozygous |
| NC_037638.1 | 27474679 | SNV | 1 | A | C | Homozygous   |
| NC_037638.1 | 27474681 | SNV | 1 | T | C | Homozygous   |
| NC_037638.1 | 27474715 | SNV | 1 | G | A | Homozygous   |
| NC_037638.1 | 27486285 | SNV | 1 | T | A | Homozygous   |
| NC_037638.1 | 27488998 | SNV | 1 | G | T | Heterozygous |
| NC_037638.1 | 27489318 | SNV | 1 | T | C | Homozygous   |
| NC_037638.1 | 27489709 | SNV | 1 | G | A | Heterozygous |
| NC_037638.1 | 27490323 | SNV | 1 | C | A | Heterozygous |
| NC_037638.1 | 27490344 | SNV | 1 | G | C | Homozygous   |
| NC_037638.1 | 27490372 | SNV | 1 | G | C | Heterozygous |
| NC_037638.1 | 27490610 | SNV | 1 | C | T | Heterozygous |
| NC_037638.1 | 27490947 | SNV | 1 | A | G | Heterozygous |
| NC_037638.1 | 27495057 | SNV | 1 | T | C | Homozygous   |
| NC_037638.1 | 27504613 | SNV | 1 | A | G | Heterozygous |
| NC_037638.1 | 27504623 | SNV | 1 | A | G | Homozygous   |
| NC_037638.1 | 27504625 | SNV | 1 | A | G | Homozygous   |
| NC_037638.1 | 27504646 | SNV | 1 | A | G | Homozygous   |
| NC_037638.1 | 27504651 | SNV | 1 | A | G | Homozygous   |
| NC_037638.1 | 27521159 | SNV | 1 | A | G | Homozygous   |
| NC_037638.1 | 27521262 | SNV | 1 | T | C | Heterozygous |
| NC_037638.1 | 27521265 | SNV | 1 | T | C | Homozygous   |
| NC_037638.1 | 27521287 | SNV | 1 | T | C | Homozygous   |

|             |          |     |   |   |   |              |
|-------------|----------|-----|---|---|---|--------------|
| NC_037638.1 | 27521726 | SNV | 1 | G | A | Heterozygous |
| NC_037638.1 | 27529985 | SNV | 1 | C | T | Homozygous   |
| NC_037638.1 | 27531372 | SNV | 1 | C | A | Heterozygous |
| NC_037638.1 | 27553012 | SNV | 1 | G | A | Heterozygous |
| NC_037638.1 | 27553015 | SNV | 1 | C | T | Heterozygous |
| NC_037638.1 | 27553019 | SNV | 1 | A | G | Homozygous   |
| NC_037638.1 | 27553060 | SNV | 1 | A | G | Homozygous   |
| NC_037638.1 | 27556266 | SNV | 1 | C | T | Heterozygous |
| NC_037638.1 | 27556355 | SNV | 1 | T | A | Homozygous   |
| NC_037638.1 | 27561072 | SNV | 1 | C | G | Heterozygous |
| NC_037638.1 | 27564057 | SNV | 1 | A | G | Homozygous   |
| NC_037638.1 | 27576167 | SNV | 1 | A | G | Homozygous   |
| NC_037638.1 | 27576191 | SNV | 1 | G | A | Heterozygous |
| NC_037638.1 | 27576226 | SNV | 1 | T | C | Homozygous   |
| NC_037638.1 | 27576417 | SNV | 1 | T | C | Homozygous   |
| NC_037638.1 | 27576421 | SNV | 1 | C | T | Heterozygous |
| NC_037638.1 | 27576518 | SNV | 1 | G | A | Heterozygous |
| NC_037638.1 | 27576535 | SNV | 1 | C | T | Heterozygous |
| NC_037638.1 | 27576546 | SNV | 1 | A | G | Homozygous   |
| NC_037638.1 | 27576741 | SNV | 1 | A | C | Heterozygous |
| NC_037638.1 | 27576756 | SNV | 1 | T | C | Homozygous   |
| NC_037638.1 | 27576791 | SNV | 1 | A | G | Heterozygous |
| NC_037638.1 | 27576791 | SNV | 1 | A | T | Heterozygous |
| NC_037638.1 | 27576809 | SNV | 1 | C | T | Heterozygous |
| NC_037638.1 | 27576820 | SNV | 1 | G | A | Heterozygous |
| NC_037638.1 | 27576947 | SNV | 1 | A | G | Homozygous   |
| NC_037638.1 | 27577042 | SNV | 1 | A | C | Heterozygous |
| NC_037638.1 | 27577100 | SNV | 1 | C | T | Homozygous   |
| NC_037638.1 | 27577277 | SNV | 1 | C | T | Homozygous   |
| NC_037638.1 | 27581757 | SNV | 1 | G | A | Homozygous   |
| NC_037638.1 | 27585751 | SNV | 1 | T | C | Heterozygous |
| NC_037638.1 | 27586822 | SNV | 1 | T | A | Homozygous   |
| NC_037638.1 | 27586825 | SNV | 1 | G | C | Homozygous   |
| NC_037638.1 | 27586831 | SNV | 1 | C | G | Homozygous   |
| NC_037638.1 | 27586841 | SNV | 1 | A | G | Homozygous   |
| NC_037638.1 | 27586843 | SNV | 1 | T | A | Homozygous   |
| NC_037638.1 | 27589287 | SNV | 1 | A | G | Homozygous   |
| NC_037638.1 | 27589594 | SNV | 1 | A | C | Homozygous   |
| NC_037638.1 | 27589716 | SNV | 1 | C | T | Heterozygous |
| NC_037638.1 | 27589767 | SNV | 1 | G | A | Heterozygous |
| NC_037638.1 | 27589808 | SNV | 1 | G | A | Heterozygous |
| NC_037638.1 | 27589846 | SNV | 1 | C | T | Homozygous   |
| NC_037638.1 | 27590126 | SNV | 1 | T | C | Heterozygous |
| NC_037638.1 | 27590386 | SNV | 1 | G | A | Homozygous   |
| NC_037638.1 | 27595690 | SNV | 1 | T | A | Homozygous   |
| NC_037638.1 | 27609051 | SNV | 1 | G | A | Homozygous   |
| NC_037638.1 | 27609054 | SNV | 1 | G | A | Homozygous   |
| NC_037638.1 | 27609057 | SNV | 1 | A | G | Heterozygous |
| NC_037638.1 | 27609066 | SNV | 1 | C | T | Homozygous   |
| NC_037638.1 | 27611599 | SNV | 1 | A | G | Heterozygous |
| NC_037638.1 | 27611610 | SNV | 1 | G | A | Heterozygous |

|             |          |     |   |   |   |              |
|-------------|----------|-----|---|---|---|--------------|
| NC_037638.1 | 27629776 | SNV | 1 | T | C | Heterozygous |
| NC_037638.1 | 27629783 | SNV | 1 | T | C | Heterozygous |
| NC_037638.1 | 27629794 | SNV | 1 | C | T | Homozygous   |
| NC_037638.1 | 27659479 | SNV | 1 | A | G | Heterozygous |
| NC_037638.1 | 27659561 | SNV | 1 | A | T | Homozygous   |
| NC_037638.1 | 27659591 | SNV | 1 | A | T | Homozygous   |
| NC_037638.1 | 27659593 | SNV | 1 | T | C | Heterozygous |
| NC_037638.1 | 27659834 | SNV | 1 | T | C | Heterozygous |
| NC_037638.1 | 27660062 | SNV | 1 | G | A | Heterozygous |
| NC_037638.1 | 27660223 | SNV | 1 | A | G | Homozygous   |
| NC_037638.1 | 27660227 | SNV | 1 | G | A | Heterozygous |
| NC_037638.1 | 27682973 | SNV | 1 | G | A | Homozygous   |
| NC_037638.1 | 27682984 | SNV | 1 | C | T | Heterozygous |
| NC_037638.1 | 27683005 | SNV | 1 | A | G | Homozygous   |
| NC_037638.1 | 27707133 | SNV | 1 | G | A | Homozygous   |
| NC_037638.1 | 27707170 | SNV | 1 | T | C | Homozygous   |
| NC_037638.1 | 27707189 | SNV | 1 | A | T | Homozygous   |
| NC_037638.1 | 27708831 | SNV | 1 | G | T | Homozygous   |
| NC_037638.1 | 27709057 | SNV | 1 | A | G | Homozygous   |
| NC_037638.1 | 27710186 | SNV | 1 | C | T | Homozygous   |
| NC_037638.1 | 27710190 | SNV | 1 | C | T | Heterozygous |
| NC_037638.1 | 27710412 | SNV | 1 | T | C | Homozygous   |
| NC_037638.1 | 27710765 | SNV | 1 | G | A | Heterozygous |
| NC_037638.1 | 27716901 | SNV | 1 | A | G | Homozygous   |
| NC_037638.1 | 27717193 | SNV | 1 | C | T | Heterozygous |
| NC_037638.1 | 27719454 | SNV | 1 | G | A | Heterozygous |
| NC_037638.1 | 27719476 | SNV | 1 | T | C | Homozygous   |
| NC_037638.1 | 27719687 | SNV | 1 | G | A | Homozygous   |
| NC_037638.1 | 27719842 | SNV | 1 | T | A | Heterozygous |
| NC_037638.1 | 27719856 | SNV | 1 | C | T | Homozygous   |
| NC_037638.1 | 27719874 | SNV | 1 | A | T | Homozygous   |
| NC_037638.1 | 27727494 | SNV | 1 | A | G | Homozygous   |
| NC_037638.1 | 27727496 | SNV | 1 | C | T | Homozygous   |
| NC_037638.1 | 27727513 | SNV | 1 | T | C | Homozygous   |
| NC_037638.1 | 27727518 | SNV | 1 | G | C | Homozygous   |
| NC_037638.1 | 27727521 | SNV | 1 | A | C | Homozygous   |
| NC_037638.1 | 27727526 | SNV | 1 | C | A | Homozygous   |
| NC_037638.1 | 27727530 | SNV | 1 | G | A | Homozygous   |
| NC_037638.1 | 27727535 | SNV | 1 | G | C | Homozygous   |
| NC_037638.1 | 27727546 | SNV | 1 | C | T | Heterozygous |
| NC_037638.1 | 27727551 | SNV | 1 | A | T | Heterozygous |
| NC_037638.1 | 27727567 | SNV | 1 | T | C | Homozygous   |
| NC_037638.1 | 27727575 | SNV | 1 | G | C | Homozygous   |
| NC_037638.1 | 27727580 | SNV | 1 | C | A | Heterozygous |
| NC_037638.1 | 27727584 | SNV | 1 | G | A | Heterozygous |
| NC_037638.1 | 27727589 | SNV | 1 | G | C | Heterozygous |
| NC_037638.1 | 27727599 | SNV | 1 | A | T | Heterozygous |
| NC_037638.1 | 27727608 | SNV | 1 | A | T | Heterozygous |
| NC_037638.1 | 27727620 | SNV | 1 | G | A | Heterozygous |
| NC_037638.1 | 27727658 | SNV | 1 | T | C | Heterozygous |
| NC_037638.1 | 27727662 | SNV | 1 | T | G | Heterozygous |

|             |          |     |   |   |   |              |
|-------------|----------|-----|---|---|---|--------------|
| NC_037638.1 | 27727688 | SNV | 1 | T | C | Homozygous   |
| NC_037638.1 | 27727694 | SNV | 1 | T | C | Heterozygous |
| NC_037638.1 | 27727700 | SNV | 1 | C | T | Heterozygous |
| NC_037638.1 | 27727706 | SNV | 1 | C | T | Heterozygous |
| NC_037638.1 | 27728103 | SNV | 1 | G | A | Heterozygous |
| NC_037638.1 | 27729182 | SNV | 1 | G | T | Heterozygous |
| NC_037638.1 | 27729184 | SNV | 1 | A | T | Heterozygous |
| NC_037638.1 | 27729192 | SNV | 1 | C | A | Homozygous   |
| NC_037638.1 | 27729195 | SNV | 1 | A | T | Homozygous   |
| NC_037638.1 | 27729200 | SNV | 1 | G | A | Homozygous   |
| NC_037638.1 | 27729212 | SNV | 1 | T | A | Homozygous   |
| NC_037638.1 | 27733267 | SNV | 1 | T | C | Homozygous   |
| NC_037638.1 | 27733327 | SNV | 1 | G | A | Homozygous   |
| NC_037638.1 | 27737744 | SNV | 1 | T | C | Homozygous   |
| NC_037638.1 | 27738015 | SNV | 1 | C | A | Heterozygous |
| NC_037638.1 | 27738368 | SNV | 1 | A | G | Homozygous   |
| NC_037638.1 | 27738470 | SNV | 1 | A | G | Homozygous   |
| NC_037638.1 | 27738609 | SNV | 1 | G | A | Heterozygous |
| NC_037639.1 | 26810    | SNV | 1 | A | T | Homozygous   |
| NC_037639.1 | 34705    | SNV | 1 | G | A | Heterozygous |
| NC_037639.1 | 34742    | SNV | 1 | C | T | Heterozygous |
| NC_037639.1 | 34753    | SNV | 1 | G | A | Homozygous   |
| NC_037639.1 | 35212    | SNV | 1 | G | A | Heterozygous |
| NC_037639.1 | 35214    | SNV | 1 | G | A | Heterozygous |
| NC_037639.1 | 35217    | SNV | 1 | A | G | Heterozygous |
| NC_037639.1 | 35236    | SNV | 1 | G | A | Heterozygous |
| NC_037639.1 | 35246    | SNV | 1 | G | A | Heterozygous |
| NC_037639.1 | 35261    | SNV | 1 | G | A | Heterozygous |
| NC_037639.1 | 35266    | SNV | 1 | G | A | Heterozygous |
| NC_037639.1 | 35308    | SNV | 1 | A | G | Heterozygous |
| NC_037639.1 | 40574    | SNV | 1 | A | G | Heterozygous |
| NC_037639.1 | 42889    | SNV | 1 | A | G | Homozygous   |
| NC_037639.1 | 42901    | SNV | 1 | C | T | Homozygous   |
| NC_037639.1 | 42959    | SNV | 1 | T | C | Homozygous   |
| NC_037639.1 | 43012    | SNV | 1 | C | T | Homozygous   |
| NC_037639.1 | 43057    | SNV | 1 | A | G | Homozygous   |
| NC_037639.1 | 43987    | SNV | 1 | C | T | Heterozygous |
| NC_037639.1 | 44712    | SNV | 1 | T | G | Homozygous   |
| NC_037639.1 | 44715    | SNV | 1 | A | G | Homozygous   |
| NC_037639.1 | 44732    | SNV | 1 | T | C | Homozygous   |
| NC_037639.1 | 45379    | SNV | 1 | C | T | Homozygous   |
| NC_037639.1 | 53095    | SNV | 1 | G | A | Heterozygous |
| NC_037639.1 | 66860    | SNV | 1 | T | C | Homozygous   |
| NC_037639.1 | 78526    | SNV | 1 | T | A | Heterozygous |
| NC_037639.1 | 78532    | SNV | 1 | A | T | Heterozygous |
| NC_037639.1 | 78540    | SNV | 1 | T | A | Heterozygous |
| NC_037639.1 | 92023    | SNV | 1 | T | C | Homozygous   |
| NC_037639.1 | 97681    | SNV | 1 | G | T | Homozygous   |
| NC_037639.1 | 98503    | SNV | 1 | A | T | Homozygous   |
| NC_037639.1 | 98514    | SNV | 1 | G | A | Homozygous   |
| NC_037639.1 | 98516    | SNV | 1 | A | T | Homozygous   |



|             |        |     |   |   |   |              |
|-------------|--------|-----|---|---|---|--------------|
| NC_037639.1 | 98523  | SNV | 1 | T | A | Homozygous   |
| NC_037639.1 | 98525  | SNV | 1 | A | T | Homozygous   |
| NC_037639.1 | 102022 | SNV | 1 | A | G | Heterozygous |
| NC_037639.1 | 108293 | SNV | 1 | T | C | Homozygous   |
| NC_037639.1 | 108847 | SNV | 1 | T | C | Homozygous   |
| NC_037639.1 | 110848 | SNV | 1 | G | A | Homozygous   |
| NC_037639.1 | 113261 | SNV | 1 | T | A | Homozygous   |
| NC_037639.1 | 113382 | SNV | 1 | T | C | Homozygous   |
| NC_037639.1 | 113590 | SNV | 1 | T | A | Homozygous   |
| NC_037639.1 | 113593 | SNV | 1 | C | T | Homozygous   |
| NC_037639.1 | 113606 | SNV | 1 | A | T | Homozygous   |
| NC_037639.1 | 113633 | SNV | 1 | T | A | Homozygous   |
| NC_037639.1 | 115583 | SNV | 1 | G | A | Homozygous   |
| NC_037639.1 | 117688 | SNV | 1 | G | A | Homozygous   |
| NC_037639.1 | 117692 | SNV | 1 | G | T | Homozygous   |
| NC_037639.1 | 118658 | SNV | 1 | A | G | Homozygous   |
| NC_037639.1 | 118921 | SNV | 1 | T | G | Homozygous   |
| NC_037639.1 | 118923 | SNV | 1 | A | T | Homozygous   |
| NC_037639.1 | 118927 | SNV | 1 | T | G | Homozygous   |
| NC_037639.1 | 119267 | SNV | 1 | A | G | Homozygous   |
| NC_037639.1 | 119462 | SNV | 1 | T | C | Homozygous   |
| NC_037639.1 | 119882 | SNV | 1 | A | G | Homozygous   |
| NC_037639.1 | 120649 | SNV | 1 | A | G | Homozygous   |
| NC_037639.1 | 120656 | SNV | 1 | T | A | Homozygous   |
| NC_037639.1 | 120663 | SNV | 1 | A | T | Homozygous   |
| NC_037639.1 | 120667 | SNV | 1 | T | A | Homozygous   |
| NC_037639.1 | 120672 | SNV | 1 | A | G | Homozygous   |
| NC_037639.1 | 120679 | SNV | 1 | C | A | Homozygous   |
| NC_037639.1 | 120707 | SNV | 1 | G | A | Homozygous   |
| NC_037639.1 | 120711 | SNV | 1 | T | A | Homozygous   |
| NC_037639.1 | 121345 | SNV | 1 | A | G | Homozygous   |
| NC_037639.1 | 121348 | SNV | 1 | T | A | Homozygous   |
| NC_037639.1 | 121410 | SNV | 1 | T | A | Homozygous   |
| NC_037639.1 | 131936 | SNV | 1 | A | G | Homozygous   |
| NC_037639.1 | 132539 | SNV | 1 | A | G | Heterozygous |
| NC_037639.1 | 138829 | SNV | 1 | A | G | Homozygous   |
| NC_037639.1 | 142785 | SNV | 1 | G | A | Homozygous   |
| NC_037639.1 | 167514 | SNV | 1 | A | G | Homozygous   |
| NC_037639.1 | 167595 | SNV | 1 | A | G | Heterozygous |
| NC_037639.1 | 167599 | SNV | 1 | A | C | Homozygous   |
| NC_037639.1 | 184915 | SNV | 1 | A | T | Homozygous   |
| NC_037639.1 | 184923 | SNV | 1 | T | A | Homozygous   |
| NC_037639.1 | 184925 | SNV | 1 | C | A | Homozygous   |
| NC_037639.1 | 184948 | SNV | 1 | A | T | Homozygous   |
| NC_037639.1 | 184955 | SNV | 1 | A | T | Homozygous   |
| NC_037639.1 | 207554 | SNV | 1 | T | A | Heterozygous |
| NC_037639.1 | 207593 | SNV | 1 | T | A | Heterozygous |
| NC_037639.1 | 207610 | SNV | 1 | G | A | Heterozygous |
| NC_037639.1 | 218205 | SNV | 1 | A | C | Homozygous   |
| NC_037639.1 | 224325 | SNV | 1 | A | T | Heterozygous |
| NC_037639.1 | 228060 | SNV | 1 | G | A | Homozygous   |

|             |        |     |   |   |   |              |
|-------------|--------|-----|---|---|---|--------------|
| NC_037639.1 | 228071 | SNV | 1 | G | A | Homozygous   |
| NC_037639.1 | 228073 | SNV | 1 | A | G | Homozygous   |
| NC_037639.1 | 228097 | SNV | 1 | A | G | Homozygous   |
| NC_037639.1 | 228111 | SNV | 1 | C | T | Homozygous   |
| NC_037639.1 | 228113 | SNV | 1 | C | T | Homozygous   |
| NC_037639.1 | 229211 | SNV | 1 | A | G | Homozygous   |
| NC_037639.1 | 229218 | SNV | 1 | T | C | Homozygous   |
| NC_037639.1 | 229242 | SNV | 1 | G | A | Homozygous   |
| NC_037639.1 | 229252 | SNV | 1 | G | A | Homozygous   |
| NC_037639.1 | 239500 | SNV | 1 | C | G | Homozygous   |
| NC_037639.1 | 239543 | SNV | 1 | T | C | Homozygous   |
| NC_037639.1 | 244645 | SNV | 1 | T | C | Homozygous   |
| NC_037639.1 | 244688 | SNV | 1 | T | C | Homozygous   |
| NC_037639.1 | 244888 | SNV | 1 | T | C | Homozygous   |
| NC_037639.1 | 246042 | SNV | 1 | C | G | Homozygous   |
| NC_037639.1 | 246045 | SNV | 1 | C | T | Heterozygous |
| NC_037639.1 | 273410 | SNV | 1 | T | G | Homozygous   |
| NC_037639.1 | 273412 | SNV | 1 | T | A | Homozygous   |
| NC_037639.1 | 273420 | SNV | 1 | T | C | Homozygous   |
| NC_037639.1 | 276750 | SNV | 1 | A | G | Homozygous   |
| NC_037639.1 | 276753 | SNV | 1 | A | G | Homozygous   |
| NC_037639.1 | 276756 | SNV | 1 | T | C | Homozygous   |
| NC_037639.1 | 276763 | SNV | 1 | C | G | Homozygous   |
| NC_037639.1 | 276766 | SNV | 1 | T | C | Homozygous   |
| NC_037639.1 | 276774 | SNV | 1 | T | C | Homozygous   |
| NC_037639.1 | 276793 | SNV | 1 | A | G | Homozygous   |
| NC_037639.1 | 276798 | SNV | 1 | A | G | Homozygous   |
| NC_037639.1 | 280706 | SNV | 1 | A | T | Homozygous   |
| NC_037639.1 | 280712 | SNV | 1 | A | G | Homozygous   |
| NC_037639.1 | 280714 | SNV | 1 | T | G | Homozygous   |
| NC_037639.1 | 280721 | SNV | 1 | A | G | Homozygous   |
| NC_037639.1 | 280736 | SNV | 1 | A | G | Homozygous   |
| NC_037639.1 | 290221 | SNV | 1 | A | C | Homozygous   |
| NC_037639.1 | 290226 | SNV | 1 | T | C | Homozygous   |
| NC_037639.1 | 294001 | SNV | 1 | T | A | Heterozygous |
| NC_037639.1 | 294047 | SNV | 1 | C | T | Heterozygous |
| NC_037639.1 | 301971 | SNV | 1 | C | T | Homozygous   |
| NC_037639.1 | 303881 | SNV | 1 | A | G | Homozygous   |
| NC_037639.1 | 303957 | SNV | 1 | T | C | Homozygous   |
| NC_037639.1 | 304003 | SNV | 1 | C | T | Heterozygous |
| NC_037639.1 | 304457 | SNV | 1 | G | T | Homozygous   |
| NC_037639.1 | 304472 | SNV | 1 | T | C | Homozygous   |
| NC_037639.1 | 316848 | SNV | 1 | A | C | Homozygous   |
| NC_037639.1 | 316858 | SNV | 1 | A | G | Homozygous   |
| NC_037639.1 | 316866 | SNV | 1 | A | T | Homozygous   |
| NC_037639.1 | 323677 | SNV | 1 | T | C | Homozygous   |
| NC_037639.1 | 325187 | SNV | 1 | C | T | Homozygous   |
| NC_037639.1 | 325343 | SNV | 1 | A | T | Homozygous   |
| NC_037639.1 | 325561 | SNV | 1 | T | C | Heterozygous |
| NC_037639.1 | 325641 | SNV | 1 | T | A | Heterozygous |
| NC_037639.1 | 325759 | SNV | 1 | T | C | Homozygous   |

|             |        |     |   |   |   |              |
|-------------|--------|-----|---|---|---|--------------|
| NC_037639.1 | 326081 | SNV | 1 | G | T | Heterozygous |
| NC_037639.1 | 330188 | SNV | 1 | C | T | Heterozygous |
| NC_037639.1 | 331209 | SNV | 1 | T | A | Homozygous   |
| NC_037639.1 | 331212 | SNV | 1 | C | T | Homozygous   |
| NC_037639.1 | 331224 | SNV | 1 | T | A | Homozygous   |
| NC_037639.1 | 331227 | SNV | 1 | T | A | Homozygous   |
| NC_037639.1 | 331235 | SNV | 1 | G | A | Homozygous   |
| NC_037639.1 | 332679 | SNV | 1 | A | C | Heterozygous |
| NC_037639.1 | 332683 | SNV | 1 | T | A | Heterozygous |
| NC_037639.1 | 332698 | SNV | 1 | A | C | Heterozygous |
| NC_037639.1 | 334261 | SNV | 1 | T | C | Homozygous   |
| NC_037639.1 | 334266 | SNV | 1 | C | T | Homozygous   |
| NC_037639.1 | 334274 | SNV | 1 | T | A | Homozygous   |
| NC_037639.1 | 337401 | SNV | 1 | T | C | Heterozygous |
| NC_037639.1 | 337405 | SNV | 1 | G | A | Homozygous   |
| NC_037639.1 | 337783 | SNV | 1 | T | C | Homozygous   |
| NC_037639.1 | 337787 | SNV | 1 | T | A | Homozygous   |
| NC_037639.1 | 337791 | SNV | 1 | A | T | Homozygous   |
| NC_037639.1 | 337793 | SNV | 1 | T | C | Homozygous   |
| NC_037639.1 | 337798 | SNV | 1 | T | C | Homozygous   |
| NC_037639.1 | 337807 | SNV | 1 | T | G | Homozygous   |
| NC_037639.1 | 342090 | SNV | 1 | T | A | Homozygous   |
| NC_037639.1 | 342117 | SNV | 1 | G | T | Homozygous   |
| NC_037639.1 | 342126 | SNV | 1 | A | T | Homozygous   |
| NC_037639.1 | 342128 | SNV | 1 | A | T | Homozygous   |
| NC_037639.1 | 342130 | SNV | 1 | A | T | Homozygous   |
| NC_037639.1 | 342535 | SNV | 1 | A | G | Homozygous   |
| NC_037639.1 | 342640 | SNV | 1 | G | A | Heterozygous |
| NC_037639.1 | 342664 | SNV | 1 | C | T | Heterozygous |
| NC_037639.1 | 342688 | SNV | 1 | G | A | Heterozygous |
| NC_037639.1 | 346448 | SNV | 1 | C | T | Heterozygous |
| NC_037639.1 | 355541 | SNV | 1 | G | T | Homozygous   |
| NC_037639.1 | 357893 | SNV | 1 | T | C | Homozygous   |
| NC_037639.1 | 359046 | SNV | 1 | A | G | Homozygous   |
| NC_037639.1 | 384694 | SNV | 1 | A | G | Heterozygous |
| NC_037639.1 | 384824 | SNV | 1 | G | A | Heterozygous |
| NC_037639.1 | 390095 | SNV | 1 | C | T | Heterozygous |
| NC_037639.1 | 390103 | SNV | 1 | G | A | Homozygous   |
| NC_037639.1 | 390107 | SNV | 1 | C | T | Heterozygous |
| NC_037639.1 | 390113 | SNV | 1 | G | A | Heterozygous |
| NC_037639.1 | 406584 | SNV | 1 | C | T | Heterozygous |
| NC_037639.1 | 406590 | SNV | 1 | C | T | Heterozygous |
| NC_037639.1 | 407208 | SNV | 1 | T | C | Homozygous   |
| NC_037639.1 | 407235 | SNV | 1 | C | T | Homozygous   |
| NC_037639.1 | 407247 | SNV | 1 | C | T | Homozygous   |
| NC_037639.1 | 417147 | SNV | 1 | G | C | Heterozygous |
| NC_037639.1 | 417204 | SNV | 1 | G | A | Heterozygous |
| NC_037639.1 | 417262 | SNV | 1 | C | T | Heterozygous |
| NC_037639.1 | 438952 | SNV | 1 | T | C | Heterozygous |
| NC_037639.1 | 438954 | SNV | 1 | C | T | Heterozygous |
| NC_037639.1 | 439739 | SNV | 1 | T | A | Homozygous   |

|             |        |     |   |   |   |              |
|-------------|--------|-----|---|---|---|--------------|
| NC_037639.1 | 448150 | SNV | 1 | G | A | Homozygous   |
| NC_037639.1 | 448747 | SNV | 1 | C | T | Homozygous   |
| NC_037639.1 | 448761 | SNV | 1 | G | A | Homozygous   |
| NC_037639.1 | 448773 | SNV | 1 | C | T | Homozygous   |
| NC_037639.1 | 448779 | SNV | 1 | G | A | Heterozygous |
| NC_037639.1 | 448789 | SNV | 1 | A | G | Homozygous   |
| NC_037639.1 | 448845 | SNV | 1 | C | T | Heterozygous |
| NC_037639.1 | 448858 | SNV | 1 | G | C | Homozygous   |
| NC_037639.1 | 448886 | SNV | 1 | C | T | Homozygous   |
| NC_037639.1 | 448906 | SNV | 1 | G | A | Heterozygous |
| NC_037639.1 | 448915 | SNV | 1 | A | G | Homozygous   |
| NC_037639.1 | 449357 | SNV | 1 | C | T | Heterozygous |
| NC_037639.1 | 449443 | SNV | 1 | C | T | Heterozygous |
| NC_037639.1 | 457748 | SNV | 1 | G | A | Heterozygous |
| NC_037639.1 | 457760 | SNV | 1 | G | A | Homozygous   |
| NC_037639.1 | 457764 | SNV | 1 | A | G | Heterozygous |
| NC_037639.1 | 457770 | SNV | 1 | A | T | Heterozygous |
| NC_037639.1 | 457774 | SNV | 1 | G | A | Homozygous   |
| NC_037639.1 | 463290 | SNV | 1 | T | G | Heterozygous |
| NC_037639.1 | 463298 | SNV | 1 | T | G | Heterozygous |
| NC_037639.1 | 463302 | SNV | 1 | T | C | Heterozygous |
| NC_037639.1 | 463305 | SNV | 1 | C | T | Heterozygous |
| NC_037639.1 | 463317 | SNV | 1 | C | T | Heterozygous |
| NC_037639.1 | 463319 | SNV | 1 | C | A | Heterozygous |
| NC_037639.1 | 463325 | SNV | 1 | C | T | Heterozygous |
| NC_037639.1 | 463327 | SNV | 1 | C | T | Heterozygous |
| NC_037639.1 | 463331 | SNV | 1 | C | T | Heterozygous |
| NC_037639.1 | 463333 | SNV | 1 | C | G | Heterozygous |
| NC_037639.1 | 463341 | SNV | 1 | C | T | Homozygous   |
| NC_037639.1 | 463343 | SNV | 1 | C | T | Heterozygous |
| NC_037639.1 | 463523 | SNV | 1 | G | A | Homozygous   |
| NC_037639.1 | 463525 | SNV | 1 | A | G | Heterozygous |
| NC_037639.1 | 463535 | SNV | 1 | G | A | Heterozygous |
| NC_037639.1 | 463580 | SNV | 1 | G | A | Heterozygous |
| NC_037639.1 | 463607 | SNV | 1 | A | T | Heterozygous |
| NC_037639.1 | 463629 | SNV | 1 | A | G | Heterozygous |
| NC_037639.1 | 463648 | SNV | 1 | T | C | Heterozygous |
| NC_037639.1 | 463670 | SNV | 1 | G | A | Heterozygous |
| NC_037639.1 | 463673 | SNV | 1 | G | A | Homozygous   |
| NC_037639.1 | 463685 | SNV | 1 | A | G | Homozygous   |
| NC_037639.1 | 463715 | SNV | 1 | T | A | Homozygous   |
| NC_037639.1 | 463739 | SNV | 1 | A | T | Heterozygous |
| NC_037639.1 | 463759 | SNV | 1 | G | A | Homozygous   |
| NC_037639.1 | 463762 | SNV | 1 | A | G | Homozygous   |
| NC_037639.1 | 463862 | SNV | 1 | A | T | Heterozygous |
| NC_037639.1 | 463919 | SNV | 1 | A | G | Heterozygous |
| NC_037639.1 | 463922 | SNV | 1 | A | T | Heterozygous |
| NC_037639.1 | 463934 | SNV | 1 | G | A | Homozygous   |
| NC_037639.1 | 463952 | SNV | 1 | T | A | Homozygous   |
| NC_037639.1 | 463957 | SNV | 1 | A | G | Heterozygous |
| NC_037639.1 | 463972 | SNV | 1 | G | A | Heterozygous |

|             |        |     |   |   |   |              |
|-------------|--------|-----|---|---|---|--------------|
| NC_037639.1 | 463988 | SNV | 1 | A | T | Heterozygous |
| NC_037639.1 | 463993 | SNV | 1 | A | G | Homozygous   |
| NC_037639.1 | 464015 | SNV | 1 | A | T | Homozygous   |
| NC_037639.1 | 464019 | SNV | 1 | T | C | Heterozygous |
| NC_037639.1 | 464105 | SNV | 1 | G | A | Homozygous   |
| NC_037639.1 | 464540 | SNV | 1 | T | C | Homozygous   |
| NC_037639.1 | 469452 | SNV | 1 | T | A | Homozygous   |
| NC_037639.1 | 469487 | SNV | 1 | T | C | Heterozygous |
| NC_037639.1 | 477973 | SNV | 1 | A | T | Heterozygous |
| NC_037639.1 | 493174 | SNV | 1 | A | T | Homozygous   |
| NC_037639.1 | 493182 | SNV | 1 | T | A | Homozygous   |
| NC_037639.1 | 493190 | SNV | 1 | C | T | Homozygous   |
| NC_037639.1 | 493194 | SNV | 1 | T | A | Homozygous   |
| NC_037639.1 | 494612 | SNV | 1 | C | T | Heterozygous |
| NC_037639.1 | 494761 | SNV | 1 | T | C | Heterozygous |
| NC_037639.1 | 494806 | SNV | 1 | C | T | Heterozygous |
| NC_037639.1 | 494856 | SNV | 1 | G | A | Heterozygous |
| NC_037639.1 | 494858 | SNV | 1 | A | G | Heterozygous |
| NC_037639.1 | 494859 | SNV | 1 | T | G | Heterozygous |
| NC_037639.1 | 494867 | SNV | 1 | T | C | Homozygous   |
| NC_037639.1 | 495846 | SNV | 1 | C | T | Homozygous   |
| NC_037639.1 | 495869 | SNV | 1 | A | C | Homozygous   |
| NC_037639.1 | 499538 | SNV | 1 | A | T | Homozygous   |
| NC_037639.1 | 499541 | SNV | 1 | G | A | Homozygous   |
| NC_037639.1 | 499560 | SNV | 1 | C | T | Homozygous   |
| NC_037639.1 | 499563 | SNV | 1 | G | A | Homozygous   |
| NC_037639.1 | 499569 | SNV | 1 | G | A | Homozygous   |
| NC_037639.1 | 499580 | SNV | 1 | G | T | Homozygous   |
| NC_037639.1 | 499588 | SNV | 1 | T | A | Homozygous   |
| NC_037639.1 | 499592 | SNV | 1 | A | T | Homozygous   |
| NC_037639.1 | 499594 | SNV | 1 | C | A | Homozygous   |
| NC_037639.1 | 499598 | SNV | 1 | A | C | Homozygous   |
| NC_037639.1 | 512462 | SNV | 1 | A | G | Homozygous   |
| NC_037639.1 | 512482 | SNV | 1 | T | C | Homozygous   |
| NC_037639.1 | 520903 | SNV | 1 | T | C | Heterozygous |
| NC_037639.1 | 560147 | SNV | 1 | A | T | Heterozygous |
| NC_037639.1 | 560191 | SNV | 1 | A | G | Homozygous   |
| NC_037639.1 | 562369 | SNV | 1 | T | C | Homozygous   |
| NC_037639.1 | 562393 | SNV | 1 | T | G | Homozygous   |
| NC_037639.1 | 562434 | SNV | 1 | T | C | Homozygous   |
| NC_037639.1 | 562454 | SNV | 1 | A | T | Heterozygous |
| NC_037639.1 | 563783 | SNV | 1 | G | A | Homozygous   |
| NC_037639.1 | 564431 | SNV | 1 | C | A | Homozygous   |
| NC_037639.1 | 564921 | SNV | 1 | T | C | Heterozygous |
| NC_037639.1 | 565494 | SNV | 1 | A | G | Homozygous   |
| NC_037639.1 | 565548 | SNV | 1 | T | C | Homozygous   |
| NC_037639.1 | 565787 | SNV | 1 | C | A | Heterozygous |
| NC_037639.1 | 566328 | SNV | 1 | A | G | Heterozygous |
| NC_037639.1 | 567571 | SNV | 1 | A | G | Homozygous   |
| NC_037639.1 | 567602 | SNV | 1 | A | G | Heterozygous |
| NC_037639.1 | 567951 | SNV | 1 | T | G | Homozygous   |

|             |        |     |   |   |   |              |
|-------------|--------|-----|---|---|---|--------------|
| NC_037639.1 | 567953 | SNV | 1 | T | C | Homozygous   |
| NC_037639.1 | 567972 | SNV | 1 | T | A | Homozygous   |
| NC_037639.1 | 569976 | SNV | 1 | A | G | Heterozygous |
| NC_037639.1 | 570044 | SNV | 1 | T | C | Homozygous   |
| NC_037639.1 | 570084 | SNV | 1 | T | C | Homozygous   |
| NC_037639.1 | 570111 | SNV | 1 | A | G | Homozygous   |
| NC_037639.1 | 574381 | SNV | 1 | A | G | Homozygous   |
| NC_037639.1 | 574399 | SNV | 1 | T | A | Homozygous   |
| NC_037639.1 | 574403 | SNV | 1 | T | G | Homozygous   |
| NC_037639.1 | 582897 | SNV | 1 | A | T | Homozygous   |
| NC_037639.1 | 582997 | SNV | 1 | T | C | Homozygous   |
| NC_037639.1 | 583655 | SNV | 1 | G | A | Heterozygous |
| NC_037639.1 | 583795 | SNV | 1 | T | C | Homozygous   |
| NC_037639.1 | 584222 | SNV | 1 | T | C | Heterozygous |
| NC_037639.1 | 584247 | SNV | 1 | A | G | Homozygous   |
| NC_037639.1 | 584534 | SNV | 1 | T | C | Heterozygous |
| NC_037639.1 | 585993 | SNV | 1 | C | T | Homozygous   |
| NC_037639.1 | 586203 | SNV | 1 | C | T | Homozygous   |
| NC_037639.1 | 586245 | SNV | 1 | T | C | Homozygous   |
| NC_037639.1 | 589869 | SNV | 1 | G | A | Heterozygous |
| NC_037639.1 | 589935 | SNV | 1 | T | G | Homozygous   |
| NC_037639.1 | 589941 | SNV | 1 | C | A | Homozygous   |
| NC_037639.1 | 589949 | SNV | 1 | T | C | Heterozygous |
| NC_037639.1 | 590131 | SNV | 1 | T | G | Homozygous   |
| NC_037639.1 | 590418 | SNV | 1 | C | T | Heterozygous |
| NC_037639.1 | 590585 | SNV | 1 | T | C | Homozygous   |
| NC_037639.1 | 590963 | SNV | 1 | C | T | Homozygous   |
| NC_037639.1 | 591227 | SNV | 1 | T | C | Homozygous   |
| NC_037639.1 | 591547 | SNV | 1 | C | T | Heterozygous |
| NC_037639.1 | 599247 | SNV | 1 | A | T | Homozygous   |
| NC_037639.1 | 599250 | SNV | 1 | T | A | Homozygous   |
| NC_037639.1 | 599260 | SNV | 1 | G | A | Homozygous   |
| NC_037639.1 | 599263 | SNV | 1 | C | T | Homozygous   |
| NC_037639.1 | 599265 | SNV | 1 | A | C | Homozygous   |
| NC_037639.1 | 608091 | SNV | 1 | A | T | Homozygous   |
| NC_037639.1 | 608113 | SNV | 1 | A | G | Homozygous   |
| NC_037639.1 | 608138 | SNV | 1 | A | T | Homozygous   |
| NC_037639.1 | 608142 | SNV | 1 | A | T | Homozygous   |
| NC_037639.1 | 608148 | SNV | 1 | G | T | Homozygous   |
| NC_037639.1 | 609978 | SNV | 1 | C | G | Homozygous   |
| NC_037639.1 | 609987 | SNV | 1 | T | C | Homozygous   |
| NC_037639.1 | 609990 | SNV | 1 | G | A | Homozygous   |
| NC_037639.1 | 610024 | SNV | 1 | T | C | Homozygous   |
| NC_037639.1 | 613013 | SNV | 1 | T | A | Homozygous   |
| NC_037639.1 | 618868 | SNV | 1 | G | T | Homozygous   |
| NC_037639.1 | 619823 | SNV | 1 | T | C | Homozygous   |
| NC_037639.1 | 619854 | SNV | 1 | T | A | Homozygous   |
| NC_037639.1 | 619952 | SNV | 1 | T | A | Homozygous   |
| NC_037639.1 | 619958 | SNV | 1 | A | T | Homozygous   |
| NC_037639.1 | 619960 | SNV | 1 | A | T | Homozygous   |
| NC_037639.1 | 619966 | SNV | 1 | A | C | Homozygous   |

|             |        |     |   |   |   |              |
|-------------|--------|-----|---|---|---|--------------|
| NC_037639.1 | 619969 | SNV | 1 | A | G | Homozygous   |
| NC_037639.1 | 632091 | SNV | 1 | T | A | Homozygous   |
| NC_037639.1 | 633761 | SNV | 1 | C | T | Homozygous   |
| NC_037639.1 | 647407 | SNV | 1 | A | G | Homozygous   |
| NC_037639.1 | 647412 | SNV | 1 | G | A | Homozygous   |
| NC_037639.1 | 647418 | SNV | 1 | C | T | Homozygous   |
| NC_037639.1 | 647424 | SNV | 1 | A | C | Homozygous   |
| NC_037639.1 | 647431 | SNV | 1 | T | A | Homozygous   |
| NC_037639.1 | 647453 | SNV | 1 | C | T | Homozygous   |
| NC_037639.1 | 658867 | SNV | 1 | A | G | Homozygous   |
| NC_037639.1 | 658871 | SNV | 1 | G | A | Heterozygous |
| NC_037639.1 | 658879 | SNV | 1 | T | C | Homozygous   |
| NC_037639.1 | 659391 | SNV | 1 | A | C | Homozygous   |
| NC_037639.1 | 659394 | SNV | 1 | T | A | Homozygous   |
| NC_037639.1 | 659434 | SNV | 1 | C | T | Heterozygous |
| NC_037639.1 | 659457 | SNV | 1 | A | T | Heterozygous |
| NC_037639.1 | 660432 | SNV | 1 | C | T | Homozygous   |
| NC_037639.1 | 660434 | SNV | 1 | T | C | Homozygous   |
| NC_037639.1 | 660437 | SNV | 1 | T | A | Homozygous   |
| NC_037639.1 | 660679 | SNV | 1 | C | T | Heterozygous |
| NC_037639.1 | 660745 | SNV | 1 | G | A | Homozygous   |
| NC_037639.1 | 660778 | SNV | 1 | T | C | Heterozygous |
| NC_037639.1 | 660924 | SNV | 1 | G | A | Heterozygous |
| NC_037639.1 | 661656 | SNV | 1 | A | G | Homozygous   |
| NC_037639.1 | 661667 | SNV | 1 | T | C | Heterozygous |
| NC_037639.1 | 661739 | SNV | 1 | T | C | Homozygous   |
| NC_037639.1 | 661748 | SNV | 1 | C | T | Heterozygous |
| NC_037639.1 | 663041 | SNV | 1 | A | G | Heterozygous |
| NC_037639.1 | 663044 | SNV | 1 | T | C | Heterozygous |
| NC_037639.1 | 663140 | SNV | 1 | A | G | Homozygous   |
| NC_037639.1 | 663359 | SNV | 1 | A | G | Homozygous   |
| NC_037639.1 | 663396 | SNV | 1 | T | C | Heterozygous |
| NC_037639.1 | 674180 | SNV | 1 | T | C | Heterozygous |
| NC_037639.1 | 685602 | SNV | 1 | T | C | Homozygous   |
| NC_037639.1 | 685683 | SNV | 1 | A | T | Heterozygous |
| NC_037639.1 | 685698 | SNV | 1 | C | T | Heterozygous |
| NC_037639.1 | 685710 | SNV | 1 | C | A | Heterozygous |
| NC_037639.1 | 685726 | SNV | 1 | C | T | Heterozygous |
| NC_037639.1 | 685788 | SNV | 1 | A | G | Heterozygous |
| NC_037639.1 | 685791 | SNV | 1 | C | T | Heterozygous |
| NC_037639.1 | 690278 | SNV | 1 | A | T | Homozygous   |
| NC_037639.1 | 690301 | SNV | 1 | A | T | Homozygous   |
| NC_037639.1 | 690312 | SNV | 1 | A | T | Homozygous   |
| NC_037639.1 | 690319 | SNV | 1 | A | T | Homozygous   |
| NC_037639.1 | 737979 | SNV | 1 | T | C | Homozygous   |
| NC_037639.1 | 738007 | SNV | 1 | A | T | Homozygous   |
| NC_037639.1 | 738015 | SNV | 1 | A | T | Homozygous   |
| NC_037639.1 | 738017 | SNV | 1 | G | T | Homozygous   |
| NC_037639.1 | 753173 | SNV | 1 | C | T | Heterozygous |
| NC_037639.1 | 755128 | SNV | 1 | A | G | Homozygous   |
| NC_037639.1 | 755276 | SNV | 1 | G | A | Heterozygous |

|             |        |     |   |   |   |              |
|-------------|--------|-----|---|---|---|--------------|
| NC_037639.1 | 782814 | SNV | 1 | T | C | Homozygous   |
| NC_037639.1 | 782822 | SNV | 1 | A | T | Homozygous   |
| NC_037639.1 | 782838 | SNV | 1 | A | T | Heterozygous |
| NC_037639.1 | 782848 | SNV | 1 | G | T | Heterozygous |
| NC_037639.1 | 782850 | SNV | 1 | T | A | Homozygous   |
| NC_037639.1 | 788079 | SNV | 1 | T | G | Homozygous   |
| NC_037639.1 | 801001 | SNV | 1 | G | A | Homozygous   |
| NC_037639.1 | 801082 | SNV | 1 | G | T | Homozygous   |
| NC_037639.1 | 801098 | SNV | 1 | T | A | Homozygous   |
| NC_037639.1 | 801205 | SNV | 1 | T | A | Heterozygous |
| NC_037639.1 | 801211 | SNV | 1 | C | T | Heterozygous |
| NC_037639.1 | 801247 | SNV | 1 | T | C | Heterozygous |
| NC_037639.1 | 801273 | SNV | 1 | T | C | Heterozygous |
| NC_037639.1 | 801320 | SNV | 1 | A | G | Heterozygous |
| NC_037639.1 | 801325 | SNV | 1 | A | G | Homozygous   |
| NC_037639.1 | 801448 | SNV | 1 | T | C | Heterozygous |
| NC_037639.1 | 802393 | SNV | 1 | T | C | Homozygous   |
| NC_037639.1 | 814570 | SNV | 1 | T | C | Homozygous   |
| NC_037639.1 | 814594 | SNV | 1 | C | A | Homozygous   |
| NC_037639.1 | 814604 | SNV | 1 | T | C | Homozygous   |
| NC_037639.1 | 814609 | SNV | 1 | G | A | Homozygous   |
| NC_037639.1 | 823798 | SNV | 1 | C | T | Heterozygous |
| NC_037639.1 | 835438 | SNV | 1 | G | C | Homozygous   |
| NC_037639.1 | 835440 | SNV | 1 | T | A | Homozygous   |
| NC_037639.1 | 835449 | SNV | 1 | A | G | Homozygous   |
| NC_037639.1 | 835452 | SNV | 1 | G | T | Homozygous   |
| NC_037639.1 | 835455 | SNV | 1 | A | C | Homozygous   |
| NC_037639.1 | 842835 | SNV | 1 | T | G | Homozygous   |
| NC_037639.1 | 843035 | SNV | 1 | A | G | Heterozygous |
| NC_037639.1 | 865275 | SNV | 1 | A | T | Homozygous   |
| NC_037639.1 | 865283 | SNV | 1 | A | G | Homozygous   |
| NC_037639.1 | 865285 | SNV | 1 | A | C | Homozygous   |
| NC_037639.1 | 869636 | SNV | 1 | C | T | Heterozygous |
| NC_037639.1 | 869963 | SNV | 1 | G | A | Homozygous   |
| NC_037639.1 | 870419 | SNV | 1 | T | C | Homozygous   |
| NC_037639.1 | 870497 | SNV | 1 | T | C | Homozygous   |
| NC_037639.1 | 870506 | SNV | 1 | A | G | Heterozygous |
| NC_037639.1 | 870655 | SNV | 1 | T | C | Homozygous   |
| NC_037639.1 | 870673 | SNV | 1 | T | C | Homozygous   |
| NC_037639.1 | 871019 | SNV | 1 | A | G | Homozygous   |
| NC_037639.1 | 871051 | SNV | 1 | A | G | Homozygous   |
| NC_037639.1 | 871098 | SNV | 1 | T | C | Homozygous   |
| NC_037639.1 | 871415 | SNV | 1 | T | C | Homozygous   |
| NC_037639.1 | 871996 | SNV | 1 | G | A | Heterozygous |
| NC_037639.1 | 872660 | SNV | 1 | A | C | Homozygous   |
| NC_037639.1 | 872881 | SNV | 1 | G | A | Homozygous   |
| NC_037639.1 | 874428 | SNV | 1 | G | A | Heterozygous |
| NC_037639.1 | 875170 | SNV | 1 | T | C | Homozygous   |
| NC_037639.1 | 875408 | SNV | 1 | A | G | Heterozygous |
| NC_037639.1 | 875410 | SNV | 1 | G | A | Homozygous   |
| NC_037639.1 | 876051 | SNV | 1 | G | A | Homozygous   |



|             |        |     |   |   |   |              |
|-------------|--------|-----|---|---|---|--------------|
| NC_037639.1 | 876290 | SNV | 1 | T | C | Heterozygous |
| NC_037639.1 | 876349 | SNV | 1 | G | A | Homozygous   |
| NC_037639.1 | 880060 | SNV | 1 | T | C | Homozygous   |
| NC_037639.1 | 880078 | SNV | 1 | T | A | Homozygous   |
| NC_037639.1 | 880104 | SNV | 1 | G | A | Homozygous   |
| NC_037639.1 | 880134 | SNV | 1 | G | A | Heterozygous |
| NC_037639.1 | 880184 | SNV | 1 | A | G | Homozygous   |
| NC_037639.1 | 880211 | SNV | 1 | G | A | Homozygous   |
| NC_037639.1 | 880354 | SNV | 1 | G | A | Heterozygous |
| NC_037639.1 | 883644 | SNV | 1 | C | T | Heterozygous |
| NC_037639.1 | 884039 | SNV | 1 | T | C | Heterozygous |
| NC_037639.1 | 887561 | SNV | 1 | T | G | Homozygous   |
| NC_037639.1 | 887568 | SNV | 1 | T | C | Homozygous   |
| NC_037639.1 | 887573 | SNV | 1 | A | G | Homozygous   |
| NC_037639.1 | 887575 | SNV | 1 | T | C | Homozygous   |
| NC_037639.1 | 887598 | SNV | 1 | G | A | Homozygous   |
| NC_037639.1 | 909062 | SNV | 1 | A | T | Homozygous   |
| NC_037639.1 | 909064 | SNV | 1 | A | G | Heterozygous |
| NC_037639.1 | 909068 | SNV | 1 | A | G | Homozygous   |
| NC_037639.1 | 909071 | SNV | 1 | T | C | Heterozygous |
| NC_037639.1 | 909112 | SNV | 1 | A | T | Homozygous   |
| NC_037639.1 | 909115 | SNV | 1 | T | A | Homozygous   |
| NC_037639.1 | 909126 | SNV | 1 | A | G | Homozygous   |
| NC_037639.1 | 909147 | SNV | 1 | T | C | Heterozygous |
| NC_037639.1 | 909168 | SNV | 1 | A | T | Heterozygous |
| NC_037639.1 | 909169 | SNV | 1 | A | T | Heterozygous |
| NC_037639.1 | 916997 | SNV | 1 | T | C | Heterozygous |
| NC_037639.1 | 917023 | SNV | 1 | A | G | Heterozygous |
| NC_037639.1 | 917023 | SNV | 1 | A | T | Heterozygous |
| NC_037639.1 | 917534 | SNV | 1 | T | A | Heterozygous |
| NC_037639.1 | 917551 | SNV | 1 | G | A | Homozygous   |
| NC_037639.1 | 948327 | SNV | 1 | A | C | Homozygous   |
| NC_037639.1 | 948329 | SNV | 1 | C | G | Homozygous   |
| NC_037639.1 | 948331 | SNV | 1 | A | G | Homozygous   |
| NC_037639.1 | 948427 | SNV | 1 | C | T | Homozygous   |
| NC_037639.1 | 948454 | SNV | 1 | A | T | Homozygous   |
| NC_037639.1 | 948463 | SNV | 1 | T | C | Homozygous   |
| NC_037639.1 | 948467 | SNV | 1 | T | C | Homozygous   |
| NC_037639.1 | 948469 | SNV | 1 | A | G | Homozygous   |
| NC_037639.1 | 956682 | SNV | 1 | A | G | Homozygous   |
| NC_037639.1 | 956834 | SNV | 1 | C | T | Heterozygous |
| NC_037639.1 | 960870 | SNV | 1 | T | G | Homozygous   |
| NC_037639.1 | 960872 | SNV | 1 | C | A | Homozygous   |
| NC_037639.1 | 960885 | SNV | 1 | G | A | Homozygous   |
| NC_037639.1 | 960888 | SNV | 1 | T | A | Homozygous   |
| NC_037639.1 | 960896 | SNV | 1 | A | C | Homozygous   |
| NC_037639.1 | 968012 | SNV | 1 | T | A | Homozygous   |
| NC_037639.1 | 973185 | SNV | 1 | G | C | Homozygous   |
| NC_037639.1 | 973193 | SNV | 1 | G | A | Homozygous   |
| NC_037639.1 | 979216 | SNV | 1 | A | T | Homozygous   |
| NC_037639.1 | 979218 | SNV | 1 | A | C | Homozygous   |

|             |         |     |   |   |   |              |
|-------------|---------|-----|---|---|---|--------------|
| NC_037639.1 | 979226  | SNV | 1 | T | A | Homozygous   |
| NC_037639.1 | 981283  | SNV | 1 | T | A | Heterozygous |
| NC_037639.1 | 982659  | SNV | 1 | T | C | Homozygous   |
| NC_037639.1 | 985179  | SNV | 1 | T | A | Homozygous   |
| NC_037639.1 | 985183  | SNV | 1 | C | T | Homozygous   |
| NC_037639.1 | 985185  | SNV | 1 | A | T | Homozygous   |
| NC_037639.1 | 985187  | SNV | 1 | T | A | Homozygous   |
| NC_037639.1 | 989716  | SNV | 1 | T | A | Homozygous   |
| NC_037639.1 | 989740  | SNV | 1 | T | C | Homozygous   |
| NC_037639.1 | 989744  | SNV | 1 | A | T | Homozygous   |
| NC_037639.1 | 989757  | SNV | 1 | T | A | Homozygous   |
| NC_037639.1 | 995277  | SNV | 1 | C | G | Homozygous   |
| NC_037639.1 | 1003555 | SNV | 1 | T | A | Homozygous   |
| NC_037639.1 | 1003566 | SNV | 1 | T | A | Heterozygous |
| NC_037639.1 | 1003574 | SNV | 1 | A | T | Heterozygous |
| NC_037639.1 | 1003581 | SNV | 1 | T | A | Homozygous   |
| NC_037639.1 | 1003583 | SNV | 1 | A | G | Heterozygous |
| NC_037639.1 | 1003593 | SNV | 1 | T | A | Heterozygous |
| NC_037639.1 | 1013623 | SNV | 1 | A | T | Homozygous   |
| NC_037639.1 | 1013638 | SNV | 1 | T | C | Homozygous   |
| NC_037639.1 | 1013642 | SNV | 1 | T | A | Homozygous   |
| NC_037639.1 | 1013644 | SNV | 1 | A | C | Homozygous   |
| NC_037639.1 | 1013655 | SNV | 1 | T | A | Homozygous   |
| NC_037639.1 | 1013660 | SNV | 1 | A | G | Homozygous   |
| NC_037639.1 | 1013664 | SNV | 1 | A | G | Homozygous   |
| NC_037639.1 | 1013675 | SNV | 1 | T | A | Homozygous   |
| NC_037639.1 | 1013679 | SNV | 1 | T | C | Homozygous   |
| NC_037639.1 | 1013682 | SNV | 1 | A | G | Homozygous   |
| NC_037639.1 | 1013684 | SNV | 1 | A | T | Homozygous   |
| NC_037639.1 | 1013691 | SNV | 1 | T | C | Homozygous   |
| NC_037639.1 | 1013694 | SNV | 1 | A | T | Homozygous   |
| NC_037639.1 | 1014566 | SNV | 1 | T | A | Homozygous   |
| NC_037639.1 | 1014572 | SNV | 1 | T | A | Homozygous   |
| NC_037639.1 | 1014595 | SNV | 1 | T | G | Heterozygous |
| NC_037639.1 | 1014600 | SNV | 1 | A | C | Homozygous   |
| NC_037639.1 | 1014618 | SNV | 1 | T | A | Homozygous   |
| NC_037639.1 | 1024452 | SNV | 1 | A | T | Homozygous   |
| NC_037639.1 | 1024732 | SNV | 1 | A | T | Homozygous   |
| NC_037639.1 | 1024745 | SNV | 1 | A | T | Homozygous   |
| NC_037639.1 | 1025376 | SNV | 1 | G | C | Homozygous   |
| NC_037639.1 | 1031303 | SNV | 1 | A | G | Heterozygous |
| NC_037639.1 | 1031326 | SNV | 1 | A | G | Heterozygous |
| NC_037639.1 | 1031347 | SNV | 1 | A | G | Heterozygous |
| NC_037639.1 | 1031350 | SNV | 1 | T | C | Heterozygous |
| NC_037639.1 | 1031358 | SNV | 1 | T | A | Heterozygous |
| NC_037639.1 | 1035159 | SNV | 1 | T | A | Homozygous   |
| NC_037639.1 | 1035774 | SNV | 1 | A | G | Heterozygous |
| NC_037639.1 | 1036023 | SNV | 1 | A | C | Heterozygous |
| NC_037639.1 | 1044591 | SNV | 1 | C | T | Heterozygous |
| NC_037639.1 | 1045844 | SNV | 1 | T | C | Homozygous   |
| NC_037639.1 | 1047548 | SNV | 1 | C | T | Heterozygous |

|             |         |     |   |   |   |              |
|-------------|---------|-----|---|---|---|--------------|
| NC_037639.1 | 1050181 | SNV | 1 | T | A | Heterozygous |
| NC_037639.1 | 1051254 | SNV | 1 | T | C | Heterozygous |
| NC_037639.1 | 1051434 | SNV | 1 | G | A | Homozygous   |
| NC_037639.1 | 1051458 | SNV | 1 | A | G | Homozygous   |
| NC_037639.1 | 1052247 | SNV | 1 | G | A | Heterozygous |
| NC_037639.1 | 1052542 | SNV | 1 | A | T | Heterozygous |
| NC_037639.1 | 1052699 | SNV | 1 | G | A | Homozygous   |
| NC_037639.1 | 1131326 | SNV | 1 | A | G | Heterozygous |
| NC_037639.1 | 1131337 | SNV | 1 | A | G | Homozygous   |
| NC_037639.1 | 1132762 | SNV | 1 | A | G | Homozygous   |
| NC_037639.1 | 1133122 | SNV | 1 | C | T | Heterozygous |
| NC_037639.1 | 1153434 | SNV | 1 | A | T | Heterozygous |
| NC_037639.1 | 1153462 | SNV | 1 | T | C | Homozygous   |
| NC_037639.1 | 1153475 | SNV | 1 | C | A | Homozygous   |
| NC_037639.1 | 1154187 | SNV | 1 | C | T | Homozygous   |
| NC_037639.1 | 1154190 | SNV | 1 | T | A | Homozygous   |
| NC_037639.1 | 1154193 | SNV | 1 | A | C | Homozygous   |
| NC_037639.1 | 1154195 | SNV | 1 | T | A | Homozygous   |
| NC_037639.1 | 1154224 | SNV | 1 | T | C | Homozygous   |
| NC_037639.1 | 1154373 | SNV | 1 | A | T | Homozygous   |
| NC_037639.1 | 1154380 | SNV | 1 | A | T | Homozygous   |
| NC_037639.1 | 1154383 | SNV | 1 | A | C | Homozygous   |
| NC_037639.1 | 1154393 | SNV | 1 | T | C | Homozygous   |
| NC_037639.1 | 1154395 | SNV | 1 | T | C | Homozygous   |
| NC_037639.1 | 1154398 | SNV | 1 | A | T | Homozygous   |
| NC_037639.1 | 1154418 | SNV | 1 | T | A | Homozygous   |
| NC_037639.1 | 1159462 | SNV | 1 | T | G | Homozygous   |
| NC_037639.1 | 1159471 | SNV | 1 | T | C | Homozygous   |
| NC_037639.1 | 1159475 | SNV | 1 | A | T | Homozygous   |
| NC_037639.1 | 1159479 | SNV | 1 | T | G | Homozygous   |
| NC_037639.1 | 1159498 | SNV | 1 | T | C | Homozygous   |
| NC_037639.1 | 1159504 | SNV | 1 | A | C | Homozygous   |
| NC_037639.1 | 1159506 | SNV | 1 | T | C | Homozygous   |
| NC_037639.1 | 1165562 | SNV | 1 | G | A | Homozygous   |
| NC_037639.1 | 1165565 | SNV | 1 | C | T | Homozygous   |
| NC_037639.1 | 1165573 | SNV | 1 | A | T | Homozygous   |
| NC_037639.1 | 1179421 | SNV | 1 | T | C | Homozygous   |
| NC_037639.1 | 1179427 | SNV | 1 | A | C | Homozygous   |
| NC_037639.1 | 1179440 | SNV | 1 | C | T | Homozygous   |
| NC_037639.1 | 1179442 | SNV | 1 | C | T | Homozygous   |
| NC_037639.1 | 1179446 | SNV | 1 | C | T | Homozygous   |
| NC_037639.1 | 1179495 | SNV | 1 | A | G | Heterozygous |
| NC_037639.1 | 1179518 | SNV | 1 | C | A | Homozygous   |
| NC_037639.1 | 1179520 | SNV | 1 | G | C | Homozygous   |
| NC_037639.1 | 1187924 | SNV | 1 | C | T | Heterozygous |
| NC_037639.1 | 1187929 | SNV | 1 | T | C | Heterozygous |
| NC_037639.1 | 1187930 | SNV | 1 | G | A | Heterozygous |
| NC_037639.1 | 1187933 | SNV | 1 | C | T | Homozygous   |
| NC_037639.1 | 1244788 | SNV | 1 | A | T | Homozygous   |
| NC_037639.1 | 1244798 | SNV | 1 | G | A | Homozygous   |
| NC_037639.1 | 1244811 | SNV | 1 | T | A | Homozygous   |

|             |         |     |   |   |   |              |
|-------------|---------|-----|---|---|---|--------------|
| NC_037639.1 | 1244814 | SNV | 1 | A | T | Homozygous   |
| NC_037639.1 | 1249696 | SNV | 1 | T | G | Homozygous   |
| NC_037639.1 | 1249701 | SNV | 1 | A | T | Homozygous   |
| NC_037639.1 | 1476798 | SNV | 1 | T | A | Heterozygous |
| NC_037639.1 | 1476856 | SNV | 1 | A | G | Homozygous   |
| NC_037639.1 | 1481328 | SNV | 1 | T | C | Homozygous   |
| NC_037639.1 | 1481330 | SNV | 1 | A | C | Homozygous   |
| NC_037639.1 | 1481335 | SNV | 1 | A | C | Homozygous   |
| NC_037639.1 | 1481388 | SNV | 1 | A | T | Homozygous   |
| NC_037639.1 | 1488348 | SNV | 1 | C | A | Homozygous   |
| NC_037639.1 | 1517784 | SNV | 1 | A | T | Homozygous   |
| NC_037639.1 | 1517825 | SNV | 1 | T | A | Homozygous   |
| NC_037639.1 | 1530841 | SNV | 1 | A | T | Homozygous   |
| NC_037639.1 | 1530851 | SNV | 1 | C | T | Homozygous   |
| NC_037639.1 | 1549485 | SNV | 1 | G | T | Homozygous   |
| NC_037639.1 | 1549515 | SNV | 1 | T | G | Homozygous   |
| NC_037639.1 | 1549518 | SNV | 1 | C | T | Homozygous   |
| NC_037639.1 | 1549520 | SNV | 1 | A | T | Homozygous   |
| NC_037639.1 | 1549523 | SNV | 1 | A | C | Homozygous   |
| NC_037639.1 | 1549532 | SNV | 1 | G | T | Homozygous   |
| NC_037639.1 | 1549534 | SNV | 1 | A | C | Homozygous   |
| NC_037639.1 | 1560139 | SNV | 1 | G | T | Heterozygous |
| NC_037639.1 | 1560144 | SNV | 1 | G | T | Homozygous   |
| NC_037639.1 | 1637042 | SNV | 1 | T | C | Heterozygous |
| NC_037639.1 | 1637045 | SNV | 1 | A | G | Heterozygous |
| NC_037639.1 | 1637255 | SNV | 1 | T | A | Heterozygous |
| NC_037639.1 | 1638071 | SNV | 1 | A | G | Heterozygous |
| NC_037639.1 | 1644713 | SNV | 1 | A | G | Homozygous   |
| NC_037639.1 | 1646093 | SNV | 1 | A | T | Homozygous   |
| NC_037639.1 | 1646117 | SNV | 1 | T | A | Homozygous   |
| NC_037639.1 | 1646121 | SNV | 1 | T | G | Homozygous   |
| NC_037639.1 | 1646131 | SNV | 1 | A | C | Homozygous   |
| NC_037639.1 | 1647122 | SNV | 1 | T | A | Heterozygous |
| NC_037639.1 | 1647134 | SNV | 1 | A | T | Heterozygous |
| NC_037639.1 | 1652019 | SNV | 1 | C | T | Homozygous   |
| NC_037639.1 | 1652288 | SNV | 1 | G | A | Homozygous   |
| NC_037639.1 | 1654041 | SNV | 1 | C | T | Homozygous   |
| NC_037639.1 | 1654232 | SNV | 1 | C | T | Homozygous   |
| NC_037639.1 | 1657302 | SNV | 1 | T | A | Homozygous   |
| NC_037639.1 | 1657307 | SNV | 1 | A | T | Homozygous   |
| NC_037639.1 | 1657309 | SNV | 1 | T | A | Homozygous   |
| NC_037639.1 | 1657331 | SNV | 1 | T | A | Homozygous   |
| NC_037639.1 | 1657334 | SNV | 1 | A | G | Homozygous   |
| NC_037639.1 | 1657346 | SNV | 1 | A | T | Homozygous   |
| NC_037639.1 | 1657351 | SNV | 1 | A | G | Homozygous   |
| NC_037639.1 | 1657652 | SNV | 1 | A | G | Homozygous   |
| NC_037639.1 | 1657799 | SNV | 1 | C | T | Homozygous   |
| NC_037639.1 | 1664260 | SNV | 1 | G | T | Homozygous   |
| NC_037639.1 | 1664262 | SNV | 1 | A | T | Homozygous   |
| NC_037639.1 | 1664278 | SNV | 1 | A | T | Homozygous   |
| NC_037639.1 | 1664929 | SNV | 1 | A | G | Heterozygous |

|             |         |     |   |   |   |              |
|-------------|---------|-----|---|---|---|--------------|
| NC_037639.1 | 1664932 | SNV | 1 | A | G | Heterozygous |
| NC_037639.1 | 1671966 | SNV | 1 | T | G | Homozygous   |
| NC_037639.1 | 1671993 | SNV | 1 | T | A | Homozygous   |
| NC_037639.1 | 1671995 | SNV | 1 | A | G | Homozygous   |
| NC_037639.1 | 1672674 | SNV | 1 | T | C | Heterozygous |
| NC_037639.1 | 1672679 | SNV | 1 | G | A | Heterozygous |
| NC_037639.1 | 1672684 | SNV | 1 | T | A | Heterozygous |
| NC_037639.1 | 1672700 | SNV | 1 | C | A | Heterozygous |
| NC_037639.1 | 1672718 | SNV | 1 | T | G | Heterozygous |
| NC_037639.1 | 1672719 | SNV | 1 | A | G | Heterozygous |
| NC_037639.1 | 1672721 | SNV | 1 | A | T | Heterozygous |
| NC_037639.1 | 1672723 | SNV | 1 | A | G | Heterozygous |
| NC_037639.1 | 1672726 | SNV | 1 | T | C | Heterozygous |
| NC_037639.1 | 1678387 | SNV | 1 | A | T | Homozygous   |
| NC_037639.1 | 1678390 | SNV | 1 | A | G | Homozygous   |
| NC_037639.1 | 1678394 | SNV | 1 | A | G | Homozygous   |
| NC_037639.1 | 1678396 | SNV | 1 | A | T | Homozygous   |
| NC_037639.1 | 1683236 | SNV | 1 | A | G | Homozygous   |
| NC_037639.1 | 1728668 | SNV | 1 | A | G | Homozygous   |
| NC_037639.1 | 1728925 | SNV | 1 | T | C | Homozygous   |
| NC_037639.1 | 1731216 | SNV | 1 | T | C | Homozygous   |
| NC_037639.1 | 1736059 | SNV | 1 | T | G | Heterozygous |
| NC_037639.1 | 1737841 | SNV | 1 | A | G | Homozygous   |
| NC_037639.1 | 1745530 | SNV | 1 | T | A | Homozygous   |
| NC_037639.1 | 1745730 | SNV | 1 | T | A | Homozygous   |
| NC_037639.1 | 1746948 | SNV | 1 | A | C | Homozygous   |
| NC_037639.1 | 1746956 | SNV | 1 | T | A | Homozygous   |
| NC_037639.1 | 1746983 | SNV | 1 | A | T | Homozygous   |
| NC_037639.1 | 1748072 | SNV | 1 | A | T | Homozygous   |
| NC_037639.1 | 1748106 | SNV | 1 | A | T | Homozygous   |
| NC_037639.1 | 1750187 | SNV | 1 | A | T | Homozygous   |
| NC_037639.1 | 1752358 | SNV | 1 | T | G | Homozygous   |
| NC_037639.1 | 1752365 | SNV | 1 | A | G | Homozygous   |
| NC_037639.1 | 1752391 | SNV | 1 | T | C | Homozygous   |
| NC_037639.1 | 1752393 | SNV | 1 | T | C | Homozygous   |
| NC_037639.1 | 1752395 | SNV | 1 | T | C | Homozygous   |
| NC_037639.1 | 1752404 | SNV | 1 | T | A | Homozygous   |
| NC_037639.1 | 1755780 | SNV | 1 | A | C | Homozygous   |
| NC_037639.1 | 1764401 | SNV | 1 | A | T | Homozygous   |
| NC_037639.1 | 1764407 | SNV | 1 | A | T | Homozygous   |
| NC_037639.1 | 1764410 | SNV | 1 | A | T | Homozygous   |
| NC_037639.1 | 1764413 | SNV | 1 | T | A | Homozygous   |
| NC_037639.1 | 1764423 | SNV | 1 | A | G | Homozygous   |
| NC_037639.1 | 1764425 | SNV | 1 | A | T | Homozygous   |
| NC_037639.1 | 1767112 | SNV | 1 | T | C | Homozygous   |
| NC_037639.1 | 1770952 | SNV | 1 | T | A | Homozygous   |
| NC_037639.1 | 1770955 | SNV | 1 | A | C | Homozygous   |
| NC_037639.1 | 1785979 | SNV | 1 | T | A | Homozygous   |
| NC_037639.1 | 1785994 | SNV | 1 | A | T | Homozygous   |
| NC_037639.1 | 1785998 | SNV | 1 | A | T | Homozygous   |
| NC_037639.1 | 1786032 | SNV | 1 | A | T | Homozygous   |

|             |         |     |   |   |   |              |
|-------------|---------|-----|---|---|---|--------------|
| NC_037639.1 | 1786034 | SNV | 1 | A | T | Homozygous   |
| NC_037639.1 | 1787492 | SNV | 1 | A | G | Homozygous   |
| NC_037639.1 | 1787897 | SNV | 1 | A | G | Homozygous   |
| NC_037639.1 | 1788600 | SNV | 1 | G | A | Homozygous   |
| NC_037639.1 | 1792296 | SNV | 1 | A | G | Homozygous   |
| NC_037639.1 | 1801048 | SNV | 1 | T | G | Homozygous   |
| NC_037639.1 | 1801050 | SNV | 1 | T | G | Homozygous   |
| NC_037639.1 | 1801052 | SNV | 1 | T | A | Homozygous   |
| NC_037639.1 | 1801061 | SNV | 1 | A | T | Homozygous   |
| NC_037639.1 | 1801070 | SNV | 1 | A | T | Homozygous   |
| NC_037639.1 | 1801075 | SNV | 1 | T | A | Homozygous   |
| NC_037639.1 | 1801080 | SNV | 1 | A | T | Homozygous   |
| NC_037639.1 | 1809175 | SNV | 1 | A | C | Heterozygous |
| NC_037639.1 | 1809185 | SNV | 1 | A | T | Homozygous   |
| NC_037639.1 | 1809191 | SNV | 1 | A | C | Homozygous   |
| NC_037639.1 | 1809193 | SNV | 1 | T | G | Homozygous   |
| NC_037639.1 | 1809199 | SNV | 1 | A | T | Homozygous   |
| NC_037639.1 | 1809203 | SNV | 1 | T | C | Homozygous   |
| NC_037639.1 | 1809211 | SNV | 1 | T | C | Homozygous   |
| NC_037639.1 | 1817612 | SNV | 1 | T | A | Homozygous   |
| NC_037639.1 | 1819566 | SNV | 1 | A | T | Homozygous   |
| NC_037639.1 | 1819569 | SNV | 1 | T | A | Homozygous   |
| NC_037639.1 | 1819572 | SNV | 1 | A | C | Homozygous   |
| NC_037639.1 | 1819586 | SNV | 1 | T | A | Homozygous   |
| NC_037639.1 | 1819589 | SNV | 1 | T | A | Homozygous   |
| NC_037639.1 | 1819591 | SNV | 1 | T | A | Homozygous   |
| NC_037639.1 | 1819593 | SNV | 1 | T | G | Homozygous   |
| NC_037639.1 | 1819600 | SNV | 1 | A | T | Homozygous   |
| NC_037639.1 | 1819626 | SNV | 1 | T | C | Homozygous   |
| NC_037639.1 | 1835258 | SNV | 1 | A | C | Homozygous   |
| NC_037639.1 | 1835262 | SNV | 1 | A | T | Homozygous   |
| NC_037639.1 | 1840711 | SNV | 1 | A | C | Homozygous   |
| NC_037639.1 | 1840719 | SNV | 1 | T | A | Homozygous   |
| NC_037639.1 | 1840754 | SNV | 1 | T | A | Homozygous   |
| NC_037639.1 | 1840759 | SNV | 1 | T | A | Homozygous   |
| NC_037639.1 | 1840762 | SNV | 1 | A | T | Homozygous   |
| NC_037639.1 | 1840765 | SNV | 1 | T | A | Homozygous   |
| NC_037639.1 | 1846604 | SNV | 1 | A | C | Homozygous   |
| NC_037639.1 | 1846621 | SNV | 1 | G | A | Homozygous   |
| NC_037639.1 | 1846673 | SNV | 1 | G | A | Homozygous   |
| NC_037639.1 | 1846694 | SNV | 1 | C | T | Homozygous   |
| NC_037639.1 | 1846704 | SNV | 1 | T | C | Heterozygous |
| NC_037639.1 | 1846704 | SNV | 1 | T | G | Heterozygous |
| NC_037639.1 | 1846707 | SNV | 1 | A | G | Heterozygous |
| NC_037639.1 | 1846709 | SNV | 1 | A | T | Heterozygous |
| NC_037639.1 | 1846711 | SNV | 1 | G | A | Heterozygous |
| NC_037639.1 | 1846714 | SNV | 1 | A | C | Heterozygous |
| NC_037639.1 | 1846721 | SNV | 1 | A | C | Homozygous   |
| NC_037639.1 | 1846726 | SNV | 1 | A | G | Homozygous   |
| NC_037639.1 | 1846755 | SNV | 1 | C | T | Homozygous   |
| NC_037639.1 | 1846763 | SNV | 1 | A | G | Homozygous   |

|             |         |     |   |   |   |              |
|-------------|---------|-----|---|---|---|--------------|
| NC_037639.1 | 1846771 | SNV | 1 | T | C | Homozygous   |
| NC_037639.1 | 1846796 | SNV | 1 | C | T | Homozygous   |
| NC_037639.1 | 1866077 | SNV | 1 | C | T | Homozygous   |
| NC_037639.1 | 1866080 | SNV | 1 | A | C | Homozygous   |
| NC_037639.1 | 1874701 | SNV | 1 | T | C | Homozygous   |
| NC_037639.1 | 1874706 | SNV | 1 | T | C | Homozygous   |
| NC_037639.1 | 1874710 | SNV | 1 | A | T | Homozygous   |
| NC_037639.1 | 1874714 | SNV | 1 | G | A | Homozygous   |
| NC_037639.1 | 1874718 | SNV | 1 | T | A | Homozygous   |
| NC_037639.1 | 1874720 | SNV | 1 | A | G | Homozygous   |
| NC_037639.1 | 1876097 | SNV | 1 | T | A | Heterozygous |
| NC_037639.1 | 1876126 | SNV | 1 | T | A | Homozygous   |
| NC_037639.1 | 1876128 | SNV | 1 | A | T | Heterozygous |
| NC_037639.1 | 1876136 | SNV | 1 | A | G | Heterozygous |
| NC_037639.1 | 1883718 | SNV | 1 | T | G | Heterozygous |
| NC_037639.1 | 1883720 | SNV | 1 | A | G | Heterozygous |
| NC_037639.1 | 1886699 | SNV | 1 | C | A | Homozygous   |
| NC_037639.1 | 1886721 | SNV | 1 | A | G | Homozygous   |
| NC_037639.1 | 1886723 | SNV | 1 | G | A | Homozygous   |
| NC_037639.1 | 1886727 | SNV | 1 | A | G | Homozygous   |
| NC_037639.1 | 1894780 | SNV | 1 | A | C | Homozygous   |
| NC_037639.1 | 1894814 | SNV | 1 | T | C | Heterozygous |
| NC_037639.1 | 1895208 | SNV | 1 | C | T | Heterozygous |
| NC_037639.1 | 1904502 | SNV | 1 | A | T | Homozygous   |
| NC_037639.1 | 1904506 | SNV | 1 | T | A | Homozygous   |
| NC_037639.1 | 1904510 | SNV | 1 | A | G | Homozygous   |
| NC_037639.1 | 1904516 | SNV | 1 | C | G | Homozygous   |
| NC_037639.1 | 1912688 | SNV | 1 | T | C | Homozygous   |
| NC_037639.1 | 1913135 | SNV | 1 | T | G | Homozygous   |
| NC_037639.1 | 1916095 | SNV | 1 | T | G | Heterozygous |
| NC_037639.1 | 1916516 | SNV | 1 | A | G | Homozygous   |
| NC_037639.1 | 1918167 | SNV | 1 | G | A | Heterozygous |
| NC_037639.1 | 1918360 | SNV | 1 | C | T | Heterozygous |
| NC_037639.1 | 1918373 | SNV | 1 | T | G | Homozygous   |
| NC_037639.1 | 1918454 | SNV | 1 | T | C | Heterozygous |
| NC_037639.1 | 1918648 | SNV | 1 | C | A | Homozygous   |
| NC_037639.1 | 1920619 | SNV | 1 | T | C | Homozygous   |
| NC_037639.1 | 1920621 | SNV | 1 | C | G | Homozygous   |
| NC_037639.1 | 1921718 | SNV | 1 | C | T | Homozygous   |
| NC_037639.1 | 1922120 | SNV | 1 | G | A | Homozygous   |
| NC_037639.1 | 1937099 | SNV | 1 | C | T | Heterozygous |
| NC_037639.1 | 1937254 | SNV | 1 | C | T | Homozygous   |
| NC_037639.1 | 1941192 | SNV | 1 | C | T | Homozygous   |
| NC_037639.1 | 1942145 | SNV | 1 | T | A | Homozygous   |
| NC_037639.1 | 1942166 | SNV | 1 | T | G | Homozygous   |
| NC_037639.1 | 1942168 | SNV | 1 | A | C | Homozygous   |
| NC_037639.1 | 1942171 | SNV | 1 | T | G | Homozygous   |
| NC_037639.1 | 1942181 | SNV | 1 | T | A | Homozygous   |
| NC_037639.1 | 1951732 | SNV | 1 | A | T | Homozygous   |
| NC_037639.1 | 1951739 | SNV | 1 | A | T | Homozygous   |
| NC_037639.1 | 1951743 | SNV | 1 | A | T | Homozygous   |

|             |         |     |   |   |   |              |
|-------------|---------|-----|---|---|---|--------------|
| NC_037639.1 | 1951754 | SNV | 1 | T | G | Homozygous   |
| NC_037639.1 | 1954243 | SNV | 1 | C | T | Heterozygous |
| NC_037639.1 | 1954433 | SNV | 1 | A | G | Homozygous   |
| NC_037639.1 | 1954443 | SNV | 1 | C | T | Homozygous   |
| NC_037639.1 | 1954453 | SNV | 1 | T | C | Homozygous   |
| NC_037639.1 | 1954456 | SNV | 1 | A | G | Homozygous   |
| NC_037639.1 | 1954460 | SNV | 1 | G | A | Homozygous   |
| NC_037639.1 | 1954486 | SNV | 1 | A | G | Homozygous   |
| NC_037639.1 | 1962915 | SNV | 1 | A | G | Homozygous   |
| NC_037639.1 | 1962943 | SNV | 1 | A | C | Homozygous   |
| NC_037639.1 | 1962949 | SNV | 1 | A | T | Homozygous   |
| NC_037639.1 | 1963273 | SNV | 1 | T | A | Homozygous   |
| NC_037639.1 | 1963278 | SNV | 1 | A | T | Homozygous   |
| NC_037639.1 | 1963289 | SNV | 1 | A | T | Homozygous   |
| NC_037639.1 | 1963450 | SNV | 1 | A | T | Homozygous   |
| NC_037639.1 | 1963476 | SNV | 1 | A | G | Homozygous   |
| NC_037639.1 | 1963479 | SNV | 1 | T | A | Homozygous   |
| NC_037639.1 | 1963481 | SNV | 1 | G | A | Homozygous   |
| NC_037639.1 | 1963491 | SNV | 1 | C | A | Homozygous   |
| NC_037639.1 | 1974989 | SNV | 1 | T | C | Heterozygous |
| NC_037639.1 | 1974992 | SNV | 1 | A | T | Heterozygous |
| NC_037639.1 | 1975008 | SNV | 1 | A | C | Heterozygous |
| NC_037639.1 | 1975018 | SNV | 1 | A | G | Heterozygous |
| NC_037639.1 | 1975021 | SNV | 1 | C | T | Homozygous   |
| NC_037639.1 | 1975045 | SNV | 1 | A | T | Homozygous   |
| NC_037639.1 | 1975052 | SNV | 1 | A | T | Homozygous   |
| NC_037639.1 | 1975058 | SNV | 1 | A | T | Homozygous   |
| NC_037639.1 | 1975068 | SNV | 1 | T | A | Homozygous   |
| NC_037639.1 | 1975087 | SNV | 1 | A | T | Homozygous   |
| NC_037639.1 | 1975101 | SNV | 1 | A | G | Homozygous   |
| NC_037639.1 | 1975111 | SNV | 1 | T | A | Homozygous   |
| NC_037639.1 | 1979866 | SNV | 1 | A | G | Heterozygous |
| NC_037639.1 | 1979869 | SNV | 1 | C | T | Heterozygous |
| NC_037639.1 | 1979874 | SNV | 1 | A | G | Homozygous   |
| NC_037639.1 | 1979878 | SNV | 1 | A | G | Heterozygous |
| NC_037639.1 | 1979886 | SNV | 1 | A | C | Homozygous   |
| NC_037639.1 | 1982655 | SNV | 1 | A | T | Homozygous   |
| NC_037639.1 | 1982658 | SNV | 1 | T | A | Homozygous   |
| NC_037639.1 | 1982660 | SNV | 1 | A | C | Homozygous   |
| NC_037639.1 | 1982664 | SNV | 1 | T | A | Homozygous   |
| NC_037639.1 | 1982676 | SNV | 1 | T | A | Homozygous   |
| NC_037639.1 | 1982681 | SNV | 1 | T | C | Homozygous   |
| NC_037639.1 | 1991899 | SNV | 1 | A | T | Homozygous   |
| NC_037639.1 | 1991910 | SNV | 1 | G | A | Homozygous   |
| NC_037639.1 | 1991919 | SNV | 1 | G | A | Homozygous   |
| NC_037639.1 | 1991921 | SNV | 1 | G | A | Homozygous   |
| NC_037639.1 | 1994081 | SNV | 1 | A | T | Homozygous   |
| NC_037639.1 | 1994102 | SNV | 1 | A | G | Heterozygous |
| NC_037639.1 | 1997332 | SNV | 1 | T | A | Homozygous   |
| NC_037639.1 | 1997367 | SNV | 1 | A | G | Homozygous   |
| NC_037639.1 | 1997370 | SNV | 1 | G | T | Homozygous   |



|             |         |     |   |   |   |              |
|-------------|---------|-----|---|---|---|--------------|
| NC_037639.1 | 1997372 | SNV | 1 | C | A | Homozygous   |
| NC_037639.1 | 1997376 | SNV | 1 | A | T | Homozygous   |
| NC_037639.1 | 1997388 | SNV | 1 | T | A | Homozygous   |
| NC_037639.1 | 1997390 | SNV | 1 | T | A | Homozygous   |
| NC_037639.1 | 1997395 | SNV | 1 | A | C | Homozygous   |
| NC_037639.1 | 1997400 | SNV | 1 | A | T | Homozygous   |
| NC_037639.1 | 1998760 | SNV | 1 | A | T | Homozygous   |
| NC_037639.1 | 1998780 | SNV | 1 | A | C | Homozygous   |
| NC_037639.1 | 1998787 | SNV | 1 | T | A | Homozygous   |
| NC_037639.1 | 1998793 | SNV | 1 | A | G | Homozygous   |
| NC_037639.1 | 1998798 | SNV | 1 | T | A | Homozygous   |
| NC_037639.1 | 1999395 | SNV | 1 | T | A | Homozygous   |
| NC_037639.1 | 1999405 | SNV | 1 | A | C | Homozygous   |
| NC_037639.1 | 1999427 | SNV | 1 | T | G | Homozygous   |
| NC_037639.1 | 1999429 | SNV | 1 | A | G | Homozygous   |
| NC_037639.1 | 2001799 | SNV | 1 | G | A | Homozygous   |
| NC_037639.1 | 2003280 | SNV | 1 | T | A | Homozygous   |
| NC_037639.1 | 2003285 | SNV | 1 | T | G | Homozygous   |
| NC_037639.1 | 2003291 | SNV | 1 | A | T | Homozygous   |
| NC_037639.1 | 2003303 | SNV | 1 | T | G | Homozygous   |
| NC_037639.1 | 2003314 | SNV | 1 | A | T | Homozygous   |
| NC_037639.1 | 2013999 | SNV | 1 | T | A | Homozygous   |
| NC_037639.1 | 2014238 | SNV | 1 | G | A | Heterozygous |
| NC_037639.1 | 2014257 | SNV | 1 | C | A | Heterozygous |
| NC_037639.1 | 2014261 | SNV | 1 | C | T | Heterozygous |
| NC_037639.1 | 2014265 | SNV | 1 | C | T | Heterozygous |
| NC_037639.1 | 2014269 | SNV | 1 | C | T | Heterozygous |
| NC_037639.1 | 2014280 | SNV | 1 | G | A | Heterozygous |
| NC_037639.1 | 2014284 | SNV | 1 | G | A | Heterozygous |
| NC_037639.1 | 2014294 | SNV | 1 | G | A | Heterozygous |
| NC_037639.1 | 2014300 | SNV | 1 | G | A | Heterozygous |
| NC_037639.1 | 2014301 | SNV | 1 | T | A | Heterozygous |
| NC_037639.1 | 2016890 | SNV | 1 | T | G | Homozygous   |
| NC_037639.1 | 2016893 | SNV | 1 | A | T | Homozygous   |
| NC_037639.1 | 2037502 | SNV | 1 | T | G | Homozygous   |
| NC_037639.1 | 2037521 | SNV | 1 | C | T | Homozygous   |
| NC_037639.1 | 2037523 | SNV | 1 | T | A | Homozygous   |
| NC_037639.1 | 2037528 | SNV | 1 | A | T | Homozygous   |
| NC_037639.1 | 2037535 | SNV | 1 | A | T | Homozygous   |
| NC_037639.1 | 2037541 | SNV | 1 | A | T | Homozygous   |
| NC_037639.1 | 2037545 | SNV | 1 | A | C | Homozygous   |
| NC_037639.1 | 2037549 | SNV | 1 | T | A | Homozygous   |
| NC_037639.1 | 2037557 | SNV | 1 | A | C | Homozygous   |
| NC_037639.1 | 2042613 | SNV | 1 | A | T | Homozygous   |
| NC_037639.1 | 2042622 | SNV | 1 | T | A | Homozygous   |
| NC_037639.1 | 2042646 | SNV | 1 | A | T | Homozygous   |
| NC_037639.1 | 2042652 | SNV | 1 | A | C | Homozygous   |
| NC_037639.1 | 2042658 | SNV | 1 | A | C | Homozygous   |
| NC_037639.1 | 2042838 | SNV | 1 | T | A | Homozygous   |
| NC_037639.1 | 2042842 | SNV | 1 | A | T | Homozygous   |
| NC_037639.1 | 2042849 | SNV | 1 | A | C | Homozygous   |

|             |         |     |   |   |   |              |
|-------------|---------|-----|---|---|---|--------------|
| NC_037639.1 | 2042854 | SNV | 1 | T | A | Homozygous   |
| NC_037639.1 | 2042862 | SNV | 1 | A | T | Homozygous   |
| NC_037639.1 | 2042866 | SNV | 1 | A | C | Homozygous   |
| NC_037639.1 | 2042870 | SNV | 1 | T | A | Homozygous   |
| NC_037639.1 | 2042908 | SNV | 1 | A | T | Homozygous   |
| NC_037639.1 | 2042912 | SNV | 1 | A | C | Homozygous   |
| NC_037639.1 | 2051178 | SNV | 1 | T | A | Homozygous   |
| NC_037639.1 | 2051191 | SNV | 1 | T | A | Homozygous   |
| NC_037639.1 | 2051204 | SNV | 1 | T | G | Homozygous   |
| NC_037639.1 | 2051213 | SNV | 1 | A | T | Homozygous   |
| NC_037639.1 | 2051219 | SNV | 1 | T | A | Homozygous   |
| NC_037639.1 | 2051225 | SNV | 1 | T | A | Homozygous   |
| NC_037639.1 | 2053754 | SNV | 1 | T | C | Homozygous   |
| NC_037639.1 | 2054860 | SNV | 1 | T | C | Homozygous   |
| NC_037639.1 | 2054866 | SNV | 1 | T | C | Homozygous   |
| NC_037639.1 | 2054875 | SNV | 1 | T | C | Homozygous   |
| NC_037639.1 | 2054881 | SNV | 1 | T | C | Homozygous   |
| NC_037639.1 | 2054883 | SNV | 1 | T | C | Homozygous   |
| NC_037639.1 | 2054902 | SNV | 1 | T | A | Homozygous   |
| NC_037639.1 | 2066918 | SNV | 1 | G | A | Heterozygous |
| NC_037639.1 | 2067108 | SNV | 1 | C | T | Heterozygous |
| NC_037639.1 | 2067129 | SNV | 1 | A | G | Heterozygous |
| NC_037639.1 | 2068268 | SNV | 1 | A | T | Heterozygous |
| NC_037639.1 | 2068390 | SNV | 1 | G | A | Heterozygous |
| NC_037639.1 | 2078617 | SNV | 1 | T | A | Homozygous   |
| NC_037639.1 | 2078619 | SNV | 1 | C | T | Heterozygous |
| NC_037639.1 | 2079425 | SNV | 1 | A | G | Heterozygous |
| NC_037639.1 | 2082822 | SNV | 1 | C | T | Homozygous   |
| NC_037639.1 | 2083848 | SNV | 1 | C | T | Homozygous   |
| NC_037639.1 | 2084139 | SNV | 1 | A | T | Homozygous   |
| NC_037639.1 | 2084964 | SNV | 1 | T | A | Homozygous   |
| NC_037639.1 | 2084968 | SNV | 1 | C | T | Homozygous   |
| NC_037639.1 | 2087839 | SNV | 1 | C | A | Homozygous   |
| NC_037639.1 | 2088235 | SNV | 1 | T | A | Homozygous   |
| NC_037639.1 | 2088244 | SNV | 1 | A | T | Homozygous   |
| NC_037639.1 | 2088251 | SNV | 1 | A | G | Homozygous   |
| NC_037639.1 | 2088260 | SNV | 1 | A | G | Homozygous   |
| NC_037639.1 | 2088264 | SNV | 1 | A | G | Homozygous   |
| NC_037639.1 | 2089634 | SNV | 1 | C | A | Homozygous   |
| NC_037639.1 | 2089657 | SNV | 1 | T | C | Homozygous   |
| NC_037639.1 | 2089679 | SNV | 1 | A | G | Homozygous   |
| NC_037639.1 | 2089696 | SNV | 1 | T | C | Homozygous   |
| NC_037639.1 | 2089711 | SNV | 1 | A | G | Homozygous   |
| NC_037639.1 | 2089714 | SNV | 1 | C | T | Homozygous   |
| NC_037639.1 | 2089867 | SNV | 1 | G | A | Homozygous   |
| NC_037639.1 | 2089882 | SNV | 1 | G | A | Homozygous   |
| NC_037639.1 | 2089889 | SNV | 1 | C | T | Heterozygous |
| NC_037639.1 | 2089895 | SNV | 1 | G | A | Homozygous   |
| NC_037639.1 | 2089901 | SNV | 1 | C | T | Homozygous   |
| NC_037639.1 | 2089906 | SNV | 1 | T | G | Homozygous   |
| NC_037639.1 | 2089914 | SNV | 1 | A | G | Homozygous   |

|             |         |     |   |   |   |              |
|-------------|---------|-----|---|---|---|--------------|
| NC_037639.1 | 2089920 | SNV | 1 | C | T | Homozygous   |
| NC_037639.1 | 2089926 | SNV | 1 | A | G | Homozygous   |
| NC_037639.1 | 2089941 | SNV | 1 | C | T | Homozygous   |
| NC_037639.1 | 2089964 | SNV | 1 | G | A | Homozygous   |
| NC_037639.1 | 2091141 | SNV | 1 | C | T | Homozygous   |
| NC_037639.1 | 2091592 | SNV | 1 | C | T | Homozygous   |
| NC_037639.1 | 2091608 | SNV | 1 | C | A | Homozygous   |
| NC_037639.1 | 2127480 | SNV | 1 | C | T | Homozygous   |
| NC_037639.1 | 2128846 | SNV | 1 | T | A | Homozygous   |
| NC_037639.1 | 2128849 | SNV | 1 | A | T | Homozygous   |
| NC_037639.1 | 2128854 | SNV | 1 | A | T | Homozygous   |
| NC_037639.1 | 2130975 | SNV | 1 | C | A | Heterozygous |
| NC_037639.1 | 2131006 | SNV | 1 | G | A | Heterozygous |
| NC_037639.1 | 2134711 | SNV | 1 | C | T | Homozygous   |
| NC_037639.1 | 2137241 | SNV | 1 | A | G | Homozygous   |
| NC_037639.1 | 2143567 | SNV | 1 | T | A | Homozygous   |
| NC_037639.1 | 2143575 | SNV | 1 | T | G | Homozygous   |
| NC_037639.1 | 2143617 | SNV | 1 | T | C | Homozygous   |
| NC_037639.1 | 2143619 | SNV | 1 | T | C | Homozygous   |
| NC_037639.1 | 2143622 | SNV | 1 | T | C | Heterozygous |
| NC_037639.1 | 2162907 | SNV | 1 | C | T | Heterozygous |
| NC_037639.1 | 2162913 | SNV | 1 | C | G | Heterozygous |
| NC_037639.1 | 2163271 | SNV | 1 | G | A | Heterozygous |
| NC_037639.1 | 2163467 | SNV | 1 | C | T | Homozygous   |
| NC_037639.1 | 2169760 | SNV | 1 | T | A | Homozygous   |
| NC_037639.1 | 2169764 | SNV | 1 | G | T | Homozygous   |
| NC_037639.1 | 2169767 | SNV | 1 | A | G | Homozygous   |
| NC_037639.1 | 2169796 | SNV | 1 | A | T | Heterozygous |
| NC_037639.1 | 2175878 | SNV | 1 | A | T | Homozygous   |
| NC_037639.1 | 2175880 | SNV | 1 | A | T | Homozygous   |
| NC_037639.1 | 2175882 | SNV | 1 | A | T | Homozygous   |
| NC_037639.1 | 2175884 | SNV | 1 | A | C | Homozygous   |
| NC_037639.1 | 2175886 | SNV | 1 | A | T | Homozygous   |
| NC_037639.1 | 2177877 | SNV | 1 | T | C | Homozygous   |
| NC_037639.1 | 2186548 | SNV | 1 | C | T | Homozygous   |
| NC_037639.1 | 2186569 | SNV | 1 | T | C | Homozygous   |
| NC_037639.1 | 2186574 | SNV | 1 | A | C | Homozygous   |
| NC_037639.1 | 2186583 | SNV | 1 | T | C | Homozygous   |
| NC_037639.1 | 2186591 | SNV | 1 | T | A | Homozygous   |
| NC_037639.1 | 2188611 | SNV | 1 | T | A | Homozygous   |
| NC_037639.1 | 2207201 | SNV | 1 | A | G | Heterozygous |
| NC_037639.1 | 2207281 | SNV | 1 | A | G | Heterozygous |
| NC_037639.1 | 2207291 | SNV | 1 | G | A | Homozygous   |
| NC_037639.1 | 2207350 | SNV | 1 | C | T | Heterozygous |
| NC_037639.1 | 2207570 | SNV | 1 | T | C | Homozygous   |
| NC_037639.1 | 2207619 | SNV | 1 | A | G | Heterozygous |
| NC_037639.1 | 2207664 | SNV | 1 | A | G | Heterozygous |
| NC_037639.1 | 2207872 | SNV | 1 | A | G | Homozygous   |
| NC_037639.1 | 2207941 | SNV | 1 | G | A | Homozygous   |
| NC_037639.1 | 2207961 | SNV | 1 | G | C | Heterozygous |
| NC_037639.1 | 2208109 | SNV | 1 | C | T | Homozygous   |

|             |         |     |   |   |   |              |
|-------------|---------|-----|---|---|---|--------------|
| NC_037639.1 | 2208115 | SNV | 1 | A | C | Heterozygous |
| NC_037639.1 | 2208124 | SNV | 1 | C | T | Heterozygous |
| NC_037639.1 | 2208131 | SNV | 1 | A | G | Heterozygous |
| NC_037639.1 | 2208795 | SNV | 1 | T | A | Heterozygous |
| NC_037639.1 | 2209792 | SNV | 1 | G | A | Heterozygous |
| NC_037639.1 | 2210153 | SNV | 1 | G | T | Heterozygous |
| NC_037639.1 | 2226601 | SNV | 1 | T | C | Homozygous   |
| NC_037639.1 | 2226615 | SNV | 1 | G | T | Homozygous   |
| NC_037639.1 | 2226624 | SNV | 1 | T | A | Homozygous   |
| NC_037639.1 | 2226630 | SNV | 1 | T | A | Homozygous   |
| NC_037639.1 | 2226637 | SNV | 1 | G | A | Homozygous   |
| NC_037639.1 | 2226654 | SNV | 1 | A | G | Homozygous   |
| NC_037639.1 | 2226662 | SNV | 1 | G | A | Homozygous   |
| NC_037639.1 | 2226667 | SNV | 1 | A | T | Heterozygous |
| NC_037639.1 | 2226670 | SNV | 1 | T | A | Homozygous   |
| NC_037639.1 | 2226679 | SNV | 1 | G | A | Heterozygous |
| NC_037639.1 | 2226685 | SNV | 1 | C | T | Heterozygous |
| NC_037639.1 | 2226686 | SNV | 1 | G | A | Heterozygous |
| NC_037639.1 | 2238346 | SNV | 1 | T | A | Heterozygous |
| NC_037639.1 | 2238364 | SNV | 1 | A | T | Heterozygous |
| NC_037639.1 | 2238366 | SNV | 1 | T | A | Heterozygous |
| NC_037639.1 | 2240403 | SNV | 1 | A | G | Homozygous   |
| NC_037639.1 | 2247047 | SNV | 1 | T | G | Homozygous   |
| NC_037639.1 | 2247061 | SNV | 1 | A | T | Homozygous   |
| NC_037639.1 | 2248251 | SNV | 1 | T | A | Heterozygous |
| NC_037639.1 | 2248253 | SNV | 1 | T | C | Heterozygous |
| NC_037639.1 | 2248256 | SNV | 1 | T | A | Heterozygous |
| NC_037639.1 | 2248607 | SNV | 1 | T | C | Homozygous   |
| NC_037639.1 | 2256798 | SNV | 1 | A | G | Homozygous   |
| NC_037639.1 | 2261604 | SNV | 1 | A | C | Homozygous   |
| NC_037639.1 | 2261607 | SNV | 1 | A | G | Homozygous   |
| NC_037639.1 | 2261641 | SNV | 1 | T | A | Homozygous   |
| NC_037639.1 | 2262591 | SNV | 1 | T | G | Heterozygous |
| NC_037639.1 | 2262597 | SNV | 1 | C | T | Homozygous   |
| NC_037639.1 | 2276179 | SNV | 1 | C | T | Heterozygous |
| NC_037639.1 | 2315198 | SNV | 1 | A | T | Heterozygous |
| NC_037639.1 | 2315204 | SNV | 1 | C | T | Heterozygous |
| NC_037639.1 | 2315230 | SNV | 1 | G | A | Heterozygous |
| NC_037639.1 | 2315819 | SNV | 1 | G | A | Heterozygous |
| NC_037639.1 | 2315856 | SNV | 1 | T | C | Homozygous   |
| NC_037639.1 | 2316272 | SNV | 1 | A | G | Homozygous   |
| NC_037639.1 | 2316290 | SNV | 1 | T | C | Homozygous   |
| NC_037639.1 | 2316313 | SNV | 1 | T | C | Homozygous   |
| NC_037639.1 | 2316324 | SNV | 1 | C | T | Homozygous   |
| NC_037639.1 | 2316331 | SNV | 1 | A | G | Homozygous   |
| NC_037639.1 | 2316368 | SNV | 1 | G | A | Homozygous   |
| NC_037639.1 | 2316375 | SNV | 1 | T | C | Homozygous   |
| NC_037639.1 | 2316377 | SNV | 1 | A | G | Homozygous   |
| NC_037639.1 | 2316393 | SNV | 1 | C | T | Heterozygous |
| NC_037639.1 | 2316397 | SNV | 1 | C | G | Heterozygous |
| NC_037639.1 | 2316399 | SNV | 1 | G | A | Heterozygous |

|             |         |     |   |   |   |              |
|-------------|---------|-----|---|---|---|--------------|
| NC_037639.1 | 2316402 | SNV | 1 | C | T | Heterozygous |
| NC_037639.1 | 2316411 | SNV | 1 | G | A | Heterozygous |
| NC_037639.1 | 2345449 | SNV | 1 | T | A | Homozygous   |
| NC_037639.1 | 2345469 | SNV | 1 | T | A | Homozygous   |
| NC_037639.1 | 2345486 | SNV | 1 | T | A | Homozygous   |
| NC_037639.1 | 2366740 | SNV | 1 | A | G | Heterozygous |
| NC_037639.1 | 2366754 | SNV | 1 | A | G | Homozygous   |
| NC_037639.1 | 2367126 | SNV | 1 | G | A | Homozygous   |
| NC_037639.1 | 2382727 | SNV | 1 | G | A | Heterozygous |
| NC_037639.1 | 2383671 | SNV | 1 | A | T | Heterozygous |
| NC_037639.1 | 2383675 | SNV | 1 | T | A | Heterozygous |
| NC_037639.1 | 2384311 | SNV | 1 | G | A | Homozygous   |
| NC_037639.1 | 2384699 | SNV | 1 | A | G | Homozygous   |
| NC_037639.1 | 2384704 | SNV | 1 | C | T | Homozygous   |
| NC_037639.1 | 2384722 | SNV | 1 | T | C | Homozygous   |
| NC_037639.1 | 2384725 | SNV | 1 | A | G | Homozygous   |
| NC_037639.1 | 2384745 | SNV | 1 | A | G | Homozygous   |
| NC_037639.1 | 2384754 | SNV | 1 | T | A | Homozygous   |
| NC_037639.1 | 2384760 | SNV | 1 | C | T | Homozygous   |
| NC_037639.1 | 2384766 | SNV | 1 | T | C | Heterozygous |
| NC_037639.1 | 2384771 | SNV | 1 | G | A | Homozygous   |
| NC_037639.1 | 2384779 | SNV | 1 | G | A | Heterozygous |
| NC_037639.1 | 2384781 | SNV | 1 | A | T | Heterozygous |
| NC_037639.1 | 2384782 | SNV | 1 | T | C | Heterozygous |
| NC_037639.1 | 2387401 | SNV | 1 | G | T | Homozygous   |
| NC_037639.1 | 2387938 | SNV | 1 | T | C | Homozygous   |
| NC_037639.1 | 2395109 | SNV | 1 | A | G | Heterozygous |
| NC_037639.1 | 2396169 | SNV | 1 | A | G | Homozygous   |
| NC_037639.1 | 2418854 | SNV | 1 | G | A | Heterozygous |
| NC_037639.1 | 2435486 | SNV | 1 | T | C | Homozygous   |
| NC_037639.1 | 2446797 | SNV | 1 | C | T | Homozygous   |
| NC_037639.1 | 2446800 | SNV | 1 | T | C | Homozygous   |
| NC_037639.1 | 2450850 | SNV | 1 | T | C | Homozygous   |
| NC_037639.1 | 2450905 | SNV | 1 | T | C | Homozygous   |
| NC_037639.1 | 2473118 | SNV | 1 | T | C | Homozygous   |
| NC_037639.1 | 2473775 | SNV | 1 | G | T | Heterozygous |
| NC_037639.1 | 2476320 | SNV | 1 | A | G | Homozygous   |
| NC_037639.1 | 2478369 | SNV | 1 | A | G | Homozygous   |
| NC_037639.1 | 2478381 | SNV | 1 | A | G | Homozygous   |
| NC_037639.1 | 2478509 | SNV | 1 | C | G | Homozygous   |
| NC_037639.1 | 2507568 | SNV | 1 | T | A | Homozygous   |
| NC_037639.1 | 2507570 | SNV | 1 | A | G | Homozygous   |
| NC_037639.1 | 2507572 | SNV | 1 | G | A | Homozygous   |
| NC_037639.1 | 2507586 | SNV | 1 | A | C | Homozygous   |
| NC_037639.1 | 2507611 | SNV | 1 | T | A | Homozygous   |
| NC_037639.1 | 2507614 | SNV | 1 | T | A | Homozygous   |
| NC_037639.1 | 2515488 | SNV | 1 | A | G | Heterozygous |
| NC_037639.1 | 2515613 | SNV | 1 | T | C | Homozygous   |
| NC_037639.1 | 2515617 | SNV | 1 | C | T | Homozygous   |
| NC_037639.1 | 2519006 | SNV | 1 | A | G | Homozygous   |
| NC_037639.1 | 2524264 | SNV | 1 | T | C | Homozygous   |

|             |         |     |   |   |   |              |
|-------------|---------|-----|---|---|---|--------------|
| NC_037639.1 | 2524281 | SNV | 1 | T | A | Homozygous   |
| NC_037639.1 | 2524283 | SNV | 1 | T | G | Homozygous   |
| NC_037639.1 | 2528143 | SNV | 1 | A | T | Homozygous   |
| NC_037639.1 | 2528152 | SNV | 1 | T | C | Heterozygous |
| NC_037639.1 | 2528162 | SNV | 1 | T | C | Heterozygous |
| NC_037639.1 | 2528165 | SNV | 1 | A | G | Heterozygous |
| NC_037639.1 | 2528167 | SNV | 1 | A | G | Heterozygous |
| NC_037639.1 | 2528169 | SNV | 1 | A | T | Heterozygous |
| NC_037639.1 | 2528177 | SNV | 1 | A | G | Heterozygous |
| NC_037639.1 | 2528179 | SNV | 1 | A | T | Heterozygous |
| NC_037639.1 | 2528181 | SNV | 1 | A | T | Heterozygous |
| NC_037639.1 | 2528184 | SNV | 1 | C | G | Heterozygous |
| NC_037639.1 | 2528190 | SNV | 1 | T | C | Heterozygous |
| NC_037639.1 | 2528553 | SNV | 1 | A | T | Homozygous   |
| NC_037639.1 | 2528577 | SNV | 1 | A | G | Homozygous   |
| NC_037639.1 | 2528587 | SNV | 1 | A | T | Homozygous   |
| NC_037639.1 | 2528590 | SNV | 1 | A | T | Homozygous   |
| NC_037639.1 | 2529196 | SNV | 1 | T | C | Homozygous   |
| NC_037639.1 | 2530961 | SNV | 1 | C | T | Heterozygous |
| NC_037639.1 | 2532390 | SNV | 1 | G | A | Homozygous   |
| NC_037639.1 | 2532802 | SNV | 1 | G | T | Heterozygous |
| NC_037639.1 | 2550490 | SNV | 1 | G | A | Heterozygous |
| NC_037639.1 | 2552790 | SNV | 1 | G | C | Heterozygous |
| NC_037639.1 | 2555359 | SNV | 1 | G | A | Heterozygous |
| NC_037639.1 | 2564352 | SNV | 1 | C | T | Heterozygous |
| NC_037639.1 | 2572369 | SNV | 1 | A | T | Homozygous   |
| NC_037639.1 | 2582562 | SNV | 1 | C | G | Homozygous   |
| NC_037639.1 | 2582571 | SNV | 1 | A | G | Homozygous   |
| NC_037639.1 | 2582706 | SNV | 1 | C | T | Homozygous   |
| NC_037639.1 | 2610055 | SNV | 1 | T | C | Homozygous   |
| NC_037639.1 | 2610350 | SNV | 1 | C | T | Heterozygous |
| NC_037639.1 | 2610391 | SNV | 1 | C | T | Heterozygous |
| NC_037639.1 | 2610660 | SNV | 1 | T | C | Homozygous   |
| NC_037639.1 | 2610699 | SNV | 1 | A | G | Homozygous   |
| NC_037639.1 | 2610761 | SNV | 1 | T | C | Homozygous   |
| NC_037639.1 | 2612248 | SNV | 1 | T | A | Homozygous   |
| NC_037639.1 | 2612962 | SNV | 1 | A | T | Heterozygous |
| NC_037639.1 | 2612963 | SNV | 1 | A | T | Heterozygous |
| NC_037639.1 | 2612966 | SNV | 1 | T | A | Heterozygous |
| NC_037639.1 | 2612970 | SNV | 1 | A | G | Heterozygous |
| NC_037639.1 | 2612975 | SNV | 1 | G | A | Heterozygous |
| NC_037639.1 | 2613005 | SNV | 1 | A | T | Homozygous   |
| NC_037639.1 | 2613011 | SNV | 1 | A | T | Homozygous   |
| NC_037639.1 | 2613051 | SNV | 1 | T | C | Homozygous   |
| NC_037639.1 | 2613058 | SNV | 1 | A | T | Homozygous   |
| NC_037639.1 | 2613065 | SNV | 1 | A | G | Homozygous   |
| NC_037639.1 | 2613067 | SNV | 1 | A | G | Homozygous   |
| NC_037639.1 | 2613635 | SNV | 1 | G | A | Heterozygous |
| NC_037639.1 | 2614832 | SNV | 1 | C | T | Homozygous   |
| NC_037639.1 | 2614845 | SNV | 1 | G | A | Heterozygous |
| NC_037639.1 | 2614894 | SNV | 1 | T | C | Homozygous   |

|             |         |     |   |   |   |              |
|-------------|---------|-----|---|---|---|--------------|
| NC_037639.1 | 2614923 | SNV | 1 | A | T | Heterozygous |
| NC_037639.1 | 2615037 | SNV | 1 | C | T | Heterozygous |
| NC_037639.1 | 2629463 | SNV | 1 | G | A | Homozygous   |
| NC_037639.1 | 2633173 | SNV | 1 | T | C | Homozygous   |
| NC_037639.1 | 2633515 | SNV | 1 | A | G | Homozygous   |
| NC_037639.1 | 2636398 | SNV | 1 | A | G | Heterozygous |
| NC_037639.1 | 2636401 | SNV | 1 | T | A | Heterozygous |
| NC_037639.1 | 2636407 | SNV | 1 | T | C | Heterozygous |
| NC_037639.1 | 2636409 | SNV | 1 | T | C | Heterozygous |
| NC_037639.1 | 2639620 | SNV | 1 | G | C | Homozygous   |
| NC_037639.1 | 2640076 | SNV | 1 | C | T | Heterozygous |
| NC_037639.1 | 2640334 | SNV | 1 | A | G | Homozygous   |
| NC_037639.1 | 2696012 | SNV | 1 | T | C | Heterozygous |
| NC_037639.1 | 2696043 | SNV | 1 | A | G | Heterozygous |
| NC_037639.1 | 2698559 | SNV | 1 | T | A | Heterozygous |
| NC_037639.1 | 2704551 | SNV | 1 | C | T | Heterozygous |
| NC_037639.1 | 2704560 | SNV | 1 | C | T | Homozygous   |
| NC_037639.1 | 2719152 | SNV | 1 | G | A | Heterozygous |
| NC_037639.1 | 2719165 | SNV | 1 | A | G | Heterozygous |
| NC_037639.1 | 2719222 | SNV | 1 | A | G | Homozygous   |
| NC_037639.1 | 2721697 | SNV | 1 | T | C | Heterozygous |
| NC_037639.1 | 2721706 | SNV | 1 | T | C | Homozygous   |
| NC_037639.1 | 2724825 | SNV | 1 | C | T | Homozygous   |
| NC_037639.1 | 2724863 | SNV | 1 | C | T | Homozygous   |
| NC_037639.1 | 2724949 | SNV | 1 | C | T | Homozygous   |
| NC_037639.1 | 2739694 | SNV | 1 | G | A | Heterozygous |
| NC_037639.1 | 2740010 | SNV | 1 | A | T | Homozygous   |
| NC_037639.1 | 2740018 | SNV | 1 | A | T | Homozygous   |
| NC_037639.1 | 2748231 | SNV | 1 | C | A | Homozygous   |
| NC_037639.1 | 2748237 | SNV | 1 | A | T | Homozygous   |
| NC_037639.1 | 2748245 | SNV | 1 | A | G | Homozygous   |
| NC_037639.1 | 2748250 | SNV | 1 | A | C | Homozygous   |
| NC_037639.1 | 2748253 | SNV | 1 | C | A | Homozygous   |
| NC_037639.1 | 2748263 | SNV | 1 | C | T | Homozygous   |
| NC_037639.1 | 2753196 | SNV | 1 | A | T | Heterozygous |
| NC_037639.1 | 2753198 | SNV | 1 | A | T | Heterozygous |
| NC_037639.1 | 2753200 | SNV | 1 | A | T | Homozygous   |
| NC_037639.1 | 2753203 | SNV | 1 | G | A | Heterozygous |
| NC_037639.1 | 2753221 | SNV | 1 | G | A | Heterozygous |
| NC_037639.1 | 2753228 | SNV | 1 | A | C | Heterozygous |
| NC_037639.1 | 2753230 | SNV | 1 | A | T | Heterozygous |
| NC_037639.1 | 2756638 | SNV | 1 | T | A | Homozygous   |
| NC_037639.1 | 2756671 | SNV | 1 | T | A | Homozygous   |
| NC_037639.1 | 2758295 | SNV | 1 | C | T | Heterozygous |
| NC_037639.1 | 2770734 | SNV | 1 | T | C | Homozygous   |
| NC_037639.1 | 2779710 | SNV | 1 | T | A | Homozygous   |
| NC_037639.1 | 2779713 | SNV | 1 | A | G | Homozygous   |
| NC_037639.1 | 2790572 | SNV | 1 | A | T | Homozygous   |
| NC_037639.1 | 2790578 | SNV | 1 | A | G | Homozygous   |
| NC_037639.1 | 2790586 | SNV | 1 | A | T | Homozygous   |
| NC_037639.1 | 2790588 | SNV | 1 | A | C | Homozygous   |

|             |         |     |   |   |   |              |
|-------------|---------|-----|---|---|---|--------------|
| NC_037639.1 | 2790594 | SNV | 1 | A | C | Homozygous   |
| NC_037639.1 | 2815322 | SNV | 1 | C | A | Homozygous   |
| NC_037639.1 | 2815353 | SNV | 1 | C | T | Homozygous   |
| NC_037639.1 | 2815381 | SNV | 1 | A | C | Homozygous   |
| NC_037639.1 | 2815383 | SNV | 1 | C | T | Homozygous   |
| NC_037639.1 | 2815385 | SNV | 1 | G | A | Homozygous   |
| NC_037639.1 | 2826354 | SNV | 1 | T | G | Homozygous   |
| NC_037639.1 | 2826356 | SNV | 1 | T | C | Homozygous   |
| NC_037639.1 | 2826368 | SNV | 1 | A | T | Homozygous   |
| NC_037639.1 | 2832425 | SNV | 1 | A | G | Homozygous   |
| NC_037639.1 | 2835324 | SNV | 1 | T | C | Homozygous   |
| NC_037639.1 | 2835326 | SNV | 1 | A | C | Homozygous   |
| NC_037639.1 | 2836840 | SNV | 1 | G | T | Homozygous   |
| NC_037639.1 | 2837638 | SNV | 1 | T | A | Homozygous   |
| NC_037639.1 | 2837640 | SNV | 1 | T | A | Homozygous   |
| NC_037639.1 | 2837644 | SNV | 1 | T | G | Homozygous   |
| NC_037639.1 | 2837646 | SNV | 1 | T | A | Homozygous   |
| NC_037639.1 | 2838218 | SNV | 1 | T | G | Homozygous   |
| NC_037639.1 | 2843870 | SNV | 1 | T | C | Homozygous   |
| NC_037639.1 | 2854319 | SNV | 1 | A | T | Homozygous   |
| NC_037639.1 | 2854327 | SNV | 1 | A | G | Homozygous   |
| NC_037639.1 | 2854334 | SNV | 1 | A | G | Homozygous   |
| NC_037639.1 | 2854341 | SNV | 1 | T | A | Homozygous   |
| NC_037639.1 | 2855297 | SNV | 1 | C | A | Heterozygous |
| NC_037639.1 | 2855303 | SNV | 1 | C | A | Heterozygous |
| NC_037639.1 | 2855305 | SNV | 1 | C | A | Homozygous   |
| NC_037639.1 | 2855310 | SNV | 1 | T | A | Heterozygous |
| NC_037639.1 | 2855330 | SNV | 1 | G | A | Heterozygous |
| NC_037639.1 | 2855336 | SNV | 1 | G | A | Heterozygous |
| NC_037639.1 | 2856460 | SNV | 1 | A | G | Homozygous   |
| NC_037639.1 | 2857916 | SNV | 1 | A | G | Heterozygous |
| NC_037639.1 | 2857924 | SNV | 1 | A | G | Heterozygous |
| NC_037639.1 | 2857928 | SNV | 1 | A | G | Heterozygous |
| NC_037639.1 | 2857932 | SNV | 1 | A | G | Heterozygous |
| NC_037639.1 | 2857936 | SNV | 1 | A | G | Homozygous   |
| NC_037639.1 | 2857948 | SNV | 1 | A | G | Heterozygous |
| NC_037639.1 | 2860216 | SNV | 1 | A | T | Homozygous   |
| NC_037639.1 | 2861551 | SNV | 1 | A | C | Homozygous   |
| NC_037639.1 | 2861555 | SNV | 1 | T | A | Homozygous   |
| NC_037639.1 | 2861994 | SNV | 1 | A | C | Heterozygous |
| NC_037639.1 | 2866966 | SNV | 1 | G | A | Heterozygous |
| NC_037639.1 | 2869767 | SNV | 1 | T | A | Homozygous   |
| NC_037639.1 | 2869777 | SNV | 1 | C | T | Homozygous   |
| NC_037639.1 | 2869780 | SNV | 1 | T | A | Homozygous   |
| NC_037639.1 | 2869785 | SNV | 1 | A | C | Homozygous   |
| NC_037639.1 | 2869787 | SNV | 1 | A | G | Homozygous   |
| NC_037639.1 | 2869793 | SNV | 1 | A | T | Homozygous   |
| NC_037639.1 | 2869795 | SNV | 1 | A | C | Homozygous   |
| NC_037639.1 | 2869797 | SNV | 1 | T | C | Homozygous   |
| NC_037639.1 | 2869820 | SNV | 1 | A | G | Homozygous   |
| NC_037639.1 | 2869833 | SNV | 1 | A | T | Homozygous   |



|             |         |     |   |   |   |              |
|-------------|---------|-----|---|---|---|--------------|
| NC_037639.1 | 2876847 | SNV | 1 | A | G | Homozygous   |
| NC_037639.1 | 2877041 | SNV | 1 | C | T | Homozygous   |
| NC_037639.1 | 2877477 | SNV | 1 | T | C | Homozygous   |
| NC_037639.1 | 2877501 | SNV | 1 | C | T | Homozygous   |
| NC_037639.1 | 2879596 | SNV | 1 | T | A | Homozygous   |
| NC_037639.1 | 2879611 | SNV | 1 | A | T | Homozygous   |
| NC_037639.1 | 2879614 | SNV | 1 | A | T | Homozygous   |
| NC_037639.1 | 2879623 | SNV | 1 | T | A | Homozygous   |
| NC_037639.1 | 2879629 | SNV | 1 | A | C | Homozygous   |
| NC_037639.1 | 2879632 | SNV | 1 | T | A | Homozygous   |
| NC_037639.1 | 2900993 | SNV | 1 | C | T | Heterozygous |
| NC_037639.1 | 2901340 | SNV | 1 | G | A | Heterozygous |
| NC_037639.1 | 2914809 | SNV | 1 | T | A | Homozygous   |
| NC_037639.1 | 2914829 | SNV | 1 | G | A | Heterozygous |
| NC_037639.1 | 2914841 | SNV | 1 | G | A | Heterozygous |
| NC_037639.1 | 2914843 | SNV | 1 | G | A | Homozygous   |
| NC_037639.1 | 2914845 | SNV | 1 | G | A | Homozygous   |
| NC_037639.1 | 2974523 | SNV | 1 | G | A | Heterozygous |
| NC_037639.1 | 2974525 | SNV | 1 | T | G | Homozygous   |
| NC_037639.1 | 2974529 | SNV | 1 | T | G | Homozygous   |
| NC_037639.1 | 2974537 | SNV | 1 | T | G | Heterozygous |
| NC_037639.1 | 2974551 | SNV | 1 | G | A | Heterozygous |
| NC_037639.1 | 2974593 | SNV | 1 | A | C | Heterozygous |
| NC_037639.1 | 2976937 | SNV | 1 | T | C | Homozygous   |
| NC_037639.1 | 2976997 | SNV | 1 | T | C | Homozygous   |
| NC_037639.1 | 2977166 | SNV | 1 | C | T | Heterozygous |
| NC_037639.1 | 2996101 | SNV | 1 | C | T | Heterozygous |
| NC_037639.1 | 2996158 | SNV | 1 | A | G | Heterozygous |
| NC_037639.1 | 2998064 | SNV | 1 | G | T | Homozygous   |
| NC_037639.1 | 3003780 | SNV | 1 | C | T | Heterozygous |
| NC_037639.1 | 3016373 | SNV | 1 | G | A | Heterozygous |
| NC_037639.1 | 3016376 | SNV | 1 | G | A | Heterozygous |
| NC_037639.1 | 3020026 | SNV | 1 | A | T | Homozygous   |
| NC_037639.1 | 3022166 | SNV | 1 | T | A | Homozygous   |
| NC_037639.1 | 3022265 | SNV | 1 | T | A | Homozygous   |
| NC_037639.1 | 3035176 | SNV | 1 | A | G | Heterozygous |
| NC_037639.1 | 3035396 | SNV | 1 | C | T | Heterozygous |
| NC_037639.1 | 3035418 | SNV | 1 | A | G | Homozygous   |
| NC_037639.1 | 3035428 | SNV | 1 | A | T | Heterozygous |
| NC_037639.1 | 3035694 | SNV | 1 | C | T | Heterozygous |
| NC_037639.1 | 3035705 | SNV | 1 | G | A | Heterozygous |
| NC_037639.1 | 3036330 | SNV | 1 | T | A | Homozygous   |
| NC_037639.1 | 3036334 | SNV | 1 | A | T | Homozygous   |
| NC_037639.1 | 3048635 | SNV | 1 | G | A | Heterozygous |
| NC_037639.1 | 3076619 | SNV | 1 | A | G | Homozygous   |
| NC_037639.1 | 3077028 | SNV | 1 | A | G | Homozygous   |
| NC_037639.1 | 3078392 | SNV | 1 | C | T | Homozygous   |
| NC_037639.1 | 3078410 | SNV | 1 | C | T | Heterozygous |
| NC_037639.1 | 3078430 | SNV | 1 | C | T | Homozygous   |
| NC_037639.1 | 3078434 | SNV | 1 | T | C | Homozygous   |
| NC_037639.1 | 3078458 | SNV | 1 | T | A | Homozygous   |

|             |         |     |   |   |   |              |
|-------------|---------|-----|---|---|---|--------------|
| NC_037639.1 | 3078508 | SNV | 1 | G | A | Homozygous   |
| NC_037639.1 | 3078517 | SNV | 1 | G | A | Heterozygous |
| NC_037639.1 | 3078523 | SNV | 1 | G | A | Heterozygous |
| NC_037639.1 | 3078532 | SNV | 1 | T | C | Heterozygous |
| NC_037639.1 | 3078547 | SNV | 1 | T | C | Homozygous   |
| NC_037639.1 | 3078939 | SNV | 1 | T | C | Homozygous   |
| NC_037639.1 | 3078999 | SNV | 1 | A | G | Heterozygous |
| NC_037639.1 | 3079018 | SNV | 1 | G | A | Heterozygous |
| NC_037639.1 | 3081700 | SNV | 1 | A | T | Homozygous   |
| NC_037639.1 | 3081716 | SNV | 1 | A | T | Homozygous   |
| NC_037639.1 | 3084396 | SNV | 1 | A | T | Heterozygous |
| NC_037639.1 | 3084398 | SNV | 1 | G | A | Homozygous   |
| NC_037639.1 | 3087177 | SNV | 1 | A | C | Homozygous   |
| NC_037639.1 | 3087195 | SNV | 1 | A | G | Heterozygous |
| NC_037639.1 | 3087212 | SNV | 1 | G | A | Heterozygous |
| NC_037639.1 | 3087267 | SNV | 1 | T | C | Homozygous   |
| NC_037639.1 | 3088243 | SNV | 1 | C | T | Heterozygous |
| NC_037639.1 | 3088309 | SNV | 1 | A | G | Homozygous   |
| NC_037639.1 | 3088365 | SNV | 1 | G | A | Heterozygous |
| NC_037639.1 | 3110409 | SNV | 1 | G | A | Homozygous   |
| NC_037639.1 | 3128605 | SNV | 1 | A | C | Homozygous   |
| NC_037639.1 | 3128612 | SNV | 1 | A | C | Homozygous   |
| NC_037639.1 | 3128614 | SNV | 1 | G | A | Homozygous   |
| NC_037639.1 | 3128616 | SNV | 1 | A | G | Homozygous   |
| NC_037639.1 | 3128620 | SNV | 1 | A | G | Homozygous   |
| NC_037639.1 | 3141356 | SNV | 1 | G | T | Homozygous   |
| NC_037639.1 | 3141409 | SNV | 1 | G | A | Homozygous   |
| NC_037639.1 | 3141420 | SNV | 1 | G | A | Heterozygous |
| NC_037639.1 | 3146003 | SNV | 1 | A | G | Homozygous   |
| NC_037639.1 | 3146241 | SNV | 1 | A | G | Homozygous   |
| NC_037639.1 | 3146250 | SNV | 1 | T | C | Homozygous   |
| NC_037639.1 | 3156059 | SNV | 1 | A | G | Homozygous   |
| NC_037639.1 | 3158652 | SNV | 1 | C | T | Heterozygous |
| NC_037639.1 | 3158661 | SNV | 1 | C | T | Heterozygous |
| NC_037639.1 | 3163820 | SNV | 1 | A | G | Heterozygous |
| NC_037639.1 | 3163825 | SNV | 1 | T | A | Heterozygous |
| NC_037639.1 | 3163923 | SNV | 1 | A | G | Homozygous   |
| NC_037639.1 | 3164121 | SNV | 1 | T | C | Heterozygous |
| NC_037639.1 | 3164264 | SNV | 1 | A | G | Heterozygous |
| NC_037639.1 | 3164273 | SNV | 1 | A | G | Heterozygous |
| NC_037639.1 | 3164277 | SNV | 1 | G | A | Heterozygous |
| NC_037639.1 | 3164329 | SNV | 1 | T | C | Homozygous   |
| NC_037639.1 | 3164522 | SNV | 1 | C | A | Heterozygous |
| NC_037639.1 | 3164538 | SNV | 1 | C | T | Heterozygous |
| NC_037639.1 | 3164564 | SNV | 1 | C | T | Heterozygous |
| NC_037639.1 | 3164572 | SNV | 1 | T | C | Heterozygous |
| NC_037639.1 | 3164586 | SNV | 1 | A | G | Homozygous   |
| NC_037639.1 | 3164596 | SNV | 1 | A | G | Homozygous   |
| NC_037639.1 | 3164613 | SNV | 1 | A | G | Homozygous   |
| NC_037639.1 | 3164748 | SNV | 1 | A | G | Homozygous   |
| NC_037639.1 | 3164758 | SNV | 1 | G | A | Homozygous   |

|             |         |     |   |   |   |              |
|-------------|---------|-----|---|---|---|--------------|
| NC_037639.1 | 3166143 | SNV | 1 | A | T | Heterozygous |
| NC_037639.1 | 3166148 | SNV | 1 | A | G | Heterozygous |
| NC_037639.1 | 3166149 | SNV | 1 | G | A | Heterozygous |
| NC_037639.1 | 3166160 | SNV | 1 | A | G | Heterozygous |
| NC_037639.1 | 3169154 | SNV | 1 | T | C | Homozygous   |
| NC_037639.1 | 3171764 | SNV | 1 | T | C | Homozygous   |
| NC_037639.1 | 3171774 | SNV | 1 | A | T | Homozygous   |
| NC_037639.1 | 3171777 | SNV | 1 | C | T | Homozygous   |
| NC_037639.1 | 3171780 | SNV | 1 | T | C | Homozygous   |
| NC_037639.1 | 3172200 | SNV | 1 | T | C | Homozygous   |
| NC_037639.1 | 3172203 | SNV | 1 | T | C | Homozygous   |
| NC_037639.1 | 3172256 | SNV | 1 | A | G | Heterozygous |
| NC_037639.1 | 3172268 | SNV | 1 | C | T | Heterozygous |
| NC_037639.1 | 3172300 | SNV | 1 | T | C | Homozygous   |
| NC_037639.1 | 3172311 | SNV | 1 | T | C | Heterozygous |
| NC_037639.1 | 3172315 | SNV | 1 | A | G | Heterozygous |
| NC_037639.1 | 3172320 | SNV | 1 | T | C | Heterozygous |
| NC_037639.1 | 3176280 | SNV | 1 | C | T | Heterozygous |
| NC_037639.1 | 3176375 | SNV | 1 | C | G | Homozygous   |
| NC_037639.1 | 3180226 | SNV | 1 | C | T | Heterozygous |
| NC_037639.1 | 3180413 | SNV | 1 | T | C | Heterozygous |
| NC_037639.1 | 3180418 | SNV | 1 | T | C | Heterozygous |
| NC_037639.1 | 3180492 | SNV | 1 | C | T | Heterozygous |
| NC_037639.1 | 3195879 | SNV | 1 | T | A | Homozygous   |
| NC_037639.1 | 3198631 | SNV | 1 | T | C | Homozygous   |
| NC_037639.1 | 3198667 | SNV | 1 | G | A | Heterozygous |
| NC_037639.1 | 3198718 | SNV | 1 | C | T | Homozygous   |
| NC_037639.1 | 3198791 | SNV | 1 | T | C | Homozygous   |
| NC_037639.1 | 3198829 | SNV | 1 | C | T | Homozygous   |
| NC_037639.1 | 3198882 | SNV | 1 | C | G | Homozygous   |
| NC_037639.1 | 3198901 | SNV | 1 | G | A | Homozygous   |
| NC_037639.1 | 3200074 | SNV | 1 | A | T | Heterozygous |
| NC_037639.1 | 3209364 | SNV | 1 | T | G | Heterozygous |
| NC_037639.1 | 3209439 | SNV | 1 | A | G | Homozygous   |
| NC_037639.1 | 3209452 | SNV | 1 | A | C | Homozygous   |
| NC_037639.1 | 3209459 | SNV | 1 | A | G | Heterozygous |
| NC_037639.1 | 3209567 | SNV | 1 | C | T | Heterozygous |
| NC_037639.1 | 3220019 | SNV | 1 | T | G | Homozygous   |
| NC_037639.1 | 3220270 | SNV | 1 | C | T | Homozygous   |
| NC_037639.1 | 3220274 | SNV | 1 | G | T | Homozygous   |
| NC_037639.1 | 3221205 | SNV | 1 | C | T | Homozygous   |
| NC_037639.1 | 3221321 | SNV | 1 | T | C | Homozygous   |
| NC_037639.1 | 3221328 | SNV | 1 | C | T | Heterozygous |
| NC_037639.1 | 3222166 | SNV | 1 | A | G | Homozygous   |
| NC_037639.1 | 3222224 | SNV | 1 | A | C | Homozygous   |
| NC_037639.1 | 3222247 | SNV | 1 | C | A | Homozygous   |
| NC_037639.1 | 3222265 | SNV | 1 | A | C | Heterozygous |
| NC_037639.1 | 3222292 | SNV | 1 | C | T | Homozygous   |
| NC_037639.1 | 3222298 | SNV | 1 | A | G | Homozygous   |
| NC_037639.1 | 3222300 | SNV | 1 | A | G | Heterozygous |
| NC_037639.1 | 3222452 | SNV | 1 | G | A | Homozygous   |

|             |         |     |   |   |   |              |
|-------------|---------|-----|---|---|---|--------------|
| NC_037639.1 | 3222465 | SNV | 1 | C | A | Homozygous   |
| NC_037639.1 | 3223958 | SNV | 1 | A | G | Homozygous   |
| NC_037639.1 | 3223968 | SNV | 1 | A | C | Heterozygous |
| NC_037639.1 | 3224030 | SNV | 1 | C | T | Homozygous   |
| NC_037639.1 | 3224047 | SNV | 1 | A | G | Homozygous   |
| NC_037639.1 | 3224055 | SNV | 1 | A | G | Homozygous   |
| NC_037639.1 | 3224172 | SNV | 1 | C | T | Heterozygous |
| NC_037639.1 | 3224561 | SNV | 1 | C | T | Heterozygous |
| NC_037639.1 | 3229700 | SNV | 1 | T | G | Heterozygous |
| NC_037639.1 | 3229702 | SNV | 1 | A | T | Homozygous   |
| NC_037639.1 | 3229706 | SNV | 1 | C | T | Homozygous   |
| NC_037639.1 | 3229708 | SNV | 1 | T | A | Heterozygous |
| NC_037639.1 | 3229718 | SNV | 1 | A | G | Homozygous   |
| NC_037639.1 | 3229730 | SNV | 1 | A | T | Heterozygous |
| NC_037639.1 | 3233155 | SNV | 1 | C | T | Heterozygous |
| NC_037639.1 | 3237582 | SNV | 1 | C | T | Homozygous   |
| NC_037639.1 | 3239504 | SNV | 1 | A | G | Homozygous   |
| NC_037639.1 | 3239887 | SNV | 1 | C | T | Heterozygous |
| NC_037639.1 | 3239894 | SNV | 1 | A | T | Heterozygous |
| NC_037639.1 | 3240043 | SNV | 1 | G | A | Heterozygous |
| NC_037639.1 | 3240096 | SNV | 1 | T | C | Heterozygous |
| NC_037639.1 | 3240201 | SNV | 1 | C | T | Heterozygous |
| NC_037639.1 | 3240285 | SNV | 1 | T | C | Homozygous   |
| NC_037639.1 | 3241952 | SNV | 1 | A | T | Heterozygous |
| NC_037639.1 | 3241954 | SNV | 1 | C | T | Homozygous   |
| NC_037639.1 | 3246294 | SNV | 1 | T | C | Heterozygous |
| NC_037639.1 | 3246520 | SNV | 1 | A | G | Homozygous   |
| NC_037639.1 | 3246529 | SNV | 1 | C | T | Heterozygous |
| NC_037639.1 | 3246970 | SNV | 1 | A | G | Heterozygous |
| NC_037639.1 | 3246973 | SNV | 1 | G | A | Heterozygous |
| NC_037639.1 | 3247015 | SNV | 1 | T | C | Homozygous   |
| NC_037639.1 | 3255029 | SNV | 1 | G | T | Heterozygous |
| NC_037639.1 | 3255037 | SNV | 1 | G | A | Heterozygous |
| NC_037639.1 | 3255044 | SNV | 1 | G | A | Heterozygous |
| NC_037639.1 | 3255239 | SNV | 1 | T | C | Homozygous   |
| NC_037639.1 | 3255404 | SNV | 1 | A | G | Homozygous   |
| NC_037639.1 | 3255407 | SNV | 1 | G | C | Heterozygous |
| NC_037639.1 | 3255479 | SNV | 1 | A | G | Homozygous   |
| NC_037639.1 | 3272324 | SNV | 1 | T | C | Homozygous   |
| NC_037639.1 | 3272332 | SNV | 1 | T | C | Homozygous   |
| NC_037639.1 | 3272338 | SNV | 1 | T | C | Homozygous   |
| NC_037639.1 | 3272366 | SNV | 1 | C | T | Heterozygous |
| NC_037639.1 | 3272425 | SNV | 1 | C | T | Heterozygous |
| NC_037639.1 | 3272533 | SNV | 1 | G | T | Homozygous   |
| NC_037639.1 | 3272544 | SNV | 1 | C | T | Heterozygous |
| NC_037639.1 | 3272552 | SNV | 1 | G | A | Heterozygous |
| NC_037639.1 | 3272854 | SNV | 1 | T | C | Homozygous   |
| NC_037639.1 | 3272884 | SNV | 1 | T | C | Homozygous   |
| NC_037639.1 | 3273249 | SNV | 1 | T | C | Homozygous   |
| NC_037639.1 | 3273263 | SNV | 1 | G | C | Homozygous   |
| NC_037639.1 | 3273266 | SNV | 1 | T | C | Homozygous   |

|             |         |     |   |   |   |              |
|-------------|---------|-----|---|---|---|--------------|
| NC_037639.1 | 3273273 | SNV | 1 | T | G | Homozygous   |
| NC_037639.1 | 3273280 | SNV | 1 | A | G | Homozygous   |
| NC_037639.1 | 3273293 | SNV | 1 | G | T | Homozygous   |
| NC_037639.1 | 3273513 | SNV | 1 | C | T | Homozygous   |
| NC_037639.1 | 3273636 | SNV | 1 | C | T | Heterozygous |
| NC_037639.1 | 3273714 | SNV | 1 | C | T | Heterozygous |
| NC_037639.1 | 3273821 | SNV | 1 | T | G | Heterozygous |
| NC_037639.1 | 3273839 | SNV | 1 | T | A | Heterozygous |
| NC_037639.1 | 3296934 | SNV | 1 | A | G | Heterozygous |
| NC_037639.1 | 3307165 | SNV | 1 | T | A | Homozygous   |
| NC_037639.1 | 3307180 | SNV | 1 | A | T | Homozygous   |
| NC_037639.1 | 3307185 | SNV | 1 | T | A | Homozygous   |
| NC_037639.1 | 3307216 | SNV | 1 | C | A | Homozygous   |
| NC_037639.1 | 3311270 | SNV | 1 | C | T | Homozygous   |
| NC_037639.1 | 3311352 | SNV | 1 | A | G | Homozygous   |
| NC_037639.1 | 3311364 | SNV | 1 | A | C | Homozygous   |
| NC_037639.1 | 3311701 | SNV | 1 | A | T | Homozygous   |
| NC_037639.1 | 3312023 | SNV | 1 | C | T | Heterozygous |
| NC_037639.1 | 3312119 | SNV | 1 | A | G | Homozygous   |
| NC_037639.1 | 3312130 | SNV | 1 | A | G | Homozygous   |
| NC_037639.1 | 3312170 | SNV | 1 | A | G | Homozygous   |
| NC_037639.1 | 3312187 | SNV | 1 | G | C | Homozygous   |
| NC_037639.1 | 3312255 | SNV | 1 | A | G | Heterozygous |
| NC_037639.1 | 3312264 | SNV | 1 | T | C | Heterozygous |
| NC_037639.1 | 3312277 | SNV | 1 | T | C | Heterozygous |
| NC_037639.1 | 3312279 | SNV | 1 | A | C | Homozygous   |
| NC_037639.1 | 3312358 | SNV | 1 | C | T | Homozygous   |
| NC_037639.1 | 3312528 | SNV | 1 | C | T | Homozygous   |
| NC_037639.1 | 3314949 | SNV | 1 | T | C | Homozygous   |
| NC_037639.1 | 3314973 | SNV | 1 | C | T | Heterozygous |
| NC_037639.1 | 3315217 | SNV | 1 | G | A | Heterozygous |
| NC_037639.1 | 3315311 | SNV | 1 | C | T | Homozygous   |
| NC_037639.1 | 3315317 | SNV | 1 | A | G | Heterozygous |
| NC_037639.1 | 3315344 | SNV | 1 | T | C | Homozygous   |
| NC_037639.1 | 3315351 | SNV | 1 | T | C | Homozygous   |
| NC_037639.1 | 3315454 | SNV | 1 | A | G | Homozygous   |
| NC_037639.1 | 3315515 | SNV | 1 | A | G | Homozygous   |
| NC_037639.1 | 3315530 | SNV | 1 | G | T | Homozygous   |
| NC_037639.1 | 3315532 | SNV | 1 | C | T | Homozygous   |
| NC_037639.1 | 3337089 | SNV | 1 | A | C | Homozygous   |
| NC_037639.1 | 3337095 | SNV | 1 | C | T | Homozygous   |
| NC_037639.1 | 3337305 | SNV | 1 | T | C | Homozygous   |
| NC_037639.1 | 3356372 | SNV | 1 | C | T | Heterozygous |
| NC_037639.1 | 3357158 | SNV | 1 | A | G | Homozygous   |
| NC_037639.1 | 3386512 | SNV | 1 | A | G | Heterozygous |
| NC_037639.1 | 3386534 | SNV | 1 | G | A | Homozygous   |
| NC_037639.1 | 3386543 | SNV | 1 | A | G | Heterozygous |
| NC_037639.1 | 3386548 | SNV | 1 | G | C | Homozygous   |
| NC_037639.1 | 3396653 | SNV | 1 | T | C | Homozygous   |
| NC_037639.1 | 3397025 | SNV | 1 | A | G | Homozygous   |
| NC_037639.1 | 3397054 | SNV | 1 | A | G | Homozygous   |

|             |         |     |   |   |   |              |
|-------------|---------|-----|---|---|---|--------------|
| NC_037639.1 | 3401611 | SNV | 1 | T | A | Homozygous   |
| NC_037639.1 | 3404513 | SNV | 1 | G | C | Homozygous   |
| NC_037639.1 | 3404581 | SNV | 1 | C | T | Homozygous   |
| NC_037639.1 | 3404717 | SNV | 1 | A | C | Homozygous   |
| NC_037639.1 | 3405068 | SNV | 1 | C | T | Homozygous   |
| NC_037639.1 | 3405106 | SNV | 1 | T | C | Homozygous   |
| NC_037639.1 | 3405347 | SNV | 1 | A | G | Heterozygous |
| NC_037639.1 | 3405363 | SNV | 1 | C | T | Heterozygous |
| NC_037639.1 | 3407063 | SNV | 1 | C | A | Homozygous   |
| NC_037639.1 | 3407068 | SNV | 1 | A | G | Homozygous   |
| NC_037639.1 | 3407070 | SNV | 1 | T | C | Homozygous   |
| NC_037639.1 | 3407075 | SNV | 1 | G | A | Homozygous   |
| NC_037639.1 | 3407077 | SNV | 1 | T | A | Homozygous   |
| NC_037639.1 | 3407081 | SNV | 1 | A | C | Homozygous   |
| NC_037639.1 | 3409278 | SNV | 1 | C | A | Homozygous   |
| NC_037639.1 | 3409282 | SNV | 1 | C | A | Homozygous   |
| NC_037639.1 | 3409286 | SNV | 1 | C | A | Homozygous   |
| NC_037639.1 | 3427747 | SNV | 1 | T | C | Homozygous   |
| NC_037639.1 | 3427864 | SNV | 1 | C | T | Homozygous   |
| NC_037639.1 | 3427907 | SNV | 1 | A | G | Homozygous   |
| NC_037639.1 | 3427917 | SNV | 1 | G | A | Homozygous   |
| NC_037639.1 | 3427924 | SNV | 1 | G | A | Homozygous   |
| NC_037639.1 | 3436408 | SNV | 1 | C | T | Heterozygous |
| NC_037639.1 | 3436463 | SNV | 1 | G | C | Homozygous   |
| NC_037639.1 | 3436906 | SNV | 1 | T | A | Heterozygous |
| NC_037639.1 | 3436909 | SNV | 1 | C | T | Homozygous   |
| NC_037639.1 | 3438031 | SNV | 1 | G | T | Homozygous   |
| NC_037639.1 | 3441498 | SNV | 1 | G | T | Heterozygous |
| NC_037639.1 | 3441513 | SNV | 1 | G | A | Heterozygous |
| NC_037639.1 | 3441517 | SNV | 1 | G | A | Heterozygous |
| NC_037639.1 | 3453758 | SNV | 1 | C | T | Heterozygous |
| NC_037639.1 | 3453771 | SNV | 1 | C | T | Heterozygous |
| NC_037639.1 | 3453812 | SNV | 1 | G | A | Homozygous   |
| NC_037639.1 | 3453826 | SNV | 1 | T | C | Homozygous   |
| NC_037639.1 | 3454041 | SNV | 1 | G | A | Heterozygous |
| NC_037639.1 | 3454083 | SNV | 1 | C | T | Heterozygous |
| NC_037639.1 | 3499753 | SNV | 1 | A | G | Homozygous   |
| NC_037639.1 | 3502775 | SNV | 1 | C | T | Heterozygous |
| NC_037639.1 | 3502943 | SNV | 1 | T | G | Heterozygous |
| NC_037639.1 | 3502945 | SNV | 1 | G | T | Homozygous   |
| NC_037639.1 | 3541487 | SNV | 1 | A | G | Homozygous   |
| NC_037639.1 | 3547692 | SNV | 1 | T | A | Homozygous   |
| NC_037639.1 | 3547839 | SNV | 1 | G | A | Homozygous   |
| NC_037639.1 | 3577743 | SNV | 1 | A | G | Homozygous   |
| NC_037639.1 | 3585667 | SNV | 1 | G | A | Homozygous   |
| NC_037639.1 | 3585669 | SNV | 1 | A | G | Homozygous   |
| NC_037639.1 | 3585676 | SNV | 1 | A | C | Homozygous   |
| NC_037639.1 | 3585680 | SNV | 1 | T | A | Homozygous   |
| NC_037639.1 | 3603831 | SNV | 1 | A | T | Heterozygous |
| NC_037639.1 | 3603834 | SNV | 1 | T | G | Heterozygous |
| NC_037639.1 | 3603881 | SNV | 1 | G | T | Heterozygous |

|             |         |     |   |   |   |              |
|-------------|---------|-----|---|---|---|--------------|
| NC_037639.1 | 3603885 | SNV | 1 | T | C | Heterozygous |
| NC_037639.1 | 3603889 | SNV | 1 | G | T | Homozygous   |
| NC_037639.1 | 3603921 | SNV | 1 | C | T | Heterozygous |
| NC_037639.1 | 3603929 | SNV | 1 | T | C | Heterozygous |
| NC_037639.1 | 3603953 | SNV | 1 | T | C | Heterozygous |
| NC_037639.1 | 3612325 | SNV | 1 | T | A | Homozygous   |
| NC_037639.1 | 3612334 | SNV | 1 | A | T | Homozygous   |
| NC_037639.1 | 3612347 | SNV | 1 | T | A | Homozygous   |
| NC_037639.1 | 3612355 | SNV | 1 | T | A | Homozygous   |
| NC_037639.1 | 3612358 | SNV | 1 | T | A | Homozygous   |
| NC_037639.1 | 3623915 | SNV | 1 | T | C | Homozygous   |
| NC_037639.1 | 3623919 | SNV | 1 | C | T | Homozygous   |
| NC_037639.1 | 3624141 | SNV | 1 | C | A | Heterozygous |
| NC_037639.1 | 3624432 | SNV | 1 | A | G | Homozygous   |
| NC_037639.1 | 3624502 | SNV | 1 | G | T | Homozygous   |
| NC_037639.1 | 3624549 | SNV | 1 | T | G | Homozygous   |
| NC_037639.1 | 3649307 | SNV | 1 | T | C | Homozygous   |
| NC_037639.1 | 3650031 | SNV | 1 | G | C | Heterozygous |
| NC_037639.1 | 3650075 | SNV | 1 | T | C | Heterozygous |
| NC_037639.1 | 3650183 | SNV | 1 | A | G | Homozygous   |
| NC_037639.1 | 3650256 | SNV | 1 | G | A | Homozygous   |
| NC_037639.1 | 3650516 | SNV | 1 | T | C | Heterozygous |
| NC_037639.1 | 3650714 | SNV | 1 | A | G | Homozygous   |
| NC_037639.1 | 3650801 | SNV | 1 | T | C | Homozygous   |
| NC_037639.1 | 3653156 | SNV | 1 | A | T | Homozygous   |
| NC_037639.1 | 3653165 | SNV | 1 | C | A | Homozygous   |
| NC_037639.1 | 3653167 | SNV | 1 | G | C | Homozygous   |
| NC_037639.1 | 3653171 | SNV | 1 | C | T | Homozygous   |
| NC_037639.1 | 3653174 | SNV | 1 | T | C | Homozygous   |
| NC_037639.1 | 3653179 | SNV | 1 | T | C | Homozygous   |
| NC_037639.1 | 3678219 | SNV | 1 | A | G | Homozygous   |
| NC_037639.1 | 3678315 | SNV | 1 | G | A | Homozygous   |
| NC_037639.1 | 3678421 | SNV | 1 | A | G | Homozygous   |
| NC_037639.1 | 3678424 | SNV | 1 | T | C | Heterozygous |
| NC_037639.1 | 3678513 | SNV | 1 | G | A | Homozygous   |
| NC_037639.1 | 3678564 | SNV | 1 | C | T | Homozygous   |
| NC_037639.1 | 3678574 | SNV | 1 | A | G | Homozygous   |
| NC_037639.1 | 3678788 | SNV | 1 | A | G | Homozygous   |
| NC_037639.1 | 3681407 | SNV | 1 | T | C | Homozygous   |
| NC_037639.1 | 3682009 | SNV | 1 | T | C | Homozygous   |
| NC_037639.1 | 3682057 | SNV | 1 | T | C | Homozygous   |
| NC_037639.1 | 3682165 | SNV | 1 | A | G | Homozygous   |
| NC_037639.1 | 3682217 | SNV | 1 | A | G | Homozygous   |
| NC_037639.1 | 3682230 | SNV | 1 | A | T | Homozygous   |
| NC_037639.1 | 3682390 | SNV | 1 | C | G | Homozygous   |
| NC_037639.1 | 3682420 | SNV | 1 | G | A | Homozygous   |
| NC_037639.1 | 3682424 | SNV | 1 | T | C | Homozygous   |
| NC_037639.1 | 3682450 | SNV | 1 | C | A | Homozygous   |
| NC_037639.1 | 3682476 | SNV | 1 | A | C | Homozygous   |
| NC_037639.1 | 3682634 | SNV | 1 | G | C | Heterozygous |
| NC_037639.1 | 3682763 | SNV | 1 | C | T | Heterozygous |

|             |         |     |   |   |   |              |
|-------------|---------|-----|---|---|---|--------------|
| NC_037639.1 | 3682764 | SNV | 1 | C | T | Heterozygous |
| NC_037639.1 | 3682788 | SNV | 1 | G | A | Homozygous   |
| NC_037639.1 | 3682826 | SNV | 1 | T | C | Heterozygous |
| NC_037639.1 | 3682840 | SNV | 1 | A | T | Homozygous   |
| NC_037639.1 | 3682853 | SNV | 1 | G | A | Heterozygous |
| NC_037639.1 | 3682871 | SNV | 1 | G | C | Homozygous   |
| NC_037639.1 | 3682875 | SNV | 1 | G | A | Heterozygous |
| NC_037639.1 | 3682887 | SNV | 1 | G | C | Heterozygous |
| NC_037639.1 | 3682895 | SNV | 1 | C | T | Heterozygous |
| NC_037639.1 | 3682917 | SNV | 1 | T | C | Homozygous   |
| NC_037639.1 | 3695950 | SNV | 1 | A | G | Homozygous   |
| NC_037639.1 | 3695960 | SNV | 1 | A | G | Homozygous   |
| NC_037639.1 | 3696013 | SNV | 1 | A | G | Heterozygous |
| NC_037639.1 | 3696020 | SNV | 1 | A | G | Homozygous   |
| NC_037639.1 | 3696126 | SNV | 1 | A | G | Homozygous   |
| NC_037639.1 | 3696803 | SNV | 1 | A | T | Homozygous   |
| NC_037639.1 | 3696811 | SNV | 1 | A | T | Homozygous   |
| NC_037639.1 | 3696814 | SNV | 1 | A | G | Homozygous   |
| NC_037639.1 | 3699864 | SNV | 1 | C | T | Heterozygous |
| NC_037639.1 | 3699919 | SNV | 1 | A | G | Heterozygous |
| NC_037639.1 | 3709155 | SNV | 1 | T | A | Homozygous   |
| NC_037639.1 | 3709180 | SNV | 1 | C | T | Heterozygous |
| NC_037639.1 | 3709182 | SNV | 1 | C | T | Heterozygous |
| NC_037639.1 | 3709244 | SNV | 1 | T | C | Homozygous   |
| NC_037639.1 | 3719290 | SNV | 1 | T | C | Homozygous   |
| NC_037639.1 | 3719715 | SNV | 1 | C | T | Homozygous   |
| NC_037639.1 | 3719803 | SNV | 1 | T | C | Homozygous   |
| NC_037639.1 | 3723534 | SNV | 1 | C | T | Homozygous   |
| NC_037639.1 | 3723620 | SNV | 1 | T | C | Heterozygous |
| NC_037639.1 | 3723622 | SNV | 1 | G | A | Heterozygous |
| NC_037639.1 | 3723707 | SNV | 1 | G | A | Heterozygous |
| NC_037639.1 | 3723717 | SNV | 1 | T | A | Heterozygous |
| NC_037639.1 | 3723734 | SNV | 1 | T | A | Homozygous   |
| NC_037639.1 | 3723767 | SNV | 1 | C | A | Homozygous   |
| NC_037639.1 | 3724096 | SNV | 1 | T | C | Homozygous   |
| NC_037639.1 | 3730851 | SNV | 1 | C | A | Heterozygous |
| NC_037639.1 | 3730928 | SNV | 1 | T | C | Homozygous   |
| NC_037639.1 | 3730938 | SNV | 1 | C | T | Homozygous   |
| NC_037639.1 | 3740843 | SNV | 1 | A | C | Heterozygous |
| NC_037639.1 | 3743370 | SNV | 1 | A | G | Homozygous   |
| NC_037639.1 | 3743374 | SNV | 1 | T | C | Homozygous   |
| NC_037639.1 | 3743420 | SNV | 1 | T | A | Homozygous   |
| NC_037639.1 | 3743852 | SNV | 1 | T | C | Homozygous   |
| NC_037639.1 | 3764936 | SNV | 1 | T | C | Heterozygous |
| NC_037639.1 | 3765087 | SNV | 1 | A | G | Heterozygous |
| NC_037639.1 | 3765120 | SNV | 1 | G | A | Homozygous   |
| NC_037639.1 | 3765128 | SNV | 1 | A | G | Heterozygous |
| NC_037639.1 | 3769968 | SNV | 1 | A | G | Homozygous   |
| NC_037639.1 | 3769970 | SNV | 1 | A | C | Homozygous   |
| NC_037639.1 | 3773760 | SNV | 1 | G | A | Heterozygous |
| NC_037639.1 | 3774103 | SNV | 1 | A | G | Homozygous   |



|             |         |     |   |   |   |              |
|-------------|---------|-----|---|---|---|--------------|
| NC_037639.1 | 3774121 | SNV | 1 | A | G | Homozygous   |
| NC_037639.1 | 3774124 | SNV | 1 | A | G | Homozygous   |
| NC_037639.1 | 3774139 | SNV | 1 | A | G | Homozygous   |
| NC_037639.1 | 3774142 | SNV | 1 | A | G | Heterozygous |
| NC_037639.1 | 3778583 | SNV | 1 | C | A | Heterozygous |
| NC_037639.1 | 3778744 | SNV | 1 | C | T | Heterozygous |
| NC_037639.1 | 3779242 | SNV | 1 | T | C | Homozygous   |
| NC_037639.1 | 3779292 | SNV | 1 | T | C | Heterozygous |
| NC_037639.1 | 3781447 | SNV | 1 | T | A | Heterozygous |
| NC_037639.1 | 3781453 | SNV | 1 | C | T | Heterozygous |
| NC_037639.1 | 3785613 | SNV | 1 | C | T | Heterozygous |
| NC_037639.1 | 3785663 | SNV | 1 | T | C | Heterozygous |
| NC_037639.1 | 3785670 | SNV | 1 | G | C | Homozygous   |
| NC_037639.1 | 3795580 | SNV | 1 | C | G | Homozygous   |
| NC_037639.1 | 3798110 | SNV | 1 | C | T | Homozygous   |
| NC_037639.1 | 3798259 | SNV | 1 | T | C | Homozygous   |
| NC_037639.1 | 3798310 | SNV | 1 | A | G | Homozygous   |
| NC_037639.1 | 3798640 | SNV | 1 | T | C | Heterozygous |
| NC_037639.1 | 3806408 | SNV | 1 | G | A | Heterozygous |
| NC_037639.1 | 3806413 | SNV | 1 | T | C | Heterozygous |
| NC_037639.1 | 3806420 | SNV | 1 | C | A | Heterozygous |
| NC_037639.1 | 3806429 | SNV | 1 | C | T | Heterozygous |
| NC_037639.1 | 3806475 | SNV | 1 | T | C | Heterozygous |
| NC_037639.1 | 3811209 | SNV | 1 | A | C | Homozygous   |
| NC_037639.1 | 3811211 | SNV | 1 | A | C | Homozygous   |
| NC_037639.1 | 3811219 | SNV | 1 | T | G | Homozygous   |
| NC_037639.1 | 3811222 | SNV | 1 | A | T | Homozygous   |
| NC_037639.1 | 3811236 | SNV | 1 | T | G | Homozygous   |
| NC_037639.1 | 3811238 | SNV | 1 | T | G | Homozygous   |
| NC_037639.1 | 3811240 | SNV | 1 | A | G | Homozygous   |
| NC_037639.1 | 3811250 | SNV | 1 | T | G | Homozygous   |
| NC_037639.1 | 3812795 | SNV | 1 | C | T | Homozygous   |
| NC_037639.1 | 3824189 | SNV | 1 | T | C | Homozygous   |
| NC_037639.1 | 3824192 | SNV | 1 | T | C | Homozygous   |
| NC_037639.1 | 3824198 | SNV | 1 | G | A | Homozygous   |
| NC_037639.1 | 3825534 | SNV | 1 | T | C | Heterozygous |
| NC_037639.1 | 3829068 | SNV | 1 | A | G | Homozygous   |
| NC_037639.1 | 3829096 | SNV | 1 | T | C | Homozygous   |
| NC_037639.1 | 3829112 | SNV | 1 | C | T | Homozygous   |
| NC_037639.1 | 3829132 | SNV | 1 | G | A | Homozygous   |
| NC_037639.1 | 3829234 | SNV | 1 | C | A | Heterozygous |
| NC_037639.1 | 3829245 | SNV | 1 | A | G | Heterozygous |
| NC_037639.1 | 3832408 | SNV | 1 | G | A | Heterozygous |
| NC_037639.1 | 3832571 | SNV | 1 | A | G | Homozygous   |
| NC_037639.1 | 3832616 | SNV | 1 | G | A | Heterozygous |
| NC_037639.1 | 3832952 | SNV | 1 | A | G | Homozygous   |
| NC_037639.1 | 3846202 | SNV | 1 | T | C | Homozygous   |
| NC_037639.1 | 3846208 | SNV | 1 | A | G | Homozygous   |
| NC_037639.1 | 3846395 | SNV | 1 | T | C | Homozygous   |
| NC_037639.1 | 3848081 | SNV | 1 | C | A | Homozygous   |
| NC_037639.1 | 3848253 | SNV | 1 | C | T | Heterozygous |

|             |         |     |   |   |   |              |
|-------------|---------|-----|---|---|---|--------------|
| NC_037639.1 | 3848256 | SNV | 1 | T | C | Heterozygous |
| NC_037639.1 | 3848280 | SNV | 1 | G | C | Heterozygous |
| NC_037639.1 | 3848530 | SNV | 1 | G | A | Heterozygous |
| NC_037639.1 | 3848555 | SNV | 1 | T | C | Homozygous   |
| NC_037639.1 | 3848586 | SNV | 1 | A | C | Homozygous   |
| NC_037639.1 | 3848717 | SNV | 1 | A | G | Homozygous   |
| NC_037639.1 | 3848817 | SNV | 1 | G | A | Heterozygous |
| NC_037639.1 | 3849178 | SNV | 1 | G | A | Heterozygous |
| NC_037639.1 | 3849508 | SNV | 1 | C | T | Heterozygous |
| NC_037639.1 | 3849543 | SNV | 1 | G | A | Homozygous   |
| NC_037639.1 | 3849595 | SNV | 1 | T | C | Homozygous   |
| NC_037639.1 | 3869453 | SNV | 1 | T | C | Heterozygous |
| NC_037639.1 | 3871532 | SNV | 1 | A | C | Heterozygous |
| NC_037639.1 | 3871600 | SNV | 1 | A | T | Heterozygous |
| NC_037639.1 | 3876039 | SNV | 1 | C | T | Heterozygous |
| NC_037639.1 | 3876463 | SNV | 1 | A | G | Homozygous   |
| NC_037639.1 | 3876894 | SNV | 1 | T | A | Homozygous   |
| NC_037639.1 | 3876909 | SNV | 1 | T | A | Homozygous   |
| NC_037639.1 | 3876911 | SNV | 1 | T | G | Homozygous   |
| NC_037639.1 | 3877521 | SNV | 1 | T | C | Homozygous   |
| NC_037639.1 | 3892539 | SNV | 1 | T | C | Heterozygous |
| NC_037639.1 | 3892589 | SNV | 1 | A | T | Homozygous   |
| NC_037639.1 | 3892592 | SNV | 1 | G | T | Homozygous   |
| NC_037639.1 | 3894901 | SNV | 1 | T | C | Homozygous   |
| NC_037639.1 | 3894910 | SNV | 1 | A | T | Homozygous   |
| NC_037639.1 | 3897347 | SNV | 1 | G | A | Homozygous   |
| NC_037639.1 | 3897349 | SNV | 1 | A | G | Heterozygous |
| NC_037639.1 | 3899570 | SNV | 1 | A | T | Homozygous   |
| NC_037639.1 | 3899576 | SNV | 1 | A | T | Homozygous   |
| NC_037639.1 | 3899588 | SNV | 1 | A | G | Homozygous   |
| NC_037639.1 | 3899609 | SNV | 1 | T | C | Homozygous   |
| NC_037639.1 | 3905532 | SNV | 1 | T | A | Homozygous   |
| NC_037639.1 | 3905537 | SNV | 1 | A | T | Homozygous   |
| NC_037639.1 | 3905546 | SNV | 1 | T | A | Homozygous   |
| NC_037639.1 | 3908904 | SNV | 1 | C | T | Heterozygous |
| NC_037639.1 | 3909027 | SNV | 1 | A | G | Homozygous   |
| NC_037639.1 | 3909055 | SNV | 1 | A | G | Homozygous   |
| NC_037639.1 | 3915264 | SNV | 1 | G | A | Homozygous   |
| NC_037639.1 | 3915850 | SNV | 1 | T | C | Homozygous   |
| NC_037639.1 | 3921437 | SNV | 1 | C | T | Homozygous   |
| NC_037639.1 | 3921516 | SNV | 1 | G | A | Homozygous   |
| NC_037639.1 | 3922188 | SNV | 1 | A | T | Homozygous   |
| NC_037639.1 | 3922194 | SNV | 1 | T | A | Heterozygous |
| NC_037639.1 | 3922201 | SNV | 1 | T | G | Heterozygous |
| NC_037639.1 | 3922204 | SNV | 1 | T | C | Heterozygous |
| NC_037639.1 | 3923163 | SNV | 1 | C | T | Homozygous   |
| NC_037639.1 | 3923165 | SNV | 1 | A | G | Homozygous   |
| NC_037639.1 | 3923272 | SNV | 1 | C | T | Homozygous   |
| NC_037639.1 | 3924624 | SNV | 1 | T | G | Homozygous   |
| NC_037639.1 | 3925117 | SNV | 1 | A | C | Heterozygous |
| NC_037639.1 | 3925817 | SNV | 1 | C | T | Homozygous   |

|             |         |     |   |   |   |              |
|-------------|---------|-----|---|---|---|--------------|
| NC_037639.1 | 3926006 | SNV | 1 | C | T | Homozygous   |
| NC_037639.1 | 3926444 | SNV | 1 | A | T | Homozygous   |
| NC_037639.1 | 3926485 | SNV | 1 | G | A | Heterozygous |
| NC_037639.1 | 3927379 | SNV | 1 | C | A | Heterozygous |
| NC_037639.1 | 3927817 | SNV | 1 | A | G | Homozygous   |
| NC_037639.1 | 3928148 | SNV | 1 | C | T | Homozygous   |
| NC_037639.1 | 3929359 | SNV | 1 | C | T | Heterozygous |
| NC_037639.1 | 3933252 | SNV | 1 | G | T | Heterozygous |
| NC_037639.1 | 3945041 | SNV | 1 | T | A | Homozygous   |
| NC_037639.1 | 3945044 | SNV | 1 | T | A | Homozygous   |
| NC_037639.1 | 3945048 | SNV | 1 | T | G | Homozygous   |
| NC_037639.1 | 3945050 | SNV | 1 | T | C | Homozygous   |
| NC_037639.1 | 3945406 | SNV | 1 | C | A | Heterozygous |
| NC_037639.1 | 3945410 | SNV | 1 | T | A | Heterozygous |
| NC_037639.1 | 3945412 | SNV | 1 | T | A | Heterozygous |
| NC_037639.1 | 3948108 | SNV | 1 | T | A | Heterozygous |
| NC_037639.1 | 3948544 | SNV | 1 | C | T | Heterozygous |
| NC_037639.1 | 3948719 | SNV | 1 | G | A | Heterozygous |
| NC_037639.1 | 3948983 | SNV | 1 | T | C | Heterozygous |
| NC_037639.1 | 3959685 | SNV | 1 | C | T | Homozygous   |
| NC_037639.1 | 3959939 | SNV | 1 | C | T | Homozygous   |
| NC_037639.1 | 3959981 | SNV | 1 | A | T | Homozygous   |
| NC_037639.1 | 3960008 | SNV | 1 | G | A | Homozygous   |
| NC_037639.1 | 3960089 | SNV | 1 | T | C | Heterozygous |
| NC_037639.1 | 3960167 | SNV | 1 | A | G | Heterozygous |
| NC_037639.1 | 3966870 | SNV | 1 | C | A | Heterozygous |
| NC_037639.1 | 3974389 | SNV | 1 | A | T | Homozygous   |
| NC_037639.1 | 3974391 | SNV | 1 | A | T | Homozygous   |
| NC_037639.1 | 3974395 | SNV | 1 | A | T | Homozygous   |
| NC_037639.1 | 3974429 | SNV | 1 | T | A | Homozygous   |
| NC_037639.1 | 3974873 | SNV | 1 | A | T | Homozygous   |
| NC_037639.1 | 3974894 | SNV | 1 | T | C | Heterozygous |
| NC_037639.1 | 3974904 | SNV | 1 | A | T | Homozygous   |
| NC_037639.1 | 3981199 | SNV | 1 | T | C | Homozygous   |
| NC_037639.1 | 3981436 | SNV | 1 | A | G | Homozygous   |
| NC_037639.1 | 3981490 | SNV | 1 | C | T | Heterozygous |
| NC_037639.1 | 3981730 | SNV | 1 | C | T | Homozygous   |
| NC_037639.1 | 4025585 | SNV | 1 | A | G | Homozygous   |
| NC_037639.1 | 4025611 | SNV | 1 | T | C | Homozygous   |
| NC_037639.1 | 4025683 | SNV | 1 | T | C | Heterozygous |
| NC_037639.1 | 4025687 | SNV | 1 | T | C | Heterozygous |
| NC_037639.1 | 4025997 | SNV | 1 | T | C | Homozygous   |
| NC_037639.1 | 4026004 | SNV | 1 | T | C | Homozygous   |
| NC_037639.1 | 4026168 | SNV | 1 | C | T | Homozygous   |
| NC_037639.1 | 4035131 | SNV | 1 | A | T | Homozygous   |
| NC_037639.1 | 4035158 | SNV | 1 | A | T | Homozygous   |
| NC_037639.1 | 4035172 | SNV | 1 | G | C | Homozygous   |
| NC_037639.1 | 4046926 | SNV | 1 | G | A | Heterozygous |
| NC_037639.1 | 4058151 | SNV | 1 | C | T | Heterozygous |
| NC_037639.1 | 4058225 | SNV | 1 | T | C | Homozygous   |
| NC_037639.1 | 4058243 | SNV | 1 | T | C | Heterozygous |

|             |         |     |   |   |   |              |
|-------------|---------|-----|---|---|---|--------------|
| NC_037639.1 | 4058255 | SNV | 1 | C | T | Heterozygous |
| NC_037639.1 | 4058257 | SNV | 1 | G | C | Homozygous   |
| NC_037639.1 | 4058268 | SNV | 1 | G | T | Heterozygous |
| NC_037639.1 | 4141182 | SNV | 1 | T | G | Homozygous   |
| NC_037639.1 | 4141289 | SNV | 1 | A | G | Homozygous   |
| NC_037639.1 | 4143983 | SNV | 1 | C | T | Heterozygous |
| NC_037639.1 | 4149059 | SNV | 1 | A | C | Homozygous   |
| NC_037639.1 | 4149061 | SNV | 1 | A | T | Homozygous   |
| NC_037639.1 | 4149063 | SNV | 1 | A | T | Homozygous   |
| NC_037639.1 | 4149070 | SNV | 1 | A | C | Homozygous   |
| NC_037639.1 | 4167217 | SNV | 1 | C | T | Heterozygous |
| NC_037639.1 | 4170684 | SNV | 1 | G | T | Heterozygous |
| NC_037639.1 | 4170693 | SNV | 1 | A | T | Heterozygous |
| NC_037639.1 | 4170767 | SNV | 1 | C | T | Homozygous   |
| NC_037639.1 | 4177095 | SNV | 1 | A | G | Homozygous   |
| NC_037639.1 | 4177579 | SNV | 1 | C | T | Heterozygous |
| NC_037639.1 | 4183395 | SNV | 1 | C | T | Heterozygous |
| NC_037639.1 | 4183419 | SNV | 1 | G | A | Homozygous   |
| NC_037639.1 | 4207369 | SNV | 1 | C | T | Homozygous   |
| NC_037639.1 | 4207653 | SNV | 1 | A | G | Homozygous   |
| NC_037639.1 | 4217823 | SNV | 1 | T | A | Homozygous   |
| NC_037639.1 | 4217833 | SNV | 1 | G | C | Homozygous   |
| NC_037639.1 | 4217859 | SNV | 1 | A | T | Homozygous   |
| NC_037639.1 | 4217865 | SNV | 1 | T | A | Homozygous   |
| NC_037639.1 | 4221329 | SNV | 1 | C | A | Homozygous   |
| NC_037639.1 | 4221333 | SNV | 1 | T | G | Homozygous   |
| NC_037639.1 | 4221359 | SNV | 1 | C | A | Homozygous   |
| NC_037639.1 | 4230880 | SNV | 1 | C | T | Homozygous   |
| NC_037639.1 | 4256960 | SNV | 1 | T | C | Homozygous   |
| NC_037639.1 | 4256966 | SNV | 1 | C | T | Homozygous   |
| NC_037639.1 | 4256970 | SNV | 1 | C | G | Homozygous   |
| NC_037639.1 | 4256977 | SNV | 1 | T | C | Homozygous   |
| NC_037639.1 | 4266854 | SNV | 1 | A | G | Homozygous   |
| NC_037639.1 | 4266981 | SNV | 1 | G | C | Homozygous   |
| NC_037639.1 | 4267350 | SNV | 1 | A | G | Homozygous   |
| NC_037639.1 | 4267356 | SNV | 1 | G | A | Homozygous   |
| NC_037639.1 | 4267377 | SNV | 1 | T | C | Homozygous   |
| NC_037639.1 | 4267532 | SNV | 1 | T | C | Homozygous   |
| NC_037639.1 | 4274301 | SNV | 1 | A | T | Homozygous   |
| NC_037639.1 | 4274304 | SNV | 1 | A | T | Homozygous   |
| NC_037639.1 | 4275491 | SNV | 1 | A | G | Homozygous   |
| NC_037639.1 | 4275518 | SNV | 1 | A | G | Homozygous   |
| NC_037639.1 | 4275551 | SNV | 1 | A | G | Homozygous   |
| NC_037639.1 | 4275641 | SNV | 1 | T | C | Homozygous   |
| NC_037639.1 | 4275700 | SNV | 1 | A | G | Homozygous   |
| NC_037639.1 | 4275710 | SNV | 1 | T | C | Homozygous   |
| NC_037639.1 | 4275776 | SNV | 1 | A | G | Homozygous   |
| NC_037639.1 | 4275789 | SNV | 1 | T | C | Homozygous   |
| NC_037639.1 | 4275820 | SNV | 1 | T | C | Homozygous   |
| NC_037639.1 | 4275867 | SNV | 1 | G | A | Heterozygous |
| NC_037639.1 | 4275885 | SNV | 1 | C | T | Homozygous   |

|             |         |     |   |   |   |              |
|-------------|---------|-----|---|---|---|--------------|
| NC_037639.1 | 4275887 | SNV | 1 | C | T | Homozygous   |
| NC_037639.1 | 4275956 | SNV | 1 | A | G | Homozygous   |
| NC_037639.1 | 4277984 | SNV | 1 | T | C | Homozygous   |
| NC_037639.1 | 4278112 | SNV | 1 | G | A | Homozygous   |
| NC_037639.1 | 4278165 | SNV | 1 | G | A | Heterozygous |
| NC_037639.1 | 4278834 | SNV | 1 | G | A | Heterozygous |
| NC_037639.1 | 4278928 | SNV | 1 | C | T | Heterozygous |
| NC_037639.1 | 4278937 | SNV | 1 | T | C | Homozygous   |
| NC_037639.1 | 4278973 | SNV | 1 | T | A | Homozygous   |
| NC_037639.1 | 4278984 | SNV | 1 | G | C | Heterozygous |
| NC_037639.1 | 4279978 | SNV | 1 | C | T | Heterozygous |
| NC_037639.1 | 4279991 | SNV | 1 | G | A | Heterozygous |
| NC_037639.1 | 4279997 | SNV | 1 | C | G | Heterozygous |
| NC_037639.1 | 4280161 | SNV | 1 | G | A | Homozygous   |
| NC_037639.1 | 4280179 | SNV | 1 | G | A | Homozygous   |
| NC_037639.1 | 4280213 | SNV | 1 | G | A | Heterozygous |
| NC_037639.1 | 4280292 | SNV | 1 | T | C | Homozygous   |
| NC_037639.1 | 4280311 | SNV | 1 | T | C | Heterozygous |
| NC_037639.1 | 4282109 | SNV | 1 | C | T | Heterozygous |
| NC_037639.1 | 4282130 | SNV | 1 | C | T | Homozygous   |
| NC_037639.1 | 4282140 | SNV | 1 | T | C | Homozygous   |
| NC_037639.1 | 4282227 | SNV | 1 | C | T | Homozygous   |
| NC_037639.1 | 4282270 | SNV | 1 | G | C | Homozygous   |
| NC_037639.1 | 4282694 | SNV | 1 | T | C | Homozygous   |
| NC_037639.1 | 4314008 | SNV | 1 | C | T | Heterozygous |
| NC_037639.1 | 4314083 | SNV | 1 | C | T | Heterozygous |
| NC_037639.1 | 4331207 | SNV | 1 | G | C | Heterozygous |
| NC_037639.1 | 4331272 | SNV | 1 | A | T | Homozygous   |
| NC_037639.1 | 4331300 | SNV | 1 | T | C | Homozygous   |
| NC_037639.1 | 4331304 | SNV | 1 | A | T | Homozygous   |
| NC_037639.1 | 4331308 | SNV | 1 | A | T | Homozygous   |
| NC_037639.1 | 4331314 | SNV | 1 | T | A | Homozygous   |
| NC_037639.1 | 4332573 | SNV | 1 | A | G | Homozygous   |
| NC_037639.1 | 4338050 | SNV | 1 | A | G | Homozygous   |
| NC_037639.1 | 4376634 | SNV | 1 | T | G | Homozygous   |
| NC_037639.1 | 4380642 | SNV | 1 | A | G | Homozygous   |
| NC_037639.1 | 4381472 | SNV | 1 | G | A | Homozygous   |
| NC_037639.1 | 4381474 | SNV | 1 | A | G | Homozygous   |
| NC_037639.1 | 4382046 | SNV | 1 | G | A | Homozygous   |
| NC_037639.1 | 4424011 | SNV | 1 | C | T | Homozygous   |
| NC_037639.1 | 4424162 | SNV | 1 | T | C | Homozygous   |
| NC_037639.1 | 4424188 | SNV | 1 | G | A | Heterozygous |
| NC_037639.1 | 4424208 | SNV | 1 | A | G | Heterozygous |
| NC_037639.1 | 4424216 | SNV | 1 | C | T | Homozygous   |
| NC_037639.1 | 4429305 | SNV | 1 | C | T | Heterozygous |
| NC_037639.1 | 4429339 | SNV | 1 | C | T | Homozygous   |
| NC_037639.1 | 4465423 | SNV | 1 | A | G | Heterozygous |
| NC_037639.1 | 4465758 | SNV | 1 | C | T | Heterozygous |
| NC_037639.1 | 4465922 | SNV | 1 | G | A | Heterozygous |
| NC_037639.1 | 4466068 | SNV | 1 | A | G | Heterozygous |
| NC_037639.1 | 4466588 | SNV | 1 | A | G | Homozygous   |

|             |         |     |   |   |   |              |
|-------------|---------|-----|---|---|---|--------------|
| NC_037639.1 | 4466605 | SNV | 1 | A | G | Homozygous   |
| NC_037639.1 | 4466644 | SNV | 1 | C | T | Heterozygous |
| NC_037639.1 | 4467343 | SNV | 1 | T | C | Heterozygous |
| NC_037639.1 | 4467394 | SNV | 1 | C | T | Heterozygous |
| NC_037639.1 | 4470205 | SNV | 1 | G | A | Heterozygous |
| NC_037639.1 | 4470281 | SNV | 1 | A | T | Homozygous   |
| NC_037639.1 | 4470462 | SNV | 1 | A | G | Homozygous   |
| NC_037639.1 | 4474484 | SNV | 1 | T | C | Homozygous   |
| NC_037639.1 | 4479438 | SNV | 1 | G | A | Homozygous   |
| NC_037639.1 | 4479675 | SNV | 1 | T | C | Homozygous   |
| NC_037639.1 | 4479882 | SNV | 1 | A | G | Homozygous   |
| NC_037639.1 | 4480587 | SNV | 1 | A | G | Heterozygous |
| NC_037639.1 | 4480754 | SNV | 1 | A | G | Homozygous   |
| NC_037639.1 | 4481624 | SNV | 1 | A | T | Heterozygous |
| NC_037639.1 | 4481630 | SNV | 1 | A | T | Heterozygous |
| NC_037639.1 | 4481633 | SNV | 1 | A | G | Homozygous   |
| NC_037639.1 | 4481636 | SNV | 1 | A | G | Homozygous   |
| NC_037639.1 | 4481654 | SNV | 1 | A | T | Homozygous   |
| NC_037639.1 | 4481657 | SNV | 1 | A | T | Homozygous   |
| NC_037639.1 | 4481767 | SNV | 1 | A | T | Heterozygous |
| NC_037639.1 | 4481770 | SNV | 1 | A | T | Homozygous   |
| NC_037639.1 | 4481773 | SNV | 1 | A | T | Homozygous   |
| NC_037639.1 | 4481776 | SNV | 1 | A | T | Homozygous   |
| NC_037639.1 | 4481780 | SNV | 1 | A | T | Homozygous   |
| NC_037639.1 | 4481783 | SNV | 1 | A | T | Homozygous   |
| NC_037639.1 | 4481786 | SNV | 1 | A | T | Heterozygous |
| NC_037639.1 | 4481789 | SNV | 1 | A | T | Homozygous   |
| NC_037639.1 | 4481792 | SNV | 1 | A | T | Heterozygous |
| NC_037639.1 | 4481813 | SNV | 1 | A | T | Homozygous   |
| NC_037639.1 | 4481818 | SNV | 1 | T | C | Homozygous   |
| NC_037639.1 | 4481851 | SNV | 1 | A | T | Homozygous   |
| NC_037639.1 | 4482521 | SNV | 1 | T | A | Heterozygous |
| NC_037639.1 | 4482713 | SNV | 1 | T | C | Heterozygous |
| NC_037639.1 | 4482744 | SNV | 1 | T | A | Homozygous   |
| NC_037639.1 | 4482775 | SNV | 1 | T | A | Heterozygous |
| NC_037639.1 | 4482823 | SNV | 1 | A | T | Homozygous   |
| NC_037639.1 | 4482826 | SNV | 1 | A | T | Heterozygous |
| NC_037639.1 | 4482836 | SNV | 1 | T | A | Homozygous   |
| NC_037639.1 | 4482852 | SNV | 1 | T | A | Homozygous   |
| NC_037639.1 | 4482881 | SNV | 1 | A | T | Homozygous   |
| NC_037639.1 | 4482888 | SNV | 1 | T | A | Homozygous   |
| NC_037639.1 | 4482891 | SNV | 1 | T | A | Homozygous   |
| NC_037639.1 | 4482918 | SNV | 1 | T | A | Heterozygous |
| NC_037639.1 | 4482982 | SNV | 1 | T | G | Homozygous   |
| NC_037639.1 | 4482987 | SNV | 1 | A | G | Homozygous   |
| NC_037639.1 | 4483000 | SNV | 1 | A | T | Homozygous   |
| NC_037639.1 | 4483003 | SNV | 1 | A | T | Heterozygous |
| NC_037639.1 | 4486851 | SNV | 1 | A | G | Homozygous   |
| NC_037639.1 | 4487290 | SNV | 1 | T | A | Homozygous   |
| NC_037639.1 | 4489567 | SNV | 1 | T | G | Homozygous   |
| NC_037639.1 | 4489575 | SNV | 1 | T | C | Homozygous   |

|             |         |     |   |   |   |              |
|-------------|---------|-----|---|---|---|--------------|
| NC_037639.1 | 4489581 | SNV | 1 | A | G | Homozygous   |
| NC_037639.1 | 4489905 | SNV | 1 | G | A | Homozygous   |
| NC_037639.1 | 4489910 | SNV | 1 | T | C | Homozygous   |
| NC_037639.1 | 4490778 | SNV | 1 | T | C | Homozygous   |
| NC_037639.1 | 4490782 | SNV | 1 | G | A | Homozygous   |
| NC_037639.1 | 4490879 | SNV | 1 | T | G | Homozygous   |
| NC_037639.1 | 4494793 | SNV | 1 | A | T | Homozygous   |
| NC_037639.1 | 4494799 | SNV | 1 | A | T | Homozygous   |
| NC_037639.1 | 4494809 | SNV | 1 | T | A | Homozygous   |
| NC_037639.1 | 4494812 | SNV | 1 | T | A | Homozygous   |
| NC_037639.1 | 4494823 | SNV | 1 | A | C | Homozygous   |
| NC_037639.1 | 4494827 | SNV | 1 | T | A | Homozygous   |
| NC_037639.1 | 4494833 | SNV | 1 | A | C | Homozygous   |
| NC_037639.1 | 4494851 | SNV | 1 | C | T | Homozygous   |
| NC_037639.1 | 4495053 | SNV | 1 | T | C | Heterozygous |
| NC_037639.1 | 4495730 | SNV | 1 | T | C | Heterozygous |
| NC_037639.1 | 4511142 | SNV | 1 | T | C | Homozygous   |
| NC_037639.1 | 4511145 | SNV | 1 | A | G | Homozygous   |
| NC_037639.1 | 4515407 | SNV | 1 | A | G | Homozygous   |
| NC_037639.1 | 4516026 | SNV | 1 | A | G | Homozygous   |
| NC_037639.1 | 4517357 | SNV | 1 | T | A | Homozygous   |
| NC_037639.1 | 4521901 | SNV | 1 | G | C | Homozygous   |
| NC_037639.1 | 4554764 | SNV | 1 | A | T | Heterozygous |
| NC_037639.1 | 4554769 | SNV | 1 | C | T | Heterozygous |
| NC_037639.1 | 4554776 | SNV | 1 | A | G | Heterozygous |
| NC_037639.1 | 4554778 | SNV | 1 | T | C | Heterozygous |
| NC_037639.1 | 4554790 | SNV | 1 | A | T | Heterozygous |
| NC_037639.1 | 4566619 | SNV | 1 | G | T | Homozygous   |
| NC_037639.1 | 4566621 | SNV | 1 | A | G | Homozygous   |
| NC_037639.1 | 4566625 | SNV | 1 | A | G | Homozygous   |
| NC_037639.1 | 4566627 | SNV | 1 | A | C | Homozygous   |
| NC_037639.1 | 4566629 | SNV | 1 | G | A | Homozygous   |
| NC_037639.1 | 4567032 | SNV | 1 | T | A | Heterozygous |
| NC_037639.1 | 4567034 | SNV | 1 | T | A | Heterozygous |
| NC_037639.1 | 4567036 | SNV | 1 | T | A | Heterozygous |
| NC_037639.1 | 4567137 | SNV | 1 | G | T | Heterozygous |
| NC_037639.1 | 4567447 | SNV | 1 | C | A | Heterozygous |
| NC_037639.1 | 4571747 | SNV | 1 | T | C | Heterozygous |
| NC_037639.1 | 4578719 | SNV | 1 | T | C | Homozygous   |
| NC_037639.1 | 4583219 | SNV | 1 | T | A | Homozygous   |
| NC_037639.1 | 4597511 | SNV | 1 | G | A | Heterozygous |
| NC_037639.1 | 4597541 | SNV | 1 | A | G | Heterozygous |
| NC_037639.1 | 4605379 | SNV | 1 | A | T | Homozygous   |
| NC_037639.1 | 4605382 | SNV | 1 | G | T | Homozygous   |
| NC_037639.1 | 4605411 | SNV | 1 | G | A | Homozygous   |
| NC_037639.1 | 4605413 | SNV | 1 | G | T | Homozygous   |
| NC_037639.1 | 4605419 | SNV | 1 | G | A | Homozygous   |
| NC_037639.1 | 4605422 | SNV | 1 | G | A | Homozygous   |
| NC_037639.1 | 4611431 | SNV | 1 | C | T | Homozygous   |
| NC_037639.1 | 4611743 | SNV | 1 | T | C | Homozygous   |
| NC_037639.1 | 4614806 | SNV | 1 | A | G | Homozygous   |

|             |         |     |   |   |   |              |
|-------------|---------|-----|---|---|---|--------------|
| NC_037639.1 | 4626931 | SNV | 1 | A | T | Homozygous   |
| NC_037639.1 | 4626954 | SNV | 1 | C | A | Homozygous   |
| NC_037639.1 | 4626970 | SNV | 1 | G | A | Homozygous   |
| NC_037639.1 | 4628791 | SNV | 1 | A | G | Heterozygous |
| NC_037639.1 | 4628797 | SNV | 1 | T | C | Homozygous   |
| NC_037639.1 | 4629101 | SNV | 1 | A | G | Heterozygous |
| NC_037639.1 | 4629718 | SNV | 1 | T | C | Homozygous   |
| NC_037639.1 | 4630161 | SNV | 1 | T | A | Heterozygous |
| NC_037639.1 | 4630165 | SNV | 1 | T | C | Homozygous   |
| NC_037639.1 | 4631242 | SNV | 1 | T | C | Homozygous   |
| NC_037639.1 | 4632320 | SNV | 1 | G | A | Homozygous   |
| NC_037639.1 | 4634944 | SNV | 1 | T | C | Heterozygous |
| NC_037639.1 | 4635362 | SNV | 1 | G | A | Heterozygous |
| NC_037639.1 | 4635364 | SNV | 1 | G | A | Heterozygous |
| NC_037639.1 | 4635398 | SNV | 1 | C | A | Homozygous   |
| NC_037639.1 | 4635400 | SNV | 1 | T | G | Homozygous   |
| NC_037639.1 | 4635779 | SNV | 1 | T | C | Homozygous   |
| NC_037639.1 | 4636989 | SNV | 1 | A | G | Homozygous   |
| NC_037639.1 | 4637065 | SNV | 1 | G | T | Heterozygous |
| NC_037639.1 | 4637695 | SNV | 1 | C | T | Heterozygous |
| NC_037639.1 | 4639245 | SNV | 1 | T | C | Homozygous   |
| NC_037639.1 | 4641666 | SNV | 1 | A | G | Heterozygous |
| NC_037639.1 | 4653255 | SNV | 1 | C | T | Heterozygous |
| NC_037639.1 | 4653379 | SNV | 1 | C | T | Heterozygous |
| NC_037639.1 | 4653479 | SNV | 1 | C | T | Heterozygous |
| NC_037639.1 | 4653593 | SNV | 1 | G | A | Homozygous   |
| NC_037639.1 | 4654001 | SNV | 1 | C | T | Heterozygous |
| NC_037639.1 | 4654022 | SNV | 1 | G | A | Homozygous   |
| NC_037639.1 | 4654183 | SNV | 1 | A | T | Heterozygous |
| NC_037639.1 | 4654479 | SNV | 1 | A | G | Heterozygous |
| NC_037639.1 | 4654547 | SNV | 1 | C | T | Homozygous   |
| NC_037639.1 | 4654564 | SNV | 1 | A | G | Heterozygous |
| NC_037639.1 | 4654569 | SNV | 1 | A | G | Heterozygous |
| NC_037639.1 | 4655084 | SNV | 1 | G | A | Heterozygous |
| NC_037639.1 | 4655253 | SNV | 1 | C | A | Homozygous   |
| NC_037639.1 | 4655294 | SNV | 1 | G | T | Homozygous   |
| NC_037639.1 | 4655447 | SNV | 1 | A | C | Homozygous   |
| NC_037639.1 | 4655477 | SNV | 1 | G | A | Heterozygous |
| NC_037639.1 | 4658758 | SNV | 1 | T | C | Heterozygous |
| NC_037639.1 | 4659314 | SNV | 1 | T | A | Heterozygous |
| NC_037639.1 | 4659320 | SNV | 1 | A | C | Homozygous   |
| NC_037639.1 | 4659323 | SNV | 1 | A | T | Homozygous   |
| NC_037639.1 | 4659806 | SNV | 1 | T | C | Homozygous   |
| NC_037639.1 | 4682850 | SNV | 1 | G | C | Homozygous   |
| NC_037639.1 | 4685805 | SNV | 1 | A | G | Homozygous   |
| NC_037639.1 | 4686244 | SNV | 1 | A | C | Homozygous   |
| NC_037639.1 | 4691330 | SNV | 1 | A | G | Homozygous   |
| NC_037639.1 | 4691473 | SNV | 1 | G | A | Heterozygous |
| NC_037639.1 | 4692396 | SNV | 1 | A | G | Homozygous   |
| NC_037639.1 | 4692483 | SNV | 1 | A | G | Homozygous   |
| NC_037639.1 | 4692662 | SNV | 1 | T | C | Heterozygous |



|             |         |     |   |   |   |              |
|-------------|---------|-----|---|---|---|--------------|
| NC_037639.1 | 4693952 | SNV | 1 | T | C | Heterozygous |
| NC_037639.1 | 4693965 | SNV | 1 | C | T | Heterozygous |
| NC_037639.1 | 4694975 | SNV | 1 | A | G | Homozygous   |
| NC_037639.1 | 4695067 | SNV | 1 | G | A | Homozygous   |
| NC_037639.1 | 4702371 | SNV | 1 | G | A | Heterozygous |
| NC_037639.1 | 4702737 | SNV | 1 | C | T | Heterozygous |
| NC_037639.1 | 4702754 | SNV | 1 | A | T | Heterozygous |
| NC_037639.1 | 4702769 | SNV | 1 | A | T | Heterozygous |
| NC_037639.1 | 4703652 | SNV | 1 | C | T | Heterozygous |
| NC_037639.1 | 4704136 | SNV | 1 | T | G | Homozygous   |
| NC_037639.1 | 4704737 | SNV | 1 | G | C | Homozygous   |
| NC_037639.1 | 4704846 | SNV | 1 | C | T | Homozygous   |
| NC_037639.1 | 4704849 | SNV | 1 | T | C | Homozygous   |
| NC_037639.1 | 4704858 | SNV | 1 | G | A | Heterozygous |
| NC_037639.1 | 4705488 | SNV | 1 | G | A | Homozygous   |
| NC_037639.1 | 4705514 | SNV | 1 | G | A | Homozygous   |
| NC_037639.1 | 4705798 | SNV | 1 | C | T | Homozygous   |
| NC_037639.1 | 4705966 | SNV | 1 | G | A | Homozygous   |
| NC_037639.1 | 4706085 | SNV | 1 | T | C | Heterozygous |
| NC_037639.1 | 4707791 | SNV | 1 | G | A | Heterozygous |
| NC_037639.1 | 4708040 | SNV | 1 | T | C | Homozygous   |
| NC_037639.1 | 4708380 | SNV | 1 | A | G | Homozygous   |
| NC_037639.1 | 4708679 | SNV | 1 | G | A | Heterozygous |
| NC_037639.1 | 4709238 | SNV | 1 | T | C | Homozygous   |
| NC_037639.1 | 4709274 | SNV | 1 | G | A | Heterozygous |
| NC_037639.1 | 4709643 | SNV | 1 | T | C | Homozygous   |
| NC_037639.1 | 4709724 | SNV | 1 | G | A | Homozygous   |
| NC_037639.1 | 4709734 | SNV | 1 | G | C | Heterozygous |
| NC_037639.1 | 4709998 | SNV | 1 | A | G | Homozygous   |
| NC_037639.1 | 4712438 | SNV | 1 | A | G | Homozygous   |
| NC_037639.1 | 4712440 | SNV | 1 | G | A | Heterozygous |
| NC_037639.1 | 4712442 | SNV | 1 | G | T | Heterozygous |
| NC_037639.1 | 4713415 | SNV | 1 | G | A | Heterozygous |
| NC_037639.1 | 4713457 | SNV | 1 | T | C | Homozygous   |
| NC_037639.1 | 4713589 | SNV | 1 | A | G | Homozygous   |
| NC_037639.1 | 4713592 | SNV | 1 | A | G | Homozygous   |
| NC_037639.1 | 4713829 | SNV | 1 | A | T | Homozygous   |
| NC_037639.1 | 4713850 | SNV | 1 | T | C | Homozygous   |
| NC_037639.1 | 4714288 | SNV | 1 | T | A | Heterozygous |
| NC_037639.1 | 4714819 | SNV | 1 | A | G | Homozygous   |
| NC_037639.1 | 4714953 | SNV | 1 | A | T | Heterozygous |
| NC_037639.1 | 4715065 | SNV | 1 | G | A | Heterozygous |
| NC_037639.1 | 4715345 | SNV | 1 | A | G | Homozygous   |
| NC_037639.1 | 4715356 | SNV | 1 | A | G | Homozygous   |
| NC_037639.1 | 4715366 | SNV | 1 | T | C | Homozygous   |
| NC_037639.1 | 4716063 | SNV | 1 | T | C | Homozygous   |
| NC_037639.1 | 4716074 | SNV | 1 | G | A | Homozygous   |
| NC_037639.1 | 4716747 | SNV | 1 | A | G | Heterozygous |
| NC_037639.1 | 4716771 | SNV | 1 | A | G | Homozygous   |
| NC_037639.1 | 4718234 | SNV | 1 | C | G | Heterozygous |
| NC_037639.1 | 4718969 | SNV | 1 | C | A | Heterozygous |

|             |         |     |   |   |   |              |
|-------------|---------|-----|---|---|---|--------------|
| NC_037639.1 | 4719167 | SNV | 1 | C | T | Homozygous   |
| NC_037639.1 | 4720053 | SNV | 1 | T | C | Homozygous   |
| NC_037639.1 | 4720106 | SNV | 1 | T | C | Homozygous   |
| NC_037639.1 | 4721280 | SNV | 1 | G | A | Homozygous   |
| NC_037639.1 | 4723567 | SNV | 1 | A | C | Homozygous   |
| NC_037639.1 | 4723574 | SNV | 1 | G | T | Homozygous   |
| NC_037639.1 | 4723579 | SNV | 1 | A | C | Homozygous   |
| NC_037639.1 | 4723583 | SNV | 1 | T | A | Homozygous   |
| NC_037639.1 | 4723588 | SNV | 1 | A | T | Homozygous   |
| NC_037639.1 | 4724880 | SNV | 1 | A | G | Homozygous   |
| NC_037639.1 | 4725140 | SNV | 1 | G | A | Heterozygous |
| NC_037639.1 | 4725178 | SNV | 1 | T | C | Homozygous   |
| NC_037639.1 | 4725259 | SNV | 1 | A | G | Heterozygous |
| NC_037639.1 | 4725279 | SNV | 1 | C | T | Heterozygous |
| NC_037639.1 | 4725378 | SNV | 1 | C | T | Homozygous   |
| NC_037639.1 | 4725410 | SNV | 1 | T | C | Homozygous   |
| NC_037639.1 | 4725447 | SNV | 1 | T | C | Homozygous   |
| NC_037639.1 | 4725849 | SNV | 1 | T | C | Heterozygous |
| NC_037639.1 | 4725912 | SNV | 1 | T | C | Homozygous   |
| NC_037639.1 | 4726649 | SNV | 1 | T | C | Heterozygous |
| NC_037639.1 | 4726682 | SNV | 1 | G | A | Heterozygous |
| NC_037639.1 | 4726745 | SNV | 1 | G | A | Heterozygous |
| NC_037639.1 | 4726932 | SNV | 1 | A | T | Homozygous   |
| NC_037639.1 | 4727067 | SNV | 1 | T | C | Heterozygous |
| NC_037639.1 | 4727214 | SNV | 1 | G | C | Homozygous   |
| NC_037639.1 | 4727236 | SNV | 1 | T | C | Homozygous   |
| NC_037639.1 | 4728119 | SNV | 1 | T | C | Heterozygous |
| NC_037639.1 | 4728664 | SNV | 1 | G | A | Heterozygous |
| NC_037639.1 | 4729028 | SNV | 1 | T | A | Heterozygous |
| NC_037639.1 | 4729030 | SNV | 1 | T | A | Heterozygous |
| NC_037639.1 | 4729045 | SNV | 1 | A | C | Heterozygous |
| NC_037639.1 | 4730851 | SNV | 1 | T | C | Heterozygous |
| NC_037639.1 | 4731090 | SNV | 1 | G | A | Homozygous   |
| NC_037639.1 | 4731347 | SNV | 1 | G | T | Heterozygous |
| NC_037639.1 | 4731378 | SNV | 1 | G | A | Homozygous   |
| NC_037639.1 | 4731420 | SNV | 1 | G | C | Heterozygous |
| NC_037639.1 | 4731422 | SNV | 1 | T | A | Heterozygous |
| NC_037639.1 | 4731424 | SNV | 1 | T | A | Heterozygous |
| NC_037639.1 | 4731428 | SNV | 1 | T | A | Heterozygous |
| NC_037639.1 | 4731643 | SNV | 1 | T | C | Homozygous   |
| NC_037639.1 | 4731704 | SNV | 1 | T | C | Heterozygous |
| NC_037639.1 | 4731743 | SNV | 1 | C | T | Homozygous   |
| NC_037639.1 | 4733007 | SNV | 1 | T | C | Homozygous   |
| NC_037639.1 | 4733013 | SNV | 1 | G | A | Heterozygous |
| NC_037639.1 | 4733028 | SNV | 1 | G | A | Homozygous   |
| NC_037639.1 | 4734195 | SNV | 1 | C | G | Heterozygous |
| NC_037639.1 | 4735874 | SNV | 1 | A | T | Homozygous   |
| NC_037639.1 | 4739684 | SNV | 1 | G | A | Heterozygous |
| NC_037639.1 | 4740838 | SNV | 1 | G | T | Homozygous   |
| NC_037639.1 | 4740862 | SNV | 1 | T | C | Homozygous   |
| NC_037639.1 | 4740864 | SNV | 1 | T | C | Homozygous   |

|             |         |     |   |   |   |              |
|-------------|---------|-----|---|---|---|--------------|
| NC_037639.1 | 4740914 | SNV | 1 | T | C | Homozygous   |
| NC_037639.1 | 4746526 | SNV | 1 | C | T | Heterozygous |
| NC_037639.1 | 4749150 | SNV | 1 | T | G | Homozygous   |
| NC_037639.1 | 4749153 | SNV | 1 | A | T | Homozygous   |
| NC_037639.1 | 4750600 | SNV | 1 | G | A | Homozygous   |
| NC_037639.1 | 4750622 | SNV | 1 | C | T | Heterozygous |
| NC_037639.1 | 4750793 | SNV | 1 | T | A | Heterozygous |
| NC_037639.1 | 4754582 | SNV | 1 | G | A | Heterozygous |
| NC_037639.1 | 4754627 | SNV | 1 | A | G | Homozygous   |
| NC_037639.1 | 4755501 | SNV | 1 | A | C | Homozygous   |
| NC_037639.1 | 4761860 | SNV | 1 | A | C | Heterozygous |
| NC_037639.1 | 4761865 | SNV | 1 | C | G | Homozygous   |
| NC_037639.1 | 4761977 | SNV | 1 | G | A | Heterozygous |
| NC_037639.1 | 4763125 | SNV | 1 | C | A | Heterozygous |
| NC_037639.1 | 4763137 | SNV | 1 | A | C | Heterozygous |
| NC_037639.1 | 4763147 | SNV | 1 | A | T | Heterozygous |
| NC_037639.1 | 4763150 | SNV | 1 | A | C | Heterozygous |
| NC_037639.1 | 4763152 | SNV | 1 | A | C | Heterozygous |
| NC_037639.1 | 4763160 | SNV | 1 | G | A | Heterozygous |
| NC_037639.1 | 4775886 | SNV | 1 | C | T | Heterozygous |
| NC_037639.1 | 4775900 | SNV | 1 | C | T | Heterozygous |
| NC_037639.1 | 4775902 | SNV | 1 | C | T | Heterozygous |
| NC_037639.1 | 4775914 | SNV | 1 | A | T | Heterozygous |
| NC_037639.1 | 4823240 | SNV | 1 | T | A | Homozygous   |
| NC_037639.1 | 4823273 | SNV | 1 | T | C | Homozygous   |
| NC_037639.1 | 4823335 | SNV | 1 | G | A | Heterozygous |
| NC_037639.1 | 4823407 | SNV | 1 | G | A | Heterozygous |
| NC_037639.1 | 4824239 | SNV | 1 | G | C | Homozygous   |
| NC_037639.1 | 4824396 | SNV | 1 | A | G | Heterozygous |
| NC_037639.1 | 4824803 | SNV | 1 | A | G | Homozygous   |
| NC_037639.1 | 4824840 | SNV | 1 | T | C | Heterozygous |
| NC_037639.1 | 4824842 | SNV | 1 | G | A | Heterozygous |
| NC_037639.1 | 4824848 | SNV | 1 | A | G | Heterozygous |
| NC_037639.1 | 4824859 | SNV | 1 | C | T | Heterozygous |
| NC_037639.1 | 4824866 | SNV | 1 | T | C | Heterozygous |
| NC_037639.1 | 4825167 | SNV | 1 | A | C | Heterozygous |
| NC_037639.1 | 4825664 | SNV | 1 | A | T | Homozygous   |
| NC_037639.1 | 4825985 | SNV | 1 | C | T | Heterozygous |
| NC_037639.1 | 4825993 | SNV | 1 | C | G | Heterozygous |
| NC_037639.1 | 4829040 | SNV | 1 | A | G | Homozygous   |
| NC_037639.1 | 4829271 | SNV | 1 | T | C | Heterozygous |
| NC_037639.1 | 4829327 | SNV | 1 | A | G | Homozygous   |
| NC_037639.1 | 4829462 | SNV | 1 | G | A | Heterozygous |
| NC_037639.1 | 4829721 | SNV | 1 | T | A | Heterozygous |
| NC_037639.1 | 4831396 | SNV | 1 | T | C | Homozygous   |
| NC_037639.1 | 4831412 | SNV | 1 | G | A | Homozygous   |
| NC_037639.1 | 4831415 | SNV | 1 | G | T | Homozygous   |
| NC_037639.1 | 4831698 | SNV | 1 | T | C | Homozygous   |
| NC_037639.1 | 4832284 | SNV | 1 | T | C | Heterozygous |
| NC_037639.1 | 4832516 | SNV | 1 | T | C | Homozygous   |
| NC_037639.1 | 4832539 | SNV | 1 | G | A | Homozygous   |

|             |         |     |   |   |   |              |
|-------------|---------|-----|---|---|---|--------------|
| NC_037639.1 | 4834290 | SNV | 1 | A | G | Homozygous   |
| NC_037639.1 | 4834458 | SNV | 1 | A | G | Homozygous   |
| NC_037639.1 | 4834497 | SNV | 1 | C | T | Homozygous   |
| NC_037639.1 | 4834740 | SNV | 1 | C | T | Heterozygous |
| NC_037639.1 | 4834824 | SNV | 1 | C | T | Homozygous   |
| NC_037639.1 | 4837596 | SNV | 1 | C | T | Heterozygous |
| NC_037639.1 | 4837810 | SNV | 1 | T | C | Homozygous   |
| NC_037639.1 | 4838299 | SNV | 1 | T | C | Homozygous   |
| NC_037639.1 | 4838319 | SNV | 1 | A | T | Heterozygous |
| NC_037639.1 | 4843274 | SNV | 1 | A | G | Homozygous   |
| NC_037639.1 | 4843276 | SNV | 1 | A | T | Homozygous   |
| NC_037639.1 | 4843290 | SNV | 1 | T | G | Homozygous   |
| NC_037639.1 | 4843292 | SNV | 1 | C | G | Homozygous   |
| NC_037639.1 | 4843787 | SNV | 1 | C | T | Homozygous   |
| NC_037639.1 | 4844002 | SNV | 1 | T | C | Heterozygous |
| NC_037639.1 | 4844479 | SNV | 1 | G | A | Heterozygous |
| NC_037639.1 | 4844494 | SNV | 1 | A | G | Heterozygous |
| NC_037639.1 | 4844588 | SNV | 1 | T | C | Homozygous   |
| NC_037639.1 | 4844620 | SNV | 1 | G | A | Homozygous   |
| NC_037639.1 | 4844653 | SNV | 1 | A | G | Homozygous   |
| NC_037639.1 | 4844764 | SNV | 1 | T | C | Homozygous   |
| NC_037639.1 | 4844854 | SNV | 1 | T | G | Heterozygous |
| NC_037639.1 | 4845057 | SNV | 1 | T | G | Homozygous   |
| NC_037639.1 | 4845174 | SNV | 1 | C | T | Heterozygous |
| NC_037639.1 | 4845187 | SNV | 1 | T | C | Heterozygous |
| NC_037639.1 | 4845219 | SNV | 1 | T | C | Homozygous   |
| NC_037639.1 | 4845231 | SNV | 1 | T | A | Homozygous   |
| NC_037639.1 | 4845514 | SNV | 1 | T | A | Heterozygous |
| NC_037639.1 | 4845847 | SNV | 1 | T | C | Heterozygous |
| NC_037639.1 | 4846017 | SNV | 1 | G | A | Heterozygous |
| NC_037639.1 | 4846027 | SNV | 1 | G | T | Heterozygous |
| NC_037639.1 | 4846032 | SNV | 1 | T | C | Heterozygous |
| NC_037639.1 | 4846176 | SNV | 1 | G | A | Homozygous   |
| NC_037639.1 | 4846198 | SNV | 1 | C | T | Homozygous   |
| NC_037639.1 | 4851424 | SNV | 1 | G | T | Heterozygous |
| NC_037639.1 | 4853661 | SNV | 1 | G | C | Homozygous   |
| NC_037639.1 | 4853960 | SNV | 1 | T | C | Homozygous   |
| NC_037639.1 | 4860445 | SNV | 1 | C | A | Homozygous   |
| NC_037639.1 | 4866152 | SNV | 1 | C | T | Homozygous   |
| NC_037639.1 | 4866213 | SNV | 1 | A | T | Homozygous   |
| NC_037639.1 | 4866216 | SNV | 1 | C | T | Homozygous   |
| NC_037639.1 | 4878254 | SNV | 1 | G | A | Heterozygous |
| NC_037639.1 | 4879702 | SNV | 1 | A | G | Homozygous   |
| NC_037639.1 | 4879808 | SNV | 1 | C | T | Homozygous   |
| NC_037639.1 | 4882686 | SNV | 1 | C | T | Homozygous   |
| NC_037639.1 | 4885989 | SNV | 1 | T | C | Homozygous   |
| NC_037639.1 | 4886345 | SNV | 1 | C | G | Homozygous   |
| NC_037639.1 | 4886389 | SNV | 1 | T | C | Homozygous   |
| NC_037639.1 | 4886398 | SNV | 1 | T | C | Heterozygous |
| NC_037639.1 | 4886532 | SNV | 1 | C | T | Heterozygous |
| NC_037639.1 | 4887743 | SNV | 1 | A | G | Homozygous   |

|             |         |     |   |   |   |              |
|-------------|---------|-----|---|---|---|--------------|
| NC_037639.1 | 4887824 | SNV | 1 | C | T | Heterozygous |
| NC_037639.1 | 4889478 | SNV | 1 | C | T | Homozygous   |
| NC_037639.1 | 4889553 | SNV | 1 | C | T | Homozygous   |
| NC_037639.1 | 4890161 | SNV | 1 | A | G | Homozygous   |
| NC_037639.1 | 4890203 | SNV | 1 | G | C | Heterozygous |
| NC_037639.1 | 4891673 | SNV | 1 | A | T | Homozygous   |
| NC_037639.1 | 4894320 | SNV | 1 | T | C | Homozygous   |
| NC_037639.1 | 4985476 | SNV | 1 | C | T | Homozygous   |
| NC_037639.1 | 4985499 | SNV | 1 | C | T | Homozygous   |
| NC_037639.1 | 4985672 | SNV | 1 | A | G | Homozygous   |
| NC_037639.1 | 4985685 | SNV | 1 | A | G | Homozygous   |
| NC_037639.1 | 4985699 | SNV | 1 | G | A | Heterozygous |
| NC_037639.1 | 4985705 | SNV | 1 | T | G | Homozygous   |
| NC_037639.1 | 4987832 | SNV | 1 | G | A | Heterozygous |
| NC_037639.1 | 4987852 | SNV | 1 | T | C | Homozygous   |
| NC_037639.1 | 4987872 | SNV | 1 | A | T | Homozygous   |
| NC_037639.1 | 4987882 | SNV | 1 | G | C | Homozygous   |
| NC_037639.1 | 4992678 | SNV | 1 | C | A | Heterozygous |
| NC_037639.1 | 4992756 | SNV | 1 | T | C | Homozygous   |
| NC_037639.1 | 4992771 | SNV | 1 | T | C | Homozygous   |
| NC_037639.1 | 4992872 | SNV | 1 | C | T | Heterozygous |
| NC_037639.1 | 4992936 | SNV | 1 | T | C | Homozygous   |
| NC_037639.1 | 4993153 | SNV | 1 | T | C | Heterozygous |
| NC_037639.1 | 5005116 | SNV | 1 | G | C | Heterozygous |
| NC_037639.1 | 5005127 | SNV | 1 | C | T | Heterozygous |
| NC_037639.1 | 5005282 | SNV | 1 | A | G | Heterozygous |
| NC_037639.1 | 5005508 | SNV | 1 | A | G | Homozygous   |
| NC_037639.1 | 5024261 | SNV | 1 | G | A | Homozygous   |
| NC_037639.1 | 5024274 | SNV | 1 | A | G | Heterozygous |
| NC_037639.1 | 5024300 | SNV | 1 | G | T | Homozygous   |
| NC_037639.1 | 5028201 | SNV | 1 | G | A | Heterozygous |
| NC_037639.1 | 5028261 | SNV | 1 | G | A | Heterozygous |
| NC_037639.1 | 5028275 | SNV | 1 | A | G | Homozygous   |
| NC_037639.1 | 5030575 | SNV | 1 | G | A | Heterozygous |
| NC_037639.1 | 5030578 | SNV | 1 | G | C | Homozygous   |
| NC_037639.1 | 5036626 | SNV | 1 | C | A | Homozygous   |
| NC_037639.1 | 5036630 | SNV | 1 | T | G | Homozygous   |
| NC_037639.1 | 5036633 | SNV | 1 | G | A | Homozygous   |
| NC_037639.1 | 5036656 | SNV | 1 | C | A | Homozygous   |
| NC_037639.1 | 5036658 | SNV | 1 | A | C | Homozygous   |
| NC_037639.1 | 5036661 | SNV | 1 | T | A | Homozygous   |
| NC_037639.1 | 5036673 | SNV | 1 | A | T | Homozygous   |
| NC_037639.1 | 5036675 | SNV | 1 | A | C | Homozygous   |
| NC_037639.1 | 5036681 | SNV | 1 | A | C | Heterozygous |
| NC_037639.1 | 5036681 | SNV | 1 | A | T | Heterozygous |
| NC_037639.1 | 5039037 | SNV | 1 | T | C | Homozygous   |
| NC_037639.1 | 5046898 | SNV | 1 | C | T | Heterozygous |
| NC_037639.1 | 5046902 | SNV | 1 | C | T | Heterozygous |
| NC_037639.1 | 5046931 | SNV | 1 | T | C | Heterozygous |
| NC_037639.1 | 5046942 | SNV | 1 | T | A | Heterozygous |
| NC_037639.1 | 5046944 | SNV | 1 | A | C | Heterozygous |

|             |         |     |   |   |   |              |
|-------------|---------|-----|---|---|---|--------------|
| NC_037639.1 | 5046961 | SNV | 1 | G | C | Homozygous   |
| NC_037639.1 | 5047017 | SNV | 1 | T | G | Homozygous   |
| NC_037639.1 | 5047031 | SNV | 1 | T | C | Homozygous   |
| NC_037639.1 | 5047060 | SNV | 1 | G | A | Homozygous   |
| NC_037639.1 | 5047102 | SNV | 1 | G | A | Homozygous   |
| NC_037639.1 | 5047117 | SNV | 1 | C | T | Homozygous   |
| NC_037639.1 | 5047152 | SNV | 1 | G | A | Heterozygous |
| NC_037639.1 | 5077676 | SNV | 1 | G | A | Heterozygous |
| NC_037639.1 | 5077989 | SNV | 1 | G | C | Heterozygous |
| NC_037639.1 | 5078649 | SNV | 1 | A | G | Homozygous   |
| NC_037639.1 | 5078838 | SNV | 1 | G | A | Heterozygous |
| NC_037639.1 | 5086103 | SNV | 1 | C | T | Homozygous   |
| NC_037639.1 | 5086166 | SNV | 1 | G | A | Heterozygous |
| NC_037639.1 | 5086283 | SNV | 1 | G | A | Heterozygous |
| NC_037639.1 | 5086284 | SNV | 1 | G | A | Heterozygous |
| NC_037639.1 | 5086398 | SNV | 1 | A | G | Heterozygous |
| NC_037639.1 | 5092679 | SNV | 1 | G | A | Heterozygous |
| NC_037639.1 | 5092718 | SNV | 1 | G | C | Homozygous   |
| NC_037639.1 | 5092788 | SNV | 1 | G | A | Homozygous   |
| NC_037639.1 | 5098444 | SNV | 1 | G | A | Heterozygous |
| NC_037639.1 | 5098465 | SNV | 1 | T | C | Heterozygous |
| NC_037639.1 | 5098505 | SNV | 1 | A | G | Homozygous   |
| NC_037639.1 | 5098507 | SNV | 1 | A | G | Homozygous   |
| NC_037639.1 | 5098603 | SNV | 1 | G | A | Heterozygous |
| NC_037639.1 | 5121295 | SNV | 1 | A | G | Heterozygous |
| NC_037639.1 | 5121301 | SNV | 1 | A | T | Heterozygous |
| NC_037639.1 | 5121307 | SNV | 1 | T | A | Heterozygous |
| NC_037639.1 | 5121311 | SNV | 1 | G | A | Heterozygous |
| NC_037639.1 | 5121322 | SNV | 1 | T | G | Heterozygous |
| NC_037639.1 | 5121324 | SNV | 1 | T | A | Heterozygous |
| NC_037639.1 | 5121325 | SNV | 1 | A | T | Heterozygous |
| NC_037639.1 | 5121326 | SNV | 1 | T | A | Heterozygous |
| NC_037639.1 | 5121595 | SNV | 1 | A | T | Homozygous   |
| NC_037639.1 | 5125518 | SNV | 1 | G | A | Homozygous   |
| NC_037639.1 | 5135113 | SNV | 1 | G | A | Homozygous   |
| NC_037639.1 | 5140711 | SNV | 1 | C | T | Homozygous   |
| NC_037639.1 | 5140718 | SNV | 1 | T | C | Heterozygous |
| NC_037639.1 | 5140721 | SNV | 1 | C | A | Homozygous   |
| NC_037639.1 | 5147072 | SNV | 1 | A | G | Heterozygous |
| NC_037639.1 | 5147177 | SNV | 1 | T | C | Homozygous   |
| NC_037639.1 | 5147227 | SNV | 1 | T | C | Homozygous   |
| NC_037639.1 | 5151774 | SNV | 1 | G | A | Heterozygous |
| NC_037639.1 | 5151832 | SNV | 1 | A | G | Homozygous   |
| NC_037639.1 | 5151858 | SNV | 1 | G | A | Heterozygous |
| NC_037639.1 | 5151870 | SNV | 1 | G | A | Heterozygous |
| NC_037639.1 | 5151874 | SNV | 1 | G | A | Heterozygous |
| NC_037639.1 | 5156650 | SNV | 1 | T | A | Heterozygous |
| NC_037639.1 | 5156836 | SNV | 1 | C | T | Heterozygous |
| NC_037639.1 | 5156937 | SNV | 1 | G | A | Heterozygous |
| NC_037639.1 | 5161207 | SNV | 1 | T | C | Homozygous   |
| NC_037639.1 | 5161225 | SNV | 1 | T | C | Heterozygous |

|             |         |     |   |   |   |              |
|-------------|---------|-----|---|---|---|--------------|
| NC_037639.1 | 5161229 | SNV | 1 | C | T | Homozygous   |
| NC_037639.1 | 5164723 | SNV | 1 | G | A | Heterozygous |
| NC_037639.1 | 5164755 | SNV | 1 | G | A | Heterozygous |
| NC_037639.1 | 5164819 | SNV | 1 | A | G | Heterozygous |
| NC_037639.1 | 5164825 | SNV | 1 | G | A | Homozygous   |
| NC_037639.1 | 5164900 | SNV | 1 | A | G | Homozygous   |
| NC_037639.1 | 5171641 | SNV | 1 | A | C | Homozygous   |
| NC_037639.1 | 5171644 | SNV | 1 | A | G | Homozygous   |
| NC_037639.1 | 5171666 | SNV | 1 | A | T | Homozygous   |
| NC_037639.1 | 5171675 | SNV | 1 | C | A | Homozygous   |
| NC_037639.1 | 5181077 | SNV | 1 | G | A | Heterozygous |
| NC_037639.1 | 5201266 | SNV | 1 | A | C | Homozygous   |
| NC_037639.1 | 5206185 | SNV | 1 | C | A | Homozygous   |
| NC_037639.1 | 5206189 | SNV | 1 | A | C | Homozygous   |
| NC_037639.1 | 5206203 | SNV | 1 | T | C | Homozygous   |
| NC_037639.1 | 5206205 | SNV | 1 | C | A | Homozygous   |
| NC_037639.1 | 5206211 | SNV | 1 | C | A | Homozygous   |
| NC_037639.1 | 5206751 | SNV | 1 | C | T | Homozygous   |
| NC_037639.1 | 5206753 | SNV | 1 | C | A | Homozygous   |
| NC_037639.1 | 5208178 | SNV | 1 | A | G | Homozygous   |
| NC_037639.1 | 5208309 | SNV | 1 | T | C | Homozygous   |
| NC_037639.1 | 5211111 | SNV | 1 | A | G | Homozygous   |
| NC_037639.1 | 5218336 | SNV | 1 | G | A | Homozygous   |
| NC_037639.1 | 5218368 | SNV | 1 | C | T | Homozygous   |
| NC_037639.1 | 5218398 | SNV | 1 | G | A | Heterozygous |
| NC_037639.1 | 5218451 | SNV | 1 | A | G | Homozygous   |
| NC_037639.1 | 5218492 | SNV | 1 | G | A | Heterozygous |
| NC_037639.1 | 5227951 | SNV | 1 | A | G | Homozygous   |
| NC_037639.1 | 5228181 | SNV | 1 | G | A | Heterozygous |
| NC_037639.1 | 5232951 | SNV | 1 | C | T | Heterozygous |
| NC_037639.1 | 5233455 | SNV | 1 | T | A | Homozygous   |
| NC_037639.1 | 5233573 | SNV | 1 | C | G | Homozygous   |
| NC_037639.1 | 5233853 | SNV | 1 | C | A | Heterozygous |
| NC_037639.1 | 5233868 | SNV | 1 | A | C | Heterozygous |
| NC_037639.1 | 5234262 | SNV | 1 | G | C | Heterozygous |
| NC_037639.1 | 5234349 | SNV | 1 | G | C | Heterozygous |
| NC_037639.1 | 5253271 | SNV | 1 | T | A | Homozygous   |
| NC_037639.1 | 5253279 | SNV | 1 | T | A | Heterozygous |
| NC_037639.1 | 5253280 | SNV | 1 | T | A | Heterozygous |
| NC_037639.1 | 5253306 | SNV | 1 | T | G | Homozygous   |
| NC_037639.1 | 5253310 | SNV | 1 | A | G | Heterozygous |
| NC_037639.1 | 5253313 | SNV | 1 | T | A | Heterozygous |
| NC_037639.1 | 5253315 | SNV | 1 | T | C | Heterozygous |
| NC_037639.1 | 5253332 | SNV | 1 | C | T | Heterozygous |
| NC_037639.1 | 5253335 | SNV | 1 | A | T | Homozygous   |
| NC_037639.1 | 5253339 | SNV | 1 | G | A | Homozygous   |
| NC_037639.1 | 5253349 | SNV | 1 | C | A | Homozygous   |
| NC_037639.1 | 5253362 | SNV | 1 | A | T | Homozygous   |
| NC_037639.1 | 5253367 | SNV | 1 | C | T | Homozygous   |
| NC_037639.1 | 5253383 | SNV | 1 | T | C | Homozygous   |
| NC_037639.1 | 5253385 | SNV | 1 | G | T | Homozygous   |

|             |         |     |   |   |   |              |
|-------------|---------|-----|---|---|---|--------------|
| NC_037639.1 | 5253395 | SNV | 1 | A | G | Homozygous   |
| NC_037639.1 | 5253402 | SNV | 1 | A | T | Homozygous   |
| NC_037639.1 | 5253423 | SNV | 1 | A | G | Homozygous   |
| NC_037639.1 | 5253433 | SNV | 1 | T | C | Heterozygous |
| NC_037639.1 | 5253552 | SNV | 1 | G | A | Homozygous   |
| NC_037639.1 | 5253555 | SNV | 1 | A | T | Homozygous   |
| NC_037639.1 | 5253564 | SNV | 1 | C | T | Homozygous   |
| NC_037639.1 | 5253567 | SNV | 1 | C | G | Homozygous   |
| NC_037639.1 | 5253579 | SNV | 1 | C | T | Homozygous   |
| NC_037639.1 | 5266078 | SNV | 1 | C | T | Heterozygous |
| NC_037639.1 | 5266216 | SNV | 1 | A | G | Homozygous   |
| NC_037639.1 | 5269058 | SNV | 1 | G | T | Heterozygous |
| NC_037639.1 | 5269062 | SNV | 1 | C | T | Heterozygous |
| NC_037639.1 | 5287016 | SNV | 1 | T | C | Homozygous   |
| NC_037639.1 | 5288471 | SNV | 1 | A | G | Homozygous   |
| NC_037639.1 | 5288488 | SNV | 1 | A | G | Heterozygous |
| NC_037639.1 | 5288508 | SNV | 1 | C | T | Heterozygous |
| NC_037639.1 | 5288530 | SNV | 1 | G | A | Heterozygous |
| NC_037639.1 | 5288564 | SNV | 1 | T | A | Heterozygous |
| NC_037639.1 | 5288674 | SNV | 1 | C | T | Homozygous   |
| NC_037639.1 | 5288740 | SNV | 1 | A | G | Heterozygous |
| NC_037639.1 | 5289040 | SNV | 1 | G | A | Heterozygous |
| NC_037639.1 | 5289062 | SNV | 1 | A | G | Heterozygous |
| NC_037639.1 | 5289062 | SNV | 1 | A | T | Heterozygous |
| NC_037639.1 | 5289081 | SNV | 1 | A | G | Homozygous   |
| NC_037639.1 | 5289095 | SNV | 1 | A | T | Heterozygous |
| NC_037639.1 | 5289176 | SNV | 1 | C | T | Homozygous   |
| NC_037639.1 | 5289325 | SNV | 1 | T | C | Homozygous   |
| NC_037639.1 | 5289329 | SNV | 1 | C | T | Heterozygous |
| NC_037639.1 | 5289333 | SNV | 1 | T | C | Heterozygous |
| NC_037639.1 | 5289488 | SNV | 1 | C | T | Heterozygous |
| NC_037639.1 | 5289834 | SNV | 1 | G | A | Homozygous   |
| NC_037639.1 | 5289952 | SNV | 1 | G | A | Heterozygous |
| NC_037639.1 | 5290365 | SNV | 1 | G | A | Homozygous   |
| NC_037639.1 | 5290551 | SNV | 1 | C | T | Homozygous   |
| NC_037639.1 | 5290554 | SNV | 1 | G | A | Heterozygous |
| NC_037639.1 | 5290590 | SNV | 1 | C | T | Heterozygous |
| NC_037639.1 | 5290702 | SNV | 1 | A | G | Homozygous   |
| NC_037639.1 | 5290736 | SNV | 1 | C | A | Homozygous   |
| NC_037639.1 | 5290784 | SNV | 1 | A | G | Heterozygous |
| NC_037639.1 | 5290850 | SNV | 1 | A | G | Heterozygous |
| NC_037639.1 | 5290939 | SNV | 1 | G | A | Heterozygous |
| NC_037639.1 | 5292826 | SNV | 1 | C | T | Heterozygous |
| NC_037639.1 | 5292830 | SNV | 1 | C | T | Homozygous   |
| NC_037639.1 | 5293067 | SNV | 1 | T | C | Homozygous   |
| NC_037639.1 | 5293204 | SNV | 1 | C | G | Homozygous   |
| NC_037639.1 | 5293222 | SNV | 1 | T | C | Homozygous   |
| NC_037639.1 | 5293292 | SNV | 1 | A | C | Homozygous   |
| NC_037639.1 | 5294457 | SNV | 1 | A | G | Homozygous   |
| NC_037639.1 | 5294846 | SNV | 1 | T | A | Homozygous   |
| NC_037639.1 | 5294903 | SNV | 1 | A | C | Homozygous   |



|             |         |     |   |   |   |              |
|-------------|---------|-----|---|---|---|--------------|
| NC_037639.1 | 5294951 | SNV | 1 | G | A | Homozygous   |
| NC_037639.1 | 5319451 | SNV | 1 | C | T | Heterozygous |
| NC_037639.1 | 5325129 | SNV | 1 | T | C | Heterozygous |
| NC_037639.1 | 5369027 | SNV | 1 | T | C | Homozygous   |
| NC_037639.1 | 5369085 | SNV | 1 | T | A | Heterozygous |
| NC_037639.1 | 5369150 | SNV | 1 | G | T | Heterozygous |
| NC_037639.1 | 5369220 | SNV | 1 | G | A | Heterozygous |
| NC_037639.1 | 5369276 | SNV | 1 | T | C | Heterozygous |
| NC_037639.1 | 5369295 | SNV | 1 | G | A | Heterozygous |
| NC_037639.1 | 5369374 | SNV | 1 | A | G | Heterozygous |
| NC_037639.1 | 5369777 | SNV | 1 | C | T | Heterozygous |
| NC_037639.1 | 5369951 | SNV | 1 | C | T | Heterozygous |
| NC_037639.1 | 5369953 | SNV | 1 | C | T | Heterozygous |
| NC_037639.1 | 5378134 | SNV | 1 | T | C | Homozygous   |
| NC_037639.1 | 5378159 | SNV | 1 | A | C | Heterozygous |
| NC_037639.1 | 5378167 | SNV | 1 | A | G | Homozygous   |
| NC_037639.1 | 5379508 | SNV | 1 | T | C | Homozygous   |
| NC_037639.1 | 5379962 | SNV | 1 | A | T | Homozygous   |
| NC_037639.1 | 5382630 | SNV | 1 | T | C | Homozygous   |
| NC_037639.1 | 5382642 | SNV | 1 | G | A | Homozygous   |
| NC_037639.1 | 5382924 | SNV | 1 | T | A | Heterozygous |
| NC_037639.1 | 5382960 | SNV | 1 | G | A | Homozygous   |
| NC_037639.1 | 5382978 | SNV | 1 | A | G | Homozygous   |
| NC_037639.1 | 5383750 | SNV | 1 | A | G | Homozygous   |
| NC_037639.1 | 5383752 | SNV | 1 | A | T | Homozygous   |
| NC_037639.1 | 5383762 | SNV | 1 | A | T | Homozygous   |
| NC_037639.1 | 5383764 | SNV | 1 | A | T | Homozygous   |
| NC_037639.1 | 5383766 | SNV | 1 | T | C | Homozygous   |
| NC_037639.1 | 5383793 | SNV | 1 | T | C | Homozygous   |
| NC_037639.1 | 5383925 | SNV | 1 | G | A | Heterozygous |
| NC_037639.1 | 5384607 | SNV | 1 | G | A | Heterozygous |
| NC_037639.1 | 5384615 | SNV | 1 | G | A | Homozygous   |
| NC_037639.1 | 5386683 | SNV | 1 | A | G | Homozygous   |
| NC_037639.1 | 5386784 | SNV | 1 | T | C | Heterozygous |
| NC_037639.1 | 5386928 | SNV | 1 | G | A | Heterozygous |
| NC_037639.1 | 5386991 | SNV | 1 | G | C | Heterozygous |
| NC_037639.1 | 5387009 | SNV | 1 | T | C | Heterozygous |
| NC_037639.1 | 5387015 | SNV | 1 | C | T | Heterozygous |
| NC_037639.1 | 5395057 | SNV | 1 | A | G | Heterozygous |
| NC_037639.1 | 5395175 | SNV | 1 | T | C | Heterozygous |
| NC_037639.1 | 5395194 | SNV | 1 | C | T | Homozygous   |
| NC_037639.1 | 5395212 | SNV | 1 | C | T | Homozygous   |
| NC_037639.1 | 5395224 | SNV | 1 | C | T | Heterozygous |
| NC_037639.1 | 5395328 | SNV | 1 | A | G | Homozygous   |
| NC_037639.1 | 5429344 | SNV | 1 | G | A | Heterozygous |
| NC_037639.1 | 5429428 | SNV | 1 | A | G | Heterozygous |
| NC_037639.1 | 5429432 | SNV | 1 | A | G | Heterozygous |
| NC_037639.1 | 5437297 | SNV | 1 | C | G | Heterozygous |
| NC_037639.1 | 5437352 | SNV | 1 | T | C | Homozygous   |
| NC_037639.1 | 5442385 | SNV | 1 | A | G | Homozygous   |
| NC_037639.1 | 5442389 | SNV | 1 | G | A | Homozygous   |

|             |         |     |   |   |   |              |
|-------------|---------|-----|---|---|---|--------------|
| NC_037639.1 | 5442401 | SNV | 1 | G | A | Homozygous   |
| NC_037639.1 | 5442403 | SNV | 1 | A | G | Homozygous   |
| NC_037639.1 | 5461754 | SNV | 1 | C | T | Heterozygous |
| NC_037639.1 | 5461972 | SNV | 1 | A | G | Homozygous   |
| NC_037639.1 | 5462088 | SNV | 1 | T | C | Homozygous   |
| NC_037639.1 | 5462423 | SNV | 1 | G | C | Homozygous   |
| NC_037639.1 | 5470197 | SNV | 1 | G | A | Heterozygous |
| NC_037639.1 | 5470212 | SNV | 1 | T | C | Heterozygous |
| NC_037639.1 | 5470221 | SNV | 1 | C | T | Heterozygous |
| NC_037639.1 | 5470236 | SNV | 1 | G | A | Heterozygous |
| NC_037639.1 | 5470281 | SNV | 1 | T | C | Heterozygous |
| NC_037639.1 | 5500250 | SNV | 1 | C | G | Homozygous   |
| NC_037639.1 | 5500285 | SNV | 1 | C | A | Heterozygous |
| NC_037639.1 | 5500293 | SNV | 1 | A | G | Heterozygous |
| NC_037639.1 | 5500296 | SNV | 1 | T | A | Heterozygous |
| NC_037639.1 | 5500320 | SNV | 1 | G | A | Homozygous   |
| NC_037639.1 | 5500326 | SNV | 1 | T | A | Homozygous   |
| NC_037639.1 | 5500374 | SNV | 1 | T | A | Heterozygous |
| NC_037639.1 | 5500381 | SNV | 1 | A | C | Homozygous   |
| NC_037639.1 | 5500467 | SNV | 1 | A | G | Heterozygous |
| NC_037639.1 | 5500470 | SNV | 1 | G | A | Heterozygous |
| NC_037639.1 | 5500473 | SNV | 1 | T | A | Heterozygous |
| NC_037639.1 | 5500476 | SNV | 1 | G | A | Homozygous   |
| NC_037639.1 | 5500534 | SNV | 1 | C | T | Heterozygous |
| NC_037639.1 | 5500539 | SNV | 1 | A | T | Homozygous   |
| NC_037639.1 | 5500548 | SNV | 1 | A | T | Heterozygous |
| NC_037639.1 | 5500560 | SNV | 1 | T | G | Heterozygous |
| NC_037639.1 | 5500565 | SNV | 1 | C | T | Heterozygous |
| NC_037639.1 | 5500570 | SNV | 1 | T | C | Heterozygous |
| NC_037639.1 | 5500574 | SNV | 1 | C | T | Heterozygous |
| NC_037639.1 | 5500695 | SNV | 1 | A | G | Homozygous   |
| NC_037639.1 | 5500698 | SNV | 1 | C | T | Homozygous   |
| NC_037639.1 | 5500701 | SNV | 1 | T | G | Homozygous   |
| NC_037639.1 | 5500712 | SNV | 1 | C | A | Homozygous   |
| NC_037639.1 | 5502668 | SNV | 1 | T | C | Homozygous   |
| NC_037639.1 | 5502771 | SNV | 1 | A | G | Homozygous   |
| NC_037639.1 | 5503006 | SNV | 1 | T | A | Heterozygous |
| NC_037639.1 | 5503008 | SNV | 1 | G | A | Heterozygous |
| NC_037639.1 | 5504011 | SNV | 1 | C | T | Heterozygous |
| NC_037639.1 | 5504241 | SNV | 1 | T | C | Homozygous   |
| NC_037639.1 | 5504509 | SNV | 1 | A | G | Heterozygous |
| NC_037639.1 | 5504731 | SNV | 1 | A | G | Heterozygous |
| NC_037639.1 | 5505331 | SNV | 1 | T | C | Homozygous   |
| NC_037639.1 | 5515042 | SNV | 1 | T | C | Homozygous   |
| NC_037639.1 | 5515126 | SNV | 1 | A | G | Homozygous   |
| NC_037639.1 | 5515888 | SNV | 1 | C | G | Heterozygous |
| NC_037639.1 | 5516092 | SNV | 1 | T | C | Homozygous   |
| NC_037639.1 | 5516147 | SNV | 1 | A | G | Homozygous   |
| NC_037639.1 | 5521390 | SNV | 1 | G | C | Heterozygous |
| NC_037639.1 | 5521457 | SNV | 1 | C | T | Homozygous   |
| NC_037639.1 | 5521792 | SNV | 1 | A | G | Homozygous   |

|             |         |     |   |   |   |              |
|-------------|---------|-----|---|---|---|--------------|
| NC_037639.1 | 5521806 | SNV | 1 | A | G | Homozygous   |
| NC_037639.1 | 5537608 | SNV | 1 | A | G | Heterozygous |
| NC_037639.1 | 5538085 | SNV | 1 | G | A | Heterozygous |
| NC_037639.1 | 5538109 | SNV | 1 | G | A | Homozygous   |
| NC_037639.1 | 5538130 | SNV | 1 | A | G | Heterozygous |
| NC_037639.1 | 5538177 | SNV | 1 | A | G | Homozygous   |
| NC_037639.1 | 5538209 | SNV | 1 | T | C | Homozygous   |
| NC_037639.1 | 5549242 | SNV | 1 | T | C | Homozygous   |
| NC_037639.1 | 5549395 | SNV | 1 | A | G | Homozygous   |
| NC_037639.1 | 5553782 | SNV | 1 | T | C | Homozygous   |
| NC_037639.1 | 5553911 | SNV | 1 | C | T | Heterozygous |
| NC_037639.1 | 5554416 | SNV | 1 | A | G | Homozygous   |
| NC_037639.1 | 5554543 | SNV | 1 | T | C | Homozygous   |
| NC_037639.1 | 5555245 | SNV | 1 | T | C | Homozygous   |
| NC_037639.1 | 5555507 | SNV | 1 | G | C | Homozygous   |
| NC_037639.1 | 5557297 | SNV | 1 | G | A | Heterozygous |
| NC_037639.1 | 5557460 | SNV | 1 | A | G | Homozygous   |
| NC_037639.1 | 5558172 | SNV | 1 | T | C | Homozygous   |
| NC_037639.1 | 5558241 | SNV | 1 | T | C | Heterozygous |
| NC_037639.1 | 5558310 | SNV | 1 | C | T | Heterozygous |
| NC_037639.1 | 5567207 | SNV | 1 | C | A | Homozygous   |
| NC_037639.1 | 5567210 | SNV | 1 | A | C | Homozygous   |
| NC_037639.1 | 5567726 | SNV | 1 | A | G | Homozygous   |
| NC_037639.1 | 5569988 | SNV | 1 | G | A | Homozygous   |
| NC_037639.1 | 5599745 | SNV | 1 | G | A | Homozygous   |
| NC_037639.1 | 5599796 | SNV | 1 | T | C | Homozygous   |
| NC_037639.1 | 5600986 | SNV | 1 | A | G | Heterozygous |
| NC_037639.1 | 5601212 | SNV | 1 | G | A | Heterozygous |
| NC_037639.1 | 5601219 | SNV | 1 | G | A | Heterozygous |
| NC_037639.1 | 5601222 | SNV | 1 | A | G | Heterozygous |
| NC_037639.1 | 5601270 | SNV | 1 | G | A | Homozygous   |
| NC_037639.1 | 5606121 | SNV | 1 | G | A | Homozygous   |
| NC_037639.1 | 5606133 | SNV | 1 | G | A | Heterozygous |
| NC_037639.1 | 5606370 | SNV | 1 | T | C | Heterozygous |
| NC_037639.1 | 5606372 | SNV | 1 | T | C | Heterozygous |
| NC_037639.1 | 5606374 | SNV | 1 | A | C | Heterozygous |
| NC_037639.1 | 5606376 | SNV | 1 | C | T | Heterozygous |
| NC_037639.1 | 5606381 | SNV | 1 | A | G | Heterozygous |
| NC_037639.1 | 5612576 | SNV | 1 | C | T | Heterozygous |
| NC_037639.1 | 5612582 | SNV | 1 | C | T | Heterozygous |
| NC_037639.1 | 5613222 | SNV | 1 | G | A | Heterozygous |
| NC_037639.1 | 5613259 | SNV | 1 | G | A | Homozygous   |
| NC_037639.1 | 5613650 | SNV | 1 | G | A | Homozygous   |
| NC_037639.1 | 5621370 | SNV | 1 | T | C | Homozygous   |
| NC_037639.1 | 5630726 | SNV | 1 | G | A | Heterozygous |
| NC_037639.1 | 5630736 | SNV | 1 | G | A | Heterozygous |
| NC_037639.1 | 5630808 | SNV | 1 | A | G | Homozygous   |
| NC_037639.1 | 5630821 | SNV | 1 | T | A | Homozygous   |
| NC_037639.1 | 5630849 | SNV | 1 | C | G | Homozygous   |
| NC_037639.1 | 5630870 | SNV | 1 | G | A | Homozygous   |
| NC_037639.1 | 5630912 | SNV | 1 | G | C | Homozygous   |

|             |         |     |   |   |   |              |
|-------------|---------|-----|---|---|---|--------------|
| NC_037639.1 | 5630925 | SNV | 1 | G | A | Homozygous   |
| NC_037639.1 | 5632200 | SNV | 1 | C | T | Heterozygous |
| NC_037639.1 | 5632267 | SNV | 1 | C | T | Homozygous   |
| NC_037639.1 | 5632285 | SNV | 1 | C | A | Heterozygous |
| NC_037639.1 | 5632330 | SNV | 1 | A | C | Homozygous   |
| NC_037639.1 | 5632359 | SNV | 1 | G | A | Heterozygous |
| NC_037639.1 | 5632492 | SNV | 1 | A | G | Homozygous   |
| NC_037639.1 | 5632514 | SNV | 1 | A | G | Heterozygous |
| NC_037639.1 | 5632529 | SNV | 1 | G | C | Homozygous   |
| NC_037639.1 | 5632608 | SNV | 1 | A | G | Homozygous   |
| NC_037639.1 | 5632647 | SNV | 1 | A | G | Homozygous   |
| NC_037639.1 | 5633535 | SNV | 1 | T | C | Homozygous   |
| NC_037639.1 | 5633575 | SNV | 1 | G | A | Homozygous   |
| NC_037639.1 | 5638534 | SNV | 1 | G | A | Homozygous   |
| NC_037639.1 | 5639189 | SNV | 1 | G | A | Homozygous   |
| NC_037639.1 | 5640278 | SNV | 1 | G | A | Heterozygous |
| NC_037639.1 | 5640294 | SNV | 1 | T | C | Homozygous   |
| NC_037639.1 | 5640371 | SNV | 1 | C | G | Heterozygous |
| NC_037639.1 | 5640380 | SNV | 1 | T | C | Homozygous   |
| NC_037639.1 | 5641869 | SNV | 1 | T | C | Heterozygous |
| NC_037639.1 | 5642088 | SNV | 1 | T | C | Heterozygous |
| NC_037639.1 | 5642343 | SNV | 1 | A | G | Homozygous   |
| NC_037639.1 | 5642929 | SNV | 1 | C | A | Homozygous   |
| NC_037639.1 | 5643271 | SNV | 1 | A | G | Homozygous   |
| NC_037639.1 | 5643336 | SNV | 1 | A | G | Homozygous   |
| NC_037639.1 | 5643442 | SNV | 1 | T | C | Homozygous   |
| NC_037639.1 | 5643452 | SNV | 1 | C | G | Homozygous   |
| NC_037639.1 | 5643652 | SNV | 1 | A | G | Homozygous   |
| NC_037639.1 | 5643987 | SNV | 1 | C | T | Homozygous   |
| NC_037639.1 | 5644045 | SNV | 1 | A | G | Homozygous   |
| NC_037639.1 | 5644077 | SNV | 1 | C | A | Heterozygous |
| NC_037639.1 | 5644150 | SNV | 1 | G | C | Heterozygous |
| NC_037639.1 | 5647045 | SNV | 1 | T | C | Homozygous   |
| NC_037639.1 | 5647139 | SNV | 1 | T | C | Homozygous   |
| NC_037639.1 | 5647184 | SNV | 1 | A | G | Homozygous   |
| NC_037639.1 | 5647209 | SNV | 1 | C | T | Heterozygous |
| NC_037639.1 | 5647429 | SNV | 1 | G | A | Heterozygous |
| NC_037639.1 | 5651969 | SNV | 1 | C | A | Heterozygous |
| NC_037639.1 | 5652093 | SNV | 1 | T | C | Heterozygous |
| NC_037639.1 | 5653504 | SNV | 1 | C | T | Heterozygous |
| NC_037639.1 | 5653506 | SNV | 1 | T | A | Heterozygous |
| NC_037639.1 | 5654243 | SNV | 1 | C | G | Homozygous   |
| NC_037639.1 | 5654337 | SNV | 1 | G | A | Homozygous   |
| NC_037639.1 | 5654371 | SNV | 1 | G | A | Heterozygous |
| NC_037639.1 | 5654982 | SNV | 1 | T | C | Homozygous   |
| NC_037639.1 | 5654991 | SNV | 1 | A | G | Homozygous   |
| NC_037639.1 | 5655771 | SNV | 1 | T | C | Homozygous   |
| NC_037639.1 | 5655965 | SNV | 1 | A | C | Homozygous   |
| NC_037639.1 | 5656464 | SNV | 1 | G | A | Homozygous   |
| NC_037639.1 | 5656466 | SNV | 1 | A | G | Heterozygous |
| NC_037639.1 | 5656470 | SNV | 1 | T | C | Homozygous   |

|             |         |     |   |   |   |              |
|-------------|---------|-----|---|---|---|--------------|
| NC_037639.1 | 5656749 | SNV | 1 | G | A | Homozygous   |
| NC_037639.1 | 5656791 | SNV | 1 | T | C | Homozygous   |
| NC_037639.1 | 5656999 | SNV | 1 | T | C | Homozygous   |
| NC_037639.1 | 5657179 | SNV | 1 | A | G | Heterozygous |
| NC_037639.1 | 5657227 | SNV | 1 | A | G | Homozygous   |
| NC_037639.1 | 5657237 | SNV | 1 | G | A | Heterozygous |
| NC_037639.1 | 5657430 | SNV | 1 | T | C | Heterozygous |
| NC_037639.1 | 5657618 | SNV | 1 | A | C | Homozygous   |
| NC_037639.1 | 5657661 | SNV | 1 | T | C | Heterozygous |
| NC_037639.1 | 5657831 | SNV | 1 | T | C | Heterozygous |
| NC_037639.1 | 5657996 | SNV | 1 | T | C | Homozygous   |
| NC_037639.1 | 5658282 | SNV | 1 | T | A | Homozygous   |
| NC_037639.1 | 5658539 | SNV | 1 | G | A | Homozygous   |
| NC_037639.1 | 5658944 | SNV | 1 | A | G | Homozygous   |
| NC_037639.1 | 5659710 | SNV | 1 | T | C | Homozygous   |
| NC_037639.1 | 5660007 | SNV | 1 | G | A | Homozygous   |
| NC_037639.1 | 5660120 | SNV | 1 | A | G | Homozygous   |
| NC_037639.1 | 5660126 | SNV | 1 | G | T | Homozygous   |
| NC_037639.1 | 5660128 | SNV | 1 | A | G | Homozygous   |
| NC_037639.1 | 5660358 | SNV | 1 | A | G | Homozygous   |
| NC_037639.1 | 5660520 | SNV | 1 | C | T | Homozygous   |
| NC_037639.1 | 5662998 | SNV | 1 | A | G | Heterozygous |
| NC_037639.1 | 5663023 | SNV | 1 | C | T | Heterozygous |
| NC_037639.1 | 5663025 | SNV | 1 | G | C | Homozygous   |
| NC_037639.1 | 5665033 | SNV | 1 | A | T | Homozygous   |
| NC_037639.1 | 5674086 | SNV | 1 | G | A | Heterozygous |
| NC_037639.1 | 5674115 | SNV | 1 | G | A | Heterozygous |
| NC_037639.1 | 5674225 | SNV | 1 | G | A | Heterozygous |
| NC_037639.1 | 5674248 | SNV | 1 | G | A | Heterozygous |
| NC_037639.1 | 5686831 | SNV | 1 | C | T | Heterozygous |
| NC_037639.1 | 5686849 | SNV | 1 | T | C | Homozygous   |
| NC_037639.1 | 5687168 | SNV | 1 | G | A | Homozygous   |
| NC_037639.1 | 5687496 | SNV | 1 | G | A | Homozygous   |
| NC_037639.1 | 5697665 | SNV | 1 | C | T | Heterozygous |
| NC_037639.1 | 5697787 | SNV | 1 | C | T | Heterozygous |
| NC_037639.1 | 5697844 | SNV | 1 | G | A | Homozygous   |
| NC_037639.1 | 5697983 | SNV | 1 | A | G | Homozygous   |
| NC_037639.1 | 5697993 | SNV | 1 | G | A | Homozygous   |
| NC_037639.1 | 5698317 | SNV | 1 | A | G | Homozygous   |
| NC_037639.1 | 5698328 | SNV | 1 | A | G | Homozygous   |
| NC_037639.1 | 5705062 | SNV | 1 | C | T | Heterozygous |
| NC_037639.1 | 5705281 | SNV | 1 | C | T | Heterozygous |
| NC_037639.1 | 5705337 | SNV | 1 | G | A | Homozygous   |
| NC_037639.1 | 5707910 | SNV | 1 | A | G | Homozygous   |
| NC_037639.1 | 5707928 | SNV | 1 | A | G | Homozygous   |
| NC_037639.1 | 5708073 | SNV | 1 | T | C | Heterozygous |
| NC_037639.1 | 5711368 | SNV | 1 | A | G | Homozygous   |
| NC_037639.1 | 5711377 | SNV | 1 | A | T | Homozygous   |
| NC_037639.1 | 5716330 | SNV | 1 | G | A | Homozygous   |
| NC_037639.1 | 5716335 | SNV | 1 | T | A | Homozygous   |
| NC_037639.1 | 5721015 | SNV | 1 | T | C | Homozygous   |

|             |         |     |   |   |   |              |
|-------------|---------|-----|---|---|---|--------------|
| NC_037639.1 | 5721247 | SNV | 1 | T | C | Homozygous   |
| NC_037639.1 | 5723179 | SNV | 1 | T | C | Homozygous   |
| NC_037639.1 | 5724315 | SNV | 1 | G | A | Homozygous   |
| NC_037639.1 | 5724328 | SNV | 1 | T | C | Heterozygous |
| NC_037639.1 | 5724346 | SNV | 1 | C | A | Homozygous   |
| NC_037639.1 | 5724747 | SNV | 1 | C | T | Heterozygous |
| NC_037639.1 | 5724852 | SNV | 1 | G | A | Heterozygous |
| NC_037639.1 | 5725012 | SNV | 1 | T | C | Homozygous   |
| NC_037639.1 | 5725617 | SNV | 1 | C | T | Heterozygous |
| NC_037639.1 | 5726162 | SNV | 1 | A | G | Heterozygous |
| NC_037639.1 | 5726295 | SNV | 1 | C | T | Heterozygous |
| NC_037639.1 | 5729528 | SNV | 1 | G | A | Homozygous   |
| NC_037639.1 | 5730318 | SNV | 1 | C | T | Heterozygous |
| NC_037639.1 | 5730321 | SNV | 1 | C | T | Heterozygous |
| NC_037639.1 | 5730421 | SNV | 1 | T | C | Homozygous   |
| NC_037639.1 | 5730733 | SNV | 1 | A | G | Homozygous   |
| NC_037639.1 | 5730775 | SNV | 1 | C | T | Heterozygous |
| NC_037639.1 | 5730783 | SNV | 1 | A | G | Heterozygous |
| NC_037639.1 | 5730785 | SNV | 1 | A | G | Heterozygous |
| NC_037639.1 | 5730792 | SNV | 1 | T | C | Heterozygous |
| NC_037639.1 | 5730793 | SNV | 1 | T | A | Heterozygous |
| NC_037639.1 | 5730795 | SNV | 1 | T | C | Heterozygous |
| NC_037639.1 | 5731140 | SNV | 1 | C | T | Heterozygous |
| NC_037639.1 | 5733096 | SNV | 1 | C | T | Heterozygous |
| NC_037639.1 | 5733222 | SNV | 1 | A | G | Homozygous   |
| NC_037639.1 | 5733497 | SNV | 1 | C | T | Heterozygous |
| NC_037639.1 | 5733501 | SNV | 1 | T | C | Heterozygous |
| NC_037639.1 | 5733633 | SNV | 1 | T | C | Homozygous   |
| NC_037639.1 | 5733697 | SNV | 1 | C | A | Heterozygous |
| NC_037639.1 | 5734076 | SNV | 1 | T | C | Homozygous   |
| NC_037639.1 | 5734083 | SNV | 1 | T | C | Homozygous   |
| NC_037639.1 | 5734101 | SNV | 1 | C | T | Heterozygous |
| NC_037639.1 | 5734112 | SNV | 1 | G | C | Heterozygous |
| NC_037639.1 | 5735279 | SNV | 1 | T | C | Homozygous   |
| NC_037639.1 | 5735454 | SNV | 1 | G | A | Heterozygous |
| NC_037639.1 | 5735529 | SNV | 1 | G | A | Homozygous   |
| NC_037639.1 | 5735991 | SNV | 1 | G | A | Homozygous   |
| NC_037639.1 | 5736741 | SNV | 1 | T | A | Homozygous   |
| NC_037639.1 | 5736787 | SNV | 1 | T | C | Heterozygous |
| NC_037639.1 | 5740872 | SNV | 1 | G | A | Heterozygous |
| NC_037639.1 | 5740882 | SNV | 1 | C | T | Heterozygous |
| NC_037639.1 | 5740922 | SNV | 1 | T | C | Heterozygous |
| NC_037639.1 | 5740950 | SNV | 1 | A | C | Homozygous   |
| NC_037639.1 | 5740958 | SNV | 1 | C | T | Homozygous   |
| NC_037639.1 | 5769234 | SNV | 1 | G | A | Heterozygous |
| NC_037639.1 | 5769250 | SNV | 1 | G | A | Heterozygous |
| NC_037639.1 | 5791331 | SNV | 1 | G | A | Homozygous   |
| NC_037639.1 | 5791336 | SNV | 1 | G | A | Homozygous   |
| NC_037639.1 | 5791339 | SNV | 1 | G | A | Homozygous   |
| NC_037639.1 | 5791346 | SNV | 1 | A | G | Homozygous   |
| NC_037639.1 | 5791373 | SNV | 1 | A | G | Homozygous   |

|             |         |     |   |   |   |              |
|-------------|---------|-----|---|---|---|--------------|
| NC_037639.1 | 5791381 | SNV | 1 | T | A | Homozygous   |
| NC_037639.1 | 5791383 | SNV | 1 | T | G | Homozygous   |
| NC_037639.1 | 5792131 | SNV | 1 | A | G | Heterozygous |
| NC_037639.1 | 5792164 | SNV | 1 | G | A | Heterozygous |
| NC_037639.1 | 5792166 | SNV | 1 | C | T | Heterozygous |
| NC_037639.1 | 5792460 | SNV | 1 | C | G | Homozygous   |
| NC_037639.1 | 5792471 | SNV | 1 | A | T | Heterozygous |
| NC_037639.1 | 5792480 | SNV | 1 | A | T | Heterozygous |
| NC_037639.1 | 5792489 | SNV | 1 | A | T | Homozygous   |
| NC_037639.1 | 5792518 | SNV | 1 | A | C | Homozygous   |
| NC_037639.1 | 5792520 | SNV | 1 | A | T | Homozygous   |
| NC_037639.1 | 5792522 | SNV | 1 | C | A | Homozygous   |
| NC_037639.1 | 5792971 | SNV | 1 | T | C | Heterozygous |
| NC_037639.1 | 5792973 | SNV | 1 | C | T | Heterozygous |
| NC_037639.1 | 5792976 | SNV | 1 | C | G | Heterozygous |
| NC_037639.1 | 5792980 | SNV | 1 | C | T | Heterozygous |
| NC_037639.1 | 5792988 | SNV | 1 | C | T | Heterozygous |
| NC_037639.1 | 5792996 | SNV | 1 | T | A | Heterozygous |
| NC_037639.1 | 5793435 | SNV | 1 | A | G | Heterozygous |
| NC_037639.1 | 5793786 | SNV | 1 | G | A | Heterozygous |
| NC_037639.1 | 5793792 | SNV | 1 | A | G | Homozygous   |
| NC_037639.1 | 5793988 | SNV | 1 | C | T | Homozygous   |
| NC_037639.1 | 5794098 | SNV | 1 | A | G | Homozygous   |
| NC_037639.1 | 5794198 | SNV | 1 | A | G | Homozygous   |
| NC_037639.1 | 5794210 | SNV | 1 | A | G | Heterozygous |
| NC_037639.1 | 5805595 | SNV | 1 | G | C | Homozygous   |
| NC_037639.1 | 5805611 | SNV | 1 | G | C | Heterozygous |
| NC_037639.1 | 5805617 | SNV | 1 | G | A | Heterozygous |
| NC_037639.1 | 5805626 | SNV | 1 | C | T | Heterozygous |
| NC_037639.1 | 5805711 | SNV | 1 | C | A | Homozygous   |
| NC_037639.1 | 5805747 | SNV | 1 | A | G | Homozygous   |
| NC_037639.1 | 5805809 | SNV | 1 | G | A | Heterozygous |
| NC_037639.1 | 5819394 | SNV | 1 | G | A | Heterozygous |
| NC_037639.1 | 5819453 | SNV | 1 | A | G | Homozygous   |
| NC_037639.1 | 5827811 | SNV | 1 | G | A | Heterozygous |
| NC_037639.1 | 5827823 | SNV | 1 | T | C | Homozygous   |
| NC_037639.1 | 5827855 | SNV | 1 | G | A | Homozygous   |
| NC_037639.1 | 5827863 | SNV | 1 | T | A | Homozygous   |
| NC_037639.1 | 5833899 | SNV | 1 | G | A | Homozygous   |
| NC_037639.1 | 5833901 | SNV | 1 | A | T | Heterozygous |
| NC_037639.1 | 5834167 | SNV | 1 | G | A | Heterozygous |
| NC_037639.1 | 5834326 | SNV | 1 | G | C | Homozygous   |
| NC_037639.1 | 5834377 | SNV | 1 | T | C | Homozygous   |
| NC_037639.1 | 5834433 | SNV | 1 | A | G | Homozygous   |
| NC_037639.1 | 5836668 | SNV | 1 | G | T | Heterozygous |
| NC_037639.1 | 5836672 | SNV | 1 | A | G | Homozygous   |
| NC_037639.1 | 5836691 | SNV | 1 | G | A | Heterozygous |
| NC_037639.1 | 5836695 | SNV | 1 | A | G | Homozygous   |
| NC_037639.1 | 5836701 | SNV | 1 | A | G | Heterozygous |
| NC_037639.1 | 5847643 | SNV | 1 | G | A | Homozygous   |
| NC_037639.1 | 5857505 | SNV | 1 | C | T | Homozygous   |

|             |         |     |   |   |   |              |
|-------------|---------|-----|---|---|---|--------------|
| NC_037639.1 | 5857514 | SNV | 1 | T | C | Heterozygous |
| NC_037639.1 | 5857554 | SNV | 1 | T | C | Heterozygous |
| NC_037639.1 | 5857556 | SNV | 1 | C | A | Heterozygous |
| NC_037639.1 | 5857562 | SNV | 1 | A | C | Homozygous   |
| NC_037639.1 | 5857566 | SNV | 1 | A | C | Heterozygous |
| NC_037639.1 | 5857574 | SNV | 1 | T | C | Homozygous   |
| NC_037639.1 | 5860600 | SNV | 1 | T | C | Homozygous   |
| NC_037639.1 | 5860741 | SNV | 1 | C | T | Homozygous   |
| NC_037639.1 | 5860745 | SNV | 1 | C | T | Heterozygous |
| NC_037639.1 | 5861486 | SNV | 1 | G | T | Heterozygous |
| NC_037639.1 | 5861535 | SNV | 1 | A | G | Heterozygous |
| NC_037639.1 | 5861557 | SNV | 1 | C | T | Heterozygous |
| NC_037639.1 | 5861953 | SNV | 1 | T | G | Heterozygous |
| NC_037639.1 | 5861956 | SNV | 1 | C | T | Heterozygous |
| NC_037639.1 | 5861958 | SNV | 1 | T | G | Heterozygous |
| NC_037639.1 | 5861960 | SNV | 1 | T | A | Heterozygous |
| NC_037639.1 | 5861963 | SNV | 1 | C | T | Heterozygous |
| NC_037639.1 | 5861969 | SNV | 1 | C | T | Heterozygous |
| NC_037639.1 | 5861975 | SNV | 1 | C | T | Heterozygous |
| NC_037639.1 | 5861978 | SNV | 1 | T | A | Heterozygous |
| NC_037639.1 | 5861980 | SNV | 1 | T | A | Homozygous   |
| NC_037639.1 | 5861982 | SNV | 1 | T | C | Heterozygous |
| NC_037639.1 | 5861987 | SNV | 1 | C | T | Heterozygous |
| NC_037639.1 | 5862022 | SNV | 1 | T | C | Homozygous   |
| NC_037639.1 | 5862151 | SNV | 1 | T | C | Heterozygous |
| NC_037639.1 | 5864309 | SNV | 1 | G | A | Heterozygous |
| NC_037639.1 | 5864408 | SNV | 1 | C | T | Heterozygous |
| NC_037639.1 | 5864455 | SNV | 1 | G | A | Heterozygous |
| NC_037639.1 | 5866198 | SNV | 1 | A | T | Homozygous   |
| NC_037639.1 | 5866223 | SNV | 1 | A | T | Homozygous   |
| NC_037639.1 | 5867776 | SNV | 1 | C | T | Heterozygous |
| NC_037639.1 | 5867811 | SNV | 1 | C | A | Heterozygous |
| NC_037639.1 | 5867819 | SNV | 1 | C | T | Heterozygous |
| NC_037639.1 | 5867823 | SNV | 1 | T | C | Heterozygous |
| NC_037639.1 | 5867827 | SNV | 1 | G | A | Heterozygous |
| NC_037639.1 | 5867855 | SNV | 1 | A | G | Homozygous   |
| NC_037639.1 | 5867922 | SNV | 1 | C | A | Heterozygous |
| NC_037639.1 | 5868038 | SNV | 1 | G | T | Heterozygous |
| NC_037639.1 | 5868071 | SNV | 1 | C | T | Heterozygous |
| NC_037639.1 | 5868076 | SNV | 1 | C | T | Homozygous   |
| NC_037639.1 | 5871721 | SNV | 1 | C | T | Heterozygous |
| NC_037639.1 | 5873572 | SNV | 1 | A | G | Homozygous   |
| NC_037639.1 | 5873617 | SNV | 1 | G | A | Heterozygous |
| NC_037639.1 | 5874607 | SNV | 1 | T | A | Heterozygous |
| NC_037639.1 | 5874646 | SNV | 1 | A | G | Heterozygous |
| NC_037639.1 | 5874852 | SNV | 1 | C | T | Homozygous   |
| NC_037639.1 | 5874902 | SNV | 1 | C | T | Homozygous   |
| NC_037639.1 | 5875048 | SNV | 1 | T | C | Heterozygous |
| NC_037639.1 | 5875052 | SNV | 1 | G | A | Heterozygous |
| NC_037639.1 | 5875064 | SNV | 1 | A | T | Homozygous   |
| NC_037639.1 | 5875071 | SNV | 1 | A | G | Homozygous   |



|             |         |     |   |   |   |              |
|-------------|---------|-----|---|---|---|--------------|
| NC_037639.1 | 5875097 | SNV | 1 | A | T | Homozygous   |
| NC_037639.1 | 5875780 | SNV | 1 | G | A | Homozygous   |
| NC_037639.1 | 5876592 | SNV | 1 | C | T | Heterozygous |
| NC_037639.1 | 5881837 | SNV | 1 | G | A | Homozygous   |
| NC_037639.1 | 5898430 | SNV | 1 | T | C | Homozygous   |
| NC_037639.1 | 5901418 | SNV | 1 | C | G | Homozygous   |
| NC_037639.1 | 5901622 | SNV | 1 | T | G | Homozygous   |
| NC_037639.1 | 5901650 | SNV | 1 | G | A | Heterozygous |
| NC_037639.1 | 5901777 | SNV | 1 | T | C | Homozygous   |
| NC_037639.1 | 5909435 | SNV | 1 | G | A | Heterozygous |
| NC_037639.1 | 5909573 | SNV | 1 | G | A | Heterozygous |
| NC_037639.1 | 5909675 | SNV | 1 | G | A | Heterozygous |
| NC_037639.1 | 5909937 | SNV | 1 | G | A | Heterozygous |
| NC_037639.1 | 5910102 | SNV | 1 | C | G | Heterozygous |
| NC_037639.1 | 5913928 | SNV | 1 | C | A | Homozygous   |
| NC_037639.1 | 5913972 | SNV | 1 | A | G | Homozygous   |
| NC_037639.1 | 5919166 | SNV | 1 | A | G | Homozygous   |
| NC_037639.1 | 5919244 | SNV | 1 | C | T | Homozygous   |
| NC_037639.1 | 5919259 | SNV | 1 | T | C | Homozygous   |
| NC_037639.1 | 5924210 | SNV | 1 | T | G | Homozygous   |
| NC_037639.1 | 5924252 | SNV | 1 | G | A | Heterozygous |
| NC_037639.1 | 5940642 | SNV | 1 | C | T | Homozygous   |
| NC_037639.1 | 5940655 | SNV | 1 | T | C | Homozygous   |
| NC_037639.1 | 5942694 | SNV | 1 | A | G | Homozygous   |
| NC_037639.1 | 5948278 | SNV | 1 | T | C | Heterozygous |
| NC_037639.1 | 5948297 | SNV | 1 | T | C | Heterozygous |
| NC_037639.1 | 5952168 | SNV | 1 | G | A | Homozygous   |
| NC_037639.1 | 5952598 | SNV | 1 | A | G | Homozygous   |
| NC_037639.1 | 5953189 | SNV | 1 | G | T | Heterozygous |
| NC_037639.1 | 5953199 | SNV | 1 | T | C | Homozygous   |
| NC_037639.1 | 5953242 | SNV | 1 | G | A | Heterozygous |
| NC_037639.1 | 5953505 | SNV | 1 | A | G | Homozygous   |
| NC_037639.1 | 5953507 | SNV | 1 | A | G | Homozygous   |
| NC_037639.1 | 5954385 | SNV | 1 | G | A | Heterozygous |
| NC_037639.1 | 5954389 | SNV | 1 | T | C | Heterozygous |
| NC_037639.1 | 5954390 | SNV | 1 | G | A | Heterozygous |
| NC_037639.1 | 5954611 | SNV | 1 | T | A | Heterozygous |
| NC_037639.1 | 5954661 | SNV | 1 | G | A | Homozygous   |
| NC_037639.1 | 5955776 | SNV | 1 | G | A | Heterozygous |
| NC_037639.1 | 5956049 | SNV | 1 | C | T | Homozygous   |
| NC_037639.1 | 5956061 | SNV | 1 | A | G | Homozygous   |
| NC_037639.1 | 5957122 | SNV | 1 | T | C | Homozygous   |
| NC_037639.1 | 5958018 | SNV | 1 | C | A | Homozygous   |
| NC_037639.1 | 5958160 | SNV | 1 | A | G | Homozygous   |
| NC_037639.1 | 5959099 | SNV | 1 | G | A | Homozygous   |
| NC_037639.1 | 5959442 | SNV | 1 | C | T | Homozygous   |
| NC_037639.1 | 5959600 | SNV | 1 | G | A | Heterozygous |
| NC_037639.1 | 5960597 | SNV | 1 | G | A | Heterozygous |
| NC_037639.1 | 5962187 | SNV | 1 | T | C | Homozygous   |
| NC_037639.1 | 5963645 | SNV | 1 | C | T | Homozygous   |
| NC_037639.1 | 5963655 | SNV | 1 | T | A | Homozygous   |

|             |         |     |   |   |   |              |
|-------------|---------|-----|---|---|---|--------------|
| NC_037639.1 | 5963657 | SNV | 1 | A | T | Homozygous   |
| NC_037639.1 | 5963664 | SNV | 1 | T | C | Homozygous   |
| NC_037639.1 | 5967407 | SNV | 1 | C | T | Homozygous   |
| NC_037639.1 | 5968115 | SNV | 1 | C | T | Homozygous   |
| NC_037639.1 | 5984862 | SNV | 1 | C | A | Homozygous   |
| NC_037639.1 | 5984864 | SNV | 1 | A | C | Homozygous   |
| NC_037639.1 | 5984910 | SNV | 1 | G | T | Homozygous   |
| NC_037639.1 | 5984914 | SNV | 1 | T | G | Homozygous   |
| NC_037639.1 | 5984917 | SNV | 1 | C | T | Homozygous   |
| NC_037639.1 | 6011561 | SNV | 1 | G | A | Heterozygous |
| NC_037639.1 | 6027487 | SNV | 1 | G | A | Heterozygous |
| NC_037639.1 | 6030490 | SNV | 1 | T | C | Homozygous   |
| NC_037639.1 | 6030496 | SNV | 1 | C | G | Heterozygous |
| NC_037639.1 | 6030496 | SNV | 1 | C | T | Heterozygous |
| NC_037639.1 | 6030504 | SNV | 1 | C | T | Heterozygous |
| NC_037639.1 | 6030506 | SNV | 1 | C | T | Homozygous   |
| NC_037639.1 | 6030508 | SNV | 1 | T | A | Homozygous   |
| NC_037639.1 | 6032518 | SNV | 1 | T | C | Homozygous   |
| NC_037639.1 | 6032559 | SNV | 1 | G | A | Heterozygous |
| NC_037639.1 | 6032574 | SNV | 1 | G | A | Homozygous   |
| NC_037639.1 | 6034596 | SNV | 1 | G | A | Homozygous   |
| NC_037639.1 | 6034603 | SNV | 1 | G | A | Homozygous   |
| NC_037639.1 | 6041561 | SNV | 1 | C | T | Heterozygous |
| NC_037639.1 | 6041642 | SNV | 1 | G | A | Heterozygous |
| NC_037639.1 | 6076661 | SNV | 1 | A | T | Heterozygous |
| NC_037639.1 | 6076665 | SNV | 1 | A | T | Heterozygous |
| NC_037639.1 | 6091353 | SNV | 1 | A | G | Heterozygous |
| NC_037639.1 | 6091533 | SNV | 1 | G | A | Heterozygous |
| NC_037639.1 | 6091546 | SNV | 1 | A | G | Homozygous   |
| NC_037639.1 | 6091588 | SNV | 1 | G | A | Heterozygous |
| NC_037639.1 | 6091592 | SNV | 1 | G | A | Homozygous   |
| NC_037639.1 | 6091696 | SNV | 1 | A | G | Homozygous   |
| NC_037639.1 | 6091701 | SNV | 1 | A | G | Homozygous   |
| NC_037639.1 | 6094000 | SNV | 1 | T | G | Heterozygous |
| NC_037639.1 | 6095678 | SNV | 1 | T | C | Homozygous   |
| NC_037639.1 | 6095721 | SNV | 1 | G | A | Homozygous   |
| NC_037639.1 | 6096079 | SNV | 1 | A | G | Homozygous   |
| NC_037639.1 | 6096108 | SNV | 1 | A | G | Homozygous   |
| NC_037639.1 | 6096189 | SNV | 1 | T | C | Heterozygous |
| NC_037639.1 | 6096210 | SNV | 1 | A | G | Heterozygous |
| NC_037639.1 | 6096222 | SNV | 1 | A | T | Heterozygous |
| NC_037639.1 | 6096232 | SNV | 1 | G | T | Homozygous   |
| NC_037639.1 | 6097170 | SNV | 1 | C | T | Homozygous   |
| NC_037639.1 | 6097196 | SNV | 1 | A | G | Homozygous   |
| NC_037639.1 | 6097543 | SNV | 1 | G | A | Heterozygous |
| NC_037639.1 | 6097855 | SNV | 1 | G | A | Heterozygous |
| NC_037639.1 | 6113107 | SNV | 1 | T | A | Heterozygous |
| NC_037639.1 | 6113107 | SNV | 1 | T | C | Heterozygous |
| NC_037639.1 | 6113109 | SNV | 1 | C | A | Homozygous   |
| NC_037639.1 | 6115932 | SNV | 1 | A | G | Heterozygous |
| NC_037639.1 | 6115942 | SNV | 1 | T | C | Homozygous   |

|             |         |     |   |   |   |              |
|-------------|---------|-----|---|---|---|--------------|
| NC_037639.1 | 6120785 | SNV | 1 | G | C | Homozygous   |
| NC_037639.1 | 6120827 | SNV | 1 | C | T | Homozygous   |
| NC_037639.1 | 6120927 | SNV | 1 | G | A | Homozygous   |
| NC_037639.1 | 6121044 | SNV | 1 | C | T | Heterozygous |
| NC_037639.1 | 6121046 | SNV | 1 | G | C | Heterozygous |
| NC_037639.1 | 6121046 | SNV | 1 | G | T | Heterozygous |
| NC_037639.1 | 6121327 | SNV | 1 | A | G | Homozygous   |
| NC_037639.1 | 6121388 | SNV | 1 | G | C | Homozygous   |
| NC_037639.1 | 6121586 | SNV | 1 | A | G | Homozygous   |
| NC_037639.1 | 6122531 | SNV | 1 | C | T | Homozygous   |
| NC_037639.1 | 6122618 | SNV | 1 | T | C | Homozygous   |
| NC_037639.1 | 6122993 | SNV | 1 | T | C | Homozygous   |
| NC_037639.1 | 6124320 | SNV | 1 | G | A | Homozygous   |
| NC_037639.1 | 6139452 | SNV | 1 | A | G | Homozygous   |
| NC_037639.1 | 6139619 | SNV | 1 | G | A | Homozygous   |
| NC_037639.1 | 6139684 | SNV | 1 | T | C | Homozygous   |
| NC_037639.1 | 6139753 | SNV | 1 | A | G | Homozygous   |
| NC_037639.1 | 6139769 | SNV | 1 | G | A | Heterozygous |
| NC_037639.1 | 6139785 | SNV | 1 | A | G | Heterozygous |
| NC_037639.1 | 6139787 | SNV | 1 | G | A | Heterozygous |
| NC_037639.1 | 6155029 | SNV | 1 | A | G | Homozygous   |
| NC_037639.1 | 6155049 | SNV | 1 | T | A | Homozygous   |
| NC_037639.1 | 6155053 | SNV | 1 | T | C | Homozygous   |
| NC_037639.1 | 6155056 | SNV | 1 | A | C | Homozygous   |
| NC_037639.1 | 6157940 | SNV | 1 | A | T | Heterozygous |
| NC_037639.1 | 6157969 | SNV | 1 | G | A | Homozygous   |
| NC_037639.1 | 6157980 | SNV | 1 | A | G | Heterozygous |
| NC_037639.1 | 6158287 | SNV | 1 | G | T | Homozygous   |
| NC_037639.1 | 6158294 | SNV | 1 | T | G | Heterozygous |
| NC_037639.1 | 6158296 | SNV | 1 | T | C | Heterozygous |
| NC_037639.1 | 6158811 | SNV | 1 | T | A | Heterozygous |
| NC_037639.1 | 6158815 | SNV | 1 | C | A | Heterozygous |
| NC_037639.1 | 6158832 | SNV | 1 | T | A | Heterozygous |
| NC_037639.1 | 6163365 | SNV | 1 | G | A | Heterozygous |
| NC_037639.1 | 6163699 | SNV | 1 | A | T | Heterozygous |
| NC_037639.1 | 6163709 | SNV | 1 | T | C | Homozygous   |
| NC_037639.1 | 6163716 | SNV | 1 | T | C | Homozygous   |
| NC_037639.1 | 6164016 | SNV | 1 | T | C | Heterozygous |
| NC_037639.1 | 6164130 | SNV | 1 | C | G | Homozygous   |
| NC_037639.1 | 6167325 | SNV | 1 | G | A | Homozygous   |
| NC_037639.1 | 6167388 | SNV | 1 | G | A | Homozygous   |
| NC_037639.1 | 6167568 | SNV | 1 | T | C | Homozygous   |
| NC_037639.1 | 6167700 | SNV | 1 | A | G | Heterozygous |
| NC_037639.1 | 6167714 | SNV | 1 | G | A | Heterozygous |
| NC_037639.1 | 6168932 | SNV | 1 | A | G | Homozygous   |
| NC_037639.1 | 6168967 | SNV | 1 | A | G | Heterozygous |
| NC_037639.1 | 6169078 | SNV | 1 | A | T | Heterozygous |
| NC_037639.1 | 6169088 | SNV | 1 | A | C | Heterozygous |
| NC_037639.1 | 6169429 | SNV | 1 | A | G | Homozygous   |
| NC_037639.1 | 6169546 | SNV | 1 | T | C | Homozygous   |
| NC_037639.1 | 6169664 | SNV | 1 | G | T | Homozygous   |

|             |         |     |   |   |   |              |
|-------------|---------|-----|---|---|---|--------------|
| NC_037639.1 | 6169667 | SNV | 1 | T | C | Homozygous   |
| NC_037639.1 | 6169669 | SNV | 1 | T | C | Homozygous   |
| NC_037639.1 | 6169674 | SNV | 1 | G | A | Homozygous   |
| NC_037639.1 | 6169679 | SNV | 1 | T | C | Homozygous   |
| NC_037639.1 | 6169805 | SNV | 1 | G | T | Heterozygous |
| NC_037639.1 | 6171468 | SNV | 1 | A | G | Homozygous   |
| NC_037639.1 | 6171482 | SNV | 1 | T | C | Homozygous   |
| NC_037639.1 | 6171504 | SNV | 1 | A | G | Homozygous   |
| NC_037639.1 | 6171672 | SNV | 1 | A | G | Homozygous   |
| NC_037639.1 | 6171715 | SNV | 1 | A | G | Homozygous   |
| NC_037639.1 | 6171727 | SNV | 1 | A | G | Homozygous   |
| NC_037639.1 | 6171805 | SNV | 1 | A | G | Heterozygous |
| NC_037639.1 | 6171831 | SNV | 1 | T | C | Homozygous   |
| NC_037639.1 | 6172416 | SNV | 1 | G | A | Homozygous   |
| NC_037639.1 | 6172501 | SNV | 1 | C | T | Heterozygous |
| NC_037639.1 | 6172505 | SNV | 1 | T | C | Heterozygous |
| NC_037639.1 | 6172713 | SNV | 1 | A | T | Heterozygous |
| NC_037639.1 | 6172726 | SNV | 1 | A | T | Heterozygous |
| NC_037639.1 | 6172729 | SNV | 1 | T | A | Heterozygous |
| NC_037639.1 | 6172731 | SNV | 1 | T | A | Heterozygous |
| NC_037639.1 | 6172735 | SNV | 1 | T | A | Heterozygous |
| NC_037639.1 | 6172737 | SNV | 1 | T | A | Heterozygous |
| NC_037639.1 | 6172755 | SNV | 1 | A | T | Heterozygous |
| NC_037639.1 | 6173701 | SNV | 1 | C | T | Heterozygous |
| NC_037639.1 | 6211675 | SNV | 1 | G | C | Heterozygous |
| NC_037639.1 | 6211693 | SNV | 1 | T | C | Heterozygous |
| NC_037639.1 | 6211696 | SNV | 1 | C | T | Heterozygous |
| NC_037639.1 | 6212120 | SNV | 1 | T | C | Homozygous   |
| NC_037639.1 | 6214026 | SNV | 1 | A | G | Homozygous   |
| NC_037639.1 | 6214039 | SNV | 1 | G | A | Heterozygous |
| NC_037639.1 | 6217999 | SNV | 1 | T | C | Heterozygous |
| NC_037639.1 | 6223192 | SNV | 1 | G | T | Homozygous   |
| NC_037639.1 | 6228825 | SNV | 1 | G | A | Heterozygous |
| NC_037639.1 | 6235489 | SNV | 1 | T | A | Homozygous   |
| NC_037639.1 | 6235651 | SNV | 1 | C | T | Heterozygous |
| NC_037639.1 | 6242556 | SNV | 1 | C | A | Homozygous   |
| NC_037639.1 | 6242560 | SNV | 1 | G | T | Homozygous   |
| NC_037639.1 | 6242581 | SNV | 1 | A | T | Homozygous   |
| NC_037639.1 | 6242587 | SNV | 1 | C | T | Homozygous   |
| NC_037639.1 | 6246684 | SNV | 1 | C | T | Heterozygous |
| NC_037639.1 | 6247944 | SNV | 1 | T | A | Homozygous   |
| NC_037639.1 | 6248598 | SNV | 1 | T | C | Homozygous   |
| NC_037639.1 | 6249044 | SNV | 1 | C | T | Homozygous   |
| NC_037639.1 | 6249048 | SNV | 1 | T | C | Heterozygous |
| NC_037639.1 | 6249051 | SNV | 1 | T | C | Homozygous   |
| NC_037639.1 | 6251447 | SNV | 1 | A | G | Heterozygous |
| NC_037639.1 | 6251528 | SNV | 1 | C | T | Heterozygous |
| NC_037639.1 | 6251531 | SNV | 1 | T | C | Homozygous   |
| NC_037639.1 | 6251573 | SNV | 1 | T | C | Homozygous   |
| NC_037639.1 | 6256888 | SNV | 1 | T | C | Homozygous   |
| NC_037639.1 | 6256895 | SNV | 1 | A | G | Homozygous   |

|             |         |     |   |   |   |              |
|-------------|---------|-----|---|---|---|--------------|
| NC_037639.1 | 6256898 | SNV | 1 | A | T | Homozygous   |
| NC_037639.1 | 6256903 | SNV | 1 | T | A | Homozygous   |
| NC_037639.1 | 6256905 | SNV | 1 | A | G | Homozygous   |
| NC_037639.1 | 6257397 | SNV | 1 | A | G | Homozygous   |
| NC_037639.1 | 6259255 | SNV | 1 | G | T | Homozygous   |
| NC_037639.1 | 6259258 | SNV | 1 | A | T | Homozygous   |
| NC_037639.1 | 6259860 | SNV | 1 | G | A | Homozygous   |
| NC_037639.1 | 6260397 | SNV | 1 | G | C | Homozygous   |
| NC_037639.1 | 6261263 | SNV | 1 | T | A | Heterozygous |
| NC_037639.1 | 6261265 | SNV | 1 | T | C | Heterozygous |
| NC_037639.1 | 6261267 | SNV | 1 | A | C | Heterozygous |
| NC_037639.1 | 6261271 | SNV | 1 | C | T | Homozygous   |
| NC_037639.1 | 6262379 | SNV | 1 | C | A | Homozygous   |
| NC_037639.1 | 6266871 | SNV | 1 | A | G | Homozygous   |
| NC_037639.1 | 6277085 | SNV | 1 | C | G | Homozygous   |
| NC_037639.1 | 6282574 | SNV | 1 | T | C | Homozygous   |
| NC_037639.1 | 6282597 | SNV | 1 | T | A | Homozygous   |
| NC_037639.1 | 6282605 | SNV | 1 | T | A | Heterozygous |
| NC_037639.1 | 6284661 | SNV | 1 | T | A | Homozygous   |
| NC_037639.1 | 6284663 | SNV | 1 | T | A | Homozygous   |
| NC_037639.1 | 6285942 | SNV | 1 | T | C | Homozygous   |
| NC_037639.1 | 6285988 | SNV | 1 | A | T | Homozygous   |
| NC_037639.1 | 6287198 | SNV | 1 | C | A | Homozygous   |
| NC_037639.1 | 6291130 | SNV | 1 | C | T | Heterozygous |
| NC_037639.1 | 6291456 | SNV | 1 | A | G | Homozygous   |
| NC_037639.1 | 6291725 | SNV | 1 | A | G | Homozygous   |
| NC_037639.1 | 6297385 | SNV | 1 | G | A | Homozygous   |
| NC_037639.1 | 6297421 | SNV | 1 | A | G | Heterozygous |
| NC_037639.1 | 6299643 | SNV | 1 | T | C | Homozygous   |
| NC_037639.1 | 6299645 | SNV | 1 | T | C | Homozygous   |
| NC_037639.1 | 6299648 | SNV | 1 | A | C | Homozygous   |
| NC_037639.1 | 6299658 | SNV | 1 | A | G | Homozygous   |
| NC_037639.1 | 6299666 | SNV | 1 | A | T | Homozygous   |
| NC_037639.1 | 6320989 | SNV | 1 | C | A | Homozygous   |
| NC_037639.1 | 6325059 | SNV | 1 | G | C | Heterozygous |
| NC_037639.1 | 6325116 | SNV | 1 | C | T | Heterozygous |
| NC_037639.1 | 6325227 | SNV | 1 | T | C | Homozygous   |
| NC_037639.1 | 6325620 | SNV | 1 | T | C | Homozygous   |
| NC_037639.1 | 6326108 | SNV | 1 | T | C | Homozygous   |
| NC_037639.1 | 6326764 | SNV | 1 | T | C | Homozygous   |
| NC_037639.1 | 6327188 | SNV | 1 | T | A | Homozygous   |
| NC_037639.1 | 6327299 | SNV | 1 | C | A | Homozygous   |
| NC_037639.1 | 6327301 | SNV | 1 | A | T | Homozygous   |
| NC_037639.1 | 6331633 | SNV | 1 | G | A | Homozygous   |
| NC_037639.1 | 6331958 | SNV | 1 | G | A | Homozygous   |
| NC_037639.1 | 6331960 | SNV | 1 | A | T | Homozygous   |
| NC_037639.1 | 6344576 | SNV | 1 | A | T | Homozygous   |
| NC_037639.1 | 6345447 | SNV | 1 | C | T | Homozygous   |
| NC_037639.1 | 6345455 | SNV | 1 | T | C | Homozygous   |
| NC_037639.1 | 6345492 | SNV | 1 | A | G | Homozygous   |
| NC_037639.1 | 6345740 | SNV | 1 | T | A | Homozygous   |

|             |         |     |   |   |   |              |
|-------------|---------|-----|---|---|---|--------------|
| NC_037639.1 | 6357743 | SNV | 1 | T | G | Homozygous   |
| NC_037639.1 | 6357752 | SNV | 1 | A | T | Heterozygous |
| NC_037639.1 | 6357762 | SNV | 1 | A | G | Heterozygous |
| NC_037639.1 | 6357767 | SNV | 1 | A | G | Heterozygous |
| NC_037639.1 | 6357778 | SNV | 1 | A | G | Heterozygous |
| NC_037639.1 | 6357797 | SNV | 1 | G | A | Homozygous   |
| NC_037639.1 | 6360333 | SNV | 1 | C | G | Homozygous   |
| NC_037639.1 | 6360341 | SNV | 1 | T | A | Homozygous   |
| NC_037639.1 | 6360348 | SNV | 1 | T | A | Homozygous   |
| NC_037639.1 | 6360365 | SNV | 1 | T | A | Homozygous   |
| NC_037639.1 | 6368641 | SNV | 1 | G | A | Homozygous   |
| NC_037639.1 | 6368851 | SNV | 1 | A | T | Homozygous   |
| NC_037639.1 | 6368906 | SNV | 1 | T | A | Homozygous   |
| NC_037639.1 | 6368909 | SNV | 1 | A | T | Homozygous   |
| NC_037639.1 | 6368913 | SNV | 1 | T | A | Homozygous   |
| NC_037639.1 | 6369773 | SNV | 1 | A | C | Homozygous   |
| NC_037639.1 | 6369777 | SNV | 1 | C | T | Homozygous   |
| NC_037639.1 | 6370330 | SNV | 1 | C | A | Homozygous   |
| NC_037639.1 | 6370844 | SNV | 1 | A | T | Heterozygous |
| NC_037639.1 | 6371771 | SNV | 1 | A | G | Homozygous   |
| NC_037639.1 | 6372055 | SNV | 1 | G | A | Homozygous   |
| NC_037639.1 | 6372075 | SNV | 1 | C | T | Homozygous   |
| NC_037639.1 | 6374503 | SNV | 1 | T | C | Homozygous   |
| NC_037639.1 | 6379170 | SNV | 1 | A | G | Homozygous   |
| NC_037639.1 | 6380667 | SNV | 1 | A | G | Heterozygous |
| NC_037639.1 | 6380674 | SNV | 1 | T | C | Heterozygous |
| NC_037639.1 | 6380868 | SNV | 1 | C | T | Homozygous   |
| NC_037639.1 | 6380920 | SNV | 1 | C | A | Heterozygous |
| NC_037639.1 | 6381378 | SNV | 1 | C | T | Heterozygous |
| NC_037639.1 | 6381497 | SNV | 1 | C | T | Heterozygous |
| NC_037639.1 | 6382431 | SNV | 1 | A | G | Homozygous   |
| NC_037639.1 | 6382500 | SNV | 1 | T | C | Homozygous   |
| NC_037639.1 | 6382771 | SNV | 1 | C | G | Homozygous   |
| NC_037639.1 | 6382788 | SNV | 1 | C | T | Heterozygous |
| NC_037639.1 | 6382815 | SNV | 1 | T | C | Homozygous   |
| NC_037639.1 | 6383070 | SNV | 1 | C | T | Heterozygous |
| NC_037639.1 | 6383152 | SNV | 1 | C | T | Heterozygous |
| NC_037639.1 | 6383162 | SNV | 1 | A | G | Homozygous   |
| NC_037639.1 | 6383167 | SNV | 1 | A | G | Homozygous   |
| NC_037639.1 | 6383180 | SNV | 1 | G | A | Heterozygous |
| NC_037639.1 | 6383200 | SNV | 1 | A | G | Homozygous   |
| NC_037639.1 | 6383259 | SNV | 1 | G | A | Heterozygous |
| NC_037639.1 | 6383475 | SNV | 1 | T | C | Homozygous   |
| NC_037639.1 | 6384060 | SNV | 1 | C | A | Heterozygous |
| NC_037639.1 | 6384503 | SNV | 1 | T | C | Homozygous   |
| NC_037639.1 | 6384518 | SNV | 1 | G | A | Heterozygous |
| NC_037639.1 | 6384530 | SNV | 1 | A | G | Homozygous   |
| NC_037639.1 | 6384544 | SNV | 1 | A | G | Heterozygous |
| NC_037639.1 | 6384616 | SNV | 1 | A | G | Heterozygous |
| NC_037639.1 | 6384713 | SNV | 1 | T | C | Heterozygous |
| NC_037639.1 | 6409708 | SNV | 1 | A | G | Homozygous   |

|             |         |     |   |   |   |              |
|-------------|---------|-----|---|---|---|--------------|
| NC_037639.1 | 6409716 | SNV | 1 | G | T | Homozygous   |
| NC_037639.1 | 6409735 | SNV | 1 | A | C | Homozygous   |
| NC_037639.1 | 6409739 | SNV | 1 | A | C | Homozygous   |
| NC_037639.1 | 6409745 | SNV | 1 | A | C | Homozygous   |
| NC_037639.1 | 6409758 | SNV | 1 | A | G | Homozygous   |
| NC_037639.1 | 6415550 | SNV | 1 | A | G | Homozygous   |
| NC_037639.1 | 6415686 | SNV | 1 | A | G | Homozygous   |
| NC_037639.1 | 6415740 | SNV | 1 | A | G | Heterozygous |
| NC_037639.1 | 6415961 | SNV | 1 | A | G | Homozygous   |
| NC_037639.1 | 6416043 | SNV | 1 | A | G | Homozygous   |
| NC_037639.1 | 6416146 | SNV | 1 | A | C | Homozygous   |
| NC_037639.1 | 6416197 | SNV | 1 | G | T | Homozygous   |
| NC_037639.1 | 6416208 | SNV | 1 | T | C | Homozygous   |
| NC_037639.1 | 6428507 | SNV | 1 | T | C | Homozygous   |
| NC_037639.1 | 6428657 | SNV | 1 | T | C | Homozygous   |
| NC_037639.1 | 6430494 | SNV | 1 | A | G | Homozygous   |
| NC_037639.1 | 6431843 | SNV | 1 | C | T | Heterozygous |
| NC_037639.1 | 6440485 | SNV | 1 | A | T | Homozygous   |
| NC_037639.1 | 6440886 | SNV | 1 | C | A | Heterozygous |
| NC_037639.1 | 6441590 | SNV | 1 | T | A | Homozygous   |
| NC_037639.1 | 6441593 | SNV | 1 | C | T | Homozygous   |
| NC_037639.1 | 6442453 | SNV | 1 | A | G | Homozygous   |
| NC_037639.1 | 6444200 | SNV | 1 | A | T | Homozygous   |
| NC_037639.1 | 6444202 | SNV | 1 | A | G | Homozygous   |
| NC_037639.1 | 6471129 | SNV | 1 | G | A | Heterozygous |
| NC_037639.1 | 6471131 | SNV | 1 | A | G | Homozygous   |
| NC_037639.1 | 6471206 | SNV | 1 | A | G | Homozygous   |
| NC_037639.1 | 6471284 | SNV | 1 | G | A | Homozygous   |
| NC_037639.1 | 6478699 | SNV | 1 | G | A | Heterozygous |
| NC_037639.1 | 6479033 | SNV | 1 | T | C | Heterozygous |
| NC_037639.1 | 6480083 | SNV | 1 | A | T | Homozygous   |
| NC_037639.1 | 6480267 | SNV | 1 | C | T | Homozygous   |
| NC_037639.1 | 6480277 | SNV | 1 | C | T | Homozygous   |
| NC_037639.1 | 6480317 | SNV | 1 | A | G | Homozygous   |
| NC_037639.1 | 6480338 | SNV | 1 | T | A | Homozygous   |
| NC_037639.1 | 6480343 | SNV | 1 | T | A | Homozygous   |
| NC_037639.1 | 6480870 | SNV | 1 | A | G | Homozygous   |
| NC_037639.1 | 6481357 | SNV | 1 | T | C | Homozygous   |
| NC_037639.1 | 6481359 | SNV | 1 | C | T | Homozygous   |
| NC_037639.1 | 6481372 | SNV | 1 | C | T | Homozygous   |
| NC_037639.1 | 6481439 | SNV | 1 | T | C | Homozygous   |
| NC_037639.1 | 6481835 | SNV | 1 | A | G | Homozygous   |
| NC_037639.1 | 6481880 | SNV | 1 | G | A | Heterozygous |
| NC_037639.1 | 6484135 | SNV | 1 | C | A | Heterozygous |
| NC_037639.1 | 6484230 | SNV | 1 | T | C | Heterozygous |
| NC_037639.1 | 6484443 | SNV | 1 | G | T | Heterozygous |
| NC_037639.1 | 6484512 | SNV | 1 | T | G | Homozygous   |
| NC_037639.1 | 6484635 | SNV | 1 | C | T | Heterozygous |
| NC_037639.1 | 6484722 | SNV | 1 | G | A | Heterozygous |
| NC_037639.1 | 6484763 | SNV | 1 | G | A | Heterozygous |
| NC_037639.1 | 6484917 | SNV | 1 | G | A | Heterozygous |

|             |         |     |   |   |   |              |
|-------------|---------|-----|---|---|---|--------------|
| NC_037639.1 | 6486382 | SNV | 1 | G | A | Homozygous   |
| NC_037639.1 | 6487325 | SNV | 1 | T | C | Homozygous   |
| NC_037639.1 | 6490740 | SNV | 1 | A | G | Homozygous   |
| NC_037639.1 | 6494463 | SNV | 1 | C | T | Homozygous   |
| NC_037639.1 | 6494610 | SNV | 1 | A | T | Heterozygous |
| NC_037639.1 | 6494616 | SNV | 1 | T | A | Heterozygous |
| NC_037639.1 | 6494616 | SNV | 1 | T | C | Heterozygous |
| NC_037639.1 | 6496231 | SNV | 1 | T | C | Heterozygous |
| NC_037639.1 | 6496888 | SNV | 1 | G | A | Homozygous   |
| NC_037639.1 | 6496925 | SNV | 1 | C | T | Heterozygous |
| NC_037639.1 | 6497029 | SNV | 1 | G | C | Homozygous   |
| NC_037639.1 | 6497050 | SNV | 1 | A | G | Homozygous   |
| NC_037639.1 | 6497063 | SNV | 1 | C | T | Heterozygous |
| NC_037639.1 | 6498149 | SNV | 1 | T | C | Heterozygous |
| NC_037639.1 | 6498152 | SNV | 1 | C | G | Heterozygous |
| NC_037639.1 | 6498204 | SNV | 1 | A | G | Homozygous   |
| NC_037639.1 | 6498548 | SNV | 1 | T | A | Heterozygous |
| NC_037639.1 | 6498563 | SNV | 1 | G | A | Homozygous   |
| NC_037639.1 | 6498590 | SNV | 1 | T | A | Heterozygous |
| NC_037639.1 | 6498605 | SNV | 1 | C | T | Heterozygous |
| NC_037639.1 | 6498667 | SNV | 1 | C | T | Homozygous   |
| NC_037639.1 | 6498671 | SNV | 1 | T | C | Homozygous   |
| NC_037639.1 | 6498744 | SNV | 1 | G | C | Homozygous   |
| NC_037639.1 | 6499114 | SNV | 1 | C | A | Heterozygous |
| NC_037639.1 | 6499119 | SNV | 1 | G | A | Heterozygous |
| NC_037639.1 | 6499133 | SNV | 1 | T | A | Heterozygous |
| NC_037639.1 | 6499366 | SNV | 1 | G | A | Homozygous   |
| NC_037639.1 | 6499407 | SNV | 1 | A | G | Heterozygous |
| NC_037639.1 | 6499441 | SNV | 1 | A | G | Homozygous   |
| NC_037639.1 | 6530163 | SNV | 1 | T | C | Heterozygous |
| NC_037639.1 | 6547065 | SNV | 1 | T | A | Heterozygous |
| NC_037639.1 | 6547551 | SNV | 1 | G | A | Homozygous   |
| NC_037639.1 | 6547579 | SNV | 1 | A | G | Heterozygous |
| NC_037639.1 | 6547584 | SNV | 1 | G | A | Heterozygous |
| NC_037639.1 | 6547592 | SNV | 1 | G | T | Heterozygous |
| NC_037639.1 | 6547612 | SNV | 1 | G | A | Homozygous   |
| NC_037639.1 | 6547615 | SNV | 1 | G | A | Heterozygous |
| NC_037639.1 | 6547648 | SNV | 1 | A | G | Heterozygous |
| NC_037639.1 | 6547767 | SNV | 1 | C | T | Heterozygous |
| NC_037639.1 | 6556719 | SNV | 1 | T | C | Homozygous   |
| NC_037639.1 | 6556756 | SNV | 1 | C | G | Heterozygous |
| NC_037639.1 | 6571796 | SNV | 1 | T | C | Homozygous   |
| NC_037639.1 | 6575091 | SNV | 1 | G | A | Homozygous   |
| NC_037639.1 | 6601513 | SNV | 1 | T | C | Heterozygous |
| NC_037639.1 | 6601515 | SNV | 1 | T | C | Heterozygous |
| NC_037639.1 | 6601611 | SNV | 1 | T | A | Homozygous   |
| NC_037639.1 | 6602855 | SNV | 1 | A | T | Homozygous   |
| NC_037639.1 | 6606685 | SNV | 1 | T | A | Homozygous   |
| NC_037639.1 | 6606695 | SNV | 1 | C | G | Homozygous   |
| NC_037639.1 | 6606710 | SNV | 1 | T | G | Homozygous   |
| NC_037639.1 | 6606723 | SNV | 1 | T | A | Homozygous   |



|             |         |     |   |   |   |              |
|-------------|---------|-----|---|---|---|--------------|
| NC_037639.1 | 6606727 | SNV | 1 | A | T | Homozygous   |
| NC_037639.1 | 6608545 | SNV | 1 | C | A | Homozygous   |
| NC_037639.1 | 6608549 | SNV | 1 | A | G | Homozygous   |
| NC_037639.1 | 6608551 | SNV | 1 | G | T | Homozygous   |
| NC_037639.1 | 6608623 | SNV | 1 | A | G | Homozygous   |
| NC_037639.1 | 6609196 | SNV | 1 | G | A | Heterozygous |
| NC_037639.1 | 6610747 | SNV | 1 | A | T | Homozygous   |
| NC_037639.1 | 6610994 | SNV | 1 | T | C | Homozygous   |
| NC_037639.1 | 6613837 | SNV | 1 | T | G | Homozygous   |
| NC_037639.1 | 6616998 | SNV | 1 | A | G | Homozygous   |
| NC_037639.1 | 6618833 | SNV | 1 | C | T | Homozygous   |
| NC_037639.1 | 6619582 | SNV | 1 | C | T | Homozygous   |
| NC_037639.1 | 6619585 | SNV | 1 | T | C | Homozygous   |
| NC_037639.1 | 6625021 | SNV | 1 | A | G | Heterozygous |
| NC_037639.1 | 6625024 | SNV | 1 | G | A | Heterozygous |
| NC_037639.1 | 6671367 | SNV | 1 | A | G | Homozygous   |
| NC_037639.1 | 6671373 | SNV | 1 | A | G | Heterozygous |
| NC_037639.1 | 6671379 | SNV | 1 | A | G | Heterozygous |
| NC_037639.1 | 6671412 | SNV | 1 | A | T | Homozygous   |
| NC_037639.1 | 6678672 | SNV | 1 | T | C | Homozygous   |
| NC_037639.1 | 6678724 | SNV | 1 | C | T | Heterozygous |
| NC_037639.1 | 6686890 | SNV | 1 | G | C | Homozygous   |
| NC_037639.1 | 6687117 | SNV | 1 | C | T | Homozygous   |
| NC_037639.1 | 6687120 | SNV | 1 | G | A | Homozygous   |
| NC_037639.1 | 6687957 | SNV | 1 | C | T | Heterozygous |
| NC_037639.1 | 6687977 | SNV | 1 | C | A | Heterozygous |
| NC_037639.1 | 6688900 | SNV | 1 | C | T | Heterozygous |
| NC_037639.1 | 6688911 | SNV | 1 | C | T | Heterozygous |
| NC_037639.1 | 6688933 | SNV | 1 | A | G | Heterozygous |
| NC_037639.1 | 6689151 | SNV | 1 | C | T | Homozygous   |
| NC_037639.1 | 6690117 | SNV | 1 | T | C | Heterozygous |
| NC_037639.1 | 6692085 | SNV | 1 | T | A | Homozygous   |
| NC_037639.1 | 6692090 | SNV | 1 | C | A | Homozygous   |
| NC_037639.1 | 6692201 | SNV | 1 | T | A | Homozygous   |
| NC_037639.1 | 6692213 | SNV | 1 | G | A | Heterozygous |
| NC_037639.1 | 6692240 | SNV | 1 | A | G | Homozygous   |
| NC_037639.1 | 6692259 | SNV | 1 | G | A | Heterozygous |
| NC_037639.1 | 6692267 | SNV | 1 | T | C | Homozygous   |
| NC_037639.1 | 6693060 | SNV | 1 | T | C | Homozygous   |
| NC_037639.1 | 6694375 | SNV | 1 | A | C | Homozygous   |
| NC_037639.1 | 6694377 | SNV | 1 | G | C | Homozygous   |
| NC_037639.1 | 6694399 | SNV | 1 | T | A | Homozygous   |
| NC_037639.1 | 6694410 | SNV | 1 | G | A | Homozygous   |
| NC_037639.1 | 6694414 | SNV | 1 | A | G | Homozygous   |
| NC_037639.1 | 6694416 | SNV | 1 | A | T | Homozygous   |
| NC_037639.1 | 6711235 | SNV | 1 | T | C | Homozygous   |
| NC_037639.1 | 6711237 | SNV | 1 | C | T | Homozygous   |
| NC_037639.1 | 6711295 | SNV | 1 | C | G | Heterozygous |
| NC_037639.1 | 6717379 | SNV | 1 | C | T | Heterozygous |
| NC_037639.1 | 6718965 | SNV | 1 | G | C | Heterozygous |
| NC_037639.1 | 6741657 | SNV | 1 | A | G | Homozygous   |

|             |         |     |   |   |   |              |
|-------------|---------|-----|---|---|---|--------------|
| NC_037639.1 | 6741709 | SNV | 1 | A | C | Homozygous   |
| NC_037639.1 | 6741728 | SNV | 1 | T | C | Homozygous   |
| NC_037639.1 | 6741910 | SNV | 1 | G | A | Homozygous   |
| NC_037639.1 | 6741953 | SNV | 1 | T | G | Homozygous   |
| NC_037639.1 | 6741955 | SNV | 1 | A | G | Homozygous   |
| NC_037639.1 | 6741987 | SNV | 1 | T | C | Homozygous   |
| NC_037639.1 | 6742231 | SNV | 1 | T | C | Heterozygous |
| NC_037639.1 | 6742271 | SNV | 1 | C | T | Heterozygous |
| NC_037639.1 | 6742348 | SNV | 1 | T | C | Homozygous   |
| NC_037639.1 | 6742351 | SNV | 1 | A | G | Heterozygous |
| NC_037639.1 | 6742353 | SNV | 1 | A | G | Heterozygous |
| NC_037639.1 | 6742355 | SNV | 1 | A | G | Heterozygous |
| NC_037639.1 | 6743392 | SNV | 1 | T | G | Heterozygous |
| NC_037639.1 | 6743402 | SNV | 1 | A | G | Homozygous   |
| NC_037639.1 | 6743417 | SNV | 1 | T | C | Heterozygous |
| NC_037639.1 | 6743463 | SNV | 1 | T | C | Homozygous   |
| NC_037639.1 | 6754664 | SNV | 1 | C | T | Heterozygous |
| NC_037639.1 | 6755041 | SNV | 1 | C | T | Heterozygous |
| NC_037639.1 | 6755086 | SNV | 1 | A | C | Homozygous   |
| NC_037639.1 | 6756434 | SNV | 1 | A | G | Homozygous   |
| NC_037639.1 | 6758237 | SNV | 1 | C | T | Heterozygous |
| NC_037639.1 | 6759154 | SNV | 1 | A | G | Homozygous   |
| NC_037639.1 | 6761809 | SNV | 1 | T | A | Homozygous   |
| NC_037639.1 | 6763317 | SNV | 1 | G | A | Homozygous   |
| NC_037639.1 | 6764634 | SNV | 1 | T | A | Homozygous   |
| NC_037639.1 | 6766759 | SNV | 1 | A | C | Homozygous   |
| NC_037639.1 | 6766765 | SNV | 1 | G | A | Homozygous   |
| NC_037639.1 | 6766767 | SNV | 1 | C | T | Homozygous   |
| NC_037639.1 | 6769090 | SNV | 1 | G | C | Homozygous   |
| NC_037639.1 | 6769094 | SNV | 1 | T | G | Homozygous   |
| NC_037639.1 | 6769100 | SNV | 1 | T | A | Homozygous   |
| NC_037639.1 | 6769102 | SNV | 1 | A | T | Homozygous   |
| NC_037639.1 | 6769105 | SNV | 1 | T | A | Homozygous   |
| NC_037639.1 | 6769107 | SNV | 1 | T | G | Homozygous   |
| NC_037639.1 | 6769111 | SNV | 1 | A | T | Homozygous   |
| NC_037639.1 | 6769114 | SNV | 1 | T | A | Homozygous   |
| NC_037639.1 | 6769118 | SNV | 1 | A | T | Homozygous   |
| NC_037639.1 | 6773511 | SNV | 1 | A | G | Homozygous   |
| NC_037639.1 | 6775269 | SNV | 1 | A | G | Homozygous   |
| NC_037639.1 | 6775862 | SNV | 1 | A | T | Heterozygous |
| NC_037639.1 | 6776143 | SNV | 1 | T | C | Homozygous   |
| NC_037639.1 | 6777399 | SNV | 1 | A | G | Heterozygous |
| NC_037639.1 | 6779741 | SNV | 1 | T | A | Homozygous   |
| NC_037639.1 | 6779746 | SNV | 1 | A | C | Homozygous   |
| NC_037639.1 | 6779759 | SNV | 1 | T | A | Homozygous   |
| NC_037639.1 | 6779766 | SNV | 1 | A | T | Homozygous   |
| NC_037639.1 | 6780583 | SNV | 1 | C | A | Homozygous   |
| NC_037639.1 | 6780587 | SNV | 1 | G | A | Homozygous   |
| NC_037639.1 | 6780597 | SNV | 1 | C | T | Homozygous   |
| NC_037639.1 | 6780602 | SNV | 1 | C | G | Homozygous   |
| NC_037639.1 | 6783715 | SNV | 1 | C | G | Heterozygous |

|             |         |     |   |   |   |              |
|-------------|---------|-----|---|---|---|--------------|
| NC_037639.1 | 6793146 | SNV | 1 | G | T | Homozygous   |
| NC_037639.1 | 6793157 | SNV | 1 | A | T | Homozygous   |
| NC_037639.1 | 6793165 | SNV | 1 | G | A | Homozygous   |
| NC_037639.1 | 6795651 | SNV | 1 | A | G | Heterozygous |
| NC_037639.1 | 6810136 | SNV | 1 | T | C | Homozygous   |
| NC_037639.1 | 6811544 | SNV | 1 | C | T | Homozygous   |
| NC_037639.1 | 6811947 | SNV | 1 | C | T | Heterozygous |
| NC_037639.1 | 6811968 | SNV | 1 | C | T | Heterozygous |
| NC_037639.1 | 6811993 | SNV | 1 | T | C | Heterozygous |
| NC_037639.1 | 6812003 | SNV | 1 | C | T | Heterozygous |
| NC_037639.1 | 6818147 | SNV | 1 | T | C | Homozygous   |
| NC_037639.1 | 6822814 | SNV | 1 | A | C | Heterozygous |
| NC_037639.1 | 6822819 | SNV | 1 | A | G | Heterozygous |
| NC_037639.1 | 6825842 | SNV | 1 | C | T | Homozygous   |
| NC_037639.1 | 6825844 | SNV | 1 | A | T | Homozygous   |
| NC_037639.1 | 6825852 | SNV | 1 | T | C | Homozygous   |
| NC_037639.1 | 6828270 | SNV | 1 | G | T | Homozygous   |
| NC_037639.1 | 6828277 | SNV | 1 | A | T | Homozygous   |
| NC_037639.1 | 6828285 | SNV | 1 | A | T | Homozygous   |
| NC_037639.1 | 6844127 | SNV | 1 | T | C | Heterozygous |
| NC_037639.1 | 6844157 | SNV | 1 | T | C | Heterozygous |
| NC_037639.1 | 6844160 | SNV | 1 | C | T | Heterozygous |
| NC_037639.1 | 6844232 | SNV | 1 | T | C | Homozygous   |
| NC_037639.1 | 6844247 | SNV | 1 | C | T | Heterozygous |
| NC_037639.1 | 6861678 | SNV | 1 | G | A | Homozygous   |
| NC_037639.1 | 6861683 | SNV | 1 | T | A | Homozygous   |
| NC_037639.1 | 6861685 | SNV | 1 | G | A | Homozygous   |
| NC_037639.1 | 6861692 | SNV | 1 | C | A | Homozygous   |
| NC_037639.1 | 6862011 | SNV | 1 | G | C | Homozygous   |
| NC_037639.1 | 6863588 | SNV | 1 | G | A | Homozygous   |
| NC_037639.1 | 6866981 | SNV | 1 | C | T | Heterozygous |
| NC_037639.1 | 6874650 | SNV | 1 | G | T | Heterozygous |
| NC_037639.1 | 6874662 | SNV | 1 | A | T | Heterozygous |
| NC_037639.1 | 6874668 | SNV | 1 | C | T | Homozygous   |
| NC_037639.1 | 6874671 | SNV | 1 | T | C | Homozygous   |
| NC_037639.1 | 6877506 | SNV | 1 | G | A | Heterozygous |
| NC_037639.1 | 6877552 | SNV | 1 | G | A | Heterozygous |
| NC_037639.1 | 6877587 | SNV | 1 | A | G | Homozygous   |
| NC_037639.1 | 6877952 | SNV | 1 | G | A | Heterozygous |
| NC_037639.1 | 6877957 | SNV | 1 | A | G | Heterozygous |
| NC_037639.1 | 6877966 | SNV | 1 | A | G | Homozygous   |
| NC_037639.1 | 6877974 | SNV | 1 | T | C | Homozygous   |
| NC_037639.1 | 6878078 | SNV | 1 | A | G | Homozygous   |
| NC_037639.1 | 6878083 | SNV | 1 | G | A | Homozygous   |
| NC_037639.1 | 6880362 | SNV | 1 | T | C | Heterozygous |
| NC_037639.1 | 6881029 | SNV | 1 | G | A | Heterozygous |
| NC_037639.1 | 6881113 | SNV | 1 | T | A | Heterozygous |
| NC_037639.1 | 6881119 | SNV | 1 | G | A | Heterozygous |
| NC_037639.1 | 6881125 | SNV | 1 | T | A | Heterozygous |
| NC_037639.1 | 6881154 | SNV | 1 | G | A | Heterozygous |
| NC_037639.1 | 6881590 | SNV | 1 | G | C | Homozygous   |

|             |         |     |   |   |   |              |
|-------------|---------|-----|---|---|---|--------------|
| NC_037639.1 | 6884648 | SNV | 1 | A | G | Homozygous   |
| NC_037639.1 | 6885250 | SNV | 1 | A | C | Heterozygous |
| NC_037639.1 | 6885252 | SNV | 1 | G | T | Heterozygous |
| NC_037639.1 | 6885272 | SNV | 1 | C | G | Homozygous   |
| NC_037639.1 | 6885434 | SNV | 1 | A | C | Homozygous   |
| NC_037639.1 | 6891089 | SNV | 1 | T | C | Homozygous   |
| NC_037639.1 | 6922114 | SNV | 1 | T | A | Heterozygous |
| NC_037639.1 | 6922621 | SNV | 1 | G | A | Heterozygous |
| NC_037639.1 | 6922789 | SNV | 1 | T | C | Homozygous   |
| NC_037639.1 | 6923630 | SNV | 1 | T | A | Heterozygous |
| NC_037639.1 | 6923632 | SNV | 1 | T | A | Heterozygous |
| NC_037639.1 | 6923657 | SNV | 1 | T | G | Homozygous   |
| NC_037639.1 | 6923667 | SNV | 1 | C | A | Heterozygous |
| NC_037639.1 | 6923677 | SNV | 1 | A | T | Heterozygous |
| NC_037639.1 | 6924170 | SNV | 1 | T | A | Homozygous   |
| NC_037639.1 | 6924173 | SNV | 1 | A | C | Homozygous   |
| NC_037639.1 | 6924177 | SNV | 1 | G | T | Homozygous   |
| NC_037639.1 | 6924605 | SNV | 1 | A | T | Homozygous   |
| NC_037639.1 | 6930159 | SNV | 1 | A | G | Homozygous   |
| NC_037639.1 | 6933946 | SNV | 1 | T | A | Homozygous   |
| NC_037639.1 | 6933950 | SNV | 1 | A | T | Homozygous   |
| NC_037639.1 | 6933952 | SNV | 1 | T | A | Homozygous   |
| NC_037639.1 | 6933956 | SNV | 1 | A | C | Homozygous   |
| NC_037639.1 | 6934001 | SNV | 1 | A | T | Homozygous   |
| NC_037639.1 | 6934003 | SNV | 1 | T | A | Homozygous   |
| NC_037639.1 | 6934005 | SNV | 1 | T | C | Homozygous   |
| NC_037639.1 | 6934010 | SNV | 1 | T | A | Homozygous   |
| NC_037639.1 | 6934283 | SNV | 1 | C | T | Homozygous   |
| NC_037639.1 | 6937841 | SNV | 1 | T | C | Homozygous   |
| NC_037639.1 | 6940416 | SNV | 1 | A | T | Homozygous   |
| NC_037639.1 | 6940423 | SNV | 1 | A | G | Homozygous   |
| NC_037639.1 | 6940451 | SNV | 1 | A | G | Homozygous   |
| NC_037639.1 | 6940454 | SNV | 1 | A | T | Homozygous   |
| NC_037639.1 | 6940687 | SNV | 1 | A | T | Homozygous   |
| NC_037639.1 | 6940690 | SNV | 1 | A | C | Homozygous   |
| NC_037639.1 | 6940695 | SNV | 1 | T | A | Homozygous   |
| NC_037639.1 | 6940927 | SNV | 1 | G | A | Heterozygous |
| NC_037639.1 | 6955752 | SNV | 1 | G | A | Homozygous   |
| NC_037639.1 | 6956754 | SNV | 1 | T | G | Heterozygous |
| NC_037639.1 | 6956905 | SNV | 1 | A | G | Homozygous   |
| NC_037639.1 | 6958552 | SNV | 1 | T | A | Homozygous   |
| NC_037639.1 | 6958555 | SNV | 1 | C | T | Homozygous   |
| NC_037639.1 | 6958732 | SNV | 1 | C | T | Homozygous   |
| NC_037639.1 | 6962528 | SNV | 1 | T | G | Homozygous   |
| NC_037639.1 | 6966750 | SNV | 1 | G | A | Homozygous   |
| NC_037639.1 | 6966753 | SNV | 1 | A | T | Homozygous   |
| NC_037639.1 | 6967847 | SNV | 1 | G | A | Homozygous   |
| NC_037639.1 | 6967942 | SNV | 1 | C | T | Homozygous   |
| NC_037639.1 | 6972658 | SNV | 1 | G | A | Homozygous   |
| NC_037639.1 | 6972730 | SNV | 1 | T | A | Homozygous   |
| NC_037639.1 | 6974000 | SNV | 1 | A | T | Homozygous   |

|             |         |     |   |   |   |              |
|-------------|---------|-----|---|---|---|--------------|
| NC_037639.1 | 6974952 | SNV | 1 | G | T | Homozygous   |
| NC_037639.1 | 6975139 | SNV | 1 | T | C | Homozygous   |
| NC_037639.1 | 6975595 | SNV | 1 | G | A | Homozygous   |
| NC_037639.1 | 6975654 | SNV | 1 | C | T | Homozygous   |
| NC_037639.1 | 6981123 | SNV | 1 | G | A | Homozygous   |
| NC_037639.1 | 6983941 | SNV | 1 | T | C | Homozygous   |
| NC_037639.1 | 6995456 | SNV | 1 | T | C | Heterozygous |
| NC_037639.1 | 6998553 | SNV | 1 | C | T | Heterozygous |
| NC_037639.1 | 7009228 | SNV | 1 | A | T | Heterozygous |
| NC_037639.1 | 7055359 | SNV | 1 | C | A | Homozygous   |
| NC_037639.1 | 7055620 | SNV | 1 | C | T | Heterozygous |
| NC_037639.1 | 7055767 | SNV | 1 | C | A | Heterozygous |
| NC_037639.1 | 7056048 | SNV | 1 | G | A | Homozygous   |
| NC_037639.1 | 7059901 | SNV | 1 | C | T | Heterozygous |
| NC_037639.1 | 7060894 | SNV | 1 | T | C | Homozygous   |
| NC_037639.1 | 7061281 | SNV | 1 | G | A | Heterozygous |
| NC_037639.1 | 7061362 | SNV | 1 | C | T | Homozygous   |
| NC_037639.1 | 7061453 | SNV | 1 | C | T | Heterozygous |
| NC_037639.1 | 7061501 | SNV | 1 | A | G | Homozygous   |
| NC_037639.1 | 7061586 | SNV | 1 | T | C | Heterozygous |
| NC_037639.1 | 7082179 | SNV | 1 | A | G | Homozygous   |
| NC_037639.1 | 7082347 | SNV | 1 | C | T | Heterozygous |
| NC_037639.1 | 7083823 | SNV | 1 | G | A | Heterozygous |
| NC_037639.1 | 7083944 | SNV | 1 | C | T | Homozygous   |
| NC_037639.1 | 7084085 | SNV | 1 | C | T | Heterozygous |
| NC_037639.1 | 7092006 | SNV | 1 | T | C | Heterozygous |
| NC_037639.1 | 7092136 | SNV | 1 | T | C | Heterozygous |
| NC_037639.1 | 7092142 | SNV | 1 | T | C | Homozygous   |
| NC_037639.1 | 7092390 | SNV | 1 | C | T | Homozygous   |
| NC_037639.1 | 7092471 | SNV | 1 | C | G | Homozygous   |
| NC_037639.1 | 7092477 | SNV | 1 | C | T | Heterozygous |
| NC_037639.1 | 7092525 | SNV | 1 | G | A | Heterozygous |
| NC_037639.1 | 7097978 | SNV | 1 | G | A | Heterozygous |
| NC_037639.1 | 7098815 | SNV | 1 | T | C | Heterozygous |
| NC_037639.1 | 7098820 | SNV | 1 | A | G | Homozygous   |
| NC_037639.1 | 7098841 | SNV | 1 | T | C | Homozygous   |
| NC_037639.1 | 7099005 | SNV | 1 | C | T | Homozygous   |
| NC_037639.1 | 7099226 | SNV | 1 | T | C | Homozygous   |
| NC_037639.1 | 7102176 | SNV | 1 | A | C | Homozygous   |
| NC_037639.1 | 7102183 | SNV | 1 | C | T | Homozygous   |
| NC_037639.1 | 7102187 | SNV | 1 | C | T | Homozygous   |
| NC_037639.1 | 7102192 | SNV | 1 | T | A | Homozygous   |
| NC_037639.1 | 7107743 | SNV | 1 | T | G | Heterozygous |
| NC_037639.1 | 7107761 | SNV | 1 | C | T | Heterozygous |
| NC_037639.1 | 7111442 | SNV | 1 | A | G | Homozygous   |
| NC_037639.1 | 7111489 | SNV | 1 | C | T | Heterozygous |
| NC_037639.1 | 7111498 | SNV | 1 | T | C | Heterozygous |
| NC_037639.1 | 7111588 | SNV | 1 | G | A | Heterozygous |
| NC_037639.1 | 7114071 | SNV | 1 | C | T | Homozygous   |
| NC_037639.1 | 7114154 | SNV | 1 | T | C | Heterozygous |
| NC_037639.1 | 7114157 | SNV | 1 | T | C | Heterozygous |

|             |         |     |   |   |   |              |
|-------------|---------|-----|---|---|---|--------------|
| NC_037639.1 | 7114293 | SNV | 1 | T | A | Heterozygous |
| NC_037639.1 | 7127547 | SNV | 1 | A | G | Heterozygous |
| NC_037639.1 | 7127553 | SNV | 1 | A | C | Homozygous   |
| NC_037639.1 | 7130179 | SNV | 1 | G | T | Homozygous   |
| NC_037639.1 | 7130182 | SNV | 1 | C | A | Homozygous   |
| NC_037639.1 | 7130185 | SNV | 1 | T | A | Homozygous   |
| NC_037639.1 | 7130188 | SNV | 1 | C | A | Homozygous   |
| NC_037639.1 | 7130224 | SNV | 1 | C | T | Homozygous   |
| NC_037639.1 | 7130226 | SNV | 1 | C | G | Homozygous   |
| NC_037639.1 | 7130228 | SNV | 1 | C | T | Homozygous   |
| NC_037639.1 | 7146189 | SNV | 1 | T | C | Homozygous   |
| NC_037639.1 | 7146194 | SNV | 1 | C | T | Homozygous   |
| NC_037639.1 | 7146198 | SNV | 1 | C | T | Homozygous   |
| NC_037639.1 | 7153017 | SNV | 1 | C | T | Homozygous   |
| NC_037639.1 | 7154793 | SNV | 1 | C | G | Heterozygous |
| NC_037639.1 | 7154824 | SNV | 1 | G | A | Heterozygous |
| NC_037639.1 | 7155088 | SNV | 1 | G | C | Heterozygous |
| NC_037639.1 | 7155105 | SNV | 1 | G | A | Homozygous   |
| NC_037639.1 | 7155199 | SNV | 1 | T | G | Homozygous   |
| NC_037639.1 | 7155227 | SNV | 1 | C | A | Homozygous   |
| NC_037639.1 | 7155420 | SNV | 1 | G | A | Homozygous   |
| NC_037639.1 | 7155958 | SNV | 1 | G | A | Homozygous   |
| NC_037639.1 | 7162568 | SNV | 1 | A | G | Homozygous   |
| NC_037639.1 | 7162674 | SNV | 1 | T | C | Homozygous   |
| NC_037639.1 | 7162709 | SNV | 1 | A | G | Homozygous   |
| NC_037639.1 | 7162941 | SNV | 1 | G | A | Heterozygous |
| NC_037639.1 | 7162995 | SNV | 1 | T | C | Homozygous   |
| NC_037639.1 | 7163939 | SNV | 1 | G | A | Homozygous   |
| NC_037639.1 | 7164013 | SNV | 1 | C | T | Homozygous   |
| NC_037639.1 | 7164295 | SNV | 1 | T | A | Heterozygous |
| NC_037639.1 | 7164315 | SNV | 1 | T | A | Heterozygous |
| NC_037639.1 | 7164319 | SNV | 1 | T | A | Heterozygous |
| NC_037639.1 | 7164335 | SNV | 1 | C | A | Heterozygous |
| NC_037639.1 | 7164339 | SNV | 1 | C | A | Heterozygous |
| NC_037639.1 | 7164345 | SNV | 1 | G | A | Heterozygous |
| NC_037639.1 | 7178845 | SNV | 1 | C | A | Homozygous   |
| NC_037639.1 | 7193898 | SNV | 1 | C | T | Heterozygous |
| NC_037639.1 | 7193946 | SNV | 1 | G | A | Heterozygous |
| NC_037639.1 | 7194031 | SNV | 1 | A | G | Heterozygous |
| NC_037639.1 | 7194054 | SNV | 1 | C | T | Heterozygous |
| NC_037639.1 | 7194059 | SNV | 1 | T | C | Heterozygous |
| NC_037639.1 | 7194061 | SNV | 1 | T | C | Heterozygous |
| NC_037639.1 | 7194265 | SNV | 1 | G | C | Homozygous   |
| NC_037639.1 | 7201166 | SNV | 1 | G | A | Homozygous   |
| NC_037639.1 | 7201187 | SNV | 1 | C | T | Heterozygous |
| NC_037639.1 | 7201195 | SNV | 1 | C | A | Heterozygous |
| NC_037639.1 | 7201199 | SNV | 1 | T | C | Homozygous   |
| NC_037639.1 | 7205828 | SNV | 1 | A | G | Homozygous   |
| NC_037639.1 | 7209316 | SNV | 1 | G | A | Heterozygous |
| NC_037639.1 | 7209324 | SNV | 1 | T | C | Heterozygous |
| NC_037639.1 | 7209353 | SNV | 1 | A | G | Homozygous   |

|             |         |     |   |   |   |              |
|-------------|---------|-----|---|---|---|--------------|
| NC_037639.1 | 7210980 | SNV | 1 | G | A | Heterozygous |
| NC_037639.1 | 7211231 | SNV | 1 | A | G | Homozygous   |
| NC_037639.1 | 7211235 | SNV | 1 | A | C | Homozygous   |
| NC_037639.1 | 7211354 | SNV | 1 | T | C | Homozygous   |
| NC_037639.1 | 7211356 | SNV | 1 | C | T | Heterozygous |
| NC_037639.1 | 7211377 | SNV | 1 | G | A | Heterozygous |
| NC_037639.1 | 7211508 | SNV | 1 | T | C | Homozygous   |
| NC_037639.1 | 7212652 | SNV | 1 | C | T | Homozygous   |
| NC_037639.1 | 7212658 | SNV | 1 | T | C | Homozygous   |
| NC_037639.1 | 7225318 | SNV | 1 | C | T | Heterozygous |
| NC_037639.1 | 7225396 | SNV | 1 | T | C | Homozygous   |
| NC_037639.1 | 7225405 | SNV | 1 | T | C | Homozygous   |
| NC_037639.1 | 7225408 | SNV | 1 | C | G | Homozygous   |
| NC_037639.1 | 7225448 | SNV | 1 | A | T | Homozygous   |
| NC_037639.1 | 7225635 | SNV | 1 | G | A | Homozygous   |
| NC_037639.1 | 7225696 | SNV | 1 | T | C | Heterozygous |
| NC_037639.1 | 7225905 | SNV | 1 | T | C | Heterozygous |
| NC_037639.1 | 7226045 | SNV | 1 | T | C | Homozygous   |
| NC_037639.1 | 7228090 | SNV | 1 | A | G | Homozygous   |
| NC_037639.1 | 7236926 | SNV | 1 | G | A | Homozygous   |
| NC_037639.1 | 7236933 | SNV | 1 | A | T | Heterozygous |
| NC_037639.1 | 7236986 | SNV | 1 | G | A | Homozygous   |
| NC_037639.1 | 7237062 | SNV | 1 | C | T | Homozygous   |
| NC_037639.1 | 7246753 | SNV | 1 | G | A | Homozygous   |
| NC_037639.1 | 7246861 | SNV | 1 | C | T | Heterozygous |
| NC_037639.1 | 7246885 | SNV | 1 | A | G | Homozygous   |
| NC_037639.1 | 7247039 | SNV | 1 | A | G | Heterozygous |
| NC_037639.1 | 7247515 | SNV | 1 | A | G | Homozygous   |
| NC_037639.1 | 7247519 | SNV | 1 | T | C | Homozygous   |
| NC_037639.1 | 7247545 | SNV | 1 | T | C | Homozygous   |
| NC_037639.1 | 7247562 | SNV | 1 | T | C | Heterozygous |
| NC_037639.1 | 7260765 | SNV | 1 | A | T | Homozygous   |
| NC_037639.1 | 7260800 | SNV | 1 | C | T | Heterozygous |
| NC_037639.1 | 7261536 | SNV | 1 | G | A | Heterozygous |
| NC_037639.1 | 7261594 | SNV | 1 | C | T | Homozygous   |
| NC_037639.1 | 7289726 | SNV | 1 | C | T | Heterozygous |
| NC_037639.1 | 7289732 | SNV | 1 | A | T | Heterozygous |
| NC_037639.1 | 7294302 | SNV | 1 | A | G | Homozygous   |
| NC_037639.1 | 7294324 | SNV | 1 | A | G | Heterozygous |
| NC_037639.1 | 7294326 | SNV | 1 | C | T | Heterozygous |
| NC_037639.1 | 7294343 | SNV | 1 | C | T | Heterozygous |
| NC_037639.1 | 7294419 | SNV | 1 | T | C | Homozygous   |
| NC_037639.1 | 7294421 | SNV | 1 | T | C | Homozygous   |
| NC_037639.1 | 7294440 | SNV | 1 | G | A | Homozygous   |
| NC_037639.1 | 7294448 | SNV | 1 | G | A | Heterozygous |
| NC_037639.1 | 7294616 | SNV | 1 | G | T | Homozygous   |
| NC_037639.1 | 7299109 | SNV | 1 | G | C | Heterozygous |
| NC_037639.1 | 7299226 | SNV | 1 | G | A | Heterozygous |
| NC_037639.1 | 7299531 | SNV | 1 | G | A | Heterozygous |
| NC_037639.1 | 7299563 | SNV | 1 | C | T | Heterozygous |
| NC_037639.1 | 7299565 | SNV | 1 | C | T | Heterozygous |

|             |         |     |   |   |   |              |
|-------------|---------|-----|---|---|---|--------------|
| NC_037639.1 | 7301746 | SNV | 1 | G | C | Homozygous   |
| NC_037639.1 | 7301749 | SNV | 1 | C | T | Heterozygous |
| NC_037639.1 | 7303731 | SNV | 1 | A | T | Homozygous   |
| NC_037639.1 | 7303744 | SNV | 1 | T | C | Heterozygous |
| NC_037639.1 | 7303769 | SNV | 1 | A | C | Heterozygous |
| NC_037639.1 | 7303775 | SNV | 1 | G | T | Heterozygous |
| NC_037639.1 | 7303777 | SNV | 1 | G | A | Heterozygous |
| NC_037639.1 | 7303777 | SNV | 1 | G | T | Heterozygous |
| NC_037639.1 | 7309525 | SNV | 1 | G | A | Homozygous   |
| NC_037639.1 | 7309607 | SNV | 1 | A | G | Homozygous   |
| NC_037639.1 | 7317893 | SNV | 1 | C | T | Heterozygous |
| NC_037639.1 | 7317931 | SNV | 1 | T | A | Homozygous   |
| NC_037639.1 | 7317970 | SNV | 1 | T | A | Homozygous   |
| NC_037639.1 | 7318068 | SNV | 1 | G | A | Heterozygous |
| NC_037639.1 | 7326308 | SNV | 1 | G | A | Heterozygous |
| NC_037639.1 | 7326313 | SNV | 1 | T | A | Homozygous   |
| NC_037639.1 | 7326353 | SNV | 1 | A | G | Homozygous   |
| NC_037639.1 | 7326357 | SNV | 1 | T | C | Homozygous   |
| NC_037639.1 | 7326376 | SNV | 1 | T | G | Homozygous   |
| NC_037639.1 | 7326577 | SNV | 1 | A | G | Heterozygous |
| NC_037639.1 | 7326846 | SNV | 1 | G | A | Heterozygous |
| NC_037639.1 | 7328776 | SNV | 1 | C | T | Heterozygous |
| NC_037639.1 | 7328896 | SNV | 1 | C | G | Homozygous   |
| NC_037639.1 | 7328909 | SNV | 1 | C | T | Homozygous   |
| NC_037639.1 | 7338178 | SNV | 1 | A | T | Heterozygous |
| NC_037639.1 | 7338198 | SNV | 1 | C | T | Heterozygous |
| NC_037639.1 | 7338224 | SNV | 1 | T | C | Homozygous   |
| NC_037639.1 | 7338299 | SNV | 1 | C | T | Heterozygous |
| NC_037639.1 | 7338347 | SNV | 1 | T | C | Homozygous   |
| NC_037639.1 | 7338434 | SNV | 1 | G | A | Heterozygous |
| NC_037639.1 | 7338442 | SNV | 1 | C | T | Heterozygous |
| NC_037639.1 | 7338457 | SNV | 1 | A | G | Heterozygous |
| NC_037639.1 | 7338513 | SNV | 1 | T | G | Heterozygous |
| NC_037639.1 | 7338707 | SNV | 1 | G | A | Homozygous   |
| NC_037639.1 | 7338885 | SNV | 1 | G | A | Heterozygous |
| NC_037639.1 | 7339237 | SNV | 1 | C | T | Homozygous   |
| NC_037639.1 | 7339284 | SNV | 1 | G | A | Homozygous   |
| NC_037639.1 | 7345262 | SNV | 1 | C | A | Heterozygous |
| NC_037639.1 | 7345267 | SNV | 1 | G | A | Heterozygous |
| NC_037639.1 | 7355520 | SNV | 1 | T | C | Homozygous   |
| NC_037639.1 | 7357118 | SNV | 1 | C | T | Heterozygous |
| NC_037639.1 | 7363835 | SNV | 1 | T | C | Homozygous   |
| NC_037639.1 | 7374334 | SNV | 1 | G | A | Homozygous   |
| NC_037639.1 | 7374350 | SNV | 1 | T | C | Homozygous   |
| NC_037639.1 | 7387146 | SNV | 1 | C | T | Homozygous   |
| NC_037639.1 | 7387150 | SNV | 1 | A | G | Homozygous   |
| NC_037639.1 | 7389483 | SNV | 1 | C | T | Heterozygous |
| NC_037639.1 | 7392083 | SNV | 1 | A | G | Homozygous   |
| NC_037639.1 | 7392114 | SNV | 1 | T | A | Heterozygous |
| NC_037639.1 | 7392288 | SNV | 1 | T | C | Homozygous   |
| NC_037639.1 | 7392476 | SNV | 1 | T | C | Homozygous   |



|             |         |     |   |   |   |              |
|-------------|---------|-----|---|---|---|--------------|
| NC_037639.1 | 7392629 | SNV | 1 | G | A | Heterozygous |
| NC_037639.1 | 7392774 | SNV | 1 | G | A | Homozygous   |
| NC_037639.1 | 7392789 | SNV | 1 | A | T | Homozygous   |
| NC_037639.1 | 7392839 | SNV | 1 | A | G | Homozygous   |
| NC_037639.1 | 7392902 | SNV | 1 | C | A | Heterozygous |
| NC_037639.1 | 7392905 | SNV | 1 | T | A | Heterozygous |
| NC_037639.1 | 7392922 | SNV | 1 | A | G | Homozygous   |
| NC_037639.1 | 7393123 | SNV | 1 | G | A | Heterozygous |
| NC_037639.1 | 7393160 | SNV | 1 | T | A | Homozygous   |
| NC_037639.1 | 7393188 | SNV | 1 | T | C | Homozygous   |
| NC_037639.1 | 7393462 | SNV | 1 | T | C | Homozygous   |
| NC_037639.1 | 7393676 | SNV | 1 | G | A | Heterozygous |
| NC_037639.1 | 7404207 | SNV | 1 | T | C | Heterozygous |
| NC_037639.1 | 7404231 | SNV | 1 | T | C | Heterozygous |
| NC_037639.1 | 7404240 | SNV | 1 | A | T | Heterozygous |
| NC_037639.1 | 7404247 | SNV | 1 | G | T | Homozygous   |
| NC_037639.1 | 7407290 | SNV | 1 | A | G | Heterozygous |
| NC_037639.1 | 7407319 | SNV | 1 | A | T | Heterozygous |
| NC_037639.1 | 7407325 | SNV | 1 | C | T | Heterozygous |
| NC_037639.1 | 7407638 | SNV | 1 | G | A | Heterozygous |
| NC_037639.1 | 7408125 | SNV | 1 | T | C | Homozygous   |
| NC_037639.1 | 7408263 | SNV | 1 | G | A | Heterozygous |
| NC_037639.1 | 7408286 | SNV | 1 | C | T | Heterozygous |
| NC_037639.1 | 7408383 | SNV | 1 | A | G | Homozygous   |
| NC_037639.1 | 7408419 | SNV | 1 | A | G | Homozygous   |
| NC_037639.1 | 7408451 | SNV | 1 | G | A | Heterozygous |
| NC_037639.1 | 7408473 | SNV | 1 | G | T | Homozygous   |
| NC_037639.1 | 7408475 | SNV | 1 | A | G | Homozygous   |
| NC_037639.1 | 7408576 | SNV | 1 | G | A | Heterozygous |
| NC_037639.1 | 7408704 | SNV | 1 | T | C | Homozygous   |
| NC_037639.1 | 7408723 | SNV | 1 | T | C | Homozygous   |
| NC_037639.1 | 7408874 | SNV | 1 | G | A | Homozygous   |
| NC_037639.1 | 7408903 | SNV | 1 | G | A | Heterozygous |
| NC_037639.1 | 7408972 | SNV | 1 | A | G | Heterozygous |
| NC_037639.1 | 7409041 | SNV | 1 | A | G | Heterozygous |
| NC_037639.1 | 7409121 | SNV | 1 | A | G | Homozygous   |
| NC_037639.1 | 7409346 | SNV | 1 | T | C | Heterozygous |
| NC_037639.1 | 7409352 | SNV | 1 | A | G | Homozygous   |
| NC_037639.1 | 7409435 | SNV | 1 | C | T | Heterozygous |
| NC_037639.1 | 7412517 | SNV | 1 | A | G | Homozygous   |
| NC_037639.1 | 7417172 | SNV | 1 | C | T | Heterozygous |
| NC_037639.1 | 7417188 | SNV | 1 | A | G | Heterozygous |
| NC_037639.1 | 7417311 | SNV | 1 | T | A | Heterozygous |
| NC_037639.1 | 7417368 | SNV | 1 | C | G | Homozygous   |
| NC_037639.1 | 7417444 | SNV | 1 | T | C | Homozygous   |
| NC_037639.1 | 7417571 | SNV | 1 | G | A | Heterozygous |
| NC_037639.1 | 7417760 | SNV | 1 | T | C | Homozygous   |
| NC_037639.1 | 7426438 | SNV | 1 | G | A | Homozygous   |
| NC_037639.1 | 7426453 | SNV | 1 | A | C | Homozygous   |
| NC_037639.1 | 7436582 | SNV | 1 | A | G | Homozygous   |
| NC_037639.1 | 7442103 | SNV | 1 | A | G | Homozygous   |

|             |         |     |   |   |   |              |
|-------------|---------|-----|---|---|---|--------------|
| NC_037639.1 | 7442133 | SNV | 1 | T | C | Homozygous   |
| NC_037639.1 | 7442185 | SNV | 1 | T | A | Homozygous   |
| NC_037639.1 | 7442266 | SNV | 1 | G | C | Heterozygous |
| NC_037639.1 | 7446833 | SNV | 1 | G | A | Heterozygous |
| NC_037639.1 | 7446868 | SNV | 1 | T | C | Homozygous   |
| NC_037639.1 | 7446969 | SNV | 1 | G | C | Heterozygous |
| NC_037639.1 | 7446972 | SNV | 1 | A | G | Heterozygous |
| NC_037639.1 | 7447009 | SNV | 1 | C | G | Homozygous   |
| NC_037639.1 | 7447027 | SNV | 1 | A | G | Homozygous   |
| NC_037639.1 | 7447866 | SNV | 1 | C | T | Heterozygous |
| NC_037639.1 | 7447868 | SNV | 1 | T | A | Heterozygous |
| NC_037639.1 | 7454633 | SNV | 1 | G | A | Heterozygous |
| NC_037639.1 | 7455037 | SNV | 1 | A | G | Heterozygous |
| NC_037639.1 | 7455778 | SNV | 1 | A | G | Heterozygous |
| NC_037639.1 | 7461016 | SNV | 1 | C | T | Heterozygous |
| NC_037639.1 | 7483767 | SNV | 1 | T | C | Homozygous   |
| NC_037639.1 | 7483776 | SNV | 1 | G | A | Homozygous   |
| NC_037639.1 | 7483787 | SNV | 1 | T | C | Homozygous   |
| NC_037639.1 | 7483819 | SNV | 1 | T | C | Homozygous   |
| NC_037639.1 | 7483823 | SNV | 1 | C | T | Homozygous   |
| NC_037639.1 | 7489672 | SNV | 1 | G | C | Heterozygous |
| NC_037639.1 | 7489784 | SNV | 1 | G | A | Heterozygous |
| NC_037639.1 | 7489795 | SNV | 1 | G | A | Heterozygous |
| NC_037639.1 | 7489910 | SNV | 1 | T | C | Heterozygous |
| NC_037639.1 | 7489995 | SNV | 1 | A | G | Homozygous   |
| NC_037639.1 | 7494785 | SNV | 1 | G | A | Heterozygous |
| NC_037639.1 | 7503088 | SNV | 1 | A | G | Homozygous   |
| NC_037639.1 | 7503280 | SNV | 1 | G | A | Heterozygous |
| NC_037639.1 | 7509388 | SNV | 1 | C | T | Homozygous   |
| NC_037639.1 | 7509620 | SNV | 1 | A | G | Homozygous   |
| NC_037639.1 | 7509713 | SNV | 1 | C | T | Heterozygous |
| NC_037639.1 | 7509715 | SNV | 1 | T | C | Heterozygous |
| NC_037639.1 | 7509720 | SNV | 1 | A | T | Homozygous   |
| NC_037639.1 | 7509781 | SNV | 1 | A | C | Homozygous   |
| NC_037639.1 | 7509784 | SNV | 1 | A | G | Homozygous   |
| NC_037639.1 | 7509833 | SNV | 1 | G | A | Homozygous   |
| NC_037639.1 | 7509837 | SNV | 1 | A | G | Homozygous   |
| NC_037639.1 | 7512023 | SNV | 1 | A | C | Homozygous   |
| NC_037639.1 | 7512214 | SNV | 1 | G | A | Homozygous   |
| NC_037639.1 | 7512599 | SNV | 1 | G | A | Homozygous   |
| NC_037639.1 | 7512658 | SNV | 1 | T | G | Homozygous   |
| NC_037639.1 | 7512740 | SNV | 1 | T | C | Homozygous   |
| NC_037639.1 | 7536848 | SNV | 1 | A | G | Homozygous   |
| NC_037639.1 | 7536854 | SNV | 1 | C | T | Homozygous   |
| NC_037639.1 | 7536891 | SNV | 1 | G | A | Heterozygous |
| NC_037639.1 | 7536900 | SNV | 1 | T | C | Heterozygous |
| NC_037639.1 | 7536904 | SNV | 1 | G | T | Heterozygous |
| NC_037639.1 | 7536938 | SNV | 1 | A | G | Homozygous   |
| NC_037639.1 | 7536940 | SNV | 1 | C | T | Heterozygous |
| NC_037639.1 | 7536977 | SNV | 1 | T | C | Homozygous   |
| NC_037639.1 | 7537018 | SNV | 1 | G | A | Heterozygous |

|             |         |     |   |   |   |              |
|-------------|---------|-----|---|---|---|--------------|
| NC_037639.1 | 7537128 | SNV | 1 | T | C | Heterozygous |
| NC_037639.1 | 7537147 | SNV | 1 | A | G | Homozygous   |
| NC_037639.1 | 7537178 | SNV | 1 | G | A | Homozygous   |
| NC_037639.1 | 7537202 | SNV | 1 | C | G | Homozygous   |
| NC_037639.1 | 7537333 | SNV | 1 | T | C | Homozygous   |
| NC_037639.1 | 7537467 | SNV | 1 | C | T | Heterozygous |
| NC_037639.1 | 7537549 | SNV | 1 | A | G | Homozygous   |
| NC_037639.1 | 7537800 | SNV | 1 | G | A | Heterozygous |
| NC_037639.1 | 7537805 | SNV | 1 | C | G | Homozygous   |
| NC_037639.1 | 7537850 | SNV | 1 | A | G | Homozygous   |
| NC_037639.1 | 7538011 | SNV | 1 | C | T | Heterozygous |
| NC_037639.1 | 7538017 | SNV | 1 | C | T | Homozygous   |
| NC_037639.1 | 7538028 | SNV | 1 | C | T | Heterozygous |
| NC_037639.1 | 7538031 | SNV | 1 | T | C | Heterozygous |
| NC_037639.1 | 7539560 | SNV | 1 | C | T | Homozygous   |
| NC_037639.1 | 7542250 | SNV | 1 | G | A | Homozygous   |
| NC_037639.1 | 7542258 | SNV | 1 | A | G | Heterozygous |
| NC_037639.1 | 7542293 | SNV | 1 | T | A | Heterozygous |
| NC_037639.1 | 7542439 | SNV | 1 | C | T | Heterozygous |
| NC_037639.1 | 7561300 | SNV | 1 | T | C | Homozygous   |
| NC_037639.1 | 7561457 | SNV | 1 | A | G | Homozygous   |
| NC_037639.1 | 7561667 | SNV | 1 | T | A | Heterozygous |
| NC_037639.1 | 7561753 | SNV | 1 | T | C | Heterozygous |
| NC_037639.1 | 7561837 | SNV | 1 | A | T | Homozygous   |
| NC_037639.1 | 7561847 | SNV | 1 | T | C | Homozygous   |
| NC_037639.1 | 7572655 | SNV | 1 | T | C | Heterozygous |
| NC_037639.1 | 7572664 | SNV | 1 | T | C | Heterozygous |
| NC_037639.1 | 7572666 | SNV | 1 | C | T | Heterozygous |
| NC_037639.1 | 7572669 | SNV | 1 | A | C | Homozygous   |
| NC_037639.1 | 7572673 | SNV | 1 | T | C | Homozygous   |
| NC_037639.1 | 7572681 | SNV | 1 | A | T | Homozygous   |
| NC_037639.1 | 7574441 | SNV | 1 | G | A | Homozygous   |
| NC_037639.1 | 7575046 | SNV | 1 | G | A | Homozygous   |
| NC_037639.1 | 7575305 | SNV | 1 | G | A | Homozygous   |
| NC_037639.1 | 7575349 | SNV | 1 | G | A | Heterozygous |
| NC_037639.1 | 7575653 | SNV | 1 | G | A | Heterozygous |
| NC_037639.1 | 7575825 | SNV | 1 | A | G | Homozygous   |
| NC_037639.1 | 7582006 | SNV | 1 | G | C | Heterozygous |
| NC_037639.1 | 7582423 | SNV | 1 | G | A | Homozygous   |
| NC_037639.1 | 7582428 | SNV | 1 | T | G | Homozygous   |
| NC_037639.1 | 7591665 | SNV | 1 | T | C | Heterozygous |
| NC_037639.1 | 7591674 | SNV | 1 | T | C | Homozygous   |
| NC_037639.1 | 7592105 | SNV | 1 | T | C | Homozygous   |
| NC_037639.1 | 7592158 | SNV | 1 | T | C | Heterozygous |
| NC_037639.1 | 7592233 | SNV | 1 | A | G | Heterozygous |
| NC_037639.1 | 7592427 | SNV | 1 | G | C | Homozygous   |
| NC_037639.1 | 7592432 | SNV | 1 | C | G | Heterozygous |
| NC_037639.1 | 7592483 | SNV | 1 | G | A | Heterozygous |
| NC_037639.1 | 7592642 | SNV | 1 | T | C | Homozygous   |
| NC_037639.1 | 7592798 | SNV | 1 | C | A | Heterozygous |
| NC_037639.1 | 7592829 | SNV | 1 | T | C | Heterozygous |

|             |         |     |   |   |   |              |
|-------------|---------|-----|---|---|---|--------------|
| NC_037639.1 | 7592841 | SNV | 1 | T | A | Heterozygous |
| NC_037639.1 | 7592845 | SNV | 1 | C | G | Heterozygous |
| NC_037639.1 | 7592903 | SNV | 1 | G | A | Heterozygous |
| NC_037639.1 | 7592908 | SNV | 1 | A | G | Heterozygous |
| NC_037639.1 | 7592910 | SNV | 1 | G | T | Heterozygous |
| NC_037639.1 | 7592915 | SNV | 1 | T | C | Homozygous   |
| NC_037639.1 | 7592925 | SNV | 1 | A | G | Homozygous   |
| NC_037639.1 | 7592959 | SNV | 1 | T | C | Homozygous   |
| NC_037639.1 | 7593004 | SNV | 1 | T | C | Heterozygous |
| NC_037639.1 | 7593012 | SNV | 1 | G | A | Heterozygous |
| NC_037639.1 | 7593076 | SNV | 1 | G | C | Heterozygous |
| NC_037639.1 | 7593103 | SNV | 1 | T | C | Heterozygous |
| NC_037639.1 | 7593301 | SNV | 1 | C | T | Heterozygous |
| NC_037639.1 | 7593336 | SNV | 1 | G | A | Heterozygous |
| NC_037639.1 | 7593350 | SNV | 1 | G | C | Heterozygous |
| NC_037639.1 | 7598470 | SNV | 1 | G | A | Heterozygous |
| NC_037639.1 | 7598487 | SNV | 1 | G | A | Heterozygous |
| NC_037639.1 | 7598534 | SNV | 1 | G | A | Homozygous   |
| NC_037639.1 | 7601637 | SNV | 1 | G | A | Heterozygous |
| NC_037639.1 | 7601781 | SNV | 1 | C | A | Homozygous   |
| NC_037639.1 | 7610788 | SNV | 1 | G | A | Homozygous   |
| NC_037639.1 | 7610823 | SNV | 1 | A | G | Homozygous   |
| NC_037639.1 | 7610875 | SNV | 1 | G | A | Homozygous   |
| NC_037639.1 | 7610944 | SNV | 1 | A | G | Homozygous   |
| NC_037639.1 | 7611001 | SNV | 1 | G | A | Homozygous   |
| NC_037639.1 | 7616164 | SNV | 1 | A | G | Heterozygous |
| NC_037639.1 | 7621186 | SNV | 1 | A | G | Heterozygous |
| NC_037639.1 | 7621190 | SNV | 1 | G | A | Homozygous   |
| NC_037639.1 | 7621313 | SNV | 1 | C | T | Heterozygous |
| NC_037639.1 | 7621355 | SNV | 1 | T | C | Heterozygous |
| NC_037639.1 | 7621462 | SNV | 1 | A | G | Homozygous   |
| NC_037639.1 | 7621591 | SNV | 1 | T | C | Heterozygous |
| NC_037639.1 | 7621766 | SNV | 1 | T | C | Heterozygous |
| NC_037639.1 | 7622973 | SNV | 1 | C | T | Homozygous   |
| NC_037639.1 | 7626594 | SNV | 1 | C | G | Homozygous   |
| NC_037639.1 | 7626706 | SNV | 1 | G | A | Homozygous   |
| NC_037639.1 | 7626770 | SNV | 1 | A | G | Heterozygous |
| NC_037639.1 | 7626792 | SNV | 1 | A | G | Homozygous   |
| NC_037639.1 | 7626894 | SNV | 1 | C | G | Homozygous   |
| NC_037639.1 | 7627100 | SNV | 1 | T | C | Homozygous   |
| NC_037639.1 | 7638223 | SNV | 1 | A | G | Heterozygous |
| NC_037639.1 | 7638295 | SNV | 1 | A | T | Homozygous   |
| NC_037639.1 | 7638421 | SNV | 1 | T | C | Homozygous   |
| NC_037639.1 | 7638458 | SNV | 1 | G | A | Heterozygous |
| NC_037639.1 | 7638461 | SNV | 1 | G | A | Heterozygous |
| NC_037639.1 | 7638473 | SNV | 1 | A | G | Homozygous   |
| NC_037639.1 | 7638503 | SNV | 1 | A | G | Homozygous   |
| NC_037639.1 | 7640655 | SNV | 1 | A | G | Homozygous   |
| NC_037639.1 | 7640682 | SNV | 1 | T | C | Heterozygous |
| NC_037639.1 | 7640688 | SNV | 1 | C | T | Heterozygous |
| NC_037639.1 | 7642237 | SNV | 1 | A | G | Homozygous   |

|             |         |     |   |   |   |              |
|-------------|---------|-----|---|---|---|--------------|
| NC_037639.1 | 7642504 | SNV | 1 | G | A | Heterozygous |
| NC_037639.1 | 7642573 | SNV | 1 | G | A | Heterozygous |
| NC_037639.1 | 7642631 | SNV | 1 | G | A | Homozygous   |
| NC_037639.1 | 7647497 | SNV | 1 | A | G | Homozygous   |
| NC_037639.1 | 7650692 | SNV | 1 | C | T | Homozygous   |
| NC_037639.1 | 7650694 | SNV | 1 | A | G | Homozygous   |
| NC_037639.1 | 7651751 | SNV | 1 | T | C | Homozygous   |
| NC_037639.1 | 7651828 | SNV | 1 | C | T | Heterozygous |
| NC_037639.1 | 7651830 | SNV | 1 | A | T | Heterozygous |
| NC_037639.1 | 7651954 | SNV | 1 | G | C | Heterozygous |
| NC_037639.1 | 7652022 | SNV | 1 | G | A | Heterozygous |
| NC_037639.1 | 7653462 | SNV | 1 | C | T | Heterozygous |
| NC_037639.1 | 7653507 | SNV | 1 | G | A | Heterozygous |
| NC_037639.1 | 7653740 | SNV | 1 | A | G | Homozygous   |
| NC_037639.1 | 7653742 | SNV | 1 | A | G | Homozygous   |
| NC_037639.1 | 7653786 | SNV | 1 | G | A | Heterozygous |
| NC_037639.1 | 7653827 | SNV | 1 | A | G | Homozygous   |
| NC_037639.1 | 7662639 | SNV | 1 | G | C | Homozygous   |
| NC_037639.1 | 7662647 | SNV | 1 | C | T | Homozygous   |
| NC_037639.1 | 7662686 | SNV | 1 | G | A | Homozygous   |
| NC_037639.1 | 7662688 | SNV | 1 | G | A | Homozygous   |
| NC_037639.1 | 7670340 | SNV | 1 | T | A | Homozygous   |
| NC_037639.1 | 7670344 | SNV | 1 | T | G | Heterozygous |
| NC_037639.1 | 7670347 | SNV | 1 | C | T | Heterozygous |
| NC_037639.1 | 7670364 | SNV | 1 | G | C | Homozygous   |
| NC_037639.1 | 7670371 | SNV | 1 | T | G | Homozygous   |
| NC_037639.1 | 7672330 | SNV | 1 | G | A | Homozygous   |
| NC_037639.1 | 7672333 | SNV | 1 | G | A | Homozygous   |
| NC_037639.1 | 7672336 | SNV | 1 | G | A | Homozygous   |
| NC_037639.1 | 7672342 | SNV | 1 | G | A | Heterozygous |
| NC_037639.1 | 7673094 | SNV | 1 | G | C | Heterozygous |
| NC_037639.1 | 7677617 | SNV | 1 | G | A | Heterozygous |
| NC_037639.1 | 7677651 | SNV | 1 | A | G | Homozygous   |
| NC_037639.1 | 7677653 | SNV | 1 | T | G | Heterozygous |
| NC_037639.1 | 7677661 | SNV | 1 | C | T | Heterozygous |
| NC_037639.1 | 7677705 | SNV | 1 | A | G | Heterozygous |
| NC_037639.1 | 7677743 | SNV | 1 | C | T | Homozygous   |
| NC_037639.1 | 7680931 | SNV | 1 | T | G | Homozygous   |
| NC_037639.1 | 7680955 | SNV | 1 | C | A | Homozygous   |
| NC_037639.1 | 7680962 | SNV | 1 | C | T | Homozygous   |
| NC_037639.1 | 7685462 | SNV | 1 | T | C | Homozygous   |
| NC_037639.1 | 7685489 | SNV | 1 | C | T | Heterozygous |
| NC_037639.1 | 7689118 | SNV | 1 | C | T | Homozygous   |
| NC_037639.1 | 7698221 | SNV | 1 | C | A | Heterozygous |
| NC_037639.1 | 7699899 | SNV | 1 | T | C | Homozygous   |
| NC_037639.1 | 7699903 | SNV | 1 | A | G | Homozygous   |
| NC_037639.1 | 7700189 | SNV | 1 | G | A | Heterozygous |
| NC_037639.1 | 7700234 | SNV | 1 | A | G | Homozygous   |
| NC_037639.1 | 7701254 | SNV | 1 | A | G | Homozygous   |
| NC_037639.1 | 7701260 | SNV | 1 | T | A | Homozygous   |
| NC_037639.1 | 7701274 | SNV | 1 | C | T | Homozygous   |

|             |         |     |   |   |   |              |
|-------------|---------|-----|---|---|---|--------------|
| NC_037639.1 | 7701280 | SNV | 1 | G | A | Homozygous   |
| NC_037639.1 | 7701282 | SNV | 1 | T | G | Homozygous   |
| NC_037639.1 | 7701286 | SNV | 1 | A | T | Homozygous   |
| NC_037639.1 | 7701319 | SNV | 1 | G | A | Homozygous   |
| NC_037639.1 | 7701386 | SNV | 1 | C | T | Homozygous   |
| NC_037639.1 | 7701411 | SNV | 1 | T | C | Homozygous   |
| NC_037639.1 | 7704669 | SNV | 1 | T | C | Homozygous   |
| NC_037639.1 | 7704703 | SNV | 1 | C | T | Homozygous   |
| NC_037639.1 | 7708852 | SNV | 1 | C | T | Homozygous   |
| NC_037639.1 | 7708854 | SNV | 1 | C | T | Homozygous   |
| NC_037639.1 | 7708859 | SNV | 1 | T | C | Homozygous   |
| NC_037639.1 | 7708861 | SNV | 1 | T | G | Homozygous   |
| NC_037639.1 | 7708866 | SNV | 1 | C | T | Homozygous   |
| NC_037639.1 | 7712211 | SNV | 1 | T | C | Homozygous   |
| NC_037639.1 | 7712266 | SNV | 1 | A | G | Homozygous   |
| NC_037639.1 | 7712283 | SNV | 1 | G | A | Homozygous   |
| NC_037639.1 | 7712285 | SNV | 1 | A | G | Heterozygous |
| NC_037639.1 | 7712303 | SNV | 1 | A | G | Homozygous   |
| NC_037639.1 | 7715217 | SNV | 1 | A | G | Homozygous   |
| NC_037639.1 | 7715403 | SNV | 1 | G | A | Heterozygous |
| NC_037639.1 | 7715407 | SNV | 1 | G | A | Heterozygous |
| NC_037639.1 | 7715689 | SNV | 1 | G | A | Heterozygous |
| NC_037639.1 | 7718808 | SNV | 1 | G | A | Homozygous   |
| NC_037639.1 | 7718820 | SNV | 1 | C | T | Heterozygous |
| NC_037639.1 | 7728979 | SNV | 1 | T | C | Heterozygous |
| NC_037639.1 | 7729001 | SNV | 1 | T | G | Heterozygous |
| NC_037639.1 | 7729005 | SNV | 1 | A | G | Heterozygous |
| NC_037639.1 | 7729012 | SNV | 1 | T | C | Homozygous   |
| NC_037639.1 | 7729249 | SNV | 1 | T | C | Homozygous   |
| NC_037639.1 | 7736830 | SNV | 1 | G | A | Heterozygous |
| NC_037639.1 | 7736848 | SNV | 1 | T | A | Homozygous   |
| NC_037639.1 | 7737072 | SNV | 1 | C | T | Heterozygous |
| NC_037639.1 | 7737108 | SNV | 1 | A | G | Heterozygous |
| NC_037639.1 | 7740210 | SNV | 1 | C | T | Homozygous   |
| NC_037639.1 | 7740313 | SNV | 1 | A | G | Homozygous   |
| NC_037639.1 | 7740346 | SNV | 1 | A | G | Homozygous   |
| NC_037639.1 | 7740432 | SNV | 1 | A | G | Homozygous   |
| NC_037639.1 | 7740655 | SNV | 1 | A | G | Heterozygous |
| NC_037639.1 | 7743885 | SNV | 1 | G | T | Heterozygous |
| NC_037639.1 | 7743905 | SNV | 1 | A | T | Homozygous   |
| NC_037639.1 | 7743921 | SNV | 1 | T | C | Heterozygous |
| NC_037639.1 | 7744233 | SNV | 1 | C | T | Heterozygous |
| NC_037639.1 | 7744245 | SNV | 1 | G | A | Heterozygous |
| NC_037639.1 | 7744256 | SNV | 1 | T | C | Heterozygous |
| NC_037639.1 | 7744263 | SNV | 1 | T | C | Homozygous   |
| NC_037639.1 | 7744293 | SNV | 1 | G | A | Heterozygous |
| NC_037639.1 | 7744464 | SNV | 1 | A | G | Homozygous   |
| NC_037639.1 | 7744781 | SNV | 1 | A | G | Homozygous   |
| NC_037639.1 | 7744864 | SNV | 1 | T | C | Homozygous   |
| NC_037639.1 | 7744867 | SNV | 1 | T | C | Homozygous   |
| NC_037639.1 | 7744889 | SNV | 1 | A | G | Heterozygous |

|             |         |     |   |   |   |              |
|-------------|---------|-----|---|---|---|--------------|
| NC_037639.1 | 7744914 | SNV | 1 | A | G | Homozygous   |
| NC_037639.1 | 7744984 | SNV | 1 | C | T | Homozygous   |
| NC_037639.1 | 7745056 | SNV | 1 | A | T | Heterozygous |
| NC_037639.1 | 7745061 | SNV | 1 | A | G | Homozygous   |
| NC_037639.1 | 7745553 | SNV | 1 | A | G | Homozygous   |
| NC_037639.1 | 7745600 | SNV | 1 | A | G | Homozygous   |
| NC_037639.1 | 7745894 | SNV | 1 | G | A | Homozygous   |
| NC_037639.1 | 7746107 | SNV | 1 | C | A | Heterozygous |
| NC_037639.1 | 7746654 | SNV | 1 | A | T | Heterozygous |
| NC_037639.1 | 7746666 | SNV | 1 | T | C | Homozygous   |
| NC_037639.1 | 7746707 | SNV | 1 | A | T | Heterozygous |
| NC_037639.1 | 7746716 | SNV | 1 | A | G | Heterozygous |
| NC_037639.1 | 7746996 | SNV | 1 | G | A | Heterozygous |
| NC_037639.1 | 7747351 | SNV | 1 | G | A | Heterozygous |
| NC_037639.1 | 7747640 | SNV | 1 | A | G | Homozygous   |
| NC_037639.1 | 7747729 | SNV | 1 | T | C | Homozygous   |
| NC_037639.1 | 7747753 | SNV | 1 | C | G | Heterozygous |
| NC_037639.1 | 7748216 | SNV | 1 | G | A | Homozygous   |
| NC_037639.1 | 7748333 | SNV | 1 | G | A | Homozygous   |
| NC_037639.1 | 7748533 | SNV | 1 | A | G | Homozygous   |
| NC_037639.1 | 7750566 | SNV | 1 | A | T | Heterozygous |
| NC_037639.1 | 7750582 | SNV | 1 | A | G | Heterozygous |
| NC_037639.1 | 7750586 | SNV | 1 | A | G | Heterozygous |
| NC_037639.1 | 7751223 | SNV | 1 | T | G | Heterozygous |
| NC_037639.1 | 7751272 | SNV | 1 | C | T | Heterozygous |
| NC_037639.1 | 7752147 | SNV | 1 | C | T | Heterozygous |
| NC_037639.1 | 7752851 | SNV | 1 | C | T | Heterozygous |
| NC_037639.1 | 7752902 | SNV | 1 | A | G | Heterozygous |
| NC_037639.1 | 7752906 | SNV | 1 | A | T | Heterozygous |
| NC_037639.1 | 7753490 | SNV | 1 | A | C | Homozygous   |
| NC_037639.1 | 7753511 | SNV | 1 | A | T | Homozygous   |
| NC_037639.1 | 7754086 | SNV | 1 | T | G | Heterozygous |
| NC_037639.1 | 7754089 | SNV | 1 | A | G | Heterozygous |
| NC_037639.1 | 7754094 | SNV | 1 | T | G | Heterozygous |
| NC_037639.1 | 7754102 | SNV | 1 | T | A | Homozygous   |
| NC_037639.1 | 7754839 | SNV | 1 | G | A | Heterozygous |
| NC_037639.1 | 7755706 | SNV | 1 | A | G | Heterozygous |
| NC_037639.1 | 7755873 | SNV | 1 | T | C | Homozygous   |
| NC_037639.1 | 7755884 | SNV | 1 | C | T | Heterozygous |
| NC_037639.1 | 7757508 | SNV | 1 | G | A | Heterozygous |
| NC_037639.1 | 7757715 | SNV | 1 | T | C | Heterozygous |
| NC_037639.1 | 7757718 | SNV | 1 | T | C | Heterozygous |
| NC_037639.1 | 7757746 | SNV | 1 | G | A | Heterozygous |
| NC_037639.1 | 7757764 | SNV | 1 | C | T | Heterozygous |
| NC_037639.1 | 7759757 | SNV | 1 | A | G | Heterozygous |
| NC_037639.1 | 7759775 | SNV | 1 | T | A | Heterozygous |
| NC_037639.1 | 7759810 | SNV | 1 | G | T | Heterozygous |
| NC_037639.1 | 7761095 | SNV | 1 | A | G | Heterozygous |
| NC_037639.1 | 7761097 | SNV | 1 | A | G | Heterozygous |
| NC_037639.1 | 7761110 | SNV | 1 | T | C | Heterozygous |
| NC_037639.1 | 7762358 | SNV | 1 | A | T | Homozygous   |

|             |         |     |   |   |   |              |
|-------------|---------|-----|---|---|---|--------------|
| NC_037639.1 | 7762360 | SNV | 1 | A | T | Homozygous   |
| NC_037639.1 | 7762374 | SNV | 1 | C | A | Homozygous   |
| NC_037639.1 | 7762748 | SNV | 1 | T | C | Heterozygous |
| NC_037639.1 | 7763245 | SNV | 1 | A | G | Homozygous   |
| NC_037639.1 | 7763427 | SNV | 1 | A | G | Heterozygous |
| NC_037639.1 | 7763443 | SNV | 1 | T | C | Heterozygous |
| NC_037639.1 | 7763762 | SNV | 1 | T | C | Homozygous   |
| NC_037639.1 | 7763837 | SNV | 1 | A | G | Homozygous   |
| NC_037639.1 | 7763985 | SNV | 1 | C | T | Heterozygous |
| NC_037639.1 | 7764033 | SNV | 1 | C | T | Heterozygous |
| NC_037639.1 | 7764040 | SNV | 1 | T | C | Heterozygous |
| NC_037639.1 | 7764043 | SNV | 1 | A | T | Heterozygous |
| NC_037639.1 | 7764169 | SNV | 1 | G | A | Heterozygous |
| NC_037639.1 | 7764171 | SNV | 1 | T | C | Heterozygous |
| NC_037639.1 | 7764192 | SNV | 1 | G | A | Heterozygous |
| NC_037639.1 | 7764331 | SNV | 1 | T | C | Homozygous   |
| NC_037639.1 | 7764336 | SNV | 1 | A | G | Homozygous   |
| NC_037639.1 | 7764426 | SNV | 1 | A | G | Homozygous   |
| NC_037639.1 | 7764496 | SNV | 1 | T | C | Homozygous   |
| NC_037639.1 | 7764514 | SNV | 1 | G | A | Heterozygous |
| NC_037639.1 | 7764520 | SNV | 1 | A | G | Homozygous   |
| NC_037639.1 | 7764715 | SNV | 1 | A | G | Homozygous   |
| NC_037639.1 | 7764785 | SNV | 1 | T | C | Homozygous   |
| NC_037639.1 | 7764866 | SNV | 1 | C | T | Homozygous   |
| NC_037639.1 | 7764890 | SNV | 1 | G | A | Homozygous   |
| NC_037639.1 | 7764901 | SNV | 1 | G | A | Heterozygous |
| NC_037639.1 | 7765039 | SNV | 1 | T | G | Heterozygous |
| NC_037639.1 | 7765136 | SNV | 1 | G | C | Homozygous   |
| NC_037639.1 | 7765183 | SNV | 1 | G | A | Homozygous   |
| NC_037639.1 | 7765414 | SNV | 1 | T | C | Homozygous   |
| NC_037639.1 | 7765545 | SNV | 1 | T | C | Homozygous   |
| NC_037639.1 | 7765780 | SNV | 1 | A | G | Homozygous   |
| NC_037639.1 | 7765807 | SNV | 1 | C | T | Heterozygous |
| NC_037639.1 | 7765827 | SNV | 1 | G | A | Heterozygous |
| NC_037639.1 | 7765859 | SNV | 1 | C | T | Homozygous   |
| NC_037639.1 | 7765869 | SNV | 1 | G | A | Heterozygous |
| NC_037639.1 | 7765904 | SNV | 1 | T | C | Heterozygous |
| NC_037639.1 | 7765975 | SNV | 1 | A | G | Homozygous   |
| NC_037639.1 | 7765995 | SNV | 1 | T | C | Heterozygous |
| NC_037639.1 | 7766181 | SNV | 1 | A | G | Homozygous   |
| NC_037639.1 | 7766187 | SNV | 1 | A | C | Homozygous   |
| NC_037639.1 | 7766209 | SNV | 1 | A | G | Homozygous   |
| NC_037639.1 | 7767284 | SNV | 1 | A | T | Heterozygous |
| NC_037639.1 | 7767286 | SNV | 1 | A | T | Heterozygous |
| NC_037639.1 | 7767288 | SNV | 1 | C | T | Homozygous   |
| NC_037639.1 | 7767297 | SNV | 1 | G | A | Heterozygous |
| NC_037639.1 | 7767302 | SNV | 1 | A | T | Heterozygous |
| NC_037639.1 | 7767585 | SNV | 1 | T | C | Homozygous   |
| NC_037639.1 | 7767669 | SNV | 1 | T | C | Homozygous   |
| NC_037639.1 | 7768230 | SNV | 1 | T | A | Homozygous   |
| NC_037639.1 | 7769011 | SNV | 1 | C | T | Heterozygous |



|             |         |     |   |   |   |              |
|-------------|---------|-----|---|---|---|--------------|
| NC_037639.1 | 7769144 | SNV | 1 | G | A | Homozygous   |
| NC_037639.1 | 7769285 | SNV | 1 | A | T | Heterozygous |
| NC_037639.1 | 7769547 | SNV | 1 | A | G | Homozygous   |
| NC_037639.1 | 7769837 | SNV | 1 | T | C | Homozygous   |
| NC_037639.1 | 7769840 | SNV | 1 | C | T | Heterozygous |
| NC_037639.1 | 7770355 | SNV | 1 | T | C | Homozygous   |
| NC_037639.1 | 7770514 | SNV | 1 | G | T | Homozygous   |
| NC_037639.1 | 7770674 | SNV | 1 | A | G | Homozygous   |
| NC_037639.1 | 7770691 | SNV | 1 | A | G | Heterozygous |
| NC_037639.1 | 7771069 | SNV | 1 | T | C | Homozygous   |
| NC_037639.1 | 7772296 | SNV | 1 | C | T | Homozygous   |
| NC_037639.1 | 7772301 | SNV | 1 | C | T | Homozygous   |
| NC_037639.1 | 7772471 | SNV | 1 | T | C | Homozygous   |
| NC_037639.1 | 7772770 | SNV | 1 | G | A | Heterozygous |
| NC_037639.1 | 7773024 | SNV | 1 | T | C | Homozygous   |
| NC_037639.1 | 7773193 | SNV | 1 | A | G | Heterozygous |
| NC_037639.1 | 7774034 | SNV | 1 | A | G | Homozygous   |
| NC_037639.1 | 7774111 | SNV | 1 | C | A | Heterozygous |
| NC_037639.1 | 7774119 | SNV | 1 | A | G | Heterozygous |
| NC_037639.1 | 7774138 | SNV | 1 | A | G | Homozygous   |
| NC_037639.1 | 7774345 | SNV | 1 | G | T | Homozygous   |
| NC_037639.1 | 7774355 | SNV | 1 | T | G | Heterozygous |
| NC_037639.1 | 7774357 | SNV | 1 | T | G | Heterozygous |
| NC_037639.1 | 7774361 | SNV | 1 | G | A | Homozygous   |
| NC_037639.1 | 7774508 | SNV | 1 | T | C | Homozygous   |
| NC_037639.1 | 7780185 | SNV | 1 | T | C | Homozygous   |
| NC_037639.1 | 7780309 | SNV | 1 | T | C | Homozygous   |
| NC_037639.1 | 7780366 | SNV | 1 | A | G | Homozygous   |
| NC_037639.1 | 7780699 | SNV | 1 | C | T | Homozygous   |
| NC_037639.1 | 7780728 | SNV | 1 | A | T | Homozygous   |
| NC_037639.1 | 7780730 | SNV | 1 | T | C | Heterozygous |
| NC_037639.1 | 7780733 | SNV | 1 | C | A | Heterozygous |
| NC_037639.1 | 7780754 | SNV | 1 | C | T | Homozygous   |
| NC_037639.1 | 7780771 | SNV | 1 | C | G | Homozygous   |
| NC_037639.1 | 7780775 | SNV | 1 | T | C | Homozygous   |
| NC_037639.1 | 7780785 | SNV | 1 | C | T | Homozygous   |
| NC_037639.1 | 7780790 | SNV | 1 | G | C | Homozygous   |
| NC_037639.1 | 7781228 | SNV | 1 | T | C | Heterozygous |
| NC_037639.1 | 7781831 | SNV | 1 | C | T | Homozygous   |
| NC_037639.1 | 7781833 | SNV | 1 | C | T | Homozygous   |
| NC_037639.1 | 7782085 | SNV | 1 | T | C | Homozygous   |
| NC_037639.1 | 7782216 | SNV | 1 | T | C | Homozygous   |
| NC_037639.1 | 7782228 | SNV | 1 | T | C | Homozygous   |
| NC_037639.1 | 7782332 | SNV | 1 | C | T | Heterozygous |
| NC_037639.1 | 7782368 | SNV | 1 | T | A | Heterozygous |
| NC_037639.1 | 7782822 | SNV | 1 | G | A | Homozygous   |
| NC_037639.1 | 7782867 | SNV | 1 | A | G | Homozygous   |
| NC_037639.1 | 7783026 | SNV | 1 | G | C | Homozygous   |
| NC_037639.1 | 7784988 | SNV | 1 | A | G | Homozygous   |
| NC_037639.1 | 7786844 | SNV | 1 | A | G | Homozygous   |
| NC_037639.1 | 7786856 | SNV | 1 | C | T | Heterozygous |

|             |         |     |   |   |   |              |
|-------------|---------|-----|---|---|---|--------------|
| NC_037639.1 | 7786862 | SNV | 1 | C | T | Heterozygous |
| NC_037639.1 | 7786886 | SNV | 1 | G | A | Heterozygous |
| NC_037639.1 | 7786902 | SNV | 1 | G | A | Heterozygous |
| NC_037639.1 | 7786957 | SNV | 1 | C | A | Homozygous   |
| NC_037639.1 | 7786964 | SNV | 1 | T | C | Homozygous   |
| NC_037639.1 | 7786968 | SNV | 1 | G | C | Heterozygous |
| NC_037639.1 | 7787048 | SNV | 1 | G | A | Homozygous   |
| NC_037639.1 | 7787069 | SNV | 1 | T | C | Heterozygous |
| NC_037639.1 | 7787077 | SNV | 1 | G | A | Heterozygous |
| NC_037639.1 | 7787112 | SNV | 1 | C | T | Heterozygous |
| NC_037639.1 | 7788851 | SNV | 1 | T | C | Homozygous   |
| NC_037639.1 | 7788956 | SNV | 1 | T | G | Homozygous   |
| NC_037639.1 | 7789073 | SNV | 1 | C | T | Heterozygous |
| NC_037639.1 | 7789108 | SNV | 1 | G | A | Heterozygous |
| NC_037639.1 | 7789128 | SNV | 1 | G | A | Homozygous   |
| NC_037639.1 | 7789397 | SNV | 1 | G | A | Homozygous   |
| NC_037639.1 | 7789433 | SNV | 1 | A | C | Homozygous   |
| NC_037639.1 | 7789474 | SNV | 1 | T | G | Heterozygous |
| NC_037639.1 | 7789742 | SNV | 1 | A | G | Homozygous   |
| NC_037639.1 | 7790191 | SNV | 1 | A | G | Homozygous   |
| NC_037639.1 | 7790272 | SNV | 1 | G | A | Homozygous   |
| NC_037639.1 | 7790837 | SNV | 1 | A | G | Homozygous   |
| NC_037639.1 | 7790854 | SNV | 1 | A | G | Homozygous   |
| NC_037639.1 | 7790856 | SNV | 1 | G | A | Heterozygous |
| NC_037639.1 | 7790898 | SNV | 1 | A | G | Heterozygous |
| NC_037639.1 | 7790910 | SNV | 1 | A | G | Heterozygous |
| NC_037639.1 | 7791027 | SNV | 1 | A | G | Homozygous   |
| NC_037639.1 | 7792346 | SNV | 1 | A | C | Heterozygous |
| NC_037639.1 | 7792622 | SNV | 1 | A | G | Heterozygous |
| NC_037639.1 | 7793109 | SNV | 1 | C | T | Homozygous   |
| NC_037639.1 | 7793314 | SNV | 1 | T | A | Homozygous   |
| NC_037639.1 | 7793622 | SNV | 1 | A | G | Heterozygous |
| NC_037639.1 | 7794025 | SNV | 1 | G | A | Heterozygous |
| NC_037639.1 | 7794135 | SNV | 1 | T | C | Homozygous   |
| NC_037639.1 | 7794167 | SNV | 1 | A | G | Homozygous   |
| NC_037639.1 | 7794266 | SNV | 1 | T | C | Heterozygous |
| NC_037639.1 | 7794272 | SNV | 1 | C | T | Heterozygous |
| NC_037639.1 | 7794283 | SNV | 1 | T | C | Homozygous   |
| NC_037639.1 | 7794287 | SNV | 1 | C | T | Homozygous   |
| NC_037639.1 | 7794290 | SNV | 1 | C | T | Homozygous   |
| NC_037639.1 | 7794361 | SNV | 1 | T | C | Homozygous   |
| NC_037639.1 | 7794412 | SNV | 1 | A | G | Homozygous   |
| NC_037639.1 | 7803494 | SNV | 1 | A | T | Homozygous   |
| NC_037639.1 | 7803648 | SNV | 1 | C | T | Heterozygous |
| NC_037639.1 | 7804044 | SNV | 1 | T | C | Homozygous   |
| NC_037639.1 | 7820867 | SNV | 1 | C | A | Homozygous   |
| NC_037639.1 | 7822995 | SNV | 1 | G | A | Heterozygous |
| NC_037639.1 | 7823007 | SNV | 1 | C | G | Homozygous   |
| NC_037639.1 | 7823013 | SNV | 1 | G | A | Heterozygous |
| NC_037639.1 | 7834025 | SNV | 1 | T | C | Homozygous   |
| NC_037639.1 | 7834119 | SNV | 1 | T | C | Homozygous   |

|             |         |     |   |   |   |              |
|-------------|---------|-----|---|---|---|--------------|
| NC_037639.1 | 7834224 | SNV | 1 | C | T | Heterozygous |
| NC_037639.1 | 7836052 | SNV | 1 | G | A | Homozygous   |
| NC_037639.1 | 7837082 | SNV | 1 | G | A | Heterozygous |
| NC_037639.1 | 7837102 | SNV | 1 | T | C | Homozygous   |
| NC_037639.1 | 7837140 | SNV | 1 | G | A | Homozygous   |
| NC_037639.1 | 7837159 | SNV | 1 | C | A | Homozygous   |
| NC_037639.1 | 7837187 | SNV | 1 | A | G | Homozygous   |
| NC_037639.1 | 7837336 | SNV | 1 | T | C | Homozygous   |
| NC_037639.1 | 7837588 | SNV | 1 | A | G | Homozygous   |
| NC_037639.1 | 7837665 | SNV | 1 | T | C | Homozygous   |
| NC_037639.1 | 7837733 | SNV | 1 | A | T | Homozygous   |
| NC_037639.1 | 7838695 | SNV | 1 | A | G | Homozygous   |
| NC_037639.1 | 7839125 | SNV | 1 | A | T | Homozygous   |
| NC_037639.1 | 7839153 | SNV | 1 | C | T | Heterozygous |
| NC_037639.1 | 7839911 | SNV | 1 | A | T | Homozygous   |
| NC_037639.1 | 7840122 | SNV | 1 | G | A | Heterozygous |
| NC_037639.1 | 7840191 | SNV | 1 | C | T | Heterozygous |
| NC_037639.1 | 7840225 | SNV | 1 | A | T | Heterozygous |
| NC_037639.1 | 7840324 | SNV | 1 | A | T | Homozygous   |
| NC_037639.1 | 7840649 | SNV | 1 | C | G | Homozygous   |
| NC_037639.1 | 7840754 | SNV | 1 | C | T | Homozygous   |
| NC_037639.1 | 7840783 | SNV | 1 | G | A | Homozygous   |
| NC_037639.1 | 7840857 | SNV | 1 | A | G | Homozygous   |
| NC_037639.1 | 7842491 | SNV | 1 | T | C | Heterozygous |
| NC_037639.1 | 7842736 | SNV | 1 | A | T | Homozygous   |
| NC_037639.1 | 7842849 | SNV | 1 | C | T | Heterozygous |
| NC_037639.1 | 7842866 | SNV | 1 | G | A | Homozygous   |
| NC_037639.1 | 7843007 | SNV | 1 | T | C | Heterozygous |
| NC_037639.1 | 7843349 | SNV | 1 | G | A | Heterozygous |
| NC_037639.1 | 7843532 | SNV | 1 | G | A | Heterozygous |
| NC_037639.1 | 7860814 | SNV | 1 | T | C | Heterozygous |
| NC_037639.1 | 7860902 | SNV | 1 | A | G | Homozygous   |
| NC_037639.1 | 7861016 | SNV | 1 | A | G | Homozygous   |
| NC_037639.1 | 7864658 | SNV | 1 | T | C | Homozygous   |
| NC_037639.1 | 7864710 | SNV | 1 | T | C | Heterozygous |
| NC_037639.1 | 7880696 | SNV | 1 | T | C | Heterozygous |
| NC_037639.1 | 7880709 | SNV | 1 | T | C | Heterozygous |
| NC_037639.1 | 7880715 | SNV | 1 | T | C | Heterozygous |
| NC_037639.1 | 7880725 | SNV | 1 | C | T | Homozygous   |
| NC_037639.1 | 7880744 | SNV | 1 | C | T | Homozygous   |
| NC_037639.1 | 7929845 | SNV | 1 | C | A | Homozygous   |
| NC_037639.1 | 7929851 | SNV | 1 | T | C | Homozygous   |
| NC_037639.1 | 7945124 | SNV | 1 | G | T | Homozygous   |
| NC_037639.1 | 7945156 | SNV | 1 | A | C | Homozygous   |
| NC_037639.1 | 7970230 | SNV | 1 | C | T | Homozygous   |
| NC_037639.1 | 7970242 | SNV | 1 | A | T | Homozygous   |
| NC_037639.1 | 7970285 | SNV | 1 | G | T | Homozygous   |
| NC_037639.1 | 8000313 | SNV | 1 | T | C | Homozygous   |
| NC_037639.1 | 8000350 | SNV | 1 | G | C | Homozygous   |
| NC_037639.1 | 8000386 | SNV | 1 | T | C | Heterozygous |
| NC_037639.1 | 8002351 | SNV | 1 | C | T | Homozygous   |

|             |         |     |   |   |   |              |
|-------------|---------|-----|---|---|---|--------------|
| NC_037639.1 | 8028981 | SNV | 1 | T | C | Heterozygous |
| NC_037639.1 | 8029008 | SNV | 1 | T | C | Homozygous   |
| NC_037639.1 | 8036201 | SNV | 1 | T | C | Heterozygous |
| NC_037639.1 | 8036206 | SNV | 1 | G | A | Heterozygous |
| NC_037639.1 | 8036209 | SNV | 1 | T | C | Heterozygous |
| NC_037639.1 | 8058913 | SNV | 1 | T | C | Heterozygous |
| NC_037639.1 | 8058918 | SNV | 1 | G | C | Heterozygous |
| NC_037639.1 | 8083352 | SNV | 1 | A | T | Homozygous   |
| NC_037639.1 | 8113201 | SNV | 1 | G | T | Heterozygous |
| NC_037639.1 | 8134938 | SNV | 1 | T | A | Homozygous   |
| NC_037639.1 | 8146798 | SNV | 1 | G | A | Homozygous   |
| NC_037639.1 | 8146885 | SNV | 1 | T | C | Homozygous   |
| NC_037639.1 | 8146887 | SNV | 1 | T | A | Homozygous   |
| NC_037639.1 | 8147605 | SNV | 1 | G | T | Homozygous   |
| NC_037639.1 | 8159459 | SNV | 1 | G | C | Heterozygous |
| NC_037639.1 | 8159505 | SNV | 1 | T | A | Homozygous   |
| NC_037639.1 | 8162468 | SNV | 1 | C | T | Homozygous   |
| NC_037639.1 | 8163161 | SNV | 1 | C | T | Homozygous   |
| NC_037639.1 | 8165115 | SNV | 1 | A | T | Homozygous   |
| NC_037639.1 | 8165122 | SNV | 1 | G | T | Homozygous   |
| NC_037639.1 | 8165125 | SNV | 1 | A | C | Heterozygous |
| NC_037639.1 | 8165125 | SNV | 1 | A | T | Heterozygous |
| NC_037639.1 | 8165130 | SNV | 1 | A | C | Homozygous   |
| NC_037639.1 | 8165132 | SNV | 1 | A | T | Homozygous   |
| NC_037639.1 | 8165134 | SNV | 1 | A | C | Homozygous   |
| NC_037639.1 | 8165155 | SNV | 1 | C | T | Homozygous   |
| NC_037639.1 | 8168345 | SNV | 1 | A | G | Heterozygous |
| NC_037639.1 | 8168373 | SNV | 1 | G | A | Heterozygous |
| NC_037639.1 | 8168414 | SNV | 1 | C | T | Heterozygous |
| NC_037639.1 | 8168918 | SNV | 1 | C | T | Heterozygous |
| NC_037639.1 | 8169608 | SNV | 1 | T | C | Homozygous   |
| NC_037639.1 | 8169913 | SNV | 1 | A | G | Homozygous   |
| NC_037639.1 | 8169975 | SNV | 1 | T | C | Homozygous   |
| NC_037639.1 | 8170178 | SNV | 1 | A | G | Homozygous   |
| NC_037639.1 | 8170282 | SNV | 1 | C | G | Homozygous   |
| NC_037639.1 | 8170557 | SNV | 1 | C | T | Heterozygous |
| NC_037639.1 | 8170965 | SNV | 1 | T | C | Heterozygous |
| NC_037639.1 | 8171044 | SNV | 1 | C | T | Heterozygous |
| NC_037639.1 | 8171791 | SNV | 1 | A | G | Homozygous   |
| NC_037639.1 | 8172342 | SNV | 1 | T | A | Heterozygous |
| NC_037639.1 | 8172384 | SNV | 1 | G | A | Heterozygous |
| NC_037639.1 | 8172431 | SNV | 1 | G | A | Heterozygous |
| NC_037639.1 | 8172609 | SNV | 1 | A | G | Homozygous   |
| NC_037639.1 | 8173036 | SNV | 1 | C | A | Heterozygous |
| NC_037639.1 | 8173533 | SNV | 1 | T | A | Heterozygous |
| NC_037639.1 | 8173536 | SNV | 1 | T | C | Heterozygous |
| NC_037639.1 | 8173541 | SNV | 1 | T | C | Heterozygous |
| NC_037639.1 | 8173546 | SNV | 1 | C | T | Heterozygous |
| NC_037639.1 | 8174726 | SNV | 1 | C | A | Heterozygous |
| NC_037639.1 | 8174733 | SNV | 1 | T | C | Heterozygous |
| NC_037639.1 | 8181810 | SNV | 1 | T | A | Heterozygous |

|             |         |     |   |   |   |              |
|-------------|---------|-----|---|---|---|--------------|
| NC_037639.1 | 8181931 | SNV | 1 | A | G | Homozygous   |
| NC_037639.1 | 8181952 | SNV | 1 | T | C | Heterozygous |
| NC_037639.1 | 8182081 | SNV | 1 | A | G | Homozygous   |
| NC_037639.1 | 8185356 | SNV | 1 | C | T | Heterozygous |
| NC_037639.1 | 8203689 | SNV | 1 | A | G | Heterozygous |
| NC_037639.1 | 8203702 | SNV | 1 | A | T | Heterozygous |
| NC_037639.1 | 8203711 | SNV | 1 | A | T | Heterozygous |
| NC_037639.1 | 8203714 | SNV | 1 | A | T | Heterozygous |
| NC_037639.1 | 8214209 | SNV | 1 | C | T | Heterozygous |
| NC_037639.1 | 8214220 | SNV | 1 | A | T | Heterozygous |
| NC_037639.1 | 8216471 | SNV | 1 | C | A | Heterozygous |
| NC_037639.1 | 8216475 | SNV | 1 | G | A | Heterozygous |
| NC_037639.1 | 8218542 | SNV | 1 | T | C | Homozygous   |
| NC_037639.1 | 8223795 | SNV | 1 | C | T | Homozygous   |
| NC_037639.1 | 8223853 | SNV | 1 | C | T | Homozygous   |
| NC_037639.1 | 8223859 | SNV | 1 | A | C | Heterozygous |
| NC_037639.1 | 8224199 | SNV | 1 | A | C | Homozygous   |
| NC_037639.1 | 8224305 | SNV | 1 | A | G | Homozygous   |
| NC_037639.1 | 8229194 | SNV | 1 | C | T | Heterozygous |
| NC_037639.1 | 8229364 | SNV | 1 | C | T | Heterozygous |
| NC_037639.1 | 8229367 | SNV | 1 | T | G | Heterozygous |
| NC_037639.1 | 8231646 | SNV | 1 | C | T | Heterozygous |
| NC_037639.1 | 8231703 | SNV | 1 | G | A | Heterozygous |
| NC_037639.1 | 8231710 | SNV | 1 | C | T | Homozygous   |
| NC_037639.1 | 8231836 | SNV | 1 | C | G | Heterozygous |
| NC_037639.1 | 8241879 | SNV | 1 | G | A | Heterozygous |
| NC_037639.1 | 8241883 | SNV | 1 | G | A | Heterozygous |
| NC_037639.1 | 8242576 | SNV | 1 | T | C | Homozygous   |
| NC_037639.1 | 8242579 | SNV | 1 | G | A | Homozygous   |
| NC_037639.1 | 8242634 | SNV | 1 | C | T | Heterozygous |
| NC_037639.1 | 8242969 | SNV | 1 | T | C | Heterozygous |
| NC_037639.1 | 8242989 | SNV | 1 | C | A | Heterozygous |
| NC_037639.1 | 8242994 | SNV | 1 | A | G | Homozygous   |
| NC_037639.1 | 8243136 | SNV | 1 | T | C | Heterozygous |
| NC_037639.1 | 8244076 | SNV | 1 | A | G | Heterozygous |
| NC_037639.1 | 8244364 | SNV | 1 | C | T | Heterozygous |
| NC_037639.1 | 8244802 | SNV | 1 | G | A | Homozygous   |
| NC_037639.1 | 8244805 | SNV | 1 | G | A | Homozygous   |
| NC_037639.1 | 8244815 | SNV | 1 | T | C | Homozygous   |
| NC_037639.1 | 8244834 | SNV | 1 | A | T | Homozygous   |
| NC_037639.1 | 8249584 | SNV | 1 | G | A | Homozygous   |
| NC_037639.1 | 8249590 | SNV | 1 | G | A | Homozygous   |
| NC_037639.1 | 8253975 | SNV | 1 | T | C | Heterozygous |
| NC_037639.1 | 8253988 | SNV | 1 | T | A | Homozygous   |
| NC_037639.1 | 8254539 | SNV | 1 | T | C | Heterozygous |
| NC_037639.1 | 8254654 | SNV | 1 | C | T | Heterozygous |
| NC_037639.1 | 8255532 | SNV | 1 | C | T | Heterozygous |
| NC_037639.1 | 8255549 | SNV | 1 | C | T | Heterozygous |
| NC_037639.1 | 8264756 | SNV | 1 | A | C | Heterozygous |
| NC_037639.1 | 8264761 | SNV | 1 | A | C | Heterozygous |
| NC_037639.1 | 8264773 | SNV | 1 | G | T | Heterozygous |

|             |         |     |   |   |   |              |
|-------------|---------|-----|---|---|---|--------------|
| NC_037639.1 | 8264792 | SNV | 1 | C | G | Homozygous   |
| NC_037639.1 | 8269057 | SNV | 1 | G | A | Homozygous   |
| NC_037639.1 | 8269097 | SNV | 1 | G | A | Homozygous   |
| NC_037639.1 | 8270650 | SNV | 1 | T | G | Homozygous   |
| NC_037639.1 | 8272818 | SNV | 1 | T | A | Homozygous   |
| NC_037639.1 | 8272821 | SNV | 1 | C | G | Homozygous   |
| NC_037639.1 | 8272827 | SNV | 1 | A | G | Homozygous   |
| NC_037639.1 | 8272832 | SNV | 1 | G | T | Homozygous   |
| NC_037639.1 | 8272859 | SNV | 1 | G | A | Homozygous   |
| NC_037639.1 | 8659500 | SNV | 1 | T | C | Homozygous   |
| NC_037639.1 | 8659581 | SNV | 1 | A | G | Homozygous   |
| NC_037639.1 | 8659584 | SNV | 1 | C | T | Heterozygous |
| NC_037639.1 | 8660295 | SNV | 1 | C | T | Heterozygous |
| NC_037639.1 | 8754979 | SNV | 1 | A | G | Homozygous   |
| NC_037639.1 | 8755013 | SNV | 1 | T | C | Homozygous   |
| NC_037639.1 | 8755050 | SNV | 1 | C | T | Heterozygous |
| NC_037639.1 | 8755060 | SNV | 1 | A | T | Homozygous   |
| NC_037639.1 | 8755201 | SNV | 1 | C | G | Homozygous   |
| NC_037639.1 | 8755300 | SNV | 1 | C | T | Heterozygous |
| NC_037639.1 | 8757375 | SNV | 1 | G | A | Homozygous   |
| NC_037639.1 | 8757382 | SNV | 1 | A | G | Homozygous   |
| NC_037639.1 | 8757393 | SNV | 1 | A | G | Heterozygous |
| NC_037639.1 | 8757393 | SNV | 1 | A | T | Heterozygous |
| NC_037639.1 | 8757405 | SNV | 1 | A | C | Heterozygous |
| NC_037639.1 | 8757407 | SNV | 1 | A | T | Homozygous   |
| NC_037639.1 | 8757409 | SNV | 1 | A | T | Homozygous   |
| NC_037639.1 | 8757608 | SNV | 1 | G | T | Homozygous   |
| NC_037639.1 | 8759818 | SNV | 1 | A | G | Homozygous   |
| NC_037639.1 | 8759821 | SNV | 1 | C | A | Homozygous   |
| NC_037639.1 | 8759835 | SNV | 1 | T | G | Homozygous   |
| NC_037639.1 | 8759854 | SNV | 1 | A | T | Homozygous   |
| NC_037639.1 | 9030521 | SNV | 1 | T | C | Homozygous   |
| NC_037639.1 | 9030637 | SNV | 1 | T | C | Homozygous   |
| NC_037639.1 | 9030940 | SNV | 1 | A | G | Homozygous   |
| NC_037639.1 | 9031156 | SNV | 1 | G | A | Homozygous   |
| NC_037639.1 | 9031624 | SNV | 1 | C | T | Homozygous   |
| NC_037639.1 | 9034479 | SNV | 1 | A | G | Homozygous   |
| NC_037639.1 | 9034497 | SNV | 1 | G | A | Heterozygous |
| NC_037639.1 | 9035598 | SNV | 1 | C | T | Homozygous   |
| NC_037639.1 | 9035895 | SNV | 1 | G | A | Homozygous   |
| NC_037639.1 | 9036192 | SNV | 1 | G | A | Heterozygous |
| NC_037639.1 | 9036222 | SNV | 1 | T | C | Homozygous   |
| NC_037639.1 | 9118127 | SNV | 1 | A | G | Homozygous   |
| NC_037639.1 | 9118290 | SNV | 1 | G | A | Heterozygous |
| NC_037639.1 | 9118582 | SNV | 1 | T | C | Homozygous   |
| NC_037639.1 | 9118615 | SNV | 1 | G | A | Heterozygous |
| NC_037639.1 | 9120550 | SNV | 1 | C | T | Homozygous   |
| NC_037639.1 | 9120596 | SNV | 1 | T | C | Heterozygous |
| NC_037639.1 | 9120827 | SNV | 1 | T | C | Homozygous   |
| NC_037639.1 | 9120919 | SNV | 1 | C | A | Heterozygous |
| NC_037639.1 | 9121012 | SNV | 1 | G | A | Homozygous   |

|             |         |     |   |   |   |              |
|-------------|---------|-----|---|---|---|--------------|
| NC_037639.1 | 9121407 | SNV | 1 | A | C | Homozygous   |
| NC_037639.1 | 9121488 | SNV | 1 | C | A | Homozygous   |
| NC_037639.1 | 9121510 | SNV | 1 | C | T | Heterozygous |
| NC_037639.1 | 9121612 | SNV | 1 | T | C | Homozygous   |
| NC_037639.1 | 9121616 | SNV | 1 | A | G | Homozygous   |
| NC_037639.1 | 9121625 | SNV | 1 | T | C | Heterozygous |
| NC_037639.1 | 9121889 | SNV | 1 | G | A | Heterozygous |
| NC_037639.1 | 9121950 | SNV | 1 | C | G | Heterozygous |
| NC_037639.1 | 9121958 | SNV | 1 | T | G | Heterozygous |
| NC_037639.1 | 9121963 | SNV | 1 | G | T | Heterozygous |
| NC_037639.1 | 9121984 | SNV | 1 | A | G | Heterozygous |
| NC_037639.1 | 9133228 | SNV | 1 | G | A | Heterozygous |
| NC_037639.1 | 9141097 | SNV | 1 | C | A | Heterozygous |
| NC_037639.1 | 9141218 | SNV | 1 | A | G | Homozygous   |
| NC_037639.1 | 9154985 | SNV | 1 | T | C | Homozygous   |
| NC_037639.1 | 9155138 | SNV | 1 | A | G | Heterozygous |
| NC_037639.1 | 9155292 | SNV | 1 | G | C | Heterozygous |
| NC_037639.1 | 9155341 | SNV | 1 | C | G | Homozygous   |
| NC_037639.1 | 9155380 | SNV | 1 | A | G | Heterozygous |
| NC_037639.1 | 9155398 | SNV | 1 | A | G | Homozygous   |
| NC_037639.1 | 9161164 | SNV | 1 | A | T | Homozygous   |
| NC_037639.1 | 9161171 | SNV | 1 | T | C | Homozygous   |
| NC_037639.1 | 9163848 | SNV | 1 | T | A | Heterozygous |
| NC_037639.1 | 9163851 | SNV | 1 | T | A | Homozygous   |
| NC_037639.1 | 9163861 | SNV | 1 | G | T | Homozygous   |
| NC_037639.1 | 9168860 | SNV | 1 | A | G | Heterozygous |
| NC_037639.1 | 9179584 | SNV | 1 | C | T | Homozygous   |
| NC_037639.1 | 9179671 | SNV | 1 | A | G | Heterozygous |
| NC_037639.1 | 9179808 | SNV | 1 | C | G | Heterozygous |
| NC_037639.1 | 9180131 | SNV | 1 | C | G | Homozygous   |
| NC_037639.1 | 9180152 | SNV | 1 | G | A | Heterozygous |
| NC_037639.1 | 9180154 | SNV | 1 | G | A | Homozygous   |
| NC_037639.1 | 9193670 | SNV | 1 | A | G | Homozygous   |
| NC_037639.1 | 9193833 | SNV | 1 | T | C | Homozygous   |
| NC_037639.1 | 9209554 | SNV | 1 | C | T | Heterozygous |
| NC_037639.1 | 9209558 | SNV | 1 | C | G | Heterozygous |
| NC_037639.1 | 9209649 | SNV | 1 | C | T | Heterozygous |
| NC_037639.1 | 9220281 | SNV | 1 | A | C | Homozygous   |
| NC_037639.1 | 9220283 | SNV | 1 | A | G | Homozygous   |
| NC_037639.1 | 9220289 | SNV | 1 | A | G | Homozygous   |
| NC_037639.1 | 9220312 | SNV | 1 | T | C | Heterozygous |
| NC_037639.1 | 9220325 | SNV | 1 | T | A | Heterozygous |
| NC_037639.1 | 9238811 | SNV | 1 | A | G | Homozygous   |
| NC_037639.1 | 9244684 | SNV | 1 | A | G | Homozygous   |
| NC_037639.1 | 9244687 | SNV | 1 | C | T | Homozygous   |
| NC_037639.1 | 9244689 | SNV | 1 | C | A | Homozygous   |
| NC_037639.1 | 9244699 | SNV | 1 | T | C | Homozygous   |
| NC_037639.1 | 9256804 | SNV | 1 | T | C | Homozygous   |
| NC_037639.1 | 9256808 | SNV | 1 | T | C | Homozygous   |
| NC_037639.1 | 9256827 | SNV | 1 | T | C | Homozygous   |
| NC_037639.1 | 9256830 | SNV | 1 | A | C | Homozygous   |

|             |         |     |   |   |   |              |
|-------------|---------|-----|---|---|---|--------------|
| NC_037639.1 | 9256834 | SNV | 1 | C | G | Homozygous   |
| NC_037639.1 | 9273529 | SNV | 1 | T | A | Homozygous   |
| NC_037639.1 | 9273596 | SNV | 1 | A | G | Heterozygous |
| NC_037639.1 | 9273680 | SNV | 1 | G | A | Homozygous   |
| NC_037639.1 | 9273699 | SNV | 1 | C | G | Heterozygous |
| NC_037639.1 | 9273726 | SNV | 1 | G | A | Homozygous   |
| NC_037639.1 | 9273750 | SNV | 1 | A | G | Heterozygous |
| NC_037639.1 | 9280002 | SNV | 1 | A | G | Homozygous   |
| NC_037639.1 | 9280209 | SNV | 1 | G | A | Heterozygous |
| NC_037639.1 | 9280273 | SNV | 1 | C | T | Homozygous   |
| NC_037639.1 | 9280412 | SNV | 1 | T | A | Homozygous   |
| NC_037639.1 | 9280503 | SNV | 1 | G | A | Homozygous   |
| NC_037639.1 | 9280597 | SNV | 1 | T | C | Heterozygous |
| NC_037639.1 | 9280604 | SNV | 1 | A | G | Heterozygous |
| NC_037639.1 | 9283367 | SNV | 1 | G | A | Heterozygous |
| NC_037639.1 | 9285957 | SNV | 1 | C | T | Homozygous   |
| NC_037639.1 | 9285965 | SNV | 1 | G | T | Homozygous   |
| NC_037639.1 | 9285972 | SNV | 1 | T | C | Homozygous   |
| NC_037639.1 | 9298285 | SNV | 1 | C | A | Homozygous   |
| NC_037639.1 | 9299538 | SNV | 1 | A | G | Heterozygous |
| NC_037639.1 | 9299735 | SNV | 1 | C | T | Heterozygous |
| NC_037639.1 | 9299845 | SNV | 1 | G | A | Heterozygous |
| NC_037639.1 | 9299959 | SNV | 1 | A | G | Homozygous   |
| NC_037639.1 | 9312790 | SNV | 1 | C | G | Homozygous   |
| NC_037639.1 | 9333294 | SNV | 1 | T | C | Homozygous   |
| NC_037639.1 | 9333623 | SNV | 1 | A | G | Heterozygous |
| NC_037639.1 | 9333687 | SNV | 1 | T | C | Homozygous   |
| NC_037639.1 | 9333691 | SNV | 1 | A | G | Homozygous   |
| NC_037639.1 | 9333710 | SNV | 1 | A | G | Homozygous   |
| NC_037639.1 | 9333725 | SNV | 1 | A | G | Heterozygous |
| NC_037639.1 | 9333746 | SNV | 1 | A | G | Homozygous   |
| NC_037639.1 | 9333880 | SNV | 1 | A | G | Homozygous   |
| NC_037639.1 | 9333909 | SNV | 1 | A | G | Homozygous   |
| NC_037639.1 | 9334212 | SNV | 1 | C | T | Heterozygous |
| NC_037639.1 | 9335281 | SNV | 1 | T | C | Homozygous   |
| NC_037639.1 | 9335426 | SNV | 1 | G | A | Heterozygous |
| NC_037639.1 | 9335438 | SNV | 1 | G | A | Homozygous   |
| NC_037639.1 | 9335518 | SNV | 1 | C | T | Heterozygous |
| NC_037639.1 | 9336885 | SNV | 1 | T | A | Homozygous   |
| NC_037639.1 | 9336887 | SNV | 1 | C | T | Homozygous   |
| NC_037639.1 | 9336897 | SNV | 1 | T | A | Heterozygous |
| NC_037639.1 | 9336914 | SNV | 1 | T | G | Heterozygous |
| NC_037639.1 | 9339570 | SNV | 1 | T | C | Homozygous   |
| NC_037639.1 | 9339612 | SNV | 1 | A | G | Homozygous   |
| NC_037639.1 | 9339624 | SNV | 1 | C | T | Heterozygous |
| NC_037639.1 | 9339714 | SNV | 1 | G | A | Homozygous   |
| NC_037639.1 | 9347390 | SNV | 1 | A | G | Homozygous   |
| NC_037639.1 | 9349091 | SNV | 1 | G | A | Heterozygous |
| NC_037639.1 | 9349269 | SNV | 1 | T | C | Homozygous   |
| NC_037639.1 | 9349304 | SNV | 1 | G | A | Heterozygous |
| NC_037639.1 | 9349307 | SNV | 1 | C | T | Heterozygous |



|             |         |     |   |   |   |              |
|-------------|---------|-----|---|---|---|--------------|
| NC_037639.1 | 9349334 | SNV | 1 | T | C | Heterozygous |
| NC_037639.1 | 9349340 | SNV | 1 | C | T | Heterozygous |
| NC_037639.1 | 9351455 | SNV | 1 | A | G | Homozygous   |
| NC_037639.1 | 9351457 | SNV | 1 | G | A | Heterozygous |
| NC_037639.1 | 9351791 | SNV | 1 | T | C | Homozygous   |
| NC_037639.1 | 9351869 | SNV | 1 | C | T | Heterozygous |
| NC_037639.1 | 9351871 | SNV | 1 | A | G | Heterozygous |
| NC_037639.1 | 9351915 | SNV | 1 | G | T | Heterozygous |
| NC_037639.1 | 9351933 | SNV | 1 | G | T | Homozygous   |
| NC_037639.1 | 9351940 | SNV | 1 | G | A | Homozygous   |
| NC_037639.1 | 9351945 | SNV | 1 | G | A | Homozygous   |
| NC_037639.1 | 9351955 | SNV | 1 | C | T | Homozygous   |
| NC_037639.1 | 9351972 | SNV | 1 | A | G | Heterozygous |
| NC_037639.1 | 9352005 | SNV | 1 | C | T | Homozygous   |
| NC_037639.1 | 9352032 | SNV | 1 | C | T | Heterozygous |
| NC_037639.1 | 9352174 | SNV | 1 | T | C | Homozygous   |
| NC_037639.1 | 9352308 | SNV | 1 | C | A | Homozygous   |
| NC_037639.1 | 9352370 | SNV | 1 | T | A | Heterozygous |
| NC_037639.1 | 9352537 | SNV | 1 | A | G | Heterozygous |
| NC_037639.1 | 9352539 | SNV | 1 | A | G | Heterozygous |
| NC_037639.1 | 9352616 | SNV | 1 | A | G | Heterozygous |
| NC_037639.1 | 9352744 | SNV | 1 | T | C | Homozygous   |
| NC_037639.1 | 9352801 | SNV | 1 | A | G | Homozygous   |
| NC_037639.1 | 9352806 | SNV | 1 | G | A | Heterozygous |
| NC_037639.1 | 9352853 | SNV | 1 | A | G | Homozygous   |
| NC_037639.1 | 9352891 | SNV | 1 | T | C | Homozygous   |
| NC_037639.1 | 9352972 | SNV | 1 | T | C | Homozygous   |
| NC_037639.1 | 9353009 | SNV | 1 | A | G | Homozygous   |
| NC_037639.1 | 9353036 | SNV | 1 | G | A | Homozygous   |
| NC_037639.1 | 9353078 | SNV | 1 | G | A | Heterozygous |
| NC_037639.1 | 9353082 | SNV | 1 | T | C | Homozygous   |
| NC_037639.1 | 9353100 | SNV | 1 | C | T | Heterozygous |
| NC_037639.1 | 9355029 | SNV | 1 | A | G | Homozygous   |
| NC_037639.1 | 9400509 | SNV | 1 | C | T | Homozygous   |
| NC_037639.1 | 9401698 | SNV | 1 | C | T | Homozygous   |
| NC_037639.1 | 9402388 | SNV | 1 | G | A | Heterozygous |
| NC_037639.1 | 9402398 | SNV | 1 | T | C | Homozygous   |
| NC_037639.1 | 9402797 | SNV | 1 | A | T | Heterozygous |
| NC_037639.1 | 9402840 | SNV | 1 | T | A | Heterozygous |
| NC_037639.1 | 9403228 | SNV | 1 | A | G | Heterozygous |
| NC_037639.1 | 9403290 | SNV | 1 | A | G | Homozygous   |
| NC_037639.1 | 9403923 | SNV | 1 | T | A | Heterozygous |
| NC_037639.1 | 9405623 | SNV | 1 | C | T | Heterozygous |
| NC_037639.1 | 9407246 | SNV | 1 | C | T | Homozygous   |
| NC_037639.1 | 9407252 | SNV | 1 | T | C | Heterozygous |
| NC_037639.1 | 9408606 | SNV | 1 | A | T | Heterozygous |
| NC_037639.1 | 9408648 | SNV | 1 | T | A | Heterozygous |
| NC_037639.1 | 9408933 | SNV | 1 | T | C | Heterozygous |
| NC_037639.1 | 9408936 | SNV | 1 | A | G | Heterozygous |
| NC_037639.1 | 9408942 | SNV | 1 | G | A | Heterozygous |
| NC_037639.1 | 9408947 | SNV | 1 | T | A | Heterozygous |

|             |         |     |   |   |   |              |
|-------------|---------|-----|---|---|---|--------------|
| NC_037639.1 | 9408994 | SNV | 1 | C | A | Heterozygous |
| NC_037639.1 | 9409859 | SNV | 1 | T | C | Heterozygous |
| NC_037639.1 | 9409864 | SNV | 1 | T | C | Heterozygous |
| NC_037639.1 | 9414453 | SNV | 1 | A | G | Heterozygous |
| NC_037639.1 | 9414554 | SNV | 1 | C | T | Heterozygous |
| NC_037639.1 | 9417964 | SNV | 1 | G | A | Homozygous   |
| NC_037639.1 | 9418023 | SNV | 1 | T | C | Heterozygous |
| NC_037639.1 | 9418025 | SNV | 1 | A | G | Homozygous   |
| NC_037639.1 | 9418069 | SNV | 1 | A | G | Homozygous   |
| NC_037639.1 | 9433154 | SNV | 1 | A | G | Homozygous   |
| NC_037639.1 | 9433173 | SNV | 1 | C | A | Homozygous   |
| NC_037639.1 | 9433177 | SNV | 1 | C | A | Homozygous   |
| NC_037639.1 | 9433979 | SNV | 1 | T | A | Homozygous   |
| NC_037639.1 | 9433984 | SNV | 1 | A | C | Homozygous   |
| NC_037639.1 | 9433993 | SNV | 1 | A | T | Homozygous   |
| NC_037639.1 | 9434000 | SNV | 1 | A | G | Homozygous   |
| NC_037639.1 | 9444846 | SNV | 1 | A | G | Homozygous   |
| NC_037639.1 | 9451551 | SNV | 1 | C | T | Heterozygous |
| NC_037639.1 | 9452374 | SNV | 1 | G | A | Heterozygous |
| NC_037639.1 | 9453252 | SNV | 1 | C | T | Homozygous   |
| NC_037639.1 | 9460285 | SNV | 1 | A | T | Heterozygous |
| NC_037639.1 | 9460288 | SNV | 1 | T | C | Heterozygous |
| NC_037639.1 | 9460512 | SNV | 1 | A | G | Homozygous   |
| NC_037639.1 | 9472931 | SNV | 1 | A | G | Heterozygous |
| NC_037639.1 | 9473021 | SNV | 1 | C | T | Heterozygous |
| NC_037639.1 | 9473772 | SNV | 1 | T | G | Homozygous   |
| NC_037639.1 | 9474591 | SNV | 1 | A | G | Heterozygous |
| NC_037639.1 | 9474598 | SNV | 1 | A | T | Homozygous   |
| NC_037639.1 | 9475015 | SNV | 1 | C | T | Heterozygous |
| NC_037639.1 | 9475071 | SNV | 1 | G | T | Heterozygous |
| NC_037639.1 | 9476060 | SNV | 1 | A | C | Heterozygous |
| NC_037639.1 | 9476096 | SNV | 1 | T | C | Heterozygous |
| NC_037639.1 | 9476118 | SNV | 1 | T | A | Heterozygous |
| NC_037639.1 | 9476121 | SNV | 1 | G | T | Heterozygous |
| NC_037639.1 | 9476300 | SNV | 1 | T | A | Homozygous   |
| NC_037639.1 | 9480931 | SNV | 1 | A | G | Homozygous   |
| NC_037639.1 | 9480941 | SNV | 1 | G | A | Homozygous   |
| NC_037639.1 | 9481060 | SNV | 1 | G | A | Heterozygous |
| NC_037639.1 | 9481137 | SNV | 1 | C | T | Homozygous   |
| NC_037639.1 | 9481171 | SNV | 1 | T | C | Homozygous   |
| NC_037639.1 | 9481187 | SNV | 1 | A | G | Heterozygous |
| NC_037639.1 | 9481198 | SNV | 1 | G | A | Heterozygous |
| NC_037639.1 | 9500591 | SNV | 1 | C | T | Heterozygous |
| NC_037639.1 | 9501358 | SNV | 1 | G | C | Homozygous   |
| NC_037639.1 | 9502139 | SNV | 1 | A | G | Homozygous   |
| NC_037639.1 | 9502144 | SNV | 1 | T | C | Homozygous   |
| NC_037639.1 | 9504310 | SNV | 1 | A | T | Homozygous   |
| NC_037639.1 | 9532558 | SNV | 1 | A | T | Heterozygous |
| NC_037639.1 | 9533072 | SNV | 1 | T | C | Homozygous   |
| NC_037639.1 | 9549265 | SNV | 1 | A | G | Homozygous   |
| NC_037639.1 | 9549448 | SNV | 1 | C | T | Heterozygous |

|             |         |     |   |   |   |              |
|-------------|---------|-----|---|---|---|--------------|
| NC_037639.1 | 9549602 | SNV | 1 | T | C | Homozygous   |
| NC_037639.1 | 9549611 | SNV | 1 | G | A | Heterozygous |
| NC_037639.1 | 9549921 | SNV | 1 | C | T | Heterozygous |
| NC_037639.1 | 9552397 | SNV | 1 | T | C | Homozygous   |
| NC_037639.1 | 9552405 | SNV | 1 | T | C | Homozygous   |
| NC_037639.1 | 9552696 | SNV | 1 | A | G | Homozygous   |
| NC_037639.1 | 9573188 | SNV | 1 | C | G | Heterozygous |
| NC_037639.1 | 9573242 | SNV | 1 | G | A | Homozygous   |
| NC_037639.1 | 9574809 | SNV | 1 | T | C | Heterozygous |
| NC_037639.1 | 9584248 | SNV | 1 | T | C | Heterozygous |
| NC_037639.1 | 9584251 | SNV | 1 | C | T | Heterozygous |
| NC_037639.1 | 9585791 | SNV | 1 | G | C | Homozygous   |
| NC_037639.1 | 9585793 | SNV | 1 | A | C | Homozygous   |
| NC_037639.1 | 9586167 | SNV | 1 | T | C | Heterozygous |
| NC_037639.1 | 9587268 | SNV | 1 | C | T | Heterozygous |
| NC_037639.1 | 9596367 | SNV | 1 | T | C | Heterozygous |
| NC_037639.1 | 9596992 | SNV | 1 | C | T | Heterozygous |
| NC_037639.1 | 9596994 | SNV | 1 | C | G | Homozygous   |
| NC_037639.1 | 9597001 | SNV | 1 | A | G | Homozygous   |
| NC_037639.1 | 9597064 | SNV | 1 | C | T | Heterozygous |
| NC_037639.1 | 9597079 | SNV | 1 | T | G | Heterozygous |
| NC_037639.1 | 9597136 | SNV | 1 | T | C | Heterozygous |
| NC_037639.1 | 9598699 | SNV | 1 | G | A | Heterozygous |
| NC_037639.1 | 9599312 | SNV | 1 | A | G | Homozygous   |
| NC_037639.1 | 9599380 | SNV | 1 | G | T | Heterozygous |
| NC_037639.1 | 9600532 | SNV | 1 | C | A | Homozygous   |
| NC_037639.1 | 9605266 | SNV | 1 | T | C | Homozygous   |
| NC_037639.1 | 9617397 | SNV | 1 | G | C | Homozygous   |
| NC_037639.1 | 9617476 | SNV | 1 | C | T | Homozygous   |
| NC_037639.1 | 9621828 | SNV | 1 | A | G | Heterozygous |
| NC_037639.1 | 9621931 | SNV | 1 | C | T | Heterozygous |
| NC_037639.1 | 9623180 | SNV | 1 | T | G | Homozygous   |
| NC_037639.1 | 9623182 | SNV | 1 | C | T | Homozygous   |
| NC_037639.1 | 9624345 | SNV | 1 | A | C | Homozygous   |
| NC_037639.1 | 9625002 | SNV | 1 | G | A | Heterozygous |
| NC_037639.1 | 9626908 | SNV | 1 | G | A | Homozygous   |
| NC_037639.1 | 9627078 | SNV | 1 | T | C | Heterozygous |
| NC_037639.1 | 9631207 | SNV | 1 | A | G | Homozygous   |
| NC_037639.1 | 9632212 | SNV | 1 | A | G | Heterozygous |
| NC_037639.1 | 9638084 | SNV | 1 | A | T | Homozygous   |
| NC_037639.1 | 9638087 | SNV | 1 | T | A | Homozygous   |
| NC_037639.1 | 9638090 | SNV | 1 | A | T | Homozygous   |
| NC_037639.1 | 9638092 | SNV | 1 | T | A | Homozygous   |
| NC_037639.1 | 9638781 | SNV | 1 | A | G | Homozygous   |
| NC_037639.1 | 9638784 | SNV | 1 | A | T | Homozygous   |
| NC_037639.1 | 9638790 | SNV | 1 | T | G | Heterozygous |
| NC_037639.1 | 9638793 | SNV | 1 | T | G | Heterozygous |
| NC_037639.1 | 9638799 | SNV | 1 | T | C | Heterozygous |
| NC_037639.1 | 9638802 | SNV | 1 | C | T | Heterozygous |
| NC_037639.1 | 9638806 | SNV | 1 | G | A | Heterozygous |
| NC_037639.1 | 9639574 | SNV | 1 | A | G | Homozygous   |

|             |         |     |   |   |   |              |
|-------------|---------|-----|---|---|---|--------------|
| NC_037639.1 | 9639970 | SNV | 1 | G | A | Homozygous   |
| NC_037639.1 | 9641102 | SNV | 1 | G | C | Homozygous   |
| NC_037639.1 | 9646646 | SNV | 1 | G | A | Homozygous   |
| NC_037639.1 | 9647766 | SNV | 1 | A | G | Homozygous   |
| NC_037639.1 | 9647867 | SNV | 1 | G | A | Heterozygous |
| NC_037639.1 | 9648378 | SNV | 1 | C | T | Homozygous   |
| NC_037639.1 | 9656247 | SNV | 1 | A | G | Heterozygous |
| NC_037639.1 | 9656299 | SNV | 1 | A | G | Heterozygous |
| NC_037639.1 | 9656445 | SNV | 1 | A | G | Heterozygous |
| NC_037639.1 | 9661029 | SNV | 1 | G | A | Heterozygous |
| NC_037639.1 | 9661790 | SNV | 1 | T | A | Homozygous   |
| NC_037639.1 | 9661809 | SNV | 1 | T | A | Homozygous   |
| NC_037639.1 | 9661826 | SNV | 1 | A | G | Homozygous   |
| NC_037639.1 | 9661831 | SNV | 1 | G | A | Homozygous   |
| NC_037639.1 | 9662713 | SNV | 1 | A | G | Heterozygous |
| NC_037639.1 | 9662934 | SNV | 1 | A | C | Heterozygous |
| NC_037639.1 | 9665130 | SNV | 1 | C | T | Heterozygous |
| NC_037639.1 | 9667326 | SNV | 1 | C | T | Homozygous   |
| NC_037639.1 | 9667328 | SNV | 1 | A | T | Homozygous   |
| NC_037639.1 | 9667429 | SNV | 1 | T | C | Homozygous   |
| NC_037639.1 | 9667432 | SNV | 1 | T | C | Heterozygous |
| NC_037639.1 | 9667435 | SNV | 1 | A | G | Heterozygous |
| NC_037639.1 | 9667438 | SNV | 1 | A | T | Heterozygous |
| NC_037639.1 | 9668095 | SNV | 1 | T | A | Heterozygous |
| NC_037639.1 | 9668101 | SNV | 1 | T | A | Homozygous   |
| NC_037639.1 | 9668107 | SNV | 1 | T | G | Homozygous   |
| NC_037639.1 | 9668110 | SNV | 1 | A | G | Homozygous   |
| NC_037639.1 | 9668119 | SNV | 1 | T | C | Homozygous   |
| NC_037639.1 | 9668125 | SNV | 1 | T | C | Homozygous   |
| NC_037639.1 | 9668149 | SNV | 1 | A | G | Homozygous   |
| NC_037639.1 | 9668152 | SNV | 1 | T | C | Homozygous   |
| NC_037639.1 | 9671624 | SNV | 1 | C | T | Homozygous   |
| NC_037639.1 | 9671692 | SNV | 1 | A | G | Homozygous   |
| NC_037639.1 | 9673443 | SNV | 1 | T | A | Homozygous   |
| NC_037639.1 | 9674135 | SNV | 1 | G | A | Homozygous   |
| NC_037639.1 | 9675164 | SNV | 1 | A | G | Homozygous   |
| NC_037639.1 | 9677648 | SNV | 1 | A | T | Heterozygous |
| NC_037639.1 | 9678028 | SNV | 1 | T | G | Homozygous   |
| NC_037639.1 | 9679137 | SNV | 1 | C | A | Heterozygous |
| NC_037639.1 | 9679141 | SNV | 1 | T | G | Heterozygous |
| NC_037639.1 | 9679144 | SNV | 1 | T | A | Heterozygous |
| NC_037639.1 | 9679150 | SNV | 1 | A | G | Heterozygous |
| NC_037639.1 | 9679170 | SNV | 1 | C | T | Heterozygous |
| NC_037639.1 | 9679172 | SNV | 1 | T | G | Heterozygous |
| NC_037639.1 | 9680780 | SNV | 1 | A | G | Homozygous   |
| NC_037639.1 | 9680871 | SNV | 1 | G | T | Homozygous   |
| NC_037639.1 | 9684211 | SNV | 1 | G | T | Homozygous   |
| NC_037639.1 | 9684884 | SNV | 1 | T | A | Homozygous   |
| NC_037639.1 | 9684886 | SNV | 1 | T | A | Homozygous   |
| NC_037639.1 | 9684888 | SNV | 1 | T | C | Homozygous   |
| NC_037639.1 | 9684895 | SNV | 1 | A | T | Homozygous   |

|             |         |     |   |   |   |              |
|-------------|---------|-----|---|---|---|--------------|
| NC_037639.1 | 9684897 | SNV | 1 | A | T | Homozygous   |
| NC_037639.1 | 9684906 | SNV | 1 | A | C | Homozygous   |
| NC_037639.1 | 9684908 | SNV | 1 | A | T | Homozygous   |
| NC_037639.1 | 9686219 | SNV | 1 | T | A | Homozygous   |
| NC_037639.1 | 9686458 | SNV | 1 | T | C | Heterozygous |
| NC_037639.1 | 9688846 | SNV | 1 | A | G | Homozygous   |
| NC_037639.1 | 9692760 | SNV | 1 | T | G | Homozygous   |
| NC_037639.1 | 9693466 | SNV | 1 | A | G | Heterozygous |
| NC_037639.1 | 9696920 | SNV | 1 | T | C | Homozygous   |
| NC_037639.1 | 9697911 | SNV | 1 | A | T | Homozygous   |
| NC_037639.1 | 9698883 | SNV | 1 | T | A | Homozygous   |
| NC_037639.1 | 9699015 | SNV | 1 | T | C | Heterozygous |
| NC_037639.1 | 9729287 | SNV | 1 | A | G | Homozygous   |
| NC_037639.1 | 9729292 | SNV | 1 | T | C | Heterozygous |
| NC_037639.1 | 9729301 | SNV | 1 | A | G | Homozygous   |
| NC_037639.1 | 9729700 | SNV | 1 | T | G | Homozygous   |
| NC_037639.1 | 9729756 | SNV | 1 | T | C | Homozygous   |
| NC_037639.1 | 9730535 | SNV | 1 | C | T | Heterozygous |
| NC_037639.1 | 9730568 | SNV | 1 | C | T | Heterozygous |
| NC_037639.1 | 9730614 | SNV | 1 | T | C | Heterozygous |
| NC_037639.1 | 9730665 | SNV | 1 | T | C | Homozygous   |
| NC_037639.1 | 9730776 | SNV | 1 | A | G | Heterozygous |
| NC_037639.1 | 9730779 | SNV | 1 | T | C | Homozygous   |
| NC_037639.1 | 9730801 | SNV | 1 | G | A | Homozygous   |
| NC_037639.1 | 9730810 | SNV | 1 | T | C | Heterozygous |
| NC_037639.1 | 9730818 | SNV | 1 | C | T | Heterozygous |
| NC_037639.1 | 9730864 | SNV | 1 | C | T | Heterozygous |
| NC_037639.1 | 9730883 | SNV | 1 | A | C | Heterozygous |
| NC_037639.1 | 9739013 | SNV | 1 | A | G | Homozygous   |
| NC_037639.1 | 9739896 | SNV | 1 | T | C | Homozygous   |
| NC_037639.1 | 9740175 | SNV | 1 | G | A | Heterozygous |
| NC_037639.1 | 9740291 | SNV | 1 | C | T | Heterozygous |
| NC_037639.1 | 9744657 | SNV | 1 | T | C | Homozygous   |
| NC_037639.1 | 9745334 | SNV | 1 | G | A | Heterozygous |
| NC_037639.1 | 9745345 | SNV | 1 | A | G | Heterozygous |
| NC_037639.1 | 9746882 | SNV | 1 | T | C | Homozygous   |
| NC_037639.1 | 9747086 | SNV | 1 | T | C | Homozygous   |
| NC_037639.1 | 9747199 | SNV | 1 | T | C | Homozygous   |
| NC_037639.1 | 9747392 | SNV | 1 | C | G | Homozygous   |
| NC_037639.1 | 9747399 | SNV | 1 | C | T | Homozygous   |
| NC_037639.1 | 9747407 | SNV | 1 | G | A | Heterozygous |
| NC_037639.1 | 9747432 | SNV | 1 | T | G | Homozygous   |
| NC_037639.1 | 9747481 | SNV | 1 | C | T | Heterozygous |
| NC_037639.1 | 9747492 | SNV | 1 | A | G | Homozygous   |
| NC_037639.1 | 9747506 | SNV | 1 | A | G | Homozygous   |
| NC_037639.1 | 9747508 | SNV | 1 | C | T | Homozygous   |
| NC_037639.1 | 9747570 | SNV | 1 | A | G | Homozygous   |
| NC_037639.1 | 9747578 | SNV | 1 | A | G | Heterozygous |
| NC_037639.1 | 9747588 | SNV | 1 | A | G | Heterozygous |
| NC_037639.1 | 9748137 | SNV | 1 | G | A | Heterozygous |
| NC_037639.1 | 9748144 | SNV | 1 | G | A | Homozygous   |

|             |         |     |   |   |   |              |
|-------------|---------|-----|---|---|---|--------------|
| NC_037639.1 | 9748152 | SNV | 1 | A | G | Heterozygous |
| NC_037639.1 | 9748156 | SNV | 1 | G | A | Heterozygous |
| NC_037639.1 | 9748187 | SNV | 1 | A | G | Heterozygous |
| NC_037639.1 | 9750966 | SNV | 1 | T | C | Homozygous   |
| NC_037639.1 | 9751110 | SNV | 1 | G | A | Heterozygous |
| NC_037639.1 | 9751122 | SNV | 1 | A | G | Heterozygous |
| NC_037639.1 | 9765170 | SNV | 1 | G | C | Heterozygous |
| NC_037639.1 | 9765206 | SNV | 1 | G | A | Heterozygous |
| NC_037639.1 | 9765297 | SNV | 1 | G | A | Homozygous   |
| NC_037639.1 | 9765307 | SNV | 1 | T | C | Homozygous   |
| NC_037639.1 | 9766094 | SNV | 1 | G | A | Homozygous   |
| NC_037639.1 | 9766126 | SNV | 1 | G | A | Heterozygous |
| NC_037639.1 | 9766139 | SNV | 1 | C | T | Heterozygous |
| NC_037639.1 | 9766169 | SNV | 1 | T | C | Heterozygous |
| NC_037639.1 | 9766266 | SNV | 1 | G | A | Homozygous   |
| NC_037639.1 | 9766305 | SNV | 1 | G | A | Homozygous   |
| NC_037639.1 | 9766494 | SNV | 1 | T | C | Homozygous   |
| NC_037639.1 | 9766703 | SNV | 1 | T | C | Heterozygous |
| NC_037639.1 | 9766748 | SNV | 1 | C | T | Heterozygous |
| NC_037639.1 | 9781330 | SNV | 1 | G | A | Heterozygous |
| NC_037639.1 | 9781629 | SNV | 1 | A | C | Homozygous   |
| NC_037639.1 | 9793365 | SNV | 1 | T | C | Homozygous   |
| NC_037639.1 | 9793381 | SNV | 1 | C | T | Homozygous   |
| NC_037639.1 | 9793383 | SNV | 1 | C | T | Heterozygous |
| NC_037639.1 | 9793720 | SNV | 1 | A | G | Homozygous   |
| NC_037639.1 | 9796523 | SNV | 1 | C | T | Heterozygous |
| NC_037639.1 | 9796859 | SNV | 1 | T | C | Heterozygous |
| NC_037639.1 | 9796861 | SNV | 1 | T | C | Heterozygous |
| NC_037639.1 | 9796866 | SNV | 1 | T | C | Homozygous   |
| NC_037639.1 | 9799833 | SNV | 1 | G | A | Homozygous   |
| NC_037639.1 | 9799859 | SNV | 1 | C | T | Homozygous   |
| NC_037639.1 | 9799912 | SNV | 1 | A | G | Homozygous   |
| NC_037639.1 | 9804289 | SNV | 1 | C | G | Homozygous   |
| NC_037639.1 | 9804308 | SNV | 1 | C | T | Homozygous   |
| NC_037639.1 | 9805197 | SNV | 1 | T | C | Heterozygous |
| NC_037639.1 | 9805263 | SNV | 1 | G | A | Homozygous   |
| NC_037639.1 | 9805279 | SNV | 1 | C | T | Heterozygous |
| NC_037639.1 | 9805314 | SNV | 1 | G | A | Heterozygous |
| NC_037639.1 | 9805348 | SNV | 1 | C | A | Heterozygous |
| NC_037639.1 | 9805650 | SNV | 1 | C | T | Homozygous   |
| NC_037639.1 | 9805669 | SNV | 1 | C | T | Homozygous   |
| NC_037639.1 | 9805687 | SNV | 1 | G | C | Homozygous   |
| NC_037639.1 | 9823932 | SNV | 1 | G | A | Heterozygous |
| NC_037639.1 | 9823945 | SNV | 1 | A | T | Heterozygous |
| NC_037639.1 | 9839152 | SNV | 1 | G | A | Heterozygous |
| NC_037639.1 | 9839190 | SNV | 1 | G | A | Heterozygous |
| NC_037639.1 | 9841910 | SNV | 1 | T | G | Heterozygous |
| NC_037639.1 | 9841914 | SNV | 1 | C | T | Heterozygous |
| NC_037639.1 | 9841921 | SNV | 1 | C | T | Homozygous   |
| NC_037639.1 | 9847047 | SNV | 1 | A | G | Homozygous   |
| NC_037639.1 | 9847081 | SNV | 1 | A | G | Homozygous   |

|             |         |     |   |   |   |              |
|-------------|---------|-----|---|---|---|--------------|
| NC_037639.1 | 9847120 | SNV | 1 | G | T | Heterozygous |
| NC_037639.1 | 9847161 | SNV | 1 | T | C | Homozygous   |
| NC_037639.1 | 9847167 | SNV | 1 | G | C | Homozygous   |
| NC_037639.1 | 9847194 | SNV | 1 | A | G | Heterozygous |
| NC_037639.1 | 9847269 | SNV | 1 | A | G | Homozygous   |
| NC_037639.1 | 9847416 | SNV | 1 | C | G | Homozygous   |
| NC_037639.1 | 9855951 | SNV | 1 | G | A | Heterozygous |
| NC_037639.1 | 9865308 | SNV | 1 | A | C | Homozygous   |
| NC_037639.1 | 9865317 | SNV | 1 | G | A | Homozygous   |
| NC_037639.1 | 9867832 | SNV | 1 | A | G | Heterozygous |
| NC_037639.1 | 9867849 | SNV | 1 | T | G | Homozygous   |
| NC_037639.1 | 9868164 | SNV | 1 | G | A | Homozygous   |
| NC_037639.1 | 9885415 | SNV | 1 | G | C | Homozygous   |
| NC_037639.1 | 9885439 | SNV | 1 | A | G | Homozygous   |
| NC_037639.1 | 9885847 | SNV | 1 | T | A | Homozygous   |
| NC_037639.1 | 9897782 | SNV | 1 | T | C | Homozygous   |
| NC_037639.1 | 9904877 | SNV | 1 | T | C | Homozygous   |
| NC_037639.1 | 9904966 | SNV | 1 | G | A | Heterozygous |
| NC_037639.1 | 9915861 | SNV | 1 | C | G | Heterozygous |
| NC_037639.1 | 9915914 | SNV | 1 | T | C | Homozygous   |
| NC_037639.1 | 9915946 | SNV | 1 | A | T | Heterozygous |
| NC_037639.1 | 9916369 | SNV | 1 | T | C | Homozygous   |
| NC_037639.1 | 9916425 | SNV | 1 | G | C | Heterozygous |
| NC_037639.1 | 9916455 | SNV | 1 | G | A | Heterozygous |
| NC_037639.1 | 9916567 | SNV | 1 | A | T | Heterozygous |
| NC_037639.1 | 9916875 | SNV | 1 | T | C | Heterozygous |
| NC_037639.1 | 9917357 | SNV | 1 | G | A | Heterozygous |
| NC_037639.1 | 9917667 | SNV | 1 | T | C | Homozygous   |
| NC_037639.1 | 9917882 | SNV | 1 | G | A | Heterozygous |
| NC_037639.1 | 9917915 | SNV | 1 | A | G | Homozygous   |
| NC_037639.1 | 9917922 | SNV | 1 | G | A | Heterozygous |
| NC_037639.1 | 9917924 | SNV | 1 | C | A | Heterozygous |
| NC_037639.1 | 9918132 | SNV | 1 | T | C | Heterozygous |
| NC_037639.1 | 9918334 | SNV | 1 | A | G | Heterozygous |
| NC_037639.1 | 9921602 | SNV | 1 | A | G | Heterozygous |
| NC_037639.1 | 9921604 | SNV | 1 | A | G | Heterozygous |
| NC_037639.1 | 9940079 | SNV | 1 | C | T | Homozygous   |
| NC_037639.1 | 9941068 | SNV | 1 | C | T | Homozygous   |
| NC_037639.1 | 9941633 | SNV | 1 | C | G | Homozygous   |
| NC_037639.1 | 9942784 | SNV | 1 | G | C | Homozygous   |
| NC_037639.1 | 9944170 | SNV | 1 | G | A | Heterozygous |
| NC_037639.1 | 9944206 | SNV | 1 | T | C | Heterozygous |
| NC_037639.1 | 9944278 | SNV | 1 | T | C | Heterozygous |
| NC_037639.1 | 9945151 | SNV | 1 | T | A | Heterozygous |
| NC_037639.1 | 9945177 | SNV | 1 | T | C | Heterozygous |
| NC_037639.1 | 9945196 | SNV | 1 | A | G | Heterozygous |
| NC_037639.1 | 9945341 | SNV | 1 | A | T | Heterozygous |
| NC_037639.1 | 9945418 | SNV | 1 | C | T | Heterozygous |
| NC_037639.1 | 9945470 | SNV | 1 | G | A | Homozygous   |
| NC_037639.1 | 9945578 | SNV | 1 | T | G | Homozygous   |
| NC_037639.1 | 9945615 | SNV | 1 | A | G | Homozygous   |

|             |         |     |   |   |   |              |
|-------------|---------|-----|---|---|---|--------------|
| NC_037639.1 | 9945738 | SNV | 1 | A | T | Homozygous   |
| NC_037639.1 | 9946261 | SNV | 1 | G | A | Heterozygous |
| NC_037639.1 | 9946268 | SNV | 1 | T | C | Homozygous   |
| NC_037639.1 | 9946401 | SNV | 1 | G | A | Homozygous   |
| NC_037639.1 | 9946594 | SNV | 1 | A | G | Heterozygous |
| NC_037639.1 | 9946643 | SNV | 1 | T | C | Heterozygous |
| NC_037639.1 | 9947088 | SNV | 1 | C | T | Heterozygous |
| NC_037639.1 | 9947130 | SNV | 1 | C | T | Homozygous   |
| NC_037639.1 | 9947133 | SNV | 1 | C | A | Homozygous   |
| NC_037639.1 | 9947141 | SNV | 1 | T | C | Heterozygous |
| NC_037639.1 | 9947229 | SNV | 1 | T | C | Homozygous   |
| NC_037639.1 | 9947360 | SNV | 1 | C | T | Heterozygous |
| NC_037639.1 | 9947906 | SNV | 1 | C | T | Heterozygous |
| NC_037639.1 | 9947914 | SNV | 1 | G | A | Heterozygous |
| NC_037639.1 | 9948056 | SNV | 1 | T | C | Homozygous   |
| NC_037639.1 | 9948181 | SNV | 1 | A | G | Homozygous   |
| NC_037639.1 | 9948255 | SNV | 1 | T | C | Homozygous   |
| NC_037639.1 | 9948341 | SNV | 1 | G | A | Homozygous   |
| NC_037639.1 | 9948364 | SNV | 1 | C | T | Heterozygous |
| NC_037639.1 | 9948371 | SNV | 1 | A | G | Homozygous   |
| NC_037639.1 | 9948387 | SNV | 1 | A | T | Heterozygous |
| NC_037639.1 | 9948390 | SNV | 1 | G | A | Heterozygous |
| NC_037639.1 | 9948461 | SNV | 1 | T | C | Homozygous   |
| NC_037639.1 | 9948467 | SNV | 1 | T | C | Homozygous   |
| NC_037639.1 | 9948701 | SNV | 1 | A | G | Heterozygous |
| NC_037639.1 | 9948723 | SNV | 1 | T | A | Heterozygous |
| NC_037639.1 | 9948955 | SNV | 1 | C | T | Heterozygous |
| NC_037639.1 | 9949081 | SNV | 1 | G | A | Homozygous   |
| NC_037639.1 | 9949199 | SNV | 1 | A | G | Heterozygous |
| NC_037639.1 | 9949210 | SNV | 1 | A | G | Homozygous   |
| NC_037639.1 | 9949242 | SNV | 1 | T | C | Homozygous   |
| NC_037639.1 | 9949411 | SNV | 1 | C | T | Heterozygous |
| NC_037639.1 | 9949522 | SNV | 1 | A | G | Homozygous   |
| NC_037639.1 | 9949866 | SNV | 1 | G | A | Homozygous   |
| NC_037639.1 | 9950023 | SNV | 1 | G | A | Heterozygous |
| NC_037639.1 | 9950032 | SNV | 1 | C | T | Heterozygous |
| NC_037639.1 | 9950099 | SNV | 1 | G | A | Heterozygous |
| NC_037639.1 | 9950173 | SNV | 1 | A | G | Homozygous   |
| NC_037639.1 | 9950211 | SNV | 1 | T | A | Heterozygous |
| NC_037639.1 | 9950298 | SNV | 1 | A | G | Heterozygous |
| NC_037639.1 | 9950345 | SNV | 1 | C | T | Homozygous   |
| NC_037639.1 | 9950371 | SNV | 1 | T | C | Homozygous   |
| NC_037639.1 | 9950414 | SNV | 1 | C | T | Heterozygous |
| NC_037639.1 | 9950699 | SNV | 1 | T | C | Homozygous   |
| NC_037639.1 | 9950706 | SNV | 1 | A | G | Homozygous   |
| NC_037639.1 | 9950755 | SNV | 1 | C | T | Heterozygous |
| NC_037639.1 | 9950767 | SNV | 1 | A | G | Heterozygous |
| NC_037639.1 | 9950835 | SNV | 1 | A | G | Homozygous   |
| NC_037639.1 | 9951018 | SNV | 1 | C | A | Heterozygous |
| NC_037639.1 | 9951044 | SNV | 1 | C | T | Heterozygous |
| NC_037639.1 | 9951277 | SNV | 1 | C | A | Homozygous   |



|             |         |     |   |   |   |              |
|-------------|---------|-----|---|---|---|--------------|
| NC_037639.1 | 9951283 | SNV | 1 | T | C | Heterozygous |
| NC_037639.1 | 9951291 | SNV | 1 | T | A | Heterozygous |
| NC_037639.1 | 9951312 | SNV | 1 | C | T | Heterozygous |
| NC_037639.1 | 9951335 | SNV | 1 | C | A | Heterozygous |
| NC_037639.1 | 9951351 | SNV | 1 | C | T | Heterozygous |
| NC_037639.1 | 9951400 | SNV | 1 | G | A | Heterozygous |
| NC_037639.1 | 9951405 | SNV | 1 | A | G | Homozygous   |
| NC_037639.1 | 9951513 | SNV | 1 | A | G | Homozygous   |
| NC_037639.1 | 9951549 | SNV | 1 | T | C | Heterozygous |
| NC_037639.1 | 9951556 | SNV | 1 | A | G | Heterozygous |
| NC_037639.1 | 9951572 | SNV | 1 | T | A | Heterozygous |
| NC_037639.1 | 9951748 | SNV | 1 | G | T | Heterozygous |
| NC_037639.1 | 9951888 | SNV | 1 | T | A | Heterozygous |
| NC_037639.1 | 9951940 | SNV | 1 | T | C | Heterozygous |
| NC_037639.1 | 9951947 | SNV | 1 | A | G | Homozygous   |
| NC_037639.1 | 9951974 | SNV | 1 | C | T | Homozygous   |
| NC_037639.1 | 9951980 | SNV | 1 | T | C | Homozygous   |
| NC_037639.1 | 9952001 | SNV | 1 | T | A | Heterozygous |
| NC_037639.1 | 9952006 | SNV | 1 | C | T | Homozygous   |
| NC_037639.1 | 9952185 | SNV | 1 | A | G | Heterozygous |
| NC_037639.1 | 9952305 | SNV | 1 | T | C | Homozygous   |
| NC_037639.1 | 9952319 | SNV | 1 | C | T | Heterozygous |
| NC_037639.1 | 9952433 | SNV | 1 | A | G | Homozygous   |
| NC_037639.1 | 9952456 | SNV | 1 | A | G | Heterozygous |
| NC_037639.1 | 9952461 | SNV | 1 | A | G | Homozygous   |
| NC_037639.1 | 9952482 | SNV | 1 | C | T | Heterozygous |
| NC_037639.1 | 9952494 | SNV | 1 | A | G | Heterozygous |
| NC_037639.1 | 9952624 | SNV | 1 | A | G | Homozygous   |
| NC_037639.1 | 9952669 | SNV | 1 | T | C | Heterozygous |
| NC_037639.1 | 9952681 | SNV | 1 | G | A | Heterozygous |
| NC_037639.1 | 9952719 | SNV | 1 | G | A | Heterozygous |
| NC_037639.1 | 9952759 | SNV | 1 | A | T | Homozygous   |
| NC_037639.1 | 9952766 | SNV | 1 | T | C | Homozygous   |
| NC_037639.1 | 9952791 | SNV | 1 | C | T | Heterozygous |
| NC_037639.1 | 9952793 | SNV | 1 | C | T | Heterozygous |
| NC_037639.1 | 9952862 | SNV | 1 | A | G | Homozygous   |
| NC_037639.1 | 9952875 | SNV | 1 | T | C | Homozygous   |
| NC_037639.1 | 9952884 | SNV | 1 | T | C | Homozygous   |
| NC_037639.1 | 9952961 | SNV | 1 | G | A | Homozygous   |
| NC_037639.1 | 9952995 | SNV | 1 | T | G | Heterozygous |
| NC_037639.1 | 9953009 | SNV | 1 | A | G | Homozygous   |
| NC_037639.1 | 9953020 | SNV | 1 | C | T | Homozygous   |
| NC_037639.1 | 9953054 | SNV | 1 | A | G | Homozygous   |
| NC_037639.1 | 9953155 | SNV | 1 | T | C | Homozygous   |
| NC_037639.1 | 9953202 | SNV | 1 | T | G | Homozygous   |
| NC_037639.1 | 9953274 | SNV | 1 | A | T | Homozygous   |
| NC_037639.1 | 9953296 | SNV | 1 | T | C | Heterozygous |
| NC_037639.1 | 9953320 | SNV | 1 | T | C | Heterozygous |
| NC_037639.1 | 9953334 | SNV | 1 | G | C | Homozygous   |
| NC_037639.1 | 9953342 | SNV | 1 | T | C | Homozygous   |
| NC_037639.1 | 9953351 | SNV | 1 | A | G | Homozygous   |

|             |         |     |   |   |   |              |
|-------------|---------|-----|---|---|---|--------------|
| NC_037639.1 | 9953353 | SNV | 1 | A | G | Homozygous   |
| NC_037639.1 | 9953370 | SNV | 1 | A | G | Homozygous   |
| NC_037639.1 | 9953403 | SNV | 1 | T | C | Homozygous   |
| NC_037639.1 | 9953448 | SNV | 1 | C | T | Heterozygous |
| NC_037639.1 | 9953499 | SNV | 1 | A | G | Homozygous   |
| NC_037639.1 | 9953508 | SNV | 1 | T | C | Homozygous   |
| NC_037639.1 | 9953528 | SNV | 1 | C | T | Homozygous   |
| NC_037639.1 | 9953552 | SNV | 1 | G | A | Homozygous   |
| NC_037639.1 | 9953663 | SNV | 1 | C | A | Heterozygous |
| NC_037639.1 | 9953672 | SNV | 1 | A | G | Heterozygous |
| NC_037639.1 | 9953724 | SNV | 1 | A | G | Homozygous   |
| NC_037639.1 | 9953820 | SNV | 1 | C | T | Heterozygous |
| NC_037639.1 | 9953829 | SNV | 1 | T | C | Homozygous   |
| NC_037639.1 | 9953857 | SNV | 1 | G | T | Heterozygous |
| NC_037639.1 | 9953884 | SNV | 1 | C | T | Heterozygous |
| NC_037639.1 | 9953890 | SNV | 1 | G | A | Heterozygous |
| NC_037639.1 | 9953893 | SNV | 1 | A | G | Homozygous   |
| NC_037639.1 | 9953940 | SNV | 1 | T | C | Homozygous   |
| NC_037639.1 | 9953959 | SNV | 1 | G | A | Heterozygous |
| NC_037639.1 | 9954013 | SNV | 1 | C | T | Heterozygous |
| NC_037639.1 | 9954016 | SNV | 1 | T | C | Heterozygous |
| NC_037639.1 | 9954020 | SNV | 1 | C | T | Heterozygous |
| NC_037639.1 | 9954050 | SNV | 1 | A | G | Homozygous   |
| NC_037639.1 | 9954082 | SNV | 1 | G | A | Heterozygous |
| NC_037639.1 | 9954085 | SNV | 1 | G | A | Heterozygous |
| NC_037639.1 | 9954087 | SNV | 1 | A | G | Heterozygous |
| NC_037639.1 | 9954124 | SNV | 1 | C | T | Heterozygous |
| NC_037639.1 | 9954218 | SNV | 1 | A | G | Homozygous   |
| NC_037639.1 | 9954239 | SNV | 1 | T | C | Homozygous   |
| NC_037639.1 | 9954241 | SNV | 1 | T | C | Homozygous   |
| NC_037639.1 | 9954271 | SNV | 1 | A | G | Homozygous   |
| NC_037639.1 | 9954297 | SNV | 1 | A | G | Heterozygous |
| NC_037639.1 | 9954518 | SNV | 1 | A | G | Homozygous   |
| NC_037639.1 | 9954647 | SNV | 1 | C | T | Heterozygous |
| NC_037639.1 | 9954755 | SNV | 1 | T | G | Heterozygous |
| NC_037639.1 | 9954818 | SNV | 1 | G | A | Homozygous   |
| NC_037639.1 | 9954849 | SNV | 1 | A | G | Homozygous   |
| NC_037639.1 | 9954876 | SNV | 1 | A | G | Heterozygous |
| NC_037639.1 | 9955107 | SNV | 1 | A | G | Heterozygous |
| NC_037639.1 | 9955134 | SNV | 1 | T | C | Heterozygous |
| NC_037639.1 | 9955150 | SNV | 1 | A | G | Homozygous   |
| NC_037639.1 | 9955266 | SNV | 1 | A | C | Heterozygous |
| NC_037639.1 | 9955267 | SNV | 1 | A | T | Heterozygous |
| NC_037639.1 | 9955271 | SNV | 1 | T | C | Homozygous   |
| NC_037639.1 | 9955279 | SNV | 1 | G | A | Heterozygous |
| NC_037639.1 | 9955288 | SNV | 1 | G | T | Homozygous   |
| NC_037639.1 | 9955308 | SNV | 1 | T | C | Homozygous   |
| NC_037639.1 | 9955505 | SNV | 1 | T | C | Homozygous   |
| NC_037639.1 | 9956248 | SNV | 1 | T | A | Heterozygous |
| NC_037639.1 | 9956312 | SNV | 1 | G | T | Homozygous   |
| NC_037639.1 | 9956340 | SNV | 1 | T | C | Heterozygous |

|             |         |     |   |   |   |              |
|-------------|---------|-----|---|---|---|--------------|
| NC_037639.1 | 9956368 | SNV | 1 | C | T | Homozygous   |
| NC_037639.1 | 9956461 | SNV | 1 | A | G | Homozygous   |
| NC_037639.1 | 9956661 | SNV | 1 | G | A | Heterozygous |
| NC_037639.1 | 9956673 | SNV | 1 | A | G | Homozygous   |
| NC_037639.1 | 9956917 | SNV | 1 | T | C | Homozygous   |
| NC_037639.1 | 9956957 | SNV | 1 | G | A | Homozygous   |
| NC_037639.1 | 9956965 | SNV | 1 | G | A | Homozygous   |
| NC_037639.1 | 9956989 | SNV | 1 | G | A | Homozygous   |
| NC_037639.1 | 9957124 | SNV | 1 | A | G | Homozygous   |
| NC_037639.1 | 9957232 | SNV | 1 | A | T | Heterozygous |
| NC_037639.1 | 9957385 | SNV | 1 | A | G | Homozygous   |
| NC_037639.1 | 9957403 | SNV | 1 | A | G | Homozygous   |
| NC_037639.1 | 9957457 | SNV | 1 | A | G | Heterozygous |
| NC_037639.1 | 9957675 | SNV | 1 | A | C | Heterozygous |
| NC_037639.1 | 9957675 | SNV | 1 | A | T | Heterozygous |
| NC_037639.1 | 9957725 | SNV | 1 | A | G | Homozygous   |
| NC_037639.1 | 9957934 | SNV | 1 | G | A | Heterozygous |
| NC_037639.1 | 9957963 | SNV | 1 | T | C | Homozygous   |
| NC_037639.1 | 9957983 | SNV | 1 | G | A | Heterozygous |
| NC_037639.1 | 9958012 | SNV | 1 | G | C | Heterozygous |
| NC_037639.1 | 9958051 | SNV | 1 | A | C | Heterozygous |
| NC_037639.1 | 9958053 | SNV | 1 | A | G | Heterozygous |
| NC_037639.1 | 9958081 | SNV | 1 | A | C | Homozygous   |
| NC_037639.1 | 9958466 | SNV | 1 | T | A | Homozygous   |
| NC_037639.1 | 9958516 | SNV | 1 | C | T | Heterozygous |
| NC_037639.1 | 9958564 | SNV | 1 | A | G | Homozygous   |
| NC_037639.1 | 9958817 | SNV | 1 | G | T | Homozygous   |
| NC_037639.1 | 9958889 | SNV | 1 | C | T | Homozygous   |
| NC_037639.1 | 9958960 | SNV | 1 | T | C | Homozygous   |
| NC_037639.1 | 9959183 | SNV | 1 | T | C | Homozygous   |
| NC_037639.1 | 9959185 | SNV | 1 | C | T | Heterozygous |
| NC_037639.1 | 9959205 | SNV | 1 | T | C | Homozygous   |
| NC_037639.1 | 9959295 | SNV | 1 | A | T | Heterozygous |
| NC_037639.1 | 9959457 | SNV | 1 | T | C | Homozygous   |
| NC_037639.1 | 9959465 | SNV | 1 | T | C | Homozygous   |
| NC_037639.1 | 9959475 | SNV | 1 | T | C | Homozygous   |
| NC_037639.1 | 9959493 | SNV | 1 | A | G | Heterozygous |
| NC_037639.1 | 9959551 | SNV | 1 | A | G | Homozygous   |
| NC_037639.1 | 9959564 | SNV | 1 | C | T | Heterozygous |
| NC_037639.1 | 9959570 | SNV | 1 | C | A | Heterozygous |
| NC_037639.1 | 9959658 | SNV | 1 | C | T | Heterozygous |
| NC_037639.1 | 9959741 | SNV | 1 | A | G | Homozygous   |
| NC_037639.1 | 9959759 | SNV | 1 | T | C | Heterozygous |
| NC_037639.1 | 9960122 | SNV | 1 | A | G | Homozygous   |
| NC_037639.1 | 9960673 | SNV | 1 | T | C | Homozygous   |
| NC_037639.1 | 9960814 | SNV | 1 | T | C | Homozygous   |
| NC_037639.1 | 9960837 | SNV | 1 | T | C | Heterozygous |
| NC_037639.1 | 9960863 | SNV | 1 | A | G | Homozygous   |
| NC_037639.1 | 9961295 | SNV | 1 | C | T | Heterozygous |
| NC_037639.1 | 9961297 | SNV | 1 | G | A | Heterozygous |
| NC_037639.1 | 9961821 | SNV | 1 | G | A | Homozygous   |

|             |         |     |   |   |   |              |
|-------------|---------|-----|---|---|---|--------------|
| NC_037639.1 | 9961952 | SNV | 1 | C | G | Homozygous   |
| NC_037639.1 | 9962516 | SNV | 1 | G | A | Heterozygous |
| NC_037639.1 | 9962518 | SNV | 1 | G | A | Homozygous   |
| NC_037639.1 | 9962522 | SNV | 1 | G | A | Homozygous   |
| NC_037639.1 | 9962565 | SNV | 1 | A | T | Homozygous   |
| NC_037639.1 | 9963025 | SNV | 1 | A | G | Heterozygous |
| NC_037639.1 | 9963053 | SNV | 1 | C | T | Homozygous   |
| NC_037639.1 | 9963336 | SNV | 1 | C | T | Homozygous   |
| NC_037639.1 | 9963368 | SNV | 1 | A | G | Homozygous   |
| NC_037639.1 | 9963370 | SNV | 1 | T | C | Homozygous   |
| NC_037639.1 | 9963572 | SNV | 1 | T | C | Homozygous   |
| NC_037639.1 | 9963691 | SNV | 1 | C | G | Homozygous   |
| NC_037639.1 | 9963715 | SNV | 1 | G | A | Heterozygous |
| NC_037639.1 | 9963982 | SNV | 1 | G | A | Homozygous   |
| NC_037639.1 | 9964178 | SNV | 1 | A | G | Homozygous   |
| NC_037639.1 | 9964212 | SNV | 1 | T | C | Homozygous   |
| NC_037639.1 | 9964582 | SNV | 1 | T | C | Homozygous   |
| NC_037639.1 | 9964616 | SNV | 1 | C | T | Heterozygous |
| NC_037639.1 | 9964830 | SNV | 1 | C | T | Homozygous   |
| NC_037639.1 | 9964894 | SNV | 1 | A | G | Homozygous   |
| NC_037639.1 | 9964931 | SNV | 1 | A | G | Homozygous   |
| NC_037639.1 | 9965145 | SNV | 1 | C | T | Heterozygous |
| NC_037639.1 | 9965475 | SNV | 1 | C | T | Homozygous   |
| NC_037639.1 | 9965494 | SNV | 1 | C | T | Homozygous   |
| NC_037639.1 | 9965765 | SNV | 1 | T | C | Heterozygous |
| NC_037639.1 | 9965773 | SNV | 1 | C | T | Heterozygous |
| NC_037639.1 | 9965824 | SNV | 1 | A | T | Homozygous   |
| NC_037639.1 | 9965926 | SNV | 1 | C | T | Heterozygous |
| NC_037639.1 | 9966124 | SNV | 1 | A | G | Homozygous   |
| NC_037639.1 | 9966447 | SNV | 1 | A | G | Homozygous   |
| NC_037639.1 | 9966505 | SNV | 1 | C | T | Heterozygous |
| NC_037639.1 | 9966583 | SNV | 1 | T | C | Homozygous   |
| NC_037639.1 | 9967003 | SNV | 1 | A | G | Homozygous   |
| NC_037639.1 | 9967114 | SNV | 1 | G | A | Homozygous   |
| NC_037639.1 | 9967125 | SNV | 1 | T | C | Heterozygous |
| NC_037639.1 | 9967158 | SNV | 1 | A | C | Heterozygous |
| NC_037639.1 | 9967175 | SNV | 1 | T | C | Homozygous   |
| NC_037639.1 | 9967207 | SNV | 1 | G | C | Homozygous   |
| NC_037639.1 | 9967238 | SNV | 1 | T | C | Homozygous   |
| NC_037639.1 | 9967256 | SNV | 1 | A | G | Homozygous   |
| NC_037639.1 | 9967289 | SNV | 1 | C | T | Heterozygous |
| NC_037639.1 | 9967467 | SNV | 1 | C | T | Homozygous   |
| NC_037639.1 | 9967489 | SNV | 1 | A | G | Heterozygous |
| NC_037639.1 | 9967582 | SNV | 1 | A | G | Homozygous   |
| NC_037639.1 | 9967678 | SNV | 1 | G | A | Homozygous   |
| NC_037639.1 | 9967711 | SNV | 1 | T | A | Homozygous   |
| NC_037639.1 | 9968420 | SNV | 1 | T | C | Homozygous   |
| NC_037639.1 | 9968532 | SNV | 1 | G | A | Heterozygous |
| NC_037639.1 | 9968616 | SNV | 1 | A | G | Heterozygous |
| NC_037639.1 | 9968631 | SNV | 1 | G | A | Heterozygous |
| NC_037639.1 | 9968719 | SNV | 1 | T | C | Homozygous   |

|             |          |     |   |   |   |              |
|-------------|----------|-----|---|---|---|--------------|
| NC_037639.1 | 9968725  | SNV | 1 | A | G | Homozygous   |
| NC_037639.1 | 9968830  | SNV | 1 | T | C | Homozygous   |
| NC_037639.1 | 9968884  | SNV | 1 | G | C | Homozygous   |
| NC_037639.1 | 9969798  | SNV | 1 | G | A | Heterozygous |
| NC_037639.1 | 9969824  | SNV | 1 | A | G | Heterozygous |
| NC_037639.1 | 9969928  | SNV | 1 | T | C | Homozygous   |
| NC_037639.1 | 9969984  | SNV | 1 | G | A | Homozygous   |
| NC_037639.1 | 9970003  | SNV | 1 | G | C | Homozygous   |
| NC_037639.1 | 9974754  | SNV | 1 | A | T | Heterozygous |
| NC_037639.1 | 9974769  | SNV | 1 | C | T | Heterozygous |
| NC_037639.1 | 9976080  | SNV | 1 | T | C | Homozygous   |
| NC_037639.1 | 9988237  | SNV | 1 | G | C | Homozygous   |
| NC_037639.1 | 9989450  | SNV | 1 | T | C | Heterozygous |
| NC_037639.1 | 9989476  | SNV | 1 | G | A | Heterozygous |
| NC_037639.1 | 9989535  | SNV | 1 | A | G | Heterozygous |
| NC_037639.1 | 9989539  | SNV | 1 | G | A | Heterozygous |
| NC_037639.1 | 9990493  | SNV | 1 | C | T | Homozygous   |
| NC_037639.1 | 9990560  | SNV | 1 | C | T | Heterozygous |
| NC_037639.1 | 9996967  | SNV | 1 | T | C | Homozygous   |
| NC_037639.1 | 9999758  | SNV | 1 | G | A | Heterozygous |
| NC_037639.1 | 10003578 | SNV | 1 | C | A | Heterozygous |
| NC_037639.1 | 10003589 | SNV | 1 | T | C | Heterozygous |
| NC_037639.1 | 10003600 | SNV | 1 | T | C | Heterozygous |
| NC_037639.1 | 10003603 | SNV | 1 | C | T | Heterozygous |
| NC_037639.1 | 10003605 | SNV | 1 | C | T | Heterozygous |
| NC_037639.1 | 10003613 | SNV | 1 | A | C | Heterozygous |
| NC_037639.1 | 10003674 | SNV | 1 | C | T | Homozygous   |
| NC_037639.1 | 10003685 | SNV | 1 | T | C | Homozygous   |
| NC_037639.1 | 10003688 | SNV | 1 | G | T | Homozygous   |
| NC_037639.1 | 10013373 | SNV | 1 | C | T | Homozygous   |
| NC_037639.1 | 10013383 | SNV | 1 | G | A | Homozygous   |
| NC_037639.1 | 10014671 | SNV | 1 | C | T | Homozygous   |
| NC_037639.1 | 10014673 | SNV | 1 | G | A | Homozygous   |
| NC_037639.1 | 10015431 | SNV | 1 | C | T | Homozygous   |
| NC_037639.1 | 10016271 | SNV | 1 | A | G | Heterozygous |
| NC_037639.1 | 10016408 | SNV | 1 | T | C | Homozygous   |
| NC_037639.1 | 10016754 | SNV | 1 | A | G | Homozygous   |
| NC_037639.1 | 10016757 | SNV | 1 | C | A | Heterozygous |
| NC_037639.1 | 10017007 | SNV | 1 | G | A | Homozygous   |
| NC_037639.1 | 10017887 | SNV | 1 | C | T | Homozygous   |
| NC_037639.1 | 10017895 | SNV | 1 | C | T | Homozygous   |
| NC_037639.1 | 10017937 | SNV | 1 | C | T | Homozygous   |
| NC_037639.1 | 10027510 | SNV | 1 | C | T | Heterozygous |
| NC_037639.1 | 10031002 | SNV | 1 | T | C | Heterozygous |
| NC_037639.1 | 10032432 | SNV | 1 | T | A | Homozygous   |
| NC_037639.1 | 10032435 | SNV | 1 | A | G | Homozygous   |
| NC_037639.1 | 10032439 | SNV | 1 | G | A | Homozygous   |
| NC_037639.1 | 10032456 | SNV | 1 | T | C | Homozygous   |
| NC_037639.1 | 10032626 | SNV | 1 | G | T | Homozygous   |
| NC_037639.1 | 10033008 | SNV | 1 | C | T | Homozygous   |
| NC_037639.1 | 10033207 | SNV | 1 | G | A | Heterozygous |

|             |          |     |   |   |   |              |
|-------------|----------|-----|---|---|---|--------------|
| NC_037639.1 | 10033291 | SNV | 1 | G | A | Heterozygous |
| NC_037639.1 | 10033401 | SNV | 1 | C | T | Heterozygous |
| NC_037639.1 | 10033491 | SNV | 1 | C | T | Homozygous   |
| NC_037639.1 | 10033494 | SNV | 1 | T | C | Homozygous   |
| NC_037639.1 | 10034120 | SNV | 1 | G | A | Heterozygous |
| NC_037639.1 | 10034184 | SNV | 1 | T | C | Homozygous   |
| NC_037639.1 | 10034340 | SNV | 1 | A | G | Heterozygous |
| NC_037639.1 | 10034347 | SNV | 1 | A | G | Heterozygous |
| NC_037639.1 | 10034369 | SNV | 1 | A | G | Heterozygous |
| NC_037639.1 | 10034420 | SNV | 1 | T | C | Homozygous   |
| NC_037639.1 | 10035030 | SNV | 1 | T | C | Homozygous   |
| NC_037639.1 | 10035049 | SNV | 1 | G | T | Homozygous   |
| NC_037639.1 | 10035082 | SNV | 1 | C | T | Homozygous   |
| NC_037639.1 | 10035086 | SNV | 1 | A | G | Homozygous   |
| NC_037639.1 | 10035088 | SNV | 1 | T | A | Homozygous   |
| NC_037639.1 | 10035090 | SNV | 1 | C | T | Homozygous   |
| NC_037639.1 | 10039405 | SNV | 1 | C | T | Heterozygous |
| NC_037639.1 | 10041906 | SNV | 1 | G | A | Heterozygous |
| NC_037639.1 | 10041910 | SNV | 1 | T | C | Heterozygous |
| NC_037639.1 | 10041913 | SNV | 1 | A | G | Heterozygous |
| NC_037639.1 | 10041918 | SNV | 1 | T | A | Heterozygous |
| NC_037639.1 | 10041946 | SNV | 1 | C | T | Heterozygous |
| NC_037639.1 | 10041954 | SNV | 1 | A | G | Heterozygous |
| NC_037639.1 | 10041959 | SNV | 1 | C | T | Heterozygous |
| NC_037639.1 | 10041963 | SNV | 1 | C | G | Heterozygous |
| NC_037639.1 | 10042542 | SNV | 1 | A | T | Heterozygous |
| NC_037639.1 | 10042545 | SNV | 1 | C | T | Heterozygous |
| NC_037639.1 | 10042570 | SNV | 1 | C | T | Heterozygous |
| NC_037639.1 | 10042584 | SNV | 1 | A | G | Heterozygous |
| NC_037639.1 | 10042593 | SNV | 1 | T | C | Homozygous   |
| NC_037639.1 | 10042597 | SNV | 1 | C | G | Homozygous   |
| NC_037639.1 | 10042606 | SNV | 1 | A | G | Heterozygous |
| NC_037639.1 | 10042608 | SNV | 1 | T | G | Heterozygous |
| NC_037639.1 | 10043305 | SNV | 1 | T | C | Homozygous   |
| NC_037639.1 | 10043317 | SNV | 1 | A | G | Homozygous   |
| NC_037639.1 | 10043326 | SNV | 1 | C | G | Homozygous   |
| NC_037639.1 | 10043332 | SNV | 1 | T | A | Homozygous   |
| NC_037639.1 | 10043343 | SNV | 1 | A | G | Homozygous   |
| NC_037639.1 | 10043362 | SNV | 1 | A | G | Homozygous   |
| NC_037639.1 | 10043379 | SNV | 1 | A | G | Homozygous   |
| NC_037639.1 | 10043382 | SNV | 1 | G | A | Homozygous   |
| NC_037639.1 | 10043456 | SNV | 1 | A | G | Homozygous   |
| NC_037639.1 | 10043471 | SNV | 1 | T | A | Homozygous   |
| NC_037639.1 | 10043486 | SNV | 1 | A | G | Homozygous   |
| NC_037639.1 | 10043489 | SNV | 1 | C | T | Homozygous   |
| NC_037639.1 | 10043495 | SNV | 1 | C | T | Homozygous   |
| NC_037639.1 | 10043506 | SNV | 1 | A | G | Homozygous   |
| NC_037639.1 | 10043512 | SNV | 1 | T | C | Homozygous   |
| NC_037639.1 | 10043555 | SNV | 1 | T | C | Homozygous   |
| NC_037639.1 | 10043582 | SNV | 1 | G | A | Homozygous   |
| NC_037639.1 | 10043612 | SNV | 1 | T | C | Homozygous   |

|             |          |     |   |   |   |              |
|-------------|----------|-----|---|---|---|--------------|
| NC_037639.1 | 10043618 | SNV | 1 | C | T | Homozygous   |
| NC_037639.1 | 10043628 | SNV | 1 | A | G | Homozygous   |
| NC_037639.1 | 10043632 | SNV | 1 | T | A | Homozygous   |
| NC_037639.1 | 10043634 | SNV | 1 | G | T | Homozygous   |
| NC_037639.1 | 10044122 | SNV | 1 | A | T | Heterozygous |
| NC_037639.1 | 10047199 | SNV | 1 | T | G | Heterozygous |
| NC_037639.1 | 10055136 | SNV | 1 | G | A | Homozygous   |
| NC_037639.1 | 10055184 | SNV | 1 | A | G | Homozygous   |
| NC_037639.1 | 10055216 | SNV | 1 | T | C | Homozygous   |
| NC_037639.1 | 10055393 | SNV | 1 | T | A | Heterozygous |
| NC_037639.1 | 10055393 | SNV | 1 | T | C | Heterozygous |
| NC_037639.1 | 10056284 | SNV | 1 | T | C | Heterozygous |
| NC_037639.1 | 10056461 | SNV | 1 | C | G | Homozygous   |
| NC_037639.1 | 10057437 | SNV | 1 | G | A | Heterozygous |
| NC_037639.1 | 10057693 | SNV | 1 | T | C | Homozygous   |
| NC_037639.1 | 10058757 | SNV | 1 | C | A | Heterozygous |
| NC_037639.1 | 10058760 | SNV | 1 | A | C | Heterozygous |
| NC_037639.1 | 10058763 | SNV | 1 | C | T | Heterozygous |
| NC_037639.1 | 10058987 | SNV | 1 | T | G | Heterozygous |
| NC_037639.1 | 10058994 | SNV | 1 | C | T | Heterozygous |
| NC_037639.1 | 10059259 | SNV | 1 | T | C | Heterozygous |
| NC_037639.1 | 10061599 | SNV | 1 | T | C | Homozygous   |
| NC_037639.1 | 10061609 | SNV | 1 | T | C | Homozygous   |
| NC_037639.1 | 10061619 | SNV | 1 | T | A | Heterozygous |
| NC_037639.1 | 10061724 | SNV | 1 | T | A | Heterozygous |
| NC_037639.1 | 10062003 | SNV | 1 | A | G | Heterozygous |
| NC_037639.1 | 10063585 | SNV | 1 | C | T | Heterozygous |
| NC_037639.1 | 10063648 | SNV | 1 | G | T | Heterozygous |
| NC_037639.1 | 10063662 | SNV | 1 | G | A | Heterozygous |
| NC_037639.1 | 10064048 | SNV | 1 | T | C | Homozygous   |
| NC_037639.1 | 10064201 | SNV | 1 | A | G | Homozygous   |
| NC_037639.1 | 10068212 | SNV | 1 | T | G | Homozygous   |
| NC_037639.1 | 10068215 | SNV | 1 | C | T | Homozygous   |
| NC_037639.1 | 10068224 | SNV | 1 | A | T | Homozygous   |
| NC_037639.1 | 10068233 | SNV | 1 | A | T | Homozygous   |
| NC_037639.1 | 10068245 | SNV | 1 | T | C | Homozygous   |
| NC_037639.1 | 10069137 | SNV | 1 | C | T | Homozygous   |
| NC_037639.1 | 10069252 | SNV | 1 | T | C | Heterozygous |
| NC_037639.1 | 10069275 | SNV | 1 | G | A | Homozygous   |
| NC_037639.1 | 10069321 | SNV | 1 | G | A | Heterozygous |
| NC_037639.1 | 10069327 | SNV | 1 | A | G | Heterozygous |
| NC_037639.1 | 10069422 | SNV | 1 | G | A | Heterozygous |
| NC_037639.1 | 10069476 | SNV | 1 | T | G | Heterozygous |
| NC_037639.1 | 10069478 | SNV | 1 | A | T | Heterozygous |
| NC_037639.1 | 10069498 | SNV | 1 | A | G | Homozygous   |
| NC_037639.1 | 10069512 | SNV | 1 | A | C | Homozygous   |
| NC_037639.1 | 10069518 | SNV | 1 | T | C | Heterozygous |
| NC_037639.1 | 10069522 | SNV | 1 | C | A | Heterozygous |
| NC_037639.1 | 10069527 | SNV | 1 | T | G | Homozygous   |
| NC_037639.1 | 10069529 | SNV | 1 | G | A | Homozygous   |
| NC_037639.1 | 10069589 | SNV | 1 | C | T | Heterozygous |

|             |          |     |   |   |   |              |
|-------------|----------|-----|---|---|---|--------------|
| NC_037639.1 | 10070585 | SNV | 1 | A | G | Homozygous   |
| NC_037639.1 | 10070591 | SNV | 1 | A | G | Homozygous   |
| NC_037639.1 | 10070599 | SNV | 1 | A | G | Homozygous   |
| NC_037639.1 | 10070618 | SNV | 1 | T | C | Homozygous   |
| NC_037639.1 | 10070651 | SNV | 1 | A | G | Homozygous   |
| NC_037639.1 | 10070654 | SNV | 1 | G | A | Homozygous   |
| NC_037639.1 | 10070656 | SNV | 1 | A | G | Homozygous   |
| NC_037639.1 | 10070663 | SNV | 1 | A | G | Homozygous   |
| NC_037639.1 | 10070673 | SNV | 1 | G | A | Homozygous   |
| NC_037639.1 | 10070681 | SNV | 1 | A | G | Homozygous   |
| NC_037639.1 | 10070687 | SNV | 1 | T | C | Homozygous   |
| NC_037639.1 | 10070705 | SNV | 1 | T | C | Heterozygous |
| NC_037639.1 | 10070709 | SNV | 1 | A | G | Heterozygous |
| NC_037639.1 | 10070712 | SNV | 1 | A | G | Heterozygous |
| NC_037639.1 | 10070714 | SNV | 1 | G | A | Heterozygous |
| NC_037639.1 | 10070723 | SNV | 1 | A | C | Homozygous   |
| NC_037639.1 | 10070729 | SNV | 1 | T | C | Homozygous   |
| NC_037639.1 | 10070744 | SNV | 1 | C | T | Homozygous   |
| NC_037639.1 | 10070747 | SNV | 1 | G | A | Homozygous   |
| NC_037639.1 | 10070751 | SNV | 1 | T | A | Heterozygous |
| NC_037639.1 | 10070765 | SNV | 1 | T | A | Heterozygous |
| NC_037639.1 | 10070783 | SNV | 1 | C | G | Homozygous   |
| NC_037639.1 | 10070786 | SNV | 1 | C | T | Heterozygous |
| NC_037639.1 | 10070792 | SNV | 1 | T | C | Heterozygous |
| NC_037639.1 | 10070795 | SNV | 1 | A | T | Heterozygous |
| NC_037639.1 | 10070833 | SNV | 1 | T | C | Heterozygous |
| NC_037639.1 | 10070840 | SNV | 1 | A | G | Homozygous   |
| NC_037639.1 | 10070843 | SNV | 1 | G | A | Heterozygous |
| NC_037639.1 | 10070846 | SNV | 1 | A | G | Homozygous   |
| NC_037639.1 | 10070870 | SNV | 1 | A | G | Homozygous   |
| NC_037639.1 | 10070876 | SNV | 1 | A | G | Homozygous   |
| NC_037639.1 | 10070879 | SNV | 1 | C | T | Homozygous   |
| NC_037639.1 | 10070915 | SNV | 1 | A | G | Homozygous   |
| NC_037639.1 | 10070930 | SNV | 1 | T | C | Homozygous   |
| NC_037639.1 | 10071172 | SNV | 1 | A | G | Homozygous   |
| NC_037639.1 | 10071210 | SNV | 1 | T | C | Homozygous   |
| NC_037639.1 | 10071237 | SNV | 1 | T | C | Homozygous   |
| NC_037639.1 | 10071243 | SNV | 1 | T | C | Homozygous   |
| NC_037639.1 | 10071960 | SNV | 1 | A | T | Homozygous   |
| NC_037639.1 | 10071977 | SNV | 1 | T | C | Homozygous   |
| NC_037639.1 | 10071996 | SNV | 1 | G | A | Homozygous   |
| NC_037639.1 | 10072001 | SNV | 1 | C | G | Homozygous   |
| NC_037639.1 | 10073523 | SNV | 1 | A | G | Heterozygous |
| NC_037639.1 | 10075179 | SNV | 1 | C | T | Heterozygous |
| NC_037639.1 | 10075299 | SNV | 1 | C | T | Heterozygous |
| NC_037639.1 | 10075575 | SNV | 1 | T | C | Heterozygous |
| NC_037639.1 | 10076361 | SNV | 1 | A | C | Heterozygous |
| NC_037639.1 | 10076553 | SNV | 1 | G | A | Heterozygous |
| NC_037639.1 | 10079527 | SNV | 1 | T | A | Heterozygous |
| NC_037639.1 | 10079560 | SNV | 1 | T | C | Heterozygous |
| NC_037639.1 | 10081613 | SNV | 1 | G | A | Homozygous   |



|             |          |     |   |   |   |              |
|-------------|----------|-----|---|---|---|--------------|
| NC_037639.1 | 10082475 | SNV | 1 | T | C | Heterozygous |
| NC_037639.1 | 10082550 | SNV | 1 | T | A | Heterozygous |
| NC_037639.1 | 10082563 | SNV | 1 | G | A | Heterozygous |
| NC_037639.1 | 10082572 | SNV | 1 | G | A | Heterozygous |
| NC_037639.1 | 10085533 | SNV | 1 | A | G | Heterozygous |
| NC_037639.1 | 10096605 | SNV | 1 | G | A | Homozygous   |
| NC_037639.1 | 10101133 | SNV | 1 | T | G | Homozygous   |
| NC_037639.1 | 10122152 | SNV | 1 | G | C | Heterozygous |
| NC_037639.1 | 10141554 | SNV | 1 | A | G | Homozygous   |
| NC_037639.1 | 10153424 | SNV | 1 | A | G | Homozygous   |
| NC_037639.1 | 10153446 | SNV | 1 | T | A | Homozygous   |
| NC_037639.1 | 10153461 | SNV | 1 | A | C | Homozygous   |
| NC_037639.1 | 10153550 | SNV | 1 | A | G | Homozygous   |
| NC_037639.1 | 10155702 | SNV | 1 | G | T | Homozygous   |
| NC_037639.1 | 10155711 | SNV | 1 | A | T | Homozygous   |
| NC_037639.1 | 10155733 | SNV | 1 | T | A | Homozygous   |
| NC_037639.1 | 10159822 | SNV | 1 | T | A | Homozygous   |
| NC_037639.1 | 10159825 | SNV | 1 | T | A | Homozygous   |
| NC_037639.1 | 10160126 | SNV | 1 | A | T | Heterozygous |
| NC_037639.1 | 10160128 | SNV | 1 | T | A | Heterozygous |
| NC_037639.1 | 10160189 | SNV | 1 | G | T | Heterozygous |
| NC_037639.1 | 10160191 | SNV | 1 | A | T | Heterozygous |
| NC_037639.1 | 10160194 | SNV | 1 | T | A | Heterozygous |
| NC_037639.1 | 10160835 | SNV | 1 | A | T | Heterozygous |
| NC_037639.1 | 10160837 | SNV | 1 | T | A | Heterozygous |
| NC_037639.1 | 10162998 | SNV | 1 | C | T | Heterozygous |
| NC_037639.1 | 10164209 | SNV | 1 | C | A | Homozygous   |
| NC_037639.1 | 10165374 | SNV | 1 | A | C | Homozygous   |
| NC_037639.1 | 10165379 | SNV | 1 | C | T | Homozygous   |
| NC_037639.1 | 10167804 | SNV | 1 | A | C | Heterozygous |
| NC_037639.1 | 10168053 | SNV | 1 | T | A | Homozygous   |
| NC_037639.1 | 10168149 | SNV | 1 | G | T | Homozygous   |
| NC_037639.1 | 10172261 | SNV | 1 | T | C | Homozygous   |
| NC_037639.1 | 10178068 | SNV | 1 | T | C | Homozygous   |
| NC_037639.1 | 10178681 | SNV | 1 | G | A | Homozygous   |
| NC_037639.1 | 10178686 | SNV | 1 | C | G | Homozygous   |
| NC_037639.1 | 10178688 | SNV | 1 | G | T | Homozygous   |
| NC_037639.1 | 10178741 | SNV | 1 | C | A | Homozygous   |
| NC_037639.1 | 10181799 | SNV | 1 | A | T | Homozygous   |
| NC_037639.1 | 10181802 | SNV | 1 | T | A | Homozygous   |
| NC_037639.1 | 10181809 | SNV | 1 | T | G | Homozygous   |
| NC_037639.1 | 10186317 | SNV | 1 | A | T | Homozygous   |
| NC_037639.1 | 10186340 | SNV | 1 | T | C | Homozygous   |
| NC_037639.1 | 10186342 | SNV | 1 | T | A | Homozygous   |
| NC_037639.1 | 10186344 | SNV | 1 | A | T | Homozygous   |
| NC_037639.1 | 10186761 | SNV | 1 | A | G | Heterozygous |
| NC_037639.1 | 10186766 | SNV | 1 | T | A | Homozygous   |
| NC_037639.1 | 10186768 | SNV | 1 | A | G | Homozygous   |
| NC_037639.1 | 10186788 | SNV | 1 | G | C | Homozygous   |
| NC_037639.1 | 10196282 | SNV | 1 | T | C | Homozygous   |
| NC_037639.1 | 10199598 | SNV | 1 | T | A | Homozygous   |

|             |          |     |   |   |   |              |
|-------------|----------|-----|---|---|---|--------------|
| NC_037639.1 | 10199601 | SNV | 1 | G | A | Homozygous   |
| NC_037639.1 | 10200527 | SNV | 1 | C | T | Homozygous   |
| NC_037639.1 | 10203222 | SNV | 1 | C | G | Heterozygous |
| NC_037639.1 | 10203400 | SNV | 1 | A | G | Homozygous   |
| NC_037639.1 | 10205543 | SNV | 1 | G | A | Heterozygous |
| NC_037639.1 | 10207280 | SNV | 1 | T | A | Homozygous   |
| NC_037639.1 | 10207291 | SNV | 1 | A | T | Homozygous   |
| NC_037639.1 | 10211709 | SNV | 1 | G | C | Heterozygous |
| NC_037639.1 | 10215174 | SNV | 1 | A | T | Heterozygous |
| NC_037639.1 | 10215284 | SNV | 1 | T | C | Homozygous   |
| NC_037639.1 | 10216750 | SNV | 1 | G | A | Heterozygous |
| NC_037639.1 | 10216795 | SNV | 1 | G | A | Heterozygous |
| NC_037639.1 | 10217014 | SNV | 1 | C | A | Homozygous   |
| NC_037639.1 | 10217044 | SNV | 1 | C | A | Heterozygous |
| NC_037639.1 | 10217272 | SNV | 1 | T | G | Homozygous   |
| NC_037639.1 | 10218119 | SNV | 1 | C | T | Homozygous   |
| NC_037639.1 | 10218208 | SNV | 1 | T | C | Homozygous   |
| NC_037639.1 | 10218243 | SNV | 1 | A | G | Heterozygous |
| NC_037639.1 | 10218624 | SNV | 1 | A | G | Homozygous   |
| NC_037639.1 | 10218994 | SNV | 1 | T | A | Homozygous   |
| NC_037639.1 | 10219658 | SNV | 1 | G | A | Heterozygous |
| NC_037639.1 | 10219667 | SNV | 1 | C | T | Heterozygous |
| NC_037639.1 | 10219888 | SNV | 1 | G | A | Homozygous   |
| NC_037639.1 | 10219902 | SNV | 1 | A | C | Homozygous   |
| NC_037639.1 | 10220096 | SNV | 1 | G | A | Heterozygous |
| NC_037639.1 | 10220142 | SNV | 1 | T | C | Homozygous   |
| NC_037639.1 | 10222473 | SNV | 1 | T | A | Homozygous   |
| NC_037639.1 | 10223180 | SNV | 1 | C | T | Heterozygous |
| NC_037639.1 | 10223194 | SNV | 1 | T | C | Homozygous   |
| NC_037639.1 | 10223552 | SNV | 1 | A | G | Homozygous   |
| NC_037639.1 | 10224639 | SNV | 1 | A | C | Homozygous   |
| NC_037639.1 | 10225476 | SNV | 1 | G | A | Heterozygous |
| NC_037639.1 | 10228605 | SNV | 1 | T | C | Homozygous   |
| NC_037639.1 | 10229305 | SNV | 1 | T | C | Homozygous   |
| NC_037639.1 | 10229329 | SNV | 1 | G | A | Heterozygous |
| NC_037639.1 | 10229331 | SNV | 1 | C | T | Heterozygous |
| NC_037639.1 | 10229337 | SNV | 1 | G | A | Heterozygous |
| NC_037639.1 | 10229407 | SNV | 1 | C | T | Homozygous   |
| NC_037639.1 | 10229413 | SNV | 1 | T | C | Homozygous   |
| NC_037639.1 | 10229504 | SNV | 1 | C | T | Heterozygous |
| NC_037639.1 | 10230400 | SNV | 1 | T | C | Homozygous   |
| NC_037639.1 | 10231252 | SNV | 1 | A | G | Homozygous   |
| NC_037639.1 | 10231420 | SNV | 1 | A | G | Heterozygous |
| NC_037639.1 | 10231463 | SNV | 1 | A | G | Homozygous   |
| NC_037639.1 | 10231765 | SNV | 1 | A | G | Homozygous   |
| NC_037639.1 | 10231826 | SNV | 1 | A | G | Heterozygous |
| NC_037639.1 | 10231834 | SNV | 1 | C | T | Heterozygous |
| NC_037639.1 | 10232469 | SNV | 1 | T | C | Homozygous   |
| NC_037639.1 | 10232595 | SNV | 1 | T | C | Homozygous   |
| NC_037639.1 | 10232951 | SNV | 1 | G | A | Homozygous   |
| NC_037639.1 | 10233047 | SNV | 1 | G | A | Heterozygous |

|             |          |     |   |   |   |              |
|-------------|----------|-----|---|---|---|--------------|
| NC_037639.1 | 10233052 | SNV | 1 | C | T | Heterozygous |
| NC_037639.1 | 10233924 | SNV | 1 | T | C | Homozygous   |
| NC_037639.1 | 10233927 | SNV | 1 | A | G | Homozygous   |
| NC_037639.1 | 10233955 | SNV | 1 | T | C | Homozygous   |
| NC_037639.1 | 10233987 | SNV | 1 | G | A | Homozygous   |
| NC_037639.1 | 10234010 | SNV | 1 | T | A | Homozygous   |
| NC_037639.1 | 10243192 | SNV | 1 | G | C | Heterozygous |
| NC_037639.1 | 10248098 | SNV | 1 | T | C | Homozygous   |
| NC_037639.1 | 10255573 | SNV | 1 | C | G | Homozygous   |
| NC_037639.1 | 10255601 | SNV | 1 | C | T | Heterozygous |
| NC_037639.1 | 10260238 | SNV | 1 | A | G | Homozygous   |
| NC_037639.1 | 10260246 | SNV | 1 | C | G | Homozygous   |
| NC_037639.1 | 10260275 | SNV | 1 | A | C | Heterozygous |
| NC_037639.1 | 10265307 | SNV | 1 | A | G | Homozygous   |
| NC_037639.1 | 10265313 | SNV | 1 | G | A | Homozygous   |
| NC_037639.1 | 10265320 | SNV | 1 | C | G | Homozygous   |
| NC_037639.1 | 10274007 | SNV | 1 | T | C | Homozygous   |
| NC_037639.1 | 10281650 | SNV | 1 | A | T | Homozygous   |
| NC_037639.1 | 10281662 | SNV | 1 | G | A | Homozygous   |
| NC_037639.1 | 10281684 | SNV | 1 | T | A | Homozygous   |
| NC_037639.1 | 10285551 | SNV | 1 | T | C | Homozygous   |
| NC_037639.1 | 10286241 | SNV | 1 | C | T | Heterozygous |
| NC_037639.1 | 10286265 | SNV | 1 | C | T | Heterozygous |
| NC_037639.1 | 10286418 | SNV | 1 | C | G | Heterozygous |
| NC_037639.1 | 10286607 | SNV | 1 | A | G | Heterozygous |
| NC_037639.1 | 10286610 | SNV | 1 | T | C | Heterozygous |
| NC_037639.1 | 10286679 | SNV | 1 | A | G | Homozygous   |
| NC_037639.1 | 10287411 | SNV | 1 | A | G | Homozygous   |
| NC_037639.1 | 10287470 | SNV | 1 | T | A | Homozygous   |
| NC_037639.1 | 10287565 | SNV | 1 | C | T | Heterozygous |
| NC_037639.1 | 10287646 | SNV | 1 | A | G | Heterozygous |
| NC_037639.1 | 10287652 | SNV | 1 | G | A | Heterozygous |
| NC_037639.1 | 10287654 | SNV | 1 | G | A | Heterozygous |
| NC_037639.1 | 10287667 | SNV | 1 | A | G | Heterozygous |
| NC_037639.1 | 10287724 | SNV | 1 | G | A | Heterozygous |
| NC_037639.1 | 10287904 | SNV | 1 | G | A | Homozygous   |
| NC_037639.1 | 10287906 | SNV | 1 | A | T | Heterozygous |
| NC_037639.1 | 10288372 | SNV | 1 | G | A | Homozygous   |
| NC_037639.1 | 10288640 | SNV | 1 | A | G | Homozygous   |
| NC_037639.1 | 10288913 | SNV | 1 | A | G | Homozygous   |
| NC_037639.1 | 10289148 | SNV | 1 | A | T | Homozygous   |
| NC_037639.1 | 10289385 | SNV | 1 | C | T | Heterozygous |
| NC_037639.1 | 10289393 | SNV | 1 | T | C | Heterozygous |
| NC_037639.1 | 10289642 | SNV | 1 | A | G | Homozygous   |
| NC_037639.1 | 10289647 | SNV | 1 | A | G | Heterozygous |
| NC_037639.1 | 10289662 | SNV | 1 | A | C | Heterozygous |
| NC_037639.1 | 10289832 | SNV | 1 | C | T | Heterozygous |
| NC_037639.1 | 10289959 | SNV | 1 | A | G | Homozygous   |
| NC_037639.1 | 10290529 | SNV | 1 | A | G | Homozygous   |
| NC_037639.1 | 10290535 | SNV | 1 | A | G | Homozygous   |
| NC_037639.1 | 10290661 | SNV | 1 | A | G | Homozygous   |

|             |          |     |   |   |   |              |
|-------------|----------|-----|---|---|---|--------------|
| NC_037639.1 | 10290749 | SNV | 1 | T | G | Homozygous   |
| NC_037639.1 | 10290755 | SNV | 1 | G | A | Homozygous   |
| NC_037639.1 | 10290778 | SNV | 1 | A | T | Homozygous   |
| NC_037639.1 | 10290891 | SNV | 1 | A | G | Heterozygous |
| NC_037639.1 | 10291334 | SNV | 1 | A | G | Homozygous   |
| NC_037639.1 | 10292401 | SNV | 1 | T | C | Homozygous   |
| NC_037639.1 | 10292429 | SNV | 1 | T | C | Homozygous   |
| NC_037639.1 | 10292466 | SNV | 1 | A | T | Homozygous   |
| NC_037639.1 | 10292951 | SNV | 1 | C | G | Heterozygous |
| NC_037639.1 | 10292958 | SNV | 1 | C | T | Heterozygous |
| NC_037639.1 | 10293054 | SNV | 1 | C | A | Heterozygous |
| NC_037639.1 | 10293087 | SNV | 1 | G | C | Heterozygous |
| NC_037639.1 | 10293661 | SNV | 1 | T | C | Homozygous   |
| NC_037639.1 | 10293701 | SNV | 1 | G | C | Heterozygous |
| NC_037639.1 | 10295746 | SNV | 1 | C | T | Homozygous   |
| NC_037639.1 | 10295873 | SNV | 1 | C | G | Homozygous   |
| NC_037639.1 | 10295875 | SNV | 1 | T | C | Homozygous   |
| NC_037639.1 | 10295888 | SNV | 1 | T | C | Homozygous   |
| NC_037639.1 | 10295912 | SNV | 1 | A | C | Homozygous   |
| NC_037639.1 | 10295957 | SNV | 1 | G | C | Homozygous   |
| NC_037639.1 | 10295989 | SNV | 1 | T | C | Homozygous   |
| NC_037639.1 | 10296039 | SNV | 1 | G | A | Heterozygous |
| NC_037639.1 | 10296041 | SNV | 1 | G | A | Heterozygous |
| NC_037639.1 | 10296046 | SNV | 1 | A | G | Homozygous   |
| NC_037639.1 | 10296056 | SNV | 1 | G | A | Homozygous   |
| NC_037639.1 | 10296070 | SNV | 1 | T | C | Homozygous   |
| NC_037639.1 | 10296132 | SNV | 1 | G | A | Homozygous   |
| NC_037639.1 | 10296144 | SNV | 1 | T | C | Homozygous   |
| NC_037639.1 | 10296246 | SNV | 1 | T | C | Homozygous   |
| NC_037639.1 | 10296250 | SNV | 1 | T | C | Homozygous   |
| NC_037639.1 | 10296264 | SNV | 1 | G | A | Homozygous   |
| NC_037639.1 | 10296311 | SNV | 1 | C | T | Heterozygous |
| NC_037639.1 | 10296362 | SNV | 1 | A | G | Homozygous   |
| NC_037639.1 | 10296402 | SNV | 1 | T | C | Homozygous   |
| NC_037639.1 | 10296423 | SNV | 1 | C | T | Heterozygous |
| NC_037639.1 | 10296604 | SNV | 1 | G | A | Heterozygous |
| NC_037639.1 | 10296643 | SNV | 1 | G | A | Heterozygous |
| NC_037639.1 | 10296644 | SNV | 1 | T | C | Heterozygous |
| NC_037639.1 | 10296664 | SNV | 1 | C | G | Homozygous   |
| NC_037639.1 | 10296679 | SNV | 1 | T | C | Homozygous   |
| NC_037639.1 | 10296715 | SNV | 1 | T | C | Homozygous   |
| NC_037639.1 | 10296733 | SNV | 1 | T | C | Homozygous   |
| NC_037639.1 | 10297079 | SNV | 1 | A | G | Homozygous   |
| NC_037639.1 | 10300730 | SNV | 1 | C | T | Heterozygous |
| NC_037639.1 | 10300751 | SNV | 1 | T | C | Homozygous   |
| NC_037639.1 | 10300774 | SNV | 1 | A | G | Homozygous   |
| NC_037639.1 | 10300901 | SNV | 1 | C | T | Heterozygous |
| NC_037639.1 | 10300931 | SNV | 1 | T | C | Homozygous   |
| NC_037639.1 | 10300940 | SNV | 1 | A | G | Homozygous   |
| NC_037639.1 | 10301249 | SNV | 1 | A | G | Homozygous   |
| NC_037639.1 | 10301273 | SNV | 1 | T | C | Homozygous   |

|             |          |     |   |   |   |              |
|-------------|----------|-----|---|---|---|--------------|
| NC_037639.1 | 10301405 | SNV | 1 | A | G | Homozygous   |
| NC_037639.1 | 10301417 | SNV | 1 | T | C | Homozygous   |
| NC_037639.1 | 10301480 | SNV | 1 | T | C | Heterozygous |
| NC_037639.1 | 10301813 | SNV | 1 | A | G | Homozygous   |
| NC_037639.1 | 10309138 | SNV | 1 | A | G | Heterozygous |
| NC_037639.1 | 10309316 | SNV | 1 | T | C | Heterozygous |
| NC_037639.1 | 10310188 | SNV | 1 | C | A | Heterozygous |
| NC_037639.1 | 10310470 | SNV | 1 | T | C | Homozygous   |
| NC_037639.1 | 10310530 | SNV | 1 | C | A | Heterozygous |
| NC_037639.1 | 10312444 | SNV | 1 | G | C | Heterozygous |
| NC_037639.1 | 10315911 | SNV | 1 | A | G | Homozygous   |
| NC_037639.1 | 10316000 | SNV | 1 | G | A | Homozygous   |
| NC_037639.1 | 10316070 | SNV | 1 | G | T | Heterozygous |
| NC_037639.1 | 10317291 | SNV | 1 | T | C | Heterozygous |
| NC_037639.1 | 10317307 | SNV | 1 | T | C | Heterozygous |
| NC_037639.1 | 10317311 | SNV | 1 | T | C | Heterozygous |
| NC_037639.1 | 10318078 | SNV | 1 | C | G | Homozygous   |
| NC_037639.1 | 10318131 | SNV | 1 | C | T | Homozygous   |
| NC_037639.1 | 10318349 | SNV | 1 | A | G | Homozygous   |
| NC_037639.1 | 10318688 | SNV | 1 | C | A | Homozygous   |
| NC_037639.1 | 10319358 | SNV | 1 | A | G | Heterozygous |
| NC_037639.1 | 10321274 | SNV | 1 | C | T | Heterozygous |
| NC_037639.1 | 10324044 | SNV | 1 | A | G | Homozygous   |
| NC_037639.1 | 10324145 | SNV | 1 | A | G | Homozygous   |
| NC_037639.1 | 10324147 | SNV | 1 | C | T | Homozygous   |
| NC_037639.1 | 10324459 | SNV | 1 | G | A | Heterozygous |
| NC_037639.1 | 10324479 | SNV | 1 | G | A | Homozygous   |
| NC_037639.1 | 10324490 | SNV | 1 | A | G | Homozygous   |
| NC_037639.1 | 10324523 | SNV | 1 | C | T | Heterozygous |
| NC_037639.1 | 10324579 | SNV | 1 | G | A | Heterozygous |
| NC_037639.1 | 10334529 | SNV | 1 | C | G | Homozygous   |
| NC_037639.1 | 10334546 | SNV | 1 | T | C | Homozygous   |
| NC_037639.1 | 10334568 | SNV | 1 | G | A | Homozygous   |
| NC_037639.1 | 10334625 | SNV | 1 | C | T | Homozygous   |
| NC_037639.1 | 10334631 | SNV | 1 | A | G | Homozygous   |
| NC_037639.1 | 10335160 | SNV | 1 | G | A | Homozygous   |
| NC_037639.1 | 10335197 | SNV | 1 | G | A | Homozygous   |
| NC_037639.1 | 10346252 | SNV | 1 | G | A | Homozygous   |
| NC_037639.1 | 10346256 | SNV | 1 | G | C | Homozygous   |
| NC_037639.1 | 10346262 | SNV | 1 | G | T | Homozygous   |
| NC_037639.1 | 10357120 | SNV | 1 | C | T | Homozygous   |
| NC_037639.1 | 10357136 | SNV | 1 | T | C | Heterozygous |
| NC_037639.1 | 10375471 | SNV | 1 | T | C | Homozygous   |
| NC_037639.1 | 10380294 | SNV | 1 | T | C | Homozygous   |
| NC_037639.1 | 10380831 | SNV | 1 | C | T | Heterozygous |
| NC_037639.1 | 10380936 | SNV | 1 | C | A | Homozygous   |
| NC_037639.1 | 10381124 | SNV | 1 | A | T | Heterozygous |
| NC_037639.1 | 10381441 | SNV | 1 | C | T | Homozygous   |
| NC_037639.1 | 10381498 | SNV | 1 | G | A | Homozygous   |
| NC_037639.1 | 10381525 | SNV | 1 | G | A | Homozygous   |
| NC_037639.1 | 10413260 | SNV | 1 | T | C | Homozygous   |

|             |          |     |   |   |   |              |
|-------------|----------|-----|---|---|---|--------------|
| NC_037639.1 | 10413267 | SNV | 1 | A | T | Homozygous   |
| NC_037639.1 | 10413277 | SNV | 1 | T | G | Homozygous   |
| NC_037639.1 | 10413292 | SNV | 1 | T | A | Heterozygous |
| NC_037639.1 | 10413913 | SNV | 1 | T | G | Homozygous   |
| NC_037639.1 | 10414211 | SNV | 1 | A | T | Homozygous   |
| NC_037639.1 | 10414213 | SNV | 1 | A | T | Homozygous   |
| NC_037639.1 | 10415950 | SNV | 1 | T | C | Heterozygous |
| NC_037639.1 | 10419185 | SNV | 1 | A | G | Homozygous   |
| NC_037639.1 | 10419529 | SNV | 1 | G | A | Homozygous   |
| NC_037639.1 | 10421553 | SNV | 1 | T | C | Heterozygous |
| NC_037639.1 | 10421603 | SNV | 1 | T | C | Homozygous   |
| NC_037639.1 | 10421609 | SNV | 1 | T | C | Heterozygous |
| NC_037639.1 | 10421619 | SNV | 1 | T | C | Heterozygous |
| NC_037639.1 | 10421633 | SNV | 1 | T | C | Heterozygous |
| NC_037639.1 | 10421640 | SNV | 1 | T | C | Heterozygous |
| NC_037639.1 | 10426513 | SNV | 1 | A | G | Heterozygous |
| NC_037639.1 | 10427179 | SNV | 1 | T | C | Homozygous   |
| NC_037639.1 | 10427448 | SNV | 1 | A | G | Homozygous   |
| NC_037639.1 | 10428527 | SNV | 1 | T | A | Heterozygous |
| NC_037639.1 | 10428529 | SNV | 1 | T | A | Heterozygous |
| NC_037639.1 | 10428539 | SNV | 1 | T | G | Heterozygous |
| NC_037639.1 | 10428569 | SNV | 1 | G | A | Heterozygous |
| NC_037639.1 | 10428571 | SNV | 1 | C | A | Homozygous   |
| NC_037639.1 | 10428575 | SNV | 1 | G | A | Homozygous   |
| NC_037639.1 | 10435681 | SNV | 1 | A | G | Heterozygous |
| NC_037639.1 | 10435694 | SNV | 1 | G | A | Heterozygous |
| NC_037639.1 | 10437445 | SNV | 1 | G | A | Homozygous   |
| NC_037639.1 | 10439661 | SNV | 1 | A | G | Homozygous   |
| NC_037639.1 | 10439665 | SNV | 1 | A | G | Homozygous   |
| NC_037639.1 | 10439827 | SNV | 1 | A | G | Homozygous   |
| NC_037639.1 | 10443239 | SNV | 1 | A | G | Heterozygous |
| NC_037639.1 | 10443362 | SNV | 1 | G | A | Heterozygous |
| NC_037639.1 | 10443834 | SNV | 1 | T | C | Heterozygous |
| NC_037639.1 | 10444955 | SNV | 1 | T | C | Heterozygous |
| NC_037639.1 | 10445187 | SNV | 1 | T | A | Homozygous   |
| NC_037639.1 | 10445376 | SNV | 1 | C | T | Heterozygous |
| NC_037639.1 | 10445839 | SNV | 1 | C | T | Homozygous   |
| NC_037639.1 | 10445850 | SNV | 1 | T | C | Homozygous   |
| NC_037639.1 | 10445852 | SNV | 1 | G | T | Homozygous   |
| NC_037639.1 | 10446487 | SNV | 1 | A | G | Heterozygous |
| NC_037639.1 | 10446507 | SNV | 1 | G | A | Homozygous   |
| NC_037639.1 | 10446639 | SNV | 1 | G | A | Heterozygous |
| NC_037639.1 | 10446651 | SNV | 1 | G | A | Heterozygous |
| NC_037639.1 | 10446694 | SNV | 1 | G | A | Heterozygous |
| NC_037639.1 | 10446758 | SNV | 1 | A | G | Homozygous   |
| NC_037639.1 | 10452403 | SNV | 1 | T | C | Heterozygous |
| NC_037639.1 | 10452436 | SNV | 1 | T | C | Heterozygous |
| NC_037639.1 | 10452475 | SNV | 1 | T | C | Homozygous   |
| NC_037639.1 | 10452789 | SNV | 1 | T | A | Homozygous   |
| NC_037639.1 | 10452801 | SNV | 1 | T | C | Heterozygous |
| NC_037639.1 | 10452804 | SNV | 1 | C | T | Heterozygous |

|             |          |     |   |   |   |              |
|-------------|----------|-----|---|---|---|--------------|
| NC_037639.1 | 10452977 | SNV | 1 | G | A | Heterozygous |
| NC_037639.1 | 10452980 | SNV | 1 | A | G | Heterozygous |
| NC_037639.1 | 10452983 | SNV | 1 | G | A | Heterozygous |
| NC_037639.1 | 10453055 | SNV | 1 | G | A | Heterozygous |
| NC_037639.1 | 10456308 | SNV | 1 | G | A | Heterozygous |
| NC_037639.1 | 10477900 | SNV | 1 | T | C | Homozygous   |
| NC_037639.1 | 10483901 | SNV | 1 | T | A | Homozygous   |
| NC_037639.1 | 10483913 | SNV | 1 | T | A | Homozygous   |
| NC_037639.1 | 10487855 | SNV | 1 | T | C | Homozygous   |
| NC_037639.1 | 10489980 | SNV | 1 | A | G | Homozygous   |
| NC_037639.1 | 10492619 | SNV | 1 | G | C | Homozygous   |
| NC_037639.1 | 10493584 | SNV | 1 | A | C | Homozygous   |
| NC_037639.1 | 10493827 | SNV | 1 | G | A | Homozygous   |
| NC_037639.1 | 10494484 | SNV | 1 | A | G | Heterozygous |
| NC_037639.1 | 10494637 | SNV | 1 | G | A | Homozygous   |
| NC_037639.1 | 10494809 | SNV | 1 | A | G | Homozygous   |
| NC_037639.1 | 10494911 | SNV | 1 | C | T | Heterozygous |
| NC_037639.1 | 10495127 | SNV | 1 | C | T | Heterozygous |
| NC_037639.1 | 10495308 | SNV | 1 | T | C | Heterozygous |
| NC_037639.1 | 10495318 | SNV | 1 | A | G | Heterozygous |
| NC_037639.1 | 10495418 | SNV | 1 | G | A | Heterozygous |
| NC_037639.1 | 10495470 | SNV | 1 | T | C | Homozygous   |
| NC_037639.1 | 10495530 | SNV | 1 | T | C | Homozygous   |
| NC_037639.1 | 10495632 | SNV | 1 | G | A | Heterozygous |
| NC_037639.1 | 10496110 | SNV | 1 | A | G | Homozygous   |
| NC_037639.1 | 10496196 | SNV | 1 | A | G | Homozygous   |
| NC_037639.1 | 10496208 | SNV | 1 | A | G | Homozygous   |
| NC_037639.1 | 10496292 | SNV | 1 | G | A | Homozygous   |
| NC_037639.1 | 10496309 | SNV | 1 | T | C | Homozygous   |
| NC_037639.1 | 10496421 | SNV | 1 | T | C | Homozygous   |
| NC_037639.1 | 10496444 | SNV | 1 | T | C | Homozygous   |
| NC_037639.1 | 10496493 | SNV | 1 | G | T | Heterozygous |
| NC_037639.1 | 10496508 | SNV | 1 | G | C | Homozygous   |
| NC_037639.1 | 10496538 | SNV | 1 | A | G | Homozygous   |
| NC_037639.1 | 10496623 | SNV | 1 | G | A | Homozygous   |
| NC_037639.1 | 10496628 | SNV | 1 | T | A | Homozygous   |
| NC_037639.1 | 10496632 | SNV | 1 | A | T | Homozygous   |
| NC_037639.1 | 10496681 | SNV | 1 | C | T | Heterozygous |
| NC_037639.1 | 10496724 | SNV | 1 | C | T | Heterozygous |
| NC_037639.1 | 10496731 | SNV | 1 | A | G | Heterozygous |
| NC_037639.1 | 10497116 | SNV | 1 | T | C | Homozygous   |
| NC_037639.1 | 10497170 | SNV | 1 | T | C | Homozygous   |
| NC_037639.1 | 10497209 | SNV | 1 | G | C | Homozygous   |
| NC_037639.1 | 10497321 | SNV | 1 | A | G | Heterozygous |
| NC_037639.1 | 10497324 | SNV | 1 | C | T | Heterozygous |
| NC_037639.1 | 10497570 | SNV | 1 | T | C | Homozygous   |
| NC_037639.1 | 10497584 | SNV | 1 | G | A | Heterozygous |
| NC_037639.1 | 10497620 | SNV | 1 | T | C | Homozygous   |
| NC_037639.1 | 10497630 | SNV | 1 | C | G | Homozygous   |
| NC_037639.1 | 10497632 | SNV | 1 | C | T | Homozygous   |
| NC_037639.1 | 10497634 | SNV | 1 | C | T | Homozygous   |

|             |          |     |   |   |   |              |
|-------------|----------|-----|---|---|---|--------------|
| NC_037639.1 | 10498130 | SNV | 1 | T | C | Homozygous   |
| NC_037639.1 | 10498318 | SNV | 1 | A | G | Homozygous   |
| NC_037639.1 | 10498326 | SNV | 1 | C | T | Homozygous   |
| NC_037639.1 | 10498392 | SNV | 1 | A | G | Homozygous   |
| NC_037639.1 | 10498517 | SNV | 1 | G | C | Heterozygous |
| NC_037639.1 | 10498862 | SNV | 1 | A | G | Homozygous   |
| NC_037639.1 | 10498876 | SNV | 1 | T | C | Homozygous   |
| NC_037639.1 | 10499140 | SNV | 1 | G | A | Homozygous   |
| NC_037639.1 | 10499276 | SNV | 1 | C | A | Homozygous   |
| NC_037639.1 | 10499515 | SNV | 1 | T | A | Heterozygous |
| NC_037639.1 | 10499515 | SNV | 1 | T | G | Heterozygous |
| NC_037639.1 | 10499887 | SNV | 1 | C | G | Homozygous   |
| NC_037639.1 | 10501634 | SNV | 1 | G | A | Heterozygous |
| NC_037639.1 | 10501755 | SNV | 1 | A | C | Homozygous   |
| NC_037639.1 | 10502151 | SNV | 1 | C | T | Heterozygous |
| NC_037639.1 | 10502264 | SNV | 1 | C | A | Homozygous   |
| NC_037639.1 | 10502370 | SNV | 1 | T | C | Homozygous   |
| NC_037639.1 | 10502469 | SNV | 1 | C | T | Heterozygous |
| NC_037639.1 | 10503679 | SNV | 1 | T | A | Homozygous   |
| NC_037639.1 | 10503693 | SNV | 1 | A | T | Homozygous   |
| NC_037639.1 | 10509570 | SNV | 1 | C | T | Homozygous   |
| NC_037639.1 | 10509572 | SNV | 1 | A | T | Homozygous   |
| NC_037639.1 | 10514346 | SNV | 1 | T | C | Heterozygous |
| NC_037639.1 | 10514358 | SNV | 1 | A | T | Heterozygous |
| NC_037639.1 | 10519112 | SNV | 1 | C | G | Homozygous   |
| NC_037639.1 | 10522434 | SNV | 1 | A | G | Homozygous   |
| NC_037639.1 | 10522912 | SNV | 1 | T | C | Homozygous   |
| NC_037639.1 | 10527948 | SNV | 1 | T | C | Heterozygous |
| NC_037639.1 | 10737884 | SNV | 1 | A | G | Heterozygous |
| NC_037639.1 | 10738795 | SNV | 1 | A | T | Heterozygous |
| NC_037639.1 | 10754185 | SNV | 1 | T | A | Homozygous   |
| NC_037639.1 | 10759970 | SNV | 1 | C | G | Homozygous   |
| NC_037639.1 | 10759993 | SNV | 1 | C | T | Homozygous   |
| NC_037639.1 | 10764083 | SNV | 1 | C | G | Homozygous   |
| NC_037639.1 | 10764121 | SNV | 1 | T | C | Homozygous   |
| NC_037639.1 | 10764154 | SNV | 1 | C | T | Homozygous   |
| NC_037639.1 | 10764209 | SNV | 1 | C | T | Homozygous   |
| NC_037639.1 | 10764275 | SNV | 1 | C | A | Homozygous   |
| NC_037639.1 | 10790778 | SNV | 1 | T | C | Homozygous   |
| NC_037639.1 | 10795730 | SNV | 1 | C | T | Homozygous   |
| NC_037639.1 | 10795768 | SNV | 1 | T | C | Homozygous   |
| NC_037639.1 | 10796967 | SNV | 1 | T | A | Homozygous   |
| NC_037639.1 | 10797348 | SNV | 1 | A | G | Homozygous   |
| NC_037639.1 | 10808535 | SNV | 1 | G | A | Heterozygous |
| NC_037639.1 | 10808546 | SNV | 1 | C | T | Heterozygous |
| NC_037639.1 | 10808567 | SNV | 1 | G | A | Homozygous   |
| NC_037639.1 | 10808579 | SNV | 1 | G | A | Heterozygous |
| NC_037639.1 | 10808582 | SNV | 1 | C | T | Heterozygous |
| NC_037639.1 | 10808583 | SNV | 1 | G | A | Heterozygous |
| NC_037639.1 | 10854313 | SNV | 1 | G | A | Homozygous   |
| NC_037639.1 | 10854957 | SNV | 1 | A | G | Homozygous   |



|             |          |     |   |   |   |              |
|-------------|----------|-----|---|---|---|--------------|
| NC_037639.1 | 10855276 | SNV | 1 | A | G | Homozygous   |
| NC_037639.1 | 10855617 | SNV | 1 | C | T | Heterozygous |
| NC_037639.1 | 10855685 | SNV | 1 | C | T | Heterozygous |
| NC_037639.1 | 10855723 | SNV | 1 | T | C | Homozygous   |
| NC_037639.1 | 10856254 | SNV | 1 | G | A | Homozygous   |
| NC_037639.1 | 10856561 | SNV | 1 | A | C | Heterozygous |
| NC_037639.1 | 10859330 | SNV | 1 | A | G | Homozygous   |
| NC_037639.1 | 10861722 | SNV | 1 | C | T | Homozygous   |
| NC_037639.1 | 10883397 | SNV | 1 | C | T | Heterozygous |
| NC_037639.1 | 10883540 | SNV | 1 | C | T | Homozygous   |
| NC_037639.1 | 10884575 | SNV | 1 | T | C | Homozygous   |
| NC_037639.1 | 10884603 | SNV | 1 | T | C | Heterozygous |
| NC_037639.1 | 10884620 | SNV | 1 | C | T | Heterozygous |
| NC_037639.1 | 10885713 | SNV | 1 | A | T | Homozygous   |
| NC_037639.1 | 10886246 | SNV | 1 | T | G | Homozygous   |
| NC_037639.1 | 10886252 | SNV | 1 | G | T | Homozygous   |
| NC_037639.1 | 10886261 | SNV | 1 | G | T | Homozygous   |
| NC_037639.1 | 10886270 | SNV | 1 | G | T | Homozygous   |
| NC_037639.1 | 10886288 | SNV | 1 | A | G | Homozygous   |
| NC_037639.1 | 10886290 | SNV | 1 | C | G | Homozygous   |
| NC_037639.1 | 10887453 | SNV | 1 | T | C | Homozygous   |
| NC_037639.1 | 10887831 | SNV | 1 | T | C | Heterozygous |
| NC_037639.1 | 10887833 | SNV | 1 | G | A | Homozygous   |
| NC_037639.1 | 10887883 | SNV | 1 | T | C | Heterozygous |
| NC_037639.1 | 10887889 | SNV | 1 | T | C | Heterozygous |
| NC_037639.1 | 10888506 | SNV | 1 | T | C | Homozygous   |
| NC_037639.1 | 10888646 | SNV | 1 | A | G | Homozygous   |
| NC_037639.1 | 10889360 | SNV | 1 | T | C | Heterozygous |
| NC_037639.1 | 10889366 | SNV | 1 | T | C | Homozygous   |
| NC_037639.1 | 10889416 | SNV | 1 | T | C | Homozygous   |
| NC_037639.1 | 10921980 | SNV | 1 | T | C | Homozygous   |
| NC_037639.1 | 10924657 | SNV | 1 | T | C | Heterozygous |
| NC_037639.1 | 10924750 | SNV | 1 | G | A | Homozygous   |
| NC_037639.1 | 10924811 | SNV | 1 | A | G | Homozygous   |
| NC_037639.1 | 10931493 | SNV | 1 | A | G | Homozygous   |
| NC_037639.1 | 10934265 | SNV | 1 | A | T | Homozygous   |
| NC_037639.1 | 10948618 | SNV | 1 | G | C | Homozygous   |
| NC_037639.1 | 10948625 | SNV | 1 | T | G | Homozygous   |
| NC_037639.1 | 10959680 | SNV | 1 | G | A | Homozygous   |
| NC_037639.1 | 10959703 | SNV | 1 | G | A | Homozygous   |
| NC_037639.1 | 10959710 | SNV | 1 | A | G | Homozygous   |
| NC_037639.1 | 10959712 | SNV | 1 | A | G | Homozygous   |
| NC_037639.1 | 10982736 | SNV | 1 | T | A | Homozygous   |
| NC_037639.1 | 10982774 | SNV | 1 | A | G | Homozygous   |
| NC_037639.1 | 10982776 | SNV | 1 | G | A | Homozygous   |
| NC_037639.1 | 10982786 | SNV | 1 | G | A | Heterozygous |
| NC_037639.1 | 10982788 | SNV | 1 | G | A | Homozygous   |
| NC_037639.1 | 10983468 | SNV | 1 | T | G | Homozygous   |
| NC_037639.1 | 10983474 | SNV | 1 | A | G | Homozygous   |
| NC_037639.1 | 10983478 | SNV | 1 | G | A | Homozygous   |
| NC_037639.1 | 10983495 | SNV | 1 | A | C | Homozygous   |

|             |          |     |   |   |   |              |
|-------------|----------|-----|---|---|---|--------------|
| NC_037639.1 | 10983509 | SNV | 1 | G | A | Homozygous   |
| NC_037639.1 | 10984151 | SNV | 1 | T | C | Homozygous   |
| NC_037639.1 | 10985577 | SNV | 1 | G | A | Heterozygous |
| NC_037639.1 | 10985731 | SNV | 1 | C | T | Heterozygous |
| NC_037639.1 | 11018453 | SNV | 1 | G | A | Homozygous   |
| NC_037639.1 | 11018456 | SNV | 1 | G | A | Homozygous   |
| NC_037639.1 | 11018960 | SNV | 1 | A | G | Heterozygous |
| NC_037639.1 | 11018992 | SNV | 1 | G | T | Heterozygous |
| NC_037639.1 | 11019197 | SNV | 1 | C | G | Homozygous   |
| NC_037639.1 | 11036037 | SNV | 1 | T | C | Homozygous   |
| NC_037639.1 | 11050332 | SNV | 1 | A | G | Homozygous   |
| NC_037639.1 | 11050481 | SNV | 1 | G | A | Homozygous   |
| NC_037639.1 | 11050510 | SNV | 1 | C | T | Homozygous   |
| NC_037639.1 | 11050745 | SNV | 1 | C | T | Heterozygous |
| NC_037639.1 | 11050953 | SNV | 1 | T | C | Homozygous   |
| NC_037639.1 | 11050956 | SNV | 1 | G | A | Homozygous   |
| NC_037639.1 | 11050995 | SNV | 1 | G | C | Homozygous   |
| NC_037639.1 | 11051046 | SNV | 1 | G | A | Heterozygous |
| NC_037639.1 | 11051368 | SNV | 1 | C | T | Heterozygous |
| NC_037639.1 | 11053135 | SNV | 1 | T | A | Homozygous   |
| NC_037639.1 | 11053189 | SNV | 1 | A | G | Homozygous   |
| NC_037639.1 | 11053614 | SNV | 1 | T | C | Heterozygous |
| NC_037639.1 | 11054176 | SNV | 1 | A | G | Homozygous   |
| NC_037639.1 | 11054250 | SNV | 1 | T | G | Homozygous   |
| NC_037639.1 | 11054558 | SNV | 1 | A | C | Heterozygous |
| NC_037639.1 | 11054764 | SNV | 1 | G | A | Heterozygous |
| NC_037639.1 | 11054891 | SNV | 1 | G | C | Homozygous   |
| NC_037639.1 | 11055295 | SNV | 1 | T | A | Homozygous   |
| NC_037639.1 | 11055399 | SNV | 1 | C | T | Homozygous   |
| NC_037639.1 | 11055543 | SNV | 1 | A | G | Heterozygous |
| NC_037639.1 | 11055727 | SNV | 1 | G | A | Heterozygous |
| NC_037639.1 | 11056342 | SNV | 1 | A | G | Heterozygous |
| NC_037639.1 | 11057120 | SNV | 1 | T | C | Heterozygous |
| NC_037639.1 | 11077983 | SNV | 1 | A | G | Homozygous   |
| NC_037639.1 | 11084474 | SNV | 1 | G | C | Heterozygous |
| NC_037639.1 | 11087652 | SNV | 1 | A | G | Heterozygous |
| NC_037639.1 | 11087678 | SNV | 1 | A | G | Heterozygous |
| NC_037639.1 | 11087730 | SNV | 1 | A | G | Heterozygous |
| NC_037639.1 | 11087767 | SNV | 1 | G | A | Heterozygous |
| NC_037639.1 | 11090613 | SNV | 1 | A | G | Heterozygous |
| NC_037639.1 | 11090698 | SNV | 1 | T | C | Homozygous   |
| NC_037639.1 | 11097403 | SNV | 1 | T | C | Homozygous   |
| NC_037639.1 | 11097414 | SNV | 1 | A | G | Homozygous   |
| NC_037639.1 | 11097459 | SNV | 1 | A | C | Homozygous   |
| NC_037639.1 | 11097461 | SNV | 1 | G | A | Homozygous   |
| NC_037639.1 | 11103252 | SNV | 1 | G | A | Homozygous   |
| NC_037639.1 | 11103257 | SNV | 1 | A | G | Homozygous   |
| NC_037639.1 | 11122574 | SNV | 1 | A | G | Heterozygous |
| NC_037639.1 | 11122937 | SNV | 1 | T | C | Heterozygous |
| NC_037639.1 | 11123196 | SNV | 1 | T | C | Heterozygous |
| NC_037639.1 | 11123282 | SNV | 1 | A | G | Homozygous   |

|             |          |     |   |   |   |              |
|-------------|----------|-----|---|---|---|--------------|
| NC_037639.1 | 11123648 | SNV | 1 | A | C | Homozygous   |
| NC_037639.1 | 11123650 | SNV | 1 | T | C | Heterozygous |
| NC_037639.1 | 11123655 | SNV | 1 | G | C | Homozygous   |
| NC_037639.1 | 11123662 | SNV | 1 | T | C | Heterozygous |
| NC_037639.1 | 11123674 | SNV | 1 | A | T | Heterozygous |
| NC_037639.1 | 11175393 | SNV | 1 | G | A | Heterozygous |
| NC_037639.1 | 11175398 | SNV | 1 | C | T | Heterozygous |
| NC_037639.1 | 11175793 | SNV | 1 | G | A | Homozygous   |
| NC_037639.1 | 11175886 | SNV | 1 | A | T | Heterozygous |
| NC_037639.1 | 11175918 | SNV | 1 | T | C | Heterozygous |
| NC_037639.1 | 11175989 | SNV | 1 | T | C | Heterozygous |
| NC_037639.1 | 11188869 | SNV | 1 | A | G | Homozygous   |
| NC_037639.1 | 11188924 | SNV | 1 | G | A | Homozygous   |
| NC_037639.1 | 11188986 | SNV | 1 | C | T | Heterozygous |
| NC_037639.1 | 11188999 | SNV | 1 | T | C | Homozygous   |
| NC_037639.1 | 11189048 | SNV | 1 | A | G | Homozygous   |
| NC_037639.1 | 11189070 | SNV | 1 | C | T | Homozygous   |
| NC_037639.1 | 11189080 | SNV | 1 | T | C | Homozygous   |
| NC_037639.1 | 11189120 | SNV | 1 | C | T | Heterozygous |
| NC_037639.1 | 11189737 | SNV | 1 | A | G | Homozygous   |
| NC_037639.1 | 11189741 | SNV | 1 | T | C | Homozygous   |
| NC_037639.1 | 11190027 | SNV | 1 | T | C | Homozygous   |
| NC_037639.1 | 11190254 | SNV | 1 | A | G | Heterozygous |
| NC_037639.1 | 11190286 | SNV | 1 | G | A | Homozygous   |
| NC_037639.1 | 11204553 | SNV | 1 | G | A | Heterozygous |
| NC_037639.1 | 11204929 | SNV | 1 | C | G | Heterozygous |
| NC_037639.1 | 11209412 | SNV | 1 | A | G | Homozygous   |
| NC_037639.1 | 11209439 | SNV | 1 | G | C | Homozygous   |
| NC_037639.1 | 11209538 | SNV | 1 | G | A | Heterozygous |
| NC_037639.1 | 11209660 | SNV | 1 | T | C | Heterozygous |
| NC_037639.1 | 11220118 | SNV | 1 | A | G | Heterozygous |
| NC_037639.1 | 11220155 | SNV | 1 | A | G | Homozygous   |
| NC_037639.1 | 11221729 | SNV | 1 | C | T | Heterozygous |
| NC_037639.1 | 11221764 | SNV | 1 | C | T | Homozygous   |
| NC_037639.1 | 11221819 | SNV | 1 | T | C | Homozygous   |
| NC_037639.1 | 11221821 | SNV | 1 | G | T | Homozygous   |
| NC_037639.1 | 11225172 | SNV | 1 | A | G | Heterozygous |
| NC_037639.1 | 11225383 | SNV | 1 | A | C | Homozygous   |
| NC_037639.1 | 11226551 | SNV | 1 | A | G | Homozygous   |
| NC_037639.1 | 11226716 | SNV | 1 | C | T | Homozygous   |
| NC_037639.1 | 11227022 | SNV | 1 | A | G | Homozygous   |
| NC_037639.1 | 11228890 | SNV | 1 | T | A | Homozygous   |
| NC_037639.1 | 11229190 | SNV | 1 | T | C | Homozygous   |
| NC_037639.1 | 11230683 | SNV | 1 | T | C | Heterozygous |
| NC_037639.1 | 11231859 | SNV | 1 | A | C | Homozygous   |
| NC_037639.1 | 11232252 | SNV | 1 | A | G | Homozygous   |
| NC_037639.1 | 11232903 | SNV | 1 | A | G | Heterozygous |
| NC_037639.1 | 11232938 | SNV | 1 | G | T | Heterozygous |
| NC_037639.1 | 11233046 | SNV | 1 | A | G | Heterozygous |
| NC_037639.1 | 11233051 | SNV | 1 | C | T | Heterozygous |
| NC_037639.1 | 11233053 | SNV | 1 | G | T | Heterozygous |

|             |          |     |   |   |   |              |
|-------------|----------|-----|---|---|---|--------------|
| NC_037639.1 | 11233057 | SNV | 1 | C | G | Heterozygous |
| NC_037639.1 | 11233150 | SNV | 1 | C | T | Heterozygous |
| NC_037639.1 | 11233554 | SNV | 1 | G | A | Heterozygous |
| NC_037639.1 | 11233837 | SNV | 1 | T | C | Homozygous   |
| NC_037639.1 | 11239600 | SNV | 1 | G | T | Homozygous   |
| NC_037639.1 | 11245591 | SNV | 1 | T | A | Homozygous   |
| NC_037639.1 | 11247456 | SNV | 1 | A | G | Heterozygous |
| NC_037639.1 | 11248263 | SNV | 1 | A | G | Homozygous   |
| NC_037639.1 | 11249130 | SNV | 1 | C | A | Heterozygous |
| NC_037639.1 | 11249153 | SNV | 1 | C | T | Heterozygous |
| NC_037639.1 | 11249166 | SNV | 1 | T | C | Heterozygous |
| NC_037639.1 | 11249169 | SNV | 1 | C | T | Heterozygous |
| NC_037639.1 | 11249175 | SNV | 1 | C | G | Heterozygous |
| NC_037639.1 | 11249175 | SNV | 1 | C | T | Heterozygous |
| NC_037639.1 | 11249179 | SNV | 1 | G | T | Homozygous   |
| NC_037639.1 | 11256067 | SNV | 1 | C | T | Heterozygous |
| NC_037639.1 | 11256296 | SNV | 1 | A | G | Homozygous   |
| NC_037639.1 | 11259630 | SNV | 1 | A | G | Heterozygous |
| NC_037639.1 | 11260003 | SNV | 1 | T | C | Homozygous   |
| NC_037639.1 | 11260395 | SNV | 1 | A | G | Homozygous   |
| NC_037639.1 | 11260506 | SNV | 1 | T | C | Homozygous   |
| NC_037639.1 | 11260527 | SNV | 1 | G | A | Homozygous   |
| NC_037639.1 | 11260576 | SNV | 1 | G | A | Heterozygous |
| NC_037639.1 | 11263684 | SNV | 1 | G | A | Heterozygous |
| NC_037639.1 | 11268497 | SNV | 1 | T | C | Homozygous   |
| NC_037639.1 | 11277211 | SNV | 1 | T | A | Homozygous   |
| NC_037639.1 | 11277214 | SNV | 1 | C | A | Homozygous   |
| NC_037639.1 | 11280475 | SNV | 1 | T | C | Heterozygous |
| NC_037639.1 | 11280477 | SNV | 1 | G | C | Heterozygous |
| NC_037639.1 | 11280591 | SNV | 1 | G | A | Homozygous   |
| NC_037639.1 | 11282509 | SNV | 1 | G | A | Homozygous   |
| NC_037639.1 | 11285702 | SNV | 1 | G | A | Homozygous   |
| NC_037639.1 | 11287164 | SNV | 1 | T | G | Homozygous   |
| NC_037639.1 | 11288233 | SNV | 1 | A | T | Homozygous   |
| NC_037639.1 | 11288768 | SNV | 1 | C | T | Heterozygous |
| NC_037639.1 | 11288773 | SNV | 1 | G | A | Homozygous   |
| NC_037639.1 | 11289069 | SNV | 1 | C | G | Heterozygous |
| NC_037639.1 | 11289430 | SNV | 1 | T | C | Heterozygous |
| NC_037639.1 | 11289564 | SNV | 1 | A | G | Heterozygous |
| NC_037639.1 | 11289573 | SNV | 1 | A | G | Heterozygous |
| NC_037639.1 | 11289599 | SNV | 1 | T | C | Homozygous   |
| NC_037639.1 | 11289629 | SNV | 1 | A | C | Homozygous   |
| NC_037639.1 | 11290044 | SNV | 1 | C | T | Homozygous   |
| NC_037639.1 | 11290115 | SNV | 1 | A | G | Homozygous   |
| NC_037639.1 | 11290147 | SNV | 1 | G | A | Heterozygous |
| NC_037639.1 | 11290360 | SNV | 1 | A | T | Homozygous   |
| NC_037639.1 | 11290574 | SNV | 1 | G | A | Homozygous   |
| NC_037639.1 | 11290773 | SNV | 1 | A | G | Heterozygous |
| NC_037639.1 | 11290806 | SNV | 1 | G | A | Homozygous   |
| NC_037639.1 | 11291040 | SNV | 1 | G | A | Homozygous   |
| NC_037639.1 | 11291070 | SNV | 1 | G | C | Homozygous   |

|             |          |     |   |   |   |              |
|-------------|----------|-----|---|---|---|--------------|
| NC_037639.1 | 11291081 | SNV | 1 | C | T | Heterozygous |
| NC_037639.1 | 11291092 | SNV | 1 | A | G | Heterozygous |
| NC_037639.1 | 11291144 | SNV | 1 | C | T | Heterozygous |
| NC_037639.1 | 11291358 | SNV | 1 | A | C | Heterozygous |
| NC_037639.1 | 11291360 | SNV | 1 | A | C | Homozygous   |
| NC_037639.1 | 11291362 | SNV | 1 | T | C | Homozygous   |
| NC_037639.1 | 11291374 | SNV | 1 | C | T | Homozygous   |
| NC_037639.1 | 11291379 | SNV | 1 | A | G | Homozygous   |
| NC_037639.1 | 11291453 | SNV | 1 | C | T | Homozygous   |
| NC_037639.1 | 11291496 | SNV | 1 | T | C | Homozygous   |
| NC_037639.1 | 11291686 | SNV | 1 | A | T | Heterozygous |
| NC_037639.1 | 11292227 | SNV | 1 | G | A | Heterozygous |
| NC_037639.1 | 11292285 | SNV | 1 | G | A | Heterozygous |
| NC_037639.1 | 11292376 | SNV | 1 | T | C | Homozygous   |
| NC_037639.1 | 11292638 | SNV | 1 | C | T | Homozygous   |
| NC_037639.1 | 11292750 | SNV | 1 | T | C | Homozygous   |
| NC_037639.1 | 11292833 | SNV | 1 | T | C | Heterozygous |
| NC_037639.1 | 11293024 | SNV | 1 | C | T | Homozygous   |
| NC_037639.1 | 11293170 | SNV | 1 | C | A | Homozygous   |
| NC_037639.1 | 11293209 | SNV | 1 | T | A | Heterozygous |
| NC_037639.1 | 11293216 | SNV | 1 | C | T | Homozygous   |
| NC_037639.1 | 11293540 | SNV | 1 | C | T | Homozygous   |
| NC_037639.1 | 11293599 | SNV | 1 | A | G | Heterozygous |
| NC_037639.1 | 11293711 | SNV | 1 | G | A | Heterozygous |
| NC_037639.1 | 11307908 | SNV | 1 | A | G | Homozygous   |
| NC_037639.1 | 11315063 | SNV | 1 | C | T | Homozygous   |
| NC_037639.1 | 11315998 | SNV | 1 | G | A | Heterozygous |
| NC_037639.1 | 11316009 | SNV | 1 | A | G | Heterozygous |
| NC_037639.1 | 11321380 | SNV | 1 | C | T | Homozygous   |
| NC_037639.1 | 11321383 | SNV | 1 | G | A | Heterozygous |
| NC_037639.1 | 11321383 | SNV | 1 | G | C | Heterozygous |
| NC_037639.1 | 11321389 | SNV | 1 | C | A | Heterozygous |
| NC_037639.1 | 11321395 | SNV | 1 | C | T | Heterozygous |
| NC_037639.1 | 11321398 | SNV | 1 | G | A | Homozygous   |
| NC_037639.1 | 11321401 | SNV | 1 | C | T | Heterozygous |
| NC_037639.1 | 11321410 | SNV | 1 | C | G | Heterozygous |
| NC_037639.1 | 11321410 | SNV | 1 | C | T | Heterozygous |
| NC_037639.1 | 11321413 | SNV | 1 | G | A | Heterozygous |
| NC_037639.1 | 11321416 | SNV | 1 | G | A | Heterozygous |
| NC_037639.1 | 11321422 | SNV | 1 | G | A | Homozygous   |
| NC_037639.1 | 11321425 | SNV | 1 | C | G | Heterozygous |
| NC_037639.1 | 11321440 | SNV | 1 | C | G | Heterozygous |
| NC_037639.1 | 11321443 | SNV | 1 | T | G | Heterozygous |
| NC_037639.1 | 11321449 | SNV | 1 | C | G | Homozygous   |
| NC_037639.1 | 11321456 | SNV | 1 | C | T | Homozygous   |
| NC_037639.1 | 11321461 | SNV | 1 | T | C | Homozygous   |
| NC_037639.1 | 11349783 | SNV | 1 | G | A | Heterozygous |
| NC_037639.1 | 11350283 | SNV | 1 | C | G | Homozygous   |
| NC_037639.1 | 11353530 | SNV | 1 | G | A | Heterozygous |
| NC_037639.1 | 11353533 | SNV | 1 | A | G | Heterozygous |
| NC_037639.1 | 11353762 | SNV | 1 | T | A | Heterozygous |

|             |          |     |   |   |   |              |
|-------------|----------|-----|---|---|---|--------------|
| NC_037639.1 | 11354057 | SNV | 1 | A | G | Heterozygous |
| NC_037639.1 | 11354482 | SNV | 1 | A | G | Homozygous   |
| NC_037639.1 | 11354832 | SNV | 1 | G | A | Heterozygous |
| NC_037639.1 | 11355869 | SNV | 1 | G | A | Homozygous   |
| NC_037639.1 | 11356492 | SNV | 1 | G | A | Heterozygous |
| NC_037639.1 | 11356752 | SNV | 1 | G | A | Heterozygous |
| NC_037639.1 | 11357029 | SNV | 1 | T | C | Homozygous   |
| NC_037639.1 | 11360935 | SNV | 1 | A | T | Homozygous   |
| NC_037639.1 | 11361425 | SNV | 1 | A | G | Homozygous   |
| NC_037639.1 | 11361536 | SNV | 1 | T | G | Homozygous   |
| NC_037639.1 | 11377572 | SNV | 1 | G | A | Heterozygous |
| NC_037639.1 | 11377672 | SNV | 1 | T | G | Homozygous   |
| NC_037639.1 | 11377682 | SNV | 1 | T | C | Homozygous   |
| NC_037639.1 | 11380599 | SNV | 1 | A | T | Homozygous   |
| NC_037639.1 | 11382211 | SNV | 1 | C | T | Heterozygous |
| NC_037639.1 | 11382215 | SNV | 1 | C | T | Heterozygous |
| NC_037639.1 | 11382218 | SNV | 1 | C | T | Heterozygous |
| NC_037639.1 | 11387313 | SNV | 1 | C | T | Heterozygous |
| NC_037639.1 | 11387425 | SNV | 1 | C | A | Homozygous   |
| NC_037639.1 | 11387447 | SNV | 1 | T | C | Homozygous   |
| NC_037639.1 | 11387466 | SNV | 1 | C | T | Heterozygous |
| NC_037639.1 | 11388459 | SNV | 1 | C | T | Homozygous   |
| NC_037639.1 | 11388558 | SNV | 1 | T | C | Homozygous   |
| NC_037639.1 | 11395654 | SNV | 1 | A | G | Homozygous   |
| NC_037639.1 | 11395749 | SNV | 1 | C | T | Heterozygous |
| NC_037639.1 | 11395763 | SNV | 1 | C | T | Homozygous   |
| NC_037639.1 | 11395778 | SNV | 1 | T | C | Heterozygous |
| NC_037639.1 | 11398590 | SNV | 1 | G | T | Heterozygous |
| NC_037639.1 | 11398592 | SNV | 1 | G | T | Heterozygous |
| NC_037639.1 | 11398594 | SNV | 1 | G | T | Heterozygous |
| NC_037639.1 | 11400395 | SNV | 1 | C | T | Heterozygous |
| NC_037639.1 | 11400403 | SNV | 1 | C | T | Heterozygous |
| NC_037639.1 | 11400429 | SNV | 1 | G | A | Heterozygous |
| NC_037639.1 | 11400757 | SNV | 1 | T | C | Heterozygous |
| NC_037639.1 | 11400958 | SNV | 1 | T | C | Homozygous   |
| NC_037639.1 | 11403571 | SNV | 1 | C | T | Heterozygous |
| NC_037639.1 | 11407504 | SNV | 1 | C | T | Heterozygous |
| NC_037639.1 | 11407507 | SNV | 1 | C | T | Heterozygous |
| NC_037639.1 | 11407510 | SNV | 1 | C | T | Heterozygous |
| NC_037639.1 | 11407522 | SNV | 1 | T | C | Homozygous   |
| NC_037639.1 | 11407537 | SNV | 1 | A | G | Homozygous   |
| NC_037639.1 | 11407544 | SNV | 1 | C | T | Heterozygous |
| NC_037639.1 | 11411542 | SNV | 1 | T | C | Homozygous   |
| NC_037639.1 | 11411544 | SNV | 1 | C | T | Homozygous   |
| NC_037639.1 | 11411546 | SNV | 1 | A | G | Homozygous   |
| NC_037639.1 | 11411560 | SNV | 1 | G | T | Homozygous   |
| NC_037639.1 | 11411565 | SNV | 1 | C | T | Homozygous   |
| NC_037639.1 | 11411791 | SNV | 1 | C | T | Heterozygous |
| NC_037639.1 | 11428482 | SNV | 1 | A | C | Heterozygous |
| NC_037639.1 | 11428487 | SNV | 1 | A | G | Heterozygous |
| NC_037639.1 | 11428514 | SNV | 1 | C | A | Homozygous   |

|             |          |     |   |   |   |              |
|-------------|----------|-----|---|---|---|--------------|
| NC_037639.1 | 11428520 | SNV | 1 | C | T | Homozygous   |
| NC_037639.1 | 11428522 | SNV | 1 | C | A | Homozygous   |
| NC_037639.1 | 11433176 | SNV | 1 | C | T | Heterozygous |
| NC_037639.1 | 11433235 | SNV | 1 | T | C | Homozygous   |
| NC_037639.1 | 11433325 | SNV | 1 | A | G | Heterozygous |
| NC_037639.1 | 11433352 | SNV | 1 | C | T | Heterozygous |
| NC_037639.1 | 11435639 | SNV | 1 | G | C | Heterozygous |
| NC_037639.1 | 11435654 | SNV | 1 | G | T | Heterozygous |
| NC_037639.1 | 11435736 | SNV | 1 | C | T | Heterozygous |
| NC_037639.1 | 11435746 | SNV | 1 | C | T | Heterozygous |
| NC_037639.1 | 11435753 | SNV | 1 | G | A | Homozygous   |
| NC_037639.1 | 11435755 | SNV | 1 | A | G | Homozygous   |
| NC_037639.1 | 11435758 | SNV | 1 | A | G | Homozygous   |
| NC_037639.1 | 11435821 | SNV | 1 | T | C | Homozygous   |
| NC_037639.1 | 11435999 | SNV | 1 | A | G | Homozygous   |
| NC_037639.1 | 11436213 | SNV | 1 | G | A | Homozygous   |
| NC_037639.1 | 11436217 | SNV | 1 | A | G | Homozygous   |
| NC_037639.1 | 11436263 | SNV | 1 | T | C | Homozygous   |
| NC_037639.1 | 11436542 | SNV | 1 | G | A | Homozygous   |
| NC_037639.1 | 11436859 | SNV | 1 | A | G | Homozygous   |
| NC_037639.1 | 11436888 | SNV | 1 | C | T | Homozygous   |
| NC_037639.1 | 11438752 | SNV | 1 | A | G | Homozygous   |
| NC_037639.1 | 11438845 | SNV | 1 | A | G | Homozygous   |
| NC_037639.1 | 11438854 | SNV | 1 | C | A | Heterozygous |
| NC_037639.1 | 11438865 | SNV | 1 | T | C | Homozygous   |
| NC_037639.1 | 11439071 | SNV | 1 | T | C | Homozygous   |
| NC_037639.1 | 11439281 | SNV | 1 | T | C | Homozygous   |
| NC_037639.1 | 11439322 | SNV | 1 | A | G | Heterozygous |
| NC_037639.1 | 11439517 | SNV | 1 | T | C | Homozygous   |
| NC_037639.1 | 11439539 | SNV | 1 | T | C | Homozygous   |
| NC_037639.1 | 11439574 | SNV | 1 | A | G | Homozygous   |
| NC_037639.1 | 11474063 | SNV | 1 | T | C | Heterozygous |
| NC_037639.1 | 11474142 | SNV | 1 | A | G | Homozygous   |
| NC_037639.1 | 11474155 | SNV | 1 | A | G | Heterozygous |
| NC_037639.1 | 11474220 | SNV | 1 | G | C | Heterozygous |
| NC_037639.1 | 11474385 | SNV | 1 | T | C | Homozygous   |
| NC_037639.1 | 11474538 | SNV | 1 | T | C | Heterozygous |
| NC_037639.1 | 11474761 | SNV | 1 | T | C | Homozygous   |
| NC_037639.1 | 11474812 | SNV | 1 | A | G | Homozygous   |
| NC_037639.1 | 11474867 | SNV | 1 | A | C | Heterozygous |
| NC_037639.1 | 11477631 | SNV | 1 | C | A | Homozygous   |
| NC_037639.1 | 11477955 | SNV | 1 | C | T | Homozygous   |
| NC_037639.1 | 11477973 | SNV | 1 | G | A | Heterozygous |
| NC_037639.1 | 11478015 | SNV | 1 | T | C | Homozygous   |
| NC_037639.1 | 11478027 | SNV | 1 | C | T | Heterozygous |
| NC_037639.1 | 11478551 | SNV | 1 | C | T | Heterozygous |
| NC_037639.1 | 11480965 | SNV | 1 | A | G | Homozygous   |
| NC_037639.1 | 11481466 | SNV | 1 | T | C | Homozygous   |
| NC_037639.1 | 11481483 | SNV | 1 | C | A | Homozygous   |
| NC_037639.1 | 11481488 | SNV | 1 | C | A | Homozygous   |
| NC_037639.1 | 11481532 | SNV | 1 | C | T | Heterozygous |

|             |          |     |   |   |   |              |
|-------------|----------|-----|---|---|---|--------------|
| NC_037639.1 | 11483347 | SNV | 1 | C | T | Heterozygous |
| NC_037639.1 | 11483682 | SNV | 1 | T | C | Homozygous   |
| NC_037639.1 | 11483948 | SNV | 1 | A | G | Homozygous   |
| NC_037639.1 | 11485195 | SNV | 1 | G | T | Heterozygous |
| NC_037639.1 | 11491133 | SNV | 1 | A | G | Homozygous   |
| NC_037639.1 | 11491238 | SNV | 1 | T | C | Heterozygous |
| NC_037639.1 | 11495294 | SNV | 1 | C | T | Heterozygous |
| NC_037639.1 | 11495388 | SNV | 1 | A | G | Homozygous   |
| NC_037639.1 | 11495452 | SNV | 1 | C | T | Homozygous   |
| NC_037639.1 | 11495725 | SNV | 1 | A | G | Homozygous   |
| NC_037639.1 | 11497275 | SNV | 1 | G | C | Heterozygous |
| NC_037639.1 | 11508331 | SNV | 1 | C | T | Heterozygous |
| NC_037639.1 | 11508336 | SNV | 1 | G | A | Homozygous   |
| NC_037639.1 | 11508338 | SNV | 1 | C | T | Heterozygous |
| NC_037639.1 | 11508340 | SNV | 1 | G | A | Heterozygous |
| NC_037639.1 | 11508344 | SNV | 1 | G | A | Heterozygous |
| NC_037639.1 | 11508368 | SNV | 1 | G | A | Homozygous   |
| NC_037639.1 | 11508781 | SNV | 1 | C | T | Heterozygous |
| NC_037639.1 | 11508783 | SNV | 1 | T | C | Heterozygous |
| NC_037639.1 | 11508812 | SNV | 1 | C | T | Heterozygous |
| NC_037639.1 | 11508815 | SNV | 1 | C | T | Heterozygous |
| NC_037639.1 | 11508831 | SNV | 1 | A | G | Homozygous   |
| NC_037639.1 | 11512280 | SNV | 1 | C | T | Homozygous   |
| NC_037639.1 | 11512299 | SNV | 1 | A | G | Heterozygous |
| NC_037639.1 | 11512386 | SNV | 1 | T | C | Homozygous   |
| NC_037639.1 | 11512416 | SNV | 1 | A | G | Homozygous   |
| NC_037639.1 | 11512418 | SNV | 1 | T | C | Homozygous   |
| NC_037639.1 | 11512464 | SNV | 1 | A | G | Homozygous   |
| NC_037639.1 | 11512568 | SNV | 1 | G | C | Homozygous   |
| NC_037639.1 | 11512977 | SNV | 1 | C | T | Heterozygous |
| NC_037639.1 | 11513187 | SNV | 1 | A | C | Homozygous   |
| NC_037639.1 | 11513197 | SNV | 1 | C | G | Homozygous   |
| NC_037639.1 | 11513451 | SNV | 1 | C | T | Heterozygous |
| NC_037639.1 | 11513620 | SNV | 1 | T | C | Homozygous   |
| NC_037639.1 | 11513623 | SNV | 1 | A | G | Homozygous   |
| NC_037639.1 | 11536420 | SNV | 1 | C | T | Homozygous   |
| NC_037639.1 | 11536446 | SNV | 1 | C | T | Heterozygous |
| NC_037639.1 | 11536497 | SNV | 1 | C | G | Heterozygous |
| NC_037639.1 | 11536507 | SNV | 1 | C | T | Heterozygous |
| NC_037639.1 | 11537554 | SNV | 1 | C | T | Homozygous   |
| NC_037639.1 | 11539866 | SNV | 1 | T | C | Homozygous   |
| NC_037639.1 | 11545402 | SNV | 1 | C | T | Homozygous   |
| NC_037639.1 | 11545432 | SNV | 1 | A | T | Heterozygous |
| NC_037639.1 | 11545436 | SNV | 1 | A | C | Homozygous   |
| NC_037639.1 | 11545440 | SNV | 1 | G | T | Homozygous   |
| NC_037639.1 | 11545452 | SNV | 1 | C | T | Homozygous   |
| NC_037639.1 | 11545463 | SNV | 1 | C | T | Heterozygous |
| NC_037639.1 | 11545466 | SNV | 1 | C | T | Homozygous   |
| NC_037639.1 | 11545472 | SNV | 1 | C | T | Heterozygous |
| NC_037639.1 | 11549718 | SNV | 1 | A | G | Homozygous   |
| NC_037639.1 | 11549748 | SNV | 1 | T | C | Heterozygous |



|             |          |     |   |   |   |              |
|-------------|----------|-----|---|---|---|--------------|
| NC_037639.1 | 11549755 | SNV | 1 | T | C | Homozygous   |
| NC_037639.1 | 11549811 | SNV | 1 | G | A | Heterozygous |
| NC_037639.1 | 11553716 | SNV | 1 | C | T | Heterozygous |
| NC_037639.1 | 11568535 | SNV | 1 | G | A | Homozygous   |
| NC_037639.1 | 11577631 | SNV | 1 | C | T | Homozygous   |
| NC_037639.1 | 11577739 | SNV | 1 | A | G | Heterozygous |
| NC_037639.1 | 11577787 | SNV | 1 | A | G | Heterozygous |
| NC_037639.1 | 11577885 | SNV | 1 | G | A | Heterozygous |
| NC_037639.1 | 11578169 | SNV | 1 | A | C | Homozygous   |
| NC_037639.1 | 11578322 | SNV | 1 | A | G | Homozygous   |
| NC_037639.1 | 11578452 | SNV | 1 | G | A | Homozygous   |
| NC_037639.1 | 11582893 | SNV | 1 | T | C | Heterozygous |
| NC_037639.1 | 11583067 | SNV | 1 | T | C | Homozygous   |
| NC_037639.1 | 11583203 | SNV | 1 | G | C | Heterozygous |
| NC_037639.1 | 11583671 | SNV | 1 | A | C | Homozygous   |
| NC_037639.1 | 11587008 | SNV | 1 | T | C | Homozygous   |
| NC_037639.1 | 11588379 | SNV | 1 | G | T | Heterozygous |
| NC_037639.1 | 11588581 | SNV | 1 | T | G | Homozygous   |
| NC_037639.1 | 11588589 | SNV | 1 | A | T | Heterozygous |
| NC_037639.1 | 11588591 | SNV | 1 | G | A | Heterozygous |
| NC_037639.1 | 11588671 | SNV | 1 | G | T | Heterozygous |
| NC_037639.1 | 11632027 | SNV | 1 | T | C | Homozygous   |
| NC_037639.1 | 11632029 | SNV | 1 | T | C | Homozygous   |
| NC_037639.1 | 11632049 | SNV | 1 | T | C | Homozygous   |
| NC_037639.1 | 11632136 | SNV | 1 | G | A | Homozygous   |
| NC_037639.1 | 11632202 | SNV | 1 | T | A | Heterozygous |
| NC_037639.1 | 11633827 | SNV | 1 | A | G | Homozygous   |
| NC_037639.1 | 11633882 | SNV | 1 | T | G | Homozygous   |
| NC_037639.1 | 11633891 | SNV | 1 | G | T | Homozygous   |
| NC_037639.1 | 11640667 | SNV | 1 | T | C | Heterozygous |
| NC_037639.1 | 11640669 | SNV | 1 | T | A | Homozygous   |
| NC_037639.1 | 11644165 | SNV | 1 | T | C | Heterozygous |
| NC_037639.1 | 11644393 | SNV | 1 | A | T | Homozygous   |
| NC_037639.1 | 11644475 | SNV | 1 | A | G | Homozygous   |
| NC_037639.1 | 11644494 | SNV | 1 | C | G | Heterozygous |
| NC_037639.1 | 11652096 | SNV | 1 | G | A | Heterozygous |
| NC_037639.1 | 11652103 | SNV | 1 | T | C | Homozygous   |
| NC_037639.1 | 11652107 | SNV | 1 | T | C | Homozygous   |
| NC_037639.1 | 11652112 | SNV | 1 | G | T | Homozygous   |
| NC_037639.1 | 11652612 | SNV | 1 | G | A | Heterozygous |
| NC_037639.1 | 11652666 | SNV | 1 | G | A | Heterozygous |
| NC_037639.1 | 11652691 | SNV | 1 | G | A | Heterozygous |
| NC_037639.1 | 11652752 | SNV | 1 | G | A | Homozygous   |
| NC_037639.1 | 11652817 | SNV | 1 | T | C | Homozygous   |
| NC_037639.1 | 11653024 | SNV | 1 | A | G | Heterozygous |
| NC_037639.1 | 11653059 | SNV | 1 | G | A | Heterozygous |
| NC_037639.1 | 11653163 | SNV | 1 | C | G | Heterozygous |
| NC_037639.1 | 11653166 | SNV | 1 | A | G | Homozygous   |
| NC_037639.1 | 11653178 | SNV | 1 | A | G | Homozygous   |
| NC_037639.1 | 11653237 | SNV | 1 | G | A | Homozygous   |
| NC_037639.1 | 11659909 | SNV | 1 | G | T | Homozygous   |

|             |          |     |   |   |   |              |
|-------------|----------|-----|---|---|---|--------------|
| NC_037639.1 | 11659966 | SNV | 1 | A | G | Homozygous   |
| NC_037639.1 | 11660214 | SNV | 1 | G | A | Heterozygous |
| NC_037639.1 | 11670282 | SNV | 1 | G | T | Homozygous   |
| NC_037639.1 | 11674587 | SNV | 1 | G | T | Homozygous   |
| NC_037639.1 | 11674621 | SNV | 1 | G | A | Heterozygous |
| NC_037639.1 | 11677247 | SNV | 1 | C | G | Homozygous   |
| NC_037639.1 | 11677416 | SNV | 1 | A | G | Homozygous   |
| NC_037639.1 | 11679278 | SNV | 1 | C | T | Heterozygous |
| NC_037639.1 | 11679282 | SNV | 1 | T | A | Heterozygous |
| NC_037639.1 | 11679297 | SNV | 1 | C | T | Heterozygous |
| NC_037639.1 | 11688761 | SNV | 1 | T | C | Homozygous   |
| NC_037639.1 | 11690504 | SNV | 1 | A | T | Heterozygous |
| NC_037639.1 | 11690507 | SNV | 1 | G | A | Heterozygous |
| NC_037639.1 | 11690511 | SNV | 1 | G | A | Heterozygous |
| NC_037639.1 | 11690519 | SNV | 1 | G | A | Heterozygous |
| NC_037639.1 | 11690535 | SNV | 1 | G | A | Heterozygous |
| NC_037639.1 | 11690541 | SNV | 1 | G | T | Heterozygous |
| NC_037639.1 | 11690788 | SNV | 1 | G | A | Homozygous   |
| NC_037639.1 | 11709585 | SNV | 1 | T | C | Heterozygous |
| NC_037639.1 | 11709975 | SNV | 1 | G | A | Heterozygous |
| NC_037639.1 | 11710716 | SNV | 1 | C | T | Heterozygous |
| NC_037639.1 | 11710740 | SNV | 1 | A | G | Homozygous   |
| NC_037639.1 | 11723388 | SNV | 1 | G | A | Heterozygous |
| NC_037639.1 | 11726650 | SNV | 1 | C | G | Homozygous   |
| NC_037639.1 | 11726720 | SNV | 1 | G | A | Heterozygous |
| NC_037639.1 | 11726820 | SNV | 1 | A | G | Homozygous   |
| NC_037639.1 | 11726835 | SNV | 1 | A | G | Homozygous   |
| NC_037639.1 | 11727275 | SNV | 1 | C | A | Homozygous   |
| NC_037639.1 | 11727277 | SNV | 1 | C | T | Homozygous   |
| NC_037639.1 | 11727287 | SNV | 1 | T | A | Homozygous   |
| NC_037639.1 | 11728535 | SNV | 1 | C | T | Heterozygous |
| NC_037639.1 | 11728539 | SNV | 1 | T | C | Heterozygous |
| NC_037639.1 | 11728545 | SNV | 1 | C | A | Heterozygous |
| NC_037639.1 | 11728568 | SNV | 1 | T | A | Heterozygous |
| NC_037639.1 | 11729487 | SNV | 1 | G | A | Heterozygous |
| NC_037639.1 | 11730633 | SNV | 1 | C | T | Homozygous   |
| NC_037639.1 | 11730664 | SNV | 1 | T | C | Homozygous   |
| NC_037639.1 | 11730701 | SNV | 1 | C | G | Homozygous   |
| NC_037639.1 | 11732068 | SNV | 1 | T | C | Homozygous   |
| NC_037639.1 | 11732395 | SNV | 1 | C | T | Homozygous   |
| NC_037639.1 | 11733094 | SNV | 1 | A | G | Homozygous   |
| NC_037639.1 | 11733308 | SNV | 1 | C | T | Homozygous   |
| NC_037639.1 | 11733312 | SNV | 1 | T | C | Homozygous   |
| NC_037639.1 | 11733380 | SNV | 1 | C | T | Homozygous   |
| NC_037639.1 | 11733526 | SNV | 1 | T | C | Heterozygous |
| NC_037639.1 | 11733996 | SNV | 1 | C | T | Homozygous   |
| NC_037639.1 | 11733999 | SNV | 1 | T | C | Homozygous   |
| NC_037639.1 | 11734148 | SNV | 1 | A | G | Homozygous   |
| NC_037639.1 | 11734223 | SNV | 1 | A | G | Heterozygous |
| NC_037639.1 | 11734493 | SNV | 1 | C | G | Heterozygous |
| NC_037639.1 | 11735428 | SNV | 1 | G | A | Homozygous   |

|             |          |     |   |   |   |              |
|-------------|----------|-----|---|---|---|--------------|
| NC_037639.1 | 11736068 | SNV | 1 | G | T | Heterozygous |
| NC_037639.1 | 11737588 | SNV | 1 | C | T | Heterozygous |
| NC_037639.1 | 11738201 | SNV | 1 | C | T | Homozygous   |
| NC_037639.1 | 11739452 | SNV | 1 | T | A | Heterozygous |
| NC_037639.1 | 11739503 | SNV | 1 | T | C | Homozygous   |
| NC_037639.1 | 11739713 | SNV | 1 | C | T | Homozygous   |
| NC_037639.1 | 11739734 | SNV | 1 | A | G | Homozygous   |
| NC_037639.1 | 11739746 | SNV | 1 | T | G | Heterozygous |
| NC_037639.1 | 11739752 | SNV | 1 | C | G | Homozygous   |
| NC_037639.1 | 11740611 | SNV | 1 | C | A | Heterozygous |
| NC_037639.1 | 11740832 | SNV | 1 | C | A | Homozygous   |
| NC_037639.1 | 11741244 | SNV | 1 | C | G | Homozygous   |
| NC_037639.1 | 11742051 | SNV | 1 | A | G | Homozygous   |
| NC_037639.1 | 11742061 | SNV | 1 | G | C | Homozygous   |
| NC_037639.1 | 11742907 | SNV | 1 | C | G | Homozygous   |
| NC_037639.1 | 11742940 | SNV | 1 | G | A | Homozygous   |
| NC_037639.1 | 11742943 | SNV | 1 | C | T | Homozygous   |
| NC_037639.1 | 11744835 | SNV | 1 | A | G | Homozygous   |
| NC_037639.1 | 11744839 | SNV | 1 | G | A | Heterozygous |
| NC_037639.1 | 11745183 | SNV | 1 | C | T | Heterozygous |
| NC_037639.1 | 11745210 | SNV | 1 | G | A | Homozygous   |
| NC_037639.1 | 11745219 | SNV | 1 | G | A | Homozygous   |
| NC_037639.1 | 11745223 | SNV | 1 | G | A | Heterozygous |
| NC_037639.1 | 11745510 | SNV | 1 | T | C | Homozygous   |
| NC_037639.1 | 11745568 | SNV | 1 | T | C | Homozygous   |
| NC_037639.1 | 11745582 | SNV | 1 | G | A | Heterozygous |
| NC_037639.1 | 11745604 | SNV | 1 | T | C | Homozygous   |
| NC_037639.1 | 11745689 | SNV | 1 | A | G | Heterozygous |
| NC_037639.1 | 11745880 | SNV | 1 | C | T | Heterozygous |
| NC_037639.1 | 11745969 | SNV | 1 | A | C | Homozygous   |
| NC_037639.1 | 11746175 | SNV | 1 | C | T | Heterozygous |
| NC_037639.1 | 11747330 | SNV | 1 | A | G | Heterozygous |
| NC_037639.1 | 11747354 | SNV | 1 | T | C | Homozygous   |
| NC_037639.1 | 11747381 | SNV | 1 | T | C | Heterozygous |
| NC_037639.1 | 11747386 | SNV | 1 | A | G | Heterozygous |
| NC_037639.1 | 11747931 | SNV | 1 | C | T | Heterozygous |
| NC_037639.1 | 11748536 | SNV | 1 | A | G | Heterozygous |
| NC_037639.1 | 11749998 | SNV | 1 | A | G | Homozygous   |
| NC_037639.1 | 11750023 | SNV | 1 | A | T | Heterozygous |
| NC_037639.1 | 11750027 | SNV | 1 | C | T | Heterozygous |
| NC_037639.1 | 11750155 | SNV | 1 | C | T | Homozygous   |
| NC_037639.1 | 11750158 | SNV | 1 | T | A | Homozygous   |
| NC_037639.1 | 11750164 | SNV | 1 | G | A | Homozygous   |
| NC_037639.1 | 11750180 | SNV | 1 | G | A | Homozygous   |
| NC_037639.1 | 11750201 | SNV | 1 | T | A | Homozygous   |
| NC_037639.1 | 11750203 | SNV | 1 | G | A | Homozygous   |
| NC_037639.1 | 11750409 | SNV | 1 | A | G | Homozygous   |
| NC_037639.1 | 11750601 | SNV | 1 | C | T | Heterozygous |
| NC_037639.1 | 11750673 | SNV | 1 | A | G | Homozygous   |
| NC_037639.1 | 11750704 | SNV | 1 | A | G | Homozygous   |
| NC_037639.1 | 11750724 | SNV | 1 | T | C | Heterozygous |

|             |          |     |   |   |   |              |
|-------------|----------|-----|---|---|---|--------------|
| NC_037639.1 | 11750796 | SNV | 1 | A | G | Homozygous   |
| NC_037639.1 | 11750975 | SNV | 1 | T | C | Heterozygous |
| NC_037639.1 | 11750994 | SNV | 1 | C | G | Homozygous   |
| NC_037639.1 | 11751071 | SNV | 1 | A | G | Heterozygous |
| NC_037639.1 | 11751091 | SNV | 1 | A | G | Homozygous   |
| NC_037639.1 | 11751190 | SNV | 1 | G | A | Homozygous   |
| NC_037639.1 | 11751212 | SNV | 1 | A | G | Homozygous   |
| NC_037639.1 | 11751230 | SNV | 1 | A | G | Homozygous   |
| NC_037639.1 | 11751503 | SNV | 1 | G | A | Heterozygous |
| NC_037639.1 | 11751542 | SNV | 1 | T | C | Homozygous   |
| NC_037639.1 | 11751544 | SNV | 1 | T | C | Homozygous   |
| NC_037639.1 | 11751562 | SNV | 1 | T | C | Homozygous   |
| NC_037639.1 | 11751619 | SNV | 1 | A | G | Homozygous   |
| NC_037639.1 | 11751680 | SNV | 1 | G | A | Heterozygous |
| NC_037639.1 | 11751694 | SNV | 1 | T | C | Heterozygous |
| NC_037639.1 | 11751716 | SNV | 1 | G | C | Heterozygous |
| NC_037639.1 | 11751738 | SNV | 1 | G | C | Homozygous   |
| NC_037639.1 | 11751768 | SNV | 1 | A | G | Homozygous   |
| NC_037639.1 | 11751873 | SNV | 1 | G | A | Heterozygous |
| NC_037639.1 | 11752237 | SNV | 1 | G | A | Homozygous   |
| NC_037639.1 | 11752275 | SNV | 1 | G | A | Homozygous   |
| NC_037639.1 | 11753113 | SNV | 1 | C | T | Heterozygous |
| NC_037639.1 | 11753225 | SNV | 1 | A | G | Homozygous   |
| NC_037639.1 | 11753405 | SNV | 1 | G | A | Heterozygous |
| NC_037639.1 | 11753424 | SNV | 1 | C | T | Homozygous   |
| NC_037639.1 | 11753426 | SNV | 1 | A | G | Heterozygous |
| NC_037639.1 | 11753437 | SNV | 1 | G | A | Homozygous   |
| NC_037639.1 | 11753442 | SNV | 1 | G | T | Homozygous   |
| NC_037639.1 | 11753965 | SNV | 1 | T | C | Heterozygous |
| NC_037639.1 | 11754153 | SNV | 1 | C | T | Homozygous   |
| NC_037639.1 | 11754473 | SNV | 1 | A | G | Heterozygous |
| NC_037639.1 | 11754476 | SNV | 1 | T | G | Heterozygous |
| NC_037639.1 | 11754485 | SNV | 1 | T | A | Heterozygous |
| NC_037639.1 | 11754524 | SNV | 1 | A | G | Heterozygous |
| NC_037639.1 | 11754546 | SNV | 1 | C | T | Homozygous   |
| NC_037639.1 | 11754598 | SNV | 1 | T | A | Heterozygous |
| NC_037639.1 | 11754623 | SNV | 1 | A | G | Homozygous   |
| NC_037639.1 | 11755309 | SNV | 1 | G | T | Homozygous   |
| NC_037639.1 | 11756125 | SNV | 1 | T | C | Heterozygous |
| NC_037639.1 | 11756168 | SNV | 1 | A | G | Heterozygous |
| NC_037639.1 | 11756179 | SNV | 1 | T | C | Homozygous   |
| NC_037639.1 | 11756537 | SNV | 1 | C | T | Heterozygous |
| NC_037639.1 | 11757947 | SNV | 1 | G | A | Heterozygous |
| NC_037639.1 | 11757983 | SNV | 1 | T | G | Homozygous   |
| NC_037639.1 | 11758089 | SNV | 1 | A | G | Homozygous   |
| NC_037639.1 | 11758392 | SNV | 1 | A | T | Heterozygous |
| NC_037639.1 | 11758432 | SNV | 1 | T | C | Homozygous   |
| NC_037639.1 | 11759426 | SNV | 1 | C | G | Homozygous   |
| NC_037639.1 | 11759880 | SNV | 1 | T | C | Heterozygous |
| NC_037639.1 | 11759890 | SNV | 1 | T | C | Homozygous   |
| NC_037639.1 | 11759910 | SNV | 1 | C | T | Heterozygous |

|             |          |     |   |   |   |              |
|-------------|----------|-----|---|---|---|--------------|
| NC_037639.1 | 11760003 | SNV | 1 | C | T | Homozygous   |
| NC_037639.1 | 11762451 | SNV | 1 | T | C | Homozygous   |
| NC_037639.1 | 11762464 | SNV | 1 | C | T | Heterozygous |
| NC_037639.1 | 11762466 | SNV | 1 | T | C | Heterozygous |
| NC_037639.1 | 11762514 | SNV | 1 | G | A | Homozygous   |
| NC_037639.1 | 11762670 | SNV | 1 | G | C | Heterozygous |
| NC_037639.1 | 11763499 | SNV | 1 | T | C | Homozygous   |
| NC_037639.1 | 11763748 | SNV | 1 | C | T | Homozygous   |
| NC_037639.1 | 11764102 | SNV | 1 | C | T | Heterozygous |
| NC_037639.1 | 11769540 | SNV | 1 | C | T | Heterozygous |
| NC_037639.1 | 11769835 | SNV | 1 | C | T | Homozygous   |
| NC_037639.1 | 11769862 | SNV | 1 | G | C | Homozygous   |
| NC_037639.1 | 11769884 | SNV | 1 | G | A | Homozygous   |
| NC_037639.1 | 11769902 | SNV | 1 | A | G | Homozygous   |
| NC_037639.1 | 11770176 | SNV | 1 | A | G | Homozygous   |
| NC_037639.1 | 11770280 | SNV | 1 | A | G | Homozygous   |
| NC_037639.1 | 11770343 | SNV | 1 | T | C | Homozygous   |
| NC_037639.1 | 11770591 | SNV | 1 | T | C | Homozygous   |
| NC_037639.1 | 11770689 | SNV | 1 | A | G | Heterozygous |
| NC_037639.1 | 11770774 | SNV | 1 | A | G | Heterozygous |
| NC_037639.1 | 11770834 | SNV | 1 | C | T | Homozygous   |
| NC_037639.1 | 11770869 | SNV | 1 | C | T | Heterozygous |
| NC_037639.1 | 11770890 | SNV | 1 | A | G | Heterozygous |
| NC_037639.1 | 11770893 | SNV | 1 | A | G | Heterozygous |
| NC_037639.1 | 11770916 | SNV | 1 | G | A | Heterozygous |
| NC_037639.1 | 11771154 | SNV | 1 | T | C | Homozygous   |
| NC_037639.1 | 11771196 | SNV | 1 | C | T | Homozygous   |
| NC_037639.1 | 11771356 | SNV | 1 | G | A | Heterozygous |
| NC_037639.1 | 11772401 | SNV | 1 | G | A | Heterozygous |
| NC_037639.1 | 11772522 | SNV | 1 | T | C | Homozygous   |
| NC_037639.1 | 11772650 | SNV | 1 | G | A | Heterozygous |
| NC_037639.1 | 11773646 | SNV | 1 | C | T | Homozygous   |
| NC_037639.1 | 11773903 | SNV | 1 | A | G | Homozygous   |
| NC_037639.1 | 11774847 | SNV | 1 | T | C | Homozygous   |
| NC_037639.1 | 11774868 | SNV | 1 | G | A | Heterozygous |
| NC_037639.1 | 11774930 | SNV | 1 | A | C | Heterozygous |
| NC_037639.1 | 11774946 | SNV | 1 | A | G | Heterozygous |
| NC_037639.1 | 11775353 | SNV | 1 | A | G | Homozygous   |
| NC_037639.1 | 11779038 | SNV | 1 | T | G | Homozygous   |
| NC_037639.1 | 11779068 | SNV | 1 | G | A | Heterozygous |
| NC_037639.1 | 11781495 | SNV | 1 | G | A | Heterozygous |
| NC_037639.1 | 11789214 | SNV | 1 | T | C | Homozygous   |
| NC_037639.1 | 11789538 | SNV | 1 | C | T | Homozygous   |
| NC_037639.1 | 11789751 | SNV | 1 | A | G | Heterozygous |
| NC_037639.1 | 11789783 | SNV | 1 | T | C | Homozygous   |
| NC_037639.1 | 11789793 | SNV | 1 | T | C | Homozygous   |
| NC_037639.1 | 11789809 | SNV | 1 | T | C | Heterozygous |
| NC_037639.1 | 11789853 | SNV | 1 | T | C | Homozygous   |
| NC_037639.1 | 11789952 | SNV | 1 | G | A | Heterozygous |
| NC_037639.1 | 11789957 | SNV | 1 | A | C | Homozygous   |
| NC_037639.1 | 11790022 | SNV | 1 | A | G | Homozygous   |

|             |          |     |   |   |   |              |
|-------------|----------|-----|---|---|---|--------------|
| NC_037639.1 | 11790027 | SNV | 1 | C | T | Heterozygous |
| NC_037639.1 | 11791103 | SNV | 1 | G | C | Heterozygous |
| NC_037639.1 | 11791406 | SNV | 1 | A | G | Homozygous   |
| NC_037639.1 | 11805520 | SNV | 1 | C | A | Heterozygous |
| NC_037639.1 | 11812218 | SNV | 1 | A | G | Homozygous   |
| NC_037639.1 | 11812339 | SNV | 1 | C | T | Homozygous   |
| NC_037639.1 | 11812345 | SNV | 1 | G | A | Homozygous   |
| NC_037639.1 | 11812423 | SNV | 1 | A | G | Homozygous   |
| NC_037639.1 | 11812467 | SNV | 1 | G | A | Homozygous   |
| NC_037639.1 | 11812587 | SNV | 1 | A | G | Homozygous   |
| NC_037639.1 | 11812596 | SNV | 1 | A | G | Homozygous   |
| NC_037639.1 | 11812614 | SNV | 1 | T | C | Homozygous   |
| NC_037639.1 | 11812616 | SNV | 1 | G | A | Homozygous   |
| NC_037639.1 | 11812659 | SNV | 1 | G | A | Homozygous   |
| NC_037639.1 | 11812712 | SNV | 1 | G | T | Homozygous   |
| NC_037639.1 | 11812722 | SNV | 1 | G | A | Heterozygous |
| NC_037639.1 | 11813303 | SNV | 1 | A | G | Homozygous   |
| NC_037639.1 | 11813318 | SNV | 1 | C | T | Heterozygous |
| NC_037639.1 | 11815472 | SNV | 1 | T | C | Homozygous   |
| NC_037639.1 | 11815570 | SNV | 1 | T | C | Homozygous   |
| NC_037639.1 | 11815624 | SNV | 1 | C | T | Heterozygous |
| NC_037639.1 | 11815638 | SNV | 1 | C | G | Heterozygous |
| NC_037639.1 | 11815645 | SNV | 1 | T | C | Heterozygous |
| NC_037639.1 | 11815994 | SNV | 1 | T | C | Heterozygous |
| NC_037639.1 | 11816129 | SNV | 1 | A | T | Homozygous   |
| NC_037639.1 | 11816134 | SNV | 1 | T | A | Homozygous   |
| NC_037639.1 | 11816137 | SNV | 1 | T | G | Homozygous   |
| NC_037639.1 | 11816324 | SNV | 1 | C | T | Heterozygous |
| NC_037639.1 | 11816343 | SNV | 1 | T | C | Heterozygous |
| NC_037639.1 | 11816366 | SNV | 1 | T | C | Homozygous   |
| NC_037639.1 | 11816429 | SNV | 1 | T | A | Heterozygous |
| NC_037639.1 | 11816433 | SNV | 1 | T | A | Homozygous   |
| NC_037639.1 | 11816557 | SNV | 1 | C | T | Homozygous   |
| NC_037639.1 | 11820318 | SNV | 1 | G | A | Homozygous   |
| NC_037639.1 | 11820555 | SNV | 1 | T | C | Homozygous   |
| NC_037639.1 | 11822253 | SNV | 1 | T | A | Homozygous   |
| NC_037639.1 | 11822257 | SNV | 1 | G | A | Homozygous   |
| NC_037639.1 | 11822259 | SNV | 1 | T | A | Homozygous   |
| NC_037639.1 | 11822267 | SNV | 1 | G | C | Homozygous   |
| NC_037639.1 | 11822275 | SNV | 1 | T | A | Homozygous   |
| NC_037639.1 | 11827577 | SNV | 1 | A | G | Heterozygous |
| NC_037639.1 | 11827851 | SNV | 1 | T | C | Heterozygous |
| NC_037639.1 | 11828150 | SNV | 1 | A | G | Homozygous   |
| NC_037639.1 | 11828320 | SNV | 1 | T | C | Heterozygous |
| NC_037639.1 | 11828458 | SNV | 1 | G | A | Homozygous   |
| NC_037639.1 | 11828577 | SNV | 1 | C | T | Heterozygous |
| NC_037639.1 | 11828833 | SNV | 1 | T | C | Homozygous   |
| NC_037639.1 | 11829090 | SNV | 1 | T | C | Homozygous   |
| NC_037639.1 | 11829460 | SNV | 1 | C | A | Homozygous   |
| NC_037639.1 | 11829557 | SNV | 1 | A | T | Homozygous   |
| NC_037639.1 | 11829559 | SNV | 1 | A | T | Homozygous   |

|             |          |     |   |   |   |              |
|-------------|----------|-----|---|---|---|--------------|
| NC_037639.1 | 11829766 | SNV | 1 | T | A | Homozygous   |
| NC_037639.1 | 11829776 | SNV | 1 | G | T | Homozygous   |
| NC_037639.1 | 11830578 | SNV | 1 | A | G | Homozygous   |
| NC_037639.1 | 11830736 | SNV | 1 | G | T | Heterozygous |
| NC_037639.1 | 11830775 | SNV | 1 | C | T | Heterozygous |
| NC_037639.1 | 11830936 | SNV | 1 | T | C | Heterozygous |
| NC_037639.1 | 11831001 | SNV | 1 | C | T | Heterozygous |
| NC_037639.1 | 11831074 | SNV | 1 | G | C | Heterozygous |
| NC_037639.1 | 11831211 | SNV | 1 | A | G | Heterozygous |
| NC_037639.1 | 11831219 | SNV | 1 | A | G | Heterozygous |
| NC_037639.1 | 11831245 | SNV | 1 | T | C | Homozygous   |
| NC_037639.1 | 11831271 | SNV | 1 | A | T | Heterozygous |
| NC_037639.1 | 11832195 | SNV | 1 | A | G | Heterozygous |
| NC_037639.1 | 11832499 | SNV | 1 | A | G | Homozygous   |
| NC_037639.1 | 11832604 | SNV | 1 | A | G | Homozygous   |
| NC_037639.1 | 11833233 | SNV | 1 | C | T | Homozygous   |
| NC_037639.1 | 11834312 | SNV | 1 | T | C | Heterozygous |
| NC_037639.1 | 11834474 | SNV | 1 | A | G | Homozygous   |
| NC_037639.1 | 11834636 | SNV | 1 | A | G | Heterozygous |
| NC_037639.1 | 11834694 | SNV | 1 | A | G | Homozygous   |
| NC_037639.1 | 11835230 | SNV | 1 | C | T | Heterozygous |
| NC_037639.1 | 11835700 | SNV | 1 | A | G | Homozygous   |
| NC_037639.1 | 11835787 | SNV | 1 | C | T | Homozygous   |
| NC_037639.1 | 11836831 | SNV | 1 | C | T | Homozygous   |
| NC_037639.1 | 11836939 | SNV | 1 | G | A | Heterozygous |
| NC_037639.1 | 11837320 | SNV | 1 | T | A | Homozygous   |
| NC_037639.1 | 11837327 | SNV | 1 | T | A | Homozygous   |
| NC_037639.1 | 11837331 | SNV | 1 | A | G | Homozygous   |
| NC_037639.1 | 11840756 | SNV | 1 | A | C | Homozygous   |
| NC_037639.1 | 11841521 | SNV | 1 | C | A | Homozygous   |
| NC_037639.1 | 11841830 | SNV | 1 | T | C | Heterozygous |
| NC_037639.1 | 11842827 | SNV | 1 | A | C | Heterozygous |
| NC_037639.1 | 11842830 | SNV | 1 | T | C | Heterozygous |
| NC_037639.1 | 11842841 | SNV | 1 | T | C | Heterozygous |
| NC_037639.1 | 11842845 | SNV | 1 | G | A | Heterozygous |
| NC_037639.1 | 11842848 | SNV | 1 | T | C | Heterozygous |
| NC_037639.1 | 11842857 | SNV | 1 | T | A | Heterozygous |
| NC_037639.1 | 11844492 | SNV | 1 | T | C | Heterozygous |
| NC_037639.1 | 11845732 | SNV | 1 | C | T | Homozygous   |
| NC_037639.1 | 11845755 | SNV | 1 | T | C | Homozygous   |
| NC_037639.1 | 11845848 | SNV | 1 | G | A | Heterozygous |
| NC_037639.1 | 11847997 | SNV | 1 | A | C | Homozygous   |
| NC_037639.1 | 11848028 | SNV | 1 | T | C | Homozygous   |
| NC_037639.1 | 11848032 | SNV | 1 | T | A | Heterozygous |
| NC_037639.1 | 11848040 | SNV | 1 | T | A | Heterozygous |
| NC_037639.1 | 11848042 | SNV | 1 | T | A | Homozygous   |
| NC_037639.1 | 11848044 | SNV | 1 | T | A | Heterozygous |
| NC_037639.1 | 11868972 | SNV | 1 | T | C | Heterozygous |
| NC_037639.1 | 11868974 | SNV | 1 | T | C | Heterozygous |
| NC_037639.1 | 11868977 | SNV | 1 | C | T | Homozygous   |
| NC_037639.1 | 11869007 | SNV | 1 | A | C | Heterozygous |

|             |          |     |   |   |   |              |
|-------------|----------|-----|---|---|---|--------------|
| NC_037639.1 | 11875855 | SNV | 1 | G | A | Homozygous   |
| NC_037639.1 | 11875865 | SNV | 1 | G | A | Heterozygous |
| NC_037639.1 | 11875874 | SNV | 1 | A | G | Homozygous   |
| NC_037639.1 | 11875878 | SNV | 1 | G | A | Homozygous   |
| NC_037639.1 | 11875902 | SNV | 1 | C | A | Homozygous   |
| NC_037639.1 | 11882228 | SNV | 1 | T | C | Homozygous   |
| NC_037639.1 | 11908390 | SNV | 1 | A | G | Homozygous   |
| NC_037639.1 | 11908422 | SNV | 1 | T | C | Heterozygous |
| NC_037639.1 | 11908472 | SNV | 1 | A | G | Homozygous   |
| NC_037639.1 | 11908521 | SNV | 1 | A | G | Homozygous   |
| NC_037639.1 | 11909175 | SNV | 1 | T | G | Heterozygous |
| NC_037639.1 | 11909182 | SNV | 1 | T | A | Heterozygous |
| NC_037639.1 | 11918027 | SNV | 1 | A | T | Heterozygous |
| NC_037639.1 | 11918031 | SNV | 1 | C | A | Homozygous   |
| NC_037639.1 | 11925531 | SNV | 1 | A | T | Homozygous   |
| NC_037639.1 | 11925893 | SNV | 1 | T | A | Homozygous   |
| NC_037639.1 | 11925897 | SNV | 1 | T | C | Homozygous   |
| NC_037639.1 | 11925899 | SNV | 1 | G | C | Homozygous   |
| NC_037639.1 | 11925907 | SNV | 1 | T | A | Homozygous   |
| NC_037639.1 | 11925918 | SNV | 1 | A | G | Homozygous   |
| NC_037639.1 | 11928076 | SNV | 1 | A | G | Heterozygous |
| NC_037639.1 | 11935321 | SNV | 1 | A | G | Homozygous   |
| NC_037639.1 | 11935341 | SNV | 1 | A | T | Homozygous   |
| NC_037639.1 | 11935360 | SNV | 1 | A | G | Homozygous   |
| NC_037639.1 | 11938213 | SNV | 1 | C | T | Homozygous   |
| NC_037639.1 | 11946440 | SNV | 1 | T | G | Homozygous   |
| NC_037639.1 | 11960258 | SNV | 1 | T | C | Heterozygous |
| NC_037639.1 | 11961235 | SNV | 1 | G | A | Homozygous   |
| NC_037639.1 | 11992031 | SNV | 1 | A | G | Homozygous   |
| NC_037639.1 | 11992670 | SNV | 1 | G | A | Heterozygous |
| NC_037639.1 | 11993196 | SNV | 1 | T | C | Homozygous   |
| NC_037639.1 | 11993232 | SNV | 1 | G | A | Heterozygous |
| NC_037639.1 | 11993254 | SNV | 1 | G | A | Homozygous   |
| NC_037639.1 | 11993277 | SNV | 1 | A | G | Homozygous   |
| NC_037639.1 | 11993342 | SNV | 1 | A | G | Homozygous   |
| NC_037639.1 | 11993359 | SNV | 1 | G | A | Heterozygous |
| NC_037639.1 | 11995324 | SNV | 1 | T | C | Heterozygous |
| NC_037639.1 | 11995507 | SNV | 1 | C | G | Homozygous   |
| NC_037639.1 | 11995639 | SNV | 1 | G | A | Heterozygous |
| NC_037639.1 | 11995750 | SNV | 1 | G | C | Homozygous   |
| NC_037639.1 | 12001613 | SNV | 1 | A | T | Homozygous   |
| NC_037639.1 | 12001616 | SNV | 1 | C | T | Heterozygous |
| NC_037639.1 | 12002068 | SNV | 1 | G | A | Homozygous   |
| NC_037639.1 | 12002535 | SNV | 1 | G | A | Heterozygous |
| NC_037639.1 | 12012208 | SNV | 1 | C | G | Homozygous   |
| NC_037639.1 | 12012216 | SNV | 1 | C | T | Homozygous   |
| NC_037639.1 | 12012220 | SNV | 1 | C | G | Homozygous   |
| NC_037639.1 | 12012228 | SNV | 1 | C | T | Heterozygous |
| NC_037639.1 | 12020117 | SNV | 1 | T | A | Homozygous   |
| NC_037639.1 | 12020120 | SNV | 1 | T | C | Homozygous   |
| NC_037639.1 | 12020122 | SNV | 1 | T | C | Homozygous   |



|             |          |     |   |   |   |              |
|-------------|----------|-----|---|---|---|--------------|
| NC_037639.1 | 12020139 | SNV | 1 | T | G | Homozygous   |
| NC_037639.1 | 12020148 | SNV | 1 | T | C | Homozygous   |
| NC_037639.1 | 12026704 | SNV | 1 | T | C | Homozygous   |
| NC_037639.1 | 12027619 | SNV | 1 | C | T | Homozygous   |
| NC_037639.1 | 12027732 | SNV | 1 | A | G | Homozygous   |
| NC_037639.1 | 12033929 | SNV | 1 | T | C | Homozygous   |
| NC_037639.1 | 12033962 | SNV | 1 | T | C | Heterozygous |
| NC_037639.1 | 12034067 | SNV | 1 | G | C | Heterozygous |
| NC_037639.1 | 12034067 | SNV | 1 | G | T | Heterozygous |
| NC_037639.1 | 12034107 | SNV | 1 | C | T | Heterozygous |
| NC_037639.1 | 12034122 | SNV | 1 | A | G | Heterozygous |
| NC_037639.1 | 12034211 | SNV | 1 | G | A | Heterozygous |
| NC_037639.1 | 12034228 | SNV | 1 | G | A | Heterozygous |
| NC_037639.1 | 12040316 | SNV | 1 | A | G | Homozygous   |
| NC_037639.1 | 12040342 | SNV | 1 | G | A | Homozygous   |
| NC_037639.1 | 12040345 | SNV | 1 | G | A | Heterozygous |
| NC_037639.1 | 12042531 | SNV | 1 | C | A | Homozygous   |
| NC_037639.1 | 12042545 | SNV | 1 | C | A | Homozygous   |
| NC_037639.1 | 12042549 | SNV | 1 | C | T | Homozygous   |
| NC_037639.1 | 12042557 | SNV | 1 | A | C | Homozygous   |
| NC_037639.1 | 12042561 | SNV | 1 | T | C | Homozygous   |
| NC_037639.1 | 12042564 | SNV | 1 | C | T | Homozygous   |
| NC_037639.1 | 12046960 | SNV | 1 | C | G | Heterozygous |
| NC_037639.1 | 12047037 | SNV | 1 | G | A | Heterozygous |
| NC_037639.1 | 12047071 | SNV | 1 | T | C | Homozygous   |
| NC_037639.1 | 12047089 | SNV | 1 | G | C | Homozygous   |
| NC_037639.1 | 12047239 | SNV | 1 | A | G | Homozygous   |
| NC_037639.1 | 12047545 | SNV | 1 | A | G | Heterozygous |
| NC_037639.1 | 12047628 | SNV | 1 | A | G | Homozygous   |
| NC_037639.1 | 12047890 | SNV | 1 | C | G | Heterozygous |
| NC_037639.1 | 12048044 | SNV | 1 | C | T | Homozygous   |
| NC_037639.1 | 12048155 | SNV | 1 | G | A | Heterozygous |
| NC_037639.1 | 12048366 | SNV | 1 | A | G | Homozygous   |
| NC_037639.1 | 12055258 | SNV | 1 | T | C | Homozygous   |
| NC_037639.1 | 12055432 | SNV | 1 | G | C | Heterozygous |
| NC_037639.1 | 12055485 | SNV | 1 | A | G | Homozygous   |
| NC_037639.1 | 12055506 | SNV | 1 | G | A | Homozygous   |
| NC_037639.1 | 12059630 | SNV | 1 | T | C | Heterozygous |
| NC_037639.1 | 12059748 | SNV | 1 | T | C | Homozygous   |
| NC_037639.1 | 12059754 | SNV | 1 | G | A | Homozygous   |
| NC_037639.1 | 12060294 | SNV | 1 | C | T | Heterozygous |
| NC_037639.1 | 12060583 | SNV | 1 | C | T | Heterozygous |
| NC_037639.1 | 12060730 | SNV | 1 | A | C | Heterozygous |
| NC_037639.1 | 12060751 | SNV | 1 | G | T | Heterozygous |
| NC_037639.1 | 12060962 | SNV | 1 | T | G | Homozygous   |
| NC_037639.1 | 12061088 | SNV | 1 | G | C | Heterozygous |
| NC_037639.1 | 12062728 | SNV | 1 | C | T | Heterozygous |
| NC_037639.1 | 12062749 | SNV | 1 | A | G | Homozygous   |
| NC_037639.1 | 12062769 | SNV | 1 | T | C | Heterozygous |
| NC_037639.1 | 12062921 | SNV | 1 | A | G | Homozygous   |
| NC_037639.1 | 12064778 | SNV | 1 | T | G | Heterozygous |

|             |          |     |   |   |   |              |
|-------------|----------|-----|---|---|---|--------------|
| NC_037639.1 | 12071364 | SNV | 1 | T | C | Heterozygous |
| NC_037639.1 | 12071373 | SNV | 1 | T | C | Heterozygous |
| NC_037639.1 | 12094864 | SNV | 1 | G | A | Heterozygous |
| NC_037639.1 | 12094886 | SNV | 1 | G | C | Heterozygous |
| NC_037639.1 | 12096250 | SNV | 1 | A | T | Homozygous   |
| NC_037639.1 | 12096259 | SNV | 1 | A | T | Homozygous   |
| NC_037639.1 | 12096262 | SNV | 1 | C | T | Homozygous   |
| NC_037639.1 | 12096267 | SNV | 1 | C | A | Homozygous   |
| NC_037639.1 | 12096269 | SNV | 1 | G | T | Homozygous   |
| NC_037639.1 | 12102119 | SNV | 1 | G | A | Homozygous   |
| NC_037639.1 | 12102147 | SNV | 1 | G | A | Heterozygous |
| NC_037639.1 | 12102167 | SNV | 1 | G | C | Heterozygous |
| NC_037639.1 | 12102237 | SNV | 1 | G | A | Homozygous   |
| NC_037639.1 | 12102538 | SNV | 1 | T | G | Homozygous   |
| NC_037639.1 | 12104817 | SNV | 1 | G | A | Homozygous   |
| NC_037639.1 | 12104822 | SNV | 1 | G | A | Homozygous   |
| NC_037639.1 | 12108944 | SNV | 1 | C | T | Homozygous   |
| NC_037639.1 | 12111692 | SNV | 1 | A | G | Homozygous   |
| NC_037639.1 | 12115187 | SNV | 1 | G | A | Homozygous   |
| NC_037639.1 | 12115207 | SNV | 1 | A | G | Homozygous   |
| NC_037639.1 | 12115223 | SNV | 1 | G | A | Homozygous   |
| NC_037639.1 | 12115926 | SNV | 1 | A | G | Heterozygous |
| NC_037639.1 | 12115949 | SNV | 1 | A | G | Homozygous   |
| NC_037639.1 | 12121436 | SNV | 1 | C | T | Heterozygous |
| NC_037639.1 | 12121860 | SNV | 1 | G | A | Heterozygous |
| NC_037639.1 | 12122323 | SNV | 1 | C | T | Heterozygous |
| NC_037639.1 | 12122484 | SNV | 1 | A | G | Heterozygous |
| NC_037639.1 | 12122696 | SNV | 1 | T | C | Homozygous   |
| NC_037639.1 | 12122741 | SNV | 1 | A | G | Homozygous   |
| NC_037639.1 | 12122754 | SNV | 1 | A | G | Heterozygous |
| NC_037639.1 | 12122775 | SNV | 1 | C | T | Homozygous   |
| NC_037639.1 | 12122783 | SNV | 1 | A | T | Homozygous   |
| NC_037639.1 | 12122785 | SNV | 1 | A | T | Homozygous   |
| NC_037639.1 | 12122787 | SNV | 1 | A | T | Heterozygous |
| NC_037639.1 | 12122797 | SNV | 1 | G | A | Homozygous   |
| NC_037639.1 | 12123876 | SNV | 1 | T | A | Homozygous   |
| NC_037639.1 | 12124015 | SNV | 1 | A | G | Heterozygous |
| NC_037639.1 | 12124599 | SNV | 1 | T | A | Homozygous   |
| NC_037639.1 | 12124868 | SNV | 1 | A | G | Heterozygous |
| NC_037639.1 | 12124946 | SNV | 1 | G | A | Homozygous   |
| NC_037639.1 | 12125343 | SNV | 1 | C | T | Homozygous   |
| NC_037639.1 | 12126028 | SNV | 1 | G | A | Heterozygous |
| NC_037639.1 | 12126086 | SNV | 1 | T | C | Heterozygous |
| NC_037639.1 | 12126218 | SNV | 1 | T | C | Homozygous   |
| NC_037639.1 | 12126602 | SNV | 1 | G | A | Heterozygous |
| NC_037639.1 | 12126921 | SNV | 1 | G | C | Homozygous   |
| NC_037639.1 | 12127131 | SNV | 1 | C | G | Homozygous   |
| NC_037639.1 | 12127553 | SNV | 1 | A | G | Heterozygous |
| NC_037639.1 | 12127582 | SNV | 1 | A | G | Homozygous   |
| NC_037639.1 | 12127786 | SNV | 1 | G | A | Heterozygous |
| NC_037639.1 | 12128091 | SNV | 1 | T | C | Homozygous   |

|             |          |     |   |   |   |              |
|-------------|----------|-----|---|---|---|--------------|
| NC_037639.1 | 12128219 | SNV | 1 | G | T | Homozygous   |
| NC_037639.1 | 12128245 | SNV | 1 | G | T | Heterozygous |
| NC_037639.1 | 12128583 | SNV | 1 | T | A | Heterozygous |
| NC_037639.1 | 12128990 | SNV | 1 | G | A | Homozygous   |
| NC_037639.1 | 12131299 | SNV | 1 | C | T | Heterozygous |
| NC_037639.1 | 12131749 | SNV | 1 | C | T | Heterozygous |
| NC_037639.1 | 12131927 | SNV | 1 | A | G | Heterozygous |
| NC_037639.1 | 12132625 | SNV | 1 | A | G | Homozygous   |
| NC_037639.1 | 12133158 | SNV | 1 | T | C | Heterozygous |
| NC_037639.1 | 12133632 | SNV | 1 | C | T | Homozygous   |
| NC_037639.1 | 12134657 | SNV | 1 | T | C | Homozygous   |
| NC_037639.1 | 12134660 | SNV | 1 | G | T | Homozygous   |
| NC_037639.1 | 12134664 | SNV | 1 | A | T | Homozygous   |
| NC_037639.1 | 12134668 | SNV | 1 | T | G | Homozygous   |
| NC_037639.1 | 12134744 | SNV | 1 | A | G | Homozygous   |
| NC_037639.1 | 12134867 | SNV | 1 | C | T | Heterozygous |
| NC_037639.1 | 12134941 | SNV | 1 | G | A | Heterozygous |
| NC_037639.1 | 12135022 | SNV | 1 | C | T | Heterozygous |
| NC_037639.1 | 12135768 | SNV | 1 | C | T | Heterozygous |
| NC_037639.1 | 12135915 | SNV | 1 | A | G | Heterozygous |
| NC_037639.1 | 12136333 | SNV | 1 | C | G | Homozygous   |
| NC_037639.1 | 12136830 | SNV | 1 | T | C | Homozygous   |
| NC_037639.1 | 12136883 | SNV | 1 | G | A | Heterozygous |
| NC_037639.1 | 12136965 | SNV | 1 | G | A | Heterozygous |
| NC_037639.1 | 12136968 | SNV | 1 | G | A | Heterozygous |
| NC_037639.1 | 12137180 | SNV | 1 | G | T | Homozygous   |
| NC_037639.1 | 12137211 | SNV | 1 | C | T | Heterozygous |
| NC_037639.1 | 12137490 | SNV | 1 | A | G | Heterozygous |
| NC_037639.1 | 12137744 | SNV | 1 | A | C | Homozygous   |
| NC_037639.1 | 12137914 | SNV | 1 | T | C | Homozygous   |
| NC_037639.1 | 12138068 | SNV | 1 | C | T | Homozygous   |
| NC_037639.1 | 12138098 | SNV | 1 | A | G | Heterozygous |
| NC_037639.1 | 12138253 | SNV | 1 | G | A | Heterozygous |
| NC_037639.1 | 12138262 | SNV | 1 | A | G | Homozygous   |
| NC_037639.1 | 12138394 | SNV | 1 | C | T | Heterozygous |
| NC_037639.1 | 12138418 | SNV | 1 | T | C | Heterozygous |
| NC_037639.1 | 12138453 | SNV | 1 | G | A | Heterozygous |
| NC_037639.1 | 12138513 | SNV | 1 | G | A | Heterozygous |
| NC_037639.1 | 12138575 | SNV | 1 | A | G | Homozygous   |
| NC_037639.1 | 12143355 | SNV | 1 | G | A | Heterozygous |
| NC_037639.1 | 12144973 | SNV | 1 | A | G | Homozygous   |
| NC_037639.1 | 12145486 | SNV | 1 | A | G | Homozygous   |
| NC_037639.1 | 12145890 | SNV | 1 | T | A | Homozygous   |
| NC_037639.1 | 12148673 | SNV | 1 | T | A | Homozygous   |
| NC_037639.1 | 12154660 | SNV | 1 | A | T | Heterozygous |
| NC_037639.1 | 12154661 | SNV | 1 | T | C | Heterozygous |
| NC_037639.1 | 12154664 | SNV | 1 | A | G | Homozygous   |
| NC_037639.1 | 12154666 | SNV | 1 | A | T | Heterozygous |
| NC_037639.1 | 12156903 | SNV | 1 | G | C | Homozygous   |
| NC_037639.1 | 12156905 | SNV | 1 | T | C | Heterozygous |
| NC_037639.1 | 12156907 | SNV | 1 | T | C | Heterozygous |

|             |          |     |   |   |   |              |
|-------------|----------|-----|---|---|---|--------------|
| NC_037639.1 | 12157833 | SNV | 1 | C | T | Heterozygous |
| NC_037639.1 | 12157837 | SNV | 1 | T | C | Heterozygous |
| NC_037639.1 | 12157850 | SNV | 1 | G | C | Heterozygous |
| NC_037639.1 | 12157861 | SNV | 1 | T | C | Heterozygous |
| NC_037639.1 | 12157864 | SNV | 1 | C | T | Heterozygous |
| NC_037639.1 | 12158169 | SNV | 1 | G | A | Heterozygous |
| NC_037639.1 | 12158187 | SNV | 1 | G | A | Homozygous   |
| NC_037639.1 | 12158247 | SNV | 1 | A | G | Homozygous   |
| NC_037639.1 | 12158285 | SNV | 1 | C | T | Heterozygous |
| NC_037639.1 | 12166146 | SNV | 1 | T | A | Homozygous   |
| NC_037639.1 | 12166156 | SNV | 1 | G | A | Homozygous   |
| NC_037639.1 | 12166172 | SNV | 1 | T | C | Homozygous   |
| NC_037639.1 | 12166217 | SNV | 1 | T | C | Homozygous   |
| NC_037639.1 | 12166314 | SNV | 1 | A | G | Heterozygous |
| NC_037639.1 | 12169095 | SNV | 1 | G | A | Heterozygous |
| NC_037639.1 | 12169851 | SNV | 1 | A | G | Homozygous   |
| NC_037639.1 | 12169861 | SNV | 1 | A | G | Homozygous   |
| NC_037639.1 | 12174464 | SNV | 1 | T | C | Homozygous   |
| NC_037639.1 | 12192791 | SNV | 1 | A | G | Homozygous   |
| NC_037639.1 | 12192867 | SNV | 1 | G | A | Heterozygous |
| NC_037639.1 | 12192929 | SNV | 1 | A | G | Homozygous   |
| NC_037639.1 | 12193066 | SNV | 1 | T | C | Homozygous   |
| NC_037639.1 | 12193249 | SNV | 1 | C | G | Heterozygous |
| NC_037639.1 | 12193447 | SNV | 1 | T | C | Homozygous   |
| NC_037639.1 | 12193544 | SNV | 1 | C | T | Homozygous   |
| NC_037639.1 | 12202655 | SNV | 1 | C | A | Heterozygous |
| NC_037639.1 | 12202780 | SNV | 1 | A | G | Homozygous   |
| NC_037639.1 | 12204510 | SNV | 1 | C | T | Homozygous   |
| NC_037639.1 | 12204514 | SNV | 1 | T | G | Homozygous   |
| NC_037639.1 | 12204516 | SNV | 1 | T | G | Homozygous   |
| NC_037639.1 | 12204540 | SNV | 1 | T | C | Homozygous   |
| NC_037639.1 | 12204542 | SNV | 1 | T | C | Homozygous   |
| NC_037639.1 | 12204547 | SNV | 1 | T | G | Homozygous   |
| NC_037639.1 | 12212126 | SNV | 1 | A | G | Heterozygous |
| NC_037639.1 | 12212216 | SNV | 1 | A | G | Heterozygous |
| NC_037639.1 | 12212305 | SNV | 1 | G | C | Heterozygous |
| NC_037639.1 | 12212376 | SNV | 1 | G | A | Homozygous   |
| NC_037639.1 | 12212380 | SNV | 1 | G | A | Heterozygous |
| NC_037639.1 | 12217111 | SNV | 1 | G | A | Heterozygous |
| NC_037639.1 | 12217115 | SNV | 1 | G | A | Homozygous   |
| NC_037639.1 | 12217117 | SNV | 1 | A | G | Homozygous   |
| NC_037639.1 | 12257640 | SNV | 1 | G | C | Homozygous   |
| NC_037639.1 | 12257652 | SNV | 1 | C | G | Heterozygous |
| NC_037639.1 | 12257663 | SNV | 1 | A | G | Homozygous   |
| NC_037639.1 | 12257695 | SNV | 1 | T | C | Heterozygous |
| NC_037639.1 | 12257733 | SNV | 1 | C | G | Homozygous   |
| NC_037639.1 | 12257767 | SNV | 1 | T | C | Homozygous   |
| NC_037639.1 | 12257885 | SNV | 1 | T | G | Homozygous   |
| NC_037639.1 | 12257921 | SNV | 1 | G | A | Homozygous   |
| NC_037639.1 | 12258011 | SNV | 1 | G | C | Heterozygous |
| NC_037639.1 | 12267979 | SNV | 1 | G | C | Heterozygous |

|             |          |     |   |   |   |              |
|-------------|----------|-----|---|---|---|--------------|
| NC_037639.1 | 12272219 | SNV | 1 | A | G | Heterozygous |
| NC_037639.1 | 12272440 | SNV | 1 | T | C | Heterozygous |
| NC_037639.1 | 12272474 | SNV | 1 | C | T | Heterozygous |
| NC_037639.1 | 12272911 | SNV | 1 | C | T | Heterozygous |
| NC_037639.1 | 12273003 | SNV | 1 | G | T | Homozygous   |
| NC_037639.1 | 12273513 | SNV | 1 | T | C | Heterozygous |
| NC_037639.1 | 12273984 | SNV | 1 | T | C | Homozygous   |
| NC_037639.1 | 12274045 | SNV | 1 | C | G | Homozygous   |
| NC_037639.1 | 12278275 | SNV | 1 | C | T | Heterozygous |
| NC_037639.1 | 12278689 | SNV | 1 | A | G | Homozygous   |
| NC_037639.1 | 12279671 | SNV | 1 | T | G | Heterozygous |
| NC_037639.1 | 12281602 | SNV | 1 | A | C | Homozygous   |
| NC_037639.1 | 12282342 | SNV | 1 | G | A | Heterozygous |
| NC_037639.1 | 12282412 | SNV | 1 | T | C | Homozygous   |
| NC_037639.1 | 12282544 | SNV | 1 | T | C | Homozygous   |
| NC_037639.1 | 12282574 | SNV | 1 | A | C | Homozygous   |
| NC_037639.1 | 12283432 | SNV | 1 | T | C | Homozygous   |
| NC_037639.1 | 12283642 | SNV | 1 | C | T | Homozygous   |
| NC_037639.1 | 12286271 | SNV | 1 | C | A | Heterozygous |
| NC_037639.1 | 12286387 | SNV | 1 | A | G | Heterozygous |
| NC_037639.1 | 12286416 | SNV | 1 | T | A | Homozygous   |
| NC_037639.1 | 12286422 | SNV | 1 | A | G | Heterozygous |
| NC_037639.1 | 12287498 | SNV | 1 | A | G | Homozygous   |
| NC_037639.1 | 12287740 | SNV | 1 | T | A | Homozygous   |
| NC_037639.1 | 12287865 | SNV | 1 | A | G | Homozygous   |
| NC_037639.1 | 12288491 | SNV | 1 | A | G | Heterozygous |
| NC_037639.1 | 12288500 | SNV | 1 | A | G | Heterozygous |
| NC_037639.1 | 12288548 | SNV | 1 | G | A | Homozygous   |
| NC_037639.1 | 12288563 | SNV | 1 | C | A | Heterozygous |
| NC_037639.1 | 12288745 | SNV | 1 | T | C | Heterozygous |
| NC_037639.1 | 12288748 | SNV | 1 | G | C | Heterozygous |
| NC_037639.1 | 12288781 | SNV | 1 | A | G | Heterozygous |
| NC_037639.1 | 12288831 | SNV | 1 | A | G | Heterozygous |
| NC_037639.1 | 12289529 | SNV | 1 | G | A | Heterozygous |
| NC_037639.1 | 12289532 | SNV | 1 | T | A | Heterozygous |
| NC_037639.1 | 12289535 | SNV | 1 | G | A | Heterozygous |
| NC_037639.1 | 12289719 | SNV | 1 | C | A | Heterozygous |
| NC_037639.1 | 12289889 | SNV | 1 | G | A | Heterozygous |
| NC_037639.1 | 12289912 | SNV | 1 | A | G | Heterozygous |
| NC_037639.1 | 12289931 | SNV | 1 | G | A | Heterozygous |
| NC_037639.1 | 12289990 | SNV | 1 | T | C | Homozygous   |
| NC_037639.1 | 12290032 | SNV | 1 | T | C | Heterozygous |
| NC_037639.1 | 12290370 | SNV | 1 | A | G | Heterozygous |
| NC_037639.1 | 12290462 | SNV | 1 | T | C | Heterozygous |
| NC_037639.1 | 12290464 | SNV | 1 | T | C | Heterozygous |
| NC_037639.1 | 12290515 | SNV | 1 | T | A | Heterozygous |
| NC_037639.1 | 12292237 | SNV | 1 | A | G | Homozygous   |
| NC_037639.1 | 12292267 | SNV | 1 | G | A | Heterozygous |
| NC_037639.1 | 12292284 | SNV | 1 | T | G | Homozygous   |
| NC_037639.1 | 12292363 | SNV | 1 | A | G | Homozygous   |
| NC_037639.1 | 12293542 | SNV | 1 | A | T | Heterozygous |

|             |          |     |   |   |   |              |
|-------------|----------|-----|---|---|---|--------------|
| NC_037639.1 | 12294038 | SNV | 1 | C | T | Heterozygous |
| NC_037639.1 | 12294285 | SNV | 1 | T | C | Heterozygous |
| NC_037639.1 | 12295012 | SNV | 1 | C | T | Heterozygous |
| NC_037639.1 | 12314145 | SNV | 1 | C | T | Heterozygous |
| NC_037639.1 | 12315768 | SNV | 1 | A | G | Homozygous   |
| NC_037639.1 | 12315946 | SNV | 1 | A | G | Homozygous   |
| NC_037639.1 | 12316709 | SNV | 1 | A | G | Heterozygous |
| NC_037639.1 | 12316939 | SNV | 1 | T | A | Homozygous   |
| NC_037639.1 | 12317064 | SNV | 1 | T | C | Heterozygous |
| NC_037639.1 | 12317074 | SNV | 1 | T | C | Homozygous   |
| NC_037639.1 | 12317165 | SNV | 1 | G | A | Homozygous   |
| NC_037639.1 | 12317517 | SNV | 1 | A | T | Heterozygous |
| NC_037639.1 | 12317540 | SNV | 1 | C | T | Heterozygous |
| NC_037639.1 | 12317542 | SNV | 1 | T | C | Heterozygous |
| NC_037639.1 | 12318492 | SNV | 1 | A | G | Heterozygous |
| NC_037639.1 | 12319137 | SNV | 1 | A | G | Heterozygous |
| NC_037639.1 | 12319165 | SNV | 1 | T | C | Homozygous   |
| NC_037639.1 | 12333979 | SNV | 1 | G | A | Heterozygous |
| NC_037639.1 | 12334026 | SNV | 1 | G | A | Heterozygous |
| NC_037639.1 | 12334240 | SNV | 1 | G | A | Heterozygous |
| NC_037639.1 | 12334253 | SNV | 1 | C | T | Heterozygous |
| NC_037639.1 | 12334318 | SNV | 1 | G | T | Homozygous   |
| NC_037639.1 | 12334725 | SNV | 1 | T | A | Homozygous   |
| NC_037639.1 | 12334731 | SNV | 1 | G | A | Heterozygous |
| NC_037639.1 | 12334735 | SNV | 1 | G | A | Homozygous   |
| NC_037639.1 | 12342435 | SNV | 1 | T | C | Homozygous   |
| NC_037639.1 | 12342501 | SNV | 1 | T | C | Homozygous   |
| NC_037639.1 | 12342513 | SNV | 1 | T | C | Homozygous   |
| NC_037639.1 | 12342517 | SNV | 1 | G | C | Homozygous   |
| NC_037639.1 | 12342831 | SNV | 1 | G | C | Heterozygous |
| NC_037639.1 | 12342854 | SNV | 1 | G | A | Homozygous   |
| NC_037639.1 | 12342859 | SNV | 1 | G | A | Homozygous   |
| NC_037639.1 | 12342867 | SNV | 1 | T | G | Heterozygous |
| NC_037639.1 | 12342871 | SNV | 1 | G | T | Heterozygous |
| NC_037639.1 | 12342881 | SNV | 1 | G | A | Heterozygous |
| NC_037639.1 | 12342972 | SNV | 1 | A | G | Homozygous   |
| NC_037639.1 | 12344880 | SNV | 1 | A | G | Heterozygous |
| NC_037639.1 | 12345226 | SNV | 1 | T | C | Homozygous   |
| NC_037639.1 | 12345287 | SNV | 1 | G | A | Heterozygous |
| NC_037639.1 | 12346213 | SNV | 1 | G | C | Heterozygous |
| NC_037639.1 | 12347789 | SNV | 1 | G | A | Homozygous   |
| NC_037639.1 | 12347845 | SNV | 1 | A | G | Heterozygous |
| NC_037639.1 | 12361488 | SNV | 1 | C | T | Homozygous   |
| NC_037639.1 | 12361550 | SNV | 1 | G | A | Homozygous   |
| NC_037639.1 | 12361569 | SNV | 1 | T | C | Homozygous   |
| NC_037639.1 | 12361663 | SNV | 1 | C | A | Heterozygous |
| NC_037639.1 | 12361711 | SNV | 1 | T | C | Homozygous   |
| NC_037639.1 | 12361749 | SNV | 1 | T | C | Homozygous   |
| NC_037639.1 | 12362937 | SNV | 1 | C | T | Heterozygous |
| NC_037639.1 | 12362940 | SNV | 1 | C | T | Heterozygous |
| NC_037639.1 | 12362945 | SNV | 1 | T | C | Heterozygous |

|             |          |     |   |   |   |              |
|-------------|----------|-----|---|---|---|--------------|
| NC_037639.1 | 12363006 | SNV | 1 | C | T | Homozygous   |
| NC_037639.1 | 12363096 | SNV | 1 | G | T | Homozygous   |
| NC_037639.1 | 12363225 | SNV | 1 | T | C | Homozygous   |
| NC_037639.1 | 12363332 | SNV | 1 | G | A | Heterozygous |
| NC_037639.1 | 12363537 | SNV | 1 | T | C | Homozygous   |
| NC_037639.1 | 12363572 | SNV | 1 | C | T | Homozygous   |
| NC_037639.1 | 12372808 | SNV | 1 | T | C | Homozygous   |
| NC_037639.1 | 12372813 | SNV | 1 | A | G | Homozygous   |
| NC_037639.1 | 12372850 | SNV | 1 | G | A | Homozygous   |
| NC_037639.1 | 12372861 | SNV | 1 | G | A | Heterozygous |
| NC_037639.1 | 12376344 | SNV | 1 | C | T | Heterozygous |
| NC_037639.1 | 12376393 | SNV | 1 | A | G | Homozygous   |
| NC_037639.1 | 12376397 | SNV | 1 | C | T | Heterozygous |
| NC_037639.1 | 12380960 | SNV | 1 | G | A | Homozygous   |
| NC_037639.1 | 12380965 | SNV | 1 | C | T | Heterozygous |
| NC_037639.1 | 12394528 | SNV | 1 | T | C | Homozygous   |
| NC_037639.1 | 12394541 | SNV | 1 | G | A | Homozygous   |
| NC_037639.1 | 12394578 | SNV | 1 | T | C | Homozygous   |
| NC_037639.1 | 12394596 | SNV | 1 | C | T | Heterozygous |
| NC_037639.1 | 12411560 | SNV | 1 | T | C | Homozygous   |
| NC_037639.1 | 12413196 | SNV | 1 | G | A | Homozygous   |
| NC_037639.1 | 12414031 | SNV | 1 | A | G | Heterozygous |
| NC_037639.1 | 12414582 | SNV | 1 | G | T | Homozygous   |
| NC_037639.1 | 12414990 | SNV | 1 | T | C | Heterozygous |
| NC_037639.1 | 12415814 | SNV | 1 | T | G | Heterozygous |
| NC_037639.1 | 12415860 | SNV | 1 | A | G | Heterozygous |
| NC_037639.1 | 12415949 | SNV | 1 | C | T | Heterozygous |
| NC_037639.1 | 12415955 | SNV | 1 | G | A | Heterozygous |
| NC_037639.1 | 12416171 | SNV | 1 | T | C | Homozygous   |
| NC_037639.1 | 12416671 | SNV | 1 | T | C | Heterozygous |
| NC_037639.1 | 12416732 | SNV | 1 | A | G | Heterozygous |
| NC_037639.1 | 12416792 | SNV | 1 | A | G | Homozygous   |
| NC_037639.1 | 12417114 | SNV | 1 | A | G | Heterozygous |
| NC_037639.1 | 12417128 | SNV | 1 | G | A | Heterozygous |
| NC_037639.1 | 12417156 | SNV | 1 | A | G | Homozygous   |
| NC_037639.1 | 12417585 | SNV | 1 | C | T | Homozygous   |
| NC_037639.1 | 12418201 | SNV | 1 | A | G | Homozygous   |
| NC_037639.1 | 12418333 | SNV | 1 | A | G | Heterozygous |
| NC_037639.1 | 12418908 | SNV | 1 | G | A | Heterozygous |
| NC_037639.1 | 12418914 | SNV | 1 | A | G | Heterozygous |
| NC_037639.1 | 12419145 | SNV | 1 | T | C | Homozygous   |
| NC_037639.1 | 12419147 | SNV | 1 | C | G | Homozygous   |
| NC_037639.1 | 12419149 | SNV | 1 | T | C | Homozygous   |
| NC_037639.1 | 12419156 | SNV | 1 | A | G | Homozygous   |
| NC_037639.1 | 12419160 | SNV | 1 | A | G | Homozygous   |
| NC_037639.1 | 12419183 | SNV | 1 | T | C | Homozygous   |
| NC_037639.1 | 12419185 | SNV | 1 | T | C | Homozygous   |
| NC_037639.1 | 12420063 | SNV | 1 | C | T | Heterozygous |
| NC_037639.1 | 12420846 | SNV | 1 | A | C | Heterozygous |
| NC_037639.1 | 12421229 | SNV | 1 | A | G | Heterozygous |
| NC_037639.1 | 12421817 | SNV | 1 | C | T | Heterozygous |

|             |          |     |   |   |   |              |
|-------------|----------|-----|---|---|---|--------------|
| NC_037639.1 | 12422029 | SNV | 1 | G | C | Heterozygous |
| NC_037639.1 | 12422745 | SNV | 1 | G | A | Heterozygous |
| NC_037639.1 | 12426000 | SNV | 1 | A | G | Heterozygous |
| NC_037639.1 | 12426026 | SNV | 1 | T | C | Heterozygous |
| NC_037639.1 | 12428033 | SNV | 1 | C | T | Heterozygous |
| NC_037639.1 | 12428936 | SNV | 1 | T | C | Heterozygous |
| NC_037639.1 | 12429066 | SNV | 1 | T | C | Heterozygous |
| NC_037639.1 | 12429177 | SNV | 1 | C | T | Homozygous   |
| NC_037639.1 | 12429188 | SNV | 1 | C | T | Heterozygous |
| NC_037639.1 | 12429218 | SNV | 1 | T | C | Heterozygous |
| NC_037639.1 | 12429223 | SNV | 1 | G | A | Heterozygous |
| NC_037639.1 | 12429226 | SNV | 1 | G | A | Heterozygous |
| NC_037639.1 | 12429272 | SNV | 1 | G | A | Heterozygous |
| NC_037639.1 | 12429297 | SNV | 1 | C | T | Heterozygous |
| NC_037639.1 | 12429331 | SNV | 1 | T | G | Homozygous   |
| NC_037639.1 | 12429346 | SNV | 1 | A | G | Heterozygous |
| NC_037639.1 | 12429363 | SNV | 1 | A | G | Heterozygous |
| NC_037639.1 | 12429365 | SNV | 1 | G | A | Heterozygous |
| NC_037639.1 | 12429372 | SNV | 1 | T | C | Heterozygous |
| NC_037639.1 | 12429427 | SNV | 1 | T | C | Homozygous   |
| NC_037639.1 | 12429471 | SNV | 1 | G | A | Homozygous   |
| NC_037639.1 | 12429521 | SNV | 1 | G | A | Heterozygous |
| NC_037639.1 | 12429533 | SNV | 1 | C | G | Heterozygous |
| NC_037639.1 | 12429589 | SNV | 1 | A | G | Heterozygous |
| NC_037639.1 | 12429667 | SNV | 1 | G | A | Heterozygous |
| NC_037639.1 | 12429688 | SNV | 1 | T | C | Heterozygous |
| NC_037639.1 | 12429768 | SNV | 1 | C | G | Heterozygous |
| NC_037639.1 | 12429796 | SNV | 1 | A | G | Heterozygous |
| NC_037639.1 | 12429800 | SNV | 1 | A | G | Heterozygous |
| NC_037639.1 | 12429812 | SNV | 1 | G | A | Heterozygous |
| NC_037639.1 | 12429815 | SNV | 1 | T | C | Heterozygous |
| NC_037639.1 | 12429821 | SNV | 1 | T | C | Heterozygous |
| NC_037639.1 | 12429853 | SNV | 1 | G | A | Heterozygous |
| NC_037639.1 | 12429884 | SNV | 1 | T | A | Homozygous   |
| NC_037639.1 | 12429903 | SNV | 1 | T | C | Homozygous   |
| NC_037639.1 | 12429906 | SNV | 1 | A | G | Homozygous   |
| NC_037639.1 | 12430090 | SNV | 1 | T | C | Homozygous   |
| NC_037639.1 | 12430136 | SNV | 1 | G | A | Homozygous   |
| NC_037639.1 | 12430281 | SNV | 1 | T | C | Homozygous   |
| NC_037639.1 | 12437639 | SNV | 1 | G | A | Homozygous   |
| NC_037639.1 | 12445797 | SNV | 1 | G | C | Heterozygous |
| NC_037639.1 | 12445968 | SNV | 1 | T | A | Homozygous   |
| NC_037639.1 | 12446273 | SNV | 1 | A | G | Homozygous   |
| NC_037639.1 | 12446485 | SNV | 1 | C | T | Heterozygous |
| NC_037639.1 | 12447761 | SNV | 1 | C | T | Homozygous   |
| NC_037639.1 | 12448459 | SNV | 1 | G | A | Heterozygous |
| NC_037639.1 | 12448943 | SNV | 1 | G | A | Heterozygous |
| NC_037639.1 | 12449201 | SNV | 1 | A | G | Heterozygous |
| NC_037639.1 | 12449255 | SNV | 1 | C | T | Heterozygous |
| NC_037639.1 | 12449960 | SNV | 1 | A | G | Heterozygous |
| NC_037639.1 | 12457909 | SNV | 1 | A | T | Homozygous   |



|             |          |     |   |   |   |              |
|-------------|----------|-----|---|---|---|--------------|
| NC_037639.1 | 12457926 | SNV | 1 | C | T | Homozygous   |
| NC_037639.1 | 12457933 | SNV | 1 | T | C | Homozygous   |
| NC_037639.1 | 12457936 | SNV | 1 | T | A | Homozygous   |
| NC_037639.1 | 12457960 | SNV | 1 | A | T | Homozygous   |
| NC_037639.1 | 12462413 | SNV | 1 | C | T | Homozygous   |
| NC_037639.1 | 12463005 | SNV | 1 | A | G | Homozygous   |
| NC_037639.1 | 12463031 | SNV | 1 | T | C | Heterozygous |
| NC_037639.1 | 12463297 | SNV | 1 | T | C | Heterozygous |
| NC_037639.1 | 12463373 | SNV | 1 | G | A | Heterozygous |
| NC_037639.1 | 12463393 | SNV | 1 | T | C | Heterozygous |
| NC_037639.1 | 12463650 | SNV | 1 | A | G | Homozygous   |
| NC_037639.1 | 12463667 | SNV | 1 | C | T | Heterozygous |
| NC_037639.1 | 12464022 | SNV | 1 | A | G | Homozygous   |
| NC_037639.1 | 12464031 | SNV | 1 | T | G | Heterozygous |
| NC_037639.1 | 12466553 | SNV | 1 | C | T | Heterozygous |
| NC_037639.1 | 12466848 | SNV | 1 | G | T | Heterozygous |
| NC_037639.1 | 12510464 | SNV | 1 | T | A | Heterozygous |
| NC_037639.1 | 12510482 | SNV | 1 | A | G | Heterozygous |
| NC_037639.1 | 12510484 | SNV | 1 | G | A | Heterozygous |
| NC_037639.1 | 12510490 | SNV | 1 | A | G | Heterozygous |
| NC_037639.1 | 12511312 | SNV | 1 | T | A | Homozygous   |
| NC_037639.1 | 12511339 | SNV | 1 | A | G | Heterozygous |
| NC_037639.1 | 12511348 | SNV | 1 | G | A | Homozygous   |
| NC_037639.1 | 12515851 | SNV | 1 | C | G | Heterozygous |
| NC_037639.1 | 12516647 | SNV | 1 | T | C | Homozygous   |
| NC_037639.1 | 12516650 | SNV | 1 | T | C | Homozygous   |
| NC_037639.1 | 12516846 | SNV | 1 | C | T | Heterozygous |
| NC_037639.1 | 12516985 | SNV | 1 | T | C | Heterozygous |
| NC_037639.1 | 12523647 | SNV | 1 | T | C | Heterozygous |
| NC_037639.1 | 12526448 | SNV | 1 | C | T | Heterozygous |
| NC_037639.1 | 12526457 | SNV | 1 | C | A | Homozygous   |
| NC_037639.1 | 12526497 | SNV | 1 | C | T | Heterozygous |
| NC_037639.1 | 12526500 | SNV | 1 | G | T | Homozygous   |
| NC_037639.1 | 12526505 | SNV | 1 | G | A | Homozygous   |
| NC_037639.1 | 12526507 | SNV | 1 | T | C | Homozygous   |
| NC_037639.1 | 12535798 | SNV | 1 | G | T | Homozygous   |
| NC_037639.1 | 12539796 | SNV | 1 | A | T | Homozygous   |
| NC_037639.1 | 12539806 | SNV | 1 | G | C | Homozygous   |
| NC_037639.1 | 12539820 | SNV | 1 | C | A | Homozygous   |
| NC_037639.1 | 12540603 | SNV | 1 | C | T | Heterozygous |
| NC_037639.1 | 12540644 | SNV | 1 | A | G | Heterozygous |
| NC_037639.1 | 12541327 | SNV | 1 | G | A | Heterozygous |
| NC_037639.1 | 12541965 | SNV | 1 | G | A | Heterozygous |
| NC_037639.1 | 12542007 | SNV | 1 | C | T | Heterozygous |
| NC_037639.1 | 12543334 | SNV | 1 | C | G | Heterozygous |
| NC_037639.1 | 12545613 | SNV | 1 | C | T | Heterozygous |
| NC_037639.1 | 12546029 | SNV | 1 | T | C | Homozygous   |
| NC_037639.1 | 12547351 | SNV | 1 | C | T | Heterozygous |
| NC_037639.1 | 12553850 | SNV | 1 | G | T | Homozygous   |
| NC_037639.1 | 12553858 | SNV | 1 | A | G | Homozygous   |
| NC_037639.1 | 12553871 | SNV | 1 | G | A | Heterozygous |

|             |          |     |   |   |   |              |
|-------------|----------|-----|---|---|---|--------------|
| NC_037639.1 | 12553896 | SNV | 1 | C | G | Heterozygous |
| NC_037639.1 | 12553905 | SNV | 1 | T | A | Homozygous   |
| NC_037639.1 | 12555986 | SNV | 1 | A | G | Heterozygous |
| NC_037639.1 | 12557316 | SNV | 1 | A | G | Homozygous   |
| NC_037639.1 | 12557702 | SNV | 1 | C | T | Heterozygous |
| NC_037639.1 | 12557713 | SNV | 1 | A | T | Heterozygous |
| NC_037639.1 | 12558122 | SNV | 1 | T | C | Heterozygous |
| NC_037639.1 | 12558125 | SNV | 1 | G | A | Heterozygous |
| NC_037639.1 | 12558145 | SNV | 1 | T | C | Homozygous   |
| NC_037639.1 | 12558266 | SNV | 1 | G | T | Heterozygous |
| NC_037639.1 | 12558270 | SNV | 1 | A | G | Heterozygous |
| NC_037639.1 | 12558302 | SNV | 1 | T | C | Homozygous   |
| NC_037639.1 | 12558350 | SNV | 1 | C | G | Heterozygous |
| NC_037639.1 | 12563885 | SNV | 1 | A | G | Homozygous   |
| NC_037639.1 | 12563934 | SNV | 1 | A | G | Homozygous   |
| NC_037639.1 | 12567068 | SNV | 1 | G | A | Heterozygous |
| NC_037639.1 | 12571244 | SNV | 1 | G | A | Heterozygous |
| NC_037639.1 | 12571251 | SNV | 1 | A | G | Heterozygous |
| NC_037639.1 | 12571264 | SNV | 1 | G | A | Heterozygous |
| NC_037639.1 | 12571298 | SNV | 1 | A | G | Homozygous   |
| NC_037639.1 | 12571305 | SNV | 1 | G | A | Homozygous   |
| NC_037639.1 | 12578413 | SNV | 1 | T | C | Homozygous   |
| NC_037639.1 | 12578425 | SNV | 1 | C | T | Heterozygous |
| NC_037639.1 | 12578542 | SNV | 1 | A | G | Homozygous   |
| NC_037639.1 | 12578560 | SNV | 1 | A | T | Homozygous   |
| NC_037639.1 | 12578961 | SNV | 1 | C | G | Homozygous   |
| NC_037639.1 | 12578964 | SNV | 1 | T | C | Homozygous   |
| NC_037639.1 | 12585754 | SNV | 1 | A | G | Homozygous   |
| NC_037639.1 | 12586423 | SNV | 1 | A | G | Homozygous   |
| NC_037639.1 | 12586590 | SNV | 1 | T | G | Homozygous   |
| NC_037639.1 | 12587040 | SNV | 1 | G | A | Heterozygous |
| NC_037639.1 | 12587603 | SNV | 1 | T | G | Homozygous   |
| NC_037639.1 | 12587605 | SNV | 1 | C | A | Homozygous   |
| NC_037639.1 | 12587802 | SNV | 1 | C | T | Heterozygous |
| NC_037639.1 | 12588018 | SNV | 1 | G | A | Heterozygous |
| NC_037639.1 | 12588021 | SNV | 1 | G | C | Heterozygous |
| NC_037639.1 | 12588308 | SNV | 1 | G | C | Homozygous   |
| NC_037639.1 | 12588810 | SNV | 1 | G | A | Heterozygous |
| NC_037639.1 | 12589018 | SNV | 1 | A | G | Homozygous   |
| NC_037639.1 | 12589094 | SNV | 1 | T | C | Heterozygous |
| NC_037639.1 | 12589811 | SNV | 1 | A | G | Heterozygous |
| NC_037639.1 | 12590744 | SNV | 1 | T | C | Homozygous   |
| NC_037639.1 | 12591235 | SNV | 1 | A | G | Homozygous   |
| NC_037639.1 | 12591245 | SNV | 1 | G | A | Homozygous   |
| NC_037639.1 | 12593031 | SNV | 1 | C | T | Heterozygous |
| NC_037639.1 | 12593341 | SNV | 1 | G | C | Heterozygous |
| NC_037639.1 | 12593345 | SNV | 1 | G | A | Heterozygous |
| NC_037639.1 | 12593842 | SNV | 1 | G | C | Homozygous   |
| NC_037639.1 | 12593912 | SNV | 1 | T | C | Homozygous   |
| NC_037639.1 | 12593932 | SNV | 1 | G | A | Heterozygous |
| NC_037639.1 | 12593941 | SNV | 1 | T | C | Homozygous   |

|             |          |     |   |   |   |              |
|-------------|----------|-----|---|---|---|--------------|
| NC_037639.1 | 12594101 | SNV | 1 | C | T | Homozygous   |
| NC_037639.1 | 12594309 | SNV | 1 | T | C | Heterozygous |
| NC_037639.1 | 12594562 | SNV | 1 | G | A | Homozygous   |
| NC_037639.1 | 12594585 | SNV | 1 | G | T | Heterozygous |
| NC_037639.1 | 12594590 | SNV | 1 | A | T | Heterozygous |
| NC_037639.1 | 12594593 | SNV | 1 | G | A | Heterozygous |
| NC_037639.1 | 12594598 | SNV | 1 | A | T | Heterozygous |
| NC_037639.1 | 12594603 | SNV | 1 | A | G | Heterozygous |
| NC_037639.1 | 12595477 | SNV | 1 | T | C | Heterozygous |
| NC_037639.1 | 12597996 | SNV | 1 | A | G | Homozygous   |
| NC_037639.1 | 12598062 | SNV | 1 | G | A | Homozygous   |
| NC_037639.1 | 12598336 | SNV | 1 | G | A | Heterozygous |
| NC_037639.1 | 12598456 | SNV | 1 | T | C | Homozygous   |
| NC_037639.1 | 12598627 | SNV | 1 | G | A | Heterozygous |
| NC_037639.1 | 12598678 | SNV | 1 | G | C | Heterozygous |
| NC_037639.1 | 12598696 | SNV | 1 | T | C | Homozygous   |
| NC_037639.1 | 12598872 | SNV | 1 | A | G | Homozygous   |
| NC_037639.1 | 12600576 | SNV | 1 | C | T | Heterozygous |
| NC_037639.1 | 12600638 | SNV | 1 | C | T | Heterozygous |
| NC_037639.1 | 12600769 | SNV | 1 | T | A | Heterozygous |
| NC_037639.1 | 12600827 | SNV | 1 | C | T | Heterozygous |
| NC_037639.1 | 12600858 | SNV | 1 | A | G | Homozygous   |
| NC_037639.1 | 12600899 | SNV | 1 | C | T | Heterozygous |
| NC_037639.1 | 12600960 | SNV | 1 | T | C | Homozygous   |
| NC_037639.1 | 12601087 | SNV | 1 | A | G | Homozygous   |
| NC_037639.1 | 12601250 | SNV | 1 | C | G | Heterozygous |
| NC_037639.1 | 12601531 | SNV | 1 | A | G | Heterozygous |
| NC_037639.1 | 12601595 | SNV | 1 | G | T | Homozygous   |
| NC_037639.1 | 12601697 | SNV | 1 | G | A | Heterozygous |
| NC_037639.1 | 12601791 | SNV | 1 | T | G | Homozygous   |
| NC_037639.1 | 12604400 | SNV | 1 | T | C | Homozygous   |
| NC_037639.1 | 12604402 | SNV | 1 | G | A | Homozygous   |
| NC_037639.1 | 12605499 | SNV | 1 | G | A | Homozygous   |
| NC_037639.1 | 12605508 | SNV | 1 | T | A | Homozygous   |
| NC_037639.1 | 12605526 | SNV | 1 | T | A | Homozygous   |
| NC_037639.1 | 12605529 | SNV | 1 | A | T | Homozygous   |
| NC_037639.1 | 12605532 | SNV | 1 | C | T | Homozygous   |
| NC_037639.1 | 12605535 | SNV | 1 | A | T | Homozygous   |
| NC_037639.1 | 12605538 | SNV | 1 | T | A | Homozygous   |
| NC_037639.1 | 12610099 | SNV | 1 | A | G | Homozygous   |
| NC_037639.1 | 12612041 | SNV | 1 | T | C | Homozygous   |
| NC_037639.1 | 12623707 | SNV | 1 | A | G | Homozygous   |
| NC_037639.1 | 12623856 | SNV | 1 | G | A | Homozygous   |
| NC_037639.1 | 12624103 | SNV | 1 | T | A | Homozygous   |
| NC_037639.1 | 12624105 | SNV | 1 | T | C | Homozygous   |
| NC_037639.1 | 12624108 | SNV | 1 | T | C | Homozygous   |
| NC_037639.1 | 12624392 | SNV | 1 | A | G | Homozygous   |
| NC_037639.1 | 12625048 | SNV | 1 | G | T | Homozygous   |
| NC_037639.1 | 12625820 | SNV | 1 | A | T | Homozygous   |
| NC_037639.1 | 12626827 | SNV | 1 | T | G | Homozygous   |
| NC_037639.1 | 12627673 | SNV | 1 | T | C | Homozygous   |

|             |          |     |   |   |   |              |
|-------------|----------|-----|---|---|---|--------------|
| NC_037639.1 | 12683982 | SNV | 1 | C | T | Homozygous   |
| NC_037639.1 | 12684167 | SNV | 1 | G | T | Heterozygous |
| NC_037639.1 | 12684232 | SNV | 1 | A | C | Homozygous   |
| NC_037639.1 | 12684242 | SNV | 1 | A | G | Homozygous   |
| NC_037639.1 | 12684447 | SNV | 1 | G | A | Heterozygous |
| NC_037639.1 | 12684582 | SNV | 1 | A | G | Heterozygous |
| NC_037639.1 | 12686076 | SNV | 1 | G | A | Heterozygous |
| NC_037639.1 | 12686122 | SNV | 1 | G | A | Heterozygous |
| NC_037639.1 | 12686342 | SNV | 1 | G | T | Homozygous   |
| NC_037639.1 | 12686377 | SNV | 1 | T | C | Homozygous   |
| NC_037639.1 | 12687531 | SNV | 1 | C | T | Homozygous   |
| NC_037639.1 | 12687549 | SNV | 1 | G | T | Heterozygous |
| NC_037639.1 | 12687571 | SNV | 1 | A | T | Heterozygous |
| NC_037639.1 | 12687573 | SNV | 1 | G | T | Heterozygous |
| NC_037639.1 | 12687591 | SNV | 1 | T | C | Heterozygous |
| NC_037639.1 | 12687860 | SNV | 1 | T | C | Homozygous   |
| NC_037639.1 | 12687942 | SNV | 1 | C | T | Heterozygous |
| NC_037639.1 | 12688022 | SNV | 1 | G | A | Homozygous   |
| NC_037639.1 | 12688024 | SNV | 1 | G | A | Homozygous   |
| NC_037639.1 | 12688121 | SNV | 1 | C | G | Homozygous   |
| NC_037639.1 | 12688397 | SNV | 1 | C | G | Homozygous   |
| NC_037639.1 | 12688450 | SNV | 1 | C | T | Homozygous   |
| NC_037639.1 | 12688485 | SNV | 1 | A | G | Homozygous   |
| NC_037639.1 | 12688917 | SNV | 1 | T | C | Heterozygous |
| NC_037639.1 | 12698413 | SNV | 1 | G | A | Homozygous   |
| NC_037639.1 | 12698444 | SNV | 1 | G | A | Heterozygous |
| NC_037639.1 | 12714945 | SNV | 1 | T | C | Heterozygous |
| NC_037639.1 | 12728202 | SNV | 1 | T | C | Homozygous   |
| NC_037639.1 | 12728208 | SNV | 1 | A | G | Homozygous   |
| NC_037639.1 | 12728762 | SNV | 1 | A | G | Heterozygous |
| NC_037639.1 | 12736119 | SNV | 1 | G | A | Heterozygous |
| NC_037639.1 | 12736930 | SNV | 1 | A | G | Homozygous   |
| NC_037639.1 | 12737815 | SNV | 1 | C | A | Heterozygous |
| NC_037639.1 | 12737996 | SNV | 1 | C | T | Heterozygous |
| NC_037639.1 | 12738200 | SNV | 1 | T | C | Homozygous   |
| NC_037639.1 | 12738270 | SNV | 1 | C | G | Homozygous   |
| NC_037639.1 | 12738323 | SNV | 1 | A | T | Heterozygous |
| NC_037639.1 | 12738329 | SNV | 1 | C | T | Heterozygous |
| NC_037639.1 | 12738700 | SNV | 1 | A | G | Homozygous   |
| NC_037639.1 | 12738707 | SNV | 1 | G | A | Heterozygous |
| NC_037639.1 | 12738736 | SNV | 1 | G | A | Homozygous   |
| NC_037639.1 | 12740114 | SNV | 1 | A | G | Homozygous   |
| NC_037639.1 | 12740218 | SNV | 1 | T | G | Heterozygous |
| NC_037639.1 | 12740938 | SNV | 1 | A | G | Homozygous   |
| NC_037639.1 | 12740953 | SNV | 1 | C | T | Homozygous   |
| NC_037639.1 | 12741157 | SNV | 1 | A | G | Homozygous   |
| NC_037639.1 | 12741226 | SNV | 1 | G | A | Heterozygous |
| NC_037639.1 | 12741591 | SNV | 1 | G | A | Heterozygous |
| NC_037639.1 | 12741880 | SNV | 1 | A | G | Homozygous   |
| NC_037639.1 | 12741889 | SNV | 1 | G | A | Heterozygous |
| NC_037639.1 | 12742060 | SNV | 1 | C | T | Heterozygous |

|             |          |     |   |   |   |              |
|-------------|----------|-----|---|---|---|--------------|
| NC_037639.1 | 12742084 | SNV | 1 | A | G | Homozygous   |
| NC_037639.1 | 12742457 | SNV | 1 | T | C | Homozygous   |
| NC_037639.1 | 12742709 | SNV | 1 | T | C | Homozygous   |
| NC_037639.1 | 12742986 | SNV | 1 | A | G | Homozygous   |
| NC_037639.1 | 12743025 | SNV | 1 | C | T | Homozygous   |
| NC_037639.1 | 12743061 | SNV | 1 | C | T | Homozygous   |
| NC_037639.1 | 12743346 | SNV | 1 | A | G | Homozygous   |
| NC_037639.1 | 12743418 | SNV | 1 | G | A | Heterozygous |
| NC_037639.1 | 12743421 | SNV | 1 | A | G | Homozygous   |
| NC_037639.1 | 12743445 | SNV | 1 | G | A | Homozygous   |
| NC_037639.1 | 12743475 | SNV | 1 | A | G | Homozygous   |
| NC_037639.1 | 12743715 | SNV | 1 | T | C | Homozygous   |
| NC_037639.1 | 12743913 | SNV | 1 | T | C | Homozygous   |
| NC_037639.1 | 12744216 | SNV | 1 | T | C | Homozygous   |
| NC_037639.1 | 12744520 | SNV | 1 | G | A | Heterozygous |
| NC_037639.1 | 12744676 | SNV | 1 | C | T | Heterozygous |
| NC_037639.1 | 12745062 | SNV | 1 | T | C | Heterozygous |
| NC_037639.1 | 12746366 | SNV | 1 | T | C | Homozygous   |
| NC_037639.1 | 12747129 | SNV | 1 | T | C | Homozygous   |
| NC_037639.1 | 12747243 | SNV | 1 | G | C | Heterozygous |
| NC_037639.1 | 12747246 | SNV | 1 | T | C | Homozygous   |
| NC_037639.1 | 12747614 | SNV | 1 | C | T | Heterozygous |
| NC_037639.1 | 12747998 | SNV | 1 | G | A | Homozygous   |
| NC_037639.1 | 12749831 | SNV | 1 | A | G | Homozygous   |
| NC_037639.1 | 12751980 | SNV | 1 | G | A | Homozygous   |
| NC_037639.1 | 12753205 | SNV | 1 | A | G | Homozygous   |
| NC_037639.1 | 12753208 | SNV | 1 | A | G | Heterozygous |
| NC_037639.1 | 12755561 | SNV | 1 | C | T | Heterozygous |
| NC_037639.1 | 12755576 | SNV | 1 | T | C | Homozygous   |
| NC_037639.1 | 12755642 | SNV | 1 | A | G | Homozygous   |
| NC_037639.1 | 12758703 | SNV | 1 | T | A | Heterozygous |
| NC_037639.1 | 12758735 | SNV | 1 | A | C | Heterozygous |
| NC_037639.1 | 12758738 | SNV | 1 | T | A | Homozygous   |
| NC_037639.1 | 12762756 | SNV | 1 | C | T | Heterozygous |
| NC_037639.1 | 12764023 | SNV | 1 | T | G | Homozygous   |
| NC_037639.1 | 12764040 | SNV | 1 | G | A | Homozygous   |
| NC_037639.1 | 12764042 | SNV | 1 | A | T | Homozygous   |
| NC_037639.1 | 12765165 | SNV | 1 | C | T | Homozygous   |
| NC_037639.1 | 12765525 | SNV | 1 | A | G | Heterozygous |
| NC_037639.1 | 12765534 | SNV | 1 | C | T | Heterozygous |
| NC_037639.1 | 12793155 | SNV | 1 | G | T | Homozygous   |
| NC_037639.1 | 12793738 | SNV | 1 | A | T | Homozygous   |
| NC_037639.1 | 12793742 | SNV | 1 | C | T | Heterozygous |
| NC_037639.1 | 12793744 | SNV | 1 | C | T | Heterozygous |
| NC_037639.1 | 12793746 | SNV | 1 | C | T | Homozygous   |
| NC_037639.1 | 12793756 | SNV | 1 | G | C | Homozygous   |
| NC_037639.1 | 12793766 | SNV | 1 | C | G | Homozygous   |
| NC_037639.1 | 12793779 | SNV | 1 | T | G | Homozygous   |
| NC_037639.1 | 12794231 | SNV | 1 | T | C | Homozygous   |
| NC_037639.1 | 12794257 | SNV | 1 | T | C | Heterozygous |
| NC_037639.1 | 12794262 | SNV | 1 | T | A | Homozygous   |

|             |          |     |   |   |   |              |
|-------------|----------|-----|---|---|---|--------------|
| NC_037639.1 | 12794299 | SNV | 1 | A | G | Homozygous   |
| NC_037639.1 | 12794411 | SNV | 1 | C | T | Heterozygous |
| NC_037639.1 | 12794753 | SNV | 1 | A | G | Homozygous   |
| NC_037639.1 | 12794763 | SNV | 1 | T | C | Heterozygous |
| NC_037639.1 | 12796430 | SNV | 1 | G | C | Homozygous   |
| NC_037639.1 | 12796663 | SNV | 1 | G | C | Homozygous   |
| NC_037639.1 | 12796695 | SNV | 1 | G | A | Homozygous   |
| NC_037639.1 | 12797167 | SNV | 1 | T | C | Heterozygous |
| NC_037639.1 | 12797264 | SNV | 1 | A | G | Homozygous   |
| NC_037639.1 | 12797316 | SNV | 1 | G | C | Homozygous   |
| NC_037639.1 | 12797500 | SNV | 1 | A | G | Homozygous   |
| NC_037639.1 | 12808443 | SNV | 1 | T | A | Homozygous   |
| NC_037639.1 | 12808636 | SNV | 1 | A | T | Homozygous   |
| NC_037639.1 | 12809596 | SNV | 1 | G | C | Heterozygous |
| NC_037639.1 | 12811848 | SNV | 1 | G | A | Homozygous   |
| NC_037639.1 | 12811904 | SNV | 1 | G | A | Heterozygous |
| NC_037639.1 | 12812185 | SNV | 1 | A | T | Heterozygous |
| NC_037639.1 | 12812195 | SNV | 1 | T | C | Homozygous   |
| NC_037639.1 | 12812198 | SNV | 1 | C | T | Homozygous   |
| NC_037639.1 | 12812207 | SNV | 1 | T | C | Homozygous   |
| NC_037639.1 | 12812220 | SNV | 1 | T | C | Heterozygous |
| NC_037639.1 | 12812227 | SNV | 1 | C | T | Heterozygous |
| NC_037639.1 | 12812535 | SNV | 1 | C | T | Homozygous   |
| NC_037639.1 | 12812540 | SNV | 1 | T | C | Heterozygous |
| NC_037639.1 | 12812545 | SNV | 1 | C | T | Heterozygous |
| NC_037639.1 | 12812548 | SNV | 1 | A | G | Heterozygous |
| NC_037639.1 | 12812560 | SNV | 1 | A | T | Heterozygous |
| NC_037639.1 | 12812565 | SNV | 1 | T | A | Heterozygous |
| NC_037639.1 | 12812961 | SNV | 1 | T | C | Homozygous   |
| NC_037639.1 | 12813083 | SNV | 1 | A | G | Homozygous   |
| NC_037639.1 | 12813211 | SNV | 1 | A | G | Homozygous   |
| NC_037639.1 | 12817573 | SNV | 1 | A | G | Homozygous   |
| NC_037639.1 | 12817682 | SNV | 1 | C | T | Heterozygous |
| NC_037639.1 | 12817754 | SNV | 1 | C | A | Heterozygous |
| NC_037639.1 | 12817945 | SNV | 1 | C | T | Heterozygous |
| NC_037639.1 | 12818012 | SNV | 1 | A | G | Homozygous   |
| NC_037639.1 | 12818019 | SNV | 1 | A | G | Heterozygous |
| NC_037639.1 | 12818098 | SNV | 1 | G | A | Heterozygous |
| NC_037639.1 | 12818219 | SNV | 1 | A | G | Homozygous   |
| NC_037639.1 | 12818361 | SNV | 1 | A | G | Homozygous   |
| NC_037639.1 | 12819032 | SNV | 1 | G | C | Homozygous   |
| NC_037639.1 | 12819076 | SNV | 1 | G | T | Heterozygous |
| NC_037639.1 | 12819122 | SNV | 1 | G | A | Heterozygous |
| NC_037639.1 | 12819280 | SNV | 1 | G | A | Homozygous   |
| NC_037639.1 | 12819406 | SNV | 1 | C | T | Homozygous   |
| NC_037639.1 | 12819465 | SNV | 1 | T | C | Homozygous   |
| NC_037639.1 | 12819527 | SNV | 1 | T | C | Homozygous   |
| NC_037639.1 | 12819552 | SNV | 1 | A | G | Homozygous   |
| NC_037639.1 | 12819654 | SNV | 1 | A | G | Homozygous   |
| NC_037639.1 | 12820313 | SNV | 1 | A | G | Heterozygous |
| NC_037639.1 | 12820330 | SNV | 1 | A | G | Heterozygous |

|             |          |     |   |   |   |              |
|-------------|----------|-----|---|---|---|--------------|
| NC_037639.1 | 12820338 | SNV | 1 | A | G | Homozygous   |
| NC_037639.1 | 12820629 | SNV | 1 | G | C | Heterozygous |
| NC_037639.1 | 12820762 | SNV | 1 | A | G | Heterozygous |
| NC_037639.1 | 12822291 | SNV | 1 | G | A | Homozygous   |
| NC_037639.1 | 12822427 | SNV | 1 | T | A | Heterozygous |
| NC_037639.1 | 12822475 | SNV | 1 | G | C | Heterozygous |
| NC_037639.1 | 12822494 | SNV | 1 | G | C | Heterozygous |
| NC_037639.1 | 12822508 | SNV | 1 | G | C | Homozygous   |
| NC_037639.1 | 12822514 | SNV | 1 | C | A | Heterozygous |
| NC_037639.1 | 12837918 | SNV | 1 | G | A | Heterozygous |
| NC_037639.1 | 12838044 | SNV | 1 | G | C | Homozygous   |
| NC_037639.1 | 12839523 | SNV | 1 | T | C | Homozygous   |
| NC_037639.1 | 12851775 | SNV | 1 | C | T | Homozygous   |
| NC_037639.1 | 12851778 | SNV | 1 | T | A | Homozygous   |
| NC_037639.1 | 12851783 | SNV | 1 | A | C | Homozygous   |
| NC_037639.1 | 12859738 | SNV | 1 | C | T | Homozygous   |
| NC_037639.1 | 12859751 | SNV | 1 | T | C | Homozygous   |
| NC_037639.1 | 12859759 | SNV | 1 | T | C | Homozygous   |
| NC_037639.1 | 12865363 | SNV | 1 | T | C | Homozygous   |
| NC_037639.1 | 12865365 | SNV | 1 | C | T | Homozygous   |
| NC_037639.1 | 12877248 | SNV | 1 | A | G | Homozygous   |
| NC_037639.1 | 12877490 | SNV | 1 | C | G | Heterozygous |
| NC_037639.1 | 12877583 | SNV | 1 | T | G | Heterozygous |
| NC_037639.1 | 12877643 | SNV | 1 | A | G | Homozygous   |
| NC_037639.1 | 12878255 | SNV | 1 | C | T | Homozygous   |
| NC_037639.1 | 12878451 | SNV | 1 | T | C | Homozygous   |
| NC_037639.1 | 12893268 | SNV | 1 | A | G | Heterozygous |
| NC_037639.1 | 12893325 | SNV | 1 | C | T | Homozygous   |
| NC_037639.1 | 12893350 | SNV | 1 | A | G | Homozygous   |
| NC_037639.1 | 12893397 | SNV | 1 | T | C | Homozygous   |
| NC_037639.1 | 12893466 | SNV | 1 | G | A | Heterozygous |
| NC_037639.1 | 12893483 | SNV | 1 | T | C | Heterozygous |
| NC_037639.1 | 12898100 | SNV | 1 | G | T | Heterozygous |
| NC_037639.1 | 12901312 | SNV | 1 | G | C | Homozygous   |
| NC_037639.1 | 12901573 | SNV | 1 | G | T | Homozygous   |
| NC_037639.1 | 12912356 | SNV | 1 | T | C | Heterozygous |
| NC_037639.1 | 12912366 | SNV | 1 | T | C | Heterozygous |
| NC_037639.1 | 12913682 | SNV | 1 | A | G | Homozygous   |
| NC_037639.1 | 12923655 | SNV | 1 | G | C | Heterozygous |
| NC_037639.1 | 12924101 | SNV | 1 | T | C | Homozygous   |
| NC_037639.1 | 12925823 | SNV | 1 | T | C | Homozygous   |
| NC_037639.1 | 12925828 | SNV | 1 | C | T | Homozygous   |
| NC_037639.1 | 12940901 | SNV | 1 | G | A | Heterozygous |
| NC_037639.1 | 12940903 | SNV | 1 | A | G | Heterozygous |
| NC_037639.1 | 12945500 | SNV | 1 | T | C | Heterozygous |
| NC_037639.1 | 12945556 | SNV | 1 | G | A | Heterozygous |
| NC_037639.1 | 12945718 | SNV | 1 | A | C | Heterozygous |
| NC_037639.1 | 12945722 | SNV | 1 | A | T | Heterozygous |
| NC_037639.1 | 12946224 | SNV | 1 | C | T | Heterozygous |
| NC_037639.1 | 12963898 | SNV | 1 | T | C | Homozygous   |
| NC_037639.1 | 12975556 | SNV | 1 | T | A | Heterozygous |

|             |          |     |   |   |   |              |
|-------------|----------|-----|---|---|---|--------------|
| NC_037639.1 | 12975567 | SNV | 1 | T | C | Homozygous   |
| NC_037639.1 | 12975629 | SNV | 1 | C | T | Homozygous   |
| NC_037639.1 | 12975656 | SNV | 1 | T | C | Heterozygous |
| NC_037639.1 | 12975660 | SNV | 1 | G | A | Homozygous   |
| NC_037639.1 | 12975704 | SNV | 1 | C | T | Homozygous   |
| NC_037639.1 | 12975707 | SNV | 1 | G | A | Homozygous   |
| NC_037639.1 | 12983931 | SNV | 1 | A | G | Homozygous   |
| NC_037639.1 | 12983933 | SNV | 1 | A | G | Homozygous   |
| NC_037639.1 | 12984185 | SNV | 1 | C | G | Homozygous   |
| NC_037639.1 | 12992770 | SNV | 1 | C | T | Heterozygous |
| NC_037639.1 | 12992801 | SNV | 1 | C | T | Homozygous   |
| NC_037639.1 | 12992817 | SNV | 1 | C | G | Heterozygous |
| NC_037639.1 | 12992821 | SNV | 1 | C | T | Homozygous   |
| NC_037639.1 | 12992911 | SNV | 1 | C | T | Heterozygous |
| NC_037639.1 | 12993095 | SNV | 1 | T | A | Homozygous   |
| NC_037639.1 | 12993283 | SNV | 1 | T | C | Homozygous   |
| NC_037639.1 | 12993621 | SNV | 1 | A | G | Homozygous   |
| NC_037639.1 | 12996440 | SNV | 1 | A | G | Heterozygous |
| NC_037639.1 | 12996530 | SNV | 1 | T | C | Heterozygous |
| NC_037639.1 | 12996858 | SNV | 1 | T | C | Homozygous   |
| NC_037639.1 | 13005031 | SNV | 1 | T | C | Homozygous   |
| NC_037639.1 | 13005037 | SNV | 1 | G | A | Homozygous   |
| NC_037639.1 | 13005079 | SNV | 1 | T | C | Homozygous   |
| NC_037639.1 | 13005108 | SNV | 1 | A | G | Heterozygous |
| NC_037639.1 | 13005304 | SNV | 1 | G | A | Heterozygous |
| NC_037639.1 | 13005309 | SNV | 1 | A | G | Homozygous   |
| NC_037639.1 | 13005511 | SNV | 1 | C | T | Heterozygous |
| NC_037639.1 | 13005674 | SNV | 1 | C | G | Heterozygous |
| NC_037639.1 | 13005683 | SNV | 1 | G | A | Heterozygous |
| NC_037639.1 | 13005686 | SNV | 1 | A | G | Homozygous   |
| NC_037639.1 | 13005741 | SNV | 1 | G | A | Heterozygous |
| NC_037639.1 | 13005785 | SNV | 1 | T | C | Homozygous   |
| NC_037639.1 | 13028215 | SNV | 1 | T | C | Heterozygous |
| NC_037639.1 | 13028251 | SNV | 1 | A | G | Heterozygous |
| NC_037639.1 | 13036450 | SNV | 1 | C | T | Heterozygous |
| NC_037639.1 | 13036485 | SNV | 1 | C | T | Heterozygous |
| NC_037639.1 | 13036490 | SNV | 1 | A | C | Homozygous   |
| NC_037639.1 | 13036516 | SNV | 1 | A | G | Homozygous   |
| NC_037639.1 | 13041107 | SNV | 1 | T | C | Homozygous   |
| NC_037639.1 | 13041150 | SNV | 1 | T | A | Homozygous   |
| NC_037639.1 | 13041201 | SNV | 1 | G | A | Heterozygous |
| NC_037639.1 | 13041613 | SNV | 1 | C | T | Homozygous   |
| NC_037639.1 | 13041656 | SNV | 1 | C | T | Homozygous   |
| NC_037639.1 | 13041663 | SNV | 1 | G | A | Homozygous   |
| NC_037639.1 | 13041691 | SNV | 1 | T | A | Homozygous   |
| NC_037639.1 | 13041979 | SNV | 1 | A | G | Homozygous   |
| NC_037639.1 | 13054470 | SNV | 1 | C | T | Homozygous   |
| NC_037639.1 | 13054747 | SNV | 1 | A | T | Heterozygous |
| NC_037639.1 | 13054751 | SNV | 1 | A | T | Homozygous   |
| NC_037639.1 | 13062526 | SNV | 1 | A | C | Heterozygous |
| NC_037639.1 | 13063101 | SNV | 1 | A | G | Homozygous   |



|             |          |     |   |   |   |              |
|-------------|----------|-----|---|---|---|--------------|
| NC_037639.1 | 13063143 | SNV | 1 | G | A | Homozygous   |
| NC_037639.1 | 13063151 | SNV | 1 | G | A | Heterozygous |
| NC_037639.1 | 13069801 | SNV | 1 | G | A | Homozygous   |
| NC_037639.1 | 13069816 | SNV | 1 | C | T | Heterozygous |
| NC_037639.1 | 13069960 | SNV | 1 | T | C | Homozygous   |
| NC_037639.1 | 13069973 | SNV | 1 | G | A | Heterozygous |
| NC_037639.1 | 13069981 | SNV | 1 | C | T | Heterozygous |
| NC_037639.1 | 13069993 | SNV | 1 | C | A | Heterozygous |
| NC_037639.1 | 13069997 | SNV | 1 | C | T | Heterozygous |
| NC_037639.1 | 13070006 | SNV | 1 | A | G | Homozygous   |
| NC_037639.1 | 13070091 | SNV | 1 | G | A | Heterozygous |
| NC_037639.1 | 13071009 | SNV | 1 | C | T | Homozygous   |
| NC_037639.1 | 13071067 | SNV | 1 | G | A | Homozygous   |
| NC_037639.1 | 13071082 | SNV | 1 | G | A | Homozygous   |
| NC_037639.1 | 13071172 | SNV | 1 | A | G | Homozygous   |
| NC_037639.1 | 13071346 | SNV | 1 | A | G | Homozygous   |
| NC_037639.1 | 13071670 | SNV | 1 | T | C | Heterozygous |
| NC_037639.1 | 13074679 | SNV | 1 | A | G | Heterozygous |
| NC_037639.1 | 13074998 | SNV | 1 | A | G | Homozygous   |
| NC_037639.1 | 13075052 | SNV | 1 | G | A | Heterozygous |
| NC_037639.1 | 13075058 | SNV | 1 | G | A | Heterozygous |
| NC_037639.1 | 13075089 | SNV | 1 | A | G | Homozygous   |
| NC_037639.1 | 13075221 | SNV | 1 | C | T | Homozygous   |
| NC_037639.1 | 13078217 | SNV | 1 | G | T | Homozygous   |
| NC_037639.1 | 13078400 | SNV | 1 | G | A | Heterozygous |
| NC_037639.1 | 13078409 | SNV | 1 | A | G | Heterozygous |
| NC_037639.1 | 13078620 | SNV | 1 | A | G | Homozygous   |
| NC_037639.1 | 13078686 | SNV | 1 | C | T | Heterozygous |
| NC_037639.1 | 13084539 | SNV | 1 | C | T | Homozygous   |
| NC_037639.1 | 13084545 | SNV | 1 | C | T | Homozygous   |
| NC_037639.1 | 13085712 | SNV | 1 | T | A | Homozygous   |
| NC_037639.1 | 13088126 | SNV | 1 | G | T | Homozygous   |
| NC_037639.1 | 13088130 | SNV | 1 | T | C | Homozygous   |
| NC_037639.1 | 13088134 | SNV | 1 | T | A | Homozygous   |
| NC_037639.1 | 13088137 | SNV | 1 | T | C | Homozygous   |
| NC_037639.1 | 13088145 | SNV | 1 | A | G | Homozygous   |
| NC_037639.1 | 13088711 | SNV | 1 | A | G | Homozygous   |
| NC_037639.1 | 13088719 | SNV | 1 | A | C | Heterozygous |
| NC_037639.1 | 13088727 | SNV | 1 | G | A | Homozygous   |
| NC_037639.1 | 13088736 | SNV | 1 | T | A | Heterozygous |
| NC_037639.1 | 13088747 | SNV | 1 | A | C | Heterozygous |
| NC_037639.1 | 13088755 | SNV | 1 | A | G | Homozygous   |
| NC_037639.1 | 13088759 | SNV | 1 | T | C | Homozygous   |
| NC_037639.1 | 13088761 | SNV | 1 | T | C | Homozygous   |
| NC_037639.1 | 13088766 | SNV | 1 | T | A | Heterozygous |
| NC_037639.1 | 13088782 | SNV | 1 | C | T | Homozygous   |
| NC_037639.1 | 13088802 | SNV | 1 | T | A | Homozygous   |
| NC_037639.1 | 13088809 | SNV | 1 | G | A | Homozygous   |
| NC_037639.1 | 13088811 | SNV | 1 | A | G | Homozygous   |
| NC_037639.1 | 13088829 | SNV | 1 | C | A | Heterozygous |
| NC_037639.1 | 13090531 | SNV | 1 | T | C | Homozygous   |

|             |          |     |   |   |   |              |
|-------------|----------|-----|---|---|---|--------------|
| NC_037639.1 | 13090539 | SNV | 1 | A | G | Homozygous   |
| NC_037639.1 | 13090541 | SNV | 1 | C | A | Homozygous   |
| NC_037639.1 | 13090565 | SNV | 1 | A | G | Heterozygous |
| NC_037639.1 | 13090576 | SNV | 1 | A | T | Heterozygous |
| NC_037639.1 | 13090584 | SNV | 1 | T | A | Heterozygous |
| NC_037639.1 | 13090589 | SNV | 1 | A | T | Heterozygous |
| NC_037639.1 | 13090594 | SNV | 1 | T | G | Heterozygous |
| NC_037639.1 | 13090608 | SNV | 1 | A | G | Heterozygous |
| NC_037639.1 | 13090615 | SNV | 1 | A | T | Heterozygous |
| NC_037639.1 | 13090690 | SNV | 1 | T | A | Homozygous   |
| NC_037639.1 | 13090693 | SNV | 1 | G | A | Homozygous   |
| NC_037639.1 | 13090707 | SNV | 1 | G | A | Homozygous   |
| NC_037639.1 | 13090721 | SNV | 1 | G | A | Homozygous   |
| NC_037639.1 | 13090731 | SNV | 1 | G | T | Homozygous   |
| NC_037639.1 | 13090758 | SNV | 1 | T | A | Heterozygous |
| NC_037639.1 | 13090771 | SNV | 1 | A | G | Heterozygous |
| NC_037639.1 | 13090772 | SNV | 1 | A | T | Heterozygous |
| NC_037639.1 | 13090778 | SNV | 1 | T | A | Homozygous   |
| NC_037639.1 | 13090786 | SNV | 1 | T | A | Homozygous   |
| NC_037639.1 | 13090789 | SNV | 1 | G | A | Homozygous   |
| NC_037639.1 | 13090796 | SNV | 1 | T | C | Homozygous   |
| NC_037639.1 | 13090799 | SNV | 1 | C | A | Homozygous   |
| NC_037639.1 | 13090841 | SNV | 1 | G | A | Homozygous   |
| NC_037639.1 | 13093165 | SNV | 1 | T | A | Homozygous   |
| NC_037639.1 | 13093699 | SNV | 1 | T | C | Homozygous   |
| NC_037639.1 | 13093735 | SNV | 1 | T | C | Heterozygous |
| NC_037639.1 | 13099251 | SNV | 1 | A | C | Homozygous   |
| NC_037639.1 | 13099255 | SNV | 1 | G | C | Homozygous   |
| NC_037639.1 | 13099258 | SNV | 1 | G | C | Homozygous   |
| NC_037639.1 | 13099297 | SNV | 1 | G | A | Homozygous   |
| NC_037639.1 | 13099307 | SNV | 1 | C | G | Homozygous   |
| NC_037639.1 | 13099312 | SNV | 1 | A | G | Homozygous   |
| NC_037639.1 | 13099314 | SNV | 1 | G | C | Homozygous   |
| NC_037639.1 | 13105373 | SNV | 1 | A | G | Homozygous   |
| NC_037639.1 | 13105390 | SNV | 1 | G | A | Heterozygous |
| NC_037639.1 | 13108591 | SNV | 1 | T | C | Homozygous   |
| NC_037639.1 | 13108593 | SNV | 1 | T | C | Homozygous   |
| NC_037639.1 | 13108621 | SNV | 1 | C | T | Homozygous   |
| NC_037639.1 | 13108623 | SNV | 1 | C | T | Homozygous   |
| NC_037639.1 | 13111770 | SNV | 1 | C | T | Heterozygous |
| NC_037639.1 | 13112491 | SNV | 1 | T | C | Heterozygous |
| NC_037639.1 | 13113225 | SNV | 1 | A | G | Heterozygous |
| NC_037639.1 | 13113274 | SNV | 1 | T | C | Homozygous   |
| NC_037639.1 | 13113532 | SNV | 1 | A | T | Heterozygous |
| NC_037639.1 | 13113708 | SNV | 1 | A | G | Heterozygous |
| NC_037639.1 | 13114018 | SNV | 1 | A | G | Homozygous   |
| NC_037639.1 | 13114122 | SNV | 1 | C | T | Homozygous   |
| NC_037639.1 | 13114137 | SNV | 1 | A | G | Heterozygous |
| NC_037639.1 | 13114169 | SNV | 1 | A | T | Homozygous   |
| NC_037639.1 | 13114171 | SNV | 1 | A | C | Homozygous   |
| NC_037639.1 | 13114193 | SNV | 1 | C | T | Homozygous   |

|             |          |     |   |   |   |              |
|-------------|----------|-----|---|---|---|--------------|
| NC_037639.1 | 13114225 | SNV | 1 | A | C | Homozygous   |
| NC_037639.1 | 13114534 | SNV | 1 | A | T | Homozygous   |
| NC_037639.1 | 13114726 | SNV | 1 | T | C | Homozygous   |
| NC_037639.1 | 13114874 | SNV | 1 | G | A | Homozygous   |
| NC_037639.1 | 13115163 | SNV | 1 | C | T | Homozygous   |
| NC_037639.1 | 13115165 | SNV | 1 | T | C | Homozygous   |
| NC_037639.1 | 13115177 | SNV | 1 | G | A | Homozygous   |
| NC_037639.1 | 13115265 | SNV | 1 | T | C | Heterozygous |
| NC_037639.1 | 13115288 | SNV | 1 | G | A | Heterozygous |
| NC_037639.1 | 13115366 | SNV | 1 | C | T | Heterozygous |
| NC_037639.1 | 13122512 | SNV | 1 | C | T | Heterozygous |
| NC_037639.1 | 13122571 | SNV | 1 | A | G | Homozygous   |
| NC_037639.1 | 13122984 | SNV | 1 | G | C | Homozygous   |
| NC_037639.1 | 13123016 | SNV | 1 | G | C | Heterozygous |
| NC_037639.1 | 13123034 | SNV | 1 | A | T | Heterozygous |
| NC_037639.1 | 13123133 | SNV | 1 | C | T | Homozygous   |
| NC_037639.1 | 13123270 | SNV | 1 | C | A | Homozygous   |
| NC_037639.1 | 13123757 | SNV | 1 | C | T | Heterozygous |
| NC_037639.1 | 13123834 | SNV | 1 | G | A | Heterozygous |
| NC_037639.1 | 13124208 | SNV | 1 | C | G | Homozygous   |
| NC_037639.1 | 13124295 | SNV | 1 | C | G | Homozygous   |
| NC_037639.1 | 13125951 | SNV | 1 | G | C | Homozygous   |
| NC_037639.1 | 13126778 | SNV | 1 | G | A | Heterozygous |
| NC_037639.1 | 13128251 | SNV | 1 | C | G | Homozygous   |
| NC_037639.1 | 13128258 | SNV | 1 | A | C | Homozygous   |
| NC_037639.1 | 13128262 | SNV | 1 | A | G | Homozygous   |
| NC_037639.1 | 13128267 | SNV | 1 | T | C | Homozygous   |
| NC_037639.1 | 13128273 | SNV | 1 | T | C | Homozygous   |
| NC_037639.1 | 13129175 | SNV | 1 | A | G | Homozygous   |
| NC_037639.1 | 13129545 | SNV | 1 | C | T | Heterozygous |
| NC_037639.1 | 13130763 | SNV | 1 | T | C | Heterozygous |
| NC_037639.1 | 13131009 | SNV | 1 | T | C | Homozygous   |
| NC_037639.1 | 13133976 | SNV | 1 | A | T | Heterozygous |
| NC_037639.1 | 13133997 | SNV | 1 | A | G | Homozygous   |
| NC_037639.1 | 13138664 | SNV | 1 | C | T | Heterozygous |
| NC_037639.1 | 13138741 | SNV | 1 | C | T | Heterozygous |
| NC_037639.1 | 13138994 | SNV | 1 | G | A | Homozygous   |
| NC_037639.1 | 13140032 | SNV | 1 | C | A | Heterozygous |
| NC_037639.1 | 13140798 | SNV | 1 | A | G | Homozygous   |
| NC_037639.1 | 13140852 | SNV | 1 | A | G | Homozygous   |
| NC_037639.1 | 13140882 | SNV | 1 | A | G | Homozygous   |
| NC_037639.1 | 13144135 | SNV | 1 | G | A | Heterozygous |
| NC_037639.1 | 13144266 | SNV | 1 | G | A | Heterozygous |
| NC_037639.1 | 13144267 | SNV | 1 | T | A | Heterozygous |
| NC_037639.1 | 13144270 | SNV | 1 | T | A | Heterozygous |
| NC_037639.1 | 13144286 | SNV | 1 | G | A | Heterozygous |
| NC_037639.1 | 13144546 | SNV | 1 | T | A | Homozygous   |
| NC_037639.1 | 13144574 | SNV | 1 | G | A | Heterozygous |
| NC_037639.1 | 13144589 | SNV | 1 | A | G | Homozygous   |
| NC_037639.1 | 13144606 | SNV | 1 | A | G | Heterozygous |
| NC_037639.1 | 13145415 | SNV | 1 | G | A | Heterozygous |

|             |          |     |   |   |   |              |
|-------------|----------|-----|---|---|---|--------------|
| NC_037639.1 | 13145430 | SNV | 1 | A | G | Heterozygous |
| NC_037639.1 | 13145449 | SNV | 1 | T | C | Heterozygous |
| NC_037639.1 | 13145451 | SNV | 1 | G | A | Heterozygous |
| NC_037639.1 | 13146181 | SNV | 1 | G | A | Homozygous   |
| NC_037639.1 | 13146552 | SNV | 1 | G | A | Homozygous   |
| NC_037639.1 | 13150240 | SNV | 1 | G | A | Heterozygous |
| NC_037639.1 | 13150246 | SNV | 1 | A | G | Heterozygous |
| NC_037639.1 | 13150248 | SNV | 1 | A | G | Heterozygous |
| NC_037639.1 | 13150252 | SNV | 1 | G | A | Heterozygous |
| NC_037639.1 | 13150259 | SNV | 1 | T | C | Heterozygous |
| NC_037639.1 | 13150271 | SNV | 1 | A | G | Heterozygous |
| NC_037639.1 | 13150629 | SNV | 1 | T | C | Homozygous   |
| NC_037639.1 | 13150647 | SNV | 1 | G | C | Heterozygous |
| NC_037639.1 | 13150650 | SNV | 1 | T | C | Heterozygous |
| NC_037639.1 | 13150653 | SNV | 1 | C | G | Heterozygous |
| NC_037639.1 | 13150659 | SNV | 1 | G | C | Heterozygous |
| NC_037639.1 | 13150670 | SNV | 1 | C | A | Homozygous   |
| NC_037639.1 | 13150674 | SNV | 1 | G | C | Homozygous   |
| NC_037639.1 | 13151203 | SNV | 1 | A | G | Homozygous   |
| NC_037639.1 | 13151283 | SNV | 1 | T | C | Homozygous   |
| NC_037639.1 | 13151537 | SNV | 1 | G | A | Heterozygous |
| NC_037639.1 | 13152401 | SNV | 1 | G | C | Homozygous   |
| NC_037639.1 | 13152518 | SNV | 1 | T | C | Heterozygous |
| NC_037639.1 | 13152544 | SNV | 1 | C | T | Heterozygous |
| NC_037639.1 | 13152937 | SNV | 1 | T | C | Homozygous   |
| NC_037639.1 | 13152943 | SNV | 1 | T | A | Homozygous   |
| NC_037639.1 | 13152964 | SNV | 1 | A | G | Homozygous   |
| NC_037639.1 | 13152967 | SNV | 1 | A | T | Homozygous   |
| NC_037639.1 | 13152970 | SNV | 1 | A | T | Homozygous   |
| NC_037639.1 | 13152979 | SNV | 1 | A | G | Homozygous   |
| NC_037639.1 | 13152982 | SNV | 1 | A | T | Homozygous   |
| NC_037639.1 | 13152991 | SNV | 1 | T | A | Homozygous   |
| NC_037639.1 | 13153001 | SNV | 1 | T | C | Homozygous   |
| NC_037639.1 | 13153375 | SNV | 1 | T | A | Homozygous   |
| NC_037639.1 | 13153469 | SNV | 1 | G | A | Heterozygous |
| NC_037639.1 | 13156252 | SNV | 1 | T | C | Heterozygous |
| NC_037639.1 | 13156348 | SNV | 1 | C | T | Heterozygous |
| NC_037639.1 | 13156478 | SNV | 1 | A | G | Homozygous   |
| NC_037639.1 | 13156489 | SNV | 1 | C | T | Heterozygous |
| NC_037639.1 | 13156633 | SNV | 1 | C | T | Homozygous   |
| NC_037639.1 | 13156753 | SNV | 1 | A | G | Heterozygous |
| NC_037639.1 | 13156786 | SNV | 1 | A | G | Homozygous   |
| NC_037639.1 | 13157083 | SNV | 1 | T | C | Homozygous   |
| NC_037639.1 | 13157556 | SNV | 1 | G | T | Heterozygous |
| NC_037639.1 | 13157799 | SNV | 1 | C | A | Homozygous   |
| NC_037639.1 | 13160438 | SNV | 1 | A | T | Heterozygous |
| NC_037639.1 | 13160511 | SNV | 1 | G | A | Heterozygous |
| NC_037639.1 | 13160819 | SNV | 1 | G | C | Heterozygous |
| NC_037639.1 | 13160908 | SNV | 1 | C | T | Heterozygous |
| NC_037639.1 | 13166387 | SNV | 1 | C | T | Homozygous   |
| NC_037639.1 | 13166395 | SNV | 1 | G | C | Heterozygous |

|             |          |     |   |   |   |              |
|-------------|----------|-----|---|---|---|--------------|
| NC_037639.1 | 13166440 | SNV | 1 | A | T | Heterozygous |
| NC_037639.1 | 13166565 | SNV | 1 | T | C | Homozygous   |
| NC_037639.1 | 13166579 | SNV | 1 | T | C | Homozygous   |
| NC_037639.1 | 13166583 | SNV | 1 | T | C | Homozygous   |
| NC_037639.1 | 13166821 | SNV | 1 | A | G | Heterozygous |
| NC_037639.1 | 13166828 | SNV | 1 | A | G | Homozygous   |
| NC_037639.1 | 13178341 | SNV | 1 | A | G | Homozygous   |
| NC_037639.1 | 13178364 | SNV | 1 | A | C | Heterozygous |
| NC_037639.1 | 13178364 | SNV | 1 | A | G | Heterozygous |
| NC_037639.1 | 13178370 | SNV | 1 | C | T | Heterozygous |
| NC_037639.1 | 13178378 | SNV | 1 | A | G | Heterozygous |
| NC_037639.1 | 13178399 | SNV | 1 | G | T | Heterozygous |
| NC_037639.1 | 13178412 | SNV | 1 | G | C | Heterozygous |
| NC_037639.1 | 13178434 | SNV | 1 | A | T | Heterozygous |
| NC_037639.1 | 13178440 | SNV | 1 | C | T | Heterozygous |
| NC_037639.1 | 13182575 | SNV | 1 | C | T | Homozygous   |
| NC_037639.1 | 13182961 | SNV | 1 | C | A | Homozygous   |
| NC_037639.1 | 13183174 | SNV | 1 | G | A | Heterozygous |
| NC_037639.1 | 13183176 | SNV | 1 | G | A | Heterozygous |
| NC_037639.1 | 13183178 | SNV | 1 | G | A | Heterozygous |
| NC_037639.1 | 13183185 | SNV | 1 | G | A | Heterozygous |
| NC_037639.1 | 13183194 | SNV | 1 | G | A | Heterozygous |
| NC_037639.1 | 13183197 | SNV | 1 | A | G | Heterozygous |
| NC_037639.1 | 13183202 | SNV | 1 | G | A | Heterozygous |
| NC_037639.1 | 13183207 | SNV | 1 | A | C | Heterozygous |
| NC_037639.1 | 13183210 | SNV | 1 | A | T | Heterozygous |
| NC_037639.1 | 13183416 | SNV | 1 | A | G | Heterozygous |
| NC_037639.1 | 13183460 | SNV | 1 | A | G | Heterozygous |
| NC_037639.1 | 13187282 | SNV | 1 | A | G | Heterozygous |
| NC_037639.1 | 13188611 | SNV | 1 | A | G | Heterozygous |
| NC_037639.1 | 13194916 | SNV | 1 | A | C | Homozygous   |
| NC_037639.1 | 13194923 | SNV | 1 | T | C | Homozygous   |
| NC_037639.1 | 13199295 | SNV | 1 | T | A | Homozygous   |
| NC_037639.1 | 13199405 | SNV | 1 | T | C | Homozygous   |
| NC_037639.1 | 13199488 | SNV | 1 | G | A | Homozygous   |
| NC_037639.1 | 13199509 | SNV | 1 | C | T | Homozygous   |
| NC_037639.1 | 13199511 | SNV | 1 | T | C | Homozygous   |
| NC_037639.1 | 13199530 | SNV | 1 | A | C | Homozygous   |
| NC_037639.1 | 13199594 | SNV | 1 | A | T | Homozygous   |
| NC_037639.1 | 13199612 | SNV | 1 | G | A | Homozygous   |
| NC_037639.1 | 13199616 | SNV | 1 | A | G | Homozygous   |
| NC_037639.1 | 13209309 | SNV | 1 | G | C | Homozygous   |
| NC_037639.1 | 13215857 | SNV | 1 | G | A | Heterozygous |
| NC_037639.1 | 13225411 | SNV | 1 | A | G | Homozygous   |
| NC_037639.1 | 13225507 | SNV | 1 | T | C | Heterozygous |
| NC_037639.1 | 13232894 | SNV | 1 | G | A | Homozygous   |
| NC_037639.1 | 13232909 | SNV | 1 | G | A | Homozygous   |
| NC_037639.1 | 13232911 | SNV | 1 | C | A | Homozygous   |
| NC_037639.1 | 13233264 | SNV | 1 | T | C | Homozygous   |
| NC_037639.1 | 13233266 | SNV | 1 | A | G | Homozygous   |
| NC_037639.1 | 13233271 | SNV | 1 | C | A | Homozygous   |

|             |          |     |   |   |   |              |
|-------------|----------|-----|---|---|---|--------------|
| NC_037639.1 | 13233299 | SNV | 1 | G | A | Homozygous   |
| NC_037639.1 | 13233316 | SNV | 1 | A | T | Homozygous   |
| NC_037639.1 | 13233321 | SNV | 1 | T | C | Homozygous   |
| NC_037639.1 | 13233328 | SNV | 1 | A | G | Homozygous   |
| NC_037639.1 | 13233330 | SNV | 1 | A | T | Homozygous   |
| NC_037639.1 | 13233332 | SNV | 1 | A | G | Homozygous   |
| NC_037639.1 | 13233335 | SNV | 1 | G | A | Homozygous   |
| NC_037639.1 | 13233339 | SNV | 1 | T | C | Homozygous   |
| NC_037639.1 | 13235419 | SNV | 1 | T | G | Heterozygous |
| NC_037639.1 | 13235434 | SNV | 1 | C | A | Heterozygous |
| NC_037639.1 | 13242468 | SNV | 1 | T | C | Homozygous   |
| NC_037639.1 | 13242643 | SNV | 1 | G | A | Heterozygous |
| NC_037639.1 | 13242694 | SNV | 1 | T | C | Homozygous   |
| NC_037639.1 | 13242804 | SNV | 1 | A | G | Homozygous   |
| NC_037639.1 | 13246046 | SNV | 1 | T | C | Homozygous   |
| NC_037639.1 | 13246442 | SNV | 1 | C | T | Heterozygous |
| NC_037639.1 | 13246455 | SNV | 1 | G | A | Homozygous   |
| NC_037639.1 | 13246519 | SNV | 1 | A | G | Homozygous   |
| NC_037639.1 | 13247170 | SNV | 1 | C | T | Homozygous   |
| NC_037639.1 | 13247188 | SNV | 1 | T | C | Heterozygous |
| NC_037639.1 | 13247338 | SNV | 1 | C | T | Heterozygous |
| NC_037639.1 | 13247442 | SNV | 1 | T | G | Homozygous   |
| NC_037639.1 | 13247574 | SNV | 1 | G | T | Heterozygous |
| NC_037639.1 | 13248813 | SNV | 1 | A | T | Homozygous   |
| NC_037639.1 | 13249210 | SNV | 1 | G | A | Homozygous   |
| NC_037639.1 | 13249339 | SNV | 1 | G | A | Homozygous   |
| NC_037639.1 | 13249432 | SNV | 1 | T | A | Homozygous   |
| NC_037639.1 | 13249805 | SNV | 1 | G | A | Homozygous   |
| NC_037639.1 | 13251153 | SNV | 1 | T | A | Heterozygous |
| NC_037639.1 | 13251185 | SNV | 1 | T | C | Heterozygous |
| NC_037639.1 | 13251188 | SNV | 1 | C | T | Homozygous   |
| NC_037639.1 | 13253084 | SNV | 1 | G | A | Heterozygous |
| NC_037639.1 | 13253946 | SNV | 1 | T | A | Homozygous   |
| NC_037639.1 | 13255208 | SNV | 1 | A | T | Heterozygous |
| NC_037639.1 | 13273669 | SNV | 1 | C | T | Homozygous   |
| NC_037639.1 | 13275104 | SNV | 1 | G | A | Heterozygous |
| NC_037639.1 | 13275140 | SNV | 1 | A | G | Homozygous   |
| NC_037639.1 | 13275262 | SNV | 1 | C | T | Homozygous   |
| NC_037639.1 | 13277259 | SNV | 1 | T | C | Heterozygous |
| NC_037639.1 | 13277264 | SNV | 1 | C | T | Heterozygous |
| NC_037639.1 | 13277300 | SNV | 1 | A | T | Heterozygous |
| NC_037639.1 | 13280222 | SNV | 1 | C | T | Homozygous   |
| NC_037639.1 | 13280631 | SNV | 1 | G | A | Heterozygous |
| NC_037639.1 | 13280854 | SNV | 1 | T | C | Homozygous   |
| NC_037639.1 | 13290151 | SNV | 1 | G | T | Heterozygous |
| NC_037639.1 | 13290157 | SNV | 1 | A | G | Heterozygous |
| NC_037639.1 | 13290195 | SNV | 1 | A | G | Homozygous   |
| NC_037639.1 | 13290199 | SNV | 1 | A | G | Homozygous   |
| NC_037639.1 | 13290204 | SNV | 1 | T | C | Heterozygous |
| NC_037639.1 | 13297568 | SNV | 1 | A | G | Homozygous   |
| NC_037639.1 | 13297575 | SNV | 1 | G | C | Homozygous   |

|             |          |     |   |   |   |              |
|-------------|----------|-----|---|---|---|--------------|
| NC_037639.1 | 13298201 | SNV | 1 | A | G | Homozygous   |
| NC_037639.1 | 13298351 | SNV | 1 | G | T | Homozygous   |
| NC_037639.1 | 13298353 | SNV | 1 | T | G | Homozygous   |
| NC_037639.1 | 13298356 | SNV | 1 | C | T | Heterozygous |
| NC_037639.1 | 13298382 | SNV | 1 | C | T | Heterozygous |
| NC_037639.1 | 13305013 | SNV | 1 | A | G | Homozygous   |
| NC_037639.1 | 13305016 | SNV | 1 | A | C | Homozygous   |
| NC_037639.1 | 13305277 | SNV | 1 | G | T | Heterozygous |
| NC_037639.1 | 13305843 | SNV | 1 | C | T | Heterozygous |
| NC_037639.1 | 13311341 | SNV | 1 | A | G | Homozygous   |
| NC_037639.1 | 13311393 | SNV | 1 | G | A | Heterozygous |
| NC_037639.1 | 13311927 | SNV | 1 | T | G | Homozygous   |
| NC_037639.1 | 13312622 | SNV | 1 | T | C | Heterozygous |
| NC_037639.1 | 13318786 | SNV | 1 | C | T | Homozygous   |
| NC_037639.1 | 13319657 | SNV | 1 | C | T | Homozygous   |
| NC_037639.1 | 13325807 | SNV | 1 | A | G | Homozygous   |
| NC_037639.1 | 13326348 | SNV | 1 | G | A | Heterozygous |
| NC_037639.1 | 13327465 | SNV | 1 | T | C | Homozygous   |
| NC_037639.1 | 13327668 | SNV | 1 | A | T | Homozygous   |
| NC_037639.1 | 13352763 | SNV | 1 | G | A | Homozygous   |
| NC_037639.1 | 13353456 | SNV | 1 | A | T | Heterozygous |
| NC_037639.1 | 13353467 | SNV | 1 | T | C | Heterozygous |
| NC_037639.1 | 13353476 | SNV | 1 | A | G | Heterozygous |
| NC_037639.1 | 13353485 | SNV | 1 | T | G | Heterozygous |
| NC_037639.1 | 13354582 | SNV | 1 | A | G | Heterozygous |
| NC_037639.1 | 13354609 | SNV | 1 | T | C | Homozygous   |
| NC_037639.1 | 13354633 | SNV | 1 | T | C | Homozygous   |
| NC_037639.1 | 13355467 | SNV | 1 | A | T | Homozygous   |
| NC_037639.1 | 13356137 | SNV | 1 | C | A | Heterozygous |
| NC_037639.1 | 13356504 | SNV | 1 | T | C | Heterozygous |
| NC_037639.1 | 13356525 | SNV | 1 | C | T | Homozygous   |
| NC_037639.1 | 13356645 | SNV | 1 | A | G | Heterozygous |
| NC_037639.1 | 13357089 | SNV | 1 | C | A | Heterozygous |
| NC_037639.1 | 13357091 | SNV | 1 | T | A | Heterozygous |
| NC_037639.1 | 13359395 | SNV | 1 | A | G | Homozygous   |
| NC_037639.1 | 13359408 | SNV | 1 | G | A | Heterozygous |
| NC_037639.1 | 13360082 | SNV | 1 | T | C | Homozygous   |
| NC_037639.1 | 13360086 | SNV | 1 | G | A | Homozygous   |
| NC_037639.1 | 13362697 | SNV | 1 | A | T | Heterozygous |
| NC_037639.1 | 13362703 | SNV | 1 | T | G | Heterozygous |
| NC_037639.1 | 13362709 | SNV | 1 | T | A | Heterozygous |
| NC_037639.1 | 13362712 | SNV | 1 | A | T | Heterozygous |
| NC_037639.1 | 13362714 | SNV | 1 | C | A | Heterozygous |
| NC_037639.1 | 13363660 | SNV | 1 | T | G | Homozygous   |
| NC_037639.1 | 13364223 | SNV | 1 | T | C | Heterozygous |
| NC_037639.1 | 13368486 | SNV | 1 | T | C | Heterozygous |
| NC_037639.1 | 13368502 | SNV | 1 | T | A | Homozygous   |
| NC_037639.1 | 13368561 | SNV | 1 | A | G | Homozygous   |
| NC_037639.1 | 13372291 | SNV | 1 | A | T | Homozygous   |
| NC_037639.1 | 13372296 | SNV | 1 | T | A | Homozygous   |
| NC_037639.1 | 13372311 | SNV | 1 | T | A | Homozygous   |

|             |          |     |   |   |   |              |
|-------------|----------|-----|---|---|---|--------------|
| NC_037639.1 | 13372591 | SNV | 1 | A | G | Homozygous   |
| NC_037639.1 | 13372595 | SNV | 1 | A | C | Heterozygous |
| NC_037639.1 | 13372597 | SNV | 1 | A | G | Heterozygous |
| NC_037639.1 | 13372604 | SNV | 1 | T | A | Homozygous   |
| NC_037639.1 | 13372606 | SNV | 1 | A | T | Homozygous   |
| NC_037639.1 | 13372609 | SNV | 1 | A | T | Homozygous   |
| NC_037639.1 | 13372615 | SNV | 1 | A | C | Homozygous   |
| NC_037639.1 | 13375442 | SNV | 1 | G | T | Heterozygous |
| NC_037639.1 | 13375448 | SNV | 1 | A | T | Heterozygous |
| NC_037639.1 | 13378041 | SNV | 1 | T | C | Homozygous   |
| NC_037639.1 | 13378590 | SNV | 1 | G | A | Homozygous   |
| NC_037639.1 | 13378601 | SNV | 1 | A | G | Heterozygous |
| NC_037639.1 | 13385279 | SNV | 1 | G | A | Heterozygous |
| NC_037639.1 | 13385311 | SNV | 1 | T | A | Homozygous   |
| NC_037639.1 | 13385317 | SNV | 1 | T | C | Homozygous   |
| NC_037639.1 | 13385330 | SNV | 1 | A | G | Homozygous   |
| NC_037639.1 | 13385336 | SNV | 1 | C | G | Homozygous   |
| NC_037639.1 | 13397923 | SNV | 1 | C | T | Homozygous   |
| NC_037639.1 | 13397953 | SNV | 1 | C | T | Heterozygous |
| NC_037639.1 | 13416199 | SNV | 1 | A | G | Homozygous   |
| NC_037639.1 | 13416231 | SNV | 1 | C | G | Heterozygous |
| NC_037639.1 | 13417904 | SNV | 1 | C | A | Homozygous   |
| NC_037639.1 | 13418337 | SNV | 1 | A | T | Homozygous   |
| NC_037639.1 | 13418388 | SNV | 1 | A | G | Homozygous   |
| NC_037639.1 | 13418951 | SNV | 1 | C | G | Homozygous   |
| NC_037639.1 | 13418954 | SNV | 1 | C | T | Heterozygous |
| NC_037639.1 | 13418966 | SNV | 1 | A | G | Homozygous   |
| NC_037639.1 | 13419661 | SNV | 1 | A | G | Heterozygous |
| NC_037639.1 | 13419669 | SNV | 1 | C | G | Heterozygous |
| NC_037639.1 | 13420151 | SNV | 1 | A | G | Heterozygous |
| NC_037639.1 | 13420620 | SNV | 1 | C | T | Homozygous   |
| NC_037639.1 | 13426099 | SNV | 1 | C | T | Heterozygous |
| NC_037639.1 | 13426515 | SNV | 1 | A | G | Heterozygous |
| NC_037639.1 | 13426556 | SNV | 1 | T | C | Heterozygous |
| NC_037639.1 | 13426576 | SNV | 1 | A | C | Homozygous   |
| NC_037639.1 | 13426920 | SNV | 1 | T | G | Heterozygous |
| NC_037639.1 | 13426943 | SNV | 1 | A | G | Heterozygous |
| NC_037639.1 | 13426970 | SNV | 1 | C | T | Heterozygous |
| NC_037639.1 | 13427012 | SNV | 1 | T | C | Homozygous   |
| NC_037639.1 | 13427167 | SNV | 1 | A | G | Heterozygous |
| NC_037639.1 | 13448342 | SNV | 1 | T | C | Heterozygous |
| NC_037639.1 | 13449662 | SNV | 1 | T | C | Homozygous   |
| NC_037639.1 | 13456573 | SNV | 1 | G | A | Heterozygous |
| NC_037639.1 | 13456689 | SNV | 1 | C | T | Homozygous   |
| NC_037639.1 | 13456743 | SNV | 1 | T | C | Heterozygous |
| NC_037639.1 | 13460000 | SNV | 1 | G | A | Heterozygous |
| NC_037639.1 | 13460097 | SNV | 1 | G | A | Homozygous   |
| NC_037639.1 | 13478613 | SNV | 1 | T | C | Heterozygous |
| NC_037639.1 | 13478850 | SNV | 1 | C | G | Heterozygous |
| NC_037639.1 | 13478905 | SNV | 1 | G | C | Heterozygous |
| NC_037639.1 | 13478907 | SNV | 1 | G | A | Heterozygous |



|             |          |     |   |   |   |              |
|-------------|----------|-----|---|---|---|--------------|
| NC_037639.1 | 13478949 | SNV | 1 | G | A | Heterozygous |
| NC_037639.1 | 13479420 | SNV | 1 | C | G | Heterozygous |
| NC_037639.1 | 13485630 | SNV | 1 | G | A | Heterozygous |
| NC_037639.1 | 13485764 | SNV | 1 | G | A | Homozygous   |
| NC_037639.1 | 13487736 | SNV | 1 | C | G | Homozygous   |
| NC_037639.1 | 13487743 | SNV | 1 | C | G | Heterozygous |
| NC_037639.1 | 13487745 | SNV | 1 | G | C | Heterozygous |
| NC_037639.1 | 13487754 | SNV | 1 | G | C | Heterozygous |
| NC_037639.1 | 13491240 | SNV | 1 | A | C | Homozygous   |
| NC_037639.1 | 13491609 | SNV | 1 | T | C | Homozygous   |
| NC_037639.1 | 13491628 | SNV | 1 | C | T | Heterozygous |
| NC_037639.1 | 13491668 | SNV | 1 | A | G | Homozygous   |
| NC_037639.1 | 13491811 | SNV | 1 | A | G | Homozygous   |
| NC_037639.1 | 13491921 | SNV | 1 | T | C | Homozygous   |
| NC_037639.1 | 13491956 | SNV | 1 | C | A | Homozygous   |
| NC_037639.1 | 13492823 | SNV | 1 | A | G | Homozygous   |
| NC_037639.1 | 13492850 | SNV | 1 | G | T | Homozygous   |
| NC_037639.1 | 13492886 | SNV | 1 | C | T | Heterozygous |
| NC_037639.1 | 13492967 | SNV | 1 | T | C | Homozygous   |
| NC_037639.1 | 13493156 | SNV | 1 | T | C | Homozygous   |
| NC_037639.1 | 13493235 | SNV | 1 | C | T | Homozygous   |
| NC_037639.1 | 13493237 | SNV | 1 | T | C | Homozygous   |
| NC_037639.1 | 13493310 | SNV | 1 | G | A | Heterozygous |
| NC_037639.1 | 13493661 | SNV | 1 | C | T | Heterozygous |
| NC_037639.1 | 13493861 | SNV | 1 | A | G | Heterozygous |
| NC_037639.1 | 13494223 | SNV | 1 | T | C | Heterozygous |
| NC_037639.1 | 13588772 | SNV | 1 | T | C | Homozygous   |
| NC_037639.1 | 13588774 | SNV | 1 | A | T | Heterozygous |
| NC_037639.1 | 13588781 | SNV | 1 | T | C | Heterozygous |
| NC_037639.1 | 13588785 | SNV | 1 | A | G | Heterozygous |
| NC_037639.1 | 13588792 | SNV | 1 | A | T | Heterozygous |
| NC_037639.1 | 13588808 | SNV | 1 | T | C | Heterozygous |
| NC_037639.1 | 13588810 | SNV | 1 | A | T | Heterozygous |
| NC_037639.1 | 13588826 | SNV | 1 | T | C | Heterozygous |
| NC_037639.1 | 13588828 | SNV | 1 | A | T | Heterozygous |
| NC_037639.1 | 13589035 | SNV | 1 | A | G | Homozygous   |
| NC_037639.1 | 13589037 | SNV | 1 | A | G | Homozygous   |
| NC_037639.1 | 13589081 | SNV | 1 | G | A | Homozygous   |
| NC_037639.1 | 13600942 | SNV | 1 | A | G | Homozygous   |
| NC_037639.1 | 13600945 | SNV | 1 | C | T | Homozygous   |
| NC_037639.1 | 13600963 | SNV | 1 | T | C | Homozygous   |
| NC_037639.1 | 13600974 | SNV | 1 | T | C | Homozygous   |
| NC_037639.1 | 13601223 | SNV | 1 | G | A | Heterozygous |
| NC_037639.1 | 13601236 | SNV | 1 | G | A | Heterozygous |
| NC_037639.1 | 13603803 | SNV | 1 | G | A | Heterozygous |
| NC_037639.1 | 13603950 | SNV | 1 | G | C | Heterozygous |
| NC_037639.1 | 13604015 | SNV | 1 | C | T | Homozygous   |
| NC_037639.1 | 13604219 | SNV | 1 | G | A | Homozygous   |
| NC_037639.1 | 13607407 | SNV | 1 | G | A | Heterozygous |
| NC_037639.1 | 13607410 | SNV | 1 | G | A | Homozygous   |
| NC_037639.1 | 13607455 | SNV | 1 | T | C | Homozygous   |

|             |          |     |   |   |   |              |
|-------------|----------|-----|---|---|---|--------------|
| NC_037639.1 | 13607459 | SNV | 1 | G | A | Heterozygous |
| NC_037639.1 | 13607461 | SNV | 1 | A | G | Heterozygous |
| NC_037639.1 | 13607585 | SNV | 1 | A | G | Homozygous   |
| NC_037639.1 | 13617953 | SNV | 1 | G | A | Homozygous   |
| NC_037639.1 | 13617962 | SNV | 1 | A | T | Heterozygous |
| NC_037639.1 | 13617994 | SNV | 1 | C | T | Homozygous   |
| NC_037639.1 | 13618367 | SNV | 1 | C | T | Homozygous   |
| NC_037639.1 | 13618398 | SNV | 1 | G | A | Homozygous   |
| NC_037639.1 | 13618435 | SNV | 1 | C | T | Heterozygous |
| NC_037639.1 | 13618757 | SNV | 1 | G | A | Heterozygous |
| NC_037639.1 | 13618799 | SNV | 1 | A | G | Homozygous   |
| NC_037639.1 | 13618835 | SNV | 1 | G | A | Homozygous   |
| NC_037639.1 | 13618901 | SNV | 1 | C | G | Homozygous   |
| NC_037639.1 | 13619023 | SNV | 1 | A | G | Homozygous   |
| NC_037639.1 | 13619048 | SNV | 1 | T | C | Homozygous   |
| NC_037639.1 | 13619054 | SNV | 1 | T | C | Homozygous   |
| NC_037639.1 | 13619067 | SNV | 1 | T | C | Heterozygous |
| NC_037639.1 | 13619120 | SNV | 1 | A | G | Homozygous   |
| NC_037639.1 | 13619152 | SNV | 1 | T | G | Homozygous   |
| NC_037639.1 | 13621816 | SNV | 1 | A | G | Heterozygous |
| NC_037639.1 | 13628789 | SNV | 1 | A | C | Homozygous   |
| NC_037639.1 | 13637235 | SNV | 1 | A | G | Homozygous   |
| NC_037639.1 | 13637523 | SNV | 1 | T | C | Heterozygous |
| NC_037639.1 | 13642176 | SNV | 1 | A | G | Heterozygous |
| NC_037639.1 | 13642187 | SNV | 1 | G | A | Homozygous   |
| NC_037639.1 | 13642203 | SNV | 1 | G | A | Heterozygous |
| NC_037639.1 | 13652502 | SNV | 1 | T | C | Heterozygous |
| NC_037639.1 | 13652598 | SNV | 1 | C | T | Homozygous   |
| NC_037639.1 | 13652607 | SNV | 1 | T | C | Homozygous   |
| NC_037639.1 | 13652625 | SNV | 1 | G | A | Heterozygous |
| NC_037639.1 | 13652660 | SNV | 1 | A | G | Heterozygous |
| NC_037639.1 | 13652701 | SNV | 1 | G | A | Heterozygous |
| NC_037639.1 | 13653086 | SNV | 1 | A | T | Heterozygous |
| NC_037639.1 | 13653092 | SNV | 1 | T | A | Heterozygous |
| NC_037639.1 | 13653104 | SNV | 1 | A | T | Homozygous   |
| NC_037639.1 | 13653257 | SNV | 1 | T | G | Heterozygous |
| NC_037639.1 | 13653283 | SNV | 1 | A | G | Homozygous   |
| NC_037639.1 | 13653287 | SNV | 1 | G | A | Heterozygous |
| NC_037639.1 | 13653292 | SNV | 1 | A | G | Homozygous   |
| NC_037639.1 | 13653322 | SNV | 1 | C | T | Heterozygous |
| NC_037639.1 | 13653967 | SNV | 1 | T | C | Heterozygous |
| NC_037639.1 | 13661383 | SNV | 1 | C | T | Heterozygous |
| NC_037639.1 | 13661388 | SNV | 1 | C | A | Heterozygous |
| NC_037639.1 | 13661505 | SNV | 1 | G | A | Heterozygous |
| NC_037639.1 | 13661893 | SNV | 1 | A | G | Homozygous   |
| NC_037639.1 | 13661993 | SNV | 1 | G | C | Homozygous   |
| NC_037639.1 | 13662016 | SNV | 1 | T | C | Heterozygous |
| NC_037639.1 | 13664850 | SNV | 1 | C | G | Homozygous   |
| NC_037639.1 | 13665162 | SNV | 1 | G | A | Homozygous   |
| NC_037639.1 | 13665191 | SNV | 1 | G | A | Heterozygous |
| NC_037639.1 | 13665834 | SNV | 1 | T | C | Heterozygous |

|             |          |     |   |   |   |              |
|-------------|----------|-----|---|---|---|--------------|
| NC_037639.1 | 13665911 | SNV | 1 | T | C | Homozygous   |
| NC_037639.1 | 13686275 | SNV | 1 | T | C | Homozygous   |
| NC_037639.1 | 13686688 | SNV | 1 | A | G | Homozygous   |
| NC_037639.1 | 13689773 | SNV | 1 | C | T | Homozygous   |
| NC_037639.1 | 13689792 | SNV | 1 | A | C | Homozygous   |
| NC_037639.1 | 13689795 | SNV | 1 | C | T | Homozygous   |
| NC_037639.1 | 13689799 | SNV | 1 | T | A | Homozygous   |
| NC_037639.1 | 13689804 | SNV | 1 | T | G | Homozygous   |
| NC_037639.1 | 13698656 | SNV | 1 | T | A | Homozygous   |
| NC_037639.1 | 13698660 | SNV | 1 | T | C | Homozygous   |
| NC_037639.1 | 13698664 | SNV | 1 | A | T | Homozygous   |
| NC_037639.1 | 13698687 | SNV | 1 | G | A | Homozygous   |
| NC_037639.1 | 13698689 | SNV | 1 | C | A | Homozygous   |
| NC_037639.1 | 13698699 | SNV | 1 | A | T | Homozygous   |
| NC_037639.1 | 13700961 | SNV | 1 | T | C | Homozygous   |
| NC_037639.1 | 13716517 | SNV | 1 | T | C | Homozygous   |
| NC_037639.1 | 13721606 | SNV | 1 | C | A | Homozygous   |
| NC_037639.1 | 13724058 | SNV | 1 | T | A | Homozygous   |
| NC_037639.1 | 13724070 | SNV | 1 | T | A | Homozygous   |
| NC_037639.1 | 13725165 | SNV | 1 | T | C | Homozygous   |
| NC_037639.1 | 13725167 | SNV | 1 | T | C | Homozygous   |
| NC_037639.1 | 13725174 | SNV | 1 | T | A | Homozygous   |
| NC_037639.1 | 13725176 | SNV | 1 | T | C | Homozygous   |
| NC_037639.1 | 13725181 | SNV | 1 | T | C | Homozygous   |
| NC_037639.1 | 13729986 | SNV | 1 | A | C | Homozygous   |
| NC_037639.1 | 13733036 | SNV | 1 | T | C | Heterozygous |
| NC_037639.1 | 13733047 | SNV | 1 | T | C | Heterozygous |
| NC_037639.1 | 13733050 | SNV | 1 | T | C | Heterozygous |
| NC_037639.1 | 13733058 | SNV | 1 | T | C | Heterozygous |
| NC_037639.1 | 13734601 | SNV | 1 | C | T | Homozygous   |
| NC_037639.1 | 13738821 | SNV | 1 | A | T | Homozygous   |
| NC_037639.1 | 13743876 | SNV | 1 | G | T | Heterozygous |
| NC_037639.1 | 13744132 | SNV | 1 | C | T | Heterozygous |
| NC_037639.1 | 13744608 | SNV | 1 | C | T | Heterozygous |
| NC_037639.1 | 13746204 | SNV | 1 | C | T | Heterozygous |
| NC_037639.1 | 13749670 | SNV | 1 | A | T | Homozygous   |
| NC_037639.1 | 13749675 | SNV | 1 | T | A | Homozygous   |
| NC_037639.1 | 13751121 | SNV | 1 | C | T | Homozygous   |
| NC_037639.1 | 13751124 | SNV | 1 | T | A | Homozygous   |
| NC_037639.1 | 13751135 | SNV | 1 | A | C | Homozygous   |
| NC_037639.1 | 13751143 | SNV | 1 | T | A | Homozygous   |
| NC_037639.1 | 13777699 | SNV | 1 | G | A | Heterozygous |
| NC_037639.1 | 13777741 | SNV | 1 | T | C | Heterozygous |
| NC_037639.1 | 13777758 | SNV | 1 | A | G | Heterozygous |
| NC_037639.1 | 13778021 | SNV | 1 | G | A | Heterozygous |
| NC_037639.1 | 13778037 | SNV | 1 | G | A | Heterozygous |
| NC_037639.1 | 13778158 | SNV | 1 | G | A | Heterozygous |
| NC_037639.1 | 13778245 | SNV | 1 | C | T | Homozygous   |
| NC_037639.1 | 13778329 | SNV | 1 | A | G | Heterozygous |
| NC_037639.1 | 13778349 | SNV | 1 | A | G | Heterozygous |
| NC_037639.1 | 13778460 | SNV | 1 | A | G | Homozygous   |

|             |          |     |   |   |   |              |
|-------------|----------|-----|---|---|---|--------------|
| NC_037639.1 | 13778487 | SNV | 1 | G | T | Homozygous   |
| NC_037639.1 | 13790681 | SNV | 1 | T | A | Heterozygous |
| NC_037639.1 | 13794159 | SNV | 1 | C | T | Homozygous   |
| NC_037639.1 | 13794202 | SNV | 1 | A | T | Homozygous   |
| NC_037639.1 | 13794211 | SNV | 1 | A | C | Homozygous   |
| NC_037639.1 | 13794215 | SNV | 1 | A | C | Homozygous   |
| NC_037639.1 | 13818878 | SNV | 1 | T | C | Homozygous   |
| NC_037639.1 | 13818882 | SNV | 1 | T | C | Homozygous   |
| NC_037639.1 | 13818891 | SNV | 1 | T | A | Homozygous   |
| NC_037639.1 | 13818896 | SNV | 1 | G | T | Homozygous   |
| NC_037639.1 | 13818903 | SNV | 1 | A | C | Homozygous   |
| NC_037639.1 | 13835749 | SNV | 1 | C | T | Heterozygous |
| NC_037639.1 | 13835806 | SNV | 1 | A | G | Heterozygous |
| NC_037639.1 | 13835824 | SNV | 1 | A | G | Homozygous   |
| NC_037639.1 | 13851330 | SNV | 1 | T | C | Homozygous   |
| NC_037639.1 | 13851370 | SNV | 1 | C | T | Homozygous   |
| NC_037639.1 | 13855763 | SNV | 1 | G | A | Heterozygous |
| NC_037639.1 | 13856510 | SNV | 1 | A | C | Homozygous   |
| NC_037639.1 | 13856519 | SNV | 1 | A | C | Homozygous   |
| NC_037639.1 | 13856525 | SNV | 1 | A | G | Homozygous   |
| NC_037639.1 | 13856527 | SNV | 1 | A | G | Homozygous   |
| NC_037639.1 | 13857474 | SNV | 1 | T | C | Homozygous   |
| NC_037639.1 | 13857837 | SNV | 1 | C | T | Homozygous   |
| NC_037639.1 | 13857963 | SNV | 1 | T | C | Heterozygous |
| NC_037639.1 | 13857996 | SNV | 1 | G | A | Homozygous   |
| NC_037639.1 | 13858087 | SNV | 1 | T | A | Homozygous   |
| NC_037639.1 | 13858089 | SNV | 1 | T | C | Homozygous   |
| NC_037639.1 | 13858780 | SNV | 1 | C | T | Homozygous   |
| NC_037639.1 | 13858832 | SNV | 1 | C | G | Homozygous   |
| NC_037639.1 | 13858875 | SNV | 1 | T | A | Heterozygous |
| NC_037639.1 | 13859125 | SNV | 1 | A | G | Heterozygous |
| NC_037639.1 | 13859848 | SNV | 1 | A | G | Homozygous   |
| NC_037639.1 | 13860272 | SNV | 1 | T | C | Homozygous   |
| NC_037639.1 | 13860278 | SNV | 1 | T | C | Homozygous   |
| NC_037639.1 | 13860579 | SNV | 1 | G | A | Heterozygous |
| NC_037639.1 | 13861260 | SNV | 1 | C | T | Heterozygous |
| NC_037639.1 | 13861415 | SNV | 1 | T | C | Homozygous   |
| NC_037639.1 | 13861499 | SNV | 1 | T | C | Heterozygous |
| NC_037639.1 | 13861658 | SNV | 1 | A | G | Homozygous   |
| NC_037639.1 | 13861662 | SNV | 1 | G | A | Homozygous   |
| NC_037639.1 | 13861816 | SNV | 1 | G | T | Heterozygous |
| NC_037639.1 | 13861820 | SNV | 1 | T | G | Homozygous   |
| NC_037639.1 | 13861826 | SNV | 1 | A | G | Heterozygous |
| NC_037639.1 | 13861988 | SNV | 1 | G | A | Heterozygous |
| NC_037639.1 | 13867300 | SNV | 1 | C | G | Homozygous   |
| NC_037639.1 | 13873823 | SNV | 1 | G | A | Heterozygous |
| NC_037639.1 | 13879053 | SNV | 1 | G | T | Heterozygous |
| NC_037639.1 | 13879317 | SNV | 1 | A | G | Homozygous   |
| NC_037639.1 | 13879482 | SNV | 1 | C | G | Heterozygous |
| NC_037639.1 | 13879484 | SNV | 1 | A | T | Heterozygous |
| NC_037639.1 | 13879511 | SNV | 1 | G | C | Homozygous   |

|             |          |     |   |   |   |              |
|-------------|----------|-----|---|---|---|--------------|
| NC_037639.1 | 13879514 | SNV | 1 | C | A | Homozygous   |
| NC_037639.1 | 13879684 | SNV | 1 | G | A | Heterozygous |
| NC_037639.1 | 13879798 | SNV | 1 | G | A | Heterozygous |
| NC_037639.1 | 13879832 | SNV | 1 | G | A | Heterozygous |
| NC_037639.1 | 13879832 | SNV | 1 | G | C | Heterozygous |
| NC_037639.1 | 13880009 | SNV | 1 | T | G | Homozygous   |
| NC_037639.1 | 13880154 | SNV | 1 | A | G | Homozygous   |
| NC_037639.1 | 13880244 | SNV | 1 | T | A | Heterozygous |
| NC_037639.1 | 13880626 | SNV | 1 | T | C | Homozygous   |
| NC_037639.1 | 13880845 | SNV | 1 | A | G | Homozygous   |
| NC_037639.1 | 13881171 | SNV | 1 | C | G | Homozygous   |
| NC_037639.1 | 13881568 | SNV | 1 | C | T | Heterozygous |
| NC_037639.1 | 13881590 | SNV | 1 | T | C | Homozygous   |
| NC_037639.1 | 13881797 | SNV | 1 | G | A | Heterozygous |
| NC_037639.1 | 13881808 | SNV | 1 | C | T | Homozygous   |
| NC_037639.1 | 13882139 | SNV | 1 | G | A | Homozygous   |
| NC_037639.1 | 13882165 | SNV | 1 | G | A | Heterozygous |
| NC_037639.1 | 13882210 | SNV | 1 | T | A | Homozygous   |
| NC_037639.1 | 13882304 | SNV | 1 | C | T | Heterozygous |
| NC_037639.1 | 13882312 | SNV | 1 | C | T | Heterozygous |
| NC_037639.1 | 13882344 | SNV | 1 | C | T | Heterozygous |
| NC_037639.1 | 13882382 | SNV | 1 | C | T | Homozygous   |
| NC_037639.1 | 13882444 | SNV | 1 | G | A | Heterozygous |
| NC_037639.1 | 13882660 | SNV | 1 | A | T | Heterozygous |
| NC_037639.1 | 13883840 | SNV | 1 | T | C | Homozygous   |
| NC_037639.1 | 13883912 | SNV | 1 | T | C | Heterozygous |
| NC_037639.1 | 13884095 | SNV | 1 | C | T | Heterozygous |
| NC_037639.1 | 13884170 | SNV | 1 | A | G | Heterozygous |
| NC_037639.1 | 13884283 | SNV | 1 | T | C | Homozygous   |
| NC_037639.1 | 13884973 | SNV | 1 | G | A | Heterozygous |
| NC_037639.1 | 13884975 | SNV | 1 | G | T | Heterozygous |
| NC_037639.1 | 13884976 | SNV | 1 | C | T | Heterozygous |
| NC_037639.1 | 13884978 | SNV | 1 | A | T | Heterozygous |
| NC_037639.1 | 13884983 | SNV | 1 | G | C | Homozygous   |
| NC_037639.1 | 13884994 | SNV | 1 | A | G | Heterozygous |
| NC_037639.1 | 13885507 | SNV | 1 | C | T | Homozygous   |
| NC_037639.1 | 13885510 | SNV | 1 | A | C | Homozygous   |
| NC_037639.1 | 13887514 | SNV | 1 | A | G | Heterozygous |
| NC_037639.1 | 13894023 | SNV | 1 | T | C | Heterozygous |
| NC_037639.1 | 13894567 | SNV | 1 | C | T | Heterozygous |
| NC_037639.1 | 13894586 | SNV | 1 | T | A | Heterozygous |
| NC_037639.1 | 13894612 | SNV | 1 | G | A | Heterozygous |
| NC_037639.1 | 13894958 | SNV | 1 | G | A | Heterozygous |
| NC_037639.1 | 13895119 | SNV | 1 | A | G | Heterozygous |
| NC_037639.1 | 13895218 | SNV | 1 | C | T | Heterozygous |
| NC_037639.1 | 13895357 | SNV | 1 | C | T | Heterozygous |
| NC_037639.1 | 13895363 | SNV | 1 | G | A | Heterozygous |
| NC_037639.1 | 13895409 | SNV | 1 | C | T | Heterozygous |
| NC_037639.1 | 13895681 | SNV | 1 | A | G | Homozygous   |
| NC_037639.1 | 13897570 | SNV | 1 | C | T | Heterozygous |
| NC_037639.1 | 13897643 | SNV | 1 | T | G | Homozygous   |

|             |          |     |   |   |   |              |
|-------------|----------|-----|---|---|---|--------------|
| NC_037639.1 | 13897748 | SNV | 1 | A | G | Homozygous   |
| NC_037639.1 | 13897763 | SNV | 1 | A | G | Homozygous   |
| NC_037639.1 | 13897775 | SNV | 1 | T | A | Heterozygous |
| NC_037639.1 | 13897819 | SNV | 1 | A | G | Homozygous   |
| NC_037639.1 | 13897952 | SNV | 1 | A | G | Heterozygous |
| NC_037639.1 | 13898225 | SNV | 1 | A | G | Homozygous   |
| NC_037639.1 | 13898232 | SNV | 1 | G | C | Homozygous   |
| NC_037639.1 | 13898551 | SNV | 1 | A | G | Homozygous   |
| NC_037639.1 | 13898564 | SNV | 1 | T | C | Heterozygous |
| NC_037639.1 | 13900475 | SNV | 1 | G | A | Homozygous   |
| NC_037639.1 | 13900478 | SNV | 1 | T | G | Homozygous   |
| NC_037639.1 | 13909267 | SNV | 1 | T | G | Homozygous   |
| NC_037639.1 | 13909285 | SNV | 1 | A | T | Homozygous   |
| NC_037639.1 | 13909300 | SNV | 1 | C | G | Homozygous   |
| NC_037639.1 | 13909304 | SNV | 1 | A | C | Homozygous   |
| NC_037639.1 | 13909324 | SNV | 1 | G | A | Homozygous   |
| NC_037639.1 | 13909334 | SNV | 1 | G | A | Homozygous   |
| NC_037639.1 | 13909361 | SNV | 1 | C | T | Homozygous   |
| NC_037639.1 | 13909420 | SNV | 1 | A | G | Homozygous   |
| NC_037639.1 | 13909440 | SNV | 1 | G | A | Homozygous   |
| NC_037639.1 | 13909450 | SNV | 1 | C | T | Homozygous   |
| NC_037639.1 | 13909466 | SNV | 1 | C | T | Homozygous   |
| NC_037639.1 | 13909475 | SNV | 1 | C | T | Heterozygous |
| NC_037639.1 | 13910673 | SNV | 1 | A | C | Homozygous   |
| NC_037639.1 | 13910824 | SNV | 1 | G | A | Homozygous   |
| NC_037639.1 | 13926558 | SNV | 1 | T | C | Heterozygous |
| NC_037639.1 | 13926598 | SNV | 1 | G | A | Heterozygous |
| NC_037639.1 | 13946889 | SNV | 1 | G | C | Homozygous   |
| NC_037639.1 | 13977567 | SNV | 1 | A | G | Homozygous   |
| NC_037639.1 | 13977572 | SNV | 1 | C | T | Homozygous   |
| NC_037639.1 | 13977579 | SNV | 1 | C | T | Homozygous   |
| NC_037639.1 | 13977601 | SNV | 1 | T | C | Homozygous   |
| NC_037639.1 | 13977688 | SNV | 1 | T | C | Homozygous   |
| NC_037639.1 | 13977691 | SNV | 1 | G | A | Heterozygous |
| NC_037639.1 | 13977857 | SNV | 1 | T | C | Homozygous   |
| NC_037639.1 | 13977988 | SNV | 1 | C | T | Homozygous   |
| NC_037639.1 | 13978164 | SNV | 1 | A | G | Homozygous   |
| NC_037639.1 | 13978329 | SNV | 1 | A | C | Homozygous   |
| NC_037639.1 | 13978470 | SNV | 1 | C | T | Homozygous   |
| NC_037639.1 | 13978797 | SNV | 1 | A | G | Homozygous   |
| NC_037639.1 | 13978932 | SNV | 1 | A | G | Homozygous   |
| NC_037639.1 | 13979014 | SNV | 1 | A | G | Homozygous   |
| NC_037639.1 | 13979203 | SNV | 1 | A | G | Heterozygous |
| NC_037639.1 | 13980398 | SNV | 1 | T | C | Heterozygous |
| NC_037639.1 | 13980417 | SNV | 1 | C | T | Homozygous   |
| NC_037639.1 | 13981741 | SNV | 1 | A | G | Homozygous   |
| NC_037639.1 | 13981766 | SNV | 1 | T | C | Heterozygous |
| NC_037639.1 | 13981873 | SNV | 1 | T | G | Homozygous   |
| NC_037639.1 | 13981934 | SNV | 1 | G | A | Heterozygous |
| NC_037639.1 | 13981947 | SNV | 1 | G | A | Heterozygous |
| NC_037639.1 | 13981952 | SNV | 1 | C | A | Heterozygous |

|             |          |     |   |   |   |              |
|-------------|----------|-----|---|---|---|--------------|
| NC_037639.1 | 13982088 | SNV | 1 | A | G | Homozygous   |
| NC_037639.1 | 13982209 | SNV | 1 | A | C | Homozygous   |
| NC_037639.1 | 13982225 | SNV | 1 | T | C | Heterozygous |
| NC_037639.1 | 13982471 | SNV | 1 | A | G | Homozygous   |
| NC_037639.1 | 13982510 | SNV | 1 | A | C | Homozygous   |
| NC_037639.1 | 13982526 | SNV | 1 | A | G | Homozygous   |
| NC_037639.1 | 13982618 | SNV | 1 | T | C | Homozygous   |
| NC_037639.1 | 13984320 | SNV | 1 | T | G | Homozygous   |
| NC_037639.1 | 13984572 | SNV | 1 | A | G | Homozygous   |
| NC_037639.1 | 13984880 | SNV | 1 | A | G | Homozygous   |
| NC_037639.1 | 13984907 | SNV | 1 | G | A | Heterozygous |
| NC_037639.1 | 13984997 | SNV | 1 | T | C | Heterozygous |
| NC_037639.1 | 13985224 | SNV | 1 | A | G | Homozygous   |
| NC_037639.1 | 13985250 | SNV | 1 | G | A | Heterozygous |
| NC_037639.1 | 13985503 | SNV | 1 | A | C | Homozygous   |
| NC_037639.1 | 13985555 | SNV | 1 | A | G | Heterozygous |
| NC_037639.1 | 13985568 | SNV | 1 | C | T | Heterozygous |
| NC_037639.1 | 13985829 | SNV | 1 | T | C | Homozygous   |
| NC_037639.1 | 13985911 | SNV | 1 | T | C | Heterozygous |
| NC_037639.1 | 13986020 | SNV | 1 | A | G | Homozygous   |
| NC_037639.1 | 13986596 | SNV | 1 | T | C | Homozygous   |
| NC_037639.1 | 13986905 | SNV | 1 | A | G | Homozygous   |
| NC_037639.1 | 13987072 | SNV | 1 | G | A | Homozygous   |
| NC_037639.1 | 13987082 | SNV | 1 | T | C | Homozygous   |
| NC_037639.1 | 13987147 | SNV | 1 | T | C | Heterozygous |
| NC_037639.1 | 13987197 | SNV | 1 | C | T | Heterozygous |
| NC_037639.1 | 13987223 | SNV | 1 | C | T | Homozygous   |
| NC_037639.1 | 13987728 | SNV | 1 | G | A | Homozygous   |
| NC_037639.1 | 13987755 | SNV | 1 | G | A | Homozygous   |
| NC_037639.1 | 13987760 | SNV | 1 | C | G | Homozygous   |
| NC_037639.1 | 13987999 | SNV | 1 | G | C | Heterozygous |
| NC_037639.1 | 13988072 | SNV | 1 | G | C | Homozygous   |
| NC_037639.1 | 13988242 | SNV | 1 | T | C | Homozygous   |
| NC_037639.1 | 13988362 | SNV | 1 | T | C | Homozygous   |
| NC_037639.1 | 13988384 | SNV | 1 | C | T | Heterozygous |
| NC_037639.1 | 13995124 | SNV | 1 | G | T | Homozygous   |
| NC_037639.1 | 13998488 | SNV | 1 | C | T | Heterozygous |
| NC_037639.1 | 13998494 | SNV | 1 | T | C | Heterozygous |
| NC_037639.1 | 13998557 | SNV | 1 | A | G | Heterozygous |
| NC_037639.1 | 13999189 | SNV | 1 | G | C | Homozygous   |
| NC_037639.1 | 13999305 | SNV | 1 | C | T | Heterozygous |
| NC_037639.1 | 13999386 | SNV | 1 | T | C | Homozygous   |
| NC_037639.1 | 13999656 | SNV | 1 | T | C | Homozygous   |
| NC_037639.1 | 13999733 | SNV | 1 | C | T | Heterozygous |
| NC_037639.1 | 13999788 | SNV | 1 | T | C | Homozygous   |
| NC_037639.1 | 13999950 | SNV | 1 | T | C | Homozygous   |
| NC_037639.1 | 14001736 | SNV | 1 | G | A | Homozygous   |
| NC_037639.1 | 14002613 | SNV | 1 | C | T | Heterozygous |
| NC_037639.1 | 14002884 | SNV | 1 | A | T | Heterozygous |
| NC_037639.1 | 14002888 | SNV | 1 | A | G | Heterozygous |
| NC_037639.1 | 14003015 | SNV | 1 | C | T | Heterozygous |

|             |          |     |   |   |   |              |
|-------------|----------|-----|---|---|---|--------------|
| NC_037639.1 | 14003229 | SNV | 1 | A | T | Homozygous   |
| NC_037639.1 | 14003321 | SNV | 1 | C | T | Homozygous   |
| NC_037639.1 | 14003325 | SNV | 1 | C | T | Homozygous   |
| NC_037639.1 | 14003351 | SNV | 1 | C | T | Homozygous   |
| NC_037639.1 | 14003631 | SNV | 1 | T | C | Heterozygous |
| NC_037639.1 | 14004336 | SNV | 1 | G | A | Homozygous   |
| NC_037639.1 | 14004530 | SNV | 1 | A | G | Homozygous   |
| NC_037639.1 | 14004578 | SNV | 1 | G | A | Heterozygous |
| NC_037639.1 | 14004717 | SNV | 1 | C | G | Heterozygous |
| NC_037639.1 | 14004822 | SNV | 1 | A | G | Heterozygous |
| NC_037639.1 | 14004892 | SNV | 1 | C | T | Homozygous   |
| NC_037639.1 | 14004911 | SNV | 1 | A | G | Heterozygous |
| NC_037639.1 | 14005048 | SNV | 1 | A | G | Homozygous   |
| NC_037639.1 | 14005123 | SNV | 1 | C | T | Heterozygous |
| NC_037639.1 | 14005140 | SNV | 1 | C | T | Homozygous   |
| NC_037639.1 | 14005166 | SNV | 1 | C | T | Heterozygous |
| NC_037639.1 | 14005182 | SNV | 1 | G | A | Heterozygous |
| NC_037639.1 | 14005195 | SNV | 1 | C | T | Heterozygous |
| NC_037639.1 | 14005593 | SNV | 1 | G | C | Heterozygous |
| NC_037639.1 | 14007109 | SNV | 1 | C | T | Heterozygous |
| NC_037639.1 | 14008471 | SNV | 1 | T | C | Homozygous   |
| NC_037639.1 | 14008570 | SNV | 1 | G | A | Heterozygous |
| NC_037639.1 | 14008916 | SNV | 1 | T | C | Homozygous   |
| NC_037639.1 | 14008975 | SNV | 1 | G | A | Homozygous   |
| NC_037639.1 | 14009061 | SNV | 1 | C | G | Homozygous   |
| NC_037639.1 | 14009073 | SNV | 1 | G | A | Heterozygous |
| NC_037639.1 | 14009079 | SNV | 1 | G | A | Heterozygous |
| NC_037639.1 | 14009366 | SNV | 1 | C | T | Heterozygous |
| NC_037639.1 | 14009369 | SNV | 1 | T | C | Homozygous   |
| NC_037639.1 | 14009501 | SNV | 1 | T | C | Homozygous   |
| NC_037639.1 | 14011387 | SNV | 1 | A | G | Homozygous   |
| NC_037639.1 | 14011497 | SNV | 1 | T | C | Homozygous   |
| NC_037639.1 | 14011546 | SNV | 1 | A | G | Homozygous   |
| NC_037639.1 | 14012965 | SNV | 1 | C | T | Heterozygous |
| NC_037639.1 | 14012980 | SNV | 1 | T | C | Homozygous   |
| NC_037639.1 | 14012986 | SNV | 1 | T | C | Heterozygous |
| NC_037639.1 | 14012995 | SNV | 1 | T | C | Homozygous   |
| NC_037639.1 | 14013001 | SNV | 1 | G | A | Homozygous   |
| NC_037639.1 | 14013007 | SNV | 1 | C | T | Homozygous   |
| NC_037639.1 | 14013181 | SNV | 1 | T | C | Homozygous   |
| NC_037639.1 | 14013389 | SNV | 1 | T | C | Heterozygous |
| NC_037639.1 | 14013451 | SNV | 1 | C | G | Heterozygous |
| NC_037639.1 | 14013464 | SNV | 1 | G | C | Homozygous   |
| NC_037639.1 | 14013475 | SNV | 1 | T | C | Homozygous   |
| NC_037639.1 | 14013491 | SNV | 1 | T | C | Homozygous   |
| NC_037639.1 | 14013529 | SNV | 1 | T | C | Heterozygous |
| NC_037639.1 | 14013683 | SNV | 1 | G | A | Homozygous   |
| NC_037639.1 | 14042096 | SNV | 1 | C | T | Heterozygous |
| NC_037639.1 | 14042461 | SNV | 1 | T | C | Homozygous   |
| NC_037639.1 | 14063986 | SNV | 1 | C | T | Heterozygous |
| NC_037639.1 | 14064094 | SNV | 1 | G | A | Homozygous   |



|             |          |     |   |   |   |              |
|-------------|----------|-----|---|---|---|--------------|
| NC_037639.1 | 14064309 | SNV | 1 | T | A | Homozygous   |
| NC_037639.1 | 14064334 | SNV | 1 | T | C | Heterozygous |
| NC_037639.1 | 14064374 | SNV | 1 | A | G | Heterozygous |
| NC_037639.1 | 14064377 | SNV | 1 | A | G | Heterozygous |
| NC_037639.1 | 14064527 | SNV | 1 | T | C | Homozygous   |
| NC_037639.1 | 14064567 | SNV | 1 | C | T | Homozygous   |
| NC_037639.1 | 14064777 | SNV | 1 | G | C | Homozygous   |
| NC_037639.1 | 14064872 | SNV | 1 | A | G | Heterozygous |
| NC_037639.1 | 14065698 | SNV | 1 | G | A | Homozygous   |
| NC_037639.1 | 14070769 | SNV | 1 | G | A | Heterozygous |
| NC_037639.1 | 14071053 | SNV | 1 | A | G | Heterozygous |
| NC_037639.1 | 14071372 | SNV | 1 | A | G | Homozygous   |
| NC_037639.1 | 14071752 | SNV | 1 | A | T | Homozygous   |
| NC_037639.1 | 14071758 | SNV | 1 | T | C | Homozygous   |
| NC_037639.1 | 14082160 | SNV | 1 | A | C | Heterozygous |
| NC_037639.1 | 14082163 | SNV | 1 | A | G | Homozygous   |
| NC_037639.1 | 14082231 | SNV | 1 | T | C | Homozygous   |
| NC_037639.1 | 14083208 | SNV | 1 | T | C | Homozygous   |
| NC_037639.1 | 14083382 | SNV | 1 | A | G | Homozygous   |
| NC_037639.1 | 14083415 | SNV | 1 | T | G | Heterozygous |
| NC_037639.1 | 14083432 | SNV | 1 | T | C | Heterozygous |
| NC_037639.1 | 14083442 | SNV | 1 | T | C | Heterozygous |
| NC_037639.1 | 14083476 | SNV | 1 | T | C | Heterozygous |
| NC_037639.1 | 14083490 | SNV | 1 | T | C | Heterozygous |
| NC_037639.1 | 14084926 | SNV | 1 | G | A | Heterozygous |
| NC_037639.1 | 14084947 | SNV | 1 | G | A | Heterozygous |
| NC_037639.1 | 14087428 | SNV | 1 | C | G | Homozygous   |
| NC_037639.1 | 14087530 | SNV | 1 | A | G | Homozygous   |
| NC_037639.1 | 14087916 | SNV | 1 | A | G | Heterozygous |
| NC_037639.1 | 14088014 | SNV | 1 | A | G | Homozygous   |
| NC_037639.1 | 14088039 | SNV | 1 | T | C | Homozygous   |
| NC_037639.1 | 14088116 | SNV | 1 | C | T | Homozygous   |
| NC_037639.1 | 14088121 | SNV | 1 | T | C | Heterozygous |
| NC_037639.1 | 14088123 | SNV | 1 | C | G | Heterozygous |
| NC_037639.1 | 14088249 | SNV | 1 | A | G | Heterozygous |
| NC_037639.1 | 14088323 | SNV | 1 | G | A | Homozygous   |
| NC_037639.1 | 14088705 | SNV | 1 | G | A | Heterozygous |
| NC_037639.1 | 14088715 | SNV | 1 | A | G | Homozygous   |
| NC_037639.1 | 14088766 | SNV | 1 | T | C | Heterozygous |
| NC_037639.1 | 14088838 | SNV | 1 | T | C | Homozygous   |
| NC_037639.1 | 14088939 | SNV | 1 | T | C | Homozygous   |
| NC_037639.1 | 14089543 | SNV | 1 | T | C | Heterozygous |
| NC_037639.1 | 14089643 | SNV | 1 | G | A | Homozygous   |
| NC_037639.1 | 14089662 | SNV | 1 | T | C | Homozygous   |
| NC_037639.1 | 14089874 | SNV | 1 | G | A | Heterozygous |
| NC_037639.1 | 14090212 | SNV | 1 | A | G | Heterozygous |
| NC_037639.1 | 14090220 | SNV | 1 | A | G | Heterozygous |
| NC_037639.1 | 14090820 | SNV | 1 | C | T | Homozygous   |
| NC_037639.1 | 14090848 | SNV | 1 | A | T | Heterozygous |
| NC_037639.1 | 14090850 | SNV | 1 | T | A | Heterozygous |
| NC_037639.1 | 14104157 | SNV | 1 | G | A | Homozygous   |

|             |          |     |   |   |   |              |
|-------------|----------|-----|---|---|---|--------------|
| NC_037639.1 | 14104317 | SNV | 1 | A | G | Homozygous   |
| NC_037639.1 | 14110668 | SNV | 1 | A | G | Homozygous   |
| NC_037639.1 | 14110963 | SNV | 1 | C | T | Heterozygous |
| NC_037639.1 | 14110968 | SNV | 1 | T | C | Heterozygous |
| NC_037639.1 | 14110977 | SNV | 1 | T | C | Heterozygous |
| NC_037639.1 | 14110997 | SNV | 1 | A | G | Heterozygous |
| NC_037639.1 | 14111027 | SNV | 1 | G | A | Heterozygous |
| NC_037639.1 | 14111074 | SNV | 1 | C | T | Heterozygous |
| NC_037639.1 | 14111134 | SNV | 1 | T | C | Homozygous   |
| NC_037639.1 | 14111165 | SNV | 1 | T | C | Homozygous   |
| NC_037639.1 | 14111171 | SNV | 1 | C | T | Homozygous   |
| NC_037639.1 | 14111257 | SNV | 1 | C | T | Homozygous   |
| NC_037639.1 | 14111406 | SNV | 1 | A | G | Homozygous   |
| NC_037639.1 | 14111534 | SNV | 1 | G | C | Heterozygous |
| NC_037639.1 | 14111606 | SNV | 1 | G | T | Heterozygous |
| NC_037639.1 | 14111763 | SNV | 1 | T | C | Heterozygous |
| NC_037639.1 | 14111979 | SNV | 1 | A | G | Homozygous   |
| NC_037639.1 | 14111985 | SNV | 1 | A | G | Heterozygous |
| NC_037639.1 | 14113927 | SNV | 1 | G | A | Homozygous   |
| NC_037639.1 | 14114035 | SNV | 1 | G | T | Heterozygous |
| NC_037639.1 | 14115580 | SNV | 1 | A | G | Homozygous   |
| NC_037639.1 | 14117483 | SNV | 1 | T | C | Homozygous   |
| NC_037639.1 | 14117489 | SNV | 1 | C | T | Homozygous   |
| NC_037639.1 | 14117917 | SNV | 1 | G | C | Homozygous   |
| NC_037639.1 | 14118101 | SNV | 1 | G | C | Homozygous   |
| NC_037639.1 | 14118105 | SNV | 1 | C | T | Heterozygous |
| NC_037639.1 | 14118164 | SNV | 1 | T | C | Homozygous   |
| NC_037639.1 | 14118380 | SNV | 1 | A | G | Homozygous   |
| NC_037639.1 | 14119066 | SNV | 1 | A | G | Heterozygous |
| NC_037639.1 | 14119411 | SNV | 1 | G | C | Homozygous   |
| NC_037639.1 | 14119630 | SNV | 1 | A | G | Homozygous   |
| NC_037639.1 | 14119642 | SNV | 1 | C | A | Heterozygous |
| NC_037639.1 | 14119946 | SNV | 1 | A | G | Homozygous   |
| NC_037639.1 | 14120051 | SNV | 1 | G | C | Heterozygous |
| NC_037639.1 | 14120233 | SNV | 1 | G | C | Homozygous   |
| NC_037639.1 | 14120333 | SNV | 1 | G | A | Heterozygous |
| NC_037639.1 | 14120348 | SNV | 1 | C | A | Homozygous   |
| NC_037639.1 | 14121225 | SNV | 1 | G | A | Heterozygous |
| NC_037639.1 | 14121349 | SNV | 1 | G | A | Homozygous   |
| NC_037639.1 | 14121373 | SNV | 1 | A | G | Homozygous   |
| NC_037639.1 | 14121935 | SNV | 1 | G | A | Homozygous   |
| NC_037639.1 | 14122291 | SNV | 1 | A | G | Homozygous   |
| NC_037639.1 | 14122358 | SNV | 1 | A | G | Homozygous   |
| NC_037639.1 | 14122390 | SNV | 1 | A | G | Homozygous   |
| NC_037639.1 | 14122468 | SNV | 1 | T | C | Homozygous   |
| NC_037639.1 | 14122505 | SNV | 1 | T | C | Heterozygous |
| NC_037639.1 | 14122700 | SNV | 1 | G | A | Heterozygous |
| NC_037639.1 | 14123019 | SNV | 1 | A | G | Heterozygous |
| NC_037639.1 | 14123023 | SNV | 1 | A | G | Heterozygous |
| NC_037639.1 | 14123030 | SNV | 1 | C | A | Heterozygous |
| NC_037639.1 | 14123043 | SNV | 1 | G | A | Heterozygous |

|             |          |     |   |   |   |              |
|-------------|----------|-----|---|---|---|--------------|
| NC_037639.1 | 14123535 | SNV | 1 | A | G | Homozygous   |
| NC_037639.1 | 14123631 | SNV | 1 | A | G | Heterozygous |
| NC_037639.1 | 14123655 | SNV | 1 | T | C | Heterozygous |
| NC_037639.1 | 14123663 | SNV | 1 | G | A | Heterozygous |
| NC_037639.1 | 14123667 | SNV | 1 | T | C | Homozygous   |
| NC_037639.1 | 14123673 | SNV | 1 | A | G | Heterozygous |
| NC_037639.1 | 14123894 | SNV | 1 | G | T | Homozygous   |
| NC_037639.1 | 14123912 | SNV | 1 | A | G | Homozygous   |
| NC_037639.1 | 14125357 | SNV | 1 | A | G | Homozygous   |
| NC_037639.1 | 14125453 | SNV | 1 | T | C | Homozygous   |
| NC_037639.1 | 14125486 | SNV | 1 | A | G | Heterozygous |
| NC_037639.1 | 14125561 | SNV | 1 | G | T | Homozygous   |
| NC_037639.1 | 14125597 | SNV | 1 | C | T | Heterozygous |
| NC_037639.1 | 14125652 | SNV | 1 | G | A | Homozygous   |
| NC_037639.1 | 14156989 | SNV | 1 | G | C | Homozygous   |
| NC_037639.1 | 14156995 | SNV | 1 | G | C | Homozygous   |
| NC_037639.1 | 14156997 | SNV | 1 | A | T | Homozygous   |
| NC_037639.1 | 14157001 | SNV | 1 | G | C | Homozygous   |
| NC_037639.1 | 14157007 | SNV | 1 | A | C | Homozygous   |
| NC_037639.1 | 14157013 | SNV | 1 | G | C | Homozygous   |
| NC_037639.1 | 14157019 | SNV | 1 | G | C | Homozygous   |
| NC_037639.1 | 14158351 | SNV | 1 | C | T | Heterozygous |
| NC_037639.1 | 14158357 | SNV | 1 | C | T | Heterozygous |
| NC_037639.1 | 14170853 | SNV | 1 | C | T | Homozygous   |
| NC_037639.1 | 14174834 | SNV | 1 | C | T | Heterozygous |
| NC_037639.1 | 14177654 | SNV | 1 | T | C | Homozygous   |
| NC_037639.1 | 14177820 | SNV | 1 | G | A | Homozygous   |
| NC_037639.1 | 14177939 | SNV | 1 | T | C | Homozygous   |
| NC_037639.1 | 14177944 | SNV | 1 | A | G | Homozygous   |
| NC_037639.1 | 14177950 | SNV | 1 | T | C | Homozygous   |
| NC_037639.1 | 14177954 | SNV | 1 | A | T | Homozygous   |
| NC_037639.1 | 14178076 | SNV | 1 | A | G | Homozygous   |
| NC_037639.1 | 14178144 | SNV | 1 | A | G | Homozygous   |
| NC_037639.1 | 14178183 | SNV | 1 | A | G | Homozygous   |
| NC_037639.1 | 14178276 | SNV | 1 | C | T | Heterozygous |
| NC_037639.1 | 14178486 | SNV | 1 | A | G | Homozygous   |
| NC_037639.1 | 14178956 | SNV | 1 | C | T | Heterozygous |
| NC_037639.1 | 14179095 | SNV | 1 | C | T | Heterozygous |
| NC_037639.1 | 14179666 | SNV | 1 | T | A | Homozygous   |
| NC_037639.1 | 14179712 | SNV | 1 | G | A | Heterozygous |
| NC_037639.1 | 14180009 | SNV | 1 | A | G | Homozygous   |
| NC_037639.1 | 14180357 | SNV | 1 | C | T | Heterozygous |
| NC_037639.1 | 14180631 | SNV | 1 | T | C | Homozygous   |
| NC_037639.1 | 14180742 | SNV | 1 | T | C | Homozygous   |
| NC_037639.1 | 14181366 | SNV | 1 | C | A | Homozygous   |
| NC_037639.1 | 14204044 | SNV | 1 | C | A | Homozygous   |
| NC_037639.1 | 14204051 | SNV | 1 | T | A | Heterozygous |
| NC_037639.1 | 14205159 | SNV | 1 | A | G | Homozygous   |
| NC_037639.1 | 14205168 | SNV | 1 | T | C | Homozygous   |
| NC_037639.1 | 14205200 | SNV | 1 | T | G | Homozygous   |
| NC_037639.1 | 14211632 | SNV | 1 | T | A | Homozygous   |

|             |          |     |   |   |   |              |
|-------------|----------|-----|---|---|---|--------------|
| NC_037639.1 | 14211635 | SNV | 1 | A | T | Homozygous   |
| NC_037639.1 | 14211637 | SNV | 1 | G | T | Homozygous   |
| NC_037639.1 | 14211664 | SNV | 1 | T | A | Homozygous   |
| NC_037639.1 | 14213621 | SNV | 1 | C | G | Homozygous   |
| NC_037639.1 | 14214090 | SNV | 1 | T | C | Homozygous   |
| NC_037639.1 | 14214557 | SNV | 1 | T | C | Homozygous   |
| NC_037639.1 | 14214605 | SNV | 1 | A | G | Homozygous   |
| NC_037639.1 | 14214873 | SNV | 1 | G | A | Homozygous   |
| NC_037639.1 | 14215038 | SNV | 1 | T | C | Homozygous   |
| NC_037639.1 | 14216796 | SNV | 1 | G | T | Heterozygous |
| NC_037639.1 | 14217257 | SNV | 1 | C | T | Heterozygous |
| NC_037639.1 | 14217263 | SNV | 1 | C | T | Heterozygous |
| NC_037639.1 | 14217269 | SNV | 1 | T | C | Heterozygous |
| NC_037639.1 | 14217277 | SNV | 1 | T | C | Heterozygous |
| NC_037639.1 | 14217281 | SNV | 1 | T | C | Heterozygous |
| NC_037639.1 | 14217546 | SNV | 1 | G | A | Homozygous   |
| NC_037639.1 | 14228326 | SNV | 1 | G | A | Heterozygous |
| NC_037639.1 | 14228372 | SNV | 1 | A | G | Homozygous   |
| NC_037639.1 | 14260669 | SNV | 1 | G | T | Heterozygous |
| NC_037639.1 | 14266020 | SNV | 1 | A | G | Heterozygous |
| NC_037639.1 | 14268233 | SNV | 1 | G | T | Heterozygous |
| NC_037639.1 | 14270921 | SNV | 1 | A | G | Homozygous   |
| NC_037639.1 | 14271215 | SNV | 1 | A | G | Homozygous   |
| NC_037639.1 | 14272479 | SNV | 1 | G | A | Heterozygous |
| NC_037639.1 | 14272491 | SNV | 1 | A | G | Heterozygous |
| NC_037639.1 | 14272605 | SNV | 1 | C | G | Homozygous   |
| NC_037639.1 | 14272950 | SNV | 1 | C | T | Homozygous   |
| NC_037639.1 | 14272970 | SNV | 1 | C | T | Heterozygous |
| NC_037639.1 | 14272976 | SNV | 1 | C | T | Homozygous   |
| NC_037639.1 | 14272982 | SNV | 1 | C | G | Homozygous   |
| NC_037639.1 | 14274556 | SNV | 1 | T | G | Homozygous   |
| NC_037639.1 | 14274606 | SNV | 1 | A | T | Homozygous   |
| NC_037639.1 | 14274609 | SNV | 1 | A | T | Homozygous   |
| NC_037639.1 | 14274667 | SNV | 1 | C | A | Homozygous   |
| NC_037639.1 | 14274835 | SNV | 1 | A | C | Homozygous   |
| NC_037639.1 | 14276222 | SNV | 1 | T | A | Homozygous   |
| NC_037639.1 | 14277189 | SNV | 1 | G | A | Homozygous   |
| NC_037639.1 | 14277398 | SNV | 1 | A | C | Heterozygous |
| NC_037639.1 | 14277400 | SNV | 1 | T | C | Heterozygous |
| NC_037639.1 | 14277409 | SNV | 1 | T | C | Heterozygous |
| NC_037639.1 | 14277415 | SNV | 1 | T | C | Heterozygous |
| NC_037639.1 | 14277447 | SNV | 1 | A | G | Heterozygous |
| NC_037639.1 | 14277450 | SNV | 1 | A | G | Heterozygous |
| NC_037639.1 | 14277460 | SNV | 1 | C | T | Homozygous   |
| NC_037639.1 | 14277463 | SNV | 1 | C | T | Heterozygous |
| NC_037639.1 | 14277468 | SNV | 1 | A | G | Homozygous   |
| NC_037639.1 | 14277475 | SNV | 1 | C | T | Homozygous   |
| NC_037639.1 | 14277481 | SNV | 1 | T | C | Heterozygous |
| NC_037639.1 | 14278064 | SNV | 1 | A | G | Homozygous   |
| NC_037639.1 | 14279011 | SNV | 1 | G | A | Heterozygous |
| NC_037639.1 | 14279106 | SNV | 1 | G | A | Heterozygous |

|             |          |     |   |   |   |              |
|-------------|----------|-----|---|---|---|--------------|
| NC_037639.1 | 14279191 | SNV | 1 | A | G | Homozygous   |
| NC_037639.1 | 14292474 | SNV | 1 | A | G | Homozygous   |
| NC_037639.1 | 14292846 | SNV | 1 | A | G | Homozygous   |
| NC_037639.1 | 14292874 | SNV | 1 | T | C | Heterozygous |
| NC_037639.1 | 14295519 | SNV | 1 | G | A | Homozygous   |
| NC_037639.1 | 14296022 | SNV | 1 | G | A | Heterozygous |
| NC_037639.1 | 14296308 | SNV | 1 | T | G | Homozygous   |
| NC_037639.1 | 14296702 | SNV | 1 | G | A | Heterozygous |
| NC_037639.1 | 14296993 | SNV | 1 | C | A | Heterozygous |
| NC_037639.1 | 14298033 | SNV | 1 | G | A | Heterozygous |
| NC_037639.1 | 14298141 | SNV | 1 | G | A | Heterozygous |
| NC_037639.1 | 14298294 | SNV | 1 | G | A | Heterozygous |
| NC_037639.1 | 14298600 | SNV | 1 | T | C | Homozygous   |
| NC_037639.1 | 14299103 | SNV | 1 | A | G | Homozygous   |
| NC_037639.1 | 14299168 | SNV | 1 | A | C | Homozygous   |
| NC_037639.1 | 14299170 | SNV | 1 | A | C | Homozygous   |
| NC_037639.1 | 14299376 | SNV | 1 | A | G | Heterozygous |
| NC_037639.1 | 14299574 | SNV | 1 | T | A | Homozygous   |
| NC_037639.1 | 14299576 | SNV | 1 | A | C | Homozygous   |
| NC_037639.1 | 14299580 | SNV | 1 | G | A | Homozygous   |
| NC_037639.1 | 14299584 | SNV | 1 | G | A | Homozygous   |
| NC_037639.1 | 14299586 | SNV | 1 | T | G | Homozygous   |
| NC_037639.1 | 14299596 | SNV | 1 | G | A | Heterozygous |
| NC_037639.1 | 14299601 | SNV | 1 | G | A | Homozygous   |
| NC_037639.1 | 14299605 | SNV | 1 | A | T | Homozygous   |
| NC_037639.1 | 14299736 | SNV | 1 | A | G | Homozygous   |
| NC_037639.1 | 14299747 | SNV | 1 | A | G | Heterozygous |
| NC_037639.1 | 14299929 | SNV | 1 | T | C | Homozygous   |
| NC_037639.1 | 14299938 | SNV | 1 | T | C | Homozygous   |
| NC_037639.1 | 14300006 | SNV | 1 | T | C | Homozygous   |
| NC_037639.1 | 14300012 | SNV | 1 | T | C | Homozygous   |
| NC_037639.1 | 14300065 | SNV | 1 | G | A | Heterozygous |
| NC_037639.1 | 14300221 | SNV | 1 | A | G | Homozygous   |
| NC_037639.1 | 14301267 | SNV | 1 | C | G | Heterozygous |
| NC_037639.1 | 14301271 | SNV | 1 | A | G | Homozygous   |
| NC_037639.1 | 14301343 | SNV | 1 | T | A | Homozygous   |
| NC_037639.1 | 14301567 | SNV | 1 | A | G | Heterozygous |
| NC_037639.1 | 14301769 | SNV | 1 | C | T | Homozygous   |
| NC_037639.1 | 14301980 | SNV | 1 | C | T | Heterozygous |
| NC_037639.1 | 14301982 | SNV | 1 | A | G | Homozygous   |
| NC_037639.1 | 14302110 | SNV | 1 | T | A | Homozygous   |
| NC_037639.1 | 14302112 | SNV | 1 | T | A | Homozygous   |
| NC_037639.1 | 14302119 | SNV | 1 | A | G | Heterozygous |
| NC_037639.1 | 14302137 | SNV | 1 | G | A | Homozygous   |
| NC_037639.1 | 14302190 | SNV | 1 | C | T | Heterozygous |
| NC_037639.1 | 14303762 | SNV | 1 | G | A | Homozygous   |
| NC_037639.1 | 14306702 | SNV | 1 | G | A | Heterozygous |
| NC_037639.1 | 14306754 | SNV | 1 | G | A | Heterozygous |
| NC_037639.1 | 14306906 | SNV | 1 | T | C | Homozygous   |
| NC_037639.1 | 14306937 | SNV | 1 | A | G | Heterozygous |
| NC_037639.1 | 14306987 | SNV | 1 | A | C | Heterozygous |

|             |          |     |   |   |   |              |
|-------------|----------|-----|---|---|---|--------------|
| NC_037639.1 | 14307098 | SNV | 1 | T | C | Homozygous   |
| NC_037639.1 | 14307170 | SNV | 1 | C | G | Homozygous   |
| NC_037639.1 | 14307173 | SNV | 1 | T | C | Homozygous   |
| NC_037639.1 | 14307176 | SNV | 1 | A | G | Homozygous   |
| NC_037639.1 | 14315135 | SNV | 1 | A | G | Heterozygous |
| NC_037639.1 | 14315363 | SNV | 1 | G | C | Homozygous   |
| NC_037639.1 | 14325712 | SNV | 1 | T | C | Homozygous   |
| NC_037639.1 | 14346200 | SNV | 1 | C | T | Homozygous   |
| NC_037639.1 | 14346203 | SNV | 1 | G | A | Homozygous   |
| NC_037639.1 | 14346351 | SNV | 1 | T | C | Heterozygous |
| NC_037639.1 | 14346358 | SNV | 1 | C | T | Heterozygous |
| NC_037639.1 | 14346390 | SNV | 1 | T | G | Homozygous   |
| NC_037639.1 | 14346419 | SNV | 1 | G | T | Heterozygous |
| NC_037639.1 | 14346425 | SNV | 1 | G | A | Heterozygous |
| NC_037639.1 | 14349247 | SNV | 1 | T | C | Homozygous   |
| NC_037639.1 | 14349267 | SNV | 1 | A | G | Homozygous   |
| NC_037639.1 | 14349327 | SNV | 1 | A | G | Homozygous   |
| NC_037639.1 | 14361770 | SNV | 1 | C | G | Homozygous   |
| NC_037639.1 | 14367938 | SNV | 1 | T | C | Homozygous   |
| NC_037639.1 | 14369401 | SNV | 1 | C | A | Heterozygous |
| NC_037639.1 | 14369405 | SNV | 1 | G | A | Heterozygous |
| NC_037639.1 | 14369465 | SNV | 1 | C | T | Heterozygous |
| NC_037639.1 | 14375386 | SNV | 1 | T | C | Homozygous   |
| NC_037639.1 | 14378335 | SNV | 1 | C | T | Heterozygous |
| NC_037639.1 | 14378371 | SNV | 1 | T | A | Homozygous   |
| NC_037639.1 | 14378555 | SNV | 1 | C | T | Heterozygous |
| NC_037639.1 | 14378594 | SNV | 1 | A | G | Homozygous   |
| NC_037639.1 | 14379024 | SNV | 1 | A | G | Homozygous   |
| NC_037639.1 | 14379063 | SNV | 1 | C | T | Homozygous   |
| NC_037639.1 | 14382233 | SNV | 1 | G | A | Heterozygous |
| NC_037639.1 | 14382237 | SNV | 1 | C | A | Homozygous   |
| NC_037639.1 | 14384225 | SNV | 1 | T | C | Heterozygous |
| NC_037639.1 | 14384412 | SNV | 1 | G | A | Homozygous   |
| NC_037639.1 | 14384417 | SNV | 1 | A | G | Homozygous   |
| NC_037639.1 | 14385629 | SNV | 1 | A | T | Heterozygous |
| NC_037639.1 | 14385709 | SNV | 1 | C | A | Homozygous   |
| NC_037639.1 | 14385726 | SNV | 1 | A | G | Homozygous   |
| NC_037639.1 | 14385728 | SNV | 1 | A | G | Homozygous   |
| NC_037639.1 | 14385757 | SNV | 1 | A | G | Homozygous   |
| NC_037639.1 | 14385759 | SNV | 1 | A | G | Homozygous   |
| NC_037639.1 | 14385777 | SNV | 1 | G | A | Homozygous   |
| NC_037639.1 | 14385966 | SNV | 1 | G | T | Heterozygous |
| NC_037639.1 | 14385971 | SNV | 1 | G | T | Heterozygous |
| NC_037639.1 | 14386165 | SNV | 1 | G | A | Homozygous   |
| NC_037639.1 | 14386213 | SNV | 1 | G | C | Homozygous   |
| NC_037639.1 | 14386224 | SNV | 1 | T | C | Heterozygous |
| NC_037639.1 | 14386230 | SNV | 1 | T | C | Heterozygous |
| NC_037639.1 | 14388125 | SNV | 1 | C | T | Homozygous   |
| NC_037639.1 | 14389913 | SNV | 1 | C | G | Homozygous   |
| NC_037639.1 | 14389916 | SNV | 1 | C | G | Homozygous   |
| NC_037639.1 | 14389919 | SNV | 1 | G | T | Homozygous   |

|             |          |     |   |   |   |              |
|-------------|----------|-----|---|---|---|--------------|
| NC_037639.1 | 14389952 | SNV | 1 | T | C | Homozygous   |
| NC_037639.1 | 14403189 | SNV | 1 | A | G | Homozygous   |
| NC_037639.1 | 14407313 | SNV | 1 | A | G | Heterozygous |
| NC_037639.1 | 14407373 | SNV | 1 | C | T | Homozygous   |
| NC_037639.1 | 14407704 | SNV | 1 | G | C | Heterozygous |
| NC_037639.1 | 14407708 | SNV | 1 | T | A | Heterozygous |
| NC_037639.1 | 14407710 | SNV | 1 | C | T | Heterozygous |
| NC_037639.1 | 14407750 | SNV | 1 | A | G | Heterozygous |
| NC_037639.1 | 14407922 | SNV | 1 | T | C | Heterozygous |
| NC_037639.1 | 14408273 | SNV | 1 | C | T | Heterozygous |
| NC_037639.1 | 14408285 | SNV | 1 | A | G | Heterozygous |
| NC_037639.1 | 14408287 | SNV | 1 | C | T | Heterozygous |
| NC_037639.1 | 14408290 | SNV | 1 | T | C | Heterozygous |
| NC_037639.1 | 14408394 | SNV | 1 | C | T | Heterozygous |
| NC_037639.1 | 14419510 | SNV | 1 | A | T | Heterozygous |
| NC_037639.1 | 14419567 | SNV | 1 | C | T | Homozygous   |
| NC_037639.1 | 14426647 | SNV | 1 | G | A | Homozygous   |
| NC_037639.1 | 14426856 | SNV | 1 | A | G | Homozygous   |
| NC_037639.1 | 14426948 | SNV | 1 | T | C | Homozygous   |
| NC_037639.1 | 14426972 | SNV | 1 | C | T | Homozygous   |
| NC_037639.1 | 14427186 | SNV | 1 | T | C | Heterozygous |
| NC_037639.1 | 14427506 | SNV | 1 | T | C | Homozygous   |
| NC_037639.1 | 14427558 | SNV | 1 | G | C | Homozygous   |
| NC_037639.1 | 14427561 | SNV | 1 | A | T | Homozygous   |
| NC_037639.1 | 14427563 | SNV | 1 | T | C | Homozygous   |
| NC_037639.1 | 14427567 | SNV | 1 | T | C | Homozygous   |
| NC_037639.1 | 14428116 | SNV | 1 | A | G | Homozygous   |
| NC_037639.1 | 14428485 | SNV | 1 | G | A | Homozygous   |
| NC_037639.1 | 14429051 | SNV | 1 | A | T | Homozygous   |
| NC_037639.1 | 14429698 | SNV | 1 | G | A | Homozygous   |
| NC_037639.1 | 14434384 | SNV | 1 | T | A | Homozygous   |
| NC_037639.1 | 14434387 | SNV | 1 | G | T | Homozygous   |
| NC_037639.1 | 14436864 | SNV | 1 | T | C | Homozygous   |
| NC_037639.1 | 14438269 | SNV | 1 | C | T | Heterozygous |
| NC_037639.1 | 14438318 | SNV | 1 | G | A | Homozygous   |
| NC_037639.1 | 14438516 | SNV | 1 | C | T | Homozygous   |
| NC_037639.1 | 14438627 | SNV | 1 | C | T | Heterozygous |
| NC_037639.1 | 14438632 | SNV | 1 | A | T | Heterozygous |
| NC_037639.1 | 14439449 | SNV | 1 | G | A | Homozygous   |
| NC_037639.1 | 14439453 | SNV | 1 | G | A | Homozygous   |
| NC_037639.1 | 14439549 | SNV | 1 | C | T | Heterozygous |
| NC_037639.1 | 14439813 | SNV | 1 | T | C | Heterozygous |
| NC_037639.1 | 14440165 | SNV | 1 | T | C | Heterozygous |
| NC_037639.1 | 14440589 | SNV | 1 | T | C | Homozygous   |
| NC_037639.1 | 14441438 | SNV | 1 | A | T | Homozygous   |
| NC_037639.1 | 14449438 | SNV | 1 | G | A | Homozygous   |
| NC_037639.1 | 14449448 | SNV | 1 | A | C | Homozygous   |
| NC_037639.1 | 14449474 | SNV | 1 | A | C | Homozygous   |
| NC_037639.1 | 14449477 | SNV | 1 | G | A | Homozygous   |
| NC_037639.1 | 14449480 | SNV | 1 | G | A | Heterozygous |
| NC_037639.1 | 14456008 | SNV | 1 | T | C | Homozygous   |

|             |          |     |   |   |   |              |
|-------------|----------|-----|---|---|---|--------------|
| NC_037639.1 | 14456013 | SNV | 1 | A | C | Homozygous   |
| NC_037639.1 | 14460309 | SNV | 1 | C | A | Heterozygous |
| NC_037639.1 | 14460313 | SNV | 1 | G | T | Heterozygous |
| NC_037639.1 | 14460337 | SNV | 1 | G | A | Heterozygous |
| NC_037639.1 | 14460353 | SNV | 1 | A | T | Homozygous   |
| NC_037639.1 | 14460355 | SNV | 1 | G | A | Heterozygous |
| NC_037639.1 | 14460369 | SNV | 1 | G | A | Homozygous   |
| NC_037639.1 | 14460372 | SNV | 1 | G | A | Homozygous   |
| NC_037639.1 | 14466223 | SNV | 1 | G | T | Heterozygous |
| NC_037639.1 | 14466412 | SNV | 1 | A | G | Homozygous   |
| NC_037639.1 | 14466448 | SNV | 1 | A | G | Homozygous   |
| NC_037639.1 | 14466450 | SNV | 1 | A | G | Homozygous   |
| NC_037639.1 | 14476935 | SNV | 1 | C | T | Heterozygous |
| NC_037639.1 | 14476945 | SNV | 1 | C | T | Heterozygous |
| NC_037639.1 | 14484328 | SNV | 1 | T | A | Heterozygous |
| NC_037639.1 | 14484332 | SNV | 1 | C | T | Homozygous   |
| NC_037639.1 | 14484354 | SNV | 1 | T | A | Heterozygous |
| NC_037639.1 | 14492198 | SNV | 1 | G | A | Homozygous   |
| NC_037639.1 | 14492201 | SNV | 1 | G | A | Heterozygous |
| NC_037639.1 | 14493863 | SNV | 1 | C | T | Homozygous   |
| NC_037639.1 | 14493865 | SNV | 1 | T | A | Homozygous   |
| NC_037639.1 | 14493883 | SNV | 1 | C | T | Homozygous   |
| NC_037639.1 | 14493885 | SNV | 1 | C | T | Homozygous   |
| NC_037639.1 | 14501426 | SNV | 1 | T | C | Heterozygous |
| NC_037639.1 | 14501436 | SNV | 1 | T | C | Heterozygous |
| NC_037639.1 | 14503404 | SNV | 1 | T | C | Homozygous   |
| NC_037639.1 | 14503431 | SNV | 1 | A | T | Homozygous   |
| NC_037639.1 | 14514163 | SNV | 1 | G | T | Homozygous   |
| NC_037639.1 | 14514191 | SNV | 1 | A | G | Heterozygous |
| NC_037639.1 | 14514195 | SNV | 1 | A | G | Heterozygous |
| NC_037639.1 | 14514197 | SNV | 1 | A | G | Heterozygous |
| NC_037639.1 | 14514213 | SNV | 1 | G | A | Homozygous   |
| NC_037639.1 | 14515627 | SNV | 1 | A | G | Homozygous   |
| NC_037639.1 | 14515635 | SNV | 1 | G | A | Homozygous   |
| NC_037639.1 | 14515665 | SNV | 1 | A | G | Homozygous   |
| NC_037639.1 | 14515671 | SNV | 1 | T | G | Homozygous   |
| NC_037639.1 | 14515677 | SNV | 1 | A | G | Homozygous   |
| NC_037639.1 | 14517803 | SNV | 1 | A | G | Homozygous   |
| NC_037639.1 | 14517813 | SNV | 1 | A | G | Homozygous   |
| NC_037639.1 | 14521592 | SNV | 1 | G | A | Heterozygous |
| NC_037639.1 | 14537350 | SNV | 1 | C | T | Homozygous   |
| NC_037639.1 | 14537602 | SNV | 1 | C | G | Homozygous   |
| NC_037639.1 | 14537720 | SNV | 1 | G | A | Homozygous   |
| NC_037639.1 | 14537808 | SNV | 1 | T | C | Homozygous   |
| NC_037639.1 | 14537879 | SNV | 1 | T | C | Homozygous   |
| NC_037639.1 | 14538232 | SNV | 1 | A | G | Heterozygous |
| NC_037639.1 | 14538317 | SNV | 1 | G | A | Heterozygous |
| NC_037639.1 | 14538332 | SNV | 1 | T | A | Homozygous   |
| NC_037639.1 | 14538343 | SNV | 1 | G | A | Homozygous   |
| NC_037639.1 | 14540760 | SNV | 1 | C | T | Homozygous   |
| NC_037639.1 | 14540793 | SNV | 1 | C | A | Heterozygous |



|             |          |     |   |   |   |              |
|-------------|----------|-----|---|---|---|--------------|
| NC_037639.1 | 14540803 | SNV | 1 | A | C | Homozygous   |
| NC_037639.1 | 14541606 | SNV | 1 | T | C | Homozygous   |
| NC_037639.1 | 14541809 | SNV | 1 | A | G | Homozygous   |
| NC_037639.1 | 14541947 | SNV | 1 | G | A | Homozygous   |
| NC_037639.1 | 14542283 | SNV | 1 | T | C | Homozygous   |
| NC_037639.1 | 14542305 | SNV | 1 | T | A | Homozygous   |
| NC_037639.1 | 14542322 | SNV | 1 | T | C | Homozygous   |
| NC_037639.1 | 14542388 | SNV | 1 | T | A | Heterozygous |
| NC_037639.1 | 14542392 | SNV | 1 | C | T | Heterozygous |
| NC_037639.1 | 14542451 | SNV | 1 | A | G | Homozygous   |
| NC_037639.1 | 14542478 | SNV | 1 | T | A | Heterozygous |
| NC_037639.1 | 14549204 | SNV | 1 | G | A | Heterozygous |
| NC_037639.1 | 14549210 | SNV | 1 | G | A | Heterozygous |
| NC_037639.1 | 14549270 | SNV | 1 | G | A | Heterozygous |
| NC_037639.1 | 14550164 | SNV | 1 | C | T | Homozygous   |
| NC_037639.1 | 14559980 | SNV | 1 | C | T | Heterozygous |
| NC_037639.1 | 14560011 | SNV | 1 | T | A | Homozygous   |
| NC_037639.1 | 14560023 | SNV | 1 | T | G | Heterozygous |
| NC_037639.1 | 14560026 | SNV | 1 | T | A | Heterozygous |
| NC_037639.1 | 14564805 | SNV | 1 | C | A | Homozygous   |
| NC_037639.1 | 14577159 | SNV | 1 | T | C | Homozygous   |
| NC_037639.1 | 14577166 | SNV | 1 | C | T | Homozygous   |
| NC_037639.1 | 14581509 | SNV | 1 | G | A | Heterozygous |
| NC_037639.1 | 14588203 | SNV | 1 | A | T | Homozygous   |
| NC_037639.1 | 14588233 | SNV | 1 | T | G | Homozygous   |
| NC_037639.1 | 14608123 | SNV | 1 | T | C | Heterozygous |
| NC_037639.1 | 14608127 | SNV | 1 | C | T | Heterozygous |
| NC_037639.1 | 14608144 | SNV | 1 | T | C | Heterozygous |
| NC_037639.1 | 14608381 | SNV | 1 | G | T | Homozygous   |
| NC_037639.1 | 14628612 | SNV | 1 | C | T | Heterozygous |
| NC_037639.1 | 14636095 | SNV | 1 | A | G | Homozygous   |
| NC_037639.1 | 14636098 | SNV | 1 | A | G | Homozygous   |
| NC_037639.1 | 14636101 | SNV | 1 | A | G | Heterozygous |
| NC_037639.1 | 14636113 | SNV | 1 | A | G | Homozygous   |
| NC_037639.1 | 14636122 | SNV | 1 | G | A | Heterozygous |
| NC_037639.1 | 14636345 | SNV | 1 | T | C | Homozygous   |
| NC_037639.1 | 14636368 | SNV | 1 | A | C | Heterozygous |
| NC_037639.1 | 14636404 | SNV | 1 | C | G | Heterozygous |
| NC_037639.1 | 14637340 | SNV | 1 | A | C | Heterozygous |
| NC_037639.1 | 14637932 | SNV | 1 | A | G | Homozygous   |
| NC_037639.1 | 14638399 | SNV | 1 | T | C | Homozygous   |
| NC_037639.1 | 14638405 | SNV | 1 | T | C | Heterozygous |
| NC_037639.1 | 14638986 | SNV | 1 | G | A | Homozygous   |
| NC_037639.1 | 14639221 | SNV | 1 | C | A | Heterozygous |
| NC_037639.1 | 14639272 | SNV | 1 | A | G | Homozygous   |
| NC_037639.1 | 14639653 | SNV | 1 | G | A | Homozygous   |
| NC_037639.1 | 14639779 | SNV | 1 | A | G | Homozygous   |
| NC_037639.1 | 14639817 | SNV | 1 | T | C | Homozygous   |
| NC_037639.1 | 14640100 | SNV | 1 | G | A | Heterozygous |
| NC_037639.1 | 14640354 | SNV | 1 | A | G | Homozygous   |
| NC_037639.1 | 14641012 | SNV | 1 | A | G | Homozygous   |

|             |          |     |   |   |   |              |
|-------------|----------|-----|---|---|---|--------------|
| NC_037639.1 | 14641854 | SNV | 1 | A | C | Homozygous   |
| NC_037639.1 | 14642446 | SNV | 1 | T | C | Heterozygous |
| NC_037639.1 | 14643719 | SNV | 1 | A | G | Homozygous   |
| NC_037639.1 | 14643725 | SNV | 1 | G | A | Homozygous   |
| NC_037639.1 | 14644124 | SNV | 1 | T | A | Homozygous   |
| NC_037639.1 | 14644131 | SNV | 1 | G | A | Homozygous   |
| NC_037639.1 | 14645546 | SNV | 1 | A | G | Heterozygous |
| NC_037639.1 | 14651927 | SNV | 1 | A | G | Heterozygous |
| NC_037639.1 | 14651961 | SNV | 1 | G | C | Homozygous   |
| NC_037639.1 | 14651965 | SNV | 1 | T | C | Homozygous   |
| NC_037639.1 | 14652184 | SNV | 1 | G | C | Heterozygous |
| NC_037639.1 | 14654148 | SNV | 1 | C | T | Heterozygous |
| NC_037639.1 | 14669772 | SNV | 1 | T | C | Homozygous   |
| NC_037639.1 | 14669892 | SNV | 1 | T | C | Homozygous   |
| NC_037639.1 | 14673407 | SNV | 1 | G | A | Homozygous   |
| NC_037639.1 | 14674908 | SNV | 1 | T | C | Heterozygous |
| NC_037639.1 | 14674951 | SNV | 1 | G | C | Homozygous   |
| NC_037639.1 | 14675026 | SNV | 1 | C | T | Heterozygous |
| NC_037639.1 | 14675039 | SNV | 1 | T | C | Heterozygous |
| NC_037639.1 | 14675077 | SNV | 1 | C | T | Heterozygous |
| NC_037639.1 | 14675131 | SNV | 1 | A | G | Homozygous   |
| NC_037639.1 | 14675213 | SNV | 1 | C | T | Homozygous   |
| NC_037639.1 | 14675704 | SNV | 1 | G | C | Heterozygous |
| NC_037639.1 | 14675799 | SNV | 1 | G | A | Heterozygous |
| NC_037639.1 | 14676602 | SNV | 1 | C | T | Heterozygous |
| NC_037639.1 | 14676720 | SNV | 1 | A | G | Homozygous   |
| NC_037639.1 | 14676796 | SNV | 1 | T | C | Heterozygous |
| NC_037639.1 | 14676878 | SNV | 1 | G | A | Heterozygous |
| NC_037639.1 | 14677025 | SNV | 1 | G | A | Heterozygous |
| NC_037639.1 | 14677150 | SNV | 1 | A | G | Homozygous   |
| NC_037639.1 | 14677243 | SNV | 1 | C | G | Homozygous   |
| NC_037639.1 | 14677338 | SNV | 1 | G | A | Heterozygous |
| NC_037639.1 | 14677378 | SNV | 1 | T | G | Heterozygous |
| NC_037639.1 | 14677385 | SNV | 1 | T | A | Heterozygous |
| NC_037639.1 | 14677413 | SNV | 1 | G | T | Heterozygous |
| NC_037639.1 | 14677467 | SNV | 1 | G | A | Homozygous   |
| NC_037639.1 | 14677491 | SNV | 1 | A | G | Homozygous   |
| NC_037639.1 | 14677502 | SNV | 1 | A | G | Heterozygous |
| NC_037639.1 | 14677691 | SNV | 1 | A | G | Homozygous   |
| NC_037639.1 | 14677707 | SNV | 1 | G | A | Heterozygous |
| NC_037639.1 | 14677709 | SNV | 1 | G | A | Homozygous   |
| NC_037639.1 | 14677711 | SNV | 1 | A | G | Heterozygous |
| NC_037639.1 | 14677748 | SNV | 1 | A | G | Homozygous   |
| NC_037639.1 | 14677761 | SNV | 1 | G | A | Heterozygous |
| NC_037639.1 | 14677954 | SNV | 1 | T | G | Homozygous   |
| NC_037639.1 | 14677956 | SNV | 1 | G | C | Heterozygous |
| NC_037639.1 | 14677975 | SNV | 1 | T | C | Heterozygous |
| NC_037639.1 | 14678318 | SNV | 1 | G | C | Homozygous   |
| NC_037639.1 | 14678360 | SNV | 1 | G | A | Heterozygous |
| NC_037639.1 | 14678662 | SNV | 1 | C | T | Homozygous   |
| NC_037639.1 | 14678875 | SNV | 1 | C | G | Homozygous   |

|             |          |     |   |   |   |              |
|-------------|----------|-----|---|---|---|--------------|
| NC_037639.1 | 14678877 | SNV | 1 | T | C | Homozygous   |
| NC_037639.1 | 14678935 | SNV | 1 | G | A | Heterozygous |
| NC_037639.1 | 14686481 | SNV | 1 | G | A | Heterozygous |
| NC_037639.1 | 14686489 | SNV | 1 | A | G | Heterozygous |
| NC_037639.1 | 14686907 | SNV | 1 | A | G | Heterozygous |
| NC_037639.1 | 14686940 | SNV | 1 | G | C | Heterozygous |
| NC_037639.1 | 14687409 | SNV | 1 | C | G | Heterozygous |
| NC_037639.1 | 14687560 | SNV | 1 | C | T | Heterozygous |
| NC_037639.1 | 14687635 | SNV | 1 | T | C | Heterozygous |
| NC_037639.1 | 14687755 | SNV | 1 | T | C | Heterozygous |
| NC_037639.1 | 14687942 | SNV | 1 | A | T | Homozygous   |
| NC_037639.1 | 14688297 | SNV | 1 | T | G | Heterozygous |
| NC_037639.1 | 14688309 | SNV | 1 | A | G | Heterozygous |
| NC_037639.1 | 14688312 | SNV | 1 | G | C | Heterozygous |
| NC_037639.1 | 14688566 | SNV | 1 | C | T | Heterozygous |
| NC_037639.1 | 14688864 | SNV | 1 | C | A | Heterozygous |
| NC_037639.1 | 14688876 | SNV | 1 | G | C | Heterozygous |
| NC_037639.1 | 14688974 | SNV | 1 | T | C | Homozygous   |
| NC_037639.1 | 14689157 | SNV | 1 | G | T | Homozygous   |
| NC_037639.1 | 14689173 | SNV | 1 | G | C | Homozygous   |
| NC_037639.1 | 14689179 | SNV | 1 | A | G | Heterozygous |
| NC_037639.1 | 14689227 | SNV | 1 | T | G | Homozygous   |
| NC_037639.1 | 14689447 | SNV | 1 | A | G | Heterozygous |
| NC_037639.1 | 14689467 | SNV | 1 | T | G | Homozygous   |
| NC_037639.1 | 14689503 | SNV | 1 | A | C | Heterozygous |
| NC_037639.1 | 14689575 | SNV | 1 | T | C | Homozygous   |
| NC_037639.1 | 14689599 | SNV | 1 | T | C | Homozygous   |
| NC_037639.1 | 14689788 | SNV | 1 | T | C | Heterozygous |
| NC_037639.1 | 14689791 | SNV | 1 | T | C | Heterozygous |
| NC_037639.1 | 14689794 | SNV | 1 | G | C | Heterozygous |
| NC_037639.1 | 14689827 | SNV | 1 | C | T | Heterozygous |
| NC_037639.1 | 14689850 | SNV | 1 | G | A | Homozygous   |
| NC_037639.1 | 14689863 | SNV | 1 | G | A | Heterozygous |
| NC_037639.1 | 14689887 | SNV | 1 | A | G | Homozygous   |
| NC_037639.1 | 14689914 | SNV | 1 | C | T | Heterozygous |
| NC_037639.1 | 14689950 | SNV | 1 | C | T | Homozygous   |
| NC_037639.1 | 14689960 | SNV | 1 | A | G | Homozygous   |
| NC_037639.1 | 14689986 | SNV | 1 | C | G | Heterozygous |
| NC_037639.1 | 14689989 | SNV | 1 | T | C | Heterozygous |
| NC_037639.1 | 14689995 | SNV | 1 | C | T | Homozygous   |
| NC_037639.1 | 14690022 | SNV | 1 | G | A | Heterozygous |
| NC_037639.1 | 14690049 | SNV | 1 | C | G | Homozygous   |
| NC_037639.1 | 14690058 | SNV | 1 | C | T | Homozygous   |
| NC_037639.1 | 14690064 | SNV | 1 | G | A | Homozygous   |
| NC_037639.1 | 14690073 | SNV | 1 | G | A | Homozygous   |
| NC_037639.1 | 14690088 | SNV | 1 | T | A | Homozygous   |
| NC_037639.1 | 14690091 | SNV | 1 | T | C | Homozygous   |
| NC_037639.1 | 14690106 | SNV | 1 | C | T | Homozygous   |
| NC_037639.1 | 14690142 | SNV | 1 | C | T | Heterozygous |
| NC_037639.1 | 14690165 | SNV | 1 | G | A | Homozygous   |
| NC_037639.1 | 14690169 | SNV | 1 | A | G | Homozygous   |

|             |          |     |   |   |   |              |
|-------------|----------|-----|---|---|---|--------------|
| NC_037639.1 | 14690175 | SNV | 1 | T | C | Homozygous   |
| NC_037639.1 | 14690178 | SNV | 1 | G | C | Heterozygous |
| NC_037639.1 | 14690181 | SNV | 1 | C | T | Heterozygous |
| NC_037639.1 | 14690187 | SNV | 1 | C | T | Heterozygous |
| NC_037639.1 | 14690193 | SNV | 1 | C | T | Heterozygous |
| NC_037639.1 | 14690196 | SNV | 1 | C | T | Heterozygous |
| NC_037639.1 | 14690207 | SNV | 1 | T | C | Heterozygous |
| NC_037639.1 | 14690223 | SNV | 1 | A | G | Heterozygous |
| NC_037639.1 | 14690250 | SNV | 1 | C | T | Homozygous   |
| NC_037639.1 | 14690268 | SNV | 1 | C | A | Homozygous   |
| NC_037639.1 | 14690275 | SNV | 1 | T | C | Homozygous   |
| NC_037639.1 | 14690280 | SNV | 1 | C | A | Heterozygous |
| NC_037639.1 | 14690289 | SNV | 1 | T | C | Homozygous   |
| NC_037639.1 | 14690319 | SNV | 1 | C | T | Heterozygous |
| NC_037639.1 | 14690341 | SNV | 1 | T | C | Heterozygous |
| NC_037639.1 | 14690343 | SNV | 1 | C | T | Homozygous   |
| NC_037639.1 | 14690485 | SNV | 1 | T | C | Heterozygous |
| NC_037639.1 | 14690490 | SNV | 1 | C | T | Heterozygous |
| NC_037639.1 | 14690517 | SNV | 1 | G | C | Heterozygous |
| NC_037639.1 | 14690526 | SNV | 1 | G | A | Heterozygous |
| NC_037639.1 | 14690532 | SNV | 1 | T | A | Heterozygous |
| NC_037639.1 | 14690559 | SNV | 1 | C | T | Homozygous   |
| NC_037639.1 | 14690562 | SNV | 1 | C | T | Heterozygous |
| NC_037639.1 | 14690655 | SNV | 1 | T | C | Heterozygous |
| NC_037639.1 | 14690661 | SNV | 1 | A | G | Heterozygous |
| NC_037639.1 | 14690664 | SNV | 1 | G | A | Heterozygous |
| NC_037639.1 | 14690667 | SNV | 1 | A | C | Heterozygous |
| NC_037639.1 | 14690823 | SNV | 1 | G | A | Heterozygous |
| NC_037639.1 | 14690826 | SNV | 1 | A | G | Heterozygous |
| NC_037639.1 | 14690832 | SNV | 1 | G | A | Heterozygous |
| NC_037639.1 | 14690838 | SNV | 1 | T | A | Heterozygous |
| NC_037639.1 | 14690844 | SNV | 1 | C | G | Heterozygous |
| NC_037639.1 | 14690847 | SNV | 1 | T | G | Heterozygous |
| NC_037639.1 | 14690849 | SNV | 1 | T | G | Heterozygous |
| NC_037639.1 | 14690866 | SNV | 1 | C | T | Heterozygous |
| NC_037639.1 | 14690901 | SNV | 1 | G | A | Heterozygous |
| NC_037639.1 | 14690998 | SNV | 1 | C | T | Heterozygous |
| NC_037639.1 | 14691000 | SNV | 1 | C | T | Heterozygous |
| NC_037639.1 | 14691027 | SNV | 1 | C | G | Homozygous   |
| NC_037639.1 | 14691165 | SNV | 1 | G | A | Homozygous   |
| NC_037639.1 | 14691171 | SNV | 1 | C | T | Heterozygous |
| NC_037639.1 | 14691174 | SNV | 1 | T | C | Heterozygous |
| NC_037639.1 | 14691212 | SNV | 1 | A | G | Homozygous   |
| NC_037639.1 | 14691229 | SNV | 1 | T | C | Homozygous   |
| NC_037639.1 | 14691246 | SNV | 1 | A | G | Homozygous   |
| NC_037639.1 | 14691336 | SNV | 1 | T | G | Homozygous   |
| NC_037639.1 | 14691348 | SNV | 1 | C | T | Homozygous   |
| NC_037639.1 | 14691375 | SNV | 1 | G | T | Heterozygous |
| NC_037639.1 | 14691543 | SNV | 1 | A | G | Homozygous   |
| NC_037639.1 | 14691549 | SNV | 1 | T | G | Heterozygous |
| NC_037639.1 | 14691555 | SNV | 1 | A | T | Homozygous   |

|             |          |     |   |   |   |              |
|-------------|----------|-----|---|---|---|--------------|
| NC_037639.1 | 14691579 | SNV | 1 | T | G | Homozygous   |
| NC_037639.1 | 14691642 | SNV | 1 | T | A | Heterozygous |
| NC_037639.1 | 14691648 | SNV | 1 | G | A | Homozygous   |
| NC_037639.1 | 14691654 | SNV | 1 | G | A | Heterozygous |
| NC_037639.1 | 14691657 | SNV | 1 | C | T | Heterozygous |
| NC_037639.1 | 14691687 | SNV | 1 | T | A | Heterozygous |
| NC_037639.1 | 14691750 | SNV | 1 | C | T | Heterozygous |
| NC_037639.1 | 14691756 | SNV | 1 | C | T | Heterozygous |
| NC_037639.1 | 14691761 | SNV | 1 | A | T | Heterozygous |
| NC_037639.1 | 14691792 | SNV | 1 | C | T | Heterozygous |
| NC_037639.1 | 14691798 | SNV | 1 | G | A | Heterozygous |
| NC_037639.1 | 14691831 | SNV | 1 | T | C | Heterozygous |
| NC_037639.1 | 14691834 | SNV | 1 | C | A | Heterozygous |
| NC_037639.1 | 14691870 | SNV | 1 | C | T | Heterozygous |
| NC_037639.1 | 14691981 | SNV | 1 | T | C | Heterozygous |
| NC_037639.1 | 14691990 | SNV | 1 | T | C | Heterozygous |
| NC_037639.1 | 14692002 | SNV | 1 | A | G | Heterozygous |
| NC_037639.1 | 14692019 | SNV | 1 | T | C | Homozygous   |
| NC_037639.1 | 14692032 | SNV | 1 | G | T | Homozygous   |
| NC_037639.1 | 14692035 | SNV | 1 | A | C | Heterozygous |
| NC_037639.1 | 14692074 | SNV | 1 | C | T | Homozygous   |
| NC_037639.1 | 14692083 | SNV | 1 | T | C | Homozygous   |
| NC_037639.1 | 14692125 | SNV | 1 | A | G | Homozygous   |
| NC_037639.1 | 14692140 | SNV | 1 | T | C | Homozygous   |
| NC_037639.1 | 14692143 | SNV | 1 | G | A | Heterozygous |
| NC_037639.1 | 14692143 | SNV | 1 | G | T | Heterozygous |
| NC_037639.1 | 14692146 | SNV | 1 | G | A | Heterozygous |
| NC_037639.1 | 14692155 | SNV | 1 | T | C | Heterozygous |
| NC_037639.1 | 14692164 | SNV | 1 | G | T | Homozygous   |
| NC_037639.1 | 14692263 | SNV | 1 | A | G | Homozygous   |
| NC_037639.1 | 14692404 | SNV | 1 | A | C | Homozygous   |
| NC_037639.1 | 14692440 | SNV | 1 | G | A | Heterozygous |
| NC_037639.1 | 14692443 | SNV | 1 | T | C | Homozygous   |
| NC_037639.1 | 14692446 | SNV | 1 | T | C | Homozygous   |
| NC_037639.1 | 14692458 | SNV | 1 | A | G | Homozygous   |
| NC_037639.1 | 14692473 | SNV | 1 | C | T | Heterozygous |
| NC_037639.1 | 14692479 | SNV | 1 | G | A | Heterozygous |
| NC_037639.1 | 14692482 | SNV | 1 | T | C | Heterozygous |
| NC_037639.1 | 14692515 | SNV | 1 | A | C | Heterozygous |
| NC_037639.1 | 14692533 | SNV | 1 | G | A | Heterozygous |
| NC_037639.1 | 14692569 | SNV | 1 | A | G | Heterozygous |
| NC_037639.1 | 14692644 | SNV | 1 | C | T | Homozygous   |
| NC_037639.1 | 14692668 | SNV | 1 | G | C | Homozygous   |
| NC_037639.1 | 14692671 | SNV | 1 | T | C | Homozygous   |
| NC_037639.1 | 14692706 | SNV | 1 | C | T | Heterozygous |
| NC_037639.1 | 14692719 | SNV | 1 | G | T | Homozygous   |
| NC_037639.1 | 14692740 | SNV | 1 | A | G | Homozygous   |
| NC_037639.1 | 14692794 | SNV | 1 | A | C | Heterozygous |
| NC_037639.1 | 14692821 | SNV | 1 | C | A | Homozygous   |
| NC_037639.1 | 14693091 | SNV | 1 | T | C | Heterozygous |
| NC_037639.1 | 14693098 | SNV | 1 | C | T | Heterozygous |

|             |          |     |   |   |   |              |
|-------------|----------|-----|---|---|---|--------------|
| NC_037639.1 | 14693256 | SNV | 1 | C | T | Heterozygous |
| NC_037639.1 | 14693258 | SNV | 1 | C | T | Heterozygous |
| NC_037639.1 | 14693260 | SNV | 1 | A | T | Heterozygous |
| NC_037639.1 | 14693268 | SNV | 1 | G | C | Homozygous   |
| NC_037639.1 | 14693313 | SNV | 1 | C | T | Homozygous   |
| NC_037639.1 | 14693316 | SNV | 1 | C | G | Homozygous   |
| NC_037639.1 | 14693589 | SNV | 1 | A | G | Homozygous   |
| NC_037639.1 | 14693592 | SNV | 1 | T | A | Heterozygous |
| NC_037639.1 | 14693616 | SNV | 1 | A | G | Heterozygous |
| NC_037639.1 | 14693620 | SNV | 1 | C | T | Heterozygous |
| NC_037639.1 | 14693622 | SNV | 1 | C | T | Heterozygous |
| NC_037639.1 | 14693676 | SNV | 1 | A | G | Heterozygous |
| NC_037639.1 | 14693688 | SNV | 1 | T | C | Heterozygous |
| NC_037639.1 | 14693722 | SNV | 1 | C | G | Heterozygous |
| NC_037639.1 | 14693724 | SNV | 1 | A | G | Heterozygous |
| NC_037639.1 | 14693733 | SNV | 1 | A | G | Homozygous   |
| NC_037639.1 | 14693757 | SNV | 1 | C | T | Heterozygous |
| NC_037639.1 | 14693760 | SNV | 1 | T | C | Homozygous   |
| NC_037639.1 | 14693775 | SNV | 1 | C | T | Heterozygous |
| NC_037639.1 | 14693796 | SNV | 1 | C | T | Heterozygous |
| NC_037639.1 | 14693862 | SNV | 1 | G | T | Heterozygous |
| NC_037639.1 | 14693865 | SNV | 1 | T | A | Heterozygous |
| NC_037639.1 | 14693871 | SNV | 1 | T | A | Homozygous   |
| NC_037639.1 | 14693898 | SNV | 1 | C | G | Homozygous   |
| NC_037639.1 | 14693907 | SNV | 1 | A | G | Heterozygous |
| NC_037639.1 | 14693907 | SNV | 1 | A | T | Heterozygous |
| NC_037639.1 | 14693925 | SNV | 1 | C | T | Heterozygous |
| NC_037639.1 | 14693979 | SNV | 1 | T | C | Homozygous   |
| NC_037639.1 | 14694132 | SNV | 1 | A | G | Heterozygous |
| NC_037639.1 | 14694141 | SNV | 1 | C | T | Heterozygous |
| NC_037639.1 | 14694143 | SNV | 1 | T | G | Heterozygous |
| NC_037639.1 | 14694165 | SNV | 1 | T | C | Homozygous   |
| NC_037639.1 | 14694216 | SNV | 1 | T | C | Heterozygous |
| NC_037639.1 | 14694219 | SNV | 1 | T | A | Heterozygous |
| NC_037639.1 | 14694247 | SNV | 1 | T | C | Heterozygous |
| NC_037639.1 | 14694345 | SNV | 1 | A | G | Homozygous   |
| NC_037639.1 | 14694382 | SNV | 1 | G | A | Heterozygous |
| NC_037639.1 | 14694384 | SNV | 1 | T | C | Heterozygous |
| NC_037639.1 | 14694387 | SNV | 1 | T | C | Heterozygous |
| NC_037639.1 | 14694399 | SNV | 1 | G | A | Heterozygous |
| NC_037639.1 | 14694402 | SNV | 1 | T | C | Heterozygous |
| NC_037639.1 | 14694405 | SNV | 1 | T | G | Heterozygous |
| NC_037639.1 | 14694420 | SNV | 1 | G | C | Heterozygous |
| NC_037639.1 | 14694423 | SNV | 1 | T | A | Heterozygous |
| NC_037639.1 | 14694433 | SNV | 1 | C | T | Homozygous   |
| NC_037639.1 | 14694438 | SNV | 1 | A | G | Homozygous   |
| NC_037639.1 | 14694453 | SNV | 1 | C | T | Homozygous   |
| NC_037639.1 | 14694456 | SNV | 1 | C | A | Heterozygous |
| NC_037639.1 | 14694456 | SNV | 1 | C | T | Heterozygous |
| NC_037639.1 | 14694459 | SNV | 1 | G | A | Homozygous   |
| NC_037639.1 | 14694465 | SNV | 1 | T | A | Heterozygous |

|             |          |     |   |   |   |              |
|-------------|----------|-----|---|---|---|--------------|
| NC_037639.1 | 14694552 | SNV | 1 | T | A | Homozygous   |
| NC_037639.1 | 14694561 | SNV | 1 | C | T | Homozygous   |
| NC_037639.1 | 14694568 | SNV | 1 | G | T | Homozygous   |
| NC_037639.1 | 14694571 | SNV | 1 | T | G | Heterozygous |
| NC_037639.1 | 14694573 | SNV | 1 | C | T | Heterozygous |
| NC_037639.1 | 14694580 | SNV | 1 | A | T | Heterozygous |
| NC_037639.1 | 14694582 | SNV | 1 | G | A | Heterozygous |
| NC_037639.1 | 14694585 | SNV | 1 | A | G | Homozygous   |
| NC_037639.1 | 14694588 | SNV | 1 | C | T | Homozygous   |
| NC_037639.1 | 14694624 | SNV | 1 | A | G | Heterozygous |
| NC_037639.1 | 14694642 | SNV | 1 | T | A | Homozygous   |
| NC_037639.1 | 14694681 | SNV | 1 | C | T | Homozygous   |
| NC_037639.1 | 14694684 | SNV | 1 | T | A | Homozygous   |
| NC_037639.1 | 14694687 | SNV | 1 | T | C | Homozygous   |
| NC_037639.1 | 14694699 | SNV | 1 | C | A | Homozygous   |
| NC_037639.1 | 14694792 | SNV | 1 | T | C | Homozygous   |
| NC_037639.1 | 14694948 | SNV | 1 | T | C | Homozygous   |
| NC_037639.1 | 14695190 | SNV | 1 | G | A | Heterozygous |
| NC_037639.1 | 14695629 | SNV | 1 | A | G | Homozygous   |
| NC_037639.1 | 14695677 | SNV | 1 | G | A | Homozygous   |
| NC_037639.1 | 14695692 | SNV | 1 | T | C | Homozygous   |
| NC_037639.1 | 14695755 | SNV | 1 | T | C | Homozygous   |
| NC_037639.1 | 14695773 | SNV | 1 | G | A | Homozygous   |
| NC_037639.1 | 14695779 | SNV | 1 | C | T | Heterozygous |
| NC_037639.1 | 14695791 | SNV | 1 | T | C | Heterozygous |
| NC_037639.1 | 14695983 | SNV | 1 | A | G | Homozygous   |
| NC_037639.1 | 14696079 | SNV | 1 | G | A | Homozygous   |
| NC_037639.1 | 14696094 | SNV | 1 | A | G | Heterozygous |
| NC_037639.1 | 14696163 | SNV | 1 | T | C | Homozygous   |
| NC_037639.1 | 14696166 | SNV | 1 | A | G | Homozygous   |
| NC_037639.1 | 14696169 | SNV | 1 | T | A | Heterozygous |
| NC_037639.1 | 14696457 | SNV | 1 | A | G | Homozygous   |
| NC_037639.1 | 14696490 | SNV | 1 | A | G | Heterozygous |
| NC_037639.1 | 14696493 | SNV | 1 | T | C | Heterozygous |
| NC_037639.1 | 14696505 | SNV | 1 | A | G | Heterozygous |
| NC_037639.1 | 14696511 | SNV | 1 | T | C | Heterozygous |
| NC_037639.1 | 14696523 | SNV | 1 | T | C | Heterozygous |
| NC_037639.1 | 14696529 | SNV | 1 | C | T | Heterozygous |
| NC_037639.1 | 14696535 | SNV | 1 | T | C | Heterozygous |
| NC_037639.1 | 14696538 | SNV | 1 | A | G | Heterozygous |
| NC_037639.1 | 14696541 | SNV | 1 | T | G | Heterozygous |
| NC_037639.1 | 14696586 | SNV | 1 | T | C | Homozygous   |
| NC_037639.1 | 14696745 | SNV | 1 | A | G | Heterozygous |
| NC_037639.1 | 14696748 | SNV | 1 | A | G | Heterozygous |
| NC_037639.1 | 14696751 | SNV | 1 | T | C | Heterozygous |
| NC_037639.1 | 14696753 | SNV | 1 | C | G | Heterozygous |
| NC_037639.1 | 14696758 | SNV | 1 | C | T | Heterozygous |
| NC_037639.1 | 14696766 | SNV | 1 | A | T | Heterozygous |
| NC_037639.1 | 14696934 | SNV | 1 | G | A | Heterozygous |
| NC_037639.1 | 14698694 | SNV | 1 | G | C | Heterozygous |
| NC_037639.1 | 14698700 | SNV | 1 | C | T | Heterozygous |

|             |          |     |   |   |   |              |
|-------------|----------|-----|---|---|---|--------------|
| NC_037639.1 | 14698709 | SNV | 1 | A | G | Heterozygous |
| NC_037639.1 | 14698720 | SNV | 1 | G | A | Heterozygous |
| NC_037639.1 | 14698750 | SNV | 1 | A | T | Heterozygous |
| NC_037639.1 | 14698770 | SNV | 1 | G | C | Homozygous   |
| NC_037639.1 | 14699154 | SNV | 1 | T | C | Homozygous   |
| NC_037639.1 | 14699192 | SNV | 1 | G | A | Heterozygous |
| NC_037639.1 | 14699214 | SNV | 1 | T | C | Heterozygous |
| NC_037639.1 | 14699227 | SNV | 1 | A | G | Heterozygous |
| NC_037639.1 | 14699276 | SNV | 1 | A | G | Homozygous   |
| NC_037639.1 | 14699283 | SNV | 1 | G | A | Heterozygous |
| NC_037639.1 | 14699294 | SNV | 1 | T | C | Heterozygous |
| NC_037639.1 | 14699300 | SNV | 1 | T | C | Heterozygous |
| NC_037639.1 | 14699306 | SNV | 1 | G | A | Heterozygous |
| NC_037639.1 | 14699311 | SNV | 1 | A | G | Homozygous   |
| NC_037639.1 | 14699513 | SNV | 1 | A | G | Homozygous   |
| NC_037639.1 | 14699558 | SNV | 1 | G | A | Heterozygous |
| NC_037639.1 | 14699563 | SNV | 1 | T | C | Heterozygous |
| NC_037639.1 | 14699597 | SNV | 1 | A | G | Homozygous   |
| NC_037639.1 | 14699740 | SNV | 1 | C | A | Homozygous   |
| NC_037639.1 | 14699743 | SNV | 1 | G | A | Homozygous   |
| NC_037639.1 | 14699747 | SNV | 1 | A | G | Homozygous   |
| NC_037639.1 | 14699755 | SNV | 1 | C | T | Heterozygous |
| NC_037639.1 | 14699778 | SNV | 1 | C | T | Heterozygous |
| NC_037639.1 | 14699796 | SNV | 1 | C | T | Heterozygous |
| NC_037639.1 | 14699800 | SNV | 1 | C | A | Homozygous   |
| NC_037639.1 | 14704206 | SNV | 1 | A | G | Homozygous   |
| NC_037639.1 | 14706844 | SNV | 1 | C | T | Heterozygous |
| NC_037639.1 | 14706847 | SNV | 1 | T | C | Heterozygous |
| NC_037639.1 | 14706908 | SNV | 1 | T | C | Homozygous   |
| NC_037639.1 | 14706912 | SNV | 1 | A | G | Homozygous   |
| NC_037639.1 | 14706922 | SNV | 1 | G | A | Homozygous   |
| NC_037639.1 | 14706930 | SNV | 1 | C | G | Heterozygous |
| NC_037639.1 | 14706960 | SNV | 1 | A | G | Homozygous   |
| NC_037639.1 | 14706962 | SNV | 1 | A | G | Heterozygous |
| NC_037639.1 | 14706991 | SNV | 1 | C | T | Heterozygous |
| NC_037639.1 | 14706993 | SNV | 1 | T | G | Homozygous   |
| NC_037639.1 | 14707001 | SNV | 1 | C | T | Heterozygous |
| NC_037639.1 | 14707012 | SNV | 1 | G | A | Heterozygous |
| NC_037639.1 | 14707230 | SNV | 1 | T | G | Homozygous   |
| NC_037639.1 | 14707252 | SNV | 1 | C | T | Heterozygous |
| NC_037639.1 | 14707303 | SNV | 1 | T | C | Heterozygous |
| NC_037639.1 | 14707379 | SNV | 1 | G | T | Heterozygous |
| NC_037639.1 | 14707410 | SNV | 1 | G | T | Heterozygous |
| NC_037639.1 | 14707544 | SNV | 1 | T | C | Homozygous   |
| NC_037639.1 | 14707641 | SNV | 1 | T | C | Homozygous   |
| NC_037639.1 | 14707694 | SNV | 1 | G | A | Heterozygous |
| NC_037639.1 | 14707723 | SNV | 1 | G | A | Homozygous   |
| NC_037639.1 | 14709444 | SNV | 1 | C | T | Homozygous   |
| NC_037639.1 | 14711451 | SNV | 1 | T | C | Heterozygous |
| NC_037639.1 | 14711454 | SNV | 1 | C | T | Heterozygous |
| NC_037639.1 | 14712280 | SNV | 1 | T | C | Homozygous   |



|             |          |     |   |   |   |              |
|-------------|----------|-----|---|---|---|--------------|
| NC_037639.1 | 14712558 | SNV | 1 | C | T | Heterozygous |
| NC_037639.1 | 14712898 | SNV | 1 | T | C | Heterozygous |
| NC_037639.1 | 14712935 | SNV | 1 | G | A | Homozygous   |
| NC_037639.1 | 14719198 | SNV | 1 | C | T | Heterozygous |
| NC_037639.1 | 14719433 | SNV | 1 | G | A | Heterozygous |
| NC_037639.1 | 14719433 | SNV | 1 | G | C | Heterozygous |
| NC_037639.1 | 14719440 | SNV | 1 | C | G | Homozygous   |
| NC_037639.1 | 14719454 | SNV | 1 | A | C | Heterozygous |
| NC_037639.1 | 14719589 | SNV | 1 | A | G | Homozygous   |
| NC_037639.1 | 14724019 | SNV | 1 | A | T | Homozygous   |
| NC_037639.1 | 14724024 | SNV | 1 | T | A | Homozygous   |
| NC_037639.1 | 14724030 | SNV | 1 | T | A | Homozygous   |
| NC_037639.1 | 14724034 | SNV | 1 | T | A | Homozygous   |
| NC_037639.1 | 14724038 | SNV | 1 | T | C | Homozygous   |
| NC_037639.1 | 14724077 | SNV | 1 | C | A | Homozygous   |
| NC_037639.1 | 14730200 | SNV | 1 | C | A | Homozygous   |
| NC_037639.1 | 14730220 | SNV | 1 | T | G | Homozygous   |
| NC_037639.1 | 14737028 | SNV | 1 | T | C | Heterozygous |
| NC_037639.1 | 14737072 | SNV | 1 | G | C | Heterozygous |
| NC_037639.1 | 14737958 | SNV | 1 | G | A | Heterozygous |
| NC_037639.1 | 14738021 | SNV | 1 | T | C | Homozygous   |
| NC_037639.1 | 14739494 | SNV | 1 | A | G | Homozygous   |
| NC_037639.1 | 14739646 | SNV | 1 | A | G | Heterozygous |
| NC_037639.1 | 14743945 | SNV | 1 | T | C | Homozygous   |
| NC_037639.1 | 14743948 | SNV | 1 | C | T | Homozygous   |
| NC_037639.1 | 14744004 | SNV | 1 | A | G | Homozygous   |
| NC_037639.1 | 14744116 | SNV | 1 | T | C | Homozygous   |
| NC_037639.1 | 14744526 | SNV | 1 | T | C | Homozygous   |
| NC_037639.1 | 14744544 | SNV | 1 | A | G | Homozygous   |
| NC_037639.1 | 14744716 | SNV | 1 | G | A | Heterozygous |
| NC_037639.1 | 14744767 | SNV | 1 | T | C | Heterozygous |
| NC_037639.1 | 14745357 | SNV | 1 | G | A | Homozygous   |
| NC_037639.1 | 14745654 | SNV | 1 | T | C | Homozygous   |
| NC_037639.1 | 14745703 | SNV | 1 | C | T | Heterozygous |
| NC_037639.1 | 14748499 | SNV | 1 | A | T | Homozygous   |
| NC_037639.1 | 14748520 | SNV | 1 | T | C | Heterozygous |
| NC_037639.1 | 14748856 | SNV | 1 | A | G | Homozygous   |
| NC_037639.1 | 14748880 | SNV | 1 | C | T | Heterozygous |
| NC_037639.1 | 14749258 | SNV | 1 | G | A | Heterozygous |
| NC_037639.1 | 14749436 | SNV | 1 | A | G | Heterozygous |
| NC_037639.1 | 14750147 | SNV | 1 | A | G | Homozygous   |
| NC_037639.1 | 14750692 | SNV | 1 | A | G | Heterozygous |
| NC_037639.1 | 14750765 | SNV | 1 | A | G | Homozygous   |
| NC_037639.1 | 14751049 | SNV | 1 | C | T | Homozygous   |
| NC_037639.1 | 14751817 | SNV | 1 | A | G | Homozygous   |
| NC_037639.1 | 14752290 | SNV | 1 | G | A | Homozygous   |
| NC_037639.1 | 14752593 | SNV | 1 | A | G | Homozygous   |
| NC_037639.1 | 14752741 | SNV | 1 | A | G | Heterozygous |
| NC_037639.1 | 14752888 | SNV | 1 | T | C | Homozygous   |
| NC_037639.1 | 14752894 | SNV | 1 | A | G | Homozygous   |
| NC_037639.1 | 14752945 | SNV | 1 | C | G | Homozygous   |

|             |          |     |   |   |   |              |
|-------------|----------|-----|---|---|---|--------------|
| NC_037639.1 | 14753056 | SNV | 1 | T | C | Homozygous   |
| NC_037639.1 | 14753291 | SNV | 1 | C | T | Heterozygous |
| NC_037639.1 | 14753297 | SNV | 1 | G | A | Heterozygous |
| NC_037639.1 | 14753528 | SNV | 1 | A | G | Homozygous   |
| NC_037639.1 | 14753828 | SNV | 1 | G | C | Homozygous   |
| NC_037639.1 | 14754011 | SNV | 1 | G | C | Heterozygous |
| NC_037639.1 | 14754206 | SNV | 1 | C | A | Heterozygous |
| NC_037639.1 | 14754320 | SNV | 1 | A | G | Homozygous   |
| NC_037639.1 | 14759040 | SNV | 1 | G | A | Heterozygous |
| NC_037639.1 | 14759045 | SNV | 1 | G | A | Heterozygous |
| NC_037639.1 | 14759046 | SNV | 1 | C | T | Heterozygous |
| NC_037639.1 | 14760789 | SNV | 1 | A | G | Heterozygous |
| NC_037639.1 | 14760899 | SNV | 1 | G | A | Homozygous   |
| NC_037639.1 | 14761000 | SNV | 1 | G | C | Homozygous   |
| NC_037639.1 | 14761246 | SNV | 1 | T | C | Heterozygous |
| NC_037639.1 | 14767491 | SNV | 1 | C | T | Homozygous   |
| NC_037639.1 | 14769508 | SNV | 1 | T | C | Heterozygous |
| NC_037639.1 | 14769535 | SNV | 1 | C | T | Heterozygous |
| NC_037639.1 | 14772692 | SNV | 1 | G | A | Heterozygous |
| NC_037639.1 | 14773123 | SNV | 1 | G | A | Heterozygous |
| NC_037639.1 | 14773276 | SNV | 1 | A | G | Homozygous   |
| NC_037639.1 | 14773600 | SNV | 1 | G | A | Homozygous   |
| NC_037639.1 | 14773657 | SNV | 1 | T | C | Heterozygous |
| NC_037639.1 | 14773757 | SNV | 1 | T | C | Heterozygous |
| NC_037639.1 | 14773846 | SNV | 1 | T | C | Homozygous   |
| NC_037639.1 | 14773873 | SNV | 1 | G | C | Homozygous   |
| NC_037639.1 | 14773919 | SNV | 1 | C | A | Homozygous   |
| NC_037639.1 | 14773969 | SNV | 1 | C | T | Homozygous   |
| NC_037639.1 | 14786960 | SNV | 1 | C | T | Homozygous   |
| NC_037639.1 | 14786966 | SNV | 1 | C | A | Homozygous   |
| NC_037639.1 | 14798120 | SNV | 1 | G | A | Heterozygous |
| NC_037639.1 | 14798135 | SNV | 1 | G | C | Heterozygous |
| NC_037639.1 | 14798141 | SNV | 1 | A | C | Homozygous   |
| NC_037639.1 | 14798147 | SNV | 1 | G | A | Heterozygous |
| NC_037639.1 | 14798149 | SNV | 1 | A | T | Heterozygous |
| NC_037639.1 | 14798153 | SNV | 1 | G | A | Heterozygous |
| NC_037639.1 | 14798157 | SNV | 1 | A | T | Heterozygous |
| NC_037639.1 | 14798196 | SNV | 1 | A | G | Heterozygous |
| NC_037639.1 | 14798200 | SNV | 1 | T | G | Homozygous   |
| NC_037639.1 | 14798203 | SNV | 1 | C | A | Heterozygous |
| NC_037639.1 | 14798334 | SNV | 1 | A | T | Homozygous   |
| NC_037639.1 | 14798339 | SNV | 1 | G | A | Heterozygous |
| NC_037639.1 | 14799441 | SNV | 1 | G | A | Heterozygous |
| NC_037639.1 | 14799464 | SNV | 1 | T | A | Homozygous   |
| NC_037639.1 | 14799466 | SNV | 1 | G | A | Homozygous   |
| NC_037639.1 | 14799468 | SNV | 1 | C | A | Homozygous   |
| NC_037639.1 | 14807201 | SNV | 1 | T | A | Homozygous   |
| NC_037639.1 | 14810466 | SNV | 1 | T | G | Homozygous   |
| NC_037639.1 | 14811093 | SNV | 1 | G | A | Heterozygous |
| NC_037639.1 | 14811609 | SNV | 1 | A | G | Heterozygous |
| NC_037639.1 | 14820344 | SNV | 1 | T | G | Heterozygous |

|             |          |     |   |   |   |              |
|-------------|----------|-----|---|---|---|--------------|
| NC_037639.1 | 14821335 | SNV | 1 | G | A | Heterozygous |
| NC_037639.1 | 14821661 | SNV | 1 | T | G | Homozygous   |
| NC_037639.1 | 14821663 | SNV | 1 | G | T | Homozygous   |
| NC_037639.1 | 14821679 | SNV | 1 | C | G | Homozygous   |
| NC_037639.1 | 14821681 | SNV | 1 | G | T | Homozygous   |
| NC_037639.1 | 14821760 | SNV | 1 | C | T | Homozygous   |
| NC_037639.1 | 14824660 | SNV | 1 | G | A | Heterozygous |
| NC_037639.1 | 14824675 | SNV | 1 | A | T | Heterozygous |
| NC_037639.1 | 14824683 | SNV | 1 | C | T | Heterozygous |
| NC_037639.1 | 14841607 | SNV | 1 | T | C | Homozygous   |
| NC_037639.1 | 14841681 | SNV | 1 | T | C | Homozygous   |
| NC_037639.1 | 14841717 | SNV | 1 | C | T | Homozygous   |
| NC_037639.1 | 14841733 | SNV | 1 | A | G | Homozygous   |
| NC_037639.1 | 14841737 | SNV | 1 | A | T | Homozygous   |
| NC_037639.1 | 14841849 | SNV | 1 | G | A | Homozygous   |
| NC_037639.1 | 14841866 | SNV | 1 | G | A | Homozygous   |
| NC_037639.1 | 14841870 | SNV | 1 | G | C | Homozygous   |
| NC_037639.1 | 14841878 | SNV | 1 | G | A | Homozygous   |
| NC_037639.1 | 14842302 | SNV | 1 | T | C | Heterozygous |
| NC_037639.1 | 14842742 | SNV | 1 | C | T | Heterozygous |
| NC_037639.1 | 14843049 | SNV | 1 | T | C | Homozygous   |
| NC_037639.1 | 14843051 | SNV | 1 | C | T | Homozygous   |
| NC_037639.1 | 14843057 | SNV | 1 | T | C | Homozygous   |
| NC_037639.1 | 14843062 | SNV | 1 | T | A | Homozygous   |
| NC_037639.1 | 14843067 | SNV | 1 | T | C | Homozygous   |
| NC_037639.1 | 14843091 | SNV | 1 | A | G | Homozygous   |
| NC_037639.1 | 14843135 | SNV | 1 | T | C | Homozygous   |
| NC_037639.1 | 14843158 | SNV | 1 | G | A | Homozygous   |
| NC_037639.1 | 14843185 | SNV | 1 | A | G | Homozygous   |
| NC_037639.1 | 14846708 | SNV | 1 | T | C | Heterozygous |
| NC_037639.1 | 14846713 | SNV | 1 | T | A | Heterozygous |
| NC_037639.1 | 14849913 | SNV | 1 | T | C | Homozygous   |
| NC_037639.1 | 14850664 | SNV | 1 | C | A | Homozygous   |
| NC_037639.1 | 14850680 | SNV | 1 | C | T | Heterozygous |
| NC_037639.1 | 14850698 | SNV | 1 | T | C | Heterozygous |
| NC_037639.1 | 14850709 | SNV | 1 | A | G | Heterozygous |
| NC_037639.1 | 14850721 | SNV | 1 | T | C | Heterozygous |
| NC_037639.1 | 14850722 | SNV | 1 | A | G | Heterozygous |
| NC_037639.1 | 14850747 | SNV | 1 | G | A | Homozygous   |
| NC_037639.1 | 14850803 | SNV | 1 | C | T | Heterozygous |
| NC_037639.1 | 14850811 | SNV | 1 | T | G | Heterozygous |
| NC_037639.1 | 14850831 | SNV | 1 | C | T | Heterozygous |
| NC_037639.1 | 14850834 | SNV | 1 | T | C | Heterozygous |
| NC_037639.1 | 14850846 | SNV | 1 | A | G | Heterozygous |
| NC_037639.1 | 14850850 | SNV | 1 | T | C | Heterozygous |
| NC_037639.1 | 14850862 | SNV | 1 | T | C | Heterozygous |
| NC_037639.1 | 14850864 | SNV | 1 | T | C | Heterozygous |
| NC_037639.1 | 14851284 | SNV | 1 | A | T | Homozygous   |
| NC_037639.1 | 14852151 | SNV | 1 | C | G | Homozygous   |
| NC_037639.1 | 14852155 | SNV | 1 | A | T | Homozygous   |
| NC_037639.1 | 14852157 | SNV | 1 | T | G | Homozygous   |

|             |          |     |   |   |   |              |
|-------------|----------|-----|---|---|---|--------------|
| NC_037639.1 | 14853445 | SNV | 1 | A | G | Heterozygous |
| NC_037639.1 | 14855706 | SNV | 1 | T | C | Homozygous   |
| NC_037639.1 | 14859754 | SNV | 1 | C | G | Homozygous   |
| NC_037639.1 | 14860214 | SNV | 1 | C | T | Homozygous   |
| NC_037639.1 | 14860283 | SNV | 1 | G | A | Heterozygous |
| NC_037639.1 | 14860415 | SNV | 1 | G | T | Heterozygous |
| NC_037639.1 | 14860578 | SNV | 1 | T | C | Heterozygous |
| NC_037639.1 | 14860702 | SNV | 1 | G | C | Heterozygous |
| NC_037639.1 | 14860964 | SNV | 1 | T | C | Homozygous   |
| NC_037639.1 | 14860966 | SNV | 1 | A | G | Homozygous   |
| NC_037639.1 | 14860976 | SNV | 1 | T | G | Homozygous   |
| NC_037639.1 | 14860988 | SNV | 1 | A | G | Homozygous   |
| NC_037639.1 | 14860998 | SNV | 1 | A | G | Homozygous   |
| NC_037639.1 | 14861097 | SNV | 1 | A | G | Homozygous   |
| NC_037639.1 | 14861453 | SNV | 1 | C | T | Heterozygous |
| NC_037639.1 | 14861477 | SNV | 1 | G | A | Heterozygous |
| NC_037639.1 | 14861833 | SNV | 1 | A | G | Heterozygous |
| NC_037639.1 | 14862014 | SNV | 1 | T | C | Homozygous   |
| NC_037639.1 | 14862146 | SNV | 1 | T | C | Heterozygous |
| NC_037639.1 | 14862152 | SNV | 1 | T | C | Homozygous   |
| NC_037639.1 | 14862218 | SNV | 1 | A | G | Homozygous   |
| NC_037639.1 | 14862835 | SNV | 1 | A | G | Homozygous   |
| NC_037639.1 | 14862946 | SNV | 1 | C | T | Heterozygous |
| NC_037639.1 | 14864699 | SNV | 1 | C | T | Heterozygous |
| NC_037639.1 | 14864708 | SNV | 1 | G | C | Heterozygous |
| NC_037639.1 | 14864711 | SNV | 1 | C | T | Homozygous   |
| NC_037639.1 | 14864729 | SNV | 1 | G | T | Homozygous   |
| NC_037639.1 | 14865295 | SNV | 1 | A | T | Homozygous   |
| NC_037639.1 | 14865335 | SNV | 1 | A | T | Homozygous   |
| NC_037639.1 | 14865381 | SNV | 1 | C | T | Homozygous   |
| NC_037639.1 | 14865439 | SNV | 1 | A | T | Homozygous   |
| NC_037639.1 | 14865449 | SNV | 1 | A | T | Homozygous   |
| NC_037639.1 | 14865478 | SNV | 1 | A | T | Heterozygous |
| NC_037639.1 | 14865483 | SNV | 1 | T | A | Heterozygous |
| NC_037639.1 | 14865503 | SNV | 1 | A | T | Heterozygous |
| NC_037639.1 | 14865537 | SNV | 1 | A | T | Heterozygous |
| NC_037639.1 | 14865596 | SNV | 1 | T | A | Homozygous   |
| NC_037639.1 | 14865679 | SNV | 1 | A | C | Heterozygous |
| NC_037639.1 | 14865683 | SNV | 1 | A | T | Heterozygous |
| NC_037639.1 | 14865693 | SNV | 1 | A | T | Heterozygous |
| NC_037639.1 | 14865729 | SNV | 1 | T | A | Heterozygous |
| NC_037639.1 | 14865745 | SNV | 1 | A | T | Homozygous   |
| NC_037639.1 | 14865747 | SNV | 1 | T | G | Heterozygous |
| NC_037639.1 | 14865759 | SNV | 1 | A | T | Homozygous   |
| NC_037639.1 | 14865763 | SNV | 1 | A | T | Heterozygous |
| NC_037639.1 | 14865767 | SNV | 1 | T | A | Heterozygous |
| NC_037639.1 | 14865773 | SNV | 1 | A | T | Homozygous   |
| NC_037639.1 | 14866228 | SNV | 1 | A | G | Homozygous   |
| NC_037639.1 | 14870621 | SNV | 1 | G | T | Homozygous   |
| NC_037639.1 | 14875963 | SNV | 1 | T | C | Homozygous   |
| NC_037639.1 | 14876057 | SNV | 1 | G | A | Homozygous   |

|             |          |     |   |   |   |              |
|-------------|----------|-----|---|---|---|--------------|
| NC_037639.1 | 14876067 | SNV | 1 | A | G | Heterozygous |
| NC_037639.1 | 14876251 | SNV | 1 | T | A | Homozygous   |
| NC_037639.1 | 14876261 | SNV | 1 | C | A | Homozygous   |
| NC_037639.1 | 14876271 | SNV | 1 | A | G | Homozygous   |
| NC_037639.1 | 14876274 | SNV | 1 | G | A | Homozygous   |
| NC_037639.1 | 14876286 | SNV | 1 | G | A | Heterozygous |
| NC_037639.1 | 14876288 | SNV | 1 | G | T | Heterozygous |
| NC_037639.1 | 14877974 | SNV | 1 | C | T | Homozygous   |
| NC_037639.1 | 14878093 | SNV | 1 | C | T | Homozygous   |
| NC_037639.1 | 14878107 | SNV | 1 | T | C | Homozygous   |
| NC_037639.1 | 14878774 | SNV | 1 | C | T | Heterozygous |
| NC_037639.1 | 14878776 | SNV | 1 | A | G | Heterozygous |
| NC_037639.1 | 14878779 | SNV | 1 | A | G | Heterozygous |
| NC_037639.1 | 14889871 | SNV | 1 | T | C | Homozygous   |
| NC_037639.1 | 14889874 | SNV | 1 | T | C | Homozygous   |
| NC_037639.1 | 14889879 | SNV | 1 | G | A | Homozygous   |
| NC_037639.1 | 14889884 | SNV | 1 | A | G | Homozygous   |
| NC_037639.1 | 14889897 | SNV | 1 | G | A | Homozygous   |
| NC_037639.1 | 14889911 | SNV | 1 | A | T | Homozygous   |
| NC_037639.1 | 14889916 | SNV | 1 | T | C | Homozygous   |
| NC_037639.1 | 14889918 | SNV | 1 | G | A | Homozygous   |
| NC_037639.1 | 14889945 | SNV | 1 | G | A | Homozygous   |
| NC_037639.1 | 14890938 | SNV | 1 | G | A | Heterozygous |
| NC_037639.1 | 14893845 | SNV | 1 | G | C | Heterozygous |
| NC_037639.1 | 14893864 | SNV | 1 | C | T | Homozygous   |
| NC_037639.1 | 14893914 | SNV | 1 | C | T | Heterozygous |
| NC_037639.1 | 14893945 | SNV | 1 | T | C | Homozygous   |
| NC_037639.1 | 14893951 | SNV | 1 | A | G | Homozygous   |
| NC_037639.1 | 14893995 | SNV | 1 | C | T | Heterozygous |
| NC_037639.1 | 14894015 | SNV | 1 | C | T | Heterozygous |
| NC_037639.1 | 14894031 | SNV | 1 | G | T | Heterozygous |
| NC_037639.1 | 14894050 | SNV | 1 | C | T | Heterozygous |
| NC_037639.1 | 14894060 | SNV | 1 | T | G | Heterozygous |
| NC_037639.1 | 14894077 | SNV | 1 | C | T | Homozygous   |
| NC_037639.1 | 14894102 | SNV | 1 | G | C | Homozygous   |
| NC_037639.1 | 14894131 | SNV | 1 | G | T | Homozygous   |
| NC_037639.1 | 14894154 | SNV | 1 | C | T | Heterozygous |
| NC_037639.1 | 14894159 | SNV | 1 | G | A | Heterozygous |
| NC_037639.1 | 14894176 | SNV | 1 | A | T | Heterozygous |
| NC_037639.1 | 14894225 | SNV | 1 | A | T | Heterozygous |
| NC_037639.1 | 14894242 | SNV | 1 | T | C | Heterozygous |
| NC_037639.1 | 14894284 | SNV | 1 | T | A | Homozygous   |
| NC_037639.1 | 14894303 | SNV | 1 | A | G | Homozygous   |
| NC_037639.1 | 14894312 | SNV | 1 | C | T | Heterozygous |
| NC_037639.1 | 14894411 | SNV | 1 | A | G | Homozygous   |
| NC_037639.1 | 14894422 | SNV | 1 | C | T | Homozygous   |
| NC_037639.1 | 14894424 | SNV | 1 | T | C | Heterozygous |
| NC_037639.1 | 14894426 | SNV | 1 | T | C | Homozygous   |
| NC_037639.1 | 14894545 | SNV | 1 | C | T | Heterozygous |
| NC_037639.1 | 14894667 | SNV | 1 | G | A | Homozygous   |
| NC_037639.1 | 14894682 | SNV | 1 | A | G | Heterozygous |

|             |          |     |   |   |   |              |
|-------------|----------|-----|---|---|---|--------------|
| NC_037639.1 | 14894733 | SNV | 1 | C | T | Homozygous   |
| NC_037639.1 | 14894789 | SNV | 1 | C | T | Heterozygous |
| NC_037639.1 | 14894827 | SNV | 1 | G | A | Heterozygous |
| NC_037639.1 | 14894834 | SNV | 1 | G | A | Heterozygous |
| NC_037639.1 | 14903998 | SNV | 1 | T | C | Heterozygous |
| NC_037639.1 | 14904051 | SNV | 1 | C | T | Heterozygous |
| NC_037639.1 | 14904080 | SNV | 1 | T | C | Homozygous   |
| NC_037639.1 | 14904169 | SNV | 1 | C | A | Heterozygous |
| NC_037639.1 | 14904171 | SNV | 1 | A | C | Heterozygous |
| NC_037639.1 | 14904177 | SNV | 1 | T | A | Heterozygous |
| NC_037639.1 | 14904263 | SNV | 1 | C | T | Heterozygous |
| NC_037639.1 | 14904365 | SNV | 1 | T | C | Heterozygous |
| NC_037639.1 | 14904395 | SNV | 1 | C | T | Heterozygous |
| NC_037639.1 | 14904466 | SNV | 1 | C | G | Heterozygous |
| NC_037639.1 | 14904488 | SNV | 1 | T | C | Homozygous   |
| NC_037639.1 | 14904495 | SNV | 1 | C | T | Heterozygous |
| NC_037639.1 | 14904653 | SNV | 1 | C | T | Heterozygous |
| NC_037639.1 | 14904706 | SNV | 1 | C | T | Heterozygous |
| NC_037639.1 | 14904740 | SNV | 1 | C | T | Homozygous   |
| NC_037639.1 | 14904745 | SNV | 1 | A | G | Homozygous   |
| NC_037639.1 | 14904858 | SNV | 1 | C | G | Heterozygous |
| NC_037639.1 | 14904882 | SNV | 1 | C | G | Heterozygous |
| NC_037639.1 | 14904895 | SNV | 1 | A | G | Homozygous   |
| NC_037639.1 | 14905006 | SNV | 1 | A | G | Homozygous   |
| NC_037639.1 | 14905541 | SNV | 1 | C | T | Homozygous   |
| NC_037639.1 | 14905565 | SNV | 1 | C | T | Homozygous   |
| NC_037639.1 | 14905611 | SNV | 1 | C | T | Homozygous   |
| NC_037639.1 | 14910164 | SNV | 1 | A | G | Heterozygous |
| NC_037639.1 | 14910165 | SNV | 1 | A | G | Heterozygous |
| NC_037639.1 | 14910167 | SNV | 1 | A | G | Heterozygous |
| NC_037639.1 | 14910169 | SNV | 1 | A | G | Heterozygous |
| NC_037639.1 | 14910287 | SNV | 1 | G | A | Heterozygous |
| NC_037639.1 | 14910291 | SNV | 1 | A | G | Homozygous   |
| NC_037639.1 | 14910330 | SNV | 1 | A | G | Homozygous   |
| NC_037639.1 | 14910363 | SNV | 1 | A | G | Homozygous   |
| NC_037639.1 | 14910411 | SNV | 1 | A | G | Heterozygous |
| NC_037639.1 | 14910457 | SNV | 1 | G | A | Heterozygous |
| NC_037639.1 | 14910494 | SNV | 1 | C | G | Heterozygous |
| NC_037639.1 | 14910600 | SNV | 1 | C | T | Homozygous   |
| NC_037639.1 | 14910606 | SNV | 1 | C | T | Homozygous   |
| NC_037639.1 | 14910669 | SNV | 1 | G | A | Heterozygous |
| NC_037639.1 | 14910676 | SNV | 1 | A | G | Homozygous   |
| NC_037639.1 | 14910692 | SNV | 1 | C | T | Heterozygous |
| NC_037639.1 | 14910695 | SNV | 1 | C | T | Heterozygous |
| NC_037639.1 | 14910721 | SNV | 1 | G | A | Heterozygous |
| NC_037639.1 | 14911571 | SNV | 1 | G | A | Heterozygous |
| NC_037639.1 | 14911575 | SNV | 1 | G | A | Heterozygous |
| NC_037639.1 | 14911579 | SNV | 1 | G | A | Homozygous   |
| NC_037639.1 | 14911583 | SNV | 1 | G | A | Homozygous   |
| NC_037639.1 | 14911593 | SNV | 1 | G | A | Heterozygous |
| NC_037639.1 | 14911599 | SNV | 1 | G | A | Homozygous   |

|             |          |     |   |   |   |              |
|-------------|----------|-----|---|---|---|--------------|
| NC_037639.1 | 14911616 | SNV | 1 | G | A | Homozygous   |
| NC_037639.1 | 14911620 | SNV | 1 | G | T | Homozygous   |
| NC_037639.1 | 14911624 | SNV | 1 | G | T | Heterozygous |
| NC_037639.1 | 14911633 | SNV | 1 | A | G | Homozygous   |
| NC_037639.1 | 14911647 | SNV | 1 | G | T | Homozygous   |
| NC_037639.1 | 14911676 | SNV | 1 | G | C | Heterozygous |
| NC_037639.1 | 14911678 | SNV | 1 | A | G | Heterozygous |
| NC_037639.1 | 14911699 | SNV | 1 | T | A | Homozygous   |
| NC_037639.1 | 14911703 | SNV | 1 | T | A | Heterozygous |
| NC_037639.1 | 14912000 | SNV | 1 | T | G | Homozygous   |
| NC_037639.1 | 14918718 | SNV | 1 | C | T | Homozygous   |
| NC_037639.1 | 14918721 | SNV | 1 | C | G | Homozygous   |
| NC_037639.1 | 14918735 | SNV | 1 | C | T | Homozygous   |
| NC_037639.1 | 14918743 | SNV | 1 | T | C | Homozygous   |
| NC_037639.1 | 14918751 | SNV | 1 | A | T | Homozygous   |
| NC_037639.1 | 14933868 | SNV | 1 | C | T | Homozygous   |
| NC_037639.1 | 14939615 | SNV | 1 | C | T | Heterozygous |
| NC_037639.1 | 14939706 | SNV | 1 | G | C | Homozygous   |
| NC_037639.1 | 14939737 | SNV | 1 | C | G | Heterozygous |
| NC_037639.1 | 14939741 | SNV | 1 | C | T | Heterozygous |
| NC_037639.1 | 14939743 | SNV | 1 | T | C | Heterozygous |
| NC_037639.1 | 14939757 | SNV | 1 | C | T | Heterozygous |
| NC_037639.1 | 14951368 | SNV | 1 | T | C | Heterozygous |
| NC_037639.1 | 14951458 | SNV | 1 | A | G | Heterozygous |
| NC_037639.1 | 14951693 | SNV | 1 | A | G | Heterozygous |
| NC_037639.1 | 14951696 | SNV | 1 | C | T | Heterozygous |
| NC_037639.1 | 14951701 | SNV | 1 | A | G | Heterozygous |
| NC_037639.1 | 14951704 | SNV | 1 | C | T | Heterozygous |
| NC_037639.1 | 14951708 | SNV | 1 | C | T | Heterozygous |
| NC_037639.1 | 14951718 | SNV | 1 | C | A | Heterozygous |
| NC_037639.1 | 14951726 | SNV | 1 | G | C | Heterozygous |
| NC_037639.1 | 14951754 | SNV | 1 | C | A | Heterozygous |
| NC_037639.1 | 14951868 | SNV | 1 | C | G | Heterozygous |
| NC_037639.1 | 14963559 | SNV | 1 | T | C | Heterozygous |
| NC_037639.1 | 14963867 | SNV | 1 | T | C | Heterozygous |
| NC_037639.1 | 14963922 | SNV | 1 | T | C | Heterozygous |
| NC_037639.1 | 14963974 | SNV | 1 | A | G | Homozygous   |
| NC_037639.1 | 14964082 | SNV | 1 | A | G | Homozygous   |
| NC_037639.1 | 14964358 | SNV | 1 | G | A | Heterozygous |
| NC_037639.1 | 14968089 | SNV | 1 | G | A | Heterozygous |
| NC_037639.1 | 14968132 | SNV | 1 | A | G | Heterozygous |
| NC_037639.1 | 14968208 | SNV | 1 | A | G | Heterozygous |
| NC_037639.1 | 14968307 | SNV | 1 | A | G | Heterozygous |
| NC_037639.1 | 14968533 | SNV | 1 | T | C | Heterozygous |
| NC_037639.1 | 14968816 | SNV | 1 | T | C | Heterozygous |
| NC_037639.1 | 14968846 | SNV | 1 | T | C | Homozygous   |
| NC_037639.1 | 14968939 | SNV | 1 | A | G | Homozygous   |
| NC_037639.1 | 14968943 | SNV | 1 | G | A | Homozygous   |
| NC_037639.1 | 14969071 | SNV | 1 | T | C | Homozygous   |
| NC_037639.1 | 14969334 | SNV | 1 | T | C | Heterozygous |
| NC_037639.1 | 14969979 | SNV | 1 | C | T | Heterozygous |

|             |          |     |   |   |   |              |
|-------------|----------|-----|---|---|---|--------------|
| NC_037639.1 | 14969982 | SNV | 1 | T | C | Heterozygous |
| NC_037639.1 | 14970019 | SNV | 1 | T | C | Homozygous   |
| NC_037639.1 | 14970273 | SNV | 1 | G | A | Heterozygous |
| NC_037639.1 | 14970759 | SNV | 1 | T | C | Homozygous   |
| NC_037639.1 | 14970973 | SNV | 1 | T | C | Homozygous   |
| NC_037639.1 | 14971012 | SNV | 1 | A | G | Homozygous   |
| NC_037639.1 | 14971394 | SNV | 1 | C | A | Heterozygous |
| NC_037639.1 | 14971408 | SNV | 1 | C | T | Homozygous   |
| NC_037639.1 | 14971638 | SNV | 1 | A | T | Heterozygous |
| NC_037639.1 | 14971640 | SNV | 1 | T | A | Heterozygous |
| NC_037639.1 | 14971785 | SNV | 1 | G | C | Heterozygous |
| NC_037639.1 | 14972398 | SNV | 1 | A | G | Heterozygous |
| NC_037639.1 | 14972954 | SNV | 1 | C | T | Homozygous   |
| NC_037639.1 | 14973401 | SNV | 1 | C | G | Heterozygous |
| NC_037639.1 | 14973494 | SNV | 1 | C | T | Heterozygous |
| NC_037639.1 | 14973519 | SNV | 1 | G | A | Heterozygous |
| NC_037639.1 | 14973537 | SNV | 1 | C | T | Heterozygous |
| NC_037639.1 | 14973554 | SNV | 1 | T | C | Heterozygous |
| NC_037639.1 | 14974032 | SNV | 1 | G | A | Heterozygous |
| NC_037639.1 | 14974060 | SNV | 1 | C | T | Heterozygous |
| NC_037639.1 | 14974406 | SNV | 1 | A | G | Heterozygous |
| NC_037639.1 | 14974485 | SNV | 1 | T | C | Heterozygous |
| NC_037639.1 | 14974646 | SNV | 1 | C | G | Heterozygous |
| NC_037639.1 | 14974668 | SNV | 1 | A | G | Homozygous   |
| NC_037639.1 | 14974671 | SNV | 1 | G | C | Heterozygous |
| NC_037639.1 | 14982248 | SNV | 1 | T | G | Homozygous   |
| NC_037639.1 | 14982252 | SNV | 1 | T | G | Homozygous   |
| NC_037639.1 | 14982258 | SNV | 1 | G | A | Homozygous   |
| NC_037639.1 | 14999459 | SNV | 1 | C | T | Heterozygous |
| NC_037639.1 | 15003279 | SNV | 1 | G | A | Heterozygous |
| NC_037639.1 | 15003282 | SNV | 1 | T | A | Heterozygous |
| NC_037639.1 | 15003285 | SNV | 1 | T | A | Heterozygous |
| NC_037639.1 | 15003292 | SNV | 1 | T | A | Homozygous   |
| NC_037639.1 | 15003295 | SNV | 1 | T | A | Homozygous   |
| NC_037639.1 | 15003304 | SNV | 1 | A | T | Heterozygous |
| NC_037639.1 | 15003317 | SNV | 1 | A | G | Homozygous   |
| NC_037639.1 | 15008239 | SNV | 1 | A | T | Homozygous   |
| NC_037639.1 | 15008265 | SNV | 1 | A | T | Homozygous   |
| NC_037639.1 | 15008271 | SNV | 1 | A | T | Homozygous   |
| NC_037639.1 | 15008274 | SNV | 1 | G | T | Homozygous   |
| NC_037639.1 | 15008277 | SNV | 1 | G | C | Homozygous   |
| NC_037639.1 | 15008294 | SNV | 1 | A | C | Homozygous   |
| NC_037639.1 | 15008429 | SNV | 1 | C | T | Heterozygous |
| NC_037639.1 | 15008458 | SNV | 1 | C | T | Heterozygous |
| NC_037639.1 | 15008481 | SNV | 1 | G | T | Homozygous   |
| NC_037639.1 | 15008486 | SNV | 1 | T | C | Homozygous   |
| NC_037639.1 | 15008896 | SNV | 1 | G | A | Homozygous   |
| NC_037639.1 | 15008898 | SNV | 1 | G | C | Homozygous   |
| NC_037639.1 | 15009765 | SNV | 1 | C | T | Heterozygous |
| NC_037639.1 | 15010081 | SNV | 1 | T | C | Homozygous   |
| NC_037639.1 | 15022505 | SNV | 1 | T | G | Homozygous   |



|             |          |     |   |   |   |              |
|-------------|----------|-----|---|---|---|--------------|
| NC_037639.1 | 15022509 | SNV | 1 | T | G | Homozygous   |
| NC_037639.1 | 15022530 | SNV | 1 | G | A | Homozygous   |
| NC_037639.1 | 15022532 | SNV | 1 | A | G | Homozygous   |
| NC_037639.1 | 15022538 | SNV | 1 | A | G | Homozygous   |
| NC_037639.1 | 15022923 | SNV | 1 | C | T | Heterozygous |
| NC_037639.1 | 15022939 | SNV | 1 | T | C | Homozygous   |
| NC_037639.1 | 15023082 | SNV | 1 | C | T | Heterozygous |
| NC_037639.1 | 15023094 | SNV | 1 | T | C | Homozygous   |
| NC_037639.1 | 15032029 | SNV | 1 | G | C | Homozygous   |
| NC_037639.1 | 15032539 | SNV | 1 | C | T | Homozygous   |
| NC_037639.1 | 15032718 | SNV | 1 | C | A | Heterozygous |
| NC_037639.1 | 15032745 | SNV | 1 | G | A | Homozygous   |
| NC_037639.1 | 15032807 | SNV | 1 | T | G | Heterozygous |
| NC_037639.1 | 15032888 | SNV | 1 | A | G | Homozygous   |
| NC_037639.1 | 15037881 | SNV | 1 | C | T | Heterozygous |
| NC_037639.1 | 15038423 | SNV | 1 | A | G | Heterozygous |
| NC_037639.1 | 15038438 | SNV | 1 | G | A | Heterozygous |
| NC_037639.1 | 15038636 | SNV | 1 | A | G | Heterozygous |
| NC_037639.1 | 15039567 | SNV | 1 | A | G | Homozygous   |
| NC_037639.1 | 15039686 | SNV | 1 | C | A | Homozygous   |
| NC_037639.1 | 15039691 | SNV | 1 | C | T | Homozygous   |
| NC_037639.1 | 15039732 | SNV | 1 | G | T | Homozygous   |
| NC_037639.1 | 15039792 | SNV | 1 | T | C | Homozygous   |
| NC_037639.1 | 15041084 | SNV | 1 | G | A | Heterozygous |
| NC_037639.1 | 15041093 | SNV | 1 | C | T | Homozygous   |
| NC_037639.1 | 15042562 | SNV | 1 | A | G | Heterozygous |
| NC_037639.1 | 15042666 | SNV | 1 | G | A | Homozygous   |
| NC_037639.1 | 15042670 | SNV | 1 | G | C | Homozygous   |
| NC_037639.1 | 15043060 | SNV | 1 | G | A | Heterozygous |
| NC_037639.1 | 15043068 | SNV | 1 | G | C | Heterozygous |
| NC_037639.1 | 15043127 | SNV | 1 | T | C | Heterozygous |
| NC_037639.1 | 15043139 | SNV | 1 | T | C | Heterozygous |
| NC_037639.1 | 15043142 | SNV | 1 | G | A | Heterozygous |
| NC_037639.1 | 15043144 | SNV | 1 | G | A | Heterozygous |
| NC_037639.1 | 15043149 | SNV | 1 | T | C | Heterozygous |
| NC_037639.1 | 15043153 | SNV | 1 | T | C | Heterozygous |
| NC_037639.1 | 15043189 | SNV | 1 | T | C | Heterozygous |
| NC_037639.1 | 15043196 | SNV | 1 | G | A | Homozygous   |
| NC_037639.1 | 15048642 | SNV | 1 | G | A | Heterozygous |
| NC_037639.1 | 15049542 | SNV | 1 | A | G | Homozygous   |
| NC_037639.1 | 15050113 | SNV | 1 | A | G | Homozygous   |
| NC_037639.1 | 15050563 | SNV | 1 | T | C | Heterozygous |
| NC_037639.1 | 15050744 | SNV | 1 | T | C | Homozygous   |
| NC_037639.1 | 15051017 | SNV | 1 | C | G | Homozygous   |
| NC_037639.1 | 15051354 | SNV | 1 | T | A | Homozygous   |
| NC_037639.1 | 15051356 | SNV | 1 | C | T | Homozygous   |
| NC_037639.1 | 15051390 | SNV | 1 | G | A | Homozygous   |
| NC_037639.1 | 15051811 | SNV | 1 | G | A | Heterozygous |
| NC_037639.1 | 15052030 | SNV | 1 | C | T | Homozygous   |
| NC_037639.1 | 15052496 | SNV | 1 | T | C | Homozygous   |
| NC_037639.1 | 15052547 | SNV | 1 | C | G | Homozygous   |

|             |          |     |   |   |   |              |
|-------------|----------|-----|---|---|---|--------------|
| NC_037639.1 | 15052845 | SNV | 1 | G | A | Heterozygous |
| NC_037639.1 | 15052955 | SNV | 1 | T | C | Heterozygous |
| NC_037639.1 | 15057762 | SNV | 1 | G | A | Homozygous   |
| NC_037639.1 | 15057822 | SNV | 1 | A | G | Homozygous   |
| NC_037639.1 | 15058635 | SNV | 1 | A | C | Homozygous   |
| NC_037639.1 | 15059059 | SNV | 1 | A | G | Homozygous   |
| NC_037639.1 | 15059061 | SNV | 1 | A | G | Homozygous   |
| NC_037639.1 | 15059337 | SNV | 1 | A | G | Homozygous   |
| NC_037639.1 | 15059347 | SNV | 1 | T | C | Homozygous   |
| NC_037639.1 | 15059352 | SNV | 1 | G | A | Homozygous   |
| NC_037639.1 | 15059407 | SNV | 1 | C | T | Homozygous   |
| NC_037639.1 | 15059901 | SNV | 1 | G | A | Heterozygous |
| NC_037639.1 | 15060028 | SNV | 1 | T | A | Homozygous   |
| NC_037639.1 | 15060186 | SNV | 1 | A | G | Homozygous   |
| NC_037639.1 | 15060669 | SNV | 1 | A | G | Homozygous   |
| NC_037639.1 | 15060763 | SNV | 1 | C | T | Homozygous   |
| NC_037639.1 | 15061261 | SNV | 1 | C | T | Homozygous   |
| NC_037639.1 | 15061273 | SNV | 1 | T | G | Homozygous   |
| NC_037639.1 | 15068780 | SNV | 1 | T | A | Homozygous   |
| NC_037639.1 | 15069982 | SNV | 1 | A | T | Homozygous   |
| NC_037639.1 | 15069986 | SNV | 1 | A | T | Heterozygous |
| NC_037639.1 | 15070090 | SNV | 1 | A | G | Heterozygous |
| NC_037639.1 | 15070520 | SNV | 1 | A | T | Homozygous   |
| NC_037639.1 | 15070522 | SNV | 1 | A | T | Heterozygous |
| NC_037639.1 | 15070538 | SNV | 1 | T | A | Homozygous   |
| NC_037639.1 | 15070542 | SNV | 1 | A | T | Homozygous   |
| NC_037639.1 | 15070552 | SNV | 1 | T | A | Homozygous   |
| NC_037639.1 | 15070602 | SNV | 1 | T | A | Heterozygous |
| NC_037639.1 | 15070702 | SNV | 1 | A | G | Homozygous   |
| NC_037639.1 | 15070845 | SNV | 1 | G | A | Homozygous   |
| NC_037639.1 | 15070866 | SNV | 1 | A | G | Heterozygous |
| NC_037639.1 | 15070886 | SNV | 1 | G | A | Heterozygous |
| NC_037639.1 | 15071330 | SNV | 1 | A | G | Homozygous   |
| NC_037639.1 | 15072086 | SNV | 1 | A | G | Homozygous   |
| NC_037639.1 | 15073682 | SNV | 1 | G | A | Heterozygous |
| NC_037639.1 | 15077257 | SNV | 1 | T | C | Homozygous   |
| NC_037639.1 | 15077987 | SNV | 1 | T | C | Homozygous   |
| NC_037639.1 | 15078161 | SNV | 1 | G | A | Homozygous   |
| NC_037639.1 | 15078552 | SNV | 1 | C | T | Homozygous   |
| NC_037639.1 | 15094131 | SNV | 1 | T | G | Heterozygous |
| NC_037639.1 | 15102381 | SNV | 1 | A | T | Homozygous   |
| NC_037639.1 | 15102384 | SNV | 1 | T | A | Homozygous   |
| NC_037639.1 | 15102389 | SNV | 1 | T | A | Homozygous   |
| NC_037639.1 | 15102392 | SNV | 1 | G | T | Homozygous   |
| NC_037639.1 | 15102506 | SNV | 1 | C | T | Homozygous   |
| NC_037639.1 | 15102509 | SNV | 1 | A | G | Heterozygous |
| NC_037639.1 | 15106750 | SNV | 1 | C | A | Homozygous   |
| NC_037639.1 | 15106752 | SNV | 1 | A | G | Homozygous   |
| NC_037639.1 | 15108066 | SNV | 1 | G | A | Homozygous   |
| NC_037639.1 | 15109043 | SNV | 1 | G | C | Homozygous   |
| NC_037639.1 | 15109443 | SNV | 1 | C | T | Homozygous   |

|             |          |     |   |   |   |              |
|-------------|----------|-----|---|---|---|--------------|
| NC_037639.1 | 15109837 | SNV | 1 | C | A | Homozygous   |
| NC_037639.1 | 15110092 | SNV | 1 | T | C | Homozygous   |
| NC_037639.1 | 15110109 | SNV | 1 | T | A | Homozygous   |
| NC_037639.1 | 15115961 | SNV | 1 | A | T | Heterozygous |
| NC_037639.1 | 15116542 | SNV | 1 | T | C | Homozygous   |
| NC_037639.1 | 15117328 | SNV | 1 | A | G | Homozygous   |
| NC_037639.1 | 15123015 | SNV | 1 | C | T | Homozygous   |
| NC_037639.1 | 15123779 | SNV | 1 | A | G | Homozygous   |
| NC_037639.1 | 15124482 | SNV | 1 | C | T | Heterozygous |
| NC_037639.1 | 15124711 | SNV | 1 | T | C | Heterozygous |
| NC_037639.1 | 15124824 | SNV | 1 | A | T | Homozygous   |
| NC_037639.1 | 15125252 | SNV | 1 | T | C | Homozygous   |
| NC_037639.1 | 15125857 | SNV | 1 | A | G | Homozygous   |
| NC_037639.1 | 15126587 | SNV | 1 | T | C | Homozygous   |
| NC_037639.1 | 15127171 | SNV | 1 | C | G | Homozygous   |
| NC_037639.1 | 15127175 | SNV | 1 | T | G | Homozygous   |
| NC_037639.1 | 15127190 | SNV | 1 | T | A | Homozygous   |
| NC_037639.1 | 15127208 | SNV | 1 | T | C | Homozygous   |
| NC_037639.1 | 15128172 | SNV | 1 | G | A | Heterozygous |
| NC_037639.1 | 15129122 | SNV | 1 | C | A | Homozygous   |
| NC_037639.1 | 15129125 | SNV | 1 | A | T | Homozygous   |
| NC_037639.1 | 15129191 | SNV | 1 | G | T | Homozygous   |
| NC_037639.1 | 15129281 | SNV | 1 | T | C | Heterozygous |
| NC_037639.1 | 15129885 | SNV | 1 | T | C | Homozygous   |
| NC_037639.1 | 15135597 | SNV | 1 | C | T | Heterozygous |
| NC_037639.1 | 15135619 | SNV | 1 | A | G | Heterozygous |
| NC_037639.1 | 15135887 | SNV | 1 | T | A | Homozygous   |
| NC_037639.1 | 15136279 | SNV | 1 | C | T | Heterozygous |
| NC_037639.1 | 15137964 | SNV | 1 | A | C | Homozygous   |
| NC_037639.1 | 15138127 | SNV | 1 | G | A | Heterozygous |
| NC_037639.1 | 15138129 | SNV | 1 | T | C | Heterozygous |
| NC_037639.1 | 15138138 | SNV | 1 | A | C | Heterozygous |
| NC_037639.1 | 15139079 | SNV | 1 | C | A | Heterozygous |
| NC_037639.1 | 15139086 | SNV | 1 | T | C | Homozygous   |
| NC_037639.1 | 15139088 | SNV | 1 | A | T | Homozygous   |
| NC_037639.1 | 15139093 | SNV | 1 | G | A | Heterozygous |
| NC_037639.1 | 15139096 | SNV | 1 | C | T | Homozygous   |
| NC_037639.1 | 15139141 | SNV | 1 | G | A | Heterozygous |
| NC_037639.1 | 15139158 | SNV | 1 | A | G | Homozygous   |
| NC_037639.1 | 15139172 | SNV | 1 | T | G | Heterozygous |
| NC_037639.1 | 15139180 | SNV | 1 | T | A | Heterozygous |
| NC_037639.1 | 15139204 | SNV | 1 | A | T | Heterozygous |
| NC_037639.1 | 15139236 | SNV | 1 | G | T | Homozygous   |
| NC_037639.1 | 15139273 | SNV | 1 | A | G | Heterozygous |
| NC_037639.1 | 15139276 | SNV | 1 | G | T | Homozygous   |
| NC_037639.1 | 15139290 | SNV | 1 | A | G | Homozygous   |
| NC_037639.1 | 15139310 | SNV | 1 | T | G | Homozygous   |
| NC_037639.1 | 15139333 | SNV | 1 | T | A | Homozygous   |
| NC_037639.1 | 15139362 | SNV | 1 | A | G | Heterozygous |
| NC_037639.1 | 15139928 | SNV | 1 | T | C | Homozygous   |
| NC_037639.1 | 15139952 | SNV | 1 | T | C | Homozygous   |

|             |          |     |   |   |   |              |
|-------------|----------|-----|---|---|---|--------------|
| NC_037639.1 | 15140803 | SNV | 1 | G | A | Heterozygous |
| NC_037639.1 | 15140830 | SNV | 1 | C | A | Heterozygous |
| NC_037639.1 | 15140833 | SNV | 1 | A | G | Homozygous   |
| NC_037639.1 | 15142482 | SNV | 1 | C | T | Homozygous   |
| NC_037639.1 | 15142853 | SNV | 1 | T | C | Homozygous   |
| NC_037639.1 | 15144043 | SNV | 1 | C | T | Homozygous   |
| NC_037639.1 | 15144076 | SNV | 1 | A | T | Homozygous   |
| NC_037639.1 | 15145308 | SNV | 1 | T | C | Homozygous   |
| NC_037639.1 | 15145501 | SNV | 1 | G | A | Heterozygous |
| NC_037639.1 | 15146361 | SNV | 1 | T | C | Homozygous   |
| NC_037639.1 | 15146391 | SNV | 1 | G | A | Heterozygous |
| NC_037639.1 | 15149596 | SNV | 1 | G | A | Heterozygous |
| NC_037639.1 | 15149818 | SNV | 1 | A | G | Homozygous   |
| NC_037639.1 | 15150053 | SNV | 1 | A | G | Homozygous   |
| NC_037639.1 | 15150561 | SNV | 1 | T | C | Heterozygous |
| NC_037639.1 | 15150731 | SNV | 1 | T | C | Homozygous   |
| NC_037639.1 | 15154598 | SNV | 1 | T | A | Homozygous   |
| NC_037639.1 | 15154601 | SNV | 1 | C | T | Homozygous   |
| NC_037639.1 | 15156113 | SNV | 1 | C | T | Heterozygous |
| NC_037639.1 | 15156867 | SNV | 1 | C | T | Homozygous   |
| NC_037639.1 | 15158750 | SNV | 1 | A | T | Heterozygous |
| NC_037639.1 | 15158759 | SNV | 1 | C | T | Heterozygous |
| NC_037639.1 | 15158763 | SNV | 1 | C | T | Heterozygous |
| NC_037639.1 | 15158795 | SNV | 1 | A | G | Heterozygous |
| NC_037639.1 | 15158849 | SNV | 1 | A | G | Heterozygous |
| NC_037639.1 | 15158859 | SNV | 1 | T | C | Heterozygous |
| NC_037639.1 | 15158865 | SNV | 1 | C | A | Heterozygous |
| NC_037639.1 | 15158867 | SNV | 1 | T | G | Heterozygous |
| NC_037639.1 | 15158873 | SNV | 1 | T | C | Heterozygous |
| NC_037639.1 | 15158885 | SNV | 1 | A | T | Heterozygous |
| NC_037639.1 | 15158888 | SNV | 1 | C | T | Heterozygous |
| NC_037639.1 | 15158918 | SNV | 1 | A | G | Heterozygous |
| NC_037639.1 | 15158921 | SNV | 1 | T | C | Heterozygous |
| NC_037639.1 | 15158926 | SNV | 1 | A | G | Homozygous   |
| NC_037639.1 | 15161502 | SNV | 1 | G | A | Homozygous   |
| NC_037639.1 | 15161678 | SNV | 1 | T | C | Homozygous   |
| NC_037639.1 | 15161680 | SNV | 1 | A | G | Homozygous   |
| NC_037639.1 | 15161781 | SNV | 1 | C | T | Heterozygous |
| NC_037639.1 | 15161816 | SNV | 1 | C | G | Heterozygous |
| NC_037639.1 | 15161835 | SNV | 1 | T | C | Heterozygous |
| NC_037639.1 | 15168262 | SNV | 1 | G | A | Heterozygous |
| NC_037639.1 | 15168269 | SNV | 1 | G | T | Heterozygous |
| NC_037639.1 | 15180051 | SNV | 1 | A | T | Homozygous   |
| NC_037639.1 | 15180056 | SNV | 1 | T | C | Homozygous   |
| NC_037639.1 | 15180062 | SNV | 1 | G | A | Homozygous   |
| NC_037639.1 | 15186582 | SNV | 1 | C | T | Heterozygous |
| NC_037639.1 | 15193491 | SNV | 1 | A | G | Homozygous   |
| NC_037639.1 | 15194457 | SNV | 1 | A | C | Heterozygous |
| NC_037639.1 | 15196952 | SNV | 1 | T | A | Homozygous   |
| NC_037639.1 | 15196960 | SNV | 1 | G | A | Homozygous   |
| NC_037639.1 | 15196971 | SNV | 1 | T | C | Homozygous   |

|             |          |     |   |   |   |              |
|-------------|----------|-----|---|---|---|--------------|
| NC_037639.1 | 15198064 | SNV | 1 | T | A | Homozygous   |
| NC_037639.1 | 15200456 | SNV | 1 | G | T | Homozygous   |
| NC_037639.1 | 15200747 | SNV | 1 | G | A | Homozygous   |
| NC_037639.1 | 15200943 | SNV | 1 | T | A | Heterozygous |
| NC_037639.1 | 15201235 | SNV | 1 | G | A | Heterozygous |
| NC_037639.1 | 15201291 | SNV | 1 | G | A | Heterozygous |
| NC_037639.1 | 15201440 | SNV | 1 | A | G | Heterozygous |
| NC_037639.1 | 15201449 | SNV | 1 | A | G | Heterozygous |
| NC_037639.1 | 15201452 | SNV | 1 | A | G | Heterozygous |
| NC_037639.1 | 15201459 | SNV | 1 | A | G | Heterozygous |
| NC_037639.1 | 15201468 | SNV | 1 | A | G | Heterozygous |
| NC_037639.1 | 15201480 | SNV | 1 | A | G | Heterozygous |
| NC_037639.1 | 15201486 | SNV | 1 | A | G | Heterozygous |
| NC_037639.1 | 15201494 | SNV | 1 | A | G | Heterozygous |
| NC_037639.1 | 15207433 | SNV | 1 | T | G | Heterozygous |
| NC_037639.1 | 15207537 | SNV | 1 | A | G | Homozygous   |
| NC_037639.1 | 15208188 | SNV | 1 | C | T | Heterozygous |
| NC_037639.1 | 15208666 | SNV | 1 | T | A | Homozygous   |
| NC_037639.1 | 15209378 | SNV | 1 | G | T | Homozygous   |
| NC_037639.1 | 15209892 | SNV | 1 | T | A | Homozygous   |
| NC_037639.1 | 15209976 | SNV | 1 | T | G | Homozygous   |
| NC_037639.1 | 15209979 | SNV | 1 | T | G | Homozygous   |
| NC_037639.1 | 15211884 | SNV | 1 | C | A | Homozygous   |
| NC_037639.1 | 15211887 | SNV | 1 | A | C | Homozygous   |
| NC_037639.1 | 15218824 | SNV | 1 | G | A | Homozygous   |
| NC_037639.1 | 15219703 | SNV | 1 | C | A | Heterozygous |
| NC_037639.1 | 15219705 | SNV | 1 | A | T | Heterozygous |
| NC_037639.1 | 15225480 | SNV | 1 | G | A | Homozygous   |
| NC_037639.1 | 15227997 | SNV | 1 | G | A | Heterozygous |
| NC_037639.1 | 15228457 | SNV | 1 | T | C | Homozygous   |
| NC_037639.1 | 15232270 | SNV | 1 | T | C | Homozygous   |
| NC_037639.1 | 15234412 | SNV | 1 | G | T | Homozygous   |
| NC_037639.1 | 15234490 | SNV | 1 | G | A | Homozygous   |
| NC_037639.1 | 15240150 | SNV | 1 | A | G | Homozygous   |
| NC_037639.1 | 15241431 | SNV | 1 | G | A | Heterozygous |
| NC_037639.1 | 15243358 | SNV | 1 | T | C | Homozygous   |
| NC_037639.1 | 15243455 | SNV | 1 | G | T | Homozygous   |
| NC_037639.1 | 15243458 | SNV | 1 | T | A | Homozygous   |
| NC_037639.1 | 15244059 | SNV | 1 | A | T | Homozygous   |
| NC_037639.1 | 15245322 | SNV | 1 | T | C | Homozygous   |
| NC_037639.1 | 15247105 | SNV | 1 | T | A | Heterozygous |
| NC_037639.1 | 15247107 | SNV | 1 | T | A | Heterozygous |
| NC_037639.1 | 15248242 | SNV | 1 | T | A | Heterozygous |
| NC_037639.1 | 15252877 | SNV | 1 | T | C | Homozygous   |
| NC_037639.1 | 15254118 | SNV | 1 | G | A | Heterozygous |
| NC_037639.1 | 15254656 | SNV | 1 | A | G | Homozygous   |
| NC_037639.1 | 15255033 | SNV | 1 | G | T | Homozygous   |
| NC_037639.1 | 15255035 | SNV | 1 | T | A | Heterozygous |
| NC_037639.1 | 15255058 | SNV | 1 | T | A | Homozygous   |
| NC_037639.1 | 15255389 | SNV | 1 | C | T | Heterozygous |
| NC_037639.1 | 15257170 | SNV | 1 | G | T | Heterozygous |

|             |          |     |   |   |   |              |
|-------------|----------|-----|---|---|---|--------------|
| NC_037639.1 | 15258906 | SNV | 1 | G | A | Heterozygous |
| NC_037639.1 | 15259504 | SNV | 1 | T | C | Homozygous   |
| NC_037639.1 | 15261783 | SNV | 1 | A | G | Homozygous   |
| NC_037639.1 | 15262058 | SNV | 1 | T | C | Homozygous   |
| NC_037639.1 | 15262080 | SNV | 1 | A | G | Homozygous   |
| NC_037639.1 | 15262082 | SNV | 1 | A | T | Homozygous   |
| NC_037639.1 | 15262084 | SNV | 1 | T | G | Homozygous   |
| NC_037639.1 | 15262090 | SNV | 1 | A | C | Homozygous   |
| NC_037639.1 | 15262097 | SNV | 1 | G | T | Homozygous   |
| NC_037639.1 | 15264417 | SNV | 1 | T | C | Heterozygous |
| NC_037639.1 | 15265765 | SNV | 1 | A | T | Homozygous   |
| NC_037639.1 | 15266231 | SNV | 1 | T | G | Heterozygous |
| NC_037639.1 | 15266616 | SNV | 1 | T | A | Homozygous   |
| NC_037639.1 | 15268109 | SNV | 1 | C | A | Heterozygous |
| NC_037639.1 | 15268302 | SNV | 1 | A | G | Homozygous   |
| NC_037639.1 | 15268982 | SNV | 1 | A | G | Homozygous   |
| NC_037639.1 | 15270825 | SNV | 1 | G | A | Homozygous   |
| NC_037639.1 | 15270951 | SNV | 1 | T | A | Heterozygous |
| NC_037639.1 | 15271264 | SNV | 1 | C | T | Heterozygous |
| NC_037639.1 | 15271464 | SNV | 1 | T | G | Homozygous   |
| NC_037639.1 | 15271470 | SNV | 1 | T | C | Homozygous   |
| NC_037639.1 | 15271489 | SNV | 1 | A | C | Heterozygous |
| NC_037639.1 | 15271807 | SNV | 1 | T | C | Homozygous   |
| NC_037639.1 | 15271834 | SNV | 1 | T | C | Heterozygous |
| NC_037639.1 | 15271837 | SNV | 1 | T | C | Homozygous   |
| NC_037639.1 | 15272074 | SNV | 1 | A | T | Heterozygous |
| NC_037639.1 | 15272092 | SNV | 1 | T | C | Homozygous   |
| NC_037639.1 | 15272105 | SNV | 1 | A | T | Heterozygous |
| NC_037639.1 | 15272124 | SNV | 1 | C | T | Homozygous   |
| NC_037639.1 | 15272139 | SNV | 1 | C | T | Homozygous   |
| NC_037639.1 | 15272351 | SNV | 1 | T | C | Heterozygous |
| NC_037639.1 | 15272419 | SNV | 1 | C | G | Heterozygous |
| NC_037639.1 | 15272425 | SNV | 1 | C | G | Heterozygous |
| NC_037639.1 | 15272431 | SNV | 1 | C | G | Heterozygous |
| NC_037639.1 | 15272437 | SNV | 1 | C | G | Heterozygous |
| NC_037639.1 | 15272768 | SNV | 1 | G | A | Homozygous   |
| NC_037639.1 | 15272770 | SNV | 1 | A | G | Homozygous   |
| NC_037639.1 | 15274505 | SNV | 1 | G | T | Heterozygous |
| NC_037639.1 | 15274537 | SNV | 1 | T | C | Homozygous   |
| NC_037639.1 | 15274633 | SNV | 1 | T | C | Homozygous   |
| NC_037639.1 | 15274638 | SNV | 1 | A | G | Homozygous   |
| NC_037639.1 | 15274691 | SNV | 1 | A | G | Homozygous   |
| NC_037639.1 | 15274851 | SNV | 1 | T | C | Homozygous   |
| NC_037639.1 | 15274924 | SNV | 1 | G | A | Heterozygous |
| NC_037639.1 | 15276740 | SNV | 1 | G | A | Heterozygous |
| NC_037639.1 | 15277003 | SNV | 1 | A | G | Homozygous   |
| NC_037639.1 | 15277110 | SNV | 1 | A | G | Heterozygous |
| NC_037639.1 | 15277167 | SNV | 1 | A | T | Heterozygous |
| NC_037639.1 | 15289446 | SNV | 1 | A | T | Homozygous   |
| NC_037639.1 | 15289452 | SNV | 1 | A | G | Homozygous   |
| NC_037639.1 | 15289584 | SNV | 1 | A | G | Heterozygous |

|             |          |     |   |   |   |              |
|-------------|----------|-----|---|---|---|--------------|
| NC_037639.1 | 15289911 | SNV | 1 | T | C | Heterozygous |
| NC_037639.1 | 15290092 | SNV | 1 | G | C | Heterozygous |
| NC_037639.1 | 15290094 | SNV | 1 | G | A | Homozygous   |
| NC_037639.1 | 15290165 | SNV | 1 | C | T | Homozygous   |
| NC_037639.1 | 15290303 | SNV | 1 | A | G | Homozygous   |
| NC_037639.1 | 15290682 | SNV | 1 | A | G | Heterozygous |
| NC_037639.1 | 15290689 | SNV | 1 | C | T | Heterozygous |
| NC_037639.1 | 15290706 | SNV | 1 | A | G | Homozygous   |
| NC_037639.1 | 15290731 | SNV | 1 | A | G | Homozygous   |
| NC_037639.1 | 15291416 | SNV | 1 | A | G | Heterozygous |
| NC_037639.1 | 15291439 | SNV | 1 | T | C | Homozygous   |
| NC_037639.1 | 15291462 | SNV | 1 | T | C | Homozygous   |
| NC_037639.1 | 15291647 | SNV | 1 | T | A | Heterozygous |
| NC_037639.1 | 15291654 | SNV | 1 | G | A | Heterozygous |
| NC_037639.1 | 15291656 | SNV | 1 | T | C | Heterozygous |
| NC_037639.1 | 15291693 | SNV | 1 | C | T | Heterozygous |
| NC_037639.1 | 15291717 | SNV | 1 | T | C | Homozygous   |
| NC_037639.1 | 15291725 | SNV | 1 | A | C | Heterozygous |
| NC_037639.1 | 15291751 | SNV | 1 | C | G | Heterozygous |
| NC_037639.1 | 15291757 | SNV | 1 | C | A | Heterozygous |
| NC_037639.1 | 15291760 | SNV | 1 | T | C | Heterozygous |
| NC_037639.1 | 15291762 | SNV | 1 | T | C | Heterozygous |
| NC_037639.1 | 15291764 | SNV | 1 | A | T | Heterozygous |
| NC_037639.1 | 15291767 | SNV | 1 | A | C | Heterozygous |
| NC_037639.1 | 15292610 | SNV | 1 | A | T | Heterozygous |
| NC_037639.1 | 15292854 | SNV | 1 | C | T | Heterozygous |
| NC_037639.1 | 15293241 | SNV | 1 | C | T | Heterozygous |
| NC_037639.1 | 15293254 | SNV | 1 | T | C | Homozygous   |
| NC_037639.1 | 15293264 | SNV | 1 | T | A | Homozygous   |
| NC_037639.1 | 15293405 | SNV | 1 | T | C | Homozygous   |
| NC_037639.1 | 15293573 | SNV | 1 | A | G | Heterozygous |
| NC_037639.1 | 15293619 | SNV | 1 | G | A | Heterozygous |
| NC_037639.1 | 15293841 | SNV | 1 | A | G | Homozygous   |
| NC_037639.1 | 15293865 | SNV | 1 | A | C | Homozygous   |
| NC_037639.1 | 15294384 | SNV | 1 | T | C | Homozygous   |
| NC_037639.1 | 15294391 | SNV | 1 | C | A | Heterozygous |
| NC_037639.1 | 15294393 | SNV | 1 | A | T | Heterozygous |
| NC_037639.1 | 15294501 | SNV | 1 | G | A | Homozygous   |
| NC_037639.1 | 15295505 | SNV | 1 | C | T | Homozygous   |
| NC_037639.1 | 15296861 | SNV | 1 | G | A | Homozygous   |
| NC_037639.1 | 15297020 | SNV | 1 | A | G | Homozygous   |
| NC_037639.1 | 15297130 | SNV | 1 | G | C | Homozygous   |
| NC_037639.1 | 15299008 | SNV | 1 | T | A | Heterozygous |
| NC_037639.1 | 15299599 | SNV | 1 | C | T | Heterozygous |
| NC_037639.1 | 15303873 | SNV | 1 | T | C | Heterozygous |
| NC_037639.1 | 15306325 | SNV | 1 | G | A | Heterozygous |
| NC_037639.1 | 15306340 | SNV | 1 | C | T | Homozygous   |
| NC_037639.1 | 15306351 | SNV | 1 | T | C | Heterozygous |
| NC_037639.1 | 15310787 | SNV | 1 | A | G | Heterozygous |
| NC_037639.1 | 15310859 | SNV | 1 | T | C | Homozygous   |
| NC_037639.1 | 15310865 | SNV | 1 | G | A | Heterozygous |

|             |          |     |   |   |   |              |
|-------------|----------|-----|---|---|---|--------------|
| NC_037639.1 | 15310963 | SNV | 1 | C | T | Heterozygous |
| NC_037639.1 | 15313640 | SNV | 1 | T | A | Heterozygous |
| NC_037639.1 | 15313643 | SNV | 1 | C | T | Heterozygous |
| NC_037639.1 | 15313653 | SNV | 1 | C | A | Heterozygous |
| NC_037639.1 | 15313655 | SNV | 1 | C | T | Heterozygous |
| NC_037639.1 | 15313661 | SNV | 1 | T | A | Heterozygous |
| NC_037639.1 | 15316133 | SNV | 1 | C | T | Heterozygous |
| NC_037639.1 | 15341568 | SNV | 1 | G | C | Homozygous   |
| NC_037639.1 | 15348799 | SNV | 1 | A | G | Homozygous   |
| NC_037639.1 | 15348956 | SNV | 1 | T | C | Homozygous   |
| NC_037639.1 | 15349161 | SNV | 1 | G | A | Heterozygous |
| NC_037639.1 | 15349335 | SNV | 1 | C | G | Homozygous   |
| NC_037639.1 | 15349411 | SNV | 1 | C | T | Heterozygous |
| NC_037639.1 | 15350619 | SNV | 1 | G | T | Homozygous   |
| NC_037639.1 | 15350783 | SNV | 1 | T | C | Heterozygous |
| NC_037639.1 | 15350919 | SNV | 1 | T | C | Homozygous   |
| NC_037639.1 | 15350927 | SNV | 1 | C | G | Heterozygous |
| NC_037639.1 | 15350953 | SNV | 1 | G | A | Heterozygous |
| NC_037639.1 | 15351078 | SNV | 1 | A | G | Homozygous   |
| NC_037639.1 | 15351098 | SNV | 1 | C | T | Heterozygous |
| NC_037639.1 | 15351101 | SNV | 1 | C | T | Homozygous   |
| NC_037639.1 | 15351143 | SNV | 1 | G | C | Heterozygous |
| NC_037639.1 | 15351179 | SNV | 1 | A | G | Heterozygous |
| NC_037639.1 | 15351192 | SNV | 1 | A | G | Homozygous   |
| NC_037639.1 | 15351312 | SNV | 1 | A | G | Heterozygous |
| NC_037639.1 | 15351326 | SNV | 1 | A | G | Homozygous   |
| NC_037639.1 | 15351349 | SNV | 1 | A | G | Heterozygous |
| NC_037639.1 | 15351431 | SNV | 1 | A | G | Heterozygous |
| NC_037639.1 | 15351437 | SNV | 1 | A | G | Homozygous   |
| NC_037639.1 | 15351488 | SNV | 1 | A | G | Homozygous   |
| NC_037639.1 | 15351516 | SNV | 1 | A | G | Homozygous   |
| NC_037639.1 | 15351528 | SNV | 1 | C | G | Homozygous   |
| NC_037639.1 | 15351606 | SNV | 1 | T | C | Homozygous   |
| NC_037639.1 | 15351611 | SNV | 1 | G | T | Heterozygous |
| NC_037639.1 | 15351618 | SNV | 1 | A | G | Homozygous   |
| NC_037639.1 | 15351622 | SNV | 1 | A | G | Heterozygous |
| NC_037639.1 | 15351699 | SNV | 1 | A | G | Heterozygous |
| NC_037639.1 | 15351870 | SNV | 1 | A | G | Heterozygous |
| NC_037639.1 | 15353457 | SNV | 1 | G | A | Homozygous   |
| NC_037639.1 | 15353461 | SNV | 1 | T | C | Homozygous   |
| NC_037639.1 | 15353463 | SNV | 1 | A | G | Homozygous   |
| NC_037639.1 | 15353467 | SNV | 1 | A | G | Homozygous   |
| NC_037639.1 | 15353470 | SNV | 1 | A | G | Homozygous   |
| NC_037639.1 | 15353513 | SNV | 1 | C | T | Homozygous   |
| NC_037639.1 | 15353517 | SNV | 1 | C | T | Homozygous   |
| NC_037639.1 | 15353535 | SNV | 1 | C | T | Homozygous   |
| NC_037639.1 | 15353553 | SNV | 1 | C | T | Heterozygous |
| NC_037639.1 | 15353560 | SNV | 1 | G | A | Heterozygous |
| NC_037639.1 | 15353563 | SNV | 1 | G | A | Heterozygous |
| NC_037639.1 | 15353589 | SNV | 1 | A | C | Heterozygous |
| NC_037639.1 | 15353698 | SNV | 1 | C | T | Heterozygous |



|             |          |     |   |   |   |              |
|-------------|----------|-----|---|---|---|--------------|
| NC_037639.1 | 15353718 | SNV | 1 | C | T | Heterozygous |
| NC_037639.1 | 15357460 | SNV | 1 | C | G | Homozygous   |
| NC_037639.1 | 15359625 | SNV | 1 | T | A | Heterozygous |
| NC_037639.1 | 15359627 | SNV | 1 | T | A | Heterozygous |
| NC_037639.1 | 15360873 | SNV | 1 | A | G | Homozygous   |
| NC_037639.1 | 15361073 | SNV | 1 | T | C | Homozygous   |
| NC_037639.1 | 15365531 | SNV | 1 | C | T | Heterozygous |
| NC_037639.1 | 15365540 | SNV | 1 | G | T | Homozygous   |
| NC_037639.1 | 15372565 | SNV | 1 | C | T | Heterozygous |
| NC_037639.1 | 15372602 | SNV | 1 | C | T | Homozygous   |
| NC_037639.1 | 15372604 | SNV | 1 | A | G | Heterozygous |
| NC_037639.1 | 15372720 | SNV | 1 | A | G | Homozygous   |
| NC_037639.1 | 15372722 | SNV | 1 | A | T | Homozygous   |
| NC_037639.1 | 15372745 | SNV | 1 | T | C | Homozygous   |
| NC_037639.1 | 15372754 | SNV | 1 | G | A | Heterozygous |
| NC_037639.1 | 15372804 | SNV | 1 | A | T | Heterozygous |
| NC_037639.1 | 15372841 | SNV | 1 | T | C | Heterozygous |
| NC_037639.1 | 15372856 | SNV | 1 | C | T | Homozygous   |
| NC_037639.1 | 15372869 | SNV | 1 | T | C | Homozygous   |
| NC_037639.1 | 15372876 | SNV | 1 | A | G | Homozygous   |
| NC_037639.1 | 15374431 | SNV | 1 | C | T | Heterozygous |
| NC_037639.1 | 15375522 | SNV | 1 | G | A | Heterozygous |
| NC_037639.1 | 15375525 | SNV | 1 | C | G | Heterozygous |
| NC_037639.1 | 15376057 | SNV | 1 | T | A | Homozygous   |
| NC_037639.1 | 15376386 | SNV | 1 | T | C | Homozygous   |
| NC_037639.1 | 15376476 | SNV | 1 | G | A | Heterozygous |
| NC_037639.1 | 15376562 | SNV | 1 | C | A | Homozygous   |
| NC_037639.1 | 15379782 | SNV | 1 | C | T | Heterozygous |
| NC_037639.1 | 15379907 | SNV | 1 | A | T | Homozygous   |
| NC_037639.1 | 15379940 | SNV | 1 | A | G | Homozygous   |
| NC_037639.1 | 15379942 | SNV | 1 | A | C | Homozygous   |
| NC_037639.1 | 15379954 | SNV | 1 | T | A | Homozygous   |
| NC_037639.1 | 15379959 | SNV | 1 | C | A | Homozygous   |
| NC_037639.1 | 15380174 | SNV | 1 | C | T | Homozygous   |
| NC_037639.1 | 15380701 | SNV | 1 | T | C | Homozygous   |
| NC_037639.1 | 15380712 | SNV | 1 | T | A | Heterozygous |
| NC_037639.1 | 15380717 | SNV | 1 | G | A | Heterozygous |
| NC_037639.1 | 15384852 | SNV | 1 | A | G | Heterozygous |
| NC_037639.1 | 15384856 | SNV | 1 | G | A | Heterozygous |
| NC_037639.1 | 15384877 | SNV | 1 | G | A | Heterozygous |
| NC_037639.1 | 15384905 | SNV | 1 | C | T | Heterozygous |
| NC_037639.1 | 15385076 | SNV | 1 | T | G | Heterozygous |
| NC_037639.1 | 15388176 | SNV | 1 | C | T | Heterozygous |
| NC_037639.1 | 15389119 | SNV | 1 | G | A | Heterozygous |
| NC_037639.1 | 15390526 | SNV | 1 | C | T | Heterozygous |
| NC_037639.1 | 15390569 | SNV | 1 | C | T | Heterozygous |
| NC_037639.1 | 15390577 | SNV | 1 | A | G | Heterozygous |
| NC_037639.1 | 15390600 | SNV | 1 | A | G | Homozygous   |
| NC_037639.1 | 15390612 | SNV | 1 | G | A | Heterozygous |
| NC_037639.1 | 15390619 | SNV | 1 | G | A | Heterozygous |
| NC_037639.1 | 15390791 | SNV | 1 | T | A | Homozygous   |

|             |          |     |   |   |   |              |
|-------------|----------|-----|---|---|---|--------------|
| NC_037639.1 | 15390800 | SNV | 1 | C | T | Heterozygous |
| NC_037639.1 | 15391009 | SNV | 1 | T | C | Homozygous   |
| NC_037639.1 | 15391015 | SNV | 1 | T | C | Homozygous   |
| NC_037639.1 | 15391030 | SNV | 1 | G | A | Homozygous   |
| NC_037639.1 | 15391073 | SNV | 1 | A | G | Homozygous   |
| NC_037639.1 | 15391089 | SNV | 1 | T | C | Heterozygous |
| NC_037639.1 | 15391097 | SNV | 1 | T | C | Homozygous   |
| NC_037639.1 | 15391279 | SNV | 1 | G | A | Heterozygous |
| NC_037639.1 | 15391390 | SNV | 1 | A | G | Heterozygous |
| NC_037639.1 | 15391486 | SNV | 1 | A | G | Homozygous   |
| NC_037639.1 | 15391494 | SNV | 1 | G | A | Heterozygous |
| NC_037639.1 | 15391499 | SNV | 1 | G | T | Homozygous   |
| NC_037639.1 | 15391528 | SNV | 1 | T | C | Homozygous   |
| NC_037639.1 | 15391633 | SNV | 1 | T | C | Homozygous   |
| NC_037639.1 | 15392399 | SNV | 1 | T | C | Heterozygous |
| NC_037639.1 | 15392537 | SNV | 1 | T | C | Homozygous   |
| NC_037639.1 | 15392577 | SNV | 1 | C | T | Homozygous   |
| NC_037639.1 | 15392625 | SNV | 1 | C | T | Heterozygous |
| NC_037639.1 | 15392640 | SNV | 1 | A | T | Heterozygous |
| NC_037639.1 | 15392752 | SNV | 1 | G | A | Homozygous   |
| NC_037639.1 | 15392790 | SNV | 1 | T | C | Homozygous   |
| NC_037639.1 | 15392806 | SNV | 1 | G | A | Homozygous   |
| NC_037639.1 | 15392938 | SNV | 1 | G | A | Heterozygous |
| NC_037639.1 | 15392991 | SNV | 1 | C | T | Homozygous   |
| NC_037639.1 | 15396044 | SNV | 1 | A | G | Heterozygous |
| NC_037639.1 | 15431215 | SNV | 1 | T | C | Homozygous   |
| NC_037639.1 | 15431223 | SNV | 1 | T | C | Homozygous   |
| NC_037639.1 | 15431238 | SNV | 1 | A | G | Homozygous   |
| NC_037639.1 | 15432192 | SNV | 1 | A | C | Heterozygous |
| NC_037639.1 | 15432796 | SNV | 1 | T | C | Homozygous   |
| NC_037639.1 | 15432936 | SNV | 1 | A | G | Heterozygous |
| NC_037639.1 | 15433133 | SNV | 1 | A | G | Heterozygous |
| NC_037639.1 | 15433194 | SNV | 1 | A | G | Heterozygous |
| NC_037639.1 | 15433534 | SNV | 1 | G | A | Heterozygous |
| NC_037639.1 | 15434091 | SNV | 1 | C | T | Homozygous   |
| NC_037639.1 | 15434463 | SNV | 1 | C | T | Heterozygous |
| NC_037639.1 | 15449507 | SNV | 1 | A | T | Homozygous   |
| NC_037639.1 | 15449524 | SNV | 1 | A | G | Homozygous   |
| NC_037639.1 | 15449526 | SNV | 1 | C | A | Homozygous   |
| NC_037639.1 | 15449528 | SNV | 1 | A | G | Homozygous   |
| NC_037639.1 | 15449790 | SNV | 1 | A | G | Homozygous   |
| NC_037639.1 | 15449894 | SNV | 1 | G | A | Homozygous   |
| NC_037639.1 | 15451060 | SNV | 1 | G | C | Homozygous   |
| NC_037639.1 | 15451068 | SNV | 1 | A | G | Homozygous   |
| NC_037639.1 | 15451360 | SNV | 1 | A | G | Homozygous   |
| NC_037639.1 | 15451390 | SNV | 1 | A | G | Homozygous   |
| NC_037639.1 | 15451423 | SNV | 1 | T | C | Homozygous   |
| NC_037639.1 | 15451498 | SNV | 1 | T | C | Homozygous   |
| NC_037639.1 | 15451531 | SNV | 1 | T | C | Homozygous   |
| NC_037639.1 | 15451542 | SNV | 1 | A | G | Homozygous   |
| NC_037639.1 | 15452563 | SNV | 1 | C | T | Homozygous   |

|             |          |     |   |   |   |              |
|-------------|----------|-----|---|---|---|--------------|
| NC_037639.1 | 15455050 | SNV | 1 | A | G | Heterozygous |
| NC_037639.1 | 15455316 | SNV | 1 | A | G | Homozygous   |
| NC_037639.1 | 15456135 | SNV | 1 | C | T | Heterozygous |
| NC_037639.1 | 15456300 | SNV | 1 | A | G | Heterozygous |
| NC_037639.1 | 15456446 | SNV | 1 | T | C | Homozygous   |
| NC_037639.1 | 15472718 | SNV | 1 | G | C | Heterozygous |
| NC_037639.1 | 15472719 | SNV | 1 | G | A | Heterozygous |
| NC_037639.1 | 15472722 | SNV | 1 | G | A | Heterozygous |
| NC_037639.1 | 15472738 | SNV | 1 | C | A | Homozygous   |
| NC_037639.1 | 15472762 | SNV | 1 | A | T | Heterozygous |
| NC_037639.1 | 15472768 | SNV | 1 | A | C | Heterozygous |
| NC_037639.1 | 15472770 | SNV | 1 | A | T | Heterozygous |
| NC_037639.1 | 15472779 | SNV | 1 | G | A | Heterozygous |
| NC_037639.1 | 15472783 | SNV | 1 | G | A | Homozygous   |
| NC_037639.1 | 15474358 | SNV | 1 | A | G | Heterozygous |
| NC_037639.1 | 15477144 | SNV | 1 | T | G | Heterozygous |
| NC_037639.1 | 15477146 | SNV | 1 | T | G | Heterozygous |
| NC_037639.1 | 15477228 | SNV | 1 | G | T | Homozygous   |
| NC_037639.1 | 15477241 | SNV | 1 | T | C | Homozygous   |
| NC_037639.1 | 15477246 | SNV | 1 | T | C | Heterozygous |
| NC_037639.1 | 15477339 | SNV | 1 | T | C | Heterozygous |
| NC_037639.1 | 15477529 | SNV | 1 | T | G | Heterozygous |
| NC_037639.1 | 15477531 | SNV | 1 | T | G | Heterozygous |
| NC_037639.1 | 15477533 | SNV | 1 | T | G | Heterozygous |
| NC_037639.1 | 15477564 | SNV | 1 | T | G | Heterozygous |
| NC_037639.1 | 15477567 | SNV | 1 | T | A | Heterozygous |
| NC_037639.1 | 15477571 | SNV | 1 | T | C | Heterozygous |
| NC_037639.1 | 15477573 | SNV | 1 | G | T | Heterozygous |
| NC_037639.1 | 15477585 | SNV | 1 | C | T | Heterozygous |
| NC_037639.1 | 15477588 | SNV | 1 | T | G | Heterozygous |
| NC_037639.1 | 15477591 | SNV | 1 | C | T | Homozygous   |
| NC_037639.1 | 15477748 | SNV | 1 | T | G | Heterozygous |
| NC_037639.1 | 15481543 | SNV | 1 | T | C | Homozygous   |
| NC_037639.1 | 15481641 | SNV | 1 | G | T | Heterozygous |
| NC_037639.1 | 15499136 | SNV | 1 | T | C | Homozygous   |
| NC_037639.1 | 15499266 | SNV | 1 | G | C | Heterozygous |
| NC_037639.1 | 15524818 | SNV | 1 | T | C | Homozygous   |
| NC_037639.1 | 15534125 | SNV | 1 | T | A | Homozygous   |
| NC_037639.1 | 15534385 | SNV | 1 | A | T | Homozygous   |
| NC_037639.1 | 15534570 | SNV | 1 | T | C | Homozygous   |
| NC_037639.1 | 15539968 | SNV | 1 | C | T | Homozygous   |
| NC_037639.1 | 15540715 | SNV | 1 | G | T | Homozygous   |
| NC_037639.1 | 15548026 | SNV | 1 | A | T | Homozygous   |
| NC_037639.1 | 15548233 | SNV | 1 | C | T | Homozygous   |
| NC_037639.1 | 15548831 | SNV | 1 | T | C | Homozygous   |
| NC_037639.1 | 15549545 | SNV | 1 | A | G | Heterozygous |
| NC_037639.1 | 15550157 | SNV | 1 | G | A | Heterozygous |
| NC_037639.1 | 15556304 | SNV | 1 | A | G | Homozygous   |
| NC_037639.1 | 15561881 | SNV | 1 | A | G | Heterozygous |
| NC_037639.1 | 15565398 | SNV | 1 | C | G | Homozygous   |
| NC_037639.1 | 15570694 | SNV | 1 | C | T | Homozygous   |

|             |          |     |   |   |   |              |
|-------------|----------|-----|---|---|---|--------------|
| NC_037639.1 | 15570808 | SNV | 1 | A | G | Homozygous   |
| NC_037639.1 | 15571248 | SNV | 1 | C | T | Homozygous   |
| NC_037639.1 | 15571264 | SNV | 1 | T | C | Heterozygous |
| NC_037639.1 | 15571284 | SNV | 1 | C | G | Homozygous   |
| NC_037639.1 | 15571324 | SNV | 1 | T | C | Homozygous   |
| NC_037639.1 | 15571380 | SNV | 1 | T | A | Homozygous   |
| NC_037639.1 | 15572029 | SNV | 1 | T | C | Heterozygous |
| NC_037639.1 | 15572229 | SNV | 1 | A | G | Heterozygous |
| NC_037639.1 | 15572307 | SNV | 1 | C | T | Homozygous   |
| NC_037639.1 | 15572471 | SNV | 1 | G | A | Heterozygous |
| NC_037639.1 | 15573226 | SNV | 1 | A | C | Heterozygous |
| NC_037639.1 | 15574003 | SNV | 1 | T | C | Homozygous   |
| NC_037639.1 | 15574020 | SNV | 1 | A | G | Homozygous   |
| NC_037639.1 | 15574569 | SNV | 1 | G | C | Homozygous   |
| NC_037639.1 | 15574583 | SNV | 1 | G | T | Homozygous   |
| NC_037639.1 | 15574617 | SNV | 1 | G | A | Heterozygous |
| NC_037639.1 | 15574620 | SNV | 1 | A | G | Heterozygous |
| NC_037639.1 | 15574629 | SNV | 1 | G | A | Heterozygous |
| NC_037639.1 | 15574632 | SNV | 1 | G | A | Heterozygous |
| NC_037639.1 | 15576132 | SNV | 1 | C | G | Heterozygous |
| NC_037639.1 | 15576135 | SNV | 1 | A | G | Homozygous   |
| NC_037639.1 | 15576417 | SNV | 1 | A | G | Homozygous   |
| NC_037639.1 | 15604255 | SNV | 1 | T | C | Heterozygous |
| NC_037639.1 | 15604257 | SNV | 1 | C | T | Heterozygous |
| NC_037639.1 | 15604259 | SNV | 1 | C | T | Homozygous   |
| NC_037639.1 | 15604630 | SNV | 1 | A | G | Homozygous   |
| NC_037639.1 | 15604984 | SNV | 1 | A | G | Homozygous   |
| NC_037639.1 | 15605286 | SNV | 1 | G | A | Heterozygous |
| NC_037639.1 | 15605468 | SNV | 1 | G | A | Heterozygous |
| NC_037639.1 | 15606141 | SNV | 1 | G | A | Heterozygous |
| NC_037639.1 | 15606238 | SNV | 1 | G | A | Heterozygous |
| NC_037639.1 | 15606308 | SNV | 1 | T | G | Homozygous   |
| NC_037639.1 | 15612852 | SNV | 1 | C | T | Homozygous   |
| NC_037639.1 | 15618576 | SNV | 1 | T | C | Homozygous   |
| NC_037639.1 | 15619452 | SNV | 1 | G | A | Homozygous   |
| NC_037639.1 | 15622734 | SNV | 1 | T | G | Heterozygous |
| NC_037639.1 | 15623015 | SNV | 1 | T | C | Homozygous   |
| NC_037639.1 | 15623135 | SNV | 1 | T | C | Homozygous   |
| NC_037639.1 | 15632428 | SNV | 1 | T | A | Homozygous   |
| NC_037639.1 | 15632956 | SNV | 1 | G | A | Homozygous   |
| NC_037639.1 | 15632974 | SNV | 1 | G | A | Homozygous   |
| NC_037639.1 | 15634039 | SNV | 1 | G | A | Heterozygous |
| NC_037639.1 | 15634115 | SNV | 1 | A | G | Heterozygous |
| NC_037639.1 | 15635073 | SNV | 1 | G | A | Homozygous   |
| NC_037639.1 | 15635465 | SNV | 1 | A | C | Homozygous   |
| NC_037639.1 | 15635513 | SNV | 1 | A | G | Heterozygous |
| NC_037639.1 | 15637067 | SNV | 1 | A | T | Homozygous   |
| NC_037639.1 | 15637079 | SNV | 1 | A | G | Heterozygous |
| NC_037639.1 | 15637718 | SNV | 1 | A | G | Homozygous   |
| NC_037639.1 | 15638133 | SNV | 1 | A | G | Homozygous   |
| NC_037639.1 | 15638136 | SNV | 1 | T | C | Homozygous   |

|             |          |     |   |   |   |              |
|-------------|----------|-----|---|---|---|--------------|
| NC_037639.1 | 15639899 | SNV | 1 | G | A | Heterozygous |
| NC_037639.1 | 15644320 | SNV | 1 | C | T | Homozygous   |
| NC_037639.1 | 15644326 | SNV | 1 | C | A | Homozygous   |
| NC_037639.1 | 15644450 | SNV | 1 | G | A | Heterozygous |
| NC_037639.1 | 15644916 | SNV | 1 | T | C | Homozygous   |
| NC_037639.1 | 15644930 | SNV | 1 | T | A | Heterozygous |
| NC_037639.1 | 15645004 | SNV | 1 | A | G | Heterozygous |
| NC_037639.1 | 15645234 | SNV | 1 | T | C | Homozygous   |
| NC_037639.1 | 15645333 | SNV | 1 | G | A | Heterozygous |
| NC_037639.1 | 15645335 | SNV | 1 | G | A | Heterozygous |
| NC_037639.1 | 15645409 | SNV | 1 | G | A | Heterozygous |
| NC_037639.1 | 15645491 | SNV | 1 | G | A | Heterozygous |
| NC_037639.1 | 15645493 | SNV | 1 | G | A | Heterozygous |
| NC_037639.1 | 15646026 | SNV | 1 | C | T | Homozygous   |
| NC_037639.1 | 15646180 | SNV | 1 | A | G | Homozygous   |
| NC_037639.1 | 15646214 | SNV | 1 | G | A | Heterozygous |
| NC_037639.1 | 15647127 | SNV | 1 | G | A | Heterozygous |
| NC_037639.1 | 15647304 | SNV | 1 | C | T | Heterozygous |
| NC_037639.1 | 15647308 | SNV | 1 | G | T | Heterozygous |
| NC_037639.1 | 15647312 | SNV | 1 | C | T | Heterozygous |
| NC_037639.1 | 15647330 | SNV | 1 | T | C | Heterozygous |
| NC_037639.1 | 15647383 | SNV | 1 | T | C | Heterozygous |
| NC_037639.1 | 15647663 | SNV | 1 | A | G | Heterozygous |
| NC_037639.1 | 15647721 | SNV | 1 | A | C | Heterozygous |
| NC_037639.1 | 15647730 | SNV | 1 | T | C | Heterozygous |
| NC_037639.1 | 15647748 | SNV | 1 | C | T | Heterozygous |
| NC_037639.1 | 15647752 | SNV | 1 | A | G | Homozygous   |
| NC_037639.1 | 15647792 | SNV | 1 | A | G | Heterozygous |
| NC_037639.1 | 15647883 | SNV | 1 | T | C | Heterozygous |
| NC_037639.1 | 15648385 | SNV | 1 | A | G | Homozygous   |
| NC_037639.1 | 15648601 | SNV | 1 | T | C | Homozygous   |
| NC_037639.1 | 15648675 | SNV | 1 | T | C | Heterozygous |
| NC_037639.1 | 15648878 | SNV | 1 | C | T | Homozygous   |
| NC_037639.1 | 15649248 | SNV | 1 | G | A | Heterozygous |
| NC_037639.1 | 15649266 | SNV | 1 | A | T | Heterozygous |
| NC_037639.1 | 15649269 | SNV | 1 | C | T | Heterozygous |
| NC_037639.1 | 15649445 | SNV | 1 | T | A | Homozygous   |
| NC_037639.1 | 15649721 | SNV | 1 | A | G | Homozygous   |
| NC_037639.1 | 15649846 | SNV | 1 | T | C | Heterozygous |
| NC_037639.1 | 15650200 | SNV | 1 | T | C | Homozygous   |
| NC_037639.1 | 15650211 | SNV | 1 | C | T | Homozygous   |
| NC_037639.1 | 15650213 | SNV | 1 | T | G | Heterozygous |
| NC_037639.1 | 15650225 | SNV | 1 | C | T | Homozygous   |
| NC_037639.1 | 15651477 | SNV | 1 | T | C | Homozygous   |
| NC_037639.1 | 15651596 | SNV | 1 | A | G | Homozygous   |
| NC_037639.1 | 15651620 | SNV | 1 | A | G | Homozygous   |
| NC_037639.1 | 15655096 | SNV | 1 | T | C | Homozygous   |
| NC_037639.1 | 15655267 | SNV | 1 | A | G | Heterozygous |
| NC_037639.1 | 15655303 | SNV | 1 | C | A | Homozygous   |
| NC_037639.1 | 15655877 | SNV | 1 | T | C | Homozygous   |
| NC_037639.1 | 15655930 | SNV | 1 | C | T | Heterozygous |

|             |          |     |   |   |   |              |
|-------------|----------|-----|---|---|---|--------------|
| NC_037639.1 | 15655936 | SNV | 1 | C | G | Heterozygous |
| NC_037639.1 | 15655980 | SNV | 1 | T | C | Homozygous   |
| NC_037639.1 | 15656369 | SNV | 1 | T | C | Heterozygous |
| NC_037639.1 | 15656950 | SNV | 1 | T | C | Homozygous   |
| NC_037639.1 | 15656957 | SNV | 1 | T | G | Homozygous   |
| NC_037639.1 | 15656960 | SNV | 1 | C | T | Homozygous   |
| NC_037639.1 | 15656986 | SNV | 1 | C | T | Homozygous   |
| NC_037639.1 | 15656994 | SNV | 1 | G | C | Heterozygous |
| NC_037639.1 | 15657106 | SNV | 1 | T | C | Heterozygous |
| NC_037639.1 | 15657770 | SNV | 1 | G | T | Heterozygous |
| NC_037639.1 | 15658472 | SNV | 1 | C | T | Heterozygous |
| NC_037639.1 | 15658499 | SNV | 1 | A | G | Homozygous   |
| NC_037639.1 | 15658610 | SNV | 1 | A | G | Homozygous   |
| NC_037639.1 | 15658643 | SNV | 1 | T | C | Homozygous   |
| NC_037639.1 | 15659108 | SNV | 1 | C | T | Heterozygous |
| NC_037639.1 | 15659112 | SNV | 1 | G | T | Heterozygous |
| NC_037639.1 | 15659183 | SNV | 1 | A | G | Homozygous   |
| NC_037639.1 | 15659543 | SNV | 1 | A | C | Heterozygous |
| NC_037639.1 | 15659570 | SNV | 1 | C | T | Heterozygous |
| NC_037639.1 | 15660044 | SNV | 1 | G | A | Homozygous   |
| NC_037639.1 | 15660178 | SNV | 1 | A | G | Heterozygous |
| NC_037639.1 | 15660278 | SNV | 1 | A | T | Homozygous   |
| NC_037639.1 | 15660504 | SNV | 1 | C | A | Heterozygous |
| NC_037639.1 | 15660676 | SNV | 1 | T | C | Homozygous   |
| NC_037639.1 | 15660693 | SNV | 1 | A | G | Heterozygous |
| NC_037639.1 | 15660697 | SNV | 1 | C | T | Heterozygous |
| NC_037639.1 | 15660761 | SNV | 1 | A | G | Homozygous   |
| NC_037639.1 | 15660826 | SNV | 1 | A | G | Homozygous   |
| NC_037639.1 | 15660854 | SNV | 1 | G | A | Heterozygous |
| NC_037639.1 | 15662012 | SNV | 1 | A | C | Heterozygous |
| NC_037639.1 | 15662377 | SNV | 1 | G | T | Heterozygous |
| NC_037639.1 | 15662473 | SNV | 1 | C | T | Heterozygous |
| NC_037639.1 | 15662495 | SNV | 1 | C | T | Homozygous   |
| NC_037639.1 | 15662843 | SNV | 1 | A | C | Homozygous   |
| NC_037639.1 | 15663121 | SNV | 1 | C | T | Heterozygous |
| NC_037639.1 | 15663556 | SNV | 1 | T | C | Homozygous   |
| NC_037639.1 | 15663764 | SNV | 1 | A | G | Homozygous   |
| NC_037639.1 | 15664057 | SNV | 1 | T | C | Heterozygous |
| NC_037639.1 | 15664103 | SNV | 1 | A | G | Heterozygous |
| NC_037639.1 | 15665290 | SNV | 1 | T | A | Homozygous   |
| NC_037639.1 | 15665464 | SNV | 1 | G | A | Heterozygous |
| NC_037639.1 | 15665602 | SNV | 1 | A | G | Heterozygous |
| NC_037639.1 | 15665632 | SNV | 1 | G | A | Heterozygous |
| NC_037639.1 | 15665803 | SNV | 1 | T | C | Heterozygous |
| NC_037639.1 | 15669137 | SNV | 1 | G | A | Heterozygous |
| NC_037639.1 | 15669685 | SNV | 1 | T | C | Homozygous   |
| NC_037639.1 | 15670041 | SNV | 1 | T | C | Homozygous   |
| NC_037639.1 | 15670378 | SNV | 1 | G | C | Homozygous   |
| NC_037639.1 | 15671254 | SNV | 1 | A | G | Heterozygous |
| NC_037639.1 | 15677515 | SNV | 1 | A | G | Homozygous   |
| NC_037639.1 | 15679056 | SNV | 1 | C | T | Homozygous   |

|             |          |     |   |   |   |              |
|-------------|----------|-----|---|---|---|--------------|
| NC_037639.1 | 15679208 | SNV | 1 | T | C | Homozygous   |
| NC_037639.1 | 15679712 | SNV | 1 | T | C | Homozygous   |
| NC_037639.1 | 15680447 | SNV | 1 | G | A | Homozygous   |
| NC_037639.1 | 15680462 | SNV | 1 | G | A | Homozygous   |
| NC_037639.1 | 15680468 | SNV | 1 | G | A | Homozygous   |
| NC_037639.1 | 15680470 | SNV | 1 | G | A | Homozygous   |
| NC_037639.1 | 15680474 | SNV | 1 | G | T | Homozygous   |
| NC_037639.1 | 15680480 | SNV | 1 | G | T | Homozygous   |
| NC_037639.1 | 15680499 | SNV | 1 | T | C | Homozygous   |
| NC_037639.1 | 15680504 | SNV | 1 | G | T | Homozygous   |
| NC_037639.1 | 15680510 | SNV | 1 | G | A | Heterozygous |
| NC_037639.1 | 15680555 | SNV | 1 | T | C | Heterozygous |
| NC_037639.1 | 15680568 | SNV | 1 | G | T | Heterozygous |
| NC_037639.1 | 15680570 | SNV | 1 | G | T | Heterozygous |
| NC_037639.1 | 15680622 | SNV | 1 | G | A | Homozygous   |
| NC_037639.1 | 15680630 | SNV | 1 | G | A | Heterozygous |
| NC_037639.1 | 15680650 | SNV | 1 | G | A | Heterozygous |
| NC_037639.1 | 15681651 | SNV | 1 | T | C | Homozygous   |
| NC_037639.1 | 15682763 | SNV | 1 | A | G | Heterozygous |
| NC_037639.1 | 15683072 | SNV | 1 | G | T | Homozygous   |
| NC_037639.1 | 15683097 | SNV | 1 | C | T | Homozygous   |
| NC_037639.1 | 15683104 | SNV | 1 | A | G | Heterozygous |
| NC_037639.1 | 15683116 | SNV | 1 | G | A | Heterozygous |
| NC_037639.1 | 15683121 | SNV | 1 | A | T | Heterozygous |
| NC_037639.1 | 15683123 | SNV | 1 | A | C | Heterozygous |
| NC_037639.1 | 15683134 | SNV | 1 | G | A | Homozygous   |
| NC_037639.1 | 15684617 | SNV | 1 | T | C | Homozygous   |
| NC_037639.1 | 15685067 | SNV | 1 | C | T | Heterozygous |
| NC_037639.1 | 15685074 | SNV | 1 | T | C | Homozygous   |
| NC_037639.1 | 15685402 | SNV | 1 | G | A | Homozygous   |
| NC_037639.1 | 15695858 | SNV | 1 | T | G | Homozygous   |
| NC_037639.1 | 15695867 | SNV | 1 | T | C | Homozygous   |
| NC_037639.1 | 15695873 | SNV | 1 | A | T | Homozygous   |
| NC_037639.1 | 15695877 | SNV | 1 | T | A | Homozygous   |
| NC_037639.1 | 15695882 | SNV | 1 | A | G | Homozygous   |
| NC_037639.1 | 15701764 | SNV | 1 | T | A | Heterozygous |
| NC_037639.1 | 15705677 | SNV | 1 | G | T | Heterozygous |
| NC_037639.1 | 15705683 | SNV | 1 | A | G | Homozygous   |
| NC_037639.1 | 15705687 | SNV | 1 | G | T | Homozygous   |
| NC_037639.1 | 15705703 | SNV | 1 | A | G | Homozygous   |
| NC_037639.1 | 15706071 | SNV | 1 | C | T | Homozygous   |
| NC_037639.1 | 15706323 | SNV | 1 | C | T | Heterozygous |
| NC_037639.1 | 15706326 | SNV | 1 | G | A | Heterozygous |
| NC_037639.1 | 15706590 | SNV | 1 | C | T | Heterozygous |
| NC_037639.1 | 15707110 | SNV | 1 | G | A | Heterozygous |
| NC_037639.1 | 15707125 | SNV | 1 | T | C | Heterozygous |
| NC_037639.1 | 15707146 | SNV | 1 | A | G | Heterozygous |
| NC_037639.1 | 15707149 | SNV | 1 | C | T | Heterozygous |
| NC_037639.1 | 15707190 | SNV | 1 | G | A | Homozygous   |
| NC_037639.1 | 15707192 | SNV | 1 | A | G | Homozygous   |
| NC_037639.1 | 15707440 | SNV | 1 | A | G | Heterozygous |

|             |          |     |   |   |   |              |
|-------------|----------|-----|---|---|---|--------------|
| NC_037639.1 | 15707500 | SNV | 1 | A | G | Heterozygous |
| NC_037639.1 | 15707533 | SNV | 1 | A | G | Heterozygous |
| NC_037639.1 | 15707536 | SNV | 1 | G | A | Heterozygous |
| NC_037639.1 | 15707551 | SNV | 1 | A | G | Homozygous   |
| NC_037639.1 | 15707557 | SNV | 1 | A | G | Heterozygous |
| NC_037639.1 | 15709331 | SNV | 1 | T | C | Homozygous   |
| NC_037639.1 | 15709383 | SNV | 1 | T | A | Homozygous   |
| NC_037639.1 | 15709634 | SNV | 1 | C | G | Homozygous   |
| NC_037639.1 | 15709705 | SNV | 1 | A | G | Heterozygous |
| NC_037639.1 | 15712906 | SNV | 1 | A | G | Homozygous   |
| NC_037639.1 | 15713111 | SNV | 1 | T | A | Homozygous   |
| NC_037639.1 | 15713113 | SNV | 1 | C | G | Homozygous   |
| NC_037639.1 | 15713267 | SNV | 1 | G | A | Homozygous   |
| NC_037639.1 | 15713372 | SNV | 1 | G | A | Heterozygous |
| NC_037639.1 | 15713524 | SNV | 1 | C | T | Heterozygous |
| NC_037639.1 | 15717017 | SNV | 1 | A | G | Heterozygous |
| NC_037639.1 | 15718035 | SNV | 1 | C | T | Heterozygous |
| NC_037639.1 | 15718046 | SNV | 1 | A | G | Heterozygous |
| NC_037639.1 | 15721372 | SNV | 1 | G | T | Heterozygous |
| NC_037639.1 | 15722002 | SNV | 1 | C | A | Homozygous   |
| NC_037639.1 | 15722005 | SNV | 1 | T | A | Homozygous   |
| NC_037639.1 | 15726935 | SNV | 1 | T | G | Heterozygous |
| NC_037639.1 | 15726942 | SNV | 1 | G | A | Homozygous   |
| NC_037639.1 | 15726951 | SNV | 1 | T | A | Heterozygous |
| NC_037639.1 | 15727886 | SNV | 1 | G | T | Heterozygous |
| NC_037639.1 | 15731236 | SNV | 1 | C | G | Homozygous   |
| NC_037639.1 | 15731238 | SNV | 1 | C | G | Homozygous   |
| NC_037639.1 | 15732335 | SNV | 1 | C | A | Homozygous   |
| NC_037639.1 | 15732344 | SNV | 1 | T | C | Heterozygous |
| NC_037639.1 | 15732349 | SNV | 1 | A | T | Homozygous   |
| NC_037639.1 | 15732351 | SNV | 1 | C | A | Homozygous   |
| NC_037639.1 | 15732354 | SNV | 1 | T | C | Homozygous   |
| NC_037639.1 | 15732357 | SNV | 1 | G | T | Homozygous   |
| NC_037639.1 | 15732360 | SNV | 1 | T | C | Homozygous   |
| NC_037639.1 | 15732365 | SNV | 1 | T | C | Homozygous   |
| NC_037639.1 | 15732367 | SNV | 1 | C | G | Homozygous   |
| NC_037639.1 | 15732459 | SNV | 1 | A | C | Heterozygous |
| NC_037639.1 | 15732465 | SNV | 1 | A | C | Heterozygous |
| NC_037639.1 | 15732477 | SNV | 1 | A | G | Heterozygous |
| NC_037639.1 | 15732495 | SNV | 1 | T | C | Heterozygous |
| NC_037639.1 | 15732549 | SNV | 1 | C | A | Heterozygous |
| NC_037639.1 | 15732581 | SNV | 1 | C | A | Homozygous   |
| NC_037639.1 | 15732592 | SNV | 1 | T | G | Homozygous   |
| NC_037639.1 | 15732619 | SNV | 1 | A | C | Homozygous   |
| NC_037639.1 | 15732625 | SNV | 1 | A | C | Homozygous   |
| NC_037639.1 | 15732646 | SNV | 1 | T | G | Homozygous   |
| NC_037639.1 | 15732759 | SNV | 1 | A | G | Heterozygous |
| NC_037639.1 | 15732763 | SNV | 1 | C | A | Heterozygous |
| NC_037639.1 | 15732766 | SNV | 1 | T | G | Heterozygous |
| NC_037639.1 | 15761813 | SNV | 1 | C | T | Heterozygous |
| NC_037639.1 | 15761816 | SNV | 1 | T | G | Heterozygous |



|             |          |     |   |   |   |              |
|-------------|----------|-----|---|---|---|--------------|
| NC_037639.1 | 15763368 | SNV | 1 | T | C | Homozygous   |
| NC_037639.1 | 15763649 | SNV | 1 | A | G | Heterozygous |
| NC_037639.1 | 15763652 | SNV | 1 | T | A | Heterozygous |
| NC_037639.1 | 15764171 | SNV | 1 | T | C | Homozygous   |
| NC_037639.1 | 15764233 | SNV | 1 | G | T | Heterozygous |
| NC_037639.1 | 15764329 | SNV | 1 | C | T | Homozygous   |
| NC_037639.1 | 15764721 | SNV | 1 | A | G | Homozygous   |
| NC_037639.1 | 15764814 | SNV | 1 | T | C | Homozygous   |
| NC_037639.1 | 15764940 | SNV | 1 | A | G | Heterozygous |
| NC_037639.1 | 15764988 | SNV | 1 | T | A | Homozygous   |
| NC_037639.1 | 15765119 | SNV | 1 | A | G | Homozygous   |
| NC_037639.1 | 15765146 | SNV | 1 | T | C | Heterozygous |
| NC_037639.1 | 15765379 | SNV | 1 | A | G | Heterozygous |
| NC_037639.1 | 15765444 | SNV | 1 | G | C | Homozygous   |
| NC_037639.1 | 15765645 | SNV | 1 | C | T | Heterozygous |
| NC_037639.1 | 15766666 | SNV | 1 | G | A | Heterozygous |
| NC_037639.1 | 15766761 | SNV | 1 | A | G | Heterozygous |
| NC_037639.1 | 15767212 | SNV | 1 | T | C | Homozygous   |
| NC_037639.1 | 15767603 | SNV | 1 | C | T | Homozygous   |
| NC_037639.1 | 15767972 | SNV | 1 | A | G | Homozygous   |
| NC_037639.1 | 15768467 | SNV | 1 | C | T | Homozygous   |
| NC_037639.1 | 15768489 | SNV | 1 | A | G | Heterozygous |
| NC_037639.1 | 15772131 | SNV | 1 | G | A | Heterozygous |
| NC_037639.1 | 15772457 | SNV | 1 | G | A | Heterozygous |
| NC_037639.1 | 15772984 | SNV | 1 | A | G | Homozygous   |
| NC_037639.1 | 15774357 | SNV | 1 | G | A | Homozygous   |
| NC_037639.1 | 15774975 | SNV | 1 | T | C | Homozygous   |
| NC_037639.1 | 15775095 | SNV | 1 | T | G | Homozygous   |
| NC_037639.1 | 15775097 | SNV | 1 | C | T | Homozygous   |
| NC_037639.1 | 15775411 | SNV | 1 | A | G | Homozygous   |
| NC_037639.1 | 15777163 | SNV | 1 | T | C | Homozygous   |
| NC_037639.1 | 15777547 | SNV | 1 | C | T | Heterozygous |
| NC_037639.1 | 15785864 | SNV | 1 | C | T | Homozygous   |
| NC_037639.1 | 15785867 | SNV | 1 | C | A | Heterozygous |
| NC_037639.1 | 15785870 | SNV | 1 | C | T | Heterozygous |
| NC_037639.1 | 15785885 | SNV | 1 | T | A | Heterozygous |
| NC_037639.1 | 15785918 | SNV | 1 | T | C | Heterozygous |
| NC_037639.1 | 15785924 | SNV | 1 | C | T | Homozygous   |
| NC_037639.1 | 15785927 | SNV | 1 | C | A | Homozygous   |
| NC_037639.1 | 15785937 | SNV | 1 | T | C | Homozygous   |
| NC_037639.1 | 15785939 | SNV | 1 | T | C | Homozygous   |
| NC_037639.1 | 15786821 | SNV | 1 | A | G | Homozygous   |
| NC_037639.1 | 15787202 | SNV | 1 | C | T | Heterozygous |
| NC_037639.1 | 15787367 | SNV | 1 | T | C | Homozygous   |
| NC_037639.1 | 15787447 | SNV | 1 | T | C | Homozygous   |
| NC_037639.1 | 15790472 | SNV | 1 | A | T | Homozygous   |
| NC_037639.1 | 15790822 | SNV | 1 | T | C | Homozygous   |
| NC_037639.1 | 15792075 | SNV | 1 | A | G | Homozygous   |
| NC_037639.1 | 15793020 | SNV | 1 | T | C | Heterozygous |
| NC_037639.1 | 15795891 | SNV | 1 | T | G | Heterozygous |
| NC_037639.1 | 15795897 | SNV | 1 | A | G | Heterozygous |

|             |          |     |   |   |   |              |
|-------------|----------|-----|---|---|---|--------------|
| NC_037639.1 | 15795901 | SNV | 1 | A | G | Heterozygous |
| NC_037639.1 | 15795903 | SNV | 1 | C | G | Heterozygous |
| NC_037639.1 | 15795905 | SNV | 1 | G | A | Heterozygous |
| NC_037639.1 | 15795909 | SNV | 1 | A | G | Heterozygous |
| NC_037639.1 | 15795921 | SNV | 1 | A | G | Heterozygous |
| NC_037639.1 | 15797367 | SNV | 1 | C | T | Homozygous   |
| NC_037639.1 | 15797406 | SNV | 1 | G | A | Homozygous   |
| NC_037639.1 | 15798557 | SNV | 1 | T | C | Homozygous   |
| NC_037639.1 | 15800207 | SNV | 1 | G | A | Homozygous   |
| NC_037639.1 | 15800488 | SNV | 1 | A | G | Homozygous   |
| NC_037639.1 | 15800506 | SNV | 1 | G | A | Heterozygous |
| NC_037639.1 | 15800818 | SNV | 1 | A | C | Heterozygous |
| NC_037639.1 | 15800820 | SNV | 1 | T | C | Heterozygous |
| NC_037639.1 | 15801120 | SNV | 1 | G | A | Heterozygous |
| NC_037639.1 | 15801138 | SNV | 1 | G | A | Homozygous   |
| NC_037639.1 | 15801151 | SNV | 1 | C | T | Homozygous   |
| NC_037639.1 | 15803331 | SNV | 1 | G | C | Homozygous   |
| NC_037639.1 | 15803334 | SNV | 1 | G | A | Homozygous   |
| NC_037639.1 | 15803338 | SNV | 1 | G | A | Homozygous   |
| NC_037639.1 | 15803342 | SNV | 1 | G | A | Homozygous   |
| NC_037639.1 | 15803345 | SNV | 1 | G | T | Homozygous   |
| NC_037639.1 | 15803360 | SNV | 1 | A | G | Heterozygous |
| NC_037639.1 | 15803362 | SNV | 1 | G | A | Heterozygous |
| NC_037639.1 | 15803368 | SNV | 1 | A | G | Heterozygous |
| NC_037639.1 | 15803390 | SNV | 1 | G | A | Homozygous   |
| NC_037639.1 | 15805070 | SNV | 1 | G | C | Heterozygous |
| NC_037639.1 | 15805074 | SNV | 1 | T | A | Heterozygous |
| NC_037639.1 | 15805080 | SNV | 1 | T | A | Heterozygous |
| NC_037639.1 | 15805086 | SNV | 1 | T | A | Heterozygous |
| NC_037639.1 | 15805088 | SNV | 1 | C | G | Heterozygous |
| NC_037639.1 | 15805094 | SNV | 1 | C | G | Heterozygous |
| NC_037639.1 | 15805100 | SNV | 1 | C | G | Heterozygous |
| NC_037639.1 | 15806767 | SNV | 1 | A | G | Homozygous   |
| NC_037639.1 | 15811117 | SNV | 1 | G | A | Heterozygous |
| NC_037639.1 | 15811157 | SNV | 1 | A | T | Heterozygous |
| NC_037639.1 | 15811183 | SNV | 1 | A | G | Homozygous   |
| NC_037639.1 | 15811279 | SNV | 1 | A | G | Heterozygous |
| NC_037639.1 | 15811313 | SNV | 1 | T | C | Heterozygous |
| NC_037639.1 | 15811426 | SNV | 1 | C | T | Homozygous   |
| NC_037639.1 | 15811578 | SNV | 1 | C | T | Homozygous   |
| NC_037639.1 | 15811649 | SNV | 1 | C | T | Heterozygous |
| NC_037639.1 | 15822182 | SNV | 1 | T | C | Heterozygous |
| NC_037639.1 | 15822749 | SNV | 1 | C | T | Heterozygous |
| NC_037639.1 | 15823065 | SNV | 1 | T | C | Heterozygous |
| NC_037639.1 | 15823131 | SNV | 1 | G | A | Heterozygous |
| NC_037639.1 | 15823434 | SNV | 1 | C | G | Homozygous   |
| NC_037639.1 | 15823442 | SNV | 1 | C | G | Heterozygous |
| NC_037639.1 | 15823478 | SNV | 1 | G | A | Homozygous   |
| NC_037639.1 | 15823551 | SNV | 1 | A | T | Heterozygous |
| NC_037639.1 | 15823654 | SNV | 1 | A | G | Heterozygous |
| NC_037639.1 | 15823672 | SNV | 1 | T | C | Heterozygous |

|             |          |     |   |   |   |              |
|-------------|----------|-----|---|---|---|--------------|
| NC_037639.1 | 15823856 | SNV | 1 | C | G | Heterozygous |
| NC_037639.1 | 15823968 | SNV | 1 | T | G | Heterozygous |
| NC_037639.1 | 15824249 | SNV | 1 | T | C | Homozygous   |
| NC_037639.1 | 15824260 | SNV | 1 | A | T | Homozygous   |
| NC_037639.1 | 15824283 | SNV | 1 | C | T | Homozygous   |
| NC_037639.1 | 15824300 | SNV | 1 | T | C | Homozygous   |
| NC_037639.1 | 15824344 | SNV | 1 | A | G | Homozygous   |
| NC_037639.1 | 15824366 | SNV | 1 | C | T | Heterozygous |
| NC_037639.1 | 15824368 | SNV | 1 | T | C | Homozygous   |
| NC_037639.1 | 15824391 | SNV | 1 | G | C | Homozygous   |
| NC_037639.1 | 15824506 | SNV | 1 | T | C | Heterozygous |
| NC_037639.1 | 15824538 | SNV | 1 | T | C | Heterozygous |
| NC_037639.1 | 15824624 | SNV | 1 | T | C | Heterozygous |
| NC_037639.1 | 15824626 | SNV | 1 | G | A | Heterozygous |
| NC_037639.1 | 15824630 | SNV | 1 | C | T | Heterozygous |
| NC_037639.1 | 15824638 | SNV | 1 | T | C | Heterozygous |
| NC_037639.1 | 15824657 | SNV | 1 | T | C | Heterozygous |
| NC_037639.1 | 15824670 | SNV | 1 | C | T | Heterozygous |
| NC_037639.1 | 15824672 | SNV | 1 | T | C | Heterozygous |
| NC_037639.1 | 15824719 | SNV | 1 | G | A | Homozygous   |
| NC_037639.1 | 15824735 | SNV | 1 | T | C | Heterozygous |
| NC_037639.1 | 15824761 | SNV | 1 | G | A | Heterozygous |
| NC_037639.1 | 15824768 | SNV | 1 | T | C | Homozygous   |
| NC_037639.1 | 15824823 | SNV | 1 | A | T | Heterozygous |
| NC_037639.1 | 15824889 | SNV | 1 | A | T | Heterozygous |
| NC_037639.1 | 15824910 | SNV | 1 | A | C | Homozygous   |
| NC_037639.1 | 15824961 | SNV | 1 | T | C | Heterozygous |
| NC_037639.1 | 15824972 | SNV | 1 | A | G | Homozygous   |
| NC_037639.1 | 15824976 | SNV | 1 | G | A | Homozygous   |
| NC_037639.1 | 15825025 | SNV | 1 | C | T | Heterozygous |
| NC_037639.1 | 15825028 | SNV | 1 | G | C | Homozygous   |
| NC_037639.1 | 15825038 | SNV | 1 | C | T | Heterozygous |
| NC_037639.1 | 15825058 | SNV | 1 | G | A | Heterozygous |
| NC_037639.1 | 15825074 | SNV | 1 | A | G | Heterozygous |
| NC_037639.1 | 15825080 | SNV | 1 | T | C | Heterozygous |
| NC_037639.1 | 15825096 | SNV | 1 | T | C | Heterozygous |
| NC_037639.1 | 15825114 | SNV | 1 | A | G | Heterozygous |
| NC_037639.1 | 15825116 | SNV | 1 | C | G | Heterozygous |
| NC_037639.1 | 15825172 | SNV | 1 | C | T | Heterozygous |
| NC_037639.1 | 15825195 | SNV | 1 | T | C | Heterozygous |
| NC_037639.1 | 15825199 | SNV | 1 | A | G | Heterozygous |
| NC_037639.1 | 15825217 | SNV | 1 | T | C | Heterozygous |
| NC_037639.1 | 15825343 | SNV | 1 | A | T | Heterozygous |
| NC_037639.1 | 15825356 | SNV | 1 | T | C | Heterozygous |
| NC_037639.1 | 15825360 | SNV | 1 | G | C | Heterozygous |
| NC_037639.1 | 15825369 | SNV | 1 | T | C | Heterozygous |
| NC_037639.1 | 15825377 | SNV | 1 | A | T | Homozygous   |
| NC_037639.1 | 15825468 | SNV | 1 | T | C | Heterozygous |
| NC_037639.1 | 15825498 | SNV | 1 | T | G | Homozygous   |
| NC_037639.1 | 15825574 | SNV | 1 | T | C | Homozygous   |
| NC_037639.1 | 15825600 | SNV | 1 | T | C | Heterozygous |

|             |          |     |   |   |   |              |
|-------------|----------|-----|---|---|---|--------------|
| NC_037639.1 | 15825617 | SNV | 1 | C | T | Heterozygous |
| NC_037639.1 | 15825620 | SNV | 1 | T | C | Heterozygous |
| NC_037639.1 | 15825675 | SNV | 1 | T | C | Heterozygous |
| NC_037639.1 | 15825691 | SNV | 1 | T | A | Homozygous   |
| NC_037639.1 | 15825747 | SNV | 1 | A | C | Heterozygous |
| NC_037639.1 | 15825789 | SNV | 1 | T | C | Homozygous   |
| NC_037639.1 | 15825891 | SNV | 1 | A | G | Heterozygous |
| NC_037639.1 | 15825911 | SNV | 1 | G | C | Heterozygous |
| NC_037639.1 | 15825942 | SNV | 1 | T | C | Homozygous   |
| NC_037639.1 | 15825944 | SNV | 1 | C | T | Homozygous   |
| NC_037639.1 | 15826031 | SNV | 1 | A | G | Heterozygous |
| NC_037639.1 | 15826097 | SNV | 1 | A | G | Heterozygous |
| NC_037639.1 | 15826106 | SNV | 1 | T | C | Heterozygous |
| NC_037639.1 | 15826130 | SNV | 1 | T | C | Homozygous   |
| NC_037639.1 | 15826151 | SNV | 1 | T | C | Heterozygous |
| NC_037639.1 | 15826188 | SNV | 1 | C | T | Heterozygous |
| NC_037639.1 | 15826212 | SNV | 1 | T | C | Homozygous   |
| NC_037639.1 | 15826227 | SNV | 1 | C | T | Homozygous   |
| NC_037639.1 | 15826229 | SNV | 1 | T | C | Heterozygous |
| NC_037639.1 | 15826301 | SNV | 1 | T | C | Homozygous   |
| NC_037639.1 | 15826513 | SNV | 1 | T | C | Homozygous   |
| NC_037639.1 | 15826558 | SNV | 1 | C | T | Heterozygous |
| NC_037639.1 | 15826823 | SNV | 1 | T | C | Homozygous   |
| NC_037639.1 | 15826855 | SNV | 1 | A | G | Heterozygous |
| NC_037639.1 | 15826861 | SNV | 1 | T | C | Heterozygous |
| NC_037639.1 | 15826877 | SNV | 1 | T | C | Heterozygous |
| NC_037639.1 | 15826895 | SNV | 1 | A | G | Heterozygous |
| NC_037639.1 | 15826897 | SNV | 1 | C | G | Heterozygous |
| NC_037639.1 | 15827081 | SNV | 1 | T | C | Heterozygous |
| NC_037639.1 | 15827096 | SNV | 1 | T | C | Heterozygous |
| NC_037639.1 | 15827103 | SNV | 1 | T | C | Homozygous   |
| NC_037639.1 | 15827457 | SNV | 1 | A | C | Heterozygous |
| NC_037639.1 | 15828373 | SNV | 1 | A | G | Homozygous   |
| NC_037639.1 | 15828831 | SNV | 1 | A | G | Homozygous   |
| NC_037639.1 | 15828870 | SNV | 1 | G | A | Heterozygous |
| NC_037639.1 | 15828918 | SNV | 1 | T | A | Heterozygous |
| NC_037639.1 | 15829027 | SNV | 1 | A | T | Heterozygous |
| NC_037639.1 | 15829311 | SNV | 1 | T | C | Heterozygous |
| NC_037639.1 | 15835125 | SNV | 1 | G | A | Heterozygous |
| NC_037639.1 | 15835191 | SNV | 1 | G | A | Homozygous   |
| NC_037639.1 | 15835245 | SNV | 1 | T | C | Heterozygous |
| NC_037639.1 | 15836136 | SNV | 1 | T | C | Heterozygous |
| NC_037639.1 | 15836725 | SNV | 1 | T | C | Heterozygous |
| NC_037639.1 | 15837100 | SNV | 1 | A | G | Homozygous   |
| NC_037639.1 | 15838810 | SNV | 1 | G | C | Homozygous   |
| NC_037639.1 | 15839608 | SNV | 1 | A | T | Homozygous   |
| NC_037639.1 | 15839629 | SNV | 1 | T | C | Homozygous   |
| NC_037639.1 | 15839869 | SNV | 1 | A | G | Heterozygous |
| NC_037639.1 | 15839907 | SNV | 1 | C | T | Heterozygous |
| NC_037639.1 | 15840132 | SNV | 1 | C | T | Homozygous   |
| NC_037639.1 | 15840140 | SNV | 1 | G | A | Heterozygous |

|             |          |     |   |   |   |              |
|-------------|----------|-----|---|---|---|--------------|
| NC_037639.1 | 15840154 | SNV | 1 | T | C | Heterozygous |
| NC_037639.1 | 15840207 | SNV | 1 | T | C | Homozygous   |
| NC_037639.1 | 15840344 | SNV | 1 | C | T | Homozygous   |
| NC_037639.1 | 15840350 | SNV | 1 | C | T | Homozygous   |
| NC_037639.1 | 15840872 | SNV | 1 | G | A | Heterozygous |
| NC_037639.1 | 15840958 | SNV | 1 | T | G | Heterozygous |
| NC_037639.1 | 15844824 | SNV | 1 | A | T | Heterozygous |
| NC_037639.1 | 15844828 | SNV | 1 | A | C | Heterozygous |
| NC_037639.1 | 15844858 | SNV | 1 | T | A | Homozygous   |
| NC_037639.1 | 15845149 | SNV | 1 | T | C | Heterozygous |
| NC_037639.1 | 15845167 | SNV | 1 | T | G | Homozygous   |
| NC_037639.1 | 15849998 | SNV | 1 | A | G | Homozygous   |
| NC_037639.1 | 15850027 | SNV | 1 | G | A | Heterozygous |
| NC_037639.1 | 15850549 | SNV | 1 | G | A | Homozygous   |
| NC_037639.1 | 15851738 | SNV | 1 | T | C | Heterozygous |
| NC_037639.1 | 15851917 | SNV | 1 | T | A | Heterozygous |
| NC_037639.1 | 15851917 | SNV | 1 | T | C | Heterozygous |
| NC_037639.1 | 15852171 | SNV | 1 | G | A | Heterozygous |
| NC_037639.1 | 15852367 | SNV | 1 | T | C | Homozygous   |
| NC_037639.1 | 15852515 | SNV | 1 | C | G | Heterozygous |
| NC_037639.1 | 15852681 | SNV | 1 | A | G | Heterozygous |
| NC_037639.1 | 15854717 | SNV | 1 | T | C | Heterozygous |
| NC_037639.1 | 15854802 | SNV | 1 | G | C | Homozygous   |
| NC_037639.1 | 15854804 | SNV | 1 | T | A | Homozygous   |
| NC_037639.1 | 15854807 | SNV | 1 | G | A | Homozygous   |
| NC_037639.1 | 15856125 | SNV | 1 | G | A | Homozygous   |
| NC_037639.1 | 15856363 | SNV | 1 | C | T | Heterozygous |
| NC_037639.1 | 15856425 | SNV | 1 | A | G | Homozygous   |
| NC_037639.1 | 15856569 | SNV | 1 | T | C | Homozygous   |
| NC_037639.1 | 15856626 | SNV | 1 | G | A | Heterozygous |
| NC_037639.1 | 15856749 | SNV | 1 | T | C | Homozygous   |
| NC_037639.1 | 15857025 | SNV | 1 | C | T | Heterozygous |
| NC_037639.1 | 15857050 | SNV | 1 | T | C | Heterozygous |
| NC_037639.1 | 15857242 | SNV | 1 | C | T | Heterozygous |
| NC_037639.1 | 15857309 | SNV | 1 | T | C | Homozygous   |
| NC_037639.1 | 15857392 | SNV | 1 | T | C | Homozygous   |
| NC_037639.1 | 15857485 | SNV | 1 | T | C | Homozygous   |
| NC_037639.1 | 15857589 | SNV | 1 | G | A | Heterozygous |
| NC_037639.1 | 15857781 | SNV | 1 | G | A | Heterozygous |
| NC_037639.1 | 15857791 | SNV | 1 | C | A | Heterozygous |
| NC_037639.1 | 15857811 | SNV | 1 | A | G | Heterozygous |
| NC_037639.1 | 15858043 | SNV | 1 | T | A | Heterozygous |
| NC_037639.1 | 15858473 | SNV | 1 | A | G | Heterozygous |
| NC_037639.1 | 15858502 | SNV | 1 | T | C | Homozygous   |
| NC_037639.1 | 15858856 | SNV | 1 | C | T | Heterozygous |
| NC_037639.1 | 15858862 | SNV | 1 | C | T | Heterozygous |
| NC_037639.1 | 15858889 | SNV | 1 | C | T | Heterozygous |
| NC_037639.1 | 15858893 | SNV | 1 | T | C | Heterozygous |
| NC_037639.1 | 15858895 | SNV | 1 | C | T | Heterozygous |
| NC_037639.1 | 15858898 | SNV | 1 | C | T | Heterozygous |
| NC_037639.1 | 15858906 | SNV | 1 | T | C | Heterozygous |

|             |          |     |   |   |   |              |
|-------------|----------|-----|---|---|---|--------------|
| NC_037639.1 | 15858955 | SNV | 1 | G | A | Heterozygous |
| NC_037639.1 | 15859006 | SNV | 1 | T | C | Homozygous   |
| NC_037639.1 | 15859285 | SNV | 1 | C | T | Heterozygous |
| NC_037639.1 | 15859297 | SNV | 1 | T | C | Heterozygous |
| NC_037639.1 | 15859333 | SNV | 1 | T | C | Homozygous   |
| NC_037639.1 | 15859335 | SNV | 1 | T | C | Homozygous   |
| NC_037639.1 | 15859406 | SNV | 1 | G | A | Homozygous   |
| NC_037639.1 | 15859676 | SNV | 1 | T | C | Homozygous   |
| NC_037639.1 | 15859701 | SNV | 1 | G | A | Homozygous   |
| NC_037639.1 | 15859716 | SNV | 1 | A | G | Homozygous   |
| NC_037639.1 | 15859821 | SNV | 1 | T | C | Homozygous   |
| NC_037639.1 | 15859945 | SNV | 1 | A | G | Heterozygous |
| NC_037639.1 | 15860021 | SNV | 1 | C | T | Homozygous   |
| NC_037639.1 | 15860195 | SNV | 1 | C | T | Homozygous   |
| NC_037639.1 | 15860208 | SNV | 1 | A | G | Homozygous   |
| NC_037639.1 | 15860259 | SNV | 1 | G | A | Heterozygous |
| NC_037639.1 | 15860628 | SNV | 1 | G | A | Heterozygous |
| NC_037639.1 | 15860911 | SNV | 1 | T | C | Heterozygous |
| NC_037639.1 | 15860915 | SNV | 1 | T | C | Heterozygous |
| NC_037639.1 | 15860919 | SNV | 1 | T | C | Homozygous   |
| NC_037639.1 | 15861025 | SNV | 1 | T | A | Homozygous   |
| NC_037639.1 | 15861027 | SNV | 1 | T | C | Homozygous   |
| NC_037639.1 | 15861031 | SNV | 1 | A | T | Heterozygous |
| NC_037639.1 | 15861060 | SNV | 1 | G | A | Homozygous   |
| NC_037639.1 | 15861104 | SNV | 1 | A | G | Homozygous   |
| NC_037639.1 | 15861106 | SNV | 1 | T | C | Homozygous   |
| NC_037639.1 | 15861592 | SNV | 1 | T | G | Heterozygous |
| NC_037639.1 | 15861594 | SNV | 1 | T | G | Heterozygous |
| NC_037639.1 | 15861599 | SNV | 1 | T | A | Heterozygous |
| NC_037639.1 | 15861602 | SNV | 1 | A | T | Heterozygous |
| NC_037639.1 | 15861728 | SNV | 1 | G | C | Homozygous   |
| NC_037639.1 | 15861967 | SNV | 1 | G | T | Homozygous   |
| NC_037639.1 | 15862096 | SNV | 1 | A | G | Homozygous   |
| NC_037639.1 | 15862196 | SNV | 1 | G | A | Heterozygous |
| NC_037639.1 | 15862277 | SNV | 1 | A | G | Heterozygous |
| NC_037639.1 | 15862386 | SNV | 1 | C | T | Heterozygous |
| NC_037639.1 | 15862627 | SNV | 1 | G | A | Homozygous   |
| NC_037639.1 | 15863067 | SNV | 1 | G | A | Heterozygous |
| NC_037639.1 | 15863830 | SNV | 1 | G | A | Heterozygous |
| NC_037639.1 | 15863889 | SNV | 1 | T | C | Homozygous   |
| NC_037639.1 | 15864001 | SNV | 1 | G | A | Heterozygous |
| NC_037639.1 | 15864539 | SNV | 1 | G | A | Heterozygous |
| NC_037639.1 | 15865352 | SNV | 1 | A | G | Homozygous   |
| NC_037639.1 | 15865538 | SNV | 1 | A | G | Homozygous   |
| NC_037639.1 | 15865780 | SNV | 1 | G | A | Heterozygous |
| NC_037639.1 | 15866160 | SNV | 1 | C | T | Heterozygous |
| NC_037639.1 | 15866339 | SNV | 1 | A | G | Homozygous   |
| NC_037639.1 | 15866439 | SNV | 1 | T | A | Homozygous   |
| NC_037639.1 | 15881584 | SNV | 1 | T | C | Homozygous   |
| NC_037639.1 | 15884896 | SNV | 1 | G | T | Heterozygous |
| NC_037639.1 | 15884908 | SNV | 1 | G | A | Heterozygous |

|             |          |     |   |   |   |              |
|-------------|----------|-----|---|---|---|--------------|
| NC_037639.1 | 15884911 | SNV | 1 | T | C | Heterozygous |
| NC_037639.1 | 15884935 | SNV | 1 | A | C | Homozygous   |
| NC_037639.1 | 15890672 | SNV | 1 | A | G | Homozygous   |
| NC_037639.1 | 15890939 | SNV | 1 | C | T | Heterozygous |
| NC_037639.1 | 15891016 | SNV | 1 | C | T | Homozygous   |
| NC_037639.1 | 15891251 | SNV | 1 | T | C | Heterozygous |
| NC_037639.1 | 15891344 | SNV | 1 | G | A | Homozygous   |
| NC_037639.1 | 15891619 | SNV | 1 | A | C | Homozygous   |
| NC_037639.1 | 15891629 | SNV | 1 | G | T | Homozygous   |
| NC_037639.1 | 15891667 | SNV | 1 | G | C | Homozygous   |
| NC_037639.1 | 15892262 | SNV | 1 | A | C | Homozygous   |
| NC_037639.1 | 15892285 | SNV | 1 | C | T | Heterozygous |
| NC_037639.1 | 15892597 | SNV | 1 | C | T | Heterozygous |
| NC_037639.1 | 15893029 | SNV | 1 | A | G | Homozygous   |
| NC_037639.1 | 15893186 | SNV | 1 | C | T | Heterozygous |
| NC_037639.1 | 15895446 | SNV | 1 | G | A | Heterozygous |
| NC_037639.1 | 15895481 | SNV | 1 | C | T | Heterozygous |
| NC_037639.1 | 15895489 | SNV | 1 | T | C | Heterozygous |
| NC_037639.1 | 15895491 | SNV | 1 | A | C | Heterozygous |
| NC_037639.1 | 15897717 | SNV | 1 | T | C | Homozygous   |
| NC_037639.1 | 15897758 | SNV | 1 | A | G | Homozygous   |
| NC_037639.1 | 15898579 | SNV | 1 | A | T | Homozygous   |
| NC_037639.1 | 15898605 | SNV | 1 | T | A | Homozygous   |
| NC_037639.1 | 15900263 | SNV | 1 | C | T | Homozygous   |
| NC_037639.1 | 15901251 | SNV | 1 | G | A | Heterozygous |
| NC_037639.1 | 15906574 | SNV | 1 | A | G | Homozygous   |
| NC_037639.1 | 15906841 | SNV | 1 | A | G | Homozygous   |
| NC_037639.1 | 15907356 | SNV | 1 | C | T | Heterozygous |
| NC_037639.1 | 15907637 | SNV | 1 | T | C | Heterozygous |
| NC_037639.1 | 15907879 | SNV | 1 | C | T | Homozygous   |
| NC_037639.1 | 15908505 | SNV | 1 | G | C | Heterozygous |
| NC_037639.1 | 15908518 | SNV | 1 | C | T | Heterozygous |
| NC_037639.1 | 15908523 | SNV | 1 | C | T | Heterozygous |
| NC_037639.1 | 15908570 | SNV | 1 | T | A | Heterozygous |
| NC_037639.1 | 15908582 | SNV | 1 | G | A | Heterozygous |
| NC_037639.1 | 15908606 | SNV | 1 | C | T | Homozygous   |
| NC_037639.1 | 15908666 | SNV | 1 | A | G | Heterozygous |
| NC_037639.1 | 15908843 | SNV | 1 | T | C | Heterozygous |
| NC_037639.1 | 15909017 | SNV | 1 | T | C | Heterozygous |
| NC_037639.1 | 15909098 | SNV | 1 | A | G | Heterozygous |
| NC_037639.1 | 15909164 | SNV | 1 | A | G | Homozygous   |
| NC_037639.1 | 15909202 | SNV | 1 | T | C | Homozygous   |
| NC_037639.1 | 15909222 | SNV | 1 | C | T | Heterozygous |
| NC_037639.1 | 15909708 | SNV | 1 | C | T | Heterozygous |
| NC_037639.1 | 15909762 | SNV | 1 | C | T | Heterozygous |
| NC_037639.1 | 15910145 | SNV | 1 | C | T | Heterozygous |
| NC_037639.1 | 15910277 | SNV | 1 | A | T | Heterozygous |
| NC_037639.1 | 15910342 | SNV | 1 | G | C | Homozygous   |
| NC_037639.1 | 15910375 | SNV | 1 | A | T | Heterozygous |
| NC_037639.1 | 15910414 | SNV | 1 | G | C | Homozygous   |
| NC_037639.1 | 15910428 | SNV | 1 | T | C | Homozygous   |

|             |          |     |   |   |   |              |
|-------------|----------|-----|---|---|---|--------------|
| NC_037639.1 | 15910438 | SNV | 1 | A | G | Homozygous   |
| NC_037639.1 | 15910650 | SNV | 1 | C | T | Homozygous   |
| NC_037639.1 | 15910957 | SNV | 1 | C | G | Heterozygous |
| NC_037639.1 | 15910993 | SNV | 1 | A | G | Homozygous   |
| NC_037639.1 | 15911073 | SNV | 1 | T | C | Homozygous   |
| NC_037639.1 | 15911414 | SNV | 1 | A | G | Heterozygous |
| NC_037639.1 | 15911627 | SNV | 1 | T | C | Heterozygous |
| NC_037639.1 | 15911684 | SNV | 1 | C | T | Heterozygous |
| NC_037639.1 | 15911767 | SNV | 1 | T | C | Homozygous   |
| NC_037639.1 | 15911794 | SNV | 1 | G | A | Heterozygous |
| NC_037639.1 | 15911815 | SNV | 1 | A | C | Homozygous   |
| NC_037639.1 | 15911883 | SNV | 1 | G | A | Heterozygous |
| NC_037639.1 | 15911894 | SNV | 1 | G | T | Heterozygous |
| NC_037639.1 | 15912075 | SNV | 1 | C | T | Heterozygous |
| NC_037639.1 | 15912078 | SNV | 1 | G | A | Heterozygous |
| NC_037639.1 | 15912294 | SNV | 1 | G | A | Heterozygous |
| NC_037639.1 | 15912435 | SNV | 1 | T | C | Heterozygous |
| NC_037639.1 | 15912734 | SNV | 1 | C | G | Heterozygous |
| NC_037639.1 | 15913749 | SNV | 1 | A | G | Homozygous   |
| NC_037639.1 | 15913783 | SNV | 1 | A | C | Heterozygous |
| NC_037639.1 | 15917144 | SNV | 1 | T | C | Homozygous   |
| NC_037639.1 | 15925237 | SNV | 1 | C | T | Heterozygous |
| NC_037639.1 | 15925254 | SNV | 1 | T | C | Homozygous   |
| NC_037639.1 | 15925457 | SNV | 1 | T | C | Heterozygous |
| NC_037639.1 | 15931147 | SNV | 1 | A | G | Heterozygous |
| NC_037639.1 | 15931194 | SNV | 1 | G | A | Heterozygous |
| NC_037639.1 | 15932081 | SNV | 1 | T | C | Homozygous   |
| NC_037639.1 | 15933749 | SNV | 1 | C | T | Heterozygous |
| NC_037639.1 | 15934093 | SNV | 1 | C | T | Heterozygous |
| NC_037639.1 | 15934219 | SNV | 1 | G | A | Homozygous   |
| NC_037639.1 | 15934224 | SNV | 1 | G | A | Heterozygous |
| NC_037639.1 | 15934229 | SNV | 1 | G | A | Heterozygous |
| NC_037639.1 | 15934679 | SNV | 1 | C | T | Heterozygous |
| NC_037639.1 | 15934753 | SNV | 1 | T | C | Heterozygous |
| NC_037639.1 | 15938044 | SNV | 1 | A | G | Heterozygous |
| NC_037639.1 | 15938197 | SNV | 1 | C | T | Heterozygous |
| NC_037639.1 | 15938302 | SNV | 1 | T | C | Homozygous   |
| NC_037639.1 | 15938475 | SNV | 1 | C | G | Homozygous   |
| NC_037639.1 | 15940221 | SNV | 1 | A | G | Heterozygous |
| NC_037639.1 | 15940225 | SNV | 1 | G | A | Heterozygous |
| NC_037639.1 | 15940761 | SNV | 1 | T | C | Homozygous   |
| NC_037639.1 | 15941380 | SNV | 1 | G | A | Heterozygous |
| NC_037639.1 | 15941471 | SNV | 1 | A | G | Heterozygous |
| NC_037639.1 | 15941693 | SNV | 1 | G | T | Homozygous   |
| NC_037639.1 | 15941696 | SNV | 1 | A | T | Homozygous   |
| NC_037639.1 | 15942003 | SNV | 1 | T | C | Homozygous   |
| NC_037639.1 | 15942958 | SNV | 1 | A | G | Homozygous   |
| NC_037639.1 | 15943680 | SNV | 1 | A | G | Heterozygous |
| NC_037639.1 | 15949362 | SNV | 1 | G | A | Homozygous   |
| NC_037639.1 | 15949804 | SNV | 1 | G | T | Homozygous   |
| NC_037639.1 | 15950402 | SNV | 1 | A | G | Homozygous   |



|             |          |     |   |   |   |              |
|-------------|----------|-----|---|---|---|--------------|
| NC_037639.1 | 15950469 | SNV | 1 | A | G | Homozygous   |
| NC_037639.1 | 15950679 | SNV | 1 | C | T | Homozygous   |
| NC_037639.1 | 15950817 | SNV | 1 | A | C | Heterozygous |
| NC_037639.1 | 15950825 | SNV | 1 | T | C | Heterozygous |
| NC_037639.1 | 15951183 | SNV | 1 | G | A | Heterozygous |
| NC_037639.1 | 15951243 | SNV | 1 | A | G | Homozygous   |
| NC_037639.1 | 15951323 | SNV | 1 | G | A | Heterozygous |
| NC_037639.1 | 15951993 | SNV | 1 | A | G | Homozygous   |
| NC_037639.1 | 15952259 | SNV | 1 | T | C | Heterozygous |
| NC_037639.1 | 15952467 | SNV | 1 | T | G | Heterozygous |
| NC_037639.1 | 15952490 | SNV | 1 | G | A | Homozygous   |
| NC_037639.1 | 15952510 | SNV | 1 | A | G | Homozygous   |
| NC_037639.1 | 15954370 | SNV | 1 | T | C | Homozygous   |
| NC_037639.1 | 15955489 | SNV | 1 | A | G | Homozygous   |
| NC_037639.1 | 15955495 | SNV | 1 | A | G | Homozygous   |
| NC_037639.1 | 15955522 | SNV | 1 | T | G | Homozygous   |
| NC_037639.1 | 15955524 | SNV | 1 | T | G | Heterozygous |
| NC_037639.1 | 15955540 | SNV | 1 | A | C | Heterozygous |
| NC_037639.1 | 15955542 | SNV | 1 | A | T | Heterozygous |
| NC_037639.1 | 15955546 | SNV | 1 | A | G | Heterozygous |
| NC_037639.1 | 15955548 | SNV | 1 | G | A | Heterozygous |
| NC_037639.1 | 15955554 | SNV | 1 | A | G | Heterozygous |
| NC_037639.1 | 15961574 | SNV | 1 | A | G | Heterozygous |
| NC_037639.1 | 15961707 | SNV | 1 | T | C | Homozygous   |
| NC_037639.1 | 15961831 | SNV | 1 | T | C | Homozygous   |
| NC_037639.1 | 15961875 | SNV | 1 | T | C | Homozygous   |
| NC_037639.1 | 15961895 | SNV | 1 | T | C | Homozygous   |
| NC_037639.1 | 15962078 | SNV | 1 | G | T | Homozygous   |
| NC_037639.1 | 15962083 | SNV | 1 | G | T | Homozygous   |
| NC_037639.1 | 15962238 | SNV | 1 | G | C | Heterozygous |
| NC_037639.1 | 15962267 | SNV | 1 | G | C | Heterozygous |
| NC_037639.1 | 15962383 | SNV | 1 | C | T | Homozygous   |
| NC_037639.1 | 15963122 | SNV | 1 | A | G | Homozygous   |
| NC_037639.1 | 15963409 | SNV | 1 | C | A | Homozygous   |
| NC_037639.1 | 15963421 | SNV | 1 | T | C | Homozygous   |
| NC_037639.1 | 15965491 | SNV | 1 | T | C | Homozygous   |
| NC_037639.1 | 15966026 | SNV | 1 | G | A | Homozygous   |
| NC_037639.1 | 15966036 | SNV | 1 | T | C | Homozygous   |
| NC_037639.1 | 15966780 | SNV | 1 | A | G | Heterozygous |
| NC_037639.1 | 15966783 | SNV | 1 | C | G | Heterozygous |
| NC_037639.1 | 15967333 | SNV | 1 | A | G | Heterozygous |
| NC_037639.1 | 15967337 | SNV | 1 | T | C | Homozygous   |
| NC_037639.1 | 15967608 | SNV | 1 | C | T | Heterozygous |
| NC_037639.1 | 15968078 | SNV | 1 | A | C | Heterozygous |
| NC_037639.1 | 15968093 | SNV | 1 | C | A | Heterozygous |
| NC_037639.1 | 15968841 | SNV | 1 | G | A | Homozygous   |
| NC_037639.1 | 15969073 | SNV | 1 | A | G | Homozygous   |
| NC_037639.1 | 15969185 | SNV | 1 | A | T | Homozygous   |
| NC_037639.1 | 15969266 | SNV | 1 | G | T | Homozygous   |
| NC_037639.1 | 15969892 | SNV | 1 | A | T | Heterozygous |
| NC_037639.1 | 15969897 | SNV | 1 | A | T | Heterozygous |

|             |          |     |   |   |   |              |
|-------------|----------|-----|---|---|---|--------------|
| NC_037639.1 | 15969915 | SNV | 1 | A | C | Heterozygous |
| NC_037639.1 | 15970064 | SNV | 1 | C | G | Homozygous   |
| NC_037639.1 | 15970115 | SNV | 1 | T | C | Homozygous   |
| NC_037639.1 | 15973766 | SNV | 1 | G | A | Heterozygous |
| NC_037639.1 | 15976708 | SNV | 1 | A | G | Homozygous   |
| NC_037639.1 | 15976772 | SNV | 1 | T | C | Heterozygous |
| NC_037639.1 | 15976909 | SNV | 1 | T | C | Homozygous   |
| NC_037639.1 | 15977235 | SNV | 1 | C | T | Heterozygous |
| NC_037639.1 | 15977600 | SNV | 1 | A | T | Heterozygous |
| NC_037639.1 | 15977656 | SNV | 1 | A | G | Homozygous   |
| NC_037639.1 | 15979548 | SNV | 1 | A | G | Homozygous   |
| NC_037639.1 | 15979768 | SNV | 1 | A | G | Homozygous   |
| NC_037639.1 | 15979783 | SNV | 1 | A | G | Homozygous   |
| NC_037639.1 | 15979965 | SNV | 1 | A | G | Homozygous   |
| NC_037639.1 | 15979998 | SNV | 1 | T | C | Homozygous   |
| NC_037639.1 | 15980037 | SNV | 1 | T | C | Heterozygous |
| NC_037639.1 | 15980742 | SNV | 1 | T | C | Heterozygous |
| NC_037639.1 | 15980756 | SNV | 1 | A | G | Homozygous   |
| NC_037639.1 | 15981371 | SNV | 1 | G | A | Homozygous   |
| NC_037639.1 | 15981377 | SNV | 1 | T | C | Heterozygous |
| NC_037639.1 | 15981394 | SNV | 1 | C | T | Heterozygous |
| NC_037639.1 | 15981549 | SNV | 1 | T | C | Homozygous   |
| NC_037639.1 | 15982219 | SNV | 1 | C | T | Homozygous   |
| NC_037639.1 | 15984254 | SNV | 1 | A | G | Homozygous   |
| NC_037639.1 | 15985355 | SNV | 1 | T | C | Homozygous   |
| NC_037639.1 | 15985496 | SNV | 1 | C | T | Heterozygous |
| NC_037639.1 | 15985628 | SNV | 1 | A | G | Homozygous   |
| NC_037639.1 | 15985923 | SNV | 1 | C | T | Homozygous   |
| NC_037639.1 | 15985925 | SNV | 1 | C | G | Homozygous   |
| NC_037639.1 | 15985982 | SNV | 1 | T | A | Heterozygous |
| NC_037639.1 | 15986060 | SNV | 1 | A | C | Heterozygous |
| NC_037639.1 | 15986261 | SNV | 1 | A | C | Homozygous   |
| NC_037639.1 | 15986265 | SNV | 1 | T | G | Homozygous   |
| NC_037639.1 | 15986884 | SNV | 1 | C | A | Heterozygous |
| NC_037639.1 | 15986933 | SNV | 1 | C | T | Heterozygous |
| NC_037639.1 | 15986969 | SNV | 1 | A | G | Homozygous   |
| NC_037639.1 | 15986976 | SNV | 1 | T | C | Homozygous   |
| NC_037639.1 | 15991894 | SNV | 1 | T | C | Homozygous   |
| NC_037639.1 | 15992758 | SNV | 1 | T | C | Heterozygous |
| NC_037639.1 | 15993164 | SNV | 1 | T | C | Homozygous   |
| NC_037639.1 | 15993493 | SNV | 1 | T | C | Homozygous   |
| NC_037639.1 | 15994076 | SNV | 1 | C | T | Homozygous   |
| NC_037639.1 | 15994089 | SNV | 1 | T | A | Homozygous   |
| NC_037639.1 | 15994208 | SNV | 1 | A | G | Homozygous   |
| NC_037639.1 | 15994228 | SNV | 1 | C | A | Homozygous   |
| NC_037639.1 | 15994891 | SNV | 1 | G | A | Heterozygous |
| NC_037639.1 | 15995213 | SNV | 1 | C | T | Homozygous   |
| NC_037639.1 | 15998080 | SNV | 1 | G | T | Heterozygous |
| NC_037639.1 | 15998103 | SNV | 1 | T | C | Homozygous   |
| NC_037639.1 | 15999074 | SNV | 1 | A | G | Homozygous   |
| NC_037639.1 | 15999212 | SNV | 1 | T | A | Heterozygous |

|             |          |     |   |   |   |              |
|-------------|----------|-----|---|---|---|--------------|
| NC_037639.1 | 16001767 | SNV | 1 | A | G | Heterozygous |
| NC_037639.1 | 16005812 | SNV | 1 | C | A | Homozygous   |
| NC_037639.1 | 16009250 | SNV | 1 | A | T | Homozygous   |
| NC_037639.1 | 16009256 | SNV | 1 | C | A | Homozygous   |
| NC_037639.1 | 16009260 | SNV | 1 | A | T | Homozygous   |
| NC_037639.1 | 16009266 | SNV | 1 | C | T | Homozygous   |
| NC_037639.1 | 16009282 | SNV | 1 | A | T | Homozygous   |
| NC_037639.1 | 16011709 | SNV | 1 | C | T | Heterozygous |
| NC_037639.1 | 16014927 | SNV | 1 | G | C | Heterozygous |
| NC_037639.1 | 16014955 | SNV | 1 | T | C | Homozygous   |
| NC_037639.1 | 16018485 | SNV | 1 | C | T | Heterozygous |
| NC_037639.1 | 16018495 | SNV | 1 | C | T | Heterozygous |
| NC_037639.1 | 16019843 | SNV | 1 | C | T | Homozygous   |
| NC_037639.1 | 16019848 | SNV | 1 | C | T | Homozygous   |
| NC_037639.1 | 16020288 | SNV | 1 | A | G | Homozygous   |
| NC_037639.1 | 16020336 | SNV | 1 | T | C | Heterozygous |
| NC_037639.1 | 16020417 | SNV | 1 | C | G | Homozygous   |
| NC_037639.1 | 16020636 | SNV | 1 | T | C | Heterozygous |
| NC_037639.1 | 16021864 | SNV | 1 | T | C | Homozygous   |
| NC_037639.1 | 16022745 | SNV | 1 | C | T | Heterozygous |
| NC_037639.1 | 16022754 | SNV | 1 | A | G | Heterozygous |
| NC_037639.1 | 16022813 | SNV | 1 | A | T | Homozygous   |
| NC_037639.1 | 16023049 | SNV | 1 | T | C | Homozygous   |
| NC_037639.1 | 16025788 | SNV | 1 | G | A | Heterozygous |
| NC_037639.1 | 16025860 | SNV | 1 | A | G | Heterozygous |
| NC_037639.1 | 16025902 | SNV | 1 | C | T | Homozygous   |
| NC_037639.1 | 16025932 | SNV | 1 | C | T | Heterozygous |
| NC_037639.1 | 16026928 | SNV | 1 | C | T | Heterozygous |
| NC_037639.1 | 16027175 | SNV | 1 | T | C | Heterozygous |
| NC_037639.1 | 16027184 | SNV | 1 | T | C | Heterozygous |
| NC_037639.1 | 16027206 | SNV | 1 | C | T | Heterozygous |
| NC_037639.1 | 16027301 | SNV | 1 | T | C | Homozygous   |
| NC_037639.1 | 16027420 | SNV | 1 | C | T | Heterozygous |
| NC_037639.1 | 16027770 | SNV | 1 | T | C | Homozygous   |
| NC_037639.1 | 16027786 | SNV | 1 | A | G | Heterozygous |
| NC_037639.1 | 16027891 | SNV | 1 | G | T | Homozygous   |
| NC_037639.1 | 16027898 | SNV | 1 | C | T | Homozygous   |
| NC_037639.1 | 16032387 | SNV | 1 | A | G | Homozygous   |
| NC_037639.1 | 16032445 | SNV | 1 | G | A | Homozygous   |
| NC_037639.1 | 16032479 | SNV | 1 | T | C | Heterozygous |
| NC_037639.1 | 16032483 | SNV | 1 | A | G | Heterozygous |
| NC_037639.1 | 16032486 | SNV | 1 | A | G | Heterozygous |
| NC_037639.1 | 16032489 | SNV | 1 | A | G | Heterozygous |
| NC_037639.1 | 16032497 | SNV | 1 | T | C | Heterozygous |
| NC_037639.1 | 16032500 | SNV | 1 | T | C | Heterozygous |
| NC_037639.1 | 16032502 | SNV | 1 | A | G | Heterozygous |
| NC_037639.1 | 16032508 | SNV | 1 | A | G | Heterozygous |
| NC_037639.1 | 16032536 | SNV | 1 | T | A | Heterozygous |
| NC_037639.1 | 16032555 | SNV | 1 | G | A | Heterozygous |
| NC_037639.1 | 16032557 | SNV | 1 | T | A | Heterozygous |
| NC_037639.1 | 16032804 | SNV | 1 | C | T | Heterozygous |

|             |          |     |   |   |   |              |
|-------------|----------|-----|---|---|---|--------------|
| NC_037639.1 | 16034160 | SNV | 1 | A | G | Homozygous   |
| NC_037639.1 | 16034986 | SNV | 1 | G | A | Heterozygous |
| NC_037639.1 | 16035229 | SNV | 1 | C | T | Homozygous   |
| NC_037639.1 | 16035254 | SNV | 1 | C | T | Heterozygous |
| NC_037639.1 | 16035434 | SNV | 1 | C | A | Heterozygous |
| NC_037639.1 | 16036402 | SNV | 1 | G | A | Heterozygous |
| NC_037639.1 | 16036615 | SNV | 1 | G | A | Heterozygous |
| NC_037639.1 | 16036652 | SNV | 1 | T | C | Heterozygous |
| NC_037639.1 | 16036690 | SNV | 1 | T | C | Heterozygous |
| NC_037639.1 | 16037353 | SNV | 1 | C | T | Heterozygous |
| NC_037639.1 | 16038135 | SNV | 1 | C | T | Heterozygous |
| NC_037639.1 | 16039477 | SNV | 1 | T | C | Homozygous   |
| NC_037639.1 | 16039524 | SNV | 1 | A | G | Homozygous   |
| NC_037639.1 | 16040159 | SNV | 1 | C | T | Homozygous   |
| NC_037639.1 | 16040164 | SNV | 1 | T | A | Homozygous   |
| NC_037639.1 | 16041619 | SNV | 1 | G | A | Homozygous   |
| NC_037639.1 | 16042384 | SNV | 1 | G | A | Heterozygous |
| NC_037639.1 | 16042397 | SNV | 1 | G | A | Heterozygous |
| NC_037639.1 | 16042838 | SNV | 1 | G | T | Homozygous   |
| NC_037639.1 | 16042943 | SNV | 1 | T | C | Homozygous   |
| NC_037639.1 | 16043158 | SNV | 1 | C | T | Heterozygous |
| NC_037639.1 | 16043167 | SNV | 1 | T | C | Heterozygous |
| NC_037639.1 | 16043171 | SNV | 1 | C | T | Heterozygous |
| NC_037639.1 | 16043175 | SNV | 1 | A | G | Heterozygous |
| NC_037639.1 | 16044770 | SNV | 1 | A | G | Homozygous   |
| NC_037639.1 | 16045233 | SNV | 1 | A | G | Homozygous   |
| NC_037639.1 | 16047075 | SNV | 1 | T | C | Heterozygous |
| NC_037639.1 | 16047137 | SNV | 1 | T | C | Homozygous   |
| NC_037639.1 | 16047142 | SNV | 1 | T | C | Homozygous   |
| NC_037639.1 | 16047145 | SNV | 1 | T | C | Homozygous   |
| NC_037639.1 | 16047175 | SNV | 1 | C | G | Homozygous   |
| NC_037639.1 | 16047187 | SNV | 1 | G | A | Homozygous   |
| NC_037639.1 | 16047211 | SNV | 1 | T | C | Homozygous   |
| NC_037639.1 | 16047265 | SNV | 1 | T | C | Homozygous   |
| NC_037639.1 | 16047384 | SNV | 1 | C | T | Homozygous   |
| NC_037639.1 | 16047399 | SNV | 1 | A | G | Homozygous   |
| NC_037639.1 | 16047525 | SNV | 1 | C | T | Homozygous   |
| NC_037639.1 | 16048051 | SNV | 1 | C | T | Heterozygous |
| NC_037639.1 | 16048957 | SNV | 1 | G | A | Homozygous   |
| NC_037639.1 | 16049165 | SNV | 1 | A | T | Homozygous   |
| NC_037639.1 | 16052833 | SNV | 1 | G | T | Heterozygous |
| NC_037639.1 | 16053781 | SNV | 1 | A | G | Homozygous   |
| NC_037639.1 | 16058559 | SNV | 1 | T | C | Homozygous   |
| NC_037639.1 | 16058923 | SNV | 1 | C | A | Heterozygous |
| NC_037639.1 | 16059006 | SNV | 1 | G | A | Heterozygous |
| NC_037639.1 | 16059093 | SNV | 1 | G | A | Homozygous   |
| NC_037639.1 | 16059330 | SNV | 1 | A | G | Homozygous   |
| NC_037639.1 | 16059777 | SNV | 1 | C | T | Homozygous   |
| NC_037639.1 | 16060036 | SNV | 1 | C | T | Homozygous   |
| NC_037639.1 | 16060418 | SNV | 1 | C | G | Homozygous   |
| NC_037639.1 | 16068877 | SNV | 1 | T | G | Heterozygous |

|             |          |     |   |   |   |              |
|-------------|----------|-----|---|---|---|--------------|
| NC_037639.1 | 16071272 | SNV | 1 | T | C | Homozygous   |
| NC_037639.1 | 16072427 | SNV | 1 | C | A | Homozygous   |
| NC_037639.1 | 16072473 | SNV | 1 | A | G | Homozygous   |
| NC_037639.1 | 16072475 | SNV | 1 | A | G | Homozygous   |
| NC_037639.1 | 16072504 | SNV | 1 | G | A | Homozygous   |
| NC_037640.1 | 10185    | SNV | 1 | C | T | Heterozygous |
| NC_037640.1 | 12548    | SNV | 1 | A | T | Heterozygous |
| NC_037640.1 | 12568    | SNV | 1 | A | G | Heterozygous |
| NC_037640.1 | 12727    | SNV | 1 | T | C | Heterozygous |
| NC_037640.1 | 12760    | SNV | 1 | A | G | Heterozygous |
| NC_037640.1 | 12763    | SNV | 1 | G | T | Heterozygous |
| NC_037640.1 | 12766    | SNV | 1 | T | C | Heterozygous |
| NC_037640.1 | 25229    | SNV | 1 | A | T | Homozygous   |
| NC_037640.1 | 25239    | SNV | 1 | A | G | Heterozygous |
| NC_037640.1 | 25249    | SNV | 1 | T | C | Heterozygous |
| NC_037640.1 | 26316    | SNV | 1 | T | A | Heterozygous |
| NC_037640.1 | 28893    | SNV | 1 | C | T | Homozygous   |
| NC_037640.1 | 40111    | SNV | 1 | G | A | Heterozygous |
| NC_037640.1 | 40167    | SNV | 1 | C | G | Homozygous   |
| NC_037640.1 | 40402    | SNV | 1 | T | C | Heterozygous |
| NC_037640.1 | 41682    | SNV | 1 | A | G | Heterozygous |
| NC_037640.1 | 48854    | SNV | 1 | A | G | Homozygous   |
| NC_037640.1 | 53210    | SNV | 1 | G | C | Homozygous   |
| NC_037640.1 | 53212    | SNV | 1 | A | T | Homozygous   |
| NC_037640.1 | 53219    | SNV | 1 | A | C | Homozygous   |
| NC_037640.1 | 53254    | SNV | 1 | G | A | Homozygous   |
| NC_037640.1 | 53260    | SNV | 1 | A | G | Homozygous   |
| NC_037640.1 | 53265    | SNV | 1 | C | T | Homozygous   |
| NC_037640.1 | 53269    | SNV | 1 | A | G | Heterozygous |
| NC_037640.1 | 56170    | SNV | 1 | T | C | Heterozygous |
| NC_037640.1 | 56515    | SNV | 1 | C | T | Heterozygous |
| NC_037640.1 | 58803    | SNV | 1 | A | G | Heterozygous |
| NC_037640.1 | 58807    | SNV | 1 | T | C | Heterozygous |
| NC_037640.1 | 62548    | SNV | 1 | C | A | Homozygous   |
| NC_037640.1 | 62551    | SNV | 1 | T | C | Homozygous   |
| NC_037640.1 | 79663    | SNV | 1 | A | G | Homozygous   |
| NC_037640.1 | 79668    | SNV | 1 | T | C | Homozygous   |
| NC_037640.1 | 79670    | SNV | 1 | G | A | Homozygous   |
| NC_037640.1 | 79672    | SNV | 1 | A | C | Homozygous   |
| NC_037640.1 | 79683    | SNV | 1 | T | A | Homozygous   |
| NC_037640.1 | 79697    | SNV | 1 | A | T | Homozygous   |
| NC_037640.1 | 79699    | SNV | 1 | A | C | Heterozygous |
| NC_037640.1 | 79704    | SNV | 1 | T | A | Homozygous   |
| NC_037640.1 | 105317   | SNV | 1 | A | T | Homozygous   |
| NC_037640.1 | 105323   | SNV | 1 | A | T | Homozygous   |
| NC_037640.1 | 105342   | SNV | 1 | A | C | Homozygous   |
| NC_037640.1 | 105347   | SNV | 1 | A | T | Homozygous   |
| NC_037640.1 | 105354   | SNV | 1 | G | T | Homozygous   |
| NC_037640.1 | 110768   | SNV | 1 | T | C | Heterozygous |
| NC_037640.1 | 110776   | SNV | 1 | G | C | Homozygous   |
| NC_037640.1 | 114128   | SNV | 1 | G | A | Heterozygous |

|             |        |     |   |   |   |              |
|-------------|--------|-----|---|---|---|--------------|
| NC_037640.1 | 120578 | SNV | 1 | T | A | Heterozygous |
| NC_037640.1 | 121070 | SNV | 1 | T | A | Homozygous   |
| NC_037640.1 | 121100 | SNV | 1 | C | T | Homozygous   |
| NC_037640.1 | 121359 | SNV | 1 | T | A | Homozygous   |
| NC_037640.1 | 121364 | SNV | 1 | A | T | Homozygous   |
| NC_037640.1 | 121511 | SNV | 1 | T | A | Homozygous   |
| NC_037640.1 | 121514 | SNV | 1 | A | T | Heterozygous |
| NC_037640.1 | 122224 | SNV | 1 | G | C | Homozygous   |
| NC_037640.1 | 128583 | SNV | 1 | A | G | Homozygous   |
| NC_037640.1 | 128624 | SNV | 1 | C | A | Homozygous   |
| NC_037640.1 | 128626 | SNV | 1 | A | C | Homozygous   |
| NC_037640.1 | 136503 | SNV | 1 | G | T | Homozygous   |
| NC_037640.1 | 136505 | SNV | 1 | A | T | Homozygous   |
| NC_037640.1 | 136509 | SNV | 1 | C | T | Homozygous   |
| NC_037640.1 | 136515 | SNV | 1 | A | T | Heterozygous |
| NC_037640.1 | 145977 | SNV | 1 | T | C | Homozygous   |
| NC_037640.1 | 145991 | SNV | 1 | T | C | Homozygous   |
| NC_037640.1 | 145999 | SNV | 1 | G | C | Homozygous   |
| NC_037640.1 | 146004 | SNV | 1 | G | A | Homozygous   |
| NC_037640.1 | 146007 | SNV | 1 | A | G | Homozygous   |
| NC_037640.1 | 146016 | SNV | 1 | G | A | Homozygous   |
| NC_037640.1 | 146023 | SNV | 1 | C | T | Homozygous   |
| NC_037640.1 | 146038 | SNV | 1 | C | T | Homozygous   |
| NC_037640.1 | 146077 | SNV | 1 | A | T | Homozygous   |
| NC_037640.1 | 146081 | SNV | 1 | T | A | Homozygous   |
| NC_037640.1 | 146089 | SNV | 1 | G | A | Homozygous   |
| NC_037640.1 | 146100 | SNV | 1 | A | G | Homozygous   |
| NC_037640.1 | 146120 | SNV | 1 | C | T | Homozygous   |
| NC_037640.1 | 146131 | SNV | 1 | T | C | Homozygous   |
| NC_037640.1 | 146243 | SNV | 1 | T | A | Homozygous   |
| NC_037640.1 | 146273 | SNV | 1 | T | C | Homozygous   |
| NC_037640.1 | 146275 | SNV | 1 | G | A | Homozygous   |
| NC_037640.1 | 146283 | SNV | 1 | G | A | Homozygous   |
| NC_037640.1 | 146313 | SNV | 1 | T | C | Homozygous   |
| NC_037640.1 | 146316 | SNV | 1 | C | T | Homozygous   |
| NC_037640.1 | 146318 | SNV | 1 | T | C | Homozygous   |
| NC_037640.1 | 146321 | SNV | 1 | T | C | Homozygous   |
| NC_037640.1 | 146347 | SNV | 1 | A | G | Homozygous   |
| NC_037640.1 | 152768 | SNV | 1 | C | T | Homozygous   |
| NC_037640.1 | 152778 | SNV | 1 | A | T | Heterozygous |
| NC_037640.1 | 152791 | SNV | 1 | G | T | Heterozygous |
| NC_037640.1 | 158252 | SNV | 1 | T | C | Homozygous   |
| NC_037640.1 | 158259 | SNV | 1 | A | C | Homozygous   |
| NC_037640.1 | 158267 | SNV | 1 | A | T | Homozygous   |
| NC_037640.1 | 158269 | SNV | 1 | A | G | Homozygous   |
| NC_037640.1 | 177547 | SNV | 1 | T | C | Homozygous   |
| NC_037640.1 | 177574 | SNV | 1 | T | C | Homozygous   |
| NC_037640.1 | 177591 | SNV | 1 | T | A | Homozygous   |
| NC_037640.1 | 177600 | SNV | 1 | T | G | Homozygous   |
| NC_037640.1 | 177906 | SNV | 1 | T | C | Heterozygous |
| NC_037640.1 | 177920 | SNV | 1 | T | A | Heterozygous |

|             |        |     |   |   |   |              |
|-------------|--------|-----|---|---|---|--------------|
| NC_037640.1 | 181902 | SNV | 1 | A | G | Homozygous   |
| NC_037640.1 | 181904 | SNV | 1 | T | A | Homozygous   |
| NC_037640.1 | 181912 | SNV | 1 | G | C | Homozygous   |
| NC_037640.1 | 181931 | SNV | 1 | T | C | Homozygous   |
| NC_037640.1 | 181940 | SNV | 1 | A | T | Homozygous   |
| NC_037640.1 | 181956 | SNV | 1 | T | C | Homozygous   |
| NC_037640.1 | 181959 | SNV | 1 | A | C | Homozygous   |
| NC_037640.1 | 181961 | SNV | 1 | T | A | Homozygous   |
| NC_037640.1 | 181965 | SNV | 1 | A | T | Homozygous   |
| NC_037640.1 | 193709 | SNV | 1 | T | C | Homozygous   |
| NC_037640.1 | 197642 | SNV | 1 | A | G | Homozygous   |
| NC_037640.1 | 197665 | SNV | 1 | T | G | Homozygous   |
| NC_037640.1 | 197670 | SNV | 1 | A | T | Homozygous   |
| NC_037640.1 | 197679 | SNV | 1 | T | G | Homozygous   |
| NC_037640.1 | 197682 | SNV | 1 | T | A | Homozygous   |
| NC_037640.1 | 209862 | SNV | 1 | C | T | Homozygous   |
| NC_037640.1 | 209875 | SNV | 1 | A | T | Homozygous   |
| NC_037640.1 | 209877 | SNV | 1 | A | T | Homozygous   |
| NC_037640.1 | 209884 | SNV | 1 | T | C | Homozygous   |
| NC_037640.1 | 209889 | SNV | 1 | A | G | Homozygous   |
| NC_037640.1 | 211410 | SNV | 1 | T | G | Homozygous   |
| NC_037640.1 | 220206 | SNV | 1 | T | A | Homozygous   |
| NC_037640.1 | 220208 | SNV | 1 | T | G | Homozygous   |
| NC_037640.1 | 220213 | SNV | 1 | T | A | Homozygous   |
| NC_037640.1 | 220216 | SNV | 1 | A | T | Homozygous   |
| NC_037640.1 | 220836 | SNV | 1 | C | T | Heterozygous |
| NC_037640.1 | 220920 | SNV | 1 | C | T | Homozygous   |
| NC_037640.1 | 221354 | SNV | 1 | A | C | Heterozygous |
| NC_037640.1 | 221359 | SNV | 1 | T | A | Heterozygous |
| NC_037640.1 | 221385 | SNV | 1 | T | C | Heterozygous |
| NC_037640.1 | 223658 | SNV | 1 | A | G | Homozygous   |
| NC_037640.1 | 223689 | SNV | 1 | T | C | Homozygous   |
| NC_037640.1 | 223692 | SNV | 1 | T | G | Homozygous   |
| NC_037640.1 | 223695 | SNV | 1 | C | T | Homozygous   |
| NC_037640.1 | 228139 | SNV | 1 | T | C | Homozygous   |
| NC_037640.1 | 231575 | SNV | 1 | A | G | Homozygous   |
| NC_037640.1 | 233419 | SNV | 1 | C | T | Homozygous   |
| NC_037640.1 | 234187 | SNV | 1 | C | T | Heterozygous |
| NC_037640.1 | 234966 | SNV | 1 | T | C | Homozygous   |
| NC_037640.1 | 235003 | SNV | 1 | T | C | Homozygous   |
| NC_037640.1 | 236611 | SNV | 1 | A | G | Homozygous   |
| NC_037640.1 | 236615 | SNV | 1 | A | G | Homozygous   |
| NC_037640.1 | 236626 | SNV | 1 | T | C | Homozygous   |
| NC_037640.1 | 236634 | SNV | 1 | A | T | Homozygous   |
| NC_037640.1 | 236637 | SNV | 1 | T | A | Homozygous   |
| NC_037640.1 | 236642 | SNV | 1 | A | G | Homozygous   |
| NC_037640.1 | 236652 | SNV | 1 | T | A | Homozygous   |
| NC_037640.1 | 236674 | SNV | 1 | C | A | Homozygous   |
| NC_037640.1 | 238742 | SNV | 1 | C | A | Homozygous   |
| NC_037640.1 | 242055 | SNV | 1 | A | G | Homozygous   |
| NC_037640.1 | 242978 | SNV | 1 | A | T | Homozygous   |

|             |        |     |   |   |   |              |
|-------------|--------|-----|---|---|---|--------------|
| NC_037640.1 | 242981 | SNV | 1 | T | A | Homozygous   |
| NC_037640.1 | 242987 | SNV | 1 | G | A | Homozygous   |
| NC_037640.1 | 243008 | SNV | 1 | A | C | Homozygous   |
| NC_037640.1 | 243409 | SNV | 1 | T | G | Homozygous   |
| NC_037640.1 | 243417 | SNV | 1 | T | C | Homozygous   |
| NC_037640.1 | 243419 | SNV | 1 | T | C | Homozygous   |
| NC_037640.1 | 243423 | SNV | 1 | T | C | Homozygous   |
| NC_037640.1 | 243428 | SNV | 1 | A | G | Homozygous   |
| NC_037640.1 | 243438 | SNV | 1 | A | G | Homozygous   |
| NC_037640.1 | 244656 | SNV | 1 | T | C | Homozygous   |
| NC_037640.1 | 253657 | SNV | 1 | G | A | Homozygous   |
| NC_037640.1 | 253659 | SNV | 1 | A | T | Homozygous   |
| NC_037640.1 | 254029 | SNV | 1 | A | G | Homozygous   |
| NC_037640.1 | 261687 | SNV | 1 | A | G | Homozygous   |
| NC_037640.1 | 262553 | SNV | 1 | G | A | Heterozygous |
| NC_037640.1 | 267177 | SNV | 1 | T | C | Homozygous   |
| NC_037640.1 | 267552 | SNV | 1 | T | G | Heterozygous |
| NC_037640.1 | 267565 | SNV | 1 | G | A | Heterozygous |
| NC_037640.1 | 267568 | SNV | 1 | A | G | Heterozygous |
| NC_037640.1 | 267571 | SNV | 1 | C | T | Heterozygous |
| NC_037640.1 | 269623 | SNV | 1 | T | A | Homozygous   |
| NC_037640.1 | 269626 | SNV | 1 | C | A | Homozygous   |
| NC_037640.1 | 269656 | SNV | 1 | T | A | Homozygous   |
| NC_037640.1 | 269664 | SNV | 1 | T | A | Homozygous   |
| NC_037640.1 | 271986 | SNV | 1 | G | A | Heterozygous |
| NC_037640.1 | 272030 | SNV | 1 | G | A | Heterozygous |
| NC_037640.1 | 276251 | SNV | 1 | C | A | Heterozygous |
| NC_037640.1 | 276349 | SNV | 1 | T | C | Heterozygous |
| NC_037640.1 | 279470 | SNV | 1 | A | G | Homozygous   |
| NC_037640.1 | 288722 | SNV | 1 | G | A | Homozygous   |
| NC_037640.1 | 289236 | SNV | 1 | A | T | Heterozygous |
| NC_037640.1 | 289244 | SNV | 1 | A | G | Heterozygous |
| NC_037640.1 | 289271 | SNV | 1 | T | A | Homozygous   |
| NC_037640.1 | 290305 | SNV | 1 | A | G | Homozygous   |
| NC_037640.1 | 293281 | SNV | 1 | A | G | Homozygous   |
| NC_037640.1 | 297396 | SNV | 1 | A | G | Heterozygous |
| NC_037640.1 | 299688 | SNV | 1 | A | G | Heterozygous |
| NC_037640.1 | 299690 | SNV | 1 | A | G | Heterozygous |
| NC_037640.1 | 310428 | SNV | 1 | C | T | Homozygous   |
| NC_037640.1 | 312987 | SNV | 1 | A | G | Homozygous   |
| NC_037640.1 | 313513 | SNV | 1 | T | C | Homozygous   |
| NC_037640.1 | 314107 | SNV | 1 | C | A | Homozygous   |
| NC_037640.1 | 314109 | SNV | 1 | A | T | Homozygous   |
| NC_037640.1 | 314119 | SNV | 1 | G | T | Homozygous   |
| NC_037640.1 | 314195 | SNV | 1 | T | C | Homozygous   |
| NC_037640.1 | 314281 | SNV | 1 | C | T | Homozygous   |
| NC_037640.1 | 314286 | SNV | 1 | A | G | Heterozygous |
| NC_037640.1 | 314322 | SNV | 1 | A | G | Heterozygous |
| NC_037640.1 | 314324 | SNV | 1 | A | G | Heterozygous |
| NC_037640.1 | 314326 | SNV | 1 | A | G | Heterozygous |
| NC_037640.1 | 314329 | SNV | 1 | C | T | Homozygous   |



|             |        |     |   |   |   |              |
|-------------|--------|-----|---|---|---|--------------|
| NC_037640.1 | 314395 | SNV | 1 | T | C | Heterozygous |
| NC_037640.1 | 314400 | SNV | 1 | T | A | Heterozygous |
| NC_037640.1 | 314468 | SNV | 1 | C | T | Homozygous   |
| NC_037640.1 | 315751 | SNV | 1 | T | G | Homozygous   |
| NC_037640.1 | 332287 | SNV | 1 | A | G | Heterozygous |
| NC_037640.1 | 333311 | SNV | 1 | C | T | Homozygous   |
| NC_037640.1 | 334656 | SNV | 1 | C | T | Heterozygous |
| NC_037640.1 | 335060 | SNV | 1 | G | A | Heterozygous |
| NC_037640.1 | 337359 | SNV | 1 | T | C | Homozygous   |
| NC_037640.1 | 343310 | SNV | 1 | A | T | Heterozygous |
| NC_037640.1 | 343313 | SNV | 1 | T | A | Heterozygous |
| NC_037640.1 | 343316 | SNV | 1 | A | G | Heterozygous |
| NC_037640.1 | 343337 | SNV | 1 | T | A | Heterozygous |
| NC_037640.1 | 343339 | SNV | 1 | T | C | Heterozygous |
| NC_037640.1 | 343346 | SNV | 1 | A | C | Heterozygous |
| NC_037640.1 | 343348 | SNV | 1 | A | T | Heterozygous |
| NC_037640.1 | 344147 | SNV | 1 | C | T | Homozygous   |
| NC_037640.1 | 344253 | SNV | 1 | C | G | Heterozygous |
| NC_037640.1 | 344255 | SNV | 1 | T | A | Heterozygous |
| NC_037640.1 | 344261 | SNV | 1 | C | T | Heterozygous |
| NC_037640.1 | 344263 | SNV | 1 | T | G | Heterozygous |
| NC_037640.1 | 345869 | SNV | 1 | A | G | Homozygous   |
| NC_037640.1 | 354411 | SNV | 1 | T | A | Homozygous   |
| NC_037640.1 | 354417 | SNV | 1 | T | A | Homozygous   |
| NC_037640.1 | 354419 | SNV | 1 | G | T | Homozygous   |
| NC_037640.1 | 354427 | SNV | 1 | G | A | Homozygous   |
| NC_037640.1 | 356207 | SNV | 1 | G | A | Homozygous   |
| NC_037640.1 | 359393 | SNV | 1 | C | T | Heterozygous |
| NC_037640.1 | 367931 | SNV | 1 | T | A | Homozygous   |
| NC_037640.1 | 367939 | SNV | 1 | A | G | Homozygous   |
| NC_037640.1 | 368133 | SNV | 1 | T | C | Heterozygous |
| NC_037640.1 | 368254 | SNV | 1 | T | A | Heterozygous |
| NC_037640.1 | 368261 | SNV | 1 | T | A | Heterozygous |
| NC_037640.1 | 368267 | SNV | 1 | T | A | Heterozygous |
| NC_037640.1 | 375317 | SNV | 1 | G | A | Heterozygous |
| NC_037640.1 | 375788 | SNV | 1 | T | C | Homozygous   |
| NC_037640.1 | 376325 | SNV | 1 | G | A | Homozygous   |
| NC_037640.1 | 376385 | SNV | 1 | T | A | Homozygous   |
| NC_037640.1 | 377507 | SNV | 1 | G | C | Homozygous   |
| NC_037640.1 | 390629 | SNV | 1 | C | T | Heterozygous |
| NC_037640.1 | 394493 | SNV | 1 | T | C | Heterozygous |
| NC_037640.1 | 395799 | SNV | 1 | T | G | Heterozygous |
| NC_037640.1 | 395924 | SNV | 1 | A | G | Homozygous   |
| NC_037640.1 | 396161 | SNV | 1 | A | G | Homozygous   |
| NC_037640.1 | 396933 | SNV | 1 | G | C | Heterozygous |
| NC_037640.1 | 397004 | SNV | 1 | A | G | Heterozygous |
| NC_037640.1 | 397090 | SNV | 1 | C | T | Heterozygous |
| NC_037640.1 | 398984 | SNV | 1 | A | T | Heterozygous |
| NC_037640.1 | 401402 | SNV | 1 | A | G | Homozygous   |
| NC_037640.1 | 409553 | SNV | 1 | A | T | Homozygous   |
| NC_037640.1 | 409555 | SNV | 1 | G | T | Homozygous   |

|             |        |     |   |   |   |              |
|-------------|--------|-----|---|---|---|--------------|
| NC_037640.1 | 412764 | SNV | 1 | G | A | Homozygous   |
| NC_037640.1 | 414234 | SNV | 1 | T | C | Homozygous   |
| NC_037640.1 | 414344 | SNV | 1 | C | G | Heterozygous |
| NC_037640.1 | 415787 | SNV | 1 | T | G | Homozygous   |
| NC_037640.1 | 415796 | SNV | 1 | A | C | Homozygous   |
| NC_037640.1 | 415805 | SNV | 1 | A | T | Homozygous   |
| NC_037640.1 | 415826 | SNV | 1 | T | C | Homozygous   |
| NC_037640.1 | 417990 | SNV | 1 | G | A | Homozygous   |
| NC_037640.1 | 422732 | SNV | 1 | T | G | Heterozygous |
| NC_037640.1 | 422735 | SNV | 1 | A | T | Homozygous   |
| NC_037640.1 | 422737 | SNV | 1 | A | G | Heterozygous |
| NC_037640.1 | 422740 | SNV | 1 | A | T | Heterozygous |
| NC_037640.1 | 422746 | SNV | 1 | A | G | Heterozygous |
| NC_037640.1 | 423496 | SNV | 1 | T | A | Homozygous   |
| NC_037640.1 | 423503 | SNV | 1 | A | T | Homozygous   |
| NC_037640.1 | 424799 | SNV | 1 | A | C | Homozygous   |
| NC_037640.1 | 424802 | SNV | 1 | G | A | Homozygous   |
| NC_037640.1 | 427351 | SNV | 1 | T | G | Homozygous   |
| NC_037640.1 | 427642 | SNV | 1 | G | A | Homozygous   |
| NC_037640.1 | 427960 | SNV | 1 | A | T | Heterozygous |
| NC_037640.1 | 427984 | SNV | 1 | A | T | Homozygous   |
| NC_037640.1 | 428391 | SNV | 1 | G | A | Homozygous   |
| NC_037640.1 | 429114 | SNV | 1 | T | C | Homozygous   |
| NC_037640.1 | 430593 | SNV | 1 | G | A | Homozygous   |
| NC_037640.1 | 430612 | SNV | 1 | G | T | Homozygous   |
| NC_037640.1 | 430619 | SNV | 1 | T | C | Homozygous   |
| NC_037640.1 | 430626 | SNV | 1 | A | T | Homozygous   |
| NC_037640.1 | 430919 | SNV | 1 | G | A | Heterozygous |
| NC_037640.1 | 431084 | SNV | 1 | G | T | Homozygous   |
| NC_037640.1 | 432247 | SNV | 1 | T | A | Homozygous   |
| NC_037640.1 | 437381 | SNV | 1 | A | G | Homozygous   |
| NC_037640.1 | 437383 | SNV | 1 | A | C | Homozygous   |
| NC_037640.1 | 442519 | SNV | 1 | C | T | Heterozygous |
| NC_037640.1 | 445222 | SNV | 1 | T | C | Homozygous   |
| NC_037640.1 | 451473 | SNV | 1 | G | T | Homozygous   |
| NC_037640.1 | 451475 | SNV | 1 | A | G | Homozygous   |
| NC_037640.1 | 453487 | SNV | 1 | A | T | Heterozygous |
| NC_037640.1 | 455903 | SNV | 1 | G | A | Heterozygous |
| NC_037640.1 | 457087 | SNV | 1 | C | T | Heterozygous |
| NC_037640.1 | 457089 | SNV | 1 | A | C | Heterozygous |
| NC_037640.1 | 457587 | SNV | 1 | T | C | Homozygous   |
| NC_037640.1 | 457611 | SNV | 1 | T | C | Homozygous   |
| NC_037640.1 | 457618 | SNV | 1 | A | T | Homozygous   |
| NC_037640.1 | 457620 | SNV | 1 | A | G | Homozygous   |
| NC_037640.1 | 457622 | SNV | 1 | A | G | Homozygous   |
| NC_037640.1 | 457630 | SNV | 1 | A | G | Homozygous   |
| NC_037640.1 | 458178 | SNV | 1 | T | A | Homozygous   |
| NC_037640.1 | 458181 | SNV | 1 | T | C | Homozygous   |
| NC_037640.1 | 458190 | SNV | 1 | T | A | Homozygous   |
| NC_037640.1 | 458657 | SNV | 1 | A | T | Homozygous   |
| NC_037640.1 | 461264 | SNV | 1 | G | C | Homozygous   |

|             |        |     |   |   |   |              |
|-------------|--------|-----|---|---|---|--------------|
| NC_037640.1 | 461344 | SNV | 1 | G | T | Homozygous   |
| NC_037640.1 | 465635 | SNV | 1 | A | G | Homozygous   |
| NC_037640.1 | 468331 | SNV | 1 | A | G | Heterozygous |
| NC_037640.1 | 470164 | SNV | 1 | A | T | Heterozygous |
| NC_037640.1 | 470166 | SNV | 1 | A | T | Heterozygous |
| NC_037640.1 | 470169 | SNV | 1 | C | T | Heterozygous |
| NC_037640.1 | 470175 | SNV | 1 | C | T | Heterozygous |
| NC_037640.1 | 470179 | SNV | 1 | A | T | Heterozygous |
| NC_037640.1 | 470194 | SNV | 1 | A | T | Heterozygous |
| NC_037640.1 | 482402 | SNV | 1 | A | G | Homozygous   |
| NC_037640.1 | 482405 | SNV | 1 | T | G | Homozygous   |
| NC_037640.1 | 482418 | SNV | 1 | A | C | Homozygous   |
| NC_037640.1 | 482421 | SNV | 1 | A | G | Homozygous   |
| NC_037640.1 | 482426 | SNV | 1 | T | A | Homozygous   |
| NC_037640.1 | 482429 | SNV | 1 | T | G | Homozygous   |
| NC_037640.1 | 482445 | SNV | 1 | T | G | Homozygous   |
| NC_037640.1 | 482447 | SNV | 1 | T | A | Homozygous   |
| NC_037640.1 | 482450 | SNV | 1 | A | T | Homozygous   |
| NC_037640.1 | 482456 | SNV | 1 | T | C | Heterozygous |
| NC_037640.1 | 482459 | SNV | 1 | A | T | Homozygous   |
| NC_037640.1 | 482465 | SNV | 1 | T | C | Homozygous   |
| NC_037640.1 | 482468 | SNV | 1 | T | G | Heterozygous |
| NC_037640.1 | 482471 | SNV | 1 | A | G | Homozygous   |
| NC_037640.1 | 482474 | SNV | 1 | A | C | Homozygous   |
| NC_037640.1 | 489192 | SNV | 1 | T | C | Heterozygous |
| NC_037640.1 | 489320 | SNV | 1 | T | C | Heterozygous |
| NC_037640.1 | 490081 | SNV | 1 | C | T | Homozygous   |
| NC_037640.1 | 490094 | SNV | 1 | A | T | Homozygous   |
| NC_037640.1 | 490096 | SNV | 1 | A | G | Homozygous   |
| NC_037640.1 | 490496 | SNV | 1 | T | C | Heterozygous |
| NC_037640.1 | 490522 | SNV | 1 | T | G | Heterozygous |
| NC_037640.1 | 490750 | SNV | 1 | T | G | Homozygous   |
| NC_037640.1 | 490753 | SNV | 1 | A | T | Homozygous   |
| NC_037640.1 | 490756 | SNV | 1 | A | G | Homozygous   |
| NC_037640.1 | 490816 | SNV | 1 | C | T | Homozygous   |
| NC_037640.1 | 491413 | SNV | 1 | T | A | Homozygous   |
| NC_037640.1 | 491416 | SNV | 1 | C | T | Homozygous   |
| NC_037640.1 | 492549 | SNV | 1 | A | T | Homozygous   |
| NC_037640.1 | 492556 | SNV | 1 | A | T | Homozygous   |
| NC_037640.1 | 492565 | SNV | 1 | T | A | Homozygous   |
| NC_037640.1 | 492567 | SNV | 1 | A | G | Homozygous   |
| NC_037640.1 | 492569 | SNV | 1 | A | G | Homozygous   |
| NC_037640.1 | 493430 | SNV | 1 | C | T | Homozygous   |
| NC_037640.1 | 527720 | SNV | 1 | T | G | Heterozygous |
| NC_037640.1 | 527738 | SNV | 1 | A | T | Heterozygous |
| NC_037640.1 | 535015 | SNV | 1 | T | C | Heterozygous |
| NC_037640.1 | 537928 | SNV | 1 | C | A | Homozygous   |
| NC_037640.1 | 539404 | SNV | 1 | C | T | Heterozygous |
| NC_037640.1 | 539657 | SNV | 1 | A | T | Homozygous   |
| NC_037640.1 | 545252 | SNV | 1 | G | A | Homozygous   |
| NC_037640.1 | 545269 | SNV | 1 | A | G | Homozygous   |

|             |        |     |   |   |   |              |
|-------------|--------|-----|---|---|---|--------------|
| NC_037640.1 | 545281 | SNV | 1 | G | T | Homozygous   |
| NC_037640.1 | 546898 | SNV | 1 | A | C | Homozygous   |
| NC_037640.1 | 546900 | SNV | 1 | A | T | Homozygous   |
| NC_037640.1 | 546904 | SNV | 1 | A | T | Homozygous   |
| NC_037640.1 | 546907 | SNV | 1 | T | A | Homozygous   |
| NC_037640.1 | 547023 | SNV | 1 | C | T | Homozygous   |
| NC_037640.1 | 547041 | SNV | 1 | A | G | Homozygous   |
| NC_037640.1 | 547050 | SNV | 1 | C | T | Homozygous   |
| NC_037640.1 | 547067 | SNV | 1 | T | C | Homozygous   |
| NC_037640.1 | 547080 | SNV | 1 | C | T | Homozygous   |
| NC_037640.1 | 547084 | SNV | 1 | T | C | Homozygous   |
| NC_037640.1 | 547136 | SNV | 1 | T | C | Homozygous   |
| NC_037640.1 | 547144 | SNV | 1 | A | C | Homozygous   |
| NC_037640.1 | 547149 | SNV | 1 | G | A | Homozygous   |
| NC_037640.1 | 547168 | SNV | 1 | C | T | Homozygous   |
| NC_037640.1 | 547183 | SNV | 1 | C | T | Homozygous   |
| NC_037640.1 | 547233 | SNV | 1 | G | A | Homozygous   |
| NC_037640.1 | 547264 | SNV | 1 | C | T | Homozygous   |
| NC_037640.1 | 547296 | SNV | 1 | G | A | Homozygous   |
| NC_037640.1 | 547306 | SNV | 1 | C | T | Homozygous   |
| NC_037640.1 | 547328 | SNV | 1 | G | A | Homozygous   |
| NC_037640.1 | 547331 | SNV | 1 | T | C | Homozygous   |
| NC_037640.1 | 547346 | SNV | 1 | A | G | Homozygous   |
| NC_037640.1 | 547348 | SNV | 1 | C | T | Homozygous   |
| NC_037640.1 | 547363 | SNV | 1 | T | A | Homozygous   |
| NC_037640.1 | 548062 | SNV | 1 | A | C | Homozygous   |
| NC_037640.1 | 548067 | SNV | 1 | A | C | Homozygous   |
| NC_037640.1 | 548071 | SNV | 1 | T | C | Homozygous   |
| NC_037640.1 | 548075 | SNV | 1 | T | C | Homozygous   |
| NC_037640.1 | 548081 | SNV | 1 | A | T | Homozygous   |
| NC_037640.1 | 549745 | SNV | 1 | G | T | Homozygous   |
| NC_037640.1 | 549747 | SNV | 1 | T | C | Homozygous   |
| NC_037640.1 | 549772 | SNV | 1 | A | G | Homozygous   |
| NC_037640.1 | 550952 | SNV | 1 | T | C | Heterozygous |
| NC_037640.1 | 551034 | SNV | 1 | T | C | Homozygous   |
| NC_037640.1 | 559731 | SNV | 1 | T | C | Homozygous   |
| NC_037640.1 | 559734 | SNV | 1 | T | C | Homozygous   |
| NC_037640.1 | 559738 | SNV | 1 | A | G | Homozygous   |
| NC_037640.1 | 559755 | SNV | 1 | A | G | Homozygous   |
| NC_037640.1 | 559759 | SNV | 1 | A | G | Homozygous   |
| NC_037640.1 | 559768 | SNV | 1 | A | G | Homozygous   |
| NC_037640.1 | 564427 | SNV | 1 | T | G | Heterozygous |
| NC_037640.1 | 564444 | SNV | 1 | A | G | Heterozygous |
| NC_037640.1 | 564657 | SNV | 1 | A | T | Homozygous   |
| NC_037640.1 | 564660 | SNV | 1 | A | G | Homozygous   |
| NC_037640.1 | 568308 | SNV | 1 | A | G | Homozygous   |
| NC_037640.1 | 568347 | SNV | 1 | T | C | Homozygous   |
| NC_037640.1 | 568351 | SNV | 1 | T | C | Homozygous   |
| NC_037640.1 | 568359 | SNV | 1 | T | C | Homozygous   |
| NC_037640.1 | 568361 | SNV | 1 | C | T | Homozygous   |
| NC_037640.1 | 568380 | SNV | 1 | A | G | Homozygous   |

|             |        |     |   |   |   |              |
|-------------|--------|-----|---|---|---|--------------|
| NC_037640.1 | 568386 | SNV | 1 | A | G | Homozygous   |
| NC_037640.1 | 568397 | SNV | 1 | C | A | Heterozygous |
| NC_037640.1 | 568403 | SNV | 1 | T | C | Heterozygous |
| NC_037640.1 | 568451 | SNV | 1 | A | G | Heterozygous |
| NC_037640.1 | 568458 | SNV | 1 | T | G | Heterozygous |
| NC_037640.1 | 568460 | SNV | 1 | C | T | Heterozygous |
| NC_037640.1 | 568487 | SNV | 1 | C | A | Heterozygous |
| NC_037640.1 | 568491 | SNV | 1 | C | T | Heterozygous |
| NC_037640.1 | 568545 | SNV | 1 | A | G | Homozygous   |
| NC_037640.1 | 574703 | SNV | 1 | T | A | Homozygous   |
| NC_037640.1 | 574711 | SNV | 1 | A | T | Homozygous   |
| NC_037640.1 | 574936 | SNV | 1 | A | C | Homozygous   |
| NC_037640.1 | 579485 | SNV | 1 | T | C | Homozygous   |
| NC_037640.1 | 579914 | SNV | 1 | A | G | Homozygous   |
| NC_037640.1 | 581761 | SNV | 1 | T | G | Homozygous   |
| NC_037640.1 | 581766 | SNV | 1 | C | T | Homozygous   |
| NC_037640.1 | 581772 | SNV | 1 | T | A | Homozygous   |
| NC_037640.1 | 596691 | SNV | 1 | G | A | Heterozygous |
| NC_037640.1 | 597444 | SNV | 1 | C | G | Homozygous   |
| NC_037640.1 | 597709 | SNV | 1 | G | A | Heterozygous |
| NC_037640.1 | 597711 | SNV | 1 | A | T | Heterozygous |
| NC_037640.1 | 599757 | SNV | 1 | C | T | Homozygous   |
| NC_037640.1 | 601720 | SNV | 1 | A | T | Homozygous   |
| NC_037640.1 | 601729 | SNV | 1 | T | G | Homozygous   |
| NC_037640.1 | 601732 | SNV | 1 | A | T | Homozygous   |
| NC_037640.1 | 601751 | SNV | 1 | T | C | Homozygous   |
| NC_037640.1 | 601763 | SNV | 1 | C | A | Homozygous   |
| NC_037640.1 | 603166 | SNV | 1 | T | A | Homozygous   |
| NC_037640.1 | 603168 | SNV | 1 | A | T | Homozygous   |
| NC_037640.1 | 603178 | SNV | 1 | T | A | Homozygous   |
| NC_037640.1 | 603181 | SNV | 1 | A | T | Homozygous   |
| NC_037640.1 | 603183 | SNV | 1 | A | G | Homozygous   |
| NC_037640.1 | 604154 | SNV | 1 | T | A | Homozygous   |
| NC_037640.1 | 604156 | SNV | 1 | C | G | Homozygous   |
| NC_037640.1 | 604160 | SNV | 1 | T | C | Heterozygous |
| NC_037640.1 | 604162 | SNV | 1 | T | A | Heterozygous |
| NC_037640.1 | 604271 | SNV | 1 | A | G | Homozygous   |
| NC_037640.1 | 604275 | SNV | 1 | A | G | Homozygous   |
| NC_037640.1 | 609133 | SNV | 1 | A | T | Homozygous   |
| NC_037640.1 | 609143 | SNV | 1 | T | C | Homozygous   |
| NC_037640.1 | 609145 | SNV | 1 | G | A | Homozygous   |
| NC_037640.1 | 609147 | SNV | 1 | A | T | Homozygous   |
| NC_037640.1 | 609165 | SNV | 1 | G | A | Homozygous   |
| NC_037640.1 | 609177 | SNV | 1 | G | A | Homozygous   |
| NC_037640.1 | 614563 | SNV | 1 | A | T | Homozygous   |
| NC_037640.1 | 614575 | SNV | 1 | T | A | Homozygous   |
| NC_037640.1 | 614994 | SNV | 1 | C | T | Heterozygous |
| NC_037640.1 | 615034 | SNV | 1 | G | A | Homozygous   |
| NC_037640.1 | 615036 | SNV | 1 | A | T | Homozygous   |
| NC_037640.1 | 615310 | SNV | 1 | A | G | Heterozygous |
| NC_037640.1 | 615538 | SNV | 1 | A | G | Homozygous   |

|             |        |     |   |   |   |              |
|-------------|--------|-----|---|---|---|--------------|
| NC_037640.1 | 619502 | SNV | 1 | T | C | Homozygous   |
| NC_037640.1 | 634929 | SNV | 1 | A | C | Homozygous   |
| NC_037640.1 | 635059 | SNV | 1 | C | T | Homozygous   |
| NC_037640.1 | 635278 | SNV | 1 | A | G | Homozygous   |
| NC_037640.1 | 636501 | SNV | 1 | G | A | Heterozygous |
| NC_037640.1 | 637031 | SNV | 1 | C | T | Heterozygous |
| NC_037640.1 | 640474 | SNV | 1 | T | A | Heterozygous |
| NC_037640.1 | 643672 | SNV | 1 | T | C | Homozygous   |
| NC_037640.1 | 644602 | SNV | 1 | T | C | Homozygous   |
| NC_037640.1 | 644726 | SNV | 1 | A | G | Homozygous   |
| NC_037640.1 | 650368 | SNV | 1 | C | T | Heterozygous |
| NC_037640.1 | 650572 | SNV | 1 | A | G | Heterozygous |
| NC_037640.1 | 654527 | SNV | 1 | T | A | Heterozygous |
| NC_037640.1 | 657007 | SNV | 1 | T | A | Homozygous   |
| NC_037640.1 | 659107 | SNV | 1 | T | C | Homozygous   |
| NC_037640.1 | 659125 | SNV | 1 | T | A | Heterozygous |
| NC_037640.1 | 659136 | SNV | 1 | A | G | Heterozygous |
| NC_037640.1 | 659746 | SNV | 1 | C | G | Homozygous   |
| NC_037640.1 | 664252 | SNV | 1 | A | G | Heterozygous |
| NC_037640.1 | 664387 | SNV | 1 | C | A | Homozygous   |
| NC_037640.1 | 664514 | SNV | 1 | C | T | Heterozygous |
| NC_037640.1 | 665267 | SNV | 1 | T | C | Homozygous   |
| NC_037640.1 | 665271 | SNV | 1 | A | T | Homozygous   |
| NC_037640.1 | 674229 | SNV | 1 | C | T | Heterozygous |
| NC_037640.1 | 674480 | SNV | 1 | G | A | Heterozygous |
| NC_037640.1 | 674795 | SNV | 1 | A | T | Homozygous   |
| NC_037640.1 | 674993 | SNV | 1 | G | A | Heterozygous |
| NC_037640.1 | 694094 | SNV | 1 | T | C | Homozygous   |
| NC_037640.1 | 694165 | SNV | 1 | A | G | Homozygous   |
| NC_037640.1 | 694258 | SNV | 1 | G | A | Homozygous   |
| NC_037640.1 | 783603 | SNV | 1 | A | G | Homozygous   |
| NC_037640.1 | 783606 | SNV | 1 | C | T | Homozygous   |
| NC_037640.1 | 783628 | SNV | 1 | C | T | Homozygous   |
| NC_037640.1 | 783634 | SNV | 1 | A | G | Homozygous   |
| NC_037640.1 | 783636 | SNV | 1 | G | A | Homozygous   |
| NC_037640.1 | 783639 | SNV | 1 | A | C | Homozygous   |
| NC_037640.1 | 783643 | SNV | 1 | C | T | Homozygous   |
| NC_037640.1 | 783646 | SNV | 1 | A | G | Homozygous   |
| NC_037640.1 | 783652 | SNV | 1 | G | A | Homozygous   |
| NC_037640.1 | 783703 | SNV | 1 | T | C | Homozygous   |
| NC_037640.1 | 783707 | SNV | 1 | G | A | Homozygous   |
| NC_037640.1 | 783727 | SNV | 1 | T | G | Homozygous   |
| NC_037640.1 | 783735 | SNV | 1 | C | T | Homozygous   |
| NC_037640.1 | 783744 | SNV | 1 | C | T | Homozygous   |
| NC_037640.1 | 783754 | SNV | 1 | T | C | Homozygous   |
| NC_037640.1 | 783883 | SNV | 1 | G | A | Homozygous   |
| NC_037640.1 | 783885 | SNV | 1 | A | G | Homozygous   |
| NC_037640.1 | 783915 | SNV | 1 | G | A | Homozygous   |
| NC_037640.1 | 783919 | SNV | 1 | T | C | Heterozygous |
| NC_037640.1 | 783926 | SNV | 1 | T | C | Heterozygous |
| NC_037640.1 | 783931 | SNV | 1 | T | A | Homozygous   |

|             |         |     |   |   |   |              |
|-------------|---------|-----|---|---|---|--------------|
| NC_037640.1 | 817941  | SNV | 1 | C | T | Homozygous   |
| NC_037640.1 | 823868  | SNV | 1 | T | C | Homozygous   |
| NC_037640.1 | 877084  | SNV | 1 | A | G | Homozygous   |
| NC_037640.1 | 877095  | SNV | 1 | T | C | Homozygous   |
| NC_037640.1 | 877098  | SNV | 1 | A | C | Homozygous   |
| NC_037640.1 | 877104  | SNV | 1 | T | C | Homozygous   |
| NC_037640.1 | 877109  | SNV | 1 | G | C | Homozygous   |
| NC_037640.1 | 878549  | SNV | 1 | T | C | Homozygous   |
| NC_037640.1 | 878574  | SNV | 1 | C | T | Homozygous   |
| NC_037640.1 | 887429  | SNV | 1 | C | A | Homozygous   |
| NC_037640.1 | 887433  | SNV | 1 | T | G | Homozygous   |
| NC_037640.1 | 887456  | SNV | 1 | A | T | Homozygous   |
| NC_037640.1 | 889360  | SNV | 1 | T | A | Heterozygous |
| NC_037640.1 | 889383  | SNV | 1 | C | A | Heterozygous |
| NC_037640.1 | 905821  | SNV | 1 | C | T | Heterozygous |
| NC_037640.1 | 905830  | SNV | 1 | G | T | Heterozygous |
| NC_037640.1 | 920990  | SNV | 1 | T | A | Homozygous   |
| NC_037640.1 | 921011  | SNV | 1 | T | A | Homozygous   |
| NC_037640.1 | 921014  | SNV | 1 | A | T | Homozygous   |
| NC_037640.1 | 921019  | SNV | 1 | A | T | Homozygous   |
| NC_037640.1 | 933202  | SNV | 1 | A | G | Homozygous   |
| NC_037640.1 | 933207  | SNV | 1 | G | A | Heterozygous |
| NC_037640.1 | 933214  | SNV | 1 | A | G | Heterozygous |
| NC_037640.1 | 933236  | SNV | 1 | A | G | Heterozygous |
| NC_037640.1 | 933239  | SNV | 1 | C | T | Heterozygous |
| NC_037640.1 | 933241  | SNV | 1 | T | C | Homozygous   |
| NC_037640.1 | 933248  | SNV | 1 | C | T | Heterozygous |
| NC_037640.1 | 933251  | SNV | 1 | A | T | Heterozygous |
| NC_037640.1 | 933256  | SNV | 1 | G | A | Homozygous   |
| NC_037640.1 | 933261  | SNV | 1 | T | C | Homozygous   |
| NC_037640.1 | 933270  | SNV | 1 | A | G | Homozygous   |
| NC_037640.1 | 963397  | SNV | 1 | C | T | Homozygous   |
| NC_037640.1 | 963508  | SNV | 1 | A | G | Homozygous   |
| NC_037640.1 | 963522  | SNV | 1 | T | C | Homozygous   |
| NC_037640.1 | 963524  | SNV | 1 | A | G | Homozygous   |
| NC_037640.1 | 963534  | SNV | 1 | C | T | Homozygous   |
| NC_037640.1 | 963560  | SNV | 1 | T | C | Homozygous   |
| NC_037640.1 | 963565  | SNV | 1 | G | A | Homozygous   |
| NC_037640.1 | 963581  | SNV | 1 | G | A | Homozygous   |
| NC_037640.1 | 983045  | SNV | 1 | C | T | Homozygous   |
| NC_037640.1 | 983049  | SNV | 1 | C | T | Homozygous   |
| NC_037640.1 | 983057  | SNV | 1 | G | A | Homozygous   |
| NC_037640.1 | 983086  | SNV | 1 | C | T | Homozygous   |
| NC_037640.1 | 1042924 | SNV | 1 | C | G | Heterozygous |
| NC_037640.1 | 1042927 | SNV | 1 | G | A | Heterozygous |
| NC_037640.1 | 1042945 | SNV | 1 | T | C | Homozygous   |
| NC_037640.1 | 1042951 | SNV | 1 | G | A | Heterozygous |
| NC_037640.1 | 1043156 | SNV | 1 | G | A | Homozygous   |
| NC_037640.1 | 1043191 | SNV | 1 | T | A | Homozygous   |
| NC_037640.1 | 1043197 | SNV | 1 | G | A | Homozygous   |
| NC_037640.1 | 1043997 | SNV | 1 | A | G | Homozygous   |

|             |         |     |   |   |   |              |
|-------------|---------|-----|---|---|---|--------------|
| NC_037640.1 | 1051158 | SNV | 1 | C | T | Homozygous   |
| NC_037640.1 | 1052622 | SNV | 1 | G | A | Homozygous   |
| NC_037640.1 | 1052972 | SNV | 1 | A | G | Homozygous   |
| NC_037640.1 | 1072988 | SNV | 1 | A | T | Homozygous   |
| NC_037640.1 | 1074900 | SNV | 1 | T | A | Homozygous   |
| NC_037640.1 | 1075357 | SNV | 1 | C | T | Homozygous   |
| NC_037640.1 | 1075380 | SNV | 1 | T | C | Heterozygous |
| NC_037640.1 | 1075385 | SNV | 1 | T | G | Homozygous   |
| NC_037640.1 | 1075391 | SNV | 1 | T | G | Homozygous   |
| NC_037640.1 | 1075393 | SNV | 1 | T | G | Homozygous   |
| NC_037640.1 | 1075422 | SNV | 1 | T | A | Homozygous   |
| NC_037640.1 | 1075424 | SNV | 1 | C | T | Homozygous   |
| NC_037640.1 | 1075428 | SNV | 1 | T | C | Homozygous   |
| NC_037640.1 | 1075682 | SNV | 1 | C | T | Heterozygous |
| NC_037640.1 | 1080683 | SNV | 1 | T | C | Heterozygous |
| NC_037640.1 | 1081184 | SNV | 1 | G | A | Homozygous   |
| NC_037640.1 | 1081838 | SNV | 1 | C | T | Homozygous   |
| NC_037640.1 | 1083895 | SNV | 1 | G | T | Homozygous   |
| NC_037640.1 | 1083900 | SNV | 1 | T | A | Homozygous   |
| NC_037640.1 | 1083915 | SNV | 1 | A | T | Homozygous   |
| NC_037640.1 | 1096983 | SNV | 1 | A | T | Homozygous   |
| NC_037640.1 | 1097016 | SNV | 1 | C | A | Homozygous   |
| NC_037640.1 | 1100859 | SNV | 1 | A | T | Homozygous   |
| NC_037640.1 | 1100871 | SNV | 1 | T | A | Homozygous   |
| NC_037640.1 | 1103591 | SNV | 1 | A | T | Homozygous   |
| NC_037640.1 | 1105214 | SNV | 1 | C | A | Homozygous   |
| NC_037640.1 | 1107217 | SNV | 1 | G | T | Homozygous   |
| NC_037640.1 | 1107224 | SNV | 1 | A | C | Homozygous   |
| NC_037640.1 | 1107231 | SNV | 1 | A | T | Homozygous   |
| NC_037640.1 | 1107253 | SNV | 1 | G | A | Homozygous   |
| NC_037640.1 | 1119215 | SNV | 1 | T | A | Homozygous   |
| NC_037640.1 | 1119228 | SNV | 1 | G | C | Homozygous   |
| NC_037640.1 | 1119230 | SNV | 1 | A | G | Homozygous   |
| NC_037640.1 | 1119233 | SNV | 1 | T | A | Homozygous   |
| NC_037640.1 | 1119237 | SNV | 1 | C | A | Homozygous   |
| NC_037640.1 | 1119239 | SNV | 1 | T | G | Homozygous   |
| NC_037640.1 | 1120245 | SNV | 1 | A | C | Homozygous   |
| NC_037640.1 | 1120265 | SNV | 1 | T | A | Homozygous   |
| NC_037640.1 | 1120272 | SNV | 1 | T | C | Homozygous   |
| NC_037640.1 | 1120279 | SNV | 1 | C | T | Homozygous   |
| NC_037640.1 | 1120284 | SNV | 1 | T | G | Homozygous   |
| NC_037640.1 | 1120288 | SNV | 1 | T | C | Homozygous   |
| NC_037640.1 | 1120292 | SNV | 1 | T | A | Homozygous   |
| NC_037640.1 | 1120295 | SNV | 1 | T | C | Homozygous   |
| NC_037640.1 | 1120302 | SNV | 1 | T | C | Homozygous   |
| NC_037640.1 | 1132378 | SNV | 1 | A | C | Homozygous   |
| NC_037640.1 | 1132394 | SNV | 1 | T | A | Homozygous   |
| NC_037640.1 | 1151445 | SNV | 1 | A | T | Homozygous   |
| NC_037640.1 | 1151450 | SNV | 1 | C | T | Homozygous   |
| NC_037640.1 | 1151457 | SNV | 1 | A | T | Homozygous   |
| NC_037640.1 | 1155620 | SNV | 1 | A | G | Homozygous   |



|             |         |     |   |   |   |              |
|-------------|---------|-----|---|---|---|--------------|
| NC_037640.1 | 1155643 | SNV | 1 | A | T | Homozygous   |
| NC_037640.1 | 1155663 | SNV | 1 | T | A | Homozygous   |
| NC_037640.1 | 1178733 | SNV | 1 | A | G | Homozygous   |
| NC_037640.1 | 1206493 | SNV | 1 | T | C | Heterozygous |
| NC_037640.1 | 1206514 | SNV | 1 | T | C | Heterozygous |
| NC_037640.1 | 1206514 | SNV | 1 | T | G | Heterozygous |
| NC_037640.1 | 1206518 | SNV | 1 | A | T | Heterozygous |
| NC_037640.1 | 1206520 | SNV | 1 | T | G | Heterozygous |
| NC_037640.1 | 1206526 | SNV | 1 | A | T | Heterozygous |
| NC_037640.1 | 1206529 | SNV | 1 | A | G | Heterozygous |
| NC_037640.1 | 1206533 | SNV | 1 | A | G | Heterozygous |
| NC_037640.1 | 1210186 | SNV | 1 | C | A | Homozygous   |
| NC_037640.1 | 1210196 | SNV | 1 | T | A | Homozygous   |
| NC_037640.1 | 1210198 | SNV | 1 | T | A | Homozygous   |
| NC_037640.1 | 1210201 | SNV | 1 | G | A | Homozygous   |
| NC_037640.1 | 1265652 | SNV | 1 | A | C | Homozygous   |
| NC_037640.1 | 1265679 | SNV | 1 | A | G | Homozygous   |
| NC_037640.1 | 1265681 | SNV | 1 | A | T | Homozygous   |
| NC_037640.1 | 1265688 | SNV | 1 | A | T | Homozygous   |
| NC_037640.1 | 1265764 | SNV | 1 | A | G | Heterozygous |
| NC_037640.1 | 1266800 | SNV | 1 | T | G | Heterozygous |
| NC_037640.1 | 1266825 | SNV | 1 | T | A | Heterozygous |
| NC_037640.1 | 1294200 | SNV | 1 | C | G | Homozygous   |
| NC_037640.1 | 1294256 | SNV | 1 | A | G | Homozygous   |
| NC_037640.1 | 1294323 | SNV | 1 | T | G | Homozygous   |
| NC_037640.1 | 1294427 | SNV | 1 | A | G | Homozygous   |
| NC_037640.1 | 1294505 | SNV | 1 | C | T | Homozygous   |
| NC_037640.1 | 1297198 | SNV | 1 | C | A | Homozygous   |
| NC_037640.1 | 1297208 | SNV | 1 | C | T | Heterozygous |
| NC_037640.1 | 1297272 | SNV | 1 | C | T | Homozygous   |
| NC_037640.1 | 1297730 | SNV | 1 | C | T | Homozygous   |
| NC_037640.1 | 1300929 | SNV | 1 | A | G | Homozygous   |
| NC_037640.1 | 1300991 | SNV | 1 | C | T | Heterozygous |
| NC_037640.1 | 1305804 | SNV | 1 | T | C | Homozygous   |
| NC_037640.1 | 1341389 | SNV | 1 | T | C | Homozygous   |
| NC_037640.1 | 1341397 | SNV | 1 | T | A | Homozygous   |
| NC_037640.1 | 1341405 | SNV | 1 | A | C | Heterozygous |
| NC_037640.1 | 1341408 | SNV | 1 | T | G | Heterozygous |
| NC_037640.1 | 1341414 | SNV | 1 | T | A | Heterozygous |
| NC_037640.1 | 1341482 | SNV | 1 | G | A | Homozygous   |
| NC_037640.1 | 1343022 | SNV | 1 | A | T | Heterozygous |
| NC_037640.1 | 1349433 | SNV | 1 | A | G | Heterozygous |
| NC_037640.1 | 1349441 | SNV | 1 | T | C | Heterozygous |
| NC_037640.1 | 1359306 | SNV | 1 | A | C | Homozygous   |
| NC_037640.1 | 1359328 | SNV | 1 | T | G | Homozygous   |
| NC_037640.1 | 1362288 | SNV | 1 | T | C | Homozygous   |
| NC_037640.1 | 1362449 | SNV | 1 | T | C | Homozygous   |
| NC_037640.1 | 1362518 | SNV | 1 | A | G | Heterozygous |
| NC_037640.1 | 1370685 | SNV | 1 | T | A | Homozygous   |
| NC_037640.1 | 1370694 | SNV | 1 | C | G | Homozygous   |
| NC_037640.1 | 1370715 | SNV | 1 | T | A | Homozygous   |

|             |         |     |   |   |   |              |
|-------------|---------|-----|---|---|---|--------------|
| NC_037640.1 | 1377743 | SNV | 1 | T | C | Heterozygous |
| NC_037640.1 | 1377750 | SNV | 1 | C | T | Heterozygous |
| NC_037640.1 | 1384856 | SNV | 1 | A | G | Heterozygous |
| NC_037640.1 | 1384920 | SNV | 1 | G | A | Heterozygous |
| NC_037640.1 | 1404911 | SNV | 1 | T | A | Heterozygous |
| NC_037640.1 | 1404918 | SNV | 1 | T | C | Homozygous   |
| NC_037640.1 | 1404925 | SNV | 1 | C | T | Homozygous   |
| NC_037640.1 | 1404930 | SNV | 1 | T | C | Heterozygous |
| NC_037640.1 | 1404930 | SNV | 1 | T | G | Heterozygous |
| NC_037640.1 | 1404934 | SNV | 1 | T | C | Heterozygous |
| NC_037640.1 | 1404938 | SNV | 1 | T | A | Heterozygous |
| NC_037640.1 | 1431616 | SNV | 1 | C | T | Homozygous   |
| NC_037640.1 | 1440329 | SNV | 1 | A | G | Heterozygous |
| NC_037640.1 | 1440337 | SNV | 1 | A | G | Heterozygous |
| NC_037640.1 | 1447739 | SNV | 1 | A | C | Heterozygous |
| NC_037640.1 | 1447759 | SNV | 1 | C | T | Heterozygous |
| NC_037640.1 | 1447796 | SNV | 1 | G | A | Heterozygous |
| NC_037640.1 | 1448190 | SNV | 1 | C | T | Homozygous   |
| NC_037640.1 | 1448239 | SNV | 1 | A | G | Homozygous   |
| NC_037640.1 | 1448360 | SNV | 1 | C | T | Heterozygous |
| NC_037640.1 | 1448392 | SNV | 1 | A | G | Homozygous   |
| NC_037640.1 | 1448406 | SNV | 1 | T | C | Homozygous   |
| NC_037640.1 | 1448719 | SNV | 1 | G | C | Homozygous   |
| NC_037640.1 | 1449014 | SNV | 1 | G | A | Homozygous   |
| NC_037640.1 | 1449135 | SNV | 1 | A | G | Heterozygous |
| NC_037640.1 | 1449857 | SNV | 1 | G | A | Homozygous   |
| NC_037640.1 | 1449896 | SNV | 1 | T | C | Homozygous   |
| NC_037640.1 | 1449965 | SNV | 1 | T | C | Homozygous   |
| NC_037640.1 | 1450521 | SNV | 1 | G | T | Homozygous   |
| NC_037640.1 | 1450659 | SNV | 1 | T | C | Homozygous   |
| NC_037640.1 | 1450779 | SNV | 1 | A | T | Heterozygous |
| NC_037640.1 | 1450833 | SNV | 1 | A | C | Heterozygous |
| NC_037640.1 | 1451167 | SNV | 1 | T | A | Heterozygous |
| NC_037640.1 | 1479085 | SNV | 1 | A | C | Homozygous   |
| NC_037640.1 | 1479092 | SNV | 1 | A | T | Homozygous   |
| NC_037640.1 | 1479103 | SNV | 1 | T | A | Homozygous   |
| NC_037640.1 | 1479123 | SNV | 1 | A | T | Homozygous   |
| NC_037640.1 | 1479131 | SNV | 1 | T | G | Homozygous   |
| NC_037640.1 | 1480617 | SNV | 1 | C | T | Homozygous   |
| NC_037640.1 | 1480625 | SNV | 1 | C | T | Heterozygous |
| NC_037640.1 | 1480858 | SNV | 1 | C | T | Heterozygous |
| NC_037640.1 | 1480972 | SNV | 1 | T | C | Heterozygous |
| NC_037640.1 | 1480990 | SNV | 1 | A | G | Homozygous   |
| NC_037640.1 | 1485436 | SNV | 1 | A | T | Heterozygous |
| NC_037640.1 | 1486366 | SNV | 1 | C | T | Heterozygous |
| NC_037640.1 | 1486446 | SNV | 1 | C | T | Homozygous   |
| NC_037640.1 | 1486486 | SNV | 1 | A | C | Heterozygous |
| NC_037640.1 | 1486590 | SNV | 1 | T | C | Heterozygous |
| NC_037640.1 | 1486593 | SNV | 1 | A | G | Homozygous   |
| NC_037640.1 | 1486605 | SNV | 1 | A | G | Heterozygous |
| NC_037640.1 | 1486667 | SNV | 1 | G | A | Heterozygous |

|             |         |     |   |   |   |              |
|-------------|---------|-----|---|---|---|--------------|
| NC_037640.1 | 1486671 | SNV | 1 | T | C | Homozygous   |
| NC_037640.1 | 1486709 | SNV | 1 | G | C | Heterozygous |
| NC_037640.1 | 1486782 | SNV | 1 | G | A | Homozygous   |
| NC_037640.1 | 1487609 | SNV | 1 | T | C | Homozygous   |
| NC_037640.1 | 1488564 | SNV | 1 | G | A | Heterozygous |
| NC_037640.1 | 1488583 | SNV | 1 | T | A | Heterozygous |
| NC_037640.1 | 1489014 | SNV | 1 | C | A | Homozygous   |
| NC_037640.1 | 1489494 | SNV | 1 | A | T | Homozygous   |
| NC_037640.1 | 1489497 | SNV | 1 | A | T | Homozygous   |
| NC_037640.1 | 1489518 | SNV | 1 | T | C | Homozygous   |
| NC_037640.1 | 1489738 | SNV | 1 | C | T | Heterozygous |
| NC_037640.1 | 1513493 | SNV | 1 | T | C | Homozygous   |
| NC_037640.1 | 1513497 | SNV | 1 | T | C | Homozygous   |
| NC_037640.1 | 1518239 | SNV | 1 | A | G | Homozygous   |
| NC_037640.1 | 1528720 | SNV | 1 | A | T | Homozygous   |
| NC_037640.1 | 1547858 | SNV | 1 | A | C | Homozygous   |
| NC_037640.1 | 1548068 | SNV | 1 | C | T | Heterozygous |
| NC_037640.1 | 1566195 | SNV | 1 | A | G | Homozygous   |
| NC_037640.1 | 1566199 | SNV | 1 | T | C | Heterozygous |
| NC_037640.1 | 1566212 | SNV | 1 | C | T | Homozygous   |
| NC_037640.1 | 1566216 | SNV | 1 | C | A | Homozygous   |
| NC_037640.1 | 1566221 | SNV | 1 | C | T | Homozygous   |
| NC_037640.1 | 1566237 | SNV | 1 | A | C | Homozygous   |
| NC_037640.1 | 1578061 | SNV | 1 | T | C | Homozygous   |
| NC_037640.1 | 1578078 | SNV | 1 | C | A | Heterozygous |
| NC_037640.1 | 1578088 | SNV | 1 | A | G | Heterozygous |
| NC_037640.1 | 1578747 | SNV | 1 | A | G | Homozygous   |
| NC_037640.1 | 1581484 | SNV | 1 | A | G | Homozygous   |
| NC_037640.1 | 1581517 | SNV | 1 | A | G | Heterozygous |
| NC_037640.1 | 1581583 | SNV | 1 | A | G | Homozygous   |
| NC_037640.1 | 1581770 | SNV | 1 | T | C | Homozygous   |
| NC_037640.1 | 1582082 | SNV | 1 | A | C | Homozygous   |
| NC_037640.1 | 1582093 | SNV | 1 | G | A | Heterozygous |
| NC_037640.1 | 1582098 | SNV | 1 | T | A | Heterozygous |
| NC_037640.1 | 1582100 | SNV | 1 | T | A | Heterozygous |
| NC_037640.1 | 1582102 | SNV | 1 | G | A | Heterozygous |
| NC_037640.1 | 1585299 | SNV | 1 | A | T | Homozygous   |
| NC_037640.1 | 1585313 | SNV | 1 | C | T | Heterozygous |
| NC_037640.1 | 1585396 | SNV | 1 | T | C | Homozygous   |
| NC_037640.1 | 1585544 | SNV | 1 | T | C | Homozygous   |
| NC_037640.1 | 1585572 | SNV | 1 | G | A | Homozygous   |
| NC_037640.1 | 1585739 | SNV | 1 | T | C | Homozygous   |
| NC_037640.1 | 1585756 | SNV | 1 | T | C | Homozygous   |
| NC_037640.1 | 1585775 | SNV | 1 | C | G | Heterozygous |
| NC_037640.1 | 1585814 | SNV | 1 | C | T | Heterozygous |
| NC_037640.1 | 1586193 | SNV | 1 | A | G | Heterozygous |
| NC_037640.1 | 1590610 | SNV | 1 | A | G | Heterozygous |
| NC_037640.1 | 1590618 | SNV | 1 | A | T | Heterozygous |
| NC_037640.1 | 1590661 | SNV | 1 | C | A | Homozygous   |
| NC_037640.1 | 1590668 | SNV | 1 | A | T | Homozygous   |
| NC_037640.1 | 1603686 | SNV | 1 | C | A | Homozygous   |

|             |         |     |   |   |   |              |
|-------------|---------|-----|---|---|---|--------------|
| NC_037640.1 | 1603688 | SNV | 1 | A | T | Homozygous   |
| NC_037640.1 | 1603731 | SNV | 1 | A | T | Homozygous   |
| NC_037640.1 | 1603738 | SNV | 1 | C | A | Heterozygous |
| NC_037640.1 | 1624183 | SNV | 1 | A | G | Heterozygous |
| NC_037640.1 | 1625530 | SNV | 1 | A | G | Heterozygous |
| NC_037640.1 | 1625577 | SNV | 1 | C | T | Homozygous   |
| NC_037640.1 | 1625590 | SNV | 1 | C | A | Heterozygous |
| NC_037640.1 | 1625594 | SNV | 1 | C | A | Heterozygous |
| NC_037640.1 | 1625614 | SNV | 1 | C | A | Heterozygous |
| NC_037640.1 | 1625631 | SNV | 1 | G | T | Homozygous   |
| NC_037640.1 | 1625690 | SNV | 1 | C | T | Heterozygous |
| NC_037640.1 | 1628337 | SNV | 1 | T | A | Heterozygous |
| NC_037640.1 | 1628340 | SNV | 1 | T | A | Homozygous   |
| NC_037640.1 | 1628354 | SNV | 1 | A | T | Heterozygous |
| NC_037640.1 | 1628533 | SNV | 1 | A | T | Homozygous   |
| NC_037640.1 | 1628536 | SNV | 1 | C | T | Homozygous   |
| NC_037640.1 | 1628563 | SNV | 1 | T | C | Homozygous   |
| NC_037640.1 | 1628641 | SNV | 1 | T | A | Homozygous   |
| NC_037640.1 | 1630135 | SNV | 1 | G | A | Homozygous   |
| NC_037640.1 | 1631597 | SNV | 1 | C | G | Heterozygous |
| NC_037640.1 | 1631787 | SNV | 1 | G | C | Homozygous   |
| NC_037640.1 | 1633273 | SNV | 1 | T | A | Homozygous   |
| NC_037640.1 | 1633275 | SNV | 1 | T | A | Heterozygous |
| NC_037640.1 | 1646814 | SNV | 1 | C | T | Homozygous   |
| NC_037640.1 | 1659419 | SNV | 1 | G | C | Heterozygous |
| NC_037640.1 | 1667313 | SNV | 1 | G | A | Homozygous   |
| NC_037640.1 | 1667999 | SNV | 1 | C | T | Homozygous   |
| NC_037640.1 | 1668142 | SNV | 1 | A | G | Homozygous   |
| NC_037640.1 | 1668345 | SNV | 1 | C | T | Homozygous   |
| NC_037640.1 | 1681526 | SNV | 1 | T | A | Homozygous   |
| NC_037640.1 | 1691147 | SNV | 1 | G | A | Heterozygous |
| NC_037640.1 | 1691315 | SNV | 1 | C | T | Homozygous   |
| NC_037640.1 | 1691507 | SNV | 1 | G | A | Heterozygous |
| NC_037640.1 | 1691523 | SNV | 1 | C | T | Homozygous   |
| NC_037640.1 | 1691527 | SNV | 1 | G | A | Homozygous   |
| NC_037640.1 | 1691537 | SNV | 1 | G | T | Heterozygous |
| NC_037640.1 | 1691548 | SNV | 1 | G | T | Homozygous   |
| NC_037640.1 | 1710892 | SNV | 1 | T | C | Homozygous   |
| NC_037640.1 | 1716877 | SNV | 1 | T | G | Homozygous   |
| NC_037640.1 | 1716881 | SNV | 1 | T | G | Heterozygous |
| NC_037640.1 | 1723053 | SNV | 1 | T | C | Heterozygous |
| NC_037640.1 | 1723230 | SNV | 1 | T | A | Homozygous   |
| NC_037640.1 | 1723233 | SNV | 1 | G | A | Homozygous   |
| NC_037640.1 | 1732889 | SNV | 1 | A | T | Heterozygous |
| NC_037640.1 | 1732891 | SNV | 1 | C | T | Heterozygous |
| NC_037640.1 | 1732901 | SNV | 1 | C | T | Heterozygous |
| NC_037640.1 | 1775387 | SNV | 1 | A | G | Homozygous   |
| NC_037640.1 | 1776150 | SNV | 1 | G | A | Heterozygous |
| NC_037640.1 | 1792517 | SNV | 1 | C | T | Homozygous   |
| NC_037640.1 | 1799623 | SNV | 1 | C | A | Heterozygous |
| NC_037640.1 | 1799995 | SNV | 1 | T | C | Homozygous   |

|             |         |     |   |   |   |              |
|-------------|---------|-----|---|---|---|--------------|
| NC_037640.1 | 1815821 | SNV | 1 | T | C | Homozygous   |
| NC_037640.1 | 1815949 | SNV | 1 | G | A | Heterozygous |
| NC_037640.1 | 1818669 | SNV | 1 | A | G | Heterozygous |
| NC_037640.1 | 1818672 | SNV | 1 | G | A | Heterozygous |
| NC_037640.1 | 1818701 | SNV | 1 | A | G | Heterozygous |
| NC_037640.1 | 1818712 | SNV | 1 | A | T | Heterozygous |
| NC_037640.1 | 1818763 | SNV | 1 | G | A | Homozygous   |
| NC_037640.1 | 1818766 | SNV | 1 | G | A | Homozygous   |
| NC_037640.1 | 1818801 | SNV | 1 | G | A | Heterozygous |
| NC_037640.1 | 1818812 | SNV | 1 | A | G | Heterozygous |
| NC_037640.1 | 1824960 | SNV | 1 | A | T | Homozygous   |
| NC_037640.1 | 1824989 | SNV | 1 | T | G | Homozygous   |
| NC_037640.1 | 1824991 | SNV | 1 | T | A | Homozygous   |
| NC_037640.1 | 1830177 | SNV | 1 | C | A | Homozygous   |
| NC_037640.1 | 1830181 | SNV | 1 | A | G | Homozygous   |
| NC_037640.1 | 1830183 | SNV | 1 | T | A | Homozygous   |
| NC_037640.1 | 1830185 | SNV | 1 | T | A | Homozygous   |
| NC_037640.1 | 1830191 | SNV | 1 | T | C | Homozygous   |
| NC_037640.1 | 1830194 | SNV | 1 | T | C | Homozygous   |
| NC_037640.1 | 1830197 | SNV | 1 | T | G | Homozygous   |
| NC_037640.1 | 1844753 | SNV | 1 | A | G | Heterozygous |
| NC_037640.1 | 1844914 | SNV | 1 | A | G | Homozygous   |
| NC_037640.1 | 1871606 | SNV | 1 | A | G | Heterozygous |
| NC_037640.1 | 1872026 | SNV | 1 | A | G | Heterozygous |
| NC_037640.1 | 1872107 | SNV | 1 | G | A | Heterozygous |
| NC_037640.1 | 1873918 | SNV | 1 | G | A | Homozygous   |
| NC_037640.1 | 1873927 | SNV | 1 | A | G | Homozygous   |
| NC_037640.1 | 1873945 | SNV | 1 | A | G | Homozygous   |
| NC_037640.1 | 1873966 | SNV | 1 | A | G | Homozygous   |
| NC_037640.1 | 1874041 | SNV | 1 | C | T | Heterozygous |
| NC_037640.1 | 1874077 | SNV | 1 | G | A | Heterozygous |
| NC_037640.1 | 1874134 | SNV | 1 | T | C | Heterozygous |
| NC_037640.1 | 1874704 | SNV | 1 | T | C | Homozygous   |
| NC_037640.1 | 1874731 | SNV | 1 | C | T | Homozygous   |
| NC_037640.1 | 1874791 | SNV | 1 | T | C | Homozygous   |
| NC_037640.1 | 1875407 | SNV | 1 | G | C | Homozygous   |
| NC_037640.1 | 1875464 | SNV | 1 | C | T | Heterozygous |
| NC_037640.1 | 1875530 | SNV | 1 | C | T | Homozygous   |
| NC_037640.1 | 1878047 | SNV | 1 | T | C | Homozygous   |
| NC_037640.1 | 1882900 | SNV | 1 | A | G | Heterozygous |
| NC_037640.1 | 1883119 | SNV | 1 | T | C | Homozygous   |
| NC_037640.1 | 1883474 | SNV | 1 | T | G | Heterozygous |
| NC_037640.1 | 1883484 | SNV | 1 | A | G | Heterozygous |
| NC_037640.1 | 1922419 | SNV | 1 | A | G | Heterozygous |
| NC_037640.1 | 1923877 | SNV | 1 | G | T | Heterozygous |
| NC_037640.1 | 1923895 | SNV | 1 | C | T | Heterozygous |
| NC_037640.1 | 1923982 | SNV | 1 | T | C | Homozygous   |
| NC_037640.1 | 1924207 | SNV | 1 | T | C | Heterozygous |
| NC_037640.1 | 1924295 | SNV | 1 | T | C | Heterozygous |
| NC_037640.1 | 1924608 | SNV | 1 | G | A | Homozygous   |
| NC_037640.1 | 1924946 | SNV | 1 | T | C | Homozygous   |

|             |         |     |   |   |   |              |
|-------------|---------|-----|---|---|---|--------------|
| NC_037640.1 | 1925128 | SNV | 1 | T | C | Heterozygous |
| NC_037640.1 | 1926350 | SNV | 1 | T | C | Homozygous   |
| NC_037640.1 | 1928613 | SNV | 1 | T | C | Homozygous   |
| NC_037640.1 | 1929265 | SNV | 1 | T | A | Homozygous   |
| NC_037640.1 | 1929267 | SNV | 1 | A | G | Homozygous   |
| NC_037640.1 | 1929269 | SNV | 1 | A | T | Homozygous   |
| NC_037640.1 | 1929275 | SNV | 1 | A | C | Homozygous   |
| NC_037640.1 | 1929601 | SNV | 1 | G | A | Heterozygous |
| NC_037640.1 | 1935623 | SNV | 1 | A | G | Heterozygous |
| NC_037640.1 | 1935648 | SNV | 1 | G | A | Heterozygous |
| NC_037640.1 | 1935651 | SNV | 1 | A | G | Heterozygous |
| NC_037640.1 | 1935704 | SNV | 1 | T | C | Homozygous   |
| NC_037640.1 | 1935933 | SNV | 1 | T | A | Homozygous   |
| NC_037640.1 | 1936155 | SNV | 1 | G | A | Heterozygous |
| NC_037640.1 | 1939688 | SNV | 1 | C | T | Heterozygous |
| NC_037640.1 | 1939712 | SNV | 1 | A | T | Homozygous   |
| NC_037640.1 | 1939818 | SNV | 1 | A | G | Homozygous   |
| NC_037640.1 | 1939884 | SNV | 1 | G | A | Heterozygous |
| NC_037640.1 | 1944033 | SNV | 1 | T | A | Heterozygous |
| NC_037640.1 | 1944184 | SNV | 1 | T | C | Homozygous   |
| NC_037640.1 | 1949173 | SNV | 1 | T | C | Homozygous   |
| NC_037640.1 | 1950477 | SNV | 1 | G | T | Homozygous   |
| NC_037640.1 | 1950946 | SNV | 1 | G | A | Heterozygous |
| NC_037640.1 | 1952060 | SNV | 1 | C | A | Homozygous   |
| NC_037640.1 | 1952740 | SNV | 1 | C | T | Homozygous   |
| NC_037640.1 | 1952851 | SNV | 1 | C | A | Homozygous   |
| NC_037640.1 | 1952975 | SNV | 1 | C | T | Homozygous   |
| NC_037640.1 | 1955914 | SNV | 1 | T | C | Homozygous   |
| NC_037640.1 | 1955919 | SNV | 1 | A | T | Homozygous   |
| NC_037640.1 | 1956106 | SNV | 1 | C | T | Heterozygous |
| NC_037640.1 | 1956253 | SNV | 1 | C | T | Homozygous   |
| NC_037640.1 | 1957601 | SNV | 1 | T | A | Homozygous   |
| NC_037640.1 | 1958595 | SNV | 1 | T | G | Heterozygous |
| NC_037640.1 | 1958938 | SNV | 1 | T | C | Homozygous   |
| NC_037640.1 | 1959007 | SNV | 1 | C | T | Homozygous   |
| NC_037640.1 | 1960289 | SNV | 1 | C | T | Homozygous   |
| NC_037640.1 | 1960444 | SNV | 1 | C | T | Heterozygous |
| NC_037640.1 | 1961336 | SNV | 1 | A | C | Heterozygous |
| NC_037640.1 | 1961344 | SNV | 1 | A | C | Heterozygous |
| NC_037640.1 | 1961350 | SNV | 1 | T | C | Heterozygous |
| NC_037640.1 | 1961353 | SNV | 1 | A | C | Heterozygous |
| NC_037640.1 | 1965136 | SNV | 1 | A | T | Homozygous   |
| NC_037640.1 | 1965437 | SNV | 1 | G | A | Homozygous   |
| NC_037640.1 | 1966577 | SNV | 1 | C | A | Homozygous   |
| NC_037640.1 | 1971642 | SNV | 1 | A | G | Heterozygous |
| NC_037640.1 | 1972165 | SNV | 1 | A | G | Homozygous   |
| NC_037640.1 | 1972328 | SNV | 1 | G | A | Heterozygous |
| NC_037640.1 | 1972363 | SNV | 1 | T | C | Homozygous   |
| NC_037640.1 | 1975546 | SNV | 1 | T | C | Heterozygous |
| NC_037640.1 | 1975560 | SNV | 1 | T | C | Heterozygous |
| NC_037640.1 | 1975564 | SNV | 1 | T | C | Heterozygous |

|             |         |     |   |   |   |              |
|-------------|---------|-----|---|---|---|--------------|
| NC_037640.1 | 1975585 | SNV | 1 | T | C | Heterozygous |
| NC_037640.1 | 1975594 | SNV | 1 | T | C | Heterozygous |
| NC_037640.1 | 1975599 | SNV | 1 | T | C | Heterozygous |
| NC_037640.1 | 1976395 | SNV | 1 | G | A | Heterozygous |
| NC_037640.1 | 1981036 | SNV | 1 | C | T | Homozygous   |
| NC_037640.1 | 1981073 | SNV | 1 | A | G | Homozygous   |
| NC_037640.1 | 1981084 | SNV | 1 | G | A | Heterozygous |
| NC_037640.1 | 1981463 | SNV | 1 | A | G | Homozygous   |
| NC_037640.1 | 2028418 | SNV | 1 | A | G | Heterozygous |
| NC_037640.1 | 2028516 | SNV | 1 | C | T | Heterozygous |
| NC_037640.1 | 2028525 | SNV | 1 | A | T | Heterozygous |
| NC_037640.1 | 2028631 | SNV | 1 | A | C | Homozygous   |
| NC_037640.1 | 2028646 | SNV | 1 | T | C | Heterozygous |
| NC_037640.1 | 2028864 | SNV | 1 | T | C | Homozygous   |
| NC_037640.1 | 2028876 | SNV | 1 | A | G | Heterozygous |
| NC_037640.1 | 2028904 | SNV | 1 | T | C | Heterozygous |
| NC_037640.1 | 2029426 | SNV | 1 | A | G | Heterozygous |
| NC_037640.1 | 2029466 | SNV | 1 | A | G | Homozygous   |
| NC_037640.1 | 2029553 | SNV | 1 | A | C | Heterozygous |
| NC_037640.1 | 2029560 | SNV | 1 | T | C | Homozygous   |
| NC_037640.1 | 2029599 | SNV | 1 | G | A | Homozygous   |
| NC_037640.1 | 2029846 | SNV | 1 | A | G | Heterozygous |
| NC_037640.1 | 2029968 | SNV | 1 | G | A | Homozygous   |
| NC_037640.1 | 2033526 | SNV | 1 | G | A | Homozygous   |
| NC_037640.1 | 2042460 | SNV | 1 | T | A | Homozygous   |
| NC_037640.1 | 2042474 | SNV | 1 | T | C | Homozygous   |
| NC_037640.1 | 2042481 | SNV | 1 | T | G | Homozygous   |
| NC_037640.1 | 2042484 | SNV | 1 | A | G | Homozygous   |
| NC_037640.1 | 2043151 | SNV | 1 | A | G | Heterozygous |
| NC_037640.1 | 2043180 | SNV | 1 | C | T | Heterozygous |
| NC_037640.1 | 2043358 | SNV | 1 | G | A | Homozygous   |
| NC_037640.1 | 2043395 | SNV | 1 | C | G | Homozygous   |
| NC_037640.1 | 2043407 | SNV | 1 | C | T | Homozygous   |
| NC_037640.1 | 2044743 | SNV | 1 | T | C | Homozygous   |
| NC_037640.1 | 2044801 | SNV | 1 | C | T | Heterozygous |
| NC_037640.1 | 2056428 | SNV | 1 | A | G | Homozygous   |
| NC_037640.1 | 2056807 | SNV | 1 | G | A | Heterozygous |
| NC_037640.1 | 2057020 | SNV | 1 | A | G | Homozygous   |
| NC_037640.1 | 2057112 | SNV | 1 | A | G | Homozygous   |
| NC_037640.1 | 2057187 | SNV | 1 | T | C | Homozygous   |
| NC_037640.1 | 2057515 | SNV | 1 | C | T | Heterozygous |
| NC_037640.1 | 2057625 | SNV | 1 | A | G | Homozygous   |
| NC_037640.1 | 2057646 | SNV | 1 | A | G | Homozygous   |
| NC_037640.1 | 2057809 | SNV | 1 | T | C | Homozygous   |
| NC_037640.1 | 2057847 | SNV | 1 | C | T | Homozygous   |
| NC_037640.1 | 2067787 | SNV | 1 | G | A | Heterozygous |
| NC_037640.1 | 2067843 | SNV | 1 | G | C | Heterozygous |
| NC_037640.1 | 2067854 | SNV | 1 | A | G | Heterozygous |
| NC_037640.1 | 2067868 | SNV | 1 | G | A | Heterozygous |
| NC_037640.1 | 2067961 | SNV | 1 | C | T | Heterozygous |
| NC_037640.1 | 2068260 | SNV | 1 | G | C | Heterozygous |

|             |         |     |   |   |   |              |
|-------------|---------|-----|---|---|---|--------------|
| NC_037640.1 | 2068353 | SNV | 1 | G | T | Heterozygous |
| NC_037640.1 | 2068356 | SNV | 1 | A | G | Homozygous   |
| NC_037640.1 | 2068382 | SNV | 1 | T | C | Homozygous   |
| NC_037640.1 | 2068394 | SNV | 1 | T | G | Homozygous   |
| NC_037640.1 | 2068406 | SNV | 1 | G | A | Heterozygous |
| NC_037640.1 | 2068492 | SNV | 1 | A | G | Homozygous   |
| NC_037640.1 | 2082607 | SNV | 1 | A | G | Homozygous   |
| NC_037640.1 | 2083791 | SNV | 1 | A | G | Homozygous   |
| NC_037640.1 | 2085962 | SNV | 1 | C | G | Homozygous   |
| NC_037640.1 | 2086198 | SNV | 1 | A | G | Heterozygous |
| NC_037640.1 | 2086221 | SNV | 1 | G | A | Heterozygous |
| NC_037640.1 | 2086320 | SNV | 1 | A | G | Heterozygous |
| NC_037640.1 | 2086726 | SNV | 1 | T | C | Homozygous   |
| NC_037640.1 | 2086859 | SNV | 1 | C | T | Heterozygous |
| NC_037640.1 | 2086865 | SNV | 1 | T | A | Homozygous   |
| NC_037640.1 | 2086905 | SNV | 1 | T | C | Homozygous   |
| NC_037640.1 | 2089144 | SNV | 1 | A | G | Heterozygous |
| NC_037640.1 | 2089168 | SNV | 1 | G | A | Homozygous   |
| NC_037640.1 | 2089198 | SNV | 1 | A | G | Homozygous   |
| NC_037640.1 | 2097104 | SNV | 1 | C | T | Homozygous   |
| NC_037640.1 | 2097120 | SNV | 1 | C | A | Homozygous   |
| NC_037640.1 | 2097757 | SNV | 1 | A | G | Homozygous   |
| NC_037640.1 | 2097798 | SNV | 1 | G | A | Heterozygous |
| NC_037640.1 | 2097890 | SNV | 1 | C | T | Heterozygous |
| NC_037640.1 | 2097907 | SNV | 1 | C | T | Heterozygous |
| NC_037640.1 | 2102111 | SNV | 1 | A | T | Heterozygous |
| NC_037640.1 | 2102118 | SNV | 1 | G | T | Heterozygous |
| NC_037640.1 | 2102194 | SNV | 1 | T | C | Heterozygous |
| NC_037640.1 | 2102317 | SNV | 1 | G | A | Heterozygous |
| NC_037640.1 | 2114838 | SNV | 1 | A | G | Homozygous   |
| NC_037640.1 | 2114841 | SNV | 1 | A | G | Homozygous   |
| NC_037640.1 | 2114847 | SNV | 1 | T | G | Homozygous   |
| NC_037640.1 | 2114850 | SNV | 1 | T | A | Homozygous   |
| NC_037640.1 | 2114853 | SNV | 1 | T | G | Homozygous   |
| NC_037640.1 | 2114856 | SNV | 1 | A | G | Homozygous   |
| NC_037640.1 | 2114859 | SNV | 1 | A | G | Homozygous   |
| NC_037640.1 | 2114874 | SNV | 1 | A | G | Homozygous   |
| NC_037640.1 | 2114877 | SNV | 1 | A | T | Heterozygous |
| NC_037640.1 | 2114880 | SNV | 1 | A | G | Heterozygous |
| NC_037640.1 | 2114885 | SNV | 1 | A | T | Heterozygous |
| NC_037640.1 | 2114889 | SNV | 1 | A | G | Heterozygous |
| NC_037640.1 | 2114889 | SNV | 1 | A | T | Heterozygous |
| NC_037640.1 | 2114907 | SNV | 1 | A | T | Homozygous   |
| NC_037640.1 | 2114913 | SNV | 1 | A | C | Heterozygous |
| NC_037640.1 | 2114916 | SNV | 1 | A | G | Heterozygous |
| NC_037640.1 | 2114919 | SNV | 1 | G | A | Heterozygous |
| NC_037640.1 | 2114923 | SNV | 1 | T | C | Homozygous   |
| NC_037640.1 | 2114927 | SNV | 1 | A | G | Homozygous   |
| NC_037640.1 | 2114959 | SNV | 1 | T | C | Homozygous   |
| NC_037640.1 | 2114985 | SNV | 1 | C | T | Homozygous   |
| NC_037640.1 | 2115259 | SNV | 1 | C | T | Homozygous   |



|             |         |     |   |   |   |              |
|-------------|---------|-----|---|---|---|--------------|
| NC_037640.1 | 2115406 | SNV | 1 | A | G | Homozygous   |
| NC_037640.1 | 2125108 | SNV | 1 | T | C | Homozygous   |
| NC_037640.1 | 2125180 | SNV | 1 | C | T | Homozygous   |
| NC_037640.1 | 2126819 | SNV | 1 | A | G | Heterozygous |
| NC_037640.1 | 2126829 | SNV | 1 | C | T | Heterozygous |
| NC_037640.1 | 2127094 | SNV | 1 | C | T | Heterozygous |
| NC_037640.1 | 2127374 | SNV | 1 | C | T | Heterozygous |
| NC_037640.1 | 2134949 | SNV | 1 | C | T | Heterozygous |
| NC_037640.1 | 2134964 | SNV | 1 | G | T | Heterozygous |
| NC_037640.1 | 2135018 | SNV | 1 | T | A | Heterozygous |
| NC_037640.1 | 2135065 | SNV | 1 | C | T | Heterozygous |
| NC_037640.1 | 2135217 | SNV | 1 | T | C | Heterozygous |
| NC_037640.1 | 2136190 | SNV | 1 | A | G | Homozygous   |
| NC_037640.1 | 2136537 | SNV | 1 | C | T | Heterozygous |
| NC_037640.1 | 2136588 | SNV | 1 | A | G | Homozygous   |
| NC_037640.1 | 2136606 | SNV | 1 | T | C | Heterozygous |
| NC_037640.1 | 2137778 | SNV | 1 | A | T | Homozygous   |
| NC_037640.1 | 2137811 | SNV | 1 | T | C | Heterozygous |
| NC_037640.1 | 2137827 | SNV | 1 | T | A | Homozygous   |
| NC_037640.1 | 2140021 | SNV | 1 | T | G | Homozygous   |
| NC_037640.1 | 2140080 | SNV | 1 | A | C | Homozygous   |
| NC_037640.1 | 2140129 | SNV | 1 | C | T | Heterozygous |
| NC_037640.1 | 2140140 | SNV | 1 | A | T | Homozygous   |
| NC_037640.1 | 2140209 | SNV | 1 | C | G | Homozygous   |
| NC_037640.1 | 2140211 | SNV | 1 | C | G | Homozygous   |
| NC_037640.1 | 2140238 | SNV | 1 | T | C | Homozygous   |
| NC_037640.1 | 2140241 | SNV | 1 | T | C | Homozygous   |
| NC_037640.1 | 2141778 | SNV | 1 | G | C | Homozygous   |
| NC_037640.1 | 2146781 | SNV | 1 | T | C | Heterozygous |
| NC_037640.1 | 2146811 | SNV | 1 | T | C | Heterozygous |
| NC_037640.1 | 2146993 | SNV | 1 | A | C | Heterozygous |
| NC_037640.1 | 2147124 | SNV | 1 | C | A | Homozygous   |
| NC_037640.1 | 2147366 | SNV | 1 | T | C | Homozygous   |
| NC_037640.1 | 2147545 | SNV | 1 | T | C | Homozygous   |
| NC_037640.1 | 2149156 | SNV | 1 | T | C | Homozygous   |
| NC_037640.1 | 2149168 | SNV | 1 | G | C | Homozygous   |
| NC_037640.1 | 2149329 | SNV | 1 | A | G | Heterozygous |
| NC_037640.1 | 2174634 | SNV | 1 | C | T | Homozygous   |
| NC_037640.1 | 2175053 | SNV | 1 | A | G | Homozygous   |
| NC_037640.1 | 2175462 | SNV | 1 | A | G | Homozygous   |
| NC_037640.1 | 2178127 | SNV | 1 | C | T | Homozygous   |
| NC_037640.1 | 2178164 | SNV | 1 | T | C | Heterozygous |
| NC_037640.1 | 2181893 | SNV | 1 | C | T | Homozygous   |
| NC_037640.1 | 2182780 | SNV | 1 | G | A | Heterozygous |
| NC_037640.1 | 2183285 | SNV | 1 | T | C | Heterozygous |
| NC_037640.1 | 2206591 | SNV | 1 | T | G | Heterozygous |
| NC_037640.1 | 2206596 | SNV | 1 | T | C | Homozygous   |
| NC_037640.1 | 2218150 | SNV | 1 | A | T | Homozygous   |
| NC_037640.1 | 2218154 | SNV | 1 | T | G | Heterozygous |
| NC_037640.1 | 2218165 | SNV | 1 | C | T | Homozygous   |
| NC_037640.1 | 2218167 | SNV | 1 | A | G | Homozygous   |

|             |         |     |   |   |   |              |
|-------------|---------|-----|---|---|---|--------------|
| NC_037640.1 | 2218172 | SNV | 1 | T | A | Homozygous   |
| NC_037640.1 | 2218181 | SNV | 1 | A | T | Homozygous   |
| NC_037640.1 | 2218184 | SNV | 1 | A | T | Homozygous   |
| NC_037640.1 | 2218191 | SNV | 1 | A | T | Homozygous   |
| NC_037640.1 | 2218205 | SNV | 1 | T | C | Homozygous   |
| NC_037640.1 | 2218208 | SNV | 1 | T | C | Homozygous   |
| NC_037640.1 | 2221458 | SNV | 1 | C | G | Heterozygous |
| NC_037640.1 | 2245177 | SNV | 1 | A | T | Homozygous   |
| NC_037640.1 | 2245181 | SNV | 1 | C | T | Homozygous   |
| NC_037640.1 | 2245183 | SNV | 1 | T | A | Heterozygous |
| NC_037640.1 | 2245285 | SNV | 1 | G | A | Homozygous   |
| NC_037640.1 | 2305509 | SNV | 1 | G | A | Heterozygous |
| NC_037640.1 | 2310097 | SNV | 1 | G | A | Heterozygous |
| NC_037640.1 | 2310170 | SNV | 1 | C | T | Homozygous   |
| NC_037640.1 | 2312812 | SNV | 1 | A | G | Homozygous   |
| NC_037640.1 | 2317017 | SNV | 1 | C | A | Homozygous   |
| NC_037640.1 | 2317929 | SNV | 1 | A | G | Heterozygous |
| NC_037640.1 | 2319942 | SNV | 1 | G | A | Heterozygous |
| NC_037640.1 | 2322531 | SNV | 1 | G | A | Homozygous   |
| NC_037640.1 | 2323028 | SNV | 1 | T | A | Heterozygous |
| NC_037640.1 | 2323037 | SNV | 1 | G | A | Heterozygous |
| NC_037640.1 | 2323041 | SNV | 1 | G | A | Heterozygous |
| NC_037640.1 | 2323045 | SNV | 1 | G | A | Heterozygous |
| NC_037640.1 | 2323065 | SNV | 1 | A | G | Heterozygous |
| NC_037640.1 | 2323067 | SNV | 1 | A | G | Heterozygous |
| NC_037640.1 | 2323069 | SNV | 1 | A | G | Homozygous   |
| NC_037640.1 | 2323079 | SNV | 1 | A | G | Heterozygous |
| NC_037640.1 | 2323915 | SNV | 1 | C | G | Homozygous   |
| NC_037640.1 | 2327012 | SNV | 1 | T | C | Homozygous   |
| NC_037640.1 | 2327038 | SNV | 1 | T | A | Homozygous   |
| NC_037640.1 | 2327047 | SNV | 1 | T | A | Homozygous   |
| NC_037640.1 | 2327051 | SNV | 1 | T | A | Homozygous   |
| NC_037640.1 | 2329296 | SNV | 1 | G | A | Heterozygous |
| NC_037640.1 | 2330725 | SNV | 1 | G | A | Homozygous   |
| NC_037640.1 | 2330812 | SNV | 1 | A | G | Heterozygous |
| NC_037640.1 | 2331462 | SNV | 1 | A | G | Homozygous   |
| NC_037640.1 | 2332680 | SNV | 1 | C | G | Homozygous   |
| NC_037640.1 | 2332866 | SNV | 1 | A | G | Homozygous   |
| NC_037640.1 | 2332877 | SNV | 1 | T | A | Homozygous   |
| NC_037640.1 | 2332909 | SNV | 1 | A | G | Homozygous   |
| NC_037640.1 | 2333021 | SNV | 1 | A | G | Homozygous   |
| NC_037640.1 | 2333360 | SNV | 1 | A | G | Homozygous   |
| NC_037640.1 | 2334603 | SNV | 1 | C | A | Heterozygous |
| NC_037640.1 | 2334646 | SNV | 1 | G | A | Homozygous   |
| NC_037640.1 | 2338656 | SNV | 1 | A | G | Homozygous   |
| NC_037640.1 | 2338760 | SNV | 1 | T | C | Homozygous   |
| NC_037640.1 | 2338778 | SNV | 1 | T | C | Homozygous   |
| NC_037640.1 | 2338787 | SNV | 1 | A | G | Homozygous   |
| NC_037640.1 | 2338855 | SNV | 1 | T | C | Homozygous   |
| NC_037640.1 | 2338880 | SNV | 1 | G | A | Heterozygous |
| NC_037640.1 | 2339188 | SNV | 1 | A | G | Heterozygous |

|             |         |     |   |   |   |              |
|-------------|---------|-----|---|---|---|--------------|
| NC_037640.1 | 2339819 | SNV | 1 | T | C | Homozygous   |
| NC_037640.1 | 2340088 | SNV | 1 | C | T | Heterozygous |
| NC_037640.1 | 2340497 | SNV | 1 | G | A | Homozygous   |
| NC_037640.1 | 2340880 | SNV | 1 | G | T | Heterozygous |
| NC_037640.1 | 2340997 | SNV | 1 | G | C | Heterozygous |
| NC_037640.1 | 2345165 | SNV | 1 | C | A | Heterozygous |
| NC_037640.1 | 2345165 | SNV | 1 | C | T | Heterozygous |
| NC_037640.1 | 2345182 | SNV | 1 | G | A | Heterozygous |
| NC_037640.1 | 2345186 | SNV | 1 | C | G | Heterozygous |
| NC_037640.1 | 2345186 | SNV | 1 | C | T | Heterozygous |
| NC_037640.1 | 2345193 | SNV | 1 | A | G | Heterozygous |
| NC_037640.1 | 2345199 | SNV | 1 | G | C | Heterozygous |
| NC_037640.1 | 2345202 | SNV | 1 | T | A | Heterozygous |
| NC_037640.1 | 2345207 | SNV | 1 | A | G | Homozygous   |
| NC_037640.1 | 2345212 | SNV | 1 | C | A | Heterozygous |
| NC_037640.1 | 2345212 | SNV | 1 | C | T | Heterozygous |
| NC_037640.1 | 2350324 | SNV | 1 | C | T | Homozygous   |
| NC_037640.1 | 2359461 | SNV | 1 | C | A | Homozygous   |
| NC_037640.1 | 2359463 | SNV | 1 | T | G | Heterozygous |
| NC_037640.1 | 2359467 | SNV | 1 | A | C | Heterozygous |
| NC_037640.1 | 2359476 | SNV | 1 | A | C | Homozygous   |
| NC_037640.1 | 2359497 | SNV | 1 | A | C | Homozygous   |
| NC_037640.1 | 2359506 | SNV | 1 | A | T | Homozygous   |
| NC_037640.1 | 2359809 | SNV | 1 | A | T | Homozygous   |
| NC_037640.1 | 2360514 | SNV | 1 | A | C | Heterozygous |
| NC_037640.1 | 2360517 | SNV | 1 | A | C | Heterozygous |
| NC_037640.1 | 2360521 | SNV | 1 | A | C | Heterozygous |
| NC_037640.1 | 2360524 | SNV | 1 | T | C | Heterozygous |
| NC_037640.1 | 2360526 | SNV | 1 | A | G | Heterozygous |
| NC_037640.1 | 2360529 | SNV | 1 | T | C | Heterozygous |
| NC_037640.1 | 2360553 | SNV | 1 | T | C | Heterozygous |
| NC_037640.1 | 2363079 | SNV | 1 | A | C | Homozygous   |
| NC_037640.1 | 2363098 | SNV | 1 | C | G | Homozygous   |
| NC_037640.1 | 2365448 | SNV | 1 | T | C | Homozygous   |
| NC_037640.1 | 2365817 | SNV | 1 | C | T | Homozygous   |
| NC_037640.1 | 2365971 | SNV | 1 | T | G | Homozygous   |
| NC_037640.1 | 2366128 | SNV | 1 | C | T | Heterozygous |
| NC_037640.1 | 2366431 | SNV | 1 | G | T | Homozygous   |
| NC_037640.1 | 2373909 | SNV | 1 | T | G | Heterozygous |
| NC_037640.1 | 2384394 | SNV | 1 | G | A | Homozygous   |
| NC_037640.1 | 2384398 | SNV | 1 | G | A | Homozygous   |
| NC_037640.1 | 2384426 | SNV | 1 | A | T | Homozygous   |
| NC_037640.1 | 2393908 | SNV | 1 | G | A | Heterozygous |
| NC_037640.1 | 2427237 | SNV | 1 | T | C | Heterozygous |
| NC_037640.1 | 2447139 | SNV | 1 | G | A | Homozygous   |
| NC_037640.1 | 2447141 | SNV | 1 | T | C | Heterozygous |
| NC_037640.1 | 2447616 | SNV | 1 | T | C | Homozygous   |
| NC_037640.1 | 2448077 | SNV | 1 | A | G | Heterozygous |
| NC_037640.1 | 2448084 | SNV | 1 | A | G | Homozygous   |
| NC_037640.1 | 2459766 | SNV | 1 | T | C | Homozygous   |
| NC_037640.1 | 2459780 | SNV | 1 | T | G | Heterozygous |

|             |         |     |   |   |   |              |
|-------------|---------|-----|---|---|---|--------------|
| NC_037640.1 | 2459795 | SNV | 1 | T | A | Heterozygous |
| NC_037640.1 | 2459796 | SNV | 1 | A | G | Heterozygous |
| NC_037640.1 | 2459923 | SNV | 1 | A | G | Homozygous   |
| NC_037640.1 | 2478088 | SNV | 1 | A | T | Homozygous   |
| NC_037640.1 | 2478091 | SNV | 1 | C | A | Homozygous   |
| NC_037640.1 | 2478110 | SNV | 1 | A | T | Homozygous   |
| NC_037640.1 | 2478129 | SNV | 1 | T | A | Homozygous   |
| NC_037640.1 | 2478147 | SNV | 1 | T | A | Heterozygous |
| NC_037640.1 | 2478154 | SNV | 1 | T | C | Heterozygous |
| NC_037640.1 | 2478156 | SNV | 1 | T | A | Heterozygous |
| NC_037640.1 | 2478160 | SNV | 1 | C | T | Heterozygous |
| NC_037640.1 | 2478162 | SNV | 1 | T | A | Heterozygous |
| NC_037640.1 | 2478168 | SNV | 1 | T | A | Heterozygous |
| NC_037640.1 | 2478188 | SNV | 1 | A | G | Heterozygous |
| NC_037640.1 | 2480985 | SNV | 1 | A | G | Heterozygous |
| NC_037640.1 | 2481060 | SNV | 1 | A | T | Heterozygous |
| NC_037640.1 | 2481112 | SNV | 1 | A | G | Heterozygous |
| NC_037640.1 | 2481128 | SNV | 1 | A | G | Heterozygous |
| NC_037640.1 | 2481303 | SNV | 1 | G | A | Heterozygous |
| NC_037640.1 | 2481307 | SNV | 1 | G | A | Heterozygous |
| NC_037640.1 | 2482455 | SNV | 1 | T | C | Homozygous   |
| NC_037640.1 | 2482458 | SNV | 1 | A | G | Homozygous   |
| NC_037640.1 | 2482611 | SNV | 1 | A | G | Heterozygous |
| NC_037640.1 | 2482828 | SNV | 1 | T | C | Homozygous   |
| NC_037640.1 | 2482839 | SNV | 1 | G | A | Heterozygous |
| NC_037640.1 | 2482851 | SNV | 1 | C | T | Homozygous   |
| NC_037640.1 | 2482854 | SNV | 1 | G | A | Homozygous   |
| NC_037640.1 | 2482870 | SNV | 1 | A | G | Heterozygous |
| NC_037640.1 | 2483116 | SNV | 1 | A | G | Homozygous   |
| NC_037640.1 | 2483216 | SNV | 1 | A | G | Homozygous   |
| NC_037640.1 | 2483565 | SNV | 1 | C | G | Heterozygous |
| NC_037640.1 | 2490544 | SNV | 1 | G | A | Heterozygous |
| NC_037640.1 | 2492400 | SNV | 1 | G | A | Homozygous   |
| NC_037640.1 | 2496177 | SNV | 1 | C | T | Heterozygous |
| NC_037640.1 | 2498362 | SNV | 1 | A | G | Homozygous   |
| NC_037640.1 | 2501764 | SNV | 1 | T | A | Heterozygous |
| NC_037640.1 | 2501851 | SNV | 1 | A | G | Homozygous   |
| NC_037640.1 | 2501962 | SNV | 1 | G | A | Heterozygous |
| NC_037640.1 | 2502002 | SNV | 1 | T | C | Homozygous   |
| NC_037640.1 | 2502014 | SNV | 1 | C | T | Heterozygous |
| NC_037640.1 | 2502026 | SNV | 1 | A | G | Homozygous   |
| NC_037640.1 | 2502038 | SNV | 1 | A | T | Heterozygous |
| NC_037640.1 | 2502076 | SNV | 1 | T | C | Homozygous   |
| NC_037640.1 | 2502087 | SNV | 1 | G | A | Heterozygous |
| NC_037640.1 | 2502098 | SNV | 1 | T | C | Homozygous   |
| NC_037640.1 | 2502132 | SNV | 1 | G | A | Heterozygous |
| NC_037640.1 | 2503313 | SNV | 1 | C | T | Homozygous   |
| NC_037640.1 | 2505580 | SNV | 1 | C | T | Heterozygous |
| NC_037640.1 | 2506411 | SNV | 1 | C | T | Homozygous   |
| NC_037640.1 | 2506438 | SNV | 1 | C | T | Heterozygous |
| NC_037640.1 | 2506447 | SNV | 1 | T | C | Homozygous   |

|             |         |     |   |   |   |              |
|-------------|---------|-----|---|---|---|--------------|
| NC_037640.1 | 2506490 | SNV | 1 | C | G | Homozygous   |
| NC_037640.1 | 2510106 | SNV | 1 | C | T | Homozygous   |
| NC_037640.1 | 2512122 | SNV | 1 | T | C | Homozygous   |
| NC_037640.1 | 2512543 | SNV | 1 | T | C | Homozygous   |
| NC_037640.1 | 2514657 | SNV | 1 | T | C | Homozygous   |
| NC_037640.1 | 2514678 | SNV | 1 | C | G | Heterozygous |
| NC_037640.1 | 2515354 | SNV | 1 | C | T | Homozygous   |
| NC_037640.1 | 2515383 | SNV | 1 | C | T | Homozygous   |
| NC_037640.1 | 2515401 | SNV | 1 | C | T | Homozygous   |
| NC_037640.1 | 2515434 | SNV | 1 | T | A | Homozygous   |
| NC_037640.1 | 2515480 | SNV | 1 | T | C | Homozygous   |
| NC_037640.1 | 2515528 | SNV | 1 | T | C | Homozygous   |
| NC_037640.1 | 2515549 | SNV | 1 | C | T | Homozygous   |
| NC_037640.1 | 2517646 | SNV | 1 | T | C | Homozygous   |
| NC_037640.1 | 2517789 | SNV | 1 | T | G | Heterozygous |
| NC_037640.1 | 2517925 | SNV | 1 | C | T | Heterozygous |
| NC_037640.1 | 2517992 | SNV | 1 | C | G | Homozygous   |
| NC_037640.1 | 2518011 | SNV | 1 | T | A | Heterozygous |
| NC_037640.1 | 2518028 | SNV | 1 | A | G | Heterozygous |
| NC_037640.1 | 2518341 | SNV | 1 | T | C | Homozygous   |
| NC_037640.1 | 2518561 | SNV | 1 | G | C | Homozygous   |
| NC_037640.1 | 2519118 | SNV | 1 | A | G | Homozygous   |
| NC_037640.1 | 2519177 | SNV | 1 | C | T | Heterozygous |
| NC_037640.1 | 2519197 | SNV | 1 | G | A | Heterozygous |
| NC_037640.1 | 2519213 | SNV | 1 | C | T | Heterozygous |
| NC_037640.1 | 2519229 | SNV | 1 | A | G | Homozygous   |
| NC_037640.1 | 2519238 | SNV | 1 | T | C | Homozygous   |
| NC_037640.1 | 2519260 | SNV | 1 | A | G | Homozygous   |
| NC_037640.1 | 2520211 | SNV | 1 | C | T | Homozygous   |
| NC_037640.1 | 2520287 | SNV | 1 | G | A | Homozygous   |
| NC_037640.1 | 2520498 | SNV | 1 | G | A | Homozygous   |
| NC_037640.1 | 2520532 | SNV | 1 | A | G | Homozygous   |
| NC_037640.1 | 2520602 | SNV | 1 | A | G | Homozygous   |
| NC_037640.1 | 2520620 | SNV | 1 | C | T | Heterozygous |
| NC_037640.1 | 2520714 | SNV | 1 | C | T | Homozygous   |
| NC_037640.1 | 2520721 | SNV | 1 | T | A | Homozygous   |
| NC_037640.1 | 2520726 | SNV | 1 | C | G | Homozygous   |
| NC_037640.1 | 2521065 | SNV | 1 | T | A | Heterozygous |
| NC_037640.1 | 2521098 | SNV | 1 | A | G | Homozygous   |
| NC_037640.1 | 2521154 | SNV | 1 | A | C | Heterozygous |
| NC_037640.1 | 2521293 | SNV | 1 | T | C | Heterozygous |
| NC_037640.1 | 2521861 | SNV | 1 | A | G | Homozygous   |
| NC_037640.1 | 2522149 | SNV | 1 | A | T | Heterozygous |
| NC_037640.1 | 2522237 | SNV | 1 | C | T | Heterozygous |
| NC_037640.1 | 2522307 | SNV | 1 | G | A | Heterozygous |
| NC_037640.1 | 2522521 | SNV | 1 | C | G | Heterozygous |
| NC_037640.1 | 2522570 | SNV | 1 | A | G | Heterozygous |
| NC_037640.1 | 2522588 | SNV | 1 | T | A | Heterozygous |
| NC_037640.1 | 2523051 | SNV | 1 | A | G | Heterozygous |
| NC_037640.1 | 2523097 | SNV | 1 | A | T | Heterozygous |
| NC_037640.1 | 2525397 | SNV | 1 | T | C | Homozygous   |

|             |         |     |   |   |   |              |
|-------------|---------|-----|---|---|---|--------------|
| NC_037640.1 | 2525681 | SNV | 1 | C | T | Heterozygous |
| NC_037640.1 | 2525789 | SNV | 1 | T | G | Homozygous   |
| NC_037640.1 | 2526017 | SNV | 1 | A | G | Homozygous   |
| NC_037640.1 | 2526182 | SNV | 1 | G | A | Heterozygous |
| NC_037640.1 | 2526238 | SNV | 1 | C | T | Heterozygous |
| NC_037640.1 | 2526245 | SNV | 1 | G | T | Heterozygous |
| NC_037640.1 | 2526723 | SNV | 1 | T | A | Homozygous   |
| NC_037640.1 | 2526794 | SNV | 1 | G | A | Homozygous   |
| NC_037640.1 | 2526798 | SNV | 1 | T | C | Homozygous   |
| NC_037640.1 | 2539911 | SNV | 1 | A | T | Homozygous   |
| NC_037640.1 | 2540169 | SNV | 1 | A | G | Heterozygous |
| NC_037640.1 | 2540283 | SNV | 1 | A | T | Heterozygous |
| NC_037640.1 | 2540317 | SNV | 1 | A | G | Heterozygous |
| NC_037640.1 | 2540682 | SNV | 1 | C | T | Homozygous   |
| NC_037640.1 | 2541406 | SNV | 1 | A | C | Homozygous   |
| NC_037640.1 | 2541567 | SNV | 1 | T | A | Homozygous   |
| NC_037640.1 | 2541711 | SNV | 1 | G | A | Heterozygous |
| NC_037640.1 | 2541716 | SNV | 1 | C | T | Heterozygous |
| NC_037640.1 | 2541734 | SNV | 1 | A | G | Homozygous   |
| NC_037640.1 | 2541740 | SNV | 1 | T | C | Homozygous   |
| NC_037640.1 | 2541750 | SNV | 1 | C | T | Heterozygous |
| NC_037640.1 | 2542192 | SNV | 1 | A | G | Homozygous   |
| NC_037640.1 | 2542249 | SNV | 1 | C | T | Homozygous   |
| NC_037640.1 | 2542440 | SNV | 1 | C | A | Heterozygous |
| NC_037640.1 | 2542442 | SNV | 1 | A | T | Heterozygous |
| NC_037640.1 | 2542472 | SNV | 1 | C | T | Heterozygous |
| NC_037640.1 | 2543447 | SNV | 1 | C | G | Heterozygous |
| NC_037640.1 | 2544577 | SNV | 1 | G | A | Homozygous   |
| NC_037640.1 | 2544907 | SNV | 1 | T | C | Heterozygous |
| NC_037640.1 | 2544927 | SNV | 1 | C | T | Homozygous   |
| NC_037640.1 | 2544931 | SNV | 1 | T | C | Homozygous   |
| NC_037640.1 | 2544938 | SNV | 1 | T | G | Homozygous   |
| NC_037640.1 | 2545049 | SNV | 1 | C | T | Homozygous   |
| NC_037640.1 | 2545255 | SNV | 1 | C | T | Homozygous   |
| NC_037640.1 | 2545302 | SNV | 1 | T | G | Heterozygous |
| NC_037640.1 | 2545337 | SNV | 1 | A | T | Homozygous   |
| NC_037640.1 | 2545363 | SNV | 1 | A | G | Heterozygous |
| NC_037640.1 | 2545443 | SNV | 1 | A | G | Homozygous   |
| NC_037640.1 | 2545505 | SNV | 1 | T | C | Heterozygous |
| NC_037640.1 | 2545630 | SNV | 1 | C | T | Heterozygous |
| NC_037640.1 | 2546165 | SNV | 1 | A | G | Heterozygous |
| NC_037640.1 | 2546428 | SNV | 1 | C | T | Homozygous   |
| NC_037640.1 | 2546596 | SNV | 1 | G | A | Heterozygous |
| NC_037640.1 | 2546708 | SNV | 1 | T | C | Homozygous   |
| NC_037640.1 | 2547117 | SNV | 1 | G | A | Homozygous   |
| NC_037640.1 | 2548507 | SNV | 1 | T | G | Heterozygous |
| NC_037640.1 | 2548531 | SNV | 1 | T | C | Heterozygous |
| NC_037640.1 | 2551758 | SNV | 1 | C | A | Homozygous   |
| NC_037640.1 | 2555666 | SNV | 1 | A | G | Homozygous   |
| NC_037640.1 | 2555844 | SNV | 1 | A | G | Homozygous   |
| NC_037640.1 | 2555931 | SNV | 1 | T | A | Heterozygous |

|             |         |     |   |   |   |              |
|-------------|---------|-----|---|---|---|--------------|
| NC_037640.1 | 2559541 | SNV | 1 | C | T | Heterozygous |
| NC_037640.1 | 2569279 | SNV | 1 | G | A | Heterozygous |
| NC_037640.1 | 2569281 | SNV | 1 | T | A | Homozygous   |
| NC_037640.1 | 2569332 | SNV | 1 | C | A | Homozygous   |
| NC_037640.1 | 2572321 | SNV | 1 | C | T | Heterozygous |
| NC_037640.1 | 2572408 | SNV | 1 | C | T | Heterozygous |
| NC_037640.1 | 2579696 | SNV | 1 | C | G | Homozygous   |
| NC_037640.1 | 2579790 | SNV | 1 | T | C | Homozygous   |
| NC_037640.1 | 2579805 | SNV | 1 | A | G | Homozygous   |
| NC_037640.1 | 2585196 | SNV | 1 | A | G | Homozygous   |
| NC_037640.1 | 2585199 | SNV | 1 | A | G | Homozygous   |
| NC_037640.1 | 2585203 | SNV | 1 | A | C | Homozygous   |
| NC_037640.1 | 2585223 | SNV | 1 | A | G | Heterozygous |
| NC_037640.1 | 2601156 | SNV | 1 | G | A | Homozygous   |
| NC_037640.1 | 2603795 | SNV | 1 | A | C | Homozygous   |
| NC_037640.1 | 2603801 | SNV | 1 | A | C | Homozygous   |
| NC_037640.1 | 2603805 | SNV | 1 | T | A | Homozygous   |
| NC_037640.1 | 2606128 | SNV | 1 | C | T | Homozygous   |
| NC_037640.1 | 2606885 | SNV | 1 | A | G | Homozygous   |
| NC_037640.1 | 2606887 | SNV | 1 | T | A | Homozygous   |
| NC_037640.1 | 2607250 | SNV | 1 | A | G | Heterozygous |
| NC_037640.1 | 2607954 | SNV | 1 | G | A | Heterozygous |
| NC_037640.1 | 2608008 | SNV | 1 | G | A | Heterozygous |
| NC_037640.1 | 2608101 | SNV | 1 | G | C | Homozygous   |
| NC_037640.1 | 2608204 | SNV | 1 | G | A | Homozygous   |
| NC_037640.1 | 2608407 | SNV | 1 | T | C | Homozygous   |
| NC_037640.1 | 2608449 | SNV | 1 | C | T | Heterozygous |
| NC_037640.1 | 2609224 | SNV | 1 | C | T | Heterozygous |
| NC_037640.1 | 2623264 | SNV | 1 | A | T | Heterozygous |
| NC_037640.1 | 2623279 | SNV | 1 | T | G | Heterozygous |
| NC_037640.1 | 2623296 | SNV | 1 | A | C | Homozygous   |
| NC_037640.1 | 2641562 | SNV | 1 | A | G | Homozygous   |
| NC_037640.1 | 2641581 | SNV | 1 | A | G | Homozygous   |
| NC_037640.1 | 2641705 | SNV | 1 | C | T | Heterozygous |
| NC_037640.1 | 2641749 | SNV | 1 | C | T | Heterozygous |
| NC_037640.1 | 2645015 | SNV | 1 | C | A | Heterozygous |
| NC_037640.1 | 2673481 | SNV | 1 | G | A | Heterozygous |
| NC_037640.1 | 2673521 | SNV | 1 | G | A | Homozygous   |
| NC_037640.1 | 2681969 | SNV | 1 | A | T | Heterozygous |
| NC_037640.1 | 2681976 | SNV | 1 | C | T | Heterozygous |
| NC_037640.1 | 2682094 | SNV | 1 | A | G | Homozygous   |
| NC_037640.1 | 2682474 | SNV | 1 | T | C | Homozygous   |
| NC_037640.1 | 2682576 | SNV | 1 | T | C | Homozygous   |
| NC_037640.1 | 2682727 | SNV | 1 | G | C | Homozygous   |
| NC_037640.1 | 2682943 | SNV | 1 | C | T | Heterozygous |
| NC_037640.1 | 2682967 | SNV | 1 | G | A | Homozygous   |
| NC_037640.1 | 2683052 | SNV | 1 | G | C | Homozygous   |
| NC_037640.1 | 2683074 | SNV | 1 | T | C | Homozygous   |
| NC_037640.1 | 2683098 | SNV | 1 | G | A | Heterozygous |
| NC_037640.1 | 2683198 | SNV | 1 | G | A | Heterozygous |
| NC_037640.1 | 2683624 | SNV | 1 | A | G | Homozygous   |

|             |         |     |   |   |   |              |
|-------------|---------|-----|---|---|---|--------------|
| NC_037640.1 | 2683662 | SNV | 1 | A | G | Heterozygous |
| NC_037640.1 | 2683709 | SNV | 1 | A | G | Heterozygous |
| NC_037640.1 | 2683783 | SNV | 1 | G | A | Homozygous   |
| NC_037640.1 | 2683807 | SNV | 1 | A | G | Heterozygous |
| NC_037640.1 | 2683853 | SNV | 1 | A | G | Heterozygous |
| NC_037640.1 | 2683857 | SNV | 1 | G | T | Heterozygous |
| NC_037640.1 | 2683896 | SNV | 1 | T | C | Homozygous   |
| NC_037640.1 | 2684427 | SNV | 1 | C | T | Heterozygous |
| NC_037640.1 | 2685643 | SNV | 1 | T | C | Homozygous   |
| NC_037640.1 | 2685664 | SNV | 1 | G | A | Heterozygous |
| NC_037640.1 | 2706735 | SNV | 1 | G | T | Homozygous   |
| NC_037640.1 | 2706742 | SNV | 1 | T | A | Homozygous   |
| NC_037640.1 | 2706769 | SNV | 1 | G | A | Homozygous   |
| NC_037640.1 | 2706803 | SNV | 1 | A | T | Heterozygous |
| NC_037640.1 | 2706808 | SNV | 1 | G | A | Homozygous   |
| NC_037640.1 | 2706859 | SNV | 1 | G | A | Homozygous   |
| NC_037640.1 | 2706861 | SNV | 1 | G | A | Homozygous   |
| NC_037640.1 | 2706863 | SNV | 1 | T | A | Heterozygous |
| NC_037640.1 | 2706878 | SNV | 1 | G | A | Homozygous   |
| NC_037640.1 | 2706885 | SNV | 1 | A | T | Homozygous   |
| NC_037640.1 | 2706890 | SNV | 1 | G | A | Homozygous   |
| NC_037640.1 | 2706893 | SNV | 1 | G | A | Homozygous   |
| NC_037640.1 | 2706940 | SNV | 1 | T | C | Homozygous   |
| NC_037640.1 | 2706946 | SNV | 1 | A | G | Homozygous   |
| NC_037640.1 | 2707000 | SNV | 1 | C | T | Homozygous   |
| NC_037640.1 | 2707028 | SNV | 1 | C | A | Heterozygous |
| NC_037640.1 | 2707054 | SNV | 1 | A | G | Heterozygous |
| NC_037640.1 | 2707147 | SNV | 1 | G | A | Homozygous   |
| NC_037640.1 | 2707154 | SNV | 1 | A | T | Homozygous   |
| NC_037640.1 | 2707157 | SNV | 1 | A | T | Homozygous   |
| NC_037640.1 | 2710585 | SNV | 1 | G | T | Homozygous   |
| NC_037640.1 | 2710611 | SNV | 1 | A | G | Homozygous   |
| NC_037640.1 | 2763819 | SNV | 1 | C | T | Homozygous   |
| NC_037640.1 | 2786599 | SNV | 1 | A | G | Homozygous   |
| NC_037640.1 | 2786619 | SNV | 1 | C | T | Heterozygous |
| NC_037640.1 | 2788784 | SNV | 1 | T | G | Homozygous   |
| NC_037640.1 | 2788788 | SNV | 1 | C | T | Homozygous   |
| NC_037640.1 | 2788799 | SNV | 1 | A | G | Homozygous   |
| NC_037640.1 | 2791105 | SNV | 1 | T | C | Homozygous   |
| NC_037640.1 | 2792609 | SNV | 1 | A | G | Homozygous   |
| NC_037640.1 | 2792997 | SNV | 1 | T | C | Homozygous   |
| NC_037640.1 | 2798076 | SNV | 1 | C | G | Homozygous   |
| NC_037640.1 | 2798084 | SNV | 1 | A | G | Homozygous   |
| NC_037640.1 | 2798112 | SNV | 1 | C | A | Homozygous   |
| NC_037640.1 | 2802710 | SNV | 1 | A | G | Homozygous   |
| NC_037640.1 | 2802717 | SNV | 1 | T | C | Homozygous   |
| NC_037640.1 | 2806098 | SNV | 1 | A | G | Homozygous   |
| NC_037640.1 | 2806103 | SNV | 1 | C | A | Heterozygous |
| NC_037640.1 | 2806240 | SNV | 1 | T | C | Heterozygous |
| NC_037640.1 | 2806243 | SNV | 1 | C | G | Heterozygous |
| NC_037640.1 | 2806376 | SNV | 1 | C | T | Homozygous   |



|             |         |     |   |   |   |              |
|-------------|---------|-----|---|---|---|--------------|
| NC_037640.1 | 2807421 | SNV | 1 | C | A | Homozygous   |
| NC_037640.1 | 2807425 | SNV | 1 | C | A | Homozygous   |
| NC_037640.1 | 2808043 | SNV | 1 | G | A | Heterozygous |
| NC_037640.1 | 2808580 | SNV | 1 | C | T | Homozygous   |
| NC_037640.1 | 2832225 | SNV | 1 | A | C | Homozygous   |
| NC_037640.1 | 2832314 | SNV | 1 | A | G | Homozygous   |
| NC_037640.1 | 2832453 | SNV | 1 | G | A | Homozygous   |
| NC_037640.1 | 2834176 | SNV | 1 | C | T | Heterozygous |
| NC_037640.1 | 2834183 | SNV | 1 | C | T | Heterozygous |
| NC_037640.1 | 2840846 | SNV | 1 | C | T | Heterozygous |
| NC_037640.1 | 2841046 | SNV | 1 | T | C | Heterozygous |
| NC_037640.1 | 2841419 | SNV | 1 | G | A | Heterozygous |
| NC_037640.1 | 2841480 | SNV | 1 | T | G | Heterozygous |
| NC_037640.1 | 2843879 | SNV | 1 | G | A | Homozygous   |
| NC_037640.1 | 2843953 | SNV | 1 | C | T | Homozygous   |
| NC_037640.1 | 2845375 | SNV | 1 | C | T | Homozygous   |
| NC_037640.1 | 2845559 | SNV | 1 | T | C | Homozygous   |
| NC_037640.1 | 2846045 | SNV | 1 | A | G | Homozygous   |
| NC_037640.1 | 2846394 | SNV | 1 | T | C | Homozygous   |
| NC_037640.1 | 2846457 | SNV | 1 | C | T | Heterozygous |
| NC_037640.1 | 2846462 | SNV | 1 | G | A | Homozygous   |
| NC_037640.1 | 2846858 | SNV | 1 | T | C | Heterozygous |
| NC_037640.1 | 2846913 | SNV | 1 | T | C | Heterozygous |
| NC_037640.1 | 2847026 | SNV | 1 | C | G | Homozygous   |
| NC_037640.1 | 2847052 | SNV | 1 | A | G | Homozygous   |
| NC_037640.1 | 2847446 | SNV | 1 | A | G | Homozygous   |
| NC_037640.1 | 2847685 | SNV | 1 | A | G | Homozygous   |
| NC_037640.1 | 2847703 | SNV | 1 | T | C | Homozygous   |
| NC_037640.1 | 2848648 | SNV | 1 | A | T | Heterozygous |
| NC_037640.1 | 2848697 | SNV | 1 | A | G | Homozygous   |
| NC_037640.1 | 2848701 | SNV | 1 | C | T | Heterozygous |
| NC_037640.1 | 2848753 | SNV | 1 | G | C | Heterozygous |
| NC_037640.1 | 2848824 | SNV | 1 | G | A | Heterozygous |
| NC_037640.1 | 2850379 | SNV | 1 | A | C | Heterozygous |
| NC_037640.1 | 2850382 | SNV | 1 | A | G | Homozygous   |
| NC_037640.1 | 2850446 | SNV | 1 | T | C | Homozygous   |
| NC_037640.1 | 2850953 | SNV | 1 | A | T | Heterozygous |
| NC_037640.1 | 2850965 | SNV | 1 | G | A | Heterozygous |
| NC_037640.1 | 2850991 | SNV | 1 | T | A | Heterozygous |
| NC_037640.1 | 2851054 | SNV | 1 | C | T | Homozygous   |
| NC_037640.1 | 2851104 | SNV | 1 | A | G | Homozygous   |
| NC_037640.1 | 2851145 | SNV | 1 | T | C | Homozygous   |
| NC_037640.1 | 2851153 | SNV | 1 | T | G | Homozygous   |
| NC_037640.1 | 2851193 | SNV | 1 | G | A | Homozygous   |
| NC_037640.1 | 2851226 | SNV | 1 | A | G | Homozygous   |
| NC_037640.1 | 2851231 | SNV | 1 | T | A | Homozygous   |
| NC_037640.1 | 2851292 | SNV | 1 | A | G | Homozygous   |
| NC_037640.1 | 2851302 | SNV | 1 | T | C | Homozygous   |
| NC_037640.1 | 2851396 | SNV | 1 | G | T | Homozygous   |
| NC_037640.1 | 2851443 | SNV | 1 | G | A | Homozygous   |
| NC_037640.1 | 2851875 | SNV | 1 | G | A | Heterozygous |

|             |         |     |   |   |   |              |
|-------------|---------|-----|---|---|---|--------------|
| NC_037640.1 | 2854397 | SNV | 1 | A | G | Homozygous   |
| NC_037640.1 | 2854447 | SNV | 1 | A | G | Homozygous   |
| NC_037640.1 | 2855520 | SNV | 1 | A | G | Homozygous   |
| NC_037640.1 | 2855529 | SNV | 1 | G | A | Homozygous   |
| NC_037640.1 | 2855569 | SNV | 1 | A | G | Homozygous   |
| NC_037640.1 | 2855587 | SNV | 1 | G | A | Homozygous   |
| NC_037640.1 | 2857773 | SNV | 1 | G | A | Heterozygous |
| NC_037640.1 | 2857898 | SNV | 1 | T | C | Heterozygous |
| NC_037640.1 | 2858953 | SNV | 1 | T | C | Homozygous   |
| NC_037640.1 | 2859007 | SNV | 1 | A | C | Homozygous   |
| NC_037640.1 | 2859022 | SNV | 1 | T | C | Homozygous   |
| NC_037640.1 | 2859032 | SNV | 1 | G | A | Homozygous   |
| NC_037640.1 | 2859093 | SNV | 1 | C | T | Heterozygous |
| NC_037640.1 | 2859219 | SNV | 1 | A | G | Homozygous   |
| NC_037640.1 | 2859324 | SNV | 1 | C | T | Heterozygous |
| NC_037640.1 | 2859430 | SNV | 1 | C | T | Heterozygous |
| NC_037640.1 | 2859614 | SNV | 1 | T | C | Homozygous   |
| NC_037640.1 | 2859902 | SNV | 1 | A | G | Homozygous   |
| NC_037640.1 | 2859951 | SNV | 1 | G | A | Heterozygous |
| NC_037640.1 | 2860179 | SNV | 1 | T | G | Homozygous   |
| NC_037640.1 | 2860277 | SNV | 1 | C | A | Heterozygous |
| NC_037640.1 | 2860378 | SNV | 1 | T | A | Heterozygous |
| NC_037640.1 | 2861515 | SNV | 1 | T | C | Homozygous   |
| NC_037640.1 | 2861531 | SNV | 1 | T | C | Homozygous   |
| NC_037640.1 | 2861696 | SNV | 1 | T | C | Homozygous   |
| NC_037640.1 | 2861796 | SNV | 1 | C | T | Heterozygous |
| NC_037640.1 | 2861943 | SNV | 1 | G | A | Homozygous   |
| NC_037640.1 | 2861955 | SNV | 1 | C | T | Homozygous   |
| NC_037640.1 | 2861968 | SNV | 1 | A | G | Homozygous   |
| NC_037640.1 | 2861973 | SNV | 1 | A | G | Homozygous   |
| NC_037640.1 | 2861985 | SNV | 1 | A | G | Homozygous   |
| NC_037640.1 | 2862264 | SNV | 1 | G | A | Heterozygous |
| NC_037640.1 | 2862349 | SNV | 1 | T | C | Heterozygous |
| NC_037640.1 | 2862391 | SNV | 1 | A | C | Heterozygous |
| NC_037640.1 | 2862414 | SNV | 1 | T | G | Heterozygous |
| NC_037640.1 | 2862432 | SNV | 1 | A | G | Homozygous   |
| NC_037640.1 | 2863884 | SNV | 1 | C | T | Heterozygous |
| NC_037640.1 | 2863941 | SNV | 1 | G | A | Homozygous   |
| NC_037640.1 | 2864234 | SNV | 1 | C | G | Homozygous   |
| NC_037640.1 | 2864490 | SNV | 1 | T | C | Homozygous   |
| NC_037640.1 | 2864502 | SNV | 1 | A | C | Heterozygous |
| NC_037640.1 | 2864523 | SNV | 1 | A | G | Homozygous   |
| NC_037640.1 | 2864541 | SNV | 1 | T | C | Homozygous   |
| NC_037640.1 | 2865347 | SNV | 1 | T | C | Homozygous   |
| NC_037640.1 | 2866139 | SNV | 1 | A | G | Homozygous   |
| NC_037640.1 | 2866567 | SNV | 1 | C | A | Homozygous   |
| NC_037640.1 | 2872217 | SNV | 1 | G | A | Heterozygous |
| NC_037640.1 | 2872248 | SNV | 1 | T | C | Heterozygous |
| NC_037640.1 | 2874073 | SNV | 1 | C | T | Heterozygous |
| NC_037640.1 | 2874121 | SNV | 1 | T | C | Homozygous   |
| NC_037640.1 | 2874342 | SNV | 1 | G | A | Homozygous   |

|             |         |     |   |   |   |              |
|-------------|---------|-----|---|---|---|--------------|
| NC_037640.1 | 2874394 | SNV | 1 | A | G | Homozygous   |
| NC_037640.1 | 2874653 | SNV | 1 | C | T | Homozygous   |
| NC_037640.1 | 2874719 | SNV | 1 | C | A | Heterozygous |
| NC_037640.1 | 2875338 | SNV | 1 | G | A | Heterozygous |
| NC_037640.1 | 2875569 | SNV | 1 | A | G | Homozygous   |
| NC_037640.1 | 2875599 | SNV | 1 | T | C | Homozygous   |
| NC_037640.1 | 2875602 | SNV | 1 | T | C | Homozygous   |
| NC_037640.1 | 2875890 | SNV | 1 | A | G | Homozygous   |
| NC_037640.1 | 2877175 | SNV | 1 | T | A | Homozygous   |
| NC_037640.1 | 2880311 | SNV | 1 | T | C | Homozygous   |
| NC_037640.1 | 2880497 | SNV | 1 | A | G | Homozygous   |
| NC_037640.1 | 2880984 | SNV | 1 | A | G | Heterozygous |
| NC_037640.1 | 2880989 | SNV | 1 | T | C | Homozygous   |
| NC_037640.1 | 2882790 | SNV | 1 | A | G | Homozygous   |
| NC_037640.1 | 2883218 | SNV | 1 | A | G | Heterozygous |
| NC_037640.1 | 2883245 | SNV | 1 | G | A | Heterozygous |
| NC_037640.1 | 2883281 | SNV | 1 | G | A | Heterozygous |
| NC_037640.1 | 2921514 | SNV | 1 | C | T | Heterozygous |
| NC_037640.1 | 2921554 | SNV | 1 | G | A | Homozygous   |
| NC_037640.1 | 2927219 | SNV | 1 | A | G | Homozygous   |
| NC_037640.1 | 2927424 | SNV | 1 | G | C | Homozygous   |
| NC_037640.1 | 2933887 | SNV | 1 | A | T | Heterozygous |
| NC_037640.1 | 2953817 | SNV | 1 | T | C | Homozygous   |
| NC_037640.1 | 2990216 | SNV | 1 | C | T | Homozygous   |
| NC_037640.1 | 2990219 | SNV | 1 | G | T | Homozygous   |
| NC_037640.1 | 2990221 | SNV | 1 | G | A | Homozygous   |
| NC_037640.1 | 2990239 | SNV | 1 | A | G | Homozygous   |
| NC_037640.1 | 2992152 | SNV | 1 | A | G | Homozygous   |
| NC_037640.1 | 2992162 | SNV | 1 | G | A | Heterozygous |
| NC_037640.1 | 2992256 | SNV | 1 | T | C | Homozygous   |
| NC_037640.1 | 2992749 | SNV | 1 | T | G | Heterozygous |
| NC_037640.1 | 2992791 | SNV | 1 | A | C | Heterozygous |
| NC_037640.1 | 2992834 | SNV | 1 | T | C | Heterozygous |
| NC_037640.1 | 2992860 | SNV | 1 | G | C | Heterozygous |
| NC_037640.1 | 2992866 | SNV | 1 | T | C | Heterozygous |
| NC_037640.1 | 2992871 | SNV | 1 | G | T | Heterozygous |
| NC_037640.1 | 2992891 | SNV | 1 | G | A | Heterozygous |
| NC_037640.1 | 2992902 | SNV | 1 | C | T | Homozygous   |
| NC_037640.1 | 2992946 | SNV | 1 | A | G | Homozygous   |
| NC_037640.1 | 2992959 | SNV | 1 | G | A | Homozygous   |
| NC_037640.1 | 2992977 | SNV | 1 | G | C | Heterozygous |
| NC_037640.1 | 2992982 | SNV | 1 | G | T | Heterozygous |
| NC_037640.1 | 2993008 | SNV | 1 | G | A | Heterozygous |
| NC_037640.1 | 2993011 | SNV | 1 | G | A | Heterozygous |
| NC_037640.1 | 2993014 | SNV | 1 | G | T | Heterozygous |
| NC_037640.1 | 2993017 | SNV | 1 | T | G | Homozygous   |
| NC_037640.1 | 2993020 | SNV | 1 | G | A | Heterozygous |
| NC_037640.1 | 2993026 | SNV | 1 | A | G | Homozygous   |
| NC_037640.1 | 2993078 | SNV | 1 | A | G | Homozygous   |
| NC_037640.1 | 2993093 | SNV | 1 | G | T | Homozygous   |
| NC_037640.1 | 2993107 | SNV | 1 | A | G | Heterozygous |

|             |         |     |   |   |   |              |
|-------------|---------|-----|---|---|---|--------------|
| NC_037640.1 | 2993113 | SNV | 1 | G | A | Heterozygous |
| NC_037640.1 | 2993124 | SNV | 1 | C | T | Heterozygous |
| NC_037640.1 | 2993215 | SNV | 1 | T | G | Homozygous   |
| NC_037640.1 | 2993221 | SNV | 1 | G | T | Homozygous   |
| NC_037640.1 | 2993233 | SNV | 1 | G | A | Heterozygous |
| NC_037640.1 | 2993236 | SNV | 1 | A | G | Homozygous   |
| NC_037640.1 | 2993442 | SNV | 1 | G | T | Heterozygous |
| NC_037640.1 | 2993448 | SNV | 1 | T | G | Homozygous   |
| NC_037640.1 | 2993454 | SNV | 1 | G | A | Heterozygous |
| NC_037640.1 | 2993465 | SNV | 1 | G | A | Homozygous   |
| NC_037640.1 | 2993469 | SNV | 1 | G | A | Homozygous   |
| NC_037640.1 | 3013667 | SNV | 1 | C | T | Heterozygous |
| NC_037640.1 | 3013677 | SNV | 1 | G | T | Heterozygous |
| NC_037640.1 | 3013684 | SNV | 1 | T | G | Heterozygous |
| NC_037640.1 | 3013711 | SNV | 1 | A | C | Heterozygous |
| NC_037640.1 | 3019346 | SNV | 1 | C | A | Heterozygous |
| NC_037640.1 | 3019705 | SNV | 1 | T | C | Heterozygous |
| NC_037640.1 | 3025712 | SNV | 1 | G | C | Homozygous   |
| NC_037640.1 | 3033543 | SNV | 1 | A | G | Homozygous   |
| NC_037640.1 | 3034982 | SNV | 1 | C | T | Homozygous   |
| NC_037640.1 | 3034984 | SNV | 1 | C | T | Heterozygous |
| NC_037640.1 | 3035016 | SNV | 1 | T | C | Homozygous   |
| NC_037640.1 | 3035023 | SNV | 1 | T | C | Homozygous   |
| NC_037640.1 | 3035048 | SNV | 1 | G | C | Homozygous   |
| NC_037640.1 | 3035061 | SNV | 1 | G | A | Heterozygous |
| NC_037640.1 | 3035141 | SNV | 1 | A | G | Heterozygous |
| NC_037640.1 | 3035146 | SNV | 1 | T | C | Homozygous   |
| NC_037640.1 | 3035155 | SNV | 1 | C | T | Heterozygous |
| NC_037640.1 | 3035436 | SNV | 1 | T | C | Homozygous   |
| NC_037640.1 | 3036178 | SNV | 1 | T | C | Heterozygous |
| NC_037640.1 | 3036180 | SNV | 1 | A | G | Homozygous   |
| NC_037640.1 | 3036191 | SNV | 1 | A | G | Heterozygous |
| NC_037640.1 | 3036229 | SNV | 1 | C | T | Heterozygous |
| NC_037640.1 | 3037124 | SNV | 1 | A | G | Homozygous   |
| NC_037640.1 | 3037236 | SNV | 1 | G | A | Heterozygous |
| NC_037640.1 | 3037390 | SNV | 1 | T | C | Homozygous   |
| NC_037640.1 | 3037513 | SNV | 1 | G | A | Homozygous   |
| NC_037640.1 | 3043527 | SNV | 1 | T | A | Heterozygous |
| NC_037640.1 | 3044483 | SNV | 1 | G | A | Homozygous   |
| NC_037640.1 | 3044972 | SNV | 1 | A | G | Homozygous   |
| NC_037640.1 | 3046720 | SNV | 1 | A | G | Heterozygous |
| NC_037640.1 | 3046725 | SNV | 1 | T | G | Heterozygous |
| NC_037640.1 | 3046732 | SNV | 1 | A | T | Heterozygous |
| NC_037640.1 | 3063708 | SNV | 1 | A | C | Homozygous   |
| NC_037640.1 | 3063715 | SNV | 1 | T | C | Homozygous   |
| NC_037640.1 | 3063740 | SNV | 1 | A | C | Homozygous   |
| NC_037640.1 | 3075583 | SNV | 1 | A | G | Heterozygous |
| NC_037640.1 | 3076065 | SNV | 1 | C | A | Heterozygous |
| NC_037640.1 | 3076172 | SNV | 1 | G | A | Heterozygous |
| NC_037640.1 | 3076196 | SNV | 1 | G | A | Heterozygous |
| NC_037640.1 | 3076573 | SNV | 1 | G | A | Heterozygous |

|             |         |     |   |   |   |              |
|-------------|---------|-----|---|---|---|--------------|
| NC_037640.1 | 3076575 | SNV | 1 | C | T | Heterozygous |
| NC_037640.1 | 3076600 | SNV | 1 | C | T | Heterozygous |
| NC_037640.1 | 3078119 | SNV | 1 | C | T | Heterozygous |
| NC_037640.1 | 3078127 | SNV | 1 | T | C | Homozygous   |
| NC_037640.1 | 3105029 | SNV | 1 | T | A | Homozygous   |
| NC_037640.1 | 3105733 | SNV | 1 | A | G | Homozygous   |
| NC_037640.1 | 3107646 | SNV | 1 | C | T | Homozygous   |
| NC_037640.1 | 3110162 | SNV | 1 | T | C | Heterozygous |
| NC_037640.1 | 3110185 | SNV | 1 | A | G | Homozygous   |
| NC_037640.1 | 3113323 | SNV | 1 | T | A | Homozygous   |
| NC_037640.1 | 3113374 | SNV | 1 | G | A | Heterozygous |
| NC_037640.1 | 3113601 | SNV | 1 | G | C | Homozygous   |
| NC_037640.1 | 3114441 | SNV | 1 | C | A | Homozygous   |
| NC_037640.1 | 3114477 | SNV | 1 | C | T | Homozygous   |
| NC_037640.1 | 3114481 | SNV | 1 | T | C | Homozygous   |
| NC_037640.1 | 3114772 | SNV | 1 | C | G | Homozygous   |
| NC_037640.1 | 3114952 | SNV | 1 | A | G | Homozygous   |
| NC_037640.1 | 3115235 | SNV | 1 | A | G | Homozygous   |
| NC_037640.1 | 3115351 | SNV | 1 | T | C | Homozygous   |
| NC_037640.1 | 3117047 | SNV | 1 | A | G | Homozygous   |
| NC_037640.1 | 3117259 | SNV | 1 | G | A | Heterozygous |
| NC_037640.1 | 3117265 | SNV | 1 | C | T | Heterozygous |
| NC_037640.1 | 3117505 | SNV | 1 | T | C | Homozygous   |
| NC_037640.1 | 3118149 | SNV | 1 | G | A | Homozygous   |
| NC_037640.1 | 3118335 | SNV | 1 | A | G | Homozygous   |
| NC_037640.1 | 3118928 | SNV | 1 | T | C | Homozygous   |
| NC_037640.1 | 3119341 | SNV | 1 | C | T | Heterozygous |
| NC_037640.1 | 3119343 | SNV | 1 | T | C | Heterozygous |
| NC_037640.1 | 3119349 | SNV | 1 | T | C | Heterozygous |
| NC_037640.1 | 3119464 | SNV | 1 | A | G | Homozygous   |
| NC_037640.1 | 3119669 | SNV | 1 | G | T | Homozygous   |
| NC_037640.1 | 3119747 | SNV | 1 | C | T | Heterozygous |
| NC_037640.1 | 3121227 | SNV | 1 | G | A | Homozygous   |
| NC_037640.1 | 3121488 | SNV | 1 | T | C | Homozygous   |
| NC_037640.1 | 3135431 | SNV | 1 | A | T | Homozygous   |
| NC_037640.1 | 3135624 | SNV | 1 | T | A | Heterozygous |
| NC_037640.1 | 3137343 | SNV | 1 | C | T | Homozygous   |
| NC_037640.1 | 3137400 | SNV | 1 | C | T | Homozygous   |
| NC_037640.1 | 3137424 | SNV | 1 | T | C | Homozygous   |
| NC_037640.1 | 3137989 | SNV | 1 | C | G | Homozygous   |
| NC_037640.1 | 3145332 | SNV | 1 | A | G | Homozygous   |
| NC_037640.1 | 3145405 | SNV | 1 | C | T | Homozygous   |
| NC_037640.1 | 3145618 | SNV | 1 | T | G | Heterozygous |
| NC_037640.1 | 3145664 | SNV | 1 | T | C | Homozygous   |
| NC_037640.1 | 3145984 | SNV | 1 | T | C | Homozygous   |
| NC_037640.1 | 3146260 | SNV | 1 | A | G | Heterozygous |
| NC_037640.1 | 3146402 | SNV | 1 | A | G | Homozygous   |
| NC_037640.1 | 3147368 | SNV | 1 | A | G | Homozygous   |
| NC_037640.1 | 3159462 | SNV | 1 | T | C | Homozygous   |
| NC_037640.1 | 3159507 | SNV | 1 | A | G | Homozygous   |
| NC_037640.1 | 3169926 | SNV | 1 | G | A | Homozygous   |

|             |         |     |   |   |   |              |
|-------------|---------|-----|---|---|---|--------------|
| NC_037640.1 | 3180066 | SNV | 1 | G | A | Homozygous   |
| NC_037640.1 | 3188610 | SNV | 1 | G | A | Homozygous   |
| NC_037640.1 | 3189110 | SNV | 1 | A | G | Homozygous   |
| NC_037640.1 | 3189261 | SNV | 1 | A | G | Homozygous   |
| NC_037640.1 | 3189269 | SNV | 1 | T | C | Homozygous   |
| NC_037640.1 | 3189335 | SNV | 1 | G | A | Heterozygous |
| NC_037640.1 | 3189424 | SNV | 1 | A | G | Homozygous   |
| NC_037640.1 | 3203833 | SNV | 1 | T | C | Homozygous   |
| NC_037640.1 | 3204040 | SNV | 1 | C | T | Homozygous   |
| NC_037640.1 | 3204424 | SNV | 1 | A | G | Heterozygous |
| NC_037640.1 | 3213021 | SNV | 1 | A | G | Homozygous   |
| NC_037640.1 | 3213261 | SNV | 1 | C | T | Homozygous   |
| NC_037640.1 | 3214862 | SNV | 1 | T | G | Heterozygous |
| NC_037640.1 | 3214892 | SNV | 1 | A | C | Heterozygous |
| NC_037640.1 | 3214895 | SNV | 1 | T | G | Heterozygous |
| NC_037640.1 | 3214897 | SNV | 1 | A | G | Heterozygous |
| NC_037640.1 | 3214910 | SNV | 1 | T | G | Heterozygous |
| NC_037640.1 | 3214916 | SNV | 1 | T | C | Heterozygous |
| NC_037640.1 | 3214919 | SNV | 1 | T | C | Heterozygous |
| NC_037640.1 | 3214922 | SNV | 1 | T | G | Heterozygous |
| NC_037640.1 | 3214926 | SNV | 1 | T | C | Heterozygous |
| NC_037640.1 | 3214934 | SNV | 1 | A | G | Heterozygous |
| NC_037640.1 | 3214937 | SNV | 1 | T | C | Heterozygous |
| NC_037640.1 | 3214940 | SNV | 1 | A | T | Heterozygous |
| NC_037640.1 | 3214946 | SNV | 1 | A | C | Heterozygous |
| NC_037640.1 | 3214952 | SNV | 1 | T | G | Heterozygous |
| NC_037640.1 | 3214961 | SNV | 1 | T | A | Heterozygous |
| NC_037640.1 | 3215122 | SNV | 1 | A | T | Homozygous   |
| NC_037640.1 | 3215135 | SNV | 1 | T | A | Homozygous   |
| NC_037640.1 | 3215686 | SNV | 1 | G | A | Homozygous   |
| NC_037640.1 | 3217596 | SNV | 1 | A | G | Homozygous   |
| NC_037640.1 | 3218304 | SNV | 1 | A | G | Homozygous   |
| NC_037640.1 | 3222836 | SNV | 1 | G | A | Heterozygous |
| NC_037640.1 | 3223256 | SNV | 1 | G | A | Homozygous   |
| NC_037640.1 | 3223438 | SNV | 1 | C | G | Homozygous   |
| NC_037640.1 | 3223442 | SNV | 1 | C | T | Homozygous   |
| NC_037640.1 | 3224090 | SNV | 1 | T | C | Homozygous   |
| NC_037640.1 | 3224134 | SNV | 1 | T | C | Homozygous   |
| NC_037640.1 | 3230392 | SNV | 1 | A | G | Heterozygous |
| NC_037640.1 | 3230395 | SNV | 1 | A | G | Heterozygous |
| NC_037640.1 | 3230405 | SNV | 1 | A | G | Heterozygous |
| NC_037640.1 | 3231446 | SNV | 1 | G | A | Homozygous   |
| NC_037640.1 | 3232077 | SNV | 1 | A | G | Homozygous   |
| NC_037640.1 | 3233176 | SNV | 1 | A | G | Heterozygous |
| NC_037640.1 | 3233532 | SNV | 1 | T | C | Homozygous   |
| NC_037640.1 | 3238161 | SNV | 1 | C | T | Homozygous   |
| NC_037640.1 | 3238293 | SNV | 1 | T | C | Homozygous   |
| NC_037640.1 | 3242255 | SNV | 1 | C | T | Heterozygous |
| NC_037640.1 | 3242290 | SNV | 1 | A | G | Homozygous   |
| NC_037640.1 | 3243681 | SNV | 1 | T | A | Heterozygous |
| NC_037640.1 | 3243703 | SNV | 1 | A | T | Heterozygous |

|             |         |     |   |   |   |              |
|-------------|---------|-----|---|---|---|--------------|
| NC_037640.1 | 3243718 | SNV | 1 | T | A | Heterozygous |
| NC_037640.1 | 3244283 | SNV | 1 | A | T | Homozygous   |
| NC_037640.1 | 3244439 | SNV | 1 | G | A | Heterozygous |
| NC_037640.1 | 3244466 | SNV | 1 | C | T | Heterozygous |
| NC_037640.1 | 3245092 | SNV | 1 | A | G | Homozygous   |
| NC_037640.1 | 3245162 | SNV | 1 | A | G | Homozygous   |
| NC_037640.1 | 3245727 | SNV | 1 | G | A | Heterozygous |
| NC_037640.1 | 3246782 | SNV | 1 | T | C | Heterozygous |
| NC_037640.1 | 3282099 | SNV | 1 | C | T | Homozygous   |
| NC_037640.1 | 3282728 | SNV | 1 | G | A | Heterozygous |
| NC_037640.1 | 3283099 | SNV | 1 | G | A | Heterozygous |
| NC_037640.1 | 3284714 | SNV | 1 | A | G | Homozygous   |
| NC_037640.1 | 3285215 | SNV | 1 | G | A | Homozygous   |
| NC_037640.1 | 3286172 | SNV | 1 | C | T | Homozygous   |
| NC_037640.1 | 3286523 | SNV | 1 | C | T | Heterozygous |
| NC_037640.1 | 3286531 | SNV | 1 | T | C | Homozygous   |
| NC_037640.1 | 3287150 | SNV | 1 | A | G | Homozygous   |
| NC_037640.1 | 3292588 | SNV | 1 | T | A | Heterozygous |
| NC_037640.1 | 3292623 | SNV | 1 | G | A | Heterozygous |
| NC_037640.1 | 3293124 | SNV | 1 | G | A | Homozygous   |
| NC_037640.1 | 3293234 | SNV | 1 | G | A | Homozygous   |
| NC_037640.1 | 3293463 | SNV | 1 | A | G | Homozygous   |
| NC_037640.1 | 3293517 | SNV | 1 | T | C | Heterozygous |
| NC_037640.1 | 3293528 | SNV | 1 | G | A | Heterozygous |
| NC_037640.1 | 3293556 | SNV | 1 | T | C | Heterozygous |
| NC_037640.1 | 3294528 | SNV | 1 | A | G | Homozygous   |
| NC_037640.1 | 3294547 | SNV | 1 | G | A | Heterozygous |
| NC_037640.1 | 3294726 | SNV | 1 | T | C | Homozygous   |
| NC_037640.1 | 3294790 | SNV | 1 | C | T | Heterozygous |
| NC_037640.1 | 3294797 | SNV | 1 | C | G | Heterozygous |
| NC_037640.1 | 3294804 | SNV | 1 | T | C | Heterozygous |
| NC_037640.1 | 3296345 | SNV | 1 | A | G | Heterozygous |
| NC_037640.1 | 3296363 | SNV | 1 | C | T | Homozygous   |
| NC_037640.1 | 3297121 | SNV | 1 | A | T | Homozygous   |
| NC_037640.1 | 3297140 | SNV | 1 | G | C | Homozygous   |
| NC_037640.1 | 3297348 | SNV | 1 | A | G | Homozygous   |
| NC_037640.1 | 3299919 | SNV | 1 | G | A | Heterozygous |
| NC_037640.1 | 3300983 | SNV | 1 | T | C | Homozygous   |
| NC_037640.1 | 3301176 | SNV | 1 | A | G | Heterozygous |
| NC_037640.1 | 3301614 | SNV | 1 | A | T | Homozygous   |
| NC_037640.1 | 3301616 | SNV | 1 | A | T | Homozygous   |
| NC_037640.1 | 3301643 | SNV | 1 | T | A | Homozygous   |
| NC_037640.1 | 3301645 | SNV | 1 | T | C | Homozygous   |
| NC_037640.1 | 3302283 | SNV | 1 | A | G | Homozygous   |
| NC_037640.1 | 3302341 | SNV | 1 | T | A | Homozygous   |
| NC_037640.1 | 3303527 | SNV | 1 | T | C | Homozygous   |
| NC_037640.1 | 3306376 | SNV | 1 | T | A | Homozygous   |
| NC_037640.1 | 3307520 | SNV | 1 | C | T | Heterozygous |
| NC_037640.1 | 3307575 | SNV | 1 | T | C | Heterozygous |
| NC_037640.1 | 3307649 | SNV | 1 | T | C | Homozygous   |
| NC_037640.1 | 3308718 | SNV | 1 | A | G | Heterozygous |

|             |         |     |   |   |   |              |
|-------------|---------|-----|---|---|---|--------------|
| NC_037640.1 | 3310037 | SNV | 1 | A | G | Heterozygous |
| NC_037640.1 | 3316034 | SNV | 1 | A | T | Homozygous   |
| NC_037640.1 | 3316041 | SNV | 1 | T | C | Homozygous   |
| NC_037640.1 | 3316046 | SNV | 1 | G | A | Homozygous   |
| NC_037640.1 | 3316487 | SNV | 1 | G | A | Heterozygous |
| NC_037640.1 | 3316561 | SNV | 1 | C | T | Heterozygous |
| NC_037640.1 | 3317019 | SNV | 1 | C | T | Heterozygous |
| NC_037640.1 | 3317052 | SNV | 1 | A | G | Homozygous   |
| NC_037640.1 | 3317731 | SNV | 1 | T | A | Homozygous   |
| NC_037640.1 | 3317734 | SNV | 1 | A | C | Homozygous   |
| NC_037640.1 | 3318030 | SNV | 1 | A | T | Homozygous   |
| NC_037640.1 | 3318072 | SNV | 1 | A | T | Homozygous   |
| NC_037640.1 | 3318218 | SNV | 1 | T | C | Heterozygous |
| NC_037640.1 | 3318255 | SNV | 1 | A | G | Heterozygous |
| NC_037640.1 | 3319550 | SNV | 1 | T | C | Heterozygous |
| NC_037640.1 | 3319625 | SNV | 1 | T | G | Heterozygous |
| NC_037640.1 | 3320432 | SNV | 1 | T | C | Homozygous   |
| NC_037640.1 | 3320456 | SNV | 1 | T | C | Heterozygous |
| NC_037640.1 | 3320600 | SNV | 1 | A | G | Homozygous   |
| NC_037640.1 | 3320816 | SNV | 1 | A | G | Homozygous   |
| NC_037640.1 | 3320969 | SNV | 1 | A | G | Heterozygous |
| NC_037640.1 | 3321071 | SNV | 1 | A | G | Heterozygous |
| NC_037640.1 | 3321143 | SNV | 1 | C | T | Homozygous   |
| NC_037640.1 | 3321278 | SNV | 1 | T | C | Heterozygous |
| NC_037640.1 | 3321815 | SNV | 1 | G | C | Heterozygous |
| NC_037640.1 | 3321818 | SNV | 1 | G | A | Heterozygous |
| NC_037640.1 | 3322086 | SNV | 1 | A | C | Homozygous   |
| NC_037640.1 | 3322091 | SNV | 1 | A | C | Homozygous   |
| NC_037640.1 | 3322511 | SNV | 1 | G | A | Homozygous   |
| NC_037640.1 | 3322521 | SNV | 1 | C | T | Homozygous   |
| NC_037640.1 | 3322608 | SNV | 1 | C | T | Homozygous   |
| NC_037640.1 | 3322914 | SNV | 1 | G | A | Heterozygous |
| NC_037640.1 | 3323304 | SNV | 1 | C | T | Homozygous   |
| NC_037640.1 | 3323463 | SNV | 1 | A | G | Heterozygous |
| NC_037640.1 | 3323622 | SNV | 1 | A | G | Heterozygous |
| NC_037640.1 | 3323667 | SNV | 1 | A | G | Homozygous   |
| NC_037640.1 | 3323688 | SNV | 1 | T | C | Heterozygous |
| NC_037640.1 | 3323790 | SNV | 1 | G | A | Homozygous   |
| NC_037640.1 | 3323817 | SNV | 1 | G | A | Homozygous   |
| NC_037640.1 | 3324240 | SNV | 1 | G | A | Homozygous   |
| NC_037640.1 | 3324252 | SNV | 1 | G | A | Homozygous   |
| NC_037640.1 | 3324396 | SNV | 1 | G | A | Heterozygous |
| NC_037640.1 | 3324450 | SNV | 1 | A | G | Homozygous   |
| NC_037640.1 | 3324639 | SNV | 1 | C | T | Heterozygous |
| NC_037640.1 | 3324681 | SNV | 1 | C | T | Homozygous   |
| NC_037640.1 | 3324687 | SNV | 1 | C | A | Heterozygous |
| NC_037640.1 | 3324894 | SNV | 1 | C | T | Heterozygous |
| NC_037640.1 | 3324915 | SNV | 1 | T | C | Heterozygous |
| NC_037640.1 | 3324951 | SNV | 1 | C | T | Homozygous   |
| NC_037640.1 | 3324990 | SNV | 1 | G | A | Homozygous   |
| NC_037640.1 | 3325605 | SNV | 1 | C | T | Heterozygous |



|             |         |     |   |   |   |              |
|-------------|---------|-----|---|---|---|--------------|
| NC_037640.1 | 3326091 | SNV | 1 | G | A | Heterozygous |
| NC_037640.1 | 3326210 | SNV | 1 | G | A | Heterozygous |
| NC_037640.1 | 3345722 | SNV | 1 | C | T | Homozygous   |
| NC_037640.1 | 3345728 | SNV | 1 | A | G | Homozygous   |
| NC_037640.1 | 3345931 | SNV | 1 | C | T | Homozygous   |
| NC_037640.1 | 3356500 | SNV | 1 | C | T | Heterozygous |
| NC_037640.1 | 3371249 | SNV | 1 | C | A | Heterozygous |
| NC_037640.1 | 3371253 | SNV | 1 | G | A | Homozygous   |
| NC_037640.1 | 3371265 | SNV | 1 | G | A | Heterozygous |
| NC_037640.1 | 3375571 | SNV | 1 | A | G | Homozygous   |
| NC_037640.1 | 3376034 | SNV | 1 | C | T | Homozygous   |
| NC_037640.1 | 3376172 | SNV | 1 | T | C | Homozygous   |
| NC_037640.1 | 3382756 | SNV | 1 | G | C | Heterozygous |
| NC_037640.1 | 3383036 | SNV | 1 | G | A | Heterozygous |
| NC_037640.1 | 3384062 | SNV | 1 | T | A | Heterozygous |
| NC_037640.1 | 3385017 | SNV | 1 | C | G | Homozygous   |
| NC_037640.1 | 3385059 | SNV | 1 | C | G | Homozygous   |
| NC_037640.1 | 3385062 | SNV | 1 | T | C | Homozygous   |
| NC_037640.1 | 3385065 | SNV | 1 | T | G | Homozygous   |
| NC_037640.1 | 3385068 | SNV | 1 | T | G | Homozygous   |
| NC_037640.1 | 3385072 | SNV | 1 | G | C | Heterozygous |
| NC_037640.1 | 3385725 | SNV | 1 | T | G | Heterozygous |
| NC_037640.1 | 3385727 | SNV | 1 | G | T | Heterozygous |
| NC_037640.1 | 3385763 | SNV | 1 | G | A | Heterozygous |
| NC_037640.1 | 3385911 | SNV | 1 | A | G | Homozygous   |
| NC_037640.1 | 3385961 | SNV | 1 | A | G | Heterozygous |
| NC_037640.1 | 3386090 | SNV | 1 | A | G | Homozygous   |
| NC_037640.1 | 3386473 | SNV | 1 | G | A | Heterozygous |
| NC_037640.1 | 3386568 | SNV | 1 | A | G | Heterozygous |
| NC_037640.1 | 3386618 | SNV | 1 | G | A | Homozygous   |
| NC_037640.1 | 3387047 | SNV | 1 | G | A | Homozygous   |
| NC_037640.1 | 3387082 | SNV | 1 | G | C | Homozygous   |
| NC_037640.1 | 3387698 | SNV | 1 | C | T | Homozygous   |
| NC_037640.1 | 3387735 | SNV | 1 | T | C | Heterozygous |
| NC_037640.1 | 3388248 | SNV | 1 | G | A | Heterozygous |
| NC_037640.1 | 3388282 | SNV | 1 | G | A | Heterozygous |
| NC_037640.1 | 3388294 | SNV | 1 | G | A | Heterozygous |
| NC_037640.1 | 3388560 | SNV | 1 | T | C | Heterozygous |
| NC_037640.1 | 3388645 | SNV | 1 | G | A | Homozygous   |
| NC_037640.1 | 3388788 | SNV | 1 | A | G | Homozygous   |
| NC_037640.1 | 3388924 | SNV | 1 | C | T | Homozygous   |
| NC_037640.1 | 3393907 | SNV | 1 | G | A | Homozygous   |
| NC_037640.1 | 3414779 | SNV | 1 | A | G | Homozygous   |
| NC_037640.1 | 3414810 | SNV | 1 | C | A | Homozygous   |
| NC_037640.1 | 3417691 | SNV | 1 | C | T | Homozygous   |
| NC_037640.1 | 3423234 | SNV | 1 | A | G | Homozygous   |
| NC_037640.1 | 3424188 | SNV | 1 | C | T | Heterozygous |
| NC_037640.1 | 3433311 | SNV | 1 | A | G | Heterozygous |
| NC_037640.1 | 3441925 | SNV | 1 | T | C | Homozygous   |
| NC_037640.1 | 3442404 | SNV | 1 | G | A | Homozygous   |
| NC_037640.1 | 3449182 | SNV | 1 | C | T | Heterozygous |

|             |         |     |   |   |   |              |
|-------------|---------|-----|---|---|---|--------------|
| NC_037640.1 | 3451044 | SNV | 1 | T | C | Heterozygous |
| NC_037640.1 | 3451430 | SNV | 1 | C | A | Heterozygous |
| NC_037640.1 | 3451434 | SNV | 1 | G | A | Heterozygous |
| NC_037640.1 | 3451467 | SNV | 1 | G | T | Heterozygous |
| NC_037640.1 | 3451470 | SNV | 1 | A | G | Heterozygous |
| NC_037640.1 | 3453585 | SNV | 1 | C | T | Heterozygous |
| NC_037640.1 | 3453586 | SNV | 1 | C | T | Heterozygous |
| NC_037640.1 | 3453606 | SNV | 1 | C | T | Heterozygous |
| NC_037640.1 | 3453613 | SNV | 1 | T | C | Homozygous   |
| NC_037640.1 | 3453723 | SNV | 1 | G | A | Homozygous   |
| NC_037640.1 | 3453788 | SNV | 1 | G | A | Heterozygous |
| NC_037640.1 | 3453792 | SNV | 1 | A | G | Heterozygous |
| NC_037640.1 | 3455865 | SNV | 1 | A | T | Homozygous   |
| NC_037640.1 | 3455957 | SNV | 1 | G | A | Homozygous   |
| NC_037640.1 | 3457378 | SNV | 1 | T | C | Homozygous   |
| NC_037640.1 | 3466720 | SNV | 1 | A | G | Homozygous   |
| NC_037640.1 | 3466740 | SNV | 1 | G | A | Homozygous   |
| NC_037640.1 | 3466742 | SNV | 1 | A | G | Homozygous   |
| NC_037640.1 | 3466750 | SNV | 1 | G | A | Heterozygous |
| NC_037640.1 | 3466758 | SNV | 1 | T | A | Homozygous   |
| NC_037640.1 | 3466761 | SNV | 1 | T | G | Homozygous   |
| NC_037640.1 | 3474023 | SNV | 1 | A | G | Heterozygous |
| NC_037640.1 | 3481072 | SNV | 1 | A | C | Homozygous   |
| NC_037640.1 | 3481145 | SNV | 1 | C | T | Heterozygous |
| NC_037640.1 | 3481150 | SNV | 1 | C | T | Heterozygous |
| NC_037640.1 | 3482133 | SNV | 1 | C | T | Homozygous   |
| NC_037640.1 | 3483809 | SNV | 1 | T | C | Homozygous   |
| NC_037640.1 | 3483823 | SNV | 1 | C | T | Heterozygous |
| NC_037640.1 | 3484151 | SNV | 1 | T | C | Homozygous   |
| NC_037640.1 | 3484381 | SNV | 1 | G | A | Homozygous   |
| NC_037640.1 | 3484518 | SNV | 1 | T | C | Heterozygous |
| NC_037640.1 | 3484561 | SNV | 1 | G | A | Heterozygous |
| NC_037640.1 | 3484596 | SNV | 1 | T | C | Homozygous   |
| NC_037640.1 | 3485636 | SNV | 1 | C | T | Heterozygous |
| NC_037640.1 | 3487681 | SNV | 1 | T | C | Homozygous   |
| NC_037640.1 | 3488098 | SNV | 1 | T | C | Homozygous   |
| NC_037640.1 | 3491972 | SNV | 1 | C | T | Homozygous   |
| NC_037640.1 | 3492901 | SNV | 1 | T | C | Homozygous   |
| NC_037640.1 | 3493083 | SNV | 1 | G | A | Homozygous   |
| NC_037640.1 | 3493185 | SNV | 1 | G | A | Heterozygous |
| NC_037640.1 | 3493294 | SNV | 1 | G | T | Homozygous   |
| NC_037640.1 | 3493520 | SNV | 1 | C | T | Heterozygous |
| NC_037640.1 | 3493574 | SNV | 1 | T | C | Homozygous   |
| NC_037640.1 | 3493771 | SNV | 1 | T | C | Homozygous   |
| NC_037640.1 | 3494992 | SNV | 1 | C | T | Homozygous   |
| NC_037640.1 | 3495297 | SNV | 1 | G | A | Homozygous   |
| NC_037640.1 | 3496343 | SNV | 1 | T | A | Homozygous   |
| NC_037640.1 | 3496528 | SNV | 1 | G | A | Homozygous   |
| NC_037640.1 | 3496890 | SNV | 1 | T | C | Homozygous   |
| NC_037640.1 | 3497082 | SNV | 1 | G | A | Homozygous   |
| NC_037640.1 | 3497100 | SNV | 1 | T | A | Homozygous   |

|             |         |     |   |   |   |              |
|-------------|---------|-----|---|---|---|--------------|
| NC_037640.1 | 3507125 | SNV | 1 | C | A | Homozygous   |
| NC_037640.1 | 3507155 | SNV | 1 | T | C | Homozygous   |
| NC_037640.1 | 3507159 | SNV | 1 | A | G | Homozygous   |
| NC_037640.1 | 3507167 | SNV | 1 | T | A | Homozygous   |
| NC_037640.1 | 3507175 | SNV | 1 | G | A | Heterozygous |
| NC_037640.1 | 3513162 | SNV | 1 | G | C | Homozygous   |
| NC_037640.1 | 3513172 | SNV | 1 | T | C | Homozygous   |
| NC_037640.1 | 3513549 | SNV | 1 | C | A | Heterozygous |
| NC_037640.1 | 3513675 | SNV | 1 | T | C | Heterozygous |
| NC_037640.1 | 3513789 | SNV | 1 | C | T | Homozygous   |
| NC_037640.1 | 3513820 | SNV | 1 | G | A | Heterozygous |
| NC_037640.1 | 3513851 | SNV | 1 | C | T | Heterozygous |
| NC_037640.1 | 3513972 | SNV | 1 | T | C | Heterozygous |
| NC_037640.1 | 3521671 | SNV | 1 | T | C | Homozygous   |
| NC_037640.1 | 3521701 | SNV | 1 | G | A | Heterozygous |
| NC_037640.1 | 3521703 | SNV | 1 | C | T | Heterozygous |
| NC_037640.1 | 3521823 | SNV | 1 | C | T | Heterozygous |
| NC_037640.1 | 3521893 | SNV | 1 | C | G | Homozygous   |
| NC_037640.1 | 3521977 | SNV | 1 | T | C | Heterozygous |
| NC_037640.1 | 3532133 | SNV | 1 | C | T | Heterozygous |
| NC_037640.1 | 3552209 | SNV | 1 | T | C | Homozygous   |
| NC_037640.1 | 3552294 | SNV | 1 | T | C | Heterozygous |
| NC_037640.1 | 3567542 | SNV | 1 | G | A | Heterozygous |
| NC_037640.1 | 3567607 | SNV | 1 | T | C | Heterozygous |
| NC_037640.1 | 3567797 | SNV | 1 | T | A | Heterozygous |
| NC_037640.1 | 3567855 | SNV | 1 | C | T | Heterozygous |
| NC_037640.1 | 3567968 | SNV | 1 | A | G | Heterozygous |
| NC_037640.1 | 3569693 | SNV | 1 | A | C | Homozygous   |
| NC_037640.1 | 3587292 | SNV | 1 | G | T | Heterozygous |
| NC_037640.1 | 3587333 | SNV | 1 | A | G | Homozygous   |
| NC_037640.1 | 3594686 | SNV | 1 | G | A | Homozygous   |
| NC_037640.1 | 3594910 | SNV | 1 | T | G | Homozygous   |
| NC_037640.1 | 3595179 | SNV | 1 | C | T | Heterozygous |
| NC_037640.1 | 3600726 | SNV | 1 | T | C | Homozygous   |
| NC_037640.1 | 3600821 | SNV | 1 | G | C | Homozygous   |
| NC_037640.1 | 3600831 | SNV | 1 | C | G | Heterozygous |
| NC_037640.1 | 3602132 | SNV | 1 | C | T | Heterozygous |
| NC_037640.1 | 3602400 | SNV | 1 | C | T | Homozygous   |
| NC_037640.1 | 3602463 | SNV | 1 | C | T | Heterozygous |
| NC_037640.1 | 3602909 | SNV | 1 | T | A | Heterozygous |
| NC_037640.1 | 3602916 | SNV | 1 | T | C | Heterozygous |
| NC_037640.1 | 3605292 | SNV | 1 | A | G | Homozygous   |
| NC_037640.1 | 3605298 | SNV | 1 | A | C | Homozygous   |
| NC_037640.1 | 3605303 | SNV | 1 | G | A | Homozygous   |
| NC_037640.1 | 3605308 | SNV | 1 | A | G | Homozygous   |
| NC_037640.1 | 3605310 | SNV | 1 | A | G | Homozygous   |
| NC_037640.1 | 3605312 | SNV | 1 | G | C | Homozygous   |
| NC_037640.1 | 3606228 | SNV | 1 | C | T | Heterozygous |
| NC_037640.1 | 3606235 | SNV | 1 | C | A | Heterozygous |
| NC_037640.1 | 3606769 | SNV | 1 | G | A | Homozygous   |
| NC_037640.1 | 3606801 | SNV | 1 | G | A | Heterozygous |

|             |         |     |   |   |   |              |
|-------------|---------|-----|---|---|---|--------------|
| NC_037640.1 | 3609110 | SNV | 1 | C | T | Heterozygous |
| NC_037640.1 | 3609747 | SNV | 1 | C | T | Homozygous   |
| NC_037640.1 | 3609765 | SNV | 1 | T | C | Homozygous   |
| NC_037640.1 | 3609787 | SNV | 1 | T | C | Homozygous   |
| NC_037640.1 | 3609805 | SNV | 1 | G | C | Homozygous   |
| NC_037640.1 | 3609819 | SNV | 1 | C | T | Homozygous   |
| NC_037640.1 | 3656613 | SNV | 1 | T | C | Homozygous   |
| NC_037640.1 | 3656619 | SNV | 1 | T | A | Homozygous   |
| NC_037640.1 | 3672647 | SNV | 1 | A | G | Heterozygous |
| NC_037640.1 | 3672988 | SNV | 1 | A | G | Heterozygous |
| NC_037640.1 | 3673757 | SNV | 1 | C | T | Heterozygous |
| NC_037640.1 | 3673791 | SNV | 1 | T | C | Homozygous   |
| NC_037640.1 | 3673858 | SNV | 1 | A | G | Homozygous   |
| NC_037640.1 | 3673868 | SNV | 1 | T | C | Homozygous   |
| NC_037640.1 | 3673896 | SNV | 1 | G | A | Homozygous   |
| NC_037640.1 | 3674094 | SNV | 1 | G | A | Heterozygous |
| NC_037640.1 | 3674295 | SNV | 1 | T | C | Heterozygous |
| NC_037640.1 | 3674381 | SNV | 1 | A | T | Homozygous   |
| NC_037640.1 | 3674446 | SNV | 1 | A | G | Homozygous   |
| NC_037640.1 | 3674509 | SNV | 1 | T | A | Heterozygous |
| NC_037640.1 | 3674606 | SNV | 1 | T | C | Homozygous   |
| NC_037640.1 | 3674756 | SNV | 1 | A | G | Homozygous   |
| NC_037640.1 | 3674822 | SNV | 1 | T | C | Homozygous   |
| NC_037640.1 | 3674844 | SNV | 1 | T | C | Heterozygous |
| NC_037640.1 | 3674908 | SNV | 1 | T | C | Homozygous   |
| NC_037640.1 | 3675068 | SNV | 1 | C | T | Homozygous   |
| NC_037640.1 | 3675080 | SNV | 1 | A | G | Homozygous   |
| NC_037640.1 | 3675407 | SNV | 1 | G | C | Heterozygous |
| NC_037640.1 | 3678843 | SNV | 1 | G | A | Homozygous   |
| NC_037640.1 | 3678992 | SNV | 1 | G | A | Homozygous   |
| NC_037640.1 | 3679047 | SNV | 1 | A | T | Heterozygous |
| NC_037640.1 | 3679064 | SNV | 1 | T | C | Heterozygous |
| NC_037640.1 | 3679282 | SNV | 1 | T | C | Heterozygous |
| NC_037640.1 | 3683048 | SNV | 1 | T | C | Homozygous   |
| NC_037640.1 | 3683941 | SNV | 1 | T | G | Homozygous   |
| NC_037640.1 | 3683948 | SNV | 1 | T | C | Homozygous   |
| NC_037640.1 | 3683952 | SNV | 1 | T | G | Homozygous   |
| NC_037640.1 | 3683955 | SNV | 1 | C | T | Homozygous   |
| NC_037640.1 | 3689893 | SNV | 1 | A | C | Heterozygous |
| NC_037640.1 | 3689907 | SNV | 1 | G | A | Homozygous   |
| NC_037640.1 | 3689968 | SNV | 1 | G | A | Homozygous   |
| NC_037640.1 | 3694501 | SNV | 1 | A | T | Heterozygous |
| NC_037640.1 | 3694543 | SNV | 1 | T | G | Homozygous   |
| NC_037640.1 | 3701887 | SNV | 1 | A | G | Homozygous   |
| NC_037640.1 | 3702261 | SNV | 1 | T | C | Homozygous   |
| NC_037640.1 | 3702283 | SNV | 1 | G | A | Heterozygous |
| NC_037640.1 | 3705859 | SNV | 1 | A | G | Heterozygous |
| NC_037640.1 | 3705878 | SNV | 1 | G | A | Heterozygous |
| NC_037640.1 | 3706215 | SNV | 1 | A | G | Homozygous   |
| NC_037640.1 | 3706254 | SNV | 1 | T | C | Heterozygous |
| NC_037640.1 | 3706398 | SNV | 1 | G | A | Homozygous   |

|             |         |     |   |   |   |              |
|-------------|---------|-----|---|---|---|--------------|
| NC_037640.1 | 3706482 | SNV | 1 | C | T | Heterozygous |
| NC_037640.1 | 3706734 | SNV | 1 | A | G | Heterozygous |
| NC_037640.1 | 3706773 | SNV | 1 | G | C | Homozygous   |
| NC_037640.1 | 3706842 | SNV | 1 | T | G | Homozygous   |
| NC_037640.1 | 3740020 | SNV | 1 | A | G | Homozygous   |
| NC_037640.1 | 3740243 | SNV | 1 | C | T | Homozygous   |
| NC_037640.1 | 3740391 | SNV | 1 | A | G | Homozygous   |
| NC_037640.1 | 3740401 | SNV | 1 | T | A | Homozygous   |
| NC_037640.1 | 3746338 | SNV | 1 | C | T | Homozygous   |
| NC_037640.1 | 3746503 | SNV | 1 | A | G | Homozygous   |
| NC_037640.1 | 3746619 | SNV | 1 | C | G | Heterozygous |
| NC_037640.1 | 3746729 | SNV | 1 | A | C | Homozygous   |
| NC_037640.1 | 3753378 | SNV | 1 | C | T | Homozygous   |
| NC_037640.1 | 3753544 | SNV | 1 | C | T | Homozygous   |
| NC_037640.1 | 3754383 | SNV | 1 | A | T | Heterozygous |
| NC_037640.1 | 3754454 | SNV | 1 | A | T | Homozygous   |
| NC_037640.1 | 3755565 | SNV | 1 | T | C | Homozygous   |
| NC_037640.1 | 3765004 | SNV | 1 | C | T | Heterozygous |
| NC_037640.1 | 3765215 | SNV | 1 | C | G | Homozygous   |
| NC_037640.1 | 3768073 | SNV | 1 | A | C | Homozygous   |
| NC_037640.1 | 3768125 | SNV | 1 | T | C | Homozygous   |
| NC_037640.1 | 3768779 | SNV | 1 | T | C | Homozygous   |
| NC_037640.1 | 3771012 | SNV | 1 | A | G | Homozygous   |
| NC_037640.1 | 3771436 | SNV | 1 | T | C | Heterozygous |
| NC_037640.1 | 3771777 | SNV | 1 | T | C | Homozygous   |
| NC_037640.1 | 3771989 | SNV | 1 | C | T | Homozygous   |
| NC_037640.1 | 3771991 | SNV | 1 | A | G | Homozygous   |
| NC_037640.1 | 3775587 | SNV | 1 | A | G | Homozygous   |
| NC_037640.1 | 3776797 | SNV | 1 | A | G | Heterozygous |
| NC_037640.1 | 3777046 | SNV | 1 | C | G | Homozygous   |
| NC_037640.1 | 3796875 | SNV | 1 | T | C | Heterozygous |
| NC_037640.1 | 3796877 | SNV | 1 | A | G | Heterozygous |
| NC_037640.1 | 3796884 | SNV | 1 | A | T | Heterozygous |
| NC_037640.1 | 3796900 | SNV | 1 | A | C | Heterozygous |
| NC_037640.1 | 3796910 | SNV | 1 | A | T | Heterozygous |
| NC_037640.1 | 3821288 | SNV | 1 | C | T | Heterozygous |
| NC_037640.1 | 3827867 | SNV | 1 | C | G | Heterozygous |
| NC_037640.1 | 3827997 | SNV | 1 | G | A | Heterozygous |
| NC_037640.1 | 3830531 | SNV | 1 | T | C | Homozygous   |
| NC_037640.1 | 3830758 | SNV | 1 | G | A | Homozygous   |
| NC_037640.1 | 3830884 | SNV | 1 | C | T | Heterozygous |
| NC_037640.1 | 3830886 | SNV | 1 | G | A | Heterozygous |
| NC_037640.1 | 3830901 | SNV | 1 | T | C | Homozygous   |
| NC_037640.1 | 3830944 | SNV | 1 | T | C | Homozygous   |
| NC_037640.1 | 3831001 | SNV | 1 | A | G | Heterozygous |
| NC_037640.1 | 3846796 | SNV | 1 | A | G | Homozygous   |
| NC_037640.1 | 3847189 | SNV | 1 | G | A | Heterozygous |
| NC_037640.1 | 3875290 | SNV | 1 | T | A | Heterozygous |
| NC_037640.1 | 3875827 | SNV | 1 | T | C | Homozygous   |
| NC_037640.1 | 3875976 | SNV | 1 | C | G | Homozygous   |
| NC_037640.1 | 3876035 | SNV | 1 | T | C | Homozygous   |

|             |         |     |   |   |   |              |
|-------------|---------|-----|---|---|---|--------------|
| NC_037640.1 | 3876311 | SNV | 1 | C | T | Heterozygous |
| NC_037640.1 | 3876326 | SNV | 1 | T | C | Homozygous   |
| NC_037640.1 | 3877992 | SNV | 1 | G | C | Heterozygous |
| NC_037640.1 | 3878001 | SNV | 1 | C | T | Homozygous   |
| NC_037640.1 | 3878009 | SNV | 1 | C | G | Homozygous   |
| NC_037640.1 | 3879095 | SNV | 1 | C | T | Homozygous   |
| NC_037640.1 | 3881353 | SNV | 1 | A | G | Homozygous   |
| NC_037640.1 | 3881361 | SNV | 1 | A | T | Homozygous   |
| NC_037640.1 | 3888597 | SNV | 1 | G | A | Homozygous   |
| NC_037640.1 | 3888606 | SNV | 1 | A | T | Homozygous   |
| NC_037640.1 | 3889643 | SNV | 1 | T | A | Homozygous   |
| NC_037640.1 | 3905170 | SNV | 1 | C | G | Heterozygous |
| NC_037640.1 | 3912143 | SNV | 1 | T | C | Homozygous   |
| NC_037640.1 | 3914062 | SNV | 1 | T | A | Homozygous   |
| NC_037640.1 | 3914088 | SNV | 1 | G | C | Heterozygous |
| NC_037640.1 | 3914141 | SNV | 1 | T | A | Homozygous   |
| NC_037640.1 | 3914150 | SNV | 1 | T | C | Homozygous   |
| NC_037640.1 | 3914182 | SNV | 1 | T | C | Heterozygous |
| NC_037640.1 | 3933049 | SNV | 1 | T | A | Homozygous   |
| NC_037640.1 | 3963334 | SNV | 1 | C | T | Homozygous   |
| NC_037640.1 | 3965635 | SNV | 1 | T | C | Heterozygous |
| NC_037640.1 | 3965641 | SNV | 1 | T | C | Heterozygous |
| NC_037640.1 | 3967927 | SNV | 1 | G | A | Heterozygous |
| NC_037640.1 | 3968629 | SNV | 1 | A | C | Homozygous   |
| NC_037640.1 | 3968930 | SNV | 1 | C | T | Heterozygous |
| NC_037640.1 | 3969763 | SNV | 1 | A | C | Homozygous   |
| NC_037640.1 | 3969956 | SNV | 1 | A | G | Homozygous   |
| NC_037640.1 | 3970806 | SNV | 1 | T | C | Homozygous   |
| NC_037640.1 | 3970851 | SNV | 1 | A | G | Homozygous   |
| NC_037640.1 | 3971025 | SNV | 1 | T | C | Homozygous   |
| NC_037640.1 | 3971031 | SNV | 1 | T | C | Homozygous   |
| NC_037640.1 | 3971056 | SNV | 1 | C | T | Homozygous   |
| NC_037640.1 | 3972651 | SNV | 1 | T | C | Homozygous   |
| NC_037640.1 | 3975070 | SNV | 1 | T | C | Homozygous   |
| NC_037640.1 | 3975079 | SNV | 1 | T | C | Homozygous   |
| NC_037640.1 | 3975105 | SNV | 1 | C | G | Heterozygous |
| NC_037640.1 | 3975164 | SNV | 1 | A | G | Homozygous   |
| NC_037640.1 | 3975179 | SNV | 1 | G | T | Homozygous   |
| NC_037640.1 | 3975230 | SNV | 1 | T | C | Heterozygous |
| NC_037640.1 | 3975246 | SNV | 1 | A | G | Homozygous   |
| NC_037640.1 | 3975251 | SNV | 1 | C | T | Heterozygous |
| NC_037640.1 | 3975304 | SNV | 1 | A | G | Heterozygous |
| NC_037640.1 | 3975331 | SNV | 1 | T | C | Heterozygous |
| NC_037640.1 | 3975340 | SNV | 1 | A | G | Homozygous   |
| NC_037640.1 | 3975369 | SNV | 1 | G | A | Heterozygous |
| NC_037640.1 | 3975384 | SNV | 1 | T | C | Homozygous   |
| NC_037640.1 | 3975390 | SNV | 1 | A | G | Homozygous   |
| NC_037640.1 | 3975432 | SNV | 1 | G | A | Homozygous   |
| NC_037640.1 | 3975502 | SNV | 1 | C | T | Heterozygous |
| NC_037640.1 | 3975512 | SNV | 1 | T | A | Heterozygous |
| NC_037640.1 | 3975533 | SNV | 1 | C | T | Heterozygous |

|             |         |     |   |   |   |              |
|-------------|---------|-----|---|---|---|--------------|
| NC_037640.1 | 3975579 | SNV | 1 | G | A | Heterozygous |
| NC_037640.1 | 3975613 | SNV | 1 | G | A | Heterozygous |
| NC_037640.1 | 3975850 | SNV | 1 | G | A | Heterozygous |
| NC_037640.1 | 3976125 | SNV | 1 | A | G | Homozygous   |
| NC_037640.1 | 3976171 | SNV | 1 | G | A | Homozygous   |
| NC_037640.1 | 3979849 | SNV | 1 | A | G | Homozygous   |
| NC_037640.1 | 3980001 | SNV | 1 | G | T | Heterozygous |
| NC_037640.1 | 3980017 | SNV | 1 | T | C | Homozygous   |
| NC_037640.1 | 3980745 | SNV | 1 | A | G | Heterozygous |
| NC_037640.1 | 3982171 | SNV | 1 | A | G | Homozygous   |
| NC_037640.1 | 3982210 | SNV | 1 | C | T | Heterozygous |
| NC_037640.1 | 3982634 | SNV | 1 | T | C | Homozygous   |
| NC_037640.1 | 3985420 | SNV | 1 | A | G | Heterozygous |
| NC_037640.1 | 3985423 | SNV | 1 | T | C | Homozygous   |
| NC_037640.1 | 3985474 | SNV | 1 | A | G | Heterozygous |
| NC_037640.1 | 3985600 | SNV | 1 | G | A | Homozygous   |
| NC_037640.1 | 3985751 | SNV | 1 | C | T | Heterozygous |
| NC_037640.1 | 3985754 | SNV | 1 | T | C | Homozygous   |
| NC_037640.1 | 3985799 | SNV | 1 | A | G | Homozygous   |
| NC_037640.1 | 3986366 | SNV | 1 | T | C | Homozygous   |
| NC_037640.1 | 3987942 | SNV | 1 | A | G | Homozygous   |
| NC_037640.1 | 3987967 | SNV | 1 | A | C | Homozygous   |
| NC_037640.1 | 3988475 | SNV | 1 | A | T | Heterozygous |
| NC_037640.1 | 3988586 | SNV | 1 | A | G | Heterozygous |
| NC_037640.1 | 3988640 | SNV | 1 | G | A | Heterozygous |
| NC_037640.1 | 3988648 | SNV | 1 | T | C | Homozygous   |
| NC_037640.1 | 3988747 | SNV | 1 | A | G | Homozygous   |
| NC_037640.1 | 3989026 | SNV | 1 | C | T | Heterozygous |
| NC_037640.1 | 3989087 | SNV | 1 | C | T | Heterozygous |
| NC_037640.1 | 3989089 | SNV | 1 | G | A | Heterozygous |
| NC_037640.1 | 3989093 | SNV | 1 | A | T | Heterozygous |
| NC_037640.1 | 3989096 | SNV | 1 | A | G | Heterozygous |
| NC_037640.1 | 3989099 | SNV | 1 | G | C | Heterozygous |
| NC_037640.1 | 3989138 | SNV | 1 | A | G | Heterozygous |
| NC_037640.1 | 3989287 | SNV | 1 | A | G | Heterozygous |
| NC_037640.1 | 3989694 | SNV | 1 | A | G | Homozygous   |
| NC_037640.1 | 3989768 | SNV | 1 | T | C | Homozygous   |
| NC_037640.1 | 3989939 | SNV | 1 | G | C | Heterozygous |
| NC_037640.1 | 3990007 | SNV | 1 | G | A | Homozygous   |
| NC_037640.1 | 3990410 | SNV | 1 | G | A | Heterozygous |
| NC_037640.1 | 3990597 | SNV | 1 | A | G | Homozygous   |
| NC_037640.1 | 3990612 | SNV | 1 | T | C | Homozygous   |
| NC_037640.1 | 3990618 | SNV | 1 | C | T | Heterozygous |
| NC_037640.1 | 3993334 | SNV | 1 | C | T | Homozygous   |
| NC_037640.1 | 3994301 | SNV | 1 | G | A | Heterozygous |
| NC_037640.1 | 3994865 | SNV | 1 | C | T | Homozygous   |
| NC_037640.1 | 3995409 | SNV | 1 | G | A | Heterozygous |
| NC_037640.1 | 3995411 | SNV | 1 | T | G | Homozygous   |
| NC_037640.1 | 3995415 | SNV | 1 | T | C | Homozygous   |
| NC_037640.1 | 3995417 | SNV | 1 | T | C | Homozygous   |
| NC_037640.1 | 3995427 | SNV | 1 | G | A | Heterozygous |

|             |         |     |   |   |   |              |
|-------------|---------|-----|---|---|---|--------------|
| NC_037640.1 | 3995457 | SNV | 1 | T | C | Heterozygous |
| NC_037640.1 | 3995468 | SNV | 1 | T | C | Homozygous   |
| NC_037640.1 | 3995475 | SNV | 1 | A | G | Homozygous   |
| NC_037640.1 | 3995489 | SNV | 1 | G | A | Heterozygous |
| NC_037640.1 | 3995674 | SNV | 1 | T | C | Homozygous   |
| NC_037640.1 | 3996136 | SNV | 1 | A | G | Homozygous   |
| NC_037640.1 | 3996229 | SNV | 1 | A | G | Homozygous   |
| NC_037640.1 | 3997093 | SNV | 1 | T | C | Homozygous   |
| NC_037640.1 | 3997443 | SNV | 1 | A | G | Homozygous   |
| NC_037640.1 | 3997694 | SNV | 1 | T | C | Heterozygous |
| NC_037640.1 | 3997773 | SNV | 1 | T | C | Homozygous   |
| NC_037640.1 | 3997922 | SNV | 1 | G | A | Heterozygous |
| NC_037640.1 | 3997960 | SNV | 1 | C | T | Heterozygous |
| NC_037640.1 | 3998450 | SNV | 1 | T | C | Heterozygous |
| NC_037640.1 | 3998793 | SNV | 1 | G | A | Homozygous   |
| NC_037640.1 | 3999047 | SNV | 1 | C | T | Homozygous   |
| NC_037640.1 | 3999057 | SNV | 1 | A | G | Homozygous   |
| NC_037640.1 | 3999334 | SNV | 1 | T | C | Heterozygous |
| NC_037640.1 | 3999368 | SNV | 1 | A | G | Homozygous   |
| NC_037640.1 | 4004140 | SNV | 1 | C | T | Homozygous   |
| NC_037640.1 | 4005061 | SNV | 1 | T | C | Heterozygous |
| NC_037640.1 | 4012966 | SNV | 1 | A | G | Heterozygous |
| NC_037640.1 | 4012969 | SNV | 1 | G | A | Homozygous   |
| NC_037640.1 | 4012996 | SNV | 1 | G | A | Homozygous   |
| NC_037640.1 | 4013002 | SNV | 1 | T | G | Homozygous   |
| NC_037640.1 | 4013324 | SNV | 1 | G | T | Homozygous   |
| NC_037640.1 | 4013334 | SNV | 1 | A | C | Homozygous   |
| NC_037640.1 | 4013357 | SNV | 1 | C | T | Homozygous   |
| NC_037640.1 | 4013364 | SNV | 1 | T | C | Homozygous   |
| NC_037640.1 | 4016367 | SNV | 1 | A | G | Homozygous   |
| NC_037640.1 | 4017532 | SNV | 1 | G | A | Heterozygous |
| NC_037640.1 | 4017547 | SNV | 1 | G | A | Heterozygous |
| NC_037640.1 | 4017562 | SNV | 1 | G | A | Homozygous   |
| NC_037640.1 | 4017590 | SNV | 1 | G | A | Homozygous   |
| NC_037640.1 | 4017651 | SNV | 1 | T | C | Homozygous   |
| NC_037640.1 | 4017694 | SNV | 1 | G | A | Heterozygous |
| NC_037640.1 | 4017783 | SNV | 1 | G | A | Heterozygous |
| NC_037640.1 | 4017978 | SNV | 1 | A | G | Homozygous   |
| NC_037640.1 | 4018324 | SNV | 1 | T | C | Heterozygous |
| NC_037640.1 | 4018389 | SNV | 1 | A | G | Homozygous   |
| NC_037640.1 | 4018448 | SNV | 1 | A | G | Heterozygous |
| NC_037640.1 | 4019269 | SNV | 1 | G | A | Homozygous   |
| NC_037640.1 | 4019298 | SNV | 1 | C | A | Homozygous   |
| NC_037640.1 | 4019325 | SNV | 1 | G | A | Homozygous   |
| NC_037640.1 | 4037752 | SNV | 1 | C | T | Homozygous   |
| NC_037640.1 | 4037756 | SNV | 1 | C | T | Homozygous   |
| NC_037640.1 | 4037760 | SNV | 1 | C | A | Homozygous   |
| NC_037640.1 | 4050574 | SNV | 1 | T | C | Homozygous   |
| NC_037640.1 | 4050589 | SNV | 1 | A | G | Homozygous   |
| NC_037640.1 | 4050619 | SNV | 1 | T | A | Heterozygous |
| NC_037640.1 | 4050667 | SNV | 1 | G | A | Heterozygous |



|             |         |     |   |   |   |              |
|-------------|---------|-----|---|---|---|--------------|
| NC_037640.1 | 4050717 | SNV | 1 | A | G | Heterozygous |
| NC_037640.1 | 4052228 | SNV | 1 | G | A | Heterozygous |
| NC_037640.1 | 4070606 | SNV | 1 | G | A | Homozygous   |
| NC_037640.1 | 4073418 | SNV | 1 | A | G | Heterozygous |
| NC_037640.1 | 4073649 | SNV | 1 | C | G | Heterozygous |
| NC_037640.1 | 4073757 | SNV | 1 | A | T | Homozygous   |
| NC_037640.1 | 4073786 | SNV | 1 | C | T | Homozygous   |
| NC_037640.1 | 4075956 | SNV | 1 | C | T | Heterozygous |
| NC_037640.1 | 4075998 | SNV | 1 | C | T | Homozygous   |
| NC_037640.1 | 4076346 | SNV | 1 | C | T | Homozygous   |
| NC_037640.1 | 4076844 | SNV | 1 | G | A | Homozygous   |
| NC_037640.1 | 4076876 | SNV | 1 | T | G | Homozygous   |
| NC_037640.1 | 4080001 | SNV | 1 | C | T | Homozygous   |
| NC_037640.1 | 4080051 | SNV | 1 | C | G | Heterozygous |
| NC_037640.1 | 4080344 | SNV | 1 | G | A | Heterozygous |
| NC_037640.1 | 4084734 | SNV | 1 | A | G | Homozygous   |
| NC_037640.1 | 4084750 | SNV | 1 | A | G | Homozygous   |
| NC_037640.1 | 4085858 | SNV | 1 | T | A | Homozygous   |
| NC_037640.1 | 4085863 | SNV | 1 | A | G | Homozygous   |
| NC_037640.1 | 4085865 | SNV | 1 | T | A | Homozygous   |
| NC_037640.1 | 4085868 | SNV | 1 | C | A | Homozygous   |
| NC_037640.1 | 4085884 | SNV | 1 | T | A | Homozygous   |
| NC_037640.1 | 4085887 | SNV | 1 | G | T | Homozygous   |
| NC_037640.1 | 4092956 | SNV | 1 | A | G | Heterozygous |
| NC_037640.1 | 4092999 | SNV | 1 | T | G | Heterozygous |
| NC_037640.1 | 4093005 | SNV | 1 | G | T | Homozygous   |
| NC_037640.1 | 4093011 | SNV | 1 | C | A | Homozygous   |
| NC_037640.1 | 4103726 | SNV | 1 | T | A | Homozygous   |
| NC_037640.1 | 4103728 | SNV | 1 | T | C | Homozygous   |
| NC_037640.1 | 4103731 | SNV | 1 | C | T | Homozygous   |
| NC_037640.1 | 4103735 | SNV | 1 | C | T | Homozygous   |
| NC_037640.1 | 4103743 | SNV | 1 | C | A | Homozygous   |
| NC_037640.1 | 4104303 | SNV | 1 | G | C | Homozygous   |
| NC_037640.1 | 4104386 | SNV | 1 | A | G | Homozygous   |
| NC_037640.1 | 4104751 | SNV | 1 | G | A | Heterozygous |
| NC_037640.1 | 4104757 | SNV | 1 | C | T | Heterozygous |
| NC_037640.1 | 4104825 | SNV | 1 | T | C | Heterozygous |
| NC_037640.1 | 4104905 | SNV | 1 | C | G | Heterozygous |
| NC_037640.1 | 4104928 | SNV | 1 | C | T | Heterozygous |
| NC_037640.1 | 4105034 | SNV | 1 | T | C | Homozygous   |
| NC_037640.1 | 4105535 | SNV | 1 | G | C | Homozygous   |
| NC_037640.1 | 4105662 | SNV | 1 | A | C | Homozygous   |
| NC_037640.1 | 4105682 | SNV | 1 | C | T | Homozygous   |
| NC_037640.1 | 4110369 | SNV | 1 | C | A | Homozygous   |
| NC_037640.1 | 4110387 | SNV | 1 | T | A | Homozygous   |
| NC_037640.1 | 4110418 | SNV | 1 | G | A | Homozygous   |
| NC_037640.1 | 4110435 | SNV | 1 | T | A | Homozygous   |
| NC_037640.1 | 4110461 | SNV | 1 | A | T | Homozygous   |
| NC_037640.1 | 4114194 | SNV | 1 | T | C | Homozygous   |
| NC_037640.1 | 4114270 | SNV | 1 | G | A | Homozygous   |
| NC_037640.1 | 4114272 | SNV | 1 | G | A | Heterozygous |

|             |         |     |   |   |   |              |
|-------------|---------|-----|---|---|---|--------------|
| NC_037640.1 | 4114307 | SNV | 1 | A | T | Homozygous   |
| NC_037640.1 | 4114356 | SNV | 1 | A | G | Heterozygous |
| NC_037640.1 | 4114359 | SNV | 1 | T | C | Heterozygous |
| NC_037640.1 | 4114363 | SNV | 1 | G | A | Heterozygous |
| NC_037640.1 | 4114398 | SNV | 1 | A | G | Homozygous   |
| NC_037640.1 | 4114436 | SNV | 1 | A | G | Homozygous   |
| NC_037640.1 | 4114438 | SNV | 1 | A | G | Heterozygous |
| NC_037640.1 | 4119113 | SNV | 1 | C | T | Homozygous   |
| NC_037640.1 | 4127513 | SNV | 1 | G | A | Heterozygous |
| NC_037640.1 | 4127531 | SNV | 1 | A | C | Homozygous   |
| NC_037640.1 | 4127548 | SNV | 1 | T | C | Heterozygous |
| NC_037640.1 | 4127608 | SNV | 1 | T | C | Homozygous   |
| NC_037640.1 | 4127621 | SNV | 1 | C | T | Heterozygous |
| NC_037640.1 | 4127657 | SNV | 1 | C | T | Homozygous   |
| NC_037640.1 | 4127688 | SNV | 1 | T | C | Homozygous   |
| NC_037640.1 | 4127819 | SNV | 1 | C | T | Homozygous   |
| NC_037640.1 | 4128023 | SNV | 1 | C | T | Heterozygous |
| NC_037640.1 | 4128030 | SNV | 1 | A | T | Homozygous   |
| NC_037640.1 | 4128032 | SNV | 1 | A | G | Homozygous   |
| NC_037640.1 | 4128044 | SNV | 1 | T | C | Homozygous   |
| NC_037640.1 | 4128213 | SNV | 1 | T | C | Heterozygous |
| NC_037640.1 | 4128321 | SNV | 1 | G | C | Homozygous   |
| NC_037640.1 | 4128397 | SNV | 1 | T | C | Homozygous   |
| NC_037640.1 | 4134523 | SNV | 1 | C | A | Heterozygous |
| NC_037640.1 | 4134528 | SNV | 1 | T | A | Heterozygous |
| NC_037640.1 | 4134556 | SNV | 1 | T | A | Heterozygous |
| NC_037640.1 | 4135055 | SNV | 1 | A | C | Homozygous   |
| NC_037640.1 | 4135067 | SNV | 1 | G | C | Homozygous   |
| NC_037640.1 | 4135077 | SNV | 1 | A | C | Heterozygous |
| NC_037640.1 | 4135082 | SNV | 1 | T | C | Heterozygous |
| NC_037640.1 | 4135210 | SNV | 1 | C | G | Heterozygous |
| NC_037640.1 | 4135230 | SNV | 1 | A | G | Homozygous   |
| NC_037640.1 | 4136889 | SNV | 1 | A | G | Heterozygous |
| NC_037640.1 | 4136896 | SNV | 1 | A | G | Heterozygous |
| NC_037640.1 | 4145241 | SNV | 1 | T | C | Homozygous   |
| NC_037640.1 | 4145309 | SNV | 1 | G | T | Heterozygous |
| NC_037640.1 | 4145312 | SNV | 1 | C | T | Heterozygous |
| NC_037640.1 | 4145332 | SNV | 1 | A | G | Homozygous   |
| NC_037640.1 | 4145364 | SNV | 1 | T | C | Homozygous   |
| NC_037640.1 | 4145378 | SNV | 1 | T | A | Homozygous   |
| NC_037640.1 | 4145449 | SNV | 1 | A | G | Homozygous   |
| NC_037640.1 | 4145736 | SNV | 1 | G | A | Heterozygous |
| NC_037640.1 | 4145749 | SNV | 1 | T | C | Heterozygous |
| NC_037640.1 | 4145953 | SNV | 1 | C | T | Homozygous   |
| NC_037640.1 | 4146609 | SNV | 1 | T | C | Homozygous   |
| NC_037640.1 | 4146620 | SNV | 1 | C | T | Heterozygous |
| NC_037640.1 | 4152899 | SNV | 1 | T | C | Homozygous   |
| NC_037640.1 | 4152938 | SNV | 1 | C | T | Homozygous   |
| NC_037640.1 | 4152951 | SNV | 1 | C | G | Homozygous   |
| NC_037640.1 | 4153202 | SNV | 1 | G | A | Heterozygous |
| NC_037640.1 | 4153225 | SNV | 1 | A | G | Homozygous   |

|             |         |     |   |   |   |              |
|-------------|---------|-----|---|---|---|--------------|
| NC_037640.1 | 4153374 | SNV | 1 | G | A | Heterozygous |
| NC_037640.1 | 4157956 | SNV | 1 | G | C | Heterozygous |
| NC_037640.1 | 4158167 | SNV | 1 | A | G | Homozygous   |
| NC_037640.1 | 4158229 | SNV | 1 | C | T | Heterozygous |
| NC_037640.1 | 4158259 | SNV | 1 | T | C | Homozygous   |
| NC_037640.1 | 4158274 | SNV | 1 | A | G | Homozygous   |
| NC_037640.1 | 4158294 | SNV | 1 | G | A | Homozygous   |
| NC_037640.1 | 4158504 | SNV | 1 | C | G | Heterozygous |
| NC_037640.1 | 4158515 | SNV | 1 | T | C | Homozygous   |
| NC_037640.1 | 4158528 | SNV | 1 | A | G | Homozygous   |
| NC_037640.1 | 4158776 | SNV | 1 | C | T | Heterozygous |
| NC_037640.1 | 4159010 | SNV | 1 | G | A | Heterozygous |
| NC_037640.1 | 4159012 | SNV | 1 | A | G | Heterozygous |
| NC_037640.1 | 4160356 | SNV | 1 | G | A | Heterozygous |
| NC_037640.1 | 4160969 | SNV | 1 | C | T | Homozygous   |
| NC_037640.1 | 4161302 | SNV | 1 | T | G | Homozygous   |
| NC_037640.1 | 4161419 | SNV | 1 | C | T | Homozygous   |
| NC_037640.1 | 4161506 | SNV | 1 | C | T | Heterozygous |
| NC_037640.1 | 4161599 | SNV | 1 | T | G | Homozygous   |
| NC_037640.1 | 4163434 | SNV | 1 | G | A | Heterozygous |
| NC_037640.1 | 4167725 | SNV | 1 | G | A | Heterozygous |
| NC_037640.1 | 4167843 | SNV | 1 | A | C | Heterozygous |
| NC_037640.1 | 4167845 | SNV | 1 | G | A | Heterozygous |
| NC_037640.1 | 4177419 | SNV | 1 | G | A | Homozygous   |
| NC_037640.1 | 4178989 | SNV | 1 | C | T | Homozygous   |
| NC_037640.1 | 4178995 | SNV | 1 | T | C | Homozygous   |
| NC_037640.1 | 4183262 | SNV | 1 | T | C | Homozygous   |
| NC_037640.1 | 4183270 | SNV | 1 | T | C | Homozygous   |
| NC_037640.1 | 4183310 | SNV | 1 | A | G | Homozygous   |
| NC_037640.1 | 4183536 | SNV | 1 | G | A | Heterozygous |
| NC_037640.1 | 4183558 | SNV | 1 | G | A | Heterozygous |
| NC_037640.1 | 4183579 | SNV | 1 | A | G | Homozygous   |
| NC_037640.1 | 4183621 | SNV | 1 | C | T | Heterozygous |
| NC_037640.1 | 4183627 | SNV | 1 | C | T | Heterozygous |
| NC_037640.1 | 4183693 | SNV | 1 | A | T | Homozygous   |
| NC_037640.1 | 4183698 | SNV | 1 | T | C | Homozygous   |
| NC_037640.1 | 4183867 | SNV | 1 | C | T | Homozygous   |
| NC_037640.1 | 4183960 | SNV | 1 | A | G | Heterozygous |
| NC_037640.1 | 4184857 | SNV | 1 | G | A | Heterozygous |
| NC_037640.1 | 4184868 | SNV | 1 | G | A | Heterozygous |
| NC_037640.1 | 4190150 | SNV | 1 | A | G | Homozygous   |
| NC_037640.1 | 4190170 | SNV | 1 | A | G | Homozygous   |
| NC_037640.1 | 4190172 | SNV | 1 | C | T | Homozygous   |
| NC_037640.1 | 4190192 | SNV | 1 | T | C | Homozygous   |
| NC_037640.1 | 4190307 | SNV | 1 | T | C | Heterozygous |
| NC_037640.1 | 4190328 | SNV | 1 | A | T | Heterozygous |
| NC_037640.1 | 4190330 | SNV | 1 | T | C | Homozygous   |
| NC_037640.1 | 4190691 | SNV | 1 | T | G | Heterozygous |
| NC_037640.1 | 4190721 | SNV | 1 | T | C | Heterozygous |
| NC_037640.1 | 4190766 | SNV | 1 | A | G | Homozygous   |
| NC_037640.1 | 4190789 | SNV | 1 | A | G | Homozygous   |

|             |         |     |   |   |   |              |
|-------------|---------|-----|---|---|---|--------------|
| NC_037640.1 | 4190893 | SNV | 1 | G | A | Heterozygous |
| NC_037640.1 | 4190909 | SNV | 1 | C | T | Homozygous   |
| NC_037640.1 | 4190921 | SNV | 1 | A | G | Homozygous   |
| NC_037640.1 | 4196465 | SNV | 1 | T | C | Homozygous   |
| NC_037640.1 | 4196473 | SNV | 1 | T | G | Homozygous   |
| NC_037640.1 | 4205895 | SNV | 1 | T | C | Homozygous   |
| NC_037640.1 | 4205900 | SNV | 1 | C | T | Homozygous   |
| NC_037640.1 | 4205904 | SNV | 1 | A | C | Homozygous   |
| NC_037640.1 | 4205943 | SNV | 1 | A | G | Homozygous   |
| NC_037640.1 | 4205982 | SNV | 1 | C | T | Homozygous   |
| NC_037640.1 | 4205998 | SNV | 1 | A | G | Homozygous   |
| NC_037640.1 | 4206080 | SNV | 1 | T | A | Homozygous   |
| NC_037640.1 | 4206107 | SNV | 1 | C | T | Homozygous   |
| NC_037640.1 | 4206156 | SNV | 1 | T | C | Homozygous   |
| NC_037640.1 | 4206170 | SNV | 1 | T | A | Homozygous   |
| NC_037640.1 | 4206194 | SNV | 1 | T | C | Homozygous   |
| NC_037640.1 | 4206203 | SNV | 1 | C | T | Homozygous   |
| NC_037640.1 | 4206257 | SNV | 1 | T | C | Homozygous   |
| NC_037640.1 | 4206273 | SNV | 1 | C | A | Homozygous   |
| NC_037640.1 | 4218523 | SNV | 1 | C | T | Homozygous   |
| NC_037640.1 | 4220886 | SNV | 1 | C | G | Homozygous   |
| NC_037640.1 | 4220909 | SNV | 1 | T | A | Heterozygous |
| NC_037640.1 | 4220912 | SNV | 1 | T | C | Heterozygous |
| NC_037640.1 | 4221807 | SNV | 1 | T | C | Heterozygous |
| NC_037640.1 | 4221935 | SNV | 1 | A | G | Homozygous   |
| NC_037640.1 | 4226237 | SNV | 1 | G | C | Homozygous   |
| NC_037640.1 | 4226240 | SNV | 1 | G | C | Homozygous   |
| NC_037640.1 | 4226270 | SNV | 1 | T | C | Homozygous   |
| NC_037640.1 | 4226301 | SNV | 1 | G | A | Heterozygous |
| NC_037640.1 | 4226318 | SNV | 1 | C | T | Homozygous   |
| NC_037640.1 | 4226328 | SNV | 1 | G | T | Homozygous   |
| NC_037640.1 | 4226395 | SNV | 1 | T | C | Homozygous   |
| NC_037640.1 | 4237221 | SNV | 1 | T | C | Homozygous   |
| NC_037640.1 | 4237232 | SNV | 1 | G | A | Heterozygous |
| NC_037640.1 | 4237269 | SNV | 1 | C | T | Heterozygous |
| NC_037640.1 | 4237386 | SNV | 1 | T | C | Homozygous   |
| NC_037640.1 | 4237903 | SNV | 1 | C | T | Heterozygous |
| NC_037640.1 | 4237909 | SNV | 1 | T | C | Homozygous   |
| NC_037640.1 | 4237925 | SNV | 1 | A | G | Homozygous   |
| NC_037640.1 | 4237931 | SNV | 1 | G | C | Homozygous   |
| NC_037640.1 | 4238009 | SNV | 1 | A | G | Heterozygous |
| NC_037640.1 | 4238011 | SNV | 1 | C | T | Homozygous   |
| NC_037640.1 | 4238016 | SNV | 1 | A | G | Homozygous   |
| NC_037640.1 | 4238029 | SNV | 1 | G | A | Heterozygous |
| NC_037640.1 | 4238061 | SNV | 1 | G | C | Heterozygous |
| NC_037640.1 | 4238089 | SNV | 1 | G | A | Homozygous   |
| NC_037640.1 | 4238428 | SNV | 1 | A | G | Homozygous   |
| NC_037640.1 | 4240164 | SNV | 1 | A | G | Heterozygous |
| NC_037640.1 | 4240173 | SNV | 1 | G | A | Heterozygous |
| NC_037640.1 | 4240175 | SNV | 1 | A | G | Heterozygous |
| NC_037640.1 | 4240177 | SNV | 1 | A | G | Heterozygous |

|             |         |     |   |   |   |              |
|-------------|---------|-----|---|---|---|--------------|
| NC_037640.1 | 4240186 | SNV | 1 | A | C | Heterozygous |
| NC_037640.1 | 4240188 | SNV | 1 | A | C | Heterozygous |
| NC_037640.1 | 4240195 | SNV | 1 | G | C | Heterozygous |
| NC_037640.1 | 4241064 | SNV | 1 | C | T | Homozygous   |
| NC_037640.1 | 4241085 | SNV | 1 | A | G | Homozygous   |
| NC_037640.1 | 4241125 | SNV | 1 | C | T | Homozygous   |
| NC_037640.1 | 4257484 | SNV | 1 | G | T | Heterozygous |
| NC_037640.1 | 4257487 | SNV | 1 | T | A | Heterozygous |
| NC_037640.1 | 4260800 | SNV | 1 | T | G | Homozygous   |
| NC_037640.1 | 4260815 | SNV | 1 | C | G | Homozygous   |
| NC_037640.1 | 4260838 | SNV | 1 | T | A | Homozygous   |
| NC_037640.1 | 4265182 | SNV | 1 | C | G | Homozygous   |
| NC_037640.1 | 4265931 | SNV | 1 | C | G | Heterozygous |
| NC_037640.1 | 4266012 | SNV | 1 | C | T | Heterozygous |
| NC_037640.1 | 4266080 | SNV | 1 | C | T | Heterozygous |
| NC_037640.1 | 4271909 | SNV | 1 | T | C | Heterozygous |
| NC_037640.1 | 4271966 | SNV | 1 | T | C | Heterozygous |
| NC_037640.1 | 4271981 | SNV | 1 | G | A | Heterozygous |
| NC_037640.1 | 4272242 | SNV | 1 | G | A | Heterozygous |
| NC_037640.1 | 4272281 | SNV | 1 | C | T | Heterozygous |
| NC_037640.1 | 4272312 | SNV | 1 | A | G | Homozygous   |
| NC_037640.1 | 4272328 | SNV | 1 | G | A | Heterozygous |
| NC_037640.1 | 4272376 | SNV | 1 | G | A | Homozygous   |
| NC_037640.1 | 4272391 | SNV | 1 | G | A | Homozygous   |
| NC_037640.1 | 4272443 | SNV | 1 | G | A | Homozygous   |
| NC_037640.1 | 4272558 | SNV | 1 | C | G | Homozygous   |
| NC_037640.1 | 4272572 | SNV | 1 | C | T | Homozygous   |
| NC_037640.1 | 4272622 | SNV | 1 | G | A | Homozygous   |
| NC_037640.1 | 4272633 | SNV | 1 | A | G | Homozygous   |
| NC_037640.1 | 4272644 | SNV | 1 | G | A | Heterozygous |
| NC_037640.1 | 4272647 | SNV | 1 | T | C | Homozygous   |
| NC_037640.1 | 4272926 | SNV | 1 | T | C | Heterozygous |
| NC_037640.1 | 4272949 | SNV | 1 | T | C | Homozygous   |
| NC_037640.1 | 4272968 | SNV | 1 | T | C | Homozygous   |
| NC_037640.1 | 4272985 | SNV | 1 | C | A | Homozygous   |
| NC_037640.1 | 4297049 | SNV | 1 | C | T | Heterozygous |
| NC_037640.1 | 4297051 | SNV | 1 | A | T | Heterozygous |
| NC_037640.1 | 4297053 | SNV | 1 | A | T | Homozygous   |
| NC_037640.1 | 4297057 | SNV | 1 | A | G | Homozygous   |
| NC_037640.1 | 4297066 | SNV | 1 | A | G | Homozygous   |
| NC_037640.1 | 4297075 | SNV | 1 | T | G | Homozygous   |
| NC_037640.1 | 4297402 | SNV | 1 | T | G | Homozygous   |
| NC_037640.1 | 4297404 | SNV | 1 | C | T | Homozygous   |
| NC_037640.1 | 4297595 | SNV | 1 | C | T | Homozygous   |
| NC_037640.1 | 4297641 | SNV | 1 | T | C | Homozygous   |
| NC_037640.1 | 4298175 | SNV | 1 | C | A | Homozygous   |
| NC_037640.1 | 4302972 | SNV | 1 | A | T | Heterozygous |
| NC_037640.1 | 4302974 | SNV | 1 | A | C | Heterozygous |
| NC_037640.1 | 4302976 | SNV | 1 | A | T | Heterozygous |
| NC_037640.1 | 4303291 | SNV | 1 | T | C | Homozygous   |
| NC_037640.1 | 4303406 | SNV | 1 | C | A | Homozygous   |

|             |         |     |   |   |   |              |
|-------------|---------|-----|---|---|---|--------------|
| NC_037640.1 | 4303409 | SNV | 1 | T | A | Homozygous   |
| NC_037640.1 | 4303824 | SNV | 1 | T | A | Homozygous   |
| NC_037640.1 | 4305804 | SNV | 1 | C | T | Homozygous   |
| NC_037640.1 | 4306888 | SNV | 1 | G | A | Heterozygous |
| NC_037640.1 | 4310003 | SNV | 1 | A | T | Heterozygous |
| NC_037640.1 | 4310788 | SNV | 1 | T | C | Homozygous   |
| NC_037640.1 | 4311198 | SNV | 1 | G | T | Homozygous   |
| NC_037640.1 | 4312205 | SNV | 1 | C | T | Homozygous   |
| NC_037640.1 | 4314726 | SNV | 1 | A | G | Heterozygous |
| NC_037640.1 | 4314740 | SNV | 1 | A | C | Heterozygous |
| NC_037640.1 | 4314754 | SNV | 1 | T | A | Homozygous   |
| NC_037640.1 | 4314756 | SNV | 1 | A | G | Heterozygous |
| NC_037640.1 | 4317511 | SNV | 1 | T | C | Homozygous   |
| NC_037640.1 | 4319844 | SNV | 1 | T | C | Homozygous   |
| NC_037640.1 | 4320502 | SNV | 1 | T | A | Homozygous   |
| NC_037640.1 | 4320504 | SNV | 1 | T | A | Homozygous   |
| NC_037640.1 | 4322339 | SNV | 1 | T | A | Homozygous   |
| NC_037640.1 | 4323985 | SNV | 1 | T | C | Heterozygous |
| NC_037640.1 | 4332507 | SNV | 1 | T | A | Homozygous   |
| NC_037640.1 | 4332509 | SNV | 1 | C | T | Homozygous   |
| NC_037640.1 | 4332511 | SNV | 1 | C | A | Homozygous   |
| NC_037640.1 | 4332930 | SNV | 1 | C | T | Homozygous   |
| NC_037640.1 | 4332995 | SNV | 1 | G | A | Homozygous   |
| NC_037640.1 | 4333939 | SNV | 1 | G | A | Homozygous   |
| NC_037640.1 | 4334302 | SNV | 1 | T | A | Homozygous   |
| NC_037640.1 | 4334304 | SNV | 1 | T | A | Homozygous   |
| NC_037640.1 | 4334306 | SNV | 1 | T | C | Homozygous   |
| NC_037640.1 | 4334311 | SNV | 1 | T | A | Homozygous   |
| NC_037640.1 | 4335506 | SNV | 1 | T | C | Homozygous   |
| NC_037640.1 | 4335508 | SNV | 1 | G | A | Homozygous   |
| NC_037640.1 | 4342076 | SNV | 1 | T | C | Homozygous   |
| NC_037640.1 | 4342269 | SNV | 1 | A | G | Homozygous   |
| NC_037640.1 | 4342585 | SNV | 1 | T | C | Homozygous   |
| NC_037640.1 | 4345646 | SNV | 1 | G | A | Homozygous   |
| NC_037640.1 | 4345805 | SNV | 1 | A | G | Homozygous   |
| NC_037640.1 | 4345865 | SNV | 1 | A | G | Homozygous   |
| NC_037640.1 | 4347029 | SNV | 1 | C | T | Heterozygous |
| NC_037640.1 | 4349065 | SNV | 1 | T | C | Heterozygous |
| NC_037640.1 | 4349389 | SNV | 1 | T | A | Homozygous   |
| NC_037640.1 | 4349391 | SNV | 1 | G | A | Homozygous   |
| NC_037640.1 | 4349422 | SNV | 1 | C | A | Homozygous   |
| NC_037640.1 | 4355336 | SNV | 1 | A | G | Homozygous   |
| NC_037640.1 | 4355591 | SNV | 1 | C | T | Homozygous   |
| NC_037640.1 | 4355597 | SNV | 1 | A | G | Homozygous   |
| NC_037640.1 | 4358277 | SNV | 1 | A | T | Homozygous   |
| NC_037640.1 | 4358320 | SNV | 1 | T | A | Homozygous   |
| NC_037640.1 | 4358462 | SNV | 1 | G | A | Heterozygous |
| NC_037640.1 | 4358477 | SNV | 1 | T | A | Homozygous   |
| NC_037640.1 | 4358481 | SNV | 1 | T | A | Heterozygous |
| NC_037640.1 | 4374627 | SNV | 1 | T | A | Heterozygous |
| NC_037640.1 | 4374629 | SNV | 1 | G | T | Heterozygous |

|             |         |     |   |   |   |              |
|-------------|---------|-----|---|---|---|--------------|
| NC_037640.1 | 4375154 | SNV | 1 | T | G | Homozygous   |
| NC_037640.1 | 4375216 | SNV | 1 | A | G | Heterozygous |
| NC_037640.1 | 4377373 | SNV | 1 | T | C | Homozygous   |
| NC_037640.1 | 4379179 | SNV | 1 | C | T | Homozygous   |
| NC_037640.1 | 4381629 | SNV | 1 | C | A | Homozygous   |
| NC_037640.1 | 4382535 | SNV | 1 | C | A | Homozygous   |
| NC_037640.1 | 4382612 | SNV | 1 | T | C | Homozygous   |
| NC_037640.1 | 4386146 | SNV | 1 | G | T | Heterozygous |
| NC_037640.1 | 4386353 | SNV | 1 | T | C | Homozygous   |
| NC_037640.1 | 4386526 | SNV | 1 | C | T | Homozygous   |
| NC_037640.1 | 4386536 | SNV | 1 | A | T | Heterozygous |
| NC_037640.1 | 4386555 | SNV | 1 | A | C | Heterozygous |
| NC_037640.1 | 4386557 | SNV | 1 | A | T | Heterozygous |
| NC_037640.1 | 4386561 | SNV | 1 | T | G | Heterozygous |
| NC_037640.1 | 4386563 | SNV | 1 | A | G | Heterozygous |
| NC_037640.1 | 4386568 | SNV | 1 | T | C | Heterozygous |
| NC_037640.1 | 4389676 | SNV | 1 | A | G | Homozygous   |
| NC_037640.1 | 4392889 | SNV | 1 | G | A | Homozygous   |
| NC_037640.1 | 4392891 | SNV | 1 | A | T | Homozygous   |
| NC_037640.1 | 4392905 | SNV | 1 | T | G | Homozygous   |
| NC_037640.1 | 4392927 | SNV | 1 | G | A | Heterozygous |
| NC_037640.1 | 4392931 | SNV | 1 | G | A | Heterozygous |
| NC_037640.1 | 4392934 | SNV | 1 | T | A | Heterozygous |
| NC_037640.1 | 4392938 | SNV | 1 | C | A | Heterozygous |
| NC_037640.1 | 4392940 | SNV | 1 | A | C | Heterozygous |
| NC_037640.1 | 4393316 | SNV | 1 | A | G | Heterozygous |
| NC_037640.1 | 4393321 | SNV | 1 | A | G | Heterozygous |
| NC_037640.1 | 4393324 | SNV | 1 | A | G | Heterozygous |
| NC_037640.1 | 4393327 | SNV | 1 | A | G | Heterozygous |
| NC_037640.1 | 4393329 | SNV | 1 | A | G | Heterozygous |
| NC_037640.1 | 4393332 | SNV | 1 | A | G | Heterozygous |
| NC_037640.1 | 4393337 | SNV | 1 | A | G | Heterozygous |
| NC_037640.1 | 4393731 | SNV | 1 | A | G | Heterozygous |
| NC_037640.1 | 4393838 | SNV | 1 | C | T | Heterozygous |
| NC_037640.1 | 4393949 | SNV | 1 | T | C | Homozygous   |
| NC_037640.1 | 4394315 | SNV | 1 | C | T | Heterozygous |
| NC_037640.1 | 4394986 | SNV | 1 | C | T | Homozygous   |
| NC_037640.1 | 4395409 | SNV | 1 | A | G | Homozygous   |
| NC_037640.1 | 4396062 | SNV | 1 | G | A | Heterozygous |
| NC_037640.1 | 4396732 | SNV | 1 | T | C | Homozygous   |
| NC_037640.1 | 4396780 | SNV | 1 | C | T | Heterozygous |
| NC_037640.1 | 4399068 | SNV | 1 | A | G | Homozygous   |
| NC_037640.1 | 4399706 | SNV | 1 | T | C | Homozygous   |
| NC_037640.1 | 4399730 | SNV | 1 | T | C | Homozygous   |
| NC_037640.1 | 4400424 | SNV | 1 | A | G | Heterozygous |
| NC_037640.1 | 4400469 | SNV | 1 | A | G | Homozygous   |
| NC_037640.1 | 4401147 | SNV | 1 | T | C | Homozygous   |
| NC_037640.1 | 4401393 | SNV | 1 | C | T | Homozygous   |
| NC_037640.1 | 4401484 | SNV | 1 | T | C | Homozygous   |
| NC_037640.1 | 4401752 | SNV | 1 | G | A | Heterozygous |
| NC_037640.1 | 4402587 | SNV | 1 | G | C | Homozygous   |

|             |         |     |   |   |   |              |
|-------------|---------|-----|---|---|---|--------------|
| NC_037640.1 | 4402920 | SNV | 1 | T | C | Homozygous   |
| NC_037640.1 | 4403401 | SNV | 1 | A | G | Heterozygous |
| NC_037640.1 | 4403864 | SNV | 1 | G | C | Homozygous   |
| NC_037640.1 | 4403866 | SNV | 1 | A | T | Homozygous   |
| NC_037640.1 | 4404405 | SNV | 1 | C | T | Heterozygous |
| NC_037640.1 | 4404438 | SNV | 1 | G | A | Heterozygous |
| NC_037640.1 | 4404447 | SNV | 1 | C | T | Heterozygous |
| NC_037640.1 | 4404504 | SNV | 1 | C | T | Heterozygous |
| NC_037640.1 | 4404510 | SNV | 1 | G | A | Heterozygous |
| NC_037640.1 | 4404682 | SNV | 1 | A | G | Homozygous   |
| NC_037640.1 | 4404776 | SNV | 1 | G | A | Homozygous   |
| NC_037640.1 | 4404833 | SNV | 1 | A | G | Heterozygous |
| NC_037640.1 | 4404980 | SNV | 1 | G | A | Heterozygous |
| NC_037640.1 | 4405037 | SNV | 1 | C | T | Heterozygous |
| NC_037640.1 | 4405044 | SNV | 1 | T | C | Heterozygous |
| NC_037640.1 | 4405520 | SNV | 1 | T | C | Homozygous   |
| NC_037640.1 | 4405580 | SNV | 1 | T | C | Homozygous   |
| NC_037640.1 | 4406009 | SNV | 1 | A | G | Homozygous   |
| NC_037640.1 | 4406157 | SNV | 1 | A | G | Heterozygous |
| NC_037640.1 | 4407866 | SNV | 1 | A | T | Heterozygous |
| NC_037640.1 | 4407869 | SNV | 1 | A | T | Homozygous   |
| NC_037640.1 | 4407872 | SNV | 1 | T | G | Heterozygous |
| NC_037640.1 | 4407879 | SNV | 1 | T | A | Heterozygous |
| NC_037640.1 | 4407883 | SNV | 1 | A | T | Heterozygous |
| NC_037640.1 | 4407895 | SNV | 1 | A | T | Heterozygous |
| NC_037640.1 | 4407919 | SNV | 1 | A | T | Heterozygous |
| NC_037640.1 | 4407926 | SNV | 1 | A | C | Heterozygous |
| NC_037640.1 | 4407930 | SNV | 1 | T | A | Heterozygous |
| NC_037640.1 | 4407948 | SNV | 1 | A | T | Heterozygous |
| NC_037640.1 | 4407952 | SNV | 1 | T | A | Homozygous   |
| NC_037640.1 | 4410317 | SNV | 1 | T | A | Heterozygous |
| NC_037640.1 | 4410319 | SNV | 1 | A | G | Heterozygous |
| NC_037640.1 | 4410570 | SNV | 1 | T | C | Homozygous   |
| NC_037640.1 | 4410602 | SNV | 1 | A | G | Homozygous   |
| NC_037640.1 | 4412179 | SNV | 1 | T | C | Homozygous   |
| NC_037640.1 | 4413239 | SNV | 1 | C | A | Homozygous   |
| NC_037640.1 | 4413241 | SNV | 1 | A | T | Homozygous   |
| NC_037640.1 | 4413628 | SNV | 1 | T | C | Homozygous   |
| NC_037640.1 | 4413631 | SNV | 1 | T | A | Homozygous   |
| NC_037640.1 | 4413854 | SNV | 1 | C | A | Homozygous   |
| NC_037640.1 | 4413939 | SNV | 1 | C | A | Homozygous   |
| NC_037640.1 | 4416473 | SNV | 1 | G | A | Homozygous   |
| NC_037640.1 | 4416475 | SNV | 1 | A | T | Homozygous   |
| NC_037640.1 | 4416551 | SNV | 1 | T | A | Homozygous   |
| NC_037640.1 | 4416555 | SNV | 1 | G | T | Homozygous   |
| NC_037640.1 | 4418487 | SNV | 1 | G | A | Heterozygous |
| NC_037640.1 | 4418794 | SNV | 1 | C | T | Heterozygous |
| NC_037640.1 | 4419038 | SNV | 1 | C | T | Homozygous   |
| NC_037640.1 | 4419461 | SNV | 1 | C | T | Heterozygous |
| NC_037640.1 | 4422110 | SNV | 1 | G | A | Heterozygous |
| NC_037640.1 | 4423355 | SNV | 1 | G | A | Homozygous   |



|             |         |     |   |   |   |              |
|-------------|---------|-----|---|---|---|--------------|
| NC_037640.1 | 4424171 | SNV | 1 | T | A | Heterozygous |
| NC_037640.1 | 4424187 | SNV | 1 | T | A | Homozygous   |
| NC_037640.1 | 4424191 | SNV | 1 | A | T | Homozygous   |
| NC_037640.1 | 4424195 | SNV | 1 | A | G | Heterozygous |
| NC_037640.1 | 4425241 | SNV | 1 | T | C | Homozygous   |
| NC_037640.1 | 4425733 | SNV | 1 | G | C | Heterozygous |
| NC_037640.1 | 4426516 | SNV | 1 | T | C | Homozygous   |
| NC_037640.1 | 4426990 | SNV | 1 | T | C | Homozygous   |
| NC_037640.1 | 4427115 | SNV | 1 | A | G | Homozygous   |
| NC_037640.1 | 4427719 | SNV | 1 | A | G | Heterozygous |
| NC_037640.1 | 4427991 | SNV | 1 | C | T | Heterozygous |
| NC_037640.1 | 4428175 | SNV | 1 | A | G | Heterozygous |
| NC_037640.1 | 4428409 | SNV | 1 | A | G | Homozygous   |
| NC_037640.1 | 4428536 | SNV | 1 | C | T | Heterozygous |
| NC_037640.1 | 4428642 | SNV | 1 | C | G | Homozygous   |
| NC_037640.1 | 4430361 | SNV | 1 | T | C | Homozygous   |
| NC_037640.1 | 4431215 | SNV | 1 | T | C | Heterozygous |
| NC_037640.1 | 4431437 | SNV | 1 | G | C | Heterozygous |
| NC_037640.1 | 4431451 | SNV | 1 | A | G | Homozygous   |
| NC_037640.1 | 4431574 | SNV | 1 | C | T | Homozygous   |
| NC_037640.1 | 4431639 | SNV | 1 | G | A | Heterozygous |
| NC_037640.1 | 4437242 | SNV | 1 | T | C | Homozygous   |
| NC_037640.1 | 4438462 | SNV | 1 | T | G | Heterozygous |
| NC_037640.1 | 4439407 | SNV | 1 | T | C | Homozygous   |
| NC_037640.1 | 4444930 | SNV | 1 | C | G | Heterozygous |
| NC_037640.1 | 4445170 | SNV | 1 | G | A | Homozygous   |
| NC_037640.1 | 4445214 | SNV | 1 | A | G | Homozygous   |
| NC_037640.1 | 4445714 | SNV | 1 | C | T | Heterozygous |
| NC_037640.1 | 4445786 | SNV | 1 | T | C | Heterozygous |
| NC_037640.1 | 4451267 | SNV | 1 | C | T | Heterozygous |
| NC_037640.1 | 4456474 | SNV | 1 | G | A | Homozygous   |
| NC_037640.1 | 4456926 | SNV | 1 | G | A | Heterozygous |
| NC_037640.1 | 4458892 | SNV | 1 | C | A | Homozygous   |
| NC_037640.1 | 4461865 | SNV | 1 | A | T | Homozygous   |
| NC_037640.1 | 4461869 | SNV | 1 | T | C | Homozygous   |
| NC_037640.1 | 4461871 | SNV | 1 | C | A | Homozygous   |
| NC_037640.1 | 4462315 | SNV | 1 | C | A | Homozygous   |
| NC_037640.1 | 4465728 | SNV | 1 | G | A | Homozygous   |
| NC_037640.1 | 4465920 | SNV | 1 | T | C | Homozygous   |
| NC_037640.1 | 4467113 | SNV | 1 | G | A | Homozygous   |
| NC_037640.1 | 4467327 | SNV | 1 | G | A | Homozygous   |
| NC_037640.1 | 4468418 | SNV | 1 | C | T | Homozygous   |
| NC_037640.1 | 4468765 | SNV | 1 | G | A | Heterozygous |
| NC_037640.1 | 4471308 | SNV | 1 | G | A | Homozygous   |
| NC_037640.1 | 4472234 | SNV | 1 | T | A | Heterozygous |
| NC_037640.1 | 4472238 | SNV | 1 | A | G | Heterozygous |
| NC_037640.1 | 4472242 | SNV | 1 | A | G | Heterozygous |
| NC_037640.1 | 4472263 | SNV | 1 | T | A | Homozygous   |
| NC_037640.1 | 4472265 | SNV | 1 | C | T | Homozygous   |
| NC_037640.1 | 4472274 | SNV | 1 | C | T | Homozygous   |
| NC_037640.1 | 4472277 | SNV | 1 | A | G | Homozygous   |

|             |         |     |   |   |   |              |
|-------------|---------|-----|---|---|---|--------------|
| NC_037640.1 | 4472279 | SNV | 1 | A | C | Homozygous   |
| NC_037640.1 | 4473162 | SNV | 1 | C | T | Homozygous   |
| NC_037640.1 | 4476519 | SNV | 1 | A | T | Homozygous   |
| NC_037640.1 | 4476972 | SNV | 1 | T | C | Homozygous   |
| NC_037640.1 | 4477980 | SNV | 1 | G | A | Homozygous   |
| NC_037640.1 | 4477983 | SNV | 1 | A | C | Homozygous   |
| NC_037640.1 | 4478766 | SNV | 1 | G | A | Homozygous   |
| NC_037640.1 | 4479188 | SNV | 1 | G | A | Homozygous   |
| NC_037640.1 | 4482339 | SNV | 1 | T | C | Heterozygous |
| NC_037640.1 | 4486814 | SNV | 1 | A | G | Homozygous   |
| NC_037640.1 | 4490061 | SNV | 1 | T | A | Homozygous   |
| NC_037640.1 | 4492891 | SNV | 1 | T | A | Homozygous   |
| NC_037640.1 | 4492893 | SNV | 1 | G | C | Homozygous   |
| NC_037640.1 | 4492898 | SNV | 1 | G | A | Homozygous   |
| NC_037640.1 | 4492904 | SNV | 1 | A | T | Homozygous   |
| NC_037640.1 | 4492911 | SNV | 1 | G | T | Homozygous   |
| NC_037640.1 | 4493014 | SNV | 1 | T | A | Homozygous   |
| NC_037640.1 | 4493018 | SNV | 1 | T | C | Homozygous   |
| NC_037640.1 | 4493020 | SNV | 1 | T | C | Homozygous   |
| NC_037640.1 | 4493046 | SNV | 1 | C | T | Homozygous   |
| NC_037640.1 | 4493048 | SNV | 1 | C | T | Homozygous   |
| NC_037640.1 | 4493206 | SNV | 1 | A | C | Homozygous   |
| NC_037640.1 | 4493215 | SNV | 1 | A | T | Homozygous   |
| NC_037640.1 | 4493218 | SNV | 1 | A | T | Homozygous   |
| NC_037640.1 | 4493237 | SNV | 1 | A | T | Homozygous   |
| NC_037640.1 | 4493245 | SNV | 1 | A | T | Homozygous   |
| NC_037640.1 | 4493250 | SNV | 1 | T | A | Homozygous   |
| NC_037640.1 | 4493273 | SNV | 1 | T | C | Homozygous   |
| NC_037640.1 | 4493275 | SNV | 1 | T | G | Homozygous   |
| NC_037640.1 | 4493283 | SNV | 1 | T | G | Homozygous   |
| NC_037640.1 | 4493288 | SNV | 1 | A | T | Homozygous   |
| NC_037640.1 | 4493292 | SNV | 1 | T | G | Homozygous   |
| NC_037640.1 | 4504516 | SNV | 1 | A | G | Homozygous   |
| NC_037640.1 | 4505380 | SNV | 1 | A | C | Heterozygous |
| NC_037640.1 | 4505381 | SNV | 1 | G | A | Heterozygous |
| NC_037640.1 | 4505386 | SNV | 1 | A | G | Homozygous   |
| NC_037640.1 | 4505388 | SNV | 1 | T | C | Heterozygous |
| NC_037640.1 | 4505407 | SNV | 1 | G | A | Heterozygous |
| NC_037640.1 | 4509031 | SNV | 1 | T | A | Heterozygous |
| NC_037640.1 | 4510092 | SNV | 1 | G | A | Heterozygous |
| NC_037640.1 | 4514210 | SNV | 1 | T | C | Homozygous   |
| NC_037640.1 | 4514231 | SNV | 1 | A | T | Homozygous   |
| NC_037640.1 | 4514693 | SNV | 1 | A | G | Homozygous   |
| NC_037640.1 | 4520075 | SNV | 1 | T | G | Heterozygous |
| NC_037640.1 | 4522928 | SNV | 1 | G | A | Homozygous   |
| NC_037640.1 | 4529288 | SNV | 1 | T | C | Heterozygous |
| NC_037640.1 | 4530241 | SNV | 1 | T | C | Homozygous   |
| NC_037640.1 | 4530275 | SNV | 1 | T | C | Homozygous   |
| NC_037640.1 | 4531190 | SNV | 1 | A | C | Homozygous   |
| NC_037640.1 | 4536605 | SNV | 1 | G | A | Heterozygous |
| NC_037640.1 | 4536684 | SNV | 1 | C | T | Homozygous   |

|             |         |     |   |   |   |              |
|-------------|---------|-----|---|---|---|--------------|
| NC_037640.1 | 4537211 | SNV | 1 | A | T | Homozygous   |
| NC_037640.1 | 4537215 | SNV | 1 | A | T | Homozygous   |
| NC_037640.1 | 4537223 | SNV | 1 | A | C | Heterozygous |
| NC_037640.1 | 4537227 | SNV | 1 | T | C | Heterozygous |
| NC_037640.1 | 4537239 | SNV | 1 | C | T | Heterozygous |
| NC_037640.1 | 4538793 | SNV | 1 | A | G | Homozygous   |
| NC_037640.1 | 4539693 | SNV | 1 | A | G | Heterozygous |
| NC_037640.1 | 4541622 | SNV | 1 | C | G | Homozygous   |
| NC_037640.1 | 4542810 | SNV | 1 | T | C | Heterozygous |
| NC_037640.1 | 4543875 | SNV | 1 | T | A | Heterozygous |
| NC_037640.1 | 4544101 | SNV | 1 | G | T | Homozygous   |
| NC_037640.1 | 4544258 | SNV | 1 | A | G | Homozygous   |
| NC_037640.1 | 4544668 | SNV | 1 | A | T | Homozygous   |
| NC_037640.1 | 4544802 | SNV | 1 | T | C | Homozygous   |
| NC_037640.1 | 4544818 | SNV | 1 | G | T | Homozygous   |
| NC_037640.1 | 4544821 | SNV | 1 | G | A | Homozygous   |
| NC_037640.1 | 4546076 | SNV | 1 | T | C | Heterozygous |
| NC_037640.1 | 4546286 | SNV | 1 | G | C | Homozygous   |
| NC_037640.1 | 4546416 | SNV | 1 | T | G | Heterozygous |
| NC_037640.1 | 4549185 | SNV | 1 | A | G | Heterozygous |
| NC_037640.1 | 4561090 | SNV | 1 | A | G | Homozygous   |
| NC_037640.1 | 4561351 | SNV | 1 | A | T | Homozygous   |
| NC_037640.1 | 4561550 | SNV | 1 | A | G | Homozygous   |
| NC_037640.1 | 4562076 | SNV | 1 | T | C | Heterozygous |
| NC_037640.1 | 4562143 | SNV | 1 | T | C | Homozygous   |
| NC_037640.1 | 4562276 | SNV | 1 | T | C | Homozygous   |
| NC_037640.1 | 4562510 | SNV | 1 | T | C | Homozygous   |
| NC_037640.1 | 4562558 | SNV | 1 | A | G | Homozygous   |
| NC_037640.1 | 4562828 | SNV | 1 | A | G | Heterozygous |
| NC_037640.1 | 4562846 | SNV | 1 | A | G | Heterozygous |
| NC_037640.1 | 4578627 | SNV | 1 | C | T | Heterozygous |
| NC_037640.1 | 4583278 | SNV | 1 | A | G | Homozygous   |
| NC_037640.1 | 4583842 | SNV | 1 | T | C | Heterozygous |
| NC_037640.1 | 4584338 | SNV | 1 | A | T | Homozygous   |
| NC_037640.1 | 4584429 | SNV | 1 | A | G | Heterozygous |
| NC_037640.1 | 4585452 | SNV | 1 | T | C | Heterozygous |
| NC_037640.1 | 4586585 | SNV | 1 | G | T | Homozygous   |
| NC_037640.1 | 4587431 | SNV | 1 | G | A | Heterozygous |
| NC_037640.1 | 4587896 | SNV | 1 | T | A | Homozygous   |
| NC_037640.1 | 4591986 | SNV | 1 | T | A | Homozygous   |
| NC_037640.1 | 4595978 | SNV | 1 | A | T | Homozygous   |
| NC_037640.1 | 4595995 | SNV | 1 | T | C | Homozygous   |
| NC_037640.1 | 4596243 | SNV | 1 | C | T | Homozygous   |
| NC_037640.1 | 4601346 | SNV | 1 | G | A | Heterozygous |
| NC_037640.1 | 4602343 | SNV | 1 | T | A | Homozygous   |
| NC_037640.1 | 4615701 | SNV | 1 | T | G | Homozygous   |
| NC_037640.1 | 4615727 | SNV | 1 | T | C | Homozygous   |
| NC_037640.1 | 4624538 | SNV | 1 | G | A | Heterozygous |
| NC_037640.1 | 4630192 | SNV | 1 | C | T | Homozygous   |
| NC_037640.1 | 4630206 | SNV | 1 | T | C | Homozygous   |
| NC_037640.1 | 4630603 | SNV | 1 | T | C | Heterozygous |

|             |         |     |   |   |   |              |
|-------------|---------|-----|---|---|---|--------------|
| NC_037640.1 | 4630610 | SNV | 1 | A | G | Heterozygous |
| NC_037640.1 | 4630753 | SNV | 1 | A | G | Homozygous   |
| NC_037640.1 | 4630888 | SNV | 1 | A | G | Homozygous   |
| NC_037640.1 | 4632280 | SNV | 1 | G | A | Heterozygous |
| NC_037640.1 | 4632376 | SNV | 1 | A | G | Homozygous   |
| NC_037640.1 | 4634851 | SNV | 1 | A | C | Heterozygous |
| NC_037640.1 | 4634960 | SNV | 1 | A | G | Homozygous   |
| NC_037640.1 | 4634975 | SNV | 1 | C | T | Homozygous   |
| NC_037640.1 | 4635031 | SNV | 1 | C | T | Heterozygous |
| NC_037640.1 | 4635067 | SNV | 1 | T | C | Heterozygous |
| NC_037640.1 | 4635655 | SNV | 1 | G | A | Heterozygous |
| NC_037640.1 | 4635770 | SNV | 1 | G | C | Homozygous   |
| NC_037640.1 | 4635791 | SNV | 1 | T | C | Homozygous   |
| NC_037640.1 | 4638512 | SNV | 1 | T | C | Homozygous   |
| NC_037640.1 | 4638553 | SNV | 1 | A | G | Heterozygous |
| NC_037640.1 | 4638563 | SNV | 1 | A | T | Heterozygous |
| NC_037640.1 | 4641186 | SNV | 1 | A | T | Homozygous   |
| NC_037640.1 | 4641595 | SNV | 1 | G | A | Homozygous   |
| NC_037640.1 | 4643520 | SNV | 1 | G | A | Homozygous   |
| NC_037640.1 | 4643593 | SNV | 1 | T | C | Homozygous   |
| NC_037640.1 | 4643600 | SNV | 1 | C | T | Heterozygous |
| NC_037640.1 | 4643624 | SNV | 1 | C | G | Homozygous   |
| NC_037640.1 | 4643636 | SNV | 1 | G | A | Homozygous   |
| NC_037640.1 | 4644078 | SNV | 1 | A | G | Heterozygous |
| NC_037640.1 | 4646367 | SNV | 1 | G | T | Homozygous   |
| NC_037640.1 | 4647721 | SNV | 1 | G | A | Heterozygous |
| NC_037640.1 | 4647946 | SNV | 1 | T | C | Heterozygous |
| NC_037640.1 | 4647993 | SNV | 1 | G | A | Heterozygous |
| NC_037640.1 | 4648291 | SNV | 1 | A | G | Heterozygous |
| NC_037640.1 | 4648389 | SNV | 1 | C | T | Heterozygous |
| NC_037640.1 | 4648435 | SNV | 1 | G | A | Heterozygous |
| NC_037640.1 | 4686442 | SNV | 1 | C | T | Heterozygous |
| NC_037640.1 | 4686572 | SNV | 1 | G | T | Heterozygous |
| NC_037640.1 | 4686764 | SNV | 1 | G | A | Heterozygous |
| NC_037640.1 | 4687532 | SNV | 1 | T | C | Heterozygous |
| NC_037640.1 | 4687554 | SNV | 1 | C | T | Heterozygous |
| NC_037640.1 | 4695276 | SNV | 1 | G | A | Homozygous   |
| NC_037640.1 | 4695320 | SNV | 1 | C | T | Homozygous   |
| NC_037640.1 | 4695494 | SNV | 1 | C | A | Heterozygous |
| NC_037640.1 | 4695646 | SNV | 1 | C | T | Heterozygous |
| NC_037640.1 | 4695978 | SNV | 1 | C | A | Heterozygous |
| NC_037640.1 | 4697314 | SNV | 1 | A | C | Heterozygous |
| NC_037640.1 | 4697316 | SNV | 1 | A | C | Heterozygous |
| NC_037640.1 | 4702993 | SNV | 1 | A | T | Homozygous   |
| NC_037640.1 | 4704567 | SNV | 1 | G | A | Heterozygous |
| NC_037640.1 | 4704771 | SNV | 1 | C | T | Heterozygous |
| NC_037640.1 | 4704918 | SNV | 1 | G | A | Heterozygous |
| NC_037640.1 | 4709853 | SNV | 1 | C | G | Heterozygous |
| NC_037640.1 | 4713292 | SNV | 1 | G | T | Heterozygous |
| NC_037640.1 | 4713370 | SNV | 1 | T | C | Homozygous   |
| NC_037640.1 | 4773093 | SNV | 1 | T | C | Homozygous   |

|             |         |     |   |   |   |              |
|-------------|---------|-----|---|---|---|--------------|
| NC_037640.1 | 4773220 | SNV | 1 | A | G | Homozygous   |
| NC_037640.1 | 4773649 | SNV | 1 | C | T | Heterozygous |
| NC_037640.1 | 4777256 | SNV | 1 | A | T | Heterozygous |
| NC_037640.1 | 4845851 | SNV | 1 | G | A | Homozygous   |
| NC_037640.1 | 4846557 | SNV | 1 | A | G | Homozygous   |
| NC_037640.1 | 4859454 | SNV | 1 | G | A | Heterozygous |
| NC_037640.1 | 4859622 | SNV | 1 | A | G | Homozygous   |
| NC_037640.1 | 4860791 | SNV | 1 | C | T | Heterozygous |
| NC_037640.1 | 4864878 | SNV | 1 | G | A | Heterozygous |
| NC_037640.1 | 4869985 | SNV | 1 | A | T | Homozygous   |
| NC_037640.1 | 4869991 | SNV | 1 | A | T | Homozygous   |
| NC_037640.1 | 4869993 | SNV | 1 | T | C | Homozygous   |
| NC_037640.1 | 4870015 | SNV | 1 | T | C | Homozygous   |
| NC_037640.1 | 4870020 | SNV | 1 | A | T | Homozygous   |
| NC_037640.1 | 4872156 | SNV | 1 | C | T | Homozygous   |
| NC_037640.1 | 4872872 | SNV | 1 | A | G | Homozygous   |
| NC_037640.1 | 4873072 | SNV | 1 | A | G | Homozygous   |
| NC_037640.1 | 4873973 | SNV | 1 | G | T | Homozygous   |
| NC_037640.1 | 4874831 | SNV | 1 | T | A | Homozygous   |
| NC_037640.1 | 4874833 | SNV | 1 | A | G | Homozygous   |
| NC_037640.1 | 4875024 | SNV | 1 | T | C | Homozygous   |
| NC_037640.1 | 4877475 | SNV | 1 | T | C | Homozygous   |
| NC_037640.1 | 4877533 | SNV | 1 | A | G | Homozygous   |
| NC_037640.1 | 4877896 | SNV | 1 | C | T | Homozygous   |
| NC_037640.1 | 4879054 | SNV | 1 | A | G | Heterozygous |
| NC_037640.1 | 4879057 | SNV | 1 | G | A | Heterozygous |
| NC_037640.1 | 4882344 | SNV | 1 | G | T | Heterozygous |
| NC_037640.1 | 4882711 | SNV | 1 | G | C | Homozygous   |
| NC_037640.1 | 4896356 | SNV | 1 | T | C | Heterozygous |
| NC_037640.1 | 4896381 | SNV | 1 | A | G | Homozygous   |
| NC_037640.1 | 4896383 | SNV | 1 | T | G | Homozygous   |
| NC_037640.1 | 4896393 | SNV | 1 | T | A | Homozygous   |
| NC_037640.1 | 4896410 | SNV | 1 | A | G | Homozygous   |
| NC_037640.1 | 4897144 | SNV | 1 | T | C | Heterozygous |
| NC_037640.1 | 4897241 | SNV | 1 | A | G | Heterozygous |
| NC_037640.1 | 4897624 | SNV | 1 | G | A | Heterozygous |
| NC_037640.1 | 4899332 | SNV | 1 | G | A | Heterozygous |
| NC_037640.1 | 4899385 | SNV | 1 | C | T | Heterozygous |
| NC_037640.1 | 4899404 | SNV | 1 | G | A | Heterozygous |
| NC_037640.1 | 4904874 | SNV | 1 | G | A | Heterozygous |
| NC_037640.1 | 4905254 | SNV | 1 | C | T | Heterozygous |
| NC_037640.1 | 4905259 | SNV | 1 | T | C | Heterozygous |
| NC_037640.1 | 4905261 | SNV | 1 | T | C | Heterozygous |
| NC_037640.1 | 4905269 | SNV | 1 | T | A | Heterozygous |
| NC_037640.1 | 4905272 | SNV | 1 | T | A | Heterozygous |
| NC_037640.1 | 4905274 | SNV | 1 | A | G | Heterozygous |
| NC_037640.1 | 4905278 | SNV | 1 | T | A | Heterozygous |
| NC_037640.1 | 4905299 | SNV | 1 | T | C | Heterozygous |
| NC_037640.1 | 4905424 | SNV | 1 | T | C | Homozygous   |
| NC_037640.1 | 4905427 | SNV | 1 | T | A | Homozygous   |
| NC_037640.1 | 4905684 | SNV | 1 | C | A | Heterozygous |

|             |         |     |   |   |   |              |
|-------------|---------|-----|---|---|---|--------------|
| NC_037640.1 | 4910286 | SNV | 1 | G | A | Heterozygous |
| NC_037640.1 | 4919632 | SNV | 1 | C | A | Heterozygous |
| NC_037640.1 | 4919836 | SNV | 1 | G | A | Heterozygous |
| NC_037640.1 | 4920498 | SNV | 1 | T | C | Heterozygous |
| NC_037640.1 | 4920528 | SNV | 1 | G | A | Heterozygous |
| NC_037640.1 | 4921010 | SNV | 1 | T | C | Homozygous   |
| NC_037640.1 | 4921565 | SNV | 1 | T | C | Homozygous   |
| NC_037640.1 | 4924452 | SNV | 1 | T | G | Homozygous   |
| NC_037640.1 | 4924456 | SNV | 1 | A | G | Homozygous   |
| NC_037640.1 | 4924857 | SNV | 1 | C | T | Homozygous   |
| NC_037640.1 | 4925236 | SNV | 1 | A | G | Homozygous   |
| NC_037640.1 | 4927759 | SNV | 1 | C | T | Heterozygous |
| NC_037640.1 | 4927875 | SNV | 1 | T | C | Heterozygous |
| NC_037640.1 | 4933296 | SNV | 1 | T | A | Heterozygous |
| NC_037640.1 | 4933319 | SNV | 1 | T | G | Heterozygous |
| NC_037640.1 | 4933579 | SNV | 1 | T | C | Heterozygous |
| NC_037640.1 | 4933604 | SNV | 1 | T | C | Homozygous   |
| NC_037640.1 | 4933786 | SNV | 1 | A | G | Heterozygous |
| NC_037640.1 | 4934870 | SNV | 1 | C | A | Heterozygous |
| NC_037640.1 | 4934888 | SNV | 1 | C | A | Heterozygous |
| NC_037640.1 | 4935259 | SNV | 1 | T | A | Heterozygous |
| NC_037640.1 | 4935417 | SNV | 1 | G | A | Homozygous   |
| NC_037640.1 | 4935463 | SNV | 1 | C | T | Heterozygous |
| NC_037640.1 | 4935491 | SNV | 1 | A | G | Heterozygous |
| NC_037640.1 | 4936190 | SNV | 1 | A | G | Homozygous   |
| NC_037640.1 | 4936499 | SNV | 1 | G | A | Heterozygous |
| NC_037640.1 | 4936837 | SNV | 1 | C | T | Heterozygous |
| NC_037640.1 | 4937116 | SNV | 1 | T | C | Homozygous   |
| NC_037640.1 | 4937396 | SNV | 1 | A | G | Homozygous   |
| NC_037640.1 | 4937448 | SNV | 1 | A | G | Heterozygous |
| NC_037640.1 | 4937450 | SNV | 1 | T | C | Heterozygous |
| NC_037640.1 | 4937474 | SNV | 1 | A | G | Heterozygous |
| NC_037640.1 | 4937594 | SNV | 1 | G | A | Homozygous   |
| NC_037640.1 | 4940553 | SNV | 1 | A | G | Homozygous   |
| NC_037640.1 | 4941621 | SNV | 1 | G | T | Heterozygous |
| NC_037640.1 | 4941623 | SNV | 1 | T | C | Heterozygous |
| NC_037640.1 | 4941630 | SNV | 1 | T | C | Homozygous   |
| NC_037640.1 | 4941633 | SNV | 1 | C | T | Heterozygous |
| NC_037640.1 | 4941636 | SNV | 1 | G | A | Heterozygous |
| NC_037640.1 | 4941648 | SNV | 1 | C | T | Heterozygous |
| NC_037640.1 | 4941660 | SNV | 1 | T | C | Heterozygous |
| NC_037640.1 | 4941663 | SNV | 1 | T | A | Heterozygous |
| NC_037640.1 | 4941681 | SNV | 1 | A | G | Heterozygous |
| NC_037640.1 | 4941687 | SNV | 1 | T | C | Heterozygous |
| NC_037640.1 | 4943460 | SNV | 1 | A | T | Homozygous   |
| NC_037640.1 | 4943528 | SNV | 1 | G | A | Homozygous   |
| NC_037640.1 | 4943874 | SNV | 1 | C | T | Homozygous   |
| NC_037640.1 | 4944017 | SNV | 1 | A | G | Homozygous   |
| NC_037640.1 | 4944120 | SNV | 1 | C | A | Heterozygous |
| NC_037640.1 | 4945093 | SNV | 1 | G | A | Homozygous   |
| NC_037640.1 | 4945831 | SNV | 1 | A | G | Homozygous   |

|             |         |     |   |   |   |              |
|-------------|---------|-----|---|---|---|--------------|
| NC_037640.1 | 4946476 | SNV | 1 | T | C | Homozygous   |
| NC_037640.1 | 4946545 | SNV | 1 | A | C | Homozygous   |
| NC_037640.1 | 4946553 | SNV | 1 | T | C | Homozygous   |
| NC_037640.1 | 4946779 | SNV | 1 | C | T | Homozygous   |
| NC_037640.1 | 4947430 | SNV | 1 | T | C | Homozygous   |
| NC_037640.1 | 4947554 | SNV | 1 | T | C | Homozygous   |
| NC_037640.1 | 4947561 | SNV | 1 | G | T | Homozygous   |
| NC_037640.1 | 4950567 | SNV | 1 | T | G | Homozygous   |
| NC_037640.1 | 4950576 | SNV | 1 | T | A | Homozygous   |
| NC_037640.1 | 4950607 | SNV | 1 | A | G | Homozygous   |
| NC_037640.1 | 4950617 | SNV | 1 | A | T | Homozygous   |
| NC_037640.1 | 4951426 | SNV | 1 | T | C | Homozygous   |
| NC_037640.1 | 4952808 | SNV | 1 | T | C | Homozygous   |
| NC_037640.1 | 4957602 | SNV | 1 | C | T | Homozygous   |
| NC_037640.1 | 4966180 | SNV | 1 | A | T | Homozygous   |
| NC_037640.1 | 4966192 | SNV | 1 | T | A | Homozygous   |
| NC_037640.1 | 4966196 | SNV | 1 | A | G | Homozygous   |
| NC_037640.1 | 4966207 | SNV | 1 | T | C | Homozygous   |
| NC_037640.1 | 4966214 | SNV | 1 | T | A | Homozygous   |
| NC_037640.1 | 4966217 | SNV | 1 | A | G | Homozygous   |
| NC_037640.1 | 4966220 | SNV | 1 | A | T | Homozygous   |
| NC_037640.1 | 4966223 | SNV | 1 | T | A | Homozygous   |
| NC_037640.1 | 4966226 | SNV | 1 | T | G | Homozygous   |
| NC_037640.1 | 4966592 | SNV | 1 | T | C | Heterozygous |
| NC_037640.1 | 4966782 | SNV | 1 | G | A | Heterozygous |
| NC_037640.1 | 4966848 | SNV | 1 | G | C | Homozygous   |
| NC_037640.1 | 4967032 | SNV | 1 | A | C | Heterozygous |
| NC_037640.1 | 4967142 | SNV | 1 | A | G | Homozygous   |
| NC_037640.1 | 4967162 | SNV | 1 | T | A | Homozygous   |
| NC_037640.1 | 4967169 | SNV | 1 | T | A | Heterozygous |
| NC_037640.1 | 4969207 | SNV | 1 | A | G | Homozygous   |
| NC_037640.1 | 4970381 | SNV | 1 | T | C | Homozygous   |
| NC_037640.1 | 4970484 | SNV | 1 | T | C | Homozygous   |
| NC_037640.1 | 4971331 | SNV | 1 | T | C | Homozygous   |
| NC_037640.1 | 4971530 | SNV | 1 | T | C | Homozygous   |
| NC_037640.1 | 4971728 | SNV | 1 | G | A | Heterozygous |
| NC_037640.1 | 4971793 | SNV | 1 | C | T | Heterozygous |
| NC_037640.1 | 4971842 | SNV | 1 | C | T | Homozygous   |
| NC_037640.1 | 4971926 | SNV | 1 | G | A | Homozygous   |
| NC_037640.1 | 4971944 | SNV | 1 | C | T | Heterozygous |
| NC_037640.1 | 4973594 | SNV | 1 | T | C | Homozygous   |
| NC_037640.1 | 4973617 | SNV | 1 | A | G | Homozygous   |
| NC_037640.1 | 4974530 | SNV | 1 | G | A | Heterozygous |
| NC_037640.1 | 4974701 | SNV | 1 | T | C | Heterozygous |
| NC_037640.1 | 4974725 | SNV | 1 | C | G | Heterozygous |
| NC_037640.1 | 4974758 | SNV | 1 | C | T | Heterozygous |
| NC_037640.1 | 4974764 | SNV | 1 | C | T | Heterozygous |
| NC_037640.1 | 4974776 | SNV | 1 | G | A | Heterozygous |
| NC_037640.1 | 4989807 | SNV | 1 | G | A | Homozygous   |
| NC_037640.1 | 4992690 | SNV | 1 | A | G | Homozygous   |
| NC_037640.1 | 4992818 | SNV | 1 | T | C | Homozygous   |

|             |         |     |   |   |   |              |
|-------------|---------|-----|---|---|---|--------------|
| NC_037640.1 | 4992820 | SNV | 1 | G | C | Heterozygous |
| NC_037640.1 | 4992872 | SNV | 1 | C | G | Heterozygous |
| NC_037640.1 | 4992904 | SNV | 1 | G | A | Homozygous   |
| NC_037640.1 | 5003563 | SNV | 1 | A | C | Heterozygous |
| NC_037640.1 | 5041825 | SNV | 1 | C | T | Homozygous   |
| NC_037640.1 | 5079272 | SNV | 1 | A | G | Homozygous   |
| NC_037640.1 | 5079298 | SNV | 1 | A | C | Homozygous   |
| NC_037640.1 | 5080347 | SNV | 1 | T | G | Homozygous   |
| NC_037640.1 | 5080351 | SNV | 1 | T | A | Homozygous   |
| NC_037640.1 | 5081812 | SNV | 1 | A | C | Homozygous   |
| NC_037640.1 | 5081829 | SNV | 1 | A | G | Homozygous   |
| NC_037640.1 | 5081838 | SNV | 1 | A | C | Homozygous   |
| NC_037640.1 | 5091931 | SNV | 1 | C | A | Homozygous   |
| NC_037640.1 | 5091935 | SNV | 1 | T | C | Heterozygous |
| NC_037640.1 | 5091967 | SNV | 1 | G | A | Homozygous   |
| NC_037640.1 | 5091970 | SNV | 1 | A | C | Homozygous   |
| NC_037640.1 | 5092529 | SNV | 1 | A | C | Homozygous   |
| NC_037640.1 | 5092577 | SNV | 1 | A | G | Homozygous   |
| NC_037640.1 | 5092705 | SNV | 1 | A | G | Homozygous   |
| NC_037640.1 | 5093169 | SNV | 1 | G | A | Homozygous   |
| NC_037640.1 | 5093245 | SNV | 1 | A | G | Homozygous   |
| NC_037640.1 | 5094756 | SNV | 1 | G | T | Heterozygous |
| NC_037640.1 | 5094809 | SNV | 1 | A | G | Homozygous   |
| NC_037640.1 | 5094887 | SNV | 1 | T | C | Homozygous   |
| NC_037640.1 | 5095091 | SNV | 1 | G | A | Homozygous   |
| NC_037640.1 | 5095141 | SNV | 1 | T | C | Homozygous   |
| NC_037640.1 | 5095166 | SNV | 1 | A | G | Homozygous   |
| NC_037640.1 | 5095334 | SNV | 1 | C | T | Homozygous   |
| NC_037640.1 | 5095924 | SNV | 1 | T | G | Homozygous   |
| NC_037640.1 | 5096250 | SNV | 1 | A | G | Homozygous   |
| NC_037640.1 | 5096625 | SNV | 1 | C | T | Heterozygous |
| NC_037640.1 | 5096639 | SNV | 1 | T | A | Heterozygous |
| NC_037640.1 | 5096667 | SNV | 1 | G | A | Heterozygous |
| NC_037640.1 | 5097585 | SNV | 1 | T | A | Homozygous   |
| NC_037640.1 | 5097594 | SNV | 1 | T | C | Heterozygous |
| NC_037640.1 | 5098001 | SNV | 1 | T | C | Heterozygous |
| NC_037640.1 | 5098106 | SNV | 1 | G | T | Homozygous   |
| NC_037640.1 | 5098193 | SNV | 1 | T | C | Homozygous   |
| NC_037640.1 | 5098589 | SNV | 1 | A | G | Heterozygous |
| NC_037640.1 | 5098755 | SNV | 1 | C | T | Heterozygous |
| NC_037640.1 | 5098786 | SNV | 1 | T | C | Heterozygous |
| NC_037640.1 | 5098842 | SNV | 1 | G | A | Heterozygous |
| NC_037640.1 | 5098870 | SNV | 1 | T | C | Heterozygous |
| NC_037640.1 | 5099137 | SNV | 1 | C | A | Homozygous   |
| NC_037640.1 | 5099264 | SNV | 1 | G | A | Homozygous   |
| NC_037640.1 | 5099291 | SNV | 1 | G | A | Heterozygous |
| NC_037640.1 | 5099608 | SNV | 1 | C | A | Heterozygous |
| NC_037640.1 | 5099803 | SNV | 1 | A | G | Homozygous   |
| NC_037640.1 | 5099844 | SNV | 1 | A | C | Homozygous   |
| NC_037640.1 | 5099847 | SNV | 1 | C | T | Homozygous   |
| NC_037640.1 | 5099934 | SNV | 1 | G | A | Heterozygous |



|             |         |     |   |   |   |              |
|-------------|---------|-----|---|---|---|--------------|
| NC_037640.1 | 5099962 | SNV | 1 | T | G | Homozygous   |
| NC_037640.1 | 5100084 | SNV | 1 | C | T | Heterozygous |
| NC_037640.1 | 5100099 | SNV | 1 | T | C | Homozygous   |
| NC_037640.1 | 5100137 | SNV | 1 | C | T | Heterozygous |
| NC_037640.1 | 5100347 | SNV | 1 | G | A | Heterozygous |
| NC_037640.1 | 5100876 | SNV | 1 | T | C | Heterozygous |
| NC_037640.1 | 5100882 | SNV | 1 | G | A | Heterozygous |
| NC_037640.1 | 5101031 | SNV | 1 | C | T | Homozygous   |
| NC_037640.1 | 5101373 | SNV | 1 | A | G | Heterozygous |
| NC_037640.1 | 5101465 | SNV | 1 | C | T | Homozygous   |
| NC_037640.1 | 5101763 | SNV | 1 | C | T | Heterozygous |
| NC_037640.1 | 5102482 | SNV | 1 | T | C | Heterozygous |
| NC_037640.1 | 5102501 | SNV | 1 | T | C | Homozygous   |
| NC_037640.1 | 5102674 | SNV | 1 | T | C | Heterozygous |
| NC_037640.1 | 5102716 | SNV | 1 | A | G | Homozygous   |
| NC_037640.1 | 5102763 | SNV | 1 | T | C | Heterozygous |
| NC_037640.1 | 5102834 | SNV | 1 | G | A | Homozygous   |
| NC_037640.1 | 5102846 | SNV | 1 | A | G | Homozygous   |
| NC_037640.1 | 5103783 | SNV | 1 | G | C | Heterozygous |
| NC_037640.1 | 5103834 | SNV | 1 | G | T | Heterozygous |
| NC_037640.1 | 5103837 | SNV | 1 | T | C | Homozygous   |
| NC_037640.1 | 5103860 | SNV | 1 | A | T | Heterozygous |
| NC_037640.1 | 5103915 | SNV | 1 | T | C | Homozygous   |
| NC_037640.1 | 5103919 | SNV | 1 | A | G | Heterozygous |
| NC_037640.1 | 5103924 | SNV | 1 | G | A | Heterozygous |
| NC_037640.1 | 5104019 | SNV | 1 | A | G | Homozygous   |
| NC_037640.1 | 5104646 | SNV | 1 | T | A | Heterozygous |
| NC_037640.1 | 5104655 | SNV | 1 | A | T | Heterozygous |
| NC_037640.1 | 5104700 | SNV | 1 | A | T | Homozygous   |
| NC_037640.1 | 5105214 | SNV | 1 | T | C | Homozygous   |
| NC_037640.1 | 5105280 | SNV | 1 | A | G | Heterozygous |
| NC_037640.1 | 5105284 | SNV | 1 | G | T | Heterozygous |
| NC_037640.1 | 5105289 | SNV | 1 | T | A | Heterozygous |
| NC_037640.1 | 5105291 | SNV | 1 | T | C | Heterozygous |
| NC_037640.1 | 5105294 | SNV | 1 | A | G | Heterozygous |
| NC_037640.1 | 5105311 | SNV | 1 | A | G | Heterozygous |
| NC_037640.1 | 5105329 | SNV | 1 | C | G | Heterozygous |
| NC_037640.1 | 5105336 | SNV | 1 | T | C | Heterozygous |
| NC_037640.1 | 5105386 | SNV | 1 | A | C | Heterozygous |
| NC_037640.1 | 5105393 | SNV | 1 | T | C | Heterozygous |
| NC_037640.1 | 5105396 | SNV | 1 | C | T | Heterozygous |
| NC_037640.1 | 5105401 | SNV | 1 | A | C | Heterozygous |
| NC_037640.1 | 5105566 | SNV | 1 | C | T | Homozygous   |
| NC_037640.1 | 5105689 | SNV | 1 | T | A | Homozygous   |
| NC_037640.1 | 5105833 | SNV | 1 | T | G | Heterozygous |
| NC_037640.1 | 5105948 | SNV | 1 | C | T | Heterozygous |
| NC_037640.1 | 5105952 | SNV | 1 | T | C | Heterozygous |
| NC_037640.1 | 5106164 | SNV | 1 | G | A | Homozygous   |
| NC_037640.1 | 5106204 | SNV | 1 | T | C | Homozygous   |
| NC_037640.1 | 5106334 | SNV | 1 | C | G | Heterozygous |
| NC_037640.1 | 5106890 | SNV | 1 | A | G | Heterozygous |

|             |         |     |   |   |   |              |
|-------------|---------|-----|---|---|---|--------------|
| NC_037640.1 | 5106942 | SNV | 1 | G | T | Heterozygous |
| NC_037640.1 | 5106944 | SNV | 1 | G | A | Heterozygous |
| NC_037640.1 | 5107163 | SNV | 1 | A | G | Homozygous   |
| NC_037640.1 | 5107280 | SNV | 1 | T | C | Homozygous   |
| NC_037640.1 | 5107548 | SNV | 1 | A | G | Heterozygous |
| NC_037640.1 | 5107685 | SNV | 1 | A | G | Homozygous   |
| NC_037640.1 | 5107924 | SNV | 1 | C | T | Homozygous   |
| NC_037640.1 | 5112271 | SNV | 1 | A | G | Homozygous   |
| NC_037640.1 | 5112337 | SNV | 1 | T | A | Heterozygous |
| NC_037640.1 | 5112339 | SNV | 1 | T | A | Heterozygous |
| NC_037640.1 | 5112372 | SNV | 1 | T | C | Homozygous   |
| NC_037640.1 | 5112406 | SNV | 1 | T | C | Homozygous   |
| NC_037640.1 | 5112535 | SNV | 1 | T | C | Heterozygous |
| NC_037640.1 | 5114526 | SNV | 1 | A | T | Heterozygous |
| NC_037640.1 | 5114535 | SNV | 1 | C | A | Heterozygous |
| NC_037640.1 | 5114571 | SNV | 1 | A | G | Homozygous   |
| NC_037640.1 | 5114725 | SNV | 1 | T | C | Heterozygous |
| NC_037640.1 | 5114728 | SNV | 1 | C | T | Heterozygous |
| NC_037640.1 | 5114730 | SNV | 1 | C | T | Heterozygous |
| NC_037640.1 | 5114733 | SNV | 1 | C | T | Homozygous   |
| NC_037640.1 | 5114854 | SNV | 1 | C | T | Heterozygous |
| NC_037640.1 | 5114861 | SNV | 1 | C | T | Heterozygous |
| NC_037640.1 | 5115421 | SNV | 1 | T | C | Heterozygous |
| NC_037640.1 | 5115457 | SNV | 1 | G | T | Heterozygous |
| NC_037640.1 | 5119164 | SNV | 1 | A | G | Homozygous   |
| NC_037640.1 | 5119170 | SNV | 1 | G | T | Homozygous   |
| NC_037640.1 | 5119483 | SNV | 1 | T | C | Homozygous   |
| NC_037640.1 | 5119704 | SNV | 1 | T | C | Homozygous   |
| NC_037640.1 | 5119706 | SNV | 1 | G | A | Heterozygous |
| NC_037640.1 | 5119733 | SNV | 1 | C | T | Homozygous   |
| NC_037640.1 | 5119759 | SNV | 1 | T | C | Homozygous   |
| NC_037640.1 | 5119817 | SNV | 1 | T | C | Homozygous   |
| NC_037640.1 | 5119897 | SNV | 1 | C | G | Homozygous   |
| NC_037640.1 | 5119899 | SNV | 1 | T | C | Homozygous   |
| NC_037640.1 | 5119933 | SNV | 1 | G | C | Homozygous   |
| NC_037640.1 | 5120442 | SNV | 1 | C | A | Homozygous   |
| NC_037640.1 | 5127211 | SNV | 1 | T | C | Homozygous   |
| NC_037640.1 | 5132455 | SNV | 1 | G | A | Heterozygous |
| NC_037640.1 | 5132529 | SNV | 1 | G | C | Heterozygous |
| NC_037640.1 | 5137981 | SNV | 1 | G | C | Heterozygous |
| NC_037640.1 | 5138427 | SNV | 1 | C | G | Homozygous   |
| NC_037640.1 | 5138430 | SNV | 1 | A | T | Homozygous   |
| NC_037640.1 | 5138466 | SNV | 1 | C | G | Homozygous   |
| NC_037640.1 | 5138472 | SNV | 1 | A | G | Homozygous   |
| NC_037640.1 | 5138477 | SNV | 1 | A | G | Homozygous   |
| NC_037640.1 | 5146684 | SNV | 1 | C | T | Heterozygous |
| NC_037640.1 | 5152922 | SNV | 1 | G | A | Heterozygous |
| NC_037640.1 | 5153008 | SNV | 1 | A | T | Heterozygous |
| NC_037640.1 | 5153015 | SNV | 1 | A | T | Heterozygous |
| NC_037640.1 | 5153062 | SNV | 1 | G | A | Heterozygous |
| NC_037640.1 | 5153893 | SNV | 1 | C | A | Heterozygous |

|             |         |     |   |   |   |              |
|-------------|---------|-----|---|---|---|--------------|
| NC_037640.1 | 5153913 | SNV | 1 | A | T | Heterozygous |
| NC_037640.1 | 5153925 | SNV | 1 | A | G | Heterozygous |
| NC_037640.1 | 5153934 | SNV | 1 | A | C | Heterozygous |
| NC_037640.1 | 5156127 | SNV | 1 | G | A | Homozygous   |
| NC_037640.1 | 5156133 | SNV | 1 | T | C | Homozygous   |
| NC_037640.1 | 5157882 | SNV | 1 | T | C | Heterozygous |
| NC_037640.1 | 5157953 | SNV | 1 | T | C | Heterozygous |
| NC_037640.1 | 5157955 | SNV | 1 | C | T | Heterozygous |
| NC_037640.1 | 5158287 | SNV | 1 | G | T | Heterozygous |
| NC_037640.1 | 5166113 | SNV | 1 | C | T | Heterozygous |
| NC_037640.1 | 5166119 | SNV | 1 | C | T | Homozygous   |
| NC_037640.1 | 5168684 | SNV | 1 | T | C | Homozygous   |
| NC_037640.1 | 5168686 | SNV | 1 | G | A | Homozygous   |
| NC_037640.1 | 5182437 | SNV | 1 | A | G | Homozygous   |
| NC_037640.1 | 5182440 | SNV | 1 | T | A | Homozygous   |
| NC_037640.1 | 5184118 | SNV | 1 | C | T | Homozygous   |
| NC_037640.1 | 5185857 | SNV | 1 | C | T | Homozygous   |
| NC_037640.1 | 5191950 | SNV | 1 | T | C | Homozygous   |
| NC_037640.1 | 5192015 | SNV | 1 | G | A | Homozygous   |
| NC_037640.1 | 5193508 | SNV | 1 | C | T | Homozygous   |
| NC_037640.1 | 5193551 | SNV | 1 | A | T | Heterozygous |
| NC_037640.1 | 5202871 | SNV | 1 | C | T | Homozygous   |
| NC_037640.1 | 5216608 | SNV | 1 | C | T | Homozygous   |
| NC_037640.1 | 5216632 | SNV | 1 | T | C | Homozygous   |
| NC_037640.1 | 5216744 | SNV | 1 | C | T | Heterozygous |
| NC_037640.1 | 5227978 | SNV | 1 | T | C | Homozygous   |
| NC_037640.1 | 5228366 | SNV | 1 | T | C | Homozygous   |
| NC_037640.1 | 5228455 | SNV | 1 | C | T | Heterozygous |
| NC_037640.1 | 5230580 | SNV | 1 | C | T | Homozygous   |
| NC_037640.1 | 5230592 | SNV | 1 | C | T | Homozygous   |
| NC_037640.1 | 5237564 | SNV | 1 | C | T | Homozygous   |
| NC_037640.1 | 5261668 | SNV | 1 | T | A | Heterozygous |
| NC_037640.1 | 5261687 | SNV | 1 | C | T | Heterozygous |
| NC_037640.1 | 5261773 | SNV | 1 | A | G | Heterozygous |
| NC_037640.1 | 5261800 | SNV | 1 | T | C | Homozygous   |
| NC_037640.1 | 5261817 | SNV | 1 | T | A | Heterozygous |
| NC_037640.1 | 5261892 | SNV | 1 | A | T | Heterozygous |
| NC_037640.1 | 5263825 | SNV | 1 | A | T | Heterozygous |
| NC_037640.1 | 5263919 | SNV | 1 | A | G | Homozygous   |
| NC_037640.1 | 5265118 | SNV | 1 | T | C | Homozygous   |
| NC_037640.1 | 5265135 | SNV | 1 | T | C | Homozygous   |
| NC_037640.1 | 5277100 | SNV | 1 | T | C | Heterozygous |
| NC_037640.1 | 5277164 | SNV | 1 | G | A | Heterozygous |
| NC_037640.1 | 5277290 | SNV | 1 | C | T | Homozygous   |
| NC_037640.1 | 5277871 | SNV | 1 | T | C | Homozygous   |
| NC_037640.1 | 5279231 | SNV | 1 | G | T | Homozygous   |
| NC_037640.1 | 5279447 | SNV | 1 | A | G | Homozygous   |
| NC_037640.1 | 5279450 | SNV | 1 | G | A | Heterozygous |
| NC_037640.1 | 5291229 | SNV | 1 | C | T | Heterozygous |
| NC_037640.1 | 5291958 | SNV | 1 | T | C | Homozygous   |
| NC_037640.1 | 5297063 | SNV | 1 | C | G | Homozygous   |

|             |         |     |   |   |   |              |
|-------------|---------|-----|---|---|---|--------------|
| NC_037640.1 | 5305107 | SNV | 1 | C | T | Heterozygous |
| NC_037640.1 | 5305114 | SNV | 1 | T | C | Homozygous   |
| NC_037640.1 | 5305210 | SNV | 1 | T | C | Heterozygous |
| NC_037640.1 | 5305256 | SNV | 1 | G | A | Heterozygous |
| NC_037640.1 | 5307142 | SNV | 1 | T | C | Heterozygous |
| NC_037640.1 | 5312478 | SNV | 1 | T | C | Homozygous   |
| NC_037640.1 | 5312773 | SNV | 1 | G | A | Homozygous   |
| NC_037640.1 | 5312777 | SNV | 1 | C | T | Heterozygous |
| NC_037640.1 | 5312800 | SNV | 1 | C | T | Heterozygous |
| NC_037640.1 | 5312854 | SNV | 1 | G | C | Heterozygous |
| NC_037640.1 | 5312894 | SNV | 1 | G | A | Homozygous   |
| NC_037640.1 | 5317083 | SNV | 1 | C | T | Heterozygous |
| NC_037640.1 | 5338438 | SNV | 1 | C | T | Heterozygous |
| NC_037640.1 | 5338527 | SNV | 1 | G | A | Heterozygous |
| NC_037640.1 | 5349797 | SNV | 1 | G | A | Homozygous   |
| NC_037640.1 | 5349799 | SNV | 1 | A | G | Heterozygous |
| NC_037640.1 | 5349860 | SNV | 1 | C | T | Heterozygous |
| NC_037640.1 | 5349931 | SNV | 1 | C | T | Heterozygous |
| NC_037640.1 | 5351632 | SNV | 1 | T | C | Homozygous   |
| NC_037640.1 | 5351764 | SNV | 1 | G | A | Heterozygous |
| NC_037640.1 | 5351884 | SNV | 1 | A | G | Homozygous   |
| NC_037640.1 | 5351968 | SNV | 1 | T | C | Homozygous   |
| NC_037640.1 | 5352137 | SNV | 1 | A | T | Homozygous   |
| NC_037640.1 | 5352237 | SNV | 1 | C | T | Heterozygous |
| NC_037640.1 | 5352583 | SNV | 1 | G | A | Heterozygous |
| NC_037640.1 | 5352598 | SNV | 1 | C | T | Homozygous   |
| NC_037640.1 | 5352976 | SNV | 1 | T | G | Homozygous   |
| NC_037640.1 | 5353242 | SNV | 1 | G | A | Heterozygous |
| NC_037640.1 | 5353317 | SNV | 1 | C | T | Homozygous   |
| NC_037640.1 | 5353355 | SNV | 1 | T | C | Homozygous   |
| NC_037640.1 | 5353380 | SNV | 1 | G | A | Homozygous   |
| NC_037640.1 | 5353646 | SNV | 1 | T | C | Homozygous   |
| NC_037640.1 | 5353652 | SNV | 1 | C | T | Heterozygous |
| NC_037640.1 | 5353667 | SNV | 1 | C | T | Homozygous   |
| NC_037640.1 | 5353732 | SNV | 1 | T | C | Heterozygous |
| NC_037640.1 | 5353944 | SNV | 1 | G | A | Homozygous   |
| NC_037640.1 | 5354158 | SNV | 1 | T | C | Homozygous   |
| NC_037640.1 | 5354432 | SNV | 1 | G | C | Heterozygous |
| NC_037640.1 | 5354731 | SNV | 1 | G | C | Heterozygous |
| NC_037640.1 | 5354743 | SNV | 1 | T | C | Homozygous   |
| NC_037640.1 | 5354748 | SNV | 1 | C | T | Homozygous   |
| NC_037640.1 | 5354766 | SNV | 1 | A | T | Heterozygous |
| NC_037640.1 | 5354777 | SNV | 1 | G | A | Heterozygous |
| NC_037640.1 | 5354836 | SNV | 1 | G | A | Homozygous   |
| NC_037640.1 | 5354871 | SNV | 1 | T | C | Heterozygous |
| NC_037640.1 | 5354900 | SNV | 1 | A | G | Homozygous   |
| NC_037640.1 | 5354916 | SNV | 1 | A | C | Homozygous   |
| NC_037640.1 | 5355997 | SNV | 1 | C | T | Heterozygous |
| NC_037640.1 | 5356005 | SNV | 1 | T | C | Homozygous   |
| NC_037640.1 | 5356361 | SNV | 1 | G | A | Homozygous   |
| NC_037640.1 | 5356568 | SNV | 1 | G | T | Heterozygous |

|             |         |     |   |   |   |              |
|-------------|---------|-----|---|---|---|--------------|
| NC_037640.1 | 5356683 | SNV | 1 | T | C | Homozygous   |
| NC_037640.1 | 5356728 | SNV | 1 | T | G | Heterozygous |
| NC_037640.1 | 5356822 | SNV | 1 | T | C | Homozygous   |
| NC_037640.1 | 5357120 | SNV | 1 | G | A | Heterozygous |
| NC_037640.1 | 5357510 | SNV | 1 | A | G | Homozygous   |
| NC_037640.1 | 5357573 | SNV | 1 | A | G | Homozygous   |
| NC_037640.1 | 5357820 | SNV | 1 | A | G | Heterozygous |
| NC_037640.1 | 5358566 | SNV | 1 | C | G | Heterozygous |
| NC_037640.1 | 5358575 | SNV | 1 | T | C | Homozygous   |
| NC_037640.1 | 5358736 | SNV | 1 | T | C | Homozygous   |
| NC_037640.1 | 5358746 | SNV | 1 | C | T | Homozygous   |
| NC_037640.1 | 5358758 | SNV | 1 | C | T | Homozygous   |
| NC_037640.1 | 5358767 | SNV | 1 | A | T | Homozygous   |
| NC_037640.1 | 5358773 | SNV | 1 | T | C | Homozygous   |
| NC_037640.1 | 5358959 | SNV | 1 | A | G | Heterozygous |
| NC_037640.1 | 5358984 | SNV | 1 | T | C | Homozygous   |
| NC_037640.1 | 5359854 | SNV | 1 | A | G | Homozygous   |
| NC_037640.1 | 5359858 | SNV | 1 | G | T | Homozygous   |
| NC_037640.1 | 5359872 | SNV | 1 | T | C | Homozygous   |
| NC_037640.1 | 5362402 | SNV | 1 | G | A | Heterozygous |
| NC_037640.1 | 5362417 | SNV | 1 | A | G | Heterozygous |
| NC_037640.1 | 5363037 | SNV | 1 | C | T | Heterozygous |
| NC_037640.1 | 5363377 | SNV | 1 | G | A | Heterozygous |
| NC_037640.1 | 5363868 | SNV | 1 | T | A | Homozygous   |
| NC_037640.1 | 5365119 | SNV | 1 | C | A | Homozygous   |
| NC_037640.1 | 5367929 | SNV | 1 | A | T | Homozygous   |
| NC_037640.1 | 5368485 | SNV | 1 | T | C | Heterozygous |
| NC_037640.1 | 5368502 | SNV | 1 | C | T | Homozygous   |
| NC_037640.1 | 5368986 | SNV | 1 | C | T | Homozygous   |
| NC_037640.1 | 5369633 | SNV | 1 | A | T | Homozygous   |
| NC_037640.1 | 5369855 | SNV | 1 | A | G | Homozygous   |
| NC_037640.1 | 5370065 | SNV | 1 | T | A | Homozygous   |
| NC_037640.1 | 5370068 | SNV | 1 | T | A | Homozygous   |
| NC_037640.1 | 5370634 | SNV | 1 | G | A | Homozygous   |
| NC_037640.1 | 5371242 | SNV | 1 | G | A | Heterozygous |
| NC_037640.1 | 5371244 | SNV | 1 | T | A | Heterozygous |
| NC_037640.1 | 5380959 | SNV | 1 | A | T | Homozygous   |
| NC_037640.1 | 5380968 | SNV | 1 | A | G | Homozygous   |
| NC_037640.1 | 5384413 | SNV | 1 | C | A | Homozygous   |
| NC_037640.1 | 5384421 | SNV | 1 | T | A | Homozygous   |
| NC_037640.1 | 5384429 | SNV | 1 | G | A | Homozygous   |
| NC_037640.1 | 5384435 | SNV | 1 | C | T | Homozygous   |
| NC_037640.1 | 5388696 | SNV | 1 | C | A | Homozygous   |
| NC_037640.1 | 5411951 | SNV | 1 | A | G | Homozygous   |
| NC_037640.1 | 5412243 | SNV | 1 | G | A | Heterozygous |
| NC_037640.1 | 5413438 | SNV | 1 | G | A | Heterozygous |
| NC_037640.1 | 5413793 | SNV | 1 | T | G | Homozygous   |
| NC_037640.1 | 5414569 | SNV | 1 | T | C | Homozygous   |
| NC_037640.1 | 5415452 | SNV | 1 | A | T | Homozygous   |
| NC_037640.1 | 5415548 | SNV | 1 | A | T | Homozygous   |
| NC_037640.1 | 5415550 | SNV | 1 | A | G | Homozygous   |

|             |         |     |   |   |   |              |
|-------------|---------|-----|---|---|---|--------------|
| NC_037640.1 | 5415941 | SNV | 1 | G | T | Heterozygous |
| NC_037640.1 | 5415944 | SNV | 1 | A | C | Heterozygous |
| NC_037640.1 | 5416187 | SNV | 1 | A | G | Homozygous   |
| NC_037640.1 | 5418163 | SNV | 1 | T | C | Homozygous   |
| NC_037640.1 | 5419060 | SNV | 1 | A | T | Homozygous   |
| NC_037640.1 | 5419516 | SNV | 1 | A | G | Homozygous   |
| NC_037640.1 | 5419534 | SNV | 1 | T | C | Homozygous   |
| NC_037640.1 | 5419799 | SNV | 1 | A | T | Homozygous   |
| NC_037640.1 | 5419947 | SNV | 1 | A | G | Heterozygous |
| NC_037640.1 | 5420109 | SNV | 1 | C | T | Heterozygous |
| NC_037640.1 | 5420241 | SNV | 1 | T | G | Homozygous   |
| NC_037640.1 | 5420710 | SNV | 1 | T | C | Homozygous   |
| NC_037640.1 | 5420802 | SNV | 1 | T | C | Homozygous   |
| NC_037640.1 | 5420823 | SNV | 1 | A | G | Heterozygous |
| NC_037640.1 | 5420973 | SNV | 1 | C | T | Heterozygous |
| NC_037640.1 | 5421336 | SNV | 1 | G | A | Heterozygous |
| NC_037640.1 | 5421789 | SNV | 1 | T | C | Homozygous   |
| NC_037640.1 | 5421799 | SNV | 1 | C | G | Homozygous   |
| NC_037640.1 | 5422747 | SNV | 1 | T | A | Heterozygous |
| NC_037640.1 | 5422854 | SNV | 1 | C | T | Homozygous   |
| NC_037640.1 | 5423442 | SNV | 1 | T | C | Homozygous   |
| NC_037640.1 | 5424010 | SNV | 1 | C | G | Heterozygous |
| NC_037640.1 | 5424060 | SNV | 1 | T | C | Heterozygous |
| NC_037640.1 | 5424159 | SNV | 1 | A | G | Homozygous   |
| NC_037640.1 | 5424759 | SNV | 1 | T | C | Heterozygous |
| NC_037640.1 | 5424822 | SNV | 1 | T | C | Homozygous   |
| NC_037640.1 | 5425764 | SNV | 1 | T | C | Homozygous   |
| NC_037640.1 | 5426439 | SNV | 1 | T | C | Homozygous   |
| NC_037640.1 | 5426701 | SNV | 1 | G | A | Homozygous   |
| NC_037640.1 | 5426703 | SNV | 1 | G | A | Homozygous   |
| NC_037640.1 | 5426741 | SNV | 1 | T | C | Homozygous   |
| NC_037640.1 | 5427181 | SNV | 1 | C | T | Homozygous   |
| NC_037640.1 | 5427348 | SNV | 1 | C | T | Homozygous   |
| NC_037640.1 | 5427445 | SNV | 1 | T | C | Heterozygous |
| NC_037640.1 | 5427651 | SNV | 1 | G | A | Heterozygous |
| NC_037640.1 | 5427976 | SNV | 1 | A | G | Heterozygous |
| NC_037640.1 | 5427999 | SNV | 1 | C | T | Heterozygous |
| NC_037640.1 | 5428093 | SNV | 1 | T | C | Heterozygous |
| NC_037640.1 | 5428502 | SNV | 1 | A | G | Homozygous   |
| NC_037640.1 | 5428527 | SNV | 1 | A | G | Homozygous   |
| NC_037640.1 | 5432679 | SNV | 1 | C | T | Heterozygous |
| NC_037640.1 | 5436235 | SNV | 1 | T | C | Heterozygous |
| NC_037640.1 | 5436239 | SNV | 1 | T | C | Heterozygous |
| NC_037640.1 | 5436244 | SNV | 1 | T | C | Heterozygous |
| NC_037640.1 | 5436247 | SNV | 1 | T | C | Heterozygous |
| NC_037640.1 | 5436583 | SNV | 1 | A | G | Homozygous   |
| NC_037640.1 | 5440379 | SNV | 1 | A | G | Homozygous   |
| NC_037640.1 | 5440819 | SNV | 1 | G | T | Homozygous   |
| NC_037640.1 | 5442626 | SNV | 1 | C | T | Homozygous   |
| NC_037640.1 | 5443920 | SNV | 1 | T | C | Homozygous   |
| NC_037640.1 | 5444137 | SNV | 1 | T | C | Heterozygous |

|             |         |     |   |   |   |              |
|-------------|---------|-----|---|---|---|--------------|
| NC_037640.1 | 5444453 | SNV | 1 | C | T | Homozygous   |
| NC_037640.1 | 5448139 | SNV | 1 | A | T | Homozygous   |
| NC_037640.1 | 5448484 | SNV | 1 | G | A | Homozygous   |
| NC_037640.1 | 5449090 | SNV | 1 | T | C | Heterozygous |
| NC_037640.1 | 5449454 | SNV | 1 | T | C | Heterozygous |
| NC_037640.1 | 5449660 | SNV | 1 | A | G | Homozygous   |
| NC_037640.1 | 5450167 | SNV | 1 | A | G | Homozygous   |
| NC_037640.1 | 5450233 | SNV | 1 | G | A | Heterozygous |
| NC_037640.1 | 5450301 | SNV | 1 | A | G | Homozygous   |
| NC_037640.1 | 5450321 | SNV | 1 | A | G | Homozygous   |
| NC_037640.1 | 5454703 | SNV | 1 | A | T | Heterozygous |
| NC_037640.1 | 5455099 | SNV | 1 | G | A | Heterozygous |
| NC_037640.1 | 5455120 | SNV | 1 | A | G | Homozygous   |
| NC_037640.1 | 5457926 | SNV | 1 | T | C | Heterozygous |
| NC_037640.1 | 5458004 | SNV | 1 | C | T | Heterozygous |
| NC_037640.1 | 5458082 | SNV | 1 | C | T | Heterozygous |
| NC_037640.1 | 5459647 | SNV | 1 | G | A | Homozygous   |
| NC_037640.1 | 5459650 | SNV | 1 | T | G | Homozygous   |
| NC_037640.1 | 5460046 | SNV | 1 | A | G | Homozygous   |
| NC_037640.1 | 5460176 | SNV | 1 | T | C | Homozygous   |
| NC_037640.1 | 5460275 | SNV | 1 | C | T | Homozygous   |
| NC_037640.1 | 5460407 | SNV | 1 | T | C | Homozygous   |
| NC_037640.1 | 5460548 | SNV | 1 | A | G | Homozygous   |
| NC_037640.1 | 5461329 | SNV | 1 | C | T | Homozygous   |
| NC_037640.1 | 5463689 | SNV | 1 | A | G | Homozygous   |
| NC_037640.1 | 5463858 | SNV | 1 | A | G | Homozygous   |
| NC_037640.1 | 5463958 | SNV | 1 | T | C | Homozygous   |
| NC_037640.1 | 5464496 | SNV | 1 | A | G | Homozygous   |
| NC_037640.1 | 5464723 | SNV | 1 | A | G | Homozygous   |
| NC_037640.1 | 5473946 | SNV | 1 | C | A | Homozygous   |
| NC_037640.1 | 5475723 | SNV | 1 | A | G | Heterozygous |
| NC_037640.1 | 5480525 | SNV | 1 | A | G | Homozygous   |
| NC_037640.1 | 5486027 | SNV | 1 | T | C | Homozygous   |
| NC_037640.1 | 5486912 | SNV | 1 | G | A | Heterozygous |
| NC_037640.1 | 5489415 | SNV | 1 | A | G | Homozygous   |
| NC_037640.1 | 5498128 | SNV | 1 | C | T | Homozygous   |
| NC_037640.1 | 5516184 | SNV | 1 | G | A | Homozygous   |
| NC_037640.1 | 5516191 | SNV | 1 | G | A | Heterozygous |
| NC_037640.1 | 5521719 | SNV | 1 | G | C | Homozygous   |
| NC_037640.1 | 5529825 | SNV | 1 | C | G | Homozygous   |
| NC_037640.1 | 5529908 | SNV | 1 | G | A | Homozygous   |
| NC_037640.1 | 5560302 | SNV | 1 | T | C | Heterozygous |
| NC_037640.1 | 5560693 | SNV | 1 | C | T | Heterozygous |
| NC_037640.1 | 5560696 | SNV | 1 | C | T | Heterozygous |
| NC_037640.1 | 5571430 | SNV | 1 | C | A | Heterozygous |
| NC_037640.1 | 5571432 | SNV | 1 | A | G | Homozygous   |
| NC_037640.1 | 5571750 | SNV | 1 | C | T | Heterozygous |
| NC_037640.1 | 5577603 | SNV | 1 | A | G | Heterozygous |
| NC_037640.1 | 5577622 | SNV | 1 | C | T | Heterozygous |
| NC_037640.1 | 5577801 | SNV | 1 | G | A | Heterozygous |
| NC_037640.1 | 5603900 | SNV | 1 | C | T | Homozygous   |

|             |         |     |   |   |   |              |
|-------------|---------|-----|---|---|---|--------------|
| NC_037640.1 | 5603908 | SNV | 1 | G | A | Heterozygous |
| NC_037640.1 | 5603910 | SNV | 1 | T | C | Heterozygous |
| NC_037640.1 | 5604018 | SNV | 1 | T | C | Homozygous   |
| NC_037640.1 | 5604256 | SNV | 1 | T | C | Homozygous   |
| NC_037640.1 | 5604361 | SNV | 1 | A | G | Heterozygous |
| NC_037640.1 | 5629304 | SNV | 1 | G | T | Homozygous   |
| NC_037640.1 | 5629319 | SNV | 1 | G | A | Heterozygous |
| NC_037640.1 | 5629331 | SNV | 1 | C | T | Heterozygous |
| NC_037640.1 | 5634850 | SNV | 1 | C | T | Heterozygous |
| NC_037640.1 | 5657543 | SNV | 1 | T | C | Homozygous   |
| NC_037640.1 | 5657564 | SNV | 1 | T | C | Homozygous   |
| NC_037640.1 | 5681074 | SNV | 1 | T | A | Homozygous   |
| NC_037640.1 | 5684789 | SNV | 1 | A | G | Homozygous   |
| NC_037640.1 | 5684820 | SNV | 1 | T | C | Homozygous   |
| NC_037640.1 | 5685075 | SNV | 1 | T | C | Homozygous   |
| NC_037640.1 | 5685540 | SNV | 1 | C | T | Heterozygous |
| NC_037640.1 | 5691593 | SNV | 1 | A | G | Homozygous   |
| NC_037640.1 | 5691711 | SNV | 1 | C | T | Homozygous   |
| NC_037640.1 | 5692678 | SNV | 1 | A | G | Heterozygous |
| NC_037640.1 | 5692703 | SNV | 1 | C | T | Homozygous   |
| NC_037640.1 | 5692961 | SNV | 1 | C | T | Heterozygous |
| NC_037640.1 | 5693060 | SNV | 1 | T | C | Homozygous   |
| NC_037640.1 | 5693244 | SNV | 1 | A | T | Homozygous   |
| NC_037640.1 | 5693956 | SNV | 1 | T | C | Homozygous   |
| NC_037640.1 | 5694171 | SNV | 1 | A | G | Homozygous   |
| NC_037640.1 | 5694805 | SNV | 1 | T | C | Homozygous   |
| NC_037640.1 | 5695003 | SNV | 1 | A | G | Homozygous   |
| NC_037640.1 | 5695073 | SNV | 1 | G | A | Homozygous   |
| NC_037640.1 | 5695100 | SNV | 1 | G | T | Heterozygous |
| NC_037640.1 | 5695102 | SNV | 1 | A | G | Heterozygous |
| NC_037640.1 | 5695108 | SNV | 1 | T | C | Homozygous   |
| NC_037640.1 | 5695110 | SNV | 1 | G | C | Homozygous   |
| NC_037640.1 | 5695126 | SNV | 1 | C | T | Homozygous   |
| NC_037640.1 | 5695128 | SNV | 1 | C | T | Homozygous   |
| NC_037640.1 | 5695136 | SNV | 1 | C | T | Homozygous   |
| NC_037640.1 | 5695139 | SNV | 1 | T | C | Homozygous   |
| NC_037640.1 | 5695761 | SNV | 1 | G | A | Homozygous   |
| NC_037640.1 | 5696163 | SNV | 1 | G | A | Homozygous   |
| NC_037640.1 | 5696219 | SNV | 1 | T | C | Homozygous   |
| NC_037640.1 | 5696235 | SNV | 1 | A | G | Homozygous   |
| NC_037640.1 | 5696552 | SNV | 1 | A | G | Homozygous   |
| NC_037640.1 | 5699577 | SNV | 1 | G | C | Homozygous   |
| NC_037640.1 | 5699603 | SNV | 1 | T | C | Homozygous   |
| NC_037640.1 | 5699741 | SNV | 1 | G | A | Heterozygous |
| NC_037640.1 | 5699823 | SNV | 1 | C | T | Heterozygous |
| NC_037640.1 | 5699858 | SNV | 1 | A | G | Homozygous   |
| NC_037640.1 | 5699925 | SNV | 1 | A | G | Homozygous   |
| NC_037640.1 | 5699930 | SNV | 1 | A | C | Heterozygous |
| NC_037640.1 | 5700056 | SNV | 1 | C | T | Heterozygous |
| NC_037640.1 | 5700171 | SNV | 1 | C | G | Homozygous   |
| NC_037640.1 | 5700371 | SNV | 1 | G | C | Heterozygous |



|             |         |     |   |   |   |              |
|-------------|---------|-----|---|---|---|--------------|
| NC_037640.1 | 5700404 | SNV | 1 | T | C | Homozygous   |
| NC_037640.1 | 5703999 | SNV | 1 | C | T | Heterozygous |
| NC_037640.1 | 5704007 | SNV | 1 | C | T | Homozygous   |
| NC_037640.1 | 5704030 | SNV | 1 | T | C | Homozygous   |
| NC_037640.1 | 5704036 | SNV | 1 | A | T | Homozygous   |
| NC_037640.1 | 5705226 | SNV | 1 | A | G | Homozygous   |
| NC_037640.1 | 5705393 | SNV | 1 | G | T | Homozygous   |
| NC_037640.1 | 5705401 | SNV | 1 | C | T | Homozygous   |
| NC_037640.1 | 5705424 | SNV | 1 | A | T | Homozygous   |
| NC_037640.1 | 5710170 | SNV | 1 | C | T | Heterozygous |
| NC_037640.1 | 5712520 | SNV | 1 | A | G | Heterozygous |
| NC_037640.1 | 5712522 | SNV | 1 | A | G | Heterozygous |
| NC_037640.1 | 5712531 | SNV | 1 | T | G | Homozygous   |
| NC_037640.1 | 5712542 | SNV | 1 | T | A | Homozygous   |
| NC_037640.1 | 5717239 | SNV | 1 | A | G | Homozygous   |
| NC_037640.1 | 5717723 | SNV | 1 | G | A | Heterozygous |
| NC_037640.1 | 5726154 | SNV | 1 | T | C | Heterozygous |
| NC_037640.1 | 5726163 | SNV | 1 | C | T | Heterozygous |
| NC_037640.1 | 5726166 | SNV | 1 | T | C | Heterozygous |
| NC_037640.1 | 5726171 | SNV | 1 | C | T | Heterozygous |
| NC_037640.1 | 5726219 | SNV | 1 | G | T | Homozygous   |
| NC_037640.1 | 5729227 | SNV | 1 | G | A | Heterozygous |
| NC_037640.1 | 5741787 | SNV | 1 | T | C | Heterozygous |
| NC_037640.1 | 5741833 | SNV | 1 | T | C | Homozygous   |
| NC_037640.1 | 5741856 | SNV | 1 | T | C | Homozygous   |
| NC_037640.1 | 5741942 | SNV | 1 | A | G | Heterozygous |
| NC_037640.1 | 5741978 | SNV | 1 | C | T | Homozygous   |
| NC_037640.1 | 5741986 | SNV | 1 | T | C | Homozygous   |
| NC_037640.1 | 5741992 | SNV | 1 | T | C | Homozygous   |
| NC_037640.1 | 5742002 | SNV | 1 | T | C | Homozygous   |
| NC_037640.1 | 5742061 | SNV | 1 | A | G | Heterozygous |
| NC_037640.1 | 5743512 | SNV | 1 | C | G | Homozygous   |
| NC_037640.1 | 5754365 | SNV | 1 | C | G | Homozygous   |
| NC_037640.1 | 5754435 | SNV | 1 | T | C | Homozygous   |
| NC_037640.1 | 5754486 | SNV | 1 | C | T | Homozygous   |
| NC_037640.1 | 5754542 | SNV | 1 | C | A | Heterozygous |
| NC_037640.1 | 5754636 | SNV | 1 | C | T | Homozygous   |
| NC_037640.1 | 5754642 | SNV | 1 | A | G | Homozygous   |
| NC_037640.1 | 5754696 | SNV | 1 | C | T | Heterozygous |
| NC_037640.1 | 5754714 | SNV | 1 | A | T | Homozygous   |
| NC_037640.1 | 5755846 | SNV | 1 | A | G | Heterozygous |
| NC_037640.1 | 5761974 | SNV | 1 | C | G | Homozygous   |
| NC_037640.1 | 5762666 | SNV | 1 | A | G | Homozygous   |
| NC_037640.1 | 5762840 | SNV | 1 | G | A | Heterozygous |
| NC_037640.1 | 5762866 | SNV | 1 | C | T | Homozygous   |
| NC_037640.1 | 5762932 | SNV | 1 | A | G | Heterozygous |
| NC_037640.1 | 5762953 | SNV | 1 | A | G | Heterozygous |
| NC_037640.1 | 5763036 | SNV | 1 | T | C | Homozygous   |
| NC_037640.1 | 5763105 | SNV | 1 | G | A | Heterozygous |
| NC_037640.1 | 5763110 | SNV | 1 | A | G | Heterozygous |
| NC_037640.1 | 5763115 | SNV | 1 | A | G | Heterozygous |

|             |         |     |   |   |   |              |
|-------------|---------|-----|---|---|---|--------------|
| NC_037640.1 | 5763423 | SNV | 1 | A | G | Heterozygous |
| NC_037640.1 | 5763452 | SNV | 1 | A | G | Homozygous   |
| NC_037640.1 | 5764026 | SNV | 1 | G | A | Heterozygous |
| NC_037640.1 | 5764055 | SNV | 1 | C | T | Heterozygous |
| NC_037640.1 | 5764119 | SNV | 1 | A | G | Heterozygous |
| NC_037640.1 | 5764122 | SNV | 1 | C | T | Heterozygous |
| NC_037640.1 | 5764184 | SNV | 1 | G | A | Heterozygous |
| NC_037640.1 | 5764200 | SNV | 1 | A | C | Homozygous   |
| NC_037640.1 | 5764206 | SNV | 1 | A | G | Homozygous   |
| NC_037640.1 | 5764383 | SNV | 1 | G | A | Heterozygous |
| NC_037640.1 | 5764450 | SNV | 1 | A | G | Homozygous   |
| NC_037640.1 | 5764535 | SNV | 1 | A | G | Homozygous   |
| NC_037640.1 | 5764754 | SNV | 1 | T | C | Homozygous   |
| NC_037640.1 | 5764757 | SNV | 1 | C | T | Heterozygous |
| NC_037640.1 | 5777506 | SNV | 1 | A | G | Homozygous   |
| NC_037640.1 | 5805668 | SNV | 1 | G | C | Heterozygous |
| NC_037640.1 | 5805682 | SNV | 1 | C | T | Heterozygous |
| NC_037640.1 | 5805715 | SNV | 1 | T | C | Homozygous   |
| NC_037640.1 | 5805735 | SNV | 1 | T | C | Homozygous   |
| NC_037640.1 | 5806187 | SNV | 1 | G | C | Heterozygous |
| NC_037640.1 | 5808490 | SNV | 1 | T | C | Homozygous   |
| NC_037640.1 | 5818821 | SNV | 1 | T | C | Heterozygous |
| NC_037640.1 | 5818835 | SNV | 1 | A | T | Heterozygous |
| NC_037640.1 | 5818842 | SNV | 1 | C | T | Heterozygous |
| NC_037640.1 | 5828585 | SNV | 1 | C | T | Homozygous   |
| NC_037640.1 | 5828612 | SNV | 1 | A | G | Homozygous   |
| NC_037640.1 | 5828979 | SNV | 1 | G | T | Homozygous   |
| NC_037640.1 | 5829002 | SNV | 1 | G | A | Homozygous   |
| NC_037640.1 | 5829944 | SNV | 1 | C | G | Homozygous   |
| NC_037640.1 | 5829947 | SNV | 1 | A | C | Homozygous   |
| NC_037640.1 | 5829975 | SNV | 1 | A | T | Homozygous   |
| NC_037640.1 | 5829980 | SNV | 1 | C | G | Homozygous   |
| NC_037640.1 | 5831081 | SNV | 1 | G | A | Homozygous   |
| NC_037640.1 | 5831120 | SNV | 1 | T | A | Heterozygous |
| NC_037640.1 | 5832205 | SNV | 1 | A | G | Homozygous   |
| NC_037640.1 | 5838805 | SNV | 1 | T | A | Heterozygous |
| NC_037640.1 | 5838909 | SNV | 1 | T | C | Homozygous   |
| NC_037640.1 | 5838979 | SNV | 1 | A | G | Homozygous   |
| NC_037640.1 | 5845375 | SNV | 1 | A | C | Homozygous   |
| NC_037640.1 | 5845420 | SNV | 1 | A | C | Homozygous   |
| NC_037640.1 | 5855283 | SNV | 1 | C | G | Homozygous   |
| NC_037640.1 | 5855343 | SNV | 1 | C | G | Homozygous   |
| NC_037640.1 | 5855843 | SNV | 1 | C | T | Homozygous   |
| NC_037640.1 | 5859066 | SNV | 1 | A | G | Homozygous   |
| NC_037640.1 | 5859199 | SNV | 1 | G | A | Heterozygous |
| NC_037640.1 | 5859263 | SNV | 1 | A | G | Homozygous   |
| NC_037640.1 | 5859284 | SNV | 1 | T | A | Heterozygous |
| NC_037640.1 | 5859388 | SNV | 1 | G | A | Heterozygous |
| NC_037640.1 | 5859619 | SNV | 1 | G | A | Heterozygous |
| NC_037640.1 | 5859839 | SNV | 1 | T | C | Heterozygous |
| NC_037640.1 | 5860200 | SNV | 1 | T | G | Heterozygous |

|             |         |     |   |   |   |              |
|-------------|---------|-----|---|---|---|--------------|
| NC_037640.1 | 5864466 | SNV | 1 | T | C | Heterozygous |
| NC_037640.1 | 5864469 | SNV | 1 | T | C | Homozygous   |
| NC_037640.1 | 5864482 | SNV | 1 | C | T | Heterozygous |
| NC_037640.1 | 5864674 | SNV | 1 | A | C | Homozygous   |
| NC_037640.1 | 5864752 | SNV | 1 | A | G | Heterozygous |
| NC_037640.1 | 5864782 | SNV | 1 | G | A | Homozygous   |
| NC_037640.1 | 5864819 | SNV | 1 | T | A | Homozygous   |
| NC_037640.1 | 5865275 | SNV | 1 | A | G | Heterozygous |
| NC_037640.1 | 5865279 | SNV | 1 | A | G | Heterozygous |
| NC_037640.1 | 5865284 | SNV | 1 | T | A | Homozygous   |
| NC_037640.1 | 5865294 | SNV | 1 | T | A | Heterozygous |
| NC_037640.1 | 5865331 | SNV | 1 | G | A | Homozygous   |
| NC_037640.1 | 5874198 | SNV | 1 | T | C | Heterozygous |
| NC_037640.1 | 5874199 | SNV | 1 | C | T | Heterozygous |
| NC_037640.1 | 5874212 | SNV | 1 | G | A | Homozygous   |
| NC_037640.1 | 5890381 | SNV | 1 | C | T | Homozygous   |
| NC_037640.1 | 5890393 | SNV | 1 | A | G | Heterozygous |
| NC_037640.1 | 5890435 | SNV | 1 | T | C | Heterozygous |
| NC_037640.1 | 5890437 | SNV | 1 | T | C | Homozygous   |
| NC_037640.1 | 5890444 | SNV | 1 | T | C | Homozygous   |
| NC_037640.1 | 5890455 | SNV | 1 | C | T | Heterozygous |
| NC_037640.1 | 5890561 | SNV | 1 | G | A | Heterozygous |
| NC_037640.1 | 5890563 | SNV | 1 | G | A | Heterozygous |
| NC_037640.1 | 5901585 | SNV | 1 | G | A | Heterozygous |
| NC_037640.1 | 5901702 | SNV | 1 | T | C | Heterozygous |
| NC_037640.1 | 5901748 | SNV | 1 | A | G | Heterozygous |
| NC_037640.1 | 5903439 | SNV | 1 | A | T | Homozygous   |
| NC_037640.1 | 5903452 | SNV | 1 | C | T | Heterozygous |
| NC_037640.1 | 5903482 | SNV | 1 | C | G | Homozygous   |
| NC_037640.1 | 5903485 | SNV | 1 | G | T | Homozygous   |
| NC_037640.1 | 5907401 | SNV | 1 | G | A | Heterozygous |
| NC_037640.1 | 5907508 | SNV | 1 | A | G | Homozygous   |
| NC_037640.1 | 5907714 | SNV | 1 | A | T | Homozygous   |
| NC_037640.1 | 5909249 | SNV | 1 | G | A | Homozygous   |
| NC_037640.1 | 5909466 | SNV | 1 | C | T | Homozygous   |
| NC_037640.1 | 5909540 | SNV | 1 | C | T | Heterozygous |
| NC_037640.1 | 5909675 | SNV | 1 | C | T | Heterozygous |
| NC_037640.1 | 5909831 | SNV | 1 | T | C | Homozygous   |
| NC_037640.1 | 5917867 | SNV | 1 | G | A | Heterozygous |
| NC_037640.1 | 5917901 | SNV | 1 | A | G | Heterozygous |
| NC_037640.1 | 5932869 | SNV | 1 | C | T | Homozygous   |
| NC_037640.1 | 5932873 | SNV | 1 | C | T | Homozygous   |
| NC_037640.1 | 5932877 | SNV | 1 | C | T | Homozygous   |
| NC_037640.1 | 5932888 | SNV | 1 | A | G | Homozygous   |
| NC_037640.1 | 5932891 | SNV | 1 | C | T | Homozygous   |
| NC_037640.1 | 5932895 | SNV | 1 | T | C | Homozygous   |
| NC_037640.1 | 5932901 | SNV | 1 | C | T | Heterozygous |
| NC_037640.1 | 5933026 | SNV | 1 | T | C | Heterozygous |
| NC_037640.1 | 5933031 | SNV | 1 | T | C | Heterozygous |
| NC_037640.1 | 5933037 | SNV | 1 | C | A | Heterozygous |
| NC_037640.1 | 5933237 | SNV | 1 | C | T | Heterozygous |

|             |         |     |   |   |   |              |
|-------------|---------|-----|---|---|---|--------------|
| NC_037640.1 | 5933266 | SNV | 1 | G | A | Heterozygous |
| NC_037640.1 | 5933352 | SNV | 1 | T | A | Heterozygous |
| NC_037640.1 | 5933360 | SNV | 1 | T | A | Heterozygous |
| NC_037640.1 | 5933364 | SNV | 1 | A | T | Heterozygous |
| NC_037640.1 | 5933369 | SNV | 1 | G | A | Homozygous   |
| NC_037640.1 | 5933778 | SNV | 1 | A | G | Heterozygous |
| NC_037640.1 | 5933807 | SNV | 1 | T | C | Heterozygous |
| NC_037640.1 | 5937608 | SNV | 1 | C | T | Homozygous   |
| NC_037640.1 | 5937676 | SNV | 1 | T | C | Heterozygous |
| NC_037640.1 | 5937760 | SNV | 1 | T | G | Heterozygous |
| NC_037640.1 | 5937805 | SNV | 1 | A | G | Heterozygous |
| NC_037640.1 | 5937807 | SNV | 1 | G | C | Heterozygous |
| NC_037640.1 | 5937809 | SNV | 1 | G | A | Heterozygous |
| NC_037640.1 | 5937822 | SNV | 1 | G | A | Heterozygous |
| NC_037640.1 | 5937853 | SNV | 1 | A | G | Homozygous   |
| NC_037640.1 | 5937863 | SNV | 1 | G | A | Heterozygous |
| NC_037640.1 | 5937887 | SNV | 1 | C | T | Heterozygous |
| NC_037640.1 | 5937893 | SNV | 1 | C | T | Heterozygous |
| NC_037640.1 | 5937987 | SNV | 1 | G | A | Heterozygous |
| NC_037640.1 | 5938058 | SNV | 1 | A | G | Heterozygous |
| NC_037640.1 | 5938421 | SNV | 1 | C | T | Homozygous   |
| NC_037640.1 | 5938969 | SNV | 1 | T | A | Heterozygous |
| NC_037640.1 | 5939004 | SNV | 1 | T | C | Heterozygous |
| NC_037640.1 | 5939025 | SNV | 1 | T | C | Homozygous   |
| NC_037640.1 | 5939029 | SNV | 1 | T | C | Homozygous   |
| NC_037640.1 | 5939033 | SNV | 1 | C | G | Heterozygous |
| NC_037640.1 | 5939044 | SNV | 1 | C | T | Homozygous   |
| NC_037640.1 | 5939108 | SNV | 1 | G | A | Homozygous   |
| NC_037640.1 | 5939154 | SNV | 1 | A | G | Homozygous   |
| NC_037640.1 | 5939290 | SNV | 1 | G | A | Homozygous   |
| NC_037640.1 | 5939421 | SNV | 1 | T | G | Heterozygous |
| NC_037640.1 | 5939660 | SNV | 1 | A | G | Homozygous   |
| NC_037640.1 | 5939688 | SNV | 1 | T | C | Homozygous   |
| NC_037640.1 | 5940090 | SNV | 1 | A | C | Homozygous   |
| NC_037640.1 | 5940092 | SNV | 1 | A | C | Homozygous   |
| NC_037640.1 | 5940464 | SNV | 1 | C | T | Heterozygous |
| NC_037640.1 | 5940466 | SNV | 1 | C | G | Heterozygous |
| NC_037640.1 | 5950471 | SNV | 1 | G | A | Heterozygous |
| NC_037640.1 | 5950517 | SNV | 1 | A | G | Homozygous   |
| NC_037640.1 | 5950524 | SNV | 1 | A | G | Homozygous   |
| NC_037640.1 | 5950631 | SNV | 1 | G | A | Heterozygous |
| NC_037640.1 | 5950677 | SNV | 1 | G | A | Heterozygous |
| NC_037640.1 | 5950715 | SNV | 1 | C | A | Heterozygous |
| NC_037640.1 | 5951034 | SNV | 1 | A | G | Heterozygous |
| NC_037640.1 | 5952096 | SNV | 1 | C | T | Homozygous   |
| NC_037640.1 | 5952143 | SNV | 1 | T | C | Homozygous   |
| NC_037640.1 | 5952310 | SNV | 1 | G | A | Homozygous   |
| NC_037640.1 | 5952929 | SNV | 1 | T | A | Homozygous   |
| NC_037640.1 | 5952967 | SNV | 1 | T | G | Homozygous   |
| NC_037640.1 | 5952970 | SNV | 1 | C | T | Homozygous   |
| NC_037640.1 | 5952974 | SNV | 1 | T | C | Homozygous   |

|             |         |     |   |   |   |              |
|-------------|---------|-----|---|---|---|--------------|
| NC_037640.1 | 5954267 | SNV | 1 | C | T | Homozygous   |
| NC_037640.1 | 5954368 | SNV | 1 | C | G | Heterozygous |
| NC_037640.1 | 5954466 | SNV | 1 | G | A | Heterozygous |
| NC_037640.1 | 5954471 | SNV | 1 | G | A | Heterozygous |
| NC_037640.1 | 5954486 | SNV | 1 | A | G | Homozygous   |
| NC_037640.1 | 5954679 | SNV | 1 | A | G | Homozygous   |
| NC_037640.1 | 5954908 | SNV | 1 | G | T | Heterozygous |
| NC_037640.1 | 5954916 | SNV | 1 | A | G | Homozygous   |
| NC_037640.1 | 5954943 | SNV | 1 | T | C | Heterozygous |
| NC_037640.1 | 5954949 | SNV | 1 | G | T | Heterozygous |
| NC_037640.1 | 5963881 | SNV | 1 | G | A | Heterozygous |
| NC_037640.1 | 5964153 | SNV | 1 | G | A | Homozygous   |
| NC_037640.1 | 5964268 | SNV | 1 | A | G | Heterozygous |
| NC_037640.1 | 5965254 | SNV | 1 | A | G | Homozygous   |
| NC_037640.1 | 5965261 | SNV | 1 | T | C | Heterozygous |
| NC_037640.1 | 5965321 | SNV | 1 | T | C | Homozygous   |
| NC_037640.1 | 5965726 | SNV | 1 | G | A | Homozygous   |
| NC_037640.1 | 5966057 | SNV | 1 | T | C | Heterozygous |
| NC_037640.1 | 5966072 | SNV | 1 | C | A | Homozygous   |
| NC_037640.1 | 5966089 | SNV | 1 | T | C | Heterozygous |
| NC_037640.1 | 5967455 | SNV | 1 | A | G | Homozygous   |
| NC_037640.1 | 5967547 | SNV | 1 | A | G | Homozygous   |
| NC_037640.1 | 5967792 | SNV | 1 | A | G | Homozygous   |
| NC_037640.1 | 5967798 | SNV | 1 | A | G | Heterozygous |
| NC_037640.1 | 5967846 | SNV | 1 | A | G | Heterozygous |
| NC_037640.1 | 5967860 | SNV | 1 | G | A | Homozygous   |
| NC_037640.1 | 5967866 | SNV | 1 | G | A | Homozygous   |
| NC_037640.1 | 5967916 | SNV | 1 | A | G | Heterozygous |
| NC_037640.1 | 5967964 | SNV | 1 | T | C | Homozygous   |
| NC_037640.1 | 5967980 | SNV | 1 | A | G | Homozygous   |
| NC_037640.1 | 5968028 | SNV | 1 | A | G | Homozygous   |
| NC_037640.1 | 5968079 | SNV | 1 | C | T | Homozygous   |
| NC_037640.1 | 5968087 | SNV | 1 | T | A | Heterozygous |
| NC_037640.1 | 5968090 | SNV | 1 | T | C | Homozygous   |
| NC_037640.1 | 5972204 | SNV | 1 | A | G | Heterozygous |
| NC_037640.1 | 5972279 | SNV | 1 | G | A | Heterozygous |
| NC_037640.1 | 5976504 | SNV | 1 | A | G | Homozygous   |
| NC_037640.1 | 5977470 | SNV | 1 | T | C | Heterozygous |
| NC_037640.1 | 5977702 | SNV | 1 | A | T | Heterozygous |
| NC_037640.1 | 5978313 | SNV | 1 | T | C | Heterozygous |
| NC_037640.1 | 5978583 | SNV | 1 | C | T | Heterozygous |
| NC_037640.1 | 5978596 | SNV | 1 | A | G | Homozygous   |
| NC_037640.1 | 5979351 | SNV | 1 | T | C | Homozygous   |
| NC_037640.1 | 5979414 | SNV | 1 | A | T | Homozygous   |
| NC_037640.1 | 5979551 | SNV | 1 | A | G | Homozygous   |
| NC_037640.1 | 5980002 | SNV | 1 | A | G | Heterozygous |
| NC_037640.1 | 5980303 | SNV | 1 | C | T | Homozygous   |
| NC_037640.1 | 5980538 | SNV | 1 | C | T | Heterozygous |
| NC_037640.1 | 5980786 | SNV | 1 | C | T | Heterozygous |
| NC_037640.1 | 5980830 | SNV | 1 | T | C | Heterozygous |
| NC_037640.1 | 5980994 | SNV | 1 | A | G | Homozygous   |

|             |         |     |   |   |   |              |
|-------------|---------|-----|---|---|---|--------------|
| NC_037640.1 | 5981289 | SNV | 1 | T | C | Homozygous   |
| NC_037640.1 | 5981292 | SNV | 1 | C | T | Heterozygous |
| NC_037640.1 | 5981295 | SNV | 1 | T | C | Heterozygous |
| NC_037640.1 | 5981751 | SNV | 1 | A | G | Homozygous   |
| NC_037640.1 | 5981800 | SNV | 1 | A | G | Homozygous   |
| NC_037640.1 | 5982252 | SNV | 1 | C | T | Heterozygous |
| NC_037640.1 | 5982779 | SNV | 1 | T | C | Homozygous   |
| NC_037640.1 | 5982783 | SNV | 1 | T | C | Homozygous   |
| NC_037640.1 | 5982794 | SNV | 1 | T | G | Homozygous   |
| NC_037640.1 | 5982819 | SNV | 1 | C | T | Homozygous   |
| NC_037640.1 | 5983742 | SNV | 1 | C | T | Heterozygous |
| NC_037640.1 | 5983748 | SNV | 1 | A | G | Heterozygous |
| NC_037640.1 | 5984044 | SNV | 1 | C | T | Homozygous   |
| NC_037640.1 | 5984057 | SNV | 1 | A | C | Heterozygous |
| NC_037640.1 | 5984081 | SNV | 1 | A | C | Heterozygous |
| NC_037640.1 | 5984779 | SNV | 1 | C | A | Homozygous   |
| NC_037640.1 | 5984787 | SNV | 1 | T | A | Heterozygous |
| NC_037640.1 | 5985184 | SNV | 1 | A | G | Homozygous   |
| NC_037640.1 | 5985544 | SNV | 1 | C | T | Homozygous   |
| NC_037640.1 | 5985593 | SNV | 1 | T | C | Homozygous   |
| NC_037640.1 | 5985595 | SNV | 1 | G | C | Homozygous   |
| NC_037640.1 | 5985737 | SNV | 1 | C | T | Homozygous   |
| NC_037640.1 | 5985744 | SNV | 1 | T | A | Homozygous   |
| NC_037640.1 | 5986668 | SNV | 1 | T | G | Homozygous   |
| NC_037640.1 | 5986670 | SNV | 1 | T | G | Homozygous   |
| NC_037640.1 | 5988168 | SNV | 1 | G | A | Homozygous   |
| NC_037640.1 | 5988183 | SNV | 1 | A | G | Homozygous   |
| NC_037640.1 | 5988361 | SNV | 1 | C | T | Homozygous   |
| NC_037640.1 | 5990648 | SNV | 1 | T | C | Homozygous   |
| NC_037640.1 | 5990739 | SNV | 1 | C | T | Heterozygous |
| NC_037640.1 | 5990922 | SNV | 1 | A | G | Homozygous   |
| NC_037640.1 | 5991005 | SNV | 1 | A | G | Homozygous   |
| NC_037640.1 | 5991091 | SNV | 1 | C | T | Heterozygous |
| NC_037640.1 | 5992379 | SNV | 1 | G | A | Heterozygous |
| NC_037640.1 | 5992398 | SNV | 1 | T | C | Homozygous   |
| NC_037640.1 | 5992495 | SNV | 1 | T | G | Heterozygous |
| NC_037640.1 | 5992526 | SNV | 1 | A | G | Homozygous   |
| NC_037640.1 | 5992550 | SNV | 1 | T | C | Heterozygous |
| NC_037640.1 | 5992557 | SNV | 1 | T | A | Heterozygous |
| NC_037640.1 | 5992997 | SNV | 1 | T | C | Homozygous   |
| NC_037640.1 | 5993011 | SNV | 1 | G | A | Homozygous   |
| NC_037640.1 | 5993340 | SNV | 1 | T | C | Homozygous   |
| NC_037640.1 | 5993345 | SNV | 1 | G | A | Heterozygous |
| NC_037640.1 | 5993350 | SNV | 1 | G | A | Heterozygous |
| NC_037640.1 | 5993415 | SNV | 1 | T | C | Homozygous   |
| NC_037640.1 | 5993479 | SNV | 1 | A | G | Homozygous   |
| NC_037640.1 | 5993868 | SNV | 1 | G | A | Homozygous   |
| NC_037640.1 | 5995888 | SNV | 1 | C | T | Heterozygous |
| NC_037640.1 | 5995896 | SNV | 1 | T | A | Heterozygous |
| NC_037640.1 | 5995947 | SNV | 1 | C | T | Heterozygous |
| NC_037640.1 | 6001053 | SNV | 1 | C | T | Heterozygous |

|             |         |     |   |   |   |              |
|-------------|---------|-----|---|---|---|--------------|
| NC_037640.1 | 6005867 | SNV | 1 | T | C | Homozygous   |
| NC_037640.1 | 6005954 | SNV | 1 | A | C | Homozygous   |
| NC_037640.1 | 6006436 | SNV | 1 | A | G | Homozygous   |
| NC_037640.1 | 6012080 | SNV | 1 | C | T | Homozygous   |
| NC_037640.1 | 6014613 | SNV | 1 | C | T | Heterozygous |
| NC_037640.1 | 6015005 | SNV | 1 | G | T | Homozygous   |
| NC_037640.1 | 6016670 | SNV | 1 | T | C | Homozygous   |
| NC_037640.1 | 6028116 | SNV | 1 | T | A | Homozygous   |
| NC_037640.1 | 6028119 | SNV | 1 | T | A | Homozygous   |
| NC_037640.1 | 6030904 | SNV | 1 | A | G | Heterozygous |
| NC_037640.1 | 6035559 | SNV | 1 | C | A | Heterozygous |
| NC_037640.1 | 6035944 | SNV | 1 | A | G | Homozygous   |
| NC_037640.1 | 6036259 | SNV | 1 | A | G | Homozygous   |
| NC_037640.1 | 6038548 | SNV | 1 | A | G | Homozygous   |
| NC_037640.1 | 6038848 | SNV | 1 | C | T | Heterozygous |
| NC_037640.1 | 6039009 | SNV | 1 | G | A | Heterozygous |
| NC_037640.1 | 6039292 | SNV | 1 | C | T | Heterozygous |
| NC_037640.1 | 6039381 | SNV | 1 | T | C | Heterozygous |
| NC_037640.1 | 6039546 | SNV | 1 | G | T | Heterozygous |
| NC_037640.1 | 6039637 | SNV | 1 | T | C | Homozygous   |
| NC_037640.1 | 6039661 | SNV | 1 | G | A | Homozygous   |
| NC_037640.1 | 6039782 | SNV | 1 | A | G | Homozygous   |
| NC_037640.1 | 6039785 | SNV | 1 | G | C | Homozygous   |
| NC_037640.1 | 6039805 | SNV | 1 | C | T | Heterozygous |
| NC_037640.1 | 6039809 | SNV | 1 | G | A | Heterozygous |
| NC_037640.1 | 6040443 | SNV | 1 | C | A | Heterozygous |
| NC_037640.1 | 6040467 | SNV | 1 | G | A | Heterozygous |
| NC_037640.1 | 6040470 | SNV | 1 | A | G | Homozygous   |
| NC_037640.1 | 6040476 | SNV | 1 | C | T | Heterozygous |
| NC_037640.1 | 6040799 | SNV | 1 | A | G | Homozygous   |
| NC_037640.1 | 6040814 | SNV | 1 | C | A | Homozygous   |
| NC_037640.1 | 6040885 | SNV | 1 | T | G | Homozygous   |
| NC_037640.1 | 6040914 | SNV | 1 | A | G | Heterozygous |
| NC_037640.1 | 6041084 | SNV | 1 | A | G | Heterozygous |
| NC_037640.1 | 6041211 | SNV | 1 | T | C | Homozygous   |
| NC_037640.1 | 6041216 | SNV | 1 | G | C | Heterozygous |
| NC_037640.1 | 6041220 | SNV | 1 | A | G | Homozygous   |
| NC_037640.1 | 6041242 | SNV | 1 | C | T | Heterozygous |
| NC_037640.1 | 6041249 | SNV | 1 | A | T | Heterozygous |
| NC_037640.1 | 6041253 | SNV | 1 | C | A | Heterozygous |
| NC_037640.1 | 6050702 | SNV | 1 | C | T | Homozygous   |
| NC_037640.1 | 6050751 | SNV | 1 | T | C | Homozygous   |
| NC_037640.1 | 6050951 | SNV | 1 | G | A | Homozygous   |
| NC_037640.1 | 6059142 | SNV | 1 | T | C | Heterozygous |
| NC_037640.1 | 6060828 | SNV | 1 | C | A | Heterozygous |
| NC_037640.1 | 6061115 | SNV | 1 | T | C | Heterozygous |
| NC_037640.1 | 6061372 | SNV | 1 | A | T | Homozygous   |
| NC_037640.1 | 6062042 | SNV | 1 | G | A | Homozygous   |
| NC_037640.1 | 6062357 | SNV | 1 | C | T | Homozygous   |
| NC_037640.1 | 6062405 | SNV | 1 | T | C | Heterozygous |
| NC_037640.1 | 6064294 | SNV | 1 | T | C | Homozygous   |

|             |         |     |   |   |   |              |
|-------------|---------|-----|---|---|---|--------------|
| NC_037640.1 | 6065009 | SNV | 1 | C | T | Heterozygous |
| NC_037640.1 | 6065214 | SNV | 1 | A | G | Heterozygous |
| NC_037640.1 | 6067064 | SNV | 1 | T | C | Homozygous   |
| NC_037640.1 | 6067104 | SNV | 1 | T | C | Heterozygous |
| NC_037640.1 | 6075059 | SNV | 1 | T | C | Homozygous   |
| NC_037640.1 | 6075244 | SNV | 1 | G | T | Homozygous   |
| NC_037640.1 | 6076178 | SNV | 1 | C | T | Heterozygous |
| NC_037640.1 | 6078176 | SNV | 1 | C | G | Heterozygous |
| NC_037640.1 | 6079551 | SNV | 1 | C | T | Heterozygous |
| NC_037640.1 | 6079742 | SNV | 1 | C | A | Homozygous   |
| NC_037640.1 | 6082778 | SNV | 1 | T | G | Homozygous   |
| NC_037640.1 | 6082787 | SNV | 1 | A | C | Heterozygous |
| NC_037640.1 | 6082787 | SNV | 1 | A | T | Heterozygous |
| NC_037640.1 | 6083378 | SNV | 1 | C | T | Homozygous   |
| NC_037640.1 | 6084937 | SNV | 1 | T | C | Heterozygous |
| NC_037640.1 | 6086260 | SNV | 1 | A | T | Heterozygous |
| NC_037640.1 | 6086811 | SNV | 1 | A | C | Homozygous   |
| NC_037640.1 | 6086911 | SNV | 1 | A | G | Homozygous   |
| NC_037640.1 | 6092910 | SNV | 1 | G | A | Homozygous   |
| NC_037640.1 | 6097103 | SNV | 1 | T | C | Homozygous   |
| NC_037640.1 | 6097179 | SNV | 1 | A | G | Homozygous   |
| NC_037640.1 | 6102027 | SNV | 1 | C | T | Heterozygous |
| NC_037640.1 | 6102210 | SNV | 1 | T | C | Homozygous   |
| NC_037640.1 | 6104255 | SNV | 1 | T | C | Homozygous   |
| NC_037640.1 | 6104260 | SNV | 1 | T | A | Homozygous   |
| NC_037640.1 | 6104272 | SNV | 1 | A | T | Homozygous   |
| NC_037640.1 | 6111873 | SNV | 1 | G | T | Heterozygous |
| NC_037640.1 | 6112369 | SNV | 1 | A | G | Homozygous   |
| NC_037640.1 | 6116660 | SNV | 1 | C | T | Homozygous   |
| NC_037640.1 | 6116756 | SNV | 1 | T | C | Homozygous   |
| NC_037640.1 | 6116906 | SNV | 1 | G | A | Heterozygous |
| NC_037640.1 | 6117001 | SNV | 1 | G | A | Heterozygous |
| NC_037640.1 | 6117852 | SNV | 1 | A | G | Homozygous   |
| NC_037640.1 | 6118307 | SNV | 1 | A | T | Homozygous   |
| NC_037640.1 | 6118772 | SNV | 1 | G | A | Homozygous   |
| NC_037640.1 | 6118841 | SNV | 1 | A | T | Homozygous   |
| NC_037640.1 | 6118868 | SNV | 1 | A | G | Homozygous   |
| NC_037640.1 | 6118870 | SNV | 1 | T | A | Homozygous   |
| NC_037640.1 | 6118992 | SNV | 1 | G | A | Homozygous   |
| NC_037640.1 | 6119127 | SNV | 1 | T | C | Homozygous   |
| NC_037640.1 | 6119164 | SNV | 1 | T | C | Homozygous   |
| NC_037640.1 | 6121892 | SNV | 1 | G | A | Homozygous   |
| NC_037640.1 | 6125793 | SNV | 1 | G | C | Heterozygous |
| NC_037640.1 | 6125793 | SNV | 1 | G | T | Heterozygous |
| NC_037640.1 | 6126148 | SNV | 1 | T | C | Homozygous   |
| NC_037640.1 | 6131031 | SNV | 1 | A | T | Homozygous   |
| NC_037640.1 | 6131034 | SNV | 1 | T | G | Homozygous   |
| NC_037640.1 | 6131037 | SNV | 1 | T | C | Homozygous   |
| NC_037640.1 | 6131041 | SNV | 1 | T | A | Homozygous   |
| NC_037640.1 | 6131046 | SNV | 1 | C | T | Homozygous   |
| NC_037640.1 | 6132122 | SNV | 1 | G | A | Heterozygous |



|             |         |     |   |   |   |              |
|-------------|---------|-----|---|---|---|--------------|
| NC_037640.1 | 6132673 | SNV | 1 | G | A | Homozygous   |
| NC_037640.1 | 6132676 | SNV | 1 | A | T | Homozygous   |
| NC_037640.1 | 6132788 | SNV | 1 | T | C | Homozygous   |
| NC_037640.1 | 6133148 | SNV | 1 | G | A | Heterozygous |
| NC_037640.1 | 6133445 | SNV | 1 | A | G | Homozygous   |
| NC_037640.1 | 6133656 | SNV | 1 | T | C | Homozygous   |
| NC_037640.1 | 6156913 | SNV | 1 | A | T | Heterozygous |
| NC_037640.1 | 6156919 | SNV | 1 | A | G | Homozygous   |
| NC_037640.1 | 6156921 | SNV | 1 | A | G | Homozygous   |
| NC_037640.1 | 6156929 | SNV | 1 | A | G | Homozygous   |
| NC_037640.1 | 6156966 | SNV | 1 | A | G | Homozygous   |
| NC_037640.1 | 6163922 | SNV | 1 | A | G | Homozygous   |
| NC_037640.1 | 6163932 | SNV | 1 | A | G | Homozygous   |
| NC_037640.1 | 6163939 | SNV | 1 | G | A | Heterozygous |
| NC_037640.1 | 6163992 | SNV | 1 | A | G | Heterozygous |
| NC_037640.1 | 6178686 | SNV | 1 | A | T | Heterozygous |
| NC_037640.1 | 6178745 | SNV | 1 | A | G | Heterozygous |
| NC_037640.1 | 6178747 | SNV | 1 | A | G | Heterozygous |
| NC_037640.1 | 6178755 | SNV | 1 | A | G | Homozygous   |
| NC_037640.1 | 6178757 | SNV | 1 | A | G | Homozygous   |
| NC_037640.1 | 6178760 | SNV | 1 | C | T | Homozygous   |
| NC_037640.1 | 6242204 | SNV | 1 | T | G | Homozygous   |
| NC_037640.1 | 6242222 | SNV | 1 | A | C | Homozygous   |
| NC_037640.1 | 6242226 | SNV | 1 | G | T | Homozygous   |
| NC_037640.1 | 6242242 | SNV | 1 | T | G | Homozygous   |
| NC_037640.1 | 6245439 | SNV | 1 | G | A | Homozygous   |
| NC_037640.1 | 6246728 | SNV | 1 | C | T | Homozygous   |
| NC_037640.1 | 6246788 | SNV | 1 | T | C | Homozygous   |
| NC_037640.1 | 6248241 | SNV | 1 | A | T | Homozygous   |
| NC_037640.1 | 6248302 | SNV | 1 | A | G | Homozygous   |
| NC_037640.1 | 6249646 | SNV | 1 | A | G | Homozygous   |
| NC_037640.1 | 6250612 | SNV | 1 | C | A | Homozygous   |
| NC_037640.1 | 6250649 | SNV | 1 | C | T | Heterozygous |
| NC_037640.1 | 6265576 | SNV | 1 | G | A | Homozygous   |
| NC_037640.1 | 6265620 | SNV | 1 | A | G | Heterozygous |
| NC_037640.1 | 6265679 | SNV | 1 | C | T | Homozygous   |
| NC_037640.1 | 6265690 | SNV | 1 | C | T | Heterozygous |
| NC_037640.1 | 6265813 | SNV | 1 | G | A | Heterozygous |
| NC_037640.1 | 6269838 | SNV | 1 | T | C | Homozygous   |
| NC_037640.1 | 6270016 | SNV | 1 | A | G | Homozygous   |
| NC_037640.1 | 6270054 | SNV | 1 | A | G | Homozygous   |
| NC_037640.1 | 6270075 | SNV | 1 | A | G | Homozygous   |
| NC_037640.1 | 6278150 | SNV | 1 | G | A | Heterozygous |
| NC_037640.1 | 6278167 | SNV | 1 | A | G | Heterozygous |
| NC_037640.1 | 6289337 | SNV | 1 | C | T | Homozygous   |
| NC_037640.1 | 6289345 | SNV | 1 | T | C | Heterozygous |
| NC_037640.1 | 6289349 | SNV | 1 | T | C | Heterozygous |
| NC_037640.1 | 6289463 | SNV | 1 | T | C | Homozygous   |
| NC_037640.1 | 6294116 | SNV | 1 | C | T | Heterozygous |
| NC_037640.1 | 6302357 | SNV | 1 | A | T | Heterozygous |
| NC_037640.1 | 6302359 | SNV | 1 | G | T | Heterozygous |

|             |         |     |   |   |   |              |
|-------------|---------|-----|---|---|---|--------------|
| NC_037640.1 | 6302367 | SNV | 1 | G | T | Homozygous   |
| NC_037640.1 | 6321269 | SNV | 1 | C | T | Homozygous   |
| NC_037640.1 | 6321286 | SNV | 1 | A | G | Homozygous   |
| NC_037640.1 | 6321288 | SNV | 1 | T | G | Heterozygous |
| NC_037640.1 | 6347914 | SNV | 1 | C | T | Heterozygous |
| NC_037640.1 | 6347999 | SNV | 1 | C | A | Homozygous   |
| NC_037640.1 | 6348054 | SNV | 1 | T | C | Homozygous   |
| NC_037640.1 | 6376341 | SNV | 1 | C | T | Homozygous   |
| NC_037640.1 | 6376430 | SNV | 1 | T | C | Heterozygous |
| NC_037640.1 | 6377869 | SNV | 1 | T | C | Heterozygous |
| NC_037640.1 | 6377941 | SNV | 1 | A | G | Homozygous   |
| NC_037640.1 | 6377986 | SNV | 1 | T | C | Heterozygous |
| NC_037640.1 | 6378386 | SNV | 1 | T | C | Heterozygous |
| NC_037640.1 | 6384074 | SNV | 1 | A | C | Homozygous   |
| NC_037640.1 | 6385854 | SNV | 1 | T | A | Homozygous   |
| NC_037640.1 | 6386794 | SNV | 1 | T | A | Homozygous   |
| NC_037640.1 | 6386802 | SNV | 1 | A | T | Homozygous   |
| NC_037640.1 | 6386806 | SNV | 1 | A | T | Homozygous   |
| NC_037640.1 | 6393937 | SNV | 1 | A | G | Heterozygous |
| NC_037640.1 | 6393941 | SNV | 1 | A | G | Heterozygous |
| NC_037640.1 | 6393947 | SNV | 1 | A | G | Heterozygous |
| NC_037640.1 | 6393951 | SNV | 1 | A | G | Heterozygous |
| NC_037640.1 | 6393975 | SNV | 1 | A | G | Homozygous   |
| NC_037640.1 | 6393977 | SNV | 1 | G | A | Homozygous   |
| NC_037640.1 | 6418454 | SNV | 1 | C | T | Homozygous   |
| NC_037640.1 | 6418475 | SNV | 1 | C | G | Homozygous   |
| NC_037640.1 | 6438017 | SNV | 1 | T | C | Homozygous   |
| NC_037640.1 | 6438022 | SNV | 1 | C | T | Heterozygous |
| NC_037640.1 | 6438031 | SNV | 1 | G | C | Heterozygous |
| NC_037640.1 | 6438065 | SNV | 1 | G | T | Heterozygous |
| NC_037640.1 | 6438090 | SNV | 1 | G | A | Heterozygous |
| NC_037640.1 | 6438225 | SNV | 1 | T | C | Homozygous   |
| NC_037640.1 | 6438361 | SNV | 1 | T | C | Homozygous   |
| NC_037640.1 | 6438548 | SNV | 1 | C | T | Heterozygous |
| NC_037640.1 | 6438747 | SNV | 1 | T | C | Homozygous   |
| NC_037640.1 | 6438815 | SNV | 1 | G | A | Heterozygous |
| NC_037640.1 | 6455339 | SNV | 1 | C | G | Heterozygous |
| NC_037640.1 | 6455544 | SNV | 1 | A | T | Homozygous   |
| NC_037640.1 | 6455836 | SNV | 1 | A | G | Homozygous   |
| NC_037640.1 | 6459910 | SNV | 1 | C | T | Homozygous   |
| NC_037640.1 | 6459918 | SNV | 1 | T | C | Homozygous   |
| NC_037640.1 | 6459959 | SNV | 1 | C | T | Heterozygous |
| NC_037640.1 | 6468084 | SNV | 1 | T | C | Homozygous   |
| NC_037640.1 | 6468119 | SNV | 1 | C | T | Homozygous   |
| NC_037640.1 | 6468217 | SNV | 1 | T | C | Homozygous   |
| NC_037640.1 | 6481547 | SNV | 1 | C | T | Homozygous   |
| NC_037640.1 | 6586274 | SNV | 1 | G | A | Homozygous   |
| NC_037640.1 | 6586277 | SNV | 1 | T | C | Homozygous   |
| NC_037640.1 | 6586311 | SNV | 1 | C | A | Heterozygous |
| NC_037640.1 | 6586603 | SNV | 1 | C | T | Homozygous   |
| NC_037640.1 | 6586768 | SNV | 1 | C | T | Heterozygous |

|             |         |     |   |   |   |              |
|-------------|---------|-----|---|---|---|--------------|
| NC_037640.1 | 6619676 | SNV | 1 | A | G | Heterozygous |
| NC_037640.1 | 6619791 | SNV | 1 | C | G | Heterozygous |
| NC_037640.1 | 6619802 | SNV | 1 | A | G | Heterozygous |
| NC_037640.1 | 6619844 | SNV | 1 | A | G | Homozygous   |
| NC_037640.1 | 6619984 | SNV | 1 | C | G | Homozygous   |
| NC_037640.1 | 6627654 | SNV | 1 | G | A | Homozygous   |
| NC_037640.1 | 6627679 | SNV | 1 | T | C | Homozygous   |
| NC_037640.1 | 6627885 | SNV | 1 | A | G | Heterozygous |
| NC_037640.1 | 6665003 | SNV | 1 | C | T | Heterozygous |
| NC_037640.1 | 6665018 | SNV | 1 | G | C | Homozygous   |
| NC_037640.1 | 6677690 | SNV | 1 | A | G | Homozygous   |
| NC_037640.1 | 6697444 | SNV | 1 | C | T | Heterozygous |
| NC_037640.1 | 6697470 | SNV | 1 | A | G | Heterozygous |
| NC_037640.1 | 6697933 | SNV | 1 | G | T | Homozygous   |
| NC_037640.1 | 6698735 | SNV | 1 | T | C | Homozygous   |
| NC_037640.1 | 6698988 | SNV | 1 | T | C | Homozygous   |
| NC_037640.1 | 6702982 | SNV | 1 | T | C | Homozygous   |
| NC_037640.1 | 6703143 | SNV | 1 | T | G | Homozygous   |
| NC_037640.1 | 6704298 | SNV | 1 | T | C | Homozygous   |
| NC_037640.1 | 6704449 | SNV | 1 | G | A | Heterozygous |
| NC_037640.1 | 6715065 | SNV | 1 | T | C | Homozygous   |
| NC_037640.1 | 6715156 | SNV | 1 | T | C | Homozygous   |
| NC_037640.1 | 6743767 | SNV | 1 | G | A | Homozygous   |
| NC_037640.1 | 6743912 | SNV | 1 | G | A | Homozygous   |
| NC_037640.1 | 6743953 | SNV | 1 | C | T | Homozygous   |
| NC_037640.1 | 6744034 | SNV | 1 | T | A | Heterozygous |
| NC_037640.1 | 6744050 | SNV | 1 | G | A | Homozygous   |
| NC_037640.1 | 6744066 | SNV | 1 | T | C | Homozygous   |
| NC_037640.1 | 6744184 | SNV | 1 | A | G | Homozygous   |
| NC_037640.1 | 6744220 | SNV | 1 | C | G | Homozygous   |
| NC_037640.1 | 6744223 | SNV | 1 | G | T | Homozygous   |
| NC_037640.1 | 6746497 | SNV | 1 | T | C | Homozygous   |
| NC_037640.1 | 6747930 | SNV | 1 | G | C | Heterozygous |
| NC_037640.1 | 6771412 | SNV | 1 | T | C | Homozygous   |
| NC_037640.1 | 6772366 | SNV | 1 | T | C | Heterozygous |
| NC_037640.1 | 6781267 | SNV | 1 | G | T | Homozygous   |
| NC_037640.1 | 6781301 | SNV | 1 | T | A | Homozygous   |
| NC_037640.1 | 6786588 | SNV | 1 | C | A | Homozygous   |
| NC_037640.1 | 6786615 | SNV | 1 | G | A | Homozygous   |
| NC_037640.1 | 6786929 | SNV | 1 | G | A | Homozygous   |
| NC_037640.1 | 6787443 | SNV | 1 | G | A | Heterozygous |
| NC_037640.1 | 6787473 | SNV | 1 | G | T | Heterozygous |
| NC_037640.1 | 6787629 | SNV | 1 | G | C | Homozygous   |
| NC_037640.1 | 6787654 | SNV | 1 | T | C | Homozygous   |
| NC_037640.1 | 6787853 | SNV | 1 | C | T | Heterozygous |
| NC_037640.1 | 6788145 | SNV | 1 | G | A | Heterozygous |
| NC_037640.1 | 6804865 | SNV | 1 | G | A | Heterozygous |
| NC_037640.1 | 6804874 | SNV | 1 | C | G | Heterozygous |
| NC_037640.1 | 6804897 | SNV | 1 | T | C | Heterozygous |
| NC_037640.1 | 6804908 | SNV | 1 | C | T | Heterozygous |
| NC_037640.1 | 6804941 | SNV | 1 | T | C | Homozygous   |

|             |         |     |   |   |   |              |
|-------------|---------|-----|---|---|---|--------------|
| NC_037640.1 | 6804979 | SNV | 1 | T | C | Homozygous   |
| NC_037640.1 | 6810095 | SNV | 1 | C | T | Heterozygous |
| NC_037640.1 | 6810107 | SNV | 1 | C | G | Homozygous   |
| NC_037640.1 | 6810167 | SNV | 1 | A | G | Heterozygous |
| NC_037640.1 | 6810171 | SNV | 1 | T | C | Homozygous   |
| NC_037640.1 | 6811103 | SNV | 1 | A | G | Heterozygous |
| NC_037640.1 | 6811117 | SNV | 1 | A | G | Heterozygous |
| NC_037640.1 | 6811284 | SNV | 1 | A | G | Heterozygous |
| NC_037640.1 | 6834441 | SNV | 1 | G | C | Heterozygous |
| NC_037640.1 | 6834784 | SNV | 1 | T | C | Homozygous   |
| NC_037640.1 | 6834975 | SNV | 1 | G | A | Homozygous   |
| NC_037640.1 | 6835007 | SNV | 1 | C | T | Homozygous   |
| NC_037640.1 | 6838710 | SNV | 1 | T | C | Homozygous   |
| NC_037640.1 | 6841404 | SNV | 1 | C | T | Homozygous   |
| NC_037640.1 | 6841409 | SNV | 1 | A | G | Heterozygous |
| NC_037640.1 | 6841440 | SNV | 1 | G | A | Homozygous   |
| NC_037640.1 | 6841496 | SNV | 1 | A | C | Heterozygous |
| NC_037640.1 | 6841535 | SNV | 1 | G | A | Heterozygous |
| NC_037640.1 | 6841537 | SNV | 1 | C | G | Heterozygous |
| NC_037640.1 | 6841561 | SNV | 1 | G | A | Heterozygous |
| NC_037640.1 | 6855538 | SNV | 1 | A | G | Homozygous   |
| NC_037640.1 | 6855548 | SNV | 1 | G | A | Heterozygous |
| NC_037640.1 | 6855639 | SNV | 1 | T | C | Homozygous   |
| NC_037640.1 | 6855658 | SNV | 1 | T | C | Heterozygous |
| NC_037640.1 | 6855679 | SNV | 1 | T | C | Homozygous   |
| NC_037640.1 | 6855943 | SNV | 1 | G | A | Heterozygous |
| NC_037640.1 | 6855953 | SNV | 1 | G | T | Heterozygous |
| NC_037640.1 | 6855956 | SNV | 1 | T | C | Homozygous   |
| NC_037640.1 | 6855959 | SNV | 1 | A | T | Homozygous   |
| NC_037640.1 | 6856029 | SNV | 1 | A | G | Heterozygous |
| NC_037640.1 | 6858915 | SNV | 1 | C | T | Homozygous   |
| NC_037640.1 | 6863019 | SNV | 1 | G | A | Homozygous   |
| NC_037640.1 | 6863498 | SNV | 1 | G | A | Homozygous   |
| NC_037640.1 | 6863564 | SNV | 1 | C | T | Heterozygous |
| NC_037640.1 | 6864047 | SNV | 1 | A | G | Heterozygous |
| NC_037640.1 | 6864397 | SNV | 1 | G | A | Homozygous   |
| NC_037640.1 | 6864724 | SNV | 1 | T | C | Heterozygous |
| NC_037640.1 | 6865162 | SNV | 1 | C | T | Homozygous   |
| NC_037640.1 | 6869997 | SNV | 1 | G | A | Homozygous   |
| NC_037640.1 | 6871133 | SNV | 1 | G | T | Homozygous   |
| NC_037640.1 | 6871651 | SNV | 1 | G | A | Homozygous   |
| NC_037640.1 | 6871738 | SNV | 1 | C | T | Homozygous   |
| NC_037640.1 | 6872246 | SNV | 1 | T | C | Homozygous   |
| NC_037640.1 | 6872249 | SNV | 1 | G | A | Homozygous   |
| NC_037640.1 | 6872335 | SNV | 1 | G | T | Homozygous   |
| NC_037640.1 | 6872416 | SNV | 1 | T | C | Homozygous   |
| NC_037640.1 | 6872458 | SNV | 1 | G | T | Homozygous   |
| NC_037640.1 | 6872600 | SNV | 1 | G | T | Homozygous   |
| NC_037640.1 | 6877134 | SNV | 1 | C | T | Homozygous   |
| NC_037640.1 | 6877734 | SNV | 1 | A | G | Heterozygous |
| NC_037640.1 | 6879698 | SNV | 1 | T | C | Homozygous   |

|             |         |     |   |   |   |              |
|-------------|---------|-----|---|---|---|--------------|
| NC_037640.1 | 6880539 | SNV | 1 | A | G | Heterozygous |
| NC_037640.1 | 6880596 | SNV | 1 | A | G | Homozygous   |
| NC_037640.1 | 6882458 | SNV | 1 | C | A | Heterozygous |
| NC_037640.1 | 6883926 | SNV | 1 | A | G | Heterozygous |
| NC_037640.1 | 6883938 | SNV | 1 | A | G | Heterozygous |
| NC_037640.1 | 6883944 | SNV | 1 | A | G | Heterozygous |
| NC_037640.1 | 6883946 | SNV | 1 | A | T | Homozygous   |
| NC_037640.1 | 6885235 | SNV | 1 | T | C | Homozygous   |
| NC_037640.1 | 6889697 | SNV | 1 | T | C | Homozygous   |
| NC_037640.1 | 6892662 | SNV | 1 | T | C | Homozygous   |
| NC_037640.1 | 6902835 | SNV | 1 | C | T | Homozygous   |
| NC_037640.1 | 6904068 | SNV | 1 | T | C | Homozygous   |
| NC_037640.1 | 6904221 | SNV | 1 | A | G | Homozygous   |
| NC_037640.1 | 6904275 | SNV | 1 | C | T | Heterozygous |
| NC_037640.1 | 6912996 | SNV | 1 | G | A | Heterozygous |
| NC_037640.1 | 6913217 | SNV | 1 | C | T | Heterozygous |
| NC_037640.1 | 6913279 | SNV | 1 | A | G | Homozygous   |
| NC_037640.1 | 6913349 | SNV | 1 | T | C | Heterozygous |
| NC_037640.1 | 6913925 | SNV | 1 | T | C | Homozygous   |
| NC_037640.1 | 6916986 | SNV | 1 | C | T | Heterozygous |
| NC_037640.1 | 6924406 | SNV | 1 | T | C | Homozygous   |
| NC_037640.1 | 6935451 | SNV | 1 | A | T | Heterozygous |
| NC_037640.1 | 6935460 | SNV | 1 | A | T | Heterozygous |
| NC_037640.1 | 6935463 | SNV | 1 | A | T | Heterozygous |
| NC_037640.1 | 6935499 | SNV | 1 | C | A | Heterozygous |
| NC_037640.1 | 6935506 | SNV | 1 | T | A | Heterozygous |
| NC_037640.1 | 6935508 | SNV | 1 | A | G | Heterozygous |
| NC_037640.1 | 6935517 | SNV | 1 | C | T | Heterozygous |
| NC_037640.1 | 6935958 | SNV | 1 | A | T | Homozygous   |
| NC_037640.1 | 6935974 | SNV | 1 | A | C | Homozygous   |
| NC_037640.1 | 6935976 | SNV | 1 | A | G | Homozygous   |
| NC_037640.1 | 6936392 | SNV | 1 | T | C | Homozygous   |
| NC_037640.1 | 6936870 | SNV | 1 | C | T | Heterozygous |
| NC_037640.1 | 6936900 | SNV | 1 | A | G | Homozygous   |
| NC_037640.1 | 6936904 | SNV | 1 | A | C | Heterozygous |
| NC_037640.1 | 6937104 | SNV | 1 | C | T | Homozygous   |
| NC_037640.1 | 6944656 | SNV | 1 | T | C | Homozygous   |
| NC_037640.1 | 6944658 | SNV | 1 | C | T | Homozygous   |
| NC_037640.1 | 6957986 | SNV | 1 | T | C | Homozygous   |
| NC_037640.1 | 6965792 | SNV | 1 | A | G | Homozygous   |
| NC_037640.1 | 6965839 | SNV | 1 | T | C | Homozygous   |
| NC_037640.1 | 6966165 | SNV | 1 | G | C | Heterozygous |
| NC_037640.1 | 6978093 | SNV | 1 | T | C | Homozygous   |
| NC_037640.1 | 6978114 | SNV | 1 | A | G | Heterozygous |
| NC_037640.1 | 6978134 | SNV | 1 | G | A | Heterozygous |
| NC_037640.1 | 6978582 | SNV | 1 | C | T | Homozygous   |
| NC_037640.1 | 6978998 | SNV | 1 | G | C | Heterozygous |
| NC_037640.1 | 6992452 | SNV | 1 | T | C | Homozygous   |
| NC_037640.1 | 6992464 | SNV | 1 | T | C | Heterozygous |
| NC_037640.1 | 6992469 | SNV | 1 | T | C | Heterozygous |
| NC_037640.1 | 6992473 | SNV | 1 | T | C | Heterozygous |

|             |         |     |   |   |   |              |
|-------------|---------|-----|---|---|---|--------------|
| NC_037640.1 | 6992481 | SNV | 1 | C | T | Heterozygous |
| NC_037640.1 | 6992483 | SNV | 1 | C | T | Heterozygous |
| NC_037640.1 | 6993918 | SNV | 1 | G | T | Homozygous   |
| NC_037640.1 | 6998490 | SNV | 1 | A | G | Heterozygous |
| NC_037640.1 | 6998534 | SNV | 1 | A | G | Heterozygous |
| NC_037640.1 | 7001276 | SNV | 1 | G | A | Heterozygous |
| NC_037640.1 | 7004145 | SNV | 1 | T | C | Homozygous   |
| NC_037640.1 | 7004396 | SNV | 1 | G | A | Heterozygous |
| NC_037640.1 | 7004441 | SNV | 1 | G | C | Homozygous   |
| NC_037640.1 | 7014283 | SNV | 1 | T | C | Homozygous   |
| NC_037640.1 | 7014300 | SNV | 1 | C | T | Heterozygous |
| NC_037640.1 | 7014307 | SNV | 1 | C | T | Heterozygous |
| NC_037640.1 | 7014387 | SNV | 1 | T | C | Homozygous   |
| NC_037640.1 | 7023511 | SNV | 1 | T | C | Homozygous   |
| NC_037640.1 | 7028163 | SNV | 1 | T | A | Heterozygous |
| NC_037640.1 | 7028287 | SNV | 1 | G | A | Heterozygous |
| NC_037640.1 | 7028289 | SNV | 1 | G | A | Heterozygous |
| NC_037640.1 | 7028304 | SNV | 1 | A | G | Heterozygous |
| NC_037640.1 | 7040341 | SNV | 1 | C | T | Homozygous   |
| NC_037640.1 | 7040344 | SNV | 1 | C | T | Heterozygous |
| NC_037640.1 | 7042216 | SNV | 1 | T | A | Homozygous   |
| NC_037640.1 | 7042355 | SNV | 1 | G | C | Homozygous   |
| NC_037640.1 | 7042630 | SNV | 1 | A | G | Homozygous   |
| NC_037640.1 | 7042845 | SNV | 1 | C | T | Homozygous   |
| NC_037640.1 | 7042853 | SNV | 1 | G | A | Heterozygous |
| NC_037640.1 | 7042898 | SNV | 1 | A | G | Heterozygous |
| NC_037640.1 | 7042908 | SNV | 1 | A | G | Heterozygous |
| NC_037640.1 | 7055427 | SNV | 1 | T | C | Heterozygous |
| NC_037640.1 | 7055792 | SNV | 1 | G | A | Heterozygous |
| NC_037640.1 | 7062349 | SNV | 1 | A | G | Heterozygous |
| NC_037640.1 | 7064148 | SNV | 1 | C | T | Heterozygous |
| NC_037640.1 | 7064175 | SNV | 1 | T | C | Homozygous   |
| NC_037640.1 | 7064295 | SNV | 1 | C | T | Homozygous   |
| NC_037640.1 | 7064311 | SNV | 1 | T | C | Homozygous   |
| NC_037640.1 | 7087205 | SNV | 1 | A | T | Homozygous   |
| NC_037640.1 | 7087220 | SNV | 1 | T | C | Heterozygous |
| NC_037640.1 | 7087242 | SNV | 1 | T | C | Heterozygous |
| NC_037640.1 | 7087246 | SNV | 1 | C | T | Heterozygous |
| NC_037640.1 | 7087251 | SNV | 1 | C | T | Heterozygous |
| NC_037640.1 | 7095857 | SNV | 1 | A | C | Heterozygous |
| NC_037640.1 | 7095862 | SNV | 1 | A | G | Heterozygous |
| NC_037640.1 | 7096539 | SNV | 1 | C | T | Homozygous   |
| NC_037640.1 | 7096544 | SNV | 1 | A | G | Homozygous   |
| NC_037640.1 | 7097510 | SNV | 1 | C | T | Heterozygous |
| NC_037640.1 | 7098032 | SNV | 1 | G | A | Heterozygous |
| NC_037640.1 | 7098303 | SNV | 1 | T | C | Heterozygous |
| NC_037640.1 | 7098866 | SNV | 1 | A | G | Homozygous   |
| NC_037640.1 | 7098874 | SNV | 1 | T | C | Homozygous   |
| NC_037640.1 | 7105279 | SNV | 1 | G | A | Heterozygous |
| NC_037640.1 | 7106728 | SNV | 1 | G | T | Homozygous   |
| NC_037640.1 | 7106963 | SNV | 1 | T | C | Heterozygous |

|             |         |     |   |   |   |              |
|-------------|---------|-----|---|---|---|--------------|
| NC_037640.1 | 7108932 | SNV | 1 | G | A | Heterozygous |
| NC_037640.1 | 7109273 | SNV | 1 | T | C | Homozygous   |
| NC_037640.1 | 7109373 | SNV | 1 | T | C | Heterozygous |
| NC_037640.1 | 7109470 | SNV | 1 | A | G | Homozygous   |
| NC_037640.1 | 7109820 | SNV | 1 | A | G | Heterozygous |
| NC_037640.1 | 7109828 | SNV | 1 | A | T | Heterozygous |
| NC_037640.1 | 7109937 | SNV | 1 | C | T | Homozygous   |
| NC_037640.1 | 7110522 | SNV | 1 | T | C | Heterozygous |
| NC_037640.1 | 7117112 | SNV | 1 | T | C | Heterozygous |
| NC_037640.1 | 7117119 | SNV | 1 | T | C | Heterozygous |
| NC_037640.1 | 7126704 | SNV | 1 | C | T | Heterozygous |
| NC_037640.1 | 7141602 | SNV | 1 | G | A | Homozygous   |
| NC_037640.1 | 7142214 | SNV | 1 | C | G | Homozygous   |
| NC_037640.1 | 7142217 | SNV | 1 | G | A | Heterozygous |
| NC_037640.1 | 7144917 | SNV | 1 | C | A | Homozygous   |
| NC_037640.1 | 7145196 | SNV | 1 | C | T | Homozygous   |
| NC_037640.1 | 7145242 | SNV | 1 | A | G | Heterozygous |
| NC_037640.1 | 7148225 | SNV | 1 | T | C | Homozygous   |
| NC_037640.1 | 7148698 | SNV | 1 | C | T | Heterozygous |
| NC_037640.1 | 7152038 | SNV | 1 | T | A | Homozygous   |
| NC_037640.1 | 7152060 | SNV | 1 | C | T | Heterozygous |
| NC_037640.1 | 7152112 | SNV | 1 | C | G | Homozygous   |
| NC_037640.1 | 7161509 | SNV | 1 | C | T | Heterozygous |
| NC_037640.1 | 7161596 | SNV | 1 | T | C | Homozygous   |
| NC_037640.1 | 7161599 | SNV | 1 | G | A | Homozygous   |
| NC_037640.1 | 7161847 | SNV | 1 | G | A | Heterozygous |
| NC_037640.1 | 7161853 | SNV | 1 | A | G | Heterozygous |
| NC_037640.1 | 7163007 | SNV | 1 | T | A | Homozygous   |
| NC_037640.1 | 7398512 | SNV | 1 | A | G | Homozygous   |
| NC_037640.1 | 7398518 | SNV | 1 | G | A | Homozygous   |
| NC_037640.1 | 7398521 | SNV | 1 | A | G | Homozygous   |
| NC_037640.1 | 7398527 | SNV | 1 | A | G | Homozygous   |
| NC_037640.1 | 7398529 | SNV | 1 | A | G | Homozygous   |
| NC_037640.1 | 7401610 | SNV | 1 | G | A | Heterozygous |
| NC_037640.1 | 7401651 | SNV | 1 | G | A | Heterozygous |
| NC_037640.1 | 7407022 | SNV | 1 | T | A | Heterozygous |
| NC_037640.1 | 7407028 | SNV | 1 | G | A | Heterozygous |
| NC_037640.1 | 7410357 | SNV | 1 | T | C | Heterozygous |
| NC_037640.1 | 7410360 | SNV | 1 | T | A | Heterozygous |
| NC_037640.1 | 7423278 | SNV | 1 | G | A | Heterozygous |
| NC_037640.1 | 7423280 | SNV | 1 | A | G | Heterozygous |
| NC_037640.1 | 7423368 | SNV | 1 | A | T | Homozygous   |
| NC_037640.1 | 7423398 | SNV | 1 | A | T | Homozygous   |
| NC_037640.1 | 7423402 | SNV | 1 | A | T | Homozygous   |
| NC_037640.1 | 7423407 | SNV | 1 | G | A | Homozygous   |
| NC_037640.1 | 7427636 | SNV | 1 | C | T | Heterozygous |
| NC_037640.1 | 7443615 | SNV | 1 | T | C | Homozygous   |
| NC_037640.1 | 7443753 | SNV | 1 | T | C | Homozygous   |
| NC_037640.1 | 7455021 | SNV | 1 | A | G | Heterozygous |
| NC_037640.1 | 7570889 | SNV | 1 | A | G | Homozygous   |
| NC_037640.1 | 7570899 | SNV | 1 | G | A | Homozygous   |

|             |         |     |   |   |   |              |
|-------------|---------|-----|---|---|---|--------------|
| NC_037640.1 | 7574669 | SNV | 1 | T | A | Heterozygous |
| NC_037640.1 | 7574673 | SNV | 1 | T | A | Heterozygous |
| NC_037640.1 | 7574678 | SNV | 1 | C | A | Heterozygous |
| NC_037640.1 | 7574681 | SNV | 1 | T | C | Heterozygous |
| NC_037640.1 | 7588092 | SNV | 1 | A | G | Homozygous   |
| NC_037640.1 | 7588095 | SNV | 1 | T | C | Homozygous   |
| NC_037640.1 | 7588131 | SNV | 1 | C | T | Homozygous   |
| NC_037640.1 | 7588245 | SNV | 1 | T | C | Homozygous   |
| NC_037640.1 | 7588391 | SNV | 1 | G | A | Heterozygous |
| NC_037640.1 | 7588744 | SNV | 1 | A | G | Homozygous   |
| NC_037640.1 | 7588797 | SNV | 1 | C | T | Heterozygous |
| NC_037640.1 | 7588813 | SNV | 1 | A | T | Homozygous   |
| NC_037640.1 | 7588877 | SNV | 1 | T | A | Heterozygous |
| NC_037640.1 | 7588888 | SNV | 1 | G | A | Heterozygous |
| NC_037640.1 | 7588964 | SNV | 1 | C | T | Heterozygous |
| NC_037640.1 | 7589068 | SNV | 1 | G | A | Heterozygous |
| NC_037640.1 | 7594717 | SNV | 1 | C | T | Homozygous   |
| NC_037640.1 | 7594723 | SNV | 1 | G | A | Heterozygous |
| NC_037640.1 | 7594885 | SNV | 1 | G | T | Heterozygous |
| NC_037640.1 | 7594897 | SNV | 1 | A | G | Heterozygous |
| NC_037640.1 | 7594938 | SNV | 1 | A | T | Heterozygous |
| NC_037640.1 | 7594975 | SNV | 1 | C | T | Heterozygous |
| NC_037640.1 | 7595616 | SNV | 1 | C | T | Heterozygous |
| NC_037640.1 | 7596327 | SNV | 1 | C | T | Heterozygous |
| NC_037640.1 | 7596504 | SNV | 1 | C | T | Homozygous   |
| NC_037640.1 | 7597562 | SNV | 1 | T | C | Heterozygous |
| NC_037640.1 | 7603006 | SNV | 1 | G | A | Heterozygous |
| NC_037640.1 | 7604258 | SNV | 1 | C | T | Heterozygous |
| NC_037640.1 | 7604957 | SNV | 1 | T | C | Heterozygous |
| NC_037640.1 | 7604985 | SNV | 1 | G | T | Homozygous   |
| NC_037640.1 | 7605172 | SNV | 1 | C | T | Heterozygous |
| NC_037640.1 | 7605305 | SNV | 1 | A | T | Homozygous   |
| NC_037640.1 | 7605307 | SNV | 1 | A | T | Homozygous   |
| NC_037640.1 | 7605381 | SNV | 1 | G | T | Homozygous   |
| NC_037640.1 | 7605446 | SNV | 1 | C | A | Heterozygous |
| NC_037640.1 | 7605448 | SNV | 1 | A | C | Heterozygous |
| NC_037640.1 | 7605776 | SNV | 1 | G | C | Heterozygous |
| NC_037640.1 | 7606435 | SNV | 1 | T | C | Heterozygous |
| NC_037640.1 | 7606585 | SNV | 1 | A | T | Heterozygous |
| NC_037640.1 | 7606645 | SNV | 1 | C | T | Heterozygous |
| NC_037640.1 | 7606688 | SNV | 1 | C | T | Heterozygous |
| NC_037640.1 | 7606758 | SNV | 1 | A | T | Homozygous   |
| NC_037640.1 | 7606972 | SNV | 1 | T | G | Heterozygous |
| NC_037640.1 | 7606974 | SNV | 1 | T | G | Heterozygous |
| NC_037640.1 | 7609684 | SNV | 1 | A | G | Homozygous   |
| NC_037640.1 | 7609719 | SNV | 1 | T | C | Homozygous   |
| NC_037640.1 | 7610116 | SNV | 1 | T | C | Heterozygous |
| NC_037640.1 | 7610251 | SNV | 1 | A | T | Heterozygous |
| NC_037640.1 | 7610254 | SNV | 1 | T | A | Heterozygous |
| NC_037640.1 | 7610268 | SNV | 1 | T | G | Heterozygous |
| NC_037640.1 | 7610289 | SNV | 1 | A | G | Homozygous   |



|             |         |     |   |   |   |              |
|-------------|---------|-----|---|---|---|--------------|
| NC_037640.1 | 7610300 | SNV | 1 | A | T | Heterozygous |
| NC_037640.1 | 7610441 | SNV | 1 | T | C | Homozygous   |
| NC_037640.1 | 7610654 | SNV | 1 | T | C | Homozygous   |
| NC_037640.1 | 7610656 | SNV | 1 | C | T | Homozygous   |
| NC_037640.1 | 7610658 | SNV | 1 | T | C | Homozygous   |
| NC_037640.1 | 7610704 | SNV | 1 | T | C | Homozygous   |
| NC_037640.1 | 7610811 | SNV | 1 | A | G | Homozygous   |
| NC_037640.1 | 7610966 | SNV | 1 | T | C | Heterozygous |
| NC_037640.1 | 7610989 | SNV | 1 | T | C | Heterozygous |
| NC_037640.1 | 7611013 | SNV | 1 | C | T | Heterozygous |
| NC_037640.1 | 7611024 | SNV | 1 | T | C | Heterozygous |
| NC_037640.1 | 7611036 | SNV | 1 | G | A | Heterozygous |
| NC_037640.1 | 7611398 | SNV | 1 | T | C | Heterozygous |
| NC_037640.1 | 7611410 | SNV | 1 | A | G | Heterozygous |
| NC_037640.1 | 7611768 | SNV | 1 | A | G | Homozygous   |
| NC_037640.1 | 7612603 | SNV | 1 | C | T | Heterozygous |
| NC_037640.1 | 7612786 | SNV | 1 | T | C | Heterozygous |
| NC_037640.1 | 7614142 | SNV | 1 | T | A | Heterozygous |
| NC_037640.1 | 7615580 | SNV | 1 | T | C | Homozygous   |
| NC_037640.1 | 7617553 | SNV | 1 | A | G | Homozygous   |
| NC_037640.1 | 7618068 | SNV | 1 | G | A | Heterozygous |
| NC_037640.1 | 7618358 | SNV | 1 | A | G | Homozygous   |
| NC_037640.1 | 7618426 | SNV | 1 | C | T | Heterozygous |
| NC_037640.1 | 7618436 | SNV | 1 | A | C | Heterozygous |
| NC_037640.1 | 7618658 | SNV | 1 | T | C | Homozygous   |
| NC_037640.1 | 7618866 | SNV | 1 | G | A | Heterozygous |
| NC_037640.1 | 7619000 | SNV | 1 | C | T | Homozygous   |
| NC_037640.1 | 7619085 | SNV | 1 | G | C | Homozygous   |
| NC_037640.1 | 7619250 | SNV | 1 | G | C | Homozygous   |
| NC_037640.1 | 7619253 | SNV | 1 | C | T | Heterozygous |
| NC_037640.1 | 7619289 | SNV | 1 | C | T | Heterozygous |
| NC_037640.1 | 7619294 | SNV | 1 | G | T | Heterozygous |
| NC_037640.1 | 7619702 | SNV | 1 | C | T | Homozygous   |
| NC_037640.1 | 7620294 | SNV | 1 | A | G | Heterozygous |
| NC_037640.1 | 7620296 | SNV | 1 | T | G | Heterozygous |
| NC_037640.1 | 7620299 | SNV | 1 | A | T | Homozygous   |
| NC_037640.1 | 7620301 | SNV | 1 | T | C | Heterozygous |
| NC_037640.1 | 7620524 | SNV | 1 | C | T | Heterozygous |
| NC_037640.1 | 7622201 | SNV | 1 | A | T | Homozygous   |
| NC_037640.1 | 7622206 | SNV | 1 | A | G | Homozygous   |
| NC_037640.1 | 7622215 | SNV | 1 | T | A | Homozygous   |
| NC_037640.1 | 7622242 | SNV | 1 | C | G | Homozygous   |
| NC_037640.1 | 7633094 | SNV | 1 | T | C | Homozygous   |
| NC_037640.1 | 7633131 | SNV | 1 | C | T | Heterozygous |
| NC_037640.1 | 7633241 | SNV | 1 | T | C | Homozygous   |
| NC_037640.1 | 7633596 | SNV | 1 | G | A | Homozygous   |
| NC_037640.1 | 7636165 | SNV | 1 | T | A | Homozygous   |
| NC_037640.1 | 7636175 | SNV | 1 | A | C | Homozygous   |
| NC_037640.1 | 7636179 | SNV | 1 | A | C | Homozygous   |
| NC_037640.1 | 7636181 | SNV | 1 | A | G | Homozygous   |
| NC_037640.1 | 7648434 | SNV | 1 | A | C | Heterozygous |

|             |         |     |   |   |   |              |
|-------------|---------|-----|---|---|---|--------------|
| NC_037640.1 | 7648462 | SNV | 1 | A | T | Heterozygous |
| NC_037640.1 | 7656682 | SNV | 1 | T | C | Homozygous   |
| NC_037640.1 | 7656835 | SNV | 1 | T | C | Homozygous   |
| NC_037640.1 | 7656978 | SNV | 1 | T | C | Heterozygous |
| NC_037640.1 | 7657003 | SNV | 1 | G | C | Homozygous   |
| NC_037640.1 | 7657330 | SNV | 1 | T | C | Heterozygous |
| NC_037640.1 | 7663873 | SNV | 1 | A | C | Homozygous   |
| NC_037640.1 | 7663883 | SNV | 1 | A | C | Homozygous   |
| NC_037640.1 | 7663890 | SNV | 1 | G | A | Homozygous   |
| NC_037640.1 | 7663894 | SNV | 1 | G | A | Homozygous   |
| NC_037640.1 | 7663907 | SNV | 1 | A | T | Heterozygous |
| NC_037640.1 | 7672751 | SNV | 1 | A | G | Homozygous   |
| NC_037640.1 | 7672754 | SNV | 1 | A | C | Homozygous   |
| NC_037640.1 | 7676298 | SNV | 1 | T | C | Homozygous   |
| NC_037640.1 | 7684891 | SNV | 1 | T | C | Homozygous   |
| NC_037640.1 | 7684957 | SNV | 1 | T | C | Homozygous   |
| NC_037640.1 | 7685044 | SNV | 1 | T | C | Heterozygous |
| NC_037640.1 | 7685057 | SNV | 1 | T | C | Homozygous   |
| NC_037640.1 | 7691632 | SNV | 1 | A | G | Homozygous   |
| NC_037640.1 | 7691799 | SNV | 1 | G | A | Homozygous   |
| NC_037640.1 | 7691998 | SNV | 1 | T | C | Homozygous   |
| NC_037640.1 | 7699587 | SNV | 1 | G | C | Heterozygous |
| NC_037640.1 | 7699834 | SNV | 1 | C | T | Heterozygous |
| NC_037640.1 | 7699838 | SNV | 1 | T | C | Homozygous   |
| NC_037640.1 | 7699841 | SNV | 1 | A | C | Homozygous   |
| NC_037640.1 | 7700012 | SNV | 1 | A | G | Homozygous   |
| NC_037640.1 | 7706178 | SNV | 1 | A | T | Heterozygous |
| NC_037640.1 | 7706221 | SNV | 1 | A | G | Homozygous   |
| NC_037640.1 | 7706254 | SNV | 1 | T | C | Heterozygous |
| NC_037640.1 | 7706609 | SNV | 1 | T | C | Heterozygous |
| NC_037640.1 | 7706663 | SNV | 1 | T | C | Homozygous   |
| NC_037640.1 | 7706950 | SNV | 1 | T | C | Heterozygous |
| NC_037640.1 | 7707027 | SNV | 1 | C | T | Heterozygous |
| NC_037640.1 | 7707091 | SNV | 1 | A | G | Heterozygous |
| NC_037640.1 | 7707116 | SNV | 1 | T | C | Heterozygous |
| NC_037640.1 | 7707138 | SNV | 1 | T | C | Homozygous   |
| NC_037640.1 | 7707150 | SNV | 1 | A | G | Homozygous   |
| NC_037640.1 | 7707199 | SNV | 1 | A | T | Heterozygous |
| NC_037640.1 | 7708063 | SNV | 1 | G | A | Homozygous   |
| NC_037640.1 | 7708067 | SNV | 1 | T | C | Heterozygous |
| NC_037640.1 | 7714063 | SNV | 1 | T | C | Homozygous   |
| NC_037640.1 | 7714185 | SNV | 1 | T | C | Homozygous   |
| NC_037640.1 | 7714190 | SNV | 1 | C | T | Homozygous   |
| NC_037640.1 | 7714300 | SNV | 1 | C | T | Heterozygous |
| NC_037640.1 | 7714366 | SNV | 1 | T | C | Homozygous   |
| NC_037640.1 | 7714552 | SNV | 1 | C | G | Homozygous   |
| NC_037640.1 | 7714869 | SNV | 1 | T | G | Homozygous   |
| NC_037640.1 | 7715039 | SNV | 1 | G | C | Homozygous   |
| NC_037640.1 | 7715137 | SNV | 1 | C | T | Heterozygous |
| NC_037640.1 | 7718874 | SNV | 1 | T | C | Homozygous   |
| NC_037640.1 | 7719027 | SNV | 1 | G | A | Heterozygous |

|             |         |     |   |   |   |              |
|-------------|---------|-----|---|---|---|--------------|
| NC_037640.1 | 7719048 | SNV | 1 | C | T | Heterozygous |
| NC_037640.1 | 7719057 | SNV | 1 | T | C | Heterozygous |
| NC_037640.1 | 7719102 | SNV | 1 | G | A | Heterozygous |
| NC_037640.1 | 7719216 | SNV | 1 | A | G | Homozygous   |
| NC_037640.1 | 7719226 | SNV | 1 | T | C | Homozygous   |
| NC_037640.1 | 7719237 | SNV | 1 | G | A | Homozygous   |
| NC_037640.1 | 7721330 | SNV | 1 | C | T | Heterozygous |
| NC_037640.1 | 7728103 | SNV | 1 | C | T | Heterozygous |
| NC_037640.1 | 7728307 | SNV | 1 | A | T | Heterozygous |
| NC_037640.1 | 7728318 | SNV | 1 | C | T | Homozygous   |
| NC_037640.1 | 7728330 | SNV | 1 | G | T | Heterozygous |
| NC_037640.1 | 7728335 | SNV | 1 | T | C | Homozygous   |
| NC_037640.1 | 7728384 | SNV | 1 | A | T | Heterozygous |
| NC_037640.1 | 7734306 | SNV | 1 | T | C | Heterozygous |
| NC_037640.1 | 7734418 | SNV | 1 | G | A | Heterozygous |
| NC_037640.1 | 7734529 | SNV | 1 | T | C | Heterozygous |
| NC_037640.1 | 7735413 | SNV | 1 | T | C | Heterozygous |
| NC_037640.1 | 7735428 | SNV | 1 | C | T | Heterozygous |
| NC_037640.1 | 7738306 | SNV | 1 | T | C | Homozygous   |
| NC_037640.1 | 7738335 | SNV | 1 | G | A | Homozygous   |
| NC_037640.1 | 7747741 | SNV | 1 | G | T | Homozygous   |
| NC_037640.1 | 7748104 | SNV | 1 | T | C | Homozygous   |
| NC_037640.1 | 7748449 | SNV | 1 | A | G | Homozygous   |
| NC_037640.1 | 7748514 | SNV | 1 | C | T | Homozygous   |
| NC_037640.1 | 7748527 | SNV | 1 | A | G | Homozygous   |
| NC_037640.1 | 7748533 | SNV | 1 | T | C | Homozygous   |
| NC_037640.1 | 7748546 | SNV | 1 | G | A | Heterozygous |
| NC_037640.1 | 7749849 | SNV | 1 | T | C | Homozygous   |
| NC_037640.1 | 7750046 | SNV | 1 | A | C | Homozygous   |
| NC_037640.1 | 7750982 | SNV | 1 | A | G | Heterozygous |
| NC_037640.1 | 7750988 | SNV | 1 | T | C | Heterozygous |
| NC_037640.1 | 7751086 | SNV | 1 | C | T | Heterozygous |
| NC_037640.1 | 7751121 | SNV | 1 | C | T | Homozygous   |
| NC_037640.1 | 7751208 | SNV | 1 | C | T | Heterozygous |
| NC_037640.1 | 7751232 | SNV | 1 | T | C | Homozygous   |
| NC_037640.1 | 7751704 | SNV | 1 | A | G | Homozygous   |
| NC_037640.1 | 7756040 | SNV | 1 | T | C | Homozygous   |
| NC_037640.1 | 7758119 | SNV | 1 | T | A | Heterozygous |
| NC_037640.1 | 7758219 | SNV | 1 | T | C | Homozygous   |
| NC_037640.1 | 7758269 | SNV | 1 | C | T | Homozygous   |
| NC_037640.1 | 7758329 | SNV | 1 | A | G | Homozygous   |
| NC_037640.1 | 7758383 | SNV | 1 | T | C | Homozygous   |
| NC_037640.1 | 7758391 | SNV | 1 | T | C | Homozygous   |
| NC_037640.1 | 7765611 | SNV | 1 | C | T | Heterozygous |
| NC_037640.1 | 7765657 | SNV | 1 | C | T | Heterozygous |
| NC_037640.1 | 7767063 | SNV | 1 | T | C | Homozygous   |
| NC_037640.1 | 7771190 | SNV | 1 | T | C | Homozygous   |
| NC_037640.1 | 7771597 | SNV | 1 | A | G | Homozygous   |
| NC_037640.1 | 7771619 | SNV | 1 | C | T | Homozygous   |
| NC_037640.1 | 7772881 | SNV | 1 | T | C | Homozygous   |
| NC_037640.1 | 7773526 | SNV | 1 | A | G | Heterozygous |

|             |         |     |   |   |   |              |
|-------------|---------|-----|---|---|---|--------------|
| NC_037640.1 | 7794946 | SNV | 1 | A | G | Homozygous   |
| NC_037640.1 | 7796647 | SNV | 1 | C | T | Heterozygous |
| NC_037640.1 | 7804793 | SNV | 1 | T | A | Homozygous   |
| NC_037640.1 | 7805250 | SNV | 1 | T | C | Heterozygous |
| NC_037640.1 | 7805296 | SNV | 1 | A | C | Homozygous   |
| NC_037640.1 | 7805585 | SNV | 1 | T | C | Heterozygous |
| NC_037640.1 | 7805633 | SNV | 1 | T | C | Heterozygous |
| NC_037640.1 | 7805825 | SNV | 1 | G | T | Homozygous   |
| NC_037640.1 | 7811098 | SNV | 1 | A | T | Homozygous   |
| NC_037640.1 | 7811380 | SNV | 1 | T | C | Homozygous   |
| NC_037640.1 | 7811552 | SNV | 1 | A | T | Homozygous   |
| NC_037640.1 | 7812734 | SNV | 1 | G | A | Homozygous   |
| NC_037640.1 | 7814264 | SNV | 1 | G | C | Homozygous   |
| NC_037640.1 | 7817322 | SNV | 1 | A | G | Homozygous   |
| NC_037640.1 | 7818439 | SNV | 1 | C | G | Homozygous   |
| NC_037640.1 | 7825683 | SNV | 1 | C | T | Heterozygous |
| NC_037640.1 | 7825711 | SNV | 1 | T | A | Homozygous   |
| NC_037640.1 | 7825741 | SNV | 1 | G | A | Heterozygous |
| NC_037640.1 | 7825743 | SNV | 1 | G | C | Heterozygous |
| NC_037640.1 | 7825746 | SNV | 1 | T | C | Heterozygous |
| NC_037640.1 | 7825748 | SNV | 1 | G | A | Heterozygous |
| NC_037640.1 | 7825779 | SNV | 1 | G | A | Heterozygous |
| NC_037640.1 | 7831190 | SNV | 1 | C | T | Heterozygous |
| NC_037640.1 | 7837199 | SNV | 1 | C | G | Heterozygous |
| NC_037640.1 | 7837219 | SNV | 1 | G | C | Heterozygous |
| NC_037640.1 | 7837237 | SNV | 1 | A | T | Homozygous   |
| NC_037640.1 | 7837289 | SNV | 1 | C | T | Heterozygous |
| NC_037640.1 | 7837321 | SNV | 1 | T | C | Heterozygous |
| NC_037640.1 | 7837334 | SNV | 1 | T | C | Homozygous   |
| NC_037640.1 | 7837518 | SNV | 1 | G | A | Homozygous   |
| NC_037640.1 | 7837871 | SNV | 1 | A | G | Heterozygous |
| NC_037640.1 | 7850319 | SNV | 1 | G | A | Homozygous   |
| NC_037640.1 | 7853539 | SNV | 1 | T | C | Homozygous   |
| NC_037640.1 | 7853569 | SNV | 1 | G | T | Heterozygous |
| NC_037640.1 | 7853736 | SNV | 1 | A | G | Homozygous   |
| NC_037640.1 | 7853738 | SNV | 1 | G | A | Heterozygous |
| NC_037640.1 | 7867306 | SNV | 1 | T | C | Homozygous   |
| NC_037640.1 | 7867385 | SNV | 1 | A | G | Heterozygous |
| NC_037640.1 | 7872071 | SNV | 1 | T | C | Homozygous   |
| NC_037640.1 | 7874131 | SNV | 1 | T | C | Homozygous   |
| NC_037640.1 | 7874149 | SNV | 1 | A | G | Heterozygous |
| NC_037640.1 | 7874188 | SNV | 1 | A | G | Homozygous   |
| NC_037640.1 | 7874216 | SNV | 1 | G | A | Heterozygous |
| NC_037640.1 | 7889500 | SNV | 1 | C | A | Homozygous   |
| NC_037640.1 | 7889664 | SNV | 1 | A | G | Heterozygous |
| NC_037640.1 | 7889704 | SNV | 1 | G | C | Heterozygous |
| NC_037640.1 | 7889934 | SNV | 1 | T | A | Heterozygous |
| NC_037640.1 | 7893759 | SNV | 1 | C | T | Heterozygous |
| NC_037640.1 | 7893912 | SNV | 1 | T | C | Homozygous   |
| NC_037640.1 | 7895535 | SNV | 1 | A | T | Homozygous   |
| NC_037640.1 | 7895544 | SNV | 1 | T | A | Homozygous   |

|             |         |     |   |   |   |              |
|-------------|---------|-----|---|---|---|--------------|
| NC_037640.1 | 7895567 | SNV | 1 | C | T | Heterozygous |
| NC_037640.1 | 7895586 | SNV | 1 | A | T | Heterozygous |
| NC_037640.1 | 7896420 | SNV | 1 | G | A | Heterozygous |
| NC_037640.1 | 7896445 | SNV | 1 | G | C | Heterozygous |
| NC_037640.1 | 7896504 | SNV | 1 | A | C | Heterozygous |
| NC_037640.1 | 7896512 | SNV | 1 | G | A | Homozygous   |
| NC_037640.1 | 7896518 | SNV | 1 | T | C | Heterozygous |
| NC_037640.1 | 7896544 | SNV | 1 | T | A | Homozygous   |
| NC_037640.1 | 7905670 | SNV | 1 | C | G | Homozygous   |
| NC_037640.1 | 7905677 | SNV | 1 | G | A | Homozygous   |
| NC_037640.1 | 7905824 | SNV | 1 | A | G | Heterozygous |
| NC_037640.1 | 7907855 | SNV | 1 | T | C | Homozygous   |
| NC_037640.1 | 7907917 | SNV | 1 | C | T | Homozygous   |
| NC_037640.1 | 7907924 | SNV | 1 | T | C | Heterozygous |
| NC_037640.1 | 7916013 | SNV | 1 | C | G | Homozygous   |
| NC_037640.1 | 7916063 | SNV | 1 | T | G | Homozygous   |
| NC_037640.1 | 7916067 | SNV | 1 | T | G | Homozygous   |
| NC_037640.1 | 7921013 | SNV | 1 | G | A | Heterozygous |
| NC_037640.1 | 7921054 | SNV | 1 | C | T | Heterozygous |
| NC_037640.1 | 7921138 | SNV | 1 | G | A | Heterozygous |
| NC_037640.1 | 7921192 | SNV | 1 | C | G | Homozygous   |
| NC_037640.1 | 7921518 | SNV | 1 | T | G | Heterozygous |
| NC_037640.1 | 7921536 | SNV | 1 | G | A | Heterozygous |
| NC_037640.1 | 7921545 | SNV | 1 | T | C | Heterozygous |
| NC_037640.1 | 7926340 | SNV | 1 | T | C | Homozygous   |
| NC_037640.1 | 7926473 | SNV | 1 | C | T | Heterozygous |
| NC_037640.1 | 7946208 | SNV | 1 | T | C | Homozygous   |
| NC_037640.1 | 7946215 | SNV | 1 | C | T | Homozygous   |
| NC_037640.1 | 7955613 | SNV | 1 | C | T | Homozygous   |
| NC_037640.1 | 7955623 | SNV | 1 | C | T | Homozygous   |
| NC_037640.1 | 7957976 | SNV | 1 | C | G | Homozygous   |
| NC_037640.1 | 7978284 | SNV | 1 | C | A | Homozygous   |
| NC_037640.1 | 7995780 | SNV | 1 | A | G | Heterozygous |
| NC_037640.1 | 7995862 | SNV | 1 | G | A | Homozygous   |
| NC_037640.1 | 7995880 | SNV | 1 | A | G | Heterozygous |
| NC_037640.1 | 7996280 | SNV | 1 | C | T | Heterozygous |
| NC_037640.1 | 7996338 | SNV | 1 | A | G | Heterozygous |
| NC_037640.1 | 7996371 | SNV | 1 | T | G | Heterozygous |
| NC_037640.1 | 7996375 | SNV | 1 | C | T | Heterozygous |
| NC_037640.1 | 7996394 | SNV | 1 | G | A | Homozygous   |
| NC_037640.1 | 7996401 | SNV | 1 | G | A | Homozygous   |
| NC_037640.1 | 7996419 | SNV | 1 | G | A | Heterozygous |
| NC_037640.1 | 7996478 | SNV | 1 | A | G | Homozygous   |
| NC_037640.1 | 7996499 | SNV | 1 | T | C | Heterozygous |
| NC_037640.1 | 7996522 | SNV | 1 | G | A | Heterozygous |
| NC_037640.1 | 7996864 | SNV | 1 | A | G | Homozygous   |
| NC_037640.1 | 7996927 | SNV | 1 | A | G | Heterozygous |
| NC_037640.1 | 7997662 | SNV | 1 | G | A | Homozygous   |
| NC_037640.1 | 7997854 | SNV | 1 | G | T | Homozygous   |
| NC_037640.1 | 7997876 | SNV | 1 | C | T | Homozygous   |
| NC_037640.1 | 7999024 | SNV | 1 | T | C | Heterozygous |

|             |         |     |   |   |   |              |
|-------------|---------|-----|---|---|---|--------------|
| NC_037640.1 | 7999156 | SNV | 1 | C | T | Homozygous   |
| NC_037640.1 | 8006383 | SNV | 1 | G | A | Homozygous   |
| NC_037640.1 | 8006393 | SNV | 1 | T | A | Homozygous   |
| NC_037640.1 | 8006554 | SNV | 1 | G | A | Homozygous   |
| NC_037640.1 | 8006577 | SNV | 1 | G | A | Homozygous   |
| NC_037640.1 | 8007076 | SNV | 1 | C | A | Heterozygous |
| NC_037640.1 | 8007085 | SNV | 1 | G | A | Heterozygous |
| NC_037640.1 | 8007089 | SNV | 1 | G | A | Heterozygous |
| NC_037640.1 | 8022644 | SNV | 1 | G | A | Heterozygous |
| NC_037640.1 | 8022648 | SNV | 1 | C | T | Homozygous   |
| NC_037640.1 | 8022661 | SNV | 1 | G | A | Heterozygous |
| NC_037640.1 | 8022673 | SNV | 1 | A | G | Heterozygous |
| NC_037640.1 | 8022676 | SNV | 1 | T | C | Homozygous   |
| NC_037640.1 | 8022685 | SNV | 1 | G | C | Homozygous   |
| NC_037640.1 | 8022708 | SNV | 1 | G | T | Homozygous   |
| NC_037640.1 | 8022756 | SNV | 1 | T | A | Heterozygous |
| NC_037640.1 | 8023061 | SNV | 1 | G | C | Homozygous   |
| NC_037640.1 | 8048949 | SNV | 1 | C | G | Homozygous   |
| NC_037640.1 | 8049109 | SNV | 1 | A | G | Heterozygous |
| NC_037640.1 | 8049811 | SNV | 1 | T | C | Homozygous   |
| NC_037640.1 | 8050017 | SNV | 1 | T | C | Heterozygous |
| NC_037640.1 | 8050150 | SNV | 1 | T | C | Heterozygous |
| NC_037640.1 | 8050926 | SNV | 1 | A | G | Homozygous   |
| NC_037640.1 | 8051274 | SNV | 1 | T | C | Homozygous   |
| NC_037640.1 | 8051365 | SNV | 1 | T | C | Homozygous   |
| NC_037640.1 | 8051575 | SNV | 1 | G | A | Heterozygous |
| NC_037640.1 | 8051617 | SNV | 1 | A | T | Heterozygous |
| NC_037640.1 | 8051723 | SNV | 1 | C | T | Homozygous   |
| NC_037640.1 | 8051769 | SNV | 1 | A | G | Heterozygous |
| NC_037640.1 | 8051840 | SNV | 1 | T | C | Homozygous   |
| NC_037640.1 | 8051856 | SNV | 1 | A | G | Homozygous   |
| NC_037640.1 | 8054164 | SNV | 1 | G | A | Heterozygous |
| NC_037640.1 | 8054882 | SNV | 1 | G | A | Heterozygous |
| NC_037640.1 | 8055130 | SNV | 1 | C | T | Heterozygous |
| NC_037640.1 | 8055132 | SNV | 1 | C | T | Heterozygous |
| NC_037640.1 | 8055135 | SNV | 1 | C | T | Heterozygous |
| NC_037640.1 | 8055145 | SNV | 1 | T | C | Heterozygous |
| NC_037640.1 | 8055230 | SNV | 1 | C | T | Homozygous   |
| NC_037640.1 | 8055471 | SNV | 1 | C | T | Heterozygous |
| NC_037640.1 | 8062053 | SNV | 1 | T | C | Homozygous   |
| NC_037640.1 | 8087833 | SNV | 1 | T | C | Heterozygous |
| NC_037640.1 | 8088350 | SNV | 1 | T | C | Homozygous   |
| NC_037640.1 | 8088380 | SNV | 1 | A | G | Homozygous   |
| NC_037640.1 | 8089917 | SNV | 1 | C | T | Heterozygous |
| NC_037640.1 | 8090506 | SNV | 1 | T | A | Homozygous   |
| NC_037640.1 | 8090521 | SNV | 1 | C | T | Heterozygous |
| NC_037640.1 | 8096164 | SNV | 1 | C | T | Homozygous   |
| NC_037640.1 | 8110540 | SNV | 1 | C | T | Homozygous   |
| NC_037640.1 | 8110866 | SNV | 1 | T | C | Homozygous   |
| NC_037640.1 | 8111335 | SNV | 1 | C | T | Heterozygous |
| NC_037640.1 | 8111836 | SNV | 1 | T | G | Homozygous   |

|             |         |     |   |   |   |              |
|-------------|---------|-----|---|---|---|--------------|
| NC_037640.1 | 8112027 | SNV | 1 | A | G | Homozygous   |
| NC_037640.1 | 8112038 | SNV | 1 | T | C | Homozygous   |
| NC_037640.1 | 8113491 | SNV | 1 | A | G | Homozygous   |
| NC_037640.1 | 8113887 | SNV | 1 | A | G | Heterozygous |
| NC_037640.1 | 8113964 | SNV | 1 | G | A | Heterozygous |
| NC_037640.1 | 8114015 | SNV | 1 | C | A | Homozygous   |
| NC_037640.1 | 8114324 | SNV | 1 | C | T | Homozygous   |
| NC_037640.1 | 8115105 | SNV | 1 | A | G | Heterozygous |
| NC_037640.1 | 8118264 | SNV | 1 | A | G | Homozygous   |
| NC_037640.1 | 8119275 | SNV | 1 | C | T | Homozygous   |
| NC_037640.1 | 8121007 | SNV | 1 | A | T | Homozygous   |
| NC_037640.1 | 8121009 | SNV | 1 | A | T | Homozygous   |
| NC_037640.1 | 8121015 | SNV | 1 | T | A | Homozygous   |
| NC_037640.1 | 8121018 | SNV | 1 | T | A | Homozygous   |
| NC_037640.1 | 8121052 | SNV | 1 | A | G | Homozygous   |
| NC_037640.1 | 8121063 | SNV | 1 | T | A | Homozygous   |
| NC_037640.1 | 8123725 | SNV | 1 | T | G | Homozygous   |
| NC_037640.1 | 8123799 | SNV | 1 | T | G | Homozygous   |
| NC_037640.1 | 8123805 | SNV | 1 | T | G | Homozygous   |
| NC_037640.1 | 8123809 | SNV | 1 | T | A | Homozygous   |
| NC_037640.1 | 8123996 | SNV | 1 | G | A | Homozygous   |
| NC_037640.1 | 8124315 | SNV | 1 | A | T | Homozygous   |
| NC_037640.1 | 8124359 | SNV | 1 | A | G | Heterozygous |
| NC_037640.1 | 8124451 | SNV | 1 | G | A | Homozygous   |
| NC_037640.1 | 8124662 | SNV | 1 | A | G | Heterozygous |
| NC_037640.1 | 8124933 | SNV | 1 | C | T | Heterozygous |
| NC_037640.1 | 8126902 | SNV | 1 | T | C | Homozygous   |
| NC_037640.1 | 8126975 | SNV | 1 | T | C | Homozygous   |
| NC_037640.1 | 8128755 | SNV | 1 | G | A | Homozygous   |
| NC_037640.1 | 8130677 | SNV | 1 | G | A | Homozygous   |
| NC_037640.1 | 8130809 | SNV | 1 | T | A | Homozygous   |
| NC_037640.1 | 8130811 | SNV | 1 | G | T | Homozygous   |
| NC_037640.1 | 8131630 | SNV | 1 | G | A | Heterozygous |
| NC_037640.1 | 8150210 | SNV | 1 | G | A | Homozygous   |
| NC_037640.1 | 8151984 | SNV | 1 | A | G | Homozygous   |
| NC_037640.1 | 8154508 | SNV | 1 | T | C | Heterozygous |
| NC_037640.1 | 8154512 | SNV | 1 | G | A | Heterozygous |
| NC_037640.1 | 8154847 | SNV | 1 | A | G | Heterozygous |
| NC_037640.1 | 8154872 | SNV | 1 | C | T | Homozygous   |
| NC_037640.1 | 8154907 | SNV | 1 | G | A | Heterozygous |
| NC_037640.1 | 8154936 | SNV | 1 | T | A | Heterozygous |
| NC_037640.1 | 8154975 | SNV | 1 | G | A | Homozygous   |
| NC_037640.1 | 8155149 | SNV | 1 | G | A | Heterozygous |
| NC_037640.1 | 8155171 | SNV | 1 | G | A | Heterozygous |
| NC_037640.1 | 8155367 | SNV | 1 | A | G | Homozygous   |
| NC_037640.1 | 8155648 | SNV | 1 | A | G | Heterozygous |
| NC_037640.1 | 8162828 | SNV | 1 | T | A | Homozygous   |
| NC_037640.1 | 8162831 | SNV | 1 | A | T | Homozygous   |
| NC_037640.1 | 8162834 | SNV | 1 | T | A | Homozygous   |
| NC_037640.1 | 8162837 | SNV | 1 | A | T | Homozygous   |
| NC_037640.1 | 8162856 | SNV | 1 | A | T | Homozygous   |

|             |         |     |   |   |   |              |
|-------------|---------|-----|---|---|---|--------------|
| NC_037640.1 | 8162867 | SNV | 1 | A | G | Homozygous   |
| NC_037640.1 | 8163578 | SNV | 1 | T | A | Homozygous   |
| NC_037640.1 | 8163591 | SNV | 1 | C | A | Homozygous   |
| NC_037640.1 | 8163598 | SNV | 1 | A | T | Homozygous   |
| NC_037640.1 | 8163602 | SNV | 1 | A | T | Homozygous   |
| NC_037640.1 | 8163611 | SNV | 1 | T | A | Homozygous   |
| NC_037640.1 | 8163614 | SNV | 1 | T | A | Heterozygous |
| NC_037640.1 | 8163620 | SNV | 1 | A | C | Heterozygous |
| NC_037640.1 | 8165844 | SNV | 1 | A | T | Homozygous   |
| NC_037640.1 | 8165847 | SNV | 1 | A | C | Homozygous   |
| NC_037640.1 | 8165854 | SNV | 1 | T | A | Homozygous   |
| NC_037640.1 | 8167546 | SNV | 1 | G | A | Homozygous   |
| NC_037640.1 | 8168163 | SNV | 1 | T | G | Homozygous   |
| NC_037640.1 | 8168166 | SNV | 1 | T | A | Homozygous   |
| NC_037640.1 | 8168418 | SNV | 1 | G | A | Heterozygous |
| NC_037640.1 | 8168948 | SNV | 1 | G | T | Homozygous   |
| NC_037640.1 | 8172017 | SNV | 1 | G | C | Homozygous   |
| NC_037640.1 | 8173100 | SNV | 1 | G | A | Homozygous   |
| NC_037640.1 | 8173798 | SNV | 1 | A | G | Homozygous   |
| NC_037640.1 | 8174720 | SNV | 1 | A | G | Homozygous   |
| NC_037640.1 | 8177472 | SNV | 1 | A | T | Homozygous   |
| NC_037640.1 | 8177474 | SNV | 1 | C | T | Homozygous   |
| NC_037640.1 | 8177477 | SNV | 1 | A | G | Homozygous   |
| NC_037640.1 | 8178113 | SNV | 1 | T | C | Homozygous   |
| NC_037640.1 | 8184259 | SNV | 1 | A | T | Homozygous   |
| NC_037640.1 | 8189765 | SNV | 1 | T | A | Homozygous   |
| NC_037640.1 | 8189767 | SNV | 1 | T | A | Homozygous   |
| NC_037640.1 | 8189771 | SNV | 1 | T | C | Homozygous   |
| NC_037640.1 | 8189776 | SNV | 1 | T | A | Homozygous   |
| NC_037640.1 | 8192990 | SNV | 1 | A | G | Homozygous   |
| NC_037640.1 | 8193002 | SNV | 1 | T | A | Homozygous   |
| NC_037640.1 | 8193005 | SNV | 1 | A | G | Homozygous   |
| NC_037640.1 | 8195376 | SNV | 1 | G | T | Heterozygous |
| NC_037640.1 | 8196159 | SNV | 1 | A | G | Homozygous   |
| NC_037640.1 | 8196948 | SNV | 1 | G | A | Heterozygous |
| NC_037640.1 | 8197039 | SNV | 1 | C | A | Heterozygous |
| NC_037640.1 | 8199614 | SNV | 1 | T | C | Homozygous   |
| NC_037640.1 | 8200094 | SNV | 1 | A | G | Homozygous   |
| NC_037640.1 | 8204338 | SNV | 1 | T | A | Homozygous   |
| NC_037640.1 | 8206142 | SNV | 1 | A | G | Heterozygous |
| NC_037640.1 | 8206226 | SNV | 1 | T | A | Homozygous   |
| NC_037640.1 | 8206767 | SNV | 1 | A | T | Homozygous   |
| NC_037640.1 | 8206773 | SNV | 1 | T | C | Homozygous   |
| NC_037640.1 | 8206775 | SNV | 1 | C | T | Homozygous   |
| NC_037640.1 | 8207659 | SNV | 1 | A | T | Heterozygous |
| NC_037640.1 | 8207663 | SNV | 1 | A | C | Heterozygous |
| NC_037640.1 | 8213532 | SNV | 1 | A | G | Homozygous   |
| NC_037640.1 | 8213597 | SNV | 1 | A | G | Heterozygous |
| NC_037640.1 | 8214815 | SNV | 1 | G | A | Homozygous   |
| NC_037640.1 | 8214831 | SNV | 1 | G | A | Homozygous   |
| NC_037640.1 | 8215819 | SNV | 1 | T | C | Homozygous   |



|             |         |     |   |   |   |              |
|-------------|---------|-----|---|---|---|--------------|
| NC_037640.1 | 8216394 | SNV | 1 | C | T | Heterozygous |
| NC_037640.1 | 8216821 | SNV | 1 | T | C | Homozygous   |
| NC_037640.1 | 8217631 | SNV | 1 | T | A | Homozygous   |
| NC_037640.1 | 8217638 | SNV | 1 | C | G | Homozygous   |
| NC_037640.1 | 8217660 | SNV | 1 | T | A | Homozygous   |
| NC_037640.1 | 8217673 | SNV | 1 | T | A | Homozygous   |
| NC_037640.1 | 8217678 | SNV | 1 | T | A | Homozygous   |
| NC_037640.1 | 8219207 | SNV | 1 | T | A | Homozygous   |
| NC_037640.1 | 8219232 | SNV | 1 | A | T | Homozygous   |
| NC_037640.1 | 8226206 | SNV | 1 | T | C | Homozygous   |
| NC_037640.1 | 8229498 | SNV | 1 | A | G | Homozygous   |
| NC_037640.1 | 8229735 | SNV | 1 | T | G | Homozygous   |
| NC_037640.1 | 8229741 | SNV | 1 | C | A | Homozygous   |
| NC_037640.1 | 8238596 | SNV | 1 | G | T | Heterozygous |
| NC_037640.1 | 8238598 | SNV | 1 | C | T | Heterozygous |
| NC_037640.1 | 8238628 | SNV | 1 | T | C | Heterozygous |
| NC_037640.1 | 8238631 | SNV | 1 | C | G | Heterozygous |
| NC_037640.1 | 8240371 | SNV | 1 | A | G | Homozygous   |
| NC_037640.1 | 8240670 | SNV | 1 | C | T | Homozygous   |
| NC_037640.1 | 8245822 | SNV | 1 | G | A | Homozygous   |
| NC_037640.1 | 8246403 | SNV | 1 | G | A | Homozygous   |
| NC_037640.1 | 8247261 | SNV | 1 | A | G | Homozygous   |
| NC_037640.1 | 8251609 | SNV | 1 | A | G | Heterozygous |
| NC_037640.1 | 8251799 | SNV | 1 | A | G | Homozygous   |
| NC_037640.1 | 8252415 | SNV | 1 | C | T | Homozygous   |
| NC_037640.1 | 8252739 | SNV | 1 | G | A | Heterozygous |
| NC_037640.1 | 8252881 | SNV | 1 | T | C | Homozygous   |
| NC_037640.1 | 8253119 | SNV | 1 | A | G | Heterozygous |
| NC_037640.1 | 8253520 | SNV | 1 | C | G | Homozygous   |
| NC_037640.1 | 8253783 | SNV | 1 | T | C | Heterozygous |
| NC_037640.1 | 8259237 | SNV | 1 | A | T | Homozygous   |
| NC_037640.1 | 8259242 | SNV | 1 | T | C | Homozygous   |
| NC_037640.1 | 8263328 | SNV | 1 | G | A | Homozygous   |
| NC_037640.1 | 8263734 | SNV | 1 | T | C | Heterozygous |
| NC_037640.1 | 8266273 | SNV | 1 | G | C | Homozygous   |
| NC_037640.1 | 8269689 | SNV | 1 | C | T | Homozygous   |
| NC_037640.1 | 8269691 | SNV | 1 | C | T | Heterozygous |
| NC_037640.1 | 8271588 | SNV | 1 | C | T | Homozygous   |
| NC_037640.1 | 8272169 | SNV | 1 | T | C | Heterozygous |
| NC_037640.1 | 8273818 | SNV | 1 | G | T | Heterozygous |
| NC_037640.1 | 8275221 | SNV | 1 | G | A | Homozygous   |
| NC_037640.1 | 8277584 | SNV | 1 | C | T | Heterozygous |
| NC_037640.1 | 8277925 | SNV | 1 | T | A | Heterozygous |
| NC_037640.1 | 8279632 | SNV | 1 | T | C | Homozygous   |
| NC_037640.1 | 8279811 | SNV | 1 | A | G | Homozygous   |
| NC_037640.1 | 8281363 | SNV | 1 | A | G | Heterozygous |
| NC_037640.1 | 8281369 | SNV | 1 | A | G | Heterozygous |
| NC_037640.1 | 8281373 | SNV | 1 | A | G | Heterozygous |
| NC_037640.1 | 8281376 | SNV | 1 | A | G | Heterozygous |
| NC_037640.1 | 8285379 | SNV | 1 | T | A | Heterozygous |
| NC_037640.1 | 8285476 | SNV | 1 | A | T | Heterozygous |

|             |         |     |   |   |   |              |
|-------------|---------|-----|---|---|---|--------------|
| NC_037640.1 | 8285478 | SNV | 1 | A | T | Heterozygous |
| NC_037640.1 | 8286418 | SNV | 1 | G | T | Heterozygous |
| NC_037640.1 | 8286994 | SNV | 1 | A | T | Heterozygous |
| NC_037640.1 | 8287007 | SNV | 1 | A | C | Heterozygous |
| NC_037640.1 | 8287011 | SNV | 1 | T | A | Heterozygous |
| NC_037640.1 | 8287021 | SNV | 1 | A | C | Heterozygous |
| NC_037640.1 | 8287026 | SNV | 1 | A | C | Heterozygous |
| NC_037640.1 | 8287552 | SNV | 1 | G | A | Homozygous   |
| NC_037640.1 | 8287950 | SNV | 1 | C | T | Homozygous   |
| NC_037640.1 | 8288106 | SNV | 1 | A | G | Homozygous   |
| NC_037640.1 | 8290061 | SNV | 1 | T | C | Homozygous   |
| NC_037640.1 | 8291485 | SNV | 1 | T | C | Heterozygous |
| NC_037640.1 | 8291494 | SNV | 1 | C | T | Heterozygous |
| NC_037640.1 | 8291884 | SNV | 1 | T | C | Homozygous   |
| NC_037640.1 | 8291964 | SNV | 1 | G | T | Heterozygous |
| NC_037640.1 | 8292519 | SNV | 1 | T | C | Homozygous   |
| NC_037640.1 | 8292560 | SNV | 1 | T | C | Homozygous   |
| NC_037640.1 | 8292570 | SNV | 1 | C | T | Homozygous   |
| NC_037640.1 | 8292573 | SNV | 1 | G | T | Homozygous   |
| NC_037640.1 | 8298078 | SNV | 1 | G | A | Heterozygous |
| NC_037640.1 | 8298088 | SNV | 1 | G | T | Heterozygous |
| NC_037640.1 | 8298094 | SNV | 1 | G | A | Heterozygous |
| NC_037640.1 | 8304834 | SNV | 1 | A | T | Heterozygous |
| NC_037640.1 | 8304842 | SNV | 1 | C | T | Homozygous   |
| NC_037640.1 | 8313110 | SNV | 1 | C | G | Heterozygous |
| NC_037640.1 | 8313694 | SNV | 1 | C | T | Heterozygous |
| NC_037640.1 | 8313783 | SNV | 1 | A | C | Heterozygous |
| NC_037640.1 | 8313803 | SNV | 1 | T | C | Heterozygous |
| NC_037640.1 | 8314002 | SNV | 1 | G | A | Heterozygous |
| NC_037640.1 | 8314042 | SNV | 1 | C | T | Heterozygous |
| NC_037640.1 | 8314127 | SNV | 1 | A | G | Heterozygous |
| NC_037640.1 | 8314364 | SNV | 1 | T | A | Homozygous   |
| NC_037640.1 | 8314367 | SNV | 1 | T | C | Homozygous   |
| NC_037640.1 | 8314371 | SNV | 1 | T | A | Homozygous   |
| NC_037640.1 | 8314864 | SNV | 1 | A | G | Homozygous   |
| NC_037640.1 | 8314925 | SNV | 1 | A | G | Heterozygous |
| NC_037640.1 | 8315043 | SNV | 1 | T | C | Heterozygous |
| NC_037640.1 | 8315102 | SNV | 1 | T | C | Homozygous   |
| NC_037640.1 | 8315111 | SNV | 1 | T | C | Homozygous   |
| NC_037640.1 | 8315175 | SNV | 1 | A | G | Homozygous   |
| NC_037640.1 | 8315185 | SNV | 1 | A | G | Homozygous   |
| NC_037640.1 | 8315770 | SNV | 1 | G | T | Homozygous   |
| NC_037640.1 | 8315828 | SNV | 1 | T | C | Homozygous   |
| NC_037640.1 | 8315992 | SNV | 1 | C | T | Heterozygous |
| NC_037640.1 | 8316026 | SNV | 1 | G | A | Heterozygous |
| NC_037640.1 | 8316524 | SNV | 1 | T | C | Homozygous   |
| NC_037640.1 | 8316550 | SNV | 1 | G | A | Heterozygous |
| NC_037640.1 | 8317734 | SNV | 1 | C | T | Heterozygous |
| NC_037640.1 | 8323939 | SNV | 1 | T | C | Heterozygous |
| NC_037640.1 | 8324153 | SNV | 1 | A | G | Homozygous   |
| NC_037640.1 | 8326557 | SNV | 1 | G | T | Homozygous   |

|             |         |     |   |   |   |              |
|-------------|---------|-----|---|---|---|--------------|
| NC_037640.1 | 8327615 | SNV | 1 | G | T | Homozygous   |
| NC_037640.1 | 8327985 | SNV | 1 | G | A | Heterozygous |
| NC_037640.1 | 8328805 | SNV | 1 | T | C | Heterozygous |
| NC_037640.1 | 8329574 | SNV | 1 | T | A | Homozygous   |
| NC_037640.1 | 8329578 | SNV | 1 | T | G | Homozygous   |
| NC_037640.1 | 8329667 | SNV | 1 | G | A | Homozygous   |
| NC_037640.1 | 8329765 | SNV | 1 | T | A | Homozygous   |
| NC_037640.1 | 8330951 | SNV | 1 | T | G | Homozygous   |
| NC_037640.1 | 8337722 | SNV | 1 | C | A | Homozygous   |
| NC_037640.1 | 8339259 | SNV | 1 | C | T | Heterozygous |
| NC_037640.1 | 8340591 | SNV | 1 | A | G | Homozygous   |
| NC_037640.1 | 8340594 | SNV | 1 | C | A | Homozygous   |
| NC_037640.1 | 8345562 | SNV | 1 | A | T | Homozygous   |
| NC_037640.1 | 8345916 | SNV | 1 | A | T | Homozygous   |
| NC_037640.1 | 8345926 | SNV | 1 | T | A | Homozygous   |
| NC_037640.1 | 8345945 | SNV | 1 | C | G | Homozygous   |
| NC_037640.1 | 8345962 | SNV | 1 | T | G | Homozygous   |
| NC_037640.1 | 8346348 | SNV | 1 | G | C | Homozygous   |
| NC_037640.1 | 8346878 | SNV | 1 | T | A | Homozygous   |
| NC_037640.1 | 8346881 | SNV | 1 | T | A | Homozygous   |
| NC_037640.1 | 8346884 | SNV | 1 | A | T | Homozygous   |
| NC_037640.1 | 8348328 | SNV | 1 | G | T | Homozygous   |
| NC_037640.1 | 8348758 | SNV | 1 | A | C | Homozygous   |
| NC_037640.1 | 8348831 | SNV | 1 | C | T | Heterozygous |
| NC_037640.1 | 8350101 | SNV | 1 | A | G | Heterozygous |
| NC_037640.1 | 8351033 | SNV | 1 | A | G | Homozygous   |
| NC_037640.1 | 8351520 | SNV | 1 | A | G | Homozygous   |
| NC_037640.1 | 8351661 | SNV | 1 | C | T | Homozygous   |
| NC_037640.1 | 8351663 | SNV | 1 | A | G | Homozygous   |
| NC_037640.1 | 8351842 | SNV | 1 | A | C | Homozygous   |
| NC_037640.1 | 8351915 | SNV | 1 | T | C | Homozygous   |
| NC_037640.1 | 8351921 | SNV | 1 | A | G | Homozygous   |
| NC_037640.1 | 8352372 | SNV | 1 | C | G | Homozygous   |
| NC_037640.1 | 8352415 | SNV | 1 | A | G | Homozygous   |
| NC_037640.1 | 8352418 | SNV | 1 | C | T | Heterozygous |
| NC_037640.1 | 8353068 | SNV | 1 | A | G | Homozygous   |
| NC_037640.1 | 8353211 | SNV | 1 | T | A | Homozygous   |
| NC_037640.1 | 8353215 | SNV | 1 | T | A | Homozygous   |
| NC_037640.1 | 8353217 | SNV | 1 | C | T | Homozygous   |
| NC_037640.1 | 8354105 | SNV | 1 | C | T | Homozygous   |
| NC_037640.1 | 8354176 | SNV | 1 | G | A | Heterozygous |
| NC_037640.1 | 8358126 | SNV | 1 | T | A | Homozygous   |
| NC_037640.1 | 8360601 | SNV | 1 | G | A | Homozygous   |
| NC_037640.1 | 8360821 | SNV | 1 | A | T | Homozygous   |
| NC_037640.1 | 8360836 | SNV | 1 | A | C | Homozygous   |
| NC_037640.1 | 8361081 | SNV | 1 | C | T | Homozygous   |
| NC_037640.1 | 8366613 | SNV | 1 | C | A | Homozygous   |
| NC_037640.1 | 8366885 | SNV | 1 | A | T | Heterozygous |
| NC_037640.1 | 8368266 | SNV | 1 | T | A | Homozygous   |
| NC_037640.1 | 8368271 | SNV | 1 | T | A | Homozygous   |
| NC_037640.1 | 8368670 | SNV | 1 | T | C | Homozygous   |

|             |         |     |   |   |   |              |
|-------------|---------|-----|---|---|---|--------------|
| NC_037640.1 | 8371505 | SNV | 1 | C | T | Homozygous   |
| NC_037640.1 | 8371653 | SNV | 1 | G | A | Homozygous   |
| NC_037640.1 | 8372161 | SNV | 1 | C | T | Homozygous   |
| NC_037640.1 | 8372276 | SNV | 1 | G | A | Heterozygous |
| NC_037640.1 | 8372301 | SNV | 1 | G | A | Heterozygous |
| NC_037640.1 | 8373023 | SNV | 1 | A | T | Homozygous   |
| NC_037640.1 | 8376960 | SNV | 1 | G | A | Heterozygous |
| NC_037640.1 | 8377240 | SNV | 1 | C | T | Homozygous   |
| NC_037640.1 | 8379147 | SNV | 1 | T | C | Homozygous   |
| NC_037640.1 | 8379410 | SNV | 1 | A | G | Homozygous   |
| NC_037640.1 | 8379520 | SNV | 1 | G | A | Homozygous   |
| NC_037640.1 | 8380250 | SNV | 1 | C | T | Homozygous   |
| NC_037640.1 | 8382818 | SNV | 1 | C | A | Homozygous   |
| NC_037640.1 | 8382836 | SNV | 1 | T | A | Homozygous   |
| NC_037640.1 | 8382839 | SNV | 1 | A | G | Homozygous   |
| NC_037640.1 | 8382842 | SNV | 1 | A | T | Homozygous   |
| NC_037640.1 | 8382850 | SNV | 1 | C | T | Homozygous   |
| NC_037640.1 | 8384857 | SNV | 1 | T | A | Homozygous   |
| NC_037640.1 | 8386603 | SNV | 1 | T | C | Homozygous   |
| NC_037640.1 | 8386997 | SNV | 1 | G | A | Heterozygous |
| NC_037640.1 | 8400009 | SNV | 1 | G | A | Homozygous   |
| NC_037640.1 | 8443610 | SNV | 1 | A | C | Homozygous   |
| NC_037640.1 | 8443614 | SNV | 1 | C | T | Homozygous   |
| NC_037640.1 | 8443644 | SNV | 1 | T | A | Homozygous   |
| NC_037640.1 | 8443647 | SNV | 1 | T | A | Homozygous   |
| NC_037640.1 | 8444709 | SNV | 1 | A | G | Homozygous   |
| NC_037640.1 | 8444722 | SNV | 1 | T | C | Homozygous   |
| NC_037640.1 | 8444726 | SNV | 1 | A | G | Homozygous   |
| NC_037640.1 | 8453645 | SNV | 1 | C | T | Heterozygous |
| NC_037640.1 | 8457250 | SNV | 1 | A | C | Homozygous   |
| NC_037640.1 | 8462027 | SNV | 1 | A | G | Heterozygous |
| NC_037640.1 | 8462029 | SNV | 1 | G | A | Heterozygous |
| NC_037640.1 | 8462045 | SNV | 1 | G | A | Heterozygous |
| NC_037640.1 | 8488888 | SNV | 1 | C | T | Homozygous   |
| NC_037640.1 | 8489015 | SNV | 1 | A | G | Heterozygous |
| NC_037640.1 | 8489063 | SNV | 1 | G | A | Homozygous   |
| NC_037640.1 | 8489073 | SNV | 1 | T | A | Homozygous   |
| NC_037640.1 | 8489094 | SNV | 1 | G | A | Heterozygous |
| NC_037640.1 | 8489122 | SNV | 1 | C | T | Heterozygous |
| NC_037640.1 | 8489229 | SNV | 1 | C | T | Homozygous   |
| NC_037640.1 | 8489248 | SNV | 1 | T | C | Homozygous   |
| NC_037640.1 | 8489256 | SNV | 1 | G | A | Heterozygous |
| NC_037640.1 | 8489312 | SNV | 1 | A | G | Homozygous   |
| NC_037640.1 | 8489338 | SNV | 1 | T | C | Homozygous   |
| NC_037640.1 | 8489367 | SNV | 1 | T | A | Homozygous   |
| NC_037640.1 | 8489395 | SNV | 1 | T | C | Heterozygous |
| NC_037640.1 | 8489427 | SNV | 1 | A | G | Heterozygous |
| NC_037640.1 | 8489443 | SNV | 1 | C | A | Homozygous   |
| NC_037640.1 | 8489456 | SNV | 1 | C | A | Heterozygous |
| NC_037640.1 | 8489854 | SNV | 1 | T | C | Homozygous   |
| NC_037640.1 | 8489910 | SNV | 1 | A | G | Homozygous   |

|             |         |     |   |   |   |              |
|-------------|---------|-----|---|---|---|--------------|
| NC_037640.1 | 8489934 | SNV | 1 | C | T | Homozygous   |
| NC_037640.1 | 8490111 | SNV | 1 | A | G | Heterozygous |
| NC_037640.1 | 8490114 | SNV | 1 | A | G | Homozygous   |
| NC_037640.1 | 8490628 | SNV | 1 | G | A | Homozygous   |
| NC_037640.1 | 8490636 | SNV | 1 | T | C | Heterozygous |
| NC_037640.1 | 8492369 | SNV | 1 | G | A | Homozygous   |
| NC_037640.1 | 8492439 | SNV | 1 | C | T | Homozygous   |
| NC_037640.1 | 8492561 | SNV | 1 | G | A | Homozygous   |
| NC_037640.1 | 8492563 | SNV | 1 | C | A | Homozygous   |
| NC_037640.1 | 8492582 | SNV | 1 | C | T | Homozygous   |
| NC_037640.1 | 8493064 | SNV | 1 | C | T | Homozygous   |
| NC_037640.1 | 8493066 | SNV | 1 | T | C | Homozygous   |
| NC_037640.1 | 8493075 | SNV | 1 | C | A | Homozygous   |
| NC_037640.1 | 8493079 | SNV | 1 | C | T | Homozygous   |
| NC_037640.1 | 8493089 | SNV | 1 | T | G | Homozygous   |
| NC_037640.1 | 8506096 | SNV | 1 | C | T | Homozygous   |
| NC_037640.1 | 8506238 | SNV | 1 | T | C | Homozygous   |
| NC_037640.1 | 8506284 | SNV | 1 | C | T | Heterozygous |
| NC_037640.1 | 8508985 | SNV | 1 | A | G | Homozygous   |
| NC_037640.1 | 8509250 | SNV | 1 | A | G | Homozygous   |
| NC_037640.1 | 8509300 | SNV | 1 | C | T | Heterozygous |
| NC_037640.1 | 8509383 | SNV | 1 | G | C | Heterozygous |
| NC_037640.1 | 8509527 | SNV | 1 | G | A | Heterozygous |
| NC_037640.1 | 8509589 | SNV | 1 | G | A | Homozygous   |
| NC_037640.1 | 8509597 | SNV | 1 | C | G | Heterozygous |
| NC_037640.1 | 8513473 | SNV | 1 | T | C | Homozygous   |
| NC_037640.1 | 8516786 | SNV | 1 | T | G | Homozygous   |
| NC_037640.1 | 8516857 | SNV | 1 | G | C | Heterozygous |
| NC_037640.1 | 8516950 | SNV | 1 | T | C | Homozygous   |
| NC_037640.1 | 8516953 | SNV | 1 | C | A | Homozygous   |
| NC_037640.1 | 8516982 | SNV | 1 | C | T | Homozygous   |
| NC_037640.1 | 8517024 | SNV | 1 | A | G | Homozygous   |
| NC_037640.1 | 8518686 | SNV | 1 | T | A | Heterozygous |
| NC_037640.1 | 8518737 | SNV | 1 | T | C | Homozygous   |
| NC_037640.1 | 8519017 | SNV | 1 | T | C | Heterozygous |
| NC_037640.1 | 8519024 | SNV | 1 | C | T | Heterozygous |
| NC_037640.1 | 8519085 | SNV | 1 | T | C | Homozygous   |
| NC_037640.1 | 8521843 | SNV | 1 | T | C | Homozygous   |
| NC_037640.1 | 8521851 | SNV | 1 | T | C | Homozygous   |
| NC_037640.1 | 8521920 | SNV | 1 | A | G | Homozygous   |
| NC_037640.1 | 8521923 | SNV | 1 | G | A | Homozygous   |
| NC_037640.1 | 8521974 | SNV | 1 | C | T | Heterozygous |
| NC_037640.1 | 8522052 | SNV | 1 | T | C | Homozygous   |
| NC_037640.1 | 8522156 | SNV | 1 | G | A | Homozygous   |
| NC_037640.1 | 8522233 | SNV | 1 | G | A | Heterozygous |
| NC_037640.1 | 8522297 | SNV | 1 | T | A | Homozygous   |
| NC_037640.1 | 8522362 | SNV | 1 | G | A | Homozygous   |
| NC_037640.1 | 8522406 | SNV | 1 | G | A | Homozygous   |
| NC_037640.1 | 8522518 | SNV | 1 | C | T | Heterozygous |
| NC_037640.1 | 8522521 | SNV | 1 | A | C | Homozygous   |
| NC_037640.1 | 8522584 | SNV | 1 | T | C | Homozygous   |

|             |         |     |   |   |   |              |
|-------------|---------|-----|---|---|---|--------------|
| NC_037640.1 | 8522736 | SNV | 1 | G | C | Heterozygous |
| NC_037640.1 | 8522752 | SNV | 1 | C | T | Heterozygous |
| NC_037640.1 | 8522877 | SNV | 1 | C | G | Homozygous   |
| NC_037640.1 | 8528295 | SNV | 1 | G | A | Heterozygous |
| NC_037640.1 | 8536305 | SNV | 1 | T | A | Homozygous   |
| NC_037640.1 | 8536352 | SNV | 1 | T | C | Homozygous   |
| NC_037640.1 | 8557731 | SNV | 1 | T | C | Homozygous   |
| NC_037640.1 | 8562240 | SNV | 1 | G | A | Heterozygous |
| NC_037640.1 | 8562347 | SNV | 1 | C | T | Homozygous   |
| NC_037640.1 | 8562398 | SNV | 1 | C | G | Homozygous   |
| NC_037640.1 | 8562471 | SNV | 1 | T | C | Heterozygous |
| NC_037640.1 | 8562542 | SNV | 1 | A | G | Homozygous   |
| NC_037640.1 | 8574949 | SNV | 1 | T | C | Heterozygous |
| NC_037640.1 | 8598603 | SNV | 1 | C | T | Heterozygous |
| NC_037640.1 | 8599565 | SNV | 1 | C | T | Homozygous   |
| NC_037640.1 | 8599608 | SNV | 1 | G | A | Heterozygous |
| NC_037640.1 | 8599732 | SNV | 1 | G | A | Heterozygous |
| NC_037640.1 | 8599778 | SNV | 1 | T | C | Heterozygous |
| NC_037640.1 | 8599781 | SNV | 1 | A | G | Heterozygous |
| NC_037640.1 | 8609437 | SNV | 1 | C | T | Heterozygous |
| NC_037640.1 | 8611247 | SNV | 1 | T | G | Heterozygous |
| NC_037640.1 | 8611488 | SNV | 1 | G | A | Heterozygous |
| NC_037640.1 | 8614047 | SNV | 1 | C | G | Heterozygous |
| NC_037640.1 | 8614074 | SNV | 1 | G | T | Heterozygous |
| NC_037640.1 | 8617414 | SNV | 1 | A | G | Heterozygous |
| NC_037640.1 | 8617425 | SNV | 1 | A | T | Homozygous   |
| NC_037640.1 | 8625745 | SNV | 1 | T | C | Homozygous   |
| NC_037640.1 | 8625749 | SNV | 1 | C | T | Heterozygous |
| NC_037640.1 | 8625766 | SNV | 1 | G | A | Heterozygous |
| NC_037640.1 | 8625798 | SNV | 1 | T | C | Heterozygous |
| NC_037640.1 | 8625837 | SNV | 1 | G | A | Heterozygous |
| NC_037640.1 | 8625870 | SNV | 1 | C | G | Heterozygous |
| NC_037640.1 | 8625877 | SNV | 1 | A | C | Heterozygous |
| NC_037640.1 | 8625951 | SNV | 1 | G | A | Homozygous   |
| NC_037640.1 | 8625966 | SNV | 1 | G | A | Heterozygous |
| NC_037640.1 | 8626116 | SNV | 1 | A | G | Heterozygous |
| NC_037640.1 | 8626193 | SNV | 1 | A | G | Heterozygous |
| NC_037640.1 | 8626200 | SNV | 1 | C | G | Homozygous   |
| NC_037640.1 | 8626652 | SNV | 1 | C | T | Heterozygous |
| NC_037640.1 | 8628634 | SNV | 1 | C | T | Heterozygous |
| NC_037640.1 | 8633657 | SNV | 1 | T | C | Homozygous   |
| NC_037640.1 | 8633721 | SNV | 1 | G | A | Heterozygous |
| NC_037640.1 | 8633737 | SNV | 1 | G | A | Homozygous   |
| NC_037640.1 | 8633878 | SNV | 1 | C | T | Heterozygous |
| NC_037640.1 | 8634014 | SNV | 1 | T | A | Homozygous   |
| NC_037640.1 | 8634018 | SNV | 1 | T | A | Heterozygous |
| NC_037640.1 | 8634058 | SNV | 1 | T | C | Heterozygous |
| NC_037640.1 | 8634332 | SNV | 1 | A | G | Heterozygous |
| NC_037640.1 | 8634638 | SNV | 1 | A | G | Heterozygous |
| NC_037640.1 | 8642910 | SNV | 1 | A | G | Heterozygous |
| NC_037640.1 | 8656896 | SNV | 1 | A | G | Homozygous   |

|             |         |     |   |   |   |              |
|-------------|---------|-----|---|---|---|--------------|
| NC_037640.1 | 8656986 | SNV | 1 | C | T | Homozygous   |
| NC_037640.1 | 8657028 | SNV | 1 | T | C | Heterozygous |
| NC_037640.1 | 8657348 | SNV | 1 | A | G | Homozygous   |
| NC_037640.1 | 8657402 | SNV | 1 | A | G | Heterozygous |
| NC_037640.1 | 8657816 | SNV | 1 | T | C | Homozygous   |
| NC_037640.1 | 8658223 | SNV | 1 | T | A | Heterozygous |
| NC_037640.1 | 8658244 | SNV | 1 | C | T | Heterozygous |
| NC_037640.1 | 8658446 | SNV | 1 | C | T | Heterozygous |
| NC_037640.1 | 8658482 | SNV | 1 | T | C | Homozygous   |
| NC_037640.1 | 8658639 | SNV | 1 | C | A | Heterozygous |
| NC_037640.1 | 8658651 | SNV | 1 | A | G | Heterozygous |
| NC_037640.1 | 8658680 | SNV | 1 | A | T | Heterozygous |
| NC_037640.1 | 8658691 | SNV | 1 | A | C | Heterozygous |
| NC_037640.1 | 8658941 | SNV | 1 | C | T | Heterozygous |
| NC_037640.1 | 8659034 | SNV | 1 | C | T | Homozygous   |
| NC_037640.1 | 8659038 | SNV | 1 | A | G | Homozygous   |
| NC_037640.1 | 8659120 | SNV | 1 | T | C | Homozygous   |
| NC_037640.1 | 8659354 | SNV | 1 | G | A | Heterozygous |
| NC_037640.1 | 8659849 | SNV | 1 | C | A | Homozygous   |
| NC_037640.1 | 8659947 | SNV | 1 | T | C | Homozygous   |
| NC_037640.1 | 8660294 | SNV | 1 | C | T | Homozygous   |
| NC_037640.1 | 8660676 | SNV | 1 | T | C | Heterozygous |
| NC_037640.1 | 8660801 | SNV | 1 | C | T | Heterozygous |
| NC_037640.1 | 8660811 | SNV | 1 | T | C | Homozygous   |
| NC_037640.1 | 8661715 | SNV | 1 | G | C | Heterozygous |
| NC_037640.1 | 8661903 | SNV | 1 | C | T | Heterozygous |
| NC_037640.1 | 8661907 | SNV | 1 | C | T | Heterozygous |
| NC_037640.1 | 8661994 | SNV | 1 | T | G | Heterozygous |
| NC_037640.1 | 8661996 | SNV | 1 | T | G | Heterozygous |
| NC_037640.1 | 8662002 | SNV | 1 | T | C | Homozygous   |
| NC_037640.1 | 8662604 | SNV | 1 | A | G | Heterozygous |
| NC_037640.1 | 8662970 | SNV | 1 | T | C | Homozygous   |
| NC_037640.1 | 8663411 | SNV | 1 | T | C | Heterozygous |
| NC_037640.1 | 8663450 | SNV | 1 | A | G | Heterozygous |
| NC_037640.1 | 8663452 | SNV | 1 | G | A | Heterozygous |
| NC_037640.1 | 8663487 | SNV | 1 | A | G | Homozygous   |
| NC_037640.1 | 8663751 | SNV | 1 | T | C | Homozygous   |
| NC_037640.1 | 8663836 | SNV | 1 | G | A | Homozygous   |
| NC_037640.1 | 8663838 | SNV | 1 | G | C | Homozygous   |
| NC_037640.1 | 8663943 | SNV | 1 | A | C | Homozygous   |
| NC_037640.1 | 8664031 | SNV | 1 | G | A | Heterozygous |
| NC_037640.1 | 8664054 | SNV | 1 | T | G | Homozygous   |
| NC_037640.1 | 8664105 | SNV | 1 | C | T | Heterozygous |
| NC_037640.1 | 8664107 | SNV | 1 | C | A | Heterozygous |
| NC_037640.1 | 8664107 | SNV | 1 | C | T | Heterozygous |
| NC_037640.1 | 8664109 | SNV | 1 | G | A | Heterozygous |
| NC_037640.1 | 8664177 | SNV | 1 | C | T | Homozygous   |
| NC_037640.1 | 8664375 | SNV | 1 | C | T | Heterozygous |
| NC_037640.1 | 8664377 | SNV | 1 | C | T | Heterozygous |
| NC_037640.1 | 8664658 | SNV | 1 | T | A | Heterozygous |
| NC_037640.1 | 8664660 | SNV | 1 | G | A | Heterozygous |

|             |         |     |   |   |   |              |
|-------------|---------|-----|---|---|---|--------------|
| NC_037640.1 | 8665038 | SNV | 1 | A | G | Heterozygous |
| NC_037640.1 | 8665040 | SNV | 1 | A | G | Heterozygous |
| NC_037640.1 | 8665042 | SNV | 1 | A | G | Heterozygous |
| NC_037640.1 | 8665048 | SNV | 1 | A | G | Heterozygous |
| NC_037640.1 | 8665076 | SNV | 1 | A | G | Heterozygous |
| NC_037640.1 | 8665086 | SNV | 1 | A | G | Heterozygous |
| NC_037640.1 | 8665102 | SNV | 1 | A | G | Homozygous   |
| NC_037640.1 | 8665107 | SNV | 1 | C | T | Homozygous   |
| NC_037640.1 | 8665123 | SNV | 1 | T | C | Homozygous   |
| NC_037640.1 | 8665129 | SNV | 1 | C | T | Homozygous   |
| NC_037640.1 | 8665497 | SNV | 1 | G | A | Homozygous   |
| NC_037640.1 | 8665587 | SNV | 1 | A | G | Heterozygous |
| NC_037640.1 | 8665619 | SNV | 1 | T | C | Homozygous   |
| NC_037640.1 | 8665667 | SNV | 1 | T | G | Homozygous   |
| NC_037640.1 | 8666148 | SNV | 1 | A | T | Heterozygous |
| NC_037640.1 | 8666152 | SNV | 1 | T | A | Heterozygous |
| NC_037640.1 | 8666158 | SNV | 1 | A | C | Heterozygous |
| NC_037640.1 | 8666209 | SNV | 1 | C | T | Heterozygous |
| NC_037640.1 | 8667315 | SNV | 1 | C | G | Homozygous   |
| NC_037640.1 | 8667319 | SNV | 1 | T | A | Homozygous   |
| NC_037640.1 | 8667321 | SNV | 1 | C | G | Homozygous   |
| NC_037640.1 | 8667327 | SNV | 1 | C | G | Homozygous   |
| NC_037640.1 | 8667330 | SNV | 1 | T | C | Homozygous   |
| NC_037640.1 | 8667339 | SNV | 1 | T | C | Homozygous   |
| NC_037640.1 | 8667343 | SNV | 1 | T | A | Homozygous   |
| NC_037640.1 | 8667345 | SNV | 1 | T | G | Homozygous   |
| NC_037640.1 | 8667349 | SNV | 1 | T | A | Homozygous   |
| NC_037640.1 | 8667351 | SNV | 1 | C | G | Homozygous   |
| NC_037640.1 | 8668669 | SNV | 1 | C | G | Heterozygous |
| NC_037640.1 | 8668891 | SNV | 1 | C | A | Heterozygous |
| NC_037640.1 | 8678612 | SNV | 1 | T | G | Homozygous   |
| NC_037640.1 | 8678674 | SNV | 1 | C | T | Homozygous   |
| NC_037640.1 | 8690460 | SNV | 1 | T | C | Heterozygous |
| NC_037640.1 | 8690507 | SNV | 1 | T | C | Heterozygous |
| NC_037640.1 | 8693542 | SNV | 1 | C | G | Homozygous   |
| NC_037640.1 | 8693603 | SNV | 1 | C | A | Homozygous   |
| NC_037640.1 | 8693608 | SNV | 1 | C | T | Homozygous   |
| NC_037640.1 | 8693638 | SNV | 1 | T | C | Homozygous   |
| NC_037640.1 | 8693737 | SNV | 1 | A | G | Homozygous   |
| NC_037640.1 | 8693740 | SNV | 1 | A | T | Homozygous   |
| NC_037640.1 | 8693756 | SNV | 1 | C | T | Homozygous   |
| NC_037640.1 | 8693806 | SNV | 1 | C | T | Homozygous   |
| NC_037640.1 | 8695699 | SNV | 1 | G | A | Homozygous   |
| NC_037640.1 | 8701045 | SNV | 1 | C | T | Heterozygous |
| NC_037640.1 | 8701117 | SNV | 1 | A | C | Homozygous   |
| NC_037640.1 | 8701124 | SNV | 1 | C | T | Heterozygous |
| NC_037640.1 | 8701126 | SNV | 1 | G | A | Heterozygous |
| NC_037640.1 | 8701145 | SNV | 1 | C | T | Heterozygous |
| NC_037640.1 | 8701162 | SNV | 1 | A | C | Heterozygous |
| NC_037640.1 | 8701175 | SNV | 1 | A | G | Homozygous   |
| NC_037640.1 | 8701302 | SNV | 1 | C | T | Heterozygous |



|             |         |     |   |   |   |              |
|-------------|---------|-----|---|---|---|--------------|
| NC_037640.1 | 8705699 | SNV | 1 | C | T | Heterozygous |
| NC_037640.1 | 8708757 | SNV | 1 | C | A | Homozygous   |
| NC_037640.1 | 8708960 | SNV | 1 | T | G | Heterozygous |
| NC_037640.1 | 8709386 | SNV | 1 | A | G | Homozygous   |
| NC_037640.1 | 8709623 | SNV | 1 | T | C | Homozygous   |
| NC_037640.1 | 8709667 | SNV | 1 | T | A | Homozygous   |
| NC_037640.1 | 8709675 | SNV | 1 | C | T | Homozygous   |
| NC_037640.1 | 8709690 | SNV | 1 | A | T | Heterozygous |
| NC_037640.1 | 8709722 | SNV | 1 | T | C | Heterozygous |
| NC_037640.1 | 8709733 | SNV | 1 | G | A | Heterozygous |
| NC_037640.1 | 8709932 | SNV | 1 | G | C | Heterozygous |
| NC_037640.1 | 8710009 | SNV | 1 | C | T | Homozygous   |
| NC_037640.1 | 8710032 | SNV | 1 | A | G | Homozygous   |
| NC_037640.1 | 8710093 | SNV | 1 | C | T | Heterozygous |
| NC_037640.1 | 8713304 | SNV | 1 | G | A | Heterozygous |
| NC_037640.1 | 8713314 | SNV | 1 | A | G | Heterozygous |
| NC_037640.1 | 8715587 | SNV | 1 | T | C | Heterozygous |
| NC_037640.1 | 8715599 | SNV | 1 | G | A | Heterozygous |
| NC_037640.1 | 8715655 | SNV | 1 | C | T | Heterozygous |
| NC_037640.1 | 8715656 | SNV | 1 | A | G | Heterozygous |
| NC_037640.1 | 8715663 | SNV | 1 | C | T | Heterozygous |
| NC_037640.1 | 8715687 | SNV | 1 | A | G | Heterozygous |
| NC_037640.1 | 8715695 | SNV | 1 | T | C | Heterozygous |
| NC_037640.1 | 8715696 | SNV | 1 | G | T | Heterozygous |
| NC_037640.1 | 8715698 | SNV | 1 | A | C | Heterozygous |
| NC_037640.1 | 8715729 | SNV | 1 | G | A | Heterozygous |
| NC_037640.1 | 8721321 | SNV | 1 | C | T | Heterozygous |
| NC_037640.1 | 8721473 | SNV | 1 | C | T | Heterozygous |
| NC_037640.1 | 8721657 | SNV | 1 | T | A | Heterozygous |
| NC_037640.1 | 8721662 | SNV | 1 | G | C | Heterozygous |
| NC_037640.1 | 8721741 | SNV | 1 | C | G | Heterozygous |
| NC_037640.1 | 8721744 | SNV | 1 | C | T | Heterozygous |
| NC_037640.1 | 8721747 | SNV | 1 | C | T | Homozygous   |
| NC_037640.1 | 8721764 | SNV | 1 | A | T | Homozygous   |
| NC_037640.1 | 8721772 | SNV | 1 | A | G | Homozygous   |
| NC_037640.1 | 8721796 | SNV | 1 | T | C | Homozygous   |
| NC_037640.1 | 8722544 | SNV | 1 | G | A | Homozygous   |
| NC_037640.1 | 8722803 | SNV | 1 | G | A | Heterozygous |
| NC_037640.1 | 8722805 | SNV | 1 | C | T | Heterozygous |
| NC_037640.1 | 8722928 | SNV | 1 | G | A | Homozygous   |
| NC_037640.1 | 8723038 | SNV | 1 | C | T | Homozygous   |
| NC_037640.1 | 8723053 | SNV | 1 | C | T | Heterozygous |
| NC_037640.1 | 8723056 | SNV | 1 | C | T | Heterozygous |
| NC_037640.1 | 8723142 | SNV | 1 | G | A | Heterozygous |
| NC_037640.1 | 8724326 | SNV | 1 | T | C | Homozygous   |
| NC_037640.1 | 8724434 | SNV | 1 | A | G | Heterozygous |
| NC_037640.1 | 8724642 | SNV | 1 | A | G | Homozygous   |
| NC_037640.1 | 8724755 | SNV | 1 | G | A | Heterozygous |
| NC_037640.1 | 8731228 | SNV | 1 | T | C | Homozygous   |
| NC_037640.1 | 8731268 | SNV | 1 | C | G | Heterozygous |
| NC_037640.1 | 8731282 | SNV | 1 | C | T | Heterozygous |

|             |         |     |   |   |   |              |
|-------------|---------|-----|---|---|---|--------------|
| NC_037640.1 | 8731306 | SNV | 1 | A | G | Heterozygous |
| NC_037640.1 | 8731329 | SNV | 1 | A | G | Homozygous   |
| NC_037640.1 | 8731381 | SNV | 1 | G | A | Heterozygous |
| NC_037640.1 | 8732580 | SNV | 1 | T | C | Homozygous   |
| NC_037640.1 | 8732609 | SNV | 1 | G | A | Homozygous   |
| NC_037640.1 | 8732755 | SNV | 1 | G | A | Homozygous   |
| NC_037640.1 | 8732778 | SNV | 1 | T | C | Homozygous   |
| NC_037640.1 | 8732903 | SNV | 1 | C | A | Homozygous   |
| NC_037640.1 | 8734526 | SNV | 1 | T | C | Homozygous   |
| NC_037640.1 | 8734539 | SNV | 1 | A | C | Homozygous   |
| NC_037640.1 | 8734543 | SNV | 1 | A | C | Homozygous   |
| NC_037640.1 | 8734547 | SNV | 1 | A | T | Homozygous   |
| NC_037640.1 | 8734555 | SNV | 1 | A | T | Homozygous   |
| NC_037640.1 | 8734561 | SNV | 1 | A | G | Homozygous   |
| NC_037640.1 | 8741891 | SNV | 1 | T | C | Homozygous   |
| NC_037640.1 | 8741914 | SNV | 1 | G | A | Homozygous   |
| NC_037640.1 | 8741919 | SNV | 1 | G | A | Homozygous   |
| NC_037640.1 | 8741997 | SNV | 1 | T | C | Homozygous   |
| NC_037640.1 | 8742041 | SNV | 1 | C | T | Homozygous   |
| NC_037640.1 | 8742048 | SNV | 1 | C | T | Heterozygous |
| NC_037640.1 | 8742055 | SNV | 1 | A | C | Homozygous   |
| NC_037640.1 | 8742057 | SNV | 1 | C | T | Homozygous   |
| NC_037640.1 | 8742068 | SNV | 1 | T | C | Homozygous   |
| NC_037640.1 | 8742085 | SNV | 1 | T | C | Homozygous   |
| NC_037640.1 | 8742088 | SNV | 1 | C | T | Homozygous   |
| NC_037640.1 | 8742099 | SNV | 1 | C | T | Heterozygous |
| NC_037640.1 | 8742115 | SNV | 1 | A | T | Heterozygous |
| NC_037640.1 | 8742227 | SNV | 1 | G | A | Homozygous   |
| NC_037640.1 | 8742332 | SNV | 1 | T | C | Homozygous   |
| NC_037640.1 | 8742513 | SNV | 1 | C | T | Heterozygous |
| NC_037640.1 | 8742540 | SNV | 1 | T | C | Heterozygous |
| NC_037640.1 | 8742684 | SNV | 1 | G | A | Homozygous   |
| NC_037640.1 | 8742753 | SNV | 1 | G | A | Homozygous   |
| NC_037640.1 | 8742813 | SNV | 1 | A | G | Heterozygous |
| NC_037640.1 | 8744538 | SNV | 1 | C | T | Heterozygous |
| NC_037640.1 | 8748949 | SNV | 1 | G | A | Heterozygous |
| NC_037640.1 | 8755921 | SNV | 1 | T | C | Heterozygous |
| NC_037640.1 | 8755926 | SNV | 1 | C | T | Heterozygous |
| NC_037640.1 | 8755930 | SNV | 1 | C | T | Heterozygous |
| NC_037640.1 | 8756111 | SNV | 1 | C | T | Heterozygous |
| NC_037640.1 | 8756432 | SNV | 1 | C | T | Heterozygous |
| NC_037640.1 | 8756500 | SNV | 1 | T | C | Heterozygous |
| NC_037640.1 | 8856702 | SNV | 1 | A | T | Homozygous   |
| NC_037640.1 | 8869457 | SNV | 1 | C | T | Homozygous   |
| NC_037640.1 | 8870373 | SNV | 1 | T | C | Homozygous   |
| NC_037640.1 | 8943468 | SNV | 1 | C | T | Heterozygous |
| NC_037640.1 | 8943511 | SNV | 1 | G | C | Heterozygous |
| NC_037640.1 | 8943514 | SNV | 1 | G | C | Heterozygous |
| NC_037640.1 | 8943595 | SNV | 1 | C | T | Heterozygous |
| NC_037640.1 | 8943633 | SNV | 1 | T | C | Homozygous   |
| NC_037640.1 | 8943701 | SNV | 1 | C | T | Homozygous   |

|             |         |     |   |   |   |              |
|-------------|---------|-----|---|---|---|--------------|
| NC_037640.1 | 8944020 | SNV | 1 | A | G | Heterozygous |
| NC_037640.1 | 8944061 | SNV | 1 | A | G | Heterozygous |
| NC_037640.1 | 8944065 | SNV | 1 | A | G | Homozygous   |
| NC_037640.1 | 8946515 | SNV | 1 | G | A | Homozygous   |
| NC_037640.1 | 8946662 | SNV | 1 | T | C | Homozygous   |
| NC_037640.1 | 8946754 | SNV | 1 | C | T | Heterozygous |
| NC_037640.1 | 8946831 | SNV | 1 | T | A | Heterozygous |
| NC_037640.1 | 8947835 | SNV | 1 | T | C | Heterozygous |
| NC_037640.1 | 8947860 | SNV | 1 | C | G | Homozygous   |
| NC_037640.1 | 8948040 | SNV | 1 | T | A | Homozygous   |
| NC_037640.1 | 8949012 | SNV | 1 | G | A | Homozygous   |
| NC_037640.1 | 8949024 | SNV | 1 | T | C | Heterozygous |
| NC_037640.1 | 8949694 | SNV | 1 | T | C | Homozygous   |
| NC_037640.1 | 8953690 | SNV | 1 | A | G | Homozygous   |
| NC_037640.1 | 8953793 | SNV | 1 | A | G | Homozygous   |
| NC_037640.1 | 8953920 | SNV | 1 | T | C | Heterozygous |
| NC_037640.1 | 8953991 | SNV | 1 | A | G | Homozygous   |
| NC_037640.1 | 8954310 | SNV | 1 | G | A | Homozygous   |
| NC_037640.1 | 8968465 | SNV | 1 | T | C | Homozygous   |
| NC_037640.1 | 8968805 | SNV | 1 | C | T | Heterozygous |
| NC_037640.1 | 8968933 | SNV | 1 | T | C | Homozygous   |
| NC_037640.1 | 8969005 | SNV | 1 | C | T | Heterozygous |
| NC_037640.1 | 8969049 | SNV | 1 | C | T | Heterozygous |
| NC_037640.1 | 8969199 | SNV | 1 | A | G | Heterozygous |
| NC_037640.1 | 8969274 | SNV | 1 | G | A | Homozygous   |
| NC_037640.1 | 8969370 | SNV | 1 | A | G | Homozygous   |
| NC_037640.1 | 8969747 | SNV | 1 | T | C | Homozygous   |
| NC_037640.1 | 8969821 | SNV | 1 | A | G | Homozygous   |
| NC_037640.1 | 8969943 | SNV | 1 | G | C | Homozygous   |
| NC_037640.1 | 8970313 | SNV | 1 | T | C | Homozygous   |
| NC_037640.1 | 8983203 | SNV | 1 | T | G | Homozygous   |
| NC_037640.1 | 8983324 | SNV | 1 | A | G | Heterozygous |
| NC_037640.1 | 8983479 | SNV | 1 | T | C | Heterozygous |
| NC_037640.1 | 8983485 | SNV | 1 | T | C | Heterozygous |
| NC_037640.1 | 8985871 | SNV | 1 | A | G | Heterozygous |
| NC_037640.1 | 8986129 | SNV | 1 | T | C | Homozygous   |
| NC_037640.1 | 8986495 | SNV | 1 | A | G | Homozygous   |
| NC_037640.1 | 8986625 | SNV | 1 | C | T | Homozygous   |
| NC_037640.1 | 9001081 | SNV | 1 | C | G | Heterozygous |
| NC_037640.1 | 9001110 | SNV | 1 | G | A | Heterozygous |
| NC_037640.1 | 9001214 | SNV | 1 | A | G | Heterozygous |
| NC_037640.1 | 9030447 | SNV | 1 | G | A | Homozygous   |
| NC_037640.1 | 9043675 | SNV | 1 | T | G | Homozygous   |
| NC_037640.1 | 9047031 | SNV | 1 | T | G | Homozygous   |
| NC_037640.1 | 9047318 | SNV | 1 | A | G | Heterozygous |
| NC_037640.1 | 9047468 | SNV | 1 | A | G | Homozygous   |
| NC_037640.1 | 9047491 | SNV | 1 | C | A | Homozygous   |
| NC_037640.1 | 9082723 | SNV | 1 | A | G | Heterozygous |
| NC_037640.1 | 9082744 | SNV | 1 | T | C | Heterozygous |
| NC_037640.1 | 9090898 | SNV | 1 | G | A | Heterozygous |
| NC_037640.1 | 9101950 | SNV | 1 | T | C | Homozygous   |

|             |         |     |   |   |   |              |
|-------------|---------|-----|---|---|---|--------------|
| NC_037640.1 | 9102000 | SNV | 1 | G | A | Homozygous   |
| NC_037640.1 | 9102062 | SNV | 1 | A | G | Homozygous   |
| NC_037640.1 | 9102097 | SNV | 1 | C | T | Heterozygous |
| NC_037640.1 | 9106820 | SNV | 1 | A | T | Homozygous   |
| NC_037640.1 | 9109675 | SNV | 1 | A | G | Homozygous   |
| NC_037640.1 | 9111371 | SNV | 1 | A | G | Homozygous   |
| NC_037640.1 | 9111392 | SNV | 1 | G | A | Homozygous   |
| NC_037640.1 | 9140225 | SNV | 1 | G | C | Homozygous   |
| NC_037640.1 | 9144210 | SNV | 1 | C | A | Homozygous   |
| NC_037640.1 | 9144212 | SNV | 1 | A | C | Homozygous   |
| NC_037640.1 | 9144231 | SNV | 1 | T | C | Heterozygous |
| NC_037640.1 | 9144247 | SNV | 1 | T | C | Heterozygous |
| NC_037640.1 | 9144388 | SNV | 1 | T | C | Homozygous   |
| NC_037640.1 | 9149215 | SNV | 1 | T | C | Homozygous   |
| NC_037640.1 | 9149270 | SNV | 1 | G | A | Heterozygous |
| NC_037640.1 | 9149272 | SNV | 1 | T | G | Heterozygous |
| NC_037640.1 | 9149374 | SNV | 1 | C | T | Homozygous   |
| NC_037640.1 | 9149452 | SNV | 1 | G | C | Homozygous   |
| NC_037640.1 | 9149477 | SNV | 1 | G | A | Homozygous   |
| NC_037640.1 | 9153102 | SNV | 1 | G | C | Homozygous   |
| NC_037640.1 | 9153146 | SNV | 1 | G | C | Heterozygous |
| NC_037640.1 | 9153225 | SNV | 1 | T | C | Homozygous   |
| NC_037640.1 | 9153274 | SNV | 1 | A | G | Homozygous   |
| NC_037640.1 | 9153282 | SNV | 1 | T | C | Homozygous   |
| NC_037640.1 | 9153305 | SNV | 1 | C | T | Homozygous   |
| NC_037640.1 | 9153323 | SNV | 1 | A | G | Homozygous   |
| NC_037640.1 | 9158704 | SNV | 1 | T | C | Homozygous   |
| NC_037640.1 | 9158723 | SNV | 1 | G | A | Homozygous   |
| NC_037640.1 | 9158745 | SNV | 1 | T | A | Homozygous   |
| NC_037640.1 | 9158820 | SNV | 1 | A | T | Homozygous   |
| NC_037640.1 | 9158828 | SNV | 1 | G | T | Heterozygous |
| NC_037640.1 | 9158850 | SNV | 1 | A | T | Homozygous   |
| NC_037640.1 | 9158921 | SNV | 1 | C | A | Homozygous   |
| NC_037640.1 | 9158927 | SNV | 1 | T | A | Homozygous   |
| NC_037640.1 | 9158934 | SNV | 1 | T | A | Homozygous   |
| NC_037640.1 | 9158936 | SNV | 1 | T | A | Homozygous   |
| NC_037640.1 | 9161837 | SNV | 1 | G | C | Heterozygous |
| NC_037640.1 | 9172325 | SNV | 1 | G | A | Homozygous   |
| NC_037640.1 | 9177947 | SNV | 1 | G | A | Heterozygous |
| NC_037640.1 | 9189836 | SNV | 1 | C | T | Heterozygous |
| NC_037640.1 | 9189947 | SNV | 1 | C | A | Heterozygous |
| NC_037640.1 | 9194740 | SNV | 1 | T | C | Heterozygous |
| NC_037640.1 | 9194756 | SNV | 1 | C | A | Heterozygous |
| NC_037640.1 | 9205254 | SNV | 1 | C | A | Heterozygous |
| NC_037640.1 | 9205261 | SNV | 1 | A | G | Heterozygous |
| NC_037640.1 | 9205293 | SNV | 1 | A | C | Homozygous   |
| NC_037640.1 | 9205299 | SNV | 1 | T | C | Homozygous   |
| NC_037640.1 | 9205304 | SNV | 1 | T | C | Homozygous   |
| NC_037640.1 | 9205325 | SNV | 1 | G | A | Homozygous   |
| NC_037640.1 | 9205340 | SNV | 1 | T | C | Homozygous   |
| NC_037640.1 | 9206283 | SNV | 1 | C | T | Heterozygous |

|             |         |     |   |   |   |              |
|-------------|---------|-----|---|---|---|--------------|
| NC_037640.1 | 9206287 | SNV | 1 | C | T | Heterozygous |
| NC_037640.1 | 9207454 | SNV | 1 | G | C | Homozygous   |
| NC_037640.1 | 9207478 | SNV | 1 | T | C | Homozygous   |
| NC_037640.1 | 9207928 | SNV | 1 | G | A | Homozygous   |
| NC_037640.1 | 9209145 | SNV | 1 | G | A | Homozygous   |
| NC_037640.1 | 9209849 | SNV | 1 | T | C | Homozygous   |
| NC_037640.1 | 9213905 | SNV | 1 | C | A | Heterozygous |
| NC_037640.1 | 9214877 | SNV | 1 | A | G | Heterozygous |
| NC_037640.1 | 9214885 | SNV | 1 | C | T | Heterozygous |
| NC_037640.1 | 9215205 | SNV | 1 | C | T | Homozygous   |
| NC_037640.1 | 9216462 | SNV | 1 | G | A | Heterozygous |
| NC_037640.1 | 9216686 | SNV | 1 | G | A | Homozygous   |
| NC_037640.1 | 9216689 | SNV | 1 | G | A | Homozygous   |
| NC_037640.1 | 9216996 | SNV | 1 | A | G | Homozygous   |
| NC_037640.1 | 9217181 | SNV | 1 | C | T | Homozygous   |
| NC_037640.1 | 9217912 | SNV | 1 | C | T | Heterozygous |
| NC_037640.1 | 9218049 | SNV | 1 | A | T | Heterozygous |
| NC_037640.1 | 9218094 | SNV | 1 | A | T | Heterozygous |
| NC_037640.1 | 9218452 | SNV | 1 | G | T | Heterozygous |
| NC_037640.1 | 9218508 | SNV | 1 | A | G | Homozygous   |
| NC_037640.1 | 9218526 | SNV | 1 | A | G | Homozygous   |
| NC_037640.1 | 9224342 | SNV | 1 | A | C | Heterozygous |
| NC_037640.1 | 9224344 | SNV | 1 | A | T | Heterozygous |
| NC_037640.1 | 9224354 | SNV | 1 | T | C | Homozygous   |
| NC_037640.1 | 9224359 | SNV | 1 | G | T | Heterozygous |
| NC_037640.1 | 9224363 | SNV | 1 | C | T | Heterozygous |
| NC_037640.1 | 9224365 | SNV | 1 | T | C | Heterozygous |
| NC_037640.1 | 9227732 | SNV | 1 | C | T | Heterozygous |
| NC_037640.1 | 9227749 | SNV | 1 | A | T | Homozygous   |
| NC_037640.1 | 9227778 | SNV | 1 | C | T | Heterozygous |
| NC_037640.1 | 9231575 | SNV | 1 | T | C | Homozygous   |
| NC_037640.1 | 9231577 | SNV | 1 | C | T | Heterozygous |
| NC_037640.1 | 9231630 | SNV | 1 | T | C | Homozygous   |
| NC_037640.1 | 9235154 | SNV | 1 | A | G | Heterozygous |
| NC_037640.1 | 9235162 | SNV | 1 | A | G | Homozygous   |
| NC_037640.1 | 9235185 | SNV | 1 | A | G | Heterozygous |
| NC_037640.1 | 9249053 | SNV | 1 | T | A | Homozygous   |
| NC_037640.1 | 9253087 | SNV | 1 | G | A | Heterozygous |
| NC_037640.1 | 9253092 | SNV | 1 | G | A | Heterozygous |
| NC_037640.1 | 9258931 | SNV | 1 | C | T | Homozygous   |
| NC_037640.1 | 9259499 | SNV | 1 | C | T | Heterozygous |
| NC_037640.1 | 9261167 | SNV | 1 | C | A | Homozygous   |
| NC_037640.1 | 9261243 | SNV | 1 | A | G | Homozygous   |
| NC_037640.1 | 9262011 | SNV | 1 | T | C | Homozygous   |
| NC_037640.1 | 9262137 | SNV | 1 | G | T | Homozygous   |
| NC_037640.1 | 9262143 | SNV | 1 | G | C | Homozygous   |
| NC_037640.1 | 9264611 | SNV | 1 | T | C | Homozygous   |
| NC_037640.1 | 9264629 | SNV | 1 | C | A | Homozygous   |
| NC_037640.1 | 9264633 | SNV | 1 | C | G | Heterozygous |
| NC_037640.1 | 9265337 | SNV | 1 | T | C | Homozygous   |
| NC_037640.1 | 9265339 | SNV | 1 | T | C | Homozygous   |

|             |         |     |   |   |   |              |
|-------------|---------|-----|---|---|---|--------------|
| NC_037640.1 | 9265353 | SNV | 1 | A | G | Homozygous   |
| NC_037640.1 | 9265369 | SNV | 1 | A | G | Homozygous   |
| NC_037640.1 | 9265379 | SNV | 1 | A | G | Heterozygous |
| NC_037640.1 | 9265457 | SNV | 1 | T | C | Homozygous   |
| NC_037640.1 | 9265523 | SNV | 1 | C | T | Homozygous   |
| NC_037640.1 | 9265538 | SNV | 1 | T | C | Homozygous   |
| NC_037640.1 | 9265577 | SNV | 1 | T | C | Homozygous   |
| NC_037640.1 | 9265580 | SNV | 1 | C | T | Homozygous   |
| NC_037640.1 | 9265669 | SNV | 1 | G | A | Heterozygous |
| NC_037640.1 | 9265678 | SNV | 1 | G | A | Heterozygous |
| NC_037640.1 | 9265748 | SNV | 1 | A | G | Homozygous   |
| NC_037640.1 | 9265946 | SNV | 1 | G | A | Homozygous   |
| NC_037640.1 | 9266227 | SNV | 1 | T | C | Homozygous   |
| NC_037640.1 | 9266263 | SNV | 1 | T | C | Heterozygous |
| NC_037640.1 | 9266278 | SNV | 1 | T | C | Homozygous   |
| NC_037640.1 | 9269863 | SNV | 1 | T | C | Homozygous   |
| NC_037640.1 | 9269935 | SNV | 1 | G | A | Homozygous   |
| NC_037640.1 | 9270013 | SNV | 1 | T | C | Homozygous   |
| NC_037640.1 | 9270047 | SNV | 1 | T | A | Homozygous   |
| NC_037640.1 | 9272576 | SNV | 1 | G | A | Homozygous   |
| NC_037640.1 | 9272650 | SNV | 1 | T | C | Homozygous   |
| NC_037640.1 | 9272947 | SNV | 1 | C | T | Heterozygous |
| NC_037640.1 | 9272958 | SNV | 1 | T | C | Homozygous   |
| NC_037640.1 | 9273054 | SNV | 1 | A | G | Homozygous   |
| NC_037640.1 | 9273066 | SNV | 1 | A | G | Heterozygous |
| NC_037640.1 | 9273346 | SNV | 1 | G | A | Heterozygous |
| NC_037640.1 | 9273357 | SNV | 1 | A | G | Homozygous   |
| NC_037640.1 | 9273910 | SNV | 1 | G | A | Heterozygous |
| NC_037640.1 | 9273936 | SNV | 1 | G | A | Homozygous   |
| NC_037640.1 | 9274000 | SNV | 1 | A | G | Homozygous   |
| NC_037640.1 | 9274077 | SNV | 1 | C | T | Heterozygous |
| NC_037640.1 | 9274098 | SNV | 1 | A | G | Homozygous   |
| NC_037640.1 | 9274105 | SNV | 1 | A | G | Homozygous   |
| NC_037640.1 | 9274117 | SNV | 1 | T | C | Homozygous   |
| NC_037640.1 | 9274200 | SNV | 1 | G | A | Homozygous   |
| NC_037640.1 | 9274220 | SNV | 1 | T | A | Homozygous   |
| NC_037640.1 | 9274242 | SNV | 1 | A | G | Homozygous   |
| NC_037640.1 | 9274258 | SNV | 1 | G | C | Homozygous   |
| NC_037640.1 | 9274515 | SNV | 1 | T | C | Homozygous   |
| NC_037640.1 | 9277232 | SNV | 1 | G | A | Heterozygous |
| NC_037640.1 | 9277364 | SNV | 1 | G | T | Heterozygous |
| NC_037640.1 | 9277371 | SNV | 1 | G | T | Heterozygous |
| NC_037640.1 | 9277377 | SNV | 1 | A | T | Heterozygous |
| NC_037640.1 | 9277782 | SNV | 1 | A | G | Homozygous   |
| NC_037640.1 | 9277969 | SNV | 1 | A | G | Heterozygous |
| NC_037640.1 | 9278437 | SNV | 1 | A | C | Homozygous   |
| NC_037640.1 | 9278532 | SNV | 1 | G | A | Homozygous   |
| NC_037640.1 | 9278596 | SNV | 1 | C | G | Homozygous   |
| NC_037640.1 | 9278607 | SNV | 1 | T | C | Homozygous   |
| NC_037640.1 | 9278624 | SNV | 1 | G | A | Heterozygous |
| NC_037640.1 | 9278678 | SNV | 1 | A | C | Heterozygous |

|             |         |     |   |   |   |              |
|-------------|---------|-----|---|---|---|--------------|
| NC_037640.1 | 9279133 | SNV | 1 | A | G | Homozygous   |
| NC_037640.1 | 9279619 | SNV | 1 | A | G | Heterozygous |
| NC_037640.1 | 9279739 | SNV | 1 | C | T | Heterozygous |
| NC_037640.1 | 9279994 | SNV | 1 | T | C | Homozygous   |
| NC_037640.1 | 9280202 | SNV | 1 | A | G | Homozygous   |
| NC_037640.1 | 9280271 | SNV | 1 | T | G | Homozygous   |
| NC_037640.1 | 9280305 | SNV | 1 | G | A | Homozygous   |
| NC_037640.1 | 9280644 | SNV | 1 | G | A | Heterozygous |
| NC_037640.1 | 9280691 | SNV | 1 | T | C | Heterozygous |
| NC_037640.1 | 9281059 | SNV | 1 | T | C | Heterozygous |
| NC_037640.1 | 9281376 | SNV | 1 | A | C | Homozygous   |
| NC_037640.1 | 9281634 | SNV | 1 | A | G | Homozygous   |
| NC_037640.1 | 9281667 | SNV | 1 | G | A | Heterozygous |
| NC_037640.1 | 9281670 | SNV | 1 | C | T | Heterozygous |
| NC_037640.1 | 9281706 | SNV | 1 | A | T | Heterozygous |
| NC_037640.1 | 9281733 | SNV | 1 | C | T | Heterozygous |
| NC_037640.1 | 9281964 | SNV | 1 | A | T | Homozygous   |
| NC_037640.1 | 9283102 | SNV | 1 | A | C | Homozygous   |
| NC_037640.1 | 9283132 | SNV | 1 | C | T | Homozygous   |
| NC_037640.1 | 9287307 | SNV | 1 | A | G | Heterozygous |
| NC_037640.1 | 9293517 | SNV | 1 | C | G | Homozygous   |
| NC_037640.1 | 9310896 | SNV | 1 | T | C | Heterozygous |
| NC_037640.1 | 9310903 | SNV | 1 | A | T | Homozygous   |
| NC_037640.1 | 9310929 | SNV | 1 | A | G | Homozygous   |
| NC_037640.1 | 9310962 | SNV | 1 | A | G | Homozygous   |
| NC_037640.1 | 9310965 | SNV | 1 | C | T | Heterozygous |
| NC_037640.1 | 9310986 | SNV | 1 | C | T | Homozygous   |
| NC_037640.1 | 9310990 | SNV | 1 | C | T | Homozygous   |
| NC_037640.1 | 9311022 | SNV | 1 | C | T | Homozygous   |
| NC_037640.1 | 9311058 | SNV | 1 | G | T | Homozygous   |
| NC_037640.1 | 9311070 | SNV | 1 | G | C | Homozygous   |
| NC_037640.1 | 9311144 | SNV | 1 | C | T | Homozygous   |
| NC_037640.1 | 9311179 | SNV | 1 | T | A | Heterozygous |
| NC_037640.1 | 9311844 | SNV | 1 | C | T | Heterozygous |
| NC_037640.1 | 9315040 | SNV | 1 | C | T | Heterozygous |
| NC_037640.1 | 9315069 | SNV | 1 | G | A | Heterozygous |
| NC_037640.1 | 9315080 | SNV | 1 | T | C | Homozygous   |
| NC_037640.1 | 9315085 | SNV | 1 | T | C | Homozygous   |
| NC_037640.1 | 9315294 | SNV | 1 | T | C | Heterozygous |
| NC_037640.1 | 9315896 | SNV | 1 | G | A | Heterozygous |
| NC_037640.1 | 9315962 | SNV | 1 | A | G | Homozygous   |
| NC_037640.1 | 9315964 | SNV | 1 | A | G | Homozygous   |
| NC_037640.1 | 9318041 | SNV | 1 | C | T | Homozygous   |
| NC_037640.1 | 9318367 | SNV | 1 | G | A | Heterozygous |
| NC_037640.1 | 9318377 | SNV | 1 | A | G | Heterozygous |
| NC_037640.1 | 9318421 | SNV | 1 | G | C | Homozygous   |
| NC_037640.1 | 9318469 | SNV | 1 | T | C | Heterozygous |
| NC_037640.1 | 9318518 | SNV | 1 | T | C | Homozygous   |
| NC_037640.1 | 9318526 | SNV | 1 | C | T | Homozygous   |
| NC_037640.1 | 9321095 | SNV | 1 | G | A | Heterozygous |
| NC_037640.1 | 9321236 | SNV | 1 | G | A | Heterozygous |

|             |         |     |   |   |   |              |
|-------------|---------|-----|---|---|---|--------------|
| NC_037640.1 | 9324622 | SNV | 1 | C | T | Heterozygous |
| NC_037640.1 | 9331213 | SNV | 1 | C | G | Homozygous   |
| NC_037640.1 | 9331243 | SNV | 1 | A | T | Homozygous   |
| NC_037640.1 | 9331835 | SNV | 1 | G | A | Homozygous   |
| NC_037640.1 | 9331838 | SNV | 1 | G | A | Homozygous   |
| NC_037640.1 | 9331844 | SNV | 1 | G | A | Homozygous   |
| NC_037640.1 | 9331847 | SNV | 1 | G | A | Homozygous   |
| NC_037640.1 | 9331850 | SNV | 1 | G | A | Homozygous   |
| NC_037640.1 | 9331852 | SNV | 1 | G | A | Homozygous   |
| NC_037640.1 | 9331862 | SNV | 1 | G | A | Homozygous   |
| NC_037640.1 | 9332295 | SNV | 1 | G | A | Heterozygous |
| NC_037640.1 | 9332298 | SNV | 1 | A | C | Heterozygous |
| NC_037640.1 | 9335527 | SNV | 1 | C | T | Homozygous   |
| NC_037640.1 | 9335646 | SNV | 1 | T | C | Homozygous   |
| NC_037640.1 | 9335749 | SNV | 1 | C | G | Heterozygous |
| NC_037640.1 | 9335797 | SNV | 1 | C | T | Heterozygous |
| NC_037640.1 | 9335894 | SNV | 1 | C | T | Heterozygous |
| NC_037640.1 | 9336659 | SNV | 1 | T | C | Heterozygous |
| NC_037640.1 | 9337067 | SNV | 1 | A | G | Heterozygous |
| NC_037640.1 | 9337069 | SNV | 1 | A | G | Heterozygous |
| NC_037640.1 | 9337077 | SNV | 1 | G | A | Homozygous   |
| NC_037640.1 | 9337723 | SNV | 1 | G | A | Homozygous   |
| NC_037640.1 | 9337740 | SNV | 1 | A | G | Homozygous   |
| NC_037640.1 | 9337765 | SNV | 1 | A | C | Homozygous   |
| NC_037640.1 | 9337822 | SNV | 1 | C | T | Homozygous   |
| NC_037640.1 | 9337857 | SNV | 1 | T | C | Homozygous   |
| NC_037640.1 | 9347138 | SNV | 1 | A | G | Homozygous   |
| NC_037640.1 | 9348180 | SNV | 1 | C | G | Heterozygous |
| NC_037640.1 | 9348501 | SNV | 1 | A | C | Homozygous   |
| NC_037640.1 | 9348748 | SNV | 1 | A | G | Homozygous   |
| NC_037640.1 | 9348754 | SNV | 1 | C | T | Homozygous   |
| NC_037640.1 | 9348862 | SNV | 1 | A | C | Homozygous   |
| NC_037640.1 | 9348913 | SNV | 1 | T | C | Heterozygous |
| NC_037640.1 | 9349018 | SNV | 1 | A | G | Heterozygous |
| NC_037640.1 | 9349230 | SNV | 1 | C | T | Homozygous   |
| NC_037640.1 | 9349423 | SNV | 1 | A | G | Homozygous   |
| NC_037640.1 | 9349540 | SNV | 1 | C | T | Homozygous   |
| NC_037640.1 | 9350211 | SNV | 1 | A | G | Homozygous   |
| NC_037640.1 | 9350240 | SNV | 1 | G | A | Homozygous   |
| NC_037640.1 | 9350256 | SNV | 1 | G | A | Homozygous   |
| NC_037640.1 | 9351124 | SNV | 1 | G | C | Heterozygous |
| NC_037640.1 | 9351130 | SNV | 1 | C | A | Homozygous   |
| NC_037640.1 | 9351144 | SNV | 1 | C | A | Heterozygous |
| NC_037640.1 | 9351604 | SNV | 1 | G | A | Heterozygous |
| NC_037640.1 | 9351694 | SNV | 1 | C | T | Heterozygous |
| NC_037640.1 | 9351769 | SNV | 1 | C | G | Homozygous   |
| NC_037640.1 | 9352221 | SNV | 1 | C | T | Homozygous   |
| NC_037640.1 | 9353359 | SNV | 1 | C | T | Heterozygous |
| NC_037640.1 | 9353529 | SNV | 1 | A | G | Homozygous   |
| NC_037640.1 | 9353592 | SNV | 1 | A | G | Homozygous   |
| NC_037640.1 | 9354295 | SNV | 1 | A | G | Heterozygous |



|             |         |     |   |   |   |              |
|-------------|---------|-----|---|---|---|--------------|
| NC_037640.1 | 9354298 | SNV | 1 | G | C | Heterozygous |
| NC_037640.1 | 9354492 | SNV | 1 | G | C | Homozygous   |
| NC_037640.1 | 9355991 | SNV | 1 | T | C | Heterozygous |
| NC_037640.1 | 9356073 | SNV | 1 | C | A | Homozygous   |
| NC_037640.1 | 9357257 | SNV | 1 | A | C | Homozygous   |
| NC_037640.1 | 9357268 | SNV | 1 | A | C | Homozygous   |
| NC_037640.1 | 9357270 | SNV | 1 | A | G | Homozygous   |
| NC_037640.1 | 9359642 | SNV | 1 | T | C | Heterozygous |
| NC_037640.1 | 9359649 | SNV | 1 | A | G | Homozygous   |
| NC_037640.1 | 9359652 | SNV | 1 | T | C | Heterozygous |
| NC_037640.1 | 9359654 | SNV | 1 | T | C | Heterozygous |
| NC_037640.1 | 9359656 | SNV | 1 | T | C | Heterozygous |
| NC_037640.1 | 9359661 | SNV | 1 | A | G | Heterozygous |
| NC_037640.1 | 9359663 | SNV | 1 | A | G | Heterozygous |
| NC_037640.1 | 9359665 | SNV | 1 | A | G | Heterozygous |
| NC_037640.1 | 9359667 | SNV | 1 | A | G | Heterozygous |
| NC_037640.1 | 9359672 | SNV | 1 | T | C | Homozygous   |
| NC_037640.1 | 9359679 | SNV | 1 | A | G | Heterozygous |
| NC_037640.1 | 9361827 | SNV | 1 | T | C | Homozygous   |
| NC_037640.1 | 9370235 | SNV | 1 | C | T | Heterozygous |
| NC_037640.1 | 9379455 | SNV | 1 | T | C | Homozygous   |
| NC_037640.1 | 9379978 | SNV | 1 | T | A | Homozygous   |
| NC_037640.1 | 9379985 | SNV | 1 | A | T | Homozygous   |
| NC_037640.1 | 9384762 | SNV | 1 | G | A | Heterozygous |
| NC_037640.1 | 9384776 | SNV | 1 | T | C | Heterozygous |
| NC_037640.1 | 9389912 | SNV | 1 | C | T | Heterozygous |
| NC_037640.1 | 9389988 | SNV | 1 | G | A | Homozygous   |
| NC_037640.1 | 9391632 | SNV | 1 | G | A | Homozygous   |
| NC_037640.1 | 9391653 | SNV | 1 | G | A | Heterozygous |
| NC_037640.1 | 9391791 | SNV | 1 | G | A | Heterozygous |
| NC_037640.1 | 9391982 | SNV | 1 | C | G | Heterozygous |
| NC_037640.1 | 9415243 | SNV | 1 | A | G | Heterozygous |
| NC_037640.1 | 9415383 | SNV | 1 | G | A | Heterozygous |
| NC_037640.1 | 9415421 | SNV | 1 | A | G | Homozygous   |
| NC_037640.1 | 9424538 | SNV | 1 | G | A | Homozygous   |
| NC_037640.1 | 9432211 | SNV | 1 | G | C | Homozygous   |
| NC_037640.1 | 9432224 | SNV | 1 | G | A | Heterozygous |
| NC_037640.1 | 9434327 | SNV | 1 | T | C | Homozygous   |
| NC_037640.1 | 9437444 | SNV | 1 | G | A | Heterozygous |
| NC_037640.1 | 9437448 | SNV | 1 | G | A | Heterozygous |
| NC_037640.1 | 9437564 | SNV | 1 | T | G | Heterozygous |
| NC_037640.1 | 9438102 | SNV | 1 | A | G | Heterozygous |
| NC_037640.1 | 9442130 | SNV | 1 | C | T | Heterozygous |
| NC_037640.1 | 9442663 | SNV | 1 | G | A | Homozygous   |
| NC_037640.1 | 9443153 | SNV | 1 | G | T | Homozygous   |
| NC_037640.1 | 9443160 | SNV | 1 | T | G | Homozygous   |
| NC_037640.1 | 9443163 | SNV | 1 | C | A | Homozygous   |
| NC_037640.1 | 9443281 | SNV | 1 | G | A | Homozygous   |
| NC_037640.1 | 9443353 | SNV | 1 | A | G | Homozygous   |
| NC_037640.1 | 9443428 | SNV | 1 | G | A | Heterozygous |
| NC_037640.1 | 9443956 | SNV | 1 | T | C | Homozygous   |

|             |         |     |   |   |   |              |
|-------------|---------|-----|---|---|---|--------------|
| NC_037640.1 | 9444859 | SNV | 1 | A | G | Homozygous   |
| NC_037640.1 | 9448295 | SNV | 1 | A | G | Homozygous   |
| NC_037640.1 | 9449215 | SNV | 1 | T | C | Homozygous   |
| NC_037640.1 | 9450734 | SNV | 1 | C | T | Heterozygous |
| NC_037640.1 | 9450741 | SNV | 1 | C | T | Heterozygous |
| NC_037640.1 | 9450801 | SNV | 1 | A | G | Homozygous   |
| NC_037640.1 | 9450818 | SNV | 1 | A | G | Heterozygous |
| NC_037640.1 | 9450987 | SNV | 1 | G | C | Heterozygous |
| NC_037640.1 | 9451485 | SNV | 1 | T | C | Heterozygous |
| NC_037640.1 | 9451558 | SNV | 1 | G | A | Homozygous   |
| NC_037640.1 | 9451583 | SNV | 1 | C | A | Heterozygous |
| NC_037640.1 | 9451945 | SNV | 1 | G | A | Heterozygous |
| NC_037640.1 | 9458384 | SNV | 1 | T | A | Heterozygous |
| NC_037640.1 | 9458868 | SNV | 1 | G | A | Heterozygous |
| NC_037640.1 | 9459025 | SNV | 1 | C | T | Homozygous   |
| NC_037640.1 | 9463274 | SNV | 1 | G | A | Homozygous   |
| NC_037640.1 | 9470043 | SNV | 1 | C | G | Homozygous   |
| NC_037640.1 | 9473275 | SNV | 1 | T | C | Homozygous   |
| NC_037640.1 | 9475175 | SNV | 1 | G | A | Heterozygous |
| NC_037640.1 | 9475213 | SNV | 1 | C | T | Homozygous   |
| NC_037640.1 | 9481161 | SNV | 1 | C | T | Heterozygous |
| NC_037640.1 | 9481635 | SNV | 1 | C | T | Heterozygous |
| NC_037640.1 | 9481652 | SNV | 1 | C | T | Heterozygous |
| NC_037640.1 | 9499625 | SNV | 1 | C | T | Heterozygous |
| NC_037640.1 | 9499627 | SNV | 1 | G | T | Heterozygous |
| NC_037640.1 | 9499631 | SNV | 1 | C | T | Heterozygous |
| NC_037640.1 | 9509031 | SNV | 1 | C | T | Heterozygous |
| NC_037640.1 | 9509143 | SNV | 1 | T | C | Homozygous   |
| NC_037640.1 | 9517748 | SNV | 1 | C | T | Heterozygous |
| NC_037640.1 | 9517776 | SNV | 1 | C | T | Homozygous   |
| NC_037640.1 | 9517869 | SNV | 1 | A | C | Heterozygous |
| NC_037640.1 | 9517872 | SNV | 1 | C | A | Homozygous   |
| NC_037640.1 | 9518044 | SNV | 1 | A | G | Homozygous   |
| NC_037640.1 | 9518149 | SNV | 1 | A | T | Heterozygous |
| NC_037640.1 | 9518261 | SNV | 1 | G | A | Heterozygous |
| NC_037640.1 | 9518505 | SNV | 1 | A | C | Homozygous   |
| NC_037640.1 | 9518522 | SNV | 1 | C | G | Homozygous   |
| NC_037640.1 | 9518571 | SNV | 1 | C | G | Homozygous   |
| NC_037640.1 | 9698658 | SNV | 1 | C | T | Heterozygous |
| NC_037640.1 | 9698664 | SNV | 1 | T | C | Homozygous   |
| NC_037640.1 | 9698692 | SNV | 1 | A | G | Homozygous   |
| NC_037640.1 | 9698846 | SNV | 1 | T | C | Homozygous   |
| NC_037640.1 | 9705951 | SNV | 1 | G | T | Heterozygous |
| NC_037640.1 | 9705954 | SNV | 1 | C | T | Heterozygous |
| NC_037640.1 | 9705958 | SNV | 1 | C | T | Heterozygous |
| NC_037640.1 | 9705962 | SNV | 1 | C | T | Heterozygous |
| NC_037640.1 | 9705968 | SNV | 1 | C | T | Heterozygous |
| NC_037640.1 | 9705972 | SNV | 1 | C | T | Heterozygous |
| NC_037640.1 | 9705976 | SNV | 1 | C | T | Heterozygous |
| NC_037640.1 | 9709128 | SNV | 1 | T | G | Heterozygous |
| NC_037640.1 | 9709130 | SNV | 1 | T | G | Heterozygous |

|             |         |     |   |   |   |              |
|-------------|---------|-----|---|---|---|--------------|
| NC_037640.1 | 9709137 | SNV | 1 | C | A | Heterozygous |
| NC_037640.1 | 9709145 | SNV | 1 | C | T | Heterozygous |
| NC_037640.1 | 9711628 | SNV | 1 | T | C | Heterozygous |
| NC_037640.1 | 9711780 | SNV | 1 | A | G | Heterozygous |
| NC_037640.1 | 9711925 | SNV | 1 | A | G | Homozygous   |
| NC_037640.1 | 9711943 | SNV | 1 | G | C | Homozygous   |
| NC_037640.1 | 9712057 | SNV | 1 | A | G | Homozygous   |
| NC_037640.1 | 9712190 | SNV | 1 | A | G | Homozygous   |
| NC_037640.1 | 9715308 | SNV | 1 | T | C | Homozygous   |
| NC_037640.1 | 9715320 | SNV | 1 | C | T | Homozygous   |
| NC_037640.1 | 9715385 | SNV | 1 | T | C | Homozygous   |
| NC_037640.1 | 9716819 | SNV | 1 | A | T | Homozygous   |
| NC_037640.1 | 9716841 | SNV | 1 | T | C | Heterozygous |
| NC_037640.1 | 9716844 | SNV | 1 | T | C | Heterozygous |
| NC_037640.1 | 9729963 | SNV | 1 | T | G | Homozygous   |
| NC_037640.1 | 9729965 | SNV | 1 | G | A | Homozygous   |
| NC_037640.1 | 9731436 | SNV | 1 | T | C | Homozygous   |
| NC_037640.1 | 9731480 | SNV | 1 | C | G | Homozygous   |
| NC_037640.1 | 9731512 | SNV | 1 | T | C | Homozygous   |
| NC_037640.1 | 9745588 | SNV | 1 | T | G | Homozygous   |
| NC_037640.1 | 9745592 | SNV | 1 | T | A | Homozygous   |
| NC_037640.1 | 9745604 | SNV | 1 | A | G | Homozygous   |
| NC_037640.1 | 9745644 | SNV | 1 | A | G | Homozygous   |
| NC_037640.1 | 9745839 | SNV | 1 | T | G | Heterozygous |
| NC_037640.1 | 9746637 | SNV | 1 | G | A | Homozygous   |
| NC_037640.1 | 9746639 | SNV | 1 | G | C | Homozygous   |
| NC_037640.1 | 9746642 | SNV | 1 | G | C | Homozygous   |
| NC_037640.1 | 9746654 | SNV | 1 | C | G | Homozygous   |
| NC_037640.1 | 9746656 | SNV | 1 | A | T | Homozygous   |
| NC_037640.1 | 9761547 | SNV | 1 | C | T | Heterozygous |
| NC_037640.1 | 9761565 | SNV | 1 | C | T | Heterozygous |
| NC_037640.1 | 9761567 | SNV | 1 | C | T | Heterozygous |
| NC_037640.1 | 9761572 | SNV | 1 | C | T | Heterozygous |
| NC_037640.1 | 9763415 | SNV | 1 | C | A | Heterozygous |
| NC_037640.1 | 9763438 | SNV | 1 | G | A | Heterozygous |
| NC_037640.1 | 9763443 | SNV | 1 | G | A | Homozygous   |
| NC_037640.1 | 9763498 | SNV | 1 | G | A | Heterozygous |
| NC_037640.1 | 9763589 | SNV | 1 | G | A | Heterozygous |
| NC_037640.1 | 9763705 | SNV | 1 | G | A | Heterozygous |
| NC_037640.1 | 9763945 | SNV | 1 | A | C | Homozygous   |
| NC_037640.1 | 9763997 | SNV | 1 | C | A | Homozygous   |
| NC_037640.1 | 9764030 | SNV | 1 | G | A | Homozygous   |
| NC_037640.1 | 9764033 | SNV | 1 | A | G | Homozygous   |
| NC_037640.1 | 9769330 | SNV | 1 | C | A | Homozygous   |
| NC_037640.1 | 9769333 | SNV | 1 | C | A | Homozygous   |
| NC_037640.1 | 9769347 | SNV | 1 | G | A | Heterozygous |
| NC_037640.1 | 9769351 | SNV | 1 | T | A | Homozygous   |
| NC_037640.1 | 9789308 | SNV | 1 | G | A | Heterozygous |
| NC_037640.1 | 9789361 | SNV | 1 | T | C | Heterozygous |
| NC_037640.1 | 9789363 | SNV | 1 | C | T | Heterozygous |
| NC_037640.1 | 9789381 | SNV | 1 | G | A | Heterozygous |

|             |         |     |   |   |   |              |
|-------------|---------|-----|---|---|---|--------------|
| NC_037640.1 | 9789436 | SNV | 1 | A | G | Heterozygous |
| NC_037640.1 | 9789479 | SNV | 1 | T | G | Heterozygous |
| NC_037640.1 | 9789536 | SNV | 1 | A | G | Homozygous   |
| NC_037640.1 | 9789566 | SNV | 1 | G | A | Homozygous   |
| NC_037640.1 | 9789588 | SNV | 1 | T | C | Heterozygous |
| NC_037640.1 | 9789590 | SNV | 1 | G | A | Homozygous   |
| NC_037640.1 | 9790958 | SNV | 1 | T | C | Heterozygous |
| NC_037640.1 | 9791098 | SNV | 1 | G | A | Homozygous   |
| NC_037640.1 | 9791114 | SNV | 1 | A | G | Heterozygous |
| NC_037640.1 | 9791132 | SNV | 1 | G | A | Heterozygous |
| NC_037640.1 | 9791393 | SNV | 1 | C | T | Heterozygous |
| NC_037640.1 | 9791457 | SNV | 1 | G | A | Heterozygous |
| NC_037640.1 | 9791589 | SNV | 1 | C | G | Heterozygous |
| NC_037640.1 | 9816695 | SNV | 1 | C | A | Heterozygous |
| NC_037640.1 | 9831273 | SNV | 1 | T | C | Homozygous   |
| NC_037640.1 | 9831291 | SNV | 1 | T | A | Heterozygous |
| NC_037640.1 | 9831301 | SNV | 1 | A | C | Homozygous   |
| NC_037640.1 | 9831312 | SNV | 1 | A | C | Heterozygous |
| NC_037640.1 | 9831316 | SNV | 1 | T | G | Heterozygous |
| NC_037640.1 | 9833093 | SNV | 1 | A | G | Homozygous   |
| NC_037640.1 | 9839388 | SNV | 1 | A | G | Homozygous   |
| NC_037640.1 | 9840066 | SNV | 1 | G | A | Homozygous   |
| NC_037640.1 | 9840120 | SNV | 1 | T | C | Homozygous   |
| NC_037640.1 | 9840957 | SNV | 1 | C | A | Homozygous   |
| NC_037640.1 | 9841897 | SNV | 1 | A | G | Heterozygous |
| NC_037640.1 | 9843319 | SNV | 1 | C | A | Homozygous   |
| NC_037640.1 | 9843323 | SNV | 1 | C | T | Homozygous   |
| NC_037640.1 | 9845267 | SNV | 1 | A | T | Homozygous   |
| NC_037640.1 | 9850002 | SNV | 1 | C | T | Heterozygous |
| NC_037640.1 | 9850527 | SNV | 1 | G | A | Homozygous   |
| NC_037640.1 | 9850674 | SNV | 1 | T | C | Homozygous   |
| NC_037640.1 | 9851307 | SNV | 1 | A | G | Homozygous   |
| NC_037640.1 | 9851487 | SNV | 1 | C | T | Homozygous   |
| NC_037640.1 | 9852425 | SNV | 1 | A | C | Homozygous   |
| NC_037640.1 | 9852868 | SNV | 1 | G | A | Heterozygous |
| NC_037640.1 | 9853224 | SNV | 1 | A | G | Homozygous   |
| NC_037640.1 | 9853231 | SNV | 1 | A | T | Homozygous   |
| NC_037640.1 | 9853449 | SNV | 1 | T | A | Homozygous   |
| NC_037640.1 | 9853461 | SNV | 1 | G | A | Homozygous   |
| NC_037640.1 | 9855894 | SNV | 1 | G | A | Homozygous   |
| NC_037640.1 | 9861152 | SNV | 1 | A | G | Homozygous   |
| NC_037640.1 | 9861662 | SNV | 1 | G | A | Homozygous   |
| NC_037640.1 | 9862548 | SNV | 1 | T | C | Heterozygous |
| NC_037640.1 | 9865234 | SNV | 1 | A | G | Homozygous   |
| NC_037640.1 | 9866284 | SNV | 1 | T | G | Homozygous   |
| NC_037640.1 | 9866709 | SNV | 1 | T | C | Homozygous   |
| NC_037640.1 | 9873433 | SNV | 1 | G | A | Homozygous   |
| NC_037640.1 | 9873437 | SNV | 1 | A | G | Heterozygous |
| NC_037640.1 | 9873499 | SNV | 1 | T | C | Heterozygous |
| NC_037640.1 | 9873504 | SNV | 1 | A | G | Homozygous   |
| NC_037640.1 | 9873612 | SNV | 1 | T | C | Homozygous   |

|             |         |     |   |   |   |              |
|-------------|---------|-----|---|---|---|--------------|
| NC_037640.1 | 9877815 | SNV | 1 | A | G | Homozygous   |
| NC_037640.1 | 9877842 | SNV | 1 | A | G | Homozygous   |
| NC_037640.1 | 9878477 | SNV | 1 | G | C | Homozygous   |
| NC_037640.1 | 9879321 | SNV | 1 | C | A | Homozygous   |
| NC_037640.1 | 9879617 | SNV | 1 | A | G | Homozygous   |
| NC_037640.1 | 9888974 | SNV | 1 | C | T | Heterozygous |
| NC_037640.1 | 9888985 | SNV | 1 | G | A | Heterozygous |
| NC_037640.1 | 9889080 | SNV | 1 | C | T | Homozygous   |
| NC_037640.1 | 9889175 | SNV | 1 | G | A | Homozygous   |
| NC_037640.1 | 9889286 | SNV | 1 | T | C | Heterozygous |
| NC_037640.1 | 9889296 | SNV | 1 | G | A | Homozygous   |
| NC_037640.1 | 9889331 | SNV | 1 | T | C | Homozygous   |
| NC_037640.1 | 9889361 | SNV | 1 | G | C | Homozygous   |
| NC_037640.1 | 9894504 | SNV | 1 | T | C | Homozygous   |
| NC_037640.1 | 9894589 | SNV | 1 | C | T | Heterozygous |
| NC_037640.1 | 9895368 | SNV | 1 | G | A | Homozygous   |
| NC_037640.1 | 9896633 | SNV | 1 | T | C | Heterozygous |
| NC_037640.1 | 9896689 | SNV | 1 | C | T | Heterozygous |
| NC_037640.1 | 9896701 | SNV | 1 | A | G | Homozygous   |
| NC_037640.1 | 9896900 | SNV | 1 | T | C | Heterozygous |
| NC_037640.1 | 9896902 | SNV | 1 | C | G | Homozygous   |
| NC_037640.1 | 9896959 | SNV | 1 | A | G | Homozygous   |
| NC_037640.1 | 9899620 | SNV | 1 | C | T | Heterozygous |
| NC_037640.1 | 9899636 | SNV | 1 | T | C | Homozygous   |
| NC_037640.1 | 9899638 | SNV | 1 | C | T | Heterozygous |
| NC_037640.1 | 9899665 | SNV | 1 | C | T | Homozygous   |
| NC_037640.1 | 9899708 | SNV | 1 | T | C | Homozygous   |
| NC_037640.1 | 9899735 | SNV | 1 | C | T | Homozygous   |
| NC_037640.1 | 9902755 | SNV | 1 | C | A | Heterozygous |
| NC_037640.1 | 9912855 | SNV | 1 | T | C | Homozygous   |
| NC_037640.1 | 9913155 | SNV | 1 | C | T | Heterozygous |
| NC_037640.1 | 9913519 | SNV | 1 | C | T | Heterozygous |
| NC_037640.1 | 9913521 | SNV | 1 | T | G | Heterozygous |
| NC_037640.1 | 9913680 | SNV | 1 | T | C | Homozygous   |
| NC_037640.1 | 9913702 | SNV | 1 | C | T | Heterozygous |
| NC_037640.1 | 9913860 | SNV | 1 | C | G | Homozygous   |
| NC_037640.1 | 9913893 | SNV | 1 | G | A | Homozygous   |
| NC_037640.1 | 9913896 | SNV | 1 | T | C | Homozygous   |
| NC_037640.1 | 9913908 | SNV | 1 | T | A | Homozygous   |
| NC_037640.1 | 9914223 | SNV | 1 | C | T | Heterozygous |
| NC_037640.1 | 9914394 | SNV | 1 | T | C | Heterozygous |
| NC_037640.1 | 9915601 | SNV | 1 | A | G | Homozygous   |
| NC_037640.1 | 9916055 | SNV | 1 | C | T | Heterozygous |
| NC_037640.1 | 9921682 | SNV | 1 | A | G | Homozygous   |
| NC_037640.1 | 9921759 | SNV | 1 | A | G | Homozygous   |
| NC_037640.1 | 9922030 | SNV | 1 | A | T | Homozygous   |
| NC_037640.1 | 9922177 | SNV | 1 | A | G | Heterozygous |
| NC_037640.1 | 9922180 | SNV | 1 | A | C | Heterozygous |
| NC_037640.1 | 9922395 | SNV | 1 | A | G | Homozygous   |
| NC_037640.1 | 9922610 | SNV | 1 | G | A | Heterozygous |
| NC_037640.1 | 9922919 | SNV | 1 | G | A | Homozygous   |

|             |         |     |   |   |   |              |
|-------------|---------|-----|---|---|---|--------------|
| NC_037640.1 | 9923172 | SNV | 1 | T | C | Homozygous   |
| NC_037640.1 | 9923233 | SNV | 1 | C | T | Homozygous   |
| NC_037640.1 | 9924857 | SNV | 1 | C | T | Heterozygous |
| NC_037640.1 | 9925196 | SNV | 1 | C | T | Homozygous   |
| NC_037640.1 | 9925305 | SNV | 1 | A | G | Homozygous   |
| NC_037640.1 | 9927284 | SNV | 1 | A | G | Homozygous   |
| NC_037640.1 | 9927369 | SNV | 1 | A | G | Homozygous   |
| NC_037640.1 | 9928878 | SNV | 1 | T | C | Heterozygous |
| NC_037640.1 | 9929763 | SNV | 1 | A | G | Heterozygous |
| NC_037640.1 | 9930261 | SNV | 1 | T | C | Heterozygous |
| NC_037640.1 | 9930460 | SNV | 1 | T | C | Homozygous   |
| NC_037640.1 | 9930481 | SNV | 1 | A | G | Homozygous   |
| NC_037640.1 | 9931063 | SNV | 1 | G | A | Homozygous   |
| NC_037640.1 | 9931187 | SNV | 1 | A | G | Homozygous   |
| NC_037640.1 | 9931226 | SNV | 1 | G | T | Heterozygous |
| NC_037640.1 | 9931336 | SNV | 1 | T | G | Homozygous   |
| NC_037640.1 | 9932198 | SNV | 1 | A | G | Heterozygous |
| NC_037640.1 | 9932261 | SNV | 1 | A | G | Heterozygous |
| NC_037640.1 | 9932339 | SNV | 1 | T | C | Heterozygous |
| NC_037640.1 | 9932423 | SNV | 1 | T | C | Homozygous   |
| NC_037640.1 | 9932459 | SNV | 1 | A | G | Homozygous   |
| NC_037640.1 | 9932483 | SNV | 1 | A | G | Heterozygous |
| NC_037640.1 | 9932619 | SNV | 1 | C | T | Heterozygous |
| NC_037640.1 | 9933026 | SNV | 1 | G | A | Heterozygous |
| NC_037640.1 | 9933080 | SNV | 1 | A | G | Homozygous   |
| NC_037640.1 | 9933100 | SNV | 1 | T | C | Homozygous   |
| NC_037640.1 | 9933114 | SNV | 1 | A | G | Homozygous   |
| NC_037640.1 | 9933372 | SNV | 1 | T | A | Heterozygous |
| NC_037640.1 | 9933432 | SNV | 1 | A | G | Homozygous   |
| NC_037640.1 | 9933465 | SNV | 1 | G | C | Homozygous   |
| NC_037640.1 | 9933683 | SNV | 1 | C | T | Heterozygous |
| NC_037640.1 | 9933684 | SNV | 1 | G | A | Heterozygous |
| NC_037640.1 | 9934132 | SNV | 1 | C | A | Heterozygous |
| NC_037640.1 | 9934259 | SNV | 1 | T | A | Homozygous   |
| NC_037640.1 | 9934261 | SNV | 1 | A | T | Homozygous   |
| NC_037640.1 | 9934275 | SNV | 1 | A | G | Homozygous   |
| NC_037640.1 | 9934295 | SNV | 1 | G | A | Heterozygous |
| NC_037640.1 | 9934302 | SNV | 1 | A | G | Homozygous   |
| NC_037640.1 | 9934916 | SNV | 1 | A | G | Homozygous   |
| NC_037640.1 | 9936524 | SNV | 1 | C | T | Heterozygous |
| NC_037640.1 | 9952497 | SNV | 1 | G | T | Heterozygous |
| NC_037640.1 | 9952506 | SNV | 1 | A | T | Heterozygous |
| NC_037640.1 | 9952921 | SNV | 1 | C | T | Homozygous   |
| NC_037640.1 | 9962327 | SNV | 1 | C | T | Homozygous   |
| NC_037640.1 | 9962363 | SNV | 1 | T | C | Homozygous   |
| NC_037640.1 | 9963915 | SNV | 1 | C | T | Heterozygous |
| NC_037640.1 | 9971200 | SNV | 1 | A | G | Homozygous   |
| NC_037640.1 | 9971265 | SNV | 1 | A | G | Homozygous   |
| NC_037640.1 | 9971291 | SNV | 1 | T | C | Homozygous   |
| NC_037640.1 | 9973497 | SNV | 1 | A | T | Homozygous   |
| NC_037640.1 | 9979510 | SNV | 1 | A | C | Homozygous   |

|             |         |     |   |   |   |              |
|-------------|---------|-----|---|---|---|--------------|
| NC_037640.1 | 9979785 | SNV | 1 | T | G | Homozygous   |
| NC_037640.1 | 9979825 | SNV | 1 | G | A | Heterozygous |
| NC_037640.1 | 9990046 | SNV | 1 | C | G | Homozygous   |
| NC_037640.1 | 9990052 | SNV | 1 | C | G | Homozygous   |
| NC_037640.1 | 9990054 | SNV | 1 | C | T | Homozygous   |
| NC_037640.1 | 9990927 | SNV | 1 | G | A | Heterozygous |
| NC_037640.1 | 9991161 | SNV | 1 | T | A | Homozygous   |
| NC_037640.1 | 9991227 | SNV | 1 | G | C | Homozygous   |
| NC_037640.1 | 9991281 | SNV | 1 | C | T | Homozygous   |
| NC_037640.1 | 9991295 | SNV | 1 | A | G | Homozygous   |
| NC_037640.1 | 9991298 | SNV | 1 | G | A | Homozygous   |
| NC_037640.1 | 9991497 | SNV | 1 | A | G | Homozygous   |
| NC_037640.1 | 9991508 | SNV | 1 | C | A | Heterozygous |
| NC_037640.1 | 9991585 | SNV | 1 | T | C | Homozygous   |
| NC_037640.1 | 9991610 | SNV | 1 | C | T | Heterozygous |
| NC_037640.1 | 9991656 | SNV | 1 | C | T | Homozygous   |
| NC_037640.1 | 9991837 | SNV | 1 | T | C | Heterozygous |
| NC_037640.1 | 9991882 | SNV | 1 | A | G | Heterozygous |
| NC_037640.1 | 9991889 | SNV | 1 | A | C | Heterozygous |
| NC_037640.1 | 9991893 | SNV | 1 | T | C | Heterozygous |
| NC_037640.1 | 9991980 | SNV | 1 | T | C | Homozygous   |
| NC_037640.1 | 9992091 | SNV | 1 | G | A | Heterozygous |
| NC_037640.1 | 9992098 | SNV | 1 | T | C | Heterozygous |
| NC_037640.1 | 9992109 | SNV | 1 | A | G | Heterozygous |
| NC_037640.1 | 9992146 | SNV | 1 | A | G | Homozygous   |
| NC_037640.1 | 9992351 | SNV | 1 | T | C | Homozygous   |
| NC_037640.1 | 9992446 | SNV | 1 | G | A | Heterozygous |
| NC_037640.1 | 9992503 | SNV | 1 | T | C | Heterozygous |
| NC_037640.1 | 9992569 | SNV | 1 | T | C | Homozygous   |
| NC_037640.1 | 9992669 | SNV | 1 | G | A | Heterozygous |
| NC_037640.1 | 9992683 | SNV | 1 | A | C | Heterozygous |
| NC_037640.1 | 9992687 | SNV | 1 | T | C | Heterozygous |
| NC_037640.1 | 9992748 | SNV | 1 | T | C | Heterozygous |
| NC_037640.1 | 9992799 | SNV | 1 | G | A | Homozygous   |
| NC_037640.1 | 9992833 | SNV | 1 | C | T | Homozygous   |
| NC_037640.1 | 9992871 | SNV | 1 | A | G | Heterozygous |
| NC_037640.1 | 9992913 | SNV | 1 | T | A | Homozygous   |
| NC_037640.1 | 9992915 | SNV | 1 | T | C | Heterozygous |
| NC_037640.1 | 9992928 | SNV | 1 | T | C | Homozygous   |
| NC_037640.1 | 9992938 | SNV | 1 | T | C | Homozygous   |
| NC_037640.1 | 9992988 | SNV | 1 | T | C | Homozygous   |
| NC_037640.1 | 9993032 | SNV | 1 | A | G | Heterozygous |
| NC_037640.1 | 9993106 | SNV | 1 | A | G | Homozygous   |
| NC_037640.1 | 9993166 | SNV | 1 | C | G | Homozygous   |
| NC_037640.1 | 9993189 | SNV | 1 | C | T | Heterozygous |
| NC_037640.1 | 9994206 | SNV | 1 | G | A | Heterozygous |
| NC_037640.1 | 9994232 | SNV | 1 | C | T | Heterozygous |
| NC_037640.1 | 9997652 | SNV | 1 | T | C | Homozygous   |
| NC_037640.1 | 9997668 | SNV | 1 | T | C | Heterozygous |
| NC_037640.1 | 9997682 | SNV | 1 | C | T | Heterozygous |
| NC_037640.1 | 9997695 | SNV | 1 | A | C | Heterozygous |

|             |          |     |   |   |   |              |
|-------------|----------|-----|---|---|---|--------------|
| NC_037640.1 | 9997770  | SNV | 1 | G | A | Heterozygous |
| NC_037640.1 | 9997778  | SNV | 1 | A | G | Homozygous   |
| NC_037640.1 | 9997842  | SNV | 1 | T | A | Heterozygous |
| NC_037640.1 | 9997879  | SNV | 1 | A | C | Heterozygous |
| NC_037640.1 | 9997901  | SNV | 1 | G | C | Homozygous   |
| NC_037640.1 | 9997931  | SNV | 1 | T | C | Homozygous   |
| NC_037640.1 | 9997947  | SNV | 1 | G | A | Homozygous   |
| NC_037640.1 | 9997955  | SNV | 1 | G | A | Homozygous   |
| NC_037640.1 | 9997965  | SNV | 1 | C | T | Homozygous   |
| NC_037640.1 | 9997974  | SNV | 1 | C | T | Heterozygous |
| NC_037640.1 | 9998069  | SNV | 1 | G | A | Homozygous   |
| NC_037640.1 | 9998075  | SNV | 1 | T | C | Homozygous   |
| NC_037640.1 | 9998133  | SNV | 1 | G | C | Homozygous   |
| NC_037640.1 | 9998154  | SNV | 1 | G | T | Heterozygous |
| NC_037640.1 | 9998165  | SNV | 1 | C | T | Heterozygous |
| NC_037640.1 | 9998176  | SNV | 1 | T | C | Homozygous   |
| NC_037640.1 | 9998179  | SNV | 1 | A | G | Heterozygous |
| NC_037640.1 | 9998220  | SNV | 1 | A | T | Homozygous   |
| NC_037640.1 | 9998233  | SNV | 1 | G | A | Homozygous   |
| NC_037640.1 | 9998333  | SNV | 1 | G | A | Heterozygous |
| NC_037640.1 | 9998384  | SNV | 1 | G | C | Heterozygous |
| NC_037640.1 | 10032047 | SNV | 1 | G | A | Heterozygous |
| NC_037640.1 | 10032208 | SNV | 1 | T | C | Homozygous   |
| NC_037640.1 | 10032224 | SNV | 1 | G | A | Heterozygous |
| NC_037640.1 | 10033604 | SNV | 1 | C | T | Homozygous   |
| NC_037640.1 | 10034017 | SNV | 1 | C | A | Heterozygous |
| NC_037640.1 | 10034481 | SNV | 1 | A | G | Heterozygous |
| NC_037640.1 | 10034737 | SNV | 1 | C | T | Homozygous   |
| NC_037640.1 | 10035080 | SNV | 1 | A | G | Heterozygous |
| NC_037640.1 | 10035536 | SNV | 1 | C | G | Heterozygous |
| NC_037640.1 | 10049354 | SNV | 1 | A | T | Homozygous   |
| NC_037640.1 | 10049358 | SNV | 1 | A | T | Homozygous   |
| NC_037640.1 | 10049751 | SNV | 1 | A | G | Homozygous   |
| NC_037640.1 | 10054531 | SNV | 1 | A | G | Heterozygous |
| NC_037640.1 | 10054692 | SNV | 1 | G | A | Homozygous   |
| NC_037640.1 | 10069977 | SNV | 1 | G | A | Homozygous   |
| NC_037640.1 | 10069982 | SNV | 1 | C | T | Heterozygous |
| NC_037640.1 | 10070009 | SNV | 1 | G | A | Heterozygous |
| NC_037640.1 | 10071155 | SNV | 1 | T | C | Homozygous   |
| NC_037640.1 | 10071220 | SNV | 1 | G | A | Heterozygous |
| NC_037640.1 | 10071577 | SNV | 1 | C | A | Homozygous   |
| NC_037640.1 | 10086112 | SNV | 1 | A | T | Homozygous   |
| NC_037640.1 | 10086122 | SNV | 1 | A | G | Homozygous   |
| NC_037640.1 | 10102517 | SNV | 1 | C | T | Heterozygous |
| NC_037640.1 | 10102524 | SNV | 1 | T | A | Heterozygous |
| NC_037640.1 | 10102528 | SNV | 1 | T | A | Heterozygous |
| NC_037640.1 | 10102624 | SNV | 1 | T | A | Heterozygous |
| NC_037640.1 | 10104951 | SNV | 1 | T | A | Homozygous   |
| NC_037640.1 | 10104956 | SNV | 1 | A | T | Homozygous   |
| NC_037640.1 | 10104958 | SNV | 1 | T | A | Homozygous   |
| NC_037640.1 | 10104962 | SNV | 1 | G | T | Homozygous   |



|             |          |     |   |   |   |              |
|-------------|----------|-----|---|---|---|--------------|
| NC_037640.1 | 10104971 | SNV | 1 | T | G | Homozygous   |
| NC_037640.1 | 10115844 | SNV | 1 | G | A | Heterozygous |
| NC_037640.1 | 10115864 | SNV | 1 | G | C | Heterozygous |
| NC_037640.1 | 10115870 | SNV | 1 | A | G | Heterozygous |
| NC_037640.1 | 10116010 | SNV | 1 | A | T | Homozygous   |
| NC_037640.1 | 10116036 | SNV | 1 | T | C | Heterozygous |
| NC_037640.1 | 10116039 | SNV | 1 | G | A | Heterozygous |
| NC_037640.1 | 10116055 | SNV | 1 | G | A | Homozygous   |
| NC_037640.1 | 10116108 | SNV | 1 | A | G | Heterozygous |
| NC_037640.1 | 10116125 | SNV | 1 | T | C | Heterozygous |
| NC_037640.1 | 10116133 | SNV | 1 | G | A | Heterozygous |
| NC_037640.1 | 10116181 | SNV | 1 | G | A | Heterozygous |
| NC_037640.1 | 10116195 | SNV | 1 | C | A | Heterozygous |
| NC_037640.1 | 10116575 | SNV | 1 | G | A | Heterozygous |
| NC_037640.1 | 10116618 | SNV | 1 | A | G | Heterozygous |
| NC_037640.1 | 10116622 | SNV | 1 | T | G | Homozygous   |
| NC_037640.1 | 10116631 | SNV | 1 | T | C | Heterozygous |
| NC_037640.1 | 10116632 | SNV | 1 | A | C | Heterozygous |
| NC_037640.1 | 10116648 | SNV | 1 | G | A | Heterozygous |
| NC_037640.1 | 10116691 | SNV | 1 | A | G | Heterozygous |
| NC_037640.1 | 10116717 | SNV | 1 | A | G | Homozygous   |
| NC_037640.1 | 10116752 | SNV | 1 | G | A | Heterozygous |
| NC_037640.1 | 10116754 | SNV | 1 | A | G | Homozygous   |
| NC_037640.1 | 10116769 | SNV | 1 | T | C | Homozygous   |
| NC_037640.1 | 10116777 | SNV | 1 | G | A | Homozygous   |
| NC_037640.1 | 10131445 | SNV | 1 | C | T | Heterozygous |
| NC_037640.1 | 10131993 | SNV | 1 | T | C | Homozygous   |
| NC_037640.1 | 10132031 | SNV | 1 | C | A | Homozygous   |
| NC_037640.1 | 10132043 | SNV | 1 | A | G | Homozygous   |
| NC_037640.1 | 10132063 | SNV | 1 | G | A | Homozygous   |
| NC_037640.1 | 10134863 | SNV | 1 | T | A | Heterozygous |
| NC_037640.1 | 10134865 | SNV | 1 | A | G | Heterozygous |
| NC_037640.1 | 10134909 | SNV | 1 | A | T | Heterozygous |
| NC_037640.1 | 10134926 | SNV | 1 | T | C | Heterozygous |
| NC_037640.1 | 10134931 | SNV | 1 | G | A | Homozygous   |
| NC_037640.1 | 10135366 | SNV | 1 | A | G | Heterozygous |
| NC_037640.1 | 10135407 | SNV | 1 | T | C | Homozygous   |
| NC_037640.1 | 10135536 | SNV | 1 | G | A | Heterozygous |
| NC_037640.1 | 10135608 | SNV | 1 | C | T | Homozygous   |
| NC_037640.1 | 10135610 | SNV | 1 | C | A | Heterozygous |
| NC_037640.1 | 10135620 | SNV | 1 | G | A | Homozygous   |
| NC_037640.1 | 10135623 | SNV | 1 | G | A | Homozygous   |
| NC_037640.1 | 10135631 | SNV | 1 | A | G | Homozygous   |
| NC_037640.1 | 10135669 | SNV | 1 | T | A | Homozygous   |
| NC_037640.1 | 10135672 | SNV | 1 | T | A | Heterozygous |
| NC_037640.1 | 10135684 | SNV | 1 | G | A | Homozygous   |
| NC_037640.1 | 10135742 | SNV | 1 | A | G | Heterozygous |
| NC_037640.1 | 10135947 | SNV | 1 | A | T | Heterozygous |
| NC_037640.1 | 10136774 | SNV | 1 | A | G | Heterozygous |
| NC_037640.1 | 10136800 | SNV | 1 | C | A | Heterozygous |
| NC_037640.1 | 10136891 | SNV | 1 | A | G | Homozygous   |

|             |          |     |   |   |   |              |
|-------------|----------|-----|---|---|---|--------------|
| NC_037640.1 | 10136918 | SNV | 1 | A | G | Homozygous   |
| NC_037640.1 | 10136922 | SNV | 1 | T | A | Homozygous   |
| NC_037640.1 | 10136934 | SNV | 1 | C | T | Heterozygous |
| NC_037640.1 | 10136936 | SNV | 1 | T | C | Heterozygous |
| NC_037640.1 | 10137019 | SNV | 1 | C | T | Heterozygous |
| NC_037640.1 | 10137024 | SNV | 1 | G | A | Heterozygous |
| NC_037640.1 | 10137025 | SNV | 1 | G | A | Heterozygous |
| NC_037640.1 | 10137113 | SNV | 1 | T | C | Homozygous   |
| NC_037640.1 | 10137117 | SNV | 1 | G | A | Homozygous   |
| NC_037640.1 | 10137127 | SNV | 1 | A | G | Homozygous   |
| NC_037640.1 | 10137154 | SNV | 1 | T | C | Homozygous   |
| NC_037640.1 | 10137212 | SNV | 1 | T | C | Heterozygous |
| NC_037640.1 | 10137232 | SNV | 1 | C | T | Heterozygous |
| NC_037640.1 | 10137556 | SNV | 1 | C | T | Heterozygous |
| NC_037640.1 | 10137573 | SNV | 1 | C | T | Heterozygous |
| NC_037640.1 | 10137589 | SNV | 1 | G | C | Heterozygous |
| NC_037640.1 | 10138021 | SNV | 1 | A | G | Heterozygous |
| NC_037640.1 | 10138023 | SNV | 1 | G | A | Heterozygous |
| NC_037640.1 | 10138118 | SNV | 1 | A | G | Homozygous   |
| NC_037640.1 | 10138122 | SNV | 1 | C | T | Homozygous   |
| NC_037640.1 | 10138189 | SNV | 1 | A | T | Homozygous   |
| NC_037640.1 | 10138214 | SNV | 1 | G | A | Heterozygous |
| NC_037640.1 | 10138216 | SNV | 1 | T | C | Heterozygous |
| NC_037640.1 | 10138223 | SNV | 1 | T | C | Homozygous   |
| NC_037640.1 | 10138233 | SNV | 1 | G | A | Heterozygous |
| NC_037640.1 | 10138297 | SNV | 1 | C | T | Heterozygous |
| NC_037640.1 | 10138305 | SNV | 1 | C | T | Homozygous   |
| NC_037640.1 | 10138324 | SNV | 1 | G | C | Homozygous   |
| NC_037640.1 | 10139197 | SNV | 1 | G | C | Homozygous   |
| NC_037640.1 | 10140779 | SNV | 1 | A | T | Heterozygous |
| NC_037640.1 | 10140788 | SNV | 1 | G | T | Homozygous   |
| NC_037640.1 | 10140793 | SNV | 1 | G | T | Homozygous   |
| NC_037640.1 | 10140875 | SNV | 1 | A | T | Heterozygous |
| NC_037640.1 | 10141360 | SNV | 1 | G | A | Heterozygous |
| NC_037640.1 | 10141362 | SNV | 1 | G | T | Heterozygous |
| NC_037640.1 | 10141367 | SNV | 1 | A | G | Heterozygous |
| NC_037640.1 | 10141371 | SNV | 1 | A | T | Heterozygous |
| NC_037640.1 | 10141812 | SNV | 1 | T | C | Homozygous   |
| NC_037640.1 | 10141845 | SNV | 1 | A | G | Homozygous   |
| NC_037640.1 | 10142088 | SNV | 1 | G | T | Heterozygous |
| NC_037640.1 | 10142526 | SNV | 1 | G | A | Heterozygous |
| NC_037640.1 | 10143488 | SNV | 1 | T | C | Heterozygous |
| NC_037640.1 | 10143497 | SNV | 1 | A | C | Homozygous   |
| NC_037640.1 | 10144754 | SNV | 1 | T | A | Heterozygous |
| NC_037640.1 | 10144983 | SNV | 1 | G | A | Homozygous   |
| NC_037640.1 | 10145482 | SNV | 1 | T | C | Homozygous   |
| NC_037640.1 | 10145670 | SNV | 1 | C | T | Homozygous   |
| NC_037640.1 | 10145948 | SNV | 1 | C | T | Homozygous   |
| NC_037640.1 | 10145952 | SNV | 1 | A | G | Homozygous   |
| NC_037640.1 | 10146111 | SNV | 1 | C | A | Homozygous   |
| NC_037640.1 | 10148429 | SNV | 1 | T | C | Homozygous   |

|             |          |     |   |   |   |              |
|-------------|----------|-----|---|---|---|--------------|
| NC_037640.1 | 10149726 | SNV | 1 | T | A | Homozygous   |
| NC_037640.1 | 10156062 | SNV | 1 | C | T | Heterozygous |
| NC_037640.1 | 10160636 | SNV | 1 | G | A | Heterozygous |
| NC_037640.1 | 10160986 | SNV | 1 | G | A | Homozygous   |
| NC_037640.1 | 10161053 | SNV | 1 | G | A | Heterozygous |
| NC_037640.1 | 10161260 | SNV | 1 | G | A | Heterozygous |
| NC_037640.1 | 10161314 | SNV | 1 | G | A | Heterozygous |
| NC_037640.1 | 10161326 | SNV | 1 | T | A | Heterozygous |
| NC_037640.1 | 10163312 | SNV | 1 | G | A | Heterozygous |
| NC_037640.1 | 10163783 | SNV | 1 | C | A | Heterozygous |
| NC_037640.1 | 10163790 | SNV | 1 | G | A | Heterozygous |
| NC_037640.1 | 10163829 | SNV | 1 | C | T | Heterozygous |
| NC_037640.1 | 10164750 | SNV | 1 | A | T | Homozygous   |
| NC_037640.1 | 10164854 | SNV | 1 | T | C | Homozygous   |
| NC_037640.1 | 10164893 | SNV | 1 | C | G | Heterozygous |
| NC_037640.1 | 10165611 | SNV | 1 | A | G | Homozygous   |
| NC_037640.1 | 10165693 | SNV | 1 | G | A | Heterozygous |
| NC_037640.1 | 10165759 | SNV | 1 | A | C | Homozygous   |
| NC_037640.1 | 10166213 | SNV | 1 | T | C | Homozygous   |
| NC_037640.1 | 10166271 | SNV | 1 | A | G | Homozygous   |
| NC_037640.1 | 10166948 | SNV | 1 | T | C | Homozygous   |
| NC_037640.1 | 10167270 | SNV | 1 | A | G | Homozygous   |
| NC_037640.1 | 10167411 | SNV | 1 | A | G | Homozygous   |
| NC_037640.1 | 10167494 | SNV | 1 | C | T | Heterozygous |
| NC_037640.1 | 10167588 | SNV | 1 | A | G | Homozygous   |
| NC_037640.1 | 10169917 | SNV | 1 | T | C | Homozygous   |
| NC_037640.1 | 10169922 | SNV | 1 | T | A | Homozygous   |
| NC_037640.1 | 10171982 | SNV | 1 | G | C | Homozygous   |
| NC_037640.1 | 10172210 | SNV | 1 | T | C | Homozygous   |
| NC_037640.1 | 10172229 | SNV | 1 | A | G | Homozygous   |
| NC_037640.1 | 10172433 | SNV | 1 | A | G | Homozygous   |
| NC_037640.1 | 10172437 | SNV | 1 | T | C | Homozygous   |
| NC_037640.1 | 10172532 | SNV | 1 | T | C | Homozygous   |
| NC_037640.1 | 10172540 | SNV | 1 | A | G | Homozygous   |
| NC_037640.1 | 10172789 | SNV | 1 | G | A | Homozygous   |
| NC_037640.1 | 10172794 | SNV | 1 | C | T | Heterozygous |
| NC_037640.1 | 10172817 | SNV | 1 | A | G | Heterozygous |
| NC_037640.1 | 10172873 | SNV | 1 | A | G | Homozygous   |
| NC_037640.1 | 10188622 | SNV | 1 | A | C | Homozygous   |
| NC_037640.1 | 10192861 | SNV | 1 | C | A | Homozygous   |
| NC_037640.1 | 10192863 | SNV | 1 | C | T | Homozygous   |
| NC_037640.1 | 10192888 | SNV | 1 | T | G | Homozygous   |
| NC_037640.1 | 10204518 | SNV | 1 | A | G | Homozygous   |
| NC_037640.1 | 10226015 | SNV | 1 | G | T | Homozygous   |
| NC_037640.1 | 10226017 | SNV | 1 | T | G | Homozygous   |
| NC_037640.1 | 10226022 | SNV | 1 | T | A | Homozygous   |
| NC_037640.1 | 10226035 | SNV | 1 | T | A | Homozygous   |
| NC_037640.1 | 10226041 | SNV | 1 | A | C | Homozygous   |
| NC_037640.1 | 10227446 | SNV | 1 | T | G | Homozygous   |
| NC_037640.1 | 10233816 | SNV | 1 | C | T | Heterozygous |
| NC_037640.1 | 10236702 | SNV | 1 | T | G | Heterozygous |

|             |          |     |   |   |   |              |
|-------------|----------|-----|---|---|---|--------------|
| NC_037640.1 | 10236707 | SNV | 1 | A | G | Heterozygous |
| NC_037640.1 | 10236713 | SNV | 1 | T | A | Heterozygous |
| NC_037640.1 | 10241251 | SNV | 1 | T | A | Heterozygous |
| NC_037640.1 | 10241254 | SNV | 1 | G | T | Heterozygous |
| NC_037640.1 | 10241402 | SNV | 1 | C | T | Heterozygous |
| NC_037640.1 | 10241572 | SNV | 1 | C | T | Homozygous   |
| NC_037640.1 | 10247020 | SNV | 1 | A | G | Homozygous   |
| NC_037640.1 | 10251914 | SNV | 1 | A | G | Homozygous   |
| NC_037640.1 | 10251941 | SNV | 1 | A | C | Heterozygous |
| NC_037640.1 | 10251943 | SNV | 1 | T | G | Heterozygous |
| NC_037640.1 | 10251947 | SNV | 1 | T | C | Heterozygous |
| NC_037640.1 | 10252619 | SNV | 1 | G | A | Heterozygous |
| NC_037640.1 | 10253811 | SNV | 1 | A | G | Homozygous   |
| NC_037640.1 | 10255173 | SNV | 1 | T | G | Homozygous   |
| NC_037640.1 | 10256858 | SNV | 1 | T | C | Homozygous   |
| NC_037640.1 | 10256868 | SNV | 1 | T | C | Heterozygous |
| NC_037640.1 | 10258534 | SNV | 1 | A | T | Homozygous   |
| NC_037640.1 | 10258550 | SNV | 1 | G | T | Homozygous   |
| NC_037640.1 | 10258560 | SNV | 1 | T | A | Homozygous   |
| NC_037640.1 | 10259000 | SNV | 1 | A | G | Homozygous   |
| NC_037640.1 | 10259002 | SNV | 1 | A | G | Homozygous   |
| NC_037640.1 | 10259809 | SNV | 1 | C | T | Homozygous   |
| NC_037640.1 | 10261874 | SNV | 1 | T | C | Heterozygous |
| NC_037640.1 | 10261895 | SNV | 1 | T | A | Heterozygous |
| NC_037640.1 | 10261898 | SNV | 1 | G | A | Heterozygous |
| NC_037640.1 | 10261901 | SNV | 1 | G | C | Heterozygous |
| NC_037640.1 | 10261904 | SNV | 1 | A | T | Heterozygous |
| NC_037640.1 | 10261907 | SNV | 1 | T | A | Heterozygous |
| NC_037640.1 | 10262189 | SNV | 1 | T | C | Homozygous   |
| NC_037640.1 | 10262474 | SNV | 1 | T | A | Heterozygous |
| NC_037640.1 | 10262925 | SNV | 1 | G | A | Heterozygous |
| NC_037640.1 | 10268888 | SNV | 1 | C | T | Heterozygous |
| NC_037640.1 | 10268973 | SNV | 1 | A | T | Homozygous   |
| NC_037640.1 | 10268976 | SNV | 1 | T | G | Homozygous   |
| NC_037640.1 | 10268979 | SNV | 1 | C | T | Homozygous   |
| NC_037640.1 | 10270047 | SNV | 1 | C | A | Homozygous   |
| NC_037640.1 | 10270049 | SNV | 1 | T | A | Homozygous   |
| NC_037640.1 | 10270051 | SNV | 1 | T | A | Homozygous   |
| NC_037640.1 | 10270054 | SNV | 1 | A | T | Homozygous   |
| NC_037640.1 | 10271021 | SNV | 1 | G | T | Homozygous   |
| NC_037640.1 | 10271199 | SNV | 1 | A | G | Homozygous   |
| NC_037640.1 | 10271217 | SNV | 1 | A | G | Heterozygous |
| NC_037640.1 | 10271376 | SNV | 1 | C | T | Heterozygous |
| NC_037640.1 | 10272074 | SNV | 1 | A | T | Homozygous   |
| NC_037640.1 | 10273259 | SNV | 1 | A | T | Heterozygous |
| NC_037640.1 | 10273265 | SNV | 1 | C | A | Heterozygous |
| NC_037640.1 | 10273267 | SNV | 1 | G | C | Heterozygous |
| NC_037640.1 | 10273271 | SNV | 1 | T | C | Heterozygous |
| NC_037640.1 | 10273274 | SNV | 1 | A | G | Heterozygous |
| NC_037640.1 | 10273295 | SNV | 1 | T | C | Heterozygous |
| NC_037640.1 | 10273298 | SNV | 1 | T | C | Heterozygous |

|             |          |     |   |   |   |              |
|-------------|----------|-----|---|---|---|--------------|
| NC_037640.1 | 10273310 | SNV | 1 | T | G | Heterozygous |
| NC_037640.1 | 10273313 | SNV | 1 | G | A | Heterozygous |
| NC_037640.1 | 10273319 | SNV | 1 | A | G | Heterozygous |
| NC_037640.1 | 10273678 | SNV | 1 | C | T | Heterozygous |
| NC_037640.1 | 10274093 | SNV | 1 | C | T | Homozygous   |
| NC_037640.1 | 10276958 | SNV | 1 | A | G | Homozygous   |
| NC_037640.1 | 10308750 | SNV | 1 | A | G | Homozygous   |
| NC_037640.1 | 10308758 | SNV | 1 | C | T | Homozygous   |
| NC_037640.1 | 10308762 | SNV | 1 | G | A | Homozygous   |
| NC_037640.1 | 10308771 | SNV | 1 | T | C | Heterozygous |
| NC_037640.1 | 10308780 | SNV | 1 | C | A | Homozygous   |
| NC_037640.1 | 10308826 | SNV | 1 | A | G | Homozygous   |
| NC_037640.1 | 10308833 | SNV | 1 | C | T | Homozygous   |
| NC_037640.1 | 10308851 | SNV | 1 | T | C | Heterozygous |
| NC_037640.1 | 10308864 | SNV | 1 | C | A | Homozygous   |
| NC_037640.1 | 10321602 | SNV | 1 | T | C | Heterozygous |
| NC_037640.1 | 10321604 | SNV | 1 | G | A | Homozygous   |
| NC_037640.1 | 10321615 | SNV | 1 | C | T | Homozygous   |
| NC_037640.1 | 10323021 | SNV | 1 | T | A | Homozygous   |
| NC_037640.1 | 10323039 | SNV | 1 | G | A | Homozygous   |
| NC_037640.1 | 10323061 | SNV | 1 | T | C | Homozygous   |
| NC_037640.1 | 10340455 | SNV | 1 | G | A | Homozygous   |
| NC_037640.1 | 10340458 | SNV | 1 | A | C | Homozygous   |
| NC_037640.1 | 10340461 | SNV | 1 | A | T | Homozygous   |
| NC_037640.1 | 10340464 | SNV | 1 | A | T | Homozygous   |
| NC_037640.1 | 10342949 | SNV | 1 | T | A | Homozygous   |
| NC_037640.1 | 10343185 | SNV | 1 | A | G | Homozygous   |
| NC_037640.1 | 10343188 | SNV | 1 | G | A | Heterozygous |
| NC_037640.1 | 10343781 | SNV | 1 | G | A | Homozygous   |
| NC_037640.1 | 10343929 | SNV | 1 | C | G | Heterozygous |
| NC_037640.1 | 10344085 | SNV | 1 | G | A | Homozygous   |
| NC_037640.1 | 10344089 | SNV | 1 | C | T | Homozygous   |
| NC_037640.1 | 10344096 | SNV | 1 | C | T | Homozygous   |
| NC_037640.1 | 10346568 | SNV | 1 | G | A | Heterozygous |
| NC_037640.1 | 10346580 | SNV | 1 | G | A | Homozygous   |
| NC_037640.1 | 10346583 | SNV | 1 | T | C | Homozygous   |
| NC_037640.1 | 10346586 | SNV | 1 | T | A | Heterozygous |
| NC_037640.1 | 10346702 | SNV | 1 | G | A | Homozygous   |
| NC_037640.1 | 10346731 | SNV | 1 | A | G | Homozygous   |
| NC_037640.1 | 10349490 | SNV | 1 | G | A | Homozygous   |
| NC_037640.1 | 10349541 | SNV | 1 | A | T | Heterozygous |
| NC_037640.1 | 10349551 | SNV | 1 | C | T | Heterozygous |
| NC_037640.1 | 10349553 | SNV | 1 | T | A | Heterozygous |
| NC_037640.1 | 10350696 | SNV | 1 | G | A | Heterozygous |
| NC_037640.1 | 10355922 | SNV | 1 | G | A | Homozygous   |
| NC_037640.1 | 10355931 | SNV | 1 | A | G | Heterozygous |
| NC_037640.1 | 10356024 | SNV | 1 | A | G | Homozygous   |
| NC_037640.1 | 10356129 | SNV | 1 | G | A | Homozygous   |
| NC_037640.1 | 10358915 | SNV | 1 | A | G | Heterozygous |
| NC_037640.1 | 10358959 | SNV | 1 | C | T | Heterozygous |
| NC_037640.1 | 10359069 | SNV | 1 | T | C | Homozygous   |

|             |          |     |   |   |   |              |
|-------------|----------|-----|---|---|---|--------------|
| NC_037640.1 | 10373820 | SNV | 1 | G | A | Homozygous   |
| NC_037640.1 | 10373824 | SNV | 1 | G | T | Homozygous   |
| NC_037640.1 | 10373826 | SNV | 1 | C | G | Homozygous   |
| NC_037640.1 | 10374038 | SNV | 1 | G | A | Heterozygous |
| NC_037640.1 | 10392999 | SNV | 1 | A | T | Homozygous   |
| NC_037640.1 | 10393173 | SNV | 1 | G | C | Homozygous   |
| NC_037640.1 | 10393559 | SNV | 1 | T | C | Homozygous   |
| NC_037640.1 | 10401773 | SNV | 1 | T | C | Homozygous   |
| NC_037640.1 | 10401797 | SNV | 1 | A | G | Homozygous   |
| NC_037640.1 | 10401807 | SNV | 1 | T | G | Homozygous   |
| NC_037640.1 | 10401809 | SNV | 1 | A | G | Heterozygous |
| NC_037640.1 | 10401812 | SNV | 1 | A | T | Heterozygous |
| NC_037640.1 | 10401830 | SNV | 1 | A | T | Heterozygous |
| NC_037640.1 | 10401835 | SNV | 1 | T | C | Heterozygous |
| NC_037640.1 | 10401839 | SNV | 1 | G | A | Heterozygous |
| NC_037640.1 | 10401845 | SNV | 1 | T | A | Homozygous   |
| NC_037640.1 | 10401870 | SNV | 1 | G | A | Heterozygous |
| NC_037640.1 | 10401899 | SNV | 1 | G | A | Heterozygous |
| NC_037640.1 | 10402028 | SNV | 1 | T | A | Homozygous   |
| NC_037640.1 | 10402032 | SNV | 1 | T | A | Heterozygous |
| NC_037640.1 | 10402046 | SNV | 1 | A | G | Homozygous   |
| NC_037640.1 | 10402052 | SNV | 1 | G | A | Homozygous   |
| NC_037640.1 | 10406497 | SNV | 1 | G | A | Homozygous   |
| NC_037640.1 | 10406563 | SNV | 1 | G | C | Heterozygous |
| NC_037640.1 | 10409481 | SNV | 1 | A | G | Homozygous   |
| NC_037640.1 | 10409550 | SNV | 1 | C | G | Homozygous   |
| NC_037640.1 | 10416781 | SNV | 1 | A | C | Heterozygous |
| NC_037640.1 | 10416799 | SNV | 1 | A | G | Homozygous   |
| NC_037640.1 | 10416804 | SNV | 1 | A | G | Homozygous   |
| NC_037640.1 | 10417190 | SNV | 1 | T | C | Homozygous   |
| NC_037640.1 | 10417198 | SNV | 1 | A | G | Homozygous   |
| NC_037640.1 | 10417239 | SNV | 1 | C | G | Homozygous   |
| NC_037640.1 | 10417361 | SNV | 1 | G | C | Heterozygous |
| NC_037640.1 | 10417380 | SNV | 1 | G | T | Heterozygous |
| NC_037640.1 | 10418201 | SNV | 1 | C | T | Homozygous   |
| NC_037640.1 | 10418261 | SNV | 1 | T | C | Homozygous   |
| NC_037640.1 | 10418640 | SNV | 1 | G | T | Homozygous   |
| NC_037640.1 | 10418743 | SNV | 1 | A | T | Heterozygous |
| NC_037640.1 | 10418775 | SNV | 1 | T | A | Heterozygous |
| NC_037640.1 | 10418782 | SNV | 1 | G | A | Homozygous   |
| NC_037640.1 | 10418906 | SNV | 1 | C | T | Heterozygous |
| NC_037640.1 | 10418925 | SNV | 1 | T | C | Heterozygous |
| NC_037640.1 | 10418932 | SNV | 1 | C | T | Heterozygous |
| NC_037640.1 | 10418934 | SNV | 1 | C | T | Heterozygous |
| NC_037640.1 | 10419019 | SNV | 1 | T | G | Homozygous   |
| NC_037640.1 | 10419077 | SNV | 1 | T | C | Heterozygous |
| NC_037640.1 | 10419129 | SNV | 1 | C | T | Homozygous   |
| NC_037640.1 | 10419168 | SNV | 1 | T | C | Homozygous   |
| NC_037640.1 | 10419217 | SNV | 1 | T | C | Homozygous   |
| NC_037640.1 | 10419232 | SNV | 1 | C | T | Heterozygous |
| NC_037640.1 | 10419270 | SNV | 1 | A | C | Homozygous   |

|             |          |     |   |   |   |              |
|-------------|----------|-----|---|---|---|--------------|
| NC_037640.1 | 10419291 | SNV | 1 | C | T | Homozygous   |
| NC_037640.1 | 10419410 | SNV | 1 | C | T | Heterozygous |
| NC_037640.1 | 10419413 | SNV | 1 | G | A | Homozygous   |
| NC_037640.1 | 10419510 | SNV | 1 | G | A | Homozygous   |
| NC_037640.1 | 10419513 | SNV | 1 | G | A | Heterozygous |
| NC_037640.1 | 10419528 | SNV | 1 | T | C | Homozygous   |
| NC_037640.1 | 10419551 | SNV | 1 | T | C | Homozygous   |
| NC_037640.1 | 10419708 | SNV | 1 | A | G | Heterozygous |
| NC_037640.1 | 10535107 | SNV | 1 | C | T | Heterozygous |
| NC_037640.1 | 10535124 | SNV | 1 | C | T | Homozygous   |
| NC_037640.1 | 10535140 | SNV | 1 | G | A | Homozygous   |
| NC_037640.1 | 10549291 | SNV | 1 | T | G | Homozygous   |
| NC_037640.1 | 10549341 | SNV | 1 | A | G | Homozygous   |
| NC_037640.1 | 10549351 | SNV | 1 | C | T | Homozygous   |
| NC_037640.1 | 10549380 | SNV | 1 | T | A | Heterozygous |
| NC_037640.1 | 10549390 | SNV | 1 | G | A | Homozygous   |
| NC_037640.1 | 10549424 | SNV | 1 | C | T | Homozygous   |
| NC_037640.1 | 10549432 | SNV | 1 | A | T | Heterozygous |
| NC_037640.1 | 10549730 | SNV | 1 | C | T | Homozygous   |
| NC_037640.1 | 10553967 | SNV | 1 | C | T | Homozygous   |
| NC_037640.1 | 10553970 | SNV | 1 | A | G | Homozygous   |
| NC_037640.1 | 10553980 | SNV | 1 | T | C | Homozygous   |
| NC_037640.1 | 10553996 | SNV | 1 | A | G | Homozygous   |
| NC_037640.1 | 10554006 | SNV | 1 | A | G | Homozygous   |
| NC_037640.1 | 10554020 | SNV | 1 | T | C | Homozygous   |
| NC_037640.1 | 10554027 | SNV | 1 | G | A | Homozygous   |
| NC_037640.1 | 10554029 | SNV | 1 | A | G | Homozygous   |
| NC_037640.1 | 10554033 | SNV | 1 | T | C | Heterozygous |
| NC_037640.1 | 10554189 | SNV | 1 | G | A | Homozygous   |
| NC_037640.1 | 10554198 | SNV | 1 | T | C | Homozygous   |
| NC_037640.1 | 10554205 | SNV | 1 | G | A | Homozygous   |
| NC_037640.1 | 10554207 | SNV | 1 | A | G | Homozygous   |
| NC_037640.1 | 10554241 | SNV | 1 | A | G | Homozygous   |
| NC_037640.1 | 10554472 | SNV | 1 | T | G | Homozygous   |
| NC_037640.1 | 10554478 | SNV | 1 | A | G | Homozygous   |
| NC_037640.1 | 10554484 | SNV | 1 | A | G | Homozygous   |
| NC_037640.1 | 10554495 | SNV | 1 | T | C | Homozygous   |
| NC_037640.1 | 10554501 | SNV | 1 | A | G | Homozygous   |
| NC_037640.1 | 10554583 | SNV | 1 | T | G | Homozygous   |
| NC_037640.1 | 10554645 | SNV | 1 | T | C | Homozygous   |
| NC_037640.1 | 10554647 | SNV | 1 | A | T | Homozygous   |
| NC_037640.1 | 10554664 | SNV | 1 | T | G | Homozygous   |
| NC_037640.1 | 10554670 | SNV | 1 | A | G | Homozygous   |
| NC_037640.1 | 10554676 | SNV | 1 | A | G | Homozygous   |
| NC_037640.1 | 10554681 | SNV | 1 | A | G | Heterozygous |
| NC_037640.1 | 10554693 | SNV | 1 | A | G | Homozygous   |
| NC_037640.1 | 10554727 | SNV | 1 | A | G | Heterozygous |
| NC_037640.1 | 10554759 | SNV | 1 | T | C | Homozygous   |
| NC_037640.1 | 10554779 | SNV | 1 | T | G | Homozygous   |
| NC_037640.1 | 10554784 | SNV | 1 | A | G | Homozygous   |
| NC_037640.1 | 10556237 | SNV | 1 | T | C | Homozygous   |

|             |          |     |   |   |   |              |
|-------------|----------|-----|---|---|---|--------------|
| NC_037640.1 | 10556313 | SNV | 1 | A | G | Homozygous   |
| NC_037640.1 | 10566302 | SNV | 1 | A | G | Homozygous   |
| NC_037640.1 | 10566366 | SNV | 1 | G | A | Homozygous   |
| NC_037640.1 | 10566377 | SNV | 1 | A | G | Homozygous   |
| NC_037640.1 | 10566380 | SNV | 1 | T | C | Homozygous   |
| NC_037640.1 | 10566385 | SNV | 1 | T | C | Homozygous   |
| NC_037640.1 | 10566387 | SNV | 1 | C | G | Homozygous   |
| NC_037640.1 | 10566428 | SNV | 1 | A | T | Heterozygous |
| NC_037640.1 | 10566433 | SNV | 1 | T | G | Heterozygous |
| NC_037640.1 | 10566438 | SNV | 1 | A | T | Homozygous   |
| NC_037640.1 | 10566445 | SNV | 1 | T | C | Homozygous   |
| NC_037640.1 | 10566451 | SNV | 1 | A | G | Homozygous   |
| NC_037640.1 | 10566710 | SNV | 1 | C | T | Homozygous   |
| NC_037640.1 | 10566715 | SNV | 1 | G | A | Heterozygous |
| NC_037640.1 | 10566719 | SNV | 1 | G | A | Heterozygous |
| NC_037640.1 | 10566730 | SNV | 1 | A | G | Heterozygous |
| NC_037640.1 | 10575439 | SNV | 1 | A | G | Homozygous   |
| NC_037640.1 | 10577692 | SNV | 1 | A | G | Homozygous   |
| NC_037640.1 | 10592986 | SNV | 1 | G | A | Homozygous   |
| NC_037640.1 | 10592988 | SNV | 1 | T | A | Homozygous   |
| NC_037640.1 | 10592991 | SNV | 1 | T | A | Homozygous   |
| NC_037640.1 | 10593023 | SNV | 1 | A | T | Homozygous   |
| NC_037640.1 | 10595949 | SNV | 1 | C | T | Heterozygous |
| NC_037640.1 | 10597383 | SNV | 1 | C | T | Heterozygous |
| NC_037640.1 | 10597504 | SNV | 1 | C | A | Heterozygous |
| NC_037640.1 | 10597507 | SNV | 1 | C | A | Heterozygous |
| NC_037640.1 | 10597511 | SNV | 1 | C | A | Heterozygous |
| NC_037640.1 | 10597844 | SNV | 1 | C | T | Heterozygous |
| NC_037640.1 | 10609727 | SNV | 1 | C | T | Homozygous   |
| NC_037640.1 | 10609729 | SNV | 1 | G | T | Homozygous   |
| NC_037640.1 | 10613527 | SNV | 1 | A | G | Homozygous   |
| NC_037640.1 | 10613560 | SNV | 1 | A | G | Homozygous   |
| NC_037640.1 | 10613637 | SNV | 1 | T | A | Heterozygous |
| NC_037640.1 | 10621826 | SNV | 1 | C | T | Homozygous   |
| NC_037640.1 | 10621835 | SNV | 1 | T | C | Heterozygous |
| NC_037640.1 | 10621871 | SNV | 1 | A | T | Homozygous   |
| NC_037640.1 | 10621877 | SNV | 1 | T | C | Homozygous   |
| NC_037640.1 | 10630109 | SNV | 1 | C | T | Heterozygous |
| NC_037640.1 | 10630111 | SNV | 1 | C | T | Heterozygous |
| NC_037640.1 | 10630149 | SNV | 1 | G | A | Heterozygous |
| NC_037640.1 | 10630162 | SNV | 1 | G | A | Homozygous   |
| NC_037640.1 | 10634738 | SNV | 1 | G | A | Heterozygous |
| NC_037640.1 | 10641139 | SNV | 1 | C | T | Homozygous   |
| NC_037640.1 | 10641163 | SNV | 1 | G | T | Homozygous   |
| NC_037640.1 | 10641174 | SNV | 1 | T | G | Homozygous   |
| NC_037640.1 | 10641178 | SNV | 1 | T | C | Homozygous   |
| NC_037640.1 | 10641194 | SNV | 1 | T | G | Homozygous   |
| NC_037640.1 | 10641198 | SNV | 1 | A | T | Homozygous   |
| NC_037640.1 | 10644122 | SNV | 1 | A | C | Homozygous   |
| NC_037640.1 | 10644142 | SNV | 1 | A | C | Homozygous   |
| NC_037640.1 | 10644145 | SNV | 1 | T | G | Homozygous   |



|             |          |     |   |   |   |              |
|-------------|----------|-----|---|---|---|--------------|
| NC_037640.1 | 10649850 | SNV | 1 | A | G | Homozygous   |
| NC_037640.1 | 10652783 | SNV | 1 | G | T | Homozygous   |
| NC_037640.1 | 10653019 | SNV | 1 | C | G | Homozygous   |
| NC_037640.1 | 10655178 | SNV | 1 | T | C | Homozygous   |
| NC_037640.1 | 10665486 | SNV | 1 | A | C | Homozygous   |
| NC_037640.1 | 10665521 | SNV | 1 | T | G | Homozygous   |
| NC_037640.1 | 10665523 | SNV | 1 | T | G | Homozygous   |
| NC_037640.1 | 10665525 | SNV | 1 | C | G | Heterozygous |
| NC_037640.1 | 10665536 | SNV | 1 | T | A | Homozygous   |
| NC_037640.1 | 10665990 | SNV | 1 | C | T | Homozygous   |
| NC_037640.1 | 10666050 | SNV | 1 | A | G | Homozygous   |
| NC_037640.1 | 10670605 | SNV | 1 | T | C | Heterozygous |
| NC_037640.1 | 10673941 | SNV | 1 | T | C | Heterozygous |
| NC_037640.1 | 10675148 | SNV | 1 | A | G | Homozygous   |
| NC_037640.1 | 10675408 | SNV | 1 | G | A | Homozygous   |
| NC_037640.1 | 10676323 | SNV | 1 | C | T | Heterozygous |
| NC_037640.1 | 10676377 | SNV | 1 | C | T | Homozygous   |
| NC_037640.1 | 10676414 | SNV | 1 | A | G | Homozygous   |
| NC_037640.1 | 10676767 | SNV | 1 | T | A | Heterozygous |
| NC_037640.1 | 10683984 | SNV | 1 | G | A | Heterozygous |
| NC_037640.1 | 10684502 | SNV | 1 | C | T | Homozygous   |
| NC_037640.1 | 10684726 | SNV | 1 | T | C | Homozygous   |
| NC_037640.1 | 10684886 | SNV | 1 | A | G | Homozygous   |
| NC_037640.1 | 10685053 | SNV | 1 | T | G | Homozygous   |
| NC_037640.1 | 10685410 | SNV | 1 | T | G | Homozygous   |
| NC_037640.1 | 10685582 | SNV | 1 | A | T | Heterozygous |
| NC_037640.1 | 10685584 | SNV | 1 | A | T | Homozygous   |
| NC_037640.1 | 10685586 | SNV | 1 | A | T | Heterozygous |
| NC_037640.1 | 10685593 | SNV | 1 | T | C | Heterozygous |
| NC_037640.1 | 10685595 | SNV | 1 | T | C | Heterozygous |
| NC_037640.1 | 10685598 | SNV | 1 | A | G | Heterozygous |
| NC_037640.1 | 10685600 | SNV | 1 | A | G | Heterozygous |
| NC_037640.1 | 10685949 | SNV | 1 | T | C | Heterozygous |
| NC_037640.1 | 10692281 | SNV | 1 | T | C | Homozygous   |
| NC_037640.1 | 10695570 | SNV | 1 | T | A | Homozygous   |
| NC_037640.1 | 10695572 | SNV | 1 | T | A | Homozygous   |
| NC_037640.1 | 10701271 | SNV | 1 | C | T | Homozygous   |
| NC_037640.1 | 10701293 | SNV | 1 | C | T | Homozygous   |
| NC_037640.1 | 10701335 | SNV | 1 | A | G | Homozygous   |
| NC_037640.1 | 10701353 | SNV | 1 | G | A | Heterozygous |
| NC_037640.1 | 10701360 | SNV | 1 | G | A | Heterozygous |
| NC_037640.1 | 10701372 | SNV | 1 | G | C | Heterozygous |
| NC_037640.1 | 10701529 | SNV | 1 | C | T | Heterozygous |
| NC_037640.1 | 10701641 | SNV | 1 | A | G | Homozygous   |
| NC_037640.1 | 10701645 | SNV | 1 | T | C | Heterozygous |
| NC_037640.1 | 10711261 | SNV | 1 | T | C | Homozygous   |
| NC_037640.1 | 10733328 | SNV | 1 | G | T | Homozygous   |
| NC_037640.1 | 10733355 | SNV | 1 | A | G | Homozygous   |
| NC_037640.1 | 10733359 | SNV | 1 | A | G | Homozygous   |
| NC_037640.1 | 10733361 | SNV | 1 | A | T | Homozygous   |
| NC_037640.1 | 10733370 | SNV | 1 | C | A | Homozygous   |

|             |          |     |   |   |   |              |
|-------------|----------|-----|---|---|---|--------------|
| NC_037640.1 | 10760300 | SNV | 1 | C | G | Heterozygous |
| NC_037640.1 | 10760422 | SNV | 1 | T | C | Homozygous   |
| NC_037640.1 | 10760466 | SNV | 1 | T | C | Heterozygous |
| NC_037640.1 | 10760644 | SNV | 1 | C | T | Heterozygous |
| NC_037640.1 | 10761301 | SNV | 1 | A | G | Homozygous   |
| NC_037640.1 | 10761369 | SNV | 1 | C | A | Heterozygous |
| NC_037640.1 | 10761413 | SNV | 1 | A | G | Homozygous   |
| NC_037640.1 | 10761710 | SNV | 1 | C | A | Homozygous   |
| NC_037640.1 | 10761811 | SNV | 1 | A | G | Homozygous   |
| NC_037640.1 | 10761858 | SNV | 1 | G | A | Homozygous   |
| NC_037640.1 | 10761894 | SNV | 1 | A | G | Heterozygous |
| NC_037640.1 | 10761905 | SNV | 1 | T | C | Homozygous   |
| NC_037640.1 | 10762060 | SNV | 1 | C | G | Homozygous   |
| NC_037640.1 | 10762073 | SNV | 1 | G | A | Homozygous   |
| NC_037640.1 | 10762131 | SNV | 1 | A | C | Heterozygous |
| NC_037640.1 | 10762133 | SNV | 1 | G | A | Heterozygous |
| NC_037640.1 | 10762139 | SNV | 1 | A | G | Homozygous   |
| NC_037640.1 | 10762265 | SNV | 1 | G | T | Heterozygous |
| NC_037640.1 | 10762268 | SNV | 1 | A | G | Heterozygous |
| NC_037640.1 | 10762330 | SNV | 1 | C | T | Heterozygous |
| NC_037640.1 | 10762424 | SNV | 1 | T | A | Heterozygous |
| NC_037640.1 | 10762427 | SNV | 1 | T | G | Heterozygous |
| NC_037640.1 | 10762439 | SNV | 1 | G | A | Heterozygous |
| NC_037640.1 | 10762475 | SNV | 1 | C | T | Heterozygous |
| NC_037640.1 | 10762542 | SNV | 1 | C | T | Heterozygous |
| NC_037640.1 | 10762544 | SNV | 1 | C | T | Homozygous   |
| NC_037640.1 | 10762548 | SNV | 1 | G | T | Heterozygous |
| NC_037640.1 | 10762553 | SNV | 1 | A | G | Heterozygous |
| NC_037640.1 | 10762787 | SNV | 1 | G | A | Heterozygous |
| NC_037640.1 | 10762805 | SNV | 1 | A | G | Homozygous   |
| NC_037640.1 | 10762820 | SNV | 1 | A | G | Heterozygous |
| NC_037640.1 | 10762837 | SNV | 1 | G | A | Heterozygous |
| NC_037640.1 | 10762921 | SNV | 1 | T | C | Heterozygous |
| NC_037640.1 | 10763049 | SNV | 1 | G | A | Homozygous   |
| NC_037640.1 | 10763056 | SNV | 1 | G | A | Homozygous   |
| NC_037640.1 | 10763094 | SNV | 1 | C | T | Homozygous   |
| NC_037640.1 | 10763105 | SNV | 1 | A | G | Homozygous   |
| NC_037640.1 | 10763378 | SNV | 1 | C | T | Heterozygous |
| NC_037640.1 | 10763438 | SNV | 1 | T | C | Heterozygous |
| NC_037640.1 | 10771444 | SNV | 1 | T | A | Heterozygous |
| NC_037640.1 | 10771519 | SNV | 1 | G | C | Homozygous   |
| NC_037640.1 | 10780873 | SNV | 1 | C | T | Heterozygous |
| NC_037640.1 | 10780884 | SNV | 1 | G | C | Homozygous   |
| NC_037640.1 | 10780886 | SNV | 1 | G | T | Homozygous   |
| NC_037640.1 | 10780900 | SNV | 1 | T | C | Homozygous   |
| NC_037640.1 | 10788124 | SNV | 1 | T | A | Heterozygous |
| NC_037640.1 | 10788773 | SNV | 1 | T | C | Heterozygous |
| NC_037640.1 | 10788775 | SNV | 1 | T | C | Heterozygous |
| NC_037640.1 | 10789016 | SNV | 1 | T | C | Homozygous   |
| NC_037640.1 | 10789023 | SNV | 1 | T | C | Homozygous   |
| NC_037640.1 | 10789160 | SNV | 1 | C | T | Homozygous   |

|             |          |     |   |   |   |              |
|-------------|----------|-----|---|---|---|--------------|
| NC_037640.1 | 10789221 | SNV | 1 | A | G | Heterozygous |
| NC_037640.1 | 10789242 | SNV | 1 | A | G | Homozygous   |
| NC_037640.1 | 10789386 | SNV | 1 | T | C | Homozygous   |
| NC_037640.1 | 10794658 | SNV | 1 | G | A | Heterozygous |
| NC_037640.1 | 10811358 | SNV | 1 | G | A | Homozygous   |
| NC_037640.1 | 10820291 | SNV | 1 | A | G | Homozygous   |
| NC_037640.1 | 10827736 | SNV | 1 | A | G | Heterozygous |
| NC_037640.1 | 10828659 | SNV | 1 | A | T | Homozygous   |
| NC_037640.1 | 10835030 | SNV | 1 | A | G | Homozygous   |
| NC_037640.1 | 10836487 | SNV | 1 | C | T | Homozygous   |
| NC_037640.1 | 10848927 | SNV | 1 | C | T | Heterozygous |
| NC_037640.1 | 10856814 | SNV | 1 | C | G | Heterozygous |
| NC_037640.1 | 10863510 | SNV | 1 | T | A | Heterozygous |
| NC_037640.1 | 10863516 | SNV | 1 | C | T | Homozygous   |
| NC_037640.1 | 10863540 | SNV | 1 | C | A | Homozygous   |
| NC_037640.1 | 10863552 | SNV | 1 | T | A | Homozygous   |
| NC_037640.1 | 10863621 | SNV | 1 | T | C | Homozygous   |
| NC_037640.1 | 10863643 | SNV | 1 | T | C | Homozygous   |
| NC_037640.1 | 10863651 | SNV | 1 | A | T | Homozygous   |
| NC_037640.1 | 10863672 | SNV | 1 | T | C | Homozygous   |
| NC_037640.1 | 10863689 | SNV | 1 | A | T | Heterozygous |
| NC_037640.1 | 10870911 | SNV | 1 | G | A | Heterozygous |
| NC_037640.1 | 10880506 | SNV | 1 | T | C | Homozygous   |
| NC_037640.1 | 10880941 | SNV | 1 | T | C | Homozygous   |
| NC_037640.1 | 10883009 | SNV | 1 | C | T | Homozygous   |
| NC_037640.1 | 10928220 | SNV | 1 | G | C | Homozygous   |
| NC_037640.1 | 10928225 | SNV | 1 | G | A | Homozygous   |
| NC_037640.1 | 10931788 | SNV | 1 | A | T | Heterozygous |
| NC_037640.1 | 10931790 | SNV | 1 | A | C | Heterozygous |
| NC_037640.1 | 10931793 | SNV | 1 | G | A | Heterozygous |
| NC_037640.1 | 10939013 | SNV | 1 | A | G | Homozygous   |
| NC_037640.1 | 10939017 | SNV | 1 | A | G | Homozygous   |
| NC_037640.1 | 10939038 | SNV | 1 | A | T | Homozygous   |
| NC_037640.1 | 10942095 | SNV | 1 | T | C | Homozygous   |
| NC_037640.1 | 10942223 | SNV | 1 | T | C | Homozygous   |
| NC_037640.1 | 10942252 | SNV | 1 | T | C | Homozygous   |
| NC_037640.1 | 10942298 | SNV | 1 | C | T | Homozygous   |
| NC_037640.1 | 10942378 | SNV | 1 | C | T | Homozygous   |
| NC_037640.1 | 10996974 | SNV | 1 | G | A | Homozygous   |
| NC_037640.1 | 10996996 | SNV | 1 | T | A | Homozygous   |
| NC_037640.1 | 10997001 | SNV | 1 | G | A | Homozygous   |
| NC_037640.1 | 10997013 | SNV | 1 | A | T | Homozygous   |
| NC_037640.1 | 10997059 | SNV | 1 | A | T | Homozygous   |
| NC_037640.1 | 10997073 | SNV | 1 | A | G | Homozygous   |
| NC_037640.1 | 10997077 | SNV | 1 | T | A | Homozygous   |
| NC_037640.1 | 10997088 | SNV | 1 | G | A | Homozygous   |
| NC_037640.1 | 10997091 | SNV | 1 | A | G | Homozygous   |
| NC_037640.1 | 10997097 | SNV | 1 | G | T | Homozygous   |
| NC_037640.1 | 10997111 | SNV | 1 | C | T | Homozygous   |
| NC_037640.1 | 10997115 | SNV | 1 | G | A | Homozygous   |
| NC_037640.1 | 11010176 | SNV | 1 | A | T | Homozygous   |

|             |          |     |   |   |   |              |
|-------------|----------|-----|---|---|---|--------------|
| NC_037640.1 | 11010183 | SNV | 1 | C | T | Homozygous   |
| NC_037640.1 | 11010188 | SNV | 1 | T | C | Homozygous   |
| NC_037640.1 | 11010198 | SNV | 1 | C | T | Homozygous   |
| NC_037640.1 | 11010204 | SNV | 1 | A | T | Homozygous   |
| NC_037640.1 | 11010209 | SNV | 1 | G | A | Homozygous   |
| NC_037640.1 | 11043938 | SNV | 1 | A | T | Heterozygous |
| NC_037640.1 | 11043952 | SNV | 1 | C | T | Homozygous   |
| NC_037640.1 | 11043957 | SNV | 1 | G | A | Heterozygous |
| NC_037640.1 | 11043980 | SNV | 1 | T | A | Homozygous   |
| NC_037640.1 | 11043990 | SNV | 1 | A | G | Homozygous   |
| NC_037640.1 | 11057535 | SNV | 1 | T | C | Heterozygous |
| NC_037640.1 | 11057838 | SNV | 1 | T | A | Heterozygous |
| NC_037640.1 | 11058103 | SNV | 1 | C | A | Homozygous   |
| NC_037640.1 | 11058474 | SNV | 1 | T | C | Homozygous   |
| NC_037640.1 | 11058567 | SNV | 1 | G | C | Homozygous   |
| NC_037640.1 | 11063356 | SNV | 1 | G | T | Heterozygous |
| NC_037640.1 | 11064440 | SNV | 1 | A | T | Heterozygous |
| NC_037640.1 | 11064447 | SNV | 1 | A | T | Homozygous   |
| NC_037640.1 | 11068074 | SNV | 1 | A | G | Heterozygous |
| NC_037640.1 | 11074369 | SNV | 1 | T | A | Heterozygous |
| NC_037640.1 | 11074407 | SNV | 1 | T | A | Heterozygous |
| NC_037640.1 | 11074532 | SNV | 1 | C | T | Heterozygous |
| NC_037640.1 | 11074540 | SNV | 1 | G | A | Heterozygous |
| NC_037640.1 | 11074553 | SNV | 1 | C | A | Heterozygous |
| NC_037640.1 | 11074554 | SNV | 1 | T | G | Heterozygous |
| NC_037640.1 | 11074579 | SNV | 1 | T | C | Heterozygous |
| NC_037640.1 | 11074583 | SNV | 1 | T | A | Heterozygous |
| NC_037640.1 | 11074593 | SNV | 1 | C | T | Heterozygous |
| NC_037640.1 | 11074624 | SNV | 1 | T | C | Homozygous   |
| NC_037640.1 | 11074627 | SNV | 1 | T | C | Homozygous   |
| NC_037640.1 | 11074630 | SNV | 1 | T | C | Homozygous   |
| NC_037640.1 | 11074633 | SNV | 1 | T | C | Homozygous   |
| NC_037640.1 | 11074653 | SNV | 1 | C | T | Heterozygous |
| NC_037640.1 | 11074665 | SNV | 1 | T | A | Heterozygous |
| NC_037640.1 | 11074674 | SNV | 1 | T | A | Heterozygous |
| NC_037640.1 | 11074677 | SNV | 1 | C | T | Heterozygous |
| NC_037640.1 | 11074687 | SNV | 1 | T | C | Heterozygous |
| NC_037640.1 | 11074689 | SNV | 1 | C | T | Homozygous   |
| NC_037640.1 | 11074693 | SNV | 1 | T | C | Heterozygous |
| NC_037640.1 | 11074701 | SNV | 1 | C | T | Homozygous   |
| NC_037640.1 | 11074713 | SNV | 1 | C | T | Homozygous   |
| NC_037640.1 | 11074716 | SNV | 1 | T | A | Homozygous   |
| NC_037640.1 | 11074727 | SNV | 1 | T | A | Homozygous   |
| NC_037640.1 | 11074737 | SNV | 1 | C | A | Homozygous   |
| NC_037640.1 | 11074787 | SNV | 1 | T | A | Heterozygous |
| NC_037640.1 | 11074797 | SNV | 1 | C | T | Heterozygous |
| NC_037640.1 | 11074799 | SNV | 1 | T | A | Heterozygous |
| NC_037640.1 | 11074817 | SNV | 1 | A | T | Homozygous   |
| NC_037640.1 | 11074819 | SNV | 1 | T | G | Homozygous   |
| NC_037640.1 | 11074821 | SNV | 1 | A | T | Homozygous   |
| NC_037640.1 | 11074833 | SNV | 1 | C | T | Homozygous   |

|             |          |     |   |   |   |              |
|-------------|----------|-----|---|---|---|--------------|
| NC_037640.1 | 11074835 | SNV | 1 | A | T | Heterozygous |
| NC_037640.1 | 11074851 | SNV | 1 | T | A | Heterozygous |
| NC_037640.1 | 11074864 | SNV | 1 | T | C | Heterozygous |
| NC_037640.1 | 11074876 | SNV | 1 | T | C | Homozygous   |
| NC_037640.1 | 11074902 | SNV | 1 | C | A | Homozygous   |
| NC_037640.1 | 11074904 | SNV | 1 | T | A | Homozygous   |
| NC_037640.1 | 11074920 | SNV | 1 | T | A | Heterozygous |
| NC_037640.1 | 11074929 | SNV | 1 | C | A | Homozygous   |
| NC_037640.1 | 11074972 | SNV | 1 | T | A | Heterozygous |
| NC_037640.1 | 11075051 | SNV | 1 | C | T | Heterozygous |
| NC_037640.1 | 11075065 | SNV | 1 | T | C | Homozygous   |
| NC_037640.1 | 11075936 | SNV | 1 | C | T | Homozygous   |
| NC_037640.1 | 11075941 | SNV | 1 | G | A | Homozygous   |
| NC_037640.1 | 11075944 | SNV | 1 | C | G | Heterozygous |
| NC_037640.1 | 11076003 | SNV | 1 | G | T | Heterozygous |
| NC_037640.1 | 11076005 | SNV | 1 | G | A | Heterozygous |
| NC_037640.1 | 11080884 | SNV | 1 | T | A | Heterozygous |
| NC_037640.1 | 11080902 | SNV | 1 | A | C | Homozygous   |
| NC_037640.1 | 11080904 | SNV | 1 | T | C | Heterozygous |
| NC_037640.1 | 11081009 | SNV | 1 | G | A | Homozygous   |
| NC_037640.1 | 11081580 | SNV | 1 | G | A | Homozygous   |
| NC_037640.1 | 11081806 | SNV | 1 | A | G | Homozygous   |
| NC_037640.1 | 11082064 | SNV | 1 | A | G | Homozygous   |
| NC_037640.1 | 11082069 | SNV | 1 | A | G | Homozygous   |
| NC_037640.1 | 11082322 | SNV | 1 | A | G | Homozygous   |
| NC_037640.1 | 11083633 | SNV | 1 | A | G | Heterozygous |
| NC_037640.1 | 11083639 | SNV | 1 | T | C | Homozygous   |
| NC_037640.1 | 11085596 | SNV | 1 | C | T | Homozygous   |
| NC_037640.1 | 11085831 | SNV | 1 | T | G | Homozygous   |
| NC_037640.1 | 11085850 | SNV | 1 | T | C | Homozygous   |
| NC_037640.1 | 11085877 | SNV | 1 | A | G | Heterozygous |
| NC_037640.1 | 11085886 | SNV | 1 | G | A | Heterozygous |
| NC_037640.1 | 11086022 | SNV | 1 | T | G | Homozygous   |
| NC_037640.1 | 11086073 | SNV | 1 | G | T | Homozygous   |
| NC_037640.1 | 11086330 | SNV | 1 | G | A | Heterozygous |
| NC_037640.1 | 11086600 | SNV | 1 | C | A | Homozygous   |
| NC_037640.1 | 11086618 | SNV | 1 | T | C | Homozygous   |
| NC_037640.1 | 11086656 | SNV | 1 | T | C | Homozygous   |
| NC_037640.1 | 11086696 | SNV | 1 | T | C | Homozygous   |
| NC_037640.1 | 11086725 | SNV | 1 | T | C | Heterozygous |
| NC_037640.1 | 11086741 | SNV | 1 | G | A | Heterozygous |
| NC_037640.1 | 11087267 | SNV | 1 | C | T | Heterozygous |
| NC_037640.1 | 11087291 | SNV | 1 | C | T | Homozygous   |
| NC_037640.1 | 11088851 | SNV | 1 | A | G | Heterozygous |
| NC_037640.1 | 11089046 | SNV | 1 | A | G | Homozygous   |
| NC_037640.1 | 11089438 | SNV | 1 | A | G | Homozygous   |
| NC_037640.1 | 11089671 | SNV | 1 | A | G | Homozygous   |
| NC_037640.1 | 11090071 | SNV | 1 | T | C | Heterozygous |
| NC_037640.1 | 11090401 | SNV | 1 | G | A | Heterozygous |
| NC_037640.1 | 11090574 | SNV | 1 | A | C | Heterozygous |
| NC_037640.1 | 11090592 | SNV | 1 | T | C | Heterozygous |

|             |          |     |   |   |   |              |
|-------------|----------|-----|---|---|---|--------------|
| NC_037640.1 | 11091384 | SNV | 1 | C | T | Heterozygous |
| NC_037640.1 | 11092247 | SNV | 1 | T | C | Heterozygous |
| NC_037640.1 | 11093760 | SNV | 1 | C | T | Heterozygous |
| NC_037640.1 | 11100106 | SNV | 1 | C | T | Homozygous   |
| NC_037640.1 | 11100108 | SNV | 1 | C | T | Homozygous   |
| NC_037640.1 | 11100117 | SNV | 1 | C | T | Heterozygous |
| NC_037640.1 | 11100119 | SNV | 1 | C | T | Homozygous   |
| NC_037640.1 | 11109969 | SNV | 1 | A | G | Heterozygous |
| NC_037640.1 | 11109976 | SNV | 1 | G | T | Heterozygous |
| NC_037640.1 | 11109979 | SNV | 1 | A | T | Heterozygous |
| NC_037640.1 | 11109997 | SNV | 1 | A | T | Heterozygous |
| NC_037640.1 | 11110003 | SNV | 1 | A | T | Heterozygous |
| NC_037640.1 | 11110026 | SNV | 1 | G | A | Homozygous   |
| NC_037640.1 | 11119384 | SNV | 1 | G | C | Homozygous   |
| NC_037640.1 | 11119409 | SNV | 1 | T | C | Homozygous   |
| NC_037640.1 | 11119436 | SNV | 1 | T | C | Homozygous   |
| NC_037640.1 | 11119463 | SNV | 1 | T | C | Homozygous   |
| NC_037640.1 | 11119497 | SNV | 1 | C | T | Heterozygous |
| NC_037640.1 | 11119638 | SNV | 1 | G | C | Homozygous   |
| NC_037640.1 | 11120040 | SNV | 1 | C | T | Heterozygous |
| NC_037640.1 | 11120335 | SNV | 1 | C | G | Heterozygous |
| NC_037640.1 | 11120512 | SNV | 1 | C | G | Heterozygous |
| NC_037640.1 | 11120841 | SNV | 1 | T | C | Homozygous   |
| NC_037640.1 | 11139681 | SNV | 1 | C | T | Homozygous   |
| NC_037640.1 | 11139683 | SNV | 1 | T | C | Homozygous   |
| NC_037640.1 | 11139689 | SNV | 1 | C | T | Homozygous   |
| NC_037640.1 | 11139709 | SNV | 1 | A | T | Homozygous   |
| NC_037640.1 | 11139715 | SNV | 1 | A | T | Homozygous   |
| NC_037640.1 | 11141115 | SNV | 1 | T | C | Homozygous   |
| NC_037640.1 | 11141157 | SNV | 1 | G | A | Heterozygous |
| NC_037640.1 | 11141365 | SNV | 1 | T | C | Homozygous   |
| NC_037640.1 | 11141372 | SNV | 1 | C | T | Homozygous   |
| NC_037640.1 | 11141389 | SNV | 1 | A | G | Heterozygous |
| NC_037640.1 | 11141391 | SNV | 1 | G | A | Heterozygous |
| NC_037640.1 | 11147608 | SNV | 1 | A | T | Heterozygous |
| NC_037640.1 | 11154731 | SNV | 1 | C | T | Heterozygous |
| NC_037640.1 | 11167383 | SNV | 1 | C | T | Homozygous   |
| NC_037640.1 | 11167385 | SNV | 1 | T | C | Homozygous   |
| NC_037640.1 | 11167387 | SNV | 1 | C | T | Homozygous   |
| NC_037640.1 | 11167397 | SNV | 1 | C | T | Homozygous   |
| NC_037640.1 | 11167409 | SNV | 1 | C | G | Homozygous   |
| NC_037640.1 | 11167411 | SNV | 1 | T | A | Heterozygous |
| NC_037640.1 | 11167414 | SNV | 1 | C | G | Homozygous   |
| NC_037640.1 | 11167417 | SNV | 1 | T | A | Heterozygous |
| NC_037640.1 | 11167437 | SNV | 1 | T | C | Heterozygous |
| NC_037640.1 | 11167504 | SNV | 1 | C | T | Heterozygous |
| NC_037640.1 | 11167509 | SNV | 1 | C | T | Heterozygous |
| NC_037640.1 | 11167528 | SNV | 1 | T | C | Heterozygous |
| NC_037640.1 | 11167530 | SNV | 1 | T | C | Heterozygous |
| NC_037640.1 | 11167660 | SNV | 1 | T | C | Heterozygous |
| NC_037640.1 | 11167694 | SNV | 1 | T | C | Heterozygous |

|             |          |     |   |   |   |              |
|-------------|----------|-----|---|---|---|--------------|
| NC_037640.1 | 11167704 | SNV | 1 | C | T | Homozygous   |
| NC_037640.1 | 11167711 | SNV | 1 | T | C | Homozygous   |
| NC_037640.1 | 11167715 | SNV | 1 | C | T | Heterozygous |
| NC_037640.1 | 11167730 | SNV | 1 | T | C | Homozygous   |
| NC_037640.1 | 11174380 | SNV | 1 | T | C | Homozygous   |
| NC_037640.1 | 11174567 | SNV | 1 | G | A | Homozygous   |
| NC_037640.1 | 11174626 | SNV | 1 | T | C | Homozygous   |
| NC_037640.1 | 11175988 | SNV | 1 | G | A | Heterozygous |
| NC_037640.1 | 11176323 | SNV | 1 | G | A | Homozygous   |
| NC_037640.1 | 11176327 | SNV | 1 | T | G | Homozygous   |
| NC_037640.1 | 11176335 | SNV | 1 | A | G | Heterozygous |
| NC_037640.1 | 11176343 | SNV | 1 | T | C | Homozygous   |
| NC_037640.1 | 11176372 | SNV | 1 | C | T | Heterozygous |
| NC_037640.1 | 11176382 | SNV | 1 | A | G | Heterozygous |
| NC_037640.1 | 11180900 | SNV | 1 | T | C | Homozygous   |
| NC_037640.1 | 11180907 | SNV | 1 | T | G | Homozygous   |
| NC_037640.1 | 11180971 | SNV | 1 | G | A | Homozygous   |
| NC_037640.1 | 11180992 | SNV | 1 | C | T | Heterozygous |
| NC_037640.1 | 11181060 | SNV | 1 | G | C | Homozygous   |
| NC_037640.1 | 11181083 | SNV | 1 | C | T | Homozygous   |
| NC_037640.1 | 11181099 | SNV | 1 | C | T | Homozygous   |
| NC_037640.1 | 11181156 | SNV | 1 | A | G | Heterozygous |
| NC_037640.1 | 11181166 | SNV | 1 | A | G | Homozygous   |
| NC_037640.1 | 11181259 | SNV | 1 | T | C | Homozygous   |
| NC_037640.1 | 11181261 | SNV | 1 | T | C | Homozygous   |
| NC_037640.1 | 11181264 | SNV | 1 | C | T | Homozygous   |
| NC_037640.1 | 11181293 | SNV | 1 | G | A | Homozygous   |
| NC_037640.1 | 11181313 | SNV | 1 | C | T | Homozygous   |
| NC_037640.1 | 11181422 | SNV | 1 | C | T | Homozygous   |
| NC_037640.1 | 11181424 | SNV | 1 | C | T | Heterozygous |
| NC_037640.1 | 11192302 | SNV | 1 | C | T | Heterozygous |
| NC_037640.1 | 11192312 | SNV | 1 | C | T | Homozygous   |
| NC_037640.1 | 11192342 | SNV | 1 | A | G | Heterozygous |
| NC_037640.1 | 11192463 | SNV | 1 | G | C | Homozygous   |
| NC_037640.1 | 11192477 | SNV | 1 | T | C | Homozygous   |
| NC_037640.1 | 11192791 | SNV | 1 | C | T | Heterozygous |
| NC_037640.1 | 11192858 | SNV | 1 | T | C | Heterozygous |
| NC_037640.1 | 11192886 | SNV | 1 | T | C | Heterozygous |
| NC_037640.1 | 11193158 | SNV | 1 | A | G | Homozygous   |
| NC_037640.1 | 11193164 | SNV | 1 | G | A | Homozygous   |
| NC_037640.1 | 11193209 | SNV | 1 | T | C | Heterozygous |
| NC_037640.1 | 11193213 | SNV | 1 | A | G | Homozygous   |
| NC_037640.1 | 11193317 | SNV | 1 | A | G | Homozygous   |
| NC_037640.1 | 11193345 | SNV | 1 | A | G | Homozygous   |
| NC_037640.1 | 11194141 | SNV | 1 | C | T | Homozygous   |
| NC_037640.1 | 11194144 | SNV | 1 | A | T | Homozygous   |
| NC_037640.1 | 11205024 | SNV | 1 | A | G | Heterozygous |
| NC_037640.1 | 11209251 | SNV | 1 | T | C | Heterozygous |
| NC_037640.1 | 11209308 | SNV | 1 | A | T | Homozygous   |
| NC_037640.1 | 11223096 | SNV | 1 | A | G | Heterozygous |
| NC_037640.1 | 11223098 | SNV | 1 | T | A | Heterozygous |

|             |          |     |   |   |   |              |
|-------------|----------|-----|---|---|---|--------------|
| NC_037640.1 | 11223103 | SNV | 1 | A | G | Heterozygous |
| NC_037640.1 | 11223109 | SNV | 1 | A | C | Heterozygous |
| NC_037640.1 | 11223112 | SNV | 1 | A | T | Heterozygous |
| NC_037640.1 | 11223114 | SNV | 1 | A | C | Heterozygous |
| NC_037640.1 | 11244529 | SNV | 1 | T | C | Heterozygous |
| NC_037640.1 | 11244568 | SNV | 1 | A | G | Homozygous   |
| NC_037640.1 | 11251215 | SNV | 1 | A | G | Homozygous   |
| NC_037640.1 | 11251218 | SNV | 1 | G | C | Homozygous   |
| NC_037640.1 | 11251253 | SNV | 1 | T | C | Homozygous   |
| NC_037640.1 | 11266981 | SNV | 1 | T | C | Homozygous   |
| NC_037640.1 | 11266983 | SNV | 1 | C | A | Homozygous   |
| NC_037640.1 | 11284166 | SNV | 1 | A | G | Homozygous   |
| NC_037640.1 | 11284196 | SNV | 1 | A | T | Heterozygous |
| NC_037640.1 | 11284253 | SNV | 1 | T | C | Heterozygous |
| NC_037640.1 | 11284264 | SNV | 1 | T | C | Heterozygous |
| NC_037640.1 | 11284683 | SNV | 1 | C | T | Homozygous   |
| NC_037640.1 | 11284693 | SNV | 1 | T | C | Homozygous   |
| NC_037640.1 | 11284699 | SNV | 1 | T | C | Homozygous   |
| NC_037640.1 | 11284719 | SNV | 1 | T | C | Heterozygous |
| NC_037640.1 | 11284749 | SNV | 1 | C | T | Heterozygous |
| NC_037640.1 | 11284760 | SNV | 1 | G | A | Heterozygous |
| NC_037640.1 | 11284783 | SNV | 1 | G | C | Homozygous   |
| NC_037640.1 | 11284799 | SNV | 1 | C | T | Heterozygous |
| NC_037640.1 | 11284825 | SNV | 1 | T | C | Heterozygous |
| NC_037640.1 | 11284845 | SNV | 1 | G | A | Homozygous   |
| NC_037640.1 | 11284861 | SNV | 1 | A | G | Heterozygous |
| NC_037640.1 | 11284915 | SNV | 1 | C | T | Heterozygous |
| NC_037640.1 | 11284957 | SNV | 1 | A | G | Heterozygous |
| NC_037640.1 | 11284964 | SNV | 1 | G | C | Heterozygous |
| NC_037640.1 | 11284975 | SNV | 1 | G | A | Heterozygous |
| NC_037640.1 | 11285205 | SNV | 1 | T | C | Homozygous   |
| NC_037640.1 | 11285271 | SNV | 1 | G | C | Homozygous   |
| NC_037640.1 | 11285311 | SNV | 1 | T | C | Homozygous   |
| NC_037640.1 | 11285356 | SNV | 1 | C | A | Heterozygous |
| NC_037640.1 | 11285388 | SNV | 1 | C | T | Heterozygous |
| NC_037640.1 | 11285420 | SNV | 1 | A | G | Heterozygous |
| NC_037640.1 | 11285429 | SNV | 1 | G | C | Heterozygous |
| NC_037640.1 | 11285431 | SNV | 1 | A | C | Heterozygous |
| NC_037640.1 | 11285482 | SNV | 1 | A | G | Homozygous   |
| NC_037640.1 | 11285492 | SNV | 1 | G | A | Homozygous   |
| NC_037640.1 | 11285524 | SNV | 1 | A | G | Heterozygous |
| NC_037640.1 | 11285529 | SNV | 1 | G | T | Heterozygous |
| NC_037640.1 | 11285533 | SNV | 1 | G | C | Homozygous   |
| NC_037640.1 | 11285682 | SNV | 1 | A | G | Heterozygous |
| NC_037640.1 | 11289112 | SNV | 1 | G | A | Heterozygous |
| NC_037640.1 | 11289150 | SNV | 1 | G | A | Homozygous   |
| NC_037640.1 | 11289178 | SNV | 1 | G | A | Homozygous   |
| NC_037640.1 | 11289446 | SNV | 1 | C | T | Heterozygous |
| NC_037640.1 | 11289454 | SNV | 1 | C | T | Heterozygous |
| NC_037640.1 | 11290663 | SNV | 1 | G | A | Heterozygous |
| NC_037640.1 | 11290677 | SNV | 1 | G | A | Heterozygous |



|             |          |     |   |   |   |              |
|-------------|----------|-----|---|---|---|--------------|
| NC_037640.1 | 11290691 | SNV | 1 | T | C | Homozygous   |
| NC_037640.1 | 11290695 | SNV | 1 | A | G | Heterozygous |
| NC_037640.1 | 11293951 | SNV | 1 | T | A | Homozygous   |
| NC_037640.1 | 11328167 | SNV | 1 | G | A | Heterozygous |
| NC_037640.1 | 11328193 | SNV | 1 | G | A | Heterozygous |
| NC_037640.1 | 11328372 | SNV | 1 | G | A | Heterozygous |
| NC_037640.1 | 11331130 | SNV | 1 | A | C | Homozygous   |
| NC_037640.1 | 11331157 | SNV | 1 | T | C | Homozygous   |
| NC_037640.1 | 11331164 | SNV | 1 | T | A | Homozygous   |
| NC_037640.1 | 11332060 | SNV | 1 | A | G | Homozygous   |
| NC_037640.1 | 11332090 | SNV | 1 | T | G | Heterozygous |
| NC_037640.1 | 11332135 | SNV | 1 | G | A | Homozygous   |
| NC_037640.1 | 11332137 | SNV | 1 | G | A | Homozygous   |
| NC_037640.1 | 11332139 | SNV | 1 | T | A | Heterozygous |
| NC_037640.1 | 11332150 | SNV | 1 | G | T | Homozygous   |
| NC_037640.1 | 11332161 | SNV | 1 | G | T | Homozygous   |
| NC_037640.1 | 11332169 | SNV | 1 | G | A | Homozygous   |
| NC_037640.1 | 11332235 | SNV | 1 | A | G | Homozygous   |
| NC_037640.1 | 11332244 | SNV | 1 | C | T | Homozygous   |
| NC_037640.1 | 11332251 | SNV | 1 | T | C | Homozygous   |
| NC_037640.1 | 11332257 | SNV | 1 | A | G | Homozygous   |
| NC_037640.1 | 11332264 | SNV | 1 | G | A | Homozygous   |
| NC_037640.1 | 11332289 | SNV | 1 | A | G | Homozygous   |
| NC_037640.1 | 11332323 | SNV | 1 | A | G | Homozygous   |
| NC_037640.1 | 11348384 | SNV | 1 | T | C | Homozygous   |
| NC_037640.1 | 11348426 | SNV | 1 | T | C | Heterozygous |
| NC_037640.1 | 11354615 | SNV | 1 | G | A | Heterozygous |
| NC_037640.1 | 11354626 | SNV | 1 | T | C | Heterozygous |
| NC_037640.1 | 11354643 | SNV | 1 | G | T | Heterozygous |
| NC_037640.1 | 11357432 | SNV | 1 | C | T | Homozygous   |
| NC_037640.1 | 11357436 | SNV | 1 | C | T | Homozygous   |
| NC_037640.1 | 11357439 | SNV | 1 | G | C | Heterozygous |
| NC_037640.1 | 11357441 | SNV | 1 | G | C | Heterozygous |
| NC_037640.1 | 11357546 | SNV | 1 | C | A | Heterozygous |
| NC_037640.1 | 11357610 | SNV | 1 | C | T | Heterozygous |
| NC_037640.1 | 11357614 | SNV | 1 | T | G | Heterozygous |
| NC_037640.1 | 11357626 | SNV | 1 | T | C | Homozygous   |
| NC_037640.1 | 11357769 | SNV | 1 | T | G | Heterozygous |
| NC_037640.1 | 11357852 | SNV | 1 | C | A | Heterozygous |
| NC_037640.1 | 11357872 | SNV | 1 | T | C | Homozygous   |
| NC_037640.1 | 11357874 | SNV | 1 | A | G | Heterozygous |
| NC_037640.1 | 11358097 | SNV | 1 | C | T | Heterozygous |
| NC_037640.1 | 11358103 | SNV | 1 | C | T | Homozygous   |
| NC_037640.1 | 11358128 | SNV | 1 | A | G | Homozygous   |
| NC_037640.1 | 11358143 | SNV | 1 | C | A | Homozygous   |
| NC_037640.1 | 11367477 | SNV | 1 | C | T | Heterozygous |
| NC_037640.1 | 11367501 | SNV | 1 | C | G | Heterozygous |
| NC_037640.1 | 11367510 | SNV | 1 | T | G | Heterozygous |
| NC_037640.1 | 11367517 | SNV | 1 | C | A | Heterozygous |
| NC_037640.1 | 11367552 | SNV | 1 | C | T | Heterozygous |
| NC_037640.1 | 11367556 | SNV | 1 | A | G | Heterozygous |

|             |          |     |   |   |   |              |
|-------------|----------|-----|---|---|---|--------------|
| NC_037640.1 | 11368953 | SNV | 1 | G | T | Heterozygous |
| NC_037640.1 | 11368977 | SNV | 1 | G | A | Homozygous   |
| NC_037640.1 | 11368984 | SNV | 1 | G | A | Heterozygous |
| NC_037640.1 | 11369004 | SNV | 1 | G | A | Homozygous   |
| NC_037640.1 | 11369022 | SNV | 1 | T | C | Homozygous   |
| NC_037640.1 | 11369027 | SNV | 1 | C | A | Homozygous   |
| NC_037640.1 | 11369031 | SNV | 1 | G | A | Homozygous   |
| NC_037640.1 | 11369297 | SNV | 1 | G | A | Homozygous   |
| NC_037640.1 | 11369300 | SNV | 1 | G | A | Homozygous   |
| NC_037640.1 | 11369311 | SNV | 1 | C | A | Homozygous   |
| NC_037640.1 | 11369716 | SNV | 1 | T | A | Homozygous   |
| NC_037640.1 | 11369718 | SNV | 1 | A | G | Homozygous   |
| NC_037640.1 | 11369722 | SNV | 1 | G | A | Homozygous   |
| NC_037640.1 | 11369727 | SNV | 1 | G | A | Homozygous   |
| NC_037640.1 | 11369869 | SNV | 1 | C | T | Homozygous   |
| NC_037640.1 | 11369877 | SNV | 1 | A | G | Heterozygous |
| NC_037640.1 | 11369879 | SNV | 1 | T | A | Homozygous   |
| NC_037640.1 | 11369926 | SNV | 1 | C | T | Heterozygous |
| NC_037640.1 | 11369933 | SNV | 1 | C | G | Heterozygous |
| NC_037640.1 | 11370014 | SNV | 1 | A | G | Homozygous   |
| NC_037640.1 | 11370037 | SNV | 1 | A | G | Heterozygous |
| NC_037640.1 | 11370111 | SNV | 1 | G | C | Homozygous   |
| NC_037640.1 | 11370194 | SNV | 1 | A | T | Homozygous   |
| NC_037640.1 | 11370204 | SNV | 1 | T | G | Heterozygous |
| NC_037640.1 | 11370330 | SNV | 1 | T | C | Homozygous   |
| NC_037640.1 | 11370337 | SNV | 1 | T | C | Homozygous   |
| NC_037640.1 | 11370358 | SNV | 1 | T | C | Homozygous   |
| NC_037640.1 | 11370363 | SNV | 1 | T | C | Homozygous   |
| NC_037640.1 | 11370373 | SNV | 1 | T | C | Homozygous   |
| NC_037640.1 | 11370399 | SNV | 1 | G | A | Homozygous   |
| NC_037640.1 | 11370401 | SNV | 1 | T | A | Homozygous   |
| NC_037640.1 | 11370411 | SNV | 1 | A | G | Heterozygous |
| NC_037640.1 | 11370436 | SNV | 1 | G | A | Homozygous   |
| NC_037640.1 | 11370439 | SNV | 1 | A | T | Homozygous   |
| NC_037640.1 | 11370445 | SNV | 1 | T | A | Heterozygous |
| NC_037640.1 | 11370447 | SNV | 1 | A | G | Homozygous   |
| NC_037640.1 | 11370456 | SNV | 1 | G | A | Homozygous   |
| NC_037640.1 | 11370561 | SNV | 1 | A | G | Heterozygous |
| NC_037640.1 | 11370596 | SNV | 1 | G | A | Heterozygous |
| NC_037640.1 | 11370601 | SNV | 1 | T | A | Heterozygous |
| NC_037640.1 | 11370633 | SNV | 1 | G | A | Heterozygous |
| NC_037640.1 | 11370662 | SNV | 1 | A | G | Heterozygous |
| NC_037640.1 | 11370673 | SNV | 1 | T | A | Heterozygous |
| NC_037640.1 | 11379641 | SNV | 1 | G | A | Heterozygous |
| NC_037640.1 | 11379756 | SNV | 1 | A | G | Heterozygous |
| NC_037640.1 | 11380185 | SNV | 1 | T | C | Heterozygous |
| NC_037640.1 | 11380415 | SNV | 1 | C | A | Heterozygous |
| NC_037640.1 | 11385540 | SNV | 1 | A | G | Heterozygous |
| NC_037640.1 | 11385547 | SNV | 1 | A | G | Heterozygous |
| NC_037640.1 | 11388390 | SNV | 1 | G | A | Heterozygous |
| NC_037640.1 | 11388399 | SNV | 1 | G | A | Heterozygous |

|             |          |     |   |   |   |              |
|-------------|----------|-----|---|---|---|--------------|
| NC_037640.1 | 11388590 | SNV | 1 | C | A | Homozygous   |
| NC_037640.1 | 11404433 | SNV | 1 | G | A | Homozygous   |
| NC_037640.1 | 11404439 | SNV | 1 | C | G | Homozygous   |
| NC_037640.1 | 11404610 | SNV | 1 | G | A | Homozygous   |
| NC_037640.1 | 11414413 | SNV | 1 | A | G | Homozygous   |
| NC_037640.1 | 11414671 | SNV | 1 | T | C | Homozygous   |
| NC_037640.1 | 11414679 | SNV | 1 | C | G | Heterozygous |
| NC_037640.1 | 11414684 | SNV | 1 | A | G | Heterozygous |
| NC_037640.1 | 11414928 | SNV | 1 | A | T | Heterozygous |
| NC_037640.1 | 11414976 | SNV | 1 | A | G | Homozygous   |
| NC_037640.1 | 11415062 | SNV | 1 | A | G | Homozygous   |
| NC_037640.1 | 11417653 | SNV | 1 | G | A | Heterozygous |
| NC_037640.1 | 11417672 | SNV | 1 | G | T | Homozygous   |
| NC_037640.1 | 11417674 | SNV | 1 | G | A | Homozygous   |
| NC_037640.1 | 11417709 | SNV | 1 | G | A | Homozygous   |
| NC_037640.1 | 11417722 | SNV | 1 | G | A | Homozygous   |
| NC_037640.1 | 11417729 | SNV | 1 | C | T | Heterozygous |
| NC_037640.1 | 11423627 | SNV | 1 | C | T | Heterozygous |
| NC_037640.1 | 11423636 | SNV | 1 | T | C | Homozygous   |
| NC_037640.1 | 11423700 | SNV | 1 | G | T | Homozygous   |
| NC_037640.1 | 11423725 | SNV | 1 | G | A | Homozygous   |
| NC_037640.1 | 11423745 | SNV | 1 | T | C | Heterozygous |
| NC_037640.1 | 11423768 | SNV | 1 | T | C | Homozygous   |
| NC_037640.1 | 11423771 | SNV | 1 | T | C | Heterozygous |
| NC_037640.1 | 11423842 | SNV | 1 | C | T | Heterozygous |
| NC_037640.1 | 11423861 | SNV | 1 | C | G | Heterozygous |
| NC_037640.1 | 11423894 | SNV | 1 | C | A | Homozygous   |
| NC_037640.1 | 11424068 | SNV | 1 | A | G | Homozygous   |
| NC_037640.1 | 11424138 | SNV | 1 | G | A | Heterozygous |
| NC_037640.1 | 11424827 | SNV | 1 | T | A | Homozygous   |
| NC_037640.1 | 11424830 | SNV | 1 | T | A | Homozygous   |
| NC_037640.1 | 11424836 | SNV | 1 | T | A | Homozygous   |
| NC_037640.1 | 11424872 | SNV | 1 | A | T | Homozygous   |
| NC_037640.1 | 11425069 | SNV | 1 | T | A | Homozygous   |
| NC_037640.1 | 11425071 | SNV | 1 | A | T | Homozygous   |
| NC_037640.1 | 11425099 | SNV | 1 | A | C | Homozygous   |
| NC_037640.1 | 11429000 | SNV | 1 | T | C | Heterozygous |
| NC_037640.1 | 11431053 | SNV | 1 | A | G | Homozygous   |
| NC_037640.1 | 11431083 | SNV | 1 | A | G | Heterozygous |
| NC_037640.1 | 11431119 | SNV | 1 | A | G | Homozygous   |
| NC_037640.1 | 11431229 | SNV | 1 | G | A | Heterozygous |
| NC_037640.1 | 11431296 | SNV | 1 | G | A | Homozygous   |
| NC_037640.1 | 11431385 | SNV | 1 | A | G | Heterozygous |
| NC_037640.1 | 11431388 | SNV | 1 | G | A | Homozygous   |
| NC_037640.1 | 11453098 | SNV | 1 | G | A | Heterozygous |
| NC_037640.1 | 11453242 | SNV | 1 | C | T | Heterozygous |
| NC_037640.1 | 11453383 | SNV | 1 | G | A | Heterozygous |
| NC_037640.1 | 11453387 | SNV | 1 | G | A | Heterozygous |
| NC_037640.1 | 11453519 | SNV | 1 | G | A | Homozygous   |
| NC_037640.1 | 11453580 | SNV | 1 | G | C | Homozygous   |
| NC_037640.1 | 11453609 | SNV | 1 | A | G | Heterozygous |

|             |          |     |   |   |   |              |
|-------------|----------|-----|---|---|---|--------------|
| NC_037640.1 | 11453655 | SNV | 1 | T | C | Heterozygous |
| NC_037640.1 | 11461698 | SNV | 1 | A | G | Homozygous   |
| NC_037640.1 | 11461706 | SNV | 1 | T | C | Heterozygous |
| NC_037640.1 | 11461708 | SNV | 1 | G | A | Homozygous   |
| NC_037640.1 | 11461968 | SNV | 1 | A | G | Heterozygous |
| NC_037640.1 | 11462007 | SNV | 1 | A | G | Homozygous   |
| NC_037640.1 | 11462093 | SNV | 1 | T | C | Homozygous   |
| NC_037640.1 | 11462101 | SNV | 1 | T | A | Heterozygous |
| NC_037640.1 | 11462105 | SNV | 1 | G | C | Heterozygous |
| NC_037640.1 | 11462105 | SNV | 1 | G | T | Heterozygous |
| NC_037640.1 | 11462153 | SNV | 1 | A | G | Heterozygous |
| NC_037640.1 | 11462369 | SNV | 1 | T | C | Heterozygous |
| NC_037640.1 | 11462417 | SNV | 1 | T | G | Heterozygous |
| NC_037640.1 | 11462419 | SNV | 1 | T | C | Homozygous   |
| NC_037640.1 | 11462446 | SNV | 1 | G | A | Heterozygous |
| NC_037640.1 | 11462454 | SNV | 1 | T | C | Homozygous   |
| NC_037640.1 | 11462616 | SNV | 1 | A | G | Homozygous   |
| NC_037640.1 | 11462625 | SNV | 1 | C | T | Homozygous   |
| NC_037640.1 | 11462646 | SNV | 1 | G | A | Homozygous   |
| NC_037640.1 | 11462671 | SNV | 1 | T | C | Homozygous   |
| NC_037640.1 | 11462676 | SNV | 1 | G | A | Heterozygous |
| NC_037640.1 | 11462681 | SNV | 1 | T | C | Homozygous   |
| NC_037640.1 | 11462697 | SNV | 1 | C | T | Heterozygous |
| NC_037640.1 | 11462704 | SNV | 1 | A | G | Homozygous   |
| NC_037640.1 | 11462748 | SNV | 1 | C | T | Heterozygous |
| NC_037640.1 | 11462772 | SNV | 1 | G | A | Heterozygous |
| NC_037640.1 | 11462821 | SNV | 1 | T | C | Homozygous   |
| NC_037640.1 | 11463238 | SNV | 1 | T | C | Homozygous   |
| NC_037640.1 | 11463292 | SNV | 1 | G | A | Homozygous   |
| NC_037640.1 | 11463448 | SNV | 1 | A | G | Homozygous   |
| NC_037640.1 | 11463745 | SNV | 1 | T | C | Heterozygous |
| NC_037640.1 | 11464609 | SNV | 1 | G | A | Homozygous   |
| NC_037640.1 | 11464681 | SNV | 1 | G | A | Heterozygous |
| NC_037640.1 | 11464934 | SNV | 1 | G | A | Homozygous   |
| NC_037640.1 | 11465029 | SNV | 1 | G | A | Heterozygous |
| NC_037640.1 | 11465979 | SNV | 1 | C | A | Heterozygous |
| NC_037640.1 | 11465983 | SNV | 1 | C | T | Heterozygous |
| NC_037640.1 | 11465994 | SNV | 1 | C | T | Homozygous   |
| NC_037640.1 | 11466029 | SNV | 1 | T | C | Heterozygous |
| NC_037640.1 | 11466048 | SNV | 1 | T | C | Homozygous   |
| NC_037640.1 | 11466081 | SNV | 1 | G | T | Homozygous   |
| NC_037640.1 | 11466526 | SNV | 1 | A | G | Homozygous   |
| NC_037640.1 | 11467043 | SNV | 1 | C | G | Heterozygous |
| NC_037640.1 | 11467074 | SNV | 1 | C | T | Homozygous   |
| NC_037640.1 | 11467108 | SNV | 1 | A | T | Heterozygous |
| NC_037640.1 | 11467175 | SNV | 1 | A | C | Heterozygous |
| NC_037640.1 | 11467458 | SNV | 1 | T | A | Heterozygous |
| NC_037640.1 | 11467528 | SNV | 1 | G | A | Homozygous   |
| NC_037640.1 | 11467561 | SNV | 1 | A | G | Heterozygous |
| NC_037640.1 | 11468327 | SNV | 1 | A | G | Homozygous   |
| NC_037640.1 | 11468672 | SNV | 1 | G | A | Homozygous   |

|             |          |     |   |   |   |              |
|-------------|----------|-----|---|---|---|--------------|
| NC_037640.1 | 11469082 | SNV | 1 | C | T | Heterozygous |
| NC_037640.1 | 11469875 | SNV | 1 | A | G | Heterozygous |
| NC_037640.1 | 11469948 | SNV | 1 | T | C | Homozygous   |
| NC_037640.1 | 11470043 | SNV | 1 | A | G | Homozygous   |
| NC_037640.1 | 11470059 | SNV | 1 | T | C | Homozygous   |
| NC_037640.1 | 11470103 | SNV | 1 | T | C | Heterozygous |
| NC_037640.1 | 11470115 | SNV | 1 | T | A | Heterozygous |
| NC_037640.1 | 11470400 | SNV | 1 | T | C | Homozygous   |
| NC_037640.1 | 11470460 | SNV | 1 | G | C | Homozygous   |
| NC_037640.1 | 11470464 | SNV | 1 | T | C | Homozygous   |
| NC_037640.1 | 11470470 | SNV | 1 | G | A | Heterozygous |
| NC_037640.1 | 11470666 | SNV | 1 | A | G | Homozygous   |
| NC_037640.1 | 11470903 | SNV | 1 | T | C | Homozygous   |
| NC_037640.1 | 11471055 | SNV | 1 | T | C | Homozygous   |
| NC_037640.1 | 11483277 | SNV | 1 | A | G | Heterozygous |
| NC_037640.1 | 11483280 | SNV | 1 | A | G | Heterozygous |
| NC_037640.1 | 11483538 | SNV | 1 | G | A | Heterozygous |
| NC_037640.1 | 11496443 | SNV | 1 | C | T | Heterozygous |
| NC_037640.1 | 11496448 | SNV | 1 | T | C | Heterozygous |
| NC_037640.1 | 11496451 | SNV | 1 | G | A | Heterozygous |
| NC_037640.1 | 11496464 | SNV | 1 | G | C | Heterozygous |
| NC_037640.1 | 11496570 | SNV | 1 | A | T | Homozygous   |
| NC_037640.1 | 11496603 | SNV | 1 | A | C | Homozygous   |
| NC_037640.1 | 11496608 | SNV | 1 | C | T | Homozygous   |
| NC_037640.1 | 11496612 | SNV | 1 | T | C | Homozygous   |
| NC_037640.1 | 11496624 | SNV | 1 | C | T | Homozygous   |
| NC_037640.1 | 11514728 | SNV | 1 | A | G | Heterozygous |
| NC_037640.1 | 11514994 | SNV | 1 | T | C | Homozygous   |
| NC_037640.1 | 11514998 | SNV | 1 | C | G | Homozygous   |
| NC_037640.1 | 11515206 | SNV | 1 | C | T | Heterozygous |
| NC_037640.1 | 11515248 | SNV | 1 | A | G | Heterozygous |
| NC_037640.1 | 11523225 | SNV | 1 | T | C | Homozygous   |
| NC_037640.1 | 11523232 | SNV | 1 | A | G | Homozygous   |
| NC_037640.1 | 11523355 | SNV | 1 | C | A | Heterozygous |
| NC_037640.1 | 11523364 | SNV | 1 | G | A | Homozygous   |
| NC_037640.1 | 11523527 | SNV | 1 | A | G | Heterozygous |
| NC_037640.1 | 11523566 | SNV | 1 | G | A | Heterozygous |
| NC_037640.1 | 11523674 | SNV | 1 | T | C | Heterozygous |
| NC_037640.1 | 11555043 | SNV | 1 | C | T | Homozygous   |
| NC_037640.1 | 11560924 | SNV | 1 | T | C | Homozygous   |
| NC_037640.1 | 11560949 | SNV | 1 | G | A | Heterozygous |
| NC_037640.1 | 11560961 | SNV | 1 | G | C | Heterozygous |
| NC_037640.1 | 11560978 | SNV | 1 | T | C | Heterozygous |
| NC_037640.1 | 11560981 | SNV | 1 | A | G | Heterozygous |
| NC_037640.1 | 11560983 | SNV | 1 | T | C | Heterozygous |
| NC_037640.1 | 11561020 | SNV | 1 | G | A | Heterozygous |
| NC_037640.1 | 11597131 | SNV | 1 | A | G | Homozygous   |
| NC_037640.1 | 11597159 | SNV | 1 | G | C | Homozygous   |
| NC_037640.1 | 11598396 | SNV | 1 | G | A | Heterozygous |
| NC_037640.1 | 11598408 | SNV | 1 | G | A | Homozygous   |
| NC_037640.1 | 11598419 | SNV | 1 | T | A | Heterozygous |

|             |          |     |   |   |   |              |
|-------------|----------|-----|---|---|---|--------------|
| NC_037640.1 | 11598423 | SNV | 1 | T | G | Heterozygous |
| NC_037640.1 | 11598778 | SNV | 1 | A | T | Homozygous   |
| NC_037640.1 | 11598800 | SNV | 1 | A | C | Homozygous   |
| NC_037640.1 | 11598805 | SNV | 1 | T | C | Homozygous   |
| NC_037640.1 | 11598809 | SNV | 1 | T | G | Homozygous   |
| NC_037640.1 | 11598814 | SNV | 1 | A | G | Homozygous   |
| NC_037640.1 | 11598818 | SNV | 1 | A | T | Homozygous   |
| NC_037640.1 | 11615476 | SNV | 1 | G | A | Heterozygous |
| NC_037640.1 | 11615489 | SNV | 1 | T | C | Heterozygous |
| NC_037640.1 | 11615495 | SNV | 1 | A | G | Homozygous   |
| NC_037640.1 | 11615725 | SNV | 1 | T | C | Homozygous   |
| NC_037640.1 | 11615734 | SNV | 1 | G | A | Homozygous   |
| NC_037640.1 | 11615737 | SNV | 1 | A | G | Heterozygous |
| NC_037640.1 | 11615740 | SNV | 1 | C | G | Heterozygous |
| NC_037640.1 | 11615796 | SNV | 1 | C | T | Homozygous   |
| NC_037640.1 | 11615883 | SNV | 1 | C | A | Heterozygous |
| NC_037640.1 | 11616053 | SNV | 1 | G | A | Homozygous   |
| NC_037640.1 | 11622164 | SNV | 1 | C | T | Heterozygous |
| NC_037640.1 | 11622191 | SNV | 1 | C | T | Homozygous   |
| NC_037640.1 | 11622196 | SNV | 1 | T | C | Heterozygous |
| NC_037640.1 | 11622202 | SNV | 1 | T | C | Heterozygous |
| NC_037640.1 | 11622234 | SNV | 1 | C | T | Heterozygous |
| NC_037640.1 | 11622292 | SNV | 1 | T | C | Homozygous   |
| NC_037640.1 | 11622355 | SNV | 1 | G | A | Heterozygous |
| NC_037640.1 | 11622360 | SNV | 1 | C | T | Heterozygous |
| NC_037640.1 | 11622372 | SNV | 1 | T | C | Heterozygous |
| NC_037640.1 | 11622373 | SNV | 1 | T | C | Heterozygous |
| NC_037640.1 | 11622375 | SNV | 1 | C | T | Heterozygous |
| NC_037640.1 | 11622455 | SNV | 1 | C | T | Homozygous   |
| NC_037640.1 | 11622475 | SNV | 1 | G | A | Homozygous   |
| NC_037640.1 | 11622482 | SNV | 1 | C | T | Heterozygous |
| NC_037640.1 | 11622496 | SNV | 1 | G | A | Heterozygous |
| NC_037640.1 | 11622506 | SNV | 1 | A | G | Homozygous   |
| NC_037640.1 | 11622523 | SNV | 1 | C | T | Heterozygous |
| NC_037640.1 | 11622559 | SNV | 1 | T | C | Heterozygous |
| NC_037640.1 | 11622572 | SNV | 1 | C | T | Homozygous   |
| NC_037640.1 | 11622583 | SNV | 1 | T | C | Homozygous   |
| NC_037640.1 | 11622599 | SNV | 1 | T | C | Homozygous   |
| NC_037640.1 | 11622642 | SNV | 1 | C | G | Heterozygous |
| NC_037640.1 | 11622643 | SNV | 1 | T | G | Heterozygous |
| NC_037640.1 | 11622645 | SNV | 1 | T | C | Heterozygous |
| NC_037640.1 | 11622664 | SNV | 1 | G | A | Homozygous   |
| NC_037640.1 | 11622671 | SNV | 1 | C | T | Homozygous   |
| NC_037640.1 | 11622679 | SNV | 1 | T | C | Homozygous   |
| NC_037640.1 | 11622682 | SNV | 1 | C | T | Homozygous   |
| NC_037640.1 | 11622691 | SNV | 1 | T | C | Homozygous   |
| NC_037640.1 | 11622693 | SNV | 1 | A | G | Homozygous   |
| NC_037640.1 | 11622700 | SNV | 1 | T | G | Homozygous   |
| NC_037640.1 | 11622758 | SNV | 1 | C | T | Homozygous   |
| NC_037640.1 | 11622765 | SNV | 1 | C | T | Heterozygous |
| NC_037640.1 | 11622769 | SNV | 1 | C | T | Heterozygous |

|             |          |     |   |   |   |              |
|-------------|----------|-----|---|---|---|--------------|
| NC_037640.1 | 11622772 | SNV | 1 | T | C | Heterozygous |
| NC_037640.1 | 11622795 | SNV | 1 | C | T | Heterozygous |
| NC_037640.1 | 11623075 | SNV | 1 | C | T | Heterozygous |
| NC_037640.1 | 11623175 | SNV | 1 | A | G | Heterozygous |
| NC_037640.1 | 11623181 | SNV | 1 | A | G | Homozygous   |
| NC_037640.1 | 11623183 | SNV | 1 | T | G | Homozygous   |
| NC_037640.1 | 11623188 | SNV | 1 | C | T | Heterozygous |
| NC_037640.1 | 11623191 | SNV | 1 | C | T | Homozygous   |
| NC_037640.1 | 11623195 | SNV | 1 | T | G | Heterozygous |
| NC_037640.1 | 11623462 | SNV | 1 | C | A | Homozygous   |
| NC_037640.1 | 11623465 | SNV | 1 | T | C | Homozygous   |
| NC_037640.1 | 11623473 | SNV | 1 | C | T | Homozygous   |
| NC_037640.1 | 11623494 | SNV | 1 | T | C | Homozygous   |
| NC_037640.1 | 11623511 | SNV | 1 | A | G | Homozygous   |
| NC_037640.1 | 11623516 | SNV | 1 | T | C | Homozygous   |
| NC_037640.1 | 11623520 | SNV | 1 | C | A | Homozygous   |
| NC_037640.1 | 11623528 | SNV | 1 | C | T | Homozygous   |
| NC_037640.1 | 11623554 | SNV | 1 | C | T | Homozygous   |
| NC_037640.1 | 11623586 | SNV | 1 | C | T | Homozygous   |
| NC_037640.1 | 11623609 | SNV | 1 | C | T | Homozygous   |
| NC_037640.1 | 11623619 | SNV | 1 | A | G | Homozygous   |
| NC_037640.1 | 11623670 | SNV | 1 | C | T | Homozygous   |
| NC_037640.1 | 11623677 | SNV | 1 | C | T | Homozygous   |
| NC_037640.1 | 11623685 | SNV | 1 | C | T | Homozygous   |
| NC_037640.1 | 11623687 | SNV | 1 | A | G | Homozygous   |
| NC_037640.1 | 11623853 | SNV | 1 | T | C | Heterozygous |
| NC_037640.1 | 11623880 | SNV | 1 | T | A | Heterozygous |
| NC_037640.1 | 11623885 | SNV | 1 | T | C | Heterozygous |
| NC_037640.1 | 11623893 | SNV | 1 | T | C | Heterozygous |
| NC_037640.1 | 11623904 | SNV | 1 | C | T | Homozygous   |
| NC_037640.1 | 11623908 | SNV | 1 | C | T | Heterozygous |
| NC_037640.1 | 11623918 | SNV | 1 | G | A | Homozygous   |
| NC_037640.1 | 11623922 | SNV | 1 | T | A | Heterozygous |
| NC_037640.1 | 11623927 | SNV | 1 | A | T | Heterozygous |
| NC_037640.1 | 11623931 | SNV | 1 | T | C | Homozygous   |
| NC_037640.1 | 11623934 | SNV | 1 | G | A | Homozygous   |
| NC_037640.1 | 11623970 | SNV | 1 | A | G | Homozygous   |
| NC_037640.1 | 11623983 | SNV | 1 | C | T | Homozygous   |
| NC_037640.1 | 11624012 | SNV | 1 | A | G | Homozygous   |
| NC_037640.1 | 11624048 | SNV | 1 | G | A | Homozygous   |
| NC_037640.1 | 11624055 | SNV | 1 | T | C | Homozygous   |
| NC_037640.1 | 11624107 | SNV | 1 | T | C | Heterozygous |
| NC_037640.1 | 11624132 | SNV | 1 | C | T | Heterozygous |
| NC_037640.1 | 11624136 | SNV | 1 | C | T | Heterozygous |
| NC_037640.1 | 11624230 | SNV | 1 | T | C | Homozygous   |
| NC_037640.1 | 11624262 | SNV | 1 | T | A | Heterozygous |
| NC_037640.1 | 11624280 | SNV | 1 | T | C | Homozygous   |
| NC_037640.1 | 11624331 | SNV | 1 | C | T | Heterozygous |
| NC_037640.1 | 11624362 | SNV | 1 | A | G | Homozygous   |
| NC_037640.1 | 11624369 | SNV | 1 | C | T | Homozygous   |
| NC_037640.1 | 11624406 | SNV | 1 | C | T | Heterozygous |

|             |          |     |   |   |   |              |
|-------------|----------|-----|---|---|---|--------------|
| NC_037640.1 | 11624409 | SNV | 1 | A | C | Heterozygous |
| NC_037640.1 | 11624413 | SNV | 1 | C | T | Heterozygous |
| NC_037640.1 | 11624421 | SNV | 1 | G | A | Homozygous   |
| NC_037640.1 | 11624433 | SNV | 1 | C | T | Homozygous   |
| NC_037640.1 | 11624436 | SNV | 1 | C | T | Homozygous   |
| NC_037640.1 | 11624440 | SNV | 1 | T | A | Homozygous   |
| NC_037640.1 | 11624443 | SNV | 1 | C | T | Homozygous   |
| NC_037640.1 | 11624475 | SNV | 1 | A | G | Homozygous   |
| NC_037640.1 | 11624477 | SNV | 1 | C | G | Homozygous   |
| NC_037640.1 | 11624514 | SNV | 1 | G | C | Homozygous   |
| NC_037640.1 | 11624607 | SNV | 1 | A | G | Homozygous   |
| NC_037640.1 | 11624619 | SNV | 1 | A | G | Homozygous   |
| NC_037640.1 | 11629007 | SNV | 1 | T | A | Homozygous   |
| NC_037640.1 | 11629022 | SNV | 1 | G | A | Homozygous   |
| NC_037640.1 | 11630311 | SNV | 1 | A | C | Homozygous   |
| NC_037640.1 | 11630321 | SNV | 1 | A | C | Homozygous   |
| NC_037640.1 | 11630330 | SNV | 1 | C | A | Homozygous   |
| NC_037640.1 | 11630517 | SNV | 1 | C | T | Heterozygous |
| NC_037640.1 | 11630528 | SNV | 1 | C | T | Homozygous   |
| NC_037640.1 | 11630536 | SNV | 1 | A | T | Homozygous   |
| NC_037640.1 | 11630540 | SNV | 1 | C | T | Heterozygous |
| NC_037640.1 | 11630542 | SNV | 1 | C | T | Heterozygous |
| NC_037640.1 | 11630647 | SNV | 1 | G | A | Homozygous   |
| NC_037640.1 | 11630786 | SNV | 1 | C | A | Heterozygous |
| NC_037640.1 | 11630786 | SNV | 1 | C | T | Heterozygous |
| NC_037640.1 | 11630792 | SNV | 1 | T | C | Heterozygous |
| NC_037640.1 | 11630795 | SNV | 1 | A | C | Heterozygous |
| NC_037640.1 | 11630803 | SNV | 1 | C | T | Heterozygous |
| NC_037640.1 | 11630805 | SNV | 1 | C | T | Heterozygous |
| NC_037640.1 | 11635200 | SNV | 1 | G | A | Homozygous   |
| NC_037640.1 | 11635223 | SNV | 1 | G | A | Heterozygous |
| NC_037640.1 | 11643848 | SNV | 1 | T | G | Homozygous   |
| NC_037640.1 | 11644205 | SNV | 1 | C | T | Heterozygous |
| NC_037640.1 | 11645319 | SNV | 1 | C | T | Heterozygous |
| NC_037640.1 | 11645346 | SNV | 1 | C | T | Homozygous   |
| NC_037640.1 | 11645505 | SNV | 1 | A | T | Heterozygous |
| NC_037640.1 | 11645507 | SNV | 1 | G | A | Heterozygous |
| NC_037640.1 | 11645513 | SNV | 1 | A | T | Heterozygous |
| NC_037640.1 | 11645517 | SNV | 1 | A | G | Heterozygous |
| NC_037640.1 | 11645519 | SNV | 1 | A | T | Heterozygous |
| NC_037640.1 | 11645984 | SNV | 1 | A | G | Homozygous   |
| NC_037640.1 | 11645990 | SNV | 1 | G | T | Homozygous   |
| NC_037640.1 | 11645996 | SNV | 1 | A | G | Homozygous   |
| NC_037640.1 | 11646017 | SNV | 1 | T | G | Homozygous   |
| NC_037640.1 | 11646020 | SNV | 1 | T | A | Homozygous   |
| NC_037640.1 | 11646023 | SNV | 1 | T | A | Homozygous   |
| NC_037640.1 | 11646216 | SNV | 1 | T | A | Homozygous   |
| NC_037640.1 | 11646218 | SNV | 1 | A | G | Homozygous   |
| NC_037640.1 | 11646234 | SNV | 1 | C | G | Homozygous   |
| NC_037640.1 | 11646240 | SNV | 1 | A | G | Homozygous   |
| NC_037640.1 | 11646245 | SNV | 1 | T | C | Homozygous   |



|             |          |     |   |   |   |              |
|-------------|----------|-----|---|---|---|--------------|
| NC_037640.1 | 11646251 | SNV | 1 | A | T | Homozygous   |
| NC_037640.1 | 11646255 | SNV | 1 | T | A | Homozygous   |
| NC_037640.1 | 11646257 | SNV | 1 | C | T | Homozygous   |
| NC_037640.1 | 11646264 | SNV | 1 | T | A | Homozygous   |
| NC_037640.1 | 11646276 | SNV | 1 | A | C | Homozygous   |
| NC_037640.1 | 11646278 | SNV | 1 | C | T | Homozygous   |
| NC_037640.1 | 11646281 | SNV | 1 | A | G | Homozygous   |
| NC_037640.1 | 11646288 | SNV | 1 | A | G | Homozygous   |
| NC_037640.1 | 11646293 | SNV | 1 | C | G | Homozygous   |
| NC_037640.1 | 11646697 | SNV | 1 | T | A | Homozygous   |
| NC_037640.1 | 11646705 | SNV | 1 | T | A | Homozygous   |
| NC_037640.1 | 11646707 | SNV | 1 | A | C | Homozygous   |
| NC_037640.1 | 11646712 | SNV | 1 | T | A | Homozygous   |
| NC_037640.1 | 11646734 | SNV | 1 | G | C | Homozygous   |
| NC_037640.1 | 11646737 | SNV | 1 | T | A | Homozygous   |
| NC_037640.1 | 11646759 | SNV | 1 | T | A | Homozygous   |
| NC_037640.1 | 11646761 | SNV | 1 | T | G | Homozygous   |
| NC_037640.1 | 11646763 | SNV | 1 | T | A | Homozygous   |
| NC_037640.1 | 11646767 | SNV | 1 | A | C | Heterozygous |
| NC_037640.1 | 11646769 | SNV | 1 | C | T | Heterozygous |
| NC_037640.1 | 11646896 | SNV | 1 | T | G | Homozygous   |
| NC_037640.1 | 11646900 | SNV | 1 | T | A | Homozygous   |
| NC_037640.1 | 11646906 | SNV | 1 | A | G | Homozygous   |
| NC_037640.1 | 11646918 | SNV | 1 | T | A | Homozygous   |
| NC_037640.1 | 11652666 | SNV | 1 | G | A | Homozygous   |
| NC_037640.1 | 11653967 | SNV | 1 | A | C | Homozygous   |
| NC_037640.1 | 11653972 | SNV | 1 | A | T | Heterozygous |
| NC_037640.1 | 11654553 | SNV | 1 | G | A | Heterozygous |
| NC_037640.1 | 11656026 | SNV | 1 | G | A | Homozygous   |
| NC_037640.1 | 11656295 | SNV | 1 | G | A | Homozygous   |
| NC_037640.1 | 11656424 | SNV | 1 | G | A | Heterozygous |
| NC_037640.1 | 11657884 | SNV | 1 | G | A | Heterozygous |
| NC_037640.1 | 11658920 | SNV | 1 | C | A | Homozygous   |
| NC_037640.1 | 11658924 | SNV | 1 | C | G | Homozygous   |
| NC_037640.1 | 11659205 | SNV | 1 | A | C | Homozygous   |
| NC_037640.1 | 11659220 | SNV | 1 | C | T | Heterozygous |
| NC_037640.1 | 11659269 | SNV | 1 | G | A | Homozygous   |
| NC_037640.1 | 11659313 | SNV | 1 | G | A | Heterozygous |
| NC_037640.1 | 11659398 | SNV | 1 | T | C | Homozygous   |
| NC_037640.1 | 11659445 | SNV | 1 | A | G | Heterozygous |
| NC_037640.1 | 11659465 | SNV | 1 | T | C | Heterozygous |
| NC_037640.1 | 11659475 | SNV | 1 | G | A | Heterozygous |
| NC_037640.1 | 11661228 | SNV | 1 | G | A | Homozygous   |
| NC_037640.1 | 11661297 | SNV | 1 | A | G | Heterozygous |
| NC_037640.1 | 11661385 | SNV | 1 | A | G | Heterozygous |
| NC_037640.1 | 11661768 | SNV | 1 | G | A | Heterozygous |
| NC_037640.1 | 11661778 | SNV | 1 | T | C | Homozygous   |
| NC_037640.1 | 11661851 | SNV | 1 | C | T | Heterozygous |
| NC_037640.1 | 11662154 | SNV | 1 | A | G | Homozygous   |
| NC_037640.1 | 11662232 | SNV | 1 | T | A | Heterozygous |
| NC_037640.1 | 11662390 | SNV | 1 | C | G | Homozygous   |

|             |          |     |   |   |   |              |
|-------------|----------|-----|---|---|---|--------------|
| NC_037640.1 | 11662445 | SNV | 1 | C | T | Heterozygous |
| NC_037640.1 | 11662845 | SNV | 1 | G | A | Homozygous   |
| NC_037640.1 | 11662934 | SNV | 1 | C | T | Heterozygous |
| NC_037640.1 | 11663207 | SNV | 1 | A | G | Heterozygous |
| NC_037640.1 | 11663490 | SNV | 1 | A | G | Homozygous   |
| NC_037640.1 | 11663730 | SNV | 1 | A | G | Homozygous   |
| NC_037640.1 | 11663883 | SNV | 1 | C | T | Heterozygous |
| NC_037640.1 | 11663900 | SNV | 1 | A | G | Heterozygous |
| NC_037640.1 | 11663907 | SNV | 1 | C | A | Heterozygous |
| NC_037640.1 | 11664001 | SNV | 1 | C | T | Homozygous   |
| NC_037640.1 | 11664093 | SNV | 1 | C | A | Heterozygous |
| NC_037640.1 | 11664120 | SNV | 1 | A | T | Homozygous   |
| NC_037640.1 | 11664328 | SNV | 1 | G | A | Heterozygous |
| NC_037640.1 | 11664330 | SNV | 1 | G | A | Homozygous   |
| NC_037640.1 | 11664407 | SNV | 1 | C | T | Heterozygous |
| NC_037640.1 | 11664438 | SNV | 1 | G | A | Homozygous   |
| NC_037640.1 | 11664554 | SNV | 1 | T | C | Homozygous   |
| NC_037640.1 | 11664611 | SNV | 1 | A | G | Homozygous   |
| NC_037640.1 | 11664722 | SNV | 1 | A | G | Homozygous   |
| NC_037640.1 | 11665021 | SNV | 1 | A | G | Homozygous   |
| NC_037640.1 | 11665452 | SNV | 1 | G | A | Homozygous   |
| NC_037640.1 | 11665590 | SNV | 1 | A | G | Homozygous   |
| NC_037640.1 | 11665887 | SNV | 1 | T | C | Homozygous   |
| NC_037640.1 | 11665916 | SNV | 1 | T | C | Homozygous   |
| NC_037640.1 | 11666034 | SNV | 1 | G | A | Heterozygous |
| NC_037640.1 | 11666244 | SNV | 1 | A | T | Heterozygous |
| NC_037640.1 | 11666267 | SNV | 1 | A | G | Heterozygous |
| NC_037640.1 | 11666853 | SNV | 1 | C | T | Heterozygous |
| NC_037640.1 | 11666893 | SNV | 1 | T | C | Heterozygous |
| NC_037640.1 | 11667312 | SNV | 1 | A | G | Heterozygous |
| NC_037640.1 | 11667325 | SNV | 1 | T | C | Heterozygous |
| NC_037640.1 | 11668116 | SNV | 1 | A | T | Homozygous   |
| NC_037640.1 | 11668217 | SNV | 1 | A | G | Homozygous   |
| NC_037640.1 | 11668641 | SNV | 1 | G | T | Heterozygous |
| NC_037640.1 | 11668709 | SNV | 1 | A | G | Homozygous   |
| NC_037640.1 | 11668844 | SNV | 1 | A | G | Homozygous   |
| NC_037640.1 | 11668848 | SNV | 1 | T | C | Heterozygous |
| NC_037640.1 | 11668853 | SNV | 1 | A | G | Homozygous   |
| NC_037640.1 | 11669499 | SNV | 1 | A | G | Homozygous   |
| NC_037640.1 | 11669661 | SNV | 1 | G | A | Heterozygous |
| NC_037640.1 | 11669835 | SNV | 1 | T | C | Homozygous   |
| NC_037640.1 | 11669908 | SNV | 1 | C | T | Heterozygous |
| NC_037640.1 | 11670768 | SNV | 1 | C | T | Heterozygous |
| NC_037640.1 | 11670994 | SNV | 1 | C | T | Heterozygous |
| NC_037640.1 | 11671311 | SNV | 1 | A | T | Heterozygous |
| NC_037640.1 | 11671864 | SNV | 1 | C | G | Homozygous   |
| NC_037640.1 | 11671897 | SNV | 1 | G | A | Heterozygous |
| NC_037640.1 | 11671900 | SNV | 1 | T | C | Homozygous   |
| NC_037640.1 | 11672124 | SNV | 1 | G | A | Homozygous   |
| NC_037640.1 | 11672137 | SNV | 1 | G | T | Heterozygous |
| NC_037640.1 | 11672218 | SNV | 1 | T | A | Homozygous   |

|             |          |     |   |   |   |              |
|-------------|----------|-----|---|---|---|--------------|
| NC_037640.1 | 11672652 | SNV | 1 | A | G | Heterozygous |
| NC_037640.1 | 11672758 | SNV | 1 | G | T | Heterozygous |
| NC_037640.1 | 11672822 | SNV | 1 | G | A | Heterozygous |
| NC_037640.1 | 11672921 | SNV | 1 | T | C | Homozygous   |
| NC_037640.1 | 11672969 | SNV | 1 | A | G | Homozygous   |
| NC_037640.1 | 11673419 | SNV | 1 | C | A | Homozygous   |
| NC_037640.1 | 11673665 | SNV | 1 | T | G | Heterozygous |
| NC_037640.1 | 11673699 | SNV | 1 | T | C | Homozygous   |
| NC_037640.1 | 11673702 | SNV | 1 | A | G | Heterozygous |
| NC_037640.1 | 11673704 | SNV | 1 | G | A | Heterozygous |
| NC_037640.1 | 11673708 | SNV | 1 | G | A | Homozygous   |
| NC_037640.1 | 11673758 | SNV | 1 | C | T | Homozygous   |
| NC_037640.1 | 11673767 | SNV | 1 | A | G | Homozygous   |
| NC_037640.1 | 11673872 | SNV | 1 | C | A | Heterozygous |
| NC_037640.1 | 11673880 | SNV | 1 | T | C | Heterozygous |
| NC_037640.1 | 11673949 | SNV | 1 | G | A | Heterozygous |
| NC_037640.1 | 11673987 | SNV | 1 | G | A | Heterozygous |
| NC_037640.1 | 11674046 | SNV | 1 | T | A | Homozygous   |
| NC_037640.1 | 11674897 | SNV | 1 | C | T | Homozygous   |
| NC_037640.1 | 11675166 | SNV | 1 | C | T | Homozygous   |
| NC_037640.1 | 11675192 | SNV | 1 | A | G | Heterozygous |
| NC_037640.1 | 11675201 | SNV | 1 | C | A | Heterozygous |
| NC_037640.1 | 11675428 | SNV | 1 | A | G | Homozygous   |
| NC_037640.1 | 11675547 | SNV | 1 | T | G | Heterozygous |
| NC_037640.1 | 11675607 | SNV | 1 | T | A | Heterozygous |
| NC_037640.1 | 11675694 | SNV | 1 | T | C | Heterozygous |
| NC_037640.1 | 11675739 | SNV | 1 | C | T | Heterozygous |
| NC_037640.1 | 11676097 | SNV | 1 | A | G | Homozygous   |
| NC_037640.1 | 11676099 | SNV | 1 | A | G | Homozygous   |
| NC_037640.1 | 11682391 | SNV | 1 | T | C | Heterozygous |
| NC_037640.1 | 11682396 | SNV | 1 | T | A | Heterozygous |
| NC_037640.1 | 11682427 | SNV | 1 | T | C | Homozygous   |
| NC_037640.1 | 11682464 | SNV | 1 | A | T | Heterozygous |
| NC_037640.1 | 11682467 | SNV | 1 | T | A | Heterozygous |
| NC_037640.1 | 11682467 | SNV | 1 | T | C | Heterozygous |
| NC_037640.1 | 11682471 | SNV | 1 | T | A | Heterozygous |
| NC_037640.1 | 11682473 | SNV | 1 | A | G | Heterozygous |
| NC_037640.1 | 11682479 | SNV | 1 | C | A | Homozygous   |
| NC_037640.1 | 11682482 | SNV | 1 | T | C | Homozygous   |
| NC_037640.1 | 11682500 | SNV | 1 | T | A | Homozygous   |
| NC_037640.1 | 11682506 | SNV | 1 | A | C | Homozygous   |
| NC_037640.1 | 11682509 | SNV | 1 | A | T | Homozygous   |
| NC_037640.1 | 11690174 | SNV | 1 | T | C | Homozygous   |
| NC_037640.1 | 11690589 | SNV | 1 | A | G | Homozygous   |
| NC_037640.1 | 11690834 | SNV | 1 | A | G | Homozygous   |
| NC_037640.1 | 11690873 | SNV | 1 | T | C | Heterozygous |
| NC_037640.1 | 11690878 | SNV | 1 | T | C | Heterozygous |
| NC_037640.1 | 11702273 | SNV | 1 | A | G | Homozygous   |
| NC_037640.1 | 11702297 | SNV | 1 | T | C | Homozygous   |
| NC_037640.1 | 11702312 | SNV | 1 | A | C | Homozygous   |
| NC_037640.1 | 11702315 | SNV | 1 | A | G | Homozygous   |

|             |          |     |   |   |   |              |
|-------------|----------|-----|---|---|---|--------------|
| NC_037640.1 | 11704088 | SNV | 1 | T | A | Homozygous   |
| NC_037640.1 | 11704106 | SNV | 1 | T | A | Homozygous   |
| NC_037640.1 | 11704109 | SNV | 1 | T | C | Heterozygous |
| NC_037640.1 | 11704112 | SNV | 1 | T | C | Heterozygous |
| NC_037640.1 | 11704115 | SNV | 1 | A | T | Homozygous   |
| NC_037640.1 | 11704119 | SNV | 1 | T | G | Homozygous   |
| NC_037640.1 | 11704124 | SNV | 1 | G | A | Homozygous   |
| NC_037640.1 | 11704127 | SNV | 1 | A | C | Homozygous   |
| NC_037640.1 | 11704129 | SNV | 1 | T | A | Homozygous   |
| NC_037640.1 | 11704142 | SNV | 1 | C | T | Homozygous   |
| NC_037640.1 | 11704149 | SNV | 1 | C | T | Homozygous   |
| NC_037640.1 | 11704152 | SNV | 1 | A | C | Homozygous   |
| NC_037640.1 | 11704154 | SNV | 1 | A | C | Heterozygous |
| NC_037640.1 | 11704573 | SNV | 1 | T | C | Heterozygous |
| NC_037640.1 | 11704576 | SNV | 1 | T | C | Heterozygous |
| NC_037640.1 | 11704606 | SNV | 1 | A | T | Heterozygous |
| NC_037640.1 | 11704633 | SNV | 1 | A | G | Heterozygous |
| NC_037640.1 | 11704636 | SNV | 1 | G | A | Heterozygous |
| NC_037640.1 | 11704648 | SNV | 1 | T | A | Heterozygous |
| NC_037640.1 | 11704651 | SNV | 1 | T | C | Heterozygous |
| NC_037640.1 | 11704654 | SNV | 1 | T | A | Heterozygous |
| NC_037640.1 | 11705136 | SNV | 1 | A | T | Heterozygous |
| NC_037640.1 | 11705145 | SNV | 1 | A | T | Heterozygous |
| NC_037640.1 | 11705148 | SNV | 1 | T | G | Heterozygous |
| NC_037640.1 | 11705154 | SNV | 1 | A | T | Heterozygous |
| NC_037640.1 | 11705157 | SNV | 1 | C | A | Heterozygous |
| NC_037640.1 | 11705166 | SNV | 1 | T | C | Heterozygous |
| NC_037640.1 | 11705172 | SNV | 1 | A | T | Heterozygous |
| NC_037640.1 | 11705176 | SNV | 1 | A | T | Heterozygous |
| NC_037640.1 | 11705178 | SNV | 1 | A | G | Homozygous   |
| NC_037640.1 | 11705181 | SNV | 1 | T | A | Homozygous   |
| NC_037640.1 | 11705184 | SNV | 1 | G | T | Homozygous   |
| NC_037640.1 | 11705327 | SNV | 1 | T | A | Homozygous   |
| NC_037640.1 | 11705329 | SNV | 1 | T | C | Homozygous   |
| NC_037640.1 | 11705332 | SNV | 1 | A | G | Homozygous   |
| NC_037640.1 | 11705419 | SNV | 1 | A | G | Homozygous   |
| NC_037640.1 | 11705423 | SNV | 1 | T | A | Homozygous   |
| NC_037640.1 | 11705425 | SNV | 1 | A | G | Homozygous   |
| NC_037640.1 | 11705428 | SNV | 1 | T | C | Homozygous   |
| NC_037640.1 | 11705434 | SNV | 1 | G | A | Homozygous   |
| NC_037640.1 | 11705437 | SNV | 1 | T | A | Homozygous   |
| NC_037640.1 | 11705440 | SNV | 1 | T | C | Heterozygous |
| NC_037640.1 | 11705449 | SNV | 1 | T | C | Homozygous   |
| NC_037640.1 | 11705453 | SNV | 1 | C | A | Homozygous   |
| NC_037640.1 | 11705455 | SNV | 1 | T | G | Homozygous   |
| NC_037640.1 | 11705471 | SNV | 1 | T | C | Heterozygous |
| NC_037640.1 | 11705480 | SNV | 1 | T | A | Heterozygous |
| NC_037640.1 | 11705488 | SNV | 1 | A | T | Heterozygous |
| NC_037640.1 | 11705491 | SNV | 1 | C | T | Heterozygous |
| NC_037640.1 | 11705497 | SNV | 1 | T | A | Heterozygous |
| NC_037640.1 | 11705500 | SNV | 1 | C | T | Heterozygous |

|             |          |     |   |   |   |              |
|-------------|----------|-----|---|---|---|--------------|
| NC_037640.1 | 11705509 | SNV | 1 | A | T | Heterozygous |
| NC_037640.1 | 11705511 | SNV | 1 | C | G | Heterozygous |
| NC_037640.1 | 11705513 | SNV | 1 | A | G | Heterozygous |
| NC_037640.1 | 11705548 | SNV | 1 | C | T | Homozygous   |
| NC_037640.1 | 11708123 | SNV | 1 | T | A | Heterozygous |
| NC_037640.1 | 11708139 | SNV | 1 | T | C | Homozygous   |
| NC_037640.1 | 11708335 | SNV | 1 | A | T | Heterozygous |
| NC_037640.1 | 11708443 | SNV | 1 | C | T | Homozygous   |
| NC_037640.1 | 11708621 | SNV | 1 | G | T | Heterozygous |
| NC_037640.1 | 11708825 | SNV | 1 | G | C | Homozygous   |
| NC_037640.1 | 11708835 | SNV | 1 | T | C | Homozygous   |
| NC_037640.1 | 11708838 | SNV | 1 | T | C | Homozygous   |
| NC_037640.1 | 11708917 | SNV | 1 | T | A | Homozygous   |
| NC_037640.1 | 11708943 | SNV | 1 | T | A | Homozygous   |
| NC_037640.1 | 11708945 | SNV | 1 | A | T | Homozygous   |
| NC_037640.1 | 11709080 | SNV | 1 | A | G | Heterozygous |
| NC_037640.1 | 11709229 | SNV | 1 | T | C | Homozygous   |
| NC_037640.1 | 11710394 | SNV | 1 | T | C | Heterozygous |
| NC_037640.1 | 11710427 | SNV | 1 | A | G | Heterozygous |
| NC_037640.1 | 11710429 | SNV | 1 | A | T | Homozygous   |
| NC_037640.1 | 11710678 | SNV | 1 | C | G | Homozygous   |
| NC_037640.1 | 11711836 | SNV | 1 | C | T | Heterozygous |
| NC_037640.1 | 11717940 | SNV | 1 | A | T | Homozygous   |
| NC_037640.1 | 11718095 | SNV | 1 | T | A | Homozygous   |
| NC_037640.1 | 11726417 | SNV | 1 | C | T | Heterozygous |
| NC_037640.1 | 11726430 | SNV | 1 | G | A | Heterozygous |
| NC_037640.1 | 11726437 | SNV | 1 | A | C | Homozygous   |
| NC_037640.1 | 11726464 | SNV | 1 | G | A | Homozygous   |
| NC_037640.1 | 11730045 | SNV | 1 | T | C | Heterozygous |
| NC_037640.1 | 11730060 | SNV | 1 | T | C | Heterozygous |
| NC_037640.1 | 11731577 | SNV | 1 | T | C | Heterozygous |
| NC_037640.1 | 11731579 | SNV | 1 | T | A | Heterozygous |
| NC_037640.1 | 11731587 | SNV | 1 | T | C | Heterozygous |
| NC_037640.1 | 11734054 | SNV | 1 | G | C | Heterozygous |
| NC_037640.1 | 11734076 | SNV | 1 | G | A | Heterozygous |
| NC_037640.1 | 11735087 | SNV | 1 | T | G | Heterozygous |
| NC_037640.1 | 11741842 | SNV | 1 | C | T | Homozygous   |
| NC_037640.1 | 11741869 | SNV | 1 | G | T | Heterozygous |
| NC_037640.1 | 11741893 | SNV | 1 | G | A | Heterozygous |
| NC_037640.1 | 11741930 | SNV | 1 | G | A | Heterozygous |
| NC_037640.1 | 11741941 | SNV | 1 | G | A | Heterozygous |
| NC_037640.1 | 11741976 | SNV | 1 | A | G | Homozygous   |
| NC_037640.1 | 11741983 | SNV | 1 | C | G | Homozygous   |
| NC_037640.1 | 11741992 | SNV | 1 | C | T | Heterozygous |
| NC_037640.1 | 11742014 | SNV | 1 | C | T | Homozygous   |
| NC_037640.1 | 11742052 | SNV | 1 | T | C | Heterozygous |
| NC_037640.1 | 11744549 | SNV | 1 | T | C | Homozygous   |
| NC_037640.1 | 11744574 | SNV | 1 | T | C | Heterozygous |
| NC_037640.1 | 11744589 | SNV | 1 | C | T | Heterozygous |
| NC_037640.1 | 11744597 | SNV | 1 | G | A | Homozygous   |
| NC_037640.1 | 11744797 | SNV | 1 | G | C | Heterozygous |

|             |          |     |   |   |   |              |
|-------------|----------|-----|---|---|---|--------------|
| NC_037640.1 | 11744879 | SNV | 1 | C | T | Heterozygous |
| NC_037640.1 | 11745014 | SNV | 1 | A | G | Homozygous   |
| NC_037640.1 | 11745083 | SNV | 1 | C | T | Heterozygous |
| NC_037640.1 | 11745159 | SNV | 1 | C | T | Heterozygous |
| NC_037640.1 | 11746035 | SNV | 1 | T | A | Homozygous   |
| NC_037640.1 | 11746061 | SNV | 1 | T | A | Homozygous   |
| NC_037640.1 | 11746071 | SNV | 1 | A | T | Homozygous   |
| NC_037640.1 | 11752277 | SNV | 1 | G | A | Homozygous   |
| NC_037640.1 | 11752314 | SNV | 1 | G | A | Heterozygous |
| NC_037640.1 | 11752320 | SNV | 1 | A | G | Homozygous   |
| NC_037640.1 | 11754181 | SNV | 1 | T | C | Homozygous   |
| NC_037640.1 | 11754209 | SNV | 1 | G | A | Heterozygous |
| NC_037640.1 | 11754218 | SNV | 1 | G | A | Heterozygous |
| NC_037640.1 | 11755353 | SNV | 1 | C | T | Heterozygous |
| NC_037640.1 | 11756462 | SNV | 1 | C | T | Homozygous   |
| NC_037640.1 | 11756471 | SNV | 1 | G | A | Heterozygous |
| NC_037640.1 | 11756473 | SNV | 1 | G | A | Heterozygous |
| NC_037640.1 | 11756505 | SNV | 1 | A | G | Homozygous   |
| NC_037640.1 | 11756508 | SNV | 1 | G | A | Heterozygous |
| NC_037640.1 | 11757265 | SNV | 1 | G | C | Homozygous   |
| NC_037640.1 | 11757381 | SNV | 1 | A | G | Heterozygous |
| NC_037640.1 | 11758786 | SNV | 1 | A | G | Homozygous   |
| NC_037640.1 | 11759540 | SNV | 1 | A | G | Homozygous   |
| NC_037640.1 | 11759544 | SNV | 1 | G | A | Homozygous   |
| NC_037640.1 | 11759552 | SNV | 1 | G | A | Homozygous   |
| NC_037640.1 | 11759584 | SNV | 1 | G | A | Homozygous   |
| NC_037640.1 | 11759586 | SNV | 1 | G | A | Homozygous   |
| NC_037640.1 | 11761295 | SNV | 1 | C | G | Homozygous   |
| NC_037640.1 | 11761387 | SNV | 1 | G | A | Heterozygous |
| NC_037640.1 | 11761756 | SNV | 1 | C | T | Homozygous   |
| NC_037640.1 | 11761780 | SNV | 1 | A | G | Homozygous   |
| NC_037640.1 | 11762346 | SNV | 1 | A | G | Homozygous   |
| NC_037640.1 | 11762384 | SNV | 1 | T | C | Homozygous   |
| NC_037640.1 | 11762450 | SNV | 1 | C | T | Heterozygous |
| NC_037640.1 | 11762494 | SNV | 1 | T | C | Homozygous   |
| NC_037640.1 | 11762945 | SNV | 1 | T | C | Homozygous   |
| NC_037640.1 | 11762954 | SNV | 1 | A | G | Heterozygous |
| NC_037640.1 | 11763154 | SNV | 1 | C | G | Homozygous   |
| NC_037640.1 | 11763404 | SNV | 1 | C | T | Homozygous   |
| NC_037640.1 | 11763552 | SNV | 1 | C | G | Homozygous   |
| NC_037640.1 | 11764972 | SNV | 1 | A | G | Heterozygous |
| NC_037640.1 | 11764985 | SNV | 1 | A | G | Heterozygous |
| NC_037640.1 | 11766247 | SNV | 1 | C | T | Heterozygous |
| NC_037640.1 | 11767194 | SNV | 1 | T | C | Homozygous   |
| NC_037640.1 | 11767197 | SNV | 1 | T | G | Heterozygous |
| NC_037640.1 | 11767200 | SNV | 1 | G | A | Heterozygous |
| NC_037640.1 | 11767213 | SNV | 1 | G | C | Homozygous   |
| NC_037640.1 | 11767233 | SNV | 1 | A | C | Heterozygous |
| NC_037640.1 | 11767326 | SNV | 1 | G | A | Heterozygous |
| NC_037640.1 | 11769663 | SNV | 1 | G | A | Homozygous   |
| NC_037640.1 | 11769673 | SNV | 1 | A | G | Homozygous   |

|             |          |     |   |   |   |              |
|-------------|----------|-----|---|---|---|--------------|
| NC_037640.1 | 11769750 | SNV | 1 | C | G | Homozygous   |
| NC_037640.1 | 11771784 | SNV | 1 | A | G | Homozygous   |
| NC_037640.1 | 11771803 | SNV | 1 | C | T | Heterozygous |
| NC_037640.1 | 11771851 | SNV | 1 | C | T | Heterozygous |
| NC_037640.1 | 11771865 | SNV | 1 | C | T | Homozygous   |
| NC_037640.1 | 11771875 | SNV | 1 | T | C | Heterozygous |
| NC_037640.1 | 11771980 | SNV | 1 | C | T | Homozygous   |
| NC_037640.1 | 11771987 | SNV | 1 | T | C | Homozygous   |
| NC_037640.1 | 11771994 | SNV | 1 | A | T | Heterozygous |
| NC_037640.1 | 11772017 | SNV | 1 | T | A | Heterozygous |
| NC_037640.1 | 11772019 | SNV | 1 | A | T | Heterozygous |
| NC_037640.1 | 11772090 | SNV | 1 | T | A | Homozygous   |
| NC_037640.1 | 11772133 | SNV | 1 | C | G | Homozygous   |
| NC_037640.1 | 11772190 | SNV | 1 | T | C | Homozygous   |
| NC_037640.1 | 11772300 | SNV | 1 | T | C | Homozygous   |
| NC_037640.1 | 11772318 | SNV | 1 | G | A | Homozygous   |
| NC_037640.1 | 11772327 | SNV | 1 | G | C | Homozygous   |
| NC_037640.1 | 11772341 | SNV | 1 | T | C | Heterozygous |
| NC_037640.1 | 11772392 | SNV | 1 | T | C | Homozygous   |
| NC_037640.1 | 11772398 | SNV | 1 | C | T | Heterozygous |
| NC_037640.1 | 11772423 | SNV | 1 | G | A | Homozygous   |
| NC_037640.1 | 11772457 | SNV | 1 | T | A | Heterozygous |
| NC_037640.1 | 11772465 | SNV | 1 | T | A | Heterozygous |
| NC_037640.1 | 11772479 | SNV | 1 | T | A | Heterozygous |
| NC_037640.1 | 11772483 | SNV | 1 | T | A | Heterozygous |
| NC_037640.1 | 11772545 | SNV | 1 | T | C | Heterozygous |
| NC_037640.1 | 11772551 | SNV | 1 | C | T | Heterozygous |
| NC_037640.1 | 11772561 | SNV | 1 | T | C | Heterozygous |
| NC_037640.1 | 11772564 | SNV | 1 | G | A | Heterozygous |
| NC_037640.1 | 11772564 | SNV | 1 | G | T | Heterozygous |
| NC_037640.1 | 11772567 | SNV | 1 | A | G | Heterozygous |
| NC_037640.1 | 11772640 | SNV | 1 | T | C | Homozygous   |
| NC_037640.1 | 11772647 | SNV | 1 | T | C | Homozygous   |
| NC_037640.1 | 11772651 | SNV | 1 | C | T | Homozygous   |
| NC_037640.1 | 11772686 | SNV | 1 | A | G | Heterozygous |
| NC_037640.1 | 11772735 | SNV | 1 | T | A | Heterozygous |
| NC_037640.1 | 11772756 | SNV | 1 | T | C | Heterozygous |
| NC_037640.1 | 11772759 | SNV | 1 | A | T | Heterozygous |
| NC_037640.1 | 11772763 | SNV | 1 | G | A | Heterozygous |
| NC_037640.1 | 11772763 | SNV | 1 | G | T | Heterozygous |
| NC_037640.1 | 11772796 | SNV | 1 | T | C | Heterozygous |
| NC_037640.1 | 11772807 | SNV | 1 | T | C | Homozygous   |
| NC_037640.1 | 11773287 | SNV | 1 | T | C | Homozygous   |
| NC_037640.1 | 11773303 | SNV | 1 | G | A | Homozygous   |
| NC_037640.1 | 11773329 | SNV | 1 | A | G | Homozygous   |
| NC_037640.1 | 11773443 | SNV | 1 | C | T | Homozygous   |
| NC_037640.1 | 11773464 | SNV | 1 | T | G | Homozygous   |
| NC_037640.1 | 11773498 | SNV | 1 | G | A | Homozygous   |
| NC_037640.1 | 11773650 | SNV | 1 | T | C | Homozygous   |
| NC_037640.1 | 11773685 | SNV | 1 | A | G | Homozygous   |
| NC_037640.1 | 11773703 | SNV | 1 | G | C | Homozygous   |

|             |          |     |   |   |   |              |
|-------------|----------|-----|---|---|---|--------------|
| NC_037640.1 | 11773718 | SNV | 1 | A | G | Homozygous   |
| NC_037640.1 | 11773722 | SNV | 1 | G | A | Homozygous   |
| NC_037640.1 | 11773735 | SNV | 1 | C | T | Homozygous   |
| NC_037640.1 | 11775816 | SNV | 1 | C | T | Homozygous   |
| NC_037640.1 | 11775845 | SNV | 1 | A | C | Homozygous   |
| NC_037640.1 | 11775847 | SNV | 1 | A | G | Homozygous   |
| NC_037640.1 | 11775859 | SNV | 1 | A | G | Homozygous   |
| NC_037640.1 | 11775861 | SNV | 1 | A | G | Homozygous   |
| NC_037640.1 | 11775867 | SNV | 1 | A | G | Homozygous   |
| NC_037640.1 | 11776006 | SNV | 1 | T | C | Homozygous   |
| NC_037640.1 | 11776014 | SNV | 1 | G | T | Homozygous   |
| NC_037640.1 | 11776017 | SNV | 1 | A | T | Homozygous   |
| NC_037640.1 | 11776021 | SNV | 1 | A | T | Homozygous   |
| NC_037640.1 | 11776318 | SNV | 1 | C | G | Homozygous   |
| NC_037640.1 | 11776344 | SNV | 1 | A | G | Homozygous   |
| NC_037640.1 | 11776350 | SNV | 1 | T | C | Heterozygous |
| NC_037640.1 | 11779801 | SNV | 1 | T | C | Heterozygous |
| NC_037640.1 | 11779817 | SNV | 1 | T | C | Heterozygous |
| NC_037640.1 | 11779820 | SNV | 1 | T | A | Heterozygous |
| NC_037640.1 | 11779832 | SNV | 1 | C | T | Homozygous   |
| NC_037640.1 | 11779835 | SNV | 1 | G | A | Heterozygous |
| NC_037640.1 | 11779852 | SNV | 1 | A | G | Heterozygous |
| NC_037640.1 | 11779866 | SNV | 1 | T | A | Heterozygous |
| NC_037640.1 | 11782972 | SNV | 1 | C | T | Heterozygous |
| NC_037640.1 | 11783012 | SNV | 1 | T | C | Heterozygous |
| NC_037640.1 | 11783063 | SNV | 1 | G | A | Heterozygous |
| NC_037640.1 | 11783275 | SNV | 1 | C | A | Homozygous   |
| NC_037640.1 | 11783283 | SNV | 1 | G | A | Homozygous   |
| NC_037640.1 | 11783347 | SNV | 1 | A | G | Homozygous   |
| NC_037640.1 | 11783369 | SNV | 1 | C | A | Homozygous   |
| NC_037640.1 | 11783385 | SNV | 1 | C | T | Homozygous   |
| NC_037640.1 | 11783503 | SNV | 1 | G | C | Homozygous   |
| NC_037640.1 | 11783511 | SNV | 1 | T | C | Homozygous   |
| NC_037640.1 | 11783995 | SNV | 1 | C | A | Heterozygous |
| NC_037640.1 | 11784000 | SNV | 1 | T | A | Heterozygous |
| NC_037640.1 | 11784007 | SNV | 1 | G | T | Heterozygous |
| NC_037640.1 | 11784010 | SNV | 1 | G | A | Homozygous   |
| NC_037640.1 | 11784068 | SNV | 1 | A | G | Homozygous   |
| NC_037640.1 | 11784117 | SNV | 1 | C | T | Heterozygous |
| NC_037640.1 | 11784230 | SNV | 1 | C | T | Heterozygous |
| NC_037640.1 | 11784343 | SNV | 1 | T | C | Heterozygous |
| NC_037640.1 | 11784361 | SNV | 1 | A | T | Heterozygous |
| NC_037640.1 | 11784381 | SNV | 1 | T | C | Homozygous   |
| NC_037640.1 | 11784398 | SNV | 1 | A | G | Homozygous   |
| NC_037640.1 | 11784410 | SNV | 1 | G | A | Homozygous   |
| NC_037640.1 | 11784437 | SNV | 1 | A | G | Homozygous   |
| NC_037640.1 | 11784451 | SNV | 1 | T | C | Homozygous   |
| NC_037640.1 | 11787829 | SNV | 1 | A | G | Homozygous   |
| NC_037640.1 | 11787949 | SNV | 1 | T | C | Homozygous   |
| NC_037640.1 | 11787993 | SNV | 1 | A | G | Heterozygous |
| NC_037640.1 | 11788000 | SNV | 1 | C | T | Heterozygous |



|             |          |     |   |   |   |              |
|-------------|----------|-----|---|---|---|--------------|
| NC_037640.1 | 11788014 | SNV | 1 | C | T | Heterozygous |
| NC_037640.1 | 11788025 | SNV | 1 | A | T | Heterozygous |
| NC_037640.1 | 11788570 | SNV | 1 | A | G | Homozygous   |
| NC_037640.1 | 11788614 | SNV | 1 | T | C | Homozygous   |
| NC_037640.1 | 11792761 | SNV | 1 | A | G | Homozygous   |
| NC_037640.1 | 11793231 | SNV | 1 | T | C | Heterozygous |
| NC_037640.1 | 11793876 | SNV | 1 | A | G | Homozygous   |
| NC_037640.1 | 11794025 | SNV | 1 | A | C | Homozygous   |
| NC_037640.1 | 11795267 | SNV | 1 | C | G | Homozygous   |
| NC_037640.1 | 11795283 | SNV | 1 | G | A | Homozygous   |
| NC_037640.1 | 11797595 | SNV | 1 | T | C | Homozygous   |
| NC_037640.1 | 11797600 | SNV | 1 | C | T | Heterozygous |
| NC_037640.1 | 11797652 | SNV | 1 | G | A | Heterozygous |
| NC_037640.1 | 11802532 | SNV | 1 | A | G | Heterozygous |
| NC_037640.1 | 11803416 | SNV | 1 | T | C | Heterozygous |
| NC_037640.1 | 11803783 | SNV | 1 | T | G | Homozygous   |
| NC_037640.1 | 11804471 | SNV | 1 | T | A | Homozygous   |
| NC_037640.1 | 11804474 | SNV | 1 | C | A | Homozygous   |
| NC_037640.1 | 11806231 | SNV | 1 | T | C | Homozygous   |
| NC_037640.1 | 11806374 | SNV | 1 | T | A | Homozygous   |
| NC_037640.1 | 11806683 | SNV | 1 | T | C | Heterozygous |
| NC_037640.1 | 11806767 | SNV | 1 | C | T | Heterozygous |
| NC_037640.1 | 11806836 | SNV | 1 | G | A | Heterozygous |
| NC_037640.1 | 11806941 | SNV | 1 | C | A | Homozygous   |
| NC_037640.1 | 11807507 | SNV | 1 | T | C | Homozygous   |
| NC_037640.1 | 11809632 | SNV | 1 | G | A | Heterozygous |
| NC_037640.1 | 11809637 | SNV | 1 | A | G | Heterozygous |
| NC_037640.1 | 11809644 | SNV | 1 | T | C | Heterozygous |
| NC_037640.1 | 11810924 | SNV | 1 | A | G | Heterozygous |
| NC_037640.1 | 11810931 | SNV | 1 | G | A | Heterozygous |
| NC_037640.1 | 11821845 | SNV | 1 | A | G | Homozygous   |
| NC_037640.1 | 11821882 | SNV | 1 | G | A | Heterozygous |
| NC_037640.1 | 11827272 | SNV | 1 | C | T | Heterozygous |
| NC_037640.1 | 11827316 | SNV | 1 | G | A | Homozygous   |
| NC_037640.1 | 11827330 | SNV | 1 | C | T | Heterozygous |
| NC_037640.1 | 11830251 | SNV | 1 | G | A | Heterozygous |
| NC_037640.1 | 11830272 | SNV | 1 | G | A | Heterozygous |
| NC_037640.1 | 11830274 | SNV | 1 | G | A | Heterozygous |
| NC_037640.1 | 11830908 | SNV | 1 | A | G | Homozygous   |
| NC_037640.1 | 11830910 | SNV | 1 | T | A | Homozygous   |
| NC_037640.1 | 11830939 | SNV | 1 | T | C | Homozygous   |
| NC_037640.1 | 11830943 | SNV | 1 | A | T | Homozygous   |
| NC_037640.1 | 11830950 | SNV | 1 | A | T | Homozygous   |
| NC_037640.1 | 11830956 | SNV | 1 | T | A | Homozygous   |
| NC_037640.1 | 11830959 | SNV | 1 | T | G | Homozygous   |
| NC_037640.1 | 11830962 | SNV | 1 | A | C | Homozygous   |
| NC_037640.1 | 11830970 | SNV | 1 | A | G | Heterozygous |
| NC_037640.1 | 11830975 | SNV | 1 | T | G | Heterozygous |
| NC_037640.1 | 11830982 | SNV | 1 | T | A | Heterozygous |
| NC_037640.1 | 11831031 | SNV | 1 | A | T | Homozygous   |
| NC_037640.1 | 11831035 | SNV | 1 | T | A | Heterozygous |

|             |          |     |   |   |   |              |
|-------------|----------|-----|---|---|---|--------------|
| NC_037640.1 | 11831044 | SNV | 1 | T | A | Homozygous   |
| NC_037640.1 | 11831046 | SNV | 1 | A | G | Heterozygous |
| NC_037640.1 | 11831080 | SNV | 1 | T | C | Homozygous   |
| NC_037640.1 | 11834146 | SNV | 1 | T | G | Homozygous   |
| NC_037640.1 | 11834159 | SNV | 1 | C | T | Heterozygous |
| NC_037640.1 | 11842751 | SNV | 1 | G | T | Homozygous   |
| NC_037640.1 | 11846554 | SNV | 1 | T | C | Homozygous   |
| NC_037640.1 | 11849043 | SNV | 1 | C | T | Homozygous   |
| NC_037640.1 | 11849211 | SNV | 1 | T | C | Homozygous   |
| NC_037640.1 | 11849415 | SNV | 1 | A | G | Homozygous   |
| NC_037640.1 | 11849457 | SNV | 1 | G | C | Heterozygous |
| NC_037640.1 | 11849674 | SNV | 1 | A | G | Homozygous   |
| NC_037640.1 | 11849843 | SNV | 1 | T | C | Homozygous   |
| NC_037640.1 | 11850070 | SNV | 1 | G | A | Heterozygous |
| NC_037640.1 | 11850121 | SNV | 1 | A | G | Homozygous   |
| NC_037640.1 | 11850182 | SNV | 1 | C | T | Heterozygous |
| NC_037640.1 | 11850262 | SNV | 1 | G | C | Heterozygous |
| NC_037640.1 | 11850289 | SNV | 1 | G | A | Heterozygous |
| NC_037640.1 | 11850406 | SNV | 1 | T | C | Homozygous   |
| NC_037640.1 | 11850849 | SNV | 1 | T | C | Heterozygous |
| NC_037640.1 | 11854178 | SNV | 1 | C | T | Heterozygous |
| NC_037640.1 | 11854252 | SNV | 1 | T | C | Homozygous   |
| NC_037640.1 | 11854453 | SNV | 1 | T | C | Homozygous   |
| NC_037640.1 | 11854460 | SNV | 1 | G | A | Homozygous   |
| NC_037640.1 | 11854553 | SNV | 1 | A | G | Heterozygous |
| NC_037640.1 | 11854609 | SNV | 1 | A | G | Heterozygous |
| NC_037640.1 | 11854885 | SNV | 1 | T | C | Heterozygous |
| NC_037640.1 | 11854891 | SNV | 1 | G | A | Heterozygous |
| NC_037640.1 | 11854905 | SNV | 1 | C | T | Heterozygous |
| NC_037640.1 | 11854922 | SNV | 1 | G | A | Heterozygous |
| NC_037640.1 | 11855000 | SNV | 1 | T | C | Homozygous   |
| NC_037640.1 | 11855169 | SNV | 1 | A | G | Heterozygous |
| NC_037640.1 | 11855172 | SNV | 1 | A | G | Homozygous   |
| NC_037640.1 | 11856755 | SNV | 1 | A | G | Heterozygous |
| NC_037640.1 | 11856782 | SNV | 1 | A | G | Heterozygous |
| NC_037640.1 | 11856976 | SNV | 1 | A | T | Heterozygous |
| NC_037640.1 | 11857106 | SNV | 1 | T | C | Homozygous   |
| NC_037640.1 | 11857599 | SNV | 1 | A | G | Homozygous   |
| NC_037640.1 | 11857722 | SNV | 1 | T | C | Homozygous   |
| NC_037640.1 | 11858885 | SNV | 1 | T | C | Homozygous   |
| NC_037640.1 | 11859008 | SNV | 1 | T | C | Homozygous   |
| NC_037640.1 | 11860450 | SNV | 1 | T | C | Heterozygous |
| NC_037640.1 | 11926291 | SNV | 1 | C | T | Heterozygous |
| NC_037640.1 | 11926768 | SNV | 1 | C | T | Homozygous   |
| NC_037640.1 | 11926858 | SNV | 1 | A | G | Heterozygous |
| NC_037640.1 | 11926922 | SNV | 1 | T | C | Heterozygous |
| NC_037640.1 | 11926951 | SNV | 1 | C | T | Heterozygous |
| NC_037640.1 | 11927125 | SNV | 1 | G | A | Heterozygous |
| NC_037640.1 | 11927142 | SNV | 1 | A | G | Heterozygous |
| NC_037640.1 | 11935189 | SNV | 1 | T | C | Homozygous   |
| NC_037640.1 | 11935207 | SNV | 1 | A | G | Heterozygous |

|             |          |     |   |   |   |              |
|-------------|----------|-----|---|---|---|--------------|
| NC_037640.1 | 11935233 | SNV | 1 | G | A | Heterozygous |
| NC_037640.1 | 11935246 | SNV | 1 | G | A | Homozygous   |
| NC_037640.1 | 11946262 | SNV | 1 | T | C | Heterozygous |
| NC_037640.1 | 11946445 | SNV | 1 | G | A | Heterozygous |
| NC_037640.1 | 11946484 | SNV | 1 | A | G | Homozygous   |
| NC_037640.1 | 11946682 | SNV | 1 | T | C | Homozygous   |
| NC_037640.1 | 11946814 | SNV | 1 | C | T | Homozygous   |
| NC_037640.1 | 11946973 | SNV | 1 | T | A | Heterozygous |
| NC_037640.1 | 11946979 | SNV | 1 | T | A | Heterozygous |
| NC_037640.1 | 11946982 | SNV | 1 | A | T | Heterozygous |
| NC_037640.1 | 11946988 | SNV | 1 | A | T | Homozygous   |
| NC_037640.1 | 11946995 | SNV | 1 | T | C | Homozygous   |
| NC_037640.1 | 11947326 | SNV | 1 | T | C | Homozygous   |
| NC_037640.1 | 11948018 | SNV | 1 | C | T | Homozygous   |
| NC_037640.1 | 11948366 | SNV | 1 | G | A | Heterozygous |
| NC_037640.1 | 11948467 | SNV | 1 | A | G | Heterozygous |
| NC_037640.1 | 11949065 | SNV | 1 | G | A | Heterozygous |
| NC_037640.1 | 11950048 | SNV | 1 | A | G | Homozygous   |
| NC_037640.1 | 11950536 | SNV | 1 | A | G | Homozygous   |
| NC_037640.1 | 11950569 | SNV | 1 | A | T | Heterozygous |
| NC_037640.1 | 11950644 | SNV | 1 | T | C | Homozygous   |
| NC_037640.1 | 11952137 | SNV | 1 | A | G | Homozygous   |
| NC_037640.1 | 11952152 | SNV | 1 | G | A | Homozygous   |
| NC_037640.1 | 11952356 | SNV | 1 | A | G | Homozygous   |
| NC_037640.1 | 11952807 | SNV | 1 | A | T | Heterozygous |
| NC_037640.1 | 11952812 | SNV | 1 | A | T | Heterozygous |
| NC_037640.1 | 11952814 | SNV | 1 | A | G | Heterozygous |
| NC_037640.1 | 11952818 | SNV | 1 | A | C | Heterozygous |
| NC_037640.1 | 11956977 | SNV | 1 | T | C | Homozygous   |
| NC_037640.1 | 11957003 | SNV | 1 | G | T | Homozygous   |
| NC_037640.1 | 11957040 | SNV | 1 | C | T | Homozygous   |
| NC_037640.1 | 11957069 | SNV | 1 | A | T | Homozygous   |
| NC_037640.1 | 11957107 | SNV | 1 | A | G | Homozygous   |
| NC_037640.1 | 11958849 | SNV | 1 | A | G | Homozygous   |
| NC_037640.1 | 11959250 | SNV | 1 | A | G | Homozygous   |
| NC_037640.1 | 11959495 | SNV | 1 | G | A | Heterozygous |
| NC_037640.1 | 11959501 | SNV | 1 | A | T | Homozygous   |
| NC_037640.1 | 11959613 | SNV | 1 | C | T | Homozygous   |
| NC_037640.1 | 11959811 | SNV | 1 | A | G | Homozygous   |
| NC_037640.1 | 11961974 | SNV | 1 | C | T | Heterozygous |
| NC_037640.1 | 11962557 | SNV | 1 | G | A | Heterozygous |
| NC_037640.1 | 11968578 | SNV | 1 | T | G | Heterozygous |
| NC_037640.1 | 11968581 | SNV | 1 | C | G | Heterozygous |
| NC_037640.1 | 11968585 | SNV | 1 | A | T | Heterozygous |
| NC_037640.1 | 11972330 | SNV | 1 | T | C | Homozygous   |
| NC_037640.1 | 11972425 | SNV | 1 | A | T | Homozygous   |
| NC_037640.1 | 11972467 | SNV | 1 | A | G | Homozygous   |
| NC_037640.1 | 11972479 | SNV | 1 | G | C | Homozygous   |
| NC_037640.1 | 11972541 | SNV | 1 | G | T | Homozygous   |
| NC_037640.1 | 11972562 | SNV | 1 | C | T | Heterozygous |
| NC_037640.1 | 11972563 | SNV | 1 | A | T | Heterozygous |

|             |          |     |   |   |   |              |
|-------------|----------|-----|---|---|---|--------------|
| NC_037640.1 | 11972589 | SNV | 1 | A | G | Heterozygous |
| NC_037640.1 | 11972674 | SNV | 1 | C | T | Heterozygous |
| NC_037640.1 | 11972688 | SNV | 1 | C | T | Heterozygous |
| NC_037640.1 | 11974822 | SNV | 1 | G | A | Homozygous   |
| NC_037640.1 | 11975214 | SNV | 1 | G | A | Heterozygous |
| NC_037640.1 | 11975255 | SNV | 1 | G | A | Homozygous   |
| NC_037640.1 | 11975281 | SNV | 1 | T | C | Heterozygous |
| NC_037640.1 | 11975300 | SNV | 1 | C | T | Homozygous   |
| NC_037640.1 | 11975342 | SNV | 1 | G | A | Homozygous   |
| NC_037640.1 | 11975359 | SNV | 1 | C | A | Heterozygous |
| NC_037640.1 | 11975389 | SNV | 1 | T | C | Heterozygous |
| NC_037640.1 | 11975395 | SNV | 1 | C | T | Heterozygous |
| NC_037640.1 | 11975422 | SNV | 1 | T | C | Heterozygous |
| NC_037640.1 | 11975441 | SNV | 1 | A | T | Heterozygous |
| NC_037640.1 | 11975486 | SNV | 1 | G | A | Heterozygous |
| NC_037640.1 | 11975497 | SNV | 1 | T | C | Heterozygous |
| NC_037640.1 | 11975510 | SNV | 1 | C | T | Homozygous   |
| NC_037640.1 | 11975587 | SNV | 1 | T | C | Heterozygous |
| NC_037640.1 | 11975615 | SNV | 1 | A | G | Homozygous   |
| NC_037640.1 | 11975914 | SNV | 1 | T | C | Heterozygous |
| NC_037640.1 | 11975918 | SNV | 1 | A | C | Homozygous   |
| NC_037640.1 | 11975921 | SNV | 1 | C | T | Heterozygous |
| NC_037640.1 | 11975926 | SNV | 1 | G | A | Heterozygous |
| NC_037640.1 | 11976025 | SNV | 1 | C | T | Heterozygous |
| NC_037640.1 | 11976249 | SNV | 1 | T | C | Homozygous   |
| NC_037640.1 | 11976298 | SNV | 1 | C | T | Homozygous   |
| NC_037640.1 | 11976302 | SNV | 1 | C | T | Homozygous   |
| NC_037640.1 | 11976305 | SNV | 1 | T | C | Homozygous   |
| NC_037640.1 | 11976308 | SNV | 1 | C | T | Homozygous   |
| NC_037640.1 | 11976317 | SNV | 1 | A | T | Homozygous   |
| NC_037640.1 | 11976328 | SNV | 1 | C | T | Homozygous   |
| NC_037640.1 | 11976330 | SNV | 1 | T | C | Homozygous   |
| NC_037640.1 | 11976333 | SNV | 1 | G | C | Homozygous   |
| NC_037640.1 | 11976347 | SNV | 1 | C | T | Homozygous   |
| NC_037640.1 | 11976351 | SNV | 1 | C | T | Homozygous   |
| NC_037640.1 | 11976353 | SNV | 1 | T | C | Homozygous   |
| NC_037640.1 | 11976374 | SNV | 1 | G | A | Homozygous   |
| NC_037640.1 | 11976376 | SNV | 1 | T | A | Homozygous   |
| NC_037640.1 | 11976383 | SNV | 1 | C | T | Homozygous   |
| NC_037640.1 | 11976392 | SNV | 1 | T | C | Homozygous   |
| NC_037640.1 | 11976396 | SNV | 1 | A | G | Homozygous   |
| NC_037640.1 | 11976431 | SNV | 1 | T | C | Homozygous   |
| NC_037640.1 | 11976467 | SNV | 1 | G | A | Homozygous   |
| NC_037640.1 | 11976470 | SNV | 1 | T | C | Homozygous   |
| NC_037640.1 | 11976519 | SNV | 1 | T | C | Homozygous   |
| NC_037640.1 | 11976619 | SNV | 1 | A | T | Homozygous   |
| NC_037640.1 | 11976627 | SNV | 1 | C | T | Heterozygous |
| NC_037640.1 | 11978701 | SNV | 1 | C | T | Heterozygous |
| NC_037640.1 | 11978704 | SNV | 1 | C | T | Homozygous   |
| NC_037640.1 | 11978798 | SNV | 1 | G | A | Heterozygous |
| NC_037640.1 | 11978805 | SNV | 1 | G | A | Heterozygous |

|             |          |     |   |   |   |              |
|-------------|----------|-----|---|---|---|--------------|
| NC_037640.1 | 11981739 | SNV | 1 | G | C | Heterozygous |
| NC_037640.1 | 11984523 | SNV | 1 | A | G | Heterozygous |
| NC_037640.1 | 11984588 | SNV | 1 | C | T | Homozygous   |
| NC_037640.1 | 11984801 | SNV | 1 | A | G | Homozygous   |
| NC_037640.1 | 11988308 | SNV | 1 | T | C | Heterozygous |
| NC_037640.1 | 11988774 | SNV | 1 | G | T | Homozygous   |
| NC_037640.1 | 11988903 | SNV | 1 | A | T | Homozygous   |
| NC_037640.1 | 11993995 | SNV | 1 | T | C | Homozygous   |
| NC_037640.1 | 11994046 | SNV | 1 | C | T | Homozygous   |
| NC_037640.1 | 11994107 | SNV | 1 | A | T | Heterozygous |
| NC_037640.1 | 11994121 | SNV | 1 | A | G | Heterozygous |
| NC_037640.1 | 11994123 | SNV | 1 | G | T | Heterozygous |
| NC_037640.1 | 11994126 | SNV | 1 | G | C | Heterozygous |
| NC_037640.1 | 11994979 | SNV | 1 | G | A | Heterozygous |
| NC_037640.1 | 11995017 | SNV | 1 | A | G | Homozygous   |
| NC_037640.1 | 11995027 | SNV | 1 | T | C | Heterozygous |
| NC_037640.1 | 11995367 | SNV | 1 | A | T | Homozygous   |
| NC_037640.1 | 11995413 | SNV | 1 | G | A | Homozygous   |
| NC_037640.1 | 11995522 | SNV | 1 | G | C | Homozygous   |
| NC_037640.1 | 11996098 | SNV | 1 | C | T | Homozygous   |
| NC_037640.1 | 11996434 | SNV | 1 | T | C | Homozygous   |
| NC_037640.1 | 11997785 | SNV | 1 | A | C | Homozygous   |
| NC_037640.1 | 11997793 | SNV | 1 | A | C | Homozygous   |
| NC_037640.1 | 11997797 | SNV | 1 | T | C | Homozygous   |
| NC_037640.1 | 11998101 | SNV | 1 | A | T | Heterozygous |
| NC_037640.1 | 11998169 | SNV | 1 | T | C | Homozygous   |
| NC_037640.1 | 12035692 | SNV | 1 | T | A | Homozygous   |
| NC_037640.1 | 12035695 | SNV | 1 | A | T | Homozygous   |
| NC_037640.1 | 12035697 | SNV | 1 | T | A | Homozygous   |
| NC_037640.1 | 12036186 | SNV | 1 | T | A | Homozygous   |
| NC_037640.1 | 12036221 | SNV | 1 | A | T | Homozygous   |
| NC_037640.1 | 12038978 | SNV | 1 | A | T | Homozygous   |
| NC_037640.1 | 12038980 | SNV | 1 | A | C | Homozygous   |
| NC_037640.1 | 12039271 | SNV | 1 | A | T | Homozygous   |
| NC_037640.1 | 12039721 | SNV | 1 | G | A | Heterozygous |
| NC_037640.1 | 12040421 | SNV | 1 | C | T | Homozygous   |
| NC_037640.1 | 12040524 | SNV | 1 | C | T | Homozygous   |
| NC_037640.1 | 12040528 | SNV | 1 | C | G | Homozygous   |
| NC_037640.1 | 12040589 | SNV | 1 | A | G | Homozygous   |
| NC_037640.1 | 12041053 | SNV | 1 | G | A | Heterozygous |
| NC_037640.1 | 12041066 | SNV | 1 | G | A | Homozygous   |
| NC_037640.1 | 12041209 | SNV | 1 | A | G | Heterozygous |
| NC_037640.1 | 12041457 | SNV | 1 | C | G | Heterozygous |
| NC_037640.1 | 12041492 | SNV | 1 | A | G | Homozygous   |
| NC_037640.1 | 12042475 | SNV | 1 | A | G | Homozygous   |
| NC_037640.1 | 12042616 | SNV | 1 | A | G | Homozygous   |
| NC_037640.1 | 12042625 | SNV | 1 | A | C | Heterozygous |
| NC_037640.1 | 12043268 | SNV | 1 | T | A | Homozygous   |
| NC_037640.1 | 12044187 | SNV | 1 | T | C | Homozygous   |
| NC_037640.1 | 12044702 | SNV | 1 | G | A | Homozygous   |
| NC_037640.1 | 12046567 | SNV | 1 | G | A | Heterozygous |

|             |          |     |   |   |   |              |
|-------------|----------|-----|---|---|---|--------------|
| NC_037640.1 | 12046614 | SNV | 1 | A | G | Homozygous   |
| NC_037640.1 | 12047448 | SNV | 1 | A | G | Homozygous   |
| NC_037640.1 | 12047506 | SNV | 1 | T | C | Homozygous   |
| NC_037640.1 | 12047747 | SNV | 1 | T | A | Homozygous   |
| NC_037640.1 | 12048002 | SNV | 1 | G | A | Homozygous   |
| NC_037640.1 | 12048004 | SNV | 1 | C | A | Homozygous   |
| NC_037640.1 | 12050061 | SNV | 1 | G | A | Homozygous   |
| NC_037640.1 | 12050625 | SNV | 1 | G | A | Heterozygous |
| NC_037640.1 | 12050807 | SNV | 1 | C | A | Heterozygous |
| NC_037640.1 | 12051195 | SNV | 1 | A | T | Homozygous   |
| NC_037640.1 | 12051198 | SNV | 1 | T | A | Heterozygous |
| NC_037640.1 | 12051404 | SNV | 1 | G | T | Heterozygous |
| NC_037640.1 | 12051690 | SNV | 1 | G | A | Heterozygous |
| NC_037640.1 | 12051694 | SNV | 1 | G | A | Heterozygous |
| NC_037640.1 | 12051865 | SNV | 1 | C | T | Homozygous   |
| NC_037640.1 | 12051993 | SNV | 1 | G | A | Heterozygous |
| NC_037640.1 | 12052001 | SNV | 1 | A | G | Homozygous   |
| NC_037640.1 | 12052463 | SNV | 1 | A | G | Heterozygous |
| NC_037640.1 | 12052592 | SNV | 1 | G | A | Heterozygous |
| NC_037640.1 | 12052684 | SNV | 1 | A | G | Heterozygous |
| NC_037640.1 | 12052855 | SNV | 1 | A | G | Homozygous   |
| NC_037640.1 | 12053054 | SNV | 1 | C | T | Heterozygous |
| NC_037640.1 | 12053800 | SNV | 1 | T | C | Heterozygous |
| NC_037640.1 | 12053806 | SNV | 1 | T | C | Heterozygous |
| NC_037640.1 | 12053828 | SNV | 1 | C | G | Heterozygous |
| NC_037640.1 | 12053890 | SNV | 1 | G | A | Heterozygous |
| NC_037640.1 | 12054022 | SNV | 1 | T | C | Homozygous   |
| NC_037640.1 | 12055944 | SNV | 1 | G | C | Homozygous   |
| NC_037640.1 | 12056215 | SNV | 1 | A | G | Heterozygous |
| NC_037640.1 | 12056974 | SNV | 1 | G | T | Homozygous   |
| NC_037640.1 | 12056980 | SNV | 1 | C | T | Homozygous   |
| NC_037640.1 | 12056982 | SNV | 1 | T | A | Heterozygous |
| NC_037640.1 | 12056985 | SNV | 1 | T | G | Heterozygous |
| NC_037640.1 | 12056994 | SNV | 1 | A | G | Homozygous   |
| NC_037640.1 | 12057000 | SNV | 1 | A | T | Homozygous   |
| NC_037640.1 | 12057050 | SNV | 1 | G | T | Homozygous   |
| NC_037640.1 | 12058457 | SNV | 1 | A | G | Heterozygous |
| NC_037640.1 | 12058465 | SNV | 1 | A | T | Homozygous   |
| NC_037640.1 | 12058473 | SNV | 1 | T | C | Heterozygous |
| NC_037640.1 | 12058474 | SNV | 1 | G | A | Heterozygous |
| NC_037640.1 | 12058719 | SNV | 1 | T | C | Homozygous   |
| NC_037640.1 | 12059113 | SNV | 1 | T | C | Heterozygous |
| NC_037640.1 | 12059895 | SNV | 1 | G | T | Heterozygous |
| NC_037640.1 | 12060265 | SNV | 1 | T | C | Heterozygous |
| NC_037640.1 | 12060283 | SNV | 1 | C | T | Heterozygous |
| NC_037640.1 | 12060485 | SNV | 1 | G | A | Homozygous   |
| NC_037640.1 | 12060530 | SNV | 1 | T | A | Heterozygous |
| NC_037640.1 | 12060878 | SNV | 1 | A | G | Heterozygous |
| NC_037640.1 | 12061021 | SNV | 1 | T | C | Heterozygous |
| NC_037640.1 | 12061113 | SNV | 1 | G | A | Homozygous   |
| NC_037640.1 | 12061417 | SNV | 1 | T | A | Heterozygous |

|             |          |     |   |   |   |              |
|-------------|----------|-----|---|---|---|--------------|
| NC_037640.1 | 12061431 | SNV | 1 | A | T | Heterozygous |
| NC_037640.1 | 12062547 | SNV | 1 | A | G | Homozygous   |
| NC_037640.1 | 12062575 | SNV | 1 | G | A | Homozygous   |
| NC_037640.1 | 12062847 | SNV | 1 | G | A | Homozygous   |
| NC_037640.1 | 12062851 | SNV | 1 | T | C | Homozygous   |
| NC_037640.1 | 12063181 | SNV | 1 | T | C | Homozygous   |
| NC_037640.1 | 12063342 | SNV | 1 | A | C | Heterozygous |
| NC_037640.1 | 12063342 | SNV | 1 | A | G | Heterozygous |
| NC_037640.1 | 12063650 | SNV | 1 | T | C | Heterozygous |
| NC_037640.1 | 12064225 | SNV | 1 | T | C | Heterozygous |
| NC_037640.1 | 12064323 | SNV | 1 | A | G | Heterozygous |
| NC_037640.1 | 12064916 | SNV | 1 | A | G | Homozygous   |
| NC_037640.1 | 12067370 | SNV | 1 | C | T | Heterozygous |
| NC_037640.1 | 12067624 | SNV | 1 | A | G | Homozygous   |
| NC_037640.1 | 12068295 | SNV | 1 | A | G | Homozygous   |
| NC_037640.1 | 12068557 | SNV | 1 | A | T | Heterozygous |
| NC_037640.1 | 12068580 | SNV | 1 | A | G | Homozygous   |
| NC_037640.1 | 12068596 | SNV | 1 | T | C | Homozygous   |
| NC_037640.1 | 12068605 | SNV | 1 | A | G | Heterozygous |
| NC_037640.1 | 12068605 | SNV | 1 | A | T | Heterozygous |
| NC_037640.1 | 12069030 | SNV | 1 | G | T | Heterozygous |
| NC_037640.1 | 12077273 | SNV | 1 | T | C | Heterozygous |
| NC_037640.1 | 12077756 | SNV | 1 | T | A | Homozygous   |
| NC_037640.1 | 12077959 | SNV | 1 | G | A | Heterozygous |
| NC_037640.1 | 12077970 | SNV | 1 | A | T | Homozygous   |
| NC_037640.1 | 12078304 | SNV | 1 | C | T | Homozygous   |
| NC_037640.1 | 12078541 | SNV | 1 | T | A | Homozygous   |
| NC_037640.1 | 12078664 | SNV | 1 | G | A | Homozygous   |
| NC_037640.1 | 12079332 | SNV | 1 | G | A | Homozygous   |
| NC_037640.1 | 12079359 | SNV | 1 | A | G | Homozygous   |
| NC_037640.1 | 12079435 | SNV | 1 | A | G | Homozygous   |
| NC_037640.1 | 12079576 | SNV | 1 | T | C | Homozygous   |
| NC_037640.1 | 12084378 | SNV | 1 | C | T | Homozygous   |
| NC_037640.1 | 12085009 | SNV | 1 | A | G | Heterozygous |
| NC_037640.1 | 12085483 | SNV | 1 | T | C | Homozygous   |
| NC_037640.1 | 12085585 | SNV | 1 | A | T | Heterozygous |
| NC_037640.1 | 12086233 | SNV | 1 | A | T | Homozygous   |
| NC_037640.1 | 12086278 | SNV | 1 | C | T | Heterozygous |
| NC_037640.1 | 12086516 | SNV | 1 | A | G | Homozygous   |
| NC_037640.1 | 12086537 | SNV | 1 | G | A | Homozygous   |
| NC_037640.1 | 12086700 | SNV | 1 | T | C | Heterozygous |
| NC_037640.1 | 12088278 | SNV | 1 | T | C | Homozygous   |
| NC_037640.1 | 12088311 | SNV | 1 | A | G | Homozygous   |
| NC_037640.1 | 12089913 | SNV | 1 | T | G | Homozygous   |
| NC_037640.1 | 12091923 | SNV | 1 | A | G | Homozygous   |
| NC_037640.1 | 12092769 | SNV | 1 | C | G | Heterozygous |
| NC_037640.1 | 12092801 | SNV | 1 | T | C | Homozygous   |
| NC_037640.1 | 12092883 | SNV | 1 | C | T | Heterozygous |
| NC_037640.1 | 12093552 | SNV | 1 | C | T | Heterozygous |
| NC_037640.1 | 12095714 | SNV | 1 | C | T | Homozygous   |
| NC_037640.1 | 12095725 | SNV | 1 | T | C | Homozygous   |

|             |          |     |   |   |   |              |
|-------------|----------|-----|---|---|---|--------------|
| NC_037640.1 | 12095751 | SNV | 1 | G | A | Homozygous   |
| NC_037640.1 | 12095758 | SNV | 1 | C | T | Homozygous   |
| NC_037640.1 | 12095764 | SNV | 1 | C | T | Heterozygous |
| NC_037640.1 | 12102708 | SNV | 1 | C | G | Heterozygous |
| NC_037640.1 | 12102746 | SNV | 1 | G | T | Heterozygous |
| NC_037640.1 | 12102751 | SNV | 1 | T | A | Heterozygous |
| NC_037640.1 | 12102851 | SNV | 1 | G | A | Heterozygous |
| NC_037640.1 | 12102864 | SNV | 1 | C | T | Heterozygous |
| NC_037640.1 | 12102866 | SNV | 1 | G | T | Heterozygous |
| NC_037640.1 | 12102869 | SNV | 1 | G | A | Heterozygous |
| NC_037640.1 | 12102871 | SNV | 1 | C | G | Heterozygous |
| NC_037640.1 | 12102873 | SNV | 1 | C | T | Heterozygous |
| NC_037640.1 | 12102882 | SNV | 1 | C | G | Heterozygous |
| NC_037640.1 | 12103206 | SNV | 1 | G | A | Homozygous   |
| NC_037640.1 | 12104972 | SNV | 1 | A | G | Homozygous   |
| NC_037640.1 | 12107351 | SNV | 1 | A | T | Heterozygous |
| NC_037640.1 | 12107355 | SNV | 1 | G | T | Heterozygous |
| NC_037640.1 | 12111716 | SNV | 1 | C | T | Heterozygous |
| NC_037640.1 | 12112068 | SNV | 1 | C | G | Heterozygous |
| NC_037640.1 | 12112547 | SNV | 1 | T | A | Heterozygous |
| NC_037640.1 | 12112556 | SNV | 1 | A | G | Heterozygous |
| NC_037640.1 | 12112573 | SNV | 1 | T | G | Heterozygous |
| NC_037640.1 | 12112576 | SNV | 1 | A | T | Heterozygous |
| NC_037640.1 | 12112584 | SNV | 1 | A | C | Heterozygous |
| NC_037640.1 | 12112586 | SNV | 1 | C | T | Heterozygous |
| NC_037640.1 | 12113520 | SNV | 1 | T | C | Heterozygous |
| NC_037640.1 | 12114269 | SNV | 1 | C | T | Homozygous   |
| NC_037640.1 | 12114326 | SNV | 1 | A | G | Homozygous   |
| NC_037640.1 | 12114518 | SNV | 1 | G | A | Homozygous   |
| NC_037640.1 | 12114879 | SNV | 1 | T | C | Homozygous   |
| NC_037640.1 | 12114949 | SNV | 1 | G | A | Homozygous   |
| NC_037640.1 | 12115239 | SNV | 1 | C | T | Heterozygous |
| NC_037640.1 | 12115282 | SNV | 1 | T | C | Heterozygous |
| NC_037640.1 | 12115670 | SNV | 1 | T | C | Homozygous   |
| NC_037640.1 | 12115839 | SNV | 1 | C | T | Heterozygous |
| NC_037640.1 | 12116778 | SNV | 1 | A | G | Homozygous   |
| NC_037640.1 | 12119258 | SNV | 1 | A | G | Heterozygous |
| NC_037640.1 | 12119828 | SNV | 1 | T | C | Homozygous   |
| NC_037640.1 | 12122712 | SNV | 1 | C | A | Heterozygous |
| NC_037640.1 | 12122718 | SNV | 1 | C | A | Heterozygous |
| NC_037640.1 | 12122724 | SNV | 1 | C | A | Heterozygous |
| NC_037640.1 | 12122726 | SNV | 1 | C | T | Homozygous   |
| NC_037640.1 | 12122730 | SNV | 1 | C | A | Heterozygous |
| NC_037640.1 | 12122736 | SNV | 1 | C | A | Heterozygous |
| NC_037640.1 | 12122740 | SNV | 1 | C | A | Heterozygous |
| NC_037640.1 | 12123138 | SNV | 1 | A | T | Heterozygous |
| NC_037640.1 | 12123146 | SNV | 1 | A | T | Heterozygous |
| NC_037640.1 | 12123148 | SNV | 1 | A | T | Heterozygous |
| NC_037640.1 | 12123859 | SNV | 1 | T | C | Homozygous   |
| NC_037640.1 | 12124081 | SNV | 1 | T | C | Heterozygous |
| NC_037640.1 | 12124087 | SNV | 1 | C | T | Homozygous   |



|             |          |     |   |   |   |              |
|-------------|----------|-----|---|---|---|--------------|
| NC_037640.1 | 12127496 | SNV | 1 | A | G | Homozygous   |
| NC_037640.1 | 12127518 | SNV | 1 | A | G | Homozygous   |
| NC_037640.1 | 12139603 | SNV | 1 | G | A | Homozygous   |
| NC_037640.1 | 12142317 | SNV | 1 | C | T | Heterozygous |
| NC_037640.1 | 12142320 | SNV | 1 | A | G | Homozygous   |
| NC_037640.1 | 12142325 | SNV | 1 | A | G | Heterozygous |
| NC_037640.1 | 12142330 | SNV | 1 | A | G | Heterozygous |
| NC_037640.1 | 12142335 | SNV | 1 | A | G | Homozygous   |
| NC_037640.1 | 12142641 | SNV | 1 | A | C | Heterozygous |
| NC_037640.1 | 12142662 | SNV | 1 | T | G | Heterozygous |
| NC_037640.1 | 12142671 | SNV | 1 | A | T | Heterozygous |
| NC_037640.1 | 12147201 | SNV | 1 | T | C | Heterozygous |
| NC_037640.1 | 12147203 | SNV | 1 | C | T | Heterozygous |
| NC_037640.1 | 12147234 | SNV | 1 | A | C | Homozygous   |
| NC_037640.1 | 12147301 | SNV | 1 | A | T | Heterozygous |
| NC_037640.1 | 12147328 | SNV | 1 | A | T | Heterozygous |
| NC_037640.1 | 12147332 | SNV | 1 | C | T | Homozygous   |
| NC_037640.1 | 12147336 | SNV | 1 | C | T | Heterozygous |
| NC_037640.1 | 12148244 | SNV | 1 | A | T | Heterozygous |
| NC_037640.1 | 12148281 | SNV | 1 | T | A | Heterozygous |
| NC_037640.1 | 12169887 | SNV | 1 | T | C | Homozygous   |
| NC_037640.1 | 12171309 | SNV | 1 | T | C | Homozygous   |
| NC_037640.1 | 12171568 | SNV | 1 | T | A | Homozygous   |
| NC_037640.1 | 12171576 | SNV | 1 | T | G | Homozygous   |
| NC_037640.1 | 12171579 | SNV | 1 | A | T | Homozygous   |
| NC_037640.1 | 12171582 | SNV | 1 | C | T | Homozygous   |
| NC_037640.1 | 12172145 | SNV | 1 | C | G | Homozygous   |
| NC_037640.1 | 12172386 | SNV | 1 | A | G | Homozygous   |
| NC_037640.1 | 12175246 | SNV | 1 | C | T | Heterozygous |
| NC_037640.1 | 12175785 | SNV | 1 | T | C | Homozygous   |
| NC_037640.1 | 12176186 | SNV | 1 | C | T | Heterozygous |
| NC_037640.1 | 12176338 | SNV | 1 | T | C | Heterozygous |
| NC_037640.1 | 12176396 | SNV | 1 | A | C | Homozygous   |
| NC_037640.1 | 12176415 | SNV | 1 | A | G | Heterozygous |
| NC_037640.1 | 12176433 | SNV | 1 | A | G | Heterozygous |
| NC_037640.1 | 12176436 | SNV | 1 | A | G | Heterozygous |
| NC_037640.1 | 12176463 | SNV | 1 | C | G | Homozygous   |
| NC_037640.1 | 12176471 | SNV | 1 | A | C | Heterozygous |
| NC_037640.1 | 12176477 | SNV | 1 | A | T | Heterozygous |
| NC_037640.1 | 12176483 | SNV | 1 | A | C | Homozygous   |
| NC_037640.1 | 12176486 | SNV | 1 | A | T | Homozygous   |
| NC_037640.1 | 12176489 | SNV | 1 | A | T | Heterozygous |
| NC_037640.1 | 12176491 | SNV | 1 | T | A | Heterozygous |
| NC_037640.1 | 12176495 | SNV | 1 | A | T | Heterozygous |
| NC_037640.1 | 12176498 | SNV | 1 | A | T | Heterozygous |
| NC_037640.1 | 12176616 | SNV | 1 | A | T | Heterozygous |
| NC_037640.1 | 12176630 | SNV | 1 | A | C | Heterozygous |
| NC_037640.1 | 12176633 | SNV | 1 | A | T | Heterozygous |
| NC_037640.1 | 12176636 | SNV | 1 | A | T | Heterozygous |
| NC_037640.1 | 12176641 | SNV | 1 | T | C | Heterozygous |
| NC_037640.1 | 12176674 | SNV | 1 | C | T | Homozygous   |

|             |          |     |   |   |   |              |
|-------------|----------|-----|---|---|---|--------------|
| NC_037640.1 | 12176907 | SNV | 1 | T | G | Homozygous   |
| NC_037640.1 | 12177191 | SNV | 1 | C | T | Heterozygous |
| NC_037640.1 | 12177202 | SNV | 1 | A | G | Homozygous   |
| NC_037640.1 | 12177893 | SNV | 1 | A | G | Heterozygous |
| NC_037640.1 | 12177991 | SNV | 1 | G | A | Homozygous   |
| NC_037640.1 | 12178011 | SNV | 1 | A | G | Homozygous   |
| NC_037640.1 | 12178089 | SNV | 1 | T | C | Homozygous   |
| NC_037640.1 | 12178170 | SNV | 1 | T | A | Homozygous   |
| NC_037640.1 | 12178338 | SNV | 1 | T | G | Homozygous   |
| NC_037640.1 | 12178558 | SNV | 1 | T | C | Homozygous   |
| NC_037640.1 | 12178899 | SNV | 1 | T | C | Homozygous   |
| NC_037640.1 | 12178912 | SNV | 1 | G | C | Homozygous   |
| NC_037640.1 | 12179087 | SNV | 1 | T | C | Homozygous   |
| NC_037640.1 | 12179142 | SNV | 1 | C | G | Homozygous   |
| NC_037640.1 | 12179247 | SNV | 1 | G | A | Homozygous   |
| NC_037640.1 | 12179253 | SNV | 1 | A | G | Heterozygous |
| NC_037640.1 | 12179539 | SNV | 1 | G | A | Homozygous   |
| NC_037640.1 | 12179551 | SNV | 1 | T | A | Heterozygous |
| NC_037640.1 | 12179673 | SNV | 1 | C | T | Homozygous   |
| NC_037640.1 | 12180006 | SNV | 1 | A | G | Heterozygous |
| NC_037640.1 | 12180107 | SNV | 1 | A | G | Heterozygous |
| NC_037640.1 | 12180336 | SNV | 1 | C | T | Heterozygous |
| NC_037640.1 | 12181352 | SNV | 1 | T | C | Heterozygous |
| NC_037640.1 | 12181355 | SNV | 1 | T | C | Heterozygous |
| NC_037640.1 | 12181358 | SNV | 1 | T | C | Heterozygous |
| NC_037640.1 | 12181360 | SNV | 1 | T | C | Heterozygous |
| NC_037640.1 | 12181376 | SNV | 1 | C | T | Heterozygous |
| NC_037640.1 | 12181378 | SNV | 1 | T | C | Heterozygous |
| NC_037640.1 | 12181383 | SNV | 1 | A | C | Heterozygous |
| NC_037640.1 | 12181392 | SNV | 1 | T | C | Heterozygous |
| NC_037640.1 | 12181394 | SNV | 1 | T | C | Heterozygous |
| NC_037640.1 | 12181399 | SNV | 1 | A | C | Heterozygous |
| NC_037640.1 | 12181570 | SNV | 1 | A | T | Heterozygous |
| NC_037640.1 | 12181577 | SNV | 1 | T | C | Homozygous   |
| NC_037640.1 | 12181580 | SNV | 1 | T | C | Homozygous   |
| NC_037640.1 | 12181588 | SNV | 1 | T | C | Homozygous   |
| NC_037640.1 | 12181590 | SNV | 1 | A | G | Homozygous   |
| NC_037640.1 | 12181613 | SNV | 1 | T | C | Homozygous   |
| NC_037640.1 | 12181617 | SNV | 1 | A | G | Homozygous   |
| NC_037640.1 | 12181760 | SNV | 1 | T | C | Homozygous   |
| NC_037640.1 | 12181811 | SNV | 1 | G | A | Homozygous   |
| NC_037640.1 | 12182107 | SNV | 1 | T | C | Heterozygous |
| NC_037640.1 | 12182137 | SNV | 1 | T | A | Heterozygous |
| NC_037640.1 | 12182188 | SNV | 1 | A | G | Homozygous   |
| NC_037640.1 | 12182302 | SNV | 1 | T | A | Homozygous   |
| NC_037640.1 | 12184252 | SNV | 1 | T | C | Heterozygous |
| NC_037640.1 | 12184255 | SNV | 1 | A | T | Homozygous   |
| NC_037640.1 | 12184258 | SNV | 1 | T | C | Heterozygous |
| NC_037640.1 | 12184263 | SNV | 1 | C | T | Homozygous   |
| NC_037640.1 | 12184269 | SNV | 1 | T | C | Heterozygous |
| NC_037640.1 | 12185035 | SNV | 1 | C | T | Homozygous   |

|             |          |     |   |   |   |              |
|-------------|----------|-----|---|---|---|--------------|
| NC_037640.1 | 12185141 | SNV | 1 | A | G | Heterozygous |
| NC_037640.1 | 12185211 | SNV | 1 | A | G | Heterozygous |
| NC_037640.1 | 12185321 | SNV | 1 | G | A | Heterozygous |
| NC_037640.1 | 12185335 | SNV | 1 | A | G | Homozygous   |
| NC_037640.1 | 12185498 | SNV | 1 | A | G | Heterozygous |
| NC_037640.1 | 12185502 | SNV | 1 | G | A | Heterozygous |
| NC_037640.1 | 12185951 | SNV | 1 | T | C | Homozygous   |
| NC_037640.1 | 12186948 | SNV | 1 | C | T | Heterozygous |
| NC_037640.1 | 12187169 | SNV | 1 | A | G | Homozygous   |
| NC_037640.1 | 12187189 | SNV | 1 | G | A | Heterozygous |
| NC_037640.1 | 12191796 | SNV | 1 | T | A | Homozygous   |
| NC_037640.1 | 12192288 | SNV | 1 | T | C | Homozygous   |
| NC_037640.1 | 12192423 | SNV | 1 | T | A | Heterozygous |
| NC_037640.1 | 12192616 | SNV | 1 | G | A | Heterozygous |
| NC_037640.1 | 12192625 | SNV | 1 | T | G | Homozygous   |
| NC_037640.1 | 12192637 | SNV | 1 | T | C | Heterozygous |
| NC_037640.1 | 12192787 | SNV | 1 | G | T | Homozygous   |
| NC_037640.1 | 12192789 | SNV | 1 | A | G | Homozygous   |
| NC_037640.1 | 12192889 | SNV | 1 | A | G | Homozygous   |
| NC_037640.1 | 12197162 | SNV | 1 | A | T | Heterozygous |
| NC_037640.1 | 12197170 | SNV | 1 | A | G | Homozygous   |
| NC_037640.1 | 12197218 | SNV | 1 | G | A | Heterozygous |
| NC_037640.1 | 12197492 | SNV | 1 | G | C | Homozygous   |
| NC_037640.1 | 12197495 | SNV | 1 | A | C | Homozygous   |
| NC_037640.1 | 12200345 | SNV | 1 | C | T | Heterozygous |
| NC_037640.1 | 12207307 | SNV | 1 | A | G | Homozygous   |
| NC_037640.1 | 12207381 | SNV | 1 | T | C | Homozygous   |
| NC_037640.1 | 12207411 | SNV | 1 | C | T | Homozygous   |
| NC_037640.1 | 12208828 | SNV | 1 | A | C | Homozygous   |
| NC_037640.1 | 12208867 | SNV | 1 | T | C | Homozygous   |
| NC_037640.1 | 12208890 | SNV | 1 | T | C | Homozygous   |
| NC_037640.1 | 12208957 | SNV | 1 | C | T | Homozygous   |
| NC_037640.1 | 12208988 | SNV | 1 | T | C | Homozygous   |
| NC_037640.1 | 12209098 | SNV | 1 | T | C | Homozygous   |
| NC_037640.1 | 12209454 | SNV | 1 | A | G | Heterozygous |
| NC_037640.1 | 12209493 | SNV | 1 | A | G | Heterozygous |
| NC_037640.1 | 12211541 | SNV | 1 | C | T | Heterozygous |
| NC_037640.1 | 12211547 | SNV | 1 | C | T | Homozygous   |
| NC_037640.1 | 12211613 | SNV | 1 | G | A | Heterozygous |
| NC_037640.1 | 12211949 | SNV | 1 | G | A | Heterozygous |
| NC_037640.1 | 12215713 | SNV | 1 | G | A | Heterozygous |
| NC_037640.1 | 12220975 | SNV | 1 | A | G | Homozygous   |
| NC_037640.1 | 12221854 | SNV | 1 | A | T | Heterozygous |
| NC_037640.1 | 12222346 | SNV | 1 | T | C | Heterozygous |
| NC_037640.1 | 12222354 | SNV | 1 | A | T | Heterozygous |
| NC_037640.1 | 12222688 | SNV | 1 | A | G | Heterozygous |
| NC_037640.1 | 12222717 | SNV | 1 | G | A | Heterozygous |
| NC_037640.1 | 12222737 | SNV | 1 | G | A | Heterozygous |
| NC_037640.1 | 12222739 | SNV | 1 | A | G | Homozygous   |
| NC_037640.1 | 12222777 | SNV | 1 | C | T | Heterozygous |
| NC_037640.1 | 12222788 | SNV | 1 | C | T | Heterozygous |

|             |          |     |   |   |   |              |
|-------------|----------|-----|---|---|---|--------------|
| NC_037640.1 | 12224374 | SNV | 1 | C | T | Heterozygous |
| NC_037640.1 | 12224423 | SNV | 1 | T | A | Heterozygous |
| NC_037640.1 | 12224439 | SNV | 1 | G | A | Heterozygous |
| NC_037640.1 | 12224642 | SNV | 1 | C | T | Heterozygous |
| NC_037640.1 | 12224672 | SNV | 1 | C | T | Homozygous   |
| NC_037640.1 | 12224708 | SNV | 1 | G | A | Homozygous   |
| NC_037640.1 | 12224774 | SNV | 1 | T | C | Heterozygous |
| NC_037640.1 | 12224776 | SNV | 1 | A | C | Heterozygous |
| NC_037640.1 | 12224795 | SNV | 1 | C | T | Homozygous   |
| NC_037640.1 | 12224813 | SNV | 1 | A | G | Homozygous   |
| NC_037640.1 | 12225299 | SNV | 1 | T | C | Heterozygous |
| NC_037640.1 | 12225519 | SNV | 1 | T | C | Homozygous   |
| NC_037640.1 | 12225667 | SNV | 1 | T | C | Homozygous   |
| NC_037640.1 | 12225707 | SNV | 1 | A | G | Heterozygous |
| NC_037640.1 | 12232094 | SNV | 1 | T | C | Heterozygous |
| NC_037640.1 | 12232759 | SNV | 1 | T | C | Homozygous   |
| NC_037640.1 | 12232771 | SNV | 1 | G | C | Homozygous   |
| NC_037640.1 | 12232777 | SNV | 1 | T | C | Homozygous   |
| NC_037640.1 | 12232800 | SNV | 1 | C | T | Heterozygous |
| NC_037640.1 | 12232831 | SNV | 1 | C | T | Heterozygous |
| NC_037640.1 | 12232891 | SNV | 1 | A | G | Heterozygous |
| NC_037640.1 | 12232949 | SNV | 1 | A | G | Heterozygous |
| NC_037640.1 | 12233194 | SNV | 1 | C | G | Homozygous   |
| NC_037640.1 | 12233359 | SNV | 1 | A | G | Homozygous   |
| NC_037640.1 | 12233407 | SNV | 1 | G | C | Homozygous   |
| NC_037640.1 | 12233411 | SNV | 1 | A | G | Homozygous   |
| NC_037640.1 | 12260456 | SNV | 1 | G | A | Homozygous   |
| NC_037640.1 | 12261676 | SNV | 1 | T | C | Homozygous   |
| NC_037640.1 | 12261679 | SNV | 1 | A | G | Homozygous   |
| NC_037640.1 | 12261685 | SNV | 1 | T | C | Heterozygous |
| NC_037640.1 | 12263432 | SNV | 1 | A | G | Homozygous   |
| NC_037640.1 | 12263442 | SNV | 1 | C | T | Heterozygous |
| NC_037640.1 | 12263488 | SNV | 1 | A | C | Heterozygous |
| NC_037640.1 | 12263670 | SNV | 1 | G | A | Homozygous   |
| NC_037640.1 | 12263813 | SNV | 1 | A | G | Homozygous   |
| NC_037640.1 | 12263871 | SNV | 1 | T | C | Homozygous   |
| NC_037640.1 | 12263990 | SNV | 1 | T | A | Heterozygous |
| NC_037640.1 | 12264212 | SNV | 1 | T | C | Homozygous   |
| NC_037640.1 | 12264481 | SNV | 1 | T | C | Homozygous   |
| NC_037640.1 | 12264567 | SNV | 1 | T | C | Homozygous   |
| NC_037640.1 | 12266873 | SNV | 1 | C | T | Heterozygous |
| NC_037640.1 | 12268842 | SNV | 1 | C | A | Homozygous   |
| NC_037640.1 | 12268844 | SNV | 1 | G | A | Homozygous   |
| NC_037640.1 | 12268940 | SNV | 1 | A | G | Homozygous   |
| NC_037640.1 | 12269635 | SNV | 1 | A | G | Homozygous   |
| NC_037640.1 | 12269954 | SNV | 1 | G | A | Homozygous   |
| NC_037640.1 | 12271661 | SNV | 1 | A | G | Homozygous   |
| NC_037640.1 | 12271831 | SNV | 1 | G | A | Homozygous   |
| NC_037640.1 | 12271864 | SNV | 1 | G | A | Homozygous   |
| NC_037640.1 | 12272583 | SNV | 1 | T | A | Homozygous   |
| NC_037640.1 | 12272801 | SNV | 1 | A | G | Homozygous   |

|             |          |     |   |   |   |              |
|-------------|----------|-----|---|---|---|--------------|
| NC_037640.1 | 12273489 | SNV | 1 | T | C | Homozygous   |
| NC_037640.1 | 12273729 | SNV | 1 | T | A | Heterozygous |
| NC_037640.1 | 12273748 | SNV | 1 | G | T | Heterozygous |
| NC_037640.1 | 12273755 | SNV | 1 | A | T | Heterozygous |
| NC_037640.1 | 12274998 | SNV | 1 | A | T | Heterozygous |
| NC_037640.1 | 12275001 | SNV | 1 | A | T | Heterozygous |
| NC_037640.1 | 12275010 | SNV | 1 | T | C | Heterozygous |
| NC_037640.1 | 12275022 | SNV | 1 | A | T | Heterozygous |
| NC_037640.1 | 12275031 | SNV | 1 | T | C | Heterozygous |
| NC_037640.1 | 12275049 | SNV | 1 | A | T | Heterozygous |
| NC_037640.1 | 12275052 | SNV | 1 | T | C | Heterozygous |
| NC_037640.1 | 12275055 | SNV | 1 | T | C | Heterozygous |
| NC_037640.1 | 12275064 | SNV | 1 | A | G | Heterozygous |
| NC_037640.1 | 12275564 | SNV | 1 | T | C | Homozygous   |
| NC_037640.1 | 12275627 | SNV | 1 | A | C | Homozygous   |
| NC_037640.1 | 12276833 | SNV | 1 | C | T | Heterozygous |
| NC_037640.1 | 12277579 | SNV | 1 | C | G | Homozygous   |
| NC_037640.1 | 12281328 | SNV | 1 | A | G | Homozygous   |
| NC_037640.1 | 12281808 | SNV | 1 | T | C | Homozygous   |
| NC_037640.1 | 12282102 | SNV | 1 | G | T | Homozygous   |
| NC_037640.1 | 12282104 | SNV | 1 | A | T | Homozygous   |
| NC_037640.1 | 12282356 | SNV | 1 | G | A | Homozygous   |
| NC_037640.1 | 12283116 | SNV | 1 | C | T | Homozygous   |
| NC_037640.1 | 12283631 | SNV | 1 | C | A | Heterozygous |
| NC_037640.1 | 12283633 | SNV | 1 | A | C | Heterozygous |
| NC_037640.1 | 12283670 | SNV | 1 | C | T | Homozygous   |
| NC_037640.1 | 12283878 | SNV | 1 | A | G | Homozygous   |
| NC_037640.1 | 12284074 | SNV | 1 | C | G | Heterozygous |
| NC_037640.1 | 12286094 | SNV | 1 | A | G | Homozygous   |
| NC_037640.1 | 12286101 | SNV | 1 | A | T | Homozygous   |
| NC_037640.1 | 12286107 | SNV | 1 | A | T | Homozygous   |
| NC_037640.1 | 12286115 | SNV | 1 | A | T | Homozygous   |
| NC_037640.1 | 12286134 | SNV | 1 | G | T | Homozygous   |
| NC_037640.1 | 12286371 | SNV | 1 | T | C | Homozygous   |
| NC_037640.1 | 12300456 | SNV | 1 | T | C | Homozygous   |
| NC_037640.1 | 12301529 | SNV | 1 | T | C | Homozygous   |
| NC_037640.1 | 12301539 | SNV | 1 | T | G | Homozygous   |
| NC_037640.1 | 12303025 | SNV | 1 | T | C | Heterozygous |
| NC_037640.1 | 12303116 | SNV | 1 | C | T | Homozygous   |
| NC_037640.1 | 12305933 | SNV | 1 | A | G | Homozygous   |
| NC_037640.1 | 12305994 | SNV | 1 | C | G | Heterozygous |
| NC_037640.1 | 12306000 | SNV | 1 | T | C | Heterozygous |
| NC_037640.1 | 12306032 | SNV | 1 | T | C | Homozygous   |
| NC_037640.1 | 12306048 | SNV | 1 | C | T | Homozygous   |
| NC_037640.1 | 12306154 | SNV | 1 | C | T | Homozygous   |
| NC_037640.1 | 12306450 | SNV | 1 | T | C | Heterozygous |
| NC_037640.1 | 12306538 | SNV | 1 | T | C | Homozygous   |
| NC_037640.1 | 12306554 | SNV | 1 | C | T | Heterozygous |
| NC_037640.1 | 12306601 | SNV | 1 | C | T | Heterozygous |
| NC_037640.1 | 12306957 | SNV | 1 | A | G | Homozygous   |
| NC_037640.1 | 12306966 | SNV | 1 | T | C | Homozygous   |

|             |          |     |   |   |   |              |
|-------------|----------|-----|---|---|---|--------------|
| NC_037640.1 | 12306972 | SNV | 1 | C | T | Heterozygous |
| NC_037640.1 | 12306981 | SNV | 1 | C | T | Heterozygous |
| NC_037640.1 | 12306984 | SNV | 1 | G | A | Heterozygous |
| NC_037640.1 | 12307005 | SNV | 1 | C | T | Heterozygous |
| NC_037640.1 | 12307121 | SNV | 1 | C | T | Homozygous   |
| NC_037640.1 | 12307306 | SNV | 1 | A | G | Homozygous   |
| NC_037640.1 | 12307445 | SNV | 1 | C | G | Homozygous   |
| NC_037640.1 | 12307470 | SNV | 1 | C | T | Heterozygous |
| NC_037640.1 | 12307522 | SNV | 1 | C | T | Heterozygous |
| NC_037640.1 | 12307710 | SNV | 1 | A | G | Homozygous   |
| NC_037640.1 | 12307755 | SNV | 1 | T | C | Homozygous   |
| NC_037640.1 | 12307780 | SNV | 1 | A | G | Heterozygous |
| NC_037640.1 | 12308154 | SNV | 1 | A | G | Heterozygous |
| NC_037640.1 | 12308459 | SNV | 1 | T | C | Heterozygous |
| NC_037640.1 | 12308488 | SNV | 1 | G | A | Homozygous   |
| NC_037640.1 | 12308497 | SNV | 1 | G | A | Heterozygous |
| NC_037640.1 | 12308500 | SNV | 1 | T | C | Heterozygous |
| NC_037640.1 | 12308504 | SNV | 1 | A | G | Homozygous   |
| NC_037640.1 | 12308519 | SNV | 1 | C | T | Homozygous   |
| NC_037640.1 | 12308580 | SNV | 1 | G | A | Homozygous   |
| NC_037640.1 | 12308604 | SNV | 1 | C | T | Heterozygous |
| NC_037640.1 | 12308947 | SNV | 1 | G | A | Heterozygous |
| NC_037640.1 | 12308985 | SNV | 1 | C | T | Heterozygous |
| NC_037640.1 | 12309078 | SNV | 1 | G | A | Heterozygous |
| NC_037640.1 | 12309296 | SNV | 1 | C | T | Homozygous   |
| NC_037640.1 | 12309522 | SNV | 1 | T | C | Homozygous   |
| NC_037640.1 | 12309542 | SNV | 1 | G | A | Heterozygous |
| NC_037640.1 | 12309571 | SNV | 1 | C | T | Heterozygous |
| NC_037640.1 | 12309730 | SNV | 1 | C | T | Homozygous   |
| NC_037640.1 | 12309824 | SNV | 1 | A | G | Heterozygous |
| NC_037640.1 | 12310068 | SNV | 1 | T | C | Homozygous   |
| NC_037640.1 | 12310150 | SNV | 1 | A | G | Heterozygous |
| NC_037640.1 | 12310162 | SNV | 1 | G | A | Heterozygous |
| NC_037640.1 | 12310234 | SNV | 1 | T | C | Homozygous   |
| NC_037640.1 | 12310237 | SNV | 1 | T | C | Heterozygous |
| NC_037640.1 | 12310267 | SNV | 1 | C | T | Homozygous   |
| NC_037640.1 | 12310401 | SNV | 1 | A | G | Heterozygous |
| NC_037640.1 | 12310410 | SNV | 1 | G | A | Heterozygous |
| NC_037640.1 | 12310514 | SNV | 1 | G | A | Heterozygous |
| NC_037640.1 | 12310707 | SNV | 1 | G | C | Homozygous   |
| NC_037640.1 | 12310745 | SNV | 1 | A | T | Heterozygous |
| NC_037640.1 | 12310749 | SNV | 1 | A | T | Heterozygous |
| NC_037640.1 | 12310752 | SNV | 1 | A | T | Heterozygous |
| NC_037640.1 | 12310756 | SNV | 1 | A | T | Heterozygous |
| NC_037640.1 | 12310758 | SNV | 1 | T | A | Heterozygous |
| NC_037640.1 | 12310964 | SNV | 1 | T | G | Homozygous   |
| NC_037640.1 | 12310972 | SNV | 1 | G | A | Heterozygous |
| NC_037640.1 | 12310978 | SNV | 1 | T | C | Heterozygous |
| NC_037640.1 | 12311172 | SNV | 1 | C | T | Heterozygous |
| NC_037640.1 | 12311230 | SNV | 1 | G | T | Homozygous   |
| NC_037640.1 | 12311265 | SNV | 1 | G | T | Heterozygous |

|             |          |     |   |   |   |              |
|-------------|----------|-----|---|---|---|--------------|
| NC_037640.1 | 12311269 | SNV | 1 | A | G | Homozygous   |
| NC_037640.1 | 12311302 | SNV | 1 | G | C | Heterozygous |
| NC_037640.1 | 12311357 | SNV | 1 | A | G | Homozygous   |
| NC_037640.1 | 12311681 | SNV | 1 | C | T | Heterozygous |
| NC_037640.1 | 12311726 | SNV | 1 | A | T | Heterozygous |
| NC_037640.1 | 12311728 | SNV | 1 | A | T | Heterozygous |
| NC_037640.1 | 12311733 | SNV | 1 | C | T | Heterozygous |
| NC_037640.1 | 12311737 | SNV | 1 | C | T | Heterozygous |
| NC_037640.1 | 12311739 | SNV | 1 | C | T | Heterozygous |
| NC_037640.1 | 12311746 | SNV | 1 | A | T | Heterozygous |
| NC_037640.1 | 12313169 | SNV | 1 | G | A | Heterozygous |
| NC_037640.1 | 12313224 | SNV | 1 | T | C | Homozygous   |
| NC_037640.1 | 12313874 | SNV | 1 | C | G | Heterozygous |
| NC_037640.1 | 12314772 | SNV | 1 | T | A | Heterozygous |
| NC_037640.1 | 12314793 | SNV | 1 | C | T | Heterozygous |
| NC_037640.1 | 12314795 | SNV | 1 | A | T | Heterozygous |
| NC_037640.1 | 12314799 | SNV | 1 | C | T | Heterozygous |
| NC_037640.1 | 12314808 | SNV | 1 | C | T | Heterozygous |
| NC_037640.1 | 12315621 | SNV | 1 | T | C | Homozygous   |
| NC_037640.1 | 12315889 | SNV | 1 | A | G | Homozygous   |
| NC_037640.1 | 12319749 | SNV | 1 | G | A | Heterozygous |
| NC_037640.1 | 12320451 | SNV | 1 | C | G | Homozygous   |
| NC_037640.1 | 12320518 | SNV | 1 | G | A | Heterozygous |
| NC_037640.1 | 12321303 | SNV | 1 | A | G | Homozygous   |
| NC_037640.1 | 12321306 | SNV | 1 | A | T | Homozygous   |
| NC_037640.1 | 12325155 | SNV | 1 | A | G | Heterozygous |
| NC_037640.1 | 12326825 | SNV | 1 | T | G | Homozygous   |
| NC_037640.1 | 12328912 | SNV | 1 | T | C | Homozygous   |
| NC_037640.1 | 12329845 | SNV | 1 | A | G | Heterozygous |
| NC_037640.1 | 12329848 | SNV | 1 | A | T | Heterozygous |
| NC_037640.1 | 12329851 | SNV | 1 | A | T | Heterozygous |
| NC_037640.1 | 12329857 | SNV | 1 | A | T | Heterozygous |
| NC_037640.1 | 12329866 | SNV | 1 | A | G | Heterozygous |
| NC_037640.1 | 12330075 | SNV | 1 | A | G | Homozygous   |
| NC_037640.1 | 12330085 | SNV | 1 | A | G | Heterozygous |
| NC_037640.1 | 12330092 | SNV | 1 | A | G | Heterozygous |
| NC_037640.1 | 12330102 | SNV | 1 | A | G | Heterozygous |
| NC_037640.1 | 12330199 | SNV | 1 | G | A | Heterozygous |
| NC_037640.1 | 12330232 | SNV | 1 | C | T | Heterozygous |
| NC_037640.1 | 12330655 | SNV | 1 | G | A | Homozygous   |
| NC_037640.1 | 12331034 | SNV | 1 | A | G | Homozygous   |
| NC_037640.1 | 12334002 | SNV | 1 | G | A | Homozygous   |
| NC_037640.1 | 12334161 | SNV | 1 | T | C | Heterozygous |
| NC_037640.1 | 12335974 | SNV | 1 | C | G | Heterozygous |
| NC_037640.1 | 12336628 | SNV | 1 | C | T | Heterozygous |
| NC_037640.1 | 12336937 | SNV | 1 | A | G | Homozygous   |
| NC_037640.1 | 12339803 | SNV | 1 | T | C | Homozygous   |
| NC_037640.1 | 12343346 | SNV | 1 | C | A | Heterozygous |
| NC_037640.1 | 12343385 | SNV | 1 | C | T | Heterozygous |
| NC_037640.1 | 12343404 | SNV | 1 | T | C | Heterozygous |
| NC_037640.1 | 12344913 | SNV | 1 | C | T | Heterozygous |

|             |          |     |   |   |   |              |
|-------------|----------|-----|---|---|---|--------------|
| NC_037640.1 | 12345761 | SNV | 1 | C | T | Heterozygous |
| NC_037640.1 | 12345767 | SNV | 1 | T | C | Heterozygous |
| NC_037640.1 | 12345781 | SNV | 1 | C | T | Heterozygous |
| NC_037640.1 | 12345953 | SNV | 1 | A | G | Homozygous   |
| NC_037640.1 | 12346011 | SNV | 1 | G | A | Heterozygous |
| NC_037640.1 | 12346019 | SNV | 1 | A | G | Homozygous   |
| NC_037640.1 | 12346035 | SNV | 1 | A | C | Heterozygous |
| NC_037640.1 | 12346042 | SNV | 1 | A | G | Heterozygous |
| NC_037640.1 | 12346044 | SNV | 1 | T | A | Heterozygous |
| NC_037640.1 | 12346047 | SNV | 1 | A | C | Heterozygous |
| NC_037640.1 | 12346073 | SNV | 1 | C | T | Heterozygous |
| NC_037640.1 | 12349907 | SNV | 1 | A | G | Homozygous   |
| NC_037640.1 | 12356984 | SNV | 1 | T | G | Homozygous   |
| NC_037640.1 | 12356986 | SNV | 1 | A | T | Homozygous   |
| NC_037640.1 | 12356991 | SNV | 1 | T | C | Homozygous   |
| NC_037640.1 | 12367218 | SNV | 1 | T | G | Homozygous   |
| NC_037640.1 | 12367220 | SNV | 1 | T | A | Homozygous   |
| NC_037640.1 | 12367226 | SNV | 1 | A | T | Homozygous   |
| NC_037640.1 | 12367235 | SNV | 1 | T | A | Homozygous   |
| NC_037640.1 | 12367241 | SNV | 1 | T | A | Homozygous   |
| NC_037640.1 | 12367271 | SNV | 1 | T | A | Homozygous   |
| NC_037640.1 | 12367278 | SNV | 1 | T | A | Homozygous   |
| NC_037640.1 | 12374935 | SNV | 1 | G | T | Heterozygous |
| NC_037640.1 | 12374941 | SNV | 1 | G | T | Heterozygous |
| NC_037640.1 | 12382687 | SNV | 1 | T | A | Heterozygous |
| NC_037640.1 | 12382690 | SNV | 1 | T | C | Heterozygous |
| NC_037640.1 | 12382711 | SNV | 1 | T | A | Heterozygous |
| NC_037640.1 | 12382718 | SNV | 1 | C | T | Homozygous   |
| NC_037640.1 | 12382727 | SNV | 1 | G | C | Homozygous   |
| NC_037640.1 | 12382735 | SNV | 1 | A | T | Homozygous   |
| NC_037640.1 | 12382740 | SNV | 1 | C | A | Homozygous   |
| NC_037640.1 | 12382748 | SNV | 1 | C | A | Homozygous   |
| NC_037640.1 | 12382773 | SNV | 1 | T | C | Homozygous   |
| NC_037640.1 | 12382778 | SNV | 1 | A | C | Heterozygous |
| NC_037640.1 | 12382780 | SNV | 1 | T | C | Homozygous   |
| NC_037640.1 | 12382784 | SNV | 1 | T | A | Homozygous   |
| NC_037640.1 | 12382799 | SNV | 1 | T | A | Homozygous   |
| NC_037640.1 | 12382898 | SNV | 1 | C | T | Heterozygous |
| NC_037640.1 | 12382907 | SNV | 1 | T | C | Homozygous   |
| NC_037640.1 | 12382910 | SNV | 1 | T | C | Homozygous   |
| NC_037640.1 | 12383074 | SNV | 1 | A | G | Heterozygous |
| NC_037640.1 | 12383076 | SNV | 1 | T | C | Homozygous   |
| NC_037640.1 | 12384087 | SNV | 1 | T | A | Heterozygous |
| NC_037640.1 | 12384106 | SNV | 1 | T | A | Heterozygous |
| NC_037640.1 | 12387755 | SNV | 1 | C | T | Heterozygous |
| NC_037640.1 | 12387812 | SNV | 1 | C | T | Homozygous   |
| NC_037640.1 | 12387824 | SNV | 1 | T | C | Heterozygous |
| NC_037640.1 | 12387832 | SNV | 1 | T | A | Heterozygous |
| NC_037640.1 | 12387840 | SNV | 1 | A | C | Homozygous   |
| NC_037640.1 | 12387865 | SNV | 1 | C | T | Heterozygous |
| NC_037640.1 | 12387956 | SNV | 1 | T | A | Homozygous   |



|             |          |     |   |   |   |              |
|-------------|----------|-----|---|---|---|--------------|
| NC_037640.1 | 12388002 | SNV | 1 | C | T | Homozygous   |
| NC_037640.1 | 12388014 | SNV | 1 | A | T | Homozygous   |
| NC_037640.1 | 12388019 | SNV | 1 | A | T | Homozygous   |
| NC_037640.1 | 12388023 | SNV | 1 | C | A | Homozygous   |
| NC_037640.1 | 12388026 | SNV | 1 | T | A | Homozygous   |
| NC_037640.1 | 12388030 | SNV | 1 | C | T | Homozygous   |
| NC_037640.1 | 12388152 | SNV | 1 | A | T | Homozygous   |
| NC_037640.1 | 12388227 | SNV | 1 | C | G | Homozygous   |
| NC_037640.1 | 12388231 | SNV | 1 | T | C | Homozygous   |
| NC_037640.1 | 12388257 | SNV | 1 | T | C | Heterozygous |
| NC_037640.1 | 12388301 | SNV | 1 | A | T | Heterozygous |
| NC_037640.1 | 12388305 | SNV | 1 | C | T | Heterozygous |
| NC_037640.1 | 12388317 | SNV | 1 | C | T | Heterozygous |
| NC_037640.1 | 12388319 | SNV | 1 | T | C | Heterozygous |
| NC_037640.1 | 12388363 | SNV | 1 | C | T | Heterozygous |
| NC_037640.1 | 12388373 | SNV | 1 | C | T | Heterozygous |
| NC_037640.1 | 12388381 | SNV | 1 | C | T | Heterozygous |
| NC_037640.1 | 12388441 | SNV | 1 | A | T | Homozygous   |
| NC_037640.1 | 12388470 | SNV | 1 | T | G | Heterozygous |
| NC_037640.1 | 12388528 | SNV | 1 | T | G | Heterozygous |
| NC_037640.1 | 12388538 | SNV | 1 | A | C | Homozygous   |
| NC_037640.1 | 12388540 | SNV | 1 | T | C | Heterozygous |
| NC_037640.1 | 12388542 | SNV | 1 | T | C | Heterozygous |
| NC_037640.1 | 12388612 | SNV | 1 | C | T | Homozygous   |
| NC_037640.1 | 12388642 | SNV | 1 | C | T | Homozygous   |
| NC_037640.1 | 12388652 | SNV | 1 | G | A | Heterozygous |
| NC_037640.1 | 12388678 | SNV | 1 | C | T | Heterozygous |
| NC_037640.1 | 12388685 | SNV | 1 | C | T | Homozygous   |
| NC_037640.1 | 12388725 | SNV | 1 | C | T | Homozygous   |
| NC_037640.1 | 12395838 | SNV | 1 | T | C | Homozygous   |
| NC_037640.1 | 12395862 | SNV | 1 | G | A | Homozygous   |
| NC_037640.1 | 12397821 | SNV | 1 | T | A | Heterozygous |
| NC_037640.1 | 12402239 | SNV | 1 | C | G | Homozygous   |
| NC_037640.1 | 12402281 | SNV | 1 | C | G | Heterozygous |
| NC_037640.1 | 12402311 | SNV | 1 | T | C | Heterozygous |
| NC_037640.1 | 12402869 | SNV | 1 | C | G | Heterozygous |
| NC_037640.1 | 12402873 | SNV | 1 | C | G | Heterozygous |
| NC_037640.1 | 12402877 | SNV | 1 | C | G | Heterozygous |
| NC_037640.1 | 12402885 | SNV | 1 | C | G | Heterozygous |
| NC_037640.1 | 12402889 | SNV | 1 | C | G | Heterozygous |
| NC_037640.1 | 12402891 | SNV | 1 | C | T | Heterozygous |
| NC_037640.1 | 12402893 | SNV | 1 | C | G | Heterozygous |
| NC_037640.1 | 12402897 | SNV | 1 | C | T | Heterozygous |
| NC_037640.1 | 12402953 | SNV | 1 | G | C | Homozygous   |
| NC_037640.1 | 12402957 | SNV | 1 | G | C | Heterozygous |
| NC_037640.1 | 12402961 | SNV | 1 | G | C | Heterozygous |
| NC_037640.1 | 12403015 | SNV | 1 | T | C | Heterozygous |
| NC_037640.1 | 12403031 | SNV | 1 | C | A | Heterozygous |
| NC_037640.1 | 12403034 | SNV | 1 | A | T | Heterozygous |
| NC_037640.1 | 12403045 | SNV | 1 | C | G | Heterozygous |
| NC_037640.1 | 12403047 | SNV | 1 | C | A | Heterozygous |

|             |          |     |   |   |   |              |
|-------------|----------|-----|---|---|---|--------------|
| NC_037640.1 | 12403049 | SNV | 1 | C | A | Heterozygous |
| NC_037640.1 | 12403058 | SNV | 1 | T | A | Homozygous   |
| NC_037640.1 | 12403063 | SNV | 1 | C | G | Heterozygous |
| NC_037640.1 | 12403069 | SNV | 1 | C | T | Heterozygous |
| NC_037640.1 | 12403077 | SNV | 1 | C | G | Heterozygous |
| NC_037640.1 | 12403509 | SNV | 1 | T | C | Heterozygous |
| NC_037640.1 | 12403528 | SNV | 1 | T | C | Heterozygous |
| NC_037640.1 | 12403536 | SNV | 1 | T | C | Heterozygous |
| NC_037640.1 | 12403567 | SNV | 1 | A | T | Heterozygous |
| NC_037640.1 | 12403621 | SNV | 1 | C | T | Heterozygous |
| NC_037640.1 | 12403655 | SNV | 1 | G | A | Heterozygous |
| NC_037640.1 | 12403670 | SNV | 1 | T | C | Homozygous   |
| NC_037640.1 | 12403705 | SNV | 1 | G | A | Heterozygous |
| NC_037640.1 | 12403723 | SNV | 1 | A | G | Homozygous   |
| NC_037640.1 | 12403739 | SNV | 1 | G | A | Homozygous   |
| NC_037640.1 | 12403751 | SNV | 1 | A | G | Homozygous   |
| NC_037640.1 | 12403753 | SNV | 1 | C | T | Homozygous   |
| NC_037640.1 | 12403760 | SNV | 1 | C | T | Homozygous   |
| NC_037640.1 | 12403796 | SNV | 1 | T | C | Homozygous   |
| NC_037640.1 | 12403809 | SNV | 1 | C | G | Heterozygous |
| NC_037640.1 | 12403821 | SNV | 1 | A | G | Heterozygous |
| NC_037640.1 | 12403842 | SNV | 1 | G | A | Heterozygous |
| NC_037640.1 | 12403853 | SNV | 1 | T | G | Homozygous   |
| NC_037640.1 | 12403880 | SNV | 1 | G | A | Homozygous   |
| NC_037640.1 | 12403886 | SNV | 1 | A | G | Heterozygous |
| NC_037640.1 | 12403915 | SNV | 1 | A | G | Heterozygous |
| NC_037640.1 | 12403936 | SNV | 1 | G | A | Homozygous   |
| NC_037640.1 | 12403942 | SNV | 1 | T | A | Homozygous   |
| NC_037640.1 | 12403946 | SNV | 1 | G | A | Homozygous   |
| NC_037640.1 | 12403960 | SNV | 1 | A | G | Heterozygous |
| NC_037640.1 | 12403975 | SNV | 1 | G | A | Heterozygous |
| NC_037640.1 | 12404010 | SNV | 1 | C | A | Homozygous   |
| NC_037640.1 | 12404012 | SNV | 1 | G | A | Homozygous   |
| NC_037640.1 | 12404022 | SNV | 1 | A | G | Heterozygous |
| NC_037640.1 | 12404052 | SNV | 1 | C | T | Heterozygous |
| NC_037640.1 | 12404080 | SNV | 1 | T | C | Homozygous   |
| NC_037640.1 | 12404107 | SNV | 1 | C | T | Heterozygous |
| NC_037640.1 | 12404182 | SNV | 1 | T | G | Homozygous   |
| NC_037640.1 | 12404202 | SNV | 1 | T | C | Homozygous   |
| NC_037640.1 | 12404215 | SNV | 1 | C | T | Homozygous   |
| NC_037640.1 | 12404275 | SNV | 1 | T | C | Heterozygous |
| NC_037640.1 | 12404289 | SNV | 1 | C | G | Homozygous   |
| NC_037640.1 | 12404295 | SNV | 1 | C | T | Homozygous   |
| NC_037640.1 | 12404304 | SNV | 1 | T | C | Heterozygous |
| NC_037640.1 | 12404308 | SNV | 1 | C | T | Heterozygous |
| NC_037640.1 | 12404335 | SNV | 1 | T | C | Homozygous   |
| NC_037640.1 | 12404343 | SNV | 1 | A | G | Heterozygous |
| NC_037640.1 | 12404347 | SNV | 1 | C | T | Heterozygous |
| NC_037640.1 | 12404351 | SNV | 1 | C | T | Heterozygous |
| NC_037640.1 | 12404368 | SNV | 1 | G | C | Heterozygous |
| NC_037640.1 | 12404385 | SNV | 1 | C | T | Heterozygous |

|             |          |     |   |   |   |              |
|-------------|----------|-----|---|---|---|--------------|
| NC_037640.1 | 12404392 | SNV | 1 | C | T | Heterozygous |
| NC_037640.1 | 12404411 | SNV | 1 | C | T | Heterozygous |
| NC_037640.1 | 12404426 | SNV | 1 | C | T | Heterozygous |
| NC_037640.1 | 12404517 | SNV | 1 | T | A | Heterozygous |
| NC_037640.1 | 12404537 | SNV | 1 | C | T | Homozygous   |
| NC_037640.1 | 12404545 | SNV | 1 | C | T | Homozygous   |
| NC_037640.1 | 12404606 | SNV | 1 | T | C | Homozygous   |
| NC_037640.1 | 12404654 | SNV | 1 | T | C | Homozygous   |
| NC_037640.1 | 12404659 | SNV | 1 | T | C | Heterozygous |
| NC_037640.1 | 12404665 | SNV | 1 | T | C | Heterozygous |
| NC_037640.1 | 12404770 | SNV | 1 | C | T | Heterozygous |
| NC_037640.1 | 12405030 | SNV | 1 | C | T | Homozygous   |
| NC_037640.1 | 12405036 | SNV | 1 | T | C | Homozygous   |
| NC_037640.1 | 12405077 | SNV | 1 | T | G | Homozygous   |
| NC_037640.1 | 12405081 | SNV | 1 | T | C | Homozygous   |
| NC_037640.1 | 12405087 | SNV | 1 | C | T | Heterozygous |
| NC_037640.1 | 12405089 | SNV | 1 | C | G | Heterozygous |
| NC_037640.1 | 12405093 | SNV | 1 | T | C | Homozygous   |
| NC_037640.1 | 12405095 | SNV | 1 | T | C | Heterozygous |
| NC_037640.1 | 12405098 | SNV | 1 | C | G | Heterozygous |
| NC_037640.1 | 12405104 | SNV | 1 | T | C | Heterozygous |
| NC_037640.1 | 12405123 | SNV | 1 | C | T | Heterozygous |
| NC_037640.1 | 12405153 | SNV | 1 | T | C | Heterozygous |
| NC_037640.1 | 12405158 | SNV | 1 | C | T | Heterozygous |
| NC_037640.1 | 12405168 | SNV | 1 | T | C | Homozygous   |
| NC_037640.1 | 12405173 | SNV | 1 | T | C | Heterozygous |
| NC_037640.1 | 12405179 | SNV | 1 | C | T | Heterozygous |
| NC_037640.1 | 12405805 | SNV | 1 | A | G | Heterozygous |
| NC_037640.1 | 12405882 | SNV | 1 | A | G | Homozygous   |
| NC_037640.1 | 12405916 | SNV | 1 | G | A | Heterozygous |
| NC_037640.1 | 12405925 | SNV | 1 | A | G | Homozygous   |
| NC_037640.1 | 12405930 | SNV | 1 | C | G | Homozygous   |
| NC_037640.1 | 12405995 | SNV | 1 | C | A | Homozygous   |
| NC_037640.1 | 12405999 | SNV | 1 | A | G | Heterozygous |
| NC_037640.1 | 12406023 | SNV | 1 | A | G | Heterozygous |
| NC_037640.1 | 12406030 | SNV | 1 | G | A | Heterozygous |
| NC_037640.1 | 12406035 | SNV | 1 | G | A | Heterozygous |
| NC_037640.1 | 12406037 | SNV | 1 | C | A | Heterozygous |
| NC_037640.1 | 12406138 | SNV | 1 | A | G | Heterozygous |
| NC_037640.1 | 12406205 | SNV | 1 | C | G | Heterozygous |
| NC_037640.1 | 12406229 | SNV | 1 | G | A | Heterozygous |
| NC_037640.1 | 12406273 | SNV | 1 | A | C | Heterozygous |
| NC_037640.1 | 12406401 | SNV | 1 | G | C | Heterozygous |
| NC_037640.1 | 12406403 | SNV | 1 | T | C | Homozygous   |
| NC_037640.1 | 12406409 | SNV | 1 | T | C | Heterozygous |
| NC_037640.1 | 12406441 | SNV | 1 | G | A | Heterozygous |
| NC_037640.1 | 12406458 | SNV | 1 | G | A | Heterozygous |
| NC_037640.1 | 12406460 | SNV | 1 | A | G | Heterozygous |
| NC_037640.1 | 12406469 | SNV | 1 | A | G | Homozygous   |
| NC_037640.1 | 12406480 | SNV | 1 | A | G | Heterozygous |
| NC_037640.1 | 12406514 | SNV | 1 | A | G | Homozygous   |

|             |          |     |   |   |   |              |
|-------------|----------|-----|---|---|---|--------------|
| NC_037640.1 | 12406520 | SNV | 1 | A | G | Homozygous   |
| NC_037640.1 | 12406524 | SNV | 1 | A | G | Heterozygous |
| NC_037640.1 | 12406547 | SNV | 1 | G | A | Heterozygous |
| NC_037640.1 | 12406581 | SNV | 1 | G | A | Heterozygous |
| NC_037640.1 | 12406590 | SNV | 1 | G | A | Heterozygous |
| NC_037640.1 | 12406596 | SNV | 1 | G | A | Heterozygous |
| NC_037640.1 | 12406611 | SNV | 1 | A | G | Heterozygous |
| NC_037640.1 | 12406626 | SNV | 1 | A | G | Homozygous   |
| NC_037640.1 | 12406633 | SNV | 1 | T | C | Heterozygous |
| NC_037640.1 | 12406663 | SNV | 1 | G | A | Heterozygous |
| NC_037640.1 | 12406670 | SNV | 1 | G | A | Homozygous   |
| NC_037640.1 | 12406673 | SNV | 1 | A | G | Heterozygous |
| NC_037640.1 | 12406678 | SNV | 1 | G | A | Homozygous   |
| NC_037640.1 | 12406685 | SNV | 1 | G | A | Heterozygous |
| NC_037640.1 | 12406687 | SNV | 1 | T | G | Homozygous   |
| NC_037640.1 | 12406703 | SNV | 1 | G | A | Heterozygous |
| NC_037640.1 | 12410120 | SNV | 1 | C | T | Heterozygous |
| NC_037640.1 | 12410223 | SNV | 1 | G | C | Homozygous   |
| NC_037640.1 | 12410231 | SNV | 1 | G | T | Homozygous   |
| NC_037640.1 | 12410261 | SNV | 1 | T | C | Heterozygous |
| NC_037640.1 | 12410317 | SNV | 1 | T | C | Heterozygous |
| NC_037640.1 | 12410369 | SNV | 1 | T | C | Homozygous   |
| NC_037640.1 | 12410376 | SNV | 1 | T | C | Heterozygous |
| NC_037640.1 | 12410448 | SNV | 1 | T | C | Heterozygous |
| NC_037640.1 | 12410487 | SNV | 1 | A | T | Homozygous   |
| NC_037640.1 | 12410498 | SNV | 1 | A | T | Homozygous   |
| NC_037640.1 | 12410500 | SNV | 1 | T | C | Homozygous   |
| NC_037640.1 | 12410502 | SNV | 1 | T | C | Homozygous   |
| NC_037640.1 | 12410504 | SNV | 1 | C | G | Homozygous   |
| NC_037640.1 | 12410524 | SNV | 1 | T | C | Homozygous   |
| NC_037640.1 | 12410526 | SNV | 1 | C | T | Homozygous   |
| NC_037640.1 | 12410528 | SNV | 1 | C | T | Homozygous   |
| NC_037640.1 | 12416199 | SNV | 1 | G | C | Heterozygous |
| NC_037640.1 | 12416201 | SNV | 1 | G | A | Heterozygous |
| NC_037640.1 | 12416211 | SNV | 1 | G | C | Heterozygous |
| NC_037640.1 | 12416218 | SNV | 1 | T | A | Heterozygous |
| NC_037640.1 | 12416224 | SNV | 1 | T | C | Heterozygous |
| NC_037640.1 | 12416235 | SNV | 1 | G | C | Heterozygous |
| NC_037640.1 | 12418459 | SNV | 1 | G | T | Heterozygous |
| NC_037640.1 | 12418522 | SNV | 1 | T | A | Homozygous   |
| NC_037640.1 | 12418535 | SNV | 1 | T | C | Homozygous   |
| NC_037640.1 | 12418539 | SNV | 1 | T | C | Homozygous   |
| NC_037640.1 | 12418549 | SNV | 1 | C | G | Heterozygous |
| NC_037640.1 | 12418579 | SNV | 1 | C | T | Heterozygous |
| NC_037640.1 | 12418602 | SNV | 1 | C | T | Heterozygous |
| NC_037640.1 | 12418638 | SNV | 1 | G | A | Heterozygous |
| NC_037640.1 | 12418713 | SNV | 1 | A | G | Homozygous   |
| NC_037640.1 | 12418743 | SNV | 1 | T | C | Homozygous   |
| NC_037640.1 | 12418751 | SNV | 1 | T | C | Heterozygous |
| NC_037640.1 | 12418764 | SNV | 1 | A | G | Heterozygous |
| NC_037640.1 | 12418766 | SNV | 1 | A | G | Heterozygous |

|             |          |     |   |   |   |              |
|-------------|----------|-----|---|---|---|--------------|
| NC_037640.1 | 12418798 | SNV | 1 | A | G | Homozygous   |
| NC_037640.1 | 12418835 | SNV | 1 | A | G | Heterozygous |
| NC_037640.1 | 12418843 | SNV | 1 | C | T | Homozygous   |
| NC_037640.1 | 12418852 | SNV | 1 | C | T | Heterozygous |
| NC_037640.1 | 12418856 | SNV | 1 | T | C | Heterozygous |
| NC_037640.1 | 12418920 | SNV | 1 | G | A | Heterozygous |
| NC_037640.1 | 12418923 | SNV | 1 | T | C | Heterozygous |
| NC_037640.1 | 12418936 | SNV | 1 | G | A | Heterozygous |
| NC_037640.1 | 12418939 | SNV | 1 | A | G | Heterozygous |
| NC_037640.1 | 12418943 | SNV | 1 | G | A | Heterozygous |
| NC_037640.1 | 12418967 | SNV | 1 | A | G | Heterozygous |
| NC_037640.1 | 12418987 | SNV | 1 | A | G | Homozygous   |
| NC_037640.1 | 12419101 | SNV | 1 | C | G | Homozygous   |
| NC_037640.1 | 12419138 | SNV | 1 | G | A | Heterozygous |
| NC_037640.1 | 12419179 | SNV | 1 | T | C | Heterozygous |
| NC_037640.1 | 12419198 | SNV | 1 | A | G | Heterozygous |
| NC_037640.1 | 12419226 | SNV | 1 | G | A | Heterozygous |
| NC_037640.1 | 12419235 | SNV | 1 | G | A | Heterozygous |
| NC_037640.1 | 12419269 | SNV | 1 | G | A | Homozygous   |
| NC_037640.1 | 12419280 | SNV | 1 | C | G | Homozygous   |
| NC_037640.1 | 12419346 | SNV | 1 | A | G | Homozygous   |
| NC_037640.1 | 12419350 | SNV | 1 | G | A | Heterozygous |
| NC_037640.1 | 12419359 | SNV | 1 | A | G | Heterozygous |
| NC_037640.1 | 12419382 | SNV | 1 | A | G | Heterozygous |
| NC_037640.1 | 12419412 | SNV | 1 | A | T | Heterozygous |
| NC_037640.1 | 12419425 | SNV | 1 | A | G | Heterozygous |
| NC_037640.1 | 12419473 | SNV | 1 | A | G | Homozygous   |
| NC_037640.1 | 12419560 | SNV | 1 | A | G | Homozygous   |
| NC_037640.1 | 12419573 | SNV | 1 | G | A | Heterozygous |
| NC_037640.1 | 12419583 | SNV | 1 | A | G | Homozygous   |
| NC_037640.1 | 12419593 | SNV | 1 | G | A | Heterozygous |
| NC_037640.1 | 12419604 | SNV | 1 | G | A | Homozygous   |
| NC_037640.1 | 12419616 | SNV | 1 | A | G | Homozygous   |
| NC_037640.1 | 12419623 | SNV | 1 | G | A | Homozygous   |
| NC_037640.1 | 12419629 | SNV | 1 | A | G | Homozygous   |
| NC_037640.1 | 12419632 | SNV | 1 | G | C | Homozygous   |
| NC_037640.1 | 12419639 | SNV | 1 | T | G | Homozygous   |
| NC_037640.1 | 12419663 | SNV | 1 | G | A | Heterozygous |
| NC_037640.1 | 12419724 | SNV | 1 | A | T | Heterozygous |
| NC_037640.1 | 12419730 | SNV | 1 | T | C | Homozygous   |
| NC_037640.1 | 12419738 | SNV | 1 | A | G | Heterozygous |
| NC_037640.1 | 12419747 | SNV | 1 | C | G | Heterozygous |
| NC_037640.1 | 12419758 | SNV | 1 | G | A | Heterozygous |
| NC_037640.1 | 12419768 | SNV | 1 | G | A | Heterozygous |
| NC_037640.1 | 12419773 | SNV | 1 | A | G | Heterozygous |
| NC_037640.1 | 12419805 | SNV | 1 | C | A | Heterozygous |
| NC_037640.1 | 12419805 | SNV | 1 | C | G | Heterozygous |
| NC_037640.1 | 12419833 | SNV | 1 | A | G | Heterozygous |
| NC_037640.1 | 12419851 | SNV | 1 | G | A | Heterozygous |
| NC_037640.1 | 12419853 | SNV | 1 | G | A | Heterozygous |
| NC_037640.1 | 12419872 | SNV | 1 | A | G | Homozygous   |

|             |          |     |   |   |   |              |
|-------------|----------|-----|---|---|---|--------------|
| NC_037640.1 | 12419874 | SNV | 1 | T | C | Homozygous   |
| NC_037640.1 | 12419916 | SNV | 1 | A | G | Heterozygous |
| NC_037640.1 | 12419923 | SNV | 1 | T | C | Heterozygous |
| NC_037640.1 | 12419943 | SNV | 1 | A | G | Heterozygous |
| NC_037640.1 | 12419949 | SNV | 1 | C | A | Homozygous   |
| NC_037640.1 | 12419954 | SNV | 1 | A | G | Heterozygous |
| NC_037640.1 | 12419956 | SNV | 1 | G | A | Homozygous   |
| NC_037640.1 | 12419994 | SNV | 1 | G | C | Homozygous   |
| NC_037640.1 | 12419997 | SNV | 1 | C | A | Heterozygous |
| NC_037640.1 | 12419999 | SNV | 1 | G | A | Heterozygous |
| NC_037640.1 | 12420074 | SNV | 1 | T | A | Heterozygous |
| NC_037640.1 | 12420100 | SNV | 1 | A | G | Heterozygous |
| NC_037640.1 | 12420105 | SNV | 1 | A | G | Heterozygous |
| NC_037640.1 | 12420163 | SNV | 1 | A | T | Homozygous   |
| NC_037640.1 | 12420201 | SNV | 1 | A | G | Homozygous   |
| NC_037640.1 | 12420216 | SNV | 1 | A | G | Heterozygous |
| NC_037640.1 | 12420223 | SNV | 1 | A | G | Homozygous   |
| NC_037640.1 | 12420242 | SNV | 1 | G | C | Heterozygous |
| NC_037640.1 | 12420261 | SNV | 1 | T | G | Heterozygous |
| NC_037640.1 | 12420265 | SNV | 1 | A | G | Heterozygous |
| NC_037640.1 | 12420304 | SNV | 1 | T | C | Heterozygous |
| NC_037640.1 | 12420306 | SNV | 1 | G | A | Homozygous   |
| NC_037640.1 | 12420308 | SNV | 1 | G | A | Homozygous   |
| NC_037640.1 | 12420325 | SNV | 1 | T | A | Homozygous   |
| NC_037640.1 | 12420342 | SNV | 1 | A | G | Heterozygous |
| NC_037640.1 | 12420364 | SNV | 1 | A | G | Heterozygous |
| NC_037640.1 | 12420368 | SNV | 1 | T | C | Homozygous   |
| NC_037640.1 | 12420371 | SNV | 1 | C | G | Heterozygous |
| NC_037640.1 | 12420373 | SNV | 1 | G | A | Heterozygous |
| NC_037640.1 | 12420377 | SNV | 1 | T | C | Homozygous   |
| NC_037640.1 | 12420383 | SNV | 1 | G | A | Heterozygous |
| NC_037640.1 | 12420385 | SNV | 1 | A | G | Heterozygous |
| NC_037640.1 | 12420390 | SNV | 1 | A | G | Heterozygous |
| NC_037640.1 | 12420474 | SNV | 1 | C | T | Heterozygous |
| NC_037640.1 | 12420478 | SNV | 1 | A | G | Heterozygous |
| NC_037640.1 | 12420483 | SNV | 1 | A | G | Heterozygous |
| NC_037640.1 | 12420509 | SNV | 1 | T | G | Homozygous   |
| NC_037640.1 | 12420530 | SNV | 1 | C | A | Heterozygous |
| NC_037640.1 | 12420549 | SNV | 1 | T | G | Heterozygous |
| NC_037640.1 | 12420562 | SNV | 1 | A | G | Homozygous   |
| NC_037640.1 | 12420568 | SNV | 1 | A | G | Heterozygous |
| NC_037640.1 | 12420601 | SNV | 1 | A | G | Heterozygous |
| NC_037640.1 | 12420614 | SNV | 1 | A | G | Homozygous   |
| NC_037640.1 | 12420621 | SNV | 1 | G | A | Heterozygous |
| NC_037640.1 | 12420641 | SNV | 1 | A | G | Homozygous   |
| NC_037640.1 | 12420675 | SNV | 1 | G | A | Heterozygous |
| NC_037640.1 | 12420698 | SNV | 1 | C | T | Homozygous   |
| NC_037640.1 | 12420702 | SNV | 1 | A | T | Heterozygous |
| NC_037640.1 | 12420707 | SNV | 1 | A | G | Homozygous   |
| NC_037640.1 | 12420711 | SNV | 1 | G | A | Homozygous   |
| NC_037640.1 | 12420747 | SNV | 1 | A | G | Heterozygous |

|             |          |     |   |   |   |              |
|-------------|----------|-----|---|---|---|--------------|
| NC_037640.1 | 12420818 | SNV | 1 | A | G | Heterozygous |
| NC_037640.1 | 12420824 | SNV | 1 | A | G | Heterozygous |
| NC_037640.1 | 12420827 | SNV | 1 | G | A | Heterozygous |
| NC_037640.1 | 12420830 | SNV | 1 | A | G | Heterozygous |
| NC_037640.1 | 12420832 | SNV | 1 | G | A | Homozygous   |
| NC_037640.1 | 12420875 | SNV | 1 | A | T | Heterozygous |
| NC_037640.1 | 12420914 | SNV | 1 | G | A | Heterozygous |
| NC_037640.1 | 12420988 | SNV | 1 | G | A | Heterozygous |
| NC_037640.1 | 12421095 | SNV | 1 | A | G | Homozygous   |
| NC_037640.1 | 12421167 | SNV | 1 | T | C | Homozygous   |
| NC_037640.1 | 12421247 | SNV | 1 | G | C | Homozygous   |
| NC_037640.1 | 12421249 | SNV | 1 | A | C | Homozygous   |
| NC_037640.1 | 12421251 | SNV | 1 | C | T | Heterozygous |
| NC_037640.1 | 12421255 | SNV | 1 | T | C | Homozygous   |
| NC_037640.1 | 12421267 | SNV | 1 | T | C | Homozygous   |
| NC_037640.1 | 12421380 | SNV | 1 | T | C | Heterozygous |
| NC_037640.1 | 12421420 | SNV | 1 | T | C | Homozygous   |
| NC_037640.1 | 12421438 | SNV | 1 | G | A | Heterozygous |
| NC_037640.1 | 12423933 | SNV | 1 | G | A | Homozygous   |
| NC_037640.1 | 12423987 | SNV | 1 | T | C | Homozygous   |
| NC_037640.1 | 12424960 | SNV | 1 | A | G | Heterozygous |
| NC_037640.1 | 12425475 | SNV | 1 | G | A | Homozygous   |
| NC_037640.1 | 12425477 | SNV | 1 | A | T | Homozygous   |
| NC_037640.1 | 12425480 | SNV | 1 | C | T | Homozygous   |
| NC_037640.1 | 12433286 | SNV | 1 | G | A | Heterozygous |
| NC_037640.1 | 12433296 | SNV | 1 | G | A | Heterozygous |
| NC_037640.1 | 12433320 | SNV | 1 | T | C | Heterozygous |
| NC_037640.1 | 12433333 | SNV | 1 | A | G | Homozygous   |
| NC_037640.1 | 12433340 | SNV | 1 | A | T | Heterozygous |
| NC_037640.1 | 12433366 | SNV | 1 | A | G | Homozygous   |
| NC_037640.1 | 12433374 | SNV | 1 | G | A | Heterozygous |
| NC_037640.1 | 12433384 | SNV | 1 | C | T | Heterozygous |
| NC_037640.1 | 12433517 | SNV | 1 | G | A | Homozygous   |
| NC_037640.1 | 12433553 | SNV | 1 | A | G | Homozygous   |
| NC_037640.1 | 12433641 | SNV | 1 | A | T | Homozygous   |
| NC_037640.1 | 12433770 | SNV | 1 | A | G | Heterozygous |
| NC_037640.1 | 12433959 | SNV | 1 | C | T | Heterozygous |
| NC_037640.1 | 12434051 | SNV | 1 | T | C | Heterozygous |
| NC_037640.1 | 12434058 | SNV | 1 | T | C | Homozygous   |
| NC_037640.1 | 12434069 | SNV | 1 | C | T | Heterozygous |
| NC_037640.1 | 12434124 | SNV | 1 | C | T | Heterozygous |
| NC_037640.1 | 12434140 | SNV | 1 | G | A | Heterozygous |
| NC_037640.1 | 12434214 | SNV | 1 | A | G | Heterozygous |
| NC_037640.1 | 12434230 | SNV | 1 | A | G | Homozygous   |
| NC_037640.1 | 12434234 | SNV | 1 | A | G | Homozygous   |
| NC_037640.1 | 12434246 | SNV | 1 | G | A | Heterozygous |
| NC_037640.1 | 12434272 | SNV | 1 | G | A | Homozygous   |
| NC_037640.1 | 12434374 | SNV | 1 | A | G | Heterozygous |
| NC_037640.1 | 12434407 | SNV | 1 | T | C | Homozygous   |
| NC_037640.1 | 12434415 | SNV | 1 | G | A | Homozygous   |
| NC_037640.1 | 12434450 | SNV | 1 | A | T | Heterozygous |

|             |          |     |   |   |   |              |
|-------------|----------|-----|---|---|---|--------------|
| NC_037640.1 | 12434473 | SNV | 1 | G | A | Heterozygous |
| NC_037640.1 | 12434486 | SNV | 1 | G | A | Heterozygous |
| NC_037640.1 | 12434567 | SNV | 1 | G | A | Homozygous   |
| NC_037640.1 | 12434573 | SNV | 1 | A | G | Homozygous   |
| NC_037640.1 | 12434586 | SNV | 1 | T | C | Homozygous   |
| NC_037640.1 | 12434711 | SNV | 1 | G | A | Heterozygous |
| NC_037640.1 | 12434779 | SNV | 1 | T | C | Homozygous   |
| NC_037640.1 | 12434784 | SNV | 1 | A | T | Heterozygous |
| NC_037640.1 | 12434869 | SNV | 1 | A | G | Homozygous   |
| NC_037640.1 | 12434891 | SNV | 1 | G | A | Heterozygous |
| NC_037640.1 | 12434906 | SNV | 1 | C | G | Heterozygous |
| NC_037640.1 | 12434937 | SNV | 1 | A | G | Heterozygous |
| NC_037640.1 | 12434947 | SNV | 1 | A | G | Heterozygous |
| NC_037640.1 | 12434950 | SNV | 1 | T | C | Heterozygous |
| NC_037640.1 | 12435014 | SNV | 1 | T | A | Heterozygous |
| NC_037640.1 | 12435090 | SNV | 1 | A | G | Heterozygous |
| NC_037640.1 | 12435101 | SNV | 1 | T | C | Homozygous   |
| NC_037640.1 | 12435105 | SNV | 1 | C | T | Homozygous   |
| NC_037640.1 | 12435112 | SNV | 1 | A | G | Homozygous   |
| NC_037640.1 | 12435121 | SNV | 1 | T | C | Homozygous   |
| NC_037640.1 | 12435172 | SNV | 1 | T | C | Homozygous   |
| NC_037640.1 | 12435188 | SNV | 1 | A | G | Heterozygous |
| NC_037640.1 | 12440506 | SNV | 1 | G | T | Homozygous   |
| NC_037640.1 | 12440511 | SNV | 1 | T | C | Heterozygous |
| NC_037640.1 | 12440546 | SNV | 1 | G | T | Homozygous   |
| NC_037640.1 | 12440550 | SNV | 1 | G | T | Heterozygous |
| NC_037640.1 | 12440562 | SNV | 1 | G | T | Homozygous   |
| NC_037640.1 | 12440566 | SNV | 1 | A | T | Heterozygous |
| NC_037640.1 | 12440570 | SNV | 1 | G | T | Heterozygous |
| NC_037640.1 | 12440599 | SNV | 1 | C | T | Heterozygous |
| NC_037640.1 | 12440613 | SNV | 1 | T | G | Heterozygous |
| NC_037640.1 | 12440630 | SNV | 1 | T | A | Heterozygous |
| NC_037640.1 | 12446529 | SNV | 1 | T | C | Homozygous   |
| NC_037640.1 | 12446532 | SNV | 1 | C | G | Homozygous   |
| NC_037640.1 | 12451945 | SNV | 1 | C | T | Homozygous   |
| NC_037640.1 | 12451967 | SNV | 1 | A | T | Homozygous   |
| NC_037640.1 | 12451981 | SNV | 1 | C | A | Homozygous   |
| NC_037640.1 | 12453377 | SNV | 1 | C | A | Homozygous   |
| NC_037640.1 | 12453399 | SNV | 1 | C | T | Heterozygous |
| NC_037640.1 | 12453401 | SNV | 1 | G | A | Homozygous   |
| NC_037640.1 | 12453812 | SNV | 1 | T | C | Homozygous   |
| NC_037640.1 | 12453842 | SNV | 1 | G | A | Homozygous   |
| NC_037640.1 | 12453862 | SNV | 1 | G | A | Homozygous   |
| NC_037640.1 | 12453865 | SNV | 1 | C | T | Homozygous   |
| NC_037640.1 | 12453895 | SNV | 1 | A | T | Homozygous   |
| NC_037640.1 | 12454043 | SNV | 1 | G | A | Heterozygous |
| NC_037640.1 | 12454123 | SNV | 1 | G | A | Heterozygous |
| NC_037640.1 | 12454129 | SNV | 1 | C | T | Heterozygous |
| NC_037640.1 | 12454140 | SNV | 1 | C | A | Homozygous   |
| NC_037640.1 | 12454271 | SNV | 1 | T | C | Heterozygous |
| NC_037640.1 | 12454365 | SNV | 1 | G | A | Homozygous   |



|             |          |     |   |   |   |              |
|-------------|----------|-----|---|---|---|--------------|
| NC_037640.1 | 12458956 | SNV | 1 | A | G | Homozygous   |
| NC_037640.1 | 12459055 | SNV | 1 | T | C | Homozygous   |
| NC_037640.1 | 12459498 | SNV | 1 | G | A | Heterozygous |
| NC_037640.1 | 12459576 | SNV | 1 | T | A | Homozygous   |
| NC_037640.1 | 12459616 | SNV | 1 | A | G | Homozygous   |
| NC_037640.1 | 12459706 | SNV | 1 | A | G | Homozygous   |
| NC_037640.1 | 12459759 | SNV | 1 | G | C | Homozygous   |
| NC_037640.1 | 12459795 | SNV | 1 | T | G | Homozygous   |
| NC_037640.1 | 12459848 | SNV | 1 | C | T | Homozygous   |
| NC_037640.1 | 12461900 | SNV | 1 | C | T | Heterozygous |
| NC_037640.1 | 12461905 | SNV | 1 | C | T | Heterozygous |
| NC_037640.1 | 12461921 | SNV | 1 | A | C | Homozygous   |
| NC_037640.1 | 12461942 | SNV | 1 | A | G | Heterozygous |
| NC_037640.1 | 12461955 | SNV | 1 | T | C | Homozygous   |
| NC_037640.1 | 12466496 | SNV | 1 | A | G | Heterozygous |
| NC_037640.1 | 12466503 | SNV | 1 | A | C | Homozygous   |
| NC_037640.1 | 12466510 | SNV | 1 | G | A | Homozygous   |
| NC_037640.1 | 12466517 | SNV | 1 | A | G | Homozygous   |
| NC_037640.1 | 12466568 | SNV | 1 | G | A | Heterozygous |
| NC_037640.1 | 12466583 | SNV | 1 | C | T | Heterozygous |
| NC_037640.1 | 12466587 | SNV | 1 | C | A | Heterozygous |
| NC_037640.1 | 12467907 | SNV | 1 | T | A | Homozygous   |
| NC_037640.1 | 12467945 | SNV | 1 | A | T | Homozygous   |
| NC_037640.1 | 12467950 | SNV | 1 | A | G | Homozygous   |
| NC_037640.1 | 12467966 | SNV | 1 | T | A | Homozygous   |
| NC_037640.1 | 12468410 | SNV | 1 | G | A | Homozygous   |
| NC_037640.1 | 12468446 | SNV | 1 | A | G | Homozygous   |
| NC_037640.1 | 12470102 | SNV | 1 | C | T | Heterozygous |
| NC_037640.1 | 12488918 | SNV | 1 | C | T | Homozygous   |
| NC_037640.1 | 12490871 | SNV | 1 | G | A | Homozygous   |
| NC_037640.1 | 12490874 | SNV | 1 | A | G | Homozygous   |
| NC_037640.1 | 12490899 | SNV | 1 | G | C | Homozygous   |
| NC_037640.1 | 12490906 | SNV | 1 | G | A | Homozygous   |
| NC_037640.1 | 12490915 | SNV | 1 | A | G | Homozygous   |
| NC_037640.1 | 12490984 | SNV | 1 | C | A | Heterozygous |
| NC_037640.1 | 12491017 | SNV | 1 | C | A | Homozygous   |
| NC_037640.1 | 12491293 | SNV | 1 | G | A | Heterozygous |
| NC_037640.1 | 12491325 | SNV | 1 | T | C | Homozygous   |
| NC_037640.1 | 12491333 | SNV | 1 | C | T | Homozygous   |
| NC_037640.1 | 12491484 | SNV | 1 | G | C | Heterozygous |
| NC_037640.1 | 12491494 | SNV | 1 | G | A | Heterozygous |
| NC_037640.1 | 12491530 | SNV | 1 | G | A | Homozygous   |
| NC_037640.1 | 12492893 | SNV | 1 | T | C | Homozygous   |
| NC_037640.1 | 12492906 | SNV | 1 | G | T | Heterozygous |
| NC_037640.1 | 12493040 | SNV | 1 | C | G | Homozygous   |
| NC_037640.1 | 12502444 | SNV | 1 | T | C | Homozygous   |
| NC_037640.1 | 12502540 | SNV | 1 | C | T | Homozygous   |
| NC_037640.1 | 12502570 | SNV | 1 | G | C | Homozygous   |
| NC_037640.1 | 12502605 | SNV | 1 | G | A | Heterozygous |
| NC_037640.1 | 12504873 | SNV | 1 | T | C | Heterozygous |
| NC_037640.1 | 12505442 | SNV | 1 | A | G | Homozygous   |

|             |          |     |   |   |   |              |
|-------------|----------|-----|---|---|---|--------------|
| NC_037640.1 | 12505543 | SNV | 1 | G | A | Heterozygous |
| NC_037640.1 | 12535551 | SNV | 1 | C | T | Homozygous   |
| NC_037640.1 | 12535587 | SNV | 1 | G | A | Heterozygous |
| NC_037640.1 | 12535613 | SNV | 1 | G | C | Heterozygous |
| NC_037640.1 | 12535640 | SNV | 1 | G | C | Heterozygous |
| NC_037640.1 | 12535803 | SNV | 1 | A | G | Homozygous   |
| NC_037640.1 | 12535812 | SNV | 1 | A | T | Heterozygous |
| NC_037640.1 | 12535842 | SNV | 1 | C | T | Heterozygous |
| NC_037640.1 | 12535923 | SNV | 1 | T | C | Homozygous   |
| NC_037640.1 | 12536074 | SNV | 1 | G | A | Heterozygous |
| NC_037640.1 | 12536411 | SNV | 1 | G | T | Homozygous   |
| NC_037640.1 | 12536652 | SNV | 1 | C | A | Homozygous   |
| NC_037640.1 | 12536745 | SNV | 1 | G | A | Heterozygous |
| NC_037640.1 | 12536758 | SNV | 1 | G | A | Homozygous   |
| NC_037640.1 | 12536818 | SNV | 1 | A | T | Heterozygous |
| NC_037640.1 | 12536940 | SNV | 1 | A | G | Heterozygous |
| NC_037640.1 | 12536954 | SNV | 1 | A | G | Homozygous   |
| NC_037640.1 | 12543442 | SNV | 1 | G | T | Heterozygous |
| NC_037640.1 | 12543501 | SNV | 1 | T | C | Homozygous   |
| NC_037640.1 | 12545347 | SNV | 1 | T | C | Homozygous   |
| NC_037640.1 | 12545595 | SNV | 1 | T | C | Homozygous   |
| NC_037640.1 | 12546611 | SNV | 1 | C | T | Homozygous   |
| NC_037640.1 | 12546830 | SNV | 1 | A | G | Homozygous   |
| NC_037640.1 | 12549005 | SNV | 1 | T | C | Homozygous   |
| NC_037640.1 | 12549258 | SNV | 1 | A | G | Heterozygous |
| NC_037640.1 | 12549382 | SNV | 1 | G | A | Homozygous   |
| NC_037640.1 | 12551474 | SNV | 1 | G | T | Heterozygous |
| NC_037640.1 | 12551479 | SNV | 1 | A | G | Homozygous   |
| NC_037640.1 | 12551989 | SNV | 1 | G | C | Heterozygous |
| NC_037640.1 | 12552073 | SNV | 1 | A | G | Homozygous   |
| NC_037640.1 | 12552882 | SNV | 1 | G | A | Heterozygous |
| NC_037640.1 | 12553331 | SNV | 1 | T | C | Homozygous   |
| NC_037640.1 | 12555053 | SNV | 1 | C | A | Homozygous   |
| NC_037640.1 | 12555104 | SNV | 1 | T | C | Homozygous   |
| NC_037640.1 | 12555350 | SNV | 1 | T | C | Homozygous   |
| NC_037640.1 | 12556857 | SNV | 1 | A | T | Heterozygous |
| NC_037640.1 | 12556875 | SNV | 1 | G | A | Homozygous   |
| NC_037640.1 | 12556931 | SNV | 1 | C | T | Heterozygous |
| NC_037640.1 | 12557206 | SNV | 1 | G | A | Heterozygous |
| NC_037640.1 | 12558002 | SNV | 1 | T | C | Homozygous   |
| NC_037640.1 | 12558115 | SNV | 1 | T | G | Homozygous   |
| NC_037640.1 | 12558257 | SNV | 1 | G | T | Homozygous   |
| NC_037640.1 | 12559879 | SNV | 1 | T | C | Heterozygous |
| NC_037640.1 | 12560149 | SNV | 1 | A | G | Homozygous   |
| NC_037640.1 | 12560470 | SNV | 1 | G | T | Homozygous   |
| NC_037640.1 | 12561926 | SNV | 1 | G | A | Heterozygous |
| NC_037640.1 | 12561931 | SNV | 1 | T | C | Heterozygous |
| NC_037640.1 | 12561971 | SNV | 1 | A | G | Heterozygous |
| NC_037640.1 | 12562455 | SNV | 1 | A | G | Homozygous   |
| NC_037640.1 | 12562640 | SNV | 1 | G | A | Heterozygous |
| NC_037640.1 | 12562701 | SNV | 1 | A | G | Homozygous   |

|             |          |     |   |   |   |              |
|-------------|----------|-----|---|---|---|--------------|
| NC_037640.1 | 12566976 | SNV | 1 | A | G | Heterozygous |
| NC_037640.1 | 12567130 | SNV | 1 | T | C | Heterozygous |
| NC_037640.1 | 12567139 | SNV | 1 | C | A | Homozygous   |
| NC_037640.1 | 12567147 | SNV | 1 | G | T | Homozygous   |
| NC_037640.1 | 12567151 | SNV | 1 | A | C | Homozygous   |
| NC_037640.1 | 12567153 | SNV | 1 | A | C | Homozygous   |
| NC_037640.1 | 12567460 | SNV | 1 | G | A | Homozygous   |
| NC_037640.1 | 12567553 | SNV | 1 | A | G | Homozygous   |
| NC_037640.1 | 12567568 | SNV | 1 | G | A | Homozygous   |
| NC_037640.1 | 12568249 | SNV | 1 | T | C | Heterozygous |
| NC_037640.1 | 12568253 | SNV | 1 | C | A | Heterozygous |
| NC_037640.1 | 12568276 | SNV | 1 | A | G | Homozygous   |
| NC_037640.1 | 12569075 | SNV | 1 | G | A | Heterozygous |
| NC_037640.1 | 12569707 | SNV | 1 | T | C | Homozygous   |
| NC_037640.1 | 12569848 | SNV | 1 | G | A | Heterozygous |
| NC_037640.1 | 12572918 | SNV | 1 | G | A | Heterozygous |
| NC_037640.1 | 12573173 | SNV | 1 | T | C | Homozygous   |
| NC_037640.1 | 12573242 | SNV | 1 | A | G | Homozygous   |
| NC_037640.1 | 12573293 | SNV | 1 | A | G | Homozygous   |
| NC_037640.1 | 12573515 | SNV | 1 | C | T | Heterozygous |
| NC_037640.1 | 12573548 | SNV | 1 | G | C | Heterozygous |
| NC_037640.1 | 12573587 | SNV | 1 | A | G | Homozygous   |
| NC_037640.1 | 12573744 | SNV | 1 | T | C | Homozygous   |
| NC_037640.1 | 12574762 | SNV | 1 | C | G | Homozygous   |
| NC_037640.1 | 12575083 | SNV | 1 | G | A | Heterozygous |
| NC_037640.1 | 12575518 | SNV | 1 | A | G | Homozygous   |
| NC_037640.1 | 12575599 | SNV | 1 | A | T | Homozygous   |
| NC_037640.1 | 12575632 | SNV | 1 | G | A | Homozygous   |
| NC_037640.1 | 12575688 | SNV | 1 | C | T | Homozygous   |
| NC_037640.1 | 12578855 | SNV | 1 | T | C | Homozygous   |
| NC_037640.1 | 12580410 | SNV | 1 | C | T | Homozygous   |
| NC_037640.1 | 12580489 | SNV | 1 | C | T | Heterozygous |
| NC_037640.1 | 12580496 | SNV | 1 | T | C | Homozygous   |
| NC_037640.1 | 12582514 | SNV | 1 | C | T | Heterozygous |
| NC_037640.1 | 12582529 | SNV | 1 | T | C | Homozygous   |
| NC_037640.1 | 12601598 | SNV | 1 | T | A | Homozygous   |
| NC_037640.1 | 12601620 | SNV | 1 | A | G | Homozygous   |
| NC_037640.1 | 12601629 | SNV | 1 | A | G | Homozygous   |
| NC_037640.1 | 12601632 | SNV | 1 | C | T | Homozygous   |
| NC_037640.1 | 12601641 | SNV | 1 | A | G | Homozygous   |
| NC_037640.1 | 12607084 | SNV | 1 | C | T | Heterozygous |
| NC_037640.1 | 12607360 | SNV | 1 | T | C | Homozygous   |
| NC_037640.1 | 12607398 | SNV | 1 | T | C | Homozygous   |
| NC_037640.1 | 12607407 | SNV | 1 | T | C | Homozygous   |
| NC_037640.1 | 12612943 | SNV | 1 | T | C | Homozygous   |
| NC_037640.1 | 12613045 | SNV | 1 | A | G | Heterozygous |
| NC_037640.1 | 12613074 | SNV | 1 | C | T | Homozygous   |
| NC_037640.1 | 12613221 | SNV | 1 | T | C | Homozygous   |
| NC_037640.1 | 12613245 | SNV | 1 | A | G | Homozygous   |
| NC_037640.1 | 12613248 | SNV | 1 | A | G | Homozygous   |
| NC_037640.1 | 12613908 | SNV | 1 | C | T | Heterozygous |

|             |          |     |   |   |   |              |
|-------------|----------|-----|---|---|---|--------------|
| NC_037640.1 | 12613921 | SNV | 1 | G | A | Homozygous   |
| NC_037640.1 | 12613963 | SNV | 1 | G | A | Heterozygous |
| NC_037640.1 | 12614019 | SNV | 1 | T | C | Homozygous   |
| NC_037640.1 | 12614197 | SNV | 1 | A | T | Heterozygous |
| NC_037640.1 | 12614540 | SNV | 1 | T | C | Heterozygous |
| NC_037640.1 | 12614835 | SNV | 1 | A | C | Homozygous   |
| NC_037640.1 | 12614927 | SNV | 1 | T | C | Heterozygous |
| NC_037640.1 | 12615024 | SNV | 1 | C | T | Homozygous   |
| NC_037640.1 | 12615167 | SNV | 1 | G | A | Heterozygous |
| NC_037640.1 | 12615190 | SNV | 1 | T | C | Homozygous   |
| NC_037640.1 | 12615243 | SNV | 1 | G | A | Heterozygous |
| NC_037640.1 | 12615262 | SNV | 1 | C | T | Heterozygous |
| NC_037640.1 | 12615265 | SNV | 1 | T | C | Heterozygous |
| NC_037640.1 | 12615339 | SNV | 1 | T | G | Heterozygous |
| NC_037640.1 | 12617486 | SNV | 1 | C | T | Heterozygous |
| NC_037640.1 | 12617489 | SNV | 1 | T | C | Heterozygous |
| NC_037640.1 | 12617853 | SNV | 1 | A | G | Homozygous   |
| NC_037640.1 | 12617888 | SNV | 1 | C | T | Homozygous   |
| NC_037640.1 | 12617894 | SNV | 1 | C | T | Heterozygous |
| NC_037640.1 | 12622696 | SNV | 1 | G | A | Heterozygous |
| NC_037640.1 | 12622743 | SNV | 1 | T | C | Heterozygous |
| NC_037640.1 | 12622891 | SNV | 1 | A | G | Heterozygous |
| NC_037640.1 | 12622956 | SNV | 1 | G | C | Homozygous   |
| NC_037640.1 | 12623073 | SNV | 1 | G | T | Heterozygous |
| NC_037640.1 | 12623077 | SNV | 1 | T | C | Heterozygous |
| NC_037640.1 | 12623090 | SNV | 1 | A | G | Heterozygous |
| NC_037640.1 | 12623160 | SNV | 1 | T | C | Homozygous   |
| NC_037640.1 | 12623214 | SNV | 1 | A | G | Homozygous   |
| NC_037640.1 | 12623617 | SNV | 1 | G | A | Homozygous   |
| NC_037640.1 | 12624737 | SNV | 1 | C | T | Heterozygous |
| NC_037640.1 | 12624779 | SNV | 1 | C | T | Heterozygous |
| NC_037640.1 | 12627321 | SNV | 1 | A | G | Homozygous   |
| NC_037640.1 | 12627324 | SNV | 1 | T | C | Homozygous   |
| NC_037640.1 | 12627326 | SNV | 1 | T | A | Homozygous   |
| NC_037640.1 | 12627331 | SNV | 1 | A | G | Homozygous   |
| NC_037640.1 | 12627334 | SNV | 1 | A | T | Homozygous   |
| NC_037640.1 | 12627346 | SNV | 1 | T | A | Homozygous   |
| NC_037640.1 | 12627372 | SNV | 1 | A | G | Homozygous   |
| NC_037640.1 | 12627375 | SNV | 1 | T | A | Homozygous   |
| NC_037640.1 | 12627377 | SNV | 1 | T | A | Homozygous   |
| NC_037640.1 | 12634069 | SNV | 1 | G | A | Homozygous   |
| NC_037640.1 | 12636569 | SNV | 1 | T | C | Heterozygous |
| NC_037640.1 | 12636829 | SNV | 1 | G | A | Homozygous   |
| NC_037640.1 | 12637132 | SNV | 1 | T | C | Heterozygous |
| NC_037640.1 | 12637595 | SNV | 1 | T | C | Homozygous   |
| NC_037640.1 | 12637751 | SNV | 1 | G | A | Homozygous   |
| NC_037640.1 | 12637777 | SNV | 1 | G | C | Homozygous   |
| NC_037640.1 | 12637914 | SNV | 1 | A | G | Heterozygous |
| NC_037640.1 | 12638104 | SNV | 1 | G | C | Heterozygous |
| NC_037640.1 | 12639118 | SNV | 1 | T | C | Heterozygous |
| NC_037640.1 | 12639121 | SNV | 1 | T | C | Homozygous   |

|             |          |     |   |   |   |              |
|-------------|----------|-----|---|---|---|--------------|
| NC_037640.1 | 12639603 | SNV | 1 | T | C | Heterozygous |
| NC_037640.1 | 12639622 | SNV | 1 | A | T | Heterozygous |
| NC_037640.1 | 12639755 | SNV | 1 | T | C | Homozygous   |
| NC_037640.1 | 12640237 | SNV | 1 | T | C | Heterozygous |
| NC_037640.1 | 12644364 | SNV | 1 | A | G | Homozygous   |
| NC_037640.1 | 12658174 | SNV | 1 | A | G | Homozygous   |
| NC_037640.1 | 12658683 | SNV | 1 | A | C | Heterozygous |
| NC_037640.1 | 12658687 | SNV | 1 | C | G | Heterozygous |
| NC_037640.1 | 12659362 | SNV | 1 | T | A | Heterozygous |
| NC_037640.1 | 12663686 | SNV | 1 | A | G | Homozygous   |
| NC_037640.1 | 12664946 | SNV | 1 | G | A | Homozygous   |
| NC_037640.1 | 12664979 | SNV | 1 | C | T | Homozygous   |
| NC_037640.1 | 12665078 | SNV | 1 | C | T | Homozygous   |
| NC_037640.1 | 12665914 | SNV | 1 | G | A | Heterozygous |
| NC_037640.1 | 12666883 | SNV | 1 | G | A | Homozygous   |
| NC_037640.1 | 12669037 | SNV | 1 | A | G | Heterozygous |
| NC_037640.1 | 12670181 | SNV | 1 | G | A | Heterozygous |
| NC_037640.1 | 12673054 | SNV | 1 | C | T | Heterozygous |
| NC_037640.1 | 12673745 | SNV | 1 | A | G | Homozygous   |
| NC_037640.1 | 12674034 | SNV | 1 | T | C | Homozygous   |
| NC_037640.1 | 12674355 | SNV | 1 | G | A | Homozygous   |
| NC_037640.1 | 12674635 | SNV | 1 | A | G | Homozygous   |
| NC_037640.1 | 12674717 | SNV | 1 | G | A | Homozygous   |
| NC_037640.1 | 12676110 | SNV | 1 | T | C | Homozygous   |
| NC_037640.1 | 12677711 | SNV | 1 | G | A | Heterozygous |
| NC_037640.1 | 12678774 | SNV | 1 | A | T | Homozygous   |
| NC_037640.1 | 12679264 | SNV | 1 | A | T | Homozygous   |
| NC_037640.1 | 12679292 | SNV | 1 | T | A | Homozygous   |
| NC_037640.1 | 12679307 | SNV | 1 | A | G | Homozygous   |
| NC_037640.1 | 12679455 | SNV | 1 | T | G | Homozygous   |
| NC_037640.1 | 12680114 | SNV | 1 | A | C | Homozygous   |
| NC_037640.1 | 12680145 | SNV | 1 | G | A | Homozygous   |
| NC_037640.1 | 12681637 | SNV | 1 | G | A | Homozygous   |
| NC_037640.1 | 12681730 | SNV | 1 | C | T | Homozygous   |
| NC_037640.1 | 12681940 | SNV | 1 | T | C | Heterozygous |
| NC_037640.1 | 12683465 | SNV | 1 | C | T | Heterozygous |
| NC_037640.1 | 12683494 | SNV | 1 | A | G | Homozygous   |
| NC_037640.1 | 12686545 | SNV | 1 | A | G | Heterozygous |
| NC_037640.1 | 12686547 | SNV | 1 | A | T | Heterozygous |
| NC_037640.1 | 12686582 | SNV | 1 | T | A | Heterozygous |
| NC_037640.1 | 12686605 | SNV | 1 | T | C | Heterozygous |
| NC_037640.1 | 12686729 | SNV | 1 | C | T | Heterozygous |
| NC_037640.1 | 12686777 | SNV | 1 | A | G | Heterozygous |
| NC_037640.1 | 12686879 | SNV | 1 | A | G | Heterozygous |
| NC_037640.1 | 12686893 | SNV | 1 | G | T | Homozygous   |
| NC_037640.1 | 12686917 | SNV | 1 | T | C | Homozygous   |
| NC_037640.1 | 12687661 | SNV | 1 | G | A | Heterozygous |
| NC_037640.1 | 12688808 | SNV | 1 | C | A | Homozygous   |
| NC_037640.1 | 12689656 | SNV | 1 | C | T | Heterozygous |
| NC_037640.1 | 12689680 | SNV | 1 | G | C | Homozygous   |
| NC_037640.1 | 12689714 | SNV | 1 | A | T | Heterozygous |

|             |          |     |   |   |   |              |
|-------------|----------|-----|---|---|---|--------------|
| NC_037640.1 | 12690811 | SNV | 1 | C | T | Homozygous   |
| NC_037640.1 | 12690891 | SNV | 1 | C | T | Heterozygous |
| NC_037640.1 | 12690905 | SNV | 1 | C | T | Heterozygous |
| NC_037640.1 | 12691093 | SNV | 1 | T | C | Homozygous   |
| NC_037640.1 | 12691356 | SNV | 1 | T | C | Homozygous   |
| NC_037640.1 | 12691376 | SNV | 1 | C | T | Homozygous   |
| NC_037640.1 | 12691378 | SNV | 1 | C | G | Homozygous   |
| NC_037640.1 | 12691390 | SNV | 1 | C | G | Homozygous   |
| NC_037640.1 | 12696285 | SNV | 1 | C | G | Heterozygous |
| NC_037640.1 | 12696295 | SNV | 1 | C | G | Heterozygous |
| NC_037640.1 | 12696526 | SNV | 1 | C | T | Heterozygous |
| NC_037640.1 | 12704788 | SNV | 1 | G | A | Heterozygous |
| NC_037640.1 | 12705084 | SNV | 1 | C | T | Heterozygous |
| NC_037640.1 | 12710370 | SNV | 1 | A | T | Heterozygous |
| NC_037640.1 | 12710375 | SNV | 1 | C | A | Homozygous   |
| NC_037640.1 | 12718555 | SNV | 1 | T | C | Homozygous   |
| NC_037640.1 | 12718607 | SNV | 1 | G | A | Heterozygous |
| NC_037640.1 | 12718755 | SNV | 1 | T | C | Heterozygous |
| NC_037640.1 | 12718771 | SNV | 1 | A | G | Homozygous   |
| NC_037640.1 | 12718773 | SNV | 1 | G | A | Homozygous   |
| NC_037640.1 | 12718916 | SNV | 1 | T | C | Heterozygous |
| NC_037640.1 | 12719100 | SNV | 1 | A | G | Homozygous   |
| NC_037640.1 | 12722881 | SNV | 1 | G | A | Homozygous   |
| NC_037640.1 | 12727201 | SNV | 1 | C | T | Homozygous   |
| NC_037640.1 | 12727804 | SNV | 1 | G | C | Homozygous   |
| NC_037640.1 | 12727807 | SNV | 1 | A | C | Homozygous   |
| NC_037640.1 | 12727930 | SNV | 1 | T | C | Heterozygous |
| NC_037640.1 | 12727971 | SNV | 1 | G | A | Homozygous   |
| NC_037640.1 | 12727980 | SNV | 1 | G | T | Homozygous   |
| NC_037640.1 | 12728389 | SNV | 1 | A | G | Homozygous   |
| NC_037640.1 | 12728404 | SNV | 1 | A | G | Homozygous   |
| NC_037640.1 | 12729371 | SNV | 1 | T | C | Heterozygous |
| NC_037640.1 | 12729547 | SNV | 1 | T | G | Homozygous   |
| NC_037640.1 | 12730684 | SNV | 1 | T | C | Heterozygous |
| NC_037640.1 | 12730911 | SNV | 1 | T | C | Heterozygous |
| NC_037640.1 | 12730945 | SNV | 1 | C | T | Homozygous   |
| NC_037640.1 | 12733288 | SNV | 1 | T | C | Homozygous   |
| NC_037640.1 | 12733333 | SNV | 1 | T | A | Heterozygous |
| NC_037640.1 | 12737942 | SNV | 1 | G | C | Homozygous   |
| NC_037640.1 | 12737944 | SNV | 1 | T | A | Homozygous   |
| NC_037640.1 | 12737963 | SNV | 1 | A | G | Homozygous   |
| NC_037640.1 | 12737977 | SNV | 1 | A | T | Homozygous   |
| NC_037640.1 | 12737980 | SNV | 1 | T | A | Homozygous   |
| NC_037640.1 | 12739770 | SNV | 1 | C | A | Heterozygous |
| NC_037640.1 | 12739912 | SNV | 1 | C | T | Homozygous   |
| NC_037640.1 | 12739916 | SNV | 1 | C | T | Homozygous   |
| NC_037640.1 | 12739920 | SNV | 1 | C | G | Homozygous   |
| NC_037640.1 | 12739922 | SNV | 1 | C | T | Homozygous   |
| NC_037640.1 | 12740986 | SNV | 1 | A | G | Heterozygous |
| NC_037640.1 | 12740988 | SNV | 1 | A | G | Heterozygous |
| NC_037640.1 | 12743511 | SNV | 1 | A | C | Homozygous   |

|             |          |     |   |   |   |              |
|-------------|----------|-----|---|---|---|--------------|
| NC_037640.1 | 12743613 | SNV | 1 | G | A | Heterozygous |
| NC_037640.1 | 12743778 | SNV | 1 | T | C | Heterozygous |
| NC_037640.1 | 12744365 | SNV | 1 | C | T | Homozygous   |
| NC_037640.1 | 12744450 | SNV | 1 | C | G | Heterozygous |
| NC_037640.1 | 12744459 | SNV | 1 | T | C | Homozygous   |
| NC_037640.1 | 12744572 | SNV | 1 | A | G | Homozygous   |
| NC_037640.1 | 12744705 | SNV | 1 | T | C | Heterozygous |
| NC_037640.1 | 12744709 | SNV | 1 | T | C | Heterozygous |
| NC_037640.1 | 12744739 | SNV | 1 | C | T | Heterozygous |
| NC_037640.1 | 12754804 | SNV | 1 | A | G | Heterozygous |
| NC_037640.1 | 12754861 | SNV | 1 | A | G | Homozygous   |
| NC_037640.1 | 12755202 | SNV | 1 | A | G | Heterozygous |
| NC_037640.1 | 12759927 | SNV | 1 | G | A | Heterozygous |
| NC_037640.1 | 12760113 | SNV | 1 | G | T | Heterozygous |
| NC_037640.1 | 12760116 | SNV | 1 | C | T | Heterozygous |
| NC_037640.1 | 12760123 | SNV | 1 | C | G | Heterozygous |
| NC_037640.1 | 12760163 | SNV | 1 | T | C | Heterozygous |
| NC_037640.1 | 12760167 | SNV | 1 | T | C | Heterozygous |
| NC_037640.1 | 12760319 | SNV | 1 | T | A | Homozygous   |
| NC_037640.1 | 12760326 | SNV | 1 | T | A | Homozygous   |
| NC_037640.1 | 12760339 | SNV | 1 | T | A | Homozygous   |
| NC_037640.1 | 12760345 | SNV | 1 | A | T | Homozygous   |
| NC_037640.1 | 12760856 | SNV | 1 | G | A | Homozygous   |
| NC_037640.1 | 12761814 | SNV | 1 | A | T | Heterozygous |
| NC_037640.1 | 12761820 | SNV | 1 | T | A | Homozygous   |
| NC_037640.1 | 12761824 | SNV | 1 | C | A | Homozygous   |
| NC_037640.1 | 12761838 | SNV | 1 | C | T | Homozygous   |
| NC_037640.1 | 12761876 | SNV | 1 | T | C | Heterozygous |
| NC_037640.1 | 12761878 | SNV | 1 | C | T | Heterozygous |
| NC_037640.1 | 12764599 | SNV | 1 | A | G | Homozygous   |
| NC_037640.1 | 12764606 | SNV | 1 | A | G | Homozygous   |
| NC_037640.1 | 12764806 | SNV | 1 | G | C | Homozygous   |
| NC_037640.1 | 12765030 | SNV | 1 | G | A | Homozygous   |
| NC_037640.1 | 12765235 | SNV | 1 | C | T | Homozygous   |
| NC_037640.1 | 12777983 | SNV | 1 | C | T | Heterozygous |
| NC_037640.1 | 12829927 | SNV | 1 | A | C | Heterozygous |
| NC_037640.1 | 12829943 | SNV | 1 | G | A | Heterozygous |
| NC_037640.1 | 12841621 | SNV | 1 | T | C | Homozygous   |
| NC_037640.1 | 12853691 | SNV | 1 | T | A | Homozygous   |
| NC_037640.1 | 12853739 | SNV | 1 | A | G | Homozygous   |
| NC_037640.1 | 12853879 | SNV | 1 | A | G | Homozygous   |
| NC_037640.1 | 12853884 | SNV | 1 | G | A | Heterozygous |
| NC_037640.1 | 12853888 | SNV | 1 | C | G | Heterozygous |
| NC_037640.1 | 12853908 | SNV | 1 | T | C | Homozygous   |
| NC_037640.1 | 12853987 | SNV | 1 | A | G | Homozygous   |
| NC_037640.1 | 12854048 | SNV | 1 | T | G | Homozygous   |
| NC_037640.1 | 12854088 | SNV | 1 | A | G | Heterozygous |
| NC_037640.1 | 12854128 | SNV | 1 | G | A | Homozygous   |
| NC_037640.1 | 12854167 | SNV | 1 | T | C | Homozygous   |
| NC_037640.1 | 12854243 | SNV | 1 | C | T | Heterozygous |
| NC_037640.1 | 12854275 | SNV | 1 | T | C | Homozygous   |

|             |          |     |   |   |   |              |
|-------------|----------|-----|---|---|---|--------------|
| NC_037640.1 | 12854291 | SNV | 1 | A | G | Homozygous   |
| NC_037640.1 | 12854294 | SNV | 1 | G | A | Homozygous   |
| NC_037640.1 | 12854408 | SNV | 1 | T | G | Homozygous   |
| NC_037640.1 | 12860451 | SNV | 1 | C | T | Heterozygous |
| NC_037640.1 | 12860517 | SNV | 1 | G | A | Heterozygous |
| NC_037640.1 | 12860644 | SNV | 1 | C | G | Heterozygous |
| NC_037640.1 | 12860783 | SNV | 1 | A | G | Homozygous   |
| NC_037640.1 | 12860790 | SNV | 1 | A | G | Homozygous   |
| NC_037640.1 | 12860800 | SNV | 1 | A | G | Homozygous   |
| NC_037640.1 | 12860920 | SNV | 1 | G | A | Heterozygous |
| NC_037640.1 | 12860922 | SNV | 1 | C | T | Heterozygous |
| NC_037640.1 | 12865085 | SNV | 1 | C | G | Homozygous   |
| NC_037640.1 | 12865093 | SNV | 1 | C | T | Homozygous   |
| NC_037640.1 | 12865124 | SNV | 1 | A | C | Homozygous   |
| NC_037640.1 | 12868037 | SNV | 1 | A | C | Homozygous   |
| NC_037640.1 | 12868074 | SNV | 1 | T | C | Homozygous   |
| NC_037640.1 | 12868114 | SNV | 1 | T | C | Homozygous   |
| NC_037640.1 | 12868152 | SNV | 1 | A | T | Homozygous   |
| NC_037640.1 | 12868283 | SNV | 1 | T | C | Homozygous   |
| NC_037640.1 | 12868453 | SNV | 1 | T | G | Heterozygous |
| NC_037640.1 | 12868458 | SNV | 1 | T | C | Homozygous   |
| NC_037640.1 | 12868481 | SNV | 1 | C | A | Homozygous   |
| NC_037640.1 | 12868523 | SNV | 1 | T | C | Homozygous   |
| NC_037640.1 | 12868627 | SNV | 1 | T | C | Heterozygous |
| NC_037640.1 | 12868634 | SNV | 1 | T | C | Heterozygous |
| NC_037640.1 | 12868696 | SNV | 1 | T | C | Heterozygous |
| NC_037640.1 | 12868853 | SNV | 1 | T | C | Heterozygous |
| NC_037640.1 | 12868926 | SNV | 1 | A | T | Heterozygous |
| NC_037640.1 | 12868973 | SNV | 1 | A | G | Heterozygous |
| NC_037640.1 | 12869034 | SNV | 1 | T | C | Heterozygous |
| NC_037640.1 | 12869091 | SNV | 1 | T | C | Heterozygous |
| NC_037640.1 | 12869097 | SNV | 1 | A | T | Heterozygous |
| NC_037640.1 | 12869100 | SNV | 1 | T | A | Heterozygous |
| NC_037640.1 | 12869116 | SNV | 1 | G | A | Heterozygous |
| NC_037640.1 | 12869365 | SNV | 1 | G | C | Homozygous   |
| NC_037640.1 | 12869372 | SNV | 1 | C | A | Heterozygous |
| NC_037640.1 | 12869457 | SNV | 1 | T | C | Homozygous   |
| NC_037640.1 | 12869507 | SNV | 1 | G | A | Homozygous   |
| NC_037640.1 | 12869549 | SNV | 1 | C | T | Homozygous   |
| NC_037640.1 | 12869553 | SNV | 1 | G | C | Homozygous   |
| NC_037640.1 | 12869573 | SNV | 1 | A | G | Homozygous   |
| NC_037640.1 | 12869577 | SNV | 1 | A | G | Homozygous   |
| NC_037640.1 | 12869591 | SNV | 1 | C | T | Homozygous   |
| NC_037640.1 | 12869599 | SNV | 1 | T | C | Heterozygous |
| NC_037640.1 | 12869617 | SNV | 1 | C | T | Homozygous   |
| NC_037640.1 | 12869657 | SNV | 1 | C | A | Heterozygous |
| NC_037640.1 | 12869678 | SNV | 1 | T | C | Homozygous   |
| NC_037640.1 | 12869693 | SNV | 1 | C | T | Heterozygous |
| NC_037640.1 | 12869697 | SNV | 1 | G | C | Heterozygous |
| NC_037640.1 | 12869704 | SNV | 1 | A | T | Heterozygous |
| NC_037640.1 | 12869736 | SNV | 1 | G | A | Heterozygous |



|             |          |     |   |   |   |              |
|-------------|----------|-----|---|---|---|--------------|
| NC_037640.1 | 12869766 | SNV | 1 | T | C | Homozygous   |
| NC_037640.1 | 12869776 | SNV | 1 | A | G | Homozygous   |
| NC_037640.1 | 12869781 | SNV | 1 | C | T | Heterozygous |
| NC_037640.1 | 12869889 | SNV | 1 | G | C | Heterozygous |
| NC_037640.1 | 12869940 | SNV | 1 | C | T | Heterozygous |
| NC_037640.1 | 12869993 | SNV | 1 | G | T | Homozygous   |
| NC_037640.1 | 12870005 | SNV | 1 | A | G | Homozygous   |
| NC_037640.1 | 12870008 | SNV | 1 | A | T | Heterozygous |
| NC_037640.1 | 12870028 | SNV | 1 | T | G | Homozygous   |
| NC_037640.1 | 12870040 | SNV | 1 | G | A | Homozygous   |
| NC_037640.1 | 12870052 | SNV | 1 | C | T | Homozygous   |
| NC_037640.1 | 12870055 | SNV | 1 | T | A | Homozygous   |
| NC_037640.1 | 12870057 | SNV | 1 | T | C | Homozygous   |
| NC_037640.1 | 12870379 | SNV | 1 | C | T | Heterozygous |
| NC_037640.1 | 12870535 | SNV | 1 | C | T | Heterozygous |
| NC_037640.1 | 12870571 | SNV | 1 | T | C | Heterozygous |
| NC_037640.1 | 12870659 | SNV | 1 | G | A | Heterozygous |
| NC_037640.1 | 12870763 | SNV | 1 | T | G | Heterozygous |
| NC_037640.1 | 12870772 | SNV | 1 | G | C | Heterozygous |
| NC_037640.1 | 12870824 | SNV | 1 | C | T | Heterozygous |
| NC_037640.1 | 12870832 | SNV | 1 | A | T | Heterozygous |
| NC_037640.1 | 12870862 | SNV | 1 | T | C | Heterozygous |
| NC_037640.1 | 12870888 | SNV | 1 | T | A | Heterozygous |
| NC_037640.1 | 12871132 | SNV | 1 | A | G | Heterozygous |
| NC_037640.1 | 12871617 | SNV | 1 | G | C | Homozygous   |
| NC_037640.1 | 12871625 | SNV | 1 | G | A | Homozygous   |
| NC_037640.1 | 12871673 | SNV | 1 | G | A | Homozygous   |
| NC_037640.1 | 12871692 | SNV | 1 | C | T | Homozygous   |
| NC_037640.1 | 12871707 | SNV | 1 | G | T | Homozygous   |
| NC_037640.1 | 12871788 | SNV | 1 | G | A | Heterozygous |
| NC_037640.1 | 12872161 | SNV | 1 | G | A | Heterozygous |
| NC_037640.1 | 12872437 | SNV | 1 | G | A | Heterozygous |
| NC_037640.1 | 12876876 | SNV | 1 | G | T | Heterozygous |
| NC_037640.1 | 12876880 | SNV | 1 | A | G | Homozygous   |
| NC_037640.1 | 12876882 | SNV | 1 | G | T | Homozygous   |
| NC_037640.1 | 12877086 | SNV | 1 | G | T | Homozygous   |
| NC_037640.1 | 12877106 | SNV | 1 | A | G | Homozygous   |
| NC_037640.1 | 12877108 | SNV | 1 | G | T | Homozygous   |
| NC_037640.1 | 12880380 | SNV | 1 | G | T | Homozygous   |
| NC_037640.1 | 12880435 | SNV | 1 | G | A | Heterozygous |
| NC_037640.1 | 12880509 | SNV | 1 | G | A | Homozygous   |
| NC_037640.1 | 12880513 | SNV | 1 | G | A | Heterozygous |
| NC_037640.1 | 12880532 | SNV | 1 | A | C | Heterozygous |
| NC_037640.1 | 12881692 | SNV | 1 | T | C | Heterozygous |
| NC_037640.1 | 12881773 | SNV | 1 | C | G | Heterozygous |
| NC_037640.1 | 12881902 | SNV | 1 | T | A | Homozygous   |
| NC_037640.1 | 12881908 | SNV | 1 | A | G | Homozygous   |
| NC_037640.1 | 12885098 | SNV | 1 | G | A | Heterozygous |
| NC_037640.1 | 12889842 | SNV | 1 | G | A | Heterozygous |
| NC_037640.1 | 12890311 | SNV | 1 | G | A | Heterozygous |
| NC_037640.1 | 12898470 | SNV | 1 | A | G | Homozygous   |

|             |          |     |   |   |   |              |
|-------------|----------|-----|---|---|---|--------------|
| NC_037640.1 | 12903639 | SNV | 1 | C | G | Heterozygous |
| NC_037640.1 | 12903641 | SNV | 1 | C | T | Heterozygous |
| NC_037640.1 | 12903653 | SNV | 1 | C | G | Heterozygous |
| NC_037640.1 | 12903663 | SNV | 1 | C | T | Heterozygous |
| NC_037640.1 | 12903669 | SNV | 1 | C | G | Heterozygous |
| NC_037640.1 | 12903683 | SNV | 1 | C | T | Heterozygous |
| NC_037640.1 | 12903687 | SNV | 1 | C | T | Heterozygous |
| NC_037640.1 | 12903689 | SNV | 1 | C | T | Heterozygous |
| NC_037640.1 | 12903701 | SNV | 1 | C | G | Homozygous   |
| NC_037640.1 | 12903750 | SNV | 1 | T | C | Heterozygous |
| NC_037640.1 | 12903754 | SNV | 1 | T | C | Heterozygous |
| NC_037640.1 | 12903774 | SNV | 1 | T | C | Heterozygous |
| NC_037640.1 | 12903783 | SNV | 1 | G | C | Heterozygous |
| NC_037640.1 | 12910456 | SNV | 1 | C | A | Homozygous   |
| NC_037640.1 | 12911233 | SNV | 1 | G | A | Homozygous   |
| NC_037640.1 | 12911246 | SNV | 1 | A | C | Homozygous   |
| NC_037640.1 | 12911322 | SNV | 1 | C | A | Homozygous   |
| NC_037640.1 | 12919580 | SNV | 1 | T | C | Heterozygous |
| NC_037640.1 | 12919677 | SNV | 1 | A | T | Homozygous   |
| NC_037640.1 | 12919759 | SNV | 1 | A | G | Heterozygous |
| NC_037640.1 | 12923251 | SNV | 1 | C | T | Homozygous   |
| NC_037640.1 | 12923271 | SNV | 1 | C | A | Homozygous   |
| NC_037640.1 | 12923275 | SNV | 1 | A | G | Homozygous   |
| NC_037640.1 | 12923279 | SNV | 1 | A | T | Heterozygous |
| NC_037640.1 | 12923281 | SNV | 1 | A | T | Heterozygous |
| NC_037640.1 | 12923291 | SNV | 1 | T | G | Homozygous   |
| NC_037640.1 | 12923293 | SNV | 1 | T | G | Heterozygous |
| NC_037640.1 | 12923297 | SNV | 1 | T | G | Heterozygous |
| NC_037640.1 | 12923303 | SNV | 1 | T | G | Heterozygous |
| NC_037640.1 | 12923320 | SNV | 1 | G | A | Homozygous   |
| NC_037640.1 | 12923348 | SNV | 1 | G | A | Heterozygous |
| NC_037640.1 | 12926777 | SNV | 1 | A | G | Homozygous   |
| NC_037640.1 | 12926843 | SNV | 1 | G | A | Heterozygous |
| NC_037640.1 | 12927852 | SNV | 1 | T | A | Heterozygous |
| NC_037640.1 | 12927903 | SNV | 1 | G | A | Heterozygous |
| NC_037640.1 | 12927911 | SNV | 1 | G | A | Heterozygous |
| NC_037640.1 | 12927927 | SNV | 1 | G | T | Heterozygous |
| NC_037640.1 | 12929810 | SNV | 1 | T | A | Homozygous   |
| NC_037640.1 | 12929887 | SNV | 1 | A | G | Homozygous   |
| NC_037640.1 | 12936144 | SNV | 1 | T | G | Homozygous   |
| NC_037640.1 | 12938470 | SNV | 1 | A | G | Homozygous   |
| NC_037640.1 | 12943668 | SNV | 1 | T | A | Homozygous   |
| NC_037640.1 | 12946135 | SNV | 1 | G | A | Homozygous   |
| NC_037640.1 | 12946138 | SNV | 1 | C | T | Homozygous   |
| NC_037640.1 | 12946142 | SNV | 1 | G | C | Homozygous   |
| NC_037640.1 | 12946150 | SNV | 1 | T | C | Homozygous   |
| NC_037640.1 | 12946178 | SNV | 1 | T | C | Homozygous   |
| NC_037640.1 | 12946183 | SNV | 1 | T | G | Homozygous   |
| NC_037640.1 | 12946191 | SNV | 1 | A | G | Homozygous   |
| NC_037640.1 | 12946195 | SNV | 1 | C | T | Homozygous   |
| NC_037640.1 | 12946203 | SNV | 1 | T | C | Heterozygous |

|             |          |     |   |   |   |              |
|-------------|----------|-----|---|---|---|--------------|
| NC_037640.1 | 12946203 | SNV | 1 | T | G | Heterozygous |
| NC_037640.1 | 12946231 | SNV | 1 | G | A | Heterozygous |
| NC_037640.1 | 12948221 | SNV | 1 | A | G | Heterozygous |
| NC_037640.1 | 12948236 | SNV | 1 | G | A | Homozygous   |
| NC_037640.1 | 12948349 | SNV | 1 | T | C | Homozygous   |
| NC_037640.1 | 12948363 | SNV | 1 | T | C | Homozygous   |
| NC_037640.1 | 12948514 | SNV | 1 | T | C | Homozygous   |
| NC_037640.1 | 12948576 | SNV | 1 | A | G | Homozygous   |
| NC_037640.1 | 12948583 | SNV | 1 | A | G | Homozygous   |
| NC_037640.1 | 12951292 | SNV | 1 | T | A | Homozygous   |
| NC_037640.1 | 12951301 | SNV | 1 | T | A | Homozygous   |
| NC_037640.1 | 12951303 | SNV | 1 | T | A | Homozygous   |
| NC_037640.1 | 12951329 | SNV | 1 | T | C | Homozygous   |
| NC_037640.1 | 12951334 | SNV | 1 | T | A | Homozygous   |
| NC_037640.1 | 12954639 | SNV | 1 | T | C | Homozygous   |
| NC_037640.1 | 12954654 | SNV | 1 | T | C | Homozygous   |
| NC_037640.1 | 12971544 | SNV | 1 | T | C | Heterozygous |
| NC_037640.1 | 12971550 | SNV | 1 | G | T | Homozygous   |
| NC_037640.1 | 12971559 | SNV | 1 | T | C | Heterozygous |
| NC_037640.1 | 12971593 | SNV | 1 | A | T | Heterozygous |
| NC_037640.1 | 12971595 | SNV | 1 | T | C | Homozygous   |
| NC_037640.1 | 12971602 | SNV | 1 | T | C | Homozygous   |
| NC_037640.1 | 12971611 | SNV | 1 | C | T | Heterozygous |
| NC_037640.1 | 12971631 | SNV | 1 | C | A | Homozygous   |
| NC_037640.1 | 12973507 | SNV | 1 | G | A | Homozygous   |
| NC_037640.1 | 12973569 | SNV | 1 | A | G | Homozygous   |
| NC_037640.1 | 12973785 | SNV | 1 | C | T | Homozygous   |
| NC_037640.1 | 12973818 | SNV | 1 | G | A | Homozygous   |
| NC_037640.1 | 12984777 | SNV | 1 | C | T | Heterozygous |
| NC_037640.1 | 12984905 | SNV | 1 | C | A | Heterozygous |
| NC_037640.1 | 12984994 | SNV | 1 | C | A | Heterozygous |
| NC_037640.1 | 12992088 | SNV | 1 | A | G | Homozygous   |
| NC_037640.1 | 12992125 | SNV | 1 | A | G | Homozygous   |
| NC_037640.1 | 12996074 | SNV | 1 | G | A | Heterozygous |
| NC_037640.1 | 12996092 | SNV | 1 | G | A | Heterozygous |
| NC_037640.1 | 12999713 | SNV | 1 | T | G | Heterozygous |
| NC_037640.1 | 13016272 | SNV | 1 | A | G | Homozygous   |
| NC_037640.1 | 13016435 | SNV | 1 | T | C | Heterozygous |
| NC_037640.1 | 13020857 | SNV | 1 | C | T | Heterozygous |
| NC_037640.1 | 13021225 | SNV | 1 | G | A | Heterozygous |
| NC_037640.1 | 13021250 | SNV | 1 | G | A | Heterozygous |
| NC_037640.1 | 13021284 | SNV | 1 | C | T | Homozygous   |
| NC_037640.1 | 13021341 | SNV | 1 | G | A | Heterozygous |
| NC_037640.1 | 13021350 | SNV | 1 | C | T | Heterozygous |
| NC_037640.1 | 13021388 | SNV | 1 | G | A | Heterozygous |
| NC_037640.1 | 13021400 | SNV | 1 | A | G | Heterozygous |
| NC_037640.1 | 13021459 | SNV | 1 | A | G | Homozygous   |
| NC_037640.1 | 13021551 | SNV | 1 | C | T | Homozygous   |
| NC_037640.1 | 13021565 | SNV | 1 | C | T | Homozygous   |
| NC_037640.1 | 13021590 | SNV | 1 | G | A | Homozygous   |
| NC_037640.1 | 13021592 | SNV | 1 | G | A | Heterozygous |

|             |          |     |   |   |   |              |
|-------------|----------|-----|---|---|---|--------------|
| NC_037640.1 | 13021622 | SNV | 1 | C | T | Homozygous   |
| NC_037640.1 | 13021626 | SNV | 1 | C | T | Homozygous   |
| NC_037640.1 | 13021651 | SNV | 1 | C | T | Heterozygous |
| NC_037640.1 | 13021715 | SNV | 1 | A | G | Homozygous   |
| NC_037640.1 | 13021737 | SNV | 1 | C | T | Homozygous   |
| NC_037640.1 | 13021744 | SNV | 1 | C | T | Heterozygous |
| NC_037640.1 | 13021760 | SNV | 1 | A | C | Homozygous   |
| NC_037640.1 | 13021769 | SNV | 1 | G | A | Heterozygous |
| NC_037640.1 | 13021853 | SNV | 1 | C | T | Homozygous   |
| NC_037640.1 | 13022148 | SNV | 1 | G | C | Homozygous   |
| NC_037640.1 | 13022181 | SNV | 1 | G | A | Homozygous   |
| NC_037640.1 | 13022227 | SNV | 1 | A | C | Heterozygous |
| NC_037640.1 | 13022273 | SNV | 1 | G | A | Heterozygous |
| NC_037640.1 | 13022282 | SNV | 1 | A | G | Heterozygous |
| NC_037640.1 | 13022288 | SNV | 1 | A | G | Heterozygous |
| NC_037640.1 | 13022293 | SNV | 1 | A | G | Heterozygous |
| NC_037640.1 | 13022298 | SNV | 1 | C | G | Heterozygous |
| NC_037640.1 | 13022306 | SNV | 1 | G | A | Heterozygous |
| NC_037640.1 | 13022309 | SNV | 1 | T | A | Heterozygous |
| NC_037640.1 | 13022309 | SNV | 1 | T | G | Heterozygous |
| NC_037640.1 | 13022397 | SNV | 1 | A | T | Heterozygous |
| NC_037640.1 | 13022400 | SNV | 1 | A | T | Homozygous   |
| NC_037640.1 | 13022408 | SNV | 1 | G | C | Homozygous   |
| NC_037640.1 | 13022446 | SNV | 1 | A | G | Heterozygous |
| NC_037640.1 | 13022451 | SNV | 1 | A | G | Heterozygous |
| NC_037640.1 | 13022601 | SNV | 1 | A | G | Heterozygous |
| NC_037640.1 | 13022621 | SNV | 1 | C | A | Heterozygous |
| NC_037640.1 | 13022678 | SNV | 1 | A | G | Heterozygous |
| NC_037640.1 | 13022758 | SNV | 1 | G | A | Heterozygous |
| NC_037640.1 | 13022797 | SNV | 1 | A | G | Heterozygous |
| NC_037640.1 | 13022842 | SNV | 1 | G | A | Heterozygous |
| NC_037640.1 | 13022872 | SNV | 1 | A | G | Heterozygous |
| NC_037640.1 | 13022902 | SNV | 1 | A | G | Homozygous   |
| NC_037640.1 | 13022926 | SNV | 1 | A | G | Heterozygous |
| NC_037640.1 | 13022931 | SNV | 1 | A | G | Heterozygous |
| NC_037640.1 | 13022959 | SNV | 1 | A | G | Homozygous   |
| NC_037640.1 | 13022970 | SNV | 1 | A | G | Heterozygous |
| NC_037640.1 | 13022977 | SNV | 1 | C | G | Homozygous   |
| NC_037640.1 | 13022987 | SNV | 1 | G | T | Homozygous   |
| NC_037640.1 | 13023011 | SNV | 1 | G | A | Heterozygous |
| NC_037640.1 | 13023012 | SNV | 1 | C | G | Heterozygous |
| NC_037640.1 | 13023017 | SNV | 1 | G | A | Homozygous   |
| NC_037640.1 | 13023053 | SNV | 1 | A | G | Homozygous   |
| NC_037640.1 | 13023058 | SNV | 1 | A | T | Homozygous   |
| NC_037640.1 | 13023062 | SNV | 1 | A | G | Heterozygous |
| NC_037640.1 | 13023075 | SNV | 1 | A | G | Heterozygous |
| NC_037640.1 | 13023167 | SNV | 1 | C | A | Homozygous   |
| NC_037640.1 | 13023172 | SNV | 1 | G | A | Homozygous   |
| NC_037640.1 | 13023175 | SNV | 1 | G | T | Homozygous   |
| NC_037640.1 | 13023254 | SNV | 1 | A | G | Heterozygous |
| NC_037640.1 | 13023256 | SNV | 1 | A | G | Heterozygous |

|             |          |     |   |   |   |              |
|-------------|----------|-----|---|---|---|--------------|
| NC_037640.1 | 13023260 | SNV | 1 | G | A | Heterozygous |
| NC_037640.1 | 13023265 | SNV | 1 | G | A | Heterozygous |
| NC_037640.1 | 13023283 | SNV | 1 | T | C | Heterozygous |
| NC_037640.1 | 13023321 | SNV | 1 | G | A | Heterozygous |
| NC_037640.1 | 13023336 | SNV | 1 | C | A | Heterozygous |
| NC_037640.1 | 13023350 | SNV | 1 | G | A | Heterozygous |
| NC_037640.1 | 13023364 | SNV | 1 | T | A | Heterozygous |
| NC_037640.1 | 13023366 | SNV | 1 | G | A | Heterozygous |
| NC_037640.1 | 13023433 | SNV | 1 | C | A | Heterozygous |
| NC_037640.1 | 13023457 | SNV | 1 | G | A | Heterozygous |
| NC_037640.1 | 13023561 | SNV | 1 | A | G | Homozygous   |
| NC_037640.1 | 13023780 | SNV | 1 | A | G | Homozygous   |
| NC_037640.1 | 13023864 | SNV | 1 | T | C | Heterozygous |
| NC_037640.1 | 13023986 | SNV | 1 | A | C | Heterozygous |
| NC_037640.1 | 13023993 | SNV | 1 | A | G | Homozygous   |
| NC_037640.1 | 13024076 | SNV | 1 | T | C | Homozygous   |
| NC_037640.1 | 13024094 | SNV | 1 | T | G | Homozygous   |
| NC_037640.1 | 13024173 | SNV | 1 | G | A | Heterozygous |
| NC_037640.1 | 13024253 | SNV | 1 | C | T | Heterozygous |
| NC_037640.1 | 13024321 | SNV | 1 | A | G | Heterozygous |
| NC_037640.1 | 13024374 | SNV | 1 | G | A | Heterozygous |
| NC_037640.1 | 13024377 | SNV | 1 | G | A | Heterozygous |
| NC_037640.1 | 13024402 | SNV | 1 | T | C | Homozygous   |
| NC_037640.1 | 13024419 | SNV | 1 | A | G | Homozygous   |
| NC_037640.1 | 13024442 | SNV | 1 | A | G | Homozygous   |
| NC_037640.1 | 13024447 | SNV | 1 | A | T | Homozygous   |
| NC_037640.1 | 13024473 | SNV | 1 | A | G | Heterozygous |
| NC_037640.1 | 13024496 | SNV | 1 | A | G | Heterozygous |
| NC_037640.1 | 13024548 | SNV | 1 | C | T | Homozygous   |
| NC_037640.1 | 13024687 | SNV | 1 | C | T | Homozygous   |
| NC_037640.1 | 13024716 | SNV | 1 | G | A | Heterozygous |
| NC_037640.1 | 13024834 | SNV | 1 | A | T | Homozygous   |
| NC_037640.1 | 13024836 | SNV | 1 | T | C | Homozygous   |
| NC_037640.1 | 13024840 | SNV | 1 | C | T | Homozygous   |
| NC_037640.1 | 13024858 | SNV | 1 | C | T | Homozygous   |
| NC_037640.1 | 13024936 | SNV | 1 | T | A | Homozygous   |
| NC_037640.1 | 13024939 | SNV | 1 | T | C | Homozygous   |
| NC_037640.1 | 13024953 | SNV | 1 | A | G | Heterozygous |
| NC_037640.1 | 13026268 | SNV | 1 | T | C | Heterozygous |
| NC_037640.1 | 13026283 | SNV | 1 | T | C | Homozygous   |
| NC_037640.1 | 13026305 | SNV | 1 | T | C | Homozygous   |
| NC_037640.1 | 13032221 | SNV | 1 | T | C | Homozygous   |
| NC_037640.1 | 13032239 | SNV | 1 | T | C | Homozygous   |
| NC_037640.1 | 13032300 | SNV | 1 | C | T | Heterozygous |
| NC_037640.1 | 13032325 | SNV | 1 | T | A | Heterozygous |
| NC_037640.1 | 13032330 | SNV | 1 | C | G | Heterozygous |
| NC_037640.1 | 13032902 | SNV | 1 | A | G | Heterozygous |
| NC_037640.1 | 13032931 | SNV | 1 | C | T | Heterozygous |
| NC_037640.1 | 13032980 | SNV | 1 | C | G | Homozygous   |
| NC_037640.1 | 13033028 | SNV | 1 | T | C | Homozygous   |
| NC_037640.1 | 13033030 | SNV | 1 | A | G | Homozygous   |

|             |          |     |   |   |   |              |
|-------------|----------|-----|---|---|---|--------------|
| NC_037640.1 | 13033068 | SNV | 1 | T | C | Homozygous   |
| NC_037640.1 | 13033135 | SNV | 1 | T | C | Homozygous   |
| NC_037640.1 | 13033620 | SNV | 1 | A | G | Homozygous   |
| NC_037640.1 | 13033866 | SNV | 1 | G | A | Heterozygous |
| NC_037640.1 | 13034036 | SNV | 1 | T | C | Homozygous   |
| NC_037640.1 | 13034294 | SNV | 1 | C | T | Homozygous   |
| NC_037640.1 | 13034945 | SNV | 1 | T | C | Heterozygous |
| NC_037640.1 | 13035345 | SNV | 1 | T | C | Homozygous   |
| NC_037640.1 | 13035362 | SNV | 1 | T | C | Homozygous   |
| NC_037640.1 | 13035402 | SNV | 1 | C | T | Heterozygous |
| NC_037640.1 | 13035483 | SNV | 1 | T | C | Heterozygous |
| NC_037640.1 | 13035538 | SNV | 1 | T | C | Heterozygous |
| NC_037640.1 | 13043487 | SNV | 1 | T | A | Homozygous   |
| NC_037640.1 | 13048576 | SNV | 1 | G | A | Heterozygous |
| NC_037640.1 | 13056459 | SNV | 1 | T | C | Homozygous   |
| NC_037640.1 | 13058784 | SNV | 1 | A | G | Homozygous   |
| NC_037640.1 | 13058796 | SNV | 1 | C | T | Heterozygous |
| NC_037640.1 | 13058978 | SNV | 1 | G | A | Heterozygous |
| NC_037640.1 | 13059105 | SNV | 1 | G | C | Homozygous   |
| NC_037640.1 | 13059384 | SNV | 1 | A | G | Homozygous   |
| NC_037640.1 | 13059621 | SNV | 1 | T | C | Heterozygous |
| NC_037640.1 | 13059799 | SNV | 1 | G | A | Heterozygous |
| NC_037640.1 | 13061274 | SNV | 1 | A | G | Homozygous   |
| NC_037640.1 | 13061310 | SNV | 1 | G | C | Homozygous   |
| NC_037640.1 | 13061570 | SNV | 1 | A | G | Heterozygous |
| NC_037640.1 | 13061621 | SNV | 1 | T | C | Homozygous   |
| NC_037640.1 | 13061962 | SNV | 1 | A | G | Homozygous   |
| NC_037640.1 | 13061968 | SNV | 1 | A | G | Homozygous   |
| NC_037640.1 | 13061978 | SNV | 1 | T | C | Homozygous   |
| NC_037640.1 | 13061984 | SNV | 1 | C | T | Heterozygous |
| NC_037640.1 | 13061986 | SNV | 1 | T | A | Heterozygous |
| NC_037640.1 | 13062192 | SNV | 1 | C | T | Homozygous   |
| NC_037640.1 | 13062212 | SNV | 1 | A | G | Homozygous   |
| NC_037640.1 | 13062610 | SNV | 1 | T | C | Homozygous   |
| NC_037640.1 | 13062621 | SNV | 1 | G | A | Homozygous   |
| NC_037640.1 | 13062623 | SNV | 1 | A | G | Heterozygous |
| NC_037640.1 | 13062722 | SNV | 1 | T | C | Homozygous   |
| NC_037640.1 | 13062826 | SNV | 1 | A | G | Homozygous   |
| NC_037640.1 | 13062884 | SNV | 1 | A | G | Homozygous   |
| NC_037640.1 | 13062914 | SNV | 1 | T | A | Heterozygous |
| NC_037640.1 | 13062923 | SNV | 1 | G | A | Heterozygous |
| NC_037640.1 | 13062936 | SNV | 1 | T | C | Heterozygous |
| NC_037640.1 | 13062946 | SNV | 1 | C | T | Heterozygous |
| NC_037640.1 | 13062983 | SNV | 1 | A | C | Heterozygous |
| NC_037640.1 | 13063000 | SNV | 1 | G | A | Heterozygous |
| NC_037640.1 | 13063029 | SNV | 1 | C | G | Homozygous   |
| NC_037640.1 | 13063060 | SNV | 1 | A | G | Heterozygous |
| NC_037640.1 | 13063230 | SNV | 1 | A | T | Homozygous   |
| NC_037640.1 | 13063623 | SNV | 1 | T | C | Homozygous   |
| NC_037640.1 | 13064037 | SNV | 1 | C | G | Homozygous   |
| NC_037640.1 | 13064109 | SNV | 1 | T | C | Heterozygous |

|             |          |     |   |   |   |              |
|-------------|----------|-----|---|---|---|--------------|
| NC_037640.1 | 13069087 | SNV | 1 | T | A | Homozygous   |
| NC_037640.1 | 13073539 | SNV | 1 | G | A | Homozygous   |
| NC_037640.1 | 13074775 | SNV | 1 | C | A | Heterozygous |
| NC_037640.1 | 13074778 | SNV | 1 | C | A | Heterozygous |
| NC_037640.1 | 13082436 | SNV | 1 | T | C | Homozygous   |
| NC_037640.1 | 13083596 | SNV | 1 | T | A | Homozygous   |
| NC_037640.1 | 13083600 | SNV | 1 | C | T | Homozygous   |
| NC_037640.1 | 13084353 | SNV | 1 | A | C | Homozygous   |
| NC_037640.1 | 13084355 | SNV | 1 | A | T | Homozygous   |
| NC_037640.1 | 13087989 | SNV | 1 | G | A | Homozygous   |
| NC_037640.1 | 13088501 | SNV | 1 | G | A | Homozygous   |
| NC_037640.1 | 13088503 | SNV | 1 | A | C | Homozygous   |
| NC_037640.1 | 13090029 | SNV | 1 | T | C | Heterozygous |
| NC_037640.1 | 13092009 | SNV | 1 | T | C | Homozygous   |
| NC_037640.1 | 13092030 | SNV | 1 | T | C | Heterozygous |
| NC_037640.1 | 13092262 | SNV | 1 | C | T | Heterozygous |
| NC_037640.1 | 13092298 | SNV | 1 | T | C | Homozygous   |
| NC_037640.1 | 13092305 | SNV | 1 | C | T | Heterozygous |
| NC_037640.1 | 13092903 | SNV | 1 | A | G | Heterozygous |
| NC_037640.1 | 13093155 | SNV | 1 | A | C | Heterozygous |
| NC_037640.1 | 13093251 | SNV | 1 | G | T | Heterozygous |
| NC_037640.1 | 13093660 | SNV | 1 | G | A | Heterozygous |
| NC_037640.1 | 13093666 | SNV | 1 | T | A | Heterozygous |
| NC_037640.1 | 13093948 | SNV | 1 | T | C | Homozygous   |
| NC_037640.1 | 13095308 | SNV | 1 | A | G | Homozygous   |
| NC_037640.1 | 13095647 | SNV | 1 | A | G | Heterozygous |
| NC_037640.1 | 13095679 | SNV | 1 | G | A | Heterozygous |
| NC_037640.1 | 13095703 | SNV | 1 | A | G | Homozygous   |
| NC_037640.1 | 13095780 | SNV | 1 | A | G | Homozygous   |
| NC_037640.1 | 13095931 | SNV | 1 | T | C | Homozygous   |
| NC_037640.1 | 13095945 | SNV | 1 | T | C | Homozygous   |
| NC_037640.1 | 13096172 | SNV | 1 | G | A | Heterozygous |
| NC_037640.1 | 13096223 | SNV | 1 | A | G | Homozygous   |
| NC_037640.1 | 13096308 | SNV | 1 | A | T | Homozygous   |
| NC_037640.1 | 13096310 | SNV | 1 | A | G | Homozygous   |
| NC_037640.1 | 13096534 | SNV | 1 | A | G | Homozygous   |
| NC_037640.1 | 13096687 | SNV | 1 | G | A | Heterozygous |
| NC_037640.1 | 13096732 | SNV | 1 | A | G | Homozygous   |
| NC_037640.1 | 13096879 | SNV | 1 | G | A | Homozygous   |
| NC_037640.1 | 13097166 | SNV | 1 | A | G | Homozygous   |
| NC_037640.1 | 13097187 | SNV | 1 | T | C | Heterozygous |
| NC_037640.1 | 13097202 | SNV | 1 | A | G | Homozygous   |
| NC_037640.1 | 13097502 | SNV | 1 | C | A | Heterozygous |
| NC_037640.1 | 13097823 | SNV | 1 | G | C | Heterozygous |
| NC_037640.1 | 13097895 | SNV | 1 | G | A | Homozygous   |
| NC_037640.1 | 13098210 | SNV | 1 | A | G | Heterozygous |
| NC_037640.1 | 13099295 | SNV | 1 | G | C | Heterozygous |
| NC_037640.1 | 13099298 | SNV | 1 | C | T | Heterozygous |
| NC_037640.1 | 13099366 | SNV | 1 | G | T | Heterozygous |
| NC_037640.1 | 13099994 | SNV | 1 | G | A | Heterozygous |
| NC_037640.1 | 13100078 | SNV | 1 | T | C | Heterozygous |

|             |          |     |   |   |   |              |
|-------------|----------|-----|---|---|---|--------------|
| NC_037640.1 | 13100087 | SNV | 1 | C | T | Heterozygous |
| NC_037640.1 | 13100092 | SNV | 1 | T | A | Heterozygous |
| NC_037640.1 | 13100697 | SNV | 1 | T | C | Homozygous   |
| NC_037640.1 | 13100707 | SNV | 1 | T | C | Homozygous   |
| NC_037640.1 | 13100795 | SNV | 1 | G | A | Heterozygous |
| NC_037640.1 | 13100811 | SNV | 1 | T | C | Homozygous   |
| NC_037640.1 | 13100907 | SNV | 1 | C | T | Heterozygous |
| NC_037640.1 | 13101252 | SNV | 1 | A | G | Heterozygous |
| NC_037640.1 | 13104422 | SNV | 1 | C | T | Heterozygous |
| NC_037640.1 | 13104448 | SNV | 1 | G | A | Heterozygous |
| NC_037640.1 | 13104451 | SNV | 1 | G | A | Heterozygous |
| NC_037640.1 | 13104478 | SNV | 1 | C | T | Heterozygous |
| NC_037640.1 | 13104496 | SNV | 1 | C | T | Heterozygous |
| NC_037640.1 | 13104554 | SNV | 1 | C | T | Homozygous   |
| NC_037640.1 | 13104592 | SNV | 1 | T | C | Homozygous   |
| NC_037640.1 | 13104626 | SNV | 1 | T | C | Homozygous   |
| NC_037640.1 | 13104672 | SNV | 1 | C | T | Heterozygous |
| NC_037640.1 | 13111435 | SNV | 1 | T | C | Homozygous   |
| NC_037640.1 | 13111455 | SNV | 1 | G | A | Homozygous   |
| NC_037640.1 | 13112184 | SNV | 1 | T | C | Homozygous   |
| NC_037640.1 | 13112215 | SNV | 1 | T | A | Homozygous   |
| NC_037640.1 | 13112228 | SNV | 1 | C | T | Homozygous   |
| NC_037640.1 | 13112237 | SNV | 1 | T | A | Homozygous   |
| NC_037640.1 | 13112239 | SNV | 1 | A | T | Homozygous   |
| NC_037640.1 | 13112251 | SNV | 1 | A | T | Homozygous   |
| NC_037640.1 | 13112459 | SNV | 1 | A | C | Homozygous   |
| NC_037640.1 | 13112461 | SNV | 1 | T | C | Homozygous   |
| NC_037640.1 | 13112468 | SNV | 1 | A | T | Homozygous   |
| NC_037640.1 | 13112494 | SNV | 1 | T | A | Homozygous   |
| NC_037640.1 | 13112502 | SNV | 1 | A | T | Homozygous   |
| NC_037640.1 | 13112513 | SNV | 1 | A | T | Homozygous   |
| NC_037640.1 | 13112517 | SNV | 1 | A | G | Homozygous   |
| NC_037640.1 | 13112533 | SNV | 1 | A | T | Homozygous   |
| NC_037640.1 | 13114404 | SNV | 1 | A | G | Homozygous   |
| NC_037640.1 | 13114480 | SNV | 1 | T | C | Homozygous   |
| NC_037640.1 | 13116275 | SNV | 1 | A | G | Heterozygous |
| NC_037640.1 | 13117109 | SNV | 1 | C | T | Heterozygous |
| NC_037640.1 | 13129805 | SNV | 1 | A | G | Heterozygous |
| NC_037640.1 | 13129808 | SNV | 1 | A | G | Heterozygous |
| NC_037640.1 | 13130137 | SNV | 1 | C | A | Homozygous   |
| NC_037640.1 | 13130140 | SNV | 1 | C | A | Homozygous   |
| NC_037640.1 | 13130145 | SNV | 1 | A | G | Homozygous   |
| NC_037640.1 | 13130149 | SNV | 1 | A | G | Homozygous   |
| NC_037640.1 | 13130152 | SNV | 1 | C | T | Homozygous   |
| NC_037640.1 | 13130156 | SNV | 1 | C | T | Homozygous   |
| NC_037640.1 | 13130169 | SNV | 1 | A | G | Homozygous   |
| NC_037640.1 | 13130176 | SNV | 1 | C | G | Heterozygous |
| NC_037640.1 | 13130178 | SNV | 1 | C | G | Heterozygous |
| NC_037640.1 | 13130183 | SNV | 1 | A | T | Heterozygous |
| NC_037640.1 | 13130185 | SNV | 1 | A | T | Heterozygous |
| NC_037640.1 | 13130467 | SNV | 1 | T | G | Homozygous   |



|             |          |     |   |   |   |              |
|-------------|----------|-----|---|---|---|--------------|
| NC_037640.1 | 13130471 | SNV | 1 | G | T | Homozygous   |
| NC_037640.1 | 13130584 | SNV | 1 | C | T | Heterozygous |
| NC_037640.1 | 13132195 | SNV | 1 | A | G | Homozygous   |
| NC_037640.1 | 13132795 | SNV | 1 | A | G | Homozygous   |
| NC_037640.1 | 13132798 | SNV | 1 | A | G | Homozygous   |
| NC_037640.1 | 13132828 | SNV | 1 | T | C | Homozygous   |
| NC_037640.1 | 13132942 | SNV | 1 | G | A | Heterozygous |
| NC_037640.1 | 13132969 | SNV | 1 | G | A | Homozygous   |
| NC_037640.1 | 13133215 | SNV | 1 | A | G | Heterozygous |
| NC_037640.1 | 13133224 | SNV | 1 | C | G | Heterozygous |
| NC_037640.1 | 13133299 | SNV | 1 | C | T | Heterozygous |
| NC_037640.1 | 13134655 | SNV | 1 | A | C | Heterozygous |
| NC_037640.1 | 13134687 | SNV | 1 | A | T | Heterozygous |
| NC_037640.1 | 13134693 | SNV | 1 | C | A | Heterozygous |
| NC_037640.1 | 13134693 | SNV | 1 | C | T | Heterozygous |
| NC_037640.1 | 13134771 | SNV | 1 | T | C | Heterozygous |
| NC_037640.1 | 13134779 | SNV | 1 | T | C | Heterozygous |
| NC_037640.1 | 13136290 | SNV | 1 | A | T | Homozygous   |
| NC_037640.1 | 13137777 | SNV | 1 | T | C | Homozygous   |
| NC_037640.1 | 13137814 | SNV | 1 | A | T | Homozygous   |
| NC_037640.1 | 13137820 | SNV | 1 | T | C | Homozygous   |
| NC_037640.1 | 13137834 | SNV | 1 | A | G | Homozygous   |
| NC_037640.1 | 13137854 | SNV | 1 | C | T | Heterozygous |
| NC_037640.1 | 13137884 | SNV | 1 | T | C | Heterozygous |
| NC_037640.1 | 13137911 | SNV | 1 | C | T | Heterozygous |
| NC_037640.1 | 13137955 | SNV | 1 | G | A | Heterozygous |
| NC_037640.1 | 13148572 | SNV | 1 | A | G | Heterozygous |
| NC_037640.1 | 13150400 | SNV | 1 | A | G | Heterozygous |
| NC_037640.1 | 13150442 | SNV | 1 | T | C | Heterozygous |
| NC_037640.1 | 13151685 | SNV | 1 | T | C | Heterozygous |
| NC_037640.1 | 13151688 | SNV | 1 | T | C | Heterozygous |
| NC_037640.1 | 13151691 | SNV | 1 | G | T | Heterozygous |
| NC_037640.1 | 13151940 | SNV | 1 | G | A | Heterozygous |
| NC_037640.1 | 13151973 | SNV | 1 | C | T | Heterozygous |
| NC_037640.1 | 13151976 | SNV | 1 | C | T | Heterozygous |
| NC_037640.1 | 13151988 | SNV | 1 | T | C | Heterozygous |
| NC_037640.1 | 13152003 | SNV | 1 | C | T | Heterozygous |
| NC_037640.1 | 13158807 | SNV | 1 | C | A | Homozygous   |
| NC_037640.1 | 13158817 | SNV | 1 | C | T | Heterozygous |
| NC_037640.1 | 13158865 | SNV | 1 | G | C | Heterozygous |
| NC_037640.1 | 13158872 | SNV | 1 | T | G | Heterozygous |
| NC_037640.1 | 13158901 | SNV | 1 | G | T | Heterozygous |
| NC_037640.1 | 13158903 | SNV | 1 | G | T | Heterozygous |
| NC_037640.1 | 13158909 | SNV | 1 | G | C | Heterozygous |
| NC_037640.1 | 13158920 | SNV | 1 | C | T | Homozygous   |
| NC_037640.1 | 13158927 | SNV | 1 | G | C | Homozygous   |
| NC_037640.1 | 13159389 | SNV | 1 | C | A | Heterozygous |
| NC_037640.1 | 13174311 | SNV | 1 | T | C | Homozygous   |
| NC_037640.1 | 13174577 | SNV | 1 | G | A | Heterozygous |
| NC_037640.1 | 13175225 | SNV | 1 | C | T | Homozygous   |
| NC_037640.1 | 13175284 | SNV | 1 | T | C | Heterozygous |

|             |          |     |   |   |   |              |
|-------------|----------|-----|---|---|---|--------------|
| NC_037640.1 | 13175290 | SNV | 1 | A | G | Heterozygous |
| NC_037640.1 | 13175293 | SNV | 1 | G | A | Heterozygous |
| NC_037640.1 | 13175305 | SNV | 1 | A | G | Homozygous   |
| NC_037640.1 | 13175499 | SNV | 1 | G | T | Homozygous   |
| NC_037640.1 | 13175506 | SNV | 1 | C | G | Homozygous   |
| NC_037640.1 | 13175510 | SNV | 1 | G | A | Heterozygous |
| NC_037640.1 | 13175522 | SNV | 1 | A | G | Homozygous   |
| NC_037640.1 | 13175525 | SNV | 1 | G | A | Heterozygous |
| NC_037640.1 | 13175552 | SNV | 1 | A | G | Heterozygous |
| NC_037640.1 | 13175555 | SNV | 1 | A | T | Heterozygous |
| NC_037640.1 | 13175639 | SNV | 1 | G | T | Heterozygous |
| NC_037640.1 | 13175659 | SNV | 1 | A | G | Homozygous   |
| NC_037640.1 | 13176030 | SNV | 1 | G | A | Homozygous   |
| NC_037640.1 | 13176040 | SNV | 1 | T | C | Homozygous   |
| NC_037640.1 | 13176103 | SNV | 1 | T | C | Homozygous   |
| NC_037640.1 | 13176113 | SNV | 1 | C | T | Homozygous   |
| NC_037640.1 | 13176320 | SNV | 1 | G | A | Homozygous   |
| NC_037640.1 | 13176325 | SNV | 1 | G | A | Homozygous   |
| NC_037640.1 | 13176460 | SNV | 1 | G | T | Heterozygous |
| NC_037640.1 | 13176467 | SNV | 1 | G | A | Heterozygous |
| NC_037640.1 | 13176473 | SNV | 1 | A | G | Homozygous   |
| NC_037640.1 | 13176476 | SNV | 1 | A | G | Homozygous   |
| NC_037640.1 | 13176487 | SNV | 1 | A | G | Homozygous   |
| NC_037640.1 | 13176528 | SNV | 1 | G | A | Heterozygous |
| NC_037640.1 | 13176630 | SNV | 1 | A | G | Homozygous   |
| NC_037640.1 | 13176716 | SNV | 1 | C | G | Heterozygous |
| NC_037640.1 | 13177251 | SNV | 1 | A | G | Homozygous   |
| NC_037640.1 | 13177259 | SNV | 1 | T | C | Homozygous   |
| NC_037640.1 | 13177369 | SNV | 1 | A | G | Heterozygous |
| NC_037640.1 | 13177455 | SNV | 1 | A | G | Heterozygous |
| NC_037640.1 | 13177514 | SNV | 1 | A | G | Homozygous   |
| NC_037640.1 | 13177742 | SNV | 1 | T | C | Heterozygous |
| NC_037640.1 | 13177744 | SNV | 1 | T | C | Heterozygous |
| NC_037640.1 | 13177752 | SNV | 1 | C | T | Heterozygous |
| NC_037640.1 | 13177918 | SNV | 1 | A | G | Heterozygous |
| NC_037640.1 | 13177938 | SNV | 1 | G | A | Homozygous   |
| NC_037640.1 | 13178192 | SNV | 1 | A | T | Homozygous   |
| NC_037640.1 | 13180279 | SNV | 1 | A | G | Homozygous   |
| NC_037640.1 | 13180281 | SNV | 1 | A | C | Homozygous   |
| NC_037640.1 | 13181185 | SNV | 1 | T | C | Heterozygous |
| NC_037640.1 | 13181339 | SNV | 1 | C | T | Homozygous   |
| NC_037640.1 | 13182027 | SNV | 1 | T | C | Homozygous   |
| NC_037640.1 | 13182312 | SNV | 1 | T | C | Heterozygous |
| NC_037640.1 | 13185011 | SNV | 1 | T | G | Heterozygous |
| NC_037640.1 | 13185045 | SNV | 1 | C | A | Homozygous   |
| NC_037640.1 | 13192942 | SNV | 1 | C | T | Homozygous   |
| NC_037640.1 | 13193746 | SNV | 1 | A | T | Homozygous   |
| NC_037640.1 | 13193749 | SNV | 1 | C | T | Homozygous   |
| NC_037640.1 | 13193764 | SNV | 1 | T | A | Heterozygous |
| NC_037640.1 | 13193766 | SNV | 1 | T | A | Heterozygous |
| NC_037640.1 | 13199707 | SNV | 1 | T | A | Homozygous   |

|             |          |     |   |   |   |              |
|-------------|----------|-----|---|---|---|--------------|
| NC_037640.1 | 13199745 | SNV | 1 | T | C | Homozygous   |
| NC_037640.1 | 13201068 | SNV | 1 | G | A | Homozygous   |
| NC_037640.1 | 13202572 | SNV | 1 | C | T | Homozygous   |
| NC_037640.1 | 13202587 | SNV | 1 | A | T | Heterozygous |
| NC_037640.1 | 13203028 | SNV | 1 | A | T | Heterozygous |
| NC_037640.1 | 13203037 | SNV | 1 | T | A | Heterozygous |
| NC_037640.1 | 13203043 | SNV | 1 | A | T | Heterozygous |
| NC_037640.1 | 13203046 | SNV | 1 | A | G | Heterozygous |
| NC_037640.1 | 13203074 | SNV | 1 | T | C | Heterozygous |
| NC_037640.1 | 13203076 | SNV | 1 | T | C | Heterozygous |
| NC_037640.1 | 13203090 | SNV | 1 | A | T | Heterozygous |
| NC_037640.1 | 13203100 | SNV | 1 | A | G | Heterozygous |
| NC_037640.1 | 13203102 | SNV | 1 | A | T | Heterozygous |
| NC_037640.1 | 13206278 | SNV | 1 | A | C | Homozygous   |
| NC_037640.1 | 13206288 | SNV | 1 | A | G | Homozygous   |
| NC_037640.1 | 13206300 | SNV | 1 | T | A | Homozygous   |
| NC_037640.1 | 13206315 | SNV | 1 | A | T | Homozygous   |
| NC_037640.1 | 13206323 | SNV | 1 | T | A | Homozygous   |
| NC_037640.1 | 13206331 | SNV | 1 | T | A | Homozygous   |
| NC_037640.1 | 13208098 | SNV | 1 | T | A | Heterozygous |
| NC_037640.1 | 13208116 | SNV | 1 | T | A | Heterozygous |
| NC_037640.1 | 13208123 | SNV | 1 | T | A | Homozygous   |
| NC_037640.1 | 13208130 | SNV | 1 | A | T | Homozygous   |
| NC_037640.1 | 13208214 | SNV | 1 | T | G | Heterozygous |
| NC_037640.1 | 13208815 | SNV | 1 | A | G | Heterozygous |
| NC_037640.1 | 13208826 | SNV | 1 | A | G | Homozygous   |
| NC_037640.1 | 13208834 | SNV | 1 | G | T | Homozygous   |
| NC_037640.1 | 13208847 | SNV | 1 | G | T | Homozygous   |
| NC_037640.1 | 13208858 | SNV | 1 | A | T | Homozygous   |
| NC_037640.1 | 13208875 | SNV | 1 | A | G | Heterozygous |
| NC_037640.1 | 13222911 | SNV | 1 | G | A | Heterozygous |
| NC_037640.1 | 13222915 | SNV | 1 | G | A | Heterozygous |
| NC_037640.1 | 13222920 | SNV | 1 | A | T | Heterozygous |
| NC_037640.1 | 13222922 | SNV | 1 | A | C | Heterozygous |
| NC_037640.1 | 13222938 | SNV | 1 | A | G | Heterozygous |
| NC_037640.1 | 13223153 | SNV | 1 | T | A | Homozygous   |
| NC_037640.1 | 13223183 | SNV | 1 | T | C | Homozygous   |
| NC_037640.1 | 13223187 | SNV | 1 | T | C | Homozygous   |
| NC_037640.1 | 13223189 | SNV | 1 | T | C | Homozygous   |
| NC_037640.1 | 13223191 | SNV | 1 | T | C | Homozygous   |
| NC_037640.1 | 13223193 | SNV | 1 | T | C | Homozygous   |
| NC_037640.1 | 13223195 | SNV | 1 | T | C | Homozygous   |
| NC_037640.1 | 13223197 | SNV | 1 | T | C | Homozygous   |
| NC_037640.1 | 13255208 | SNV | 1 | G | A | Heterozygous |
| NC_037640.1 | 13260654 | SNV | 1 | C | A | Heterozygous |
| NC_037640.1 | 13273963 | SNV | 1 | A | G | Heterozygous |
| NC_037640.1 | 13273969 | SNV | 1 | A | G | Heterozygous |
| NC_037640.1 | 13273975 | SNV | 1 | A | G | Heterozygous |
| NC_037640.1 | 13274971 | SNV | 1 | A | G | Homozygous   |
| NC_037640.1 | 13274976 | SNV | 1 | A | G | Homozygous   |
| NC_037640.1 | 13274990 | SNV | 1 | C | T | Heterozygous |

|             |          |     |   |   |   |              |
|-------------|----------|-----|---|---|---|--------------|
| NC_037640.1 | 13274997 | SNV | 1 | A | C | Homozygous   |
| NC_037640.1 | 13279589 | SNV | 1 | G | T | Heterozygous |
| NC_037640.1 | 13279745 | SNV | 1 | G | A | Heterozygous |
| NC_037640.1 | 13285154 | SNV | 1 | G | A | Homozygous   |
| NC_037640.1 | 13285583 | SNV | 1 | G | A | Homozygous   |
| NC_037640.1 | 13286101 | SNV | 1 | T | C | Heterozygous |
| NC_037640.1 | 13286110 | SNV | 1 | C | T | Heterozygous |
| NC_037640.1 | 13286112 | SNV | 1 | C | T | Homozygous   |
| NC_037640.1 | 13286123 | SNV | 1 | G | T | Homozygous   |
| NC_037640.1 | 13286131 | SNV | 1 | G | A | Homozygous   |
| NC_037640.1 | 13286137 | SNV | 1 | C | T | Heterozygous |
| NC_037640.1 | 13286139 | SNV | 1 | G | A | Heterozygous |
| NC_037640.1 | 13286347 | SNV | 1 | A | G | Homozygous   |
| NC_037640.1 | 13287729 | SNV | 1 | C | T | Homozygous   |
| NC_037640.1 | 13290083 | SNV | 1 | A | G | Homozygous   |
| NC_037640.1 | 13290810 | SNV | 1 | A | T | Heterozygous |
| NC_037640.1 | 13290819 | SNV | 1 | A | T | Heterozygous |
| NC_037640.1 | 13290831 | SNV | 1 | A | T | Heterozygous |
| NC_037640.1 | 13290834 | SNV | 1 | A | T | Heterozygous |
| NC_037640.1 | 13290837 | SNV | 1 | T | G | Heterozygous |
| NC_037640.1 | 13290873 | SNV | 1 | A | T | Heterozygous |
| NC_037640.1 | 13290883 | SNV | 1 | A | T | Heterozygous |
| NC_037640.1 | 13290890 | SNV | 1 | T | A | Heterozygous |
| NC_037640.1 | 13292577 | SNV | 1 | A | G | Homozygous   |
| NC_037640.1 | 13299542 | SNV | 1 | T | C | Homozygous   |
| NC_037640.1 | 13299726 | SNV | 1 | A | G | Homozygous   |
| NC_037640.1 | 13300360 | SNV | 1 | C | T | Homozygous   |
| NC_037640.1 | 13300368 | SNV | 1 | T | A | Homozygous   |
| NC_037640.1 | 13300390 | SNV | 1 | A | T | Homozygous   |
| NC_037640.1 | 13300394 | SNV | 1 | T | A | Homozygous   |
| NC_037640.1 | 13305982 | SNV | 1 | A | T | Homozygous   |
| NC_037640.1 | 13313420 | SNV | 1 | A | G | Homozygous   |
| NC_037640.1 | 13313724 | SNV | 1 | T | C | Heterozygous |
| NC_037640.1 | 13314105 | SNV | 1 | A | G | Homozygous   |
| NC_037640.1 | 13320661 | SNV | 1 | C | A | Homozygous   |
| NC_037640.1 | 13320702 | SNV | 1 | C | T | Heterozygous |
| NC_037640.1 | 13320708 | SNV | 1 | T | A | Heterozygous |
| NC_037640.1 | 13324494 | SNV | 1 | T | C | Heterozygous |
| NC_037640.1 | 13324498 | SNV | 1 | T | C | Heterozygous |
| NC_037640.1 | 13324632 | SNV | 1 | T | C | Homozygous   |
| NC_037640.1 | 13324689 | SNV | 1 | T | G | Heterozygous |
| NC_037640.1 | 13325372 | SNV | 1 | A | G | Heterozygous |
| NC_037640.1 | 13325751 | SNV | 1 | C | T | Homozygous   |
| NC_037640.1 | 13326502 | SNV | 1 | T | C | Heterozygous |
| NC_037640.1 | 13327058 | SNV | 1 | T | C | Homozygous   |
| NC_037640.1 | 13327204 | SNV | 1 | G | A | Heterozygous |
| NC_037640.1 | 13327529 | SNV | 1 | A | G | Homozygous   |
| NC_037640.1 | 13327583 | SNV | 1 | T | C | Homozygous   |
| NC_037640.1 | 13327849 | SNV | 1 | T | C | Homozygous   |
| NC_037640.1 | 13328433 | SNV | 1 | A | G | Homozygous   |
| NC_037640.1 | 13328468 | SNV | 1 | G | A | Heterozygous |

|             |          |     |   |   |   |              |
|-------------|----------|-----|---|---|---|--------------|
| NC_037640.1 | 13328569 | SNV | 1 | C | G | Heterozygous |
| NC_037640.1 | 13328573 | SNV | 1 | C | T | Heterozygous |
| NC_037640.1 | 13328622 | SNV | 1 | C | T | Homozygous   |
| NC_037640.1 | 13328630 | SNV | 1 | A | T | Heterozygous |
| NC_037640.1 | 13328851 | SNV | 1 | A | G | Homozygous   |
| NC_037640.1 | 13329819 | SNV | 1 | A | G | Homozygous   |
| NC_037640.1 | 13329918 | SNV | 1 | A | G | Homozygous   |
| NC_037640.1 | 13330342 | SNV | 1 | A | G | Heterozygous |
| NC_037640.1 | 13330367 | SNV | 1 | T | C | Homozygous   |
| NC_037640.1 | 13330413 | SNV | 1 | T | C | Heterozygous |
| NC_037640.1 | 13330799 | SNV | 1 | A | G | Homozygous   |
| NC_037640.1 | 13330939 | SNV | 1 | A | G | Homozygous   |
| NC_037640.1 | 13330941 | SNV | 1 | T | C | Homozygous   |
| NC_037640.1 | 13330951 | SNV | 1 | T | C | Homozygous   |
| NC_037640.1 | 13330961 | SNV | 1 | A | G | Homozygous   |
| NC_037640.1 | 13330965 | SNV | 1 | T | C | Homozygous   |
| NC_037640.1 | 13331079 | SNV | 1 | T | C | Heterozygous |
| NC_037640.1 | 13331155 | SNV | 1 | A | G | Homozygous   |
| NC_037640.1 | 13331159 | SNV | 1 | A | G | Homozygous   |
| NC_037640.1 | 13331215 | SNV | 1 | A | G | Homozygous   |
| NC_037640.1 | 13331219 | SNV | 1 | A | G | Heterozygous |
| NC_037640.1 | 13331255 | SNV | 1 | T | C | Homozygous   |
| NC_037640.1 | 13331279 | SNV | 1 | T | C | Homozygous   |
| NC_037640.1 | 13331435 | SNV | 1 | A | G | Homozygous   |
| NC_037640.1 | 13331565 | SNV | 1 | T | C | Homozygous   |
| NC_037640.1 | 13332097 | SNV | 1 | A | G | Homozygous   |
| NC_037640.1 | 13332187 | SNV | 1 | A | G | Homozygous   |
| NC_037640.1 | 13338149 | SNV | 1 | T | C | Homozygous   |
| NC_037640.1 | 13338163 | SNV | 1 | G | A | Heterozygous |
| NC_037640.1 | 13338169 | SNV | 1 | G | A | Heterozygous |
| NC_037640.1 | 13338176 | SNV | 1 | G | A | Homozygous   |
| NC_037640.1 | 13338179 | SNV | 1 | A | G | Homozygous   |
| NC_037640.1 | 13338452 | SNV | 1 | T | G | Heterozygous |
| NC_037640.1 | 13338616 | SNV | 1 | T | C | Heterozygous |
| NC_037640.1 | 13338621 | SNV | 1 | T | C | Homozygous   |
| NC_037640.1 | 13338671 | SNV | 1 | A | G | Homozygous   |
| NC_037640.1 | 13340289 | SNV | 1 | A | G | Homozygous   |
| NC_037640.1 | 13340359 | SNV | 1 | T | C | Homozygous   |
| NC_037640.1 | 13340637 | SNV | 1 | G | A | Homozygous   |
| NC_037640.1 | 13340978 | SNV | 1 | G | A | Heterozygous |
| NC_037640.1 | 13344811 | SNV | 1 | T | C | Homozygous   |
| NC_037640.1 | 13344907 | SNV | 1 | T | C | Heterozygous |
| NC_037640.1 | 13344929 | SNV | 1 | C | T | Heterozygous |
| NC_037640.1 | 13344988 | SNV | 1 | C | T | Homozygous   |
| NC_037640.1 | 13345441 | SNV | 1 | C | T | Heterozygous |
| NC_037640.1 | 13345766 | SNV | 1 | A | T | Heterozygous |
| NC_037640.1 | 13346030 | SNV | 1 | C | T | Heterozygous |
| NC_037640.1 | 13347920 | SNV | 1 | C | T | Heterozygous |
| NC_037640.1 | 13347974 | SNV | 1 | G | A | Heterozygous |
| NC_037640.1 | 13354541 | SNV | 1 | A | C | Homozygous   |
| NC_037640.1 | 13356493 | SNV | 1 | C | T | Heterozygous |

|             |          |     |   |   |   |              |
|-------------|----------|-----|---|---|---|--------------|
| NC_037640.1 | 13356516 | SNV | 1 | G | A | Heterozygous |
| NC_037640.1 | 13357046 | SNV | 1 | A | G | Heterozygous |
| NC_037640.1 | 13357565 | SNV | 1 | G | A | Homozygous   |
| NC_037640.1 | 13357592 | SNV | 1 | A | G | Heterozygous |
| NC_037640.1 | 13357601 | SNV | 1 | A | G | Homozygous   |
| NC_037640.1 | 13357630 | SNV | 1 | T | A | Heterozygous |
| NC_037640.1 | 13357633 | SNV | 1 | A | T | Heterozygous |
| NC_037640.1 | 13359203 | SNV | 1 | C | T | Homozygous   |
| NC_037640.1 | 13359451 | SNV | 1 | G | A | Heterozygous |
| NC_037640.1 | 13359497 | SNV | 1 | G | C | Heterozygous |
| NC_037640.1 | 13359668 | SNV | 1 | A | G | Homozygous   |
| NC_037640.1 | 13359722 | SNV | 1 | G | T | Heterozygous |
| NC_037640.1 | 13359938 | SNV | 1 | A | G | Heterozygous |
| NC_037640.1 | 13360165 | SNV | 1 | C | T | Homozygous   |
| NC_037640.1 | 13360532 | SNV | 1 | G | C | Heterozygous |
| NC_037640.1 | 13360722 | SNV | 1 | A | T | Heterozygous |
| NC_037640.1 | 13360724 | SNV | 1 | A | T | Heterozygous |
| NC_037640.1 | 13361182 | SNV | 1 | A | C | Heterozygous |
| NC_037640.1 | 13361276 | SNV | 1 | T | C | Heterozygous |
| NC_037640.1 | 13361281 | SNV | 1 | G | A | Homozygous   |
| NC_037640.1 | 13362082 | SNV | 1 | T | C | Homozygous   |
| NC_037640.1 | 13362142 | SNV | 1 | T | C | Heterozygous |
| NC_037640.1 | 13363740 | SNV | 1 | G | A | Heterozygous |
| NC_037640.1 | 13364546 | SNV | 1 | G | C | Heterozygous |
| NC_037640.1 | 13364548 | SNV | 1 | C | G | Heterozygous |
| NC_037640.1 | 13364550 | SNV | 1 | A | T | Heterozygous |
| NC_037640.1 | 13364554 | SNV | 1 | A | T | Heterozygous |
| NC_037640.1 | 13364557 | SNV | 1 | A | T | Homozygous   |
| NC_037640.1 | 13364790 | SNV | 1 | G | A | Homozygous   |
| NC_037640.1 | 13365025 | SNV | 1 | G | A | Homozygous   |
| NC_037640.1 | 13370707 | SNV | 1 | C | T | Heterozygous |
| NC_037640.1 | 13373278 | SNV | 1 | C | T | Homozygous   |
| NC_037640.1 | 13373510 | SNV | 1 | G | C | Heterozygous |
| NC_037640.1 | 13378059 | SNV | 1 | G | A | Homozygous   |
| NC_037640.1 | 13378114 | SNV | 1 | T | C | Homozygous   |
| NC_037640.1 | 13382488 | SNV | 1 | A | C | Homozygous   |
| NC_037640.1 | 13382490 | SNV | 1 | A | T | Homozygous   |
| NC_037640.1 | 13382493 | SNV | 1 | T | A | Homozygous   |
| NC_037640.1 | 13382502 | SNV | 1 | T | A | Homozygous   |
| NC_037640.1 | 13382507 | SNV | 1 | C | T | Homozygous   |
| NC_037640.1 | 13382510 | SNV | 1 | A | G | Homozygous   |
| NC_037640.1 | 13386117 | SNV | 1 | A | G | Homozygous   |
| NC_037640.1 | 13386564 | SNV | 1 | G | A | Heterozygous |
| NC_037640.1 | 13395830 | SNV | 1 | A | G | Homozygous   |
| NC_037640.1 | 13395916 | SNV | 1 | A | G | Homozygous   |
| NC_037640.1 | 13396115 | SNV | 1 | C | T | Heterozygous |
| NC_037640.1 | 13396458 | SNV | 1 | C | T | Heterozygous |
| NC_037640.1 | 13396864 | SNV | 1 | T | C | Homozygous   |
| NC_037640.1 | 13396866 | SNV | 1 | A | T | Homozygous   |
| NC_037640.1 | 13396944 | SNV | 1 | T | C | Homozygous   |
| NC_037640.1 | 13397316 | SNV | 1 | G | A | Heterozygous |

|             |          |     |   |   |   |              |
|-------------|----------|-----|---|---|---|--------------|
| NC_037640.1 | 13407015 | SNV | 1 | T | C | Heterozygous |
| NC_037640.1 | 13408634 | SNV | 1 | C | T | Heterozygous |
| NC_037640.1 | 13412030 | SNV | 1 | T | A | Homozygous   |
| NC_037640.1 | 13412032 | SNV | 1 | T | A | Homozygous   |
| NC_037640.1 | 13412048 | SNV | 1 | T | G | Homozygous   |
| NC_037640.1 | 13412050 | SNV | 1 | A | T | Homozygous   |
| NC_037640.1 | 13424847 | SNV | 1 | A | C | Homozygous   |
| NC_037640.1 | 13424852 | SNV | 1 | G | A | Heterozygous |
| NC_037640.1 | 13435240 | SNV | 1 | A | G | Homozygous   |
| NC_037640.1 | 13435248 | SNV | 1 | A | G | Homozygous   |
| NC_037640.1 | 13438168 | SNV | 1 | C | T | Heterozygous |
| NC_037640.1 | 13438471 | SNV | 1 | T | C | Homozygous   |
| NC_037640.1 | 13438549 | SNV | 1 | C | T | Homozygous   |
| NC_037640.1 | 13438579 | SNV | 1 | G | C | Homozygous   |
| NC_037640.1 | 13439018 | SNV | 1 | G | A | Homozygous   |
| NC_037640.1 | 13439330 | SNV | 1 | T | C | Homozygous   |
| NC_037640.1 | 13439363 | SNV | 1 | C | T | Heterozygous |
| NC_037640.1 | 13439365 | SNV | 1 | C | T | Heterozygous |
| NC_037640.1 | 13439398 | SNV | 1 | C | T | Heterozygous |
| NC_037640.1 | 13439660 | SNV | 1 | G | A | Homozygous   |
| NC_037640.1 | 13440011 | SNV | 1 | T | C | Homozygous   |
| NC_037640.1 | 13440019 | SNV | 1 | T | C | Homozygous   |
| NC_037640.1 | 13440297 | SNV | 1 | T | C | Homozygous   |
| NC_037640.1 | 13440340 | SNV | 1 | G | A | Heterozygous |
| NC_037640.1 | 13440467 | SNV | 1 | A | G | Heterozygous |
| NC_037640.1 | 13440544 | SNV | 1 | T | C | Homozygous   |
| NC_037640.1 | 13440598 | SNV | 1 | A | G | Homozygous   |
| NC_037640.1 | 13440608 | SNV | 1 | G | A | Heterozygous |
| NC_037640.1 | 13440616 | SNV | 1 | A | T | Heterozygous |
| NC_037640.1 | 13440632 | SNV | 1 | T | A | Homozygous   |
| NC_037640.1 | 13440636 | SNV | 1 | G | A | Heterozygous |
| NC_037640.1 | 13440658 | SNV | 1 | G | A | Heterozygous |
| NC_037640.1 | 13440792 | SNV | 1 | T | C | Homozygous   |
| NC_037640.1 | 13441823 | SNV | 1 | G | A | Heterozygous |
| NC_037640.1 | 13441961 | SNV | 1 | A | G | Homozygous   |
| NC_037640.1 | 13442018 | SNV | 1 | T | G | Homozygous   |
| NC_037640.1 | 13442265 | SNV | 1 | A | G | Homozygous   |
| NC_037640.1 | 13442313 | SNV | 1 | T | C | Homozygous   |
| NC_037640.1 | 13442327 | SNV | 1 | T | G | Homozygous   |
| NC_037640.1 | 13443292 | SNV | 1 | A | C | Homozygous   |
| NC_037640.1 | 13443395 | SNV | 1 | A | G | Homozygous   |
| NC_037640.1 | 13443566 | SNV | 1 | C | G | Homozygous   |
| NC_037640.1 | 13443792 | SNV | 1 | A | G | Homozygous   |
| NC_037640.1 | 13443796 | SNV | 1 | C | T | Homozygous   |
| NC_037640.1 | 13443901 | SNV | 1 | T | C | Homozygous   |
| NC_037640.1 | 13443919 | SNV | 1 | A | C | Heterozygous |
| NC_037640.1 | 13443958 | SNV | 1 | T | C | Homozygous   |
| NC_037640.1 | 13444263 | SNV | 1 | C | G | Homozygous   |
| NC_037640.1 | 13444361 | SNV | 1 | C | T | Heterozygous |
| NC_037640.1 | 13444468 | SNV | 1 | T | C | Homozygous   |
| NC_037640.1 | 13444523 | SNV | 1 | C | T | Heterozygous |

|             |          |     |   |   |   |              |
|-------------|----------|-----|---|---|---|--------------|
| NC_037640.1 | 13444785 | SNV | 1 | C | T | Homozygous   |
| NC_037640.1 | 13444856 | SNV | 1 | G | A | Homozygous   |
| NC_037640.1 | 13444874 | SNV | 1 | T | C | Homozygous   |
| NC_037640.1 | 13444959 | SNV | 1 | C | T | Heterozygous |
| NC_037640.1 | 13445331 | SNV | 1 | A | G | Homozygous   |
| NC_037640.1 | 13445388 | SNV | 1 | G | A | Heterozygous |
| NC_037640.1 | 13445408 | SNV | 1 | G | A | Heterozygous |
| NC_037640.1 | 13445704 | SNV | 1 | T | C | Heterozygous |
| NC_037640.1 | 13446763 | SNV | 1 | A | G | Homozygous   |
| NC_037640.1 | 13446781 | SNV | 1 | A | G | Homozygous   |
| NC_037640.1 | 13447368 | SNV | 1 | A | G | Homozygous   |
| NC_037640.1 | 13447442 | SNV | 1 | C | T | Homozygous   |
| NC_037640.1 | 13447496 | SNV | 1 | C | T | Homozygous   |
| NC_037640.1 | 13450705 | SNV | 1 | A | G | Heterozygous |
| NC_037640.1 | 13450973 | SNV | 1 | T | C | Homozygous   |
| NC_037640.1 | 13450991 | SNV | 1 | T | C | Heterozygous |
| NC_037640.1 | 13451000 | SNV | 1 | G | A | Homozygous   |
| NC_037640.1 | 13457947 | SNV | 1 | C | G | Heterozygous |
| NC_037640.1 | 13461803 | SNV | 1 | T | C | Homozygous   |
| NC_037640.1 | 13462186 | SNV | 1 | T | C | Homozygous   |
| NC_037640.1 | 13462223 | SNV | 1 | G | A | Heterozygous |
| NC_037640.1 | 13462500 | SNV | 1 | T | C | Homozygous   |
| NC_037640.1 | 13462607 | SNV | 1 | G | T | Heterozygous |
| NC_037640.1 | 13466325 | SNV | 1 | C | A | Heterozygous |
| NC_037640.1 | 13466498 | SNV | 1 | T | C | Homozygous   |
| NC_037640.1 | 13466528 | SNV | 1 | C | G | Homozygous   |
| NC_037640.1 | 13466540 | SNV | 1 | A | G | Heterozygous |
| NC_037640.1 | 13466642 | SNV | 1 | T | C | Homozygous   |
| NC_037640.1 | 13466705 | SNV | 1 | G | A | Heterozygous |
| NC_037640.1 | 13466716 | SNV | 1 | A | G | Homozygous   |
| NC_037640.1 | 13467217 | SNV | 1 | T | C | Homozygous   |
| NC_037640.1 | 13467257 | SNV | 1 | A | G | Homozygous   |
| NC_037640.1 | 13467264 | SNV | 1 | A | G | Heterozygous |
| NC_037640.1 | 13467377 | SNV | 1 | A | G | Homozygous   |
| NC_037640.1 | 13467638 | SNV | 1 | A | G | Heterozygous |
| NC_037640.1 | 13467692 | SNV | 1 | T | C | Homozygous   |
| NC_037640.1 | 13467698 | SNV | 1 | G | C | Homozygous   |
| NC_037640.1 | 13472243 | SNV | 1 | A | G | Homozygous   |
| NC_037640.1 | 13472247 | SNV | 1 | A | T | Homozygous   |
| NC_037640.1 | 13472251 | SNV | 1 | T | G | Homozygous   |
| NC_037640.1 | 13474114 | SNV | 1 | A | G | Homozygous   |
| NC_037640.1 | 13476455 | SNV | 1 | T | C | Homozygous   |
| NC_037640.1 | 13476859 | SNV | 1 | C | T | Heterozygous |
| NC_037640.1 | 13477099 | SNV | 1 | T | C | Homozygous   |
| NC_037640.1 | 13477367 | SNV | 1 | A | T | Homozygous   |
| NC_037640.1 | 13477574 | SNV | 1 | T | C | Homozygous   |
| NC_037640.1 | 13477697 | SNV | 1 | T | C | Heterozygous |
| NC_037640.1 | 13477734 | SNV | 1 | C | T | Homozygous   |
| NC_037640.1 | 13477752 | SNV | 1 | T | C | Homozygous   |
| NC_037640.1 | 13477755 | SNV | 1 | C | G | Homozygous   |
| NC_037640.1 | 13477783 | SNV | 1 | C | T | Homozygous   |



|             |          |     |   |   |   |              |
|-------------|----------|-----|---|---|---|--------------|
| NC_037640.1 | 13477851 | SNV | 1 | T | C | Heterozygous |
| NC_037640.1 | 13477854 | SNV | 1 | T | A | Homozygous   |
| NC_037640.1 | 13478333 | SNV | 1 | T | C | Heterozygous |
| NC_037640.1 | 13478743 | SNV | 1 | G | A | Heterozygous |
| NC_037640.1 | 13478790 | SNV | 1 | C | T | Heterozygous |
| NC_037640.1 | 13478802 | SNV | 1 | T | G | Homozygous   |
| NC_037640.1 | 13479286 | SNV | 1 | G | A | Heterozygous |
| NC_037640.1 | 13479322 | SNV | 1 | C | T | Heterozygous |
| NC_037640.1 | 13479551 | SNV | 1 | G | A | Heterozygous |
| NC_037640.1 | 13479679 | SNV | 1 | C | A | Heterozygous |
| NC_037640.1 | 13479892 | SNV | 1 | T | C | Heterozygous |
| NC_037640.1 | 13481477 | SNV | 1 | T | C | Homozygous   |
| NC_037640.1 | 13482835 | SNV | 1 | T | C | Homozygous   |
| NC_037640.1 | 13482965 | SNV | 1 | A | G | Homozygous   |
| NC_037640.1 | 13483004 | SNV | 1 | G | A | Homozygous   |
| NC_037640.1 | 13483065 | SNV | 1 | A | G | Heterozygous |
| NC_037640.1 | 13494116 | SNV | 1 | A | C | Homozygous   |
| NC_037640.1 | 13494130 | SNV | 1 | T | A | Homozygous   |
| NC_037640.1 | 13494132 | SNV | 1 | T | C | Homozygous   |
| NC_037640.1 | 13496712 | SNV | 1 | T | A | Homozygous   |
| NC_037640.1 | 13507820 | SNV | 1 | G | A | Heterozygous |
| NC_037640.1 | 13508087 | SNV | 1 | T | C | Homozygous   |
| NC_037640.1 | 13508104 | SNV | 1 | C | T | Homozygous   |
| NC_037640.1 | 13509349 | SNV | 1 | T | C | Homozygous   |
| NC_037640.1 | 13509911 | SNV | 1 | T | C | Homozygous   |
| NC_037640.1 | 13510209 | SNV | 1 | G | C | Heterozygous |
| NC_037640.1 | 13510449 | SNV | 1 | C | G | Homozygous   |
| NC_037640.1 | 13510524 | SNV | 1 | G | T | Heterozygous |
| NC_037640.1 | 13510580 | SNV | 1 | C | T | Homozygous   |
| NC_037640.1 | 13510617 | SNV | 1 | C | T | Homozygous   |
| NC_037640.1 | 13510725 | SNV | 1 | C | T | Homozygous   |
| NC_037640.1 | 13510738 | SNV | 1 | G | A | Homozygous   |
| NC_037640.1 | 13510823 | SNV | 1 | A | G | Homozygous   |
| NC_037640.1 | 13510850 | SNV | 1 | T | C | Homozygous   |
| NC_037640.1 | 13512294 | SNV | 1 | G | C | Heterozygous |
| NC_037640.1 | 13513039 | SNV | 1 | C | G | Heterozygous |
| NC_037640.1 | 13513487 | SNV | 1 | T | A | Heterozygous |
| NC_037640.1 | 13513489 | SNV | 1 | T | C | Heterozygous |
| NC_037640.1 | 13513695 | SNV | 1 | A | G | Heterozygous |
| NC_037640.1 | 13513739 | SNV | 1 | G | A | Homozygous   |
| NC_037640.1 | 13513842 | SNV | 1 | T | C | Heterozygous |
| NC_037640.1 | 13513880 | SNV | 1 | G | A | Homozygous   |
| NC_037640.1 | 13513900 | SNV | 1 | C | A | Heterozygous |
| NC_037640.1 | 13513978 | SNV | 1 | G | A | Homozygous   |
| NC_037640.1 | 13514017 | SNV | 1 | A | T | Homozygous   |
| NC_037640.1 | 13514143 | SNV | 1 | A | G | Heterozygous |
| NC_037640.1 | 13514279 | SNV | 1 | T | C | Heterozygous |
| NC_037640.1 | 13514417 | SNV | 1 | A | G | Homozygous   |
| NC_037640.1 | 13514923 | SNV | 1 | G | A | Heterozygous |
| NC_037640.1 | 13514964 | SNV | 1 | G | A | Heterozygous |
| NC_037640.1 | 13515069 | SNV | 1 | A | G | Heterozygous |

|             |          |     |   |   |   |              |
|-------------|----------|-----|---|---|---|--------------|
| NC_037640.1 | 13515145 | SNV | 1 | T | A | Heterozygous |
| NC_037640.1 | 13515167 | SNV | 1 | T | C | Homozygous   |
| NC_037640.1 | 13515195 | SNV | 1 | A | G | Homozygous   |
| NC_037640.1 | 13515211 | SNV | 1 | G | A | Homozygous   |
| NC_037640.1 | 13515213 | SNV | 1 | G | A | Homozygous   |
| NC_037640.1 | 13515221 | SNV | 1 | A | G | Heterozygous |
| NC_037640.1 | 13515227 | SNV | 1 | G | A | Heterozygous |
| NC_037640.1 | 13515229 | SNV | 1 | A | G | Heterozygous |
| NC_037640.1 | 13515246 | SNV | 1 | G | A | Heterozygous |
| NC_037640.1 | 13515349 | SNV | 1 | A | G | Heterozygous |
| NC_037640.1 | 13515462 | SNV | 1 | G | A | Heterozygous |
| NC_037640.1 | 13515500 | SNV | 1 | G | T | Homozygous   |
| NC_037640.1 | 13515551 | SNV | 1 | C | T | Homozygous   |
| NC_037640.1 | 13516368 | SNV | 1 | A | C | Homozygous   |
| NC_037640.1 | 13516977 | SNV | 1 | C | T | Homozygous   |
| NC_037640.1 | 13517019 | SNV | 1 | A | G | Heterozygous |
| NC_037640.1 | 13517070 | SNV | 1 | A | G | Heterozygous |
| NC_037640.1 | 13517267 | SNV | 1 | C | T | Heterozygous |
| NC_037640.1 | 13517283 | SNV | 1 | G | A | Heterozygous |
| NC_037640.1 | 13517298 | SNV | 1 | G | A | Heterozygous |
| NC_037640.1 | 13517301 | SNV | 1 | A | C | Heterozygous |
| NC_037640.1 | 13517301 | SNV | 1 | A | G | Heterozygous |
| NC_037640.1 | 13517304 | SNV | 1 | C | T | Heterozygous |
| NC_037640.1 | 13517338 | SNV | 1 | G | A | Homozygous   |
| NC_037640.1 | 13517372 | SNV | 1 | T | A | Heterozygous |
| NC_037640.1 | 13517511 | SNV | 1 | A | T | Heterozygous |
| NC_037640.1 | 13517524 | SNV | 1 | A | G | Heterozygous |
| NC_037640.1 | 13517659 | SNV | 1 | T | C | Homozygous   |
| NC_037640.1 | 13517929 | SNV | 1 | C | A | Homozygous   |
| NC_037640.1 | 13518104 | SNV | 1 | A | G | Homozygous   |
| NC_037640.1 | 13518119 | SNV | 1 | T | C | Heterozygous |
| NC_037640.1 | 13518150 | SNV | 1 | C | T | Homozygous   |
| NC_037640.1 | 13518166 | SNV | 1 | G | A | Homozygous   |
| NC_037640.1 | 13518282 | SNV | 1 | G | A | Homozygous   |
| NC_037640.1 | 13519681 | SNV | 1 | C | T | Homozygous   |
| NC_037640.1 | 13519807 | SNV | 1 | C | T | Heterozygous |
| NC_037640.1 | 13520180 | SNV | 1 | A | G | Heterozygous |
| NC_037640.1 | 13520425 | SNV | 1 | T | C | Heterozygous |
| NC_037640.1 | 13520433 | SNV | 1 | A | C | Homozygous   |
| NC_037640.1 | 13520468 | SNV | 1 | A | G | Heterozygous |
| NC_037640.1 | 13520657 | SNV | 1 | C | T | Heterozygous |
| NC_037640.1 | 13520960 | SNV | 1 | T | A | Heterozygous |
| NC_037640.1 | 13520971 | SNV | 1 | T | C | Heterozygous |
| NC_037640.1 | 13521380 | SNV | 1 | T | A | Heterozygous |
| NC_037640.1 | 13521380 | SNV | 1 | T | G | Heterozygous |
| NC_037640.1 | 13521399 | SNV | 1 | G | A | Heterozygous |
| NC_037640.1 | 13521578 | SNV | 1 | G | A | Heterozygous |
| NC_037640.1 | 13521597 | SNV | 1 | T | G | Heterozygous |
| NC_037640.1 | 13521600 | SNV | 1 | T | A | Heterozygous |
| NC_037640.1 | 13521653 | SNV | 1 | A | G | Homozygous   |
| NC_037640.1 | 13521877 | SNV | 1 | C | T | Homozygous   |

|             |          |     |   |   |   |              |
|-------------|----------|-----|---|---|---|--------------|
| NC_037640.1 | 13527444 | SNV | 1 | T | C | Homozygous   |
| NC_037640.1 | 13527626 | SNV | 1 | A | C | Heterozygous |
| NC_037640.1 | 13527666 | SNV | 1 | A | G | Homozygous   |
| NC_037640.1 | 13527998 | SNV | 1 | G | A | Heterozygous |
| NC_037640.1 | 13528003 | SNV | 1 | T | C | Heterozygous |
| NC_037640.1 | 13528844 | SNV | 1 | T | C | Heterozygous |
| NC_037640.1 | 13529000 | SNV | 1 | T | C | Homozygous   |
| NC_037640.1 | 13529908 | SNV | 1 | A | G | Homozygous   |
| NC_037640.1 | 13530087 | SNV | 1 | G | T | Homozygous   |
| NC_037640.1 | 13530103 | SNV | 1 | A | C | Homozygous   |
| NC_037640.1 | 13530107 | SNV | 1 | A | C | Heterozygous |
| NC_037640.1 | 13530107 | SNV | 1 | A | T | Heterozygous |
| NC_037640.1 | 13530115 | SNV | 1 | A | T | Heterozygous |
| NC_037640.1 | 13530137 | SNV | 1 | A | G | Heterozygous |
| NC_037640.1 | 13532745 | SNV | 1 | A | G | Heterozygous |
| NC_037640.1 | 13532755 | SNV | 1 | A | G | Heterozygous |
| NC_037640.1 | 13533426 | SNV | 1 | A | G | Heterozygous |
| NC_037640.1 | 13533823 | SNV | 1 | G | A | Heterozygous |
| NC_037640.1 | 13543951 | SNV | 1 | A | G | Homozygous   |
| NC_037640.1 | 13544123 | SNV | 1 | G | T | Homozygous   |
| NC_037640.1 | 13544803 | SNV | 1 | G | C | Homozygous   |
| NC_037640.1 | 13544806 | SNV | 1 | T | A | Homozygous   |
| NC_037640.1 | 13545313 | SNV | 1 | A | G | Homozygous   |
| NC_037640.1 | 13545449 | SNV | 1 | A | G | Heterozygous |
| NC_037640.1 | 13545655 | SNV | 1 | T | A | Homozygous   |
| NC_037640.1 | 13545663 | SNV | 1 | A | C | Homozygous   |
| NC_037640.1 | 13545680 | SNV | 1 | T | C | Heterozygous |
| NC_037640.1 | 13551420 | SNV | 1 | T | C | Homozygous   |
| NC_037640.1 | 13553060 | SNV | 1 | A | G | Homozygous   |
| NC_037640.1 | 13554219 | SNV | 1 | T | C | Heterozygous |
| NC_037640.1 | 13554222 | SNV | 1 | A | T | Homozygous   |
| NC_037640.1 | 13554224 | SNV | 1 | A | T | Homozygous   |
| NC_037640.1 | 13554332 | SNV | 1 | C | T | Heterozygous |
| NC_037640.1 | 13555598 | SNV | 1 | G | A | Homozygous   |
| NC_037640.1 | 13563636 | SNV | 1 | A | G | Homozygous   |
| NC_037640.1 | 13563645 | SNV | 1 | A | G | Heterozygous |
| NC_037640.1 | 13563650 | SNV | 1 | A | G | Heterozygous |
| NC_037640.1 | 13563660 | SNV | 1 | A | G | Heterozygous |
| NC_037640.1 | 13563663 | SNV | 1 | A | G | Heterozygous |
| NC_037640.1 | 13563674 | SNV | 1 | A | G | Heterozygous |
| NC_037640.1 | 13563678 | SNV | 1 | A | G | Heterozygous |
| NC_037640.1 | 13563701 | SNV | 1 | A | G | Heterozygous |
| NC_037640.1 | 13568854 | SNV | 1 | C | T | Heterozygous |
| NC_037640.1 | 13568885 | SNV | 1 | A | G | Homozygous   |
| NC_037640.1 | 13568909 | SNV | 1 | G | A | Homozygous   |
| NC_037640.1 | 13569029 | SNV | 1 | A | T | Heterozygous |
| NC_037640.1 | 13569490 | SNV | 1 | A | T | Heterozygous |
| NC_037640.1 | 13570407 | SNV | 1 | A | C | Heterozygous |
| NC_037640.1 | 13570564 | SNV | 1 | C | T | Homozygous   |
| NC_037640.1 | 13575306 | SNV | 1 | G | A | Heterozygous |
| NC_037640.1 | 13576720 | SNV | 1 | T | A | Homozygous   |

|             |          |     |   |   |   |              |
|-------------|----------|-----|---|---|---|--------------|
| NC_037640.1 | 13576727 | SNV | 1 | T | A | Homozygous   |
| NC_037640.1 | 13580716 | SNV | 1 | T | C | Homozygous   |
| NC_037640.1 | 13580718 | SNV | 1 | T | C | Homozygous   |
| NC_037640.1 | 13580722 | SNV | 1 | T | C | Homozygous   |
| NC_037640.1 | 13581053 | SNV | 1 | T | C | Heterozygous |
| NC_037640.1 | 13591467 | SNV | 1 | G | A | Homozygous   |
| NC_037640.1 | 13591473 | SNV | 1 | C | T | Homozygous   |
| NC_037640.1 | 13591535 | SNV | 1 | G | A | Heterozygous |
| NC_037640.1 | 13591537 | SNV | 1 | T | A | Heterozygous |
| NC_037640.1 | 13591543 | SNV | 1 | T | A | Heterozygous |
| NC_037640.1 | 13593881 | SNV | 1 | A | G | Heterozygous |
| NC_037640.1 | 13593918 | SNV | 1 | A | T | Heterozygous |
| NC_037640.1 | 13595572 | SNV | 1 | A | C | Heterozygous |
| NC_037640.1 | 13595572 | SNV | 1 | A | T | Heterozygous |
| NC_037640.1 | 13595575 | SNV | 1 | A | T | Heterozygous |
| NC_037640.1 | 13595578 | SNV | 1 | A | T | Heterozygous |
| NC_037640.1 | 13595581 | SNV | 1 | T | A | Heterozygous |
| NC_037640.1 | 13595603 | SNV | 1 | T | C | Heterozygous |
| NC_037640.1 | 13595604 | SNV | 1 | A | G | Heterozygous |
| NC_037640.1 | 13595611 | SNV | 1 | A | T | Heterozygous |
| NC_037640.1 | 13595613 | SNV | 1 | T | A | Heterozygous |
| NC_037640.1 | 13595619 | SNV | 1 | A | G | Heterozygous |
| NC_037641.1 | 1660     | SNV | 1 | T | C | Homozygous   |
| NC_037641.1 | 1796     | SNV | 1 | A | T | Homozygous   |
| NC_037641.1 | 1799     | SNV | 1 | A | T | Homozygous   |
| NC_037641.1 | 1822     | SNV | 1 | T | C | Homozygous   |
| NC_037641.1 | 1962     | SNV | 1 | A | G | Homozygous   |
| NC_037641.1 | 5445     | SNV | 1 | G | T | Homozygous   |
| NC_037641.1 | 6213     | SNV | 1 | T | A | Homozygous   |
| NC_037641.1 | 6240     | SNV | 1 | T | C | Homozygous   |
| NC_037641.1 | 7524     | SNV | 1 | C | T | Heterozygous |
| NC_037641.1 | 8661     | SNV | 1 | T | C | Homozygous   |
| NC_037641.1 | 8854     | SNV | 1 | C | T | Homozygous   |
| NC_037641.1 | 8864     | SNV | 1 | T | C | Heterozygous |
| NC_037641.1 | 8979     | SNV | 1 | T | C | Homozygous   |
| NC_037641.1 | 9068     | SNV | 1 | C | T | Heterozygous |
| NC_037641.1 | 9467     | SNV | 1 | C | T | Homozygous   |
| NC_037641.1 | 10235    | SNV | 1 | G | C | Heterozygous |
| NC_037641.1 | 10984    | SNV | 1 | A | G | Homozygous   |
| NC_037641.1 | 11743    | SNV | 1 | C | T | Heterozygous |
| NC_037641.1 | 13035    | SNV | 1 | T | C | Homozygous   |
| NC_037641.1 | 13958    | SNV | 1 | A | G | Heterozygous |
| NC_037641.1 | 13966    | SNV | 1 | A | G | Heterozygous |
| NC_037641.1 | 16224    | SNV | 1 | C | T | Heterozygous |
| NC_037641.1 | 17179    | SNV | 1 | G | A | Homozygous   |
| NC_037641.1 | 17523    | SNV | 1 | C | T | Heterozygous |
| NC_037641.1 | 24561    | SNV | 1 | A | G | Homozygous   |
| NC_037641.1 | 25481    | SNV | 1 | G | T | Homozygous   |
| NC_037641.1 | 25688    | SNV | 1 | G | A | Heterozygous |
| NC_037641.1 | 27212    | SNV | 1 | C | T | Homozygous   |
| NC_037641.1 | 27338    | SNV | 1 | C | T | Homozygous   |

|             |        |     |   |   |   |              |
|-------------|--------|-----|---|---|---|--------------|
| NC_037641.1 | 28263  | SNV | 1 | G | T | Homozygous   |
| NC_037641.1 | 28392  | SNV | 1 | A | G | Homozygous   |
| NC_037641.1 | 32619  | SNV | 1 | G | A | Homozygous   |
| NC_037641.1 | 32621  | SNV | 1 | G | A | Homozygous   |
| NC_037641.1 | 40104  | SNV | 1 | G | A | Heterozygous |
| NC_037641.1 | 44641  | SNV | 1 | A | G | Heterozygous |
| NC_037641.1 | 44647  | SNV | 1 | G | A | Homozygous   |
| NC_037641.1 | 66881  | SNV | 1 | A | G | Homozygous   |
| NC_037641.1 | 66898  | SNV | 1 | T | C | Homozygous   |
| NC_037641.1 | 66922  | SNV | 1 | C | T | Homozygous   |
| NC_037641.1 | 67881  | SNV | 1 | G | T | Homozygous   |
| NC_037641.1 | 68757  | SNV | 1 | G | T | Homozygous   |
| NC_037641.1 | 69044  | SNV | 1 | G | A | Homozygous   |
| NC_037641.1 | 71193  | SNV | 1 | C | T | Heterozygous |
| NC_037641.1 | 72306  | SNV | 1 | C | T | Heterozygous |
| NC_037641.1 | 72616  | SNV | 1 | G | C | Homozygous   |
| NC_037641.1 | 72787  | SNV | 1 | A | G | Homozygous   |
| NC_037641.1 | 76298  | SNV | 1 | C | T | Heterozygous |
| NC_037641.1 | 83883  | SNV | 1 | C | T | Homozygous   |
| NC_037641.1 | 89561  | SNV | 1 | T | C | Homozygous   |
| NC_037641.1 | 102654 | SNV | 1 | C | T | Homozygous   |
| NC_037641.1 | 102696 | SNV | 1 | C | T | Homozygous   |
| NC_037641.1 | 102700 | SNV | 1 | C | T | Homozygous   |
| NC_037641.1 | 105897 | SNV | 1 | T | C | Heterozygous |
| NC_037641.1 | 105909 | SNV | 1 | G | A | Homozygous   |
| NC_037641.1 | 106065 | SNV | 1 | A | T | Homozygous   |
| NC_037641.1 | 106932 | SNV | 1 | C | T | Heterozygous |
| NC_037641.1 | 108402 | SNV | 1 | T | A | Homozygous   |
| NC_037641.1 | 108422 | SNV | 1 | G | C | Homozygous   |
| NC_037641.1 | 108424 | SNV | 1 | A | G | Homozygous   |
| NC_037641.1 | 108432 | SNV | 1 | T | G | Homozygous   |
| NC_037641.1 | 108436 | SNV | 1 | T | C | Homozygous   |
| NC_037641.1 | 108440 | SNV | 1 | T | G | Homozygous   |
| NC_037641.1 | 108443 | SNV | 1 | T | A | Homozygous   |
| NC_037641.1 | 108446 | SNV | 1 | T | A | Homozygous   |
| NC_037641.1 | 115182 | SNV | 1 | T | C | Heterozygous |
| NC_037641.1 | 115203 | SNV | 1 | T | C | Homozygous   |
| NC_037641.1 | 115244 | SNV | 1 | G | A | Heterozygous |
| NC_037641.1 | 115576 | SNV | 1 | A | G | Heterozygous |
| NC_037641.1 | 117188 | SNV | 1 | T | C | Heterozygous |
| NC_037641.1 | 117212 | SNV | 1 | A | T | Heterozygous |
| NC_037641.1 | 117219 | SNV | 1 | T | G | Heterozygous |
| NC_037641.1 | 121036 | SNV | 1 | C | T | Homozygous   |
| NC_037641.1 | 121044 | SNV | 1 | T | C | Homozygous   |
| NC_037641.1 | 121047 | SNV | 1 | T | C | Homozygous   |
| NC_037641.1 | 128275 | SNV | 1 | A | C | Heterozygous |
| NC_037641.1 | 128279 | SNV | 1 | A | C | Heterozygous |
| NC_037641.1 | 128282 | SNV | 1 | T | G | Heterozygous |
| NC_037641.1 | 128289 | SNV | 1 | A | T | Heterozygous |
| NC_037641.1 | 128296 | SNV | 1 | T | A | Heterozygous |
| NC_037641.1 | 128314 | SNV | 1 | A | C | Heterozygous |

|             |        |     |   |   |   |              |
|-------------|--------|-----|---|---|---|--------------|
| NC_037641.1 | 128319 | SNV | 1 | C | G | Heterozygous |
| NC_037641.1 | 131915 | SNV | 1 | T | A | Heterozygous |
| NC_037641.1 | 133446 | SNV | 1 | T | C | Homozygous   |
| NC_037641.1 | 133454 | SNV | 1 | C | T | Homozygous   |
| NC_037641.1 | 133709 | SNV | 1 | G | A | Homozygous   |
| NC_037641.1 | 133737 | SNV | 1 | T | C | Heterozygous |
| NC_037641.1 | 133940 | SNV | 1 | A | T | Homozygous   |
| NC_037641.1 | 134121 | SNV | 1 | A | G | Homozygous   |
| NC_037641.1 | 136484 | SNV | 1 | T | C | Homozygous   |
| NC_037641.1 | 136692 | SNV | 1 | T | C | Heterozygous |
| NC_037641.1 | 137203 | SNV | 1 | T | C | Heterozygous |
| NC_037641.1 | 137239 | SNV | 1 | A | G | Heterozygous |
| NC_037641.1 | 137335 | SNV | 1 | A | G | Homozygous   |
| NC_037641.1 | 137681 | SNV | 1 | C | T | Homozygous   |
| NC_037641.1 | 137691 | SNV | 1 | T | C | Heterozygous |
| NC_037641.1 | 138085 | SNV | 1 | G | A | Homozygous   |
| NC_037641.1 | 138106 | SNV | 1 | A | G | Homozygous   |
| NC_037641.1 | 138115 | SNV | 1 | T | C | Homozygous   |
| NC_037641.1 | 138227 | SNV | 1 | T | C | Homozygous   |
| NC_037641.1 | 138297 | SNV | 1 | C | T | Heterozygous |
| NC_037641.1 | 138503 | SNV | 1 | T | A | Heterozygous |
| NC_037641.1 | 138533 | SNV | 1 | G | A | Homozygous   |
| NC_037641.1 | 138604 | SNV | 1 | T | C | Homozygous   |
| NC_037641.1 | 138656 | SNV | 1 | A | G | Homozygous   |
| NC_037641.1 | 139092 | SNV | 1 | T | C | Homozygous   |
| NC_037641.1 | 139934 | SNV | 1 | A | G | Heterozygous |
| NC_037641.1 | 140112 | SNV | 1 | G | T | Homozygous   |
| NC_037641.1 | 140360 | SNV | 1 | C | T | Heterozygous |
| NC_037641.1 | 140381 | SNV | 1 | C | T | Homozygous   |
| NC_037641.1 | 140500 | SNV | 1 | A | G | Homozygous   |
| NC_037641.1 | 141047 | SNV | 1 | G | A | Heterozygous |
| NC_037641.1 | 141347 | SNV | 1 | T | C | Heterozygous |
| NC_037641.1 | 141355 | SNV | 1 | C | T | Heterozygous |
| NC_037641.1 | 141422 | SNV | 1 | G | A | Heterozygous |
| NC_037641.1 | 141614 | SNV | 1 | C | T | Heterozygous |
| NC_037641.1 | 141682 | SNV | 1 | G | A | Heterozygous |
| NC_037641.1 | 141702 | SNV | 1 | C | A | Heterozygous |
| NC_037641.1 | 143624 | SNV | 1 | T | A | Heterozygous |
| NC_037641.1 | 144115 | SNV | 1 | C | A | Heterozygous |
| NC_037641.1 | 144151 | SNV | 1 | A | G | Homozygous   |
| NC_037641.1 | 145921 | SNV | 1 | A | G | Homozygous   |
| NC_037641.1 | 145965 | SNV | 1 | G | A | Homozygous   |
| NC_037641.1 | 146173 | SNV | 1 | A | G | Homozygous   |
| NC_037641.1 | 146185 | SNV | 1 | T | C | Homozygous   |
| NC_037641.1 | 146841 | SNV | 1 | G | A | Homozygous   |
| NC_037641.1 | 146843 | SNV | 1 | C | T | Homozygous   |
| NC_037641.1 | 146886 | SNV | 1 | G | A | Homozygous   |
| NC_037641.1 | 146975 | SNV | 1 | T | A | Heterozygous |
| NC_037641.1 | 147492 | SNV | 1 | C | T | Homozygous   |
| NC_037641.1 | 148241 | SNV | 1 | A | G | Heterozygous |
| NC_037641.1 | 148312 | SNV | 1 | G | A | Heterozygous |

|             |        |     |   |   |   |              |
|-------------|--------|-----|---|---|---|--------------|
| NC_037641.1 | 153429 | SNV | 1 | T | C | Homozygous   |
| NC_037641.1 | 155320 | SNV | 1 | G | T | Homozygous   |
| NC_037641.1 | 155350 | SNV | 1 | G | T | Homozygous   |
| NC_037641.1 | 155355 | SNV | 1 | T | A | Homozygous   |
| NC_037641.1 | 155364 | SNV | 1 | T | A | Homozygous   |
| NC_037641.1 | 158369 | SNV | 1 | T | C | Homozygous   |
| NC_037641.1 | 163224 | SNV | 1 | A | G | Homozygous   |
| NC_037641.1 | 163303 | SNV | 1 | G | A | Homozygous   |
| NC_037641.1 | 163402 | SNV | 1 | G | A | Homozygous   |
| NC_037641.1 | 165750 | SNV | 1 | G | A | Homozygous   |
| NC_037641.1 | 165753 | SNV | 1 | C | T | Homozygous   |
| NC_037641.1 | 167575 | SNV | 1 | C | T | Heterozygous |
| NC_037641.1 | 167782 | SNV | 1 | T | G | Heterozygous |
| NC_037641.1 | 168004 | SNV | 1 | T | G | Heterozygous |
| NC_037641.1 | 168007 | SNV | 1 | T | A | Heterozygous |
| NC_037641.1 | 168009 | SNV | 1 | T | C | Heterozygous |
| NC_037641.1 | 168025 | SNV | 1 | T | C | Homozygous   |
| NC_037641.1 | 168037 | SNV | 1 | A | G | Homozygous   |
| NC_037641.1 | 168043 | SNV | 1 | T | A | Homozygous   |
| NC_037641.1 | 168049 | SNV | 1 | T | A | Homozygous   |
| NC_037641.1 | 168061 | SNV | 1 | A | T | Homozygous   |
| NC_037641.1 | 168064 | SNV | 1 | T | C | Homozygous   |
| NC_037641.1 | 168067 | SNV | 1 | T | C | Heterozygous |
| NC_037641.1 | 168073 | SNV | 1 | T | C | Heterozygous |
| NC_037641.1 | 168088 | SNV | 1 | T | C | Heterozygous |
| NC_037641.1 | 168091 | SNV | 1 | T | A | Heterozygous |
| NC_037641.1 | 168094 | SNV | 1 | T | C | Heterozygous |
| NC_037641.1 | 173118 | SNV | 1 | T | A | Homozygous   |
| NC_037641.1 | 173195 | SNV | 1 | A | T | Homozygous   |
| NC_037641.1 | 221492 | SNV | 1 | T | C | Homozygous   |
| NC_037641.1 | 222447 | SNV | 1 | T | C | Heterozygous |
| NC_037641.1 | 222799 | SNV | 1 | T | C | Homozygous   |
| NC_037641.1 | 222801 | SNV | 1 | T | C | Homozygous   |
| NC_037641.1 | 222919 | SNV | 1 | A | G | Homozygous   |
| NC_037641.1 | 223303 | SNV | 1 | T | C | Homozygous   |
| NC_037641.1 | 223483 | SNV | 1 | T | G | Heterozygous |
| NC_037641.1 | 223896 | SNV | 1 | G | A | Homozygous   |
| NC_037641.1 | 228924 | SNV | 1 | T | C | Homozygous   |
| NC_037641.1 | 228995 | SNV | 1 | C | G | Heterozygous |
| NC_037641.1 | 229001 | SNV | 1 | C | T | Heterozygous |
| NC_037641.1 | 232230 | SNV | 1 | A | T | Homozygous   |
| NC_037641.1 | 232234 | SNV | 1 | A | G | Homozygous   |
| NC_037641.1 | 235157 | SNV | 1 | G | A | Homozygous   |
| NC_037641.1 | 235162 | SNV | 1 | A | G | Homozygous   |
| NC_037641.1 | 235302 | SNV | 1 | A | G | Heterozygous |
| NC_037641.1 | 239238 | SNV | 1 | G | C | Homozygous   |
| NC_037641.1 | 239247 | SNV | 1 | C | T | Homozygous   |
| NC_037641.1 | 239253 | SNV | 1 | C | G | Homozygous   |
| NC_037641.1 | 239255 | SNV | 1 | T | A | Homozygous   |
| NC_037641.1 | 258499 | SNV | 1 | C | T | Heterozygous |
| NC_037641.1 | 292120 | SNV | 1 | T | C | Homozygous   |

|             |        |     |   |   |   |              |
|-------------|--------|-----|---|---|---|--------------|
| NC_037641.1 | 292156 | SNV | 1 | T | C | Homozygous   |
| NC_037641.1 | 292168 | SNV | 1 | A | C | Homozygous   |
| NC_037641.1 | 292174 | SNV | 1 | A | T | Homozygous   |
| NC_037641.1 | 292208 | SNV | 1 | A | T | Heterozygous |
| NC_037641.1 | 292212 | SNV | 1 | A | T | Homozygous   |
| NC_037641.1 | 292214 | SNV | 1 | A | G | Heterozygous |
| NC_037641.1 | 292216 | SNV | 1 | A | T | Heterozygous |
| NC_037641.1 | 293160 | SNV | 1 | T | A | Homozygous   |
| NC_037641.1 | 293183 | SNV | 1 | A | T | Homozygous   |
| NC_037641.1 | 293190 | SNV | 1 | A | G | Homozygous   |
| NC_037641.1 | 323727 | SNV | 1 | A | C | Homozygous   |
| NC_037641.1 | 323730 | SNV | 1 | G | A | Homozygous   |
| NC_037641.1 | 323733 | SNV | 1 | A | G | Homozygous   |
| NC_037641.1 | 323735 | SNV | 1 | C | A | Homozygous   |
| NC_037641.1 | 324972 | SNV | 1 | C | T | Heterozygous |
| NC_037641.1 | 346669 | SNV | 1 | T | A | Homozygous   |
| NC_037641.1 | 346705 | SNV | 1 | A | G | Homozygous   |
| NC_037641.1 | 346707 | SNV | 1 | T | A | Homozygous   |
| NC_037641.1 | 346710 | SNV | 1 | A | T | Homozygous   |
| NC_037641.1 | 346713 | SNV | 1 | A | T | Homozygous   |
| NC_037641.1 | 346719 | SNV | 1 | A | T | Homozygous   |
| NC_037641.1 | 354835 | SNV | 1 | A | G | Homozygous   |
| NC_037641.1 | 354863 | SNV | 1 | T | C | Heterozygous |
| NC_037641.1 | 354940 | SNV | 1 | C | T | Homozygous   |
| NC_037641.1 | 355092 | SNV | 1 | A | T | Homozygous   |
| NC_037641.1 | 359608 | SNV | 1 | T | A | Homozygous   |
| NC_037641.1 | 360472 | SNV | 1 | C | T | Heterozygous |
| NC_037641.1 | 360489 | SNV | 1 | C | T | Heterozygous |
| NC_037641.1 | 360497 | SNV | 1 | A | C | Heterozygous |
| NC_037641.1 | 360508 | SNV | 1 | C | T | Heterozygous |
| NC_037641.1 | 360513 | SNV | 1 | C | T | Heterozygous |
| NC_037641.1 | 361664 | SNV | 1 | T | C | Homozygous   |
| NC_037641.1 | 361678 | SNV | 1 | T | C | Homozygous   |
| NC_037641.1 | 361681 | SNV | 1 | C | A | Homozygous   |
| NC_037641.1 | 377551 | SNV | 1 | G | T | Homozygous   |
| NC_037641.1 | 377554 | SNV | 1 | A | C | Homozygous   |
| NC_037641.1 | 377556 | SNV | 1 | G | C | Homozygous   |
| NC_037641.1 | 377559 | SNV | 1 | T | G | Homozygous   |
| NC_037641.1 | 401521 | SNV | 1 | G | A | Heterozygous |
| NC_037641.1 | 401578 | SNV | 1 | A | C | Heterozygous |
| NC_037641.1 | 401703 | SNV | 1 | G | T | Heterozygous |
| NC_037641.1 | 423817 | SNV | 1 | G | A | Homozygous   |
| NC_037641.1 | 423824 | SNV | 1 | A | G | Heterozygous |
| NC_037641.1 | 423836 | SNV | 1 | G | A | Heterozygous |
| NC_037641.1 | 423861 | SNV | 1 | G | A | Heterozygous |
| NC_037641.1 | 426982 | SNV | 1 | A | T | Homozygous   |
| NC_037641.1 | 427004 | SNV | 1 | T | A | Homozygous   |
| NC_037641.1 | 427012 | SNV | 1 | C | T | Homozygous   |
| NC_037641.1 | 427024 | SNV | 1 | A | T | Homozygous   |
| NC_037641.1 | 434684 | SNV | 1 | A | G | Homozygous   |
| NC_037641.1 | 437661 | SNV | 1 | G | A | Homozygous   |



|             |        |     |   |   |   |              |
|-------------|--------|-----|---|---|---|--------------|
| NC_037641.1 | 437678 | SNV | 1 | A | T | Homozygous   |
| NC_037641.1 | 437691 | SNV | 1 | C | G | Homozygous   |
| NC_037641.1 | 440932 | SNV | 1 | G | C | Heterozygous |
| NC_037641.1 | 441440 | SNV | 1 | G | C | Heterozygous |
| NC_037641.1 | 441473 | SNV | 1 | T | A | Heterozygous |
| NC_037641.1 | 441485 | SNV | 1 | C | T | Heterozygous |
| NC_037641.1 | 443777 | SNV | 1 | A | G | Homozygous   |
| NC_037641.1 | 444291 | SNV | 1 | A | G | Homozygous   |
| NC_037641.1 | 445195 | SNV | 1 | A | T | Homozygous   |
| NC_037641.1 | 445246 | SNV | 1 | T | C | Homozygous   |
| NC_037641.1 | 448456 | SNV | 1 | G | A | Heterozygous |
| NC_037641.1 | 448459 | SNV | 1 | C | A | Homozygous   |
| NC_037641.1 | 448513 | SNV | 1 | T | A | Heterozygous |
| NC_037641.1 | 450136 | SNV | 1 | T | C | Homozygous   |
| NC_037641.1 | 450947 | SNV | 1 | G | A | Heterozygous |
| NC_037641.1 | 451415 | SNV | 1 | T | C | Homozygous   |
| NC_037641.1 | 452106 | SNV | 1 | C | T | Homozygous   |
| NC_037641.1 | 452120 | SNV | 1 | A | G | Homozygous   |
| NC_037641.1 | 452131 | SNV | 1 | C | T | Homozygous   |
| NC_037641.1 | 454001 | SNV | 1 | T | C | Homozygous   |
| NC_037641.1 | 454033 | SNV | 1 | G | A | Heterozygous |
| NC_037641.1 | 454513 | SNV | 1 | C | T | Heterozygous |
| NC_037641.1 | 454533 | SNV | 1 | A | G | Heterozygous |
| NC_037641.1 | 454600 | SNV | 1 | A | T | Heterozygous |
| NC_037641.1 | 454668 | SNV | 1 | A | G | Homozygous   |
| NC_037641.1 | 454673 | SNV | 1 | A | T | Homozygous   |
| NC_037641.1 | 454691 | SNV | 1 | A | G | Homozygous   |
| NC_037641.1 | 454709 | SNV | 1 | G | C | Homozygous   |
| NC_037641.1 | 454729 | SNV | 1 | G | A | Heterozygous |
| NC_037641.1 | 454758 | SNV | 1 | T | C | Homozygous   |
| NC_037641.1 | 454769 | SNV | 1 | T | C | Homozygous   |
| NC_037641.1 | 454863 | SNV | 1 | C | T | Heterozygous |
| NC_037641.1 | 465848 | SNV | 1 | A | G | Heterozygous |
| NC_037641.1 | 465850 | SNV | 1 | T | A | Heterozygous |
| NC_037641.1 | 465857 | SNV | 1 | A | C | Heterozygous |
| NC_037641.1 | 465859 | SNV | 1 | A | C | Homozygous   |
| NC_037641.1 | 465892 | SNV | 1 | A | G | Homozygous   |
| NC_037641.1 | 465898 | SNV | 1 | A | T | Homozygous   |
| NC_037641.1 | 465904 | SNV | 1 | A | T | Homozygous   |
| NC_037641.1 | 466129 | SNV | 1 | A | T | Homozygous   |
| NC_037641.1 | 466153 | SNV | 1 | T | A | Homozygous   |
| NC_037641.1 | 477837 | SNV | 1 | A | G | Homozygous   |
| NC_037641.1 | 477855 | SNV | 1 | T | A | Homozygous   |
| NC_037641.1 | 486626 | SNV | 1 | A | G | Homozygous   |
| NC_037641.1 | 486633 | SNV | 1 | T | G | Homozygous   |
| NC_037641.1 | 490306 | SNV | 1 | T | C | Homozygous   |
| NC_037641.1 | 490313 | SNV | 1 | A | T | Homozygous   |
| NC_037641.1 | 490317 | SNV | 1 | T | G | Homozygous   |
| NC_037641.1 | 490319 | SNV | 1 | T | A | Homozygous   |
| NC_037641.1 | 490328 | SNV | 1 | T | A | Homozygous   |
| NC_037641.1 | 619198 | SNV | 1 | G | T | Homozygous   |

|             |        |     |   |   |   |              |
|-------------|--------|-----|---|---|---|--------------|
| NC_037641.1 | 619220 | SNV | 1 | A | T | Heterozygous |
| NC_037641.1 | 619238 | SNV | 1 | A | G | Homozygous   |
| NC_037641.1 | 619240 | SNV | 1 | A | G | Homozygous   |
| NC_037641.1 | 621365 | SNV | 1 | G | T | Homozygous   |
| NC_037641.1 | 721329 | SNV | 1 | G | A | Heterozygous |
| NC_037641.1 | 721406 | SNV | 1 | G | A | Heterozygous |
| NC_037641.1 | 721888 | SNV | 1 | G | A | Heterozygous |
| NC_037641.1 | 725034 | SNV | 1 | C | A | Heterozygous |
| NC_037641.1 | 745221 | SNV | 1 | G | A | Heterozygous |
| NC_037641.1 | 765509 | SNV | 1 | T | C | Heterozygous |
| NC_037641.1 | 766193 | SNV | 1 | A | T | Heterozygous |
| NC_037641.1 | 768549 | SNV | 1 | C | A | Homozygous   |
| NC_037641.1 | 769254 | SNV | 1 | G | T | Homozygous   |
| NC_037641.1 | 770799 | SNV | 1 | A | G | Heterozygous |
| NC_037641.1 | 771541 | SNV | 1 | C | T | Heterozygous |
| NC_037641.1 | 772399 | SNV | 1 | T | A | Homozygous   |
| NC_037641.1 | 772409 | SNV | 1 | T | A | Homozygous   |
| NC_037641.1 | 772422 | SNV | 1 | A | T | Homozygous   |
| NC_037641.1 | 772440 | SNV | 1 | T | C | Homozygous   |
| NC_037641.1 | 772444 | SNV | 1 | C | T | Homozygous   |
| NC_037641.1 | 772450 | SNV | 1 | G | C | Heterozygous |
| NC_037641.1 | 772454 | SNV | 1 | T | A | Heterozygous |
| NC_037641.1 | 814134 | SNV | 1 | T | C | Heterozygous |
| NC_037641.1 | 814139 | SNV | 1 | A | T | Heterozygous |
| NC_037641.1 | 814147 | SNV | 1 | A | C | Heterozygous |
| NC_037641.1 | 814151 | SNV | 1 | A | G | Heterozygous |
| NC_037641.1 | 814157 | SNV | 1 | A | T | Heterozygous |
| NC_037641.1 | 814165 | SNV | 1 | A | G | Heterozygous |
| NC_037641.1 | 814200 | SNV | 1 | A | T | Heterozygous |
| NC_037641.1 | 816036 | SNV | 1 | A | G | Homozygous   |
| NC_037641.1 | 816075 | SNV | 1 | G | A | Homozygous   |
| NC_037641.1 | 816077 | SNV | 1 | A | C | Homozygous   |
| NC_037641.1 | 819029 | SNV | 1 | G | T | Homozygous   |
| NC_037641.1 | 827547 | SNV | 1 | A | T | Homozygous   |
| NC_037641.1 | 827555 | SNV | 1 | T | C | Homozygous   |
| NC_037641.1 | 827578 | SNV | 1 | T | C | Homozygous   |
| NC_037641.1 | 827645 | SNV | 1 | A | G | Heterozygous |
| NC_037641.1 | 827647 | SNV | 1 | A | G | Homozygous   |
| NC_037641.1 | 836774 | SNV | 1 | C | T | Homozygous   |
| NC_037641.1 | 847756 | SNV | 1 | T | C | Homozygous   |
| NC_037641.1 | 847763 | SNV | 1 | G | A | Heterozygous |
| NC_037641.1 | 847812 | SNV | 1 | G | T | Homozygous   |
| NC_037641.1 | 847824 | SNV | 1 | G | T | Heterozygous |
| NC_037641.1 | 872136 | SNV | 1 | T | A | Homozygous   |
| NC_037641.1 | 875275 | SNV | 1 | T | A | Homozygous   |
| NC_037641.1 | 875286 | SNV | 1 | A | T | Homozygous   |
| NC_037641.1 | 875290 | SNV | 1 | A | G | Homozygous   |
| NC_037641.1 | 875292 | SNV | 1 | G | A | Homozygous   |
| NC_037641.1 | 875295 | SNV | 1 | G | T | Homozygous   |
| NC_037641.1 | 875300 | SNV | 1 | T | A | Homozygous   |
| NC_037641.1 | 883162 | SNV | 1 | T | A | Homozygous   |

|             |        |     |   |   |   |              |
|-------------|--------|-----|---|---|---|--------------|
| NC_037641.1 | 883172 | SNV | 1 | T | G | Homozygous   |
| NC_037641.1 | 883178 | SNV | 1 | A | T | Homozygous   |
| NC_037641.1 | 883180 | SNV | 1 | A | G | Homozygous   |
| NC_037641.1 | 883183 | SNV | 1 | A | T | Homozygous   |
| NC_037641.1 | 889083 | SNV | 1 | A | C | Homozygous   |
| NC_037641.1 | 889092 | SNV | 1 | A | C | Homozygous   |
| NC_037641.1 | 889124 | SNV | 1 | A | T | Homozygous   |
| NC_037641.1 | 889126 | SNV | 1 | T | C | Homozygous   |
| NC_037641.1 | 892134 | SNV | 1 | A | C | Homozygous   |
| NC_037641.1 | 892137 | SNV | 1 | C | T | Heterozygous |
| NC_037641.1 | 892142 | SNV | 1 | A | C | Homozygous   |
| NC_037641.1 | 892150 | SNV | 1 | T | C | Heterozygous |
| NC_037641.1 | 892158 | SNV | 1 | T | C | Homozygous   |
| NC_037641.1 | 892190 | SNV | 1 | A | G | Heterozygous |
| NC_037641.1 | 892192 | SNV | 1 | A | C | Heterozygous |
| NC_037641.1 | 893395 | SNV | 1 | C | A | Homozygous   |
| NC_037641.1 | 893400 | SNV | 1 | G | T | Homozygous   |
| NC_037641.1 | 893418 | SNV | 1 | T | C | Homozygous   |
| NC_037641.1 | 895023 | SNV | 1 | T | A | Heterozygous |
| NC_037641.1 | 895041 | SNV | 1 | T | A | Heterozygous |
| NC_037641.1 | 898371 | SNV | 1 | T | A | Homozygous   |
| NC_037641.1 | 898374 | SNV | 1 | T | A | Homozygous   |
| NC_037641.1 | 898377 | SNV | 1 | A | C | Homozygous   |
| NC_037641.1 | 898416 | SNV | 1 | T | A | Homozygous   |
| NC_037641.1 | 898419 | SNV | 1 | T | C | Homozygous   |
| NC_037641.1 | 903398 | SNV | 1 | A | G | Homozygous   |
| NC_037641.1 | 903440 | SNV | 1 | T | C | Homozygous   |
| NC_037641.1 | 903453 | SNV | 1 | C | T | Heterozygous |
| NC_037641.1 | 903473 | SNV | 1 | G | A | Heterozygous |
| NC_037641.1 | 911748 | SNV | 1 | A | T | Heterozygous |
| NC_037641.1 | 911764 | SNV | 1 | C | A | Homozygous   |
| NC_037641.1 | 912331 | SNV | 1 | A | T | Homozygous   |
| NC_037641.1 | 928956 | SNV | 1 | A | G | Homozygous   |
| NC_037641.1 | 928964 | SNV | 1 | T | C | Homozygous   |
| NC_037641.1 | 928989 | SNV | 1 | A | G | Homozygous   |
| NC_037641.1 | 928991 | SNV | 1 | A | T | Homozygous   |
| NC_037641.1 | 928994 | SNV | 1 | A | T | Homozygous   |
| NC_037641.1 | 928997 | SNV | 1 | C | T | Homozygous   |
| NC_037641.1 | 932870 | SNV | 1 | T | A | Heterozygous |
| NC_037641.1 | 937933 | SNV | 1 | A | C | Homozygous   |
| NC_037641.1 | 937943 | SNV | 1 | A | T | Heterozygous |
| NC_037641.1 | 937945 | SNV | 1 | T | A | Heterozygous |
| NC_037641.1 | 937978 | SNV | 1 | A | T | Homozygous   |
| NC_037641.1 | 937988 | SNV | 1 | T | A | Heterozygous |
| NC_037641.1 | 938090 | SNV | 1 | A | T | Heterozygous |
| NC_037641.1 | 961200 | SNV | 1 | A | T | Homozygous   |
| NC_037641.1 | 964846 | SNV | 1 | T | G | Homozygous   |
| NC_037641.1 | 964874 | SNV | 1 | G | A | Homozygous   |
| NC_037641.1 | 964882 | SNV | 1 | A | T | Heterozygous |
| NC_037641.1 | 964907 | SNV | 1 | T | A | Heterozygous |
| NC_037641.1 | 964918 | SNV | 1 | A | C | Heterozygous |

|             |         |     |   |   |   |              |
|-------------|---------|-----|---|---|---|--------------|
| NC_037641.1 | 964931  | SNV | 1 | T | A | Heterozygous |
| NC_037641.1 | 964935  | SNV | 1 | A | T | Heterozygous |
| NC_037641.1 | 967895  | SNV | 1 | A | T | Homozygous   |
| NC_037641.1 | 967904  | SNV | 1 | A | T | Homozygous   |
| NC_037641.1 | 967906  | SNV | 1 | A | G | Homozygous   |
| NC_037641.1 | 995944  | SNV | 1 | T | A | Homozygous   |
| NC_037641.1 | 995962  | SNV | 1 | T | A | Homozygous   |
| NC_037641.1 | 1004324 | SNV | 1 | C | A | Homozygous   |
| NC_037641.1 | 1004326 | SNV | 1 | C | G | Homozygous   |
| NC_037641.1 | 1004337 | SNV | 1 | A | T | Homozygous   |
| NC_037641.1 | 1004344 | SNV | 1 | C | A | Homozygous   |
| NC_037641.1 | 1011770 | SNV | 1 | T | C | Homozygous   |
| NC_037641.1 | 1011811 | SNV | 1 | T | C | Homozygous   |
| NC_037641.1 | 1027534 | SNV | 1 | A | T | Homozygous   |
| NC_037641.1 | 1027536 | SNV | 1 | A | T | Homozygous   |
| NC_037641.1 | 1027540 | SNV | 1 | A | G | Homozygous   |
| NC_037641.1 | 1027558 | SNV | 1 | T | G | Homozygous   |
| NC_037641.1 | 1027561 | SNV | 1 | G | T | Homozygous   |
| NC_037641.1 | 1030503 | SNV | 1 | A | G | Homozygous   |
| NC_037641.1 | 1030528 | SNV | 1 | A | G | Homozygous   |
| NC_037641.1 | 1030546 | SNV | 1 | A | C | Homozygous   |
| NC_037641.1 | 1035391 | SNV | 1 | G | A | Heterozygous |
| NC_037641.1 | 1035411 | SNV | 1 | A | G | Heterozygous |
| NC_037641.1 | 1035458 | SNV | 1 | T | C | Homozygous   |
| NC_037641.1 | 1035465 | SNV | 1 | A | T | Homozygous   |
| NC_037641.1 | 1035494 | SNV | 1 | T | A | Homozygous   |
| NC_037641.1 | 1035499 | SNV | 1 | G | C | Homozygous   |
| NC_037641.1 | 1035502 | SNV | 1 | T | C | Homozygous   |
| NC_037641.1 | 1035504 | SNV | 1 | A | T | Homozygous   |
| NC_037641.1 | 1035508 | SNV | 1 | A | G | Homozygous   |
| NC_037641.1 | 1035527 | SNV | 1 | T | A | Homozygous   |
| NC_037641.1 | 1043543 | SNV | 1 | T | C | Heterozygous |
| NC_037641.1 | 1043546 | SNV | 1 | T | G | Heterozygous |
| NC_037641.1 | 1043548 | SNV | 1 | G | A | Heterozygous |
| NC_037641.1 | 1043550 | SNV | 1 | A | C | Heterozygous |
| NC_037641.1 | 1043552 | SNV | 1 | T | G | Heterozygous |
| NC_037641.1 | 1043553 | SNV | 1 | G | T | Heterozygous |
| NC_037641.1 | 1048580 | SNV | 1 | C | T | Heterozygous |
| NC_037641.1 | 1048594 | SNV | 1 | A | T | Heterozygous |
| NC_037641.1 | 1048606 | SNV | 1 | G | T | Homozygous   |
| NC_037641.1 | 1053457 | SNV | 1 | G | A | Heterozygous |
| NC_037641.1 | 1053467 | SNV | 1 | T | C | Heterozygous |
| NC_037641.1 | 1053472 | SNV | 1 | G | A | Heterozygous |
| NC_037641.1 | 1053484 | SNV | 1 | A | G | Homozygous   |
| NC_037641.1 | 1053490 | SNV | 1 | A | G | Homozygous   |
| NC_037641.1 | 1057363 | SNV | 1 | A | G | Homozygous   |
| NC_037641.1 | 1057370 | SNV | 1 | G | T | Homozygous   |
| NC_037641.1 | 1057372 | SNV | 1 | T | C | Homozygous   |
| NC_037641.1 | 1057381 | SNV | 1 | T | A | Homozygous   |
| NC_037641.1 | 1057390 | SNV | 1 | T | C | Homozygous   |
| NC_037641.1 | 1066659 | SNV | 1 | T | A | Homozygous   |

|             |         |     |   |   |   |              |
|-------------|---------|-----|---|---|---|--------------|
| NC_037641.1 | 1066679 | SNV | 1 | A | G | Homozygous   |
| NC_037641.1 | 1066682 | SNV | 1 | A | G | Homozygous   |
| NC_037641.1 | 1066684 | SNV | 1 | A | G | Homozygous   |
| NC_037641.1 | 1069950 | SNV | 1 | A | T | Heterozygous |
| NC_037641.1 | 1069952 | SNV | 1 | T | C | Heterozygous |
| NC_037641.1 | 1069962 | SNV | 1 | T | G | Heterozygous |
| NC_037641.1 | 1069964 | SNV | 1 | A | T | Heterozygous |
| NC_037641.1 | 1069965 | SNV | 1 | A | G | Heterozygous |
| NC_037641.1 | 1069967 | SNV | 1 | A | T | Heterozygous |
| NC_037641.1 | 1069978 | SNV | 1 | T | C | Heterozygous |
| NC_037641.1 | 1077870 | SNV | 1 | G | C | Heterozygous |
| NC_037641.1 | 1077873 | SNV | 1 | C | T | Heterozygous |
| NC_037641.1 | 1087428 | SNV | 1 | A | T | Heterozygous |
| NC_037641.1 | 1087434 | SNV | 1 | A | T | Heterozygous |
| NC_037641.1 | 1096224 | SNV | 1 | A | C | Heterozygous |
| NC_037641.1 | 1096240 | SNV | 1 | T | G | Homozygous   |
| NC_037641.1 | 1097326 | SNV | 1 | T | A | Homozygous   |
| NC_037641.1 | 1097332 | SNV | 1 | C | A | Homozygous   |
| NC_037641.1 | 1097336 | SNV | 1 | T | G | Homozygous   |
| NC_037641.1 | 1097339 | SNV | 1 | T | A | Homozygous   |
| NC_037641.1 | 1097355 | SNV | 1 | A | T | Heterozygous |
| NC_037641.1 | 1097357 | SNV | 1 | T | A | Heterozygous |
| NC_037641.1 | 1097369 | SNV | 1 | T | A | Heterozygous |
| NC_037641.1 | 1097372 | SNV | 1 | C | G | Homozygous   |
| NC_037641.1 | 1108081 | SNV | 1 | A | T | Homozygous   |
| NC_037641.1 | 1108102 | SNV | 1 | T | A | Homozygous   |
| NC_037641.1 | 1120441 | SNV | 1 | T | G | Heterozygous |
| NC_037641.1 | 1185140 | SNV | 1 | T | A | Heterozygous |
| NC_037641.1 | 1185151 | SNV | 1 | A | T | Heterozygous |
| NC_037641.1 | 1197982 | SNV | 1 | G | A | Homozygous   |
| NC_037641.1 | 1753070 | SNV | 1 | C | A | Homozygous   |
| NC_037641.1 | 1753089 | SNV | 1 | T | G | Homozygous   |
| NC_037641.1 | 1753098 | SNV | 1 | G | A | Homozygous   |
| NC_037641.1 | 1753111 | SNV | 1 | T | A | Homozygous   |
| NC_037641.1 | 1753124 | SNV | 1 | A | G | Homozygous   |
| NC_037641.1 | 1753174 | SNV | 1 | C | T | Heterozygous |
| NC_037641.1 | 1753194 | SNV | 1 | T | A | Heterozygous |
| NC_037641.1 | 1753221 | SNV | 1 | G | C | Heterozygous |
| NC_037641.1 | 1753247 | SNV | 1 | G | A | Homozygous   |
| NC_037641.1 | 1753288 | SNV | 1 | T | G | Heterozygous |
| NC_037641.1 | 1753309 | SNV | 1 | C | T | Heterozygous |
| NC_037641.1 | 1753317 | SNV | 1 | A | T | Homozygous   |
| NC_037641.1 | 1753320 | SNV | 1 | A | G | Heterozygous |
| NC_037641.1 | 1753346 | SNV | 1 | C | T | Heterozygous |
| NC_037641.1 | 1753355 | SNV | 1 | T | C | Heterozygous |
| NC_037641.1 | 1753366 | SNV | 1 | A | T | Homozygous   |
| NC_037641.1 | 1753390 | SNV | 1 | A | T | Homozygous   |
| NC_037641.1 | 1753397 | SNV | 1 | T | C | Homozygous   |
| NC_037641.1 | 1753446 | SNV | 1 | T | C | Heterozygous |
| NC_037641.1 | 1753484 | SNV | 1 | C | T | Heterozygous |
| NC_037641.1 | 1753537 | SNV | 1 | T | C | Heterozygous |

|             |         |     |   |   |   |              |
|-------------|---------|-----|---|---|---|--------------|
| NC_037641.1 | 1753575 | SNV | 1 | C | T | Heterozygous |
| NC_037641.1 | 1753577 | SNV | 1 | A | T | Heterozygous |
| NC_037641.1 | 1753580 | SNV | 1 | T | C | Heterozygous |
| NC_037641.1 | 1760123 | SNV | 1 | T | C | Homozygous   |
| NC_037641.1 | 1760692 | SNV | 1 | T | C | Homozygous   |
| NC_037641.1 | 1762809 | SNV | 1 | T | C | Homozygous   |
| NC_037641.1 | 1762858 | SNV | 1 | G | A | Homozygous   |
| NC_037641.1 | 1762875 | SNV | 1 | C | T | Homozygous   |
| NC_037641.1 | 1762881 | SNV | 1 | C | T | Homozygous   |
| NC_037641.1 | 1762887 | SNV | 1 | T | A | Homozygous   |
| NC_037641.1 | 1762896 | SNV | 1 | C | A | Heterozygous |
| NC_037641.1 | 1762901 | SNV | 1 | A | G | Heterozygous |
| NC_037641.1 | 1762904 | SNV | 1 | C | T | Heterozygous |
| NC_037641.1 | 1763003 | SNV | 1 | T | C | Homozygous   |
| NC_037641.1 | 1763028 | SNV | 1 | A | G | Homozygous   |
| NC_037641.1 | 1763035 | SNV | 1 | T | C | Homozygous   |
| NC_037641.1 | 1763058 | SNV | 1 | T | C | Homozygous   |
| NC_037641.1 | 1763075 | SNV | 1 | G | A | Heterozygous |
| NC_037641.1 | 1763090 | SNV | 1 | T | A | Heterozygous |
| NC_037641.1 | 1763108 | SNV | 1 | C | G | Homozygous   |
| NC_037641.1 | 1763140 | SNV | 1 | G | A | Homozygous   |
| NC_037641.1 | 1763142 | SNV | 1 | A | G | Homozygous   |
| NC_037641.1 | 1763195 | SNV | 1 | C | T | Homozygous   |
| NC_037641.1 | 1763370 | SNV | 1 | T | A | Heterozygous |
| NC_037641.1 | 1763388 | SNV | 1 | A | T | Heterozygous |
| NC_037641.1 | 1763392 | SNV | 1 | C | T | Heterozygous |
| NC_037641.1 | 1763415 | SNV | 1 | G | A | Heterozygous |
| NC_037641.1 | 1763439 | SNV | 1 | T | C | Heterozygous |
| NC_037641.1 | 1763454 | SNV | 1 | T | C | Heterozygous |
| NC_037641.1 | 1763459 | SNV | 1 | T | C | Heterozygous |
| NC_037641.1 | 1763510 | SNV | 1 | T | C | Heterozygous |
| NC_037641.1 | 1763512 | SNV | 1 | A | G | Heterozygous |
| NC_037641.1 | 1763518 | SNV | 1 | T | C | Heterozygous |
| NC_037641.1 | 1763523 | SNV | 1 | T | C | Heterozygous |
| NC_037641.1 | 1763535 | SNV | 1 | A | G | Heterozygous |
| NC_037641.1 | 1763665 | SNV | 1 | C | A | Heterozygous |
| NC_037641.1 | 1763870 | SNV | 1 | T | C | Heterozygous |
| NC_037641.1 | 1764063 | SNV | 1 | T | A | Heterozygous |
| NC_037641.1 | 1764069 | SNV | 1 | G | A | Heterozygous |
| NC_037641.1 | 1764095 | SNV | 1 | T | C | Heterozygous |
| NC_037641.1 | 1764104 | SNV | 1 | C | T | Heterozygous |
| NC_037641.1 | 1764107 | SNV | 1 | G | A | Heterozygous |
| NC_037641.1 | 1764188 | SNV | 1 | T | A | Heterozygous |
| NC_037641.1 | 1764191 | SNV | 1 | C | G | Heterozygous |
| NC_037641.1 | 1764195 | SNV | 1 | C | T | Heterozygous |
| NC_037641.1 | 1764217 | SNV | 1 | A | G | Heterozygous |
| NC_037641.1 | 1764235 | SNV | 1 | G | A | Heterozygous |
| NC_037641.1 | 1764240 | SNV | 1 | A | G | Heterozygous |
| NC_037641.1 | 1764252 | SNV | 1 | C | G | Heterozygous |
| NC_037641.1 | 1764257 | SNV | 1 | C | T | Heterozygous |
| NC_037641.1 | 1764260 | SNV | 1 | A | G | Heterozygous |

|             |         |     |   |   |   |              |
|-------------|---------|-----|---|---|---|--------------|
| NC_037641.1 | 1764287 | SNV | 1 | C | T | Heterozygous |
| NC_037641.1 | 1764296 | SNV | 1 | T | C | Heterozygous |
| NC_037641.1 | 1764327 | SNV | 1 | G | A | Homozygous   |
| NC_037641.1 | 1764349 | SNV | 1 | T | A | Heterozygous |
| NC_037641.1 | 1764655 | SNV | 1 | T | C | Homozygous   |
| NC_037641.1 | 1765508 | SNV | 1 | C | T | Heterozygous |
| NC_037641.1 | 1765535 | SNV | 1 | G | A | Heterozygous |
| NC_037641.1 | 1765544 | SNV | 1 | G | T | Heterozygous |
| NC_037641.1 | 1765558 | SNV | 1 | T | C | Heterozygous |
| NC_037641.1 | 1765586 | SNV | 1 | C | T | Homozygous   |
| NC_037641.1 | 1765589 | SNV | 1 | C | T | Heterozygous |
| NC_037641.1 | 1765594 | SNV | 1 | C | T | Heterozygous |
| NC_037641.1 | 1765609 | SNV | 1 | A | T | Homozygous   |
| NC_037641.1 | 1765619 | SNV | 1 | C | T | Homozygous   |
| NC_037641.1 | 1765623 | SNV | 1 | C | T | Homozygous   |
| NC_037641.1 | 1765637 | SNV | 1 | T | C | Homozygous   |
| NC_037641.1 | 1765644 | SNV | 1 | T | A | Homozygous   |
| NC_037641.1 | 1765683 | SNV | 1 | T | C | Homozygous   |
| NC_037641.1 | 1765702 | SNV | 1 | G | C | Homozygous   |
| NC_037641.1 | 1765723 | SNV | 1 | A | G | Homozygous   |
| NC_037641.1 | 1765764 | SNV | 1 | G | A | Homozygous   |
| NC_037641.1 | 1765773 | SNV | 1 | T | A | Homozygous   |
| NC_037641.1 | 1765787 | SNV | 1 | G | A | Heterozygous |
| NC_037641.1 | 1765808 | SNV | 1 | C | G | Homozygous   |
| NC_037641.1 | 1765832 | SNV | 1 | T | G | Heterozygous |
| NC_037641.1 | 1765835 | SNV | 1 | T | A | Heterozygous |
| NC_037641.1 | 1765847 | SNV | 1 | T | A | Homozygous   |
| NC_037641.1 | 1765851 | SNV | 1 | C | T | Homozygous   |
| NC_037641.1 | 1765872 | SNV | 1 | C | T | Homozygous   |
| NC_037641.1 | 1765909 | SNV | 1 | A | G | Homozygous   |
| NC_037641.1 | 1765919 | SNV | 1 | A | G | Homozygous   |
| NC_037641.1 | 1765933 | SNV | 1 | C | T | Homozygous   |
| NC_037641.1 | 1765953 | SNV | 1 | A | G | Homozygous   |
| NC_037641.1 | 1766540 | SNV | 1 | A | G | Heterozygous |
| NC_037641.1 | 1766565 | SNV | 1 | C | T | Heterozygous |
| NC_037641.1 | 1766578 | SNV | 1 | C | T | Heterozygous |
| NC_037641.1 | 1766581 | SNV | 1 | G | A | Heterozygous |
| NC_037641.1 | 1766592 | SNV | 1 | A | G | Homozygous   |
| NC_037641.1 | 1766950 | SNV | 1 | T | C | Homozygous   |
| NC_037641.1 | 1767027 | SNV | 1 | A | G | Heterozygous |
| NC_037641.1 | 1767049 | SNV | 1 | A | G | Heterozygous |
| NC_037641.1 | 1767052 | SNV | 1 | T | C | Heterozygous |
| NC_037641.1 | 1767517 | SNV | 1 | T | A | Heterozygous |
| NC_037641.1 | 1767519 | SNV | 1 | T | C | Heterozygous |
| NC_037641.1 | 1767554 | SNV | 1 | T | C | Heterozygous |
| NC_037641.1 | 1767592 | SNV | 1 | C | T | Heterozygous |
| NC_037641.1 | 1767594 | SNV | 1 | A | G | Heterozygous |
| NC_037641.1 | 1767616 | SNV | 1 | T | C | Heterozygous |
| NC_037641.1 | 1767643 | SNV | 1 | G | A | Heterozygous |
| NC_037641.1 | 1767660 | SNV | 1 | C | T | Heterozygous |
| NC_037641.1 | 1767663 | SNV | 1 | T | C | Heterozygous |

|             |         |     |   |   |   |              |
|-------------|---------|-----|---|---|---|--------------|
| NC_037641.1 | 1767676 | SNV | 1 | C | T | Heterozygous |
| NC_037641.1 | 1779469 | SNV | 1 | G | A | Heterozygous |
| NC_037641.1 | 1779662 | SNV | 1 | G | A | Heterozygous |
| NC_037641.1 | 1779764 | SNV | 1 | G | A | Heterozygous |
| NC_037641.1 | 1813874 | SNV | 1 | A | G | Heterozygous |
| NC_037641.1 | 1813883 | SNV | 1 | T | C | Heterozygous |
| NC_037641.1 | 1813888 | SNV | 1 | T | C | Heterozygous |
| NC_037641.1 | 1813891 | SNV | 1 | G | T | Heterozygous |
| NC_037641.1 | 1814740 | SNV | 1 | T | C | Homozygous   |
| NC_037641.1 | 1814742 | SNV | 1 | A | G | Homozygous   |
| NC_037641.1 | 1814773 | SNV | 1 | A | T | Homozygous   |
| NC_037641.1 | 1814777 | SNV | 1 | A | T | Homozygous   |
| NC_037641.1 | 1831643 | SNV | 1 | T | A | Homozygous   |
| NC_037641.1 | 1831648 | SNV | 1 | A | T | Homozygous   |
| NC_037641.1 | 1831653 | SNV | 1 | A | T | Homozygous   |
| NC_037641.1 | 1831655 | SNV | 1 | A | G | Homozygous   |
| NC_037641.1 | 1831662 | SNV | 1 | C | A | Homozygous   |
| NC_037641.1 | 1831665 | SNV | 1 | A | G | Homozygous   |
| NC_037641.1 | 1831672 | SNV | 1 | G | T | Homozygous   |
| NC_037641.1 | 1831676 | SNV | 1 | T | A | Homozygous   |
| NC_037641.1 | 1831955 | SNV | 1 | T | C | Homozygous   |
| NC_037641.1 | 1838621 | SNV | 1 | C | A | Homozygous   |
| NC_037641.1 | 1838625 | SNV | 1 | A | T | Homozygous   |
| NC_037641.1 | 1838629 | SNV | 1 | A | T | Homozygous   |
| NC_037641.1 | 1838631 | SNV | 1 | T | A | Homozygous   |
| NC_037641.1 | 1838641 | SNV | 1 | G | A | Homozygous   |
| NC_037641.1 | 1838647 | SNV | 1 | A | T | Homozygous   |
| NC_037641.1 | 1838652 | SNV | 1 | C | A | Homozygous   |
| NC_037641.1 | 1845732 | SNV | 1 | A | G | Homozygous   |
| NC_037641.1 | 1845736 | SNV | 1 | A | C | Homozygous   |
| NC_037641.1 | 1847768 | SNV | 1 | T | C | Homozygous   |
| NC_037641.1 | 1848146 | SNV | 1 | T | C | Homozygous   |
| NC_037641.1 | 1848151 | SNV | 1 | C | T | Homozygous   |
| NC_037641.1 | 1848163 | SNV | 1 | T | G | Homozygous   |
| NC_037641.1 | 1861488 | SNV | 1 | A | T | Heterozygous |
| NC_037641.1 | 1866066 | SNV | 1 | T | A | Homozygous   |
| NC_037641.1 | 1866077 | SNV | 1 | A | T | Homozygous   |
| NC_037641.1 | 1866082 | SNV | 1 | A | T | Homozygous   |
| NC_037641.1 | 1866086 | SNV | 1 | A | T | Homozygous   |
| NC_037641.1 | 1866088 | SNV | 1 | T | C | Homozygous   |
| NC_037641.1 | 1866260 | SNV | 1 | A | G | Heterozygous |
| NC_037641.1 | 1866740 | SNV | 1 | A | T | Heterozygous |
| NC_037641.1 | 1866742 | SNV | 1 | A | T | Heterozygous |
| NC_037641.1 | 1866744 | SNV | 1 | T | C | Heterozygous |
| NC_037641.1 | 1887797 | SNV | 1 | T | C | Homozygous   |
| NC_037641.1 | 1892464 | SNV | 1 | T | G | Homozygous   |
| NC_037641.1 | 1892469 | SNV | 1 | A | C | Homozygous   |
| NC_037641.1 | 1892477 | SNV | 1 | A | T | Homozygous   |
| NC_037641.1 | 1892482 | SNV | 1 | T | G | Homozygous   |
| NC_037641.1 | 1892484 | SNV | 1 | T | A | Homozygous   |
| NC_037641.1 | 1906194 | SNV | 1 | A | C | Homozygous   |



|             |         |     |   |   |   |              |
|-------------|---------|-----|---|---|---|--------------|
| NC_037641.1 | 1906197 | SNV | 1 | A | T | Homozygous   |
| NC_037641.1 | 1906199 | SNV | 1 | T | C | Homozygous   |
| NC_037641.1 | 1906202 | SNV | 1 | T | A | Homozygous   |
| NC_037641.1 | 1906207 | SNV | 1 | C | A | Homozygous   |
| NC_037641.1 | 1906211 | SNV | 1 | A | T | Homozygous   |
| NC_037641.1 | 1911258 | SNV | 1 | C | T | Homozygous   |
| NC_037641.1 | 1911495 | SNV | 1 | C | T | Homozygous   |
| NC_037641.1 | 1914161 | SNV | 1 | G | C | Homozygous   |
| NC_037641.1 | 1921422 | SNV | 1 | G | C | Homozygous   |
| NC_037641.1 | 1921424 | SNV | 1 | A | T | Homozygous   |
| NC_037641.1 | 1925714 | SNV | 1 | C | A | Homozygous   |
| NC_037641.1 | 1925716 | SNV | 1 | T | A | Homozygous   |
| NC_037641.1 | 1925721 | SNV | 1 | A | G | Homozygous   |
| NC_037641.1 | 1925723 | SNV | 1 | A | C | Homozygous   |
| NC_037641.1 | 1925727 | SNV | 1 | T | C | Homozygous   |
| NC_037641.1 | 1933129 | SNV | 1 | T | G | Homozygous   |
| NC_037641.1 | 1967594 | SNV | 1 | T | A | Homozygous   |
| NC_037641.1 | 1967601 | SNV | 1 | T | G | Homozygous   |
| NC_037641.1 | 1967606 | SNV | 1 | A | C | Homozygous   |
| NC_037641.1 | 1967609 | SNV | 1 | C | T | Homozygous   |
| NC_037641.1 | 1967611 | SNV | 1 | T | G | Homozygous   |
| NC_037641.1 | 1967613 | SNV | 1 | A | G | Homozygous   |
| NC_037641.1 | 1967639 | SNV | 1 | A | C | Homozygous   |
| NC_037641.1 | 1970870 | SNV | 1 | T | A | Heterozygous |
| NC_037641.1 | 1970910 | SNV | 1 | T | A | Heterozygous |
| NC_037641.1 | 2005095 | SNV | 1 | A | G | Homozygous   |
| NC_037641.1 | 2005097 | SNV | 1 | T | A | Homozygous   |
| NC_037641.1 | 2043930 | SNV | 1 | A | G | Homozygous   |
| NC_037641.1 | 2043934 | SNV | 1 | T | A | Homozygous   |
| NC_037641.1 | 2043937 | SNV | 1 | A | G | Homozygous   |
| NC_037641.1 | 2043942 | SNV | 1 | A | T | Heterozygous |
| NC_037641.1 | 2043946 | SNV | 1 | A | T | Heterozygous |
| NC_037641.1 | 2043948 | SNV | 1 | A | G | Heterozygous |
| NC_037641.1 | 2045321 | SNV | 1 | T | A | Homozygous   |
| NC_037641.1 | 2045327 | SNV | 1 | A | G | Homozygous   |
| NC_037641.1 | 2045548 | SNV | 1 | A | G | Heterozygous |
| NC_037641.1 | 2091792 | SNV | 1 | G | A | Homozygous   |
| NC_037641.1 | 2091795 | SNV | 1 | T | A | Homozygous   |
| NC_037641.1 | 2091799 | SNV | 1 | C | A | Homozygous   |
| NC_037641.1 | 2096756 | SNV | 1 | A | G | Homozygous   |
| NC_037641.1 | 2098985 | SNV | 1 | A | G | Homozygous   |
| NC_037641.1 | 2101480 | SNV | 1 | T | A | Homozygous   |
| NC_037641.1 | 2101482 | SNV | 1 | T | C | Homozygous   |
| NC_037641.1 | 2101489 | SNV | 1 | A | C | Homozygous   |
| NC_037641.1 | 2132100 | SNV | 1 | A | C | Homozygous   |
| NC_037641.1 | 2132500 | SNV | 1 | A | T | Homozygous   |
| NC_037641.1 | 2132509 | SNV | 1 | C | T | Homozygous   |
| NC_037641.1 | 2132587 | SNV | 1 | T | C | Homozygous   |
| NC_037641.1 | 2132891 | SNV | 1 | T | A | Homozygous   |
| NC_037641.1 | 2132894 | SNV | 1 | T | G | Homozygous   |
| NC_037641.1 | 2132896 | SNV | 1 | A | C | Homozygous   |

|             |         |     |   |   |   |              |
|-------------|---------|-----|---|---|---|--------------|
| NC_037641.1 | 2132901 | SNV | 1 | C | A | Homozygous   |
| NC_037641.1 | 2132907 | SNV | 1 | C | A | Homozygous   |
| NC_037641.1 | 2132909 | SNV | 1 | C | A | Homozygous   |
| NC_037641.1 | 2132921 | SNV | 1 | C | T | Homozygous   |
| NC_037641.1 | 2132931 | SNV | 1 | A | T | Homozygous   |
| NC_037641.1 | 2133365 | SNV | 1 | T | G | Homozygous   |
| NC_037641.1 | 2133370 | SNV | 1 | T | A | Homozygous   |
| NC_037641.1 | 2133395 | SNV | 1 | T | G | Homozygous   |
| NC_037641.1 | 2136881 | SNV | 1 | A | G | Homozygous   |
| NC_037641.1 | 2136899 | SNV | 1 | A | C | Homozygous   |
| NC_037641.1 | 2137046 | SNV | 1 | T | G | Homozygous   |
| NC_037641.1 | 2137067 | SNV | 1 | A | T | Homozygous   |
| NC_037641.1 | 2137073 | SNV | 1 | T | C | Homozygous   |
| NC_037641.1 | 2137075 | SNV | 1 | C | A | Homozygous   |
| NC_037641.1 | 2137090 | SNV | 1 | T | C | Homozygous   |
| NC_037641.1 | 2137094 | SNV | 1 | A | T | Homozygous   |
| NC_037641.1 | 2154399 | SNV | 1 | A | T | Heterozygous |
| NC_037641.1 | 2169552 | SNV | 1 | T | A | Heterozygous |
| NC_037641.1 | 2169612 | SNV | 1 | G | A | Heterozygous |
| NC_037641.1 | 2174880 | SNV | 1 | A | T | Heterozygous |
| NC_037641.1 | 2174884 | SNV | 1 | T | C | Heterozygous |
| NC_037641.1 | 2182009 | SNV | 1 | G | C | Heterozygous |
| NC_037641.1 | 2182883 | SNV | 1 | G | A | Homozygous   |
| NC_037641.1 | 2182945 | SNV | 1 | A | G | Heterozygous |
| NC_037641.1 | 2182951 | SNV | 1 | A | G | Heterozygous |
| NC_037641.1 | 2183007 | SNV | 1 | A | T | Heterozygous |
| NC_037641.1 | 2184076 | SNV | 1 | T | G | Homozygous   |
| NC_037641.1 | 2184078 | SNV | 1 | G | C | Homozygous   |
| NC_037641.1 | 2184089 | SNV | 1 | G | T | Homozygous   |
| NC_037641.1 | 2184214 | SNV | 1 | G | A | Homozygous   |
| NC_037641.1 | 2189457 | SNV | 1 | A | T | Heterozygous |
| NC_037641.1 | 2189465 | SNV | 1 | A | G | Heterozygous |
| NC_037641.1 | 2189469 | SNV | 1 | A | T | Heterozygous |
| NC_037641.1 | 2189553 | SNV | 1 | A | C | Heterozygous |
| NC_037641.1 | 2190679 | SNV | 1 | T | A | Heterozygous |
| NC_037641.1 | 2190709 | SNV | 1 | T | A | Heterozygous |
| NC_037641.1 | 2194018 | SNV | 1 | C | T | Homozygous   |
| NC_037641.1 | 2195122 | SNV | 1 | C | T | Homozygous   |
| NC_037641.1 | 2195539 | SNV | 1 | A | G | Homozygous   |
| NC_037641.1 | 2195545 | SNV | 1 | A | C | Homozygous   |
| NC_037641.1 | 2195550 | SNV | 1 | T | A | Homozygous   |
| NC_037641.1 | 2198695 | SNV | 1 | A | T | Homozygous   |
| NC_037641.1 | 2198697 | SNV | 1 | C | G | Homozygous   |
| NC_037641.1 | 2198700 | SNV | 1 | A | T | Homozygous   |
| NC_037641.1 | 2198702 | SNV | 1 | A | T | Homozygous   |
| NC_037641.1 | 2198708 | SNV | 1 | C | G | Homozygous   |
| NC_037641.1 | 2198727 | SNV | 1 | T | A | Homozygous   |
| NC_037641.1 | 2210209 | SNV | 1 | T | C | Homozygous   |
| NC_037641.1 | 2210214 | SNV | 1 | A | C | Homozygous   |
| NC_037641.1 | 2210219 | SNV | 1 | T | A | Homozygous   |
| NC_037641.1 | 2210223 | SNV | 1 | T | A | Homozygous   |

|             |         |     |   |   |   |              |
|-------------|---------|-----|---|---|---|--------------|
| NC_037641.1 | 2212250 | SNV | 1 | T | C | Homozygous   |
| NC_037641.1 | 2212252 | SNV | 1 | A | T | Homozygous   |
| NC_037641.1 | 2212254 | SNV | 1 | T | A | Homozygous   |
| NC_037641.1 | 2212257 | SNV | 1 | T | A | Homozygous   |
| NC_037641.1 | 2212284 | SNV | 1 | A | T | Homozygous   |
| NC_037641.1 | 2212286 | SNV | 1 | C | T | Homozygous   |
| NC_037641.1 | 2216041 | SNV | 1 | A | G | Homozygous   |
| NC_037641.1 | 2216044 | SNV | 1 | G | A | Homozygous   |
| NC_037641.1 | 2233033 | SNV | 1 | T | C | Homozygous   |
| NC_037641.1 | 2233057 | SNV | 1 | T | A | Homozygous   |
| NC_037641.1 | 2233061 | SNV | 1 | A | T | Homozygous   |
| NC_037641.1 | 2233069 | SNV | 1 | A | T | Homozygous   |
| NC_037641.1 | 2255869 | SNV | 1 | G | A | Heterozygous |
| NC_037641.1 | 2255928 | SNV | 1 | G | C | Heterozygous |
| NC_037641.1 | 2255992 | SNV | 1 | G | A | Homozygous   |
| NC_037641.1 | 2256341 | SNV | 1 | A | G | Homozygous   |
| NC_037641.1 | 2256480 | SNV | 1 | G | A | Homozygous   |
| NC_037641.1 | 2265169 | SNV | 1 | A | G | Heterozygous |
| NC_037641.1 | 2265195 | SNV | 1 | T | G | Homozygous   |
| NC_037641.1 | 2265203 | SNV | 1 | A | G | Homozygous   |
| NC_037641.1 | 2265208 | SNV | 1 | A | G | Homozygous   |
| NC_037641.1 | 2265212 | SNV | 1 | T | A | Homozygous   |
| NC_037641.1 | 2265222 | SNV | 1 | T | A | Homozygous   |
| NC_037641.1 | 2265224 | SNV | 1 | A | T | Homozygous   |
| NC_037641.1 | 2289038 | SNV | 1 | G | A | Homozygous   |
| NC_037641.1 | 2289047 | SNV | 1 | A | T | Homozygous   |
| NC_037641.1 | 2289056 | SNV | 1 | T | G | Homozygous   |
| NC_037641.1 | 2289063 | SNV | 1 | A | T | Homozygous   |
| NC_037641.1 | 2289071 | SNV | 1 | A | G | Homozygous   |
| NC_037641.1 | 2294051 | SNV | 1 | G | T | Homozygous   |
| NC_037641.1 | 2294053 | SNV | 1 | A | T | Homozygous   |
| NC_037641.1 | 2294058 | SNV | 1 | A | T | Homozygous   |
| NC_037641.1 | 2294076 | SNV | 1 | A | T | Homozygous   |
| NC_037641.1 | 2294096 | SNV | 1 | A | C | Homozygous   |
| NC_037641.1 | 2296303 | SNV | 1 | T | A | Homozygous   |
| NC_037641.1 | 2296315 | SNV | 1 | T | A | Homozygous   |
| NC_037641.1 | 2296356 | SNV | 1 | T | A | Homozygous   |
| NC_037641.1 | 2296360 | SNV | 1 | T | C | Homozygous   |
| NC_037641.1 | 2303955 | SNV | 1 | A | C | Homozygous   |
| NC_037641.1 | 2303961 | SNV | 1 | A | T | Homozygous   |
| NC_037641.1 | 2303964 | SNV | 1 | C | A | Homozygous   |
| NC_037641.1 | 2303967 | SNV | 1 | C | T | Homozygous   |
| NC_037641.1 | 2303969 | SNV | 1 | A | T | Homozygous   |
| NC_037641.1 | 2326529 | SNV | 1 | A | C | Homozygous   |
| NC_037641.1 | 2326559 | SNV | 1 | G | T | Homozygous   |
| NC_037641.1 | 2336166 | SNV | 1 | T | C | Heterozygous |
| NC_037641.1 | 2358464 | SNV | 1 | A | T | Homozygous   |
| NC_037641.1 | 2358491 | SNV | 1 | T | A | Homozygous   |
| NC_037641.1 | 2358497 | SNV | 1 | T | A | Homozygous   |
| NC_037641.1 | 2396273 | SNV | 1 | T | C | Heterozygous |
| NC_037641.1 | 2396287 | SNV | 1 | C | T | Homozygous   |

|             |         |     |   |   |   |              |
|-------------|---------|-----|---|---|---|--------------|
| NC_037641.1 | 2396305 | SNV | 1 | T | C | Homozygous   |
| NC_037641.1 | 2458537 | SNV | 1 | A | C | Heterozygous |
| NC_037641.1 | 2462375 | SNV | 1 | T | C | Homozygous   |
| NC_037641.1 | 2462390 | SNV | 1 | C | T | Homozygous   |
| NC_037641.1 | 2467622 | SNV | 1 | A | T | Homozygous   |
| NC_037641.1 | 2467641 | SNV | 1 | T | C | Homozygous   |
| NC_037641.1 | 2467646 | SNV | 1 | G | T | Homozygous   |
| NC_037641.1 | 2474182 | SNV | 1 | A | G | Homozygous   |
| NC_037641.1 | 2474212 | SNV | 1 | T | C | Homozygous   |
| NC_037641.1 | 2474219 | SNV | 1 | C | A | Homozygous   |
| NC_037641.1 | 2491712 | SNV | 1 | C | A | Homozygous   |
| NC_037641.1 | 2491722 | SNV | 1 | C | A | Homozygous   |
| NC_037641.1 | 2491724 | SNV | 1 | T | A | Homozygous   |
| NC_037641.1 | 2491726 | SNV | 1 | T | A | Homozygous   |
| NC_037641.1 | 2491751 | SNV | 1 | T | C | Heterozygous |
| NC_037641.1 | 2510358 | SNV | 1 | C | T | Homozygous   |
| NC_037641.1 | 2510367 | SNV | 1 | C | T | Homozygous   |
| NC_037641.1 | 2510380 | SNV | 1 | T | C | Homozygous   |
| NC_037641.1 | 2510409 | SNV | 1 | C | T | Homozygous   |
| NC_037641.1 | 2510439 | SNV | 1 | A | C | Homozygous   |
| NC_037641.1 | 2511755 | SNV | 1 | A | C | Homozygous   |
| NC_037641.1 | 2511761 | SNV | 1 | C | T | Homozygous   |
| NC_037641.1 | 2511763 | SNV | 1 | C | T | Homozygous   |
| NC_037641.1 | 2511765 | SNV | 1 | T | G | Heterozygous |
| NC_037641.1 | 2512970 | SNV | 1 | C | T | Homozygous   |
| NC_037641.1 | 2513320 | SNV | 1 | C | T | Homozygous   |
| NC_037641.1 | 2513323 | SNV | 1 | G | A | Homozygous   |
| NC_037641.1 | 2535127 | SNV | 1 | G | C | Homozygous   |
| NC_037641.1 | 2541413 | SNV | 1 | A | G | Homozygous   |
| NC_037641.1 | 2541504 | SNV | 1 | C | T | Homozygous   |
| NC_037641.1 | 2550837 | SNV | 1 | G | A | Heterozygous |
| NC_037641.1 | 2552408 | SNV | 1 | T | A | Homozygous   |
| NC_037641.1 | 2552411 | SNV | 1 | G | A | Heterozygous |
| NC_037641.1 | 2552423 | SNV | 1 | C | T | Homozygous   |
| NC_037641.1 | 2552436 | SNV | 1 | C | A | Heterozygous |
| NC_037641.1 | 2552460 | SNV | 1 | C | T | Heterozygous |
| NC_037641.1 | 2552467 | SNV | 1 | G | C | Heterozygous |
| NC_037641.1 | 2559116 | SNV | 1 | T | C | Homozygous   |
| NC_037641.1 | 2559119 | SNV | 1 | T | G | Heterozygous |
| NC_037641.1 | 2559123 | SNV | 1 | A | T | Homozygous   |
| NC_037641.1 | 2568273 | SNV | 1 | C | T | Heterozygous |
| NC_037641.1 | 2569983 | SNV | 1 | T | C | Homozygous   |
| NC_037641.1 | 2569989 | SNV | 1 | C | T | Homozygous   |
| NC_037641.1 | 2578419 | SNV | 1 | C | T | Homozygous   |
| NC_037641.1 | 2578421 | SNV | 1 | A | T | Homozygous   |
| NC_037641.1 | 2578447 | SNV | 1 | G | A | Homozygous   |
| NC_037641.1 | 2578450 | SNV | 1 | G | A | Homozygous   |
| NC_037641.1 | 2578452 | SNV | 1 | A | T | Homozygous   |
| NC_037641.1 | 2578457 | SNV | 1 | G | A | Homozygous   |
| NC_037641.1 | 2580463 | SNV | 1 | A | G | Homozygous   |
| NC_037641.1 | 2580635 | SNV | 1 | T | C | Homozygous   |

|             |         |     |   |   |   |              |
|-------------|---------|-----|---|---|---|--------------|
| NC_037641.1 | 2580772 | SNV | 1 | G | A | Heterozygous |
| NC_037641.1 | 2581612 | SNV | 1 | A | T | Homozygous   |
| NC_037641.1 | 2581615 | SNV | 1 | A | C | Homozygous   |
| NC_037641.1 | 2581618 | SNV | 1 | A | C | Homozygous   |
| NC_037641.1 | 2581620 | SNV | 1 | T | G | Homozygous   |
| NC_037641.1 | 2581624 | SNV | 1 | A | C | Homozygous   |
| NC_037641.1 | 2581649 | SNV | 1 | A | T | Homozygous   |
| NC_037641.1 | 2611804 | SNV | 1 | C | A | Heterozygous |
| NC_037641.1 | 2611810 | SNV | 1 | A | G | Homozygous   |
| NC_037641.1 | 2611822 | SNV | 1 | T | G | Heterozygous |
| NC_037641.1 | 2611825 | SNV | 1 | A | T | Heterozygous |
| NC_037641.1 | 2611828 | SNV | 1 | T | C | Heterozygous |
| NC_037641.1 | 2611836 | SNV | 1 | T | C | Heterozygous |
| NC_037641.1 | 2611852 | SNV | 1 | T | C | Homozygous   |
| NC_037641.1 | 2611854 | SNV | 1 | A | C | Homozygous   |
| NC_037641.1 | 2611856 | SNV | 1 | A | T | Homozygous   |
| NC_037641.1 | 2611883 | SNV | 1 | G | A | Heterozygous |
| NC_037641.1 | 2611892 | SNV | 1 | G | A | Heterozygous |
| NC_037641.1 | 2611895 | SNV | 1 | C | T | Heterozygous |
| NC_037641.1 | 2611900 | SNV | 1 | A | G | Homozygous   |
| NC_037641.1 | 2611905 | SNV | 1 | C | T | Heterozygous |
| NC_037641.1 | 2611912 | SNV | 1 | C | T | Homozygous   |
| NC_037641.1 | 2618284 | SNV | 1 | A | G | Homozygous   |
| NC_037641.1 | 2618293 | SNV | 1 | A | G | Homozygous   |
| NC_037641.1 | 2620375 | SNV | 1 | G | A | Heterozygous |
| NC_037641.1 | 2620517 | SNV | 1 | C | T | Heterozygous |
| NC_037641.1 | 2620529 | SNV | 1 | T | C | Homozygous   |
| NC_037641.1 | 2620675 | SNV | 1 | T | C | Homozygous   |
| NC_037641.1 | 2621168 | SNV | 1 | C | T | Heterozygous |
| NC_037641.1 | 2621195 | SNV | 1 | T | C | Homozygous   |
| NC_037641.1 | 2621342 | SNV | 1 | C | T | Heterozygous |
| NC_037641.1 | 2621497 | SNV | 1 | A | G | Homozygous   |
| NC_037641.1 | 2621499 | SNV | 1 | T | C | Homozygous   |
| NC_037641.1 | 2621505 | SNV | 1 | T | C | Homozygous   |
| NC_037641.1 | 2621520 | SNV | 1 | A | G | Heterozygous |
| NC_037641.1 | 2621539 | SNV | 1 | C | T | Heterozygous |
| NC_037641.1 | 2621657 | SNV | 1 | A | G | Homozygous   |
| NC_037641.1 | 2621866 | SNV | 1 | T | C | Homozygous   |
| NC_037641.1 | 2621952 | SNV | 1 | T | C | Heterozygous |
| NC_037641.1 | 2621967 | SNV | 1 | T | C | Homozygous   |
| NC_037641.1 | 2622204 | SNV | 1 | C | T | Homozygous   |
| NC_037641.1 | 2622315 | SNV | 1 | T | C | Heterozygous |
| NC_037641.1 | 2622471 | SNV | 1 | C | T | Heterozygous |
| NC_037641.1 | 2622677 | SNV | 1 | A | G | Homozygous   |
| NC_037641.1 | 2622698 | SNV | 1 | C | T | Heterozygous |
| NC_037641.1 | 2622734 | SNV | 1 | T | C | Homozygous   |
| NC_037641.1 | 2622740 | SNV | 1 | C | T | Homozygous   |
| NC_037641.1 | 2622779 | SNV | 1 | C | T | Heterozygous |
| NC_037641.1 | 2628468 | SNV | 1 | G | T | Homozygous   |
| NC_037641.1 | 2628470 | SNV | 1 | C | A | Homozygous   |
| NC_037641.1 | 2646462 | SNV | 1 | G | A | Heterozygous |

|             |         |     |   |   |   |              |
|-------------|---------|-----|---|---|---|--------------|
| NC_037641.1 | 2693897 | SNV | 1 | A | G | Homozygous   |
| NC_037641.1 | 2693903 | SNV | 1 | G | A | Heterozygous |
| NC_037641.1 | 2695068 | SNV | 1 | T | C | Homozygous   |
| NC_037641.1 | 2705947 | SNV | 1 | T | C | Homozygous   |
| NC_037641.1 | 2705975 | SNV | 1 | G | A | Heterozygous |
| NC_037641.1 | 2706130 | SNV | 1 | A | G | Homozygous   |
| NC_037641.1 | 2706132 | SNV | 1 | G | A | Homozygous   |
| NC_037641.1 | 2706191 | SNV | 1 | C | T | Homozygous   |
| NC_037641.1 | 2706403 | SNV | 1 | G | A | Heterozygous |
| NC_037641.1 | 2707261 | SNV | 1 | G | A | Heterozygous |
| NC_037641.1 | 2707515 | SNV | 1 | G | A | Heterozygous |
| NC_037641.1 | 2707577 | SNV | 1 | T | A | Heterozygous |
| NC_037641.1 | 2707583 | SNV | 1 | C | A | Heterozygous |
| NC_037641.1 | 2707619 | SNV | 1 | T | G | Homozygous   |
| NC_037641.1 | 2714292 | SNV | 1 | A | G | Homozygous   |
| NC_037641.1 | 2714296 | SNV | 1 | A | G | Homozygous   |
| NC_037641.1 | 2714304 | SNV | 1 | T | C | Homozygous   |
| NC_037641.1 | 2726674 | SNV | 1 | G | A | Heterozygous |
| NC_037641.1 | 2728704 | SNV | 1 | G | A | Heterozygous |
| NC_037641.1 | 2729357 | SNV | 1 | T | C | Homozygous   |
| NC_037641.1 | 2729503 | SNV | 1 | G | A | Homozygous   |
| NC_037641.1 | 2729677 | SNV | 1 | T | C | Heterozygous |
| NC_037641.1 | 2729742 | SNV | 1 | T | C | Homozygous   |
| NC_037641.1 | 2729934 | SNV | 1 | T | C | Homozygous   |
| NC_037641.1 | 2730068 | SNV | 1 | T | A | Heterozygous |
| NC_037641.1 | 2730221 | SNV | 1 | A | G | Homozygous   |
| NC_037641.1 | 2730469 | SNV | 1 | G | A | Homozygous   |
| NC_037641.1 | 2730474 | SNV | 1 | C | T | Heterozygous |
| NC_037641.1 | 2730554 | SNV | 1 | C | T | Heterozygous |
| NC_037641.1 | 2731937 | SNV | 1 | G | C | Heterozygous |
| NC_037641.1 | 2731942 | SNV | 1 | T | C | Heterozygous |
| NC_037641.1 | 2732212 | SNV | 1 | G | A | Homozygous   |
| NC_037641.1 | 2732214 | SNV | 1 | G | A | Homozygous   |
| NC_037641.1 | 2732248 | SNV | 1 | T | G | Homozygous   |
| NC_037641.1 | 2732258 | SNV | 1 | T | C | Homozygous   |
| NC_037641.1 | 2732320 | SNV | 1 | C | G | Homozygous   |
| NC_037641.1 | 2732337 | SNV | 1 | C | T | Homozygous   |
| NC_037641.1 | 2732351 | SNV | 1 | A | G | Homozygous   |
| NC_037641.1 | 2732404 | SNV | 1 | G | A | Homozygous   |
| NC_037641.1 | 2732422 | SNV | 1 | A | G | Homozygous   |
| NC_037641.1 | 2732427 | SNV | 1 | C | T | Heterozygous |
| NC_037641.1 | 2732504 | SNV | 1 | C | G | Homozygous   |
| NC_037641.1 | 2732506 | SNV | 1 | A | G | Homozygous   |
| NC_037641.1 | 2732514 | SNV | 1 | A | T | Homozygous   |
| NC_037641.1 | 2732601 | SNV | 1 | C | T | Heterozygous |
| NC_037641.1 | 2732607 | SNV | 1 | G | A | Heterozygous |
| NC_037641.1 | 2732801 | SNV | 1 | A | T | Heterozygous |
| NC_037641.1 | 2733158 | SNV | 1 | A | G | Homozygous   |
| NC_037641.1 | 2746491 | SNV | 1 | A | G | Homozygous   |
| NC_037641.1 | 2746533 | SNV | 1 | T | C | Homozygous   |
| NC_037641.1 | 2749880 | SNV | 1 | T | C | Homozygous   |

|             |         |     |   |   |   |              |
|-------------|---------|-----|---|---|---|--------------|
| NC_037641.1 | 2750213 | SNV | 1 | A | G | Homozygous   |
| NC_037641.1 | 2750222 | SNV | 1 | T | G | Homozygous   |
| NC_037641.1 | 2750259 | SNV | 1 | A | G | Homozygous   |
| NC_037641.1 | 2750318 | SNV | 1 | G | T | Heterozygous |
| NC_037641.1 | 2750346 | SNV | 1 | C | T | Heterozygous |
| NC_037641.1 | 2751103 | SNV | 1 | T | C | Heterozygous |
| NC_037641.1 | 2751193 | SNV | 1 | A | G | Homozygous   |
| NC_037641.1 | 2751208 | SNV | 1 | C | T | Heterozygous |
| NC_037641.1 | 2754503 | SNV | 1 | T | C | Homozygous   |
| NC_037641.1 | 2754506 | SNV | 1 | G | A | Heterozygous |
| NC_037641.1 | 2754520 | SNV | 1 | T | C | Homozygous   |
| NC_037641.1 | 2776963 | SNV | 1 | G | A | Heterozygous |
| NC_037641.1 | 2783903 | SNV | 1 | A | G | Homozygous   |
| NC_037641.1 | 2783905 | SNV | 1 | C | T | Homozygous   |
| NC_037641.1 | 2783934 | SNV | 1 | T | A | Homozygous   |
| NC_037641.1 | 2785082 | SNV | 1 | G | T | Homozygous   |
| NC_037641.1 | 2785086 | SNV | 1 | C | T | Homozygous   |
| NC_037641.1 | 2785090 | SNV | 1 | T | C | Heterozygous |
| NC_037641.1 | 2785092 | SNV | 1 | G | A | Homozygous   |
| NC_037641.1 | 2785096 | SNV | 1 | G | C | Homozygous   |
| NC_037641.1 | 2785117 | SNV | 1 | C | T | Homozygous   |
| NC_037641.1 | 2785127 | SNV | 1 | T | A | Heterozygous |
| NC_037641.1 | 2786728 | SNV | 1 | C | A | Heterozygous |
| NC_037641.1 | 2787764 | SNV | 1 | A | G | Homozygous   |
| NC_037641.1 | 2787790 | SNV | 1 | T | C | Heterozygous |
| NC_037641.1 | 2787793 | SNV | 1 | T | C | Heterozygous |
| NC_037641.1 | 2787799 | SNV | 1 | T | C | Heterozygous |
| NC_037641.1 | 2787802 | SNV | 1 | T | C | Heterozygous |
| NC_037641.1 | 2787805 | SNV | 1 | T | C | Heterozygous |
| NC_037641.1 | 2787814 | SNV | 1 | T | A | Heterozygous |
| NC_037641.1 | 2787814 | SNV | 1 | T | C | Heterozygous |
| NC_037641.1 | 2787817 | SNV | 1 | C | G | Heterozygous |
| NC_037641.1 | 2787823 | SNV | 1 | T | A | Heterozygous |
| NC_037641.1 | 2787826 | SNV | 1 | T | C | Heterozygous |
| NC_037641.1 | 2787829 | SNV | 1 | T | A | Heterozygous |
| NC_037641.1 | 2787834 | SNV | 1 | A | G | Heterozygous |
| NC_037641.1 | 2787842 | SNV | 1 | G | C | Heterozygous |
| NC_037641.1 | 2787844 | SNV | 1 | T | A | Heterozygous |
| NC_037641.1 | 2787850 | SNV | 1 | C | T | Homozygous   |
| NC_037641.1 | 2787856 | SNV | 1 | C | G | Homozygous   |
| NC_037641.1 | 2787862 | SNV | 1 | A | C | Homozygous   |
| NC_037641.1 | 2787868 | SNV | 1 | A | T | Homozygous   |
| NC_037641.1 | 2787886 | SNV | 1 | C | A | Homozygous   |
| NC_037641.1 | 2787889 | SNV | 1 | C | T | Homozygous   |
| NC_037641.1 | 2787902 | SNV | 1 | A | G | Heterozygous |
| NC_037641.1 | 2787904 | SNV | 1 | T | C | Heterozygous |
| NC_037641.1 | 2787907 | SNV | 1 | C | T | Heterozygous |
| NC_037641.1 | 2787919 | SNV | 1 | T | A | Homozygous   |
| NC_037641.1 | 2787922 | SNV | 1 | C | T | Heterozygous |
| NC_037641.1 | 2787967 | SNV | 1 | C | T | Heterozygous |
| NC_037641.1 | 2787969 | SNV | 1 | A | C | Homozygous   |

|             |         |     |   |   |   |              |
|-------------|---------|-----|---|---|---|--------------|
| NC_037641.1 | 2787973 | SNV | 1 | T | G | Homozygous   |
| NC_037641.1 | 2789003 | SNV | 1 | A | G | Homozygous   |
| NC_037641.1 | 2789014 | SNV | 1 | G | A | Homozygous   |
| NC_037641.1 | 2789595 | SNV | 1 | A | C | Homozygous   |
| NC_037641.1 | 2789632 | SNV | 1 | T | C | Homozygous   |
| NC_037641.1 | 2789881 | SNV | 1 | T | G | Homozygous   |
| NC_037641.1 | 2791187 | SNV | 1 | T | A | Homozygous   |
| NC_037641.1 | 2791469 | SNV | 1 | A | G | Heterozygous |
| NC_037641.1 | 2791476 | SNV | 1 | A | G | Heterozygous |
| NC_037641.1 | 2791516 | SNV | 1 | A | T | Homozygous   |
| NC_037641.1 | 2791532 | SNV | 1 | A | G | Heterozygous |
| NC_037641.1 | 2791534 | SNV | 1 | A | G | Heterozygous |
| NC_037641.1 | 2791543 | SNV | 1 | A | G | Heterozygous |
| NC_037641.1 | 2791577 | SNV | 1 | C | T | Homozygous   |
| NC_037641.1 | 2791792 | SNV | 1 | T | A | Heterozygous |
| NC_037641.1 | 2792091 | SNV | 1 | A | G | Homozygous   |
| NC_037641.1 | 2792101 | SNV | 1 | G | A | Heterozygous |
| NC_037641.1 | 2792103 | SNV | 1 | G | A | Heterozygous |
| NC_037641.1 | 2792105 | SNV | 1 | A | G | Homozygous   |
| NC_037641.1 | 2792149 | SNV | 1 | C | G | Homozygous   |
| NC_037641.1 | 2792589 | SNV | 1 | G | A | Heterozygous |
| NC_037641.1 | 2793076 | SNV | 1 | A | C | Homozygous   |
| NC_037641.1 | 2793081 | SNV | 1 | G | T | Homozygous   |
| NC_037641.1 | 2793781 | SNV | 1 | T | C | Heterozygous |
| NC_037641.1 | 2794345 | SNV | 1 | C | A | Homozygous   |
| NC_037641.1 | 2794357 | SNV | 1 | T | C | Homozygous   |
| NC_037641.1 | 2794370 | SNV | 1 | G | A | Heterozygous |
| NC_037641.1 | 2794381 | SNV | 1 | T | A | Homozygous   |
| NC_037641.1 | 2794396 | SNV | 1 | C | T | Heterozygous |
| NC_037641.1 | 2794414 | SNV | 1 | T | A | Homozygous   |
| NC_037641.1 | 2794418 | SNV | 1 | A | C | Homozygous   |
| NC_037641.1 | 2794448 | SNV | 1 | C | G | Homozygous   |
| NC_037641.1 | 2794560 | SNV | 1 | T | C | Homozygous   |
| NC_037641.1 | 2800761 | SNV | 1 | G | A | Homozygous   |
| NC_037641.1 | 2802724 | SNV | 1 | T | A | Homozygous   |
| NC_037641.1 | 2802747 | SNV | 1 | G | A | Heterozygous |
| NC_037641.1 | 2802905 | SNV | 1 | G | A | Homozygous   |
| NC_037641.1 | 2803600 | SNV | 1 | T | C | Homozygous   |
| NC_037641.1 | 2806014 | SNV | 1 | T | A | Heterozygous |
| NC_037641.1 | 2806571 | SNV | 1 | A | G | Homozygous   |
| NC_037641.1 | 2807099 | SNV | 1 | A | G | Homozygous   |
| NC_037641.1 | 2807104 | SNV | 1 | T | A | Homozygous   |
| NC_037641.1 | 2807509 | SNV | 1 | A | G | Homozygous   |
| NC_037641.1 | 2809994 | SNV | 1 | G | A | Homozygous   |
| NC_037641.1 | 2810636 | SNV | 1 | G | T | Homozygous   |
| NC_037641.1 | 2811009 | SNV | 1 | T | A | Homozygous   |
| NC_037641.1 | 2811090 | SNV | 1 | T | G | Homozygous   |
| NC_037641.1 | 2811100 | SNV | 1 | G | A | Homozygous   |
| NC_037641.1 | 2811191 | SNV | 1 | G | A | Homozygous   |
| NC_037641.1 | 2813744 | SNV | 1 | T | C | Homozygous   |
| NC_037641.1 | 2813799 | SNV | 1 | A | C | Homozygous   |



|             |         |     |   |   |   |              |
|-------------|---------|-----|---|---|---|--------------|
| NC_037641.1 | 2813942 | SNV | 1 | A | G | Heterozygous |
| NC_037641.1 | 2814021 | SNV | 1 | C | A | Heterozygous |
| NC_037641.1 | 2814185 | SNV | 1 | G | A | Heterozygous |
| NC_037641.1 | 2814187 | SNV | 1 | T | A | Heterozygous |
| NC_037641.1 | 2814190 | SNV | 1 | A | T | Heterozygous |
| NC_037641.1 | 2814194 | SNV | 1 | T | C | Heterozygous |
| NC_037641.1 | 2814197 | SNV | 1 | G | A | Heterozygous |
| NC_037641.1 | 2814226 | SNV | 1 | T | A | Homozygous   |
| NC_037641.1 | 2814229 | SNV | 1 | C | A | Homozygous   |
| NC_037641.1 | 2815930 | SNV | 1 | A | G | Homozygous   |
| NC_037641.1 | 2815932 | SNV | 1 | C | T | Homozygous   |
| NC_037641.1 | 2823336 | SNV | 1 | T | C | Homozygous   |
| NC_037641.1 | 2824266 | SNV | 1 | G | T | Heterozygous |
| NC_037641.1 | 2824282 | SNV | 1 | C | G | Heterozygous |
| NC_037641.1 | 2824285 | SNV | 1 | T | A | Heterozygous |
| NC_037641.1 | 2824287 | SNV | 1 | G | A | Heterozygous |
| NC_037641.1 | 2824300 | SNV | 1 | T | G | Homozygous   |
| NC_037641.1 | 2824303 | SNV | 1 | T | C | Heterozygous |
| NC_037641.1 | 2824318 | SNV | 1 | A | G | Heterozygous |
| NC_037641.1 | 2824321 | SNV | 1 | A | G | Heterozygous |
| NC_037641.1 | 2824330 | SNV | 1 | T | A | Heterozygous |
| NC_037641.1 | 2827974 | SNV | 1 | C | T | Homozygous   |
| NC_037641.1 | 2828620 | SNV | 1 | A | T | Homozygous   |
| NC_037641.1 | 2828695 | SNV | 1 | T | A | Homozygous   |
| NC_037641.1 | 2829591 | SNV | 1 | A | T | Heterozygous |
| NC_037641.1 | 2829595 | SNV | 1 | A | T | Heterozygous |
| NC_037641.1 | 2832918 | SNV | 1 | T | C | Heterozygous |
| NC_037641.1 | 2832920 | SNV | 1 | C | A | Heterozygous |
| NC_037641.1 | 2832922 | SNV | 1 | G | A | Heterozygous |
| NC_037641.1 | 2834658 | SNV | 1 | C | T | Homozygous   |
| NC_037641.1 | 2854083 | SNV | 1 | T | C | Homozygous   |
| NC_037641.1 | 2855522 | SNV | 1 | G | A | Heterozygous |
| NC_037641.1 | 2856228 | SNV | 1 | G | A | Homozygous   |
| NC_037641.1 | 2857211 | SNV | 1 | T | C | Homozygous   |
| NC_037641.1 | 2860669 | SNV | 1 | T | A | Homozygous   |
| NC_037641.1 | 2861761 | SNV | 1 | A | G | Heterozygous |
| NC_037641.1 | 2863411 | SNV | 1 | G | A | Homozygous   |
| NC_037641.1 | 2863607 | SNV | 1 | T | C | Homozygous   |
| NC_037641.1 | 2864491 | SNV | 1 | T | C | Homozygous   |
| NC_037641.1 | 2864586 | SNV | 1 | A | G | Homozygous   |
| NC_037641.1 | 2866110 | SNV | 1 | C | A | Heterozygous |
| NC_037641.1 | 2866194 | SNV | 1 | G | A | Homozygous   |
| NC_037641.1 | 2866279 | SNV | 1 | A | G | Homozygous   |
| NC_037641.1 | 2872670 | SNV | 1 | C | T | Homozygous   |
| NC_037641.1 | 2872715 | SNV | 1 | T | C | Homozygous   |
| NC_037641.1 | 2872732 | SNV | 1 | G | A | Homozygous   |
| NC_037641.1 | 2872739 | SNV | 1 | C | T | Heterozygous |
| NC_037641.1 | 2872752 | SNV | 1 | C | T | Heterozygous |
| NC_037641.1 | 2873294 | SNV | 1 | T | C | Homozygous   |
| NC_037641.1 | 2873345 | SNV | 1 | A | G | Homozygous   |
| NC_037641.1 | 2873507 | SNV | 1 | G | A | Homozygous   |

|             |         |     |   |   |   |              |
|-------------|---------|-----|---|---|---|--------------|
| NC_037641.1 | 2873569 | SNV | 1 | C | T | Heterozygous |
| NC_037641.1 | 2873873 | SNV | 1 | A | G | Heterozygous |
| NC_037641.1 | 2873932 | SNV | 1 | T | C | Homozygous   |
| NC_037641.1 | 2874014 | SNV | 1 | C | T | Homozygous   |
| NC_037641.1 | 2874016 | SNV | 1 | T | C | Homozygous   |
| NC_037641.1 | 2874020 | SNV | 1 | C | T | Homozygous   |
| NC_037641.1 | 2874337 | SNV | 1 | A | G | Heterozygous |
| NC_037641.1 | 2875751 | SNV | 1 | G | A | Heterozygous |
| NC_037641.1 | 2875818 | SNV | 1 | T | C | Homozygous   |
| NC_037641.1 | 2875892 | SNV | 1 | T | C | Heterozygous |
| NC_037641.1 | 2875970 | SNV | 1 | T | C | Heterozygous |
| NC_037641.1 | 2877492 | SNV | 1 | C | T | Homozygous   |
| NC_037641.1 | 2877527 | SNV | 1 | T | C | Homozygous   |
| NC_037641.1 | 2877596 | SNV | 1 | A | G | Homozygous   |
| NC_037641.1 | 2877644 | SNV | 1 | C | T | Homozygous   |
| NC_037641.1 | 2877774 | SNV | 1 | T | C | Homozygous   |
| NC_037641.1 | 2877803 | SNV | 1 | A | G | Homozygous   |
| NC_037641.1 | 2878079 | SNV | 1 | C | A | Heterozygous |
| NC_037641.1 | 2878166 | SNV | 1 | A | G | Homozygous   |
| NC_037641.1 | 2878411 | SNV | 1 | C | T | Homozygous   |
| NC_037641.1 | 2878422 | SNV | 1 | G | A | Homozygous   |
| NC_037641.1 | 2878496 | SNV | 1 | A | G | Heterozygous |
| NC_037641.1 | 2879128 | SNV | 1 | T | G | Homozygous   |
| NC_037641.1 | 2879131 | SNV | 1 | A | G | Homozygous   |
| NC_037641.1 | 2879147 | SNV | 1 | C | G | Homozygous   |
| NC_037641.1 | 2879323 | SNV | 1 | T | C | Homozygous   |
| NC_037641.1 | 2879335 | SNV | 1 | T | C | Homozygous   |
| NC_037641.1 | 2879349 | SNV | 1 | T | C | Homozygous   |
| NC_037641.1 | 2879388 | SNV | 1 | T | C | Homozygous   |
| NC_037641.1 | 2879428 | SNV | 1 | A | G | Heterozygous |
| NC_037641.1 | 2879446 | SNV | 1 | C | T | Heterozygous |
| NC_037641.1 | 2879507 | SNV | 1 | T | C | Homozygous   |
| NC_037641.1 | 2879513 | SNV | 1 | C | T | Heterozygous |
| NC_037641.1 | 2879516 | SNV | 1 | C | T | Heterozygous |
| NC_037641.1 | 2879519 | SNV | 1 | T | C | Heterozygous |
| NC_037641.1 | 2879522 | SNV | 1 | C | T | Homozygous   |
| NC_037641.1 | 2881020 | SNV | 1 | C | T | Heterozygous |
| NC_037641.1 | 2881204 | SNV | 1 | T | C | Heterozygous |
| NC_037641.1 | 2881210 | SNV | 1 | C | T | Homozygous   |
| NC_037641.1 | 2881225 | SNV | 1 | T | C | Homozygous   |
| NC_037641.1 | 2882815 | SNV | 1 | C | G | Homozygous   |
| NC_037641.1 | 2882856 | SNV | 1 | T | A | Heterozygous |
| NC_037641.1 | 2883665 | SNV | 1 | C | T | Heterozygous |
| NC_037641.1 | 2883676 | SNV | 1 | C | T | Homozygous   |
| NC_037641.1 | 2884346 | SNV | 1 | T | C | Heterozygous |
| NC_037641.1 | 2884422 | SNV | 1 | T | A | Homozygous   |
| NC_037641.1 | 2884439 | SNV | 1 | T | C | Heterozygous |
| NC_037641.1 | 2885035 | SNV | 1 | C | T | Heterozygous |
| NC_037641.1 | 2885212 | SNV | 1 | T | C | Homozygous   |
| NC_037641.1 | 2885503 | SNV | 1 | A | G | Heterozygous |
| NC_037641.1 | 2885627 | SNV | 1 | C | T | Heterozygous |

|             |         |     |   |   |   |              |
|-------------|---------|-----|---|---|---|--------------|
| NC_037641.1 | 2886256 | SNV | 1 | C | T | Heterozygous |
| NC_037641.1 | 2886332 | SNV | 1 | C | T | Homozygous   |
| NC_037641.1 | 2886351 | SNV | 1 | G | T | Homozygous   |
| NC_037641.1 | 2886469 | SNV | 1 | C | T | Heterozygous |
| NC_037641.1 | 2887865 | SNV | 1 | T | A | Homozygous   |
| NC_037641.1 | 2887869 | SNV | 1 | C | A | Homozygous   |
| NC_037641.1 | 2887872 | SNV | 1 | G | A | Heterozygous |
| NC_037641.1 | 2887874 | SNV | 1 | A | T | Heterozygous |
| NC_037641.1 | 2887877 | SNV | 1 | T | A | Homozygous   |
| NC_037641.1 | 2887886 | SNV | 1 | T | A | Homozygous   |
| NC_037641.1 | 2887913 | SNV | 1 | A | T | Heterozygous |
| NC_037641.1 | 2887915 | SNV | 1 | T | A | Heterozygous |
| NC_037641.1 | 2888491 | SNV | 1 | T | A | Heterozygous |
| NC_037641.1 | 2889005 | SNV | 1 | C | G | Homozygous   |
| NC_037641.1 | 2889126 | SNV | 1 | A | G | Homozygous   |
| NC_037641.1 | 2890133 | SNV | 1 | G | T | Heterozygous |
| NC_037641.1 | 2890197 | SNV | 1 | A | G | Heterozygous |
| NC_037641.1 | 2890663 | SNV | 1 | C | T | Heterozygous |
| NC_037641.1 | 2890673 | SNV | 1 | G | A | Heterozygous |
| NC_037641.1 | 2890830 | SNV | 1 | T | C | Homozygous   |
| NC_037641.1 | 2890870 | SNV | 1 | T | C | Heterozygous |
| NC_037641.1 | 2890877 | SNV | 1 | T | C | Homozygous   |
| NC_037641.1 | 2890907 | SNV | 1 | T | C | Homozygous   |
| NC_037641.1 | 2891499 | SNV | 1 | A | G | Heterozygous |
| NC_037641.1 | 2891501 | SNV | 1 | A | G | Heterozygous |
| NC_037641.1 | 2891503 | SNV | 1 | A | G | Heterozygous |
| NC_037641.1 | 2891512 | SNV | 1 | A | T | Heterozygous |
| NC_037641.1 | 2891553 | SNV | 1 | C | A | Heterozygous |
| NC_037641.1 | 2893082 | SNV | 1 | A | G | Heterozygous |
| NC_037641.1 | 2893113 | SNV | 1 | C | T | Heterozygous |
| NC_037641.1 | 2893137 | SNV | 1 | T | C | Homozygous   |
| NC_037641.1 | 2893164 | SNV | 1 | A | C | Homozygous   |
| NC_037641.1 | 2893322 | SNV | 1 | C | T | Heterozygous |
| NC_037641.1 | 2893329 | SNV | 1 | C | G | Heterozygous |
| NC_037641.1 | 2893527 | SNV | 1 | T | C | Homozygous   |
| NC_037641.1 | 2893725 | SNV | 1 | A | C | Homozygous   |
| NC_037641.1 | 2893733 | SNV | 1 | A | T | Homozygous   |
| NC_037641.1 | 2893936 | SNV | 1 | A | G | Homozygous   |
| NC_037641.1 | 2893947 | SNV | 1 | T | C | Homozygous   |
| NC_037641.1 | 2893952 | SNV | 1 | G | A | Homozygous   |
| NC_037641.1 | 2893976 | SNV | 1 | C | T | Homozygous   |
| NC_037641.1 | 2893985 | SNV | 1 | T | G | Heterozygous |
| NC_037641.1 | 2894214 | SNV | 1 | G | A | Heterozygous |
| NC_037641.1 | 2894220 | SNV | 1 | G | T | Heterozygous |
| NC_037641.1 | 2894226 | SNV | 1 | C | T | Homozygous   |
| NC_037641.1 | 2895877 | SNV | 1 | T | C | Homozygous   |
| NC_037641.1 | 2895982 | SNV | 1 | T | C | Homozygous   |
| NC_037641.1 | 2895984 | SNV | 1 | G | A | Homozygous   |
| NC_037641.1 | 2896943 | SNV | 1 | T | C | Heterozygous |
| NC_037641.1 | 2896963 | SNV | 1 | T | C | Heterozygous |
| NC_037641.1 | 2896977 | SNV | 1 | C | T | Heterozygous |

|             |         |     |   |   |   |              |
|-------------|---------|-----|---|---|---|--------------|
| NC_037641.1 | 2898058 | SNV | 1 | G | A | Heterozygous |
| NC_037641.1 | 2898076 | SNV | 1 | G | A | Homozygous   |
| NC_037641.1 | 2903555 | SNV | 1 | T | C | Homozygous   |
| NC_037641.1 | 2903595 | SNV | 1 | C | T | Homozygous   |
| NC_037641.1 | 2907183 | SNV | 1 | T | C | Homozygous   |
| NC_037641.1 | 2907232 | SNV | 1 | T | C | Heterozygous |
| NC_037641.1 | 2907643 | SNV | 1 | T | C | Homozygous   |
| NC_037641.1 | 2907937 | SNV | 1 | C | T | Homozygous   |
| NC_037641.1 | 2908550 | SNV | 1 | G | A | Homozygous   |
| NC_037641.1 | 2908636 | SNV | 1 | G | A | Heterozygous |
| NC_037641.1 | 2979713 | SNV | 1 | G | T | Homozygous   |
| NC_037641.1 | 2980099 | SNV | 1 | A | G | Homozygous   |
| NC_037641.1 | 2992053 | SNV | 1 | G | A | Heterozygous |
| NC_037641.1 | 2992788 | SNV | 1 | G | A | Heterozygous |
| NC_037641.1 | 2992859 | SNV | 1 | C | T | Heterozygous |
| NC_037641.1 | 2992910 | SNV | 1 | C | T | Heterozygous |
| NC_037641.1 | 2992915 | SNV | 1 | C | T | Homozygous   |
| NC_037641.1 | 2992917 | SNV | 1 | T | C | Heterozygous |
| NC_037641.1 | 3009061 | SNV | 1 | T | C | Heterozygous |
| NC_037641.1 | 3009066 | SNV | 1 | G | C | Heterozygous |
| NC_037641.1 | 3009070 | SNV | 1 | G | C | Heterozygous |
| NC_037641.1 | 3009110 | SNV | 1 | T | C | Homozygous   |
| NC_037641.1 | 3009198 | SNV | 1 | G | A | Heterozygous |
| NC_037641.1 | 3009233 | SNV | 1 | T | C | Homozygous   |
| NC_037641.1 | 3010190 | SNV | 1 | A | T | Heterozygous |
| NC_037641.1 | 3010192 | SNV | 1 | C | T | Heterozygous |
| NC_037641.1 | 3020504 | SNV | 1 | C | A | Homozygous   |
| NC_037641.1 | 3020507 | SNV | 1 | C | A | Homozygous   |
| NC_037641.1 | 3020515 | SNV | 1 | T | A | Homozygous   |
| NC_037641.1 | 3020521 | SNV | 1 | A | C | Homozygous   |
| NC_037641.1 | 3020523 | SNV | 1 | C | A | Homozygous   |
| NC_037641.1 | 3056365 | SNV | 1 | C | T | Heterozygous |
| NC_037641.1 | 3064859 | SNV | 1 | T | C | Heterozygous |
| NC_037641.1 | 3064892 | SNV | 1 | A | G | Heterozygous |
| NC_037641.1 | 3064896 | SNV | 1 | A | G | Heterozygous |
| NC_037641.1 | 3064912 | SNV | 1 | T | C | Homozygous   |
| NC_037641.1 | 3075338 | SNV | 1 | G | A | Heterozygous |
| NC_037641.1 | 3082409 | SNV | 1 | G | C | Heterozygous |
| NC_037641.1 | 3082486 | SNV | 1 | C | A | Homozygous   |
| NC_037641.1 | 3082557 | SNV | 1 | C | T | Heterozygous |
| NC_037641.1 | 3084516 | SNV | 1 | C | T | Heterozygous |
| NC_037641.1 | 3094238 | SNV | 1 | G | C | Heterozygous |
| NC_037641.1 | 3094242 | SNV | 1 | T | A | Heterozygous |
| NC_037641.1 | 3094243 | SNV | 1 | T | C | Heterozygous |
| NC_037641.1 | 3094265 | SNV | 1 | A | C | Homozygous   |
| NC_037641.1 | 3094304 | SNV | 1 | T | C | Homozygous   |
| NC_037641.1 | 3100737 | SNV | 1 | C | T | Homozygous   |
| NC_037641.1 | 3100867 | SNV | 1 | G | C | Homozygous   |
| NC_037641.1 | 3102879 | SNV | 1 | C | T | Homozygous   |
| NC_037641.1 | 3105631 | SNV | 1 | T | C | Heterozygous |
| NC_037641.1 | 3105873 | SNV | 1 | T | C | Heterozygous |

|             |         |     |   |   |   |              |
|-------------|---------|-----|---|---|---|--------------|
| NC_037641.1 | 3105907 | SNV | 1 | C | T | Heterozygous |
| NC_037641.1 | 3113965 | SNV | 1 | C | A | Homozygous   |
| NC_037641.1 | 3114483 | SNV | 1 | T | G | Homozygous   |
| NC_037641.1 | 3126996 | SNV | 1 | T | A | Heterozygous |
| NC_037641.1 | 3127030 | SNV | 1 | A | T | Heterozygous |
| NC_037641.1 | 3127332 | SNV | 1 | A | T | Heterozygous |
| NC_037641.1 | 3127352 | SNV | 1 | A | G | Homozygous   |
| NC_037641.1 | 3137105 | SNV | 1 | T | A | Homozygous   |
| NC_037641.1 | 3145139 | SNV | 1 | T | C | Homozygous   |
| NC_037641.1 | 3193427 | SNV | 1 | A | G | Heterozygous |
| NC_037641.1 | 3193452 | SNV | 1 | A | G | Homozygous   |
| NC_037641.1 | 3222460 | SNV | 1 | T | C | Heterozygous |
| NC_037641.1 | 3222467 | SNV | 1 | T | G | Heterozygous |
| NC_037641.1 | 3222477 | SNV | 1 | T | C | Heterozygous |
| NC_037641.1 | 3253518 | SNV | 1 | C | A | Homozygous   |
| NC_037641.1 | 3253527 | SNV | 1 | C | T | Homozygous   |
| NC_037641.1 | 3253530 | SNV | 1 | T | G | Homozygous   |
| NC_037641.1 | 3299794 | SNV | 1 | G | T | Homozygous   |
| NC_037641.1 | 3299797 | SNV | 1 | T | C | Homozygous   |
| NC_037641.1 | 3299821 | SNV | 1 | C | T | Homozygous   |
| NC_037641.1 | 3299831 | SNV | 1 | C | A | Homozygous   |
| NC_037641.1 | 3299834 | SNV | 1 | C | T | Homozygous   |
| NC_037641.1 | 3299840 | SNV | 1 | C | T | Homozygous   |
| NC_037641.1 | 3316707 | SNV | 1 | T | C | Homozygous   |
| NC_037641.1 | 3316769 | SNV | 1 | G | A | Homozygous   |
| NC_037641.1 | 3317375 | SNV | 1 | T | A | Homozygous   |
| NC_037641.1 | 3317380 | SNV | 1 | A | C | Homozygous   |
| NC_037641.1 | 3325848 | SNV | 1 | C | T | Heterozygous |
| NC_037641.1 | 3335011 | SNV | 1 | C | G | Homozygous   |
| NC_037641.1 | 3338413 | SNV | 1 | T | A | Homozygous   |
| NC_037641.1 | 3339075 | SNV | 1 | A | T | Homozygous   |
| NC_037641.1 | 3339078 | SNV | 1 | C | T | Homozygous   |
| NC_037641.1 | 3339175 | SNV | 1 | G | T | Homozygous   |
| NC_037641.1 | 3340234 | SNV | 1 | A | T | Homozygous   |
| NC_037641.1 | 3340259 | SNV | 1 | T | A | Heterozygous |
| NC_037641.1 | 3340267 | SNV | 1 | A | G | Heterozygous |
| NC_037641.1 | 3340278 | SNV | 1 | A | T | Heterozygous |
| NC_037641.1 | 3340285 | SNV | 1 | T | G | Heterozygous |
| NC_037641.1 | 3340288 | SNV | 1 | T | A | Homozygous   |
| NC_037641.1 | 3340293 | SNV | 1 | T | A | Heterozygous |
| NC_037641.1 | 3340300 | SNV | 1 | A | G | Heterozygous |
| NC_037641.1 | 3340313 | SNV | 1 | T | C | Heterozygous |
| NC_037641.1 | 3340535 | SNV | 1 | A | C | Homozygous   |
| NC_037641.1 | 3340658 | SNV | 1 | T | A | Heterozygous |
| NC_037641.1 | 3340691 | SNV | 1 | C | T | Heterozygous |
| NC_037641.1 | 3341345 | SNV | 1 | G | A | Heterozygous |
| NC_037641.1 | 3343691 | SNV | 1 | G | A | Homozygous   |
| NC_037641.1 | 3345035 | SNV | 1 | T | A | Homozygous   |
| NC_037641.1 | 3345080 | SNV | 1 | A | T | Heterozygous |
| NC_037641.1 | 3345082 | SNV | 1 | A | C | Heterozygous |
| NC_037641.1 | 3345084 | SNV | 1 | A | G | Heterozygous |

|             |         |     |   |   |   |              |
|-------------|---------|-----|---|---|---|--------------|
| NC_037641.1 | 3345123 | SNV | 1 | T | C | Homozygous   |
| NC_037641.1 | 3347865 | SNV | 1 | T | A | Homozygous   |
| NC_037641.1 | 3350904 | SNV | 1 | T | A | Heterozygous |
| NC_037641.1 | 3350918 | SNV | 1 | A | T | Heterozygous |
| NC_037641.1 | 3350921 | SNV | 1 | A | T | Heterozygous |
| NC_037641.1 | 3350930 | SNV | 1 | A | T | Heterozygous |
| NC_037641.1 | 3352563 | SNV | 1 | G | A | Homozygous   |
| NC_037641.1 | 3355865 | SNV | 1 | A | G | Homozygous   |
| NC_037641.1 | 3357432 | SNV | 1 | C | T | Homozygous   |
| NC_037641.1 | 3358453 | SNV | 1 | C | T | Heterozygous |
| NC_037641.1 | 3360915 | SNV | 1 | T | C | Homozygous   |
| NC_037641.1 | 3361477 | SNV | 1 | A | G | Heterozygous |
| NC_037641.1 | 3364056 | SNV | 1 | A | G | Heterozygous |
| NC_037641.1 | 3366518 | SNV | 1 | A | T | Homozygous   |
| NC_037641.1 | 3366526 | SNV | 1 | T | A | Homozygous   |
| NC_037641.1 | 3366537 | SNV | 1 | A | G | Homozygous   |
| NC_037641.1 | 3366544 | SNV | 1 | G | A | Homozygous   |
| NC_037641.1 | 3366566 | SNV | 1 | T | A | Homozygous   |
| NC_037641.1 | 3375421 | SNV | 1 | G | A | Homozygous   |
| NC_037641.1 | 3384235 | SNV | 1 | G | A | Homozygous   |
| NC_037641.1 | 3386323 | SNV | 1 | A | G | Homozygous   |
| NC_037641.1 | 3386334 | SNV | 1 | A | T | Homozygous   |
| NC_037641.1 | 3386336 | SNV | 1 | A | T | Homozygous   |
| NC_037641.1 | 3386354 | SNV | 1 | T | G | Homozygous   |
| NC_037641.1 | 3386370 | SNV | 1 | T | A | Homozygous   |
| NC_037641.1 | 3389185 | SNV | 1 | C | A | Homozygous   |
| NC_037641.1 | 3389191 | SNV | 1 | G | A | Heterozygous |
| NC_037641.1 | 3389197 | SNV | 1 | A | T | Heterozygous |
| NC_037641.1 | 3389201 | SNV | 1 | A | G | Heterozygous |
| NC_037641.1 | 3389748 | SNV | 1 | A | G | Heterozygous |
| NC_037641.1 | 3397865 | SNV | 1 | C | T | Heterozygous |
| NC_037641.1 | 3403832 | SNV | 1 | C | G | Homozygous   |
| NC_037641.1 | 3404183 | SNV | 1 | A | C | Homozygous   |
| NC_037641.1 | 3404198 | SNV | 1 | C | A | Heterozygous |
| NC_037641.1 | 3404200 | SNV | 1 | A | C | Heterozygous |
| NC_037641.1 | 3404400 | SNV | 1 | A | G | Homozygous   |
| NC_037641.1 | 3413961 | SNV | 1 | T | A | Homozygous   |
| NC_037641.1 | 3413966 | SNV | 1 | A | T | Homozygous   |
| NC_037641.1 | 3415435 | SNV | 1 | G | A | Heterozygous |
| NC_037641.1 | 3416683 | SNV | 1 | T | C | Homozygous   |
| NC_037641.1 | 3416686 | SNV | 1 | A | T | Homozygous   |
| NC_037641.1 | 3416689 | SNV | 1 | C | T | Homozygous   |
| NC_037641.1 | 3430026 | SNV | 1 | A | C | Homozygous   |
| NC_037641.1 | 3430029 | SNV | 1 | T | C | Homozygous   |
| NC_037641.1 | 3442489 | SNV | 1 | C | T | Homozygous   |
| NC_037641.1 | 3442725 | SNV | 1 | T | A | Homozygous   |
| NC_037641.1 | 3442727 | SNV | 1 | C | T | Homozygous   |
| NC_037641.1 | 3443545 | SNV | 1 | T | C | Homozygous   |
| NC_037641.1 | 3448446 | SNV | 1 | C | A | Homozygous   |
| NC_037641.1 | 3453628 | SNV | 1 | T | C | Homozygous   |
| NC_037641.1 | 3453641 | SNV | 1 | A | G | Homozygous   |

|             |         |     |   |   |   |              |
|-------------|---------|-----|---|---|---|--------------|
| NC_037641.1 | 3453643 | SNV | 1 | A | G | Homozygous   |
| NC_037641.1 | 3460751 | SNV | 1 | T | C | Homozygous   |
| NC_037641.1 | 3460755 | SNV | 1 | A | T | Homozygous   |
| NC_037641.1 | 3460758 | SNV | 1 | A | G | Homozygous   |
| NC_037641.1 | 3460763 | SNV | 1 | T | A | Homozygous   |
| NC_037641.1 | 3467568 | SNV | 1 | T | C | Heterozygous |
| NC_037641.1 | 3468151 | SNV | 1 | A | G | Heterozygous |
| NC_037641.1 | 3468155 | SNV | 1 | C | T | Heterozygous |
| NC_037641.1 | 3471678 | SNV | 1 | T | A | Homozygous   |
| NC_037641.1 | 3471702 | SNV | 1 | T | A | Homozygous   |
| NC_037641.1 | 3471707 | SNV | 1 | T | G | Homozygous   |
| NC_037641.1 | 3471709 | SNV | 1 | G | A | Homozygous   |
| NC_037641.1 | 3471712 | SNV | 1 | T | A | Homozygous   |
| NC_037641.1 | 3471715 | SNV | 1 | A | C | Homozygous   |
| NC_037641.1 | 3472427 | SNV | 1 | C | T | Homozygous   |
| NC_037641.1 | 3472430 | SNV | 1 | C | T | Heterozygous |
| NC_037641.1 | 3472433 | SNV | 1 | C | T | Homozygous   |
| NC_037641.1 | 3472436 | SNV | 1 | A | T | Heterozygous |
| NC_037641.1 | 3478344 | SNV | 1 | T | G | Homozygous   |
| NC_037641.1 | 3478369 | SNV | 1 | C | T | Homozygous   |
| NC_037641.1 | 3479986 | SNV | 1 | G | A | Heterozygous |
| NC_037641.1 | 3482699 | SNV | 1 | G | C | Homozygous   |
| NC_037641.1 | 3482768 | SNV | 1 | C | T | Heterozygous |
| NC_037641.1 | 3482774 | SNV | 1 | C | G | Homozygous   |
| NC_037641.1 | 3485905 | SNV | 1 | T | C | Homozygous   |
| NC_037641.1 | 3487159 | SNV | 1 | G | A | Heterozygous |
| NC_037641.1 | 3487427 | SNV | 1 | T | C | Homozygous   |
| NC_037641.1 | 3494188 | SNV | 1 | C | T | Homozygous   |
| NC_037641.1 | 3496033 | SNV | 1 | A | G | Homozygous   |
| NC_037641.1 | 3496478 | SNV | 1 | G | C | Homozygous   |
| NC_037641.1 | 3496853 | SNV | 1 | G | A | Heterozygous |
| NC_037641.1 | 3496883 | SNV | 1 | G | A | Heterozygous |
| NC_037641.1 | 3497092 | SNV | 1 | T | C | Homozygous   |
| NC_037641.1 | 3497195 | SNV | 1 | A | G | Heterozygous |
| NC_037641.1 | 3497558 | SNV | 1 | T | C | Homozygous   |
| NC_037641.1 | 3498883 | SNV | 1 | C | T | Homozygous   |
| NC_037641.1 | 3499200 | SNV | 1 | A | G | Homozygous   |
| NC_037641.1 | 3499609 | SNV | 1 | A | G | Homozygous   |
| NC_037641.1 | 3499668 | SNV | 1 | C | T | Homozygous   |
| NC_037641.1 | 3499791 | SNV | 1 | T | C | Heterozygous |
| NC_037641.1 | 3500150 | SNV | 1 | C | A | Heterozygous |
| NC_037641.1 | 3500241 | SNV | 1 | T | C | Heterozygous |
| NC_037641.1 | 3500420 | SNV | 1 | A | G | Homozygous   |
| NC_037641.1 | 3500465 | SNV | 1 | G | A | Homozygous   |
| NC_037641.1 | 3500477 | SNV | 1 | T | A | Heterozygous |
| NC_037641.1 | 3500539 | SNV | 1 | G | A | Heterozygous |
| NC_037641.1 | 3500580 | SNV | 1 | A | G | Heterozygous |
| NC_037641.1 | 3500644 | SNV | 1 | A | G | Homozygous   |
| NC_037641.1 | 3501325 | SNV | 1 | T | C | Homozygous   |
| NC_037641.1 | 3501615 | SNV | 1 | T | C | Homozygous   |
| NC_037641.1 | 3501617 | SNV | 1 | A | G | Homozygous   |

|             |         |     |   |   |   |              |
|-------------|---------|-----|---|---|---|--------------|
| NC_037641.1 | 3509768 | SNV | 1 | A | G | Heterozygous |
| NC_037641.1 | 3509776 | SNV | 1 | A | G | Heterozygous |
| NC_037641.1 | 3509807 | SNV | 1 | G | A | Homozygous   |
| NC_037641.1 | 3512792 | SNV | 1 | C | A | Heterozygous |
| NC_037641.1 | 3512974 | SNV | 1 | T | A | Heterozygous |
| NC_037641.1 | 3517297 | SNV | 1 | T | C | Homozygous   |
| NC_037641.1 | 3517333 | SNV | 1 | T | C | Heterozygous |
| NC_037641.1 | 3517375 | SNV | 1 | T | C | Homozygous   |
| NC_037641.1 | 3520261 | SNV | 1 | C | T | Homozygous   |
| NC_037641.1 | 3533480 | SNV | 1 | G | A | Homozygous   |
| NC_037641.1 | 3542574 | SNV | 1 | T | G | Heterozygous |
| NC_037641.1 | 3543164 | SNV | 1 | A | G | Homozygous   |
| NC_037641.1 | 3565851 | SNV | 1 | A | T | Homozygous   |
| NC_037641.1 | 3576749 | SNV | 1 | G | A | Heterozygous |
| NC_037641.1 | 3576927 | SNV | 1 | C | T | Heterozygous |
| NC_037641.1 | 3577188 | SNV | 1 | T | C | Homozygous   |
| NC_037641.1 | 3577226 | SNV | 1 | C | T | Homozygous   |
| NC_037641.1 | 3577434 | SNV | 1 | A | G | Homozygous   |
| NC_037641.1 | 3579598 | SNV | 1 | A | T | Heterozygous |
| NC_037641.1 | 3579601 | SNV | 1 | C | G | Heterozygous |
| NC_037641.1 | 3579603 | SNV | 1 | A | T | Heterozygous |
| NC_037641.1 | 3587583 | SNV | 1 | G | A | Homozygous   |
| NC_037641.1 | 3600734 | SNV | 1 | C | A | Homozygous   |
| NC_037641.1 | 3602807 | SNV | 1 | C | T | Heterozygous |
| NC_037641.1 | 3602820 | SNV | 1 | T | C | Homozygous   |
| NC_037641.1 | 3602895 | SNV | 1 | A | G | Homozygous   |
| NC_037641.1 | 3603010 | SNV | 1 | A | G | Homozygous   |
| NC_037641.1 | 3603014 | SNV | 1 | T | C | Homozygous   |
| NC_037641.1 | 3603018 | SNV | 1 | T | C | Homozygous   |
| NC_037641.1 | 3614188 | SNV | 1 | T | A | Homozygous   |
| NC_037641.1 | 3615348 | SNV | 1 | G | A | Heterozygous |
| NC_037641.1 | 3615469 | SNV | 1 | C | T | Heterozygous |
| NC_037641.1 | 3622736 | SNV | 1 | T | C | Homozygous   |
| NC_037641.1 | 3623040 | SNV | 1 | A | G | Homozygous   |
| NC_037641.1 | 3623332 | SNV | 1 | C | A | Heterozygous |
| NC_037641.1 | 3623344 | SNV | 1 | G | A | Heterozygous |
| NC_037641.1 | 3623347 | SNV | 1 | T | G | Heterozygous |
| NC_037641.1 | 3623368 | SNV | 1 | A | G | Heterozygous |
| NC_037641.1 | 3623489 | SNV | 1 | T | C | Heterozygous |
| NC_037641.1 | 3623561 | SNV | 1 | T | A | Homozygous   |
| NC_037641.1 | 3623643 | SNV | 1 | C | T | Heterozygous |
| NC_037641.1 | 3623649 | SNV | 1 | A | C | Heterozygous |
| NC_037641.1 | 3623681 | SNV | 1 | G | A | Heterozygous |
| NC_037641.1 | 3623737 | SNV | 1 | C | T | Homozygous   |
| NC_037641.1 | 3623757 | SNV | 1 | A | G | Homozygous   |
| NC_037641.1 | 3623892 | SNV | 1 | T | C | Homozygous   |
| NC_037641.1 | 3627644 | SNV | 1 | A | G | Homozygous   |
| NC_037641.1 | 3627696 | SNV | 1 | T | A | Heterozygous |
| NC_037641.1 | 3627710 | SNV | 1 | C | A | Homozygous   |
| NC_037641.1 | 3627727 | SNV | 1 | A | G | Homozygous   |
| NC_037641.1 | 3627949 | SNV | 1 | C | T | Homozygous   |



|             |         |     |   |   |   |              |
|-------------|---------|-----|---|---|---|--------------|
| NC_037641.1 | 3627982 | SNV | 1 | C | T | Heterozygous |
| NC_037641.1 | 3628002 | SNV | 1 | G | A | Heterozygous |
| NC_037641.1 | 3628077 | SNV | 1 | T | C | Homozygous   |
| NC_037641.1 | 3628081 | SNV | 1 | T | C | Heterozygous |
| NC_037641.1 | 3628088 | SNV | 1 | T | C | Homozygous   |
| NC_037641.1 | 3628194 | SNV | 1 | A | G | Heterozygous |
| NC_037641.1 | 3628199 | SNV | 1 | G | A | Homozygous   |
| NC_037641.1 | 3628315 | SNV | 1 | T | C | Heterozygous |
| NC_037641.1 | 3628427 | SNV | 1 | G | C | Heterozygous |
| NC_037641.1 | 3628469 | SNV | 1 | G | A | Heterozygous |
| NC_037641.1 | 3628491 | SNV | 1 | G | C | Homozygous   |
| NC_037641.1 | 3628786 | SNV | 1 | T | C | Homozygous   |
| NC_037641.1 | 3634965 | SNV | 1 | T | C | Homozygous   |
| NC_037641.1 | 3635164 | SNV | 1 | T | C | Heterozygous |
| NC_037641.1 | 3637630 | SNV | 1 | C | T | Homozygous   |
| NC_037641.1 | 3637641 | SNV | 1 | T | A | Heterozygous |
| NC_037641.1 | 3648919 | SNV | 1 | T | G | Heterozygous |
| NC_037641.1 | 3648921 | SNV | 1 | T | G | Heterozygous |
| NC_037641.1 | 3653473 | SNV | 1 | G | T | Heterozygous |
| NC_037641.1 | 3653486 | SNV | 1 | C | G | Homozygous   |
| NC_037641.1 | 3653657 | SNV | 1 | A | G | Homozygous   |
| NC_037641.1 | 3653707 | SNV | 1 | A | G | Homozygous   |
| NC_037641.1 | 3653715 | SNV | 1 | G | A | Heterozygous |
| NC_037641.1 | 3653723 | SNV | 1 | A | C | Homozygous   |
| NC_037641.1 | 3653735 | SNV | 1 | G | A | Homozygous   |
| NC_037641.1 | 3653846 | SNV | 1 | C | T | Homozygous   |
| NC_037641.1 | 3653904 | SNV | 1 | T | A | Heterozygous |
| NC_037641.1 | 3653965 | SNV | 1 | C | G | Heterozygous |
| NC_037641.1 | 3653988 | SNV | 1 | A | G | Homozygous   |
| NC_037641.1 | 3654047 | SNV | 1 | C | T | Homozygous   |
| NC_037641.1 | 3654061 | SNV | 1 | C | T | Heterozygous |
| NC_037641.1 | 3657116 | SNV | 1 | C | A | Homozygous   |
| NC_037641.1 | 3657129 | SNV | 1 | G | A | Homozygous   |
| NC_037641.1 | 3660241 | SNV | 1 | A | G | Homozygous   |
| NC_037641.1 | 3660776 | SNV | 1 | G | A | Heterozygous |
| NC_037641.1 | 3660809 | SNV | 1 | G | T | Heterozygous |
| NC_037641.1 | 3667233 | SNV | 1 | C | T | Heterozygous |
| NC_037641.1 | 3667324 | SNV | 1 | G | A | Heterozygous |
| NC_037641.1 | 3670295 | SNV | 1 | A | T | Homozygous   |
| NC_037641.1 | 3670298 | SNV | 1 | A | T | Homozygous   |
| NC_037641.1 | 3670301 | SNV | 1 | G | T | Homozygous   |
| NC_037641.1 | 3670304 | SNV | 1 | A | T | Homozygous   |
| NC_037641.1 | 3670357 | SNV | 1 | C | A | Heterozygous |
| NC_037641.1 | 3670668 | SNV | 1 | A | T | Homozygous   |
| NC_037641.1 | 3674990 | SNV | 1 | A | C | Homozygous   |
| NC_037641.1 | 3674993 | SNV | 1 | T | A | Homozygous   |
| NC_037641.1 | 3680123 | SNV | 1 | T | G | Homozygous   |
| NC_037641.1 | 3683113 | SNV | 1 | T | G | Homozygous   |
| NC_037641.1 | 3683234 | SNV | 1 | G | A | Homozygous   |
| NC_037641.1 | 3683573 | SNV | 1 | A | G | Heterozygous |
| NC_037641.1 | 3683713 | SNV | 1 | G | A | Homozygous   |

|             |         |     |   |   |   |              |
|-------------|---------|-----|---|---|---|--------------|
| NC_037641.1 | 3686324 | SNV | 1 | T | C | Homozygous   |
| NC_037641.1 | 3687045 | SNV | 1 | A | G | Heterozygous |
| NC_037641.1 | 3687063 | SNV | 1 | A | G | Heterozygous |
| NC_037641.1 | 3687074 | SNV | 1 | A | G | Heterozygous |
| NC_037641.1 | 3687079 | SNV | 1 | A | G | Heterozygous |
| NC_037641.1 | 3687088 | SNV | 1 | A | G | Heterozygous |
| NC_037641.1 | 3688885 | SNV | 1 | T | C | Homozygous   |
| NC_037641.1 | 3689600 | SNV | 1 | T | A | Homozygous   |
| NC_037641.1 | 3690727 | SNV | 1 | T | A | Heterozygous |
| NC_037641.1 | 3690751 | SNV | 1 | T | G | Homozygous   |
| NC_037641.1 | 3690768 | SNV | 1 | A | C | Homozygous   |
| NC_037641.1 | 3690770 | SNV | 1 | A | G | Homozygous   |
| NC_037641.1 | 3700511 | SNV | 1 | A | G | Heterozygous |
| NC_037641.1 | 3700614 | SNV | 1 | A | G | Homozygous   |
| NC_037641.1 | 3701246 | SNV | 1 | C | A | Homozygous   |
| NC_037641.1 | 3701741 | SNV | 1 | A | C | Homozygous   |
| NC_037641.1 | 3702472 | SNV | 1 | A | T | Homozygous   |
| NC_037641.1 | 3705139 | SNV | 1 | A | G | Homozygous   |
| NC_037641.1 | 3705142 | SNV | 1 | T | G | Homozygous   |
| NC_037641.1 | 3705145 | SNV | 1 | T | A | Homozygous   |
| NC_037641.1 | 3705148 | SNV | 1 | C | G | Homozygous   |
| NC_037641.1 | 3705470 | SNV | 1 | C | G | Heterozygous |
| NC_037641.1 | 3710782 | SNV | 1 | A | C | Homozygous   |
| NC_037641.1 | 3710784 | SNV | 1 | C | A | Homozygous   |
| NC_037641.1 | 3710787 | SNV | 1 | A | C | Homozygous   |
| NC_037641.1 | 3710790 | SNV | 1 | A | T | Homozygous   |
| NC_037641.1 | 3710792 | SNV | 1 | A | C | Homozygous   |
| NC_037641.1 | 3710796 | SNV | 1 | A | G | Homozygous   |
| NC_037641.1 | 3710798 | SNV | 1 | A | C | Homozygous   |
| NC_037641.1 | 3713399 | SNV | 1 | A | T | Homozygous   |
| NC_037641.1 | 3713402 | SNV | 1 | A | G | Homozygous   |
| NC_037641.1 | 3716710 | SNV | 1 | T | A | Homozygous   |
| NC_037641.1 | 3717013 | SNV | 1 | C | T | Homozygous   |
| NC_037641.1 | 3719813 | SNV | 1 | C | A | Homozygous   |
| NC_037641.1 | 3722448 | SNV | 1 | A | T | Homozygous   |
| NC_037641.1 | 3722453 | SNV | 1 | A | C | Homozygous   |
| NC_037641.1 | 3723832 | SNV | 1 | G | A | Homozygous   |
| NC_037641.1 | 3725193 | SNV | 1 | C | T | Homozygous   |
| NC_037641.1 | 3725324 | SNV | 1 | T | G | Homozygous   |
| NC_037641.1 | 3725330 | SNV | 1 | A | T | Homozygous   |
| NC_037641.1 | 3725333 | SNV | 1 | A | T | Homozygous   |
| NC_037641.1 | 3725335 | SNV | 1 | C | A | Homozygous   |
| NC_037641.1 | 3725460 | SNV | 1 | T | C | Homozygous   |
| NC_037641.1 | 3725700 | SNV | 1 | G | C | Homozygous   |
| NC_037641.1 | 3725702 | SNV | 1 | T | A | Homozygous   |
| NC_037641.1 | 3725708 | SNV | 1 | G | A | Homozygous   |
| NC_037641.1 | 3725744 | SNV | 1 | C | T | Homozygous   |
| NC_037641.1 | 3726002 | SNV | 1 | C | T | Homozygous   |
| NC_037641.1 | 3726122 | SNV | 1 | T | C | Homozygous   |
| NC_037641.1 | 3727917 | SNV | 1 | T | C | Homozygous   |
| NC_037641.1 | 3730317 | SNV | 1 | T | C | Homozygous   |

|             |         |     |   |   |   |              |
|-------------|---------|-----|---|---|---|--------------|
| NC_037641.1 | 3730518 | SNV | 1 | A | G | Homozygous   |
| NC_037641.1 | 3730520 | SNV | 1 | A | G | Homozygous   |
| NC_037641.1 | 3730523 | SNV | 1 | T | A | Homozygous   |
| NC_037641.1 | 3730835 | SNV | 1 | G | A | Homozygous   |
| NC_037641.1 | 3731634 | SNV | 1 | A | T | Homozygous   |
| NC_037641.1 | 3732268 | SNV | 1 | C | T | Homozygous   |
| NC_037641.1 | 3733345 | SNV | 1 | T | A | Homozygous   |
| NC_037641.1 | 3733751 | SNV | 1 | A | T | Homozygous   |
| NC_037641.1 | 3733827 | SNV | 1 | T | C | Homozygous   |
| NC_037641.1 | 3785086 | SNV | 1 | G | C | Homozygous   |
| NC_037641.1 | 3785089 | SNV | 1 | A | G | Homozygous   |
| NC_037641.1 | 3785092 | SNV | 1 | A | G | Homozygous   |
| NC_037641.1 | 3786502 | SNV | 1 | C | T | Homozygous   |
| NC_037641.1 | 3786506 | SNV | 1 | T | C | Homozygous   |
| NC_037641.1 | 3786515 | SNV | 1 | C | T | Homozygous   |
| NC_037641.1 | 3797903 | SNV | 1 | G | A | Homozygous   |
| NC_037641.1 | 3798445 | SNV | 1 | T | C | Homozygous   |
| NC_037641.1 | 3798460 | SNV | 1 | G | C | Homozygous   |
| NC_037641.1 | 3798467 | SNV | 1 | T | C | Homozygous   |
| NC_037641.1 | 3799139 | SNV | 1 | T | A | Heterozygous |
| NC_037641.1 | 3800314 | SNV | 1 | A | G | Homozygous   |
| NC_037641.1 | 3800486 | SNV | 1 | G | A | Homozygous   |
| NC_037641.1 | 3850745 | SNV | 1 | T | A | Homozygous   |
| NC_037641.1 | 3850761 | SNV | 1 | T | A | Heterozygous |
| NC_037641.1 | 3850761 | SNV | 1 | T | G | Heterozygous |
| NC_037641.1 | 3850767 | SNV | 1 | T | G | Homozygous   |
| NC_037641.1 | 3850783 | SNV | 1 | T | C | Homozygous   |
| NC_037641.1 | 3872617 | SNV | 1 | G | T | Homozygous   |
| NC_037641.1 | 3887891 | SNV | 1 | C | T | Homozygous   |
| NC_037641.1 | 3889579 | SNV | 1 | A | G | Heterozygous |
| NC_037641.1 | 3889585 | SNV | 1 | A | G | Homozygous   |
| NC_037641.1 | 3899203 | SNV | 1 | A | T | Homozygous   |
| NC_037641.1 | 3899212 | SNV | 1 | G | A | Homozygous   |
| NC_037641.1 | 3899215 | SNV | 1 | T | G | Homozygous   |
| NC_037641.1 | 3899237 | SNV | 1 | C | T | Homozygous   |
| NC_037641.1 | 3911060 | SNV | 1 | T | C | Heterozygous |
| NC_037641.1 | 3911072 | SNV | 1 | C | T | Heterozygous |
| NC_037641.1 | 3911077 | SNV | 1 | C | T | Heterozygous |
| NC_037641.1 | 3911094 | SNV | 1 | T | C | Heterozygous |
| NC_037641.1 | 3911136 | SNV | 1 | T | C | Heterozygous |
| NC_037641.1 | 3911437 | SNV | 1 | T | A | Homozygous   |
| NC_037641.1 | 3911440 | SNV | 1 | T | A | Homozygous   |
| NC_037641.1 | 3911472 | SNV | 1 | C | A | Homozygous   |
| NC_037641.1 | 3911478 | SNV | 1 | C | A | Heterozygous |
| NC_037641.1 | 3934643 | SNV | 1 | G | A | Heterozygous |
| NC_037641.1 | 3957271 | SNV | 1 | C | T | Heterozygous |
| NC_037641.1 | 4010623 | SNV | 1 | G | A | Heterozygous |
| NC_037641.1 | 4010779 | SNV | 1 | G | A | Heterozygous |
| NC_037641.1 | 4010860 | SNV | 1 | G | A | Heterozygous |
| NC_037641.1 | 4010881 | SNV | 1 | C | T | Heterozygous |
| NC_037641.1 | 4010918 | SNV | 1 | G | A | Homozygous   |

|             |         |     |   |   |   |              |
|-------------|---------|-----|---|---|---|--------------|
| NC_037641.1 | 4010950 | SNV | 1 | A | G | Homozygous   |
| NC_037641.1 | 4011017 | SNV | 1 | T | C | Homozygous   |
| NC_037641.1 | 4011025 | SNV | 1 | C | A | Heterozygous |
| NC_037641.1 | 4011033 | SNV | 1 | G | A | Heterozygous |
| NC_037641.1 | 4011172 | SNV | 1 | T | C | Homozygous   |
| NC_037641.1 | 4011341 | SNV | 1 | C | T | Heterozygous |
| NC_037641.1 | 4011431 | SNV | 1 | A | G | Heterozygous |
| NC_037641.1 | 4011454 | SNV | 1 | G | A | Homozygous   |
| NC_037641.1 | 4011494 | SNV | 1 | A | G | Heterozygous |
| NC_037641.1 | 4011521 | SNV | 1 | G | A | Heterozygous |
| NC_037641.1 | 4011544 | SNV | 1 | A | G | Heterozygous |
| NC_037641.1 | 4012598 | SNV | 1 | A | G | Homozygous   |
| NC_037641.1 | 4027434 | SNV | 1 | G | A | Homozygous   |
| NC_037641.1 | 4027442 | SNV | 1 | G | C | Homozygous   |
| NC_037641.1 | 4038261 | SNV | 1 | G | A | Homozygous   |
| NC_037641.1 | 4038405 | SNV | 1 | G | A | Heterozygous |
| NC_037641.1 | 4038501 | SNV | 1 | A | G | Homozygous   |
| NC_037641.1 | 4062995 | SNV | 1 | A | G | Heterozygous |
| NC_037641.1 | 4063068 | SNV | 1 | C | T | Homozygous   |
| NC_037641.1 | 4066748 | SNV | 1 | C | T | Heterozygous |
| NC_037641.1 | 4077106 | SNV | 1 | G | A | Heterozygous |
| NC_037641.1 | 4077131 | SNV | 1 | A | G | Homozygous   |
| NC_037641.1 | 4077158 | SNV | 1 | C | T | Heterozygous |
| NC_037641.1 | 4077197 | SNV | 1 | A | G | Homozygous   |
| NC_037641.1 | 4077270 | SNV | 1 | A | G | Homozygous   |
| NC_037641.1 | 4077287 | SNV | 1 | A | T | Heterozygous |
| NC_037641.1 | 4077295 | SNV | 1 | C | G | Heterozygous |
| NC_037641.1 | 4080717 | SNV | 1 | C | T | Homozygous   |
| NC_037641.1 | 4093048 | SNV | 1 | A | G | Homozygous   |
| NC_037641.1 | 4093119 | SNV | 1 | T | C | Homozygous   |
| NC_037641.1 | 4093365 | SNV | 1 | T | C | Homozygous   |
| NC_037641.1 | 4103719 | SNV | 1 | A | G | Heterozygous |
| NC_037641.1 | 4103910 | SNV | 1 | A | G | Homozygous   |
| NC_037641.1 | 4105847 | SNV | 1 | T | C | Homozygous   |
| NC_037641.1 | 4105849 | SNV | 1 | G | A | Homozygous   |
| NC_037641.1 | 4106122 | SNV | 1 | T | C | Homozygous   |
| NC_037641.1 | 4106160 | SNV | 1 | T | C | Homozygous   |
| NC_037641.1 | 4110715 | SNV | 1 | T | C | Heterozygous |
| NC_037641.1 | 4110719 | SNV | 1 | T | C | Homozygous   |
| NC_037641.1 | 4110726 | SNV | 1 | C | T | Homozygous   |
| NC_037641.1 | 4110737 | SNV | 1 | C | T | Heterozygous |
| NC_037641.1 | 4140057 | SNV | 1 | C | T | Homozygous   |
| NC_037641.1 | 4140125 | SNV | 1 | C | T | Homozygous   |
| NC_037641.1 | 4140160 | SNV | 1 | T | C | Homozygous   |
| NC_037641.1 | 4140170 | SNV | 1 | C | T | Homozygous   |
| NC_037641.1 | 4143075 | SNV | 1 | G | A | Heterozygous |
| NC_037641.1 | 4143275 | SNV | 1 | A | G | Homozygous   |
| NC_037641.1 | 4172207 | SNV | 1 | A | C | Heterozygous |
| NC_037641.1 | 4174747 | SNV | 1 | G | A | Heterozygous |
| NC_037641.1 | 4174878 | SNV | 1 | A | G | Homozygous   |
| NC_037641.1 | 4185837 | SNV | 1 | T | G | Heterozygous |

|             |         |     |   |   |   |              |
|-------------|---------|-----|---|---|---|--------------|
| NC_037641.1 | 4185843 | SNV | 1 | C | T | Heterozygous |
| NC_037641.1 | 4185846 | SNV | 1 | C | T | Homozygous   |
| NC_037641.1 | 4185868 | SNV | 1 | G | A | Homozygous   |
| NC_037641.1 | 4187336 | SNV | 1 | G | A | Heterozygous |
| NC_037641.1 | 4210355 | SNV | 1 | C | T | Heterozygous |
| NC_037641.1 | 4210369 | SNV | 1 | C | T | Heterozygous |
| NC_037641.1 | 4210626 | SNV | 1 | C | T | Homozygous   |
| NC_037641.1 | 4210643 | SNV | 1 | A | C | Heterozygous |
| NC_037641.1 | 4211255 | SNV | 1 | C | T | Homozygous   |
| NC_037641.1 | 4211269 | SNV | 1 | A | G | Homozygous   |
| NC_037641.1 | 4212234 | SNV | 1 | A | C | Heterozygous |
| NC_037641.1 | 4212535 | SNV | 1 | T | C | Homozygous   |
| NC_037641.1 | 4212739 | SNV | 1 | C | T | Heterozygous |
| NC_037641.1 | 4212907 | SNV | 1 | A | G | Heterozygous |
| NC_037641.1 | 4213469 | SNV | 1 | T | C | Homozygous   |
| NC_037641.1 | 4215277 | SNV | 1 | C | T | Homozygous   |
| NC_037641.1 | 4215570 | SNV | 1 | G | A | Heterozygous |
| NC_037641.1 | 4215637 | SNV | 1 | A | G | Heterozygous |
| NC_037641.1 | 4216159 | SNV | 1 | C | T | Homozygous   |
| NC_037641.1 | 4216229 | SNV | 1 | C | T | Heterozygous |
| NC_037641.1 | 4217467 | SNV | 1 | T | C | Heterozygous |
| NC_037641.1 | 4218346 | SNV | 1 | A | G | Homozygous   |
| NC_037641.1 | 4244379 | SNV | 1 | A | G | Heterozygous |
| NC_037641.1 | 4244428 | SNV | 1 | G | A | Heterozygous |
| NC_037641.1 | 4244454 | SNV | 1 | T | C | Homozygous   |
| NC_037641.1 | 4244497 | SNV | 1 | C | T | Heterozygous |
| NC_037641.1 | 4244695 | SNV | 1 | A | G | Homozygous   |
| NC_037641.1 | 4244749 | SNV | 1 | T | C | Heterozygous |
| NC_037641.1 | 4245437 | SNV | 1 | T | C | Homozygous   |
| NC_037641.1 | 4245447 | SNV | 1 | T | C | Homozygous   |
| NC_037641.1 | 4245891 | SNV | 1 | T | C | Heterozygous |
| NC_037641.1 | 4245900 | SNV | 1 | G | A | Heterozygous |
| NC_037641.1 | 4245912 | SNV | 1 | T | C | Heterozygous |
| NC_037641.1 | 4245944 | SNV | 1 | C | G | Heterozygous |
| NC_037641.1 | 4246321 | SNV | 1 | G | C | Heterozygous |
| NC_037641.1 | 4246486 | SNV | 1 | T | C | Homozygous   |
| NC_037641.1 | 4246697 | SNV | 1 | C | T | Heterozygous |
| NC_037641.1 | 4246733 | SNV | 1 | G | C | Homozygous   |
| NC_037641.1 | 4246851 | SNV | 1 | T | C | Homozygous   |
| NC_037641.1 | 4246994 | SNV | 1 | C | T | Heterozygous |
| NC_037641.1 | 4247022 | SNV | 1 | G | T | Homozygous   |
| NC_037641.1 | 4247299 | SNV | 1 | G | T | Homozygous   |
| NC_037641.1 | 4252011 | SNV | 1 | G | T | Heterozygous |
| NC_037641.1 | 4252986 | SNV | 1 | C | T | Heterozygous |
| NC_037641.1 | 4254242 | SNV | 1 | C | T | Heterozygous |
| NC_037641.1 | 4254253 | SNV | 1 | A | G | Homozygous   |
| NC_037641.1 | 4254258 | SNV | 1 | G | T | Homozygous   |
| NC_037641.1 | 4285880 | SNV | 1 | C | G | Heterozygous |
| NC_037641.1 | 4285900 | SNV | 1 | T | C | Heterozygous |
| NC_037641.1 | 4285937 | SNV | 1 | A | G | Homozygous   |
| NC_037641.1 | 4285949 | SNV | 1 | T | G | Heterozygous |

|             |         |     |   |   |   |              |
|-------------|---------|-----|---|---|---|--------------|
| NC_037641.1 | 4286088 | SNV | 1 | T | C | Heterozygous |
| NC_037641.1 | 4286313 | SNV | 1 | G | A | Homozygous   |
| NC_037641.1 | 4286402 | SNV | 1 | C | T | Homozygous   |
| NC_037641.1 | 4286547 | SNV | 1 | C | T | Homozygous   |
| NC_037641.1 | 4286574 | SNV | 1 | G | T | Homozygous   |
| NC_037641.1 | 4286696 | SNV | 1 | G | A | Homozygous   |
| NC_037641.1 | 4286758 | SNV | 1 | G | T | Homozygous   |
| NC_037641.1 | 4286774 | SNV | 1 | C | T | Homozygous   |
| NC_037641.1 | 4290781 | SNV | 1 | A | G | Heterozygous |
| NC_037641.1 | 4291772 | SNV | 1 | C | T | Heterozygous |
| NC_037641.1 | 4291892 | SNV | 1 | T | G | Homozygous   |
| NC_037641.1 | 4291910 | SNV | 1 | C | G | Homozygous   |
| NC_037641.1 | 4291966 | SNV | 1 | A | G | Homozygous   |
| NC_037641.1 | 4292041 | SNV | 1 | A | G | Homozygous   |
| NC_037641.1 | 4292102 | SNV | 1 | A | G | Heterozygous |
| NC_037641.1 | 4292115 | SNV | 1 | T | C | Heterozygous |
| NC_037641.1 | 4292118 | SNV | 1 | T | C | Heterozygous |
| NC_037641.1 | 4292150 | SNV | 1 | T | C | Homozygous   |
| NC_037641.1 | 4311142 | SNV | 1 | C | T | Homozygous   |
| NC_037641.1 | 4311156 | SNV | 1 | T | A | Homozygous   |
| NC_037641.1 | 4311188 | SNV | 1 | A | G | Heterozygous |
| NC_037641.1 | 4325179 | SNV | 1 | T | A | Homozygous   |
| NC_037641.1 | 4325190 | SNV | 1 | T | A | Homozygous   |
| NC_037641.1 | 4325194 | SNV | 1 | A | G | Homozygous   |
| NC_037641.1 | 4327955 | SNV | 1 | A | G | Homozygous   |
| NC_037641.1 | 4329808 | SNV | 1 | A | G | Heterozygous |
| NC_037641.1 | 4329834 | SNV | 1 | A | G | Heterozygous |
| NC_037641.1 | 4329837 | SNV | 1 | G | A | Heterozygous |
| NC_037641.1 | 4330020 | SNV | 1 | T | C | Homozygous   |
| NC_037641.1 | 4330026 | SNV | 1 | T | C | Homozygous   |
| NC_037641.1 | 4330092 | SNV | 1 | C | T | Homozygous   |
| NC_037641.1 | 4330109 | SNV | 1 | A | G | Heterozygous |
| NC_037641.1 | 4339790 | SNV | 1 | A | G | Homozygous   |
| NC_037641.1 | 4343088 | SNV | 1 | C | T | Homozygous   |
| NC_037641.1 | 4349153 | SNV | 1 | T | C | Homozygous   |
| NC_037641.1 | 4349162 | SNV | 1 | A | G | Homozygous   |
| NC_037641.1 | 4353147 | SNV | 1 | A | G | Homozygous   |
| NC_037641.1 | 4353313 | SNV | 1 | C | T | Heterozygous |
| NC_037641.1 | 4353332 | SNV | 1 | T | C | Heterozygous |
| NC_037641.1 | 4353373 | SNV | 1 | G | T | Homozygous   |
| NC_037641.1 | 4360211 | SNV | 1 | C | T | Homozygous   |
| NC_037641.1 | 4360416 | SNV | 1 | C | T | Homozygous   |
| NC_037641.1 | 4360432 | SNV | 1 | T | C | Homozygous   |
| NC_037641.1 | 4360452 | SNV | 1 | T | G | Homozygous   |
| NC_037641.1 | 4360480 | SNV | 1 | G | A | Homozygous   |
| NC_037641.1 | 4363643 | SNV | 1 | A | T | Homozygous   |
| NC_037641.1 | 4363798 | SNV | 1 | A | G | Homozygous   |
| NC_037641.1 | 4363806 | SNV | 1 | C | T | Heterozygous |
| NC_037641.1 | 4363872 | SNV | 1 | C | T | Heterozygous |
| NC_037641.1 | 4363965 | SNV | 1 | A | G | Heterozygous |
| NC_037641.1 | 4364112 | SNV | 1 | T | C | Homozygous   |

|             |         |     |   |   |   |              |
|-------------|---------|-----|---|---|---|--------------|
| NC_037641.1 | 4364574 | SNV | 1 | T | A | Heterozygous |
| NC_037641.1 | 4364629 | SNV | 1 | A | G | Heterozygous |
| NC_037641.1 | 4364686 | SNV | 1 | T | C | Homozygous   |
| NC_037641.1 | 4364734 | SNV | 1 | C | G | Heterozygous |
| NC_037641.1 | 4364749 | SNV | 1 | G | A | Homozygous   |
| NC_037641.1 | 4364804 | SNV | 1 | T | C | Heterozygous |
| NC_037641.1 | 4365046 | SNV | 1 | C | T | Heterozygous |
| NC_037641.1 | 4365059 | SNV | 1 | A | C | Heterozygous |
| NC_037641.1 | 4365062 | SNV | 1 | G | A | Heterozygous |
| NC_037641.1 | 4365124 | SNV | 1 | T | C | Homozygous   |
| NC_037641.1 | 4365126 | SNV | 1 | G | A | Homozygous   |
| NC_037641.1 | 4365137 | SNV | 1 | T | A | Heterozygous |
| NC_037641.1 | 4365173 | SNV | 1 | C | T | Homozygous   |
| NC_037641.1 | 4366037 | SNV | 1 | A | G | Homozygous   |
| NC_037641.1 | 4366331 | SNV | 1 | T | C | Homozygous   |
| NC_037641.1 | 4366366 | SNV | 1 | C | T | Heterozygous |
| NC_037641.1 | 4366404 | SNV | 1 | T | G | Homozygous   |
| NC_037641.1 | 4366406 | SNV | 1 | C | T | Heterozygous |
| NC_037641.1 | 4366427 | SNV | 1 | A | G | Heterozygous |
| NC_037641.1 | 4379575 | SNV | 1 | G | C | Homozygous   |
| NC_037641.1 | 4379843 | SNV | 1 | T | C | Homozygous   |
| NC_037641.1 | 4379931 | SNV | 1 | T | C | Heterozygous |
| NC_037641.1 | 4380238 | SNV | 1 | T | C | Heterozygous |
| NC_037641.1 | 4386237 | SNV | 1 | T | A | Homozygous   |
| NC_037641.1 | 4386243 | SNV | 1 | G | T | Homozygous   |
| NC_037641.1 | 4386255 | SNV | 1 | A | G | Homozygous   |
| NC_037641.1 | 4386257 | SNV | 1 | A | G | Homozygous   |
| NC_037641.1 | 4386259 | SNV | 1 | A | T | Homozygous   |
| NC_037641.1 | 4386263 | SNV | 1 | G | A | Homozygous   |
| NC_037641.1 | 4388465 | SNV | 1 | A | G | Homozygous   |
| NC_037641.1 | 4388470 | SNV | 1 | G | T | Heterozygous |
| NC_037641.1 | 4388485 | SNV | 1 | C | T | Homozygous   |
| NC_037641.1 | 4388489 | SNV | 1 | C | T | Heterozygous |
| NC_037641.1 | 4388550 | SNV | 1 | T | C | Heterozygous |
| NC_037641.1 | 4472489 | SNV | 1 | T | C | Homozygous   |
| NC_037641.1 | 4476275 | SNV | 1 | C | T | Homozygous   |
| NC_037641.1 | 4476827 | SNV | 1 | C | A | Heterozygous |
| NC_037641.1 | 4479985 | SNV | 1 | A | G | Homozygous   |
| NC_037641.1 | 4480000 | SNV | 1 | G | A | Homozygous   |
| NC_037641.1 | 4480042 | SNV | 1 | A | G | Heterozygous |
| NC_037641.1 | 4486626 | SNV | 1 | A | G | Heterozygous |
| NC_037641.1 | 4486629 | SNV | 1 | A | C | Heterozygous |
| NC_037641.1 | 4486632 | SNV | 1 | T | C | Heterozygous |
| NC_037641.1 | 4486662 | SNV | 1 | T | C | Heterozygous |
| NC_037641.1 | 4487101 | SNV | 1 | T | C | Homozygous   |
| NC_037641.1 | 4487175 | SNV | 1 | C | T | Homozygous   |
| NC_037641.1 | 4488788 | SNV | 1 | T | C | Homozygous   |
| NC_037641.1 | 4489413 | SNV | 1 | C | A | Heterozygous |
| NC_037641.1 | 4489869 | SNV | 1 | C | A | Homozygous   |
| NC_037641.1 | 4493148 | SNV | 1 | C | T | Homozygous   |
| NC_037641.1 | 4493953 | SNV | 1 | A | G | Homozygous   |

|             |         |     |   |   |   |              |
|-------------|---------|-----|---|---|---|--------------|
| NC_037641.1 | 4493995 | SNV | 1 | A | G | Homozygous   |
| NC_037641.1 | 4494761 | SNV | 1 | T | C | Homozygous   |
| NC_037641.1 | 4494777 | SNV | 1 | T | C | Homozygous   |
| NC_037641.1 | 4494870 | SNV | 1 | T | C | Homozygous   |
| NC_037641.1 | 4508526 | SNV | 1 | G | C | Heterozygous |
| NC_037641.1 | 4508695 | SNV | 1 | C | A | Heterozygous |
| NC_037641.1 | 4508697 | SNV | 1 | T | A | Heterozygous |
| NC_037641.1 | 4508754 | SNV | 1 | C | T | Homozygous   |
| NC_037641.1 | 4518249 | SNV | 1 | T | C | Homozygous   |
| NC_037641.1 | 4518331 | SNV | 1 | T | C | Homozygous   |
| NC_037641.1 | 4518356 | SNV | 1 | A | G | Heterozygous |
| NC_037641.1 | 4518366 | SNV | 1 | G | A | Homozygous   |
| NC_037641.1 | 4538423 | SNV | 1 | A | G | Homozygous   |
| NC_037641.1 | 4565731 | SNV | 1 | C | T | Heterozygous |
| NC_037641.1 | 4568918 | SNV | 1 | T | A | Heterozygous |
| NC_037641.1 | 4581307 | SNV | 1 | A | C | Homozygous   |
| NC_037641.1 | 4596902 | SNV | 1 | G | C | Homozygous   |
| NC_037641.1 | 4596916 | SNV | 1 | C | T | Homozygous   |
| NC_037641.1 | 4596925 | SNV | 1 | G | A | Heterozygous |
| NC_037641.1 | 4596934 | SNV | 1 | T | C | Homozygous   |
| NC_037641.1 | 4605989 | SNV | 1 | G | T | Homozygous   |
| NC_037641.1 | 4606046 | SNV | 1 | C | T | Heterozygous |
| NC_037641.1 | 4606079 | SNV | 1 | C | T | Homozygous   |
| NC_037641.1 | 4615475 | SNV | 1 | A | G | Heterozygous |
| NC_037641.1 | 4615565 | SNV | 1 | A | C | Homozygous   |
| NC_037641.1 | 4615567 | SNV | 1 | A | C | Homozygous   |
| NC_037641.1 | 4615704 | SNV | 1 | G | C | Homozygous   |
| NC_037641.1 | 4615733 | SNV | 1 | G | A | Homozygous   |
| NC_037641.1 | 4615746 | SNV | 1 | A | G | Heterozygous |
| NC_037641.1 | 4615871 | SNV | 1 | C | T | Homozygous   |
| NC_037641.1 | 4616969 | SNV | 1 | G | A | Heterozygous |
| NC_037641.1 | 4617015 | SNV | 1 | C | T | Heterozygous |
| NC_037641.1 | 4619718 | SNV | 1 | A | G | Homozygous   |
| NC_037641.1 | 4619721 | SNV | 1 | T | C | Homozygous   |
| NC_037641.1 | 4619730 | SNV | 1 | C | T | Heterozygous |
| NC_037641.1 | 4619799 | SNV | 1 | A | G | Homozygous   |
| NC_037641.1 | 4619811 | SNV | 1 | A | G | Homozygous   |
| NC_037641.1 | 4621770 | SNV | 1 | T | C | Homozygous   |
| NC_037641.1 | 4622973 | SNV | 1 | T | C | Heterozygous |
| NC_037641.1 | 4623024 | SNV | 1 | T | C | Homozygous   |
| NC_037641.1 | 4623030 | SNV | 1 | G | A | Heterozygous |
| NC_037641.1 | 4623064 | SNV | 1 | T | C | Homozygous   |
| NC_037641.1 | 4623416 | SNV | 1 | T | C | Homozygous   |
| NC_037641.1 | 4623423 | SNV | 1 | A | G | Homozygous   |
| NC_037641.1 | 4623429 | SNV | 1 | C | T | Heterozygous |
| NC_037641.1 | 4623626 | SNV | 1 | C | T | Homozygous   |
| NC_037641.1 | 4623932 | SNV | 1 | T | C | Homozygous   |
| NC_037641.1 | 4624112 | SNV | 1 | A | G | Homozygous   |
| NC_037641.1 | 4624249 | SNV | 1 | A | G | Heterozygous |
| NC_037641.1 | 4624276 | SNV | 1 | C | T | Heterozygous |
| NC_037641.1 | 4624285 | SNV | 1 | A | G | Homozygous   |



|             |         |     |   |   |   |              |
|-------------|---------|-----|---|---|---|--------------|
| NC_037641.1 | 4624302 | SNV | 1 | C | T | Heterozygous |
| NC_037641.1 | 4624333 | SNV | 1 | G | A | Homozygous   |
| NC_037641.1 | 4624401 | SNV | 1 | A | G | Homozygous   |
| NC_037641.1 | 4624425 | SNV | 1 | T | C | Homozygous   |
| NC_037641.1 | 4630577 | SNV | 1 | C | T | Heterozygous |
| NC_037641.1 | 4630585 | SNV | 1 | A | T | Heterozygous |
| NC_037641.1 | 4630764 | SNV | 1 | T | C | Heterozygous |
| NC_037641.1 | 4630841 | SNV | 1 | A | G | Homozygous   |
| NC_037641.1 | 4631576 | SNV | 1 | G | A | Homozygous   |
| NC_037641.1 | 4631800 | SNV | 1 | G | T | Homozygous   |
| NC_037641.1 | 4632581 | SNV | 1 | T | G | Homozygous   |
| NC_037641.1 | 4633990 | SNV | 1 | A | G | Heterozygous |
| NC_037641.1 | 4634846 | SNV | 1 | C | T | Heterozygous |
| NC_037641.1 | 4637205 | SNV | 1 | G | A | Homozygous   |
| NC_037641.1 | 4637211 | SNV | 1 | T | A | Homozygous   |
| NC_037641.1 | 4637273 | SNV | 1 | C | T | Homozygous   |
| NC_037641.1 | 4637535 | SNV | 1 | G | A | Homozygous   |
| NC_037641.1 | 4637542 | SNV | 1 | G | A | Homozygous   |
| NC_037641.1 | 4637546 | SNV | 1 | A | G | Homozygous   |
| NC_037641.1 | 4653089 | SNV | 1 | A | C | Heterozygous |
| NC_037641.1 | 4653099 | SNV | 1 | A | G | Heterozygous |
| NC_037641.1 | 4653101 | SNV | 1 | G | A | Homozygous   |
| NC_037641.1 | 4653105 | SNV | 1 | A | G | Heterozygous |
| NC_037641.1 | 4653107 | SNV | 1 | G | A | Homozygous   |
| NC_037641.1 | 4653114 | SNV | 1 | G | A | Heterozygous |
| NC_037641.1 | 4653123 | SNV | 1 | C | G | Homozygous   |
| NC_037641.1 | 4657070 | SNV | 1 | C | T | Heterozygous |
| NC_037641.1 | 4657072 | SNV | 1 | C | T | Heterozygous |
| NC_037641.1 | 4673921 | SNV | 1 | T | C | Homozygous   |
| NC_037641.1 | 4673923 | SNV | 1 | C | G | Homozygous   |
| NC_037641.1 | 4693804 | SNV | 1 | C | A | Homozygous   |
| NC_037641.1 | 4698168 | SNV | 1 | C | T | Homozygous   |
| NC_037641.1 | 4698345 | SNV | 1 | A | G | Homozygous   |
| NC_037641.1 | 4700026 | SNV | 1 | A | G | Heterozygous |
| NC_037641.1 | 4700037 | SNV | 1 | C | T | Homozygous   |
| NC_037641.1 | 4700057 | SNV | 1 | C | T | Homozygous   |
| NC_037641.1 | 4700065 | SNV | 1 | C | T | Heterozygous |
| NC_037641.1 | 4700110 | SNV | 1 | T | C | Homozygous   |
| NC_037641.1 | 4700112 | SNV | 1 | T | C | Heterozygous |
| NC_037641.1 | 4700139 | SNV | 1 | C | G | Heterozygous |
| NC_037641.1 | 4700190 | SNV | 1 | C | T | Homozygous   |
| NC_037641.1 | 4700970 | SNV | 1 | C | T | Homozygous   |
| NC_037641.1 | 4701108 | SNV | 1 | C | T | Homozygous   |
| NC_037641.1 | 4701306 | SNV | 1 | T | G | Homozygous   |
| NC_037641.1 | 4701380 | SNV | 1 | C | A | Heterozygous |
| NC_037641.1 | 4705579 | SNV | 1 | T | C | Homozygous   |
| NC_037641.1 | 4709229 | SNV | 1 | G | C | Homozygous   |
| NC_037641.1 | 4709236 | SNV | 1 | T | A | Homozygous   |
| NC_037641.1 | 4709656 | SNV | 1 | T | A | Heterozygous |
| NC_037641.1 | 4709737 | SNV | 1 | A | G | Homozygous   |
| NC_037641.1 | 4709769 | SNV | 1 | G | A | Homozygous   |

|             |         |     |   |   |   |              |
|-------------|---------|-----|---|---|---|--------------|
| NC_037641.1 | 4709802 | SNV | 1 | T | C | Heterozygous |
| NC_037641.1 | 4709807 | SNV | 1 | C | T | Heterozygous |
| NC_037641.1 | 4724870 | SNV | 1 | C | T | Heterozygous |
| NC_037641.1 | 4724904 | SNV | 1 | T | C | Homozygous   |
| NC_037641.1 | 4730418 | SNV | 1 | A | G | Homozygous   |
| NC_037641.1 | 4730773 | SNV | 1 | C | T | Heterozygous |
| NC_037641.1 | 4730786 | SNV | 1 | G | A | Heterozygous |
| NC_037641.1 | 4730791 | SNV | 1 | T | C | Heterozygous |
| NC_037641.1 | 4730793 | SNV | 1 | G | A | Heterozygous |
| NC_037641.1 | 4738843 | SNV | 1 | T | C | Homozygous   |
| NC_037641.1 | 4739720 | SNV | 1 | A | G | Homozygous   |
| NC_037641.1 | 4739844 | SNV | 1 | A | G | Heterozygous |
| NC_037641.1 | 4739847 | SNV | 1 | A | C | Heterozygous |
| NC_037641.1 | 4739848 | SNV | 1 | G | A | Heterozygous |
| NC_037641.1 | 4739853 | SNV | 1 | A | G | Heterozygous |
| NC_037641.1 | 4739866 | SNV | 1 | A | G | Heterozygous |
| NC_037641.1 | 4741312 | SNV | 1 | G | A | Heterozygous |
| NC_037641.1 | 4741758 | SNV | 1 | G | A | Homozygous   |
| NC_037641.1 | 4741917 | SNV | 1 | C | T | Heterozygous |
| NC_037641.1 | 4741936 | SNV | 1 | A | G | Heterozygous |
| NC_037641.1 | 4741945 | SNV | 1 | G | T | Homozygous   |
| NC_037641.1 | 4741975 | SNV | 1 | T | A | Homozygous   |
| NC_037641.1 | 4742002 | SNV | 1 | T | C | Homozygous   |
| NC_037641.1 | 4742117 | SNV | 1 | T | A | Homozygous   |
| NC_037641.1 | 4742264 | SNV | 1 | G | A | Heterozygous |
| NC_037641.1 | 4742362 | SNV | 1 | T | C | Homozygous   |
| NC_037641.1 | 4742394 | SNV | 1 | T | G | Homozygous   |
| NC_037641.1 | 4742487 | SNV | 1 | G | A | Homozygous   |
| NC_037641.1 | 4742577 | SNV | 1 | T | C | Homozygous   |
| NC_037641.1 | 4742637 | SNV | 1 | T | C | Heterozygous |
| NC_037641.1 | 4742644 | SNV | 1 | C | T | Heterozygous |
| NC_037641.1 | 4742717 | SNV | 1 | T | C | Homozygous   |
| NC_037641.1 | 4742825 | SNV | 1 | A | G | Homozygous   |
| NC_037641.1 | 4742827 | SNV | 1 | T | C | Heterozygous |
| NC_037641.1 | 4743169 | SNV | 1 | A | G | Heterozygous |
| NC_037641.1 | 4743261 | SNV | 1 | C | G | Heterozygous |
| NC_037641.1 | 4743263 | SNV | 1 | G | A | Heterozygous |
| NC_037641.1 | 4743284 | SNV | 1 | C | T | Homozygous   |
| NC_037641.1 | 4743325 | SNV | 1 | T | C | Homozygous   |
| NC_037641.1 | 4749081 | SNV | 1 | A | G | Homozygous   |
| NC_037641.1 | 4749297 | SNV | 1 | A | G | Homozygous   |
| NC_037641.1 | 4749304 | SNV | 1 | T | C | Heterozygous |
| NC_037641.1 | 4749347 | SNV | 1 | T | C | Homozygous   |
| NC_037641.1 | 4749361 | SNV | 1 | C | T | Homozygous   |
| NC_037641.1 | 4749385 | SNV | 1 | T | C | Heterozygous |
| NC_037641.1 | 4749397 | SNV | 1 | A | G | Homozygous   |
| NC_037641.1 | 4752568 | SNV | 1 | A | G | Heterozygous |
| NC_037641.1 | 4752600 | SNV | 1 | G | T | Homozygous   |
| NC_037641.1 | 4760367 | SNV | 1 | A | G | Homozygous   |
| NC_037641.1 | 4760471 | SNV | 1 | A | C | Homozygous   |
| NC_037641.1 | 4761906 | SNV | 1 | A | G | Homozygous   |

|             |         |     |   |   |   |              |
|-------------|---------|-----|---|---|---|--------------|
| NC_037641.1 | 4761956 | SNV | 1 | G | T | Homozygous   |
| NC_037641.1 | 4761958 | SNV | 1 | A | G | Homozygous   |
| NC_037641.1 | 4762030 | SNV | 1 | T | A | Homozygous   |
| NC_037641.1 | 4762037 | SNV | 1 | C | A | Homozygous   |
| NC_037641.1 | 4762612 | SNV | 1 | G | A | Heterozygous |
| NC_037641.1 | 4762923 | SNV | 1 | C | T | Heterozygous |
| NC_037641.1 | 4762994 | SNV | 1 | T | C | Homozygous   |
| NC_037641.1 | 4763199 | SNV | 1 | G | C | Homozygous   |
| NC_037641.1 | 4775354 | SNV | 1 | A | G | Homozygous   |
| NC_037641.1 | 4776205 | SNV | 1 | T | A | Heterozygous |
| NC_037641.1 | 4776688 | SNV | 1 | T | G | Heterozygous |
| NC_037641.1 | 4776737 | SNV | 1 | T | C | Homozygous   |
| NC_037641.1 | 4776788 | SNV | 1 | T | C | Heterozygous |
| NC_037641.1 | 4779284 | SNV | 1 | T | C | Homozygous   |
| NC_037641.1 | 4782402 | SNV | 1 | G | A | Homozygous   |
| NC_037641.1 | 4782429 | SNV | 1 | C | T | Homozygous   |
| NC_037641.1 | 4783000 | SNV | 1 | G | A | Homozygous   |
| NC_037641.1 | 4783259 | SNV | 1 | T | C | Homozygous   |
| NC_037641.1 | 4783543 | SNV | 1 | T | G | Homozygous   |
| NC_037641.1 | 4783584 | SNV | 1 | C | A | Homozygous   |
| NC_037641.1 | 4783725 | SNV | 1 | T | C | Heterozygous |
| NC_037641.1 | 4784227 | SNV | 1 | G | A | Heterozygous |
| NC_037641.1 | 4784442 | SNV | 1 | A | G | Heterozygous |
| NC_037641.1 | 4784512 | SNV | 1 | A | G | Homozygous   |
| NC_037641.1 | 4784517 | SNV | 1 | A | G | Homozygous   |
| NC_037641.1 | 4785482 | SNV | 1 | C | T | Homozygous   |
| NC_037641.1 | 4788055 | SNV | 1 | C | T | Homozygous   |
| NC_037641.1 | 4788057 | SNV | 1 | C | T | Homozygous   |
| NC_037641.1 | 4788349 | SNV | 1 | T | C | Homozygous   |
| NC_037641.1 | 4788485 | SNV | 1 | C | T | Homozygous   |
| NC_037641.1 | 4791606 | SNV | 1 | C | T | Homozygous   |
| NC_037641.1 | 4792591 | SNV | 1 | G | A | Homozygous   |
| NC_037641.1 | 4793276 | SNV | 1 | G | A | Heterozygous |
| NC_037641.1 | 4793342 | SNV | 1 | C | T | Homozygous   |
| NC_037641.1 | 4793752 | SNV | 1 | T | C | Homozygous   |
| NC_037641.1 | 4793770 | SNV | 1 | G | A | Heterozygous |
| NC_037641.1 | 4794201 | SNV | 1 | G | A | Heterozygous |
| NC_037641.1 | 4794279 | SNV | 1 | A | G | Homozygous   |
| NC_037641.1 | 4796138 | SNV | 1 | A | G | Homozygous   |
| NC_037641.1 | 4796431 | SNV | 1 | A | G | Homozygous   |
| NC_037641.1 | 4798106 | SNV | 1 | T | C | Homozygous   |
| NC_037641.1 | 4799428 | SNV | 1 | A | G | Homozygous   |
| NC_037641.1 | 4799848 | SNV | 1 | T | C | Homozygous   |
| NC_037641.1 | 4799866 | SNV | 1 | T | C | Homozygous   |
| NC_037641.1 | 4801311 | SNV | 1 | T | C | Homozygous   |
| NC_037641.1 | 4801757 | SNV | 1 | G | A | Heterozygous |
| NC_037641.1 | 4801973 | SNV | 1 | C | T | Homozygous   |
| NC_037641.1 | 4802367 | SNV | 1 | C | T | Heterozygous |
| NC_037641.1 | 4803135 | SNV | 1 | C | T | Heterozygous |
| NC_037641.1 | 4813496 | SNV | 1 | T | C | Heterozygous |
| NC_037641.1 | 4817806 | SNV | 1 | T | A | Homozygous   |

|             |         |     |   |   |   |              |
|-------------|---------|-----|---|---|---|--------------|
| NC_037641.1 | 4817808 | SNV | 1 | A | G | Homozygous   |
| NC_037641.1 | 4819052 | SNV | 1 | A | G | Homozygous   |
| NC_037641.1 | 4821869 | SNV | 1 | C | A | Homozygous   |
| NC_037641.1 | 4824211 | SNV | 1 | G | A | Heterozygous |
| NC_037641.1 | 4826207 | SNV | 1 | G | A | Homozygous   |
| NC_037641.1 | 4826213 | SNV | 1 | A | T | Homozygous   |
| NC_037641.1 | 4826216 | SNV | 1 | G | A | Heterozygous |
| NC_037641.1 | 4826316 | SNV | 1 | T | C | Homozygous   |
| NC_037641.1 | 4826470 | SNV | 1 | T | C | Homozygous   |
| NC_037641.1 | 4826481 | SNV | 1 | A | T | Homozygous   |
| NC_037641.1 | 4832742 | SNV | 1 | C | T | Heterozygous |
| NC_037641.1 | 4833633 | SNV | 1 | C | T | Heterozygous |
| NC_037641.1 | 4834002 | SNV | 1 | A | T | Homozygous   |
| NC_037641.1 | 4834289 | SNV | 1 | C | A | Homozygous   |
| NC_037641.1 | 4841650 | SNV | 1 | A | T | Homozygous   |
| NC_037641.1 | 4841660 | SNV | 1 | A | T | Heterozygous |
| NC_037641.1 | 4841662 | SNV | 1 | T | C | Heterozygous |
| NC_037641.1 | 4841665 | SNV | 1 | G | A | Heterozygous |
| NC_037641.1 | 4844146 | SNV | 1 | C | T | Heterozygous |
| NC_037641.1 | 4845114 | SNV | 1 | C | T | Homozygous   |
| NC_037641.1 | 4847592 | SNV | 1 | A | G | Homozygous   |
| NC_037641.1 | 4847988 | SNV | 1 | G | A | Heterozygous |
| NC_037641.1 | 4848012 | SNV | 1 | C | T | Heterozygous |
| NC_037641.1 | 4848112 | SNV | 1 | C | T | Homozygous   |
| NC_037641.1 | 4849122 | SNV | 1 | C | T | Homozygous   |
| NC_037641.1 | 4850137 | SNV | 1 | T | A | Heterozygous |
| NC_037641.1 | 4850228 | SNV | 1 | C | T | Homozygous   |
| NC_037641.1 | 4850653 | SNV | 1 | T | A | Homozygous   |
| NC_037641.1 | 4850821 | SNV | 1 | T | C | Heterozygous |
| NC_037641.1 | 4851515 | SNV | 1 | G | A | Heterozygous |
| NC_037641.1 | 4851890 | SNV | 1 | T | C | Heterozygous |
| NC_037641.1 | 4851898 | SNV | 1 | T | A | Heterozygous |
| NC_037641.1 | 4851911 | SNV | 1 | T | A | Heterozygous |
| NC_037641.1 | 4851913 | SNV | 1 | T | A | Heterozygous |
| NC_037641.1 | 4851933 | SNV | 1 | A | T | Homozygous   |
| NC_037641.1 | 4851941 | SNV | 1 | T | C | Homozygous   |
| NC_037641.1 | 4851967 | SNV | 1 | A | T | Homozygous   |
| NC_037641.1 | 4852492 | SNV | 1 | A | G | Heterozygous |
| NC_037641.1 | 4856380 | SNV | 1 | G | A | Heterozygous |
| NC_037641.1 | 4856394 | SNV | 1 | T | C | Heterozygous |
| NC_037641.1 | 4856734 | SNV | 1 | T | C | Homozygous   |
| NC_037641.1 | 4856879 | SNV | 1 | T | C | Homozygous   |
| NC_037641.1 | 4856886 | SNV | 1 | A | T | Heterozygous |
| NC_037641.1 | 4859340 | SNV | 1 | T | C | Homozygous   |
| NC_037641.1 | 4859531 | SNV | 1 | A | G | Homozygous   |
| NC_037641.1 | 4859534 | SNV | 1 | A | G | Heterozygous |
| NC_037641.1 | 4859546 | SNV | 1 | C | T | Homozygous   |
| NC_037641.1 | 4859680 | SNV | 1 | A | G | Homozygous   |
| NC_037641.1 | 4859696 | SNV | 1 | C | A | Heterozygous |
| NC_037641.1 | 4859700 | SNV | 1 | G | A | Heterozygous |
| NC_037641.1 | 4859717 | SNV | 1 | G | A | Heterozygous |

|             |         |     |   |   |   |              |
|-------------|---------|-----|---|---|---|--------------|
| NC_037641.1 | 4859727 | SNV | 1 | G | A | Heterozygous |
| NC_037641.1 | 4860552 | SNV | 1 | G | A | Homozygous   |
| NC_037641.1 | 4860559 | SNV | 1 | A | G | Homozygous   |
| NC_037641.1 | 4860596 | SNV | 1 | T | C | Heterozygous |
| NC_037641.1 | 4861036 | SNV | 1 | G | C | Homozygous   |
| NC_037641.1 | 4861217 | SNV | 1 | T | C | Heterozygous |
| NC_037641.1 | 4861339 | SNV | 1 | T | A | Homozygous   |
| NC_037641.1 | 4861368 | SNV | 1 | A | G | Heterozygous |
| NC_037641.1 | 4861409 | SNV | 1 | G | T | Heterozygous |
| NC_037641.1 | 4861416 | SNV | 1 | G | A | Heterozygous |
| NC_037641.1 | 4861854 | SNV | 1 | T | C | Homozygous   |
| NC_037641.1 | 4862344 | SNV | 1 | T | C | Homozygous   |
| NC_037641.1 | 4862409 | SNV | 1 | C | G | Heterozygous |
| NC_037641.1 | 4862921 | SNV | 1 | A | C | Heterozygous |
| NC_037641.1 | 4862942 | SNV | 1 | C | T | Homozygous   |
| NC_037641.1 | 4862952 | SNV | 1 | G | A | Homozygous   |
| NC_037641.1 | 4863206 | SNV | 1 | T | C | Homozygous   |
| NC_037641.1 | 4863636 | SNV | 1 | G | A | Heterozygous |
| NC_037641.1 | 4864014 | SNV | 1 | G | A | Homozygous   |
| NC_037641.1 | 4864064 | SNV | 1 | G | C | Homozygous   |
| NC_037641.1 | 4864099 | SNV | 1 | T | G | Homozygous   |
| NC_037641.1 | 4864576 | SNV | 1 | G | C | Heterozygous |
| NC_037641.1 | 4864595 | SNV | 1 | T | C | Homozygous   |
| NC_037641.1 | 4864659 | SNV | 1 | A | G | Homozygous   |
| NC_037641.1 | 4864681 | SNV | 1 | G | C | Homozygous   |
| NC_037641.1 | 4865051 | SNV | 1 | C | G | Heterozygous |
| NC_037641.1 | 4865088 | SNV | 1 | A | G | Homozygous   |
| NC_037641.1 | 4865641 | SNV | 1 | A | G | Homozygous   |
| NC_037641.1 | 4865810 | SNV | 1 | C | T | Homozygous   |
| NC_037641.1 | 4865845 | SNV | 1 | G | A | Heterozygous |
| NC_037641.1 | 4865924 | SNV | 1 | A | C | Homozygous   |
| NC_037641.1 | 4865933 | SNV | 1 | G | T | Homozygous   |
| NC_037641.1 | 4866002 | SNV | 1 | C | T | Homozygous   |
| NC_037641.1 | 4866014 | SNV | 1 | T | G | Homozygous   |
| NC_037641.1 | 4866102 | SNV | 1 | T | C | Heterozygous |
| NC_037641.1 | 4866187 | SNV | 1 | T | C | Heterozygous |
| NC_037641.1 | 4866193 | SNV | 1 | A | G | Heterozygous |
| NC_037641.1 | 4866193 | SNV | 1 | A | T | Heterozygous |
| NC_037641.1 | 4866212 | SNV | 1 | G | A | Heterozygous |
| NC_037641.1 | 4866215 | SNV | 1 | T | C | Homozygous   |
| NC_037641.1 | 4866467 | SNV | 1 | T | C | Homozygous   |
| NC_037641.1 | 4866469 | SNV | 1 | T | C | Heterozygous |
| NC_037641.1 | 4866574 | SNV | 1 | T | C | Homozygous   |
| NC_037641.1 | 4866579 | SNV | 1 | G | C | Homozygous   |
| NC_037641.1 | 4866615 | SNV | 1 | C | T | Homozygous   |
| NC_037641.1 | 4867971 | SNV | 1 | A | G | Homozygous   |
| NC_037641.1 | 4868075 | SNV | 1 | A | T | Heterozygous |
| NC_037641.1 | 4868077 | SNV | 1 | A | G | Heterozygous |
| NC_037641.1 | 4869192 | SNV | 1 | A | G | Heterozygous |
| NC_037641.1 | 4869898 | SNV | 1 | G | A | Heterozygous |
| NC_037641.1 | 4870165 | SNV | 1 | G | A | Heterozygous |

|             |         |     |   |   |   |              |
|-------------|---------|-----|---|---|---|--------------|
| NC_037641.1 | 4870431 | SNV | 1 | G | T | Heterozygous |
| NC_037641.1 | 4870434 | SNV | 1 | A | G | Homozygous   |
| NC_037641.1 | 4870436 | SNV | 1 | A | G | Homozygous   |
| NC_037641.1 | 4870445 | SNV | 1 | T | C | Heterozygous |
| NC_037641.1 | 4870448 | SNV | 1 | C | T | Heterozygous |
| NC_037641.1 | 4870506 | SNV | 1 | C | T | Heterozygous |
| NC_037641.1 | 4871475 | SNV | 1 | A | G | Homozygous   |
| NC_037641.1 | 4871534 | SNV | 1 | T | C | Homozygous   |
| NC_037641.1 | 4871578 | SNV | 1 | A | G | Heterozygous |
| NC_037641.1 | 4871580 | SNV | 1 | T | C | Heterozygous |
| NC_037641.1 | 4871582 | SNV | 1 | A | T | Heterozygous |
| NC_037641.1 | 4871702 | SNV | 1 | T | C | Heterozygous |
| NC_037641.1 | 4871705 | SNV | 1 | A | G | Homozygous   |
| NC_037641.1 | 4871712 | SNV | 1 | C | T | Heterozygous |
| NC_037641.1 | 4871714 | SNV | 1 | T | C | Heterozygous |
| NC_037641.1 | 4871719 | SNV | 1 | G | C | Heterozygous |
| NC_037641.1 | 4871719 | SNV | 1 | G | T | Heterozygous |
| NC_037641.1 | 4871721 | SNV | 1 | G | A | Homozygous   |
| NC_037641.1 | 4871931 | SNV | 1 | T | C | Homozygous   |
| NC_037641.1 | 4871941 | SNV | 1 | A | G | Homozygous   |
| NC_037641.1 | 4872043 | SNV | 1 | T | C | Homozygous   |
| NC_037641.1 | 4872055 | SNV | 1 | A | T | Heterozygous |
| NC_037641.1 | 4876012 | SNV | 1 | G | A | Homozygous   |
| NC_037641.1 | 4876018 | SNV | 1 | G | A | Homozygous   |
| NC_037641.1 | 4876033 | SNV | 1 | G | A | Homozygous   |
| NC_037641.1 | 4876056 | SNV | 1 | G | A | Homozygous   |
| NC_037641.1 | 4876059 | SNV | 1 | G | A | Homozygous   |
| NC_037641.1 | 4876398 | SNV | 1 | G | A | Heterozygous |
| NC_037641.1 | 4876405 | SNV | 1 | T | C | Heterozygous |
| NC_037641.1 | 4878467 | SNV | 1 | A | G | Heterozygous |
| NC_037641.1 | 4878481 | SNV | 1 | T | C | Heterozygous |
| NC_037641.1 | 4878487 | SNV | 1 | T | C | Heterozygous |
| NC_037641.1 | 4878496 | SNV | 1 | T | C | Heterozygous |
| NC_037641.1 | 4878504 | SNV | 1 | G | A | Heterozygous |
| NC_037641.1 | 4878511 | SNV | 1 | T | C | Heterozygous |
| NC_037641.1 | 4878536 | SNV | 1 | G | A | Heterozygous |
| NC_037641.1 | 4878540 | SNV | 1 | T | C | Heterozygous |
| NC_037641.1 | 4878555 | SNV | 1 | T | C | Heterozygous |
| NC_037641.1 | 4879643 | SNV | 1 | G | A | Homozygous   |
| NC_037641.1 | 4879663 | SNV | 1 | G | A | Homozygous   |
| NC_037641.1 | 4879669 | SNV | 1 | G | T | Homozygous   |
| NC_037641.1 | 4881283 | SNV | 1 | A | G | Homozygous   |
| NC_037641.1 | 4881289 | SNV | 1 | G | C | Homozygous   |
| NC_037641.1 | 4881293 | SNV | 1 | A | G | Homozygous   |
| NC_037641.1 | 4881324 | SNV | 1 | G | A | Homozygous   |
| NC_037641.1 | 4883406 | SNV | 1 | T | C | Homozygous   |
| NC_037641.1 | 4885370 | SNV | 1 | A | G | Heterozygous |
| NC_037641.1 | 4902769 | SNV | 1 | A | G | Homozygous   |
| NC_037641.1 | 4917088 | SNV | 1 | T | C | Homozygous   |
| NC_037641.1 | 4921721 | SNV | 1 | G | T | Homozygous   |
| NC_037641.1 | 4921732 | SNV | 1 | C | G | Homozygous   |

|             |         |     |   |   |   |              |
|-------------|---------|-----|---|---|---|--------------|
| NC_037641.1 | 4921750 | SNV | 1 | G | A | Heterozygous |
| NC_037641.1 | 4921770 | SNV | 1 | G | A | Homozygous   |
| NC_037641.1 | 4922713 | SNV | 1 | C | G | Heterozygous |
| NC_037641.1 | 4922739 | SNV | 1 | C | T | Homozygous   |
| NC_037641.1 | 4929236 | SNV | 1 | C | G | Heterozygous |
| NC_037641.1 | 4933585 | SNV | 1 | T | C | Homozygous   |
| NC_037641.1 | 4935289 | SNV | 1 | G | A | Homozygous   |
| NC_037641.1 | 4935348 | SNV | 1 | T | C | Homozygous   |
| NC_037641.1 | 4935361 | SNV | 1 | T | C | Homozygous   |
| NC_037641.1 | 4935394 | SNV | 1 | T | C | Heterozygous |
| NC_037641.1 | 4935422 | SNV | 1 | T | C | Heterozygous |
| NC_037641.1 | 4935433 | SNV | 1 | C | T | Homozygous   |
| NC_037641.1 | 4935439 | SNV | 1 | A | T | Homozygous   |
| NC_037641.1 | 4935458 | SNV | 1 | C | T | Heterozygous |
| NC_037641.1 | 4935494 | SNV | 1 | C | T | Homozygous   |
| NC_037641.1 | 4935500 | SNV | 1 | T | C | Heterozygous |
| NC_037641.1 | 4957319 | SNV | 1 | G | A | Heterozygous |
| NC_037641.1 | 4957319 | SNV | 1 | G | T | Heterozygous |
| NC_037641.1 | 4957321 | SNV | 1 | G | A | Homozygous   |
| NC_037641.1 | 4957328 | SNV | 1 | G | A | Homozygous   |
| NC_037641.1 | 4957355 | SNV | 1 | G | T | Homozygous   |
| NC_037641.1 | 4957359 | SNV | 1 | A | C | Heterozygous |
| NC_037641.1 | 4957359 | SNV | 1 | A | G | Heterozygous |
| NC_037641.1 | 4973082 | SNV | 1 | T | A | Homozygous   |
| NC_037641.1 | 4973399 | SNV | 1 | A | G | Homozygous   |
| NC_037641.1 | 4980354 | SNV | 1 | G | C | Homozygous   |
| NC_037641.1 | 4989055 | SNV | 1 | G | A | Homozygous   |
| NC_037641.1 | 4996125 | SNV | 1 | G | A | Homozygous   |
| NC_037641.1 | 4996130 | SNV | 1 | A | T | Homozygous   |
| NC_037641.1 | 4996136 | SNV | 1 | G | A | Homozygous   |
| NC_037641.1 | 4996144 | SNV | 1 | G | C | Homozygous   |
| NC_037641.1 | 4996147 | SNV | 1 | A | C | Homozygous   |
| NC_037641.1 | 4996151 | SNV | 1 | A | G | Homozygous   |
| NC_037641.1 | 4996153 | SNV | 1 | A | G | Homozygous   |
| NC_037641.1 | 4996158 | SNV | 1 | A | G | Homozygous   |
| NC_037641.1 | 4996160 | SNV | 1 | C | G | Homozygous   |
| NC_037641.1 | 4996162 | SNV | 1 | A | C | Homozygous   |
| NC_037641.1 | 4996166 | SNV | 1 | G | T | Homozygous   |
| NC_037641.1 | 5007603 | SNV | 1 | A | T | Homozygous   |
| NC_037641.1 | 5015233 | SNV | 1 | T | C | Homozygous   |
| NC_037641.1 | 5015665 | SNV | 1 | T | C | Homozygous   |
| NC_037641.1 | 5029510 | SNV | 1 | T | C | Homozygous   |
| NC_037641.1 | 5029703 | SNV | 1 | A | G | Homozygous   |
| NC_037641.1 | 5029706 | SNV | 1 | G | C | Heterozygous |
| NC_037641.1 | 5029760 | SNV | 1 | A | G | Homozygous   |
| NC_037641.1 | 5029946 | SNV | 1 | G | A | Heterozygous |
| NC_037641.1 | 5030030 | SNV | 1 | A | G | Homozygous   |
| NC_037641.1 | 5030179 | SNV | 1 | A | C | Heterozygous |
| NC_037641.1 | 5030332 | SNV | 1 | C | T | Heterozygous |
| NC_037641.1 | 5030398 | SNV | 1 | C | T | Heterozygous |
| NC_037641.1 | 5030404 | SNV | 1 | C | T | Heterozygous |

|             |         |     |   |   |   |              |
|-------------|---------|-----|---|---|---|--------------|
| NC_037641.1 | 5030409 | SNV | 1 | T | C | Homozygous   |
| NC_037641.1 | 5030545 | SNV | 1 | T | C | Homozygous   |
| NC_037641.1 | 5030564 | SNV | 1 | A | G | Heterozygous |
| NC_037641.1 | 5030592 | SNV | 1 | C | T | Homozygous   |
| NC_037641.1 | 5030670 | SNV | 1 | G | A | Heterozygous |
| NC_037641.1 | 5030715 | SNV | 1 | A | G | Homozygous   |
| NC_037641.1 | 5030789 | SNV | 1 | T | C | Homozygous   |
| NC_037641.1 | 5030793 | SNV | 1 | G | A | Heterozygous |
| NC_037641.1 | 5030967 | SNV | 1 | G | A | Heterozygous |
| NC_037641.1 | 5031096 | SNV | 1 | A | T | Heterozygous |
| NC_037641.1 | 5031322 | SNV | 1 | T | C | Homozygous   |
| NC_037641.1 | 5031652 | SNV | 1 | C | G | Heterozygous |
| NC_037641.1 | 5031993 | SNV | 1 | A | G | Homozygous   |
| NC_037641.1 | 5032436 | SNV | 1 | G | A | Heterozygous |
| NC_037641.1 | 5032655 | SNV | 1 | G | A | Homozygous   |
| NC_037641.1 | 5033254 | SNV | 1 | C | G | Heterozygous |
| NC_037641.1 | 5033533 | SNV | 1 | T | C | Homozygous   |
| NC_037641.1 | 5034228 | SNV | 1 | A | G | Homozygous   |
| NC_037641.1 | 5037151 | SNV | 1 | T | C | Homozygous   |
| NC_037641.1 | 5037181 | SNV | 1 | T | G | Heterozygous |
| NC_037641.1 | 5037283 | SNV | 1 | T | C | Homozygous   |
| NC_037641.1 | 5037345 | SNV | 1 | A | G | Homozygous   |
| NC_037641.1 | 5037538 | SNV | 1 | C | G | Homozygous   |
| NC_037641.1 | 5037571 | SNV | 1 | T | C | Homozygous   |
| NC_037641.1 | 5037609 | SNV | 1 | T | A | Homozygous   |
| NC_037641.1 | 5037611 | SNV | 1 | G | T | Heterozygous |
| NC_037641.1 | 5037621 | SNV | 1 | G | A | Heterozygous |
| NC_037641.1 | 5037666 | SNV | 1 | G | A | Homozygous   |
| NC_037641.1 | 5037918 | SNV | 1 | T | C | Heterozygous |
| NC_037641.1 | 5038978 | SNV | 1 | C | T | Heterozygous |
| NC_037641.1 | 5039044 | SNV | 1 | T | G | Heterozygous |
| NC_037641.1 | 5039126 | SNV | 1 | C | T | Homozygous   |
| NC_037641.1 | 5039222 | SNV | 1 | C | T | Homozygous   |
| NC_037641.1 | 5041475 | SNV | 1 | T | C | Heterozygous |
| NC_037641.1 | 5041483 | SNV | 1 | T | C | Heterozygous |
| NC_037641.1 | 5041485 | SNV | 1 | T | C | Homozygous   |
| NC_037641.1 | 5041497 | SNV | 1 | G | A | Heterozygous |
| NC_037641.1 | 5041508 | SNV | 1 | C | A | Heterozygous |
| NC_037641.1 | 5041514 | SNV | 1 | G | A | Heterozygous |
| NC_037641.1 | 5041519 | SNV | 1 | T | C | Homozygous   |
| NC_037641.1 | 5041525 | SNV | 1 | T | C | Homozygous   |
| NC_037641.1 | 5041544 | SNV | 1 | T | C | Homozygous   |
| NC_037641.1 | 5041563 | SNV | 1 | G | A | Heterozygous |
| NC_037641.1 | 5041567 | SNV | 1 | T | C | Heterozygous |
| NC_037641.1 | 5041609 | SNV | 1 | T | C | Heterozygous |
| NC_037641.1 | 5041621 | SNV | 1 | T | C | Heterozygous |
| NC_037641.1 | 5041624 | SNV | 1 | T | C | Homozygous   |
| NC_037641.1 | 5041644 | SNV | 1 | T | C | Heterozygous |
| NC_037641.1 | 5042005 | SNV | 1 | T | A | Heterozygous |
| NC_037641.1 | 5042027 | SNV | 1 | A | G | Heterozygous |
| NC_037641.1 | 5042029 | SNV | 1 | C | T | Homozygous   |



|             |         |     |   |   |   |              |
|-------------|---------|-----|---|---|---|--------------|
| NC_037641.1 | 5042038 | SNV | 1 | G | A | Heterozygous |
| NC_037641.1 | 5042059 | SNV | 1 | G | A | Homozygous   |
| NC_037641.1 | 5042068 | SNV | 1 | G | A | Homozygous   |
| NC_037641.1 | 5042075 | SNV | 1 | C | T | Homozygous   |
| NC_037641.1 | 5042082 | SNV | 1 | G | A | Heterozygous |
| NC_037641.1 | 5042513 | SNV | 1 | G | A | Heterozygous |
| NC_037641.1 | 5042516 | SNV | 1 | G | A | Homozygous   |
| NC_037641.1 | 5042520 | SNV | 1 | T | A | Homozygous   |
| NC_037641.1 | 5042560 | SNV | 1 | G | A | Homozygous   |
| NC_037641.1 | 5042563 | SNV | 1 | C | T | Heterozygous |
| NC_037641.1 | 5042566 | SNV | 1 | T | C | Homozygous   |
| NC_037641.1 | 5042571 | SNV | 1 | G | A | Heterozygous |
| NC_037641.1 | 5042575 | SNV | 1 | T | A | Heterozygous |
| NC_037641.1 | 5042579 | SNV | 1 | G | T | Heterozygous |
| NC_037641.1 | 5042598 | SNV | 1 | T | C | Heterozygous |
| NC_037641.1 | 5043176 | SNV | 1 | A | G | Heterozygous |
| NC_037641.1 | 5043780 | SNV | 1 | G | A | Homozygous   |
| NC_037641.1 | 5053150 | SNV | 1 | T | C | Heterozygous |
| NC_037641.1 | 5053347 | SNV | 1 | A | G | Heterozygous |
| NC_037641.1 | 5053861 | SNV | 1 | G | C | Heterozygous |
| NC_037641.1 | 5053867 | SNV | 1 | G | A | Heterozygous |
| NC_037641.1 | 5054031 | SNV | 1 | A | G | Homozygous   |
| NC_037641.1 | 5054116 | SNV | 1 | A | G | Heterozygous |
| NC_037641.1 | 5054145 | SNV | 1 | T | C | Homozygous   |
| NC_037641.1 | 5055081 | SNV | 1 | C | A | Heterozygous |
| NC_037641.1 | 5058486 | SNV | 1 | C | T | Heterozygous |
| NC_037641.1 | 5059109 | SNV | 1 | T | C | Homozygous   |
| NC_037641.1 | 5060040 | SNV | 1 | T | C | Homozygous   |
| NC_037641.1 | 5061493 | SNV | 1 | A | G | Homozygous   |
| NC_037641.1 | 5063612 | SNV | 1 | T | C | Homozygous   |
| NC_037641.1 | 5066234 | SNV | 1 | G | A | Homozygous   |
| NC_037641.1 | 5066638 | SNV | 1 | G | A | Heterozygous |
| NC_037641.1 | 5066656 | SNV | 1 | C | T | Heterozygous |
| NC_037641.1 | 5076730 | SNV | 1 | G | C | Heterozygous |
| NC_037641.1 | 5076776 | SNV | 1 | A | T | Heterozygous |
| NC_037641.1 | 5077463 | SNV | 1 | G | T | Heterozygous |
| NC_037641.1 | 5077470 | SNV | 1 | C | T | Heterozygous |
| NC_037641.1 | 5077478 | SNV | 1 | T | G | Heterozygous |
| NC_037641.1 | 5077559 | SNV | 1 | A | G | Homozygous   |
| NC_037641.1 | 5077561 | SNV | 1 | T | A | Homozygous   |
| NC_037641.1 | 5077573 | SNV | 1 | T | C | Homozygous   |
| NC_037641.1 | 5077650 | SNV | 1 | G | C | Heterozygous |
| NC_037641.1 | 5077657 | SNV | 1 | G | A | Heterozygous |
| NC_037641.1 | 5080415 | SNV | 1 | T | A | Heterozygous |
| NC_037641.1 | 5111217 | SNV | 1 | G | A | Heterozygous |
| NC_037641.1 | 5111484 | SNV | 1 | A | G | Homozygous   |
| NC_037641.1 | 5111586 | SNV | 1 | T | C | Homozygous   |
| NC_037641.1 | 5111913 | SNV | 1 | A | T | Homozygous   |
| NC_037641.1 | 5111975 | SNV | 1 | T | C | Homozygous   |
| NC_037641.1 | 5111978 | SNV | 1 | A | G | Homozygous   |
| NC_037641.1 | 5111983 | SNV | 1 | G | A | Homozygous   |

|             |         |     |   |   |   |              |
|-------------|---------|-----|---|---|---|--------------|
| NC_037641.1 | 5112036 | SNV | 1 | C | T | Homozygous   |
| NC_037641.1 | 5112232 | SNV | 1 | T | A | Homozygous   |
| NC_037641.1 | 5112471 | SNV | 1 | C | T | Homozygous   |
| NC_037641.1 | 5112537 | SNV | 1 | C | T | Homozygous   |
| NC_037641.1 | 5116296 | SNV | 1 | T | C | Homozygous   |
| NC_037641.1 | 5116432 | SNV | 1 | G | A | Heterozygous |
| NC_037641.1 | 5121988 | SNV | 1 | C | T | Homozygous   |
| NC_037641.1 | 5122071 | SNV | 1 | A | G | Homozygous   |
| NC_037641.1 | 5122109 | SNV | 1 | C | T | Heterozygous |
| NC_037641.1 | 5133754 | SNV | 1 | A | G | Heterozygous |
| NC_037641.1 | 5134139 | SNV | 1 | A | G | Homozygous   |
| NC_037641.1 | 5134507 | SNV | 1 | G | A | Homozygous   |
| NC_037641.1 | 5134750 | SNV | 1 | A | G | Homozygous   |
| NC_037641.1 | 5134863 | SNV | 1 | A | C | Heterozygous |
| NC_037641.1 | 5134873 | SNV | 1 | A | T | Heterozygous |
| NC_037641.1 | 5136823 | SNV | 1 | G | A | Heterozygous |
| NC_037641.1 | 5137762 | SNV | 1 | C | A | Homozygous   |
| NC_037641.1 | 5138028 | SNV | 1 | C | A | Homozygous   |
| NC_037641.1 | 5138502 | SNV | 1 | C | G | Homozygous   |
| NC_037641.1 | 5141610 | SNV | 1 | A | G | Homozygous   |
| NC_037641.1 | 5142350 | SNV | 1 | C | T | Heterozygous |
| NC_037641.1 | 5143895 | SNV | 1 | A | G | Homozygous   |
| NC_037641.1 | 5146170 | SNV | 1 | T | G | Homozygous   |
| NC_037641.1 | 5147800 | SNV | 1 | C | T | Heterozygous |
| NC_037641.1 | 5147827 | SNV | 1 | A | C | Heterozygous |
| NC_037641.1 | 5147833 | SNV | 1 | T | A | Heterozygous |
| NC_037641.1 | 5147837 | SNV | 1 | T | A | Heterozygous |
| NC_037641.1 | 5147845 | SNV | 1 | C | T | Heterozygous |
| NC_037641.1 | 5147849 | SNV | 1 | T | A | Heterozygous |
| NC_037641.1 | 5147852 | SNV | 1 | A | T | Heterozygous |
| NC_037641.1 | 5147857 | SNV | 1 | T | A | Heterozygous |
| NC_037641.1 | 5147866 | SNV | 1 | A | G | Heterozygous |
| NC_037641.1 | 5147871 | SNV | 1 | T | A | Heterozygous |
| NC_037641.1 | 5147879 | SNV | 1 | C | A | Heterozygous |
| NC_037641.1 | 5149851 | SNV | 1 | A | G | Homozygous   |
| NC_037641.1 | 5196538 | SNV | 1 | C | T | Heterozygous |
| NC_037641.1 | 5196678 | SNV | 1 | G | C | Homozygous   |
| NC_037641.1 | 5205443 | SNV | 1 | A | G | Heterozygous |
| NC_037641.1 | 5205472 | SNV | 1 | A | G | Heterozygous |
| NC_037641.1 | 5214449 | SNV | 1 | G | A | Heterozygous |
| NC_037641.1 | 5214628 | SNV | 1 | A | G | Homozygous   |
| NC_037641.1 | 5214727 | SNV | 1 | C | T | Homozygous   |
| NC_037641.1 | 5214731 | SNV | 1 | A | T | Heterozygous |
| NC_037641.1 | 5216191 | SNV | 1 | C | T | Homozygous   |
| NC_037641.1 | 5216194 | SNV | 1 | C | T | Heterozygous |
| NC_037641.1 | 5216475 | SNV | 1 | C | T | Heterozygous |
| NC_037641.1 | 5216507 | SNV | 1 | T | C | Heterozygous |
| NC_037641.1 | 5216570 | SNV | 1 | T | C | Homozygous   |
| NC_037641.1 | 5217001 | SNV | 1 | T | C | Homozygous   |
| NC_037641.1 | 5218308 | SNV | 1 | T | C | Homozygous   |
| NC_037641.1 | 5218764 | SNV | 1 | A | G | Homozygous   |

|             |         |     |   |   |   |              |
|-------------|---------|-----|---|---|---|--------------|
| NC_037641.1 | 5219184 | SNV | 1 | T | C | Homozygous   |
| NC_037641.1 | 5219830 | SNV | 1 | G | A | Homozygous   |
| NC_037641.1 | 5220138 | SNV | 1 | C | G | Homozygous   |
| NC_037641.1 | 5220497 | SNV | 1 | T | C | Homozygous   |
| NC_037641.1 | 5220671 | SNV | 1 | T | C | Homozygous   |
| NC_037641.1 | 5220816 | SNV | 1 | A | G | Homozygous   |
| NC_037641.1 | 5222254 | SNV | 1 | T | C | Homozygous   |
| NC_037641.1 | 5222320 | SNV | 1 | C | T | Homozygous   |
| NC_037641.1 | 5229188 | SNV | 1 | C | T | Heterozygous |
| NC_037641.1 | 5235356 | SNV | 1 | T | C | Homozygous   |
| NC_037641.1 | 5235569 | SNV | 1 | G | A | Heterozygous |
| NC_037641.1 | 5236000 | SNV | 1 | A | G | Homozygous   |
| NC_037641.1 | 5236261 | SNV | 1 | A | G | Homozygous   |
| NC_037641.1 | 5236501 | SNV | 1 | C | G | Heterozygous |
| NC_037641.1 | 5236942 | SNV | 1 | C | T | Heterozygous |
| NC_037641.1 | 5237099 | SNV | 1 | G | A | Homozygous   |
| NC_037641.1 | 5237765 | SNV | 1 | G | A | Homozygous   |
| NC_037641.1 | 5237973 | SNV | 1 | G | A | Homozygous   |
| NC_037641.1 | 5238129 | SNV | 1 | G | C | Heterozygous |
| NC_037641.1 | 5238405 | SNV | 1 | C | T | Heterozygous |
| NC_037641.1 | 5238443 | SNV | 1 | G | A | Heterozygous |
| NC_037641.1 | 5238578 | SNV | 1 | G | A | Homozygous   |
| NC_037641.1 | 5238882 | SNV | 1 | G | C | Heterozygous |
| NC_037641.1 | 5238997 | SNV | 1 | C | T | Homozygous   |
| NC_037641.1 | 5239398 | SNV | 1 | C | T | Heterozygous |
| NC_037641.1 | 5239471 | SNV | 1 | A | G | Homozygous   |
| NC_037641.1 | 5240324 | SNV | 1 | A | G | Homozygous   |
| NC_037641.1 | 5240403 | SNV | 1 | A | G | Heterozygous |
| NC_037641.1 | 5240407 | SNV | 1 | C | T | Homozygous   |
| NC_037641.1 | 5240485 | SNV | 1 | T | C | Homozygous   |
| NC_037641.1 | 5240610 | SNV | 1 | T | C | Heterozygous |
| NC_037641.1 | 5240792 | SNV | 1 | T | C | Heterozygous |
| NC_037641.1 | 5240802 | SNV | 1 | A | G | Homozygous   |
| NC_037641.1 | 5240827 | SNV | 1 | A | G | Homozygous   |
| NC_037641.1 | 5243208 | SNV | 1 | G | A | Homozygous   |
| NC_037641.1 | 5243229 | SNV | 1 | T | C | Homozygous   |
| NC_037641.1 | 5243282 | SNV | 1 | A | G | Heterozygous |
| NC_037641.1 | 5243320 | SNV | 1 | G | A | Heterozygous |
| NC_037641.1 | 5243852 | SNV | 1 | C | T | Homozygous   |
| NC_037641.1 | 5243984 | SNV | 1 | A | G | Homozygous   |
| NC_037641.1 | 5244310 | SNV | 1 | A | G | Homozygous   |
| NC_037641.1 | 5244313 | SNV | 1 | A | T | Homozygous   |
| NC_037641.1 | 5244411 | SNV | 1 | G | C | Heterozygous |
| NC_037641.1 | 5244454 | SNV | 1 | A | T | Heterozygous |
| NC_037641.1 | 5244550 | SNV | 1 | A | G | Homozygous   |
| NC_037641.1 | 5244833 | SNV | 1 | A | G | Heterozygous |
| NC_037641.1 | 5244858 | SNV | 1 | C | T | Homozygous   |
| NC_037641.1 | 5244934 | SNV | 1 | T | C | Heterozygous |
| NC_037641.1 | 5244936 | SNV | 1 | C | T | Homozygous   |
| NC_037641.1 | 5244981 | SNV | 1 | C | T | Heterozygous |
| NC_037641.1 | 5245412 | SNV | 1 | T | C | Homozygous   |

|             |         |     |   |   |   |              |
|-------------|---------|-----|---|---|---|--------------|
| NC_037641.1 | 5245430 | SNV | 1 | A | G | Homozygous   |
| NC_037641.1 | 5245463 | SNV | 1 | A | G | Homozygous   |
| NC_037641.1 | 5245542 | SNV | 1 | C | T | Homozygous   |
| NC_037641.1 | 5245620 | SNV | 1 | G | A | Heterozygous |
| NC_037641.1 | 5245630 | SNV | 1 | A | G | Heterozygous |
| NC_037641.1 | 5245636 | SNV | 1 | C | G | Heterozygous |
| NC_037641.1 | 5245701 | SNV | 1 | T | C | Heterozygous |
| NC_037641.1 | 5245763 | SNV | 1 | T | C | Homozygous   |
| NC_037641.1 | 5245803 | SNV | 1 | A | T | Heterozygous |
| NC_037641.1 | 5245919 | SNV | 1 | C | T | Heterozygous |
| NC_037641.1 | 5246222 | SNV | 1 | A | G | Homozygous   |
| NC_037641.1 | 5246546 | SNV | 1 | C | T | Heterozygous |
| NC_037641.1 | 5246584 | SNV | 1 | T | G | Heterozygous |
| NC_037641.1 | 5246603 | SNV | 1 | G | A | Homozygous   |
| NC_037641.1 | 5246621 | SNV | 1 | T | C | Homozygous   |
| NC_037641.1 | 5246627 | SNV | 1 | C | T | Heterozygous |
| NC_037641.1 | 5246764 | SNV | 1 | C | T | Heterozygous |
| NC_037641.1 | 5246787 | SNV | 1 | A | G | Homozygous   |
| NC_037641.1 | 5246983 | SNV | 1 | T | C | Heterozygous |
| NC_037641.1 | 5247096 | SNV | 1 | A | G | Heterozygous |
| NC_037641.1 | 5247255 | SNV | 1 | G | A | Heterozygous |
| NC_037641.1 | 5247415 | SNV | 1 | A | G | Heterozygous |
| NC_037641.1 | 5247418 | SNV | 1 | G | A | Homozygous   |
| NC_037641.1 | 5247435 | SNV | 1 | G | A | Heterozygous |
| NC_037641.1 | 5247442 | SNV | 1 | T | C | Homozygous   |
| NC_037641.1 | 5247480 | SNV | 1 | A | G | Homozygous   |
| NC_037641.1 | 5247500 | SNV | 1 | A | G | Homozygous   |
| NC_037641.1 | 5247522 | SNV | 1 | T | A | Homozygous   |
| NC_037641.1 | 5247526 | SNV | 1 | T | C | Homozygous   |
| NC_037641.1 | 5247529 | SNV | 1 | T | C | Homozygous   |
| NC_037641.1 | 5248168 | SNV | 1 | C | T | Heterozygous |
| NC_037641.1 | 5248209 | SNV | 1 | C | T | Heterozygous |
| NC_037641.1 | 5248221 | SNV | 1 | G | A | Heterozygous |
| NC_037641.1 | 5248245 | SNV | 1 | C | T | Homozygous   |
| NC_037641.1 | 5248330 | SNV | 1 | G | A | Heterozygous |
| NC_037641.1 | 5248404 | SNV | 1 | C | T | Heterozygous |
| NC_037641.1 | 5248484 | SNV | 1 | T | C | Homozygous   |
| NC_037641.1 | 5248490 | SNV | 1 | T | C | Homozygous   |
| NC_037641.1 | 5248855 | SNV | 1 | A | G | Homozygous   |
| NC_037641.1 | 5248874 | SNV | 1 | A | T | Heterozygous |
| NC_037641.1 | 5249057 | SNV | 1 | A | G | Homozygous   |
| NC_037641.1 | 5249077 | SNV | 1 | A | G | Heterozygous |
| NC_037641.1 | 5249205 | SNV | 1 | A | T | Homozygous   |
| NC_037641.1 | 5249376 | SNV | 1 | T | A | Homozygous   |
| NC_037641.1 | 5249512 | SNV | 1 | A | G | Heterozygous |
| NC_037641.1 | 5249518 | SNV | 1 | G | A | Heterozygous |
| NC_037641.1 | 5249674 | SNV | 1 | T | A | Heterozygous |
| NC_037641.1 | 5249893 | SNV | 1 | C | T | Homozygous   |
| NC_037641.1 | 5249908 | SNV | 1 | C | T | Homozygous   |
| NC_037641.1 | 5249938 | SNV | 1 | T | C | Homozygous   |
| NC_037641.1 | 5249964 | SNV | 1 | G | A | Homozygous   |

|             |         |     |   |   |   |              |
|-------------|---------|-----|---|---|---|--------------|
| NC_037641.1 | 5250349 | SNV | 1 | A | G | Homozygous   |
| NC_037641.1 | 5250451 | SNV | 1 | A | G | Homozygous   |
| NC_037641.1 | 5250543 | SNV | 1 | T | C | Heterozygous |
| NC_037641.1 | 5250590 | SNV | 1 | T | C | Homozygous   |
| NC_037641.1 | 5250603 | SNV | 1 | G | A | Homozygous   |
| NC_037641.1 | 5250621 | SNV | 1 | A | G | Homozygous   |
| NC_037641.1 | 5250633 | SNV | 1 | T | C | Homozygous   |
| NC_037641.1 | 5251095 | SNV | 1 | C | A | Heterozygous |
| NC_037641.1 | 5252290 | SNV | 1 | C | T | Homozygous   |
| NC_037641.1 | 5252696 | SNV | 1 | G | C | Homozygous   |
| NC_037641.1 | 5253297 | SNV | 1 | C | G | Homozygous   |
| NC_037641.1 | 5253644 | SNV | 1 | A | T | Homozygous   |
| NC_037641.1 | 5253774 | SNV | 1 | T | C | Homozygous   |
| NC_037641.1 | 5254409 | SNV | 1 | A | G | Homozygous   |
| NC_037641.1 | 5254430 | SNV | 1 | T | C | Homozygous   |
| NC_037641.1 | 5254956 | SNV | 1 | A | G | Homozygous   |
| NC_037641.1 | 5254998 | SNV | 1 | T | C | Homozygous   |
| NC_037641.1 | 5255068 | SNV | 1 | A | T | Heterozygous |
| NC_037641.1 | 5255079 | SNV | 1 | A | G | Heterozygous |
| NC_037641.1 | 5255546 | SNV | 1 | T | A | Homozygous   |
| NC_037641.1 | 5255726 | SNV | 1 | T | C | Homozygous   |
| NC_037641.1 | 5255916 | SNV | 1 | G | A | Homozygous   |
| NC_037641.1 | 5256160 | SNV | 1 | A | G | Homozygous   |
| NC_037641.1 | 5256165 | SNV | 1 | T | A | Heterozygous |
| NC_037641.1 | 5258164 | SNV | 1 | T | C | Homozygous   |
| NC_037641.1 | 5258211 | SNV | 1 | C | T | Homozygous   |
| NC_037641.1 | 5258238 | SNV | 1 | C | T | Heterozygous |
| NC_037641.1 | 5258405 | SNV | 1 | C | T | Homozygous   |
| NC_037641.1 | 5258514 | SNV | 1 | A | T | Homozygous   |
| NC_037641.1 | 5258529 | SNV | 1 | T | G | Homozygous   |
| NC_037641.1 | 5258802 | SNV | 1 | T | C | Heterozygous |
| NC_037641.1 | 5258806 | SNV | 1 | C | T | Heterozygous |
| NC_037641.1 | 5258815 | SNV | 1 | C | T | Heterozygous |
| NC_037641.1 | 5258838 | SNV | 1 | T | C | Homozygous   |
| NC_037641.1 | 5258874 | SNV | 1 | C | G | Homozygous   |
| NC_037641.1 | 5258928 | SNV | 1 | C | T | Homozygous   |
| NC_037641.1 | 5258978 | SNV | 1 | T | C | Homozygous   |
| NC_037641.1 | 5259256 | SNV | 1 | C | G | Homozygous   |
| NC_037641.1 | 5259272 | SNV | 1 | C | A | Heterozygous |
| NC_037641.1 | 5259324 | SNV | 1 | C | T | Heterozygous |
| NC_037641.1 | 5259331 | SNV | 1 | T | C | Heterozygous |
| NC_037641.1 | 5260245 | SNV | 1 | C | G | Heterozygous |
| NC_037641.1 | 5260269 | SNV | 1 | A | G | Homozygous   |
| NC_037641.1 | 5261547 | SNV | 1 | A | G | Homozygous   |
| NC_037641.1 | 5261554 | SNV | 1 | G | A | Homozygous   |
| NC_037641.1 | 5261582 | SNV | 1 | T | C | Homozygous   |
| NC_037641.1 | 5261775 | SNV | 1 | C | T | Homozygous   |
| NC_037641.1 | 5261850 | SNV | 1 | T | C | Homozygous   |
| NC_037641.1 | 5261963 | SNV | 1 | C | T | Heterozygous |
| NC_037641.1 | 5261994 | SNV | 1 | A | G | Heterozygous |
| NC_037641.1 | 5262022 | SNV | 1 | C | G | Heterozygous |

|             |         |     |   |   |   |              |
|-------------|---------|-----|---|---|---|--------------|
| NC_037641.1 | 5263701 | SNV | 1 | A | G | Heterozygous |
| NC_037641.1 | 5263707 | SNV | 1 | T | C | Heterozygous |
| NC_037641.1 | 5263785 | SNV | 1 | T | C | Homozygous   |
| NC_037641.1 | 5266740 | SNV | 1 | T | C | Homozygous   |
| NC_037641.1 | 5266839 | SNV | 1 | A | G | Homozygous   |
| NC_037641.1 | 5266894 | SNV | 1 | T | G | Homozygous   |
| NC_037641.1 | 5266910 | SNV | 1 | A | G | Homozygous   |
| NC_037641.1 | 5266984 | SNV | 1 | T | C | Homozygous   |
| NC_037641.1 | 5267053 | SNV | 1 | A | G | Homozygous   |
| NC_037641.1 | 5267162 | SNV | 1 | T | C | Heterozygous |
| NC_037641.1 | 5267165 | SNV | 1 | C | G | Heterozygous |
| NC_037641.1 | 5267178 | SNV | 1 | C | T | Heterozygous |
| NC_037641.1 | 5267300 | SNV | 1 | T | C | Homozygous   |
| NC_037641.1 | 5267411 | SNV | 1 | T | C | Heterozygous |
| NC_037641.1 | 5267520 | SNV | 1 | T | C | Heterozygous |
| NC_037641.1 | 5267561 | SNV | 1 | T | C | Homozygous   |
| NC_037641.1 | 5267700 | SNV | 1 | G | A | Heterozygous |
| NC_037641.1 | 5267758 | SNV | 1 | C | T | Homozygous   |
| NC_037641.1 | 5267938 | SNV | 1 | A | G | Homozygous   |
| NC_037641.1 | 5268041 | SNV | 1 | C | A | Heterozygous |
| NC_037641.1 | 5268063 | SNV | 1 | G | A | Heterozygous |
| NC_037641.1 | 5268176 | SNV | 1 | A | G | Homozygous   |
| NC_037641.1 | 5268187 | SNV | 1 | C | T | Heterozygous |
| NC_037641.1 | 5268208 | SNV | 1 | T | A | Heterozygous |
| NC_037641.1 | 5268637 | SNV | 1 | T | A | Homozygous   |
| NC_037641.1 | 5268867 | SNV | 1 | T | C | Heterozygous |
| NC_037641.1 | 5269095 | SNV | 1 | C | T | Homozygous   |
| NC_037641.1 | 5269192 | SNV | 1 | A | G | Homozygous   |
| NC_037641.1 | 5269269 | SNV | 1 | A | G | Homozygous   |
| NC_037641.1 | 5270342 | SNV | 1 | C | T | Homozygous   |
| NC_037641.1 | 5272077 | SNV | 1 | A | T | Homozygous   |
| NC_037641.1 | 5272156 | SNV | 1 | A | G | Heterozygous |
| NC_037641.1 | 5272302 | SNV | 1 | C | G | Homozygous   |
| NC_037641.1 | 5272512 | SNV | 1 | A | C | Heterozygous |
| NC_037641.1 | 5272560 | SNV | 1 | C | T | Heterozygous |
| NC_037641.1 | 5272901 | SNV | 1 | A | G | Heterozygous |
| NC_037641.1 | 5272906 | SNV | 1 | T | C | Heterozygous |
| NC_037641.1 | 5272970 | SNV | 1 | T | C | Homozygous   |
| NC_037641.1 | 5273065 | SNV | 1 | A | G | Heterozygous |
| NC_037641.1 | 5273079 | SNV | 1 | A | G | Homozygous   |
| NC_037641.1 | 5273086 | SNV | 1 | T | C | Heterozygous |
| NC_037641.1 | 5274989 | SNV | 1 | C | T | Homozygous   |
| NC_037641.1 | 5274996 | SNV | 1 | A | G | Homozygous   |
| NC_037641.1 | 5279515 | SNV | 1 | C | T | Heterozygous |
| NC_037641.1 | 5279528 | SNV | 1 | T | C | Homozygous   |
| NC_037641.1 | 5279722 | SNV | 1 | G | A | Homozygous   |
| NC_037641.1 | 5279729 | SNV | 1 | G | T | Heterozygous |
| NC_037641.1 | 5279781 | SNV | 1 | G | A | Heterozygous |
| NC_037641.1 | 5279880 | SNV | 1 | G | T | Homozygous   |
| NC_037641.1 | 5280088 | SNV | 1 | G | C | Homozygous   |
| NC_037641.1 | 5280122 | SNV | 1 | T | G | Homozygous   |

|             |         |     |   |   |   |              |
|-------------|---------|-----|---|---|---|--------------|
| NC_037641.1 | 5280130 | SNV | 1 | G | A | Heterozygous |
| NC_037641.1 | 5280170 | SNV | 1 | A | G | Heterozygous |
| NC_037641.1 | 5280365 | SNV | 1 | G | A | Heterozygous |
| NC_037641.1 | 5280381 | SNV | 1 | C | G | Heterozygous |
| NC_037641.1 | 5280463 | SNV | 1 | C | T | Homozygous   |
| NC_037641.1 | 5280644 | SNV | 1 | T | C | Homozygous   |
| NC_037641.1 | 5280728 | SNV | 1 | T | C | Homozygous   |
| NC_037641.1 | 5280731 | SNV | 1 | T | G | Homozygous   |
| NC_037641.1 | 5282562 | SNV | 1 | G | A | Homozygous   |
| NC_037641.1 | 5282564 | SNV | 1 | C | T | Homozygous   |
| NC_037641.1 | 5282684 | SNV | 1 | T | C | Homozygous   |
| NC_037641.1 | 5282829 | SNV | 1 | T | C | Heterozygous |
| NC_037641.1 | 5282882 | SNV | 1 | G | A | Homozygous   |
| NC_037641.1 | 5282892 | SNV | 1 | C | T | Heterozygous |
| NC_037641.1 | 5282908 | SNV | 1 | C | T | Heterozygous |
| NC_037641.1 | 5283428 | SNV | 1 | T | C | Homozygous   |
| NC_037641.1 | 5283439 | SNV | 1 | C | T | Homozygous   |
| NC_037641.1 | 5285604 | SNV | 1 | A | G | Homozygous   |
| NC_037641.1 | 5285720 | SNV | 1 | C | T | Heterozygous |
| NC_037641.1 | 5285752 | SNV | 1 | A | G | Homozygous   |
| NC_037641.1 | 5285833 | SNV | 1 | A | C | Heterozygous |
| NC_037641.1 | 5285837 | SNV | 1 | C | T | Heterozygous |
| NC_037641.1 | 5285838 | SNV | 1 | C | T | Heterozygous |
| NC_037641.1 | 5285861 | SNV | 1 | G | A | Heterozygous |
| NC_037641.1 | 5285907 | SNV | 1 | T | C | Homozygous   |
| NC_037641.1 | 5285927 | SNV | 1 | C | G | Homozygous   |
| NC_037641.1 | 5285951 | SNV | 1 | G | A | Homozygous   |
| NC_037641.1 | 5287339 | SNV | 1 | T | A | Heterozygous |
| NC_037641.1 | 5287341 | SNV | 1 | T | A | Heterozygous |
| NC_037641.1 | 5287347 | SNV | 1 | T | A | Heterozygous |
| NC_037641.1 | 5287512 | SNV | 1 | A | G | Heterozygous |
| NC_037641.1 | 5287514 | SNV | 1 | G | A | Heterozygous |
| NC_037641.1 | 5289151 | SNV | 1 | T | C | Homozygous   |
| NC_037641.1 | 5289260 | SNV | 1 | A | G | Homozygous   |
| NC_037641.1 | 5289687 | SNV | 1 | T | C | Heterozygous |
| NC_037641.1 | 5289891 | SNV | 1 | T | C | Homozygous   |
| NC_037641.1 | 5290105 | SNV | 1 | C | T | Heterozygous |
| NC_037641.1 | 5290318 | SNV | 1 | G | A | Heterozygous |
| NC_037641.1 | 5290406 | SNV | 1 | A | G | Homozygous   |
| NC_037641.1 | 5290425 | SNV | 1 | G | A | Heterozygous |
| NC_037641.1 | 5290435 | SNV | 1 | A | G | Homozygous   |
| NC_037641.1 | 5292430 | SNV | 1 | C | T | Homozygous   |
| NC_037641.1 | 5292470 | SNV | 1 | A | G | Homozygous   |
| NC_037641.1 | 5292982 | SNV | 1 | G | C | Heterozygous |
| NC_037641.1 | 5293007 | SNV | 1 | T | C | Heterozygous |
| NC_037641.1 | 5293013 | SNV | 1 | C | T | Heterozygous |
| NC_037641.1 | 5293050 | SNV | 1 | C | T | Homozygous   |
| NC_037641.1 | 5293160 | SNV | 1 | T | C | Homozygous   |
| NC_037641.1 | 5293184 | SNV | 1 | C | T | Heterozygous |
| NC_037641.1 | 5293196 | SNV | 1 | C | T | Homozygous   |
| NC_037641.1 | 5293247 | SNV | 1 | A | G | Homozygous   |

|             |         |     |   |   |   |              |
|-------------|---------|-----|---|---|---|--------------|
| NC_037641.1 | 5298733 | SNV | 1 | T | G | Homozygous   |
| NC_037641.1 | 5298857 | SNV | 1 | A | G | Homozygous   |
| NC_037641.1 | 5302036 | SNV | 1 | A | G | Homozygous   |
| NC_037641.1 | 5302425 | SNV | 1 | T | C | Homozygous   |
| NC_037641.1 | 5302465 | SNV | 1 | C | T | Heterozygous |
| NC_037641.1 | 5302762 | SNV | 1 | T | C | Homozygous   |
| NC_037641.1 | 5302780 | SNV | 1 | A | G | Heterozygous |
| NC_037641.1 | 5302872 | SNV | 1 | A | G | Homozygous   |
| NC_037641.1 | 5302913 | SNV | 1 | T | C | Heterozygous |
| NC_037641.1 | 5302931 | SNV | 1 | A | G | Homozygous   |
| NC_037641.1 | 5302943 | SNV | 1 | A | G | Heterozygous |
| NC_037641.1 | 5303292 | SNV | 1 | G | A | Heterozygous |
| NC_037641.1 | 5309806 | SNV | 1 | G | A | Heterozygous |
| NC_037641.1 | 5310917 | SNV | 1 | T | C | Homozygous   |
| NC_037641.1 | 5310940 | SNV | 1 | T | C | Heterozygous |
| NC_037641.1 | 5310946 | SNV | 1 | C | G | Heterozygous |
| NC_037641.1 | 5310950 | SNV | 1 | C | T | Heterozygous |
| NC_037641.1 | 5310952 | SNV | 1 | C | G | Heterozygous |
| NC_037641.1 | 5310996 | SNV | 1 | A | G | Homozygous   |
| NC_037641.1 | 5311004 | SNV | 1 | C | G | Heterozygous |
| NC_037641.1 | 5311009 | SNV | 1 | T | A | Homozygous   |
| NC_037641.1 | 5311012 | SNV | 1 | C | G | Homozygous   |
| NC_037641.1 | 5325601 | SNV | 1 | C | T | Heterozygous |
| NC_037641.1 | 5325638 | SNV | 1 | T | C | Heterozygous |
| NC_037641.1 | 5329447 | SNV | 1 | G | A | Heterozygous |
| NC_037641.1 | 5329514 | SNV | 1 | C | T | Homozygous   |
| NC_037641.1 | 5329517 | SNV | 1 | A | T | Homozygous   |
| NC_037641.1 | 5329523 | SNV | 1 | A | C | Homozygous   |
| NC_037641.1 | 5333049 | SNV | 1 | C | T | Homozygous   |
| NC_037641.1 | 5333207 | SNV | 1 | A | G | Homozygous   |
| NC_037641.1 | 5333222 | SNV | 1 | C | T | Homozygous   |
| NC_037641.1 | 5333355 | SNV | 1 | G | C | Homozygous   |
| NC_037641.1 | 5333493 | SNV | 1 | A | G | Homozygous   |
| NC_037641.1 | 5333495 | SNV | 1 | A | G | Homozygous   |
| NC_037641.1 | 5346654 | SNV | 1 | T | C | Heterozygous |
| NC_037641.1 | 5346694 | SNV | 1 | C | T | Homozygous   |
| NC_037641.1 | 5346696 | SNV | 1 | A | G | Heterozygous |
| NC_037641.1 | 5346833 | SNV | 1 | A | G | Homozygous   |
| NC_037641.1 | 5346868 | SNV | 1 | A | C | Homozygous   |
| NC_037641.1 | 5346878 | SNV | 1 | T | A | Homozygous   |
| NC_037641.1 | 5346918 | SNV | 1 | T | C | Homozygous   |
| NC_037641.1 | 5347016 | SNV | 1 | T | C | Heterozygous |
| NC_037641.1 | 5347220 | SNV | 1 | A | G | Homozygous   |
| NC_037641.1 | 5347443 | SNV | 1 | G | A | Homozygous   |
| NC_037641.1 | 5347460 | SNV | 1 | C | T | Homozygous   |
| NC_037641.1 | 5347548 | SNV | 1 | T | C | Homozygous   |
| NC_037641.1 | 5347567 | SNV | 1 | G | T | Homozygous   |
| NC_037641.1 | 5347624 | SNV | 1 | G | A | Homozygous   |
| NC_037641.1 | 5369445 | SNV | 1 | A | C | Homozygous   |
| NC_037641.1 | 5369614 | SNV | 1 | G | A | Heterozygous |
| NC_037641.1 | 5369743 | SNV | 1 | A | G | Heterozygous |



|             |         |     |   |   |   |              |
|-------------|---------|-----|---|---|---|--------------|
| NC_037641.1 | 5369762 | SNV | 1 | G | A | Heterozygous |
| NC_037641.1 | 5371648 | SNV | 1 | T | C | Homozygous   |
| NC_037641.1 | 5371800 | SNV | 1 | C | T | Heterozygous |
| NC_037641.1 | 5371875 | SNV | 1 | G | A | Heterozygous |
| NC_037641.1 | 5371878 | SNV | 1 | C | T | Heterozygous |
| NC_037641.1 | 5371979 | SNV | 1 | C | T | Heterozygous |
| NC_037641.1 | 5371990 | SNV | 1 | C | T | Homozygous   |
| NC_037641.1 | 5372014 | SNV | 1 | T | A | Heterozygous |
| NC_037641.1 | 5372016 | SNV | 1 | C | A | Heterozygous |
| NC_037641.1 | 5372404 | SNV | 1 | C | G | Homozygous   |
| NC_037641.1 | 5372410 | SNV | 1 | T | C | Homozygous   |
| NC_037641.1 | 5372618 | SNV | 1 | A | G | Heterozygous |
| NC_037641.1 | 5372966 | SNV | 1 | G | A | Heterozygous |
| NC_037641.1 | 5372969 | SNV | 1 | T | C | Homozygous   |
| NC_037641.1 | 5373298 | SNV | 1 | G | C | Heterozygous |
| NC_037641.1 | 5373320 | SNV | 1 | G | A | Heterozygous |
| NC_037641.1 | 5373323 | SNV | 1 | G | A | Heterozygous |
| NC_037641.1 | 5373679 | SNV | 1 | T | C | Heterozygous |
| NC_037641.1 | 5373781 | SNV | 1 | T | C | Heterozygous |
| NC_037641.1 | 5374284 | SNV | 1 | A | T | Homozygous   |
| NC_037641.1 | 5377903 | SNV | 1 | T | A | Homozygous   |
| NC_037641.1 | 5378129 | SNV | 1 | T | C | Homozygous   |
| NC_037641.1 | 5390121 | SNV | 1 | G | T | Homozygous   |
| NC_037641.1 | 5390179 | SNV | 1 | T | C | Heterozygous |
| NC_037641.1 | 5392484 | SNV | 1 | A | G | Homozygous   |
| NC_037641.1 | 5393055 | SNV | 1 | T | C | Homozygous   |
| NC_037641.1 | 5393271 | SNV | 1 | T | C | Homozygous   |
| NC_037641.1 | 5393416 | SNV | 1 | G | A | Homozygous   |
| NC_037641.1 | 5394193 | SNV | 1 | T | C | Homozygous   |
| NC_037641.1 | 5396355 | SNV | 1 | A | G | Homozygous   |
| NC_037641.1 | 5396628 | SNV | 1 | G | C | Homozygous   |
| NC_037641.1 | 5396668 | SNV | 1 | A | G | Homozygous   |
| NC_037641.1 | 5399512 | SNV | 1 | A | G | Homozygous   |
| NC_037641.1 | 5399773 | SNV | 1 | A | G | Homozygous   |
| NC_037641.1 | 5400026 | SNV | 1 | G | A | Heterozygous |
| NC_037641.1 | 5400059 | SNV | 1 | T | A | Heterozygous |
| NC_037641.1 | 5400167 | SNV | 1 | T | G | Homozygous   |
| NC_037641.1 | 5400509 | SNV | 1 | G | A | Heterozygous |
| NC_037641.1 | 5400859 | SNV | 1 | G | A | Heterozygous |
| NC_037641.1 | 5401905 | SNV | 1 | A | G | Heterozygous |
| NC_037641.1 | 5401911 | SNV | 1 | A | G | Heterozygous |
| NC_037641.1 | 5401917 | SNV | 1 | A | G | Heterozygous |
| NC_037641.1 | 5401939 | SNV | 1 | A | T | Heterozygous |
| NC_037641.1 | 5402061 | SNV | 1 | T | C | Homozygous   |
| NC_037641.1 | 5402166 | SNV | 1 | T | C | Homozygous   |
| NC_037641.1 | 5402181 | SNV | 1 | A | G | Homozygous   |
| NC_037641.1 | 5402226 | SNV | 1 | G | A | Homozygous   |
| NC_037641.1 | 5402244 | SNV | 1 | G | A | Homozygous   |
| NC_037641.1 | 5402256 | SNV | 1 | G | A | Homozygous   |
| NC_037641.1 | 5403263 | SNV | 1 | C | T | Heterozygous |
| NC_037641.1 | 5408049 | SNV | 1 | G | T | Heterozygous |

|             |         |     |   |   |   |              |
|-------------|---------|-----|---|---|---|--------------|
| NC_037641.1 | 5408052 | SNV | 1 | A | T | Heterozygous |
| NC_037641.1 | 5408064 | SNV | 1 | G | T | Heterozygous |
| NC_037641.1 | 5408082 | SNV | 1 | T | A | Homozygous   |
| NC_037641.1 | 5413283 | SNV | 1 | A | G | Homozygous   |
| NC_037641.1 | 5413731 | SNV | 1 | T | C | Homozygous   |
| NC_037641.1 | 5414144 | SNV | 1 | C | G | Heterozygous |
| NC_037641.1 | 5414146 | SNV | 1 | T | C | Heterozygous |
| NC_037641.1 | 5414219 | SNV | 1 | T | C | Heterozygous |
| NC_037641.1 | 5414235 | SNV | 1 | T | C | Heterozygous |
| NC_037641.1 | 5414241 | SNV | 1 | T | C | Homozygous   |
| NC_037641.1 | 5414325 | SNV | 1 | A | G | Heterozygous |
| NC_037641.1 | 5416617 | SNV | 1 | A | G | Homozygous   |
| NC_037641.1 | 5420592 | SNV | 1 | G | A | Heterozygous |
| NC_037641.1 | 5421054 | SNV | 1 | G | A | Homozygous   |
| NC_037641.1 | 5421056 | SNV | 1 | A | C | Homozygous   |
| NC_037641.1 | 5421134 | SNV | 1 | A | T | Homozygous   |
| NC_037641.1 | 5421362 | SNV | 1 | G | A | Heterozygous |
| NC_037641.1 | 5422934 | SNV | 1 | T | G | Homozygous   |
| NC_037641.1 | 5426246 | SNV | 1 | A | G | Homozygous   |
| NC_037641.1 | 5431560 | SNV | 1 | A | G | Heterozygous |
| NC_037641.1 | 5431871 | SNV | 1 | T | C | Homozygous   |
| NC_037641.1 | 5431964 | SNV | 1 | T | C | Homozygous   |
| NC_037641.1 | 5432616 | SNV | 1 | C | T | Heterozygous |
| NC_037641.1 | 5432704 | SNV | 1 | G | A | Heterozygous |
| NC_037641.1 | 5442989 | SNV | 1 | C | T | Homozygous   |
| NC_037641.1 | 5454329 | SNV | 1 | T | A | Homozygous   |
| NC_037641.1 | 5456615 | SNV | 1 | G | A | Homozygous   |
| NC_037641.1 | 5457235 | SNV | 1 | T | A | Homozygous   |
| NC_037641.1 | 5457249 | SNV | 1 | T | C | Homozygous   |
| NC_037641.1 | 5457721 | SNV | 1 | G | C | Homozygous   |
| NC_037641.1 | 5457835 | SNV | 1 | T | C | Homozygous   |
| NC_037641.1 | 5457868 | SNV | 1 | G | A | Heterozygous |
| NC_037641.1 | 5457894 | SNV | 1 | A | C | Homozygous   |
| NC_037641.1 | 5457999 | SNV | 1 | C | G | Homozygous   |
| NC_037641.1 | 5458021 | SNV | 1 | T | C | Homozygous   |
| NC_037641.1 | 5458041 | SNV | 1 | A | G | Heterozygous |
| NC_037641.1 | 5458087 | SNV | 1 | A | G | Homozygous   |
| NC_037641.1 | 5458096 | SNV | 1 | T | C | Homozygous   |
| NC_037641.1 | 5458466 | SNV | 1 | G | C | Homozygous   |
| NC_037641.1 | 5459229 | SNV | 1 | C | T | Heterozygous |
| NC_037641.1 | 5459664 | SNV | 1 | T | C | Heterozygous |
| NC_037641.1 | 5459680 | SNV | 1 | G | A | Heterozygous |
| NC_037641.1 | 5459757 | SNV | 1 | T | G | Heterozygous |
| NC_037641.1 | 5459765 | SNV | 1 | A | G | Heterozygous |
| NC_037641.1 | 5459774 | SNV | 1 | A | G | Heterozygous |
| NC_037641.1 | 5459784 | SNV | 1 | A | T | Heterozygous |
| NC_037641.1 | 5459923 | SNV | 1 | G | A | Homozygous   |
| NC_037641.1 | 5459929 | SNV | 1 | G | A | Homozygous   |
| NC_037641.1 | 5459931 | SNV | 1 | A | T | Homozygous   |
| NC_037641.1 | 5459933 | SNV | 1 | T | C | Homozygous   |
| NC_037641.1 | 5459947 | SNV | 1 | G | A | Homozygous   |

|             |         |     |   |   |   |              |
|-------------|---------|-----|---|---|---|--------------|
| NC_037641.1 | 5459966 | SNV | 1 | T | C | Homozygous   |
| NC_037641.1 | 5459970 | SNV | 1 | A | C | Homozygous   |
| NC_037641.1 | 5459973 | SNV | 1 | A | G | Homozygous   |
| NC_037641.1 | 5459983 | SNV | 1 | G | A | Homozygous   |
| NC_037641.1 | 5459985 | SNV | 1 | A | T | Homozygous   |
| NC_037641.1 | 5460010 | SNV | 1 | G | A | Homozygous   |
| NC_037641.1 | 5460012 | SNV | 1 | G | A | Homozygous   |
| NC_037641.1 | 5460022 | SNV | 1 | G | T | Homozygous   |
| NC_037641.1 | 5460035 | SNV | 1 | T | C | Homozygous   |
| NC_037641.1 | 5460057 | SNV | 1 | A | T | Homozygous   |
| NC_037641.1 | 5460059 | SNV | 1 | T | C | Homozygous   |
| NC_037641.1 | 5460064 | SNV | 1 | G | A | Heterozygous |
| NC_037641.1 | 5460207 | SNV | 1 | A | G | Heterozygous |
| NC_037641.1 | 5460250 | SNV | 1 | G | A | Heterozygous |
| NC_037641.1 | 5460261 | SNV | 1 | A | G | Heterozygous |
| NC_037641.1 | 5460264 | SNV | 1 | A | G | Heterozygous |
| NC_037641.1 | 5460296 | SNV | 1 | T | A | Heterozygous |
| NC_037641.1 | 5460351 | SNV | 1 | T | C | Homozygous   |
| NC_037641.1 | 5478396 | SNV | 1 | A | C | Homozygous   |
| NC_037641.1 | 5479107 | SNV | 1 | T | C | Heterozygous |
| NC_037641.1 | 5480714 | SNV | 1 | G | C | Heterozygous |
| NC_037641.1 | 5489041 | SNV | 1 | T | C | Heterozygous |
| NC_037641.1 | 5490914 | SNV | 1 | C | T | Homozygous   |
| NC_037641.1 | 5496675 | SNV | 1 | A | G | Homozygous   |
| NC_037641.1 | 5497042 | SNV | 1 | G | A | Heterozygous |
| NC_037641.1 | 5498580 | SNV | 1 | A | G | Homozygous   |
| NC_037641.1 | 5501822 | SNV | 1 | G | A | Heterozygous |
| NC_037641.1 | 5503189 | SNV | 1 | A | T | Homozygous   |
| NC_037641.1 | 5503202 | SNV | 1 | A | G | Homozygous   |
| NC_037641.1 | 5503209 | SNV | 1 | T | A | Homozygous   |
| NC_037641.1 | 5503212 | SNV | 1 | T | G | Homozygous   |
| NC_037641.1 | 5503216 | SNV | 1 | T | A | Homozygous   |
| NC_037641.1 | 5503219 | SNV | 1 | A | C | Homozygous   |
| NC_037641.1 | 5506127 | SNV | 1 | G | T | Homozygous   |
| NC_037641.1 | 5511161 | SNV | 1 | A | T | Heterozygous |
| NC_037641.1 | 5511266 | SNV | 1 | A | T | Homozygous   |
| NC_037641.1 | 5511274 | SNV | 1 | G | A | Homozygous   |
| NC_037641.1 | 5511277 | SNV | 1 | C | T | Homozygous   |
| NC_037641.1 | 5511284 | SNV | 1 | G | T | Homozygous   |
| NC_037641.1 | 5511327 | SNV | 1 | C | A | Heterozygous |
| NC_037641.1 | 5511329 | SNV | 1 | C | T | Homozygous   |
| NC_037641.1 | 5511342 | SNV | 1 | A | T | Homozygous   |
| NC_037641.1 | 5511347 | SNV | 1 | C | A | Homozygous   |
| NC_037641.1 | 5511360 | SNV | 1 | C | A | Homozygous   |
| NC_037641.1 | 5513683 | SNV | 1 | T | A | Homozygous   |
| NC_037641.1 | 5513688 | SNV | 1 | T | A | Homozygous   |
| NC_037641.1 | 5513695 | SNV | 1 | T | G | Homozygous   |
| NC_037641.1 | 5521611 | SNV | 1 | C | T | Heterozygous |
| NC_037641.1 | 5524523 | SNV | 1 | A | G | Heterozygous |
| NC_037641.1 | 5525633 | SNV | 1 | T | C | Homozygous   |
| NC_037641.1 | 5528170 | SNV | 1 | A | G | Heterozygous |

|             |         |     |   |   |   |              |
|-------------|---------|-----|---|---|---|--------------|
| NC_037641.1 | 5528175 | SNV | 1 | A | G | Homozygous   |
| NC_037641.1 | 5528197 | SNV | 1 | A | G | Heterozygous |
| NC_037641.1 | 5533825 | SNV | 1 | C | T | Heterozygous |
| NC_037641.1 | 5535161 | SNV | 1 | T | C | Heterozygous |
| NC_037641.1 | 5538858 | SNV | 1 | T | C | Homozygous   |
| NC_037641.1 | 5538903 | SNV | 1 | A | G | Homozygous   |
| NC_037641.1 | 5538924 | SNV | 1 | T | A | Homozygous   |
| NC_037641.1 | 5544456 | SNV | 1 | A | G | Homozygous   |
| NC_037641.1 | 5544461 | SNV | 1 | A | G | Homozygous   |
| NC_037641.1 | 5544463 | SNV | 1 | A | C | Homozygous   |
| NC_037641.1 | 5544466 | SNV | 1 | A | T | Homozygous   |
| NC_037641.1 | 5554279 | SNV | 1 | T | C | Heterozygous |
| NC_037641.1 | 5554292 | SNV | 1 | A | G | Heterozygous |
| NC_037641.1 | 5557229 | SNV | 1 | G | A | Heterozygous |
| NC_037641.1 | 5580571 | SNV | 1 | T | C | Heterozygous |
| NC_037641.1 | 5580762 | SNV | 1 | G | C | Heterozygous |
| NC_037641.1 | 5580771 | SNV | 1 | A | C | Heterozygous |
| NC_037641.1 | 5580888 | SNV | 1 | G | A | Homozygous   |
| NC_037641.1 | 5584916 | SNV | 1 | C | T | Homozygous   |
| NC_037641.1 | 5585155 | SNV | 1 | T | C | Homozygous   |
| NC_037641.1 | 5585196 | SNV | 1 | C | A | Homozygous   |
| NC_037641.1 | 5590511 | SNV | 1 | T | C | Heterozygous |
| NC_037641.1 | 5593126 | SNV | 1 | T | A | Homozygous   |
| NC_037641.1 | 5593778 | SNV | 1 | G | A | Homozygous   |
| NC_037641.1 | 5595671 | SNV | 1 | A | G | Homozygous   |
| NC_037641.1 | 5595675 | SNV | 1 | C | T | Homozygous   |
| NC_037641.1 | 5595690 | SNV | 1 | T | A | Homozygous   |
| NC_037641.1 | 5595716 | SNV | 1 | A | G | Homozygous   |
| NC_037641.1 | 5597589 | SNV | 1 | G | A | Heterozygous |
| NC_037641.1 | 5599146 | SNV | 1 | C | T | Heterozygous |
| NC_037641.1 | 5599222 | SNV | 1 | G | A | Homozygous   |
| NC_037641.1 | 5599803 | SNV | 1 | T | C | Homozygous   |
| NC_037641.1 | 5599806 | SNV | 1 | C | T | Homozygous   |
| NC_037641.1 | 5600423 | SNV | 1 | A | T | Homozygous   |
| NC_037641.1 | 5600426 | SNV | 1 | G | A | Homozygous   |
| NC_037641.1 | 5600638 | SNV | 1 | T | A | Homozygous   |
| NC_037641.1 | 5600677 | SNV | 1 | T | C | Homozygous   |
| NC_037641.1 | 5615267 | SNV | 1 | A | G | Heterozygous |
| NC_037641.1 | 5615275 | SNV | 1 | C | T | Heterozygous |
| NC_037641.1 | 5622247 | SNV | 1 | A | G | Homozygous   |
| NC_037641.1 | 5622290 | SNV | 1 | A | G | Homozygous   |
| NC_037641.1 | 5622296 | SNV | 1 | A | G | Homozygous   |
| NC_037641.1 | 5623489 | SNV | 1 | G | T | Homozygous   |
| NC_037641.1 | 5623525 | SNV | 1 | G | T | Homozygous   |
| NC_037641.1 | 5624083 | SNV | 1 | A | T | Homozygous   |
| NC_037641.1 | 5624085 | SNV | 1 | A | T | Homozygous   |
| NC_037641.1 | 5624113 | SNV | 1 | G | A | Homozygous   |
| NC_037641.1 | 5624125 | SNV | 1 | A | T | Homozygous   |
| NC_037641.1 | 5634100 | SNV | 1 | A | T | Homozygous   |
| NC_037641.1 | 5634123 | SNV | 1 | A | T | Homozygous   |
| NC_037641.1 | 5634127 | SNV | 1 | A | G | Homozygous   |

|             |         |     |   |   |   |              |
|-------------|---------|-----|---|---|---|--------------|
| NC_037641.1 | 5638364 | SNV | 1 | T | A | Heterozygous |
| NC_037641.1 | 5639884 | SNV | 1 | C | T | Heterozygous |
| NC_037641.1 | 5640280 | SNV | 1 | A | G | Heterozygous |
| NC_037641.1 | 5645273 | SNV | 1 | C | T | Homozygous   |
| NC_037641.1 | 5645631 | SNV | 1 | T | C | Homozygous   |
| NC_037641.1 | 5646315 | SNV | 1 | T | C | Homozygous   |
| NC_037641.1 | 5650515 | SNV | 1 | A | T | Homozygous   |
| NC_037641.1 | 5650526 | SNV | 1 | A | T | Homozygous   |
| NC_037641.1 | 5650967 | SNV | 1 | G | A | Homozygous   |
| NC_037641.1 | 5651216 | SNV | 1 | T | C | Homozygous   |
| NC_037641.1 | 5651418 | SNV | 1 | A | C | Heterozygous |
| NC_037641.1 | 5651608 | SNV | 1 | G | A | Homozygous   |
| NC_037641.1 | 5652262 | SNV | 1 | G | A | Homozygous   |
| NC_037641.1 | 5652406 | SNV | 1 | G | A | Heterozygous |
| NC_037641.1 | 5652565 | SNV | 1 | T | C | Homozygous   |
| NC_037641.1 | 5652652 | SNV | 1 | C | T | Heterozygous |
| NC_037641.1 | 5658330 | SNV | 1 | C | G | Homozygous   |
| NC_037641.1 | 5664393 | SNV | 1 | C | T | Homozygous   |
| NC_037641.1 | 5664659 | SNV | 1 | A | T | Homozygous   |
| NC_037641.1 | 5665997 | SNV | 1 | T | C | Homozygous   |
| NC_037641.1 | 5666002 | SNV | 1 | A | C | Heterozygous |
| NC_037641.1 | 5666028 | SNV | 1 | G | T | Homozygous   |
| NC_037641.1 | 5666863 | SNV | 1 | A | T | Homozygous   |
| NC_037641.1 | 5666865 | SNV | 1 | C | T | Homozygous   |
| NC_037641.1 | 5667109 | SNV | 1 | T | A | Homozygous   |
| NC_037641.1 | 5672844 | SNV | 1 | T | G | Heterozygous |
| NC_037641.1 | 5672847 | SNV | 1 | T | A | Homozygous   |
| NC_037641.1 | 5672879 | SNV | 1 | T | C | Homozygous   |
| NC_037641.1 | 5672885 | SNV | 1 | A | C | Homozygous   |
| NC_037641.1 | 5674358 | SNV | 1 | A | C | Homozygous   |
| NC_037641.1 | 5674360 | SNV | 1 | A | T | Homozygous   |
| NC_037641.1 | 5674372 | SNV | 1 | G | A | Homozygous   |
| NC_037641.1 | 5674374 | SNV | 1 | G | A | Homozygous   |
| NC_037641.1 | 5675005 | SNV | 1 | C | G | Homozygous   |
| NC_037641.1 | 5675046 | SNV | 1 | C | T | Heterozygous |
| NC_037641.1 | 5676706 | SNV | 1 | A | G | Homozygous   |
| NC_037641.1 | 5678907 | SNV | 1 | A | T | Homozygous   |
| NC_037641.1 | 5678916 | SNV | 1 | T | C | Homozygous   |
| NC_037641.1 | 5678922 | SNV | 1 | G | T | Homozygous   |
| NC_037641.1 | 5679572 | SNV | 1 | A | G | Homozygous   |
| NC_037641.1 | 5679590 | SNV | 1 | T | A | Homozygous   |
| NC_037641.1 | 5680487 | SNV | 1 | T | A | Homozygous   |
| NC_037641.1 | 5680493 | SNV | 1 | A | C | Homozygous   |
| NC_037641.1 | 5680522 | SNV | 1 | T | G | Homozygous   |
| NC_037641.1 | 5685083 | SNV | 1 | T | G | Homozygous   |
| NC_037641.1 | 5685087 | SNV | 1 | A | G | Homozygous   |
| NC_037641.1 | 5685090 | SNV | 1 | T | A | Homozygous   |
| NC_037641.1 | 5685103 | SNV | 1 | A | T | Homozygous   |
| NC_037641.1 | 5685107 | SNV | 1 | T | A | Homozygous   |
| NC_037641.1 | 5685111 | SNV | 1 | T | C | Homozygous   |
| NC_037641.1 | 5686633 | SNV | 1 | C | G | Homozygous   |

|             |         |     |   |   |   |              |
|-------------|---------|-----|---|---|---|--------------|
| NC_037641.1 | 5687087 | SNV | 1 | G | A | Homozygous   |
| NC_037641.1 | 5687613 | SNV | 1 | G | A | Homozygous   |
| NC_037641.1 | 5689687 | SNV | 1 | A | C | Homozygous   |
| NC_037641.1 | 5689689 | SNV | 1 | G | C | Homozygous   |
| NC_037641.1 | 5689698 | SNV | 1 | T | A | Homozygous   |
| NC_037641.1 | 5689704 | SNV | 1 | T | A | Homozygous   |
| NC_037641.1 | 5689706 | SNV | 1 | A | T | Homozygous   |
| NC_037641.1 | 5689708 | SNV | 1 | A | G | Homozygous   |
| NC_037641.1 | 5689712 | SNV | 1 | T | G | Homozygous   |
| NC_037641.1 | 5689716 | SNV | 1 | T | A | Homozygous   |
| NC_037641.1 | 5689745 | SNV | 1 | G | A | Homozygous   |
| NC_037641.1 | 5690011 | SNV | 1 | C | A | Heterozygous |
| NC_037641.1 | 5692533 | SNV | 1 | A | T | Homozygous   |
| NC_037641.1 | 5692575 | SNV | 1 | C | T | Heterozygous |
| NC_037641.1 | 5692804 | SNV | 1 | G | A | Homozygous   |
| NC_037641.1 | 5693367 | SNV | 1 | T | A | Heterozygous |
| NC_037641.1 | 5693720 | SNV | 1 | C | T | Homozygous   |
| NC_037641.1 | 5693722 | SNV | 1 | A | T | Homozygous   |
| NC_037641.1 | 5700741 | SNV | 1 | G | A | Homozygous   |
| NC_037641.1 | 5701591 | SNV | 1 | A | T | Heterozygous |
| NC_037641.1 | 5701783 | SNV | 1 | A | G | Homozygous   |
| NC_037641.1 | 5703380 | SNV | 1 | G | A | Homozygous   |
| NC_037641.1 | 5703607 | SNV | 1 | C | T | Heterozygous |
| NC_037641.1 | 5719260 | SNV | 1 | G | A | Homozygous   |
| NC_037641.1 | 5719270 | SNV | 1 | C | A | Homozygous   |
| NC_037641.1 | 5719277 | SNV | 1 | A | G | Homozygous   |
| NC_037641.1 | 5719301 | SNV | 1 | C | G | Homozygous   |
| NC_037641.1 | 5724606 | SNV | 1 | T | C | Homozygous   |
| NC_037641.1 | 5724640 | SNV | 1 | T | A | Homozygous   |
| NC_037641.1 | 5724643 | SNV | 1 | T | A | Homozygous   |
| NC_037641.1 | 5724652 | SNV | 1 | T | A | Homozygous   |
| NC_037641.1 | 5729921 | SNV | 1 | G | A | Homozygous   |
| NC_037641.1 | 5732114 | SNV | 1 | T | C | Homozygous   |
| NC_037641.1 | 5732186 | SNV | 1 | A | T | Homozygous   |
| NC_037641.1 | 5732906 | SNV | 1 | T | A | Homozygous   |
| NC_037641.1 | 5732910 | SNV | 1 | T | A | Homozygous   |
| NC_037641.1 | 5732913 | SNV | 1 | T | A | Homozygous   |
| NC_037641.1 | 5732915 | SNV | 1 | A | T | Homozygous   |
| NC_037641.1 | 5735913 | SNV | 1 | A | G | Homozygous   |
| NC_037641.1 | 5737366 | SNV | 1 | T | C | Homozygous   |
| NC_037641.1 | 5750079 | SNV | 1 | T | C | Homozygous   |
| NC_037641.1 | 5754584 | SNV | 1 | A | G | Heterozygous |
| NC_037641.1 | 5754725 | SNV | 1 | G | A | Heterozygous |
| NC_037641.1 | 5754727 | SNV | 1 | A | G | Heterozygous |
| NC_037641.1 | 5754778 | SNV | 1 | C | T | Homozygous   |
| NC_037641.1 | 5754788 | SNV | 1 | C | G | Heterozygous |
| NC_037641.1 | 5758662 | SNV | 1 | C | T | Homozygous   |
| NC_037641.1 | 5766580 | SNV | 1 | A | C | Homozygous   |
| NC_037641.1 | 5766584 | SNV | 1 | C | T | Homozygous   |
| NC_037641.1 | 5768289 | SNV | 1 | G | A | Heterozygous |
| NC_037641.1 | 5768311 | SNV | 1 | T | C | Heterozygous |

|             |         |     |   |   |   |              |
|-------------|---------|-----|---|---|---|--------------|
| NC_037641.1 | 5771259 | SNV | 1 | T | C | Homozygous   |
| NC_037641.1 | 5771314 | SNV | 1 | T | C | Homozygous   |
| NC_037641.1 | 5780753 | SNV | 1 | G | A | Heterozygous |
| NC_037641.1 | 5781455 | SNV | 1 | G | A | Heterozygous |
| NC_037641.1 | 5781536 | SNV | 1 | C | T | Heterozygous |
| NC_037641.1 | 5781987 | SNV | 1 | C | T | Heterozygous |
| NC_037641.1 | 5782951 | SNV | 1 | A | G | Homozygous   |
| NC_037641.1 | 5784619 | SNV | 1 | A | G | Homozygous   |
| NC_037641.1 | 5788589 | SNV | 1 | G | A | Heterozygous |
| NC_037641.1 | 5789173 | SNV | 1 | C | T | Heterozygous |
| NC_037641.1 | 5789405 | SNV | 1 | T | G | Heterozygous |
| NC_037641.1 | 5790812 | SNV | 1 | T | A | Homozygous   |
| NC_037641.1 | 5790828 | SNV | 1 | T | A | Homozygous   |
| NC_037641.1 | 5790861 | SNV | 1 | C | A | Homozygous   |
| NC_037641.1 | 5791928 | SNV | 1 | G | A | Heterozygous |
| NC_037641.1 | 5792070 | SNV | 1 | C | T | Heterozygous |
| NC_037641.1 | 5792997 | SNV | 1 | A | G | Homozygous   |
| NC_037641.1 | 5795896 | SNV | 1 | A | C | Homozygous   |
| NC_037641.1 | 5795933 | SNV | 1 | C | T | Homozygous   |
| NC_037641.1 | 5795937 | SNV | 1 | T | C | Homozygous   |
| NC_037641.1 | 5795940 | SNV | 1 | A | T | Homozygous   |
| NC_037641.1 | 5797923 | SNV | 1 | T | C | Heterozygous |
| NC_037641.1 | 5802044 | SNV | 1 | A | C | Homozygous   |
| NC_037641.1 | 5808021 | SNV | 1 | G | A | Homozygous   |
| NC_037641.1 | 5808030 | SNV | 1 | C | T | Homozygous   |
| NC_037641.1 | 5808332 | SNV | 1 | G | A | Homozygous   |
| NC_037641.1 | 5808373 | SNV | 1 | T | A | Heterozygous |
| NC_037641.1 | 5808462 | SNV | 1 | A | G | Heterozygous |
| NC_037641.1 | 5808640 | SNV | 1 | C | G | Heterozygous |
| NC_037641.1 | 5808642 | SNV | 1 | A | T | Heterozygous |
| NC_037641.1 | 5808656 | SNV | 1 | C | T | Homozygous   |
| NC_037641.1 | 5808673 | SNV | 1 | C | G | Homozygous   |
| NC_037641.1 | 5814460 | SNV | 1 | A | G | Heterozygous |
| NC_037641.1 | 5820379 | SNV | 1 | C | T | Heterozygous |
| NC_037641.1 | 5820499 | SNV | 1 | G | A | Homozygous   |
| NC_037641.1 | 5820805 | SNV | 1 | G | A | Homozygous   |
| NC_037641.1 | 5821148 | SNV | 1 | C | T | Heterozygous |
| NC_037641.1 | 5822759 | SNV | 1 | A | G | Homozygous   |
| NC_037641.1 | 5825434 | SNV | 1 | A | T | Heterozygous |
| NC_037641.1 | 5825472 | SNV | 1 | C | T | Heterozygous |
| NC_037641.1 | 5825506 | SNV | 1 | C | A | Homozygous   |
| NC_037641.1 | 5829281 | SNV | 1 | T | C | Homozygous   |
| NC_037641.1 | 5834076 | SNV | 1 | T | C | Homozygous   |
| NC_037641.1 | 5834174 | SNV | 1 | T | C | Homozygous   |
| NC_037641.1 | 5843387 | SNV | 1 | C | T | Homozygous   |
| NC_037641.1 | 5845736 | SNV | 1 | G | T | Homozygous   |
| NC_037641.1 | 5847458 | SNV | 1 | C | T | Heterozygous |
| NC_037641.1 | 5847644 | SNV | 1 | A | G | Homozygous   |
| NC_037641.1 | 5848100 | SNV | 1 | T | G | Homozygous   |
| NC_037641.1 | 5848118 | SNV | 1 | C | T | Heterozygous |
| NC_037641.1 | 5848298 | SNV | 1 | G | A | Heterozygous |

|             |         |     |   |   |   |              |
|-------------|---------|-----|---|---|---|--------------|
| NC_037641.1 | 5848635 | SNV | 1 | G | A | Homozygous   |
| NC_037641.1 | 5848978 | SNV | 1 | T | G | Homozygous   |
| NC_037641.1 | 5848980 | SNV | 1 | G | A | Homozygous   |
| NC_037641.1 | 5849256 | SNV | 1 | C | T | Heterozygous |
| NC_037641.1 | 5849298 | SNV | 1 | A | G | Homozygous   |
| NC_037641.1 | 5849479 | SNV | 1 | T | A | Homozygous   |
| NC_037641.1 | 5849484 | SNV | 1 | T | A | Homozygous   |
| NC_037641.1 | 5849486 | SNV | 1 | T | C | Homozygous   |
| NC_037641.1 | 5849488 | SNV | 1 | A | C | Homozygous   |
| NC_037641.1 | 5849494 | SNV | 1 | T | C | Homozygous   |
| NC_037641.1 | 5849499 | SNV | 1 | A | G | Homozygous   |
| NC_037641.1 | 5850197 | SNV | 1 | A | G | Homozygous   |
| NC_037641.1 | 5850377 | SNV | 1 | C | T | Homozygous   |
| NC_037641.1 | 5850396 | SNV | 1 | A | G | Homozygous   |
| NC_037641.1 | 5850478 | SNV | 1 | A | G | Homozygous   |
| NC_037641.1 | 5855066 | SNV | 1 | C | T | Heterozygous |
| NC_037641.1 | 5855982 | SNV | 1 | C | T | Homozygous   |
| NC_037641.1 | 5856194 | SNV | 1 | T | C | Homozygous   |
| NC_037641.1 | 5859095 | SNV | 1 | A | G | Heterozygous |
| NC_037641.1 | 5860660 | SNV | 1 | A | C | Heterozygous |
| NC_037641.1 | 5862035 | SNV | 1 | A | T | Homozygous   |
| NC_037641.1 | 5862692 | SNV | 1 | T | A | Homozygous   |
| NC_037641.1 | 5863225 | SNV | 1 | C | T | Heterozygous |
| NC_037641.1 | 5863324 | SNV | 1 | T | C | Homozygous   |
| NC_037641.1 | 5863361 | SNV | 1 | C | T | Homozygous   |
| NC_037641.1 | 5865439 | SNV | 1 | T | C | Heterozygous |
| NC_037641.1 | 5867789 | SNV | 1 | A | C | Heterozygous |
| NC_037641.1 | 5867800 | SNV | 1 | A | C | Heterozygous |
| NC_037641.1 | 5867803 | SNV | 1 | T | G | Heterozygous |
| NC_037641.1 | 5869312 | SNV | 1 | A | G | Heterozygous |
| NC_037641.1 | 5869320 | SNV | 1 | A | G | Heterozygous |
| NC_037641.1 | 5869326 | SNV | 1 | A | G | Heterozygous |
| NC_037641.1 | 5869346 | SNV | 1 | A | G | Heterozygous |
| NC_037641.1 | 5869627 | SNV | 1 | A | G | Heterozygous |
| NC_037641.1 | 5869632 | SNV | 1 | A | G | Heterozygous |
| NC_037641.1 | 5869635 | SNV | 1 | A | G | Heterozygous |
| NC_037641.1 | 5869639 | SNV | 1 | A | G | Heterozygous |
| NC_037641.1 | 5870565 | SNV | 1 | T | A | Heterozygous |
| NC_037641.1 | 5878163 | SNV | 1 | C | T | Heterozygous |
| NC_037641.1 | 5879363 | SNV | 1 | T | A | Homozygous   |
| NC_037641.1 | 5879368 | SNV | 1 | A | T | Heterozygous |
| NC_037641.1 | 5882383 | SNV | 1 | T | G | Heterozygous |
| NC_037641.1 | 5883376 | SNV | 1 | T | C | Homozygous   |
| NC_037641.1 | 5883414 | SNV | 1 | A | T | Heterozygous |
| NC_037641.1 | 5886000 | SNV | 1 | T | A | Homozygous   |
| NC_037641.1 | 5886006 | SNV | 1 | A | C | Homozygous   |
| NC_037641.1 | 5886017 | SNV | 1 | A | C | Homozygous   |
| NC_037641.1 | 5887543 | SNV | 1 | T | C | Homozygous   |
| NC_037641.1 | 5889742 | SNV | 1 | A | G | Homozygous   |
| NC_037641.1 | 5891215 | SNV | 1 | G | T | Homozygous   |
| NC_037641.1 | 5891217 | SNV | 1 | A | T | Homozygous   |



|             |         |     |   |   |   |              |
|-------------|---------|-----|---|---|---|--------------|
| NC_037641.1 | 5891692 | SNV | 1 | T | G | Homozygous   |
| NC_037641.1 | 5893573 | SNV | 1 | A | G | Homozygous   |
| NC_037641.1 | 5897200 | SNV | 1 | T | A | Homozygous   |
| NC_037641.1 | 5897550 | SNV | 1 | T | C | Homozygous   |
| NC_037641.1 | 5897555 | SNV | 1 | T | A | Homozygous   |
| NC_037641.1 | 5899500 | SNV | 1 | C | A | Heterozygous |
| NC_037641.1 | 5899983 | SNV | 1 | A | G | Heterozygous |
| NC_037641.1 | 5902190 | SNV | 1 | A | C | Heterozygous |
| NC_037641.1 | 5902197 | SNV | 1 | A | T | Heterozygous |
| NC_037641.1 | 5903099 | SNV | 1 | T | A | Homozygous   |
| NC_037641.1 | 5903104 | SNV | 1 | A | G | Homozygous   |
| NC_037641.1 | 5903127 | SNV | 1 | A | T | Homozygous   |
| NC_037641.1 | 5903129 | SNV | 1 | A | C | Homozygous   |
| NC_037641.1 | 5903141 | SNV | 1 | A | T | Homozygous   |
| NC_037641.1 | 5907680 | SNV | 1 | A | G | Homozygous   |
| NC_037641.1 | 5907683 | SNV | 1 | A | G | Homozygous   |
| NC_037641.1 | 5907687 | SNV | 1 | A | T | Homozygous   |
| NC_037641.1 | 5907696 | SNV | 1 | G | A | Homozygous   |
| NC_037641.1 | 5907699 | SNV | 1 | A | C | Homozygous   |
| NC_037641.1 | 5907701 | SNV | 1 | T | C | Homozygous   |
| NC_037641.1 | 5907708 | SNV | 1 | A | G | Homozygous   |
| NC_037641.1 | 5907715 | SNV | 1 | G | T | Homozygous   |
| NC_037641.1 | 5907720 | SNV | 1 | T | C | Homozygous   |
| NC_037641.1 | 5909427 | SNV | 1 | A | G | Homozygous   |
| NC_037641.1 | 5910084 | SNV | 1 | C | T | Homozygous   |
| NC_037641.1 | 5911336 | SNV | 1 | T | C | Homozygous   |
| NC_037641.1 | 5920353 | SNV | 1 | T | A | Homozygous   |
| NC_037641.1 | 5920780 | SNV | 1 | T | C | Homozygous   |
| NC_037641.1 | 5921092 | SNV | 1 | C | T | Homozygous   |
| NC_037641.1 | 5921557 | SNV | 1 | C | A | Homozygous   |
| NC_037641.1 | 5922038 | SNV | 1 | C | T | Heterozygous |
| NC_037641.1 | 5922040 | SNV | 1 | G | T | Heterozygous |
| NC_037641.1 | 5922285 | SNV | 1 | C | T | Homozygous   |
| NC_037641.1 | 5924212 | SNV | 1 | G | A | Homozygous   |
| NC_037641.1 | 5924778 | SNV | 1 | T | A | Homozygous   |
| NC_037641.1 | 5925015 | SNV | 1 | C | T | Homozygous   |
| NC_037641.1 | 5925076 | SNV | 1 | T | C | Homozygous   |
| NC_037641.1 | 5925559 | SNV | 1 | A | C | Homozygous   |
| NC_037641.1 | 5931016 | SNV | 1 | C | T | Homozygous   |
| NC_037641.1 | 5931157 | SNV | 1 | A | C | Homozygous   |
| NC_037641.1 | 5931161 | SNV | 1 | T | A | Heterozygous |
| NC_037641.1 | 5931163 | SNV | 1 | A | G | Heterozygous |
| NC_037641.1 | 5931165 | SNV | 1 | A | T | Homozygous   |
| NC_037641.1 | 5933076 | SNV | 1 | A | C | Homozygous   |
| NC_037641.1 | 5933081 | SNV | 1 | A | T | Homozygous   |
| NC_037641.1 | 5933084 | SNV | 1 | T | C | Homozygous   |
| NC_037641.1 | 5933299 | SNV | 1 | A | G | Homozygous   |
| NC_037641.1 | 5934015 | SNV | 1 | T | A | Homozygous   |
| NC_037641.1 | 5934022 | SNV | 1 | A | T | Homozygous   |
| NC_037641.1 | 5936210 | SNV | 1 | G | A | Heterozygous |
| NC_037641.1 | 5936536 | SNV | 1 | T | C | Heterozygous |

|             |         |     |   |   |   |              |
|-------------|---------|-----|---|---|---|--------------|
| NC_037641.1 | 5936556 | SNV | 1 | C | T | Homozygous   |
| NC_037641.1 | 5936728 | SNV | 1 | A | G | Homozygous   |
| NC_037641.1 | 5937533 | SNV | 1 | C | A | Homozygous   |
| NC_037641.1 | 5939188 | SNV | 1 | G | A | Homozygous   |
| NC_037641.1 | 5940270 | SNV | 1 | T | G | Heterozygous |
| NC_037641.1 | 5941132 | SNV | 1 | A | G | Homozygous   |
| NC_037641.1 | 5944336 | SNV | 1 | C | T | Homozygous   |
| NC_037641.1 | 5944460 | SNV | 1 | C | T | Homozygous   |
| NC_037641.1 | 5944480 | SNV | 1 | A | G | Homozygous   |
| NC_037641.1 | 5944500 | SNV | 1 | T | C | Homozygous   |
| NC_037641.1 | 5944807 | SNV | 1 | A | G | Homozygous   |
| NC_037641.1 | 5944996 | SNV | 1 | T | C | Heterozygous |
| NC_037641.1 | 5945000 | SNV | 1 | C | T | Heterozygous |
| NC_037641.1 | 5945298 | SNV | 1 | T | C | Homozygous   |
| NC_037641.1 | 5945896 | SNV | 1 | G | T | Heterozygous |
| NC_037641.1 | 5945946 | SNV | 1 | G | A | Homozygous   |
| NC_037641.1 | 5946838 | SNV | 1 | C | T | Homozygous   |
| NC_037641.1 | 5946988 | SNV | 1 | A | G | Homozygous   |
| NC_037641.1 | 5951165 | SNV | 1 | G | A | Homozygous   |
| NC_037641.1 | 5951167 | SNV | 1 | C | T | Homozygous   |
| NC_037641.1 | 5953525 | SNV | 1 | A | C | Homozygous   |
| NC_037641.1 | 5953535 | SNV | 1 | G | A | Homozygous   |
| NC_037641.1 | 5969013 | SNV | 1 | A | G | Heterozygous |
| NC_037641.1 | 5969020 | SNV | 1 | A | G | Heterozygous |
| NC_037641.1 | 5970767 | SNV | 1 | G | A | Homozygous   |
| NC_037641.1 | 5971971 | SNV | 1 | T | C | Heterozygous |
| NC_037641.1 | 5971976 | SNV | 1 | G | A | Heterozygous |
| NC_037641.1 | 5973930 | SNV | 1 | T | C | Homozygous   |
| NC_037641.1 | 5974335 | SNV | 1 | C | G | Heterozygous |
| NC_037641.1 | 5974408 | SNV | 1 | C | T | Homozygous   |
| NC_037641.1 | 5974465 | SNV | 1 | T | C | Heterozygous |
| NC_037641.1 | 5974755 | SNV | 1 | T | C | Heterozygous |
| NC_037641.1 | 5974841 | SNV | 1 | T | C | Heterozygous |
| NC_037641.1 | 5975147 | SNV | 1 | A | G | Homozygous   |
| NC_037641.1 | 5975160 | SNV | 1 | A | G | Homozygous   |
| NC_037641.1 | 5975214 | SNV | 1 | T | C | Homozygous   |
| NC_037641.1 | 5975265 | SNV | 1 | A | G | Homozygous   |
| NC_037641.1 | 5975327 | SNV | 1 | C | T | Heterozygous |
| NC_037641.1 | 5975379 | SNV | 1 | G | A | Homozygous   |
| NC_037641.1 | 5975502 | SNV | 1 | A | T | Homozygous   |
| NC_037641.1 | 5975842 | SNV | 1 | A | C | Homozygous   |
| NC_037641.1 | 5975848 | SNV | 1 | A | T | Homozygous   |
| NC_037641.1 | 5975850 | SNV | 1 | A | G | Homozygous   |
| NC_037641.1 | 5976265 | SNV | 1 | G | A | Heterozygous |
| NC_037641.1 | 5976288 | SNV | 1 | G | A | Heterozygous |
| NC_037641.1 | 5976620 | SNV | 1 | G | A | Homozygous   |
| NC_037641.1 | 5976624 | SNV | 1 | C | T | Homozygous   |
| NC_037641.1 | 5976724 | SNV | 1 | C | T | Heterozygous |
| NC_037641.1 | 5976881 | SNV | 1 | C | T | Homozygous   |
| NC_037641.1 | 5977072 | SNV | 1 | C | G | Homozygous   |
| NC_037641.1 | 5977115 | SNV | 1 | G | A | Homozygous   |

|             |         |     |   |   |   |              |
|-------------|---------|-----|---|---|---|--------------|
| NC_037641.1 | 5977117 | SNV | 1 | C | A | Homozygous   |
| NC_037641.1 | 5977424 | SNV | 1 | G | A | Heterozygous |
| NC_037641.1 | 5977432 | SNV | 1 | C | T | Heterozygous |
| NC_037641.1 | 5979832 | SNV | 1 | A | G | Heterozygous |
| NC_037641.1 | 5979919 | SNV | 1 | C | T | Homozygous   |
| NC_037641.1 | 5979990 | SNV | 1 | G | A | Homozygous   |
| NC_037641.1 | 5980065 | SNV | 1 | T | A | Homozygous   |
| NC_037641.1 | 5980067 | SNV | 1 | A | T | Homozygous   |
| NC_037641.1 | 5980077 | SNV | 1 | C | T | Homozygous   |
| NC_037641.1 | 5980254 | SNV | 1 | A | G | Homozygous   |
| NC_037641.1 | 5980652 | SNV | 1 | C | T | Homozygous   |
| NC_037641.1 | 5980974 | SNV | 1 | G | T | Homozygous   |
| NC_037641.1 | 5984091 | SNV | 1 | C | G | Homozygous   |
| NC_037641.1 | 6013330 | SNV | 1 | T | C | Homozygous   |
| NC_037641.1 | 6013333 | SNV | 1 | T | G | Homozygous   |
| NC_037641.1 | 6013346 | SNV | 1 | G | T | Homozygous   |
| NC_037641.1 | 6013359 | SNV | 1 | A | C | Homozygous   |
| NC_037641.1 | 6028153 | SNV | 1 | C | T | Heterozygous |
| NC_037641.1 | 6028158 | SNV | 1 | A | C | Heterozygous |
| NC_037641.1 | 6028177 | SNV | 1 | G | A | Heterozygous |
| NC_037641.1 | 6028193 | SNV | 1 | C | A | Heterozygous |
| NC_037641.1 | 6028196 | SNV | 1 | G | A | Heterozygous |
| NC_037641.1 | 6028210 | SNV | 1 | A | G | Heterozygous |
| NC_037641.1 | 6028220 | SNV | 1 | C | T | Heterozygous |
| NC_037641.1 | 6028228 | SNV | 1 | A | G | Heterozygous |
| NC_037641.1 | 6028285 | SNV | 1 | G | A | Heterozygous |
| NC_037641.1 | 6028304 | SNV | 1 | G | C | Homozygous   |
| NC_037641.1 | 6028312 | SNV | 1 | A | G | Heterozygous |
| NC_037641.1 | 6028335 | SNV | 1 | T | C | Homozygous   |
| NC_037641.1 | 6028347 | SNV | 1 | C | A | Homozygous   |
| NC_037641.1 | 6028353 | SNV | 1 | C | T | Heterozygous |
| NC_037641.1 | 6028359 | SNV | 1 | C | T | Heterozygous |
| NC_037641.1 | 6028368 | SNV | 1 | C | G | Heterozygous |
| NC_037641.1 | 6028370 | SNV | 1 | T | A | Heterozygous |
| NC_037641.1 | 6031387 | SNV | 1 | T | C | Homozygous   |
| NC_037641.1 | 6031443 | SNV | 1 | C | T | Homozygous   |
| NC_037641.1 | 6031454 | SNV | 1 | C | T | Homozygous   |
| NC_037641.1 | 6032315 | SNV | 1 | C | T | Homozygous   |
| NC_037641.1 | 6032491 | SNV | 1 | T | C | Homozygous   |
| NC_037641.1 | 6032568 | SNV | 1 | T | C | Homozygous   |
| NC_037641.1 | 6032575 | SNV | 1 | G | C | Homozygous   |
| NC_037641.1 | 6032721 | SNV | 1 | G | A | Homozygous   |
| NC_037641.1 | 6043928 | SNV | 1 | T | C | Heterozygous |
| NC_037641.1 | 6044164 | SNV | 1 | A | G | Homozygous   |
| NC_037641.1 | 6044198 | SNV | 1 | C | T | Homozygous   |
| NC_037641.1 | 6056770 | SNV | 1 | G | C | Homozygous   |
| NC_037641.1 | 6056784 | SNV | 1 | C | T | Heterozygous |
| NC_037641.1 | 6057527 | SNV | 1 | G | A | Homozygous   |
| NC_037641.1 | 6057531 | SNV | 1 | C | A | Homozygous   |
| NC_037641.1 | 6063316 | SNV | 1 | C | T | Heterozygous |
| NC_037641.1 | 6063322 | SNV | 1 | C | T | Heterozygous |

|             |         |     |   |   |   |              |
|-------------|---------|-----|---|---|---|--------------|
| NC_037641.1 | 6063334 | SNV | 1 | C | T | Homozygous   |
| NC_037641.1 | 6063336 | SNV | 1 | T | C | Heterozygous |
| NC_037641.1 | 6087499 | SNV | 1 | G | A | Heterozygous |
| NC_037641.1 | 6093537 | SNV | 1 | A | G | Homozygous   |
| NC_037641.1 | 6110014 | SNV | 1 | C | T | Homozygous   |
| NC_037641.1 | 6110016 | SNV | 1 | A | G | Homozygous   |
| NC_037641.1 | 6110541 | SNV | 1 | G | C | Heterozygous |
| NC_037641.1 | 6110544 | SNV | 1 | G | C | Heterozygous |
| NC_037641.1 | 6110563 | SNV | 1 | T | G | Heterozygous |
| NC_037641.1 | 6110670 | SNV | 1 | C | T | Heterozygous |
| NC_037641.1 | 6110701 | SNV | 1 | A | G | Heterozygous |
| NC_037641.1 | 6111051 | SNV | 1 | A | G | Homozygous   |
| NC_037641.1 | 6120690 | SNV | 1 | T | G | Heterozygous |
| NC_037641.1 | 6136322 | SNV | 1 | T | C | Homozygous   |
| NC_037641.1 | 6136593 | SNV | 1 | C | G | Homozygous   |
| NC_037641.1 | 6136742 | SNV | 1 | T | C | Homozygous   |
| NC_037641.1 | 6136788 | SNV | 1 | C | T | Homozygous   |
| NC_037641.1 | 6136799 | SNV | 1 | A | C | Heterozygous |
| NC_037641.1 | 6136803 | SNV | 1 | A | G | Heterozygous |
| NC_037641.1 | 6136810 | SNV | 1 | C | T | Heterozygous |
| NC_037641.1 | 6136814 | SNV | 1 | G | A | Heterozygous |
| NC_037641.1 | 6136861 | SNV | 1 | A | G | Heterozygous |
| NC_037641.1 | 6136870 | SNV | 1 | A | G | Heterozygous |
| NC_037641.1 | 6137003 | SNV | 1 | C | T | Heterozygous |
| NC_037641.1 | 6137024 | SNV | 1 | C | T | Homozygous   |
| NC_037641.1 | 6137518 | SNV | 1 | G | A | Heterozygous |
| NC_037641.1 | 6137873 | SNV | 1 | A | T | Heterozygous |
| NC_037641.1 | 6137878 | SNV | 1 | G | A | Heterozygous |
| NC_037641.1 | 6144900 | SNV | 1 | A | G | Homozygous   |
| NC_037641.1 | 6144963 | SNV | 1 | T | C | Homozygous   |
| NC_037641.1 | 6145025 | SNV | 1 | A | G | Homozygous   |
| NC_037641.1 | 6145222 | SNV | 1 | T | C | Homozygous   |
| NC_037641.1 | 6145436 | SNV | 1 | T | C | Homozygous   |
| NC_037641.1 | 6145440 | SNV | 1 | A | G | Homozygous   |
| NC_037641.1 | 6145447 | SNV | 1 | T | G | Heterozygous |
| NC_037641.1 | 6145449 | SNV | 1 | G | C | Homozygous   |
| NC_037641.1 | 6146755 | SNV | 1 | A | T | Homozygous   |
| NC_037641.1 | 6146757 | SNV | 1 | G | C | Homozygous   |
| NC_037641.1 | 6146763 | SNV | 1 | A | T | Homozygous   |
| NC_037641.1 | 6146768 | SNV | 1 | A | T | Homozygous   |
| NC_037641.1 | 6146771 | SNV | 1 | T | A | Homozygous   |
| NC_037641.1 | 6149714 | SNV | 1 | C | A | Heterozygous |
| NC_037641.1 | 6183904 | SNV | 1 | C | T | Homozygous   |
| NC_037641.1 | 6183906 | SNV | 1 | C | T | Homozygous   |
| NC_037641.1 | 6183908 | SNV | 1 | C | T | Homozygous   |
| NC_037641.1 | 6212035 | SNV | 1 | C | T | Homozygous   |
| NC_037641.1 | 6239626 | SNV | 1 | C | G | Heterozygous |
| NC_037641.1 | 6239649 | SNV | 1 | T | A | Homozygous   |
| NC_037641.1 | 6239651 | SNV | 1 | A | T | Homozygous   |
| NC_037641.1 | 6239653 | SNV | 1 | C | G | Homozygous   |
| NC_037641.1 | 6245402 | SNV | 1 | A | C | Homozygous   |

|             |         |     |   |   |   |              |
|-------------|---------|-----|---|---|---|--------------|
| NC_037641.1 | 6245407 | SNV | 1 | G | C | Homozygous   |
| NC_037641.1 | 6245425 | SNV | 1 | A | G | Homozygous   |
| NC_037641.1 | 6258101 | SNV | 1 | A | T | Heterozygous |
| NC_037641.1 | 6258137 | SNV | 1 | C | T | Heterozygous |
| NC_037641.1 | 6258162 | SNV | 1 | T | C | Homozygous   |
| NC_037641.1 | 6258378 | SNV | 1 | G | A | Heterozygous |
| NC_037641.1 | 6258562 | SNV | 1 | G | A | Homozygous   |
| NC_037641.1 | 6258568 | SNV | 1 | G | A | Heterozygous |
| NC_037641.1 | 6258596 | SNV | 1 | T | C | Homozygous   |
| NC_037641.1 | 6258610 | SNV | 1 | G | A | Homozygous   |
| NC_037641.1 | 6269960 | SNV | 1 | A | G | Homozygous   |
| NC_037641.1 | 6270068 | SNV | 1 | T | C | Homozygous   |
| NC_037641.1 | 6270278 | SNV | 1 | G | A | Heterozygous |
| NC_037641.1 | 6279305 | SNV | 1 | G | A | Heterozygous |
| NC_037641.1 | 6279310 | SNV | 1 | G | A | Heterozygous |
| NC_037641.1 | 6280965 | SNV | 1 | T | C | Heterozygous |
| NC_037641.1 | 6295580 | SNV | 1 | C | T | Heterozygous |
| NC_037641.1 | 6301982 | SNV | 1 | A | G | Heterozygous |
| NC_037641.1 | 6302388 | SNV | 1 | T | C | Homozygous   |
| NC_037641.1 | 6307609 | SNV | 1 | A | T | Homozygous   |
| NC_037641.1 | 6307615 | SNV | 1 | C | T | Homozygous   |
| NC_037641.1 | 6307621 | SNV | 1 | C | T | Homozygous   |
| NC_037641.1 | 6307648 | SNV | 1 | A | G | Homozygous   |
| NC_037641.1 | 6310706 | SNV | 1 | A | T | Heterozygous |
| NC_037641.1 | 6310710 | SNV | 1 | A | G | Heterozygous |
| NC_037641.1 | 6318193 | SNV | 1 | C | T | Heterozygous |
| NC_037641.1 | 6318232 | SNV | 1 | C | T | Heterozygous |
| NC_037641.1 | 6319408 | SNV | 1 | A | G | Heterozygous |
| NC_037641.1 | 6319425 | SNV | 1 | C | T | Heterozygous |
| NC_037641.1 | 6319439 | SNV | 1 | G | A | Homozygous   |
| NC_037641.1 | 6319443 | SNV | 1 | A | G | Heterozygous |
| NC_037641.1 | 6319446 | SNV | 1 | A | G | Homozygous   |
| NC_037641.1 | 6319453 | SNV | 1 | C | G | Homozygous   |
| NC_037641.1 | 6329982 | SNV | 1 | T | A | Homozygous   |
| NC_037641.1 | 6329984 | SNV | 1 | G | C | Homozygous   |
| NC_037641.1 | 6333575 | SNV | 1 | A | G | Homozygous   |
| NC_037641.1 | 6333587 | SNV | 1 | A | G | Homozygous   |
| NC_037641.1 | 6336689 | SNV | 1 | T | C | Heterozygous |
| NC_037641.1 | 6342574 | SNV | 1 | C | T | Heterozygous |
| NC_037641.1 | 6342652 | SNV | 1 | A | G | Homozygous   |
| NC_037641.1 | 6342704 | SNV | 1 | G | A | Homozygous   |
| NC_037641.1 | 6343386 | SNV | 1 | C | T | Heterozygous |
| NC_037641.1 | 6343462 | SNV | 1 | C | T | Heterozygous |
| NC_037641.1 | 6343507 | SNV | 1 | C | T | Heterozygous |
| NC_037641.1 | 6343623 | SNV | 1 | A | T | Heterozygous |
| NC_037641.1 | 6346676 | SNV | 1 | C | T | Homozygous   |
| NC_037641.1 | 6346708 | SNV | 1 | G | A | Heterozygous |
| NC_037641.1 | 6348556 | SNV | 1 | C | T | Heterozygous |
| NC_037641.1 | 6348575 | SNV | 1 | C | T | Heterozygous |
| NC_037641.1 | 6348577 | SNV | 1 | C | T | Heterozygous |
| NC_037641.1 | 6348579 | SNV | 1 | C | T | Homozygous   |

|             |         |     |   |   |   |              |
|-------------|---------|-----|---|---|---|--------------|
| NC_037641.1 | 6349782 | SNV | 1 | C | T | Heterozygous |
| NC_037641.1 | 6349868 | SNV | 1 | G | A | Heterozygous |
| NC_037641.1 | 6357557 | SNV | 1 | T | A | Heterozygous |
| NC_037641.1 | 6357565 | SNV | 1 | G | T | Heterozygous |
| NC_037641.1 | 6375146 | SNV | 1 | T | C | Heterozygous |
| NC_037641.1 | 6376645 | SNV | 1 | G | A | Homozygous   |
| NC_037641.1 | 6379524 | SNV | 1 | A | C | Homozygous   |
| NC_037641.1 | 6379539 | SNV | 1 | T | C | Homozygous   |
| NC_037641.1 | 6379561 | SNV | 1 | G | C | Homozygous   |
| NC_037641.1 | 6386115 | SNV | 1 | C | T | Homozygous   |
| NC_037641.1 | 6386158 | SNV | 1 | C | T | Homozygous   |
| NC_037641.1 | 6386255 | SNV | 1 | A | T | Heterozygous |
| NC_037641.1 | 6386401 | SNV | 1 | G | T | Heterozygous |
| NC_037641.1 | 6388094 | SNV | 1 | T | C | Homozygous   |
| NC_037641.1 | 6388204 | SNV | 1 | T | C | Homozygous   |
| NC_037641.1 | 6388211 | SNV | 1 | T | C | Heterozygous |
| NC_037641.1 | 6388305 | SNV | 1 | G | A | Homozygous   |
| NC_037641.1 | 6391187 | SNV | 1 | T | A | Homozygous   |
| NC_037641.1 | 6391193 | SNV | 1 | G | A | Homozygous   |
| NC_037641.1 | 6391198 | SNV | 1 | T | G | Homozygous   |
| NC_037641.1 | 6391214 | SNV | 1 | T | C | Homozygous   |
| NC_037641.1 | 6391219 | SNV | 1 | C | G | Homozygous   |
| NC_037641.1 | 6391243 | SNV | 1 | G | T | Homozygous   |
| NC_037641.1 | 6391375 | SNV | 1 | A | G | Homozygous   |
| NC_037641.1 | 6391384 | SNV | 1 | T | C | Heterozygous |
| NC_037641.1 | 6391407 | SNV | 1 | T | C | Heterozygous |
| NC_037641.1 | 6391491 | SNV | 1 | G | A | Homozygous   |
| NC_037641.1 | 6391533 | SNV | 1 | C | T | Homozygous   |
| NC_037641.1 | 6391564 | SNV | 1 | T | C | Homozygous   |
| NC_037641.1 | 6391598 | SNV | 1 | A | G | Heterozygous |
| NC_037641.1 | 6391660 | SNV | 1 | T | C | Homozygous   |
| NC_037641.1 | 6391664 | SNV | 1 | T | A | Homozygous   |
| NC_037641.1 | 6391710 | SNV | 1 | T | A | Homozygous   |
| NC_037641.1 | 6391713 | SNV | 1 | C | T | Homozygous   |
| NC_037641.1 | 6391721 | SNV | 1 | G | A | Heterozygous |
| NC_037641.1 | 6391734 | SNV | 1 | T | G | Heterozygous |
| NC_037641.1 | 6391738 | SNV | 1 | A | T | Homozygous   |
| NC_037641.1 | 6391747 | SNV | 1 | C | A | Heterozygous |
| NC_037641.1 | 6391752 | SNV | 1 | A | T | Heterozygous |
| NC_037641.1 | 6391757 | SNV | 1 | A | T | Heterozygous |
| NC_037641.1 | 6391761 | SNV | 1 | G | A | Heterozygous |
| NC_037641.1 | 6391770 | SNV | 1 | G | C | Homozygous   |
| NC_037641.1 | 6391793 | SNV | 1 | C | T | Heterozygous |
| NC_037641.1 | 6392070 | SNV | 1 | A | G | Homozygous   |
| NC_037641.1 | 6392077 | SNV | 1 | T | G | Heterozygous |
| NC_037641.1 | 6392086 | SNV | 1 | C | G | Heterozygous |
| NC_037641.1 | 6392088 | SNV | 1 | T | A | Heterozygous |
| NC_037641.1 | 6392095 | SNV | 1 | T | G | Heterozygous |
| NC_037641.1 | 6392102 | SNV | 1 | A | G | Heterozygous |
| NC_037641.1 | 6392151 | SNV | 1 | C | G | Homozygous   |
| NC_037641.1 | 6392214 | SNV | 1 | C | T | Homozygous   |

|             |         |     |   |   |   |              |
|-------------|---------|-----|---|---|---|--------------|
| NC_037641.1 | 6392218 | SNV | 1 | G | C | Homozygous   |
| NC_037641.1 | 6392220 | SNV | 1 | A | G | Heterozygous |
| NC_037641.1 | 6392249 | SNV | 1 | T | C | Homozygous   |
| NC_037641.1 | 6392259 | SNV | 1 | C | T | Heterozygous |
| NC_037641.1 | 6392276 | SNV | 1 | C | T | Homozygous   |
| NC_037641.1 | 6392521 | SNV | 1 | C | T | Homozygous   |
| NC_037641.1 | 6392545 | SNV | 1 | C | T | Heterozygous |
| NC_037641.1 | 6392547 | SNV | 1 | A | G | Heterozygous |
| NC_037641.1 | 6392567 | SNV | 1 | G | A | Homozygous   |
| NC_037641.1 | 6392574 | SNV | 1 | T | C | Homozygous   |
| NC_037641.1 | 6392576 | SNV | 1 | C | T | Heterozygous |
| NC_037641.1 | 6392583 | SNV | 1 | A | T | Homozygous   |
| NC_037641.1 | 6392585 | SNV | 1 | T | C | Homozygous   |
| NC_037641.1 | 6392589 | SNV | 1 | T | G | Homozygous   |
| NC_037641.1 | 6392595 | SNV | 1 | C | A | Homozygous   |
| NC_037641.1 | 6392601 | SNV | 1 | A | C | Homozygous   |
| NC_037641.1 | 6392787 | SNV | 1 | C | G | Heterozygous |
| NC_037641.1 | 6392804 | SNV | 1 | A | C | Homozygous   |
| NC_037641.1 | 6392813 | SNV | 1 | G | A | Homozygous   |
| NC_037641.1 | 6392821 | SNV | 1 | G | A | Homozygous   |
| NC_037641.1 | 6392828 | SNV | 1 | A | G | Homozygous   |
| NC_037641.1 | 6402734 | SNV | 1 | A | C | Homozygous   |
| NC_037641.1 | 6402801 | SNV | 1 | A | C | Homozygous   |
| NC_037641.1 | 6402832 | SNV | 1 | A | G | Heterozygous |
| NC_037641.1 | 6402882 | SNV | 1 | A | G | Homozygous   |
| NC_037641.1 | 6402889 | SNV | 1 | A | G | Homozygous   |
| NC_037641.1 | 6402956 | SNV | 1 | C | T | Heterozygous |
| NC_037641.1 | 6402972 | SNV | 1 | A | G | Homozygous   |
| NC_037641.1 | 6403000 | SNV | 1 | G | A | Heterozygous |
| NC_037641.1 | 6411194 | SNV | 1 | C | T | Heterozygous |
| NC_037641.1 | 6411203 | SNV | 1 | G | T | Heterozygous |
| NC_037641.1 | 6411212 | SNV | 1 | G | T | Heterozygous |
| NC_037641.1 | 6411219 | SNV | 1 | G | A | Homozygous   |
| NC_037641.1 | 6411251 | SNV | 1 | G | C | Homozygous   |
| NC_037641.1 | 6411256 | SNV | 1 | G | T | Heterozygous |
| NC_037641.1 | 6411301 | SNV | 1 | C | T | Heterozygous |
| NC_037641.1 | 6422770 | SNV | 1 | C | T | Homozygous   |
| NC_037641.1 | 6461263 | SNV | 1 | G | A | Heterozygous |
| NC_037641.1 | 6462468 | SNV | 1 | G | A | Heterozygous |
| NC_037641.1 | 6463037 | SNV | 1 | A | G | Heterozygous |
| NC_037641.1 | 6463175 | SNV | 1 | C | T | Homozygous   |
| NC_037641.1 | 6463523 | SNV | 1 | G | A | Homozygous   |
| NC_037641.1 | 6463525 | SNV | 1 | G | C | Homozygous   |
| NC_037641.1 | 6464077 | SNV | 1 | T | C | Homozygous   |
| NC_037641.1 | 6464313 | SNV | 1 | C | T | Homozygous   |
| NC_037641.1 | 6464316 | SNV | 1 | T | C | Heterozygous |
| NC_037641.1 | 6465108 | SNV | 1 | T | C | Heterozygous |
| NC_037641.1 | 6465120 | SNV | 1 | G | A | Homozygous   |
| NC_037641.1 | 6465570 | SNV | 1 | T | C | Homozygous   |
| NC_037641.1 | 6465579 | SNV | 1 | C | T | Heterozygous |
| NC_037641.1 | 6465800 | SNV | 1 | A | G | Homozygous   |

|             |         |     |   |   |   |              |
|-------------|---------|-----|---|---|---|--------------|
| NC_037641.1 | 6465813 | SNV | 1 | G | C | Homozygous   |
| NC_037641.1 | 6466505 | SNV | 1 | A | G | Homozygous   |
| NC_037641.1 | 6466613 | SNV | 1 | G | C | Homozygous   |
| NC_037641.1 | 6466662 | SNV | 1 | C | T | Homozygous   |
| NC_037641.1 | 6468350 | SNV | 1 | T | C | Homozygous   |
| NC_037641.1 | 6468358 | SNV | 1 | T | C | Homozygous   |
| NC_037641.1 | 6468373 | SNV | 1 | T | C | Homozygous   |
| NC_037641.1 | 6498957 | SNV | 1 | G | C | Homozygous   |
| NC_037641.1 | 6498959 | SNV | 1 | A | C | Homozygous   |
| NC_037641.1 | 6508984 | SNV | 1 | A | T | Homozygous   |
| NC_037641.1 | 6508986 | SNV | 1 | T | A | Homozygous   |
| NC_037641.1 | 6508993 | SNV | 1 | A | C | Homozygous   |
| NC_037641.1 | 6509021 | SNV | 1 | A | G | Homozygous   |
| NC_037641.1 | 6509043 | SNV | 1 | A | G | Homozygous   |
| NC_037641.1 | 6509051 | SNV | 1 | A | G | Homozygous   |
| NC_037641.1 | 6564706 | SNV | 1 | A | T | Heterozygous |
| NC_037641.1 | 6564724 | SNV | 1 | A | T | Homozygous   |
| NC_037641.1 | 6565646 | SNV | 1 | T | C | Heterozygous |
| NC_037641.1 | 6565707 | SNV | 1 | T | C | Homozygous   |
| NC_037641.1 | 6565899 | SNV | 1 | T | C | Heterozygous |
| NC_037641.1 | 6565996 | SNV | 1 | G | A | Heterozygous |
| NC_037641.1 | 6568626 | SNV | 1 | C | T | Homozygous   |
| NC_037641.1 | 6568842 | SNV | 1 | C | T | Homozygous   |
| NC_037641.1 | 6568862 | SNV | 1 | A | T | Heterozygous |
| NC_037641.1 | 6569351 | SNV | 1 | G | A | Homozygous   |
| NC_037641.1 | 6570010 | SNV | 1 | G | A | Homozygous   |
| NC_037641.1 | 6570114 | SNV | 1 | G | A | Heterozygous |
| NC_037641.1 | 6570129 | SNV | 1 | C | G | Heterozygous |
| NC_037641.1 | 6570132 | SNV | 1 | T | C | Homozygous   |
| NC_037641.1 | 6599021 | SNV | 1 | G | C | Heterozygous |
| NC_037641.1 | 6603653 | SNV | 1 | G | A | Homozygous   |
| NC_037641.1 | 6603932 | SNV | 1 | A | G | Heterozygous |
| NC_037641.1 | 6604371 | SNV | 1 | G | A | Heterozygous |
| NC_037641.1 | 6604391 | SNV | 1 | C | T | Homozygous   |
| NC_037641.1 | 6604407 | SNV | 1 | C | T | Homozygous   |
| NC_037641.1 | 6608665 | SNV | 1 | G | A | Heterozygous |
| NC_037641.1 | 6608697 | SNV | 1 | C | T | Heterozygous |
| NC_037641.1 | 6608715 | SNV | 1 | A | G | Heterozygous |
| NC_037641.1 | 6608718 | SNV | 1 | G | A | Homozygous   |
| NC_037641.1 | 6608720 | SNV | 1 | G | A | Homozygous   |
| NC_037641.1 | 6608722 | SNV | 1 | T | G | Homozygous   |
| NC_037641.1 | 6608853 | SNV | 1 | A | G | Heterozygous |
| NC_037641.1 | 6608868 | SNV | 1 | T | C | Homozygous   |
| NC_037641.1 | 6618100 | SNV | 1 | G | T | Homozygous   |
| NC_037641.1 | 6619946 | SNV | 1 | T | C | Homozygous   |
| NC_037641.1 | 6619960 | SNV | 1 | G | A | Heterozygous |
| NC_037641.1 | 6620023 | SNV | 1 | A | G | Homozygous   |
| NC_037641.1 | 6620027 | SNV | 1 | C | G | Homozygous   |
| NC_037641.1 | 6627108 | SNV | 1 | A | C | Homozygous   |
| NC_037641.1 | 6627131 | SNV | 1 | A | G | Homozygous   |
| NC_037641.1 | 6627133 | SNV | 1 | T | G | Homozygous   |



|             |         |     |   |   |   |              |
|-------------|---------|-----|---|---|---|--------------|
| NC_037641.1 | 6629619 | SNV | 1 | T | C | Heterozygous |
| NC_037641.1 | 6629629 | SNV | 1 | A | G | Heterozygous |
| NC_037641.1 | 6629646 | SNV | 1 | A | G | Homozygous   |
| NC_037641.1 | 6629883 | SNV | 1 | T | A | Homozygous   |
| NC_037641.1 | 6629917 | SNV | 1 | A | T | Heterozygous |
| NC_037641.1 | 6629933 | SNV | 1 | C | T | Homozygous   |
| NC_037641.1 | 6632832 | SNV | 1 | C | T | Heterozygous |
| NC_037641.1 | 6632949 | SNV | 1 | G | A | Heterozygous |
| NC_037641.1 | 6632960 | SNV | 1 | G | A | Heterozygous |
| NC_037641.1 | 6641388 | SNV | 1 | T | A | Homozygous   |
| NC_037641.1 | 6641433 | SNV | 1 | G | A | Heterozygous |
| NC_037641.1 | 6641602 | SNV | 1 | C | T | Homozygous   |
| NC_037641.1 | 6641687 | SNV | 1 | T | C | Homozygous   |
| NC_037641.1 | 6641756 | SNV | 1 | G | A | Heterozygous |
| NC_037641.1 | 6641837 | SNV | 1 | G | A | Heterozygous |
| NC_037641.1 | 6651870 | SNV | 1 | G | A | Heterozygous |
| NC_037641.1 | 6651870 | SNV | 1 | G | C | Heterozygous |
| NC_037641.1 | 6651993 | SNV | 1 | G | A | Heterozygous |
| NC_037641.1 | 6656110 | SNV | 1 | A | G | Homozygous   |
| NC_037641.1 | 6656222 | SNV | 1 | C | G | Homozygous   |
| NC_037641.1 | 6657398 | SNV | 1 | T | C | Heterozygous |
| NC_037641.1 | 6657417 | SNV | 1 | G | A | Heterozygous |
| NC_037641.1 | 6657587 | SNV | 1 | G | A | Heterozygous |
| NC_037641.1 | 6657605 | SNV | 1 | A | G | Homozygous   |
| NC_037641.1 | 6657612 | SNV | 1 | A | G | Homozygous   |
| NC_037641.1 | 6668784 | SNV | 1 | A | G | Heterozygous |
| NC_037641.1 | 6669043 | SNV | 1 | G | A | Homozygous   |
| NC_037641.1 | 6669142 | SNV | 1 | A | C | Heterozygous |
| NC_037641.1 | 6669280 | SNV | 1 | T | C | Heterozygous |
| NC_037641.1 | 6669367 | SNV | 1 | G | C | Homozygous   |
| NC_037641.1 | 6672407 | SNV | 1 | G | A | Heterozygous |
| NC_037641.1 | 6675401 | SNV | 1 | G | T | Homozygous   |
| NC_037641.1 | 6675410 | SNV | 1 | C | G | Homozygous   |
| NC_037641.1 | 6675424 | SNV | 1 | A | G | Homozygous   |
| NC_037641.1 | 6677823 | SNV | 1 | C | T | Heterozygous |
| NC_037641.1 | 6677857 | SNV | 1 | G | C | Heterozygous |
| NC_037641.1 | 6678092 | SNV | 1 | T | C | Homozygous   |
| NC_037641.1 | 6678113 | SNV | 1 | G | A | Homozygous   |
| NC_037641.1 | 6678481 | SNV | 1 | A | G | Heterozygous |
| NC_037641.1 | 6678582 | SNV | 1 | T | G | Homozygous   |
| NC_037641.1 | 6679257 | SNV | 1 | T | A | Homozygous   |
| NC_037641.1 | 6679289 | SNV | 1 | G | T | Homozygous   |
| NC_037641.1 | 6687875 | SNV | 1 | A | G | Heterozygous |
| NC_037641.1 | 6687952 | SNV | 1 | G | A | Heterozygous |
| NC_037641.1 | 6688350 | SNV | 1 | A | G | Homozygous   |
| NC_037641.1 | 6688749 | SNV | 1 | T | G | Heterozygous |
| NC_037641.1 | 6688754 | SNV | 1 | T | C | Homozygous   |
| NC_037641.1 | 6688794 | SNV | 1 | T | C | Homozygous   |
| NC_037641.1 | 6688811 | SNV | 1 | T | C | Homozygous   |
| NC_037641.1 | 6688865 | SNV | 1 | C | T | Homozygous   |
| NC_037641.1 | 6688885 | SNV | 1 | A | G | Homozygous   |

|             |         |     |   |   |   |              |
|-------------|---------|-----|---|---|---|--------------|
| NC_037641.1 | 6688893 | SNV | 1 | A | G | Homozygous   |
| NC_037641.1 | 6688990 | SNV | 1 | G | A | Heterozygous |
| NC_037641.1 | 6689096 | SNV | 1 | C | T | Heterozygous |
| NC_037641.1 | 6689284 | SNV | 1 | C | T | Heterozygous |
| NC_037641.1 | 6689311 | SNV | 1 | G | C | Homozygous   |
| NC_037641.1 | 6700349 | SNV | 1 | C | T | Heterozygous |
| NC_037641.1 | 6704599 | SNV | 1 | C | T | Heterozygous |
| NC_037641.1 | 6704604 | SNV | 1 | T | C | Heterozygous |
| NC_037641.1 | 6704610 | SNV | 1 | T | C | Heterozygous |
| NC_037641.1 | 6706772 | SNV | 1 | T | A | Heterozygous |
| NC_037641.1 | 6707080 | SNV | 1 | G | A | Homozygous   |
| NC_037641.1 | 6709378 | SNV | 1 | A | T | Homozygous   |
| NC_037641.1 | 6709382 | SNV | 1 | A | T | Heterozygous |
| NC_037641.1 | 6709966 | SNV | 1 | C | T | Heterozygous |
| NC_037641.1 | 6710000 | SNV | 1 | G | T | Homozygous   |
| NC_037641.1 | 6710793 | SNV | 1 | T | C | Heterozygous |
| NC_037641.1 | 6711791 | SNV | 1 | T | C | Homozygous   |
| NC_037641.1 | 6711959 | SNV | 1 | G | T | Heterozygous |
| NC_037641.1 | 6716603 | SNV | 1 | C | G | Homozygous   |
| NC_037641.1 | 6716693 | SNV | 1 | T | C | Homozygous   |
| NC_037641.1 | 6716698 | SNV | 1 | C | A | Heterozygous |
| NC_037641.1 | 6716702 | SNV | 1 | A | T | Heterozygous |
| NC_037641.1 | 6716755 | SNV | 1 | C | T | Heterozygous |
| NC_037641.1 | 6716761 | SNV | 1 | C | A | Heterozygous |
| NC_037641.1 | 6718646 | SNV | 1 | T | C | Homozygous   |
| NC_037641.1 | 6718661 | SNV | 1 | T | C | Homozygous   |
| NC_037641.1 | 6719997 | SNV | 1 | A | C | Homozygous   |
| NC_037641.1 | 6720416 | SNV | 1 | G | A | Heterozygous |
| NC_037641.1 | 6720626 | SNV | 1 | C | T | Heterozygous |
| NC_037641.1 | 6720632 | SNV | 1 | C | T | Heterozygous |
| NC_037641.1 | 6720635 | SNV | 1 | C | T | Heterozygous |
| NC_037641.1 | 6721299 | SNV | 1 | G | A | Homozygous   |
| NC_037641.1 | 6721650 | SNV | 1 | G | C | Homozygous   |
| NC_037641.1 | 6721652 | SNV | 1 | C | G | Homozygous   |
| NC_037641.1 | 6721727 | SNV | 1 | T | C | Heterozygous |
| NC_037641.1 | 6722344 | SNV | 1 | G | A | Heterozygous |
| NC_037641.1 | 6722722 | SNV | 1 | C | T | Heterozygous |
| NC_037641.1 | 6722915 | SNV | 1 | A | G | Homozygous   |
| NC_037641.1 | 6722920 | SNV | 1 | G | A | Heterozygous |
| NC_037641.1 | 6723056 | SNV | 1 | T | C | Homozygous   |
| NC_037641.1 | 6723092 | SNV | 1 | A | C | Homozygous   |
| NC_037641.1 | 6723189 | SNV | 1 | T | C | Homozygous   |
| NC_037641.1 | 6723288 | SNV | 1 | G | A | Heterozygous |
| NC_037641.1 | 6724557 | SNV | 1 | T | C | Heterozygous |
| NC_037641.1 | 6724587 | SNV | 1 | G | A | Heterozygous |
| NC_037641.1 | 6724599 | SNV | 1 | C | T | Heterozygous |
| NC_037641.1 | 6724713 | SNV | 1 | T | C | Homozygous   |
| NC_037641.1 | 6725004 | SNV | 1 | T | C | Homozygous   |
| NC_037641.1 | 6725619 | SNV | 1 | T | C | Homozygous   |
| NC_037641.1 | 6726015 | SNV | 1 | G | A | Heterozygous |
| NC_037641.1 | 6726187 | SNV | 1 | T | C | Heterozygous |

|             |         |     |   |   |   |              |
|-------------|---------|-----|---|---|---|--------------|
| NC_037641.1 | 6726265 | SNV | 1 | T | A | Heterozygous |
| NC_037641.1 | 6726386 | SNV | 1 | C | T | Homozygous   |
| NC_037641.1 | 6726393 | SNV | 1 | A | C | Homozygous   |
| NC_037641.1 | 6726395 | SNV | 1 | C | T | Homozygous   |
| NC_037641.1 | 6726491 | SNV | 1 | G | A | Homozygous   |
| NC_037641.1 | 6726603 | SNV | 1 | A | T | Heterozygous |
| NC_037641.1 | 6728106 | SNV | 1 | G | A | Heterozygous |
| NC_037641.1 | 6728157 | SNV | 1 | C | T | Heterozygous |
| NC_037641.1 | 6728166 | SNV | 1 | A | G | Homozygous   |
| NC_037641.1 | 6728786 | SNV | 1 | C | T | Heterozygous |
| NC_037641.1 | 6729075 | SNV | 1 | A | G | Homozygous   |
| NC_037641.1 | 6732044 | SNV | 1 | C | T | Homozygous   |
| NC_037641.1 | 6732048 | SNV | 1 | T | C | Homozygous   |
| NC_037641.1 | 6732057 | SNV | 1 | C | G | Homozygous   |
| NC_037641.1 | 6732090 | SNV | 1 | T | C | Homozygous   |
| NC_037641.1 | 6732141 | SNV | 1 | A | C | Homozygous   |
| NC_037641.1 | 6732153 | SNV | 1 | T | C | Homozygous   |
| NC_037641.1 | 6732279 | SNV | 1 | A | G | Heterozygous |
| NC_037641.1 | 6732324 | SNV | 1 | G | A | Homozygous   |
| NC_037641.1 | 6732331 | SNV | 1 | G | A | Homozygous   |
| NC_037641.1 | 6732382 | SNV | 1 | T | C | Homozygous   |
| NC_037641.1 | 6732670 | SNV | 1 | T | C | Heterozygous |
| NC_037641.1 | 6732673 | SNV | 1 | A | G | Homozygous   |
| NC_037641.1 | 6732712 | SNV | 1 | A | G | Homozygous   |
| NC_037641.1 | 6732860 | SNV | 1 | C | T | Heterozygous |
| NC_037641.1 | 6732943 | SNV | 1 | C | G | Heterozygous |
| NC_037641.1 | 6732967 | SNV | 1 | A | G | Heterozygous |
| NC_037641.1 | 6733129 | SNV | 1 | A | G | Homozygous   |
| NC_037641.1 | 6733165 | SNV | 1 | A | G | Homozygous   |
| NC_037641.1 | 6733634 | SNV | 1 | C | T | Heterozygous |
| NC_037641.1 | 6733637 | SNV | 1 | A | C | Homozygous   |
| NC_037641.1 | 6735751 | SNV | 1 | G | C | Homozygous   |
| NC_037641.1 | 6735758 | SNV | 1 | A | G | Homozygous   |
| NC_037641.1 | 6735762 | SNV | 1 | C | T | Homozygous   |
| NC_037641.1 | 6735775 | SNV | 1 | C | T | Homozygous   |
| NC_037641.1 | 6735884 | SNV | 1 | C | T | Heterozygous |
| NC_037641.1 | 6737861 | SNV | 1 | G | A | Homozygous   |
| NC_037641.1 | 6737876 | SNV | 1 | A | G | Homozygous   |
| NC_037641.1 | 6737895 | SNV | 1 | C | T | Homozygous   |
| NC_037641.1 | 6738207 | SNV | 1 | G | T | Heterozygous |
| NC_037641.1 | 6738687 | SNV | 1 | T | C | Heterozygous |
| NC_037641.1 | 6738816 | SNV | 1 | C | T | Homozygous   |
| NC_037641.1 | 6738934 | SNV | 1 | C | G | Heterozygous |
| NC_037641.1 | 6738938 | SNV | 1 | G | C | Heterozygous |
| NC_037641.1 | 6739088 | SNV | 1 | A | G | Heterozygous |
| NC_037641.1 | 6741632 | SNV | 1 | C | T | Heterozygous |
| NC_037641.1 | 6741668 | SNV | 1 | C | T | Heterozygous |
| NC_037641.1 | 6741677 | SNV | 1 | C | G | Heterozygous |
| NC_037641.1 | 6741746 | SNV | 1 | G | A | Homozygous   |
| NC_037641.1 | 6741758 | SNV | 1 | G | C | Homozygous   |
| NC_037641.1 | 6741760 | SNV | 1 | G | A | Heterozygous |

|             |         |     |   |   |   |              |
|-------------|---------|-----|---|---|---|--------------|
| NC_037641.1 | 6746572 | SNV | 1 | T | C | Homozygous   |
| NC_037641.1 | 6746887 | SNV | 1 | C | T | Heterozygous |
| NC_037641.1 | 6749880 | SNV | 1 | G | A | Heterozygous |
| NC_037641.1 | 6749884 | SNV | 1 | T | A | Heterozygous |
| NC_037641.1 | 6750315 | SNV | 1 | T | C | Heterozygous |
| NC_037641.1 | 6750374 | SNV | 1 | A | T | Heterozygous |
| NC_037641.1 | 6750551 | SNV | 1 | A | G | Homozygous   |
| NC_037641.1 | 6750889 | SNV | 1 | A | G | Homozygous   |
| NC_037641.1 | 6750998 | SNV | 1 | T | C | Homozygous   |
| NC_037641.1 | 6752339 | SNV | 1 | C | T | Heterozygous |
| NC_037641.1 | 6752357 | SNV | 1 | T | G | Homozygous   |
| NC_037641.1 | 6752736 | SNV | 1 | T | C | Homozygous   |
| NC_037641.1 | 6752865 | SNV | 1 | G | A | Heterozygous |
| NC_037641.1 | 6752877 | SNV | 1 | T | C | Homozygous   |
| NC_037641.1 | 6753177 | SNV | 1 | T | C | Heterozygous |
| NC_037641.1 | 6753206 | SNV | 1 | A | G | Homozygous   |
| NC_037641.1 | 6755529 | SNV | 1 | T | C | Homozygous   |
| NC_037641.1 | 6756834 | SNV | 1 | C | T | Heterozygous |
| NC_037641.1 | 6757035 | SNV | 1 | C | T | Homozygous   |
| NC_037641.1 | 6757041 | SNV | 1 | A | C | Heterozygous |
| NC_037641.1 | 6757104 | SNV | 1 | G | C | Heterozygous |
| NC_037641.1 | 6759666 | SNV | 1 | A | G | Homozygous   |
| NC_037641.1 | 6761551 | SNV | 1 | C | T | Homozygous   |
| NC_037641.1 | 6763019 | SNV | 1 | C | A | Heterozygous |
| NC_037641.1 | 6763024 | SNV | 1 | G | A | Heterozygous |
| NC_037641.1 | 6763028 | SNV | 1 | T | A | Homozygous   |
| NC_037641.1 | 6763094 | SNV | 1 | C | T | Homozygous   |
| NC_037641.1 | 6763099 | SNV | 1 | G | C | Homozygous   |
| NC_037641.1 | 6763248 | SNV | 1 | A | C | Homozygous   |
| NC_037641.1 | 6763745 | SNV | 1 | A | T | Heterozygous |
| NC_037641.1 | 6763763 | SNV | 1 | A | G | Homozygous   |
| NC_037641.1 | 6764707 | SNV | 1 | G | A | Homozygous   |
| NC_037641.1 | 6765014 | SNV | 1 | T | A | Heterozygous |
| NC_037641.1 | 6765127 | SNV | 1 | T | C | Homozygous   |
| NC_037641.1 | 6765142 | SNV | 1 | A | G | Homozygous   |
| NC_037641.1 | 6765455 | SNV | 1 | A | T | Heterozygous |
| NC_037641.1 | 6765660 | SNV | 1 | C | T | Homozygous   |
| NC_037641.1 | 6765673 | SNV | 1 | A | G | Homozygous   |
| NC_037641.1 | 6765720 | SNV | 1 | A | G | Homozygous   |
| NC_037641.1 | 6766095 | SNV | 1 | T | C | Heterozygous |
| NC_037641.1 | 6766172 | SNV | 1 | A | G | Homozygous   |
| NC_037641.1 | 6767133 | SNV | 1 | A | G | Homozygous   |
| NC_037641.1 | 6770036 | SNV | 1 | T | A | Homozygous   |
| NC_037641.1 | 6770058 | SNV | 1 | T | A | Homozygous   |
| NC_037641.1 | 6770060 | SNV | 1 | T | G | Homozygous   |
| NC_037641.1 | 6770067 | SNV | 1 | A | T | Homozygous   |
| NC_037641.1 | 6771234 | SNV | 1 | A | T | Homozygous   |
| NC_037641.1 | 6771236 | SNV | 1 | T | A | Homozygous   |
| NC_037641.1 | 6771242 | SNV | 1 | T | A | Homozygous   |
| NC_037641.1 | 6771244 | SNV | 1 | T | C | Homozygous   |
| NC_037641.1 | 6771247 | SNV | 1 | A | T | Homozygous   |

|             |         |     |   |   |   |              |
|-------------|---------|-----|---|---|---|--------------|
| NC_037641.1 | 6771249 | SNV | 1 | A | C | Homozygous   |
| NC_037641.1 | 6771254 | SNV | 1 | A | T | Homozygous   |
| NC_037641.1 | 6771259 | SNV | 1 | T | A | Homozygous   |
| NC_037641.1 | 6771267 | SNV | 1 | T | A | Homozygous   |
| NC_037641.1 | 6777008 | SNV | 1 | T | C | Homozygous   |
| NC_037641.1 | 6777053 | SNV | 1 | C | T | Heterozygous |
| NC_037641.1 | 6780797 | SNV | 1 | G | A | Heterozygous |
| NC_037641.1 | 6781696 | SNV | 1 | G | A | Heterozygous |
| NC_037641.1 | 6782310 | SNV | 1 | T | A | Heterozygous |
| NC_037641.1 | 6782319 | SNV | 1 | A | G | Heterozygous |
| NC_037641.1 | 6785460 | SNV | 1 | A | G | Heterozygous |
| NC_037641.1 | 6785472 | SNV | 1 | T | G | Heterozygous |
| NC_037641.1 | 6785530 | SNV | 1 | T | C | Heterozygous |
| NC_037641.1 | 6785937 | SNV | 1 | C | T | Heterozygous |
| NC_037641.1 | 6786245 | SNV | 1 | T | C | Homozygous   |
| NC_037641.1 | 6786355 | SNV | 1 | A | G | Homozygous   |
| NC_037641.1 | 6786964 | SNV | 1 | T | C | Homozygous   |
| NC_037641.1 | 6787277 | SNV | 1 | G | A | Homozygous   |
| NC_037641.1 | 6790653 | SNV | 1 | G | A | Heterozygous |
| NC_037641.1 | 6812667 | SNV | 1 | C | T | Homozygous   |
| NC_037641.1 | 6812670 | SNV | 1 | C | T | Homozygous   |
| NC_037641.1 | 6846260 | SNV | 1 | A | G | Homozygous   |
| NC_037641.1 | 6846288 | SNV | 1 | T | C | Heterozygous |
| NC_037641.1 | 6846358 | SNV | 1 | A | G | Heterozygous |
| NC_037641.1 | 6846363 | SNV | 1 | G | A | Heterozygous |
| NC_037641.1 | 6846369 | SNV | 1 | T | C | Heterozygous |
| NC_037641.1 | 6846436 | SNV | 1 | G | A | Homozygous   |
| NC_037641.1 | 6846453 | SNV | 1 | T | C | Homozygous   |
| NC_037641.1 | 6846535 | SNV | 1 | A | G | Homozygous   |
| NC_037641.1 | 6846702 | SNV | 1 | T | G | Homozygous   |
| NC_037641.1 | 6847090 | SNV | 1 | G | A | Heterozygous |
| NC_037641.1 | 6847235 | SNV | 1 | T | C | Homozygous   |
| NC_037641.1 | 6859203 | SNV | 1 | A | G | Homozygous   |
| NC_037641.1 | 6860790 | SNV | 1 | A | G | Homozygous   |
| NC_037641.1 | 6860827 | SNV | 1 | G | A | Homozygous   |
| NC_037641.1 | 6860917 | SNV | 1 | A | G | Homozygous   |
| NC_037641.1 | 6860926 | SNV | 1 | C | T | Heterozygous |
| NC_037641.1 | 6860935 | SNV | 1 | G | A | Heterozygous |
| NC_037641.1 | 6860987 | SNV | 1 | A | G | Homozygous   |
| NC_037641.1 | 6861022 | SNV | 1 | G | C | Heterozygous |
| NC_037641.1 | 6861113 | SNV | 1 | T | C | Heterozygous |
| NC_037641.1 | 6861115 | SNV | 1 | C | G | Heterozygous |
| NC_037641.1 | 6861136 | SNV | 1 | G | A | Heterozygous |
| NC_037641.1 | 6869123 | SNV | 1 | G | A | Heterozygous |
| NC_037641.1 | 6871466 | SNV | 1 | C | T | Homozygous   |
| NC_037641.1 | 6873759 | SNV | 1 | A | G | Homozygous   |
| NC_037641.1 | 6873864 | SNV | 1 | A | G | Heterozygous |
| NC_037641.1 | 6873904 | SNV | 1 | G | C | Heterozygous |
| NC_037641.1 | 6874132 | SNV | 1 | G | A | Heterozygous |
| NC_037641.1 | 6874168 | SNV | 1 | T | A | Heterozygous |
| NC_037641.1 | 6874531 | SNV | 1 | G | T | Homozygous   |

|             |         |     |   |   |   |              |
|-------------|---------|-----|---|---|---|--------------|
| NC_037641.1 | 6874538 | SNV | 1 | A | C | Heterozygous |
| NC_037641.1 | 6874540 | SNV | 1 | G | T | Heterozygous |
| NC_037641.1 | 6874657 | SNV | 1 | G | T | Heterozygous |
| NC_037641.1 | 6874681 | SNV | 1 | C | T | Heterozygous |
| NC_037641.1 | 6883302 | SNV | 1 | A | C | Homozygous   |
| NC_037641.1 | 6883304 | SNV | 1 | T | C | Homozygous   |
| NC_037641.1 | 6883311 | SNV | 1 | C | T | Homozygous   |
| NC_037641.1 | 6883319 | SNV | 1 | T | C | Homozygous   |
| NC_037641.1 | 6883608 | SNV | 1 | T | C | Homozygous   |
| NC_037641.1 | 6890977 | SNV | 1 | A | G | Homozygous   |
| NC_037641.1 | 6894026 | SNV | 1 | T | C | Homozygous   |
| NC_037641.1 | 6894061 | SNV | 1 | T | C | Heterozygous |
| NC_037641.1 | 6894141 | SNV | 1 | T | G | Homozygous   |
| NC_037641.1 | 6894168 | SNV | 1 | T | C | Heterozygous |
| NC_037641.1 | 6899597 | SNV | 1 | T | C | Homozygous   |
| NC_037641.1 | 6899745 | SNV | 1 | G | T | Heterozygous |
| NC_037641.1 | 6899968 | SNV | 1 | C | T | Heterozygous |
| NC_037641.1 | 6900243 | SNV | 1 | T | C | Homozygous   |
| NC_037641.1 | 6900303 | SNV | 1 | T | C | Homozygous   |
| NC_037641.1 | 6900364 | SNV | 1 | G | A | Heterozygous |
| NC_037641.1 | 6902476 | SNV | 1 | A | G | Homozygous   |
| NC_037641.1 | 6910805 | SNV | 1 | T | C | Homozygous   |
| NC_037641.1 | 6910836 | SNV | 1 | C | T | Homozygous   |
| NC_037641.1 | 6910838 | SNV | 1 | A | G | Homozygous   |
| NC_037641.1 | 6910855 | SNV | 1 | G | A | Homozygous   |
| NC_037641.1 | 6911011 | SNV | 1 | C | T | Heterozygous |
| NC_037641.1 | 6911202 | SNV | 1 | T | C | Homozygous   |
| NC_037641.1 | 6911220 | SNV | 1 | C | T | Homozygous   |
| NC_037641.1 | 6911247 | SNV | 1 | A | G | Homozygous   |
| NC_037641.1 | 6913578 | SNV | 1 | C | T | Heterozygous |
| NC_037641.1 | 6913579 | SNV | 1 | T | G | Heterozygous |
| NC_037641.1 | 6913975 | SNV | 1 | G | A | Heterozygous |
| NC_037641.1 | 6913978 | SNV | 1 | G | A | Heterozygous |
| NC_037641.1 | 6913992 | SNV | 1 | C | T | Homozygous   |
| NC_037641.1 | 6913994 | SNV | 1 | C | A | Heterozygous |
| NC_037641.1 | 6913994 | SNV | 1 | C | T | Heterozygous |
| NC_037641.1 | 6914014 | SNV | 1 | C | T | Heterozygous |
| NC_037641.1 | 6914073 | SNV | 1 | T | G | Homozygous   |
| NC_037641.1 | 6914151 | SNV | 1 | T | C | Homozygous   |
| NC_037641.1 | 6914154 | SNV | 1 | A | G | Homozygous   |
| NC_037641.1 | 6914400 | SNV | 1 | G | A | Homozygous   |
| NC_037641.1 | 6914600 | SNV | 1 | C | G | Homozygous   |
| NC_037641.1 | 6914727 | SNV | 1 | G | A | Homozygous   |
| NC_037641.1 | 6914792 | SNV | 1 | T | C | Heterozygous |
| NC_037641.1 | 6914850 | SNV | 1 | T | C | Homozygous   |
| NC_037641.1 | 6914852 | SNV | 1 | T | C | Homozygous   |
| NC_037641.1 | 6914857 | SNV | 1 | C | T | Heterozygous |
| NC_037641.1 | 6914912 | SNV | 1 | T | C | Homozygous   |
| NC_037641.1 | 6914927 | SNV | 1 | T | C | Homozygous   |
| NC_037641.1 | 6914966 | SNV | 1 | A | T | Homozygous   |
| NC_037641.1 | 6914985 | SNV | 1 | C | T | Homozygous   |

|             |         |     |   |   |   |              |
|-------------|---------|-----|---|---|---|--------------|
| NC_037641.1 | 6915026 | SNV | 1 | T | C | Homozygous   |
| NC_037641.1 | 6915056 | SNV | 1 | C | T | Heterozygous |
| NC_037641.1 | 6915109 | SNV | 1 | T | G | Homozygous   |
| NC_037641.1 | 6915132 | SNV | 1 | T | G | Homozygous   |
| NC_037641.1 | 6916156 | SNV | 1 | T | A | Heterozygous |
| NC_037641.1 | 6916225 | SNV | 1 | A | G | Heterozygous |
| NC_037641.1 | 6916456 | SNV | 1 | T | C | Homozygous   |
| NC_037641.1 | 6916464 | SNV | 1 | T | C | Homozygous   |
| NC_037641.1 | 6916549 | SNV | 1 | G | A | Homozygous   |
| NC_037641.1 | 6916621 | SNV | 1 | A | G | Homozygous   |
| NC_037641.1 | 6917149 | SNV | 1 | A | G | Homozygous   |
| NC_037641.1 | 6917310 | SNV | 1 | T | C | Homozygous   |
| NC_037641.1 | 6917327 | SNV | 1 | T | C | Heterozygous |
| NC_037641.1 | 6920362 | SNV | 1 | T | C | Homozygous   |
| NC_037641.1 | 6920391 | SNV | 1 | T | C | Homozygous   |
| NC_037641.1 | 6920408 | SNV | 1 | G | A | Homozygous   |
| NC_037641.1 | 6920450 | SNV | 1 | G | A | Homozygous   |
| NC_037641.1 | 6920460 | SNV | 1 | A | G | Homozygous   |
| NC_037641.1 | 6920477 | SNV | 1 | A | G | Homozygous   |
| NC_037641.1 | 6920486 | SNV | 1 | G | A | Homozygous   |
| NC_037641.1 | 6939693 | SNV | 1 | T | A | Homozygous   |
| NC_037641.1 | 6939708 | SNV | 1 | C | T | Homozygous   |
| NC_037641.1 | 6939712 | SNV | 1 | C | T | Homozygous   |
| NC_037641.1 | 6947580 | SNV | 1 | T | C | Homozygous   |
| NC_037641.1 | 6951509 | SNV | 1 | C | T | Homozygous   |
| NC_037641.1 | 6951833 | SNV | 1 | A | G | Homozygous   |
| NC_037641.1 | 6951835 | SNV | 1 | T | C | Homozygous   |
| NC_037641.1 | 6951866 | SNV | 1 | C | G | Homozygous   |
| NC_037641.1 | 6952171 | SNV | 1 | T | A | Heterozygous |
| NC_037641.1 | 6952174 | SNV | 1 | T | A | Heterozygous |
| NC_037641.1 | 6969147 | SNV | 1 | A | G | Homozygous   |
| NC_037641.1 | 6969342 | SNV | 1 | G | A | Heterozygous |
| NC_037641.1 | 6970272 | SNV | 1 | G | C | Heterozygous |
| NC_037641.1 | 6970935 | SNV | 1 | C | G | Homozygous   |
| NC_037641.1 | 6971016 | SNV | 1 | C | T | Heterozygous |
| NC_037641.1 | 6971033 | SNV | 1 | C | T | Homozygous   |
| NC_037641.1 | 6971242 | SNV | 1 | T | C | Homozygous   |
| NC_037641.1 | 6971455 | SNV | 1 | A | G | Heterozygous |
| NC_037641.1 | 6971529 | SNV | 1 | C | T | Heterozygous |
| NC_037641.1 | 6971655 | SNV | 1 | G | A | Heterozygous |
| NC_037641.1 | 6971908 | SNV | 1 | C | T | Heterozygous |
| NC_037641.1 | 6971996 | SNV | 1 | G | C | Heterozygous |
| NC_037641.1 | 6972000 | SNV | 1 | T | C | Heterozygous |
| NC_037641.1 | 6972271 | SNV | 1 | T | G | Heterozygous |
| NC_037641.1 | 6972274 | SNV | 1 | T | A | Heterozygous |
| NC_037641.1 | 6972278 | SNV | 1 | G | T | Heterozygous |
| NC_037641.1 | 6972280 | SNV | 1 | T | C | Heterozygous |
| NC_037641.1 | 6972629 | SNV | 1 | C | T | Homozygous   |
| NC_037641.1 | 6974178 | SNV | 1 | G | A | Heterozygous |
| NC_037641.1 | 6975093 | SNV | 1 | G | A | Heterozygous |
| NC_037641.1 | 6975109 | SNV | 1 | T | C | Homozygous   |

|             |         |     |   |   |   |              |
|-------------|---------|-----|---|---|---|--------------|
| NC_037641.1 | 6975342 | SNV | 1 | G | A | Heterozygous |
| NC_037641.1 | 6975490 | SNV | 1 | G | T | Homozygous   |
| NC_037641.1 | 6975494 | SNV | 1 | C | T | Homozygous   |
| NC_037641.1 | 6975501 | SNV | 1 | T | C | Homozygous   |
| NC_037641.1 | 6975508 | SNV | 1 | C | T | Homozygous   |
| NC_037641.1 | 6975544 | SNV | 1 | A | G | Homozygous   |
| NC_037641.1 | 6976198 | SNV | 1 | G | A | Homozygous   |
| NC_037641.1 | 6976239 | SNV | 1 | G | C | Homozygous   |
| NC_037641.1 | 6976507 | SNV | 1 | A | G | Homozygous   |
| NC_037641.1 | 6976522 | SNV | 1 | A | G | Homozygous   |
| NC_037641.1 | 6976526 | SNV | 1 | G | T | Homozygous   |
| NC_037641.1 | 6976590 | SNV | 1 | C | T | Heterozygous |
| NC_037641.1 | 6976727 | SNV | 1 | T | C | Homozygous   |
| NC_037641.1 | 6977540 | SNV | 1 | T | C | Homozygous   |
| NC_037641.1 | 6977666 | SNV | 1 | A | G | Heterozygous |
| NC_037641.1 | 6977706 | SNV | 1 | G | A | Homozygous   |
| NC_037641.1 | 6980242 | SNV | 1 | T | C | Homozygous   |
| NC_037641.1 | 6980268 | SNV | 1 | C | A | Heterozygous |
| NC_037641.1 | 6980286 | SNV | 1 | C | T | Homozygous   |
| NC_037641.1 | 6980302 | SNV | 1 | C | T | Heterozygous |
| NC_037641.1 | 6980313 | SNV | 1 | T | C | Heterozygous |
| NC_037641.1 | 6980615 | SNV | 1 | C | T | Heterozygous |
| NC_037641.1 | 6981099 | SNV | 1 | C | T | Homozygous   |
| NC_037641.1 | 6981266 | SNV | 1 | A | G | Homozygous   |
| NC_037641.1 | 6981286 | SNV | 1 | T | C | Homozygous   |
| NC_037641.1 | 6981338 | SNV | 1 | C | T | Homozygous   |
| NC_037641.1 | 6981404 | SNV | 1 | A | G | Homozygous   |
| NC_037641.1 | 6981556 | SNV | 1 | C | A | Homozygous   |
| NC_037641.1 | 6981668 | SNV | 1 | C | T | Heterozygous |
| NC_037641.1 | 6981874 | SNV | 1 | A | C | Homozygous   |
| NC_037641.1 | 6981889 | SNV | 1 | C | T | Heterozygous |
| NC_037641.1 | 6981893 | SNV | 1 | A | G | Heterozygous |
| NC_037641.1 | 6981913 | SNV | 1 | A | G | Homozygous   |
| NC_037641.1 | 6982425 | SNV | 1 | G | A | Homozygous   |
| NC_037641.1 | 6982453 | SNV | 1 | T | C | Heterozygous |
| NC_037641.1 | 6982511 | SNV | 1 | C | T | Heterozygous |
| NC_037641.1 | 6982525 | SNV | 1 | C | A | Heterozygous |
| NC_037641.1 | 6982571 | SNV | 1 | C | T | Heterozygous |
| NC_037641.1 | 6982592 | SNV | 1 | T | C | Homozygous   |
| NC_037641.1 | 6982605 | SNV | 1 | T | C | Heterozygous |
| NC_037641.1 | 6982815 | SNV | 1 | T | C | Heterozygous |
| NC_037641.1 | 6987863 | SNV | 1 | A | G | Homozygous   |
| NC_037641.1 | 6995119 | SNV | 1 | C | T | Homozygous   |
| NC_037641.1 | 6995127 | SNV | 1 | C | G | Homozygous   |
| NC_037641.1 | 6997100 | SNV | 1 | G | A | Heterozygous |
| NC_037641.1 | 6997164 | SNV | 1 | T | C | Heterozygous |
| NC_037641.1 | 6997192 | SNV | 1 | G | A | Heterozygous |
| NC_037641.1 | 6997261 | SNV | 1 | G | A | Heterozygous |
| NC_037641.1 | 6997328 | SNV | 1 | G | A | Heterozygous |
| NC_037641.1 | 6997351 | SNV | 1 | G | C | Homozygous   |
| NC_037641.1 | 6997470 | SNV | 1 | G | A | Homozygous   |



|             |         |     |   |   |   |              |
|-------------|---------|-----|---|---|---|--------------|
| NC_037641.1 | 6997481 | SNV | 1 | C | A | Homozygous   |
| NC_037641.1 | 6997547 | SNV | 1 | A | G | Homozygous   |
| NC_037641.1 | 6997550 | SNV | 1 | G | A | Homozygous   |
| NC_037641.1 | 6998192 | SNV | 1 | C | T | Homozygous   |
| NC_037641.1 | 6998291 | SNV | 1 | G | A | Heterozygous |
| NC_037641.1 | 6998298 | SNV | 1 | G | C | Heterozygous |
| NC_037641.1 | 6998302 | SNV | 1 | T | C | Heterozygous |
| NC_037641.1 | 6998332 | SNV | 1 | T | A | Heterozygous |
| NC_037641.1 | 6998336 | SNV | 1 | G | A | Heterozygous |
| NC_037641.1 | 6998425 | SNV | 1 | A | G | Heterozygous |
| NC_037641.1 | 6998482 | SNV | 1 | C | T | Homozygous   |
| NC_037641.1 | 6998527 | SNV | 1 | C | T | Homozygous   |
| NC_037641.1 | 6998534 | SNV | 1 | G | A | Homozygous   |
| NC_037641.1 | 6998571 | SNV | 1 | A | G | Homozygous   |
| NC_037641.1 | 6998594 | SNV | 1 | C | T | Homozygous   |
| NC_037641.1 | 6998665 | SNV | 1 | C | T | Heterozygous |
| NC_037641.1 | 6998771 | SNV | 1 | G | A | Heterozygous |
| NC_037641.1 | 6998807 | SNV | 1 | C | T | Heterozygous |
| NC_037641.1 | 6998878 | SNV | 1 | T | C | Heterozygous |
| NC_037641.1 | 6999353 | SNV | 1 | A | G | Homozygous   |
| NC_037641.1 | 6999410 | SNV | 1 | A | T | Homozygous   |
| NC_037641.1 | 6999501 | SNV | 1 | A | G | Homozygous   |
| NC_037641.1 | 6999614 | SNV | 1 | T | C | Homozygous   |
| NC_037641.1 | 6999803 | SNV | 1 | A | G | Homozygous   |
| NC_037641.1 | 6999912 | SNV | 1 | T | C | Homozygous   |
| NC_037641.1 | 6999991 | SNV | 1 | A | G | Homozygous   |
| NC_037641.1 | 7000002 | SNV | 1 | T | C | Homozygous   |
| NC_037641.1 | 7000009 | SNV | 1 | T | G | Homozygous   |
| NC_037641.1 | 7000040 | SNV | 1 | T | C | Homozygous   |
| NC_037641.1 | 7000063 | SNV | 1 | C | T | Homozygous   |
| NC_037641.1 | 7000066 | SNV | 1 | T | C | Homozygous   |
| NC_037641.1 | 7000098 | SNV | 1 | A | G | Homozygous   |
| NC_037641.1 | 7000111 | SNV | 1 | C | T | Homozygous   |
| NC_037641.1 | 7000162 | SNV | 1 | C | A | Heterozygous |
| NC_037641.1 | 7000990 | SNV | 1 | A | G | Homozygous   |
| NC_037641.1 | 7001060 | SNV | 1 | C | T | Homozygous   |
| NC_037641.1 | 7001073 | SNV | 1 | A | T | Heterozygous |
| NC_037641.1 | 7001109 | SNV | 1 | A | G | Heterozygous |
| NC_037641.1 | 7001281 | SNV | 1 | C | T | Homozygous   |
| NC_037641.1 | 7001359 | SNV | 1 | C | T | Heterozygous |
| NC_037641.1 | 7001383 | SNV | 1 | T | C | Homozygous   |
| NC_037641.1 | 7001461 | SNV | 1 | T | C | Heterozygous |
| NC_037641.1 | 7002168 | SNV | 1 | C | T | Homozygous   |
| NC_037641.1 | 7002172 | SNV | 1 | T | C | Heterozygous |
| NC_037641.1 | 7002235 | SNV | 1 | T | C | Heterozygous |
| NC_037641.1 | 7002265 | SNV | 1 | C | T | Homozygous   |
| NC_037641.1 | 7002779 | SNV | 1 | A | G | Homozygous   |
| NC_037641.1 | 7002783 | SNV | 1 | A | G | Homozygous   |
| NC_037641.1 | 7002827 | SNV | 1 | A | G | Heterozygous |
| NC_037641.1 | 7006980 | SNV | 1 | T | G | Homozygous   |
| NC_037641.1 | 7006983 | SNV | 1 | T | A | Homozygous   |

|             |         |     |   |   |   |              |
|-------------|---------|-----|---|---|---|--------------|
| NC_037641.1 | 7006986 | SNV | 1 | T | A | Homozygous   |
| NC_037641.1 | 7006989 | SNV | 1 | T | G | Homozygous   |
| NC_037641.1 | 7014524 | SNV | 1 | A | G | Homozygous   |
| NC_037641.1 | 7014554 | SNV | 1 | G | A | Homozygous   |
| NC_037641.1 | 7014569 | SNV | 1 | C | T | Homozygous   |
| NC_037641.1 | 7017354 | SNV | 1 | A | G | Homozygous   |
| NC_037641.1 | 7027689 | SNV | 1 | T | A | Heterozygous |
| NC_037641.1 | 7034689 | SNV | 1 | A | T | Heterozygous |
| NC_037641.1 | 7034691 | SNV | 1 | G | C | Heterozygous |
| NC_037641.1 | 7034707 | SNV | 1 | G | A | Heterozygous |
| NC_037641.1 | 7034726 | SNV | 1 | A | G | Homozygous   |
| NC_037641.1 | 7039760 | SNV | 1 | T | A | Homozygous   |
| NC_037641.1 | 7039786 | SNV | 1 | G | A | Heterozygous |
| NC_037641.1 | 7039872 | SNV | 1 | A | G | Homozygous   |
| NC_037641.1 | 7039882 | SNV | 1 | T | C | Homozygous   |
| NC_037641.1 | 7040499 | SNV | 1 | T | G | Homozygous   |
| NC_037641.1 | 7040509 | SNV | 1 | T | G | Homozygous   |
| NC_037641.1 | 7040512 | SNV | 1 | G | A | Homozygous   |
| NC_037641.1 | 7045750 | SNV | 1 | A | G | Homozygous   |
| NC_037641.1 | 7045754 | SNV | 1 | T | A | Homozygous   |
| NC_037641.1 | 7045763 | SNV | 1 | G | A | Homozygous   |
| NC_037641.1 | 7045781 | SNV | 1 | T | G | Homozygous   |
| NC_037641.1 | 7045785 | SNV | 1 | A | G | Homozygous   |
| NC_037641.1 | 7045787 | SNV | 1 | T | C | Homozygous   |
| NC_037641.1 | 7045790 | SNV | 1 | T | C | Homozygous   |
| NC_037641.1 | 7050639 | SNV | 1 | A | G | Homozygous   |
| NC_037641.1 | 7050641 | SNV | 1 | A | C | Homozygous   |
| NC_037641.1 | 7050664 | SNV | 1 | T | G | Homozygous   |
| NC_037641.1 | 7050666 | SNV | 1 | A | T | Homozygous   |
| NC_037641.1 | 7050670 | SNV | 1 | A | G | Homozygous   |
| NC_037641.1 | 7061982 | SNV | 1 | A | G | Homozygous   |
| NC_037641.1 | 7062042 | SNV | 1 | T | C | Homozygous   |
| NC_037641.1 | 7062058 | SNV | 1 | T | C | Homozygous   |
| NC_037641.1 | 7062077 | SNV | 1 | T | C | Homozygous   |
| NC_037641.1 | 7062602 | SNV | 1 | A | G | Heterozygous |
| NC_037641.1 | 7074319 | SNV | 1 | C | T | Heterozygous |
| NC_037641.1 | 7075686 | SNV | 1 | C | T | Heterozygous |
| NC_037641.1 | 7075701 | SNV | 1 | C | T | Homozygous   |
| NC_037641.1 | 7076686 | SNV | 1 | T | C | Homozygous   |
| NC_037641.1 | 7084230 | SNV | 1 | T | C | Homozygous   |
| NC_037641.1 | 7084360 | SNV | 1 | A | G | Homozygous   |
| NC_037641.1 | 7084530 | SNV | 1 | G | A | Homozygous   |
| NC_037641.1 | 7085395 | SNV | 1 | T | C | Homozygous   |
| NC_037641.1 | 7095796 | SNV | 1 | G | A | Homozygous   |
| NC_037641.1 | 7095833 | SNV | 1 | G | A | Heterozygous |
| NC_037641.1 | 7095944 | SNV | 1 | T | A | Homozygous   |
| NC_037641.1 | 7095967 | SNV | 1 | G | A | Homozygous   |
| NC_037641.1 | 7096008 | SNV | 1 | A | G | Homozygous   |
| NC_037641.1 | 7096023 | SNV | 1 | G | A | Homozygous   |
| NC_037641.1 | 7096064 | SNV | 1 | G | A | Heterozygous |
| NC_037641.1 | 7096084 | SNV | 1 | T | C | Homozygous   |

|             |         |     |   |   |   |              |
|-------------|---------|-----|---|---|---|--------------|
| NC_037641.1 | 7096638 | SNV | 1 | G | A | Homozygous   |
| NC_037641.1 | 7096940 | SNV | 1 | A | G | Homozygous   |
| NC_037641.1 | 7097037 | SNV | 1 | G | A | Homozygous   |
| NC_037641.1 | 7097173 | SNV | 1 | G | C | Homozygous   |
| NC_037641.1 | 7097533 | SNV | 1 | T | C | Homozygous   |
| NC_037641.1 | 7097756 | SNV | 1 | A | C | Homozygous   |
| NC_037641.1 | 7099021 | SNV | 1 | A | G | Homozygous   |
| NC_037641.1 | 7099115 | SNV | 1 | A | G | Homozygous   |
| NC_037641.1 | 7099140 | SNV | 1 | T | C | Homozygous   |
| NC_037641.1 | 7099169 | SNV | 1 | C | A | Homozygous   |
| NC_037641.1 | 7099183 | SNV | 1 | A | G | Homozygous   |
| NC_037641.1 | 7099199 | SNV | 1 | A | G | Homozygous   |
| NC_037641.1 | 7099461 | SNV | 1 | A | G | Homozygous   |
| NC_037641.1 | 7113658 | SNV | 1 | G | A | Homozygous   |
| NC_037641.1 | 7113667 | SNV | 1 | T | C | Homozygous   |
| NC_037641.1 | 7117285 | SNV | 1 | A | G | Homozygous   |
| NC_037641.1 | 7117494 | SNV | 1 | T | C | Homozygous   |
| NC_037641.1 | 7117918 | SNV | 1 | A | G | Heterozygous |
| NC_037641.1 | 7117981 | SNV | 1 | A | G | Homozygous   |
| NC_037641.1 | 7117983 | SNV | 1 | T | C | Homozygous   |
| NC_037641.1 | 7118001 | SNV | 1 | T | C | Homozygous   |
| NC_037641.1 | 7118061 | SNV | 1 | C | A | Homozygous   |
| NC_037641.1 | 7118114 | SNV | 1 | G | A | Homozygous   |
| NC_037641.1 | 7118124 | SNV | 1 | G | A | Heterozygous |
| NC_037641.1 | 7118143 | SNV | 1 | G | A | Homozygous   |
| NC_037641.1 | 7118243 | SNV | 1 | G | C | Homozygous   |
| NC_037641.1 | 7118447 | SNV | 1 | G | C | Homozygous   |
| NC_037641.1 | 7122410 | SNV | 1 | A | T | Homozygous   |
| NC_037641.1 | 7122412 | SNV | 1 | A | T | Homozygous   |
| NC_037641.1 | 7122437 | SNV | 1 | T | C | Homozygous   |
| NC_037641.1 | 7125612 | SNV | 1 | G | A | Homozygous   |
| NC_037641.1 | 7125627 | SNV | 1 | G | A | Heterozygous |
| NC_037641.1 | 7140866 | SNV | 1 | G | A | Heterozygous |
| NC_037641.1 | 7146423 | SNV | 1 | A | G | Homozygous   |
| NC_037641.1 | 7146499 | SNV | 1 | A | G | Homozygous   |
| NC_037641.1 | 7147109 | SNV | 1 | T | A | Homozygous   |
| NC_037641.1 | 7147151 | SNV | 1 | T | C | Homozygous   |
| NC_037641.1 | 7147219 | SNV | 1 | C | T | Heterozygous |
| NC_037641.1 | 7154797 | SNV | 1 | T | C | Homozygous   |
| NC_037641.1 | 7155033 | SNV | 1 | A | G | Homozygous   |
| NC_037641.1 | 7155038 | SNV | 1 | A | G | Heterozygous |
| NC_037641.1 | 7155039 | SNV | 1 | G | A | Heterozygous |
| NC_037641.1 | 7155115 | SNV | 1 | G | A | Heterozygous |
| NC_037641.1 | 7155120 | SNV | 1 | G | A | Heterozygous |
| NC_037641.1 | 7155125 | SNV | 1 | G | A | Heterozygous |
| NC_037641.1 | 7155145 | SNV | 1 | G | A | Homozygous   |
| NC_037641.1 | 7155151 | SNV | 1 | G | A | Heterozygous |
| NC_037641.1 | 7155157 | SNV | 1 | A | C | Homozygous   |
| NC_037641.1 | 7155206 | SNV | 1 | A | G | Homozygous   |
| NC_037641.1 | 7155254 | SNV | 1 | A | G | Homozygous   |
| NC_037641.1 | 7155525 | SNV | 1 | A | G | Homozygous   |

|             |         |     |   |   |   |              |
|-------------|---------|-----|---|---|---|--------------|
| NC_037641.1 | 7155728 | SNV | 1 | A | G | Homozygous   |
| NC_037641.1 | 7155893 | SNV | 1 | C | T | Homozygous   |
| NC_037641.1 | 7157953 | SNV | 1 | A | T | Homozygous   |
| NC_037641.1 | 7157982 | SNV | 1 | T | A | Homozygous   |
| NC_037641.1 | 7157985 | SNV | 1 | C | A | Homozygous   |
| NC_037641.1 | 7157988 | SNV | 1 | A | C | Homozygous   |
| NC_037641.1 | 7171941 | SNV | 1 | A | G | Homozygous   |
| NC_037641.1 | 7172310 | SNV | 1 | G | C | Homozygous   |
| NC_037641.1 | 7186981 | SNV | 1 | C | G | Homozygous   |
| NC_037641.1 | 7187005 | SNV | 1 | T | G | Homozygous   |
| NC_037641.1 | 7187008 | SNV | 1 | C | T | Homozygous   |
| NC_037641.1 | 7187024 | SNV | 1 | T | G | Homozygous   |
| NC_037641.1 | 7211111 | SNV | 1 | G | A | Homozygous   |
| NC_037641.1 | 7211137 | SNV | 1 | T | C | Homozygous   |
| NC_037641.1 | 7211162 | SNV | 1 | A | G | Heterozygous |
| NC_037641.1 | 7211167 | SNV | 1 | A | G | Homozygous   |
| NC_037641.1 | 7211285 | SNV | 1 | G | A | Homozygous   |
| NC_037641.1 | 7211322 | SNV | 1 | T | C | Heterozygous |
| NC_037641.1 | 7211408 | SNV | 1 | T | C | Homozygous   |
| NC_037641.1 | 7211420 | SNV | 1 | G | A | Heterozygous |
| NC_037641.1 | 7211427 | SNV | 1 | T | C | Heterozygous |
| NC_037641.1 | 7215465 | SNV | 1 | C | A | Homozygous   |
| NC_037641.1 | 7215476 | SNV | 1 | C | G | Homozygous   |
| NC_037641.1 | 7219539 | SNV | 1 | G | T | Homozygous   |
| NC_037641.1 | 7219543 | SNV | 1 | C | T | Heterozygous |
| NC_037641.1 | 7219575 | SNV | 1 | A | G | Heterozygous |
| NC_037641.1 | 7219610 | SNV | 1 | G | A | Heterozygous |
| NC_037641.1 | 7219627 | SNV | 1 | T | C | Homozygous   |
| NC_037641.1 | 7219652 | SNV | 1 | A | G | Heterozygous |
| NC_037641.1 | 7219670 | SNV | 1 | C | T | Heterozygous |
| NC_037641.1 | 7219712 | SNV | 1 | A | G | Heterozygous |
| NC_037641.1 | 7219718 | SNV | 1 | G | A | Heterozygous |
| NC_037641.1 | 7219724 | SNV | 1 | C | G | Homozygous   |
| NC_037641.1 | 7219971 | SNV | 1 | A | G | Homozygous   |
| NC_037641.1 | 7220012 | SNV | 1 | T | C | Homozygous   |
| NC_037641.1 | 7220048 | SNV | 1 | T | C | Homozygous   |
| NC_037641.1 | 7220244 | SNV | 1 | A | C | Heterozygous |
| NC_037641.1 | 7220246 | SNV | 1 | G | C | Heterozygous |
| NC_037641.1 | 7220321 | SNV | 1 | A | T | Homozygous   |
| NC_037641.1 | 7220845 | SNV | 1 | A | G | Homozygous   |
| NC_037641.1 | 7221063 | SNV | 1 | G | A | Heterozygous |
| NC_037641.1 | 7221108 | SNV | 1 | A | G | Homozygous   |
| NC_037641.1 | 7247433 | SNV | 1 | A | T | Homozygous   |
| NC_037641.1 | 7247450 | SNV | 1 | A | T | Homozygous   |
| NC_037641.1 | 7247452 | SNV | 1 | T | C | Homozygous   |
| NC_037641.1 | 7247457 | SNV | 1 | A | C | Homozygous   |
| NC_037641.1 | 7263990 | SNV | 1 | C | T | Heterozygous |
| NC_037641.1 | 7263994 | SNV | 1 | C | T | Heterozygous |
| NC_037641.1 | 7264035 | SNV | 1 | G | A | Homozygous   |
| NC_037641.1 | 7264131 | SNV | 1 | G | A | Homozygous   |
| NC_037641.1 | 7264156 | SNV | 1 | T | C | Homozygous   |

|             |         |     |   |   |   |              |
|-------------|---------|-----|---|---|---|--------------|
| NC_037641.1 | 7264219 | SNV | 1 | G | A | Homozygous   |
| NC_037641.1 | 7286714 | SNV | 1 | T | G | Homozygous   |
| NC_037641.1 | 7286733 | SNV | 1 | A | G | Homozygous   |
| NC_037641.1 | 7290000 | SNV | 1 | T | C | Homozygous   |
| NC_037641.1 | 7290004 | SNV | 1 | T | C | Homozygous   |
| NC_037641.1 | 7290203 | SNV | 1 | A | G | Homozygous   |
| NC_037641.1 | 7290271 | SNV | 1 | T | C | Heterozygous |
| NC_037641.1 | 7290294 | SNV | 1 | G | A | Homozygous   |
| NC_037641.1 | 7290416 | SNV | 1 | T | C | Homozygous   |
| NC_037641.1 | 7294715 | SNV | 1 | C | T | Homozygous   |
| NC_037641.1 | 7295019 | SNV | 1 | A | G | Homozygous   |
| NC_037641.1 | 7295094 | SNV | 1 | A | G | Homozygous   |
| NC_037641.1 | 7295157 | SNV | 1 | C | G | Homozygous   |
| NC_037641.1 | 7295231 | SNV | 1 | T | C | Heterozygous |
| NC_037641.1 | 7295270 | SNV | 1 | C | T | Heterozygous |
| NC_037641.1 | 7295297 | SNV | 1 | A | G | Homozygous   |
| NC_037641.1 | 7295347 | SNV | 1 | G | A | Heterozygous |
| NC_037641.1 | 7296014 | SNV | 1 | G | A | Homozygous   |
| NC_037641.1 | 7311488 | SNV | 1 | A | G | Heterozygous |
| NC_037641.1 | 7311495 | SNV | 1 | T | C | Heterozygous |
| NC_037641.1 | 7311523 | SNV | 1 | C | T | Heterozygous |
| NC_037641.1 | 7311552 | SNV | 1 | A | G | Heterozygous |
| NC_037641.1 | 7311618 | SNV | 1 | T | C | Homozygous   |
| NC_037641.1 | 7311985 | SNV | 1 | A | G | Homozygous   |
| NC_037641.1 | 7323517 | SNV | 1 | A | G | Heterozygous |
| NC_037641.1 | 7324077 | SNV | 1 | A | G | Homozygous   |
| NC_037641.1 | 7324084 | SNV | 1 | A | T | Homozygous   |
| NC_037641.1 | 7335658 | SNV | 1 | G | C | Heterozygous |
| NC_037641.1 | 7338949 | SNV | 1 | A | C | Homozygous   |
| NC_037641.1 | 7375951 | SNV | 1 | A | G | Homozygous   |
| NC_037641.1 | 7375969 | SNV | 1 | A | G | Heterozygous |
| NC_037641.1 | 7379655 | SNV | 1 | C | T | Heterozygous |
| NC_037641.1 | 7379669 | SNV | 1 | T | C | Homozygous   |
| NC_037641.1 | 7379697 | SNV | 1 | T | C | Heterozygous |
| NC_037641.1 | 7379701 | SNV | 1 | A | T | Heterozygous |
| NC_037641.1 | 7379703 | SNV | 1 | T | A | Heterozygous |
| NC_037641.1 | 7379707 | SNV | 1 | G | T | Heterozygous |
| NC_037641.1 | 7379713 | SNV | 1 | C | T | Heterozygous |
| NC_037641.1 | 7379737 | SNV | 1 | C | T | Heterozygous |
| NC_037641.1 | 7379975 | SNV | 1 | G | A | Heterozygous |
| NC_037641.1 | 7382322 | SNV | 1 | G | A | Homozygous   |
| NC_037641.1 | 7382412 | SNV | 1 | T | C | Homozygous   |
| NC_037641.1 | 7382512 | SNV | 1 | T | C | Homozygous   |
| NC_037641.1 | 7382747 | SNV | 1 | A | G | Homozygous   |
| NC_037641.1 | 7382952 | SNV | 1 | G | A | Heterozygous |
| NC_037641.1 | 7386108 | SNV | 1 | T | C | Homozygous   |
| NC_037641.1 | 7411764 | SNV | 1 | T | C | Homozygous   |
| NC_037641.1 | 7411851 | SNV | 1 | C | T | Homozygous   |
| NC_037641.1 | 7411990 | SNV | 1 | A | G | Homozygous   |
| NC_037641.1 | 7412001 | SNV | 1 | T | C | Homozygous   |
| NC_037641.1 | 7420365 | SNV | 1 | G | A | Heterozygous |

|             |         |     |   |   |   |              |
|-------------|---------|-----|---|---|---|--------------|
| NC_037641.1 | 7420391 | SNV | 1 | T | C | Homozygous   |
| NC_037641.1 | 7420747 | SNV | 1 | A | G | Homozygous   |
| NC_037641.1 | 7420774 | SNV | 1 | G | A | Heterozygous |
| NC_037641.1 | 7426053 | SNV | 1 | C | A | Homozygous   |
| NC_037641.1 | 7426080 | SNV | 1 | T | G | Homozygous   |
| NC_037641.1 | 7426086 | SNV | 1 | T | G | Homozygous   |
| NC_037641.1 | 7426425 | SNV | 1 | T | A | Heterozygous |
| NC_037641.1 | 7426534 | SNV | 1 | A | G | Heterozygous |
| NC_037641.1 | 7426536 | SNV | 1 | T | G | Homozygous   |
| NC_037641.1 | 7426716 | SNV | 1 | T | G | Heterozygous |
| NC_037641.1 | 7437669 | SNV | 1 | G | A | Homozygous   |
| NC_037641.1 | 7437699 | SNV | 1 | G | A | Homozygous   |
| NC_037641.1 | 7437703 | SNV | 1 | G | A | Homozygous   |
| NC_037641.1 | 7437709 | SNV | 1 | A | G | Homozygous   |
| NC_037641.1 | 7445235 | SNV | 1 | C | T | Heterozygous |
| NC_037641.1 | 7445240 | SNV | 1 | C | A | Homozygous   |
| NC_037641.1 | 7445245 | SNV | 1 | C | T | Homozygous   |
| NC_037641.1 | 7447931 | SNV | 1 | G | A | Homozygous   |
| NC_037641.1 | 7447940 | SNV | 1 | C | G | Homozygous   |
| NC_037641.1 | 7448158 | SNV | 1 | A | G | Heterozygous |
| NC_037641.1 | 7448194 | SNV | 1 | A | C | Homozygous   |
| NC_037641.1 | 7448225 | SNV | 1 | G | A | Heterozygous |
| NC_037641.1 | 7448232 | SNV | 1 | C | T | Homozygous   |
| NC_037641.1 | 7448255 | SNV | 1 | G | A | Heterozygous |
| NC_037641.1 | 7448342 | SNV | 1 | C | T | Heterozygous |
| NC_037641.1 | 7448473 | SNV | 1 | A | G | Heterozygous |
| NC_037641.1 | 7488213 | SNV | 1 | A | G | Homozygous   |
| NC_037641.1 | 7488554 | SNV | 1 | G | A | Heterozygous |
| NC_037641.1 | 7488589 | SNV | 1 | G | A | Heterozygous |
| NC_037641.1 | 7488696 | SNV | 1 | G | T | Homozygous   |
| NC_037641.1 | 7488698 | SNV | 1 | G | T | Heterozygous |
| NC_037641.1 | 7488700 | SNV | 1 | G | A | Heterozygous |
| NC_037641.1 | 7488980 | SNV | 1 | G | A | Heterozygous |
| NC_037641.1 | 7489113 | SNV | 1 | A | G | Homozygous   |
| NC_037641.1 | 7489116 | SNV | 1 | A | G | Heterozygous |
| NC_037641.1 | 7494086 | SNV | 1 | T | C | Heterozygous |
| NC_037641.1 | 7494204 | SNV | 1 | A | C | Heterozygous |
| NC_037641.1 | 7494213 | SNV | 1 | C | T | Heterozygous |
| NC_037641.1 | 7494234 | SNV | 1 | C | T | Heterozygous |
| NC_037641.1 | 7494240 | SNV | 1 | T | C | Homozygous   |
| NC_037641.1 | 7494267 | SNV | 1 | T | C | Heterozygous |
| NC_037641.1 | 7494295 | SNV | 1 | C | T | Heterozygous |
| NC_037641.1 | 7494299 | SNV | 1 | T | C | Heterozygous |
| NC_037641.1 | 7494501 | SNV | 1 | A | G | Homozygous   |
| NC_037641.1 | 7494575 | SNV | 1 | A | G | Homozygous   |
| NC_037641.1 | 7494603 | SNV | 1 | A | G | Homozygous   |
| NC_037641.1 | 7494761 | SNV | 1 | T | C | Homozygous   |
| NC_037641.1 | 7494830 | SNV | 1 | C | T | Heterozygous |
| NC_037641.1 | 7494875 | SNV | 1 | A | G | Heterozygous |
| NC_037641.1 | 7494969 | SNV | 1 | A | G | Homozygous   |
| NC_037641.1 | 7494980 | SNV | 1 | T | C | Homozygous   |

|             |         |     |   |   |   |              |
|-------------|---------|-----|---|---|---|--------------|
| NC_037641.1 | 7495024 | SNV | 1 | A | C | Homozygous   |
| NC_037641.1 | 7498118 | SNV | 1 | G | C | Homozygous   |
| NC_037641.1 | 7498165 | SNV | 1 | G | A | Heterozygous |
| NC_037641.1 | 7498222 | SNV | 1 | A | G | Heterozygous |
| NC_037641.1 | 7498300 | SNV | 1 | G | A | Homozygous   |
| NC_037641.1 | 7498430 | SNV | 1 | T | A | Homozygous   |
| NC_037641.1 | 7498448 | SNV | 1 | G | C | Heterozygous |
| NC_037641.1 | 7498451 | SNV | 1 | G | A | Heterozygous |
| NC_037641.1 | 7498484 | SNV | 1 | C | T | Homozygous   |
| NC_037641.1 | 7498489 | SNV | 1 | T | C | Heterozygous |
| NC_037641.1 | 7498491 | SNV | 1 | G | A | Heterozygous |
| NC_037641.1 | 7504713 | SNV | 1 | T | A | Homozygous   |
| NC_037641.1 | 7504716 | SNV | 1 | G | A | Homozygous   |
| NC_037641.1 | 7504726 | SNV | 1 | G | C | Homozygous   |
| NC_037641.1 | 7504744 | SNV | 1 | A | T | Homozygous   |
| NC_037641.1 | 7514336 | SNV | 1 | A | G | Homozygous   |
| NC_037641.1 | 7514374 | SNV | 1 | A | G | Heterozygous |
| NC_037641.1 | 7514375 | SNV | 1 | A | G | Heterozygous |
| NC_037641.1 | 7514377 | SNV | 1 | G | A | Homozygous   |
| NC_037641.1 | 7519691 | SNV | 1 | A | G | Heterozygous |
| NC_037641.1 | 7519698 | SNV | 1 | G | A | Homozygous   |
| NC_037641.1 | 7519703 | SNV | 1 | A | G | Homozygous   |
| NC_037641.1 | 7519732 | SNV | 1 | A | G | Homozygous   |
| NC_037641.1 | 7526525 | SNV | 1 | G | A | Homozygous   |
| NC_037641.1 | 7533282 | SNV | 1 | A | G | Homozygous   |
| NC_037641.1 | 7533286 | SNV | 1 | A | G | Homozygous   |
| NC_037641.1 | 7533294 | SNV | 1 | G | A | Homozygous   |
| NC_037641.1 | 7533512 | SNV | 1 | T | C | Homozygous   |
| NC_037641.1 | 7533517 | SNV | 1 | T | G | Heterozygous |
| NC_037641.1 | 7533520 | SNV | 1 | C | T | Heterozygous |
| NC_037641.1 | 7534385 | SNV | 1 | T | C | Homozygous   |
| NC_037641.1 | 7534439 | SNV | 1 | A | G | Homozygous   |
| NC_037641.1 | 7539013 | SNV | 1 | A | G | Homozygous   |
| NC_037641.1 | 7539206 | SNV | 1 | A | G | Heterozygous |
| NC_037641.1 | 7539267 | SNV | 1 | G | A | Heterozygous |
| NC_037641.1 | 7539545 | SNV | 1 | T | A | Homozygous   |
| NC_037641.1 | 7539551 | SNV | 1 | A | T | Homozygous   |
| NC_037641.1 | 7539582 | SNV | 1 | C | A | Homozygous   |
| NC_037641.1 | 7539590 | SNV | 1 | G | A | Homozygous   |
| NC_037641.1 | 7542984 | SNV | 1 | T | C | Homozygous   |
| NC_037641.1 | 7543002 | SNV | 1 | G | A | Heterozygous |
| NC_037641.1 | 7553919 | SNV | 1 | C | T | Homozygous   |
| NC_037641.1 | 7553922 | SNV | 1 | A | G | Heterozygous |
| NC_037641.1 | 7554006 | SNV | 1 | G | A | Heterozygous |
| NC_037641.1 | 7561259 | SNV | 1 | G | A | Heterozygous |
| NC_037641.1 | 7561582 | SNV | 1 | T | C | Heterozygous |
| NC_037641.1 | 7561893 | SNV | 1 | A | G | Homozygous   |
| NC_037641.1 | 7562619 | SNV | 1 | C | G | Homozygous   |
| NC_037641.1 | 7562667 | SNV | 1 | C | T | Heterozygous |
| NC_037641.1 | 7562728 | SNV | 1 | G | A | Heterozygous |
| NC_037641.1 | 7562735 | SNV | 1 | G | A | Heterozygous |

|             |         |     |   |   |   |              |
|-------------|---------|-----|---|---|---|--------------|
| NC_037641.1 | 7562740 | SNV | 1 | T | G | Heterozygous |
| NC_037641.1 | 7562751 | SNV | 1 | A | G | Heterozygous |
| NC_037641.1 | 7562849 | SNV | 1 | T | C | Homozygous   |
| NC_037641.1 | 7562922 | SNV | 1 | A | G | Homozygous   |
| NC_037641.1 | 7564125 | SNV | 1 | A | G | Homozygous   |
| NC_037641.1 | 7565736 | SNV | 1 | A | G | Homozygous   |
| NC_037641.1 | 7565854 | SNV | 1 | A | G | Homozygous   |
| NC_037641.1 | 7570098 | SNV | 1 | G | A | Homozygous   |
| NC_037641.1 | 7570132 | SNV | 1 | A | G | Homozygous   |
| NC_037641.1 | 7570205 | SNV | 1 | T | C | Homozygous   |
| NC_037641.1 | 7570241 | SNV | 1 | T | C | Heterozygous |
| NC_037641.1 | 7570485 | SNV | 1 | G | A | Heterozygous |
| NC_037641.1 | 7571151 | SNV | 1 | C | T | Heterozygous |
| NC_037641.1 | 7571163 | SNV | 1 | G | A | Heterozygous |
| NC_037641.1 | 7571205 | SNV | 1 | T | C | Homozygous   |
| NC_037641.1 | 7571397 | SNV | 1 | C | T | Homozygous   |
| NC_037641.1 | 7571436 | SNV | 1 | A | G | Homozygous   |
| NC_037641.1 | 7571454 | SNV | 1 | A | G | Homozygous   |
| NC_037641.1 | 7571499 | SNV | 1 | A | G | Homozygous   |
| NC_037641.1 | 7571520 | SNV | 1 | G | A | Heterozygous |
| NC_037641.1 | 7571523 | SNV | 1 | C | T | Heterozygous |
| NC_037641.1 | 7571615 | SNV | 1 | C | T | Homozygous   |
| NC_037641.1 | 7571645 | SNV | 1 | A | G | Homozygous   |
| NC_037641.1 | 7571674 | SNV | 1 | C | T | Heterozygous |
| NC_037641.1 | 7571696 | SNV | 1 | G | A | Homozygous   |
| NC_037641.1 | 7571802 | SNV | 1 | C | T | Heterozygous |
| NC_037641.1 | 7572150 | SNV | 1 | G | A | Heterozygous |
| NC_037641.1 | 7572152 | SNV | 1 | A | G | Heterozygous |
| NC_037641.1 | 7572279 | SNV | 1 | A | G | Homozygous   |
| NC_037641.1 | 7572293 | SNV | 1 | A | T | Homozygous   |
| NC_037641.1 | 7572340 | SNV | 1 | T | C | Heterozygous |
| NC_037641.1 | 7572401 | SNV | 1 | A | T | Heterozygous |
| NC_037641.1 | 7572405 | SNV | 1 | C | T | Homozygous   |
| NC_037641.1 | 7572453 | SNV | 1 | T | A | Heterozygous |
| NC_037641.1 | 7573021 | SNV | 1 | C | T | Heterozygous |
| NC_037641.1 | 7573983 | SNV | 1 | A | G | Homozygous   |
| NC_037641.1 | 7573986 | SNV | 1 | A | G | Homozygous   |
| NC_037641.1 | 7574055 | SNV | 1 | C | T | Heterozygous |
| NC_037641.1 | 7574761 | SNV | 1 | C | T | Homozygous   |
| NC_037641.1 | 7575025 | SNV | 1 | A | G | Homozygous   |
| NC_037641.1 | 7575201 | SNV | 1 | T | C | Homozygous   |
| NC_037641.1 | 7575234 | SNV | 1 | T | C | Homozygous   |
| NC_037641.1 | 7575972 | SNV | 1 | G | A | Homozygous   |
| NC_037641.1 | 7576585 | SNV | 1 | C | T | Heterozygous |
| NC_037641.1 | 7576595 | SNV | 1 | A | C | Heterozygous |
| NC_037641.1 | 7577344 | SNV | 1 | C | A | Homozygous   |
| NC_037641.1 | 7578495 | SNV | 1 | G | A | Heterozygous |
| NC_037641.1 | 7578528 | SNV | 1 | A | C | Homozygous   |
| NC_037641.1 | 7578710 | SNV | 1 | C | T | Homozygous   |
| NC_037641.1 | 7579380 | SNV | 1 | G | A | Heterozygous |
| NC_037641.1 | 7580798 | SNV | 1 | A | T | Heterozygous |



|             |         |     |   |   |   |              |
|-------------|---------|-----|---|---|---|--------------|
| NC_037641.1 | 7581392 | SNV | 1 | T | C | Homozygous   |
| NC_037641.1 | 7581703 | SNV | 1 | T | C | Homozygous   |
| NC_037641.1 | 7582870 | SNV | 1 | T | C | Homozygous   |
| NC_037641.1 | 7582893 | SNV | 1 | G | A | Heterozygous |
| NC_037641.1 | 7582916 | SNV | 1 | T | C | Homozygous   |
| NC_037641.1 | 7586457 | SNV | 1 | A | G | Homozygous   |
| NC_037641.1 | 7586504 | SNV | 1 | C | T | Heterozygous |
| NC_037641.1 | 7586832 | SNV | 1 | T | C | Homozygous   |
| NC_037641.1 | 7586904 | SNV | 1 | C | T | Homozygous   |
| NC_037641.1 | 7587294 | SNV | 1 | G | T | Heterozygous |
| NC_037641.1 | 7587749 | SNV | 1 | C | T | Homozygous   |
| NC_037641.1 | 7587955 | SNV | 1 | C | G | Homozygous   |
| NC_037641.1 | 7588463 | SNV | 1 | A | G | Homozygous   |
| NC_037641.1 | 7588532 | SNV | 1 | G | A | Heterozygous |
| NC_037641.1 | 7588580 | SNV | 1 | A | T | Heterozygous |
| NC_037641.1 | 7596348 | SNV | 1 | G | A | Heterozygous |
| NC_037641.1 | 7596723 | SNV | 1 | G | T | Homozygous   |
| NC_037641.1 | 7599694 | SNV | 1 | T | C | Homozygous   |
| NC_037641.1 | 7600463 | SNV | 1 | G | T | Heterozygous |
| NC_037641.1 | 7600490 | SNV | 1 | G | A | Homozygous   |
| NC_037641.1 | 7600558 | SNV | 1 | A | G | Homozygous   |
| NC_037641.1 | 7600591 | SNV | 1 | A | G | Homozygous   |
| NC_037641.1 | 7600750 | SNV | 1 | A | G | Homozygous   |
| NC_037641.1 | 7600962 | SNV | 1 | T | A | Heterozygous |
| NC_037641.1 | 7600973 | SNV | 1 | A | G | Heterozygous |
| NC_037641.1 | 7609910 | SNV | 1 | G | A | Heterozygous |
| NC_037641.1 | 7620450 | SNV | 1 | T | C | Homozygous   |
| NC_037641.1 | 7620458 | SNV | 1 | G | C | Heterozygous |
| NC_037641.1 | 7626591 | SNV | 1 | C | T | Homozygous   |
| NC_037641.1 | 7626603 | SNV | 1 | C | G | Heterozygous |
| NC_037641.1 | 7626609 | SNV | 1 | C | T | Homozygous   |
| NC_037641.1 | 7626650 | SNV | 1 | G | A | Homozygous   |
| NC_037641.1 | 7626666 | SNV | 1 | C | T | Homozygous   |
| NC_037641.1 | 7626669 | SNV | 1 | G | A | Homozygous   |
| NC_037641.1 | 7645712 | SNV | 1 | G | C | Homozygous   |
| NC_037641.1 | 7660629 | SNV | 1 | C | T | Homozygous   |
| NC_037641.1 | 7667386 | SNV | 1 | T | C | Homozygous   |
| NC_037641.1 | 7669058 | SNV | 1 | C | T | Homozygous   |
| NC_037641.1 | 7669239 | SNV | 1 | A | G | Homozygous   |
| NC_037641.1 | 7669316 | SNV | 1 | T | A | Heterozygous |
| NC_037641.1 | 7669319 | SNV | 1 | T | A | Heterozygous |
| NC_037641.1 | 7669327 | SNV | 1 | G | A | Heterozygous |
| NC_037641.1 | 7669327 | SNV | 1 | G | T | Heterozygous |
| NC_037641.1 | 7669345 | SNV | 1 | G | A | Heterozygous |
| NC_037641.1 | 7669350 | SNV | 1 | C | A | Heterozygous |
| NC_037641.1 | 7669372 | SNV | 1 | C | G | Homozygous   |
| NC_037641.1 | 7669402 | SNV | 1 | T | C | Heterozygous |
| NC_037641.1 | 7669942 | SNV | 1 | T | A | Homozygous   |
| NC_037641.1 | 7669959 | SNV | 1 | A | C | Homozygous   |
| NC_037641.1 | 7688391 | SNV | 1 | A | C | Heterozygous |
| NC_037641.1 | 7688391 | SNV | 1 | A | G | Heterozygous |

|             |         |     |   |   |   |              |
|-------------|---------|-----|---|---|---|--------------|
| NC_037641.1 | 7688396 | SNV | 1 | A | C | Heterozygous |
| NC_037641.1 | 7688399 | SNV | 1 | T | G | Heterozygous |
| NC_037641.1 | 7692693 | SNV | 1 | A | G | Homozygous   |
| NC_037641.1 | 7692697 | SNV | 1 | T | A | Homozygous   |
| NC_037641.1 | 7692702 | SNV | 1 | G | C | Homozygous   |
| NC_037641.1 | 7692706 | SNV | 1 | C | A | Homozygous   |
| NC_037641.1 | 7692708 | SNV | 1 | C | T | Homozygous   |
| NC_037641.1 | 7692711 | SNV | 1 | A | G | Homozygous   |
| NC_037641.1 | 7693127 | SNV | 1 | T | A | Heterozygous |
| NC_037641.1 | 7693650 | SNV | 1 | C | G | Homozygous   |
| NC_037641.1 | 7693674 | SNV | 1 | T | C | Heterozygous |
| NC_037641.1 | 7693928 | SNV | 1 | C | T | Heterozygous |
| NC_037641.1 | 7694319 | SNV | 1 | A | G | Heterozygous |
| NC_037641.1 | 7707261 | SNV | 1 | T | A | Homozygous   |
| NC_037641.1 | 7707263 | SNV | 1 | T | A | Homozygous   |
| NC_037641.1 | 7707270 | SNV | 1 | A | T | Homozygous   |
| NC_037641.1 | 7707288 | SNV | 1 | C | A | Homozygous   |
| NC_037641.1 | 7707290 | SNV | 1 | G | T | Homozygous   |
| NC_037641.1 | 7726745 | SNV | 1 | A | G | Heterozygous |
| NC_037641.1 | 7727099 | SNV | 1 | G | A | Homozygous   |
| NC_037641.1 | 7727120 | SNV | 1 | A | G | Heterozygous |
| NC_037641.1 | 7742487 | SNV | 1 | T | A | Homozygous   |
| NC_037641.1 | 7742489 | SNV | 1 | C | G | Homozygous   |
| NC_037641.1 | 7746418 | SNV | 1 | G | A | Homozygous   |
| NC_037641.1 | 7746422 | SNV | 1 | C | A | Homozygous   |
| NC_037641.1 | 7746466 | SNV | 1 | T | C | Homozygous   |
| NC_037641.1 | 7749828 | SNV | 1 | T | C | Homozygous   |
| NC_037641.1 | 7749840 | SNV | 1 | T | C | Homozygous   |
| NC_037641.1 | 7749860 | SNV | 1 | A | C | Homozygous   |
| NC_037641.1 | 7749923 | SNV | 1 | G | A | Homozygous   |
| NC_037641.1 | 7749943 | SNV | 1 | A | G | Heterozygous |
| NC_037641.1 | 7752245 | SNV | 1 | A | G | Heterozygous |
| NC_037641.1 | 7752318 | SNV | 1 | G | C | Homozygous   |
| NC_037641.1 | 7781478 | SNV | 1 | G | T | Heterozygous |
| NC_037641.1 | 7781515 | SNV | 1 | A | G | Homozygous   |
| NC_037641.1 | 7781560 | SNV | 1 | T | C | Homozygous   |
| NC_037641.1 | 7781563 | SNV | 1 | A | C | Heterozygous |
| NC_037641.1 | 7781623 | SNV | 1 | G | A | Homozygous   |
| NC_037641.1 | 7781633 | SNV | 1 | G | A | Heterozygous |
| NC_037641.1 | 7781639 | SNV | 1 | A | G | Homozygous   |
| NC_037641.1 | 7781665 | SNV | 1 | T | G | Heterozygous |
| NC_037641.1 | 7781717 | SNV | 1 | A | G | Heterozygous |
| NC_037641.1 | 7781721 | SNV | 1 | A | G | Heterozygous |
| NC_037641.1 | 7781735 | SNV | 1 | A | G | Homozygous   |
| NC_037641.1 | 7781745 | SNV | 1 | C | G | Heterozygous |
| NC_037641.1 | 7781765 | SNV | 1 | G | A | Heterozygous |
| NC_037641.1 | 7781798 | SNV | 1 | A | C | Heterozygous |
| NC_037641.1 | 7807288 | SNV | 1 | G | A | Homozygous   |
| NC_037641.1 | 7807309 | SNV | 1 | T | C | Homozygous   |
| NC_037641.1 | 7807529 | SNV | 1 | A | G | Homozygous   |
| NC_037641.1 | 7819073 | SNV | 1 | A | G | Homozygous   |

|             |         |     |   |   |   |              |
|-------------|---------|-----|---|---|---|--------------|
| NC_037641.1 | 7819202 | SNV | 1 | T | C | Homozygous   |
| NC_037641.1 | 7819231 | SNV | 1 | G | A | Homozygous   |
| NC_037641.1 | 7819233 | SNV | 1 | G | A | Homozygous   |
| NC_037641.1 | 7819235 | SNV | 1 | G | A | Heterozygous |
| NC_037641.1 | 7819237 | SNV | 1 | G | A | Heterozygous |
| NC_037641.1 | 7819253 | SNV | 1 | G | A | Heterozygous |
| NC_037641.1 | 7819991 | SNV | 1 | A | T | Homozygous   |
| NC_037641.1 | 7840649 | SNV | 1 | C | T | Homozygous   |
| NC_037641.1 | 7840695 | SNV | 1 | T | C | Heterozygous |
| NC_037641.1 | 7845590 | SNV | 1 | T | A | Homozygous   |
| NC_037641.1 | 7849281 | SNV | 1 | A | G | Homozygous   |
| NC_037641.1 | 7849284 | SNV | 1 | T | C | Homozygous   |
| NC_037641.1 | 7849295 | SNV | 1 | G | C | Homozygous   |
| NC_037641.1 | 7851959 | SNV | 1 | T | C | Homozygous   |
| NC_037641.1 | 7853061 | SNV | 1 | C | T | Heterozygous |
| NC_037641.1 | 7853082 | SNV | 1 | G | A | Heterozygous |
| NC_037641.1 | 7855918 | SNV | 1 | A | G | Heterozygous |
| NC_037641.1 | 7855921 | SNV | 1 | G | A | Heterozygous |
| NC_037641.1 | 7855954 | SNV | 1 | G | A | Heterozygous |
| NC_037641.1 | 7856003 | SNV | 1 | A | G | Homozygous   |
| NC_037641.1 | 7856511 | SNV | 1 | T | C | Heterozygous |
| NC_037641.1 | 7856689 | SNV | 1 | A | G | Homozygous   |
| NC_037641.1 | 7859105 | SNV | 1 | A | C | Homozygous   |
| NC_037641.1 | 7859112 | SNV | 1 | T | C | Homozygous   |
| NC_037641.1 | 7859267 | SNV | 1 | G | A | Homozygous   |
| NC_037641.1 | 7861068 | SNV | 1 | G | A | Homozygous   |
| NC_037641.1 | 7861812 | SNV | 1 | T | A | Homozygous   |
| NC_037641.1 | 7861815 | SNV | 1 | T | G | Homozygous   |
| NC_037641.1 | 7862217 | SNV | 1 | T | C | Heterozygous |
| NC_037641.1 | 7862709 | SNV | 1 | T | C | Homozygous   |
| NC_037641.1 | 7862943 | SNV | 1 | A | G | Heterozygous |
| NC_037641.1 | 7863015 | SNV | 1 | G | A | Homozygous   |
| NC_037641.1 | 7864236 | SNV | 1 | A | G | Homozygous   |
| NC_037641.1 | 7865026 | SNV | 1 | C | T | Homozygous   |
| NC_037641.1 | 7865169 | SNV | 1 | T | G | Heterozygous |
| NC_037641.1 | 7865174 | SNV | 1 | A | T | Heterozygous |
| NC_037641.1 | 7865484 | SNV | 1 | T | G | Homozygous   |
| NC_037641.1 | 7867805 | SNV | 1 | A | G | Homozygous   |
| NC_037641.1 | 7873145 | SNV | 1 | C | T | Homozygous   |
| NC_037641.1 | 7873521 | SNV | 1 | A | G | Heterozygous |
| NC_037641.1 | 7877855 | SNV | 1 | A | G | Heterozygous |
| NC_037641.1 | 7877857 | SNV | 1 | G | A | Heterozygous |
| NC_037641.1 | 7892339 | SNV | 1 | A | C | Homozygous   |
| NC_037641.1 | 7892365 | SNV | 1 | G | C | Homozygous   |
| NC_037641.1 | 7895931 | SNV | 1 | C | T | Heterozygous |
| NC_037641.1 | 7898071 | SNV | 1 | G | A | Heterozygous |
| NC_037641.1 | 7899190 | SNV | 1 | A | T | Homozygous   |
| NC_037641.1 | 7899197 | SNV | 1 | G | T | Homozygous   |
| NC_037641.1 | 7899207 | SNV | 1 | A | C | Homozygous   |
| NC_037641.1 | 7899210 | SNV | 1 | A | T | Homozygous   |
| NC_037641.1 | 7899212 | SNV | 1 | A | C | Homozygous   |

|             |         |     |   |   |   |              |
|-------------|---------|-----|---|---|---|--------------|
| NC_037641.1 | 7899225 | SNV | 1 | C | T | Homozygous   |
| NC_037641.1 | 7899242 | SNV | 1 | A | T | Homozygous   |
| NC_037641.1 | 7906005 | SNV | 1 | G | A | Homozygous   |
| NC_037641.1 | 7907545 | SNV | 1 | G | A | Heterozygous |
| NC_037641.1 | 7927286 | SNV | 1 | A | T | Homozygous   |
| NC_037641.1 | 7938442 | SNV | 1 | T | A | Homozygous   |
| NC_037641.1 | 7938726 | SNV | 1 | G | A | Heterozygous |
| NC_037641.1 | 7938882 | SNV | 1 | T | C | Heterozygous |
| NC_037641.1 | 7938895 | SNV | 1 | T | C | Homozygous   |
| NC_037641.1 | 7939036 | SNV | 1 | G | A | Homozygous   |
| NC_037641.1 | 7939104 | SNV | 1 | T | C | Homozygous   |
| NC_037641.1 | 7939114 | SNV | 1 | T | C | Homozygous   |
| NC_037641.1 | 7940264 | SNV | 1 | T | C | Homozygous   |
| NC_037641.1 | 7940268 | SNV | 1 | C | T | Homozygous   |
| NC_037641.1 | 7940286 | SNV | 1 | T | C | Homozygous   |
| NC_037641.1 | 7942947 | SNV | 1 | C | T | Homozygous   |
| NC_037641.1 | 7944177 | SNV | 1 | C | T | Heterozygous |
| NC_037641.1 | 7950251 | SNV | 1 | G | A | Heterozygous |
| NC_037641.1 | 7950391 | SNV | 1 | G | A | Homozygous   |
| NC_037641.1 | 7953137 | SNV | 1 | G | A | Homozygous   |
| NC_037641.1 | 7955064 | SNV | 1 | A | G | Homozygous   |
| NC_037641.1 | 7955720 | SNV | 1 | T | A | Heterozygous |
| NC_037641.1 | 7955725 | SNV | 1 | T | C | Heterozygous |
| NC_037641.1 | 7955733 | SNV | 1 | G | A | Heterozygous |
| NC_037641.1 | 7968663 | SNV | 1 | C | T | Heterozygous |
| NC_037641.1 | 7968727 | SNV | 1 | T | A | Heterozygous |
| NC_037641.1 | 7974593 | SNV | 1 | G | A | Homozygous   |
| NC_037641.1 | 7974601 | SNV | 1 | T | A | Homozygous   |
| NC_037641.1 | 7974846 | SNV | 1 | T | A | Heterozygous |
| NC_037641.1 | 7974923 | SNV | 1 | T | C | Homozygous   |
| NC_037641.1 | 7975264 | SNV | 1 | T | C | Homozygous   |
| NC_037641.1 | 7981694 | SNV | 1 | T | G | Homozygous   |
| NC_037641.1 | 7981700 | SNV | 1 | A | T | Homozygous   |
| NC_037641.1 | 7981705 | SNV | 1 | T | A | Homozygous   |
| NC_037641.1 | 7981708 | SNV | 1 | T | A | Homozygous   |
| NC_037641.1 | 7989219 | SNV | 1 | A | C | Heterozygous |
| NC_037641.1 | 7989720 | SNV | 1 | A | G | Heterozygous |
| NC_037641.1 | 7989730 | SNV | 1 | C | T | Heterozygous |
| NC_037641.1 | 7990572 | SNV | 1 | T | A | Homozygous   |
| NC_037641.1 | 7991651 | SNV | 1 | T | C | Homozygous   |
| NC_037641.1 | 7991729 | SNV | 1 | T | C | Homozygous   |
| NC_037641.1 | 7992031 | SNV | 1 | G | A | Heterozygous |
| NC_037641.1 | 7992033 | SNV | 1 | G | A | Heterozygous |
| NC_037641.1 | 7992063 | SNV | 1 | A | G | Heterozygous |
| NC_037641.1 | 7992111 | SNV | 1 | G | T | Homozygous   |
| NC_037641.1 | 7992547 | SNV | 1 | G | A | Homozygous   |
| NC_037641.1 | 7996708 | SNV | 1 | A | C | Homozygous   |
| NC_037641.1 | 7996730 | SNV | 1 | G | A | Homozygous   |
| NC_037641.1 | 7996732 | SNV | 1 | G | C | Heterozygous |
| NC_037641.1 | 7996737 | SNV | 1 | A | G | Homozygous   |
| NC_037641.1 | 7996746 | SNV | 1 | C | A | Heterozygous |

|             |         |     |   |   |   |              |
|-------------|---------|-----|---|---|---|--------------|
| NC_037641.1 | 7996766 | SNV | 1 | T | G | Homozygous   |
| NC_037641.1 | 8001838 | SNV | 1 | C | T | Homozygous   |
| NC_037641.1 | 8001974 | SNV | 1 | C | T | Heterozygous |
| NC_037641.1 | 8001985 | SNV | 1 | T | C | Heterozygous |
| NC_037641.1 | 8001998 | SNV | 1 | A | G | Heterozygous |
| NC_037641.1 | 8002971 | SNV | 1 | T | C | Heterozygous |
| NC_037641.1 | 8002977 | SNV | 1 | T | A | Heterozygous |
| NC_037641.1 | 8002983 | SNV | 1 | C | T | Heterozygous |
| NC_037641.1 | 8002987 | SNV | 1 | C | T | Heterozygous |
| NC_037641.1 | 8003002 | SNV | 1 | A | T | Homozygous   |
| NC_037641.1 | 8003004 | SNV | 1 | C | T | Homozygous   |
| NC_037641.1 | 8007221 | SNV | 1 | G | A | Homozygous   |
| NC_037641.1 | 8007300 | SNV | 1 | A | G | Homozygous   |
| NC_037641.1 | 8007600 | SNV | 1 | G | A | Homozygous   |
| NC_037641.1 | 8007920 | SNV | 1 | G | T | Homozygous   |
| NC_037641.1 | 8008011 | SNV | 1 | G | A | Heterozygous |
| NC_037641.1 | 8008137 | SNV | 1 | T | G | Homozygous   |
| NC_037641.1 | 8008581 | SNV | 1 | G | A | Heterozygous |
| NC_037641.1 | 8008747 | SNV | 1 | C | T | Homozygous   |
| NC_037641.1 | 8008828 | SNV | 1 | A | C | Homozygous   |
| NC_037641.1 | 8009382 | SNV | 1 | T | C | Homozygous   |
| NC_037641.1 | 8009410 | SNV | 1 | C | A | Heterozygous |
| NC_037641.1 | 8009488 | SNV | 1 | C | T | Heterozygous |
| NC_037641.1 | 8009519 | SNV | 1 | T | C | Homozygous   |
| NC_037641.1 | 8009869 | SNV | 1 | G | A | Heterozygous |
| NC_037641.1 | 8009886 | SNV | 1 | C | T | Heterozygous |
| NC_037641.1 | 8009925 | SNV | 1 | A | T | Heterozygous |
| NC_037641.1 | 8009998 | SNV | 1 | A | G | Heterozygous |
| NC_037641.1 | 8010012 | SNV | 1 | G | A | Homozygous   |
| NC_037641.1 | 8010516 | SNV | 1 | G | A | Heterozygous |
| NC_037641.1 | 8010593 | SNV | 1 | G | T | Homozygous   |
| NC_037641.1 | 8010598 | SNV | 1 | C | T | Heterozygous |
| NC_037641.1 | 8010891 | SNV | 1 | C | T | Homozygous   |
| NC_037641.1 | 8010903 | SNV | 1 | T | A | Heterozygous |
| NC_037641.1 | 8010917 | SNV | 1 | A | C | Heterozygous |
| NC_037641.1 | 8010938 | SNV | 1 | A | G | Homozygous   |
| NC_037641.1 | 8010943 | SNV | 1 | T | C | Homozygous   |
| NC_037641.1 | 8010958 | SNV | 1 | T | C | Homozygous   |
| NC_037641.1 | 8010960 | SNV | 1 | C | T | Heterozygous |
| NC_037641.1 | 8010975 | SNV | 1 | A | G | Homozygous   |
| NC_037641.1 | 8011189 | SNV | 1 | G | A | Homozygous   |
| NC_037641.1 | 8012001 | SNV | 1 | A | G | Homozygous   |
| NC_037641.1 | 8012037 | SNV | 1 | A | G | Homozygous   |
| NC_037641.1 | 8012697 | SNV | 1 | C | A | Homozygous   |
| NC_037641.1 | 8012858 | SNV | 1 | T | C | Homozygous   |
| NC_037641.1 | 8013023 | SNV | 1 | A | G | Homozygous   |
| NC_037641.1 | 8013387 | SNV | 1 | T | C | Homozygous   |
| NC_037641.1 | 8013457 | SNV | 1 | G | A | Heterozygous |
| NC_037641.1 | 8013474 | SNV | 1 | T | C | Homozygous   |
| NC_037641.1 | 8013945 | SNV | 1 | T | C | Homozygous   |
| NC_037641.1 | 8013947 | SNV | 1 | A | G | Homozygous   |

|             |         |     |   |   |   |              |
|-------------|---------|-----|---|---|---|--------------|
| NC_037641.1 | 8013963 | SNV | 1 | A | G | Heterozygous |
| NC_037641.1 | 8014078 | SNV | 1 | A | G | Homozygous   |
| NC_037641.1 | 8014278 | SNV | 1 | A | G | Homozygous   |
| NC_037641.1 | 8014514 | SNV | 1 | G | A | Heterozygous |
| NC_037641.1 | 8014534 | SNV | 1 | A | G | Homozygous   |
| NC_037641.1 | 8014569 | SNV | 1 | T | C | Homozygous   |
| NC_037641.1 | 8014909 | SNV | 1 | C | G | Homozygous   |
| NC_037641.1 | 8015262 | SNV | 1 | T | C | Homozygous   |
| NC_037641.1 | 8015289 | SNV | 1 | C | T | Homozygous   |
| NC_037641.1 | 8015291 | SNV | 1 | A | C | Homozygous   |
| NC_037641.1 | 8015310 | SNV | 1 | T | C | Homozygous   |
| NC_037641.1 | 8015436 | SNV | 1 | T | C | Homozygous   |
| NC_037641.1 | 8015618 | SNV | 1 | A | G | Heterozygous |
| NC_037641.1 | 8015892 | SNV | 1 | A | G | Heterozygous |
| NC_037641.1 | 8016216 | SNV | 1 | C | T | Homozygous   |
| NC_037641.1 | 8016219 | SNV | 1 | C | T | Heterozygous |
| NC_037641.1 | 8020537 | SNV | 1 | C | G | Homozygous   |
| NC_037641.1 | 8023825 | SNV | 1 | A | G | Homozygous   |
| NC_037641.1 | 8023828 | SNV | 1 | T | A | Homozygous   |
| NC_037641.1 | 8023850 | SNV | 1 | A | G | Homozygous   |
| NC_037641.1 | 8023853 | SNV | 1 | A | T | Homozygous   |
| NC_037641.1 | 8023858 | SNV | 1 | A | T | Homozygous   |
| NC_037641.1 | 8038858 | SNV | 1 | C | A | Heterozygous |
| NC_037641.1 | 8039227 | SNV | 1 | A | G | Heterozygous |
| NC_037641.1 | 8039251 | SNV | 1 | A | G | Homozygous   |
| NC_037641.1 | 8043795 | SNV | 1 | G | A | Homozygous   |
| NC_037641.1 | 8044286 | SNV | 1 | G | A | Heterozygous |
| NC_037641.1 | 8045142 | SNV | 1 | G | A | Homozygous   |
| NC_037641.1 | 8045255 | SNV | 1 | T | A | Heterozygous |
| NC_037641.1 | 8045255 | SNV | 1 | T | C | Heterozygous |
| NC_037641.1 | 8045258 | SNV | 1 | A | G | Heterozygous |
| NC_037641.1 | 8048378 | SNV | 1 | T | C | Homozygous   |
| NC_037641.1 | 8048869 | SNV | 1 | T | C | Homozygous   |
| NC_037641.1 | 8049106 | SNV | 1 | A | T | Homozygous   |
| NC_037641.1 | 8049111 | SNV | 1 | A | G | Homozygous   |
| NC_037641.1 | 8049114 | SNV | 1 | C | T | Homozygous   |
| NC_037641.1 | 8049311 | SNV | 1 | C | T | Homozygous   |
| NC_037641.1 | 8049372 | SNV | 1 | C | A | Homozygous   |
| NC_037641.1 | 8049375 | SNV | 1 | A | T | Homozygous   |
| NC_037641.1 | 8069069 | SNV | 1 | T | C | Homozygous   |
| NC_037641.1 | 8077752 | SNV | 1 | A | G | Homozygous   |
| NC_037641.1 | 8077756 | SNV | 1 | G | T | Homozygous   |
| NC_037641.1 | 8077765 | SNV | 1 | A | G | Homozygous   |
| NC_037641.1 | 8077777 | SNV | 1 | G | A | Homozygous   |
| NC_037641.1 | 8077779 | SNV | 1 | C | T | Homozygous   |
| NC_037641.1 | 8101148 | SNV | 1 | G | A | Homozygous   |
| NC_037641.1 | 8101163 | SNV | 1 | C | T | Heterozygous |
| NC_037641.1 | 8128471 | SNV | 1 | C | A | Homozygous   |
| NC_037641.1 | 8128482 | SNV | 1 | A | G | Homozygous   |
| NC_037641.1 | 8135865 | SNV | 1 | G | A | Homozygous   |
| NC_037641.1 | 8137698 | SNV | 1 | T | A | Homozygous   |

|             |         |     |   |   |   |              |
|-------------|---------|-----|---|---|---|--------------|
| NC_037641.1 | 8138000 | SNV | 1 | G | A | Homozygous   |
| NC_037641.1 | 8138082 | SNV | 1 | A | G | Heterozygous |
| NC_037641.1 | 8139051 | SNV | 1 | A | G | Homozygous   |
| NC_037641.1 | 8139053 | SNV | 1 | T | A | Homozygous   |
| NC_037641.1 | 8139563 | SNV | 1 | A | G | Heterozygous |
| NC_037641.1 | 8139783 | SNV | 1 | T | G | Homozygous   |
| NC_037641.1 | 8139787 | SNV | 1 | G | A | Homozygous   |
| NC_037641.1 | 8204869 | SNV | 1 | T | C | Homozygous   |
| NC_037641.1 | 8204872 | SNV | 1 | C | A | Homozygous   |
| NC_037641.1 | 8205351 | SNV | 1 | C | T | Homozygous   |
| NC_037641.1 | 8205552 | SNV | 1 | A | G | Homozygous   |
| NC_037641.1 | 8205663 | SNV | 1 | C | T | Homozygous   |
| NC_037641.1 | 8205759 | SNV | 1 | C | T | Heterozygous |
| NC_037641.1 | 8205808 | SNV | 1 | A | C | Homozygous   |
| NC_037641.1 | 8205846 | SNV | 1 | T | C | Homozygous   |
| NC_037641.1 | 8205978 | SNV | 1 | A | G | Homozygous   |
| NC_037641.1 | 8206069 | SNV | 1 | G | A | Homozygous   |
| NC_037641.1 | 8206310 | SNV | 1 | C | T | Heterozygous |
| NC_037641.1 | 8206332 | SNV | 1 | A | G | Homozygous   |
| NC_037641.1 | 8209716 | SNV | 1 | G | A | Heterozygous |
| NC_037641.1 | 8209760 | SNV | 1 | G | A | Homozygous   |
| NC_037641.1 | 8209820 | SNV | 1 | T | C | Homozygous   |
| NC_037641.1 | 8210662 | SNV | 1 | A | G | Homozygous   |
| NC_037641.1 | 8210699 | SNV | 1 | G | A | Heterozygous |
| NC_037641.1 | 8210702 | SNV | 1 | G | A | Homozygous   |
| NC_037641.1 | 8210705 | SNV | 1 | G | A | Homozygous   |
| NC_037641.1 | 8224728 | SNV | 1 | C | G | Homozygous   |
| NC_037641.1 | 8224730 | SNV | 1 | A | G | Homozygous   |
| NC_037641.1 | 8224757 | SNV | 1 | A | C | Homozygous   |
| NC_037641.1 | 8224767 | SNV | 1 | A | G | Homozygous   |
| NC_037641.1 | 8224773 | SNV | 1 | A | C | Homozygous   |
| NC_037641.1 | 8228785 | SNV | 1 | C | T | Heterozygous |
| NC_037641.1 | 8228836 | SNV | 1 | T | C | Heterozygous |
| NC_037641.1 | 8228887 | SNV | 1 | C | T | Homozygous   |
| NC_037641.1 | 8229084 | SNV | 1 | G | T | Heterozygous |
| NC_037641.1 | 8229136 | SNV | 1 | C | A | Homozygous   |
| NC_037641.1 | 8251786 | SNV | 1 | G | T | Homozygous   |
| NC_037641.1 | 8278995 | SNV | 1 | T | C | Heterozygous |
| NC_037641.1 | 8279004 | SNV | 1 | A | T | Heterozygous |
| NC_037641.1 | 8279008 | SNV | 1 | T | G | Heterozygous |
| NC_037641.1 | 8279082 | SNV | 1 | T | C | Homozygous   |
| NC_037641.1 | 8279084 | SNV | 1 | G | A | Homozygous   |
| NC_037641.1 | 8279086 | SNV | 1 | T | C | Homozygous   |
| NC_037641.1 | 8279114 | SNV | 1 | T | A | Homozygous   |
| NC_037641.1 | 8279247 | SNV | 1 | A | G | Homozygous   |
| NC_037641.1 | 8279405 | SNV | 1 | A | T | Heterozygous |
| NC_037641.1 | 8279645 | SNV | 1 | A | G | Homozygous   |
| NC_037641.1 | 8279779 | SNV | 1 | G | A | Heterozygous |
| NC_037641.1 | 8279796 | SNV | 1 | G | A | Heterozygous |
| NC_037641.1 | 8279856 | SNV | 1 | C | T | Homozygous   |
| NC_037641.1 | 8279880 | SNV | 1 | G | A | Homozygous   |

|             |         |     |   |   |   |              |
|-------------|---------|-----|---|---|---|--------------|
| NC_037641.1 | 8279883 | SNV | 1 | A | T | Homozygous   |
| NC_037641.1 | 8279916 | SNV | 1 | T | G | Homozygous   |
| NC_037641.1 | 8279920 | SNV | 1 | T | A | Homozygous   |
| NC_037641.1 | 8279945 | SNV | 1 | A | G | Homozygous   |
| NC_037641.1 | 8282593 | SNV | 1 | A | G | Homozygous   |
| NC_037641.1 | 8282835 | SNV | 1 | C | T | Homozygous   |
| NC_037641.1 | 8282943 | SNV | 1 | C | T | Homozygous   |
| NC_037641.1 | 8282986 | SNV | 1 | A | G | Homozygous   |
| NC_037641.1 | 8283064 | SNV | 1 | G | C | Homozygous   |
| NC_037641.1 | 8283076 | SNV | 1 | C | T | Homozygous   |
| NC_037641.1 | 8283573 | SNV | 1 | C | T | Homozygous   |
| NC_037641.1 | 8283836 | SNV | 1 | G | A | Homozygous   |
| NC_037641.1 | 8285323 | SNV | 1 | T | G | Homozygous   |
| NC_037641.1 | 8286634 | SNV | 1 | A | G | Homozygous   |
| NC_037641.1 | 8286663 | SNV | 1 | A | G | Homozygous   |
| NC_037641.1 | 8286697 | SNV | 1 | C | T | Heterozygous |
| NC_037641.1 | 8286700 | SNV | 1 | C | T | Homozygous   |
| NC_037641.1 | 8286805 | SNV | 1 | T | G | Homozygous   |
| NC_037641.1 | 8293518 | SNV | 1 | G | A | Homozygous   |
| NC_037641.1 | 8293528 | SNV | 1 | G | C | Homozygous   |
| NC_037641.1 | 8296034 | SNV | 1 | G | A | Heterozygous |
| NC_037641.1 | 8296078 | SNV | 1 | G | T | Heterozygous |
| NC_037641.1 | 8296434 | SNV | 1 | A | G | Heterozygous |
| NC_037641.1 | 8296474 | SNV | 1 | G | A | Heterozygous |
| NC_037641.1 | 8296485 | SNV | 1 | G | A | Heterozygous |
| NC_037641.1 | 8297541 | SNV | 1 | T | C | Homozygous   |
| NC_037641.1 | 8297559 | SNV | 1 | T | C | Homozygous   |
| NC_037641.1 | 8301247 | SNV | 1 | G | A | Homozygous   |
| NC_037641.1 | 8304769 | SNV | 1 | G | A | Heterozygous |
| NC_037641.1 | 8304774 | SNV | 1 | C | A | Homozygous   |
| NC_037641.1 | 8304796 | SNV | 1 | A | C | Heterozygous |
| NC_037641.1 | 8305636 | SNV | 1 | G | A | Heterozygous |
| NC_037641.1 | 8305640 | SNV | 1 | G | A | Heterozygous |
| NC_037641.1 | 8305643 | SNV | 1 | A | G | Heterozygous |
| NC_037641.1 | 8305672 | SNV | 1 | A | G | Heterozygous |
| NC_037641.1 | 8307343 | SNV | 1 | C | T | Heterozygous |
| NC_037641.1 | 8311276 | SNV | 1 | A | G | Homozygous   |
| NC_037641.1 | 8311299 | SNV | 1 | T | C | Homozygous   |
| NC_037641.1 | 8311317 | SNV | 1 | A | G | Homozygous   |
| NC_037641.1 | 8311321 | SNV | 1 | A | G | Homozygous   |
| NC_037641.1 | 8312118 | SNV | 1 | T | C | Homozygous   |
| NC_037641.1 | 8312126 | SNV | 1 | C | G | Homozygous   |
| NC_037641.1 | 8312273 | SNV | 1 | T | G | Homozygous   |
| NC_037641.1 | 8312286 | SNV | 1 | A | G | Heterozygous |
| NC_037641.1 | 8312303 | SNV | 1 | G | A | Homozygous   |
| NC_037641.1 | 8312389 | SNV | 1 | A | G | Homozygous   |
| NC_037641.1 | 8314067 | SNV | 1 | A | C | Homozygous   |
| NC_037641.1 | 8314084 | SNV | 1 | G | A | Heterozygous |
| NC_037641.1 | 8314097 | SNV | 1 | G | A | Homozygous   |
| NC_037641.1 | 8314117 | SNV | 1 | G | A | Homozygous   |
| NC_037641.1 | 8322707 | SNV | 1 | C | A | Homozygous   |



|             |         |     |   |   |   |              |
|-------------|---------|-----|---|---|---|--------------|
| NC_037641.1 | 8323145 | SNV | 1 | G | A | Heterozygous |
| NC_037641.1 | 8325748 | SNV | 1 | T | C | Homozygous   |
| NC_037641.1 | 8325759 | SNV | 1 | G | A | Heterozygous |
| NC_037641.1 | 8325791 | SNV | 1 | C | T | Heterozygous |
| NC_037641.1 | 8325836 | SNV | 1 | G | C | Heterozygous |
| NC_037641.1 | 8325838 | SNV | 1 | T | A | Homozygous   |
| NC_037641.1 | 8325874 | SNV | 1 | G | A | Homozygous   |
| NC_037641.1 | 8341241 | SNV | 1 | C | T | Heterozygous |
| NC_037641.1 | 8341319 | SNV | 1 | G | C | Homozygous   |
| NC_037641.1 | 8341614 | SNV | 1 | C | T | Homozygous   |
| NC_037641.1 | 8341670 | SNV | 1 | A | G | Homozygous   |
| NC_037641.1 | 8343389 | SNV | 1 | T | C | Homozygous   |
| NC_037641.1 | 8345197 | SNV | 1 | G | A | Homozygous   |
| NC_037641.1 | 8345200 | SNV | 1 | G | A | Homozygous   |
| NC_037641.1 | 8345203 | SNV | 1 | A | G | Homozygous   |
| NC_037641.1 | 8345224 | SNV | 1 | G | A | Heterozygous |
| NC_037641.1 | 8345244 | SNV | 1 | C | G | Homozygous   |
| NC_037641.1 | 8345251 | SNV | 1 | C | A | Heterozygous |
| NC_037641.1 | 8347560 | SNV | 1 | T | C | Homozygous   |
| NC_037641.1 | 8347587 | SNV | 1 | G | C | Homozygous   |
| NC_037641.1 | 8347590 | SNV | 1 | C | G | Heterozygous |
| NC_037641.1 | 8347595 | SNV | 1 | A | T | Homozygous   |
| NC_037641.1 | 8347605 | SNV | 1 | C | G | Homozygous   |
| NC_037641.1 | 8350348 | SNV | 1 | A | T | Homozygous   |
| NC_037641.1 | 8350351 | SNV | 1 | C | A | Homozygous   |
| NC_037641.1 | 8350356 | SNV | 1 | A | T | Homozygous   |
| NC_037641.1 | 8350360 | SNV | 1 | T | A | Homozygous   |
| NC_037641.1 | 8355885 | SNV | 1 | C | T | Heterozygous |
| NC_037641.1 | 8356135 | SNV | 1 | T | C | Heterozygous |
| NC_037641.1 | 8361337 | SNV | 1 | A | T | Heterozygous |
| NC_037641.1 | 8361351 | SNV | 1 | T | C | Heterozygous |
| NC_037641.1 | 8366378 | SNV | 1 | T | C | Homozygous   |
| NC_037641.1 | 8366381 | SNV | 1 | T | C | Homozygous   |
| NC_037641.1 | 8366392 | SNV | 1 | C | A | Heterozygous |
| NC_037641.1 | 8366410 | SNV | 1 | C | T | Homozygous   |
| NC_037641.1 | 8366426 | SNV | 1 | C | T | Homozygous   |
| NC_037641.1 | 8366429 | SNV | 1 | T | C | Homozygous   |
| NC_037641.1 | 8366431 | SNV | 1 | C | T | Homozygous   |
| NC_037641.1 | 8366883 | SNV | 1 | C | T | Homozygous   |
| NC_037641.1 | 8366891 | SNV | 1 | T | C | Homozygous   |
| NC_037641.1 | 8366894 | SNV | 1 | A | G | Homozygous   |
| NC_037641.1 | 8366899 | SNV | 1 | C | G | Homozygous   |
| NC_037641.1 | 8371881 | SNV | 1 | G | T | Homozygous   |
| NC_037641.1 | 8371887 | SNV | 1 | G | C | Heterozygous |
| NC_037641.1 | 8371889 | SNV | 1 | G | A | Heterozygous |
| NC_037641.1 | 8371902 | SNV | 1 | A | G | Heterozygous |
| NC_037641.1 | 8371905 | SNV | 1 | A | T | Homozygous   |
| NC_037641.1 | 8378970 | SNV | 1 | T | G | Homozygous   |
| NC_037641.1 | 8380592 | SNV | 1 | C | T | Homozygous   |
| NC_037641.1 | 8383291 | SNV | 1 | G | A | Homozygous   |
| NC_037641.1 | 8383294 | SNV | 1 | C | G | Homozygous   |

|             |         |     |   |   |   |              |
|-------------|---------|-----|---|---|---|--------------|
| NC_037641.1 | 8383318 | SNV | 1 | C | T | Homozygous   |
| NC_037641.1 | 8383361 | SNV | 1 | C | T | Heterozygous |
| NC_037641.1 | 8391279 | SNV | 1 | C | T | Homozygous   |
| NC_037641.1 | 8391626 | SNV | 1 | A | G | Homozygous   |
| NC_037641.1 | 8391978 | SNV | 1 | A | G | Homozygous   |
| NC_037641.1 | 8392170 | SNV | 1 | A | G | Homozygous   |
| NC_037641.1 | 8393191 | SNV | 1 | G | T | Homozygous   |
| NC_037641.1 | 8393200 | SNV | 1 | C | G | Homozygous   |
| NC_037641.1 | 8393203 | SNV | 1 | T | G | Homozygous   |
| NC_037641.1 | 8393221 | SNV | 1 | C | T | Heterozygous |
| NC_037641.1 | 8394657 | SNV | 1 | T | C | Homozygous   |
| NC_037641.1 | 8394953 | SNV | 1 | C | T | Homozygous   |
| NC_037641.1 | 8394982 | SNV | 1 | G | T | Heterozygous |
| NC_037641.1 | 8395015 | SNV | 1 | A | G | Homozygous   |
| NC_037641.1 | 8399789 | SNV | 1 | T | A | Homozygous   |
| NC_037641.1 | 8399797 | SNV | 1 | C | A | Homozygous   |
| NC_037641.1 | 8399800 | SNV | 1 | A | T | Homozygous   |
| NC_037641.1 | 8399829 | SNV | 1 | A | T | Homozygous   |
| NC_037641.1 | 8399831 | SNV | 1 | A | T | Homozygous   |
| NC_037641.1 | 8405651 | SNV | 1 | A | G | Homozygous   |
| NC_037641.1 | 8405809 | SNV | 1 | A | G | Heterozygous |
| NC_037641.1 | 8405831 | SNV | 1 | A | G | Homozygous   |
| NC_037641.1 | 8405838 | SNV | 1 | G | A | Homozygous   |
| NC_037641.1 | 8405843 | SNV | 1 | A | G | Homozygous   |
| NC_037641.1 | 8406439 | SNV | 1 | A | G | Heterozygous |
| NC_037641.1 | 8406451 | SNV | 1 | G | A | Heterozygous |
| NC_037641.1 | 8408576 | SNV | 1 | G | T | Heterozygous |
| NC_037641.1 | 8408619 | SNV | 1 | T | C | Heterozygous |
| NC_037641.1 | 8409110 | SNV | 1 | T | G | Homozygous   |
| NC_037641.1 | 8409409 | SNV | 1 | A | T | Homozygous   |
| NC_037641.1 | 8409411 | SNV | 1 | T | C | Homozygous   |
| NC_037641.1 | 8409457 | SNV | 1 | T | A | Homozygous   |
| NC_037641.1 | 8409676 | SNV | 1 | G | A | Homozygous   |
| NC_037641.1 | 8409691 | SNV | 1 | C | A | Heterozygous |
| NC_037641.1 | 8409756 | SNV | 1 | T | C | Heterozygous |
| NC_037641.1 | 8409765 | SNV | 1 | T | C | Homozygous   |
| NC_037641.1 | 8409769 | SNV | 1 | A | G | Heterozygous |
| NC_037641.1 | 8409817 | SNV | 1 | A | G | Heterozygous |
| NC_037641.1 | 8409827 | SNV | 1 | T | C | Heterozygous |
| NC_037641.1 | 8409951 | SNV | 1 | T | C | Heterozygous |
| NC_037641.1 | 8409958 | SNV | 1 | A | G | Heterozygous |
| NC_037641.1 | 8409962 | SNV | 1 | G | C | Heterozygous |
| NC_037641.1 | 8409962 | SNV | 1 | G | T | Heterozygous |
| NC_037641.1 | 8409971 | SNV | 1 | C | T | Heterozygous |
| NC_037641.1 | 8409983 | SNV | 1 | A | T | Homozygous   |
| NC_037641.1 | 8410100 | SNV | 1 | C | T | Heterozygous |
| NC_037641.1 | 8410105 | SNV | 1 | A | G | Heterozygous |
| NC_037641.1 | 8410108 | SNV | 1 | A | C | Heterozygous |
| NC_037641.1 | 8410127 | SNV | 1 | C | T | Homozygous   |
| NC_037641.1 | 8410129 | SNV | 1 | C | A | Homozygous   |
| NC_037641.1 | 8410133 | SNV | 1 | C | T | Heterozygous |

|             |         |     |   |   |   |              |
|-------------|---------|-----|---|---|---|--------------|
| NC_037641.1 | 8410136 | SNV | 1 | C | T | Heterozygous |
| NC_037641.1 | 8410139 | SNV | 1 | C | G | Homozygous   |
| NC_037641.1 | 8410141 | SNV | 1 | A | T | Homozygous   |
| NC_037641.1 | 8410144 | SNV | 1 | A | G | Homozygous   |
| NC_037641.1 | 8410231 | SNV | 1 | T | G | Heterozygous |
| NC_037641.1 | 8410233 | SNV | 1 | G | A | Homozygous   |
| NC_037641.1 | 8410245 | SNV | 1 | G | A | Heterozygous |
| NC_037641.1 | 8410257 | SNV | 1 | A | T | Heterozygous |
| NC_037641.1 | 8410260 | SNV | 1 | A | G | Homozygous   |
| NC_037641.1 | 8410263 | SNV | 1 | A | C | Heterozygous |
| NC_037641.1 | 8410269 | SNV | 1 | A | G | Heterozygous |
| NC_037641.1 | 8410331 | SNV | 1 | T | C | Heterozygous |
| NC_037641.1 | 8410335 | SNV | 1 | A | T | Heterozygous |
| NC_037641.1 | 8410434 | SNV | 1 | C | G | Homozygous   |
| NC_037641.1 | 8410499 | SNV | 1 | A | G | Heterozygous |
| NC_037641.1 | 8410503 | SNV | 1 | T | C | Homozygous   |
| NC_037641.1 | 8410508 | SNV | 1 | A | G | Heterozygous |
| NC_037641.1 | 8410510 | SNV | 1 | C | T | Heterozygous |
| NC_037641.1 | 8410539 | SNV | 1 | A | C | Homozygous   |
| NC_037641.1 | 8410546 | SNV | 1 | T | C | Homozygous   |
| NC_037641.1 | 8410549 | SNV | 1 | T | C | Homozygous   |
| NC_037641.1 | 8410551 | SNV | 1 | T | G | Homozygous   |
| NC_037641.1 | 8410875 | SNV | 1 | A | T | Heterozygous |
| NC_037641.1 | 8410884 | SNV | 1 | T | G | Heterozygous |
| NC_037641.1 | 8411475 | SNV | 1 | A | C | Heterozygous |
| NC_037641.1 | 8411483 | SNV | 1 | T | C | Heterozygous |
| NC_037641.1 | 8411492 | SNV | 1 | A | T | Heterozygous |
| NC_037641.1 | 8411749 | SNV | 1 | A | G | Homozygous   |
| NC_037641.1 | 8412145 | SNV | 1 | G | A | Heterozygous |
| NC_037641.1 | 8412240 | SNV | 1 | A | G | Homozygous   |
| NC_037641.1 | 8413278 | SNV | 1 | T | C | Homozygous   |
| NC_037641.1 | 8413890 | SNV | 1 | T | G | Heterozygous |
| NC_037641.1 | 8414001 | SNV | 1 | T | C | Homozygous   |
| NC_037641.1 | 8414460 | SNV | 1 | G | A | Homozygous   |
| NC_037641.1 | 8414568 | SNV | 1 | C | T | Homozygous   |
| NC_037641.1 | 8415442 | SNV | 1 | G | A | Homozygous   |
| NC_037641.1 | 8415803 | SNV | 1 | T | C | Heterozygous |
| NC_037641.1 | 8415877 | SNV | 1 | T | C | Homozygous   |
| NC_037641.1 | 8415898 | SNV | 1 | T | C | Homozygous   |
| NC_037641.1 | 8415906 | SNV | 1 | A | C | Homozygous   |
| NC_037641.1 | 8416029 | SNV | 1 | A | G | Heterozygous |
| NC_037641.1 | 8416150 | SNV | 1 | C | T | Homozygous   |
| NC_037641.1 | 8416539 | SNV | 1 | A | T | Homozygous   |
| NC_037641.1 | 8416643 | SNV | 1 | A | G | Homozygous   |
| NC_037641.1 | 8416765 | SNV | 1 | T | C | Heterozygous |
| NC_037641.1 | 8417024 | SNV | 1 | G | A | Heterozygous |
| NC_037641.1 | 8417103 | SNV | 1 | T | C | Heterozygous |
| NC_037641.1 | 8417138 | SNV | 1 | G | A | Heterozygous |
| NC_037641.1 | 8417171 | SNV | 1 | T | C | Homozygous   |
| NC_037641.1 | 8417228 | SNV | 1 | T | C | Heterozygous |
| NC_037641.1 | 8417435 | SNV | 1 | T | C | Homozygous   |

|             |         |     |   |   |   |              |
|-------------|---------|-----|---|---|---|--------------|
| NC_037641.1 | 8417662 | SNV | 1 | A | T | Heterozygous |
| NC_037641.1 | 8417858 | SNV | 1 | A | G | Homozygous   |
| NC_037641.1 | 8419845 | SNV | 1 | C | T | Heterozygous |
| NC_037641.1 | 8419848 | SNV | 1 | T | C | Heterozygous |
| NC_037641.1 | 8419851 | SNV | 1 | T | C | Heterozygous |
| NC_037641.1 | 8420643 | SNV | 1 | A | T | Heterozygous |
| NC_037641.1 | 8420904 | SNV | 1 | T | C | Heterozygous |
| NC_037641.1 | 8420967 | SNV | 1 | T | C | Homozygous   |
| NC_037641.1 | 8421007 | SNV | 1 | A | G | Heterozygous |
| NC_037641.1 | 8421408 | SNV | 1 | A | G | Homozygous   |
| NC_037641.1 | 8421859 | SNV | 1 | A | G | Heterozygous |
| NC_037641.1 | 8421862 | SNV | 1 | A | G | Heterozygous |
| NC_037641.1 | 8421891 | SNV | 1 | A | T | Homozygous   |
| NC_037641.1 | 8421911 | SNV | 1 | A | G | Homozygous   |
| NC_037641.1 | 8422194 | SNV | 1 | G | A | Homozygous   |
| NC_037641.1 | 8422278 | SNV | 1 | G | A | Heterozygous |
| NC_037641.1 | 8422385 | SNV | 1 | G | A | Heterozygous |
| NC_037641.1 | 8422465 | SNV | 1 | G | A | Heterozygous |
| NC_037641.1 | 8422492 | SNV | 1 | T | C | Heterozygous |
| NC_037641.1 | 8422495 | SNV | 1 | G | A | Heterozygous |
| NC_037641.1 | 8422627 | SNV | 1 | C | G | Heterozygous |
| NC_037641.1 | 8426115 | SNV | 1 | T | C | Heterozygous |
| NC_037641.1 | 8426477 | SNV | 1 | T | C | Homozygous   |
| NC_037641.1 | 8426600 | SNV | 1 | C | T | Homozygous   |
| NC_037641.1 | 8426723 | SNV | 1 | G | A | Heterozygous |
| NC_037641.1 | 8426728 | SNV | 1 | G | A | Heterozygous |
| NC_037641.1 | 8426791 | SNV | 1 | G | A | Heterozygous |
| NC_037641.1 | 8426792 | SNV | 1 | C | T | Heterozygous |
| NC_037641.1 | 8426807 | SNV | 1 | T | C | Homozygous   |
| NC_037641.1 | 8426809 | SNV | 1 | T | C | Heterozygous |
| NC_037641.1 | 8427697 | SNV | 1 | G | A | Heterozygous |
| NC_037641.1 | 8428581 | SNV | 1 | T | C | Heterozygous |
| NC_037641.1 | 8428587 | SNV | 1 | T | C | Heterozygous |
| NC_037641.1 | 8428589 | SNV | 1 | T | C | Heterozygous |
| NC_037641.1 | 8428607 | SNV | 1 | T | C | Homozygous   |
| NC_037641.1 | 8428621 | SNV | 1 | A | G | Homozygous   |
| NC_037641.1 | 8428782 | SNV | 1 | A | G | Homozygous   |
| NC_037641.1 | 8429807 | SNV | 1 | C | T | Heterozygous |
| NC_037641.1 | 8430044 | SNV | 1 | T | C | Homozygous   |
| NC_037641.1 | 8430062 | SNV | 1 | G | T | Heterozygous |
| NC_037641.1 | 8430072 | SNV | 1 | G | A | Heterozygous |
| NC_037641.1 | 8430076 | SNV | 1 | T | C | Heterozygous |
| NC_037641.1 | 8430196 | SNV | 1 | A | G | Heterozygous |
| NC_037641.1 | 8430279 | SNV | 1 | T | C | Heterozygous |
| NC_037641.1 | 8431125 | SNV | 1 | A | G | Heterozygous |
| NC_037641.1 | 8431417 | SNV | 1 | A | G | Homozygous   |
| NC_037641.1 | 8431448 | SNV | 1 | C | T | Heterozygous |
| NC_037641.1 | 8431613 | SNV | 1 | C | T | Heterozygous |
| NC_037641.1 | 8431655 | SNV | 1 | A | T | Heterozygous |
| NC_037641.1 | 8431823 | SNV | 1 | C | T | Homozygous   |
| NC_037641.1 | 8431828 | SNV | 1 | T | G | Heterozygous |

|             |         |     |   |   |   |              |
|-------------|---------|-----|---|---|---|--------------|
| NC_037641.1 | 8431832 | SNV | 1 | C | T | Heterozygous |
| NC_037641.1 | 8431838 | SNV | 1 | C | T | Heterozygous |
| NC_037641.1 | 8431843 | SNV | 1 | T | G | Heterozygous |
| NC_037641.1 | 8432414 | SNV | 1 | A | G | Homozygous   |
| NC_037641.1 | 8432442 | SNV | 1 | A | G | Homozygous   |
| NC_037641.1 | 8432597 | SNV | 1 | A | G | Heterozygous |
| NC_037641.1 | 8432702 | SNV | 1 | A | G | Homozygous   |
| NC_037641.1 | 8432988 | SNV | 1 | A | G | Homozygous   |
| NC_037641.1 | 8433053 | SNV | 1 | A | G | Heterozygous |
| NC_037641.1 | 8433135 | SNV | 1 | C | T | Heterozygous |
| NC_037641.1 | 8433173 | SNV | 1 | A | G | Homozygous   |
| NC_037641.1 | 8433573 | SNV | 1 | C | T | Homozygous   |
| NC_037641.1 | 8434639 | SNV | 1 | G | A | Homozygous   |
| NC_037641.1 | 8434663 | SNV | 1 | A | G | Homozygous   |
| NC_037641.1 | 8434680 | SNV | 1 | A | G | Heterozygous |
| NC_037641.1 | 8434691 | SNV | 1 | T | C | Heterozygous |
| NC_037641.1 | 8434720 | SNV | 1 | A | T | Heterozygous |
| NC_037641.1 | 8434788 | SNV | 1 | C | G | Homozygous   |
| NC_037641.1 | 8434818 | SNV | 1 | G | A | Homozygous   |
| NC_037641.1 | 8435129 | SNV | 1 | G | C | Homozygous   |
| NC_037641.1 | 8435226 | SNV | 1 | G | A | Heterozygous |
| NC_037641.1 | 8435245 | SNV | 1 | T | C | Homozygous   |
| NC_037641.1 | 8435486 | SNV | 1 | T | C | Heterozygous |
| NC_037641.1 | 8435892 | SNV | 1 | G | C | Heterozygous |
| NC_037641.1 | 8435950 | SNV | 1 | T | C | Homozygous   |
| NC_037641.1 | 8435971 | SNV | 1 | C | A | Homozygous   |
| NC_037641.1 | 8435996 | SNV | 1 | G | T | Heterozygous |
| NC_037641.1 | 8436022 | SNV | 1 | C | T | Heterozygous |
| NC_037641.1 | 8436073 | SNV | 1 | A | G | Homozygous   |
| NC_037641.1 | 8436104 | SNV | 1 | C | G | Heterozygous |
| NC_037641.1 | 8436137 | SNV | 1 | G | A | Homozygous   |
| NC_037641.1 | 8436205 | SNV | 1 | A | G | Homozygous   |
| NC_037641.1 | 8436278 | SNV | 1 | G | A | Heterozygous |
| NC_037641.1 | 8436282 | SNV | 1 | A | G | Homozygous   |
| NC_037641.1 | 8436290 | SNV | 1 | G | A | Heterozygous |
| NC_037641.1 | 8436509 | SNV | 1 | C | T | Heterozygous |
| NC_037641.1 | 8436512 | SNV | 1 | T | C | Heterozygous |
| NC_037641.1 | 8436515 | SNV | 1 | T | C | Heterozygous |
| NC_037641.1 | 8436544 | SNV | 1 | A | G | Heterozygous |
| NC_037641.1 | 8438832 | SNV | 1 | T | C | Homozygous   |
| NC_037641.1 | 8439058 | SNV | 1 | A | G | Homozygous   |
| NC_037641.1 | 8439106 | SNV | 1 | T | C | Heterozygous |
| NC_037641.1 | 8439109 | SNV | 1 | C | T | Heterozygous |
| NC_037641.1 | 8439117 | SNV | 1 | T | C | Heterozygous |
| NC_037641.1 | 8439125 | SNV | 1 | C | T | Homozygous   |
| NC_037641.1 | 8439562 | SNV | 1 | T | C | Heterozygous |
| NC_037641.1 | 8439566 | SNV | 1 | A | G | Heterozygous |
| NC_037641.1 | 8439702 | SNV | 1 | C | A | Homozygous   |
| NC_037641.1 | 8439725 | SNV | 1 | C | T | Homozygous   |
| NC_037641.1 | 8440210 | SNV | 1 | A | G | Homozygous   |
| NC_037641.1 | 8440327 | SNV | 1 | A | G | Homozygous   |

|             |         |     |   |   |   |              |
|-------------|---------|-----|---|---|---|--------------|
| NC_037641.1 | 8440350 | SNV | 1 | G | A | Homozygous   |
| NC_037641.1 | 8440360 | SNV | 1 | A | G | Homozygous   |
| NC_037641.1 | 8440362 | SNV | 1 | G | T | Homozygous   |
| NC_037641.1 | 8440715 | SNV | 1 | A | G | Homozygous   |
| NC_037641.1 | 8441050 | SNV | 1 | T | C | Homozygous   |
| NC_037641.1 | 8441134 | SNV | 1 | A | G | Homozygous   |
| NC_037641.1 | 8441150 | SNV | 1 | A | C | Heterozygous |
| NC_037641.1 | 8441179 | SNV | 1 | T | C | Homozygous   |
| NC_037641.1 | 8441185 | SNV | 1 | T | G | Homozygous   |
| NC_037641.1 | 8441196 | SNV | 1 | A | G | Homozygous   |
| NC_037641.1 | 8441208 | SNV | 1 | C | T | Homozygous   |
| NC_037641.1 | 8441214 | SNV | 1 | C | T | Homozygous   |
| NC_037641.1 | 8441231 | SNV | 1 | A | G | Homozygous   |
| NC_037641.1 | 8441531 | SNV | 1 | G | A | Homozygous   |
| NC_037641.1 | 8441697 | SNV | 1 | A | G | Heterozygous |
| NC_037641.1 | 8441746 | SNV | 1 | A | C | Heterozygous |
| NC_037641.1 | 8442074 | SNV | 1 | A | G | Heterozygous |
| NC_037641.1 | 8442632 | SNV | 1 | T | A | Homozygous   |
| NC_037641.1 | 8442802 | SNV | 1 | C | T | Homozygous   |
| NC_037641.1 | 8442812 | SNV | 1 | T | C | Heterozygous |
| NC_037641.1 | 8442831 | SNV | 1 | T | C | Heterozygous |
| NC_037641.1 | 8442841 | SNV | 1 | T | C | Heterozygous |
| NC_037641.1 | 8442844 | SNV | 1 | A | G | Heterozygous |
| NC_037641.1 | 8443057 | SNV | 1 | A | G | Heterozygous |
| NC_037641.1 | 8443065 | SNV | 1 | G | A | Heterozygous |
| NC_037641.1 | 8443103 | SNV | 1 | A | T | Heterozygous |
| NC_037641.1 | 8443105 | SNV | 1 | T | A | Heterozygous |
| NC_037641.1 | 8443247 | SNV | 1 | A | G | Homozygous   |
| NC_037641.1 | 8443451 | SNV | 1 | T | C | Homozygous   |
| NC_037641.1 | 8443574 | SNV | 1 | A | G | Homozygous   |
| NC_037641.1 | 8443604 | SNV | 1 | A | T | Heterozygous |
| NC_037641.1 | 8443701 | SNV | 1 | G | A | Heterozygous |
| NC_037641.1 | 8443762 | SNV | 1 | A | G | Heterozygous |
| NC_037641.1 | 8443823 | SNV | 1 | A | G | Heterozygous |
| NC_037641.1 | 8443998 | SNV | 1 | C | G | Heterozygous |
| NC_037641.1 | 8444206 | SNV | 1 | G | A | Heterozygous |
| NC_037641.1 | 8444209 | SNV | 1 | T | C | Homozygous   |
| NC_037641.1 | 8444322 | SNV | 1 | A | G | Homozygous   |
| NC_037641.1 | 8444354 | SNV | 1 | A | G | Heterozygous |
| NC_037641.1 | 8444411 | SNV | 1 | G | T | Homozygous   |
| NC_037641.1 | 8444826 | SNV | 1 | C | T | Homozygous   |
| NC_037641.1 | 8444866 | SNV | 1 | G | A | Heterozygous |
| NC_037641.1 | 8444870 | SNV | 1 | G | A | Heterozygous |
| NC_037641.1 | 8444884 | SNV | 1 | C | G | Heterozygous |
| NC_037641.1 | 8446052 | SNV | 1 | G | A | Heterozygous |
| NC_037641.1 | 8446055 | SNV | 1 | A | G | Heterozygous |
| NC_037641.1 | 8446115 | SNV | 1 | T | C | Homozygous   |
| NC_037641.1 | 8446186 | SNV | 1 | A | G | Homozygous   |
| NC_037641.1 | 8446296 | SNV | 1 | C | A | Homozygous   |
| NC_037641.1 | 8446321 | SNV | 1 | A | G | Homozygous   |
| NC_037641.1 | 8446328 | SNV | 1 | T | C | Heterozygous |

|             |         |     |   |   |   |              |
|-------------|---------|-----|---|---|---|--------------|
| NC_037641.1 | 8446347 | SNV | 1 | T | C | Homozygous   |
| NC_037641.1 | 8446363 | SNV | 1 | A | G | Heterozygous |
| NC_037641.1 | 8446365 | SNV | 1 | C | T | Heterozygous |
| NC_037641.1 | 8446411 | SNV | 1 | C | T | Heterozygous |
| NC_037641.1 | 8446463 | SNV | 1 | A | G | Heterozygous |
| NC_037641.1 | 8446478 | SNV | 1 | C | T | Heterozygous |
| NC_037641.1 | 8446527 | SNV | 1 | C | T | Heterozygous |
| NC_037641.1 | 8446606 | SNV | 1 | A | G | Homozygous   |
| NC_037641.1 | 8446609 | SNV | 1 | G | C | Homozygous   |
| NC_037641.1 | 8446612 | SNV | 1 | A | C | Homozygous   |
| NC_037641.1 | 8447176 | SNV | 1 | G | A | Heterozygous |
| NC_037641.1 | 8447222 | SNV | 1 | T | C | Homozygous   |
| NC_037641.1 | 8447238 | SNV | 1 | A | G | Homozygous   |
| NC_037641.1 | 8447463 | SNV | 1 | G | A | Heterozygous |
| NC_037641.1 | 8447503 | SNV | 1 | C | T | Heterozygous |
| NC_037641.1 | 8448741 | SNV | 1 | G | A | Heterozygous |
| NC_037641.1 | 8450920 | SNV | 1 | C | T | Heterozygous |
| NC_037641.1 | 8451539 | SNV | 1 | G | A | Homozygous   |
| NC_037641.1 | 8452160 | SNV | 1 | T | C | Homozygous   |
| NC_037641.1 | 8452507 | SNV | 1 | A | G | Homozygous   |
| NC_037641.1 | 8452681 | SNV | 1 | C | T | Homozygous   |
| NC_037641.1 | 8452713 | SNV | 1 | T | C | Heterozygous |
| NC_037641.1 | 8453612 | SNV | 1 | G | A | Heterozygous |
| NC_037641.1 | 8453647 | SNV | 1 | A | G | Homozygous   |
| NC_037641.1 | 8453888 | SNV | 1 | A | G | Heterozygous |
| NC_037641.1 | 8453926 | SNV | 1 | T | C | Homozygous   |
| NC_037641.1 | 8454111 | SNV | 1 | A | T | Heterozygous |
| NC_037641.1 | 8454203 | SNV | 1 | A | G | Heterozygous |
| NC_037641.1 | 8454922 | SNV | 1 | C | T | Heterozygous |
| NC_037641.1 | 8455206 | SNV | 1 | A | G | Homozygous   |
| NC_037641.1 | 8455442 | SNV | 1 | A | G | Heterozygous |
| NC_037641.1 | 8455450 | SNV | 1 | A | G | Heterozygous |
| NC_037641.1 | 8455520 | SNV | 1 | A | G | Heterozygous |
| NC_037641.1 | 8455531 | SNV | 1 | G | A | Heterozygous |
| NC_037641.1 | 8455538 | SNV | 1 | A | G | Homozygous   |
| NC_037641.1 | 8455555 | SNV | 1 | C | T | Homozygous   |
| NC_037641.1 | 8455566 | SNV | 1 | C | T | Homozygous   |
| NC_037641.1 | 8455570 | SNV | 1 | T | C | Homozygous   |
| NC_037641.1 | 8455573 | SNV | 1 | G | A | Homozygous   |
| NC_037641.1 | 8455575 | SNV | 1 | A | G | Heterozygous |
| NC_037641.1 | 8455634 | SNV | 1 | G | A | Heterozygous |
| NC_037641.1 | 8455638 | SNV | 1 | G | A | Heterozygous |
| NC_037641.1 | 8455659 | SNV | 1 | G | A | Homozygous   |
| NC_037641.1 | 8455732 | SNV | 1 | G | A | Heterozygous |
| NC_037641.1 | 8455756 | SNV | 1 | C | T | Heterozygous |
| NC_037641.1 | 8455767 | SNV | 1 | C | T | Heterozygous |
| NC_037641.1 | 8455774 | SNV | 1 | G | A | Homozygous   |
| NC_037641.1 | 8455932 | SNV | 1 | T | C | Homozygous   |
| NC_037641.1 | 8456296 | SNV | 1 | A | G | Homozygous   |
| NC_037641.1 | 8456301 | SNV | 1 | T | A | Heterozygous |
| NC_037641.1 | 8456597 | SNV | 1 | G | C | Homozygous   |

|             |         |     |   |   |   |              |
|-------------|---------|-----|---|---|---|--------------|
| NC_037641.1 | 8456706 | SNV | 1 | G | A | Homozygous   |
| NC_037641.1 | 8456748 | SNV | 1 | A | G | Homozygous   |
| NC_037641.1 | 8457167 | SNV | 1 | T | C | Homozygous   |
| NC_037641.1 | 8457174 | SNV | 1 | T | G | Homozygous   |
| NC_037641.1 | 8457330 | SNV | 1 | A | G | Heterozygous |
| NC_037641.1 | 8460219 | SNV | 1 | G | T | Heterozygous |
| NC_037641.1 | 8460224 | SNV | 1 | A | G | Heterozygous |
| NC_037641.1 | 8460234 | SNV | 1 | C | T | Heterozygous |
| NC_037641.1 | 8460261 | SNV | 1 | A | G | Homozygous   |
| NC_037641.1 | 8460281 | SNV | 1 | T | C | Heterozygous |
| NC_037641.1 | 8460396 | SNV | 1 | T | C | Homozygous   |
| NC_037641.1 | 8460549 | SNV | 1 | G | A | Heterozygous |
| NC_037641.1 | 8460670 | SNV | 1 | A | G | Heterozygous |
| NC_037641.1 | 8460849 | SNV | 1 | T | C | Heterozygous |
| NC_037641.1 | 8460855 | SNV | 1 | T | C | Heterozygous |
| NC_037641.1 | 8460918 | SNV | 1 | G | T | Heterozygous |
| NC_037641.1 | 8461258 | SNV | 1 | C | T | Homozygous   |
| NC_037641.1 | 8461285 | SNV | 1 | T | C | Homozygous   |
| NC_037641.1 | 8461815 | SNV | 1 | G | A | Heterozygous |
| NC_037641.1 | 8462181 | SNV | 1 | G | A | Heterozygous |
| NC_037641.1 | 8462577 | SNV | 1 | C | G | Homozygous   |
| NC_037641.1 | 8462598 | SNV | 1 | G | A | Heterozygous |
| NC_037641.1 | 8462851 | SNV | 1 | T | C | Homozygous   |
| NC_037641.1 | 8462929 | SNV | 1 | G | C | Heterozygous |
| NC_037641.1 | 8462936 | SNV | 1 | C | T | Heterozygous |
| NC_037641.1 | 8463290 | SNV | 1 | C | T | Heterozygous |
| NC_037641.1 | 8463392 | SNV | 1 | A | G | Homozygous   |
| NC_037641.1 | 8463422 | SNV | 1 | T | C | Heterozygous |
| NC_037641.1 | 8463424 | SNV | 1 | A | G | Homozygous   |
| NC_037641.1 | 8463463 | SNV | 1 | G | A | Homozygous   |
| NC_037641.1 | 8463510 | SNV | 1 | A | G | Homozygous   |
| NC_037641.1 | 8463542 | SNV | 1 | T | C | Homozygous   |
| NC_037641.1 | 8463579 | SNV | 1 | G | T | Heterozygous |
| NC_037641.1 | 8463604 | SNV | 1 | G | A | Heterozygous |
| NC_037641.1 | 8463653 | SNV | 1 | G | A | Homozygous   |
| NC_037641.1 | 8463900 | SNV | 1 | A | G | Homozygous   |
| NC_037641.1 | 8464012 | SNV | 1 | A | G | Heterozygous |
| NC_037641.1 | 8464023 | SNV | 1 | A | G | Homozygous   |
| NC_037641.1 | 8464755 | SNV | 1 | G | A | Heterozygous |
| NC_037641.1 | 8467689 | SNV | 1 | A | G | Homozygous   |
| NC_037641.1 | 8467949 | SNV | 1 | G | A | Homozygous   |
| NC_037641.1 | 8468686 | SNV | 1 | G | A | Heterozygous |
| NC_037641.1 | 8468760 | SNV | 1 | C | A | Homozygous   |
| NC_037641.1 | 8468802 | SNV | 1 | T | C | Homozygous   |
| NC_037641.1 | 8468858 | SNV | 1 | A | T | Homozygous   |
| NC_037641.1 | 8468913 | SNV | 1 | A | C | Heterozygous |
| NC_037641.1 | 8468960 | SNV | 1 | G | T | Heterozygous |
| NC_037641.1 | 8469072 | SNV | 1 | A | G | Heterozygous |
| NC_037641.1 | 8469113 | SNV | 1 | C | T | Homozygous   |
| NC_037641.1 | 8469645 | SNV | 1 | T | C | Homozygous   |
| NC_037641.1 | 8469652 | SNV | 1 | A | G | Homozygous   |



|             |         |     |   |   |   |              |
|-------------|---------|-----|---|---|---|--------------|
| NC_037641.1 | 8469672 | SNV | 1 | A | G | Heterozygous |
| NC_037641.1 | 8469814 | SNV | 1 | T | C | Homozygous   |
| NC_037641.1 | 8472089 | SNV | 1 | A | T | Homozygous   |
| NC_037641.1 | 8472092 | SNV | 1 | T | A | Homozygous   |
| NC_037641.1 | 8472095 | SNV | 1 | A | C | Homozygous   |
| NC_037641.1 | 8472355 | SNV | 1 | G | A | Heterozygous |
| NC_037641.1 | 8472365 | SNV | 1 | A | G | Homozygous   |
| NC_037641.1 | 8472475 | SNV | 1 | T | C | Homozygous   |
| NC_037641.1 | 8473381 | SNV | 1 | C | T | Heterozygous |
| NC_037641.1 | 8473387 | SNV | 1 | G | C | Heterozygous |
| NC_037641.1 | 8473677 | SNV | 1 | G | A | Heterozygous |
| NC_037641.1 | 8474213 | SNV | 1 | G | T | Homozygous   |
| NC_037641.1 | 8474257 | SNV | 1 | T | C | Homozygous   |
| NC_037641.1 | 8474432 | SNV | 1 | T | C | Heterozygous |
| NC_037641.1 | 8474464 | SNV | 1 | T | C | Homozygous   |
| NC_037641.1 | 8474556 | SNV | 1 | C | T | Homozygous   |
| NC_037641.1 | 8474574 | SNV | 1 | C | T | Heterozygous |
| NC_037641.1 | 8474723 | SNV | 1 | G | A | Heterozygous |
| NC_037641.1 | 8475096 | SNV | 1 | T | C | Heterozygous |
| NC_037641.1 | 8475782 | SNV | 1 | T | A | Homozygous   |
| NC_037641.1 | 8475954 | SNV | 1 | G | A | Heterozygous |
| NC_037641.1 | 8475983 | SNV | 1 | G | A | Homozygous   |
| NC_037641.1 | 8489045 | SNV | 1 | A | G | Homozygous   |
| NC_037641.1 | 8489434 | SNV | 1 | T | C | Homozygous   |
| NC_037641.1 | 8490343 | SNV | 1 | A | G | Heterozygous |
| NC_037641.1 | 8490441 | SNV | 1 | T | C | Homozygous   |
| NC_037641.1 | 8494271 | SNV | 1 | A | G | Heterozygous |
| NC_037641.1 | 8494418 | SNV | 1 | A | T | Homozygous   |
| NC_037641.1 | 8494656 | SNV | 1 | G | C | Homozygous   |
| NC_037641.1 | 8494658 | SNV | 1 | A | T | Homozygous   |
| NC_037641.1 | 8494999 | SNV | 1 | G | T | Homozygous   |
| NC_037641.1 | 8495138 | SNV | 1 | T | G | Homozygous   |
| NC_037641.1 | 8495297 | SNV | 1 | A | T | Heterozygous |
| NC_037641.1 | 8495647 | SNV | 1 | T | A | Heterozygous |
| NC_037641.1 | 8497423 | SNV | 1 | A | G | Heterozygous |
| NC_037641.1 | 8497432 | SNV | 1 | A | T | Heterozygous |
| NC_037641.1 | 8497451 | SNV | 1 | A | T | Heterozygous |
| NC_037641.1 | 8497461 | SNV | 1 | A | G | Heterozygous |
| NC_037641.1 | 8501770 | SNV | 1 | G | T | Homozygous   |
| NC_037641.1 | 8501773 | SNV | 1 | C | T | Heterozygous |
| NC_037641.1 | 8501901 | SNV | 1 | G | A | Homozygous   |
| NC_037641.1 | 8505646 | SNV | 1 | T | A | Homozygous   |
| NC_037641.1 | 8505657 | SNV | 1 | A | G | Homozygous   |
| NC_037641.1 | 8505661 | SNV | 1 | G | C | Homozygous   |
| NC_037641.1 | 8505663 | SNV | 1 | T | A | Homozygous   |
| NC_037641.1 | 8514444 | SNV | 1 | T | C | Homozygous   |
| NC_037641.1 | 8519247 | SNV | 1 | T | C | Homozygous   |
| NC_037641.1 | 8520802 | SNV | 1 | G | A | Heterozygous |
| NC_037641.1 | 8520891 | SNV | 1 | T | C | Homozygous   |
| NC_037641.1 | 8521295 | SNV | 1 | C | T | Homozygous   |
| NC_037641.1 | 8522036 | SNV | 1 | C | T | Heterozygous |

|             |         |     |   |   |   |              |
|-------------|---------|-----|---|---|---|--------------|
| NC_037641.1 | 8523112 | SNV | 1 | C | T | Heterozygous |
| NC_037641.1 | 8533510 | SNV | 1 | A | T | Homozygous   |
| NC_037641.1 | 8534833 | SNV | 1 | T | C | Heterozygous |
| NC_037641.1 | 8544081 | SNV | 1 | A | G | Heterozygous |
| NC_037641.1 | 8544124 | SNV | 1 | T | A | Homozygous   |
| NC_037641.1 | 8544137 | SNV | 1 | C | T | Homozygous   |
| NC_037641.1 | 8544177 | SNV | 1 | C | T | Homozygous   |
| NC_037641.1 | 8544213 | SNV | 1 | A | C | Heterozygous |
| NC_037641.1 | 8544227 | SNV | 1 | T | C | Heterozygous |
| NC_037641.1 | 8544257 | SNV | 1 | C | T | Homozygous   |
| NC_037641.1 | 8544302 | SNV | 1 | G | A | Homozygous   |
| NC_037641.1 | 8556659 | SNV | 1 | T | G | Homozygous   |
| NC_037641.1 | 8556666 | SNV | 1 | G | C | Homozygous   |
| NC_037641.1 | 8556672 | SNV | 1 | G | A | Homozygous   |
| NC_037641.1 | 8556675 | SNV | 1 | G | A | Homozygous   |
| NC_037641.1 | 8556704 | SNV | 1 | G | C | Homozygous   |
| NC_037641.1 | 8556711 | SNV | 1 | G | A | Homozygous   |
| NC_037641.1 | 8561029 | SNV | 1 | A | T | Heterozygous |
| NC_037641.1 | 8561046 | SNV | 1 | T | C | Homozygous   |
| NC_037641.1 | 8561103 | SNV | 1 | G | A | Homozygous   |
| NC_037641.1 | 8579766 | SNV | 1 | G | A | Homozygous   |
| NC_037641.1 | 8579794 | SNV | 1 | T | C | Homozygous   |
| NC_037641.1 | 8579876 | SNV | 1 | C | T | Homozygous   |
| NC_037641.1 | 8579898 | SNV | 1 | G | C | Heterozygous |
| NC_037641.1 | 8579917 | SNV | 1 | A | C | Heterozygous |
| NC_037641.1 | 8579933 | SNV | 1 | G | A | Homozygous   |
| NC_037641.1 | 8579997 | SNV | 1 | T | C | Heterozygous |
| NC_037641.1 | 8580035 | SNV | 1 | G | T | Homozygous   |
| NC_037641.1 | 8581148 | SNV | 1 | A | T | Heterozygous |
| NC_037641.1 | 8581186 | SNV | 1 | A | G | Homozygous   |
| NC_037641.1 | 8586197 | SNV | 1 | G | A | Homozygous   |
| NC_037641.1 | 8586199 | SNV | 1 | G | A | Homozygous   |
| NC_037641.1 | 8588013 | SNV | 1 | T | A | Homozygous   |
| NC_037641.1 | 8588029 | SNV | 1 | T | G | Homozygous   |
| NC_037641.1 | 8588031 | SNV | 1 | A | G | Homozygous   |
| NC_037641.1 | 8588036 | SNV | 1 | G | T | Homozygous   |
| NC_037641.1 | 8589721 | SNV | 1 | G | A | Homozygous   |
| NC_037641.1 | 8589828 | SNV | 1 | G | A | Heterozygous |
| NC_037641.1 | 8589870 | SNV | 1 | T | C | Homozygous   |
| NC_037641.1 | 8590047 | SNV | 1 | G | A | Heterozygous |
| NC_037641.1 | 8590050 | SNV | 1 | T | A | Heterozygous |
| NC_037641.1 | 8611062 | SNV | 1 | G | T | Homozygous   |
| NC_037641.1 | 8611069 | SNV | 1 | A | T | Homozygous   |
| NC_037641.1 | 8611102 | SNV | 1 | G | A | Heterozygous |
| NC_037641.1 | 8611118 | SNV | 1 | A | C | Heterozygous |
| NC_037641.1 | 8611159 | SNV | 1 | G | A | Homozygous   |
| NC_037641.1 | 8611422 | SNV | 1 | A | G | Homozygous   |
| NC_037641.1 | 8611444 | SNV | 1 | G | A | Homozygous   |
| NC_037641.1 | 8625050 | SNV | 1 | A | G | Homozygous   |
| NC_037641.1 | 8627914 | SNV | 1 | G | A | Homozygous   |
| NC_037641.1 | 8627983 | SNV | 1 | G | A | Homozygous   |

|             |         |     |   |   |   |              |
|-------------|---------|-----|---|---|---|--------------|
| NC_037641.1 | 8628106 | SNV | 1 | C | T | Heterozygous |
| NC_037641.1 | 8628150 | SNV | 1 | T | G | Homozygous   |
| NC_037641.1 | 8629250 | SNV | 1 | A | G | Homozygous   |
| NC_037641.1 | 8648397 | SNV | 1 | A | G | Heterozygous |
| NC_037641.1 | 8648878 | SNV | 1 | G | A | Homozygous   |
| NC_037641.1 | 8649116 | SNV | 1 | A | G | Homozygous   |
| NC_037641.1 | 8649261 | SNV | 1 | T | C | Heterozygous |
| NC_037641.1 | 8649280 | SNV | 1 | C | T | Homozygous   |
| NC_037641.1 | 8653503 | SNV | 1 | A | G | Homozygous   |
| NC_037641.1 | 8653506 | SNV | 1 | C | T | Homozygous   |
| NC_037641.1 | 8653713 | SNV | 1 | C | A | Homozygous   |
| NC_037641.1 | 8655623 | SNV | 1 | T | A | Heterozygous |
| NC_037641.1 | 8655631 | SNV | 1 | T | G | Heterozygous |
| NC_037641.1 | 8655640 | SNV | 1 | C | G | Heterozygous |
| NC_037641.1 | 8655644 | SNV | 1 | C | T | Heterozygous |
| NC_037641.1 | 8655646 | SNV | 1 | C | A | Heterozygous |
| NC_037641.1 | 8655671 | SNV | 1 | C | T | Heterozygous |
| NC_037641.1 | 8655673 | SNV | 1 | C | T | Heterozygous |
| NC_037641.1 | 8655675 | SNV | 1 | T | G | Heterozygous |
| NC_037641.1 | 8655677 | SNV | 1 | C | T | Heterozygous |
| NC_037641.1 | 8655682 | SNV | 1 | C | G | Heterozygous |
| NC_037641.1 | 8655695 | SNV | 1 | G | T | Heterozygous |
| NC_037641.1 | 8655774 | SNV | 1 | G | C | Heterozygous |
| NC_037641.1 | 8656687 | SNV | 1 | C | T | Homozygous   |
| NC_037641.1 | 8656696 | SNV | 1 | C | T | Heterozygous |
| NC_037641.1 | 8659836 | SNV | 1 | G | T | Heterozygous |
| NC_037641.1 | 8666690 | SNV | 1 | G | A | Homozygous   |
| NC_037641.1 | 8667003 | SNV | 1 | G | A | Homozygous   |
| NC_037641.1 | 8721189 | SNV | 1 | G | C | Homozygous   |
| NC_037641.1 | 8756710 | SNV | 1 | C | T | Homozygous   |
| NC_037641.1 | 8765816 | SNV | 1 | G | C | Heterozygous |
| NC_037641.1 | 8765825 | SNV | 1 | G | A | Homozygous   |
| NC_037641.1 | 8765831 | SNV | 1 | G | A | Homozygous   |
| NC_037641.1 | 8765855 | SNV | 1 | T | G | Homozygous   |
| NC_037641.1 | 8765858 | SNV | 1 | T | A | Homozygous   |
| NC_037641.1 | 8776541 | SNV | 1 | T | A | Heterozygous |
| NC_037641.1 | 8776547 | SNV | 1 | T | C | Heterozygous |
| NC_037641.1 | 8776549 | SNV | 1 | C | T | Heterozygous |
| NC_037641.1 | 8776646 | SNV | 1 | C | T | Homozygous   |
| NC_037641.1 | 8776871 | SNV | 1 | C | G | Homozygous   |
| NC_037641.1 | 8777007 | SNV | 1 | G | T | Homozygous   |
| NC_037641.1 | 8806031 | SNV | 1 | G | A | Heterozygous |
| NC_037641.1 | 8806164 | SNV | 1 | C | T | Homozygous   |
| NC_037641.1 | 8806260 | SNV | 1 | T | G | Homozygous   |
| NC_037641.1 | 8831021 | SNV | 1 | T | A | Homozygous   |
| NC_037641.1 | 8831024 | SNV | 1 | T | A | Homozygous   |
| NC_037641.1 | 8831027 | SNV | 1 | A | C | Homozygous   |
| NC_037641.1 | 8838358 | SNV | 1 | C | G | Homozygous   |
| NC_037641.1 | 8838365 | SNV | 1 | T | C | Homozygous   |
| NC_037641.1 | 8838376 | SNV | 1 | A | G | Homozygous   |
| NC_037641.1 | 8838453 | SNV | 1 | C | T | Heterozygous |

|             |         |     |   |   |   |              |
|-------------|---------|-----|---|---|---|--------------|
| NC_037641.1 | 8838531 | SNV | 1 | A | T | Homozygous   |
| NC_037641.1 | 8847443 | SNV | 1 | T | C | Heterozygous |
| NC_037641.1 | 8847615 | SNV | 1 | G | C | Heterozygous |
| NC_037641.1 | 8848072 | SNV | 1 | A | G | Heterozygous |
| NC_037641.1 | 8848094 | SNV | 1 | T | A | Heterozygous |
| NC_037641.1 | 8858887 | SNV | 1 | C | T | Heterozygous |
| NC_037641.1 | 8859230 | SNV | 1 | T | C | Homozygous   |
| NC_037641.1 | 8859234 | SNV | 1 | T | C | Homozygous   |
| NC_037641.1 | 8860659 | SNV | 1 | A | C | Heterozygous |
| NC_037641.1 | 8860669 | SNV | 1 | T | G | Heterozygous |
| NC_037641.1 | 8860681 | SNV | 1 | C | T | Heterozygous |
| NC_037641.1 | 8860809 | SNV | 1 | G | A | Heterozygous |
| NC_037641.1 | 8860824 | SNV | 1 | C | G | Heterozygous |
| NC_037641.1 | 8860892 | SNV | 1 | G | C | Homozygous   |
| NC_037641.1 | 8861082 | SNV | 1 | A | C | Homozygous   |
| NC_037641.1 | 8861704 | SNV | 1 | T | C | Homozygous   |
| NC_037641.1 | 8861746 | SNV | 1 | A | C | Heterozygous |
| NC_037641.1 | 8861770 | SNV | 1 | G | A | Heterozygous |
| NC_037641.1 | 8862085 | SNV | 1 | C | A | Heterozygous |
| NC_037641.1 | 8862133 | SNV | 1 | C | T | Homozygous   |
| NC_037641.1 | 8862139 | SNV | 1 | G | A | Heterozygous |
| NC_037641.1 | 8862267 | SNV | 1 | T | C | Homozygous   |
| NC_037641.1 | 8862737 | SNV | 1 | T | A | Homozygous   |
| NC_037641.1 | 8863087 | SNV | 1 | A | G | Homozygous   |
| NC_037641.1 | 8863096 | SNV | 1 | A | G | Homozygous   |
| NC_037641.1 | 8863335 | SNV | 1 | A | G | Homozygous   |
| NC_037641.1 | 8868536 | SNV | 1 | G | A | Homozygous   |
| NC_037641.1 | 8868568 | SNV | 1 | T | C | Homozygous   |
| NC_037641.1 | 8868747 | SNV | 1 | A | G | Homozygous   |
| NC_037641.1 | 8871415 | SNV | 1 | T | A | Homozygous   |
| NC_037641.1 | 8874119 | SNV | 1 | G | T | Homozygous   |
| NC_037641.1 | 8874165 | SNV | 1 | G | A | Heterozygous |
| NC_037641.1 | 8874650 | SNV | 1 | G | A | Heterozygous |
| NC_037641.1 | 8875346 | SNV | 1 | T | C | Heterozygous |
| NC_037641.1 | 8875394 | SNV | 1 | G | A | Heterozygous |
| NC_037641.1 | 8875396 | SNV | 1 | G | A | Heterozygous |
| NC_037641.1 | 8875413 | SNV | 1 | A | T | Heterozygous |
| NC_037641.1 | 8875491 | SNV | 1 | G | A | Heterozygous |
| NC_037641.1 | 8875544 | SNV | 1 | T | C | Heterozygous |
| NC_037641.1 | 8875936 | SNV | 1 | T | G | Heterozygous |
| NC_037641.1 | 8875948 | SNV | 1 | A | T | Homozygous   |
| NC_037641.1 | 8875951 | SNV | 1 | T | A | Homozygous   |
| NC_037641.1 | 8875964 | SNV | 1 | A | G | Homozygous   |
| NC_037641.1 | 8875983 | SNV | 1 | T | C | Heterozygous |
| NC_037641.1 | 8876163 | SNV | 1 | C | T | Homozygous   |
| NC_037641.1 | 8876302 | SNV | 1 | A | G | Homozygous   |
| NC_037641.1 | 8876353 | SNV | 1 | A | G | Homozygous   |
| NC_037641.1 | 8876411 | SNV | 1 | C | T | Heterozygous |
| NC_037641.1 | 8876738 | SNV | 1 | A | G | Homozygous   |
| NC_037641.1 | 8876745 | SNV | 1 | A | G | Homozygous   |
| NC_037641.1 | 8876859 | SNV | 1 | A | G | Homozygous   |

|             |         |     |   |   |   |              |
|-------------|---------|-----|---|---|---|--------------|
| NC_037641.1 | 8876879 | SNV | 1 | C | G | Heterozygous |
| NC_037641.1 | 8876891 | SNV | 1 | G | C | Heterozygous |
| NC_037641.1 | 8877036 | SNV | 1 | C | T | Heterozygous |
| NC_037641.1 | 8877326 | SNV | 1 | A | C | Heterozygous |
| NC_037641.1 | 8877410 | SNV | 1 | A | G | Homozygous   |
| NC_037641.1 | 8877576 | SNV | 1 | A | G | Homozygous   |
| NC_037641.1 | 8877594 | SNV | 1 | A | G | Homozygous   |
| NC_037641.1 | 8877618 | SNV | 1 | T | C | Homozygous   |
| NC_037641.1 | 8877633 | SNV | 1 | C | T | Heterozygous |
| NC_037641.1 | 8877738 | SNV | 1 | T | A | Homozygous   |
| NC_037641.1 | 8878131 | SNV | 1 | T | C | Homozygous   |
| NC_037641.1 | 8878206 | SNV | 1 | A | T | Heterozygous |
| NC_037641.1 | 8878248 | SNV | 1 | T | C | Heterozygous |
| NC_037641.1 | 8878703 | SNV | 1 | G | A | Heterozygous |
| NC_037641.1 | 8879078 | SNV | 1 | A | G | Homozygous   |
| NC_037641.1 | 8879086 | SNV | 1 | T | C | Homozygous   |
| NC_037641.1 | 8879700 | SNV | 1 | G | A | Heterozygous |
| NC_037641.1 | 8879737 | SNV | 1 | A | G | Heterozygous |
| NC_037641.1 | 8880598 | SNV | 1 | A | G | Heterozygous |
| NC_037641.1 | 8886344 | SNV | 1 | T | C | Homozygous   |
| NC_037641.1 | 8886397 | SNV | 1 | A | T | Homozygous   |
| NC_037641.1 | 8886414 | SNV | 1 | G | A | Homozygous   |
| NC_037641.1 | 8886433 | SNV | 1 | T | A | Homozygous   |
| NC_037641.1 | 8888276 | SNV | 1 | A | T | Homozygous   |
| NC_037641.1 | 8888279 | SNV | 1 | A | T | Homozygous   |
| NC_037641.1 | 8891467 | SNV | 1 | A | C | Homozygous   |
| NC_037641.1 | 8940768 | SNV | 1 | A | G | Heterozygous |
| NC_037641.1 | 8940876 | SNV | 1 | T | C | Homozygous   |
| NC_037641.1 | 8940955 | SNV | 1 | T | C | Homozygous   |
| NC_037641.1 | 8940988 | SNV | 1 | A | G | Homozygous   |
| NC_037641.1 | 8941210 | SNV | 1 | A | G | Homozygous   |
| NC_037641.1 | 8945853 | SNV | 1 | A | G | Heterozygous |
| NC_037641.1 | 8953579 | SNV | 1 | T | G | Heterozygous |
| NC_037641.1 | 8961558 | SNV | 1 | T | C | Heterozygous |
| NC_037641.1 | 8962051 | SNV | 1 | C | T | Heterozygous |
| NC_037641.1 | 8962055 | SNV | 1 | C | A | Heterozygous |
| NC_037641.1 | 8962057 | SNV | 1 | C | T | Heterozygous |
| NC_037641.1 | 8966437 | SNV | 1 | A | G | Heterozygous |
| NC_037641.1 | 8971972 | SNV | 1 | A | G | Homozygous   |
| NC_037641.1 | 8971977 | SNV | 1 | G | T | Homozygous   |
| NC_037641.1 | 8972006 | SNV | 1 | A | G | Homozygous   |
| NC_037641.1 | 8972009 | SNV | 1 | C | T | Homozygous   |
| NC_037641.1 | 8974827 | SNV | 1 | G | A | Homozygous   |
| NC_037641.1 | 8979907 | SNV | 1 | A | G | Homozygous   |
| NC_037641.1 | 8979909 | SNV | 1 | A | G | Heterozygous |
| NC_037641.1 | 8979923 | SNV | 1 | G | A | Heterozygous |
| NC_037641.1 | 8980142 | SNV | 1 | A | G | Homozygous   |
| NC_037641.1 | 8980250 | SNV | 1 | T | C | Heterozygous |
| NC_037641.1 | 8980292 | SNV | 1 | A | G | Heterozygous |
| NC_037641.1 | 8980754 | SNV | 1 | A | G | Heterozygous |
| NC_037641.1 | 8980865 | SNV | 1 | C | T | Homozygous   |

|             |         |     |   |   |   |              |
|-------------|---------|-----|---|---|---|--------------|
| NC_037641.1 | 8980892 | SNV | 1 | C | T | Heterozygous |
| NC_037641.1 | 8980910 | SNV | 1 | T | C | Heterozygous |
| NC_037641.1 | 8981015 | SNV | 1 | C | T | Homozygous   |
| NC_037641.1 | 8981354 | SNV | 1 | A | G | Heterozygous |
| NC_037641.1 | 8981467 | SNV | 1 | A | T | Heterozygous |
| NC_037641.1 | 8981610 | SNV | 1 | G | C | Heterozygous |
| NC_037641.1 | 8982162 | SNV | 1 | T | C | Homozygous   |
| NC_037641.1 | 8986571 | SNV | 1 | T | C | Homozygous   |
| NC_037641.1 | 8986601 | SNV | 1 | G | A | Heterozygous |
| NC_037641.1 | 8986642 | SNV | 1 | T | A | Heterozygous |
| NC_037641.1 | 8986658 | SNV | 1 | G | A | Heterozygous |
| NC_037641.1 | 8986685 | SNV | 1 | T | C | Homozygous   |
| NC_037641.1 | 8986714 | SNV | 1 | A | T | Heterozygous |
| NC_037641.1 | 8986752 | SNV | 1 | C | T | Homozygous   |
| NC_037641.1 | 8986761 | SNV | 1 | T | A | Homozygous   |
| NC_037641.1 | 8986763 | SNV | 1 | T | G | Homozygous   |
| NC_037641.1 | 8986770 | SNV | 1 | G | A | Homozygous   |
| NC_037641.1 | 8986788 | SNV | 1 | T | A | Homozygous   |
| NC_037641.1 | 8986976 | SNV | 1 | G | A | Heterozygous |
| NC_037641.1 | 8986979 | SNV | 1 | A | G | Homozygous   |
| NC_037641.1 | 8986997 | SNV | 1 | C | A | Homozygous   |
| NC_037641.1 | 8987017 | SNV | 1 | T | A | Heterozygous |
| NC_037641.1 | 8987028 | SNV | 1 | G | A | Homozygous   |
| NC_037641.1 | 8987070 | SNV | 1 | T | C | Homozygous   |
| NC_037641.1 | 8987235 | SNV | 1 | T | C | Homozygous   |
| NC_037641.1 | 8987290 | SNV | 1 | A | G | Heterozygous |
| NC_037641.1 | 8987430 | SNV | 1 | G | A | Homozygous   |
| NC_037641.1 | 8987478 | SNV | 1 | A | G | Homozygous   |
| NC_037641.1 | 8987497 | SNV | 1 | G | A | Heterozygous |
| NC_037641.1 | 8987744 | SNV | 1 | T | C | Heterozygous |
| NC_037641.1 | 8991763 | SNV | 1 | A | G | Heterozygous |
| NC_037641.1 | 8991770 | SNV | 1 | T | C | Heterozygous |
| NC_037641.1 | 8993456 | SNV | 1 | G | A | Heterozygous |
| NC_037641.1 | 8993505 | SNV | 1 | A | G | Homozygous   |
| NC_037641.1 | 8993535 | SNV | 1 | A | G | Homozygous   |
| NC_037641.1 | 9009208 | SNV | 1 | T | A | Homozygous   |
| NC_037641.1 | 9009218 | SNV | 1 | T | G | Homozygous   |
| NC_037641.1 | 9009229 | SNV | 1 | A | G | Homozygous   |
| NC_037641.1 | 9013511 | SNV | 1 | G | A | Heterozygous |
| NC_037641.1 | 9015902 | SNV | 1 | G | A | Homozygous   |
| NC_037641.1 | 9016841 | SNV | 1 | G | A | Heterozygous |
| NC_037641.1 | 9016870 | SNV | 1 | T | C | Heterozygous |
| NC_037641.1 | 9016943 | SNV | 1 | G | A | Heterozygous |
| NC_037641.1 | 9017186 | SNV | 1 | A | G | Heterozygous |
| NC_037641.1 | 9017726 | SNV | 1 | C | T | Heterozygous |
| NC_037641.1 | 9017854 | SNV | 1 | G | T | Heterozygous |
| NC_037641.1 | 9017867 | SNV | 1 | C | T | Heterozygous |
| NC_037641.1 | 9017873 | SNV | 1 | G | A | Homozygous   |
| NC_037641.1 | 9017897 | SNV | 1 | T | G | Homozygous   |
| NC_037641.1 | 9017900 | SNV | 1 | T | C | Homozygous   |
| NC_037641.1 | 9018161 | SNV | 1 | A | G | Heterozygous |

|             |         |     |   |   |   |              |
|-------------|---------|-----|---|---|---|--------------|
| NC_037641.1 | 9018223 | SNV | 1 | C | T | Heterozygous |
| NC_037641.1 | 9018294 | SNV | 1 | G | A | Homozygous   |
| NC_037641.1 | 9018296 | SNV | 1 | C | T | Heterozygous |
| NC_037641.1 | 9018299 | SNV | 1 | G | A | Heterozygous |
| NC_037641.1 | 9018376 | SNV | 1 | A | G | Homozygous   |
| NC_037641.1 | 9018387 | SNV | 1 | C | G | Homozygous   |
| NC_037641.1 | 9023309 | SNV | 1 | T | C | Heterozygous |
| NC_037641.1 | 9023359 | SNV | 1 | T | G | Heterozygous |
| NC_037641.1 | 9023445 | SNV | 1 | T | C | Homozygous   |
| NC_037641.1 | 9023942 | SNV | 1 | A | G | Heterozygous |
| NC_037641.1 | 9024078 | SNV | 1 | T | C | Homozygous   |
| NC_037641.1 | 9028938 | SNV | 1 | A | G | Homozygous   |
| NC_037641.1 | 9028954 | SNV | 1 | G | A | Homozygous   |
| NC_037641.1 | 9029003 | SNV | 1 | C | T | Heterozygous |
| NC_037641.1 | 9029064 | SNV | 1 | C | G | Homozygous   |
| NC_037641.1 | 9029121 | SNV | 1 | C | T | Homozygous   |
| NC_037641.1 | 9029150 | SNV | 1 | G | A | Homozygous   |
| NC_037641.1 | 9029157 | SNV | 1 | G | A | Homozygous   |
| NC_037641.1 | 9032814 | SNV | 1 | T | C | Heterozygous |
| NC_037641.1 | 9033051 | SNV | 1 | A | G | Heterozygous |
| NC_037641.1 | 9033145 | SNV | 1 | A | G | Heterozygous |
| NC_037641.1 | 9033384 | SNV | 1 | A | G | Heterozygous |
| NC_037641.1 | 9036787 | SNV | 1 | T | C | Homozygous   |
| NC_037641.1 | 9036860 | SNV | 1 | T | C | Heterozygous |
| NC_037641.1 | 9036869 | SNV | 1 | A | G | Homozygous   |
| NC_037641.1 | 9036997 | SNV | 1 | A | G | Heterozygous |
| NC_037641.1 | 9037283 | SNV | 1 | C | A | Heterozygous |
| NC_037641.1 | 9037539 | SNV | 1 | G | C | Homozygous   |
| NC_037641.1 | 9037648 | SNV | 1 | C | T | Heterozygous |
| NC_037641.1 | 9037691 | SNV | 1 | G | A | Homozygous   |
| NC_037641.1 | 9037706 | SNV | 1 | C | T | Heterozygous |
| NC_037641.1 | 9037728 | SNV | 1 | G | T | Homozygous   |
| NC_037641.1 | 9037840 | SNV | 1 | A | G | Heterozygous |
| NC_037641.1 | 9037857 | SNV | 1 | A | G | Heterozygous |
| NC_037641.1 | 9037891 | SNV | 1 | A | C | Homozygous   |
| NC_037641.1 | 9037966 | SNV | 1 | T | C | Homozygous   |
| NC_037641.1 | 9038016 | SNV | 1 | A | G | Homozygous   |
| NC_037641.1 | 9038021 | SNV | 1 | T | G | Homozygous   |
| NC_037641.1 | 9038045 | SNV | 1 | C | T | Heterozygous |
| NC_037641.1 | 9038060 | SNV | 1 | A | G | Heterozygous |
| NC_037641.1 | 9038062 | SNV | 1 | G | C | Heterozygous |
| NC_037641.1 | 9038157 | SNV | 1 | G | A | Heterozygous |
| NC_037641.1 | 9038258 | SNV | 1 | A | G | Homozygous   |
| NC_037641.1 | 9038780 | SNV | 1 | G | A | Homozygous   |
| NC_037641.1 | 9040571 | SNV | 1 | A | C | Heterozygous |
| NC_037641.1 | 9040758 | SNV | 1 | T | C | Homozygous   |
| NC_037641.1 | 9040857 | SNV | 1 | C | T | Homozygous   |
| NC_037641.1 | 9041315 | SNV | 1 | G | A | Homozygous   |
| NC_037641.1 | 9041769 | SNV | 1 | C | T | Heterozygous |
| NC_037641.1 | 9041774 | SNV | 1 | T | C | Heterozygous |
| NC_037641.1 | 9042054 | SNV | 1 | T | C | Homozygous   |

|             |         |     |   |   |   |              |
|-------------|---------|-----|---|---|---|--------------|
| NC_037641.1 | 9042272 | SNV | 1 | C | T | Heterozygous |
| NC_037641.1 | 9042506 | SNV | 1 | G | A | Heterozygous |
| NC_037641.1 | 9042617 | SNV | 1 | C | T | Heterozygous |
| NC_037641.1 | 9043048 | SNV | 1 | G | A | Homozygous   |
| NC_037641.1 | 9043068 | SNV | 1 | A | G | Heterozygous |
| NC_037641.1 | 9043176 | SNV | 1 | G | A | Homozygous   |
| NC_037641.1 | 9043297 | SNV | 1 | T | G | Heterozygous |
| NC_037641.1 | 9043344 | SNV | 1 | T | C | Homozygous   |
| NC_037641.1 | 9043352 | SNV | 1 | A | G | Homozygous   |
| NC_037641.1 | 9043355 | SNV | 1 | A | C | Homozygous   |
| NC_037641.1 | 9043840 | SNV | 1 | T | C | Heterozygous |
| NC_037641.1 | 9043953 | SNV | 1 | T | C | Homozygous   |
| NC_037641.1 | 9044287 | SNV | 1 | A | G | Heterozygous |
| NC_037641.1 | 9044629 | SNV | 1 | A | G | Heterozygous |
| NC_037641.1 | 9044923 | SNV | 1 | A | T | Heterozygous |
| NC_037641.1 | 9044957 | SNV | 1 | C | T | Heterozygous |
| NC_037641.1 | 9045087 | SNV | 1 | G | A | Heterozygous |
| NC_037641.1 | 9045313 | SNV | 1 | G | A | Heterozygous |
| NC_037641.1 | 9046105 | SNV | 1 | G | A | Heterozygous |
| NC_037641.1 | 9046335 | SNV | 1 | T | C | Heterozygous |
| NC_037641.1 | 9046400 | SNV | 1 | T | C | Homozygous   |
| NC_037641.1 | 9046460 | SNV | 1 | T | C | Homozygous   |
| NC_037641.1 | 9046474 | SNV | 1 | A | G | Homozygous   |
| NC_037641.1 | 9046871 | SNV | 1 | G | C | Heterozygous |
| NC_037641.1 | 9046894 | SNV | 1 | G | A | Heterozygous |
| NC_037641.1 | 9047045 | SNV | 1 | C | T | Homozygous   |
| NC_037641.1 | 9047071 | SNV | 1 | T | C | Homozygous   |
| NC_037641.1 | 9047095 | SNV | 1 | A | G | Heterozygous |
| NC_037641.1 | 9047097 | SNV | 1 | A | G | Heterozygous |
| NC_037641.1 | 9047104 | SNV | 1 | A | G | Homozygous   |
| NC_037641.1 | 9047112 | SNV | 1 | G | A | Heterozygous |
| NC_037641.1 | 9047137 | SNV | 1 | C | T | Heterozygous |
| NC_037641.1 | 9047397 | SNV | 1 | A | G | Homozygous   |
| NC_037641.1 | 9047411 | SNV | 1 | T | C | Homozygous   |
| NC_037641.1 | 9047492 | SNV | 1 | A | G | Homozygous   |
| NC_037641.1 | 9047508 | SNV | 1 | T | C | Homozygous   |
| NC_037641.1 | 9047999 | SNV | 1 | G | A | Heterozygous |
| NC_037641.1 | 9048279 | SNV | 1 | C | T | Heterozygous |
| NC_037641.1 | 9048352 | SNV | 1 | T | C | Homozygous   |
| NC_037641.1 | 9051786 | SNV | 1 | C | G | Homozygous   |
| NC_037641.1 | 9051803 | SNV | 1 | T | C | Homozygous   |
| NC_037641.1 | 9051881 | SNV | 1 | T | C | Homozygous   |
| NC_037641.1 | 9052082 | SNV | 1 | G | A | Homozygous   |
| NC_037641.1 | 9052092 | SNV | 1 | G | A | Heterozygous |
| NC_037641.1 | 9052170 | SNV | 1 | A | G | Homozygous   |
| NC_037641.1 | 9052198 | SNV | 1 | C | T | Homozygous   |
| NC_037641.1 | 9052289 | SNV | 1 | T | A | Heterozygous |
| NC_037641.1 | 9052297 | SNV | 1 | T | C | Heterozygous |
| NC_037641.1 | 9052361 | SNV | 1 | A | G | Heterozygous |
| NC_037641.1 | 9052411 | SNV | 1 | G | A | Heterozygous |
| NC_037641.1 | 9052453 | SNV | 1 | G | A | Heterozygous |



|             |         |     |   |   |   |              |
|-------------|---------|-----|---|---|---|--------------|
| NC_037641.1 | 9053011 | SNV | 1 | G | A | Heterozygous |
| NC_037641.1 | 9053017 | SNV | 1 | T | C | Heterozygous |
| NC_037641.1 | 9053026 | SNV | 1 | T | C | Heterozygous |
| NC_037641.1 | 9053042 | SNV | 1 | G | T | Homozygous   |
| NC_037641.1 | 9053109 | SNV | 1 | C | T | Homozygous   |
| NC_037641.1 | 9053296 | SNV | 1 | T | C | Homozygous   |
| NC_037641.1 | 9053344 | SNV | 1 | T | A | Homozygous   |
| NC_037641.1 | 9053437 | SNV | 1 | A | T | Heterozygous |
| NC_037641.1 | 9053441 | SNV | 1 | T | C | Heterozygous |
| NC_037641.1 | 9053466 | SNV | 1 | T | C | Heterozygous |
| NC_037641.1 | 9053486 | SNV | 1 | A | T | Heterozygous |
| NC_037641.1 | 9053510 | SNV | 1 | C | T | Heterozygous |
| NC_037641.1 | 9053521 | SNV | 1 | A | T | Heterozygous |
| NC_037641.1 | 9053662 | SNV | 1 | T | C | Heterozygous |
| NC_037641.1 | 9053696 | SNV | 1 | G | A | Heterozygous |
| NC_037641.1 | 9054935 | SNV | 1 | C | T | Homozygous   |
| NC_037641.1 | 9055948 | SNV | 1 | A | G | Homozygous   |
| NC_037641.1 | 9056488 | SNV | 1 | G | A | Homozygous   |
| NC_037641.1 | 9056619 | SNV | 1 | A | G | Homozygous   |
| NC_037641.1 | 9058550 | SNV | 1 | T | A | Homozygous   |
| NC_037641.1 | 9058553 | SNV | 1 | T | A | Homozygous   |
| NC_037641.1 | 9059544 | SNV | 1 | G | A | Heterozygous |
| NC_037641.1 | 9059846 | SNV | 1 | G | T | Homozygous   |
| NC_037641.1 | 9060077 | SNV | 1 | T | C | Homozygous   |
| NC_037641.1 | 9062200 | SNV | 1 | G | A | Heterozygous |
| NC_037641.1 | 9062288 | SNV | 1 | A | T | Homozygous   |
| NC_037641.1 | 9064639 | SNV | 1 | T | C | Homozygous   |
| NC_037641.1 | 9065419 | SNV | 1 | T | C | Homozygous   |
| NC_037641.1 | 9065431 | SNV | 1 | C | T | Heterozygous |
| NC_037641.1 | 9065510 | SNV | 1 | C | T | Heterozygous |
| NC_037641.1 | 9067482 | SNV | 1 | T | C | Homozygous   |
| NC_037641.1 | 9071121 | SNV | 1 | A | G | Homozygous   |
| NC_037641.1 | 9075261 | SNV | 1 | G | A | Homozygous   |
| NC_037641.1 | 9075314 | SNV | 1 | C | T | Heterozygous |
| NC_037641.1 | 9076295 | SNV | 1 | T | C | Homozygous   |
| NC_037641.1 | 9076664 | SNV | 1 | A | G | Homozygous   |
| NC_037641.1 | 9076670 | SNV | 1 | A | G | Homozygous   |
| NC_037641.1 | 9076717 | SNV | 1 | C | T | Heterozygous |
| NC_037641.1 | 9076720 | SNV | 1 | G | A | Heterozygous |
| NC_037641.1 | 9077045 | SNV | 1 | T | G | Homozygous   |
| NC_037641.1 | 9077051 | SNV | 1 | T | G | Homozygous   |
| NC_037641.1 | 9077164 | SNV | 1 | A | G | Homozygous   |
| NC_037641.1 | 9079393 | SNV | 1 | G | A | Heterozygous |
| NC_037641.1 | 9079525 | SNV | 1 | C | T | Homozygous   |
| NC_037641.1 | 9079540 | SNV | 1 | A | G | Homozygous   |
| NC_037641.1 | 9079589 | SNV | 1 | C | T | Homozygous   |
| NC_037641.1 | 9079594 | SNV | 1 | T | C | Homozygous   |
| NC_037641.1 | 9079739 | SNV | 1 | C | T | Homozygous   |
| NC_037641.1 | 9079842 | SNV | 1 | T | C | Heterozygous |
| NC_037641.1 | 9079899 | SNV | 1 | A | G | Heterozygous |
| NC_037641.1 | 9080015 | SNV | 1 | A | T | Heterozygous |

|             |         |     |   |   |   |              |
|-------------|---------|-----|---|---|---|--------------|
| NC_037641.1 | 9080045 | SNV | 1 | T | C | Heterozygous |
| NC_037641.1 | 9080045 | SNV | 1 | T | G | Heterozygous |
| NC_037641.1 | 9080483 | SNV | 1 | G | C | Homozygous   |
| NC_037641.1 | 9080517 | SNV | 1 | T | A | Heterozygous |
| NC_037641.1 | 9080529 | SNV | 1 | C | T | Homozygous   |
| NC_037641.1 | 9080586 | SNV | 1 | G | C | Homozygous   |
| NC_037641.1 | 9080606 | SNV | 1 | T | C | Homozygous   |
| NC_037641.1 | 9080778 | SNV | 1 | G | A | Homozygous   |
| NC_037641.1 | 9081034 | SNV | 1 | C | T | Homozygous   |
| NC_037641.1 | 9085592 | SNV | 1 | C | A | Heterozygous |
| NC_037641.1 | 9085599 | SNV | 1 | C | T | Homozygous   |
| NC_037641.1 | 9085601 | SNV | 1 | A | T | Homozygous   |
| NC_037641.1 | 9085611 | SNV | 1 | T | C | Heterozygous |
| NC_037641.1 | 9085614 | SNV | 1 | C | T | Heterozygous |
| NC_037641.1 | 9088260 | SNV | 1 | T | G | Homozygous   |
| NC_037641.1 | 9088265 | SNV | 1 | T | G | Homozygous   |
| NC_037641.1 | 9088832 | SNV | 1 | A | G | Homozygous   |
| NC_037641.1 | 9088834 | SNV | 1 | G | A | Heterozygous |
| NC_037641.1 | 9088855 | SNV | 1 | A | G | Homozygous   |
| NC_037641.1 | 9101613 | SNV | 1 | C | T | Heterozygous |
| NC_037641.1 | 9101870 | SNV | 1 | C | T | Heterozygous |
| NC_037641.1 | 9101956 | SNV | 1 | G | C | Heterozygous |
| NC_037641.1 | 9106363 | SNV | 1 | A | G | Heterozygous |
| NC_037641.1 | 9106395 | SNV | 1 | A | T | Heterozygous |
| NC_037641.1 | 9108289 | SNV | 1 | T | C | Heterozygous |
| NC_037641.1 | 9108293 | SNV | 1 | A | G | Heterozygous |
| NC_037641.1 | 9108297 | SNV | 1 | C | T | Heterozygous |
| NC_037641.1 | 9108649 | SNV | 1 | G | A | Homozygous   |
| NC_037641.1 | 9108660 | SNV | 1 | C | T | Homozygous   |
| NC_037641.1 | 9108667 | SNV | 1 | C | T | Homozygous   |
| NC_037641.1 | 9108677 | SNV | 1 | T | C | Homozygous   |
| NC_037641.1 | 9108796 | SNV | 1 | C | G | Heterozygous |
| NC_037641.1 | 9108805 | SNV | 1 | A | G | Homozygous   |
| NC_037641.1 | 9108824 | SNV | 1 | G | A | Heterozygous |
| NC_037641.1 | 9108879 | SNV | 1 | G | A | Heterozygous |
| NC_037641.1 | 9108888 | SNV | 1 | A | G | Homozygous   |
| NC_037641.1 | 9108890 | SNV | 1 | C | T | Homozygous   |
| NC_037641.1 | 9108915 | SNV | 1 | T | C | Heterozygous |
| NC_037641.1 | 9108945 | SNV | 1 | A | G | Heterozygous |
| NC_037641.1 | 9110448 | SNV | 1 | C | T | Heterozygous |
| NC_037641.1 | 9110547 | SNV | 1 | T | G | Heterozygous |
| NC_037641.1 | 9110551 | SNV | 1 | A | G | Heterozygous |
| NC_037641.1 | 9110659 | SNV | 1 | T | C | Heterozygous |
| NC_037641.1 | 9110715 | SNV | 1 | T | C | Homozygous   |
| NC_037641.1 | 9110718 | SNV | 1 | T | C | Heterozygous |
| NC_037641.1 | 9110723 | SNV | 1 | T | C | Heterozygous |
| NC_037641.1 | 9110804 | SNV | 1 | G | A | Homozygous   |
| NC_037641.1 | 9110973 | SNV | 1 | G | A | Heterozygous |
| NC_037641.1 | 9111071 | SNV | 1 | G | A | Homozygous   |
| NC_037641.1 | 9111208 | SNV | 1 | T | A | Homozygous   |
| NC_037641.1 | 9111536 | SNV | 1 | A | G | Heterozygous |

|             |         |     |   |   |   |              |
|-------------|---------|-----|---|---|---|--------------|
| NC_037641.1 | 9111553 | SNV | 1 | C | T | Heterozygous |
| NC_037641.1 | 9111556 | SNV | 1 | A | G | Heterozygous |
| NC_037641.1 | 9111564 | SNV | 1 | A | G | Homozygous   |
| NC_037641.1 | 9113920 | SNV | 1 | A | G | Homozygous   |
| NC_037641.1 | 9114046 | SNV | 1 | T | C | Heterozygous |
| NC_037641.1 | 9114086 | SNV | 1 | A | G | Homozygous   |
| NC_037641.1 | 9114115 | SNV | 1 | C | T | Heterozygous |
| NC_037641.1 | 9114117 | SNV | 1 | C | T | Heterozygous |
| NC_037641.1 | 9120307 | SNV | 1 | G | A | Heterozygous |
| NC_037641.1 | 9120340 | SNV | 1 | G | A | Homozygous   |
| NC_037641.1 | 9120356 | SNV | 1 | G | A | Homozygous   |
| NC_037641.1 | 9136899 | SNV | 1 | C | G | Homozygous   |
| NC_037641.1 | 9137964 | SNV | 1 | T | C | Heterozygous |
| NC_037641.1 | 9138048 | SNV | 1 | A | G | Homozygous   |
| NC_037641.1 | 9138664 | SNV | 1 | T | C | Heterozygous |
| NC_037641.1 | 9138731 | SNV | 1 | T | C | Homozygous   |
| NC_037641.1 | 9138847 | SNV | 1 | T | C | Heterozygous |
| NC_037641.1 | 9138864 | SNV | 1 | T | C | Homozygous   |
| NC_037641.1 | 9138892 | SNV | 1 | G | A | Homozygous   |
| NC_037641.1 | 9139677 | SNV | 1 | C | T | Homozygous   |
| NC_037641.1 | 9139806 | SNV | 1 | C | T | Heterozygous |
| NC_037641.1 | 9139827 | SNV | 1 | T | C | Homozygous   |
| NC_037641.1 | 9152040 | SNV | 1 | A | G | Homozygous   |
| NC_037641.1 | 9152480 | SNV | 1 | T | C | Heterozygous |
| NC_037641.1 | 9152490 | SNV | 1 | T | C | Heterozygous |
| NC_037641.1 | 9152518 | SNV | 1 | C | T | Heterozygous |
| NC_037641.1 | 9152609 | SNV | 1 | G | C | Heterozygous |
| NC_037641.1 | 9152636 | SNV | 1 | T | C | Heterozygous |
| NC_037641.1 | 9152736 | SNV | 1 | G | C | Heterozygous |
| NC_037641.1 | 9152885 | SNV | 1 | T | C | Heterozygous |
| NC_037641.1 | 9153426 | SNV | 1 | A | G | Heterozygous |
| NC_037641.1 | 9153445 | SNV | 1 | C | T | Heterozygous |
| NC_037641.1 | 9153671 | SNV | 1 | G | C | Heterozygous |
| NC_037641.1 | 9153726 | SNV | 1 | G | A | Heterozygous |
| NC_037641.1 | 9154001 | SNV | 1 | T | C | Heterozygous |
| NC_037641.1 | 9154136 | SNV | 1 | C | T | Heterozygous |
| NC_037641.1 | 9154211 | SNV | 1 | C | T | Heterozygous |
| NC_037641.1 | 9156939 | SNV | 1 | T | A | Homozygous   |
| NC_037641.1 | 9156947 | SNV | 1 | A | T | Homozygous   |
| NC_037641.1 | 9156967 | SNV | 1 | T | G | Homozygous   |
| NC_037641.1 | 9156974 | SNV | 1 | A | G | Homozygous   |
| NC_037641.1 | 9172945 | SNV | 1 | G | A | Heterozygous |
| NC_037641.1 | 9187244 | SNV | 1 | A | G | Heterozygous |
| NC_037641.1 | 9187258 | SNV | 1 | G | A | Homozygous   |
| NC_037641.1 | 9187686 | SNV | 1 | C | T | Heterozygous |
| NC_037641.1 | 9187688 | SNV | 1 | C | T | Homozygous   |
| NC_037641.1 | 9188315 | SNV | 1 | A | G | Homozygous   |
| NC_037641.1 | 9195814 | SNV | 1 | T | G | Homozygous   |
| NC_037641.1 | 9195824 | SNV | 1 | G | C | Homozygous   |
| NC_037641.1 | 9195832 | SNV | 1 | G | A | Homozygous   |
| NC_037641.1 | 9198527 | SNV | 1 | G | A | Heterozygous |

|             |         |     |   |   |   |              |
|-------------|---------|-----|---|---|---|--------------|
| NC_037641.1 | 9198554 | SNV | 1 | T | C | Homozygous   |
| NC_037641.1 | 9198578 | SNV | 1 | G | A | Heterozygous |
| NC_037641.1 | 9203154 | SNV | 1 | G | A | Heterozygous |
| NC_037641.1 | 9248096 | SNV | 1 | A | C | Homozygous   |
| NC_037641.1 | 9248126 | SNV | 1 | G | C | Homozygous   |
| NC_037641.1 | 9248129 | SNV | 1 | T | C | Homozygous   |
| NC_037641.1 | 9259405 | SNV | 1 | C | G | Homozygous   |
| NC_037641.1 | 9259413 | SNV | 1 | G | A | Heterozygous |
| NC_037641.1 | 9259416 | SNV | 1 | A | G | Heterozygous |
| NC_037641.1 | 9259419 | SNV | 1 | A | G | Heterozygous |
| NC_037641.1 | 9259435 | SNV | 1 | G | A | Homozygous   |
| NC_037641.1 | 9273398 | SNV | 1 | G | A | Homozygous   |
| NC_037641.1 | 9273446 | SNV | 1 | G | A | Homozygous   |
| NC_037641.1 | 9274247 | SNV | 1 | T | C | Heterozygous |
| NC_037641.1 | 9274276 | SNV | 1 | C | T | Heterozygous |
| NC_037641.1 | 9274282 | SNV | 1 | C | T | Heterozygous |
| NC_037641.1 | 9290918 | SNV | 1 | G | A | Homozygous   |
| NC_037641.1 | 9290925 | SNV | 1 | A | T | Homozygous   |
| NC_037641.1 | 9290930 | SNV | 1 | A | T | Homozygous   |
| NC_037641.1 | 9290996 | SNV | 1 | T | G | Homozygous   |
| NC_037641.1 | 9291005 | SNV | 1 | A | T | Homozygous   |
| NC_037641.1 | 9291011 | SNV | 1 | A | T | Homozygous   |
| NC_037641.1 | 9291014 | SNV | 1 | G | A | Homozygous   |
| NC_037641.1 | 9291018 | SNV | 1 | T | C | Homozygous   |
| NC_037641.1 | 9318644 | SNV | 1 | A | G | Homozygous   |
| NC_037641.1 | 9318647 | SNV | 1 | T | G | Homozygous   |
| NC_037641.1 | 9318693 | SNV | 1 | C | T | Homozygous   |
| NC_037641.1 | 9318697 | SNV | 1 | C | T | Heterozygous |
| NC_037641.1 | 9318801 | SNV | 1 | A | G | Heterozygous |
| NC_037641.1 | 9318821 | SNV | 1 | A | G | Homozygous   |
| NC_037641.1 | 9318837 | SNV | 1 | A | T | Heterozygous |
| NC_037641.1 | 9318851 | SNV | 1 | A | G | Heterozygous |
| NC_037641.1 | 9319051 | SNV | 1 | A | G | Heterozygous |
| NC_037641.1 | 9319069 | SNV | 1 | A | G | Homozygous   |
| NC_037641.1 | 9319133 | SNV | 1 | T | C | Homozygous   |
| NC_037641.1 | 9319562 | SNV | 1 | G | A | Heterozygous |
| NC_037641.1 | 9319611 | SNV | 1 | A | G | Heterozygous |
| NC_037641.1 | 9319970 | SNV | 1 | G | A | Heterozygous |
| NC_037641.1 | 9320205 | SNV | 1 | G | A | Homozygous   |
| NC_037641.1 | 9320295 | SNV | 1 | A | G | Heterozygous |
| NC_037641.1 | 9320301 | SNV | 1 | C | T | Homozygous   |
| NC_037641.1 | 9333569 | SNV | 1 | T | C | Heterozygous |
| NC_037641.1 | 9333596 | SNV | 1 | T | C | Heterozygous |
| NC_037641.1 | 9333672 | SNV | 1 | T | C | Homozygous   |
| NC_037641.1 | 9334085 | SNV | 1 | T | C | Homozygous   |
| NC_037641.1 | 9334090 | SNV | 1 | A | G | Homozygous   |
| NC_037641.1 | 9334112 | SNV | 1 | A | G | Homozygous   |
| NC_037641.1 | 9334127 | SNV | 1 | A | G | Heterozygous |
| NC_037641.1 | 9334179 | SNV | 1 | G | A | Heterozygous |
| NC_037641.1 | 9355550 | SNV | 1 | T | G | Heterozygous |
| NC_037641.1 | 9355556 | SNV | 1 | A | T | Homozygous   |

|             |         |     |   |   |   |              |
|-------------|---------|-----|---|---|---|--------------|
| NC_037641.1 | 9355559 | SNV | 1 | C | T | Homozygous   |
| NC_037641.1 | 9355564 | SNV | 1 | T | C | Homozygous   |
| NC_037641.1 | 9355566 | SNV | 1 | C | T | Homozygous   |
| NC_037641.1 | 9355611 | SNV | 1 | A | T | Heterozygous |
| NC_037641.1 | 9355624 | SNV | 1 | T | C | Heterozygous |
| NC_037641.1 | 9355634 | SNV | 1 | G | T | Homozygous   |
| NC_037641.1 | 9367849 | SNV | 1 | G | A | Heterozygous |
| NC_037641.1 | 9367864 | SNV | 1 | G | C | Heterozygous |
| NC_037641.1 | 9367866 | SNV | 1 | C | T | Heterozygous |
| NC_037641.1 | 9367883 | SNV | 1 | C | T | Heterozygous |
| NC_037641.1 | 9374546 | SNV | 1 | A | G | Homozygous   |
| NC_037641.1 | 9383251 | SNV | 1 | C | A | Homozygous   |
| NC_037641.1 | 9383307 | SNV | 1 | G | T | Homozygous   |
| NC_037641.1 | 9391770 | SNV | 1 | G | C | Heterozygous |
| NC_037641.1 | 9391815 | SNV | 1 | T | C | Heterozygous |
| NC_037641.1 | 9391938 | SNV | 1 | A | C | Homozygous   |
| NC_037641.1 | 9391943 | SNV | 1 | T | A | Homozygous   |
| NC_037641.1 | 9391947 | SNV | 1 | C | T | Homozygous   |
| NC_037641.1 | 9391956 | SNV | 1 | T | C | Homozygous   |
| NC_037641.1 | 9391969 | SNV | 1 | T | C | Heterozygous |
| NC_037641.1 | 9391979 | SNV | 1 | T | C | Heterozygous |
| NC_037641.1 | 9391983 | SNV | 1 | C | T | Homozygous   |
| NC_037641.1 | 9422737 | SNV | 1 | G | C | Heterozygous |
| NC_037641.1 | 9422739 | SNV | 1 | A | G | Heterozygous |
| NC_037641.1 | 9422746 | SNV | 1 | G | A | Heterozygous |
| NC_037641.1 | 9422748 | SNV | 1 | G | A | Homozygous   |
| NC_037641.1 | 9430687 | SNV | 1 | T | C | Heterozygous |
| NC_037641.1 | 9433437 | SNV | 1 | T | C | Homozygous   |
| NC_037641.1 | 9433441 | SNV | 1 | C | T | Heterozygous |
| NC_037641.1 | 9436511 | SNV | 1 | C | T | Heterozygous |
| NC_037641.1 | 9436632 | SNV | 1 | C | A | Heterozygous |
| NC_037641.1 | 9436634 | SNV | 1 | T | C | Heterozygous |
| NC_037641.1 | 9436636 | SNV | 1 | T | C | Heterozygous |
| NC_037641.1 | 9436641 | SNV | 1 | C | G | Heterozygous |
| NC_037641.1 | 9436738 | SNV | 1 | G | T | Heterozygous |
| NC_037641.1 | 9436837 | SNV | 1 | T | C | Homozygous   |
| NC_037641.1 | 9436944 | SNV | 1 | C | T | Homozygous   |
| NC_037641.1 | 9436954 | SNV | 1 | A | T | Homozygous   |
| NC_037641.1 | 9436973 | SNV | 1 | T | C | Homozygous   |
| NC_037641.1 | 9436992 | SNV | 1 | A | G | Homozygous   |
| NC_037641.1 | 9437001 | SNV | 1 | A | G | Homozygous   |
| NC_037641.1 | 9437015 | SNV | 1 | A | G | Homozygous   |
| NC_037641.1 | 9437030 | SNV | 1 | A | T | Homozygous   |
| NC_037641.1 | 9437043 | SNV | 1 | A | G | Homozygous   |
| NC_037641.1 | 9437074 | SNV | 1 | G | A | Heterozygous |
| NC_037641.1 | 9437141 | SNV | 1 | A | G | Homozygous   |
| NC_037641.1 | 9441129 | SNV | 1 | T | G | Homozygous   |
| NC_037641.1 | 9441134 | SNV | 1 | C | T | Homozygous   |
| NC_037641.1 | 9441141 | SNV | 1 | A | G | Homozygous   |
| NC_037641.1 | 9441145 | SNV | 1 | G | C | Homozygous   |
| NC_037641.1 | 9441161 | SNV | 1 | T | C | Homozygous   |

|             |         |     |   |   |   |              |
|-------------|---------|-----|---|---|---|--------------|
| NC_037641.1 | 9441254 | SNV | 1 | T | C | Homozygous   |
| NC_037641.1 | 9468082 | SNV | 1 | C | T | Homozygous   |
| NC_037641.1 | 9468482 | SNV | 1 | A | G | Homozygous   |
| NC_037641.1 | 9468532 | SNV | 1 | A | G | Homozygous   |
| NC_037641.1 | 9468564 | SNV | 1 | T | C | Homozygous   |
| NC_037641.1 | 9468776 | SNV | 1 | T | C | Homozygous   |
| NC_037641.1 | 9468899 | SNV | 1 | G | A | Homozygous   |
| NC_037641.1 | 9469093 | SNV | 1 | A | G | Heterozygous |
| NC_037641.1 | 9469152 | SNV | 1 | A | G | Homozygous   |
| NC_037641.1 | 9469202 | SNV | 1 | G | A | Homozygous   |
| NC_037641.1 | 9469204 | SNV | 1 | G | A | Heterozygous |
| NC_037641.1 | 9469242 | SNV | 1 | G | A | Heterozygous |
| NC_037641.1 | 9469317 | SNV | 1 | A | G | Homozygous   |
| NC_037641.1 | 9469502 | SNV | 1 | G | A | Homozygous   |
| NC_037641.1 | 9469640 | SNV | 1 | G | A | Heterozygous |
| NC_037641.1 | 9469686 | SNV | 1 | A | G | Homozygous   |
| NC_037641.1 | 9469688 | SNV | 1 | A | G | Homozygous   |
| NC_037641.1 | 9469750 | SNV | 1 | C | G | Heterozygous |
| NC_037641.1 | 9469788 | SNV | 1 | G | T | Homozygous   |
| NC_037641.1 | 9469817 | SNV | 1 | T | C | Heterozygous |
| NC_037641.1 | 9469920 | SNV | 1 | G | A | Homozygous   |
| NC_037641.1 | 9469965 | SNV | 1 | C | T | Heterozygous |
| NC_037641.1 | 9469987 | SNV | 1 | A | T | Heterozygous |
| NC_037641.1 | 9470245 | SNV | 1 | C | T | Heterozygous |
| NC_037641.1 | 9470476 | SNV | 1 | C | T | Homozygous   |
| NC_037641.1 | 9471197 | SNV | 1 | G | A | Heterozygous |
| NC_037641.1 | 9471200 | SNV | 1 | T | G | Heterozygous |
| NC_037641.1 | 9471204 | SNV | 1 | C | T | Heterozygous |
| NC_037641.1 | 9471226 | SNV | 1 | C | T | Homozygous   |
| NC_037641.1 | 9473051 | SNV | 1 | A | G | Heterozygous |
| NC_037641.1 | 9473053 | SNV | 1 | A | G | Heterozygous |
| NC_037641.1 | 9473055 | SNV | 1 | A | G | Heterozygous |
| NC_037641.1 | 9473069 | SNV | 1 | A | G | Heterozygous |
| NC_037641.1 | 9473085 | SNV | 1 | G | A | Heterozygous |
| NC_037641.1 | 9473095 | SNV | 1 | A | G | Heterozygous |
| NC_037641.1 | 9473124 | SNV | 1 | T | C | Heterozygous |
| NC_037641.1 | 9473133 | SNV | 1 | A | G | Heterozygous |
| NC_037641.1 | 9473149 | SNV | 1 | A | G | Heterozygous |
| NC_037641.1 | 9475821 | SNV | 1 | G | C | Heterozygous |
| NC_037641.1 | 9475823 | SNV | 1 | T | C | Homozygous   |
| NC_037641.1 | 9475855 | SNV | 1 | A | G | Homozygous   |
| NC_037641.1 | 9475973 | SNV | 1 | A | G | Homozygous   |
| NC_037641.1 | 9476263 | SNV | 1 | A | T | Heterozygous |
| NC_037641.1 | 9477662 | SNV | 1 | G | A | Heterozygous |
| NC_037641.1 | 9477820 | SNV | 1 | T | C | Homozygous   |
| NC_037641.1 | 9478167 | SNV | 1 | G | A | Homozygous   |
| NC_037641.1 | 9478410 | SNV | 1 | T | A | Heterozygous |
| NC_037641.1 | 9478423 | SNV | 1 | C | T | Homozygous   |
| NC_037641.1 | 9478439 | SNV | 1 | A | G | Homozygous   |
| NC_037641.1 | 9478446 | SNV | 1 | G | A | Homozygous   |
| NC_037641.1 | 9478454 | SNV | 1 | T | C | Homozygous   |

|             |         |     |   |   |   |              |
|-------------|---------|-----|---|---|---|--------------|
| NC_037641.1 | 9478617 | SNV | 1 | G | A | Heterozygous |
| NC_037641.1 | 9479630 | SNV | 1 | G | A | Homozygous   |
| NC_037641.1 | 9479648 | SNV | 1 | A | G | Heterozygous |
| NC_037641.1 | 9481352 | SNV | 1 | G | A | Homozygous   |
| NC_037641.1 | 9481390 | SNV | 1 | C | T | Heterozygous |
| NC_037641.1 | 9481625 | SNV | 1 | G | A | Homozygous   |
| NC_037641.1 | 9490140 | SNV | 1 | C | G | Heterozygous |
| NC_037641.1 | 9496040 | SNV | 1 | T | C | Homozygous   |
| NC_037641.1 | 9496069 | SNV | 1 | T | G | Homozygous   |
| NC_037641.1 | 9498594 | SNV | 1 | C | G | Homozygous   |
| NC_037641.1 | 9498602 | SNV | 1 | C | T | Homozygous   |
| NC_037641.1 | 9498630 | SNV | 1 | C | T | Homozygous   |
| NC_037641.1 | 9498637 | SNV | 1 | C | G | Homozygous   |
| NC_037641.1 | 9498887 | SNV | 1 | T | C | Homozygous   |
| NC_037641.1 | 9498897 | SNV | 1 | G | A | Heterozygous |
| NC_037641.1 | 9499039 | SNV | 1 | G | A | Heterozygous |
| NC_037641.1 | 9499058 | SNV | 1 | G | A | Homozygous   |
| NC_037641.1 | 9500199 | SNV | 1 | C | T | Heterozygous |
| NC_037641.1 | 9502452 | SNV | 1 | G | A | Heterozygous |
| NC_037641.1 | 9502455 | SNV | 1 | G | A | Heterozygous |
| NC_037641.1 | 9502462 | SNV | 1 | A | G | Heterozygous |
| NC_037641.1 | 9502495 | SNV | 1 | G | A | Heterozygous |
| NC_037641.1 | 9502669 | SNV | 1 | C | T | Homozygous   |
| NC_037641.1 | 9586325 | SNV | 1 | A | G | Homozygous   |
| NC_037641.1 | 9586343 | SNV | 1 | A | G | Homozygous   |
| NC_037641.1 | 9586385 | SNV | 1 | T | C | Homozygous   |
| NC_037641.1 | 9613941 | SNV | 1 | T | C | Homozygous   |
| NC_037641.1 | 9614067 | SNV | 1 | C | A | Homozygous   |
| NC_037641.1 | 9614100 | SNV | 1 | C | T | Homozygous   |
| NC_037641.1 | 9614123 | SNV | 1 | A | G | Homozygous   |
| NC_037641.1 | 9614182 | SNV | 1 | A | G | Homozygous   |
| NC_037641.1 | 9614320 | SNV | 1 | C | G | Heterozygous |
| NC_037641.1 | 9614411 | SNV | 1 | T | C | Homozygous   |
| NC_037641.1 | 9614445 | SNV | 1 | T | C | Homozygous   |
| NC_037641.1 | 9614557 | SNV | 1 | G | A | Heterozygous |
| NC_037641.1 | 9614625 | SNV | 1 | A | G | Heterozygous |
| NC_037641.1 | 9615250 | SNV | 1 | A | T | Heterozygous |
| NC_037641.1 | 9615944 | SNV | 1 | T | C | Homozygous   |
| NC_037641.1 | 9616009 | SNV | 1 | A | T | Heterozygous |
| NC_037641.1 | 9616372 | SNV | 1 | A | G | Homozygous   |
| NC_037641.1 | 9616412 | SNV | 1 | A | G | Homozygous   |
| NC_037641.1 | 9616524 | SNV | 1 | A | G | Homozygous   |
| NC_037641.1 | 9616557 | SNV | 1 | G | A | Homozygous   |
| NC_037641.1 | 9616564 | SNV | 1 | G | A | Homozygous   |
| NC_037641.1 | 9616587 | SNV | 1 | T | C | Homozygous   |
| NC_037641.1 | 9616595 | SNV | 1 | T | C | Homozygous   |
| NC_037641.1 | 9616813 | SNV | 1 | T | C | Homozygous   |
| NC_037641.1 | 9616873 | SNV | 1 | G | A | Heterozygous |
| NC_037641.1 | 9616939 | SNV | 1 | C | T | Homozygous   |
| NC_037641.1 | 9616947 | SNV | 1 | T | C | Homozygous   |
| NC_037641.1 | 9617106 | SNV | 1 | A | G | Homozygous   |

|             |         |     |   |   |   |              |
|-------------|---------|-----|---|---|---|--------------|
| NC_037641.1 | 9617303 | SNV | 1 | C | T | Heterozygous |
| NC_037641.1 | 9617672 | SNV | 1 | A | T | Homozygous   |
| NC_037641.1 | 9617681 | SNV | 1 | A | G | Homozygous   |
| NC_037641.1 | 9617702 | SNV | 1 | A | G | Homozygous   |
| NC_037641.1 | 9617709 | SNV | 1 | T | A | Homozygous   |
| NC_037641.1 | 9617711 | SNV | 1 | G | A | Homozygous   |
| NC_037641.1 | 9617718 | SNV | 1 | A | G | Heterozygous |
| NC_037641.1 | 9617922 | SNV | 1 | T | C | Homozygous   |
| NC_037641.1 | 9617930 | SNV | 1 | T | C | Homozygous   |
| NC_037641.1 | 9617953 | SNV | 1 | A | G | Homozygous   |
| NC_037641.1 | 9617982 | SNV | 1 | A | G | Heterozygous |
| NC_037641.1 | 9618014 | SNV | 1 | G | A | Homozygous   |
| NC_037641.1 | 9618304 | SNV | 1 | C | G | Heterozygous |
| NC_037641.1 | 9618313 | SNV | 1 | T | C | Heterozygous |
| NC_037641.1 | 9618351 | SNV | 1 | A | T | Homozygous   |
| NC_037641.1 | 9618360 | SNV | 1 | T | C | Heterozygous |
| NC_037641.1 | 9618796 | SNV | 1 | A | G | Homozygous   |
| NC_037641.1 | 9618819 | SNV | 1 | T | A | Heterozygous |
| NC_037641.1 | 9618929 | SNV | 1 | C | T | Homozygous   |
| NC_037641.1 | 9619393 | SNV | 1 | T | C | Homozygous   |
| NC_037641.1 | 9619535 | SNV | 1 | C | T | Heterozygous |
| NC_037641.1 | 9620242 | SNV | 1 | C | T | Heterozygous |
| NC_037641.1 | 9620588 | SNV | 1 | C | G | Homozygous   |
| NC_037641.1 | 9620757 | SNV | 1 | T | C | Heterozygous |
| NC_037641.1 | 9620787 | SNV | 1 | A | G | Homozygous   |
| NC_037641.1 | 9620797 | SNV | 1 | G | A | Homozygous   |
| NC_037641.1 | 9620809 | SNV | 1 | G | A | Heterozygous |
| NC_037641.1 | 9620814 | SNV | 1 | C | T | Heterozygous |
| NC_037641.1 | 9621491 | SNV | 1 | G | T | Homozygous   |
| NC_037641.1 | 9621724 | SNV | 1 | A | G | Homozygous   |
| NC_037641.1 | 9623417 | SNV | 1 | C | T | Heterozygous |
| NC_037641.1 | 9623510 | SNV | 1 | A | G | Homozygous   |
| NC_037641.1 | 9623873 | SNV | 1 | A | G | Homozygous   |
| NC_037641.1 | 9623996 | SNV | 1 | A | T | Homozygous   |
| NC_037641.1 | 9623999 | SNV | 1 | T | C | Homozygous   |
| NC_037641.1 | 9624009 | SNV | 1 | G | A | Homozygous   |
| NC_037641.1 | 9624233 | SNV | 1 | A | T | Homozygous   |
| NC_037641.1 | 9624235 | SNV | 1 | G | T | Homozygous   |
| NC_037641.1 | 9624256 | SNV | 1 | A | T | Homozygous   |
| NC_037641.1 | 9624472 | SNV | 1 | A | G | Homozygous   |
| NC_037641.1 | 9624747 | SNV | 1 | T | C | Heterozygous |
| NC_037641.1 | 9624813 | SNV | 1 | C | T | Heterozygous |
| NC_037641.1 | 9624899 | SNV | 1 | A | G | Homozygous   |
| NC_037641.1 | 9625368 | SNV | 1 | C | T | Heterozygous |
| NC_037641.1 | 9626681 | SNV | 1 | T | C | Homozygous   |
| NC_037641.1 | 9626776 | SNV | 1 | C | T | Homozygous   |
| NC_037641.1 | 9626811 | SNV | 1 | T | G | Heterozygous |
| NC_037641.1 | 9626822 | SNV | 1 | C | T | Heterozygous |
| NC_037641.1 | 9626834 | SNV | 1 | C | T | Homozygous   |
| NC_037641.1 | 9626845 | SNV | 1 | G | A | Heterozygous |
| NC_037641.1 | 9626854 | SNV | 1 | T | A | Heterozygous |



|             |         |     |   |   |   |              |
|-------------|---------|-----|---|---|---|--------------|
| NC_037641.1 | 9626886 | SNV | 1 | A | G | Homozygous   |
| NC_037641.1 | 9626895 | SNV | 1 | A | G | Homozygous   |
| NC_037641.1 | 9627069 | SNV | 1 | C | A | Heterozygous |
| NC_037641.1 | 9627330 | SNV | 1 | C | T | Heterozygous |
| NC_037641.1 | 9627351 | SNV | 1 | G | T | Homozygous   |
| NC_037641.1 | 9627357 | SNV | 1 | C | T | Heterozygous |
| NC_037641.1 | 9627361 | SNV | 1 | G | T | Heterozygous |
| NC_037641.1 | 9627430 | SNV | 1 | C | T | Heterozygous |
| NC_037641.1 | 9628787 | SNV | 1 | A | G | Homozygous   |
| NC_037641.1 | 9632687 | SNV | 1 | T | A | Homozygous   |
| NC_037641.1 | 9632690 | SNV | 1 | C | A | Homozygous   |
| NC_037641.1 | 9632694 | SNV | 1 | T | A | Homozygous   |
| NC_037641.1 | 9632696 | SNV | 1 | C | T | Homozygous   |
| NC_037641.1 | 9632702 | SNV | 1 | C | T | Homozygous   |
| NC_037641.1 | 9638456 | SNV | 1 | G | A | Heterozygous |
| NC_037641.1 | 9638460 | SNV | 1 | T | A | Heterozygous |
| NC_037641.1 | 9642669 | SNV | 1 | A | G | Homozygous   |
| NC_037641.1 | 9642672 | SNV | 1 | G | A | Heterozygous |
| NC_037641.1 | 9647339 | SNV | 1 | T | C | Homozygous   |
| NC_037641.1 | 9647487 | SNV | 1 | C | T | Heterozygous |
| NC_037641.1 | 9647542 | SNV | 1 | T | G | Heterozygous |
| NC_037641.1 | 9647905 | SNV | 1 | A | G | Heterozygous |
| NC_037641.1 | 9647907 | SNV | 1 | A | G | Homozygous   |
| NC_037641.1 | 9648447 | SNV | 1 | G | C | Homozygous   |
| NC_037641.1 | 9649044 | SNV | 1 | T | C | Homozygous   |
| NC_037641.1 | 9654865 | SNV | 1 | C | T | Heterozygous |
| NC_037641.1 | 9654871 | SNV | 1 | T | C | Heterozygous |
| NC_037641.1 | 9654877 | SNV | 1 | T | C | Homozygous   |
| NC_037641.1 | 9671441 | SNV | 1 | G | C | Homozygous   |
| NC_037641.1 | 9671444 | SNV | 1 | G | A | Homozygous   |
| NC_037641.1 | 9671453 | SNV | 1 | G | C | Homozygous   |
| NC_037641.1 | 9671456 | SNV | 1 | G | C | Homozygous   |
| NC_037641.1 | 9671464 | SNV | 1 | A | G | Homozygous   |
| NC_037641.1 | 9671492 | SNV | 1 | A | G | Heterozygous |
| NC_037641.1 | 9671494 | SNV | 1 | G | A | Homozygous   |
| NC_037641.1 | 9671497 | SNV | 1 | G | A | Heterozygous |
| NC_037641.1 | 9676775 | SNV | 1 | A | G | Homozygous   |
| NC_037641.1 | 9676801 | SNV | 1 | T | C | Homozygous   |
| NC_037641.1 | 9676804 | SNV | 1 | A | G | Homozygous   |
| NC_037641.1 | 9677375 | SNV | 1 | G | T | Homozygous   |
| NC_037641.1 | 9677456 | SNV | 1 | T | G | Homozygous   |
| NC_037641.1 | 9677461 | SNV | 1 | G | A | Homozygous   |
| NC_037641.1 | 9677570 | SNV | 1 | T | C | Heterozygous |
| NC_037641.1 | 9677589 | SNV | 1 | T | C | Heterozygous |
| NC_037641.1 | 9677672 | SNV | 1 | G | A | Heterozygous |
| NC_037641.1 | 9680006 | SNV | 1 | C | T | Heterozygous |
| NC_037641.1 | 9680012 | SNV | 1 | C | G | Heterozygous |
| NC_037641.1 | 9680024 | SNV | 1 | C | T | Heterozygous |
| NC_037641.1 | 9680027 | SNV | 1 | C | T | Heterozygous |
| NC_037641.1 | 9683263 | SNV | 1 | C | T | Heterozygous |
| NC_037641.1 | 9683267 | SNV | 1 | T | C | Heterozygous |

|             |         |     |   |   |   |              |
|-------------|---------|-----|---|---|---|--------------|
| NC_037641.1 | 9683270 | SNV | 1 | T | C | Heterozygous |
| NC_037641.1 | 9685645 | SNV | 1 | C | T | Homozygous   |
| NC_037641.1 | 9685846 | SNV | 1 | T | C | Heterozygous |
| NC_037641.1 | 9685848 | SNV | 1 | T | C | Heterozygous |
| NC_037641.1 | 9685854 | SNV | 1 | A | C | Heterozygous |
| NC_037641.1 | 9685858 | SNV | 1 | C | T | Heterozygous |
| NC_037641.1 | 9685861 | SNV | 1 | C | T | Heterozygous |
| NC_037641.1 | 9685980 | SNV | 1 | T | C | Homozygous   |
| NC_037641.1 | 9685994 | SNV | 1 | C | T | Homozygous   |
| NC_037641.1 | 9686016 | SNV | 1 | A | G | Homozygous   |
| NC_037641.1 | 9686021 | SNV | 1 | G | T | Heterozygous |
| NC_037641.1 | 9694573 | SNV | 1 | A | G | Homozygous   |
| NC_037641.1 | 9694575 | SNV | 1 | A | G | Heterozygous |
| NC_037641.1 | 9694578 | SNV | 1 | G | T | Heterozygous |
| NC_037641.1 | 9694587 | SNV | 1 | A | T | Homozygous   |
| NC_037641.1 | 9694605 | SNV | 1 | G | A | Homozygous   |
| NC_037641.1 | 9695564 | SNV | 1 | A | G | Homozygous   |
| NC_037641.1 | 9695570 | SNV | 1 | A | G | Homozygous   |
| NC_037641.1 | 9695580 | SNV | 1 | T | A | Homozygous   |
| NC_037641.1 | 9695586 | SNV | 1 | G | A | Homozygous   |
| NC_037641.1 | 9695590 | SNV | 1 | G | A | Homozygous   |
| NC_037641.1 | 9696296 | SNV | 1 | C | T | Heterozygous |
| NC_037641.1 | 9696639 | SNV | 1 | T | A | Heterozygous |
| NC_037641.1 | 9696976 | SNV | 1 | C | T | Heterozygous |
| NC_037641.1 | 9697012 | SNV | 1 | C | T | Homozygous   |
| NC_037641.1 | 9697022 | SNV | 1 | C | T | Heterozygous |
| NC_037641.1 | 9697285 | SNV | 1 | G | A | Homozygous   |
| NC_037641.1 | 9697302 | SNV | 1 | C | T | Homozygous   |
| NC_037641.1 | 9699425 | SNV | 1 | G | A | Homozygous   |
| NC_037641.1 | 9699457 | SNV | 1 | T | C | Homozygous   |
| NC_037641.1 | 9700047 | SNV | 1 | G | C | Heterozygous |
| NC_037641.1 | 9700239 | SNV | 1 | G | A | Heterozygous |
| NC_037641.1 | 9701997 | SNV | 1 | A | G | Homozygous   |
| NC_037641.1 | 9702000 | SNV | 1 | A | G | Homozygous   |
| NC_037641.1 | 9702005 | SNV | 1 | A | C | Homozygous   |
| NC_037641.1 | 9702007 | SNV | 1 | A | T | Homozygous   |
| NC_037641.1 | 9702011 | SNV | 1 | A | C | Homozygous   |
| NC_037641.1 | 9702256 | SNV | 1 | T | A | Heterozygous |
| NC_037641.1 | 9741888 | SNV | 1 | C | G | Heterozygous |
| NC_037641.1 | 9745472 | SNV | 1 | A | G | Homozygous   |
| NC_037641.1 | 9745712 | SNV | 1 | G | A | Heterozygous |
| NC_037641.1 | 9745942 | SNV | 1 | G | A | Homozygous   |
| NC_037641.1 | 9746008 | SNV | 1 | G | A | Homozygous   |
| NC_037641.1 | 9748020 | SNV | 1 | A | T | Heterozygous |
| NC_037641.1 | 9748031 | SNV | 1 | G | A | Homozygous   |
| NC_037641.1 | 9756774 | SNV | 1 | T | C | Homozygous   |
| NC_037641.1 | 9756890 | SNV | 1 | A | G | Heterozygous |
| NC_037641.1 | 9756983 | SNV | 1 | G | A | Heterozygous |
| NC_037641.1 | 9757136 | SNV | 1 | G | C | Homozygous   |
| NC_037641.1 | 9757172 | SNV | 1 | C | T | Homozygous   |
| NC_037641.1 | 9757329 | SNV | 1 | G | A | Heterozygous |

|             |         |     |   |   |   |              |
|-------------|---------|-----|---|---|---|--------------|
| NC_037641.1 | 9757395 | SNV | 1 | T | C | Heterozygous |
| NC_037641.1 | 9757407 | SNV | 1 | C | G | Homozygous   |
| NC_037641.1 | 9757451 | SNV | 1 | G | A | Heterozygous |
| NC_037641.1 | 9757527 | SNV | 1 | A | G | Homozygous   |
| NC_037641.1 | 9758801 | SNV | 1 | T | C | Homozygous   |
| NC_037641.1 | 9758923 | SNV | 1 | T | C | Homozygous   |
| NC_037641.1 | 9759097 | SNV | 1 | C | T | Heterozygous |
| NC_037641.1 | 9759100 | SNV | 1 | T | C | Heterozygous |
| NC_037641.1 | 9759520 | SNV | 1 | A | G | Heterozygous |
| NC_037641.1 | 9759531 | SNV | 1 | A | T | Heterozygous |
| NC_037641.1 | 9767537 | SNV | 1 | T | C | Heterozygous |
| NC_037641.1 | 9767582 | SNV | 1 | T | C | Heterozygous |
| NC_037641.1 | 9767684 | SNV | 1 | T | C | Heterozygous |
| NC_037641.1 | 9767752 | SNV | 1 | A | G | Homozygous   |
| NC_037641.1 | 9767853 | SNV | 1 | G | A | Heterozygous |
| NC_037641.1 | 9767885 | SNV | 1 | T | C | Homozygous   |
| NC_037641.1 | 9767930 | SNV | 1 | G | A | Heterozygous |
| NC_037641.1 | 9768022 | SNV | 1 | A | G | Homozygous   |
| NC_037641.1 | 9768037 | SNV | 1 | G | A | Heterozygous |
| NC_037641.1 | 9768200 | SNV | 1 | T | C | Homozygous   |
| NC_037641.1 | 9777368 | SNV | 1 | A | G | Heterozygous |
| NC_037641.1 | 9780513 | SNV | 1 | G | A | Heterozygous |
| NC_037641.1 | 9780666 | SNV | 1 | G | T | Homozygous   |
| NC_037641.1 | 9780668 | SNV | 1 | A | C | Heterozygous |
| NC_037641.1 | 9781066 | SNV | 1 | G | C | Heterozygous |
| NC_037641.1 | 9781081 | SNV | 1 | A | G | Homozygous   |
| NC_037641.1 | 9781573 | SNV | 1 | G | A | Heterozygous |
| NC_037641.1 | 9781610 | SNV | 1 | A | G | Homozygous   |
| NC_037641.1 | 9781622 | SNV | 1 | C | T | Heterozygous |
| NC_037641.1 | 9785017 | SNV | 1 | C | T | Heterozygous |
| NC_037641.1 | 9787239 | SNV | 1 | T | C | Heterozygous |
| NC_037641.1 | 9787320 | SNV | 1 | G | A | Heterozygous |
| NC_037641.1 | 9787387 | SNV | 1 | G | A | Heterozygous |
| NC_037641.1 | 9788812 | SNV | 1 | A | T | Homozygous   |
| NC_037641.1 | 9788815 | SNV | 1 | A | G | Homozygous   |
| NC_037641.1 | 9788827 | SNV | 1 | T | A | Homozygous   |
| NC_037641.1 | 9788829 | SNV | 1 | G | A | Homozygous   |
| NC_037641.1 | 9794336 | SNV | 1 | G | C | Heterozygous |
| NC_037641.1 | 9794370 | SNV | 1 | G | C | Heterozygous |
| NC_037641.1 | 9795150 | SNV | 1 | T | C | Homozygous   |
| NC_037641.1 | 9799476 | SNV | 1 | A | C | Homozygous   |
| NC_037641.1 | 9799559 | SNV | 1 | A | G | Homozygous   |
| NC_037641.1 | 9799572 | SNV | 1 | T | C | Homozygous   |
| NC_037641.1 | 9799593 | SNV | 1 | A | G | Homozygous   |
| NC_037641.1 | 9799612 | SNV | 1 | G | T | Homozygous   |
| NC_037641.1 | 9800052 | SNV | 1 | C | T | Homozygous   |
| NC_037641.1 | 9801126 | SNV | 1 | A | G | Homozygous   |
| NC_037641.1 | 9801151 | SNV | 1 | A | G | Homozygous   |
| NC_037641.1 | 9801356 | SNV | 1 | C | T | Homozygous   |
| NC_037641.1 | 9801387 | SNV | 1 | C | T | Homozygous   |
| NC_037641.1 | 9801391 | SNV | 1 | C | T | Heterozygous |

|             |         |     |   |   |   |              |
|-------------|---------|-----|---|---|---|--------------|
| NC_037641.1 | 9801393 | SNV | 1 | G | A | Heterozygous |
| NC_037641.1 | 9801401 | SNV | 1 | A | G | Heterozygous |
| NC_037641.1 | 9805258 | SNV | 1 | T | C | Homozygous   |
| NC_037641.1 | 9805284 | SNV | 1 | T | C | Homozygous   |
| NC_037641.1 | 9805365 | SNV | 1 | A | G | Heterozygous |
| NC_037641.1 | 9805436 | SNV | 1 | T | A | Homozygous   |
| NC_037641.1 | 9805530 | SNV | 1 | A | G | Homozygous   |
| NC_037641.1 | 9805571 | SNV | 1 | C | T | Heterozygous |
| NC_037641.1 | 9808468 | SNV | 1 | A | G | Homozygous   |
| NC_037641.1 | 9808488 | SNV | 1 | T | C | Homozygous   |
| NC_037641.1 | 9808518 | SNV | 1 | A | T | Homozygous   |
| NC_037641.1 | 9808529 | SNV | 1 | A | G | Homozygous   |
| NC_037641.1 | 9808558 | SNV | 1 | C | T | Homozygous   |
| NC_037641.1 | 9810817 | SNV | 1 | A | G | Homozygous   |
| NC_037641.1 | 9810826 | SNV | 1 | T | C | Homozygous   |
| NC_037641.1 | 9811061 | SNV | 1 | T | C | Homozygous   |
| NC_037641.1 | 9811086 | SNV | 1 | G | A | Heterozygous |
| NC_037641.1 | 9811144 | SNV | 1 | G | A | Homozygous   |
| NC_037641.1 | 9811153 | SNV | 1 | G | A | Homozygous   |
| NC_037641.1 | 9819111 | SNV | 1 | A | G | Homozygous   |
| NC_037641.1 | 9819150 | SNV | 1 | C | T | Heterozygous |
| NC_037641.1 | 9830425 | SNV | 1 | A | G | Homozygous   |
| NC_037641.1 | 9830457 | SNV | 1 | T | C | Homozygous   |
| NC_037641.1 | 9830554 | SNV | 1 | C | G | Homozygous   |
| NC_037641.1 | 9830556 | SNV | 1 | G | C | Homozygous   |
| NC_037641.1 | 9830640 | SNV | 1 | C | T | Homozygous   |
| NC_037641.1 | 9830648 | SNV | 1 | C | T | Homozygous   |
| NC_037641.1 | 9848840 | SNV | 1 | T | C | Heterozygous |
| NC_037641.1 | 9848881 | SNV | 1 | T | C | Homozygous   |
| NC_037641.1 | 9848932 | SNV | 1 | T | A | Heterozygous |
| NC_037641.1 | 9848935 | SNV | 1 | A | G | Heterozygous |
| NC_037641.1 | 9848991 | SNV | 1 | T | C | Homozygous   |
| NC_037641.1 | 9852247 | SNV | 1 | A | G | Homozygous   |
| NC_037641.1 | 9852463 | SNV | 1 | C | T | Homozygous   |
| NC_037641.1 | 9852475 | SNV | 1 | C | T | Heterozygous |
| NC_037641.1 | 9852554 | SNV | 1 | A | G | Heterozygous |
| NC_037641.1 | 9852590 | SNV | 1 | C | T | Heterozygous |
| NC_037641.1 | 9870005 | SNV | 1 | G | C | Homozygous   |
| NC_037641.1 | 9870699 | SNV | 1 | T | C | Homozygous   |
| NC_037641.1 | 9903773 | SNV | 1 | T | C | Homozygous   |
| NC_037641.1 | 9903950 | SNV | 1 | A | G | Homozygous   |
| NC_037641.1 | 9904018 | SNV | 1 | C | T | Heterozygous |
| NC_037641.1 | 9905474 | SNV | 1 | A | T | Heterozygous |
| NC_037641.1 | 9909637 | SNV | 1 | G | A | Homozygous   |
| NC_037641.1 | 9909731 | SNV | 1 | A | G | Homozygous   |
| NC_037641.1 | 9909761 | SNV | 1 | T | A | Homozygous   |
| NC_037641.1 | 9909764 | SNV | 1 | G | A | Homozygous   |
| NC_037641.1 | 9909790 | SNV | 1 | G | A | Homozygous   |
| NC_037641.1 | 9909819 | SNV | 1 | G | C | Homozygous   |
| NC_037641.1 | 9912900 | SNV | 1 | T | G | Heterozygous |
| NC_037641.1 | 9912906 | SNV | 1 | A | G | Heterozygous |

|             |         |     |   |   |   |              |
|-------------|---------|-----|---|---|---|--------------|
| NC_037641.1 | 9912924 | SNV | 1 | A | T | Heterozygous |
| NC_037641.1 | 9912939 | SNV | 1 | T | C | Homozygous   |
| NC_037641.1 | 9912952 | SNV | 1 | G | A | Homozygous   |
| NC_037641.1 | 9914855 | SNV | 1 | G | A | Heterozygous |
| NC_037641.1 | 9914876 | SNV | 1 | G | T | Heterozygous |
| NC_037641.1 | 9914879 | SNV | 1 | G | T | Heterozygous |
| NC_037641.1 | 9914883 | SNV | 1 | A | G | Heterozygous |
| NC_037641.1 | 9914888 | SNV | 1 | G | A | Heterozygous |
| NC_037641.1 | 9914912 | SNV | 1 | A | G | Homozygous   |
| NC_037641.1 | 9915736 | SNV | 1 | T | C | Homozygous   |
| NC_037641.1 | 9915950 | SNV | 1 | C | T | Heterozygous |
| NC_037641.1 | 9924909 | SNV | 1 | C | T | Heterozygous |
| NC_037641.1 | 9927616 | SNV | 1 | C | T | Homozygous   |
| NC_037641.1 | 9929163 | SNV | 1 | C | T | Homozygous   |
| NC_037641.1 | 9929165 | SNV | 1 | A | G | Homozygous   |
| NC_037641.1 | 9930128 | SNV | 1 | C | A | Homozygous   |
| NC_037641.1 | 9933623 | SNV | 1 | A | G | Homozygous   |
| NC_037641.1 | 9936241 | SNV | 1 | C | T | Heterozygous |
| NC_037641.1 | 9936265 | SNV | 1 | C | A | Homozygous   |
| NC_037641.1 | 9948876 | SNV | 1 | C | G | Homozygous   |
| NC_037641.1 | 9949028 | SNV | 1 | G | C | Homozygous   |
| NC_037641.1 | 9951411 | SNV | 1 | T | A | Homozygous   |
| NC_037641.1 | 9953622 | SNV | 1 | T | C | Homozygous   |
| NC_037641.1 | 9953624 | SNV | 1 | T | C | Homozygous   |
| NC_037641.1 | 9953632 | SNV | 1 | T | C | Homozygous   |
| NC_037641.1 | 9953639 | SNV | 1 | A | G | Homozygous   |
| NC_037641.1 | 9953641 | SNV | 1 | A | T | Homozygous   |
| NC_037641.1 | 9953643 | SNV | 1 | A | T | Homozygous   |
| NC_037641.1 | 9953648 | SNV | 1 | T | A | Homozygous   |
| NC_037641.1 | 9953650 | SNV | 1 | T | C | Homozygous   |
| NC_037641.1 | 9956346 | SNV | 1 | A | G | Homozygous   |
| NC_037641.1 | 9957771 | SNV | 1 | A | G | Homozygous   |
| NC_037641.1 | 9957822 | SNV | 1 | T | C | Heterozygous |
| NC_037641.1 | 9957880 | SNV | 1 | G | A | Heterozygous |
| NC_037641.1 | 9965398 | SNV | 1 | G | C | Homozygous   |
| NC_037641.1 | 9966170 | SNV | 1 | G | T | Heterozygous |
| NC_037641.1 | 9967284 | SNV | 1 | T | C | Homozygous   |
| NC_037641.1 | 9967503 | SNV | 1 | G | A | Homozygous   |
| NC_037641.1 | 9970071 | SNV | 1 | A | G | Heterozygous |
| NC_037641.1 | 9970261 | SNV | 1 | G | A | Heterozygous |
| NC_037641.1 | 9970541 | SNV | 1 | T | C | Homozygous   |
| NC_037641.1 | 9970554 | SNV | 1 | C | T | Heterozygous |
| NC_037641.1 | 9970844 | SNV | 1 | A | G | Homozygous   |
| NC_037641.1 | 9971020 | SNV | 1 | T | C | Homozygous   |
| NC_037641.1 | 9973064 | SNV | 1 | T | C | Homozygous   |
| NC_037641.1 | 9973076 | SNV | 1 | G | A | Heterozygous |
| NC_037641.1 | 9973183 | SNV | 1 | T | C | Homozygous   |
| NC_037641.1 | 9973354 | SNV | 1 | G | A | Heterozygous |
| NC_037641.1 | 9973431 | SNV | 1 | G | A | Heterozygous |
| NC_037641.1 | 9976882 | SNV | 1 | A | G | Homozygous   |
| NC_037641.1 | 9976899 | SNV | 1 | C | G | Heterozygous |

|             |         |     |   |   |   |              |
|-------------|---------|-----|---|---|---|--------------|
| NC_037641.1 | 9980371 | SNV | 1 | G | A | Heterozygous |
| NC_037641.1 | 9981140 | SNV | 1 | T | C | Homozygous   |
| NC_037641.1 | 9981266 | SNV | 1 | G | A | Heterozygous |
| NC_037641.1 | 9981303 | SNV | 1 | A | G | Heterozygous |
| NC_037641.1 | 9981309 | SNV | 1 | C | T | Heterozygous |
| NC_037641.1 | 9981326 | SNV | 1 | T | C | Homozygous   |
| NC_037641.1 | 9981837 | SNV | 1 | T | C | Homozygous   |
| NC_037641.1 | 9981840 | SNV | 1 | C | G | Homozygous   |
| NC_037641.1 | 9982045 | SNV | 1 | T | C | Homozygous   |
| NC_037641.1 | 9982067 | SNV | 1 | T | G | Homozygous   |
| NC_037641.1 | 9982541 | SNV | 1 | C | G | Homozygous   |
| NC_037641.1 | 9982549 | SNV | 1 | T | A | Heterozygous |
| NC_037641.1 | 9983269 | SNV | 1 | C | A | Heterozygous |
| NC_037641.1 | 9983312 | SNV | 1 | T | A | Heterozygous |
| NC_037641.1 | 9983719 | SNV | 1 | T | A | Heterozygous |
| NC_037641.1 | 9983728 | SNV | 1 | C | T | Heterozygous |
| NC_037641.1 | 9983766 | SNV | 1 | C | A | Heterozygous |
| NC_037641.1 | 9984671 | SNV | 1 | G | A | Heterozygous |
| NC_037641.1 | 9985470 | SNV | 1 | T | C | Homozygous   |
| NC_037641.1 | 9985758 | SNV | 1 | G | A | Heterozygous |
| NC_037641.1 | 9986167 | SNV | 1 | T | C | Homozygous   |
| NC_037641.1 | 9986199 | SNV | 1 | A | G | Heterozygous |
| NC_037641.1 | 9986250 | SNV | 1 | G | T | Homozygous   |
| NC_037641.1 | 9986350 | SNV | 1 | C | T | Homozygous   |
| NC_037641.1 | 9987018 | SNV | 1 | A | T | Homozygous   |
| NC_037641.1 | 9987029 | SNV | 1 | C | T | Homozygous   |
| NC_037641.1 | 9988054 | SNV | 1 | C | T | Heterozygous |
| NC_037641.1 | 9988122 | SNV | 1 | A | T | Heterozygous |
| NC_037641.1 | 9988124 | SNV | 1 | A | G | Heterozygous |
| NC_037641.1 | 9989702 | SNV | 1 | T | C | Homozygous   |
| NC_037641.1 | 9989881 | SNV | 1 | G | A | Heterozygous |
| NC_037641.1 | 9989884 | SNV | 1 | A | G | Homozygous   |
| NC_037641.1 | 9991968 | SNV | 1 | C | T | Homozygous   |
| NC_037641.1 | 9991977 | SNV | 1 | G | C | Homozygous   |
| NC_037641.1 | 9992007 | SNV | 1 | G | A | Homozygous   |
| NC_037641.1 | 9992099 | SNV | 1 | T | C | Homozygous   |
| NC_037641.1 | 9992487 | SNV | 1 | T | A | Homozygous   |
| NC_037641.1 | 9992538 | SNV | 1 | A | G | Homozygous   |
| NC_037641.1 | 9992562 | SNV | 1 | T | C | Homozygous   |
| NC_037641.1 | 9993330 | SNV | 1 | G | A | Heterozygous |
| NC_037641.1 | 9993406 | SNV | 1 | T | C | Homozygous   |
| NC_037641.1 | 9993438 | SNV | 1 | C | T | Heterozygous |
| NC_037641.1 | 9995818 | SNV | 1 | A | G | Homozygous   |
| NC_037641.1 | 9996355 | SNV | 1 | T | A | Homozygous   |
| NC_037641.1 | 9996369 | SNV | 1 | C | T | Homozygous   |
| NC_037641.1 | 9996393 | SNV | 1 | C | G | Homozygous   |
| NC_037641.1 | 9996974 | SNV | 1 | A | G | Heterozygous |
| NC_037641.1 | 9996991 | SNV | 1 | T | A | Heterozygous |
| NC_037641.1 | 9998224 | SNV | 1 | C | T | Homozygous   |
| NC_037641.1 | 9998715 | SNV | 1 | T | C | Homozygous   |
| NC_037641.1 | 9998721 | SNV | 1 | T | C | Homozygous   |

|             |          |     |   |   |   |              |
|-------------|----------|-----|---|---|---|--------------|
| NC_037641.1 | 9998754  | SNV | 1 | G | C | Homozygous   |
| NC_037641.1 | 9998761  | SNV | 1 | C | T | Homozygous   |
| NC_037641.1 | 9998804  | SNV | 1 | A | G | Heterozygous |
| NC_037641.1 | 9998841  | SNV | 1 | G | A | Heterozygous |
| NC_037641.1 | 9998989  | SNV | 1 | T | A | Heterozygous |
| NC_037641.1 | 9999474  | SNV | 1 | C | T | Homozygous   |
| NC_037641.1 | 9999599  | SNV | 1 | C | T | Homozygous   |
| NC_037641.1 | 9999659  | SNV | 1 | G | A | Homozygous   |
| NC_037641.1 | 10000077 | SNV | 1 | A | C | Homozygous   |
| NC_037641.1 | 10000149 | SNV | 1 | A | G | Homozygous   |
| NC_037641.1 | 10000153 | SNV | 1 | G | C | Homozygous   |
| NC_037641.1 | 10000366 | SNV | 1 | T | C | Homozygous   |
| NC_037641.1 | 10000442 | SNV | 1 | G | T | Heterozygous |
| NC_037641.1 | 10000513 | SNV | 1 | A | G | Homozygous   |
| NC_037641.1 | 10000743 | SNV | 1 | A | G | Heterozygous |
| NC_037641.1 | 10001059 | SNV | 1 | C | G | Heterozygous |
| NC_037641.1 | 10001062 | SNV | 1 | A | G | Heterozygous |
| NC_037641.1 | 10001220 | SNV | 1 | C | T | Homozygous   |
| NC_037641.1 | 10001275 | SNV | 1 | G | A | Heterozygous |
| NC_037641.1 | 10001281 | SNV | 1 | G | A | Heterozygous |
| NC_037641.1 | 10001283 | SNV | 1 | C | T | Heterozygous |
| NC_037641.1 | 10001371 | SNV | 1 | T | C | Heterozygous |
| NC_037641.1 | 10001454 | SNV | 1 | G | A | Heterozygous |
| NC_037641.1 | 10001506 | SNV | 1 | G | A | Heterozygous |
| NC_037641.1 | 10001603 | SNV | 1 | A | G | Homozygous   |
| NC_037641.1 | 10001633 | SNV | 1 | A | G | Homozygous   |
| NC_037641.1 | 10001650 | SNV | 1 | G | A | Heterozygous |
| NC_037641.1 | 10001670 | SNV | 1 | G | A | Heterozygous |
| NC_037641.1 | 10001713 | SNV | 1 | G | T | Homozygous   |
| NC_037641.1 | 10001722 | SNV | 1 | G | A | Homozygous   |
| NC_037641.1 | 10001794 | SNV | 1 | A | G | Heterozygous |
| NC_037641.1 | 10001923 | SNV | 1 | A | G | Heterozygous |
| NC_037641.1 | 10002037 | SNV | 1 | T | C | Homozygous   |
| NC_037641.1 | 10002040 | SNV | 1 | T | C | Homozygous   |
| NC_037641.1 | 10002181 | SNV | 1 | A | G | Homozygous   |
| NC_037641.1 | 10002334 | SNV | 1 | A | G | Heterozygous |
| NC_037641.1 | 10002586 | SNV | 1 | A | G | Homozygous   |
| NC_037641.1 | 10002632 | SNV | 1 | A | T | Homozygous   |
| NC_037641.1 | 10002680 | SNV | 1 | G | A | Homozygous   |
| NC_037641.1 | 10002686 | SNV | 1 | A | G | Homozygous   |
| NC_037641.1 | 10002751 | SNV | 1 | A | C | Heterozygous |
| NC_037641.1 | 10002963 | SNV | 1 | G | A | Heterozygous |
| NC_037641.1 | 10003163 | SNV | 1 | A | G | Homozygous   |
| NC_037641.1 | 10003167 | SNV | 1 | T | C | Homozygous   |
| NC_037641.1 | 10003198 | SNV | 1 | A | G | Homozygous   |
| NC_037641.1 | 10003201 | SNV | 1 | A | G | Heterozygous |
| NC_037641.1 | 10003230 | SNV | 1 | A | G | Homozygous   |
| NC_037641.1 | 10003283 | SNV | 1 | A | G | Homozygous   |
| NC_037641.1 | 10003294 | SNV | 1 | T | C | Homozygous   |
| NC_037641.1 | 10003299 | SNV | 1 | A | G | Homozygous   |
| NC_037641.1 | 10003348 | SNV | 1 | C | G | Homozygous   |

|             |          |     |   |   |   |              |
|-------------|----------|-----|---|---|---|--------------|
| NC_037641.1 | 10003501 | SNV | 1 | G | C | Heterozygous |
| NC_037641.1 | 10003545 | SNV | 1 | C | T | Heterozygous |
| NC_037641.1 | 10003738 | SNV | 1 | T | A | Homozygous   |
| NC_037641.1 | 10003758 | SNV | 1 | A | G | Homozygous   |
| NC_037641.1 | 10003894 | SNV | 1 | T | G | Homozygous   |
| NC_037641.1 | 10004128 | SNV | 1 | C | G | Homozygous   |
| NC_037641.1 | 10004225 | SNV | 1 | A | G | Heterozygous |
| NC_037641.1 | 10004248 | SNV | 1 | G | A | Heterozygous |
| NC_037641.1 | 10004251 | SNV | 1 | G | A | Heterozygous |
| NC_037641.1 | 10004254 | SNV | 1 | G | A | Homozygous   |
| NC_037641.1 | 10004331 | SNV | 1 | T | C | Homozygous   |
| NC_037641.1 | 10004352 | SNV | 1 | T | C | Heterozygous |
| NC_037641.1 | 10004406 | SNV | 1 | G | T | Heterozygous |
| NC_037641.1 | 10004422 | SNV | 1 | A | T | Heterozygous |
| NC_037641.1 | 10004429 | SNV | 1 | G | A | Heterozygous |
| NC_037641.1 | 10004509 | SNV | 1 | C | A | Homozygous   |
| NC_037641.1 | 10004536 | SNV | 1 | G | A | Heterozygous |
| NC_037641.1 | 10004549 | SNV | 1 | A | G | Homozygous   |
| NC_037641.1 | 10004596 | SNV | 1 | G | C | Homozygous   |
| NC_037641.1 | 10004827 | SNV | 1 | C | G | Homozygous   |
| NC_037641.1 | 10004868 | SNV | 1 | G | A | Heterozygous |
| NC_037641.1 | 10004872 | SNV | 1 | G | A | Heterozygous |
| NC_037641.1 | 10004872 | SNV | 1 | G | C | Heterozygous |
| NC_037641.1 | 10004965 | SNV | 1 | C | T | Heterozygous |
| NC_037641.1 | 10004977 | SNV | 1 | A | G | Heterozygous |
| NC_037641.1 | 10005085 | SNV | 1 | T | C | Homozygous   |
| NC_037641.1 | 10005202 | SNV | 1 | G | A | Heterozygous |
| NC_037641.1 | 10005220 | SNV | 1 | C | G | Homozygous   |
| NC_037641.1 | 10005231 | SNV | 1 | T | C | Homozygous   |
| NC_037641.1 | 10005310 | SNV | 1 | A | G | Heterozygous |
| NC_037641.1 | 10005358 | SNV | 1 | C | G | Homozygous   |
| NC_037641.1 | 10005364 | SNV | 1 | A | G | Homozygous   |
| NC_037641.1 | 10005397 | SNV | 1 | T | C | Homozygous   |
| NC_037641.1 | 10005401 | SNV | 1 | C | G | Heterozygous |
| NC_037641.1 | 10005424 | SNV | 1 | G | A | Heterozygous |
| NC_037641.1 | 10005426 | SNV | 1 | G | T | Heterozygous |
| NC_037641.1 | 10005431 | SNV | 1 | G | A | Heterozygous |
| NC_037641.1 | 10005488 | SNV | 1 | T | G | Homozygous   |
| NC_037641.1 | 10005555 | SNV | 1 | T | C | Heterozygous |
| NC_037641.1 | 10005916 | SNV | 1 | C | T | Heterozygous |
| NC_037641.1 | 10006024 | SNV | 1 | T | C | Homozygous   |
| NC_037641.1 | 10006036 | SNV | 1 | A | T | Homozygous   |
| NC_037641.1 | 10006051 | SNV | 1 | T | G | Heterozygous |
| NC_037641.1 | 10006054 | SNV | 1 | A | G | Heterozygous |
| NC_037641.1 | 10006060 | SNV | 1 | C | G | Heterozygous |
| NC_037641.1 | 10006232 | SNV | 1 | G | A | Heterozygous |
| NC_037641.1 | 10006299 | SNV | 1 | C | T | Homozygous   |
| NC_037641.1 | 10006365 | SNV | 1 | T | C | Heterozygous |
| NC_037641.1 | 10006720 | SNV | 1 | G | C | Heterozygous |
| NC_037641.1 | 10006832 | SNV | 1 | A | G | Heterozygous |
| NC_037641.1 | 10006966 | SNV | 1 | A | G | Heterozygous |



|             |          |     |   |   |   |              |
|-------------|----------|-----|---|---|---|--------------|
| NC_037641.1 | 10006990 | SNV | 1 | G | A | Heterozygous |
| NC_037641.1 | 10007060 | SNV | 1 | A | G | Homozygous   |
| NC_037641.1 | 10007129 | SNV | 1 | A | G | Homozygous   |
| NC_037641.1 | 10007200 | SNV | 1 | C | A | Homozygous   |
| NC_037641.1 | 10007434 | SNV | 1 | A | G | Homozygous   |
| NC_037641.1 | 10007458 | SNV | 1 | A | G | Homozygous   |
| NC_037641.1 | 10007465 | SNV | 1 | A | G | Homozygous   |
| NC_037641.1 | 10007470 | SNV | 1 | A | G | Homozygous   |
| NC_037641.1 | 10007487 | SNV | 1 | A | G | Heterozygous |
| NC_037641.1 | 10007491 | SNV | 1 | A | G | Heterozygous |
| NC_037641.1 | 10007503 | SNV | 1 | C | T | Homozygous   |
| NC_037641.1 | 10007510 | SNV | 1 | G | A | Heterozygous |
| NC_037641.1 | 10007558 | SNV | 1 | A | G | Homozygous   |
| NC_037641.1 | 10007579 | SNV | 1 | A | G | Homozygous   |
| NC_037641.1 | 10007632 | SNV | 1 | T | A | Homozygous   |
| NC_037641.1 | 10007857 | SNV | 1 | T | A | Homozygous   |
| NC_037641.1 | 10007893 | SNV | 1 | C | T | Heterozygous |
| NC_037641.1 | 10007896 | SNV | 1 | A | G | Heterozygous |
| NC_037641.1 | 10008034 | SNV | 1 | C | G | Heterozygous |
| NC_037641.1 | 10008088 | SNV | 1 | A | G | Heterozygous |
| NC_037641.1 | 10008186 | SNV | 1 | T | C | Homozygous   |
| NC_037641.1 | 10008192 | SNV | 1 | T | G | Homozygous   |
| NC_037641.1 | 10008203 | SNV | 1 | A | G | Heterozygous |
| NC_037641.1 | 10008226 | SNV | 1 | A | G | Homozygous   |
| NC_037641.1 | 10008247 | SNV | 1 | G | A | Heterozygous |
| NC_037641.1 | 10008253 | SNV | 1 | G | C | Heterozygous |
| NC_037641.1 | 10008255 | SNV | 1 | T | C | Homozygous   |
| NC_037641.1 | 10008258 | SNV | 1 | G | A | Homozygous   |
| NC_037641.1 | 10008395 | SNV | 1 | A | G | Homozygous   |
| NC_037641.1 | 10008403 | SNV | 1 | A | G | Homozygous   |
| NC_037641.1 | 10008640 | SNV | 1 | T | C | Homozygous   |
| NC_037641.1 | 10008739 | SNV | 1 | A | G | Homozygous   |
| NC_037641.1 | 10008861 | SNV | 1 | T | C | Homozygous   |
| NC_037641.1 | 10008871 | SNV | 1 | A | G | Homozygous   |
| NC_037641.1 | 10008887 | SNV | 1 | C | A | Homozygous   |
| NC_037641.1 | 10008994 | SNV | 1 | G | T | Heterozygous |
| NC_037641.1 | 10009264 | SNV | 1 | G | C | Homozygous   |
| NC_037641.1 | 10009341 | SNV | 1 | C | G | Homozygous   |
| NC_037641.1 | 10009392 | SNV | 1 | T | C | Homozygous   |
| NC_037641.1 | 10009486 | SNV | 1 | A | G | Homozygous   |
| NC_037641.1 | 10009502 | SNV | 1 | A | G | Homozygous   |
| NC_037641.1 | 10009722 | SNV | 1 | T | C | Homozygous   |
| NC_037641.1 | 10009807 | SNV | 1 | G | C | Homozygous   |
| NC_037641.1 | 10009906 | SNV | 1 | A | T | Homozygous   |
| NC_037641.1 | 10009911 | SNV | 1 | A | G | Homozygous   |
| NC_037641.1 | 10010014 | SNV | 1 | C | G | Heterozygous |
| NC_037641.1 | 10010669 | SNV | 1 | A | G | Homozygous   |
| NC_037641.1 | 10011074 | SNV | 1 | A | G | Heterozygous |
| NC_037641.1 | 10011177 | SNV | 1 | T | C | Homozygous   |
| NC_037641.1 | 10011223 | SNV | 1 | A | G | Homozygous   |
| NC_037641.1 | 10012164 | SNV | 1 | T | C | Homozygous   |

|             |          |     |   |   |   |              |
|-------------|----------|-----|---|---|---|--------------|
| NC_037641.1 | 10012237 | SNV | 1 | T | A | Homozygous   |
| NC_037641.1 | 10012275 | SNV | 1 | T | C | Heterozygous |
| NC_037641.1 | 10012287 | SNV | 1 | T | C | Homozygous   |
| NC_037641.1 | 10012370 | SNV | 1 | T | C | Homozygous   |
| NC_037641.1 | 10012479 | SNV | 1 | G | A | Heterozygous |
| NC_037641.1 | 10012515 | SNV | 1 | A | G | Homozygous   |
| NC_037641.1 | 10012758 | SNV | 1 | T | C | Homozygous   |
| NC_037641.1 | 10012768 | SNV | 1 | T | C | Homozygous   |
| NC_037641.1 | 10012840 | SNV | 1 | G | A | Heterozygous |
| NC_037641.1 | 10013394 | SNV | 1 | T | C | Homozygous   |
| NC_037641.1 | 10013401 | SNV | 1 | C | T | Homozygous   |
| NC_037641.1 | 10013764 | SNV | 1 | T | G | Heterozygous |
| NC_037641.1 | 10013802 | SNV | 1 | T | C | Heterozygous |
| NC_037641.1 | 10013806 | SNV | 1 | T | G | Homozygous   |
| NC_037641.1 | 10013821 | SNV | 1 | G | C | Heterozygous |
| NC_037641.1 | 10013875 | SNV | 1 | C | G | Homozygous   |
| NC_037641.1 | 10014028 | SNV | 1 | T | C | Homozygous   |
| NC_037641.1 | 10014423 | SNV | 1 | T | C | Homozygous   |
| NC_037641.1 | 10014575 | SNV | 1 | A | G | Homozygous   |
| NC_037641.1 | 10014695 | SNV | 1 | C | T | Heterozygous |
| NC_037641.1 | 10014815 | SNV | 1 | A | G | Homozygous   |
| NC_037641.1 | 10014905 | SNV | 1 | A | G | Heterozygous |
| NC_037641.1 | 10014918 | SNV | 1 | A | G | Homozygous   |
| NC_037641.1 | 10014944 | SNV | 1 | G | A | Heterozygous |
| NC_037641.1 | 10015160 | SNV | 1 | T | C | Homozygous   |
| NC_037641.1 | 10015775 | SNV | 1 | A | G | Homozygous   |
| NC_037641.1 | 10016020 | SNV | 1 | T | C | Heterozygous |
| NC_037641.1 | 10016153 | SNV | 1 | G | A | Heterozygous |
| NC_037641.1 | 10017929 | SNV | 1 | A | G | Heterozygous |
| NC_037641.1 | 10017976 | SNV | 1 | G | A | Heterozygous |
| NC_037641.1 | 10018646 | SNV | 1 | A | G | Homozygous   |
| NC_037641.1 | 10018716 | SNV | 1 | A | G | Homozygous   |
| NC_037641.1 | 10018764 | SNV | 1 | A | G | Homozygous   |
| NC_037641.1 | 10019672 | SNV | 1 | C | A | Heterozygous |
| NC_037641.1 | 10020306 | SNV | 1 | G | A | Heterozygous |
| NC_037641.1 | 10020735 | SNV | 1 | G | A | Homozygous   |
| NC_037641.1 | 10021842 | SNV | 1 | T | C | Homozygous   |
| NC_037641.1 | 10021875 | SNV | 1 | G | A | Homozygous   |
| NC_037641.1 | 10022191 | SNV | 1 | T | C | Heterozygous |
| NC_037641.1 | 10029394 | SNV | 1 | T | C | Heterozygous |
| NC_037641.1 | 10031218 | SNV | 1 | T | A | Homozygous   |
| NC_037641.1 | 10031221 | SNV | 1 | T | A | Homozygous   |
| NC_037641.1 | 10031225 | SNV | 1 | T | A | Heterozygous |
| NC_037641.1 | 10040518 | SNV | 1 | A | G | Homozygous   |
| NC_037641.1 | 10043960 | SNV | 1 | G | A | Heterozygous |
| NC_037641.1 | 10044309 | SNV | 1 | C | T | Heterozygous |
| NC_037641.1 | 10044595 | SNV | 1 | G | A | Homozygous   |
| NC_037641.1 | 10123143 | SNV | 1 | C | T | Homozygous   |
| NC_037641.1 | 10123419 | SNV | 1 | T | A | Heterozygous |
| NC_037641.1 | 10123606 | SNV | 1 | T | C | Heterozygous |
| NC_037641.1 | 10123726 | SNV | 1 | C | G | Heterozygous |

|             |          |     |   |   |   |              |
|-------------|----------|-----|---|---|---|--------------|
| NC_037641.1 | 10123767 | SNV | 1 | C | T | Heterozygous |
| NC_037641.1 | 10124194 | SNV | 1 | C | G | Heterozygous |
| NC_037641.1 | 10125236 | SNV | 1 | A | G | Homozygous   |
| NC_037641.1 | 10125268 | SNV | 1 | T | C | Heterozygous |
| NC_037641.1 | 10146916 | SNV | 1 | T | C | Heterozygous |
| NC_037641.1 | 10146923 | SNV | 1 | C | T | Homozygous   |
| NC_037641.1 | 10147685 | SNV | 1 | A | G | Homozygous   |
| NC_037641.1 | 10147705 | SNV | 1 | T | C | Heterozygous |
| NC_037641.1 | 10147759 | SNV | 1 | A | G | Homozygous   |
| NC_037641.1 | 10147783 | SNV | 1 | G | A | Heterozygous |
| NC_037641.1 | 10147981 | SNV | 1 | T | C | Homozygous   |
| NC_037641.1 | 10148056 | SNV | 1 | G | C | Heterozygous |
| NC_037641.1 | 10148092 | SNV | 1 | A | G | Homozygous   |
| NC_037641.1 | 10160051 | SNV | 1 | A | G | Homozygous   |
| NC_037641.1 | 10162992 | SNV | 1 | G | A | Homozygous   |
| NC_037641.1 | 10163065 | SNV | 1 | G | T | Homozygous   |
| NC_037641.1 | 10163071 | SNV | 1 | G | A | Heterozygous |
| NC_037641.1 | 10163537 | SNV | 1 | A | G | Homozygous   |
| NC_037641.1 | 10164391 | SNV | 1 | T | C | Homozygous   |
| NC_037641.1 | 10164487 | SNV | 1 | G | A | Homozygous   |
| NC_037641.1 | 10164880 | SNV | 1 | A | G | Homozygous   |
| NC_037641.1 | 10164889 | SNV | 1 | A | T | Homozygous   |
| NC_037641.1 | 10166096 | SNV | 1 | C | T | Heterozygous |
| NC_037641.1 | 10179624 | SNV | 1 | C | G | Homozygous   |
| NC_037641.1 | 10186266 | SNV | 1 | A | G | Homozygous   |
| NC_037641.1 | 10186270 | SNV | 1 | T | A | Homozygous   |
| NC_037641.1 | 10186285 | SNV | 1 | T | G | Homozygous   |
| NC_037641.1 | 10196231 | SNV | 1 | A | G | Heterozygous |
| NC_037641.1 | 10197640 | SNV | 1 | C | T | Heterozygous |
| NC_037641.1 | 10203809 | SNV | 1 | C | T | Homozygous   |
| NC_037641.1 | 10204099 | SNV | 1 | T | A | Homozygous   |
| NC_037641.1 | 10204480 | SNV | 1 | T | C | Homozygous   |
| NC_037641.1 | 10204818 | SNV | 1 | A | G | Homozygous   |
| NC_037641.1 | 10204975 | SNV | 1 | A | T | Homozygous   |
| NC_037641.1 | 10206193 | SNV | 1 | A | G | Homozygous   |
| NC_037641.1 | 10206216 | SNV | 1 | G | C | Homozygous   |
| NC_037641.1 | 10206613 | SNV | 1 | C | T | Homozygous   |
| NC_037641.1 | 10209243 | SNV | 1 | A | C | Homozygous   |
| NC_037641.1 | 10209247 | SNV | 1 | A | G | Homozygous   |
| NC_037641.1 | 10209259 | SNV | 1 | T | G | Homozygous   |
| NC_037641.1 | 10209262 | SNV | 1 | T | C | Homozygous   |
| NC_037641.1 | 10209286 | SNV | 1 | A | G | Homozygous   |
| NC_037641.1 | 10209289 | SNV | 1 | A | G | Homozygous   |
| NC_037641.1 | 10209298 | SNV | 1 | T | C | Homozygous   |
| NC_037641.1 | 10209300 | SNV | 1 | A | G | Homozygous   |
| NC_037641.1 | 10209306 | SNV | 1 | T | C | Homozygous   |
| NC_037641.1 | 10209310 | SNV | 1 | T | G | Homozygous   |
| NC_037641.1 | 10209313 | SNV | 1 | T | C | Homozygous   |
| NC_037641.1 | 10211778 | SNV | 1 | T | C | Heterozygous |
| NC_037641.1 | 10211974 | SNV | 1 | G | A | Homozygous   |
| NC_037641.1 | 10212132 | SNV | 1 | G | A | Homozygous   |

|             |          |     |   |   |   |              |
|-------------|----------|-----|---|---|---|--------------|
| NC_037641.1 | 10212258 | SNV | 1 | A | G | Heterozygous |
| NC_037641.1 | 10214457 | SNV | 1 | C | T | Homozygous   |
| NC_037641.1 | 10214811 | SNV | 1 | C | T | Heterozygous |
| NC_037641.1 | 10216043 | SNV | 1 | G | A | Heterozygous |
| NC_037641.1 | 10217147 | SNV | 1 | C | T | Homozygous   |
| NC_037641.1 | 10218330 | SNV | 1 | G | T | Heterozygous |
| NC_037641.1 | 10218607 | SNV | 1 | C | T | Homozygous   |
| NC_037641.1 | 10219043 | SNV | 1 | A | G | Heterozygous |
| NC_037641.1 | 10219115 | SNV | 1 | T | C | Homozygous   |
| NC_037641.1 | 10227860 | SNV | 1 | C | T | Heterozygous |
| NC_037641.1 | 10227918 | SNV | 1 | A | G | Homozygous   |
| NC_037641.1 | 10228030 | SNV | 1 | A | T | Heterozygous |
| NC_037641.1 | 10228034 | SNV | 1 | T | C | Homozygous   |
| NC_037641.1 | 10228188 | SNV | 1 | A | G | Homozygous   |
| NC_037641.1 | 10230124 | SNV | 1 | C | T | Homozygous   |
| NC_037641.1 | 10230248 | SNV | 1 | A | G | Homozygous   |
| NC_037641.1 | 10230298 | SNV | 1 | G | T | Heterozygous |
| NC_037641.1 | 10230305 | SNV | 1 | C | T | Heterozygous |
| NC_037641.1 | 10230755 | SNV | 1 | C | T | Homozygous   |
| NC_037641.1 | 10231173 | SNV | 1 | A | G | Homozygous   |
| NC_037641.1 | 10231433 | SNV | 1 | A | G | Homozygous   |
| NC_037641.1 | 10231676 | SNV | 1 | T | G | Homozygous   |
| NC_037641.1 | 10231790 | SNV | 1 | T | C | Homozygous   |
| NC_037641.1 | 10231994 | SNV | 1 | C | T | Heterozygous |
| NC_037641.1 | 10232126 | SNV | 1 | T | C | Homozygous   |
| NC_037641.1 | 10232177 | SNV | 1 | A | G | Heterozygous |
| NC_037641.1 | 10232526 | SNV | 1 | C | G | Homozygous   |
| NC_037641.1 | 10232588 | SNV | 1 | T | C | Heterozygous |
| NC_037641.1 | 10232592 | SNV | 1 | A | G | Heterozygous |
| NC_037641.1 | 10233137 | SNV | 1 | G | C | Heterozygous |
| NC_037641.1 | 10233835 | SNV | 1 | A | G | Heterozygous |
| NC_037641.1 | 10234138 | SNV | 1 | A | G | Homozygous   |
| NC_037641.1 | 10234185 | SNV | 1 | A | C | Homozygous   |
| NC_037641.1 | 10234262 | SNV | 1 | C | T | Heterozygous |
| NC_037641.1 | 10234331 | SNV | 1 | C | A | Heterozygous |
| NC_037641.1 | 10234343 | SNV | 1 | T | C | Heterozygous |
| NC_037641.1 | 10234348 | SNV | 1 | C | T | Heterozygous |
| NC_037641.1 | 10234355 | SNV | 1 | T | C | Heterozygous |
| NC_037641.1 | 10234439 | SNV | 1 | T | C | Heterozygous |
| NC_037641.1 | 10234535 | SNV | 1 | T | C | Heterozygous |
| NC_037641.1 | 10234568 | SNV | 1 | T | C | Heterozygous |
| NC_037641.1 | 10234631 | SNV | 1 | T | C | Heterozygous |
| NC_037641.1 | 10234684 | SNV | 1 | T | C | Homozygous   |
| NC_037641.1 | 10235153 | SNV | 1 | C | T | Homozygous   |
| NC_037641.1 | 10235345 | SNV | 1 | C | T | Heterozygous |
| NC_037641.1 | 10235843 | SNV | 1 | T | C | Homozygous   |
| NC_037641.1 | 10236155 | SNV | 1 | T | C | Heterozygous |
| NC_037641.1 | 10236163 | SNV | 1 | C | T | Heterozygous |
| NC_037641.1 | 10236177 | SNV | 1 | C | T | Homozygous   |
| NC_037641.1 | 10236191 | SNV | 1 | T | C | Heterozygous |
| NC_037641.1 | 10237246 | SNV | 1 | C | T | Heterozygous |

|             |          |     |   |   |   |              |
|-------------|----------|-----|---|---|---|--------------|
| NC_037641.1 | 10237384 | SNV | 1 | G | A | Heterozygous |
| NC_037641.1 | 10237608 | SNV | 1 | T | C | Homozygous   |
| NC_037641.1 | 10237752 | SNV | 1 | A | G | Heterozygous |
| NC_037641.1 | 10237810 | SNV | 1 | T | C | Homozygous   |
| NC_037641.1 | 10237814 | SNV | 1 | C | T | Heterozygous |
| NC_037641.1 | 10237898 | SNV | 1 | T | C | Homozygous   |
| NC_037641.1 | 10238012 | SNV | 1 | C | T | Heterozygous |
| NC_037641.1 | 10238072 | SNV | 1 | G | A | Heterozygous |
| NC_037641.1 | 10238113 | SNV | 1 | T | C | Heterozygous |
| NC_037641.1 | 10238150 | SNV | 1 | A | G | Heterozygous |
| NC_037641.1 | 10238198 | SNV | 1 | C | T | Heterozygous |
| NC_037641.1 | 10238224 | SNV | 1 | C | T | Homozygous   |
| NC_037641.1 | 10238421 | SNV | 1 | A | G | Homozygous   |
| NC_037641.1 | 10238525 | SNV | 1 | T | C | Heterozygous |
| NC_037641.1 | 10238563 | SNV | 1 | T | C | Homozygous   |
| NC_037641.1 | 10238602 | SNV | 1 | G | A | Heterozygous |
| NC_037641.1 | 10238608 | SNV | 1 | C | T | Heterozygous |
| NC_037641.1 | 10238739 | SNV | 1 | C | T | Heterozygous |
| NC_037641.1 | 10238756 | SNV | 1 | G | A | Heterozygous |
| NC_037641.1 | 10238916 | SNV | 1 | G | A | Heterozygous |
| NC_037641.1 | 10238975 | SNV | 1 | A | G | Heterozygous |
| NC_037641.1 | 10238980 | SNV | 1 | T | C | Heterozygous |
| NC_037641.1 | 10239056 | SNV | 1 | C | T | Heterozygous |
| NC_037641.1 | 10239095 | SNV | 1 | C | T | Heterozygous |
| NC_037641.1 | 10239136 | SNV | 1 | C | G | Heterozygous |
| NC_037641.1 | 10239140 | SNV | 1 | T | C | Heterozygous |
| NC_037641.1 | 10239298 | SNV | 1 | G | A | Homozygous   |
| NC_037641.1 | 10239388 | SNV | 1 | C | T | Heterozygous |
| NC_037641.1 | 10239425 | SNV | 1 | C | T | Heterozygous |
| NC_037641.1 | 10239839 | SNV | 1 | C | T | Homozygous   |
| NC_037641.1 | 10240125 | SNV | 1 | C | T | Heterozygous |
| NC_037641.1 | 10240153 | SNV | 1 | T | C | Homozygous   |
| NC_037641.1 | 10240361 | SNV | 1 | G | A | Heterozygous |
| NC_037641.1 | 10240385 | SNV | 1 | T | C | Homozygous   |
| NC_037641.1 | 10240405 | SNV | 1 | T | A | Heterozygous |
| NC_037641.1 | 10240424 | SNV | 1 | A | G | Homozygous   |
| NC_037641.1 | 10241780 | SNV | 1 | A | T | Homozygous   |
| NC_037641.1 | 10241969 | SNV | 1 | A | G | Homozygous   |
| NC_037641.1 | 10242599 | SNV | 1 | C | T | Heterozygous |
| NC_037641.1 | 10242624 | SNV | 1 | T | A | Heterozygous |
| NC_037641.1 | 10244145 | SNV | 1 | T | C | Homozygous   |
| NC_037641.1 | 10244740 | SNV | 1 | A | G | Homozygous   |
| NC_037641.1 | 10245027 | SNV | 1 | A | T | Heterozygous |
| NC_037641.1 | 10255206 | SNV | 1 | A | G | Heterozygous |
| NC_037641.1 | 10255234 | SNV | 1 | T | A | Heterozygous |
| NC_037641.1 | 10256195 | SNV | 1 | A | G | Heterozygous |
| NC_037641.1 | 10257453 | SNV | 1 | A | T | Heterozygous |
| NC_037641.1 | 10257455 | SNV | 1 | A | T | Heterozygous |
| NC_037641.1 | 10257459 | SNV | 1 | A | T | Heterozygous |
| NC_037641.1 | 10263909 | SNV | 1 | G | A | Heterozygous |
| NC_037641.1 | 10264535 | SNV | 1 | T | A | Homozygous   |

|             |          |     |   |   |   |              |
|-------------|----------|-----|---|---|---|--------------|
| NC_037641.1 | 10264551 | SNV | 1 | T | A | Homozygous   |
| NC_037641.1 | 10264558 | SNV | 1 | A | T | Homozygous   |
| NC_037641.1 | 10267781 | SNV | 1 | T | C | Homozygous   |
| NC_037641.1 | 10271250 | SNV | 1 | G | A | Heterozygous |
| NC_037641.1 | 10271506 | SNV | 1 | A | T | Heterozygous |
| NC_037641.1 | 10271522 | SNV | 1 | G | T | Heterozygous |
| NC_037641.1 | 10272820 | SNV | 1 | T | C | Homozygous   |
| NC_037641.1 | 10272833 | SNV | 1 | A | C | Homozygous   |
| NC_037641.1 | 10274731 | SNV | 1 | G | A | Heterozygous |
| NC_037641.1 | 10275035 | SNV | 1 | G | A | Homozygous   |
| NC_037641.1 | 10275141 | SNV | 1 | C | T | Homozygous   |
| NC_037641.1 | 10275908 | SNV | 1 | T | C | Homozygous   |
| NC_037641.1 | 10275939 | SNV | 1 | G | T | Homozygous   |
| NC_037641.1 | 10276938 | SNV | 1 | A | T | Homozygous   |
| NC_037641.1 | 10277016 | SNV | 1 | C | T | Heterozygous |
| NC_037641.1 | 10277225 | SNV | 1 | T | C | Homozygous   |
| NC_037641.1 | 10277350 | SNV | 1 | T | G | Homozygous   |
| NC_037641.1 | 10277357 | SNV | 1 | A | G | Heterozygous |
| NC_037641.1 | 10277439 | SNV | 1 | C | T | Heterozygous |
| NC_037641.1 | 10277931 | SNV | 1 | T | C | Homozygous   |
| NC_037641.1 | 10277933 | SNV | 1 | G | C | Homozygous   |
| NC_037641.1 | 10292836 | SNV | 1 | T | A | Homozygous   |
| NC_037641.1 | 10292838 | SNV | 1 | A | T | Homozygous   |
| NC_037641.1 | 10292875 | SNV | 1 | G | A | Homozygous   |
| NC_037641.1 | 10295013 | SNV | 1 | G | C | Heterozygous |
| NC_037641.1 | 10295021 | SNV | 1 | A | G | Heterozygous |
| NC_037641.1 | 10303597 | SNV | 1 | A | G | Heterozygous |
| NC_037641.1 | 10314980 | SNV | 1 | G | C | Homozygous   |
| NC_037641.1 | 10315025 | SNV | 1 | C | T | Heterozygous |
| NC_037641.1 | 10315098 | SNV | 1 | G | A | Heterozygous |
| NC_037641.1 | 10324862 | SNV | 1 | G | C | Heterozygous |
| NC_037641.1 | 10332445 | SNV | 1 | T | C | Heterozygous |
| NC_037641.1 | 10332791 | SNV | 1 | A | G | Heterozygous |
| NC_037641.1 | 10332819 | SNV | 1 | A | G | Homozygous   |
| NC_037641.1 | 10333027 | SNV | 1 | C | T | Homozygous   |
| NC_037641.1 | 10340881 | SNV | 1 | A | C | Heterozygous |
| NC_037641.1 | 10340884 | SNV | 1 | A | T | Heterozygous |
| NC_037641.1 | 10340886 | SNV | 1 | G | T | Homozygous   |
| NC_037641.1 | 10340889 | SNV | 1 | A | T | Heterozygous |
| NC_037641.1 | 10340891 | SNV | 1 | A | T | Heterozygous |
| NC_037641.1 | 10340894 | SNV | 1 | A | T | Heterozygous |
| NC_037641.1 | 10340905 | SNV | 1 | A | T | Homozygous   |
| NC_037641.1 | 10340909 | SNV | 1 | C | T | Heterozygous |
| NC_037641.1 | 10358314 | SNV | 1 | T | G | Homozygous   |
| NC_037641.1 | 10358410 | SNV | 1 | A | G | Heterozygous |
| NC_037641.1 | 10358427 | SNV | 1 | A | G | Heterozygous |
| NC_037641.1 | 10358450 | SNV | 1 | G | A | Heterozygous |
| NC_037641.1 | 10361478 | SNV | 1 | G | A | Heterozygous |
| NC_037641.1 | 10361480 | SNV | 1 | A | T | Heterozygous |
| NC_037641.1 | 10361528 | SNV | 1 | G | A | Heterozygous |
| NC_037641.1 | 10370627 | SNV | 1 | T | C | Homozygous   |

|             |          |     |   |   |   |              |
|-------------|----------|-----|---|---|---|--------------|
| NC_037641.1 | 10370703 | SNV | 1 | C | A | Homozygous   |
| NC_037641.1 | 10371906 | SNV | 1 | G | A | Heterozygous |
| NC_037641.1 | 10371931 | SNV | 1 | T | C | Homozygous   |
| NC_037641.1 | 10372068 | SNV | 1 | A | G | Heterozygous |
| NC_037641.1 | 10376320 | SNV | 1 | T | C | Homozygous   |
| NC_037641.1 | 10376325 | SNV | 1 | C | T | Homozygous   |
| NC_037641.1 | 10376353 | SNV | 1 | C | T | Homozygous   |
| NC_037641.1 | 10376357 | SNV | 1 | T | G | Homozygous   |
| NC_037641.1 | 10387753 | SNV | 1 | C | T | Heterozygous |
| NC_037641.1 | 10395581 | SNV | 1 | G | A | Heterozygous |
| NC_037641.1 | 10395587 | SNV | 1 | C | A | Homozygous   |
| NC_037641.1 | 10395648 | SNV | 1 | C | A | Homozygous   |
| NC_037641.1 | 10395693 | SNV | 1 | T | C | Heterozygous |
| NC_037641.1 | 10396031 | SNV | 1 | A | G | Homozygous   |
| NC_037641.1 | 10396768 | SNV | 1 | G | A | Heterozygous |
| NC_037641.1 | 10400452 | SNV | 1 | A | G | Homozygous   |
| NC_037641.1 | 10402205 | SNV | 1 | T | A | Heterozygous |
| NC_037641.1 | 10402212 | SNV | 1 | T | G | Homozygous   |
| NC_037641.1 | 10402214 | SNV | 1 | C | T | Homozygous   |
| NC_037641.1 | 10402758 | SNV | 1 | A | T | Heterozygous |
| NC_037641.1 | 10402872 | SNV | 1 | G | A | Homozygous   |
| NC_037641.1 | 10402876 | SNV | 1 | A | G | Homozygous   |
| NC_037641.1 | 10404900 | SNV | 1 | G | A | Homozygous   |
| NC_037641.1 | 10405185 | SNV | 1 | A | G | Heterozygous |
| NC_037641.1 | 10405205 | SNV | 1 | T | A | Homozygous   |
| NC_037641.1 | 10406840 | SNV | 1 | T | C | Homozygous   |
| NC_037641.1 | 10411986 | SNV | 1 | C | T | Homozygous   |
| NC_037641.1 | 10416993 | SNV | 1 | C | T | Heterozygous |
| NC_037641.1 | 10416996 | SNV | 1 | C | T | Heterozygous |
| NC_037641.1 | 10429968 | SNV | 1 | T | C | Homozygous   |
| NC_037641.1 | 10433506 | SNV | 1 | A | T | Homozygous   |
| NC_037641.1 | 10433516 | SNV | 1 | T | G | Homozygous   |
| NC_037641.1 | 10433520 | SNV | 1 | G | T | Homozygous   |
| NC_037641.1 | 10434937 | SNV | 1 | A | T | Heterozygous |
| NC_037641.1 | 10434940 | SNV | 1 | C | T | Heterozygous |
| NC_037641.1 | 10436598 | SNV | 1 | G | A | Heterozygous |
| NC_037641.1 | 10436602 | SNV | 1 | C | T | Heterozygous |
| NC_037641.1 | 10436621 | SNV | 1 | C | T | Heterozygous |
| NC_037641.1 | 10436692 | SNV | 1 | A | G | Heterozygous |
| NC_037641.1 | 10436710 | SNV | 1 | A | G | Heterozygous |
| NC_037641.1 | 10436719 | SNV | 1 | T | C | Heterozygous |
| NC_037641.1 | 10436800 | SNV | 1 | C | T | Homozygous   |
| NC_037641.1 | 10436821 | SNV | 1 | C | T | Homozygous   |
| NC_037641.1 | 10436840 | SNV | 1 | T | C | Homozygous   |
| NC_037641.1 | 10436930 | SNV | 1 | T | C | Homozygous   |
| NC_037641.1 | 10437091 | SNV | 1 | T | C | Homozygous   |
| NC_037641.1 | 10454568 | SNV | 1 | A | G | Homozygous   |
| NC_037641.1 | 10457799 | SNV | 1 | T | C | Homozygous   |
| NC_037641.1 | 10458315 | SNV | 1 | G | A | Heterozygous |
| NC_037641.1 | 10465294 | SNV | 1 | T | C | Homozygous   |
| NC_037641.1 | 10465390 | SNV | 1 | G | A | Heterozygous |

|             |          |     |   |   |   |              |
|-------------|----------|-----|---|---|---|--------------|
| NC_037641.1 | 10465487 | SNV | 1 | G | C | Heterozygous |
| NC_037641.1 | 10465494 | SNV | 1 | C | T | Heterozygous |
| NC_037641.1 | 10465528 | SNV | 1 | T | C | Heterozygous |
| NC_037641.1 | 10465577 | SNV | 1 | A | G | Homozygous   |
| NC_037641.1 | 10466045 | SNV | 1 | G | A | Heterozygous |
| NC_037641.1 | 10466242 | SNV | 1 | G | C | Homozygous   |
| NC_037641.1 | 10468594 | SNV | 1 | C | T | Homozygous   |
| NC_037641.1 | 10470777 | SNV | 1 | A | G | Homozygous   |
| NC_037641.1 | 10471683 | SNV | 1 | G | C | Homozygous   |
| NC_037641.1 | 10473087 | SNV | 1 | T | G | Homozygous   |
| NC_037641.1 | 10473411 | SNV | 1 | G | A | Heterozygous |
| NC_037641.1 | 10478115 | SNV | 1 | T | C | Heterozygous |
| NC_037641.1 | 10478172 | SNV | 1 | C | A | Homozygous   |
| NC_037641.1 | 10494252 | SNV | 1 | T | C | Homozygous   |
| NC_037641.1 | 10503082 | SNV | 1 | T | A | Homozygous   |
| NC_037641.1 | 10503085 | SNV | 1 | T | A | Homozygous   |
| NC_037641.1 | 10503088 | SNV | 1 | T | C | Homozygous   |
| NC_037641.1 | 10503812 | SNV | 1 | T | G | Heterozygous |
| NC_037641.1 | 10503815 | SNV | 1 | T | A | Heterozygous |
| NC_037641.1 | 10503818 | SNV | 1 | T | A | Heterozygous |
| NC_037641.1 | 10503824 | SNV | 1 | A | C | Heterozygous |
| NC_037641.1 | 10503829 | SNV | 1 | T | G | Heterozygous |
| NC_037641.1 | 10503848 | SNV | 1 | A | T | Heterozygous |
| NC_037641.1 | 10503851 | SNV | 1 | A | G | Heterozygous |
| NC_037641.1 | 10503857 | SNV | 1 | A | T | Heterozygous |
| NC_037641.1 | 10503863 | SNV | 1 | A | C | Heterozygous |
| NC_037641.1 | 10503866 | SNV | 1 | A | T | Heterozygous |
| NC_037641.1 | 10503869 | SNV | 1 | A | T | Heterozygous |
| NC_037641.1 | 10503875 | SNV | 1 | G | C | Heterozygous |
| NC_037641.1 | 10503882 | SNV | 1 | T | C | Homozygous   |
| NC_037641.1 | 10507131 | SNV | 1 | T | A | Homozygous   |
| NC_037641.1 | 10509103 | SNV | 1 | G | A | Homozygous   |
| NC_037641.1 | 10512321 | SNV | 1 | T | C | Homozygous   |
| NC_037641.1 | 10512324 | SNV | 1 | A | T | Homozygous   |
| NC_037641.1 | 10513979 | SNV | 1 | T | C | Homozygous   |
| NC_037641.1 | 10514063 | SNV | 1 | T | C | Homozygous   |
| NC_037641.1 | 10514279 | SNV | 1 | T | C | Heterozygous |
| NC_037641.1 | 10514905 | SNV | 1 | C | T | Heterozygous |
| NC_037641.1 | 10517859 | SNV | 1 | T | C | Homozygous   |
| NC_037641.1 | 10518249 | SNV | 1 | A | G | Heterozygous |
| NC_037641.1 | 10518270 | SNV | 1 | A | G | Homozygous   |
| NC_037641.1 | 10519029 | SNV | 1 | T | A | Homozygous   |
| NC_037641.1 | 10519705 | SNV | 1 | C | G | Homozygous   |
| NC_037641.1 | 10521006 | SNV | 1 | A | T | Homozygous   |
| NC_037641.1 | 10521012 | SNV | 1 | A | G | Homozygous   |
| NC_037641.1 | 10521014 | SNV | 1 | T | A | Homozygous   |
| NC_037641.1 | 10521036 | SNV | 1 | T | G | Homozygous   |
| NC_037641.1 | 10530674 | SNV | 1 | T | C | Homozygous   |
| NC_037641.1 | 10532097 | SNV | 1 | A | G | Homozygous   |
| NC_037641.1 | 10532142 | SNV | 1 | C | A | Heterozygous |
| NC_037641.1 | 10532232 | SNV | 1 | T | C | Homozygous   |



|             |          |     |   |   |   |              |
|-------------|----------|-----|---|---|---|--------------|
| NC_037641.1 | 10535761 | SNV | 1 | T | C | Homozygous   |
| NC_037641.1 | 10535896 | SNV | 1 | A | G | Homozygous   |
| NC_037641.1 | 10535918 | SNV | 1 | A | G | Homozygous   |
| NC_037641.1 | 10535920 | SNV | 1 | A | G | Homozygous   |
| NC_037641.1 | 10535974 | SNV | 1 | T | C | Heterozygous |
| NC_037641.1 | 10536264 | SNV | 1 | G | A | Heterozygous |
| NC_037641.1 | 10538094 | SNV | 1 | C | T | Heterozygous |
| NC_037641.1 | 10538103 | SNV | 1 | C | T | Heterozygous |
| NC_037641.1 | 10538115 | SNV | 1 | T | G | Heterozygous |
| NC_037641.1 | 10538196 | SNV | 1 | A | T | Heterozygous |
| NC_037641.1 | 10538200 | SNV | 1 | G | T | Heterozygous |
| NC_037641.1 | 10538205 | SNV | 1 | A | T | Heterozygous |
| NC_037641.1 | 10539659 | SNV | 1 | T | C | Homozygous   |
| NC_037641.1 | 10539664 | SNV | 1 | G | A | Heterozygous |
| NC_037641.1 | 10539668 | SNV | 1 | G | A | Homozygous   |
| NC_037641.1 | 10539684 | SNV | 1 | A | G | Homozygous   |
| NC_037641.1 | 10539688 | SNV | 1 | A | C | Homozygous   |
| NC_037641.1 | 10539690 | SNV | 1 | A | C | Homozygous   |
| NC_037641.1 | 10539693 | SNV | 1 | A | G | Homozygous   |
| NC_037641.1 | 10539745 | SNV | 1 | A | C | Homozygous   |
| NC_037641.1 | 10539749 | SNV | 1 | G | A | Heterozygous |
| NC_037641.1 | 10544926 | SNV | 1 | G | A | Homozygous   |
| NC_037641.1 | 10545760 | SNV | 1 | A | C | Homozygous   |
| NC_037641.1 | 10545764 | SNV | 1 | T | A | Homozygous   |
| NC_037641.1 | 10545853 | SNV | 1 | C | T | Heterozygous |
| NC_037641.1 | 10545964 | SNV | 1 | T | C | Heterozygous |
| NC_037641.1 | 10546068 | SNV | 1 | G | A | Homozygous   |
| NC_037641.1 | 10546136 | SNV | 1 | A | G | Homozygous   |
| NC_037641.1 | 10546446 | SNV | 1 | C | T | Heterozygous |
| NC_037641.1 | 10599397 | SNV | 1 | T | C | Homozygous   |
| NC_037641.1 | 10599980 | SNV | 1 | G | A | Homozygous   |
| NC_037641.1 | 10600134 | SNV | 1 | T | C | Heterozygous |
| NC_037641.1 | 10600143 | SNV | 1 | T | C | Heterozygous |
| NC_037641.1 | 10600146 | SNV | 1 | G | T | Heterozygous |
| NC_037641.1 | 10600154 | SNV | 1 | G | T | Heterozygous |
| NC_037641.1 | 10600395 | SNV | 1 | T | C | Homozygous   |
| NC_037641.1 | 10600843 | SNV | 1 | A | G | Heterozygous |
| NC_037641.1 | 10600861 | SNV | 1 | A | G | Homozygous   |
| NC_037641.1 | 10605285 | SNV | 1 | T | G | Homozygous   |
| NC_037641.1 | 10605291 | SNV | 1 | T | C | Homozygous   |
| NC_037641.1 | 10605295 | SNV | 1 | T | A | Homozygous   |
| NC_037641.1 | 10605297 | SNV | 1 | T | G | Homozygous   |
| NC_037641.1 | 10605300 | SNV | 1 | T | C | Homozygous   |
| NC_037641.1 | 10605303 | SNV | 1 | T | C | Homozygous   |
| NC_037641.1 | 10606800 | SNV | 1 | A | G | Heterozygous |
| NC_037641.1 | 10607063 | SNV | 1 | C | A | Homozygous   |
| NC_037641.1 | 10610632 | SNV | 1 | A | G | Homozygous   |
| NC_037641.1 | 10610679 | SNV | 1 | T | C | Homozygous   |
| NC_037641.1 | 10611163 | SNV | 1 | A | T | Homozygous   |
| NC_037641.1 | 10611167 | SNV | 1 | A | T | Homozygous   |
| NC_037641.1 | 10611170 | SNV | 1 | A | T | Homozygous   |

|             |          |     |   |   |   |              |
|-------------|----------|-----|---|---|---|--------------|
| NC_037641.1 | 10611202 | SNV | 1 | C | G | Homozygous   |
| NC_037641.1 | 10611206 | SNV | 1 | C | T | Homozygous   |
| NC_037641.1 | 10611211 | SNV | 1 | C | T | Homozygous   |
| NC_037641.1 | 10611217 | SNV | 1 | C | T | Homozygous   |
| NC_037641.1 | 10617924 | SNV | 1 | G | T | Heterozygous |
| NC_037641.1 | 10618175 | SNV | 1 | C | T | Homozygous   |
| NC_037641.1 | 10618206 | SNV | 1 | C | T | Homozygous   |
| NC_037641.1 | 10618252 | SNV | 1 | T | C | Heterozygous |
| NC_037641.1 | 10618258 | SNV | 1 | C | G | Heterozygous |
| NC_037641.1 | 10618260 | SNV | 1 | C | G | Heterozygous |
| NC_037641.1 | 10623365 | SNV | 1 | C | T | Heterozygous |
| NC_037641.1 | 10623705 | SNV | 1 | A | G | Heterozygous |
| NC_037641.1 | 10623730 | SNV | 1 | G | C | Heterozygous |
| NC_037641.1 | 10625913 | SNV | 1 | G | A | Heterozygous |
| NC_037641.1 | 10627909 | SNV | 1 | G | A | Heterozygous |
| NC_037641.1 | 10628303 | SNV | 1 | A | C | Homozygous   |
| NC_037641.1 | 10637886 | SNV | 1 | T | C | Homozygous   |
| NC_037641.1 | 10638934 | SNV | 1 | C | T | Homozygous   |
| NC_037641.1 | 10639380 | SNV | 1 | C | G | Heterozygous |
| NC_037641.1 | 10639395 | SNV | 1 | T | C | Heterozygous |
| NC_037641.1 | 10639782 | SNV | 1 | G | A | Heterozygous |
| NC_037641.1 | 10639783 | SNV | 1 | G | A | Heterozygous |
| NC_037641.1 | 10639786 | SNV | 1 | G | C | Heterozygous |
| NC_037641.1 | 10639942 | SNV | 1 | G | A | Heterozygous |
| NC_037641.1 | 10640114 | SNV | 1 | A | C | Homozygous   |
| NC_037641.1 | 10640459 | SNV | 1 | G | A | Homozygous   |
| NC_037641.1 | 10640584 | SNV | 1 | T | C | Heterozygous |
| NC_037641.1 | 10640601 | SNV | 1 | A | G | Heterozygous |
| NC_037641.1 | 10640704 | SNV | 1 | A | G | Heterozygous |
| NC_037641.1 | 10641046 | SNV | 1 | T | C | Homozygous   |
| NC_037641.1 | 10642507 | SNV | 1 | C | G | Heterozygous |
| NC_037641.1 | 10642538 | SNV | 1 | G | T | Homozygous   |
| NC_037641.1 | 10642775 | SNV | 1 | T | C | Heterozygous |
| NC_037641.1 | 10643153 | SNV | 1 | T | G | Heterozygous |
| NC_037641.1 | 10643441 | SNV | 1 | T | C | Heterozygous |
| NC_037641.1 | 10643726 | SNV | 1 | T | C | Heterozygous |
| NC_037641.1 | 10644568 | SNV | 1 | A | G | Homozygous   |
| NC_037641.1 | 10644594 | SNV | 1 | T | C | Homozygous   |
| NC_037641.1 | 10644877 | SNV | 1 | A | G | Homozygous   |
| NC_037641.1 | 10644979 | SNV | 1 | C | T | Homozygous   |
| NC_037641.1 | 10645114 | SNV | 1 | C | G | Homozygous   |
| NC_037641.1 | 10646129 | SNV | 1 | G | C | Homozygous   |
| NC_037641.1 | 10646469 | SNV | 1 | T | C | Homozygous   |
| NC_037641.1 | 10646493 | SNV | 1 | T | A | Heterozygous |
| NC_037641.1 | 10646582 | SNV | 1 | T | C | Heterozygous |
| NC_037641.1 | 10646640 | SNV | 1 | C | G | Heterozygous |
| NC_037641.1 | 10647121 | SNV | 1 | A | G | Heterozygous |
| NC_037641.1 | 10648727 | SNV | 1 | C | T | Homozygous   |
| NC_037641.1 | 10648863 | SNV | 1 | G | T | Homozygous   |
| NC_037641.1 | 10649375 | SNV | 1 | G | C | Homozygous   |
| NC_037641.1 | 10649462 | SNV | 1 | T | C | Homozygous   |

|             |          |     |   |   |   |              |
|-------------|----------|-----|---|---|---|--------------|
| NC_037641.1 | 10649585 | SNV | 1 | G | A | Heterozygous |
| NC_037641.1 | 10649945 | SNV | 1 | T | A | Homozygous   |
| NC_037641.1 | 10650230 | SNV | 1 | C | T | Heterozygous |
| NC_037641.1 | 10650237 | SNV | 1 | C | G | Heterozygous |
| NC_037641.1 | 10650552 | SNV | 1 | C | T | Homozygous   |
| NC_037641.1 | 10650565 | SNV | 1 | A | G | Homozygous   |
| NC_037641.1 | 10651097 | SNV | 1 | C | T | Heterozygous |
| NC_037641.1 | 10651160 | SNV | 1 | A | G | Homozygous   |
| NC_037641.1 | 10651210 | SNV | 1 | T | C | Homozygous   |
| NC_037641.1 | 10651231 | SNV | 1 | T | C | Homozygous   |
| NC_037641.1 | 10651528 | SNV | 1 | A | C | Homozygous   |
| NC_037641.1 | 10651602 | SNV | 1 | T | C | Homozygous   |
| NC_037641.1 | 10651761 | SNV | 1 | C | T | Heterozygous |
| NC_037641.1 | 10651807 | SNV | 1 | C | T | Heterozygous |
| NC_037641.1 | 10652196 | SNV | 1 | G | A | Homozygous   |
| NC_037641.1 | 10652310 | SNV | 1 | G | A | Homozygous   |
| NC_037641.1 | 10652407 | SNV | 1 | C | T | Homozygous   |
| NC_037641.1 | 10652662 | SNV | 1 | G | A | Heterozygous |
| NC_037641.1 | 10652728 | SNV | 1 | A | G | Heterozygous |
| NC_037641.1 | 10652775 | SNV | 1 | G | A | Heterozygous |
| NC_037641.1 | 10652798 | SNV | 1 | T | C | Homozygous   |
| NC_037641.1 | 10652891 | SNV | 1 | C | T | Homozygous   |
| NC_037641.1 | 10652932 | SNV | 1 | C | T | Homozygous   |
| NC_037641.1 | 10653952 | SNV | 1 | A | G | Heterozygous |
| NC_037641.1 | 10653990 | SNV | 1 | C | T | Homozygous   |
| NC_037641.1 | 10654559 | SNV | 1 | G | A | Heterozygous |
| NC_037641.1 | 10654565 | SNV | 1 | G | A | Heterozygous |
| NC_037641.1 | 10655021 | SNV | 1 | G | A | Heterozygous |
| NC_037641.1 | 10655135 | SNV | 1 | C | T | Heterozygous |
| NC_037641.1 | 10655196 | SNV | 1 | G | A | Homozygous   |
| NC_037641.1 | 10655568 | SNV | 1 | A | G | Homozygous   |
| NC_037641.1 | 10655580 | SNV | 1 | C | G | Homozygous   |
| NC_037641.1 | 10655598 | SNV | 1 | C | T | Homozygous   |
| NC_037641.1 | 10655637 | SNV | 1 | A | G | Homozygous   |
| NC_037641.1 | 10655804 | SNV | 1 | A | G | Homozygous   |
| NC_037641.1 | 10655821 | SNV | 1 | A | G | Homozygous   |
| NC_037641.1 | 10655926 | SNV | 1 | C | T | Heterozygous |
| NC_037641.1 | 10656277 | SNV | 1 | T | C | Homozygous   |
| NC_037641.1 | 10656403 | SNV | 1 | G | C | Homozygous   |
| NC_037641.1 | 10656642 | SNV | 1 | A | G | Homozygous   |
| NC_037641.1 | 10656741 | SNV | 1 | T | C | Heterozygous |
| NC_037641.1 | 10658254 | SNV | 1 | T | C | Homozygous   |
| NC_037641.1 | 10658495 | SNV | 1 | A | G | Homozygous   |
| NC_037641.1 | 10658507 | SNV | 1 | T | C | Homozygous   |
| NC_037641.1 | 10658519 | SNV | 1 | T | C | Homozygous   |
| NC_037641.1 | 10658824 | SNV | 1 | C | T | Heterozygous |
| NC_037641.1 | 10658980 | SNV | 1 | C | T | Heterozygous |
| NC_037641.1 | 10659226 | SNV | 1 | C | T | Heterozygous |
| NC_037641.1 | 10659382 | SNV | 1 | C | T | Homozygous   |
| NC_037641.1 | 10659384 | SNV | 1 | T | C | Homozygous   |
| NC_037641.1 | 10659645 | SNV | 1 | A | G | Heterozygous |

|             |          |     |   |   |   |              |
|-------------|----------|-----|---|---|---|--------------|
| NC_037641.1 | 10659667 | SNV | 1 | C | T | Heterozygous |
| NC_037641.1 | 10659822 | SNV | 1 | T | C | Homozygous   |
| NC_037641.1 | 10708044 | SNV | 1 | A | G | Heterozygous |
| NC_037641.1 | 10708060 | SNV | 1 | A | G | Homozygous   |
| NC_037641.1 | 10708096 | SNV | 1 | A | G | Heterozygous |
| NC_037641.1 | 10708105 | SNV | 1 | A | G | Homozygous   |
| NC_037641.1 | 10708314 | SNV | 1 | T | C | Homozygous   |
| NC_037641.1 | 10708367 | SNV | 1 | A | G | Heterozygous |
| NC_037641.1 | 10715020 | SNV | 1 | G | A | Homozygous   |
| NC_037641.1 | 10715082 | SNV | 1 | G | A | Heterozygous |
| NC_037641.1 | 10721300 | SNV | 1 | A | G | Heterozygous |
| NC_037641.1 | 10721305 | SNV | 1 | A | G | Heterozygous |
| NC_037641.1 | 10721329 | SNV | 1 | G | A | Heterozygous |
| NC_037641.1 | 10724756 | SNV | 1 | C | T | Homozygous   |
| NC_037641.1 | 10736752 | SNV | 1 | A | G | Homozygous   |
| NC_037641.1 | 10736812 | SNV | 1 | G | A | Heterozygous |
| NC_037641.1 | 10737064 | SNV | 1 | C | T | Homozygous   |
| NC_037641.1 | 10737434 | SNV | 1 | G | C | Homozygous   |
| NC_037641.1 | 10737644 | SNV | 1 | C | T | Heterozygous |
| NC_037641.1 | 10737657 | SNV | 1 | G | A | Heterozygous |
| NC_037641.1 | 10737665 | SNV | 1 | T | C | Heterozygous |
| NC_037641.1 | 10737675 | SNV | 1 | C | T | Homozygous   |
| NC_037641.1 | 10737681 | SNV | 1 | C | T | Heterozygous |
| NC_037641.1 | 10753652 | SNV | 1 | T | C | Homozygous   |
| NC_037641.1 | 10760438 | SNV | 1 | A | G | Heterozygous |
| NC_037641.1 | 10783584 | SNV | 1 | T | C | Homozygous   |
| NC_037641.1 | 10783775 | SNV | 1 | T | C | Heterozygous |
| NC_037641.1 | 10783931 | SNV | 1 | T | C | Homozygous   |
| NC_037641.1 | 10783947 | SNV | 1 | T | A | Heterozygous |
| NC_037641.1 | 10785543 | SNV | 1 | A | C | Heterozygous |
| NC_037641.1 | 10785590 | SNV | 1 | A | G | Homozygous   |
| NC_037641.1 | 10785624 | SNV | 1 | G | A | Heterozygous |
| NC_037641.1 | 10786147 | SNV | 1 | C | G | Heterozygous |
| NC_037641.1 | 10786168 | SNV | 1 | C | T | Homozygous   |
| NC_037641.1 | 10789031 | SNV | 1 | T | C | Homozygous   |
| NC_037641.1 | 10789951 | SNV | 1 | T | C | Heterozygous |
| NC_037641.1 | 10790011 | SNV | 1 | G | C | Heterozygous |
| NC_037641.1 | 10799842 | SNV | 1 | A | G | Homozygous   |
| NC_037641.1 | 10799848 | SNV | 1 | G | A | Heterozygous |
| NC_037641.1 | 10799856 | SNV | 1 | A | G | Heterozygous |
| NC_037641.1 | 10799863 | SNV | 1 | C | G | Homozygous   |
| NC_037641.1 | 10800061 | SNV | 1 | G | A | Heterozygous |
| NC_037641.1 | 10800358 | SNV | 1 | A | G | Homozygous   |
| NC_037641.1 | 10800689 | SNV | 1 | A | G | Homozygous   |
| NC_037641.1 | 10800807 | SNV | 1 | T | C | Homozygous   |
| NC_037641.1 | 10800827 | SNV | 1 | G | C | Heterozygous |
| NC_037641.1 | 10801245 | SNV | 1 | T | C | Homozygous   |
| NC_037641.1 | 10801341 | SNV | 1 | T | C | Homozygous   |
| NC_037641.1 | 10801604 | SNV | 1 | A | G | Homozygous   |
| NC_037641.1 | 10801624 | SNV | 1 | A | G | Homozygous   |
| NC_037641.1 | 10801665 | SNV | 1 | C | G | Homozygous   |

|             |          |     |   |   |   |              |
|-------------|----------|-----|---|---|---|--------------|
| NC_037641.1 | 10801857 | SNV | 1 | C | T | Homozygous   |
| NC_037641.1 | 10802008 | SNV | 1 | T | C | Heterozygous |
| NC_037641.1 | 10802154 | SNV | 1 | A | G | Homozygous   |
| NC_037641.1 | 10802475 | SNV | 1 | G | C | Homozygous   |
| NC_037641.1 | 10810103 | SNV | 1 | T | C | Heterozygous |
| NC_037641.1 | 10810114 | SNV | 1 | C | T | Homozygous   |
| NC_037641.1 | 10810144 | SNV | 1 | C | T | Homozygous   |
| NC_037641.1 | 10810148 | SNV | 1 | G | T | Homozygous   |
| NC_037641.1 | 10810153 | SNV | 1 | C | A | Homozygous   |
| NC_037641.1 | 10810157 | SNV | 1 | T | C | Heterozygous |
| NC_037641.1 | 10810165 | SNV | 1 | C | T | Heterozygous |
| NC_037641.1 | 10810171 | SNV | 1 | C | T | Heterozygous |
| NC_037641.1 | 10810209 | SNV | 1 | C | T | Heterozygous |
| NC_037641.1 | 10810213 | SNV | 1 | G | T | Heterozygous |
| NC_037641.1 | 10810218 | SNV | 1 | A | G | Homozygous   |
| NC_037641.1 | 10810248 | SNV | 1 | A | C | Homozygous   |
| NC_037641.1 | 10810276 | SNV | 1 | G | A | Heterozygous |
| NC_037641.1 | 10810289 | SNV | 1 | C | T | Heterozygous |
| NC_037641.1 | 10810309 | SNV | 1 | A | G | Homozygous   |
| NC_037641.1 | 10821175 | SNV | 1 | C | A | Heterozygous |
| NC_037641.1 | 10821180 | SNV | 1 | T | A | Heterozygous |
| NC_037641.1 | 10832027 | SNV | 1 | A | C | Heterozygous |
| NC_037641.1 | 10832035 | SNV | 1 | A | G | Heterozygous |
| NC_037641.1 | 10832049 | SNV | 1 | A | G | Heterozygous |
| NC_037641.1 | 10840458 | SNV | 1 | C | T | Heterozygous |
| NC_037641.1 | 10840467 | SNV | 1 | T | C | Heterozygous |
| NC_037641.1 | 10840514 | SNV | 1 | C | T | Heterozygous |
| NC_037641.1 | 10852546 | SNV | 1 | A | C | Heterozygous |
| NC_037641.1 | 10868874 | SNV | 1 | T | C | Homozygous   |
| NC_037641.1 | 10875238 | SNV | 1 | T | C | Heterozygous |
| NC_037641.1 | 10875269 | SNV | 1 | T | C | Heterozygous |
| NC_037641.1 | 10890489 | SNV | 1 | C | T | Homozygous   |
| NC_037641.1 | 10890495 | SNV | 1 | C | T | Homozygous   |
| NC_037641.1 | 10890508 | SNV | 1 | C | T | Homozygous   |
| NC_037641.1 | 10898169 | SNV | 1 | A | C | Homozygous   |
| NC_037641.1 | 10898245 | SNV | 1 | A | G | Homozygous   |
| NC_037641.1 | 10898366 | SNV | 1 | A | G | Heterozygous |
| NC_037641.1 | 10927990 | SNV | 1 | A | G | Heterozygous |
| NC_037641.1 | 10948155 | SNV | 1 | C | A | Homozygous   |
| NC_037641.1 | 10948159 | SNV | 1 | C | T | Homozygous   |
| NC_037641.1 | 10953598 | SNV | 1 | T | C | Homozygous   |
| NC_037641.1 | 10953602 | SNV | 1 | G | C | Homozygous   |
| NC_037641.1 | 10955745 | SNV | 1 | C | G | Homozygous   |
| NC_037641.1 | 10955750 | SNV | 1 | A | G | Homozygous   |
| NC_037641.1 | 10955760 | SNV | 1 | T | G | Heterozygous |
| NC_037641.1 | 10955762 | SNV | 1 | G | A | Heterozygous |
| NC_037641.1 | 10955768 | SNV | 1 | A | G | Homozygous   |
| NC_037641.1 | 10955789 | SNV | 1 | C | G | Homozygous   |
| NC_037641.1 | 10955795 | SNV | 1 | G | C | Homozygous   |
| NC_037641.1 | 10955797 | SNV | 1 | T | C | Homozygous   |
| NC_037641.1 | 10955802 | SNV | 1 | T | C | Homozygous   |

|             |          |     |   |   |   |              |
|-------------|----------|-----|---|---|---|--------------|
| NC_037641.1 | 10963840 | SNV | 1 | A | G | Homozygous   |
| NC_037641.1 | 10963878 | SNV | 1 | A | T | Homozygous   |
| NC_037641.1 | 10964687 | SNV | 1 | A | C | Heterozygous |
| NC_037641.1 | 10964688 | SNV | 1 | G | A | Heterozygous |
| NC_037641.1 | 10964692 | SNV | 1 | G | T | Heterozygous |
| NC_037641.1 | 10964713 | SNV | 1 | A | G | Heterozygous |
| NC_037641.1 | 11030557 | SNV | 1 | C | T | Homozygous   |
| NC_037641.1 | 11030593 | SNV | 1 | A | G | Homozygous   |
| NC_037641.1 | 11030602 | SNV | 1 | A | G | Heterozygous |
| NC_037641.1 | 11063371 | SNV | 1 | G | C | Heterozygous |
| NC_037641.1 | 11064015 | SNV | 1 | G | A | Heterozygous |
| NC_037641.1 | 11064142 | SNV | 1 | A | C | Homozygous   |
| NC_037641.1 | 11064145 | SNV | 1 | C | T | Homozygous   |
| NC_037641.1 | 11064197 | SNV | 1 | C | T | Heterozygous |
| NC_037641.1 | 11064305 | SNV | 1 | A | T | Heterozygous |
| NC_037641.1 | 11064320 | SNV | 1 | T | C | Heterozygous |
| NC_037641.1 | 11064647 | SNV | 1 | G | A | Heterozygous |
| NC_037641.1 | 11071551 | SNV | 1 | C | A | Homozygous   |
| NC_037641.1 | 11073160 | SNV | 1 | G | T | Homozygous   |
| NC_037641.1 | 11073285 | SNV | 1 | G | A | Homozygous   |
| NC_037641.1 | 11073816 | SNV | 1 | G | C | Homozygous   |
| NC_037641.1 | 11075494 | SNV | 1 | A | T | Heterozygous |
| NC_037641.1 | 11075496 | SNV | 1 | G | C | Heterozygous |
| NC_037641.1 | 11075498 | SNV | 1 | G | C | Heterozygous |
| NC_037641.1 | 11075743 | SNV | 1 | G | A | Homozygous   |
| NC_037641.1 | 11076155 | SNV | 1 | C | T | Heterozygous |
| NC_037641.1 | 11078359 | SNV | 1 | G | A | Heterozygous |
| NC_037641.1 | 11080305 | SNV | 1 | G | A | Heterozygous |
| NC_037641.1 | 11080433 | SNV | 1 | T | C | Homozygous   |
| NC_037641.1 | 11080510 | SNV | 1 | C | T | Homozygous   |
| NC_037641.1 | 11080535 | SNV | 1 | T | C | Heterozygous |
| NC_037641.1 | 11082544 | SNV | 1 | G | A | Homozygous   |
| NC_037641.1 | 11086274 | SNV | 1 | G | A | Heterozygous |
| NC_037641.1 | 11086312 | SNV | 1 | T | G | Heterozygous |
| NC_037641.1 | 11086664 | SNV | 1 | C | G | Homozygous   |
| NC_037641.1 | 11086798 | SNV | 1 | T | C | Homozygous   |
| NC_037641.1 | 11086911 | SNV | 1 | C | T | Heterozygous |
| NC_037641.1 | 11087968 | SNV | 1 | T | C | Heterozygous |
| NC_037641.1 | 11088395 | SNV | 1 | T | C | Heterozygous |
| NC_037641.1 | 11088398 | SNV | 1 | C | T | Homozygous   |
| NC_037641.1 | 11088935 | SNV | 1 | T | C | Homozygous   |
| NC_037641.1 | 11089331 | SNV | 1 | A | G | Homozygous   |
| NC_037641.1 | 11089456 | SNV | 1 | G | A | Homozygous   |
| NC_037641.1 | 11090569 | SNV | 1 | G | A | Homozygous   |
| NC_037641.1 | 11090638 | SNV | 1 | A | G | Heterozygous |
| NC_037641.1 | 11091085 | SNV | 1 | T | A | Homozygous   |
| NC_037641.1 | 11091087 | SNV | 1 | G | A | Homozygous   |
| NC_037641.1 | 11091132 | SNV | 1 | T | C | Homozygous   |
| NC_037641.1 | 11091277 | SNV | 1 | G | T | Homozygous   |
| NC_037641.1 | 11091361 | SNV | 1 | T | C | Heterozygous |
| NC_037641.1 | 11091886 | SNV | 1 | C | A | Heterozygous |

|             |          |     |   |   |   |              |
|-------------|----------|-----|---|---|---|--------------|
| NC_037641.1 | 11093228 | SNV | 1 | G | A | Heterozygous |
| NC_037641.1 | 11093259 | SNV | 1 | T | C | Homozygous   |
| NC_037641.1 | 11093264 | SNV | 1 | C | T | Heterozygous |
| NC_037641.1 | 11093422 | SNV | 1 | A | G | Homozygous   |
| NC_037641.1 | 11094472 | SNV | 1 | T | C | Homozygous   |
| NC_037641.1 | 11101461 | SNV | 1 | T | C | Heterozygous |
| NC_037641.1 | 11102662 | SNV | 1 | G | A | Heterozygous |
| NC_037641.1 | 11104090 | SNV | 1 | T | C | Heterozygous |
| NC_037641.1 | 11104502 | SNV | 1 | A | G | Homozygous   |
| NC_037641.1 | 11105661 | SNV | 1 | C | T | Heterozygous |
| NC_037641.1 | 11105934 | SNV | 1 | C | T | Heterozygous |
| NC_037641.1 | 11107322 | SNV | 1 | T | C | Homozygous   |
| NC_037641.1 | 11108074 | SNV | 1 | T | C | Heterozygous |
| NC_037641.1 | 11109011 | SNV | 1 | T | C | Heterozygous |
| NC_037641.1 | 11109473 | SNV | 1 | C | T | Homozygous   |
| NC_037641.1 | 11109651 | SNV | 1 | A | T | Homozygous   |
| NC_037641.1 | 11111683 | SNV | 1 | A | G | Homozygous   |
| NC_037641.1 | 11111687 | SNV | 1 | A | C | Homozygous   |
| NC_037641.1 | 11111706 | SNV | 1 | T | C | Homozygous   |
| NC_037641.1 | 11111722 | SNV | 1 | T | A | Homozygous   |
| NC_037641.1 | 11112146 | SNV | 1 | T | C | Homozygous   |
| NC_037641.1 | 11115690 | SNV | 1 | C | T | Heterozygous |
| NC_037641.1 | 11116152 | SNV | 1 | A | G | Homozygous   |
| NC_037641.1 | 11116414 | SNV | 1 | A | T | Homozygous   |
| NC_037641.1 | 11116437 | SNV | 1 | C | G | Homozygous   |
| NC_037641.1 | 11116500 | SNV | 1 | A | G | Heterozygous |
| NC_037641.1 | 11116520 | SNV | 1 | C | T | Heterozygous |
| NC_037641.1 | 11116527 | SNV | 1 | T | A | Homozygous   |
| NC_037641.1 | 11116743 | SNV | 1 | A | G | Homozygous   |
| NC_037641.1 | 11116895 | SNV | 1 | A | T | Heterozygous |
| NC_037641.1 | 11116918 | SNV | 1 | T | A | Homozygous   |
| NC_037641.1 | 11116935 | SNV | 1 | A | G | Homozygous   |
| NC_037641.1 | 11116946 | SNV | 1 | C | A | Homozygous   |
| NC_037641.1 | 11117009 | SNV | 1 | A | G | Homozygous   |
| NC_037641.1 | 11120897 | SNV | 1 | A | G | Heterozygous |
| NC_037641.1 | 11124527 | SNV | 1 | T | C | Homozygous   |
| NC_037641.1 | 11124531 | SNV | 1 | G | A | Heterozygous |
| NC_037641.1 | 11124736 | SNV | 1 | C | T | Heterozygous |
| NC_037641.1 | 11124806 | SNV | 1 | C | T | Heterozygous |
| NC_037641.1 | 11124812 | SNV | 1 | G | A | Heterozygous |
| NC_037641.1 | 11124815 | SNV | 1 | G | A | Homozygous   |
| NC_037641.1 | 11124859 | SNV | 1 | C | T | Heterozygous |
| NC_037641.1 | 11145492 | SNV | 1 | G | A | Heterozygous |
| NC_037641.1 | 11145649 | SNV | 1 | T | C | Homozygous   |
| NC_037641.1 | 11146215 | SNV | 1 | A | G | Homozygous   |
| NC_037641.1 | 11146362 | SNV | 1 | A | G | Heterozygous |
| NC_037641.1 | 11146422 | SNV | 1 | T | C | Homozygous   |
| NC_037641.1 | 11146521 | SNV | 1 | T | C | Homozygous   |
| NC_037641.1 | 11146543 | SNV | 1 | T | C | Heterozygous |
| NC_037641.1 | 11147940 | SNV | 1 | C | T | Homozygous   |
| NC_037641.1 | 11151951 | SNV | 1 | C | G | Homozygous   |

|             |          |     |   |   |   |              |
|-------------|----------|-----|---|---|---|--------------|
| NC_037641.1 | 11151963 | SNV | 1 | C | G | Homozygous   |
| NC_037641.1 | 11151969 | SNV | 1 | T | C | Homozygous   |
| NC_037641.1 | 11151973 | SNV | 1 | T | C | Homozygous   |
| NC_037641.1 | 11151977 | SNV | 1 | T | C | Homozygous   |
| NC_037641.1 | 11158818 | SNV | 1 | A | C | Homozygous   |
| NC_037641.1 | 11159568 | SNV | 1 | A | G | Homozygous   |
| NC_037641.1 | 11160081 | SNV | 1 | A | G | Heterozygous |
| NC_037641.1 | 11160444 | SNV | 1 | C | T | Homozygous   |
| NC_037641.1 | 11160483 | SNV | 1 | T | C | Homozygous   |
| NC_037641.1 | 11160801 | SNV | 1 | G | A | Heterozygous |
| NC_037641.1 | 11160822 | SNV | 1 | A | T | Heterozygous |
| NC_037641.1 | 11164856 | SNV | 1 | A | T | Homozygous   |
| NC_037641.1 | 11164873 | SNV | 1 | G | A | Heterozygous |
| NC_037641.1 | 11165847 | SNV | 1 | A | C | Homozygous   |
| NC_037641.1 | 11166367 | SNV | 1 | T | C | Heterozygous |
| NC_037641.1 | 11167922 | SNV | 1 | G | C | Heterozygous |
| NC_037641.1 | 11168050 | SNV | 1 | G | A | Heterozygous |
| NC_037641.1 | 11169223 | SNV | 1 | C | G | Homozygous   |
| NC_037641.1 | 11169225 | SNV | 1 | G | C | Homozygous   |
| NC_037641.1 | 11169717 | SNV | 1 | T | C | Homozygous   |
| NC_037641.1 | 11169724 | SNV | 1 | A | C | Homozygous   |
| NC_037641.1 | 11169728 | SNV | 1 | T | A | Homozygous   |
| NC_037641.1 | 11169750 | SNV | 1 | A | T | Homozygous   |
| NC_037641.1 | 11169911 | SNV | 1 | C | T | Heterozygous |
| NC_037641.1 | 11170660 | SNV | 1 | C | T | Homozygous   |
| NC_037641.1 | 11170877 | SNV | 1 | T | C | Homozygous   |
| NC_037641.1 | 11171064 | SNV | 1 | C | T | Heterozygous |
| NC_037641.1 | 11171761 | SNV | 1 | G | A | Homozygous   |
| NC_037641.1 | 11172273 | SNV | 1 | T | C | Homozygous   |
| NC_037641.1 | 11180538 | SNV | 1 | G | C | Heterozygous |
| NC_037641.1 | 11180639 | SNV | 1 | A | C | Homozygous   |
| NC_037641.1 | 11181206 | SNV | 1 | G | T | Heterozygous |
| NC_037641.1 | 11181239 | SNV | 1 | A | G | Homozygous   |
| NC_037641.1 | 11181242 | SNV | 1 | T | A | Homozygous   |
| NC_037641.1 | 11182513 | SNV | 1 | C | T | Homozygous   |
| NC_037641.1 | 11184804 | SNV | 1 | C | T | Heterozygous |
| NC_037641.1 | 11185183 | SNV | 1 | T | A | Homozygous   |
| NC_037641.1 | 11185216 | SNV | 1 | A | C | Homozygous   |
| NC_037641.1 | 11185221 | SNV | 1 | A | C | Homozygous   |
| NC_037641.1 | 11185225 | SNV | 1 | G | A | Homozygous   |
| NC_037641.1 | 11185234 | SNV | 1 | C | A | Homozygous   |
| NC_037641.1 | 11186687 | SNV | 1 | G | A | Heterozygous |
| NC_037641.1 | 11186855 | SNV | 1 | C | G | Heterozygous |
| NC_037641.1 | 11186922 | SNV | 1 | C | T | Heterozygous |
| NC_037641.1 | 11186954 | SNV | 1 | A | C | Homozygous   |
| NC_037641.1 | 11187023 | SNV | 1 | C | T | Homozygous   |
| NC_037641.1 | 11190501 | SNV | 1 | A | G | Homozygous   |
| NC_037641.1 | 11190650 | SNV | 1 | G | A | Heterozygous |
| NC_037641.1 | 11190710 | SNV | 1 | T | C | Homozygous   |
| NC_037641.1 | 11195186 | SNV | 1 | C | T | Heterozygous |
| NC_037641.1 | 11195217 | SNV | 1 | T | C | Homozygous   |



|             |          |     |   |   |   |              |
|-------------|----------|-----|---|---|---|--------------|
| NC_037641.1 | 11196599 | SNV | 1 | G | A | Homozygous   |
| NC_037641.1 | 11200963 | SNV | 1 | A | G | Heterozygous |
| NC_037641.1 | 11201047 | SNV | 1 | G | A | Heterozygous |
| NC_037641.1 | 11202285 | SNV | 1 | G | A | Heterozygous |
| NC_037641.1 | 11203821 | SNV | 1 | C | A | Homozygous   |
| NC_037641.1 | 11203824 | SNV | 1 | A | T | Homozygous   |
| NC_037641.1 | 11207726 | SNV | 1 | T | C | Homozygous   |
| NC_037641.1 | 11207742 | SNV | 1 | C | T | Homozygous   |
| NC_037641.1 | 11208229 | SNV | 1 | A | G | Homozygous   |
| NC_037641.1 | 11209606 | SNV | 1 | T | C | Homozygous   |
| NC_037641.1 | 11210261 | SNV | 1 | A | G | Homozygous   |
| NC_037641.1 | 11212532 | SNV | 1 | T | C | Homozygous   |
| NC_037641.1 | 11212535 | SNV | 1 | A | G | Homozygous   |
| NC_037641.1 | 11212917 | SNV | 1 | T | A | Homozygous   |
| NC_037641.1 | 11213086 | SNV | 1 | A | G | Homozygous   |
| NC_037641.1 | 11213236 | SNV | 1 | G | A | Homozygous   |
| NC_037641.1 | 11213502 | SNV | 1 | G | A | Homozygous   |
| NC_037641.1 | 11214336 | SNV | 1 | T | A | Homozygous   |
| NC_037641.1 | 11215163 | SNV | 1 | C | T | Heterozygous |
| NC_037641.1 | 11216079 | SNV | 1 | C | T | Heterozygous |
| NC_037641.1 | 11221002 | SNV | 1 | A | G | Homozygous   |
| NC_037641.1 | 11229699 | SNV | 1 | T | C | Homozygous   |
| NC_037641.1 | 11229720 | SNV | 1 | T | C | Homozygous   |
| NC_037641.1 | 11232442 | SNV | 1 | A | G | Homozygous   |
| NC_037641.1 | 11233251 | SNV | 1 | T | C | Homozygous   |
| NC_037641.1 | 11238894 | SNV | 1 | C | T | Homozygous   |
| NC_037641.1 | 11242893 | SNV | 1 | A | G | Heterozygous |
| NC_037641.1 | 11248547 | SNV | 1 | C | T | Homozygous   |
| NC_037641.1 | 11249237 | SNV | 1 | A | G | Homozygous   |
| NC_037641.1 | 11249295 | SNV | 1 | G | A | Homozygous   |
| NC_037641.1 | 11249301 | SNV | 1 | A | T | Heterozygous |
| NC_037641.1 | 11249351 | SNV | 1 | C | T | Heterozygous |
| NC_037641.1 | 11249356 | SNV | 1 | G | A | Heterozygous |
| NC_037641.1 | 11257858 | SNV | 1 | T | G | Homozygous   |
| NC_037641.1 | 11257861 | SNV | 1 | A | G | Homozygous   |
| NC_037641.1 | 11257863 | SNV | 1 | A | G | Homozygous   |
| NC_037641.1 | 11257880 | SNV | 1 | A | C | Homozygous   |
| NC_037641.1 | 11257885 | SNV | 1 | T | A | Homozygous   |
| NC_037641.1 | 11259458 | SNV | 1 | C | T | Homozygous   |
| NC_037641.1 | 11259874 | SNV | 1 | C | A | Homozygous   |
| NC_037641.1 | 11260434 | SNV | 1 | G | A | Homozygous   |
| NC_037641.1 | 11260795 | SNV | 1 | A | G | Heterozygous |
| NC_037641.1 | 11268054 | SNV | 1 | A | T | Homozygous   |
| NC_037641.1 | 11268422 | SNV | 1 | T | C | Heterozygous |
| NC_037641.1 | 11268482 | SNV | 1 | A | T | Homozygous   |
| NC_037641.1 | 11269753 | SNV | 1 | A | T | Heterozygous |
| NC_037641.1 | 11270121 | SNV | 1 | T | C | Heterozygous |
| NC_037641.1 | 11270328 | SNV | 1 | T | C | Homozygous   |
| NC_037641.1 | 11270424 | SNV | 1 | C | T | Heterozygous |
| NC_037641.1 | 11272161 | SNV | 1 | A | G | Homozygous   |
| NC_037641.1 | 11273341 | SNV | 1 | C | T | Heterozygous |

|             |          |     |   |   |   |              |
|-------------|----------|-----|---|---|---|--------------|
| NC_037641.1 | 11275390 | SNV | 1 | A | G | Homozygous   |
| NC_037641.1 | 11275393 | SNV | 1 | A | G | Homozygous   |
| NC_037641.1 | 11275818 | SNV | 1 | C | T | Homozygous   |
| NC_037641.1 | 11276715 | SNV | 1 | T | C | Homozygous   |
| NC_037641.1 | 11295589 | SNV | 1 | C | G | Heterozygous |
| NC_037641.1 | 11295636 | SNV | 1 | A | G | Heterozygous |
| NC_037641.1 | 11295913 | SNV | 1 | G | T | Heterozygous |
| NC_037641.1 | 11304357 | SNV | 1 | G | A | Heterozygous |
| NC_037641.1 | 11304393 | SNV | 1 | A | G | Homozygous   |
| NC_037641.1 | 11304413 | SNV | 1 | A | G | Homozygous   |
| NC_037641.1 | 11304440 | SNV | 1 | A | G | Homozygous   |
| NC_037641.1 | 11304453 | SNV | 1 | G | A | Heterozygous |
| NC_037641.1 | 11304469 | SNV | 1 | A | G | Homozygous   |
| NC_037641.1 | 11304514 | SNV | 1 | C | T | Homozygous   |
| NC_037641.1 | 11316800 | SNV | 1 | C | T | Homozygous   |
| NC_037641.1 | 11316802 | SNV | 1 | T | A | Heterozygous |
| NC_037641.1 | 11316804 | SNV | 1 | T | A | Homozygous   |
| NC_037641.1 | 11316808 | SNV | 1 | T | C | Homozygous   |
| NC_037641.1 | 11316837 | SNV | 1 | C | T | Homozygous   |
| NC_037641.1 | 11316840 | SNV | 1 | C | T | Homozygous   |
| NC_037641.1 | 11320960 | SNV | 1 | A | G | Heterozygous |
| NC_037641.1 | 11321037 | SNV | 1 | A | G | Heterozygous |
| NC_037641.1 | 11329243 | SNV | 1 | T | C | Homozygous   |
| NC_037641.1 | 11329342 | SNV | 1 | G | C | Heterozygous |
| NC_037641.1 | 11329368 | SNV | 1 | A | G | Heterozygous |
| NC_037641.1 | 11329565 | SNV | 1 | C | T | Heterozygous |
| NC_037641.1 | 11333464 | SNV | 1 | A | G | Homozygous   |
| NC_037641.1 | 11333642 | SNV | 1 | T | C | Homozygous   |
| NC_037641.1 | 11333663 | SNV | 1 | G | C | Homozygous   |
| NC_037641.1 | 11334453 | SNV | 1 | G | A | Heterozygous |
| NC_037641.1 | 11336774 | SNV | 1 | C | T | Heterozygous |
| NC_037641.1 | 11345912 | SNV | 1 | T | C | Heterozygous |
| NC_037641.1 | 11345917 | SNV | 1 | A | G | Heterozygous |
| NC_037641.1 | 11345921 | SNV | 1 | A | G | Heterozygous |
| NC_037641.1 | 11345923 | SNV | 1 | A | G | Heterozygous |
| NC_037641.1 | 11345939 | SNV | 1 | A | G | Heterozygous |
| NC_037641.1 | 11345945 | SNV | 1 | A | G | Heterozygous |
| NC_037641.1 | 11345949 | SNV | 1 | A | G | Heterozygous |
| NC_037641.1 | 11346031 | SNV | 1 | T | A | Heterozygous |
| NC_037641.1 | 11349662 | SNV | 1 | A | G | Heterozygous |
| NC_037641.1 | 11353931 | SNV | 1 | G | A | Heterozygous |
| NC_037641.1 | 11353936 | SNV | 1 | A | G | Heterozygous |
| NC_037641.1 | 11353939 | SNV | 1 | A | G | Heterozygous |
| NC_037641.1 | 11357436 | SNV | 1 | T | A | Homozygous   |
| NC_037641.1 | 11357441 | SNV | 1 | A | G | Homozygous   |
| NC_037641.1 | 11358675 | SNV | 1 | C | T | Homozygous   |
| NC_037641.1 | 11358712 | SNV | 1 | T | A | Homozygous   |
| NC_037641.1 | 11358714 | SNV | 1 | C | A | Homozygous   |
| NC_037641.1 | 11358716 | SNV | 1 | C | A | Homozygous   |
| NC_037641.1 | 11359191 | SNV | 1 | T | C | Homozygous   |
| NC_037641.1 | 11361119 | SNV | 1 | C | A | Homozygous   |

|             |          |     |   |   |   |              |
|-------------|----------|-----|---|---|---|--------------|
| NC_037641.1 | 11361320 | SNV | 1 | C | G | Heterozygous |
| NC_037641.1 | 11361346 | SNV | 1 | G | A | Heterozygous |
| NC_037641.1 | 11361350 | SNV | 1 | A | T | Heterozygous |
| NC_037641.1 | 11361366 | SNV | 1 | C | T | Homozygous   |
| NC_037641.1 | 11361374 | SNV | 1 | G | A | Heterozygous |
| NC_037641.1 | 11383304 | SNV | 1 | T | C | Homozygous   |
| NC_037641.1 | 11383327 | SNV | 1 | T | C | Homozygous   |
| NC_037641.1 | 11383641 | SNV | 1 | T | C | Homozygous   |
| NC_037641.1 | 11383802 | SNV | 1 | C | T | Homozygous   |
| NC_037641.1 | 11385624 | SNV | 1 | A | C | Heterozygous |
| NC_037641.1 | 11392361 | SNV | 1 | C | A | Heterozygous |
| NC_037641.1 | 11398827 | SNV | 1 | A | G | Heterozygous |
| NC_037641.1 | 11399327 | SNV | 1 | G | A | Homozygous   |
| NC_037641.1 | 11413176 | SNV | 1 | C | T | Homozygous   |
| NC_037641.1 | 11413192 | SNV | 1 | G | T | Homozygous   |
| NC_037641.1 | 11414242 | SNV | 1 | A | C | Homozygous   |
| NC_037641.1 | 11414623 | SNV | 1 | A | G | Homozygous   |
| NC_037641.1 | 11414641 | SNV | 1 | G | A | Homozygous   |
| NC_037641.1 | 11415249 | SNV | 1 | C | T | Homozygous   |
| NC_037641.1 | 11415254 | SNV | 1 | T | G | Homozygous   |
| NC_037641.1 | 11415256 | SNV | 1 | T | A | Homozygous   |
| NC_037641.1 | 11415260 | SNV | 1 | C | A | Homozygous   |
| NC_037641.1 | 11420937 | SNV | 1 | C | G | Homozygous   |
| NC_037641.1 | 11424911 | SNV | 1 | T | A | Heterozygous |
| NC_037641.1 | 11424912 | SNV | 1 | C | A | Heterozygous |
| NC_037641.1 | 11424919 | SNV | 1 | T | G | Heterozygous |
| NC_037641.1 | 11424922 | SNV | 1 | C | G | Heterozygous |
| NC_037641.1 | 11424923 | SNV | 1 | T | G | Heterozygous |
| NC_037641.1 | 11424925 | SNV | 1 | T | G | Heterozygous |
| NC_037641.1 | 11424941 | SNV | 1 | T | C | Heterozygous |
| NC_037641.1 | 11424942 | SNV | 1 | C | G | Heterozygous |
| NC_037641.1 | 11424946 | SNV | 1 | A | G | Homozygous   |
| NC_037641.1 | 11424952 | SNV | 1 | A | T | Homozygous   |
| NC_037641.1 | 11424958 | SNV | 1 | A | G | Homozygous   |
| NC_037641.1 | 11429397 | SNV | 1 | T | C | Homozygous   |
| NC_037641.1 | 11429409 | SNV | 1 | C | T | Homozygous   |
| NC_037641.1 | 11429417 | SNV | 1 | C | T | Heterozygous |
| NC_037641.1 | 11487057 | SNV | 1 | A | C | Homozygous   |
| NC_037641.1 | 11487092 | SNV | 1 | G | A | Heterozygous |
| NC_037641.1 | 11487715 | SNV | 1 | T | C | Homozygous   |
| NC_037641.1 | 11487830 | SNV | 1 | G | A | Heterozygous |
| NC_037641.1 | 11487857 | SNV | 1 | G | A | Heterozygous |
| NC_037641.1 | 11500339 | SNV | 1 | A | T | Homozygous   |
| NC_037641.1 | 11500344 | SNV | 1 | T | A | Homozygous   |
| NC_037641.1 | 11500349 | SNV | 1 | A | T | Homozygous   |
| NC_037641.1 | 11500364 | SNV | 1 | T | C | Homozygous   |
| NC_037641.1 | 11502866 | SNV | 1 | A | G | Heterozygous |
| NC_037641.1 | 11503286 | SNV | 1 | T | C | Homozygous   |
| NC_037641.1 | 11505735 | SNV | 1 | A | G | Homozygous   |
| NC_037641.1 | 11506425 | SNV | 1 | C | T | Heterozygous |
| NC_037641.1 | 11506433 | SNV | 1 | G | A | Heterozygous |

|             |          |     |   |   |   |              |
|-------------|----------|-----|---|---|---|--------------|
| NC_037641.1 | 11506441 | SNV | 1 | A | G | Heterozygous |
| NC_037641.1 | 11506450 | SNV | 1 | T | G | Heterozygous |
| NC_037641.1 | 11506455 | SNV | 1 | A | G | Homozygous   |
| NC_037641.1 | 11506459 | SNV | 1 | T | C | Heterozygous |
| NC_037641.1 | 11506461 | SNV | 1 | T | C | Heterozygous |
| NC_037641.1 | 11506569 | SNV | 1 | A | G | Heterozygous |
| NC_037641.1 | 11506831 | SNV | 1 | A | G | Heterozygous |
| NC_037641.1 | 11506869 | SNV | 1 | G | C | Heterozygous |
| NC_037641.1 | 11506953 | SNV | 1 | A | G | Heterozygous |
| NC_037641.1 | 11506986 | SNV | 1 | G | A | Homozygous   |
| NC_037641.1 | 11509032 | SNV | 1 | T | C | Homozygous   |
| NC_037641.1 | 11510785 | SNV | 1 | A | G | Homozygous   |
| NC_037641.1 | 11510908 | SNV | 1 | C | T | Heterozygous |
| NC_037641.1 | 11511427 | SNV | 1 | T | C | Homozygous   |
| NC_037641.1 | 11511731 | SNV | 1 | A | G | Heterozygous |
| NC_037641.1 | 11516120 | SNV | 1 | A | G | Homozygous   |
| NC_037641.1 | 11516336 | SNV | 1 | A | G | Heterozygous |
| NC_037641.1 | 11516348 | SNV | 1 | T | C | Homozygous   |
| NC_037641.1 | 11516355 | SNV | 1 | A | G | Homozygous   |
| NC_037641.1 | 11524887 | SNV | 1 | A | G | Homozygous   |
| NC_037641.1 | 11524894 | SNV | 1 | C | T | Homozygous   |
| NC_037641.1 | 11524901 | SNV | 1 | G | A | Homozygous   |
| NC_037641.1 | 11524937 | SNV | 1 | G | A | Homozygous   |
| NC_037641.1 | 11524940 | SNV | 1 | G | A | Homozygous   |
| NC_037641.1 | 11524946 | SNV | 1 | G | A | Homozygous   |
| NC_037641.1 | 11524954 | SNV | 1 | G | A | Homozygous   |
| NC_037641.1 | 11525793 | SNV | 1 | G | T | Heterozygous |
| NC_037641.1 | 11527384 | SNV | 1 | C | T | Heterozygous |
| NC_037641.1 | 11528937 | SNV | 1 | A | G | Heterozygous |
| NC_037641.1 | 11529323 | SNV | 1 | T | C | Heterozygous |
| NC_037641.1 | 11530717 | SNV | 1 | G | A | Heterozygous |
| NC_037641.1 | 11530924 | SNV | 1 | A | G | Homozygous   |
| NC_037641.1 | 11531081 | SNV | 1 | C | A | Heterozygous |
| NC_037641.1 | 11531530 | SNV | 1 | T | C | Homozygous   |
| NC_037641.1 | 11533680 | SNV | 1 | G | T | Heterozygous |
| NC_037641.1 | 11533731 | SNV | 1 | T | C | Heterozygous |
| NC_037641.1 | 11534771 | SNV | 1 | G | A | Homozygous   |
| NC_037641.1 | 11534778 | SNV | 1 | A | C | Homozygous   |
| NC_037641.1 | 11534791 | SNV | 1 | A | T | Homozygous   |
| NC_037641.1 | 11534801 | SNV | 1 | A | C | Homozygous   |
| NC_037641.1 | 11534804 | SNV | 1 | A | G | Homozygous   |
| NC_037641.1 | 11534818 | SNV | 1 | A | T | Homozygous   |
| NC_037641.1 | 11534823 | SNV | 1 | T | G | Homozygous   |
| NC_037641.1 | 11535129 | SNV | 1 | T | A | Heterozygous |
| NC_037641.1 | 11535306 | SNV | 1 | G | A | Homozygous   |
| NC_037641.1 | 11535564 | SNV | 1 | T | A | Homozygous   |
| NC_037641.1 | 11536454 | SNV | 1 | A | T | Homozygous   |
| NC_037641.1 | 11538433 | SNV | 1 | A | G | Heterozygous |
| NC_037641.1 | 11540108 | SNV | 1 | G | A | Homozygous   |
| NC_037641.1 | 11545670 | SNV | 1 | C | T | Heterozygous |
| NC_037641.1 | 11545675 | SNV | 1 | C | T | Heterozygous |

|             |          |     |   |   |   |              |
|-------------|----------|-----|---|---|---|--------------|
| NC_037641.1 | 11545718 | SNV | 1 | T | A | Heterozygous |
| NC_037641.1 | 11545751 | SNV | 1 | C | T | Homozygous   |
| NC_037641.1 | 11545808 | SNV | 1 | C | T | Heterozygous |
| NC_037641.1 | 11549489 | SNV | 1 | A | G | Homozygous   |
| NC_037641.1 | 11549689 | SNV | 1 | T | C | Homozygous   |
| NC_037641.1 | 11549823 | SNV | 1 | A | C | Homozygous   |
| NC_037641.1 | 11550266 | SNV | 1 | C | G | Heterozygous |
| NC_037641.1 | 11550341 | SNV | 1 | G | A | Heterozygous |
| NC_037641.1 | 11550344 | SNV | 1 | C | A | Heterozygous |
| NC_037641.1 | 11551598 | SNV | 1 | T | C | Homozygous   |
| NC_037641.1 | 11551619 | SNV | 1 | T | C | Heterozygous |
| NC_037641.1 | 11551627 | SNV | 1 | C | T | Heterozygous |
| NC_037641.1 | 11551679 | SNV | 1 | A | C | Heterozygous |
| NC_037641.1 | 11553750 | SNV | 1 | C | T | Heterozygous |
| NC_037641.1 | 11560107 | SNV | 1 | A | T | Homozygous   |
| NC_037641.1 | 11560537 | SNV | 1 | G | T | Homozygous   |
| NC_037641.1 | 11564116 | SNV | 1 | A | G | Homozygous   |
| NC_037641.1 | 11564898 | SNV | 1 | A | G | Heterozygous |
| NC_037641.1 | 11565000 | SNV | 1 | G | A | Heterozygous |
| NC_037641.1 | 11565034 | SNV | 1 | A | G | Heterozygous |
| NC_037641.1 | 11566128 | SNV | 1 | T | A | Heterozygous |
| NC_037641.1 | 11566362 | SNV | 1 | T | C | Homozygous   |
| NC_037641.1 | 11566724 | SNV | 1 | G | T | Homozygous   |
| NC_037641.1 | 11567394 | SNV | 1 | A | G | Homozygous   |
| NC_037641.1 | 11568228 | SNV | 1 | T | C | Heterozygous |
| NC_037641.1 | 11568707 | SNV | 1 | G | T | Homozygous   |
| NC_037641.1 | 11580531 | SNV | 1 | T | C | Heterozygous |
| NC_037641.1 | 11580549 | SNV | 1 | C | T | Heterozygous |
| NC_037641.1 | 11581630 | SNV | 1 | T | C | Homozygous   |
| NC_037641.1 | 11582224 | SNV | 1 | T | C | Homozygous   |
| NC_037641.1 | 11607113 | SNV | 1 | A | G | Homozygous   |
| NC_037641.1 | 11607304 | SNV | 1 | C | T | Heterozygous |
| NC_037641.1 | 11607392 | SNV | 1 | G | A | Heterozygous |
| NC_037641.1 | 11607397 | SNV | 1 | T | C | Homozygous   |
| NC_037641.1 | 11607475 | SNV | 1 | G | T | Homozygous   |
| NC_037641.1 | 11607563 | SNV | 1 | C | A | Homozygous   |
| NC_037641.1 | 11608827 | SNV | 1 | A | T | Heterozygous |
| NC_037641.1 | 11608843 | SNV | 1 | A | T | Heterozygous |
| NC_037641.1 | 11608845 | SNV | 1 | C | T | Homozygous   |
| NC_037641.1 | 11608851 | SNV | 1 | C | T | Homozygous   |
| NC_037641.1 | 11609954 | SNV | 1 | A | G | Homozygous   |
| NC_037641.1 | 11613030 | SNV | 1 | C | T | Homozygous   |
| NC_037641.1 | 11616179 | SNV | 1 | G | C | Homozygous   |
| NC_037641.1 | 11616361 | SNV | 1 | C | T | Heterozygous |
| NC_037641.1 | 11616458 | SNV | 1 | T | C | Homozygous   |
| NC_037641.1 | 11618748 | SNV | 1 | A | G | Heterozygous |
| NC_037641.1 | 11618839 | SNV | 1 | T | C | Homozygous   |
| NC_037641.1 | 11649413 | SNV | 1 | A | G | Homozygous   |
| NC_037641.1 | 11649448 | SNV | 1 | A | G | Heterozygous |
| NC_037641.1 | 11649466 | SNV | 1 | A | G | Heterozygous |
| NC_037641.1 | 11649583 | SNV | 1 | T | C | Homozygous   |

|             |          |     |   |   |   |              |
|-------------|----------|-----|---|---|---|--------------|
| NC_037641.1 | 11649950 | SNV | 1 | A | G | Homozygous   |
| NC_037641.1 | 11650046 | SNV | 1 | G | A | Heterozygous |
| NC_037641.1 | 11650136 | SNV | 1 | C | T | Homozygous   |
| NC_037641.1 | 11650153 | SNV | 1 | G | A | Heterozygous |
| NC_037641.1 | 11650465 | SNV | 1 | C | T | Heterozygous |
| NC_037641.1 | 11650471 | SNV | 1 | G | C | Heterozygous |
| NC_037641.1 | 11650473 | SNV | 1 | A | T | Heterozygous |
| NC_037641.1 | 11650660 | SNV | 1 | G | A | Heterozygous |
| NC_037641.1 | 11650943 | SNV | 1 | T | A | Heterozygous |
| NC_037641.1 | 11651015 | SNV | 1 | A | G | Homozygous   |
| NC_037641.1 | 11651205 | SNV | 1 | G | C | Heterozygous |
| NC_037641.1 | 11651210 | SNV | 1 | C | A | Homozygous   |
| NC_037641.1 | 11652378 | SNV | 1 | T | C | Homozygous   |
| NC_037641.1 | 11652418 | SNV | 1 | G | A | Homozygous   |
| NC_037641.1 | 11652521 | SNV | 1 | T | C | Homozygous   |
| NC_037641.1 | 11652567 | SNV | 1 | G | A | Heterozygous |
| NC_037641.1 | 11652572 | SNV | 1 | T | A | Heterozygous |
| NC_037641.1 | 11652906 | SNV | 1 | A | C | Homozygous   |
| NC_037641.1 | 11653150 | SNV | 1 | G | A | Heterozygous |
| NC_037641.1 | 11653220 | SNV | 1 | G | A | Heterozygous |
| NC_037641.1 | 11655496 | SNV | 1 | C | G | Heterozygous |
| NC_037641.1 | 11660485 | SNV | 1 | C | T | Homozygous   |
| NC_037641.1 | 11660493 | SNV | 1 | T | C | Heterozygous |
| NC_037641.1 | 11677418 | SNV | 1 | C | G | Homozygous   |
| NC_037641.1 | 11677427 | SNV | 1 | T | C | Homozygous   |
| NC_037641.1 | 11677456 | SNV | 1 | T | C | Heterozygous |
| NC_037641.1 | 11677558 | SNV | 1 | A | C | Homozygous   |
| NC_037641.1 | 11677669 | SNV | 1 | T | C | Heterozygous |
| NC_037641.1 | 11687605 | SNV | 1 | A | G | Homozygous   |
| NC_037641.1 | 11708230 | SNV | 1 | T | C | Homozygous   |
| NC_037641.1 | 11708275 | SNV | 1 | G | C | Homozygous   |
| NC_037641.1 | 11712560 | SNV | 1 | T | C | Homozygous   |
| NC_037641.1 | 11712674 | SNV | 1 | C | T | Homozygous   |
| NC_037641.1 | 11715666 | SNV | 1 | T | C | Homozygous   |
| NC_037641.1 | 11715679 | SNV | 1 | A | G | Homozygous   |
| NC_037641.1 | 11715828 | SNV | 1 | A | G | Homozygous   |
| NC_037641.1 | 11715835 | SNV | 1 | C | A | Homozygous   |
| NC_037641.1 | 11716179 | SNV | 1 | T | C | Homozygous   |
| NC_037641.1 | 11716196 | SNV | 1 | C | T | Heterozygous |
| NC_037641.1 | 11716521 | SNV | 1 | T | C | Homozygous   |
| NC_037641.1 | 11728600 | SNV | 1 | T | C | Homozygous   |
| NC_037641.1 | 11738820 | SNV | 1 | C | T | Heterozygous |
| NC_037641.1 | 11738825 | SNV | 1 | C | T | Heterozygous |
| NC_037641.1 | 11739145 | SNV | 1 | C | T | Heterozygous |
| NC_037641.1 | 11768018 | SNV | 1 | G | A | Heterozygous |
| NC_037641.1 | 11768084 | SNV | 1 | A | G | Heterozygous |
| NC_037641.1 | 11768157 | SNV | 1 | A | G | Heterozygous |
| NC_037641.1 | 11768159 | SNV | 1 | T | G | Heterozygous |
| NC_037641.1 | 11768162 | SNV | 1 | A | G | Heterozygous |
| NC_037641.1 | 11768168 | SNV | 1 | C | T | Homozygous   |
| NC_037641.1 | 11768282 | SNV | 1 | C | T | Heterozygous |

|             |          |     |   |   |   |              |
|-------------|----------|-----|---|---|---|--------------|
| NC_037641.1 | 11768311 | SNV | 1 | C | T | Heterozygous |
| NC_037641.1 | 11768415 | SNV | 1 | T | C | Homozygous   |
| NC_037641.1 | 11819197 | SNV | 1 | G | A | Heterozygous |
| NC_037641.1 | 11822622 | SNV | 1 | A | G | Homozygous   |
| NC_037641.1 | 11822838 | SNV | 1 | T | G | Heterozygous |
| NC_037641.1 | 11822842 | SNV | 1 | T | G | Heterozygous |
| NC_037641.1 | 11822846 | SNV | 1 | T | G | Heterozygous |
| NC_037641.1 | 11822918 | SNV | 1 | C | T | Heterozygous |
| NC_037641.1 | 11823290 | SNV | 1 | G | A | Heterozygous |
| NC_037641.1 | 11823414 | SNV | 1 | A | T | Homozygous   |
| NC_037641.1 | 11823467 | SNV | 1 | A | T | Homozygous   |
| NC_037641.1 | 11823554 | SNV | 1 | G | A | Heterozygous |
| NC_037641.1 | 11823648 | SNV | 1 | G | A | Homozygous   |
| NC_037641.1 | 11823935 | SNV | 1 | T | C | Homozygous   |
| NC_037641.1 | 11823941 | SNV | 1 | T | C | Homozygous   |
| NC_037641.1 | 11826059 | SNV | 1 | T | G | Heterozygous |
| NC_037641.1 | 11826092 | SNV | 1 | G | A | Heterozygous |
| NC_037641.1 | 11826411 | SNV | 1 | G | A | Homozygous   |
| NC_037641.1 | 11826420 | SNV | 1 | C | G | Homozygous   |
| NC_037641.1 | 11826864 | SNV | 1 | A | T | Heterozygous |
| NC_037641.1 | 11826866 | SNV | 1 | A | G | Heterozygous |
| NC_037641.1 | 11826868 | SNV | 1 | A | G | Homozygous   |
| NC_037641.1 | 11826886 | SNV | 1 | A | G | Heterozygous |
| NC_037641.1 | 11826888 | SNV | 1 | A | G | Heterozygous |
| NC_037641.1 | 11828299 | SNV | 1 | T | A | Heterozygous |
| NC_037641.1 | 11829507 | SNV | 1 | G | C | Homozygous   |
| NC_037641.1 | 11830161 | SNV | 1 | C | G | Homozygous   |
| NC_037641.1 | 11830231 | SNV | 1 | G | C | Homozygous   |
| NC_037641.1 | 11830361 | SNV | 1 | C | A | Heterozygous |
| NC_037641.1 | 11830436 | SNV | 1 | C | T | Heterozygous |
| NC_037641.1 | 11830469 | SNV | 1 | T | C | Homozygous   |
| NC_037641.1 | 11830929 | SNV | 1 | G | A | Homozygous   |
| NC_037641.1 | 11830971 | SNV | 1 | T | C | Homozygous   |
| NC_037641.1 | 11831052 | SNV | 1 | C | G | Homozygous   |
| NC_037641.1 | 11831115 | SNV | 1 | G | A | Heterozygous |
| NC_037641.1 | 11831118 | SNV | 1 | G | A | Heterozygous |
| NC_037641.1 | 11831121 | SNV | 1 | C | T | Heterozygous |
| NC_037641.1 | 11831344 | SNV | 1 | G | T | Homozygous   |
| NC_037641.1 | 11831525 | SNV | 1 | A | G | Homozygous   |
| NC_037641.1 | 11831624 | SNV | 1 | G | C | Homozygous   |
| NC_037641.1 | 11831654 | SNV | 1 | G | A | Homozygous   |
| NC_037641.1 | 11832020 | SNV | 1 | T | C | Heterozygous |
| NC_037641.1 | 11832023 | SNV | 1 | T | C | Homozygous   |
| NC_037641.1 | 11832062 | SNV | 1 | A | G | Homozygous   |
| NC_037641.1 | 11832317 | SNV | 1 | T | A | Homozygous   |
| NC_037641.1 | 11832421 | SNV | 1 | G | A | Homozygous   |
| NC_037641.1 | 11835390 | SNV | 1 | C | T | Heterozygous |
| NC_037641.1 | 11835707 | SNV | 1 | C | G | Heterozygous |
| NC_037641.1 | 11835835 | SNV | 1 | C | G | Heterozygous |
| NC_037641.1 | 11836265 | SNV | 1 | C | T | Homozygous   |
| NC_037641.1 | 11836759 | SNV | 1 | G | C | Heterozygous |

|             |          |     |   |   |   |              |
|-------------|----------|-----|---|---|---|--------------|
| NC_037641.1 | 11837449 | SNV | 1 | T | C | Heterozygous |
| NC_037641.1 | 11839153 | SNV | 1 | A | T | Homozygous   |
| NC_037641.1 | 11839675 | SNV | 1 | A | G | Heterozygous |
| NC_037641.1 | 11839686 | SNV | 1 | T | C | Homozygous   |
| NC_037641.1 | 11840919 | SNV | 1 | A | G | Homozygous   |
| NC_037641.1 | 11842201 | SNV | 1 | A | G | Heterozygous |
| NC_037641.1 | 11842204 | SNV | 1 | A | T | Heterozygous |
| NC_037641.1 | 11842218 | SNV | 1 | T | C | Heterozygous |
| NC_037641.1 | 11842221 | SNV | 1 | T | C | Heterozygous |
| NC_037641.1 | 11842227 | SNV | 1 | T | C | Heterozygous |
| NC_037641.1 | 11843096 | SNV | 1 | A | G | Heterozygous |
| NC_037641.1 | 11843651 | SNV | 1 | A | G | Heterozygous |
| NC_037641.1 | 11843953 | SNV | 1 | A | G | Homozygous   |
| NC_037641.1 | 11844242 | SNV | 1 | A | G | Homozygous   |
| NC_037641.1 | 11844466 | SNV | 1 | G | A | Heterozygous |
| NC_037641.1 | 11844651 | SNV | 1 | A | G | Heterozygous |
| NC_037641.1 | 11845337 | SNV | 1 | T | C | Homozygous   |
| NC_037641.1 | 11845339 | SNV | 1 | A | G | Homozygous   |
| NC_037641.1 | 11845407 | SNV | 1 | C | T | Heterozygous |
| NC_037641.1 | 11846285 | SNV | 1 | A | G | Heterozygous |
| NC_037641.1 | 11846438 | SNV | 1 | A | G | Homozygous   |
| NC_037641.1 | 11846471 | SNV | 1 | A | G | Heterozygous |
| NC_037641.1 | 11848928 | SNV | 1 | T | G | Heterozygous |
| NC_037641.1 | 11848945 | SNV | 1 | G | A | Heterozygous |
| NC_037641.1 | 11848962 | SNV | 1 | C | T | Heterozygous |
| NC_037641.1 | 11861608 | SNV | 1 | C | T | Homozygous   |
| NC_037641.1 | 11861611 | SNV | 1 | C | T | Homozygous   |
| NC_037641.1 | 11861613 | SNV | 1 | T | G | Homozygous   |
| NC_037641.1 | 11861617 | SNV | 1 | A | G | Homozygous   |
| NC_037641.1 | 11861620 | SNV | 1 | C | T | Homozygous   |
| NC_037641.1 | 11861624 | SNV | 1 | C | T | Homozygous   |
| NC_037641.1 | 11861632 | SNV | 1 | A | G | Homozygous   |
| NC_037641.1 | 11861635 | SNV | 1 | C | T | Homozygous   |
| NC_037641.1 | 11861638 | SNV | 1 | G | C | Homozygous   |
| NC_037641.1 | 11861641 | SNV | 1 | G | A | Homozygous   |
| NC_037641.1 | 11861643 | SNV | 1 | T | C | Homozygous   |
| NC_037641.1 | 11861647 | SNV | 1 | A | G | Homozygous   |
| NC_037641.1 | 11861650 | SNV | 1 | A | T | Homozygous   |
| NC_037641.1 | 11861653 | SNV | 1 | G | A | Homozygous   |
| NC_037641.1 | 11861657 | SNV | 1 | A | T | Homozygous   |
| NC_037641.1 | 11861659 | SNV | 1 | C | T | Homozygous   |
| NC_037641.1 | 11865860 | SNV | 1 | C | G | Homozygous   |
| NC_037641.1 | 11865972 | SNV | 1 | A | G | Homozygous   |
| NC_037641.1 | 11867467 | SNV | 1 | T | G | Homozygous   |
| NC_037641.1 | 11867471 | SNV | 1 | T | G | Homozygous   |
| NC_037641.1 | 11867478 | SNV | 1 | A | T | Homozygous   |
| NC_037641.1 | 11870667 | SNV | 1 | T | G | Homozygous   |
| NC_037641.1 | 11877149 | SNV | 1 | A | G | Homozygous   |
| NC_037641.1 | 11877509 | SNV | 1 | C | G | Homozygous   |
| NC_037641.1 | 11877770 | SNV | 1 | G | A | Heterozygous |
| NC_037641.1 | 11879116 | SNV | 1 | T | G | Heterozygous |



|             |          |     |   |   |   |              |
|-------------|----------|-----|---|---|---|--------------|
| NC_037641.1 | 11879177 | SNV | 1 | A | G | Heterozygous |
| NC_037641.1 | 11879177 | SNV | 1 | A | T | Heterozygous |
| NC_037641.1 | 11880144 | SNV | 1 | A | G | Heterozygous |
| NC_037641.1 | 11880174 | SNV | 1 | T | C | Homozygous   |
| NC_037641.1 | 11880199 | SNV | 1 | T | C | Heterozygous |
| NC_037641.1 | 11880245 | SNV | 1 | C | T | Heterozygous |
| NC_037641.1 | 11880264 | SNV | 1 | T | C | Heterozygous |
| NC_037641.1 | 11880429 | SNV | 1 | T | C | Homozygous   |
| NC_037641.1 | 11880452 | SNV | 1 | A | C | Homozygous   |
| NC_037641.1 | 11880458 | SNV | 1 | A | G | Homozygous   |
| NC_037641.1 | 11880614 | SNV | 1 | A | G | Homozygous   |
| NC_037641.1 | 11880636 | SNV | 1 | A | T | Homozygous   |
| NC_037641.1 | 11880643 | SNV | 1 | C | A | Heterozygous |
| NC_037641.1 | 11883425 | SNV | 1 | C | T | Homozygous   |
| NC_037641.1 | 11883572 | SNV | 1 | T | C | Homozygous   |
| NC_037641.1 | 11883586 | SNV | 1 | C | T | Homozygous   |
| NC_037641.1 | 11883693 | SNV | 1 | A | G | Heterozygous |
| NC_037641.1 | 11884254 | SNV | 1 | A | G | Homozygous   |
| NC_037641.1 | 11884257 | SNV | 1 | A | T | Homozygous   |
| NC_037641.1 | 11884360 | SNV | 1 | G | A | Heterozygous |
| NC_037641.1 | 11884468 | SNV | 1 | C | T | Homozygous   |
| NC_037641.1 | 11885504 | SNV | 1 | C | T | Homozygous   |
| NC_037641.1 | 11887005 | SNV | 1 | T | C | Heterozygous |
| NC_037641.1 | 11887324 | SNV | 1 | A | G | Homozygous   |
| NC_037641.1 | 11887539 | SNV | 1 | A | G | Homozygous   |
| NC_037641.1 | 11887834 | SNV | 1 | A | G | Homozygous   |
| NC_037641.1 | 11887861 | SNV | 1 | A | G | Homozygous   |
| NC_037641.1 | 11887876 | SNV | 1 | C | G | Homozygous   |
| NC_037641.1 | 11887882 | SNV | 1 | T | C | Homozygous   |
| NC_037641.1 | 11887891 | SNV | 1 | T | C | Homozygous   |
| NC_037641.1 | 11888014 | SNV | 1 | T | C | Heterozygous |
| NC_037641.1 | 11888109 | SNV | 1 | C | T | Heterozygous |
| NC_037641.1 | 11888114 | SNV | 1 | A | G | Homozygous   |
| NC_037641.1 | 11888318 | SNV | 1 | C | T | Homozygous   |
| NC_037641.1 | 11888342 | SNV | 1 | C | T | Homozygous   |
| NC_037641.1 | 11888470 | SNV | 1 | A | G | Heterozygous |
| NC_037641.1 | 11888637 | SNV | 1 | A | G | Homozygous   |
| NC_037641.1 | 11888810 | SNV | 1 | T | C | Heterozygous |
| NC_037641.1 | 11888828 | SNV | 1 | T | C | Homozygous   |
| NC_037641.1 | 11889119 | SNV | 1 | T | G | Homozygous   |
| NC_037641.1 | 11889595 | SNV | 1 | T | G | Heterozygous |
| NC_037641.1 | 11889667 | SNV | 1 | C | T | Heterozygous |
| NC_037641.1 | 11889789 | SNV | 1 | T | C | Homozygous   |
| NC_037641.1 | 11889792 | SNV | 1 | T | G | Homozygous   |
| NC_037641.1 | 11889796 | SNV | 1 | C | T | Homozygous   |
| NC_037641.1 | 11889811 | SNV | 1 | C | G | Heterozygous |
| NC_037641.1 | 11889811 | SNV | 1 | C | T | Heterozygous |
| NC_037641.1 | 11889961 | SNV | 1 | G | A | Homozygous   |
| NC_037641.1 | 11890038 | SNV | 1 | T | G | Homozygous   |
| NC_037641.1 | 11890040 | SNV | 1 | C | T | Homozygous   |
| NC_037641.1 | 11890042 | SNV | 1 | G | A | Homozygous   |

|             |          |     |   |   |   |              |
|-------------|----------|-----|---|---|---|--------------|
| NC_037641.1 | 11891659 | SNV | 1 | T | A | Heterozygous |
| NC_037641.1 | 11892877 | SNV | 1 | G | A | Heterozygous |
| NC_037641.1 | 11893019 | SNV | 1 | C | T | Homozygous   |
| NC_037641.1 | 11893397 | SNV | 1 | C | T | Heterozygous |
| NC_037641.1 | 11903078 | SNV | 1 | G | A | Homozygous   |
| NC_037641.1 | 11904945 | SNV | 1 | G | C | Heterozygous |
| NC_037641.1 | 11905233 | SNV | 1 | C | T | Homozygous   |
| NC_037641.1 | 11905709 | SNV | 1 | G | A | Homozygous   |
| NC_037641.1 | 11905793 | SNV | 1 | A | G | Homozygous   |
| NC_037641.1 | 11906791 | SNV | 1 | C | T | Homozygous   |
| NC_037641.1 | 11906999 | SNV | 1 | T | A | Homozygous   |
| NC_037641.1 | 11907005 | SNV | 1 | C | A | Homozygous   |
| NC_037641.1 | 11909112 | SNV | 1 | G | T | Homozygous   |
| NC_037641.1 | 11909114 | SNV | 1 | A | T | Homozygous   |
| NC_037641.1 | 11909422 | SNV | 1 | A | T | Homozygous   |
| NC_037641.1 | 11909474 | SNV | 1 | A | G | Homozygous   |
| NC_037641.1 | 11909477 | SNV | 1 | C | A | Homozygous   |
| NC_037641.1 | 11909493 | SNV | 1 | C | T | Heterozygous |
| NC_037641.1 | 11913710 | SNV | 1 | C | T | Homozygous   |
| NC_037641.1 | 11913995 | SNV | 1 | A | T | Homozygous   |
| NC_037641.1 | 11914404 | SNV | 1 | A | T | Homozygous   |
| NC_037641.1 | 11916867 | SNV | 1 | G | T | Homozygous   |
| NC_037641.1 | 11917371 | SNV | 1 | A | C | Homozygous   |
| NC_037641.1 | 11920960 | SNV | 1 | C | T | Homozygous   |
| NC_037641.1 | 11922011 | SNV | 1 | A | G | Heterozygous |
| NC_037641.1 | 11928732 | SNV | 1 | A | G | Homozygous   |
| NC_037641.1 | 11928861 | SNV | 1 | C | T | Homozygous   |
| NC_037641.1 | 11929363 | SNV | 1 | T | C | Heterozygous |
| NC_037641.1 | 11929426 | SNV | 1 | G | A | Heterozygous |
| NC_037641.1 | 11929471 | SNV | 1 | T | C | Homozygous   |
| NC_037641.1 | 11929737 | SNV | 1 | G | A | Heterozygous |
| NC_037641.1 | 11929740 | SNV | 1 | C | T | Heterozygous |
| NC_037641.1 | 11929755 | SNV | 1 | C | T | Heterozygous |
| NC_037641.1 | 11929973 | SNV | 1 | C | T | Homozygous   |
| NC_037641.1 | 11930147 | SNV | 1 | T | C | Heterozygous |
| NC_037641.1 | 11930217 | SNV | 1 | A | C | Homozygous   |
| NC_037641.1 | 11930561 | SNV | 1 | A | T | Homozygous   |
| NC_037641.1 | 11930916 | SNV | 1 | T | G | Homozygous   |
| NC_037641.1 | 11930925 | SNV | 1 | A | C | Homozygous   |
| NC_037641.1 | 11930935 | SNV | 1 | A | C | Homozygous   |
| NC_037641.1 | 11931021 | SNV | 1 | C | T | Homozygous   |
| NC_037641.1 | 11931027 | SNV | 1 | C | T | Homozygous   |
| NC_037641.1 | 11931034 | SNV | 1 | A | G | Homozygous   |
| NC_037641.1 | 11931037 | SNV | 1 | A | C | Homozygous   |
| NC_037641.1 | 11931062 | SNV | 1 | T | C | Homozygous   |
| NC_037641.1 | 11931075 | SNV | 1 | C | T | Homozygous   |
| NC_037641.1 | 11931084 | SNV | 1 | C | T | Homozygous   |
| NC_037641.1 | 11931088 | SNV | 1 | G | A | Homozygous   |
| NC_037641.1 | 11931090 | SNV | 1 | C | T | Homozygous   |
| NC_037641.1 | 11931094 | SNV | 1 | G | A | Homozygous   |
| NC_037641.1 | 11932020 | SNV | 1 | T | C | Homozygous   |

|             |          |     |   |   |   |              |
|-------------|----------|-----|---|---|---|--------------|
| NC_037641.1 | 11933234 | SNV | 1 | A | G | Heterozygous |
| NC_037641.1 | 11933238 | SNV | 1 | A | C | Heterozygous |
| NC_037641.1 | 11933265 | SNV | 1 | T | C | Homozygous   |
| NC_037641.1 | 11933269 | SNV | 1 | C | T | Heterozygous |
| NC_037641.1 | 11933272 | SNV | 1 | A | G | Heterozygous |
| NC_037641.1 | 11933275 | SNV | 1 | T | C | Heterozygous |
| NC_037641.1 | 11933280 | SNV | 1 | G | A | Heterozygous |
| NC_037641.1 | 11935765 | SNV | 1 | A | G | Homozygous   |
| NC_037641.1 | 11935784 | SNV | 1 | A | G | Heterozygous |
| NC_037641.1 | 11935791 | SNV | 1 | T | A | Heterozygous |
| NC_037641.1 | 11935990 | SNV | 1 | G | A | Homozygous   |
| NC_037641.1 | 11936337 | SNV | 1 | G | A | Heterozygous |
| NC_037641.1 | 11936414 | SNV | 1 | C | T | Homozygous   |
| NC_037641.1 | 11936981 | SNV | 1 | A | G | Homozygous   |
| NC_037641.1 | 11937096 | SNV | 1 | G | A | Homozygous   |
| NC_037641.1 | 11937797 | SNV | 1 | A | G | Homozygous   |
| NC_037641.1 | 11938584 | SNV | 1 | T | A | Homozygous   |
| NC_037641.1 | 11938587 | SNV | 1 | T | C | Homozygous   |
| NC_037641.1 | 11938600 | SNV | 1 | A | C | Homozygous   |
| NC_037641.1 | 11938611 | SNV | 1 | A | C | Homozygous   |
| NC_037641.1 | 11938992 | SNV | 1 | T | C | Homozygous   |
| NC_037641.1 | 11939041 | SNV | 1 | C | T | Homozygous   |
| NC_037641.1 | 11939450 | SNV | 1 | A | G | Heterozygous |
| NC_037641.1 | 11939630 | SNV | 1 | T | C | Homozygous   |
| NC_037641.1 | 11939762 | SNV | 1 | G | C | Heterozygous |
| NC_037641.1 | 11939764 | SNV | 1 | A | G | Heterozygous |
| NC_037641.1 | 11940183 | SNV | 1 | T | G | Homozygous   |
| NC_037641.1 | 11940189 | SNV | 1 | A | T | Homozygous   |
| NC_037641.1 | 11940231 | SNV | 1 | A | G | Heterozygous |
| NC_037641.1 | 11940237 | SNV | 1 | T | G | Heterozygous |
| NC_037641.1 | 11940296 | SNV | 1 | A | G | Homozygous   |
| NC_037641.1 | 11940310 | SNV | 1 | G | A | Heterozygous |
| NC_037641.1 | 11940626 | SNV | 1 | T | C | Homozygous   |
| NC_037641.1 | 11940885 | SNV | 1 | C | T | Heterozygous |
| NC_037641.1 | 11940973 | SNV | 1 | G | A | Homozygous   |
| NC_037641.1 | 11941448 | SNV | 1 | T | C | Heterozygous |
| NC_037641.1 | 11941559 | SNV | 1 | G | A | Heterozygous |
| NC_037641.1 | 11941793 | SNV | 1 | C | T | Heterozygous |
| NC_037641.1 | 11941980 | SNV | 1 | G | A | Heterozygous |
| NC_037641.1 | 11942105 | SNV | 1 | A | G | Homozygous   |
| NC_037641.1 | 11942506 | SNV | 1 | T | C | Homozygous   |
| NC_037641.1 | 11942510 | SNV | 1 | A | C | Heterozygous |
| NC_037641.1 | 11942524 | SNV | 1 | T | C | Heterozygous |
| NC_037641.1 | 11942592 | SNV | 1 | C | G | Heterozygous |
| NC_037641.1 | 11942606 | SNV | 1 | C | T | Homozygous   |
| NC_037641.1 | 11942705 | SNV | 1 | T | C | Heterozygous |
| NC_037641.1 | 11942733 | SNV | 1 | C | T | Heterozygous |
| NC_037641.1 | 11942902 | SNV | 1 | T | C | Heterozygous |
| NC_037641.1 | 11943007 | SNV | 1 | G | A | Heterozygous |
| NC_037641.1 | 11944097 | SNV | 1 | G | T | Heterozygous |
| NC_037641.1 | 11944099 | SNV | 1 | C | T | Heterozygous |

|             |          |     |   |   |   |              |
|-------------|----------|-----|---|---|---|--------------|
| NC_037641.1 | 11944115 | SNV | 1 | G | A | Homozygous   |
| NC_037641.1 | 11944117 | SNV | 1 | G | T | Heterozygous |
| NC_037641.1 | 11944347 | SNV | 1 | A | G | Homozygous   |
| NC_037641.1 | 11946363 | SNV | 1 | A | T | Homozygous   |
| NC_037641.1 | 11946374 | SNV | 1 | A | T | Homozygous   |
| NC_037641.1 | 11946380 | SNV | 1 | A | T | Homozygous   |
| NC_037641.1 | 11949892 | SNV | 1 | C | T | Homozygous   |
| NC_037641.1 | 11955136 | SNV | 1 | T | A | Homozygous   |
| NC_037641.1 | 11956432 | SNV | 1 | G | A | Heterozygous |
| NC_037641.1 | 11957439 | SNV | 1 | G | A | Heterozygous |
| NC_037641.1 | 11959044 | SNV | 1 | G | A | Heterozygous |
| NC_037641.1 | 11959380 | SNV | 1 | T | A | Heterozygous |
| NC_037641.1 | 11959700 | SNV | 1 | G | A | Heterozygous |
| NC_037641.1 | 11960079 | SNV | 1 | G | T | Heterozygous |
| NC_037641.1 | 11960648 | SNV | 1 | G | A | Heterozygous |
| NC_037641.1 | 11960880 | SNV | 1 | T | C | Homozygous   |
| NC_037641.1 | 11961618 | SNV | 1 | G | A | Heterozygous |
| NC_037641.1 | 11962573 | SNV | 1 | A | G | Homozygous   |
| NC_037641.1 | 11964732 | SNV | 1 | A | T | Homozygous   |
| NC_037641.1 | 11964734 | SNV | 1 | A | C | Homozygous   |
| NC_037641.1 | 11968547 | SNV | 1 | G | A | Heterozygous |
| NC_037641.1 | 11968964 | SNV | 1 | T | C | Homozygous   |
| NC_037641.1 | 11969724 | SNV | 1 | G | C | Homozygous   |
| NC_037641.1 | 11969923 | SNV | 1 | A | G | Heterozygous |
| NC_037641.1 | 11969929 | SNV | 1 | G | A | Heterozygous |
| NC_037641.1 | 11970333 | SNV | 1 | G | A | Homozygous   |
| NC_037641.1 | 11970348 | SNV | 1 | C | T | Heterozygous |
| NC_037641.1 | 11970515 | SNV | 1 | A | G | Homozygous   |
| NC_037641.1 | 11970590 | SNV | 1 | G | A | Heterozygous |
| NC_037641.1 | 11970785 | SNV | 1 | T | C | Homozygous   |
| NC_037641.1 | 11971183 | SNV | 1 | T | C | Heterozygous |
| NC_037641.1 | 11971198 | SNV | 1 | C | T | Homozygous   |
| NC_037641.1 | 11971427 | SNV | 1 | A | G | Heterozygous |
| NC_037641.1 | 11971433 | SNV | 1 | A | G | Heterozygous |
| NC_037641.1 | 11972890 | SNV | 1 | T | A | Homozygous   |
| NC_037641.1 | 11972895 | SNV | 1 | G | C | Homozygous   |
| NC_037641.1 | 11972899 | SNV | 1 | G | T | Homozygous   |
| NC_037641.1 | 11972901 | SNV | 1 | A | T | Homozygous   |
| NC_037641.1 | 11972909 | SNV | 1 | A | C | Homozygous   |
| NC_037641.1 | 11975566 | SNV | 1 | G | A | Heterozygous |
| NC_037641.1 | 11976638 | SNV | 1 | T | C | Homozygous   |
| NC_037641.1 | 11976988 | SNV | 1 | C | A | Homozygous   |
| NC_037641.1 | 11977602 | SNV | 1 | A | G | Homozygous   |
| NC_037641.1 | 11977611 | SNV | 1 | G | A | Homozygous   |
| NC_037641.1 | 11977824 | SNV | 1 | A | G | Homozygous   |
| NC_037641.1 | 11978109 | SNV | 1 | G | A | Heterozygous |
| NC_037641.1 | 11978116 | SNV | 1 | T | C | Heterozygous |
| NC_037641.1 | 11979884 | SNV | 1 | A | G | Heterozygous |
| NC_037641.1 | 11980146 | SNV | 1 | G | C | Homozygous   |
| NC_037641.1 | 11982105 | SNV | 1 | T | C | Heterozygous |
| NC_037641.1 | 11982113 | SNV | 1 | G | A | Heterozygous |

|             |          |     |   |   |   |              |
|-------------|----------|-----|---|---|---|--------------|
| NC_037641.1 | 11982875 | SNV | 1 | G | A | Homozygous   |
| NC_037641.1 | 11983697 | SNV | 1 | C | G | Homozygous   |
| NC_037641.1 | 11983809 | SNV | 1 | T | C | Heterozygous |
| NC_037641.1 | 11985205 | SNV | 1 | T | C | Heterozygous |
| NC_037641.1 | 11985207 | SNV | 1 | T | C | Heterozygous |
| NC_037641.1 | 11987071 | SNV | 1 | A | G | Homozygous   |
| NC_037641.1 | 11987265 | SNV | 1 | A | T | Homozygous   |
| NC_037641.1 | 11988077 | SNV | 1 | T | G | Homozygous   |
| NC_037641.1 | 11988118 | SNV | 1 | A | G | Homozygous   |
| NC_037641.1 | 11988777 | SNV | 1 | T | C | Homozygous   |
| NC_037641.1 | 11988827 | SNV | 1 | G | A | Heterozygous |
| NC_037641.1 | 11992293 | SNV | 1 | T | C | Heterozygous |
| NC_037641.1 | 11992513 | SNV | 1 | T | C | Homozygous   |
| NC_037641.1 | 11992700 | SNV | 1 | G | T | Heterozygous |
| NC_037641.1 | 11992704 | SNV | 1 | C | T | Heterozygous |
| NC_037641.1 | 11994495 | SNV | 1 | T | C | Heterozygous |
| NC_037641.1 | 11994895 | SNV | 1 | T | A | Homozygous   |
| NC_037641.1 | 11994992 | SNV | 1 | T | A | Homozygous   |
| NC_037641.1 | 11994994 | SNV | 1 | G | A | Homozygous   |
| NC_037641.1 | 11995806 | SNV | 1 | A | G | Homozygous   |
| NC_037641.1 | 11995883 | SNV | 1 | A | C | Homozygous   |
| NC_037641.1 | 11995885 | SNV | 1 | T | A | Homozygous   |
| NC_037641.1 | 11997043 | SNV | 1 | C | T | Heterozygous |
| NC_037641.1 | 11997093 | SNV | 1 | G | A | Heterozygous |
| NC_037641.1 | 11997105 | SNV | 1 | A | G | Heterozygous |
| NC_037641.1 | 11997138 | SNV | 1 | A | G | Heterozygous |
| NC_037641.1 | 11997232 | SNV | 1 | G | A | Homozygous   |
| NC_037641.1 | 11998148 | SNV | 1 | T | C | Heterozygous |
| NC_037641.1 | 11998179 | SNV | 1 | T | G | Heterozygous |
| NC_037641.1 | 11998189 | SNV | 1 | A | T | Heterozygous |
| NC_037641.1 | 11998238 | SNV | 1 | A | T | Heterozygous |
| NC_037641.1 | 11998248 | SNV | 1 | G | A | Heterozygous |
| NC_037641.1 | 11998329 | SNV | 1 | T | A | Homozygous   |
| NC_037641.1 | 11998391 | SNV | 1 | T | C | Homozygous   |
| NC_037641.1 | 11998692 | SNV | 1 | A | G | Heterozygous |
| NC_037641.1 | 12013474 | SNV | 1 | T | C | Homozygous   |
| NC_037641.1 | 12015645 | SNV | 1 | A | G | Homozygous   |
| NC_037641.1 | 12015690 | SNV | 1 | A | G | Homozygous   |
| NC_037641.1 | 12015825 | SNV | 1 | C | T | Heterozygous |
| NC_037641.1 | 12015829 | SNV | 1 | G | A | Homozygous   |
| NC_037641.1 | 12018821 | SNV | 1 | T | A | Heterozygous |
| NC_037641.1 | 12018903 | SNV | 1 | T | C | Homozygous   |
| NC_037641.1 | 12019092 | SNV | 1 | A | G | Homozygous   |
| NC_037641.1 | 12019229 | SNV | 1 | C | G | Heterozygous |
| NC_037641.1 | 12019379 | SNV | 1 | T | C | Homozygous   |
| NC_037641.1 | 12019421 | SNV | 1 | C | T | Heterozygous |
| NC_037641.1 | 12027088 | SNV | 1 | T | C | Heterozygous |
| NC_037641.1 | 12027327 | SNV | 1 | T | C | Homozygous   |
| NC_037641.1 | 12027774 | SNV | 1 | A | G | Homozygous   |
| NC_037641.1 | 12028077 | SNV | 1 | A | G | Homozygous   |
| NC_037641.1 | 12028230 | SNV | 1 | C | T | Heterozygous |

|             |          |     |   |   |   |              |
|-------------|----------|-----|---|---|---|--------------|
| NC_037641.1 | 12028253 | SNV | 1 | G | A | Heterozygous |
| NC_037641.1 | 12028253 | SNV | 1 | G | C | Heterozygous |
| NC_037641.1 | 12028255 | SNV | 1 | G | A | Heterozygous |
| NC_037641.1 | 12028268 | SNV | 1 | C | G | Heterozygous |
| NC_037641.1 | 12028279 | SNV | 1 | T | C | Homozygous   |
| NC_037641.1 | 12029064 | SNV | 1 | T | C | Homozygous   |
| NC_037641.1 | 12029100 | SNV | 1 | T | C | Heterozygous |
| NC_037641.1 | 12029325 | SNV | 1 | T | C | Homozygous   |
| NC_037641.1 | 12029370 | SNV | 1 | G | A | Heterozygous |
| NC_037641.1 | 12029624 | SNV | 1 | T | C | Homozygous   |
| NC_037641.1 | 12030971 | SNV | 1 | A | G | Homozygous   |
| NC_037641.1 | 12036439 | SNV | 1 | G | T | Homozygous   |
| NC_037641.1 | 12036441 | SNV | 1 | G | C | Homozygous   |
| NC_037641.1 | 12036452 | SNV | 1 | A | T | Homozygous   |
| NC_037641.1 | 12036454 | SNV | 1 | A | C | Homozygous   |
| NC_037641.1 | 12036464 | SNV | 1 | A | T | Homozygous   |
| NC_037641.1 | 12039000 | SNV | 1 | C | T | Heterozygous |
| NC_037641.1 | 12039201 | SNV | 1 | C | T | Heterozygous |
| NC_037641.1 | 12039328 | SNV | 1 | A | G | Homozygous   |
| NC_037641.1 | 12039358 | SNV | 1 | G | A | Heterozygous |
| NC_037641.1 | 12041443 | SNV | 1 | C | A | Heterozygous |
| NC_037641.1 | 12041445 | SNV | 1 | G | A | Heterozygous |
| NC_037641.1 | 12041452 | SNV | 1 | G | C | Homozygous   |
| NC_037641.1 | 12041454 | SNV | 1 | G | T | Homozygous   |
| NC_037641.1 | 12041458 | SNV | 1 | A | G | Homozygous   |
| NC_037641.1 | 12041460 | SNV | 1 | C | T | Homozygous   |
| NC_037641.1 | 12041469 | SNV | 1 | A | T | Homozygous   |
| NC_037641.1 | 12041490 | SNV | 1 | T | A | Homozygous   |
| NC_037641.1 | 12041492 | SNV | 1 | C | G | Homozygous   |
| NC_037641.1 | 12041833 | SNV | 1 | T | C | Homozygous   |
| NC_037641.1 | 12041854 | SNV | 1 | C | G | Heterozygous |
| NC_037641.1 | 12041864 | SNV | 1 | G | A | Heterozygous |
| NC_037641.1 | 12041869 | SNV | 1 | G | A | Homozygous   |
| NC_037641.1 | 12041872 | SNV | 1 | C | T | Homozygous   |
| NC_037641.1 | 12041881 | SNV | 1 | G | C | Heterozygous |
| NC_037641.1 | 12041890 | SNV | 1 | C | G | Heterozygous |
| NC_037641.1 | 12041908 | SNV | 1 | G | A | Homozygous   |
| NC_037641.1 | 12041911 | SNV | 1 | G | T | Homozygous   |
| NC_037641.1 | 12041929 | SNV | 1 | A | G | Heterozygous |
| NC_037641.1 | 12041941 | SNV | 1 | C | G | Heterozygous |
| NC_037641.1 | 12041944 | SNV | 1 | C | G | Heterozygous |
| NC_037641.1 | 12041950 | SNV | 1 | T | C | Heterozygous |
| NC_037641.1 | 12041959 | SNV | 1 | A | C | Heterozygous |
| NC_037641.1 | 12041986 | SNV | 1 | C | G | Heterozygous |
| NC_037641.1 | 12041991 | SNV | 1 | T | A | Heterozygous |
| NC_037641.1 | 12041995 | SNV | 1 | C | G | Heterozygous |
| NC_037641.1 | 12041998 | SNV | 1 | T | G | Heterozygous |
| NC_037641.1 | 12042001 | SNV | 1 | A | C | Heterozygous |
| NC_037641.1 | 12042016 | SNV | 1 | T | C | Heterozygous |
| NC_037641.1 | 12042028 | SNV | 1 | C | G | Heterozygous |
| NC_037641.1 | 12042031 | SNV | 1 | A | G | Heterozygous |

|             |          |     |   |   |   |              |
|-------------|----------|-----|---|---|---|--------------|
| NC_037641.1 | 12042037 | SNV | 1 | G | C | Heterozygous |
| NC_037641.1 | 12042040 | SNV | 1 | T | C | Heterozygous |
| NC_037641.1 | 12042043 | SNV | 1 | G | C | Heterozygous |
| NC_037641.1 | 12042049 | SNV | 1 | T | C | Heterozygous |
| NC_037641.1 | 12042055 | SNV | 1 | G | T | Heterozygous |
| NC_037641.1 | 12042079 | SNV | 1 | G | C | Heterozygous |
| NC_037641.1 | 12042094 | SNV | 1 | G | C | Heterozygous |
| NC_037641.1 | 12042097 | SNV | 1 | G | C | Heterozygous |
| NC_037641.1 | 12042100 | SNV | 1 | G | C | Heterozygous |
| NC_037641.1 | 12042106 | SNV | 1 | G | C | Heterozygous |
| NC_037641.1 | 12042112 | SNV | 1 | G | T | Heterozygous |
| NC_037641.1 | 12042124 | SNV | 1 | A | G | Heterozygous |
| NC_037641.1 | 12042126 | SNV | 1 | G | A | Heterozygous |
| NC_037641.1 | 12042421 | SNV | 1 | T | C | Heterozygous |
| NC_037641.1 | 12042424 | SNV | 1 | G | C | Heterozygous |
| NC_037641.1 | 12042427 | SNV | 1 | T | C | Heterozygous |
| NC_037641.1 | 12042430 | SNV | 1 | T | C | Heterozygous |
| NC_037641.1 | 12042433 | SNV | 1 | C | G | Heterozygous |
| NC_037641.1 | 12042436 | SNV | 1 | C | G | Heterozygous |
| NC_037641.1 | 12042442 | SNV | 1 | T | C | Heterozygous |
| NC_037641.1 | 12042445 | SNV | 1 | G | C | Heterozygous |
| NC_037641.1 | 12042469 | SNV | 1 | C | T | Heterozygous |
| NC_037641.1 | 12042472 | SNV | 1 | T | C | Heterozygous |
| NC_037641.1 | 12042491 | SNV | 1 | G | T | Heterozygous |
| NC_037641.1 | 12042493 | SNV | 1 | C | T | Heterozygous |
| NC_037641.1 | 12042502 | SNV | 1 | A | G | Heterozygous |
| NC_037641.1 | 12042505 | SNV | 1 | G | A | Homozygous   |
| NC_037641.1 | 12042508 | SNV | 1 | A | G | Heterozygous |
| NC_037641.1 | 12042532 | SNV | 1 | C | T | Homozygous   |
| NC_037641.1 | 12042556 | SNV | 1 | C | A | Homozygous   |
| NC_037641.1 | 12042559 | SNV | 1 | C | T | Homozygous   |
| NC_037641.1 | 12042568 | SNV | 1 | A | C | Homozygous   |
| NC_037641.1 | 12042574 | SNV | 1 | G | T | Homozygous   |
| NC_037641.1 | 12042586 | SNV | 1 | A | G | Homozygous   |
| NC_037641.1 | 12042593 | SNV | 1 | A | C | Homozygous   |
| NC_037641.1 | 12042595 | SNV | 1 | A | C | Homozygous   |
| NC_037641.1 | 12042598 | SNV | 1 | G | A | Homozygous   |
| NC_037641.1 | 12042601 | SNV | 1 | A | G | Homozygous   |
| NC_037641.1 | 12042604 | SNV | 1 | G | A | Homozygous   |
| NC_037641.1 | 12042607 | SNV | 1 | C | G | Homozygous   |
| NC_037641.1 | 12042610 | SNV | 1 | G | A | Homozygous   |
| NC_037641.1 | 12042616 | SNV | 1 | A | G | Homozygous   |
| NC_037641.1 | 12042619 | SNV | 1 | C | A | Homozygous   |
| NC_037641.1 | 12042622 | SNV | 1 | A | G | Homozygous   |
| NC_037641.1 | 12042898 | SNV | 1 | A | G | Heterozygous |
| NC_037641.1 | 12042928 | SNV | 1 | G | C | Homozygous   |
| NC_037641.1 | 12042932 | SNV | 1 | C | T | Homozygous   |
| NC_037641.1 | 12042934 | SNV | 1 | C | G | Homozygous   |
| NC_037641.1 | 12042937 | SNV | 1 | T | C | Heterozygous |
| NC_037641.1 | 12042946 | SNV | 1 | G | T | Homozygous   |
| NC_037641.1 | 12042949 | SNV | 1 | C | G | Homozygous   |

|             |          |     |   |   |   |              |
|-------------|----------|-----|---|---|---|--------------|
| NC_037641.1 | 12042982 | SNV | 1 | C | A | Heterozygous |
| NC_037641.1 | 12042991 | SNV | 1 | T | C | Heterozygous |
| NC_037641.1 | 12042997 | SNV | 1 | C | T | Heterozygous |
| NC_037641.1 | 12043001 | SNV | 1 | C | T | Heterozygous |
| NC_037641.1 | 12043009 | SNV | 1 | C | A | Heterozygous |
| NC_037641.1 | 12043012 | SNV | 1 | A | G | Heterozygous |
| NC_037641.1 | 12043027 | SNV | 1 | A | G | Heterozygous |
| NC_037641.1 | 12043030 | SNV | 1 | A | T | Heterozygous |
| NC_037641.1 | 12043093 | SNV | 1 | T | C | Homozygous   |
| NC_037641.1 | 12043886 | SNV | 1 | G | A | Heterozygous |
| NC_037641.1 | 12045948 | SNV | 1 | T | A | Homozygous   |
| NC_037641.1 | 12045974 | SNV | 1 | A | T | Heterozygous |
| NC_037641.1 | 12046204 | SNV | 1 | G | A | Homozygous   |
| NC_037641.1 | 12046207 | SNV | 1 | C | A | Homozygous   |
| NC_037641.1 | 12046210 | SNV | 1 | A | G | Homozygous   |
| NC_037641.1 | 12046213 | SNV | 1 | C | A | Homozygous   |
| NC_037641.1 | 12046219 | SNV | 1 | A | G | Homozygous   |
| NC_037641.1 | 12046228 | SNV | 1 | A | G | Heterozygous |
| NC_037641.1 | 12046234 | SNV | 1 | G | T | Homozygous   |
| NC_037641.1 | 12046237 | SNV | 1 | G | C | Homozygous   |
| NC_037641.1 | 12046240 | SNV | 1 | C | A | Heterozygous |
| NC_037641.1 | 12046243 | SNV | 1 | G | A | Heterozygous |
| NC_037641.1 | 12046267 | SNV | 1 | G | A | Homozygous   |
| NC_037641.1 | 12046288 | SNV | 1 | A | G | Homozygous   |
| NC_037641.1 | 12046291 | SNV | 1 | C | T | Heterozygous |
| NC_037641.1 | 12046294 | SNV | 1 | T | C | Homozygous   |
| NC_037641.1 | 12046309 | SNV | 1 | G | C | Homozygous   |
| NC_037641.1 | 12046311 | SNV | 1 | G | A | Homozygous   |
| NC_037641.1 | 12046315 | SNV | 1 | C | A | Homozygous   |
| NC_037641.1 | 12046345 | SNV | 1 | T | C | Homozygous   |
| NC_037641.1 | 12046372 | SNV | 1 | G | A | Heterozygous |
| NC_037641.1 | 12046377 | SNV | 1 | C | A | Heterozygous |
| NC_037641.1 | 12046383 | SNV | 1 | T | A | Heterozygous |
| NC_037641.1 | 12046387 | SNV | 1 | C | T | Heterozygous |
| NC_037641.1 | 12046390 | SNV | 1 | T | A | Heterozygous |
| NC_037641.1 | 12046396 | SNV | 1 | C | T | Heterozygous |
| NC_037641.1 | 12046414 | SNV | 1 | A | G | Heterozygous |
| NC_037641.1 | 12046426 | SNV | 1 | G | A | Heterozygous |
| NC_037641.1 | 12046432 | SNV | 1 | G | A | Heterozygous |
| NC_037641.1 | 12046443 | SNV | 1 | T | A | Homozygous   |
| NC_037641.1 | 12046450 | SNV | 1 | G | A | Heterozygous |
| NC_037641.1 | 12046453 | SNV | 1 | A | G | Homozygous   |
| NC_037641.1 | 12046455 | SNV | 1 | T | G | Heterozygous |
| NC_037641.1 | 12046459 | SNV | 1 | G | A | Homozygous   |
| NC_037641.1 | 12046465 | SNV | 1 | C | T | Heterozygous |
| NC_037641.1 | 12046468 | SNV | 1 | G | A | Homozygous   |
| NC_037641.1 | 12046471 | SNV | 1 | G | A | Homozygous   |
| NC_037641.1 | 12046477 | SNV | 1 | C | T | Homozygous   |
| NC_037641.1 | 12046499 | SNV | 1 | C | T | Heterozygous |
| NC_037641.1 | 12046501 | SNV | 1 | C | G | Homozygous   |
| NC_037641.1 | 12046503 | SNV | 1 | A | T | Homozygous   |



|             |          |     |   |   |   |              |
|-------------|----------|-----|---|---|---|--------------|
| NC_037641.1 | 12046507 | SNV | 1 | C | T | Heterozygous |
| NC_037641.1 | 12046510 | SNV | 1 | C | T | Heterozygous |
| NC_037641.1 | 12046516 | SNV | 1 | C | G | Heterozygous |
| NC_037641.1 | 12046535 | SNV | 1 | C | T | Heterozygous |
| NC_037641.1 | 12046540 | SNV | 1 | C | A | Heterozygous |
| NC_037641.1 | 12046552 | SNV | 1 | C | T | Heterozygous |
| NC_037641.1 | 12046558 | SNV | 1 | G | C | Heterozygous |
| NC_037641.1 | 12046561 | SNV | 1 | C | G | Heterozygous |
| NC_037641.1 | 12046570 | SNV | 1 | T | C | Heterozygous |
| NC_037641.1 | 12046573 | SNV | 1 | G | A | Heterozygous |
| NC_037641.1 | 12046579 | SNV | 1 | G | C | Heterozygous |
| NC_037641.1 | 12046579 | SNV | 1 | G | T | Heterozygous |
| NC_037641.1 | 12046711 | SNV | 1 | C | A | Homozygous   |
| NC_037641.1 | 12046717 | SNV | 1 | C | A | Heterozygous |
| NC_037641.1 | 12046717 | SNV | 1 | C | G | Heterozygous |
| NC_037641.1 | 12046720 | SNV | 1 | G | A | Heterozygous |
| NC_037641.1 | 12046738 | SNV | 1 | C | T | Homozygous   |
| NC_037641.1 | 12046741 | SNV | 1 | T | C | Homozygous   |
| NC_037641.1 | 12046750 | SNV | 1 | T | A | Homozygous   |
| NC_037641.1 | 12046752 | SNV | 1 | C | A | Homozygous   |
| NC_037641.1 | 12046756 | SNV | 1 | C | G | Homozygous   |
| NC_037641.1 | 12046762 | SNV | 1 | G | A | Homozygous   |
| NC_037641.1 | 12046765 | SNV | 1 | G | A | Homozygous   |
| NC_037641.1 | 12046816 | SNV | 1 | A | G | Homozygous   |
| NC_037641.1 | 12046825 | SNV | 1 | G | C | Homozygous   |
| NC_037641.1 | 12046838 | SNV | 1 | T | G | Homozygous   |
| NC_037641.1 | 12046840 | SNV | 1 | C | G | Homozygous   |
| NC_037641.1 | 12046849 | SNV | 1 | C | A | Homozygous   |
| NC_037641.1 | 12046851 | SNV | 1 | A | G | Homozygous   |
| NC_037641.1 | 12046870 | SNV | 1 | G | A | Homozygous   |
| NC_037641.1 | 12046876 | SNV | 1 | G | A | Homozygous   |
| NC_037641.1 | 12046879 | SNV | 1 | C | T | Heterozygous |
| NC_037641.1 | 12046885 | SNV | 1 | G | A | Heterozygous |
| NC_037641.1 | 12046915 | SNV | 1 | G | C | Homozygous   |
| NC_037641.1 | 12046918 | SNV | 1 | C | G | Homozygous   |
| NC_037641.1 | 12046920 | SNV | 1 | A | G | Homozygous   |
| NC_037641.1 | 12046954 | SNV | 1 | G | A | Heterozygous |
| NC_037641.1 | 12046960 | SNV | 1 | G | A | Heterozygous |
| NC_037641.1 | 12046963 | SNV | 1 | G | A | Heterozygous |
| NC_037641.1 | 12046966 | SNV | 1 | G | A | Heterozygous |
| NC_037641.1 | 12046969 | SNV | 1 | C | G | Heterozygous |
| NC_037641.1 | 12046972 | SNV | 1 | T | C | Heterozygous |
| NC_037641.1 | 12046981 | SNV | 1 | C | A | Homozygous   |
| NC_037641.1 | 12046984 | SNV | 1 | C | A | Homozygous   |
| NC_037641.1 | 12046990 | SNV | 1 | C | G | Homozygous   |
| NC_037641.1 | 12046994 | SNV | 1 | T | A | Homozygous   |
| NC_037641.1 | 12046996 | SNV | 1 | C | G | Homozygous   |
| NC_037641.1 | 12047005 | SNV | 1 | T | C | Homozygous   |
| NC_037641.1 | 12047008 | SNV | 1 | A | T | Homozygous   |
| NC_037641.1 | 12047010 | SNV | 1 | G | T | Homozygous   |
| NC_037641.1 | 12047026 | SNV | 1 | C | T | Homozygous   |

|             |          |     |   |   |   |              |
|-------------|----------|-----|---|---|---|--------------|
| NC_037641.1 | 12047028 | SNV | 1 | G | T | Homozygous   |
| NC_037641.1 | 12047038 | SNV | 1 | G | A | Homozygous   |
| NC_037641.1 | 12047041 | SNV | 1 | G | C | Homozygous   |
| NC_037641.1 | 12047046 | SNV | 1 | A | G | Homozygous   |
| NC_037641.1 | 12047050 | SNV | 1 | G | C | Homozygous   |
| NC_037641.1 | 12047062 | SNV | 1 | A | G | Heterozygous |
| NC_037641.1 | 12047068 | SNV | 1 | G | T | Homozygous   |
| NC_037641.1 | 12047071 | SNV | 1 | G | T | Homozygous   |
| NC_037641.1 | 12047074 | SNV | 1 | C | A | Heterozygous |
| NC_037641.1 | 12047074 | SNV | 1 | C | G | Heterozygous |
| NC_037641.1 | 12047077 | SNV | 1 | C | G | Homozygous   |
| NC_037641.1 | 12047079 | SNV | 1 | A | G | Heterozygous |
| NC_037641.1 | 12047091 | SNV | 1 | G | C | Heterozygous |
| NC_037641.1 | 12047095 | SNV | 1 | G | A | Heterozygous |
| NC_037641.1 | 12047098 | SNV | 1 | G | C | Homozygous   |
| NC_037641.1 | 12047106 | SNV | 1 | G | A | Heterozygous |
| NC_037641.1 | 12047149 | SNV | 1 | C | G | Heterozygous |
| NC_037641.1 | 12047155 | SNV | 1 | C | G | Heterozygous |
| NC_037641.1 | 12047161 | SNV | 1 | T | C | Heterozygous |
| NC_037641.1 | 12047164 | SNV | 1 | A | G | Heterozygous |
| NC_037641.1 | 12047179 | SNV | 1 | A | G | Heterozygous |
| NC_037641.1 | 12047188 | SNV | 1 | C | G | Homozygous   |
| NC_037641.1 | 12047194 | SNV | 1 | A | G | Heterozygous |
| NC_037641.1 | 12047206 | SNV | 1 | C | G | Homozygous   |
| NC_037641.1 | 12047209 | SNV | 1 | C | G | Homozygous   |
| NC_037641.1 | 12047212 | SNV | 1 | T | C | Homozygous   |
| NC_037641.1 | 12047215 | SNV | 1 | G | C | Heterozygous |
| NC_037641.1 | 12047221 | SNV | 1 | C | G | Heterozygous |
| NC_037641.1 | 12047242 | SNV | 1 | C | G | Homozygous   |
| NC_037641.1 | 12047244 | SNV | 1 | G | T | Homozygous   |
| NC_037641.1 | 12047260 | SNV | 1 | C | A | Heterozygous |
| NC_037641.1 | 12047260 | SNV | 1 | C | G | Heterozygous |
| NC_037641.1 | 12047271 | SNV | 1 | C | A | Heterozygous |
| NC_037641.1 | 12047278 | SNV | 1 | C | G | Homozygous   |
| NC_037641.1 | 12047281 | SNV | 1 | C | G | Heterozygous |
| NC_037641.1 | 12047281 | SNV | 1 | C | T | Heterozygous |
| NC_037641.1 | 12047284 | SNV | 1 | T | G | Homozygous   |
| NC_037641.1 | 12047290 | SNV | 1 | G | C | Heterozygous |
| NC_037641.1 | 12047298 | SNV | 1 | G | T | Heterozygous |
| NC_037641.1 | 12048050 | SNV | 1 | T | C | Homozygous   |
| NC_037641.1 | 12048054 | SNV | 1 | G | A | Homozygous   |
| NC_037641.1 | 12048089 | SNV | 1 | G | A | Homozygous   |
| NC_037641.1 | 12048272 | SNV | 1 | A | G | Heterozygous |
| NC_037641.1 | 12049111 | SNV | 1 | T | C | Heterozygous |
| NC_037641.1 | 12049561 | SNV | 1 | A | G | Homozygous   |
| NC_037641.1 | 12049564 | SNV | 1 | A | G | Homozygous   |
| NC_037641.1 | 12050069 | SNV | 1 | A | T | Heterozygous |
| NC_037641.1 | 12050074 | SNV | 1 | A | G | Homozygous   |
| NC_037641.1 | 12050099 | SNV | 1 | T | C | Heterozygous |
| NC_037641.1 | 12050120 | SNV | 1 | T | C | Heterozygous |
| NC_037641.1 | 12051381 | SNV | 1 | C | T | Homozygous   |

|             |          |     |   |   |   |              |
|-------------|----------|-----|---|---|---|--------------|
| NC_037641.1 | 12051409 | SNV | 1 | G | A | Homozygous   |
| NC_037641.1 | 12051935 | SNV | 1 | T | C | Homozygous   |
| NC_037641.1 | 12051948 | SNV | 1 | C | G | Homozygous   |
| NC_037641.1 | 12053782 | SNV | 1 | T | C | Homozygous   |
| NC_037641.1 | 12053824 | SNV | 1 | A | G | Homozygous   |
| NC_037641.1 | 12053941 | SNV | 1 | G | A | Heterozygous |
| NC_037641.1 | 12053944 | SNV | 1 | G | A | Heterozygous |
| NC_037641.1 | 12053953 | SNV | 1 | G | A | Heterozygous |
| NC_037641.1 | 12054172 | SNV | 1 | T | C | Homozygous   |
| NC_037641.1 | 12054490 | SNV | 1 | C | T | Heterozygous |
| NC_037641.1 | 12054595 | SNV | 1 | G | A | Homozygous   |
| NC_037641.1 | 12054691 | SNV | 1 | A | G | Homozygous   |
| NC_037641.1 | 12054694 | SNV | 1 | T | C | Homozygous   |
| NC_037641.1 | 12054931 | SNV | 1 | A | G | Homozygous   |
| NC_037641.1 | 12057813 | SNV | 1 | G | A | Heterozygous |
| NC_037641.1 | 12058138 | SNV | 1 | A | G | Homozygous   |
| NC_037641.1 | 12059276 | SNV | 1 | C | T | Homozygous   |
| NC_037641.1 | 12059281 | SNV | 1 | T | C | Heterozygous |
| NC_037641.1 | 12059283 | SNV | 1 | C | T | Heterozygous |
| NC_037641.1 | 12061017 | SNV | 1 | A | G | Homozygous   |
| NC_037641.1 | 12061283 | SNV | 1 | G | A | Heterozygous |
| NC_037641.1 | 12061596 | SNV | 1 | T | C | Heterozygous |
| NC_037641.1 | 12061650 | SNV | 1 | A | T | Heterozygous |
| NC_037641.1 | 12061694 | SNV | 1 | C | T | Heterozygous |
| NC_037641.1 | 12061696 | SNV | 1 | C | T | Heterozygous |
| NC_037641.1 | 12061918 | SNV | 1 | G | C | Heterozygous |
| NC_037641.1 | 12061952 | SNV | 1 | G | A | Heterozygous |
| NC_037641.1 | 12061954 | SNV | 1 | C | T | Homozygous   |
| NC_037641.1 | 12062312 | SNV | 1 | A | G | Heterozygous |
| NC_037641.1 | 12062461 | SNV | 1 | G | A | Homozygous   |
| NC_037641.1 | 12062481 | SNV | 1 | T | G | Homozygous   |
| NC_037641.1 | 12062499 | SNV | 1 | A | G | Heterozygous |
| NC_037641.1 | 12062944 | SNV | 1 | A | G | Heterozygous |
| NC_037641.1 | 12063073 | SNV | 1 | A | G | Homozygous   |
| NC_037641.1 | 12063221 | SNV | 1 | A | G | Homozygous   |
| NC_037641.1 | 12063589 | SNV | 1 | A | T | Heterozygous |
| NC_037641.1 | 12064079 | SNV | 1 | G | A | Homozygous   |
| NC_037641.1 | 12064112 | SNV | 1 | A | G | Homozygous   |
| NC_037641.1 | 12064205 | SNV | 1 | T | G | Heterozygous |
| NC_037641.1 | 12064229 | SNV | 1 | C | T | Homozygous   |
| NC_037641.1 | 12064321 | SNV | 1 | A | G | Homozygous   |
| NC_037641.1 | 12064332 | SNV | 1 | T | A | Homozygous   |
| NC_037641.1 | 12066298 | SNV | 1 | A | G | Homozygous   |
| NC_037641.1 | 12066305 | SNV | 1 | C | T | Homozygous   |
| NC_037641.1 | 12067935 | SNV | 1 | A | G | Homozygous   |
| NC_037641.1 | 12068219 | SNV | 1 | C | T | Heterozygous |
| NC_037641.1 | 12068294 | SNV | 1 | A | G | Homozygous   |
| NC_037641.1 | 12068530 | SNV | 1 | A | G | Homozygous   |
| NC_037641.1 | 12068938 | SNV | 1 | C | T | Heterozygous |
| NC_037641.1 | 12069060 | SNV | 1 | A | G | Homozygous   |
| NC_037641.1 | 12074057 | SNV | 1 | A | G | Heterozygous |

|             |          |     |   |   |   |              |
|-------------|----------|-----|---|---|---|--------------|
| NC_037641.1 | 12074163 | SNV | 1 | C | T | Heterozygous |
| NC_037641.1 | 12086275 | SNV | 1 | C | T | Heterozygous |
| NC_037641.1 | 12086396 | SNV | 1 | C | T | Homozygous   |
| NC_037641.1 | 12086592 | SNV | 1 | G | A | Heterozygous |
| NC_037641.1 | 12086707 | SNV | 1 | A | G | Homozygous   |
| NC_037641.1 | 12086714 | SNV | 1 | A | G | Homozygous   |
| NC_037641.1 | 12086740 | SNV | 1 | T | C | Homozygous   |
| NC_037641.1 | 12086929 | SNV | 1 | C | G | Heterozygous |
| NC_037641.1 | 12086991 | SNV | 1 | C | A | Homozygous   |
| NC_037641.1 | 12087016 | SNV | 1 | T | C | Homozygous   |
| NC_037641.1 | 12087051 | SNV | 1 | A | G | Homozygous   |
| NC_037641.1 | 12087131 | SNV | 1 | A | G | Homozygous   |
| NC_037641.1 | 12087255 | SNV | 1 | C | A | Heterozygous |
| NC_037641.1 | 12087333 | SNV | 1 | T | C | Homozygous   |
| NC_037641.1 | 12087348 | SNV | 1 | C | T | Heterozygous |
| NC_037641.1 | 12087444 | SNV | 1 | A | G | Heterozygous |
| NC_037641.1 | 12087820 | SNV | 1 | A | T | Homozygous   |
| NC_037641.1 | 12088556 | SNV | 1 | G | A | Homozygous   |
| NC_037641.1 | 12088735 | SNV | 1 | C | T | Homozygous   |
| NC_037641.1 | 12088930 | SNV | 1 | C | G | Homozygous   |
| NC_037641.1 | 12088957 | SNV | 1 | A | G | Homozygous   |
| NC_037641.1 | 12089001 | SNV | 1 | T | A | Heterozygous |
| NC_037641.1 | 12091749 | SNV | 1 | T | C | Heterozygous |
| NC_037641.1 | 12091790 | SNV | 1 | C | T | Heterozygous |
| NC_037641.1 | 12091800 | SNV | 1 | A | G | Heterozygous |
| NC_037641.1 | 12094299 | SNV | 1 | T | C | Homozygous   |
| NC_037641.1 | 12094326 | SNV | 1 | G | T | Homozygous   |
| NC_037641.1 | 12094635 | SNV | 1 | C | T | Heterozygous |
| NC_037641.1 | 12096007 | SNV | 1 | A | G | Homozygous   |
| NC_037641.1 | 12096397 | SNV | 1 | T | C | Heterozygous |
| NC_037641.1 | 12096399 | SNV | 1 | G | A | Heterozygous |
| NC_037641.1 | 12096401 | SNV | 1 | G | T | Heterozygous |
| NC_037641.1 | 12096403 | SNV | 1 | A | C | Heterozygous |
| NC_037641.1 | 12096406 | SNV | 1 | C | G | Heterozygous |
| NC_037641.1 | 12096421 | SNV | 1 | G | A | Heterozygous |
| NC_037641.1 | 12103295 | SNV | 1 | A | G | Homozygous   |
| NC_037641.1 | 12104240 | SNV | 1 | C | T | Homozygous   |
| NC_037641.1 | 12104344 | SNV | 1 | A | G | Homozygous   |
| NC_037641.1 | 12105010 | SNV | 1 | A | G | Heterozygous |
| NC_037641.1 | 12108528 | SNV | 1 | G | A | Homozygous   |
| NC_037641.1 | 12108548 | SNV | 1 | T | C | Homozygous   |
| NC_037641.1 | 12109093 | SNV | 1 | A | G | Heterozygous |
| NC_037641.1 | 12109215 | SNV | 1 | G | A | Heterozygous |
| NC_037641.1 | 12109762 | SNV | 1 | A | G | Homozygous   |
| NC_037641.1 | 12109780 | SNV | 1 | A | G | Homozygous   |
| NC_037641.1 | 12110749 | SNV | 1 | G | T | Heterozygous |
| NC_037641.1 | 12110885 | SNV | 1 | C | G | Heterozygous |
| NC_037641.1 | 12110915 | SNV | 1 | C | T | Heterozygous |
| NC_037641.1 | 12112759 | SNV | 1 | A | G | Homozygous   |
| NC_037641.1 | 12112774 | SNV | 1 | T | G | Homozygous   |
| NC_037641.1 | 12112778 | SNV | 1 | G | A | Heterozygous |

|             |          |     |   |   |   |              |
|-------------|----------|-----|---|---|---|--------------|
| NC_037641.1 | 12112780 | SNV | 1 | G | A | Homozygous   |
| NC_037641.1 | 12112784 | SNV | 1 | T | G | Homozygous   |
| NC_037641.1 | 12112811 | SNV | 1 | T | C | Homozygous   |
| NC_037641.1 | 12112814 | SNV | 1 | T | C | Homozygous   |
| NC_037641.1 | 12112824 | SNV | 1 | C | T | Homozygous   |
| NC_037641.1 | 12112832 | SNV | 1 | C | T | Homozygous   |
| NC_037641.1 | 12112834 | SNV | 1 | C | T | Homozygous   |
| NC_037641.1 | 12113252 | SNV | 1 | A | G | Homozygous   |
| NC_037641.1 | 12114827 | SNV | 1 | C | T | Heterozygous |
| NC_037641.1 | 12116458 | SNV | 1 | C | G | Homozygous   |
| NC_037641.1 | 12116603 | SNV | 1 | G | A | Heterozygous |
| NC_037641.1 | 12120003 | SNV | 1 | C | T | Homozygous   |
| NC_037641.1 | 12120058 | SNV | 1 | G | C | Homozygous   |
| NC_037641.1 | 12120550 | SNV | 1 | C | T | Heterozygous |
| NC_037641.1 | 12120619 | SNV | 1 | A | T | Homozygous   |
| NC_037641.1 | 12120838 | SNV | 1 | G | T | Homozygous   |
| NC_037641.1 | 12120844 | SNV | 1 | C | G | Heterozygous |
| NC_037641.1 | 12120856 | SNV | 1 | T | G | Heterozygous |
| NC_037641.1 | 12120867 | SNV | 1 | T | G | Heterozygous |
| NC_037641.1 | 12120896 | SNV | 1 | C | A | Homozygous   |
| NC_037641.1 | 12120900 | SNV | 1 | G | A | Homozygous   |
| NC_037641.1 | 12120913 | SNV | 1 | T | C | Homozygous   |
| NC_037641.1 | 12120920 | SNV | 1 | C | G | Homozygous   |
| NC_037641.1 | 12120931 | SNV | 1 | T | C | Homozygous   |
| NC_037641.1 | 12134127 | SNV | 1 | C | T | Homozygous   |
| NC_037641.1 | 12134133 | SNV | 1 | C | T | Homozygous   |
| NC_037641.1 | 12134143 | SNV | 1 | C | G | Homozygous   |
| NC_037641.1 | 12134147 | SNV | 1 | C | G | Homozygous   |
| NC_037641.1 | 12134149 | SNV | 1 | C | A | Homozygous   |
| NC_037641.1 | 12134173 | SNV | 1 | C | T | Homozygous   |
| NC_037641.1 | 12134176 | SNV | 1 | A | T | Homozygous   |
| NC_037641.1 | 12138239 | SNV | 1 | G | C | Homozygous   |
| NC_037641.1 | 12138242 | SNV | 1 | T | C | Heterozygous |
| NC_037641.1 | 12139098 | SNV | 1 | T | C | Homozygous   |
| NC_037641.1 | 12139105 | SNV | 1 | G | T | Heterozygous |
| NC_037641.1 | 12139288 | SNV | 1 | A | G | Homozygous   |
| NC_037641.1 | 12139477 | SNV | 1 | G | A | Heterozygous |
| NC_037641.1 | 12142181 | SNV | 1 | C | T | Heterozygous |
| NC_037641.1 | 12142399 | SNV | 1 | G | A | Homozygous   |
| NC_037641.1 | 12142565 | SNV | 1 | A | T | Homozygous   |
| NC_037641.1 | 12142653 | SNV | 1 | G | T | Homozygous   |
| NC_037641.1 | 12143845 | SNV | 1 | C | G | Heterozygous |
| NC_037641.1 | 12144099 | SNV | 1 | T | G | Homozygous   |
| NC_037641.1 | 12144680 | SNV | 1 | T | C | Heterozygous |
| NC_037641.1 | 12145284 | SNV | 1 | T | C | Heterozygous |
| NC_037641.1 | 12145300 | SNV | 1 | T | C | Heterozygous |
| NC_037641.1 | 12145303 | SNV | 1 | T | C | Heterozygous |
| NC_037641.1 | 12145786 | SNV | 1 | T | G | Homozygous   |
| NC_037641.1 | 12145849 | SNV | 1 | A | G | Homozygous   |
| NC_037641.1 | 12145930 | SNV | 1 | C | T | Heterozygous |
| NC_037641.1 | 12146924 | SNV | 1 | T | C | Heterozygous |

|             |          |     |   |   |   |              |
|-------------|----------|-----|---|---|---|--------------|
| NC_037641.1 | 12147328 | SNV | 1 | T | A | Homozygous   |
| NC_037641.1 | 12148508 | SNV | 1 | G | T | Homozygous   |
| NC_037641.1 | 12148817 | SNV | 1 | T | C | Homozygous   |
| NC_037641.1 | 12150108 | SNV | 1 | C | G | Homozygous   |
| NC_037641.1 | 12150834 | SNV | 1 | T | A | Homozygous   |
| NC_037641.1 | 12152045 | SNV | 1 | G | A | Heterozygous |
| NC_037641.1 | 12152574 | SNV | 1 | C | T | Heterozygous |
| NC_037641.1 | 12154390 | SNV | 1 | C | T | Heterozygous |
| NC_037641.1 | 12155264 | SNV | 1 | T | G | Homozygous   |
| NC_037641.1 | 12155271 | SNV | 1 | T | A | Homozygous   |
| NC_037641.1 | 12155279 | SNV | 1 | T | A | Homozygous   |
| NC_037641.1 | 12155282 | SNV | 1 | T | A | Homozygous   |
| NC_037641.1 | 12155284 | SNV | 1 | A | G | Homozygous   |
| NC_037641.1 | 12155793 | SNV | 1 | A | G | Heterozygous |
| NC_037641.1 | 12158352 | SNV | 1 | C | A | Homozygous   |
| NC_037641.1 | 12158760 | SNV | 1 | G | A | Homozygous   |
| NC_037641.1 | 12158763 | SNV | 1 | C | A | Homozygous   |
| NC_037641.1 | 12158808 | SNV | 1 | C | T | Homozygous   |
| NC_037641.1 | 12159060 | SNV | 1 | A | G | Homozygous   |
| NC_037641.1 | 12159410 | SNV | 1 | G | C | Homozygous   |
| NC_037641.1 | 12159588 | SNV | 1 | G | A | Homozygous   |
| NC_037641.1 | 12160858 | SNV | 1 | G | A | Homozygous   |
| NC_037641.1 | 12162095 | SNV | 1 | C | T | Homozygous   |
| NC_037641.1 | 12162145 | SNV | 1 | A | G | Homozygous   |
| NC_037641.1 | 12162175 | SNV | 1 | G | A | Homozygous   |
| NC_037641.1 | 12162261 | SNV | 1 | T | A | Heterozygous |
| NC_037641.1 | 12162461 | SNV | 1 | A | G | Homozygous   |
| NC_037641.1 | 12162569 | SNV | 1 | A | G | Homozygous   |
| NC_037641.1 | 12163139 | SNV | 1 | C | T | Homozygous   |
| NC_037641.1 | 12163323 | SNV | 1 | G | A | Homozygous   |
| NC_037641.1 | 12163377 | SNV | 1 | T | C | Homozygous   |
| NC_037641.1 | 12163802 | SNV | 1 | A | G | Homozygous   |
| NC_037641.1 | 12163878 | SNV | 1 | C | T | Homozygous   |
| NC_037641.1 | 12164109 | SNV | 1 | A | T | Homozygous   |
| NC_037641.1 | 12164112 | SNV | 1 | G | A | Homozygous   |
| NC_037641.1 | 12164241 | SNV | 1 | G | A | Homozygous   |
| NC_037641.1 | 12166187 | SNV | 1 | G | A | Homozygous   |
| NC_037641.1 | 12166681 | SNV | 1 | C | T | Heterozygous |
| NC_037641.1 | 12166694 | SNV | 1 | T | C | Homozygous   |
| NC_037641.1 | 12167019 | SNV | 1 | A | G | Heterozygous |
| NC_037641.1 | 12167555 | SNV | 1 | T | G | Heterozygous |
| NC_037641.1 | 12167559 | SNV | 1 | T | G | Heterozygous |
| NC_037641.1 | 12167567 | SNV | 1 | G | T | Heterozygous |
| NC_037641.1 | 12167569 | SNV | 1 | G | T | Heterozygous |
| NC_037641.1 | 12167575 | SNV | 1 | G | T | Heterozygous |
| NC_037641.1 | 12167581 | SNV | 1 | G | T | Homozygous   |
| NC_037641.1 | 12167942 | SNV | 1 | T | C | Homozygous   |
| NC_037641.1 | 12168132 | SNV | 1 | C | T | Homozygous   |
| NC_037641.1 | 12168137 | SNV | 1 | T | C | Heterozygous |
| NC_037641.1 | 12168539 | SNV | 1 | T | C | Homozygous   |
| NC_037641.1 | 12168790 | SNV | 1 | T | C | Homozygous   |

|             |          |     |   |   |   |              |
|-------------|----------|-----|---|---|---|--------------|
| NC_037641.1 | 12168815 | SNV | 1 | T | C | Homozygous   |
| NC_037641.1 | 12168829 | SNV | 1 | C | T | Heterozygous |
| NC_037641.1 | 12168835 | SNV | 1 | A | G | Homozygous   |
| NC_037641.1 | 12169373 | SNV | 1 | T | C | Homozygous   |
| NC_037641.1 | 12169815 | SNV | 1 | G | T | Homozygous   |
| NC_037641.1 | 12170028 | SNV | 1 | A | G | Homozygous   |
| NC_037641.1 | 12170154 | SNV | 1 | C | T | Heterozygous |
| NC_037641.1 | 12170290 | SNV | 1 | A | G | Homozygous   |
| NC_037641.1 | 12171920 | SNV | 1 | A | G | Homozygous   |
| NC_037641.1 | 12172001 | SNV | 1 | A | T | Heterozygous |
| NC_037641.1 | 12172040 | SNV | 1 | C | T | Homozygous   |
| NC_037641.1 | 12172721 | SNV | 1 | T | C | Heterozygous |
| NC_037641.1 | 12172807 | SNV | 1 | C | T | Homozygous   |
| NC_037641.1 | 12172841 | SNV | 1 | A | T | Heterozygous |
| NC_037641.1 | 12172913 | SNV | 1 | T | C | Heterozygous |
| NC_037641.1 | 12172916 | SNV | 1 | C | T | Heterozygous |
| NC_037641.1 | 12172937 | SNV | 1 | T | C | Heterozygous |
| NC_037641.1 | 12174488 | SNV | 1 | C | T | Homozygous   |
| NC_037641.1 | 12174491 | SNV | 1 | T | C | Heterozygous |
| NC_037641.1 | 12174493 | SNV | 1 | T | C | Heterozygous |
| NC_037641.1 | 12174540 | SNV | 1 | T | C | Homozygous   |
| NC_037641.1 | 12174545 | SNV | 1 | A | G | Heterozygous |
| NC_037641.1 | 12174576 | SNV | 1 | A | T | Homozygous   |
| NC_037641.1 | 12174622 | SNV | 1 | C | T | Homozygous   |
| NC_037641.1 | 12174642 | SNV | 1 | C | G | Heterozygous |
| NC_037641.1 | 12174709 | SNV | 1 | G | C | Homozygous   |
| NC_037641.1 | 12174889 | SNV | 1 | T | C | Homozygous   |
| NC_037641.1 | 12174894 | SNV | 1 | T | C | Heterozygous |
| NC_037641.1 | 12174906 | SNV | 1 | C | T | Homozygous   |
| NC_037641.1 | 12175011 | SNV | 1 | A | G | Homozygous   |
| NC_037641.1 | 12179605 | SNV | 1 | A | T | Homozygous   |
| NC_037641.1 | 12179883 | SNV | 1 | C | T | Homozygous   |
| NC_037641.1 | 12180165 | SNV | 1 | C | G | Homozygous   |
| NC_037641.1 | 12180991 | SNV | 1 | T | G | Heterozygous |
| NC_037641.1 | 12183822 | SNV | 1 | A | G | Homozygous   |
| NC_037641.1 | 12184728 | SNV | 1 | C | T | Homozygous   |
| NC_037641.1 | 12185407 | SNV | 1 | G | A | Heterozygous |
| NC_037641.1 | 12185446 | SNV | 1 | C | T | Heterozygous |
| NC_037641.1 | 12185712 | SNV | 1 | T | A | Homozygous   |
| NC_037641.1 | 12185724 | SNV | 1 | T | C | Heterozygous |
| NC_037641.1 | 12185727 | SNV | 1 | C | T | Homozygous   |
| NC_037641.1 | 12185748 | SNV | 1 | C | T | Homozygous   |
| NC_037641.1 | 12185796 | SNV | 1 | A | G | Homozygous   |
| NC_037641.1 | 12185801 | SNV | 1 | G | A | Homozygous   |
| NC_037641.1 | 12185843 | SNV | 1 | T | C | Homozygous   |
| NC_037641.1 | 12185884 | SNV | 1 | C | T | Homozygous   |
| NC_037641.1 | 12185897 | SNV | 1 | C | T | Homozygous   |
| NC_037641.1 | 12185975 | SNV | 1 | G | A | Heterozygous |
| NC_037641.1 | 12186282 | SNV | 1 | G | T | Homozygous   |
| NC_037641.1 | 12186284 | SNV | 1 | C | T | Heterozygous |
| NC_037641.1 | 12186288 | SNV | 1 | C | A | Heterozygous |

|             |          |     |   |   |   |              |
|-------------|----------|-----|---|---|---|--------------|
| NC_037641.1 | 12188884 | SNV | 1 | C | T | Homozygous   |
| NC_037641.1 | 12193365 | SNV | 1 | C | T | Homozygous   |
| NC_037641.1 | 12193370 | SNV | 1 | T | C | Homozygous   |
| NC_037641.1 | 12193374 | SNV | 1 | T | C | Heterozygous |
| NC_037641.1 | 12193380 | SNV | 1 | T | C | Heterozygous |
| NC_037641.1 | 12193407 | SNV | 1 | T | A | Heterozygous |
| NC_037641.1 | 12193415 | SNV | 1 | T | A | Heterozygous |
| NC_037641.1 | 12193431 | SNV | 1 | T | G | Heterozygous |
| NC_037641.1 | 12193578 | SNV | 1 | C | T | Homozygous   |
| NC_037641.1 | 12199124 | SNV | 1 | C | T | Homozygous   |
| NC_037641.1 | 12200468 | SNV | 1 | C | T | Homozygous   |
| NC_037641.1 | 12200484 | SNV | 1 | T | C | Homozygous   |
| NC_037641.1 | 12200492 | SNV | 1 | C | T | Homozygous   |
| NC_037641.1 | 12200494 | SNV | 1 | T | A | Homozygous   |
| NC_037641.1 | 12204559 | SNV | 1 | G | A | Homozygous   |
| NC_037641.1 | 12204942 | SNV | 1 | G | A | Heterozygous |
| NC_037641.1 | 12205669 | SNV | 1 | A | G | Homozygous   |
| NC_037641.1 | 12206465 | SNV | 1 | T | C | Homozygous   |
| NC_037641.1 | 12210171 | SNV | 1 | T | A | Heterozygous |
| NC_037641.1 | 12212996 | SNV | 1 | T | C | Homozygous   |
| NC_037641.1 | 12214600 | SNV | 1 | T | G | Homozygous   |
| NC_037641.1 | 12215832 | SNV | 1 | C | T | Homozygous   |
| NC_037641.1 | 12215938 | SNV | 1 | T | C | Homozygous   |
| NC_037641.1 | 12216607 | SNV | 1 | A | C | Heterozygous |
| NC_037641.1 | 12218215 | SNV | 1 | T | C | Heterozygous |
| NC_037641.1 | 12218497 | SNV | 1 | A | C | Heterozygous |
| NC_037641.1 | 12218747 | SNV | 1 | C | T | Heterozygous |
| NC_037641.1 | 12219408 | SNV | 1 | C | T | Homozygous   |
| NC_037641.1 | 12219410 | SNV | 1 | T | C | Heterozygous |
| NC_037641.1 | 12219419 | SNV | 1 | A | G | Heterozygous |
| NC_037641.1 | 12219427 | SNV | 1 | A | G | Heterozygous |
| NC_037641.1 | 12219450 | SNV | 1 | T | C | Heterozygous |
| NC_037641.1 | 12223151 | SNV | 1 | T | C | Homozygous   |
| NC_037641.1 | 12223419 | SNV | 1 | G | A | Homozygous   |
| NC_037641.1 | 12223444 | SNV | 1 | A | G | Homozygous   |
| NC_037641.1 | 12223619 | SNV | 1 | T | C | Homozygous   |
| NC_037641.1 | 12224213 | SNV | 1 | C | G | Heterozygous |
| NC_037641.1 | 12224463 | SNV | 1 | T | C | Heterozygous |
| NC_037641.1 | 12224483 | SNV | 1 | G | A | Homozygous   |
| NC_037641.1 | 12224528 | SNV | 1 | T | C | Homozygous   |
| NC_037641.1 | 12224711 | SNV | 1 | A | C | Homozygous   |
| NC_037641.1 | 12224921 | SNV | 1 | T | C | Homozygous   |
| NC_037641.1 | 12224941 | SNV | 1 | C | T | Heterozygous |
| NC_037641.1 | 12224973 | SNV | 1 | C | T | Homozygous   |
| NC_037641.1 | 12224994 | SNV | 1 | A | G | Heterozygous |
| NC_037641.1 | 12225015 | SNV | 1 | T | C | Homozygous   |
| NC_037641.1 | 12225039 | SNV | 1 | G | A | Heterozygous |
| NC_037641.1 | 12225095 | SNV | 1 | C | G | Heterozygous |
| NC_037641.1 | 12225203 | SNV | 1 | G | A | Homozygous   |
| NC_037641.1 | 12225641 | SNV | 1 | T | C | Heterozygous |
| NC_037641.1 | 12226025 | SNV | 1 | C | T | Heterozygous |



|             |          |     |   |   |   |              |
|-------------|----------|-----|---|---|---|--------------|
| NC_037641.1 | 12226244 | SNV | 1 | A | G | Heterozygous |
| NC_037641.1 | 12226247 | SNV | 1 | C | G | Heterozygous |
| NC_037641.1 | 12226286 | SNV | 1 | G | A | Heterozygous |
| NC_037641.1 | 12226289 | SNV | 1 | G | C | Heterozygous |
| NC_037641.1 | 12226307 | SNV | 1 | T | G | Heterozygous |
| NC_037641.1 | 12226487 | SNV | 1 | C | T | Homozygous   |
| NC_037641.1 | 12226490 | SNV | 1 | C | T | Heterozygous |
| NC_037641.1 | 12226595 | SNV | 1 | G | C | Heterozygous |
| NC_037641.1 | 12226739 | SNV | 1 | G | A | Heterozygous |
| NC_037641.1 | 12226759 | SNV | 1 | A | G | Heterozygous |
| NC_037641.1 | 12226823 | SNV | 1 | C | A | Homozygous   |
| NC_037641.1 | 12226841 | SNV | 1 | C | T | Heterozygous |
| NC_037641.1 | 12227018 | SNV | 1 | C | T | Heterozygous |
| NC_037641.1 | 12227453 | SNV | 1 | T | A | Homozygous   |
| NC_037641.1 | 12227552 | SNV | 1 | A | G | Homozygous   |
| NC_037641.1 | 12227636 | SNV | 1 | C | G | Heterozygous |
| NC_037641.1 | 12228001 | SNV | 1 | G | A | Heterozygous |
| NC_037641.1 | 12228014 | SNV | 1 | C | A | Heterozygous |
| NC_037641.1 | 12228027 | SNV | 1 | A | G | Heterozygous |
| NC_037641.1 | 12228030 | SNV | 1 | A | G | Homozygous   |
| NC_037641.1 | 12228053 | SNV | 1 | A | G | Heterozygous |
| NC_037641.1 | 12228122 | SNV | 1 | G | A | Heterozygous |
| NC_037641.1 | 12228186 | SNV | 1 | A | G | Heterozygous |
| NC_037641.1 | 12228298 | SNV | 1 | C | T | Heterozygous |
| NC_037641.1 | 12228320 | SNV | 1 | C | T | Heterozygous |
| NC_037641.1 | 12228322 | SNV | 1 | A | G | Heterozygous |
| NC_037641.1 | 12228330 | SNV | 1 | A | G | Heterozygous |
| NC_037641.1 | 12228394 | SNV | 1 | T | C | Homozygous   |
| NC_037641.1 | 12228399 | SNV | 1 | T | C | Homozygous   |
| NC_037641.1 | 12228410 | SNV | 1 | T | C | Homozygous   |
| NC_037641.1 | 12228444 | SNV | 1 | T | C | Homozygous   |
| NC_037641.1 | 12228446 | SNV | 1 | C | T | Homozygous   |
| NC_037641.1 | 12228529 | SNV | 1 | T | G | Heterozygous |
| NC_037641.1 | 12228647 | SNV | 1 | G | A | Heterozygous |
| NC_037641.1 | 12228656 | SNV | 1 | T | C | Heterozygous |
| NC_037641.1 | 12228677 | SNV | 1 | T | C | Homozygous   |
| NC_037641.1 | 12228687 | SNV | 1 | G | A | Heterozygous |
| NC_037641.1 | 12228798 | SNV | 1 | G | A | Heterozygous |
| NC_037641.1 | 12228886 | SNV | 1 | C | T | Homozygous   |
| NC_037641.1 | 12228891 | SNV | 1 | G | A | Homozygous   |
| NC_037641.1 | 12228909 | SNV | 1 | G | A | Homozygous   |
| NC_037641.1 | 12229046 | SNV | 1 | G | A | Heterozygous |
| NC_037641.1 | 12229053 | SNV | 1 | G | A | Heterozygous |
| NC_037641.1 | 12229118 | SNV | 1 | T | C | Homozygous   |
| NC_037641.1 | 12229124 | SNV | 1 | T | C | Homozygous   |
| NC_037641.1 | 12229133 | SNV | 1 | G | A | Homozygous   |
| NC_037641.1 | 12229140 | SNV | 1 | G | A | Homozygous   |
| NC_037641.1 | 12229310 | SNV | 1 | T | C | Heterozygous |
| NC_037641.1 | 12229396 | SNV | 1 | A | G | Homozygous   |
| NC_037641.1 | 12229446 | SNV | 1 | C | T | Heterozygous |
| NC_037641.1 | 12229563 | SNV | 1 | A | G | Heterozygous |

|             |          |     |   |   |   |              |
|-------------|----------|-----|---|---|---|--------------|
| NC_037641.1 | 12229720 | SNV | 1 | T | C | Heterozygous |
| NC_037641.1 | 12229855 | SNV | 1 | T | C | Heterozygous |
| NC_037641.1 | 12229892 | SNV | 1 | T | A | Heterozygous |
| NC_037641.1 | 12229923 | SNV | 1 | C | T | Heterozygous |
| NC_037641.1 | 12229926 | SNV | 1 | G | A | Heterozygous |
| NC_037641.1 | 12229935 | SNV | 1 | C | G | Heterozygous |
| NC_037641.1 | 12229940 | SNV | 1 | T | C | Heterozygous |
| NC_037641.1 | 12229953 | SNV | 1 | T | C | Heterozygous |
| NC_037641.1 | 12229963 | SNV | 1 | G | A | Heterozygous |
| NC_037641.1 | 12230015 | SNV | 1 | G | A | Homozygous   |
| NC_037641.1 | 12230070 | SNV | 1 | T | C | Heterozygous |
| NC_037641.1 | 12230084 | SNV | 1 | G | A | Heterozygous |
| NC_037641.1 | 12230093 | SNV | 1 | T | C | Heterozygous |
| NC_037641.1 | 12230118 | SNV | 1 | A | G | Heterozygous |
| NC_037641.1 | 12230321 | SNV | 1 | G | A | Heterozygous |
| NC_037641.1 | 12230359 | SNV | 1 | T | C | Heterozygous |
| NC_037641.1 | 12230365 | SNV | 1 | G | A | Heterozygous |
| NC_037641.1 | 12230372 | SNV | 1 | G | A | Heterozygous |
| NC_037641.1 | 12230380 | SNV | 1 | C | T | Heterozygous |
| NC_037641.1 | 12230394 | SNV | 1 | A | G | Homozygous   |
| NC_037641.1 | 12230396 | SNV | 1 | T | A | Homozygous   |
| NC_037641.1 | 12230410 | SNV | 1 | T | C | Homozygous   |
| NC_037641.1 | 12230423 | SNV | 1 | A | G | Heterozygous |
| NC_037641.1 | 12230461 | SNV | 1 | T | C | Heterozygous |
| NC_037641.1 | 12230465 | SNV | 1 | C | G | Homozygous   |
| NC_037641.1 | 12230493 | SNV | 1 | A | G | Homozygous   |
| NC_037641.1 | 12230495 | SNV | 1 | A | T | Homozygous   |
| NC_037641.1 | 12230516 | SNV | 1 | T | C | Homozygous   |
| NC_037641.1 | 12230528 | SNV | 1 | A | T | Homozygous   |
| NC_037641.1 | 12230534 | SNV | 1 | A | G | Homozygous   |
| NC_037641.1 | 12230588 | SNV | 1 | A | G | Homozygous   |
| NC_037641.1 | 12230600 | SNV | 1 | A | C | Homozygous   |
| NC_037641.1 | 12230760 | SNV | 1 | A | G | Homozygous   |
| NC_037641.1 | 12230762 | SNV | 1 | G | T | Homozygous   |
| NC_037641.1 | 12230810 | SNV | 1 | C | G | Homozygous   |
| NC_037641.1 | 12230984 | SNV | 1 | C | G | Heterozygous |
| NC_037641.1 | 12231152 | SNV | 1 | T | C | Heterozygous |
| NC_037641.1 | 12231155 | SNV | 1 | A | G | Homozygous   |
| NC_037641.1 | 12231302 | SNV | 1 | C | G | Heterozygous |
| NC_037641.1 | 12231580 | SNV | 1 | C | G | Heterozygous |
| NC_037641.1 | 12231654 | SNV | 1 | G | T | Homozygous   |
| NC_037641.1 | 12231702 | SNV | 1 | C | T | Homozygous   |
| NC_037641.1 | 12232010 | SNV | 1 | A | G | Homozygous   |
| NC_037641.1 | 12232028 | SNV | 1 | C | G | Homozygous   |
| NC_037641.1 | 12232055 | SNV | 1 | T | G | Homozygous   |
| NC_037641.1 | 12233725 | SNV | 1 | T | A | Homozygous   |
| NC_037641.1 | 12233825 | SNV | 1 | G | T | Homozygous   |
| NC_037641.1 | 12233879 | SNV | 1 | A | G | Homozygous   |
| NC_037641.1 | 12233894 | SNV | 1 | A | G | Homozygous   |
| NC_037641.1 | 12234071 | SNV | 1 | C | T | Heterozygous |
| NC_037641.1 | 12234913 | SNV | 1 | G | T | Heterozygous |

|             |          |     |   |   |   |              |
|-------------|----------|-----|---|---|---|--------------|
| NC_037641.1 | 12234925 | SNV | 1 | T | C | Heterozygous |
| NC_037641.1 | 12234936 | SNV | 1 | T | C | Heterozygous |
| NC_037641.1 | 12234940 | SNV | 1 | A | T | Homozygous   |
| NC_037641.1 | 12234942 | SNV | 1 | G | C | Homozygous   |
| NC_037641.1 | 12234983 | SNV | 1 | T | A | Heterozygous |
| NC_037641.1 | 12235157 | SNV | 1 | T | C | Homozygous   |
| NC_037641.1 | 12235518 | SNV | 1 | A | G | Homozygous   |
| NC_037641.1 | 12236374 | SNV | 1 | A | C | Homozygous   |
| NC_037641.1 | 12237335 | SNV | 1 | A | G | Heterozygous |
| NC_037641.1 | 12237343 | SNV | 1 | A | T | Homozygous   |
| NC_037641.1 | 12237731 | SNV | 1 | A | G | Homozygous   |
| NC_037641.1 | 12239820 | SNV | 1 | G | T | Homozygous   |
| NC_037641.1 | 12239823 | SNV | 1 | C | T | Homozygous   |
| NC_037641.1 | 12239826 | SNV | 1 | G | C | Homozygous   |
| NC_037641.1 | 12239877 | SNV | 1 | C | T | Homozygous   |
| NC_037641.1 | 12239922 | SNV | 1 | A | G | Heterozygous |
| NC_037641.1 | 12239934 | SNV | 1 | G | C | Homozygous   |
| NC_037641.1 | 12239938 | SNV | 1 | A | G | Homozygous   |
| NC_037641.1 | 12240182 | SNV | 1 | A | G | Homozygous   |
| NC_037641.1 | 12240871 | SNV | 1 | A | G | Homozygous   |
| NC_037641.1 | 12240883 | SNV | 1 | C | T | Heterozygous |
| NC_037641.1 | 12240936 | SNV | 1 | G | A | Heterozygous |
| NC_037641.1 | 12240939 | SNV | 1 | C | T | Heterozygous |
| NC_037641.1 | 12241029 | SNV | 1 | T | C | Homozygous   |
| NC_037641.1 | 12241149 | SNV | 1 | C | G | Homozygous   |
| NC_037641.1 | 12241164 | SNV | 1 | A | G | Heterozygous |
| NC_037641.1 | 12241167 | SNV | 1 | T | C | Homozygous   |
| NC_037641.1 | 12241272 | SNV | 1 | G | C | Heterozygous |
| NC_037641.1 | 12241869 | SNV | 1 | T | C | Homozygous   |
| NC_037641.1 | 12241963 | SNV | 1 | C | T | Heterozygous |
| NC_037641.1 | 12241965 | SNV | 1 | T | G | Heterozygous |
| NC_037641.1 | 12241968 | SNV | 1 | G | A | Heterozygous |
| NC_037641.1 | 12242016 | SNV | 1 | G | C | Homozygous   |
| NC_037641.1 | 12242031 | SNV | 1 | T | C | Homozygous   |
| NC_037641.1 | 12242091 | SNV | 1 | T | C | Heterozygous |
| NC_037641.1 | 12242328 | SNV | 1 | C | G | Homozygous   |
| NC_037641.1 | 12243612 | SNV | 1 | C | T | Heterozygous |
| NC_037641.1 | 12243660 | SNV | 1 | C | T | Heterozygous |
| NC_037641.1 | 12245380 | SNV | 1 | T | C | Homozygous   |
| NC_037641.1 | 12245467 | SNV | 1 | C | A | Heterozygous |
| NC_037641.1 | 12245656 | SNV | 1 | C | G | Homozygous   |
| NC_037641.1 | 12245951 | SNV | 1 | C | T | Heterozygous |
| NC_037641.1 | 12245962 | SNV | 1 | G | C | Homozygous   |
| NC_037641.1 | 12245984 | SNV | 1 | T | C | Heterozygous |
| NC_037641.1 | 12246595 | SNV | 1 | A | C | Homozygous   |
| NC_037641.1 | 12247009 | SNV | 1 | C | T | Heterozygous |
| NC_037641.1 | 12247572 | SNV | 1 | T | A | Homozygous   |
| NC_037641.1 | 12247612 | SNV | 1 | T | A | Homozygous   |
| NC_037641.1 | 12247624 | SNV | 1 | A | T | Homozygous   |
| NC_037641.1 | 12247988 | SNV | 1 | T | C | Homozygous   |
| NC_037641.1 | 12247997 | SNV | 1 | C | T | Heterozygous |

|             |          |     |   |   |   |              |
|-------------|----------|-----|---|---|---|--------------|
| NC_037641.1 | 12248036 | SNV | 1 | C | G | Homozygous   |
| NC_037641.1 | 12248125 | SNV | 1 | C | T | Heterozygous |
| NC_037641.1 | 12248129 | SNV | 1 | C | T | Heterozygous |
| NC_037641.1 | 12248134 | SNV | 1 | C | T | Heterozygous |
| NC_037641.1 | 12248137 | SNV | 1 | C | T | Heterozygous |
| NC_037641.1 | 12249479 | SNV | 1 | C | T | Heterozygous |
| NC_037641.1 | 12250974 | SNV | 1 | G | A | Homozygous   |
| NC_037641.1 | 12251114 | SNV | 1 | T | C | Heterozygous |
| NC_037641.1 | 12251116 | SNV | 1 | T | C | Homozygous   |
| NC_037641.1 | 12251682 | SNV | 1 | G | A | Homozygous   |
| NC_037641.1 | 12252534 | SNV | 1 | G | A | Homozygous   |
| NC_037641.1 | 12252702 | SNV | 1 | T | A | Homozygous   |
| NC_037641.1 | 12252716 | SNV | 1 | G | A | Heterozygous |
| NC_037641.1 | 12253256 | SNV | 1 | T | A | Heterozygous |
| NC_037641.1 | 12253260 | SNV | 1 | T | A | Heterozygous |
| NC_037641.1 | 12253270 | SNV | 1 | T | A | Heterozygous |
| NC_037641.1 | 12254124 | SNV | 1 | T | C | Heterozygous |
| NC_037641.1 | 12254848 | SNV | 1 | A | G | Homozygous   |
| NC_037641.1 | 12254906 | SNV | 1 | A | G | Heterozygous |
| NC_037641.1 | 12254993 | SNV | 1 | G | A | Heterozygous |
| NC_037641.1 | 12255028 | SNV | 1 | C | T | Heterozygous |
| NC_037641.1 | 12255031 | SNV | 1 | G | A | Heterozygous |
| NC_037641.1 | 12255219 | SNV | 1 | C | T | Heterozygous |
| NC_037641.1 | 12255610 | SNV | 1 | T | C | Heterozygous |
| NC_037641.1 | 12256464 | SNV | 1 | A | G | Heterozygous |
| NC_037641.1 | 12257613 | SNV | 1 | A | G | Homozygous   |
| NC_037641.1 | 12257680 | SNV | 1 | A | C | Homozygous   |
| NC_037641.1 | 12257682 | SNV | 1 | C | G | Heterozygous |
| NC_037641.1 | 12257686 | SNV | 1 | A | C | Heterozygous |
| NC_037641.1 | 12257696 | SNV | 1 | T | C | Homozygous   |
| NC_037641.1 | 12257698 | SNV | 1 | T | C | Homozygous   |
| NC_037641.1 | 12257704 | SNV | 1 | C | T | Heterozygous |
| NC_037641.1 | 12257751 | SNV | 1 | G | A | Homozygous   |
| NC_037641.1 | 12257760 | SNV | 1 | T | G | Heterozygous |
| NC_037641.1 | 12257780 | SNV | 1 | C | T | Homozygous   |
| NC_037641.1 | 12257813 | SNV | 1 | G | A | Homozygous   |
| NC_037641.1 | 12258161 | SNV | 1 | G | A | Heterozygous |
| NC_037641.1 | 12258209 | SNV | 1 | G | A | Homozygous   |
| NC_037641.1 | 12258215 | SNV | 1 | A | G | Homozygous   |
| NC_037641.1 | 12258242 | SNV | 1 | A | G | Homozygous   |
| NC_037641.1 | 12259270 | SNV | 1 | C | T | Heterozygous |
| NC_037641.1 | 12259283 | SNV | 1 | T | C | Heterozygous |
| NC_037641.1 | 12259288 | SNV | 1 | T | C | Homozygous   |
| NC_037641.1 | 12259317 | SNV | 1 | T | A | Homozygous   |
| NC_037641.1 | 12259757 | SNV | 1 | A | C | Homozygous   |
| NC_037641.1 | 12259782 | SNV | 1 | A | G | Homozygous   |
| NC_037641.1 | 12259917 | SNV | 1 | A | G | Heterozygous |
| NC_037641.1 | 12260228 | SNV | 1 | T | C | Heterozygous |
| NC_037641.1 | 12260233 | SNV | 1 | T | C | Heterozygous |
| NC_037641.1 | 12260237 | SNV | 1 | C | T | Heterozygous |
| NC_037641.1 | 12260240 | SNV | 1 | T | C | Heterozygous |

|             |          |     |   |   |   |              |
|-------------|----------|-----|---|---|---|--------------|
| NC_037641.1 | 12260712 | SNV | 1 | C | T | Heterozygous |
| NC_037641.1 | 12260716 | SNV | 1 | A | G | Heterozygous |
| NC_037641.1 | 12260719 | SNV | 1 | A | G | Heterozygous |
| NC_037641.1 | 12260825 | SNV | 1 | G | A | Heterozygous |
| NC_037641.1 | 12260912 | SNV | 1 | T | C | Homozygous   |
| NC_037641.1 | 12260939 | SNV | 1 | G | A | Heterozygous |
| NC_037641.1 | 12261037 | SNV | 1 | T | C | Homozygous   |
| NC_037641.1 | 12261204 | SNV | 1 | T | C | Heterozygous |
| NC_037641.1 | 12261345 | SNV | 1 | T | C | Homozygous   |
| NC_037641.1 | 12261502 | SNV | 1 | A | G | Homozygous   |
| NC_037641.1 | 12261550 | SNV | 1 | A | C | Homozygous   |
| NC_037641.1 | 12261599 | SNV | 1 | T | C | Homozygous   |
| NC_037641.1 | 12261684 | SNV | 1 | T | C | Homozygous   |
| NC_037641.1 | 12262378 | SNV | 1 | T | C | Homozygous   |
| NC_037641.1 | 12263571 | SNV | 1 | T | C | Homozygous   |
| NC_037641.1 | 12263781 | SNV | 1 | T | C | Heterozygous |
| NC_037641.1 | 12263787 | SNV | 1 | T | C | Heterozygous |
| NC_037641.1 | 12263790 | SNV | 1 | T | C | Heterozygous |
| NC_037641.1 | 12263799 | SNV | 1 | T | C | Homozygous   |
| NC_037641.1 | 12263856 | SNV | 1 | C | T | Heterozygous |
| NC_037641.1 | 12263859 | SNV | 1 | T | C | Homozygous   |
| NC_037641.1 | 12263930 | SNV | 1 | T | A | Homozygous   |
| NC_037641.1 | 12264051 | SNV | 1 | T | C | Homozygous   |
| NC_037641.1 | 12264251 | SNV | 1 | A | G | Homozygous   |
| NC_037641.1 | 12264253 | SNV | 1 | A | G | Homozygous   |
| NC_037641.1 | 12264255 | SNV | 1 | C | T | Heterozygous |
| NC_037641.1 | 12264274 | SNV | 1 | T | C | Homozygous   |
| NC_037641.1 | 12264334 | SNV | 1 | G | A | Homozygous   |
| NC_037641.1 | 12264431 | SNV | 1 | T | C | Homozygous   |
| NC_037641.1 | 12264464 | SNV | 1 | A | G | Homozygous   |
| NC_037641.1 | 12264490 | SNV | 1 | G | A | Homozygous   |
| NC_037641.1 | 12264514 | SNV | 1 | G | A | Homozygous   |
| NC_037641.1 | 12264630 | SNV | 1 | G | A | Homozygous   |
| NC_037641.1 | 12264673 | SNV | 1 | T | C | Homozygous   |
| NC_037641.1 | 12264675 | SNV | 1 | C | T | Homozygous   |
| NC_037641.1 | 12264691 | SNV | 1 | A | G | Homozygous   |
| NC_037641.1 | 12265125 | SNV | 1 | G | A | Homozygous   |
| NC_037641.1 | 12265128 | SNV | 1 | A | G | Homozygous   |
| NC_037641.1 | 12265130 | SNV | 1 | A | G | Homozygous   |
| NC_037641.1 | 12265509 | SNV | 1 | A | G | Homozygous   |
| NC_037641.1 | 12265657 | SNV | 1 | A | G | Homozygous   |
| NC_037641.1 | 12265738 | SNV | 1 | C | T | Heterozygous |
| NC_037641.1 | 12266393 | SNV | 1 | C | T | Heterozygous |
| NC_037641.1 | 12266657 | SNV | 1 | C | G | Homozygous   |
| NC_037641.1 | 12267924 | SNV | 1 | G | A | Heterozygous |
| NC_037641.1 | 12267983 | SNV | 1 | T | C | Homozygous   |
| NC_037641.1 | 12268261 | SNV | 1 | G | T | Homozygous   |
| NC_037641.1 | 12268396 | SNV | 1 | T | C | Homozygous   |
| NC_037641.1 | 12268398 | SNV | 1 | T | G | Homozygous   |
| NC_037641.1 | 12272459 | SNV | 1 | T | C | Heterozygous |
| NC_037641.1 | 12273199 | SNV | 1 | A | G | Homozygous   |

|             |          |     |   |   |   |              |
|-------------|----------|-----|---|---|---|--------------|
| NC_037641.1 | 12273319 | SNV | 1 | G | C | Heterozygous |
| NC_037641.1 | 12273739 | SNV | 1 | A | G | Heterozygous |
| NC_037641.1 | 12273745 | SNV | 1 | G | A | Homozygous   |
| NC_037641.1 | 12273747 | SNV | 1 | T | G | Homozygous   |
| NC_037641.1 | 12273763 | SNV | 1 | A | G | Homozygous   |
| NC_037641.1 | 12273772 | SNV | 1 | T | A | Homozygous   |
| NC_037641.1 | 12273782 | SNV | 1 | A | T | Homozygous   |
| NC_037641.1 | 12276694 | SNV | 1 | A | T | Homozygous   |
| NC_037641.1 | 12277243 | SNV | 1 | G | A | Heterozygous |
| NC_037641.1 | 12277264 | SNV | 1 | T | C | Heterozygous |
| NC_037641.1 | 12277341 | SNV | 1 | G | A | Heterozygous |
| NC_037641.1 | 12278886 | SNV | 1 | C | T | Heterozygous |
| NC_037641.1 | 12325197 | SNV | 1 | T | C | Homozygous   |
| NC_037641.1 | 12325338 | SNV | 1 | C | T | Heterozygous |
| NC_037641.1 | 12325339 | SNV | 1 | T | C | Heterozygous |
| NC_037641.1 | 12325496 | SNV | 1 | C | G | Homozygous   |
| NC_037641.1 | 12326125 | SNV | 1 | T | C | Homozygous   |
| NC_037641.1 | 12326132 | SNV | 1 | G | A | Homozygous   |
| NC_037641.1 | 12327009 | SNV | 1 | A | G | Homozygous   |
| NC_037641.1 | 12340463 | SNV | 1 | A | G | Homozygous   |
| NC_037641.1 | 12341227 | SNV | 1 | C | T | Heterozygous |
| NC_037641.1 | 12342453 | SNV | 1 | A | G | Homozygous   |
| NC_037641.1 | 12343294 | SNV | 1 | T | A | Heterozygous |
| NC_037641.1 | 12343305 | SNV | 1 | A | C | Heterozygous |
| NC_037641.1 | 12343307 | SNV | 1 | A | T | Homozygous   |
| NC_037641.1 | 12343309 | SNV | 1 | T | A | Heterozygous |
| NC_037641.1 | 12343321 | SNV | 1 | T | G | Heterozygous |
| NC_037641.1 | 12343324 | SNV | 1 | A | G | Heterozygous |
| NC_037641.1 | 12343356 | SNV | 1 | A | T | Homozygous   |
| NC_037641.1 | 12343360 | SNV | 1 | A | T | Homozygous   |
| NC_037641.1 | 12343527 | SNV | 1 | A | C | Homozygous   |
| NC_037641.1 | 12343531 | SNV | 1 | A | G | Homozygous   |
| NC_037641.1 | 12343538 | SNV | 1 | T | C | Homozygous   |
| NC_037641.1 | 12343550 | SNV | 1 | T | A | Homozygous   |
| NC_037641.1 | 12353922 | SNV | 1 | T | G | Homozygous   |
| NC_037641.1 | 12354030 | SNV | 1 | G | C | Homozygous   |
| NC_037641.1 | 12354036 | SNV | 1 | A | G | Homozygous   |
| NC_037641.1 | 12354087 | SNV | 1 | G | C | Heterozygous |
| NC_037641.1 | 12354614 | SNV | 1 | T | C | Heterozygous |
| NC_037641.1 | 12358172 | SNV | 1 | T | C | Heterozygous |
| NC_037641.1 | 12359876 | SNV | 1 | A | G | Homozygous   |
| NC_037641.1 | 12359901 | SNV | 1 | A | G | Homozygous   |
| NC_037641.1 | 12360220 | SNV | 1 | A | G | Homozygous   |
| NC_037641.1 | 12360747 | SNV | 1 | T | C | Heterozygous |
| NC_037641.1 | 12360789 | SNV | 1 | C | T | Homozygous   |
| NC_037641.1 | 12360813 | SNV | 1 | T | C | Heterozygous |
| NC_037641.1 | 12360870 | SNV | 1 | G | A | Homozygous   |
| NC_037641.1 | 12361400 | SNV | 1 | G | A | Homozygous   |
| NC_037641.1 | 12361594 | SNV | 1 | G | A | Homozygous   |
| NC_037641.1 | 12361764 | SNV | 1 | C | T | Homozygous   |
| NC_037641.1 | 12361910 | SNV | 1 | A | G | Homozygous   |

|             |          |     |   |   |   |              |
|-------------|----------|-----|---|---|---|--------------|
| NC_037641.1 | 12362495 | SNV | 1 | A | C | Homozygous   |
| NC_037641.1 | 12362500 | SNV | 1 | A | G | Homozygous   |
| NC_037641.1 | 12362833 | SNV | 1 | C | T | Heterozygous |
| NC_037641.1 | 12362953 | SNV | 1 | C | T | Heterozygous |
| NC_037641.1 | 12364091 | SNV | 1 | A | T | Heterozygous |
| NC_037641.1 | 12364093 | SNV | 1 | G | A | Heterozygous |
| NC_037641.1 | 12364113 | SNV | 1 | T | G | Heterozygous |
| NC_037641.1 | 12373829 | SNV | 1 | C | T | Heterozygous |
| NC_037641.1 | 12374087 | SNV | 1 | A | G | Homozygous   |
| NC_037641.1 | 12374369 | SNV | 1 | G | A | Homozygous   |
| NC_037641.1 | 12374445 | SNV | 1 | A | C | Heterozygous |
| NC_037641.1 | 12374486 | SNV | 1 | A | G | Heterozygous |
| NC_037641.1 | 12375528 | SNV | 1 | G | A | Homozygous   |
| NC_037641.1 | 12376005 | SNV | 1 | C | T | Homozygous   |
| NC_037641.1 | 12376889 | SNV | 1 | C | T | Homozygous   |
| NC_037641.1 | 12377010 | SNV | 1 | C | A | Homozygous   |
| NC_037641.1 | 12381112 | SNV | 1 | A | G | Heterozygous |
| NC_037641.1 | 12381933 | SNV | 1 | A | G | Homozygous   |
| NC_037641.1 | 12381935 | SNV | 1 | A | C | Homozygous   |
| NC_037641.1 | 12381941 | SNV | 1 | T | A | Homozygous   |
| NC_037641.1 | 12381944 | SNV | 1 | T | C | Homozygous   |
| NC_037641.1 | 12387999 | SNV | 1 | T | C | Homozygous   |
| NC_037641.1 | 12388027 | SNV | 1 | T | G | Heterozygous |
| NC_037641.1 | 12388034 | SNV | 1 | T | C | Heterozygous |
| NC_037641.1 | 12388325 | SNV | 1 | T | C | Homozygous   |
| NC_037641.1 | 12388496 | SNV | 1 | C | T | Homozygous   |
| NC_037641.1 | 12388551 | SNV | 1 | G | A | Homozygous   |
| NC_037641.1 | 12388573 | SNV | 1 | C | T | Homozygous   |
| NC_037641.1 | 12388618 | SNV | 1 | C | T | Homozygous   |
| NC_037641.1 | 12388626 | SNV | 1 | C | T | Homozygous   |
| NC_037641.1 | 12388670 | SNV | 1 | G | A | Homozygous   |
| NC_037641.1 | 12388783 | SNV | 1 | T | C | Homozygous   |
| NC_037641.1 | 12388798 | SNV | 1 | A | G | Homozygous   |
| NC_037641.1 | 12388838 | SNV | 1 | T | C | Homozygous   |
| NC_037641.1 | 12388854 | SNV | 1 | G | A | Heterozygous |
| NC_037641.1 | 12388962 | SNV | 1 | C | T | Homozygous   |
| NC_037641.1 | 12392512 | SNV | 1 | G | C | Heterozygous |
| NC_037641.1 | 12392627 | SNV | 1 | G | A | Heterozygous |
| NC_037641.1 | 12392670 | SNV | 1 | A | G | Homozygous   |
| NC_037641.1 | 12392672 | SNV | 1 | C | A | Heterozygous |
| NC_037641.1 | 12392874 | SNV | 1 | C | G | Heterozygous |
| NC_037641.1 | 12392885 | SNV | 1 | C | T | Heterozygous |
| NC_037641.1 | 12392897 | SNV | 1 | T | C | Homozygous   |
| NC_037641.1 | 12392906 | SNV | 1 | C | T | Heterozygous |
| NC_037641.1 | 12392915 | SNV | 1 | T | A | Heterozygous |
| NC_037641.1 | 12393074 | SNV | 1 | G | A | Heterozygous |
| NC_037641.1 | 12393125 | SNV | 1 | A | G | Homozygous   |
| NC_037641.1 | 12393131 | SNV | 1 | T | C | Heterozygous |
| NC_037641.1 | 12393135 | SNV | 1 | A | G | Heterozygous |
| NC_037641.1 | 12395015 | SNV | 1 | T | C | Heterozygous |
| NC_037641.1 | 12395102 | SNV | 1 | T | C | Homozygous   |

|             |          |     |   |   |   |              |
|-------------|----------|-----|---|---|---|--------------|
| NC_037641.1 | 12396365 | SNV | 1 | G | A | Heterozygous |
| NC_037641.1 | 12397655 | SNV | 1 | G | C | Homozygous   |
| NC_037641.1 | 12399075 | SNV | 1 | T | A | Homozygous   |
| NC_037641.1 | 12400236 | SNV | 1 | A | G | Homozygous   |
| NC_037641.1 | 12401840 | SNV | 1 | T | C | Heterozygous |
| NC_037641.1 | 12402318 | SNV | 1 | A | T | Heterozygous |
| NC_037641.1 | 12409181 | SNV | 1 | C | T | Heterozygous |
| NC_037641.1 | 12409671 | SNV | 1 | G | T | Homozygous   |
| NC_037641.1 | 12409926 | SNV | 1 | T | C | Heterozygous |
| NC_037641.1 | 12411230 | SNV | 1 | C | T | Heterozygous |
| NC_037641.1 | 12411305 | SNV | 1 | T | C | Homozygous   |
| NC_037641.1 | 12411311 | SNV | 1 | A | G | Homozygous   |
| NC_037641.1 | 12411355 | SNV | 1 | A | G | Homozygous   |
| NC_037641.1 | 12412498 | SNV | 1 | G | A | Homozygous   |
| NC_037641.1 | 12412697 | SNV | 1 | C | A | Homozygous   |
| NC_037641.1 | 12413016 | SNV | 1 | A | G | Heterozygous |
| NC_037641.1 | 12413028 | SNV | 1 | A | G | Homozygous   |
| NC_037641.1 | 12413149 | SNV | 1 | T | C | Heterozygous |
| NC_037641.1 | 12413202 | SNV | 1 | C | T | Heterozygous |
| NC_037641.1 | 12413222 | SNV | 1 | T | C | Heterozygous |
| NC_037641.1 | 12413534 | SNV | 1 | T | C | Homozygous   |
| NC_037641.1 | 12413931 | SNV | 1 | A | G | Homozygous   |
| NC_037641.1 | 12414155 | SNV | 1 | A | G | Homozygous   |
| NC_037641.1 | 12414291 | SNV | 1 | A | G | Homozygous   |
| NC_037641.1 | 12414599 | SNV | 1 | T | G | Homozygous   |
| NC_037641.1 | 12414614 | SNV | 1 | A | G | Heterozygous |
| NC_037641.1 | 12414640 | SNV | 1 | T | C | Homozygous   |
| NC_037641.1 | 12414643 | SNV | 1 | C | T | Heterozygous |
| NC_037641.1 | 12414723 | SNV | 1 | A | G | Homozygous   |
| NC_037641.1 | 12414995 | SNV | 1 | C | T | Heterozygous |
| NC_037641.1 | 12415065 | SNV | 1 | A | G | Heterozygous |
| NC_037641.1 | 12415086 | SNV | 1 | T | C | Homozygous   |
| NC_037641.1 | 12415112 | SNV | 1 | A | G | Homozygous   |
| NC_037641.1 | 12415120 | SNV | 1 | A | G | Homozygous   |
| NC_037641.1 | 12415362 | SNV | 1 | C | T | Heterozygous |
| NC_037641.1 | 12415507 | SNV | 1 | A | G | Homozygous   |
| NC_037641.1 | 12415595 | SNV | 1 | G | A | Homozygous   |
| NC_037641.1 | 12415929 | SNV | 1 | A | G | Homozygous   |
| NC_037641.1 | 12415955 | SNV | 1 | T | C | Homozygous   |
| NC_037641.1 | 12416287 | SNV | 1 | C | T | Homozygous   |
| NC_037641.1 | 12416354 | SNV | 1 | A | G | Homozygous   |
| NC_037641.1 | 12416651 | SNV | 1 | A | C | Heterozygous |
| NC_037641.1 | 12416682 | SNV | 1 | C | T | Homozygous   |
| NC_037641.1 | 12416690 | SNV | 1 | G | C | Heterozygous |
| NC_037641.1 | 12416879 | SNV | 1 | T | C | Homozygous   |
| NC_037641.1 | 12416909 | SNV | 1 | A | C | Heterozygous |
| NC_037641.1 | 12416993 | SNV | 1 | A | C | Heterozygous |
| NC_037641.1 | 12417008 | SNV | 1 | T | C | Heterozygous |
| NC_037641.1 | 12417548 | SNV | 1 | G | A | Homozygous   |
| NC_037641.1 | 12417584 | SNV | 1 | T | C | Heterozygous |
| NC_037641.1 | 12417827 | SNV | 1 | T | C | Homozygous   |



|             |          |     |   |   |   |              |
|-------------|----------|-----|---|---|---|--------------|
| NC_037641.1 | 12417837 | SNV | 1 | A | G | Homozygous   |
| NC_037641.1 | 12417933 | SNV | 1 | G | A | Heterozygous |
| NC_037641.1 | 12418010 | SNV | 1 | T | C | Homozygous   |
| NC_037641.1 | 12418523 | SNV | 1 | A | C | Homozygous   |
| NC_037641.1 | 12418787 | SNV | 1 | C | T | Homozygous   |
| NC_037641.1 | 12423144 | SNV | 1 | C | A | Homozygous   |
| NC_037641.1 | 12423146 | SNV | 1 | A | C | Homozygous   |
| NC_037641.1 | 12423148 | SNV | 1 | C | T | Homozygous   |
| NC_037641.1 | 12423195 | SNV | 1 | G | A | Heterozygous |
| NC_037641.1 | 12423199 | SNV | 1 | G | A | Heterozygous |
| NC_037641.1 | 12431470 | SNV | 1 | T | C | Homozygous   |
| NC_037641.1 | 12431569 | SNV | 1 | G | A | Heterozygous |
| NC_037641.1 | 12431596 | SNV | 1 | C | T | Heterozygous |
| NC_037641.1 | 12432045 | SNV | 1 | A | G | Homozygous   |
| NC_037641.1 | 12432047 | SNV | 1 | A | G | Homozygous   |
| NC_037641.1 | 12432148 | SNV | 1 | C | T | Homozygous   |
| NC_037641.1 | 12434736 | SNV | 1 | G | A | Homozygous   |
| NC_037641.1 | 12436614 | SNV | 1 | G | A | Heterozygous |
| NC_037641.1 | 12436935 | SNV | 1 | A | G | Heterozygous |
| NC_037641.1 | 12437394 | SNV | 1 | T | C | Homozygous   |
| NC_037641.1 | 12437859 | SNV | 1 | A | G | Homozygous   |
| NC_037641.1 | 12438169 | SNV | 1 | C | T | Homozygous   |
| NC_037641.1 | 12439724 | SNV | 1 | A | G | Homozygous   |
| NC_037641.1 | 12440000 | SNV | 1 | A | G | Homozygous   |
| NC_037641.1 | 12440481 | SNV | 1 | G | A | Homozygous   |
| NC_037641.1 | 12440581 | SNV | 1 | T | C | Homozygous   |
| NC_037641.1 | 12442805 | SNV | 1 | C | T | Heterozygous |
| NC_037641.1 | 12442807 | SNV | 1 | C | T | Heterozygous |
| NC_037641.1 | 12443386 | SNV | 1 | T | C | Homozygous   |
| NC_037641.1 | 12443469 | SNV | 1 | G | T | Homozygous   |
| NC_037641.1 | 12443506 | SNV | 1 | T | C | Heterozygous |
| NC_037641.1 | 12443572 | SNV | 1 | T | G | Homozygous   |
| NC_037641.1 | 12445955 | SNV | 1 | T | C | Homozygous   |
| NC_037641.1 | 12445957 | SNV | 1 | T | A | Homozygous   |
| NC_037641.1 | 12445959 | SNV | 1 | A | T | Homozygous   |
| NC_037641.1 | 12445962 | SNV | 1 | A | T | Homozygous   |
| NC_037641.1 | 12445964 | SNV | 1 | C | T | Homozygous   |
| NC_037641.1 | 12445979 | SNV | 1 | C | A | Heterozygous |
| NC_037641.1 | 12447387 | SNV | 1 | T | G | Homozygous   |
| NC_037641.1 | 12447494 | SNV | 1 | C | T | Heterozygous |
| NC_037641.1 | 12447651 | SNV | 1 | G | T | Heterozygous |
| NC_037641.1 | 12447657 | SNV | 1 | G | T | Heterozygous |
| NC_037641.1 | 12451696 | SNV | 1 | A | G | Homozygous   |
| NC_037641.1 | 12456355 | SNV | 1 | A | G | Homozygous   |
| NC_037641.1 | 12456392 | SNV | 1 | A | G | Heterozygous |
| NC_037641.1 | 12458069 | SNV | 1 | G | A | Homozygous   |
| NC_037641.1 | 12460427 | SNV | 1 | C | T | Heterozygous |
| NC_037641.1 | 12460576 | SNV | 1 | T | C | Homozygous   |
| NC_037641.1 | 12461120 | SNV | 1 | A | G | Heterozygous |
| NC_037641.1 | 12461191 | SNV | 1 | T | C | Heterozygous |
| NC_037641.1 | 12461199 | SNV | 1 | T | C | Homozygous   |

|             |          |     |   |   |   |              |
|-------------|----------|-----|---|---|---|--------------|
| NC_037641.1 | 12464190 | SNV | 1 | G | A | Heterozygous |
| NC_037641.1 | 12464265 | SNV | 1 | A | T | Heterozygous |
| NC_037641.1 | 12464280 | SNV | 1 | T | C | Homozygous   |
| NC_037641.1 | 12464326 | SNV | 1 | T | C | Homozygous   |
| NC_037641.1 | 12464355 | SNV | 1 | C | T | Heterozygous |
| NC_037641.1 | 12464357 | SNV | 1 | A | G | Homozygous   |
| NC_037641.1 | 12467069 | SNV | 1 | T | C | Heterozygous |
| NC_037641.1 | 12467111 | SNV | 1 | A | G | Homozygous   |
| NC_037641.1 | 12467117 | SNV | 1 | A | T | Homozygous   |
| NC_037641.1 | 12467443 | SNV | 1 | G | A | Homozygous   |
| NC_037641.1 | 12470894 | SNV | 1 | A | G | Heterozygous |
| NC_037641.1 | 12470903 | SNV | 1 | C | T | Homozygous   |
| NC_037641.1 | 12471185 | SNV | 1 | A | G | Homozygous   |
| NC_037641.1 | 12471208 | SNV | 1 | A | G | Heterozygous |
| NC_037641.1 | 12471346 | SNV | 1 | A | G | Homozygous   |
| NC_037641.1 | 12471445 | SNV | 1 | T | A | Heterozygous |
| NC_037641.1 | 12471663 | SNV | 1 | A | T | Homozygous   |
| NC_037641.1 | 12471835 | SNV | 1 | T | C | Heterozygous |
| NC_037641.1 | 12471855 | SNV | 1 | T | C | Heterozygous |
| NC_037641.1 | 12472305 | SNV | 1 | A | T | Heterozygous |
| NC_037641.1 | 12472314 | SNV | 1 | A | C | Heterozygous |
| NC_037641.1 | 12472323 | SNV | 1 | A | C | Heterozygous |
| NC_037641.1 | 12472327 | SNV | 1 | T | A | Heterozygous |
| NC_037641.1 | 12472328 | SNV | 1 | T | C | Heterozygous |
| NC_037641.1 | 12472333 | SNV | 1 | T | C | Heterozygous |
| NC_037641.1 | 12472342 | SNV | 1 | C | T | Heterozygous |
| NC_037641.1 | 12472374 | SNV | 1 | T | A | Homozygous   |
| NC_037641.1 | 12472467 | SNV | 1 | G | A | Heterozygous |
| NC_037641.1 | 12472555 | SNV | 1 | G | A | Heterozygous |
| NC_037641.1 | 12472563 | SNV | 1 | T | C | Homozygous   |
| NC_037641.1 | 12472739 | SNV | 1 | T | A | Heterozygous |
| NC_037641.1 | 12472883 | SNV | 1 | A | G | Homozygous   |
| NC_037641.1 | 12472944 | SNV | 1 | C | T | Homozygous   |
| NC_037641.1 | 12476192 | SNV | 1 | G | A | Homozygous   |
| NC_037641.1 | 12476209 | SNV | 1 | G | A | Heterozygous |
| NC_037641.1 | 12476211 | SNV | 1 | G | A | Heterozygous |
| NC_037641.1 | 12476219 | SNV | 1 | G | A | Heterozygous |
| NC_037641.1 | 12476221 | SNV | 1 | G | A | Heterozygous |
| NC_037641.1 | 12476223 | SNV | 1 | G | A | Heterozygous |
| NC_037641.1 | 12476233 | SNV | 1 | G | T | Heterozygous |
| NC_037641.1 | 12476235 | SNV | 1 | G | A | Heterozygous |
| NC_037641.1 | 12476238 | SNV | 1 | A | G | Heterozygous |
| NC_037641.1 | 12476242 | SNV | 1 | A | G | Homozygous   |
| NC_037641.1 | 12476245 | SNV | 1 | G | T | Heterozygous |
| NC_037641.1 | 12476247 | SNV | 1 | G | A | Heterozygous |
| NC_037641.1 | 12476253 | SNV | 1 | G | C | Heterozygous |
| NC_037641.1 | 12476287 | SNV | 1 | G | A | Heterozygous |
| NC_037641.1 | 12477783 | SNV | 1 | A | G | Homozygous   |
| NC_037641.1 | 12478899 | SNV | 1 | A | G | Homozygous   |
| NC_037641.1 | 12479193 | SNV | 1 | G | A | Heterozygous |
| NC_037641.1 | 12479251 | SNV | 1 | C | T | Homozygous   |

|             |          |     |   |   |   |              |
|-------------|----------|-----|---|---|---|--------------|
| NC_037641.1 | 12481747 | SNV | 1 | C | G | Heterozygous |
| NC_037641.1 | 12488171 | SNV | 1 | C | T | Heterozygous |
| NC_037641.1 | 12488307 | SNV | 1 | G | A | Homozygous   |
| NC_037641.1 | 12493798 | SNV | 1 | G | T | Heterozygous |
| NC_037641.1 | 12493804 | SNV | 1 | G | A | Homozygous   |
| NC_037641.1 | 12493983 | SNV | 1 | A | G | Homozygous   |
| NC_037641.1 | 12494070 | SNV | 1 | A | G | Homozygous   |
| NC_037641.1 | 12494085 | SNV | 1 | G | A | Heterozygous |
| NC_037641.1 | 12494578 | SNV | 1 | C | G | Heterozygous |
| NC_037641.1 | 12494854 | SNV | 1 | A | G | Homozygous   |
| NC_037641.1 | 12494868 | SNV | 1 | T | A | Homozygous   |
| NC_037641.1 | 12495205 | SNV | 1 | G | A | Heterozygous |
| NC_037641.1 | 12495426 | SNV | 1 | T | C | Heterozygous |
| NC_037641.1 | 12495676 | SNV | 1 | C | T | Homozygous   |
| NC_037641.1 | 12495764 | SNV | 1 | G | A | Heterozygous |
| NC_037641.1 | 12496395 | SNV | 1 | T | C | Heterozygous |
| NC_037641.1 | 12496503 | SNV | 1 | T | C | Homozygous   |
| NC_037641.1 | 12496640 | SNV | 1 | C | G | Heterozygous |
| NC_037641.1 | 12496655 | SNV | 1 | T | C | Heterozygous |
| NC_037641.1 | 12496754 | SNV | 1 | G | A | Homozygous   |
| NC_037641.1 | 12496842 | SNV | 1 | A | G | Heterozygous |
| NC_037641.1 | 12497331 | SNV | 1 | T | C | Heterozygous |
| NC_037641.1 | 12497643 | SNV | 1 | C | T | Homozygous   |
| NC_037641.1 | 12497667 | SNV | 1 | T | C | Homozygous   |
| NC_037641.1 | 12497691 | SNV | 1 | T | C | Homozygous   |
| NC_037641.1 | 12506416 | SNV | 1 | C | T | Heterozygous |
| NC_037641.1 | 12510104 | SNV | 1 | T | C | Heterozygous |
| NC_037641.1 | 12510443 | SNV | 1 | T | C | Homozygous   |
| NC_037641.1 | 12510520 | SNV | 1 | A | T | Homozygous   |
| NC_037641.1 | 12510531 | SNV | 1 | A | T | Heterozygous |
| NC_037641.1 | 12510536 | SNV | 1 | C | T | Heterozygous |
| NC_037641.1 | 12520368 | SNV | 1 | C | T | Heterozygous |
| NC_037641.1 | 12520373 | SNV | 1 | G | C | Homozygous   |
| NC_037641.1 | 12520375 | SNV | 1 | C | T | Heterozygous |
| NC_037641.1 | 12520386 | SNV | 1 | C | T | Heterozygous |
| NC_037641.1 | 12522813 | SNV | 1 | C | T | Homozygous   |
| NC_037641.1 | 12522815 | SNV | 1 | A | C | Homozygous   |
| NC_037641.1 | 12522868 | SNV | 1 | G | A | Homozygous   |
| NC_037641.1 | 12526201 | SNV | 1 | G | A | Heterozygous |
| NC_037641.1 | 12526239 | SNV | 1 | G | A | Heterozygous |
| NC_037641.1 | 12526437 | SNV | 1 | G | A | Heterozygous |
| NC_037641.1 | 12526465 | SNV | 1 | T | G | Heterozygous |
| NC_037641.1 | 12526523 | SNV | 1 | T | C | Heterozygous |
| NC_037641.1 | 12526530 | SNV | 1 | C | T | Heterozygous |
| NC_037641.1 | 12526762 | SNV | 1 | A | T | Homozygous   |
| NC_037641.1 | 12532173 | SNV | 1 | C | T | Homozygous   |
| NC_037641.1 | 12532181 | SNV | 1 | C | T | Heterozygous |
| NC_037641.1 | 12532184 | SNV | 1 | T | A | Heterozygous |
| NC_037641.1 | 12532191 | SNV | 1 | C | T | Heterozygous |
| NC_037641.1 | 12532224 | SNV | 1 | T | G | Heterozygous |
| NC_037641.1 | 12532228 | SNV | 1 | G | T | Homozygous   |

|             |          |     |   |   |   |              |
|-------------|----------|-----|---|---|---|--------------|
| NC_037641.1 | 12532234 | SNV | 1 | T | G | Homozygous   |
| NC_037641.1 | 12532238 | SNV | 1 | T | G | Homozygous   |
| NC_037641.1 | 12532244 | SNV | 1 | G | A | Homozygous   |
| NC_037641.1 | 12532250 | SNV | 1 | T | C | Heterozygous |
| NC_037641.1 | 12532253 | SNV | 1 | C | T | Homozygous   |
| NC_037641.1 | 12532255 | SNV | 1 | C | T | Homozygous   |
| NC_037641.1 | 12532258 | SNV | 1 | C | A | Heterozygous |
| NC_037641.1 | 12532532 | SNV | 1 | G | A | Homozygous   |
| NC_037641.1 | 12533071 | SNV | 1 | T | A | Homozygous   |
| NC_037641.1 | 12533094 | SNV | 1 | C | A | Homozygous   |
| NC_037641.1 | 12535358 | SNV | 1 | T | C | Homozygous   |
| NC_037641.1 | 12535364 | SNV | 1 | C | T | Homozygous   |
| NC_037641.1 | 12535388 | SNV | 1 | C | G | Homozygous   |
| NC_037641.1 | 12535392 | SNV | 1 | G | T | Homozygous   |
| NC_037641.1 | 12535397 | SNV | 1 | T | C | Heterozygous |
| NC_037641.1 | 12539986 | SNV | 1 | A | G | Homozygous   |
| NC_037641.1 | 12539991 | SNV | 1 | A | G | Homozygous   |
| NC_037641.1 | 12540003 | SNV | 1 | A | G | Homozygous   |
| NC_037641.1 | 12540126 | SNV | 1 | A | G | Heterozygous |
| NC_037641.1 | 12540128 | SNV | 1 | A | G | Heterozygous |
| NC_037641.1 | 12540130 | SNV | 1 | A | G | Heterozygous |
| NC_037641.1 | 12540134 | SNV | 1 | A | G | Heterozygous |
| NC_037641.1 | 12540136 | SNV | 1 | A | G | Heterozygous |
| NC_037641.1 | 12540478 | SNV | 1 | G | A | Heterozygous |
| NC_037641.1 | 12540493 | SNV | 1 | A | G | Heterozygous |
| NC_037641.1 | 12541858 | SNV | 1 | C | T | Homozygous   |
| NC_037641.1 | 12541889 | SNV | 1 | G | C | Homozygous   |
| NC_037641.1 | 12541895 | SNV | 1 | T | C | Homozygous   |
| NC_037641.1 | 12541979 | SNV | 1 | G | A | Heterozygous |
| NC_037641.1 | 12541983 | SNV | 1 | T | G | Heterozygous |
| NC_037641.1 | 12542934 | SNV | 1 | A | T | Heterozygous |
| NC_037641.1 | 12543033 | SNV | 1 | C | A | Heterozygous |
| NC_037641.1 | 12543035 | SNV | 1 | A | C | Heterozygous |
| NC_037641.1 | 12543416 | SNV | 1 | G | A | Heterozygous |
| NC_037641.1 | 12543447 | SNV | 1 | A | G | Homozygous   |
| NC_037641.1 | 12543491 | SNV | 1 | C | A | Heterozygous |
| NC_037641.1 | 12543539 | SNV | 1 | C | A | Homozygous   |
| NC_037641.1 | 12543767 | SNV | 1 | C | T | Heterozygous |
| NC_037641.1 | 12543813 | SNV | 1 | C | T | Heterozygous |
| NC_037641.1 | 12544090 | SNV | 1 | T | C | Homozygous   |
| NC_037641.1 | 12544216 | SNV | 1 | G | A | Homozygous   |
| NC_037641.1 | 12544219 | SNV | 1 | G | A | Homozygous   |
| NC_037641.1 | 12544516 | SNV | 1 | A | T | Heterozygous |
| NC_037641.1 | 12544694 | SNV | 1 | G | T | Heterozygous |
| NC_037641.1 | 12544697 | SNV | 1 | C | T | Heterozygous |
| NC_037641.1 | 12544815 | SNV | 1 | T | A | Homozygous   |
| NC_037641.1 | 12545367 | SNV | 1 | T | A | Homozygous   |
| NC_037641.1 | 12545379 | SNV | 1 | A | T | Homozygous   |
| NC_037641.1 | 12545382 | SNV | 1 | G | A | Homozygous   |
| NC_037641.1 | 12545399 | SNV | 1 | A | C | Homozygous   |
| NC_037641.1 | 12545653 | SNV | 1 | C | G | Heterozygous |

|             |          |     |   |   |   |              |
|-------------|----------|-----|---|---|---|--------------|
| NC_037641.1 | 12545667 | SNV | 1 | C | A | Heterozygous |
| NC_037641.1 | 12545670 | SNV | 1 | T | C | Heterozygous |
| NC_037641.1 | 12546329 | SNV | 1 | T | A | Heterozygous |
| NC_037641.1 | 12546332 | SNV | 1 | T | A | Heterozygous |
| NC_037641.1 | 12546345 | SNV | 1 | G | C | Heterozygous |
| NC_037641.1 | 12546350 | SNV | 1 | A | T | Homozygous   |
| NC_037641.1 | 12546377 | SNV | 1 | G | C | Heterozygous |
| NC_037641.1 | 12546389 | SNV | 1 | G | A | Heterozygous |
| NC_037641.1 | 12546636 | SNV | 1 | A | G | Homozygous   |
| NC_037641.1 | 12546905 | SNV | 1 | A | G | Homozygous   |
| NC_037641.1 | 12547235 | SNV | 1 | C | A | Heterozygous |
| NC_037641.1 | 12547428 | SNV | 1 | C | T | Homozygous   |
| NC_037641.1 | 12547515 | SNV | 1 | G | T | Heterozygous |
| NC_037641.1 | 12547545 | SNV | 1 | C | T | Heterozygous |
| NC_037641.1 | 12547836 | SNV | 1 | G | A | Homozygous   |
| NC_037641.1 | 12547861 | SNV | 1 | C | T | Homozygous   |
| NC_037641.1 | 12547865 | SNV | 1 | G | A | Homozygous   |
| NC_037641.1 | 12547868 | SNV | 1 | C | T | Homozygous   |
| NC_037641.1 | 12547870 | SNV | 1 | T | C | Homozygous   |
| NC_037641.1 | 12547904 | SNV | 1 | G | T | Homozygous   |
| NC_037641.1 | 12547906 | SNV | 1 | C | T | Homozygous   |
| NC_037641.1 | 12547910 | SNV | 1 | G | A | Homozygous   |
| NC_037641.1 | 12547913 | SNV | 1 | G | A | Homozygous   |
| NC_037641.1 | 12548535 | SNV | 1 | C | T | Homozygous   |
| NC_037641.1 | 12549664 | SNV | 1 | T | C | Homozygous   |
| NC_037641.1 | 12549814 | SNV | 1 | T | C | Homozygous   |
| NC_037641.1 | 12550091 | SNV | 1 | C | T | Heterozygous |
| NC_037641.1 | 12550108 | SNV | 1 | A | G | Homozygous   |
| NC_037641.1 | 12550439 | SNV | 1 | G | A | Homozygous   |
| NC_037641.1 | 12552379 | SNV | 1 | T | A | Homozygous   |
| NC_037641.1 | 12553747 | SNV | 1 | T | C | Homozygous   |
| NC_037641.1 | 12553856 | SNV | 1 | T | G | Homozygous   |
| NC_037641.1 | 12553859 | SNV | 1 | G | A | Homozygous   |
| NC_037641.1 | 12554271 | SNV | 1 | G | T | Homozygous   |
| NC_037641.1 | 12559251 | SNV | 1 | T | C | Homozygous   |
| NC_037641.1 | 12559616 | SNV | 1 | C | T | Heterozygous |
| NC_037641.1 | 12559638 | SNV | 1 | T | C | Homozygous   |
| NC_037641.1 | 12560556 | SNV | 1 | T | A | Heterozygous |
| NC_037641.1 | 12560619 | SNV | 1 | C | T | Heterozygous |
| NC_037641.1 | 12560647 | SNV | 1 | C | G | Homozygous   |
| NC_037641.1 | 12561390 | SNV | 1 | C | T | Heterozygous |
| NC_037641.1 | 12563250 | SNV | 1 | C | T | Homozygous   |
| NC_037641.1 | 12567234 | SNV | 1 | A | G | Homozygous   |
| NC_037641.1 | 12573630 | SNV | 1 | G | A | Heterozygous |
| NC_037641.1 | 12574785 | SNV | 1 | C | T | Heterozygous |
| NC_037641.1 | 12574792 | SNV | 1 | T | A | Heterozygous |
| NC_037641.1 | 12580834 | SNV | 1 | G | T | Heterozygous |
| NC_037641.1 | 12580838 | SNV | 1 | G | T | Heterozygous |
| NC_037641.1 | 12580844 | SNV | 1 | T | C | Heterozygous |
| NC_037641.1 | 12580853 | SNV | 1 | T | C | Heterozygous |
| NC_037641.1 | 12580856 | SNV | 1 | T | G | Homozygous   |

|             |          |     |   |   |   |              |
|-------------|----------|-----|---|---|---|--------------|
| NC_037641.1 | 12580862 | SNV | 1 | T | G | Homozygous   |
| NC_037641.1 | 12580865 | SNV | 1 | T | G | Homozygous   |
| NC_037641.1 | 12580883 | SNV | 1 | T | C | Heterozygous |
| NC_037641.1 | 12580889 | SNV | 1 | A | T | Heterozygous |
| NC_037641.1 | 12580898 | SNV | 1 | G | A | Heterozygous |
| NC_037641.1 | 12580907 | SNV | 1 | T | G | Heterozygous |
| NC_037641.1 | 12580913 | SNV | 1 | T | A | Heterozygous |
| NC_037641.1 | 12580915 | SNV | 1 | T | G | Heterozygous |
| NC_037641.1 | 12580919 | SNV | 1 | T | C | Heterozygous |
| NC_037641.1 | 12580922 | SNV | 1 | T | A | Heterozygous |
| NC_037641.1 | 12580927 | SNV | 1 | T | C | Heterozygous |
| NC_037641.1 | 12580936 | SNV | 1 | C | T | Heterozygous |
| NC_037641.1 | 12583655 | SNV | 1 | G | T | Homozygous   |
| NC_037641.1 | 12584076 | SNV | 1 | G | A | Homozygous   |
| NC_037641.1 | 12584491 | SNV | 1 | A | G | Homozygous   |
| NC_037641.1 | 12584523 | SNV | 1 | C | T | Heterozygous |
| NC_037641.1 | 12587748 | SNV | 1 | T | G | Heterozygous |
| NC_037641.1 | 12587755 | SNV | 1 | T | C | Heterozygous |
| NC_037641.1 | 12587761 | SNV | 1 | T | C | Homozygous   |
| NC_037641.1 | 12587824 | SNV | 1 | G | A | Heterozygous |
| NC_037641.1 | 12588317 | SNV | 1 | A | T | Heterozygous |
| NC_037641.1 | 12589636 | SNV | 1 | G | A | Homozygous   |
| NC_037641.1 | 12589684 | SNV | 1 | A | T | Homozygous   |
| NC_037641.1 | 12589687 | SNV | 1 | G | T | Homozygous   |
| NC_037641.1 | 12589691 | SNV | 1 | G | T | Heterozygous |
| NC_037641.1 | 12589696 | SNV | 1 | G | T | Heterozygous |
| NC_037641.1 | 12589708 | SNV | 1 | G | T | Heterozygous |
| NC_037641.1 | 12589715 | SNV | 1 | A | T | Heterozygous |
| NC_037641.1 | 12589717 | SNV | 1 | G | T | Homozygous   |
| NC_037641.1 | 12589963 | SNV | 1 | G | A | Homozygous   |
| NC_037641.1 | 12590038 | SNV | 1 | G | A | Heterozygous |
| NC_037641.1 | 12590197 | SNV | 1 | A | G | Heterozygous |
| NC_037641.1 | 12590204 | SNV | 1 | C | A | Heterozygous |
| NC_037641.1 | 12590222 | SNV | 1 | C | T | Heterozygous |
| NC_037641.1 | 12590271 | SNV | 1 | G | A | Heterozygous |
| NC_037641.1 | 12600061 | SNV | 1 | G | A | Heterozygous |
| NC_037641.1 | 12600234 | SNV | 1 | G | T | Heterozygous |
| NC_037641.1 | 12600340 | SNV | 1 | A | G | Homozygous   |
| NC_037641.1 | 12600574 | SNV | 1 | C | T | Heterozygous |
| NC_037641.1 | 12600592 | SNV | 1 | A | G | Heterozygous |
| NC_037641.1 | 12600942 | SNV | 1 | A | G | Heterozygous |
| NC_037641.1 | 12604848 | SNV | 1 | C | T | Homozygous   |
| NC_037641.1 | 12605676 | SNV | 1 | A | G | Heterozygous |
| NC_037641.1 | 12605726 | SNV | 1 | G | C | Heterozygous |
| NC_037641.1 | 12605927 | SNV | 1 | A | C | Homozygous   |
| NC_037641.1 | 12605951 | SNV | 1 | A | C | Heterozygous |
| NC_037641.1 | 12605960 | SNV | 1 | C | T | Heterozygous |
| NC_037641.1 | 12606000 | SNV | 1 | T | C | Heterozygous |
| NC_037641.1 | 12606210 | SNV | 1 | T | C | Heterozygous |
| NC_037641.1 | 12606290 | SNV | 1 | C | T | Homozygous   |
| NC_037641.1 | 12606730 | SNV | 1 | A | G | Heterozygous |

|             |          |     |   |   |   |              |
|-------------|----------|-----|---|---|---|--------------|
| NC_037641.1 | 12606747 | SNV | 1 | C | T | Heterozygous |
| NC_037641.1 | 12606870 | SNV | 1 | A | G | Heterozygous |
| NC_037641.1 | 12606898 | SNV | 1 | G | A | Heterozygous |
| NC_037641.1 | 12607580 | SNV | 1 | T | C | Homozygous   |
| NC_037641.1 | 12609448 | SNV | 1 | T | G | Homozygous   |
| NC_037641.1 | 12609471 | SNV | 1 | C | T | Homozygous   |
| NC_037641.1 | 12609487 | SNV | 1 | A | G | Homozygous   |
| NC_037641.1 | 12609489 | SNV | 1 | T | C | Heterozygous |
| NC_037641.1 | 12609582 | SNV | 1 | G | C | Homozygous   |
| NC_037641.1 | 12609928 | SNV | 1 | C | A | Homozygous   |
| NC_037641.1 | 12609948 | SNV | 1 | T | C | Homozygous   |
| NC_037641.1 | 12609970 | SNV | 1 | G | A | Heterozygous |
| NC_037641.1 | 12609982 | SNV | 1 | A | G | Heterozygous |
| NC_037641.1 | 12610063 | SNV | 1 | A | G | Homozygous   |
| NC_037641.1 | 12610202 | SNV | 1 | A | G | Homozygous   |
| NC_037641.1 | 12610232 | SNV | 1 | A | G | Homozygous   |
| NC_037641.1 | 12610298 | SNV | 1 | T | C | Heterozygous |
| NC_037641.1 | 12610352 | SNV | 1 | T | C | Heterozygous |
| NC_037641.1 | 12610355 | SNV | 1 | C | T | Heterozygous |
| NC_037641.1 | 12610795 | SNV | 1 | C | T | Heterozygous |
| NC_037641.1 | 12610810 | SNV | 1 | G | T | Homozygous   |
| NC_037641.1 | 12610873 | SNV | 1 | A | G | Homozygous   |
| NC_037641.1 | 12610948 | SNV | 1 | T | C | Homozygous   |
| NC_037641.1 | 12611011 | SNV | 1 | A | G | Homozygous   |
| NC_037641.1 | 12611014 | SNV | 1 | A | G | Heterozygous |
| NC_037641.1 | 12611488 | SNV | 1 | C | T | Heterozygous |
| NC_037641.1 | 12611518 | SNV | 1 | C | T | Heterozygous |
| NC_037641.1 | 12611535 | SNV | 1 | A | G | Heterozygous |
| NC_037641.1 | 12612137 | SNV | 1 | T | C | Homozygous   |
| NC_037641.1 | 12612675 | SNV | 1 | G | A | Heterozygous |
| NC_037641.1 | 12612816 | SNV | 1 | T | C | Homozygous   |
| NC_037641.1 | 12613529 | SNV | 1 | A | G | Homozygous   |
| NC_037641.1 | 12613942 | SNV | 1 | C | G | Homozygous   |
| NC_037641.1 | 12613966 | SNV | 1 | G | T | Homozygous   |
| NC_037641.1 | 12614359 | SNV | 1 | G | A | Homozygous   |
| NC_037641.1 | 12614451 | SNV | 1 | T | C | Homozygous   |
| NC_037641.1 | 12614969 | SNV | 1 | G | A | Heterozygous |
| NC_037641.1 | 12616201 | SNV | 1 | T | C | Homozygous   |
| NC_037641.1 | 12616368 | SNV | 1 | C | A | Homozygous   |
| NC_037641.1 | 12617222 | SNV | 1 | A | G | Homozygous   |
| NC_037641.1 | 12617228 | SNV | 1 | A | G | Homozygous   |
| NC_037641.1 | 12618114 | SNV | 1 | T | C | Homozygous   |
| NC_037641.1 | 12620049 | SNV | 1 | C | T | Heterozygous |
| NC_037641.1 | 12620050 | SNV | 1 | A | T | Heterozygous |
| NC_037641.1 | 12620069 | SNV | 1 | G | C | Homozygous   |
| NC_037641.1 | 12620077 | SNV | 1 | C | T | Homozygous   |
| NC_037641.1 | 12620145 | SNV | 1 | A | G | Homozygous   |
| NC_037641.1 | 12620165 | SNV | 1 | T | C | Homozygous   |
| NC_037641.1 | 12620244 | SNV | 1 | G | A | Homozygous   |
| NC_037641.1 | 12620417 | SNV | 1 | T | A | Heterozygous |
| NC_037641.1 | 12624488 | SNV | 1 | T | C | Homozygous   |

|             |          |     |   |   |   |              |
|-------------|----------|-----|---|---|---|--------------|
| NC_037641.1 | 12624790 | SNV | 1 | T | C | Heterozygous |
| NC_037641.1 | 12624972 | SNV | 1 | T | A | Heterozygous |
| NC_037641.1 | 12624978 | SNV | 1 | A | T | Heterozygous |
| NC_037641.1 | 12625066 | SNV | 1 | A | G | Heterozygous |
| NC_037641.1 | 12626033 | SNV | 1 | A | G | Heterozygous |
| NC_037641.1 | 12626970 | SNV | 1 | C | T | Homozygous   |
| NC_037641.1 | 12627067 | SNV | 1 | T | A | Homozygous   |
| NC_037641.1 | 12627214 | SNV | 1 | G | A | Homozygous   |
| NC_037641.1 | 12627241 | SNV | 1 | A | G | Homozygous   |
| NC_037641.1 | 12627279 | SNV | 1 | G | A | Homozygous   |
| NC_037641.1 | 12627284 | SNV | 1 | G | A | Homozygous   |
| NC_037641.1 | 12627709 | SNV | 1 | C | T | Heterozygous |
| NC_037641.1 | 12628013 | SNV | 1 | T | A | Heterozygous |
| NC_037641.1 | 12628027 | SNV | 1 | A | T | Heterozygous |
| NC_037641.1 | 12628577 | SNV | 1 | A | T | Homozygous   |
| NC_037641.1 | 12628579 | SNV | 1 | C | G | Homozygous   |
| NC_037641.1 | 12629060 | SNV | 1 | G | A | Heterozygous |
| NC_037641.1 | 12629062 | SNV | 1 | G | A | Homozygous   |
| NC_037641.1 | 12629064 | SNV | 1 | G | T | Homozygous   |
| NC_037641.1 | 12629165 | SNV | 1 | A | T | Heterozygous |
| NC_037641.1 | 12629167 | SNV | 1 | A | T | Heterozygous |
| NC_037641.1 | 12629169 | SNV | 1 | A | T | Heterozygous |
| NC_037641.1 | 12629173 | SNV | 1 | G | T | Heterozygous |
| NC_037641.1 | 12630674 | SNV | 1 | C | A | Homozygous   |
| NC_037641.1 | 12630681 | SNV | 1 | C | T | Homozygous   |
| NC_037641.1 | 12630700 | SNV | 1 | T | C | Homozygous   |
| NC_037641.1 | 12630706 | SNV | 1 | T | C | Homozygous   |
| NC_037641.1 | 12630798 | SNV | 1 | T | A | Homozygous   |
| NC_037641.1 | 12630811 | SNV | 1 | C | G | Homozygous   |
| NC_037641.1 | 12630823 | SNV | 1 | A | C | Homozygous   |
| NC_037641.1 | 12630833 | SNV | 1 | A | G | Homozygous   |
| NC_037641.1 | 12630835 | SNV | 1 | A | C | Homozygous   |
| NC_037641.1 | 12631235 | SNV | 1 | C | T | Homozygous   |
| NC_037641.1 | 12631263 | SNV | 1 | C | T | Homozygous   |
| NC_037641.1 | 12631271 | SNV | 1 | T | C | Homozygous   |
| NC_037641.1 | 12631275 | SNV | 1 | T | G | Homozygous   |
| NC_037641.1 | 12631277 | SNV | 1 | T | A | Homozygous   |
| NC_037641.1 | 12631279 | SNV | 1 | T | A | Heterozygous |
| NC_037641.1 | 12631825 | SNV | 1 | A | G | Heterozygous |
| NC_037641.1 | 12633848 | SNV | 1 | A | T | Homozygous   |
| NC_037641.1 | 12633854 | SNV | 1 | T | G | Homozygous   |
| NC_037641.1 | 12633863 | SNV | 1 | A | G | Heterozygous |
| NC_037641.1 | 12633866 | SNV | 1 | T | G | Heterozygous |
| NC_037641.1 | 12634143 | SNV | 1 | C | G | Homozygous   |
| NC_037641.1 | 12634150 | SNV | 1 | C | A | Homozygous   |
| NC_037641.1 | 12634152 | SNV | 1 | T | A | Homozygous   |
| NC_037641.1 | 12634156 | SNV | 1 | T | A | Homozygous   |
| NC_037641.1 | 12634197 | SNV | 1 | A | G | Heterozygous |
| NC_037641.1 | 12634741 | SNV | 1 | G | T | Heterozygous |
| NC_037641.1 | 12636116 | SNV | 1 | A | C | Homozygous   |
| NC_037641.1 | 12637122 | SNV | 1 | C | A | Homozygous   |



|             |          |     |   |   |   |              |
|-------------|----------|-----|---|---|---|--------------|
| NC_037641.1 | 12637158 | SNV | 1 | T | A | Heterozygous |
| NC_037641.1 | 12639062 | SNV | 1 | T | A | Homozygous   |
| NC_037641.1 | 12639064 | SNV | 1 | A | T | Heterozygous |
| NC_037641.1 | 12640143 | SNV | 1 | A | T | Homozygous   |
| NC_037641.1 | 12640197 | SNV | 1 | T | A | Heterozygous |
| NC_037641.1 | 12640202 | SNV | 1 | G | A | Heterozygous |
| NC_037641.1 | 12640206 | SNV | 1 | G | A | Heterozygous |
| NC_037641.1 | 12640252 | SNV | 1 | A | C | Heterozygous |
| NC_037641.1 | 12640256 | SNV | 1 | A | G | Heterozygous |
| NC_037641.1 | 12640258 | SNV | 1 | G | A | Heterozygous |
| NC_037641.1 | 12640287 | SNV | 1 | G | T | Homozygous   |
| NC_037641.1 | 12641719 | SNV | 1 | A | G | Heterozygous |
| NC_037641.1 | 12641747 | SNV | 1 | T | C | Heterozygous |
| NC_037641.1 | 12641751 | SNV | 1 | T | C | Heterozygous |
| NC_037641.1 | 12641754 | SNV | 1 | T | A | Heterozygous |
| NC_037641.1 | 12641760 | SNV | 1 | T | G | Heterozygous |
| NC_037641.1 | 12641764 | SNV | 1 | A | G | Heterozygous |
| NC_037641.1 | 12641769 | SNV | 1 | G | C | Heterozygous |
| NC_037641.1 | 12643683 | SNV | 1 | G | A | Homozygous   |
| NC_037641.1 | 12643687 | SNV | 1 | G | A | Heterozygous |
| NC_037641.1 | 12643690 | SNV | 1 | T | C | Heterozygous |
| NC_037641.1 | 12643694 | SNV | 1 | T | C | Heterozygous |
| NC_037641.1 | 12643696 | SNV | 1 | T | C | Heterozygous |
| NC_037641.1 | 12643698 | SNV | 1 | T | C | Heterozygous |
| NC_037641.1 | 12643706 | SNV | 1 | T | C | Heterozygous |
| NC_037641.1 | 12643707 | SNV | 1 | G | A | Heterozygous |
| NC_037641.1 | 12643729 | SNV | 1 | A | G | Heterozygous |
| NC_037641.1 | 12643731 | SNV | 1 | A | T | Heterozygous |
| NC_037641.1 | 12643737 | SNV | 1 | T | C | Heterozygous |
| NC_037641.1 | 12643738 | SNV | 1 | A | T | Heterozygous |
| NC_037641.1 | 12643739 | SNV | 1 | C | T | Heterozygous |
| NC_037641.1 | 12643741 | SNV | 1 | T | C | Heterozygous |
| NC_037641.1 | 12643742 | SNV | 1 | A | G | Heterozygous |
| NC_037641.1 | 12643770 | SNV | 1 | C | A | Heterozygous |
| NC_037641.1 | 12643779 | SNV | 1 | A | G | Homozygous   |
| NC_037641.1 | 12644207 | SNV | 1 | T | A | Homozygous   |
| NC_037641.1 | 12644211 | SNV | 1 | T | A | Heterozygous |
| NC_037641.1 | 12644215 | SNV | 1 | T | A | Heterozygous |
| NC_037641.1 | 12647979 | SNV | 1 | T | C | Homozygous   |
| NC_037641.1 | 12648118 | SNV | 1 | G | T | Heterozygous |
| NC_037641.1 | 12651953 | SNV | 1 | T | C | Homozygous   |
| NC_037641.1 | 12653294 | SNV | 1 | A | G | Homozygous   |
| NC_037641.1 | 12654999 | SNV | 1 | G | T | Homozygous   |
| NC_037641.1 | 12655155 | SNV | 1 | G | A | Homozygous   |
| NC_037641.1 | 12656966 | SNV | 1 | C | G | Homozygous   |
| NC_037641.1 | 12662308 | SNV | 1 | T | C | Homozygous   |
| NC_037641.1 | 12662320 | SNV | 1 | T | A | Homozygous   |
| NC_037641.1 | 12662329 | SNV | 1 | G | A | Homozygous   |
| NC_037641.1 | 12662365 | SNV | 1 | T | A | Homozygous   |
| NC_037641.1 | 12662368 | SNV | 1 | A | T | Homozygous   |
| NC_037641.1 | 12662371 | SNV | 1 | G | A | Homozygous   |

|             |          |     |   |   |   |              |
|-------------|----------|-----|---|---|---|--------------|
| NC_037641.1 | 12662374 | SNV | 1 | C | G | Homozygous   |
| NC_037641.1 | 12662377 | SNV | 1 | T | A | Homozygous   |
| NC_037641.1 | 12662379 | SNV | 1 | A | G | Homozygous   |
| NC_037641.1 | 12662383 | SNV | 1 | A | T | Homozygous   |
| NC_037641.1 | 12662386 | SNV | 1 | A | T | Homozygous   |
| NC_037641.1 | 12662389 | SNV | 1 | A | G | Homozygous   |
| NC_037641.1 | 12662392 | SNV | 1 | A | G | Homozygous   |
| NC_037641.1 | 12662397 | SNV | 1 | T | G | Homozygous   |
| NC_037641.1 | 12662488 | SNV | 1 | C | T | Homozygous   |
| NC_037641.1 | 12662490 | SNV | 1 | T | C | Homozygous   |
| NC_037641.1 | 12662509 | SNV | 1 | G | A | Homozygous   |
| NC_037641.1 | 12662512 | SNV | 1 | T | C | Homozygous   |
| NC_037641.1 | 12662554 | SNV | 1 | T | C | Homozygous   |
| NC_037641.1 | 12662563 | SNV | 1 | A | T | Homozygous   |
| NC_037641.1 | 12669141 | SNV | 1 | T | C | Heterozygous |
| NC_037641.1 | 12669184 | SNV | 1 | A | G | Heterozygous |
| NC_037641.1 | 12669252 | SNV | 1 | T | C | Homozygous   |
| NC_037641.1 | 12669569 | SNV | 1 | A | T | Heterozygous |
| NC_037641.1 | 12669573 | SNV | 1 | C | A | Heterozygous |
| NC_037641.1 | 12669578 | SNV | 1 | T | A | Heterozygous |
| NC_037641.1 | 12669589 | SNV | 1 | A | G | Heterozygous |
| NC_037641.1 | 12670500 | SNV | 1 | T | A | Homozygous   |
| NC_037641.1 | 12670502 | SNV | 1 | A | C | Homozygous   |
| NC_037641.1 | 12671087 | SNV | 1 | C | T | Heterozygous |
| NC_037641.1 | 12673289 | SNV | 1 | G | A | Heterozygous |
| NC_037641.1 | 12677125 | SNV | 1 | A | T | Heterozygous |
| NC_037641.1 | 12677132 | SNV | 1 | T | A | Heterozygous |
| NC_037641.1 | 12683958 | SNV | 1 | C | G | Heterozygous |
| NC_037641.1 | 12685360 | SNV | 1 | G | C | Homozygous   |
| NC_037641.1 | 12685362 | SNV | 1 | T | C | Homozygous   |
| NC_037641.1 | 12685365 | SNV | 1 | T | C | Heterozygous |
| NC_037641.1 | 12685375 | SNV | 1 | A | T | Homozygous   |
| NC_037641.1 | 12685396 | SNV | 1 | C | T | Homozygous   |
| NC_037641.1 | 12685409 | SNV | 1 | A | T | Homozygous   |
| NC_037641.1 | 12685415 | SNV | 1 | A | T | Homozygous   |
| NC_037641.1 | 12685419 | SNV | 1 | A | C | Heterozygous |
| NC_037641.1 | 12685419 | SNV | 1 | A | T | Heterozygous |
| NC_037641.1 | 12685423 | SNV | 1 | A | T | Homozygous   |
| NC_037641.1 | 12685427 | SNV | 1 | A | T | Homozygous   |
| NC_037641.1 | 12686601 | SNV | 1 | G | T | Heterozygous |
| NC_037641.1 | 12687322 | SNV | 1 | C | T | Homozygous   |
| NC_037641.1 | 12688112 | SNV | 1 | T | A | Homozygous   |
| NC_037641.1 | 12688114 | SNV | 1 | A | T | Homozygous   |
| NC_037641.1 | 12688143 | SNV | 1 | G | A | Homozygous   |
| NC_037641.1 | 12688145 | SNV | 1 | T | A | Homozygous   |
| NC_037641.1 | 12688152 | SNV | 1 | T | A | Homozygous   |
| NC_037641.1 | 12688160 | SNV | 1 | A | T | Homozygous   |
| NC_037641.1 | 12690746 | SNV | 1 | A | T | Homozygous   |
| NC_037641.1 | 12690754 | SNV | 1 | G | A | Homozygous   |
| NC_037641.1 | 12691388 | SNV | 1 | T | C | Homozygous   |
| NC_037641.1 | 12691980 | SNV | 1 | A | G | Heterozygous |

|             |          |     |   |   |   |              |
|-------------|----------|-----|---|---|---|--------------|
| NC_037641.1 | 12692016 | SNV | 1 | G | A | Homozygous   |
| NC_037641.1 | 12692025 | SNV | 1 | G | A | Heterozygous |
| NC_037641.1 | 12693367 | SNV | 1 | A | G | Homozygous   |
| NC_037641.1 | 12693454 | SNV | 1 | T | C | Homozygous   |
| NC_037641.1 | 12693514 | SNV | 1 | G | A | Homozygous   |
| NC_037641.1 | 12693771 | SNV | 1 | C | T | Heterozygous |
| NC_037641.1 | 12693773 | SNV | 1 | C | T | Heterozygous |
| NC_037641.1 | 12693777 | SNV | 1 | A | T | Heterozygous |
| NC_037641.1 | 12693787 | SNV | 1 | A | T | Heterozygous |
| NC_037641.1 | 12694079 | SNV | 1 | T | C | Homozygous   |
| NC_037641.1 | 12695445 | SNV | 1 | T | C | Homozygous   |
| NC_037641.1 | 12695810 | SNV | 1 | G | A | Heterozygous |
| NC_037641.1 | 12695821 | SNV | 1 | A | G | Homozygous   |
| NC_037641.1 | 12695921 | SNV | 1 | T | C | Homozygous   |
| NC_037641.1 | 12710117 | SNV | 1 | G | C | Heterozygous |
| NC_037641.1 | 12710852 | SNV | 1 | G | A | Homozygous   |
| NC_037641.1 | 12710863 | SNV | 1 | T | A | Homozygous   |
| NC_037641.1 | 12710880 | SNV | 1 | T | A | Homozygous   |
| NC_037641.1 | 12710902 | SNV | 1 | A | G | Homozygous   |
| NC_037641.1 | 12710934 | SNV | 1 | A | G | Homozygous   |
| NC_037641.1 | 12711953 | SNV | 1 | T | C | Homozygous   |
| NC_037641.1 | 12712859 | SNV | 1 | T | C | Heterozygous |
| NC_037641.1 | 12712887 | SNV | 1 | C | T | Heterozygous |
| NC_037641.1 | 12713488 | SNV | 1 | G | A | Heterozygous |
| NC_037641.1 | 12713490 | SNV | 1 | G | A | Heterozygous |
| NC_037641.1 | 12713492 | SNV | 1 | G | A | Heterozygous |
| NC_037641.1 | 12714729 | SNV | 1 | G | A | Heterozygous |
| NC_037641.1 | 12715389 | SNV | 1 | T | C | Homozygous   |
| NC_037641.1 | 12718349 | SNV | 1 | G | T | Homozygous   |
| NC_037641.1 | 12718756 | SNV | 1 | C | T | Heterozygous |
| NC_037641.1 | 12718779 | SNV | 1 | A | G | Homozygous   |
| NC_037641.1 | 12718793 | SNV | 1 | C | T | Heterozygous |
| NC_037641.1 | 12719112 | SNV | 1 | C | A | Heterozygous |
| NC_037641.1 | 12719380 | SNV | 1 | G | C | Heterozygous |
| NC_037641.1 | 12719466 | SNV | 1 | C | T | Heterozygous |
| NC_037641.1 | 12719495 | SNV | 1 | C | G | Heterozygous |
| NC_037641.1 | 12719542 | SNV | 1 | T | C | Homozygous   |
| NC_037641.1 | 12719772 | SNV | 1 | A | G | Homozygous   |
| NC_037641.1 | 12719865 | SNV | 1 | C | T | Heterozygous |
| NC_037641.1 | 12720295 | SNV | 1 | T | C | Homozygous   |
| NC_037641.1 | 12720501 | SNV | 1 | C | T | Homozygous   |
| NC_037641.1 | 12720681 | SNV | 1 | G | A | Heterozygous |
| NC_037641.1 | 12720777 | SNV | 1 | A | G | Heterozygous |
| NC_037641.1 | 12721248 | SNV | 1 | T | C | Homozygous   |
| NC_037641.1 | 12722381 | SNV | 1 | T | A | Heterozygous |
| NC_037641.1 | 12722471 | SNV | 1 | C | T | Homozygous   |
| NC_037641.1 | 12722493 | SNV | 1 | A | G | Homozygous   |
| NC_037641.1 | 12722544 | SNV | 1 | T | C | Heterozygous |
| NC_037641.1 | 12722938 | SNV | 1 | A | G | Homozygous   |
| NC_037641.1 | 12725208 | SNV | 1 | G | T | Homozygous   |
| NC_037641.1 | 12726006 | SNV | 1 | T | G | Homozygous   |

|             |          |     |   |   |   |              |
|-------------|----------|-----|---|---|---|--------------|
| NC_037641.1 | 12726074 | SNV | 1 | A | G | Heterozygous |
| NC_037641.1 | 12726091 | SNV | 1 | G | T | Heterozygous |
| NC_037641.1 | 12726133 | SNV | 1 | A | T | Homozygous   |
| NC_037641.1 | 12726138 | SNV | 1 | T | A | Homozygous   |
| NC_037641.1 | 12726140 | SNV | 1 | G | A | Homozygous   |
| NC_037641.1 | 12726151 | SNV | 1 | G | T | Homozygous   |
| NC_037641.1 | 12726154 | SNV | 1 | A | T | Homozygous   |
| NC_037641.1 | 12726295 | SNV | 1 | A | T | Heterozygous |
| NC_037641.1 | 12727108 | SNV | 1 | C | T | Homozygous   |
| NC_037641.1 | 12727940 | SNV | 1 | G | A | Heterozygous |
| NC_037641.1 | 12731605 | SNV | 1 | T | C | Heterozygous |
| NC_037641.1 | 12731616 | SNV | 1 | T | C | Heterozygous |
| NC_037641.1 | 12734159 | SNV | 1 | G | A | Heterozygous |
| NC_037641.1 | 12734363 | SNV | 1 | G | A | Homozygous   |
| NC_037641.1 | 12737950 | SNV | 1 | C | T | Heterozygous |
| NC_037641.1 | 12742329 | SNV | 1 | T | C | Homozygous   |
| NC_037641.1 | 12744789 | SNV | 1 | T | C | Heterozygous |
| NC_037641.1 | 12744874 | SNV | 1 | T | C | Homozygous   |
| NC_037641.1 | 12745288 | SNV | 1 | A | G | Homozygous   |
| NC_037641.1 | 12745635 | SNV | 1 | C | T | Heterozygous |
| NC_037641.1 | 12745645 | SNV | 1 | A | G | Homozygous   |
| NC_037641.1 | 12745813 | SNV | 1 | C | T | Heterozygous |
| NC_037641.1 | 12745857 | SNV | 1 | T | C | Heterozygous |
| NC_037641.1 | 12746054 | SNV | 1 | T | C | Heterozygous |
| NC_037641.1 | 12746059 | SNV | 1 | A | G | Heterozygous |
| NC_037641.1 | 12746066 | SNV | 1 | A | T | Heterozygous |
| NC_037641.1 | 12746432 | SNV | 1 | A | G | Heterozygous |
| NC_037641.1 | 12746458 | SNV | 1 | C | T | Homozygous   |
| NC_037641.1 | 12746898 | SNV | 1 | G | A | Heterozygous |
| NC_037641.1 | 12747009 | SNV | 1 | A | G | Homozygous   |
| NC_037641.1 | 12747060 | SNV | 1 | A | G | Homozygous   |
| NC_037641.1 | 12747081 | SNV | 1 | T | C | Heterozygous |
| NC_037641.1 | 12747153 | SNV | 1 | A | G | Homozygous   |
| NC_037641.1 | 12747296 | SNV | 1 | C | G | Homozygous   |
| NC_037641.1 | 12747429 | SNV | 1 | T | C | Homozygous   |
| NC_037641.1 | 12747532 | SNV | 1 | C | A | Homozygous   |
| NC_037641.1 | 12749892 | SNV | 1 | C | T | Homozygous   |
| NC_037641.1 | 12755296 | SNV | 1 | C | A | Homozygous   |
| NC_037641.1 | 12756106 | SNV | 1 | C | G | Homozygous   |
| NC_037641.1 | 12756387 | SNV | 1 | C | A | Homozygous   |
| NC_037641.1 | 12762930 | SNV | 1 | T | G | Homozygous   |
| NC_037641.1 | 12762954 | SNV | 1 | A | G | Homozygous   |
| NC_037641.1 | 12768528 | SNV | 1 | G | A | Heterozygous |
| NC_037641.1 | 12768840 | SNV | 1 | G | A | Heterozygous |
| NC_037641.1 | 12769406 | SNV | 1 | T | G | Heterozygous |
| NC_037641.1 | 12769418 | SNV | 1 | T | A | Heterozygous |
| NC_037641.1 | 12770040 | SNV | 1 | C | A | Heterozygous |
| NC_037641.1 | 12770230 | SNV | 1 | C | T | Heterozygous |
| NC_037641.1 | 12770237 | SNV | 1 | A | T | Heterozygous |
| NC_037641.1 | 12770333 | SNV | 1 | A | G | Heterozygous |
| NC_037641.1 | 12770942 | SNV | 1 | T | A | Heterozygous |

|             |          |     |   |   |   |              |
|-------------|----------|-----|---|---|---|--------------|
| NC_037641.1 | 12771016 | SNV | 1 | C | T | Heterozygous |
| NC_037641.1 | 12776427 | SNV | 1 | C | G | Heterozygous |
| NC_037641.1 | 12776512 | SNV | 1 | G | A | Homozygous   |
| NC_037641.1 | 12776519 | SNV | 1 | A | G | Homozygous   |
| NC_037641.1 | 12776776 | SNV | 1 | T | C | Heterozygous |
| NC_037641.1 | 12776778 | SNV | 1 | T | A | Heterozygous |
| NC_037641.1 | 12776781 | SNV | 1 | A | T | Homozygous   |
| NC_037641.1 | 12778398 | SNV | 1 | T | C | Heterozygous |
| NC_037641.1 | 12778441 | SNV | 1 | C | T | Heterozygous |
| NC_037641.1 | 12786512 | SNV | 1 | T | C | Heterozygous |
| NC_037641.1 | 12786954 | SNV | 1 | T | C | Homozygous   |
| NC_037641.1 | 12786957 | SNV | 1 | A | T | Homozygous   |
| NC_037641.1 | 12786960 | SNV | 1 | T | A | Homozygous   |
| NC_037641.1 | 12786962 | SNV | 1 | A | T | Homozygous   |
| NC_037641.1 | 12786967 | SNV | 1 | G | C | Homozygous   |
| NC_037641.1 | 12787151 | SNV | 1 | A | C | Heterozygous |
| NC_037641.1 | 12787199 | SNV | 1 | A | T | Heterozygous |
| NC_037641.1 | 12787664 | SNV | 1 | A | G | Homozygous   |
| NC_037641.1 | 12787681 | SNV | 1 | A | G | Homozygous   |
| NC_037641.1 | 12788263 | SNV | 1 | G | A | Homozygous   |
| NC_037641.1 | 12788939 | SNV | 1 | G | A | Heterozygous |
| NC_037641.1 | 12789363 | SNV | 1 | T | C | Homozygous   |
| NC_037641.1 | 12789399 | SNV | 1 | G | A | Heterozygous |
| NC_037641.1 | 12789551 | SNV | 1 | G | A | Heterozygous |
| NC_037641.1 | 12790074 | SNV | 1 | C | T | Heterozygous |
| NC_037641.1 | 12790110 | SNV | 1 | C | T | Homozygous   |
| NC_037641.1 | 12790648 | SNV | 1 | T | A | Homozygous   |
| NC_037641.1 | 12790650 | SNV | 1 | A | C | Homozygous   |
| NC_037641.1 | 12790830 | SNV | 1 | T | A | Homozygous   |
| NC_037641.1 | 12791000 | SNV | 1 | T | C | Homozygous   |
| NC_037641.1 | 12791042 | SNV | 1 | T | C | Heterozygous |
| NC_037641.1 | 12791102 | SNV | 1 | G | A | Heterozygous |
| NC_037641.1 | 12791272 | SNV | 1 | A | T | Homozygous   |
| NC_037641.1 | 12791319 | SNV | 1 | T | C | Homozygous   |
| NC_037641.1 | 12791353 | SNV | 1 | C | G | Homozygous   |
| NC_037641.1 | 12791365 | SNV | 1 | C | T | Heterozygous |
| NC_037641.1 | 12791406 | SNV | 1 | C | T | Heterozygous |
| NC_037641.1 | 12791467 | SNV | 1 | G | A | Homozygous   |
| NC_037641.1 | 12791560 | SNV | 1 | G | A | Heterozygous |
| NC_037641.1 | 12794970 | SNV | 1 | T | C | Homozygous   |
| NC_037641.1 | 12795021 | SNV | 1 | T | C | Homozygous   |
| NC_037641.1 | 12795550 | SNV | 1 | G | A | Homozygous   |
| NC_037641.1 | 12795584 | SNV | 1 | C | T | Heterozygous |
| NC_037641.1 | 12795613 | SNV | 1 | C | T | Heterozygous |
| NC_037641.1 | 12800785 | SNV | 1 | G | A | Homozygous   |
| NC_037641.1 | 12814152 | SNV | 1 | C | G | Homozygous   |
| NC_037641.1 | 12816276 | SNV | 1 | T | G | Heterozygous |
| NC_037641.1 | 12816285 | SNV | 1 | T | C | Homozygous   |
| NC_037641.1 | 12816785 | SNV | 1 | T | C | Homozygous   |
| NC_037641.1 | 12817742 | SNV | 1 | C | T | Heterozygous |
| NC_037641.1 | 12818651 | SNV | 1 | G | A | Heterozygous |

|             |          |     |   |   |   |              |
|-------------|----------|-----|---|---|---|--------------|
| NC_037641.1 | 12818717 | SNV | 1 | G | T | Heterozygous |
| NC_037641.1 | 12819053 | SNV | 1 | G | A | Homozygous   |
| NC_037641.1 | 12819092 | SNV | 1 | G | A | Homozygous   |
| NC_037641.1 | 12820209 | SNV | 1 | T | C | Heterozygous |
| NC_037641.1 | 12820347 | SNV | 1 | T | G | Homozygous   |
| NC_037641.1 | 12820350 | SNV | 1 | T | A | Homozygous   |
| NC_037641.1 | 12820589 | SNV | 1 | A | G | Homozygous   |
| NC_037641.1 | 12820876 | SNV | 1 | C | T | Homozygous   |
| NC_037641.1 | 12821070 | SNV | 1 | T | C | Homozygous   |
| NC_037641.1 | 12821684 | SNV | 1 | C | A | Homozygous   |
| NC_037641.1 | 12822456 | SNV | 1 | T | C | Homozygous   |
| NC_037641.1 | 12822689 | SNV | 1 | T | C | Homozygous   |
| NC_037641.1 | 12823036 | SNV | 1 | G | A | Heterozygous |
| NC_037641.1 | 12823172 | SNV | 1 | T | C | Homozygous   |
| NC_037641.1 | 12825640 | SNV | 1 | T | C | Heterozygous |
| NC_037641.1 | 12825657 | SNV | 1 | T | C | Heterozygous |
| NC_037641.1 | 12825661 | SNV | 1 | T | C | Heterozygous |
| NC_037641.1 | 12825664 | SNV | 1 | T | C | Heterozygous |
| NC_037641.1 | 12825669 | SNV | 1 | T | C | Heterozygous |
| NC_037641.1 | 12825672 | SNV | 1 | T | C | Heterozygous |
| NC_037641.1 | 12825674 | SNV | 1 | T | C | Heterozygous |
| NC_037641.1 | 12825677 | SNV | 1 | T | C | Heterozygous |
| NC_037641.1 | 12825686 | SNV | 1 | T | C | Heterozygous |
| NC_037641.1 | 12826934 | SNV | 1 | T | G | Homozygous   |
| NC_037641.1 | 12827350 | SNV | 1 | A | G | Homozygous   |
| NC_037641.1 | 12827384 | SNV | 1 | C | G | Homozygous   |
| NC_037641.1 | 12827387 | SNV | 1 | A | G | Homozygous   |
| NC_037641.1 | 12828190 | SNV | 1 | A | G | Homozygous   |
| NC_037641.1 | 12831920 | SNV | 1 | A | T | Homozygous   |
| NC_037641.1 | 12832043 | SNV | 1 | A | G | Homozygous   |
| NC_037641.1 | 12832135 | SNV | 1 | A | G | Homozygous   |
| NC_037641.1 | 12832178 | SNV | 1 | T | C | Heterozygous |
| NC_037641.1 | 12832289 | SNV | 1 | A | G | Heterozygous |
| NC_037641.1 | 12832548 | SNV | 1 | C | T | Homozygous   |
| NC_037641.1 | 12841524 | SNV | 1 | C | T | Homozygous   |
| NC_037641.1 | 12842763 | SNV | 1 | A | G | Heterozygous |
| NC_037641.1 | 12842796 | SNV | 1 | C | T | Homozygous   |
| NC_037641.1 | 12847417 | SNV | 1 | G | A | Heterozygous |
| NC_037641.1 | 12847563 | SNV | 1 | A | G | Heterozygous |
| NC_037641.1 | 12847566 | SNV | 1 | A | T | Heterozygous |
| NC_037641.1 | 12847575 | SNV | 1 | A | T | Heterozygous |
| NC_037641.1 | 12847580 | SNV | 1 | A | T | Heterozygous |
| NC_037641.1 | 12847601 | SNV | 1 | G | T | Heterozygous |
| NC_037641.1 | 12850288 | SNV | 1 | C | T | Heterozygous |
| NC_037641.1 | 12851357 | SNV | 1 | G | A | Homozygous   |
| NC_037641.1 | 12851700 | SNV | 1 | A | G | Homozygous   |
| NC_037641.1 | 12853067 | SNV | 1 | G | A | Homozygous   |
| NC_037641.1 | 12853925 | SNV | 1 | A | G | Homozygous   |
| NC_037641.1 | 12867521 | SNV | 1 | T | C | Homozygous   |
| NC_037641.1 | 12868294 | SNV | 1 | A | G | Homozygous   |
| NC_037641.1 | 12868347 | SNV | 1 | G | C | Heterozygous |

|             |          |     |   |   |   |              |
|-------------|----------|-----|---|---|---|--------------|
| NC_037641.1 | 12869221 | SNV | 1 | C | T | Homozygous   |
| NC_037641.1 | 12869570 | SNV | 1 | G | A | Heterozygous |
| NC_037641.1 | 12869606 | SNV | 1 | A | G | Homozygous   |
| NC_037641.1 | 12869799 | SNV | 1 | T | A | Homozygous   |
| NC_037641.1 | 12869978 | SNV | 1 | A | G | Heterozygous |
| NC_037641.1 | 12870329 | SNV | 1 | C | T | Homozygous   |
| NC_037641.1 | 12871657 | SNV | 1 | A | G | Homozygous   |
| NC_037641.1 | 12871810 | SNV | 1 | G | A | Homozygous   |
| NC_037641.1 | 12871891 | SNV | 1 | A | G | Homozygous   |
| NC_037641.1 | 12872737 | SNV | 1 | A | G | Homozygous   |
| NC_037641.1 | 12893327 | SNV | 1 | A | G | Heterozygous |
| NC_037641.1 | 12893444 | SNV | 1 | A | G | Homozygous   |
| NC_037641.1 | 12893455 | SNV | 1 | A | G | Heterozygous |
| NC_037641.1 | 12893458 | SNV | 1 | G | A | Heterozygous |
| NC_037641.1 | 12893532 | SNV | 1 | G | A | Homozygous   |
| NC_037641.1 | 12894080 | SNV | 1 | A | G | Heterozygous |
| NC_037641.1 | 12894212 | SNV | 1 | G | A | Homozygous   |
| NC_037641.1 | 12894221 | SNV | 1 | A | C | Homozygous   |
| NC_037641.1 | 12894237 | SNV | 1 | A | C | Homozygous   |
| NC_037641.1 | 12894681 | SNV | 1 | A | C | Homozygous   |
| NC_037641.1 | 12901529 | SNV | 1 | G | A | Homozygous   |
| NC_037641.1 | 12901552 | SNV | 1 | G | T | Homozygous   |
| NC_037641.1 | 12901560 | SNV | 1 | G | T | Homozygous   |
| NC_037641.1 | 12905024 | SNV | 1 | G | A | Homozygous   |
| NC_037641.1 | 12905072 | SNV | 1 | G | A | Homozygous   |
| NC_037641.1 | 12905099 | SNV | 1 | T | C | Homozygous   |
| NC_037641.1 | 12905176 | SNV | 1 | T | A | Homozygous   |
| NC_037641.1 | 12905181 | SNV | 1 | C | G | Homozygous   |
| NC_037641.1 | 12905997 | SNV | 1 | G | A | Heterozygous |
| NC_037641.1 | 12910783 | SNV | 1 | A | T | Homozygous   |
| NC_037641.1 | 12910801 | SNV | 1 | C | A | Homozygous   |
| NC_037641.1 | 12914975 | SNV | 1 | T | C | Heterozygous |
| NC_037641.1 | 12915017 | SNV | 1 | T | G | Homozygous   |
| NC_037641.1 | 12915026 | SNV | 1 | T | C | Homozygous   |
| NC_037641.1 | 12915034 | SNV | 1 | C | T | Heterozygous |
| NC_037641.1 | 12915037 | SNV | 1 | C | T | Heterozygous |
| NC_037641.1 | 12915067 | SNV | 1 | C | T | Heterozygous |
| NC_037641.1 | 12915077 | SNV | 1 | T | C | Heterozygous |
| NC_037641.1 | 12915091 | SNV | 1 | C | T | Heterozygous |
| NC_037641.1 | 12915094 | SNV | 1 | C | G | Heterozygous |
| NC_037641.1 | 12920189 | SNV | 1 | C | T | Homozygous   |
| NC_037641.1 | 12920218 | SNV | 1 | G | A | Homozygous   |
| NC_037641.1 | 12920390 | SNV | 1 | C | T | Heterozygous |
| NC_037641.1 | 12920448 | SNV | 1 | T | C | Heterozygous |
| NC_037641.1 | 12920501 | SNV | 1 | T | C | Homozygous   |
| NC_037641.1 | 12921333 | SNV | 1 | G | A | Homozygous   |
| NC_037641.1 | 12922991 | SNV | 1 | A | G | Heterozygous |
| NC_037641.1 | 12924751 | SNV | 1 | T | A | Homozygous   |
| NC_037641.1 | 12925501 | SNV | 1 | A | G | Heterozygous |
| NC_037641.1 | 12925545 | SNV | 1 | T | C | Heterozygous |
| NC_037641.1 | 12925551 | SNV | 1 | C | T | Heterozygous |

|             |          |     |   |   |   |              |
|-------------|----------|-----|---|---|---|--------------|
| NC_037641.1 | 12925936 | SNV | 1 | A | G | Heterozygous |
| NC_037641.1 | 12925940 | SNV | 1 | A | G | Heterozygous |
| NC_037641.1 | 12927687 | SNV | 1 | T | C | Homozygous   |
| NC_037641.1 | 12928019 | SNV | 1 | A | T | Homozygous   |
| NC_037641.1 | 12928033 | SNV | 1 | A | G | Homozygous   |
| NC_037641.1 | 12928038 | SNV | 1 | T | C | Homozygous   |
| NC_037641.1 | 12928041 | SNV | 1 | A | T | Homozygous   |
| NC_037641.1 | 12928072 | SNV | 1 | C | A | Homozygous   |
| NC_037641.1 | 12930459 | SNV | 1 | C | T | Heterozygous |
| NC_037641.1 | 12931806 | SNV | 1 | T | C | Homozygous   |
| NC_037641.1 | 12932117 | SNV | 1 | G | A | Homozygous   |
| NC_037641.1 | 12932123 | SNV | 1 | G | C | Homozygous   |
| NC_037641.1 | 12932391 | SNV | 1 | A | G | Homozygous   |
| NC_037641.1 | 12932419 | SNV | 1 | A | G | Homozygous   |
| NC_037641.1 | 12940948 | SNV | 1 | C | T | Heterozygous |
| NC_037641.1 | 12941501 | SNV | 1 | T | C | Heterozygous |
| NC_037641.1 | 12941736 | SNV | 1 | C | G | Homozygous   |
| NC_037641.1 | 12941775 | SNV | 1 | A | T | Heterozygous |
| NC_037641.1 | 12941903 | SNV | 1 | T | C | Homozygous   |
| NC_037641.1 | 12942112 | SNV | 1 | T | C | Homozygous   |
| NC_037641.1 | 12942129 | SNV | 1 | T | C | Homozygous   |
| NC_037641.1 | 12942174 | SNV | 1 | C | T | Heterozygous |
| NC_037641.1 | 12942352 | SNV | 1 | C | T | Homozygous   |
| NC_037641.1 | 12942373 | SNV | 1 | C | T | Heterozygous |
| NC_037641.1 | 12942407 | SNV | 1 | G | A | Heterozygous |
| NC_037641.1 | 12942421 | SNV | 1 | A | G | Homozygous   |
| NC_037641.1 | 12942433 | SNV | 1 | A | T | Homozygous   |
| NC_037641.1 | 12942436 | SNV | 1 | G | A | Heterozygous |
| NC_037641.1 | 12942465 | SNV | 1 | C | A | Heterozygous |
| NC_037641.1 | 12942469 | SNV | 1 | T | A | Heterozygous |
| NC_037641.1 | 12942478 | SNV | 1 | G | A | Homozygous   |
| NC_037641.1 | 12942524 | SNV | 1 | G | A | Heterozygous |
| NC_037641.1 | 12942535 | SNV | 1 | T | C | Homozygous   |
| NC_037641.1 | 12942544 | SNV | 1 | C | A | Heterozygous |
| NC_037641.1 | 12942604 | SNV | 1 | T | G | Heterozygous |
| NC_037641.1 | 12942616 | SNV | 1 | G | A | Heterozygous |
| NC_037641.1 | 12942639 | SNV | 1 | T | C | Heterozygous |
| NC_037641.1 | 12942654 | SNV | 1 | A | G | Homozygous   |
| NC_037641.1 | 12942660 | SNV | 1 | T | C | Homozygous   |
| NC_037641.1 | 12942692 | SNV | 1 | G | A | Heterozygous |
| NC_037641.1 | 12942725 | SNV | 1 | T | A | Heterozygous |
| NC_037641.1 | 12942761 | SNV | 1 | C | T | Heterozygous |
| NC_037641.1 | 12942781 | SNV | 1 | T | C | Heterozygous |
| NC_037641.1 | 12942788 | SNV | 1 | T | C | Homozygous   |
| NC_037641.1 | 12942804 | SNV | 1 | C | A | Heterozygous |
| NC_037641.1 | 12942834 | SNV | 1 | T | C | Homozygous   |
| NC_037641.1 | 12942869 | SNV | 1 | T | C | Heterozygous |
| NC_037641.1 | 12942899 | SNV | 1 | C | A | Homozygous   |
| NC_037641.1 | 12942901 | SNV | 1 | C | T | Homozygous   |
| NC_037641.1 | 12942904 | SNV | 1 | G | A | Homozygous   |
| NC_037641.1 | 12942910 | SNV | 1 | C | T | Heterozygous |



|             |          |     |   |   |   |              |
|-------------|----------|-----|---|---|---|--------------|
| NC_037641.1 | 12942915 | SNV | 1 | A | G | Heterozygous |
| NC_037641.1 | 12942946 | SNV | 1 | C | T | Homozygous   |
| NC_037641.1 | 12942952 | SNV | 1 | C | A | Homozygous   |
| NC_037641.1 | 12942964 | SNV | 1 | T | A | Homozygous   |
| NC_037641.1 | 12942966 | SNV | 1 | G | A | Homozygous   |
| NC_037641.1 | 12942999 | SNV | 1 | A | C | Homozygous   |
| NC_037641.1 | 12943008 | SNV | 1 | A | G | Heterozygous |
| NC_037641.1 | 12943061 | SNV | 1 | T | G | Homozygous   |
| NC_037641.1 | 12943107 | SNV | 1 | C | T | Heterozygous |
| NC_037641.1 | 12943171 | SNV | 1 | T | C | Homozygous   |
| NC_037641.1 | 12943401 | SNV | 1 | T | C | Heterozygous |
| NC_037641.1 | 12943409 | SNV | 1 | A | G | Homozygous   |
| NC_037641.1 | 12943463 | SNV | 1 | A | G | Homozygous   |
| NC_037641.1 | 12943484 | SNV | 1 | T | C | Heterozygous |
| NC_037641.1 | 12943494 | SNV | 1 | G | C | Homozygous   |
| NC_037641.1 | 12943832 | SNV | 1 | C | T | Homozygous   |
| NC_037641.1 | 12943865 | SNV | 1 | A | G | Heterozygous |
| NC_037641.1 | 12943868 | SNV | 1 | G | A | Heterozygous |
| NC_037641.1 | 12951598 | SNV | 1 | T | C | Homozygous   |
| NC_037641.1 | 12951628 | SNV | 1 | T | A | Homozygous   |
| NC_037641.1 | 12951637 | SNV | 1 | A | C | Homozygous   |
| NC_037641.1 | 12953544 | SNV | 1 | T | C | Heterozygous |
| NC_037641.1 | 12953590 | SNV | 1 | A | G | Homozygous   |
| NC_037641.1 | 12953593 | SNV | 1 | T | C | Homozygous   |
| NC_037641.1 | 12953636 | SNV | 1 | C | T | Homozygous   |
| NC_037641.1 | 12953648 | SNV | 1 | C | T | Homozygous   |
| NC_037641.1 | 12953681 | SNV | 1 | T | A | Homozygous   |
| NC_037641.1 | 12953956 | SNV | 1 | C | T | Heterozygous |
| NC_037641.1 | 12953980 | SNV | 1 | C | T | Heterozygous |
| NC_037641.1 | 12953985 | SNV | 1 | T | C | Heterozygous |
| NC_037641.1 | 12954047 | SNV | 1 | A | G | Homozygous   |
| NC_037641.1 | 12959289 | SNV | 1 | G | A | Heterozygous |
| NC_037641.1 | 12959312 | SNV | 1 | A | T | Homozygous   |
| NC_037641.1 | 12977422 | SNV | 1 | G | C | Heterozygous |
| NC_037641.1 | 12977443 | SNV | 1 | A | G | Homozygous   |
| NC_037641.1 | 12977628 | SNV | 1 | C | T | Homozygous   |
| NC_037641.1 | 12977654 | SNV | 1 | T | A | Homozygous   |
| NC_037641.1 | 12982010 | SNV | 1 | G | A | Heterozygous |
| NC_037641.1 | 12982017 | SNV | 1 | C | T | Homozygous   |
| NC_037641.1 | 12982020 | SNV | 1 | G | A | Homozygous   |
| NC_037641.1 | 12982022 | SNV | 1 | G | A | Heterozygous |
| NC_037641.1 | 12982026 | SNV | 1 | G | A | Heterozygous |
| NC_037641.1 | 12982028 | SNV | 1 | G | A | Heterozygous |
| NC_037641.1 | 12982471 | SNV | 1 | A | T | Heterozygous |
| NC_037641.1 | 12982589 | SNV | 1 | G | A | Homozygous   |
| NC_037641.1 | 12982764 | SNV | 1 | G | A | Heterozygous |
| NC_037641.1 | 12982991 | SNV | 1 | C | A | Heterozygous |
| NC_037641.1 | 12983297 | SNV | 1 | A | G | Homozygous   |
| NC_037641.1 | 12983411 | SNV | 1 | C | G | Homozygous   |
| NC_037641.1 | 12983462 | SNV | 1 | G | A | Heterozygous |
| NC_037641.1 | 12983480 | SNV | 1 | A | G | Homozygous   |

|             |          |     |   |   |   |              |
|-------------|----------|-----|---|---|---|--------------|
| NC_037641.1 | 12983510 | SNV | 1 | T | C | Homozygous   |
| NC_037641.1 | 12983688 | SNV | 1 | C | A | Homozygous   |
| NC_037641.1 | 12983905 | SNV | 1 | T | C | Homozygous   |
| NC_037641.1 | 12985636 | SNV | 1 | A | C | Homozygous   |
| NC_037641.1 | 12985656 | SNV | 1 | C | T | Heterozygous |
| NC_037641.1 | 12985664 | SNV | 1 | A | T | Homozygous   |
| NC_037641.1 | 12985672 | SNV | 1 | C | T | Homozygous   |
| NC_037641.1 | 12985679 | SNV | 1 | T | C | Heterozygous |
| NC_037641.1 | 12985705 | SNV | 1 | T | C | Heterozygous |
| NC_037641.1 | 12994071 | SNV | 1 | G | A | Homozygous   |
| NC_037641.1 | 12994256 | SNV | 1 | C | T | Heterozygous |
| NC_037641.1 | 12994378 | SNV | 1 | T | C | Homozygous   |
| NC_037641.1 | 12994453 | SNV | 1 | C | T | Homozygous   |
| NC_037641.1 | 12994455 | SNV | 1 | T | C | Homozygous   |
| NC_037641.1 | 12994683 | SNV | 1 | G | A | Heterozygous |
| NC_037641.1 | 12994685 | SNV | 1 | G | T | Heterozygous |
| NC_037641.1 | 12994846 | SNV | 1 | T | C | Homozygous   |
| NC_037641.1 | 12994946 | SNV | 1 | C | G | Homozygous   |
| NC_037641.1 | 12994950 | SNV | 1 | T | C | Homozygous   |
| NC_037641.1 | 12995128 | SNV | 1 | G | A | Heterozygous |
| NC_037641.1 | 12995427 | SNV | 1 | T | G | Homozygous   |
| NC_037641.1 | 12996954 | SNV | 1 | A | C | Heterozygous |
| NC_037641.1 | 13003115 | SNV | 1 | T | A | Heterozygous |
| NC_037641.1 | 13003138 | SNV | 1 | T | C | Homozygous   |
| NC_037641.1 | 13003224 | SNV | 1 | T | C | Heterozygous |
| NC_037641.1 | 13003332 | SNV | 1 | C | G | Heterozygous |
| NC_037641.1 | 13004561 | SNV | 1 | T | C | Homozygous   |
| NC_037641.1 | 13004857 | SNV | 1 | C | T | Homozygous   |
| NC_037641.1 | 13005298 | SNV | 1 | C | A | Homozygous   |
| NC_037641.1 | 13005377 | SNV | 1 | A | G | Homozygous   |
| NC_037641.1 | 13005649 | SNV | 1 | T | A | Homozygous   |
| NC_037641.1 | 13005651 | SNV | 1 | C | T | Homozygous   |
| NC_037641.1 | 13006104 | SNV | 1 | C | T | Homozygous   |
| NC_037641.1 | 13006285 | SNV | 1 | A | G | Homozygous   |
| NC_037641.1 | 13006573 | SNV | 1 | A | G | Homozygous   |
| NC_037641.1 | 13008004 | SNV | 1 | C | T | Homozygous   |
| NC_037641.1 | 13008048 | SNV | 1 | C | T | Heterozygous |
| NC_037641.1 | 13009209 | SNV | 1 | C | T | Heterozygous |
| NC_037641.1 | 13009414 | SNV | 1 | T | C | Homozygous   |
| NC_037641.1 | 13009426 | SNV | 1 | C | G | Heterozygous |
| NC_037641.1 | 13009441 | SNV | 1 | A | C | Heterozygous |
| NC_037641.1 | 13013589 | SNV | 1 | T | C | Heterozygous |
| NC_037641.1 | 13013647 | SNV | 1 | G | T | Homozygous   |
| NC_037641.1 | 13014010 | SNV | 1 | T | C | Heterozygous |
| NC_037641.1 | 13014090 | SNV | 1 | G | A | Heterozygous |
| NC_037641.1 | 13014198 | SNV | 1 | T | G | Homozygous   |
| NC_037641.1 | 13022122 | SNV | 1 | C | T | Heterozygous |
| NC_037641.1 | 13022139 | SNV | 1 | A | G | Heterozygous |
| NC_037641.1 | 13022325 | SNV | 1 | C | G | Homozygous   |
| NC_037641.1 | 13022363 | SNV | 1 | G | A | Homozygous   |
| NC_037641.1 | 13023080 | SNV | 1 | G | A | Heterozygous |

|             |          |     |   |   |   |              |
|-------------|----------|-----|---|---|---|--------------|
| NC_037641.1 | 13023301 | SNV | 1 | T | C | Heterozygous |
| NC_037641.1 | 13023315 | SNV | 1 | T | C | Heterozygous |
| NC_037641.1 | 13023330 | SNV | 1 | A | G | Heterozygous |
| NC_037641.1 | 13023358 | SNV | 1 | G | A | Homozygous   |
| NC_037641.1 | 13023385 | SNV | 1 | T | C | Homozygous   |
| NC_037641.1 | 13023924 | SNV | 1 | A | G | Homozygous   |
| NC_037641.1 | 13024379 | SNV | 1 | G | C | Heterozygous |
| NC_037641.1 | 13024476 | SNV | 1 | T | C | Heterozygous |
| NC_037641.1 | 13024553 | SNV | 1 | T | C | Heterozygous |
| NC_037641.1 | 13025168 | SNV | 1 | T | C | Homozygous   |
| NC_037641.1 | 13025194 | SNV | 1 | T | C | Heterozygous |
| NC_037641.1 | 13025234 | SNV | 1 | A | T | Homozygous   |
| NC_037641.1 | 13025877 | SNV | 1 | A | G | Homozygous   |
| NC_037641.1 | 13026071 | SNV | 1 | A | G | Homozygous   |
| NC_037641.1 | 13026092 | SNV | 1 | C | A | Heterozygous |
| NC_037641.1 | 13026099 | SNV | 1 | T | C | Homozygous   |
| NC_037641.1 | 13026104 | SNV | 1 | G | A | Homozygous   |
| NC_037641.1 | 13026109 | SNV | 1 | T | C | Homozygous   |
| NC_037641.1 | 13026211 | SNV | 1 | G | A | Heterozygous |
| NC_037641.1 | 13026236 | SNV | 1 | A | G | Heterozygous |
| NC_037641.1 | 13026244 | SNV | 1 | G | A | Heterozygous |
| NC_037641.1 | 13026368 | SNV | 1 | G | A | Homozygous   |
| NC_037641.1 | 13026726 | SNV | 1 | C | T | Homozygous   |
| NC_037641.1 | 13026736 | SNV | 1 | C | T | Heterozygous |
| NC_037641.1 | 13026847 | SNV | 1 | T | A | Heterozygous |
| NC_037641.1 | 13028193 | SNV | 1 | G | A | Heterozygous |
| NC_037641.1 | 13028205 | SNV | 1 | A | G | Homozygous   |
| NC_037641.1 | 13028912 | SNV | 1 | C | T | Heterozygous |
| NC_037641.1 | 13029046 | SNV | 1 | G | A | Homozygous   |
| NC_037641.1 | 13029049 | SNV | 1 | C | T | Homozygous   |
| NC_037641.1 | 13029052 | SNV | 1 | G | A | Homozygous   |
| NC_037641.1 | 13029192 | SNV | 1 | G | C | Homozygous   |
| NC_037641.1 | 13029340 | SNV | 1 | T | G | Homozygous   |
| NC_037641.1 | 13029531 | SNV | 1 | G | A | Homozygous   |
| NC_037641.1 | 13029947 | SNV | 1 | T | C | Homozygous   |
| NC_037641.1 | 13030022 | SNV | 1 | A | G | Homozygous   |
| NC_037641.1 | 13030467 | SNV | 1 | G | A | Heterozygous |
| NC_037641.1 | 13030668 | SNV | 1 | T | C | Homozygous   |
| NC_037641.1 | 13030734 | SNV | 1 | C | T | Heterozygous |
| NC_037641.1 | 13030762 | SNV | 1 | A | G | Homozygous   |
| NC_037641.1 | 13030934 | SNV | 1 | T | C | Heterozygous |
| NC_037641.1 | 13030975 | SNV | 1 | C | A | Homozygous   |
| NC_037641.1 | 13030988 | SNV | 1 | G | A | Heterozygous |
| NC_037641.1 | 13031036 | SNV | 1 | G | C | Heterozygous |
| NC_037641.1 | 13031046 | SNV | 1 | A | G | Heterozygous |
| NC_037641.1 | 13031300 | SNV | 1 | T | C | Heterozygous |
| NC_037641.1 | 13031335 | SNV | 1 | C | T | Heterozygous |
| NC_037641.1 | 13031989 | SNV | 1 | T | G | Homozygous   |
| NC_037641.1 | 13033425 | SNV | 1 | G | A | Heterozygous |
| NC_037641.1 | 13033650 | SNV | 1 | T | G | Homozygous   |
| NC_037641.1 | 13036415 | SNV | 1 | A | G | Heterozygous |

|             |          |     |   |   |   |              |
|-------------|----------|-----|---|---|---|--------------|
| NC_037641.1 | 13036430 | SNV | 1 | A | G | Heterozygous |
| NC_037641.1 | 13036794 | SNV | 1 | C | T | Homozygous   |
| NC_037641.1 | 13041334 | SNV | 1 | A | G | Homozygous   |
| NC_037641.1 | 13050738 | SNV | 1 | T | G | Homozygous   |
| NC_037641.1 | 13050749 | SNV | 1 | T | G | Homozygous   |
| NC_037641.1 | 13050754 | SNV | 1 | T | C | Homozygous   |
| NC_037641.1 | 13054600 | SNV | 1 | G | A | Heterozygous |
| NC_037641.1 | 13054602 | SNV | 1 | G | C | Heterozygous |
| NC_037641.1 | 13054609 | SNV | 1 | A | G | Heterozygous |
| NC_037641.1 | 13054621 | SNV | 1 | A | T | Heterozygous |
| NC_037641.1 | 13054623 | SNV | 1 | A | T | Heterozygous |
| NC_037641.1 | 13054625 | SNV | 1 | A | T | Heterozygous |
| NC_037641.1 | 13060385 | SNV | 1 | C | A | Homozygous   |
| NC_037641.1 | 13060405 | SNV | 1 | C | G | Homozygous   |
| NC_037641.1 | 13060420 | SNV | 1 | T | C | Homozygous   |
| NC_037641.1 | 13060432 | SNV | 1 | C | T | Homozygous   |
| NC_037641.1 | 13060436 | SNV | 1 | T | A | Heterozygous |
| NC_037641.1 | 13060441 | SNV | 1 | G | A | Heterozygous |
| NC_037641.1 | 13060446 | SNV | 1 | T | C | Homozygous   |
| NC_037641.1 | 13060448 | SNV | 1 | C | T | Homozygous   |
| NC_037641.1 | 13060456 | SNV | 1 | C | T | Homozygous   |
| NC_037641.1 | 13060461 | SNV | 1 | A | T | Homozygous   |
| NC_037641.1 | 13060463 | SNV | 1 | G | A | Homozygous   |
| NC_037641.1 | 13064682 | SNV | 1 | C | G | Homozygous   |
| NC_037641.1 | 13064720 | SNV | 1 | T | C | Homozygous   |
| NC_037641.1 | 13064761 | SNV | 1 | A | G | Homozygous   |
| NC_037641.1 | 13064764 | SNV | 1 | C | T | Homozygous   |
| NC_037641.1 | 13064777 | SNV | 1 | T | C | Homozygous   |
| NC_037641.1 | 13064791 | SNV | 1 | C | T | Heterozygous |
| NC_037641.1 | 13067415 | SNV | 1 | A | G | Homozygous   |
| NC_037641.1 | 13067428 | SNV | 1 | T | C | Heterozygous |
| NC_037641.1 | 13067438 | SNV | 1 | C | T | Heterozygous |
| NC_037641.1 | 13067865 | SNV | 1 | A | G | Heterozygous |
| NC_037641.1 | 13069744 | SNV | 1 | T | A | Homozygous   |
| NC_037641.1 | 13069746 | SNV | 1 | A | G | Homozygous   |
| NC_037641.1 | 13069750 | SNV | 1 | A | G | Homozygous   |
| NC_037641.1 | 13076573 | SNV | 1 | A | G | Homozygous   |
| NC_037641.1 | 13076595 | SNV | 1 | T | A | Homozygous   |
| NC_037641.1 | 13086190 | SNV | 1 | C | T | Heterozygous |
| NC_037641.1 | 13086201 | SNV | 1 | T | C | Homozygous   |
| NC_037641.1 | 13086270 | SNV | 1 | C | T | Heterozygous |
| NC_037641.1 | 13086782 | SNV | 1 | T | A | Homozygous   |
| NC_037641.1 | 13086807 | SNV | 1 | G | A | Homozygous   |
| NC_037641.1 | 13086821 | SNV | 1 | T | C | Homozygous   |
| NC_037641.1 | 13097625 | SNV | 1 | A | G | Homozygous   |
| NC_037641.1 | 13098093 | SNV | 1 | C | T | Homozygous   |
| NC_037641.1 | 13110344 | SNV | 1 | C | A | Heterozygous |
| NC_037641.1 | 13111404 | SNV | 1 | T | A | Homozygous   |
| NC_037641.1 | 13111409 | SNV | 1 | T | C | Homozygous   |
| NC_037641.1 | 13111415 | SNV | 1 | T | C | Homozygous   |
| NC_037641.1 | 13111444 | SNV | 1 | C | T | Homozygous   |

|             |          |     |   |   |   |              |
|-------------|----------|-----|---|---|---|--------------|
| NC_037641.1 | 13111447 | SNV | 1 | C | A | Homozygous   |
| NC_037641.1 | 13121147 | SNV | 1 | A | T | Heterozygous |
| NC_037641.1 | 13148489 | SNV | 1 | G | A | Homozygous   |
| NC_037641.1 | 13148517 | SNV | 1 | T | C | Homozygous   |
| NC_037641.1 | 13148521 | SNV | 1 | C | A | Homozygous   |
| NC_037641.1 | 13149226 | SNV | 1 | A | T | Homozygous   |
| NC_037641.1 | 13149231 | SNV | 1 | A | C | Homozygous   |
| NC_037641.1 | 13149473 | SNV | 1 | A | G | Homozygous   |
| NC_037641.1 | 13149765 | SNV | 1 | C | T | Homozygous   |
| NC_037641.1 | 13151464 | SNV | 1 | T | G | Heterozygous |
| NC_037641.1 | 13151498 | SNV | 1 | G | A | Homozygous   |
| NC_037641.1 | 13151535 | SNV | 1 | A | G | Heterozygous |
| NC_037641.1 | 13151542 | SNV | 1 | T | C | Heterozygous |
| NC_037641.1 | 13155039 | SNV | 1 | C | T | Homozygous   |
| NC_037641.1 | 13155084 | SNV | 1 | G | A | Homozygous   |
| NC_037641.1 | 13155109 | SNV | 1 | A | G | Homozygous   |
| NC_037641.1 | 13157927 | SNV | 1 | A | G | Homozygous   |
| NC_037641.1 | 13161370 | SNV | 1 | A | G | Homozygous   |
| NC_037641.1 | 13162025 | SNV | 1 | T | C | Homozygous   |
| NC_037641.1 | 13162082 | SNV | 1 | C | A | Heterozygous |
| NC_037641.1 | 13162139 | SNV | 1 | G | A | Heterozygous |
| NC_037641.1 | 13162322 | SNV | 1 | T | C | Heterozygous |
| NC_037641.1 | 13162586 | SNV | 1 | T | C | Homozygous   |
| NC_037641.1 | 13162699 | SNV | 1 | T | C | Homozygous   |
| NC_037641.1 | 13162934 | SNV | 1 | G | A | Heterozygous |
| NC_037641.1 | 13163376 | SNV | 1 | C | T | Homozygous   |
| NC_037641.1 | 13163683 | SNV | 1 | C | T | Heterozygous |
| NC_037641.1 | 13163810 | SNV | 1 | A | G | Homozygous   |
| NC_037641.1 | 13163824 | SNV | 1 | A | G | Homozygous   |
| NC_037641.1 | 13163924 | SNV | 1 | T | C | Homozygous   |
| NC_037641.1 | 13164596 | SNV | 1 | T | C | Homozygous   |
| NC_037641.1 | 13164611 | SNV | 1 | A | C | Homozygous   |
| NC_037641.1 | 13164628 | SNV | 1 | A | G | Homozygous   |
| NC_037641.1 | 13164655 | SNV | 1 | A | G | Homozygous   |
| NC_037641.1 | 13164972 | SNV | 1 | A | G | Homozygous   |
| NC_037641.1 | 13164982 | SNV | 1 | T | A | Homozygous   |
| NC_037641.1 | 13164985 | SNV | 1 | C | A | Homozygous   |
| NC_037641.1 | 13164992 | SNV | 1 | T | C | Homozygous   |
| NC_037641.1 | 13165004 | SNV | 1 | C | G | Heterozygous |
| NC_037641.1 | 13165085 | SNV | 1 | T | C | Heterozygous |
| NC_037641.1 | 13165173 | SNV | 1 | T | C | Homozygous   |
| NC_037641.1 | 13165899 | SNV | 1 | A | G | Homozygous   |
| NC_037641.1 | 13166076 | SNV | 1 | A | G | Homozygous   |
| NC_037641.1 | 13166081 | SNV | 1 | T | C | Homozygous   |
| NC_037641.1 | 13166169 | SNV | 1 | G | A | Homozygous   |
| NC_037641.1 | 13166214 | SNV | 1 | A | T | Heterozygous |
| NC_037641.1 | 13166332 | SNV | 1 | A | G | Homozygous   |
| NC_037641.1 | 13166740 | SNV | 1 | A | G | Homozygous   |
| NC_037641.1 | 13166759 | SNV | 1 | G | A | Homozygous   |
| NC_037641.1 | 13167123 | SNV | 1 | C | T | Heterozygous |
| NC_037641.1 | 13167482 | SNV | 1 | A | G | Homozygous   |

|             |          |     |   |   |   |              |
|-------------|----------|-----|---|---|---|--------------|
| NC_037641.1 | 13167488 | SNV | 1 | T | G | Homozygous   |
| NC_037641.1 | 13167500 | SNV | 1 | G | T | Heterozygous |
| NC_037641.1 | 13167503 | SNV | 1 | C | T | Homozygous   |
| NC_037641.1 | 13167629 | SNV | 1 | A | C | Heterozygous |
| NC_037641.1 | 13168200 | SNV | 1 | T | C | Homozygous   |
| NC_037641.1 | 13168202 | SNV | 1 | T | C | Homozygous   |
| NC_037641.1 | 13168204 | SNV | 1 | A | C | Homozygous   |
| NC_037641.1 | 13168206 | SNV | 1 | A | T | Homozygous   |
| NC_037641.1 | 13168214 | SNV | 1 | T | A | Homozygous   |
| NC_037641.1 | 13168227 | SNV | 1 | T | A | Homozygous   |
| NC_037641.1 | 13168255 | SNV | 1 | C | A | Homozygous   |
| NC_037641.1 | 13168675 | SNV | 1 | C | T | Homozygous   |
| NC_037641.1 | 13169680 | SNV | 1 | A | G | Homozygous   |
| NC_037641.1 | 13169686 | SNV | 1 | T | C | Homozygous   |
| NC_037641.1 | 13169728 | SNV | 1 | A | G | Homozygous   |
| NC_037641.1 | 13169761 | SNV | 1 | G | A | Heterozygous |
| NC_037641.1 | 13169815 | SNV | 1 | A | G | Homozygous   |
| NC_037641.1 | 13169894 | SNV | 1 | C | G | Homozygous   |
| NC_037641.1 | 13169907 | SNV | 1 | A | C | Heterozygous |
| NC_037641.1 | 13169910 | SNV | 1 | G | C | Homozygous   |
| NC_037641.1 | 13169997 | SNV | 1 | T | C | Homozygous   |
| NC_037641.1 | 13173075 | SNV | 1 | T | C | Heterozygous |
| NC_037641.1 | 13173147 | SNV | 1 | A | G | Homozygous   |
| NC_037641.1 | 13174740 | SNV | 1 | T | A | Heterozygous |
| NC_037641.1 | 13175153 | SNV | 1 | C | T | Heterozygous |
| NC_037641.1 | 13178820 | SNV | 1 | T | C | Homozygous   |
| NC_037641.1 | 13185412 | SNV | 1 | A | T | Homozygous   |
| NC_037641.1 | 13186070 | SNV | 1 | T | A | Homozygous   |
| NC_037641.1 | 13186072 | SNV | 1 | C | T | Heterozygous |
| NC_037641.1 | 13186147 | SNV | 1 | A | G | Homozygous   |
| NC_037641.1 | 13186324 | SNV | 1 | A | G | Homozygous   |
| NC_037641.1 | 13186372 | SNV | 1 | T | C | Homozygous   |
| NC_037641.1 | 13187127 | SNV | 1 | C | G | Homozygous   |
| NC_037641.1 | 13190554 | SNV | 1 | T | C | Heterozygous |
| NC_037641.1 | 13198094 | SNV | 1 | G | A | Heterozygous |
| NC_037641.1 | 13202078 | SNV | 1 | T | A | Homozygous   |
| NC_037641.1 | 13202081 | SNV | 1 | G | A | Homozygous   |
| NC_037641.1 | 13202086 | SNV | 1 | T | C | Heterozygous |
| NC_037641.1 | 13202619 | SNV | 1 | C | T | Homozygous   |
| NC_037641.1 | 13203016 | SNV | 1 | C | G | Homozygous   |
| NC_037641.1 | 13203266 | SNV | 1 | G | A | Heterozygous |
| NC_037641.1 | 13203414 | SNV | 1 | A | G | Homozygous   |
| NC_037641.1 | 13203755 | SNV | 1 | T | G | Heterozygous |
| NC_037641.1 | 13203776 | SNV | 1 | C | T | Homozygous   |
| NC_037641.1 | 13204384 | SNV | 1 | G | A | Homozygous   |
| NC_037641.1 | 13205550 | SNV | 1 | G | A | Homozygous   |
| NC_037641.1 | 13205738 | SNV | 1 | T | C | Homozygous   |
| NC_037641.1 | 13205767 | SNV | 1 | T | C | Homozygous   |
| NC_037641.1 | 13205778 | SNV | 1 | T | C | Homozygous   |
| NC_037641.1 | 13205780 | SNV | 1 | T | C | Homozygous   |
| NC_037641.1 | 13206289 | SNV | 1 | T | A | Heterozygous |

|             |          |     |   |   |   |              |
|-------------|----------|-----|---|---|---|--------------|
| NC_037641.1 | 13206326 | SNV | 1 | A | G | Homozygous   |
| NC_037641.1 | 13206329 | SNV | 1 | T | A | Homozygous   |
| NC_037641.1 | 13206335 | SNV | 1 | A | G | Heterozygous |
| NC_037641.1 | 13206342 | SNV | 1 | T | C | Heterozygous |
| NC_037641.1 | 13206349 | SNV | 1 | C | T | Heterozygous |
| NC_037641.1 | 13206356 | SNV | 1 | G | A | Heterozygous |
| NC_037641.1 | 13206358 | SNV | 1 | G | A | Heterozygous |
| NC_037641.1 | 13206574 | SNV | 1 | A | G | Homozygous   |
| NC_037641.1 | 13206684 | SNV | 1 | G | A | Heterozygous |
| NC_037641.1 | 13206707 | SNV | 1 | A | G | Heterozygous |
| NC_037641.1 | 13206711 | SNV | 1 | C | A | Homozygous   |
| NC_037641.1 | 13207092 | SNV | 1 | A | G | Heterozygous |
| NC_037641.1 | 13207620 | SNV | 1 | T | C | Homozygous   |
| NC_037641.1 | 13207626 | SNV | 1 | G | T | Heterozygous |
| NC_037641.1 | 13207778 | SNV | 1 | A | G | Homozygous   |
| NC_037641.1 | 13208044 | SNV | 1 | A | T | Homozygous   |
| NC_037641.1 | 13208169 | SNV | 1 | G | C | Heterozygous |
| NC_037641.1 | 13208514 | SNV | 1 | G | A | Homozygous   |
| NC_037641.1 | 13209037 | SNV | 1 | T | C | Homozygous   |
| NC_037641.1 | 13209120 | SNV | 1 | G | A | Heterozygous |
| NC_037641.1 | 13209354 | SNV | 1 | A | T | Homozygous   |
| NC_037641.1 | 13210296 | SNV | 1 | G | C | Homozygous   |
| NC_037641.1 | 13210341 | SNV | 1 | G | A | Heterozygous |
| NC_037641.1 | 13210347 | SNV | 1 | G | A | Homozygous   |
| NC_037641.1 | 13210683 | SNV | 1 | C | G | Heterozygous |
| NC_037641.1 | 13213176 | SNV | 1 | G | A | Heterozygous |
| NC_037641.1 | 13213186 | SNV | 1 | A | G | Homozygous   |
| NC_037641.1 | 13227687 | SNV | 1 | C | T | Homozygous   |
| NC_037641.1 | 13227695 | SNV | 1 | T | C | Homozygous   |
| NC_037641.1 | 13227699 | SNV | 1 | C | T | Homozygous   |
| NC_037641.1 | 13227702 | SNV | 1 | C | T | Homozygous   |
| NC_037641.1 | 13227704 | SNV | 1 | C | T | Homozygous   |
| NC_037641.1 | 13227708 | SNV | 1 | C | T | Homozygous   |
| NC_037641.1 | 13227710 | SNV | 1 | C | T | Homozygous   |
| NC_037641.1 | 13227712 | SNV | 1 | C | T | Homozygous   |
| NC_037641.1 | 13246738 | SNV | 1 | C | T | Homozygous   |
| NC_037641.1 | 13256972 | SNV | 1 | G | A | Homozygous   |
| NC_037641.1 | 13256977 | SNV | 1 | A | T | Homozygous   |
| NC_037641.1 | 13256983 | SNV | 1 | C | T | Homozygous   |
| NC_037641.1 | 13263028 | SNV | 1 | T | C | Heterozygous |
| NC_037641.1 | 13263524 | SNV | 1 | T | C | Heterozygous |
| NC_037641.1 | 13263534 | SNV | 1 | T | C | Heterozygous |
| NC_037641.1 | 13263820 | SNV | 1 | T | C | Heterozygous |
| NC_037641.1 | 13264147 | SNV | 1 | C | T | Heterozygous |
| NC_037641.1 | 13264196 | SNV | 1 | G | A | Heterozygous |
| NC_037641.1 | 13264203 | SNV | 1 | C | T | Heterozygous |
| NC_037641.1 | 13264281 | SNV | 1 | G | C | Homozygous   |
| NC_037641.1 | 13272893 | SNV | 1 | T | A | Heterozygous |
| NC_037641.1 | 13272896 | SNV | 1 | T | C | Heterozygous |
| NC_037641.1 | 13272898 | SNV | 1 | G | A | Homozygous   |
| NC_037641.1 | 13272907 | SNV | 1 | G | C | Homozygous   |

|             |          |     |   |   |   |              |
|-------------|----------|-----|---|---|---|--------------|
| NC_037641.1 | 13272912 | SNV | 1 | G | C | Homozygous   |
| NC_037641.1 | 13272929 | SNV | 1 | C | T | Heterozygous |
| NC_037641.1 | 13272934 | SNV | 1 | C | T | Heterozygous |
| NC_037641.1 | 13272957 | SNV | 1 | G | C | Homozygous   |
| NC_037641.1 | 13272962 | SNV | 1 | G | C | Homozygous   |
| NC_037641.1 | 13272967 | SNV | 1 | G | C | Homozygous   |
| NC_037641.1 | 13272972 | SNV | 1 | G | C | Homozygous   |
| NC_037641.1 | 13272983 | SNV | 1 | G | A | Homozygous   |
| NC_037641.1 | 13279178 | SNV | 1 | A | G | Homozygous   |
| NC_037641.1 | 13279240 | SNV | 1 | G | A | Homozygous   |
| NC_037641.1 | 13279243 | SNV | 1 | G | A | Heterozygous |
| NC_037641.1 | 13279248 | SNV | 1 | G | A | Heterozygous |
| NC_037641.1 | 13279252 | SNV | 1 | G | C | Homozygous   |
| NC_037641.1 | 13279256 | SNV | 1 | G | A | Heterozygous |
| NC_037641.1 | 13281807 | SNV | 1 | G | C | Heterozygous |
| NC_037641.1 | 13281853 | SNV | 1 | C | T | Heterozygous |
| NC_037641.1 | 13281885 | SNV | 1 | G | A | Homozygous   |
| NC_037641.1 | 13281920 | SNV | 1 | G | A | Heterozygous |
| NC_037641.1 | 13291122 | SNV | 1 | C | G | Homozygous   |
| NC_037641.1 | 13291429 | SNV | 1 | T | C | Homozygous   |
| NC_037641.1 | 13294482 | SNV | 1 | C | T | Homozygous   |
| NC_037641.1 | 13294488 | SNV | 1 | T | A | Homozygous   |
| NC_037641.1 | 13294501 | SNV | 1 | T | A | Homozygous   |
| NC_037641.1 | 13309747 | SNV | 1 | G | A | Heterozygous |
| NC_037641.1 | 13309809 | SNV | 1 | A | C | Homozygous   |
| NC_037641.1 | 13317922 | SNV | 1 | T | C | Homozygous   |
| NC_037641.1 | 13317924 | SNV | 1 | T | C | Homozygous   |
| NC_037641.1 | 13317930 | SNV | 1 | T | C | Homozygous   |
| NC_037641.1 | 13317936 | SNV | 1 | T | C | Heterozygous |
| NC_037641.1 | 13317938 | SNV | 1 | T | C | Homozygous   |
| NC_037641.1 | 13317947 | SNV | 1 | A | G | Homozygous   |
| NC_037641.1 | 13317950 | SNV | 1 | T | C | Homozygous   |
| NC_037641.1 | 13317954 | SNV | 1 | T | C | Homozygous   |
| NC_037641.1 | 13317957 | SNV | 1 | A | G | Homozygous   |
| NC_037641.1 | 13317962 | SNV | 1 | T | C | Heterozygous |
| NC_037641.1 | 13317968 | SNV | 1 | T | G | Heterozygous |
| NC_037641.1 | 13317991 | SNV | 1 | A | T | Heterozygous |
| NC_037641.1 | 13317994 | SNV | 1 | T | G | Heterozygous |
| NC_037641.1 | 13323004 | SNV | 1 | G | A | Heterozygous |
| NC_037641.1 | 13323006 | SNV | 1 | T | C | Homozygous   |
| NC_037641.1 | 13323011 | SNV | 1 | G | C | Heterozygous |
| NC_037641.1 | 13323015 | SNV | 1 | C | T | Homozygous   |
| NC_037641.1 | 13323018 | SNV | 1 | C | T | Homozygous   |
| NC_037641.1 | 13323021 | SNV | 1 | C | T | Homozygous   |
| NC_037641.1 | 13323023 | SNV | 1 | G | C | Homozygous   |
| NC_037641.1 | 13323029 | SNV | 1 | G | A | Homozygous   |
| NC_037641.1 | 13327693 | SNV | 1 | G | A | Homozygous   |
| NC_037641.1 | 13327699 | SNV | 1 | G | A | Homozygous   |
| NC_037641.1 | 13328760 | SNV | 1 | G | C | Heterozygous |
| NC_037641.1 | 13328793 | SNV | 1 | A | G | Homozygous   |
| NC_037641.1 | 13328898 | SNV | 1 | A | G | Heterozygous |



|             |          |     |   |   |   |              |
|-------------|----------|-----|---|---|---|--------------|
| NC_037641.1 | 13328914 | SNV | 1 | G | A | Heterozygous |
| NC_037641.1 | 13328920 | SNV | 1 | A | G | Heterozygous |
| NC_037641.1 | 13339442 | SNV | 1 | T | C | Heterozygous |
| NC_037641.1 | 13342594 | SNV | 1 | G | A | Homozygous   |
| NC_037641.1 | 13342602 | SNV | 1 | A | C | Homozygous   |
| NC_037641.1 | 13342606 | SNV | 1 | A | G | Homozygous   |
| NC_037641.1 | 13342609 | SNV | 1 | G | A | Homozygous   |
| NC_037641.1 | 13342612 | SNV | 1 | G | A | Homozygous   |
| NC_037641.1 | 13342617 | SNV | 1 | A | T | Homozygous   |
| NC_037641.1 | 13342627 | SNV | 1 | G | A | Heterozygous |
| NC_037641.1 | 13342631 | SNV | 1 | T | C | Homozygous   |
| NC_037641.1 | 13342672 | SNV | 1 | G | A | Homozygous   |
| NC_037641.1 | 13342674 | SNV | 1 | G | T | Homozygous   |
| NC_037641.1 | 13342676 | SNV | 1 | T | C | Homozygous   |
| NC_037641.1 | 13342678 | SNV | 1 | A | G | Homozygous   |
| NC_037641.1 | 13343750 | SNV | 1 | G | T | Homozygous   |
| NC_037641.1 | 13348583 | SNV | 1 | T | C | Homozygous   |
| NC_037641.1 | 13348689 | SNV | 1 | C | T | Heterozygous |
| NC_037641.1 | 13349736 | SNV | 1 | A | G | Homozygous   |
| NC_037641.1 | 13349783 | SNV | 1 | C | G | Homozygous   |
| NC_037641.1 | 13349905 | SNV | 1 | G | A | Heterozygous |
| NC_037641.1 | 13349955 | SNV | 1 | A | G | Homozygous   |
| NC_037641.1 | 13349987 | SNV | 1 | A | G | Heterozygous |
| NC_037641.1 | 13352049 | SNV | 1 | C | T | Homozygous   |
| NC_037641.1 | 13352082 | SNV | 1 | A | G | Homozygous   |
| NC_037641.1 | 13352084 | SNV | 1 | C | T | Homozygous   |
| NC_037641.1 | 13358661 | SNV | 1 | C | T | Homozygous   |
| NC_037641.1 | 13358685 | SNV | 1 | T | A | Heterozygous |
| NC_037641.1 | 13358726 | SNV | 1 | A | C | Homozygous   |
| NC_037641.1 | 13365184 | SNV | 1 | A | G | Homozygous   |
| NC_037641.1 | 13371854 | SNV | 1 | A | G | Homozygous   |
| NC_037641.1 | 13371874 | SNV | 1 | T | C | Heterozygous |
| NC_037641.1 | 13371889 | SNV | 1 | A | T | Homozygous   |
| NC_037641.1 | 13378262 | SNV | 1 | A | C | Homozygous   |
| NC_037641.1 | 13378264 | SNV | 1 | G | C | Homozygous   |
| NC_037641.1 | 13378272 | SNV | 1 | A | G | Homozygous   |
| NC_037641.1 | 13378274 | SNV | 1 | G | T | Homozygous   |
| NC_037641.1 | 13378290 | SNV | 1 | C | G | Homozygous   |
| NC_037641.1 | 13378294 | SNV | 1 | G | A | Heterozygous |
| NC_037641.1 | 13378304 | SNV | 1 | G | A | Heterozygous |
| NC_037641.1 | 13378310 | SNV | 1 | G | A | Heterozygous |
| NC_037641.1 | 13378312 | SNV | 1 | G | A | Heterozygous |
| NC_037641.1 | 13378342 | SNV | 1 | G | A | Homozygous   |
| NC_037641.1 | 13378347 | SNV | 1 | G | A | Homozygous   |
| NC_037641.1 | 13378350 | SNV | 1 | A | G | Homozygous   |
| NC_037641.1 | 13378357 | SNV | 1 | G | T | Heterozygous |
| NC_037641.1 | 13378359 | SNV | 1 | G | A | Homozygous   |
| NC_037641.1 | 13378365 | SNV | 1 | G | A | Heterozygous |
| NC_037641.1 | 13378368 | SNV | 1 | A | T | Heterozygous |
| NC_037641.1 | 13389784 | SNV | 1 | G | T | Homozygous   |
| NC_037641.1 | 13390990 | SNV | 1 | A | C | Homozygous   |

|             |          |     |   |   |   |              |
|-------------|----------|-----|---|---|---|--------------|
| NC_037641.1 | 13391009 | SNV | 1 | G | A | Homozygous   |
| NC_037641.1 | 13391112 | SNV | 1 | G | A | Homozygous   |
| NC_037641.1 | 13391212 | SNV | 1 | G | A | Homozygous   |
| NC_037641.1 | 13391237 | SNV | 1 | A | G | Homozygous   |
| NC_037641.1 | 13391311 | SNV | 1 | G | A | Heterozygous |
| NC_037641.1 | 13391391 | SNV | 1 | A | T | Homozygous   |
| NC_037641.1 | 13391393 | SNV | 1 | C | A | Heterozygous |
| NC_037641.1 | 13391408 | SNV | 1 | T | A | Heterozygous |
| NC_037641.1 | 13391416 | SNV | 1 | G | A | Homozygous   |
| NC_037641.1 | 13391419 | SNV | 1 | G | A | Homozygous   |
| NC_037641.1 | 13391431 | SNV | 1 | T | C | Homozygous   |
| NC_037641.1 | 13391455 | SNV | 1 | T | G | Homozygous   |
| NC_037641.1 | 13391559 | SNV | 1 | A | G | Homozygous   |
| NC_037641.1 | 13391562 | SNV | 1 | A | G | Homozygous   |
| NC_037641.1 | 13391658 | SNV | 1 | A | G | Homozygous   |
| NC_037641.1 | 13391678 | SNV | 1 | T | C | Homozygous   |
| NC_037641.1 | 13391681 | SNV | 1 | A | G | Homozygous   |
| NC_037641.1 | 13391692 | SNV | 1 | C | G | Homozygous   |
| NC_037641.1 | 13391748 | SNV | 1 | T | C | Homozygous   |
| NC_037641.1 | 13391786 | SNV | 1 | A | G | Homozygous   |
| NC_037641.1 | 13391815 | SNV | 1 | G | A | Homozygous   |
| NC_037641.1 | 13391852 | SNV | 1 | T | C | Homozygous   |
| NC_037641.1 | 13391855 | SNV | 1 | T | C | Homozygous   |
| NC_037641.1 | 13391962 | SNV | 1 | G | C | Homozygous   |
| NC_037641.1 | 13391984 | SNV | 1 | T | C | Heterozygous |
| NC_037641.1 | 13392001 | SNV | 1 | G | A | Homozygous   |
| NC_037641.1 | 13392058 | SNV | 1 | T | C | Homozygous   |
| NC_037642.1 | 31522    | SNV | 1 | A | C | Heterozygous |
| NC_037642.1 | 31958    | SNV | 1 | A | T | Homozygous   |
| NC_037642.1 | 58893    | SNV | 1 | A | T | Homozygous   |
| NC_037642.1 | 58895    | SNV | 1 | A | T | Homozygous   |
| NC_037642.1 | 58897    | SNV | 1 | A | T | Homozygous   |
| NC_037642.1 | 58911    | SNV | 1 | A | T | Homozygous   |
| NC_037642.1 | 58914    | SNV | 1 | T | A | Homozygous   |
| NC_037642.1 | 58917    | SNV | 1 | T | A | Homozygous   |
| NC_037642.1 | 58948    | SNV | 1 | T | G | Homozygous   |
| NC_037642.1 | 62323    | SNV | 1 | C | T | Heterozygous |
| NC_037642.1 | 62341    | SNV | 1 | G | T | Homozygous   |
| NC_037642.1 | 62347    | SNV | 1 | G | T | Homozygous   |
| NC_037642.1 | 62349    | SNV | 1 | C | T | Heterozygous |
| NC_037642.1 | 62356    | SNV | 1 | C | T | Heterozygous |
| NC_037642.1 | 62362    | SNV | 1 | G | T | Heterozygous |
| NC_037642.1 | 62373    | SNV | 1 | G | T | Heterozygous |
| NC_037642.1 | 62385    | SNV | 1 | A | T | Heterozygous |
| NC_037642.1 | 62489    | SNV | 1 | C | T | Heterozygous |
| NC_037642.1 | 68115    | SNV | 1 | G | A | Homozygous   |
| NC_037642.1 | 68123    | SNV | 1 | T | A | Homozygous   |
| NC_037642.1 | 68146    | SNV | 1 | T | G | Homozygous   |
| NC_037642.1 | 68164    | SNV | 1 | T | C | Heterozygous |
| NC_037642.1 | 68166    | SNV | 1 | T | C | Heterozygous |
| NC_037642.1 | 70511    | SNV | 1 | A | C | Heterozygous |

|             |        |     |   |   |   |              |
|-------------|--------|-----|---|---|---|--------------|
| NC_037642.1 | 70515  | SNV | 1 | A | C | Heterozygous |
| NC_037642.1 | 70520  | SNV | 1 | T | C | Heterozygous |
| NC_037642.1 | 70522  | SNV | 1 | T | G | Heterozygous |
| NC_037642.1 | 73069  | SNV | 1 | T | A | Heterozygous |
| NC_037642.1 | 74781  | SNV | 1 | C | G | Homozygous   |
| NC_037642.1 | 74791  | SNV | 1 | C | G | Homozygous   |
| NC_037642.1 | 74795  | SNV | 1 | C | T | Homozygous   |
| NC_037642.1 | 79072  | SNV | 1 | A | T | Homozygous   |
| NC_037642.1 | 79086  | SNV | 1 | A | G | Homozygous   |
| NC_037642.1 | 79089  | SNV | 1 | A | T | Homozygous   |
| NC_037642.1 | 80315  | SNV | 1 | C | T | Homozygous   |
| NC_037642.1 | 85533  | SNV | 1 | A | G | Homozygous   |
| NC_037642.1 | 87125  | SNV | 1 | T | G | Homozygous   |
| NC_037642.1 | 87161  | SNV | 1 | C | T | Homozygous   |
| NC_037642.1 | 90668  | SNV | 1 | A | C | Homozygous   |
| NC_037642.1 | 90690  | SNV | 1 | C | A | Homozygous   |
| NC_037642.1 | 90693  | SNV | 1 | A | T | Homozygous   |
| NC_037642.1 | 90708  | SNV | 1 | A | T | Homozygous   |
| NC_037642.1 | 91046  | SNV | 1 | G | C | Homozygous   |
| NC_037642.1 | 91050  | SNV | 1 | T | A | Homozygous   |
| NC_037642.1 | 91055  | SNV | 1 | A | T | Homozygous   |
| NC_037642.1 | 91071  | SNV | 1 | A | C | Homozygous   |
| NC_037642.1 | 92535  | SNV | 1 | T | A | Homozygous   |
| NC_037642.1 | 92555  | SNV | 1 | T | G | Homozygous   |
| NC_037642.1 | 92571  | SNV | 1 | T | A | Homozygous   |
| NC_037642.1 | 101337 | SNV | 1 | T | G | Homozygous   |
| NC_037642.1 | 101349 | SNV | 1 | T | C | Homozygous   |
| NC_037642.1 | 108951 | SNV | 1 | A | T | Homozygous   |
| NC_037642.1 | 108960 | SNV | 1 | A | T | Homozygous   |
| NC_037642.1 | 108988 | SNV | 1 | C | A | Homozygous   |
| NC_037642.1 | 119475 | SNV | 1 | T | A | Heterozygous |
| NC_037642.1 | 119479 | SNV | 1 | T | A | Homozygous   |
| NC_037642.1 | 119519 | SNV | 1 | T | A | Homozygous   |
| NC_037642.1 | 119525 | SNV | 1 | T | G | Homozygous   |
| NC_037642.1 | 119528 | SNV | 1 | A | T | Homozygous   |
| NC_037642.1 | 119548 | SNV | 1 | T | A | Heterozygous |
| NC_037642.1 | 119552 | SNV | 1 | T | A | Heterozygous |
| NC_037642.1 | 120370 | SNV | 1 | T | G | Homozygous   |
| NC_037642.1 | 120393 | SNV | 1 | A | G | Homozygous   |
| NC_037642.1 | 120398 | SNV | 1 | G | A | Homozygous   |
| NC_037642.1 | 120407 | SNV | 1 | T | A | Homozygous   |
| NC_037642.1 | 129247 | SNV | 1 | C | G | Homozygous   |
| NC_037642.1 | 130764 | SNV | 1 | A | C | Homozygous   |
| NC_037642.1 | 130769 | SNV | 1 | C | T | Homozygous   |
| NC_037642.1 | 132785 | SNV | 1 | T | C | Homozygous   |
| NC_037642.1 | 132987 | SNV | 1 | T | A | Heterozygous |
| NC_037642.1 | 132999 | SNV | 1 | T | A | Heterozygous |
| NC_037642.1 | 136734 | SNV | 1 | C | A | Homozygous   |
| NC_037642.1 | 136970 | SNV | 1 | G | A | Homozygous   |
| NC_037642.1 | 139042 | SNV | 1 | A | T | Homozygous   |
| NC_037642.1 | 139316 | SNV | 1 | T | G | Heterozygous |

|             |        |     |   |   |   |              |
|-------------|--------|-----|---|---|---|--------------|
| NC_037642.1 | 139319 | SNV | 1 | T | A | Heterozygous |
| NC_037642.1 | 139331 | SNV | 1 | C | T | Heterozygous |
| NC_037642.1 | 139470 | SNV | 1 | T | G | Heterozygous |
| NC_037642.1 | 140623 | SNV | 1 | T | G | Homozygous   |
| NC_037642.1 | 140881 | SNV | 1 | C | G | Heterozygous |
| NC_037642.1 | 142378 | SNV | 1 | G | A | Homozygous   |
| NC_037642.1 | 143135 | SNV | 1 | G | A | Homozygous   |
| NC_037642.1 | 143635 | SNV | 1 | T | C | Homozygous   |
| NC_037642.1 | 144572 | SNV | 1 | A | G | Homozygous   |
| NC_037642.1 | 144875 | SNV | 1 | T | G | Homozygous   |
| NC_037642.1 | 144916 | SNV | 1 | T | C | Homozygous   |
| NC_037642.1 | 145049 | SNV | 1 | C | A | Heterozygous |
| NC_037642.1 | 145317 | SNV | 1 | C | T | Homozygous   |
| NC_037642.1 | 145959 | SNV | 1 | C | A | Homozygous   |
| NC_037642.1 | 146355 | SNV | 1 | A | G | Homozygous   |
| NC_037642.1 | 146599 | SNV | 1 | C | T | Heterozygous |
| NC_037642.1 | 147292 | SNV | 1 | A | T | Homozygous   |
| NC_037642.1 | 147306 | SNV | 1 | C | T | Homozygous   |
| NC_037642.1 | 147308 | SNV | 1 | A | T | Homozygous   |
| NC_037642.1 | 147310 | SNV | 1 | A | C | Homozygous   |
| NC_037642.1 | 152598 | SNV | 1 | A | T | Homozygous   |
| NC_037642.1 | 153103 | SNV | 1 | C | G | Homozygous   |
| NC_037642.1 | 153815 | SNV | 1 | G | T | Homozygous   |
| NC_037642.1 | 158337 | SNV | 1 | A | G | Homozygous   |
| NC_037642.1 | 163233 | SNV | 1 | A | C | Homozygous   |
| NC_037642.1 | 163495 | SNV | 1 | G | C | Heterozygous |
| NC_037642.1 | 163994 | SNV | 1 | C | G | Homozygous   |
| NC_037642.1 | 164096 | SNV | 1 | C | T | Homozygous   |
| NC_037642.1 | 164100 | SNV | 1 | C | T | Homozygous   |
| NC_037642.1 | 166255 | SNV | 1 | T | C | Homozygous   |
| NC_037642.1 | 168965 | SNV | 1 | C | T | Heterozygous |
| NC_037642.1 | 169467 | SNV | 1 | G | A | Homozygous   |
| NC_037642.1 | 169486 | SNV | 1 | C | T | Homozygous   |
| NC_037642.1 | 175399 | SNV | 1 | A | G | Heterozygous |
| NC_037642.1 | 175402 | SNV | 1 | T | C | Heterozygous |
| NC_037642.1 | 175408 | SNV | 1 | T | C | Heterozygous |
| NC_037642.1 | 175411 | SNV | 1 | A | G | Homozygous   |
| NC_037642.1 | 175414 | SNV | 1 | T | A | Homozygous   |
| NC_037642.1 | 175435 | SNV | 1 | A | T | Homozygous   |
| NC_037642.1 | 175441 | SNV | 1 | A | T | Homozygous   |
| NC_037642.1 | 175445 | SNV | 1 | C | A | Homozygous   |
| NC_037642.1 | 175450 | SNV | 1 | C | T | Homozygous   |
| NC_037642.1 | 177612 | SNV | 1 | G | A | Homozygous   |
| NC_037642.1 | 177627 | SNV | 1 | G | A | Homozygous   |
| NC_037642.1 | 179887 | SNV | 1 | T | C | Heterozygous |
| NC_037642.1 | 183130 | SNV | 1 | G | A | Heterozygous |
| NC_037642.1 | 185874 | SNV | 1 | C | A | Heterozygous |
| NC_037642.1 | 186366 | SNV | 1 | T | A | Heterozygous |
| NC_037642.1 | 186393 | SNV | 1 | T | A | Heterozygous |
| NC_037642.1 | 186396 | SNV | 1 | A | T | Heterozygous |
| NC_037642.1 | 186398 | SNV | 1 | A | T | Heterozygous |

|             |        |     |   |   |   |              |
|-------------|--------|-----|---|---|---|--------------|
| NC_037642.1 | 186409 | SNV | 1 | T | A | Heterozygous |
| NC_037642.1 | 188299 | SNV | 1 | C | A | Heterozygous |
| NC_037642.1 | 188514 | SNV | 1 | T | G | Homozygous   |
| NC_037642.1 | 188517 | SNV | 1 | C | G | Homozygous   |
| NC_037642.1 | 193520 | SNV | 1 | G | A | Heterozygous |
| NC_037642.1 | 195471 | SNV | 1 | C | T | Homozygous   |
| NC_037642.1 | 195669 | SNV | 1 | C | A | Homozygous   |
| NC_037642.1 | 197154 | SNV | 1 | A | G | Homozygous   |
| NC_037642.1 | 208892 | SNV | 1 | T | C | Homozygous   |
| NC_037642.1 | 208897 | SNV | 1 | A | G | Homozygous   |
| NC_037642.1 | 209295 | SNV | 1 | G | C | Homozygous   |
| NC_037642.1 | 209298 | SNV | 1 | A | C | Homozygous   |
| NC_037642.1 | 214946 | SNV | 1 | A | C | Homozygous   |
| NC_037642.1 | 214949 | SNV | 1 | T | A | Homozygous   |
| NC_037642.1 | 215922 | SNV | 1 | T | G | Heterozygous |
| NC_037642.1 | 216087 | SNV | 1 | T | A | Homozygous   |
| NC_037642.1 | 216115 | SNV | 1 | G | C | Homozygous   |
| NC_037642.1 | 216122 | SNV | 1 | A | T | Homozygous   |
| NC_037642.1 | 217100 | SNV | 1 | T | A | Homozygous   |
| NC_037642.1 | 217583 | SNV | 1 | G | A | Homozygous   |
| NC_037642.1 | 218228 | SNV | 1 | A | G | Heterozygous |
| NC_037642.1 | 218277 | SNV | 1 | G | C | Homozygous   |
| NC_037642.1 | 218342 | SNV | 1 | A | G | Heterozygous |
| NC_037642.1 | 218361 | SNV | 1 | A | G | Heterozygous |
| NC_037642.1 | 218459 | SNV | 1 | A | T | Heterozygous |
| NC_037642.1 | 218461 | SNV | 1 | A | C | Heterozygous |
| NC_037642.1 | 218467 | SNV | 1 | T | A | Heterozygous |
| NC_037642.1 | 218475 | SNV | 1 | A | C | Heterozygous |
| NC_037642.1 | 218478 | SNV | 1 | T | A | Heterozygous |
| NC_037642.1 | 218544 | SNV | 1 | C | T | Homozygous   |
| NC_037642.1 | 218563 | SNV | 1 | C | T | Homozygous   |
| NC_037642.1 | 218757 | SNV | 1 | T | C | Homozygous   |
| NC_037642.1 | 219472 | SNV | 1 | A | G | Homozygous   |
| NC_037642.1 | 219541 | SNV | 1 | A | T | Heterozygous |
| NC_037642.1 | 219552 | SNV | 1 | A | G | Heterozygous |
| NC_037642.1 | 219559 | SNV | 1 | C | T | Homozygous   |
| NC_037642.1 | 219574 | SNV | 1 | A | T | Heterozygous |
| NC_037642.1 | 219577 | SNV | 1 | C | T | Heterozygous |
| NC_037642.1 | 219582 | SNV | 1 | A | G | Heterozygous |
| NC_037642.1 | 219585 | SNV | 1 | C | T | Heterozygous |
| NC_037642.1 | 219587 | SNV | 1 | C | A | Heterozygous |
| NC_037642.1 | 219589 | SNV | 1 | C | G | Heterozygous |
| NC_037642.1 | 219622 | SNV | 1 | A | T | Heterozygous |
| NC_037642.1 | 223978 | SNV | 1 | T | C | Homozygous   |
| NC_037642.1 | 225223 | SNV | 1 | T | A | Homozygous   |
| NC_037642.1 | 225247 | SNV | 1 | T | C | Homozygous   |
| NC_037642.1 | 225256 | SNV | 1 | C | T | Homozygous   |
| NC_037642.1 | 226570 | SNV | 1 | T | C | Homozygous   |
| NC_037642.1 | 228003 | SNV | 1 | A | T | Heterozygous |
| NC_037642.1 | 228047 | SNV | 1 | T | A | Homozygous   |
| NC_037642.1 | 232060 | SNV | 1 | T | C | Heterozygous |

|             |        |     |   |   |   |              |
|-------------|--------|-----|---|---|---|--------------|
| NC_037642.1 | 232525 | SNV | 1 | C | T | Homozygous   |
| NC_037642.1 | 235385 | SNV | 1 | T | C | Homozygous   |
| NC_037642.1 | 244863 | SNV | 1 | G | A | Homozygous   |
| NC_037642.1 | 250994 | SNV | 1 | A | G | Homozygous   |
| NC_037642.1 | 250997 | SNV | 1 | T | A | Homozygous   |
| NC_037642.1 | 251321 | SNV | 1 | T | C | Homozygous   |
| NC_037642.1 | 251349 | SNV | 1 | G | A | Homozygous   |
| NC_037642.1 | 251765 | SNV | 1 | A | G | Homozygous   |
| NC_037642.1 | 252377 | SNV | 1 | G | A | Homozygous   |
| NC_037642.1 | 252606 | SNV | 1 | T | A | Homozygous   |
| NC_037642.1 | 254211 | SNV | 1 | G | A | Homozygous   |
| NC_037642.1 | 254808 | SNV | 1 | A | G | Homozygous   |
| NC_037642.1 | 254816 | SNV | 1 | A | C | Homozygous   |
| NC_037642.1 | 254820 | SNV | 1 | A | C | Homozygous   |
| NC_037642.1 | 254822 | SNV | 1 | T | A | Heterozygous |
| NC_037642.1 | 255281 | SNV | 1 | A | T | Homozygous   |
| NC_037642.1 | 255285 | SNV | 1 | A | T | Homozygous   |
| NC_037642.1 | 255301 | SNV | 1 | A | G | Homozygous   |
| NC_037642.1 | 256303 | SNV | 1 | A | T | Homozygous   |
| NC_037642.1 | 256721 | SNV | 1 | A | C | Homozygous   |
| NC_037642.1 | 256724 | SNV | 1 | T | G | Homozygous   |
| NC_037642.1 | 256726 | SNV | 1 | T | A | Homozygous   |
| NC_037642.1 | 256734 | SNV | 1 | A | T | Homozygous   |
| NC_037642.1 | 256736 | SNV | 1 | A | T | Homozygous   |
| NC_037642.1 | 256740 | SNV | 1 | C | A | Homozygous   |
| NC_037642.1 | 256743 | SNV | 1 | A | T | Homozygous   |
| NC_037642.1 | 256745 | SNV | 1 | T | C | Homozygous   |
| NC_037642.1 | 256765 | SNV | 1 | A | T | Homozygous   |
| NC_037642.1 | 256893 | SNV | 1 | A | C | Heterozygous |
| NC_037642.1 | 256897 | SNV | 1 | A | C | Heterozygous |
| NC_037642.1 | 256899 | SNV | 1 | T | A | Heterozygous |
| NC_037642.1 | 256911 | SNV | 1 | A | G | Heterozygous |
| NC_037642.1 | 256911 | SNV | 1 | A | T | Heterozygous |
| NC_037642.1 | 261238 | SNV | 1 | A | G | Homozygous   |
| NC_037642.1 | 261242 | SNV | 1 | A | G | Homozygous   |
| NC_037642.1 | 262126 | SNV | 1 | T | A | Heterozygous |
| NC_037642.1 | 262136 | SNV | 1 | T | A | Heterozygous |
| NC_037642.1 | 262147 | SNV | 1 | A | G | Heterozygous |
| NC_037642.1 | 262154 | SNV | 1 | A | G | Heterozygous |
| NC_037642.1 | 271336 | SNV | 1 | A | G | Homozygous   |
| NC_037642.1 | 276929 | SNV | 1 | C | T | Homozygous   |
| NC_037642.1 | 276931 | SNV | 1 | A | G | Homozygous   |
| NC_037642.1 | 276934 | SNV | 1 | A | T | Homozygous   |
| NC_037642.1 | 276937 | SNV | 1 | A | C | Homozygous   |
| NC_037642.1 | 282842 | SNV | 1 | T | G | Heterozygous |
| NC_037642.1 | 282861 | SNV | 1 | T | G | Heterozygous |
| NC_037642.1 | 282870 | SNV | 1 | G | T | Heterozygous |
| NC_037642.1 | 282874 | SNV | 1 | C | T | Homozygous   |
| NC_037642.1 | 285488 | SNV | 1 | C | T | Heterozygous |
| NC_037642.1 | 285492 | SNV | 1 | T | A | Heterozygous |
| NC_037642.1 | 287989 | SNV | 1 | G | C | Homozygous   |

|             |        |     |   |   |   |              |
|-------------|--------|-----|---|---|---|--------------|
| NC_037642.1 | 289175 | SNV | 1 | A | C | Homozygous   |
| NC_037642.1 | 289181 | SNV | 1 | A | T | Homozygous   |
| NC_037642.1 | 289201 | SNV | 1 | A | T | Homozygous   |
| NC_037642.1 | 289388 | SNV | 1 | G | A | Homozygous   |
| NC_037642.1 | 289395 | SNV | 1 | T | C | Homozygous   |
| NC_037642.1 | 289397 | SNV | 1 | A | T | Homozygous   |
| NC_037642.1 | 289409 | SNV | 1 | A | T | Heterozygous |
| NC_037642.1 | 296206 | SNV | 1 | T | A | Homozygous   |
| NC_037642.1 | 318589 | SNV | 1 | A | C | Homozygous   |
| NC_037642.1 | 318592 | SNV | 1 | T | A | Homozygous   |
| NC_037642.1 | 318594 | SNV | 1 | A | G | Homozygous   |
| NC_037642.1 | 318619 | SNV | 1 | T | A | Homozygous   |
| NC_037642.1 | 330666 | SNV | 1 | C | A | Homozygous   |
| NC_037642.1 | 330668 | SNV | 1 | G | A | Homozygous   |
| NC_037642.1 | 331350 | SNV | 1 | C | A | Homozygous   |
| NC_037642.1 | 332547 | SNV | 1 | T | A | Homozygous   |
| NC_037642.1 | 332567 | SNV | 1 | T | C | Homozygous   |
| NC_037642.1 | 332583 | SNV | 1 | T | G | Homozygous   |
| NC_037642.1 | 340754 | SNV | 1 | T | G | Homozygous   |
| NC_037642.1 | 341112 | SNV | 1 | T | A | Homozygous   |
| NC_037642.1 | 342482 | SNV | 1 | A | C | Homozygous   |
| NC_037642.1 | 343817 | SNV | 1 | A | G | Homozygous   |
| NC_037642.1 | 349717 | SNV | 1 | G | A | Homozygous   |
| NC_037642.1 | 350225 | SNV | 1 | G | A | Homozygous   |
| NC_037642.1 | 368618 | SNV | 1 | G | T | Heterozygous |
| NC_037642.1 | 373071 | SNV | 1 | G | A | Homozygous   |
| NC_037642.1 | 373673 | SNV | 1 | A | T | Heterozygous |
| NC_037642.1 | 376504 | SNV | 1 | C | T | Homozygous   |
| NC_037642.1 | 378378 | SNV | 1 | C | A | Heterozygous |
| NC_037642.1 | 378383 | SNV | 1 | G | A | Heterozygous |
| NC_037642.1 | 378385 | SNV | 1 | T | A | Heterozygous |
| NC_037642.1 | 378387 | SNV | 1 | C | A | Heterozygous |
| NC_037642.1 | 379200 | SNV | 1 | T | C | Heterozygous |
| NC_037642.1 | 380652 | SNV | 1 | T | C | Homozygous   |
| NC_037642.1 | 380820 | SNV | 1 | T | C | Homozygous   |
| NC_037642.1 | 381456 | SNV | 1 | C | T | Homozygous   |
| NC_037642.1 | 381800 | SNV | 1 | G | A | Homozygous   |
| NC_037642.1 | 384999 | SNV | 1 | A | G | Homozygous   |
| NC_037642.1 | 385004 | SNV | 1 | T | C | Homozygous   |
| NC_037642.1 | 385020 | SNV | 1 | T | C | Homozygous   |
| NC_037642.1 | 386349 | SNV | 1 | A | T | Homozygous   |
| NC_037642.1 | 386352 | SNV | 1 | A | T | Heterozygous |
| NC_037642.1 | 386370 | SNV | 1 | A | T | Heterozygous |
| NC_037642.1 | 386379 | SNV | 1 | A | G | Heterozygous |
| NC_037642.1 | 392646 | SNV | 1 | A | T | Heterozygous |
| NC_037642.1 | 392649 | SNV | 1 | A | T | Heterozygous |
| NC_037642.1 | 392655 | SNV | 1 | A | C | Homozygous   |
| NC_037642.1 | 392660 | SNV | 1 | A | T | Heterozygous |
| NC_037642.1 | 392662 | SNV | 1 | T | A | Heterozygous |
| NC_037642.1 | 393510 | SNV | 1 | A | T | Homozygous   |
| NC_037642.1 | 393513 | SNV | 1 | A | G | Homozygous   |

|             |        |     |   |   |   |              |
|-------------|--------|-----|---|---|---|--------------|
| NC_037642.1 | 393517 | SNV | 1 | T | G | Homozygous   |
| NC_037642.1 | 393522 | SNV | 1 | G | C | Homozygous   |
| NC_037642.1 | 393932 | SNV | 1 | A | T | Homozygous   |
| NC_037642.1 | 395813 | SNV | 1 | C | A | Homozygous   |
| NC_037642.1 | 396493 | SNV | 1 | T | C | Heterozygous |
| NC_037642.1 | 396552 | SNV | 1 | T | A | Heterozygous |
| NC_037642.1 | 396712 | SNV | 1 | G | A | Homozygous   |
| NC_037642.1 | 396714 | SNV | 1 | G | A | Homozygous   |
| NC_037642.1 | 397453 | SNV | 1 | T | A | Heterozygous |
| NC_037642.1 | 397895 | SNV | 1 | T | A | Heterozygous |
| NC_037642.1 | 397901 | SNV | 1 | T | G | Heterozygous |
| NC_037642.1 | 397914 | SNV | 1 | T | A | Heterozygous |
| NC_037642.1 | 397918 | SNV | 1 | T | A | Heterozygous |
| NC_037642.1 | 398335 | SNV | 1 | A | T | Homozygous   |
| NC_037642.1 | 401808 | SNV | 1 | G | C | Homozygous   |
| NC_037642.1 | 401811 | SNV | 1 | A | G | Homozygous   |
| NC_037642.1 | 422247 | SNV | 1 | T | A | Homozygous   |
| NC_037642.1 | 422253 | SNV | 1 | T | A | Homozygous   |
| NC_037642.1 | 422284 | SNV | 1 | T | A | Homozygous   |
| NC_037642.1 | 422287 | SNV | 1 | T | A | Homozygous   |
| NC_037642.1 | 422293 | SNV | 1 | T | A | Homozygous   |
| NC_037642.1 | 425816 | SNV | 1 | C | T | Homozygous   |
| NC_037642.1 | 427255 | SNV | 1 | A | C | Homozygous   |
| NC_037642.1 | 427257 | SNV | 1 | A | T | Homozygous   |
| NC_037642.1 | 427733 | SNV | 1 | G | A | Homozygous   |
| NC_037642.1 | 472475 | SNV | 1 | T | G | Homozygous   |
| NC_037642.1 | 472494 | SNV | 1 | T | G | Homozygous   |
| NC_037642.1 | 477493 | SNV | 1 | C | T | Homozygous   |
| NC_037642.1 | 477513 | SNV | 1 | C | T | Homozygous   |
| NC_037642.1 | 477515 | SNV | 1 | C | A | Homozygous   |
| NC_037642.1 | 479989 | SNV | 1 | A | G | Homozygous   |
| NC_037642.1 | 484632 | SNV | 1 | G | A | Heterozygous |
| NC_037642.1 | 485116 | SNV | 1 | A | C | Homozygous   |
| NC_037642.1 | 485119 | SNV | 1 | A | T | Homozygous   |
| NC_037642.1 | 485139 | SNV | 1 | A | T | Homozygous   |
| NC_037642.1 | 485152 | SNV | 1 | A | T | Homozygous   |
| NC_037642.1 | 487648 | SNV | 1 | T | C | Homozygous   |
| NC_037642.1 | 488797 | SNV | 1 | C | T | Homozygous   |
| NC_037642.1 | 489069 | SNV | 1 | C | T | Heterozygous |
| NC_037642.1 | 489185 | SNV | 1 | C | T | Homozygous   |
| NC_037642.1 | 489366 | SNV | 1 | C | T | Heterozygous |
| NC_037642.1 | 489421 | SNV | 1 | A | G | Homozygous   |
| NC_037642.1 | 492513 | SNV | 1 | G | C | Heterozygous |
| NC_037642.1 | 492518 | SNV | 1 | C | T | Homozygous   |
| NC_037642.1 | 492586 | SNV | 1 | C | A | Homozygous   |
| NC_037642.1 | 494094 | SNV | 1 | G | A | Heterozygous |
| NC_037642.1 | 494108 | SNV | 1 | A | G | Homozygous   |
| NC_037642.1 | 494451 | SNV | 1 | A | C | Homozygous   |
| NC_037642.1 | 494906 | SNV | 1 | A | T | Heterozygous |
| NC_037642.1 | 494943 | SNV | 1 | A | T | Heterozygous |
| NC_037642.1 | 494948 | SNV | 1 | A | T | Heterozygous |



|             |        |     |   |   |   |              |
|-------------|--------|-----|---|---|---|--------------|
| NC_037642.1 | 494950 | SNV | 1 | G | C | Homozygous   |
| NC_037642.1 | 494954 | SNV | 1 | A | C | Heterozygous |
| NC_037642.1 | 494960 | SNV | 1 | T | C | Heterozygous |
| NC_037642.1 | 495152 | SNV | 1 | A | G | Heterozygous |
| NC_037642.1 | 495347 | SNV | 1 | A | C | Homozygous   |
| NC_037642.1 | 495436 | SNV | 1 | T | G | Homozygous   |
| NC_037642.1 | 496368 | SNV | 1 | G | A | Heterozygous |
| NC_037642.1 | 505392 | SNV | 1 | G | T | Homozygous   |
| NC_037642.1 | 505820 | SNV | 1 | C | T | Homozygous   |
| NC_037642.1 | 510047 | SNV | 1 | T | C | Homozygous   |
| NC_037642.1 | 510161 | SNV | 1 | A | T | Heterozygous |
| NC_037642.1 | 510167 | SNV | 1 | T | C | Heterozygous |
| NC_037642.1 | 510170 | SNV | 1 | A | G | Heterozygous |
| NC_037642.1 | 510173 | SNV | 1 | A | T | Heterozygous |
| NC_037642.1 | 510176 | SNV | 1 | A | T | Heterozygous |
| NC_037642.1 | 510179 | SNV | 1 | A | G | Heterozygous |
| NC_037642.1 | 510182 | SNV | 1 | T | C | Heterozygous |
| NC_037642.1 | 510191 | SNV | 1 | C | T | Heterozygous |
| NC_037642.1 | 510206 | SNV | 1 | A | T | Homozygous   |
| NC_037642.1 | 510209 | SNV | 1 | C | G | Homozygous   |
| NC_037642.1 | 510225 | SNV | 1 | T | G | Heterozygous |
| NC_037642.1 | 510227 | SNV | 1 | A | C | Heterozygous |
| NC_037642.1 | 510230 | SNV | 1 | A | G | Heterozygous |
| NC_037642.1 | 510251 | SNV | 1 | A | C | Heterozygous |
| NC_037642.1 | 510255 | SNV | 1 | A | T | Heterozygous |
| NC_037642.1 | 510300 | SNV | 1 | G | C | Homozygous   |
| NC_037642.1 | 510898 | SNV | 1 | T | C | Heterozygous |
| NC_037642.1 | 511397 | SNV | 1 | A | G | Heterozygous |
| NC_037642.1 | 515475 | SNV | 1 | T | C | Homozygous   |
| NC_037642.1 | 515995 | SNV | 1 | C | T | Homozygous   |
| NC_037642.1 | 516051 | SNV | 1 | T | A | Homozygous   |
| NC_037642.1 | 516485 | SNV | 1 | G | T | Heterozygous |
| NC_037642.1 | 516861 | SNV | 1 | A | G | Homozygous   |
| NC_037642.1 | 517715 | SNV | 1 | G | T | Heterozygous |
| NC_037642.1 | 517850 | SNV | 1 | A | C | Homozygous   |
| NC_037642.1 | 517854 | SNV | 1 | T | G | Homozygous   |
| NC_037642.1 | 517867 | SNV | 1 | C | A | Heterozygous |
| NC_037642.1 | 517869 | SNV | 1 | C | A | Heterozygous |
| NC_037642.1 | 517869 | SNV | 1 | C | T | Heterozygous |
| NC_037642.1 | 517873 | SNV | 1 | T | A | Heterozygous |
| NC_037642.1 | 517874 | SNV | 1 | T | A | Heterozygous |
| NC_037642.1 | 523357 | SNV | 1 | A | G | Heterozygous |
| NC_037642.1 | 523699 | SNV | 1 | T | A | Homozygous   |
| NC_037642.1 | 523703 | SNV | 1 | T | A | Homozygous   |
| NC_037642.1 | 523707 | SNV | 1 | A | C | Homozygous   |
| NC_037642.1 | 523709 | SNV | 1 | A | T | Homozygous   |
| NC_037642.1 | 523716 | SNV | 1 | T | A | Homozygous   |
| NC_037642.1 | 523719 | SNV | 1 | A | C | Homozygous   |
| NC_037642.1 | 523724 | SNV | 1 | A | T | Homozygous   |
| NC_037642.1 | 523732 | SNV | 1 | A | T | Homozygous   |
| NC_037642.1 | 523734 | SNV | 1 | T | A | Homozygous   |

|             |        |     |   |   |   |              |
|-------------|--------|-----|---|---|---|--------------|
| NC_037642.1 | 525295 | SNV | 1 | G | T | Homozygous   |
| NC_037642.1 | 525298 | SNV | 1 | A | C | Homozygous   |
| NC_037642.1 | 525458 | SNV | 1 | A | C | Homozygous   |
| NC_037642.1 | 526159 | SNV | 1 | C | T | Homozygous   |
| NC_037642.1 | 526161 | SNV | 1 | G | T | Homozygous   |
| NC_037642.1 | 530057 | SNV | 1 | T | G | Homozygous   |
| NC_037642.1 | 531820 | SNV | 1 | T | A | Heterozygous |
| NC_037642.1 | 534651 | SNV | 1 | C | T | Homozygous   |
| NC_037642.1 | 543566 | SNV | 1 | G | A | Heterozygous |
| NC_037642.1 | 544960 | SNV | 1 | G | T | Heterozygous |
| NC_037642.1 | 545706 | SNV | 1 | G | A | Homozygous   |
| NC_037642.1 | 545709 | SNV | 1 | T | C | Homozygous   |
| NC_037642.1 | 545738 | SNV | 1 | A | G | Homozygous   |
| NC_037642.1 | 545756 | SNV | 1 | A | T | Heterozygous |
| NC_037642.1 | 545778 | SNV | 1 | A | T | Homozygous   |
| NC_037642.1 | 545785 | SNV | 1 | A | T | Heterozygous |
| NC_037642.1 | 547759 | SNV | 1 | G | A | Homozygous   |
| NC_037642.1 | 548395 | SNV | 1 | A | C | Homozygous   |
| NC_037642.1 | 548440 | SNV | 1 | G | C | Homozygous   |
| NC_037642.1 | 548897 | SNV | 1 | G | T | Homozygous   |
| NC_037642.1 | 548899 | SNV | 1 | A | C | Homozygous   |
| NC_037642.1 | 551832 | SNV | 1 | C | T | Homozygous   |
| NC_037642.1 | 552435 | SNV | 1 | C | A | Heterozygous |
| NC_037642.1 | 558024 | SNV | 1 | T | C | Homozygous   |
| NC_037642.1 | 561787 | SNV | 1 | A | G | Homozygous   |
| NC_037642.1 | 564852 | SNV | 1 | T | A | Homozygous   |
| NC_037642.1 | 564875 | SNV | 1 | G | T | Homozygous   |
| NC_037642.1 | 564877 | SNV | 1 | A | G | Homozygous   |
| NC_037642.1 | 570435 | SNV | 1 | C | T | Homozygous   |
| NC_037642.1 | 570447 | SNV | 1 | T | A | Homozygous   |
| NC_037642.1 | 570455 | SNV | 1 | T | C | Homozygous   |
| NC_037642.1 | 570457 | SNV | 1 | T | A | Homozygous   |
| NC_037642.1 | 570461 | SNV | 1 | A | T | Homozygous   |
| NC_037642.1 | 570464 | SNV | 1 | T | A | Homozygous   |
| NC_037642.1 | 570467 | SNV | 1 | T | A | Homozygous   |
| NC_037642.1 | 570628 | SNV | 1 | T | C | Homozygous   |
| NC_037642.1 | 579500 | SNV | 1 | T | A | Homozygous   |
| NC_037642.1 | 579505 | SNV | 1 | A | T | Homozygous   |
| NC_037642.1 | 584536 | SNV | 1 | T | C | Homozygous   |
| NC_037642.1 | 584538 | SNV | 1 | A | C | Homozygous   |
| NC_037642.1 | 584544 | SNV | 1 | T | C | Homozygous   |
| NC_037642.1 | 584547 | SNV | 1 | A | T | Homozygous   |
| NC_037642.1 | 584550 | SNV | 1 | A | T | Homozygous   |
| NC_037642.1 | 584556 | SNV | 1 | C | T | Homozygous   |
| NC_037642.1 | 589599 | SNV | 1 | G | A | Homozygous   |
| NC_037642.1 | 589602 | SNV | 1 | T | C | Homozygous   |
| NC_037642.1 | 589605 | SNV | 1 | A | G | Homozygous   |
| NC_037642.1 | 589811 | SNV | 1 | G | T | Homozygous   |
| NC_037642.1 | 589813 | SNV | 1 | A | T | Homozygous   |
| NC_037642.1 | 591026 | SNV | 1 | A | G | Homozygous   |
| NC_037642.1 | 591968 | SNV | 1 | A | G | Homozygous   |

|             |        |     |   |   |   |              |
|-------------|--------|-----|---|---|---|--------------|
| NC_037642.1 | 591990 | SNV | 1 | A | G | Homozygous   |
| NC_037642.1 | 615292 | SNV | 1 | A | G | Homozygous   |
| NC_037642.1 | 615326 | SNV | 1 | C | T | Homozygous   |
| NC_037642.1 | 616498 | SNV | 1 | A | T | Homozygous   |
| NC_037642.1 | 616586 | SNV | 1 | C | T | Homozygous   |
| NC_037642.1 | 616589 | SNV | 1 | T | A | Homozygous   |
| NC_037642.1 | 617336 | SNV | 1 | T | C | Homozygous   |
| NC_037642.1 | 625238 | SNV | 1 | A | T | Homozygous   |
| NC_037642.1 | 625258 | SNV | 1 | G | C | Homozygous   |
| NC_037642.1 | 625260 | SNV | 1 | A | C | Homozygous   |
| NC_037642.1 | 634848 | SNV | 1 | T | A | Homozygous   |
| NC_037642.1 | 634850 | SNV | 1 | T | A | Homozygous   |
| NC_037642.1 | 634863 | SNV | 1 | T | A | Homozygous   |
| NC_037642.1 | 634890 | SNV | 1 | A | T | Homozygous   |
| NC_037642.1 | 634895 | SNV | 1 | T | A | Homozygous   |
| NC_037642.1 | 634900 | SNV | 1 | T | A | Homozygous   |
| NC_037642.1 | 634903 | SNV | 1 | A | T | Homozygous   |
| NC_037642.1 | 795801 | SNV | 1 | A | G | Homozygous   |
| NC_037642.1 | 795840 | SNV | 1 | C | T | Heterozygous |
| NC_037642.1 | 795948 | SNV | 1 | A | G | Homozygous   |
| NC_037642.1 | 796017 | SNV | 1 | A | G | Homozygous   |
| NC_037642.1 | 799975 | SNV | 1 | A | C | Homozygous   |
| NC_037642.1 | 801152 | SNV | 1 | G | T | Homozygous   |
| NC_037642.1 | 801281 | SNV | 1 | G | C | Homozygous   |
| NC_037642.1 | 801963 | SNV | 1 | A | G | Homozygous   |
| NC_037642.1 | 802411 | SNV | 1 | T | C | Heterozygous |
| NC_037642.1 | 802568 | SNV | 1 | A | T | Heterozygous |
| NC_037642.1 | 802572 | SNV | 1 | A | G | Heterozygous |
| NC_037642.1 | 802577 | SNV | 1 | T | A | Heterozygous |
| NC_037642.1 | 802622 | SNV | 1 | A | G | Heterozygous |
| NC_037642.1 | 802639 | SNV | 1 | C | T | Heterozygous |
| NC_037642.1 | 802674 | SNV | 1 | C | T | Heterozygous |
| NC_037642.1 | 802824 | SNV | 1 | G | A | Homozygous   |
| NC_037642.1 | 802839 | SNV | 1 | A | G | Homozygous   |
| NC_037642.1 | 803241 | SNV | 1 | T | G | Heterozygous |
| NC_037642.1 | 803252 | SNV | 1 | G | T | Heterozygous |
| NC_037642.1 | 803292 | SNV | 1 | C | A | Heterozygous |
| NC_037642.1 | 839375 | SNV | 1 | G | A | Heterozygous |
| NC_037642.1 | 839380 | SNV | 1 | T | A | Heterozygous |
| NC_037642.1 | 839388 | SNV | 1 | G | A | Heterozygous |
| NC_037642.1 | 839398 | SNV | 1 | T | C | Heterozygous |
| NC_037642.1 | 839410 | SNV | 1 | A | T | Heterozygous |
| NC_037642.1 | 839440 | SNV | 1 | T | C | Homozygous   |
| NC_037642.1 | 839452 | SNV | 1 | C | T | Homozygous   |
| NC_037642.1 | 839456 | SNV | 1 | G | A | Heterozygous |
| NC_037642.1 | 839470 | SNV | 1 | T | A | Homozygous   |
| NC_037642.1 | 839482 | SNV | 1 | T | C | Homozygous   |
| NC_037642.1 | 839485 | SNV | 1 | T | C | Homozygous   |
| NC_037642.1 | 840619 | SNV | 1 | C | T | Homozygous   |
| NC_037642.1 | 840622 | SNV | 1 | C | T | Homozygous   |
| NC_037642.1 | 840628 | SNV | 1 | C | T | Homozygous   |

|             |        |     |   |   |   |              |
|-------------|--------|-----|---|---|---|--------------|
| NC_037642.1 | 840631 | SNV | 1 | C | T | Homozygous   |
| NC_037642.1 | 840636 | SNV | 1 | G | T | Homozygous   |
| NC_037642.1 | 840659 | SNV | 1 | C | T | Heterozygous |
| NC_037642.1 | 840661 | SNV | 1 | C | T | Homozygous   |
| NC_037642.1 | 840667 | SNV | 1 | T | C | Homozygous   |
| NC_037642.1 | 840678 | SNV | 1 | T | C | Heterozygous |
| NC_037642.1 | 852019 | SNV | 1 | A | T | Heterozygous |
| NC_037642.1 | 852036 | SNV | 1 | A | G | Heterozygous |
| NC_037642.1 | 852058 | SNV | 1 | C | A | Homozygous   |
| NC_037642.1 | 856499 | SNV | 1 | T | C | Homozygous   |
| NC_037642.1 | 856504 | SNV | 1 | G | A | Homozygous   |
| NC_037642.1 | 867341 | SNV | 1 | T | A | Homozygous   |
| NC_037642.1 | 867354 | SNV | 1 | T | A | Homozygous   |
| NC_037642.1 | 867359 | SNV | 1 | A | T | Homozygous   |
| NC_037642.1 | 867379 | SNV | 1 | T | A | Homozygous   |
| NC_037642.1 | 867381 | SNV | 1 | T | A | Homozygous   |
| NC_037642.1 | 867383 | SNV | 1 | T | A | Homozygous   |
| NC_037642.1 | 873191 | SNV | 1 | T | A | Homozygous   |
| NC_037642.1 | 873198 | SNV | 1 | T | A | Homozygous   |
| NC_037642.1 | 873200 | SNV | 1 | T | A | Homozygous   |
| NC_037642.1 | 873209 | SNV | 1 | A | T | Homozygous   |
| NC_037642.1 | 873223 | SNV | 1 | T | A | Homozygous   |
| NC_037642.1 | 873225 | SNV | 1 | T | A | Homozygous   |
| NC_037642.1 | 873336 | SNV | 1 | T | A | Homozygous   |
| NC_037642.1 | 873338 | SNV | 1 | T | G | Homozygous   |
| NC_037642.1 | 873340 | SNV | 1 | C | A | Homozygous   |
| NC_037642.1 | 873348 | SNV | 1 | A | G | Homozygous   |
| NC_037642.1 | 873350 | SNV | 1 | C | T | Homozygous   |
| NC_037642.1 | 873353 | SNV | 1 | T | A | Homozygous   |
| NC_037642.1 | 880199 | SNV | 1 | C | T | Heterozygous |
| NC_037642.1 | 884420 | SNV | 1 | C | A | Homozygous   |
| NC_037642.1 | 911820 | SNV | 1 | T | A | Homozygous   |
| NC_037642.1 | 911829 | SNV | 1 | T | A | Homozygous   |
| NC_037642.1 | 922086 | SNV | 1 | T | A | Heterozygous |
| NC_037642.1 | 922090 | SNV | 1 | A | T | Homozygous   |
| NC_037642.1 | 922096 | SNV | 1 | C | T | Heterozygous |
| NC_037642.1 | 930161 | SNV | 1 | T | A | Homozygous   |
| NC_037642.1 | 930166 | SNV | 1 | T | G | Homozygous   |
| NC_037642.1 | 930174 | SNV | 1 | T | G | Homozygous   |
| NC_037642.1 | 930180 | SNV | 1 | T | G | Homozygous   |
| NC_037642.1 | 930182 | SNV | 1 | A | G | Homozygous   |
| NC_037642.1 | 930186 | SNV | 1 | C | G | Homozygous   |
| NC_037642.1 | 930190 | SNV | 1 | G | C | Homozygous   |
| NC_037642.1 | 931363 | SNV | 1 | A | C | Homozygous   |
| NC_037642.1 | 931365 | SNV | 1 | T | A | Homozygous   |
| NC_037642.1 | 931369 | SNV | 1 | T | A | Homozygous   |
| NC_037642.1 | 931385 | SNV | 1 | C | T | Homozygous   |
| NC_037642.1 | 931395 | SNV | 1 | C | A | Homozygous   |
| NC_037642.1 | 931398 | SNV | 1 | A | C | Homozygous   |
| NC_037642.1 | 932906 | SNV | 1 | T | G | Homozygous   |
| NC_037642.1 | 932910 | SNV | 1 | T | A | Homozygous   |

|             |         |     |   |   |   |              |
|-------------|---------|-----|---|---|---|--------------|
| NC_037642.1 | 948725  | SNV | 1 | C | T | Homozygous   |
| NC_037642.1 | 948727  | SNV | 1 | G | C | Homozygous   |
| NC_037642.1 | 948733  | SNV | 1 | T | A | Homozygous   |
| NC_037642.1 | 949333  | SNV | 1 | T | A | Homozygous   |
| NC_037642.1 | 949335  | SNV | 1 | T | C | Homozygous   |
| NC_037642.1 | 949337  | SNV | 1 | T | G | Homozygous   |
| NC_037642.1 | 949340  | SNV | 1 | T | A | Homozygous   |
| NC_037642.1 | 949362  | SNV | 1 | C | A | Homozygous   |
| NC_037642.1 | 949364  | SNV | 1 | A | G | Homozygous   |
| NC_037642.1 | 949366  | SNV | 1 | A | T | Homozygous   |
| NC_037642.1 | 949369  | SNV | 1 | T | A | Homozygous   |
| NC_037642.1 | 999197  | SNV | 1 | C | T | Heterozygous |
| NC_037642.1 | 999411  | SNV | 1 | T | A | Homozygous   |
| NC_037642.1 | 1001257 | SNV | 1 | A | G | Heterozygous |
| NC_037642.1 | 1002300 | SNV | 1 | T | C | Homozygous   |
| NC_037642.1 | 1002396 | SNV | 1 | A | G | Homozygous   |
| NC_037642.1 | 1002489 | SNV | 1 | C | T | Homozygous   |
| NC_037642.1 | 1014148 | SNV | 1 | G | C | Heterozygous |
| NC_037642.1 | 1014154 | SNV | 1 | A | C | Heterozygous |
| NC_037642.1 | 1014613 | SNV | 1 | C | T | Heterozygous |
| NC_037642.1 | 1016574 | SNV | 1 | T | C | Homozygous   |
| NC_037642.1 | 1017354 | SNV | 1 | C | A | Homozygous   |
| NC_037642.1 | 1018091 | SNV | 1 | G | A | Heterozygous |
| NC_037642.1 | 1019083 | SNV | 1 | C | A | Homozygous   |
| NC_037642.1 | 1019087 | SNV | 1 | C | A | Heterozygous |
| NC_037642.1 | 1019233 | SNV | 1 | C | T | Homozygous   |
| NC_037642.1 | 1020717 | SNV | 1 | A | G | Homozygous   |
| NC_037642.1 | 1028511 | SNV | 1 | T | G | Homozygous   |
| NC_037642.1 | 1028521 | SNV | 1 | A | G | Homozygous   |
| NC_037642.1 | 1028523 | SNV | 1 | T | A | Homozygous   |
| NC_037642.1 | 1028527 | SNV | 1 | A | T | Homozygous   |
| NC_037642.1 | 1028529 | SNV | 1 | T | C | Homozygous   |
| NC_037642.1 | 1032389 | SNV | 1 | A | G | Homozygous   |
| NC_037642.1 | 1032448 | SNV | 1 | T | C | Heterozygous |
| NC_037642.1 | 1032782 | SNV | 1 | G | C | Heterozygous |
| NC_037642.1 | 1087285 | SNV | 1 | C | G | Homozygous   |
| NC_037642.1 | 1087327 | SNV | 1 | A | G | Homozygous   |
| NC_037642.1 | 1087521 | SNV | 1 | G | A | Heterozygous |
| NC_037642.1 | 1101085 | SNV | 1 | C | G | Heterozygous |
| NC_037642.1 | 1101327 | SNV | 1 | T | C | Homozygous   |
| NC_037642.1 | 1101847 | SNV | 1 | T | A | Homozygous   |
| NC_037642.1 | 1101849 | SNV | 1 | A | G | Homozygous   |
| NC_037642.1 | 1101854 | SNV | 1 | A | T | Homozygous   |
| NC_037642.1 | 1107213 | SNV | 1 | T | A | Homozygous   |
| NC_037642.1 | 1107246 | SNV | 1 | A | G | Heterozygous |
| NC_037642.1 | 1123679 | SNV | 1 | G | A | Homozygous   |
| NC_037642.1 | 1133457 | SNV | 1 | A | T | Homozygous   |
| NC_037642.1 | 1133459 | SNV | 1 | A | T | Homozygous   |
| NC_037642.1 | 1133487 | SNV | 1 | A | G | Homozygous   |
| NC_037642.1 | 1133490 | SNV | 1 | A | G | Homozygous   |
| NC_037642.1 | 1133492 | SNV | 1 | A | T | Homozygous   |

|             |         |     |   |   |   |              |
|-------------|---------|-----|---|---|---|--------------|
| NC_037642.1 | 1134706 | SNV | 1 | A | G | Homozygous   |
| NC_037642.1 | 1144416 | SNV | 1 | G | A | Homozygous   |
| NC_037642.1 | 1149810 | SNV | 1 | T | C | Heterozygous |
| NC_037642.1 | 1149855 | SNV | 1 | C | A | Heterozygous |
| NC_037642.1 | 1149864 | SNV | 1 | C | T | Heterozygous |
| NC_037642.1 | 1154264 | SNV | 1 | G | A | Heterozygous |
| NC_037642.1 | 1157822 | SNV | 1 | T | A | Heterozygous |
| NC_037642.1 | 1157828 | SNV | 1 | G | A | Homozygous   |
| NC_037642.1 | 1157959 | SNV | 1 | A | G | Homozygous   |
| NC_037642.1 | 1177630 | SNV | 1 | T | C | Heterozygous |
| NC_037642.1 | 1177641 | SNV | 1 | T | C | Homozygous   |
| NC_037642.1 | 1185039 | SNV | 1 | G | A | Homozygous   |
| NC_037642.1 | 1187982 | SNV | 1 | G | A | Homozygous   |
| NC_037642.1 | 1187988 | SNV | 1 | A | G | Heterozygous |
| NC_037642.1 | 1193135 | SNV | 1 | G | C | Homozygous   |
| NC_037642.1 | 1197879 | SNV | 1 | C | A | Homozygous   |
| NC_037642.1 | 1197896 | SNV | 1 | A | C | Homozygous   |
| NC_037642.1 | 1197898 | SNV | 1 | G | A | Homozygous   |
| NC_037642.1 | 1197913 | SNV | 1 | A | C | Homozygous   |
| NC_037642.1 | 1197917 | SNV | 1 | A | T | Homozygous   |
| NC_037642.1 | 1197936 | SNV | 1 | G | C | Homozygous   |
| NC_037642.1 | 1197938 | SNV | 1 | T | A | Homozygous   |
| NC_037642.1 | 1204926 | SNV | 1 | T | C | Heterozygous |
| NC_037642.1 | 1206154 | SNV | 1 | G | A | Homozygous   |
| NC_037642.1 | 1206177 | SNV | 1 | A | G | Heterozygous |
| NC_037642.1 | 1226144 | SNV | 1 | C | T | Heterozygous |
| NC_037642.1 | 1226154 | SNV | 1 | C | T | Heterozygous |
| NC_037642.1 | 1226158 | SNV | 1 | C | T | Heterozygous |
| NC_037642.1 | 1226160 | SNV | 1 | C | T | Heterozygous |
| NC_037642.1 | 1226163 | SNV | 1 | T | C | Heterozygous |
| NC_037642.1 | 1226165 | SNV | 1 | C | T | Heterozygous |
| NC_037642.1 | 1226185 | SNV | 1 | C | A | Homozygous   |
| NC_037642.1 | 1227196 | SNV | 1 | C | T | Heterozygous |
| NC_037642.1 | 1227235 | SNV | 1 | G | A | Heterozygous |
| NC_037642.1 | 1227349 | SNV | 1 | A | G | Homozygous   |
| NC_037642.1 | 1227489 | SNV | 1 | G | A | Heterozygous |
| NC_037642.1 | 1227499 | SNV | 1 | G | A | Homozygous   |
| NC_037642.1 | 1227671 | SNV | 1 | G | A | Homozygous   |
| NC_037642.1 | 1227692 | SNV | 1 | A | G | Homozygous   |
| NC_037642.1 | 1227697 | SNV | 1 | A | G | Homozygous   |
| NC_037642.1 | 1227733 | SNV | 1 | A | G | Homozygous   |
| NC_037642.1 | 1227754 | SNV | 1 | G | A | Homozygous   |
| NC_037642.1 | 1243164 | SNV | 1 | A | G | Homozygous   |
| NC_037642.1 | 1243167 | SNV | 1 | A | G | Heterozygous |
| NC_037642.1 | 1243185 | SNV | 1 | A | G | Heterozygous |
| NC_037642.1 | 1243241 | SNV | 1 | G | A | Heterozygous |
| NC_037642.1 | 1243253 | SNV | 1 | A | G | Homozygous   |
| NC_037642.1 | 1243257 | SNV | 1 | G | T | Homozygous   |
| NC_037642.1 | 1243270 | SNV | 1 | T | C | Homozygous   |
| NC_037642.1 | 1243278 | SNV | 1 | T | C | Heterozygous |
| NC_037642.1 | 1243280 | SNV | 1 | T | C | Heterozygous |

|             |         |     |   |   |   |              |
|-------------|---------|-----|---|---|---|--------------|
| NC_037642.1 | 1243315 | SNV | 1 | T | G | Heterozygous |
| NC_037642.1 | 1243323 | SNV | 1 | A | G | Heterozygous |
| NC_037642.1 | 1243343 | SNV | 1 | G | A | Heterozygous |
| NC_037642.1 | 1243482 | SNV | 1 | T | C | Homozygous   |
| NC_037642.1 | 1260916 | SNV | 1 | A | G | Homozygous   |
| NC_037642.1 | 1260928 | SNV | 1 | A | C | Homozygous   |
| NC_037642.1 | 1260934 | SNV | 1 | G | A | Homozygous   |
| NC_037642.1 | 1288371 | SNV | 1 | C | G | Heterozygous |
| NC_037642.1 | 1288404 | SNV | 1 | G | A | Heterozygous |
| NC_037642.1 | 1288416 | SNV | 1 | G | A | Heterozygous |
| NC_037642.1 | 1288421 | SNV | 1 | G | A | Heterozygous |
| NC_037642.1 | 1295045 | SNV | 1 | T | G | Heterozygous |
| NC_037642.1 | 1295071 | SNV | 1 | A | G | Heterozygous |
| NC_037642.1 | 1295078 | SNV | 1 | C | G | Heterozygous |
| NC_037642.1 | 1295129 | SNV | 1 | T | C | Homozygous   |
| NC_037642.1 | 1295227 | SNV | 1 | A | G | Homozygous   |
| NC_037642.1 | 1295325 | SNV | 1 | G | A | Homozygous   |
| NC_037642.1 | 1295379 | SNV | 1 | A | G | Heterozygous |
| NC_037642.1 | 1295503 | SNV | 1 | G | A | Heterozygous |
| NC_037642.1 | 1295623 | SNV | 1 | C | T | Heterozygous |
| NC_037642.1 | 1295749 | SNV | 1 | G | A | Homozygous   |
| NC_037642.1 | 1310231 | SNV | 1 | C | T | Heterozygous |
| NC_037642.1 | 1310432 | SNV | 1 | G | A | Heterozygous |
| NC_037642.1 | 1320949 | SNV | 1 | G | A | Homozygous   |
| NC_037642.1 | 1324902 | SNV | 1 | T | A | Homozygous   |
| NC_037642.1 | 1339832 | SNV | 1 | C | T | Heterozygous |
| NC_037642.1 | 1340175 | SNV | 1 | G | A | Homozygous   |
| NC_037642.1 | 1340231 | SNV | 1 | T | C | Homozygous   |
| NC_037642.1 | 1340472 | SNV | 1 | A | G | Homozygous   |
| NC_037642.1 | 1340718 | SNV | 1 | G | A | Heterozygous |
| NC_037642.1 | 1340773 | SNV | 1 | T | C | Heterozygous |
| NC_037642.1 | 1340794 | SNV | 1 | G | A | Heterozygous |
| NC_037642.1 | 1340817 | SNV | 1 | G | A | Homozygous   |
| NC_037642.1 | 1344076 | SNV | 1 | C | T | Homozygous   |
| NC_037642.1 | 1344084 | SNV | 1 | C | G | Homozygous   |
| NC_037642.1 | 1344087 | SNV | 1 | C | T | Heterozygous |
| NC_037642.1 | 1344103 | SNV | 1 | C | G | Homozygous   |
| NC_037642.1 | 1344108 | SNV | 1 | G | A | Homozygous   |
| NC_037642.1 | 1344126 | SNV | 1 | T | C | Homozygous   |
| NC_037642.1 | 1344135 | SNV | 1 | C | T | Homozygous   |
| NC_037642.1 | 1344144 | SNV | 1 | T | C | Homozygous   |
| NC_037642.1 | 1344178 | SNV | 1 | T | C | Homozygous   |
| NC_037642.1 | 1344182 | SNV | 1 | G | A | Homozygous   |
| NC_037642.1 | 1344191 | SNV | 1 | A | G | Homozygous   |
| NC_037642.1 | 1344193 | SNV | 1 | G | A | Heterozygous |
| NC_037642.1 | 1344199 | SNV | 1 | G | A | Heterozygous |
| NC_037642.1 | 1344210 | SNV | 1 | A | C | Heterozygous |
| NC_037642.1 | 1354987 | SNV | 1 | A | G | Homozygous   |
| NC_037642.1 | 1355129 | SNV | 1 | A | G | Homozygous   |
| NC_037642.1 | 1355341 | SNV | 1 | A | G | Heterozygous |
| NC_037642.1 | 1355406 | SNV | 1 | T | G | Heterozygous |

|             |         |     |   |   |   |              |
|-------------|---------|-----|---|---|---|--------------|
| NC_037642.1 | 1355496 | SNV | 1 | C | G | Heterozygous |
| NC_037642.1 | 1355519 | SNV | 1 | A | C | Homozygous   |
| NC_037642.1 | 1381776 | SNV | 1 | C | T | Heterozygous |
| NC_037642.1 | 1381789 | SNV | 1 | C | T | Heterozygous |
| NC_037642.1 | 1381809 | SNV | 1 | A | T | Heterozygous |
| NC_037642.1 | 1381811 | SNV | 1 | G | T | Homozygous   |
| NC_037642.1 | 1381814 | SNV | 1 | G | T | Heterozygous |
| NC_037642.1 | 1381817 | SNV | 1 | C | T | Heterozygous |
| NC_037642.1 | 1387048 | SNV | 1 | T | A | Heterozygous |
| NC_037642.1 | 1387050 | SNV | 1 | C | A | Homozygous   |
| NC_037642.1 | 1388763 | SNV | 1 | G | A | Homozygous   |
| NC_037642.1 | 1388799 | SNV | 1 | T | A | Homozygous   |
| NC_037642.1 | 1388863 | SNV | 1 | T | C | Homozygous   |
| NC_037642.1 | 1388879 | SNV | 1 | C | T | Homozygous   |
| NC_037642.1 | 1388884 | SNV | 1 | T | A | Homozygous   |
| NC_037642.1 | 1388888 | SNV | 1 | T | C | Homozygous   |
| NC_037642.1 | 1390014 | SNV | 1 | T | C | Homozygous   |
| NC_037642.1 | 1405186 | SNV | 1 | G | A | Homozygous   |
| NC_037642.1 | 1405224 | SNV | 1 | G | A | Heterozygous |
| NC_037642.1 | 1414405 | SNV | 1 | A | G | Homozygous   |
| NC_037642.1 | 1414428 | SNV | 1 | C | T | Heterozygous |
| NC_037642.1 | 1459435 | SNV | 1 | T | A | Homozygous   |
| NC_037642.1 | 1477877 | SNV | 1 | G | T | Homozygous   |
| NC_037642.1 | 1477898 | SNV | 1 | A | G | Homozygous   |
| NC_037642.1 | 1477922 | SNV | 1 | T | A | Homozygous   |
| NC_037642.1 | 1477931 | SNV | 1 | A | T | Homozygous   |
| NC_037642.1 | 1477941 | SNV | 1 | T | C | Homozygous   |
| NC_037642.1 | 1477986 | SNV | 1 | A | G | Heterozygous |
| NC_037642.1 | 1477996 | SNV | 1 | A | T | Heterozygous |
| NC_037642.1 | 1480212 | SNV | 1 | A | G | Heterozygous |
| NC_037642.1 | 1480222 | SNV | 1 | C | A | Heterozygous |
| NC_037642.1 | 1480337 | SNV | 1 | G | A | Homozygous   |
| NC_037642.1 | 1480419 | SNV | 1 | G | A | Homozygous   |
| NC_037642.1 | 1480518 | SNV | 1 | G | C | Homozygous   |
| NC_037642.1 | 1480611 | SNV | 1 | T | C | Heterozygous |
| NC_037642.1 | 1480670 | SNV | 1 | G | A | Heterozygous |
| NC_037642.1 | 1480860 | SNV | 1 | T | G | Homozygous   |
| NC_037642.1 | 1480916 | SNV | 1 | T | C | Homozygous   |
| NC_037642.1 | 1482363 | SNV | 1 | C | T | Homozygous   |
| NC_037642.1 | 1482370 | SNV | 1 | A | G | Heterozygous |
| NC_037642.1 | 1482384 | SNV | 1 | G | A | Heterozygous |
| NC_037642.1 | 1482443 | SNV | 1 | A | C | Homozygous   |
| NC_037642.1 | 1482493 | SNV | 1 | G | A | Heterozygous |
| NC_037642.1 | 1482642 | SNV | 1 | T | A | Homozygous   |
| NC_037642.1 | 1482662 | SNV | 1 | A | G | Heterozygous |
| NC_037642.1 | 1482664 | SNV | 1 | A | G | Heterozygous |
| NC_037642.1 | 1482772 | SNV | 1 | A | G | Homozygous   |
| NC_037642.1 | 1491199 | SNV | 1 | T | A | Homozygous   |
| NC_037642.1 | 1509876 | SNV | 1 | T | C | Homozygous   |
| NC_037642.1 | 1509879 | SNV | 1 | T | C | Homozygous   |
| NC_037642.1 | 1518635 | SNV | 1 | T | C | Heterozygous |



|             |         |     |   |   |   |              |
|-------------|---------|-----|---|---|---|--------------|
| NC_037642.1 | 1518674 | SNV | 1 | C | T | Heterozygous |
| NC_037642.1 | 1518688 | SNV | 1 | T | C | Homozygous   |
| NC_037642.1 | 1518701 | SNV | 1 | A | G | Homozygous   |
| NC_037642.1 | 1518703 | SNV | 1 | C | T | Homozygous   |
| NC_037642.1 | 1518996 | SNV | 1 | G | A | Homozygous   |
| NC_037642.1 | 1519199 | SNV | 1 | A | G | Homozygous   |
| NC_037642.1 | 1519205 | SNV | 1 | G | A | Heterozygous |
| NC_037642.1 | 1519306 | SNV | 1 | A | G | Homozygous   |
| NC_037642.1 | 1519622 | SNV | 1 | C | T | Heterozygous |
| NC_037642.1 | 1519624 | SNV | 1 | C | T | Homozygous   |
| NC_037642.1 | 1519645 | SNV | 1 | T | C | Homozygous   |
| NC_037642.1 | 1519778 | SNV | 1 | T | C | Homozygous   |
| NC_037642.1 | 1519799 | SNV | 1 | G | A | Heterozygous |
| NC_037642.1 | 1519822 | SNV | 1 | T | C | Heterozygous |
| NC_037642.1 | 1519908 | SNV | 1 | A | G | Heterozygous |
| NC_037642.1 | 1519911 | SNV | 1 | G | A | Heterozygous |
| NC_037642.1 | 1519913 | SNV | 1 | A | G | Heterozygous |
| NC_037642.1 | 1524303 | SNV | 1 | A | G | Homozygous   |
| NC_037642.1 | 1532764 | SNV | 1 | G | A | Heterozygous |
| NC_037642.1 | 1532766 | SNV | 1 | G | A | Homozygous   |
| NC_037642.1 | 1532788 | SNV | 1 | T | C | Homozygous   |
| NC_037642.1 | 1532806 | SNV | 1 | T | C | Homozygous   |
| NC_037642.1 | 1534204 | SNV | 1 | T | A | Homozygous   |
| NC_037642.1 | 1534210 | SNV | 1 | T | C | Homozygous   |
| NC_037642.1 | 1534214 | SNV | 1 | A | T | Homozygous   |
| NC_037642.1 | 1534220 | SNV | 1 | A | C | Homozygous   |
| NC_037642.1 | 1534222 | SNV | 1 | T | A | Homozygous   |
| NC_037642.1 | 1534252 | SNV | 1 | T | A | Homozygous   |
| NC_037642.1 | 1540017 | SNV | 1 | T | C | Homozygous   |
| NC_037642.1 | 1540020 | SNV | 1 | T | C | Homozygous   |
| NC_037642.1 | 1540022 | SNV | 1 | C | A | Homozygous   |
| NC_037642.1 | 1541729 | SNV | 1 | G | A | Heterozygous |
| NC_037642.1 | 1541734 | SNV | 1 | G | T | Heterozygous |
| NC_037642.1 | 1541737 | SNV | 1 | A | G | Heterozygous |
| NC_037642.1 | 1541742 | SNV | 1 | G | A | Heterozygous |
| NC_037642.1 | 1568716 | SNV | 1 | T | C | Homozygous   |
| NC_037642.1 | 1568758 | SNV | 1 | T | C | Homozygous   |
| NC_037642.1 | 1568800 | SNV | 1 | G | A | Homozygous   |
| NC_037642.1 | 1568950 | SNV | 1 | T | C | Homozygous   |
| NC_037642.1 | 1570245 | SNV | 1 | C | T | Homozygous   |
| NC_037642.1 | 1570278 | SNV | 1 | A | C | Heterozygous |
| NC_037642.1 | 1570290 | SNV | 1 | C | T | Homozygous   |
| NC_037642.1 | 1570323 | SNV | 1 | T | C | Homozygous   |
| NC_037642.1 | 1575018 | SNV | 1 | A | G | Homozygous   |
| NC_037642.1 | 1575089 | SNV | 1 | A | G | Homozygous   |
| NC_037642.1 | 1575344 | SNV | 1 | A | G | Homozygous   |
| NC_037642.1 | 1648015 | SNV | 1 | A | G | Homozygous   |
| NC_037642.1 | 1650631 | SNV | 1 | G | A | Homozygous   |
| NC_037642.1 | 1650635 | SNV | 1 | C | G | Homozygous   |
| NC_037642.1 | 1650643 | SNV | 1 | A | T | Homozygous   |
| NC_037642.1 | 1657212 | SNV | 1 | G | A | Heterozygous |

|             |         |     |   |   |   |              |
|-------------|---------|-----|---|---|---|--------------|
| NC_037642.1 | 1657247 | SNV | 1 | A | G | Heterozygous |
| NC_037642.1 | 1661208 | SNV | 1 | A | G | Homozygous   |
| NC_037642.1 | 1666359 | SNV | 1 | A | T | Heterozygous |
| NC_037642.1 | 1666372 | SNV | 1 | T | C | Homozygous   |
| NC_037642.1 | 1666468 | SNV | 1 | G | A | Homozygous   |
| NC_037642.1 | 1666472 | SNV | 1 | G | A | Heterozygous |
| NC_037642.1 | 1666484 | SNV | 1 | C | A | Heterozygous |
| NC_037642.1 | 1688126 | SNV | 1 | G | A | Homozygous   |
| NC_037642.1 | 1688129 | SNV | 1 | G | A | Homozygous   |
| NC_037642.1 | 1688132 | SNV | 1 | G | A | Homozygous   |
| NC_037642.1 | 1688140 | SNV | 1 | A | T | Homozygous   |
| NC_037642.1 | 1688142 | SNV | 1 | C | T | Homozygous   |
| NC_037642.1 | 1688146 | SNV | 1 | A | T | Homozygous   |
| NC_037642.1 | 1688149 | SNV | 1 | A | T | Homozygous   |
| NC_037642.1 | 1688153 | SNV | 1 | T | C | Homozygous   |
| NC_037642.1 | 1688171 | SNV | 1 | G | T | Homozygous   |
| NC_037642.1 | 1692265 | SNV | 1 | G | A | Heterozygous |
| NC_037642.1 | 1692271 | SNV | 1 | G | A | Heterozygous |
| NC_037642.1 | 1692308 | SNV | 1 | C | A | Heterozygous |
| NC_037642.1 | 1692363 | SNV | 1 | T | C | Homozygous   |
| NC_037642.1 | 1700166 | SNV | 1 | G | C | Heterozygous |
| NC_037642.1 | 1713972 | SNV | 1 | A | G | Heterozygous |
| NC_037642.1 | 1714221 | SNV | 1 | A | G | Homozygous   |
| NC_037642.1 | 1714511 | SNV | 1 | C | A | Heterozygous |
| NC_037642.1 | 1714572 | SNV | 1 | G | A | Homozygous   |
| NC_037642.1 | 1714577 | SNV | 1 | C | T | Heterozygous |
| NC_037642.1 | 1718838 | SNV | 1 | A | G | Homozygous   |
| NC_037642.1 | 1719002 | SNV | 1 | T | A | Heterozygous |
| NC_037642.1 | 1719027 | SNV | 1 | T | C | Heterozygous |
| NC_037642.1 | 1719140 | SNV | 1 | A | T | Homozygous   |
| NC_037642.1 | 1719163 | SNV | 1 | A | G | Homozygous   |
| NC_037642.1 | 1719181 | SNV | 1 | G | A | Homozygous   |
| NC_037642.1 | 1727200 | SNV | 1 | C | T | Heterozygous |
| NC_037642.1 | 1727221 | SNV | 1 | A | G | Homozygous   |
| NC_037642.1 | 1737674 | SNV | 1 | C | T | Heterozygous |
| NC_037642.1 | 1737892 | SNV | 1 | A | T | Homozygous   |
| NC_037642.1 | 1738645 | SNV | 1 | T | G | Homozygous   |
| NC_037642.1 | 1738658 | SNV | 1 | T | C | Homozygous   |
| NC_037642.1 | 1738670 | SNV | 1 | T | C | Homozygous   |
| NC_037642.1 | 1738686 | SNV | 1 | C | T | Heterozygous |
| NC_037642.1 | 1738967 | SNV | 1 | A | C | Heterozygous |
| NC_037642.1 | 1738969 | SNV | 1 | A | C | Heterozygous |
| NC_037642.1 | 1738972 | SNV | 1 | A | T | Heterozygous |
| NC_037642.1 | 1738974 | SNV | 1 | A | C | Homozygous   |
| NC_037642.1 | 1738982 | SNV | 1 | A | G | Homozygous   |
| NC_037642.1 | 1738985 | SNV | 1 | A | G | Homozygous   |
| NC_037642.1 | 1739152 | SNV | 1 | G | A | Homozygous   |
| NC_037642.1 | 1739342 | SNV | 1 | A | G | Heterozygous |
| NC_037642.1 | 1739352 | SNV | 1 | G | A | Heterozygous |
| NC_037642.1 | 1740740 | SNV | 1 | C | A | Homozygous   |
| NC_037642.1 | 1740742 | SNV | 1 | A | T | Homozygous   |

|             |         |     |   |   |   |              |
|-------------|---------|-----|---|---|---|--------------|
| NC_037642.1 | 1740745 | SNV | 1 | T | A | Homozygous   |
| NC_037642.1 | 1740774 | SNV | 1 | G | A | Homozygous   |
| NC_037642.1 | 1740783 | SNV | 1 | T | C | Homozygous   |
| NC_037642.1 | 1741184 | SNV | 1 | A | G | Heterozygous |
| NC_037642.1 | 1741190 | SNV | 1 | G | A | Heterozygous |
| NC_037642.1 | 1741211 | SNV | 1 | G | A | Heterozygous |
| NC_037642.1 | 1741214 | SNV | 1 | G | A | Heterozygous |
| NC_037642.1 | 1741599 | SNV | 1 | T | C | Homozygous   |
| NC_037642.1 | 1743269 | SNV | 1 | A | G | Heterozygous |
| NC_037642.1 | 1743275 | SNV | 1 | A | G | Heterozygous |
| NC_037642.1 | 1743280 | SNV | 1 | C | T | Heterozygous |
| NC_037642.1 | 1743282 | SNV | 1 | T | C | Heterozygous |
| NC_037642.1 | 1743284 | SNV | 1 | T | C | Heterozygous |
| NC_037642.1 | 1743553 | SNV | 1 | G | A | Homozygous   |
| NC_037642.1 | 1743597 | SNV | 1 | A | T | Heterozygous |
| NC_037642.1 | 1744599 | SNV | 1 | C | A | Homozygous   |
| NC_037642.1 | 1744755 | SNV | 1 | C | T | Heterozygous |
| NC_037642.1 | 1744800 | SNV | 1 | A | G | Heterozygous |
| NC_037642.1 | 1744861 | SNV | 1 | G | A | Homozygous   |
| NC_037642.1 | 1744887 | SNV | 1 | G | A | Heterozygous |
| NC_037642.1 | 1744909 | SNV | 1 | G | A | Heterozygous |
| NC_037642.1 | 1745286 | SNV | 1 | T | C | Homozygous   |
| NC_037642.1 | 1745472 | SNV | 1 | T | C | Homozygous   |
| NC_037642.1 | 1745871 | SNV | 1 | A | G | Homozygous   |
| NC_037642.1 | 1745918 | SNV | 1 | A | G | Homozygous   |
| NC_037642.1 | 1746154 | SNV | 1 | T | C | Homozygous   |
| NC_037642.1 | 1746242 | SNV | 1 | G | A | Homozygous   |
| NC_037642.1 | 1746261 | SNV | 1 | G | A | Homozygous   |
| NC_037642.1 | 1746643 | SNV | 1 | A | G | Homozygous   |
| NC_037642.1 | 1747734 | SNV | 1 | A | G | Heterozygous |
| NC_037642.1 | 1747844 | SNV | 1 | C | A | Heterozygous |
| NC_037642.1 | 1747887 | SNV | 1 | G | A | Heterozygous |
| NC_037642.1 | 1747910 | SNV | 1 | A | G | Homozygous   |
| NC_037642.1 | 1747919 | SNV | 1 | A | T | Heterozygous |
| NC_037642.1 | 1747921 | SNV | 1 | G | T | Heterozygous |
| NC_037642.1 | 1747942 | SNV | 1 | G | A | Heterozygous |
| NC_037642.1 | 1747949 | SNV | 1 | A | G | Heterozygous |
| NC_037642.1 | 1748297 | SNV | 1 | C | T | Homozygous   |
| NC_037642.1 | 1748620 | SNV | 1 | G | A | Homozygous   |
| NC_037642.1 | 1748694 | SNV | 1 | A | G | Homozygous   |
| NC_037642.1 | 1749032 | SNV | 1 | A | G | Heterozygous |
| NC_037642.1 | 1749195 | SNV | 1 | T | A | Homozygous   |
| NC_037642.1 | 1749198 | SNV | 1 | G | A | Homozygous   |
| NC_037642.1 | 1749234 | SNV | 1 | T | C | Homozygous   |
| NC_037642.1 | 1749280 | SNV | 1 | A | G | Homozygous   |
| NC_037642.1 | 1749496 | SNV | 1 | A | G | Heterozygous |
| NC_037642.1 | 1750325 | SNV | 1 | G | C | Heterozygous |
| NC_037642.1 | 1750469 | SNV | 1 | G | A | Heterozygous |
| NC_037642.1 | 1750472 | SNV | 1 | A | G | Heterozygous |
| NC_037642.1 | 1761672 | SNV | 1 | C | T | Heterozygous |
| NC_037642.1 | 1761696 | SNV | 1 | A | G | Homozygous   |

|             |         |     |   |   |   |              |
|-------------|---------|-----|---|---|---|--------------|
| NC_037642.1 | 1762239 | SNV | 1 | G | A | Heterozygous |
| NC_037642.1 | 1762275 | SNV | 1 | A | G | Heterozygous |
| NC_037642.1 | 1764577 | SNV | 1 | A | G | Heterozygous |
| NC_037642.1 | 1766787 | SNV | 1 | C | T | Heterozygous |
| NC_037642.1 | 1766789 | SNV | 1 | G | A | Heterozygous |
| NC_037642.1 | 1766791 | SNV | 1 | G | A | Heterozygous |
| NC_037642.1 | 1766836 | SNV | 1 | T | C | Heterozygous |
| NC_037642.1 | 1766840 | SNV | 1 | C | A | Homozygous   |
| NC_037642.1 | 1766856 | SNV | 1 | C | T | Heterozygous |
| NC_037642.1 | 1766876 | SNV | 1 | C | T | Homozygous   |
| NC_037642.1 | 1766880 | SNV | 1 | G | T | Homozygous   |
| NC_037642.1 | 1766904 | SNV | 1 | C | T | Heterozygous |
| NC_037642.1 | 1767060 | SNV | 1 | C | T | Heterozygous |
| NC_037642.1 | 1767099 | SNV | 1 | C | T | Homozygous   |
| NC_037642.1 | 1767128 | SNV | 1 | A | G | Heterozygous |
| NC_037642.1 | 1767131 | SNV | 1 | T | C | Heterozygous |
| NC_037642.1 | 1767136 | SNV | 1 | A | C | Homozygous   |
| NC_037642.1 | 1767157 | SNV | 1 | A | G | Heterozygous |
| NC_037642.1 | 1767162 | SNV | 1 | T | G | Heterozygous |
| NC_037642.1 | 1767753 | SNV | 1 | T | C | Homozygous   |
| NC_037642.1 | 1767763 | SNV | 1 | T | A | Homozygous   |
| NC_037642.1 | 1767768 | SNV | 1 | T | A | Homozygous   |
| NC_037642.1 | 1767780 | SNV | 1 | G | A | Heterozygous |
| NC_037642.1 | 1767790 | SNV | 1 | G | A | Homozygous   |
| NC_037642.1 | 1767803 | SNV | 1 | A | T | Homozygous   |
| NC_037642.1 | 1770138 | SNV | 1 | T | C | Homozygous   |
| NC_037642.1 | 1770413 | SNV | 1 | C | T | Homozygous   |
| NC_037642.1 | 1770903 | SNV | 1 | C | T | Homozygous   |
| NC_037642.1 | 1770914 | SNV | 1 | G | T | Heterozygous |
| NC_037642.1 | 1770927 | SNV | 1 | A | T | Heterozygous |
| NC_037642.1 | 1770933 | SNV | 1 | A | T | Heterozygous |
| NC_037642.1 | 1770939 | SNV | 1 | C | T | Heterozygous |
| NC_037642.1 | 1770941 | SNV | 1 | C | T | Heterozygous |
| NC_037642.1 | 1773283 | SNV | 1 | T | C | Homozygous   |
| NC_037642.1 | 1773374 | SNV | 1 | G | C | Homozygous   |
| NC_037642.1 | 1773500 | SNV | 1 | C | G | Heterozygous |
| NC_037642.1 | 1794424 | SNV | 1 | T | C | Heterozygous |
| NC_037642.1 | 1794480 | SNV | 1 | C | T | Heterozygous |
| NC_037642.1 | 1805848 | SNV | 1 | G | A | Heterozygous |
| NC_037642.1 | 1805855 | SNV | 1 | G | A | Heterozygous |
| NC_037642.1 | 1805858 | SNV | 1 | A | G | Homozygous   |
| NC_037642.1 | 1805860 | SNV | 1 | A | G | Heterozygous |
| NC_037642.1 | 1814293 | SNV | 1 | T | A | Homozygous   |
| NC_037642.1 | 1814299 | SNV | 1 | A | C | Homozygous   |
| NC_037642.1 | 1814303 | SNV | 1 | C | A | Homozygous   |
| NC_037642.1 | 1814315 | SNV | 1 | T | A | Homozygous   |
| NC_037642.1 | 1814335 | SNV | 1 | A | G | Homozygous   |
| NC_037642.1 | 1815367 | SNV | 1 | C | T | Heterozygous |
| NC_037642.1 | 1815397 | SNV | 1 | C | T | Heterozygous |
| NC_037642.1 | 1823665 | SNV | 1 | T | C | Heterozygous |
| NC_037642.1 | 1828046 | SNV | 1 | C | T | Heterozygous |

|             |         |     |   |   |   |              |
|-------------|---------|-----|---|---|---|--------------|
| NC_037642.1 | 1837555 | SNV | 1 | T | C | Heterozygous |
| NC_037642.1 | 1837814 | SNV | 1 | T | C | Homozygous   |
| NC_037642.1 | 1891836 | SNV | 1 | T | G | Homozygous   |
| NC_037642.1 | 1892156 | SNV | 1 | T | G | Heterozygous |
| NC_037642.1 | 1892158 | SNV | 1 | A | T | Homozygous   |
| NC_037642.1 | 1892202 | SNV | 1 | T | A | Heterozygous |
| NC_037642.1 | 1905941 | SNV | 1 | A | T | Homozygous   |
| NC_037642.1 | 1909892 | SNV | 1 | G | C | Homozygous   |
| NC_037642.1 | 1909906 | SNV | 1 | G | T | Heterozygous |
| NC_037642.1 | 1909912 | SNV | 1 | C | T | Heterozygous |
| NC_037642.1 | 1910233 | SNV | 1 | C | T | Heterozygous |
| NC_037642.1 | 1916619 | SNV | 1 | T | C | Heterozygous |
| NC_037642.1 | 1917406 | SNV | 1 | C | T | Homozygous   |
| NC_037642.1 | 1929606 | SNV | 1 | T | C | Heterozygous |
| NC_037642.1 | 1938371 | SNV | 1 | A | G | Homozygous   |
| NC_037642.1 | 1938374 | SNV | 1 | T | G | Homozygous   |
| NC_037642.1 | 1938902 | SNV | 1 | C | T | Heterozygous |
| NC_037642.1 | 1938932 | SNV | 1 | C | T | Heterozygous |
| NC_037642.1 | 1939224 | SNV | 1 | G | A | Homozygous   |
| NC_037642.1 | 1940015 | SNV | 1 | T | G | Homozygous   |
| NC_037642.1 | 1940022 | SNV | 1 | T | A | Homozygous   |
| NC_037642.1 | 1941409 | SNV | 1 | T | C | Homozygous   |
| NC_037642.1 | 1941614 | SNV | 1 | T | C | Homozygous   |
| NC_037642.1 | 1941687 | SNV | 1 | G | T | Homozygous   |
| NC_037642.1 | 1941946 | SNV | 1 | T | C | Homozygous   |
| NC_037642.1 | 1941973 | SNV | 1 | T | C | Heterozygous |
| NC_037642.1 | 1941996 | SNV | 1 | G | T | Heterozygous |
| NC_037642.1 | 1942387 | SNV | 1 | G | A | Homozygous   |
| NC_037642.1 | 1942457 | SNV | 1 | G | A | Heterozygous |
| NC_037642.1 | 1942474 | SNV | 1 | A | G | Homozygous   |
| NC_037642.1 | 1942493 | SNV | 1 | A | G | Heterozygous |
| NC_037642.1 | 1942634 | SNV | 1 | G | A | Heterozygous |
| NC_037642.1 | 1942735 | SNV | 1 | A | G | Heterozygous |
| NC_037642.1 | 1942738 | SNV | 1 | G | A | Heterozygous |
| NC_037642.1 | 1942744 | SNV | 1 | A | G | Heterozygous |
| NC_037642.1 | 1942747 | SNV | 1 | G | A | Heterozygous |
| NC_037642.1 | 1942760 | SNV | 1 | A | G | Heterozygous |
| NC_037642.1 | 1942775 | SNV | 1 | A | G | Heterozygous |
| NC_037642.1 | 1942866 | SNV | 1 | G | A | Heterozygous |
| NC_037642.1 | 1942963 | SNV | 1 | T | G | Heterozygous |
| NC_037642.1 | 1942965 | SNV | 1 | A | T | Heterozygous |
| NC_037642.1 | 1942971 | SNV | 1 | G | A | Homozygous   |
| NC_037642.1 | 1942984 | SNV | 1 | C | T | Homozygous   |
| NC_037642.1 | 1942986 | SNV | 1 | G | A | Homozygous   |
| NC_037642.1 | 1943022 | SNV | 1 | G | A | Homozygous   |
| NC_037642.1 | 1943030 | SNV | 1 | A | G | Homozygous   |
| NC_037642.1 | 1943046 | SNV | 1 | G | A | Homozygous   |
| NC_037642.1 | 1943076 | SNV | 1 | A | G | Heterozygous |
| NC_037642.1 | 1943080 | SNV | 1 | C | T | Homozygous   |
| NC_037642.1 | 1943089 | SNV | 1 | C | T | Heterozygous |
| NC_037642.1 | 1943091 | SNV | 1 | A | T | Heterozygous |

|             |         |     |   |   |   |              |
|-------------|---------|-----|---|---|---|--------------|
| NC_037642.1 | 1943095 | SNV | 1 | C | T | Heterozygous |
| NC_037642.1 | 1943108 | SNV | 1 | G | A | Heterozygous |
| NC_037642.1 | 1943251 | SNV | 1 | T | C | Homozygous   |
| NC_037642.1 | 1946298 | SNV | 1 | T | A | Heterozygous |
| NC_037642.1 | 1946305 | SNV | 1 | C | A | Heterozygous |
| NC_037642.1 | 1946878 | SNV | 1 | C | T | Heterozygous |
| NC_037642.1 | 1947618 | SNV | 1 | A | G | Homozygous   |
| NC_037642.1 | 1948361 | SNV | 1 | C | T | Heterozygous |
| NC_037642.1 | 1948389 | SNV | 1 | T | G | Heterozygous |
| NC_037642.1 | 1948390 | SNV | 1 | T | A | Heterozygous |
| NC_037642.1 | 1948393 | SNV | 1 | A | G | Heterozygous |
| NC_037642.1 | 1948394 | SNV | 1 | T | A | Heterozygous |
| NC_037642.1 | 1948396 | SNV | 1 | T | A | Heterozygous |
| NC_037642.1 | 1948401 | SNV | 1 | T | C | Heterozygous |
| NC_037642.1 | 1948410 | SNV | 1 | G | T | Heterozygous |
| NC_037642.1 | 1948422 | SNV | 1 | T | A | Homozygous   |
| NC_037642.1 | 1948425 | SNV | 1 | A | T | Homozygous   |
| NC_037642.1 | 1950962 | SNV | 1 | A | G | Homozygous   |
| NC_037642.1 | 1951002 | SNV | 1 | A | T | Homozygous   |
| NC_037642.1 | 1951004 | SNV | 1 | G | A | Homozygous   |
| NC_037642.1 | 1958645 | SNV | 1 | T | A | Heterozygous |
| NC_037642.1 | 1958647 | SNV | 1 | A | C | Heterozygous |
| NC_037642.1 | 1968251 | SNV | 1 | C | T | Homozygous   |
| NC_037642.1 | 1968275 | SNV | 1 | G | T | Heterozygous |
| NC_037642.1 | 1968292 | SNV | 1 | A | T | Homozygous   |
| NC_037642.1 | 1978507 | SNV | 1 | G | A | Homozygous   |
| NC_037642.1 | 2025815 | SNV | 1 | A | G | Heterozygous |
| NC_037642.1 | 2030128 | SNV | 1 | T | C | Homozygous   |
| NC_037642.1 | 2030142 | SNV | 1 | C | A | Homozygous   |
| NC_037642.1 | 2033389 | SNV | 1 | C | G | Homozygous   |
| NC_037642.1 | 2033394 | SNV | 1 | A | G | Homozygous   |
| NC_037642.1 | 2033458 | SNV | 1 | G | A | Homozygous   |
| NC_037642.1 | 2035753 | SNV | 1 | T | C | Homozygous   |
| NC_037642.1 | 2035758 | SNV | 1 | A | G | Heterozygous |
| NC_037642.1 | 2035785 | SNV | 1 | T | C | Heterozygous |
| NC_037642.1 | 2035790 | SNV | 1 | A | G | Heterozygous |
| NC_037642.1 | 2035799 | SNV | 1 | T | C | Homozygous   |
| NC_037642.1 | 2037725 | SNV | 1 | G | A | Heterozygous |
| NC_037642.1 | 2037808 | SNV | 1 | C | T | Homozygous   |
| NC_037642.1 | 2050750 | SNV | 1 | T | G | Heterozygous |
| NC_037642.1 | 2050753 | SNV | 1 | T | C | Heterozygous |
| NC_037642.1 | 2056676 | SNV | 1 | T | G | Heterozygous |
| NC_037642.1 | 2056678 | SNV | 1 | T | C | Homozygous   |
| NC_037642.1 | 2056713 | SNV | 1 | C | T | Heterozygous |
| NC_037642.1 | 2056715 | SNV | 1 | C | T | Heterozygous |
| NC_037642.1 | 2056813 | SNV | 1 | G | A | Heterozygous |
| NC_037642.1 | 2056863 | SNV | 1 | T | C | Homozygous   |
| NC_037642.1 | 2059209 | SNV | 1 | T | C | Homozygous   |
| NC_037642.1 | 2059224 | SNV | 1 | C | T | Heterozygous |
| NC_037642.1 | 2059231 | SNV | 1 | A | G | Homozygous   |
| NC_037642.1 | 2062885 | SNV | 1 | C | T | Heterozygous |

|             |         |     |   |   |   |              |
|-------------|---------|-----|---|---|---|--------------|
| NC_037642.1 | 2063137 | SNV | 1 | T | C | Homozygous   |
| NC_037642.1 | 2063149 | SNV | 1 | T | C | Heterozygous |
| NC_037642.1 | 2063239 | SNV | 1 | T | C | Homozygous   |
| NC_037642.1 | 2066701 | SNV | 1 | A | T | Homozygous   |
| NC_037642.1 | 2066724 | SNV | 1 | G | T | Heterozygous |
| NC_037642.1 | 2066732 | SNV | 1 | G | T | Homozygous   |
| NC_037642.1 | 2072292 | SNV | 1 | A | T | Homozygous   |
| NC_037642.1 | 2072323 | SNV | 1 | A | C | Homozygous   |
| NC_037642.1 | 2078142 | SNV | 1 | T | A | Homozygous   |
| NC_037642.1 | 2078144 | SNV | 1 | A | G | Homozygous   |
| NC_037642.1 | 2078169 | SNV | 1 | T | A | Homozygous   |
| NC_037642.1 | 2078173 | SNV | 1 | T | A | Homozygous   |
| NC_037642.1 | 2082519 | SNV | 1 | A | G | Homozygous   |
| NC_037642.1 | 2093480 | SNV | 1 | C | G | Homozygous   |
| NC_037642.1 | 2093742 | SNV | 1 | C | T | Heterozygous |
| NC_037642.1 | 2099328 | SNV | 1 | C | T | Heterozygous |
| NC_037642.1 | 2099488 | SNV | 1 | C | T | Heterozygous |
| NC_037642.1 | 2099840 | SNV | 1 | A | G | Homozygous   |
| NC_037642.1 | 2099933 | SNV | 1 | G | T | Homozygous   |
| NC_037642.1 | 2099974 | SNV | 1 | T | C | Homozygous   |
| NC_037642.1 | 2100453 | SNV | 1 | A | G | Homozygous   |
| NC_037642.1 | 2100511 | SNV | 1 | C | T | Homozygous   |
| NC_037642.1 | 2100531 | SNV | 1 | C | T | Heterozygous |
| NC_037642.1 | 2100644 | SNV | 1 | C | G | Homozygous   |
| NC_037642.1 | 2100864 | SNV | 1 | C | T | Homozygous   |
| NC_037642.1 | 2106760 | SNV | 1 | A | T | Homozygous   |
| NC_037642.1 | 2106763 | SNV | 1 | A | T | Homozygous   |
| NC_037642.1 | 2106767 | SNV | 1 | C | A | Homozygous   |
| NC_037642.1 | 2106769 | SNV | 1 | T | G | Heterozygous |
| NC_037642.1 | 2106827 | SNV | 1 | T | C | Homozygous   |
| NC_037642.1 | 2106950 | SNV | 1 | A | G | Homozygous   |
| NC_037642.1 | 2112156 | SNV | 1 | A | G | Homozygous   |
| NC_037642.1 | 2112167 | SNV | 1 | G | A | Homozygous   |
| NC_037642.1 | 2112181 | SNV | 1 | T | G | Homozygous   |
| NC_037642.1 | 2131729 | SNV | 1 | A | T | Homozygous   |
| NC_037642.1 | 2131738 | SNV | 1 | T | C | Homozygous   |
| NC_037642.1 | 2131749 | SNV | 1 | A | C | Homozygous   |
| NC_037642.1 | 2139811 | SNV | 1 | T | A | Homozygous   |
| NC_037642.1 | 2139836 | SNV | 1 | A | G | Homozygous   |
| NC_037642.1 | 2139842 | SNV | 1 | A | T | Homozygous   |
| NC_037642.1 | 2139853 | SNV | 1 | T | G | Homozygous   |
| NC_037642.1 | 2139862 | SNV | 1 | G | A | Homozygous   |
| NC_037642.1 | 2140274 | SNV | 1 | A | G | Homozygous   |
| NC_037642.1 | 2140279 | SNV | 1 | G | A | Homozygous   |
| NC_037642.1 | 2153278 | SNV | 1 | C | T | Homozygous   |
| NC_037642.1 | 2153765 | SNV | 1 | C | T | Heterozygous |
| NC_037642.1 | 2153769 | SNV | 1 | C | T | Heterozygous |
| NC_037642.1 | 2153867 | SNV | 1 | T | C | Homozygous   |
| NC_037642.1 | 2153888 | SNV | 1 | A | C | Heterozygous |
| NC_037642.1 | 2153899 | SNV | 1 | A | G | Heterozygous |
| NC_037642.1 | 2158922 | SNV | 1 | C | A | Heterozygous |

|             |         |     |   |   |   |              |
|-------------|---------|-----|---|---|---|--------------|
| NC_037642.1 | 2159020 | SNV | 1 | T | C | Heterozygous |
| NC_037642.1 | 2159045 | SNV | 1 | G | T | Heterozygous |
| NC_037642.1 | 2159197 | SNV | 1 | A | G | Homozygous   |
| NC_037642.1 | 2159273 | SNV | 1 | G | A | Heterozygous |
| NC_037642.1 | 2159335 | SNV | 1 | C | T | Heterozygous |
| NC_037642.1 | 2159427 | SNV | 1 | G | T | Homozygous   |
| NC_037642.1 | 2159506 | SNV | 1 | A | T | Heterozygous |
| NC_037642.1 | 2159544 | SNV | 1 | A | G | Heterozygous |
| NC_037642.1 | 2159544 | SNV | 1 | A | T | Heterozygous |
| NC_037642.1 | 2161908 | SNV | 1 | A | C | Homozygous   |
| NC_037642.1 | 2167081 | SNV | 1 | G | A | Heterozygous |
| NC_037642.1 | 2167116 | SNV | 1 | C | A | Homozygous   |
| NC_037642.1 | 2169794 | SNV | 1 | A | G | Homozygous   |
| NC_037642.1 | 2169849 | SNV | 1 | C | T | Heterozygous |
| NC_037642.1 | 2194376 | SNV | 1 | T | G | Homozygous   |
| NC_037642.1 | 2194385 | SNV | 1 | T | G | Homozygous   |
| NC_037642.1 | 2194387 | SNV | 1 | C | G | Homozygous   |
| NC_037642.1 | 2201813 | SNV | 1 | G | A | Homozygous   |
| NC_037642.1 | 2210540 | SNV | 1 | G | C | Homozygous   |
| NC_037642.1 | 2210559 | SNV | 1 | C | A | Homozygous   |
| NC_037642.1 | 2210576 | SNV | 1 | T | C | Homozygous   |
| NC_037642.1 | 2212774 | SNV | 1 | T | C | Homozygous   |
| NC_037642.1 | 2223003 | SNV | 1 | G | A | Heterozygous |
| NC_037642.1 | 2223006 | SNV | 1 | G | A | Heterozygous |
| NC_037642.1 | 2227743 | SNV | 1 | C | A | Heterozygous |
| NC_037642.1 | 2228427 | SNV | 1 | G | A | Homozygous   |
| NC_037642.1 | 2228499 | SNV | 1 | T | C | Homozygous   |
| NC_037642.1 | 2234124 | SNV | 1 | T | C | Homozygous   |
| NC_037642.1 | 2234131 | SNV | 1 | T | C | Homozygous   |
| NC_037642.1 | 2234155 | SNV | 1 | A | G | Homozygous   |
| NC_037642.1 | 2234157 | SNV | 1 | C | T | Homozygous   |
| NC_037642.1 | 2234177 | SNV | 1 | T | C | Homozygous   |
| NC_037642.1 | 2234189 | SNV | 1 | G | A | Homozygous   |
| NC_037642.1 | 2234201 | SNV | 1 | A | G | Homozygous   |
| NC_037642.1 | 2234206 | SNV | 1 | A | T | Homozygous   |
| NC_037642.1 | 2237487 | SNV | 1 | T | A | Homozygous   |
| NC_037642.1 | 2237490 | SNV | 1 | A | G | Homozygous   |
| NC_037642.1 | 2237503 | SNV | 1 | G | T | Homozygous   |
| NC_037642.1 | 2237871 | SNV | 1 | A | G | Homozygous   |
| NC_037642.1 | 2238014 | SNV | 1 | T | C | Homozygous   |
| NC_037642.1 | 2238069 | SNV | 1 | C | A | Heterozygous |
| NC_037642.1 | 2238071 | SNV | 1 | T | C | Homozygous   |
| NC_037642.1 | 2238082 | SNV | 1 | G | A | Heterozygous |
| NC_037642.1 | 2238096 | SNV | 1 | T | C | Heterozygous |
| NC_037642.1 | 2257410 | SNV | 1 | T | C | Homozygous   |
| NC_037642.1 | 2261966 | SNV | 1 | G | A | Heterozygous |
| NC_037642.1 | 2262716 | SNV | 1 | A | T | Homozygous   |
| NC_037642.1 | 2262777 | SNV | 1 | T | C | Heterozygous |
| NC_037642.1 | 2263602 | SNV | 1 | G | T | Homozygous   |
| NC_037642.1 | 2263663 | SNV | 1 | C | T | Heterozygous |
| NC_037642.1 | 2264896 | SNV | 1 | C | T | Heterozygous |



|             |         |     |   |   |   |              |
|-------------|---------|-----|---|---|---|--------------|
| NC_037642.1 | 2264944 | SNV | 1 | T | G | Heterozygous |
| NC_037642.1 | 2264947 | SNV | 1 | T | A | Heterozygous |
| NC_037642.1 | 2264950 | SNV | 1 | C | T | Heterozygous |
| NC_037642.1 | 2265004 | SNV | 1 | C | T | Homozygous   |
| NC_037642.1 | 2265421 | SNV | 1 | A | T | Homozygous   |
| NC_037642.1 | 2265736 | SNV | 1 | G | T | Heterozygous |
| NC_037642.1 | 2268089 | SNV | 1 | T | A | Heterozygous |
| NC_037642.1 | 2268496 | SNV | 1 | A | G | Heterozygous |
| NC_037642.1 | 2270761 | SNV | 1 | A | G | Heterozygous |
| NC_037642.1 | 2270764 | SNV | 1 | T | C | Heterozygous |
| NC_037642.1 | 2270770 | SNV | 1 | T | A | Heterozygous |
| NC_037642.1 | 2270776 | SNV | 1 | C | A | Heterozygous |
| NC_037642.1 | 2270786 | SNV | 1 | T | A | Heterozygous |
| NC_037642.1 | 2270807 | SNV | 1 | A | T | Homozygous   |
| NC_037642.1 | 2270819 | SNV | 1 | C | T | Homozygous   |
| NC_037642.1 | 2270821 | SNV | 1 | T | A | Homozygous   |
| NC_037642.1 | 2271449 | SNV | 1 | A | G | Homozygous   |
| NC_037642.1 | 2271461 | SNV | 1 | A | G | Homozygous   |
| NC_037642.1 | 2271463 | SNV | 1 | A | T | Homozygous   |
| NC_037642.1 | 2271472 | SNV | 1 | T | G | Homozygous   |
| NC_037642.1 | 2271491 | SNV | 1 | T | C | Homozygous   |
| NC_037642.1 | 2271611 | SNV | 1 | A | G | Heterozygous |
| NC_037642.1 | 2272280 | SNV | 1 | A | T | Homozygous   |
| NC_037642.1 | 2272287 | SNV | 1 | A | G | Homozygous   |
| NC_037642.1 | 2272290 | SNV | 1 | A | T | Homozygous   |
| NC_037642.1 | 2275934 | SNV | 1 | T | C | Homozygous   |
| NC_037642.1 | 2276471 | SNV | 1 | T | G | Homozygous   |
| NC_037642.1 | 2278724 | SNV | 1 | G | T | Homozygous   |
| NC_037642.1 | 2279014 | SNV | 1 | T | A | Homozygous   |
| NC_037642.1 | 2279514 | SNV | 1 | T | C | Homozygous   |
| NC_037642.1 | 2279517 | SNV | 1 | T | A | Homozygous   |
| NC_037642.1 | 2282003 | SNV | 1 | A | G | Homozygous   |
| NC_037642.1 | 2282005 | SNV | 1 | A | G | Homozygous   |
| NC_037642.1 | 2282007 | SNV | 1 | A | G | Homozygous   |
| NC_037642.1 | 2282037 | SNV | 1 | T | G | Homozygous   |
| NC_037642.1 | 2284420 | SNV | 1 | A | C | Homozygous   |
| NC_037642.1 | 2354698 | SNV | 1 | A | T | Heterozygous |
| NC_037642.1 | 2354702 | SNV | 1 | A | C | Heterozygous |
| NC_037642.1 | 2356559 | SNV | 1 | A | G | Homozygous   |
| NC_037642.1 | 2357209 | SNV | 1 | T | A | Heterozygous |
| NC_037642.1 | 2357212 | SNV | 1 | T | A | Heterozygous |
| NC_037642.1 | 2357220 | SNV | 1 | T | A | Homozygous   |
| NC_037642.1 | 2385751 | SNV | 1 | A | G | Homozygous   |
| NC_037642.1 | 2385757 | SNV | 1 | G | A | Heterozygous |
| NC_037642.1 | 2385760 | SNV | 1 | C | T | Heterozygous |
| NC_037642.1 | 2385793 | SNV | 1 | C | T | Heterozygous |
| NC_037642.1 | 2385811 | SNV | 1 | A | G | Homozygous   |
| NC_037642.1 | 2385814 | SNV | 1 | G | A | Heterozygous |
| NC_037642.1 | 2392464 | SNV | 1 | T | C | Homozygous   |
| NC_037642.1 | 2411263 | SNV | 1 | G | A | Heterozygous |
| NC_037642.1 | 2411374 | SNV | 1 | A | G | Heterozygous |

|             |         |     |   |   |   |              |
|-------------|---------|-----|---|---|---|--------------|
| NC_037642.1 | 2417053 | SNV | 1 | C | T | Homozygous   |
| NC_037642.1 | 2417063 | SNV | 1 | C | T | Homozygous   |
| NC_037642.1 | 2417117 | SNV | 1 | G | A | Homozygous   |
| NC_037642.1 | 2435613 | SNV | 1 | A | G | Homozygous   |
| NC_037642.1 | 2436518 | SNV | 1 | A | G | Homozygous   |
| NC_037642.1 | 2436854 | SNV | 1 | A | G | Homozygous   |
| NC_037642.1 | 2436935 | SNV | 1 | T | C | Heterozygous |
| NC_037642.1 | 2436938 | SNV | 1 | C | G | Heterozygous |
| NC_037642.1 | 2437015 | SNV | 1 | T | C | Heterozygous |
| NC_037642.1 | 2437041 | SNV | 1 | C | T | Heterozygous |
| NC_037642.1 | 2437054 | SNV | 1 | G | A | Heterozygous |
| NC_037642.1 | 2437665 | SNV | 1 | T | G | Homozygous   |
| NC_037642.1 | 2437847 | SNV | 1 | G | A | Heterozygous |
| NC_037642.1 | 2438037 | SNV | 1 | C | T | Homozygous   |
| NC_037642.1 | 2438102 | SNV | 1 | G | T | Homozygous   |
| NC_037642.1 | 2438108 | SNV | 1 | G | A | Heterozygous |
| NC_037642.1 | 2453528 | SNV | 1 | T | C | Homozygous   |
| NC_037642.1 | 2453574 | SNV | 1 | G | A | Homozygous   |
| NC_037642.1 | 2453578 | SNV | 1 | C | G | Homozygous   |
| NC_037642.1 | 2453710 | SNV | 1 | T | C | Homozygous   |
| NC_037642.1 | 2454204 | SNV | 1 | C | T | Heterozygous |
| NC_037642.1 | 2454287 | SNV | 1 | G | A | Heterozygous |
| NC_037642.1 | 2454308 | SNV | 1 | C | T | Homozygous   |
| NC_037642.1 | 2457939 | SNV | 1 | A | G | Heterozygous |
| NC_037642.1 | 2457947 | SNV | 1 | T | C | Heterozygous |
| NC_037642.1 | 2457998 | SNV | 1 | A | T | Homozygous   |
| NC_037642.1 | 2458003 | SNV | 1 | A | G | Homozygous   |
| NC_037642.1 | 2458016 | SNV | 1 | C | T | Heterozygous |
| NC_037642.1 | 2458023 | SNV | 1 | C | T | Heterozygous |
| NC_037642.1 | 2458040 | SNV | 1 | C | G | Heterozygous |
| NC_037642.1 | 2458053 | SNV | 1 | G | A | Heterozygous |
| NC_037642.1 | 2458060 | SNV | 1 | T | C | Heterozygous |
| NC_037642.1 | 2458117 | SNV | 1 | C | T | Homozygous   |
| NC_037642.1 | 2458367 | SNV | 1 | T | C | Homozygous   |
| NC_037642.1 | 2458762 | SNV | 1 | A | G | Homozygous   |
| NC_037642.1 | 2458773 | SNV | 1 | G | A | Homozygous   |
| NC_037642.1 | 2458777 | SNV | 1 | C | T | Heterozygous |
| NC_037642.1 | 2458781 | SNV | 1 | C | T | Heterozygous |
| NC_037642.1 | 2458786 | SNV | 1 | A | G | Homozygous   |
| NC_037642.1 | 2458800 | SNV | 1 | C | T | Homozygous   |
| NC_037642.1 | 2458872 | SNV | 1 | A | G | Homozygous   |
| NC_037642.1 | 2458954 | SNV | 1 | A | G | Heterozygous |
| NC_037642.1 | 2459156 | SNV | 1 | C | T | Heterozygous |
| NC_037642.1 | 2459210 | SNV | 1 | C | G | Heterozygous |
| NC_037642.1 | 2475552 | SNV | 1 | T | C | Homozygous   |
| NC_037642.1 | 2475698 | SNV | 1 | G | A | Heterozygous |
| NC_037642.1 | 2483810 | SNV | 1 | T | C | Heterozygous |
| NC_037642.1 | 2484072 | SNV | 1 | T | A | Homozygous   |
| NC_037642.1 | 2484080 | SNV | 1 | T | A | Homozygous   |
| NC_037642.1 | 2484084 | SNV | 1 | T | A | Homozygous   |
| NC_037642.1 | 2485917 | SNV | 1 | A | G | Heterozygous |

|             |         |     |   |   |   |              |
|-------------|---------|-----|---|---|---|--------------|
| NC_037642.1 | 2486003 | SNV | 1 | C | T | Homozygous   |
| NC_037642.1 | 2486505 | SNV | 1 | T | A | Heterozygous |
| NC_037642.1 | 2503266 | SNV | 1 | T | A | Homozygous   |
| NC_037642.1 | 2509509 | SNV | 1 | C | T | Homozygous   |
| NC_037642.1 | 2509511 | SNV | 1 | A | T | Homozygous   |
| NC_037642.1 | 2509513 | SNV | 1 | T | A | Homozygous   |
| NC_037642.1 | 2509517 | SNV | 1 | A | T | Homozygous   |
| NC_037642.1 | 2509557 | SNV | 1 | A | T | Homozygous   |
| NC_037642.1 | 2510606 | SNV | 1 | C | T | Homozygous   |
| NC_037642.1 | 2510619 | SNV | 1 | C | T | Heterozygous |
| NC_037642.1 | 2510730 | SNV | 1 | G | A | Heterozygous |
| NC_037642.1 | 2511840 | SNV | 1 | C | A | Heterozygous |
| NC_037642.1 | 2524210 | SNV | 1 | T | C | Homozygous   |
| NC_037642.1 | 2524360 | SNV | 1 | A | G | Homozygous   |
| NC_037642.1 | 2530597 | SNV | 1 | C | T | Heterozygous |
| NC_037642.1 | 2530762 | SNV | 1 | T | C | Heterozygous |
| NC_037642.1 | 2530818 | SNV | 1 | A | T | Homozygous   |
| NC_037642.1 | 2530949 | SNV | 1 | T | C | Homozygous   |
| NC_037642.1 | 2530962 | SNV | 1 | C | T | Heterozygous |
| NC_037642.1 | 2531039 | SNV | 1 | C | T | Heterozygous |
| NC_037642.1 | 2531153 | SNV | 1 | G | A | Heterozygous |
| NC_037642.1 | 2531192 | SNV | 1 | T | C | Homozygous   |
| NC_037642.1 | 2531231 | SNV | 1 | G | C | Homozygous   |
| NC_037642.1 | 2531279 | SNV | 1 | T | C | Homozygous   |
| NC_037642.1 | 2532540 | SNV | 1 | C | T | Homozygous   |
| NC_037642.1 | 2532612 | SNV | 1 | C | T | Heterozygous |
| NC_037642.1 | 2532651 | SNV | 1 | T | C | Heterozygous |
| NC_037642.1 | 2541698 | SNV | 1 | A | G | Homozygous   |
| NC_037642.1 | 2541707 | SNV | 1 | G | A | Homozygous   |
| NC_037642.1 | 2541733 | SNV | 1 | T | A | Homozygous   |
| NC_037642.1 | 2551299 | SNV | 1 | A | G | Homozygous   |
| NC_037642.1 | 2551307 | SNV | 1 | C | T | Homozygous   |
| NC_037642.1 | 2551380 | SNV | 1 | G | A | Homozygous   |
| NC_037642.1 | 2551387 | SNV | 1 | C | T | Heterozygous |
| NC_037642.1 | 2551398 | SNV | 1 | T | C | Homozygous   |
| NC_037642.1 | 2551417 | SNV | 1 | T | C | Heterozygous |
| NC_037642.1 | 2551429 | SNV | 1 | G | A | Heterozygous |
| NC_037642.1 | 2551432 | SNV | 1 | A | G | Homozygous   |
| NC_037642.1 | 2551503 | SNV | 1 | A | G | Heterozygous |
| NC_037642.1 | 2551550 | SNV | 1 | A | G | Homozygous   |
| NC_037642.1 | 2555618 | SNV | 1 | C | T | Homozygous   |
| NC_037642.1 | 2564920 | SNV | 1 | G | T | Homozygous   |
| NC_037642.1 | 2564928 | SNV | 1 | A | G | Homozygous   |
| NC_037642.1 | 2564935 | SNV | 1 | C | T | Homozygous   |
| NC_037642.1 | 2564942 | SNV | 1 | C | A | Homozygous   |
| NC_037642.1 | 2564953 | SNV | 1 | C | G | Homozygous   |
| NC_037642.1 | 2564990 | SNV | 1 | A | G | Homozygous   |
| NC_037642.1 | 2581348 | SNV | 1 | T | C | Homozygous   |
| NC_037642.1 | 2581435 | SNV | 1 | A | G | Heterozygous |
| NC_037642.1 | 2581435 | SNV | 1 | A | T | Heterozygous |
| NC_037642.1 | 2581437 | SNV | 1 | T | A | Heterozygous |

|             |         |     |   |   |   |              |
|-------------|---------|-----|---|---|---|--------------|
| NC_037642.1 | 2581440 | SNV | 1 | G | A | Heterozygous |
| NC_037642.1 | 2581444 | SNV | 1 | C | T | Heterozygous |
| NC_037642.1 | 2581446 | SNV | 1 | C | T | Homozygous   |
| NC_037642.1 | 2586406 | SNV | 1 | T | C | Homozygous   |
| NC_037642.1 | 2586513 | SNV | 1 | C | G | Homozygous   |
| NC_037642.1 | 2591450 | SNV | 1 | C | T | Homozygous   |
| NC_037642.1 | 2591514 | SNV | 1 | T | C | Homozygous   |
| NC_037642.1 | 2591532 | SNV | 1 | A | G | Homozygous   |
| NC_037642.1 | 2591655 | SNV | 1 | A | T | Homozygous   |
| NC_037642.1 | 2591907 | SNV | 1 | C | T | Heterozygous |
| NC_037642.1 | 2591919 | SNV | 1 | T | G | Heterozygous |
| NC_037642.1 | 2591925 | SNV | 1 | G | A | Homozygous   |
| NC_037642.1 | 2591979 | SNV | 1 | A | G | Homozygous   |
| NC_037642.1 | 2592021 | SNV | 1 | C | T | Homozygous   |
| NC_037642.1 | 2592032 | SNV | 1 | C | T | Heterozygous |
| NC_037642.1 | 2593894 | SNV | 1 | T | C | Homozygous   |
| NC_037642.1 | 2593975 | SNV | 1 | T | C | Homozygous   |
| NC_037642.1 | 2594019 | SNV | 1 | T | C | Homozygous   |
| NC_037642.1 | 2594047 | SNV | 1 | C | G | Homozygous   |
| NC_037642.1 | 2594174 | SNV | 1 | G | A | Heterozygous |
| NC_037642.1 | 2594208 | SNV | 1 | T | G | Heterozygous |
| NC_037642.1 | 2594212 | SNV | 1 | A | G | Heterozygous |
| NC_037642.1 | 2594213 | SNV | 1 | C | T | Heterozygous |
| NC_037642.1 | 2594231 | SNV | 1 | C | T | Heterozygous |
| NC_037642.1 | 2594234 | SNV | 1 | C | T | Heterozygous |
| NC_037642.1 | 2594244 | SNV | 1 | C | T | Heterozygous |
| NC_037642.1 | 2594246 | SNV | 1 | T | C | Homozygous   |
| NC_037642.1 | 2594267 | SNV | 1 | C | T | Homozygous   |
| NC_037642.1 | 2594305 | SNV | 1 | G | A | Heterozygous |
| NC_037642.1 | 2594348 | SNV | 1 | A | G | Heterozygous |
| NC_037642.1 | 2594433 | SNV | 1 | T | A | Homozygous   |
| NC_037642.1 | 2608204 | SNV | 1 | G | T | Homozygous   |
| NC_037642.1 | 2608215 | SNV | 1 | A | T | Homozygous   |
| NC_037642.1 | 2608220 | SNV | 1 | C | T | Homozygous   |
| NC_037642.1 | 2609366 | SNV | 1 | C | T | Heterozygous |
| NC_037642.1 | 2609414 | SNV | 1 | T | C | Homozygous   |
| NC_037642.1 | 2609427 | SNV | 1 | C | T | Heterozygous |
| NC_037642.1 | 2609464 | SNV | 1 | T | C | Heterozygous |
| NC_037642.1 | 2609506 | SNV | 1 | A | C | Heterozygous |
| NC_037642.1 | 2609626 | SNV | 1 | A | G | Homozygous   |
| NC_037642.1 | 2609797 | SNV | 1 | A | G | Homozygous   |
| NC_037642.1 | 2609949 | SNV | 1 | C | T | Heterozygous |
| NC_037642.1 | 2609953 | SNV | 1 | T | C | Homozygous   |
| NC_037642.1 | 2609973 | SNV | 1 | T | C | Heterozygous |
| NC_037642.1 | 2609975 | SNV | 1 | T | C | Heterozygous |
| NC_037642.1 | 2609978 | SNV | 1 | G | T | Heterozygous |
| NC_037642.1 | 2609981 | SNV | 1 | G | C | Heterozygous |
| NC_037642.1 | 2610047 | SNV | 1 | A | G | Homozygous   |
| NC_037642.1 | 2622733 | SNV | 1 | C | T | Homozygous   |
| NC_037642.1 | 2622756 | SNV | 1 | G | A | Heterozygous |
| NC_037642.1 | 2622777 | SNV | 1 | C | T | Heterozygous |

|             |         |     |   |   |   |              |
|-------------|---------|-----|---|---|---|--------------|
| NC_037642.1 | 2633514 | SNV | 1 | C | T | Heterozygous |
| NC_037642.1 | 2633946 | SNV | 1 | A | G | Homozygous   |
| NC_037642.1 | 2633951 | SNV | 1 | G | A | Homozygous   |
| NC_037642.1 | 2633978 | SNV | 1 | A | G | Heterozygous |
| NC_037642.1 | 2633994 | SNV | 1 | T | C | Homozygous   |
| NC_037642.1 | 2634015 | SNV | 1 | T | C | Heterozygous |
| NC_037642.1 | 2634099 | SNV | 1 | T | C | Homozygous   |
| NC_037642.1 | 2634109 | SNV | 1 | T | C | Homozygous   |
| NC_037642.1 | 2634117 | SNV | 1 | T | C | Homozygous   |
| NC_037642.1 | 2634259 | SNV | 1 | T | C | Heterozygous |
| NC_037642.1 | 2634268 | SNV | 1 | T | C | Homozygous   |
| NC_037642.1 | 2634277 | SNV | 1 | G | A | Homozygous   |
| NC_037642.1 | 2634333 | SNV | 1 | C | T | Heterozygous |
| NC_037642.1 | 2634367 | SNV | 1 | T | C | Homozygous   |
| NC_037642.1 | 2635142 | SNV | 1 | C | T | Heterozygous |
| NC_037642.1 | 2635153 | SNV | 1 | C | T | Heterozygous |
| NC_037642.1 | 2636149 | SNV | 1 | G | A | Homozygous   |
| NC_037642.1 | 2636155 | SNV | 1 | G | C | Heterozygous |
| NC_037642.1 | 2636157 | SNV | 1 | G | C | Heterozygous |
| NC_037642.1 | 2636160 | SNV | 1 | A | T | Heterozygous |
| NC_037642.1 | 2636188 | SNV | 1 | A | G | Homozygous   |
| NC_037642.1 | 2639888 | SNV | 1 | G | A | Homozygous   |
| NC_037642.1 | 2645171 | SNV | 1 | T | C | Homozygous   |
| NC_037642.1 | 2645269 | SNV | 1 | A | T | Heterozygous |
| NC_037642.1 | 2645321 | SNV | 1 | G | C | Homozygous   |
| NC_037642.1 | 2645383 | SNV | 1 | T | C | Homozygous   |
| NC_037642.1 | 2645451 | SNV | 1 | G | A | Homozygous   |
| NC_037642.1 | 2645585 | SNV | 1 | G | A | Homozygous   |
| NC_037642.1 | 2645587 | SNV | 1 | T | C | Heterozygous |
| NC_037642.1 | 2647633 | SNV | 1 | A | C | Heterozygous |
| NC_037642.1 | 2658710 | SNV | 1 | A | G | Homozygous   |
| NC_037642.1 | 2658715 | SNV | 1 | T | A | Homozygous   |
| NC_037642.1 | 2658723 | SNV | 1 | A | T | Homozygous   |
| NC_037642.1 | 2658727 | SNV | 1 | G | C | Homozygous   |
| NC_037642.1 | 2658751 | SNV | 1 | A | T | Homozygous   |
| NC_037642.1 | 2659762 | SNV | 1 | A | G | Homozygous   |
| NC_037642.1 | 2659795 | SNV | 1 | A | G | Homozygous   |
| NC_037642.1 | 2671218 | SNV | 1 | A | G | Homozygous   |
| NC_037642.1 | 2671269 | SNV | 1 | A | G | Homozygous   |
| NC_037642.1 | 2671278 | SNV | 1 | A | G | Heterozygous |
| NC_037642.1 | 2671430 | SNV | 1 | A | G | Homozygous   |
| NC_037642.1 | 2671433 | SNV | 1 | T | A | Heterozygous |
| NC_037642.1 | 2671440 | SNV | 1 | A | G | Heterozygous |
| NC_037642.1 | 2671463 | SNV | 1 | G | T | Homozygous   |
| NC_037642.1 | 2685247 | SNV | 1 | A | G | Homozygous   |
| NC_037642.1 | 2685335 | SNV | 1 | T | A | Heterozygous |
| NC_037642.1 | 2723821 | SNV | 1 | T | A | Heterozygous |
| NC_037642.1 | 2723827 | SNV | 1 | T | A | Heterozygous |
| NC_037642.1 | 2723833 | SNV | 1 | A | G | Heterozygous |
| NC_037642.1 | 2758728 | SNV | 1 | C | T | Homozygous   |
| NC_037642.1 | 2758733 | SNV | 1 | A | T | Homozygous   |

|             |         |     |   |   |   |              |
|-------------|---------|-----|---|---|---|--------------|
| NC_037642.1 | 2759774 | SNV | 1 | A | G | Homozygous   |
| NC_037642.1 | 2760586 | SNV | 1 | G | C | Homozygous   |
| NC_037642.1 | 2760625 | SNV | 1 | A | G | Homozygous   |
| NC_037642.1 | 2766609 | SNV | 1 | T | G | Heterozygous |
| NC_037642.1 | 2769995 | SNV | 1 | T | C | Homozygous   |
| NC_037642.1 | 2769997 | SNV | 1 | T | C | Homozygous   |
| NC_037642.1 | 2770003 | SNV | 1 | T | G | Homozygous   |
| NC_037642.1 | 2772045 | SNV | 1 | G | A | Heterozygous |
| NC_037642.1 | 2780827 | SNV | 1 | A | G | Heterozygous |
| NC_037642.1 | 2782177 | SNV | 1 | C | T | Heterozygous |
| NC_037642.1 | 2782353 | SNV | 1 | G | A | Heterozygous |
| NC_037642.1 | 2782366 | SNV | 1 | T | C | Homozygous   |
| NC_037642.1 | 2787566 | SNV | 1 | A | G | Homozygous   |
| NC_037642.1 | 2787582 | SNV | 1 | G | A | Homozygous   |
| NC_037642.1 | 2789156 | SNV | 1 | C | T | Heterozygous |
| NC_037642.1 | 2789158 | SNV | 1 | G | A | Heterozygous |
| NC_037642.1 | 2789164 | SNV | 1 | T | A | Homozygous   |
| NC_037642.1 | 2790112 | SNV | 1 | A | G | Heterozygous |
| NC_037642.1 | 2790160 | SNV | 1 | A | G | Heterozygous |
| NC_037642.1 | 2790247 | SNV | 1 | G | A | Heterozygous |
| NC_037642.1 | 2791775 | SNV | 1 | A | G | Homozygous   |
| NC_037642.1 | 2791833 | SNV | 1 | A | G | Heterozygous |
| NC_037642.1 | 2839827 | SNV | 1 | G | A | Homozygous   |
| NC_037642.1 | 2845441 | SNV | 1 | G | C | Homozygous   |
| NC_037642.1 | 2845452 | SNV | 1 | A | T | Homozygous   |
| NC_037642.1 | 2845454 | SNV | 1 | C | A | Homozygous   |
| NC_037642.1 | 2859404 | SNV | 1 | A | G | Heterozygous |
| NC_037642.1 | 2863328 | SNV | 1 | A | T | Homozygous   |
| NC_037642.1 | 2863339 | SNV | 1 | C | G | Homozygous   |
| NC_037642.1 | 2863348 | SNV | 1 | T | C | Homozygous   |
| NC_037642.1 | 2863355 | SNV | 1 | A | G | Heterozygous |
| NC_037642.1 | 2863366 | SNV | 1 | C | G | Homozygous   |
| NC_037642.1 | 2863368 | SNV | 1 | C | T | Heterozygous |
| NC_037642.1 | 2863394 | SNV | 1 | T | C | Homozygous   |
| NC_037642.1 | 2863396 | SNV | 1 | G | A | Heterozygous |
| NC_037642.1 | 2863398 | SNV | 1 | G | A | Heterozygous |
| NC_037642.1 | 2863415 | SNV | 1 | A | G | Homozygous   |
| NC_037642.1 | 2863423 | SNV | 1 | C | T | Heterozygous |
| NC_037642.1 | 2864692 | SNV | 1 | T | G | Homozygous   |
| NC_037642.1 | 2864716 | SNV | 1 | G | T | Homozygous   |
| NC_037642.1 | 2864718 | SNV | 1 | T | C | Homozygous   |
| NC_037642.1 | 2864720 | SNV | 1 | A | T | Homozygous   |
| NC_037642.1 | 2876525 | SNV | 1 | C | T | Heterozygous |
| NC_037642.1 | 2876532 | SNV | 1 | C | T | Homozygous   |
| NC_037642.1 | 2876601 | SNV | 1 | A | G | Homozygous   |
| NC_037642.1 | 2877119 | SNV | 1 | C | T | Heterozygous |
| NC_037642.1 | 2878080 | SNV | 1 | T | G | Heterozygous |
| NC_037642.1 | 2879733 | SNV | 1 | C | T | Homozygous   |
| NC_037642.1 | 2880306 | SNV | 1 | C | G | Heterozygous |
| NC_037642.1 | 2883851 | SNV | 1 | C | A | Homozygous   |
| NC_037642.1 | 2883855 | SNV | 1 | A | G | Homozygous   |

|             |         |     |   |   |   |              |
|-------------|---------|-----|---|---|---|--------------|
| NC_037642.1 | 2883872 | SNV | 1 | A | T | Homozygous   |
| NC_037642.1 | 2883875 | SNV | 1 | A | G | Homozygous   |
| NC_037642.1 | 2883879 | SNV | 1 | A | T | Homozygous   |
| NC_037642.1 | 2886585 | SNV | 1 | G | A | Homozygous   |
| NC_037642.1 | 2889488 | SNV | 1 | T | C | Homozygous   |
| NC_037642.1 | 2890369 | SNV | 1 | C | T | Heterozygous |
| NC_037642.1 | 2890465 | SNV | 1 | T | C | Heterozygous |
| NC_037642.1 | 2920896 | SNV | 1 | G | A | Heterozygous |
| NC_037642.1 | 2933845 | SNV | 1 | T | G | Heterozygous |
| NC_037642.1 | 2961727 | SNV | 1 | G | A | Homozygous   |
| NC_037642.1 | 2961731 | SNV | 1 | T | A | Homozygous   |
| NC_037642.1 | 2961733 | SNV | 1 | G | C | Homozygous   |
| NC_037642.1 | 2961738 | SNV | 1 | T | A | Homozygous   |
| NC_037642.1 | 2965446 | SNV | 1 | G | T | Homozygous   |
| NC_037642.1 | 2965451 | SNV | 1 | C | T | Homozygous   |
| NC_037642.1 | 2968703 | SNV | 1 | C | T | Homozygous   |
| NC_037642.1 | 2972940 | SNV | 1 | T | C | Homozygous   |
| NC_037642.1 | 2975886 | SNV | 1 | G | T | Homozygous   |
| NC_037642.1 | 2990836 | SNV | 1 | C | T | Heterozygous |
| NC_037642.1 | 2992290 | SNV | 1 | T | C | Heterozygous |
| NC_037642.1 | 2993080 | SNV | 1 | A | T | Heterozygous |
| NC_037642.1 | 2997635 | SNV | 1 | G | T | Heterozygous |
| NC_037642.1 | 2997822 | SNV | 1 | T | G | Homozygous   |
| NC_037642.1 | 2998429 | SNV | 1 | A | G | Homozygous   |
| NC_037642.1 | 2998476 | SNV | 1 | G | A | Homozygous   |
| NC_037642.1 | 2998990 | SNV | 1 | G | T | Homozygous   |
| NC_037642.1 | 2999951 | SNV | 1 | T | G | Heterozygous |
| NC_037642.1 | 3002165 | SNV | 1 | A | G | Heterozygous |
| NC_037642.1 | 3002247 | SNV | 1 | C | G | Homozygous   |
| NC_037642.1 | 3002398 | SNV | 1 | C | T | Heterozygous |
| NC_037642.1 | 3005294 | SNV | 1 | C | G | Heterozygous |
| NC_037642.1 | 3059361 | SNV | 1 | C | G | Heterozygous |
| NC_037642.1 | 3059979 | SNV | 1 | C | T | Heterozygous |
| NC_037642.1 | 3060160 | SNV | 1 | T | C | Homozygous   |
| NC_037642.1 | 3060212 | SNV | 1 | T | C | Homozygous   |
| NC_037642.1 | 3060225 | SNV | 1 | G | A | Homozygous   |
| NC_037642.1 | 3060248 | SNV | 1 | G | A | Homozygous   |
| NC_037642.1 | 3060468 | SNV | 1 | G | A | Homozygous   |
| NC_037642.1 | 3060478 | SNV | 1 | G | A | Homozygous   |
| NC_037642.1 | 3060535 | SNV | 1 | A | T | Heterozygous |
| NC_037642.1 | 3061043 | SNV | 1 | T | C | Heterozygous |
| NC_037642.1 | 3098735 | SNV | 1 | A | G | Homozygous   |
| NC_037642.1 | 3098744 | SNV | 1 | T | G | Homozygous   |
| NC_037642.1 | 3098749 | SNV | 1 | G | A | Homozygous   |
| NC_037642.1 | 3098771 | SNV | 1 | A | G | Heterozygous |
| NC_037642.1 | 3098773 | SNV | 1 | A | G | Heterozygous |
| NC_037642.1 | 3098776 | SNV | 1 | G | A | Heterozygous |
| NC_037642.1 | 3295710 | SNV | 1 | A | T | Homozygous   |
| NC_037642.1 | 3296327 | SNV | 1 | A | G | Homozygous   |
| NC_037642.1 | 3296504 | SNV | 1 | T | C | Homozygous   |
| NC_037642.1 | 3296727 | SNV | 1 | G | C | Homozygous   |

|             |         |     |   |   |   |              |
|-------------|---------|-----|---|---|---|--------------|
| NC_037642.1 | 3389799 | SNV | 1 | T | C | Homozygous   |
| NC_037642.1 | 3390400 | SNV | 1 | C | T | Heterozygous |
| NC_037642.1 | 3390522 | SNV | 1 | C | T | Homozygous   |
| NC_037642.1 | 3390667 | SNV | 1 | A | G | Homozygous   |
| NC_037642.1 | 3393210 | SNV | 1 | A | G | Heterozygous |
| NC_037642.1 | 3393481 | SNV | 1 | C | T | Heterozygous |
| NC_037642.1 | 3393563 | SNV | 1 | A | G | Heterozygous |
| NC_037642.1 | 3393581 | SNV | 1 | G | A | Heterozygous |
| NC_037642.1 | 3393606 | SNV | 1 | C | A | Heterozygous |
| NC_037642.1 | 3393637 | SNV | 1 | T | A | Heterozygous |
| NC_037642.1 | 3393641 | SNV | 1 | A | G | Heterozygous |
| NC_037642.1 | 3393643 | SNV | 1 | A | G | Heterozygous |
| NC_037642.1 | 3393648 | SNV | 1 | A | G | Heterozygous |
| NC_037642.1 | 3393672 | SNV | 1 | G | C | Heterozygous |
| NC_037642.1 | 3393754 | SNV | 1 | T | C | Homozygous   |
| NC_037642.1 | 3395943 | SNV | 1 | T | C | Homozygous   |
| NC_037642.1 | 3395987 | SNV | 1 | G | A | Heterozygous |
| NC_037642.1 | 3395996 | SNV | 1 | A | G | Heterozygous |
| NC_037642.1 | 3396013 | SNV | 1 | A | G | Heterozygous |
| NC_037642.1 | 3398702 | SNV | 1 | G | A | Homozygous   |
| NC_037642.1 | 3398705 | SNV | 1 | T | C | Homozygous   |
| NC_037642.1 | 3405890 | SNV | 1 | C | A | Heterozygous |
| NC_037642.1 | 3405902 | SNV | 1 | C | A | Heterozygous |
| NC_037642.1 | 3405907 | SNV | 1 | T | C | Homozygous   |
| NC_037642.1 | 3405910 | SNV | 1 | C | T | Homozygous   |
| NC_037642.1 | 3405913 | SNV | 1 | C | T | Homozygous   |
| NC_037642.1 | 3405917 | SNV | 1 | T | C | Homozygous   |
| NC_037642.1 | 3410708 | SNV | 1 | C | T | Heterozygous |
| NC_037642.1 | 3410764 | SNV | 1 | T | C | Heterozygous |
| NC_037642.1 | 3414678 | SNV | 1 | A | G | Heterozygous |
| NC_037642.1 | 3433510 | SNV | 1 | G | A | Heterozygous |
| NC_037642.1 | 3433578 | SNV | 1 | C | A | Heterozygous |
| NC_037642.1 | 3435879 | SNV | 1 | G | A | Heterozygous |
| NC_037642.1 | 3435885 | SNV | 1 | A | G | Heterozygous |
| NC_037642.1 | 3435891 | SNV | 1 | G | T | Homozygous   |
| NC_037642.1 | 3435909 | SNV | 1 | G | T | Heterozygous |
| NC_037642.1 | 3435912 | SNV | 1 | G | A | Homozygous   |
| NC_037642.1 | 3435915 | SNV | 1 | A | T | Homozygous   |
| NC_037642.1 | 3435933 | SNV | 1 | G | T | Homozygous   |
| NC_037642.1 | 3442231 | SNV | 1 | C | G | Homozygous   |
| NC_037642.1 | 3442486 | SNV | 1 | C | T | Homozygous   |
| NC_037642.1 | 3442650 | SNV | 1 | G | A | Heterozygous |
| NC_037642.1 | 3443072 | SNV | 1 | C | T | Heterozygous |
| NC_037642.1 | 3443196 | SNV | 1 | T | C | Homozygous   |
| NC_037642.1 | 3443247 | SNV | 1 | A | C | Homozygous   |
| NC_037642.1 | 3443249 | SNV | 1 | G | T | Homozygous   |
| NC_037642.1 | 3443251 | SNV | 1 | A | G | Heterozygous |
| NC_037642.1 | 3443253 | SNV | 1 | C | A | Homozygous   |
| NC_037642.1 | 3443303 | SNV | 1 | A | G | Homozygous   |
| NC_037642.1 | 3453059 | SNV | 1 | C | T | Homozygous   |
| NC_037642.1 | 3453063 | SNV | 1 | T | G | Homozygous   |



|             |         |     |   |   |   |              |
|-------------|---------|-----|---|---|---|--------------|
| NC_037642.1 | 3453069 | SNV | 1 | C | T | Homozygous   |
| NC_037642.1 | 3453090 | SNV | 1 | T | C | Homozygous   |
| NC_037642.1 | 3453092 | SNV | 1 | T | C | Homozygous   |
| NC_037642.1 | 3455316 | SNV | 1 | A | G | Heterozygous |
| NC_037642.1 | 3455510 | SNV | 1 | A | G | Heterozygous |
| NC_037642.1 | 3455728 | SNV | 1 | A | G | Heterozygous |
| NC_037642.1 | 3463438 | SNV | 1 | G | T | Heterozygous |
| NC_037642.1 | 3463445 | SNV | 1 | A | G | Homozygous   |
| NC_037642.1 | 3463558 | SNV | 1 | C | G | Heterozygous |
| NC_037642.1 | 3463583 | SNV | 1 | A | G | Heterozygous |
| NC_037642.1 | 3464039 | SNV | 1 | C | T | Heterozygous |
| NC_037642.1 | 3470345 | SNV | 1 | A | G | Heterozygous |
| NC_037642.1 | 3470538 | SNV | 1 | C | T | Heterozygous |
| NC_037642.1 | 3470568 | SNV | 1 | G | A | Heterozygous |
| NC_037642.1 | 3470570 | SNV | 1 | G | A | Heterozygous |
| NC_037642.1 | 3470573 | SNV | 1 | A | C | Heterozygous |
| NC_037642.1 | 3470580 | SNV | 1 | G | A | Heterozygous |
| NC_037642.1 | 3470599 | SNV | 1 | G | A | Heterozygous |
| NC_037642.1 | 3470602 | SNV | 1 | G | A | Heterozygous |
| NC_037642.1 | 3471780 | SNV | 1 | G | A | Heterozygous |
| NC_037642.1 | 3472118 | SNV | 1 | A | G | Homozygous   |
| NC_037642.1 | 3472134 | SNV | 1 | A | G | Homozygous   |
| NC_037642.1 | 3472137 | SNV | 1 | A | G | Homozygous   |
| NC_037642.1 | 3472645 | SNV | 1 | A | G | Homozygous   |
| NC_037642.1 | 3472664 | SNV | 1 | A | G | Homozygous   |
| NC_037642.1 | 3569949 | SNV | 1 | A | G | Homozygous   |
| NC_037642.1 | 3570170 | SNV | 1 | T | C | Homozygous   |
| NC_037642.1 | 3577277 | SNV | 1 | G | T | Homozygous   |
| NC_037642.1 | 3590574 | SNV | 1 | A | G | Homozygous   |
| NC_037642.1 | 3590577 | SNV | 1 | T | G | Homozygous   |
| NC_037642.1 | 3590582 | SNV | 1 | A | T | Homozygous   |
| NC_037642.1 | 3590585 | SNV | 1 | A | T | Homozygous   |
| NC_037642.1 | 3590592 | SNV | 1 | G | A | Homozygous   |
| NC_037642.1 | 3598919 | SNV | 1 | C | A | Homozygous   |
| NC_037642.1 | 3598945 | SNV | 1 | T | A | Homozygous   |
| NC_037642.1 | 3619295 | SNV | 1 | C | T | Heterozygous |
| NC_037642.1 | 3619323 | SNV | 1 | A | G | Heterozygous |
| NC_037642.1 | 3619362 | SNV | 1 | G | A | Heterozygous |
| NC_037642.1 | 3619798 | SNV | 1 | T | A | Homozygous   |
| NC_037642.1 | 3619802 | SNV | 1 | T | A | Homozygous   |
| NC_037642.1 | 3619808 | SNV | 1 | T | C | Homozygous   |
| NC_037642.1 | 3620610 | SNV | 1 | C | T | Homozygous   |
| NC_037642.1 | 3620638 | SNV | 1 | A | G | Homozygous   |
| NC_037642.1 | 3620657 | SNV | 1 | G | A | Homozygous   |
| NC_037642.1 | 3620659 | SNV | 1 | G | A | Homozygous   |
| NC_037642.1 | 3620846 | SNV | 1 | A | T | Heterozygous |
| NC_037642.1 | 3632824 | SNV | 1 | T | C | Homozygous   |
| NC_037642.1 | 3633005 | SNV | 1 | T | A | Homozygous   |
| NC_037642.1 | 3633423 | SNV | 1 | A | G | Heterozygous |
| NC_037642.1 | 3633430 | SNV | 1 | C | G | Heterozygous |
| NC_037642.1 | 3633435 | SNV | 1 | T | C | Heterozygous |

|             |         |     |   |   |   |              |
|-------------|---------|-----|---|---|---|--------------|
| NC_037642.1 | 3633564 | SNV | 1 | C | T | Heterozygous |
| NC_037642.1 | 3634489 | SNV | 1 | C | T | Heterozygous |
| NC_037642.1 | 3635196 | SNV | 1 | T | C | Homozygous   |
| NC_037642.1 | 3635267 | SNV | 1 | T | C | Homozygous   |
| NC_037642.1 | 3635277 | SNV | 1 | T | A | Heterozygous |
| NC_037642.1 | 3637079 | SNV | 1 | T | C | Homozygous   |
| NC_037642.1 | 3637667 | SNV | 1 | G | A | Heterozygous |
| NC_037642.1 | 3637953 | SNV | 1 | A | G | Homozygous   |
| NC_037642.1 | 3637972 | SNV | 1 | A | G | Heterozygous |
| NC_037642.1 | 3642054 | SNV | 1 | T | A | Homozygous   |
| NC_037642.1 | 3642075 | SNV | 1 | G | A | Heterozygous |
| NC_037642.1 | 3642082 | SNV | 1 | T | A | Homozygous   |
| NC_037642.1 | 3642094 | SNV | 1 | G | T | Homozygous   |
| NC_037642.1 | 3647387 | SNV | 1 | T | C | Homozygous   |
| NC_037642.1 | 3787498 | SNV | 1 | T | G | Heterozygous |
| NC_037642.1 | 3787506 | SNV | 1 | G | A | Heterozygous |
| NC_037642.1 | 3787549 | SNV | 1 | A | T | Heterozygous |
| NC_037642.1 | 3787554 | SNV | 1 | T | C | Heterozygous |
| NC_037642.1 | 3787566 | SNV | 1 | T | C | Heterozygous |
| NC_037642.1 | 3787574 | SNV | 1 | G | C | Heterozygous |
| NC_037642.1 | 3787795 | SNV | 1 | C | G | Heterozygous |
| NC_037642.1 | 3787878 | SNV | 1 | T | C | Homozygous   |
| NC_037642.1 | 3795591 | SNV | 1 | A | T | Heterozygous |
| NC_037642.1 | 3799695 | SNV | 1 | A | G | Homozygous   |
| NC_037642.1 | 3800850 | SNV | 1 | T | C | Heterozygous |
| NC_037642.1 | 3800859 | SNV | 1 | C | G | Heterozygous |
| NC_037642.1 | 3801111 | SNV | 1 | T | C | Homozygous   |
| NC_037642.1 | 3801573 | SNV | 1 | T | C | Homozygous   |
| NC_037642.1 | 3802321 | SNV | 1 | C | T | Homozygous   |
| NC_037642.1 | 3806299 | SNV | 1 | C | T | Homozygous   |
| NC_037642.1 | 3806327 | SNV | 1 | A | G | Homozygous   |
| NC_037642.1 | 3806495 | SNV | 1 | C | T | Heterozygous |
| NC_037642.1 | 3806501 | SNV | 1 | T | C | Heterozygous |
| NC_037642.1 | 3806531 | SNV | 1 | T | C | Homozygous   |
| NC_037642.1 | 3815567 | SNV | 1 | T | C | Homozygous   |
| NC_037642.1 | 3815579 | SNV | 1 | C | G | Homozygous   |
| NC_037642.1 | 3817556 | SNV | 1 | A | T | Homozygous   |
| NC_037642.1 | 3817574 | SNV | 1 | C | T | Homozygous   |
| NC_037642.1 | 3817619 | SNV | 1 | T | C | Homozygous   |
| NC_037642.1 | 3817721 | SNV | 1 | C | T | Homozygous   |
| NC_037642.1 | 3817733 | SNV | 1 | C | T | Homozygous   |
| NC_037642.1 | 3817789 | SNV | 1 | G | A | Homozygous   |
| NC_037642.1 | 3817817 | SNV | 1 | C | T | Homozygous   |
| NC_037642.1 | 3817834 | SNV | 1 | A | T | Homozygous   |
| NC_037642.1 | 3817855 | SNV | 1 | A | G | Homozygous   |
| NC_037642.1 | 3817903 | SNV | 1 | C | T | Heterozygous |
| NC_037642.1 | 3832412 | SNV | 1 | C | T | Heterozygous |
| NC_037642.1 | 3855097 | SNV | 1 | A | G | Homozygous   |
| NC_037642.1 | 3855338 | SNV | 1 | A | G | Homozygous   |
| NC_037642.1 | 3855598 | SNV | 1 | G | A | Heterozygous |
| NC_037642.1 | 3859227 | SNV | 1 | A | T | Heterozygous |

|             |         |     |   |   |   |              |
|-------------|---------|-----|---|---|---|--------------|
| NC_037642.1 | 3859239 | SNV | 1 | A | G | Homozygous   |
| NC_037642.1 | 3861763 | SNV | 1 | T | C | Homozygous   |
| NC_037642.1 | 3886768 | SNV | 1 | G | T | Heterozygous |
| NC_037642.1 | 3886773 | SNV | 1 | A | G | Heterozygous |
| NC_037642.1 | 3886775 | SNV | 1 | C | T | Homozygous   |
| NC_037642.1 | 3889330 | SNV | 1 | A | T | Homozygous   |
| NC_037642.1 | 3889340 | SNV | 1 | T | A | Homozygous   |
| NC_037642.1 | 3889344 | SNV | 1 | A | T | Heterozygous |
| NC_037642.1 | 3889348 | SNV | 1 | A | T | Homozygous   |
| NC_037642.1 | 3889382 | SNV | 1 | C | A | Heterozygous |
| NC_037642.1 | 3902179 | SNV | 1 | A | T | Homozygous   |
| NC_037642.1 | 3902196 | SNV | 1 | G | T | Homozygous   |
| NC_037642.1 | 3902199 | SNV | 1 | A | G | Homozygous   |
| NC_037642.1 | 3902202 | SNV | 1 | T | G | Homozygous   |
| NC_037642.1 | 3902204 | SNV | 1 | T | A | Homozygous   |
| NC_037642.1 | 3902208 | SNV | 1 | A | T | Homozygous   |
| NC_037642.1 | 3905545 | SNV | 1 | C | T | Heterozygous |
| NC_037642.1 | 3905669 | SNV | 1 | C | T | Homozygous   |
| NC_037642.1 | 3905756 | SNV | 1 | C | T | Heterozygous |
| NC_037642.1 | 3905775 | SNV | 1 | C | T | Heterozygous |
| NC_037642.1 | 3905803 | SNV | 1 | C | T | Homozygous   |
| NC_037642.1 | 3905959 | SNV | 1 | G | C | Heterozygous |
| NC_037642.1 | 3906060 | SNV | 1 | A | G | Homozygous   |
| NC_037642.1 | 3906282 | SNV | 1 | G | A | Homozygous   |
| NC_037642.1 | 3906319 | SNV | 1 | C | T | Homozygous   |
| NC_037642.1 | 3947806 | SNV | 1 | C | T | Heterozygous |
| NC_037642.1 | 3947887 | SNV | 1 | G | C | Homozygous   |
| NC_037642.1 | 3950082 | SNV | 1 | T | C | Homozygous   |
| NC_037642.1 | 3950197 | SNV | 1 | C | T | Heterozygous |
| NC_037642.1 | 3950211 | SNV | 1 | G | A | Heterozygous |
| NC_037642.1 | 3951704 | SNV | 1 | C | T | Homozygous   |
| NC_037642.1 | 4170183 | SNV | 1 | T | C | Homozygous   |
| NC_037642.1 | 4170438 | SNV | 1 | C | T | Heterozygous |
| NC_037642.1 | 4170451 | SNV | 1 | T | G | Homozygous   |
| NC_037642.1 | 4170595 | SNV | 1 | A | G | Heterozygous |
| NC_037642.1 | 4170810 | SNV | 1 | T | C | Heterozygous |
| NC_037642.1 | 4171106 | SNV | 1 | T | A | Heterozygous |
| NC_037642.1 | 4171113 | SNV | 1 | A | T | Heterozygous |
| NC_037642.1 | 4171116 | SNV | 1 | A | C | Heterozygous |
| NC_037642.1 | 4171126 | SNV | 1 | A | T | Heterozygous |
| NC_037642.1 | 4171128 | SNV | 1 | T | G | Heterozygous |
| NC_037642.1 | 4171138 | SNV | 1 | C | A | Homozygous   |
| NC_037642.1 | 4171382 | SNV | 1 | G | A | Heterozygous |
| NC_037642.1 | 4171480 | SNV | 1 | T | C | Homozygous   |
| NC_037642.1 | 4171551 | SNV | 1 | C | T | Heterozygous |
| NC_037642.1 | 4171642 | SNV | 1 | T | C | Homozygous   |
| NC_037642.1 | 4172743 | SNV | 1 | C | T | Heterozygous |
| NC_037642.1 | 4172783 | SNV | 1 | A | T | Heterozygous |
| NC_037642.1 | 4204882 | SNV | 1 | A | T | Heterozygous |
| NC_037642.1 | 4204889 | SNV | 1 | G | A | Homozygous   |
| NC_037642.1 | 4204913 | SNV | 1 | A | G | Homozygous   |

|             |         |     |   |   |   |              |
|-------------|---------|-----|---|---|---|--------------|
| NC_037642.1 | 4205413 | SNV | 1 | T | A | Homozygous   |
| NC_037642.1 | 4218727 | SNV | 1 | A | G | Homozygous   |
| NC_037642.1 | 4218988 | SNV | 1 | A | G | Homozygous   |
| NC_037642.1 | 4219157 | SNV | 1 | A | G | Homozygous   |
| NC_037642.1 | 4219324 | SNV | 1 | A | G | Homozygous   |
| NC_037642.1 | 4219347 | SNV | 1 | T | C | Homozygous   |
| NC_037642.1 | 4219425 | SNV | 1 | G | A | Homozygous   |
| NC_037642.1 | 4219438 | SNV | 1 | C | T | Homozygous   |
| NC_037642.1 | 4219536 | SNV | 1 | G | A | Homozygous   |
| NC_037642.1 | 4227041 | SNV | 1 | A | T | Homozygous   |
| NC_037642.1 | 4227056 | SNV | 1 | T | G | Homozygous   |
| NC_037642.1 | 4227063 | SNV | 1 | T | C | Homozygous   |
| NC_037642.1 | 4227068 | SNV | 1 | T | G | Homozygous   |
| NC_037642.1 | 4227072 | SNV | 1 | A | C | Homozygous   |
| NC_037642.1 | 4292963 | SNV | 1 | G | A | Homozygous   |
| NC_037642.1 | 4294422 | SNV | 1 | T | C | Homozygous   |
| NC_037642.1 | 4333737 | SNV | 1 | C | T | Heterozygous |
| NC_037642.1 | 4333748 | SNV | 1 | C | T | Heterozygous |
| NC_037642.1 | 4333751 | SNV | 1 | A | C | Homozygous   |
| NC_037642.1 | 4333804 | SNV | 1 | G | T | Homozygous   |
| NC_037642.1 | 4333817 | SNV | 1 | A | C | Heterozygous |
| NC_037642.1 | 4333835 | SNV | 1 | T | C | Heterozygous |
| NC_037642.1 | 4339240 | SNV | 1 | G | T | Heterozygous |
| NC_037642.1 | 4355234 | SNV | 1 | C | A | Homozygous   |
| NC_037642.1 | 4355239 | SNV | 1 | T | A | Homozygous   |
| NC_037642.1 | 4355246 | SNV | 1 | G | A | Homozygous   |
| NC_037642.1 | 4363576 | SNV | 1 | C | A | Homozygous   |
| NC_037642.1 | 4364239 | SNV | 1 | C | T | Homozygous   |
| NC_037642.1 | 4364367 | SNV | 1 | C | T | Heterozygous |
| NC_037642.1 | 4364378 | SNV | 1 | G | A | Heterozygous |
| NC_037642.1 | 4364423 | SNV | 1 | G | A | Homozygous   |
| NC_037642.1 | 4366580 | SNV | 1 | T | C | Homozygous   |
| NC_037642.1 | 4366893 | SNV | 1 | A | G | Homozygous   |
| NC_037642.1 | 4371689 | SNV | 1 | T | A | Heterozygous |
| NC_037642.1 | 4371882 | SNV | 1 | C | A | Heterozygous |
| NC_037642.1 | 4372116 | SNV | 1 | A | G | Heterozygous |
| NC_037642.1 | 4372825 | SNV | 1 | A | G | Heterozygous |
| NC_037642.1 | 4372831 | SNV | 1 | T | C | Heterozygous |
| NC_037642.1 | 4372957 | SNV | 1 | C | G | Homozygous   |
| NC_037642.1 | 4373204 | SNV | 1 | A | G | Homozygous   |
| NC_037642.1 | 4373210 | SNV | 1 | C | T | Homozygous   |
| NC_037642.1 | 4376233 | SNV | 1 | A | G | Homozygous   |
| NC_037642.1 | 4376274 | SNV | 1 | G | T | Homozygous   |
| NC_037642.1 | 4376283 | SNV | 1 | T | C | Homozygous   |
| NC_037642.1 | 4376286 | SNV | 1 | T | C | Homozygous   |
| NC_037642.1 | 4378334 | SNV | 1 | T | C | Heterozygous |
| NC_037642.1 | 4378440 | SNV | 1 | A | G | Homozygous   |
| NC_037642.1 | 4378476 | SNV | 1 | A | G | Homozygous   |
| NC_037642.1 | 4381492 | SNV | 1 | T | C | Homozygous   |
| NC_037642.1 | 4381498 | SNV | 1 | G | A | Heterozygous |
| NC_037642.1 | 4381661 | SNV | 1 | T | C | Heterozygous |

|             |         |     |   |   |   |              |
|-------------|---------|-----|---|---|---|--------------|
| NC_037642.1 | 4381673 | SNV | 1 | A | G | Heterozygous |
| NC_037642.1 | 4381676 | SNV | 1 | A | G | Heterozygous |
| NC_037642.1 | 4381700 | SNV | 1 | A | G | Heterozygous |
| NC_037642.1 | 4381705 | SNV | 1 | C | A | Heterozygous |
| NC_037642.1 | 4381740 | SNV | 1 | G | T | Homozygous   |
| NC_037642.1 | 4381742 | SNV | 1 | G | A | Homozygous   |
| NC_037642.1 | 4381771 | SNV | 1 | T | C | Homozygous   |
| NC_037642.1 | 4381774 | SNV | 1 | A | G | Heterozygous |
| NC_037642.1 | 4381823 | SNV | 1 | C | T | Homozygous   |
| NC_037642.1 | 4381889 | SNV | 1 | C | T | Heterozygous |
| NC_037642.1 | 4381975 | SNV | 1 | C | T | Homozygous   |
| NC_037642.1 | 4382007 | SNV | 1 | C | T | Homozygous   |
| NC_037642.1 | 4382234 | SNV | 1 | G | A | Heterozygous |
| NC_037642.1 | 4382272 | SNV | 1 | T | C | Homozygous   |
| NC_037642.1 | 4382274 | SNV | 1 | A | G | Homozygous   |
| NC_037642.1 | 4382289 | SNV | 1 | C | T | Heterozygous |
| NC_037642.1 | 4382357 | SNV | 1 | A | G | Homozygous   |
| NC_037642.1 | 4383057 | SNV | 1 | A | G | Homozygous   |
| NC_037642.1 | 4383068 | SNV | 1 | C | T | Homozygous   |
| NC_037642.1 | 4384716 | SNV | 1 | T | C | Homozygous   |
| NC_037642.1 | 4384720 | SNV | 1 | G | A | Heterozygous |
| NC_037642.1 | 4384749 | SNV | 1 | C | T | Heterozygous |
| NC_037642.1 | 4384798 | SNV | 1 | T | C | Heterozygous |
| NC_037642.1 | 4384804 | SNV | 1 | T | C | Homozygous   |
| NC_037642.1 | 4385082 | SNV | 1 | T | C | Homozygous   |
| NC_037642.1 | 4385184 | SNV | 1 | C | T | Heterozygous |
| NC_037642.1 | 4385495 | SNV | 1 | A | T | Heterozygous |
| NC_037642.1 | 4385953 | SNV | 1 | G | A | Heterozygous |
| NC_037642.1 | 4385957 | SNV | 1 | A | G | Homozygous   |
| NC_037642.1 | 4385973 | SNV | 1 | C | G | Heterozygous |
| NC_037642.1 | 4386055 | SNV | 1 | G | A | Homozygous   |
| NC_037642.1 | 4388919 | SNV | 1 | G | C | Heterozygous |
| NC_037642.1 | 4388924 | SNV | 1 | G | C | Heterozygous |
| NC_037642.1 | 4389051 | SNV | 1 | C | T | Heterozygous |
| NC_037642.1 | 4389820 | SNV | 1 | T | C | Heterozygous |
| NC_037642.1 | 4389849 | SNV | 1 | A | G | Heterozygous |
| NC_037642.1 | 4389899 | SNV | 1 | A | G | Heterozygous |
| NC_037642.1 | 4389974 | SNV | 1 | C | T | Heterozygous |
| NC_037642.1 | 4390076 | SNV | 1 | A | G | Heterozygous |
| NC_037642.1 | 4390108 | SNV | 1 | T | C | Homozygous   |
| NC_037642.1 | 4390115 | SNV | 1 | A | G | Homozygous   |
| NC_037642.1 | 4390128 | SNV | 1 | A | G | Homozygous   |
| NC_037642.1 | 4390142 | SNV | 1 | A | G | Homozygous   |
| NC_037642.1 | 4390374 | SNV | 1 | G | A | Homozygous   |
| NC_037642.1 | 4390376 | SNV | 1 | G | A | Heterozygous |
| NC_037642.1 | 4390568 | SNV | 1 | G | A | Homozygous   |
| NC_037642.1 | 4391812 | SNV | 1 | A | G | Homozygous   |
| NC_037642.1 | 4391820 | SNV | 1 | G | A | Homozygous   |
| NC_037642.1 | 4393221 | SNV | 1 | C | T | Heterozygous |
| NC_037642.1 | 4393375 | SNV | 1 | A | G | Heterozygous |
| NC_037642.1 | 4393436 | SNV | 1 | A | G | Homozygous   |

|             |         |     |   |   |   |              |
|-------------|---------|-----|---|---|---|--------------|
| NC_037642.1 | 4393667 | SNV | 1 | C | T | Homozygous   |
| NC_037642.1 | 4393738 | SNV | 1 | G | A | Homozygous   |
| NC_037642.1 | 4393765 | SNV | 1 | G | A | Homozygous   |
| NC_037642.1 | 4393802 | SNV | 1 | A | G | Heterozygous |
| NC_037642.1 | 4393820 | SNV | 1 | G | A | Heterozygous |
| NC_037642.1 | 4394003 | SNV | 1 | C | T | Homozygous   |
| NC_037642.1 | 4394041 | SNV | 1 | C | T | Heterozygous |
| NC_037642.1 | 4394823 | SNV | 1 | C | T | Heterozygous |
| NC_037642.1 | 4395140 | SNV | 1 | T | C | Homozygous   |
| NC_037642.1 | 4395151 | SNV | 1 | A | G | Heterozygous |
| NC_037642.1 | 4395184 | SNV | 1 | G | A | Heterozygous |
| NC_037642.1 | 4395191 | SNV | 1 | T | A | Homozygous   |
| NC_037642.1 | 4395196 | SNV | 1 | T | A | Homozygous   |
| NC_037642.1 | 4395539 | SNV | 1 | C | T | Heterozygous |
| NC_037642.1 | 4395547 | SNV | 1 | G | A | Heterozygous |
| NC_037642.1 | 4395854 | SNV | 1 | T | C | Homozygous   |
| NC_037642.1 | 4395886 | SNV | 1 | T | C | Homozygous   |
| NC_037642.1 | 4395897 | SNV | 1 | G | A | Heterozygous |
| NC_037642.1 | 4395947 | SNV | 1 | G | A | Homozygous   |
| NC_037642.1 | 4396272 | SNV | 1 | T | C | Homozygous   |
| NC_037642.1 | 4397630 | SNV | 1 | G | A | Homozygous   |
| NC_037642.1 | 4397722 | SNV | 1 | G | A | Homozygous   |
| NC_037642.1 | 4398226 | SNV | 1 | C | G | Homozygous   |
| NC_037642.1 | 4409109 | SNV | 1 | A | G | Heterozygous |
| NC_037642.1 | 4409130 | SNV | 1 | C | G | Heterozygous |
| NC_037642.1 | 4409191 | SNV | 1 | C | G | Heterozygous |
| NC_037642.1 | 4409288 | SNV | 1 | G | T | Heterozygous |
| NC_037642.1 | 4409297 | SNV | 1 | G | T | Heterozygous |
| NC_037642.1 | 4417275 | SNV | 1 | C | T | Homozygous   |
| NC_037642.1 | 4417279 | SNV | 1 | C | T | Homozygous   |
| NC_037642.1 | 4417290 | SNV | 1 | C | T | Homozygous   |
| NC_037642.1 | 4417352 | SNV | 1 | A | G | Homozygous   |
| NC_037642.1 | 4417467 | SNV | 1 | A | G | Homozygous   |
| NC_037642.1 | 4417474 | SNV | 1 | G | C | Homozygous   |
| NC_037642.1 | 4417476 | SNV | 1 | A | G | Homozygous   |
| NC_037642.1 | 4417479 | SNV | 1 | A | G | Homozygous   |
| NC_037642.1 | 4417493 | SNV | 1 | A | T | Homozygous   |
| NC_037642.1 | 4417511 | SNV | 1 | A | T | Heterozygous |
| NC_037642.1 | 4418054 | SNV | 1 | G | A | Heterozygous |
| NC_037642.1 | 4426056 | SNV | 1 | G | A | Heterozygous |
| NC_037642.1 | 4426148 | SNV | 1 | A | G | Homozygous   |
| NC_037642.1 | 4426153 | SNV | 1 | A | G | Homozygous   |
| NC_037642.1 | 4426204 | SNV | 1 | G | C | Homozygous   |
| NC_037642.1 | 4427071 | SNV | 1 | C | T | Heterozygous |
| NC_037642.1 | 4427086 | SNV | 1 | C | T | Homozygous   |
| NC_037642.1 | 4427147 | SNV | 1 | C | G | Heterozygous |
| NC_037642.1 | 4427233 | SNV | 1 | C | G | Heterozygous |
| NC_037642.1 | 4427492 | SNV | 1 | T | C | Homozygous   |
| NC_037642.1 | 4427697 | SNV | 1 | A | G | Homozygous   |
| NC_037642.1 | 4427837 | SNV | 1 | A | G | Homozygous   |
| NC_037642.1 | 4428013 | SNV | 1 | T | C | Homozygous   |

|             |         |     |   |   |   |              |
|-------------|---------|-----|---|---|---|--------------|
| NC_037642.1 | 4434573 | SNV | 1 | G | A | Heterozygous |
| NC_037642.1 | 4435828 | SNV | 1 | G | A | Heterozygous |
| NC_037642.1 | 4436411 | SNV | 1 | A | G | Homozygous   |
| NC_037642.1 | 4452027 | SNV | 1 | C | T | Homozygous   |
| NC_037642.1 | 4452089 | SNV | 1 | T | C | Homozygous   |
| NC_037642.1 | 4455835 | SNV | 1 | G | C | Homozygous   |
| NC_037642.1 | 4455860 | SNV | 1 | T | G | Homozygous   |
| NC_037642.1 | 4456132 | SNV | 1 | C | T | Heterozygous |
| NC_037642.1 | 4456149 | SNV | 1 | C | A | Heterozygous |
| NC_037642.1 | 4464155 | SNV | 1 | G | A | Heterozygous |
| NC_037642.1 | 4464206 | SNV | 1 | C | T | Homozygous   |
| NC_037642.1 | 4464214 | SNV | 1 | T | C | Homozygous   |
| NC_037642.1 | 4464223 | SNV | 1 | A | G | Heterozygous |
| NC_037642.1 | 4464239 | SNV | 1 | T | C | Heterozygous |
| NC_037642.1 | 4464382 | SNV | 1 | G | A | Heterozygous |
| NC_037642.1 | 4464405 | SNV | 1 | A | G | Homozygous   |
| NC_037642.1 | 4464439 | SNV | 1 | C | T | Homozygous   |
| NC_037642.1 | 4464443 | SNV | 1 | T | C | Homozygous   |
| NC_037642.1 | 4464479 | SNV | 1 | G | T | Heterozygous |
| NC_037642.1 | 4464536 | SNV | 1 | C | T | Heterozygous |
| NC_037642.1 | 4464720 | SNV | 1 | T | C | Homozygous   |
| NC_037642.1 | 4464834 | SNV | 1 | A | G | Homozygous   |
| NC_037642.1 | 4465410 | SNV | 1 | G | A | Homozygous   |
| NC_037642.1 | 4470688 | SNV | 1 | C | T | Homozygous   |
| NC_037642.1 | 4470777 | SNV | 1 | C | G | Homozygous   |
| NC_037642.1 | 4487330 | SNV | 1 | C | T | Heterozygous |
| NC_037642.1 | 4487360 | SNV | 1 | C | G | Heterozygous |
| NC_037642.1 | 4487406 | SNV | 1 | G | A | Heterozygous |
| NC_037642.1 | 4487495 | SNV | 1 | A | G | Homozygous   |
| NC_037642.1 | 4487538 | SNV | 1 | C | T | Heterozygous |
| NC_037642.1 | 4487580 | SNV | 1 | T | C | Heterozygous |
| NC_037642.1 | 4489610 | SNV | 1 | C | T | Heterozygous |
| NC_037642.1 | 4489620 | SNV | 1 | A | G | Homozygous   |
| NC_037642.1 | 4489639 | SNV | 1 | A | G | Homozygous   |
| NC_037642.1 | 4495799 | SNV | 1 | A | G | Heterozygous |
| NC_037642.1 | 4505617 | SNV | 1 | T | C | Homozygous   |
| NC_037642.1 | 4505813 | SNV | 1 | A | G | Heterozygous |
| NC_037642.1 | 4505816 | SNV | 1 | G | A | Heterozygous |
| NC_037642.1 | 4505832 | SNV | 1 | G | A | Homozygous   |
| NC_037642.1 | 4506062 | SNV | 1 | G | A | Homozygous   |
| NC_037642.1 | 4506074 | SNV | 1 | A | G | Homozygous   |
| NC_037642.1 | 4506571 | SNV | 1 | T | C | Homozygous   |
| NC_037642.1 | 4506667 | SNV | 1 | C | T | Homozygous   |
| NC_037642.1 | 4506856 | SNV | 1 | A | G | Homozygous   |
| NC_037642.1 | 4518667 | SNV | 1 | C | T | Homozygous   |
| NC_037642.1 | 4521543 | SNV | 1 | T | C | Homozygous   |
| NC_037642.1 | 4527434 | SNV | 1 | C | T | Heterozygous |
| NC_037642.1 | 4527489 | SNV | 1 | T | C | Homozygous   |
| NC_037642.1 | 4527508 | SNV | 1 | G | T | Homozygous   |
| NC_037642.1 | 4527510 | SNV | 1 | G | C | Homozygous   |
| NC_037642.1 | 4527519 | SNV | 1 | G | C | Homozygous   |

|             |         |     |   |   |   |              |
|-------------|---------|-----|---|---|---|--------------|
| NC_037642.1 | 4527521 | SNV | 1 | C | T | Homozygous   |
| NC_037642.1 | 4527536 | SNV | 1 | C | G | Homozygous   |
| NC_037642.1 | 4527551 | SNV | 1 | T | C | Homozygous   |
| NC_037642.1 | 4530636 | SNV | 1 | A | G | Homozygous   |
| NC_037642.1 | 4532115 | SNV | 1 | G | A | Heterozygous |
| NC_037642.1 | 4532236 | SNV | 1 | C | T | Homozygous   |
| NC_037642.1 | 4533836 | SNV | 1 | G | C | Heterozygous |
| NC_037642.1 | 4533844 | SNV | 1 | G | A | Heterozygous |
| NC_037642.1 | 4533880 | SNV | 1 | G | A | Heterozygous |
| NC_037642.1 | 4533942 | SNV | 1 | C | G | Homozygous   |
| NC_037642.1 | 4533954 | SNV | 1 | A | T | Homozygous   |
| NC_037642.1 | 4533956 | SNV | 1 | C | T | Homozygous   |
| NC_037642.1 | 4533967 | SNV | 1 | G | T | Heterozygous |
| NC_037642.1 | 4537423 | SNV | 1 | A | G | Homozygous   |
| NC_037642.1 | 4537457 | SNV | 1 | A | G | Homozygous   |
| NC_037642.1 | 4577402 | SNV | 1 | A | G | Homozygous   |
| NC_037642.1 | 4577479 | SNV | 1 | T | C | Heterozygous |
| NC_037642.1 | 4577604 | SNV | 1 | A | G | Homozygous   |
| NC_037642.1 | 4577654 | SNV | 1 | A | G | Homozygous   |
| NC_037642.1 | 4598055 | SNV | 1 | T | C | Homozygous   |
| NC_037642.1 | 4598172 | SNV | 1 | C | T | Homozygous   |
| NC_037642.1 | 4598181 | SNV | 1 | T | G | Heterozygous |
| NC_037642.1 | 4600419 | SNV | 1 | G | T | Heterozygous |
| NC_037642.1 | 4611193 | SNV | 1 | C | T | Heterozygous |
| NC_037642.1 | 4611237 | SNV | 1 | T | A | Homozygous   |
| NC_037642.1 | 4626155 | SNV | 1 | T | C | Homozygous   |
| NC_037642.1 | 4626159 | SNV | 1 | T | G | Heterozygous |
| NC_037642.1 | 4632650 | SNV | 1 | C | T | Homozygous   |
| NC_037642.1 | 4647306 | SNV | 1 | A | T | Homozygous   |
| NC_037642.1 | 4647311 | SNV | 1 | A | T | Homozygous   |
| NC_037642.1 | 4647327 | SNV | 1 | C | A | Homozygous   |
| NC_037642.1 | 4647333 | SNV | 1 | C | A | Homozygous   |
| NC_037642.1 | 4647749 | SNV | 1 | C | T | Heterozygous |
| NC_037642.1 | 4647755 | SNV | 1 | T | C | Homozygous   |
| NC_037642.1 | 4647819 | SNV | 1 | A | G | Heterozygous |
| NC_037642.1 | 4647823 | SNV | 1 | G | C | Heterozygous |
| NC_037642.1 | 4648335 | SNV | 1 | C | T | Heterozygous |
| NC_037642.1 | 4648369 | SNV | 1 | T | C | Homozygous   |
| NC_037642.1 | 4648445 | SNV | 1 | G | A | Heterozygous |
| NC_037642.1 | 4648678 | SNV | 1 | G | A | Homozygous   |
| NC_037642.1 | 4659921 | SNV | 1 | C | T | Heterozygous |
| NC_037642.1 | 4659933 | SNV | 1 | T | C | Homozygous   |
| NC_037642.1 | 4659950 | SNV | 1 | T | C | Homozygous   |
| NC_037642.1 | 4660014 | SNV | 1 | T | C | Homozygous   |
| NC_037642.1 | 4660855 | SNV | 1 | C | T | Heterozygous |
| NC_037642.1 | 4660976 | SNV | 1 | T | C | Heterozygous |
| NC_037642.1 | 4661990 | SNV | 1 | C | T | Heterozygous |
| NC_037642.1 | 4662191 | SNV | 1 | T | C | Homozygous   |
| NC_037642.1 | 4662346 | SNV | 1 | C | T | Homozygous   |
| NC_037642.1 | 4665021 | SNV | 1 | C | T | Heterozygous |
| NC_037642.1 | 4674729 | SNV | 1 | C | T | Heterozygous |



|             |         |     |   |   |   |              |
|-------------|---------|-----|---|---|---|--------------|
| NC_037642.1 | 4674776 | SNV | 1 | A | G | Homozygous   |
| NC_037642.1 | 4681181 | SNV | 1 | G | C | Homozygous   |
| NC_037642.1 | 4681191 | SNV | 1 | T | C | Homozygous   |
| NC_037642.1 | 4681224 | SNV | 1 | A | G | Homozygous   |
| NC_037642.1 | 4697294 | SNV | 1 | A | G | Homozygous   |
| NC_037642.1 | 4697364 | SNV | 1 | C | T | Homozygous   |
| NC_037642.1 | 4697420 | SNV | 1 | C | G | Heterozygous |
| NC_037642.1 | 4697435 | SNV | 1 | T | C | Homozygous   |
| NC_037642.1 | 4697521 | SNV | 1 | A | G | Homozygous   |
| NC_037642.1 | 4697610 | SNV | 1 | A | G | Homozygous   |
| NC_037642.1 | 4697616 | SNV | 1 | G | A | Homozygous   |
| NC_037642.1 | 4697623 | SNV | 1 | C | T | Homozygous   |
| NC_037642.1 | 4697805 | SNV | 1 | C | T | Homozygous   |
| NC_037642.1 | 4707823 | SNV | 1 | A | G | Heterozygous |
| NC_037642.1 | 4707885 | SNV | 1 | C | T | Heterozygous |
| NC_037642.1 | 4708463 | SNV | 1 | A | G | Heterozygous |
| NC_037642.1 | 4708876 | SNV | 1 | C | A | Homozygous   |
| NC_037642.1 | 4709000 | SNV | 1 | T | C | Homozygous   |
| NC_037642.1 | 4709128 | SNV | 1 | A | G | Homozygous   |
| NC_037642.1 | 4711539 | SNV | 1 | G | A | Homozygous   |
| NC_037642.1 | 4711725 | SNV | 1 | T | G | Heterozygous |
| NC_037642.1 | 4711727 | SNV | 1 | A | T | Heterozygous |
| NC_037642.1 | 4711730 | SNV | 1 | C | A | Heterozygous |
| NC_037642.1 | 4711734 | SNV | 1 | A | C | Heterozygous |
| NC_037642.1 | 4711956 | SNV | 1 | T | C | Homozygous   |
| NC_037642.1 | 4712021 | SNV | 1 | G | A | Homozygous   |
| NC_037642.1 | 4712098 | SNV | 1 | C | T | Heterozygous |
| NC_037642.1 | 4712101 | SNV | 1 | T | C | Homozygous   |
| NC_037642.1 | 4712244 | SNV | 1 | G | A | Homozygous   |
| NC_037642.1 | 4712769 | SNV | 1 | C | G | Homozygous   |
| NC_037642.1 | 4712902 | SNV | 1 | G | T | Homozygous   |
| NC_037642.1 | 4713067 | SNV | 1 | T | C | Homozygous   |
| NC_037642.1 | 4713909 | SNV | 1 | G | A | Homozygous   |
| NC_037642.1 | 4714786 | SNV | 1 | C | T | Homozygous   |
| NC_037642.1 | 4715498 | SNV | 1 | G | A | Heterozygous |
| NC_037642.1 | 4715795 | SNV | 1 | C | T | Homozygous   |
| NC_037642.1 | 4716995 | SNV | 1 | G | A | Homozygous   |
| NC_037642.1 | 4716998 | SNV | 1 | T | G | Homozygous   |
| NC_037642.1 | 4717028 | SNV | 1 | A | G | Homozygous   |
| NC_037642.1 | 4717095 | SNV | 1 | T | A | Heterozygous |
| NC_037642.1 | 4717098 | SNV | 1 | A | G | Heterozygous |
| NC_037642.1 | 4717109 | SNV | 1 | T | C | Heterozygous |
| NC_037642.1 | 4721703 | SNV | 1 | T | C | Homozygous   |
| NC_037642.1 | 4724717 | SNV | 1 | C | T | Heterozygous |
| NC_037642.1 | 4724864 | SNV | 1 | G | T | Homozygous   |
| NC_037642.1 | 4725191 | SNV | 1 | C | A | Heterozygous |
| NC_037642.1 | 4725306 | SNV | 1 | T | C | Heterozygous |
| NC_037642.1 | 4725463 | SNV | 1 | T | C | Homozygous   |
| NC_037642.1 | 4725934 | SNV | 1 | G | C | Homozygous   |
| NC_037642.1 | 4726217 | SNV | 1 | A | T | Homozygous   |
| NC_037642.1 | 4726249 | SNV | 1 | A | G | Homozygous   |

|             |         |     |   |   |   |              |
|-------------|---------|-----|---|---|---|--------------|
| NC_037642.1 | 4726255 | SNV | 1 | A | G | Homozygous   |
| NC_037642.1 | 4726262 | SNV | 1 | G | A | Homozygous   |
| NC_037642.1 | 4727945 | SNV | 1 | T | C | Homozygous   |
| NC_037642.1 | 4730598 | SNV | 1 | T | C | Homozygous   |
| NC_037642.1 | 4733741 | SNV | 1 | A | G | Homozygous   |
| NC_037642.1 | 4733826 | SNV | 1 | C | T | Homozygous   |
| NC_037642.1 | 4733843 | SNV | 1 | T | G | Homozygous   |
| NC_037642.1 | 4733848 | SNV | 1 | T | A | Homozygous   |
| NC_037642.1 | 4733977 | SNV | 1 | T | A | Homozygous   |
| NC_037642.1 | 4734116 | SNV | 1 | T | A | Homozygous   |
| NC_037642.1 | 4734122 | SNV | 1 | G | A | Homozygous   |
| NC_037642.1 | 4734124 | SNV | 1 | A | T | Homozygous   |
| NC_037642.1 | 4734147 | SNV | 1 | A | C | Homozygous   |
| NC_037642.1 | 4734746 | SNV | 1 | T | A | Homozygous   |
| NC_037642.1 | 4742270 | SNV | 1 | T | G | Heterozygous |
| NC_037642.1 | 4742273 | SNV | 1 | C | T | Heterozygous |
| NC_037642.1 | 4742275 | SNV | 1 | T | G | Heterozygous |
| NC_037642.1 | 4742306 | SNV | 1 | C | T | Homozygous   |
| NC_037642.1 | 4742311 | SNV | 1 | T | G | Heterozygous |
| NC_037642.1 | 4742451 | SNV | 1 | T | C | Heterozygous |
| NC_037642.1 | 4742455 | SNV | 1 | C | A | Heterozygous |
| NC_037642.1 | 4742462 | SNV | 1 | T | A | Heterozygous |
| NC_037642.1 | 4742465 | SNV | 1 | C | T | Heterozygous |
| NC_037642.1 | 4742467 | SNV | 1 | C | T | Heterozygous |
| NC_037642.1 | 4742478 | SNV | 1 | G | T | Homozygous   |
| NC_037642.1 | 4742818 | SNV | 1 | C | A | Homozygous   |
| NC_037642.1 | 4742821 | SNV | 1 | T | A | Homozygous   |
| NC_037642.1 | 4742824 | SNV | 1 | T | G | Homozygous   |
| NC_037642.1 | 4742828 | SNV | 1 | T | A | Homozygous   |
| NC_037642.1 | 4742834 | SNV | 1 | T | C | Homozygous   |
| NC_037642.1 | 4742836 | SNV | 1 | T | A | Homozygous   |
| NC_037642.1 | 4743102 | SNV | 1 | A | T | Homozygous   |
| NC_037642.1 | 4743104 | SNV | 1 | A | T | Homozygous   |
| NC_037642.1 | 4743106 | SNV | 1 | A | T | Homozygous   |
| NC_037642.1 | 4743113 | SNV | 1 | G | A | Homozygous   |
| NC_037642.1 | 4749763 | SNV | 1 | T | C | Homozygous   |
| NC_037642.1 | 4750895 | SNV | 1 | A | C | Heterozygous |
| NC_037642.1 | 4750896 | SNV | 1 | A | T | Heterozygous |
| NC_037642.1 | 4750926 | SNV | 1 | T | C | Homozygous   |
| NC_037642.1 | 4750934 | SNV | 1 | A | T | Homozygous   |
| NC_037642.1 | 4750937 | SNV | 1 | A | C | Homozygous   |
| NC_037642.1 | 4750940 | SNV | 1 | A | T | Homozygous   |
| NC_037642.1 | 4750959 | SNV | 1 | A | T | Homozygous   |
| NC_037642.1 | 4751098 | SNV | 1 | G | C | Homozygous   |
| NC_037642.1 | 4751731 | SNV | 1 | C | T | Heterozygous |
| NC_037642.1 | 4752182 | SNV | 1 | T | A | Heterozygous |
| NC_037642.1 | 4752898 | SNV | 1 | A | G | Homozygous   |
| NC_037642.1 | 4757720 | SNV | 1 | G | T | Homozygous   |
| NC_037642.1 | 4757725 | SNV | 1 | G | A | Heterozygous |
| NC_037642.1 | 4757727 | SNV | 1 | T | A | Heterozygous |
| NC_037642.1 | 4757784 | SNV | 1 | T | A | Heterozygous |

|             |         |     |   |   |   |              |
|-------------|---------|-----|---|---|---|--------------|
| NC_037642.1 | 4758319 | SNV | 1 | A | G | Homozygous   |
| NC_037642.1 | 4758954 | SNV | 1 | A | G | Homozygous   |
| NC_037642.1 | 4759138 | SNV | 1 | G | A | Homozygous   |
| NC_037642.1 | 4759162 | SNV | 1 | G | A | Heterozygous |
| NC_037642.1 | 4759314 | SNV | 1 | T | C | Homozygous   |
| NC_037642.1 | 4760933 | SNV | 1 | T | C | Homozygous   |
| NC_037642.1 | 4760956 | SNV | 1 | T | C | Homozygous   |
| NC_037642.1 | 4760958 | SNV | 1 | C | G | Heterozygous |
| NC_037642.1 | 4761377 | SNV | 1 | C | T | Heterozygous |
| NC_037642.1 | 4761868 | SNV | 1 | A | C | Heterozygous |
| NC_037642.1 | 4761916 | SNV | 1 | T | C | Homozygous   |
| NC_037642.1 | 4762149 | SNV | 1 | A | G | Heterozygous |
| NC_037642.1 | 4763628 | SNV | 1 | C | T | Homozygous   |
| NC_037642.1 | 4763634 | SNV | 1 | A | T | Homozygous   |
| NC_037642.1 | 4763637 | SNV | 1 | A | G | Homozygous   |
| NC_037642.1 | 4763853 | SNV | 1 | G | A | Heterozygous |
| NC_037642.1 | 4778185 | SNV | 1 | A | T | Heterozygous |
| NC_037642.1 | 4778191 | SNV | 1 | G | T | Heterozygous |
| NC_037642.1 | 4778484 | SNV | 1 | T | G | Homozygous   |
| NC_037642.1 | 4778510 | SNV | 1 | T | C | Homozygous   |
| NC_037642.1 | 4778920 | SNV | 1 | G | A | Heterozygous |
| NC_037642.1 | 4778923 | SNV | 1 | G | A | Heterozygous |
| NC_037642.1 | 4779039 | SNV | 1 | C | G | Heterozygous |
| NC_037642.1 | 4780954 | SNV | 1 | A | T | Homozygous   |
| NC_037642.1 | 4780968 | SNV | 1 | A | T | Homozygous   |
| NC_037642.1 | 4780992 | SNV | 1 | C | T | Homozygous   |
| NC_037642.1 | 4793797 | SNV | 1 | A | G | Heterozygous |
| NC_037642.1 | 4793985 | SNV | 1 | G | C | Homozygous   |
| NC_037642.1 | 4793999 | SNV | 1 | T | C | Heterozygous |
| NC_037642.1 | 4794009 | SNV | 1 | C | T | Heterozygous |
| NC_037642.1 | 4794143 | SNV | 1 | T | C | Homozygous   |
| NC_037642.1 | 4804580 | SNV | 1 | G | A | Homozygous   |
| NC_037642.1 | 4805386 | SNV | 1 | G | A | Heterozygous |
| NC_037642.1 | 4826077 | SNV | 1 | A | G | Homozygous   |
| NC_037642.1 | 4826079 | SNV | 1 | G | A | Heterozygous |
| NC_037642.1 | 4826083 | SNV | 1 | C | G | Heterozygous |
| NC_037642.1 | 4826086 | SNV | 1 | A | T | Homozygous   |
| NC_037642.1 | 4826091 | SNV | 1 | G | C | Homozygous   |
| NC_037642.1 | 4826093 | SNV | 1 | T | G | Homozygous   |
| NC_037642.1 | 4826099 | SNV | 1 | G | T | Heterozygous |
| NC_037642.1 | 4826102 | SNV | 1 | A | G | Heterozygous |
| NC_037642.1 | 4826139 | SNV | 1 | C | G | Homozygous   |
| NC_037642.1 | 4826145 | SNV | 1 | A | C | Heterozygous |
| NC_037642.1 | 4826153 | SNV | 1 | G | C | Heterozygous |
| NC_037642.1 | 4826163 | SNV | 1 | C | G | Heterozygous |
| NC_037642.1 | 4837598 | SNV | 1 | G | A | Heterozygous |
| NC_037642.1 | 4843982 | SNV | 1 | A | G | Homozygous   |
| NC_037642.1 | 4852488 | SNV | 1 | C | T | Heterozygous |
| NC_037642.1 | 4852489 | SNV | 1 | G | A | Heterozygous |
| NC_037642.1 | 4852495 | SNV | 1 | G | A | Heterozygous |
| NC_037642.1 | 4887209 | SNV | 1 | A | G | Homozygous   |

|             |         |     |   |   |   |              |
|-------------|---------|-----|---|---|---|--------------|
| NC_037642.1 | 4887240 | SNV | 1 | A | G | Homozygous   |
| NC_037642.1 | 4930832 | SNV | 1 | T | C | Heterozygous |
| NC_037642.1 | 4930837 | SNV | 1 | A | T | Heterozygous |
| NC_037642.1 | 4930840 | SNV | 1 | T | C | Heterozygous |
| NC_037642.1 | 4931653 | SNV | 1 | A | G | Homozygous   |
| NC_037642.1 | 4934887 | SNV | 1 | G | A | Heterozygous |
| NC_037642.1 | 4955376 | SNV | 1 | T | A | Homozygous   |
| NC_037642.1 | 4955844 | SNV | 1 | C | A | Heterozygous |
| NC_037642.1 | 4957219 | SNV | 1 | C | T | Heterozygous |
| NC_037642.1 | 4958089 | SNV | 1 | G | A | Homozygous   |
| NC_037642.1 | 4958797 | SNV | 1 | C | T | Heterozygous |
| NC_037642.1 | 4959062 | SNV | 1 | T | A | Homozygous   |
| NC_037642.1 | 4959945 | SNV | 1 | T | C | Homozygous   |
| NC_037642.1 | 4960209 | SNV | 1 | A | G | Heterozygous |
| NC_037642.1 | 4960216 | SNV | 1 | G | A | Homozygous   |
| NC_037642.1 | 4960267 | SNV | 1 | A | G | Homozygous   |
| NC_037642.1 | 4960502 | SNV | 1 | A | T | Homozygous   |
| NC_037642.1 | 4960610 | SNV | 1 | C | T | Homozygous   |
| NC_037642.1 | 4960613 | SNV | 1 | T | C | Heterozygous |
| NC_037642.1 | 4960796 | SNV | 1 | G | T | Homozygous   |
| NC_037642.1 | 4960818 | SNV | 1 | C | T | Homozygous   |
| NC_037642.1 | 4960927 | SNV | 1 | A | G | Homozygous   |
| NC_037642.1 | 4960952 | SNV | 1 | A | G | Homozygous   |
| NC_037642.1 | 4961018 | SNV | 1 | G | C | Homozygous   |
| NC_037642.1 | 4962023 | SNV | 1 | T | C | Heterozygous |
| NC_037642.1 | 4962033 | SNV | 1 | A | G | Heterozygous |
| NC_037642.1 | 4962129 | SNV | 1 | C | T | Heterozygous |
| NC_037642.1 | 4962148 | SNV | 1 | C | G | Heterozygous |
| NC_037642.1 | 4962269 | SNV | 1 | T | C | Homozygous   |
| NC_037642.1 | 4962811 | SNV | 1 | A | G | Homozygous   |
| NC_037642.1 | 4962815 | SNV | 1 | G | C | Homozygous   |
| NC_037642.1 | 4962893 | SNV | 1 | T | A | Heterozygous |
| NC_037642.1 | 4964091 | SNV | 1 | A | G | Homozygous   |
| NC_037642.1 | 4970041 | SNV | 1 | A | G | Homozygous   |
| NC_037642.1 | 4970045 | SNV | 1 | T | C | Heterozygous |
| NC_037642.1 | 4970613 | SNV | 1 | A | G | Heterozygous |
| NC_037642.1 | 4973040 | SNV | 1 | T | C | Heterozygous |
| NC_037642.1 | 4973118 | SNV | 1 | G | A | Homozygous   |
| NC_037642.1 | 4974583 | SNV | 1 | C | T | Heterozygous |
| NC_037642.1 | 4974596 | SNV | 1 | A | G | Heterozygous |
| NC_037642.1 | 4974688 | SNV | 1 | T | A | Heterozygous |
| NC_037642.1 | 4974724 | SNV | 1 | T | C | Heterozygous |
| NC_037642.1 | 4974877 | SNV | 1 | A | G | Homozygous   |
| NC_037642.1 | 4977450 | SNV | 1 | A | G | Homozygous   |
| NC_037642.1 | 4977705 | SNV | 1 | T | C | Homozygous   |
| NC_037642.1 | 4978209 | SNV | 1 | A | G | Homozygous   |
| NC_037642.1 | 4978216 | SNV | 1 | A | G | Homozygous   |
| NC_037642.1 | 4985732 | SNV | 1 | G | A | Heterozygous |
| NC_037642.1 | 4988439 | SNV | 1 | G | T | Homozygous   |
| NC_037642.1 | 4988904 | SNV | 1 | A | T | Heterozygous |
| NC_037642.1 | 4990280 | SNV | 1 | C | T | Heterozygous |

|             |         |     |   |   |   |              |
|-------------|---------|-----|---|---|---|--------------|
| NC_037642.1 | 4990293 | SNV | 1 | A | T | Homozygous   |
| NC_037642.1 | 4990295 | SNV | 1 | C | A | Homozygous   |
| NC_037642.1 | 4990300 | SNV | 1 | T | C | Heterozygous |
| NC_037642.1 | 4992312 | SNV | 1 | T | C | Homozygous   |
| NC_037642.1 | 4992904 | SNV | 1 | T | G | Homozygous   |
| NC_037642.1 | 4995024 | SNV | 1 | C | T | Heterozygous |
| NC_037642.1 | 4995312 | SNV | 1 | A | G | Homozygous   |
| NC_037642.1 | 4995623 | SNV | 1 | A | G | Homozygous   |
| NC_037642.1 | 4997557 | SNV | 1 | A | T | Homozygous   |
| NC_037642.1 | 4997560 | SNV | 1 | T | A | Homozygous   |
| NC_037642.1 | 4998590 | SNV | 1 | T | C | Homozygous   |
| NC_037642.1 | 5003522 | SNV | 1 | A | T | Heterozygous |
| NC_037642.1 | 5009090 | SNV | 1 | G | T | Heterozygous |
| NC_037642.1 | 5010565 | SNV | 1 | T | A | Heterozygous |
| NC_037642.1 | 5010567 | SNV | 1 | A | T | Heterozygous |
| NC_037642.1 | 5010593 | SNV | 1 | G | A | Heterozygous |
| NC_037642.1 | 5010598 | SNV | 1 | T | C | Heterozygous |
| NC_037642.1 | 5010602 | SNV | 1 | A | T | Homozygous   |
| NC_037642.1 | 5012777 | SNV | 1 | A | G | Heterozygous |
| NC_037642.1 | 5015144 | SNV | 1 | A | C | Homozygous   |
| NC_037642.1 | 5015148 | SNV | 1 | G | T | Homozygous   |
| NC_037642.1 | 5015151 | SNV | 1 | A | T | Homozygous   |
| NC_037642.1 | 5015153 | SNV | 1 | A | C | Homozygous   |
| NC_037642.1 | 5015162 | SNV | 1 | C | A | Homozygous   |
| NC_037642.1 | 5015164 | SNV | 1 | A | G | Homozygous   |
| NC_037642.1 | 5019809 | SNV | 1 | A | G | Homozygous   |
| NC_037642.1 | 5037999 | SNV | 1 | A | G | Homozygous   |
| NC_037642.1 | 5038168 | SNV | 1 | T | A | Homozygous   |
| NC_037642.1 | 5038174 | SNV | 1 | T | C | Heterozygous |
| NC_037642.1 | 5038177 | SNV | 1 | C | T | Homozygous   |
| NC_037642.1 | 5038205 | SNV | 1 | C | T | Heterozygous |
| NC_037642.1 | 5040538 | SNV | 1 | A | G | Heterozygous |
| NC_037642.1 | 5065974 | SNV | 1 | C | T | Heterozygous |
| NC_037642.1 | 5069644 | SNV | 1 | C | T | Homozygous   |
| NC_037642.1 | 5069649 | SNV | 1 | T | A | Homozygous   |
| NC_037642.1 | 5069653 | SNV | 1 | C | A | Homozygous   |
| NC_037642.1 | 5069688 | SNV | 1 | T | C | Homozygous   |
| NC_037642.1 | 5070087 | SNV | 1 | A | T | Homozygous   |
| NC_037642.1 | 5070091 | SNV | 1 | T | C | Heterozygous |
| NC_037642.1 | 5070096 | SNV | 1 | C | T | Homozygous   |
| NC_037642.1 | 5082121 | SNV | 1 | T | C | Homozygous   |
| NC_037642.1 | 5082127 | SNV | 1 | T | C | Homozygous   |
| NC_037642.1 | 5082143 | SNV | 1 | C | T | Heterozygous |
| NC_037642.1 | 5089570 | SNV | 1 | A | C | Heterozygous |
| NC_037642.1 | 5089578 | SNV | 1 | C | T | Heterozygous |
| NC_037642.1 | 5089593 | SNV | 1 | A | G | Homozygous   |
| NC_037642.1 | 5089618 | SNV | 1 | A | G | Homozygous   |
| NC_037642.1 | 5089629 | SNV | 1 | C | T | Homozygous   |
| NC_037642.1 | 5089637 | SNV | 1 | C | T | Heterozygous |
| NC_037642.1 | 5089680 | SNV | 1 | A | G | Homozygous   |
| NC_037642.1 | 5089724 | SNV | 1 | T | C | Homozygous   |

|             |         |     |   |   |   |              |
|-------------|---------|-----|---|---|---|--------------|
| NC_037642.1 | 5089748 | SNV | 1 | G | A | Homozygous   |
| NC_037642.1 | 5113884 | SNV | 1 | T | G | Homozygous   |
| NC_037642.1 | 5114016 | SNV | 1 | A | G | Homozygous   |
| NC_037642.1 | 5114173 | SNV | 1 | A | T | Heterozygous |
| NC_037642.1 | 5114244 | SNV | 1 | G | A | Homozygous   |
| NC_037642.1 | 5114332 | SNV | 1 | C | T | Homozygous   |
| NC_037642.1 | 5114338 | SNV | 1 | G | A | Homozygous   |
| NC_037642.1 | 5114343 | SNV | 1 | A | G | Homozygous   |
| NC_037642.1 | 5114348 | SNV | 1 | G | A | Homozygous   |
| NC_037642.1 | 5117224 | SNV | 1 | C | T | Homozygous   |
| NC_037642.1 | 5146779 | SNV | 1 | C | T | Homozygous   |
| NC_037642.1 | 5146827 | SNV | 1 | G | T | Homozygous   |
| NC_037642.1 | 5146846 | SNV | 1 | A | G | Homozygous   |
| NC_037642.1 | 5146975 | SNV | 1 | G | A | Homozygous   |
| NC_037642.1 | 5147167 | SNV | 1 | G | A | Heterozygous |
| NC_037642.1 | 5147197 | SNV | 1 | A | G | Homozygous   |
| NC_037642.1 | 5147205 | SNV | 1 | C | T | Heterozygous |
| NC_037642.1 | 5147211 | SNV | 1 | A | G | Homozygous   |
| NC_037642.1 | 5147334 | SNV | 1 | A | G | Heterozygous |
| NC_037642.1 | 5157771 | SNV | 1 | A | G | Heterozygous |
| NC_037642.1 | 5158234 | SNV | 1 | C | G | Homozygous   |
| NC_037642.1 | 5159340 | SNV | 1 | A | G | Homozygous   |
| NC_037642.1 | 5159453 | SNV | 1 | T | C | Homozygous   |
| NC_037642.1 | 5159508 | SNV | 1 | T | A | Homozygous   |
| NC_037642.1 | 5160110 | SNV | 1 | A | G | Homozygous   |
| NC_037642.1 | 5160288 | SNV | 1 | T | C | Homozygous   |
| NC_037642.1 | 5163618 | SNV | 1 | T | C | Homozygous   |
| NC_037642.1 | 5166744 | SNV | 1 | A | T | Heterozygous |
| NC_037642.1 | 5167765 | SNV | 1 | G | A | Heterozygous |
| NC_037642.1 | 5167835 | SNV | 1 | T | C | Homozygous   |
| NC_037642.1 | 5167837 | SNV | 1 | G | T | Homozygous   |
| NC_037642.1 | 5167843 | SNV | 1 | A | C | Homozygous   |
| NC_037642.1 | 5167845 | SNV | 1 | T | C | Homozygous   |
| NC_037642.1 | 5167873 | SNV | 1 | T | C | Homozygous   |
| NC_037642.1 | 5167881 | SNV | 1 | A | G | Homozygous   |
| NC_037642.1 | 5168462 | SNV | 1 | T | G | Homozygous   |
| NC_037642.1 | 5168544 | SNV | 1 | G | A | Heterozygous |
| NC_037642.1 | 5168661 | SNV | 1 | A | G | Homozygous   |
| NC_037642.1 | 5169737 | SNV | 1 | C | T | Homozygous   |
| NC_037642.1 | 5169814 | SNV | 1 | T | A | Homozygous   |
| NC_037642.1 | 5169886 | SNV | 1 | G | A | Homozygous   |
| NC_037642.1 | 5169973 | SNV | 1 | C | T | Homozygous   |
| NC_037642.1 | 5170003 | SNV | 1 | C | T | Homozygous   |
| NC_037642.1 | 5170553 | SNV | 1 | G | A | Heterozygous |
| NC_037642.1 | 5170769 | SNV | 1 | G | A | Heterozygous |
| NC_037642.1 | 5201067 | SNV | 1 | G | C | Homozygous   |
| NC_037642.1 | 5206525 | SNV | 1 | G | A | Heterozygous |
| NC_037642.1 | 5206528 | SNV | 1 | C | T | Heterozygous |
| NC_037642.1 | 5206530 | SNV | 1 | C | T | Heterozygous |
| NC_037642.1 | 5206537 | SNV | 1 | T | C | Heterozygous |
| NC_037642.1 | 5206546 | SNV | 1 | C | T | Heterozygous |

|             |         |     |   |   |   |              |
|-------------|---------|-----|---|---|---|--------------|
| NC_037642.1 | 5206557 | SNV | 1 | G | A | Heterozygous |
| NC_037642.1 | 5206988 | SNV | 1 | A | G | Homozygous   |
| NC_037642.1 | 5207048 | SNV | 1 | T | C | Homozygous   |
| NC_037642.1 | 5207059 | SNV | 1 | A | G | Homozygous   |
| NC_037642.1 | 5208320 | SNV | 1 | A | G | Heterozygous |
| NC_037642.1 | 5210063 | SNV | 1 | C | T | Homozygous   |
| NC_037642.1 | 5210065 | SNV | 1 | A | G | Homozygous   |
| NC_037642.1 | 5210083 | SNV | 1 | C | T | Homozygous   |
| NC_037642.1 | 5210089 | SNV | 1 | C | G | Homozygous   |
| NC_037642.1 | 5210095 | SNV | 1 | C | T | Homozygous   |
| NC_037642.1 | 5210100 | SNV | 1 | C | A | Homozygous   |
| NC_037642.1 | 5210105 | SNV | 1 | C | G | Homozygous   |
| NC_037642.1 | 5210109 | SNV | 1 | C | T | Homozygous   |
| NC_037642.1 | 5214181 | SNV | 1 | G | A | Heterozygous |
| NC_037642.1 | 5214217 | SNV | 1 | C | T | Homozygous   |
| NC_037642.1 | 5220569 | SNV | 1 | T | C | Heterozygous |
| NC_037642.1 | 5220609 | SNV | 1 | A | G | Homozygous   |
| NC_037642.1 | 5220715 | SNV | 1 | G | A | Heterozygous |
| NC_037642.1 | 5220849 | SNV | 1 | C | T | Heterozygous |
| NC_037642.1 | 5221005 | SNV | 1 | T | C | Homozygous   |
| NC_037642.1 | 5221082 | SNV | 1 | A | G | Homozygous   |
| NC_037642.1 | 5221288 | SNV | 1 | T | C | Homozygous   |
| NC_037642.1 | 5221354 | SNV | 1 | G | A | Heterozygous |
| NC_037642.1 | 5221507 | SNV | 1 | C | G | Heterozygous |
| NC_037642.1 | 5222447 | SNV | 1 | G | A | Heterozygous |
| NC_037642.1 | 5222481 | SNV | 1 | T | A | Heterozygous |
| NC_037642.1 | 5222741 | SNV | 1 | C | T | Homozygous   |
| NC_037642.1 | 5222745 | SNV | 1 | A | G | Homozygous   |
| NC_037642.1 | 5222784 | SNV | 1 | A | G | Homozygous   |
| NC_037642.1 | 5222828 | SNV | 1 | A | G | Homozygous   |
| NC_037642.1 | 5223009 | SNV | 1 | A | G | Heterozygous |
| NC_037642.1 | 5223031 | SNV | 1 | A | G | Homozygous   |
| NC_037642.1 | 5223044 | SNV | 1 | T | C | Homozygous   |
| NC_037642.1 | 5223050 | SNV | 1 | A | G | Heterozygous |
| NC_037642.1 | 5223056 | SNV | 1 | T | C | Heterozygous |
| NC_037642.1 | 5223058 | SNV | 1 | A | G | Heterozygous |
| NC_037642.1 | 5223130 | SNV | 1 | A | G | Homozygous   |
| NC_037642.1 | 5223138 | SNV | 1 | T | C | Homozygous   |
| NC_037642.1 | 5223157 | SNV | 1 | G | C | Homozygous   |
| NC_037642.1 | 5223439 | SNV | 1 | G | A | Heterozygous |
| NC_037642.1 | 5223454 | SNV | 1 | C | T | Heterozygous |
| NC_037642.1 | 5224082 | SNV | 1 | G | C | Heterozygous |
| NC_037642.1 | 5224598 | SNV | 1 | G | A | Heterozygous |
| NC_037642.1 | 5224621 | SNV | 1 | T | C | Heterozygous |
| NC_037642.1 | 5225606 | SNV | 1 | T | C | Homozygous   |
| NC_037642.1 | 5226413 | SNV | 1 | C | T | Heterozygous |
| NC_037642.1 | 5226429 | SNV | 1 | T | C | Heterozygous |
| NC_037642.1 | 5226469 | SNV | 1 | A | G | Homozygous   |
| NC_037642.1 | 5226530 | SNV | 1 | A | G | Homozygous   |
| NC_037642.1 | 5226859 | SNV | 1 | T | C | Heterozygous |
| NC_037642.1 | 5226865 | SNV | 1 | C | T | Heterozygous |

|             |         |     |   |   |   |              |
|-------------|---------|-----|---|---|---|--------------|
| NC_037642.1 | 5226878 | SNV | 1 | C | T | Heterozygous |
| NC_037642.1 | 5235173 | SNV | 1 | G | A | Homozygous   |
| NC_037642.1 | 5235219 | SNV | 1 | A | G | Homozygous   |
| NC_037642.1 | 5236049 | SNV | 1 | C | T | Homozygous   |
| NC_037642.1 | 5236235 | SNV | 1 | G | A | Heterozygous |
| NC_037642.1 | 5236317 | SNV | 1 | C | T | Heterozygous |
| NC_037642.1 | 5236371 | SNV | 1 | T | C | Homozygous   |
| NC_037642.1 | 5236588 | SNV | 1 | G | A | Homozygous   |
| NC_037642.1 | 5236595 | SNV | 1 | G | A | Heterozygous |
| NC_037642.1 | 5236617 | SNV | 1 | T | C | Homozygous   |
| NC_037642.1 | 5236664 | SNV | 1 | A | G | Heterozygous |
| NC_037642.1 | 5236666 | SNV | 1 | T | A | Homozygous   |
| NC_037642.1 | 5236671 | SNV | 1 | T | G | Heterozygous |
| NC_037642.1 | 5236809 | SNV | 1 | C | T | Homozygous   |
| NC_037642.1 | 5236836 | SNV | 1 | T | C | Homozygous   |
| NC_037642.1 | 5237006 | SNV | 1 | A | G | Homozygous   |
| NC_037642.1 | 5237024 | SNV | 1 | C | T | Homozygous   |
| NC_037642.1 | 5237060 | SNV | 1 | A | G | Homozygous   |
| NC_037642.1 | 5249359 | SNV | 1 | C | T | Heterozygous |
| NC_037642.1 | 5249366 | SNV | 1 | T | C | Heterozygous |
| NC_037642.1 | 5263884 | SNV | 1 | A | G | Heterozygous |
| NC_037642.1 | 5263893 | SNV | 1 | G | A | Homozygous   |
| NC_037642.1 | 5273804 | SNV | 1 | T | A | Homozygous   |
| NC_037642.1 | 5273806 | SNV | 1 | A | T | Heterozygous |
| NC_037642.1 | 5273812 | SNV | 1 | A | C | Homozygous   |
| NC_037642.1 | 5273815 | SNV | 1 | A | C | Homozygous   |
| NC_037642.1 | 5273818 | SNV | 1 | A | T | Homozygous   |
| NC_037642.1 | 5273822 | SNV | 1 | T | C | Heterozygous |
| NC_037642.1 | 5273827 | SNV | 1 | C | G | Homozygous   |
| NC_037642.1 | 5286753 | SNV | 1 | A | G | Homozygous   |
| NC_037642.1 | 5297905 | SNV | 1 | T | C | Homozygous   |
| NC_037642.1 | 5298335 | SNV | 1 | T | C | Homozygous   |
| NC_037642.1 | 5301199 | SNV | 1 | T | A | Homozygous   |
| NC_037642.1 | 5301213 | SNV | 1 | T | G | Homozygous   |
| NC_037642.1 | 5301235 | SNV | 1 | A | T | Homozygous   |
| NC_037642.1 | 5301237 | SNV | 1 | T | C | Homozygous   |
| NC_037642.1 | 5309033 | SNV | 1 | T | A | Homozygous   |
| NC_037642.1 | 5321846 | SNV | 1 | A | G | Heterozygous |
| NC_037642.1 | 5321874 | SNV | 1 | C | G | Heterozygous |
| NC_037642.1 | 5322337 | SNV | 1 | A | T | Heterozygous |
| NC_037642.1 | 5322378 | SNV | 1 | C | A | Heterozygous |
| NC_037642.1 | 5322383 | SNV | 1 | A | G | Homozygous   |
| NC_037642.1 | 5329458 | SNV | 1 | A | T | Heterozygous |
| NC_037642.1 | 5329508 | SNV | 1 | A | G | Homozygous   |
| NC_037642.1 | 5364801 | SNV | 1 | T | C | Homozygous   |
| NC_037642.1 | 5382532 | SNV | 1 | C | T | Heterozygous |
| NC_037642.1 | 5382549 | SNV | 1 | T | C | Homozygous   |
| NC_037642.1 | 5382871 | SNV | 1 | C | T | Heterozygous |
| NC_037642.1 | 5383176 | SNV | 1 | A | C | Homozygous   |
| NC_037642.1 | 5383852 | SNV | 1 | A | G | Heterozygous |
| NC_037642.1 | 5383919 | SNV | 1 | T | C | Homozygous   |



|             |         |     |   |   |   |              |
|-------------|---------|-----|---|---|---|--------------|
| NC_037642.1 | 5384455 | SNV | 1 | T | C | Homozygous   |
| NC_037642.1 | 5387186 | SNV | 1 | G | A | Heterozygous |
| NC_037642.1 | 5387246 | SNV | 1 | C | T | Homozygous   |
| NC_037642.1 | 5387592 | SNV | 1 | C | T | Homozygous   |
| NC_037642.1 | 5387739 | SNV | 1 | C | T | Heterozygous |
| NC_037642.1 | 5388091 | SNV | 1 | C | T | Heterozygous |
| NC_037642.1 | 5388101 | SNV | 1 | A | G | Heterozygous |
| NC_037642.1 | 5388980 | SNV | 1 | A | C | Heterozygous |
| NC_037642.1 | 5389016 | SNV | 1 | T | C | Heterozygous |
| NC_037642.1 | 5389029 | SNV | 1 | A | T | Heterozygous |
| NC_037642.1 | 5389032 | SNV | 1 | T | A | Heterozygous |
| NC_037642.1 | 5389038 | SNV | 1 | A | G | Heterozygous |
| NC_037642.1 | 5389050 | SNV | 1 | A | C | Heterozygous |
| NC_037642.1 | 5392645 | SNV | 1 | G | T | Homozygous   |
| NC_037642.1 | 5392779 | SNV | 1 | T | A | Homozygous   |
| NC_037642.1 | 5392965 | SNV | 1 | T | A | Homozygous   |
| NC_037642.1 | 5392973 | SNV | 1 | T | A | Homozygous   |
| NC_037642.1 | 5393558 | SNV | 1 | G | T | Homozygous   |
| NC_037642.1 | 5393619 | SNV | 1 | T | C | Homozygous   |
| NC_037642.1 | 5393624 | SNV | 1 | T | C | Homozygous   |
| NC_037642.1 | 5393627 | SNV | 1 | T | A | Homozygous   |
| NC_037642.1 | 5394708 | SNV | 1 | T | C | Homozygous   |
| NC_037642.1 | 5395285 | SNV | 1 | T | C | Heterozygous |
| NC_037642.1 | 5395866 | SNV | 1 | T | C | Homozygous   |
| NC_037642.1 | 5396510 | SNV | 1 | G | A | Heterozygous |
| NC_037642.1 | 5396527 | SNV | 1 | C | T | Homozygous   |
| NC_037642.1 | 5396550 | SNV | 1 | A | T | Homozygous   |
| NC_037642.1 | 5396552 | SNV | 1 | T | A | Homozygous   |
| NC_037642.1 | 5396556 | SNV | 1 | A | T | Homozygous   |
| NC_037642.1 | 5396593 | SNV | 1 | A | T | Homozygous   |
| NC_037642.1 | 5396598 | SNV | 1 | T | A | Homozygous   |
| NC_037642.1 | 5396602 | SNV | 1 | T | A | Homozygous   |
| NC_037642.1 | 5412250 | SNV | 1 | A | G | Homozygous   |
| NC_037642.1 | 5412253 | SNV | 1 | G | A | Homozygous   |
| NC_037642.1 | 5413488 | SNV | 1 | A | G | Homozygous   |
| NC_037642.1 | 5414153 | SNV | 1 | T | C | Heterozygous |
| NC_037642.1 | 5415827 | SNV | 1 | C | T | Heterozygous |
| NC_037642.1 | 5420789 | SNV | 1 | G | A | Homozygous   |
| NC_037642.1 | 5420798 | SNV | 1 | T | A | Heterozygous |
| NC_037642.1 | 5420869 | SNV | 1 | G | A | Homozygous   |
| NC_037642.1 | 5420874 | SNV | 1 | G | A | Heterozygous |
| NC_037642.1 | 5422439 | SNV | 1 | A | G | Homozygous   |
| NC_037642.1 | 5422758 | SNV | 1 | C | T | Heterozygous |
| NC_037642.1 | 5430513 | SNV | 1 | G | A | Heterozygous |
| NC_037642.1 | 5430553 | SNV | 1 | G | C | Homozygous   |
| NC_037642.1 | 5431347 | SNV | 1 | C | T | Heterozygous |
| NC_037642.1 | 5436523 | SNV | 1 | A | G | Heterozygous |
| NC_037642.1 | 5436550 | SNV | 1 | A | G | Homozygous   |
| NC_037642.1 | 5437160 | SNV | 1 | C | T | Homozygous   |
| NC_037642.1 | 5437279 | SNV | 1 | C | A | Homozygous   |
| NC_037642.1 | 5437325 | SNV | 1 | A | G | Heterozygous |

|             |         |     |   |   |   |              |
|-------------|---------|-----|---|---|---|--------------|
| NC_037642.1 | 5469312 | SNV | 1 | T | C | Heterozygous |
| NC_037642.1 | 5469587 | SNV | 1 | T | C | Heterozygous |
| NC_037642.1 | 5469755 | SNV | 1 | A | G | Homozygous   |
| NC_037642.1 | 5469786 | SNV | 1 | T | C | Homozygous   |
| NC_037642.1 | 5469804 | SNV | 1 | G | C | Heterozygous |
| NC_037642.1 | 5469829 | SNV | 1 | A | G | Homozygous   |
| NC_037642.1 | 5470005 | SNV | 1 | A | G | Homozygous   |
| NC_037642.1 | 5470597 | SNV | 1 | G | A | Heterozygous |
| NC_037642.1 | 5470631 | SNV | 1 | C | T | Heterozygous |
| NC_037642.1 | 5474044 | SNV | 1 | T | A | Heterozygous |
| NC_037642.1 | 5475126 | SNV | 1 | T | C | Homozygous   |
| NC_037642.1 | 5477066 | SNV | 1 | A | T | Homozygous   |
| NC_037642.1 | 5477098 | SNV | 1 | T | A | Heterozygous |
| NC_037642.1 | 5478637 | SNV | 1 | A | C | Heterozygous |
| NC_037642.1 | 5478643 | SNV | 1 | T | C | Heterozygous |
| NC_037642.1 | 5478647 | SNV | 1 | G | A | Heterozygous |
| NC_037642.1 | 5478658 | SNV | 1 | G | C | Heterozygous |
| NC_037642.1 | 5478663 | SNV | 1 | G | C | Heterozygous |
| NC_037642.1 | 5478682 | SNV | 1 | A | T | Heterozygous |
| NC_037642.1 | 5482194 | SNV | 1 | T | A | Homozygous   |
| NC_037642.1 | 5482220 | SNV | 1 | A | T | Homozygous   |
| NC_037642.1 | 5482222 | SNV | 1 | G | A | Homozygous   |
| NC_037642.1 | 5485219 | SNV | 1 | C | T | Heterozygous |
| NC_037642.1 | 5486925 | SNV | 1 | A | C | Homozygous   |
| NC_037642.1 | 5487582 | SNV | 1 | A | G | Homozygous   |
| NC_037642.1 | 5495928 | SNV | 1 | T | C | Heterozygous |
| NC_037642.1 | 5498044 | SNV | 1 | C | G | Heterozygous |
| NC_037642.1 | 5503011 | SNV | 1 | A | G | Homozygous   |
| NC_037642.1 | 5504039 | SNV | 1 | T | C | Homozygous   |
| NC_037642.1 | 5504195 | SNV | 1 | A | T | Heterozygous |
| NC_037642.1 | 5512616 | SNV | 1 | A | G | Homozygous   |
| NC_037642.1 | 5513567 | SNV | 1 | A | G | Homozygous   |
| NC_037642.1 | 5514553 | SNV | 1 | A | T | Heterozygous |
| NC_037642.1 | 5514594 | SNV | 1 | A | G | Homozygous   |
| NC_037642.1 | 5517205 | SNV | 1 | G | A | Homozygous   |
| NC_037642.1 | 5517208 | SNV | 1 | C | A | Homozygous   |
| NC_037642.1 | 5517211 | SNV | 1 | A | G | Homozygous   |
| NC_037642.1 | 5517233 | SNV | 1 | G | A | Homozygous   |
| NC_037642.1 | 5517236 | SNV | 1 | A | G | Homozygous   |
| NC_037642.1 | 5518782 | SNV | 1 | G | T | Homozygous   |
| NC_037642.1 | 5518806 | SNV | 1 | G | A | Homozygous   |
| NC_037642.1 | 5532111 | SNV | 1 | C | T | Heterozygous |
| NC_037642.1 | 5532190 | SNV | 1 | A | G | Heterozygous |
| NC_037642.1 | 5532192 | SNV | 1 | A | G | Homozygous   |
| NC_037642.1 | 5532304 | SNV | 1 | A | G | Homozygous   |
| NC_037642.1 | 5542534 | SNV | 1 | A | G | Heterozygous |
| NC_037642.1 | 5550441 | SNV | 1 | A | G | Heterozygous |
| NC_037642.1 | 5561948 | SNV | 1 | G | A | Heterozygous |
| NC_037642.1 | 5562215 | SNV | 1 | A | G | Homozygous   |
| NC_037642.1 | 5562221 | SNV | 1 | G | A | Heterozygous |
| NC_037642.1 | 5562228 | SNV | 1 | G | A | Heterozygous |

|             |         |     |   |   |   |              |
|-------------|---------|-----|---|---|---|--------------|
| NC_037642.1 | 5562929 | SNV | 1 | G | A | Heterozygous |
| NC_037642.1 | 5568465 | SNV | 1 | A | G | Homozygous   |
| NC_037642.1 | 5568494 | SNV | 1 | G | A | Homozygous   |
| NC_037642.1 | 5568722 | SNV | 1 | A | G | Heterozygous |
| NC_037642.1 | 5568783 | SNV | 1 | C | G | Heterozygous |
| NC_037642.1 | 5568801 | SNV | 1 | C | T | Heterozygous |
| NC_037642.1 | 5581437 | SNV | 1 | T | A | Heterozygous |
| NC_037642.1 | 5581492 | SNV | 1 | C | T | Homozygous   |
| NC_037642.1 | 5581554 | SNV | 1 | C | A | Heterozygous |
| NC_037642.1 | 5581830 | SNV | 1 | A | G | Homozygous   |
| NC_037642.1 | 5581891 | SNV | 1 | T | C | Heterozygous |
| NC_037642.1 | 5585389 | SNV | 1 | G | A | Heterozygous |
| NC_037642.1 | 5585441 | SNV | 1 | G | A | Heterozygous |
| NC_037642.1 | 5585457 | SNV | 1 | G | A | Homozygous   |
| NC_037642.1 | 5585465 | SNV | 1 | G | A | Homozygous   |
| NC_037642.1 | 5585473 | SNV | 1 | G | A | Homozygous   |
| NC_037642.1 | 5585481 | SNV | 1 | G | A | Homozygous   |
| NC_037642.1 | 5585485 | SNV | 1 | G | A | Heterozygous |
| NC_037642.1 | 5585487 | SNV | 1 | T | C | Heterozygous |
| NC_037642.1 | 5585489 | SNV | 1 | G | A | Homozygous   |
| NC_037642.1 | 5587938 | SNV | 1 | T | C | Homozygous   |
| NC_037642.1 | 5587966 | SNV | 1 | C | A | Heterozygous |
| NC_037642.1 | 5607662 | SNV | 1 | A | G | Homozygous   |
| NC_037642.1 | 5607676 | SNV | 1 | T | C | Homozygous   |
| NC_037642.1 | 5607678 | SNV | 1 | T | C | Homozygous   |
| NC_037642.1 | 5607701 | SNV | 1 | C | T | Homozygous   |
| NC_037642.1 | 5607708 | SNV | 1 | A | G | Homozygous   |
| NC_037642.1 | 5607730 | SNV | 1 | G | A | Heterozygous |
| NC_037642.1 | 5613848 | SNV | 1 | A | G | Homozygous   |
| NC_037642.1 | 5613868 | SNV | 1 | A | T | Homozygous   |
| NC_037642.1 | 5616641 | SNV | 1 | A | G | Homozygous   |
| NC_037642.1 | 5616654 | SNV | 1 | A | G | Homozygous   |
| NC_037642.1 | 5616701 | SNV | 1 | T | C | Homozygous   |
| NC_037642.1 | 5617203 | SNV | 1 | G | A | Heterozygous |
| NC_037642.1 | 5617328 | SNV | 1 | G | A | Heterozygous |
| NC_037642.1 | 5617619 | SNV | 1 | G | A | Heterozygous |
| NC_037642.1 | 5617626 | SNV | 1 | G | A | Heterozygous |
| NC_037642.1 | 5617677 | SNV | 1 | A | G | Heterozygous |
| NC_037642.1 | 5617713 | SNV | 1 | T | G | Heterozygous |
| NC_037642.1 | 5618217 | SNV | 1 | C | T | Heterozygous |
| NC_037642.1 | 5618319 | SNV | 1 | A | G | Homozygous   |
| NC_037642.1 | 5618393 | SNV | 1 | T | A | Homozygous   |
| NC_037642.1 | 5618417 | SNV | 1 | C | T | Homozygous   |
| NC_037642.1 | 5618454 | SNV | 1 | T | C | Heterozygous |
| NC_037642.1 | 5618720 | SNV | 1 | A | G | Homozygous   |
| NC_037642.1 | 5619846 | SNV | 1 | G | A | Heterozygous |
| NC_037642.1 | 5619856 | SNV | 1 | T | C | Homozygous   |
| NC_037642.1 | 5621062 | SNV | 1 | T | A | Homozygous   |
| NC_037642.1 | 5621081 | SNV | 1 | C | T | Homozygous   |
| NC_037642.1 | 5621084 | SNV | 1 | C | G | Homozygous   |
| NC_037642.1 | 5621111 | SNV | 1 | T | C | Homozygous   |

|             |         |     |   |   |   |              |
|-------------|---------|-----|---|---|---|--------------|
| NC_037642.1 | 5621114 | SNV | 1 | A | C | Homozygous   |
| NC_037642.1 | 5621124 | SNV | 1 | T | A | Homozygous   |
| NC_037642.1 | 5621177 | SNV | 1 | G | A | Heterozygous |
| NC_037642.1 | 5621196 | SNV | 1 | T | C | Heterozygous |
| NC_037642.1 | 5621282 | SNV | 1 | G | A | Heterozygous |
| NC_037642.1 | 5621349 | SNV | 1 | G | A | Heterozygous |
| NC_037642.1 | 5621431 | SNV | 1 | A | C | Heterozygous |
| NC_037642.1 | 5621608 | SNV | 1 | A | C | Homozygous   |
| NC_037642.1 | 5621787 | SNV | 1 | A | G | Heterozygous |
| NC_037642.1 | 5621808 | SNV | 1 | T | C | Heterozygous |
| NC_037642.1 | 5622406 | SNV | 1 | G | A | Heterozygous |
| NC_037642.1 | 5622424 | SNV | 1 | A | G | Heterozygous |
| NC_037642.1 | 5622450 | SNV | 1 | A | G | Heterozygous |
| NC_037642.1 | 5622498 | SNV | 1 | C | T | Homozygous   |
| NC_037642.1 | 5622535 | SNV | 1 | A | G | Homozygous   |
| NC_037642.1 | 5669842 | SNV | 1 | A | G | Heterozygous |
| NC_037642.1 | 5669848 | SNV | 1 | G | A | Heterozygous |
| NC_037642.1 | 5669908 | SNV | 1 | T | C | Homozygous   |
| NC_037642.1 | 5669945 | SNV | 1 | T | C | Homozygous   |
| NC_037642.1 | 5673932 | SNV | 1 | C | T | Heterozygous |
| NC_037642.1 | 5673936 | SNV | 1 | G | T | Heterozygous |
| NC_037642.1 | 5673965 | SNV | 1 | G | A | Homozygous   |
| NC_037642.1 | 5673968 | SNV | 1 | A | G | Homozygous   |
| NC_037642.1 | 5673995 | SNV | 1 | T | C | Homozygous   |
| NC_037642.1 | 5674034 | SNV | 1 | G | A | Heterozygous |
| NC_037642.1 | 5674094 | SNV | 1 | G | A | Heterozygous |
| NC_037642.1 | 5674265 | SNV | 1 | G | A | Heterozygous |
| NC_037642.1 | 5694730 | SNV | 1 | G | A | Homozygous   |
| NC_037642.1 | 5694735 | SNV | 1 | A | G | Homozygous   |
| NC_037642.1 | 5694755 | SNV | 1 | A | G | Homozygous   |
| NC_037642.1 | 5694758 | SNV | 1 | G | A | Homozygous   |
| NC_037642.1 | 5694762 | SNV | 1 | G | C | Homozygous   |
| NC_037642.1 | 5694769 | SNV | 1 | C | A | Homozygous   |
| NC_037642.1 | 5698535 | SNV | 1 | A | G | Homozygous   |
| NC_037642.1 | 5703117 | SNV | 1 | A | C | Homozygous   |
| NC_037642.1 | 5714223 | SNV | 1 | G | A | Heterozygous |
| NC_037642.1 | 5719337 | SNV | 1 | T | C | Heterozygous |
| NC_037642.1 | 5719340 | SNV | 1 | C | T | Heterozygous |
| NC_037642.1 | 5719344 | SNV | 1 | G | C | Heterozygous |
| NC_037642.1 | 5719367 | SNV | 1 | G | C | Heterozygous |
| NC_037642.1 | 5720053 | SNV | 1 | T | C | Homozygous   |
| NC_037642.1 | 5720056 | SNV | 1 | A | T | Homozygous   |
| NC_037642.1 | 5720077 | SNV | 1 | T | G | Homozygous   |
| NC_037642.1 | 5720081 | SNV | 1 | T | C | Homozygous   |
| NC_037642.1 | 5720085 | SNV | 1 | T | G | Homozygous   |
| NC_037642.1 | 5720091 | SNV | 1 | T | A | Homozygous   |
| NC_037642.1 | 5720096 | SNV | 1 | T | A | Homozygous   |
| NC_037642.1 | 5721654 | SNV | 1 | G | A | Homozygous   |
| NC_037642.1 | 5723808 | SNV | 1 | G | A | Heterozygous |
| NC_037642.1 | 5731349 | SNV | 1 | G | A | Homozygous   |
| NC_037642.1 | 5739253 | SNV | 1 | T | C | Homozygous   |

|             |         |     |   |   |   |              |
|-------------|---------|-----|---|---|---|--------------|
| NC_037642.1 | 5739400 | SNV | 1 | A | G | Heterozygous |
| NC_037642.1 | 5739477 | SNV | 1 | G | A | Homozygous   |
| NC_037642.1 | 5742296 | SNV | 1 | A | G | Homozygous   |
| NC_037642.1 | 5746461 | SNV | 1 | C | A | Heterozygous |
| NC_037642.1 | 5746463 | SNV | 1 | G | A | Heterozygous |
| NC_037642.1 | 5746463 | SNV | 1 | G | T | Heterozygous |
| NC_037642.1 | 5746502 | SNV | 1 | C | T | Heterozygous |
| NC_037642.1 | 5752321 | SNV | 1 | T | A | Homozygous   |
| NC_037642.1 | 5752329 | SNV | 1 | C | A | Homozygous   |
| NC_037642.1 | 5754253 | SNV | 1 | T | C | Heterozygous |
| NC_037642.1 | 5754544 | SNV | 1 | T | C | Homozygous   |
| NC_037642.1 | 5754556 | SNV | 1 | A | G | Homozygous   |
| NC_037642.1 | 5754742 | SNV | 1 | C | T | Heterozygous |
| NC_037642.1 | 5755165 | SNV | 1 | T | C | Homozygous   |
| NC_037642.1 | 5755281 | SNV | 1 | C | T | Homozygous   |
| NC_037642.1 | 5755367 | SNV | 1 | A | T | Homozygous   |
| NC_037642.1 | 5755416 | SNV | 1 | T | C | Heterozygous |
| NC_037642.1 | 5755481 | SNV | 1 | T | C | Heterozygous |
| NC_037642.1 | 5755569 | SNV | 1 | T | C | Heterozygous |
| NC_037642.1 | 5761098 | SNV | 1 | A | G | Heterozygous |
| NC_037642.1 | 5761129 | SNV | 1 | C | T | Heterozygous |
| NC_037642.1 | 5761459 | SNV | 1 | T | C | Homozygous   |
| NC_037642.1 | 5761493 | SNV | 1 | T | G | Heterozygous |
| NC_037642.1 | 5761508 | SNV | 1 | T | A | Heterozygous |
| NC_037642.1 | 5761510 | SNV | 1 | T | G | Heterozygous |
| NC_037642.1 | 5761520 | SNV | 1 | T | C | Heterozygous |
| NC_037642.1 | 5761546 | SNV | 1 | T | C | Homozygous   |
| NC_037642.1 | 5762143 | SNV | 1 | A | G | Homozygous   |
| NC_037642.1 | 5762849 | SNV | 1 | G | A | Heterozygous |
| NC_037642.1 | 5763067 | SNV | 1 | T | C | Homozygous   |
| NC_037642.1 | 5763172 | SNV | 1 | A | G | Homozygous   |
| NC_037642.1 | 5763493 | SNV | 1 | T | C | Heterozygous |
| NC_037642.1 | 5763988 | SNV | 1 | C | T | Heterozygous |
| NC_037642.1 | 5764071 | SNV | 1 | A | G | Heterozygous |
| NC_037642.1 | 5764209 | SNV | 1 | A | C | Homozygous   |
| NC_037642.1 | 5764211 | SNV | 1 | A | G | Homozygous   |
| NC_037642.1 | 5764223 | SNV | 1 | T | G | Homozygous   |
| NC_037642.1 | 5764253 | SNV | 1 | G | A | Homozygous   |
| NC_037642.1 | 5764510 | SNV | 1 | C | T | Heterozygous |
| NC_037642.1 | 5764714 | SNV | 1 | A | G | Homozygous   |
| NC_037642.1 | 5764727 | SNV | 1 | A | G | Homozygous   |
| NC_037642.1 | 5764730 | SNV | 1 | G | T | Homozygous   |
| NC_037642.1 | 5764747 | SNV | 1 | A | G | Heterozygous |
| NC_037642.1 | 5764782 | SNV | 1 | T | C | Homozygous   |
| NC_037642.1 | 5765160 | SNV | 1 | A | G | Homozygous   |
| NC_037642.1 | 5765447 | SNV | 1 | T | C | Homozygous   |
| NC_037642.1 | 5765465 | SNV | 1 | G | A | Homozygous   |
| NC_037642.1 | 5765477 | SNV | 1 | A | G | Homozygous   |
| NC_037642.1 | 5766216 | SNV | 1 | A | G | Homozygous   |
| NC_037642.1 | 5771523 | SNV | 1 | A | G | Homozygous   |
| NC_037642.1 | 5771545 | SNV | 1 | A | G | Homozygous   |

|             |         |     |   |   |   |              |
|-------------|---------|-----|---|---|---|--------------|
| NC_037642.1 | 5771588 | SNV | 1 | T | C | Homozygous   |
| NC_037642.1 | 5776048 | SNV | 1 | A | G | Homozygous   |
| NC_037642.1 | 5776519 | SNV | 1 | A | G | Homozygous   |
| NC_037642.1 | 5776543 | SNV | 1 | G | A | Heterozygous |
| NC_037642.1 | 5776591 | SNV | 1 | G | C | Homozygous   |
| NC_037642.1 | 5776593 | SNV | 1 | C | T | Heterozygous |
| NC_037642.1 | 5776604 | SNV | 1 | C | T | Heterozygous |
| NC_037642.1 | 5776610 | SNV | 1 | C | T | Heterozygous |
| NC_037642.1 | 5776853 | SNV | 1 | A | G | Homozygous   |
| NC_037642.1 | 5776913 | SNV | 1 | A | G | Heterozygous |
| NC_037642.1 | 5781188 | SNV | 1 | A | G | Homozygous   |
| NC_037642.1 | 5781630 | SNV | 1 | T | C | Heterozygous |
| NC_037642.1 | 5793690 | SNV | 1 | G | A | Heterozygous |
| NC_037642.1 | 5799255 | SNV | 1 | C | T | Heterozygous |
| NC_037642.1 | 5799282 | SNV | 1 | A | T | Homozygous   |
| NC_037642.1 | 5800001 | SNV | 1 | G | A | Heterozygous |
| NC_037642.1 | 5800014 | SNV | 1 | G | A | Heterozygous |
| NC_037642.1 | 5800146 | SNV | 1 | A | G | Homozygous   |
| NC_037642.1 | 5801058 | SNV | 1 | C | T | Homozygous   |
| NC_037642.1 | 5801376 | SNV | 1 | A | G | Heterozygous |
| NC_037642.1 | 5801627 | SNV | 1 | G | A | Heterozygous |
| NC_037642.1 | 5804961 | SNV | 1 | T | C | Homozygous   |
| NC_037642.1 | 5805224 | SNV | 1 | C | G | Homozygous   |
| NC_037642.1 | 5805238 | SNV | 1 | T | C | Homozygous   |
| NC_037642.1 | 5805508 | SNV | 1 | T | A | Heterozygous |
| NC_037642.1 | 5805832 | SNV | 1 | T | C | Homozygous   |
| NC_037642.1 | 5805861 | SNV | 1 | C | T | Heterozygous |
| NC_037642.1 | 5806845 | SNV | 1 | A | G | Heterozygous |
| NC_037642.1 | 5807210 | SNV | 1 | T | C | Homozygous   |
| NC_037642.1 | 5807266 | SNV | 1 | C | T | Homozygous   |
| NC_037642.1 | 5808224 | SNV | 1 | T | G | Heterozygous |
| NC_037642.1 | 5808480 | SNV | 1 | A | T | Heterozygous |
| NC_037642.1 | 5808488 | SNV | 1 | G | A | Heterozygous |
| NC_037642.1 | 5808895 | SNV | 1 | C | A | Homozygous   |
| NC_037642.1 | 5808907 | SNV | 1 | A | T | Homozygous   |
| NC_037642.1 | 5808910 | SNV | 1 | G | A | Homozygous   |
| NC_037642.1 | 5808912 | SNV | 1 | T | A | Homozygous   |
| NC_037642.1 | 5808917 | SNV | 1 | T | G | Homozygous   |
| NC_037642.1 | 5808921 | SNV | 1 | T | G | Homozygous   |
| NC_037642.1 | 5808924 | SNV | 1 | C | T | Homozygous   |
| NC_037642.1 | 5808927 | SNV | 1 | T | A | Homozygous   |
| NC_037642.1 | 5808932 | SNV | 1 | C | A | Homozygous   |
| NC_037642.1 | 5815155 | SNV | 1 | G | A | Homozygous   |
| NC_037642.1 | 5816852 | SNV | 1 | T | C | Homozygous   |
| NC_037642.1 | 5816912 | SNV | 1 | A | G | Homozygous   |
| NC_037642.1 | 5817547 | SNV | 1 | A | G | Homozygous   |
| NC_037642.1 | 5817553 | SNV | 1 | G | A | Heterozygous |
| NC_037642.1 | 5817751 | SNV | 1 | A | G | Homozygous   |
| NC_037642.1 | 5817874 | SNV | 1 | G | A | Heterozygous |
| NC_037642.1 | 5817882 | SNV | 1 | T | C | Homozygous   |
| NC_037642.1 | 5817891 | SNV | 1 | A | G | Heterozygous |

|             |         |     |   |   |   |              |
|-------------|---------|-----|---|---|---|--------------|
| NC_037642.1 | 5817913 | SNV | 1 | C | T | Heterozygous |
| NC_037642.1 | 5817937 | SNV | 1 | A | C | Homozygous   |
| NC_037642.1 | 5817956 | SNV | 1 | G | A | Heterozygous |
| NC_037642.1 | 5817980 | SNV | 1 | A | C | Heterozygous |
| NC_037642.1 | 5818110 | SNV | 1 | T | C | Homozygous   |
| NC_037642.1 | 5818144 | SNV | 1 | C | T | Heterozygous |
| NC_037642.1 | 5818174 | SNV | 1 | G | A | Homozygous   |
| NC_037642.1 | 5818219 | SNV | 1 | G | A | Homozygous   |
| NC_037642.1 | 5818228 | SNV | 1 | C | T | Heterozygous |
| NC_037642.1 | 5818521 | SNV | 1 | C | T | Homozygous   |
| NC_037642.1 | 5818545 | SNV | 1 | C | A | Homozygous   |
| NC_037642.1 | 5818558 | SNV | 1 | C | T | Homozygous   |
| NC_037642.1 | 5818911 | SNV | 1 | C | G | Heterozygous |
| NC_037642.1 | 5821535 | SNV | 1 | A | G | Homozygous   |
| NC_037642.1 | 5821699 | SNV | 1 | C | T | Heterozygous |
| NC_037642.1 | 5821733 | SNV | 1 | G | C | Heterozygous |
| NC_037642.1 | 5821820 | SNV | 1 | T | C | Heterozygous |
| NC_037642.1 | 5821853 | SNV | 1 | A | G | Homozygous   |
| NC_037642.1 | 5822120 | SNV | 1 | T | C | Homozygous   |
| NC_037642.1 | 5822366 | SNV | 1 | C | G | Homozygous   |
| NC_037642.1 | 5822585 | SNV | 1 | C | T | Homozygous   |
| NC_037642.1 | 5822675 | SNV | 1 | T | C | Homozygous   |
| NC_037642.1 | 5823020 | SNV | 1 | C | T | Heterozygous |
| NC_037642.1 | 5823540 | SNV | 1 | T | C | Heterozygous |
| NC_037642.1 | 5823604 | SNV | 1 | T | A | Homozygous   |
| NC_037642.1 | 5823707 | SNV | 1 | A | G | Homozygous   |
| NC_037642.1 | 5823913 | SNV | 1 | G | A | Heterozygous |
| NC_037642.1 | 5824098 | SNV | 1 | G | A | Homozygous   |
| NC_037642.1 | 5824182 | SNV | 1 | G | A | Homozygous   |
| NC_037642.1 | 5824255 | SNV | 1 | C | T | Heterozygous |
| NC_037642.1 | 5824314 | SNV | 1 | G | A | Homozygous   |
| NC_037642.1 | 5824334 | SNV | 1 | A | G | Heterozygous |
| NC_037642.1 | 5824338 | SNV | 1 | T | C | Heterozygous |
| NC_037642.1 | 5824430 | SNV | 1 | A | T | Homozygous   |
| NC_037642.1 | 5824611 | SNV | 1 | T | C | Homozygous   |
| NC_037642.1 | 5824716 | SNV | 1 | G | A | Heterozygous |
| NC_037642.1 | 5826591 | SNV | 1 | G | A | Homozygous   |
| NC_037642.1 | 5826710 | SNV | 1 | T | G | Homozygous   |
| NC_037642.1 | 5827043 | SNV | 1 | T | G | Homozygous   |
| NC_037642.1 | 5827350 | SNV | 1 | A | T | Heterozygous |
| NC_037642.1 | 5827387 | SNV | 1 | A | G | Homozygous   |
| NC_037642.1 | 5827426 | SNV | 1 | G | T | Homozygous   |
| NC_037642.1 | 5827624 | SNV | 1 | A | G | Heterozygous |
| NC_037642.1 | 5827944 | SNV | 1 | C | G | Homozygous   |
| NC_037642.1 | 5830191 | SNV | 1 | A | G | Homozygous   |
| NC_037642.1 | 5833066 | SNV | 1 | G | A | Heterozygous |
| NC_037642.1 | 5835201 | SNV | 1 | A | G | Heterozygous |
| NC_037642.1 | 5835242 | SNV | 1 | G | T | Homozygous   |
| NC_037642.1 | 5836058 | SNV | 1 | C | A | Heterozygous |
| NC_037642.1 | 5838813 | SNV | 1 | A | G | Homozygous   |
| NC_037642.1 | 5839183 | SNV | 1 | A | G | Heterozygous |

|             |         |     |   |   |   |              |
|-------------|---------|-----|---|---|---|--------------|
| NC_037642.1 | 5839183 | SNV | 1 | A | T | Heterozygous |
| NC_037642.1 | 5839254 | SNV | 1 | A | G | Homozygous   |
| NC_037642.1 | 5841120 | SNV | 1 | A | G | Homozygous   |
| NC_037642.1 | 5841154 | SNV | 1 | C | T | Heterozygous |
| NC_037642.1 | 5842101 | SNV | 1 | G | T | Homozygous   |
| NC_037642.1 | 5842438 | SNV | 1 | T | C | Homozygous   |
| NC_037642.1 | 5842512 | SNV | 1 | A | G | Homozygous   |
| NC_037642.1 | 5842554 | SNV | 1 | G | A | Homozygous   |
| NC_037642.1 | 5842590 | SNV | 1 | A | G | Homozygous   |
| NC_037642.1 | 5843140 | SNV | 1 | A | T | Heterozygous |
| NC_037642.1 | 5843170 | SNV | 1 | A | G | Heterozygous |
| NC_037642.1 | 5843212 | SNV | 1 | G | A | Heterozygous |
| NC_037642.1 | 5843215 | SNV | 1 | A | C | Heterozygous |
| NC_037642.1 | 5843217 | SNV | 1 | A | C | Heterozygous |
| NC_037642.1 | 5843702 | SNV | 1 | G | A | Heterozygous |
| NC_037642.1 | 5843706 | SNV | 1 | G | A | Heterozygous |
| NC_037642.1 | 5843710 | SNV | 1 | G | A | Heterozygous |
| NC_037642.1 | 5843715 | SNV | 1 | G | A | Homozygous   |
| NC_037642.1 | 5843987 | SNV | 1 | G | T | Homozygous   |
| NC_037642.1 | 5843991 | SNV | 1 | T | C | Homozygous   |
| NC_037642.1 | 5844017 | SNV | 1 | T | A | Homozygous   |
| NC_037642.1 | 5844024 | SNV | 1 | T | A | Homozygous   |
| NC_037642.1 | 5848650 | SNV | 1 | A | T | Homozygous   |
| NC_037642.1 | 5891181 | SNV | 1 | G | C | Homozygous   |
| NC_037642.1 | 5891186 | SNV | 1 | T | C | Heterozygous |
| NC_037642.1 | 5891189 | SNV | 1 | A | C | Heterozygous |
| NC_037642.1 | 5891239 | SNV | 1 | C | T | Heterozygous |
| NC_037642.1 | 5892037 | SNV | 1 | T | C | Heterozygous |
| NC_037642.1 | 5892151 | SNV | 1 | C | T | Heterozygous |
| NC_037642.1 | 5892697 | SNV | 1 | A | G | Homozygous   |
| NC_037642.1 | 5893247 | SNV | 1 | G | A | Heterozygous |
| NC_037642.1 | 5893313 | SNV | 1 | C | T | Heterozygous |
| NC_037642.1 | 5894051 | SNV | 1 | C | T | Heterozygous |
| NC_037642.1 | 5894233 | SNV | 1 | A | G | Heterozygous |
| NC_037642.1 | 5894280 | SNV | 1 | G | A | Heterozygous |
| NC_037642.1 | 5894328 | SNV | 1 | A | G | Heterozygous |
| NC_037642.1 | 5894391 | SNV | 1 | G | A | Heterozygous |
| NC_037642.1 | 5897986 | SNV | 1 | G | A | Heterozygous |
| NC_037642.1 | 5899052 | SNV | 1 | C | T | Homozygous   |
| NC_037642.1 | 5899054 | SNV | 1 | G | C | Homozygous   |
| NC_037642.1 | 5900227 | SNV | 1 | G | T | Heterozygous |
| NC_037642.1 | 5900327 | SNV | 1 | T | G | Homozygous   |
| NC_037642.1 | 5900329 | SNV | 1 | T | G | Homozygous   |
| NC_037642.1 | 5900339 | SNV | 1 | C | G | Heterozygous |
| NC_037642.1 | 5900901 | SNV | 1 | G | A | Homozygous   |
| NC_037642.1 | 5909249 | SNV | 1 | A | G | Homozygous   |
| NC_037642.1 | 5910392 | SNV | 1 | A | T | Heterozygous |
| NC_037642.1 | 5910502 | SNV | 1 | A | G | Homozygous   |
| NC_037642.1 | 5910789 | SNV | 1 | C | A | Heterozygous |
| NC_037642.1 | 5910915 | SNV | 1 | G | A | Heterozygous |
| NC_037642.1 | 5914311 | SNV | 1 | T | C | Homozygous   |



|             |         |     |   |   |   |              |
|-------------|---------|-----|---|---|---|--------------|
| NC_037642.1 | 5914455 | SNV | 1 | T | C | Homozygous   |
| NC_037642.1 | 5917893 | SNV | 1 | A | C | Heterozygous |
| NC_037642.1 | 5917989 | SNV | 1 | C | T | Homozygous   |
| NC_037642.1 | 5920058 | SNV | 1 | A | T | Homozygous   |
| NC_037642.1 | 5920092 | SNV | 1 | G | T | Heterozygous |
| NC_037642.1 | 5920099 | SNV | 1 | A | T | Heterozygous |
| NC_037642.1 | 5920101 | SNV | 1 | A | T | Heterozygous |
| NC_037642.1 | 5920105 | SNV | 1 | A | C | Heterozygous |
| NC_037642.1 | 5920107 | SNV | 1 | A | T | Heterozygous |
| NC_037642.1 | 5920116 | SNV | 1 | A | T | Heterozygous |
| NC_037642.1 | 5920134 | SNV | 1 | G | T | Heterozygous |
| NC_037642.1 | 5920146 | SNV | 1 | T | C | Heterozygous |
| NC_037642.1 | 5920433 | SNV | 1 | C | T | Homozygous   |
| NC_037642.1 | 5920850 | SNV | 1 | C | T | Heterozygous |
| NC_037642.1 | 5921058 | SNV | 1 | A | G | Homozygous   |
| NC_037642.1 | 5921260 | SNV | 1 | A | G | Heterozygous |
| NC_037642.1 | 5921456 | SNV | 1 | A | T | Homozygous   |
| NC_037642.1 | 5921787 | SNV | 1 | C | A | Homozygous   |
| NC_037642.1 | 5924146 | SNV | 1 | T | A | Homozygous   |
| NC_037642.1 | 5924344 | SNV | 1 | T | A | Heterozygous |
| NC_037642.1 | 5924367 | SNV | 1 | T | C | Homozygous   |
| NC_037642.1 | 5925564 | SNV | 1 | A | G | Homozygous   |
| NC_037642.1 | 5928230 | SNV | 1 | A | T | Heterozygous |
| NC_037642.1 | 5928297 | SNV | 1 | A | G | Homozygous   |
| NC_037642.1 | 5928546 | SNV | 1 | T | C | Homozygous   |
| NC_037642.1 | 5928548 | SNV | 1 | C | T | Homozygous   |
| NC_037642.1 | 5928583 | SNV | 1 | T | C | Heterozygous |
| NC_037642.1 | 5929804 | SNV | 1 | T | C | Homozygous   |
| NC_037642.1 | 5931349 | SNV | 1 | C | T | Homozygous   |
| NC_037642.1 | 5933783 | SNV | 1 | T | A | Heterozygous |
| NC_037642.1 | 5933809 | SNV | 1 | A | T | Homozygous   |
| NC_037642.1 | 5933815 | SNV | 1 | T | G | Homozygous   |
| NC_037642.1 | 5933820 | SNV | 1 | T | G | Homozygous   |
| NC_037642.1 | 5933831 | SNV | 1 | A | G | Homozygous   |
| NC_037642.1 | 5934873 | SNV | 1 | A | G | Homozygous   |
| NC_037642.1 | 5937567 | SNV | 1 | C | T | Homozygous   |
| NC_037642.1 | 5937628 | SNV | 1 | T | C | Homozygous   |
| NC_037642.1 | 5938164 | SNV | 1 | T | C | Heterozygous |
| NC_037642.1 | 5938200 | SNV | 1 | T | C | Heterozygous |
| NC_037642.1 | 5938205 | SNV | 1 | A | G | Homozygous   |
| NC_037642.1 | 5938241 | SNV | 1 | C | T | Heterozygous |
| NC_037642.1 | 5938247 | SNV | 1 | A | C | Heterozygous |
| NC_037642.1 | 5938256 | SNV | 1 | T | A | Heterozygous |
| NC_037642.1 | 5938352 | SNV | 1 | C | T | Homozygous   |
| NC_037642.1 | 5938473 | SNV | 1 | G | A | Heterozygous |
| NC_037642.1 | 5938481 | SNV | 1 | T | C | Heterozygous |
| NC_037642.1 | 5938484 | SNV | 1 | C | T | Heterozygous |
| NC_037642.1 | 5938486 | SNV | 1 | G | A | Homozygous   |
| NC_037642.1 | 5940591 | SNV | 1 | A | G | Homozygous   |
| NC_037642.1 | 5942545 | SNV | 1 | C | T | Heterozygous |
| NC_037642.1 | 5942612 | SNV | 1 | T | C | Heterozygous |

|             |         |     |   |   |   |              |
|-------------|---------|-----|---|---|---|--------------|
| NC_037642.1 | 5942691 | SNV | 1 | T | C | Homozygous   |
| NC_037642.1 | 5942781 | SNV | 1 | G | A | Heterozygous |
| NC_037642.1 | 5942912 | SNV | 1 | G | A | Homozygous   |
| NC_037642.1 | 5949413 | SNV | 1 | C | G | Homozygous   |
| NC_037642.1 | 5949437 | SNV | 1 | C | T | Heterozygous |
| NC_037642.1 | 5949452 | SNV | 1 | T | C | Homozygous   |
| NC_037642.1 | 5949468 | SNV | 1 | T | C | Homozygous   |
| NC_037642.1 | 5956266 | SNV | 1 | T | G | Homozygous   |
| NC_037642.1 | 5956271 | SNV | 1 | A | C | Homozygous   |
| NC_037642.1 | 5956304 | SNV | 1 | G | C | Homozygous   |
| NC_037642.1 | 5976758 | SNV | 1 | C | T | Heterozygous |
| NC_037642.1 | 5995274 | SNV | 1 | T | G | Homozygous   |
| NC_037642.1 | 5995490 | SNV | 1 | T | C | Heterozygous |
| NC_037642.1 | 5995664 | SNV | 1 | G | A | Heterozygous |
| NC_037642.1 | 5999262 | SNV | 1 | C | T | Homozygous   |
| NC_037642.1 | 5999296 | SNV | 1 | C | T | Homozygous   |
| NC_037642.1 | 6014547 | SNV | 1 | C | T | Homozygous   |
| NC_037642.1 | 6015212 | SNV | 1 | C | T | Heterozygous |
| NC_037642.1 | 6016656 | SNV | 1 | G | A | Heterozygous |
| NC_037642.1 | 6033181 | SNV | 1 | C | G | Homozygous   |
| NC_037642.1 | 6047773 | SNV | 1 | G | A | Homozygous   |
| NC_037642.1 | 6047799 | SNV | 1 | C | T | Heterozygous |
| NC_037642.1 | 6047808 | SNV | 1 | A | G | Heterozygous |
| NC_037642.1 | 6047916 | SNV | 1 | A | G | Homozygous   |
| NC_037642.1 | 6047961 | SNV | 1 | C | T | Heterozygous |
| NC_037642.1 | 6055880 | SNV | 1 | C | T | Heterozygous |
| NC_037642.1 | 6055903 | SNV | 1 | T | A | Heterozygous |
| NC_037642.1 | 6056072 | SNV | 1 | A | G | Heterozygous |
| NC_037642.1 | 6056141 | SNV | 1 | T | C | Homozygous   |
| NC_037642.1 | 6056169 | SNV | 1 | C | T | Homozygous   |
| NC_037642.1 | 6094409 | SNV | 1 | T | A | Homozygous   |
| NC_037642.1 | 6094482 | SNV | 1 | A | G | Heterozygous |
| NC_037642.1 | 6094718 | SNV | 1 | T | C | Homozygous   |
| NC_037642.1 | 6094784 | SNV | 1 | A | T | Heterozygous |
| NC_037642.1 | 6094841 | SNV | 1 | A | G | Heterozygous |
| NC_037642.1 | 6094848 | SNV | 1 | A | C | Homozygous   |
| NC_037642.1 | 6094868 | SNV | 1 | C | T | Homozygous   |
| NC_037642.1 | 6094888 | SNV | 1 | G | A | Heterozygous |
| NC_037642.1 | 6095087 | SNV | 1 | C | T | Heterozygous |
| NC_037642.1 | 6095129 | SNV | 1 | T | C | Homozygous   |
| NC_037642.1 | 6095148 | SNV | 1 | G | A | Homozygous   |
| NC_037642.1 | 6097673 | SNV | 1 | G | T | Homozygous   |
| NC_037642.1 | 6097804 | SNV | 1 | A | C | Heterozygous |
| NC_037642.1 | 6097833 | SNV | 1 | T | C | Homozygous   |
| NC_037642.1 | 6098048 | SNV | 1 | A | G | Homozygous   |
| NC_037642.1 | 6098072 | SNV | 1 | A | G | Homozygous   |
| NC_037642.1 | 6098292 | SNV | 1 | C | T | Heterozygous |
| NC_037642.1 | 6100107 | SNV | 1 | A | G | Homozygous   |
| NC_037642.1 | 6100110 | SNV | 1 | C | T | Homozygous   |
| NC_037642.1 | 6100122 | SNV | 1 | T | G | Homozygous   |
| NC_037642.1 | 6100205 | SNV | 1 | T | C | Heterozygous |

|             |         |     |   |   |   |              |
|-------------|---------|-----|---|---|---|--------------|
| NC_037642.1 | 6100210 | SNV | 1 | C | T | Homozygous   |
| NC_037642.1 | 6100220 | SNV | 1 | T | C | Homozygous   |
| NC_037642.1 | 6100292 | SNV | 1 | A | G | Homozygous   |
| NC_037642.1 | 6100429 | SNV | 1 | C | T | Homozygous   |
| NC_037642.1 | 6113549 | SNV | 1 | T | A | Homozygous   |
| NC_037642.1 | 6113582 | SNV | 1 | G | T | Homozygous   |
| NC_037642.1 | 6113597 | SNV | 1 | C | A | Homozygous   |
| NC_037642.1 | 6113968 | SNV | 1 | A | G | Homozygous   |
| NC_037642.1 | 6114313 | SNV | 1 | A | G | Heterozygous |
| NC_037642.1 | 6114359 | SNV | 1 | C | T | Heterozygous |
| NC_037642.1 | 6114454 | SNV | 1 | G | T | Homozygous   |
| NC_037642.1 | 6120677 | SNV | 1 | T | C | Homozygous   |
| NC_037642.1 | 6120690 | SNV | 1 | A | G | Homozygous   |
| NC_037642.1 | 6120693 | SNV | 1 | C | T | Homozygous   |
| NC_037642.1 | 6120696 | SNV | 1 | G | C | Heterozygous |
| NC_037642.1 | 6120713 | SNV | 1 | G | C | Homozygous   |
| NC_037642.1 | 6121041 | SNV | 1 | T | C | Heterozygous |
| NC_037642.1 | 6121043 | SNV | 1 | C | A | Heterozygous |
| NC_037642.1 | 6121051 | SNV | 1 | C | T | Heterozygous |
| NC_037642.1 | 6121057 | SNV | 1 | C | A | Heterozygous |
| NC_037642.1 | 6121060 | SNV | 1 | G | C | Homozygous   |
| NC_037642.1 | 6121088 | SNV | 1 | G | A | Homozygous   |
| NC_037642.1 | 6121327 | SNV | 1 | C | T | Heterozygous |
| NC_037642.1 | 6121330 | SNV | 1 | C | T | Heterozygous |
| NC_037642.1 | 6121809 | SNV | 1 | T | C | Homozygous   |
| NC_037642.1 | 6121821 | SNV | 1 | G | C | Heterozygous |
| NC_037642.1 | 6121827 | SNV | 1 | T | G | Heterozygous |
| NC_037642.1 | 6121886 | SNV | 1 | T | C | Heterozygous |
| NC_037642.1 | 6121925 | SNV | 1 | T | C | Homozygous   |
| NC_037642.1 | 6129397 | SNV | 1 | G | A | Homozygous   |
| NC_037642.1 | 6129465 | SNV | 1 | G | T | Homozygous   |
| NC_037642.1 | 6129607 | SNV | 1 | C | T | Heterozygous |
| NC_037642.1 | 6144710 | SNV | 1 | G | T | Heterozygous |
| NC_037642.1 | 6144722 | SNV | 1 | A | G | Homozygous   |
| NC_037642.1 | 6182832 | SNV | 1 | C | A | Heterozygous |
| NC_037642.1 | 6291551 | SNV | 1 | T | C | Heterozygous |
| NC_037642.1 | 6291792 | SNV | 1 | C | T | Homozygous   |
| NC_037642.1 | 6291944 | SNV | 1 | G | T | Heterozygous |
| NC_037642.1 | 6292143 | SNV | 1 | C | T | Homozygous   |
| NC_037642.1 | 6292200 | SNV | 1 | T | A | Homozygous   |
| NC_037642.1 | 6292206 | SNV | 1 | C | T | Heterozygous |
| NC_037642.1 | 6292495 | SNV | 1 | A | G | Heterozygous |
| NC_037642.1 | 6292510 | SNV | 1 | C | T | Heterozygous |
| NC_037642.1 | 6292646 | SNV | 1 | T | C | Homozygous   |
| NC_037642.1 | 6292728 | SNV | 1 | A | G | Heterozygous |
| NC_037642.1 | 6292802 | SNV | 1 | C | T | Heterozygous |
| NC_037642.1 | 6293217 | SNV | 1 | G | A | Heterozygous |
| NC_037642.1 | 6293472 | SNV | 1 | A | G | Homozygous   |
| NC_037642.1 | 6294020 | SNV | 1 | G | A | Homozygous   |
| NC_037642.1 | 6294029 | SNV | 1 | G | A | Homozygous   |
| NC_037642.1 | 6294032 | SNV | 1 | T | A | Homozygous   |

|             |         |     |   |   |   |              |
|-------------|---------|-----|---|---|---|--------------|
| NC_037642.1 | 6294037 | SNV | 1 | G | A | Homozygous   |
| NC_037642.1 | 6294040 | SNV | 1 | T | A | Homozygous   |
| NC_037642.1 | 6294067 | SNV | 1 | G | T | Homozygous   |
| NC_037642.1 | 6294279 | SNV | 1 | G | A | Heterozygous |
| NC_037642.1 | 6294464 | SNV | 1 | C | T | Homozygous   |
| NC_037642.1 | 6294481 | SNV | 1 | T | C | Heterozygous |
| NC_037642.1 | 6297549 | SNV | 1 | C | T | Homozygous   |
| NC_037642.1 | 6297965 | SNV | 1 | T | C | Heterozygous |
| NC_037642.1 | 6298245 | SNV | 1 | T | C | Homozygous   |
| NC_037642.1 | 6298422 | SNV | 1 | G | A | Heterozygous |
| NC_037642.1 | 6298423 | SNV | 1 | A | T | Heterozygous |
| NC_037642.1 | 6298461 | SNV | 1 | T | C | Homozygous   |
| NC_037642.1 | 6301903 | SNV | 1 | A | G | Homozygous   |
| NC_037642.1 | 6301985 | SNV | 1 | C | T | Heterozygous |
| NC_037642.1 | 6302073 | SNV | 1 | A | G | Homozygous   |
| NC_037642.1 | 6302075 | SNV | 1 | A | G | Homozygous   |
| NC_037642.1 | 6302102 | SNV | 1 | T | C | Heterozygous |
| NC_037642.1 | 6302357 | SNV | 1 | C | G | Heterozygous |
| NC_037642.1 | 6302361 | SNV | 1 | G | A | Heterozygous |
| NC_037642.1 | 6303226 | SNV | 1 | T | C | Heterozygous |
| NC_037642.1 | 6303386 | SNV | 1 | A | G | Homozygous   |
| NC_037642.1 | 6303435 | SNV | 1 | T | C | Homozygous   |
| NC_037642.1 | 6303463 | SNV | 1 | A | G | Homozygous   |
| NC_037642.1 | 6303527 | SNV | 1 | T | C | Homozygous   |
| NC_037642.1 | 6303545 | SNV | 1 | C | T | Homozygous   |
| NC_037642.1 | 6303562 | SNV | 1 | G | T | Homozygous   |
| NC_037642.1 | 6303705 | SNV | 1 | G | T | Homozygous   |
| NC_037642.1 | 6304277 | SNV | 1 | G | C | Heterozygous |
| NC_037642.1 | 6304776 | SNV | 1 | C | G | Homozygous   |
| NC_037642.1 | 6305583 | SNV | 1 | G | A | Heterozygous |
| NC_037642.1 | 6305757 | SNV | 1 | C | T | Homozygous   |
| NC_037642.1 | 6308371 | SNV | 1 | A | G | Heterozygous |
| NC_037642.1 | 6308374 | SNV | 1 | A | G | Heterozygous |
| NC_037642.1 | 6308532 | SNV | 1 | A | G | Homozygous   |
| NC_037642.1 | 6309470 | SNV | 1 | C | T | Homozygous   |
| NC_037642.1 | 6309472 | SNV | 1 | C | T | Homozygous   |
| NC_037642.1 | 6309486 | SNV | 1 | C | T | Homozygous   |
| NC_037642.1 | 6309566 | SNV | 1 | C | T | Homozygous   |
| NC_037642.1 | 6309654 | SNV | 1 | G | A | Heterozygous |
| NC_037642.1 | 6309873 | SNV | 1 | A | T | Homozygous   |
| NC_037642.1 | 6309895 | SNV | 1 | A | G | Homozygous   |
| NC_037642.1 | 6309906 | SNV | 1 | G | A | Homozygous   |
| NC_037642.1 | 6309922 | SNV | 1 | G | A | Homozygous   |
| NC_037642.1 | 6309929 | SNV | 1 | A | G | Homozygous   |
| NC_037642.1 | 6310090 | SNV | 1 | T | C | Heterozygous |
| NC_037642.1 | 6310093 | SNV | 1 | A | G | Heterozygous |
| NC_037642.1 | 6310290 | SNV | 1 | G | A | Heterozygous |
| NC_037642.1 | 6310325 | SNV | 1 | G | A | Heterozygous |
| NC_037642.1 | 6310345 | SNV | 1 | C | T | Homozygous   |
| NC_037642.1 | 6311829 | SNV | 1 | T | A | Heterozygous |
| NC_037642.1 | 6311833 | SNV | 1 | A | G | Homozygous   |

|             |         |     |   |   |   |              |
|-------------|---------|-----|---|---|---|--------------|
| NC_037642.1 | 6311840 | SNV | 1 | G | A | Heterozygous |
| NC_037642.1 | 6312112 | SNV | 1 | A | G | Homozygous   |
| NC_037642.1 | 6312248 | SNV | 1 | T | C | Homozygous   |
| NC_037642.1 | 6312352 | SNV | 1 | T | C | Homozygous   |
| NC_037642.1 | 6312466 | SNV | 1 | A | C | Homozygous   |
| NC_037642.1 | 6312481 | SNV | 1 | T | C | Heterozygous |
| NC_037642.1 | 6312802 | SNV | 1 | C | T | Homozygous   |
| NC_037642.1 | 6312855 | SNV | 1 | A | G | Homozygous   |
| NC_037642.1 | 6313086 | SNV | 1 | A | G | Homozygous   |
| NC_037642.1 | 6313149 | SNV | 1 | G | C | Homozygous   |
| NC_037642.1 | 6313252 | SNV | 1 | C | A | Heterozygous |
| NC_037642.1 | 6313772 | SNV | 1 | A | G | Heterozygous |
| NC_037642.1 | 6313968 | SNV | 1 | A | G | Homozygous   |
| NC_037642.1 | 6314034 | SNV | 1 | G | A | Homozygous   |
| NC_037642.1 | 6314371 | SNV | 1 | A | T | Heterozygous |
| NC_037642.1 | 6314580 | SNV | 1 | G | C | Heterozygous |
| NC_037642.1 | 6314699 | SNV | 1 | T | C | Homozygous   |
| NC_037642.1 | 6315134 | SNV | 1 | G | A | Homozygous   |
| NC_037642.1 | 6321134 | SNV | 1 | T | C | Homozygous   |
| NC_037642.1 | 6322652 | SNV | 1 | C | T | Heterozygous |
| NC_037642.1 | 6322654 | SNV | 1 | T | C | Homozygous   |
| NC_037642.1 | 6322733 | SNV | 1 | A | G | Homozygous   |
| NC_037642.1 | 6322760 | SNV | 1 | G | A | Heterozygous |
| NC_037642.1 | 6322787 | SNV | 1 | C | T | Heterozygous |
| NC_037642.1 | 6322791 | SNV | 1 | T | C | Homozygous   |
| NC_037642.1 | 6322805 | SNV | 1 | T | C | Homozygous   |
| NC_037642.1 | 6324564 | SNV | 1 | T | C | Homozygous   |
| NC_037642.1 | 6324567 | SNV | 1 | C | A | Homozygous   |
| NC_037642.1 | 6324572 | SNV | 1 | T | C | Homozygous   |
| NC_037642.1 | 6324601 | SNV | 1 | A | G | Homozygous   |
| NC_037642.1 | 6325610 | SNV | 1 | A | G | Heterozygous |
| NC_037642.1 | 6325700 | SNV | 1 | C | T | Homozygous   |
| NC_037642.1 | 6326045 | SNV | 1 | C | T | Heterozygous |
| NC_037642.1 | 6326047 | SNV | 1 | T | C | Heterozygous |
| NC_037642.1 | 6326052 | SNV | 1 | G | A | Heterozygous |
| NC_037642.1 | 6326089 | SNV | 1 | T | C | Homozygous   |
| NC_037642.1 | 6326149 | SNV | 1 | C | T | Homozygous   |
| NC_037642.1 | 6326152 | SNV | 1 | T | C | Homozygous   |
| NC_037642.1 | 6326155 | SNV | 1 | C | T | Heterozygous |
| NC_037642.1 | 6326212 | SNV | 1 | C | T | Heterozygous |
| NC_037642.1 | 6326217 | SNV | 1 | A | G | Homozygous   |
| NC_037642.1 | 6326552 | SNV | 1 | T | A | Homozygous   |
| NC_037642.1 | 6326569 | SNV | 1 | T | C | Homozygous   |
| NC_037642.1 | 6326601 | SNV | 1 | A | G | Heterozygous |
| NC_037642.1 | 6326618 | SNV | 1 | C | T | Heterozygous |
| NC_037642.1 | 6326638 | SNV | 1 | C | A | Heterozygous |
| NC_037642.1 | 6326929 | SNV | 1 | G | A | Heterozygous |
| NC_037642.1 | 6327026 | SNV | 1 | C | T | Heterozygous |
| NC_037642.1 | 6327149 | SNV | 1 | T | C | Homozygous   |
| NC_037642.1 | 6327600 | SNV | 1 | T | G | Homozygous   |
| NC_037642.1 | 6327662 | SNV | 1 | A | G | Homozygous   |

|             |         |     |   |   |   |              |
|-------------|---------|-----|---|---|---|--------------|
| NC_037642.1 | 6327953 | SNV | 1 | C | T | Heterozygous |
| NC_037642.1 | 6327964 | SNV | 1 | A | G | Homozygous   |
| NC_037642.1 | 6328688 | SNV | 1 | T | C | Homozygous   |
| NC_037642.1 | 6328906 | SNV | 1 | G | T | Heterozygous |
| NC_037642.1 | 6373903 | SNV | 1 | G | C | Heterozygous |
| NC_037642.1 | 6374033 | SNV | 1 | C | G | Homozygous   |
| NC_037642.1 | 6374067 | SNV | 1 | T | C | Homozygous   |
| NC_037642.1 | 6374084 | SNV | 1 | G | A | Heterozygous |
| NC_037642.1 | 6374100 | SNV | 1 | C | T | Heterozygous |
| NC_037642.1 | 6374263 | SNV | 1 | A | G | Heterozygous |
| NC_037642.1 | 6374442 | SNV | 1 | T | C | Homozygous   |
| NC_037642.1 | 6374633 | SNV | 1 | A | G | Heterozygous |
| NC_037642.1 | 6374711 | SNV | 1 | A | G | Homozygous   |
| NC_037642.1 | 6375152 | SNV | 1 | G | A | Homozygous   |
| NC_037642.1 | 6375280 | SNV | 1 | T | C | Homozygous   |
| NC_037642.1 | 6375294 | SNV | 1 | A | G | Homozygous   |
| NC_037642.1 | 6375303 | SNV | 1 | A | G | Homozygous   |
| NC_037642.1 | 6375312 | SNV | 1 | T | G | Homozygous   |
| NC_037642.1 | 6375331 | SNV | 1 | A | G | Homozygous   |
| NC_037642.1 | 6375361 | SNV | 1 | C | T | Homozygous   |
| NC_037642.1 | 6375376 | SNV | 1 | C | A | Heterozygous |
| NC_037642.1 | 6375428 | SNV | 1 | A | G | Homozygous   |
| NC_037642.1 | 6375433 | SNV | 1 | A | G | Homozygous   |
| NC_037642.1 | 6375456 | SNV | 1 | G | A | Heterozygous |
| NC_037642.1 | 6375649 | SNV | 1 | T | C | Homozygous   |
| NC_037642.1 | 6375658 | SNV | 1 | T | G | Heterozygous |
| NC_037642.1 | 6376110 | SNV | 1 | C | T | Heterozygous |
| NC_037642.1 | 6376187 | SNV | 1 | T | C | Homozygous   |
| NC_037642.1 | 6376947 | SNV | 1 | C | A | Heterozygous |
| NC_037642.1 | 6378661 | SNV | 1 | T | C | Homozygous   |
| NC_037642.1 | 6378910 | SNV | 1 | T | C | Homozygous   |
| NC_037642.1 | 6379083 | SNV | 1 | C | T | Homozygous   |
| NC_037642.1 | 6379091 | SNV | 1 | C | T | Homozygous   |
| NC_037642.1 | 6379194 | SNV | 1 | T | C | Heterozygous |
| NC_037642.1 | 6379270 | SNV | 1 | A | G | Heterozygous |
| NC_037642.1 | 6380242 | SNV | 1 | C | T | Heterozygous |
| NC_037642.1 | 6380279 | SNV | 1 | A | G | Homozygous   |
| NC_037642.1 | 6380294 | SNV | 1 | G | A | Homozygous   |
| NC_037642.1 | 6380310 | SNV | 1 | A | G | Heterozygous |
| NC_037642.1 | 6380345 | SNV | 1 | C | T | Homozygous   |
| NC_037642.1 | 6380392 | SNV | 1 | A | G | Homozygous   |
| NC_037642.1 | 6381361 | SNV | 1 | C | A | Homozygous   |
| NC_037642.1 | 6381367 | SNV | 1 | A | T | Homozygous   |
| NC_037642.1 | 6381375 | SNV | 1 | A | T | Homozygous   |
| NC_037642.1 | 6386203 | SNV | 1 | C | G | Homozygous   |
| NC_037642.1 | 6386207 | SNV | 1 | C | G | Homozygous   |
| NC_037642.1 | 6386272 | SNV | 1 | A | G | Heterozygous |
| NC_037642.1 | 6388902 | SNV | 1 | T | G | Heterozygous |
| NC_037642.1 | 6388904 | SNV | 1 | C | A | Heterozygous |
| NC_037642.1 | 6390343 | SNV | 1 | C | A | Heterozygous |
| NC_037642.1 | 6391233 | SNV | 1 | G | A | Heterozygous |

|             |         |     |   |   |   |              |
|-------------|---------|-----|---|---|---|--------------|
| NC_037642.1 | 6391424 | SNV | 1 | G | A | Heterozygous |
| NC_037642.1 | 6391498 | SNV | 1 | A | G | Heterozygous |
| NC_037642.1 | 6391556 | SNV | 1 | A | C | Homozygous   |
| NC_037642.1 | 6391586 | SNV | 1 | G | A | Heterozygous |
| NC_037642.1 | 6391590 | SNV | 1 | G | T | Heterozygous |
| NC_037642.1 | 6391594 | SNV | 1 | G | T | Heterozygous |
| NC_037642.1 | 6391603 | SNV | 1 | A | G | Homozygous   |
| NC_037642.1 | 6394484 | SNV | 1 | C | T | Heterozygous |
| NC_037642.1 | 6394496 | SNV | 1 | C | T | Heterozygous |
| NC_037642.1 | 6397426 | SNV | 1 | T | C | Heterozygous |
| NC_037642.1 | 6397563 | SNV | 1 | C | T | Heterozygous |
| NC_037642.1 | 6397566 | SNV | 1 | T | C | Heterozygous |
| NC_037642.1 | 6397572 | SNV | 1 | T | C | Homozygous   |
| NC_037642.1 | 6397630 | SNV | 1 | A | G | Homozygous   |
| NC_037642.1 | 6397670 | SNV | 1 | A | G | Heterozygous |
| NC_037642.1 | 6397709 | SNV | 1 | T | C | Heterozygous |
| NC_037642.1 | 6397757 | SNV | 1 | A | G | Heterozygous |
| NC_037642.1 | 6398386 | SNV | 1 | G | A | Homozygous   |
| NC_037642.1 | 6400022 | SNV | 1 | A | G | Homozygous   |
| NC_037642.1 | 6407676 | SNV | 1 | A | T | Homozygous   |
| NC_037642.1 | 6409241 | SNV | 1 | G | T | Homozygous   |
| NC_037642.1 | 6413965 | SNV | 1 | C | G | Homozygous   |
| NC_037642.1 | 6414025 | SNV | 1 | G | A | Heterozygous |
| NC_037642.1 | 6414033 | SNV | 1 | C | A | Homozygous   |
| NC_037642.1 | 6416775 | SNV | 1 | A | C | Homozygous   |
| NC_037642.1 | 6416778 | SNV | 1 | G | A | Homozygous   |
| NC_037642.1 | 6416784 | SNV | 1 | A | G | Homozygous   |
| NC_037642.1 | 6419043 | SNV | 1 | T | C | Homozygous   |
| NC_037642.1 | 6419051 | SNV | 1 | T | C | Heterozygous |
| NC_037642.1 | 6419095 | SNV | 1 | T | C | Homozygous   |
| NC_037642.1 | 6419109 | SNV | 1 | C | T | Homozygous   |
| NC_037642.1 | 6419123 | SNV | 1 | C | T | Heterozygous |
| NC_037642.1 | 6419160 | SNV | 1 | G | C | Homozygous   |
| NC_037642.1 | 6419193 | SNV | 1 | C | T | Homozygous   |
| NC_037642.1 | 6438041 | SNV | 1 | A | G | Homozygous   |
| NC_037642.1 | 6438193 | SNV | 1 | A | G | Homozygous   |
| NC_037642.1 | 6445140 | SNV | 1 | G | C | Heterozygous |
| NC_037642.1 | 6448838 | SNV | 1 | C | A | Heterozygous |
| NC_037642.1 | 6449148 | SNV | 1 | C | G | Homozygous   |
| NC_037642.1 | 6449153 | SNV | 1 | C | A | Heterozygous |
| NC_037642.1 | 6449210 | SNV | 1 | A | T | Heterozygous |
| NC_037642.1 | 6454350 | SNV | 1 | G | A | Heterozygous |
| NC_037642.1 | 6457251 | SNV | 1 | T | C | Heterozygous |
| NC_037642.1 | 6457254 | SNV | 1 | T | C | Heterozygous |
| NC_037642.1 | 6457257 | SNV | 1 | T | C | Heterozygous |
| NC_037642.1 | 6457261 | SNV | 1 | C | T | Heterozygous |
| NC_037642.1 | 6457264 | SNV | 1 | C | T | Heterozygous |
| NC_037642.1 | 6478051 | SNV | 1 | T | C | Homozygous   |
| NC_037642.1 | 6478248 | SNV | 1 | T | C | Homozygous   |
| NC_037642.1 | 6480871 | SNV | 1 | A | G | Homozygous   |
| NC_037642.1 | 6501800 | SNV | 1 | A | G | Homozygous   |

|             |         |     |   |   |   |              |
|-------------|---------|-----|---|---|---|--------------|
| NC_037642.1 | 6515746 | SNV | 1 | T | C | Heterozygous |
| NC_037642.1 | 6521647 | SNV | 1 | G | A | Homozygous   |
| NC_037642.1 | 6521745 | SNV | 1 | C | T | Heterozygous |
| NC_037642.1 | 6521751 | SNV | 1 | C | T | Heterozygous |
| NC_037642.1 | 6521977 | SNV | 1 | C | T | Heterozygous |
| NC_037642.1 | 6522055 | SNV | 1 | T | A | Heterozygous |
| NC_037642.1 | 6522066 | SNV | 1 | T | A | Homozygous   |
| NC_037642.1 | 6522068 | SNV | 1 | A | C | Homozygous   |
| NC_037642.1 | 6522071 | SNV | 1 | G | A | Homozygous   |
| NC_037642.1 | 6522074 | SNV | 1 | A | G | Homozygous   |
| NC_037642.1 | 6522076 | SNV | 1 | A | C | Homozygous   |
| NC_037642.1 | 6522080 | SNV | 1 | A | G | Homozygous   |
| NC_037642.1 | 6522083 | SNV | 1 | G | C | Homozygous   |
| NC_037642.1 | 6525098 | SNV | 1 | A | G | Homozygous   |
| NC_037642.1 | 6525249 | SNV | 1 | T | A | Homozygous   |
| NC_037642.1 | 6526862 | SNV | 1 | T | C | Heterozygous |
| NC_037642.1 | 6527277 | SNV | 1 | T | C | Heterozygous |
| NC_037642.1 | 6535613 | SNV | 1 | G | A | Heterozygous |
| NC_037642.1 | 6536101 | SNV | 1 | A | G | Heterozygous |
| NC_037642.1 | 6539755 | SNV | 1 | T | C | Heterozygous |
| NC_037642.1 | 6540582 | SNV | 1 | G | A | Homozygous   |
| NC_037642.1 | 6540842 | SNV | 1 | A | G | Homozygous   |
| NC_037642.1 | 6541480 | SNV | 1 | C | T | Homozygous   |
| NC_037642.1 | 6541483 | SNV | 1 | A | T | Homozygous   |
| NC_037642.1 | 6542253 | SNV | 1 | A | G | Homozygous   |
| NC_037642.1 | 6542354 | SNV | 1 | T | C | Heterozygous |
| NC_037642.1 | 6542503 | SNV | 1 | C | T | Heterozygous |
| NC_037642.1 | 6542848 | SNV | 1 | T | A | Homozygous   |
| NC_037642.1 | 6543082 | SNV | 1 | G | A | Heterozygous |
| NC_037642.1 | 6544709 | SNV | 1 | A | G | Homozygous   |
| NC_037642.1 | 6545823 | SNV | 1 | C | T | Heterozygous |
| NC_037642.1 | 6546085 | SNV | 1 | A | T | Homozygous   |
| NC_037642.1 | 6547372 | SNV | 1 | G | A | Heterozygous |
| NC_037642.1 | 6551081 | SNV | 1 | A | G | Homozygous   |
| NC_037642.1 | 6551084 | SNV | 1 | A | G | Homozygous   |
| NC_037642.1 | 6554895 | SNV | 1 | C | T | Homozygous   |
| NC_037642.1 | 6555503 | SNV | 1 | T | G | Homozygous   |
| NC_037642.1 | 6562768 | SNV | 1 | A | G | Heterozygous |
| NC_037642.1 | 6562786 | SNV | 1 | C | T | Heterozygous |
| NC_037642.1 | 6565496 | SNV | 1 | C | T | Homozygous   |
| NC_037642.1 | 6567335 | SNV | 1 | A | T | Homozygous   |
| NC_037642.1 | 6567337 | SNV | 1 | T | C | Homozygous   |
| NC_037642.1 | 6567340 | SNV | 1 | A | G | Homozygous   |
| NC_037642.1 | 6567346 | SNV | 1 | T | A | Homozygous   |
| NC_037642.1 | 6567372 | SNV | 1 | C | A | Homozygous   |
| NC_037642.1 | 6567375 | SNV | 1 | A | C | Homozygous   |
| NC_037642.1 | 6569110 | SNV | 1 | A | G | Homozygous   |
| NC_037642.1 | 6569400 | SNV | 1 | C | G | Homozygous   |
| NC_037642.1 | 6578996 | SNV | 1 | T | C | Homozygous   |
| NC_037642.1 | 6579194 | SNV | 1 | C | T | Homozygous   |
| NC_037642.1 | 6580215 | SNV | 1 | A | G | Homozygous   |



|             |         |     |   |   |   |              |
|-------------|---------|-----|---|---|---|--------------|
| NC_037642.1 | 6580301 | SNV | 1 | G | A | Homozygous   |
| NC_037642.1 | 6583527 | SNV | 1 | T | G | Homozygous   |
| NC_037642.1 | 6588404 | SNV | 1 | T | C | Homozygous   |
| NC_037642.1 | 6590002 | SNV | 1 | C | T | Homozygous   |
| NC_037642.1 | 6590625 | SNV | 1 | T | A | Heterozygous |
| NC_037642.1 | 6590717 | SNV | 1 | G | A | Heterozygous |
| NC_037642.1 | 6591551 | SNV | 1 | C | T | Homozygous   |
| NC_037642.1 | 6591906 | SNV | 1 | G | A | Homozygous   |
| NC_037642.1 | 6592116 | SNV | 1 | A | G | Homozygous   |
| NC_037642.1 | 6599232 | SNV | 1 | T | A | Homozygous   |
| NC_037642.1 | 6602834 | SNV | 1 | A | T | Homozygous   |
| NC_037642.1 | 6602937 | SNV | 1 | T | G | Homozygous   |
| NC_037642.1 | 6605238 | SNV | 1 | A | G | Homozygous   |
| NC_037642.1 | 6605264 | SNV | 1 | A | G | Heterozygous |
| NC_037642.1 | 6605602 | SNV | 1 | G | C | Homozygous   |
| NC_037642.1 | 6615294 | SNV | 1 | A | G | Homozygous   |
| NC_037642.1 | 6619730 | SNV | 1 | G | A | Homozygous   |
| NC_037642.1 | 6620352 | SNV | 1 | A | G | Homozygous   |
| NC_037642.1 | 6620916 | SNV | 1 | T | C | Homozygous   |
| NC_037642.1 | 6621028 | SNV | 1 | T | C | Homozygous   |
| NC_037642.1 | 6621795 | SNV | 1 | A | G | Homozygous   |
| NC_037642.1 | 6622726 | SNV | 1 | A | G | Heterozygous |
| NC_037642.1 | 6623812 | SNV | 1 | A | G | Heterozygous |
| NC_037642.1 | 6624271 | SNV | 1 | C | T | Heterozygous |
| NC_037642.1 | 6624273 | SNV | 1 | T | C | Homozygous   |
| NC_037642.1 | 6624685 | SNV | 1 | T | C | Homozygous   |
| NC_037642.1 | 6626019 | SNV | 1 | G | A | Homozygous   |
| NC_037642.1 | 6626217 | SNV | 1 | C | T | Homozygous   |
| NC_037642.1 | 6626251 | SNV | 1 | T | A | Homozygous   |
| NC_037642.1 | 6626359 | SNV | 1 | C | T | Heterozygous |
| NC_037642.1 | 6626774 | SNV | 1 | C | T | Homozygous   |
| NC_037642.1 | 6626906 | SNV | 1 | T | C | Homozygous   |
| NC_037642.1 | 6627057 | SNV | 1 | G | A | Heterozygous |
| NC_037642.1 | 6627126 | SNV | 1 | T | C | Homozygous   |
| NC_037642.1 | 6627274 | SNV | 1 | G | A | Heterozygous |
| NC_037642.1 | 6627355 | SNV | 1 | T | C | Homozygous   |
| NC_037642.1 | 6627859 | SNV | 1 | T | C | Homozygous   |
| NC_037642.1 | 6627999 | SNV | 1 | T | G | Heterozygous |
| NC_037642.1 | 6631912 | SNV | 1 | C | T | Homozygous   |
| NC_037642.1 | 6634217 | SNV | 1 | G | A | Heterozygous |
| NC_037642.1 | 6634764 | SNV | 1 | G | A | Homozygous   |
| NC_037642.1 | 6635108 | SNV | 1 | G | A | Heterozygous |
| NC_037642.1 | 6640562 | SNV | 1 | T | C | Homozygous   |
| NC_037642.1 | 6640766 | SNV | 1 | A | G | Homozygous   |
| NC_037642.1 | 6640896 | SNV | 1 | C | T | Homozygous   |
| NC_037642.1 | 6640992 | SNV | 1 | G | T | Homozygous   |
| NC_037642.1 | 6641144 | SNV | 1 | T | C | Homozygous   |
| NC_037642.1 | 6641159 | SNV | 1 | C | T | Heterozygous |
| NC_037642.1 | 6641771 | SNV | 1 | T | C | Heterozygous |
| NC_037642.1 | 6641784 | SNV | 1 | A | G | Homozygous   |
| NC_037642.1 | 6641860 | SNV | 1 | C | T | Heterozygous |

|             |         |     |   |   |   |              |
|-------------|---------|-----|---|---|---|--------------|
| NC_037642.1 | 6641872 | SNV | 1 | C | T | Homozygous   |
| NC_037642.1 | 6641922 | SNV | 1 | A | T | Homozygous   |
| NC_037642.1 | 6642124 | SNV | 1 | A | T | Homozygous   |
| NC_037642.1 | 6642474 | SNV | 1 | A | C | Homozygous   |
| NC_037642.1 | 6642564 | SNV | 1 | G | A | Homozygous   |
| NC_037642.1 | 6642683 | SNV | 1 | C | T | Heterozygous |
| NC_037642.1 | 6642694 | SNV | 1 | C | T | Homozygous   |
| NC_037642.1 | 6643251 | SNV | 1 | T | C | Homozygous   |
| NC_037642.1 | 6643426 | SNV | 1 | G | A | Homozygous   |
| NC_037642.1 | 6643811 | SNV | 1 | T | C | Homozygous   |
| NC_037642.1 | 6644303 | SNV | 1 | G | A | Heterozygous |
| NC_037642.1 | 6644306 | SNV | 1 | C | T | Heterozygous |
| NC_037642.1 | 6645072 | SNV | 1 | C | T | Heterozygous |
| NC_037642.1 | 6657035 | SNV | 1 | C | A | Homozygous   |
| NC_037642.1 | 6657241 | SNV | 1 | A | G | Heterozygous |
| NC_037642.1 | 6657903 | SNV | 1 | A | T | Heterozygous |
| NC_037642.1 | 6660813 | SNV | 1 | G | T | Homozygous   |
| NC_037642.1 | 6660817 | SNV | 1 | A | C | Homozygous   |
| NC_037642.1 | 6660820 | SNV | 1 | A | C | Homozygous   |
| NC_037642.1 | 6660843 | SNV | 1 | G | C | Homozygous   |
| NC_037642.1 | 6660846 | SNV | 1 | T | C | Homozygous   |
| NC_037642.1 | 6660855 | SNV | 1 | G | C | Homozygous   |
| NC_037642.1 | 6660859 | SNV | 1 | G | T | Homozygous   |
| NC_037642.1 | 6663059 | SNV | 1 | C | A | Heterozygous |
| NC_037642.1 | 6663475 | SNV | 1 | C | T | Homozygous   |
| NC_037642.1 | 6663488 | SNV | 1 | G | T | Heterozygous |
| NC_037642.1 | 6663493 | SNV | 1 | A | G | Heterozygous |
| NC_037642.1 | 6663493 | SNV | 1 | A | T | Heterozygous |
| NC_037642.1 | 6663599 | SNV | 1 | C | T | Heterozygous |
| NC_037642.1 | 6663642 | SNV | 1 | C | T | Heterozygous |
| NC_037642.1 | 6663733 | SNV | 1 | C | T | Heterozygous |
| NC_037642.1 | 6663763 | SNV | 1 | A | G | Homozygous   |
| NC_037642.1 | 6663910 | SNV | 1 | A | T | Heterozygous |
| NC_037642.1 | 6663928 | SNV | 1 | A | T | Heterozygous |
| NC_037642.1 | 6663934 | SNV | 1 | C | T | Heterozygous |
| NC_037642.1 | 6663937 | SNV | 1 | C | A | Heterozygous |
| NC_037642.1 | 6663940 | SNV | 1 | T | G | Heterozygous |
| NC_037642.1 | 6663956 | SNV | 1 | T | A | Heterozygous |
| NC_037642.1 | 6668394 | SNV | 1 | C | G | Heterozygous |
| NC_037642.1 | 6668419 | SNV | 1 | G | A | Heterozygous |
| NC_037642.1 | 6670075 | SNV | 1 | A | G | Homozygous   |
| NC_037642.1 | 6830352 | SNV | 1 | A | G | Homozygous   |
| NC_037642.1 | 6830368 | SNV | 1 | A | G | Heterozygous |
| NC_037642.1 | 6830732 | SNV | 1 | A | G | Homozygous   |
| NC_037642.1 | 6831295 | SNV | 1 | A | G | Homozygous   |
| NC_037642.1 | 6831515 | SNV | 1 | T | C | Homozygous   |
| NC_037642.1 | 6831635 | SNV | 1 | G | A | Heterozygous |
| NC_037642.1 | 6831865 | SNV | 1 | C | T | Heterozygous |
| NC_037642.1 | 6832537 | SNV | 1 | T | C | Homozygous   |
| NC_037642.1 | 6832543 | SNV | 1 | C | T | Homozygous   |
| NC_037642.1 | 6832619 | SNV | 1 | T | A | Heterozygous |

|             |         |     |   |   |   |              |
|-------------|---------|-----|---|---|---|--------------|
| NC_037642.1 | 6832680 | SNV | 1 | C | T | Heterozygous |
| NC_037642.1 | 6834413 | SNV | 1 | C | T | Heterozygous |
| NC_037642.1 | 6834422 | SNV | 1 | G | A | Heterozygous |
| NC_037642.1 | 6836602 | SNV | 1 | T | C | Homozygous   |
| NC_037642.1 | 6836679 | SNV | 1 | C | G | Homozygous   |
| NC_037642.1 | 6838261 | SNV | 1 | T | C | Homozygous   |
| NC_037642.1 | 6846477 | SNV | 1 | T | A | Homozygous   |
| NC_037642.1 | 6846499 | SNV | 1 | G | T | Homozygous   |
| NC_037642.1 | 6846501 | SNV | 1 | T | A | Homozygous   |
| NC_037642.1 | 6846504 | SNV | 1 | A | T | Homozygous   |
| NC_037642.1 | 6846514 | SNV | 1 | T | C | Homozygous   |
| NC_037642.1 | 6846516 | SNV | 1 | T | G | Homozygous   |
| NC_037642.1 | 6846522 | SNV | 1 | T | A | Homozygous   |
| NC_037642.1 | 6846525 | SNV | 1 | A | T | Homozygous   |
| NC_037642.1 | 6847688 | SNV | 1 | G | A | Homozygous   |
| NC_037642.1 | 6852047 | SNV | 1 | T | C | Homozygous   |
| NC_037642.1 | 6852270 | SNV | 1 | G | A | Homozygous   |
| NC_037642.1 | 6855709 | SNV | 1 | C | T | Homozygous   |
| NC_037642.1 | 6855719 | SNV | 1 | C | A | Homozygous   |
| NC_037642.1 | 6864254 | SNV | 1 | A | G | Homozygous   |
| NC_037642.1 | 6864321 | SNV | 1 | A | G | Heterozygous |
| NC_037642.1 | 6864706 | SNV | 1 | C | T | Heterozygous |
| NC_037642.1 | 6865645 | SNV | 1 | A | G | Homozygous   |
| NC_037642.1 | 6865744 | SNV | 1 | T | A | Heterozygous |
| NC_037642.1 | 6865746 | SNV | 1 | G | A | Heterozygous |
| NC_037642.1 | 6865836 | SNV | 1 | A | T | Homozygous   |
| NC_037642.1 | 6866176 | SNV | 1 | C | G | Homozygous   |
| NC_037642.1 | 6866541 | SNV | 1 | C | T | Heterozygous |
| NC_037642.1 | 6866816 | SNV | 1 | T | C | Heterozygous |
| NC_037642.1 | 6867119 | SNV | 1 | G | A | Heterozygous |
| NC_037642.1 | 6867327 | SNV | 1 | A | G | Homozygous   |
| NC_037642.1 | 6869905 | SNV | 1 | G | A | Heterozygous |
| NC_037642.1 | 6871574 | SNV | 1 | C | T | Heterozygous |
| NC_037642.1 | 6871957 | SNV | 1 | T | C | Homozygous   |
| NC_037642.1 | 6872094 | SNV | 1 | C | T | Homozygous   |
| NC_037642.1 | 6872260 | SNV | 1 | T | C | Homozygous   |
| NC_037642.1 | 6872273 | SNV | 1 | T | C | Homozygous   |
| NC_037642.1 | 6872338 | SNV | 1 | T | C | Heterozygous |
| NC_037642.1 | 6873733 | SNV | 1 | G | A | Heterozygous |
| NC_037642.1 | 6873762 | SNV | 1 | T | A | Heterozygous |
| NC_037642.1 | 6874486 | SNV | 1 | A | G | Homozygous   |
| NC_037642.1 | 6876742 | SNV | 1 | T | C | Heterozygous |
| NC_037642.1 | 6876854 | SNV | 1 | T | C | Heterozygous |
| NC_037642.1 | 6877347 | SNV | 1 | C | A | Homozygous   |
| NC_037642.1 | 6877886 | SNV | 1 | C | T | Heterozygous |
| NC_037642.1 | 6878067 | SNV | 1 | T | C | Homozygous   |
| NC_037642.1 | 6878705 | SNV | 1 | C | T | Heterozygous |
| NC_037642.1 | 6879806 | SNV | 1 | G | A | Homozygous   |
| NC_037642.1 | 6879809 | SNV | 1 | T | C | Homozygous   |
| NC_037642.1 | 6879815 | SNV | 1 | T | C | Homozygous   |
| NC_037642.1 | 6880380 | SNV | 1 | T | C | Homozygous   |

|             |         |     |   |   |   |              |
|-------------|---------|-----|---|---|---|--------------|
| NC_037642.1 | 6897966 | SNV | 1 | C | T | Heterozygous |
| NC_037642.1 | 6898075 | SNV | 1 | C | T | Homozygous   |
| NC_037642.1 | 6898127 | SNV | 1 | G | A | Homozygous   |
| NC_037642.1 | 6898158 | SNV | 1 | C | G | Homozygous   |
| NC_037642.1 | 6898295 | SNV | 1 | C | T | Heterozygous |
| NC_037642.1 | 6899003 | SNV | 1 | T | A | Heterozygous |
| NC_037642.1 | 6899006 | SNV | 1 | T | A | Heterozygous |
| NC_037642.1 | 6899099 | SNV | 1 | C | T | Heterozygous |
| NC_037642.1 | 6899161 | SNV | 1 | T | C | Homozygous   |
| NC_037642.1 | 6899342 | SNV | 1 | A | G | Homozygous   |
| NC_037642.1 | 6899434 | SNV | 1 | G | A | Heterozygous |
| NC_037642.1 | 6899437 | SNV | 1 | T | C | Homozygous   |
| NC_037642.1 | 6899441 | SNV | 1 | A | G | Homozygous   |
| NC_037642.1 | 6899746 | SNV | 1 | C | T | Homozygous   |
| NC_037642.1 | 6899748 | SNV | 1 | G | C | Homozygous   |
| NC_037642.1 | 6899766 | SNV | 1 | A | G | Homozygous   |
| NC_037642.1 | 6899776 | SNV | 1 | A | G | Homozygous   |
| NC_037642.1 | 6904962 | SNV | 1 | A | G | Heterozygous |
| NC_037642.1 | 6908799 | SNV | 1 | G | A | Heterozygous |
| NC_037642.1 | 6908801 | SNV | 1 | G | A | Heterozygous |
| NC_037642.1 | 6908862 | SNV | 1 | G | A | Heterozygous |
| NC_037642.1 | 6908971 | SNV | 1 | T | A | Homozygous   |
| NC_037642.1 | 6911693 | SNV | 1 | C | T | Homozygous   |
| NC_037642.1 | 6911972 | SNV | 1 | A | G | Homozygous   |
| NC_037642.1 | 6919214 | SNV | 1 | C | T | Heterozygous |
| NC_037642.1 | 6919216 | SNV | 1 | A | G | Heterozygous |
| NC_037642.1 | 6919220 | SNV | 1 | C | A | Heterozygous |
| NC_037642.1 | 6919234 | SNV | 1 | C | A | Homozygous   |
| NC_037642.1 | 6919466 | SNV | 1 | A | C | Heterozygous |
| NC_037642.1 | 6919496 | SNV | 1 | G | A | Heterozygous |
| NC_037642.1 | 6919500 | SNV | 1 | T | C | Homozygous   |
| NC_037642.1 | 6919512 | SNV | 1 | A | G | Homozygous   |
| NC_037642.1 | 6919532 | SNV | 1 | C | T | Homozygous   |
| NC_037642.1 | 6919563 | SNV | 1 | G | A | Homozygous   |
| NC_037642.1 | 6919774 | SNV | 1 | A | G | Heterozygous |
| NC_037642.1 | 6919793 | SNV | 1 | C | T | Heterozygous |
| NC_037642.1 | 6919824 | SNV | 1 | G | A | Heterozygous |
| NC_037642.1 | 6919826 | SNV | 1 | C | T | Heterozygous |
| NC_037642.1 | 6919863 | SNV | 1 | G | A | Homozygous   |
| NC_037642.1 | 6923161 | SNV | 1 | C | A | Homozygous   |
| NC_037642.1 | 6923182 | SNV | 1 | T | C | Homozygous   |
| NC_037642.1 | 6934570 | SNV | 1 | G | A | Heterozygous |
| NC_037642.1 | 6934655 | SNV | 1 | G | A | Homozygous   |
| NC_037642.1 | 6943389 | SNV | 1 | A | G | Homozygous   |
| NC_037642.1 | 6943427 | SNV | 1 | C | T | Heterozygous |
| NC_037642.1 | 6943463 | SNV | 1 | G | A | Heterozygous |
| NC_037642.1 | 6949861 | SNV | 1 | A | G | Homozygous   |
| NC_037642.1 | 6951097 | SNV | 1 | G | C | Homozygous   |
| NC_037642.1 | 6951114 | SNV | 1 | C | T | Heterozygous |
| NC_037642.1 | 6951120 | SNV | 1 | T | C | Heterozygous |
| NC_037642.1 | 6969377 | SNV | 1 | T | C | Homozygous   |

|             |         |     |   |   |   |              |
|-------------|---------|-----|---|---|---|--------------|
| NC_037642.1 | 6969420 | SNV | 1 | G | A | Heterozygous |
| NC_037642.1 | 6969877 | SNV | 1 | C | G | Heterozygous |
| NC_037642.1 | 6969896 | SNV | 1 | G | A | Homozygous   |
| NC_037642.1 | 6970045 | SNV | 1 | G | A | Heterozygous |
| NC_037642.1 | 6970322 | SNV | 1 | A | G | Homozygous   |
| NC_037642.1 | 6970867 | SNV | 1 | C | T | Heterozygous |
| NC_037642.1 | 6970870 | SNV | 1 | C | T | Homozygous   |
| NC_037642.1 | 6970971 | SNV | 1 | C | T | Heterozygous |
| NC_037642.1 | 6970978 | SNV | 1 | C | T | Heterozygous |
| NC_037642.1 | 6971120 | SNV | 1 | A | G | Heterozygous |
| NC_037642.1 | 6971125 | SNV | 1 | C | T | Heterozygous |
| NC_037642.1 | 6971159 | SNV | 1 | G | A | Homozygous   |
| NC_037642.1 | 6972691 | SNV | 1 | G | A | Homozygous   |
| NC_037642.1 | 6972736 | SNV | 1 | T | C | Homozygous   |
| NC_037642.1 | 6984199 | SNV | 1 | C | G | Heterozygous |
| NC_037642.1 | 6984660 | SNV | 1 | A | G | Heterozygous |
| NC_037642.1 | 6985288 | SNV | 1 | C | G | Homozygous   |
| NC_037642.1 | 6985291 | SNV | 1 | T | C | Homozygous   |
| NC_037642.1 | 6986744 | SNV | 1 | G | A | Heterozygous |
| NC_037642.1 | 6986846 | SNV | 1 | A | T | Heterozygous |
| NC_037642.1 | 6987210 | SNV | 1 | G | A | Heterozygous |
| NC_037642.1 | 6987899 | SNV | 1 | C | A | Homozygous   |
| NC_037642.1 | 6987913 | SNV | 1 | G | A | Homozygous   |
| NC_037642.1 | 6987915 | SNV | 1 | G | A | Homozygous   |
| NC_037642.1 | 6987931 | SNV | 1 | G | C | Heterozygous |
| NC_037642.1 | 6988423 | SNV | 1 | C | T | Homozygous   |
| NC_037642.1 | 6988500 | SNV | 1 | A | G | Heterozygous |
| NC_037642.1 | 6988508 | SNV | 1 | C | T | Heterozygous |
| NC_037642.1 | 6989119 | SNV | 1 | C | T | Heterozygous |
| NC_037642.1 | 6989147 | SNV | 1 | T | A | Homozygous   |
| NC_037642.1 | 6990060 | SNV | 1 | G | C | Homozygous   |
| NC_037642.1 | 6990075 | SNV | 1 | A | T | Homozygous   |
| NC_037642.1 | 6990125 | SNV | 1 | C | A | Heterozygous |
| NC_037642.1 | 6990159 | SNV | 1 | A | G | Homozygous   |
| NC_037642.1 | 6990165 | SNV | 1 | A | G | Heterozygous |
| NC_037642.1 | 6991004 | SNV | 1 | T | A | Heterozygous |
| NC_037642.1 | 6991018 | SNV | 1 | T | A | Homozygous   |
| NC_037642.1 | 6991021 | SNV | 1 | A | T | Heterozygous |
| NC_037642.1 | 6991042 | SNV | 1 | T | C | Heterozygous |
| NC_037642.1 | 6992032 | SNV | 1 | A | T | Heterozygous |
| NC_037642.1 | 6992035 | SNV | 1 | A | C | Heterozygous |
| NC_037642.1 | 6992038 | SNV | 1 | A | C | Heterozygous |
| NC_037642.1 | 6992046 | SNV | 1 | T | G | Heterozygous |
| NC_037642.1 | 6992404 | SNV | 1 | A | G | Homozygous   |
| NC_037642.1 | 6992644 | SNV | 1 | T | C | Heterozygous |
| NC_037642.1 | 6992783 | SNV | 1 | T | C | Homozygous   |
| NC_037642.1 | 6992847 | SNV | 1 | A | G | Homozygous   |
| NC_037642.1 | 6992854 | SNV | 1 | T | C | Heterozygous |
| NC_037642.1 | 6992860 | SNV | 1 | C | T | Heterozygous |
| NC_037642.1 | 6992868 | SNV | 1 | T | C | Heterozygous |
| NC_037642.1 | 6992888 | SNV | 1 | T | C | Homozygous   |

|             |         |     |   |   |   |              |
|-------------|---------|-----|---|---|---|--------------|
| NC_037642.1 | 6992902 | SNV | 1 | C | T | Heterozygous |
| NC_037642.1 | 6992969 | SNV | 1 | T | C | Heterozygous |
| NC_037642.1 | 6993242 | SNV | 1 | T | C | Heterozygous |
| NC_037642.1 | 6993410 | SNV | 1 | T | C | Homozygous   |
| NC_037642.1 | 6993491 | SNV | 1 | G | A | Heterozygous |
| NC_037642.1 | 6994030 | SNV | 1 | G | C | Homozygous   |
| NC_037642.1 | 6994037 | SNV | 1 | C | T | Heterozygous |
| NC_037642.1 | 6994092 | SNV | 1 | G | A | Homozygous   |
| NC_037642.1 | 6994095 | SNV | 1 | A | G | Homozygous   |
| NC_037642.1 | 6994100 | SNV | 1 | C | T | Homozygous   |
| NC_037642.1 | 6994289 | SNV | 1 | C | T | Heterozygous |
| NC_037642.1 | 6994353 | SNV | 1 | T | C | Heterozygous |
| NC_037642.1 | 6994819 | SNV | 1 | T | C | Homozygous   |
| NC_037642.1 | 6994823 | SNV | 1 | G | A | Homozygous   |
| NC_037642.1 | 6994840 | SNV | 1 | A | G | Homozygous   |
| NC_037642.1 | 6994856 | SNV | 1 | C | A | Heterozygous |
| NC_037642.1 | 6994967 | SNV | 1 | T | A | Heterozygous |
| NC_037642.1 | 6994992 | SNV | 1 | T | C | Homozygous   |
| NC_037642.1 | 6995020 | SNV | 1 | G | A | Heterozygous |
| NC_037642.1 | 6995324 | SNV | 1 | C | T | Homozygous   |
| NC_037642.1 | 6995863 | SNV | 1 | C | T | Homozygous   |
| NC_037642.1 | 6995892 | SNV | 1 | T | C | Heterozygous |
| NC_037642.1 | 6996030 | SNV | 1 | C | T | Heterozygous |
| NC_037642.1 | 6996039 | SNV | 1 | C | T | Heterozygous |
| NC_037642.1 | 6996046 | SNV | 1 | T | G | Homozygous   |
| NC_037642.1 | 6996049 | SNV | 1 | A | G | Homozygous   |
| NC_037642.1 | 6996086 | SNV | 1 | A | G | Homozygous   |
| NC_037642.1 | 6996182 | SNV | 1 | T | C | Homozygous   |
| NC_037642.1 | 6996191 | SNV | 1 | T | C | Heterozygous |
| NC_037642.1 | 6996756 | SNV | 1 | A | G | Heterozygous |
| NC_037642.1 | 6996789 | SNV | 1 | T | C | Homozygous   |
| NC_037642.1 | 6996818 | SNV | 1 | T | C | Heterozygous |
| NC_037642.1 | 6996820 | SNV | 1 | T | G | Heterozygous |
| NC_037642.1 | 6997012 | SNV | 1 | A | T | Heterozygous |
| NC_037642.1 | 6997234 | SNV | 1 | A | T | Heterozygous |
| NC_037642.1 | 6997334 | SNV | 1 | T | C | Heterozygous |
| NC_037642.1 | 6997658 | SNV | 1 | C | T | Homozygous   |
| NC_037642.1 | 6997749 | SNV | 1 | G | A | Homozygous   |
| NC_037642.1 | 6998584 | SNV | 1 | C | T | Heterozygous |
| NC_037642.1 | 6998593 | SNV | 1 | G | A | Homozygous   |
| NC_037642.1 | 6998604 | SNV | 1 | A | G | Homozygous   |
| NC_037642.1 | 6998842 | SNV | 1 | T | C | Homozygous   |
| NC_037642.1 | 6998984 | SNV | 1 | C | G | Homozygous   |
| NC_037642.1 | 6998987 | SNV | 1 | G | A | Homozygous   |
| NC_037642.1 | 6999214 | SNV | 1 | A | T | Heterozygous |
| NC_037642.1 | 6999600 | SNV | 1 | C | T | Heterozygous |
| NC_037642.1 | 6999749 | SNV | 1 | C | T | Heterozygous |
| NC_037642.1 | 7000472 | SNV | 1 | G | A | Heterozygous |
| NC_037642.1 | 7000573 | SNV | 1 | G | A | Heterozygous |
| NC_037642.1 | 7001388 | SNV | 1 | A | G | Heterozygous |
| NC_037642.1 | 7001579 | SNV | 1 | A | G | Homozygous   |

|             |         |     |   |   |   |              |
|-------------|---------|-----|---|---|---|--------------|
| NC_037642.1 | 7001661 | SNV | 1 | T | C | Heterozygous |
| NC_037642.1 | 7002783 | SNV | 1 | C | T | Heterozygous |
| NC_037642.1 | 7002800 | SNV | 1 | C | T | Homozygous   |
| NC_037642.1 | 7002830 | SNV | 1 | T | C | Homozygous   |
| NC_037642.1 | 7003227 | SNV | 1 | A | G | Homozygous   |
| NC_037642.1 | 7003245 | SNV | 1 | A | T | Heterozygous |
| NC_037642.1 | 7003661 | SNV | 1 | A | C | Homozygous   |
| NC_037642.1 | 7004521 | SNV | 1 | C | T | Homozygous   |
| NC_037642.1 | 7004632 | SNV | 1 | G | A | Homozygous   |
| NC_037642.1 | 7004787 | SNV | 1 | A | G | Homozygous   |
| NC_037642.1 | 7017939 | SNV | 1 | A | G | Homozygous   |
| NC_037642.1 | 7020616 | SNV | 1 | C | A | Homozygous   |
| NC_037642.1 | 7020939 | SNV | 1 | A | G | Homozygous   |
| NC_037642.1 | 7020984 | SNV | 1 | C | T | Homozygous   |
| NC_037642.1 | 7021009 | SNV | 1 | A | T | Homozygous   |
| NC_037642.1 | 7021399 | SNV | 1 | A | G | Heterozygous |
| NC_037642.1 | 7021976 | SNV | 1 | T | C | Homozygous   |
| NC_037642.1 | 7022012 | SNV | 1 | C | G | Heterozygous |
| NC_037642.1 | 7022014 | SNV | 1 | A | C | Heterozygous |
| NC_037642.1 | 7022016 | SNV | 1 | A | G | Heterozygous |
| NC_037642.1 | 7022029 | SNV | 1 | T | C | Homozygous   |
| NC_037642.1 | 7022954 | SNV | 1 | C | T | Heterozygous |
| NC_037642.1 | 7022957 | SNV | 1 | C | T | Heterozygous |
| NC_037642.1 | 7024050 | SNV | 1 | G | A | Homozygous   |
| NC_037642.1 | 7025269 | SNV | 1 | T | C | Heterozygous |
| NC_037642.1 | 7025294 | SNV | 1 | T | C | Heterozygous |
| NC_037642.1 | 7025789 | SNV | 1 | G | A | Heterozygous |
| NC_037642.1 | 7025941 | SNV | 1 | C | G | Heterozygous |
| NC_037642.1 | 7025983 | SNV | 1 | A | G | Heterozygous |
| NC_037642.1 | 7026011 | SNV | 1 | C | T | Homozygous   |
| NC_037642.1 | 7026107 | SNV | 1 | A | G | Heterozygous |
| NC_037642.1 | 7026352 | SNV | 1 | T | C | Heterozygous |
| NC_037642.1 | 7026411 | SNV | 1 | T | C | Heterozygous |
| NC_037642.1 | 7026457 | SNV | 1 | C | T | Homozygous   |
| NC_037642.1 | 7026723 | SNV | 1 | A | G | Heterozygous |
| NC_037642.1 | 7026920 | SNV | 1 | C | T | Heterozygous |
| NC_037642.1 | 7027278 | SNV | 1 | A | G | Homozygous   |
| NC_037642.1 | 7027604 | SNV | 1 | G | A | Heterozygous |
| NC_037642.1 | 7028049 | SNV | 1 | T | G | Heterozygous |
| NC_037642.1 | 7028054 | SNV | 1 | G | A | Heterozygous |
| NC_037642.1 | 7029338 | SNV | 1 | A | G | Homozygous   |
| NC_037642.1 | 7029424 | SNV | 1 | T | C | Heterozygous |
| NC_037642.1 | 7029430 | SNV | 1 | C | T | Homozygous   |
| NC_037642.1 | 7029432 | SNV | 1 | T | C | Homozygous   |
| NC_037642.1 | 7029750 | SNV | 1 | T | C | Homozygous   |
| NC_037642.1 | 7033090 | SNV | 1 | T | C | Heterozygous |
| NC_037642.1 | 7033096 | SNV | 1 | T | C | Heterozygous |
| NC_037642.1 | 7033506 | SNV | 1 | C | T | Homozygous   |
| NC_037642.1 | 7033791 | SNV | 1 | A | T | Heterozygous |
| NC_037642.1 | 7033902 | SNV | 1 | G | A | Heterozygous |
| NC_037642.1 | 7033907 | SNV | 1 | A | G | Homozygous   |

|             |         |     |   |   |   |              |
|-------------|---------|-----|---|---|---|--------------|
| NC_037642.1 | 7034375 | SNV | 1 | A | G | Heterozygous |
| NC_037642.1 | 7034508 | SNV | 1 | C | T | Homozygous   |
| NC_037642.1 | 7034598 | SNV | 1 | C | T | Heterozygous |
| NC_037642.1 | 7034609 | SNV | 1 | C | G | Heterozygous |
| NC_037642.1 | 7034635 | SNV | 1 | C | T | Homozygous   |
| NC_037642.1 | 7034643 | SNV | 1 | G | A | Heterozygous |
| NC_037642.1 | 7035335 | SNV | 1 | C | T | Heterozygous |
| NC_037642.1 | 7035340 | SNV | 1 | T | C | Heterozygous |
| NC_037642.1 | 7035370 | SNV | 1 | T | C | Heterozygous |
| NC_037642.1 | 7035698 | SNV | 1 | T | C | Heterozygous |
| NC_037642.1 | 7050320 | SNV | 1 | T | C | Heterozygous |
| NC_037642.1 | 7050324 | SNV | 1 | C | T | Homozygous   |
| NC_037642.1 | 7050326 | SNV | 1 | G | A | Homozygous   |
| NC_037642.1 | 7050339 | SNV | 1 | G | A | Homozygous   |
| NC_037642.1 | 7050344 | SNV | 1 | A | T | Homozygous   |
| NC_037642.1 | 7058641 | SNV | 1 | G | A | Homozygous   |
| NC_037642.1 | 7058909 | SNV | 1 | C | T | Heterozygous |
| NC_037642.1 | 7058961 | SNV | 1 | G | A | Heterozygous |
| NC_037642.1 | 7058976 | SNV | 1 | G | A | Homozygous   |
| NC_037642.1 | 7059203 | SNV | 1 | T | A | Heterozygous |
| NC_037642.1 | 7059590 | SNV | 1 | T | C | Homozygous   |
| NC_037642.1 | 7059603 | SNV | 1 | G | A | Heterozygous |
| NC_037642.1 | 7059606 | SNV | 1 | A | G | Heterozygous |
| NC_037642.1 | 7059876 | SNV | 1 | C | T | Homozygous   |
| NC_037642.1 | 7059882 | SNV | 1 | G | T | Homozygous   |
| NC_037642.1 | 7064325 | SNV | 1 | G | A | Heterozygous |
| NC_037642.1 | 7064371 | SNV | 1 | C | T | Heterozygous |
| NC_037642.1 | 7065948 | SNV | 1 | T | C | Heterozygous |
| NC_037642.1 | 7066037 | SNV | 1 | G | A | Heterozygous |
| NC_037642.1 | 7066195 | SNV | 1 | T | A | Heterozygous |
| NC_037642.1 | 7066310 | SNV | 1 | T | C | Homozygous   |
| NC_037642.1 | 7066322 | SNV | 1 | C | T | Heterozygous |
| NC_037642.1 | 7066910 | SNV | 1 | A | G | Homozygous   |
| NC_037642.1 | 7071695 | SNV | 1 | T | C | Heterozygous |
| NC_037642.1 | 7076929 | SNV | 1 | T | A | Homozygous   |
| NC_037642.1 | 7076949 | SNV | 1 | T | A | Homozygous   |
| NC_037642.1 | 7078398 | SNV | 1 | T | G | Homozygous   |
| NC_037642.1 | 7086089 | SNV | 1 | T | C | Homozygous   |
| NC_037642.1 | 7086502 | SNV | 1 | G | A | Homozygous   |
| NC_037642.1 | 7094585 | SNV | 1 | T | A | Heterozygous |
| NC_037642.1 | 7099691 | SNV | 1 | A | G | Homozygous   |
| NC_037642.1 | 7099902 | SNV | 1 | G | A | Heterozygous |
| NC_037642.1 | 7111003 | SNV | 1 | T | G | Homozygous   |
| NC_037642.1 | 7111541 | SNV | 1 | A | G | Heterozygous |
| NC_037642.1 | 7111628 | SNV | 1 | T | C | Homozygous   |
| NC_037642.1 | 7111667 | SNV | 1 | C | T | Heterozygous |
| NC_037642.1 | 7111823 | SNV | 1 | T | C | Homozygous   |
| NC_037642.1 | 7111857 | SNV | 1 | A | G | Homozygous   |
| NC_037642.1 | 7112216 | SNV | 1 | T | C | Homozygous   |
| NC_037642.1 | 7112285 | SNV | 1 | T | C | Homozygous   |
| NC_037642.1 | 7112303 | SNV | 1 | T | C | Homozygous   |



|             |         |     |   |   |   |              |
|-------------|---------|-----|---|---|---|--------------|
| NC_037642.1 | 7112351 | SNV | 1 | T | G | Homozygous   |
| NC_037642.1 | 7112498 | SNV | 1 | T | C | Heterozygous |
| NC_037642.1 | 7113408 | SNV | 1 | G | A | Homozygous   |
| NC_037642.1 | 7113480 | SNV | 1 | T | C | Homozygous   |
| NC_037642.1 | 7113514 | SNV | 1 | G | A | Homozygous   |
| NC_037642.1 | 7113694 | SNV | 1 | T | C | Heterozygous |
| NC_037642.1 | 7113703 | SNV | 1 | A | G | Heterozygous |
| NC_037642.1 | 7113739 | SNV | 1 | A | G | Heterozygous |
| NC_037642.1 | 7113834 | SNV | 1 | G | A | Homozygous   |
| NC_037642.1 | 7113873 | SNV | 1 | A | G | Homozygous   |
| NC_037642.1 | 7113988 | SNV | 1 | T | C | Homozygous   |
| NC_037642.1 | 7114188 | SNV | 1 | G | A | Homozygous   |
| NC_037642.1 | 7133933 | SNV | 1 | C | T | Heterozygous |
| NC_037642.1 | 7133951 | SNV | 1 | C | T | Heterozygous |
| NC_037642.1 | 7133973 | SNV | 1 | A | G | Heterozygous |
| NC_037642.1 | 7133983 | SNV | 1 | A | G | Homozygous   |
| NC_037642.1 | 7133994 | SNV | 1 | G | A | Heterozygous |
| NC_037642.1 | 7133999 | SNV | 1 | A | T | Heterozygous |
| NC_037642.1 | 7134009 | SNV | 1 | G | A | Heterozygous |
| NC_037642.1 | 7139194 | SNV | 1 | G | T | Homozygous   |
| NC_037642.1 | 7144217 | SNV | 1 | A | T | Homozygous   |
| NC_037642.1 | 7144219 | SNV | 1 | T | A | Homozygous   |
| NC_037642.1 | 7144224 | SNV | 1 | C | T | Homozygous   |
| NC_037642.1 | 7152763 | SNV | 1 | T | C | Homozygous   |
| NC_037642.1 | 7152861 | SNV | 1 | T | C | Homozygous   |
| NC_037642.1 | 7152874 | SNV | 1 | T | C | Homozygous   |
| NC_037642.1 | 7159294 | SNV | 1 | C | T | Homozygous   |
| NC_037642.1 | 7159327 | SNV | 1 | T | C | Homozygous   |
| NC_037642.1 | 7159360 | SNV | 1 | G | A | Homozygous   |
| NC_037642.1 | 7159426 | SNV | 1 | C | T | Homozygous   |
| NC_037642.1 | 7159448 | SNV | 1 | A | G | Homozygous   |
| NC_037642.1 | 7159606 | SNV | 1 | C | T | Homozygous   |
| NC_037642.1 | 7159649 | SNV | 1 | C | T | Homozygous   |
| NC_037642.1 | 7175585 | SNV | 1 | T | G | Heterozygous |
| NC_037642.1 | 7177085 | SNV | 1 | T | C | Homozygous   |
| NC_037642.1 | 7177116 | SNV | 1 | C | T | Heterozygous |
| NC_037642.1 | 7177141 | SNV | 1 | C | G | Heterozygous |
| NC_037642.1 | 7177199 | SNV | 1 | C | T | Heterozygous |
| NC_037642.1 | 7178160 | SNV | 1 | A | G | Homozygous   |
| NC_037642.1 | 7178431 | SNV | 1 | C | T | Heterozygous |
| NC_037642.1 | 7178753 | SNV | 1 | T | C | Heterozygous |
| NC_037642.1 | 7178944 | SNV | 1 | G | A | Homozygous   |
| NC_037642.1 | 7178982 | SNV | 1 | G | A | Homozygous   |
| NC_037642.1 | 7178992 | SNV | 1 | C | T | Heterozygous |
| NC_037642.1 | 7179033 | SNV | 1 | G | A | Homozygous   |
| NC_037642.1 | 7179047 | SNV | 1 | T | C | Homozygous   |
| NC_037642.1 | 7179051 | SNV | 1 | A | G | Homozygous   |
| NC_037642.1 | 7179073 | SNV | 1 | C | T | Homozygous   |
| NC_037642.1 | 7179680 | SNV | 1 | C | A | Homozygous   |
| NC_037642.1 | 7181992 | SNV | 1 | T | C | Homozygous   |
| NC_037642.1 | 7182377 | SNV | 1 | T | C | Homozygous   |

|             |         |     |   |   |   |              |
|-------------|---------|-----|---|---|---|--------------|
| NC_037642.1 | 7182448 | SNV | 1 | A | G | Homozygous   |
| NC_037642.1 | 7182485 | SNV | 1 | G | T | Heterozygous |
| NC_037642.1 | 7182705 | SNV | 1 | T | C | Heterozygous |
| NC_037642.1 | 7182723 | SNV | 1 | T | C | Homozygous   |
| NC_037642.1 | 7182843 | SNV | 1 | C | T | Heterozygous |
| NC_037642.1 | 7183140 | SNV | 1 | G | A | Heterozygous |
| NC_037642.1 | 7183321 | SNV | 1 | A | G | Homozygous   |
| NC_037642.1 | 7183859 | SNV | 1 | T | C | Heterozygous |
| NC_037642.1 | 7183934 | SNV | 1 | G | A | Homozygous   |
| NC_037642.1 | 7184037 | SNV | 1 | T | C | Homozygous   |
| NC_037642.1 | 7184709 | SNV | 1 | T | C | Heterozygous |
| NC_037642.1 | 7185027 | SNV | 1 | T | C | Heterozygous |
| NC_037642.1 | 7185182 | SNV | 1 | A | G | Homozygous   |
| NC_037642.1 | 7185219 | SNV | 1 | A | G | Heterozygous |
| NC_037642.1 | 7185242 | SNV | 1 | T | C | Heterozygous |
| NC_037642.1 | 7185244 | SNV | 1 | T | C | Heterozygous |
| NC_037642.1 | 7185272 | SNV | 1 | T | C | Heterozygous |
| NC_037642.1 | 7185462 | SNV | 1 | A | G | Homozygous   |
| NC_037642.1 | 7185606 | SNV | 1 | G | C | Homozygous   |
| NC_037642.1 | 7185987 | SNV | 1 | T | C | Homozygous   |
| NC_037642.1 | 7186646 | SNV | 1 | A | C | Heterozygous |
| NC_037642.1 | 7186818 | SNV | 1 | T | C | Homozygous   |
| NC_037642.1 | 7187428 | SNV | 1 | T | A | Heterozygous |
| NC_037642.1 | 7188231 | SNV | 1 | A | G | Heterozygous |
| NC_037642.1 | 7188233 | SNV | 1 | A | G | Heterozygous |
| NC_037642.1 | 7189584 | SNV | 1 | A | G | Homozygous   |
| NC_037642.1 | 7190539 | SNV | 1 | G | T | Heterozygous |
| NC_037642.1 | 7190548 | SNV | 1 | A | T | Heterozygous |
| NC_037642.1 | 7190564 | SNV | 1 | A | T | Heterozygous |
| NC_037642.1 | 7192009 | SNV | 1 | T | A | Homozygous   |
| NC_037642.1 | 7192012 | SNV | 1 | G | T | Homozygous   |
| NC_037642.1 | 7192015 | SNV | 1 | T | C | Homozygous   |
| NC_037642.1 | 7192017 | SNV | 1 | T | A | Homozygous   |
| NC_037642.1 | 7194153 | SNV | 1 | G | A | Heterozygous |
| NC_037642.1 | 7197510 | SNV | 1 | A | G | Homozygous   |
| NC_037642.1 | 7239485 | SNV | 1 | T | C | Homozygous   |
| NC_037642.1 | 7275166 | SNV | 1 | A | C | Homozygous   |
| NC_037642.1 | 7275175 | SNV | 1 | A | T | Homozygous   |
| NC_037642.1 | 7275200 | SNV | 1 | A | G | Heterozygous |
| NC_037642.1 | 7275204 | SNV | 1 | G | A | Homozygous   |
| NC_037642.1 | 7284975 | SNV | 1 | G | T | Heterozygous |
| NC_037642.1 | 7284979 | SNV | 1 | G | T | Heterozygous |
| NC_037642.1 | 7284983 | SNV | 1 | G | T | Heterozygous |
| NC_037642.1 | 7312120 | SNV | 1 | T | C | Heterozygous |
| NC_037642.1 | 7313575 | SNV | 1 | T | C | Homozygous   |
| NC_037642.1 | 7313577 | SNV | 1 | T | G | Heterozygous |
| NC_037642.1 | 7320022 | SNV | 1 | C | T | Heterozygous |
| NC_037642.1 | 7320033 | SNV | 1 | G | T | Heterozygous |
| NC_037642.1 | 7321642 | SNV | 1 | T | C | Homozygous   |
| NC_037642.1 | 7322138 | SNV | 1 | G | A | Homozygous   |
| NC_037642.1 | 7322196 | SNV | 1 | A | G | Heterozygous |

|             |         |     |   |   |   |              |
|-------------|---------|-----|---|---|---|--------------|
| NC_037642.1 | 7322203 | SNV | 1 | G | A | Homozygous   |
| NC_037642.1 | 7322208 | SNV | 1 | C | T | Homozygous   |
| NC_037642.1 | 7322280 | SNV | 1 | T | C | Homozygous   |
| NC_037642.1 | 7322322 | SNV | 1 | A | T | Homozygous   |
| NC_037642.1 | 7322331 | SNV | 1 | T | C | Homozygous   |
| NC_037642.1 | 7322479 | SNV | 1 | G | A | Homozygous   |
| NC_037642.1 | 7322761 | SNV | 1 | A | G | Heterozygous |
| NC_037642.1 | 7322831 | SNV | 1 | A | G | Homozygous   |
| NC_037642.1 | 7322942 | SNV | 1 | G | A | Heterozygous |
| NC_037642.1 | 7329701 | SNV | 1 | A | G | Homozygous   |
| NC_037642.1 | 7334899 | SNV | 1 | A | T | Homozygous   |
| NC_037642.1 | 7335036 | SNV | 1 | A | T | Heterozygous |
| NC_037642.1 | 7342945 | SNV | 1 | A | G | Homozygous   |
| NC_037642.1 | 7342951 | SNV | 1 | A | G | Homozygous   |
| NC_037642.1 | 7345559 | SNV | 1 | G | A | Homozygous   |
| NC_037642.1 | 7347439 | SNV | 1 | T | C | Homozygous   |
| NC_037642.1 | 7348139 | SNV | 1 | A | T | Homozygous   |
| NC_037642.1 | 7349537 | SNV | 1 | A | G | Homozygous   |
| NC_037642.1 | 7351156 | SNV | 1 | G | T | Homozygous   |
| NC_037642.1 | 7354712 | SNV | 1 | T | A | Homozygous   |
| NC_037642.1 | 7354717 | SNV | 1 | A | C | Homozygous   |
| NC_037642.1 | 7354727 | SNV | 1 | A | C | Homozygous   |
| NC_037642.1 | 7354733 | SNV | 1 | A | T | Homozygous   |
| NC_037642.1 | 7354742 | SNV | 1 | T | G | Homozygous   |
| NC_037642.1 | 7354746 | SNV | 1 | T | C | Homozygous   |
| NC_037642.1 | 7354756 | SNV | 1 | T | C | Homozygous   |
| NC_037642.1 | 7357536 | SNV | 1 | A | G | Heterozygous |
| NC_037642.1 | 7357620 | SNV | 1 | T | G | Homozygous   |
| NC_037642.1 | 7357624 | SNV | 1 | T | G | Homozygous   |
| NC_037642.1 | 7358413 | SNV | 1 | A | T | Heterozygous |
| NC_037642.1 | 7358443 | SNV | 1 | T | A | Homozygous   |
| NC_037642.1 | 7358447 | SNV | 1 | A | T | Homozygous   |
| NC_037642.1 | 7358457 | SNV | 1 | T | G | Heterozygous |
| NC_037642.1 | 7360189 | SNV | 1 | G | A | Heterozygous |
| NC_037642.1 | 7360193 | SNV | 1 | T | C | Heterozygous |
| NC_037642.1 | 7360195 | SNV | 1 | T | A | Heterozygous |
| NC_037642.1 | 7360197 | SNV | 1 | T | A | Heterozygous |
| NC_037642.1 | 7360205 | SNV | 1 | A | T | Heterozygous |
| NC_037642.1 | 7360677 | SNV | 1 | A | G | Homozygous   |
| NC_037642.1 | 7362241 | SNV | 1 | C | T | Homozygous   |
| NC_037642.1 | 7364316 | SNV | 1 | T | G | Heterozygous |
| NC_037642.1 | 7364750 | SNV | 1 | T | A | Heterozygous |
| NC_037642.1 | 7364775 | SNV | 1 | A | T | Heterozygous |
| NC_037642.1 | 7364784 | SNV | 1 | A | T | Heterozygous |
| NC_037642.1 | 7364786 | SNV | 1 | A | T | Heterozygous |
| NC_037642.1 | 7364788 | SNV | 1 | A | T | Heterozygous |
| NC_037642.1 | 7364799 | SNV | 1 | T | A | Heterozygous |
| NC_037642.1 | 7364810 | SNV | 1 | A | T | Heterozygous |
| NC_037642.1 | 7365041 | SNV | 1 | T | A | Homozygous   |
| NC_037642.1 | 7365301 | SNV | 1 | C | G | Homozygous   |
| NC_037642.1 | 7365677 | SNV | 1 | C | T | Homozygous   |

|             |         |     |   |   |   |              |
|-------------|---------|-----|---|---|---|--------------|
| NC_037642.1 | 7372262 | SNV | 1 | A | G | Heterozygous |
| NC_037642.1 | 7372267 | SNV | 1 | A | G | Heterozygous |
| NC_037642.1 | 7373322 | SNV | 1 | G | T | Homozygous   |
| NC_037642.1 | 7373707 | SNV | 1 | C | T | Heterozygous |
| NC_037642.1 | 7382510 | SNV | 1 | T | G | Homozygous   |
| NC_037642.1 | 7382531 | SNV | 1 | A | T | Homozygous   |
| NC_037642.1 | 7382541 | SNV | 1 | C | A | Homozygous   |
| NC_037642.1 | 7382547 | SNV | 1 | A | G | Homozygous   |
| NC_037642.1 | 7382553 | SNV | 1 | A | T | Homozygous   |
| NC_037642.1 | 7387169 | SNV | 1 | T | C | Homozygous   |
| NC_037642.1 | 7390408 | SNV | 1 | T | C | Homozygous   |
| NC_037642.1 | 7393971 | SNV | 1 | C | A | Homozygous   |
| NC_037642.1 | 7394547 | SNV | 1 | A | G | Homozygous   |
| NC_037642.1 | 7398209 | SNV | 1 | A | G | Heterozygous |
| NC_037642.1 | 7398212 | SNV | 1 | T | C | Heterozygous |
| NC_037642.1 | 7398215 | SNV | 1 | T | C | Heterozygous |
| NC_037642.1 | 7398235 | SNV | 1 | G | T | Homozygous   |
| NC_037642.1 | 7398237 | SNV | 1 | T | C | Homozygous   |
| NC_037642.1 | 7398251 | SNV | 1 | A | T | Homozygous   |
| NC_037642.1 | 7398257 | SNV | 1 | A | T | Homozygous   |
| NC_037642.1 | 7398261 | SNV | 1 | A | T | Homozygous   |
| NC_037642.1 | 7398752 | SNV | 1 | T | C | Homozygous   |
| NC_037642.1 | 7399269 | SNV | 1 | C | G | Homozygous   |
| NC_037642.1 | 7402859 | SNV | 1 | C | G | Heterozygous |
| NC_037642.1 | 7405666 | SNV | 1 | A | G | Homozygous   |
| NC_037642.1 | 7405735 | SNV | 1 | T | C | Heterozygous |
| NC_037642.1 | 7405738 | SNV | 1 | T | C | Heterozygous |
| NC_037642.1 | 7405756 | SNV | 1 | T | C | Heterozygous |
| NC_037642.1 | 7405759 | SNV | 1 | C | T | Heterozygous |
| NC_037642.1 | 7405762 | SNV | 1 | A | G | Heterozygous |
| NC_037642.1 | 7405765 | SNV | 1 | T | A | Heterozygous |
| NC_037642.1 | 7405789 | SNV | 1 | A | G | Heterozygous |
| NC_037642.1 | 7405795 | SNV | 1 | T | A | Heterozygous |
| NC_037642.1 | 7405798 | SNV | 1 | A | C | Heterozygous |
| NC_037642.1 | 7406656 | SNV | 1 | C | A | Homozygous   |
| NC_037642.1 | 7406659 | SNV | 1 | A | G | Homozygous   |
| NC_037642.1 | 7407061 | SNV | 1 | C | A | Heterozygous |
| NC_037642.1 | 7412264 | SNV | 1 | T | C | Homozygous   |
| NC_037642.1 | 7420086 | SNV | 1 | C | A | Heterozygous |
| NC_037642.1 | 7420694 | SNV | 1 | C | A | Heterozygous |
| NC_037642.1 | 7420703 | SNV | 1 | A | T | Heterozygous |
| NC_037642.1 | 7420721 | SNV | 1 | A | G | Heterozygous |
| NC_037642.1 | 7420724 | SNV | 1 | C | T | Heterozygous |
| NC_037642.1 | 7421427 | SNV | 1 | A | T | Homozygous   |
| NC_037642.1 | 7422698 | SNV | 1 | T | A | Homozygous   |
| NC_037642.1 | 7422701 | SNV | 1 | C | T | Homozygous   |
| NC_037642.1 | 7430672 | SNV | 1 | A | T | Homozygous   |
| NC_037642.1 | 7431357 | SNV | 1 | A | G | Homozygous   |
| NC_037642.1 | 7432456 | SNV | 1 | T | C | Homozygous   |
| NC_037642.1 | 7435004 | SNV | 1 | A | G | Heterozygous |
| NC_037642.1 | 7439018 | SNV | 1 | G | A | Homozygous   |

|             |         |     |   |   |   |              |
|-------------|---------|-----|---|---|---|--------------|
| NC_037642.1 | 7439229 | SNV | 1 | C | T | Homozygous   |
| NC_037642.1 | 7439287 | SNV | 1 | T | A | Homozygous   |
| NC_037642.1 | 7441956 | SNV | 1 | A | G | Homozygous   |
| NC_037642.1 | 7447889 | SNV | 1 | C | G | Homozygous   |
| NC_037642.1 | 7449240 | SNV | 1 | A | G | Homozygous   |
| NC_037642.1 | 7449247 | SNV | 1 | G | A | Homozygous   |
| NC_037642.1 | 7450466 | SNV | 1 | A | G | Homozygous   |
| NC_037642.1 | 7456084 | SNV | 1 | T | A | Heterozygous |
| NC_037642.1 | 7456091 | SNV | 1 | G | A | Homozygous   |
| NC_037642.1 | 7461363 | SNV | 1 | C | T | Homozygous   |
| NC_037642.1 | 7461370 | SNV | 1 | T | A | Heterozygous |
| NC_037642.1 | 7461371 | SNV | 1 | T | A | Heterozygous |
| NC_037642.1 | 7461380 | SNV | 1 | A | T | Heterozygous |
| NC_037642.1 | 7464038 | SNV | 1 | C | A | Homozygous   |
| NC_037642.1 | 7464371 | SNV | 1 | T | A | Homozygous   |
| NC_037642.1 | 7464394 | SNV | 1 | C | T | Homozygous   |
| NC_037642.1 | 7464398 | SNV | 1 | A | T | Homozygous   |
| NC_037642.1 | 7464403 | SNV | 1 | C | G | Homozygous   |
| NC_037642.1 | 7464515 | SNV | 1 | A | C | Homozygous   |
| NC_037642.1 | 7464524 | SNV | 1 | A | G | Homozygous   |
| NC_037642.1 | 7464526 | SNV | 1 | A | T | Homozygous   |
| NC_037642.1 | 7464536 | SNV | 1 | T | A | Homozygous   |
| NC_037642.1 | 7464567 | SNV | 1 | A | C | Homozygous   |
| NC_037642.1 | 7465662 | SNV | 1 | C | T | Homozygous   |
| NC_037642.1 | 7466496 | SNV | 1 | A | T | Homozygous   |
| NC_037642.1 | 7467841 | SNV | 1 | T | A | Homozygous   |
| NC_037642.1 | 7468542 | SNV | 1 | G | A | Homozygous   |
| NC_037642.1 | 7468853 | SNV | 1 | T | A | Homozygous   |
| NC_037642.1 | 7470016 | SNV | 1 | A | T | Homozygous   |
| NC_037642.1 | 7470019 | SNV | 1 | A | T | Homozygous   |
| NC_037642.1 | 7470031 | SNV | 1 | T | A | Homozygous   |
| NC_037642.1 | 7470040 | SNV | 1 | T | A | Homozygous   |
| NC_037642.1 | 7470046 | SNV | 1 | T | A | Homozygous   |
| NC_037642.1 | 7470049 | SNV | 1 | T | A | Homozygous   |
| NC_037642.1 | 7470051 | SNV | 1 | T | C | Homozygous   |
| NC_037642.1 | 7472410 | SNV | 1 | T | G | Homozygous   |
| NC_037642.1 | 7472458 | SNV | 1 | G | A | Homozygous   |
| NC_037642.1 | 7476797 | SNV | 1 | T | C | Homozygous   |
| NC_037642.1 | 7478671 | SNV | 1 | A | T | Homozygous   |
| NC_037642.1 | 7484899 | SNV | 1 | A | G | Homozygous   |
| NC_037642.1 | 7487106 | SNV | 1 | A | G | Homozygous   |
| NC_037642.1 | 7487812 | SNV | 1 | T | C | Homozygous   |
| NC_037642.1 | 7487829 | SNV | 1 | T | G | Homozygous   |
| NC_037642.1 | 7487833 | SNV | 1 | G | A | Homozygous   |
| NC_037642.1 | 7487843 | SNV | 1 | A | T | Homozygous   |
| NC_037642.1 | 7487854 | SNV | 1 | A | T | Heterozygous |
| NC_037642.1 | 7488535 | SNV | 1 | C | T | Homozygous   |
| NC_037642.1 | 7489285 | SNV | 1 | A | G | Homozygous   |
| NC_037642.1 | 7492513 | SNV | 1 | A | T | Heterozygous |
| NC_037642.1 | 7492519 | SNV | 1 | A | T | Heterozygous |
| NC_037642.1 | 7505694 | SNV | 1 | G | A | Homozygous   |

|             |         |     |   |   |   |              |
|-------------|---------|-----|---|---|---|--------------|
| NC_037642.1 | 7505697 | SNV | 1 | T | A | Homozygous   |
| NC_037642.1 | 7505719 | SNV | 1 | A | C | Heterozygous |
| NC_037642.1 | 7505719 | SNV | 1 | A | T | Heterozygous |
| NC_037642.1 | 7505740 | SNV | 1 | C | T | Homozygous   |
| NC_037642.1 | 7505743 | SNV | 1 | T | C | Homozygous   |
| NC_037642.1 | 7505748 | SNV | 1 | G | A | Homozygous   |
| NC_037642.1 | 7512588 | SNV | 1 | G | T | Homozygous   |
| NC_037642.1 | 7512590 | SNV | 1 | A | C | Homozygous   |
| NC_037642.1 | 7512849 | SNV | 1 | C | A | Homozygous   |
| NC_037642.1 | 7512859 | SNV | 1 | G | A | Heterozygous |
| NC_037642.1 | 7514077 | SNV | 1 | A | T | Homozygous   |
| NC_037642.1 | 7514086 | SNV | 1 | A | T | Homozygous   |
| NC_037642.1 | 7520064 | SNV | 1 | C | T | Homozygous   |
| NC_037642.1 | 7534665 | SNV | 1 | G | A | Heterozygous |
| NC_037642.1 | 7534674 | SNV | 1 | C | T | Heterozygous |
| NC_037642.1 | 7534695 | SNV | 1 | A | T | Heterozygous |
| NC_037642.1 | 7534701 | SNV | 1 | A | G | Homozygous   |
| NC_037642.1 | 7534750 | SNV | 1 | T | C | Heterozygous |
| NC_037642.1 | 7535714 | SNV | 1 | A | T | Homozygous   |
| NC_037642.1 | 7535738 | SNV | 1 | A | C | Homozygous   |
| NC_037642.1 | 7535745 | SNV | 1 | G | A | Homozygous   |
| NC_037642.1 | 7535757 | SNV | 1 | A | G | Homozygous   |
| NC_037642.1 | 7535760 | SNV | 1 | A | G | Homozygous   |
| NC_037642.1 | 7541636 | SNV | 1 | C | T | Homozygous   |
| NC_037642.1 | 7541638 | SNV | 1 | T | C | Homozygous   |
| NC_037642.1 | 7541645 | SNV | 1 | C | G | Homozygous   |
| NC_037642.1 | 7541674 | SNV | 1 | T | C | Homozygous   |
| NC_037642.1 | 7554377 | SNV | 1 | G | A | Homozygous   |
| NC_037642.1 | 7573442 | SNV | 1 | G | A | Homozygous   |
| NC_037642.1 | 7573485 | SNV | 1 | C | A | Homozygous   |
| NC_037642.1 | 7574312 | SNV | 1 | G | A | Homozygous   |
| NC_037642.1 | 7574317 | SNV | 1 | G | A | Heterozygous |
| NC_037642.1 | 7574319 | SNV | 1 | G | A | Heterozygous |
| NC_037642.1 | 7574353 | SNV | 1 | A | G | Homozygous   |
| NC_037642.1 | 7574356 | SNV | 1 | T | A | Homozygous   |
| NC_037642.1 | 7574358 | SNV | 1 | T | G | Homozygous   |
| NC_037642.1 | 7609386 | SNV | 1 | G | A | Homozygous   |
| NC_037642.1 | 7609676 | SNV | 1 | T | C | Homozygous   |
| NC_037642.1 | 7610382 | SNV | 1 | A | G | Heterozygous |
| NC_037642.1 | 7611069 | SNV | 1 | A | G | Homozygous   |
| NC_037642.1 | 7630747 | SNV | 1 | T | G | Homozygous   |
| NC_037642.1 | 7630773 | SNV | 1 | T | C | Homozygous   |
| NC_037642.1 | 7632932 | SNV | 1 | C | T | Homozygous   |
| NC_037642.1 | 7632957 | SNV | 1 | C | T | Heterozygous |
| NC_037642.1 | 7632961 | SNV | 1 | C | T | Homozygous   |
| NC_037642.1 | 7632972 | SNV | 1 | C | T | Homozygous   |
| NC_037642.1 | 7632974 | SNV | 1 | T | G | Homozygous   |
| NC_037642.1 | 7632976 | SNV | 1 | C | T | Homozygous   |
| NC_037642.1 | 7632979 | SNV | 1 | C | T | Homozygous   |
| NC_037642.1 | 7632986 | SNV | 1 | T | G | Heterozygous |
| NC_037642.1 | 7632991 | SNV | 1 | C | T | Heterozygous |

|             |         |     |   |   |   |              |
|-------------|---------|-----|---|---|---|--------------|
| NC_037642.1 | 7658695 | SNV | 1 | A | G | Homozygous   |
| NC_037642.1 | 7658729 | SNV | 1 | A | G | Homozygous   |
| NC_037642.1 | 7658904 | SNV | 1 | C | T | Homozygous   |
| NC_037642.1 | 7658954 | SNV | 1 | A | G | Heterozygous |
| NC_037642.1 | 7659477 | SNV | 1 | C | A | Homozygous   |
| NC_037642.1 | 7666929 | SNV | 1 | C | T | Homozygous   |
| NC_037642.1 | 7669626 | SNV | 1 | A | G | Heterozygous |
| NC_037642.1 | 7669677 | SNV | 1 | A | C | Heterozygous |
| NC_037642.1 | 7669681 | SNV | 1 | T | C | Heterozygous |
| NC_037642.1 | 7669685 | SNV | 1 | A | G | Heterozygous |
| NC_037642.1 | 7670907 | SNV | 1 | C | T | Homozygous   |
| NC_037642.1 | 7670909 | SNV | 1 | T | A | Homozygous   |
| NC_037642.1 | 7683831 | SNV | 1 | T | C | Heterozygous |
| NC_037642.1 | 7683998 | SNV | 1 | T | C | Homozygous   |
| NC_037642.1 | 7684123 | SNV | 1 | T | C | Homozygous   |
| NC_037642.1 | 7695863 | SNV | 1 | A | G | Homozygous   |
| NC_037642.1 | 7695908 | SNV | 1 | A | G | Homozygous   |
| NC_037642.1 | 7695920 | SNV | 1 | A | G | Homozygous   |
| NC_037642.1 | 7695922 | SNV | 1 | G | A | Homozygous   |
| NC_037642.1 | 7695926 | SNV | 1 | A | G | Homozygous   |
| NC_037642.1 | 7695933 | SNV | 1 | G | A | Heterozygous |
| NC_037642.1 | 7696968 | SNV | 1 | C | T | Homozygous   |
| NC_037642.1 | 7697353 | SNV | 1 | A | G | Homozygous   |
| NC_037642.1 | 7697388 | SNV | 1 | T | C | Heterozygous |
| NC_037642.1 | 7701443 | SNV | 1 | G | C | Heterozygous |
| NC_037642.1 | 7705131 | SNV | 1 | G | A | Heterozygous |
| NC_037642.1 | 7705154 | SNV | 1 | G | A | Heterozygous |
| NC_037642.1 | 7705219 | SNV | 1 | G | C | Heterozygous |
| NC_037642.1 | 7705255 | SNV | 1 | A | C | Heterozygous |
| NC_037642.1 | 7705258 | SNV | 1 | A | G | Heterozygous |
| NC_037642.1 | 7705265 | SNV | 1 | A | G | Heterozygous |
| NC_037642.1 | 7705286 | SNV | 1 | A | G | Heterozygous |
| NC_037642.1 | 7713297 | SNV | 1 | C | A | Homozygous   |
| NC_037642.1 | 7713329 | SNV | 1 | C | T | Homozygous   |
| NC_037642.1 | 7713341 | SNV | 1 | T | C | Homozygous   |
| NC_037642.1 | 7713352 | SNV | 1 | G | T | Homozygous   |
| NC_037642.1 | 7713354 | SNV | 1 | G | T | Homozygous   |
| NC_037642.1 | 7720681 | SNV | 1 | T | C | Homozygous   |
| NC_037642.1 | 7720684 | SNV | 1 | T | C | Homozygous   |
| NC_037642.1 | 7722029 | SNV | 1 | C | T | Heterozygous |
| NC_037642.1 | 7722039 | SNV | 1 | C | A | Homozygous   |
| NC_037642.1 | 7722065 | SNV | 1 | C | A | Heterozygous |
| NC_037642.1 | 7722124 | SNV | 1 | C | T | Homozygous   |
| NC_037642.1 | 7722129 | SNV | 1 | A | G | Homozygous   |
| NC_037642.1 | 7722137 | SNV | 1 | C | G | Homozygous   |
| NC_037642.1 | 7722139 | SNV | 1 | A | G | Homozygous   |
| NC_037642.1 | 7723543 | SNV | 1 | A | T | Heterozygous |
| NC_037642.1 | 7723561 | SNV | 1 | C | G | Homozygous   |
| NC_037642.1 | 7723579 | SNV | 1 | A | G | Heterozygous |
| NC_037642.1 | 7723583 | SNV | 1 | A | G | Heterozygous |
| NC_037642.1 | 7726099 | SNV | 1 | C | T | Homozygous   |

|             |         |     |   |   |   |              |
|-------------|---------|-----|---|---|---|--------------|
| NC_037642.1 | 7726108 | SNV | 1 | T | C | Homozygous   |
| NC_037642.1 | 7726112 | SNV | 1 | A | T | Homozygous   |
| NC_037642.1 | 7726115 | SNV | 1 | A | T | Homozygous   |
| NC_037642.1 | 7726913 | SNV | 1 | G | A | Heterozygous |
| NC_037642.1 | 7728161 | SNV | 1 | G | A | Heterozygous |
| NC_037642.1 | 7731465 | SNV | 1 | T | A | Heterozygous |
| NC_037642.1 | 7731476 | SNV | 1 | T | C | Heterozygous |
| NC_037642.1 | 7731478 | SNV | 1 | T | G | Heterozygous |
| NC_037642.1 | 7731480 | SNV | 1 | C | T | Heterozygous |
| NC_037642.1 | 7731618 | SNV | 1 | A | G | Heterozygous |
| NC_037642.1 | 7731693 | SNV | 1 | A | G | Homozygous   |
| NC_037642.1 | 7731862 | SNV | 1 | G | A | Heterozygous |
| NC_037642.1 | 7732025 | SNV | 1 | C | A | Homozygous   |
| NC_037642.1 | 7732233 | SNV | 1 | A | G | Homozygous   |
| NC_037642.1 | 7735549 | SNV | 1 | C | T | Heterozygous |
| NC_037642.1 | 7735558 | SNV | 1 | A | C | Homozygous   |
| NC_037642.1 | 7735578 | SNV | 1 | T | C | Homozygous   |
| NC_037642.1 | 7735889 | SNV | 1 | G | C | Heterozygous |
| NC_037642.1 | 7762210 | SNV | 1 | T | A | Homozygous   |
| NC_037642.1 | 7762218 | SNV | 1 | C | T | Homozygous   |
| NC_037642.1 | 7762255 | SNV | 1 | C | T | Homozygous   |
| NC_037642.1 | 7762266 | SNV | 1 | G | T | Homozygous   |
| NC_037642.1 | 7779043 | SNV | 1 | A | G | Homozygous   |
| NC_037642.1 | 7779106 | SNV | 1 | T | C | Homozygous   |
| NC_037642.1 | 7779238 | SNV | 1 | T | C | Heterozygous |
| NC_037642.1 | 7779370 | SNV | 1 | G | C | Heterozygous |
| NC_037642.1 | 7779631 | SNV | 1 | G | A | Heterozygous |
| NC_037642.1 | 7779675 | SNV | 1 | T | G | Homozygous   |
| NC_037642.1 | 7789205 | SNV | 1 | T | C | Heterozygous |
| NC_037642.1 | 7789219 | SNV | 1 | T | C | Heterozygous |
| NC_037642.1 | 7791222 | SNV | 1 | C | A | Heterozygous |
| NC_037642.1 | 7791228 | SNV | 1 | T | C | Heterozygous |
| NC_037642.1 | 7802571 | SNV | 1 | T | C | Heterozygous |
| NC_037642.1 | 7802577 | SNV | 1 | T | C | Homozygous   |
| NC_037642.1 | 7802597 | SNV | 1 | C | A | Heterozygous |
| NC_037642.1 | 7802603 | SNV | 1 | T | C | Heterozygous |
| NC_037642.1 | 7802605 | SNV | 1 | T | C | Heterozygous |
| NC_037642.1 | 7802613 | SNV | 1 | A | C | Homozygous   |
| NC_037642.1 | 7805319 | SNV | 1 | G | A | Heterozygous |
| NC_037642.1 | 7805459 | SNV | 1 | C | T | Heterozygous |
| NC_037642.1 | 7807935 | SNV | 1 | T | C | Heterozygous |
| NC_037642.1 | 7807945 | SNV | 1 | G | A | Heterozygous |
| NC_037642.1 | 7809243 | SNV | 1 | C | T | Heterozygous |
| NC_037642.1 | 7809347 | SNV | 1 | C | T | Heterozygous |
| NC_037642.1 | 7809426 | SNV | 1 | A | G | Heterozygous |
| NC_037642.1 | 7809439 | SNV | 1 | A | G | Homozygous   |
| NC_037642.1 | 7815220 | SNV | 1 | T | C | Homozygous   |
| NC_037642.1 | 7823526 | SNV | 1 | C | A | Heterozygous |
| NC_037642.1 | 7838628 | SNV | 1 | G | A | Heterozygous |
| NC_037642.1 | 7838640 | SNV | 1 | G | A | Heterozygous |
| NC_037642.1 | 7843458 | SNV | 1 | T | C | Heterozygous |



|             |         |     |   |   |   |              |
|-------------|---------|-----|---|---|---|--------------|
| NC_037642.1 | 7854937 | SNV | 1 | G | A | Heterozygous |
| NC_037642.1 | 7854939 | SNV | 1 | G | A | Homozygous   |
| NC_037642.1 | 7870155 | SNV | 1 | C | A | Homozygous   |
| NC_037642.1 | 7870157 | SNV | 1 | C | G | Homozygous   |
| NC_037642.1 | 7870160 | SNV | 1 | C | T | Homozygous   |
| NC_037642.1 | 7870165 | SNV | 1 | T | C | Homozygous   |
| NC_037642.1 | 7870171 | SNV | 1 | A | G | Homozygous   |
| NC_037642.1 | 7879090 | SNV | 1 | G | A | Homozygous   |
| NC_037642.1 | 7879104 | SNV | 1 | G | A | Homozygous   |
| NC_037642.1 | 7879381 | SNV | 1 | G | A | Homozygous   |
| NC_037642.1 | 7882468 | SNV | 1 | G | A | Homozygous   |
| NC_037642.1 | 7882470 | SNV | 1 | A | G | Heterozygous |
| NC_037642.1 | 7885498 | SNV | 1 | A | G | Homozygous   |
| NC_037642.1 | 7889126 | SNV | 1 | G | C | Homozygous   |
| NC_037642.1 | 7896237 | SNV | 1 | T | C | Homozygous   |
| NC_037642.1 | 7896245 | SNV | 1 | C | T | Homozygous   |
| NC_037642.1 | 7896251 | SNV | 1 | G | T | Homozygous   |
| NC_037642.1 | 7896292 | SNV | 1 | G | T | Homozygous   |
| NC_037642.1 | 7896295 | SNV | 1 | T | C | Homozygous   |
| NC_037642.1 | 7896302 | SNV | 1 | G | C | Homozygous   |
| NC_037642.1 | 7896306 | SNV | 1 | G | T | Homozygous   |
| NC_037642.1 | 7896858 | SNV | 1 | T | A | Heterozygous |
| NC_037642.1 | 7896860 | SNV | 1 | T | A | Heterozygous |
| NC_037642.1 | 7896863 | SNV | 1 | C | A | Heterozygous |
| NC_037642.1 | 7897215 | SNV | 1 | A | G | Homozygous   |
| NC_037642.1 | 7897229 | SNV | 1 | T | C | Heterozygous |
| NC_037642.1 | 7897255 | SNV | 1 | T | A | Heterozygous |
| NC_037642.1 | 7903206 | SNV | 1 | G | A | Heterozygous |
| NC_037642.1 | 7903216 | SNV | 1 | A | C | Heterozygous |
| NC_037642.1 | 7903222 | SNV | 1 | A | G | Heterozygous |
| NC_037642.1 | 7903233 | SNV | 1 | G | T | Heterozygous |
| NC_037642.1 | 7903235 | SNV | 1 | G | A | Heterozygous |
| NC_037642.1 | 7903242 | SNV | 1 | A | G | Heterozygous |
| NC_037642.1 | 7903244 | SNV | 1 | G | A | Heterozygous |
| NC_037642.1 | 7911589 | SNV | 1 | C | T | Heterozygous |
| NC_037642.1 | 7911687 | SNV | 1 | T | A | Heterozygous |
| NC_037642.1 | 7911918 | SNV | 1 | A | T | Homozygous   |
| NC_037642.1 | 7911923 | SNV | 1 | A | G | Homozygous   |
| NC_037642.1 | 7918950 | SNV | 1 | C | T | Heterozygous |
| NC_037642.1 | 7918958 | SNV | 1 | T | A | Heterozygous |
| NC_037642.1 | 7918973 | SNV | 1 | C | G | Heterozygous |
| NC_037642.1 | 7918983 | SNV | 1 | G | C | Heterozygous |
| NC_037642.1 | 7922552 | SNV | 1 | G | A | Homozygous   |
| NC_037642.1 | 7922561 | SNV | 1 | C | A | Homozygous   |
| NC_037642.1 | 7922568 | SNV | 1 | G | C | Homozygous   |
| NC_037642.1 | 7933742 | SNV | 1 | C | A | Homozygous   |
| NC_037642.1 | 7933744 | SNV | 1 | G | T | Homozygous   |
| NC_037642.1 | 7933747 | SNV | 1 | A | G | Heterozygous |
| NC_037642.1 | 7933777 | SNV | 1 | C | A | Homozygous   |
| NC_037642.1 | 7940569 | SNV | 1 | C | G | Homozygous   |
| NC_037642.1 | 7944692 | SNV | 1 | C | T | Heterozygous |

|             |         |     |   |   |   |              |
|-------------|---------|-----|---|---|---|--------------|
| NC_037642.1 | 7944716 | SNV | 1 | C | T | Heterozygous |
| NC_037642.1 | 7944721 | SNV | 1 | C | A | Heterozygous |
| NC_037642.1 | 7944725 | SNV | 1 | C | T | Heterozygous |
| NC_037642.1 | 7944728 | SNV | 1 | T | A | Heterozygous |
| NC_037642.1 | 7959585 | SNV | 1 | G | C | Homozygous   |
| NC_037642.1 | 7959603 | SNV | 1 | G | A | Homozygous   |
| NC_037642.1 | 7959605 | SNV | 1 | A | T | Heterozygous |
| NC_037642.1 | 7959658 | SNV | 1 | T | A | Homozygous   |
| NC_037642.1 | 7959668 | SNV | 1 | A | G | Homozygous   |
| NC_037642.1 | 7959700 | SNV | 1 | A | G | Heterozygous |
| NC_037642.1 | 7959706 | SNV | 1 | A | T | Heterozygous |
| NC_037642.1 | 7959734 | SNV | 1 | A | G | Heterozygous |
| NC_037642.1 | 7959759 | SNV | 1 | G | A | Heterozygous |
| NC_037642.1 | 7959777 | SNV | 1 | G | A | Heterozygous |
| NC_037642.1 | 7995581 | SNV | 1 | C | T | Heterozygous |
| NC_037642.1 | 7995618 | SNV | 1 | C | T | Heterozygous |
| NC_037642.1 | 8034807 | SNV | 1 | G | T | Homozygous   |
| NC_037642.1 | 8036687 | SNV | 1 | A | G | Homozygous   |
| NC_037642.1 | 8036716 | SNV | 1 | G | A | Homozygous   |
| NC_037642.1 | 8045409 | SNV | 1 | G | A | Homozygous   |
| NC_037642.1 | 8045432 | SNV | 1 | A | G | Homozygous   |
| NC_037642.1 | 8062750 | SNV | 1 | C | T | Homozygous   |
| NC_037642.1 | 8062769 | SNV | 1 | G | A | Homozygous   |
| NC_037642.1 | 8062796 | SNV | 1 | A | G | Homozygous   |
| NC_037642.1 | 8062807 | SNV | 1 | C | G | Homozygous   |
| NC_037642.1 | 8062924 | SNV | 1 | G | C | Heterozygous |
| NC_037642.1 | 8084976 | SNV | 1 | A | T | Homozygous   |
| NC_037642.1 | 8084989 | SNV | 1 | G | A | Homozygous   |
| NC_037642.1 | 8091557 | SNV | 1 | T | C | Homozygous   |
| NC_037642.1 | 8091690 | SNV | 1 | C | T | Homozygous   |
| NC_037642.1 | 8091943 | SNV | 1 | G | A | Heterozygous |
| NC_037642.1 | 8092057 | SNV | 1 | T | C | Homozygous   |
| NC_037642.1 | 8092118 | SNV | 1 | A | G | Homozygous   |
| NC_037642.1 | 8092144 | SNV | 1 | A | T | Homozygous   |
| NC_037642.1 | 8092195 | SNV | 1 | G | A | Homozygous   |
| NC_037642.1 | 8092304 | SNV | 1 | G | A | Heterozygous |
| NC_037642.1 | 8092755 | SNV | 1 | C | G | Heterozygous |
| NC_037642.1 | 8092758 | SNV | 1 | G | A | Heterozygous |
| NC_037642.1 | 8092760 | SNV | 1 | G | A | Heterozygous |
| NC_037642.1 | 8093063 | SNV | 1 | G | T | Homozygous   |
| NC_037642.1 | 8093065 | SNV | 1 | G | A | Homozygous   |
| NC_037642.1 | 8093070 | SNV | 1 | A | C | Homozygous   |
| NC_037642.1 | 8093077 | SNV | 1 | T | A | Homozygous   |
| NC_037642.1 | 8093228 | SNV | 1 | A | G | Homozygous   |
| NC_037642.1 | 8229593 | SNV | 1 | T | C | Heterozygous |
| NC_037642.1 | 8230474 | SNV | 1 | C | T | Heterozygous |
| NC_037642.1 | 8230510 | SNV | 1 | G | A | Heterozygous |
| NC_037642.1 | 8230512 | SNV | 1 | A | G | Homozygous   |
| NC_037642.1 | 8248131 | SNV | 1 | A | G | Homozygous   |
| NC_037642.1 | 8248370 | SNV | 1 | G | A | Heterozygous |
| NC_037642.1 | 8248411 | SNV | 1 | T | C | Homozygous   |

|             |         |     |   |   |   |              |
|-------------|---------|-----|---|---|---|--------------|
| NC_037642.1 | 8248438 | SNV | 1 | A | G | Homozygous   |
| NC_037642.1 | 8248446 | SNV | 1 | G | A | Homozygous   |
| NC_037642.1 | 8248455 | SNV | 1 | T | C | Homozygous   |
| NC_037642.1 | 8248460 | SNV | 1 | G | A | Homozygous   |
| NC_037642.1 | 8248502 | SNV | 1 | G | A | Homozygous   |
| NC_037642.1 | 8248876 | SNV | 1 | A | G | Homozygous   |
| NC_037642.1 | 8249125 | SNV | 1 | A | G | Homozygous   |
| NC_037642.1 | 8249194 | SNV | 1 | G | A | Heterozygous |
| NC_037642.1 | 8250801 | SNV | 1 | C | T | Heterozygous |
| NC_037642.1 | 8250920 | SNV | 1 | A | G | Homozygous   |
| NC_037642.1 | 8255235 | SNV | 1 | C | T | Heterozygous |
| NC_037642.1 | 8256117 | SNV | 1 | T | C | Heterozygous |
| NC_037642.1 | 8256242 | SNV | 1 | A | G | Heterozygous |
| NC_037642.1 | 8256731 | SNV | 1 | A | G | Homozygous   |
| NC_037642.1 | 8257734 | SNV | 1 | T | A | Homozygous   |
| NC_037642.1 | 8257738 | SNV | 1 | T | A | Homozygous   |
| NC_037642.1 | 8257742 | SNV | 1 | T | G | Homozygous   |
| NC_037642.1 | 8257751 | SNV | 1 | A | C | Homozygous   |
| NC_037642.1 | 8257765 | SNV | 1 | A | T | Homozygous   |
| NC_037642.1 | 8257768 | SNV | 1 | A | T | Homozygous   |
| NC_037642.1 | 8257880 | SNV | 1 | A | T | Homozygous   |
| NC_037642.1 | 8257886 | SNV | 1 | A | G | Homozygous   |
| NC_037642.1 | 8259144 | SNV | 1 | G | T | Homozygous   |
| NC_037642.1 | 8259148 | SNV | 1 | T | C | Homozygous   |
| NC_037642.1 | 8260214 | SNV | 1 | G | C | Heterozygous |
| NC_037642.1 | 8260896 | SNV | 1 | C | T | Heterozygous |
| NC_037642.1 | 8260951 | SNV | 1 | A | T | Heterozygous |
| NC_037642.1 | 8260955 | SNV | 1 | C | T | Heterozygous |
| NC_037642.1 | 8261420 | SNV | 1 | T | C | Heterozygous |
| NC_037642.1 | 8261614 | SNV | 1 | C | T | Homozygous   |
| NC_037642.1 | 8261620 | SNV | 1 | T | C | Homozygous   |
| NC_037642.1 | 8263924 | SNV | 1 | C | T | Heterozygous |
| NC_037642.1 | 8264076 | SNV | 1 | C | A | Homozygous   |
| NC_037642.1 | 8264078 | SNV | 1 | A | T | Homozygous   |
| NC_037642.1 | 8264265 | SNV | 1 | G | A | Heterozygous |
| NC_037642.1 | 8267675 | SNV | 1 | A | T | Homozygous   |
| NC_037642.1 | 8267700 | SNV | 1 | T | A | Homozygous   |
| NC_037642.1 | 8267703 | SNV | 1 | T | C | Homozygous   |
| NC_037642.1 | 8267721 | SNV | 1 | T | C | Homozygous   |
| NC_037642.1 | 8267724 | SNV | 1 | A | T | Homozygous   |
| NC_037642.1 | 8267892 | SNV | 1 | A | G | Homozygous   |
| NC_037642.1 | 8268166 | SNV | 1 | G | A | Homozygous   |
| NC_037642.1 | 8269501 | SNV | 1 | C | T | Homozygous   |
| NC_037642.1 | 8272412 | SNV | 1 | A | T | Homozygous   |
| NC_037642.1 | 8272952 | SNV | 1 | A | G | Homozygous   |
| NC_037642.1 | 8272977 | SNV | 1 | G | A | Homozygous   |
| NC_037642.1 | 8272980 | SNV | 1 | A | T | Homozygous   |
| NC_037642.1 | 8272985 | SNV | 1 | A | G | Homozygous   |
| NC_037642.1 | 8274283 | SNV | 1 | T | A | Homozygous   |
| NC_037642.1 | 8277779 | SNV | 1 | A | G | Heterozygous |
| NC_037642.1 | 8277849 | SNV | 1 | G | A | Heterozygous |

|             |         |     |   |   |   |              |
|-------------|---------|-----|---|---|---|--------------|
| NC_037642.1 | 8277942 | SNV | 1 | A | C | Homozygous   |
| NC_037642.1 | 8278141 | SNV | 1 | T | C | Heterozygous |
| NC_037642.1 | 8294065 | SNV | 1 | T | C | Homozygous   |
| NC_037642.1 | 8294068 | SNV | 1 | A | C | Homozygous   |
| NC_037642.1 | 8294080 | SNV | 1 | A | T | Homozygous   |
| NC_037642.1 | 8294088 | SNV | 1 | A | G | Homozygous   |
| NC_037642.1 | 8294091 | SNV | 1 | T | C | Homozygous   |
| NC_037642.1 | 8309031 | SNV | 1 | A | G | Heterozygous |
| NC_037642.1 | 8309059 | SNV | 1 | C | T | Heterozygous |
| NC_037642.1 | 8309105 | SNV | 1 | C | A | Heterozygous |
| NC_037642.1 | 8309255 | SNV | 1 | T | C | Heterozygous |
| NC_037642.1 | 8309303 | SNV | 1 | G | A | Homozygous   |
| NC_037642.1 | 8309343 | SNV | 1 | A | G | Homozygous   |
| NC_037642.1 | 8309376 | SNV | 1 | T | C | Homozygous   |
| NC_037642.1 | 8309593 | SNV | 1 | T | C | Homozygous   |
| NC_037642.1 | 8309619 | SNV | 1 | A | G | Heterozygous |
| NC_037642.1 | 8309706 | SNV | 1 | A | G | Heterozygous |
| NC_037642.1 | 8309863 | SNV | 1 | A | G | Homozygous   |
| NC_037642.1 | 8309875 | SNV | 1 | A | G | Homozygous   |
| NC_037642.1 | 8344064 | SNV | 1 | G | A | Homozygous   |
| NC_037642.1 | 8361553 | SNV | 1 | C | T | Heterozygous |
| NC_037642.1 | 8361565 | SNV | 1 | T | C | Homozygous   |
| NC_037642.1 | 8362010 | SNV | 1 | A | G | Homozygous   |
| NC_037642.1 | 8366372 | SNV | 1 | A | G | Homozygous   |
| NC_037642.1 | 8366383 | SNV | 1 | G | A | Homozygous   |
| NC_037642.1 | 8366414 | SNV | 1 | A | G | Homozygous   |
| NC_037642.1 | 8366420 | SNV | 1 | T | C | Homozygous   |
| NC_037642.1 | 8367815 | SNV | 1 | A | G | Homozygous   |
| NC_037642.1 | 8372036 | SNV | 1 | C | T | Heterozygous |
| NC_037642.1 | 8372129 | SNV | 1 | G | A | Heterozygous |
| NC_037642.1 | 8372546 | SNV | 1 | C | A | Homozygous   |
| NC_037642.1 | 8372549 | SNV | 1 | G | A | Heterozygous |
| NC_037642.1 | 8372711 | SNV | 1 | T | C | Heterozygous |
| NC_037642.1 | 8372723 | SNV | 1 | T | G | Homozygous   |
| NC_037642.1 | 8372741 | SNV | 1 | C | T | Heterozygous |
| NC_037642.1 | 8372749 | SNV | 1 | G | C | Homozygous   |
| NC_037642.1 | 8372755 | SNV | 1 | A | G | Homozygous   |
| NC_037642.1 | 8372774 | SNV | 1 | G | A | Heterozygous |
| NC_037642.1 | 8372779 | SNV | 1 | A | G | Heterozygous |
| NC_037642.1 | 8372783 | SNV | 1 | A | G | Heterozygous |
| NC_037642.1 | 8372815 | SNV | 1 | G | T | Homozygous   |
| NC_037642.1 | 8373067 | SNV | 1 | C | A | Homozygous   |
| NC_037642.1 | 8373523 | SNV | 1 | A | G | Heterozygous |
| NC_037642.1 | 8373975 | SNV | 1 | A | G | Heterozygous |
| NC_037642.1 | 8374043 | SNV | 1 | T | A | Homozygous   |
| NC_037642.1 | 8375228 | SNV | 1 | A | C | Homozygous   |
| NC_037642.1 | 8375233 | SNV | 1 | A | G | Homozygous   |
| NC_037642.1 | 8375235 | SNV | 1 | G | A | Homozygous   |
| NC_037642.1 | 8375279 | SNV | 1 | A | G | Homozygous   |
| NC_037642.1 | 8375287 | SNV | 1 | T | A | Homozygous   |
| NC_037642.1 | 8375326 | SNV | 1 | C | T | Heterozygous |

|             |         |     |   |   |   |              |
|-------------|---------|-----|---|---|---|--------------|
| NC_037642.1 | 8375356 | SNV | 1 | C | G | Heterozygous |
| NC_037642.1 | 8375443 | SNV | 1 | A | G | Homozygous   |
| NC_037642.1 | 8375566 | SNV | 1 | A | T | Homozygous   |
| NC_037642.1 | 8375575 | SNV | 1 | C | T | Homozygous   |
| NC_037642.1 | 8375675 | SNV | 1 | A | G | Heterozygous |
| NC_037642.1 | 8380335 | SNV | 1 | G | A | Heterozygous |
| NC_037642.1 | 8380348 | SNV | 1 | G | A | Homozygous   |
| NC_037642.1 | 8381389 | SNV | 1 | T | C | Heterozygous |
| NC_037642.1 | 8381483 | SNV | 1 | G | A | Heterozygous |
| NC_037642.1 | 8381674 | SNV | 1 | G | A | Heterozygous |
| NC_037642.1 | 8381847 | SNV | 1 | C | T | Heterozygous |
| NC_037642.1 | 8382765 | SNV | 1 | A | G | Homozygous   |
| NC_037642.1 | 8382767 | SNV | 1 | G | C | Homozygous   |
| NC_037642.1 | 8382953 | SNV | 1 | A | G | Homozygous   |
| NC_037642.1 | 8382957 | SNV | 1 | A | G | Homozygous   |
| NC_037642.1 | 8383120 | SNV | 1 | A | G | Heterozygous |
| NC_037642.1 | 8383267 | SNV | 1 | A | G | Homozygous   |
| NC_037642.1 | 8383330 | SNV | 1 | A | G | Homozygous   |
| NC_037642.1 | 8383607 | SNV | 1 | G | A | Heterozygous |
| NC_037642.1 | 8391190 | SNV | 1 | A | G | Heterozygous |
| NC_037642.1 | 8391250 | SNV | 1 | C | T | Homozygous   |
| NC_037642.1 | 8391743 | SNV | 1 | G | C | Homozygous   |
| NC_037642.1 | 8391918 | SNV | 1 | T | A | Heterozygous |
| NC_037642.1 | 8392223 | SNV | 1 | C | T | Homozygous   |
| NC_037642.1 | 8393025 | SNV | 1 | A | G | Homozygous   |
| NC_037642.1 | 8393084 | SNV | 1 | G | A | Homozygous   |
| NC_037642.1 | 8394583 | SNV | 1 | G | A | Homozygous   |
| NC_037642.1 | 8395549 | SNV | 1 | A | G | Heterozygous |
| NC_037642.1 | 8395807 | SNV | 1 | T | C | Homozygous   |
| NC_037642.1 | 8396055 | SNV | 1 | G | C | Homozygous   |
| NC_037642.1 | 8396057 | SNV | 1 | T | A | Homozygous   |
| NC_037642.1 | 8396139 | SNV | 1 | A | G | Homozygous   |
| NC_037642.1 | 8396570 | SNV | 1 | G | A | Heterozygous |
| NC_037642.1 | 8397935 | SNV | 1 | A | G | Homozygous   |
| NC_037642.1 | 8398008 | SNV | 1 | T | C | Heterozygous |
| NC_037642.1 | 8398111 | SNV | 1 | T | A | Heterozygous |
| NC_037642.1 | 8398139 | SNV | 1 | C | T | Heterozygous |
| NC_037642.1 | 8398194 | SNV | 1 | T | C | Heterozygous |
| NC_037642.1 | 8398747 | SNV | 1 | C | A | Homozygous   |
| NC_037642.1 | 8398749 | SNV | 1 | G | A | Homozygous   |
| NC_037642.1 | 8419055 | SNV | 1 | A | G | Homozygous   |
| NC_037642.1 | 8419115 | SNV | 1 | T | C | Homozygous   |
| NC_037642.1 | 8420449 | SNV | 1 | A | T | Heterozygous |
| NC_037642.1 | 8422957 | SNV | 1 | A | T | Homozygous   |
| NC_037642.1 | 8426488 | SNV | 1 | G | T | Heterozygous |
| NC_037642.1 | 8426798 | SNV | 1 | T | C | Homozygous   |
| NC_037642.1 | 8427984 | SNV | 1 | T | C | Homozygous   |
| NC_037642.1 | 8432028 | SNV | 1 | T | C | Homozygous   |
| NC_037642.1 | 8434639 | SNV | 1 | T | C | Homozygous   |
| NC_037642.1 | 8434868 | SNV | 1 | T | C | Homozygous   |
| NC_037642.1 | 8435325 | SNV | 1 | C | T | Heterozygous |

|             |         |     |   |   |   |              |
|-------------|---------|-----|---|---|---|--------------|
| NC_037642.1 | 8435341 | SNV | 1 | T | C | Heterozygous |
| NC_037642.1 | 8436302 | SNV | 1 | G | A | Heterozygous |
| NC_037642.1 | 8437198 | SNV | 1 | C | T | Heterozygous |
| NC_037642.1 | 8437333 | SNV | 1 | G | T | Heterozygous |
| NC_037642.1 | 8437650 | SNV | 1 | A | G | Homozygous   |
| NC_037642.1 | 8437791 | SNV | 1 | A | T | Heterozygous |
| NC_037642.1 | 8437800 | SNV | 1 | A | G | Heterozygous |
| NC_037642.1 | 8437825 | SNV | 1 | T | C | Heterozygous |
| NC_037642.1 | 8437829 | SNV | 1 | C | T | Heterozygous |
| NC_037642.1 | 8437849 | SNV | 1 | T | C | Homozygous   |
| NC_037642.1 | 8437873 | SNV | 1 | T | C | Heterozygous |
| NC_037642.1 | 8438080 | SNV | 1 | G | C | Heterozygous |
| NC_037642.1 | 8438102 | SNV | 1 | T | G | Heterozygous |
| NC_037642.1 | 8438305 | SNV | 1 | T | C | Homozygous   |
| NC_037642.1 | 8438434 | SNV | 1 | C | G | Heterozygous |
| NC_037642.1 | 8439337 | SNV | 1 | T | C | Homozygous   |
| NC_037642.1 | 8439432 | SNV | 1 | C | T | Heterozygous |
| NC_037642.1 | 8440064 | SNV | 1 | T | C | Homozygous   |
| NC_037642.1 | 8440262 | SNV | 1 | A | G | Heterozygous |
| NC_037642.1 | 8440352 | SNV | 1 | A | G | Homozygous   |
| NC_037642.1 | 8440406 | SNV | 1 | G | A | Heterozygous |
| NC_037642.1 | 8440436 | SNV | 1 | A | G | Homozygous   |
| NC_037642.1 | 8441054 | SNV | 1 | A | G | Homozygous   |
| NC_037642.1 | 8441298 | SNV | 1 | G | T | Homozygous   |
| NC_037642.1 | 8441318 | SNV | 1 | G | T | Heterozygous |
| NC_037642.1 | 8441330 | SNV | 1 | T | G | Homozygous   |
| NC_037642.1 | 8443501 | SNV | 1 | T | G | Heterozygous |
| NC_037642.1 | 8443658 | SNV | 1 | T | C | Heterozygous |
| NC_037642.1 | 8443762 | SNV | 1 | G | A | Homozygous   |
| NC_037642.1 | 8443794 | SNV | 1 | A | G | Heterozygous |
| NC_037642.1 | 8447712 | SNV | 1 | G | A | Heterozygous |
| NC_037642.1 | 8450523 | SNV | 1 | T | C | Heterozygous |
| NC_037642.1 | 8450536 | SNV | 1 | T | C | Heterozygous |
| NC_037642.1 | 8450544 | SNV | 1 | T | C | Homozygous   |
| NC_037642.1 | 8454816 | SNV | 1 | T | A | Homozygous   |
| NC_037642.1 | 8456346 | SNV | 1 | A | G | Homozygous   |
| NC_037642.1 | 8462538 | SNV | 1 | G | A | Heterozygous |
| NC_037642.1 | 8462553 | SNV | 1 | A | G | Heterozygous |
| NC_037642.1 | 8462832 | SNV | 1 | C | T | Heterozygous |
| NC_037642.1 | 8466479 | SNV | 1 | G | A | Heterozygous |
| NC_037642.1 | 8466587 | SNV | 1 | G | A | Heterozygous |
| NC_037642.1 | 8468336 | SNV | 1 | A | G | Heterozygous |
| NC_037642.1 | 8468398 | SNV | 1 | A | G | Homozygous   |
| NC_037642.1 | 8468566 | SNV | 1 | C | T | Heterozygous |
| NC_037642.1 | 8470328 | SNV | 1 | A | T | Heterozygous |
| NC_037642.1 | 8472452 | SNV | 1 | T | C | Homozygous   |
| NC_037642.1 | 8475962 | SNV | 1 | G | T | Heterozygous |
| NC_037642.1 | 8485585 | SNV | 1 | T | C | Homozygous   |
| NC_037642.1 | 8485591 | SNV | 1 | T | A | Homozygous   |
| NC_037642.1 | 8490592 | SNV | 1 | C | T | Heterozygous |
| NC_037642.1 | 8492211 | SNV | 1 | A | G | Homozygous   |

|             |         |     |   |   |   |              |
|-------------|---------|-----|---|---|---|--------------|
| NC_037642.1 | 8492549 | SNV | 1 | G | A | Heterozygous |
| NC_037642.1 | 8492579 | SNV | 1 | T | A | Heterozygous |
| NC_037642.1 | 8492585 | SNV | 1 | A | T | Heterozygous |
| NC_037642.1 | 8493406 | SNV | 1 | A | T | Heterozygous |
| NC_037642.1 | 8493410 | SNV | 1 | T | G | Heterozygous |
| NC_037642.1 | 8493416 | SNV | 1 | A | T | Heterozygous |
| NC_037642.1 | 8493420 | SNV | 1 | T | A | Heterozygous |
| NC_037642.1 | 8493429 | SNV | 1 | A | T | Heterozygous |
| NC_037642.1 | 8500905 | SNV | 1 | G | A | Homozygous   |
| NC_037642.1 | 8501821 | SNV | 1 | T | A | Homozygous   |
| NC_037642.1 | 8502319 | SNV | 1 | C | T | Homozygous   |
| NC_037642.1 | 8503864 | SNV | 1 | A | T | Homozygous   |
| NC_037642.1 | 8503899 | SNV | 1 | C | T | Homozygous   |
| NC_037642.1 | 8503902 | SNV | 1 | T | C | Homozygous   |
| NC_037642.1 | 8503908 | SNV | 1 | A | T | Homozygous   |
| NC_037642.1 | 8503920 | SNV | 1 | A | C | Homozygous   |
| NC_037642.1 | 8507167 | SNV | 1 | C | T | Homozygous   |
| NC_037642.1 | 8507329 | SNV | 1 | A | G | Homozygous   |
| NC_037642.1 | 8508088 | SNV | 1 | G | C | Homozygous   |
| NC_037642.1 | 8508107 | SNV | 1 | T | C | Homozygous   |
| NC_037642.1 | 8508249 | SNV | 1 | C | T | Heterozygous |
| NC_037642.1 | 8510744 | SNV | 1 | T | G | Homozygous   |
| NC_037642.1 | 8511460 | SNV | 1 | A | G | Homozygous   |
| NC_037642.1 | 8511609 | SNV | 1 | C | T | Homozygous   |
| NC_037642.1 | 8511644 | SNV | 1 | G | A | Homozygous   |
| NC_037642.1 | 8512012 | SNV | 1 | A | G | Homozygous   |
| NC_037642.1 | 8512347 | SNV | 1 | G | A | Homozygous   |
| NC_037642.1 | 8512418 | SNV | 1 | A | G | Heterozygous |
| NC_037642.1 | 8512545 | SNV | 1 | T | G | Homozygous   |
| NC_037642.1 | 8512557 | SNV | 1 | T | A | Homozygous   |
| NC_037642.1 | 8512600 | SNV | 1 | T | C | Heterozygous |
| NC_037642.1 | 8512672 | SNV | 1 | T | C | Homozygous   |
| NC_037642.1 | 8512942 | SNV | 1 | G | A | Homozygous   |
| NC_037642.1 | 8513129 | SNV | 1 | G | A | Heterozygous |
| NC_037642.1 | 8513156 | SNV | 1 | A | G | Homozygous   |
| NC_037642.1 | 8513432 | SNV | 1 | G | A | Homozygous   |
| NC_037642.1 | 8513847 | SNV | 1 | G | A | Heterozygous |
| NC_037642.1 | 8513904 | SNV | 1 | A | G | Heterozygous |
| NC_037642.1 | 8514035 | SNV | 1 | C | T | Heterozygous |
| NC_037642.1 | 8516663 | SNV | 1 | A | G | Homozygous   |
| NC_037642.1 | 8518678 | SNV | 1 | A | G | Homozygous   |
| NC_037642.1 | 8519836 | SNV | 1 | T | C | Heterozygous |
| NC_037642.1 | 8520664 | SNV | 1 | T | C | Homozygous   |
| NC_037642.1 | 8520667 | SNV | 1 | C | T | Homozygous   |
| NC_037642.1 | 8520818 | SNV | 1 | A | G | Heterozygous |
| NC_037642.1 | 8520826 | SNV | 1 | A | G | Heterozygous |
| NC_037642.1 | 8520828 | SNV | 1 | A | T | Heterozygous |
| NC_037642.1 | 8520853 | SNV | 1 | T | A | Heterozygous |
| NC_037642.1 | 8520855 | SNV | 1 | A | G | Heterozygous |
| NC_037642.1 | 8520857 | SNV | 1 | A | G | Heterozygous |
| NC_037642.1 | 8523583 | SNV | 1 | T | G | Heterozygous |

|             |         |     |   |   |   |              |
|-------------|---------|-----|---|---|---|--------------|
| NC_037642.1 | 8527856 | SNV | 1 | T | C | Heterozygous |
| NC_037642.1 | 8537174 | SNV | 1 | T | G | Homozygous   |
| NC_037642.1 | 8537176 | SNV | 1 | C | A | Homozygous   |
| NC_037642.1 | 8537596 | SNV | 1 | C | G | Homozygous   |
| NC_037642.1 | 8537600 | SNV | 1 | T | C | Homozygous   |
| NC_037642.1 | 8537668 | SNV | 1 | C | A | Homozygous   |
| NC_037642.1 | 8538695 | SNV | 1 | A | T | Homozygous   |
| NC_037642.1 | 8555072 | SNV | 1 | C | T | Heterozygous |
| NC_037642.1 | 8555096 | SNV | 1 | G | A | Heterozygous |
| NC_037642.1 | 8555117 | SNV | 1 | C | G | Homozygous   |
| NC_037642.1 | 8555177 | SNV | 1 | T | C | Heterozygous |
| NC_037642.1 | 8555179 | SNV | 1 | T | C | Heterozygous |
| NC_037642.1 | 8555195 | SNV | 1 | C | A | Homozygous   |
| NC_037642.1 | 8555202 | SNV | 1 | A | G | Homozygous   |
| NC_037642.1 | 8566962 | SNV | 1 | G | A | Homozygous   |
| NC_037642.1 | 8567192 | SNV | 1 | T | C | Heterozygous |
| NC_037642.1 | 8567206 | SNV | 1 | A | G | Homozygous   |
| NC_037642.1 | 8567226 | SNV | 1 | A | G | Homozygous   |
| NC_037642.1 | 8567243 | SNV | 1 | A | T | Heterozygous |
| NC_037642.1 | 8567249 | SNV | 1 | T | C | Heterozygous |
| NC_037642.1 | 8567311 | SNV | 1 | A | G | Homozygous   |
| NC_037642.1 | 8567419 | SNV | 1 | C | T | Heterozygous |
| NC_037642.1 | 8567422 | SNV | 1 | A | G | Heterozygous |
| NC_037642.1 | 8567544 | SNV | 1 | T | C | Homozygous   |
| NC_037642.1 | 8567863 | SNV | 1 | G | A | Heterozygous |
| NC_037642.1 | 8568056 | SNV | 1 | C | G | Homozygous   |
| NC_037642.1 | 8568292 | SNV | 1 | C | T | Heterozygous |
| NC_037642.1 | 8568313 | SNV | 1 | A | G | Homozygous   |
| NC_037642.1 | 8568420 | SNV | 1 | T | C | Homozygous   |
| NC_037642.1 | 8569877 | SNV | 1 | C | T | Homozygous   |
| NC_037642.1 | 8570513 | SNV | 1 | G | A | Heterozygous |
| NC_037642.1 | 8570549 | SNV | 1 | T | C | Heterozygous |
| NC_037642.1 | 8570551 | SNV | 1 | A | G | Heterozygous |
| NC_037642.1 | 8570563 | SNV | 1 | C | T | Homozygous   |
| NC_037642.1 | 8570660 | SNV | 1 | A | G | Homozygous   |
| NC_037642.1 | 8570796 | SNV | 1 | T | C | Homozygous   |
| NC_037642.1 | 8570809 | SNV | 1 | T | C | Heterozygous |
| NC_037642.1 | 8571163 | SNV | 1 | G | A | Homozygous   |
| NC_037642.1 | 8571245 | SNV | 1 | A | G | Heterozygous |
| NC_037642.1 | 8571254 | SNV | 1 | A | G | Homozygous   |
| NC_037642.1 | 8571265 | SNV | 1 | A | G | Homozygous   |
| NC_037642.1 | 8571321 | SNV | 1 | T | A | Heterozygous |
| NC_037642.1 | 8571578 | SNV | 1 | G | A | Heterozygous |
| NC_037642.1 | 8571644 | SNV | 1 | G | A | Heterozygous |
| NC_037642.1 | 8571719 | SNV | 1 | T | C | Homozygous   |
| NC_037642.1 | 8571866 | SNV | 1 | C | T | Homozygous   |
| NC_037642.1 | 8572020 | SNV | 1 | G | A | Heterozygous |
| NC_037642.1 | 8572023 | SNV | 1 | A | C | Heterozygous |
| NC_037642.1 | 8572026 | SNV | 1 | G | A | Heterozygous |
| NC_037642.1 | 8572028 | SNV | 1 | A | G | Heterozygous |
| NC_037642.1 | 8572039 | SNV | 1 | T | G | Homozygous   |



|             |         |     |   |   |   |              |
|-------------|---------|-----|---|---|---|--------------|
| NC_037642.1 | 8572261 | SNV | 1 | G | A | Heterozygous |
| NC_037642.1 | 8572264 | SNV | 1 | C | T | Heterozygous |
| NC_037642.1 | 8572354 | SNV | 1 | T | C | Homozygous   |
| NC_037642.1 | 8572481 | SNV | 1 | G | A | Heterozygous |
| NC_037642.1 | 8572585 | SNV | 1 | T | C | Homozygous   |
| NC_037642.1 | 8572604 | SNV | 1 | A | G | Homozygous   |
| NC_037642.1 | 8572626 | SNV | 1 | A | G | Heterozygous |
| NC_037642.1 | 8572632 | SNV | 1 | G | A | Heterozygous |
| NC_037642.1 | 8572715 | SNV | 1 | G | A | Heterozygous |
| NC_037642.1 | 8572800 | SNV | 1 | A | G | Homozygous   |
| NC_037642.1 | 8572839 | SNV | 1 | T | C | Heterozygous |
| NC_037642.1 | 8572842 | SNV | 1 | A | G | Heterozygous |
| NC_037642.1 | 8572931 | SNV | 1 | C | T | Heterozygous |
| NC_037642.1 | 8572960 | SNV | 1 | T | C | Heterozygous |
| NC_037642.1 | 8572967 | SNV | 1 | A | G | Heterozygous |
| NC_037642.1 | 8573014 | SNV | 1 | C | T | Heterozygous |
| NC_037642.1 | 8590773 | SNV | 1 | C | T | Heterozygous |
| NC_037642.1 | 8590846 | SNV | 1 | T | C | Homozygous   |
| NC_037642.1 | 8601485 | SNV | 1 | T | C | Homozygous   |
| NC_037642.1 | 8601488 | SNV | 1 | G | C | Homozygous   |
| NC_037642.1 | 8601503 | SNV | 1 | A | G | Homozygous   |
| NC_037642.1 | 8601808 | SNV | 1 | A | G | Homozygous   |
| NC_037642.1 | 8601946 | SNV | 1 | A | G | Heterozygous |
| NC_037642.1 | 8613855 | SNV | 1 | C | T | Heterozygous |
| NC_037642.1 | 8613867 | SNV | 1 | C | T | Heterozygous |
| NC_037642.1 | 8636095 | SNV | 1 | G | T | Homozygous   |
| NC_037642.1 | 8640568 | SNV | 1 | C | T | Homozygous   |
| NC_037642.1 | 8640573 | SNV | 1 | G | A | Homozygous   |
| NC_037642.1 | 8640712 | SNV | 1 | G | A | Homozygous   |
| NC_037642.1 | 8641351 | SNV | 1 | C | T | Heterozygous |
| NC_037642.1 | 8641446 | SNV | 1 | G | C | Homozygous   |
| NC_037642.1 | 8641630 | SNV | 1 | G | T | Heterozygous |
| NC_037642.1 | 8641657 | SNV | 1 | T | C | Homozygous   |
| NC_037642.1 | 8642673 | SNV | 1 | A | G | Heterozygous |
| NC_037642.1 | 8642883 | SNV | 1 | T | C | Homozygous   |
| NC_037642.1 | 8642888 | SNV | 1 | G | A | Heterozygous |
| NC_037642.1 | 8642939 | SNV | 1 | C | T | Homozygous   |
| NC_037642.1 | 8643020 | SNV | 1 | A | G | Homozygous   |
| NC_037642.1 | 8643316 | SNV | 1 | T | C | Homozygous   |
| NC_037642.1 | 8643418 | SNV | 1 | T | G | Homozygous   |
| NC_037642.1 | 8643641 | SNV | 1 | C | T | Heterozygous |
| NC_037642.1 | 8643692 | SNV | 1 | G | A | Homozygous   |
| NC_037642.1 | 8692831 | SNV | 1 | G | A | Homozygous   |
| NC_037642.1 | 8692871 | SNV | 1 | C | G | Heterozygous |
| NC_037642.1 | 8692874 | SNV | 1 | A | G | Heterozygous |
| NC_037642.1 | 8692880 | SNV | 1 | A | G | Heterozygous |
| NC_037642.1 | 8692928 | SNV | 1 | G | A | Heterozygous |
| NC_037642.1 | 8692931 | SNV | 1 | G | A | Homozygous   |
| NC_037642.1 | 8693129 | SNV | 1 | A | G | Homozygous   |
| NC_037642.1 | 8693131 | SNV | 1 | A | G | Heterozygous |
| NC_037642.1 | 8693161 | SNV | 1 | A | C | Heterozygous |

|             |         |     |   |   |   |              |
|-------------|---------|-----|---|---|---|--------------|
| NC_037642.1 | 8693236 | SNV | 1 | A | G | Homozygous   |
| NC_037642.1 | 8698520 | SNV | 1 | G | A | Heterozygous |
| NC_037642.1 | 8711147 | SNV | 1 | G | A | Heterozygous |
| NC_037642.1 | 8711158 | SNV | 1 | T | A | Heterozygous |
| NC_037642.1 | 8711158 | SNV | 1 | T | G | Heterozygous |
| NC_037642.1 | 8711168 | SNV | 1 | G | A | Heterozygous |
| NC_037642.1 | 8711195 | SNV | 1 | G | A | Heterozygous |
| NC_037642.1 | 8711201 | SNV | 1 | G | A | Heterozygous |
| NC_037642.1 | 8739895 | SNV | 1 | T | C | Homozygous   |
| NC_037642.1 | 8739933 | SNV | 1 | G | A | Homozygous   |
| NC_037642.1 | 8740102 | SNV | 1 | G | A | Heterozygous |
| NC_037642.1 | 8740185 | SNV | 1 | G | A | Homozygous   |
| NC_037642.1 | 8747564 | SNV | 1 | G | A | Homozygous   |
| NC_037642.1 | 8747717 | SNV | 1 | G | A | Heterozygous |
| NC_037642.1 | 8747719 | SNV | 1 | G | A | Heterozygous |
| NC_037642.1 | 8747723 | SNV | 1 | A | G | Heterozygous |
| NC_037642.1 | 8747730 | SNV | 1 | G | A | Homozygous   |
| NC_037642.1 | 8747748 | SNV | 1 | G | C | Heterozygous |
| NC_037642.1 | 8771810 | SNV | 1 | C | T | Heterozygous |
| NC_037642.1 | 8771819 | SNV | 1 | T | A | Heterozygous |
| NC_037642.1 | 8771823 | SNV | 1 | T | A | Homozygous   |
| NC_037642.1 | 8771827 | SNV | 1 | T | A | Heterozygous |
| NC_037642.1 | 8771838 | SNV | 1 | C | T | Heterozygous |
| NC_037642.1 | 8771845 | SNV | 1 | T | C | Heterozygous |
| NC_037642.1 | 8771854 | SNV | 1 | C | T | Heterozygous |
| NC_037642.1 | 8771856 | SNV | 1 | C | T | Heterozygous |
| NC_037642.1 | 8771864 | SNV | 1 | C | T | Homozygous   |
| NC_037642.1 | 8771866 | SNV | 1 | C | T | Heterozygous |
| NC_037642.1 | 8788738 | SNV | 1 | A | T | Homozygous   |
| NC_037642.1 | 8788759 | SNV | 1 | G | A | Homozygous   |
| NC_037642.1 | 8792401 | SNV | 1 | C | T | Homozygous   |
| NC_037642.1 | 8792420 | SNV | 1 | C | T | Homozygous   |
| NC_037642.1 | 8792426 | SNV | 1 | C | T | Homozygous   |
| NC_037642.1 | 8792463 | SNV | 1 | C | A | Heterozygous |
| NC_037642.1 | 8801232 | SNV | 1 | A | T | Homozygous   |
| NC_037642.1 | 8801242 | SNV | 1 | T | A | Homozygous   |
| NC_037642.1 | 8801253 | SNV | 1 | T | A | Homozygous   |
| NC_037642.1 | 8801260 | SNV | 1 | A | T | Heterozygous |
| NC_037642.1 | 8809948 | SNV | 1 | G | A | Heterozygous |
| NC_037642.1 | 8809967 | SNV | 1 | G | A | Homozygous   |
| NC_037642.1 | 8810000 | SNV | 1 | A | G | Homozygous   |
| NC_037642.1 | 8810052 | SNV | 1 | T | C | Heterozygous |
| NC_037642.1 | 8810119 | SNV | 1 | A | G | Homozygous   |
| NC_037642.1 | 8810181 | SNV | 1 | T | C | Homozygous   |
| NC_037642.1 | 8810240 | SNV | 1 | C | T | Heterozygous |
| NC_037642.1 | 8810287 | SNV | 1 | G | A | Heterozygous |
| NC_037642.1 | 8816304 | SNV | 1 | T | C | Homozygous   |
| NC_037642.1 | 8825169 | SNV | 1 | C | A | Heterozygous |
| NC_037642.1 | 8835650 | SNV | 1 | G | C | Homozygous   |
| NC_037642.1 | 8835656 | SNV | 1 | G | A | Homozygous   |
| NC_037642.1 | 8835675 | SNV | 1 | C | T | Heterozygous |

|             |         |     |   |   |   |              |
|-------------|---------|-----|---|---|---|--------------|
| NC_037642.1 | 8836151 | SNV | 1 | G | A | Heterozygous |
| NC_037642.1 | 8836322 | SNV | 1 | C | T | Heterozygous |
| NC_037642.1 | 8836343 | SNV | 1 | A | G | Homozygous   |
| NC_037642.1 | 8836759 | SNV | 1 | C | A | Homozygous   |
| NC_037642.1 | 8836771 | SNV | 1 | A | G | Homozygous   |
| NC_037642.1 | 8837170 | SNV | 1 | A | G | Heterozygous |
| NC_037642.1 | 8837175 | SNV | 1 | G | A | Homozygous   |
| NC_037642.1 | 8837306 | SNV | 1 | T | A | Heterozygous |
| NC_037642.1 | 8838436 | SNV | 1 | A | G | Heterozygous |
| NC_037642.1 | 8838774 | SNV | 1 | A | G | Homozygous   |
| NC_037642.1 | 8843940 | SNV | 1 | A | G | Homozygous   |
| NC_037642.1 | 8846010 | SNV | 1 | C | G | Homozygous   |
| NC_037642.1 | 8846095 | SNV | 1 | T | C | Heterozygous |
| NC_037642.1 | 8848632 | SNV | 1 | A | C | Heterozygous |
| NC_037642.1 | 8865888 | SNV | 1 | A | G | Homozygous   |
| NC_037642.1 | 8866086 | SNV | 1 | T | C | Heterozygous |
| NC_037642.1 | 8866093 | SNV | 1 | C | T | Heterozygous |
| NC_037642.1 | 8866285 | SNV | 1 | G | A | Heterozygous |
| NC_037642.1 | 8886017 | SNV | 1 | C | T | Homozygous   |
| NC_037642.1 | 8886144 | SNV | 1 | C | T | Homozygous   |
| NC_037642.1 | 8886732 | SNV | 1 | T | C | Heterozygous |
| NC_037642.1 | 8887258 | SNV | 1 | C | T | Heterozygous |
| NC_037642.1 | 8888432 | SNV | 1 | T | A | Homozygous   |
| NC_037642.1 | 8889754 | SNV | 1 | C | T | Homozygous   |
| NC_037642.1 | 8890051 | SNV | 1 | A | T | Heterozygous |
| NC_037642.1 | 8890677 | SNV | 1 | C | G | Homozygous   |
| NC_037642.1 | 8898617 | SNV | 1 | C | A | Heterozygous |
| NC_037642.1 | 8898691 | SNV | 1 | T | C | Homozygous   |
| NC_037642.1 | 8898866 | SNV | 1 | C | T | Heterozygous |
| NC_037642.1 | 8899038 | SNV | 1 | T | C | Heterozygous |
| NC_037642.1 | 8899138 | SNV | 1 | A | G | Homozygous   |
| NC_037642.1 | 8899145 | SNV | 1 | A | G | Homozygous   |
| NC_037642.1 | 8899321 | SNV | 1 | G | A | Homozygous   |
| NC_037642.1 | 8899680 | SNV | 1 | A | G | Homozygous   |
| NC_037642.1 | 8899771 | SNV | 1 | T | C | Heterozygous |
| NC_037642.1 | 8899823 | SNV | 1 | A | G | Heterozygous |
| NC_037642.1 | 8899837 | SNV | 1 | C | T | Heterozygous |
| NC_037642.1 | 8899866 | SNV | 1 | T | C | Heterozygous |
| NC_037642.1 | 8900231 | SNV | 1 | A | G | Homozygous   |
| NC_037642.1 | 8900235 | SNV | 1 | A | G | Homozygous   |
| NC_037642.1 | 8900350 | SNV | 1 | A | G | Homozygous   |
| NC_037642.1 | 8901423 | SNV | 1 | C | T | Heterozygous |
| NC_037642.1 | 8901891 | SNV | 1 | A | G | Homozygous   |
| NC_037642.1 | 8902124 | SNV | 1 | C | T | Homozygous   |
| NC_037642.1 | 8902195 | SNV | 1 | T | C | Homozygous   |
| NC_037642.1 | 8907375 | SNV | 1 | G | A | Heterozygous |
| NC_037642.1 | 8907380 | SNV | 1 | T | G | Heterozygous |
| NC_037642.1 | 8907539 | SNV | 1 | T | C | Homozygous   |
| NC_037642.1 | 8907611 | SNV | 1 | T | C | Homozygous   |
| NC_037642.1 | 8908090 | SNV | 1 | A | G | Homozygous   |
| NC_037642.1 | 8908092 | SNV | 1 | T | G | Homozygous   |

|             |         |     |   |   |   |              |
|-------------|---------|-----|---|---|---|--------------|
| NC_037642.1 | 8908106 | SNV | 1 | G | A | Homozygous   |
| NC_037642.1 | 8908109 | SNV | 1 | A | T | Heterozygous |
| NC_037642.1 | 8908259 | SNV | 1 | C | G | Homozygous   |
| NC_037642.1 | 8912053 | SNV | 1 | G | A | Homozygous   |
| NC_037642.1 | 8912056 | SNV | 1 | A | G | Heterozygous |
| NC_037642.1 | 8912117 | SNV | 1 | T | C | Heterozygous |
| NC_037642.1 | 8912189 | SNV | 1 | T | C | Homozygous   |
| NC_037642.1 | 8912449 | SNV | 1 | C | T | Heterozygous |
| NC_037642.1 | 8912486 | SNV | 1 | C | T | Heterozygous |
| NC_037642.1 | 8912497 | SNV | 1 | C | T | Heterozygous |
| NC_037642.1 | 8912626 | SNV | 1 | A | G | Heterozygous |
| NC_037642.1 | 8912693 | SNV | 1 | A | G | Homozygous   |
| NC_037642.1 | 8912708 | SNV | 1 | C | T | Homozygous   |
| NC_037642.1 | 8912747 | SNV | 1 | C | T | Homozygous   |
| NC_037642.1 | 8912974 | SNV | 1 | T | C | Heterozygous |
| NC_037642.1 | 8913191 | SNV | 1 | T | C | Heterozygous |
| NC_037642.1 | 8913809 | SNV | 1 | G | A | Heterozygous |
| NC_037642.1 | 8913824 | SNV | 1 | A | G | Heterozygous |
| NC_037642.1 | 8913834 | SNV | 1 | C | T | Homozygous   |
| NC_037642.1 | 8930211 | SNV | 1 | C | T | Heterozygous |
| NC_037642.1 | 8930212 | SNV | 1 | C | T | Heterozygous |
| NC_037642.1 | 8932929 | SNV | 1 | G | A | Heterozygous |
| NC_037642.1 | 8933207 | SNV | 1 | G | A | Heterozygous |
| NC_037642.1 | 8950373 | SNV | 1 | A | G | Homozygous   |
| NC_037642.1 | 8960659 | SNV | 1 | A | G | Homozygous   |
| NC_037642.1 | 8960698 | SNV | 1 | A | G | Homozygous   |
| NC_037642.1 | 8967496 | SNV | 1 | T | A | Homozygous   |
| NC_037642.1 | 8967498 | SNV | 1 | A | G | Heterozygous |
| NC_037642.1 | 8967509 | SNV | 1 | T | A | Homozygous   |
| NC_037642.1 | 8967514 | SNV | 1 | G | A | Homozygous   |
| NC_037642.1 | 8974789 | SNV | 1 | A | G | Homozygous   |
| NC_037642.1 | 8976519 | SNV | 1 | C | T | Homozygous   |
| NC_037642.1 | 9000207 | SNV | 1 | T | C | Heterozygous |
| NC_037642.1 | 9034939 | SNV | 1 | G | A | Heterozygous |
| NC_037642.1 | 9041323 | SNV | 1 | T | C | Homozygous   |
| NC_037642.1 | 9041382 | SNV | 1 | C | T | Heterozygous |
| NC_037642.1 | 9041611 | SNV | 1 | T | C | Homozygous   |
| NC_037642.1 | 9043470 | SNV | 1 | A | G | Heterozygous |
| NC_037642.1 | 9058974 | SNV | 1 | T | C | Homozygous   |
| NC_037642.1 | 9059020 | SNV | 1 | G | A | Heterozygous |
| NC_037642.1 | 9059039 | SNV | 1 | A | T | Heterozygous |
| NC_037642.1 | 9063882 | SNV | 1 | C | G | Heterozygous |
| NC_037642.1 | 9064716 | SNV | 1 | T | C | Homozygous   |
| NC_037642.1 | 9065185 | SNV | 1 | G | A | Heterozygous |
| NC_037642.1 | 9065773 | SNV | 1 | C | T | Heterozygous |
| NC_037642.1 | 9065810 | SNV | 1 | T | C | Homozygous   |
| NC_037642.1 | 9065981 | SNV | 1 | C | T | Homozygous   |
| NC_037642.1 | 9067034 | SNV | 1 | C | T | Heterozygous |
| NC_037642.1 | 9067175 | SNV | 1 | G | C | Heterozygous |
| NC_037642.1 | 9067278 | SNV | 1 | G | C | Heterozygous |
| NC_037642.1 | 9067339 | SNV | 1 | A | G | Homozygous   |

|             |         |     |   |   |   |              |
|-------------|---------|-----|---|---|---|--------------|
| NC_037642.1 | 9067494 | SNV | 1 | A | G | Homozygous   |
| NC_037642.1 | 9070262 | SNV | 1 | G | A | Homozygous   |
| NC_037642.1 | 9070307 | SNV | 1 | C | T | Heterozygous |
| NC_037642.1 | 9070486 | SNV | 1 | T | C | Homozygous   |
| NC_037642.1 | 9086602 | SNV | 1 | A | T | Heterozygous |
| NC_037642.1 | 9086604 | SNV | 1 | C | T | Heterozygous |
| NC_037642.1 | 9086613 | SNV | 1 | C | T | Heterozygous |
| NC_037642.1 | 9086628 | SNV | 1 | G | A | Heterozygous |
| NC_037642.1 | 9086654 | SNV | 1 | C | T | Homozygous   |
| NC_037642.1 | 9087387 | SNV | 1 | T | C | Homozygous   |
| NC_037642.1 | 9087639 | SNV | 1 | G | A | Homozygous   |
| NC_037642.1 | 9090454 | SNV | 1 | A | G | Homozygous   |
| NC_037642.1 | 9091074 | SNV | 1 | G | T | Homozygous   |
| NC_037642.1 | 9091101 | SNV | 1 | A | G | Homozygous   |
| NC_037642.1 | 9091103 | SNV | 1 | T | G | Homozygous   |
| NC_037642.1 | 9091110 | SNV | 1 | A | C | Homozygous   |
| NC_037642.1 | 9097377 | SNV | 1 | A | T | Heterozygous |
| NC_037642.1 | 9097385 | SNV | 1 | T | G | Homozygous   |
| NC_037642.1 | 9097389 | SNV | 1 | C | A | Homozygous   |
| NC_037642.1 | 9103835 | SNV | 1 | C | T | Homozygous   |
| NC_037642.1 | 9108625 | SNV | 1 | C | T | Homozygous   |
| NC_037642.1 | 9108631 | SNV | 1 | T | C | Homozygous   |
| NC_037642.1 | 9108635 | SNV | 1 | T | C | Homozygous   |
| NC_037642.1 | 9108637 | SNV | 1 | C | T | Homozygous   |
| NC_037642.1 | 9108649 | SNV | 1 | T | A | Homozygous   |
| NC_037642.1 | 9108652 | SNV | 1 | T | A | Homozygous   |
| NC_037642.1 | 9108655 | SNV | 1 | A | G | Homozygous   |
| NC_037642.1 | 9273448 | SNV | 1 | A | G | Heterozygous |
| NC_037642.1 | 9273513 | SNV | 1 | G | A | Heterozygous |
| NC_037642.1 | 9283738 | SNV | 1 | C | T | Homozygous   |
| NC_037642.1 | 9283742 | SNV | 1 | C | T | Heterozygous |
| NC_037642.1 | 9285245 | SNV | 1 | A | G | Homozygous   |
| NC_037642.1 | 9285265 | SNV | 1 | G | T | Homozygous   |
| NC_037642.1 | 9286215 | SNV | 1 | A | C | Heterozygous |
| NC_037642.1 | 9286245 | SNV | 1 | C | T | Heterozygous |
| NC_037642.1 | 9286253 | SNV | 1 | G | A | Heterozygous |
| NC_037642.1 | 9286593 | SNV | 1 | G | A | Heterozygous |
| NC_037642.1 | 9286599 | SNV | 1 | T | G | Homozygous   |
| NC_037642.1 | 9286602 | SNV | 1 | C | T | Homozygous   |
| NC_037642.1 | 9290876 | SNV | 1 | C | T | Homozygous   |
| NC_037642.1 | 9290933 | SNV | 1 | G | A | Heterozygous |
| NC_037642.1 | 9291028 | SNV | 1 | A | G | Homozygous   |
| NC_037642.1 | 9291106 | SNV | 1 | C | T | Heterozygous |
| NC_037642.1 | 9291177 | SNV | 1 | G | A | Heterozygous |
| NC_037642.1 | 9291253 | SNV | 1 | T | C | Homozygous   |
| NC_037642.1 | 9291414 | SNV | 1 | G | C | Homozygous   |
| NC_037642.1 | 9313237 | SNV | 1 | A | G | Homozygous   |
| NC_037642.1 | 9313260 | SNV | 1 | G | A | Heterozygous |
| NC_037642.1 | 9313267 | SNV | 1 | G | T | Heterozygous |
| NC_037642.1 | 9313269 | SNV | 1 | G | A | Homozygous   |
| NC_037642.1 | 9313273 | SNV | 1 | A | T | Heterozygous |

|             |         |     |   |   |   |              |
|-------------|---------|-----|---|---|---|--------------|
| NC_037642.1 | 9317978 | SNV | 1 | T | C | Homozygous   |
| NC_037642.1 | 9318132 | SNV | 1 | A | G | Homozygous   |
| NC_037642.1 | 9323059 | SNV | 1 | C | T | Heterozygous |
| NC_037642.1 | 9325307 | SNV | 1 | T | C | Homozygous   |
| NC_037642.1 | 9325511 | SNV | 1 | A | G | Homozygous   |
| NC_037642.1 | 9325699 | SNV | 1 | A | T | Heterozygous |
| NC_037642.1 | 9326009 | SNV | 1 | G | A | Homozygous   |
| NC_037642.1 | 9327253 | SNV | 1 | T | A | Homozygous   |
| NC_037642.1 | 9333485 | SNV | 1 | G | A | Homozygous   |
| NC_037642.1 | 9334770 | SNV | 1 | C | T | Heterozygous |
| NC_037642.1 | 9335573 | SNV | 1 | G | A | Homozygous   |
| NC_037642.1 | 9339961 | SNV | 1 | G | A | Heterozygous |
| NC_037642.1 | 9340563 | SNV | 1 | G | A | Homozygous   |
| NC_037642.1 | 9341914 | SNV | 1 | T | A | Heterozygous |
| NC_037642.1 | 9342304 | SNV | 1 | G | A | Homozygous   |
| NC_037642.1 | 9343148 | SNV | 1 | C | T | Homozygous   |
| NC_037642.1 | 9343244 | SNV | 1 | T | C | Homozygous   |
| NC_037642.1 | 9343791 | SNV | 1 | G | A | Heterozygous |
| NC_037642.1 | 9343800 | SNV | 1 | G | A | Heterozygous |
| NC_037642.1 | 9344009 | SNV | 1 | A | G | Homozygous   |
| NC_037642.1 | 9344065 | SNV | 1 | A | G | Heterozygous |
| NC_037642.1 | 9344075 | SNV | 1 | G | A | Heterozygous |
| NC_037642.1 | 9344264 | SNV | 1 | T | C | Homozygous   |
| NC_037642.1 | 9345332 | SNV | 1 | C | A | Heterozygous |
| NC_037642.1 | 9345656 | SNV | 1 | T | A | Homozygous   |
| NC_037642.1 | 9346708 | SNV | 1 | G | C | Homozygous   |
| NC_037642.1 | 9347107 | SNV | 1 | T | A | Homozygous   |
| NC_037642.1 | 9347215 | SNV | 1 | T | G | Heterozygous |
| NC_037642.1 | 9347825 | SNV | 1 | G | A | Homozygous   |
| NC_037642.1 | 9348212 | SNV | 1 | C | T | Heterozygous |
| NC_037642.1 | 9350694 | SNV | 1 | T | A | Homozygous   |
| NC_037642.1 | 9350785 | SNV | 1 | C | A | Homozygous   |
| NC_037642.1 | 9350964 | SNV | 1 | A | T | Homozygous   |
| NC_037642.1 | 9353411 | SNV | 1 | T | C | Homozygous   |
| NC_037642.1 | 9353912 | SNV | 1 | G | C | Homozygous   |
| NC_037642.1 | 9354385 | SNV | 1 | C | T | Heterozygous |
| NC_037642.1 | 9354489 | SNV | 1 | T | C | Homozygous   |
| NC_037642.1 | 9354519 | SNV | 1 | T | A | Heterozygous |
| NC_037642.1 | 9354525 | SNV | 1 | A | C | Homozygous   |
| NC_037642.1 | 9354586 | SNV | 1 | A | G | Heterozygous |
| NC_037642.1 | 9354711 | SNV | 1 | C | T | Homozygous   |
| NC_037642.1 | 9357444 | SNV | 1 | T | A | Heterozygous |
| NC_037642.1 | 9357446 | SNV | 1 | G | T | Heterozygous |
| NC_037642.1 | 9357507 | SNV | 1 | G | A | Homozygous   |
| NC_037642.1 | 9357510 | SNV | 1 | T | C | Homozygous   |
| NC_037642.1 | 9358128 | SNV | 1 | C | A | Homozygous   |
| NC_037642.1 | 9358323 | SNV | 1 | T | C | Homozygous   |
| NC_037642.1 | 9359142 | SNV | 1 | C | T | Homozygous   |
| NC_037642.1 | 9367892 | SNV | 1 | T | G | Homozygous   |
| NC_037642.1 | 9367894 | SNV | 1 | G | A | Homozygous   |
| NC_037642.1 | 9369195 | SNV | 1 | T | A | Homozygous   |

|             |         |     |   |   |   |              |
|-------------|---------|-----|---|---|---|--------------|
| NC_037642.1 | 9369205 | SNV | 1 | A | T | Homozygous   |
| NC_037642.1 | 9369242 | SNV | 1 | A | C | Homozygous   |
| NC_037642.1 | 9369247 | SNV | 1 | C | G | Heterozygous |
| NC_037642.1 | 9371246 | SNV | 1 | A | T | Homozygous   |
| NC_037642.1 | 9372922 | SNV | 1 | T | A | Homozygous   |
| NC_037642.1 | 9372924 | SNV | 1 | T | A | Homozygous   |
| NC_037642.1 | 9372943 | SNV | 1 | G | C | Homozygous   |
| NC_037642.1 | 9372946 | SNV | 1 | A | G | Homozygous   |
| NC_037642.1 | 9373073 | SNV | 1 | T | A | Heterozygous |
| NC_037642.1 | 9373570 | SNV | 1 | G | A | Homozygous   |
| NC_037642.1 | 9384872 | SNV | 1 | T | A | Homozygous   |
| NC_037642.1 | 9385126 | SNV | 1 | G | A | Homozygous   |
| NC_037642.1 | 9386475 | SNV | 1 | C | T | Homozygous   |
| NC_037642.1 | 9386479 | SNV | 1 | A | T | Heterozygous |
| NC_037642.1 | 9386670 | SNV | 1 | C | T | Homozygous   |
| NC_037642.1 | 9387809 | SNV | 1 | G | T | Homozygous   |
| NC_037642.1 | 9387990 | SNV | 1 | G | A | Homozygous   |
| NC_037642.1 | 9388063 | SNV | 1 | C | A | Heterozygous |
| NC_037642.1 | 9391500 | SNV | 1 | T | A | Homozygous   |
| NC_037642.1 | 9391742 | SNV | 1 | A | G | Homozygous   |
| NC_037642.1 | 9395097 | SNV | 1 | A | G | Homozygous   |
| NC_037642.1 | 9395443 | SNV | 1 | T | A | Homozygous   |
| NC_037642.1 | 9397873 | SNV | 1 | A | T | Homozygous   |
| NC_037642.1 | 9397881 | SNV | 1 | C | T | Heterozygous |
| NC_037642.1 | 9397901 | SNV | 1 | T | C | Homozygous   |
| NC_037642.1 | 9397938 | SNV | 1 | C | T | Homozygous   |
| NC_037642.1 | 9398044 | SNV | 1 | A | G | Homozygous   |
| NC_037642.1 | 9398068 | SNV | 1 | A | G | Heterozygous |
| NC_037642.1 | 9398132 | SNV | 1 | G | A | Homozygous   |
| NC_037642.1 | 9398277 | SNV | 1 | T | C | Heterozygous |
| NC_037642.1 | 9398286 | SNV | 1 | C | T | Heterozygous |
| NC_037642.1 | 9399401 | SNV | 1 | C | T | Heterozygous |
| NC_037642.1 | 9399503 | SNV | 1 | T | C | Heterozygous |
| NC_037642.1 | 9399542 | SNV | 1 | T | A | Homozygous   |
| NC_037642.1 | 9399561 | SNV | 1 | C | T | Homozygous   |
| NC_037642.1 | 9399973 | SNV | 1 | C | T | Heterozygous |
| NC_037642.1 | 9400129 | SNV | 1 | A | G | Heterozygous |
| NC_037642.1 | 9424059 | SNV | 1 | T | C | Homozygous   |
| NC_037642.1 | 9426178 | SNV | 1 | T | C | Homozygous   |
| NC_037642.1 | 9426755 | SNV | 1 | C | T | Heterozygous |
| NC_037642.1 | 9426779 | SNV | 1 | G | A | Heterozygous |
| NC_037642.1 | 9428249 | SNV | 1 | G | A | Heterozygous |
| NC_037642.1 | 9428540 | SNV | 1 | G | A | Heterozygous |
| NC_037642.1 | 9431233 | SNV | 1 | G | A | Homozygous   |
| NC_037642.1 | 9431249 | SNV | 1 | T | C | Homozygous   |
| NC_037642.1 | 9431255 | SNV | 1 | A | G | Homozygous   |
| NC_037642.1 | 9431518 | SNV | 1 | T | C | Homozygous   |
| NC_037642.1 | 9437298 | SNV | 1 | G | A | Homozygous   |
| NC_037642.1 | 9437928 | SNV | 1 | T | C | Homozygous   |
| NC_037642.1 | 9439956 | SNV | 1 | T | C | Homozygous   |
| NC_037642.1 | 9440348 | SNV | 1 | A | G | Homozygous   |

|             |         |     |   |   |   |              |
|-------------|---------|-----|---|---|---|--------------|
| NC_037642.1 | 9441225 | SNV | 1 | C | A | Heterozygous |
| NC_037642.1 | 9442073 | SNV | 1 | G | A | Homozygous   |
| NC_037642.1 | 9442612 | SNV | 1 | T | A | Homozygous   |
| NC_037642.1 | 9444084 | SNV | 1 | A | T | Homozygous   |
| NC_037642.1 | 9444524 | SNV | 1 | G | C | Homozygous   |
| NC_037642.1 | 9444529 | SNV | 1 | A | T | Homozygous   |
| NC_037642.1 | 9445396 | SNV | 1 | A | G | Homozygous   |
| NC_037642.1 | 9445521 | SNV | 1 | G | A | Heterozygous |
| NC_037642.1 | 9445578 | SNV | 1 | T | A | Heterozygous |
| NC_037642.1 | 9445581 | SNV | 1 | A | G | Heterozygous |
| NC_037642.1 | 9445700 | SNV | 1 | A | C | Heterozygous |
| NC_037642.1 | 9445702 | SNV | 1 | G | C | Heterozygous |
| NC_037642.1 | 9445705 | SNV | 1 | T | A | Heterozygous |
| NC_037642.1 | 9445929 | SNV | 1 | G | A | Homozygous   |
| NC_037642.1 | 9446244 | SNV | 1 | A | G | Homozygous   |
| NC_037642.1 | 9446258 | SNV | 1 | G | T | Homozygous   |
| NC_037642.1 | 9446405 | SNV | 1 | G | A | Homozygous   |
| NC_037642.1 | 9446945 | SNV | 1 | A | T | Homozygous   |
| NC_037642.1 | 9446958 | SNV | 1 | T | C | Homozygous   |
| NC_037642.1 | 9447878 | SNV | 1 | G | A | Homozygous   |
| NC_037642.1 | 9447885 | SNV | 1 | T | C | Homozygous   |
| NC_037642.1 | 9448798 | SNV | 1 | T | G | Homozygous   |
| NC_037642.1 | 9448809 | SNV | 1 | A | T | Homozygous   |
| NC_037642.1 | 9448813 | SNV | 1 | T | C | Homozygous   |
| NC_037642.1 | 9448821 | SNV | 1 | A | C | Homozygous   |
| NC_037642.1 | 9452790 | SNV | 1 | G | A | Homozygous   |
| NC_037642.1 | 9456658 | SNV | 1 | C | G | Homozygous   |
| NC_037642.1 | 9456727 | SNV | 1 | T | G | Heterozygous |
| NC_037642.1 | 9459194 | SNV | 1 | G | A | Homozygous   |
| NC_037642.1 | 9460117 | SNV | 1 | A | G | Homozygous   |
| NC_037642.1 | 9460599 | SNV | 1 | C | A | Heterozygous |
| NC_037642.1 | 9460784 | SNV | 1 | G | T | Homozygous   |
| NC_037642.1 | 9460884 | SNV | 1 | G | A | Heterozygous |
| NC_037642.1 | 9462305 | SNV | 1 | T | C | Homozygous   |
| NC_037642.1 | 9468247 | SNV | 1 | C | T | Homozygous   |
| NC_037642.1 | 9475816 | SNV | 1 | A | G | Homozygous   |
| NC_037642.1 | 9475866 | SNV | 1 | C | T | Heterozygous |
| NC_037642.1 | 9476216 | SNV | 1 | T | C | Homozygous   |
| NC_037642.1 | 9482176 | SNV | 1 | C | T | Homozygous   |
| NC_037642.1 | 9486131 | SNV | 1 | G | A | Heterozygous |
| NC_037642.1 | 9488068 | SNV | 1 | A | T | Heterozygous |
| NC_037642.1 | 9491408 | SNV | 1 | G | T | Homozygous   |
| NC_037642.1 | 9491913 | SNV | 1 | G | A | Heterozygous |
| NC_037642.1 | 9492423 | SNV | 1 | T | C | Homozygous   |
| NC_037642.1 | 9493823 | SNV | 1 | T | C | Heterozygous |
| NC_037642.1 | 9494287 | SNV | 1 | C | T | Homozygous   |
| NC_037642.1 | 9495178 | SNV | 1 | T | C | Homozygous   |
| NC_037642.1 | 9495187 | SNV | 1 | A | T | Homozygous   |
| NC_037642.1 | 9495190 | SNV | 1 | A | T | Homozygous   |
| NC_037642.1 | 9495206 | SNV | 1 | G | T | Homozygous   |
| NC_037642.1 | 9495209 | SNV | 1 | A | T | Homozygous   |



|             |         |     |   |   |   |              |
|-------------|---------|-----|---|---|---|--------------|
| NC_037642.1 | 9497329 | SNV | 1 | A | G | Homozygous   |
| NC_037642.1 | 9499032 | SNV | 1 | A | G | Heterozygous |
| NC_037642.1 | 9507801 | SNV | 1 | A | G | Homozygous   |
| NC_037642.1 | 9508762 | SNV | 1 | T | C | Heterozygous |
| NC_037642.1 | 9511275 | SNV | 1 | T | C | Homozygous   |
| NC_037642.1 | 9513642 | SNV | 1 | A | G | Homozygous   |
| NC_037642.1 | 9514356 | SNV | 1 | T | G | Homozygous   |
| NC_037642.1 | 9514429 | SNV | 1 | A | C | Homozygous   |
| NC_037642.1 | 9514532 | SNV | 1 | T | C | Homozygous   |
| NC_037642.1 | 9514745 | SNV | 1 | A | G | Homozygous   |
| NC_037642.1 | 9515299 | SNV | 1 | A | T | Homozygous   |
| NC_037642.1 | 9516033 | SNV | 1 | C | T | Homozygous   |
| NC_037642.1 | 9516724 | SNV | 1 | A | G | Homozygous   |
| NC_037642.1 | 9518809 | SNV | 1 | A | G | Homozygous   |
| NC_037642.1 | 9520730 | SNV | 1 | G | A | Heterozygous |
| NC_037642.1 | 9521738 | SNV | 1 | C | T | Homozygous   |
| NC_037642.1 | 9522004 | SNV | 1 | T | C | Homozygous   |
| NC_037642.1 | 9522120 | SNV | 1 | A | G | Homozygous   |
| NC_037642.1 | 9522451 | SNV | 1 | T | C | Homozygous   |
| NC_037642.1 | 9523220 | SNV | 1 | T | C | Homozygous   |
| NC_037642.1 | 9523378 | SNV | 1 | T | A | Homozygous   |
| NC_037642.1 | 9523639 | SNV | 1 | G | A | Homozygous   |
| NC_037642.1 | 9525373 | SNV | 1 | A | G | Homozygous   |
| NC_037642.1 | 9530124 | SNV | 1 | G | T | Homozygous   |
| NC_037642.1 | 9530493 | SNV | 1 | G | C | Heterozygous |
| NC_037642.1 | 9530496 | SNV | 1 | G | C | Homozygous   |
| NC_037642.1 | 9530499 | SNV | 1 | G | T | Heterozygous |
| NC_037642.1 | 9530502 | SNV | 1 | G | T | Heterozygous |
| NC_037642.1 | 9530522 | SNV | 1 | A | T | Heterozygous |
| NC_037642.1 | 9530525 | SNV | 1 | T | A | Homozygous   |
| NC_037642.1 | 9530532 | SNV | 1 | C | T | Heterozygous |
| NC_037642.1 | 9530534 | SNV | 1 | A | T | Heterozygous |
| NC_037642.1 | 9530554 | SNV | 1 | C | T | Heterozygous |
| NC_037642.1 | 9530557 | SNV | 1 | C | T | Heterozygous |
| NC_037642.1 | 9530560 | SNV | 1 | C | T | Heterozygous |
| NC_037642.1 | 9530563 | SNV | 1 | C | A | Heterozygous |
| NC_037642.1 | 9530570 | SNV | 1 | A | T | Heterozygous |
| NC_037642.1 | 9530573 | SNV | 1 | A | T | Heterozygous |
| NC_037642.1 | 9530580 | SNV | 1 | C | T | Heterozygous |
| NC_037642.1 | 9530582 | SNV | 1 | A | C | Heterozygous |
| NC_037642.1 | 9530593 | SNV | 1 | T | C | Heterozygous |
| NC_037642.1 | 9530614 | SNV | 1 | T | C | Heterozygous |
| NC_037642.1 | 9530625 | SNV | 1 | T | C | Heterozygous |
| NC_037642.1 | 9530740 | SNV | 1 | T | C | Homozygous   |
| NC_037642.1 | 9533329 | SNV | 1 | T | A | Homozygous   |
| NC_037642.1 | 9533368 | SNV | 1 | A | G | Homozygous   |
| NC_037642.1 | 9534120 | SNV | 1 | A | T | Heterozygous |
| NC_037642.1 | 9534129 | SNV | 1 | A | C | Heterozygous |
| NC_037642.1 | 9534847 | SNV | 1 | T | A | Homozygous   |
| NC_037642.1 | 9540262 | SNV | 1 | C | T | Heterozygous |
| NC_037642.1 | 9541171 | SNV | 1 | T | C | Homozygous   |

|             |         |     |   |   |   |              |
|-------------|---------|-----|---|---|---|--------------|
| NC_037642.1 | 9542008 | SNV | 1 | A | G | Heterozygous |
| NC_037642.1 | 9542480 | SNV | 1 | G | A | Heterozygous |
| NC_037642.1 | 9543623 | SNV | 1 | T | G | Heterozygous |
| NC_037642.1 | 9543644 | SNV | 1 | T | A | Heterozygous |
| NC_037642.1 | 9546358 | SNV | 1 | A | G | Homozygous   |
| NC_037642.1 | 9548086 | SNV | 1 | G | A | Homozygous   |
| NC_037642.1 | 9548298 | SNV | 1 | A | T | Homozygous   |
| NC_037642.1 | 9548628 | SNV | 1 | T | C | Homozygous   |
| NC_037642.1 | 9549353 | SNV | 1 | A | T | Heterozygous |
| NC_037642.1 | 9555377 | SNV | 1 | T | C | Homozygous   |
| NC_037642.1 | 9556503 | SNV | 1 | T | A | Homozygous   |
| NC_037642.1 | 9556510 | SNV | 1 | A | T | Homozygous   |
| NC_037642.1 | 9556539 | SNV | 1 | A | T | Homozygous   |
| NC_037642.1 | 9556543 | SNV | 1 | A | T | Homozygous   |
| NC_037642.1 | 9557166 | SNV | 1 | G | A | Homozygous   |
| NC_037642.1 | 9558033 | SNV | 1 | C | T | Homozygous   |
| NC_037642.1 | 9558088 | SNV | 1 | T | C | Homozygous   |
| NC_037642.1 | 9558641 | SNV | 1 | C | T | Heterozygous |
| NC_037642.1 | 9559277 | SNV | 1 | T | A | Homozygous   |
| NC_037642.1 | 9561633 | SNV | 1 | A | G | Homozygous   |
| NC_037642.1 | 9561654 | SNV | 1 | A | T | Heterozygous |
| NC_037642.1 | 9561657 | SNV | 1 | C | T | Heterozygous |
| NC_037642.1 | 9561675 | SNV | 1 | T | A | Heterozygous |
| NC_037642.1 | 9561678 | SNV | 1 | T | C | Heterozygous |
| NC_037642.1 | 9563787 | SNV | 1 | T | C | Homozygous   |
| NC_037642.1 | 9565258 | SNV | 1 | T | C | Heterozygous |
| NC_037642.1 | 9566497 | SNV | 1 | C | A | Homozygous   |
| NC_037642.1 | 9567383 | SNV | 1 | C | T | Heterozygous |
| NC_037642.1 | 9568184 | SNV | 1 | G | A | Heterozygous |
| NC_037642.1 | 9568316 | SNV | 1 | A | G | Homozygous   |
| NC_037642.1 | 9569737 | SNV | 1 | T | G | Homozygous   |
| NC_037642.1 | 9569744 | SNV | 1 | T | A | Homozygous   |
| NC_037642.1 | 9569746 | SNV | 1 | G | A | Heterozygous |
| NC_037642.1 | 9569751 | SNV | 1 | T | A | Homozygous   |
| NC_037642.1 | 9569768 | SNV | 1 | T | A | Homozygous   |
| NC_037642.1 | 9569770 | SNV | 1 | T | A | Homozygous   |
| NC_037642.1 | 9569772 | SNV | 1 | G | A | Heterozygous |
| NC_037642.1 | 9569776 | SNV | 1 | T | A | Homozygous   |
| NC_037642.1 | 9569779 | SNV | 1 | T | A | Homozygous   |
| NC_037642.1 | 9569857 | SNV | 1 | T | A | Homozygous   |
| NC_037642.1 | 9574583 | SNV | 1 | A | G | Homozygous   |
| NC_037642.1 | 9574586 | SNV | 1 | T | G | Homozygous   |
| NC_037642.1 | 9574590 | SNV | 1 | A | G | Homozygous   |
| NC_037642.1 | 9574592 | SNV | 1 | A | G | Homozygous   |
| NC_037642.1 | 9574656 | SNV | 1 | C | T | Homozygous   |
| NC_037642.1 | 9578724 | SNV | 1 | A | T | Homozygous   |
| NC_037642.1 | 9578733 | SNV | 1 | A | T | Homozygous   |
| NC_037642.1 | 9578846 | SNV | 1 | A | T | Heterozygous |
| NC_037642.1 | 9578857 | SNV | 1 | G | T | Homozygous   |
| NC_037642.1 | 9580225 | SNV | 1 | A | T | Homozygous   |
| NC_037642.1 | 9580674 | SNV | 1 | G | A | Homozygous   |

|             |         |     |   |   |   |              |
|-------------|---------|-----|---|---|---|--------------|
| NC_037642.1 | 9580891 | SNV | 1 | A | G | Heterozygous |
| NC_037642.1 | 9580897 | SNV | 1 | A | C | Homozygous   |
| NC_037642.1 | 9580900 | SNV | 1 | A | G | Homozygous   |
| NC_037642.1 | 9580904 | SNV | 1 | T | C | Homozygous   |
| NC_037642.1 | 9580933 | SNV | 1 | A | G | Heterozygous |
| NC_037642.1 | 9580938 | SNV | 1 | A | G | Heterozygous |
| NC_037642.1 | 9580942 | SNV | 1 | T | G | Heterozygous |
| NC_037642.1 | 9580945 | SNV | 1 | C | T | Heterozygous |
| NC_037642.1 | 9580951 | SNV | 1 | A | T | Heterozygous |
| NC_037642.1 | 9580954 | SNV | 1 | G | A | Heterozygous |
| NC_037642.1 | 9580966 | SNV | 1 | A | G | Heterozygous |
| NC_037642.1 | 9580976 | SNV | 1 | T | C | Heterozygous |
| NC_037642.1 | 9580978 | SNV | 1 | G | C | Heterozygous |
| NC_037642.1 | 9581172 | SNV | 1 | A | G | Homozygous   |
| NC_037642.1 | 9581175 | SNV | 1 | A | G | Homozygous   |
| NC_037642.1 | 9581178 | SNV | 1 | A | C | Homozygous   |
| NC_037642.1 | 9581181 | SNV | 1 | A | C | Homozygous   |
| NC_037642.1 | 9581184 | SNV | 1 | A | G | Heterozygous |
| NC_037642.1 | 9581196 | SNV | 1 | G | T | Homozygous   |
| NC_037642.1 | 9581199 | SNV | 1 | T | G | Homozygous   |
| NC_037642.1 | 9581202 | SNV | 1 | T | C | Heterozygous |
| NC_037642.1 | 9581208 | SNV | 1 | A | G | Heterozygous |
| NC_037642.1 | 9581211 | SNV | 1 | A | G | Heterozygous |
| NC_037642.1 | 9581220 | SNV | 1 | A | G | Heterozygous |
| NC_037642.1 | 9581420 | SNV | 1 | A | T | Homozygous   |
| NC_037642.1 | 9584237 | SNV | 1 | C | T | Homozygous   |
| NC_037642.1 | 9584849 | SNV | 1 | T | C | Homozygous   |
| NC_037642.1 | 9598547 | SNV | 1 | G | A | Heterozygous |
| NC_037642.1 | 9598569 | SNV | 1 | C | A | Heterozygous |
| NC_037642.1 | 9598573 | SNV | 1 | G | A | Heterozygous |
| NC_037642.1 | 9633633 | SNV | 1 | C | T | Heterozygous |
| NC_037642.1 | 9657725 | SNV | 1 | C | G | Homozygous   |
| NC_037642.1 | 9657728 | SNV | 1 | C | T | Homozygous   |
| NC_037642.1 | 9657738 | SNV | 1 | G | C | Homozygous   |
| NC_037642.1 | 9657741 | SNV | 1 | C | T | Homozygous   |
| NC_037642.1 | 9700942 | SNV | 1 | T | C | Heterozygous |
| NC_037642.1 | 9700958 | SNV | 1 | T | C | Homozygous   |
| NC_037642.1 | 9701899 | SNV | 1 | G | T | Heterozygous |
| NC_037642.1 | 9702112 | SNV | 1 | A | G | Homozygous   |
| NC_037642.1 | 9703294 | SNV | 1 | T | G | Homozygous   |
| NC_037642.1 | 9703605 | SNV | 1 | T | C | Homozygous   |
| NC_037642.1 | 9703877 | SNV | 1 | A | G | Homozygous   |
| NC_037642.1 | 9704466 | SNV | 1 | T | A | Heterozygous |
| NC_037642.1 | 9704893 | SNV | 1 | A | T | Homozygous   |
| NC_037642.1 | 9705074 | SNV | 1 | T | C | Homozygous   |
| NC_037642.1 | 9705165 | SNV | 1 | T | C | Heterozygous |
| NC_037642.1 | 9705210 | SNV | 1 | G | A | Heterozygous |
| NC_037642.1 | 9705621 | SNV | 1 | C | T | Homozygous   |
| NC_037642.1 | 9705974 | SNV | 1 | G | A | Heterozygous |
| NC_037642.1 | 9707033 | SNV | 1 | C | T | Homozygous   |
| NC_037642.1 | 9707123 | SNV | 1 | G | A | Homozygous   |

|             |         |     |   |   |   |              |
|-------------|---------|-----|---|---|---|--------------|
| NC_037642.1 | 9709176 | SNV | 1 | A | G | Homozygous   |
| NC_037642.1 | 9709182 | SNV | 1 | T | C | Heterozygous |
| NC_037642.1 | 9709184 | SNV | 1 | T | A | Heterozygous |
| NC_037642.1 | 9709189 | SNV | 1 | A | T | Heterozygous |
| NC_037642.1 | 9709220 | SNV | 1 | C | A | Homozygous   |
| NC_037642.1 | 9716433 | SNV | 1 | C | T | Heterozygous |
| NC_037642.1 | 9716661 | SNV | 1 | G | T | Heterozygous |
| NC_037642.1 | 9716667 | SNV | 1 | T | C | Heterozygous |
| NC_037642.1 | 9716671 | SNV | 1 | A | G | Heterozygous |
| NC_037642.1 | 9716695 | SNV | 1 | A | C | Heterozygous |
| NC_037642.1 | 9716701 | SNV | 1 | C | T | Heterozygous |
| NC_037642.1 | 9720507 | SNV | 1 | G | A | Homozygous   |
| NC_037642.1 | 9720530 | SNV | 1 | T | A | Homozygous   |
| NC_037642.1 | 9723215 | SNV | 1 | G | T | Homozygous   |
| NC_037642.1 | 9723223 | SNV | 1 | G | T | Homozygous   |
| NC_037642.1 | 9723226 | SNV | 1 | A | T | Homozygous   |
| NC_037642.1 | 9723229 | SNV | 1 | A | T | Homozygous   |
| NC_037642.1 | 9723232 | SNV | 1 | A | G | Homozygous   |
| NC_037642.1 | 9725326 | SNV | 1 | G | A | Heterozygous |
| NC_037642.1 | 9725822 | SNV | 1 | T | C | Homozygous   |
| NC_037642.1 | 9725999 | SNV | 1 | T | C | Heterozygous |
| NC_037642.1 | 9726015 | SNV | 1 | A | G | Homozygous   |
| NC_037642.1 | 9726035 | SNV | 1 | T | A | Homozygous   |
| NC_037642.1 | 9726078 | SNV | 1 | G | A | Heterozygous |
| NC_037642.1 | 9726087 | SNV | 1 | C | T | Heterozygous |
| NC_037642.1 | 9726169 | SNV | 1 | G | A | Heterozygous |
| NC_037642.1 | 9726178 | SNV | 1 | G | A | Heterozygous |
| NC_037642.1 | 9726278 | SNV | 1 | A | G | Homozygous   |
| NC_037642.1 | 9726335 | SNV | 1 | G | C | Homozygous   |
| NC_037642.1 | 9726357 | SNV | 1 | A | T | Homozygous   |
| NC_037642.1 | 9726376 | SNV | 1 | A | G | Homozygous   |
| NC_037642.1 | 9726396 | SNV | 1 | G | A | Homozygous   |
| NC_037642.1 | 9726406 | SNV | 1 | C | T | Homozygous   |
| NC_037642.1 | 9726438 | SNV | 1 | T | C | Heterozygous |
| NC_037642.1 | 9726457 | SNV | 1 | A | G | Homozygous   |
| NC_037642.1 | 9726463 | SNV | 1 | C | T | Homozygous   |
| NC_037642.1 | 9726515 | SNV | 1 | T | C | Heterozygous |
| NC_037642.1 | 9726546 | SNV | 1 | T | A | Heterozygous |
| NC_037642.1 | 9726600 | SNV | 1 | A | T | Heterozygous |
| NC_037642.1 | 9726700 | SNV | 1 | G | A | Heterozygous |
| NC_037642.1 | 9726760 | SNV | 1 | G | A | Heterozygous |
| NC_037642.1 | 9726800 | SNV | 1 | T | A | Heterozygous |
| NC_037642.1 | 9726802 | SNV | 1 | T | C | Homozygous   |
| NC_037642.1 | 9726871 | SNV | 1 | C | A | Heterozygous |
| NC_037642.1 | 9726897 | SNV | 1 | T | C | Homozygous   |
| NC_037642.1 | 9727444 | SNV | 1 | C | T | Heterozygous |
| NC_037642.1 | 9727547 | SNV | 1 | C | T | Heterozygous |
| NC_037642.1 | 9727689 | SNV | 1 | G | C | Homozygous   |
| NC_037642.1 | 9727814 | SNV | 1 | C | T | Heterozygous |
| NC_037642.1 | 9727950 | SNV | 1 | T | C | Heterozygous |
| NC_037642.1 | 9728322 | SNV | 1 | G | A | Heterozygous |

|             |         |     |   |   |   |              |
|-------------|---------|-----|---|---|---|--------------|
| NC_037642.1 | 9728517 | SNV | 1 | A | G | Homozygous   |
| NC_037642.1 | 9728701 | SNV | 1 | G | A | Homozygous   |
| NC_037642.1 | 9728912 | SNV | 1 | A | G | Homozygous   |
| NC_037642.1 | 9729377 | SNV | 1 | A | G | Heterozygous |
| NC_037642.1 | 9729418 | SNV | 1 | G | A | Heterozygous |
| NC_037642.1 | 9729790 | SNV | 1 | C | T | Heterozygous |
| NC_037642.1 | 9729891 | SNV | 1 | G | C | Heterozygous |
| NC_037642.1 | 9730266 | SNV | 1 | T | C | Heterozygous |
| NC_037642.1 | 9731930 | SNV | 1 | A | C | Heterozygous |
| NC_037642.1 | 9731932 | SNV | 1 | A | C | Homozygous   |
| NC_037642.1 | 9732488 | SNV | 1 | A | G | Heterozygous |
| NC_037642.1 | 9732646 | SNV | 1 | C | T | Heterozygous |
| NC_037642.1 | 9732662 | SNV | 1 | A | G | Homozygous   |
| NC_037642.1 | 9732664 | SNV | 1 | A | G | Heterozygous |
| NC_037642.1 | 9732668 | SNV | 1 | A | G | Homozygous   |
| NC_037642.1 | 9732689 | SNV | 1 | A | G | Homozygous   |
| NC_037642.1 | 9732715 | SNV | 1 | G | A | Heterozygous |
| NC_037642.1 | 9732721 | SNV | 1 | G | C | Heterozygous |
| NC_037642.1 | 9732751 | SNV | 1 | G | A | Homozygous   |
| NC_037642.1 | 9733545 | SNV | 1 | C | T | Homozygous   |
| NC_037642.1 | 9733886 | SNV | 1 | G | A | Homozygous   |
| NC_037642.1 | 9734047 | SNV | 1 | C | T | Heterozygous |
| NC_037642.1 | 9734978 | SNV | 1 | T | C | Homozygous   |
| NC_037642.1 | 9736595 | SNV | 1 | A | G | Homozygous   |
| NC_037642.1 | 9736620 | SNV | 1 | A | G | Heterozygous |
| NC_037642.1 | 9737384 | SNV | 1 | G | A | Homozygous   |
| NC_037642.1 | 9742673 | SNV | 1 | C | T | Heterozygous |
| NC_037642.1 | 9742676 | SNV | 1 | T | A | Heterozygous |
| NC_037642.1 | 9743314 | SNV | 1 | A | G | Heterozygous |
| NC_037642.1 | 9743409 | SNV | 1 | G | A | Homozygous   |
| NC_037642.1 | 9743478 | SNV | 1 | C | T | Heterozygous |
| NC_037642.1 | 9743778 | SNV | 1 | G | A | Heterozygous |
| NC_037642.1 | 9743807 | SNV | 1 | A | G | Heterozygous |
| NC_037642.1 | 9744292 | SNV | 1 | T | C | Homozygous   |
| NC_037642.1 | 9744318 | SNV | 1 | C | T | Homozygous   |
| NC_037642.1 | 9744622 | SNV | 1 | T | C | Homozygous   |
| NC_037642.1 | 9745059 | SNV | 1 | C | T | Heterozygous |
| NC_037642.1 | 9745278 | SNV | 1 | C | T | Heterozygous |
| NC_037642.1 | 9745368 | SNV | 1 | T | A | Homozygous   |
| NC_037642.1 | 9745377 | SNV | 1 | C | T | Homozygous   |
| NC_037642.1 | 9745572 | SNV | 1 | A | G | Homozygous   |
| NC_037642.1 | 9745974 | SNV | 1 | C | T | Homozygous   |
| NC_037642.1 | 9747065 | SNV | 1 | C | T | Heterozygous |
| NC_037642.1 | 9749236 | SNV | 1 | T | C | Homozygous   |
| NC_037642.1 | 9749257 | SNV | 1 | T | C | Homozygous   |
| NC_037642.1 | 9749993 | SNV | 1 | C | T | Heterozygous |
| NC_037642.1 | 9750093 | SNV | 1 | T | A | Homozygous   |
| NC_037642.1 | 9750476 | SNV | 1 | A | G | Heterozygous |
| NC_037642.1 | 9750805 | SNV | 1 | A | C | Homozygous   |
| NC_037642.1 | 9750822 | SNV | 1 | T | A | Homozygous   |
| NC_037642.1 | 9750939 | SNV | 1 | A | G | Homozygous   |

|             |         |     |   |   |   |              |
|-------------|---------|-----|---|---|---|--------------|
| NC_037642.1 | 9751097 | SNV | 1 | G | A | Heterozygous |
| NC_037642.1 | 9751285 | SNV | 1 | C | T | Heterozygous |
| NC_037642.1 | 9752541 | SNV | 1 | G | A | Heterozygous |
| NC_037642.1 | 9752662 | SNV | 1 | G | A | Heterozygous |
| NC_037642.1 | 9752920 | SNV | 1 | C | T | Heterozygous |
| NC_037642.1 | 9753634 | SNV | 1 | T | G | Heterozygous |
| NC_037642.1 | 9753636 | SNV | 1 | T | C | Heterozygous |
| NC_037642.1 | 9759827 | SNV | 1 | A | C | Homozygous   |
| NC_037642.1 | 9759829 | SNV | 1 | C | T | Heterozygous |
| NC_037642.1 | 9760016 | SNV | 1 | C | T | Homozygous   |
| NC_037642.1 | 9760048 | SNV | 1 | T | C | Homozygous   |
| NC_037642.1 | 9760271 | SNV | 1 | C | T | Heterozygous |
| NC_037642.1 | 9760516 | SNV | 1 | C | A | Heterozygous |
| NC_037642.1 | 9760632 | SNV | 1 | A | G | Homozygous   |
| NC_037642.1 | 9760872 | SNV | 1 | A | G | Homozygous   |
| NC_037642.1 | 9760880 | SNV | 1 | G | A | Homozygous   |
| NC_037642.1 | 9760883 | SNV | 1 | C | T | Homozygous   |
| NC_037642.1 | 9760905 | SNV | 1 | T | C | Homozygous   |
| NC_037642.1 | 9760958 | SNV | 1 | A | T | Homozygous   |
| NC_037642.1 | 9761064 | SNV | 1 | G | A | Heterozygous |
| NC_037642.1 | 9761359 | SNV | 1 | T | C | Homozygous   |
| NC_037642.1 | 9761457 | SNV | 1 | T | A | Homozygous   |
| NC_037642.1 | 9761664 | SNV | 1 | G | A | Heterozygous |
| NC_037642.1 | 9761712 | SNV | 1 | A | G | Homozygous   |
| NC_037642.1 | 9761819 | SNV | 1 | G | A | Heterozygous |
| NC_037642.1 | 9761919 | SNV | 1 | G | A | Heterozygous |
| NC_037642.1 | 9762099 | SNV | 1 | T | C | Homozygous   |
| NC_037642.1 | 9762611 | SNV | 1 | T | C | Heterozygous |
| NC_037642.1 | 9762692 | SNV | 1 | G | A | Heterozygous |
| NC_037642.1 | 9763467 | SNV | 1 | T | C | Homozygous   |
| NC_037642.1 | 9763923 | SNV | 1 | T | C | Homozygous   |
| NC_037642.1 | 9764093 | SNV | 1 | C | T | Homozygous   |
| NC_037642.1 | 9766540 | SNV | 1 | T | C | Homozygous   |
| NC_037642.1 | 9777472 | SNV | 1 | A | C | Heterozygous |
| NC_037642.1 | 9777482 | SNV | 1 | A | G | Heterozygous |
| NC_037642.1 | 9777491 | SNV | 1 | G | A | Heterozygous |
| NC_037642.1 | 9779219 | SNV | 1 | T | C | Homozygous   |
| NC_037642.1 | 9779221 | SNV | 1 | T | C | Homozygous   |
| NC_037642.1 | 9779603 | SNV | 1 | T | C | Heterozygous |
| NC_037642.1 | 9779612 | SNV | 1 | T | C | Heterozygous |
| NC_037642.1 | 9785109 | SNV | 1 | A | G | Homozygous   |
| NC_037642.1 | 9785116 | SNV | 1 | C | T | Heterozygous |
| NC_037642.1 | 9785151 | SNV | 1 | G | A | Heterozygous |
| NC_037642.1 | 9785166 | SNV | 1 | C | G | Heterozygous |
| NC_037642.1 | 9785277 | SNV | 1 | A | G | Heterozygous |
| NC_037642.1 | 9785380 | SNV | 1 | A | G | Homozygous   |
| NC_037642.1 | 9787752 | SNV | 1 | C | T | Homozygous   |
| NC_037642.1 | 9788056 | SNV | 1 | C | G | Heterozygous |
| NC_037642.1 | 9788164 | SNV | 1 | G | C | Homozygous   |
| NC_037642.1 | 9789040 | SNV | 1 | C | A | Homozygous   |
| NC_037642.1 | 9789042 | SNV | 1 | C | A | Heterozygous |

|             |         |     |   |   |   |              |
|-------------|---------|-----|---|---|---|--------------|
| NC_037642.1 | 9789046 | SNV | 1 | C | T | Heterozygous |
| NC_037642.1 | 9789048 | SNV | 1 | C | A | Heterozygous |
| NC_037642.1 | 9789052 | SNV | 1 | C | A | Homozygous   |
| NC_037642.1 | 9789188 | SNV | 1 | T | C | Heterozygous |
| NC_037642.1 | 9789250 | SNV | 1 | C | T | Heterozygous |
| NC_037642.1 | 9790452 | SNV | 1 | G | C | Heterozygous |
| NC_037642.1 | 9804018 | SNV | 1 | C | T | Heterozygous |
| NC_037642.1 | 9804066 | SNV | 1 | T | C | Homozygous   |
| NC_037642.1 | 9804099 | SNV | 1 | A | G | Homozygous   |
| NC_037642.1 | 9804555 | SNV | 1 | T | G | Homozygous   |
| NC_037642.1 | 9808169 | SNV | 1 | T | C | Homozygous   |
| NC_037642.1 | 9808204 | SNV | 1 | A | T | Heterozygous |
| NC_037642.1 | 9808250 | SNV | 1 | G | A | Homozygous   |
| NC_037642.1 | 9808308 | SNV | 1 | C | T | Homozygous   |
| NC_037642.1 | 9809440 | SNV | 1 | T | C | Heterozygous |
| NC_037642.1 | 9809679 | SNV | 1 | C | T | Heterozygous |
| NC_037642.1 | 9810073 | SNV | 1 | C | T | Heterozygous |
| NC_037642.1 | 9810546 | SNV | 1 | T | G | Homozygous   |
| NC_037642.1 | 9810618 | SNV | 1 | T | C | Homozygous   |
| NC_037642.1 | 9811741 | SNV | 1 | T | C | Homozygous   |
| NC_037642.1 | 9811771 | SNV | 1 | G | A | Homozygous   |
| NC_037642.1 | 9819574 | SNV | 1 | C | T | Homozygous   |
| NC_037642.1 | 9819742 | SNV | 1 | C | T | Heterozygous |
| NC_037642.1 | 9819802 | SNV | 1 | T | C | Homozygous   |
| NC_037642.1 | 9820060 | SNV | 1 | G | T | Heterozygous |
| NC_037642.1 | 9820103 | SNV | 1 | A | G | Heterozygous |
| NC_037642.1 | 9820131 | SNV | 1 | G | A | Heterozygous |
| NC_037642.1 | 9825929 | SNV | 1 | T | C | Homozygous   |
| NC_037642.1 | 9825931 | SNV | 1 | T | C | Homozygous   |
| NC_037642.1 | 9838762 | SNV | 1 | A | G | Homozygous   |
| NC_037642.1 | 9839483 | SNV | 1 | C | T | Heterozygous |
| NC_037642.1 | 9840979 | SNV | 1 | A | T | Heterozygous |
| NC_037642.1 | 9841244 | SNV | 1 | A | G | Homozygous   |
| NC_037642.1 | 9841781 | SNV | 1 | A | G | Homozygous   |
| NC_037642.1 | 9842118 | SNV | 1 | G | A | Homozygous   |
| NC_037642.1 | 9843323 | SNV | 1 | T | C | Heterozygous |
| NC_037642.1 | 9846410 | SNV | 1 | T | G | Homozygous   |
| NC_037642.1 | 9846418 | SNV | 1 | A | T | Homozygous   |
| NC_037642.1 | 9846441 | SNV | 1 | A | G | Homozygous   |
| NC_037642.1 | 9848134 | SNV | 1 | G | A | Homozygous   |
| NC_037642.1 | 9848290 | SNV | 1 | T | C | Homozygous   |
| NC_037642.1 | 9849510 | SNV | 1 | T | C | Homozygous   |
| NC_037642.1 | 9850157 | SNV | 1 | C | G | Homozygous   |
| NC_037642.1 | 9850208 | SNV | 1 | C | T | Homozygous   |
| NC_037642.1 | 9850289 | SNV | 1 | T | C | Homozygous   |
| NC_037642.1 | 9850941 | SNV | 1 | G | A | Homozygous   |
| NC_037642.1 | 9850960 | SNV | 1 | T | C | Heterozygous |
| NC_037642.1 | 9850974 | SNV | 1 | G | T | Heterozygous |
| NC_037642.1 | 9851071 | SNV | 1 | C | T | Homozygous   |
| NC_037642.1 | 9866253 | SNV | 1 | C | T | Homozygous   |
| NC_037642.1 | 9866271 | SNV | 1 | C | T | Heterozygous |

|             |         |     |   |   |   |              |
|-------------|---------|-----|---|---|---|--------------|
| NC_037642.1 | 9866385 | SNV | 1 | T | C | Homozygous   |
| NC_037642.1 | 9889922 | SNV | 1 | G | A | Homozygous   |
| NC_037642.1 | 9890267 | SNV | 1 | G | A | Heterozygous |
| NC_037642.1 | 9891444 | SNV | 1 | C | T | Homozygous   |
| NC_037642.1 | 9891512 | SNV | 1 | C | T | Heterozygous |
| NC_037642.1 | 9891523 | SNV | 1 | C | T | Homozygous   |
| NC_037642.1 | 9892134 | SNV | 1 | C | T | Homozygous   |
| NC_037642.1 | 9898172 | SNV | 1 | A | G | Homozygous   |
| NC_037642.1 | 9898352 | SNV | 1 | C | T | Heterozygous |
| NC_037642.1 | 9898538 | SNV | 1 | T | A | Homozygous   |
| NC_037642.1 | 9899313 | SNV | 1 | C | T | Heterozygous |
| NC_037642.1 | 9899950 | SNV | 1 | G | A | Heterozygous |
| NC_037642.1 | 9900125 | SNV | 1 | C | T | Homozygous   |
| NC_037642.1 | 9900313 | SNV | 1 | A | G | Heterozygous |
| NC_037642.1 | 9900315 | SNV | 1 | A | G | Heterozygous |
| NC_037642.1 | 9900894 | SNV | 1 | T | C | Heterozygous |
| NC_037642.1 | 9904317 | SNV | 1 | A | G | Homozygous   |
| NC_037642.1 | 9904952 | SNV | 1 | G | A | Heterozygous |
| NC_037642.1 | 9904955 | SNV | 1 | A | C | Homozygous   |
| NC_037642.1 | 9905744 | SNV | 1 | G | T | Homozygous   |
| NC_037642.1 | 9905814 | SNV | 1 | A | G | Homozygous   |
| NC_037642.1 | 9906514 | SNV | 1 | C | T | Heterozygous |
| NC_037642.1 | 9912357 | SNV | 1 | G | A | Heterozygous |
| NC_037642.1 | 9912643 | SNV | 1 | G | A | Heterozygous |
| NC_037642.1 | 9912680 | SNV | 1 | C | T | Homozygous   |
| NC_037642.1 | 9912682 | SNV | 1 | A | G | Homozygous   |
| NC_037642.1 | 9912836 | SNV | 1 | A | T | Homozygous   |
| NC_037642.1 | 9912838 | SNV | 1 | A | T | Homozygous   |
| NC_037642.1 | 9913118 | SNV | 1 | T | A | Heterozygous |
| NC_037642.1 | 9913558 | SNV | 1 | T | C | Homozygous   |
| NC_037642.1 | 9918338 | SNV | 1 | G | A | Heterozygous |
| NC_037642.1 | 9924663 | SNV | 1 | C | T | Homozygous   |
| NC_037642.1 | 9924705 | SNV | 1 | A | G | Homozygous   |
| NC_037642.1 | 9924876 | SNV | 1 | C | T | Heterozygous |
| NC_037642.1 | 9925110 | SNV | 1 | C | T | Heterozygous |
| NC_037642.1 | 9931604 | SNV | 1 | C | T | Heterozygous |
| NC_037642.1 | 9931739 | SNV | 1 | A | G | Heterozygous |
| NC_037642.1 | 9932076 | SNV | 1 | C | A | Heterozygous |
| NC_037642.1 | 9932209 | SNV | 1 | A | G | Homozygous   |
| NC_037642.1 | 9932421 | SNV | 1 | A | G | Heterozygous |
| NC_037642.1 | 9932618 | SNV | 1 | T | C | Heterozygous |
| NC_037642.1 | 9933091 | SNV | 1 | A | G | Heterozygous |
| NC_037642.1 | 9933278 | SNV | 1 | C | T | Homozygous   |
| NC_037642.1 | 9933722 | SNV | 1 | T | C | Homozygous   |
| NC_037642.1 | 9933765 | SNV | 1 | A | G | Homozygous   |
| NC_037642.1 | 9933884 | SNV | 1 | A | G | Heterozygous |
| NC_037642.1 | 9934172 | SNV | 1 | G | A | Heterozygous |
| NC_037642.1 | 9934240 | SNV | 1 | A | G | Homozygous   |
| NC_037642.1 | 9934459 | SNV | 1 | A | G | Homozygous   |
| NC_037642.1 | 9934904 | SNV | 1 | C | T | Heterozygous |
| NC_037642.1 | 9936206 | SNV | 1 | C | T | Homozygous   |



|             |          |     |   |   |   |              |
|-------------|----------|-----|---|---|---|--------------|
| NC_037642.1 | 9937704  | SNV | 1 | T | G | Heterozygous |
| NC_037642.1 | 9937940  | SNV | 1 | G | A | Heterozygous |
| NC_037642.1 | 9938067  | SNV | 1 | C | G | Homozygous   |
| NC_037642.1 | 9938746  | SNV | 1 | T | A | Heterozygous |
| NC_037642.1 | 9938895  | SNV | 1 | A | T | Homozygous   |
| NC_037642.1 | 9939109  | SNV | 1 | G | C | Homozygous   |
| NC_037642.1 | 9939280  | SNV | 1 | C | T | Homozygous   |
| NC_037642.1 | 9939292  | SNV | 1 | C | T | Homozygous   |
| NC_037642.1 | 9939632  | SNV | 1 | A | G | Homozygous   |
| NC_037642.1 | 9939636  | SNV | 1 | T | G | Heterozygous |
| NC_037642.1 | 9939650  | SNV | 1 | A | G | Heterozygous |
| NC_037642.1 | 9939655  | SNV | 1 | T | G | Heterozygous |
| NC_037642.1 | 9939660  | SNV | 1 | T | G | Heterozygous |
| NC_037642.1 | 9939700  | SNV | 1 | A | G | Homozygous   |
| NC_037642.1 | 9939760  | SNV | 1 | T | G | Heterozygous |
| NC_037642.1 | 9941664  | SNV | 1 | T | C | Homozygous   |
| NC_037642.1 | 9941678  | SNV | 1 | A | G | Homozygous   |
| NC_037642.1 | 9941889  | SNV | 1 | C | G | Heterozygous |
| NC_037642.1 | 9941907  | SNV | 1 | A | G | Heterozygous |
| NC_037642.1 | 9944443  | SNV | 1 | C | T | Heterozygous |
| NC_037642.1 | 9944635  | SNV | 1 | G | T | Homozygous   |
| NC_037642.1 | 9944713  | SNV | 1 | A | G | Homozygous   |
| NC_037642.1 | 9944746  | SNV | 1 | T | C | Homozygous   |
| NC_037642.1 | 9956203  | SNV | 1 | T | C | Homozygous   |
| NC_037642.1 | 9956208  | SNV | 1 | T | C | Homozygous   |
| NC_037642.1 | 9956216  | SNV | 1 | C | T | Homozygous   |
| NC_037642.1 | 9956220  | SNV | 1 | T | A | Homozygous   |
| NC_037642.1 | 9956225  | SNV | 1 | C | T | Homozygous   |
| NC_037642.1 | 9956232  | SNV | 1 | C | T | Homozygous   |
| NC_037642.1 | 9956237  | SNV | 1 | T | C | Homozygous   |
| NC_037642.1 | 9962970  | SNV | 1 | C | T | Homozygous   |
| NC_037642.1 | 9963257  | SNV | 1 | C | A | Homozygous   |
| NC_037642.1 | 9965240  | SNV | 1 | T | C | Heterozygous |
| NC_037642.1 | 9965569  | SNV | 1 | G | C | Homozygous   |
| NC_037642.1 | 9967125  | SNV | 1 | C | T | Homozygous   |
| NC_037642.1 | 9967292  | SNV | 1 | A | G | Homozygous   |
| NC_037642.1 | 9985367  | SNV | 1 | G | A | Heterozygous |
| NC_037642.1 | 9985377  | SNV | 1 | A | T | Heterozygous |
| NC_037642.1 | 9985390  | SNV | 1 | T | C | Heterozygous |
| NC_037642.1 | 9985393  | SNV | 1 | G | T | Heterozygous |
| NC_037642.1 | 9985398  | SNV | 1 | A | T | Heterozygous |
| NC_037642.1 | 9985400  | SNV | 1 | C | T | Heterozygous |
| NC_037642.1 | 10004678 | SNV | 1 | C | T | Homozygous   |
| NC_037642.1 | 10004919 | SNV | 1 | A | T | Heterozygous |
| NC_037642.1 | 10005124 | SNV | 1 | T | A | Heterozygous |
| NC_037642.1 | 10005127 | SNV | 1 | T | A | Heterozygous |
| NC_037642.1 | 10014865 | SNV | 1 | G | A | Heterozygous |
| NC_037642.1 | 10014869 | SNV | 1 | C | T | Homozygous   |
| NC_037642.1 | 10015070 | SNV | 1 | A | G | Heterozygous |
| NC_037642.1 | 10015559 | SNV | 1 | A | G | Homozygous   |
| NC_037642.1 | 10016047 | SNV | 1 | G | T | Heterozygous |

|             |          |     |   |   |   |              |
|-------------|----------|-----|---|---|---|--------------|
| NC_037642.1 | 10016051 | SNV | 1 | T | A | Heterozygous |
| NC_037642.1 | 10016131 | SNV | 1 | A | C | Homozygous   |
| NC_037642.1 | 10017944 | SNV | 1 | T | A | Homozygous   |
| NC_037642.1 | 10017967 | SNV | 1 | G | A | Homozygous   |
| NC_037642.1 | 10018529 | SNV | 1 | T | C | Homozygous   |
| NC_037642.1 | 10018712 | SNV | 1 | C | T | Heterozygous |
| NC_037642.1 | 10018828 | SNV | 1 | C | T | Homozygous   |
| NC_037642.1 | 10019556 | SNV | 1 | T | C | Homozygous   |
| NC_037642.1 | 10024121 | SNV | 1 | A | T | Heterozygous |
| NC_037642.1 | 10024135 | SNV | 1 | T | C | Heterozygous |
| NC_037642.1 | 10024225 | SNV | 1 | G | A | Heterozygous |
| NC_037642.1 | 10025461 | SNV | 1 | A | G | Homozygous   |
| NC_037642.1 | 10026524 | SNV | 1 | T | C | Heterozygous |
| NC_037642.1 | 10029835 | SNV | 1 | T | C | Heterozygous |
| NC_037642.1 | 10029866 | SNV | 1 | A | T | Heterozygous |
| NC_037642.1 | 10029873 | SNV | 1 | T | A | Homozygous   |
| NC_037642.1 | 10029918 | SNV | 1 | A | G | Homozygous   |
| NC_037642.1 | 10030336 | SNV | 1 | A | T | Homozygous   |
| NC_037642.1 | 10030620 | SNV | 1 | T | C | Homozygous   |
| NC_037642.1 | 10030842 | SNV | 1 | G | A | Heterozygous |
| NC_037642.1 | 10042351 | SNV | 1 | A | G | Heterozygous |
| NC_037642.1 | 10044840 | SNV | 1 | C | T | Heterozygous |
| NC_037642.1 | 10044880 | SNV | 1 | T | C | Homozygous   |
| NC_037642.1 | 10045086 | SNV | 1 | C | T | Homozygous   |
| NC_037642.1 | 10045552 | SNV | 1 | G | A | Heterozygous |
| NC_037642.1 | 10045562 | SNV | 1 | T | C | Heterozygous |
| NC_037642.1 | 10045590 | SNV | 1 | A | G | Homozygous   |
| NC_037642.1 | 10048480 | SNV | 1 | T | A | Homozygous   |
| NC_037642.1 | 10048486 | SNV | 1 | C | A | Heterozygous |
| NC_037642.1 | 10048492 | SNV | 1 | T | A | Heterozygous |
| NC_037642.1 | 10048513 | SNV | 1 | G | A | Homozygous   |
| NC_037642.1 | 10048573 | SNV | 1 | G | A | Heterozygous |
| NC_037642.1 | 10048579 | SNV | 1 | G | A | Heterozygous |
| NC_037642.1 | 10048584 | SNV | 1 | G | A | Heterozygous |
| NC_037642.1 | 10048943 | SNV | 1 | A | G | Homozygous   |
| NC_037642.1 | 10055751 | SNV | 1 | T | C | Homozygous   |
| NC_037642.1 | 10061808 | SNV | 1 | A | G | Homozygous   |
| NC_037642.1 | 10061811 | SNV | 1 | T | G | Homozygous   |
| NC_037642.1 | 10081464 | SNV | 1 | T | G | Homozygous   |
| NC_037642.1 | 10081466 | SNV | 1 | T | A | Homozygous   |
| NC_037642.1 | 10081472 | SNV | 1 | T | C | Homozygous   |
| NC_037642.1 | 10081476 | SNV | 1 | T | C | Homozygous   |
| NC_037642.1 | 10081478 | SNV | 1 | T | C | Homozygous   |
| NC_037642.1 | 10081481 | SNV | 1 | A | G | Homozygous   |
| NC_037642.1 | 10090696 | SNV | 1 | G | C | Homozygous   |
| NC_037642.1 | 10090809 | SNV | 1 | A | C | Homozygous   |
| NC_037642.1 | 10090813 | SNV | 1 | G | C | Homozygous   |
| NC_037642.1 | 10090815 | SNV | 1 | A | G | Heterozygous |
| NC_037642.1 | 10090834 | SNV | 1 | A | G | Homozygous   |
| NC_037642.1 | 10090998 | SNV | 1 | A | G | Homozygous   |
| NC_037642.1 | 10091150 | SNV | 1 | C | T | Heterozygous |

|             |          |     |   |   |   |              |
|-------------|----------|-----|---|---|---|--------------|
| NC_037642.1 | 10091572 | SNV | 1 | T | C | Homozygous   |
| NC_037642.1 | 10091610 | SNV | 1 | C | T | Heterozygous |
| NC_037642.1 | 10091697 | SNV | 1 | C | T | Homozygous   |
| NC_037642.1 | 10091700 | SNV | 1 | T | C | Homozygous   |
| NC_037642.1 | 10091718 | SNV | 1 | A | T | Homozygous   |
| NC_037642.1 | 10121745 | SNV | 1 | A | G | Heterozygous |
| NC_037642.1 | 10121751 | SNV | 1 | A | T | Heterozygous |
| NC_037642.1 | 10121754 | SNV | 1 | T | C | Heterozygous |
| NC_037642.1 | 10121756 | SNV | 1 | T | C | Heterozygous |
| NC_037642.1 | 10128489 | SNV | 1 | A | C | Homozygous   |
| NC_037642.1 | 10168016 | SNV | 1 | A | G | Homozygous   |
| NC_037642.1 | 10168022 | SNV | 1 | T | C | Homozygous   |
| NC_037642.1 | 10168078 | SNV | 1 | A | C | Homozygous   |
| NC_037642.1 | 10168083 | SNV | 1 | A | T | Homozygous   |
| NC_037642.1 | 10176347 | SNV | 1 | G | A | Heterozygous |
| NC_037642.1 | 10176673 | SNV | 1 | T | C | Heterozygous |
| NC_037642.1 | 10176676 | SNV | 1 | T | C | Heterozygous |
| NC_037642.1 | 10176681 | SNV | 1 | A | G | Homozygous   |
| NC_037642.1 | 10176756 | SNV | 1 | C | T | Homozygous   |
| NC_037642.1 | 10176768 | SNV | 1 | C | T | Homozygous   |
| NC_037642.1 | 10176789 | SNV | 1 | T | C | Homozygous   |
| NC_037642.1 | 10176819 | SNV | 1 | G | A | Homozygous   |
| NC_037642.1 | 10176833 | SNV | 1 | A | G | Homozygous   |
| NC_037642.1 | 10176853 | SNV | 1 | A | G | Homozygous   |
| NC_037642.1 | 10176897 | SNV | 1 | C | A | Heterozygous |
| NC_037642.1 | 10177108 | SNV | 1 | C | T | Homozygous   |
| NC_037642.1 | 10177225 | SNV | 1 | T | C | Heterozygous |
| NC_037642.1 | 10177243 | SNV | 1 | A | G | Heterozygous |
| NC_037642.1 | 10177465 | SNV | 1 | C | T | Heterozygous |
| NC_037642.1 | 10177478 | SNV | 1 | C | T | Homozygous   |
| NC_037642.1 | 10177528 | SNV | 1 | T | A | Heterozygous |
| NC_037642.1 | 10177536 | SNV | 1 | C | T | Homozygous   |
| NC_037642.1 | 10177543 | SNV | 1 | T | C | Heterozygous |
| NC_037642.1 | 10177563 | SNV | 1 | C | T | Heterozygous |
| NC_037642.1 | 10177564 | SNV | 1 | G | T | Heterozygous |
| NC_037642.1 | 10181886 | SNV | 1 | G | A | Homozygous   |
| NC_037642.1 | 10181898 | SNV | 1 | A | G | Heterozygous |
| NC_037642.1 | 10181907 | SNV | 1 | C | G | Homozygous   |
| NC_037642.1 | 10181919 | SNV | 1 | A | G | Heterozygous |
| NC_037642.1 | 10181963 | SNV | 1 | A | G | Heterozygous |
| NC_037642.1 | 10181967 | SNV | 1 | A | T | Heterozygous |
| NC_037642.1 | 10196369 | SNV | 1 | C | T | Heterozygous |
| NC_037642.1 | 10196546 | SNV | 1 | A | G | Homozygous   |
| NC_037642.1 | 10196663 | SNV | 1 | T | C | Heterozygous |
| NC_037642.1 | 10196840 | SNV | 1 | A | G | Homozygous   |
| NC_037642.1 | 10197231 | SNV | 1 | T | C | Homozygous   |
| NC_037642.1 | 10197522 | SNV | 1 | A | G | Homozygous   |
| NC_037642.1 | 10198194 | SNV | 1 | T | C | Homozygous   |
| NC_037642.1 | 10198248 | SNV | 1 | G | A | Heterozygous |
| NC_037642.1 | 10198269 | SNV | 1 | T | C | Heterozygous |
| NC_037642.1 | 10201737 | SNV | 1 | T | C | Homozygous   |

|             |          |     |   |   |   |              |
|-------------|----------|-----|---|---|---|--------------|
| NC_037642.1 | 10201752 | SNV | 1 | T | C | Homozygous   |
| NC_037642.1 | 10201761 | SNV | 1 | C | T | Homozygous   |
| NC_037642.1 | 10214084 | SNV | 1 | T | C | Homozygous   |
| NC_037642.1 | 10231023 | SNV | 1 | A | G | Homozygous   |
| NC_037642.1 | 10231065 | SNV | 1 | A | G | Heterozygous |
| NC_037642.1 | 10231772 | SNV | 1 | G | C | Heterozygous |
| NC_037642.1 | 10231776 | SNV | 1 | G | A | Homozygous   |
| NC_037642.1 | 10239810 | SNV | 1 | A | G | Heterozygous |
| NC_037642.1 | 10239869 | SNV | 1 | C | T | Heterozygous |
| NC_037642.1 | 10239901 | SNV | 1 | T | C | Homozygous   |
| NC_037642.1 | 10247281 | SNV | 1 | T | C | Homozygous   |
| NC_037642.1 | 10248145 | SNV | 1 | C | G | Homozygous   |
| NC_037642.1 | 10248148 | SNV | 1 | C | A | Homozygous   |
| NC_037642.1 | 10248160 | SNV | 1 | A | G | Homozygous   |
| NC_037642.1 | 10248172 | SNV | 1 | T | C | Homozygous   |
| NC_037642.1 | 10248177 | SNV | 1 | T | C | Homozygous   |
| NC_037642.1 | 10248194 | SNV | 1 | G | A | Homozygous   |
| NC_037642.1 | 10248200 | SNV | 1 | A | G | Homozygous   |
| NC_037642.1 | 10248203 | SNV | 1 | C | T | Heterozygous |
| NC_037642.1 | 10248206 | SNV | 1 | A | T | Heterozygous |
| NC_037642.1 | 10248209 | SNV | 1 | G | A | Heterozygous |
| NC_037642.1 | 10248214 | SNV | 1 | G | A | Heterozygous |
| NC_037642.1 | 10248218 | SNV | 1 | C | T | Heterozygous |
| NC_037642.1 | 10248223 | SNV | 1 | C | T | Heterozygous |
| NC_037642.1 | 10248226 | SNV | 1 | A | T | Homozygous   |
| NC_037642.1 | 10248229 | SNV | 1 | G | A | Heterozygous |
| NC_037642.1 | 10248235 | SNV | 1 | G | A | Heterozygous |
| NC_037642.1 | 10248238 | SNV | 1 | C | T | Homozygous   |
| NC_037642.1 | 10253661 | SNV | 1 | C | G | Homozygous   |
| NC_037642.1 | 10253679 | SNV | 1 | T | A | Heterozygous |
| NC_037642.1 | 10256205 | SNV | 1 | G | A | Homozygous   |
| NC_037642.1 | 10260365 | SNV | 1 | C | G | Heterozygous |
| NC_037642.1 | 10260374 | SNV | 1 | T | C | Heterozygous |
| NC_037642.1 | 10260377 | SNV | 1 | T | C | Heterozygous |
| NC_037642.1 | 10268039 | SNV | 1 | G | A | Homozygous   |
| NC_037642.1 | 10269313 | SNV | 1 | A | C | Heterozygous |
| NC_037642.1 | 10269323 | SNV | 1 | T | C | Heterozygous |
| NC_037642.1 | 10271478 | SNV | 1 | A | G | Homozygous   |
| NC_037642.1 | 10279484 | SNV | 1 | A | C | Homozygous   |
| NC_037642.1 | 10279508 | SNV | 1 | G | A | Heterozygous |
| NC_037642.1 | 10279643 | SNV | 1 | A | G | Heterozygous |
| NC_037642.1 | 10280010 | SNV | 1 | G | A | Homozygous   |
| NC_037642.1 | 10280109 | SNV | 1 | G | A | Homozygous   |
| NC_037642.1 | 10280128 | SNV | 1 | T | C | Homozygous   |
| NC_037642.1 | 10280194 | SNV | 1 | A | G | Homozygous   |
| NC_037642.1 | 10280205 | SNV | 1 | C | T | Homozygous   |
| NC_037642.1 | 10280228 | SNV | 1 | A | G | Homozygous   |
| NC_037642.1 | 10280240 | SNV | 1 | A | C | Heterozygous |
| NC_037642.1 | 10280255 | SNV | 1 | G | A | Homozygous   |
| NC_037642.1 | 10280297 | SNV | 1 | G | A | Heterozygous |
| NC_037642.1 | 10280301 | SNV | 1 | C | T | Heterozygous |

|             |          |     |   |   |   |              |
|-------------|----------|-----|---|---|---|--------------|
| NC_037642.1 | 10280335 | SNV | 1 | A | G | Homozygous   |
| NC_037642.1 | 10280338 | SNV | 1 | C | A | Heterozygous |
| NC_037642.1 | 10280352 | SNV | 1 | C | T | Heterozygous |
| NC_037642.1 | 10280356 | SNV | 1 | G | A | Heterozygous |
| NC_037642.1 | 10280372 | SNV | 1 | T | G | Heterozygous |
| NC_037642.1 | 10280375 | SNV | 1 | G | A | Heterozygous |
| NC_037642.1 | 10280381 | SNV | 1 | C | T | Heterozygous |
| NC_037642.1 | 10280410 | SNV | 1 | A | T | Heterozygous |
| NC_037642.1 | 10280416 | SNV | 1 | G | A | Heterozygous |
| NC_037642.1 | 10280421 | SNV | 1 | A | G | Heterozygous |
| NC_037642.1 | 10280441 | SNV | 1 | G | A | Heterozygous |
| NC_037642.1 | 10280461 | SNV | 1 | A | G | Homozygous   |
| NC_037642.1 | 10280527 | SNV | 1 | A | G | Heterozygous |
| NC_037642.1 | 10280546 | SNV | 1 | A | G | Heterozygous |
| NC_037642.1 | 10280554 | SNV | 1 | T | C | Homozygous   |
| NC_037642.1 | 10280642 | SNV | 1 | A | G | Heterozygous |
| NC_037642.1 | 10280652 | SNV | 1 | T | A | Heterozygous |
| NC_037642.1 | 10280668 | SNV | 1 | T | C | Homozygous   |
| NC_037642.1 | 10280680 | SNV | 1 | A | G | Homozygous   |
| NC_037642.1 | 10280726 | SNV | 1 | C | T | Heterozygous |
| NC_037642.1 | 10280730 | SNV | 1 | T | A | Homozygous   |
| NC_037642.1 | 10280743 | SNV | 1 | C | T | Homozygous   |
| NC_037642.1 | 10280751 | SNV | 1 | A | G | Homozygous   |
| NC_037642.1 | 10280785 | SNV | 1 | T | C | Homozygous   |
| NC_037642.1 | 10280788 | SNV | 1 | A | G | Homozygous   |
| NC_037642.1 | 10280825 | SNV | 1 | C | T | Heterozygous |
| NC_037642.1 | 10280829 | SNV | 1 | T | C | Heterozygous |
| NC_037642.1 | 10280856 | SNV | 1 | A | G | Heterozygous |
| NC_037642.1 | 10280858 | SNV | 1 | C | T | Homozygous   |
| NC_037642.1 | 10280873 | SNV | 1 | A | G | Heterozygous |
| NC_037642.1 | 10280881 | SNV | 1 | T | C | Homozygous   |
| NC_037642.1 | 10280903 | SNV | 1 | A | G | Heterozygous |
| NC_037642.1 | 10280910 | SNV | 1 | A | G | Heterozygous |
| NC_037642.1 | 10280933 | SNV | 1 | C | T | Homozygous   |
| NC_037642.1 | 10280979 | SNV | 1 | G | A | Homozygous   |
| NC_037642.1 | 10280985 | SNV | 1 | C | A | Heterozygous |
| NC_037642.1 | 10280985 | SNV | 1 | C | G | Heterozygous |
| NC_037642.1 | 10281042 | SNV | 1 | C | T | Heterozygous |
| NC_037642.1 | 10281169 | SNV | 1 | T | C | Homozygous   |
| NC_037642.1 | 10281209 | SNV | 1 | G | A | Heterozygous |
| NC_037642.1 | 10281223 | SNV | 1 | A | C | Heterozygous |
| NC_037642.1 | 10281304 | SNV | 1 | A | C | Homozygous   |
| NC_037642.1 | 10281312 | SNV | 1 | A | C | Heterozygous |
| NC_037642.1 | 10281397 | SNV | 1 | T | C | Homozygous   |
| NC_037642.1 | 10281463 | SNV | 1 | A | G | Homozygous   |
| NC_037642.1 | 10281499 | SNV | 1 | C | G | Heterozygous |
| NC_037642.1 | 10281581 | SNV | 1 | G | C | Heterozygous |
| NC_037642.1 | 10281617 | SNV | 1 | T | C | Heterozygous |
| NC_037642.1 | 10281724 | SNV | 1 | T | C | Heterozygous |
| NC_037642.1 | 10281738 | SNV | 1 | T | G | Heterozygous |
| NC_037642.1 | 10281956 | SNV | 1 | G | A | Homozygous   |

|             |          |     |   |   |   |              |
|-------------|----------|-----|---|---|---|--------------|
| NC_037642.1 | 10281999 | SNV | 1 | A | G | Homozygous   |
| NC_037642.1 | 10282014 | SNV | 1 | T | C | Homozygous   |
| NC_037642.1 | 10286325 | SNV | 1 | C | T | Heterozygous |
| NC_037642.1 | 10286359 | SNV | 1 | C | T | Heterozygous |
| NC_037642.1 | 10286363 | SNV | 1 | G | A | Heterozygous |
| NC_037642.1 | 10286477 | SNV | 1 | C | G | Heterozygous |
| NC_037642.1 | 10286728 | SNV | 1 | G | A | Homozygous   |
| NC_037642.1 | 10286732 | SNV | 1 | A | G | Homozygous   |
| NC_037642.1 | 10286782 | SNV | 1 | A | G | Homozygous   |
| NC_037642.1 | 10286859 | SNV | 1 | T | C | Homozygous   |
| NC_037642.1 | 10286872 | SNV | 1 | C | G | Homozygous   |
| NC_037642.1 | 10291454 | SNV | 1 | A | G | Homozygous   |
| NC_037642.1 | 10291552 | SNV | 1 | C | G | Homozygous   |
| NC_037642.1 | 10291621 | SNV | 1 | A | G | Heterozygous |
| NC_037642.1 | 10294393 | SNV | 1 | G | T | Heterozygous |
| NC_037642.1 | 10294435 | SNV | 1 | A | G | Homozygous   |
| NC_037642.1 | 10294442 | SNV | 1 | T | C | Homozygous   |
| NC_037642.1 | 10294467 | SNV | 1 | C | G | Homozygous   |
| NC_037642.1 | 10294473 | SNV | 1 | G | A | Homozygous   |
| NC_037642.1 | 10294507 | SNV | 1 | G | A | Homozygous   |
| NC_037642.1 | 10294509 | SNV | 1 | T | C | Homozygous   |
| NC_037642.1 | 10294533 | SNV | 1 | G | A | Homozygous   |
| NC_037642.1 | 10294591 | SNV | 1 | G | C | Homozygous   |
| NC_037642.1 | 10294610 | SNV | 1 | A | G | Homozygous   |
| NC_037642.1 | 10307242 | SNV | 1 | G | A | Homozygous   |
| NC_037642.1 | 10307244 | SNV | 1 | G | A | Homozygous   |
| NC_037642.1 | 10307322 | SNV | 1 | A | G | Homozygous   |
| NC_037642.1 | 10307325 | SNV | 1 | G | A | Heterozygous |
| NC_037642.1 | 10307550 | SNV | 1 | A | T | Heterozygous |
| NC_037642.1 | 10307733 | SNV | 1 | A | G | Heterozygous |
| NC_037642.1 | 10307837 | SNV | 1 | C | T | Heterozygous |
| NC_037642.1 | 10307931 | SNV | 1 | T | C | Heterozygous |
| NC_037642.1 | 10308013 | SNV | 1 | T | C | Homozygous   |
| NC_037642.1 | 10308026 | SNV | 1 | A | G | Homozygous   |
| NC_037642.1 | 10308079 | SNV | 1 | C | T | Heterozygous |
| NC_037642.1 | 10308130 | SNV | 1 | A | G | Homozygous   |
| NC_037642.1 | 10308183 | SNV | 1 | T | C | Homozygous   |
| NC_037642.1 | 10308279 | SNV | 1 | G | A | Homozygous   |
| NC_037642.1 | 10308833 | SNV | 1 | G | A | Homozygous   |
| NC_037642.1 | 10308835 | SNV | 1 | A | G | Homozygous   |
| NC_037642.1 | 10309080 | SNV | 1 | A | G | Homozygous   |
| NC_037642.1 | 10309690 | SNV | 1 | A | G | Heterozygous |
| NC_037642.1 | 10310078 | SNV | 1 | A | G | Homozygous   |
| NC_037642.1 | 10310316 | SNV | 1 | G | A | Heterozygous |
| NC_037642.1 | 10310322 | SNV | 1 | A | G | Homozygous   |
| NC_037642.1 | 10310325 | SNV | 1 | G | A | Homozygous   |
| NC_037642.1 | 10310339 | SNV | 1 | A | G | Homozygous   |
| NC_037642.1 | 10317946 | SNV | 1 | A | G | Homozygous   |
| NC_037642.1 | 10317962 | SNV | 1 | G | A | Heterozygous |
| NC_037642.1 | 10317968 | SNV | 1 | G | A | Heterozygous |
| NC_037642.1 | 10318009 | SNV | 1 | G | A | Heterozygous |

|             |          |     |   |   |   |              |
|-------------|----------|-----|---|---|---|--------------|
| NC_037642.1 | 10318013 | SNV | 1 | C | A | Homozygous   |
| NC_037642.1 | 10318091 | SNV | 1 | T | C | Heterozygous |
| NC_037642.1 | 10318105 | SNV | 1 | G | A | Heterozygous |
| NC_037642.1 | 10318137 | SNV | 1 | G | T | Heterozygous |
| NC_037642.1 | 10318143 | SNV | 1 | A | G | Heterozygous |
| NC_037642.1 | 10318196 | SNV | 1 | G | A | Homozygous   |
| NC_037642.1 | 10318440 | SNV | 1 | A | G | Heterozygous |
| NC_037642.1 | 10318444 | SNV | 1 | C | T | Heterozygous |
| NC_037642.1 | 10318453 | SNV | 1 | A | T | Heterozygous |
| NC_037642.1 | 10318456 | SNV | 1 | T | C | Heterozygous |
| NC_037642.1 | 10324481 | SNV | 1 | G | A | Homozygous   |
| NC_037642.1 | 10324483 | SNV | 1 | G | T | Homozygous   |
| NC_037642.1 | 10325234 | SNV | 1 | G | A | Homozygous   |
| NC_037642.1 | 10325396 | SNV | 1 | C | T | Homozygous   |
| NC_037642.1 | 10325414 | SNV | 1 | G | T | Homozygous   |
| NC_037642.1 | 10325422 | SNV | 1 | T | C | Homozygous   |
| NC_037642.1 | 10325438 | SNV | 1 | T | G | Homozygous   |
| NC_037642.1 | 10330726 | SNV | 1 | G | A | Heterozygous |
| NC_037642.1 | 10330741 | SNV | 1 | A | G | Homozygous   |
| NC_037642.1 | 10330748 | SNV | 1 | G | A | Heterozygous |
| NC_037642.1 | 10330751 | SNV | 1 | G | A | Heterozygous |
| NC_037642.1 | 10330753 | SNV | 1 | T | G | Heterozygous |
| NC_037642.1 | 10330755 | SNV | 1 | G | A | Heterozygous |
| NC_037642.1 | 10330861 | SNV | 1 | G | A | Homozygous   |
| NC_037642.1 | 10330880 | SNV | 1 | A | G | Homozygous   |
| NC_037642.1 | 10334478 | SNV | 1 | G | A | Heterozygous |
| NC_037642.1 | 10336128 | SNV | 1 | A | G | Homozygous   |
| NC_037642.1 | 10336149 | SNV | 1 | T | C | Homozygous   |
| NC_037642.1 | 10336158 | SNV | 1 | A | C | Homozygous   |
| NC_037642.1 | 10336203 | SNV | 1 | T | C | Homozygous   |
| NC_037642.1 | 10336239 | SNV | 1 | G | A | Homozygous   |
| NC_037642.1 | 10336314 | SNV | 1 | A | T | Homozygous   |
| NC_037642.1 | 10336572 | SNV | 1 | T | C | Homozygous   |
| NC_037642.1 | 10336728 | SNV | 1 | T | C | Heterozygous |
| NC_037642.1 | 10336881 | SNV | 1 | A | G | Heterozygous |
| NC_037642.1 | 10337103 | SNV | 1 | C | T | Heterozygous |
| NC_037642.1 | 10337112 | SNV | 1 | C | T | Homozygous   |
| NC_037642.1 | 10337136 | SNV | 1 | T | C | Homozygous   |
| NC_037642.1 | 10337145 | SNV | 1 | A | G | Homozygous   |
| NC_037642.1 | 10337337 | SNV | 1 | A | G | Homozygous   |
| NC_037642.1 | 10337609 | SNV | 1 | T | C | Heterozygous |
| NC_037642.1 | 10337648 | SNV | 1 | C | T | Heterozygous |
| NC_037642.1 | 10337757 | SNV | 1 | A | G | Homozygous   |
| NC_037642.1 | 10337868 | SNV | 1 | A | G | Heterozygous |
| NC_037642.1 | 10337869 | SNV | 1 | T | A | Heterozygous |
| NC_037642.1 | 10338160 | SNV | 1 | T | C | Homozygous   |
| NC_037642.1 | 10339192 | SNV | 1 | A | C | Homozygous   |
| NC_037642.1 | 10339213 | SNV | 1 | A | G | Homozygous   |
| NC_037642.1 | 10339302 | SNV | 1 | G | A | Heterozygous |
| NC_037642.1 | 10339921 | SNV | 1 | A | T | Homozygous   |
| NC_037642.1 | 10339960 | SNV | 1 | G | A | Homozygous   |

|             |          |     |   |   |   |              |
|-------------|----------|-----|---|---|---|--------------|
| NC_037642.1 | 10340272 | SNV | 1 | A | G | Homozygous   |
| NC_037642.1 | 10340549 | SNV | 1 | G | A | Homozygous   |
| NC_037642.1 | 10340581 | SNV | 1 | A | G | Heterozygous |
| NC_037642.1 | 10340625 | SNV | 1 | C | A | Homozygous   |
| NC_037642.1 | 10340767 | SNV | 1 | A | G | Homozygous   |
| NC_037642.1 | 10340815 | SNV | 1 | A | G | Heterozygous |
| NC_037642.1 | 10340836 | SNV | 1 | G | A | Homozygous   |
| NC_037642.1 | 10341343 | SNV | 1 | A | G | Homozygous   |
| NC_037642.1 | 10341535 | SNV | 1 | C | A | Homozygous   |
| NC_037642.1 | 10341598 | SNV | 1 | A | G | Heterozygous |
| NC_037642.1 | 10341628 | SNV | 1 | A | G | Heterozygous |
| NC_037642.1 | 10342844 | SNV | 1 | A | G | Homozygous   |
| NC_037642.1 | 10343039 | SNV | 1 | A | G | Homozygous   |
| NC_037642.1 | 10343618 | SNV | 1 | A | G | Homozygous   |
| NC_037642.1 | 10346804 | SNV | 1 | C | T | Homozygous   |
| NC_037642.1 | 10346892 | SNV | 1 | T | C | Heterozygous |
| NC_037642.1 | 10347474 | SNV | 1 | C | T | Homozygous   |
| NC_037642.1 | 10347775 | SNV | 1 | T | C | Heterozygous |
| NC_037642.1 | 10347883 | SNV | 1 | T | A | Heterozygous |
| NC_037642.1 | 10348076 | SNV | 1 | A | G | Homozygous   |
| NC_037642.1 | 10350808 | SNV | 1 | C | T | Heterozygous |
| NC_037642.1 | 10350822 | SNV | 1 | T | G | Heterozygous |
| NC_037642.1 | 10350951 | SNV | 1 | C | T | Heterozygous |
| NC_037642.1 | 10351003 | SNV | 1 | G | A | Heterozygous |
| NC_037642.1 | 10352251 | SNV | 1 | G | T | Homozygous   |
| NC_037642.1 | 10353360 | SNV | 1 | C | T | Homozygous   |
| NC_037642.1 | 10353431 | SNV | 1 | C | T | Homozygous   |
| NC_037642.1 | 10354839 | SNV | 1 | G | A | Heterozygous |
| NC_037642.1 | 10354914 | SNV | 1 | A | G | Heterozygous |
| NC_037642.1 | 10354987 | SNV | 1 | T | G | Homozygous   |
| NC_037642.1 | 10355035 | SNV | 1 | A | G | Homozygous   |
| NC_037642.1 | 10359009 | SNV | 1 | T | C | Heterozygous |
| NC_037642.1 | 10359010 | SNV | 1 | G | C | Heterozygous |
| NC_037642.1 | 10387780 | SNV | 1 | A | C | Homozygous   |
| NC_037642.1 | 10387839 | SNV | 1 | G | A | Homozygous   |
| NC_037642.1 | 10387895 | SNV | 1 | A | G | Homozygous   |
| NC_037642.1 | 10394886 | SNV | 1 | A | G | Homozygous   |
| NC_037642.1 | 10394905 | SNV | 1 | T | C | Heterozygous |
| NC_037642.1 | 10394916 | SNV | 1 | A | C | Homozygous   |
| NC_037642.1 | 10394956 | SNV | 1 | A | G | Homozygous   |
| NC_037642.1 | 10395111 | SNV | 1 | G | A | Homozygous   |
| NC_037642.1 | 10395113 | SNV | 1 | G | C | Heterozygous |
| NC_037642.1 | 10402644 | SNV | 1 | C | A | Homozygous   |
| NC_037642.1 | 10402691 | SNV | 1 | A | C | Heterozygous |
| NC_037642.1 | 10407206 | SNV | 1 | T | A | Heterozygous |
| NC_037642.1 | 10407208 | SNV | 1 | G | A | Heterozygous |
| NC_037642.1 | 10407215 | SNV | 1 | T | A | Heterozygous |
| NC_037642.1 | 10407223 | SNV | 1 | G | T | Heterozygous |
| NC_037642.1 | 10407227 | SNV | 1 | T | G | Heterozygous |
| NC_037642.1 | 10419550 | SNV | 1 | A | G | Homozygous   |
| NC_037642.1 | 10419554 | SNV | 1 | A | G | Homozygous   |



|             |          |     |   |   |   |              |
|-------------|----------|-----|---|---|---|--------------|
| NC_037642.1 | 10419586 | SNV | 1 | T | A | Homozygous   |
| NC_037642.1 | 10419827 | SNV | 1 | T | A | Homozygous   |
| NC_037642.1 | 10419834 | SNV | 1 | C | A | Homozygous   |
| NC_037642.1 | 10419863 | SNV | 1 | A | G | Homozygous   |
| NC_037642.1 | 10424873 | SNV | 1 | T | A | Homozygous   |
| NC_037642.1 | 10425047 | SNV | 1 | T | A | Homozygous   |
| NC_037642.1 | 10425052 | SNV | 1 | C | T | Homozygous   |
| NC_037642.1 | 10425067 | SNV | 1 | G | A | Homozygous   |
| NC_037642.1 | 10425072 | SNV | 1 | G | C | Homozygous   |
| NC_037642.1 | 10425087 | SNV | 1 | G | T | Homozygous   |
| NC_037642.1 | 10425106 | SNV | 1 | T | C | Homozygous   |
| NC_037642.1 | 10435757 | SNV | 1 | A | G | Homozygous   |
| NC_037642.1 | 10436174 | SNV | 1 | A | G | Homozygous   |
| NC_037642.1 | 10436176 | SNV | 1 | A | G | Homozygous   |
| NC_037642.1 | 10436179 | SNV | 1 | A | G | Homozygous   |
| NC_037642.1 | 10436196 | SNV | 1 | C | T | Homozygous   |
| NC_037642.1 | 10436235 | SNV | 1 | C | T | Homozygous   |
| NC_037642.1 | 10436288 | SNV | 1 | A | G | Heterozygous |
| NC_037642.1 | 10444362 | SNV | 1 | T | C | Homozygous   |
| NC_037642.1 | 10445571 | SNV | 1 | A | T | Heterozygous |
| NC_037642.1 | 10451094 | SNV | 1 | C | T | Heterozygous |
| NC_037642.1 | 10453165 | SNV | 1 | T | C | Homozygous   |
| NC_037642.1 | 10453308 | SNV | 1 | A | G | Homozygous   |
| NC_037642.1 | 10455088 | SNV | 1 | G | A | Homozygous   |
| NC_037642.1 | 10455716 | SNV | 1 | G | A | Heterozygous |
| NC_037642.1 | 10455737 | SNV | 1 | C | T | Heterozygous |
| NC_037642.1 | 10456246 | SNV | 1 | T | C | Heterozygous |
| NC_037642.1 | 10456311 | SNV | 1 | T | G | Homozygous   |
| NC_037642.1 | 10456350 | SNV | 1 | G | A | Heterozygous |
| NC_037642.1 | 10456379 | SNV | 1 | C | T | Heterozygous |
| NC_037642.1 | 10456464 | SNV | 1 | T | C | Homozygous   |
| NC_037642.1 | 10456707 | SNV | 1 | T | A | Homozygous   |
| NC_037642.1 | 10457127 | SNV | 1 | C | T | Homozygous   |
| NC_037642.1 | 10457238 | SNV | 1 | C | T | Heterozygous |
| NC_037642.1 | 10457264 | SNV | 1 | T | C | Homozygous   |
| NC_037642.1 | 10457300 | SNV | 1 | A | C | Heterozygous |
| NC_037642.1 | 10457300 | SNV | 1 | A | T | Heterozygous |
| NC_037642.1 | 10457324 | SNV | 1 | C | T | Homozygous   |
| NC_037642.1 | 10457331 | SNV | 1 | C | T | Homozygous   |
| NC_037642.1 | 10457333 | SNV | 1 | G | A | Heterozygous |
| NC_037642.1 | 10457339 | SNV | 1 | G | A | Homozygous   |
| NC_037642.1 | 10457345 | SNV | 1 | A | G | Homozygous   |
| NC_037642.1 | 10457440 | SNV | 1 | A | G | Homozygous   |
| NC_037642.1 | 10457459 | SNV | 1 | T | C | Homozygous   |
| NC_037642.1 | 10457798 | SNV | 1 | A | G | Heterozygous |
| NC_037642.1 | 10457822 | SNV | 1 | T | C | Heterozygous |
| NC_037642.1 | 10457899 | SNV | 1 | G | A | Homozygous   |
| NC_037642.1 | 10458276 | SNV | 1 | A | G | Heterozygous |
| NC_037642.1 | 10458481 | SNV | 1 | A | G | Heterozygous |
| NC_037642.1 | 10458686 | SNV | 1 | T | C | Homozygous   |
| NC_037642.1 | 10458799 | SNV | 1 | T | C | Homozygous   |

|             |          |     |   |   |   |              |
|-------------|----------|-----|---|---|---|--------------|
| NC_037642.1 | 10458863 | SNV | 1 | T | C | Heterozygous |
| NC_037642.1 | 10458867 | SNV | 1 | A | G | Heterozygous |
| NC_037642.1 | 10460092 | SNV | 1 | A | T | Heterozygous |
| NC_037642.1 | 10460107 | SNV | 1 | T | C | Heterozygous |
| NC_037642.1 | 10460437 | SNV | 1 | C | A | Homozygous   |
| NC_037642.1 | 10460536 | SNV | 1 | T | C | Homozygous   |
| NC_037642.1 | 10460635 | SNV | 1 | C | T | Heterozygous |
| NC_037642.1 | 10460767 | SNV | 1 | A | G | Heterozygous |
| NC_037642.1 | 10460803 | SNV | 1 | G | A | Heterozygous |
| NC_037642.1 | 10460974 | SNV | 1 | C | T | Heterozygous |
| NC_037642.1 | 10462647 | SNV | 1 | A | G | Homozygous   |
| NC_037642.1 | 10462668 | SNV | 1 | T | C | Heterozygous |
| NC_037642.1 | 10462818 | SNV | 1 | G | A | Homozygous   |
| NC_037642.1 | 10463104 | SNV | 1 | G | A | Heterozygous |
| NC_037642.1 | 10463125 | SNV | 1 | G | A | Heterozygous |
| NC_037642.1 | 10463188 | SNV | 1 | C | T | Homozygous   |
| NC_037642.1 | 10463276 | SNV | 1 | G | A | Heterozygous |
| NC_037642.1 | 10463297 | SNV | 1 | T | C | Homozygous   |
| NC_037642.1 | 10463303 | SNV | 1 | C | T | Homozygous   |
| NC_037642.1 | 10463543 | SNV | 1 | C | T | Heterozygous |
| NC_037642.1 | 10463552 | SNV | 1 | T | C | Heterozygous |
| NC_037642.1 | 10463687 | SNV | 1 | C | T | Heterozygous |
| NC_037642.1 | 10464540 | SNV | 1 | A | G | Heterozygous |
| NC_037642.1 | 10464654 | SNV | 1 | A | G | Heterozygous |
| NC_037642.1 | 10464660 | SNV | 1 | G | A | Heterozygous |
| NC_037642.1 | 10464732 | SNV | 1 | T | C | Heterozygous |
| NC_037642.1 | 10464753 | SNV | 1 | A | G | Heterozygous |
| NC_037642.1 | 10464850 | SNV | 1 | G | A | Homozygous   |
| NC_037642.1 | 10464861 | SNV | 1 | G | A | Homozygous   |
| NC_037642.1 | 10464922 | SNV | 1 | T | C | Heterozygous |
| NC_037642.1 | 10465025 | SNV | 1 | A | G | Homozygous   |
| NC_037642.1 | 10465047 | SNV | 1 | A | G | Homozygous   |
| NC_037642.1 | 10465225 | SNV | 1 | C | T | Heterozygous |
| NC_037642.1 | 10465524 | SNV | 1 | G | A | Heterozygous |
| NC_037642.1 | 10465932 | SNV | 1 | T | C | Homozygous   |
| NC_037642.1 | 10465978 | SNV | 1 | T | C | Homozygous   |
| NC_037642.1 | 10465988 | SNV | 1 | C | T | Homozygous   |
| NC_037642.1 | 10465996 | SNV | 1 | T | C | Homozygous   |
| NC_037642.1 | 10466124 | SNV | 1 | T | C | Heterozygous |
| NC_037642.1 | 10466360 | SNV | 1 | T | C | Homozygous   |
| NC_037642.1 | 10466485 | SNV | 1 | T | C | Heterozygous |
| NC_037642.1 | 10466594 | SNV | 1 | T | A | Homozygous   |
| NC_037642.1 | 10466605 | SNV | 1 | C | T | Heterozygous |
| NC_037642.1 | 10467121 | SNV | 1 | G | T | Homozygous   |
| NC_037642.1 | 10467203 | SNV | 1 | G | A | Homozygous   |
| NC_037642.1 | 10467339 | SNV | 1 | G | T | Homozygous   |
| NC_037642.1 | 10467533 | SNV | 1 | G | T | Homozygous   |
| NC_037642.1 | 10468912 | SNV | 1 | A | G | Homozygous   |
| NC_037642.1 | 10469716 | SNV | 1 | A | T | Heterozygous |
| NC_037642.1 | 10470466 | SNV | 1 | C | T | Heterozygous |
| NC_037642.1 | 10470496 | SNV | 1 | A | G | Heterozygous |

|             |          |     |   |   |   |              |
|-------------|----------|-----|---|---|---|--------------|
| NC_037642.1 | 10470499 | SNV | 1 | T | C | Heterozygous |
| NC_037642.1 | 10470672 | SNV | 1 | C | T | Homozygous   |
| NC_037642.1 | 10471024 | SNV | 1 | T | C | Homozygous   |
| NC_037642.1 | 10471060 | SNV | 1 | C | T | Heterozygous |
| NC_037642.1 | 10471163 | SNV | 1 | C | T | Heterozygous |
| NC_037642.1 | 10471937 | SNV | 1 | A | G | Homozygous   |
| NC_037642.1 | 10472205 | SNV | 1 | T | C | Heterozygous |
| NC_037642.1 | 10475621 | SNV | 1 | A | G | Heterozygous |
| NC_037642.1 | 10475693 | SNV | 1 | C | T | Homozygous   |
| NC_037642.1 | 10475711 | SNV | 1 | G | T | Heterozygous |
| NC_037642.1 | 10475745 | SNV | 1 | A | G | Heterozygous |
| NC_037642.1 | 10475803 | SNV | 1 | G | A | Heterozygous |
| NC_037642.1 | 10479462 | SNV | 1 | T | C | Homozygous   |
| NC_037642.1 | 10480454 | SNV | 1 | C | T | Heterozygous |
| NC_037642.1 | 10480637 | SNV | 1 | G | A | Homozygous   |
| NC_037642.1 | 10480661 | SNV | 1 | T | C | Homozygous   |
| NC_037642.1 | 10487246 | SNV | 1 | C | G | Homozygous   |
| NC_037642.1 | 10491661 | SNV | 1 | T | A | Heterozygous |
| NC_037642.1 | 10491763 | SNV | 1 | G | C | Heterozygous |
| NC_037642.1 | 10492026 | SNV | 1 | G | A | Heterozygous |
| NC_037642.1 | 10492039 | SNV | 1 | T | C | Homozygous   |
| NC_037642.1 | 10492327 | SNV | 1 | T | C | Homozygous   |
| NC_037642.1 | 10492480 | SNV | 1 | T | C | Homozygous   |
| NC_037642.1 | 10492500 | SNV | 1 | T | C | Homozygous   |
| NC_037642.1 | 10492506 | SNV | 1 | A | G | Homozygous   |
| NC_037642.1 | 10492541 | SNV | 1 | T | C | Heterozygous |
| NC_037642.1 | 10492566 | SNV | 1 | T | A | Homozygous   |
| NC_037642.1 | 10492642 | SNV | 1 | T | C | Homozygous   |
| NC_037642.1 | 10493025 | SNV | 1 | T | C | Homozygous   |
| NC_037642.1 | 10494067 | SNV | 1 | C | G | Homozygous   |
| NC_037642.1 | 10494261 | SNV | 1 | A | G | Heterozygous |
| NC_037642.1 | 10495080 | SNV | 1 | G | A | Homozygous   |
| NC_037642.1 | 10495090 | SNV | 1 | C | T | Homozygous   |
| NC_037642.1 | 10495093 | SNV | 1 | T | C | Homozygous   |
| NC_037642.1 | 10495211 | SNV | 1 | A | G | Heterozygous |
| NC_037642.1 | 10507073 | SNV | 1 | T | C | Homozygous   |
| NC_037642.1 | 10507184 | SNV | 1 | C | T | Heterozygous |
| NC_037642.1 | 10507240 | SNV | 1 | C | G | Heterozygous |
| NC_037642.1 | 10507245 | SNV | 1 | C | T | Heterozygous |
| NC_037642.1 | 10507261 | SNV | 1 | A | G | Homozygous   |
| NC_037642.1 | 10509759 | SNV | 1 | G | A | Homozygous   |
| NC_037642.1 | 10513748 | SNV | 1 | G | A | Homozygous   |
| NC_037642.1 | 10513765 | SNV | 1 | T | C | Homozygous   |
| NC_037642.1 | 10514673 | SNV | 1 | G | A | Homozygous   |
| NC_037642.1 | 10514891 | SNV | 1 | G | C | Homozygous   |
| NC_037642.1 | 10523452 | SNV | 1 | G | A | Homozygous   |
| NC_037642.1 | 10523479 | SNV | 1 | G | A | Heterozygous |
| NC_037642.1 | 10523480 | SNV | 1 | G | A | Heterozygous |
| NC_037642.1 | 10536018 | SNV | 1 | C | T | Heterozygous |
| NC_037642.1 | 10541153 | SNV | 1 | C | G | Heterozygous |
| NC_037642.1 | 10541359 | SNV | 1 | A | G | Homozygous   |

|             |          |     |   |   |   |              |
|-------------|----------|-----|---|---|---|--------------|
| NC_037642.1 | 10541369 | SNV | 1 | C | T | Heterozygous |
| NC_037642.1 | 10541384 | SNV | 1 | C | G | Heterozygous |
| NC_037642.1 | 10541420 | SNV | 1 | G | A | Homozygous   |
| NC_037642.1 | 10541510 | SNV | 1 | C | A | Heterozygous |
| NC_037642.1 | 10541528 | SNV | 1 | A | G | Homozygous   |
| NC_037642.1 | 10541544 | SNV | 1 | T | C | Heterozygous |
| NC_037642.1 | 10552431 | SNV | 1 | G | A | Heterozygous |
| NC_037642.1 | 10552519 | SNV | 1 | T | C | Homozygous   |
| NC_037642.1 | 10565918 | SNV | 1 | G | T | Heterozygous |
| NC_037642.1 | 10565957 | SNV | 1 | G | A | Heterozygous |
| NC_037642.1 | 10566034 | SNV | 1 | T | G | Homozygous   |
| NC_037642.1 | 10566388 | SNV | 1 | G | T | Heterozygous |
| NC_037642.1 | 10566390 | SNV | 1 | T | C | Heterozygous |
| NC_037642.1 | 10566410 | SNV | 1 | C | T | Heterozygous |
| NC_037642.1 | 10566453 | SNV | 1 | T | C | Heterozygous |
| NC_037642.1 | 10566457 | SNV | 1 | A | T | Heterozygous |
| NC_037642.1 | 10566520 | SNV | 1 | C | T | Heterozygous |
| NC_037642.1 | 10566569 | SNV | 1 | G | A | Heterozygous |
| NC_037642.1 | 10566571 | SNV | 1 | C | T | Heterozygous |
| NC_037642.1 | 10566639 | SNV | 1 | T | C | Heterozygous |
| NC_037642.1 | 10566701 | SNV | 1 | G | A | Homozygous   |
| NC_037642.1 | 10570495 | SNV | 1 | C | T | Homozygous   |
| NC_037642.1 | 10570502 | SNV | 1 | T | G | Homozygous   |
| NC_037642.1 | 10570623 | SNV | 1 | G | C | Heterozygous |
| NC_037642.1 | 10570655 | SNV | 1 | T | C | Homozygous   |
| NC_037642.1 | 10570657 | SNV | 1 | T | C | Homozygous   |
| NC_037642.1 | 10570675 | SNV | 1 | A | T | Homozygous   |
| NC_037642.1 | 10570694 | SNV | 1 | A | G | Homozygous   |
| NC_037642.1 | 10570696 | SNV | 1 | C | T | Homozygous   |
| NC_037642.1 | 10570698 | SNV | 1 | A | C | Homozygous   |
| NC_037642.1 | 10570841 | SNV | 1 | C | T | Homozygous   |
| NC_037642.1 | 10571229 | SNV | 1 | C | T | Heterozygous |
| NC_037642.1 | 10571233 | SNV | 1 | G | A | Heterozygous |
| NC_037642.1 | 10575073 | SNV | 1 | C | T | Heterozygous |
| NC_037642.1 | 10575199 | SNV | 1 | C | T | Homozygous   |
| NC_037642.1 | 10575231 | SNV | 1 | T | C | Homozygous   |
| NC_037642.1 | 10575431 | SNV | 1 | A | G | Homozygous   |
| NC_037642.1 | 10575456 | SNV | 1 | A | G | Homozygous   |
| NC_037642.1 | 10575683 | SNV | 1 | T | C | Homozygous   |
| NC_037642.1 | 10575718 | SNV | 1 | C | T | Homozygous   |
| NC_037642.1 | 10575771 | SNV | 1 | C | T | Homozygous   |
| NC_037642.1 | 10575809 | SNV | 1 | C | G | Homozygous   |
| NC_037642.1 | 10576310 | SNV | 1 | G | A | Heterozygous |
| NC_037642.1 | 10576331 | SNV | 1 | T | C | Heterozygous |
| NC_037642.1 | 10576375 | SNV | 1 | C | T | Homozygous   |
| NC_037642.1 | 10576386 | SNV | 1 | C | T | Heterozygous |
| NC_037642.1 | 10576542 | SNV | 1 | T | C | Homozygous   |
| NC_037642.1 | 10576557 | SNV | 1 | T | C | Homozygous   |
| NC_037642.1 | 10579409 | SNV | 1 | C | T | Heterozygous |
| NC_037642.1 | 10579513 | SNV | 1 | C | T | Heterozygous |
| NC_037642.1 | 10579554 | SNV | 1 | T | C | Heterozygous |

|             |          |     |   |   |   |              |
|-------------|----------|-----|---|---|---|--------------|
| NC_037642.1 | 10579558 | SNV | 1 | C | G | Heterozygous |
| NC_037642.1 | 10579564 | SNV | 1 | T | G | Heterozygous |
| NC_037642.1 | 10579577 | SNV | 1 | C | A | Heterozygous |
| NC_037642.1 | 10579586 | SNV | 1 | A | C | Heterozygous |
| NC_037642.1 | 10579631 | SNV | 1 | T | C | Heterozygous |
| NC_037642.1 | 10579641 | SNV | 1 | T | C | Heterozygous |
| NC_037642.1 | 10579645 | SNV | 1 | T | C | Heterozygous |
| NC_037642.1 | 10579648 | SNV | 1 | C | T | Heterozygous |
| NC_037642.1 | 10579658 | SNV | 1 | C | T | Heterozygous |
| NC_037642.1 | 10579688 | SNV | 1 | T | C | Heterozygous |
| NC_037642.1 | 10579708 | SNV | 1 | T | C | Heterozygous |
| NC_037642.1 | 10579720 | SNV | 1 | G | A | Heterozygous |
| NC_037642.1 | 10579720 | SNV | 1 | G | T | Heterozygous |
| NC_037642.1 | 10579730 | SNV | 1 | T | C | Heterozygous |
| NC_037642.1 | 10579775 | SNV | 1 | C | A | Homozygous   |
| NC_037642.1 | 10579777 | SNV | 1 | T | C | Homozygous   |
| NC_037642.1 | 10579922 | SNV | 1 | T | G | Heterozygous |
| NC_037642.1 | 10592222 | SNV | 1 | T | C | Heterozygous |
| NC_037642.1 | 10592223 | SNV | 1 | C | T | Heterozygous |
| NC_037642.1 | 10592235 | SNV | 1 | G | A | Heterozygous |
| NC_037642.1 | 10592237 | SNV | 1 | A | G | Homozygous   |
| NC_037642.1 | 10592239 | SNV | 1 | C | T | Heterozygous |
| NC_037642.1 | 10592245 | SNV | 1 | G | A | Heterozygous |
| NC_037642.1 | 10592250 | SNV | 1 | G | A | Heterozygous |
| NC_037642.1 | 10592292 | SNV | 1 | C | T | Homozygous   |
| NC_037642.1 | 10592294 | SNV | 1 | A | T | Homozygous   |
| NC_037642.1 | 10592300 | SNV | 1 | T | C | Heterozygous |
| NC_037642.1 | 10592308 | SNV | 1 | T | C | Heterozygous |
| NC_037642.1 | 10592357 | SNV | 1 | C | T | Heterozygous |
| NC_037642.1 | 10592363 | SNV | 1 | T | C | Homozygous   |
| NC_037642.1 | 10592402 | SNV | 1 | A | C | Heterozygous |
| NC_037642.1 | 10592409 | SNV | 1 | A | G | Homozygous   |
| NC_037642.1 | 10592430 | SNV | 1 | T | C | Heterozygous |
| NC_037642.1 | 10592434 | SNV | 1 | C | T | Heterozygous |
| NC_037642.1 | 10592436 | SNV | 1 | C | T | Heterozygous |
| NC_037642.1 | 10592439 | SNV | 1 | T | C | Homozygous   |
| NC_037642.1 | 10592443 | SNV | 1 | C | T | Homozygous   |
| NC_037642.1 | 10592460 | SNV | 1 | C | T | Heterozygous |
| NC_037642.1 | 10592505 | SNV | 1 | A | G | Homozygous   |
| NC_037642.1 | 10592528 | SNV | 1 | C | T | Heterozygous |
| NC_037642.1 | 10592538 | SNV | 1 | T | C | Heterozygous |
| NC_037642.1 | 10592542 | SNV | 1 | A | C | Heterozygous |
| NC_037642.1 | 10592556 | SNV | 1 | T | C | Homozygous   |
| NC_037642.1 | 10592559 | SNV | 1 | T | C | Homozygous   |
| NC_037642.1 | 10592570 | SNV | 1 | G | A | Homozygous   |
| NC_037642.1 | 10592575 | SNV | 1 | G | A | Homozygous   |
| NC_037642.1 | 10592587 | SNV | 1 | G | A | Heterozygous |
| NC_037642.1 | 10592601 | SNV | 1 | C | T | Heterozygous |
| NC_037642.1 | 10592625 | SNV | 1 | T | C | Homozygous   |
| NC_037642.1 | 10592656 | SNV | 1 | C | T | Heterozygous |
| NC_037642.1 | 10592689 | SNV | 1 | T | C | Heterozygous |

|             |          |     |   |   |   |              |
|-------------|----------|-----|---|---|---|--------------|
| NC_037642.1 | 10592829 | SNV | 1 | T | C | Homozygous   |
| NC_037642.1 | 10592833 | SNV | 1 | C | T | Heterozygous |
| NC_037642.1 | 10592837 | SNV | 1 | T | C | Heterozygous |
| NC_037642.1 | 10592852 | SNV | 1 | A | G | Heterozygous |
| NC_037642.1 | 10592856 | SNV | 1 | T | C | Homozygous   |
| NC_037642.1 | 10592861 | SNV | 1 | G | A | Homozygous   |
| NC_037642.1 | 10592866 | SNV | 1 | C | T | Homozygous   |
| NC_037642.1 | 10592881 | SNV | 1 | T | C | Homozygous   |
| NC_037642.1 | 10592885 | SNV | 1 | C | T | Homozygous   |
| NC_037642.1 | 10592896 | SNV | 1 | A | G | Homozygous   |
| NC_037642.1 | 10592908 | SNV | 1 | A | G | Homozygous   |
| NC_037642.1 | 10592930 | SNV | 1 | T | C | Homozygous   |
| NC_037642.1 | 10592935 | SNV | 1 | T | C | Homozygous   |
| NC_037642.1 | 10592959 | SNV | 1 | G | C | Homozygous   |
| NC_037642.1 | 10592963 | SNV | 1 | C | T | Homozygous   |
| NC_037642.1 | 10592995 | SNV | 1 | G | A | Heterozygous |
| NC_037642.1 | 10592998 | SNV | 1 | G | A | Heterozygous |
| NC_037642.1 | 10593012 | SNV | 1 | A | T | Homozygous   |
| NC_037642.1 | 10593026 | SNV | 1 | T | C | Heterozygous |
| NC_037642.1 | 10593042 | SNV | 1 | C | T | Heterozygous |
| NC_037642.1 | 10593052 | SNV | 1 | C | T | Homozygous   |
| NC_037642.1 | 10593064 | SNV | 1 | C | T | Homozygous   |
| NC_037642.1 | 10593109 | SNV | 1 | T | C | Homozygous   |
| NC_037642.1 | 10593115 | SNV | 1 | T | C | Homozygous   |
| NC_037642.1 | 10593118 | SNV | 1 | C | G | Homozygous   |
| NC_037642.1 | 10593289 | SNV | 1 | G | A | Homozygous   |
| NC_037642.1 | 10593291 | SNV | 1 | A | G | Homozygous   |
| NC_037642.1 | 10593295 | SNV | 1 | G | A | Homozygous   |
| NC_037642.1 | 10597746 | SNV | 1 | A | G | Homozygous   |
| NC_037642.1 | 10597848 | SNV | 1 | C | T | Homozygous   |
| NC_037642.1 | 10623444 | SNV | 1 | A | G | Heterozygous |
| NC_037642.1 | 10623447 | SNV | 1 | C | T | Heterozygous |
| NC_037642.1 | 10623504 | SNV | 1 | A | T | Homozygous   |
| NC_037642.1 | 10623507 | SNV | 1 | A | T | Homozygous   |
| NC_037642.1 | 10636724 | SNV | 1 | C | T | Heterozygous |
| NC_037642.1 | 10636772 | SNV | 1 | A | G | Homozygous   |
| NC_037642.1 | 10636976 | SNV | 1 | A | T | Homozygous   |
| NC_037642.1 | 10654135 | SNV | 1 | C | T | Homozygous   |
| NC_037642.1 | 10655454 | SNV | 1 | G | A | Homozygous   |
| NC_037642.1 | 10655484 | SNV | 1 | G | C | Homozygous   |
| NC_037642.1 | 10655487 | SNV | 1 | G | T | Homozygous   |
| NC_037642.1 | 10658660 | SNV | 1 | A | G | Homozygous   |
| NC_037642.1 | 10664579 | SNV | 1 | C | A | Heterozygous |
| NC_037642.1 | 10664584 | SNV | 1 | G | A | Heterozygous |
| NC_037642.1 | 10664607 | SNV | 1 | C | T | Heterozygous |
| NC_037642.1 | 10664626 | SNV | 1 | G | A | Heterozygous |
| NC_037642.1 | 10690534 | SNV | 1 | G | A | Heterozygous |
| NC_037642.1 | 10690706 | SNV | 1 | C | T | Homozygous   |
| NC_037642.1 | 10691983 | SNV | 1 | G | A | Homozygous   |
| NC_037642.1 | 10692081 | SNV | 1 | C | T | Heterozygous |
| NC_037642.1 | 10692534 | SNV | 1 | A | C | Homozygous   |

|             |          |     |   |   |   |              |
|-------------|----------|-----|---|---|---|--------------|
| NC_037642.1 | 10694687 | SNV | 1 | G | T | Homozygous   |
| NC_037642.1 | 10694793 | SNV | 1 | A | G | Homozygous   |
| NC_037642.1 | 10696014 | SNV | 1 | T | C | Homozygous   |
| NC_037642.1 | 10696089 | SNV | 1 | A | G | Heterozygous |
| NC_037642.1 | 10697260 | SNV | 1 | C | T | Heterozygous |
| NC_037642.1 | 10702259 | SNV | 1 | C | T | Heterozygous |
| NC_037642.1 | 10704880 | SNV | 1 | A | T | Homozygous   |
| NC_037642.1 | 10705679 | SNV | 1 | T | C | Heterozygous |
| NC_037642.1 | 10705746 | SNV | 1 | T | C | Homozygous   |
| NC_037642.1 | 10714798 | SNV | 1 | C | T | Heterozygous |
| NC_037642.1 | 10715411 | SNV | 1 | T | C | Homozygous   |
| NC_037642.1 | 10716735 | SNV | 1 | T | A | Homozygous   |
| NC_037642.1 | 10718108 | SNV | 1 | C | G | Homozygous   |
| NC_037642.1 | 10721829 | SNV | 1 | T | C | Heterozygous |
| NC_037642.1 | 10722507 | SNV | 1 | A | G | Heterozygous |
| NC_037642.1 | 10723098 | SNV | 1 | A | G | Homozygous   |
| NC_037642.1 | 10724611 | SNV | 1 | T | G | Homozygous   |
| NC_037642.1 | 10724888 | SNV | 1 | A | T | Homozygous   |
| NC_037642.1 | 10725212 | SNV | 1 | T | C | Homozygous   |
| NC_037642.1 | 10725218 | SNV | 1 | T | C | Homozygous   |
| NC_037642.1 | 10725898 | SNV | 1 | A | G | Heterozygous |
| NC_037642.1 | 10726117 | SNV | 1 | T | G | Homozygous   |
| NC_037642.1 | 10726119 | SNV | 1 | A | G | Homozygous   |
| NC_037642.1 | 10726274 | SNV | 1 | G | A | Homozygous   |
| NC_037642.1 | 10726307 | SNV | 1 | C | T | Homozygous   |
| NC_037642.1 | 10726319 | SNV | 1 | T | A | Homozygous   |
| NC_037642.1 | 10726335 | SNV | 1 | A | G | Homozygous   |
| NC_037642.1 | 10726415 | SNV | 1 | G | A | Homozygous   |
| NC_037642.1 | 10726421 | SNV | 1 | G | A | Homozygous   |
| NC_037642.1 | 10726919 | SNV | 1 | A | T | Homozygous   |
| NC_037642.1 | 10726935 | SNV | 1 | C | G | Homozygous   |
| NC_037642.1 | 10726942 | SNV | 1 | C | G | Heterozygous |
| NC_037642.1 | 10726951 | SNV | 1 | A | G | Heterozygous |
| NC_037642.1 | 10732605 | SNV | 1 | C | T | Heterozygous |
| NC_037642.1 | 10732633 | SNV | 1 | G | A | Homozygous   |
| NC_037642.1 | 10732662 | SNV | 1 | T | C | Homozygous   |
| NC_037642.1 | 10732726 | SNV | 1 | G | A | Homozygous   |
| NC_037642.1 | 10732731 | SNV | 1 | T | C | Homozygous   |
| NC_037642.1 | 10732746 | SNV | 1 | T | C | Homozygous   |
| NC_037642.1 | 10732783 | SNV | 1 | A | G | Homozygous   |
| NC_037642.1 | 10732785 | SNV | 1 | T | C | Homozygous   |
| NC_037642.1 | 10733037 | SNV | 1 | C | T | Heterozygous |
| NC_037642.1 | 10733136 | SNV | 1 | T | C | Homozygous   |
| NC_037642.1 | 10735251 | SNV | 1 | G | T | Homozygous   |
| NC_037642.1 | 10735270 | SNV | 1 | G | A | Heterozygous |
| NC_037642.1 | 10735491 | SNV | 1 | A | T | Homozygous   |
| NC_037642.1 | 10735496 | SNV | 1 | T | A | Homozygous   |
| NC_037642.1 | 10735507 | SNV | 1 | A | C | Homozygous   |
| NC_037642.1 | 10736303 | SNV | 1 | C | T | Heterozygous |
| NC_037642.1 | 10736309 | SNV | 1 | G | A | Homozygous   |
| NC_037642.1 | 10736313 | SNV | 1 | T | C | Homozygous   |

|             |          |     |   |   |   |              |
|-------------|----------|-----|---|---|---|--------------|
| NC_037642.1 | 10738517 | SNV | 1 | G | C | Heterozygous |
| NC_037642.1 | 10746856 | SNV | 1 | T | G | Homozygous   |
| NC_037642.1 | 10746859 | SNV | 1 | T | A | Homozygous   |
| NC_037642.1 | 10746865 | SNV | 1 | A | T | Homozygous   |
| NC_037642.1 | 10746875 | SNV | 1 | C | A | Homozygous   |
| NC_037642.1 | 10746878 | SNV | 1 | T | C | Homozygous   |
| NC_037642.1 | 10746970 | SNV | 1 | A | G | Heterozygous |
| NC_037642.1 | 10747078 | SNV | 1 | T | C | Heterozygous |
| NC_037642.1 | 10748852 | SNV | 1 | T | A | Homozygous   |
| NC_037642.1 | 10751847 | SNV | 1 | C | T | Homozygous   |
| NC_037642.1 | 10751855 | SNV | 1 | C | A | Heterozygous |
| NC_037642.1 | 10751863 | SNV | 1 | A | C | Heterozygous |
| NC_037642.1 | 10751869 | SNV | 1 | C | A | Homozygous   |
| NC_037642.1 | 10751948 | SNV | 1 | C | G | Heterozygous |
| NC_037642.1 | 10752750 | SNV | 1 | T | C | Homozygous   |
| NC_037642.1 | 10752817 | SNV | 1 | A | G | Heterozygous |
| NC_037642.1 | 10753087 | SNV | 1 | G | A | Heterozygous |
| NC_037642.1 | 10753116 | SNV | 1 | T | C | Heterozygous |
| NC_037642.1 | 10753334 | SNV | 1 | A | G | Heterozygous |
| NC_037642.1 | 10753376 | SNV | 1 | T | C | Homozygous   |
| NC_037642.1 | 10753431 | SNV | 1 | C | T | Heterozygous |
| NC_037642.1 | 10753434 | SNV | 1 | A | G | Homozygous   |
| NC_037642.1 | 10753439 | SNV | 1 | T | C | Heterozygous |
| NC_037642.1 | 10753443 | SNV | 1 | G | A | Heterozygous |
| NC_037642.1 | 10753488 | SNV | 1 | C | T | Heterozygous |
| NC_037642.1 | 10753593 | SNV | 1 | G | C | Heterozygous |
| NC_037642.1 | 10759488 | SNV | 1 | A | G | Homozygous   |
| NC_037642.1 | 10759571 | SNV | 1 | C | T | Heterozygous |
| NC_037642.1 | 10760181 | SNV | 1 | A | G | Homozygous   |
| NC_037642.1 | 10760343 | SNV | 1 | T | C | Homozygous   |
| NC_037642.1 | 10760528 | SNV | 1 | A | G | Homozygous   |
| NC_037642.1 | 10760873 | SNV | 1 | C | T | Heterozygous |
| NC_037642.1 | 10764329 | SNV | 1 | T | C | Homozygous   |
| NC_037642.1 | 10764365 | SNV | 1 | T | C | Homozygous   |
| NC_037642.1 | 10771410 | SNV | 1 | T | C | Homozygous   |
| NC_037642.1 | 10771574 | SNV | 1 | G | A | Homozygous   |
| NC_037642.1 | 10771677 | SNV | 1 | T | C | Heterozygous |
| NC_037642.1 | 10773394 | SNV | 1 | A | G | Heterozygous |
| NC_037642.1 | 10773659 | SNV | 1 | A | T | Heterozygous |
| NC_037642.1 | 10773699 | SNV | 1 | T | C | Homozygous   |
| NC_037642.1 | 10788457 | SNV | 1 | C | T | Heterozygous |
| NC_037642.1 | 10788517 | SNV | 1 | C | T | Heterozygous |
| NC_037642.1 | 10792921 | SNV | 1 | A | G | Homozygous   |
| NC_037642.1 | 10808318 | SNV | 1 | A | G | Homozygous   |
| NC_037642.1 | 10808558 | SNV | 1 | T | C | Homozygous   |
| NC_037642.1 | 10809012 | SNV | 1 | G | A | Homozygous   |
| NC_037642.1 | 10809325 | SNV | 1 | T | C | Heterozygous |
| NC_037642.1 | 10809623 | SNV | 1 | A | G | Heterozygous |
| NC_037642.1 | 10811855 | SNV | 1 | A | G | Homozygous   |
| NC_037642.1 | 10811863 | SNV | 1 | G | A | Heterozygous |
| NC_037642.1 | 10811926 | SNV | 1 | C | T | Heterozygous |



|             |          |     |   |   |   |              |
|-------------|----------|-----|---|---|---|--------------|
| NC_037642.1 | 10813276 | SNV | 1 | A | G | Homozygous   |
| NC_037642.1 | 10813751 | SNV | 1 | A | G | Homozygous   |
| NC_037642.1 | 10813808 | SNV | 1 | T | C | Homozygous   |
| NC_037642.1 | 10813902 | SNV | 1 | G | A | Homozygous   |
| NC_037642.1 | 10813908 | SNV | 1 | C | T | Homozygous   |
| NC_037642.1 | 10813916 | SNV | 1 | T | C | Heterozygous |
| NC_037642.1 | 10814145 | SNV | 1 | T | C | Heterozygous |
| NC_037642.1 | 10814173 | SNV | 1 | T | A | Heterozygous |
| NC_037642.1 | 10814177 | SNV | 1 | T | C | Heterozygous |
| NC_037642.1 | 10814182 | SNV | 1 | T | C | Heterozygous |
| NC_037642.1 | 10814188 | SNV | 1 | T | C | Heterozygous |
| NC_037642.1 | 10814194 | SNV | 1 | C | T | Heterozygous |
| NC_037642.1 | 10814510 | SNV | 1 | T | C | Homozygous   |
| NC_037642.1 | 10814525 | SNV | 1 | C | T | Heterozygous |
| NC_037642.1 | 10814567 | SNV | 1 | C | T | Heterozygous |
| NC_037642.1 | 10814596 | SNV | 1 | T | C | Heterozygous |
| NC_037642.1 | 10814602 | SNV | 1 | T | C | Heterozygous |
| NC_037642.1 | 10814713 | SNV | 1 | C | T | Heterozygous |
| NC_037642.1 | 10814958 | SNV | 1 | C | G | Heterozygous |
| NC_037642.1 | 10815078 | SNV | 1 | A | G | Homozygous   |
| NC_037642.1 | 10816479 | SNV | 1 | A | T | Heterozygous |
| NC_037642.1 | 10816918 | SNV | 1 | A | G | Heterozygous |
| NC_037642.1 | 10818342 | SNV | 1 | A | T | Heterozygous |
| NC_037642.1 | 10818427 | SNV | 1 | G | A | Heterozygous |
| NC_037642.1 | 10818720 | SNV | 1 | T | C | Heterozygous |
| NC_037642.1 | 10818728 | SNV | 1 | G | A | Heterozygous |
| NC_037642.1 | 10819158 | SNV | 1 | A | G | Heterozygous |
| NC_037642.1 | 10819412 | SNV | 1 | T | A | Heterozygous |
| NC_037642.1 | 10819416 | SNV | 1 | C | G | Heterozygous |
| NC_037642.1 | 10820069 | SNV | 1 | A | G | Homozygous   |
| NC_037642.1 | 10820165 | SNV | 1 | A | G | Heterozygous |
| NC_037642.1 | 10820299 | SNV | 1 | T | A | Heterozygous |
| NC_037642.1 | 10820305 | SNV | 1 | A | G | Homozygous   |
| NC_037642.1 | 10820317 | SNV | 1 | T | C | Homozygous   |
| NC_037642.1 | 10820637 | SNV | 1 | T | C | Homozygous   |
| NC_037642.1 | 10821481 | SNV | 1 | A | G | Homozygous   |
| NC_037642.1 | 10821496 | SNV | 1 | C | G | Homozygous   |
| NC_037642.1 | 10821531 | SNV | 1 | T | C | Homozygous   |
| NC_037642.1 | 10821556 | SNV | 1 | G | C | Heterozygous |
| NC_037642.1 | 10821583 | SNV | 1 | C | T | Heterozygous |
| NC_037642.1 | 10821588 | SNV | 1 | G | A | Homozygous   |
| NC_037642.1 | 10821600 | SNV | 1 | A | G | Homozygous   |
| NC_037642.1 | 10821616 | SNV | 1 | C | T | Heterozygous |
| NC_037642.1 | 10821627 | SNV | 1 | C | T | Heterozygous |
| NC_037642.1 | 10821702 | SNV | 1 | C | G | Heterozygous |
| NC_037642.1 | 10821722 | SNV | 1 | T | C | Homozygous   |
| NC_037642.1 | 10821835 | SNV | 1 | A | C | Homozygous   |
| NC_037642.1 | 10821906 | SNV | 1 | C | A | Heterozygous |
| NC_037642.1 | 10823387 | SNV | 1 | A | G | Homozygous   |
| NC_037642.1 | 10823405 | SNV | 1 | C | T | Heterozygous |
| NC_037642.1 | 10823741 | SNV | 1 | T | C | Homozygous   |

|             |          |     |   |   |   |              |
|-------------|----------|-----|---|---|---|--------------|
| NC_037642.1 | 10824060 | SNV | 1 | G | A | Heterozygous |
| NC_037642.1 | 10824093 | SNV | 1 | C | T | Heterozygous |
| NC_037642.1 | 10824102 | SNV | 1 | A | T | Heterozygous |
| NC_037642.1 | 10824405 | SNV | 1 | A | G | Homozygous   |
| NC_037642.1 | 10824429 | SNV | 1 | A | G | Homozygous   |
| NC_037642.1 | 10824435 | SNV | 1 | T | C | Homozygous   |
| NC_037642.1 | 10824528 | SNV | 1 | G | C | Heterozygous |
| NC_037642.1 | 10824559 | SNV | 1 | T | C | Heterozygous |
| NC_037642.1 | 10824606 | SNV | 1 | T | A | Heterozygous |
| NC_037642.1 | 10824931 | SNV | 1 | A | G | Homozygous   |
| NC_037642.1 | 10825501 | SNV | 1 | T | C | Homozygous   |
| NC_037642.1 | 10837176 | SNV | 1 | A | G | Homozygous   |
| NC_037642.1 | 10837301 | SNV | 1 | A | G | Homozygous   |
| NC_037642.1 | 10837303 | SNV | 1 | C | T | Homozygous   |
| NC_037642.1 | 10837578 | SNV | 1 | G | A | Homozygous   |
| NC_037642.1 | 10837593 | SNV | 1 | C | T | Homozygous   |
| NC_037642.1 | 10839697 | SNV | 1 | A | T | Heterozygous |
| NC_037642.1 | 10844879 | SNV | 1 | C | T | Homozygous   |
| NC_037642.1 | 10844988 | SNV | 1 | G | A | Heterozygous |
| NC_037642.1 | 10847863 | SNV | 1 | T | C | Homozygous   |
| NC_037642.1 | 10848639 | SNV | 1 | A | G | Homozygous   |
| NC_037642.1 | 10849806 | SNV | 1 | G | A | Homozygous   |
| NC_037642.1 | 10850186 | SNV | 1 | T | G | Heterozygous |
| NC_037642.1 | 10850190 | SNV | 1 | A | G | Homozygous   |
| NC_037642.1 | 10850418 | SNV | 1 | G | A | Heterozygous |
| NC_037642.1 | 10855435 | SNV | 1 | A | C | Homozygous   |
| NC_037642.1 | 10863119 | SNV | 1 | A | T | Homozygous   |
| NC_037642.1 | 10863122 | SNV | 1 | T | G | Homozygous   |
| NC_037642.1 | 10863131 | SNV | 1 | T | G | Heterozygous |
| NC_037642.1 | 10863144 | SNV | 1 | T | A | Heterozygous |
| NC_037642.1 | 10863155 | SNV | 1 | A | T | Heterozygous |
| NC_037642.1 | 10863158 | SNV | 1 | T | G | Heterozygous |
| NC_037642.1 | 10863171 | SNV | 1 | T | A | Homozygous   |
| NC_037642.1 | 10864268 | SNV | 1 | T | A | Homozygous   |
| NC_037642.1 | 10864324 | SNV | 1 | T | C | Homozygous   |
| NC_037642.1 | 10864466 | SNV | 1 | A | G | Heterozygous |
| NC_037642.1 | 10865133 | SNV | 1 | A | G | Heterozygous |
| NC_037642.1 | 10872850 | SNV | 1 | T | A | Heterozygous |
| NC_037642.1 | 10882292 | SNV | 1 | T | C | Homozygous   |
| NC_037642.1 | 10882301 | SNV | 1 | A | C | Homozygous   |
| NC_037642.1 | 10882304 | SNV | 1 | A | G | Homozygous   |
| NC_037642.1 | 10882308 | SNV | 1 | G | A | Homozygous   |
| NC_037642.1 | 10882311 | SNV | 1 | T | G | Homozygous   |
| NC_037642.1 | 10882314 | SNV | 1 | C | T | Homozygous   |
| NC_037642.1 | 10882317 | SNV | 1 | T | C | Homozygous   |
| NC_037642.1 | 10882326 | SNV | 1 | T | C | Homozygous   |
| NC_037642.1 | 10882328 | SNV | 1 | A | T | Homozygous   |
| NC_037642.1 | 10882340 | SNV | 1 | A | G | Homozygous   |
| NC_037642.1 | 10882345 | SNV | 1 | A | C | Homozygous   |
| NC_037642.1 | 10882356 | SNV | 1 | C | A | Homozygous   |
| NC_037642.1 | 10882364 | SNV | 1 | T | A | Homozygous   |

|             |          |     |   |   |   |              |
|-------------|----------|-----|---|---|---|--------------|
| NC_037642.1 | 10882388 | SNV | 1 | A | C | Heterozygous |
| NC_037642.1 | 10882388 | SNV | 1 | A | T | Heterozygous |
| NC_037642.1 | 10882391 | SNV | 1 | A | G | Homozygous   |
| NC_037642.1 | 10882405 | SNV | 1 | T | A | Homozygous   |
| NC_037642.1 | 10882415 | SNV | 1 | T | C | Homozygous   |
| NC_037642.1 | 10882478 | SNV | 1 | A | C | Heterozygous |
| NC_037642.1 | 10882484 | SNV | 1 | T | G | Heterozygous |
| NC_037642.1 | 10882490 | SNV | 1 | A | G | Heterozygous |
| NC_037642.1 | 10882496 | SNV | 1 | A | G | Heterozygous |
| NC_037642.1 | 10882499 | SNV | 1 | T | A | Heterozygous |
| NC_037642.1 | 10882502 | SNV | 1 | A | T | Heterozygous |
| NC_037642.1 | 10882507 | SNV | 1 | A | C | Heterozygous |
| NC_037642.1 | 10882509 | SNV | 1 | A | G | Heterozygous |
| NC_037642.1 | 10882514 | SNV | 1 | A | G | Heterozygous |
| NC_037642.1 | 10882517 | SNV | 1 | A | G | Heterozygous |
| NC_037642.1 | 10882528 | SNV | 1 | A | T | Heterozygous |
| NC_037642.1 | 10897604 | SNV | 1 | T | C | Homozygous   |
| NC_037642.1 | 10897607 | SNV | 1 | T | C | Homozygous   |
| NC_037642.1 | 10897639 | SNV | 1 | T | C | Heterozygous |
| NC_037642.1 | 10899793 | SNV | 1 | G | T | Heterozygous |
| NC_037642.1 | 10900942 | SNV | 1 | T | C | Homozygous   |
| NC_037642.1 | 10901026 | SNV | 1 | T | C | Homozygous   |
| NC_037642.1 | 10902692 | SNV | 1 | C | T | Heterozygous |
| NC_037642.1 | 10902749 | SNV | 1 | C | T | Heterozygous |
| NC_037642.1 | 10907513 | SNV | 1 | T | C | Heterozygous |
| NC_037642.1 | 10907725 | SNV | 1 | G | A | Homozygous   |
| NC_037642.1 | 10908258 | SNV | 1 | G | A | Heterozygous |
| NC_037642.1 | 10908270 | SNV | 1 | T | A | Homozygous   |
| NC_037642.1 | 10908279 | SNV | 1 | A | T | Heterozygous |
| NC_037642.1 | 10908290 | SNV | 1 | G | A | Heterozygous |
| NC_037642.1 | 10909207 | SNV | 1 | A | G | Homozygous   |
| NC_037642.1 | 10909997 | SNV | 1 | A | G | Homozygous   |
| NC_037642.1 | 10910143 | SNV | 1 | T | A | Homozygous   |
| NC_037642.1 | 10910440 | SNV | 1 | T | C | Heterozygous |
| NC_037642.1 | 10911256 | SNV | 1 | C | A | Homozygous   |
| NC_037642.1 | 10911396 | SNV | 1 | T | C | Homozygous   |
| NC_037642.1 | 10911411 | SNV | 1 | G | A | Homozygous   |
| NC_037642.1 | 10912309 | SNV | 1 | T | C | Homozygous   |
| NC_037642.1 | 10912366 | SNV | 1 | T | C | Homozygous   |
| NC_037642.1 | 10912405 | SNV | 1 | A | G | Heterozygous |
| NC_037642.1 | 10912510 | SNV | 1 | A | T | Heterozygous |
| NC_037642.1 | 10922314 | SNV | 1 | C | T | Heterozygous |
| NC_037642.1 | 10931347 | SNV | 1 | G | A | Homozygous   |
| NC_037642.1 | 10932108 | SNV | 1 | G | A | Heterozygous |
| NC_037642.1 | 10932206 | SNV | 1 | C | T | Heterozygous |
| NC_037642.1 | 10932249 | SNV | 1 | C | T | Homozygous   |
| NC_037642.1 | 10932296 | SNV | 1 | T | C | Homozygous   |
| NC_037642.1 | 10932337 | SNV | 1 | C | T | Heterozygous |
| NC_037642.1 | 10932462 | SNV | 1 | C | T | Homozygous   |
| NC_037642.1 | 10932626 | SNV | 1 | A | G | Heterozygous |
| NC_037642.1 | 10932653 | SNV | 1 | C | T | Heterozygous |

|             |          |     |   |   |   |              |
|-------------|----------|-----|---|---|---|--------------|
| NC_037642.1 | 10932655 | SNV | 1 | A | G | Heterozygous |
| NC_037642.1 | 10932673 | SNV | 1 | T | C | Homozygous   |
| NC_037642.1 | 10932801 | SNV | 1 | C | T | Homozygous   |
| NC_037642.1 | 10933154 | SNV | 1 | C | T | Heterozygous |
| NC_037642.1 | 10933241 | SNV | 1 | A | G | Heterozygous |
| NC_037642.1 | 10933460 | SNV | 1 | C | T | Homozygous   |
| NC_037642.1 | 10933550 | SNV | 1 | T | C | Homozygous   |
| NC_037642.1 | 10933605 | SNV | 1 | C | G | Heterozygous |
| NC_037642.1 | 10933611 | SNV | 1 | G | A | Heterozygous |
| NC_037642.1 | 10933677 | SNV | 1 | C | G | Homozygous   |
| NC_037642.1 | 10933883 | SNV | 1 | A | G | Heterozygous |
| NC_037642.1 | 10934150 | SNV | 1 | C | T | Homozygous   |
| NC_037642.1 | 10934164 | SNV | 1 | G | C | Heterozygous |
| NC_037642.1 | 10936178 | SNV | 1 | G | T | Homozygous   |
| NC_037642.1 | 10936204 | SNV | 1 | A | T | Homozygous   |
| NC_037642.1 | 10936206 | SNV | 1 | A | T | Homozygous   |
| NC_037642.1 | 10936211 | SNV | 1 | T | A | Homozygous   |
| NC_037642.1 | 10937728 | SNV | 1 | T | A | Homozygous   |
| NC_037642.1 | 10938211 | SNV | 1 | A | T | Homozygous   |
| NC_037642.1 | 10938214 | SNV | 1 | G | C | Homozygous   |
| NC_037642.1 | 10938216 | SNV | 1 | A | T | Homozygous   |
| NC_037642.1 | 10938218 | SNV | 1 | A | G | Homozygous   |
| NC_037642.1 | 10939719 | SNV | 1 | G | A | Homozygous   |
| NC_037642.1 | 10942952 | SNV | 1 | A | T | Heterozygous |
| NC_037642.1 | 10942963 | SNV | 1 | T | A | Heterozygous |
| NC_037642.1 | 10942983 | SNV | 1 | T | A | Heterozygous |
| NC_037642.1 | 10945237 | SNV | 1 | A | G | Homozygous   |
| NC_037642.1 | 10946126 | SNV | 1 | T | G | Homozygous   |
| NC_037642.1 | 10946735 | SNV | 1 | T | A | Homozygous   |
| NC_037642.1 | 10946737 | SNV | 1 | G | A | Homozygous   |
| NC_037642.1 | 10948403 | SNV | 1 | T | C | Homozygous   |
| NC_037642.1 | 10948827 | SNV | 1 | T | A | Homozygous   |
| NC_037642.1 | 10948835 | SNV | 1 | T | A | Homozygous   |
| NC_037642.1 | 10948837 | SNV | 1 | A | T | Homozygous   |
| NC_037642.1 | 10948839 | SNV | 1 | T | A | Homozygous   |
| NC_037642.1 | 10954887 | SNV | 1 | A | T | Homozygous   |
| NC_037642.1 | 10954889 | SNV | 1 | T | G | Homozygous   |
| NC_037642.1 | 10954956 | SNV | 1 | G | T | Homozygous   |
| NC_037642.1 | 10955045 | SNV | 1 | G | A | Homozygous   |
| NC_037642.1 | 10955048 | SNV | 1 | A | C | Homozygous   |
| NC_037642.1 | 10955050 | SNV | 1 | A | G | Homozygous   |
| NC_037642.1 | 10955098 | SNV | 1 | C | T | Homozygous   |
| NC_037642.1 | 10955105 | SNV | 1 | A | T | Homozygous   |
| NC_037642.1 | 10955113 | SNV | 1 | G | C | Homozygous   |
| NC_037642.1 | 10956686 | SNV | 1 | C | T | Homozygous   |
| NC_037642.1 | 10957536 | SNV | 1 | C | T | Homozygous   |
| NC_037642.1 | 10959725 | SNV | 1 | C | T | Heterozygous |
| NC_037642.1 | 10959808 | SNV | 1 | A | G | Homozygous   |
| NC_037642.1 | 10960266 | SNV | 1 | C | T | Homozygous   |
| NC_037642.1 | 10960530 | SNV | 1 | C | A | Heterozygous |
| NC_037642.1 | 10961183 | SNV | 1 | G | A | Heterozygous |

|             |          |     |   |   |   |              |
|-------------|----------|-----|---|---|---|--------------|
| NC_037642.1 | 10967067 | SNV | 1 | C | T | Homozygous   |
| NC_037642.1 | 10967662 | SNV | 1 | G | A | Homozygous   |
| NC_037642.1 | 10972086 | SNV | 1 | G | A | Heterozygous |
| NC_037642.1 | 10975811 | SNV | 1 | G | A | Homozygous   |
| NC_037642.1 | 10977068 | SNV | 1 | T | C | Homozygous   |
| NC_037642.1 | 10977269 | SNV | 1 | T | C | Homozygous   |
| NC_037642.1 | 10977348 | SNV | 1 | A | G | Homozygous   |
| NC_037642.1 | 10977400 | SNV | 1 | A | C | Homozygous   |
| NC_037642.1 | 10977796 | SNV | 1 | G | A | Heterozygous |
| NC_037642.1 | 10979231 | SNV | 1 | A | T | Homozygous   |
| NC_037642.1 | 10980778 | SNV | 1 | A | G | Homozygous   |
| NC_037642.1 | 10988460 | SNV | 1 | C | T | Homozygous   |
| NC_037642.1 | 10995556 | SNV | 1 | G | A | Homozygous   |
| NC_037642.1 | 11001048 | SNV | 1 | C | T | Homozygous   |
| NC_037642.1 | 11002009 | SNV | 1 | G | C | Homozygous   |
| NC_037642.1 | 11002031 | SNV | 1 | A | C | Homozygous   |
| NC_037642.1 | 11002082 | SNV | 1 | T | C | Heterozygous |
| NC_037642.1 | 11002170 | SNV | 1 | A | T | Heterozygous |
| NC_037642.1 | 11002305 | SNV | 1 | T | C | Homozygous   |
| NC_037642.1 | 11002314 | SNV | 1 | G | A | Heterozygous |
| NC_037642.1 | 11002464 | SNV | 1 | T | C | Homozygous   |
| NC_037642.1 | 11008296 | SNV | 1 | G | C | Heterozygous |
| NC_037642.1 | 11008422 | SNV | 1 | C | T | Heterozygous |
| NC_037642.1 | 11008437 | SNV | 1 | C | T | Homozygous   |
| NC_037642.1 | 11008521 | SNV | 1 | A | G | Heterozygous |
| NC_037642.1 | 11008611 | SNV | 1 | C | T | Heterozygous |
| NC_037642.1 | 11009235 | SNV | 1 | G | A | Heterozygous |
| NC_037642.1 | 11009343 | SNV | 1 | C | T | Heterozygous |
| NC_037642.1 | 11009479 | SNV | 1 | A | G | Homozygous   |
| NC_037642.1 | 11009658 | SNV | 1 | C | T | Homozygous   |
| NC_037642.1 | 11009979 | SNV | 1 | T | A | Heterozygous |
| NC_037642.1 | 11010153 | SNV | 1 | C | T | Heterozygous |
| NC_037642.1 | 11010162 | SNV | 1 | G | A | Homozygous   |
| NC_037642.1 | 11010351 | SNV | 1 | T | C | Heterozygous |
| NC_037642.1 | 11010387 | SNV | 1 | A | T | Homozygous   |
| NC_037642.1 | 11010396 | SNV | 1 | C | A | Heterozygous |
| NC_037642.1 | 11010399 | SNV | 1 | C | T | Heterozygous |
| NC_037642.1 | 11010402 | SNV | 1 | A | G | Homozygous   |
| NC_037642.1 | 11010417 | SNV | 1 | T | C | Homozygous   |
| NC_037642.1 | 11010618 | SNV | 1 | G | C | Heterozygous |
| NC_037642.1 | 11010699 | SNV | 1 | A | G | Homozygous   |
| NC_037642.1 | 11010887 | SNV | 1 | C | A | Homozygous   |
| NC_037642.1 | 11010958 | SNV | 1 | T | C | Homozygous   |
| NC_037642.1 | 11011093 | SNV | 1 | C | T | Heterozygous |
| NC_037642.1 | 11011180 | SNV | 1 | C | A | Heterozygous |
| NC_037642.1 | 11011201 | SNV | 1 | A | G | Homozygous   |
| NC_037642.1 | 11011207 | SNV | 1 | G | A | Homozygous   |
| NC_037642.1 | 11011213 | SNV | 1 | C | T | Homozygous   |
| NC_037642.1 | 11011363 | SNV | 1 | C | T | Heterozygous |
| NC_037642.1 | 11012037 | SNV | 1 | G | A | Heterozygous |
| NC_037642.1 | 11012069 | SNV | 1 | G | A | Homozygous   |

|             |          |     |   |   |   |              |
|-------------|----------|-----|---|---|---|--------------|
| NC_037642.1 | 11012268 | SNV | 1 | A | G | Heterozygous |
| NC_037642.1 | 11012281 | SNV | 1 | C | T | Heterozygous |
| NC_037642.1 | 11012375 | SNV | 1 | A | C | Homozygous   |
| NC_037642.1 | 11012390 | SNV | 1 | C | T | Heterozygous |
| NC_037642.1 | 11013000 | SNV | 1 | T | C | Homozygous   |
| NC_037642.1 | 11013059 | SNV | 1 | T | A | Heterozygous |
| NC_037642.1 | 11013140 | SNV | 1 | C | T | Heterozygous |
| NC_037642.1 | 11013159 | SNV | 1 | A | G | Homozygous   |
| NC_037642.1 | 11013167 | SNV | 1 | G | A | Heterozygous |
| NC_037642.1 | 11013229 | SNV | 1 | T | C | Homozygous   |
| NC_037642.1 | 11013350 | SNV | 1 | C | A | Homozygous   |
| NC_037642.1 | 11013404 | SNV | 1 | A | T | Heterozygous |
| NC_037642.1 | 11013518 | SNV | 1 | T | C | Heterozygous |
| NC_037642.1 | 11013534 | SNV | 1 | T | C | Homozygous   |
| NC_037642.1 | 11013559 | SNV | 1 | T | C | Heterozygous |
| NC_037642.1 | 11013596 | SNV | 1 | T | A | Homozygous   |
| NC_037642.1 | 11013939 | SNV | 1 | C | T | Homozygous   |
| NC_037642.1 | 11020256 | SNV | 1 | T | G | Homozygous   |
| NC_037642.1 | 11020299 | SNV | 1 | T | C | Homozygous   |
| NC_037642.1 | 11020559 | SNV | 1 | A | G | Heterozygous |
| NC_037642.1 | 11020787 | SNV | 1 | A | G | Heterozygous |
| NC_037642.1 | 11020922 | SNV | 1 | G | A | Homozygous   |
| NC_037642.1 | 11020924 | SNV | 1 | C | T | Homozygous   |
| NC_037642.1 | 11020976 | SNV | 1 | A | G | Homozygous   |
| NC_037642.1 | 11026673 | SNV | 1 | A | T | Heterozygous |
| NC_037642.1 | 11026892 | SNV | 1 | C | G | Homozygous   |
| NC_037642.1 | 11026988 | SNV | 1 | C | T | Heterozygous |
| NC_037642.1 | 11027021 | SNV | 1 | C | G | Homozygous   |
| NC_037642.1 | 11027273 | SNV | 1 | C | T | Heterozygous |
| NC_037642.1 | 11027295 | SNV | 1 | C | G | Homozygous   |
| NC_037642.1 | 11027302 | SNV | 1 | T | C | Homozygous   |
| NC_037642.1 | 11027316 | SNV | 1 | A | G | Heterozygous |
| NC_037642.1 | 11027327 | SNV | 1 | T | C | Homozygous   |
| NC_037642.1 | 11027544 | SNV | 1 | C | T | Heterozygous |
| NC_037642.1 | 11027816 | SNV | 1 | T | C | Heterozygous |
| NC_037642.1 | 11027819 | SNV | 1 | G | C | Heterozygous |
| NC_037642.1 | 11029210 | SNV | 1 | A | G | Homozygous   |
| NC_037642.1 | 11029324 | SNV | 1 | G | C | Homozygous   |
| NC_037642.1 | 11029396 | SNV | 1 | G | C | Heterozygous |
| NC_037642.1 | 11029399 | SNV | 1 | G | C | Heterozygous |
| NC_037642.1 | 11029536 | SNV | 1 | G | A | Heterozygous |
| NC_037642.1 | 11029542 | SNV | 1 | G | C | Homozygous   |
| NC_037642.1 | 11033337 | SNV | 1 | G | A | Heterozygous |
| NC_037642.1 | 11033426 | SNV | 1 | T | C | Homozygous   |
| NC_037642.1 | 11033445 | SNV | 1 | C | A | Heterozygous |
| NC_037642.1 | 11033715 | SNV | 1 | C | T | Homozygous   |
| NC_037642.1 | 11033842 | SNV | 1 | T | C | Heterozygous |
| NC_037642.1 | 11037129 | SNV | 1 | T | C | Heterozygous |
| NC_037642.1 | 11037148 | SNV | 1 | C | T | Heterozygous |
| NC_037642.1 | 11037149 | SNV | 1 | C | G | Heterozygous |
| NC_037642.1 | 11037498 | SNV | 1 | A | C | Heterozygous |

|             |          |     |   |   |   |              |
|-------------|----------|-----|---|---|---|--------------|
| NC_037642.1 | 11037555 | SNV | 1 | C | A | Heterozygous |
| NC_037642.1 | 11037576 | SNV | 1 | C | G | Heterozygous |
| NC_037642.1 | 11037603 | SNV | 1 | A | G | Homozygous   |
| NC_037642.1 | 11037607 | SNV | 1 | G | A | Homozygous   |
| NC_037642.1 | 11041415 | SNV | 1 | A | G | Homozygous   |
| NC_037642.1 | 11041433 | SNV | 1 | A | G | Homozygous   |
| NC_037642.1 | 11041453 | SNV | 1 | T | C | Homozygous   |
| NC_037642.1 | 11041496 | SNV | 1 | T | C | Homozygous   |
| NC_037642.1 | 11041618 | SNV | 1 | G | C | Heterozygous |
| NC_037642.1 | 11041628 | SNV | 1 | C | T | Heterozygous |
| NC_037642.1 | 11041631 | SNV | 1 | G | A | Heterozygous |
| NC_037642.1 | 11041706 | SNV | 1 | T | C | Homozygous   |
| NC_037642.1 | 11041747 | SNV | 1 | G | A | Heterozygous |
| NC_037642.1 | 11052579 | SNV | 1 | T | A | Homozygous   |
| NC_037642.1 | 11053023 | SNV | 1 | G | A | Heterozygous |
| NC_037642.1 | 11053024 | SNV | 1 | G | A | Heterozygous |
| NC_037642.1 | 11053028 | SNV | 1 | G | A | Heterozygous |
| NC_037642.1 | 11053088 | SNV | 1 | C | T | Homozygous   |
| NC_037642.1 | 11054522 | SNV | 1 | A | G | Heterozygous |
| NC_037642.1 | 11054537 | SNV | 1 | G | A | Heterozygous |
| NC_037642.1 | 11054575 | SNV | 1 | A | G | Heterozygous |
| NC_037642.1 | 11054580 | SNV | 1 | G | C | Heterozygous |
| NC_037642.1 | 11054586 | SNV | 1 | G | T | Homozygous   |
| NC_037642.1 | 11054592 | SNV | 1 | G | A | Homozygous   |
| NC_037642.1 | 11054600 | SNV | 1 | G | A | Homozygous   |
| NC_037642.1 | 11054605 | SNV | 1 | C | G | Homozygous   |
| NC_037642.1 | 11054665 | SNV | 1 | A | G | Heterozygous |
| NC_037642.1 | 11054677 | SNV | 1 | G | A | Heterozygous |
| NC_037642.1 | 11054691 | SNV | 1 | A | G | Heterozygous |
| NC_037642.1 | 11054739 | SNV | 1 | G | A | Heterozygous |
| NC_037642.1 | 11054745 | SNV | 1 | G | A | Heterozygous |
| NC_037642.1 | 11054765 | SNV | 1 | A | G | Homozygous   |
| NC_037642.1 | 11054778 | SNV | 1 | G | A | Homozygous   |
| NC_037642.1 | 11054783 | SNV | 1 | C | G | Homozygous   |
| NC_037642.1 | 11077787 | SNV | 1 | T | G | Homozygous   |
| NC_037642.1 | 11077793 | SNV | 1 | T | A | Homozygous   |
| NC_037642.1 | 11077805 | SNV | 1 | G | A | Homozygous   |
| NC_037642.1 | 11081794 | SNV | 1 | T | C | Homozygous   |
| NC_037642.1 | 11102123 | SNV | 1 | T | C | Homozygous   |
| NC_037642.1 | 11102128 | SNV | 1 | T | C | Heterozygous |
| NC_037642.1 | 11112770 | SNV | 1 | C | T | Homozygous   |
| NC_037642.1 | 11113000 | SNV | 1 | G | C | Heterozygous |
| NC_037642.1 | 11113272 | SNV | 1 | A | T | Homozygous   |
| NC_037642.1 | 11113280 | SNV | 1 | C | G | Heterozygous |
| NC_037642.1 | 11113365 | SNV | 1 | A | G | Homozygous   |
| NC_037642.1 | 11113640 | SNV | 1 | C | T | Heterozygous |
| NC_037642.1 | 11113647 | SNV | 1 | G | A | Heterozygous |
| NC_037642.1 | 11113652 | SNV | 1 | C | T | Heterozygous |
| NC_037642.1 | 11113700 | SNV | 1 | C | T | Heterozygous |
| NC_037642.1 | 11113715 | SNV | 1 | A | G | Homozygous   |
| NC_037642.1 | 11113721 | SNV | 1 | T | C | Homozygous   |

|             |          |     |   |   |   |              |
|-------------|----------|-----|---|---|---|--------------|
| NC_037642.1 | 11113785 | SNV | 1 | C | T | Heterozygous |
| NC_037642.1 | 11113790 | SNV | 1 | T | C | Heterozygous |
| NC_037642.1 | 11113797 | SNV | 1 | A | G | Homozygous   |
| NC_037642.1 | 11113815 | SNV | 1 | T | C | Heterozygous |
| NC_037642.1 | 11113904 | SNV | 1 | C | T | Heterozygous |
| NC_037642.1 | 11113938 | SNV | 1 | T | C | Homozygous   |
| NC_037642.1 | 11114090 | SNV | 1 | A | G | Homozygous   |
| NC_037642.1 | 11114124 | SNV | 1 | C | T | Heterozygous |
| NC_037642.1 | 11114135 | SNV | 1 | G | A | Heterozygous |
| NC_037642.1 | 11114140 | SNV | 1 | C | T | Homozygous   |
| NC_037642.1 | 11114167 | SNV | 1 | G | A | Heterozygous |
| NC_037642.1 | 11114176 | SNV | 1 | T | C | Homozygous   |
| NC_037642.1 | 11114200 | SNV | 1 | C | T | Heterozygous |
| NC_037642.1 | 11114249 | SNV | 1 | G | C | Heterozygous |
| NC_037642.1 | 11114299 | SNV | 1 | C | T | Homozygous   |
| NC_037642.1 | 11114319 | SNV | 1 | C | T | Homozygous   |
| NC_037642.1 | 11120220 | SNV | 1 | C | T | Heterozygous |
| NC_037642.1 | 11138914 | SNV | 1 | G | A | Heterozygous |
| NC_037642.1 | 11141287 | SNV | 1 | C | T | Homozygous   |
| NC_037642.1 | 11141384 | SNV | 1 | G | C | Homozygous   |
| NC_037642.1 | 11141432 | SNV | 1 | G | A | Homozygous   |
| NC_037642.1 | 11142995 | SNV | 1 | C | T | Heterozygous |
| NC_037642.1 | 11142997 | SNV | 1 | C | T | Heterozygous |
| NC_037642.1 | 11142999 | SNV | 1 | G | A | Homozygous   |
| NC_037642.1 | 11143003 | SNV | 1 | G | A | Heterozygous |
| NC_037642.1 | 11143009 | SNV | 1 | T | C | Heterozygous |
| NC_037642.1 | 11143875 | SNV | 1 | C | G | Heterozygous |
| NC_037642.1 | 11143884 | SNV | 1 | C | T | Heterozygous |
| NC_037642.1 | 11143889 | SNV | 1 | C | G | Homozygous   |
| NC_037642.1 | 11143893 | SNV | 1 | C | G | Heterozygous |
| NC_037642.1 | 11143898 | SNV | 1 | T | A | Heterozygous |
| NC_037642.1 | 11143901 | SNV | 1 | C | G | Heterozygous |
| NC_037642.1 | 11143903 | SNV | 1 | C | G | Heterozygous |
| NC_037642.1 | 11143907 | SNV | 1 | A | G | Homozygous   |
| NC_037642.1 | 11143909 | SNV | 1 | G | C | Homozygous   |
| NC_037642.1 | 11143921 | SNV | 1 | C | A | Heterozygous |
| NC_037642.1 | 11143927 | SNV | 1 | A | C | Homozygous   |
| NC_037642.1 | 11143947 | SNV | 1 | G | C | Heterozygous |
| NC_037642.1 | 11143951 | SNV | 1 | G | C | Heterozygous |
| NC_037642.1 | 11143955 | SNV | 1 | T | C | Heterozygous |
| NC_037642.1 | 11143957 | SNV | 1 | T | C | Heterozygous |
| NC_037642.1 | 11143977 | SNV | 1 | T | C | Homozygous   |
| NC_037642.1 | 11143999 | SNV | 1 | A | C | Heterozygous |
| NC_037642.1 | 11144008 | SNV | 1 | C | T | Heterozygous |
| NC_037642.1 | 11144081 | SNV | 1 | T | C | Heterozygous |
| NC_037642.1 | 11144094 | SNV | 1 | C | T | Homozygous   |
| NC_037642.1 | 11144100 | SNV | 1 | C | T | Heterozygous |
| NC_037642.1 | 11144129 | SNV | 1 | G | A | Heterozygous |
| NC_037642.1 | 11144134 | SNV | 1 | T | C | Heterozygous |
| NC_037642.1 | 11144143 | SNV | 1 | A | G | Homozygous   |
| NC_037642.1 | 11144147 | SNV | 1 | G | C | Heterozygous |



|             |          |     |   |   |   |              |
|-------------|----------|-----|---|---|---|--------------|
| NC_037642.1 | 11144159 | SNV | 1 | G | C | Heterozygous |
| NC_037642.1 | 11144180 | SNV | 1 | C | G | Homozygous   |
| NC_037642.1 | 11144200 | SNV | 1 | C | G | Homozygous   |
| NC_037642.1 | 11144204 | SNV | 1 | C | A | Homozygous   |
| NC_037642.1 | 11144222 | SNV | 1 | G | T | Heterozygous |
| NC_037642.1 | 11144238 | SNV | 1 | A | G | Heterozygous |
| NC_037642.1 | 11144256 | SNV | 1 | C | G | Heterozygous |
| NC_037642.1 | 11144262 | SNV | 1 | C | G | Heterozygous |
| NC_037642.1 | 11144267 | SNV | 1 | T | C | Heterozygous |
| NC_037642.1 | 11144274 | SNV | 1 | C | T | Homozygous   |
| NC_037642.1 | 11144278 | SNV | 1 | C | G | Homozygous   |
| NC_037642.1 | 11144282 | SNV | 1 | C | G | Homozygous   |
| NC_037642.1 | 11144284 | SNV | 1 | A | T | Homozygous   |
| NC_037642.1 | 11144289 | SNV | 1 | T | A | Homozygous   |
| NC_037642.1 | 11144294 | SNV | 1 | A | C | Homozygous   |
| NC_037642.1 | 11144298 | SNV | 1 | G | C | Homozygous   |
| NC_037642.1 | 11144302 | SNV | 1 | C | G | Homozygous   |
| NC_037642.1 | 11144359 | SNV | 1 | A | G | Homozygous   |
| NC_037642.1 | 11163911 | SNV | 1 | T | C | Homozygous   |
| NC_037642.1 | 11169106 | SNV | 1 | C | A | Homozygous   |
| NC_037642.1 | 11169124 | SNV | 1 | T | A | Heterozygous |
| NC_037642.1 | 11169127 | SNV | 1 | G | A | Homozygous   |
| NC_037642.1 | 11169132 | SNV | 1 | A | T | Homozygous   |
| NC_037642.1 | 11169145 | SNV | 1 | T | C | Heterozygous |
| NC_037642.1 | 11170808 | SNV | 1 | G | T | Heterozygous |
| NC_037642.1 | 11170815 | SNV | 1 | A | C | Heterozygous |
| NC_037642.1 | 11180924 | SNV | 1 | T | G | Homozygous   |
| NC_037642.1 | 11180930 | SNV | 1 | C | T | Heterozygous |
| NC_037642.1 | 11180975 | SNV | 1 | G | A | Heterozygous |
| NC_037642.1 | 11180996 | SNV | 1 | A | G | Heterozygous |
| NC_037642.1 | 11181009 | SNV | 1 | A | G | Homozygous   |
| NC_037642.1 | 11181013 | SNV | 1 | A | G | Heterozygous |
| NC_037642.1 | 11181074 | SNV | 1 | A | C | Heterozygous |
| NC_037642.1 | 11181081 | SNV | 1 | C | T | Homozygous   |
| NC_037642.1 | 11181084 | SNV | 1 | G | A | Heterozygous |
| NC_037642.1 | 11181098 | SNV | 1 | G | T | Heterozygous |
| NC_037642.1 | 11181100 | SNV | 1 | G | T | Heterozygous |
| NC_037642.1 | 11181132 | SNV | 1 | G | A | Homozygous   |
| NC_037642.1 | 11181134 | SNV | 1 | C | G | Homozygous   |
| NC_037642.1 | 11181167 | SNV | 1 | G | T | Heterozygous |
| NC_037642.1 | 11181173 | SNV | 1 | C | A | Homozygous   |
| NC_037642.1 | 11181190 | SNV | 1 | G | A | Homozygous   |
| NC_037642.1 | 11181226 | SNV | 1 | C | T | Homozygous   |
| NC_037642.1 | 11181337 | SNV | 1 | G | T | Homozygous   |
| NC_037642.1 | 11181420 | SNV | 1 | G | A | Homozygous   |
| NC_037642.1 | 11181427 | SNV | 1 | A | G | Heterozygous |
| NC_037642.1 | 11181533 | SNV | 1 | A | G | Heterozygous |
| NC_037642.1 | 11181825 | SNV | 1 | A | G | Heterozygous |
| NC_037642.1 | 11181967 | SNV | 1 | G | A | Heterozygous |
| NC_037642.1 | 11181987 | SNV | 1 | C | T | Heterozygous |
| NC_037642.1 | 11182007 | SNV | 1 | C | A | Heterozygous |

|             |          |     |   |   |   |              |
|-------------|----------|-----|---|---|---|--------------|
| NC_037642.1 | 11182035 | SNV | 1 | C | T | Homozygous   |
| NC_037642.1 | 11182084 | SNV | 1 | A | G | Homozygous   |
| NC_037642.1 | 11182089 | SNV | 1 | T | C | Heterozygous |
| NC_037642.1 | 11182093 | SNV | 1 | A | C | Heterozygous |
| NC_037642.1 | 11182112 | SNV | 1 | G | A | Homozygous   |
| NC_037642.1 | 11182125 | SNV | 1 | G | A | Heterozygous |
| NC_037642.1 | 11182207 | SNV | 1 | A | G | Homozygous   |
| NC_037642.1 | 11182213 | SNV | 1 | A | G | Homozygous   |
| NC_037642.1 | 11182265 | SNV | 1 | G | A | Homozygous   |
| NC_037642.1 | 11182268 | SNV | 1 | G | A | Homozygous   |
| NC_037642.1 | 11182277 | SNV | 1 | A | G | Homozygous   |
| NC_037642.1 | 11182295 | SNV | 1 | A | G | Homozygous   |
| NC_037642.1 | 11182304 | SNV | 1 | C | T | Homozygous   |
| NC_037642.1 | 11182741 | SNV | 1 | G | C | Homozygous   |
| NC_037642.1 | 11182755 | SNV | 1 | G | C | Homozygous   |
| NC_037642.1 | 11182997 | SNV | 1 | A | G | Homozygous   |
| NC_037642.1 | 11183030 | SNV | 1 | T | C | Homozygous   |
| NC_037642.1 | 11183163 | SNV | 1 | T | C | Homozygous   |
| NC_037642.1 | 11183266 | SNV | 1 | A | G | Homozygous   |
| NC_037642.1 | 11186755 | SNV | 1 | C | T | Heterozygous |
| NC_037642.1 | 11186779 | SNV | 1 | A | G | Homozygous   |
| NC_037642.1 | 11186792 | SNV | 1 | A | T | Heterozygous |
| NC_037642.1 | 11186793 | SNV | 1 | C | T | Heterozygous |
| NC_037642.1 | 11187444 | SNV | 1 | C | T | Heterozygous |
| NC_037642.1 | 11187448 | SNV | 1 | G | A | Heterozygous |
| NC_037642.1 | 11187478 | SNV | 1 | T | C | Heterozygous |
| NC_037642.1 | 11195409 | SNV | 1 | G | A | Heterozygous |
| NC_037642.1 | 11195595 | SNV | 1 | G | A | Homozygous   |
| NC_037642.1 | 11195599 | SNV | 1 | G | A | Homozygous   |
| NC_037642.1 | 11209617 | SNV | 1 | C | T | Homozygous   |
| NC_037642.1 | 11209619 | SNV | 1 | A | G | Heterozygous |
| NC_037642.1 | 11209762 | SNV | 1 | A | G | Heterozygous |
| NC_037642.1 | 11211570 | SNV | 1 | A | G | Heterozygous |
| NC_037642.1 | 11211731 | SNV | 1 | G | T | Homozygous   |
| NC_037642.1 | 11211746 | SNV | 1 | T | A | Homozygous   |
| NC_037642.1 | 11211787 | SNV | 1 | T | C | Homozygous   |
| NC_037642.1 | 11212029 | SNV | 1 | T | G | Homozygous   |
| NC_037642.1 | 11212033 | SNV | 1 | T | G | Homozygous   |
| NC_037642.1 | 11212681 | SNV | 1 | G | A | Homozygous   |
| NC_037642.1 | 11212898 | SNV | 1 | C | T | Homozygous   |
| NC_037642.1 | 11213170 | SNV | 1 | T | C | Homozygous   |
| NC_037642.1 | 11213316 | SNV | 1 | A | G | Heterozygous |
| NC_037642.1 | 11213746 | SNV | 1 | G | C | Heterozygous |
| NC_037642.1 | 11214094 | SNV | 1 | T | C | Homozygous   |
| NC_037642.1 | 11214750 | SNV | 1 | A | G | Heterozygous |
| NC_037642.1 | 11216071 | SNV | 1 | G | T | Homozygous   |
| NC_037642.1 | 11233162 | SNV | 1 | C | T | Heterozygous |
| NC_037642.1 | 11234989 | SNV | 1 | G | A | Homozygous   |
| NC_037642.1 | 11235213 | SNV | 1 | G | T | Homozygous   |
| NC_037642.1 | 11235215 | SNV | 1 | A | T | Homozygous   |
| NC_037642.1 | 11235221 | SNV | 1 | T | A | Homozygous   |

|             |          |     |   |   |   |              |
|-------------|----------|-----|---|---|---|--------------|
| NC_037642.1 | 11235451 | SNV | 1 | A | G | Homozygous   |
| NC_037642.1 | 11235500 | SNV | 1 | T | C | Homozygous   |
| NC_037642.1 | 11237453 | SNV | 1 | T | G | Heterozygous |
| NC_037642.1 | 11237486 | SNV | 1 | A | T | Heterozygous |
| NC_037642.1 | 11237490 | SNV | 1 | A | T | Homozygous   |
| NC_037642.1 | 11242861 | SNV | 1 | C | T | Heterozygous |
| NC_037642.1 | 11243873 | SNV | 1 | G | A | Heterozygous |
| NC_037642.1 | 11246868 | SNV | 1 | A | C | Homozygous   |
| NC_037642.1 | 11248065 | SNV | 1 | G | A | Homozygous   |
| NC_037642.1 | 11248086 | SNV | 1 | A | G | Homozygous   |
| NC_037642.1 | 11248173 | SNV | 1 | C | T | Homozygous   |
| NC_037642.1 | 11248996 | SNV | 1 | T | C | Homozygous   |
| NC_037642.1 | 11249021 | SNV | 1 | G | A | Heterozygous |
| NC_037642.1 | 11249040 | SNV | 1 | C | T | Heterozygous |
| NC_037642.1 | 11249490 | SNV | 1 | C | T | Heterozygous |
| NC_037642.1 | 11249911 | SNV | 1 | T | A | Homozygous   |
| NC_037642.1 | 11249928 | SNV | 1 | T | C | Heterozygous |
| NC_037642.1 | 11249988 | SNV | 1 | A | G | Homozygous   |
| NC_037642.1 | 11250074 | SNV | 1 | G | C | Heterozygous |
| NC_037642.1 | 11250398 | SNV | 1 | A | G | Homozygous   |
| NC_037642.1 | 11252578 | SNV | 1 | T | C | Homozygous   |
| NC_037642.1 | 11253066 | SNV | 1 | T | G | Homozygous   |
| NC_037642.1 | 11255586 | SNV | 1 | G | A | Heterozygous |
| NC_037642.1 | 11256109 | SNV | 1 | G | A | Heterozygous |
| NC_037642.1 | 11256112 | SNV | 1 | G | A | Homozygous   |
| NC_037642.1 | 11256134 | SNV | 1 | C | T | Homozygous   |
| NC_037642.1 | 11256200 | SNV | 1 | A | G | Homozygous   |
| NC_037642.1 | 11256231 | SNV | 1 | A | G | Homozygous   |
| NC_037642.1 | 11256446 | SNV | 1 | C | T | Heterozygous |
| NC_037642.1 | 11256453 | SNV | 1 | C | T | Heterozygous |
| NC_037642.1 | 11259223 | SNV | 1 | A | G | Heterozygous |
| NC_037642.1 | 11263170 | SNV | 1 | T | A | Heterozygous |
| NC_037642.1 | 11264185 | SNV | 1 | A | G | Homozygous   |
| NC_037642.1 | 11264243 | SNV | 1 | C | T | Homozygous   |
| NC_037642.1 | 11264529 | SNV | 1 | A | G | Homozygous   |
| NC_037642.1 | 11264558 | SNV | 1 | G | A | Heterozygous |
| NC_037642.1 | 11264608 | SNV | 1 | C | T | Heterozygous |
| NC_037642.1 | 11264619 | SNV | 1 | G | A | Homozygous   |
| NC_037642.1 | 11265561 | SNV | 1 | G | A | Homozygous   |
| NC_037642.1 | 11265980 | SNV | 1 | A | G | Homozygous   |
| NC_037642.1 | 11265984 | SNV | 1 | T | C | Heterozygous |
| NC_037642.1 | 11266468 | SNV | 1 | C | G | Heterozygous |
| NC_037642.1 | 11266953 | SNV | 1 | T | C | Heterozygous |
| NC_037642.1 | 11266959 | SNV | 1 | C | T | Heterozygous |
| NC_037642.1 | 11266961 | SNV | 1 | C | T | Heterozygous |
| NC_037642.1 | 11267073 | SNV | 1 | A | G | Homozygous   |
| NC_037642.1 | 11267367 | SNV | 1 | G | A | Homozygous   |
| NC_037642.1 | 11272536 | SNV | 1 | G | A | Heterozygous |
| NC_037642.1 | 11272811 | SNV | 1 | G | A | Homozygous   |
| NC_037642.1 | 11274293 | SNV | 1 | G | A | Homozygous   |
| NC_037642.1 | 11279547 | SNV | 1 | T | C | Homozygous   |

|             |          |     |   |   |   |              |
|-------------|----------|-----|---|---|---|--------------|
| NC_037642.1 | 11280134 | SNV | 1 | G | C | Homozygous   |
| NC_037642.1 | 11280266 | SNV | 1 | C | G | Heterozygous |
| NC_037642.1 | 11280269 | SNV | 1 | C | T | Heterozygous |
| NC_037642.1 | 11281097 | SNV | 1 | C | T | Heterozygous |
| NC_037642.1 | 11293763 | SNV | 1 | T | C | Homozygous   |
| NC_037642.1 | 11294258 | SNV | 1 | T | C | Homozygous   |
| NC_037642.1 | 11294459 | SNV | 1 | T | G | Homozygous   |
| NC_037642.1 | 11294537 | SNV | 1 | G | T | Homozygous   |
| NC_037642.1 | 11294733 | SNV | 1 | A | G | Homozygous   |
| NC_037642.1 | 11295066 | SNV | 1 | G | C | Homozygous   |
| NC_037642.1 | 11295250 | SNV | 1 | C | T | Heterozygous |
| NC_037642.1 | 11295323 | SNV | 1 | G | A | Heterozygous |
| NC_037642.1 | 11296463 | SNV | 1 | A | G | Homozygous   |
| NC_037642.1 | 11296486 | SNV | 1 | A | C | Heterozygous |
| NC_037642.1 | 11296486 | SNV | 1 | A | T | Heterozygous |
| NC_037642.1 | 11296561 | SNV | 1 | G | C | Heterozygous |
| NC_037642.1 | 11296788 | SNV | 1 | C | T | Heterozygous |
| NC_037642.1 | 11296805 | SNV | 1 | C | G | Homozygous   |
| NC_037642.1 | 11297047 | SNV | 1 | A | T | Homozygous   |
| NC_037642.1 | 11297527 | SNV | 1 | G | C | Heterozygous |
| NC_037642.1 | 11298106 | SNV | 1 | G | A | Heterozygous |
| NC_037642.1 | 11298266 | SNV | 1 | C | T | Homozygous   |
| NC_037642.1 | 11298353 | SNV | 1 | G | A | Homozygous   |
| NC_037642.1 | 11298400 | SNV | 1 | C | T | Heterozygous |
| NC_037642.1 | 11298809 | SNV | 1 | T | C | Homozygous   |
| NC_037642.1 | 11299638 | SNV | 1 | C | T | Heterozygous |
| NC_037642.1 | 11299924 | SNV | 1 | T | G | Homozygous   |
| NC_037642.1 | 11300143 | SNV | 1 | G | A | Homozygous   |
| NC_037642.1 | 11300196 | SNV | 1 | T | A | Homozygous   |
| NC_037642.1 | 11300246 | SNV | 1 | C | T | Heterozygous |
| NC_037642.1 | 11300315 | SNV | 1 | T | A | Homozygous   |
| NC_037642.1 | 11300318 | SNV | 1 | G | A | Homozygous   |
| NC_037642.1 | 11300480 | SNV | 1 | G | A | Homozygous   |
| NC_037642.1 | 11300563 | SNV | 1 | C | T | Heterozygous |
| NC_037642.1 | 11300567 | SNV | 1 | T | C | Homozygous   |
| NC_037642.1 | 11300637 | SNV | 1 | C | T | Heterozygous |
| NC_037642.1 | 11300656 | SNV | 1 | A | G | Homozygous   |
| NC_037642.1 | 11306607 | SNV | 1 | A | G | Homozygous   |
| NC_037642.1 | 11306782 | SNV | 1 | A | G | Homozygous   |
| NC_037642.1 | 11307131 | SNV | 1 | G | T | Homozygous   |
| NC_037642.1 | 11308573 | SNV | 1 | C | T | Heterozygous |
| NC_037642.1 | 11308683 | SNV | 1 | T | C | Heterozygous |
| NC_037642.1 | 11308973 | SNV | 1 | A | G | Homozygous   |
| NC_037642.1 | 11309145 | SNV | 1 | T | C | Homozygous   |
| NC_037642.1 | 11310278 | SNV | 1 | T | C | Homozygous   |
| NC_037642.1 | 11310359 | SNV | 1 | G | A | Heterozygous |
| NC_037642.1 | 11310367 | SNV | 1 | G | C | Homozygous   |
| NC_037642.1 | 11310397 | SNV | 1 | G | A | Homozygous   |
| NC_037642.1 | 11310456 | SNV | 1 | G | A | Heterozygous |
| NC_037642.1 | 11311369 | SNV | 1 | A | G | Homozygous   |
| NC_037642.1 | 11311433 | SNV | 1 | T | A | Homozygous   |

|             |          |     |   |   |   |              |
|-------------|----------|-----|---|---|---|--------------|
| NC_037642.1 | 11311694 | SNV | 1 | G | A | Heterozygous |
| NC_037642.1 | 11311790 | SNV | 1 | T | C | Homozygous   |
| NC_037642.1 | 11311886 | SNV | 1 | T | C | Heterozygous |
| NC_037642.1 | 11311918 | SNV | 1 | A | G | Homozygous   |
| NC_037642.1 | 11311967 | SNV | 1 | A | T | Homozygous   |
| NC_037642.1 | 11312278 | SNV | 1 | A | G | Homozygous   |
| NC_037642.1 | 11312522 | SNV | 1 | T | C | Homozygous   |
| NC_037642.1 | 11312637 | SNV | 1 | T | C | Homozygous   |
| NC_037642.1 | 11313587 | SNV | 1 | A | G | Homozygous   |
| NC_037642.1 | 11313680 | SNV | 1 | C | G | Homozygous   |
| NC_037642.1 | 11314241 | SNV | 1 | T | C | Homozygous   |
| NC_037642.1 | 11314329 | SNV | 1 | T | C | Homozygous   |
| NC_037642.1 | 11314760 | SNV | 1 | T | C | Homozygous   |
| NC_037642.1 | 11314928 | SNV | 1 | C | T | Heterozygous |
| NC_037642.1 | 11315040 | SNV | 1 | C | T | Homozygous   |
| NC_037642.1 | 11315097 | SNV | 1 | C | T | Heterozygous |
| NC_037642.1 | 11315675 | SNV | 1 | G | A | Heterozygous |
| NC_037642.1 | 11315682 | SNV | 1 | T | G | Heterozygous |
| NC_037642.1 | 11315749 | SNV | 1 | G | T | Heterozygous |
| NC_037642.1 | 11315783 | SNV | 1 | A | G | Homozygous   |
| NC_037642.1 | 11315795 | SNV | 1 | A | G | Heterozygous |
| NC_037642.1 | 11315909 | SNV | 1 | T | C | Heterozygous |
| NC_037642.1 | 11316087 | SNV | 1 | G | A | Homozygous   |
| NC_037642.1 | 11316145 | SNV | 1 | G | T | Homozygous   |
| NC_037642.1 | 11316182 | SNV | 1 | G | A | Homozygous   |
| NC_037642.1 | 11316379 | SNV | 1 | T | C | Homozygous   |
| NC_037642.1 | 11316574 | SNV | 1 | T | C | Homozygous   |
| NC_037642.1 | 11317021 | SNV | 1 | A | G | Heterozygous |
| NC_037642.1 | 11317047 | SNV | 1 | T | G | Heterozygous |
| NC_037642.1 | 11317367 | SNV | 1 | C | T | Heterozygous |
| NC_037642.1 | 11317907 | SNV | 1 | A | C | Heterozygous |
| NC_037642.1 | 11317929 | SNV | 1 | G | A | Heterozygous |
| NC_037642.1 | 11317973 | SNV | 1 | T | C | Heterozygous |
| NC_037642.1 | 11318059 | SNV | 1 | T | C | Homozygous   |
| NC_037642.1 | 11318090 | SNV | 1 | C | T | Heterozygous |
| NC_037642.1 | 11318232 | SNV | 1 | C | A | Homozygous   |
| NC_037642.1 | 11318459 | SNV | 1 | T | C | Homozygous   |
| NC_037642.1 | 11318969 | SNV | 1 | A | G | Homozygous   |
| NC_037642.1 | 11318973 | SNV | 1 | A | G | Heterozygous |
| NC_037642.1 | 11318977 | SNV | 1 | A | G | Homozygous   |
| NC_037642.1 | 11318998 | SNV | 1 | A | G | Heterozygous |
| NC_037642.1 | 11319206 | SNV | 1 | C | G | Homozygous   |
| NC_037642.1 | 11319544 | SNV | 1 | T | C | Heterozygous |
| NC_037642.1 | 11319572 | SNV | 1 | C | A | Homozygous   |
| NC_037642.1 | 11319646 | SNV | 1 | A | C | Homozygous   |
| NC_037642.1 | 11319927 | SNV | 1 | C | T | Homozygous   |
| NC_037642.1 | 11320503 | SNV | 1 | T | C | Homozygous   |
| NC_037642.1 | 11320565 | SNV | 1 | G | A | Heterozygous |
| NC_037642.1 | 11320567 | SNV | 1 | T | C | Heterozygous |
| NC_037642.1 | 11320609 | SNV | 1 | C | T | Heterozygous |
| NC_037642.1 | 11321100 | SNV | 1 | T | C | Heterozygous |

|             |          |     |   |   |   |              |
|-------------|----------|-----|---|---|---|--------------|
| NC_037642.1 | 11321136 | SNV | 1 | T | C | Heterozygous |
| NC_037642.1 | 11321510 | SNV | 1 | A | G | Homozygous   |
| NC_037642.1 | 11321513 | SNV | 1 | A | G | Homozygous   |
| NC_037642.1 | 11321519 | SNV | 1 | A | G | Homozygous   |
| NC_037642.1 | 11321521 | SNV | 1 | T | C | Homozygous   |
| NC_037642.1 | 11321527 | SNV | 1 | T | C | Homozygous   |
| NC_037642.1 | 11321678 | SNV | 1 | A | G | Homozygous   |
| NC_037642.1 | 11322370 | SNV | 1 | G | A | Heterozygous |
| NC_037642.1 | 11323049 | SNV | 1 | C | T | Homozygous   |
| NC_037642.1 | 11323232 | SNV | 1 | C | T | Heterozygous |
| NC_037642.1 | 11323283 | SNV | 1 | G | T | Heterozygous |
| NC_037642.1 | 11323356 | SNV | 1 | T | C | Homozygous   |
| NC_037642.1 | 11323382 | SNV | 1 | T | A | Homozygous   |
| NC_037642.1 | 11323751 | SNV | 1 | G | C | Homozygous   |
| NC_037642.1 | 11323774 | SNV | 1 | G | A | Homozygous   |
| NC_037642.1 | 11323777 | SNV | 1 | G | A | Homozygous   |
| NC_037642.1 | 11324168 | SNV | 1 | A | G | Homozygous   |
| NC_037642.1 | 11324176 | SNV | 1 | T | A | Homozygous   |
| NC_037642.1 | 11324178 | SNV | 1 | A | G | Homozygous   |
| NC_037642.1 | 11324879 | SNV | 1 | G | A | Heterozygous |
| NC_037642.1 | 11325445 | SNV | 1 | A | G | Heterozygous |
| NC_037642.1 | 11325871 | SNV | 1 | C | T | Heterozygous |
| NC_037642.1 | 11326013 | SNV | 1 | C | A | Heterozygous |
| NC_037642.1 | 11326054 | SNV | 1 | T | C | Homozygous   |
| NC_037642.1 | 11326213 | SNV | 1 | A | G | Homozygous   |
| NC_037642.1 | 11326216 | SNV | 1 | A | T | Heterozygous |
| NC_037642.1 | 11326287 | SNV | 1 | A | G | Heterozygous |
| NC_037642.1 | 11326541 | SNV | 1 | T | C | Heterozygous |
| NC_037642.1 | 11326548 | SNV | 1 | T | C | Homozygous   |
| NC_037642.1 | 11326552 | SNV | 1 | T | C | Homozygous   |
| NC_037642.1 | 11326559 | SNV | 1 | A | G | Homozygous   |
| NC_037642.1 | 11327763 | SNV | 1 | C | G | Homozygous   |
| NC_037642.1 | 11327957 | SNV | 1 | T | C | Heterozygous |
| NC_037642.1 | 11328139 | SNV | 1 | A | G | Heterozygous |
| NC_037642.1 | 11328651 | SNV | 1 | T | C | Homozygous   |
| NC_037642.1 | 11328956 | SNV | 1 | C | T | Homozygous   |
| NC_037642.1 | 11329080 | SNV | 1 | T | C | Homozygous   |
| NC_037642.1 | 11329185 | SNV | 1 | A | G | Homozygous   |
| NC_037642.1 | 11329344 | SNV | 1 | G | A | Heterozygous |
| NC_037642.1 | 11329464 | SNV | 1 | T | C | Heterozygous |
| NC_037642.1 | 11329916 | SNV | 1 | T | C | Heterozygous |
| NC_037642.1 | 11329940 | SNV | 1 | T | C | Heterozygous |
| NC_037642.1 | 11330241 | SNV | 1 | T | C | Homozygous   |
| NC_037642.1 | 11330245 | SNV | 1 | G | A | Homozygous   |
| NC_037642.1 | 11330250 | SNV | 1 | A | G | Homozygous   |
| NC_037642.1 | 11330537 | SNV | 1 | T | C | Homozygous   |
| NC_037642.1 | 11330906 | SNV | 1 | T | C | Homozygous   |
| NC_037642.1 | 11330911 | SNV | 1 | A | G | Homozygous   |
| NC_037642.1 | 11331062 | SNV | 1 | A | G | Heterozygous |
| NC_037642.1 | 11331177 | SNV | 1 | A | G | Heterozygous |
| NC_037642.1 | 11332581 | SNV | 1 | C | T | Homozygous   |

|             |          |     |   |   |   |              |
|-------------|----------|-----|---|---|---|--------------|
| NC_037642.1 | 11332587 | SNV | 1 | T | C | Homozygous   |
| NC_037642.1 | 11332601 | SNV | 1 | T | A | Homozygous   |
| NC_037642.1 | 11332859 | SNV | 1 | C | T | Homozygous   |
| NC_037642.1 | 11333029 | SNV | 1 | A | G | Homozygous   |
| NC_037642.1 | 11333055 | SNV | 1 | T | C | Heterozygous |
| NC_037642.1 | 11338254 | SNV | 1 | T | C | Homozygous   |
| NC_037642.1 | 11339214 | SNV | 1 | C | T | Heterozygous |
| NC_037642.1 | 11340518 | SNV | 1 | T | C | Homozygous   |
| NC_037642.1 | 11343426 | SNV | 1 | A | C | Homozygous   |
| NC_037642.1 | 11343429 | SNV | 1 | A | T | Homozygous   |
| NC_037642.1 | 11344684 | SNV | 1 | A | G | Homozygous   |
| NC_037642.1 | 11345957 | SNV | 1 | T | G | Homozygous   |
| NC_037642.1 | 11346121 | SNV | 1 | C | T | Homozygous   |
| NC_037642.1 | 11346200 | SNV | 1 | C | T | Homozygous   |
| NC_037642.1 | 11350701 | SNV | 1 | A | C | Heterozygous |
| NC_037642.1 | 11350705 | SNV | 1 | A | G | Heterozygous |
| NC_037642.1 | 11351331 | SNV | 1 | A | G | Homozygous   |
| NC_037642.1 | 11358274 | SNV | 1 | A | G | Homozygous   |
| NC_037642.1 | 11358771 | SNV | 1 | T | C | Homozygous   |
| NC_037642.1 | 11359305 | SNV | 1 | A | G | Homozygous   |
| NC_037642.1 | 11359317 | SNV | 1 | A | T | Homozygous   |
| NC_037642.1 | 11359331 | SNV | 1 | A | G | Homozygous   |
| NC_037642.1 | 11362908 | SNV | 1 | T | C | Homozygous   |
| NC_037642.1 | 11363330 | SNV | 1 | C | A | Homozygous   |
| NC_037642.1 | 11363333 | SNV | 1 | T | A | Homozygous   |
| NC_037642.1 | 11363397 | SNV | 1 | C | A | Homozygous   |
| NC_037642.1 | 11363836 | SNV | 1 | G | A | Heterozygous |
| NC_037642.1 | 11363883 | SNV | 1 | T | C | Heterozygous |
| NC_037642.1 | 11363994 | SNV | 1 | A | T | Heterozygous |
| NC_037642.1 | 11365304 | SNV | 1 | C | T | Homozygous   |
| NC_037642.1 | 11365589 | SNV | 1 | A | T | Homozygous   |
| NC_037642.1 | 11370984 | SNV | 1 | A | C | Homozygous   |
| NC_037642.1 | 11370994 | SNV | 1 | T | A | Homozygous   |
| NC_037642.1 | 11378402 | SNV | 1 | T | G | Heterozygous |
| NC_037642.1 | 11381386 | SNV | 1 | T | A | Homozygous   |
| NC_037642.1 | 11381389 | SNV | 1 | G | C | Homozygous   |
| NC_037642.1 | 11381395 | SNV | 1 | T | A | Heterozygous |
| NC_037642.1 | 11381397 | SNV | 1 | C | G | Heterozygous |
| NC_037642.1 | 11381416 | SNV | 1 | G | A | Homozygous   |
| NC_037642.1 | 11381482 | SNV | 1 | G | A | Heterozygous |
| NC_037642.1 | 11383739 | SNV | 1 | C | T | Homozygous   |
| NC_037642.1 | 11383756 | SNV | 1 | T | C | Heterozygous |
| NC_037642.1 | 11383909 | SNV | 1 | T | G | Homozygous   |
| NC_037642.1 | 11396136 | SNV | 1 | G | C | Heterozygous |
| NC_037642.1 | 11398015 | SNV | 1 | T | C | Homozygous   |
| NC_037642.1 | 11398025 | SNV | 1 | T | C | Homozygous   |
| NC_037642.1 | 11398052 | SNV | 1 | T | C | Homozygous   |
| NC_037642.1 | 11398214 | SNV | 1 | A | C | Homozygous   |
| NC_037642.1 | 11399441 | SNV | 1 | T | C | Heterozygous |
| NC_037642.1 | 11401178 | SNV | 1 | G | A | Heterozygous |
| NC_037642.1 | 11401203 | SNV | 1 | T | G | Heterozygous |

|             |          |     |   |   |   |              |
|-------------|----------|-----|---|---|---|--------------|
| NC_037642.1 | 11401718 | SNV | 1 | G | A | Homozygous   |
| NC_037642.1 | 11401818 | SNV | 1 | T | C | Homozygous   |
| NC_037642.1 | 11402367 | SNV | 1 | C | T | Homozygous   |
| NC_037642.1 | 11403154 | SNV | 1 | A | G | Homozygous   |
| NC_037642.1 | 11403585 | SNV | 1 | G | A | Heterozygous |
| NC_037642.1 | 11404689 | SNV | 1 | C | G | Homozygous   |
| NC_037642.1 | 11415720 | SNV | 1 | T | C | Homozygous   |
| NC_037642.1 | 11416568 | SNV | 1 | G | T | Heterozygous |
| NC_037642.1 | 11417200 | SNV | 1 | T | A | Homozygous   |
| NC_037642.1 | 11417558 | SNV | 1 | C | T | Homozygous   |
| NC_037642.1 | 11422037 | SNV | 1 | T | C | Homozygous   |
| NC_037642.1 | 11424182 | SNV | 1 | T | A | Heterozygous |
| NC_037642.1 | 11425538 | SNV | 1 | T | G | Homozygous   |
| NC_037642.1 | 11425558 | SNV | 1 | A | G | Homozygous   |
| NC_037642.1 | 11426069 | SNV | 1 | G | A | Heterozygous |
| NC_037642.1 | 11430058 | SNV | 1 | T | A | Homozygous   |
| NC_037642.1 | 11430068 | SNV | 1 | T | A | Homozygous   |
| NC_037642.1 | 11430076 | SNV | 1 | T | A | Homozygous   |
| NC_037642.1 | 11430337 | SNV | 1 | A | G | Heterozygous |
| NC_037642.1 | 11430424 | SNV | 1 | A | T | Heterozygous |
| NC_037642.1 | 11430432 | SNV | 1 | T | A | Heterozygous |
| NC_037642.1 | 11430434 | SNV | 1 | G | A | Heterozygous |
| NC_037642.1 | 11430869 | SNV | 1 | G | A | Homozygous   |
| NC_037642.1 | 11430946 | SNV | 1 | T | A | Homozygous   |
| NC_037642.1 | 11434815 | SNV | 1 | C | T | Heterozygous |
| NC_037642.1 | 11434899 | SNV | 1 | T | C | Homozygous   |
| NC_037642.1 | 11435231 | SNV | 1 | T | C | Heterozygous |
| NC_037642.1 | 11439628 | SNV | 1 | T | G | Homozygous   |
| NC_037642.1 | 11441522 | SNV | 1 | T | C | Homozygous   |
| NC_037642.1 | 11441533 | SNV | 1 | T | A | Homozygous   |
| NC_037642.1 | 11441560 | SNV | 1 | A | T | Homozygous   |
| NC_037642.1 | 11441565 | SNV | 1 | T | A | Homozygous   |
| NC_037642.1 | 11444278 | SNV | 1 | A | G | Homozygous   |
| NC_037642.1 | 11444562 | SNV | 1 | A | G | Heterozygous |
| NC_037642.1 | 11444594 | SNV | 1 | T | C | Homozygous   |
| NC_037642.1 | 11450801 | SNV | 1 | C | T | Heterozygous |
| NC_037642.1 | 11451152 | SNV | 1 | G | C | Homozygous   |
| NC_037642.1 | 11451769 | SNV | 1 | T | C | Homozygous   |
| NC_037642.1 | 11452072 | SNV | 1 | G | A | Homozygous   |
| NC_037642.1 | 11452984 | SNV | 1 | A | G | Heterozygous |
| NC_037642.1 | 11453001 | SNV | 1 | T | A | Heterozygous |
| NC_037642.1 | 11458156 | SNV | 1 | C | G | Homozygous   |
| NC_037642.1 | 11458218 | SNV | 1 | A | G | Homozygous   |
| NC_037642.1 | 11458508 | SNV | 1 | A | G | Homozygous   |
| NC_037642.1 | 11458925 | SNV | 1 | A | G | Heterozygous |
| NC_037642.1 | 11463460 | SNV | 1 | C | T | Homozygous   |
| NC_037642.1 | 11463481 | SNV | 1 | C | T | Homozygous   |
| NC_037642.1 | 11464349 | SNV | 1 | G | A | Homozygous   |
| NC_037642.1 | 11464887 | SNV | 1 | G | T | Homozygous   |
| NC_037642.1 | 11465169 | SNV | 1 | G | A | Homozygous   |
| NC_037642.1 | 11465438 | SNV | 1 | G | A | Heterozygous |



|             |          |     |   |   |   |              |
|-------------|----------|-----|---|---|---|--------------|
| NC_037642.1 | 11466166 | SNV | 1 | C | A | Heterozygous |
| NC_037642.1 | 11467040 | SNV | 1 | G | A | Homozygous   |
| NC_037642.1 | 11467063 | SNV | 1 | G | T | Heterozygous |
| NC_037642.1 | 11470121 | SNV | 1 | A | G | Homozygous   |
| NC_037642.1 | 11470229 | SNV | 1 | T | G | Heterozygous |
| NC_037642.1 | 11470368 | SNV | 1 | A | G | Homozygous   |
| NC_037642.1 | 11470493 | SNV | 1 | C | T | Heterozygous |
| NC_037642.1 | 11470523 | SNV | 1 | T | A | Heterozygous |
| NC_037642.1 | 11470574 | SNV | 1 | A | G | Homozygous   |
| NC_037642.1 | 11470577 | SNV | 1 | G | A | Heterozygous |
| NC_037642.1 | 11470595 | SNV | 1 | C | T | Homozygous   |
| NC_037642.1 | 11470615 | SNV | 1 | G | A | Homozygous   |
| NC_037642.1 | 11470626 | SNV | 1 | C | T | Heterozygous |
| NC_037642.1 | 11470645 | SNV | 1 | G | A | Heterozygous |
| NC_037642.1 | 11470698 | SNV | 1 | T | C | Homozygous   |
| NC_037642.1 | 11470700 | SNV | 1 | A | G | Homozygous   |
| NC_037642.1 | 11470737 | SNV | 1 | C | T | Heterozygous |
| NC_037642.1 | 11470821 | SNV | 1 | A | G | Homozygous   |
| NC_037642.1 | 11470878 | SNV | 1 | C | T | Heterozygous |
| NC_037642.1 | 11470887 | SNV | 1 | G | T | Homozygous   |
| NC_037642.1 | 11470899 | SNV | 1 | A | C | Heterozygous |
| NC_037642.1 | 11470926 | SNV | 1 | T | G | Homozygous   |
| NC_037642.1 | 11470931 | SNV | 1 | G | A | Heterozygous |
| NC_037642.1 | 11470943 | SNV | 1 | G | A | Homozygous   |
| NC_037642.1 | 11470954 | SNV | 1 | T | C | Homozygous   |
| NC_037642.1 | 11470978 | SNV | 1 | A | C | Homozygous   |
| NC_037642.1 | 11470995 | SNV | 1 | A | G | Homozygous   |
| NC_037642.1 | 11471085 | SNV | 1 | A | G | Homozygous   |
| NC_037642.1 | 11471111 | SNV | 1 | G | A | Heterozygous |
| NC_037642.1 | 11471156 | SNV | 1 | T | C | Homozygous   |
| NC_037642.1 | 11471160 | SNV | 1 | T | C | Homozygous   |
| NC_037642.1 | 11471431 | SNV | 1 | C | G | Heterozygous |
| NC_037642.1 | 11471436 | SNV | 1 | C | T | Homozygous   |
| NC_037642.1 | 11471589 | SNV | 1 | C | T | Homozygous   |
| NC_037642.1 | 11471591 | SNV | 1 | T | C | Heterozygous |
| NC_037642.1 | 11471626 | SNV | 1 | A | C | Homozygous   |
| NC_037642.1 | 11471635 | SNV | 1 | T | C | Heterozygous |
| NC_037642.1 | 11471670 | SNV | 1 | T | A | Heterozygous |
| NC_037642.1 | 11471681 | SNV | 1 | G | A | Homozygous   |
| NC_037642.1 | 11471686 | SNV | 1 | A | G | Homozygous   |
| NC_037642.1 | 11471862 | SNV | 1 | T | C | Homozygous   |
| NC_037642.1 | 11472029 | SNV | 1 | G | C | Heterozygous |
| NC_037642.1 | 11472105 | SNV | 1 | T | C | Heterozygous |
| NC_037642.1 | 11472248 | SNV | 1 | A | G | Homozygous   |
| NC_037642.1 | 11472646 | SNV | 1 | T | A | Heterozygous |
| NC_037642.1 | 11472919 | SNV | 1 | T | C | Homozygous   |
| NC_037642.1 | 11472953 | SNV | 1 | A | G | Homozygous   |
| NC_037642.1 | 11472982 | SNV | 1 | T | C | Homozygous   |
| NC_037642.1 | 11472990 | SNV | 1 | C | T | Homozygous   |
| NC_037642.1 | 11473012 | SNV | 1 | T | G | Homozygous   |
| NC_037642.1 | 11473014 | SNV | 1 | C | T | Homozygous   |

|             |          |     |   |   |   |              |
|-------------|----------|-----|---|---|---|--------------|
| NC_037642.1 | 11473018 | SNV | 1 | T | C | Homozygous   |
| NC_037642.1 | 11473067 | SNV | 1 | T | C | Homozygous   |
| NC_037642.1 | 11473079 | SNV | 1 | T | C | Heterozygous |
| NC_037642.1 | 11473085 | SNV | 1 | G | A | Heterozygous |
| NC_037642.1 | 11473109 | SNV | 1 | A | G | Heterozygous |
| NC_037642.1 | 11473124 | SNV | 1 | C | T | Heterozygous |
| NC_037642.1 | 11473150 | SNV | 1 | G | A | Homozygous   |
| NC_037642.1 | 11473198 | SNV | 1 | C | T | Heterozygous |
| NC_037642.1 | 11473212 | SNV | 1 | A | G | Homozygous   |
| NC_037642.1 | 11473222 | SNV | 1 | G | C | Heterozygous |
| NC_037642.1 | 11473291 | SNV | 1 | C | T | Homozygous   |
| NC_037642.1 | 11473293 | SNV | 1 | G | A | Homozygous   |
| NC_037642.1 | 11473299 | SNV | 1 | G | A | Homozygous   |
| NC_037642.1 | 11473382 | SNV | 1 | G | A | Homozygous   |
| NC_037642.1 | 11473399 | SNV | 1 | C | A | Heterozygous |
| NC_037642.1 | 11473403 | SNV | 1 | T | C | Homozygous   |
| NC_037642.1 | 11473414 | SNV | 1 | T | C | Homozygous   |
| NC_037642.1 | 11473420 | SNV | 1 | C | T | Heterozygous |
| NC_037642.1 | 11473440 | SNV | 1 | G | A | Heterozygous |
| NC_037642.1 | 11473443 | SNV | 1 | G | A | Heterozygous |
| NC_037642.1 | 11473452 | SNV | 1 | A | G | Homozygous   |
| NC_037642.1 | 11473469 | SNV | 1 | A | C | Heterozygous |
| NC_037642.1 | 11473483 | SNV | 1 | G | A | Heterozygous |
| NC_037642.1 | 11473490 | SNV | 1 | A | T | Heterozygous |
| NC_037642.1 | 11473493 | SNV | 1 | C | A | Heterozygous |
| NC_037642.1 | 11474535 | SNV | 1 | A | G | Heterozygous |
| NC_037642.1 | 11474694 | SNV | 1 | T | C | Homozygous   |
| NC_037642.1 | 11474864 | SNV | 1 | A | C | Homozygous   |
| NC_037642.1 | 11474964 | SNV | 1 | A | G | Heterozygous |
| NC_037642.1 | 11475358 | SNV | 1 | C | G | Heterozygous |
| NC_037642.1 | 11475496 | SNV | 1 | T | C | Homozygous   |
| NC_037642.1 | 11475526 | SNV | 1 | T | A | Heterozygous |
| NC_037642.1 | 11475550 | SNV | 1 | G | A | Homozygous   |
| NC_037642.1 | 11475630 | SNV | 1 | C | T | Homozygous   |
| NC_037642.1 | 11475716 | SNV | 1 | T | C | Homozygous   |
| NC_037642.1 | 11484112 | SNV | 1 | T | C | Homozygous   |
| NC_037642.1 | 11484136 | SNV | 1 | G | A | Heterozygous |
| NC_037642.1 | 11484371 | SNV | 1 | C | T | Heterozygous |
| NC_037642.1 | 11486290 | SNV | 1 | C | T | Homozygous   |
| NC_037642.1 | 11486303 | SNV | 1 | T | A | Homozygous   |
| NC_037642.1 | 11486313 | SNV | 1 | G | A | Homozygous   |
| NC_037642.1 | 11486333 | SNV | 1 | T | A | Homozygous   |
| NC_037642.1 | 11486335 | SNV | 1 | A | T | Homozygous   |
| NC_037642.1 | 11486337 | SNV | 1 | T | A | Homozygous   |
| NC_037642.1 | 11493338 | SNV | 1 | C | G | Heterozygous |
| NC_037642.1 | 11493516 | SNV | 1 | T | C | Homozygous   |
| NC_037642.1 | 11493520 | SNV | 1 | C | T | Homozygous   |
| NC_037642.1 | 11493529 | SNV | 1 | T | C | Homozygous   |
| NC_037642.1 | 11493539 | SNV | 1 | T | C | Homozygous   |
| NC_037642.1 | 11493558 | SNV | 1 | A | G | Heterozygous |
| NC_037642.1 | 11493581 | SNV | 1 | C | T | Heterozygous |

|             |          |     |   |   |   |              |
|-------------|----------|-----|---|---|---|--------------|
| NC_037642.1 | 11493709 | SNV | 1 | T | G | Homozygous   |
| NC_037642.1 | 11493750 | SNV | 1 | A | G | Homozygous   |
| NC_037642.1 | 11493781 | SNV | 1 | T | C | Homozygous   |
| NC_037642.1 | 11493801 | SNV | 1 | G | C | Homozygous   |
| NC_037642.1 | 11493824 | SNV | 1 | G | A | Heterozygous |
| NC_037642.1 | 11503074 | SNV | 1 | T | C | Homozygous   |
| NC_037642.1 | 11510711 | SNV | 1 | T | G | Heterozygous |
| NC_037642.1 | 11538044 | SNV | 1 | A | T | Homozygous   |
| NC_037642.1 | 11538052 | SNV | 1 | G | A | Homozygous   |
| NC_037642.1 | 11544813 | SNV | 1 | T | C | Heterozygous |
| NC_037642.1 | 11544818 | SNV | 1 | T | A | Homozygous   |
| NC_037642.1 | 11544827 | SNV | 1 | A | T | Homozygous   |
| NC_037642.1 | 11544830 | SNV | 1 | T | C | Heterozygous |
| NC_037642.1 | 11544869 | SNV | 1 | G | A | Homozygous   |
| NC_037642.1 | 11544880 | SNV | 1 | T | A | Heterozygous |
| NC_037642.1 | 11544913 | SNV | 1 | G | A | Homozygous   |
| NC_037642.1 | 11544918 | SNV | 1 | A | G | Heterozygous |
| NC_037642.1 | 11545192 | SNV | 1 | A | T | Homozygous   |
| NC_037642.1 | 11545198 | SNV | 1 | A | G | Homozygous   |
| NC_037642.1 | 11545230 | SNV | 1 | T | A | Heterozygous |
| NC_037642.1 | 11547516 | SNV | 1 | T | C | Heterozygous |
| NC_037642.1 | 11547519 | SNV | 1 | G | A | Homozygous   |
| NC_037642.1 | 11547523 | SNV | 1 | C | T | Homozygous   |
| NC_037642.1 | 11550723 | SNV | 1 | T | C | Homozygous   |
| NC_037642.1 | 11550818 | SNV | 1 | C | A | Heterozygous |
| NC_037642.1 | 11550879 | SNV | 1 | C | T | Heterozygous |
| NC_037642.1 | 11553481 | SNV | 1 | G | A | Heterozygous |
| NC_037642.1 | 11553483 | SNV | 1 | G | C | Homozygous   |
| NC_037642.1 | 11553490 | SNV | 1 | A | G | Heterozygous |
| NC_037642.1 | 11553500 | SNV | 1 | A | G | Heterozygous |
| NC_037642.1 | 11553502 | SNV | 1 | A | G | Homozygous   |
| NC_037642.1 | 11560036 | SNV | 1 | A | G | Homozygous   |
| NC_037642.1 | 11560039 | SNV | 1 | A | G | Homozygous   |
| NC_037642.1 | 11560042 | SNV | 1 | T | G | Homozygous   |
| NC_037642.1 | 11560046 | SNV | 1 | G | C | Homozygous   |
| NC_037642.1 | 11560048 | SNV | 1 | A | T | Homozygous   |
| NC_037642.1 | 11560054 | SNV | 1 | A | G | Homozygous   |
| NC_037642.1 | 11560057 | SNV | 1 | A | G | Homozygous   |
| NC_037642.1 | 11560077 | SNV | 1 | A | G | Homozygous   |
| NC_037642.1 | 11560523 | SNV | 1 | A | G | Homozygous   |
| NC_037642.1 | 11560527 | SNV | 1 | T | A | Homozygous   |
| NC_037642.1 | 11560534 | SNV | 1 | A | G | Homozygous   |
| NC_037642.1 | 11560545 | SNV | 1 | G | A | Homozygous   |
| NC_037642.1 | 11560549 | SNV | 1 | G | A | Homozygous   |
| NC_037642.1 | 11560552 | SNV | 1 | T | A | Heterozygous |
| NC_037642.1 | 11582372 | SNV | 1 | G | A | Homozygous   |
| NC_037642.1 | 11582425 | SNV | 1 | C | T | Homozygous   |
| NC_037642.1 | 11584523 | SNV | 1 | T | A | Homozygous   |
| NC_037642.1 | 11584530 | SNV | 1 | C | T | Homozygous   |
| NC_037642.1 | 11584533 | SNV | 1 | G | C | Homozygous   |
| NC_037642.1 | 11598201 | SNV | 1 | A | T | Heterozygous |

|             |          |     |   |   |   |              |
|-------------|----------|-----|---|---|---|--------------|
| NC_037642.1 | 11598217 | SNV | 1 | A | G | Homozygous   |
| NC_037642.1 | 11598478 | SNV | 1 | A | G | Heterozygous |
| NC_037642.1 | 11629297 | SNV | 1 | T | C | Homozygous   |
| NC_037642.1 | 11629498 | SNV | 1 | C | A | Heterozygous |
| NC_037642.1 | 11629510 | SNV | 1 | A | G | Homozygous   |
| NC_037642.1 | 11629514 | SNV | 1 | G | A | Heterozygous |
| NC_037642.1 | 11629515 | SNV | 1 | G | T | Heterozygous |
| NC_037642.1 | 11629534 | SNV | 1 | A | G | Homozygous   |
| NC_037642.1 | 11629908 | SNV | 1 | A | G | Heterozygous |
| NC_037642.1 | 11629910 | SNV | 1 | A | G | Heterozygous |
| NC_037642.1 | 11633760 | SNV | 1 | C | T | Heterozygous |
| NC_037642.1 | 11633843 | SNV | 1 | C | T | Heterozygous |
| NC_037642.1 | 11633882 | SNV | 1 | G | T | Homozygous   |
| NC_037642.1 | 11668614 | SNV | 1 | T | A | Heterozygous |
| NC_037642.1 | 11668621 | SNV | 1 | T | A | Heterozygous |
| NC_037642.1 | 11674337 | SNV | 1 | A | G | Heterozygous |
| NC_037642.1 | 11674348 | SNV | 1 | A | G | Homozygous   |
| NC_037642.1 | 11675226 | SNV | 1 | T | C | Homozygous   |
| NC_037642.1 | 11675501 | SNV | 1 | C | T | Heterozygous |
| NC_037642.1 | 11675823 | SNV | 1 | C | G | Homozygous   |
| NC_037642.1 | 11675952 | SNV | 1 | T | C | Homozygous   |
| NC_037642.1 | 11676082 | SNV | 1 | C | T | Homozygous   |
| NC_037642.1 | 11676085 | SNV | 1 | G | C | Homozygous   |
| NC_037642.1 | 11676120 | SNV | 1 | G | A | Heterozygous |
| NC_037642.1 | 11676373 | SNV | 1 | G | C | Heterozygous |
| NC_037642.1 | 11676412 | SNV | 1 | G | A | Heterozygous |
| NC_037642.1 | 11676716 | SNV | 1 | A | G | Heterozygous |
| NC_037642.1 | 11676744 | SNV | 1 | T | C | Heterozygous |
| NC_037642.1 | 11676745 | SNV | 1 | T | A | Heterozygous |
| NC_037642.1 | 11677963 | SNV | 1 | A | C | Homozygous   |
| NC_037642.1 | 11677966 | SNV | 1 | A | T | Homozygous   |
| NC_037642.1 | 11677981 | SNV | 1 | T | A | Homozygous   |
| NC_037642.1 | 11677996 | SNV | 1 | T | C | Heterozygous |
| NC_037642.1 | 11678014 | SNV | 1 | T | A | Heterozygous |
| NC_037642.1 | 11678017 | SNV | 1 | T | C | Heterozygous |
| NC_037642.1 | 11678436 | SNV | 1 | G | A | Homozygous   |
| NC_037642.1 | 11678561 | SNV | 1 | A | G | Homozygous   |
| NC_037642.1 | 11679401 | SNV | 1 | A | T | Heterozygous |
| NC_037642.1 | 11679438 | SNV | 1 | G | A | Heterozygous |
| NC_037642.1 | 11679618 | SNV | 1 | C | T | Heterozygous |
| NC_037642.1 | 11682666 | SNV | 1 | T | A | Homozygous   |
| NC_037642.1 | 11682668 | SNV | 1 | T | C | Homozygous   |
| NC_037642.1 | 11682673 | SNV | 1 | T | C | Homozygous   |
| NC_037642.1 | 11682690 | SNV | 1 | C | A | Homozygous   |
| NC_037642.1 | 11682699 | SNV | 1 | A | T | Homozygous   |
| NC_037642.1 | 11682730 | SNV | 1 | A | G | Heterozygous |
| NC_037642.1 | 11682769 | SNV | 1 | T | C | Heterozygous |
| NC_037642.1 | 11683016 | SNV | 1 | C | G | Heterozygous |
| NC_037642.1 | 11683018 | SNV | 1 | C | T | Heterozygous |
| NC_037642.1 | 11683031 | SNV | 1 | G | A | Heterozygous |
| NC_037642.1 | 11683075 | SNV | 1 | T | A | Homozygous   |

|             |          |     |   |   |   |              |
|-------------|----------|-----|---|---|---|--------------|
| NC_037642.1 | 11683086 | SNV | 1 | T | G | Homozygous   |
| NC_037642.1 | 11683089 | SNV | 1 | T | C | Homozygous   |
| NC_037642.1 | 11683128 | SNV | 1 | C | T | Homozygous   |
| NC_037642.1 | 11683164 | SNV | 1 | G | T | Homozygous   |
| NC_037642.1 | 11683167 | SNV | 1 | T | G | Homozygous   |
| NC_037642.1 | 11683170 | SNV | 1 | A | T | Homozygous   |
| NC_037642.1 | 11683212 | SNV | 1 | T | C | Homozygous   |
| NC_037642.1 | 11683362 | SNV | 1 | C | T | Homozygous   |
| NC_037642.1 | 11683425 | SNV | 1 | A | C | Heterozygous |
| NC_037642.1 | 11683431 | SNV | 1 | C | A | Heterozygous |
| NC_037642.1 | 11683437 | SNV | 1 | C | G | Heterozygous |
| NC_037642.1 | 11685046 | SNV | 1 | T | C | Homozygous   |
| NC_037642.1 | 11685183 | SNV | 1 | A | G | Heterozygous |
| NC_037642.1 | 11685185 | SNV | 1 | A | G | Heterozygous |
| NC_037642.1 | 11685249 | SNV | 1 | A | G | Homozygous   |
| NC_037642.1 | 11685390 | SNV | 1 | G | A | Heterozygous |
| NC_037642.1 | 11685405 | SNV | 1 | G | A | Homozygous   |
| NC_037642.1 | 11685459 | SNV | 1 | T | C | Heterozygous |
| NC_037642.1 | 11685673 | SNV | 1 | G | A | Homozygous   |
| NC_037642.1 | 11685683 | SNV | 1 | T | C | Homozygous   |
| NC_037642.1 | 11685692 | SNV | 1 | G | A | Homozygous   |
| NC_037642.1 | 11685720 | SNV | 1 | A | G | Homozygous   |
| NC_037642.1 | 11685731 | SNV | 1 | G | C | Homozygous   |
| NC_037642.1 | 11685784 | SNV | 1 | G | A | Homozygous   |
| NC_037642.1 | 11685786 | SNV | 1 | G | A | Heterozygous |
| NC_037642.1 | 11686073 | SNV | 1 | G | A | Heterozygous |
| NC_037642.1 | 11686197 | SNV | 1 | T | A | Homozygous   |
| NC_037642.1 | 11686448 | SNV | 1 | A | G | Homozygous   |
| NC_037642.1 | 11699557 | SNV | 1 | C | T | Heterozygous |
| NC_037642.1 | 11699794 | SNV | 1 | C | G | Homozygous   |
| NC_037642.1 | 11699817 | SNV | 1 | C | G | Homozygous   |
| NC_037642.1 | 11699861 | SNV | 1 | C | T | Heterozygous |
| NC_037642.1 | 11699870 | SNV | 1 | C | T | Homozygous   |
| NC_037642.1 | 11701002 | SNV | 1 | G | T | Homozygous   |
| NC_037642.1 | 11701005 | SNV | 1 | C | G | Homozygous   |
| NC_037642.1 | 11701007 | SNV | 1 | A | G | Homozygous   |
| NC_037642.1 | 11701009 | SNV | 1 | C | G | Homozygous   |
| NC_037642.1 | 11701013 | SNV | 1 | G | A | Homozygous   |
| NC_037642.1 | 11701024 | SNV | 1 | G | A | Homozygous   |
| NC_037642.1 | 11701032 | SNV | 1 | C | A | Homozygous   |
| NC_037642.1 | 11706619 | SNV | 1 | C | T | Homozygous   |
| NC_037642.1 | 11706659 | SNV | 1 | C | T | Homozygous   |
| NC_037642.1 | 11706661 | SNV | 1 | G | T | Heterozygous |
| NC_037642.1 | 11706665 | SNV | 1 | T | C | Heterozygous |
| NC_037642.1 | 11706667 | SNV | 1 | C | T | Heterozygous |
| NC_037642.1 | 11711544 | SNV | 1 | A | G | Homozygous   |
| NC_037642.1 | 11711550 | SNV | 1 | G | C | Homozygous   |
| NC_037642.1 | 11711556 | SNV | 1 | T | C | Heterozygous |
| NC_037642.1 | 11711581 | SNV | 1 | T | C | Heterozygous |
| NC_037642.1 | 11716776 | SNV | 1 | T | C | Heterozygous |
| NC_037642.1 | 11716833 | SNV | 1 | T | C | Homozygous   |

|             |          |     |   |   |   |              |
|-------------|----------|-----|---|---|---|--------------|
| NC_037642.1 | 11716842 | SNV | 1 | C | T | Heterozygous |
| NC_037642.1 | 11717099 | SNV | 1 | C | T | Homozygous   |
| NC_037642.1 | 11724315 | SNV | 1 | G | A | Heterozygous |
| NC_037642.1 | 11731509 | SNV | 1 | T | C | Homozygous   |
| NC_037642.1 | 11731563 | SNV | 1 | A | G | Heterozygous |
| NC_037642.1 | 11733935 | SNV | 1 | A | G | Heterozygous |
| NC_037642.1 | 11733937 | SNV | 1 | G | A | Heterozygous |
| NC_037642.1 | 11751580 | SNV | 1 | C | T | Homozygous   |
| NC_037642.1 | 11756972 | SNV | 1 | T | C | Homozygous   |
| NC_037642.1 | 11758093 | SNV | 1 | G | T | Heterozygous |
| NC_037642.1 | 11758352 | SNV | 1 | C | T | Heterozygous |
| NC_037642.1 | 11758437 | SNV | 1 | A | G | Heterozygous |
| NC_037642.1 | 11830171 | SNV | 1 | A | C | Homozygous   |
| NC_037642.1 | 11830284 | SNV | 1 | T | C | Heterozygous |
| NC_037642.1 | 11830319 | SNV | 1 | T | C | Heterozygous |
| NC_037642.1 | 11832681 | SNV | 1 | C | T | Heterozygous |
| NC_037642.1 | 11832730 | SNV | 1 | G | A | Heterozygous |
| NC_037642.1 | 11835114 | SNV | 1 | T | C | Homozygous   |
| NC_037642.1 | 11835118 | SNV | 1 | C | T | Heterozygous |
| NC_037642.1 | 11835124 | SNV | 1 | C | T | Heterozygous |
| NC_037642.1 | 11835193 | SNV | 1 | C | G | Heterozygous |
| NC_037642.1 | 11851799 | SNV | 1 | T | A | Heterozygous |
| NC_037642.1 | 11851809 | SNV | 1 | G | A | Heterozygous |
| NC_037642.1 | 11851827 | SNV | 1 | G | A | Homozygous   |
| NC_037642.1 | 11851835 | SNV | 1 | G | A | Homozygous   |
| NC_037642.1 | 11853141 | SNV | 1 | T | G | Homozygous   |
| NC_037642.1 | 11853145 | SNV | 1 | A | T | Homozygous   |
| NC_037642.1 | 11853151 | SNV | 1 | T | A | Homozygous   |
| NC_037642.1 | 11860719 | SNV | 1 | C | T | Homozygous   |
| NC_037642.1 | 11860724 | SNV | 1 | C | T | Homozygous   |
| NC_037642.1 | 11865108 | SNV | 1 | A | C | Heterozygous |
| NC_037642.1 | 11875537 | SNV | 1 | C | T | Heterozygous |
| NC_037642.1 | 11875605 | SNV | 1 | G | A | Heterozygous |
| NC_037642.1 | 11875609 | SNV | 1 | G | A | Heterozygous |
| NC_037642.1 | 11875613 | SNV | 1 | G | A | Heterozygous |
| NC_037642.1 | 11876807 | SNV | 1 | C | T | Heterozygous |
| NC_037642.1 | 11876816 | SNV | 1 | A | G | Heterozygous |
| NC_037642.1 | 11876818 | SNV | 1 | A | G | Heterozygous |
| NC_037642.1 | 11876820 | SNV | 1 | A | G | Heterozygous |
| NC_037642.1 | 11876824 | SNV | 1 | A | G | Heterozygous |
| NC_037642.1 | 11877976 | SNV | 1 | G | A | Heterozygous |
| NC_037642.1 | 11877978 | SNV | 1 | A | G | Homozygous   |
| NC_037642.1 | 11878019 | SNV | 1 | C | T | Homozygous   |
| NC_037642.1 | 11881305 | SNV | 1 | T | C | Homozygous   |
| NC_037642.1 | 11881328 | SNV | 1 | G | C | Heterozygous |
| NC_037642.1 | 11886606 | SNV | 1 | G | A | Homozygous   |
| NC_037642.1 | 11888656 | SNV | 1 | A | G | Homozygous   |
| NC_037642.1 | 11890338 | SNV | 1 | A | C | Heterozygous |
| NC_037642.1 | 11890342 | SNV | 1 | A | C | Heterozygous |
| NC_037642.1 | 11897584 | SNV | 1 | G | T | Heterozygous |
| NC_037642.1 | 11897610 | SNV | 1 | G | T | Heterozygous |

|             |          |     |   |   |   |              |
|-------------|----------|-----|---|---|---|--------------|
| NC_037642.1 | 11897636 | SNV | 1 | G | T | Homozygous   |
| NC_037642.1 | 11897639 | SNV | 1 | T | C | Heterozygous |
| NC_037642.1 | 11899981 | SNV | 1 | C | A | Heterozygous |
| NC_037642.1 | 11905252 | SNV | 1 | C | T | Heterozygous |
| NC_037642.1 | 11905282 | SNV | 1 | G | A | Heterozygous |
| NC_037642.1 | 11905934 | SNV | 1 | T | C | Homozygous   |
| NC_037642.1 | 11905937 | SNV | 1 | T | C | Homozygous   |
| NC_037642.1 | 11911629 | SNV | 1 | C | G | Heterozygous |
| NC_037642.1 | 11911632 | SNV | 1 | G | C | Heterozygous |
| NC_037642.1 | 11911905 | SNV | 1 | G | A | Heterozygous |
| NC_037642.1 | 11916329 | SNV | 1 | A | G | Homozygous   |
| NC_037642.1 | 11919236 | SNV | 1 | T | C | Homozygous   |
| NC_037642.1 | 11919266 | SNV | 1 | A | G | Heterozygous |
| NC_037642.1 | 11919399 | SNV | 1 | G | T | Homozygous   |
| NC_037642.1 | 11919434 | SNV | 1 | T | C | Homozygous   |
| NC_037642.1 | 11919460 | SNV | 1 | C | T | Homozygous   |
| NC_037642.1 | 11919501 | SNV | 1 | G | A | Homozygous   |
| NC_037642.1 | 11919626 | SNV | 1 | T | C | Homozygous   |
| NC_037642.1 | 11921451 | SNV | 1 | T | C | Homozygous   |
| NC_037642.1 | 11921467 | SNV | 1 | C | G | Homozygous   |
| NC_037642.1 | 11929372 | SNV | 1 | C | G | Heterozygous |
| NC_037642.1 | 11929837 | SNV | 1 | G | C | Homozygous   |
| NC_037642.1 | 11930685 | SNV | 1 | A | G | Homozygous   |
| NC_037642.1 | 11930738 | SNV | 1 | A | G | Homozygous   |
| NC_037642.1 | 11930754 | SNV | 1 | G | A | Heterozygous |
| NC_037642.1 | 11930757 | SNV | 1 | G | A | Heterozygous |
| NC_037642.1 | 11930767 | SNV | 1 | A | T | Heterozygous |
| NC_037642.1 | 11931249 | SNV | 1 | C | T | Heterozygous |
| NC_037642.1 | 11931390 | SNV | 1 | T | C | Homozygous   |
| NC_037642.1 | 11931985 | SNV | 1 | T | C | Homozygous   |
| NC_037642.1 | 11932134 | SNV | 1 | G | T | Heterozygous |
| NC_037642.1 | 11932201 | SNV | 1 | C | T | Heterozygous |
| NC_037642.1 | 11932211 | SNV | 1 | T | G | Heterozygous |
| NC_037642.1 | 11932214 | SNV | 1 | T | G | Heterozygous |
| NC_037642.1 | 11932580 | SNV | 1 | A | T | Heterozygous |
| NC_037642.1 | 11932732 | SNV | 1 | C | T | Homozygous   |
| NC_037642.1 | 11932824 | SNV | 1 | C | A | Heterozygous |
| NC_037642.1 | 11933083 | SNV | 1 | T | C | Homozygous   |
| NC_037642.1 | 11933140 | SNV | 1 | A | G | Heterozygous |
| NC_037642.1 | 11933236 | SNV | 1 | T | C | Homozygous   |
| NC_037642.1 | 11934671 | SNV | 1 | T | C | Heterozygous |
| NC_037642.1 | 11934674 | SNV | 1 | G | C | Heterozygous |
| NC_037642.1 | 11935179 | SNV | 1 | T | C | Homozygous   |
| NC_037642.1 | 11935657 | SNV | 1 | G | A | Heterozygous |
| NC_037642.1 | 11935661 | SNV | 1 | G | A | Heterozygous |
| NC_037642.1 | 11935692 | SNV | 1 | T | C | Homozygous   |
| NC_037642.1 | 11936864 | SNV | 1 | T | A | Homozygous   |
| NC_037642.1 | 11936868 | SNV | 1 | A | C | Homozygous   |
| NC_037642.1 | 11936871 | SNV | 1 | C | A | Homozygous   |
| NC_037642.1 | 11936883 | SNV | 1 | A | T | Homozygous   |
| NC_037642.1 | 11943170 | SNV | 1 | C | T | Heterozygous |

|             |          |     |   |   |   |              |
|-------------|----------|-----|---|---|---|--------------|
| NC_037642.1 | 11943350 | SNV | 1 | T | C | Homozygous   |
| NC_037642.1 | 11943371 | SNV | 1 | A | G | Homozygous   |
| NC_037642.1 | 11943662 | SNV | 1 | T | C | Homozygous   |
| NC_037642.1 | 11943690 | SNV | 1 | T | C | Homozygous   |
| NC_037642.1 | 11943732 | SNV | 1 | G | A | Homozygous   |
| NC_037642.1 | 11945059 | SNV | 1 | C | G | Heterozygous |
| NC_037642.1 | 11947025 | SNV | 1 | A | C | Homozygous   |
| NC_037642.1 | 11947028 | SNV | 1 | C | A | Homozygous   |
| NC_037642.1 | 11952024 | SNV | 1 | C | T | Heterozygous |
| NC_037642.1 | 11952294 | SNV | 1 | C | A | Heterozygous |
| NC_037642.1 | 11956015 | SNV | 1 | C | T | Homozygous   |
| NC_037642.1 | 11956377 | SNV | 1 | T | A | Homozygous   |
| NC_037642.1 | 11956382 | SNV | 1 | G | T | Homozygous   |
| NC_037642.1 | 11961522 | SNV | 1 | A | G | Homozygous   |
| NC_037642.1 | 11962142 | SNV | 1 | C | T | Homozygous   |
| NC_037642.1 | 11962914 | SNV | 1 | T | C | Homozygous   |
| NC_037642.1 | 11965801 | SNV | 1 | G | A | Homozygous   |
| NC_037642.1 | 11966017 | SNV | 1 | A | G | Homozygous   |
| NC_037642.1 | 11966236 | SNV | 1 | C | T | Homozygous   |
| NC_037642.1 | 11966405 | SNV | 1 | C | T | Homozygous   |
| NC_037642.1 | 11966718 | SNV | 1 | C | T | Homozygous   |
| NC_037642.1 | 11967726 | SNV | 1 | A | T | Homozygous   |
| NC_037642.1 | 11967729 | SNV | 1 | C | T | Homozygous   |
| NC_037642.1 | 11977627 | SNV | 1 | G | A | Homozygous   |
| NC_037642.1 | 11993593 | SNV | 1 | T | C | Homozygous   |
| NC_037642.1 | 11993823 | SNV | 1 | A | G | Homozygous   |
| NC_037642.1 | 11993920 | SNV | 1 | C | T | Homozygous   |
| NC_037642.1 | 11993934 | SNV | 1 | G | A | Heterozygous |
| NC_037642.1 | 11994547 | SNV | 1 | A | G | Homozygous   |
| NC_037642.1 | 11996381 | SNV | 1 | T | C | Heterozygous |
| NC_037642.1 | 11996389 | SNV | 1 | A | C | Heterozygous |
| NC_037642.1 | 11996393 | SNV | 1 | A | G | Heterozygous |
| NC_037642.1 | 11996395 | SNV | 1 | G | A | Heterozygous |
| NC_037642.1 | 11996400 | SNV | 1 | A | G | Heterozygous |
| NC_037642.1 | 11996411 | SNV | 1 | A | G | Heterozygous |
| NC_037642.1 | 11997715 | SNV | 1 | A | T | Homozygous   |
| NC_037642.1 | 11997717 | SNV | 1 | A | C | Homozygous   |
| NC_037642.1 | 12001490 | SNV | 1 | A | G | Homozygous   |
| NC_037642.1 | 12002568 | SNV | 1 | G | A | Homozygous   |
| NC_037642.1 | 12003351 | SNV | 1 | G | A | Homozygous   |
| NC_037642.1 | 12004066 | SNV | 1 | T | C | Homozygous   |
| NC_037642.1 | 12007022 | SNV | 1 | C | T | Heterozygous |
| NC_037642.1 | 12007366 | SNV | 1 | C | T | Homozygous   |
| NC_037642.1 | 12007374 | SNV | 1 | A | C | Homozygous   |
| NC_037642.1 | 12007381 | SNV | 1 | T | C | Homozygous   |
| NC_037642.1 | 12007388 | SNV | 1 | T | A | Homozygous   |
| NC_037642.1 | 12007392 | SNV | 1 | A | G | Homozygous   |
| NC_037642.1 | 12011670 | SNV | 1 | T | A | Homozygous   |
| NC_037642.1 | 12011674 | SNV | 1 | T | A | Homozygous   |
| NC_037642.1 | 12011790 | SNV | 1 | T | A | Homozygous   |
| NC_037642.1 | 12012089 | SNV | 1 | T | A | Heterozygous |



|             |          |     |   |   |   |              |
|-------------|----------|-----|---|---|---|--------------|
| NC_037642.1 | 12013928 | SNV | 1 | C | T | Homozygous   |
| NC_037642.1 | 12013968 | SNV | 1 | G | A | Heterozygous |
| NC_037642.1 | 12015044 | SNV | 1 | A | G | Heterozygous |
| NC_037642.1 | 12016283 | SNV | 1 | A | G | Homozygous   |
| NC_037642.1 | 12025761 | SNV | 1 | A | G | Homozygous   |
| NC_037642.1 | 12025782 | SNV | 1 | T | G | Homozygous   |
| NC_037642.1 | 12025791 | SNV | 1 | T | C | Homozygous   |
| NC_037642.1 | 12025799 | SNV | 1 | T | G | Homozygous   |
| NC_037642.1 | 12025802 | SNV | 1 | T | C | Homozygous   |
| NC_037642.1 | 12029647 | SNV | 1 | T | G | Homozygous   |
| NC_037642.1 | 12029652 | SNV | 1 | T | G | Homozygous   |
| NC_037642.1 | 12029666 | SNV | 1 | T | A | Homozygous   |
| NC_037642.1 | 12029683 | SNV | 1 | A | T | Homozygous   |
| NC_037642.1 | 12029685 | SNV | 1 | T | A | Homozygous   |
| NC_037642.1 | 12036180 | SNV | 1 | A | C | Heterozygous |
| NC_037642.1 | 12046997 | SNV | 1 | T | C | Homozygous   |
| NC_037642.1 | 12049184 | SNV | 1 | G | A | Homozygous   |
| NC_037642.1 | 12049190 | SNV | 1 | T | G | Homozygous   |
| NC_037642.1 | 12049195 | SNV | 1 | T | A | Homozygous   |
| NC_037642.1 | 12049198 | SNV | 1 | T | C | Homozygous   |
| NC_037642.1 | 12049230 | SNV | 1 | C | A | Homozygous   |
| NC_037642.1 | 12050664 | SNV | 1 | T | C | Homozygous   |
| NC_037642.1 | 12050874 | SNV | 1 | T | G | Homozygous   |
| NC_037642.1 | 12051845 | SNV | 1 | C | G | Homozygous   |
| NC_037642.1 | 12053904 | SNV | 1 | A | C | Homozygous   |
| NC_037642.1 | 12054044 | SNV | 1 | T | C | Homozygous   |
| NC_037642.1 | 12054150 | SNV | 1 | A | T | Homozygous   |
| NC_037642.1 | 12055733 | SNV | 1 | T | C | Homozygous   |
| NC_037642.1 | 12055775 | SNV | 1 | C | T | Homozygous   |
| NC_037642.1 | 12058911 | SNV | 1 | A | C | Heterozygous |
| NC_037642.1 | 12059453 | SNV | 1 | C | T | Heterozygous |
| NC_037642.1 | 12061359 | SNV | 1 | T | C | Homozygous   |
| NC_037642.1 | 12062351 | SNV | 1 | C | A | Homozygous   |
| NC_037642.1 | 12069083 | SNV | 1 | C | T | Heterozygous |
| NC_037642.1 | 12073457 | SNV | 1 | C | T | Heterozygous |
| NC_037642.1 | 12073463 | SNV | 1 | A | C | Heterozygous |
| NC_037642.1 | 12075024 | SNV | 1 | G | A | Heterozygous |
| NC_037642.1 | 12075090 | SNV | 1 | G | C | Heterozygous |
| NC_037642.1 | 12075840 | SNV | 1 | T | C | Homozygous   |
| NC_037642.1 | 12075867 | SNV | 1 | C | G | Homozygous   |
| NC_037642.1 | 12077848 | SNV | 1 | A | G | Homozygous   |
| NC_037642.1 | 12077926 | SNV | 1 | A | G | Heterozygous |
| NC_037642.1 | 12077961 | SNV | 1 | T | C | Homozygous   |
| NC_037642.1 | 12081694 | SNV | 1 | G | C | Heterozygous |
| NC_037642.1 | 12082755 | SNV | 1 | T | C | Homozygous   |
| NC_037642.1 | 12089560 | SNV | 1 | A | G | Homozygous   |
| NC_037642.1 | 12095772 | SNV | 1 | T | C | Homozygous   |
| NC_037642.1 | 12096870 | SNV | 1 | C | T | Heterozygous |
| NC_037642.1 | 12109024 | SNV | 1 | A | G | Homozygous   |
| NC_037642.1 | 12113454 | SNV | 1 | T | C | Homozygous   |
| NC_037642.1 | 12113463 | SNV | 1 | A | G | Homozygous   |

|             |          |     |   |   |   |              |
|-------------|----------|-----|---|---|---|--------------|
| NC_037642.1 | 12113565 | SNV | 1 | T | A | Homozygous   |
| NC_037642.1 | 12114214 | SNV | 1 | T | C | Heterozygous |
| NC_037642.1 | 12114660 | SNV | 1 | T | C | Heterozygous |
| NC_037642.1 | 12114921 | SNV | 1 | C | A | Homozygous   |
| NC_037642.1 | 12114926 | SNV | 1 | C | A | Homozygous   |
| NC_037642.1 | 12114959 | SNV | 1 | C | A | Homozygous   |
| NC_037642.1 | 12115048 | SNV | 1 | T | C | Heterozygous |
| NC_037642.1 | 12120694 | SNV | 1 | C | T | Heterozygous |
| NC_037642.1 | 12120714 | SNV | 1 | A | T | Heterozygous |
| NC_037642.1 | 12120784 | SNV | 1 | G | A | Homozygous   |
| NC_037642.1 | 12121101 | SNV | 1 | G | A | Heterozygous |
| NC_037642.1 | 12122593 | SNV | 1 | G | A | Heterozygous |
| NC_037642.1 | 12122715 | SNV | 1 | A | G | Heterozygous |
| NC_037642.1 | 12126547 | SNV | 1 | G | A | Heterozygous |
| NC_037642.1 | 12126557 | SNV | 1 | G | A | Heterozygous |
| NC_037642.1 | 12126617 | SNV | 1 | T | A | Homozygous   |
| NC_037642.1 | 12126625 | SNV | 1 | C | T | Homozygous   |
| NC_037642.1 | 12126627 | SNV | 1 | A | C | Homozygous   |
| NC_037642.1 | 12126681 | SNV | 1 | A | G | Homozygous   |
| NC_037642.1 | 12129178 | SNV | 1 | T | A | Homozygous   |
| NC_037642.1 | 12129182 | SNV | 1 | T | C | Homozygous   |
| NC_037642.1 | 12129188 | SNV | 1 | A | G | Homozygous   |
| NC_037642.1 | 12133727 | SNV | 1 | A | G | Homozygous   |
| NC_037642.1 | 12133749 | SNV | 1 | C | G | Heterozygous |
| NC_037642.1 | 12134216 | SNV | 1 | A | T | Heterozygous |
| NC_037642.1 | 12134359 | SNV | 1 | C | T | Homozygous   |
| NC_037642.1 | 12134369 | SNV | 1 | A | G | Homozygous   |
| NC_037642.1 | 12134398 | SNV | 1 | A | G | Homozygous   |
| NC_037642.1 | 12134430 | SNV | 1 | G | A | Homozygous   |
| NC_037642.1 | 12134433 | SNV | 1 | A | G | Homozygous   |
| NC_037642.1 | 12134436 | SNV | 1 | C | T | Heterozygous |
| NC_037642.1 | 12137100 | SNV | 1 | A | C | Heterozygous |
| NC_037642.1 | 12138608 | SNV | 1 | C | T | Homozygous   |
| NC_037642.1 | 12138673 | SNV | 1 | T | C | Homozygous   |
| NC_037642.1 | 12138836 | SNV | 1 | C | T | Heterozygous |
| NC_037642.1 | 12138852 | SNV | 1 | G | C | Homozygous   |
| NC_037642.1 | 12138883 | SNV | 1 | T | A | Heterozygous |
| NC_037642.1 | 12139071 | SNV | 1 | C | T | Heterozygous |
| NC_037642.1 | 12139147 | SNV | 1 | A | G | Homozygous   |
| NC_037642.1 | 12139465 | SNV | 1 | G | A | Homozygous   |
| NC_037642.1 | 12139514 | SNV | 1 | G | A | Homozygous   |
| NC_037642.1 | 12139551 | SNV | 1 | C | T | Heterozygous |
| NC_037642.1 | 12139556 | SNV | 1 | G | A | Heterozygous |
| NC_037642.1 | 12139578 | SNV | 1 | C | T | Heterozygous |
| NC_037642.1 | 12139607 | SNV | 1 | A | G | Homozygous   |
| NC_037642.1 | 12142370 | SNV | 1 | A | G | Homozygous   |
| NC_037642.1 | 12142796 | SNV | 1 | T | C | Homozygous   |
| NC_037642.1 | 12142815 | SNV | 1 | G | A | Homozygous   |
| NC_037642.1 | 12142817 | SNV | 1 | G | C | Heterozygous |
| NC_037642.1 | 12143083 | SNV | 1 | A | G | Homozygous   |
| NC_037642.1 | 12143254 | SNV | 1 | A | G | Homozygous   |

|             |          |     |   |   |   |              |
|-------------|----------|-----|---|---|---|--------------|
| NC_037642.1 | 12143427 | SNV | 1 | T | C | Homozygous   |
| NC_037642.1 | 12143450 | SNV | 1 | C | G | Heterozygous |
| NC_037642.1 | 12143544 | SNV | 1 | C | T | Heterozygous |
| NC_037642.1 | 12143623 | SNV | 1 | A | G | Heterozygous |
| NC_037642.1 | 12143627 | SNV | 1 | A | G | Homozygous   |
| NC_037642.1 | 12143683 | SNV | 1 | A | G | Heterozygous |
| NC_037642.1 | 12143706 | SNV | 1 | G | A | Heterozygous |
| NC_037642.1 | 12143818 | SNV | 1 | A | G | Heterozygous |
| NC_037642.1 | 12143871 | SNV | 1 | A | G | Heterozygous |
| NC_037642.1 | 12143874 | SNV | 1 | G | A | Homozygous   |
| NC_037642.1 | 12143959 | SNV | 1 | A | G | Homozygous   |
| NC_037642.1 | 12143985 | SNV | 1 | T | C | Homozygous   |
| NC_037642.1 | 12143994 | SNV | 1 | A | G | Heterozygous |
| NC_037642.1 | 12143996 | SNV | 1 | A | G | Heterozygous |
| NC_037642.1 | 12144026 | SNV | 1 | A | G | Heterozygous |
| NC_037642.1 | 12144144 | SNV | 1 | A | G | Heterozygous |
| NC_037642.1 | 12144151 | SNV | 1 | A | T | Heterozygous |
| NC_037642.1 | 12144162 | SNV | 1 | A | G | Heterozygous |
| NC_037642.1 | 12144167 | SNV | 1 | A | T | Homozygous   |
| NC_037642.1 | 12144179 | SNV | 1 | A | G | Heterozygous |
| NC_037642.1 | 12144181 | SNV | 1 | A | G | Heterozygous |
| NC_037642.1 | 12144188 | SNV | 1 | T | C | Heterozygous |
| NC_037642.1 | 12144190 | SNV | 1 | C | T | Heterozygous |
| NC_037642.1 | 12144201 | SNV | 1 | A | G | Heterozygous |
| NC_037642.1 | 12144205 | SNV | 1 | A | G | Heterozygous |
| NC_037642.1 | 12144211 | SNV | 1 | A | G | Heterozygous |
| NC_037642.1 | 12144223 | SNV | 1 | A | G | Heterozygous |
| NC_037642.1 | 12144230 | SNV | 1 | G | A | Heterozygous |
| NC_037642.1 | 12144276 | SNV | 1 | C | A | Heterozygous |
| NC_037642.1 | 12144351 | SNV | 1 | A | G | Heterozygous |
| NC_037642.1 | 12144353 | SNV | 1 | G | A | Heterozygous |
| NC_037642.1 | 12144376 | SNV | 1 | T | A | Homozygous   |
| NC_037642.1 | 12144403 | SNV | 1 | A | G | Heterozygous |
| NC_037642.1 | 12144432 | SNV | 1 | G | A | Heterozygous |
| NC_037642.1 | 12144459 | SNV | 1 | G | A | Heterozygous |
| NC_037642.1 | 12144544 | SNV | 1 | C | G | Homozygous   |
| NC_037642.1 | 12144547 | SNV | 1 | G | A | Heterozygous |
| NC_037642.1 | 12144555 | SNV | 1 | C | A | Homozygous   |
| NC_037642.1 | 12144560 | SNV | 1 | G | A | Homozygous   |
| NC_037642.1 | 12144624 | SNV | 1 | G | A | Heterozygous |
| NC_037642.1 | 12144654 | SNV | 1 | T | C | Heterozygous |
| NC_037642.1 | 12144657 | SNV | 1 | A | G | Heterozygous |
| NC_037642.1 | 12144678 | SNV | 1 | C | T | Heterozygous |
| NC_037642.1 | 12144684 | SNV | 1 | T | C | Heterozygous |
| NC_037642.1 | 12144689 | SNV | 1 | G | A | Heterozygous |
| NC_037642.1 | 12144712 | SNV | 1 | A | G | Heterozygous |
| NC_037642.1 | 12144714 | SNV | 1 | A | G | Heterozygous |
| NC_037642.1 | 12144733 | SNV | 1 | T | C | Heterozygous |
| NC_037642.1 | 12144778 | SNV | 1 | C | T | Homozygous   |
| NC_037642.1 | 12144781 | SNV | 1 | C | T | Homozygous   |
| NC_037642.1 | 12144888 | SNV | 1 | T | C | Homozygous   |

|             |          |     |   |   |   |              |
|-------------|----------|-----|---|---|---|--------------|
| NC_037642.1 | 12145044 | SNV | 1 | G | A | Heterozygous |
| NC_037642.1 | 12145138 | SNV | 1 | T | A | Homozygous   |
| NC_037642.1 | 12145470 | SNV | 1 | T | C | Homozygous   |
| NC_037642.1 | 12145585 | SNV | 1 | C | T | Heterozygous |
| NC_037642.1 | 12145591 | SNV | 1 | T | C | Homozygous   |
| NC_037642.1 | 12145600 | SNV | 1 | A | G | Homozygous   |
| NC_037642.1 | 12145702 | SNV | 1 | G | A | Heterozygous |
| NC_037642.1 | 12152499 | SNV | 1 | G | T | Homozygous   |
| NC_037642.1 | 12152509 | SNV | 1 | C | A | Homozygous   |
| NC_037642.1 | 12152514 | SNV | 1 | C | A | Homozygous   |
| NC_037642.1 | 12152516 | SNV | 1 | G | A | Homozygous   |
| NC_037642.1 | 12152526 | SNV | 1 | G | A | Homozygous   |
| NC_037642.1 | 12152544 | SNV | 1 | C | T | Homozygous   |
| NC_037642.1 | 12154522 | SNV | 1 | G | A | Heterozygous |
| NC_037642.1 | 12155068 | SNV | 1 | T | C | Heterozygous |
| NC_037642.1 | 12157411 | SNV | 1 | G | A | Heterozygous |
| NC_037642.1 | 12163236 | SNV | 1 | G | A | Homozygous   |
| NC_037642.1 | 12171239 | SNV | 1 | G | A | Homozygous   |
| NC_037642.1 | 12171243 | SNV | 1 | C | A | Homozygous   |
| NC_037642.1 | 12179221 | SNV | 1 | A | G | Homozygous   |
| NC_037642.1 | 12179310 | SNV | 1 | G | A | Heterozygous |
| NC_037642.1 | 12185314 | SNV | 1 | C | T | Homozygous   |
| NC_037642.1 | 12185323 | SNV | 1 | T | A | Homozygous   |
| NC_037642.1 | 12185358 | SNV | 1 | G | A | Homozygous   |
| NC_037642.1 | 12185372 | SNV | 1 | G | A | Homozygous   |
| NC_037642.1 | 12185379 | SNV | 1 | A | G | Homozygous   |
| NC_037642.1 | 12185383 | SNV | 1 | C | T | Homozygous   |
| NC_037642.1 | 12185392 | SNV | 1 | A | G | Homozygous   |
| NC_037642.1 | 12189028 | SNV | 1 | A | G | Homozygous   |
| NC_037642.1 | 12194007 | SNV | 1 | A | G | Homozygous   |
| NC_037642.1 | 12194046 | SNV | 1 | A | G | Homozygous   |
| NC_037642.1 | 12194518 | SNV | 1 | C | T | Heterozygous |
| NC_037642.1 | 12194530 | SNV | 1 | T | C | Homozygous   |
| NC_037642.1 | 12194904 | SNV | 1 | T | C | Homozygous   |
| NC_037642.1 | 12195064 | SNV | 1 | C | T | Homozygous   |
| NC_037642.1 | 12195162 | SNV | 1 | G | A | Homozygous   |
| NC_037642.1 | 12195172 | SNV | 1 | A | G | Homozygous   |
| NC_037642.1 | 12195186 | SNV | 1 | T | C | Homozygous   |
| NC_037642.1 | 12195263 | SNV | 1 | G | A | Heterozygous |
| NC_037642.1 | 12195414 | SNV | 1 | T | C | Homozygous   |
| NC_037642.1 | 12195855 | SNV | 1 | A | G | Homozygous   |
| NC_037642.1 | 12195935 | SNV | 1 | A | G | Homozygous   |
| NC_037642.1 | 12196029 | SNV | 1 | T | C | Heterozygous |
| NC_037642.1 | 12196051 | SNV | 1 | C | T | Heterozygous |
| NC_037642.1 | 12196166 | SNV | 1 | G | A | Homozygous   |
| NC_037642.1 | 12196581 | SNV | 1 | A | G | Homozygous   |
| NC_037642.1 | 12198309 | SNV | 1 | G | A | Heterozygous |
| NC_037642.1 | 12198418 | SNV | 1 | G | A | Homozygous   |
| NC_037642.1 | 12198454 | SNV | 1 | A | T | Homozygous   |
| NC_037642.1 | 12198524 | SNV | 1 | G | A | Homozygous   |
| NC_037642.1 | 12198572 | SNV | 1 | G | A | Heterozygous |

|             |          |     |   |   |   |              |
|-------------|----------|-----|---|---|---|--------------|
| NC_037642.1 | 12198761 | SNV | 1 | A | T | Homozygous   |
| NC_037642.1 | 12201449 | SNV | 1 | T | C | Homozygous   |
| NC_037642.1 | 12202013 | SNV | 1 | T | C | Homozygous   |
| NC_037642.1 | 12202727 | SNV | 1 | A | T | Homozygous   |
| NC_037642.1 | 12203125 | SNV | 1 | T | C | Homozygous   |
| NC_037642.1 | 12203966 | SNV | 1 | C | T | Homozygous   |
| NC_037642.1 | 12203969 | SNV | 1 | A | T | Homozygous   |
| NC_037642.1 | 12209937 | SNV | 1 | C | A | Homozygous   |
| NC_037642.1 | 12211863 | SNV | 1 | T | C | Homozygous   |
| NC_037642.1 | 12212671 | SNV | 1 | A | G | Homozygous   |
| NC_037642.1 | 12212683 | SNV | 1 | A | T | Homozygous   |
| NC_037642.1 | 12215861 | SNV | 1 | T | G | Homozygous   |
| NC_037642.1 | 12217032 | SNV | 1 | A | G | Homozygous   |
| NC_037642.1 | 12218130 | SNV | 1 | G | A | Heterozygous |
| NC_037642.1 | 12219614 | SNV | 1 | T | C | Homozygous   |
| NC_037642.1 | 12219819 | SNV | 1 | C | T | Homozygous   |
| NC_037642.1 | 12219823 | SNV | 1 | C | T | Homozygous   |
| NC_037642.1 | 12219826 | SNV | 1 | A | G | Homozygous   |
| NC_037642.1 | 12219830 | SNV | 1 | A | T | Homozygous   |
| NC_037642.1 | 12219833 | SNV | 1 | T | A | Homozygous   |
| NC_037642.1 | 12219836 | SNV | 1 | A | C | Homozygous   |
| NC_037642.1 | 12219858 | SNV | 1 | A | G | Heterozygous |
| NC_037642.1 | 12222991 | SNV | 1 | G | A | Heterozygous |
| NC_037642.1 | 12226340 | SNV | 1 | C | T | Homozygous   |
| NC_037642.1 | 12226546 | SNV | 1 | C | T | Heterozygous |
| NC_037642.1 | 12227107 | SNV | 1 | A | G | Heterozygous |
| NC_037642.1 | 12227213 | SNV | 1 | A | G | Homozygous   |
| NC_037642.1 | 12227242 | SNV | 1 | T | G | Heterozygous |
| NC_037642.1 | 12227267 | SNV | 1 | G | A | Heterozygous |
| NC_037642.1 | 12227365 | SNV | 1 | A | G | Heterozygous |
| NC_037642.1 | 12227436 | SNV | 1 | T | C | Heterozygous |
| NC_037642.1 | 12227928 | SNV | 1 | A | T | Homozygous   |
| NC_037642.1 | 12228002 | SNV | 1 | T | A | Heterozygous |
| NC_037642.1 | 12228207 | SNV | 1 | G | C | Heterozygous |
| NC_037642.1 | 12228217 | SNV | 1 | A | G | Heterozygous |
| NC_037642.1 | 12230114 | SNV | 1 | G | T | Homozygous   |
| NC_037642.1 | 12230303 | SNV | 1 | G | A | Homozygous   |
| NC_037642.1 | 12230308 | SNV | 1 | G | A | Homozygous   |
| NC_037642.1 | 12230314 | SNV | 1 | T | C | Homozygous   |
| NC_037642.1 | 12230316 | SNV | 1 | T | G | Homozygous   |
| NC_037642.1 | 12230327 | SNV | 1 | A | T | Homozygous   |
| NC_037642.1 | 12230337 | SNV | 1 | G | C | Homozygous   |
| NC_037642.1 | 12234413 | SNV | 1 | T | G | Homozygous   |
| NC_037642.1 | 12234416 | SNV | 1 | T | A | Homozygous   |
| NC_037642.1 | 12234440 | SNV | 1 | C | T | Homozygous   |
| NC_037642.1 | 12234455 | SNV | 1 | T | G | Homozygous   |
| NC_037642.1 | 12235129 | SNV | 1 | A | T | Homozygous   |
| NC_037642.1 | 12235133 | SNV | 1 | T | G | Homozygous   |
| NC_037642.1 | 12235137 | SNV | 1 | A | T | Homozygous   |
| NC_037642.1 | 12235140 | SNV | 1 | T | A | Homozygous   |
| NC_037642.1 | 12235143 | SNV | 1 | T | G | Homozygous   |

|             |          |     |   |   |   |              |
|-------------|----------|-----|---|---|---|--------------|
| NC_037642.1 | 12235152 | SNV | 1 | T | A | Homozygous   |
| NC_037642.1 | 12235154 | SNV | 1 | T | A | Homozygous   |
| NC_037642.1 | 12235161 | SNV | 1 | T | A | Homozygous   |
| NC_037642.1 | 12235189 | SNV | 1 | T | A | Homozygous   |
| NC_037642.1 | 12236679 | SNV | 1 | A | G | Homozygous   |
| NC_037642.1 | 12236696 | SNV | 1 | T | C | Homozygous   |
| NC_037642.1 | 12236989 | SNV | 1 | T | C | Heterozygous |
| NC_037642.1 | 12237291 | SNV | 1 | A | G | Heterozygous |
| NC_037642.1 | 12237298 | SNV | 1 | T | C | Heterozygous |
| NC_037642.1 | 12237304 | SNV | 1 | T | C | Heterozygous |
| NC_037642.1 | 12237306 | SNV | 1 | T | C | Homozygous   |
| NC_037642.1 | 12237308 | SNV | 1 | T | C | Heterozygous |
| NC_037642.1 | 12237323 | SNV | 1 | A | T | Heterozygous |
| NC_037642.1 | 12237335 | SNV | 1 | A | T | Heterozygous |
| NC_037642.1 | 12240923 | SNV | 1 | G | A | Homozygous   |
| NC_037642.1 | 12241084 | SNV | 1 | T | C | Homozygous   |
| NC_037642.1 | 12241100 | SNV | 1 | G | A | Homozygous   |
| NC_037642.1 | 12241133 | SNV | 1 | T | C | Homozygous   |
| NC_037642.1 | 12241135 | SNV | 1 | A | T | Homozygous   |
| NC_037642.1 | 12241137 | SNV | 1 | A | G | Homozygous   |
| NC_037642.1 | 12241144 | SNV | 1 | T | C | Heterozygous |
| NC_037642.1 | 12241152 | SNV | 1 | A | G | Homozygous   |
| NC_037642.1 | 12241160 | SNV | 1 | A | G | Homozygous   |
| NC_037642.1 | 12241178 | SNV | 1 | T | C | Homozygous   |
| NC_037642.1 | 12241266 | SNV | 1 | G | A | Homozygous   |
| NC_037642.1 | 12241308 | SNV | 1 | T | C | Homozygous   |
| NC_037642.1 | 12241337 | SNV | 1 | A | G | Homozygous   |
| NC_037642.1 | 12241423 | SNV | 1 | T | C | Homozygous   |
| NC_037642.1 | 12253110 | SNV | 1 | T | A | Homozygous   |
| NC_037642.1 | 12257163 | SNV | 1 | G | T | Homozygous   |
| NC_037642.1 | 12257207 | SNV | 1 | G | A | Homozygous   |
| NC_037642.1 | 12257209 | SNV | 1 | T | A | Homozygous   |
| NC_037642.1 | 12257218 | SNV | 1 | G | T | Homozygous   |
| NC_037642.1 | 12257224 | SNV | 1 | A | C | Homozygous   |
| NC_037642.1 | 12257232 | SNV | 1 | T | C | Homozygous   |
| NC_037642.1 | 12259894 | SNV | 1 | G | A | Heterozygous |
| NC_037642.1 | 12260621 | SNV | 1 | T | C | Homozygous   |
| NC_037642.1 | 12260640 | SNV | 1 | T | C | Homozygous   |
| NC_037642.1 | 12260645 | SNV | 1 | C | T | Heterozygous |
| NC_037642.1 | 12260922 | SNV | 1 | T | A | Heterozygous |
| NC_037642.1 | 12260925 | SNV | 1 | T | A | Heterozygous |
| NC_037642.1 | 12260928 | SNV | 1 | A | C | Heterozygous |
| NC_037642.1 | 12260928 | SNV | 1 | A | G | Heterozygous |
| NC_037642.1 | 12260936 | SNV | 1 | A | G | Heterozygous |
| NC_037642.1 | 12260936 | SNV | 1 | A | T | Heterozygous |
| NC_037642.1 | 12260944 | SNV | 1 | A | T | Homozygous   |
| NC_037642.1 | 12260954 | SNV | 1 | A | T | Heterozygous |
| NC_037642.1 | 12260956 | SNV | 1 | A | G | Heterozygous |
| NC_037642.1 | 12260959 | SNV | 1 | A | T | Heterozygous |
| NC_037642.1 | 12260961 | SNV | 1 | C | T | Heterozygous |
| NC_037642.1 | 12260965 | SNV | 1 | A | T | Heterozygous |

|             |          |     |   |   |   |              |
|-------------|----------|-----|---|---|---|--------------|
| NC_037642.1 | 12260968 | SNV | 1 | A | T | Heterozygous |
| NC_037642.1 | 12260980 | SNV | 1 | T | C | Heterozygous |
| NC_037642.1 | 12260985 | SNV | 1 | A | T | Heterozygous |
| NC_037642.1 | 12261059 | SNV | 1 | A | T | Homozygous   |
| NC_037642.1 | 12261061 | SNV | 1 | A | T | Homozygous   |
| NC_037642.1 | 12261067 | SNV | 1 | A | T | Homozygous   |
| NC_037642.1 | 12261103 | SNV | 1 | A | G | Homozygous   |
| NC_037642.1 | 12261110 | SNV | 1 | A | T | Heterozygous |
| NC_037642.1 | 12261196 | SNV | 1 | A | C | Homozygous   |
| NC_037642.1 | 12261210 | SNV | 1 | A | T | Heterozygous |
| NC_037642.1 | 12261220 | SNV | 1 | A | G | Heterozygous |
| NC_037642.1 | 12261235 | SNV | 1 | A | C | Heterozygous |
| NC_037642.1 | 12261266 | SNV | 1 | T | C | Heterozygous |
| NC_037642.1 | 12261268 | SNV | 1 | A | T | Heterozygous |
| NC_037642.1 | 12261271 | SNV | 1 | A | G | Homozygous   |
| NC_037642.1 | 12261274 | SNV | 1 | A | C | Homozygous   |
| NC_037642.1 | 12261458 | SNV | 1 | A | C | Homozygous   |
| NC_037642.1 | 12261489 | SNV | 1 | T | C | Homozygous   |
| NC_037642.1 | 12261491 | SNV | 1 | A | T | Homozygous   |
| NC_037642.1 | 12261494 | SNV | 1 | A | G | Homozygous   |
| NC_037642.1 | 12261498 | SNV | 1 | A | C | Homozygous   |
| NC_037642.1 | 12261523 | SNV | 1 | A | C | Heterozygous |
| NC_037642.1 | 12261572 | SNV | 1 | A | G | Heterozygous |
| NC_037642.1 | 12261574 | SNV | 1 | T | C | Heterozygous |
| NC_037642.1 | 12261692 | SNV | 1 | G | A | Heterozygous |
| NC_037642.1 | 12261766 | SNV | 1 | T | A | Heterozygous |
| NC_037642.1 | 12263075 | SNV | 1 | T | C | Homozygous   |
| NC_037642.1 | 12267526 | SNV | 1 | C | A | Heterozygous |
| NC_037642.1 | 12267552 | SNV | 1 | G | A | Homozygous   |
| NC_037642.1 | 12269592 | SNV | 1 | C | T | Homozygous   |
| NC_037642.1 | 12269596 | SNV | 1 | C | T | Homozygous   |
| NC_037642.1 | 12269599 | SNV | 1 | T | A | Heterozygous |
| NC_037642.1 | 12269602 | SNV | 1 | T | A | Heterozygous |
| NC_037642.1 | 12269608 | SNV | 1 | C | A | Homozygous   |
| NC_037642.1 | 12271005 | SNV | 1 | G | A | Heterozygous |
| NC_037642.1 | 12276248 | SNV | 1 | A | G | Homozygous   |
| NC_037642.1 | 12276269 | SNV | 1 | T | C | Homozygous   |
| NC_037642.1 | 12276281 | SNV | 1 | G | A | Heterozygous |
| NC_037642.1 | 12276298 | SNV | 1 | G | A | Homozygous   |
| NC_037642.1 | 12276328 | SNV | 1 | T | C | Homozygous   |
| NC_037642.1 | 12276345 | SNV | 1 | C | T | Heterozygous |
| NC_037642.1 | 12276383 | SNV | 1 | A | G | Homozygous   |
| NC_037642.1 | 12276402 | SNV | 1 | T | A | Homozygous   |
| NC_037642.1 | 12276507 | SNV | 1 | G | A | Heterozygous |
| NC_037642.1 | 12276551 | SNV | 1 | T | C | Heterozygous |
| NC_037642.1 | 12276628 | SNV | 1 | G | A | Heterozygous |
| NC_037642.1 | 12276760 | SNV | 1 | G | A | Homozygous   |
| NC_037642.1 | 12276776 | SNV | 1 | C | T | Homozygous   |
| NC_037642.1 | 12276778 | SNV | 1 | C | T | Heterozygous |
| NC_037642.1 | 12289973 | SNV | 1 | G | A | Homozygous   |
| NC_037642.1 | 12289993 | SNV | 1 | A | C | Homozygous   |

|             |          |     |   |   |   |              |
|-------------|----------|-----|---|---|---|--------------|
| NC_037642.1 | 12290012 | SNV | 1 | A | C | Heterozygous |
| NC_037642.1 | 12290090 | SNV | 1 | A | G | Heterozygous |
| NC_037642.1 | 12297415 | SNV | 1 | C | A | Heterozygous |
| NC_037642.1 | 12297454 | SNV | 1 | G | A | Homozygous   |
| NC_037642.1 | 12297460 | SNV | 1 | G | A | Heterozygous |
| NC_037642.1 | 12297490 | SNV | 1 | G | A | Homozygous   |
| NC_037642.1 | 12297521 | SNV | 1 | C | G | Homozygous   |
| NC_037642.1 | 12297783 | SNV | 1 | T | G | Heterozygous |
| NC_037642.1 | 12297791 | SNV | 1 | G | T | Heterozygous |
| NC_037642.1 | 12297832 | SNV | 1 | C | T | Homozygous   |
| NC_037642.1 | 12297834 | SNV | 1 | T | C | Homozygous   |
| NC_037642.1 | 12297836 | SNV | 1 | T | C | Heterozygous |
| NC_037642.1 | 12297842 | SNV | 1 | T | C | Heterozygous |
| NC_037642.1 | 12297850 | SNV | 1 | T | C | Heterozygous |
| NC_037642.1 | 12297853 | SNV | 1 | G | T | Homozygous   |
| NC_037642.1 | 12297857 | SNV | 1 | G | T | Homozygous   |
| NC_037642.1 | 12297861 | SNV | 1 | G | T | Homozygous   |
| NC_037642.1 | 12297865 | SNV | 1 | G | T | Heterozygous |
| NC_037642.1 | 12297886 | SNV | 1 | A | C | Homozygous   |
| NC_037642.1 | 12297913 | SNV | 1 | T | G | Homozygous   |
| NC_037642.1 | 12298577 | SNV | 1 | T | A | Homozygous   |
| NC_037642.1 | 12298584 | SNV | 1 | T | C | Homozygous   |
| NC_037642.1 | 12298586 | SNV | 1 | T | A | Homozygous   |
| NC_037642.1 | 12298614 | SNV | 1 | A | C | Homozygous   |
| NC_037642.1 | 12298619 | SNV | 1 | T | G | Homozygous   |
| NC_037642.1 | 12304354 | SNV | 1 | T | G | Homozygous   |
| NC_037642.1 | 12304596 | SNV | 1 | A | G | Heterozygous |
| NC_037642.1 | 12304624 | SNV | 1 | A | G | Heterozygous |
| NC_037642.1 | 12304632 | SNV | 1 | A | G | Heterozygous |
| NC_037642.1 | 12304635 | SNV | 1 | G | A | Heterozygous |
| NC_037642.1 | 12304638 | SNV | 1 | G | A | Homozygous   |
| NC_037642.1 | 12304641 | SNV | 1 | A | G | Homozygous   |
| NC_037642.1 | 12310579 | SNV | 1 | G | A | Homozygous   |
| NC_037642.1 | 12310589 | SNV | 1 | A | T | Homozygous   |
| NC_037642.1 | 12310592 | SNV | 1 | G | A | Homozygous   |
| NC_037642.1 | 12311009 | SNV | 1 | T | C | Heterozygous |
| NC_037642.1 | 12311028 | SNV | 1 | C | A | Homozygous   |
| NC_037642.1 | 12312021 | SNV | 1 | T | C | Homozygous   |
| NC_037642.1 | 12312038 | SNV | 1 | T | C | Homozygous   |
| NC_037642.1 | 12315609 | SNV | 1 | G | A | Heterozygous |
| NC_037642.1 | 12316440 | SNV | 1 | T | A | Homozygous   |
| NC_037642.1 | 12317066 | SNV | 1 | T | C | Homozygous   |
| NC_037642.1 | 12317111 | SNV | 1 | A | G | Homozygous   |
| NC_037642.1 | 12317188 | SNV | 1 | G | A | Heterozygous |
| NC_037642.1 | 12317259 | SNV | 1 | T | C | Homozygous   |
| NC_037642.1 | 12317296 | SNV | 1 | A | G | Homozygous   |
| NC_037642.1 | 12317599 | SNV | 1 | T | C | Homozygous   |
| NC_037642.1 | 12317700 | SNV | 1 | C | A | Heterozygous |
| NC_037642.1 | 12317782 | SNV | 1 | A | G | Homozygous   |
| NC_037642.1 | 12321061 | SNV | 1 | C | T | Homozygous   |
| NC_037642.1 | 12321673 | SNV | 1 | A | G | Heterozygous |



|             |          |     |   |   |   |              |
|-------------|----------|-----|---|---|---|--------------|
| NC_037642.1 | 12321678 | SNV | 1 | T | A | Homozygous   |
| NC_037642.1 | 12321736 | SNV | 1 | A | G | Homozygous   |
| NC_037642.1 | 12325398 | SNV | 1 | C | T | Homozygous   |
| NC_037642.1 | 12325457 | SNV | 1 | T | A | Homozygous   |
| NC_037642.1 | 12325892 | SNV | 1 | T | C | Homozygous   |
| NC_037642.1 | 12325898 | SNV | 1 | C | T | Homozygous   |
| NC_037642.1 | 12325909 | SNV | 1 | C | T | Homozygous   |
| NC_037642.1 | 12325920 | SNV | 1 | T | A | Homozygous   |
| NC_037642.1 | 12329766 | SNV | 1 | C | T | Heterozygous |
| NC_037642.1 | 12330260 | SNV | 1 | A | G | Heterozygous |
| NC_037642.1 | 12330271 | SNV | 1 | G | C | Heterozygous |
| NC_037642.1 | 12330273 | SNV | 1 | C | A | Heterozygous |
| NC_037642.1 | 12330311 | SNV | 1 | C | T | Homozygous   |
| NC_037642.1 | 12330322 | SNV | 1 | A | C | Homozygous   |
| NC_037642.1 | 12330330 | SNV | 1 | G | A | Homozygous   |
| NC_037642.1 | 12330370 | SNV | 1 | A | G | Homozygous   |
| NC_037642.1 | 12330399 | SNV | 1 | T | C | Homozygous   |
| NC_037642.1 | 12330401 | SNV | 1 | T | C | Homozygous   |
| NC_037642.1 | 12330433 | SNV | 1 | C | T | Heterozygous |
| NC_037642.1 | 12330435 | SNV | 1 | C | T | Heterozygous |
| NC_037642.1 | 12330459 | SNV | 1 | T | C | Heterozygous |
| NC_037642.1 | 12330484 | SNV | 1 | C | G | Heterozygous |
| NC_037642.1 | 12330532 | SNV | 1 | G | A | Heterozygous |
| NC_037642.1 | 12330560 | SNV | 1 | A | G | Heterozygous |
| NC_037642.1 | 12330568 | SNV | 1 | C | G | Heterozygous |
| NC_037642.1 | 12334160 | SNV | 1 | T | C | Heterozygous |
| NC_037642.1 | 12341750 | SNV | 1 | T | C | Homozygous   |
| NC_037642.1 | 12341763 | SNV | 1 | G | C | Heterozygous |
| NC_037642.1 | 12341791 | SNV | 1 | A | G | Heterozygous |
| NC_037642.1 | 12341796 | SNV | 1 | A | C | Heterozygous |
| NC_037642.1 | 12341800 | SNV | 1 | A | G | Homozygous   |
| NC_037642.1 | 12342475 | SNV | 1 | C | G | Homozygous   |
| NC_037642.1 | 12342501 | SNV | 1 | G | A | Homozygous   |
| NC_037642.1 | 12342530 | SNV | 1 | T | A | Heterozygous |
| NC_037642.1 | 12342534 | SNV | 1 | T | A | Heterozygous |
| NC_037642.1 | 12342625 | SNV | 1 | G | A | Heterozygous |
| NC_037642.1 | 12342637 | SNV | 1 | G | C | Homozygous   |
| NC_037642.1 | 12350277 | SNV | 1 | C | T | Heterozygous |
| NC_037642.1 | 12356634 | SNV | 1 | T | G | Heterozygous |
| NC_037642.1 | 12363749 | SNV | 1 | G | A | Heterozygous |
| NC_037642.1 | 12363757 | SNV | 1 | A | G | Heterozygous |
| NC_037642.1 | 12363769 | SNV | 1 | G | A | Heterozygous |
| NC_037642.1 | 12363772 | SNV | 1 | T | C | Homozygous   |
| NC_037642.1 | 12363776 | SNV | 1 | C | A | Heterozygous |
| NC_037642.1 | 12363787 | SNV | 1 | A | G | Heterozygous |
| NC_037642.1 | 12363798 | SNV | 1 | A | C | Heterozygous |
| NC_037642.1 | 12364966 | SNV | 1 | A | G | Heterozygous |
| NC_037642.1 | 12365049 | SNV | 1 | T | C | Homozygous   |
| NC_037642.1 | 12369139 | SNV | 1 | C | A | Homozygous   |
| NC_037642.1 | 12372426 | SNV | 1 | A | G | Homozygous   |
| NC_037642.1 | 12372439 | SNV | 1 | T | C | Homozygous   |

|             |          |     |   |   |   |              |
|-------------|----------|-----|---|---|---|--------------|
| NC_037642.1 | 12381585 | SNV | 1 | C | A | Heterozygous |
| NC_037642.1 | 12381590 | SNV | 1 | A | G | Heterozygous |
| NC_037642.1 | 12381594 | SNV | 1 | A | G | Heterozygous |
| NC_037642.1 | 12381597 | SNV | 1 | C | T | Heterozygous |
| NC_037642.1 | 12381601 | SNV | 1 | C | T | Heterozygous |
| NC_037642.1 | 12381614 | SNV | 1 | A | G | Heterozygous |
| NC_037642.1 | 12383084 | SNV | 1 | C | A | Homozygous   |
| NC_037642.1 | 12383086 | SNV | 1 | T | C | Homozygous   |
| NC_037642.1 | 12383107 | SNV | 1 | C | G | Homozygous   |
| NC_037642.1 | 12383120 | SNV | 1 | T | A | Homozygous   |
| NC_037642.1 | 12387374 | SNV | 1 | A | T | Heterozygous |
| NC_037642.1 | 12387426 | SNV | 1 | A | C | Homozygous   |
| NC_037642.1 | 12387433 | SNV | 1 | A | T | Heterozygous |
| NC_037642.1 | 12390477 | SNV | 1 | G | T | Homozygous   |
| NC_037642.1 | 12390492 | SNV | 1 | C | T | Heterozygous |
| NC_037642.1 | 12390495 | SNV | 1 | C | T | Heterozygous |
| NC_037642.1 | 12390498 | SNV | 1 | C | T | Heterozygous |
| NC_037642.1 | 12390501 | SNV | 1 | C | T | Heterozygous |
| NC_037642.1 | 12390624 | SNV | 1 | C | T | Heterozygous |
| NC_037642.1 | 12397120 | SNV | 1 | A | T | Heterozygous |
| NC_037642.1 | 12397126 | SNV | 1 | A | T | Heterozygous |
| NC_037642.1 | 12397127 | SNV | 1 | T | C | Heterozygous |
| NC_037642.1 | 12397130 | SNV | 1 | A | G | Heterozygous |
| NC_037642.1 | 12397131 | SNV | 1 | T | C | Heterozygous |
| NC_037642.1 | 12397134 | SNV | 1 | A | G | Heterozygous |
| NC_037642.1 | 12397139 | SNV | 1 | T | C | Heterozygous |
| NC_037642.1 | 12399830 | SNV | 1 | A | C | Heterozygous |
| NC_037642.1 | 12401067 | SNV | 1 | C | T | Homozygous   |
| NC_037642.1 | 12401318 | SNV | 1 | T | C | Heterozygous |
| NC_037642.1 | 12406415 | SNV | 1 | C | A | Heterozygous |
| NC_037642.1 | 12409098 | SNV | 1 | T | C | Homozygous   |
| NC_037642.1 | 12410666 | SNV | 1 | T | G | Heterozygous |
| NC_037642.1 | 12413518 | SNV | 1 | C | T | Heterozygous |
| NC_037642.1 | 12413612 | SNV | 1 | G | A | Homozygous   |
| NC_037642.1 | 12413948 | SNV | 1 | G | A | Homozygous   |
| NC_037642.1 | 12414208 | SNV | 1 | A | G | Homozygous   |
| NC_037642.1 | 12417943 | SNV | 1 | A | T | Heterozygous |
| NC_037642.1 | 12418586 | SNV | 1 | T | A | Heterozygous |
| NC_037642.1 | 12418594 | SNV | 1 | T | G | Heterozygous |
| NC_037642.1 | 12418598 | SNV | 1 | C | T | Homozygous   |
| NC_037642.1 | 12418601 | SNV | 1 | T | C | Heterozygous |
| NC_037642.1 | 12418609 | SNV | 1 | T | C | Heterozygous |
| NC_037642.1 | 12418628 | SNV | 1 | T | C | Heterozygous |
| NC_037642.1 | 12419576 | SNV | 1 | G | A | Heterozygous |
| NC_037642.1 | 12419742 | SNV | 1 | C | T | Heterozygous |
| NC_037642.1 | 12420460 | SNV | 1 | C | T | Homozygous   |
| NC_037642.1 | 12420549 | SNV | 1 | C | A | Homozygous   |
| NC_037642.1 | 12420659 | SNV | 1 | G | A | Homozygous   |
| NC_037642.1 | 12420896 | SNV | 1 | A | T | Heterozygous |
| NC_037642.1 | 12420902 | SNV | 1 | G | A | Homozygous   |
| NC_037642.1 | 12420910 | SNV | 1 | A | G | Homozygous   |

|             |          |     |   |   |   |              |
|-------------|----------|-----|---|---|---|--------------|
| NC_037642.1 | 12421866 | SNV | 1 | G | T | Heterozygous |
| NC_037642.1 | 12426202 | SNV | 1 | T | G | Homozygous   |
| NC_037642.1 | 12426222 | SNV | 1 | C | T | Homozygous   |
| NC_037642.1 | 12426225 | SNV | 1 | C | T | Homozygous   |
| NC_037642.1 | 12426288 | SNV | 1 | C | T | Heterozygous |
| NC_037642.1 | 12426563 | SNV | 1 | A | G | Homozygous   |
| NC_037642.1 | 12426572 | SNV | 1 | T | A | Heterozygous |
| NC_037642.1 | 12426659 | SNV | 1 | G | T | Homozygous   |
| NC_037642.1 | 12426726 | SNV | 1 | A | G | Heterozygous |
| NC_037642.1 | 12426763 | SNV | 1 | A | T | Homozygous   |
| NC_037642.1 | 12426766 | SNV | 1 | A | G | Homozygous   |
| NC_037642.1 | 12426886 | SNV | 1 | T | C | Heterozygous |
| NC_037642.1 | 12426982 | SNV | 1 | A | G | Homozygous   |
| NC_037642.1 | 12427578 | SNV | 1 | G | T | Homozygous   |
| NC_037642.1 | 12427598 | SNV | 1 | T | A | Homozygous   |
| NC_037642.1 | 12427600 | SNV | 1 | A | C | Heterozygous |
| NC_037642.1 | 12427600 | SNV | 1 | A | G | Heterozygous |
| NC_037642.1 | 12427618 | SNV | 1 | A | C | Homozygous   |
| NC_037642.1 | 12427622 | SNV | 1 | T | C | Homozygous   |
| NC_037642.1 | 12427628 | SNV | 1 | T | C | Homozygous   |
| NC_037642.1 | 12427632 | SNV | 1 | T | C | Homozygous   |
| NC_037642.1 | 12427634 | SNV | 1 | T | C | Homozygous   |
| NC_037642.1 | 12427983 | SNV | 1 | A | G | Homozygous   |
| NC_037642.1 | 12428904 | SNV | 1 | G | A | Heterozygous |
| NC_037642.1 | 12428991 | SNV | 1 | A | G | Homozygous   |
| NC_037642.1 | 12429024 | SNV | 1 | C | T | Heterozygous |
| NC_037642.1 | 12429244 | SNV | 1 | T | C | Homozygous   |
| NC_037642.1 | 12429457 | SNV | 1 | G | A | Heterozygous |
| NC_037642.1 | 12429511 | SNV | 1 | A | G | Homozygous   |
| NC_037642.1 | 12429547 | SNV | 1 | A | G | Homozygous   |
| NC_037642.1 | 12429553 | SNV | 1 | C | T | Homozygous   |
| NC_037642.1 | 12429603 | SNV | 1 | T | C | Homozygous   |
| NC_037642.1 | 12430477 | SNV | 1 | G | T | Homozygous   |
| NC_037642.1 | 12430485 | SNV | 1 | G | T | Homozygous   |
| NC_037642.1 | 12430488 | SNV | 1 | C | T | Heterozygous |
| NC_037642.1 | 12430491 | SNV | 1 | G | T | Heterozygous |
| NC_037642.1 | 12430517 | SNV | 1 | G | T | Homozygous   |
| NC_037642.1 | 12430523 | SNV | 1 | G | T | Homozygous   |
| NC_037642.1 | 12430529 | SNV | 1 | A | T | Heterozygous |
| NC_037642.1 | 12430551 | SNV | 1 | T | G | Heterozygous |
| NC_037642.1 | 12430565 | SNV | 1 | G | T | Homozygous   |
| NC_037642.1 | 12430575 | SNV | 1 | T | G | Heterozygous |
| NC_037642.1 | 12430601 | SNV | 1 | G | T | Heterozygous |
| NC_037642.1 | 12430644 | SNV | 1 | T | C | Heterozygous |
| NC_037642.1 | 12430648 | SNV | 1 | T | C | Heterozygous |
| NC_037642.1 | 12430666 | SNV | 1 | G | C | Heterozygous |
| NC_037642.1 | 12430680 | SNV | 1 | C | G | Heterozygous |
| NC_037642.1 | 12430683 | SNV | 1 | G | T | Heterozygous |
| NC_037642.1 | 12430688 | SNV | 1 | T | C | Heterozygous |
| NC_037642.1 | 12430691 | SNV | 1 | T | G | Heterozygous |
| NC_037642.1 | 12430693 | SNV | 1 | A | T | Heterozygous |

|             |          |     |   |   |   |              |
|-------------|----------|-----|---|---|---|--------------|
| NC_037642.1 | 12430695 | SNV | 1 | T | C | Heterozygous |
| NC_037642.1 | 12430697 | SNV | 1 | G | T | Heterozygous |
| NC_037642.1 | 12430728 | SNV | 1 | T | A | Homozygous   |
| NC_037642.1 | 12430733 | SNV | 1 | G | T | Homozygous   |
| NC_037642.1 | 12430739 | SNV | 1 | G | T | Homozygous   |
| NC_037642.1 | 12430744 | SNV | 1 | T | C | Homozygous   |
| NC_037642.1 | 12430749 | SNV | 1 | G | T | Homozygous   |
| NC_037642.1 | 12430751 | SNV | 1 | T | A | Heterozygous |
| NC_037642.1 | 12430766 | SNV | 1 | T | C | Homozygous   |
| NC_037642.1 | 12430776 | SNV | 1 | T | C | Homozygous   |
| NC_037642.1 | 12430805 | SNV | 1 | T | C | Homozygous   |
| NC_037642.1 | 12430850 | SNV | 1 | T | C | Homozygous   |
| NC_037642.1 | 12430873 | SNV | 1 | T | C | Heterozygous |
| NC_037642.1 | 12430913 | SNV | 1 | T | C | Homozygous   |
| NC_037642.1 | 12431086 | SNV | 1 | T | G | Homozygous   |
| NC_037642.1 | 12435074 | SNV | 1 | A | T | Homozygous   |
| NC_037642.1 | 12435762 | SNV | 1 | T | C | Homozygous   |
| NC_037642.1 | 12435765 | SNV | 1 | T | A | Homozygous   |
| NC_037642.1 | 12435769 | SNV | 1 | A | T | Homozygous   |
| NC_037642.1 | 12442513 | SNV | 1 | G | C | Heterozygous |
| NC_037642.1 | 12442558 | SNV | 1 | G | A | Homozygous   |
| NC_037642.1 | 12442560 | SNV | 1 | C | T | Homozygous   |
| NC_037642.1 | 12443174 | SNV | 1 | C | G | Heterozygous |
| NC_037642.1 | 12443886 | SNV | 1 | G | A | Heterozygous |
| NC_037642.1 | 12443973 | SNV | 1 | A | G | Heterozygous |
| NC_037642.1 | 12444260 | SNV | 1 | C | T | Homozygous   |
| NC_037642.1 | 12444318 | SNV | 1 | C | A | Heterozygous |
| NC_037642.1 | 12444373 | SNV | 1 | G | A | Homozygous   |
| NC_037642.1 | 12445041 | SNV | 1 | C | T | Heterozygous |
| NC_037642.1 | 12446447 | SNV | 1 | A | T | Homozygous   |
| NC_037642.1 | 12446471 | SNV | 1 | A | G | Homozygous   |
| NC_037642.1 | 12446532 | SNV | 1 | A | G | Homozygous   |
| NC_037642.1 | 12446614 | SNV | 1 | T | C | Homozygous   |
| NC_037642.1 | 12446754 | SNV | 1 | G | A | Heterozygous |
| NC_037642.1 | 12446930 | SNV | 1 | G | A | Homozygous   |
| NC_037642.1 | 12447467 | SNV | 1 | T | G | Heterozygous |
| NC_037642.1 | 12447610 | SNV | 1 | C | T | Homozygous   |
| NC_037642.1 | 12448020 | SNV | 1 | A | G | Homozygous   |
| NC_037642.1 | 12448036 | SNV | 1 | G | T | Heterozygous |
| NC_037642.1 | 12448395 | SNV | 1 | T | A | Homozygous   |
| NC_037642.1 | 12448424 | SNV | 1 | T | C | Homozygous   |
| NC_037642.1 | 12449008 | SNV | 1 | T | C | Heterozygous |
| NC_037642.1 | 12449147 | SNV | 1 | G | C | Homozygous   |
| NC_037642.1 | 12449522 | SNV | 1 | A | G | Homozygous   |
| NC_037642.1 | 12449906 | SNV | 1 | G | A | Heterozygous |
| NC_037642.1 | 12450053 | SNV | 1 | C | T | Homozygous   |
| NC_037642.1 | 12450130 | SNV | 1 | C | T | Homozygous   |
| NC_037642.1 | 12450429 | SNV | 1 | C | T | Homozygous   |
| NC_037642.1 | 12450450 | SNV | 1 | G | C | Homozygous   |
| NC_037642.1 | 12450566 | SNV | 1 | T | C | Heterozygous |
| NC_037642.1 | 12450632 | SNV | 1 | C | T | Homozygous   |

|             |          |     |   |   |   |              |
|-------------|----------|-----|---|---|---|--------------|
| NC_037642.1 | 12450638 | SNV | 1 | C | T | Heterozygous |
| NC_037642.1 | 12450645 | SNV | 1 | C | T | Heterozygous |
| NC_037642.1 | 12450720 | SNV | 1 | G | C | Homozygous   |
| NC_037642.1 | 12451172 | SNV | 1 | G | T | Homozygous   |
| NC_037642.1 | 12451249 | SNV | 1 | G | A | Homozygous   |
| NC_037642.1 | 12451355 | SNV | 1 | G | C | Heterozygous |
| NC_037642.1 | 12451381 | SNV | 1 | C | T | Homozygous   |
| NC_037642.1 | 12451471 | SNV | 1 | T | C | Homozygous   |
| NC_037642.1 | 12451487 | SNV | 1 | A | C | Heterozygous |
| NC_037642.1 | 12451651 | SNV | 1 | G | T | Heterozygous |
| NC_037642.1 | 12451674 | SNV | 1 | G | A | Heterozygous |
| NC_037642.1 | 12451678 | SNV | 1 | G | A | Heterozygous |
| NC_037642.1 | 12454494 | SNV | 1 | A | G | Homozygous   |
| NC_037642.1 | 12454506 | SNV | 1 | C | T | Homozygous   |
| NC_037642.1 | 12454514 | SNV | 1 | C | G | Heterozygous |
| NC_037642.1 | 12454855 | SNV | 1 | T | C | Heterozygous |
| NC_037642.1 | 12454991 | SNV | 1 | T | C | Heterozygous |
| NC_037642.1 | 12458796 | SNV | 1 | G | A | Homozygous   |
| NC_037642.1 | 12458812 | SNV | 1 | G | A | Heterozygous |
| NC_037642.1 | 12458898 | SNV | 1 | T | C | Heterozygous |
| NC_037642.1 | 12458913 | SNV | 1 | A | C | Homozygous   |
| NC_037642.1 | 12458954 | SNV | 1 | A | G | Heterozygous |
| NC_037642.1 | 12458961 | SNV | 1 | T | C | Homozygous   |
| NC_037642.1 | 12458973 | SNV | 1 | A | G | Homozygous   |
| NC_037642.1 | 12459110 | SNV | 1 | A | G | Homozygous   |
| NC_037642.1 | 12459121 | SNV | 1 | A | G | Homozygous   |
| NC_037642.1 | 12459148 | SNV | 1 | A | T | Homozygous   |
| NC_037642.1 | 12459150 | SNV | 1 | A | C | Homozygous   |
| NC_037642.1 | 12459414 | SNV | 1 | A | C | Heterozygous |
| NC_037642.1 | 12459416 | SNV | 1 | A | G | Heterozygous |
| NC_037642.1 | 12459435 | SNV | 1 | T | C | Homozygous   |
| NC_037642.1 | 12459447 | SNV | 1 | A | G | Homozygous   |
| NC_037642.1 | 12459452 | SNV | 1 | T | C | Homozygous   |
| NC_037642.1 | 12459475 | SNV | 1 | C | T | Homozygous   |
| NC_037642.1 | 12459478 | SNV | 1 | G | A | Homozygous   |
| NC_037642.1 | 12460094 | SNV | 1 | G | A | Heterozygous |
| NC_037642.1 | 12461122 | SNV | 1 | G | A | Homozygous   |
| NC_037642.1 | 12461136 | SNV | 1 | T | C | Homozygous   |
| NC_037642.1 | 12461277 | SNV | 1 | T | C | Homozygous   |
| NC_037642.1 | 12461326 | SNV | 1 | T | C | Homozygous   |
| NC_037642.1 | 12461378 | SNV | 1 | A | T | Homozygous   |
| NC_037642.1 | 12461395 | SNV | 1 | C | T | Heterozygous |
| NC_037642.1 | 12461455 | SNV | 1 | G | A | Heterozygous |
| NC_037642.1 | 12461762 | SNV | 1 | A | G | Homozygous   |
| NC_037642.1 | 12461997 | SNV | 1 | C | T | Homozygous   |
| NC_037642.1 | 12462072 | SNV | 1 | T | C | Homozygous   |
| NC_037642.1 | 12462082 | SNV | 1 | T | C | Homozygous   |
| NC_037642.1 | 12462131 | SNV | 1 | G | C | Homozygous   |
| NC_037642.1 | 12462135 | SNV | 1 | A | G | Homozygous   |
| NC_037642.1 | 12462154 | SNV | 1 | A | G | Heterozygous |
| NC_037642.1 | 12462799 | SNV | 1 | C | T | Heterozygous |

|             |          |     |   |   |   |              |
|-------------|----------|-----|---|---|---|--------------|
| NC_037642.1 | 12462818 | SNV | 1 | G | A | Homozygous   |
| NC_037642.1 | 12462853 | SNV | 1 | T | C | Homozygous   |
| NC_037642.1 | 12463000 | SNV | 1 | G | A | Heterozygous |
| NC_037642.1 | 12463204 | SNV | 1 | G | T | Heterozygous |
| NC_037642.1 | 12463228 | SNV | 1 | G | C | Homozygous   |
| NC_037642.1 | 12463351 | SNV | 1 | T | A | Heterozygous |
| NC_037642.1 | 12463459 | SNV | 1 | T | A | Homozygous   |
| NC_037642.1 | 12463492 | SNV | 1 | C | T | Heterozygous |
| NC_037642.1 | 12463512 | SNV | 1 | C | A | Homozygous   |
| NC_037642.1 | 12463514 | SNV | 1 | T | A | Homozygous   |
| NC_037642.1 | 12463748 | SNV | 1 | C | T | Homozygous   |
| NC_037642.1 | 12463868 | SNV | 1 | A | G | Homozygous   |
| NC_037642.1 | 12463951 | SNV | 1 | G | A | Heterozygous |
| NC_037642.1 | 12473344 | SNV | 1 | T | C | Heterozygous |
| NC_037642.1 | 12473446 | SNV | 1 | T | C | Homozygous   |
| NC_037642.1 | 12473484 | SNV | 1 | G | A | Heterozygous |
| NC_037642.1 | 12476073 | SNV | 1 | T | C | Heterozygous |
| NC_037642.1 | 12476099 | SNV | 1 | G | A | Heterozygous |
| NC_037642.1 | 12476169 | SNV | 1 | A | T | Heterozygous |
| NC_037642.1 | 12476173 | SNV | 1 | G | A | Heterozygous |
| NC_037642.1 | 12476417 | SNV | 1 | G | A | Homozygous   |
| NC_037642.1 | 12476902 | SNV | 1 | T | C | Heterozygous |
| NC_037642.1 | 12476906 | SNV | 1 | C | T | Heterozygous |
| NC_037642.1 | 12482758 | SNV | 1 | C | A | Heterozygous |
| NC_037642.1 | 12482773 | SNV | 1 | A | T | Heterozygous |
| NC_037642.1 | 12482781 | SNV | 1 | T | C | Heterozygous |
| NC_037642.1 | 12482798 | SNV | 1 | T | C | Homozygous   |
| NC_037642.1 | 12482880 | SNV | 1 | T | C | Homozygous   |
| NC_037642.1 | 12482890 | SNV | 1 | G | A | Heterozygous |
| NC_037642.1 | 12482949 | SNV | 1 | A | G | Heterozygous |
| NC_037642.1 | 12482957 | SNV | 1 | C | T | Homozygous   |
| NC_037642.1 | 12483296 | SNV | 1 | A | G | Homozygous   |
| NC_037642.1 | 12483317 | SNV | 1 | T | A | Heterozygous |
| NC_037642.1 | 12483327 | SNV | 1 | G | A | Homozygous   |
| NC_037642.1 | 12483336 | SNV | 1 | A | G | Heterozygous |
| NC_037642.1 | 12483477 | SNV | 1 | T | C | Homozygous   |
| NC_037642.1 | 12483520 | SNV | 1 | T | C | Heterozygous |
| NC_037642.1 | 12483645 | SNV | 1 | T | C | Heterozygous |
| NC_037642.1 | 12483912 | SNV | 1 | G | A | Homozygous   |
| NC_037642.1 | 12483927 | SNV | 1 | C | G | Heterozygous |
| NC_037642.1 | 12483954 | SNV | 1 | T | C | Heterozygous |
| NC_037642.1 | 12484397 | SNV | 1 | A | G | Homozygous   |
| NC_037642.1 | 12489069 | SNV | 1 | A | G | Homozygous   |
| NC_037642.1 | 12489208 | SNV | 1 | A | G | Homozygous   |
| NC_037642.1 | 12489214 | SNV | 1 | G | A | Homozygous   |
| NC_037642.1 | 12489218 | SNV | 1 | G | A | Homozygous   |
| NC_037642.1 | 12489222 | SNV | 1 | G | A | Homozygous   |
| NC_037642.1 | 12489319 | SNV | 1 | C | T | Heterozygous |
| NC_037642.1 | 12489366 | SNV | 1 | T | C | Heterozygous |
| NC_037642.1 | 12489369 | SNV | 1 | T | A | Homozygous   |
| NC_037642.1 | 12489483 | SNV | 1 | C | G | Heterozygous |

|             |          |     |   |   |   |              |
|-------------|----------|-----|---|---|---|--------------|
| NC_037642.1 | 12489503 | SNV | 1 | T | C | Heterozygous |
| NC_037642.1 | 12489525 | SNV | 1 | T | C | Homozygous   |
| NC_037642.1 | 12489536 | SNV | 1 | T | C | Heterozygous |
| NC_037642.1 | 12489624 | SNV | 1 | T | C | Heterozygous |
| NC_037642.1 | 12489635 | SNV | 1 | T | C | Homozygous   |
| NC_037642.1 | 12489646 | SNV | 1 | T | C | Homozygous   |
| NC_037642.1 | 12489673 | SNV | 1 | T | C | Homozygous   |
| NC_037642.1 | 12489700 | SNV | 1 | T | A | Heterozygous |
| NC_037642.1 | 12489719 | SNV | 1 | C | T | Heterozygous |
| NC_037642.1 | 12489750 | SNV | 1 | C | T | Heterozygous |
| NC_037642.1 | 12489758 | SNV | 1 | T | C | Heterozygous |
| NC_037642.1 | 12489769 | SNV | 1 | T | C | Heterozygous |
| NC_037642.1 | 12489772 | SNV | 1 | C | A | Heterozygous |
| NC_037642.1 | 12489813 | SNV | 1 | T | C | Heterozygous |
| NC_037642.1 | 12492591 | SNV | 1 | A | G | Homozygous   |
| NC_037642.1 | 12492599 | SNV | 1 | A | T | Homozygous   |
| NC_037642.1 | 12492604 | SNV | 1 | G | A | Homozygous   |
| NC_037642.1 | 12492609 | SNV | 1 | A | T | Homozygous   |
| NC_037642.1 | 12492614 | SNV | 1 | G | A | Homozygous   |
| NC_037642.1 | 12492624 | SNV | 1 | G | A | Heterozygous |
| NC_037642.1 | 12492628 | SNV | 1 | G | A | Heterozygous |
| NC_037642.1 | 12495206 | SNV | 1 | T | A | Heterozygous |
| NC_037642.1 | 12495210 | SNV | 1 | T | A | Heterozygous |
| NC_037642.1 | 12496395 | SNV | 1 | G | A | Heterozygous |
| NC_037642.1 | 12496400 | SNV | 1 | C | T | Heterozygous |
| NC_037642.1 | 12497247 | SNV | 1 | C | T | Homozygous   |
| NC_037642.1 | 12497371 | SNV | 1 | T | C | Heterozygous |
| NC_037642.1 | 12497410 | SNV | 1 | A | G | Homozygous   |
| NC_037642.1 | 12497564 | SNV | 1 | G | A | Heterozygous |
| NC_037642.1 | 12497584 | SNV | 1 | G | A | Heterozygous |
| NC_037642.1 | 12497641 | SNV | 1 | G | A | Heterozygous |
| NC_037642.1 | 12497647 | SNV | 1 | T | C | Heterozygous |
| NC_037642.1 | 12497679 | SNV | 1 | G | A | Homozygous   |
| NC_037642.1 | 12497733 | SNV | 1 | A | G | Homozygous   |
| NC_037642.1 | 12497759 | SNV | 1 | C | T | Homozygous   |
| NC_037642.1 | 12497765 | SNV | 1 | T | A | Heterozygous |
| NC_037642.1 | 12497858 | SNV | 1 | A | G | Homozygous   |
| NC_037642.1 | 12497902 | SNV | 1 | A | G | Heterozygous |
| NC_037642.1 | 12505915 | SNV | 1 | T | G | Homozygous   |
| NC_037642.1 | 12505932 | SNV | 1 | T | C | Homozygous   |
| NC_037642.1 | 12505942 | SNV | 1 | T | G | Homozygous   |
| NC_037642.1 | 12507795 | SNV | 1 | G | A | Homozygous   |
| NC_037642.1 | 12507804 | SNV | 1 | T | C | Homozygous   |
| NC_037642.1 | 12512211 | SNV | 1 | A | G | Heterozygous |
| NC_037642.1 | 12512220 | SNV | 1 | C | T | Heterozygous |
| NC_037642.1 | 12512294 | SNV | 1 | C | G | Homozygous   |
| NC_037642.1 | 12512322 | SNV | 1 | A | G | Homozygous   |
| NC_037642.1 | 12515729 | SNV | 1 | A | T | Homozygous   |
| NC_037642.1 | 12515743 | SNV | 1 | G | A | Homozygous   |
| NC_037642.1 | 12515774 | SNV | 1 | G | A | Homozygous   |
| NC_037642.1 | 12515808 | SNV | 1 | T | G | Heterozygous |

|             |          |     |   |   |   |              |
|-------------|----------|-----|---|---|---|--------------|
| NC_037642.1 | 12515810 | SNV | 1 | T | C | Heterozygous |
| NC_037642.1 | 12515812 | SNV | 1 | T | A | Heterozygous |
| NC_037642.1 | 12515824 | SNV | 1 | G | T | Heterozygous |
| NC_037642.1 | 12515826 | SNV | 1 | A | T | Heterozygous |
| NC_037642.1 | 12515893 | SNV | 1 | G | A | Heterozygous |
| NC_037642.1 | 12515922 | SNV | 1 | A | G | Heterozygous |
| NC_037642.1 | 12515976 | SNV | 1 | C | T | Heterozygous |
| NC_037642.1 | 12516386 | SNV | 1 | G | C | Heterozygous |
| NC_037642.1 | 12516422 | SNV | 1 | G | A | Heterozygous |
| NC_037642.1 | 12516506 | SNV | 1 | A | G | Homozygous   |
| NC_037642.1 | 12516588 | SNV | 1 | G | A | Homozygous   |
| NC_037642.1 | 12516631 | SNV | 1 | T | C | Homozygous   |
| NC_037642.1 | 12516680 | SNV | 1 | G | A | Heterozygous |
| NC_037642.1 | 12521632 | SNV | 1 | C | G | Homozygous   |
| NC_037642.1 | 12521761 | SNV | 1 | A | G | Homozygous   |
| NC_037642.1 | 12521810 | SNV | 1 | C | T | Homozygous   |
| NC_037642.1 | 12521859 | SNV | 1 | A | G | Homozygous   |
| NC_037642.1 | 12521875 | SNV | 1 | A | G | Heterozygous |
| NC_037642.1 | 12523923 | SNV | 1 | G | A | Homozygous   |
| NC_037642.1 | 12523935 | SNV | 1 | A | T | Heterozygous |
| NC_037642.1 | 12523978 | SNV | 1 | T | C | Homozygous   |
| NC_037642.1 | 12524024 | SNV | 1 | C | T | Heterozygous |
| NC_037642.1 | 12524083 | SNV | 1 | T | C | Homozygous   |
| NC_037642.1 | 12524252 | SNV | 1 | G | A | Homozygous   |
| NC_037642.1 | 12525043 | SNV | 1 | T | C | Heterozygous |
| NC_037642.1 | 12525067 | SNV | 1 | A | G | Heterozygous |
| NC_037642.1 | 12527330 | SNV | 1 | T | C | Homozygous   |
| NC_037642.1 | 12528105 | SNV | 1 | A | T | Heterozygous |
| NC_037642.1 | 12528108 | SNV | 1 | C | T | Heterozygous |
| NC_037642.1 | 12528246 | SNV | 1 | C | T | Heterozygous |
| NC_037642.1 | 12528332 | SNV | 1 | A | G | Heterozygous |
| NC_037642.1 | 12528357 | SNV | 1 | T | C | Homozygous   |
| NC_037642.1 | 12530066 | SNV | 1 | G | A | Homozygous   |
| NC_037642.1 | 12530077 | SNV | 1 | G | A | Heterozygous |
| NC_037642.1 | 12530080 | SNV | 1 | C | A | Homozygous   |
| NC_037642.1 | 12530429 | SNV | 1 | G | T | Heterozygous |
| NC_037642.1 | 12530540 | SNV | 1 | C | T | Heterozygous |
| NC_037642.1 | 12530639 | SNV | 1 | C | G | Homozygous   |
| NC_037642.1 | 12531574 | SNV | 1 | C | T | Homozygous   |
| NC_037642.1 | 12531579 | SNV | 1 | A | G | Heterozygous |
| NC_037642.1 | 12531584 | SNV | 1 | G | A | Homozygous   |
| NC_037642.1 | 12531595 | SNV | 1 | T | C | Homozygous   |
| NC_037642.1 | 12531629 | SNV | 1 | T | A | Heterozygous |
| NC_037642.1 | 12531631 | SNV | 1 | A | T | Homozygous   |
| NC_037642.1 | 12531654 | SNV | 1 | T | G | Homozygous   |
| NC_037642.1 | 12531658 | SNV | 1 | A | G | Homozygous   |
| NC_037642.1 | 12531662 | SNV | 1 | T | G | Homozygous   |
| NC_037642.1 | 12535134 | SNV | 1 | A | G | Heterozygous |
| NC_037642.1 | 12535283 | SNV | 1 | G | A | Heterozygous |
| NC_037642.1 | 12535366 | SNV | 1 | C | A | Homozygous   |
| NC_037642.1 | 12535371 | SNV | 1 | G | A | Heterozygous |



|             |          |     |   |   |   |              |
|-------------|----------|-----|---|---|---|--------------|
| NC_037642.1 | 12535385 | SNV | 1 | A | G | Heterozygous |
| NC_037642.1 | 12535438 | SNV | 1 | A | G | Homozygous   |
| NC_037642.1 | 12537044 | SNV | 1 | C | T | Heterozygous |
| NC_037642.1 | 12537135 | SNV | 1 | C | T | Heterozygous |
| NC_037642.1 | 12537294 | SNV | 1 | A | G | Heterozygous |
| NC_037642.1 | 12537345 | SNV | 1 | A | C | Homozygous   |
| NC_037642.1 | 12537412 | SNV | 1 | T | A | Homozygous   |
| NC_037642.1 | 12537418 | SNV | 1 | T | C | Homozygous   |
| NC_037642.1 | 12543992 | SNV | 1 | T | C | Heterozygous |
| NC_037642.1 | 12543996 | SNV | 1 | C | T | Heterozygous |
| NC_037642.1 | 12544194 | SNV | 1 | C | G | Heterozygous |
| NC_037642.1 | 12544654 | SNV | 1 | T | C | Heterozygous |
| NC_037642.1 | 12544659 | SNV | 1 | T | C | Heterozygous |
| NC_037642.1 | 12544685 | SNV | 1 | T | C | Heterozygous |
| NC_037642.1 | 12544687 | SNV | 1 | T | C | Heterozygous |
| NC_037642.1 | 12545598 | SNV | 1 | A | G | Homozygous   |
| NC_037642.1 | 12548886 | SNV | 1 | C | T | Homozygous   |
| NC_037642.1 | 12548911 | SNV | 1 | T | A | Homozygous   |
| NC_037642.1 | 12548927 | SNV | 1 | T | C | Homozygous   |
| NC_037642.1 | 12549178 | SNV | 1 | C | T | Homozygous   |
| NC_037642.1 | 12550118 | SNV | 1 | G | A | Heterozygous |
| NC_037642.1 | 12550129 | SNV | 1 | C | T | Heterozygous |
| NC_037642.1 | 12550133 | SNV | 1 | C | T | Heterozygous |
| NC_037642.1 | 12550537 | SNV | 1 | G | C | Homozygous   |
| NC_037642.1 | 12550541 | SNV | 1 | C | A | Homozygous   |
| NC_037642.1 | 12550543 | SNV | 1 | C | T | Homozygous   |
| NC_037642.1 | 12550553 | SNV | 1 | C | T | Homozygous   |
| NC_037642.1 | 12554560 | SNV | 1 | G | A | Heterozygous |
| NC_037642.1 | 12554596 | SNV | 1 | C | T | Homozygous   |
| NC_037642.1 | 12554662 | SNV | 1 | C | T | Heterozygous |
| NC_037642.1 | 12554803 | SNV | 1 | G | A | Homozygous   |
| NC_037642.1 | 12554816 | SNV | 1 | A | G | Homozygous   |
| NC_037642.1 | 12554954 | SNV | 1 | C | T | Homozygous   |
| NC_037642.1 | 12555402 | SNV | 1 | A | G | Heterozygous |
| NC_037642.1 | 12555537 | SNV | 1 | G | A | Homozygous   |
| NC_037642.1 | 12555539 | SNV | 1 | A | G | Homozygous   |
| NC_037642.1 | 12555676 | SNV | 1 | C | T | Heterozygous |
| NC_037642.1 | 12556552 | SNV | 1 | A | G | Heterozygous |
| NC_037642.1 | 12556819 | SNV | 1 | C | T | Homozygous   |
| NC_037642.1 | 12565084 | SNV | 1 | G | A | Heterozygous |
| NC_037642.1 | 12565113 | SNV | 1 | T | C | Heterozygous |
| NC_037642.1 | 12565161 | SNV | 1 | G | A | Heterozygous |
| NC_037642.1 | 12565170 | SNV | 1 | T | C | Heterozygous |
| NC_037642.1 | 12565199 | SNV | 1 | G | A | Heterozygous |
| NC_037642.1 | 12565270 | SNV | 1 | C | T | Homozygous   |
| NC_037642.1 | 12565382 | SNV | 1 | A | G | Heterozygous |
| NC_037642.1 | 12565646 | SNV | 1 | C | T | Heterozygous |
| NC_037642.1 | 12565877 | SNV | 1 | A | G | Homozygous   |
| NC_037642.1 | 12565925 | SNV | 1 | A | G | Homozygous   |
| NC_037642.1 | 12565927 | SNV | 1 | A | G | Homozygous   |
| NC_037642.1 | 12566027 | SNV | 1 | T | C | Heterozygous |

|             |          |     |   |   |   |              |
|-------------|----------|-----|---|---|---|--------------|
| NC_037642.1 | 12566096 | SNV | 1 | A | G | Homozygous   |
| NC_037642.1 | 12566192 | SNV | 1 | A | G | Heterozygous |
| NC_037642.1 | 12566365 | SNV | 1 | A | G | Heterozygous |
| NC_037642.1 | 12566513 | SNV | 1 | T | C | Homozygous   |
| NC_037642.1 | 12566527 | SNV | 1 | C | T | Homozygous   |
| NC_037642.1 | 12566842 | SNV | 1 | C | T | Homozygous   |
| NC_037642.1 | 12567395 | SNV | 1 | G | A | Homozygous   |
| NC_037642.1 | 12567473 | SNV | 1 | C | T | Heterozygous |
| NC_037642.1 | 12567640 | SNV | 1 | T | C | Homozygous   |
| NC_037642.1 | 12567654 | SNV | 1 | G | C | Homozygous   |
| NC_037642.1 | 12568863 | SNV | 1 | T | C | Homozygous   |
| NC_037642.1 | 12569090 | SNV | 1 | T | C | Heterozygous |
| NC_037642.1 | 12569123 | SNV | 1 | G | T | Homozygous   |
| NC_037642.1 | 12569131 | SNV | 1 | A | G | Homozygous   |
| NC_037642.1 | 12571186 | SNV | 1 | T | C | Heterozygous |
| NC_037642.1 | 12571189 | SNV | 1 | C | T | Heterozygous |
| NC_037642.1 | 12585526 | SNV | 1 | T | C | Homozygous   |
| NC_037642.1 | 12585533 | SNV | 1 | T | C | Homozygous   |
| NC_037642.1 | 12585557 | SNV | 1 | T | C | Homozygous   |
| NC_037642.1 | 12585563 | SNV | 1 | C | A | Homozygous   |
| NC_037642.1 | 12585588 | SNV | 1 | T | C | Homozygous   |
| NC_037642.1 | 12585637 | SNV | 1 | T | C | Heterozygous |
| NC_037642.1 | 12586598 | SNV | 1 | A | T | Homozygous   |
| NC_037642.1 | 12586600 | SNV | 1 | T | C | Homozygous   |
| NC_037642.1 | 12586604 | SNV | 1 | C | A | Homozygous   |
| NC_037642.1 | 12586608 | SNV | 1 | A | C | Homozygous   |
| NC_037642.1 | 12588322 | SNV | 1 | T | C | Homozygous   |
| NC_037642.1 | 12593674 | SNV | 1 | T | A | Homozygous   |
| NC_037642.1 | 12593678 | SNV | 1 | T | G | Homozygous   |
| NC_037642.1 | 12593746 | SNV | 1 | T | A | Homozygous   |
| NC_037642.1 | 12593750 | SNV | 1 | T | G | Homozygous   |
| NC_037642.1 | 12593754 | SNV | 1 | T | A | Homozygous   |
| NC_037642.1 | 12593758 | SNV | 1 | T | G | Homozygous   |
| NC_037642.1 | 12593762 | SNV | 1 | T | A | Homozygous   |
| NC_037642.1 | 12593770 | SNV | 1 | T | A | Homozygous   |
| NC_037642.1 | 12593774 | SNV | 1 | A | G | Homozygous   |
| NC_037642.1 | 12593782 | SNV | 1 | A | T | Homozygous   |
| NC_037642.1 | 12593824 | SNV | 1 | T | G | Homozygous   |
| NC_037642.1 | 12593827 | SNV | 1 | C | T | Homozygous   |
| NC_037642.1 | 12593857 | SNV | 1 | T | C | Homozygous   |
| NC_037642.1 | 12593861 | SNV | 1 | C | T | Heterozygous |
| NC_037642.1 | 12593867 | SNV | 1 | C | T | Heterozygous |
| NC_037642.1 | 12593882 | SNV | 1 | T | G | Homozygous   |
| NC_037642.1 | 12593939 | SNV | 1 | T | C | Homozygous   |
| NC_037642.1 | 12593941 | SNV | 1 | G | A | Heterozygous |
| NC_037642.1 | 12593943 | SNV | 1 | T | C | Homozygous   |
| NC_037642.1 | 12593953 | SNV | 1 | C | T | Heterozygous |
| NC_037642.1 | 12593955 | SNV | 1 | G | C | Heterozygous |
| NC_037642.1 | 12593959 | SNV | 1 | C | T | Heterozygous |
| NC_037642.1 | 12593969 | SNV | 1 | T | C | Heterozygous |
| NC_037642.1 | 12593974 | SNV | 1 | G | A | Homozygous   |

|             |          |     |   |   |   |              |
|-------------|----------|-----|---|---|---|--------------|
| NC_037642.1 | 12593977 | SNV | 1 | T | C | Homozygous   |
| NC_037642.1 | 12594018 | SNV | 1 | G | A | Heterozygous |
| NC_037642.1 | 12594031 | SNV | 1 | C | T | Homozygous   |
| NC_037642.1 | 12594059 | SNV | 1 | A | G | Homozygous   |
| NC_037642.1 | 12594094 | SNV | 1 | T | C | Heterozygous |
| NC_037642.1 | 12594141 | SNV | 1 | A | G | Homozygous   |
| NC_037642.1 | 12594199 | SNV | 1 | T | C | Homozygous   |
| NC_037642.1 | 12594207 | SNV | 1 | T | C | Heterozygous |
| NC_037642.1 | 12594211 | SNV | 1 | C | T | Homozygous   |
| NC_037642.1 | 12594216 | SNV | 1 | A | G | Homozygous   |
| NC_037642.1 | 12594251 | SNV | 1 | T | C | Homozygous   |
| NC_037642.1 | 12594274 | SNV | 1 | G | A | Heterozygous |
| NC_037642.1 | 12594277 | SNV | 1 | T | C | Homozygous   |
| NC_037642.1 | 12602413 | SNV | 1 | C | A | Heterozygous |
| NC_037642.1 | 12602575 | SNV | 1 | C | T | Heterozygous |
| NC_037642.1 | 12602674 | SNV | 1 | T | C | Heterozygous |
| NC_037642.1 | 12602677 | SNV | 1 | T | A | Heterozygous |
| NC_037642.1 | 12602680 | SNV | 1 | A | C | Heterozygous |
| NC_037642.1 | 12602688 | SNV | 1 | T | A | Heterozygous |
| NC_037642.1 | 12602708 | SNV | 1 | A | T | Heterozygous |
| NC_037642.1 | 12602752 | SNV | 1 | T | A | Heterozygous |
| NC_037642.1 | 12602818 | SNV | 1 | T | A | Heterozygous |
| NC_037642.1 | 12602862 | SNV | 1 | T | A | Homozygous   |
| NC_037642.1 | 12602866 | SNV | 1 | C | T | Homozygous   |
| NC_037642.1 | 12602870 | SNV | 1 | T | C | Homozygous   |
| NC_037642.1 | 12602890 | SNV | 1 | T | C | Homozygous   |
| NC_037642.1 | 12602899 | SNV | 1 | T | C | Homozygous   |
| NC_037642.1 | 12602906 | SNV | 1 | A | C | Homozygous   |
| NC_037642.1 | 12602912 | SNV | 1 | T | C | Homozygous   |
| NC_037642.1 | 12602961 | SNV | 1 | T | A | Homozygous   |
| NC_037642.1 | 12602972 | SNV | 1 | C | G | Homozygous   |
| NC_037642.1 | 12602977 | SNV | 1 | A | G | Homozygous   |
| NC_037642.1 | 12602979 | SNV | 1 | C | A | Homozygous   |
| NC_037642.1 | 12602981 | SNV | 1 | C | A | Homozygous   |
| NC_037642.1 | 12609220 | SNV | 1 | A | G | Homozygous   |
| NC_037642.1 | 12609770 | SNV | 1 | T | C | Heterozygous |
| NC_037642.1 | 12609864 | SNV | 1 | A | G | Homozygous   |
| NC_037642.1 | 12609966 | SNV | 1 | G | C | Heterozygous |
| NC_037642.1 | 12610089 | SNV | 1 | T | G | Heterozygous |
| NC_037642.1 | 12610212 | SNV | 1 | C | G | Homozygous   |
| NC_037642.1 | 12610239 | SNV | 1 | C | T | Homozygous   |
| NC_037642.1 | 12610700 | SNV | 1 | A | G | Homozygous   |
| NC_037642.1 | 12610920 | SNV | 1 | T | A | Heterozygous |
| NC_037642.1 | 12610927 | SNV | 1 | A | G | Homozygous   |
| NC_037642.1 | 12610937 | SNV | 1 | T | C | Heterozygous |
| NC_037642.1 | 12611032 | SNV | 1 | A | G | Homozygous   |
| NC_037642.1 | 12611648 | SNV | 1 | A | G | Homozygous   |
| NC_037642.1 | 12613592 | SNV | 1 | G | A | Heterozygous |
| NC_037642.1 | 12613911 | SNV | 1 | C | T | Homozygous   |
| NC_037642.1 | 12613927 | SNV | 1 | A | G | Heterozygous |
| NC_037642.1 | 12613933 | SNV | 1 | A | C | Heterozygous |

|             |          |     |   |   |   |              |
|-------------|----------|-----|---|---|---|--------------|
| NC_037642.1 | 12613962 | SNV | 1 | A | G | Heterozygous |
| NC_037642.1 | 12614016 | SNV | 1 | T | C | Heterozygous |
| NC_037642.1 | 12614060 | SNV | 1 | C | T | Heterozygous |
| NC_037642.1 | 12614360 | SNV | 1 | T | C | Heterozygous |
| NC_037642.1 | 12614409 | SNV | 1 | T | A | Homozygous   |
| NC_037642.1 | 12614417 | SNV | 1 | A | G | Homozygous   |
| NC_037642.1 | 12614561 | SNV | 1 | G | A | Homozygous   |
| NC_037642.1 | 12614615 | SNV | 1 | C | T | Homozygous   |
| NC_037642.1 | 12614759 | SNV | 1 | A | G | Homozygous   |
| NC_037642.1 | 12614816 | SNV | 1 | T | C | Homozygous   |
| NC_037642.1 | 12614955 | SNV | 1 | A | G | Homozygous   |
| NC_037642.1 | 12615437 | SNV | 1 | A | T | Heterozygous |
| NC_037642.1 | 12615463 | SNV | 1 | T | A | Heterozygous |
| NC_037642.1 | 12617576 | SNV | 1 | G | A | Homozygous   |
| NC_037642.1 | 12617955 | SNV | 1 | A | G | Homozygous   |
| NC_037642.1 | 12618252 | SNV | 1 | G | A | Homozygous   |
| NC_037642.1 | 12618791 | SNV | 1 | T | C | Heterozygous |
| NC_037642.1 | 12618934 | SNV | 1 | T | C | Homozygous   |
| NC_037642.1 | 12619835 | SNV | 1 | A | T | Heterozygous |
| NC_037642.1 | 12619863 | SNV | 1 | C | T | Homozygous   |
| NC_037642.1 | 12628256 | SNV | 1 | T | C | Heterozygous |
| NC_037642.1 | 12634569 | SNV | 1 | T | C | Homozygous   |
| NC_037642.1 | 12634773 | SNV | 1 | A | G | Homozygous   |
| NC_037642.1 | 12640805 | SNV | 1 | A | G | Homozygous   |
| NC_037642.1 | 12641130 | SNV | 1 | C | T | Homozygous   |
| NC_037642.1 | 12642961 | SNV | 1 | T | A | Homozygous   |
| NC_037642.1 | 12645572 | SNV | 1 | C | G | Homozygous   |
| NC_037642.1 | 12645574 | SNV | 1 | A | G | Homozygous   |
| NC_037642.1 | 12645660 | SNV | 1 | C | T | Heterozygous |
| NC_037642.1 | 12645688 | SNV | 1 | T | C | Homozygous   |
| NC_037642.1 | 12646561 | SNV | 1 | C | T | Homozygous   |
| NC_037642.1 | 12646750 | SNV | 1 | C | T | Heterozygous |
| NC_037642.1 | 12647135 | SNV | 1 | T | C | Homozygous   |
| NC_037642.1 | 12647314 | SNV | 1 | C | G | Heterozygous |
| NC_037642.1 | 12647511 | SNV | 1 | G | A | Homozygous   |
| NC_037642.1 | 12647677 | SNV | 1 | G | A | Heterozygous |
| NC_037642.1 | 12648265 | SNV | 1 | A | G | Heterozygous |
| NC_037642.1 | 12648468 | SNV | 1 | A | G | Homozygous   |
| NC_037642.1 | 12648808 | SNV | 1 | A | G | Homozygous   |
| NC_037642.1 | 12649225 | SNV | 1 | T | A | Heterozygous |
| NC_037642.1 | 12649234 | SNV | 1 | T | G | Heterozygous |
| NC_037642.1 | 12652884 | SNV | 1 | A | G | Homozygous   |
| NC_037642.1 | 12653476 | SNV | 1 | T | C | Homozygous   |
| NC_037642.1 | 12653535 | SNV | 1 | T | A | Homozygous   |
| NC_037642.1 | 12653541 | SNV | 1 | T | C | Heterozygous |
| NC_037642.1 | 12653591 | SNV | 1 | T | C | Homozygous   |
| NC_037642.1 | 12659035 | SNV | 1 | A | C | Homozygous   |
| NC_037642.1 | 12661158 | SNV | 1 | G | A | Homozygous   |
| NC_037642.1 | 12662215 | SNV | 1 | T | C | Homozygous   |
| NC_037642.1 | 12662274 | SNV | 1 | C | T | Heterozygous |
| NC_037642.1 | 12666536 | SNV | 1 | C | T | Homozygous   |

|             |          |     |   |   |   |              |
|-------------|----------|-----|---|---|---|--------------|
| NC_037642.1 | 12666616 | SNV | 1 | C | T | Homozygous   |
| NC_037642.1 | 12667006 | SNV | 1 | C | T | Heterozygous |
| NC_037642.1 | 12667127 | SNV | 1 | C | G | Homozygous   |
| NC_037642.1 | 12667285 | SNV | 1 | T | C | Homozygous   |
| NC_037642.1 | 12667294 | SNV | 1 | G | A | Homozygous   |
| NC_037642.1 | 12667310 | SNV | 1 | T | C | Heterozygous |
| NC_037642.1 | 12667480 | SNV | 1 | C | T | Homozygous   |
| NC_037642.1 | 12667745 | SNV | 1 | C | T | Heterozygous |
| NC_037642.1 | 12667750 | SNV | 1 | C | T | Homozygous   |
| NC_037642.1 | 12668532 | SNV | 1 | C | T | Heterozygous |
| NC_037642.1 | 12669550 | SNV | 1 | T | C | Heterozygous |
| NC_037642.1 | 12669976 | SNV | 1 | T | A | Heterozygous |
| NC_037642.1 | 12670066 | SNV | 1 | G | A | Heterozygous |
| NC_037642.1 | 12670105 | SNV | 1 | G | A | Heterozygous |
| NC_037642.1 | 12670146 | SNV | 1 | C | A | Heterozygous |
| NC_037642.1 | 12670215 | SNV | 1 | C | T | Heterozygous |
| NC_037642.1 | 12670240 | SNV | 1 | C | T | Heterozygous |
| NC_037642.1 | 12670327 | SNV | 1 | T | C | Homozygous   |
| NC_037642.1 | 12670435 | SNV | 1 | G | A | Heterozygous |
| NC_037642.1 | 12670453 | SNV | 1 | A | G | Homozygous   |
| NC_037642.1 | 12670510 | SNV | 1 | G | A | Homozygous   |
| NC_037642.1 | 12670528 | SNV | 1 | A | G | Homozygous   |
| NC_037642.1 | 12670858 | SNV | 1 | T | C | Heterozygous |
| NC_037642.1 | 12670981 | SNV | 1 | T | C | Homozygous   |
| NC_037642.1 | 12671011 | SNV | 1 | A | G | Homozygous   |
| NC_037642.1 | 12672109 | SNV | 1 | A | T | Homozygous   |
| NC_037642.1 | 12672115 | SNV | 1 | A | G | Homozygous   |
| NC_037642.1 | 12672151 | SNV | 1 | A | G | Homozygous   |
| NC_037642.1 | 12672163 | SNV | 1 | A | G | Homozygous   |
| NC_037642.1 | 12672181 | SNV | 1 | C | G | Homozygous   |
| NC_037642.1 | 12672211 | SNV | 1 | A | G | Homozygous   |
| NC_037642.1 | 12672441 | SNV | 1 | A | G | Homozygous   |
| NC_037642.1 | 12672449 | SNV | 1 | G | T | Homozygous   |
| NC_037642.1 | 12672464 | SNV | 1 | G | A | Heterozygous |
| NC_037642.1 | 12673019 | SNV | 1 | G | A | Heterozygous |
| NC_037642.1 | 12673037 | SNV | 1 | G | A | Heterozygous |
| NC_037642.1 | 12673079 | SNV | 1 | C | T | Homozygous   |
| NC_037642.1 | 12673145 | SNV | 1 | A | G | Homozygous   |
| NC_037642.1 | 12673177 | SNV | 1 | A | C | Heterozygous |
| NC_037642.1 | 12673180 | SNV | 1 | A | C | Heterozygous |
| NC_037642.1 | 12673189 | SNV | 1 | G | A | Heterozygous |
| NC_037642.1 | 12673642 | SNV | 1 | C | T | Heterozygous |
| NC_037642.1 | 12673819 | SNV | 1 | A | G | Homozygous   |
| NC_037642.1 | 12673840 | SNV | 1 | T | C | Homozygous   |
| NC_037642.1 | 12674063 | SNV | 1 | A | G | Heterozygous |
| NC_037642.1 | 12674093 | SNV | 1 | C | T | Homozygous   |
| NC_037642.1 | 12674095 | SNV | 1 | C | T | Heterozygous |
| NC_037642.1 | 12674097 | SNV | 1 | C | T | Heterozygous |
| NC_037642.1 | 12674104 | SNV | 1 | T | C | Homozygous   |
| NC_037642.1 | 12674279 | SNV | 1 | G | A | Heterozygous |
| NC_037642.1 | 12674387 | SNV | 1 | T | C | Heterozygous |

|             |          |     |   |   |   |              |
|-------------|----------|-----|---|---|---|--------------|
| NC_037642.1 | 12674611 | SNV | 1 | C | T | Heterozygous |
| NC_037642.1 | 12674645 | SNV | 1 | T | C | Homozygous   |
| NC_037642.1 | 12674736 | SNV | 1 | G | A | Homozygous   |
| NC_037642.1 | 12675091 | SNV | 1 | G | A | Homozygous   |
| NC_037642.1 | 12675371 | SNV | 1 | A | G | Homozygous   |
| NC_037642.1 | 12675388 | SNV | 1 | T | C | Homozygous   |
| NC_037642.1 | 12675529 | SNV | 1 | G | A | Heterozygous |
| NC_037642.1 | 12675533 | SNV | 1 | T | C | Homozygous   |
| NC_037642.1 | 12675805 | SNV | 1 | T | G | Homozygous   |
| NC_037642.1 | 12675809 | SNV | 1 | T | C | Heterozygous |
| NC_037642.1 | 12675812 | SNV | 1 | G | A | Heterozygous |
| NC_037642.1 | 12675836 | SNV | 1 | T | C | Heterozygous |
| NC_037642.1 | 12675837 | SNV | 1 | G | T | Heterozygous |
| NC_037642.1 | 12675849 | SNV | 1 | A | G | Homozygous   |
| NC_037642.1 | 12675860 | SNV | 1 | T | C | Heterozygous |
| NC_037642.1 | 12675864 | SNV | 1 | G | T | Homozygous   |
| NC_037642.1 | 12675867 | SNV | 1 | T | C | Homozygous   |
| NC_037642.1 | 12675883 | SNV | 1 | C | T | Heterozygous |
| NC_037642.1 | 12675892 | SNV | 1 | A | T | Homozygous   |
| NC_037642.1 | 12675911 | SNV | 1 | C | G | Homozygous   |
| NC_037642.1 | 12675931 | SNV | 1 | G | A | Heterozygous |
| NC_037642.1 | 12676138 | SNV | 1 | C | T | Homozygous   |
| NC_037642.1 | 12679063 | SNV | 1 | C | A | Homozygous   |
| NC_037642.1 | 12679154 | SNV | 1 | C | T | Homozygous   |
| NC_037642.1 | 12679590 | SNV | 1 | G | A | Heterozygous |
| NC_037642.1 | 12680700 | SNV | 1 | T | C | Homozygous   |
| NC_037642.1 | 12680802 | SNV | 1 | G | A | Heterozygous |
| NC_037642.1 | 12681051 | SNV | 1 | T | A | Heterozygous |
| NC_037642.1 | 12681344 | SNV | 1 | G | A | Heterozygous |
| NC_037642.1 | 12681346 | SNV | 1 | T | A | Homozygous   |
| NC_037642.1 | 12681388 | SNV | 1 | G | A | Heterozygous |
| NC_037642.1 | 12682836 | SNV | 1 | T | C | Homozygous   |
| NC_037642.1 | 12682889 | SNV | 1 | C | G | Homozygous   |
| NC_037642.1 | 12682976 | SNV | 1 | A | G | Homozygous   |
| NC_037642.1 | 12699763 | SNV | 1 | C | A | Homozygous   |
| NC_037642.1 | 12700229 | SNV | 1 | T | A | Homozygous   |
| NC_037642.1 | 12700717 | SNV | 1 | G | T | Heterozygous |
| NC_037642.1 | 12700720 | SNV | 1 | A | G | Heterozygous |
| NC_037642.1 | 12700977 | SNV | 1 | A | G | Homozygous   |
| NC_037642.1 | 12701763 | SNV | 1 | T | A | Homozygous   |
| NC_037642.1 | 12701783 | SNV | 1 | T | C | Homozygous   |
| NC_037642.1 | 12702223 | SNV | 1 | A | G | Homozygous   |
| NC_037642.1 | 12702293 | SNV | 1 | G | T | Homozygous   |
| NC_037642.1 | 12702969 | SNV | 1 | C | T | Heterozygous |
| NC_037642.1 | 12706424 | SNV | 1 | T | C | Heterozygous |
| NC_037642.1 | 12710072 | SNV | 1 | C | T | Heterozygous |
| NC_037642.1 | 12711458 | SNV | 1 | C | T | Homozygous   |
| NC_037642.1 | 12712256 | SNV | 1 | A | T | Heterozygous |
| NC_037642.1 | 12712564 | SNV | 1 | C | T | Heterozygous |
| NC_037642.1 | 12715218 | SNV | 1 | A | G | Homozygous   |
| NC_037642.1 | 12715960 | SNV | 1 | C | T | Homozygous   |

|             |          |     |   |   |   |              |
|-------------|----------|-----|---|---|---|--------------|
| NC_037642.1 | 12716475 | SNV | 1 | C | T | Heterozygous |
| NC_037642.1 | 12717230 | SNV | 1 | A | G | Homozygous   |
| NC_037642.1 | 12722361 | SNV | 1 | T | C | Homozygous   |
| NC_037642.1 | 12723162 | SNV | 1 | T | A | Heterozygous |
| NC_037642.1 | 12723534 | SNV | 1 | G | A | Heterozygous |
| NC_037642.1 | 12723546 | SNV | 1 | A | G | Heterozygous |
| NC_037642.1 | 12723622 | SNV | 1 | A | T | Heterozygous |
| NC_037642.1 | 12723896 | SNV | 1 | A | C | Homozygous   |
| NC_037642.1 | 12723899 | SNV | 1 | C | G | Homozygous   |
| NC_037642.1 | 12724217 | SNV | 1 | T | C | Heterozygous |
| NC_037642.1 | 12726507 | SNV | 1 | A | T | Homozygous   |
| NC_037642.1 | 12732396 | SNV | 1 | C | A | Homozygous   |
| NC_037642.1 | 12732547 | SNV | 1 | A | T | Homozygous   |
| NC_037642.1 | 12744626 | SNV | 1 | T | G | Heterozygous |
| NC_037642.1 | 12744628 | SNV | 1 | T | A | Heterozygous |
| NC_037642.1 | 12744637 | SNV | 1 | A | T | Heterozygous |
| NC_037642.1 | 12744640 | SNV | 1 | T | G | Heterozygous |
| NC_037642.1 | 12746312 | SNV | 1 | T | C | Homozygous   |
| NC_037642.1 | 12746334 | SNV | 1 | A | T | Homozygous   |
| NC_037642.1 | 12746337 | SNV | 1 | A | T | Homozygous   |
| NC_037642.1 | 12746840 | SNV | 1 | G | A | Heterozygous |
| NC_037642.1 | 12757938 | SNV | 1 | T | C | Homozygous   |
| NC_037642.1 | 12758073 | SNV | 1 | G | A | Heterozygous |
| NC_037642.1 | 12758095 | SNV | 1 | C | G | Heterozygous |
| NC_037642.1 | 12758136 | SNV | 1 | A | G | Homozygous   |
| NC_037642.1 | 12758340 | SNV | 1 | G | A | Heterozygous |
| NC_037642.1 | 12758355 | SNV | 1 | A | G | Homozygous   |
| NC_037642.1 | 12759667 | SNV | 1 | T | C | Homozygous   |
| NC_037642.1 | 12760124 | SNV | 1 | A | G | Homozygous   |
| NC_037642.1 | 12760132 | SNV | 1 | C | A | Homozygous   |
| NC_037642.1 | 12760186 | SNV | 1 | C | T | Homozygous   |
| NC_037642.1 | 12762439 | SNV | 1 | G | A | Heterozygous |
| NC_037642.1 | 12762679 | SNV | 1 | A | G | Homozygous   |
| NC_037642.1 | 12762724 | SNV | 1 | A | G | Homozygous   |
| NC_037642.1 | 12763034 | SNV | 1 | A | G | Homozygous   |
| NC_037642.1 | 12763128 | SNV | 1 | G | C | Homozygous   |
| NC_037642.1 | 12763156 | SNV | 1 | A | T | Heterozygous |
| NC_037642.1 | 12763168 | SNV | 1 | C | T | Homozygous   |
| NC_037642.1 | 12763239 | SNV | 1 | A | G | Homozygous   |
| NC_037642.1 | 12763245 | SNV | 1 | A | G | Homozygous   |
| NC_037642.1 | 12763263 | SNV | 1 | A | G | Homozygous   |
| NC_037642.1 | 12763692 | SNV | 1 | C | T | Heterozygous |
| NC_037642.1 | 12763775 | SNV | 1 | T | A | Homozygous   |
| NC_037642.1 | 12763792 | SNV | 1 | C | A | Homozygous   |
| NC_037642.1 | 12763891 | SNV | 1 | A | G | Heterozygous |
| NC_037642.1 | 12763894 | SNV | 1 | A | G | Heterozygous |
| NC_037642.1 | 12763933 | SNV | 1 | G | A | Heterozygous |
| NC_037642.1 | 12763936 | SNV | 1 | G | A | Homozygous   |
| NC_037642.1 | 12764115 | SNV | 1 | A | T | Homozygous   |
| NC_037642.1 | 12764163 | SNV | 1 | T | C | Homozygous   |
| NC_037642.1 | 12764201 | SNV | 1 | G | A | Heterozygous |

|             |          |     |   |   |   |              |
|-------------|----------|-----|---|---|---|--------------|
| NC_037642.1 | 12764352 | SNV | 1 | A | G | Homozygous   |
| NC_037642.1 | 12764408 | SNV | 1 | T | C | Homozygous   |
| NC_037642.1 | 12768324 | SNV | 1 | A | G | Homozygous   |
| NC_037642.1 | 12769428 | SNV | 1 | T | C | Homozygous   |
| NC_037642.1 | 12772562 | SNV | 1 | A | G | Homozygous   |
| NC_037642.1 | 12772794 | SNV | 1 | C | G | Heterozygous |
| NC_037642.1 | 12772797 | SNV | 1 | A | G | Heterozygous |
| NC_037642.1 | 12772808 | SNV | 1 | T | C | Heterozygous |
| NC_037642.1 | 12772820 | SNV | 1 | A | G | Heterozygous |
| NC_037642.1 | 12772823 | SNV | 1 | A | G | Heterozygous |
| NC_037642.1 | 12772829 | SNV | 1 | G | A | Heterozygous |
| NC_037642.1 | 12772832 | SNV | 1 | C | A | Heterozygous |
| NC_037642.1 | 12772834 | SNV | 1 | A | G | Heterozygous |
| NC_037642.1 | 12772850 | SNV | 1 | T | C | Heterozygous |
| NC_037642.1 | 12772858 | SNV | 1 | T | C | Heterozygous |
| NC_037642.1 | 12772862 | SNV | 1 | T | A | Heterozygous |
| NC_037642.1 | 12772868 | SNV | 1 | G | A | Heterozygous |
| NC_037642.1 | 12772871 | SNV | 1 | T | A | Heterozygous |
| NC_037642.1 | 12772877 | SNV | 1 | G | A | Heterozygous |
| NC_037642.1 | 12772883 | SNV | 1 | T | A | Heterozygous |
| NC_037642.1 | 12772894 | SNV | 1 | C | G | Heterozygous |
| NC_037642.1 | 12772900 | SNV | 1 | C | T | Heterozygous |
| NC_037642.1 | 12772904 | SNV | 1 | T | A | Heterozygous |
| NC_037642.1 | 12772916 | SNV | 1 | A | G | Heterozygous |
| NC_037642.1 | 12772919 | SNV | 1 | A | G | Heterozygous |
| NC_037642.1 | 12772925 | SNV | 1 | A | G | Homozygous   |
| NC_037642.1 | 12772946 | SNV | 1 | T | C | Homozygous   |
| NC_037642.1 | 12772952 | SNV | 1 | G | A | Heterozygous |
| NC_037642.1 | 12772955 | SNV | 1 | A | G | Heterozygous |
| NC_037642.1 | 12772958 | SNV | 1 | T | A | Homozygous   |
| NC_037642.1 | 12772991 | SNV | 1 | G | A | Heterozygous |
| NC_037642.1 | 12772994 | SNV | 1 | T | C | Homozygous   |
| NC_037642.1 | 12772997 | SNV | 1 | T | G | Heterozygous |
| NC_037642.1 | 12773006 | SNV | 1 | G | A | Homozygous   |
| NC_037642.1 | 12773009 | SNV | 1 | T | C | Homozygous   |
| NC_037642.1 | 12773030 | SNV | 1 | C | G | Homozygous   |
| NC_037642.1 | 12773033 | SNV | 1 | A | G | Heterozygous |
| NC_037642.1 | 12773036 | SNV | 1 | A | T | Homozygous   |
| NC_037642.1 | 12773039 | SNV | 1 | A | T | Homozygous   |
| NC_037642.1 | 12773041 | SNV | 1 | G | T | Homozygous   |
| NC_037642.1 | 12773048 | SNV | 1 | T | C | Homozygous   |
| NC_037642.1 | 12773054 | SNV | 1 | T | C | Heterozygous |
| NC_037642.1 | 12773057 | SNV | 1 | T | G | Homozygous   |
| NC_037642.1 | 12773059 | SNV | 1 | A | G | Homozygous   |
| NC_037642.1 | 12773063 | SNV | 1 | A | G | Homozygous   |
| NC_037642.1 | 12773081 | SNV | 1 | T | C | Homozygous   |
| NC_037642.1 | 12773087 | SNV | 1 | G | T | Homozygous   |
| NC_037642.1 | 12773300 | SNV | 1 | T | C | Heterozygous |
| NC_037642.1 | 12773315 | SNV | 1 | T | C | Heterozygous |
| NC_037642.1 | 12773327 | SNV | 1 | T | C | Heterozygous |
| NC_037642.1 | 12773330 | SNV | 1 | A | G | Heterozygous |



|             |          |     |   |   |   |              |
|-------------|----------|-----|---|---|---|--------------|
| NC_037642.1 | 12773339 | SNV | 1 | A | T | Heterozygous |
| NC_037642.1 | 12773369 | SNV | 1 | G | A | Homozygous   |
| NC_037642.1 | 12773372 | SNV | 1 | A | T | Homozygous   |
| NC_037642.1 | 12773378 | SNV | 1 | G | C | Heterozygous |
| NC_037642.1 | 12773390 | SNV | 1 | G | A | Heterozygous |
| NC_037642.1 | 12773399 | SNV | 1 | A | G | Heterozygous |
| NC_037642.1 | 12773408 | SNV | 1 | A | G | Heterozygous |
| NC_037642.1 | 12773411 | SNV | 1 | A | G | Heterozygous |
| NC_037642.1 | 12773414 | SNV | 1 | A | G | Heterozygous |
| NC_037642.1 | 12773418 | SNV | 1 | A | G | Heterozygous |
| NC_037642.1 | 12774854 | SNV | 1 | T | C | Homozygous   |
| NC_037642.1 | 12781937 | SNV | 1 | T | C | Homozygous   |
| NC_037642.1 | 12782049 | SNV | 1 | A | G | Heterozygous |
| NC_037642.1 | 12782467 | SNV | 1 | A | T | Homozygous   |
| NC_037642.1 | 12783640 | SNV | 1 | T | C | Homozygous   |
| NC_037642.1 | 12783717 | SNV | 1 | C | T | Heterozygous |
| NC_037642.1 | 12783745 | SNV | 1 | T | C | Homozygous   |
| NC_037642.1 | 12783774 | SNV | 1 | C | A | Heterozygous |
| NC_037642.1 | 12783820 | SNV | 1 | C | T | Homozygous   |
| NC_037642.1 | 12784012 | SNV | 1 | T | C | Homozygous   |
| NC_037642.1 | 12784200 | SNV | 1 | T | G | Homozygous   |
| NC_037642.1 | 12784211 | SNV | 1 | T | C | Homozygous   |
| NC_037642.1 | 12784836 | SNV | 1 | A | G | Homozygous   |
| NC_037642.1 | 12784947 | SNV | 1 | C | T | Homozygous   |
| NC_037642.1 | 12785817 | SNV | 1 | C | T | Heterozygous |
| NC_037642.1 | 12785958 | SNV | 1 | A | G | Heterozygous |
| NC_037642.1 | 12785969 | SNV | 1 | G | C | Heterozygous |
| NC_037642.1 | 12785972 | SNV | 1 | T | C | Heterozygous |
| NC_037642.1 | 12786778 | SNV | 1 | C | G | Heterozygous |
| NC_037642.1 | 12787311 | SNV | 1 | T | C | Homozygous   |
| NC_037642.1 | 12787649 | SNV | 1 | T | G | Heterozygous |
| NC_037642.1 | 12787967 | SNV | 1 | C | T | Heterozygous |
| NC_037642.1 | 12787973 | SNV | 1 | C | T | Heterozygous |
| NC_037642.1 | 12788135 | SNV | 1 | T | C | Homozygous   |
| NC_037642.1 | 12788276 | SNV | 1 | T | C | Homozygous   |
| NC_037642.1 | 12788565 | SNV | 1 | T | C | Heterozygous |
| NC_037642.1 | 12788586 | SNV | 1 | T | C | Homozygous   |
| NC_037642.1 | 12788635 | SNV | 1 | T | C | Homozygous   |
| NC_037642.1 | 12791426 | SNV | 1 | T | A | Heterozygous |
| NC_037642.1 | 12791967 | SNV | 1 | T | C | Homozygous   |
| NC_037642.1 | 12792388 | SNV | 1 | T | C | Homozygous   |
| NC_037642.1 | 12792482 | SNV | 1 | G | A | Homozygous   |
| NC_037642.1 | 12792654 | SNV | 1 | C | T | Heterozygous |
| NC_037642.1 | 12792668 | SNV | 1 | C | T | Heterozygous |
| NC_037642.1 | 12795268 | SNV | 1 | A | G | Heterozygous |
| NC_037642.1 | 12795322 | SNV | 1 | C | T | Heterozygous |
| NC_037642.1 | 12795541 | SNV | 1 | A | T | Heterozygous |
| NC_037642.1 | 12795592 | SNV | 1 | G | C | Homozygous   |
| NC_037642.1 | 12795690 | SNV | 1 | C | T | Heterozygous |
| NC_037642.1 | 12795788 | SNV | 1 | T | C | Homozygous   |
| NC_037642.1 | 12795832 | SNV | 1 | C | T | Homozygous   |

|             |          |     |   |   |   |              |
|-------------|----------|-----|---|---|---|--------------|
| NC_037642.1 | 12795934 | SNV | 1 | C | T | Heterozygous |
| NC_037642.1 | 12796150 | SNV | 1 | A | T | Heterozygous |
| NC_037642.1 | 12796184 | SNV | 1 | C | T | Homozygous   |
| NC_037642.1 | 12801137 | SNV | 1 | A | T | Heterozygous |
| NC_037642.1 | 12801141 | SNV | 1 | A | C | Homozygous   |
| NC_037642.1 | 12801148 | SNV | 1 | T | C | Homozygous   |
| NC_037642.1 | 12801175 | SNV | 1 | T | G | Heterozygous |
| NC_037642.1 | 12809985 | SNV | 1 | T | C | Heterozygous |
| NC_037642.1 | 12810152 | SNV | 1 | T | C | Homozygous   |
| NC_037642.1 | 12810186 | SNV | 1 | T | C | Homozygous   |
| NC_037642.1 | 12810295 | SNV | 1 | A | G | Heterozygous |
| NC_037642.1 | 12810358 | SNV | 1 | T | C | Heterozygous |
| NC_037642.1 | 12810398 | SNV | 1 | T | C | Homozygous   |
| NC_037642.1 | 12810457 | SNV | 1 | A | G | Homozygous   |
| NC_037642.1 | 12810461 | SNV | 1 | G | A | Homozygous   |
| NC_037642.1 | 12810471 | SNV | 1 | T | C | Homozygous   |
| NC_037642.1 | 12815397 | SNV | 1 | C | G | Heterozygous |
| NC_037642.1 | 12815466 | SNV | 1 | C | T | Heterozygous |
| NC_037642.1 | 12815898 | SNV | 1 | G | C | Heterozygous |
| NC_037642.1 | 12816039 | SNV | 1 | C | T | Homozygous   |
| NC_037642.1 | 12816182 | SNV | 1 | C | T | Heterozygous |
| NC_037642.1 | 12816505 | SNV | 1 | A | G | Heterozygous |
| NC_037642.1 | 12816550 | SNV | 1 | G | A | Heterozygous |
| NC_037642.1 | 12819622 | SNV | 1 | A | G | Homozygous   |
| NC_037642.1 | 12819630 | SNV | 1 | G | A | Homozygous   |
| NC_037642.1 | 12820682 | SNV | 1 | G | A | Homozygous   |
| NC_037642.1 | 12820756 | SNV | 1 | T | C | Homozygous   |
| NC_037642.1 | 12820760 | SNV | 1 | A | G | Heterozygous |
| NC_037642.1 | 12820775 | SNV | 1 | T | C | Homozygous   |
| NC_037642.1 | 12820892 | SNV | 1 | G | A | Homozygous   |
| NC_037642.1 | 12821158 | SNV | 1 | T | A | Heterozygous |
| NC_037642.1 | 12821250 | SNV | 1 | C | T | Heterozygous |
| NC_037642.1 | 12821446 | SNV | 1 | T | C | Homozygous   |
| NC_037642.1 | 12821543 | SNV | 1 | A | G | Heterozygous |
| NC_037642.1 | 12821641 | SNV | 1 | C | T | Heterozygous |
| NC_037642.1 | 12823154 | SNV | 1 | G | A | Heterozygous |
| NC_037642.1 | 12823276 | SNV | 1 | T | C | Heterozygous |
| NC_037642.1 | 12823281 | SNV | 1 | A | G | Heterozygous |
| NC_037642.1 | 12823287 | SNV | 1 | G | A | Heterozygous |
| NC_037642.1 | 12823289 | SNV | 1 | A | G | Heterozygous |
| NC_037642.1 | 12823297 | SNV | 1 | G | C | Heterozygous |
| NC_037642.1 | 12823311 | SNV | 1 | G | C | Heterozygous |
| NC_037642.1 | 12823315 | SNV | 1 | A | T | Heterozygous |
| NC_037642.1 | 12823325 | SNV | 1 | A | C | Heterozygous |
| NC_037642.1 | 12823327 | SNV | 1 | C | A | Homozygous   |
| NC_037642.1 | 12823332 | SNV | 1 | T | A | Heterozygous |
| NC_037642.1 | 12823335 | SNV | 1 | A | G | Heterozygous |
| NC_037642.1 | 12824308 | SNV | 1 | A | G | Heterozygous |
| NC_037642.1 | 12825254 | SNV | 1 | T | C | Homozygous   |
| NC_037642.1 | 12826085 | SNV | 1 | T | G | Homozygous   |
| NC_037642.1 | 12826100 | SNV | 1 | T | C | Heterozygous |

|             |          |     |   |   |   |              |
|-------------|----------|-----|---|---|---|--------------|
| NC_037642.1 | 12826198 | SNV | 1 | A | G | Homozygous   |
| NC_037642.1 | 12826215 | SNV | 1 | C | T | Heterozygous |
| NC_037642.1 | 12826355 | SNV | 1 | T | C | Heterozygous |
| NC_037642.1 | 12826546 | SNV | 1 | G | C | Homozygous   |
| NC_037642.1 | 12826579 | SNV | 1 | A | G | Heterozygous |
| NC_037642.1 | 12826582 | SNV | 1 | G | A | Heterozygous |
| NC_037642.1 | 12826627 | SNV | 1 | T | C | Homozygous   |
| NC_037642.1 | 12826650 | SNV | 1 | C | T | Homozygous   |
| NC_037642.1 | 12827797 | SNV | 1 | T | C | Heterozygous |
| NC_037642.1 | 12827877 | SNV | 1 | A | T | Heterozygous |
| NC_037642.1 | 12827901 | SNV | 1 | C | T | Heterozygous |
| NC_037642.1 | 12828366 | SNV | 1 | G | A | Homozygous   |
| NC_037642.1 | 12828374 | SNV | 1 | A | T | Heterozygous |
| NC_037642.1 | 12829013 | SNV | 1 | G | T | Homozygous   |
| NC_037642.1 | 12831168 | SNV | 1 | C | T | Homozygous   |
| NC_037642.1 | 12831318 | SNV | 1 | C | T | Homozygous   |
| NC_037642.1 | 12831333 | SNV | 1 | C | T | Homozygous   |
| NC_037642.1 | 12831355 | SNV | 1 | T | C | Homozygous   |
| NC_037642.1 | 12831365 | SNV | 1 | A | G | Homozygous   |
| NC_037642.1 | 12832346 | SNV | 1 | T | G | Heterozygous |
| NC_037642.1 | 12832372 | SNV | 1 | T | A | Heterozygous |
| NC_037642.1 | 12832374 | SNV | 1 | T | A | Heterozygous |
| NC_037642.1 | 12838226 | SNV | 1 | A | G | Homozygous   |
| NC_037642.1 | 12839486 | SNV | 1 | T | A | Heterozygous |
| NC_037642.1 | 12841971 | SNV | 1 | T | C | Homozygous   |
| NC_037642.1 | 12843913 | SNV | 1 | C | T | Homozygous   |
| NC_037642.1 | 12843982 | SNV | 1 | C | T | Homozygous   |
| NC_037642.1 | 12843984 | SNV | 1 | A | G | Homozygous   |
| NC_037642.1 | 12843986 | SNV | 1 | T | C | Homozygous   |
| NC_037642.1 | 12844115 | SNV | 1 | C | T | Heterozygous |
| NC_037642.1 | 12844191 | SNV | 1 | A | G | Homozygous   |
| NC_037642.1 | 12844329 | SNV | 1 | A | G | Homozygous   |
| NC_037642.1 | 12851960 | SNV | 1 | G | C | Heterozygous |
| NC_037642.1 | 12851966 | SNV | 1 | G | A | Heterozygous |
| NC_037642.1 | 12851968 | SNV | 1 | G | C | Heterozygous |
| NC_037642.1 | 12861912 | SNV | 1 | A | G | Homozygous   |
| NC_037642.1 | 12861917 | SNV | 1 | A | G | Homozygous   |
| NC_037642.1 | 12861981 | SNV | 1 | G | A | Homozygous   |
| NC_037642.1 | 12861992 | SNV | 1 | G | C | Homozygous   |
| NC_037642.1 | 12862017 | SNV | 1 | T | C | Homozygous   |
| NC_037642.1 | 12862036 | SNV | 1 | A | G | Heterozygous |
| NC_037642.1 | 12862217 | SNV | 1 | G | T | Heterozygous |
| NC_037642.1 | 12862219 | SNV | 1 | G | A | Heterozygous |
| NC_037642.1 | 12862224 | SNV | 1 | A | G | Heterozygous |
| NC_037642.1 | 12862301 | SNV | 1 | C | T | Heterozygous |
| NC_037642.1 | 12862306 | SNV | 1 | C | T | Homozygous   |
| NC_037642.1 | 12862314 | SNV | 1 | C | T | Heterozygous |
| NC_037642.1 | 12862357 | SNV | 1 | C | G | Homozygous   |
| NC_037642.1 | 12862366 | SNV | 1 | A | G | Homozygous   |
| NC_037642.1 | 12862402 | SNV | 1 | A | T | Homozygous   |
| NC_037642.1 | 12866365 | SNV | 1 | A | G | Heterozygous |

|             |          |     |   |   |   |              |
|-------------|----------|-----|---|---|---|--------------|
| NC_037642.1 | 12866399 | SNV | 1 | G | A | Heterozygous |
| NC_037642.1 | 12866407 | SNV | 1 | G | C | Heterozygous |
| NC_037642.1 | 12877660 | SNV | 1 | C | T | Heterozygous |
| NC_037642.1 | 12877738 | SNV | 1 | T | C | Heterozygous |
| NC_037642.1 | 12883397 | SNV | 1 | C | T | Homozygous   |
| NC_037642.1 | 12883461 | SNV | 1 | T | C | Homozygous   |
| NC_037642.1 | 12883465 | SNV | 1 | G | C | Homozygous   |
| NC_037642.1 | 12883469 | SNV | 1 | G | C | Homozygous   |
| NC_037642.1 | 12883475 | SNV | 1 | T | C | Heterozygous |
| NC_037642.1 | 12883479 | SNV | 1 | C | T | Heterozygous |
| NC_037642.1 | 12892863 | SNV | 1 | C | T | Heterozygous |
| NC_037642.1 | 12892962 | SNV | 1 | T | A | Homozygous   |
| NC_037642.1 | 12893162 | SNV | 1 | G | C | Homozygous   |
| NC_037642.1 | 12898634 | SNV | 1 | T | C | Homozygous   |
| NC_037642.1 | 12898642 | SNV | 1 | T | G | Homozygous   |
| NC_037642.1 | 12899016 | SNV | 1 | T | A | Heterozygous |
| NC_037642.1 | 12899401 | SNV | 1 | G | A | Heterozygous |
| NC_037642.1 | 12899822 | SNV | 1 | C | T | Heterozygous |
| NC_037642.1 | 12900760 | SNV | 1 | C | T | Homozygous   |
| NC_037642.1 | 12900762 | SNV | 1 | T | C | Homozygous   |
| NC_037642.1 | 12901441 | SNV | 1 | T | C | Homozygous   |
| NC_037642.1 | 12916082 | SNV | 1 | A | G | Heterozygous |
| NC_037642.1 | 12916192 | SNV | 1 | A | G | Heterozygous |
| NC_037642.1 | 12916354 | SNV | 1 | A | G | Homozygous   |
| NC_037642.1 | 12916403 | SNV | 1 | C | T | Homozygous   |
| NC_037642.1 | 12916443 | SNV | 1 | A | T | Heterozygous |
| NC_037642.1 | 12916632 | SNV | 1 | T | C | Heterozygous |
| NC_037642.1 | 12916755 | SNV | 1 | A | G | Homozygous   |
| NC_037642.1 | 12916772 | SNV | 1 | C | T | Heterozygous |
| NC_037642.1 | 12917165 | SNV | 1 | T | C | Homozygous   |
| NC_037642.1 | 12917274 | SNV | 1 | A | G | Homozygous   |
| NC_037642.1 | 12917370 | SNV | 1 | C | A | Homozygous   |
| NC_037642.1 | 12917384 | SNV | 1 | G | A | Homozygous   |
| NC_037642.1 | 12917387 | SNV | 1 | T | C | Homozygous   |
| NC_037642.1 | 12917418 | SNV | 1 | A | G | Homozygous   |
| NC_037642.1 | 12917486 | SNV | 1 | T | C | Heterozygous |
| NC_037642.1 | 12917536 | SNV | 1 | T | A | Homozygous   |
| NC_037642.1 | 12917726 | SNV | 1 | G | A | Heterozygous |
| NC_037642.1 | 12917813 | SNV | 1 | A | G | Homozygous   |
| NC_037642.1 | 12917828 | SNV | 1 | A | G | Heterozygous |
| NC_037642.1 | 12918200 | SNV | 1 | C | T | Heterozygous |
| NC_037642.1 | 12918203 | SNV | 1 | C | G | Heterozygous |
| NC_037642.1 | 12918215 | SNV | 1 | T | C | Heterozygous |
| NC_037642.1 | 12918218 | SNV | 1 | G | A | Heterozygous |
| NC_037642.1 | 12918248 | SNV | 1 | T | A | Heterozygous |
| NC_037642.1 | 12918525 | SNV | 1 | A | G | Homozygous   |
| NC_037642.1 | 12918560 | SNV | 1 | T | C | Homozygous   |
| NC_037642.1 | 12919101 | SNV | 1 | T | C | Homozygous   |
| NC_037642.1 | 12919133 | SNV | 1 | A | G | Heterozygous |
| NC_037642.1 | 12920309 | SNV | 1 | G | A | Homozygous   |
| NC_037642.1 | 12920339 | SNV | 1 | G | A | Homozygous   |

|             |          |     |   |   |   |              |
|-------------|----------|-----|---|---|---|--------------|
| NC_037642.1 | 12929055 | SNV | 1 | T | C | Homozygous   |
| NC_037642.1 | 12930561 | SNV | 1 | A | C | Heterozygous |
| NC_037642.1 | 12933913 | SNV | 1 | T | A | Homozygous   |
| NC_037642.1 | 12934070 | SNV | 1 | A | G | Homozygous   |
| NC_037642.1 | 12934074 | SNV | 1 | T | G | Homozygous   |
| NC_037642.1 | 12935180 | SNV | 1 | C | T | Homozygous   |
| NC_037642.1 | 12938366 | SNV | 1 | T | A | Homozygous   |
| NC_037642.1 | 12940257 | SNV | 1 | T | A | Homozygous   |
| NC_037642.1 | 12940274 | SNV | 1 | A | T | Homozygous   |
| NC_037642.1 | 12940282 | SNV | 1 | T | G | Homozygous   |
| NC_037642.1 | 12940686 | SNV | 1 | A | G | Homozygous   |
| NC_037642.1 | 12941382 | SNV | 1 | A | G | Heterozygous |
| NC_037642.1 | 12941390 | SNV | 1 | T | C | Heterozygous |
| NC_037642.1 | 12941395 | SNV | 1 | A | G | Heterozygous |
| NC_037642.1 | 12941411 | SNV | 1 | A | T | Homozygous   |
| NC_037642.1 | 12941415 | SNV | 1 | A | G | Homozygous   |
| NC_037642.1 | 12941427 | SNV | 1 | A | G | Homozygous   |
| NC_037642.1 | 12941431 | SNV | 1 | A | G | Homozygous   |
| NC_037642.1 | 12941461 | SNV | 1 | T | C | Heterozygous |
| NC_037642.1 | 12941465 | SNV | 1 | T | C | Heterozygous |
| NC_037642.1 | 12941468 | SNV | 1 | G | A | Homozygous   |
| NC_037642.1 | 12941471 | SNV | 1 | T | C | Heterozygous |
| NC_037642.1 | 12941479 | SNV | 1 | T | C | Homozygous   |
| NC_037642.1 | 12941739 | SNV | 1 | A | T | Heterozygous |
| NC_037642.1 | 12946708 | SNV | 1 | T | C | Homozygous   |
| NC_037642.1 | 12947059 | SNV | 1 | G | A | Heterozygous |
| NC_037642.1 | 12948608 | SNV | 1 | A | T | Homozygous   |
| NC_037642.1 | 12950262 | SNV | 1 | A | G | Homozygous   |
| NC_037642.1 | 12952472 | SNV | 1 | G | A | Homozygous   |
| NC_037642.1 | 12954138 | SNV | 1 | A | G | Homozygous   |
| NC_037642.1 | 12954644 | SNV | 1 | C | T | Heterozygous |
| NC_037642.1 | 12954692 | SNV | 1 | T | C | Heterozygous |
| NC_037642.1 | 12956108 | SNV | 1 | C | T | Heterozygous |
| NC_037642.1 | 12958485 | SNV | 1 | A | T | Homozygous   |
| NC_037642.1 | 12958494 | SNV | 1 | T | C | Homozygous   |
| NC_037642.1 | 12958503 | SNV | 1 | A | T | Homozygous   |
| NC_037642.1 | 12958506 | SNV | 1 | T | C | Homozygous   |
| NC_037642.1 | 12968311 | SNV | 1 | G | A | Heterozygous |
| NC_037642.1 | 12968630 | SNV | 1 | A | G | Homozygous   |
| NC_037642.1 | 12968649 | SNV | 1 | G | A | Heterozygous |
| NC_037642.1 | 12968651 | SNV | 1 | C | T | Heterozygous |
| NC_037642.1 | 12968697 | SNV | 1 | G | A | Heterozygous |
| NC_037642.1 | 12968751 | SNV | 1 | T | C | Homozygous   |
| NC_037642.1 | 12968785 | SNV | 1 | C | T | Heterozygous |
| NC_037642.1 | 12968806 | SNV | 1 | G | A | Heterozygous |
| NC_037642.1 | 12969386 | SNV | 1 | A | G | Homozygous   |
| NC_037642.1 | 12969441 | SNV | 1 | A | G | Heterozygous |
| NC_037642.1 | 12969641 | SNV | 1 | T | C | Homozygous   |
| NC_037642.1 | 12969869 | SNV | 1 | A | G | Homozygous   |
| NC_037642.1 | 12969925 | SNV | 1 | C | T | Heterozygous |
| NC_037642.1 | 12970005 | SNV | 1 | G | A | Heterozygous |

|             |          |     |   |   |   |              |
|-------------|----------|-----|---|---|---|--------------|
| NC_037642.1 | 12970133 | SNV | 1 | C | T | Homozygous   |
| NC_037642.1 | 12970441 | SNV | 1 | T | G | Heterozygous |
| NC_037642.1 | 12970448 | SNV | 1 | A | C | Homozygous   |
| NC_037642.1 | 12970451 | SNV | 1 | A | T | Heterozygous |
| NC_037642.1 | 12970454 | SNV | 1 | A | T | Heterozygous |
| NC_037642.1 | 12970462 | SNV | 1 | T | G | Heterozygous |
| NC_037642.1 | 12970469 | SNV | 1 | T | G | Heterozygous |
| NC_037642.1 | 12970490 | SNV | 1 | T | A | Heterozygous |
| NC_037642.1 | 12970549 | SNV | 1 | A | G | Homozygous   |
| NC_037642.1 | 12970704 | SNV | 1 | T | C | Heterozygous |
| NC_037642.1 | 12970742 | SNV | 1 | T | C | Homozygous   |
| NC_037642.1 | 12970847 | SNV | 1 | A | G | Homozygous   |
| NC_037642.1 | 12971303 | SNV | 1 | G | C | Heterozygous |
| NC_037642.1 | 12971325 | SNV | 1 | T | G | Heterozygous |
| NC_037642.1 | 12971330 | SNV | 1 | C | T | Heterozygous |
| NC_037642.1 | 12971339 | SNV | 1 | G | T | Heterozygous |
| NC_037642.1 | 12972076 | SNV | 1 | A | G | Homozygous   |
| NC_037642.1 | 12973171 | SNV | 1 | A | G | Heterozygous |
| NC_037642.1 | 12988034 | SNV | 1 | A | G | Homozygous   |
| NC_037642.1 | 12988062 | SNV | 1 | G | A | Heterozygous |
| NC_037642.1 | 12988066 | SNV | 1 | G | A | Heterozygous |
| NC_037642.1 | 12988073 | SNV | 1 | A | G | Heterozygous |
| NC_037642.1 | 12988084 | SNV | 1 | A | G | Homozygous   |
| NC_037642.1 | 12988089 | SNV | 1 | A | C | Homozygous   |
| NC_037642.1 | 12992631 | SNV | 1 | G | T | Homozygous   |
| NC_037642.1 | 12994631 | SNV | 1 | T | C | Homozygous   |
| NC_037642.1 | 12994636 | SNV | 1 | A | G | Homozygous   |
| NC_037642.1 | 12994641 | SNV | 1 | A | G | Homozygous   |
| NC_037642.1 | 12994645 | SNV | 1 | T | C | Homozygous   |
| NC_037642.1 | 12994665 | SNV | 1 | C | A | Homozygous   |
| NC_037642.1 | 12994698 | SNV | 1 | C | G | Heterozygous |
| NC_037642.1 | 12996988 | SNV | 1 | G | A | Homozygous   |
| NC_037642.1 | 13007285 | SNV | 1 | A | G | Homozygous   |
| NC_037642.1 | 13007288 | SNV | 1 | A | T | Homozygous   |
| NC_037642.1 | 13007319 | SNV | 1 | G | C | Homozygous   |
| NC_037642.1 | 13008823 | SNV | 1 | G | A | Heterozygous |
| NC_037642.1 | 13008829 | SNV | 1 | G | A | Heterozygous |
| NC_037642.1 | 13018086 | SNV | 1 | A | G | Homozygous   |
| NC_037642.1 | 13018098 | SNV | 1 | T | A | Homozygous   |
| NC_037642.1 | 13018109 | SNV | 1 | T | A | Homozygous   |
| NC_037642.1 | 13018111 | SNV | 1 | A | T | Homozygous   |
| NC_037642.1 | 13018114 | SNV | 1 | A | T | Homozygous   |
| NC_037642.1 | 13018117 | SNV | 1 | A | T | Homozygous   |
| NC_037642.1 | 13018135 | SNV | 1 | A | T | Homozygous   |
| NC_037642.1 | 13024321 | SNV | 1 | C | G | Heterozygous |
| NC_037642.1 | 13024402 | SNV | 1 | C | T | Heterozygous |
| NC_037642.1 | 13029087 | SNV | 1 | G | A | Heterozygous |
| NC_037642.1 | 13029089 | SNV | 1 | C | T | Heterozygous |
| NC_037642.1 | 13029222 | SNV | 1 | G | A | Heterozygous |
| NC_037642.1 | 13029471 | SNV | 1 | T | A | Homozygous   |
| NC_037642.1 | 13035993 | SNV | 1 | T | C | Homozygous   |

|             |          |     |   |   |   |              |
|-------------|----------|-----|---|---|---|--------------|
| NC_037642.1 | 13037180 | SNV | 1 | A | T | Homozygous   |
| NC_037642.1 | 13037188 | SNV | 1 | A | T | Homozygous   |
| NC_037642.1 | 13037191 | SNV | 1 | A | T | Homozygous   |
| NC_037642.1 | 13037196 | SNV | 1 | A | T | Homozygous   |
| NC_037642.1 | 13037205 | SNV | 1 | T | C | Homozygous   |
| NC_037642.1 | 13037208 | SNV | 1 | A | G | Homozygous   |
| NC_037642.1 | 13037217 | SNV | 1 | T | C | Homozygous   |
| NC_037642.1 | 13037220 | SNV | 1 | A | T | Homozygous   |
| NC_037642.1 | 13037223 | SNV | 1 | A | T | Homozygous   |
| NC_037642.1 | 13042008 | SNV | 1 | A | T | Homozygous   |
| NC_037642.1 | 13042025 | SNV | 1 | T | G | Homozygous   |
| NC_037642.1 | 13042181 | SNV | 1 | C | G | Homozygous   |
| NC_037642.1 | 13042286 | SNV | 1 | T | C | Homozygous   |
| NC_037642.1 | 13042360 | SNV | 1 | G | C | Homozygous   |
| NC_037642.1 | 13042394 | SNV | 1 | A | C | Homozygous   |
| NC_037642.1 | 13042397 | SNV | 1 | C | G | Homozygous   |
| NC_037642.1 | 13044979 | SNV | 1 | A | G | Homozygous   |
| NC_037642.1 | 13045164 | SNV | 1 | T | A | Heterozygous |
| NC_037642.1 | 13045195 | SNV | 1 | A | G | Homozygous   |
| NC_037642.1 | 13045216 | SNV | 1 | A | G | Homozygous   |
| NC_037642.1 | 13045366 | SNV | 1 | A | G | Homozygous   |
| NC_037642.1 | 13045370 | SNV | 1 | G | T | Homozygous   |
| NC_037642.1 | 13045414 | SNV | 1 | T | C | Homozygous   |
| NC_037642.1 | 13048414 | SNV | 1 | G | A | Heterozygous |
| NC_037642.1 | 13048778 | SNV | 1 | G | A | Heterozygous |
| NC_037642.1 | 13048870 | SNV | 1 | C | A | Heterozygous |
| NC_037642.1 | 13048999 | SNV | 1 | T | C | Heterozygous |
| NC_037642.1 | 13049021 | SNV | 1 | A | C | Heterozygous |
| NC_037642.1 | 13049026 | SNV | 1 | C | T | Homozygous   |
| NC_037642.1 | 13049118 | SNV | 1 | C | A | Homozygous   |
| NC_037642.1 | 13049222 | SNV | 1 | C | A | Heterozygous |
| NC_037642.1 | 13049354 | SNV | 1 | G | A | Heterozygous |
| NC_037642.1 | 13049446 | SNV | 1 | A | C | Homozygous   |
| NC_037642.1 | 13049494 | SNV | 1 | T | C | Heterozygous |
| NC_037642.1 | 13049521 | SNV | 1 | C | T | Heterozygous |
| NC_037642.1 | 13049586 | SNV | 1 | C | T | Heterozygous |
| NC_037642.1 | 13049612 | SNV | 1 | G | C | Homozygous   |
| NC_037642.1 | 13051461 | SNV | 1 | G | A | Heterozygous |
| NC_037642.1 | 13051467 | SNV | 1 | G | A | Heterozygous |
| NC_037642.1 | 13051565 | SNV | 1 | A | G | Homozygous   |
| NC_037642.1 | 13051932 | SNV | 1 | A | C | Heterozygous |
| NC_037642.1 | 13054385 | SNV | 1 | G | T | Heterozygous |
| NC_037642.1 | 13055991 | SNV | 1 | T | A | Homozygous   |
| NC_037642.1 | 13058814 | SNV | 1 | T | C | Homozygous   |
| NC_037642.1 | 13059588 | SNV | 1 | A | G | Heterozygous |
| NC_037642.1 | 13059858 | SNV | 1 | G | A | Heterozygous |
| NC_037642.1 | 13060207 | SNV | 1 | C | T | Homozygous   |
| NC_037642.1 | 13060418 | SNV | 1 | A | T | Homozygous   |
| NC_037642.1 | 13060535 | SNV | 1 | A | C | Heterozygous |
| NC_037642.1 | 13074812 | SNV | 1 | G | A | Homozygous   |
| NC_037642.1 | 13075314 | SNV | 1 | C | T | Homozygous   |

|             |          |     |   |   |   |              |
|-------------|----------|-----|---|---|---|--------------|
| NC_037642.1 | 13078940 | SNV | 1 | C | T | Homozygous   |
| NC_037642.1 | 13080145 | SNV | 1 | C | T | Heterozygous |
| NC_037642.1 | 13080152 | SNV | 1 | C | T | Heterozygous |
| NC_037642.1 | 13080374 | SNV | 1 | T | C | Heterozygous |
| NC_037642.1 | 13080584 | SNV | 1 | A | T | Homozygous   |
| NC_037642.1 | 13081221 | SNV | 1 | A | G | Heterozygous |
| NC_037642.1 | 13084907 | SNV | 1 | T | C | Heterozygous |
| NC_037642.1 | 13084918 | SNV | 1 | T | G | Heterozygous |
| NC_037642.1 | 13085004 | SNV | 1 | C | T | Homozygous   |
| NC_037642.1 | 13085009 | SNV | 1 | A | G | Homozygous   |
| NC_037642.1 | 13085395 | SNV | 1 | T | C | Homozygous   |
| NC_037642.1 | 13085908 | SNV | 1 | G | A | Heterozygous |
| NC_037642.1 | 13085992 | SNV | 1 | T | C | Homozygous   |
| NC_037642.1 | 13086259 | SNV | 1 | C | A | Homozygous   |
| NC_037642.1 | 13086537 | SNV | 1 | C | A | Heterozygous |
| NC_037642.1 | 13089722 | SNV | 1 | A | T | Heterozygous |
| NC_037642.1 | 13094482 | SNV | 1 | T | G | Heterozygous |
| NC_037642.1 | 13099606 | SNV | 1 | T | A | Heterozygous |
| NC_037642.1 | 13099636 | SNV | 1 | C | T | Homozygous   |
| NC_037642.1 | 13100020 | SNV | 1 | G | A | Heterozygous |
| NC_037642.1 | 13100425 | SNV | 1 | T | C | Homozygous   |
| NC_037642.1 | 13100441 | SNV | 1 | T | C | Homozygous   |
| NC_037642.1 | 13101157 | SNV | 1 | G | A | Homozygous   |
| NC_037642.1 | 13102981 | SNV | 1 | G | A | Homozygous   |
| NC_037642.1 | 13103105 | SNV | 1 | T | C | Heterozygous |
| NC_037642.1 | 13113721 | SNV | 1 | T | C | Homozygous   |
| NC_037642.1 | 13113724 | SNV | 1 | T | A | Homozygous   |
| NC_037642.1 | 13114859 | SNV | 1 | T | C | Homozygous   |
| NC_037642.1 | 13114895 | SNV | 1 | A | C | Heterozygous |
| NC_037642.1 | 13114899 | SNV | 1 | T | G | Heterozygous |
| NC_037642.1 | 13114903 | SNV | 1 | A | C | Heterozygous |
| NC_037642.1 | 13115243 | SNV | 1 | C | A | Homozygous   |
| NC_037642.1 | 13115393 | SNV | 1 | T | C | Homozygous   |
| NC_037642.1 | 13117779 | SNV | 1 | A | C | Heterozygous |
| NC_037642.1 | 13118409 | SNV | 1 | A | G | Homozygous   |
| NC_037642.1 | 13120194 | SNV | 1 | C | T | Heterozygous |
| NC_037642.1 | 13120639 | SNV | 1 | A | G | Homozygous   |
| NC_037642.1 | 13120726 | SNV | 1 | A | T | Homozygous   |
| NC_037642.1 | 13122742 | SNV | 1 | C | T | Homozygous   |
| NC_037642.1 | 13125723 | SNV | 1 | T | G | Heterozygous |
| NC_037642.1 | 13125735 | SNV | 1 | A | T | Heterozygous |
| NC_037642.1 | 13125738 | SNV | 1 | T | C | Heterozygous |
| NC_037642.1 | 13125741 | SNV | 1 | A | G | Heterozygous |
| NC_037642.1 | 13125743 | SNV | 1 | T | C | Heterozygous |
| NC_037642.1 | 13125746 | SNV | 1 | A | T | Heterozygous |
| NC_037642.1 | 13125748 | SNV | 1 | A | T | Heterozygous |
| NC_037642.1 | 13125750 | SNV | 1 | A | T | Heterozygous |
| NC_037642.1 | 13125753 | SNV | 1 | T | A | Heterozygous |
| NC_037642.1 | 13125774 | SNV | 1 | A | G | Heterozygous |
| NC_037642.1 | 13125777 | SNV | 1 | A | G | Heterozygous |
| NC_037642.1 | 13125780 | SNV | 1 | A | G | Heterozygous |



|             |          |     |   |   |   |              |
|-------------|----------|-----|---|---|---|--------------|
| NC_037642.1 | 13125786 | SNV | 1 | A | T | Heterozygous |
| NC_037642.1 | 13125789 | SNV | 1 | T | A | Heterozygous |
| NC_037642.1 | 13125792 | SNV | 1 | T | C | Heterozygous |
| NC_037642.1 | 13125795 | SNV | 1 | T | C | Heterozygous |
| NC_037642.1 | 13125801 | SNV | 1 | T | C | Heterozygous |
| NC_037642.1 | 13129601 | SNV | 1 | T | G | Heterozygous |
| NC_037642.1 | 13129608 | SNV | 1 | G | T | Heterozygous |
| NC_037642.1 | 13129730 | SNV | 1 | G | A | Heterozygous |
| NC_037642.1 | 13130321 | SNV | 1 | G | A | Homozygous   |
| NC_037642.1 | 13133180 | SNV | 1 | A | G | Homozygous   |
| NC_037642.1 | 13133667 | SNV | 1 | A | G | Heterozygous |
| NC_037642.1 | 13133862 | SNV | 1 | G | A | Homozygous   |
| NC_037642.1 | 13134472 | SNV | 1 | C | T | Homozygous   |
| NC_037642.1 | 13134578 | SNV | 1 | C | T | Homozygous   |
| NC_037642.1 | 13135019 | SNV | 1 | A | T | Homozygous   |
| NC_037642.1 | 13135108 | SNV | 1 | A | G | Heterozygous |
| NC_037642.1 | 13135206 | SNV | 1 | A | G | Heterozygous |
| NC_037642.1 | 13135479 | SNV | 1 | C | T | Heterozygous |
| NC_037642.1 | 13135557 | SNV | 1 | A | G | Homozygous   |
| NC_037642.1 | 13136247 | SNV | 1 | T | C | Heterozygous |
| NC_037642.1 | 13136251 | SNV | 1 | T | C | Homozygous   |
| NC_037642.1 | 13136256 | SNV | 1 | T | C | Homozygous   |
| NC_037642.1 | 13137619 | SNV | 1 | G | A | Heterozygous |
| NC_037642.1 | 13141638 | SNV | 1 | T | C | Heterozygous |
| NC_037642.1 | 13141641 | SNV | 1 | C | T | Heterozygous |
| NC_037642.1 | 13141644 | SNV | 1 | A | C | Heterozygous |
| NC_037642.1 | 13141644 | SNV | 1 | A | G | Heterozygous |
| NC_037642.1 | 13141656 | SNV | 1 | T | C | Heterozygous |
| NC_037642.1 | 13141686 | SNV | 1 | A | G | Heterozygous |
| NC_037642.1 | 13141689 | SNV | 1 | T | C | Homozygous   |
| NC_037642.1 | 13141692 | SNV | 1 | T | C | Heterozygous |
| NC_037642.1 | 13141704 | SNV | 1 | T | C | Heterozygous |
| NC_037642.1 | 13141764 | SNV | 1 | C | G | Homozygous   |
| NC_037642.1 | 13141770 | SNV | 1 | T | G | Homozygous   |
| NC_037642.1 | 13141776 | SNV | 1 | C | T | Heterozygous |
| NC_037642.1 | 13141791 | SNV | 1 | C | G | Heterozygous |
| NC_037642.1 | 13141794 | SNV | 1 | A | G | Heterozygous |
| NC_037642.1 | 13141815 | SNV | 1 | T | C | Heterozygous |
| NC_037642.1 | 13141818 | SNV | 1 | G | C | Homozygous   |
| NC_037642.1 | 13141824 | SNV | 1 | T | C | Homozygous   |
| NC_037642.1 | 13141830 | SNV | 1 | C | T | Heterozygous |
| NC_037642.1 | 13141833 | SNV | 1 | A | G | Heterozygous |
| NC_037642.1 | 13142130 | SNV | 1 | A | T | Heterozygous |
| NC_037642.1 | 13142182 | SNV | 1 | A | T | Heterozygous |
| NC_037642.1 | 13142184 | SNV | 1 | C | A | Heterozygous |
| NC_037642.1 | 13142188 | SNV | 1 | C | G | Heterozygous |
| NC_037642.1 | 13142206 | SNV | 1 | C | T | Heterozygous |
| NC_037642.1 | 13142211 | SNV | 1 | C | T | Heterozygous |
| NC_037642.1 | 13142214 | SNV | 1 | C | T | Heterozygous |
| NC_037642.1 | 13142217 | SNV | 1 | A | G | Heterozygous |
| NC_037642.1 | 13142229 | SNV | 1 | C | T | Heterozygous |

|             |          |     |   |   |   |              |
|-------------|----------|-----|---|---|---|--------------|
| NC_037642.1 | 13142232 | SNV | 1 | C | T | Heterozygous |
| NC_037642.1 | 13142518 | SNV | 1 | C | T | Heterozygous |
| NC_037642.1 | 13142571 | SNV | 1 | T | C | Homozygous   |
| NC_037642.1 | 13142625 | SNV | 1 | C | T | Homozygous   |
| NC_037642.1 | 13142689 | SNV | 1 | G | C | Homozygous   |
| NC_037642.1 | 13142749 | SNV | 1 | A | T | Heterozygous |
| NC_037642.1 | 13143031 | SNV | 1 | A | G | Homozygous   |
| NC_037642.1 | 13143143 | SNV | 1 | T | C | Homozygous   |
| NC_037642.1 | 13145710 | SNV | 1 | T | C | Homozygous   |
| NC_037642.1 | 13145728 | SNV | 1 | T | A | Homozygous   |
| NC_037642.1 | 13145735 | SNV | 1 | A | G | Homozygous   |
| NC_037642.1 | 13145738 | SNV | 1 | T | A | Homozygous   |
| NC_037642.1 | 13145743 | SNV | 1 | A | T | Homozygous   |
| NC_037642.1 | 13145751 | SNV | 1 | A | C | Homozygous   |
| NC_037642.1 | 13147382 | SNV | 1 | T | C | Homozygous   |
| NC_037642.1 | 13147766 | SNV | 1 | C | T | Homozygous   |
| NC_037642.1 | 13147775 | SNV | 1 | C | T | Homozygous   |
| NC_037642.1 | 13147778 | SNV | 1 | C | A | Homozygous   |
| NC_037642.1 | 13147781 | SNV | 1 | C | T | Homozygous   |
| NC_037642.1 | 13147784 | SNV | 1 | C | T | Homozygous   |
| NC_037642.1 | 13147790 | SNV | 1 | C | G | Homozygous   |
| NC_037642.1 | 13147796 | SNV | 1 | G | T | Homozygous   |
| NC_037642.1 | 13147799 | SNV | 1 | C | T | Homozygous   |
| NC_037642.1 | 13147805 | SNV | 1 | C | T | Homozygous   |
| NC_037642.1 | 13147808 | SNV | 1 | C | T | Homozygous   |
| NC_037642.1 | 13147811 | SNV | 1 | G | A | Homozygous   |
| NC_037642.1 | 13147814 | SNV | 1 | C | A | Homozygous   |
| NC_037642.1 | 13147817 | SNV | 1 | C | G | Homozygous   |
| NC_037642.1 | 13147821 | SNV | 1 | C | T | Homozygous   |
| NC_037642.1 | 13147829 | SNV | 1 | G | A | Homozygous   |
| NC_037642.1 | 13147847 | SNV | 1 | C | A | Homozygous   |
| NC_037642.1 | 13147858 | SNV | 1 | C | G | Homozygous   |
| NC_037642.1 | 13147863 | SNV | 1 | A | T | Homozygous   |
| NC_037642.1 | 13147865 | SNV | 1 | G | T | Homozygous   |
| NC_037642.1 | 13152610 | SNV | 1 | A | G | Heterozygous |
| NC_037642.1 | 13152613 | SNV | 1 | A | C | Heterozygous |
| NC_037642.1 | 13152619 | SNV | 1 | G | C | Heterozygous |
| NC_037642.1 | 13152625 | SNV | 1 | T | C | Heterozygous |
| NC_037642.1 | 13152628 | SNV | 1 | G | C | Heterozygous |
| NC_037642.1 | 13152634 | SNV | 1 | T | C | Heterozygous |
| NC_037642.1 | 13152655 | SNV | 1 | T | C | Heterozygous |
| NC_037642.1 | 13152658 | SNV | 1 | A | G | Heterozygous |
| NC_037642.1 | 13152788 | SNV | 1 | C | A | Heterozygous |
| NC_037642.1 | 13152797 | SNV | 1 | C | T | Homozygous   |
| NC_037642.1 | 13152800 | SNV | 1 | T | G | Homozygous   |
| NC_037642.1 | 13152806 | SNV | 1 | T | G | Heterozygous |
| NC_037642.1 | 13152809 | SNV | 1 | A | G | Homozygous   |
| NC_037642.1 | 13152812 | SNV | 1 | A | G | Homozygous   |
| NC_037642.1 | 13152821 | SNV | 1 | C | T | Heterozygous |
| NC_037642.1 | 13152824 | SNV | 1 | A | G | Heterozygous |
| NC_037642.1 | 13152824 | SNV | 1 | A | T | Heterozygous |

|             |          |     |   |   |   |              |
|-------------|----------|-----|---|---|---|--------------|
| NC_037642.1 | 13152827 | SNV | 1 | G | T | Heterozygous |
| NC_037642.1 | 13152830 | SNV | 1 | C | T | Heterozygous |
| NC_037642.1 | 13152833 | SNV | 1 | G | A | Heterozygous |
| NC_037642.1 | 13152848 | SNV | 1 | A | G | Homozygous   |
| NC_037642.1 | 13152860 | SNV | 1 | T | C | Homozygous   |
| NC_037642.1 | 13152863 | SNV | 1 | A | G | Homozygous   |
| NC_037642.1 | 13152881 | SNV | 1 | C | T | Homozygous   |
| NC_037642.1 | 13152884 | SNV | 1 | T | C | Homozygous   |
| NC_037642.1 | 13152892 | SNV | 1 | C | G | Homozygous   |
| NC_037642.1 | 13152905 | SNV | 1 | C | T | Homozygous   |
| NC_037642.1 | 13152914 | SNV | 1 | A | G | Heterozygous |
| NC_037642.1 | 13152917 | SNV | 1 | A | T | Heterozygous |
| NC_037642.1 | 13152929 | SNV | 1 | C | A | Heterozygous |
| NC_037642.1 | 13152932 | SNV | 1 | C | T | Heterozygous |
| NC_037642.1 | 13152938 | SNV | 1 | C | T | Heterozygous |
| NC_037642.1 | 13152942 | SNV | 1 | T | C | Heterozygous |
| NC_037642.1 | 13152947 | SNV | 1 | A | T | Heterozygous |
| NC_037642.1 | 13152950 | SNV | 1 | T | C | Heterozygous |
| NC_037642.1 | 13152953 | SNV | 1 | C | T | Heterozygous |
| NC_037642.1 | 13152956 | SNV | 1 | C | T | Heterozygous |
| NC_037642.1 | 13152968 | SNV | 1 | C | A | Heterozygous |
| NC_037642.1 | 13152971 | SNV | 1 | C | T | Heterozygous |
| NC_037642.1 | 13152974 | SNV | 1 | A | G | Heterozygous |
| NC_037642.1 | 13152983 | SNV | 1 | G | A | Homozygous   |
| NC_037642.1 | 13152986 | SNV | 1 | C | A | Heterozygous |
| NC_037642.1 | 13152992 | SNV | 1 | G | C | Heterozygous |
| NC_037642.1 | 13152995 | SNV | 1 | T | C | Heterozygous |
| NC_037642.1 | 13152998 | SNV | 1 | G | A | Heterozygous |
| NC_037642.1 | 13153001 | SNV | 1 | A | G | Heterozygous |
| NC_037642.1 | 13153007 | SNV | 1 | C | T | Heterozygous |
| NC_037642.1 | 13153013 | SNV | 1 | A | G | Heterozygous |
| NC_037642.1 | 13153016 | SNV | 1 | G | A | Heterozygous |
| NC_037642.1 | 13154111 | SNV | 1 | G | A | Homozygous   |
| NC_037642.1 | 13158562 | SNV | 1 | T | C | Heterozygous |
| NC_037642.1 | 13158565 | SNV | 1 | T | C | Heterozygous |
| NC_037642.1 | 13158584 | SNV | 1 | T | C | Heterozygous |
| NC_037642.1 | 13159482 | SNV | 1 | T | C | Homozygous   |
| NC_037642.1 | 13159700 | SNV | 1 | G | T | Homozygous   |
| NC_037642.1 | 13159759 | SNV | 1 | A | G | Homozygous   |
| NC_037642.1 | 13160056 | SNV | 1 | T | A | Heterozygous |
| NC_037642.1 | 13160060 | SNV | 1 | A | C | Heterozygous |
| NC_037642.1 | 13160133 | SNV | 1 | C | T | Homozygous   |
| NC_037642.1 | 13160349 | SNV | 1 | A | G | Homozygous   |
| NC_037642.1 | 13160396 | SNV | 1 | G | A | Homozygous   |
| NC_037642.1 | 13160844 | SNV | 1 | C | T | Heterozygous |
| NC_037642.1 | 13161353 | SNV | 1 | G | T | Homozygous   |
| NC_037642.1 | 13161591 | SNV | 1 | A | G | Heterozygous |
| NC_037642.1 | 13161896 | SNV | 1 | G | A | Heterozygous |
| NC_037642.1 | 13163018 | SNV | 1 | A | G | Homozygous   |
| NC_037642.1 | 13164516 | SNV | 1 | T | C | Heterozygous |
| NC_037642.1 | 13165714 | SNV | 1 | A | G | Homozygous   |

|             |          |     |   |   |   |              |
|-------------|----------|-----|---|---|---|--------------|
| NC_037642.1 | 13165743 | SNV | 1 | C | T | Heterozygous |
| NC_037642.1 | 13166040 | SNV | 1 | T | C | Homozygous   |
| NC_037642.1 | 13171294 | SNV | 1 | G | A | Heterozygous |
| NC_037642.1 | 13171297 | SNV | 1 | T | A | Heterozygous |
| NC_037642.1 | 13171297 | SNV | 1 | T | G | Heterozygous |
| NC_037642.1 | 13171301 | SNV | 1 | A | T | Heterozygous |
| NC_037642.1 | 13171309 | SNV | 1 | A | G | Heterozygous |
| NC_037642.1 | 13171311 | SNV | 1 | A | T | Heterozygous |
| NC_037642.1 | 13171322 | SNV | 1 | G | A | Heterozygous |
| NC_037642.1 | 13171361 | SNV | 1 | A | G | Heterozygous |
| NC_037642.1 | 13171365 | SNV | 1 | A | T | Heterozygous |
| NC_037642.1 | 13175442 | SNV | 1 | A | G | Heterozygous |
| NC_037642.1 | 13177113 | SNV | 1 | T | C | Homozygous   |
| NC_037642.1 | 13177645 | SNV | 1 | T | A | Heterozygous |
| NC_037642.1 | 13177656 | SNV | 1 | A | T | Heterozygous |
| NC_037642.1 | 13177725 | SNV | 1 | A | G | Homozygous   |
| NC_037642.1 | 13177935 | SNV | 1 | A | G | Homozygous   |
| NC_037642.1 | 13177941 | SNV | 1 | G | T | Homozygous   |
| NC_037642.1 | 13178004 | SNV | 1 | T | G | Homozygous   |
| NC_037642.1 | 13178025 | SNV | 1 | A | G | Heterozygous |
| NC_037642.1 | 13178864 | SNV | 1 | A | G | Homozygous   |
| NC_037642.1 | 13179452 | SNV | 1 | T | C | Homozygous   |
| NC_037642.1 | 13180314 | SNV | 1 | A | G | Homozygous   |
| NC_037642.1 | 13181118 | SNV | 1 | G | T | Homozygous   |
| NC_037642.1 | 13181122 | SNV | 1 | G | C | Homozygous   |
| NC_037642.1 | 13181168 | SNV | 1 | G | C | Heterozygous |
| NC_037642.1 | 13182273 | SNV | 1 | A | G | Homozygous   |
| NC_037642.1 | 13182599 | SNV | 1 | C | T | Heterozygous |
| NC_037642.1 | 13182636 | SNV | 1 | T | C | Homozygous   |
| NC_037642.1 | 13182690 | SNV | 1 | T | C | Homozygous   |
| NC_037642.1 | 13182817 | SNV | 1 | G | C | Homozygous   |
| NC_037642.1 | 13183154 | SNV | 1 | A | C | Homozygous   |
| NC_037642.1 | 13185618 | SNV | 1 | G | A | Heterozygous |
| NC_037642.1 | 13185633 | SNV | 1 | G | A | Heterozygous |
| NC_037642.1 | 13205385 | SNV | 1 | A | G | Homozygous   |
| NC_037642.1 | 13205421 | SNV | 1 | A | G | Heterozygous |
| NC_037642.1 | 13205439 | SNV | 1 | A | G | Homozygous   |
| NC_037642.1 | 13205470 | SNV | 1 | T | C | Homozygous   |
| NC_037642.1 | 13205596 | SNV | 1 | T | C | Heterozygous |
| NC_037642.1 | 13205608 | SNV | 1 | T | C | Heterozygous |
| NC_037642.1 | 13205663 | SNV | 1 | A | G | Heterozygous |
| NC_037642.1 | 13206328 | SNV | 1 | T | C | Homozygous   |
| NC_037642.1 | 13206602 | SNV | 1 | G | A | Heterozygous |
| NC_037642.1 | 13206790 | SNV | 1 | C | T | Homozygous   |
| NC_037642.1 | 13207112 | SNV | 1 | T | C | Homozygous   |
| NC_037642.1 | 13207134 | SNV | 1 | G | A | Heterozygous |
| NC_037642.1 | 13207254 | SNV | 1 | C | A | Homozygous   |
| NC_037642.1 | 13207256 | SNV | 1 | A | T | Homozygous   |
| NC_037642.1 | 13207260 | SNV | 1 | A | T | Homozygous   |
| NC_037642.1 | 13207433 | SNV | 1 | C | T | Heterozygous |
| NC_037642.1 | 13209800 | SNV | 1 | A | C | Heterozygous |

|             |          |     |   |   |   |              |
|-------------|----------|-----|---|---|---|--------------|
| NC_037642.1 | 13209803 | SNV | 1 | G | A | Heterozygous |
| NC_037642.1 | 13209825 | SNV | 1 | G | T | Heterozygous |
| NC_037642.1 | 13209827 | SNV | 1 | G | A | Heterozygous |
| NC_037642.1 | 13209829 | SNV | 1 | G | A | Heterozygous |
| NC_037642.1 | 13209832 | SNV | 1 | A | C | Homozygous   |
| NC_037642.1 | 13209835 | SNV | 1 | G | T | Heterozygous |
| NC_037642.1 | 13210901 | SNV | 1 | A | C | Homozygous   |
| NC_037642.1 | 13210907 | SNV | 1 | C | T | Homozygous   |
| NC_037642.1 | 13219071 | SNV | 1 | G | A | Homozygous   |
| NC_037642.1 | 13219922 | SNV | 1 | T | A | Heterozygous |
| NC_037642.1 | 13220449 | SNV | 1 | C | T | Heterozygous |
| NC_037642.1 | 13220500 | SNV | 1 | A | G | Homozygous   |
| NC_037642.1 | 13220594 | SNV | 1 | C | T | Heterozygous |
| NC_037642.1 | 13220665 | SNV | 1 | C | G | Homozygous   |
| NC_037642.1 | 13220964 | SNV | 1 | A | G | Heterozygous |
| NC_037642.1 | 13220970 | SNV | 1 | C | A | Heterozygous |
| NC_037642.1 | 13220993 | SNV | 1 | A | G | Homozygous   |
| NC_037642.1 | 13227291 | SNV | 1 | T | C | Heterozygous |
| NC_037642.1 | 13227305 | SNV | 1 | G | A | Heterozygous |
| NC_037642.1 | 13230346 | SNV | 1 | A | C | Heterozygous |
| NC_037642.1 | 13230353 | SNV | 1 | C | T | Heterozygous |
| NC_037642.1 | 13230516 | SNV | 1 | A | G | Homozygous   |
| NC_037642.1 | 13230703 | SNV | 1 | G | A | Heterozygous |
| NC_037642.1 | 13230712 | SNV | 1 | T | A | Homozygous   |
| NC_037642.1 | 13231096 | SNV | 1 | G | A | Heterozygous |
| NC_037642.1 | 13231102 | SNV | 1 | T | G | Homozygous   |
| NC_037642.1 | 13231107 | SNV | 1 | G | A | Homozygous   |
| NC_037642.1 | 13231700 | SNV | 1 | C | T | Heterozygous |
| NC_037642.1 | 13231868 | SNV | 1 | T | C | Homozygous   |
| NC_037642.1 | 13232069 | SNV | 1 | T | C | Homozygous   |
| NC_037642.1 | 13232149 | SNV | 1 | T | C | Homozygous   |
| NC_037642.1 | 13234416 | SNV | 1 | A | G | Homozygous   |
| NC_037642.1 | 13234496 | SNV | 1 | G | A | Heterozygous |
| NC_037642.1 | 13234525 | SNV | 1 | C | A | Heterozygous |
| NC_037642.1 | 13234528 | SNV | 1 | T | C | Homozygous   |
| NC_037642.1 | 13242435 | SNV | 1 | T | C | Homozygous   |
| NC_037642.1 | 13242514 | SNV | 1 | A | G | Heterozygous |
| NC_037642.1 | 13242696 | SNV | 1 | A | G | Homozygous   |
| NC_037642.1 | 13242788 | SNV | 1 | T | C | Homozygous   |
| NC_037642.1 | 13242946 | SNV | 1 | T | C | Homozygous   |
| NC_037642.1 | 13243115 | SNV | 1 | C | T | Homozygous   |
| NC_037642.1 | 13243322 | SNV | 1 | T | C | Homozygous   |
| NC_037642.1 | 13243476 | SNV | 1 | T | C | Homozygous   |
| NC_037642.1 | 13243559 | SNV | 1 | C | T | Heterozygous |
| NC_037642.1 | 13259779 | SNV | 1 | T | C | Heterozygous |
| NC_037642.1 | 13260132 | SNV | 1 | A | G | Homozygous   |
| NC_037642.1 | 13263356 | SNV | 1 | A | T | Homozygous   |
| NC_037642.1 | 13267225 | SNV | 1 | G | A | Heterozygous |
| NC_037642.1 | 13267681 | SNV | 1 | C | A | Homozygous   |
| NC_037642.1 | 13267684 | SNV | 1 | A | C | Homozygous   |
| NC_037642.1 | 13267688 | SNV | 1 | A | G | Homozygous   |

|             |          |     |   |   |   |              |
|-------------|----------|-----|---|---|---|--------------|
| NC_037642.1 | 13269395 | SNV | 1 | T | C | Homozygous   |
| NC_037642.1 | 13269688 | SNV | 1 | A | G | Homozygous   |
| NC_037642.1 | 13270556 | SNV | 1 | T | C | Homozygous   |
| NC_037642.1 | 13270594 | SNV | 1 | C | A | Homozygous   |
| NC_037642.1 | 13270610 | SNV | 1 | A | G | Homozygous   |
| NC_037642.1 | 13273945 | SNV | 1 | A | G | Homozygous   |
| NC_037642.1 | 13273951 | SNV | 1 | A | G | Homozygous   |
| NC_037642.1 | 13275305 | SNV | 1 | G | A | Homozygous   |
| NC_037642.1 | 13275396 | SNV | 1 | T | A | Homozygous   |
| NC_037642.1 | 13282858 | SNV | 1 | A | C | Homozygous   |
| NC_037642.1 | 13282865 | SNV | 1 | G | A | Homozygous   |
| NC_037642.1 | 13282869 | SNV | 1 | T | A | Homozygous   |
| NC_037642.1 | 13282871 | SNV | 1 | T | A | Homozygous   |
| NC_037642.1 | 13291617 | SNV | 1 | T | G | Homozygous   |
| NC_037642.1 | 13291729 | SNV | 1 | C | G | Homozygous   |
| NC_037642.1 | 13292244 | SNV | 1 | G | A | Heterozygous |
| NC_037642.1 | 13292247 | SNV | 1 | C | T | Heterozygous |
| NC_037642.1 | 13293602 | SNV | 1 | C | T | Heterozygous |
| NC_037642.1 | 13294986 | SNV | 1 | A | T | Heterozygous |
| NC_037642.1 | 13295519 | SNV | 1 | C | T | Heterozygous |
| NC_037642.1 | 13295591 | SNV | 1 | C | T | Homozygous   |
| NC_037642.1 | 13296380 | SNV | 1 | T | A | Heterozygous |
| NC_037642.1 | 13296411 | SNV | 1 | A | G | Heterozygous |
| NC_037642.1 | 13296922 | SNV | 1 | T | C | Homozygous   |
| NC_037642.1 | 13298560 | SNV | 1 | A | G | Homozygous   |
| NC_037642.1 | 13299041 | SNV | 1 | A | G | Homozygous   |
| NC_037642.1 | 13303146 | SNV | 1 | A | G | Homozygous   |
| NC_037642.1 | 13303338 | SNV | 1 | A | G | Homozygous   |
| NC_037642.1 | 13305241 | SNV | 1 | C | T | Homozygous   |
| NC_037642.1 | 13305246 | SNV | 1 | A | T | Homozygous   |
| NC_037642.1 | 13305248 | SNV | 1 | A | C | Homozygous   |
| NC_037642.1 | 13311140 | SNV | 1 | T | C | Heterozygous |
| NC_037642.1 | 13311140 | SNV | 1 | T | G | Heterozygous |
| NC_037642.1 | 13314467 | SNV | 1 | A | G | Homozygous   |
| NC_037642.1 | 13314476 | SNV | 1 | T | C | Homozygous   |
| NC_037642.1 | 13316440 | SNV | 1 | C | T | Heterozygous |
| NC_037642.1 | 13319885 | SNV | 1 | C | A | Homozygous   |
| NC_037642.1 | 13319887 | SNV | 1 | G | A | Homozygous   |
| NC_037642.1 | 13320485 | SNV | 1 | A | C | Homozygous   |
| NC_037642.1 | 13320515 | SNV | 1 | G | A | Homozygous   |
| NC_037642.1 | 13322547 | SNV | 1 | T | C | Heterozygous |
| NC_037642.1 | 13322898 | SNV | 1 | T | C | Heterozygous |
| NC_037642.1 | 13323286 | SNV | 1 | A | G | Homozygous   |
| NC_037642.1 | 13323288 | SNV | 1 | A | C | Homozygous   |
| NC_037642.1 | 13323294 | SNV | 1 | T | C | Homozygous   |
| NC_037642.1 | 13323321 | SNV | 1 | A | G | Homozygous   |
| NC_037642.1 | 13323823 | SNV | 1 | C | T | Homozygous   |
| NC_037642.1 | 13324359 | SNV | 1 | C | T | Heterozygous |
| NC_037642.1 | 13324671 | SNV | 1 | A | G | Heterozygous |
| NC_037642.1 | 13324948 | SNV | 1 | A | G | Homozygous   |
| NC_037642.1 | 13325067 | SNV | 1 | A | G | Heterozygous |

|             |          |     |   |   |   |              |
|-------------|----------|-----|---|---|---|--------------|
| NC_037642.1 | 13325103 | SNV | 1 | T | C | Homozygous   |
| NC_037642.1 | 13333178 | SNV | 1 | G | A | Heterozygous |
| NC_037642.1 | 13333205 | SNV | 1 | T | C | Homozygous   |
| NC_037642.1 | 13333207 | SNV | 1 | G | A | Heterozygous |
| NC_037642.1 | 13333480 | SNV | 1 | C | A | Heterozygous |
| NC_037642.1 | 13336179 | SNV | 1 | T | C | Homozygous   |
| NC_037642.1 | 13336185 | SNV | 1 | T | A | Homozygous   |
| NC_037642.1 | 13336190 | SNV | 1 | A | T | Homozygous   |
| NC_037642.1 | 13336195 | SNV | 1 | T | G | Homozygous   |
| NC_037642.1 | 13336213 | SNV | 1 | T | C | Homozygous   |
| NC_037642.1 | 13336232 | SNV | 1 | T | C | Heterozygous |
| NC_037642.1 | 13336236 | SNV | 1 | T | C | Heterozygous |
| NC_037642.1 | 13336240 | SNV | 1 | T | A | Heterozygous |
| NC_037642.1 | 13336240 | SNV | 1 | T | C | Heterozygous |
| NC_037642.1 | 13336245 | SNV | 1 | C | G | Heterozygous |
| NC_037642.1 | 13336255 | SNV | 1 | A | G | Homozygous   |
| NC_037642.1 | 13336259 | SNV | 1 | A | G | Homozygous   |
| NC_037642.1 | 13336261 | SNV | 1 | A | G | Homozygous   |
| NC_037642.1 | 13336270 | SNV | 1 | G | A | Homozygous   |
| NC_037642.1 | 13336287 | SNV | 1 | T | C | Homozygous   |
| NC_037642.1 | 13336321 | SNV | 1 | T | G | Homozygous   |
| NC_037642.1 | 13336327 | SNV | 1 | A | T | Homozygous   |
| NC_037642.1 | 13336331 | SNV | 1 | A | G | Homozygous   |
| NC_037642.1 | 13336336 | SNV | 1 | A | T | Heterozygous |
| NC_037642.1 | 13336345 | SNV | 1 | C | T | Heterozygous |
| NC_037642.1 | 13336348 | SNV | 1 | A | G | Homozygous   |
| NC_037642.1 | 13336351 | SNV | 1 | G | A | Heterozygous |
| NC_037642.1 | 13336368 | SNV | 1 | T | C | Heterozygous |
| NC_037642.1 | 13336388 | SNV | 1 | A | G | Heterozygous |
| NC_037642.1 | 13336392 | SNV | 1 | G | T | Heterozygous |
| NC_037642.1 | 13336395 | SNV | 1 | T | C | Heterozygous |
| NC_037642.1 | 13336405 | SNV | 1 | G | A | Heterozygous |
| NC_037642.1 | 13336409 | SNV | 1 | G | A | Homozygous   |
| NC_037642.1 | 13336419 | SNV | 1 | T | C | Homozygous   |
| NC_037642.1 | 13336422 | SNV | 1 | C | A | Heterozygous |
| NC_037642.1 | 13336427 | SNV | 1 | A | G | Heterozygous |
| NC_037642.1 | 13336436 | SNV | 1 | T | C | Heterozygous |
| NC_037642.1 | 13336455 | SNV | 1 | T | A | Heterozygous |
| NC_037642.1 | 13336460 | SNV | 1 | T | A | Heterozygous |
| NC_037642.1 | 13336467 | SNV | 1 | T | A | Heterozygous |
| NC_037642.1 | 13336476 | SNV | 1 | A | G | Homozygous   |
| NC_037642.1 | 13336479 | SNV | 1 | A | G | Homozygous   |
| NC_037642.1 | 13336509 | SNV | 1 | G | A | Homozygous   |
| NC_037642.1 | 13336519 | SNV | 1 | A | G | Homozygous   |
| NC_037642.1 | 13336528 | SNV | 1 | A | G | Homozygous   |
| NC_037642.1 | 13336538 | SNV | 1 | G | A | Homozygous   |
| NC_037642.1 | 13336543 | SNV | 1 | A | G | Homozygous   |
| NC_037642.1 | 13336687 | SNV | 1 | T | C | Homozygous   |
| NC_037642.1 | 13336696 | SNV | 1 | G | T | Homozygous   |
| NC_037642.1 | 13336701 | SNV | 1 | T | C | Homozygous   |
| NC_037642.1 | 13336706 | SNV | 1 | T | C | Heterozygous |

|             |          |     |   |   |   |              |
|-------------|----------|-----|---|---|---|--------------|
| NC_037642.1 | 13336710 | SNV | 1 | G | A | Homozygous   |
| NC_037642.1 | 13336722 | SNV | 1 | T | C | Heterozygous |
| NC_037642.1 | 13336726 | SNV | 1 | T | A | Homozygous   |
| NC_037642.1 | 13336732 | SNV | 1 | G | C | Heterozygous |
| NC_037642.1 | 13336759 | SNV | 1 | T | C | Homozygous   |
| NC_037642.1 | 13336761 | SNV | 1 | T | C | Homozygous   |
| NC_037642.1 | 13336798 | SNV | 1 | T | C | Heterozygous |
| NC_037642.1 | 13336799 | SNV | 1 | G | A | Heterozygous |
| NC_037642.1 | 13336806 | SNV | 1 | G | A | Homozygous   |
| NC_037642.1 | 13336825 | SNV | 1 | G | A | Heterozygous |
| NC_037642.1 | 13336841 | SNV | 1 | T | A | Homozygous   |
| NC_037642.1 | 13336856 | SNV | 1 | A | G | Heterozygous |
| NC_037642.1 | 13336860 | SNV | 1 | T | C | Homozygous   |
| NC_037642.1 | 13336864 | SNV | 1 | T | A | Homozygous   |
| NC_037642.1 | 13336878 | SNV | 1 | A | G | Homozygous   |
| NC_037642.1 | 13336886 | SNV | 1 | C | T | Homozygous   |
| NC_037642.1 | 13336905 | SNV | 1 | T | C | Homozygous   |
| NC_037642.1 | 13336925 | SNV | 1 | A | G | Homozygous   |
| NC_037642.1 | 13336929 | SNV | 1 | C | T | Homozygous   |
| NC_037642.1 | 13336948 | SNV | 1 | A | T | Homozygous   |
| NC_037642.1 | 13336950 | SNV | 1 | T | C | Homozygous   |
| NC_037642.1 | 13336956 | SNV | 1 | C | G | Homozygous   |
| NC_037642.1 | 13336980 | SNV | 1 | A | G | Homozygous   |
| NC_037642.1 | 13336992 | SNV | 1 | T | C | Homozygous   |
| NC_037642.1 | 13336996 | SNV | 1 | C | T | Homozygous   |
| NC_037642.1 | 13337022 | SNV | 1 | G | A | Homozygous   |
| NC_037642.1 | 13337026 | SNV | 1 | A | T | Heterozygous |
| NC_037642.1 | 13337040 | SNV | 1 | T | C | Homozygous   |
| NC_037642.1 | 13337049 | SNV | 1 | T | C | Heterozygous |
| NC_037642.1 | 13337054 | SNV | 1 | A | G | Heterozygous |
| NC_037642.1 | 13337059 | SNV | 1 | C | T | Heterozygous |
| NC_037642.1 | 13337062 | SNV | 1 | A | G | Heterozygous |
| NC_037642.1 | 13337068 | SNV | 1 | A | T | Homozygous   |
| NC_037642.1 | 13337083 | SNV | 1 | A | G | Heterozygous |
| NC_037642.1 | 13337105 | SNV | 1 | G | T | Homozygous   |
| NC_037642.1 | 13337146 | SNV | 1 | A | C | Heterozygous |
| NC_037642.1 | 13337149 | SNV | 1 | A | C | Heterozygous |
| NC_037642.1 | 13337181 | SNV | 1 | C | G | Heterozygous |
| NC_037642.1 | 13337200 | SNV | 1 | T | C | Homozygous   |
| NC_037642.1 | 13337226 | SNV | 1 | A | G | Heterozygous |
| NC_037642.1 | 13337230 | SNV | 1 | T | C | Heterozygous |
| NC_037642.1 | 13337240 | SNV | 1 | A | G | Heterozygous |
| NC_037642.1 | 13337248 | SNV | 1 | A | G | Heterozygous |
| NC_037642.1 | 13337277 | SNV | 1 | G | A | Heterozygous |
| NC_037642.1 | 13337320 | SNV | 1 | G | A | Homozygous   |
| NC_037642.1 | 13337326 | SNV | 1 | C | T | Homozygous   |
| NC_037642.1 | 13337347 | SNV | 1 | C | T | Homozygous   |
| NC_037642.1 | 13337361 | SNV | 1 | T | A | Homozygous   |
| NC_037642.1 | 13337413 | SNV | 1 | T | G | Homozygous   |
| NC_037642.1 | 13337423 | SNV | 1 | A | T | Homozygous   |
| NC_037642.1 | 13337425 | SNV | 1 | T | C | Homozygous   |



|             |          |     |   |   |   |              |
|-------------|----------|-----|---|---|---|--------------|
| NC_037642.1 | 13337430 | SNV | 1 | T | A | Homozygous   |
| NC_037642.1 | 13337432 | SNV | 1 | T | C | Homozygous   |
| NC_037642.1 | 13337450 | SNV | 1 | T | G | Heterozygous |
| NC_037642.1 | 13337453 | SNV | 1 | G | A | Heterozygous |
| NC_037642.1 | 13337461 | SNV | 1 | C | A | Heterozygous |
| NC_037642.1 | 13337464 | SNV | 1 | T | A | Heterozygous |
| NC_037642.1 | 13337468 | SNV | 1 | A | C | Heterozygous |
| NC_037642.1 | 13337473 | SNV | 1 | A | T | Heterozygous |
| NC_037642.1 | 13338088 | SNV | 1 | A | G | Homozygous   |
| NC_037642.1 | 13340138 | SNV | 1 | A | C | Homozygous   |
| NC_037642.1 | 13340140 | SNV | 1 | A | C | Homozygous   |
| NC_037642.1 | 13340146 | SNV | 1 | A | C | Homozygous   |
| NC_037642.1 | 13340164 | SNV | 1 | A | T | Homozygous   |
| NC_037642.1 | 13340166 | SNV | 1 | A | G | Homozygous   |
| NC_037642.1 | 13340169 | SNV | 1 | C | G | Homozygous   |
| NC_037642.1 | 13340171 | SNV | 1 | T | G | Homozygous   |
| NC_037642.1 | 13340512 | SNV | 1 | T | C | Homozygous   |
| NC_037642.1 | 13340519 | SNV | 1 | A | G | Homozygous   |
| NC_037642.1 | 13342471 | SNV | 1 | T | A | Homozygous   |
| NC_037642.1 | 13344350 | SNV | 1 | G | C | Heterozygous |
| NC_037642.1 | 13344355 | SNV | 1 | C | T | Heterozygous |
| NC_037642.1 | 13344366 | SNV | 1 | G | T | Homozygous   |
| NC_037642.1 | 13347595 | SNV | 1 | T | C | Heterozygous |
| NC_037642.1 | 13348420 | SNV | 1 | A | C | Homozygous   |
| NC_037642.1 | 13348425 | SNV | 1 | T | A | Homozygous   |
| NC_037642.1 | 13348428 | SNV | 1 | T | A | Homozygous   |
| NC_037642.1 | 13348432 | SNV | 1 | T | A | Homozygous   |
| NC_037642.1 | 13348554 | SNV | 1 | G | A | Homozygous   |
| NC_037642.1 | 13348923 | SNV | 1 | A | G | Homozygous   |
| NC_037642.1 | 13349939 | SNV | 1 | A | G | Heterozygous |
| NC_037642.1 | 13349942 | SNV | 1 | C | A | Heterozygous |
| NC_037642.1 | 13349946 | SNV | 1 | A | T | Heterozygous |
| NC_037642.1 | 13349949 | SNV | 1 | A | C | Heterozygous |
| NC_037642.1 | 13350734 | SNV | 1 | A | T | Heterozygous |
| NC_037642.1 | 13352292 | SNV | 1 | A | C | Homozygous   |
| NC_037642.1 | 13352538 | SNV | 1 | C | A | Homozygous   |
| NC_037642.1 | 13352814 | SNV | 1 | A | C | Homozygous   |
| NC_037642.1 | 13353184 | SNV | 1 | A | T | Homozygous   |
| NC_037642.1 | 13353197 | SNV | 1 | T | A | Homozygous   |
| NC_037642.1 | 13353225 | SNV | 1 | T | C | Homozygous   |
| NC_037642.1 | 13353227 | SNV | 1 | T | C | Homozygous   |
| NC_037642.1 | 13353233 | SNV | 1 | A | G | Homozygous   |
| NC_037642.1 | 13354378 | SNV | 1 | A | G | Heterozygous |
| NC_037642.1 | 13360631 | SNV | 1 | A | G | Homozygous   |
| NC_037642.1 | 13377230 | SNV | 1 | A | G | Homozygous   |
| NC_037642.1 | 13379883 | SNV | 1 | A | C | Heterozygous |
| NC_037642.1 | 13380792 | SNV | 1 | A | G | Homozygous   |
| NC_037642.1 | 13380840 | SNV | 1 | G | A | Heterozygous |
| NC_037642.1 | 13380882 | SNV | 1 | T | C | Heterozygous |
| NC_037642.1 | 13380965 | SNV | 1 | C | T | Heterozygous |
| NC_037642.1 | 13387698 | SNV | 1 | A | G | Heterozygous |

|             |          |     |   |   |   |              |
|-------------|----------|-----|---|---|---|--------------|
| NC_037642.1 | 13388392 | SNV | 1 | C | T | Heterozygous |
| NC_037642.1 | 13391436 | SNV | 1 | T | C | Homozygous   |
| NC_037642.1 | 13393218 | SNV | 1 | C | T | Heterozygous |
| NC_037642.1 | 13393244 | SNV | 1 | C | G | Homozygous   |
| NC_037642.1 | 13393553 | SNV | 1 | G | A | Heterozygous |
| NC_037642.1 | 13393625 | SNV | 1 | A | G | Homozygous   |
| NC_037642.1 | 13393667 | SNV | 1 | C | T | Homozygous   |
| NC_037642.1 | 13394055 | SNV | 1 | A | T | Homozygous   |
| NC_037642.1 | 13394067 | SNV | 1 | T | G | Heterozygous |
| NC_037642.1 | 13394363 | SNV | 1 | C | T | Heterozygous |
| NC_037642.1 | 13394418 | SNV | 1 | G | A | Heterozygous |
| NC_037642.1 | 13397853 | SNV | 1 | G | A | Homozygous   |
| NC_037642.1 | 13397925 | SNV | 1 | G | A | Heterozygous |
| NC_037642.1 | 13398032 | SNV | 1 | C | G | Heterozygous |
| NC_037642.1 | 13398052 | SNV | 1 | C | T | Heterozygous |
| NC_037642.1 | 13400456 | SNV | 1 | C | T | Heterozygous |
| NC_037642.1 | 13400652 | SNV | 1 | C | A | Heterozygous |
| NC_037642.1 | 13400770 | SNV | 1 | C | T | Heterozygous |
| NC_037642.1 | 13400885 | SNV | 1 | T | C | Heterozygous |
| NC_037642.1 | 13400889 | SNV | 1 | A | G | Heterozygous |
| NC_037642.1 | 13400906 | SNV | 1 | T | C | Heterozygous |
| NC_037642.1 | 13400932 | SNV | 1 | C | T | Heterozygous |
| NC_037642.1 | 13400939 | SNV | 1 | G | A | Homozygous   |
| NC_037642.1 | 13401035 | SNV | 1 | T | C | Homozygous   |
| NC_037642.1 | 13401987 | SNV | 1 | C | T | Heterozygous |
| NC_037642.1 | 13406761 | SNV | 1 | C | T | Heterozygous |
| NC_037642.1 | 13411585 | SNV | 1 | C | T | Heterozygous |
| NC_037642.1 | 13412183 | SNV | 1 | A | G | Homozygous   |
| NC_037642.1 | 13412677 | SNV | 1 | A | G | Homozygous   |
| NC_037642.1 | 13413110 | SNV | 1 | T | C | Heterozygous |
| NC_037642.1 | 13413142 | SNV | 1 | G | A | Homozygous   |
| NC_037642.1 | 13414006 | SNV | 1 | T | C | Heterozygous |
| NC_037642.1 | 13414047 | SNV | 1 | C | T | Homozygous   |
| NC_037642.1 | 13414141 | SNV | 1 | C | T | Heterozygous |
| NC_037642.1 | 13414165 | SNV | 1 | C | G | Homozygous   |
| NC_037642.1 | 13414168 | SNV | 1 | C | T | Homozygous   |
| NC_037642.1 | 13414256 | SNV | 1 | G | A | Heterozygous |
| NC_037642.1 | 13414434 | SNV | 1 | A | G | Homozygous   |
| NC_037642.1 | 13414602 | SNV | 1 | C | T | Homozygous   |
| NC_037642.1 | 13414628 | SNV | 1 | G | A | Homozygous   |
| NC_037642.1 | 13414712 | SNV | 1 | C | T | Heterozygous |
| NC_037642.1 | 13414779 | SNV | 1 | C | T | Heterozygous |
| NC_037642.1 | 13414789 | SNV | 1 | C | T | Homozygous   |
| NC_037642.1 | 13414815 | SNV | 1 | A | G | Heterozygous |
| NC_037642.1 | 13414838 | SNV | 1 | T | C | Heterozygous |
| NC_037642.1 | 13414878 | SNV | 1 | A | G | Homozygous   |
| NC_037642.1 | 13414908 | SNV | 1 | A | T | Homozygous   |
| NC_037642.1 | 13414912 | SNV | 1 | C | T | Heterozygous |
| NC_037642.1 | 13415073 | SNV | 1 | C | T | Homozygous   |
| NC_037642.1 | 13415277 | SNV | 1 | A | G | Homozygous   |
| NC_037642.1 | 13415460 | SNV | 1 | C | T | Heterozygous |

|             |          |     |   |   |   |              |
|-------------|----------|-----|---|---|---|--------------|
| NC_037642.1 | 13415491 | SNV | 1 | A | G | Heterozygous |
| NC_037642.1 | 13415616 | SNV | 1 | A | G | Homozygous   |
| NC_037642.1 | 13415924 | SNV | 1 | T | A | Heterozygous |
| NC_037642.1 | 13416240 | SNV | 1 | T | G | Homozygous   |
| NC_037642.1 | 13416311 | SNV | 1 | T | C | Homozygous   |
| NC_037642.1 | 13416380 | SNV | 1 | T | C | Heterozygous |
| NC_037642.1 | 13416485 | SNV | 1 | T | C | Heterozygous |
| NC_037642.1 | 13416496 | SNV | 1 | A | G | Heterozygous |
| NC_037642.1 | 13416576 | SNV | 1 | T | C | Homozygous   |
| NC_037642.1 | 13416648 | SNV | 1 | A | G | Homozygous   |
| NC_037642.1 | 13417926 | SNV | 1 | T | C | Heterozygous |
| NC_037642.1 | 13423078 | SNV | 1 | T | C | Homozygous   |
| NC_037642.1 | 13423194 | SNV | 1 | T | C | Homozygous   |
| NC_037642.1 | 13424080 | SNV | 1 | A | G | Homozygous   |
| NC_037642.1 | 13424218 | SNV | 1 | G | A | Heterozygous |
| NC_037642.1 | 13424224 | SNV | 1 | A | T | Heterozygous |
| NC_037642.1 | 13424253 | SNV | 1 | A | G | Homozygous   |
| NC_037642.1 | 13424883 | SNV | 1 | G | A | Heterozygous |
| NC_037642.1 | 13424985 | SNV | 1 | G | A | Heterozygous |
| NC_037642.1 | 13428629 | SNV | 1 | C | T | Heterozygous |
| NC_037642.1 | 13429123 | SNV | 1 | C | T | Homozygous   |
| NC_037642.1 | 13429365 | SNV | 1 | T | C | Homozygous   |
| NC_037642.1 | 13434099 | SNV | 1 | C | T | Homozygous   |
| NC_037642.1 | 13434101 | SNV | 1 | T | C | Homozygous   |
| NC_037642.1 | 13434202 | SNV | 1 | C | G | Homozygous   |
| NC_037642.1 | 13434406 | SNV | 1 | T | C | Homozygous   |
| NC_037642.1 | 13434574 | SNV | 1 | T | C | Homozygous   |
| NC_037642.1 | 13434630 | SNV | 1 | A | G | Homozygous   |
| NC_037642.1 | 13444208 | SNV | 1 | T | C | Heterozygous |
| NC_037642.1 | 13444415 | SNV | 1 | T | C | Homozygous   |
| NC_037642.1 | 13444641 | SNV | 1 | C | T | Homozygous   |
| NC_037642.1 | 13444674 | SNV | 1 | C | T | Heterozygous |
| NC_037642.1 | 13444765 | SNV | 1 | A | G | Homozygous   |
| NC_037642.1 | 13445016 | SNV | 1 | T | A | Homozygous   |
| NC_037642.1 | 13446569 | SNV | 1 | C | T | Homozygous   |
| NC_037642.1 | 13447906 | SNV | 1 | T | G | Heterozygous |
| NC_037642.1 | 13447908 | SNV | 1 | T | G | Heterozygous |
| NC_037642.1 | 13447912 | SNV | 1 | G | A | Heterozygous |
| NC_037642.1 | 13447914 | SNV | 1 | T | A | Heterozygous |
| NC_037642.1 | 13447933 | SNV | 1 | T | C | Heterozygous |
| NC_037642.1 | 13447957 | SNV | 1 | A | T | Heterozygous |
| NC_037642.1 | 13447960 | SNV | 1 | C | A | Heterozygous |
| NC_037642.1 | 13447962 | SNV | 1 | C | T | Heterozygous |
| NC_037642.1 | 13451757 | SNV | 1 | T | C | Homozygous   |
| NC_037642.1 | 13451890 | SNV | 1 | T | A | Homozygous   |
| NC_037642.1 | 13451944 | SNV | 1 | T | C | Homozygous   |
| NC_037642.1 | 13451994 | SNV | 1 | G | A | Homozygous   |
| NC_037642.1 | 13452767 | SNV | 1 | A | G | Homozygous   |
| NC_037642.1 | 13460329 | SNV | 1 | C | G | Homozygous   |
| NC_037642.1 | 13460483 | SNV | 1 | C | T | Heterozygous |
| NC_037642.1 | 13460540 | SNV | 1 | T | C | Heterozygous |

|             |          |     |   |   |   |              |
|-------------|----------|-----|---|---|---|--------------|
| NC_037642.1 | 13461032 | SNV | 1 | T | C | Homozygous   |
| NC_037642.1 | 13461053 | SNV | 1 | T | C | Homozygous   |
| NC_037642.1 | 13461625 | SNV | 1 | A | G | Heterozygous |
| NC_037642.1 | 13463825 | SNV | 1 | T | C | Homozygous   |
| NC_037642.1 | 13464519 | SNV | 1 | C | T | Homozygous   |
| NC_037642.1 | 13464525 | SNV | 1 | G | A | Homozygous   |
| NC_037642.1 | 13464539 | SNV | 1 | A | G | Homozygous   |
| NC_037642.1 | 13464593 | SNV | 1 | C | T | Homozygous   |
| NC_037642.1 | 13466051 | SNV | 1 | T | C | Homozygous   |
| NC_037642.1 | 13466499 | SNV | 1 | A | C | Homozygous   |
| NC_037642.1 | 13466984 | SNV | 1 | G | A | Homozygous   |
| NC_037642.1 | 13467227 | SNV | 1 | A | T | Homozygous   |
| NC_037642.1 | 13470215 | SNV | 1 | G | A | Homozygous   |
| NC_037642.1 | 13476771 | SNV | 1 | T | C | Heterozygous |
| NC_037642.1 | 13477091 | SNV | 1 | A | G | Heterozygous |
| NC_037642.1 | 13477203 | SNV | 1 | A | G | Heterozygous |
| NC_037642.1 | 13477403 | SNV | 1 | A | G | Heterozygous |
| NC_037642.1 | 13480148 | SNV | 1 | A | G | Heterozygous |
| NC_037642.1 | 13480466 | SNV | 1 | A | G | Homozygous   |
| NC_037642.1 | 13480686 | SNV | 1 | T | C | Homozygous   |
| NC_037642.1 | 13480693 | SNV | 1 | C | T | Homozygous   |
| NC_037642.1 | 13480706 | SNV | 1 | G | A | Homozygous   |
| NC_037642.1 | 13481079 | SNV | 1 | A | G | Homozygous   |
| NC_037642.1 | 13481312 | SNV | 1 | G | A | Homozygous   |
| NC_037642.1 | 13481506 | SNV | 1 | G | A | Heterozygous |
| NC_037642.1 | 13482122 | SNV | 1 | T | C | Homozygous   |
| NC_037642.1 | 13482321 | SNV | 1 | G | A | Homozygous   |
| NC_037642.1 | 13483209 | SNV | 1 | A | G | Homozygous   |
| NC_037642.1 | 13483373 | SNV | 1 | A | G | Heterozygous |
| NC_037642.1 | 13483584 | SNV | 1 | C | T | Heterozygous |
| NC_037642.1 | 13483711 | SNV | 1 | C | T | Heterozygous |
| NC_037642.1 | 13483733 | SNV | 1 | C | T | Heterozygous |
| NC_037642.1 | 13483767 | SNV | 1 | C | T | Heterozygous |
| NC_037642.1 | 13484145 | SNV | 1 | T | A | Homozygous   |
| NC_037642.1 | 13484152 | SNV | 1 | G | A | Heterozygous |
| NC_037642.1 | 13484475 | SNV | 1 | A | G | Homozygous   |
| NC_037642.1 | 13484496 | SNV | 1 | T | C | Homozygous   |
| NC_037642.1 | 13484507 | SNV | 1 | C | T | Homozygous   |
| NC_037642.1 | 13484536 | SNV | 1 | C | T | Homozygous   |
| NC_037642.1 | 13484611 | SNV | 1 | A | G | Homozygous   |
| NC_037642.1 | 13484633 | SNV | 1 | A | G | Homozygous   |
| NC_037642.1 | 13484674 | SNV | 1 | T | C | Homozygous   |
| NC_037642.1 | 13484944 | SNV | 1 | G | A | Homozygous   |
| NC_037642.1 | 13484966 | SNV | 1 | G | A | Heterozygous |
| NC_037642.1 | 13484984 | SNV | 1 | C | T | Homozygous   |
| NC_037642.1 | 13485051 | SNV | 1 | G | A | Heterozygous |
| NC_037642.1 | 13485124 | SNV | 1 | G | A | Heterozygous |
| NC_037642.1 | 13485202 | SNV | 1 | A | G | Heterozygous |
| NC_037642.1 | 13485314 | SNV | 1 | A | G | Heterozygous |
| NC_037642.1 | 13485412 | SNV | 1 | C | T | Homozygous   |
| NC_037642.1 | 13485450 | SNV | 1 | A | G | Homozygous   |

|             |          |     |   |   |   |              |
|-------------|----------|-----|---|---|---|--------------|
| NC_037642.1 | 13485597 | SNV | 1 | T | G | Homozygous   |
| NC_037642.1 | 13485601 | SNV | 1 | C | T | Homozygous   |
| NC_037642.1 | 13485673 | SNV | 1 | T | C | Homozygous   |
| NC_037642.1 | 13485692 | SNV | 1 | T | C | Homozygous   |
| NC_037642.1 | 13485874 | SNV | 1 | T | A | Homozygous   |
| NC_037642.1 | 13485954 | SNV | 1 | A | G | Homozygous   |
| NC_037642.1 | 13485961 | SNV | 1 | G | A | Homozygous   |
| NC_037642.1 | 13485975 | SNV | 1 | T | C | Homozygous   |
| NC_037642.1 | 13485982 | SNV | 1 | C | T | Heterozygous |
| NC_037642.1 | 13486018 | SNV | 1 | T | C | Homozygous   |
| NC_037642.1 | 13486083 | SNV | 1 | G | A | Homozygous   |
| NC_037642.1 | 13486219 | SNV | 1 | C | T | Heterozygous |
| NC_037642.1 | 13486243 | SNV | 1 | A | G | Homozygous   |
| NC_037642.1 | 13486292 | SNV | 1 | T | C | Homozygous   |
| NC_037642.1 | 13486457 | SNV | 1 | A | G | Homozygous   |
| NC_037642.1 | 13486599 | SNV | 1 | G | A | Homozygous   |
| NC_037642.1 | 13486702 | SNV | 1 | G | A | Homozygous   |
| NC_037642.1 | 13486812 | SNV | 1 | T | C | Heterozygous |
| NC_037642.1 | 13486842 | SNV | 1 | G | A | Heterozygous |
| NC_037642.1 | 13487115 | SNV | 1 | G | A | Heterozygous |
| NC_037642.1 | 13487160 | SNV | 1 | G | A | Homozygous   |
| NC_037642.1 | 13487190 | SNV | 1 | C | T | Homozygous   |
| NC_037642.1 | 13487395 | SNV | 1 | G | T | Homozygous   |
| NC_037642.1 | 13487540 | SNV | 1 | T | C | Homozygous   |
| NC_037642.1 | 13487752 | SNV | 1 | A | G | Homozygous   |
| NC_037642.1 | 13488818 | SNV | 1 | A | G | Heterozygous |
| NC_037642.1 | 13488835 | SNV | 1 | A | G | Homozygous   |
| NC_037642.1 | 13488866 | SNV | 1 | C | T | Homozygous   |
| NC_037642.1 | 13489019 | SNV | 1 | T | C | Homozygous   |
| NC_037642.1 | 13489482 | SNV | 1 | T | C | Homozygous   |
| NC_037642.1 | 13489777 | SNV | 1 | T | C | Homozygous   |
| NC_037642.1 | 13489980 | SNV | 1 | C | T | Homozygous   |
| NC_037642.1 | 13490583 | SNV | 1 | T | C | Homozygous   |
| NC_037642.1 | 13491016 | SNV | 1 | G | A | Heterozygous |
| NC_037642.1 | 13492764 | SNV | 1 | T | A | Heterozygous |
| NC_037642.1 | 13495511 | SNV | 1 | G | A | Homozygous   |
| NC_037642.1 | 13495517 | SNV | 1 | C | G | Homozygous   |
| NC_037642.1 | 13495549 | SNV | 1 | G | A | Homozygous   |
| NC_037642.1 | 13496145 | SNV | 1 | T | C | Homozygous   |
| NC_037642.1 | 13497069 | SNV | 1 | G | A | Heterozygous |
| NC_037642.1 | 13498136 | SNV | 1 | C | A | Homozygous   |
| NC_037642.1 | 13498139 | SNV | 1 | C | T | Homozygous   |
| NC_037642.1 | 13498141 | SNV | 1 | A | T | Homozygous   |
| NC_037642.1 | 13498147 | SNV | 1 | A | T | Homozygous   |
| NC_037642.1 | 13498155 | SNV | 1 | C | T | Homozygous   |
| NC_037642.1 | 13498157 | SNV | 1 | C | T | Homozygous   |
| NC_037642.1 | 13500856 | SNV | 1 | A | T | Homozygous   |
| NC_037642.1 | 13501106 | SNV | 1 | C | T | Heterozygous |
| NC_037642.1 | 13501121 | SNV | 1 | T | C | Heterozygous |
| NC_037642.1 | 13501454 | SNV | 1 | C | T | Homozygous   |
| NC_037642.1 | 13501491 | SNV | 1 | A | T | Homozygous   |

|             |          |     |   |   |   |              |
|-------------|----------|-----|---|---|---|--------------|
| NC_037642.1 | 13501793 | SNV | 1 | C | T | Homozygous   |
| NC_037642.1 | 13501796 | SNV | 1 | G | T | Homozygous   |
| NC_037642.1 | 13501824 | SNV | 1 | A | C | Homozygous   |
| NC_037642.1 | 13502284 | SNV | 1 | C | T | Heterozygous |
| NC_037642.1 | 13502779 | SNV | 1 | C | G | Heterozygous |
| NC_037642.1 | 13502791 | SNV | 1 | A | G | Heterozygous |
| NC_037642.1 | 13503384 | SNV | 1 | G | A | Homozygous   |
| NC_037642.1 | 13503420 | SNV | 1 | C | T | Homozygous   |
| NC_037642.1 | 13503436 | SNV | 1 | G | A | Heterozygous |
| NC_037642.1 | 13503705 | SNV | 1 | T | C | Homozygous   |
| NC_037642.1 | 13503985 | SNV | 1 | C | T | Homozygous   |
| NC_037642.1 | 13503989 | SNV | 1 | C | T | Heterozygous |
| NC_037642.1 | 13504219 | SNV | 1 | G | A | Heterozygous |
| NC_037642.1 | 13504427 | SNV | 1 | C | T | Heterozygous |
| NC_037642.1 | 13504804 | SNV | 1 | T | C | Homozygous   |
| NC_037642.1 | 13504808 | SNV | 1 | C | A | Heterozygous |
| NC_037642.1 | 13506000 | SNV | 1 | G | A | Homozygous   |
| NC_037642.1 | 13506149 | SNV | 1 | C | G | Homozygous   |
| NC_037642.1 | 13506526 | SNV | 1 | G | A | Homozygous   |
| NC_037642.1 | 13506758 | SNV | 1 | A | G | Homozygous   |
| NC_037642.1 | 13507103 | SNV | 1 | T | A | Heterozygous |
| NC_037642.1 | 13507233 | SNV | 1 | C | T | Homozygous   |
| NC_037642.1 | 13508104 | SNV | 1 | G | A | Homozygous   |
| NC_037642.1 | 13508236 | SNV | 1 | A | T | Homozygous   |
| NC_037642.1 | 13508373 | SNV | 1 | T | A | Heterozygous |
| NC_037642.1 | 13508559 | SNV | 1 | T | A | Heterozygous |
| NC_037642.1 | 13508789 | SNV | 1 | T | C | Homozygous   |
| NC_037642.1 | 13508833 | SNV | 1 | G | A | Homozygous   |
| NC_037642.1 | 13508835 | SNV | 1 | T | A | Heterozygous |
| NC_037642.1 | 13509046 | SNV | 1 | A | G | Homozygous   |
| NC_037642.1 | 13509087 | SNV | 1 | A | T | Homozygous   |
| NC_037642.1 | 13509192 | SNV | 1 | A | G | Heterozygous |
| NC_037642.1 | 13509457 | SNV | 1 | A | G | Heterozygous |
| NC_037642.1 | 13509516 | SNV | 1 | G | A | Heterozygous |
| NC_037642.1 | 13511165 | SNV | 1 | A | G | Heterozygous |
| NC_037642.1 | 13512644 | SNV | 1 | T | C | Homozygous   |
| NC_037642.1 | 13512856 | SNV | 1 | T | C | Homozygous   |
| NC_037642.1 | 13512969 | SNV | 1 | G | A | Heterozygous |
| NC_037642.1 | 13513165 | SNV | 1 | G | C | Homozygous   |
| NC_037642.1 | 13513244 | SNV | 1 | G | A | Homozygous   |
| NC_037642.1 | 13514060 | SNV | 1 | C | T | Heterozygous |
| NC_037642.1 | 13514076 | SNV | 1 | T | C | Heterozygous |
| NC_037642.1 | 13514087 | SNV | 1 | G | A | Homozygous   |
| NC_037642.1 | 13514148 | SNV | 1 | G | T | Homozygous   |
| NC_037642.1 | 13514160 | SNV | 1 | A | G | Homozygous   |
| NC_037642.1 | 13514785 | SNV | 1 | A | G | Heterozygous |
| NC_037642.1 | 13515203 | SNV | 1 | T | A | Heterozygous |
| NC_037642.1 | 13515239 | SNV | 1 | G | A | Heterozygous |
| NC_037642.1 | 13516984 | SNV | 1 | A | G | Heterozygous |
| NC_037642.1 | 13517014 | SNV | 1 | T | C | Heterozygous |
| NC_037642.1 | 13517356 | SNV | 1 | C | T | Heterozygous |

|             |          |     |   |   |   |              |
|-------------|----------|-----|---|---|---|--------------|
| NC_037642.1 | 13517920 | SNV | 1 | T | A | Heterozygous |
| NC_037642.1 | 13517956 | SNV | 1 | T | A | Heterozygous |
| NC_037642.1 | 13517958 | SNV | 1 | G | A | Heterozygous |
| NC_037642.1 | 13518683 | SNV | 1 | T | C | Homozygous   |
| NC_037642.1 | 13527095 | SNV | 1 | T | A | Homozygous   |
| NC_037642.1 | 13527100 | SNV | 1 | T | C | Homozygous   |
| NC_037642.1 | 13527133 | SNV | 1 | T | G | Homozygous   |
| NC_037642.1 | 13527144 | SNV | 1 | C | T | Homozygous   |
| NC_037642.1 | 13527152 | SNV | 1 | C | T | Homozygous   |
| NC_037642.1 | 13527214 | SNV | 1 | C | A | Heterozygous |
| NC_037642.1 | 13527285 | SNV | 1 | G | A | Homozygous   |
| NC_037642.1 | 13527382 | SNV | 1 | T | G | Homozygous   |
| NC_037642.1 | 13527396 | SNV | 1 | T | C | Heterozygous |
| NC_037642.1 | 13527401 | SNV | 1 | G | A | Heterozygous |
| NC_037642.1 | 13527403 | SNV | 1 | G | A | Heterozygous |
| NC_037642.1 | 13527407 | SNV | 1 | G | A | Homozygous   |
| NC_037642.1 | 13527410 | SNV | 1 | C | T | Heterozygous |
| NC_037642.1 | 13527523 | SNV | 1 | A | T | Heterozygous |
| NC_037642.1 | 13527527 | SNV | 1 | G | C | Heterozygous |
| NC_037642.1 | 13527533 | SNV | 1 | A | T | Homozygous   |
| NC_037642.1 | 13527864 | SNV | 1 | C | T | Homozygous   |
| NC_037642.1 | 13527872 | SNV | 1 | C | T | Homozygous   |
| NC_037642.1 | 13527880 | SNV | 1 | C | T | Homozygous   |
| NC_037642.1 | 13527882 | SNV | 1 | C | T | Homozygous   |
| NC_037642.1 | 13527891 | SNV | 1 | A | G | Homozygous   |
| NC_037642.1 | 13528206 | SNV | 1 | C | T | Homozygous   |
| NC_037642.1 | 13528225 | SNV | 1 | A | T | Homozygous   |
| NC_037642.1 | 13528230 | SNV | 1 | T | C | Homozygous   |
| NC_037642.1 | 13528232 | SNV | 1 | C | T | Homozygous   |
| NC_037642.1 | 13528234 | SNV | 1 | A | C | Homozygous   |
| NC_037642.1 | 13528236 | SNV | 1 | C | T | Homozygous   |
| NC_037642.1 | 13528238 | SNV | 1 | C | G | Homozygous   |
| NC_037642.1 | 13528242 | SNV | 1 | C | T | Homozygous   |
| NC_037642.1 | 13528250 | SNV | 1 | C | T | Homozygous   |
| NC_037642.1 | 13528254 | SNV | 1 | C | A | Homozygous   |
| NC_037642.1 | 13529202 | SNV | 1 | T | C | Homozygous   |
| NC_037642.1 | 13529958 | SNV | 1 | T | C | Homozygous   |
| NC_037642.1 | 13530205 | SNV | 1 | T | C | Homozygous   |
| NC_037642.1 | 13530800 | SNV | 1 | T | C | Heterozygous |
| NC_037642.1 | 13541888 | SNV | 1 | T | C | Heterozygous |
| NC_037642.1 | 13542416 | SNV | 1 | A | G | Homozygous   |
| NC_037642.1 | 13544013 | SNV | 1 | T | C | Homozygous   |
| NC_037642.1 | 13544019 | SNV | 1 | T | A | Homozygous   |
| NC_037642.1 | 13547657 | SNV | 1 | T | A | Homozygous   |
| NC_037642.1 | 13547666 | SNV | 1 | A | T | Homozygous   |
| NC_037642.1 | 13547668 | SNV | 1 | T | A | Homozygous   |
| NC_037642.1 | 13547670 | SNV | 1 | G | A | Homozygous   |
| NC_037642.1 | 13547672 | SNV | 1 | T | A | Homozygous   |
| NC_037642.1 | 13557568 | SNV | 1 | A | C | Homozygous   |
| NC_037642.1 | 13557588 | SNV | 1 | C | T | Heterozygous |
| NC_037642.1 | 13557592 | SNV | 1 | C | T | Heterozygous |

|             |          |     |   |   |   |              |
|-------------|----------|-----|---|---|---|--------------|
| NC_037642.1 | 13557594 | SNV | 1 | C | T | Heterozygous |
| NC_037642.1 | 13557596 | SNV | 1 | C | T | Heterozygous |
| NC_037642.1 | 13572129 | SNV | 1 | G | A | Homozygous   |
| NC_037642.1 | 13572135 | SNV | 1 | G | T | Homozygous   |
| NC_037642.1 | 13572144 | SNV | 1 | T | G | Homozygous   |
| NC_037642.1 | 13572147 | SNV | 1 | A | G | Homozygous   |
| NC_037642.1 | 13572152 | SNV | 1 | C | G | Homozygous   |
| NC_037642.1 | 13572162 | SNV | 1 | C | G | Homozygous   |
| NC_037642.1 | 13572186 | SNV | 1 | T | A | Homozygous   |
| NC_037642.1 | 13576639 | SNV | 1 | T | G | Homozygous   |
| NC_037642.1 | 13576646 | SNV | 1 | A | G | Heterozygous |
| NC_037642.1 | 13576648 | SNV | 1 | A | T | Heterozygous |
| NC_037642.1 | 13576656 | SNV | 1 | A | G | Homozygous   |
| NC_037642.1 | 13576667 | SNV | 1 | T | G | Homozygous   |
| NC_037642.1 | 13576692 | SNV | 1 | A | G | Homozygous   |
| NC_037642.1 | 13576697 | SNV | 1 | T | A | Homozygous   |
| NC_037642.1 | 13579105 | SNV | 1 | A | G | Heterozygous |
| NC_037642.1 | 13596326 | SNV | 1 | G | T | Heterozygous |
| NC_037642.1 | 13596607 | SNV | 1 | A | G | Homozygous   |
| NC_037642.1 | 13596660 | SNV | 1 | A | G | Homozygous   |
| NC_037642.1 | 13596688 | SNV | 1 | A | G | Homozygous   |
| NC_037642.1 | 13596724 | SNV | 1 | T | A | Homozygous   |
| NC_037642.1 | 13596730 | SNV | 1 | A | C | Homozygous   |
| NC_037642.1 | 13596801 | SNV | 1 | T | C | Heterozygous |
| NC_037642.1 | 13596822 | SNV | 1 | G | A | Heterozygous |
| NC_037642.1 | 13596878 | SNV | 1 | T | C | Heterozygous |
| NC_037642.1 | 13597178 | SNV | 1 | A | G | Homozygous   |
| NC_037642.1 | 13597265 | SNV | 1 | C | T | Heterozygous |
| NC_037642.1 | 13597300 | SNV | 1 | C | T | Heterozygous |
| NC_037642.1 | 13597302 | SNV | 1 | T | C | Heterozygous |
| NC_037642.1 | 13597382 | SNV | 1 | C | T | Heterozygous |
| NC_037642.1 | 13597587 | SNV | 1 | T | C | Homozygous   |
| NC_037642.1 | 13597617 | SNV | 1 | G | A | Heterozygous |
| NC_037642.1 | 13597698 | SNV | 1 | T | C | Homozygous   |
| NC_037642.1 | 13597701 | SNV | 1 | A | G | Homozygous   |
| NC_037642.1 | 13597720 | SNV | 1 | T | C | Heterozygous |
| NC_037642.1 | 13600789 | SNV | 1 | T | C | Homozygous   |
| NC_037642.1 | 13600882 | SNV | 1 | C | T | Heterozygous |
| NC_037642.1 | 13601657 | SNV | 1 | C | T | Homozygous   |
| NC_037642.1 | 13606919 | SNV | 1 | T | G | Homozygous   |
| NC_037642.1 | 13607006 | SNV | 1 | C | T | Heterozygous |
| NC_037642.1 | 13617745 | SNV | 1 | G | T | Homozygous   |
| NC_037642.1 | 13618442 | SNV | 1 | G | T | Heterozygous |
| NC_037642.1 | 13618949 | SNV | 1 | C | A | Heterozygous |
| NC_037642.1 | 13619029 | SNV | 1 | T | A | Homozygous   |
| NC_037642.1 | 13619664 | SNV | 1 | T | G | Heterozygous |
| NC_037642.1 | 13619834 | SNV | 1 | C | T | Heterozygous |
| NC_037642.1 | 13620394 | SNV | 1 | T | G | Heterozygous |
| NC_037642.1 | 13620481 | SNV | 1 | A | G | Homozygous   |
| NC_037642.1 | 13620588 | SNV | 1 | C | T | Heterozygous |
| NC_037642.1 | 13620620 | SNV | 1 | T | A | Heterozygous |



|             |          |     |   |   |   |              |
|-------------|----------|-----|---|---|---|--------------|
| NC_037642.1 | 13621161 | SNV | 1 | A | G | Homozygous   |
| NC_037642.1 | 13621179 | SNV | 1 | T | A | Heterozygous |
| NC_037642.1 | 13622779 | SNV | 1 | T | C | Homozygous   |
| NC_037642.1 | 13622782 | SNV | 1 | A | T | Heterozygous |
| NC_037642.1 | 13626275 | SNV | 1 | A | G | Homozygous   |
| NC_037642.1 | 13630877 | SNV | 1 | A | G | Homozygous   |
| NC_037642.1 | 13630905 | SNV | 1 | G | A | Heterozygous |
| NC_037642.1 | 13630926 | SNV | 1 | G | A | Heterozygous |
| NC_037642.1 | 13630970 | SNV | 1 | C | T | Heterozygous |
| NC_037642.1 | 13631024 | SNV | 1 | C | T | Heterozygous |
| NC_037642.1 | 13631100 | SNV | 1 | T | C | Homozygous   |
| NC_037642.1 | 13631106 | SNV | 1 | G | A | Homozygous   |
| NC_037642.1 | 13631336 | SNV | 1 | T | A | Homozygous   |
| NC_037642.1 | 13631338 | SNV | 1 | T | C | Homozygous   |
| NC_037642.1 | 13631630 | SNV | 1 | C | G | Heterozygous |
| NC_037642.1 | 13631727 | SNV | 1 | G | A | Homozygous   |
| NC_037642.1 | 13632330 | SNV | 1 | G | C | Homozygous   |
| NC_037642.1 | 13632450 | SNV | 1 | A | G | Homozygous   |
| NC_037642.1 | 13632635 | SNV | 1 | A | G | Heterozygous |
| NC_037642.1 | 13632744 | SNV | 1 | A | T | Heterozygous |
| NC_037642.1 | 13632756 | SNV | 1 | T | G | Heterozygous |
| NC_037642.1 | 13633091 | SNV | 1 | G | C | Heterozygous |
| NC_037642.1 | 13633629 | SNV | 1 | C | G | Homozygous   |
| NC_037642.1 | 13633660 | SNV | 1 | C | T | Homozygous   |
| NC_037642.1 | 13633672 | SNV | 1 | A | G | Heterozygous |
| NC_037642.1 | 13633779 | SNV | 1 | T | A | Homozygous   |
| NC_037642.1 | 13633838 | SNV | 1 | A | C | Heterozygous |
| NC_037642.1 | 13634191 | SNV | 1 | C | A | Homozygous   |
| NC_037642.1 | 13634946 | SNV | 1 | C | T | Homozygous   |
| NC_037642.1 | 13634948 | SNV | 1 | G | A | Homozygous   |
| NC_037642.1 | 13636075 | SNV | 1 | T | G | Heterozygous |
| NC_037642.1 | 13636478 | SNV | 1 | A | T | Homozygous   |
| NC_037642.1 | 13636648 | SNV | 1 | T | A | Homozygous   |
| NC_037642.1 | 13636652 | SNV | 1 | A | T | Homozygous   |
| NC_037642.1 | 13637203 | SNV | 1 | C | A | Heterozygous |
| NC_037642.1 | 13637265 | SNV | 1 | T | C | Heterozygous |
| NC_037642.1 | 13639428 | SNV | 1 | A | G | Heterozygous |
| NC_037642.1 | 13639472 | SNV | 1 | A | T | Homozygous   |
| NC_037642.1 | 13640158 | SNV | 1 | A | G | Homozygous   |
| NC_037642.1 | 13640330 | SNV | 1 | T | C | Heterozygous |
| NC_037642.1 | 13640633 | SNV | 1 | T | G | Heterozygous |
| NC_037642.1 | 13640677 | SNV | 1 | G | A | Heterozygous |
| NC_037642.1 | 13642087 | SNV | 1 | C | T | Heterozygous |
| NC_037642.1 | 13642456 | SNV | 1 | G | T | Homozygous   |
| NC_037642.1 | 13643290 | SNV | 1 | G | A | Homozygous   |
| NC_037642.1 | 13643664 | SNV | 1 | C | T | Heterozygous |
| NC_037642.1 | 13643937 | SNV | 1 | T | A | Heterozygous |
| NC_037642.1 | 13644220 | SNV | 1 | A | G | Heterozygous |
| NC_037642.1 | 13644469 | SNV | 1 | G | A | Homozygous   |
| NC_037642.1 | 13645188 | SNV | 1 | G | A | Homozygous   |
| NC_037642.1 | 13648615 | SNV | 1 | G | A | Heterozygous |

|             |          |     |   |   |   |              |
|-------------|----------|-----|---|---|---|--------------|
| NC_037642.1 | 13648652 | SNV | 1 | T | C | Homozygous   |
| NC_037642.1 | 13649091 | SNV | 1 | A | G | Homozygous   |
| NC_037642.1 | 13649725 | SNV | 1 | C | T | Heterozygous |
| NC_037642.1 | 13652260 | SNV | 1 | A | C | Heterozygous |
| NC_037642.1 | 13652926 | SNV | 1 | T | A | Heterozygous |
| NC_037642.1 | 13652936 | SNV | 1 | A | C | Heterozygous |
| NC_037642.1 | 13652940 | SNV | 1 | C | T | Heterozygous |
| NC_037642.1 | 13652944 | SNV | 1 | T | C | Homozygous   |
| NC_037642.1 | 13652948 | SNV | 1 | G | C | Homozygous   |
| NC_037642.1 | 13652956 | SNV | 1 | T | C | Heterozygous |
| NC_037642.1 | 13652961 | SNV | 1 | T | C | Homozygous   |
| NC_037642.1 | 13652963 | SNV | 1 | T | C | Heterozygous |
| NC_037642.1 | 13652966 | SNV | 1 | T | C | Heterozygous |
| NC_037642.1 | 13652985 | SNV | 1 | T | C | Homozygous   |
| NC_037642.1 | 13653060 | SNV | 1 | C | T | Heterozygous |
| NC_037642.1 | 13653064 | SNV | 1 | G | C | Homozygous   |
| NC_037642.1 | 13653091 | SNV | 1 | T | A | Heterozygous |
| NC_037642.1 | 13653139 | SNV | 1 | T | G | Heterozygous |
| NC_037642.1 | 13653142 | SNV | 1 | C | A | Heterozygous |
| NC_037642.1 | 13653170 | SNV | 1 | C | G | Homozygous   |
| NC_037642.1 | 13653186 | SNV | 1 | C | T | Homozygous   |
| NC_037642.1 | 13653190 | SNV | 1 | C | T | Homozygous   |
| NC_037642.1 | 13653198 | SNV | 1 | T | G | Homozygous   |
| NC_037642.1 | 13653208 | SNV | 1 | C | T | Homozygous   |
| NC_037642.1 | 13653212 | SNV | 1 | G | T | Homozygous   |
| NC_037642.1 | 13653277 | SNV | 1 | A | T | Homozygous   |
| NC_037642.1 | 13653281 | SNV | 1 | T | C | Heterozygous |
| NC_037642.1 | 13653501 | SNV | 1 | T | G | Homozygous   |
| NC_037642.1 | 13653507 | SNV | 1 | C | T | Heterozygous |
| NC_037642.1 | 13653512 | SNV | 1 | T | C | Homozygous   |
| NC_037642.1 | 13653514 | SNV | 1 | A | T | Homozygous   |
| NC_037642.1 | 13653516 | SNV | 1 | T | C | Homozygous   |
| NC_037642.1 | 13653520 | SNV | 1 | T | C | Homozygous   |
| NC_037642.1 | 13653528 | SNV | 1 | T | C | Homozygous   |
| NC_037642.1 | 13653552 | SNV | 1 | T | C | Homozygous   |
| NC_037642.1 | 13653568 | SNV | 1 | T | C | Homozygous   |
| NC_037642.1 | 13653580 | SNV | 1 | T | C | Homozygous   |
| NC_037642.1 | 13653584 | SNV | 1 | T | C | Homozygous   |
| NC_037642.1 | 13653642 | SNV | 1 | G | C | Homozygous   |
| NC_037642.1 | 13653664 | SNV | 1 | T | G | Homozygous   |
| NC_037642.1 | 13653670 | SNV | 1 | T | C | Heterozygous |
| NC_037642.1 | 13653678 | SNV | 1 | C | T | Heterozygous |
| NC_037642.1 | 13653690 | SNV | 1 | C | T | Homozygous   |
| NC_037642.1 | 13653707 | SNV | 1 | C | T | Heterozygous |
| NC_037642.1 | 13653747 | SNV | 1 | T | C | Homozygous   |
| NC_037642.1 | 13653759 | SNV | 1 | T | A | Homozygous   |
| NC_037642.1 | 13653771 | SNV | 1 | T | C | Homozygous   |
| NC_037642.1 | 13653779 | SNV | 1 | G | C | Homozygous   |
| NC_037642.1 | 13653784 | SNV | 1 | T | C | Homozygous   |
| NC_037642.1 | 13653827 | SNV | 1 | C | T | Heterozygous |
| NC_037642.1 | 13653838 | SNV | 1 | G | C | Heterozygous |

|             |          |     |   |   |   |              |
|-------------|----------|-----|---|---|---|--------------|
| NC_037642.1 | 13653842 | SNV | 1 | G | C | Heterozygous |
| NC_037642.1 | 13654616 | SNV | 1 | C | T | Homozygous   |
| NC_037642.1 | 13654623 | SNV | 1 | T | A | Homozygous   |
| NC_037642.1 | 13654634 | SNV | 1 | C | T | Homozygous   |
| NC_037642.1 | 13654686 | SNV | 1 | A | G | Homozygous   |
| NC_037642.1 | 13654691 | SNV | 1 | C | T | Homozygous   |
| NC_037642.1 | 13654693 | SNV | 1 | T | C | Homozygous   |
| NC_037642.1 | 13654700 | SNV | 1 | C | T | Homozygous   |
| NC_037642.1 | 13654704 | SNV | 1 | T | C | Heterozygous |
| NC_037642.1 | 13654769 | SNV | 1 | C | T | Homozygous   |
| NC_037642.1 | 13655065 | SNV | 1 | T | C | Homozygous   |
| NC_037642.1 | 13655203 | SNV | 1 | A | G | Homozygous   |
| NC_037642.1 | 13655593 | SNV | 1 | G | A | Heterozygous |
| NC_037642.1 | 13655614 | SNV | 1 | A | T | Homozygous   |
| NC_037642.1 | 13655754 | SNV | 1 | A | G | Homozygous   |
| NC_037642.1 | 13655757 | SNV | 1 | G | A | Heterozygous |
| NC_037642.1 | 13655796 | SNV | 1 | T | C | Homozygous   |
| NC_037642.1 | 13656049 | SNV | 1 | G | A | Homozygous   |
| NC_037642.1 | 13656340 | SNV | 1 | G | A | Heterozygous |
| NC_037642.1 | 13657159 | SNV | 1 | A | G | Heterozygous |
| NC_037642.1 | 13657213 | SNV | 1 | T | G | Homozygous   |
| NC_037642.1 | 13658514 | SNV | 1 | T | C | Homozygous   |
| NC_037642.1 | 13658523 | SNV | 1 | C | G | Heterozygous |
| NC_037642.1 | 13658676 | SNV | 1 | A | G | Homozygous   |
| NC_037642.1 | 13658805 | SNV | 1 | T | C | Homozygous   |
| NC_037642.1 | 13658832 | SNV | 1 | C | A | Homozygous   |
| NC_037642.1 | 13658838 | SNV | 1 | T | C | Homozygous   |
| NC_037642.1 | 13658856 | SNV | 1 | A | G | Homozygous   |
| NC_037642.1 | 13658868 | SNV | 1 | A | G | Homozygous   |
| NC_037642.1 | 13658871 | SNV | 1 | T | C | Homozygous   |
| NC_037642.1 | 13658920 | SNV | 1 | A | G | Homozygous   |
| NC_037642.1 | 13658974 | SNV | 1 | C | T | Heterozygous |
| NC_037642.1 | 13658982 | SNV | 1 | T | C | Homozygous   |
| NC_037642.1 | 13658992 | SNV | 1 | C | A | Homozygous   |
| NC_037642.1 | 13659002 | SNV | 1 | T | C | Heterozygous |
| NC_037642.1 | 13659048 | SNV | 1 | C | G | Heterozygous |
| NC_037642.1 | 13659048 | SNV | 1 | C | T | Heterozygous |
| NC_037642.1 | 13659087 | SNV | 1 | T | C | Homozygous   |
| NC_037642.1 | 13659123 | SNV | 1 | T | C | Homozygous   |
| NC_037642.1 | 13659138 | SNV | 1 | T | C | Homozygous   |
| NC_037642.1 | 13659147 | SNV | 1 | T | C | Homozygous   |
| NC_037642.1 | 13659219 | SNV | 1 | C | T | Heterozygous |
| NC_037642.1 | 13659291 | SNV | 1 | C | G | Heterozygous |
| NC_037642.1 | 13659390 | SNV | 1 | C | T | Homozygous   |
| NC_037642.1 | 13659405 | SNV | 1 | G | A | Heterozygous |
| NC_037642.1 | 13659425 | SNV | 1 | C | G | Heterozygous |
| NC_037642.1 | 13659552 | SNV | 1 | C | T | Heterozygous |
| NC_037642.1 | 13659639 | SNV | 1 | C | T | Heterozygous |
| NC_037642.1 | 13660372 | SNV | 1 | G | A | Homozygous   |
| NC_037642.1 | 13660473 | SNV | 1 | A | T | Homozygous   |
| NC_037642.1 | 13660694 | SNV | 1 | C | T | Homozygous   |

|             |          |     |   |   |   |              |
|-------------|----------|-----|---|---|---|--------------|
| NC_037642.1 | 13660711 | SNV | 1 | T | C | Heterozygous |
| NC_037642.1 | 13660720 | SNV | 1 | G | A | Heterozygous |
| NC_037642.1 | 13660734 | SNV | 1 | T | A | Heterozygous |
| NC_037642.1 | 13660843 | SNV | 1 | T | C | Homozygous   |
| NC_037642.1 | 13660927 | SNV | 1 | A | G | Homozygous   |
| NC_037642.1 | 13661940 | SNV | 1 | T | C | Homozygous   |
| NC_037642.1 | 13662428 | SNV | 1 | T | C | Homozygous   |
| NC_037642.1 | 13662447 | SNV | 1 | G | A | Homozygous   |
| NC_037642.1 | 13662909 | SNV | 1 | A | G | Heterozygous |
| NC_037642.1 | 13662960 | SNV | 1 | G | A | Homozygous   |
| NC_037642.1 | 13663242 | SNV | 1 | C | T | Heterozygous |
| NC_037642.1 | 13663278 | SNV | 1 | C | G | Homozygous   |
| NC_037642.1 | 13663452 | SNV | 1 | A | C | Heterozygous |
| NC_037642.1 | 13663467 | SNV | 1 | G | A | Homozygous   |
| NC_037642.1 | 13666619 | SNV | 1 | A | T | Heterozygous |
| NC_037642.1 | 13666624 | SNV | 1 | A | G | Heterozygous |
| NC_037642.1 | 13666633 | SNV | 1 | C | G | Heterozygous |
| NC_037642.1 | 13666639 | SNV | 1 | G | A | Heterozygous |
| NC_037642.1 | 13666646 | SNV | 1 | A | G | Heterozygous |
| NC_037642.1 | 13670529 | SNV | 1 | C | T | Heterozygous |
| NC_037642.1 | 13671523 | SNV | 1 | T | A | Heterozygous |
| NC_037642.1 | 13671525 | SNV | 1 | T | A | Heterozygous |
| NC_037642.1 | 13673278 | SNV | 1 | C | T | Heterozygous |
| NC_037642.1 | 13676666 | SNV | 1 | A | G | Heterozygous |
| NC_037642.1 | 13676668 | SNV | 1 | T | G | Heterozygous |
| NC_037642.1 | 13676674 | SNV | 1 | T | A | Heterozygous |
| NC_037642.1 | 13676680 | SNV | 1 | T | G | Heterozygous |
| NC_037642.1 | 13676685 | SNV | 1 | T | A | Heterozygous |
| NC_037642.1 | 13676690 | SNV | 1 | A | T | Heterozygous |
| NC_037642.1 | 13676801 | SNV | 1 | G | A | Heterozygous |
| NC_037642.1 | 13680681 | SNV | 1 | C | T | Heterozygous |
| NC_037642.1 | 13680951 | SNV | 1 | T | C | Homozygous   |
| NC_037642.1 | 13680956 | SNV | 1 | G | A | Heterozygous |
| NC_037642.1 | 13681007 | SNV | 1 | G | A | Heterozygous |
| NC_037642.1 | 13681061 | SNV | 1 | A | G | Homozygous   |
| NC_037642.1 | 13681354 | SNV | 1 | C | T | Homozygous   |
| NC_037642.1 | 13681357 | SNV | 1 | T | C | Homozygous   |
| NC_037642.1 | 13681415 | SNV | 1 | C | T | Homozygous   |
| NC_037642.1 | 13681518 | SNV | 1 | A | G | Heterozygous |
| NC_037642.1 | 13684916 | SNV | 1 | C | T | Homozygous   |
| NC_037642.1 | 13684976 | SNV | 1 | G | A | Homozygous   |
| NC_037642.1 | 13685287 | SNV | 1 | T | C | Homozygous   |
| NC_037642.1 | 13685427 | SNV | 1 | G | A | Heterozygous |
| NC_037642.1 | 13685502 | SNV | 1 | C | T | Homozygous   |
| NC_037642.1 | 13685601 | SNV | 1 | C | T | Heterozygous |
| NC_037642.1 | 13685816 | SNV | 1 | G | A | Heterozygous |
| NC_037642.1 | 13687129 | SNV | 1 | G | C | Heterozygous |
| NC_037642.1 | 13687156 | SNV | 1 | C | T | Heterozygous |
| NC_037642.1 | 13687636 | SNV | 1 | T | C | Homozygous   |
| NC_037642.1 | 13687701 | SNV | 1 | A | G | Homozygous   |
| NC_037642.1 | 13687906 | SNV | 1 | T | G | Homozygous   |

|             |          |     |   |   |   |              |
|-------------|----------|-----|---|---|---|--------------|
| NC_037642.1 | 13687909 | SNV | 1 | C | T | Heterozygous |
| NC_037642.1 | 13687915 | SNV | 1 | C | A | Homozygous   |
| NC_037642.1 | 13688034 | SNV | 1 | T | C | Homozygous   |
| NC_037642.1 | 13688053 | SNV | 1 | A | G | Homozygous   |
| NC_037642.1 | 13688056 | SNV | 1 | G | A | Homozygous   |
| NC_037642.1 | 13688080 | SNV | 1 | A | G | Homozygous   |
| NC_037642.1 | 13688191 | SNV | 1 | A | G | Homozygous   |
| NC_037642.1 | 13688203 | SNV | 1 | G | A | Homozygous   |
| NC_037642.1 | 13688308 | SNV | 1 | G | A | Heterozygous |
| NC_037642.1 | 13688368 | SNV | 1 | A | G | Homozygous   |
| NC_037642.1 | 13688447 | SNV | 1 | T | C | Homozygous   |
| NC_037642.1 | 13688455 | SNV | 1 | G | A | Homozygous   |
| NC_037642.1 | 13688959 | SNV | 1 | A | G | Heterozygous |
| NC_037642.1 | 13689019 | SNV | 1 | G | A | Heterozygous |
| NC_037642.1 | 13689055 | SNV | 1 | T | C | Homozygous   |
| NC_037642.1 | 13689058 | SNV | 1 | T | C | Homozygous   |
| NC_037642.1 | 13689127 | SNV | 1 | C | T | Heterozygous |
| NC_037642.1 | 13689154 | SNV | 1 | C | T | Heterozygous |
| NC_037642.1 | 13689262 | SNV | 1 | A | G | Homozygous   |
| NC_037642.1 | 13689424 | SNV | 1 | A | C | Homozygous   |
| NC_037642.1 | 13689442 | SNV | 1 | T | C | Homozygous   |
| NC_037642.1 | 13689549 | SNV | 1 | T | C | Homozygous   |
| NC_037642.1 | 13689564 | SNV | 1 | A | C | Heterozygous |
| NC_037642.1 | 13689668 | SNV | 1 | T | A | Homozygous   |
| NC_037642.1 | 13689768 | SNV | 1 | G | A | Homozygous   |
| NC_037642.1 | 13690195 | SNV | 1 | G | A | Heterozygous |
| NC_037642.1 | 13690251 | SNV | 1 | T | C | Homozygous   |
| NC_037642.1 | 13691982 | SNV | 1 | T | C | Heterozygous |
| NC_037642.1 | 13692241 | SNV | 1 | T | C | Homozygous   |
| NC_037642.1 | 13692271 | SNV | 1 | C | T | Homozygous   |
| NC_037642.1 | 13692283 | SNV | 1 | G | C | Homozygous   |
| NC_037642.1 | 13692738 | SNV | 1 | T | G | Homozygous   |
| NC_037642.1 | 13692768 | SNV | 1 | T | G | Heterozygous |
| NC_037642.1 | 13693642 | SNV | 1 | A | G | Heterozygous |
| NC_037642.1 | 13693796 | SNV | 1 | G | T | Heterozygous |
| NC_037642.1 | 13693798 | SNV | 1 | T | G | Homozygous   |
| NC_037642.1 | 13693918 | SNV | 1 | C | T | Heterozygous |
| NC_037642.1 | 13694824 | SNV | 1 | A | G | Heterozygous |
| NC_037642.1 | 13694829 | SNV | 1 | G | A | Heterozygous |
| NC_037642.1 | 13694835 | SNV | 1 | A | G | Heterozygous |
| NC_037642.1 | 13694986 | SNV | 1 | T | C | Homozygous   |
| NC_037642.1 | 13695266 | SNV | 1 | C | T | Homozygous   |
| NC_037642.1 | 13695304 | SNV | 1 | C | T | Heterozygous |
| NC_037642.1 | 13695372 | SNV | 1 | A | G | Homozygous   |
| NC_037642.1 | 13696022 | SNV | 1 | G | C | Heterozygous |
| NC_037642.1 | 13696050 | SNV | 1 | A | G | Homozygous   |
| NC_037642.1 | 13696100 | SNV | 1 | C | T | Heterozygous |
| NC_037642.1 | 13696636 | SNV | 1 | A | G | Homozygous   |
| NC_037642.1 | 13697011 | SNV | 1 | C | T | Homozygous   |
| NC_037642.1 | 13697316 | SNV | 1 | G | A | Heterozygous |
| NC_037642.1 | 13697416 | SNV | 1 | T | C | Heterozygous |

|             |          |     |   |   |   |              |
|-------------|----------|-----|---|---|---|--------------|
| NC_037642.1 | 13698250 | SNV | 1 | C | T | Heterozygous |
| NC_037642.1 | 13698253 | SNV | 1 | T | C | Heterozygous |
| NC_037642.1 | 13698265 | SNV | 1 | T | C | Homozygous   |
| NC_037642.1 | 13698382 | SNV | 1 | C | T | Heterozygous |
| NC_037642.1 | 13698388 | SNV | 1 | T | C | Homozygous   |
| NC_037642.1 | 13698580 | SNV | 1 | A | C | Heterozygous |
| NC_037642.1 | 13698715 | SNV | 1 | C | T | Heterozygous |
| NC_037642.1 | 13698724 | SNV | 1 | T | C | Heterozygous |
| NC_037642.1 | 13698727 | SNV | 1 | C | T | Heterozygous |
| NC_037642.1 | 13698856 | SNV | 1 | C | T | Homozygous   |
| NC_037642.1 | 13698946 | SNV | 1 | G | C | Homozygous   |
| NC_037642.1 | 13699231 | SNV | 1 | G | C | Homozygous   |
| NC_037642.1 | 13700514 | SNV | 1 | G | A | Homozygous   |
| NC_037642.1 | 13700516 | SNV | 1 | A | G | Homozygous   |
| NC_037642.1 | 13700666 | SNV | 1 | G | C | Heterozygous |
| NC_037642.1 | 13700874 | SNV | 1 | G | C | Homozygous   |
| NC_037642.1 | 13700907 | SNV | 1 | A | C | Homozygous   |
| NC_037642.1 | 13700947 | SNV | 1 | T | C | Heterozygous |
| NC_037642.1 | 13700965 | SNV | 1 | C | T | Homozygous   |
| NC_037642.1 | 13701031 | SNV | 1 | T | C | Homozygous   |
| NC_037642.1 | 13701312 | SNV | 1 | T | C | Heterozygous |
| NC_037642.1 | 13701908 | SNV | 1 | C | A | Homozygous   |
| NC_037642.1 | 13701912 | SNV | 1 | C | T | Homozygous   |
| NC_037642.1 | 13702243 | SNV | 1 | T | C | Heterozygous |
| NC_037642.1 | 13702289 | SNV | 1 | T | C | Homozygous   |
| NC_037642.1 | 13702408 | SNV | 1 | T | C | Heterozygous |
| NC_037642.1 | 13703093 | SNV | 1 | C | T | Heterozygous |
| NC_037642.1 | 13703126 | SNV | 1 | C | G | Heterozygous |
| NC_037642.1 | 13703146 | SNV | 1 | A | C | Heterozygous |
| NC_037642.1 | 13703160 | SNV | 1 | C | T | Heterozygous |
| NC_037642.1 | 13703166 | SNV | 1 | C | T | Heterozygous |
| NC_037642.1 | 13703491 | SNV | 1 | T | C | Homozygous   |
| NC_037642.1 | 13703665 | SNV | 1 | T | C | Homozygous   |
| NC_037642.1 | 13703761 | SNV | 1 | G | T | Heterozygous |
| NC_037642.1 | 13703872 | SNV | 1 | G | C | Homozygous   |
| NC_037642.1 | 13703875 | SNV | 1 | C | G | Heterozygous |
| NC_037642.1 | 13704028 | SNV | 1 | C | T | Homozygous   |
| NC_037642.1 | 13704609 | SNV | 1 | A | G | Homozygous   |
| NC_037642.1 | 13705065 | SNV | 1 | G | T | Heterozygous |
| NC_037642.1 | 13705068 | SNV | 1 | G | T | Heterozygous |
| NC_037642.1 | 13705071 | SNV | 1 | T | G | Heterozygous |
| NC_037642.1 | 13705088 | SNV | 1 | C | G | Homozygous   |
| NC_037642.1 | 13705823 | SNV | 1 | T | C | Homozygous   |
| NC_037642.1 | 13706568 | SNV | 1 | G | A | Heterozygous |
| NC_037642.1 | 13706576 | SNV | 1 | A | G | Homozygous   |
| NC_037642.1 | 13706579 | SNV | 1 | G | C | Heterozygous |
| NC_037642.1 | 13706585 | SNV | 1 | G | A | Heterozygous |
| NC_037642.1 | 13706635 | SNV | 1 | A | G | Homozygous   |
| NC_037642.1 | 13706871 | SNV | 1 | C | T | Heterozygous |
| NC_037642.1 | 13706960 | SNV | 1 | G | A | Heterozygous |
| NC_037642.1 | 13706990 | SNV | 1 | A | G | Homozygous   |

|             |          |     |   |   |   |              |
|-------------|----------|-----|---|---|---|--------------|
| NC_037642.1 | 13707187 | SNV | 1 | G | A | Heterozygous |
| NC_037642.1 | 13707263 | SNV | 1 | T | C | Heterozygous |
| NC_037642.1 | 13707270 | SNV | 1 | C | T | Heterozygous |
| NC_037642.1 | 13707674 | SNV | 1 | T | C | Heterozygous |
| NC_037642.1 | 13707693 | SNV | 1 | T | C | Homozygous   |
| NC_037642.1 | 13707737 | SNV | 1 | C | T | Heterozygous |
| NC_037642.1 | 13707846 | SNV | 1 | T | A | Heterozygous |
| NC_037642.1 | 13708053 | SNV | 1 | T | C | Homozygous   |
| NC_037642.1 | 13708296 | SNV | 1 | G | A | Homozygous   |
| NC_037642.1 | 13708430 | SNV | 1 | C | T | Homozygous   |
| NC_037642.1 | 13709333 | SNV | 1 | C | T | Homozygous   |
| NC_037642.1 | 13710994 | SNV | 1 | T | C | Heterozygous |
| NC_037642.1 | 13714270 | SNV | 1 | T | A | Heterozygous |
| NC_037642.1 | 13714398 | SNV | 1 | G | A | Homozygous   |
| NC_037642.1 | 13714405 | SNV | 1 | T | C | Homozygous   |
| NC_037642.1 | 13714436 | SNV | 1 | A | G | Heterozygous |
| NC_037642.1 | 13714440 | SNV | 1 | C | T | Heterozygous |
| NC_037642.1 | 13714442 | SNV | 1 | A | G | Heterozygous |
| NC_037642.1 | 13714458 | SNV | 1 | A | T | Heterozygous |
| NC_037642.1 | 13715257 | SNV | 1 | T | C | Heterozygous |
| NC_037642.1 | 13715431 | SNV | 1 | T | C | Homozygous   |
| NC_037642.1 | 13715844 | SNV | 1 | A | G | Heterozygous |
| NC_037642.1 | 13715864 | SNV | 1 | C | G | Heterozygous |
| NC_037642.1 | 13715872 | SNV | 1 | T | C | Homozygous   |
| NC_037642.1 | 13715879 | SNV | 1 | A | G | Heterozygous |
| NC_037642.1 | 13715885 | SNV | 1 | G | A | Heterozygous |
| NC_037642.1 | 13716694 | SNV | 1 | T | C | Heterozygous |
| NC_037642.1 | 13716706 | SNV | 1 | C | T | Homozygous   |
| NC_037642.1 | 13716713 | SNV | 1 | G | T | Heterozygous |
| NC_037642.1 | 13716718 | SNV | 1 | C | T | Heterozygous |
| NC_037642.1 | 13717344 | SNV | 1 | T | C | Heterozygous |
| NC_037642.1 | 13717476 | SNV | 1 | T | C | Homozygous   |
| NC_037642.1 | 13717553 | SNV | 1 | A | G | Heterozygous |
| NC_037642.1 | 13717561 | SNV | 1 | T | A | Homozygous   |
| NC_037642.1 | 13717567 | SNV | 1 | G | T | Homozygous   |
| NC_037642.1 | 13717737 | SNV | 1 | G | A | Homozygous   |
| NC_037642.1 | 13717875 | SNV | 1 | T | C | Heterozygous |
| NC_037642.1 | 13718164 | SNV | 1 | T | C | Heterozygous |
| NC_037642.1 | 13724149 | SNV | 1 | T | A | Heterozygous |
| NC_037642.1 | 13724180 | SNV | 1 | T | G | Homozygous   |
| NC_037642.1 | 13724600 | SNV | 1 | A | G | Homozygous   |
| NC_037642.1 | 13724634 | SNV | 1 | A | C | Homozygous   |
| NC_037642.1 | 13724738 | SNV | 1 | A | G | Heterozygous |
| NC_037642.1 | 13725703 | SNV | 1 | A | G | Homozygous   |
| NC_037642.1 | 13725740 | SNV | 1 | G | A | Homozygous   |
| NC_037642.1 | 13726788 | SNV | 1 | T | C | Heterozygous |
| NC_037642.1 | 13727616 | SNV | 1 | T | C | Homozygous   |
| NC_037642.1 | 13731121 | SNV | 1 | T | C | Heterozygous |
| NC_037642.1 | 13732338 | SNV | 1 | A | C | Heterozygous |
| NC_037642.1 | 13732546 | SNV | 1 | C | T | Heterozygous |
| NC_037642.1 | 13732794 | SNV | 1 | T | C | Homozygous   |

|             |          |     |   |   |   |              |
|-------------|----------|-----|---|---|---|--------------|
| NC_037642.1 | 13732822 | SNV | 1 | G | A | Heterozygous |
| NC_037642.1 | 13732833 | SNV | 1 | T | C | Heterozygous |
| NC_037642.1 | 13733683 | SNV | 1 | A | G | Heterozygous |
| NC_037642.1 | 13733727 | SNV | 1 | C | T | Heterozygous |
| NC_037642.1 | 13733738 | SNV | 1 | A | G | Homozygous   |
| NC_037642.1 | 13733742 | SNV | 1 | T | C | Homozygous   |
| NC_037642.1 | 13733770 | SNV | 1 | A | G | Homozygous   |
| NC_037642.1 | 13733778 | SNV | 1 | A | G | Homozygous   |
| NC_037642.1 | 13733781 | SNV | 1 | T | A | Heterozygous |
| NC_037642.1 | 13734178 | SNV | 1 | A | G | Homozygous   |
| NC_037642.1 | 13734295 | SNV | 1 | C | T | Heterozygous |
| NC_037642.1 | 13734378 | SNV | 1 | T | C | Homozygous   |
| NC_037642.1 | 13734457 | SNV | 1 | C | T | Homozygous   |
| NC_037642.1 | 13734616 | SNV | 1 | C | T | Heterozygous |
| NC_037642.1 | 13734781 | SNV | 1 | G | T | Heterozygous |
| NC_037642.1 | 13734811 | SNV | 1 | C | T | Homozygous   |
| NC_037642.1 | 13734835 | SNV | 1 | T | C | Homozygous   |
| NC_037642.1 | 13735075 | SNV | 1 | C | G | Heterozygous |
| NC_037642.1 | 13736012 | SNV | 1 | C | T | Heterozygous |
| NC_037642.1 | 13736031 | SNV | 1 | T | C | Homozygous   |
| NC_037642.1 | 13736331 | SNV | 1 | T | G | Heterozygous |
| NC_037642.1 | 13736519 | SNV | 1 | G | A | Homozygous   |
| NC_037642.1 | 13736549 | SNV | 1 | T | C | Homozygous   |
| NC_037642.1 | 13736577 | SNV | 1 | C | T | Homozygous   |
| NC_037642.1 | 13736583 | SNV | 1 | A | C | Homozygous   |
| NC_037642.1 | 13739510 | SNV | 1 | G | A | Heterozygous |
| NC_037642.1 | 13739972 | SNV | 1 | C | G | Heterozygous |
| NC_037642.1 | 13740463 | SNV | 1 | G | A | Homozygous   |
| NC_037642.1 | 13740605 | SNV | 1 | G | A | Homozygous   |
| NC_037642.1 | 13740728 | SNV | 1 | A | T | Homozygous   |
| NC_037642.1 | 13740807 | SNV | 1 | A | G | Homozygous   |
| NC_037642.1 | 13741509 | SNV | 1 | T | C | Homozygous   |
| NC_037642.1 | 13741868 | SNV | 1 | A | G | Homozygous   |
| NC_037642.1 | 13745712 | SNV | 1 | T | C | Heterozygous |
| NC_037642.1 | 13745786 | SNV | 1 | C | T | Heterozygous |
| NC_037642.1 | 13745796 | SNV | 1 | C | T | Heterozygous |
| NC_037642.1 | 13745819 | SNV | 1 | T | C | Homozygous   |
| NC_037642.1 | 13745829 | SNV | 1 | C | T | Homozygous   |
| NC_037642.1 | 13745831 | SNV | 1 | T | C | Homozygous   |
| NC_037642.1 | 13746562 | SNV | 1 | T | C | Homozygous   |
| NC_037642.1 | 13746678 | SNV | 1 | C | A | Homozygous   |
| NC_037642.1 | 13747218 | SNV | 1 | C | T | Homozygous   |
| NC_037642.1 | 13747222 | SNV | 1 | C | T | Homozygous   |
| NC_037642.1 | 13747228 | SNV | 1 | C | G | Homozygous   |
| NC_037642.1 | 13748551 | SNV | 1 | G | A | Heterozygous |
| NC_037642.1 | 13748554 | SNV | 1 | A | G | Heterozygous |
| NC_037642.1 | 13748560 | SNV | 1 | A | G | Heterozygous |
| NC_037642.1 | 13748615 | SNV | 1 | A | C | Homozygous   |
| NC_037642.1 | 13749071 | SNV | 1 | A | G | Heterozygous |
| NC_037642.1 | 13749296 | SNV | 1 | T | C | Heterozygous |
| NC_037642.1 | 13751105 | SNV | 1 | T | A | Homozygous   |



|             |          |     |   |   |   |              |
|-------------|----------|-----|---|---|---|--------------|
| NC_037642.1 | 13751109 | SNV | 1 | T | A | Homozygous   |
| NC_037642.1 | 13753008 | SNV | 1 | T | A | Heterozygous |
| NC_037642.1 | 13753010 | SNV | 1 | T | C | Homozygous   |
| NC_037642.1 | 13753417 | SNV | 1 | A | G | Homozygous   |
| NC_037642.1 | 13753709 | SNV | 1 | G | A | Heterozygous |
| NC_037642.1 | 13753826 | SNV | 1 | T | C | Heterozygous |
| NC_037642.1 | 13753846 | SNV | 1 | T | C | Heterozygous |
| NC_037642.1 | 13753849 | SNV | 1 | T | A | Heterozygous |
| NC_037642.1 | 13753967 | SNV | 1 | A | G | Homozygous   |
| NC_037642.1 | 13754707 | SNV | 1 | A | G | Homozygous   |
| NC_037642.1 | 13754752 | SNV | 1 | A | C | Homozygous   |
| NC_037642.1 | 13755079 | SNV | 1 | T | C | Homozygous   |
| NC_037642.1 | 13755102 | SNV | 1 | C | T | Heterozygous |
| NC_037642.1 | 13755176 | SNV | 1 | A | G | Homozygous   |
| NC_037642.1 | 13755362 | SNV | 1 | A | G | Homozygous   |
| NC_037642.1 | 13755940 | SNV | 1 | T | C | Homozygous   |
| NC_037642.1 | 13756245 | SNV | 1 | G | A | Heterozygous |
| NC_037642.1 | 13756349 | SNV | 1 | T | A | Heterozygous |
| NC_037642.1 | 13756349 | SNV | 1 | T | C | Heterozygous |
| NC_037642.1 | 13756406 | SNV | 1 | T | C | Homozygous   |
| NC_037642.1 | 13756906 | SNV | 1 | T | C | Heterozygous |
| NC_037642.1 | 13757033 | SNV | 1 | T | C | Homozygous   |
| NC_037642.1 | 13757218 | SNV | 1 | G | A | Heterozygous |
| NC_037642.1 | 13757747 | SNV | 1 | T | A | Heterozygous |
| NC_037642.1 | 13757844 | SNV | 1 | A | G | Homozygous   |
| NC_037642.1 | 13758063 | SNV | 1 | T | C | Homozygous   |
| NC_037642.1 | 13758163 | SNV | 1 | A | G | Heterozygous |
| NC_037642.1 | 13758366 | SNV | 1 | G | A | Homozygous   |
| NC_037642.1 | 13758440 | SNV | 1 | T | C | Homozygous   |
| NC_037642.1 | 13765260 | SNV | 1 | G | A | Homozygous   |
| NC_037642.1 | 13765270 | SNV | 1 | A | G | Heterozygous |
| NC_037642.1 | 13765278 | SNV | 1 | G | A | Heterozygous |
| NC_037642.1 | 13765284 | SNV | 1 | A | T | Heterozygous |
| NC_037642.1 | 13765286 | SNV | 1 | A | G | Heterozygous |
| NC_037642.1 | 13765288 | SNV | 1 | A | G | Heterozygous |
| NC_037642.1 | 13765296 | SNV | 1 | G | A | Heterozygous |
| NC_037642.1 | 13765302 | SNV | 1 | A | G | Heterozygous |
| NC_037642.1 | 13765334 | SNV | 1 | G | A | Heterozygous |
| NC_037642.1 | 13765338 | SNV | 1 | A | G | Heterozygous |
| NC_037642.1 | 13765344 | SNV | 1 | A | G | Heterozygous |
| NC_037642.1 | 13765354 | SNV | 1 | G | A | Homozygous   |
| NC_037642.1 | 13765360 | SNV | 1 | A | T | Heterozygous |
| NC_037642.1 | 13765362 | SNV | 1 | A | G | Heterozygous |
| NC_037642.1 | 13765368 | SNV | 1 | A | G | Heterozygous |
| NC_037642.1 | 13765378 | SNV | 1 | A | G | Heterozygous |
| NC_037642.1 | 13765414 | SNV | 1 | A | G | Heterozygous |
| NC_037642.1 | 13765416 | SNV | 1 | A | G | Heterozygous |
| NC_037642.1 | 13771430 | SNV | 1 | A | G | Homozygous   |
| NC_037642.1 | 13771481 | SNV | 1 | G | T | Heterozygous |
| NC_037642.1 | 13771489 | SNV | 1 | A | G | Heterozygous |
| NC_037642.1 | 13779332 | SNV | 1 | A | G | Homozygous   |

|             |          |     |   |   |   |              |
|-------------|----------|-----|---|---|---|--------------|
| NC_037642.1 | 13779359 | SNV | 1 | G | A | Homozygous   |
| NC_037642.1 | 13779754 | SNV | 1 | G | A | Homozygous   |
| NC_037642.1 | 13780730 | SNV | 1 | T | C | Homozygous   |
| NC_037642.1 | 13781056 | SNV | 1 | T | A | Heterozygous |
| NC_037642.1 | 13781227 | SNV | 1 | T | C | Homozygous   |
| NC_037642.1 | 13781334 | SNV | 1 | T | A | Heterozygous |
| NC_037642.1 | 13781394 | SNV | 1 | G | A | Homozygous   |
| NC_037642.1 | 13784718 | SNV | 1 | G | T | Homozygous   |
| NC_037642.1 | 13784720 | SNV | 1 | G | T | Homozygous   |
| NC_037642.1 | 13784725 | SNV | 1 | A | C | Homozygous   |
| NC_037642.1 | 13784729 | SNV | 1 | A | C | Homozygous   |
| NC_037642.1 | 13784733 | SNV | 1 | A | T | Homozygous   |
| NC_037642.1 | 13784737 | SNV | 1 | A | C | Homozygous   |
| NC_037642.1 | 13784746 | SNV | 1 | G | A | Homozygous   |
| NC_037642.1 | 13785334 | SNV | 1 | T | C | Heterozygous |
| NC_037642.1 | 13785540 | SNV | 1 | G | A | Homozygous   |
| NC_037642.1 | 13785624 | SNV | 1 | G | A | Homozygous   |
| NC_037642.1 | 13785794 | SNV | 1 | A | G | Homozygous   |
| NC_037642.1 | 13790506 | SNV | 1 | A | T | Homozygous   |
| NC_037642.1 | 13790510 | SNV | 1 | G | A | Heterozygous |
| NC_037642.1 | 13790559 | SNV | 1 | A | T | Homozygous   |
| NC_037642.1 | 13790563 | SNV | 1 | A | G | Homozygous   |
| NC_037642.1 | 13790573 | SNV | 1 | T | C | Homozygous   |
| NC_037642.1 | 13790584 | SNV | 1 | A | G | Heterozygous |
| NC_037642.1 | 13790593 | SNV | 1 | T | C | Homozygous   |
| NC_037642.1 | 13790656 | SNV | 1 | A | G | Homozygous   |
| NC_037642.1 | 13790704 | SNV | 1 | G | A | Homozygous   |
| NC_037642.1 | 13790791 | SNV | 1 | G | C | Homozygous   |
| NC_037642.1 | 13790871 | SNV | 1 | A | G | Heterozygous |
| NC_037642.1 | 13790874 | SNV | 1 | G | A | Homozygous   |
| NC_037642.1 | 13791010 | SNV | 1 | G | A | Heterozygous |
| NC_037642.1 | 13791027 | SNV | 1 | T | C | Homozygous   |
| NC_037642.1 | 13791029 | SNV | 1 | A | G | Homozygous   |
| NC_037642.1 | 13791052 | SNV | 1 | A | G | Homozygous   |
| NC_037642.1 | 13791055 | SNV | 1 | G | A | Homozygous   |
| NC_037642.1 | 13791185 | SNV | 1 | A | G | Homozygous   |
| NC_037642.1 | 13791327 | SNV | 1 | G | A | Heterozygous |
| NC_037642.1 | 13791342 | SNV | 1 | A | G | Homozygous   |
| NC_037642.1 | 13791351 | SNV | 1 | C | T | Heterozygous |
| NC_037642.1 | 13791353 | SNV | 1 | A | G | Heterozygous |
| NC_037642.1 | 13792067 | SNV | 1 | C | G | Homozygous   |
| NC_037642.1 | 13796828 | SNV | 1 | A | T | Heterozygous |
| NC_037642.1 | 13799211 | SNV | 1 | G | A | Heterozygous |
| NC_037642.1 | 13799500 | SNV | 1 | T | C | Homozygous   |
| NC_037642.1 | 13799594 | SNV | 1 | C | G | Heterozygous |
| NC_037642.1 | 13799782 | SNV | 1 | C | T | Homozygous   |
| NC_037642.1 | 13799804 | SNV | 1 | A | C | Homozygous   |
| NC_037642.1 | 13799823 | SNV | 1 | A | T | Homozygous   |
| NC_037642.1 | 13799836 | SNV | 1 | T | C | Homozygous   |
| NC_037642.1 | 13799897 | SNV | 1 | G | A | Heterozygous |
| NC_037642.1 | 13801365 | SNV | 1 | G | A | Heterozygous |

|             |          |     |   |   |   |              |
|-------------|----------|-----|---|---|---|--------------|
| NC_037642.1 | 13802339 | SNV | 1 | C | T | Homozygous   |
| NC_037642.1 | 13802667 | SNV | 1 | T | A | Heterozygous |
| NC_037642.1 | 13803003 | SNV | 1 | A | G | Heterozygous |
| NC_037642.1 | 13803208 | SNV | 1 | A | G | Homozygous   |
| NC_037642.1 | 13803264 | SNV | 1 | A | G | Homozygous   |
| NC_037642.1 | 13804617 | SNV | 1 | A | T | Homozygous   |
| NC_037642.1 | 13804627 | SNV | 1 | A | C | Homozygous   |
| NC_037642.1 | 13804630 | SNV | 1 | A | C | Homozygous   |
| NC_037642.1 | 13804634 | SNV | 1 | G | T | Homozygous   |
| NC_037642.1 | 13805095 | SNV | 1 | T | A | Homozygous   |
| NC_037642.1 | 13805114 | SNV | 1 | C | T | Homozygous   |
| NC_037642.1 | 13805120 | SNV | 1 | T | G | Homozygous   |
| NC_037642.1 | 13805124 | SNV | 1 | T | A | Homozygous   |
| NC_037642.1 | 13805614 | SNV | 1 | A | T | Heterozygous |
| NC_037642.1 | 13805620 | SNV | 1 | C | A | Heterozygous |
| NC_037642.1 | 13805624 | SNV | 1 | A | G | Heterozygous |
| NC_037642.1 | 13805635 | SNV | 1 | G | T | Heterozygous |
| NC_037642.1 | 13805653 | SNV | 1 | C | G | Heterozygous |
| NC_037642.1 | 13806126 | SNV | 1 | G | A | Heterozygous |
| NC_037642.1 | 13806220 | SNV | 1 | A | T | Heterozygous |
| NC_037642.1 | 13806232 | SNV | 1 | A | G | Heterozygous |
| NC_037642.1 | 13806244 | SNV | 1 | A | G | Heterozygous |
| NC_037642.1 | 13806247 | SNV | 1 | A | G | Heterozygous |
| NC_037642.1 | 13806650 | SNV | 1 | C | T | Heterozygous |
| NC_037642.1 | 13808372 | SNV | 1 | A | G | Homozygous   |
| NC_037642.1 | 13810394 | SNV | 1 | A | C | Homozygous   |
| NC_037642.1 | 13811023 | SNV | 1 | G | A | Homozygous   |
| NC_037642.1 | 13811282 | SNV | 1 | A | T | Homozygous   |
| NC_037642.1 | 13811435 | SNV | 1 | T | C | Heterozygous |
| NC_037642.1 | 13811443 | SNV | 1 | G | C | Heterozygous |
| NC_037642.1 | 13811787 | SNV | 1 | T | C | Homozygous   |
| NC_037642.1 | 13812215 | SNV | 1 | C | T | Homozygous   |
| NC_037642.1 | 13812346 | SNV | 1 | T | C | Heterozygous |
| NC_037642.1 | 13812583 | SNV | 1 | T | C | Homozygous   |
| NC_037642.1 | 13813025 | SNV | 1 | T | A | Homozygous   |
| NC_037642.1 | 13813249 | SNV | 1 | T | C | Homozygous   |
| NC_037642.1 | 13813421 | SNV | 1 | C | A | Heterozygous |
| NC_037642.1 | 13813679 | SNV | 1 | A | G | Homozygous   |
| NC_037642.1 | 13813758 | SNV | 1 | G | A | Homozygous   |
| NC_037642.1 | 13814577 | SNV | 1 | T | C | Homozygous   |
| NC_037642.1 | 13814765 | SNV | 1 | T | C | Homozygous   |
| NC_037642.1 | 13822649 | SNV | 1 | T | C | Homozygous   |
| NC_037642.1 | 13824064 | SNV | 1 | A | G | Homozygous   |
| NC_037642.1 | 13824093 | SNV | 1 | G | A | Homozygous   |
| NC_037642.1 | 13824697 | SNV | 1 | A | T | Homozygous   |
| NC_037642.1 | 13825098 | SNV | 1 | A | T | Homozygous   |
| NC_037642.1 | 13825250 | SNV | 1 | T | C | Homozygous   |
| NC_037642.1 | 13827191 | SNV | 1 | T | C | Heterozygous |
| NC_037642.1 | 13827488 | SNV | 1 | T | A | Homozygous   |
| NC_037642.1 | 13827765 | SNV | 1 | T | A | Homozygous   |
| NC_037642.1 | 13827767 | SNV | 1 | A | C | Homozygous   |

|             |          |     |   |   |   |              |
|-------------|----------|-----|---|---|---|--------------|
| NC_037642.1 | 13828871 | SNV | 1 | T | A | Homozygous   |
| NC_037642.1 | 13831121 | SNV | 1 | C | A | Homozygous   |
| NC_037642.1 | 13836269 | SNV | 1 | A | G | Homozygous   |
| NC_037642.1 | 13836314 | SNV | 1 | C | T | Homozygous   |
| NC_037642.1 | 13839452 | SNV | 1 | G | C | Homozygous   |
| NC_037642.1 | 13839523 | SNV | 1 | C | G | Heterozygous |
| NC_037642.1 | 13841288 | SNV | 1 | T | G | Homozygous   |
| NC_037642.1 | 13841679 | SNV | 1 | T | C | Homozygous   |
| NC_037642.1 | 13842591 | SNV | 1 | A | T | Heterozygous |
| NC_037642.1 | 13842597 | SNV | 1 | A | C | Heterozygous |
| NC_037642.1 | 13842599 | SNV | 1 | T | G | Heterozygous |
| NC_037642.1 | 13842608 | SNV | 1 | T | C | Homozygous   |
| NC_037642.1 | 13842630 | SNV | 1 | T | C | Heterozygous |
| NC_037642.1 | 13842716 | SNV | 1 | T | C | Heterozygous |
| NC_037642.1 | 13844818 | SNV | 1 | G | A | Heterozygous |
| NC_037642.1 | 13844848 | SNV | 1 | T | A | Homozygous   |
| NC_037642.1 | 13845263 | SNV | 1 | A | T | Homozygous   |
| NC_037642.1 | 13845272 | SNV | 1 | A | T | Heterozygous |
| NC_037642.1 | 13847452 | SNV | 1 | G | T | Heterozygous |
| NC_037642.1 | 13847463 | SNV | 1 | A | C | Homozygous   |
| NC_037642.1 | 13847508 | SNV | 1 | C | T | Homozygous   |
| NC_037642.1 | 13847511 | SNV | 1 | C | T | Homozygous   |
| NC_037642.1 | 13847517 | SNV | 1 | G | T | Homozygous   |
| NC_037642.1 | 13847520 | SNV | 1 | G | T | Homozygous   |
| NC_037642.1 | 13847523 | SNV | 1 | G | C | Homozygous   |
| NC_037642.1 | 13847526 | SNV | 1 | A | C | Homozygous   |
| NC_037642.1 | 13847529 | SNV | 1 | C | T | Homozygous   |
| NC_037642.1 | 13850001 | SNV | 1 | T | C | Homozygous   |
| NC_037642.1 | 13852032 | SNV | 1 | A | G | Heterozygous |
| NC_037642.1 | 13852035 | SNV | 1 | A | G | Homozygous   |
| NC_037642.1 | 13852059 | SNV | 1 | A | G | Homozygous   |
| NC_037642.1 | 13852067 | SNV | 1 | G | A | Heterozygous |
| NC_037642.1 | 13859847 | SNV | 1 | T | C | Heterozygous |
| NC_037642.1 | 13860453 | SNV | 1 | T | C | Heterozygous |
| NC_037642.1 | 13860594 | SNV | 1 | G | A | Heterozygous |
| NC_037642.1 | 13860919 | SNV | 1 | T | C | Homozygous   |
| NC_037642.1 | 13861708 | SNV | 1 | T | C | Heterozygous |
| NC_037642.1 | 13862557 | SNV | 1 | G | T | Homozygous   |
| NC_037642.1 | 13864002 | SNV | 1 | T | A | Heterozygous |
| NC_037642.1 | 13864015 | SNV | 1 | T | C | Heterozygous |
| NC_037642.1 | 13864026 | SNV | 1 | A | T | Heterozygous |
| NC_037642.1 | 13865633 | SNV | 1 | A | T | Heterozygous |
| NC_037642.1 | 13865635 | SNV | 1 | C | T | Heterozygous |
| NC_037642.1 | 13865664 | SNV | 1 | G | A | Heterozygous |
| NC_037642.1 | 13869407 | SNV | 1 | A | G | Homozygous   |
| NC_037642.1 | 13869644 | SNV | 1 | A | G | Heterozygous |
| NC_037642.1 | 13869924 | SNV | 1 | A | G | Homozygous   |
| NC_037642.1 | 13870176 | SNV | 1 | G | A | Homozygous   |
| NC_037642.1 | 13870489 | SNV | 1 | T | C | Homozygous   |
| NC_037642.1 | 13870497 | SNV | 1 | C | T | Heterozygous |
| NC_037642.1 | 13870528 | SNV | 1 | C | A | Homozygous   |

|             |          |     |   |   |   |              |
|-------------|----------|-----|---|---|---|--------------|
| NC_037642.1 | 13870532 | SNV | 1 | C | A | Homozygous   |
| NC_037642.1 | 13870536 | SNV | 1 | C | A | Homozygous   |
| NC_037642.1 | 13870540 | SNV | 1 | C | A | Heterozygous |
| NC_037642.1 | 13870544 | SNV | 1 | C | A | Homozygous   |
| NC_037642.1 | 13871235 | SNV | 1 | C | T | Heterozygous |
| NC_037642.1 | 13871437 | SNV | 1 | G | A | Homozygous   |
| NC_037642.1 | 13871529 | SNV | 1 | C | T | Homozygous   |
| NC_037642.1 | 13872372 | SNV | 1 | T | G | Homozygous   |
| NC_037642.1 | 13872657 | SNV | 1 | G | A | Heterozygous |
| NC_037642.1 | 13872679 | SNV | 1 | C | G | Heterozygous |
| NC_037642.1 | 13872686 | SNV | 1 | T | C | Heterozygous |
| NC_037642.1 | 13872695 | SNV | 1 | A | G | Heterozygous |
| NC_037642.1 | 13872702 | SNV | 1 | G | A | Heterozygous |
| NC_037642.1 | 13873291 | SNV | 1 | C | T | Homozygous   |
| NC_037642.1 | 13873309 | SNV | 1 | A | G | Heterozygous |
| NC_037642.1 | 13873507 | SNV | 1 | T | C | Homozygous   |
| NC_037642.1 | 13873531 | SNV | 1 | T | C | Homozygous   |
| NC_037642.1 | 13873646 | SNV | 1 | G | A | Homozygous   |
| NC_037642.1 | 13873936 | SNV | 1 | A | G | Homozygous   |
| NC_037642.1 | 13874180 | SNV | 1 | C | T | Homozygous   |
| NC_037642.1 | 13874207 | SNV | 1 | T | C | Homozygous   |
| NC_037642.1 | 13876339 | SNV | 1 | C | T | Heterozygous |
| NC_037642.1 | 13876397 | SNV | 1 | C | T | Heterozygous |
| NC_037642.1 | 13876906 | SNV | 1 | C | T | Heterozygous |
| NC_037642.1 | 13877324 | SNV | 1 | C | T | Heterozygous |
| NC_037642.1 | 13877428 | SNV | 1 | T | C | Homozygous   |
| NC_037642.1 | 13879930 | SNV | 1 | A | T | Homozygous   |
| NC_037642.1 | 13881264 | SNV | 1 | A | G | Heterozygous |
| NC_037642.1 | 13881671 | SNV | 1 | A | G | Homozygous   |
| NC_037642.1 | 13881885 | SNV | 1 | C | T | Homozygous   |
| NC_037642.1 | 13882388 | SNV | 1 | A | G | Homozygous   |
| NC_037642.1 | 13882486 | SNV | 1 | C | A | Homozygous   |
| NC_037642.1 | 13882849 | SNV | 1 | A | T | Heterozygous |
| NC_037642.1 | 13883369 | SNV | 1 | C | T | Heterozygous |
| NC_037642.1 | 13883383 | SNV | 1 | T | C | Heterozygous |
| NC_037642.1 | 13883461 | SNV | 1 | T | C | Heterozygous |
| NC_037642.1 | 13883542 | SNV | 1 | T | C | Homozygous   |
| NC_037642.1 | 13883609 | SNV | 1 | T | C | Homozygous   |
| NC_037642.1 | 13883706 | SNV | 1 | C | T | Homozygous   |
| NC_037642.1 | 13883748 | SNV | 1 | A | G | Homozygous   |
| NC_037642.1 | 13884298 | SNV | 1 | G | A | Homozygous   |
| NC_037642.1 | 13884487 | SNV | 1 | G | A | Homozygous   |
| NC_037642.1 | 13884610 | SNV | 1 | A | G | Homozygous   |
| NC_037642.1 | 13884710 | SNV | 1 | A | G | Heterozygous |
| NC_037642.1 | 13885100 | SNV | 1 | A | G | Homozygous   |
| NC_037642.1 | 13889101 | SNV | 1 | C | T | Heterozygous |
| NC_037643.1 | 92095    | SNV | 1 | C | T | Homozygous   |
| NC_037643.1 | 95159    | SNV | 1 | T | A | Homozygous   |
| NC_037643.1 | 96605    | SNV | 1 | T | A | Homozygous   |
| NC_037643.1 | 96610    | SNV | 1 | A | T | Homozygous   |
| NC_037643.1 | 96638    | SNV | 1 | A | T | Homozygous   |

|             |        |     |   |   |   |              |
|-------------|--------|-----|---|---|---|--------------|
| NC_037643.1 | 96640  | SNV | 1 | A | T | Homozygous   |
| NC_037643.1 | 96643  | SNV | 1 | T | A | Homozygous   |
| NC_037643.1 | 96646  | SNV | 1 | T | C | Homozygous   |
| NC_037643.1 | 99866  | SNV | 1 | C | A | Homozygous   |
| NC_037643.1 | 99875  | SNV | 1 | A | G | Homozygous   |
| NC_037643.1 | 99896  | SNV | 1 | A | G | Homozygous   |
| NC_037643.1 | 109330 | SNV | 1 | A | G | Heterozygous |
| NC_037643.1 | 119265 | SNV | 1 | C | T | Homozygous   |
| NC_037643.1 | 121239 | SNV | 1 | A | T | Homozygous   |
| NC_037643.1 | 121242 | SNV | 1 | A | C | Homozygous   |
| NC_037643.1 | 121252 | SNV | 1 | A | T | Homozygous   |
| NC_037643.1 | 122113 | SNV | 1 | T | A | Homozygous   |
| NC_037643.1 | 122133 | SNV | 1 | T | C | Homozygous   |
| NC_037643.1 | 133312 | SNV | 1 | T | C | Homozygous   |
| NC_037643.1 | 133316 | SNV | 1 | T | C | Homozygous   |
| NC_037643.1 | 133333 | SNV | 1 | C | T | Homozygous   |
| NC_037643.1 | 133354 | SNV | 1 | G | A | Heterozygous |
| NC_037643.1 | 137961 | SNV | 1 | C | G | Homozygous   |
| NC_037643.1 | 137963 | SNV | 1 | A | T | Homozygous   |
| NC_037643.1 | 141713 | SNV | 1 | G | T | Heterozygous |
| NC_037643.1 | 141718 | SNV | 1 | G | T | Homozygous   |
| NC_037643.1 | 141727 | SNV | 1 | C | T | Heterozygous |
| NC_037643.1 | 141742 | SNV | 1 | G | T | Heterozygous |
| NC_037643.1 | 141747 | SNV | 1 | C | T | Heterozygous |
| NC_037643.1 | 144678 | SNV | 1 | C | T | Homozygous   |
| NC_037643.1 | 144699 | SNV | 1 | A | G | Homozygous   |
| NC_037643.1 | 144710 | SNV | 1 | G | A | Homozygous   |
| NC_037643.1 | 144713 | SNV | 1 | A | G | Heterozygous |
| NC_037643.1 | 144723 | SNV | 1 | A | G | Homozygous   |
| NC_037643.1 | 155665 | SNV | 1 | C | T | Homozygous   |
| NC_037643.1 | 155682 | SNV | 1 | G | A | Homozygous   |
| NC_037643.1 | 155688 | SNV | 1 | A | G | Homozygous   |
| NC_037643.1 | 155690 | SNV | 1 | G | A | Homozygous   |
| NC_037643.1 | 155698 | SNV | 1 | T | C | Homozygous   |
| NC_037643.1 | 155737 | SNV | 1 | C | T | Homozygous   |
| NC_037643.1 | 155739 | SNV | 1 | G | C | Homozygous   |
| NC_037643.1 | 158381 | SNV | 1 | C | T | Homozygous   |
| NC_037643.1 | 158426 | SNV | 1 | A | G | Homozygous   |
| NC_037643.1 | 158469 | SNV | 1 | A | G | Homozygous   |
| NC_037643.1 | 158484 | SNV | 1 | A | G | Homozygous   |
| NC_037643.1 | 158528 | SNV | 1 | A | G | Homozygous   |
| NC_037643.1 | 158538 | SNV | 1 | A | G | Homozygous   |
| NC_037643.1 | 158734 | SNV | 1 | C | T | Homozygous   |
| NC_037643.1 | 158739 | SNV | 1 | C | T | Homozygous   |
| NC_037643.1 | 158744 | SNV | 1 | C | T | Homozygous   |
| NC_037643.1 | 158753 | SNV | 1 | G | A | Homozygous   |
| NC_037643.1 | 158760 | SNV | 1 | C | T | Homozygous   |
| NC_037643.1 | 158805 | SNV | 1 | C | T | Homozygous   |
| NC_037643.1 | 158807 | SNV | 1 | C | T | Homozygous   |
| NC_037643.1 | 158812 | SNV | 1 | G | A | Homozygous   |
| NC_037643.1 | 158882 | SNV | 1 | C | T | Heterozygous |

|             |        |     |   |   |   |              |
|-------------|--------|-----|---|---|---|--------------|
| NC_037643.1 | 158935 | SNV | 1 | G | T | Homozygous   |
| NC_037643.1 | 158962 | SNV | 1 | A | G | Homozygous   |
| NC_037643.1 | 158985 | SNV | 1 | A | G | Homozygous   |
| NC_037643.1 | 158996 | SNV | 1 | T | C | Homozygous   |
| NC_037643.1 | 158999 | SNV | 1 | A | G | Homozygous   |
| NC_037643.1 | 173435 | SNV | 1 | A | G | Homozygous   |
| NC_037643.1 | 173444 | SNV | 1 | T | C | Homozygous   |
| NC_037643.1 | 173446 | SNV | 1 | A | T | Homozygous   |
| NC_037643.1 | 173454 | SNV | 1 | T | G | Homozygous   |
| NC_037643.1 | 173457 | SNV | 1 | A | T | Homozygous   |
| NC_037643.1 | 175422 | SNV | 1 | A | T | Homozygous   |
| NC_037643.1 | 175433 | SNV | 1 | T | C | Homozygous   |
| NC_037643.1 | 175445 | SNV | 1 | T | C | Heterozygous |
| NC_037643.1 | 175448 | SNV | 1 | A | G | Homozygous   |
| NC_037643.1 | 175450 | SNV | 1 | A | T | Homozygous   |
| NC_037643.1 | 175452 | SNV | 1 | T | C | Heterozygous |
| NC_037643.1 | 175471 | SNV | 1 | A | T | Homozygous   |
| NC_037643.1 | 175473 | SNV | 1 | T | C | Homozygous   |
| NC_037643.1 | 175481 | SNV | 1 | A | G | Homozygous   |
| NC_037643.1 | 175488 | SNV | 1 | A | T | Homozygous   |
| NC_037643.1 | 175501 | SNV | 1 | T | A | Homozygous   |
| NC_037643.1 | 175509 | SNV | 1 | A | G | Homozygous   |
| NC_037643.1 | 175513 | SNV | 1 | A | G | Homozygous   |
| NC_037643.1 | 175516 | SNV | 1 | T | A | Homozygous   |
| NC_037643.1 | 175518 | SNV | 1 | C | A | Homozygous   |
| NC_037643.1 | 183511 | SNV | 1 | A | T | Homozygous   |
| NC_037643.1 | 183520 | SNV | 1 | A | T | Homozygous   |
| NC_037643.1 | 183535 | SNV | 1 | A | G | Homozygous   |
| NC_037643.1 | 183547 | SNV | 1 | T | A | Homozygous   |
| NC_037643.1 | 183549 | SNV | 1 | T | A | Homozygous   |
| NC_037643.1 | 183574 | SNV | 1 | T | C | Homozygous   |
| NC_037643.1 | 183585 | SNV | 1 | T | A | Homozygous   |
| NC_037643.1 | 183591 | SNV | 1 | A | C | Homozygous   |
| NC_037643.1 | 204371 | SNV | 1 | C | T | Homozygous   |
| NC_037643.1 | 214338 | SNV | 1 | T | C | Homozygous   |
| NC_037643.1 | 214340 | SNV | 1 | T | C | Homozygous   |
| NC_037643.1 | 214354 | SNV | 1 | A | T | Homozygous   |
| NC_037643.1 | 214356 | SNV | 1 | A | T | Homozygous   |
| NC_037643.1 | 214359 | SNV | 1 | A | T | Homozygous   |
| NC_037643.1 | 214361 | SNV | 1 | A | T | Homozygous   |
| NC_037643.1 | 214363 | SNV | 1 | C | T | Homozygous   |
| NC_037643.1 | 214374 | SNV | 1 | T | G | Homozygous   |
| NC_037643.1 | 214621 | SNV | 1 | A | T | Homozygous   |
| NC_037643.1 | 214624 | SNV | 1 | T | C | Homozygous   |
| NC_037643.1 | 214628 | SNV | 1 | A | T | Homozygous   |
| NC_037643.1 | 214636 | SNV | 1 | A | G | Homozygous   |
| NC_037643.1 | 214675 | SNV | 1 | T | A | Homozygous   |
| NC_037643.1 | 215584 | SNV | 1 | G | A | Heterozygous |
| NC_037643.1 | 215608 | SNV | 1 | T | C | Heterozygous |
| NC_037643.1 | 218035 | SNV | 1 | A | G | Heterozygous |
| NC_037643.1 | 218046 | SNV | 1 | T | C | Heterozygous |

|             |        |     |   |   |   |              |
|-------------|--------|-----|---|---|---|--------------|
| NC_037643.1 | 218056 | SNV | 1 | T | A | Heterozygous |
| NC_037643.1 | 218062 | SNV | 1 | A | C | Heterozygous |
| NC_037643.1 | 225161 | SNV | 1 | A | G | Homozygous   |
| NC_037643.1 | 225167 | SNV | 1 | A | C | Homozygous   |
| NC_037643.1 | 225175 | SNV | 1 | A | G | Homozygous   |
| NC_037643.1 | 225185 | SNV | 1 | A | G | Homozygous   |
| NC_037643.1 | 225187 | SNV | 1 | T | A | Homozygous   |
| NC_037643.1 | 228979 | SNV | 1 | A | G | Homozygous   |
| NC_037643.1 | 229024 | SNV | 1 | A | T | Homozygous   |
| NC_037643.1 | 231694 | SNV | 1 | A | G | Homozygous   |
| NC_037643.1 | 231701 | SNV | 1 | C | T | Homozygous   |
| NC_037643.1 | 231708 | SNV | 1 | A | T | Homozygous   |
| NC_037643.1 | 231715 | SNV | 1 | A | G | Homozygous   |
| NC_037643.1 | 231719 | SNV | 1 | T | C | Homozygous   |
| NC_037643.1 | 231722 | SNV | 1 | T | A | Homozygous   |
| NC_037643.1 | 236417 | SNV | 1 | A | C | Homozygous   |
| NC_037643.1 | 236428 | SNV | 1 | T | A | Homozygous   |
| NC_037643.1 | 236431 | SNV | 1 | T | A | Homozygous   |
| NC_037643.1 | 236440 | SNV | 1 | T | C | Homozygous   |
| NC_037643.1 | 236443 | SNV | 1 | T | A | Homozygous   |
| NC_037643.1 | 236455 | SNV | 1 | T | G | Homozygous   |
| NC_037643.1 | 236459 | SNV | 1 | T | C | Homozygous   |
| NC_037643.1 | 238627 | SNV | 1 | T | A | Homozygous   |
| NC_037643.1 | 242359 | SNV | 1 | A | C | Homozygous   |
| NC_037643.1 | 242365 | SNV | 1 | T | C | Homozygous   |
| NC_037643.1 | 244596 | SNV | 1 | G | A | Heterozygous |
| NC_037643.1 | 245652 | SNV | 1 | G | A | Homozygous   |
| NC_037643.1 | 247387 | SNV | 1 | A | G | Homozygous   |
| NC_037643.1 | 247653 | SNV | 1 | G | A | Homozygous   |
| NC_037643.1 | 249921 | SNV | 1 | T | A | Homozygous   |
| NC_037643.1 | 249929 | SNV | 1 | T | A | Homozygous   |
| NC_037643.1 | 249934 | SNV | 1 | T | G | Homozygous   |
| NC_037643.1 | 249942 | SNV | 1 | A | C | Homozygous   |
| NC_037643.1 | 255672 | SNV | 1 | G | A | Homozygous   |
| NC_037643.1 | 255695 | SNV | 1 | T | C | Homozygous   |
| NC_037643.1 | 255697 | SNV | 1 | A | T | Homozygous   |
| NC_037643.1 | 260561 | SNV | 1 | C | T | Homozygous   |
| NC_037643.1 | 260568 | SNV | 1 | A | G | Homozygous   |
| NC_037643.1 | 260582 | SNV | 1 | A | T | Homozygous   |
| NC_037643.1 | 260975 | SNV | 1 | T | C | Homozygous   |
| NC_037643.1 | 261006 | SNV | 1 | T | C | Homozygous   |
| NC_037643.1 | 261021 | SNV | 1 | T | C | Homozygous   |
| NC_037643.1 | 261032 | SNV | 1 | A | G | Homozygous   |
| NC_037643.1 | 266021 | SNV | 1 | T | A | Homozygous   |
| NC_037643.1 | 266035 | SNV | 1 | A | C | Homozygous   |
| NC_037643.1 | 266039 | SNV | 1 | A | T | Homozygous   |
| NC_037643.1 | 266059 | SNV | 1 | T | A | Homozygous   |
| NC_037643.1 | 269390 | SNV | 1 | T | A | Heterozygous |
| NC_037643.1 | 269393 | SNV | 1 | A | C | Homozygous   |
| NC_037643.1 | 269400 | SNV | 1 | C | T | Heterozygous |
| NC_037643.1 | 270216 | SNV | 1 | T | C | Homozygous   |



|             |        |     |   |   |   |              |
|-------------|--------|-----|---|---|---|--------------|
| NC_037643.1 | 270221 | SNV | 1 | A | G | Homozygous   |
| NC_037643.1 | 270226 | SNV | 1 | T | C | Heterozygous |
| NC_037643.1 | 270227 | SNV | 1 | A | T | Heterozygous |
| NC_037643.1 | 270239 | SNV | 1 | A | T | Heterozygous |
| NC_037643.1 | 270251 | SNV | 1 | G | A | Heterozygous |
| NC_037643.1 | 270263 | SNV | 1 | A | C | Heterozygous |
| NC_037643.1 | 270267 | SNV | 1 | T | C | Heterozygous |
| NC_037643.1 | 273101 | SNV | 1 | C | T | Homozygous   |
| NC_037643.1 | 275092 | SNV | 1 | T | C | Heterozygous |
| NC_037643.1 | 275412 | SNV | 1 | C | T | Homozygous   |
| NC_037643.1 | 275607 | SNV | 1 | T | C | Homozygous   |
| NC_037643.1 | 282188 | SNV | 1 | A | T | Homozygous   |
| NC_037643.1 | 282190 | SNV | 1 | A | T | Homozygous   |
| NC_037643.1 | 282197 | SNV | 1 | A | T | Homozygous   |
| NC_037643.1 | 282201 | SNV | 1 | T | A | Homozygous   |
| NC_037643.1 | 282203 | SNV | 1 | A | T | Homozygous   |
| NC_037643.1 | 282222 | SNV | 1 | T | G | Homozygous   |
| NC_037643.1 | 283168 | SNV | 1 | T | C | Homozygous   |
| NC_037643.1 | 286291 | SNV | 1 | A | G | Homozygous   |
| NC_037643.1 | 287960 | SNV | 1 | A | T | Homozygous   |
| NC_037643.1 | 287963 | SNV | 1 | A | T | Homozygous   |
| NC_037643.1 | 287966 | SNV | 1 | A | C | Homozygous   |
| NC_037643.1 | 287973 | SNV | 1 | C | T | Homozygous   |
| NC_037643.1 | 287977 | SNV | 1 | A | T | Homozygous   |
| NC_037643.1 | 287994 | SNV | 1 | A | T | Homozygous   |
| NC_037643.1 | 287996 | SNV | 1 | T | A | Homozygous   |
| NC_037643.1 | 287999 | SNV | 1 | A | T | Homozygous   |
| NC_037643.1 | 288006 | SNV | 1 | T | A | Homozygous   |
| NC_037643.1 | 288013 | SNV | 1 | T | A | Homozygous   |
| NC_037643.1 | 306231 | SNV | 1 | C | T | Heterozygous |
| NC_037643.1 | 306565 | SNV | 1 | A | T | Homozygous   |
| NC_037643.1 | 306572 | SNV | 1 | T | A | Homozygous   |
| NC_037643.1 | 308881 | SNV | 1 | A | T | Homozygous   |
| NC_037643.1 | 308883 | SNV | 1 | A | G | Homozygous   |
| NC_037643.1 | 308888 | SNV | 1 | C | T | Homozygous   |
| NC_037643.1 | 308894 | SNV | 1 | A | T | Homozygous   |
| NC_037643.1 | 308911 | SNV | 1 | T | A | Homozygous   |
| NC_037643.1 | 308915 | SNV | 1 | A | T | Homozygous   |
| NC_037643.1 | 308929 | SNV | 1 | A | T | Homozygous   |
| NC_037643.1 | 315974 | SNV | 1 | A | T | Heterozygous |
| NC_037643.1 | 316044 | SNV | 1 | G | A | Heterozygous |
| NC_037643.1 | 316052 | SNV | 1 | G | A | Heterozygous |
| NC_037643.1 | 316768 | SNV | 1 | A | T | Homozygous   |
| NC_037643.1 | 316776 | SNV | 1 | T | A | Homozygous   |
| NC_037643.1 | 316780 | SNV | 1 | T | A | Homozygous   |
| NC_037643.1 | 316782 | SNV | 1 | A | T | Homozygous   |
| NC_037643.1 | 316785 | SNV | 1 | T | C | Homozygous   |
| NC_037643.1 | 316787 | SNV | 1 | T | A | Homozygous   |
| NC_037643.1 | 319634 | SNV | 1 | G | A | Homozygous   |
| NC_037643.1 | 319645 | SNV | 1 | T | A | Homozygous   |
| NC_037643.1 | 319647 | SNV | 1 | G | T | Homozygous   |

|             |        |     |   |   |   |              |
|-------------|--------|-----|---|---|---|--------------|
| NC_037643.1 | 319670 | SNV | 1 | A | T | Homozygous   |
| NC_037643.1 | 319672 | SNV | 1 | A | T | Homozygous   |
| NC_037643.1 | 319674 | SNV | 1 | A | C | Homozygous   |
| NC_037643.1 | 319934 | SNV | 1 | T | A | Homozygous   |
| NC_037643.1 | 321687 | SNV | 1 | G | A | Heterozygous |
| NC_037643.1 | 321722 | SNV | 1 | T | C | Heterozygous |
| NC_037643.1 | 321748 | SNV | 1 | G | A | Heterozygous |
| NC_037643.1 | 321751 | SNV | 1 | G | A | Heterozygous |
| NC_037643.1 | 321805 | SNV | 1 | T | A | Heterozygous |
| NC_037643.1 | 321820 | SNV | 1 | T | A | Homozygous   |
| NC_037643.1 | 321865 | SNV | 1 | T | G | Homozygous   |
| NC_037643.1 | 321878 | SNV | 1 | G | A | Homozygous   |
| NC_037643.1 | 321883 | SNV | 1 | A | G | Homozygous   |
| NC_037643.1 | 321909 | SNV | 1 | A | G | Homozygous   |
| NC_037643.1 | 321911 | SNV | 1 | C | T | Homozygous   |
| NC_037643.1 | 321924 | SNV | 1 | C | T | Homozygous   |
| NC_037643.1 | 323768 | SNV | 1 | T | C | Homozygous   |
| NC_037643.1 | 328720 | SNV | 1 | T | C | Heterozygous |
| NC_037643.1 | 328723 | SNV | 1 | T | C | Heterozygous |
| NC_037643.1 | 328791 | SNV | 1 | C | T | Homozygous   |
| NC_037643.1 | 328794 | SNV | 1 | T | C | Heterozygous |
| NC_037643.1 | 328800 | SNV | 1 | T | C | Homozygous   |
| NC_037643.1 | 328803 | SNV | 1 | T | C | Homozygous   |
| NC_037643.1 | 328806 | SNV | 1 | T | C | Homozygous   |
| NC_037643.1 | 328808 | SNV | 1 | A | G | Homozygous   |
| NC_037643.1 | 328814 | SNV | 1 | A | T | Homozygous   |
| NC_037643.1 | 336373 | SNV | 1 | A | T | Homozygous   |
| NC_037643.1 | 336376 | SNV | 1 | A | G | Homozygous   |
| NC_037643.1 | 336381 | SNV | 1 | T | A | Homozygous   |
| NC_037643.1 | 336383 | SNV | 1 | T | G | Homozygous   |
| NC_037643.1 | 336390 | SNV | 1 | A | T | Homozygous   |
| NC_037643.1 | 336397 | SNV | 1 | A | T | Homozygous   |
| NC_037643.1 | 336401 | SNV | 1 | T | A | Homozygous   |
| NC_037643.1 | 337534 | SNV | 1 | T | C | Homozygous   |
| NC_037643.1 | 337536 | SNV | 1 | A | C | Homozygous   |
| NC_037643.1 | 346806 | SNV | 1 | G | A | Heterozygous |
| NC_037643.1 | 346817 | SNV | 1 | T | C | Heterozygous |
| NC_037643.1 | 346851 | SNV | 1 | T | G | Heterozygous |
| NC_037643.1 | 346936 | SNV | 1 | A | T | Homozygous   |
| NC_037643.1 | 346940 | SNV | 1 | A | T | Homozygous   |
| NC_037643.1 | 346961 | SNV | 1 | C | T | Homozygous   |
| NC_037643.1 | 346974 | SNV | 1 | A | G | Homozygous   |
| NC_037643.1 | 351986 | SNV | 1 | T | A | Homozygous   |
| NC_037643.1 | 351988 | SNV | 1 | T | A | Homozygous   |
| NC_037643.1 | 351991 | SNV | 1 | A | G | Homozygous   |
| NC_037643.1 | 352002 | SNV | 1 | A | T | Homozygous   |
| NC_037643.1 | 353170 | SNV | 1 | A | G | Heterozygous |
| NC_037643.1 | 353563 | SNV | 1 | C | T | Homozygous   |
| NC_037643.1 | 353621 | SNV | 1 | C | T | Homozygous   |
| NC_037643.1 | 353640 | SNV | 1 | A | G | Homozygous   |
| NC_037643.1 | 353828 | SNV | 1 | G | A | Homozygous   |

|             |        |     |   |   |   |              |
|-------------|--------|-----|---|---|---|--------------|
| NC_037643.1 | 353830 | SNV | 1 | G | A | Homozygous   |
| NC_037643.1 | 353933 | SNV | 1 | G | A | Homozygous   |
| NC_037643.1 | 354431 | SNV | 1 | A | G | Homozygous   |
| NC_037643.1 | 354459 | SNV | 1 | A | G | Homozygous   |
| NC_037643.1 | 354501 | SNV | 1 | A | G | Homozygous   |
| NC_037643.1 | 359628 | SNV | 1 | T | A | Homozygous   |
| NC_037643.1 | 359634 | SNV | 1 | T | A | Homozygous   |
| NC_037643.1 | 359652 | SNV | 1 | G | A | Homozygous   |
| NC_037643.1 | 362054 | SNV | 1 | T | C | Heterozygous |
| NC_037643.1 | 362057 | SNV | 1 | T | C | Heterozygous |
| NC_037643.1 | 362099 | SNV | 1 | A | C | Heterozygous |
| NC_037643.1 | 362125 | SNV | 1 | T | C | Heterozygous |
| NC_037643.1 | 363219 | SNV | 1 | A | T | Homozygous   |
| NC_037643.1 | 363231 | SNV | 1 | A | T | Heterozygous |
| NC_037643.1 | 363241 | SNV | 1 | A | T | Heterozygous |
| NC_037643.1 | 363246 | SNV | 1 | A | T | Heterozygous |
| NC_037643.1 | 363282 | SNV | 1 | A | G | Homozygous   |
| NC_037643.1 | 363288 | SNV | 1 | T | C | Homozygous   |
| NC_037643.1 | 363337 | SNV | 1 | A | G | Homozygous   |
| NC_037643.1 | 365238 | SNV | 1 | T | A | Homozygous   |
| NC_037643.1 | 365240 | SNV | 1 | A | G | Homozygous   |
| NC_037643.1 | 365244 | SNV | 1 | T | G | Homozygous   |
| NC_037643.1 | 365259 | SNV | 1 | A | T | Homozygous   |
| NC_037643.1 | 365271 | SNV | 1 | A | T | Homozygous   |
| NC_037643.1 | 376662 | SNV | 1 | A | T | Homozygous   |
| NC_037643.1 | 376682 | SNV | 1 | T | C | Homozygous   |
| NC_037643.1 | 376685 | SNV | 1 | T | A | Homozygous   |
| NC_037643.1 | 378777 | SNV | 1 | A | G | Heterozygous |
| NC_037643.1 | 378782 | SNV | 1 | T | C | Heterozygous |
| NC_037643.1 | 378787 | SNV | 1 | T | G | Heterozygous |
| NC_037643.1 | 378790 | SNV | 1 | A | T | Heterozygous |
| NC_037643.1 | 378797 | SNV | 1 | A | G | Heterozygous |
| NC_037643.1 | 378799 | SNV | 1 | A | T | Heterozygous |
| NC_037643.1 | 412718 | SNV | 1 | A | C | Homozygous   |
| NC_037643.1 | 412720 | SNV | 1 | A | T | Homozygous   |
| NC_037643.1 | 412725 | SNV | 1 | T | G | Homozygous   |
| NC_037643.1 | 412752 | SNV | 1 | A | G | Homozygous   |
| NC_037643.1 | 416257 | SNV | 1 | T | C | Homozygous   |
| NC_037643.1 | 416261 | SNV | 1 | A | C | Homozygous   |
| NC_037643.1 | 416278 | SNV | 1 | T | A | Homozygous   |
| NC_037643.1 | 416284 | SNV | 1 | A | G | Homozygous   |
| NC_037643.1 | 416289 | SNV | 1 | T | A | Homozygous   |
| NC_037643.1 | 423455 | SNV | 1 | T | C | Homozygous   |
| NC_037643.1 | 423458 | SNV | 1 | T | G | Homozygous   |
| NC_037643.1 | 423461 | SNV | 1 | C | G | Homozygous   |
| NC_037643.1 | 423472 | SNV | 1 | C | T | Homozygous   |
| NC_037643.1 | 432083 | SNV | 1 | T | C | Homozygous   |
| NC_037643.1 | 432122 | SNV | 1 | G | A | Heterozygous |
| NC_037643.1 | 432199 | SNV | 1 | G | T | Homozygous   |
| NC_037643.1 | 432370 | SNV | 1 | C | T | Heterozygous |
| NC_037643.1 | 432421 | SNV | 1 | G | T | Homozygous   |

|             |        |     |   |   |   |              |
|-------------|--------|-----|---|---|---|--------------|
| NC_037643.1 | 432480 | SNV | 1 | A | T | Heterozygous |
| NC_037643.1 | 434017 | SNV | 1 | T | A | Homozygous   |
| NC_037643.1 | 441344 | SNV | 1 | A | G | Homozygous   |
| NC_037643.1 | 441352 | SNV | 1 | A | G | Homozygous   |
| NC_037643.1 | 441365 | SNV | 1 | G | T | Homozygous   |
| NC_037643.1 | 458806 | SNV | 1 | C | T | Homozygous   |
| NC_037643.1 | 458812 | SNV | 1 | T | A | Homozygous   |
| NC_037643.1 | 458822 | SNV | 1 | T | G | Homozygous   |
| NC_037643.1 | 458825 | SNV | 1 | T | C | Homozygous   |
| NC_037643.1 | 458835 | SNV | 1 | A | C | Homozygous   |
| NC_037643.1 | 560563 | SNV | 1 | A | G | Heterozygous |
| NC_037643.1 | 560693 | SNV | 1 | A | G | Homozygous   |
| NC_037643.1 | 560703 | SNV | 1 | A | G | Homozygous   |
| NC_037643.1 | 560743 | SNV | 1 | T | C | Homozygous   |
| NC_037643.1 | 560745 | SNV | 1 | T | A | Homozygous   |
| NC_037643.1 | 560751 | SNV | 1 | T | A | Homozygous   |
| NC_037643.1 | 560755 | SNV | 1 | G | A | Homozygous   |
| NC_037643.1 | 560757 | SNV | 1 | C | T | Homozygous   |
| NC_037643.1 | 560762 | SNV | 1 | A | G | Homozygous   |
| NC_037643.1 | 560765 | SNV | 1 | A | G | Heterozygous |
| NC_037643.1 | 560863 | SNV | 1 | A | G | Homozygous   |
| NC_037643.1 | 560872 | SNV | 1 | A | G | Homozygous   |
| NC_037643.1 | 560947 | SNV | 1 | G | A | Heterozygous |
| NC_037643.1 | 560951 | SNV | 1 | C | A | Heterozygous |
| NC_037643.1 | 560956 | SNV | 1 | T | A | Heterozygous |
| NC_037643.1 | 565648 | SNV | 1 | G | A | Homozygous   |
| NC_037643.1 | 566172 | SNV | 1 | G | A | Homozygous   |
| NC_037643.1 | 566374 | SNV | 1 | T | C | Homozygous   |
| NC_037643.1 | 566814 | SNV | 1 | T | C | Homozygous   |
| NC_037643.1 | 566906 | SNV | 1 | T | C | Homozygous   |
| NC_037643.1 | 568782 | SNV | 1 | A | G | Homozygous   |
| NC_037643.1 | 571332 | SNV | 1 | A | G | Heterozygous |
| NC_037643.1 | 571334 | SNV | 1 | T | G | Heterozygous |
| NC_037643.1 | 571343 | SNV | 1 | T | C | Heterozygous |
| NC_037643.1 | 571353 | SNV | 1 | T | C | Heterozygous |
| NC_037643.1 | 571355 | SNV | 1 | A | G | Heterozygous |
| NC_037643.1 | 571360 | SNV | 1 | T | C | Heterozygous |
| NC_037643.1 | 571364 | SNV | 1 | G | T | Heterozygous |
| NC_037643.1 | 571369 | SNV | 1 | T | C | Heterozygous |
| NC_037643.1 | 571375 | SNV | 1 | T | C | Heterozygous |
| NC_037643.1 | 574534 | SNV | 1 | T | G | Homozygous   |
| NC_037643.1 | 576773 | SNV | 1 | G | T | Homozygous   |
| NC_037643.1 | 577004 | SNV | 1 | T | G | Homozygous   |
| NC_037643.1 | 577006 | SNV | 1 | T | G | Homozygous   |
| NC_037643.1 | 579623 | SNV | 1 | T | C | Homozygous   |
| NC_037643.1 | 580284 | SNV | 1 | A | T | Homozygous   |
| NC_037643.1 | 580933 | SNV | 1 | T | C | Homozygous   |
| NC_037643.1 | 580939 | SNV | 1 | A | G | Homozygous   |
| NC_037643.1 | 600504 | SNV | 1 | C | T | Homozygous   |
| NC_037643.1 | 600520 | SNV | 1 | C | G | Heterozygous |
| NC_037643.1 | 600522 | SNV | 1 | C | T | Heterozygous |

|             |        |     |   |   |   |              |
|-------------|--------|-----|---|---|---|--------------|
| NC_037643.1 | 600539 | SNV | 1 | G | A | Homozygous   |
| NC_037643.1 | 600555 | SNV | 1 | G | A | Homozygous   |
| NC_037643.1 | 602556 | SNV | 1 | T | A | Homozygous   |
| NC_037643.1 | 605448 | SNV | 1 | C | T | Heterozygous |
| NC_037643.1 | 606865 | SNV | 1 | T | A | Heterozygous |
| NC_037643.1 | 607472 | SNV | 1 | G | C | Homozygous   |
| NC_037643.1 | 637248 | SNV | 1 | G | A | Heterozygous |
| NC_037643.1 | 637267 | SNV | 1 | T | C | Heterozygous |
| NC_037643.1 | 640150 | SNV | 1 | G | T | Heterozygous |
| NC_037643.1 | 640162 | SNV | 1 | A | T | Heterozygous |
| NC_037643.1 | 640194 | SNV | 1 | T | G | Heterozygous |
| NC_037643.1 | 650382 | SNV | 1 | T | C | Homozygous   |
| NC_037643.1 | 650387 | SNV | 1 | A | T | Homozygous   |
| NC_037643.1 | 650390 | SNV | 1 | T | A | Homozygous   |
| NC_037643.1 | 650400 | SNV | 1 | A | T | Homozygous   |
| NC_037643.1 | 650407 | SNV | 1 | T | C | Homozygous   |
| NC_037643.1 | 655956 | SNV | 1 | A | T | Heterozygous |
| NC_037643.1 | 670540 | SNV | 1 | T | G | Homozygous   |
| NC_037643.1 | 670580 | SNV | 1 | T | C | Homozygous   |
| NC_037643.1 | 670588 | SNV | 1 | A | G | Homozygous   |
| NC_037643.1 | 676897 | SNV | 1 | T | A | Homozygous   |
| NC_037643.1 | 676904 | SNV | 1 | T | G | Homozygous   |
| NC_037643.1 | 677834 | SNV | 1 | A | G | Homozygous   |
| NC_037643.1 | 677837 | SNV | 1 | T | C | Homozygous   |
| NC_037643.1 | 677853 | SNV | 1 | C | T | Homozygous   |
| NC_037643.1 | 677855 | SNV | 1 | C | T | Homozygous   |
| NC_037643.1 | 677858 | SNV | 1 | T | C | Heterozygous |
| NC_037643.1 | 677870 | SNV | 1 | A | G | Homozygous   |
| NC_037643.1 | 677872 | SNV | 1 | C | T | Homozygous   |
| NC_037643.1 | 677877 | SNV | 1 | T | A | Homozygous   |
| NC_037643.1 | 677880 | SNV | 1 | T | C | Homozygous   |
| NC_037643.1 | 677882 | SNV | 1 | T | A | Homozygous   |
| NC_037643.1 | 678261 | SNV | 1 | A | G | Homozygous   |
| NC_037643.1 | 678270 | SNV | 1 | G | A | Homozygous   |
| NC_037643.1 | 678278 | SNV | 1 | A | G | Homozygous   |
| NC_037643.1 | 678282 | SNV | 1 | C | T | Homozygous   |
| NC_037643.1 | 678287 | SNV | 1 | G | A | Homozygous   |
| NC_037643.1 | 678289 | SNV | 1 | G | A | Homozygous   |
| NC_037643.1 | 678305 | SNV | 1 | T | C | Homozygous   |
| NC_037643.1 | 678307 | SNV | 1 | G | A | Homozygous   |
| NC_037643.1 | 679551 | SNV | 1 | T | A | Homozygous   |
| NC_037643.1 | 679559 | SNV | 1 | A | T | Homozygous   |
| NC_037643.1 | 679561 | SNV | 1 | A | T | Homozygous   |
| NC_037643.1 | 679584 | SNV | 1 | T | A | Homozygous   |
| NC_037643.1 | 679600 | SNV | 1 | T | A | Homozygous   |
| NC_037643.1 | 688281 | SNV | 1 | C | T | Homozygous   |
| NC_037643.1 | 688284 | SNV | 1 | A | G | Homozygous   |
| NC_037643.1 | 688299 | SNV | 1 | T | A | Homozygous   |
| NC_037643.1 | 688302 | SNV | 1 | C | T | Homozygous   |
| NC_037643.1 | 688327 | SNV | 1 | G | A | Homozygous   |
| NC_037643.1 | 688330 | SNV | 1 | T | G | Homozygous   |

|             |        |     |   |   |   |              |
|-------------|--------|-----|---|---|---|--------------|
| NC_037643.1 | 692313 | SNV | 1 | A | C | Homozygous   |
| NC_037643.1 | 692320 | SNV | 1 | T | A | Homozygous   |
| NC_037643.1 | 692322 | SNV | 1 | T | A | Homozygous   |
| NC_037643.1 | 692325 | SNV | 1 | C | A | Homozygous   |
| NC_037643.1 | 692328 | SNV | 1 | A | T | Homozygous   |
| NC_037643.1 | 696422 | SNV | 1 | A | G | Heterozygous |
| NC_037643.1 | 696497 | SNV | 1 | C | T | Heterozygous |
| NC_037643.1 | 696531 | SNV | 1 | T | C | Heterozygous |
| NC_037643.1 | 696535 | SNV | 1 | T | C | Heterozygous |
| NC_037643.1 | 696549 | SNV | 1 | C | T | Heterozygous |
| NC_037643.1 | 696569 | SNV | 1 | T | C | Homozygous   |
| NC_037643.1 | 696573 | SNV | 1 | T | C | Homozygous   |
| NC_037643.1 | 696641 | SNV | 1 | T | C | Heterozygous |
| NC_037643.1 | 696757 | SNV | 1 | T | C | Heterozygous |
| NC_037643.1 | 696783 | SNV | 1 | T | C | Heterozygous |
| NC_037643.1 | 696785 | SNV | 1 | T | C | Heterozygous |
| NC_037643.1 | 699551 | SNV | 1 | C | A | Homozygous   |
| NC_037643.1 | 699555 | SNV | 1 | A | C | Homozygous   |
| NC_037643.1 | 699557 | SNV | 1 | G | T | Homozygous   |
| NC_037643.1 | 699559 | SNV | 1 | T | C | Homozygous   |
| NC_037643.1 | 699561 | SNV | 1 | T | A | Homozygous   |
| NC_037643.1 | 699584 | SNV | 1 | T | C | Homozygous   |
| NC_037643.1 | 699590 | SNV | 1 | T | C | Homozygous   |
| NC_037643.1 | 706420 | SNV | 1 | A | G | Heterozygous |
| NC_037643.1 | 706425 | SNV | 1 | G | T | Heterozygous |
| NC_037643.1 | 706433 | SNV | 1 | G | A | Heterozygous |
| NC_037643.1 | 706433 | SNV | 1 | G | T | Heterozygous |
| NC_037643.1 | 706437 | SNV | 1 | G | A | Homozygous   |
| NC_037643.1 | 710248 | SNV | 1 | T | C | Heterozygous |
| NC_037643.1 | 714152 | SNV | 1 | A | T | Heterozygous |
| NC_037643.1 | 714157 | SNV | 1 | A | G | Heterozygous |
| NC_037643.1 | 729836 | SNV | 1 | A | C | Homozygous   |
| NC_037643.1 | 729859 | SNV | 1 | T | A | Homozygous   |
| NC_037643.1 | 729862 | SNV | 1 | A | C | Homozygous   |
| NC_037643.1 | 729865 | SNV | 1 | G | T | Homozygous   |
| NC_037643.1 | 729875 | SNV | 1 | A | T | Homozygous   |
| NC_037643.1 | 729883 | SNV | 1 | A | T | Homozygous   |
| NC_037643.1 | 737902 | SNV | 1 | C | T | Heterozygous |
| NC_037643.1 | 737918 | SNV | 1 | C | T | Heterozygous |
| NC_037643.1 | 738751 | SNV | 1 | A | G | Homozygous   |
| NC_037643.1 | 738837 | SNV | 1 | C | G | Heterozygous |
| NC_037643.1 | 738841 | SNV | 1 | G | A | Heterozygous |
| NC_037643.1 | 738849 | SNV | 1 | C | A | Homozygous   |
| NC_037643.1 | 748204 | SNV | 1 | T | C | Homozygous   |
| NC_037643.1 | 748226 | SNV | 1 | A | G | Homozygous   |
| NC_037643.1 | 754704 | SNV | 1 | C | T | Heterozygous |
| NC_037643.1 | 769656 | SNV | 1 | A | T | Heterozygous |
| NC_037643.1 | 769660 | SNV | 1 | T | A | Homozygous   |
| NC_037643.1 | 769662 | SNV | 1 | A | T | Heterozygous |
| NC_037643.1 | 769674 | SNV | 1 | G | T | Homozygous   |
| NC_037643.1 | 769684 | SNV | 1 | A | T | Homozygous   |

|             |        |     |   |   |   |              |
|-------------|--------|-----|---|---|---|--------------|
| NC_037643.1 | 773319 | SNV | 1 | G | A | Heterozygous |
| NC_037643.1 | 773330 | SNV | 1 | C | T | Heterozygous |
| NC_037643.1 | 773339 | SNV | 1 | G | A | Heterozygous |
| NC_037643.1 | 773343 | SNV | 1 | G | A | Heterozygous |
| NC_037643.1 | 773350 | SNV | 1 | C | T | Heterozygous |
| NC_037643.1 | 776215 | SNV | 1 | G | A | Homozygous   |
| NC_037643.1 | 776226 | SNV | 1 | G | A | Homozygous   |
| NC_037643.1 | 776228 | SNV | 1 | G | T | Homozygous   |
| NC_037643.1 | 776231 | SNV | 1 | C | T | Homozygous   |
| NC_037643.1 | 777824 | SNV | 1 | G | A | Heterozygous |
| NC_037643.1 | 777876 | SNV | 1 | T | C | Heterozygous |
| NC_037643.1 | 780432 | SNV | 1 | T | C | Homozygous   |
| NC_037643.1 | 780458 | SNV | 1 | T | A | Homozygous   |
| NC_037643.1 | 780462 | SNV | 1 | T | C | Homozygous   |
| NC_037643.1 | 781439 | SNV | 1 | T | A | Homozygous   |
| NC_037643.1 | 781445 | SNV | 1 | C | A | Homozygous   |
| NC_037643.1 | 781471 | SNV | 1 | A | C | Homozygous   |
| NC_037643.1 | 782838 | SNV | 1 | T | C | Homozygous   |
| NC_037643.1 | 782881 | SNV | 1 | G | C | Homozygous   |
| NC_037643.1 | 783715 | SNV | 1 | T | A | Homozygous   |
| NC_037643.1 | 783720 | SNV | 1 | A | G | Homozygous   |
| NC_037643.1 | 783722 | SNV | 1 | G | A | Homozygous   |
| NC_037643.1 | 783730 | SNV | 1 | T | C | Homozygous   |
| NC_037643.1 | 783739 | SNV | 1 | G | A | Homozygous   |
| NC_037643.1 | 783769 | SNV | 1 | C | T | Homozygous   |
| NC_037643.1 | 783771 | SNV | 1 | G | C | Homozygous   |
| NC_037643.1 | 783798 | SNV | 1 | G | A | Homozygous   |
| NC_037643.1 | 783805 | SNV | 1 | T | C | Homozygous   |
| NC_037643.1 | 783878 | SNV | 1 | A | G | Homozygous   |
| NC_037643.1 | 783892 | SNV | 1 | A | C | Homozygous   |
| NC_037643.1 | 783932 | SNV | 1 | A | T | Homozygous   |
| NC_037643.1 | 783941 | SNV | 1 | A | G | Homozygous   |
| NC_037643.1 | 783945 | SNV | 1 | A | G | Homozygous   |
| NC_037643.1 | 783950 | SNV | 1 | A | G | Homozygous   |
| NC_037643.1 | 783952 | SNV | 1 | G | A | Homozygous   |
| NC_037643.1 | 785138 | SNV | 1 | G | T | Homozygous   |
| NC_037643.1 | 785154 | SNV | 1 | T | A | Homozygous   |
| NC_037643.1 | 785586 | SNV | 1 | A | C | Homozygous   |
| NC_037643.1 | 785611 | SNV | 1 | T | C | Homozygous   |
| NC_037643.1 | 785623 | SNV | 1 | T | A | Homozygous   |
| NC_037643.1 | 786256 | SNV | 1 | T | A | Homozygous   |
| NC_037643.1 | 788735 | SNV | 1 | T | A | Homozygous   |
| NC_037643.1 | 788779 | SNV | 1 | A | T | Heterozygous |
| NC_037643.1 | 788792 | SNV | 1 | T | A | Heterozygous |
| NC_037643.1 | 790764 | SNV | 1 | T | C | Heterozygous |
| NC_037643.1 | 790814 | SNV | 1 | A | G | Heterozygous |
| NC_037643.1 | 790823 | SNV | 1 | T | A | Homozygous   |
| NC_037643.1 | 790825 | SNV | 1 | T | C | Heterozygous |
| NC_037643.1 | 790829 | SNV | 1 | T | A | Heterozygous |
| NC_037643.1 | 790835 | SNV | 1 | A | G | Homozygous   |
| NC_037643.1 | 790929 | SNV | 1 | A | C | Homozygous   |

|             |        |     |   |   |   |              |
|-------------|--------|-----|---|---|---|--------------|
| NC_037643.1 | 790958 | SNV | 1 | A | G | Heterozygous |
| NC_037643.1 | 790977 | SNV | 1 | A | G | Heterozygous |
| NC_037643.1 | 793095 | SNV | 1 | A | T | Homozygous   |
| NC_037643.1 | 793118 | SNV | 1 | A | T | Homozygous   |
| NC_037643.1 | 793120 | SNV | 1 | A | C | Homozygous   |
| NC_037643.1 | 794210 | SNV | 1 | A | T | Homozygous   |
| NC_037643.1 | 794236 | SNV | 1 | T | C | Homozygous   |
| NC_037643.1 | 794246 | SNV | 1 | A | T | Homozygous   |
| NC_037643.1 | 803464 | SNV | 1 | T | C | Homozygous   |
| NC_037643.1 | 803665 | SNV | 1 | A | G | Homozygous   |
| NC_037643.1 | 803712 | SNV | 1 | C | T | Heterozygous |
| NC_037643.1 | 803728 | SNV | 1 | C | T | Heterozygous |
| NC_037643.1 | 803753 | SNV | 1 | G | A | Homozygous   |
| NC_037643.1 | 806929 | SNV | 1 | G | A | Homozygous   |
| NC_037643.1 | 806934 | SNV | 1 | G | A | Homozygous   |
| NC_037643.1 | 806936 | SNV | 1 | C | T | Homozygous   |
| NC_037643.1 | 807590 | SNV | 1 | A | T | Homozygous   |
| NC_037643.1 | 807607 | SNV | 1 | A | T | Heterozygous |
| NC_037643.1 | 810280 | SNV | 1 | A | T | Homozygous   |
| NC_037643.1 | 810294 | SNV | 1 | A | T | Homozygous   |
| NC_037643.1 | 810309 | SNV | 1 | A | T | Homozygous   |
| NC_037643.1 | 814344 | SNV | 1 | T | A | Homozygous   |
| NC_037643.1 | 814354 | SNV | 1 | A | T | Homozygous   |
| NC_037643.1 | 814372 | SNV | 1 | T | C | Homozygous   |
| NC_037643.1 | 814380 | SNV | 1 | T | A | Homozygous   |
| NC_037643.1 | 818064 | SNV | 1 | A | G | Homozygous   |
| NC_037643.1 | 842832 | SNV | 1 | A | T | Heterozygous |
| NC_037643.1 | 853945 | SNV | 1 | A | C | Homozygous   |
| NC_037643.1 | 853957 | SNV | 1 | A | C | Homozygous   |
| NC_037643.1 | 853964 | SNV | 1 | T | C | Homozygous   |
| NC_037643.1 | 853968 | SNV | 1 | A | C | Homozygous   |
| NC_037643.1 | 853973 | SNV | 1 | A | T | Homozygous   |
| NC_037643.1 | 853991 | SNV | 1 | T | A | Homozygous   |
| NC_037643.1 | 853999 | SNV | 1 | T | A | Homozygous   |
| NC_037643.1 | 884213 | SNV | 1 | T | G | Homozygous   |
| NC_037643.1 | 884222 | SNV | 1 | A | T | Homozygous   |
| NC_037643.1 | 884226 | SNV | 1 | A | T | Homozygous   |
| NC_037643.1 | 885308 | SNV | 1 | T | A | Heterozygous |
| NC_037643.1 | 885310 | SNV | 1 | T | A | Heterozygous |
| NC_037643.1 | 885312 | SNV | 1 | T | A | Heterozygous |
| NC_037643.1 | 885314 | SNV | 1 | T | A | Heterozygous |
| NC_037643.1 | 885351 | SNV | 1 | A | G | Heterozygous |
| NC_037643.1 | 889870 | SNV | 1 | T | C | Heterozygous |
| NC_037643.1 | 889871 | SNV | 1 | A | T | Heterozygous |
| NC_037643.1 | 889874 | SNV | 1 | T | A | Heterozygous |
| NC_037643.1 | 889878 | SNV | 1 | T | G | Heterozygous |
| NC_037643.1 | 889881 | SNV | 1 | T | A | Heterozygous |
| NC_037643.1 | 889912 | SNV | 1 | T | A | Heterozygous |
| NC_037643.1 | 889920 | SNV | 1 | T | A | Heterozygous |
| NC_037643.1 | 889933 | SNV | 1 | A | T | Heterozygous |
| NC_037643.1 | 889951 | SNV | 1 | T | A | Heterozygous |



|             |        |     |   |   |   |              |
|-------------|--------|-----|---|---|---|--------------|
| NC_037643.1 | 889983 | SNV | 1 | T | A | Heterozygous |
| NC_037643.1 | 889985 | SNV | 1 | A | T | Homozygous   |
| NC_037643.1 | 889989 | SNV | 1 | A | T | Heterozygous |
| NC_037643.1 | 889991 | SNV | 1 | T | A | Homozygous   |
| NC_037643.1 | 890001 | SNV | 1 | A | C | Homozygous   |
| NC_037643.1 | 890003 | SNV | 1 | A | C | Homozygous   |
| NC_037643.1 | 890005 | SNV | 1 | A | T | Homozygous   |
| NC_037643.1 | 890009 | SNV | 1 | A | T | Homozygous   |
| NC_037643.1 | 890011 | SNV | 1 | A | T | Homozygous   |
| NC_037643.1 | 925543 | SNV | 1 | A | C | Homozygous   |
| NC_037643.1 | 925555 | SNV | 1 | A | G | Homozygous   |
| NC_037643.1 | 925575 | SNV | 1 | A | T | Homozygous   |
| NC_037643.1 | 925578 | SNV | 1 | T | A | Homozygous   |
| NC_037643.1 | 935063 | SNV | 1 | T | C | Homozygous   |
| NC_037643.1 | 944409 | SNV | 1 | A | T | Homozygous   |
| NC_037643.1 | 944411 | SNV | 1 | A | C | Homozygous   |
| NC_037643.1 | 944416 | SNV | 1 | A | T | Homozygous   |
| NC_037643.1 | 944420 | SNV | 1 | A | T | Homozygous   |
| NC_037643.1 | 944426 | SNV | 1 | A | T | Homozygous   |
| NC_037643.1 | 944428 | SNV | 1 | T | C | Homozygous   |
| NC_037643.1 | 944433 | SNV | 1 | A | G | Homozygous   |
| NC_037643.1 | 944444 | SNV | 1 | A | G | Homozygous   |
| NC_037643.1 | 944450 | SNV | 1 | T | C | Homozygous   |
| NC_037643.1 | 944453 | SNV | 1 | A | T | Homozygous   |
| NC_037643.1 | 944461 | SNV | 1 | A | T | Homozygous   |
| NC_037643.1 | 944464 | SNV | 1 | T | A | Homozygous   |
| NC_037643.1 | 946789 | SNV | 1 | T | A | Heterozygous |
| NC_037643.1 | 953146 | SNV | 1 | T | G | Homozygous   |
| NC_037643.1 | 953175 | SNV | 1 | A | G | Homozygous   |
| NC_037643.1 | 953177 | SNV | 1 | T | G | Homozygous   |
| NC_037643.1 | 953183 | SNV | 1 | T | A | Homozygous   |
| NC_037643.1 | 953188 | SNV | 1 | A | G | Homozygous   |
| NC_037643.1 | 954322 | SNV | 1 | G | A | Homozygous   |
| NC_037643.1 | 954326 | SNV | 1 | A | T | Homozygous   |
| NC_037643.1 | 954328 | SNV | 1 | A | T | Homozygous   |
| NC_037643.1 | 954334 | SNV | 1 | A | T | Homozygous   |
| NC_037643.1 | 954343 | SNV | 1 | A | T | Homozygous   |
| NC_037643.1 | 954353 | SNV | 1 | A | T | Homozygous   |
| NC_037643.1 | 954371 | SNV | 1 | A | T | Homozygous   |
| NC_037643.1 | 956826 | SNV | 1 | A | T | Homozygous   |
| NC_037643.1 | 956831 | SNV | 1 | T | C | Homozygous   |
| NC_037643.1 | 971813 | SNV | 1 | G | C | Homozygous   |
| NC_037643.1 | 971819 | SNV | 1 | A | C | Homozygous   |
| NC_037643.1 | 971823 | SNV | 1 | A | G | Homozygous   |
| NC_037643.1 | 971836 | SNV | 1 | T | A | Homozygous   |
| NC_037643.1 | 976843 | SNV | 1 | A | G | Homozygous   |
| NC_037643.1 | 976856 | SNV | 1 | T | G | Homozygous   |
| NC_037643.1 | 976859 | SNV | 1 | A | T | Homozygous   |
| NC_037643.1 | 976887 | SNV | 1 | T | A | Homozygous   |
| NC_037643.1 | 976891 | SNV | 1 | A | G | Homozygous   |
| NC_037643.1 | 986528 | SNV | 1 | T | C | Homozygous   |

|             |         |     |   |   |   |              |
|-------------|---------|-----|---|---|---|--------------|
| NC_037643.1 | 986530  | SNV | 1 | G | C | Homozygous   |
| NC_037643.1 | 986534  | SNV | 1 | A | G | Homozygous   |
| NC_037643.1 | 986536  | SNV | 1 | A | C | Homozygous   |
| NC_037643.1 | 986545  | SNV | 1 | A | C | Homozygous   |
| NC_037643.1 | 988606  | SNV | 1 | A | T | Homozygous   |
| NC_037643.1 | 988608  | SNV | 1 | A | T | Homozygous   |
| NC_037643.1 | 988611  | SNV | 1 | G | A | Homozygous   |
| NC_037643.1 | 988614  | SNV | 1 | A | G | Homozygous   |
| NC_037643.1 | 988620  | SNV | 1 | A | T | Homozygous   |
| NC_037643.1 | 988630  | SNV | 1 | T | C | Homozygous   |
| NC_037643.1 | 988638  | SNV | 1 | G | A | Homozygous   |
| NC_037643.1 | 988641  | SNV | 1 | T | C | Homozygous   |
| NC_037643.1 | 998901  | SNV | 1 | T | A | Homozygous   |
| NC_037643.1 | 998928  | SNV | 1 | A | C | Homozygous   |
| NC_037643.1 | 1006358 | SNV | 1 | T | A | Homozygous   |
| NC_037643.1 | 1006361 | SNV | 1 | T | C | Homozygous   |
| NC_037643.1 | 1006369 | SNV | 1 | T | C | Homozygous   |
| NC_037643.1 | 1010483 | SNV | 1 | A | T | Homozygous   |
| NC_037643.1 | 1010486 | SNV | 1 | A | C | Homozygous   |
| NC_037643.1 | 1010488 | SNV | 1 | A | T | Homozygous   |
| NC_037643.1 | 1010491 | SNV | 1 | A | T | Homozygous   |
| NC_037643.1 | 1010493 | SNV | 1 | A | G | Homozygous   |
| NC_037643.1 | 1010505 | SNV | 1 | T | A | Homozygous   |
| NC_037643.1 | 1012043 | SNV | 1 | A | G | Heterozygous |
| NC_037643.1 | 1012052 | SNV | 1 | T | A | Heterozygous |
| NC_037643.1 | 1012057 | SNV | 1 | A | T | Heterozygous |
| NC_037643.1 | 1012068 | SNV | 1 | T | A | Homozygous   |
| NC_037643.1 | 1012090 | SNV | 1 | T | A | Heterozygous |
| NC_037643.1 | 1012091 | SNV | 1 | A | G | Heterozygous |
| NC_037643.1 | 1012094 | SNV | 1 | T | A | Heterozygous |
| NC_037643.1 | 1012096 | SNV | 1 | T | G | Heterozygous |
| NC_037643.1 | 1012102 | SNV | 1 | T | A | Heterozygous |
| NC_037643.1 | 1012102 | SNV | 1 | T | C | Heterozygous |
| NC_037643.1 | 1012106 | SNV | 1 | T | A | Heterozygous |
| NC_037643.1 | 1015268 | SNV | 1 | C | T | Homozygous   |
| NC_037643.1 | 1015274 | SNV | 1 | C | T | Heterozygous |
| NC_037643.1 | 1015276 | SNV | 1 | T | C | Heterozygous |
| NC_037643.1 | 1015353 | SNV | 1 | G | A | Heterozygous |
| NC_037643.1 | 1119367 | SNV | 1 | A | T | Homozygous   |
| NC_037643.1 | 1119369 | SNV | 1 | A | T | Homozygous   |
| NC_037643.1 | 1119399 | SNV | 1 | G | A | Homozygous   |
| NC_037643.1 | 1119414 | SNV | 1 | A | T | Homozygous   |
| NC_037643.1 | 1122153 | SNV | 1 | T | A | Heterozygous |
| NC_037643.1 | 1122162 | SNV | 1 | A | T | Heterozygous |
| NC_037643.1 | 1122166 | SNV | 1 | T | G | Heterozygous |
| NC_037643.1 | 1122171 | SNV | 1 | A | G | Heterozygous |
| NC_037643.1 | 1122177 | SNV | 1 | T | C | Heterozygous |
| NC_037643.1 | 1122180 | SNV | 1 | T | C | Heterozygous |
| NC_037643.1 | 1122181 | SNV | 1 | A | G | Heterozygous |
| NC_037643.1 | 1122183 | SNV | 1 | A | G | Heterozygous |
| NC_037643.1 | 1122185 | SNV | 1 | T | C | Heterozygous |

|             |         |     |   |   |   |              |
|-------------|---------|-----|---|---|---|--------------|
| NC_037643.1 | 1122187 | SNV | 1 | T | C | Heterozygous |
| NC_037643.1 | 1122213 | SNV | 1 | T | C | Heterozygous |
| NC_037643.1 | 1134924 | SNV | 1 | A | G | Homozygous   |
| NC_037643.1 | 1138475 | SNV | 1 | T | C | Homozygous   |
| NC_037643.1 | 1138478 | SNV | 1 | A | C | Homozygous   |
| NC_037643.1 | 1138485 | SNV | 1 | A | G | Homozygous   |
| NC_037643.1 | 1138487 | SNV | 1 | A | T | Homozygous   |
| NC_037643.1 | 1138510 | SNV | 1 | C | T | Homozygous   |
| NC_037643.1 | 1378326 | SNV | 1 | T | C | Homozygous   |
| NC_037643.1 | 1378357 | SNV | 1 | C | T | Homozygous   |
| NC_037643.1 | 1443893 | SNV | 1 | C | T | Homozygous   |
| NC_037643.1 | 1443896 | SNV | 1 | A | T | Homozygous   |
| NC_037643.1 | 1444978 | SNV | 1 | T | A | Homozygous   |
| NC_037643.1 | 1444980 | SNV | 1 | A | T | Homozygous   |
| NC_037643.1 | 1444991 | SNV | 1 | A | T | Homozygous   |
| NC_037643.1 | 1445005 | SNV | 1 | A | C | Homozygous   |
| NC_037643.1 | 1449347 | SNV | 1 | T | C | Homozygous   |
| NC_037643.1 | 1452316 | SNV | 1 | T | C | Homozygous   |
| NC_037643.1 | 1452330 | SNV | 1 | T | A | Homozygous   |
| NC_037643.1 | 1452340 | SNV | 1 | T | C | Homozygous   |
| NC_037643.1 | 1452342 | SNV | 1 | G | C | Homozygous   |
| NC_037643.1 | 1486655 | SNV | 1 | T | G | Heterozygous |
| NC_037643.1 | 1486661 | SNV | 1 | T | G | Heterozygous |
| NC_037643.1 | 1486672 | SNV | 1 | A | C | Heterozygous |
| NC_037643.1 | 1486673 | SNV | 1 | A | G | Heterozygous |
| NC_037643.1 | 1486679 | SNV | 1 | T | C | Heterozygous |
| NC_037643.1 | 1486695 | SNV | 1 | T | A | Homozygous   |
| NC_037643.1 | 1486698 | SNV | 1 | T | C | Homozygous   |
| NC_037643.1 | 1486701 | SNV | 1 | C | T | Homozygous   |
| NC_037643.1 | 1486706 | SNV | 1 | C | T | Homozygous   |
| NC_037643.1 | 1486709 | SNV | 1 | A | C | Homozygous   |
| NC_037643.1 | 1487644 | SNV | 1 | C | T | Heterozygous |
| NC_037643.1 | 1487987 | SNV | 1 | T | C | Homozygous   |
| NC_037643.1 | 1487993 | SNV | 1 | T | C | Homozygous   |
| NC_037643.1 | 1488013 | SNV | 1 | T | C | Homozygous   |
| NC_037643.1 | 1488017 | SNV | 1 | T | C | Homozygous   |
| NC_037643.1 | 1495101 | SNV | 1 | T | C | Heterozygous |
| NC_037643.1 | 1495110 | SNV | 1 | A | G | Homozygous   |
| NC_037643.1 | 1495112 | SNV | 1 | A | G | Heterozygous |
| NC_037643.1 | 1495114 | SNV | 1 | A | G | Heterozygous |
| NC_037643.1 | 1495127 | SNV | 1 | T | C | Heterozygous |
| NC_037643.1 | 1495129 | SNV | 1 | T | C | Heterozygous |
| NC_037643.1 | 1495131 | SNV | 1 | T | C | Heterozygous |
| NC_037643.1 | 1495137 | SNV | 1 | T | C | Heterozygous |
| NC_037643.1 | 1495143 | SNV | 1 | T | C | Heterozygous |
| NC_037643.1 | 1495177 | SNV | 1 | T | A | Heterozygous |
| NC_037643.1 | 1499518 | SNV | 1 | C | T | Homozygous   |
| NC_037643.1 | 1499531 | SNV | 1 | A | G | Homozygous   |
| NC_037643.1 | 1499636 | SNV | 1 | C | T | Heterozygous |
| NC_037643.1 | 1506702 | SNV | 1 | A | G | Homozygous   |
| NC_037643.1 | 1506783 | SNV | 1 | C | T | Homozygous   |

|             |         |     |   |   |   |              |
|-------------|---------|-----|---|---|---|--------------|
| NC_037643.1 | 1506787 | SNV | 1 | T | A | Homozygous   |
| NC_037643.1 | 1508244 | SNV | 1 | A | G | Heterozygous |
| NC_037643.1 | 1508248 | SNV | 1 | A | T | Heterozygous |
| NC_037643.1 | 1508260 | SNV | 1 | A | G | Heterozygous |
| NC_037643.1 | 1508271 | SNV | 1 | T | C | Heterozygous |
| NC_037643.1 | 1509102 | SNV | 1 | A | T | Homozygous   |
| NC_037643.1 | 1509104 | SNV | 1 | T | C | Homozygous   |
| NC_037643.1 | 1525128 | SNV | 1 | T | A | Homozygous   |
| NC_037643.1 | 1525141 | SNV | 1 | T | A | Homozygous   |
| NC_037643.1 | 1525170 | SNV | 1 | T | G | Homozygous   |
| NC_037643.1 | 1527442 | SNV | 1 | C | T | Homozygous   |
| NC_037643.1 | 1527444 | SNV | 1 | C | T | Homozygous   |
| NC_037643.1 | 1527473 | SNV | 1 | T | C | Homozygous   |
| NC_037643.1 | 1527622 | SNV | 1 | A | G | Homozygous   |
| NC_037643.1 | 1535975 | SNV | 1 | T | A | Homozygous   |
| NC_037643.1 | 1535977 | SNV | 1 | T | G | Homozygous   |
| NC_037643.1 | 1545571 | SNV | 1 | T | C | Homozygous   |
| NC_037643.1 | 1545784 | SNV | 1 | G | A | Heterozygous |
| NC_037643.1 | 1556400 | SNV | 1 | C | T | Homozygous   |
| NC_037643.1 | 1556425 | SNV | 1 | T | C | Heterozygous |
| NC_037643.1 | 1556440 | SNV | 1 | C | T | Heterozygous |
| NC_037643.1 | 1556452 | SNV | 1 | C | T | Heterozygous |
| NC_037643.1 | 1556463 | SNV | 1 | T | G | Heterozygous |
| NC_037643.1 | 1556466 | SNV | 1 | T | C | Homozygous   |
| NC_037643.1 | 1556473 | SNV | 1 | G | T | Heterozygous |
| NC_037643.1 | 1558270 | SNV | 1 | T | A | Homozygous   |
| NC_037643.1 | 1558275 | SNV | 1 | T | A | Homozygous   |
| NC_037643.1 | 1558281 | SNV | 1 | T | G | Heterozygous |
| NC_037643.1 | 1558287 | SNV | 1 | A | T | Heterozygous |
| NC_037643.1 | 1570517 | SNV | 1 | A | G | Homozygous   |
| NC_037643.1 | 1572330 | SNV | 1 | T | A | Homozygous   |
| NC_037643.1 | 1572337 | SNV | 1 | A | G | Homozygous   |
| NC_037643.1 | 1572344 | SNV | 1 | A | C | Homozygous   |
| NC_037643.1 | 1572349 | SNV | 1 | G | A | Homozygous   |
| NC_037643.1 | 1572982 | SNV | 1 | T | A | Homozygous   |
| NC_037643.1 | 1572984 | SNV | 1 | T | A | Homozygous   |
| NC_037643.1 | 1573002 | SNV | 1 | T | C | Homozygous   |
| NC_037643.1 | 1575364 | SNV | 1 | T | C | Heterozygous |
| NC_037643.1 | 1576545 | SNV | 1 | G | A | Heterozygous |
| NC_037643.1 | 1576553 | SNV | 1 | T | C | Heterozygous |
| NC_037643.1 | 1576556 | SNV | 1 | T | A | Heterozygous |
| NC_037643.1 | 1576586 | SNV | 1 | A | G | Heterozygous |
| NC_037643.1 | 1576594 | SNV | 1 | T | C | Heterozygous |
| NC_037643.1 | 1576601 | SNV | 1 | A | G | Heterozygous |
| NC_037643.1 | 1576604 | SNV | 1 | T | C | Heterozygous |
| NC_037643.1 | 1576609 | SNV | 1 | C | T | Heterozygous |
| NC_037643.1 | 1579747 | SNV | 1 | A | G | Homozygous   |
| NC_037643.1 | 1583195 | SNV | 1 | C | A | Homozygous   |
| NC_037643.1 | 1583199 | SNV | 1 | C | T | Homozygous   |
| NC_037643.1 | 1583207 | SNV | 1 | C | T | Homozygous   |
| NC_037643.1 | 1583214 | SNV | 1 | T | G | Homozygous   |

|             |         |     |   |   |   |              |
|-------------|---------|-----|---|---|---|--------------|
| NC_037643.1 | 1584789 | SNV | 1 | T | C | Homozygous   |
| NC_037643.1 | 1584792 | SNV | 1 | C | T | Homozygous   |
| NC_037643.1 | 1586200 | SNV | 1 | A | T | Homozygous   |
| NC_037643.1 | 1586203 | SNV | 1 | C | T | Homozygous   |
| NC_037643.1 | 1586215 | SNV | 1 | T | A | Homozygous   |
| NC_037643.1 | 1586218 | SNV | 1 | A | T | Homozygous   |
| NC_037643.1 | 1586222 | SNV | 1 | A | T | Homozygous   |
| NC_037643.1 | 1590720 | SNV | 1 | C | T | Heterozygous |
| NC_037643.1 | 1590859 | SNV | 1 | G | A | Heterozygous |
| NC_037643.1 | 1591012 | SNV | 1 | C | A | Heterozygous |
| NC_037643.1 | 1592123 | SNV | 1 | C | T | Homozygous   |
| NC_037643.1 | 1593475 | SNV | 1 | T | A | Homozygous   |
| NC_037643.1 | 1593477 | SNV | 1 | T | A | Homozygous   |
| NC_037643.1 | 1593479 | SNV | 1 | A | T | Homozygous   |
| NC_037643.1 | 1593503 | SNV | 1 | T | C | Homozygous   |
| NC_037643.1 | 1593508 | SNV | 1 | A | T | Homozygous   |
| NC_037643.1 | 1593510 | SNV | 1 | A | T | Homozygous   |
| NC_037643.1 | 1593512 | SNV | 1 | C | T | Homozygous   |
| NC_037643.1 | 1593514 | SNV | 1 | G | T | Homozygous   |
| NC_037643.1 | 1600163 | SNV | 1 | T | C | Homozygous   |
| NC_037643.1 | 1600188 | SNV | 1 | T | G | Homozygous   |
| NC_037643.1 | 1600204 | SNV | 1 | T | A | Homozygous   |
| NC_037643.1 | 1600208 | SNV | 1 | A | T | Homozygous   |
| NC_037643.1 | 1600215 | SNV | 1 | A | T | Homozygous   |
| NC_037643.1 | 1600219 | SNV | 1 | A | T | Homozygous   |
| NC_037643.1 | 1600719 | SNV | 1 | T | A | Homozygous   |
| NC_037643.1 | 1612994 | SNV | 1 | A | G | Homozygous   |
| NC_037643.1 | 1612999 | SNV | 1 | T | C | Homozygous   |
| NC_037643.1 | 1613001 | SNV | 1 | T | C | Homozygous   |
| NC_037643.1 | 1613007 | SNV | 1 | T | A | Homozygous   |
| NC_037643.1 | 1613011 | SNV | 1 | T | C | Homozygous   |
| NC_037643.1 | 1617268 | SNV | 1 | T | C | Homozygous   |
| NC_037643.1 | 1618196 | SNV | 1 | C | T | Heterozygous |
| NC_037643.1 | 1618208 | SNV | 1 | C | T | Heterozygous |
| NC_037643.1 | 1618295 | SNV | 1 | A | G | Homozygous   |
| NC_037643.1 | 1618462 | SNV | 1 | A | G | Homozygous   |
| NC_037643.1 | 1618501 | SNV | 1 | C | T | Homozygous   |
| NC_037643.1 | 1618552 | SNV | 1 | T | C | Homozygous   |
| NC_037643.1 | 1625479 | SNV | 1 | T | C | Homozygous   |
| NC_037643.1 | 1625493 | SNV | 1 | A | G | Homozygous   |
| NC_037643.1 | 1625498 | SNV | 1 | A | C | Heterozygous |
| NC_037643.1 | 1625501 | SNV | 1 | A | T | Heterozygous |
| NC_037643.1 | 1625508 | SNV | 1 | T | A | Heterozygous |
| NC_037643.1 | 1625510 | SNV | 1 | T | A | Heterozygous |
| NC_037643.1 | 1625513 | SNV | 1 | A | T | Heterozygous |
| NC_037643.1 | 1625517 | SNV | 1 | T | G | Homozygous   |
| NC_037643.1 | 1626165 | SNV | 1 | C | T | Heterozygous |
| NC_037643.1 | 1626174 | SNV | 1 | C | T | Heterozygous |
| NC_037643.1 | 1635814 | SNV | 1 | T | G | Heterozygous |
| NC_037643.1 | 1635938 | SNV | 1 | A | G | Heterozygous |
| NC_037643.1 | 1635949 | SNV | 1 | C | A | Heterozygous |

|             |         |     |   |   |   |              |
|-------------|---------|-----|---|---|---|--------------|
| NC_037643.1 | 1636026 | SNV | 1 | A | G | Homozygous   |
| NC_037643.1 | 1636220 | SNV | 1 | C | T | Heterozygous |
| NC_037643.1 | 1636590 | SNV | 1 | A | G | Homozygous   |
| NC_037643.1 | 1636669 | SNV | 1 | A | G | Heterozygous |
| NC_037643.1 | 1636684 | SNV | 1 | A | G | Homozygous   |
| NC_037643.1 | 1636917 | SNV | 1 | G | A | Heterozygous |
| NC_037643.1 | 1638307 | SNV | 1 | C | A | Heterozygous |
| NC_037643.1 | 1638419 | SNV | 1 | T | C | Homozygous   |
| NC_037643.1 | 1638428 | SNV | 1 | A | G | Homozygous   |
| NC_037643.1 | 1639049 | SNV | 1 | C | T | Homozygous   |
| NC_037643.1 | 1639081 | SNV | 1 | C | T | Heterozygous |
| NC_037643.1 | 1639092 | SNV | 1 | G | A | Homozygous   |
| NC_037643.1 | 1639101 | SNV | 1 | C | T | Homozygous   |
| NC_037643.1 | 1639398 | SNV | 1 | T | C | Homozygous   |
| NC_037643.1 | 1639420 | SNV | 1 | G | A | Heterozygous |
| NC_037643.1 | 1639457 | SNV | 1 | G | A | Heterozygous |
| NC_037643.1 | 1639696 | SNV | 1 | G | T | Homozygous   |
| NC_037643.1 | 1639810 | SNV | 1 | T | C | Homozygous   |
| NC_037643.1 | 1639819 | SNV | 1 | A | G | Homozygous   |
| NC_037643.1 | 1639911 | SNV | 1 | A | G | Heterozygous |
| NC_037643.1 | 1640505 | SNV | 1 | C | T | Heterozygous |
| NC_037643.1 | 1640640 | SNV | 1 | G | A | Heterozygous |
| NC_037643.1 | 1641588 | SNV | 1 | G | A | Homozygous   |
| NC_037643.1 | 1641601 | SNV | 1 | A | T | Homozygous   |
| NC_037643.1 | 1641624 | SNV | 1 | T | A | Heterozygous |
| NC_037643.1 | 1643578 | SNV | 1 | A | G | Homozygous   |
| NC_037643.1 | 1644420 | SNV | 1 | C | T | Heterozygous |
| NC_037643.1 | 1645159 | SNV | 1 | T | C | Homozygous   |
| NC_037643.1 | 1657502 | SNV | 1 | A | G | Homozygous   |
| NC_037643.1 | 1657909 | SNV | 1 | T | C | Homozygous   |
| NC_037643.1 | 1658054 | SNV | 1 | T | C | Homozygous   |
| NC_037643.1 | 1658459 | SNV | 1 | T | C | Homozygous   |
| NC_037643.1 | 1658888 | SNV | 1 | C | T | Homozygous   |
| NC_037643.1 | 1658984 | SNV | 1 | A | G | Heterozygous |
| NC_037643.1 | 1658987 | SNV | 1 | T | A | Heterozygous |
| NC_037643.1 | 1658990 | SNV | 1 | A | T | Heterozygous |
| NC_037643.1 | 1658993 | SNV | 1 | A | T | Homozygous   |
| NC_037643.1 | 1658996 | SNV | 1 | A | T | Homozygous   |
| NC_037643.1 | 1659014 | SNV | 1 | A | G | Homozygous   |
| NC_037643.1 | 1659020 | SNV | 1 | A | G | Homozygous   |
| NC_037643.1 | 1659023 | SNV | 1 | T | G | Homozygous   |
| NC_037643.1 | 1659025 | SNV | 1 | T | G | Homozygous   |
| NC_037643.1 | 1659031 | SNV | 1 | T | A | Heterozygous |
| NC_037643.1 | 1659035 | SNV | 1 | T | A | Heterozygous |
| NC_037643.1 | 1659044 | SNV | 1 | T | C | Heterozygous |
| NC_037643.1 | 1659056 | SNV | 1 | A | G | Heterozygous |
| NC_037643.1 | 1665907 | SNV | 1 | A | G | Homozygous   |
| NC_037643.1 | 1666427 | SNV | 1 | A | G | Homozygous   |
| NC_037643.1 | 1668781 | SNV | 1 | A | T | Homozygous   |
| NC_037643.1 | 1668940 | SNV | 1 | C | A | Homozygous   |
| NC_037643.1 | 1668944 | SNV | 1 | T | C | Homozygous   |

|             |         |     |   |   |   |              |
|-------------|---------|-----|---|---|---|--------------|
| NC_037643.1 | 1668952 | SNV | 1 | T | C | Homozygous   |
| NC_037643.1 | 1668971 | SNV | 1 | A | T | Homozygous   |
| NC_037643.1 | 1669284 | SNV | 1 | T | A | Homozygous   |
| NC_037643.1 | 1672240 | SNV | 1 | T | A | Homozygous   |
| NC_037643.1 | 1672243 | SNV | 1 | T | A | Homozygous   |
| NC_037643.1 | 1672254 | SNV | 1 | G | T | Homozygous   |
| NC_037643.1 | 1675211 | SNV | 1 | T | A | Homozygous   |
| NC_037643.1 | 1675228 | SNV | 1 | G | A | Homozygous   |
| NC_037643.1 | 1676584 | SNV | 1 | C | T | Homozygous   |
| NC_037643.1 | 1676613 | SNV | 1 | G | T | Homozygous   |
| NC_037643.1 | 1676617 | SNV | 1 | T | A | Homozygous   |
| NC_037643.1 | 1676620 | SNV | 1 | T | A | Homozygous   |
| NC_037643.1 | 1676628 | SNV | 1 | T | A | Homozygous   |
| NC_037643.1 | 1677974 | SNV | 1 | A | G | Homozygous   |
| NC_037643.1 | 1678000 | SNV | 1 | A | G | Heterozygous |
| NC_037643.1 | 1678029 | SNV | 1 | T | C | Heterozygous |
| NC_037643.1 | 1686382 | SNV | 1 | G | T | Homozygous   |
| NC_037643.1 | 1686478 | SNV | 1 | G | A | Heterozygous |
| NC_037643.1 | 1686511 | SNV | 1 | C | T | Heterozygous |
| NC_037643.1 | 1686531 | SNV | 1 | A | C | Homozygous   |
| NC_037643.1 | 1686712 | SNV | 1 | G | A | Heterozygous |
| NC_037643.1 | 1686943 | SNV | 1 | A | G | Heterozygous |
| NC_037643.1 | 1686965 | SNV | 1 | T | A | Heterozygous |
| NC_037643.1 | 1687056 | SNV | 1 | A | T | Homozygous   |
| NC_037643.1 | 1687152 | SNV | 1 | C | T | Homozygous   |
| NC_037643.1 | 1687374 | SNV | 1 | C | T | Heterozygous |
| NC_037643.1 | 1688935 | SNV | 1 | C | A | Homozygous   |
| NC_037643.1 | 1690378 | SNV | 1 | A | G | Homozygous   |
| NC_037643.1 | 1693220 | SNV | 1 | T | C | Homozygous   |
| NC_037643.1 | 1693424 | SNV | 1 | A | G | Homozygous   |
| NC_037643.1 | 1693522 | SNV | 1 | A | G | Homozygous   |
| NC_037643.1 | 1693606 | SNV | 1 | A | T | Homozygous   |
| NC_037643.1 | 1693611 | SNV | 1 | T | A | Homozygous   |
| NC_037643.1 | 1693823 | SNV | 1 | T | A | Homozygous   |
| NC_037643.1 | 1693964 | SNV | 1 | G | T | Homozygous   |
| NC_037643.1 | 1694326 | SNV | 1 | A | G | Heterozygous |
| NC_037643.1 | 1709588 | SNV | 1 | G | A | Homozygous   |
| NC_037643.1 | 1709590 | SNV | 1 | G | A | Homozygous   |
| NC_037643.1 | 1709621 | SNV | 1 | G | A | Homozygous   |
| NC_037643.1 | 1709626 | SNV | 1 | A | T | Homozygous   |
| NC_037643.1 | 1759133 | SNV | 1 | A | G | Heterozygous |
| NC_037643.1 | 1759145 | SNV | 1 | A | G | Homozygous   |
| NC_037643.1 | 1759155 | SNV | 1 | T | A | Homozygous   |
| NC_037643.1 | 1759807 | SNV | 1 | G | T | Heterozygous |
| NC_037643.1 | 1760438 | SNV | 1 | A | G | Homozygous   |
| NC_037643.1 | 1760797 | SNV | 1 | A | G | Homozygous   |
| NC_037643.1 | 1761034 | SNV | 1 | C | T | Homozygous   |
| NC_037643.1 | 1761348 | SNV | 1 | T | C | Homozygous   |
| NC_037643.1 | 1761399 | SNV | 1 | G | A | Homozygous   |
| NC_037643.1 | 1761588 | SNV | 1 | T | C | Heterozygous |
| NC_037643.1 | 1762700 | SNV | 1 | T | C | Homozygous   |

|             |         |     |   |   |   |              |
|-------------|---------|-----|---|---|---|--------------|
| NC_037643.1 | 1763167 | SNV | 1 | A | T | Homozygous   |
| NC_037643.1 | 1763410 | SNV | 1 | T | C | Heterozygous |
| NC_037643.1 | 1763414 | SNV | 1 | C | G | Heterozygous |
| NC_037643.1 | 1763416 | SNV | 1 | T | A | Heterozygous |
| NC_037643.1 | 1763427 | SNV | 1 | G | T | Heterozygous |
| NC_037643.1 | 1763428 | SNV | 1 | T | C | Heterozygous |
| NC_037643.1 | 1766419 | SNV | 1 | G | A | Homozygous   |
| NC_037643.1 | 1766495 | SNV | 1 | A | G | Homozygous   |
| NC_037643.1 | 1781425 | SNV | 1 | C | T | Homozygous   |
| NC_037643.1 | 1781431 | SNV | 1 | T | A | Homozygous   |
| NC_037643.1 | 1781434 | SNV | 1 | C | A | Homozygous   |
| NC_037643.1 | 1781439 | SNV | 1 | T | C | Homozygous   |
| NC_037643.1 | 1781445 | SNV | 1 | C | T | Homozygous   |
| NC_037643.1 | 1781448 | SNV | 1 | A | T | Homozygous   |
| NC_037643.1 | 1781457 | SNV | 1 | A | C | Heterozygous |
| NC_037643.1 | 1790403 | SNV | 1 | T | A | Homozygous   |
| NC_037643.1 | 1790424 | SNV | 1 | T | A | Homozygous   |
| NC_037643.1 | 1794189 | SNV | 1 | T | A | Homozygous   |
| NC_037643.1 | 1794193 | SNV | 1 | T | A | Homozygous   |
| NC_037643.1 | 1794195 | SNV | 1 | T | A | Homozygous   |
| NC_037643.1 | 1794209 | SNV | 1 | C | G | Homozygous   |
| NC_037643.1 | 1800391 | SNV | 1 | G | T | Heterozygous |
| NC_037643.1 | 1800396 | SNV | 1 | G | A | Heterozygous |
| NC_037643.1 | 1800401 | SNV | 1 | A | G | Heterozygous |
| NC_037643.1 | 1800406 | SNV | 1 | G | C | Heterozygous |
| NC_037643.1 | 1800433 | SNV | 1 | C | T | Heterozygous |
| NC_037643.1 | 1800435 | SNV | 1 | T | C | Heterozygous |
| NC_037643.1 | 1800442 | SNV | 1 | C | T | Heterozygous |
| NC_037643.1 | 1800444 | SNV | 1 | G | T | Homozygous   |
| NC_037643.1 | 1800453 | SNV | 1 | A | C | Homozygous   |
| NC_037643.1 | 1800476 | SNV | 1 | T | C | Homozygous   |
| NC_037643.1 | 1808144 | SNV | 1 | T | A | Heterozygous |
| NC_037643.1 | 1813386 | SNV | 1 | G | A | Heterozygous |
| NC_037643.1 | 1814703 | SNV | 1 | C | T | Heterozygous |
| NC_037643.1 | 1814766 | SNV | 1 | C | T | Heterozygous |
| NC_037643.1 | 1815196 | SNV | 1 | T | A | Heterozygous |
| NC_037643.1 | 1815440 | SNV | 1 | G | A | Heterozygous |
| NC_037643.1 | 1815642 | SNV | 1 | G | A | Heterozygous |
| NC_037643.1 | 1815722 | SNV | 1 | A | T | Heterozygous |
| NC_037643.1 | 1815941 | SNV | 1 | A | G | Homozygous   |
| NC_037643.1 | 1816170 | SNV | 1 | G | A | Heterozygous |
| NC_037643.1 | 1816730 | SNV | 1 | A | G | Heterozygous |
| NC_037643.1 | 1817176 | SNV | 1 | C | T | Heterozygous |
| NC_037643.1 | 1820592 | SNV | 1 | A | G | Homozygous   |
| NC_037643.1 | 1820718 | SNV | 1 | G | A | Heterozygous |
| NC_037643.1 | 1820791 | SNV | 1 | T | C | Homozygous   |
| NC_037643.1 | 1838015 | SNV | 1 | A | G | Homozygous   |
| NC_037643.1 | 1838051 | SNV | 1 | T | C | Heterozygous |
| NC_037643.1 | 1838373 | SNV | 1 | A | G | Homozygous   |
| NC_037643.1 | 1838665 | SNV | 1 | T | A | Homozygous   |
| NC_037643.1 | 1838670 | SNV | 1 | C | T | Heterozygous |



|             |         |     |   |   |   |              |
|-------------|---------|-----|---|---|---|--------------|
| NC_037643.1 | 1839034 | SNV | 1 | T | C | Homozygous   |
| NC_037643.1 | 1839236 | SNV | 1 | C | T | Homozygous   |
| NC_037643.1 | 1839812 | SNV | 1 | G | A | Homozygous   |
| NC_037643.1 | 1840470 | SNV | 1 | C | T | Homozygous   |
| NC_037643.1 | 1840473 | SNV | 1 | A | T | Homozygous   |
| NC_037643.1 | 1840507 | SNV | 1 | T | A | Homozygous   |
| NC_037643.1 | 1840515 | SNV | 1 | T | A | Homozygous   |
| NC_037643.1 | 1840518 | SNV | 1 | A | G | Homozygous   |
| NC_037643.1 | 1840524 | SNV | 1 | T | G | Homozygous   |
| NC_037643.1 | 1840546 | SNV | 1 | T | A | Homozygous   |
| NC_037643.1 | 1840551 | SNV | 1 | A | T | Homozygous   |
| NC_037643.1 | 1840554 | SNV | 1 | A | G | Homozygous   |
| NC_037643.1 | 1840568 | SNV | 1 | A | G | Homozygous   |
| NC_037643.1 | 1841591 | SNV | 1 | A | T | Heterozygous |
| NC_037643.1 | 1841594 | SNV | 1 | G | A | Heterozygous |
| NC_037643.1 | 1841629 | SNV | 1 | T | C | Homozygous   |
| NC_037643.1 | 1841729 | SNV | 1 | T | A | Homozygous   |
| NC_037643.1 | 1842574 | SNV | 1 | A | G | Homozygous   |
| NC_037643.1 | 1843953 | SNV | 1 | A | G | Heterozygous |
| NC_037643.1 | 1852053 | SNV | 1 | T | G | Heterozygous |
| NC_037643.1 | 1852091 | SNV | 1 | C | G | Homozygous   |
| NC_037643.1 | 1852116 | SNV | 1 | A | C | Heterozygous |
| NC_037643.1 | 1852175 | SNV | 1 | T | A | Heterozygous |
| NC_037643.1 | 1852425 | SNV | 1 | A | T | Homozygous   |
| NC_037643.1 | 1852428 | SNV | 1 | T | A | Homozygous   |
| NC_037643.1 | 1852431 | SNV | 1 | G | A | Homozygous   |
| NC_037643.1 | 1852530 | SNV | 1 | C | T | Heterozygous |
| NC_037643.1 | 1864894 | SNV | 1 | A | G | Heterozygous |
| NC_037643.1 | 1864901 | SNV | 1 | C | T | Homozygous   |
| NC_037643.1 | 1870052 | SNV | 1 | C | T | Homozygous   |
| NC_037643.1 | 1872052 | SNV | 1 | C | G | Heterozygous |
| NC_037643.1 | 1872116 | SNV | 1 | T | C | Heterozygous |
| NC_037643.1 | 1875395 | SNV | 1 | A | G | Homozygous   |
| NC_037643.1 | 1875400 | SNV | 1 | A | G | Homozygous   |
| NC_037643.1 | 1875404 | SNV | 1 | G | A | Homozygous   |
| NC_037643.1 | 1875427 | SNV | 1 | C | G | Homozygous   |
| NC_037643.1 | 1875431 | SNV | 1 | A | G | Heterozygous |
| NC_037643.1 | 1899977 | SNV | 1 | G | T | Homozygous   |
| NC_037643.1 | 1900120 | SNV | 1 | C | G | Homozygous   |
| NC_037643.1 | 1900125 | SNV | 1 | T | A | Homozygous   |
| NC_037643.1 | 1900134 | SNV | 1 | A | T | Homozygous   |
| NC_037643.1 | 1900140 | SNV | 1 | G | A | Homozygous   |
| NC_037643.1 | 1900194 | SNV | 1 | G | A | Homozygous   |
| NC_037643.1 | 1903961 | SNV | 1 | C | T | Heterozygous |
| NC_037643.1 | 1911907 | SNV | 1 | G | A | Heterozygous |
| NC_037643.1 | 1911917 | SNV | 1 | A | T | Homozygous   |
| NC_037643.1 | 1911930 | SNV | 1 | G | A | Heterozygous |
| NC_037643.1 | 1914007 | SNV | 1 | G | A | Heterozygous |
| NC_037643.1 | 1952713 | SNV | 1 | T | C | Homozygous   |
| NC_037643.1 | 1953049 | SNV | 1 | A | C | Homozygous   |
| NC_037643.1 | 1953066 | SNV | 1 | C | T | Homozygous   |

|             |         |     |   |   |   |              |
|-------------|---------|-----|---|---|---|--------------|
| NC_037643.1 | 1953070 | SNV | 1 | T | C | Heterozygous |
| NC_037643.1 | 1956890 | SNV | 1 | A | G | Heterozygous |
| NC_037643.1 | 1956928 | SNV | 1 | G | A | Homozygous   |
| NC_037643.1 | 1992533 | SNV | 1 | A | G | Homozygous   |
| NC_037643.1 | 1992839 | SNV | 1 | A | T | Homozygous   |
| NC_037643.1 | 1992893 | SNV | 1 | T | A | Homozygous   |
| NC_037643.1 | 1992953 | SNV | 1 | T | C | Heterozygous |
| NC_037643.1 | 1993126 | SNV | 1 | T | C | Homozygous   |
| NC_037643.1 | 1993186 | SNV | 1 | T | C | Homozygous   |
| NC_037643.1 | 1993207 | SNV | 1 | A | G | Heterozygous |
| NC_037643.1 | 1993294 | SNV | 1 | T | A | Heterozygous |
| NC_037643.1 | 1994561 | SNV | 1 | G | A | Heterozygous |
| NC_037643.1 | 1995293 | SNV | 1 | G | A | Homozygous   |
| NC_037643.1 | 1995452 | SNV | 1 | G | A | Homozygous   |
| NC_037643.1 | 1995557 | SNV | 1 | T | A | Homozygous   |
| NC_037643.1 | 1995561 | SNV | 1 | T | C | Homozygous   |
| NC_037643.1 | 1995775 | SNV | 1 | C | T | Homozygous   |
| NC_037643.1 | 1996217 | SNV | 1 | C | G | Homozygous   |
| NC_037643.1 | 1996220 | SNV | 1 | A | T | Heterozygous |
| NC_037643.1 | 1996473 | SNV | 1 | C | A | Heterozygous |
| NC_037643.1 | 1996696 | SNV | 1 | G | A | Homozygous   |
| NC_037643.1 | 1996709 | SNV | 1 | T | C | Homozygous   |
| NC_037643.1 | 1996751 | SNV | 1 | A | G | Homozygous   |
| NC_037643.1 | 1996875 | SNV | 1 | T | C | Heterozygous |
| NC_037643.1 | 1996898 | SNV | 1 | A | G | Homozygous   |
| NC_037643.1 | 2007333 | SNV | 1 | A | C | Heterozygous |
| NC_037643.1 | 2007339 | SNV | 1 | G | A | Heterozygous |
| NC_037643.1 | 2007372 | SNV | 1 | A | T | Heterozygous |
| NC_037643.1 | 2008013 | SNV | 1 | A | G | Homozygous   |
| NC_037643.1 | 2008467 | SNV | 1 | A | G | Homozygous   |
| NC_037643.1 | 2018481 | SNV | 1 | T | G | Homozygous   |
| NC_037643.1 | 2020443 | SNV | 1 | C | A | Homozygous   |
| NC_037643.1 | 2020457 | SNV | 1 | A | T | Homozygous   |
| NC_037643.1 | 2020459 | SNV | 1 | G | A | Homozygous   |
| NC_037643.1 | 2020470 | SNV | 1 | T | C | Homozygous   |
| NC_037643.1 | 2023071 | SNV | 1 | T | A | Heterozygous |
| NC_037643.1 | 2023078 | SNV | 1 | T | A | Heterozygous |
| NC_037643.1 | 2023087 | SNV | 1 | A | G | Heterozygous |
| NC_037643.1 | 2023863 | SNV | 1 | G | A | Heterozygous |
| NC_037643.1 | 2024249 | SNV | 1 | C | A | Heterozygous |
| NC_037643.1 | 2024305 | SNV | 1 | C | T | Homozygous   |
| NC_037643.1 | 2024331 | SNV | 1 | T | A | Homozygous   |
| NC_037643.1 | 2024381 | SNV | 1 | G | A | Homozygous   |
| NC_037643.1 | 2024428 | SNV | 1 | C | T | Homozygous   |
| NC_037643.1 | 2024454 | SNV | 1 | C | A | Heterozygous |
| NC_037643.1 | 2024570 | SNV | 1 | C | A | Heterozygous |
| NC_037643.1 | 2024809 | SNV | 1 | A | C | Homozygous   |
| NC_037643.1 | 2025037 | SNV | 1 | C | A | Homozygous   |
| NC_037643.1 | 2025043 | SNV | 1 | C | T | Heterozygous |
| NC_037643.1 | 2025994 | SNV | 1 | T | C | Homozygous   |
| NC_037643.1 | 2031160 | SNV | 1 | A | G | Homozygous   |

|             |         |     |   |   |   |              |
|-------------|---------|-----|---|---|---|--------------|
| NC_037643.1 | 2037772 | SNV | 1 | C | T | Homozygous   |
| NC_037643.1 | 2037852 | SNV | 1 | A | G | Heterozygous |
| NC_037643.1 | 2041796 | SNV | 1 | T | C | Homozygous   |
| NC_037643.1 | 2041860 | SNV | 1 | G | A | Homozygous   |
| NC_037643.1 | 2054159 | SNV | 1 | C | A | Homozygous   |
| NC_037643.1 | 2054994 | SNV | 1 | G | C | Homozygous   |
| NC_037643.1 | 2055381 | SNV | 1 | C | G | Heterozygous |
| NC_037643.1 | 2057967 | SNV | 1 | A | G | Homozygous   |
| NC_037643.1 | 2057976 | SNV | 1 | G | A | Homozygous   |
| NC_037643.1 | 2072397 | SNV | 1 | A | G | Homozygous   |
| NC_037643.1 | 2072402 | SNV | 1 | A | G | Homozygous   |
| NC_037643.1 | 2072405 | SNV | 1 | A | C | Homozygous   |
| NC_037643.1 | 2072408 | SNV | 1 | A | G | Homozygous   |
| NC_037643.1 | 2075941 | SNV | 1 | A | G | Homozygous   |
| NC_037643.1 | 2076478 | SNV | 1 | A | C | Homozygous   |
| NC_037643.1 | 2076714 | SNV | 1 | T | C | Heterozygous |
| NC_037643.1 | 2078818 | SNV | 1 | A | G | Heterozygous |
| NC_037643.1 | 2078820 | SNV | 1 | A | C | Heterozygous |
| NC_037643.1 | 2078832 | SNV | 1 | A | G | Heterozygous |
| NC_037643.1 | 2078863 | SNV | 1 | G | A | Heterozygous |
| NC_037643.1 | 2078941 | SNV | 1 | A | G | Homozygous   |
| NC_037643.1 | 2079387 | SNV | 1 | G | C | Homozygous   |
| NC_037643.1 | 2079544 | SNV | 1 | C | G | Heterozygous |
| NC_037643.1 | 2079585 | SNV | 1 | A | C | Homozygous   |
| NC_037643.1 | 2080948 | SNV | 1 | G | A | Heterozygous |
| NC_037643.1 | 2088037 | SNV | 1 | A | G | Homozygous   |
| NC_037643.1 | 2103006 | SNV | 1 | C | T | Heterozygous |
| NC_037643.1 | 2103011 | SNV | 1 | A | C | Heterozygous |
| NC_037643.1 | 2103030 | SNV | 1 | G | A | Heterozygous |
| NC_037643.1 | 2103040 | SNV | 1 | A | C | Heterozygous |
| NC_037643.1 | 2103044 | SNV | 1 | G | A | Heterozygous |
| NC_037643.1 | 2103049 | SNV | 1 | A | G | Heterozygous |
| NC_037643.1 | 2103057 | SNV | 1 | G | A | Heterozygous |
| NC_037643.1 | 2105730 | SNV | 1 | A | T | Homozygous   |
| NC_037643.1 | 2105732 | SNV | 1 | C | T | Homozygous   |
| NC_037643.1 | 2105739 | SNV | 1 | T | A | Homozygous   |
| NC_037643.1 | 2122931 | SNV | 1 | T | C | Homozygous   |
| NC_037643.1 | 2128176 | SNV | 1 | A | C | Homozygous   |
| NC_037643.1 | 2128178 | SNV | 1 | T | A | Heterozygous |
| NC_037643.1 | 2128203 | SNV | 1 | C | T | Heterozygous |
| NC_037643.1 | 2128228 | SNV | 1 | A | T | Homozygous   |
| NC_037643.1 | 2138514 | SNV | 1 | A | T | Homozygous   |
| NC_037643.1 | 2141554 | SNV | 1 | C | T | Heterozygous |
| NC_037643.1 | 2141575 | SNV | 1 | C | T | Homozygous   |
| NC_037643.1 | 2141577 | SNV | 1 | C | T | Homozygous   |
| NC_037643.1 | 2141854 | SNV | 1 | A | G | Homozygous   |
| NC_037643.1 | 2144696 | SNV | 1 | C | T | Heterozygous |
| NC_037643.1 | 2144731 | SNV | 1 | C | A | Homozygous   |
| NC_037643.1 | 2152426 | SNV | 1 | T | C | Homozygous   |
| NC_037643.1 | 2152433 | SNV | 1 | T | C | Homozygous   |
| NC_037643.1 | 2166824 | SNV | 1 | G | A | Heterozygous |

|             |         |     |   |   |   |              |
|-------------|---------|-----|---|---|---|--------------|
| NC_037643.1 | 2166901 | SNV | 1 | T | A | Heterozygous |
| NC_037643.1 | 2167187 | SNV | 1 | G | A | Heterozygous |
| NC_037643.1 | 2199937 | SNV | 1 | G | C | Heterozygous |
| NC_037643.1 | 2199941 | SNV | 1 | T | A | Homozygous   |
| NC_037643.1 | 2200078 | SNV | 1 | A | C | Homozygous   |
| NC_037643.1 | 2200091 | SNV | 1 | T | A | Homozygous   |
| NC_037643.1 | 2201233 | SNV | 1 | A | C | Homozygous   |
| NC_037643.1 | 2201412 | SNV | 1 | C | T | Heterozygous |
| NC_037643.1 | 2201421 | SNV | 1 | A | G | Homozygous   |
| NC_037643.1 | 2202593 | SNV | 1 | C | T | Heterozygous |
| NC_037643.1 | 2202698 | SNV | 1 | A | G | Homozygous   |
| NC_037643.1 | 2203008 | SNV | 1 | A | C | Homozygous   |
| NC_037643.1 | 2206546 | SNV | 1 | G | A | Heterozygous |
| NC_037643.1 | 2206790 | SNV | 1 | T | G | Homozygous   |
| NC_037643.1 | 2212045 | SNV | 1 | G | A | Heterozygous |
| NC_037643.1 | 2212121 | SNV | 1 | A | G | Homozygous   |
| NC_037643.1 | 2212206 | SNV | 1 | A | G | Homozygous   |
| NC_037643.1 | 2212535 | SNV | 1 | C | T | Homozygous   |
| NC_037643.1 | 2212595 | SNV | 1 | A | C | Homozygous   |
| NC_037643.1 | 2212707 | SNV | 1 | T | A | Homozygous   |
| NC_037643.1 | 2212712 | SNV | 1 | A | G | Homozygous   |
| NC_037643.1 | 2224013 | SNV | 1 | A | G | Homozygous   |
| NC_037643.1 | 2224044 | SNV | 1 | T | C | Homozygous   |
| NC_037643.1 | 2224123 | SNV | 1 | A | G | Homozygous   |
| NC_037643.1 | 2224206 | SNV | 1 | G | A | Heterozygous |
| NC_037643.1 | 2224260 | SNV | 1 | G | A | Heterozygous |
| NC_037643.1 | 2226569 | SNV | 1 | T | G | Homozygous   |
| NC_037643.1 | 2226582 | SNV | 1 | A | T | Homozygous   |
| NC_037643.1 | 2226621 | SNV | 1 | T | C | Heterozygous |
| NC_037643.1 | 2226626 | SNV | 1 | T | C | Heterozygous |
| NC_037643.1 | 2226817 | SNV | 1 | G | A | Heterozygous |
| NC_037643.1 | 2227955 | SNV | 1 | C | T | Heterozygous |
| NC_037643.1 | 2227957 | SNV | 1 | A | G | Homozygous   |
| NC_037643.1 | 2231645 | SNV | 1 | T | A | Homozygous   |
| NC_037643.1 | 2231649 | SNV | 1 | T | A | Homozygous   |
| NC_037643.1 | 2231655 | SNV | 1 | T | A | Homozygous   |
| NC_037643.1 | 2231657 | SNV | 1 | A | T | Homozygous   |
| NC_037643.1 | 2231660 | SNV | 1 | T | A | Homozygous   |
| NC_037643.1 | 2231662 | SNV | 1 | A | T | Homozygous   |
| NC_037643.1 | 2231668 | SNV | 1 | A | T | Homozygous   |
| NC_037643.1 | 2231670 | SNV | 1 | A | G | Homozygous   |
| NC_037643.1 | 2231680 | SNV | 1 | T | C | Homozygous   |
| NC_037643.1 | 2239891 | SNV | 1 | A | C | Homozygous   |
| NC_037643.1 | 2239893 | SNV | 1 | A | T | Homozygous   |
| NC_037643.1 | 2239897 | SNV | 1 | A | G | Homozygous   |
| NC_037643.1 | 2239905 | SNV | 1 | A | T | Homozygous   |
| NC_037643.1 | 2239928 | SNV | 1 | T | A | Homozygous   |
| NC_037643.1 | 2306098 | SNV | 1 | G | A | Homozygous   |
| NC_037643.1 | 2306153 | SNV | 1 | C | T | Heterozygous |
| NC_037643.1 | 2307027 | SNV | 1 | C | T | Heterozygous |
| NC_037643.1 | 2309152 | SNV | 1 | G | C | Heterozygous |

|             |         |     |   |   |   |              |
|-------------|---------|-----|---|---|---|--------------|
| NC_037643.1 | 2311349 | SNV | 1 | T | G | Heterozygous |
| NC_037643.1 | 2313859 | SNV | 1 | A | T | Homozygous   |
| NC_037643.1 | 2313867 | SNV | 1 | A | C | Homozygous   |
| NC_037643.1 | 2313878 | SNV | 1 | A | G | Homozygous   |
| NC_037643.1 | 2313885 | SNV | 1 | A | T | Homozygous   |
| NC_037643.1 | 2313887 | SNV | 1 | G | T | Homozygous   |
| NC_037643.1 | 2313890 | SNV | 1 | G | A | Homozygous   |
| NC_037643.1 | 2317371 | SNV | 1 | T | C | Homozygous   |
| NC_037643.1 | 2317428 | SNV | 1 | C | T | Heterozygous |
| NC_037643.1 | 2318344 | SNV | 1 | C | T | Homozygous   |
| NC_037643.1 | 2318354 | SNV | 1 | G | A | Homozygous   |
| NC_037643.1 | 2318391 | SNV | 1 | T | C | Homozygous   |
| NC_037643.1 | 2318446 | SNV | 1 | C | T | Heterozygous |
| NC_037643.1 | 2318457 | SNV | 1 | C | T | Heterozygous |
| NC_037643.1 | 2321367 | SNV | 1 | C | G | Homozygous   |
| NC_037643.1 | 2321680 | SNV | 1 | A | T | Homozygous   |
| NC_037643.1 | 2327256 | SNV | 1 | A | C | Heterozygous |
| NC_037643.1 | 2327343 | SNV | 1 | T | G | Heterozygous |
| NC_037643.1 | 2327345 | SNV | 1 | A | G | Heterozygous |
| NC_037643.1 | 2327350 | SNV | 1 | A | G | Heterozygous |
| NC_037643.1 | 2327356 | SNV | 1 | T | G | Homozygous   |
| NC_037643.1 | 2327392 | SNV | 1 | A | G | Homozygous   |
| NC_037643.1 | 2341274 | SNV | 1 | C | T | Heterozygous |
| NC_037643.1 | 2344596 | SNV | 1 | T | C | Heterozygous |
| NC_037643.1 | 2344618 | SNV | 1 | C | T | Homozygous   |
| NC_037643.1 | 2346099 | SNV | 1 | A | G | Heterozygous |
| NC_037643.1 | 2350223 | SNV | 1 | T | C | Homozygous   |
| NC_037643.1 | 2352222 | SNV | 1 | C | T | Heterozygous |
| NC_037643.1 | 2357486 | SNV | 1 | A | T | Homozygous   |
| NC_037643.1 | 2357508 | SNV | 1 | T | C | Homozygous   |
| NC_037643.1 | 2357512 | SNV | 1 | T | C | Homozygous   |
| NC_037643.1 | 2357851 | SNV | 1 | T | C | Homozygous   |
| NC_037643.1 | 2358057 | SNV | 1 | C | T | Homozygous   |
| NC_037643.1 | 2358346 | SNV | 1 | T | A | Homozygous   |
| NC_037643.1 | 2358350 | SNV | 1 | G | A | Homozygous   |
| NC_037643.1 | 2358469 | SNV | 1 | C | T | Heterozygous |
| NC_037643.1 | 2358771 | SNV | 1 | T | C | Heterozygous |
| NC_037643.1 | 2358779 | SNV | 1 | C | T | Homozygous   |
| NC_037643.1 | 2359900 | SNV | 1 | C | T | Homozygous   |
| NC_037643.1 | 2361552 | SNV | 1 | T | C | Homozygous   |
| NC_037643.1 | 2361628 | SNV | 1 | T | C | Homozygous   |
| NC_037643.1 | 2365426 | SNV | 1 | A | G | Homozygous   |
| NC_037643.1 | 2365432 | SNV | 1 | A | C | Homozygous   |
| NC_037643.1 | 2365434 | SNV | 1 | A | C | Homozygous   |
| NC_037643.1 | 2365442 | SNV | 1 | A | G | Homozygous   |
| NC_037643.1 | 2365449 | SNV | 1 | G | C | Homozygous   |
| NC_037643.1 | 2367145 | SNV | 1 | T | A | Homozygous   |
| NC_037643.1 | 2367189 | SNV | 1 | T | C | Heterozygous |
| NC_037643.1 | 2368342 | SNV | 1 | A | G | Homozygous   |
| NC_037643.1 | 2368357 | SNV | 1 | C | T | Homozygous   |
| NC_037643.1 | 2368392 | SNV | 1 | G | C | Heterozygous |

|             |         |     |   |   |   |              |
|-------------|---------|-----|---|---|---|--------------|
| NC_037643.1 | 2368537 | SNV | 1 | A | G | Homozygous   |
| NC_037643.1 | 2368561 | SNV | 1 | A | G | Homozygous   |
| NC_037643.1 | 2368636 | SNV | 1 | T | C | Heterozygous |
| NC_037643.1 | 2368682 | SNV | 1 | A | G | Heterozygous |
| NC_037643.1 | 2379281 | SNV | 1 | G | T | Homozygous   |
| NC_037643.1 | 2379433 | SNV | 1 | C | T | Heterozygous |
| NC_037643.1 | 2379460 | SNV | 1 | C | T | Homozygous   |
| NC_037643.1 | 2379467 | SNV | 1 | G | T | Homozygous   |
| NC_037643.1 | 2384376 | SNV | 1 | C | T | Heterozygous |
| NC_037643.1 | 2386425 | SNV | 1 | A | G | Heterozygous |
| NC_037643.1 | 2406055 | SNV | 1 | C | G | Heterozygous |
| NC_037643.1 | 2406058 | SNV | 1 | A | G | Heterozygous |
| NC_037643.1 | 2406061 | SNV | 1 | T | A | Heterozygous |
| NC_037643.1 | 2406064 | SNV | 1 | A | C | Heterozygous |
| NC_037643.1 | 2406273 | SNV | 1 | T | C | Homozygous   |
| NC_037643.1 | 2410028 | SNV | 1 | T | C | Homozygous   |
| NC_037643.1 | 2410210 | SNV | 1 | A | T | Homozygous   |
| NC_037643.1 | 2410222 | SNV | 1 | T | C | Homozygous   |
| NC_037643.1 | 2410230 | SNV | 1 | T | A | Homozygous   |
| NC_037643.1 | 2410502 | SNV | 1 | C | T | Heterozygous |
| NC_037643.1 | 2410854 | SNV | 1 | C | T | Homozygous   |
| NC_037643.1 | 2410866 | SNV | 1 | C | T | Heterozygous |
| NC_037643.1 | 2410896 | SNV | 1 | G | A | Heterozygous |
| NC_037643.1 | 2411011 | SNV | 1 | T | C | Homozygous   |
| NC_037643.1 | 2411061 | SNV | 1 | A | G | Heterozygous |
| NC_037643.1 | 2411078 | SNV | 1 | A | G | Heterozygous |
| NC_037643.1 | 2411299 | SNV | 1 | G | A | Homozygous   |
| NC_037643.1 | 2411448 | SNV | 1 | T | C | Heterozygous |
| NC_037643.1 | 2411691 | SNV | 1 | G | T | Heterozygous |
| NC_037643.1 | 2411693 | SNV | 1 | A | T | Heterozygous |
| NC_037643.1 | 2412879 | SNV | 1 | G | C | Homozygous   |
| NC_037643.1 | 2412990 | SNV | 1 | T | G | Heterozygous |
| NC_037643.1 | 2413587 | SNV | 1 | C | T | Heterozygous |
| NC_037643.1 | 2413591 | SNV | 1 | C | T | Homozygous   |
| NC_037643.1 | 2413668 | SNV | 1 | A | G | Homozygous   |
| NC_037643.1 | 2413681 | SNV | 1 | A | G | Homozygous   |
| NC_037643.1 | 2413697 | SNV | 1 | C | T | Homozygous   |
| NC_037643.1 | 2413919 | SNV | 1 | A | G | Heterozygous |
| NC_037643.1 | 2413998 | SNV | 1 | A | G | Heterozygous |
| NC_037643.1 | 2414066 | SNV | 1 | A | G | Homozygous   |
| NC_037643.1 | 2414126 | SNV | 1 | A | G | Homozygous   |
| NC_037643.1 | 2414168 | SNV | 1 | A | C | Heterozygous |
| NC_037643.1 | 2414935 | SNV | 1 | C | T | Homozygous   |
| NC_037643.1 | 2414992 | SNV | 1 | C | T | Heterozygous |
| NC_037643.1 | 2415617 | SNV | 1 | A | T | Homozygous   |
| NC_037643.1 | 2415620 | SNV | 1 | T | C | Homozygous   |
| NC_037643.1 | 2415622 | SNV | 1 | C | T | Homozygous   |
| NC_037643.1 | 2415666 | SNV | 1 | G | A | Homozygous   |
| NC_037643.1 | 2415723 | SNV | 1 | G | A | Homozygous   |
| NC_037643.1 | 2416018 | SNV | 1 | T | G | Heterozygous |
| NC_037643.1 | 2416587 | SNV | 1 | G | C | Homozygous   |

|             |         |     |   |   |   |              |
|-------------|---------|-----|---|---|---|--------------|
| NC_037643.1 | 2416595 | SNV | 1 | C | T | Homozygous   |
| NC_037643.1 | 2416598 | SNV | 1 | T | C | Homozygous   |
| NC_037643.1 | 2416610 | SNV | 1 | T | C | Homozygous   |
| NC_037643.1 | 2416615 | SNV | 1 | T | G | Homozygous   |
| NC_037643.1 | 2416619 | SNV | 1 | C | T | Homozygous   |
| NC_037643.1 | 2416622 | SNV | 1 | T | C | Homozygous   |
| NC_037643.1 | 2416633 | SNV | 1 | G | T | Homozygous   |
| NC_037643.1 | 2416968 | SNV | 1 | T | C | Homozygous   |
| NC_037643.1 | 2430745 | SNV | 1 | G | C | Heterozygous |
| NC_037643.1 | 2473120 | SNV | 1 | A | G | Homozygous   |
| NC_037643.1 | 2473125 | SNV | 1 | T | A | Homozygous   |
| NC_037643.1 | 2473383 | SNV | 1 | T | C | Heterozygous |
| NC_037643.1 | 2473401 | SNV | 1 | T | C | Heterozygous |
| NC_037643.1 | 2473404 | SNV | 1 | C | A | Heterozygous |
| NC_037643.1 | 2473409 | SNV | 1 | C | G | Heterozygous |
| NC_037643.1 | 2473429 | SNV | 1 | G | A | Heterozygous |
| NC_037643.1 | 2473566 | SNV | 1 | T | C | Heterozygous |
| NC_037643.1 | 2473568 | SNV | 1 | T | C | Homozygous   |
| NC_037643.1 | 2473699 | SNV | 1 | T | C | Homozygous   |
| NC_037643.1 | 2473870 | SNV | 1 | A | G | Homozygous   |
| NC_037643.1 | 2482616 | SNV | 1 | T | C | Homozygous   |
| NC_037643.1 | 2482670 | SNV | 1 | G | C | Homozygous   |
| NC_037643.1 | 2482707 | SNV | 1 | G | A | Homozygous   |
| NC_037643.1 | 2483040 | SNV | 1 | C | T | Heterozygous |
| NC_037643.1 | 2487286 | SNV | 1 | T | A | Homozygous   |
| NC_037643.1 | 2487294 | SNV | 1 | T | G | Homozygous   |
| NC_037643.1 | 2487300 | SNV | 1 | T | C | Homozygous   |
| NC_037643.1 | 2487303 | SNV | 1 | A | T | Homozygous   |
| NC_037643.1 | 2487305 | SNV | 1 | G | C | Homozygous   |
| NC_037643.1 | 2508223 | SNV | 1 | C | G | Homozygous   |
| NC_037643.1 | 2535507 | SNV | 1 | A | C | Homozygous   |
| NC_037643.1 | 2535546 | SNV | 1 | T | C | Homozygous   |
| NC_037643.1 | 2535675 | SNV | 1 | T | G | Homozygous   |
| NC_037643.1 | 2535766 | SNV | 1 | A | G | Homozygous   |
| NC_037643.1 | 2535768 | SNV | 1 | T | G | Heterozygous |
| NC_037643.1 | 2535790 | SNV | 1 | A | G | Heterozygous |
| NC_037643.1 | 2535857 | SNV | 1 | T | C | Heterozygous |
| NC_037643.1 | 2535863 | SNV | 1 | G | A | Heterozygous |
| NC_037643.1 | 2535913 | SNV | 1 | T | C | Homozygous   |
| NC_037643.1 | 2536009 | SNV | 1 | T | C | Heterozygous |
| NC_037643.1 | 2536013 | SNV | 1 | T | C | Homozygous   |
| NC_037643.1 | 2536021 | SNV | 1 | T | C | Homozygous   |
| NC_037643.1 | 2536088 | SNV | 1 | T | C | Homozygous   |
| NC_037643.1 | 2536530 | SNV | 1 | T | C | Heterozygous |
| NC_037643.1 | 2536533 | SNV | 1 | T | A | Heterozygous |
| NC_037643.1 | 2536563 | SNV | 1 | G | A | Homozygous   |
| NC_037643.1 | 2536628 | SNV | 1 | A | G | Homozygous   |
| NC_037643.1 | 2536884 | SNV | 1 | A | G | Heterozygous |
| NC_037643.1 | 2536936 | SNV | 1 | T | C | Homozygous   |
| NC_037643.1 | 2538860 | SNV | 1 | T | C | Homozygous   |
| NC_037643.1 | 2538923 | SNV | 1 | T | C | Heterozygous |

|             |         |     |   |   |   |              |
|-------------|---------|-----|---|---|---|--------------|
| NC_037643.1 | 2544699 | SNV | 1 | T | C | Heterozygous |
| NC_037643.1 | 2548720 | SNV | 1 | G | A | Heterozygous |
| NC_037643.1 | 2548726 | SNV | 1 | A | G | Heterozygous |
| NC_037643.1 | 2553279 | SNV | 1 | A | G | Homozygous   |
| NC_037643.1 | 2553304 | SNV | 1 | A | G | Heterozygous |
| NC_037643.1 | 2557853 | SNV | 1 | T | A | Homozygous   |
| NC_037643.1 | 2557859 | SNV | 1 | A | T | Homozygous   |
| NC_037643.1 | 2557861 | SNV | 1 | T | A | Homozygous   |
| NC_037643.1 | 2557877 | SNV | 1 | T | C | Homozygous   |
| NC_037643.1 | 2557886 | SNV | 1 | T | C | Homozygous   |
| NC_037643.1 | 2557890 | SNV | 1 | A | C | Homozygous   |
| NC_037643.1 | 2557915 | SNV | 1 | G | A | Homozygous   |
| NC_037643.1 | 2567665 | SNV | 1 | T | C | Homozygous   |
| NC_037643.1 | 2567767 | SNV | 1 | A | G | Homozygous   |
| NC_037643.1 | 2567829 | SNV | 1 | C | T | Heterozygous |
| NC_037643.1 | 2567847 | SNV | 1 | G | A | Heterozygous |
| NC_037643.1 | 2570700 | SNV | 1 | T | C | Homozygous   |
| NC_037643.1 | 2570776 | SNV | 1 | C | T | Homozygous   |
| NC_037643.1 | 2570798 | SNV | 1 | T | C | Homozygous   |
| NC_037643.1 | 2572917 | SNV | 1 | A | G | Homozygous   |
| NC_037643.1 | 2572983 | SNV | 1 | C | T | Heterozygous |
| NC_037643.1 | 2572990 | SNV | 1 | T | G | Homozygous   |
| NC_037643.1 | 2581486 | SNV | 1 | A | G | Homozygous   |
| NC_037643.1 | 2581614 | SNV | 1 | A | G | Homozygous   |
| NC_037643.1 | 2581736 | SNV | 1 | G | A | Heterozygous |
| NC_037643.1 | 2581811 | SNV | 1 | A | G | Homozygous   |
| NC_037643.1 | 2581852 | SNV | 1 | G | A | Heterozygous |
| NC_037643.1 | 2581867 | SNV | 1 | G | A | Heterozygous |
| NC_037643.1 | 2584970 | SNV | 1 | G | A | Heterozygous |
| NC_037643.1 | 2586977 | SNV | 1 | C | T | Heterozygous |
| NC_037643.1 | 2675022 | SNV | 1 | A | G | Heterozygous |
| NC_037643.1 | 2675051 | SNV | 1 | A | G | Homozygous   |
| NC_037643.1 | 2675180 | SNV | 1 | C | T | Heterozygous |
| NC_037643.1 | 2675330 | SNV | 1 | G | T | Heterozygous |
| NC_037643.1 | 2675353 | SNV | 1 | A | G | Heterozygous |
| NC_037643.1 | 2675411 | SNV | 1 | A | G | Homozygous   |
| NC_037643.1 | 2675454 | SNV | 1 | A | G | Homozygous   |
| NC_037643.1 | 2675513 | SNV | 1 | T | A | Homozygous   |
| NC_037643.1 | 2675530 | SNV | 1 | G | A | Homozygous   |
| NC_037643.1 | 2675570 | SNV | 1 | G | A | Homozygous   |
| NC_037643.1 | 2675590 | SNV | 1 | A | G | Homozygous   |
| NC_037643.1 | 2675597 | SNV | 1 | C | T | Homozygous   |
| NC_037643.1 | 2675610 | SNV | 1 | C | T | Homozygous   |
| NC_037643.1 | 2675612 | SNV | 1 | T | C | Homozygous   |
| NC_037643.1 | 2675618 | SNV | 1 | A | C | Homozygous   |
| NC_037643.1 | 2675627 | SNV | 1 | C | T | Homozygous   |
| NC_037643.1 | 2675636 | SNV | 1 | G | A | Homozygous   |
| NC_037643.1 | 2675638 | SNV | 1 | A | G | Homozygous   |
| NC_037643.1 | 2675649 | SNV | 1 | G | A | Homozygous   |
| NC_037643.1 | 2675654 | SNV | 1 | A | G | Homozygous   |
| NC_037643.1 | 2675660 | SNV | 1 | C | T | Homozygous   |



|             |         |     |   |   |   |              |
|-------------|---------|-----|---|---|---|--------------|
| NC_037643.1 | 2675703 | SNV | 1 | G | A | Homozygous   |
| NC_037643.1 | 2675705 | SNV | 1 | A | G | Homozygous   |
| NC_037643.1 | 2675715 | SNV | 1 | T | C | Homozygous   |
| NC_037643.1 | 2675733 | SNV | 1 | C | A | Homozygous   |
| NC_037643.1 | 2675738 | SNV | 1 | C | T | Homozygous   |
| NC_037643.1 | 2675762 | SNV | 1 | C | T | Heterozygous |
| NC_037643.1 | 2675765 | SNV | 1 | C | T | Homozygous   |
| NC_037643.1 | 2675768 | SNV | 1 | T | G | Heterozygous |
| NC_037643.1 | 2675780 | SNV | 1 | A | G | Heterozygous |
| NC_037643.1 | 2675788 | SNV | 1 | T | C | Heterozygous |
| NC_037643.1 | 2675814 | SNV | 1 | A | G | Homozygous   |
| NC_037643.1 | 2675840 | SNV | 1 | C | G | Homozygous   |
| NC_037643.1 | 2675903 | SNV | 1 | A | G | Heterozygous |
| NC_037643.1 | 2675907 | SNV | 1 | A | G | Heterozygous |
| NC_037643.1 | 2675909 | SNV | 1 | C | T | Heterozygous |
| NC_037643.1 | 2675966 | SNV | 1 | T | C | Heterozygous |
| NC_037643.1 | 2675982 | SNV | 1 | G | A | Heterozygous |
| NC_037643.1 | 2676031 | SNV | 1 | G | A | Homozygous   |
| NC_037643.1 | 2676062 | SNV | 1 | A | G | Homozygous   |
| NC_037643.1 | 2676065 | SNV | 1 | T | C | Homozygous   |
| NC_037643.1 | 2676104 | SNV | 1 | G | A | Heterozygous |
| NC_037643.1 | 2676116 | SNV | 1 | C | T | Heterozygous |
| NC_037643.1 | 2676119 | SNV | 1 | G | A | Heterozygous |
| NC_037643.1 | 2676122 | SNV | 1 | G | A | Heterozygous |
| NC_037643.1 | 2676134 | SNV | 1 | C | T | Homozygous   |
| NC_037643.1 | 2676143 | SNV | 1 | G | A | Homozygous   |
| NC_037643.1 | 2676168 | SNV | 1 | G | C | Heterozygous |
| NC_037643.1 | 2676238 | SNV | 1 | A | G | Heterozygous |
| NC_037643.1 | 2676257 | SNV | 1 | C | T | Heterozygous |
| NC_037643.1 | 2676262 | SNV | 1 | G | T | Heterozygous |
| NC_037643.1 | 2676295 | SNV | 1 | C | T | Heterozygous |
| NC_037643.1 | 2676320 | SNV | 1 | C | G | Homozygous   |
| NC_037643.1 | 2676342 | SNV | 1 | C | T | Homozygous   |
| NC_037643.1 | 2676348 | SNV | 1 | C | T | Homozygous   |
| NC_037643.1 | 2676350 | SNV | 1 | A | T | Homozygous   |
| NC_037643.1 | 2676358 | SNV | 1 | G | C | Homozygous   |
| NC_037643.1 | 2676393 | SNV | 1 | A | G | Homozygous   |
| NC_037643.1 | 2676630 | SNV | 1 | T | C | Homozygous   |
| NC_037643.1 | 2676635 | SNV | 1 | A | G | Homozygous   |
| NC_037643.1 | 2676641 | SNV | 1 | C | T | Homozygous   |
| NC_037643.1 | 2676648 | SNV | 1 | G | A | Homozygous   |
| NC_037643.1 | 2676707 | SNV | 1 | C | T | Homozygous   |
| NC_037643.1 | 2760099 | SNV | 1 | A | G | Homozygous   |
| NC_037643.1 | 2760106 | SNV | 1 | G | A | Heterozygous |
| NC_037643.1 | 2765149 | SNV | 1 | A | G | Homozygous   |
| NC_037643.1 | 2765164 | SNV | 1 | A | G | Homozygous   |
| NC_037643.1 | 2806008 | SNV | 1 | G | T | Homozygous   |
| NC_037643.1 | 2806044 | SNV | 1 | C | T | Heterozygous |
| NC_037643.1 | 2806051 | SNV | 1 | A | T | Heterozygous |
| NC_037643.1 | 2806060 | SNV | 1 | A | G | Heterozygous |
| NC_037643.1 | 2806063 | SNV | 1 | T | C | Homozygous   |

|             |         |     |   |   |   |              |
|-------------|---------|-----|---|---|---|--------------|
| NC_037643.1 | 2806094 | SNV | 1 | C | T | Heterozygous |
| NC_037643.1 | 2806121 | SNV | 1 | T | A | Homozygous   |
| NC_037643.1 | 2849566 | SNV | 1 | A | G | Homozygous   |
| NC_037643.1 | 2849573 | SNV | 1 | T | A | Heterozygous |
| NC_037643.1 | 2849608 | SNV | 1 | T | A | Heterozygous |
| NC_037643.1 | 2849613 | SNV | 1 | T | A | Heterozygous |
| NC_037643.1 | 2849714 | SNV | 1 | T | C | Homozygous   |
| NC_037643.1 | 2853911 | SNV | 1 | T | C | Homozygous   |
| NC_037643.1 | 2853927 | SNV | 1 | A | G | Homozygous   |
| NC_037643.1 | 2853968 | SNV | 1 | G | T | Heterozygous |
| NC_037643.1 | 2854271 | SNV | 1 | G | A | Homozygous   |
| NC_037643.1 | 2854289 | SNV | 1 | T | C | Heterozygous |
| NC_037643.1 | 2854309 | SNV | 1 | C | G | Homozygous   |
| NC_037643.1 | 2854313 | SNV | 1 | G | A | Homozygous   |
| NC_037643.1 | 2854316 | SNV | 1 | A | G | Homozygous   |
| NC_037643.1 | 2854362 | SNV | 1 | G | C | Heterozygous |
| NC_037643.1 | 2860805 | SNV | 1 | C | T | Heterozygous |
| NC_037643.1 | 2860897 | SNV | 1 | C | T | Heterozygous |
| NC_037643.1 | 2866309 | SNV | 1 | A | G | Homozygous   |
| NC_037643.1 | 2866314 | SNV | 1 | C | T | Homozygous   |
| NC_037643.1 | 2866326 | SNV | 1 | A | G | Homozygous   |
| NC_037643.1 | 2866329 | SNV | 1 | C | T | Heterozygous |
| NC_037643.1 | 2866346 | SNV | 1 | A | G | Homozygous   |
| NC_037643.1 | 2866393 | SNV | 1 | A | G | Homozygous   |
| NC_037643.1 | 2866481 | SNV | 1 | A | G | Homozygous   |
| NC_037643.1 | 2866784 | SNV | 1 | G | A | Heterozygous |
| NC_037643.1 | 2869163 | SNV | 1 | T | C | Heterozygous |
| NC_037643.1 | 2870510 | SNV | 1 | T | C | Homozygous   |
| NC_037643.1 | 2870555 | SNV | 1 | A | G | Heterozygous |
| NC_037643.1 | 2870578 | SNV | 1 | G | A | Heterozygous |
| NC_037643.1 | 2870618 | SNV | 1 | C | T | Heterozygous |
| NC_037643.1 | 2870669 | SNV | 1 | C | T | Homozygous   |
| NC_037643.1 | 2870761 | SNV | 1 | A | G | Homozygous   |
| NC_037643.1 | 2871011 | SNV | 1 | A | C | Heterozygous |
| NC_037643.1 | 2871033 | SNV | 1 | G | A | Heterozygous |
| NC_037643.1 | 2896312 | SNV | 1 | T | C | Heterozygous |
| NC_037643.1 | 2896401 | SNV | 1 | C | G | Homozygous   |
| NC_037643.1 | 2896425 | SNV | 1 | C | T | Homozygous   |
| NC_037643.1 | 2896477 | SNV | 1 | T | C | Homozygous   |
| NC_037643.1 | 2896483 | SNV | 1 | A | G | Homozygous   |
| NC_037643.1 | 2896660 | SNV | 1 | A | C | Heterozygous |
| NC_037643.1 | 2901870 | SNV | 1 | T | G | Homozygous   |
| NC_037643.1 | 2901874 | SNV | 1 | T | C | Homozygous   |
| NC_037643.1 | 2906725 | SNV | 1 | A | G | Homozygous   |
| NC_037643.1 | 2911472 | SNV | 1 | A | G | Homozygous   |
| NC_037643.1 | 2956339 | SNV | 1 | T | C | Heterozygous |
| NC_037643.1 | 2956508 | SNV | 1 | T | G | Homozygous   |
| NC_037643.1 | 2957898 | SNV | 1 | T | G | Heterozygous |
| NC_037643.1 | 2959879 | SNV | 1 | A | G | Homozygous   |
| NC_037643.1 | 2960826 | SNV | 1 | T | C | Homozygous   |
| NC_037643.1 | 2961256 | SNV | 1 | C | T | Heterozygous |

|             |         |     |   |   |   |              |
|-------------|---------|-----|---|---|---|--------------|
| NC_037643.1 | 2961394 | SNV | 1 | A | G | Homozygous   |
| NC_037643.1 | 2961433 | SNV | 1 | C | T | Heterozygous |
| NC_037643.1 | 2961439 | SNV | 1 | T | A | Homozygous   |
| NC_037643.1 | 2961647 | SNV | 1 | C | T | Heterozygous |
| NC_037643.1 | 2973961 | SNV | 1 | G | A | Heterozygous |
| NC_037643.1 | 2975146 | SNV | 1 | G | A | Heterozygous |
| NC_037643.1 | 2975369 | SNV | 1 | G | A | Homozygous   |
| NC_037643.1 | 2975459 | SNV | 1 | G | A | Homozygous   |
| NC_037643.1 | 2981252 | SNV | 1 | G | A | Heterozygous |
| NC_037643.1 | 2981635 | SNV | 1 | G | A | Homozygous   |
| NC_037643.1 | 2982361 | SNV | 1 | A | C | Heterozygous |
| NC_037643.1 | 2982383 | SNV | 1 | G | A | Homozygous   |
| NC_037643.1 | 2982897 | SNV | 1 | A | T | Heterozygous |
| NC_037643.1 | 2982899 | SNV | 1 | T | G | Heterozygous |
| NC_037643.1 | 2983182 | SNV | 1 | A | G | Heterozygous |
| NC_037643.1 | 2983207 | SNV | 1 | A | G | Homozygous   |
| NC_037643.1 | 2983237 | SNV | 1 | G | T | Homozygous   |
| NC_037643.1 | 2983244 | SNV | 1 | A | G | Heterozygous |
| NC_037643.1 | 2983866 | SNV | 1 | G | A | Homozygous   |
| NC_037643.1 | 2984272 | SNV | 1 | G | A | Heterozygous |
| NC_037643.1 | 2984431 | SNV | 1 | A | G | Homozygous   |
| NC_037643.1 | 2984517 | SNV | 1 | C | T | Homozygous   |
| NC_037643.1 | 2984746 | SNV | 1 | A | T | Heterozygous |
| NC_037643.1 | 2984776 | SNV | 1 | G | T | Heterozygous |
| NC_037643.1 | 2985142 | SNV | 1 | G | A | Heterozygous |
| NC_037643.1 | 2985153 | SNV | 1 | G | C | Homozygous   |
| NC_037643.1 | 2985209 | SNV | 1 | A | G | Homozygous   |
| NC_037643.1 | 2997550 | SNV | 1 | G | T | Heterozygous |
| NC_037643.1 | 2997577 | SNV | 1 | T | C | Homozygous   |
| NC_037643.1 | 2997609 | SNV | 1 | T | C | Homozygous   |
| NC_037643.1 | 2997645 | SNV | 1 | A | G | Homozygous   |
| NC_037643.1 | 2998738 | SNV | 1 | T | C | Homozygous   |
| NC_037643.1 | 3015717 | SNV | 1 | G | A | Homozygous   |
| NC_037643.1 | 3015723 | SNV | 1 | G | C | Homozygous   |
| NC_037643.1 | 3015726 | SNV | 1 | T | C | Homozygous   |
| NC_037643.1 | 3015736 | SNV | 1 | G | A | Homozygous   |
| NC_037643.1 | 3023621 | SNV | 1 | A | C | Heterozygous |
| NC_037643.1 | 3024400 | SNV | 1 | C | T | Heterozygous |
| NC_037643.1 | 3024417 | SNV | 1 | T | C | Heterozygous |
| NC_037643.1 | 3024427 | SNV | 1 | G | T | Heterozygous |
| NC_037643.1 | 3024488 | SNV | 1 | C | T | Heterozygous |
| NC_037643.1 | 3024542 | SNV | 1 | T | C | Homozygous   |
| NC_037643.1 | 3024556 | SNV | 1 | C | T | Heterozygous |
| NC_037643.1 | 3024581 | SNV | 1 | A | C | Homozygous   |
| NC_037643.1 | 3024672 | SNV | 1 | C | T | Homozygous   |
| NC_037643.1 | 3024998 | SNV | 1 | G | A | Heterozygous |
| NC_037643.1 | 3025003 | SNV | 1 | G | C | Heterozygous |
| NC_037643.1 | 3026492 | SNV | 1 | G | A | Heterozygous |
| NC_037643.1 | 3026658 | SNV | 1 | C | T | Heterozygous |
| NC_037643.1 | 3027027 | SNV | 1 | G | A | Heterozygous |
| NC_037643.1 | 3030362 | SNV | 1 | C | T | Heterozygous |

|             |         |     |   |   |   |              |
|-------------|---------|-----|---|---|---|--------------|
| NC_037643.1 | 3030616 | SNV | 1 | C | G | Heterozygous |
| NC_037643.1 | 3030653 | SNV | 1 | T | C | Heterozygous |
| NC_037643.1 | 3030748 | SNV | 1 | T | C | Heterozygous |
| NC_037643.1 | 3030758 | SNV | 1 | T | C | Heterozygous |
| NC_037643.1 | 3030781 | SNV | 1 | T | C | Homozygous   |
| NC_037643.1 | 3030789 | SNV | 1 | A | G | Homozygous   |
| NC_037643.1 | 3030816 | SNV | 1 | T | C | Heterozygous |
| NC_037643.1 | 3031232 | SNV | 1 | G | A | Heterozygous |
| NC_037643.1 | 3031236 | SNV | 1 | A | G | Homozygous   |
| NC_037643.1 | 3056389 | SNV | 1 | C | T | Heterozygous |
| NC_037643.1 | 3058561 | SNV | 1 | T | C | Homozygous   |
| NC_037643.1 | 3058596 | SNV | 1 | T | C | Homozygous   |
| NC_037643.1 | 3058967 | SNV | 1 | C | G | Homozygous   |
| NC_037643.1 | 3058992 | SNV | 1 | A | G | Heterozygous |
| NC_037643.1 | 3059061 | SNV | 1 | A | G | Heterozygous |
| NC_037643.1 | 3059090 | SNV | 1 | T | C | Heterozygous |
| NC_037643.1 | 3059101 | SNV | 1 | T | C | Heterozygous |
| NC_037643.1 | 3059453 | SNV | 1 | T | A | Heterozygous |
| NC_037643.1 | 3059457 | SNV | 1 | A | T | Homozygous   |
| NC_037643.1 | 3060761 | SNV | 1 | T | C | Homozygous   |
| NC_037643.1 | 3063305 | SNV | 1 | C | T | Homozygous   |
| NC_037643.1 | 3067019 | SNV | 1 | G | C | Homozygous   |
| NC_037643.1 | 3067450 | SNV | 1 | G | A | Heterozygous |
| NC_037643.1 | 3067542 | SNV | 1 | G | A | Heterozygous |
| NC_037643.1 | 3067571 | SNV | 1 | C | G | Homozygous   |
| NC_037643.1 | 3067884 | SNV | 1 | A | G | Heterozygous |
| NC_037643.1 | 3068199 | SNV | 1 | A | G | Homozygous   |
| NC_037643.1 | 3068275 | SNV | 1 | G | A | Homozygous   |
| NC_037643.1 | 3068374 | SNV | 1 | G | A | Homozygous   |
| NC_037643.1 | 3069280 | SNV | 1 | C | G | Homozygous   |
| NC_037643.1 | 3069349 | SNV | 1 | G | A | Homozygous   |
| NC_037643.1 | 3070205 | SNV | 1 | A | G | Homozygous   |
| NC_037643.1 | 3070664 | SNV | 1 | A | G | Homozygous   |
| NC_037643.1 | 3070791 | SNV | 1 | C | G | Heterozygous |
| NC_037643.1 | 3071024 | SNV | 1 | A | G | Homozygous   |
| NC_037643.1 | 3071070 | SNV | 1 | T | A | Heterozygous |
| NC_037643.1 | 3071179 | SNV | 1 | A | G | Heterozygous |
| NC_037643.1 | 3071567 | SNV | 1 | T | C | Heterozygous |
| NC_037643.1 | 3073069 | SNV | 1 | A | G | Heterozygous |
| NC_037643.1 | 3159006 | SNV | 1 | G | A | Heterozygous |
| NC_037643.1 | 3159626 | SNV | 1 | A | G | Heterozygous |
| NC_037643.1 | 3221007 | SNV | 1 | G | A | Heterozygous |
| NC_037643.1 | 3221081 | SNV | 1 | C | A | Homozygous   |
| NC_037643.1 | 3224771 | SNV | 1 | A | G | Homozygous   |
| NC_037643.1 | 3224833 | SNV | 1 | A | T | Homozygous   |
| NC_037643.1 | 3224902 | SNV | 1 | T | C | Homozygous   |
| NC_037643.1 | 3225052 | SNV | 1 | T | G | Homozygous   |
| NC_037643.1 | 3226573 | SNV | 1 | T | C | Homozygous   |
| NC_037643.1 | 3226757 | SNV | 1 | T | C | Heterozygous |
| NC_037643.1 | 3226893 | SNV | 1 | G | A | Heterozygous |
| NC_037643.1 | 3255704 | SNV | 1 | C | T | Homozygous   |

|             |         |     |   |   |   |              |
|-------------|---------|-----|---|---|---|--------------|
| NC_037643.1 | 3255740 | SNV | 1 | T | C | Homozygous   |
| NC_037643.1 | 3257992 | SNV | 1 | G | A | Homozygous   |
| NC_037643.1 | 3267345 | SNV | 1 | T | G | Homozygous   |
| NC_037643.1 | 3267352 | SNV | 1 | A | T | Homozygous   |
| NC_037643.1 | 3267355 | SNV | 1 | G | A | Homozygous   |
| NC_037643.1 | 3267364 | SNV | 1 | T | A | Homozygous   |
| NC_037643.1 | 3267367 | SNV | 1 | C | A | Homozygous   |
| NC_037643.1 | 3267375 | SNV | 1 | T | A | Homozygous   |
| NC_037643.1 | 3267378 | SNV | 1 | A | C | Homozygous   |
| NC_037643.1 | 3274131 | SNV | 1 | A | C | Homozygous   |
| NC_037643.1 | 3274149 | SNV | 1 | T | C | Homozygous   |
| NC_037643.1 | 3276007 | SNV | 1 | A | T | Heterozygous |
| NC_037643.1 | 3276037 | SNV | 1 | T | C | Homozygous   |
| NC_037643.1 | 3276055 | SNV | 1 | T | G | Heterozygous |
| NC_037643.1 | 3276076 | SNV | 1 | T | C | Heterozygous |
| NC_037643.1 | 3276086 | SNV | 1 | C | T | Heterozygous |
| NC_037643.1 | 3276159 | SNV | 1 | T | C | Homozygous   |
| NC_037643.1 | 3276223 | SNV | 1 | G | A | Heterozygous |
| NC_037643.1 | 3276252 | SNV | 1 | C | T | Heterozygous |
| NC_037643.1 | 3276259 | SNV | 1 | T | C | Heterozygous |
| NC_037643.1 | 3276338 | SNV | 1 | G | A | Heterozygous |
| NC_037643.1 | 3276356 | SNV | 1 | A | G | Heterozygous |
| NC_037643.1 | 3276427 | SNV | 1 | A | G | Heterozygous |
| NC_037643.1 | 3276517 | SNV | 1 | C | T | Heterozygous |
| NC_037643.1 | 3276535 | SNV | 1 | G | A | Homozygous   |
| NC_037643.1 | 3276553 | SNV | 1 | G | A | Homozygous   |
| NC_037643.1 | 3276589 | SNV | 1 | A | G | Homozygous   |
| NC_037643.1 | 3276592 | SNV | 1 | A | G | Heterozygous |
| NC_037643.1 | 3276619 | SNV | 1 | A | G | Heterozygous |
| NC_037643.1 | 3276664 | SNV | 1 | G | A | Heterozygous |
| NC_037643.1 | 3276737 | SNV | 1 | T | C | Heterozygous |
| NC_037643.1 | 3277051 | SNV | 1 | T | C | Heterozygous |
| NC_037643.1 | 3291613 | SNV | 1 | C | T | Heterozygous |
| NC_037643.1 | 3291908 | SNV | 1 | T | C | Heterozygous |
| NC_037643.1 | 3291971 | SNV | 1 | T | C | Homozygous   |
| NC_037643.1 | 3298244 | SNV | 1 | T | C | Homozygous   |
| NC_037643.1 | 3298291 | SNV | 1 | C | T | Heterozygous |
| NC_037643.1 | 3298298 | SNV | 1 | T | A | Heterozygous |
| NC_037643.1 | 3310299 | SNV | 1 | T | G | Homozygous   |
| NC_037643.1 | 3404438 | SNV | 1 | C | T | Homozygous   |
| NC_037643.1 | 3405094 | SNV | 1 | T | C | Homozygous   |
| NC_037643.1 | 3424207 | SNV | 1 | T | A | Homozygous   |
| NC_037643.1 | 3425759 | SNV | 1 | C | T | Homozygous   |
| NC_037643.1 | 3427675 | SNV | 1 | A | T | Heterozygous |
| NC_037643.1 | 3448533 | SNV | 1 | T | C | Homozygous   |
| NC_037643.1 | 3572858 | SNV | 1 | C | G | Heterozygous |
| NC_037643.1 | 3573649 | SNV | 1 | T | A | Homozygous   |
| NC_037643.1 | 3573651 | SNV | 1 | A | T | Homozygous   |
| NC_037643.1 | 3573872 | SNV | 1 | C | T | Heterozygous |
| NC_037643.1 | 3575463 | SNV | 1 | C | T | Homozygous   |
| NC_037643.1 | 3575678 | SNV | 1 | G | C | Homozygous   |

|             |         |     |   |   |   |              |
|-------------|---------|-----|---|---|---|--------------|
| NC_037643.1 | 3575739 | SNV | 1 | C | T | Heterozygous |
| NC_037643.1 | 3575745 | SNV | 1 | A | G | Homozygous   |
| NC_037643.1 | 3575753 | SNV | 1 | T | C | Heterozygous |
| NC_037643.1 | 3575790 | SNV | 1 | T | C | Heterozygous |
| NC_037643.1 | 3575792 | SNV | 1 | C | T | Heterozygous |
| NC_037643.1 | 3576360 | SNV | 1 | C | G | Homozygous   |
| NC_037643.1 | 3576645 | SNV | 1 | T | C | Homozygous   |
| NC_037643.1 | 3577448 | SNV | 1 | C | T | Heterozygous |
| NC_037643.1 | 3577465 | SNV | 1 | G | C | Heterozygous |
| NC_037643.1 | 3577513 | SNV | 1 | G | A | Homozygous   |
| NC_037643.1 | 3588824 | SNV | 1 | A | G | Homozygous   |
| NC_037643.1 | 3589177 | SNV | 1 | A | G | Heterozygous |
| NC_037643.1 | 3589328 | SNV | 1 | A | G | Homozygous   |
| NC_037643.1 | 3595413 | SNV | 1 | T | C | Homozygous   |
| NC_037643.1 | 3599372 | SNV | 1 | T | C | Homozygous   |
| NC_037643.1 | 3600145 | SNV | 1 | G | A | Homozygous   |
| NC_037643.1 | 3621987 | SNV | 1 | C | G | Homozygous   |
| NC_037643.1 | 3622007 | SNV | 1 | C | T | Heterozygous |
| NC_037643.1 | 3622015 | SNV | 1 | C | T | Homozygous   |
| NC_037643.1 | 3661576 | SNV | 1 | A | G | Heterozygous |
| NC_037643.1 | 3661587 | SNV | 1 | T | C | Heterozygous |
| NC_037643.1 | 3661600 | SNV | 1 | A | G | Heterozygous |
| NC_037643.1 | 3663317 | SNV | 1 | T | A | Homozygous   |
| NC_037643.1 | 3663339 | SNV | 1 | A | T | Homozygous   |
| NC_037643.1 | 3664994 | SNV | 1 | A | G | Homozygous   |
| NC_037643.1 | 3665012 | SNV | 1 | A | G | Heterozygous |
| NC_037643.1 | 3665201 | SNV | 1 | A | C | Homozygous   |
| NC_037643.1 | 3665328 | SNV | 1 | G | A | Homozygous   |
| NC_037643.1 | 3665684 | SNV | 1 | A | T | Heterozygous |
| NC_037643.1 | 3666240 | SNV | 1 | A | G | Homozygous   |
| NC_037643.1 | 3667674 | SNV | 1 | G | A | Heterozygous |
| NC_037643.1 | 3681491 | SNV | 1 | A | G | Heterozygous |
| NC_037643.1 | 3682023 | SNV | 1 | G | A | Homozygous   |
| NC_037643.1 | 3682949 | SNV | 1 | C | T | Homozygous   |
| NC_037643.1 | 3684083 | SNV | 1 | C | T | Heterozygous |
| NC_037643.1 | 3684171 | SNV | 1 | A | G | Homozygous   |
| NC_037643.1 | 3684580 | SNV | 1 | C | T | Heterozygous |
| NC_037643.1 | 3684591 | SNV | 1 | C | T | Homozygous   |
| NC_037643.1 | 3684809 | SNV | 1 | G | A | Heterozygous |
| NC_037643.1 | 3684823 | SNV | 1 | G | A | Heterozygous |
| NC_037643.1 | 3684850 | SNV | 1 | A | G | Homozygous   |
| NC_037643.1 | 3697984 | SNV | 1 | A | C | Homozygous   |
| NC_037643.1 | 3698006 | SNV | 1 | T | C | Homozygous   |
| NC_037643.1 | 3698011 | SNV | 1 | A | T | Homozygous   |
| NC_037643.1 | 3698013 | SNV | 1 | T | A | Homozygous   |
| NC_037643.1 | 3698661 | SNV | 1 | G | T | Homozygous   |
| NC_037643.1 | 3700113 | SNV | 1 | G | C | Homozygous   |
| NC_037643.1 | 3701570 | SNV | 1 | G | A | Heterozygous |
| NC_037643.1 | 3702705 | SNV | 1 | T | C | Heterozygous |
| NC_037643.1 | 3703364 | SNV | 1 | T | C | Homozygous   |
| NC_037643.1 | 3703459 | SNV | 1 | G | A | Heterozygous |

|             |         |     |   |   |   |              |
|-------------|---------|-----|---|---|---|--------------|
| NC_037643.1 | 3706742 | SNV | 1 | A | G | Heterozygous |
| NC_037643.1 | 3712898 | SNV | 1 | C | G | Heterozygous |
| NC_037643.1 | 3712898 | SNV | 1 | C | T | Heterozygous |
| NC_037643.1 | 3716234 | SNV | 1 | T | A | Heterozygous |
| NC_037643.1 | 3716240 | SNV | 1 | G | A | Homozygous   |
| NC_037643.1 | 3716242 | SNV | 1 | G | A | Homozygous   |
| NC_037643.1 | 3716247 | SNV | 1 | T | A | Homozygous   |
| NC_037643.1 | 3716252 | SNV | 1 | G | C | Homozygous   |
| NC_037643.1 | 3716254 | SNV | 1 | A | C | Homozygous   |
| NC_037643.1 | 3743915 | SNV | 1 | T | A | Heterozygous |
| NC_037643.1 | 3760965 | SNV | 1 | T | C | Homozygous   |
| NC_037643.1 | 3761133 | SNV | 1 | A | G | Homozygous   |
| NC_037643.1 | 3762192 | SNV | 1 | G | A | Homozygous   |
| NC_037643.1 | 3762202 | SNV | 1 | G | A | Heterozygous |
| NC_037643.1 | 3762214 | SNV | 1 | G | A | Heterozygous |
| NC_037643.1 | 3762224 | SNV | 1 | C | T | Heterozygous |
| NC_037643.1 | 3762267 | SNV | 1 | G | A | Heterozygous |
| NC_037643.1 | 3762294 | SNV | 1 | T | C | Homozygous   |
| NC_037643.1 | 3762575 | SNV | 1 | A | G | Heterozygous |
| NC_037643.1 | 3794134 | SNV | 1 | G | A | Homozygous   |
| NC_037643.1 | 3794875 | SNV | 1 | A | G | Homozygous   |
| NC_037643.1 | 3794893 | SNV | 1 | C | T | Homozygous   |
| NC_037643.1 | 3794895 | SNV | 1 | A | G | Homozygous   |
| NC_037643.1 | 3795462 | SNV | 1 | A | T | Homozygous   |
| NC_037643.1 | 3795472 | SNV | 1 | C | T | Homozygous   |
| NC_037643.1 | 3795475 | SNV | 1 | A | T | Homozygous   |
| NC_037643.1 | 3795491 | SNV | 1 | G | A | Homozygous   |
| NC_037643.1 | 3797447 | SNV | 1 | T | C | Heterozygous |
| NC_037643.1 | 3797449 | SNV | 1 | T | G | Heterozygous |
| NC_037643.1 | 3797451 | SNV | 1 | A | C | Heterozygous |
| NC_037643.1 | 3797459 | SNV | 1 | A | T | Heterozygous |
| NC_037643.1 | 3797480 | SNV | 1 | G | A | Homozygous   |
| NC_037643.1 | 3797580 | SNV | 1 | G | A | Homozygous   |
| NC_037643.1 | 3800735 | SNV | 1 | T | G | Heterozygous |
| NC_037643.1 | 3800738 | SNV | 1 | C | T | Heterozygous |
| NC_037643.1 | 3800781 | SNV | 1 | A | G | Homozygous   |
| NC_037643.1 | 3801221 | SNV | 1 | A | G | Heterozygous |
| NC_037643.1 | 3801291 | SNV | 1 | G | A | Heterozygous |
| NC_037643.1 | 3801310 | SNV | 1 | C | T | Homozygous   |
| NC_037643.1 | 3802795 | SNV | 1 | A | G | Homozygous   |
| NC_037643.1 | 3802799 | SNV | 1 | A | T | Homozygous   |
| NC_037643.1 | 3802801 | SNV | 1 | A | G | Homozygous   |
| NC_037643.1 | 3802825 | SNV | 1 | T | G | Heterozygous |
| NC_037643.1 | 3802827 | SNV | 1 | A | G | Heterozygous |
| NC_037643.1 | 3802827 | SNV | 1 | A | T | Heterozygous |
| NC_037643.1 | 3802829 | SNV | 1 | T | G | Heterozygous |
| NC_037643.1 | 3802834 | SNV | 1 | C | T | Heterozygous |
| NC_037643.1 | 3802836 | SNV | 1 | A | G | Heterozygous |
| NC_037643.1 | 3802838 | SNV | 1 | A | G | Heterozygous |
| NC_037643.1 | 3802846 | SNV | 1 | A | G | Heterozygous |
| NC_037643.1 | 3802848 | SNV | 1 | A | G | Homozygous   |

|             |         |     |   |   |   |              |
|-------------|---------|-----|---|---|---|--------------|
| NC_037643.1 | 3802850 | SNV | 1 | A | G | Heterozygous |
| NC_037643.1 | 3802854 | SNV | 1 | A | G | Homozygous   |
| NC_037643.1 | 3802869 | SNV | 1 | T | C | Heterozygous |
| NC_037643.1 | 3802874 | SNV | 1 | A | C | Heterozygous |
| NC_037643.1 | 3802881 | SNV | 1 | A | G | Heterozygous |
| NC_037643.1 | 3802889 | SNV | 1 | T | C | Heterozygous |
| NC_037643.1 | 3802892 | SNV | 1 | A | G | Heterozygous |
| NC_037643.1 | 3803371 | SNV | 1 | T | A | Heterozygous |
| NC_037643.1 | 3803513 | SNV | 1 | A | G | Heterozygous |
| NC_037643.1 | 3803516 | SNV | 1 | A | T | Heterozygous |
| NC_037643.1 | 3803571 | SNV | 1 | A | G | Heterozygous |
| NC_037643.1 | 3804665 | SNV | 1 | C | A | Homozygous   |
| NC_037643.1 | 3804757 | SNV | 1 | A | G | Homozygous   |
| NC_037643.1 | 3804770 | SNV | 1 | G | A | Homozygous   |
| NC_037643.1 | 3805087 | SNV | 1 | A | C | Homozygous   |
| NC_037643.1 | 3805090 | SNV | 1 | A | T | Homozygous   |
| NC_037643.1 | 3805127 | SNV | 1 | T | A | Heterozygous |
| NC_037643.1 | 3805202 | SNV | 1 | A | G | Heterozygous |
| NC_037643.1 | 3805229 | SNV | 1 | T | C | Heterozygous |
| NC_037643.1 | 3833196 | SNV | 1 | A | G | Homozygous   |
| NC_037643.1 | 3833405 | SNV | 1 | T | C | Heterozygous |
| NC_037643.1 | 3874867 | SNV | 1 | T | C | Homozygous   |
| NC_037643.1 | 3877818 | SNV | 1 | T | A | Heterozygous |
| NC_037643.1 | 3896967 | SNV | 1 | T | C | Heterozygous |
| NC_037643.1 | 3897069 | SNV | 1 | G | A | Heterozygous |
| NC_037643.1 | 3897087 | SNV | 1 | T | C | Homozygous   |
| NC_037643.1 | 3905681 | SNV | 1 | C | A | Heterozygous |
| NC_037643.1 | 3905703 | SNV | 1 | C | T | Heterozygous |
| NC_037643.1 | 3916251 | SNV | 1 | A | G | Heterozygous |
| NC_037643.1 | 3916379 | SNV | 1 | A | G | Homozygous   |
| NC_037643.1 | 3927387 | SNV | 1 | T | C | Heterozygous |
| NC_037643.1 | 3927428 | SNV | 1 | C | T | Homozygous   |
| NC_037643.1 | 3927453 | SNV | 1 | G | T | Homozygous   |
| NC_037643.1 | 3927465 | SNV | 1 | T | C | Homozygous   |
| NC_037643.1 | 3927582 | SNV | 1 | A | G | Homozygous   |
| NC_037643.1 | 3927889 | SNV | 1 | T | C | Heterozygous |
| NC_037643.1 | 3927895 | SNV | 1 | C | G | Heterozygous |
| NC_037643.1 | 3946207 | SNV | 1 | G | A | Heterozygous |
| NC_037643.1 | 3946211 | SNV | 1 | A | G | Homozygous   |
| NC_037643.1 | 3946252 | SNV | 1 | T | G | Homozygous   |
| NC_037643.1 | 3963222 | SNV | 1 | C | G | Homozygous   |
| NC_037643.1 | 3964083 | SNV | 1 | A | C | Heterozygous |
| NC_037643.1 | 3964685 | SNV | 1 | A | G | Homozygous   |
| NC_037643.1 | 3964979 | SNV | 1 | G | T | Homozygous   |
| NC_037643.1 | 3965210 | SNV | 1 | T | C | Homozygous   |
| NC_037643.1 | 3965549 | SNV | 1 | T | C | Homozygous   |
| NC_037643.1 | 3965576 | SNV | 1 | T | C | Homozygous   |
| NC_037643.1 | 3965626 | SNV | 1 | T | C | Heterozygous |
| NC_037643.1 | 3965906 | SNV | 1 | T | C | Heterozygous |
| NC_037643.1 | 3965926 | SNV | 1 | A | C | Homozygous   |
| NC_037643.1 | 3966034 | SNV | 1 | T | C | Homozygous   |



|             |         |     |   |   |   |              |
|-------------|---------|-----|---|---|---|--------------|
| NC_037643.1 | 3966270 | SNV | 1 | T | C | Homozygous   |
| NC_037643.1 | 3966435 | SNV | 1 | T | C | Heterozygous |
| NC_037643.1 | 3966742 | SNV | 1 | C | T | Homozygous   |
| NC_037643.1 | 3966774 | SNV | 1 | C | T | Heterozygous |
| NC_037643.1 | 3966776 | SNV | 1 | C | T | Heterozygous |
| NC_037643.1 | 3966907 | SNV | 1 | C | A | Heterozygous |
| NC_037643.1 | 3968746 | SNV | 1 | A | G | Homozygous   |
| NC_037643.1 | 3968915 | SNV | 1 | G | T | Heterozygous |
| NC_037643.1 | 3969567 | SNV | 1 | G | C | Homozygous   |
| NC_037643.1 | 3969996 | SNV | 1 | T | G | Heterozygous |
| NC_037643.1 | 3970112 | SNV | 1 | A | G | Homozygous   |
| NC_037643.1 | 3970291 | SNV | 1 | A | C | Homozygous   |
| NC_037643.1 | 3971069 | SNV | 1 | C | T | Heterozygous |
| NC_037643.1 | 3971153 | SNV | 1 | T | C | Heterozygous |
| NC_037643.1 | 3971666 | SNV | 1 | A | G | Heterozygous |
| NC_037643.1 | 3971673 | SNV | 1 | T | C | Heterozygous |
| NC_037643.1 | 3971915 | SNV | 1 | T | C | Homozygous   |
| NC_037643.1 | 3974790 | SNV | 1 | C | G | Homozygous   |
| NC_037643.1 | 3975344 | SNV | 1 | C | T | Homozygous   |
| NC_037643.1 | 3995229 | SNV | 1 | A | G | Heterozygous |
| NC_037643.1 | 4129748 | SNV | 1 | A | T | Homozygous   |
| NC_037643.1 | 4129762 | SNV | 1 | C | T | Homozygous   |
| NC_037643.1 | 4131943 | SNV | 1 | T | C | Heterozygous |
| NC_037643.1 | 4131945 | SNV | 1 | G | A | Heterozygous |
| NC_037643.1 | 4150781 | SNV | 1 | A | C | Homozygous   |
| NC_037643.1 | 4150795 | SNV | 1 | C | T | Homozygous   |
| NC_037643.1 | 4150975 | SNV | 1 | G | A | Heterozygous |
| NC_037643.1 | 4150977 | SNV | 1 | G | A | Homozygous   |
| NC_037643.1 | 4150979 | SNV | 1 | G | A | Homozygous   |
| NC_037643.1 | 4151006 | SNV | 1 | C | T | Heterozygous |
| NC_037643.1 | 4151196 | SNV | 1 | G | A | Heterozygous |
| NC_037643.1 | 4151222 | SNV | 1 | A | G | Homozygous   |
| NC_037643.1 | 4151358 | SNV | 1 | C | A | Heterozygous |
| NC_037643.1 | 4155976 | SNV | 1 | G | A | Heterozygous |
| NC_037643.1 | 4155978 | SNV | 1 | A | G | Heterozygous |
| NC_037643.1 | 4179801 | SNV | 1 | T | C | Heterozygous |
| NC_037643.1 | 4179807 | SNV | 1 | C | T | Heterozygous |
| NC_037643.1 | 4179813 | SNV | 1 | T | C | Heterozygous |
| NC_037643.1 | 4179819 | SNV | 1 | C | T | Heterozygous |
| NC_037643.1 | 4179833 | SNV | 1 | T | A | Heterozygous |
| NC_037643.1 | 4179838 | SNV | 1 | T | A | Heterozygous |
| NC_037643.1 | 4179840 | SNV | 1 | T | C | Heterozygous |
| NC_037643.1 | 4201573 | SNV | 1 | G | A | Homozygous   |
| NC_037643.1 | 4201583 | SNV | 1 | G | A | Heterozygous |
| NC_037643.1 | 4201612 | SNV | 1 | G | A | Heterozygous |
| NC_037643.1 | 4208927 | SNV | 1 | C | T | Homozygous   |
| NC_037643.1 | 4222712 | SNV | 1 | T | C | Homozygous   |
| NC_037643.1 | 4222717 | SNV | 1 | G | C | Heterozygous |
| NC_037643.1 | 4222726 | SNV | 1 | T | C | Heterozygous |
| NC_037643.1 | 4224199 | SNV | 1 | G | A | Heterozygous |
| NC_037643.1 | 4224256 | SNV | 1 | A | G | Homozygous   |

|             |         |     |   |   |   |              |
|-------------|---------|-----|---|---|---|--------------|
| NC_037643.1 | 4224448 | SNV | 1 | C | T | Heterozygous |
| NC_037643.1 | 4224910 | SNV | 1 | A | G | Homozygous   |
| NC_037643.1 | 4225337 | SNV | 1 | A | G | Homozygous   |
| NC_037643.1 | 4225392 | SNV | 1 | T | C | Heterozygous |
| NC_037643.1 | 4228091 | SNV | 1 | G | A | Homozygous   |
| NC_037643.1 | 4228099 | SNV | 1 | A | G | Homozygous   |
| NC_037643.1 | 4229010 | SNV | 1 | A | G | Homozygous   |
| NC_037643.1 | 4236414 | SNV | 1 | C | T | Heterozygous |
| NC_037643.1 | 4236514 | SNV | 1 | G | A | Homozygous   |
| NC_037643.1 | 4236547 | SNV | 1 | A | G | Homozygous   |
| NC_037643.1 | 4248433 | SNV | 1 | A | G | Heterozygous |
| NC_037643.1 | 4248543 | SNV | 1 | C | T | Homozygous   |
| NC_037643.1 | 4255156 | SNV | 1 | A | T | Homozygous   |
| NC_037643.1 | 4255209 | SNV | 1 | T | G | Homozygous   |
| NC_037643.1 | 4257210 | SNV | 1 | C | T | Homozygous   |
| NC_037643.1 | 4263864 | SNV | 1 | T | C | Heterozygous |
| NC_037643.1 | 4263888 | SNV | 1 | A | G | Homozygous   |
| NC_037643.1 | 4263993 | SNV | 1 | T | C | Homozygous   |
| NC_037643.1 | 4264680 | SNV | 1 | A | G | Homozygous   |
| NC_037643.1 | 4264784 | SNV | 1 | C | T | Homozygous   |
| NC_037643.1 | 4277589 | SNV | 1 | G | A | Heterozygous |
| NC_037643.1 | 4288210 | SNV | 1 | A | G | Homozygous   |
| NC_037643.1 | 4288216 | SNV | 1 | A | T | Homozygous   |
| NC_037643.1 | 4288221 | SNV | 1 | T | C | Homozygous   |
| NC_037643.1 | 4288228 | SNV | 1 | A | G | Homozygous   |
| NC_037643.1 | 4288231 | SNV | 1 | T | C | Homozygous   |
| NC_037643.1 | 4288233 | SNV | 1 | T | C | Homozygous   |
| NC_037643.1 | 4288259 | SNV | 1 | T | A | Heterozygous |
| NC_037643.1 | 4288262 | SNV | 1 | G | A | Heterozygous |
| NC_037643.1 | 4288265 | SNV | 1 | T | A | Heterozygous |
| NC_037643.1 | 4299890 | SNV | 1 | C | T | Homozygous   |
| NC_037643.1 | 4299935 | SNV | 1 | C | T | Homozygous   |
| NC_037643.1 | 4300074 | SNV | 1 | C | T | Heterozygous |
| NC_037643.1 | 4317792 | SNV | 1 | T | C | Homozygous   |
| NC_037643.1 | 4317878 | SNV | 1 | A | G | Homozygous   |
| NC_037643.1 | 4317930 | SNV | 1 | A | G | Homozygous   |
| NC_037643.1 | 4317941 | SNV | 1 | C | T | Heterozygous |
| NC_037643.1 | 4317958 | SNV | 1 | C | T | Heterozygous |
| NC_037643.1 | 4336453 | SNV | 1 | G | C | Homozygous   |
| NC_037643.1 | 4336558 | SNV | 1 | T | G | Homozygous   |
| NC_037643.1 | 4336571 | SNV | 1 | G | A | Homozygous   |
| NC_037643.1 | 4336784 | SNV | 1 | C | G | Heterozygous |
| NC_037643.1 | 4351993 | SNV | 1 | A | G | Homozygous   |
| NC_037643.1 | 4369495 | SNV | 1 | T | C | Homozygous   |
| NC_037643.1 | 4369535 | SNV | 1 | A | G | Homozygous   |
| NC_037643.1 | 4432504 | SNV | 1 | T | G | Heterozygous |
| NC_037643.1 | 4432510 | SNV | 1 | C | T | Homozygous   |
| NC_037643.1 | 4432544 | SNV | 1 | G | A | Homozygous   |
| NC_037643.1 | 4432552 | SNV | 1 | A | T | Homozygous   |
| NC_037643.1 | 4432559 | SNV | 1 | G | T | Heterozygous |
| NC_037643.1 | 4464879 | SNV | 1 | A | C | Homozygous   |

|             |         |     |   |   |   |              |
|-------------|---------|-----|---|---|---|--------------|
| NC_037643.1 | 4464892 | SNV | 1 | G | A | Homozygous   |
| NC_037643.1 | 4464924 | SNV | 1 | T | A | Homozygous   |
| NC_037643.1 | 4466604 | SNV | 1 | C | T | Homozygous   |
| NC_037643.1 | 4466613 | SNV | 1 | G | T | Homozygous   |
| NC_037643.1 | 4466615 | SNV | 1 | C | A | Heterozygous |
| NC_037643.1 | 4479859 | SNV | 1 | G | C | Heterozygous |
| NC_037643.1 | 4481433 | SNV | 1 | G | A | Heterozygous |
| NC_037643.1 | 4483437 | SNV | 1 | G | A | Heterozygous |
| NC_037643.1 | 4483495 | SNV | 1 | G | A | Heterozygous |
| NC_037643.1 | 4483545 | SNV | 1 | T | C | Homozygous   |
| NC_037643.1 | 4484039 | SNV | 1 | C | T | Heterozygous |
| NC_037643.1 | 4484244 | SNV | 1 | G | A | Homozygous   |
| NC_037643.1 | 4488850 | SNV | 1 | A | T | Homozygous   |
| NC_037643.1 | 4489230 | SNV | 1 | A | G | Heterozygous |
| NC_037643.1 | 4489254 | SNV | 1 | G | A | Heterozygous |
| NC_037643.1 | 4489260 | SNV | 1 | T | C | Homozygous   |
| NC_037643.1 | 4489337 | SNV | 1 | A | T | Homozygous   |
| NC_037643.1 | 4489340 | SNV | 1 | G | A | Homozygous   |
| NC_037643.1 | 4489454 | SNV | 1 | T | C | Homozygous   |
| NC_037643.1 | 4489809 | SNV | 1 | A | G | Heterozygous |
| NC_037643.1 | 4490254 | SNV | 1 | A | G | Homozygous   |
| NC_037643.1 | 4490614 | SNV | 1 | T | G | Homozygous   |
| NC_037643.1 | 4490616 | SNV | 1 | A | C | Homozygous   |
| NC_037643.1 | 4490619 | SNV | 1 | G | A | Homozygous   |
| NC_037643.1 | 4497577 | SNV | 1 | A | C | Homozygous   |
| NC_037643.1 | 4497747 | SNV | 1 | T | C | Heterozygous |
| NC_037643.1 | 4501059 | SNV | 1 | T | C | Heterozygous |
| NC_037643.1 | 4501310 | SNV | 1 | G | A | Homozygous   |
| NC_037643.1 | 4501507 | SNV | 1 | G | A | Heterozygous |
| NC_037643.1 | 4501837 | SNV | 1 | A | G | Heterozygous |
| NC_037643.1 | 4501893 | SNV | 1 | T | C | Homozygous   |
| NC_037643.1 | 4588386 | SNV | 1 | T | C | Heterozygous |
| NC_037643.1 | 4588425 | SNV | 1 | A | G | Heterozygous |
| NC_037643.1 | 4588431 | SNV | 1 | A | G | Homozygous   |
| NC_037643.1 | 4588435 | SNV | 1 | T | A | Homozygous   |
| NC_037643.1 | 4588438 | SNV | 1 | G | A | Homozygous   |
| NC_037643.1 | 4588473 | SNV | 1 | T | G | Heterozygous |
| NC_037643.1 | 4588509 | SNV | 1 | G | A | Heterozygous |
| NC_037643.1 | 4588525 | SNV | 1 | A | T | Homozygous   |
| NC_037643.1 | 4588579 | SNV | 1 | A | T | Homozygous   |
| NC_037643.1 | 4589296 | SNV | 1 | C | T | Heterozygous |
| NC_037643.1 | 4589301 | SNV | 1 | C | T | Heterozygous |
| NC_037643.1 | 4589341 | SNV | 1 | G | A | Homozygous   |
| NC_037643.1 | 4589353 | SNV | 1 | A | C | Homozygous   |
| NC_037643.1 | 4589368 | SNV | 1 | A | C | Homozygous   |
| NC_037643.1 | 4589372 | SNV | 1 | G | C | Heterozygous |
| NC_037643.1 | 4589528 | SNV | 1 | C | A | Homozygous   |
| NC_037643.1 | 4589541 | SNV | 1 | C | T | Homozygous   |
| NC_037643.1 | 4589552 | SNV | 1 | C | T | Heterozygous |
| NC_037643.1 | 4589556 | SNV | 1 | G | A | Heterozygous |
| NC_037643.1 | 4589575 | SNV | 1 | A | G | Heterozygous |

|             |         |     |   |   |   |              |
|-------------|---------|-----|---|---|---|--------------|
| NC_037643.1 | 4590333 | SNV | 1 | C | T | Heterozygous |
| NC_037643.1 | 4598496 | SNV | 1 | C | T | Homozygous   |
| NC_037643.1 | 4602232 | SNV | 1 | A | G | Homozygous   |
| NC_037643.1 | 4602247 | SNV | 1 | A | G | Homozygous   |
| NC_037643.1 | 4602278 | SNV | 1 | T | C | Homozygous   |
| NC_037643.1 | 4602445 | SNV | 1 | A | G | Homozygous   |
| NC_037643.1 | 4603813 | SNV | 1 | T | C | Homozygous   |
| NC_037643.1 | 4603969 | SNV | 1 | A | G | Homozygous   |
| NC_037643.1 | 4605087 | SNV | 1 | A | G | Homozygous   |
| NC_037643.1 | 4608302 | SNV | 1 | G | A | Homozygous   |
| NC_037643.1 | 4608305 | SNV | 1 | T | C | Homozygous   |
| NC_037643.1 | 4608329 | SNV | 1 | G | A | Heterozygous |
| NC_037643.1 | 4608335 | SNV | 1 | T | C | Heterozygous |
| NC_037643.1 | 4608626 | SNV | 1 | T | C | Heterozygous |
| NC_037643.1 | 4612154 | SNV | 1 | A | T | Homozygous   |
| NC_037643.1 | 4612353 | SNV | 1 | T | G | Homozygous   |
| NC_037643.1 | 4612377 | SNV | 1 | A | G | Homozygous   |
| NC_037643.1 | 4612397 | SNV | 1 | T | C | Homozygous   |
| NC_037643.1 | 4612414 | SNV | 1 | C | G | Heterozygous |
| NC_037643.1 | 4612597 | SNV | 1 | A | G | Homozygous   |
| NC_037643.1 | 4612790 | SNV | 1 | C | T | Homozygous   |
| NC_037643.1 | 4612801 | SNV | 1 | T | C | Homozygous   |
| NC_037643.1 | 4612858 | SNV | 1 | T | C | Homozygous   |
| NC_037643.1 | 4612907 | SNV | 1 | G | A | Heterozygous |
| NC_037643.1 | 4612928 | SNV | 1 | T | C | Homozygous   |
| NC_037643.1 | 4613429 | SNV | 1 | C | T | Heterozygous |
| NC_037643.1 | 4613433 | SNV | 1 | G | A | Heterozygous |
| NC_037643.1 | 4613465 | SNV | 1 | T | C | Heterozygous |
| NC_037643.1 | 4613840 | SNV | 1 | T | C | Homozygous   |
| NC_037643.1 | 4613864 | SNV | 1 | T | C | Homozygous   |
| NC_037643.1 | 4618901 | SNV | 1 | A | G | Heterozygous |
| NC_037643.1 | 4618905 | SNV | 1 | G | A | Homozygous   |
| NC_037643.1 | 4621901 | SNV | 1 | T | A | Homozygous   |
| NC_037643.1 | 4621984 | SNV | 1 | A | G | Homozygous   |
| NC_037643.1 | 4623515 | SNV | 1 | A | G | Homozygous   |
| NC_037643.1 | 4623557 | SNV | 1 | G | A | Homozygous   |
| NC_037643.1 | 4623562 | SNV | 1 | A | T | Homozygous   |
| NC_037643.1 | 4623704 | SNV | 1 | G | A | Homozygous   |
| NC_037643.1 | 4623706 | SNV | 1 | T | A | Homozygous   |
| NC_037643.1 | 4624221 | SNV | 1 | G | A | Homozygous   |
| NC_037643.1 | 4624245 | SNV | 1 | G | A | Homozygous   |
| NC_037643.1 | 4625291 | SNV | 1 | G | A | Heterozygous |
| NC_037643.1 | 4625408 | SNV | 1 | T | C | Homozygous   |
| NC_037643.1 | 4626190 | SNV | 1 | A | T | Homozygous   |
| NC_037643.1 | 4626744 | SNV | 1 | T | C | Homozygous   |
| NC_037643.1 | 4630602 | SNV | 1 | C | T | Homozygous   |
| NC_037643.1 | 4630604 | SNV | 1 | A | G | Homozygous   |
| NC_037643.1 | 4640753 | SNV | 1 | C | T | Homozygous   |
| NC_037643.1 | 4640967 | SNV | 1 | A | T | Homozygous   |
| NC_037643.1 | 4648247 | SNV | 1 | A | G | Homozygous   |
| NC_037643.1 | 4648298 | SNV | 1 | A | G | Homozygous   |

|             |         |     |   |   |   |              |
|-------------|---------|-----|---|---|---|--------------|
| NC_037643.1 | 4648543 | SNV | 1 | C | T | Homozygous   |
| NC_037643.1 | 4650356 | SNV | 1 | G | A | Heterozygous |
| NC_037643.1 | 4650390 | SNV | 1 | A | G | Homozygous   |
| NC_037643.1 | 4650392 | SNV | 1 | A | G | Homozygous   |
| NC_037643.1 | 4650399 | SNV | 1 | A | G | Homozygous   |
| NC_037643.1 | 4650549 | SNV | 1 | C | T | Heterozygous |
| NC_037643.1 | 4650552 | SNV | 1 | T | C | Heterozygous |
| NC_037643.1 | 4667940 | SNV | 1 | A | T | Homozygous   |
| NC_037643.1 | 4669784 | SNV | 1 | A | G | Homozygous   |
| NC_037643.1 | 4673697 | SNV | 1 | T | C | Homozygous   |
| NC_037643.1 | 4673970 | SNV | 1 | T | C | Homozygous   |
| NC_037643.1 | 4673981 | SNV | 1 | G | A | Homozygous   |
| NC_037643.1 | 4680963 | SNV | 1 | A | T | Homozygous   |
| NC_037643.1 | 4680980 | SNV | 1 | T | G | Homozygous   |
| NC_037643.1 | 4680984 | SNV | 1 | G | A | Homozygous   |
| NC_037643.1 | 4680988 | SNV | 1 | T | A | Homozygous   |
| NC_037643.1 | 4680998 | SNV | 1 | C | A | Homozygous   |
| NC_037643.1 | 4681012 | SNV | 1 | C | A | Homozygous   |
| NC_037643.1 | 4681019 | SNV | 1 | C | A | Homozygous   |
| NC_037643.1 | 4787202 | SNV | 1 | A | G | Homozygous   |
| NC_037643.1 | 4787211 | SNV | 1 | T | A | Homozygous   |
| NC_037643.1 | 4787217 | SNV | 1 | T | A | Homozygous   |
| NC_037643.1 | 4787221 | SNV | 1 | T | A | Homozygous   |
| NC_037643.1 | 4787228 | SNV | 1 | A | T | Homozygous   |
| NC_037643.1 | 4787236 | SNV | 1 | C | A | Homozygous   |
| NC_037643.1 | 4787242 | SNV | 1 | A | T | Homozygous   |
| NC_037643.1 | 4787540 | SNV | 1 | G | T | Homozygous   |
| NC_037643.1 | 4787548 | SNV | 1 | A | G | Homozygous   |
| NC_037643.1 | 4787551 | SNV | 1 | T | A | Homozygous   |
| NC_037643.1 | 4787561 | SNV | 1 | T | A | Homozygous   |
| NC_037643.1 | 4787566 | SNV | 1 | T | A | Homozygous   |
| NC_037643.1 | 4787569 | SNV | 1 | T | A | Homozygous   |
| NC_037643.1 | 4792660 | SNV | 1 | C | T | Homozygous   |
| NC_037643.1 | 4792939 | SNV | 1 | G | T | Homozygous   |
| NC_037643.1 | 4793492 | SNV | 1 | G | A | Homozygous   |
| NC_037643.1 | 4793639 | SNV | 1 | G | A | Homozygous   |
| NC_037643.1 | 4794161 | SNV | 1 | T | A | Homozygous   |
| NC_037643.1 | 4794546 | SNV | 1 | C | T | Homozygous   |
| NC_037643.1 | 4798107 | SNV | 1 | C | T | Homozygous   |
| NC_037643.1 | 4799223 | SNV | 1 | G | T | Homozygous   |
| NC_037643.1 | 4799227 | SNV | 1 | T | G | Homozygous   |
| NC_037643.1 | 4799525 | SNV | 1 | A | T | Homozygous   |
| NC_037643.1 | 4799530 | SNV | 1 | G | A | Homozygous   |
| NC_037643.1 | 4799534 | SNV | 1 | T | G | Homozygous   |
| NC_037643.1 | 4799544 | SNV | 1 | T | A | Homozygous   |
| NC_037643.1 | 4799680 | SNV | 1 | T | G | Heterozygous |
| NC_037643.1 | 4799701 | SNV | 1 | A | T | Heterozygous |
| NC_037643.1 | 4799842 | SNV | 1 | A | T | Homozygous   |
| NC_037643.1 | 4799853 | SNV | 1 | G | T | Homozygous   |
| NC_037643.1 | 4799856 | SNV | 1 | A | T | Homozygous   |
| NC_037643.1 | 4799874 | SNV | 1 | T | G | Homozygous   |

|             |         |     |   |   |   |              |
|-------------|---------|-----|---|---|---|--------------|
| NC_037643.1 | 4799878 | SNV | 1 | G | A | Homozygous   |
| NC_037643.1 | 4799880 | SNV | 1 | T | C | Homozygous   |
| NC_037643.1 | 4799882 | SNV | 1 | A | T | Homozygous   |
| NC_037643.1 | 4804919 | SNV | 1 | T | A | Homozygous   |
| NC_037643.1 | 4805231 | SNV | 1 | C | T | Homozygous   |
| NC_037643.1 | 4808962 | SNV | 1 | T | C | Homozygous   |
| NC_037643.1 | 4808981 | SNV | 1 | A | G | Homozygous   |
| NC_037643.1 | 4808983 | SNV | 1 | A | G | Homozygous   |
| NC_037643.1 | 4812961 | SNV | 1 | A | G | Homozygous   |
| NC_037643.1 | 4819407 | SNV | 1 | A | T | Homozygous   |
| NC_037643.1 | 4819415 | SNV | 1 | T | A | Homozygous   |
| NC_037643.1 | 4819419 | SNV | 1 | G | A | Homozygous   |
| NC_037643.1 | 4822133 | SNV | 1 | T | C | Homozygous   |
| NC_037643.1 | 4822482 | SNV | 1 | A | G | Homozygous   |
| NC_037643.1 | 4825498 | SNV | 1 | T | G | Homozygous   |
| NC_037643.1 | 4825504 | SNV | 1 | A | T | Homozygous   |
| NC_037643.1 | 4825507 | SNV | 1 | A | C | Homozygous   |
| NC_037643.1 | 4830420 | SNV | 1 | G | A | Heterozygous |
| NC_037643.1 | 4832746 | SNV | 1 | T | C | Homozygous   |
| NC_037643.1 | 4833498 | SNV | 1 | A | T | Homozygous   |
| NC_037643.1 | 4833500 | SNV | 1 | A | G | Homozygous   |
| NC_037643.1 | 4833504 | SNV | 1 | A | G | Homozygous   |
| NC_037643.1 | 4835035 | SNV | 1 | G | A | Heterozygous |
| NC_037643.1 | 4836377 | SNV | 1 | C | T | Heterozygous |
| NC_037643.1 | 4837185 | SNV | 1 | A | T | Heterozygous |
| NC_037643.1 | 4840821 | SNV | 1 | T | A | Homozygous   |
| NC_037643.1 | 4840845 | SNV | 1 | T | A | Homozygous   |
| NC_037643.1 | 4840849 | SNV | 1 | T | A | Homozygous   |
| NC_037643.1 | 4840851 | SNV | 1 | A | C | Homozygous   |
| NC_037643.1 | 4842126 | SNV | 1 | C | T | Homozygous   |
| NC_037643.1 | 4842894 | SNV | 1 | T | A | Homozygous   |
| NC_037643.1 | 4861140 | SNV | 1 | T | C | Homozygous   |
| NC_037643.1 | 4862842 | SNV | 1 | A | G | Homozygous   |
| NC_037643.1 | 4864823 | SNV | 1 | T | A | Homozygous   |
| NC_037643.1 | 4866198 | SNV | 1 | T | G | Heterozygous |
| NC_037643.1 | 4866307 | SNV | 1 | G | A | Heterozygous |
| NC_037643.1 | 4867581 | SNV | 1 | T | G | Homozygous   |
| NC_037643.1 | 4868029 | SNV | 1 | G | C | Heterozygous |
| NC_037643.1 | 4868050 | SNV | 1 | C | T | Heterozygous |
| NC_037643.1 | 4868147 | SNV | 1 | G | A | Heterozygous |
| NC_037643.1 | 4868281 | SNV | 1 | G | A | Heterozygous |
| NC_037643.1 | 4868421 | SNV | 1 | T | G | Heterozygous |
| NC_037643.1 | 4892476 | SNV | 1 | G | T | Homozygous   |
| NC_037643.1 | 4893228 | SNV | 1 | T | C | Homozygous   |
| NC_037643.1 | 4913927 | SNV | 1 | A | G | Homozygous   |
| NC_037643.1 | 4913990 | SNV | 1 | T | C | Homozygous   |
| NC_037643.1 | 4913993 | SNV | 1 | T | C | Homozygous   |
| NC_037643.1 | 4914035 | SNV | 1 | C | T | Heterozygous |
| NC_037643.1 | 4914104 | SNV | 1 | C | T | Homozygous   |
| NC_037643.1 | 4914174 | SNV | 1 | G | A | Homozygous   |
| NC_037643.1 | 4914273 | SNV | 1 | G | A | Heterozygous |

|             |         |     |   |   |   |              |
|-------------|---------|-----|---|---|---|--------------|
| NC_037643.1 | 4914325 | SNV | 1 | A | G | Homozygous   |
| NC_037643.1 | 4934088 | SNV | 1 | A | T | Homozygous   |
| NC_037643.1 | 4934091 | SNV | 1 | C | A | Homozygous   |
| NC_037643.1 | 4934122 | SNV | 1 | T | G | Homozygous   |
| NC_037643.1 | 4934124 | SNV | 1 | A | C | Homozygous   |
| NC_037643.1 | 4934128 | SNV | 1 | G | A | Homozygous   |
| NC_037643.1 | 4939141 | SNV | 1 | T | C | Homozygous   |
| NC_037643.1 | 4939249 | SNV | 1 | C | T | Homozygous   |
| NC_037643.1 | 4939437 | SNV | 1 | T | C | Homozygous   |
| NC_037643.1 | 4939531 | SNV | 1 | A | G | Homozygous   |
| NC_037643.1 | 4940042 | SNV | 1 | G | A | Heterozygous |
| NC_037643.1 | 4944542 | SNV | 1 | G | T | Homozygous   |
| NC_037643.1 | 4944546 | SNV | 1 | A | C | Homozygous   |
| NC_037643.1 | 4944557 | SNV | 1 | G | C | Homozygous   |
| NC_037643.1 | 4944592 | SNV | 1 | A | G | Homozygous   |
| NC_037643.1 | 4944595 | SNV | 1 | G | A | Heterozygous |
| NC_037643.1 | 4944595 | SNV | 1 | G | T | Heterozygous |
| NC_037643.1 | 4944597 | SNV | 1 | C | T | Homozygous   |
| NC_037643.1 | 4948027 | SNV | 1 | G | A | Homozygous   |
| NC_037643.1 | 4956079 | SNV | 1 | T | C | Heterozygous |
| NC_037643.1 | 4961594 | SNV | 1 | G | A | Homozygous   |
| NC_037643.1 | 4961681 | SNV | 1 | C | G | Homozygous   |
| NC_037643.1 | 4965359 | SNV | 1 | T | A | Homozygous   |
| NC_037643.1 | 4965365 | SNV | 1 | G | A | Heterozygous |
| NC_037643.1 | 4965369 | SNV | 1 | G | A | Homozygous   |
| NC_037643.1 | 4971342 | SNV | 1 | A | G | Homozygous   |
| NC_037643.1 | 4971544 | SNV | 1 | A | G | Heterozygous |
| NC_037643.1 | 4971547 | SNV | 1 | G | A | Homozygous   |
| NC_037643.1 | 4971554 | SNV | 1 | G | A | Heterozygous |
| NC_037643.1 | 4971583 | SNV | 1 | G | A | Heterozygous |
| NC_037643.1 | 4971755 | SNV | 1 | A | G | Heterozygous |
| NC_037643.1 | 4971819 | SNV | 1 | A | G | Homozygous   |
| NC_037643.1 | 4972256 | SNV | 1 | T | C | Homozygous   |
| NC_037643.1 | 4972260 | SNV | 1 | T | C | Heterozygous |
| NC_037643.1 | 4972595 | SNV | 1 | T | C | Homozygous   |
| NC_037643.1 | 4972626 | SNV | 1 | G | A | Heterozygous |
| NC_037643.1 | 4978585 | SNV | 1 | C | A | Heterozygous |
| NC_037643.1 | 4978725 | SNV | 1 | T | G | Homozygous   |
| NC_037643.1 | 4978743 | SNV | 1 | A | T | Heterozygous |
| NC_037643.1 | 4979249 | SNV | 1 | G | A | Homozygous   |
| NC_037643.1 | 4979447 | SNV | 1 | A | G | Homozygous   |
| NC_037643.1 | 4979499 | SNV | 1 | G | A | Heterozygous |
| NC_037643.1 | 4979608 | SNV | 1 | C | T | Homozygous   |
| NC_037643.1 | 4979822 | SNV | 1 | G | A | Heterozygous |
| NC_037643.1 | 4980113 | SNV | 1 | A | G | Homozygous   |
| NC_037643.1 | 4981473 | SNV | 1 | C | T | Heterozygous |
| NC_037643.1 | 5000117 | SNV | 1 | A | G | Homozygous   |
| NC_037643.1 | 5000181 | SNV | 1 | G | A | Heterozygous |
| NC_037643.1 | 5000305 | SNV | 1 | G | C | Heterozygous |
| NC_037643.1 | 5000483 | SNV | 1 | A | G | Homozygous   |
| NC_037643.1 | 5000543 | SNV | 1 | G | A | Heterozygous |

|             |         |     |   |   |   |              |
|-------------|---------|-----|---|---|---|--------------|
| NC_037643.1 | 5013836 | SNV | 1 | T | A | Homozygous   |
| NC_037643.1 | 5013839 | SNV | 1 | T | A | Homozygous   |
| NC_037643.1 | 5013864 | SNV | 1 | A | T | Homozygous   |
| NC_037643.1 | 5019336 | SNV | 1 | G | A | Heterozygous |
| NC_037643.1 | 5067656 | SNV | 1 | C | T | Heterozygous |
| NC_037643.1 | 5067660 | SNV | 1 | A | G | Heterozygous |
| NC_037643.1 | 5067902 | SNV | 1 | G | C | Heterozygous |
| NC_037643.1 | 5099008 | SNV | 1 | A | T | Heterozygous |
| NC_037643.1 | 5108210 | SNV | 1 | A | T | Homozygous   |
| NC_037643.1 | 5108260 | SNV | 1 | A | C | Heterozygous |
| NC_037643.1 | 5108262 | SNV | 1 | G | A | Homozygous   |
| NC_037643.1 | 5120329 | SNV | 1 | C | T | Heterozygous |
| NC_037643.1 | 5122406 | SNV | 1 | A | G | Homozygous   |
| NC_037643.1 | 5122435 | SNV | 1 | A | G | Homozygous   |
| NC_037643.1 | 5122437 | SNV | 1 | A | C | Homozygous   |
| NC_037643.1 | 5124371 | SNV | 1 | G | A | Homozygous   |
| NC_037643.1 | 5134001 | SNV | 1 | A | T | Heterozygous |
| NC_037643.1 | 5140630 | SNV | 1 | T | C | Heterozygous |
| NC_037643.1 | 5140639 | SNV | 1 | A | G | Heterozygous |
| NC_037643.1 | 5140936 | SNV | 1 | T | C | Heterozygous |
| NC_037643.1 | 5140948 | SNV | 1 | A | G | Heterozygous |
| NC_037643.1 | 5141035 | SNV | 1 | A | G | Homozygous   |
| NC_037643.1 | 5141149 | SNV | 1 | A | G | Heterozygous |
| NC_037643.1 | 5141161 | SNV | 1 | A | C | Heterozygous |
| NC_037643.1 | 5141164 | SNV | 1 | T | C | Heterozygous |
| NC_037643.1 | 5141170 | SNV | 1 | A | G | Heterozygous |
| NC_037643.1 | 5141182 | SNV | 1 | T | A | Heterozygous |
| NC_037643.1 | 5141185 | SNV | 1 | T | C | Heterozygous |
| NC_037643.1 | 5141194 | SNV | 1 | T | C | Heterozygous |
| NC_037643.1 | 5141203 | SNV | 1 | A | G | Homozygous   |
| NC_037643.1 | 5141206 | SNV | 1 | T | C | Homozygous   |
| NC_037643.1 | 5141224 | SNV | 1 | T | A | Homozygous   |
| NC_037643.1 | 5141231 | SNV | 1 | A | C | Homozygous   |
| NC_037643.1 | 5141239 | SNV | 1 | A | G | Heterozygous |
| NC_037643.1 | 5141242 | SNV | 1 | T | A | Heterozygous |
| NC_037643.1 | 5141245 | SNV | 1 | A | T | Homozygous   |
| NC_037643.1 | 5141251 | SNV | 1 | T | C | Heterozygous |
| NC_037643.1 | 5141254 | SNV | 1 | T | C | Heterozygous |
| NC_037643.1 | 5141257 | SNV | 1 | A | G | Heterozygous |
| NC_037643.1 | 5141260 | SNV | 1 | A | G | Heterozygous |
| NC_037643.1 | 5141266 | SNV | 1 | A | G | Heterozygous |
| NC_037643.1 | 5141271 | SNV | 1 | A | C | Heterozygous |
| NC_037643.1 | 5141275 | SNV | 1 | A | G | Heterozygous |
| NC_037643.1 | 5141332 | SNV | 1 | A | G | Heterozygous |
| NC_037643.1 | 5141680 | SNV | 1 | T | C | Heterozygous |
| NC_037643.1 | 5141682 | SNV | 1 | G | T | Heterozygous |
| NC_037643.1 | 5141695 | SNV | 1 | A | C | Heterozygous |
| NC_037643.1 | 5141704 | SNV | 1 | T | C | Heterozygous |
| NC_037643.1 | 5141713 | SNV | 1 | A | G | Heterozygous |
| NC_037643.1 | 5141719 | SNV | 1 | G | A | Heterozygous |
| NC_037643.1 | 5141725 | SNV | 1 | G | A | Heterozygous |



|             |         |     |   |   |   |              |
|-------------|---------|-----|---|---|---|--------------|
| NC_037643.1 | 5141761 | SNV | 1 | A | G | Heterozygous |
| NC_037643.1 | 5141770 | SNV | 1 | T | C | Heterozygous |
| NC_037643.1 | 5141776 | SNV | 1 | T | C | Heterozygous |
| NC_037643.1 | 5141791 | SNV | 1 | A | C | Heterozygous |
| NC_037643.1 | 5141976 | SNV | 1 | A | G | Homozygous   |
| NC_037643.1 | 5141998 | SNV | 1 | T | A | Heterozygous |
| NC_037643.1 | 5142000 | SNV | 1 | T | G | Heterozygous |
| NC_037643.1 | 5142010 | SNV | 1 | T | C | Homozygous   |
| NC_037643.1 | 5142013 | SNV | 1 | T | G | Homozygous   |
| NC_037643.1 | 5142031 | SNV | 1 | T | C | Heterozygous |
| NC_037643.1 | 5142034 | SNV | 1 | A | G | Heterozygous |
| NC_037643.1 | 5142037 | SNV | 1 | T | C | Homozygous   |
| NC_037643.1 | 5142040 | SNV | 1 | C | G | Homozygous   |
| NC_037643.1 | 5142043 | SNV | 1 | T | C | Homozygous   |
| NC_037643.1 | 5142046 | SNV | 1 | T | G | Homozygous   |
| NC_037643.1 | 5142049 | SNV | 1 | A | G | Heterozygous |
| NC_037643.1 | 5142052 | SNV | 1 | T | G | Homozygous   |
| NC_037643.1 | 5142055 | SNV | 1 | A | G | Homozygous   |
| NC_037643.1 | 5142061 | SNV | 1 | A | G | Homozygous   |
| NC_037643.1 | 5142064 | SNV | 1 | T | A | Homozygous   |
| NC_037643.1 | 5142082 | SNV | 1 | A | G | Heterozygous |
| NC_037643.1 | 5142091 | SNV | 1 | T | C | Heterozygous |
| NC_037643.1 | 5142109 | SNV | 1 | G | C | Heterozygous |
| NC_037643.1 | 5143910 | SNV | 1 | G | A | Homozygous   |
| NC_037643.1 | 5152538 | SNV | 1 | A | T | Heterozygous |
| NC_037643.1 | 5155064 | SNV | 1 | A | G | Homozygous   |
| NC_037643.1 | 5155929 | SNV | 1 | T | A | Homozygous   |
| NC_037643.1 | 5157632 | SNV | 1 | A | C | Homozygous   |
| NC_037643.1 | 5157662 | SNV | 1 | A | G | Homozygous   |
| NC_037643.1 | 5157669 | SNV | 1 | T | C | Homozygous   |
| NC_037643.1 | 5160226 | SNV | 1 | C | T | Homozygous   |
| NC_037643.1 | 5160604 | SNV | 1 | C | T | Heterozygous |
| NC_037643.1 | 5160724 | SNV | 1 | C | T | Heterozygous |
| NC_037643.1 | 5160747 | SNV | 1 | C | T | Heterozygous |
| NC_037643.1 | 5160749 | SNV | 1 | A | G | Heterozygous |
| NC_037643.1 | 5160807 | SNV | 1 | G | A | Heterozygous |
| NC_037643.1 | 5160815 | SNV | 1 | C | T | Homozygous   |
| NC_037643.1 | 5163802 | SNV | 1 | C | A | Heterozygous |
| NC_037643.1 | 5165290 | SNV | 1 | T | C | Homozygous   |
| NC_037643.1 | 5169229 | SNV | 1 | A | T | Heterozygous |
| NC_037643.1 | 5169231 | SNV | 1 | T | A | Heterozygous |
| NC_037643.1 | 5169233 | SNV | 1 | A | G | Heterozygous |
| NC_037643.1 | 5169237 | SNV | 1 | T | G | Heterozygous |
| NC_037643.1 | 5169259 | SNV | 1 | T | G | Heterozygous |
| NC_037643.1 | 5169261 | SNV | 1 | T | G | Heterozygous |
| NC_037643.1 | 5172931 | SNV | 1 | T | C | Homozygous   |
| NC_037643.1 | 5173021 | SNV | 1 | G | A | Homozygous   |
| NC_037643.1 | 5173153 | SNV | 1 | A | G | Heterozygous |
| NC_037643.1 | 5173835 | SNV | 1 | A | T | Homozygous   |
| NC_037643.1 | 5173849 | SNV | 1 | A | G | Homozygous   |
| NC_037643.1 | 5174645 | SNV | 1 | T | C | Heterozygous |

|             |         |     |   |   |   |              |
|-------------|---------|-----|---|---|---|--------------|
| NC_037643.1 | 5174972 | SNV | 1 | C | T | Heterozygous |
| NC_037643.1 | 5174979 | SNV | 1 | G | C | Heterozygous |
| NC_037643.1 | 5174998 | SNV | 1 | G | C | Heterozygous |
| NC_037643.1 | 5175003 | SNV | 1 | A | G | Heterozygous |
| NC_037643.1 | 5175005 | SNV | 1 | T | A | Heterozygous |
| NC_037643.1 | 5175018 | SNV | 1 | T | A | Heterozygous |
| NC_037643.1 | 5175136 | SNV | 1 | T | C | Homozygous   |
| NC_037643.1 | 5175853 | SNV | 1 | C | T | Homozygous   |
| NC_037643.1 | 5178700 | SNV | 1 | T | C | Homozygous   |
| NC_037643.1 | 5180134 | SNV | 1 | T | C | Homozygous   |
| NC_037643.1 | 5181000 | SNV | 1 | A | C | Homozygous   |
| NC_037643.1 | 5181037 | SNV | 1 | G | A | Heterozygous |
| NC_037643.1 | 5182041 | SNV | 1 | A | G | Heterozygous |
| NC_037643.1 | 5188606 | SNV | 1 | A | C | Heterozygous |
| NC_037643.1 | 5188817 | SNV | 1 | A | G | Homozygous   |
| NC_037643.1 | 5199279 | SNV | 1 | G | A | Homozygous   |
| NC_037643.1 | 5199302 | SNV | 1 | A | G | Homozygous   |
| NC_037643.1 | 5199472 | SNV | 1 | G | A | Heterozygous |
| NC_037643.1 | 5200475 | SNV | 1 | A | G | Homozygous   |
| NC_037643.1 | 5222429 | SNV | 1 | A | G | Heterozygous |
| NC_037643.1 | 5222684 | SNV | 1 | G | T | Homozygous   |
| NC_037643.1 | 5222731 | SNV | 1 | T | C | Homozygous   |
| NC_037643.1 | 5222823 | SNV | 1 | A | G | Homozygous   |
| NC_037643.1 | 5222910 | SNV | 1 | C | T | Heterozygous |
| NC_037643.1 | 5222918 | SNV | 1 | C | T | Heterozygous |
| NC_037643.1 | 5222921 | SNV | 1 | A | T | Heterozygous |
| NC_037643.1 | 5223252 | SNV | 1 | T | C | Homozygous   |
| NC_037643.1 | 5227055 | SNV | 1 | G | T | Homozygous   |
| NC_037643.1 | 5227076 | SNV | 1 | T | C | Homozygous   |
| NC_037643.1 | 5227078 | SNV | 1 | G | A | Heterozygous |
| NC_037643.1 | 5227116 | SNV | 1 | A | C | Homozygous   |
| NC_037643.1 | 5227131 | SNV | 1 | A | G | Homozygous   |
| NC_037643.1 | 5229984 | SNV | 1 | A | G | Homozygous   |
| NC_037643.1 | 5230611 | SNV | 1 | G | A | Heterozygous |
| NC_037643.1 | 5231318 | SNV | 1 | T | C | Heterozygous |
| NC_037643.1 | 5231580 | SNV | 1 | G | A | Homozygous   |
| NC_037643.1 | 5231634 | SNV | 1 | A | G | Homozygous   |
| NC_037643.1 | 5231829 | SNV | 1 | C | G | Homozygous   |
| NC_037643.1 | 5231836 | SNV | 1 | C | T | Heterozygous |
| NC_037643.1 | 5231982 | SNV | 1 | A | T | Heterozygous |
| NC_037643.1 | 5233098 | SNV | 1 | G | A | Heterozygous |
| NC_037643.1 | 5234307 | SNV | 1 | A | G | Homozygous   |
| NC_037643.1 | 5234343 | SNV | 1 | G | A | Heterozygous |
| NC_037643.1 | 5234391 | SNV | 1 | C | T | Heterozygous |
| NC_037643.1 | 5234505 | SNV | 1 | T | A | Homozygous   |
| NC_037643.1 | 5234675 | SNV | 1 | A | G | Homozygous   |
| NC_037643.1 | 5237643 | SNV | 1 | T | C | Heterozygous |
| NC_037643.1 | 5239194 | SNV | 1 | A | G | Homozygous   |
| NC_037643.1 | 5240250 | SNV | 1 | C | T | Heterozygous |
| NC_037643.1 | 5240260 | SNV | 1 | C | T | Heterozygous |
| NC_037643.1 | 5240349 | SNV | 1 | G | A | Heterozygous |

|             |         |     |   |   |   |              |
|-------------|---------|-----|---|---|---|--------------|
| NC_037643.1 | 5240481 | SNV | 1 | C | T | Heterozygous |
| NC_037643.1 | 5240487 | SNV | 1 | T | C | Heterozygous |
| NC_037643.1 | 5240557 | SNV | 1 | A | G | Heterozygous |
| NC_037643.1 | 5240821 | SNV | 1 | T | G | Homozygous   |
| NC_037643.1 | 5240826 | SNV | 1 | T | A | Homozygous   |
| NC_037643.1 | 5240832 | SNV | 1 | C | G | Homozygous   |
| NC_037643.1 | 5241015 | SNV | 1 | A | G | Heterozygous |
| NC_037643.1 | 5241079 | SNV | 1 | T | C | Homozygous   |
| NC_037643.1 | 5241244 | SNV | 1 | T | A | Heterozygous |
| NC_037643.1 | 5241297 | SNV | 1 | A | G | Homozygous   |
| NC_037643.1 | 5241978 | SNV | 1 | C | T | Heterozygous |
| NC_037643.1 | 5242054 | SNV | 1 | A | G | Homozygous   |
| NC_037643.1 | 5243049 | SNV | 1 | A | G | Homozygous   |
| NC_037643.1 | 5243304 | SNV | 1 | C | T | Homozygous   |
| NC_037643.1 | 5243567 | SNV | 1 | C | T | Heterozygous |
| NC_037643.1 | 5255537 | SNV | 1 | T | C | Homozygous   |
| NC_037643.1 | 5255921 | SNV | 1 | T | A | Heterozygous |
| NC_037643.1 | 5255924 | SNV | 1 | C | G | Heterozygous |
| NC_037643.1 | 5256558 | SNV | 1 | T | A | Heterozygous |
| NC_037643.1 | 5262848 | SNV | 1 | G | A | Homozygous   |
| NC_037643.1 | 5263294 | SNV | 1 | A | G | Homozygous   |
| NC_037643.1 | 5282297 | SNV | 1 | A | C | Heterozygous |
| NC_037643.1 | 5282482 | SNV | 1 | A | T | Homozygous   |
| NC_037643.1 | 5282926 | SNV | 1 | G | A | Homozygous   |
| NC_037643.1 | 5284729 | SNV | 1 | T | C | Homozygous   |
| NC_037643.1 | 5285086 | SNV | 1 | C | A | Homozygous   |
| NC_037643.1 | 5286305 | SNV | 1 | A | G | Homozygous   |
| NC_037643.1 | 5286872 | SNV | 1 | C | A | Homozygous   |
| NC_037643.1 | 5289980 | SNV | 1 | A | T | Homozygous   |
| NC_037643.1 | 5290004 | SNV | 1 | T | A | Homozygous   |
| NC_037643.1 | 5290031 | SNV | 1 | G | A | Homozygous   |
| NC_037643.1 | 5290969 | SNV | 1 | A | T | Homozygous   |
| NC_037643.1 | 5291600 | SNV | 1 | C | A | Homozygous   |
| NC_037643.1 | 5292597 | SNV | 1 | G | A | Heterozygous |
| NC_037643.1 | 5302244 | SNV | 1 | C | T | Heterozygous |
| NC_037643.1 | 5302278 | SNV | 1 | G | A | Homozygous   |
| NC_037643.1 | 5302329 | SNV | 1 | C | T | Homozygous   |
| NC_037643.1 | 5302344 | SNV | 1 | T | C | Homozygous   |
| NC_037643.1 | 5302437 | SNV | 1 | C | T | Heterozygous |
| NC_037643.1 | 5302474 | SNV | 1 | T | C | Homozygous   |
| NC_037643.1 | 5302492 | SNV | 1 | A | G | Homozygous   |
| NC_037643.1 | 5302586 | SNV | 1 | T | C | Homozygous   |
| NC_037643.1 | 5302625 | SNV | 1 | A | G | Homozygous   |
| NC_037643.1 | 5303202 | SNV | 1 | A | G | Heterozygous |
| NC_037643.1 | 5304977 | SNV | 1 | G | T | Homozygous   |
| NC_037643.1 | 5306688 | SNV | 1 | T | C | Heterozygous |
| NC_037643.1 | 5309981 | SNV | 1 | C | T | Homozygous   |
| NC_037643.1 | 5313733 | SNV | 1 | G | T | Homozygous   |
| NC_037643.1 | 5313742 | SNV | 1 | A | T | Homozygous   |
| NC_037643.1 | 5313762 | SNV | 1 | A | G | Homozygous   |
| NC_037643.1 | 5313768 | SNV | 1 | A | T | Homozygous   |

|             |         |     |   |   |   |              |
|-------------|---------|-----|---|---|---|--------------|
| NC_037643.1 | 5313779 | SNV | 1 | T | A | Homozygous   |
| NC_037643.1 | 5315382 | SNV | 1 | C | A | Heterozygous |
| NC_037643.1 | 5315423 | SNV | 1 | C | T | Heterozygous |
| NC_037643.1 | 5315453 | SNV | 1 | G | A | Homozygous   |
| NC_037643.1 | 5315455 | SNV | 1 | A | T | Heterozygous |
| NC_037643.1 | 5315483 | SNV | 1 | A | G | Homozygous   |
| NC_037643.1 | 5322875 | SNV | 1 | C | G | Homozygous   |
| NC_037643.1 | 5323300 | SNV | 1 | A | G | Homozygous   |
| NC_037643.1 | 5323448 | SNV | 1 | T | A | Heterozygous |
| NC_037643.1 | 5323453 | SNV | 1 | G | T | Heterozygous |
| NC_037643.1 | 5323576 | SNV | 1 | A | G | Heterozygous |
| NC_037643.1 | 5323648 | SNV | 1 | T | C | Homozygous   |
| NC_037643.1 | 5323861 | SNV | 1 | G | A | Homozygous   |
| NC_037643.1 | 5324562 | SNV | 1 | T | C | Heterozygous |
| NC_037643.1 | 5326163 | SNV | 1 | A | C | Heterozygous |
| NC_037643.1 | 5326163 | SNV | 1 | A | G | Heterozygous |
| NC_037643.1 | 5326427 | SNV | 1 | C | T | Heterozygous |
| NC_037643.1 | 5326507 | SNV | 1 | A | G | Homozygous   |
| NC_037643.1 | 5326514 | SNV | 1 | C | T | Homozygous   |
| NC_037643.1 | 5326616 | SNV | 1 | G | A | Homozygous   |
| NC_037643.1 | 5327005 | SNV | 1 | G | A | Heterozygous |
| NC_037643.1 | 5327605 | SNV | 1 | T | C | Homozygous   |
| NC_037643.1 | 5330925 | SNV | 1 | A | G | Heterozygous |
| NC_037643.1 | 5330945 | SNV | 1 | A | G | Heterozygous |
| NC_037643.1 | 5330948 | SNV | 1 | A | G | Heterozygous |
| NC_037643.1 | 5330957 | SNV | 1 | T | C | Homozygous   |
| NC_037643.1 | 5330974 | SNV | 1 | A | G | Heterozygous |
| NC_037643.1 | 5330981 | SNV | 1 | A | G | Heterozygous |
| NC_037643.1 | 5330985 | SNV | 1 | A | G | Heterozygous |
| NC_037643.1 | 5332093 | SNV | 1 | T | C | Homozygous   |
| NC_037643.1 | 5332113 | SNV | 1 | C | T | Homozygous   |
| NC_037643.1 | 5332127 | SNV | 1 | C | A | Homozygous   |
| NC_037643.1 | 5336023 | SNV | 1 | C | T | Heterozygous |
| NC_037643.1 | 5338758 | SNV | 1 | A | G | Homozygous   |
| NC_037643.1 | 5338801 | SNV | 1 | C | T | Heterozygous |
| NC_037643.1 | 5339229 | SNV | 1 | C | T | Homozygous   |
| NC_037643.1 | 5339303 | SNV | 1 | A | G | Homozygous   |
| NC_037643.1 | 5339451 | SNV | 1 | G | A | Heterozygous |
| NC_037643.1 | 5339468 | SNV | 1 | A | G | Homozygous   |
| NC_037643.1 | 5339472 | SNV | 1 | C | T | Heterozygous |
| NC_037643.1 | 5339551 | SNV | 1 | A | C | Homozygous   |
| NC_037643.1 | 5355880 | SNV | 1 | G | T | Homozygous   |
| NC_037643.1 | 5355898 | SNV | 1 | A | G | Heterozygous |
| NC_037643.1 | 5355901 | SNV | 1 | T | G | Homozygous   |
| NC_037643.1 | 5355904 | SNV | 1 | T | A | Homozygous   |
| NC_037643.1 | 5355907 | SNV | 1 | G | A | Homozygous   |
| NC_037643.1 | 5355910 | SNV | 1 | C | A | Homozygous   |
| NC_037643.1 | 5361882 | SNV | 1 | T | C | Heterozygous |
| NC_037643.1 | 5362799 | SNV | 1 | A | G | Homozygous   |
| NC_037643.1 | 5363699 | SNV | 1 | A | G | Homozygous   |
| NC_037643.1 | 5366435 | SNV | 1 | T | C | Heterozygous |

|             |         |     |   |   |   |              |
|-------------|---------|-----|---|---|---|--------------|
| NC_037643.1 | 5366471 | SNV | 1 | A | T | Heterozygous |
| NC_037643.1 | 5366474 | SNV | 1 | G | A | Heterozygous |
| NC_037643.1 | 5366756 | SNV | 1 | T | G | Homozygous   |
| NC_037643.1 | 5366762 | SNV | 1 | A | G | Homozygous   |
| NC_037643.1 | 5366777 | SNV | 1 | T | C | Heterozygous |
| NC_037643.1 | 5366781 | SNV | 1 | A | G | Heterozygous |
| NC_037643.1 | 5366794 | SNV | 1 | C | G | Heterozygous |
| NC_037643.1 | 5367904 | SNV | 1 | C | G | Homozygous   |
| NC_037643.1 | 5367992 | SNV | 1 | C | G | Homozygous   |
| NC_037643.1 | 5371444 | SNV | 1 | G | A | Heterozygous |
| NC_037643.1 | 5371982 | SNV | 1 | G | T | Heterozygous |
| NC_037643.1 | 5384128 | SNV | 1 | C | G | Heterozygous |
| NC_037643.1 | 5384130 | SNV | 1 | C | T | Heterozygous |
| NC_037643.1 | 5388399 | SNV | 1 | G | T | Heterozygous |
| NC_037643.1 | 5389717 | SNV | 1 | T | C | Homozygous   |
| NC_037643.1 | 5389722 | SNV | 1 | T | G | Homozygous   |
| NC_037643.1 | 5389726 | SNV | 1 | A | T | Homozygous   |
| NC_037643.1 | 5392724 | SNV | 1 | C | T | Heterozygous |
| NC_037643.1 | 5399557 | SNV | 1 | G | A | Heterozygous |
| NC_037643.1 | 5406276 | SNV | 1 | G | A | Homozygous   |
| NC_037643.1 | 5406283 | SNV | 1 | G | A | Homozygous   |
| NC_037643.1 | 5406303 | SNV | 1 | G | A | Homozygous   |
| NC_037643.1 | 5406315 | SNV | 1 | A | T | Heterozygous |
| NC_037643.1 | 5406324 | SNV | 1 | C | A | Homozygous   |
| NC_037643.1 | 5421452 | SNV | 1 | T | G | Heterozygous |
| NC_037643.1 | 5432677 | SNV | 1 | A | C | Homozygous   |
| NC_037643.1 | 5443712 | SNV | 1 | T | C | Heterozygous |
| NC_037643.1 | 5446606 | SNV | 1 | A | G | Homozygous   |
| NC_037643.1 | 5447285 | SNV | 1 | C | T | Homozygous   |
| NC_037643.1 | 5448742 | SNV | 1 | T | A | Homozygous   |
| NC_037643.1 | 5448772 | SNV | 1 | A | G | Homozygous   |
| NC_037643.1 | 5448781 | SNV | 1 | C | T | Homozygous   |
| NC_037643.1 | 5453490 | SNV | 1 | G | A | Heterozygous |
| NC_037643.1 | 5453535 | SNV | 1 | T | C | Homozygous   |
| NC_037643.1 | 5453835 | SNV | 1 | G | A | Homozygous   |
| NC_037643.1 | 5453914 | SNV | 1 | C | T | Heterozygous |
| NC_037643.1 | 5453917 | SNV | 1 | T | C | Homozygous   |
| NC_037643.1 | 5453959 | SNV | 1 | C | T | Heterozygous |
| NC_037643.1 | 5454043 | SNV | 1 | A | G | Homozygous   |
| NC_037643.1 | 5454773 | SNV | 1 | T | C | Heterozygous |
| NC_037643.1 | 5454775 | SNV | 1 | G | A | Heterozygous |
| NC_037643.1 | 5454941 | SNV | 1 | A | G | Homozygous   |
| NC_037643.1 | 5455227 | SNV | 1 | C | T | Heterozygous |
| NC_037643.1 | 5456565 | SNV | 1 | G | A | Heterozygous |
| NC_037643.1 | 5457327 | SNV | 1 | T | C | Homozygous   |
| NC_037643.1 | 5457757 | SNV | 1 | C | T | Heterozygous |
| NC_037643.1 | 5458261 | SNV | 1 | C | T | Heterozygous |
| NC_037643.1 | 5458327 | SNV | 1 | T | C | Homozygous   |
| NC_037643.1 | 5458403 | SNV | 1 | A | G | Heterozygous |
| NC_037643.1 | 5478036 | SNV | 1 | C | T | Heterozygous |
| NC_037643.1 | 5478081 | SNV | 1 | A | G | Homozygous   |

|             |         |     |   |   |   |              |
|-------------|---------|-----|---|---|---|--------------|
| NC_037643.1 | 5478141 | SNV | 1 | T | C | Homozygous   |
| NC_037643.1 | 5478280 | SNV | 1 | C | T | Homozygous   |
| NC_037643.1 | 5478346 | SNV | 1 | G | A | Homozygous   |
| NC_037643.1 | 5478376 | SNV | 1 | A | T | Homozygous   |
| NC_037643.1 | 5478500 | SNV | 1 | T | C | Homozygous   |
| NC_037643.1 | 5529739 | SNV | 1 | T | C | Homozygous   |
| NC_037643.1 | 5536416 | SNV | 1 | G | C | Homozygous   |
| NC_037643.1 | 5536422 | SNV | 1 | G | T | Homozygous   |
| NC_037643.1 | 5550069 | SNV | 1 | T | G | Homozygous   |
| NC_037643.1 | 5550071 | SNV | 1 | T | A | Homozygous   |
| NC_037643.1 | 5550073 | SNV | 1 | T | G | Homozygous   |
| NC_037643.1 | 5550091 | SNV | 1 | T | G | Heterozygous |
| NC_037643.1 | 5550093 | SNV | 1 | A | G | Heterozygous |
| NC_037643.1 | 5550121 | SNV | 1 | C | T | Heterozygous |
| NC_037643.1 | 5553229 | SNV | 1 | A | G | Heterozygous |
| NC_037643.1 | 5565757 | SNV | 1 | A | G | Homozygous   |
| NC_037643.1 | 5565912 | SNV | 1 | T | C | Homozygous   |
| NC_037643.1 | 5565925 | SNV | 1 | T | A | Homozygous   |
| NC_037643.1 | 5565950 | SNV | 1 | G | A | Homozygous   |
| NC_037643.1 | 5572793 | SNV | 1 | G | A | Heterozygous |
| NC_037643.1 | 5576848 | SNV | 1 | A | C | Homozygous   |
| NC_037643.1 | 5576869 | SNV | 1 | T | A | Homozygous   |
| NC_037643.1 | 5576872 | SNV | 1 | T | A | Homozygous   |
| NC_037643.1 | 5576874 | SNV | 1 | A | C | Homozygous   |
| NC_037643.1 | 5585132 | SNV | 1 | G | A | Homozygous   |
| NC_037643.1 | 5591337 | SNV | 1 | T | A | Homozygous   |
| NC_037643.1 | 5591341 | SNV | 1 | G | T | Homozygous   |
| NC_037643.1 | 5591343 | SNV | 1 | A | T | Homozygous   |
| NC_037643.1 | 5591349 | SNV | 1 | G | A | Homozygous   |
| NC_037643.1 | 5621661 | SNV | 1 | C | A | Heterozygous |
| NC_037643.1 | 5621671 | SNV | 1 | G | A | Heterozygous |
| NC_037643.1 | 5621699 | SNV | 1 | G | C | Homozygous   |
| NC_037643.1 | 5621704 | SNV | 1 | G | A | Homozygous   |
| NC_037643.1 | 5634748 | SNV | 1 | G | C | Homozygous   |
| NC_037643.1 | 5654688 | SNV | 1 | C | T | Heterozygous |
| NC_037643.1 | 5656236 | SNV | 1 | A | G | Homozygous   |
| NC_037643.1 | 5656458 | SNV | 1 | A | G | Homozygous   |
| NC_037643.1 | 5657001 | SNV | 1 | G | A | Heterozygous |
| NC_037643.1 | 5657199 | SNV | 1 | G | A | Heterozygous |
| NC_037643.1 | 5657213 | SNV | 1 | T | C | Heterozygous |
| NC_037643.1 | 5657220 | SNV | 1 | A | T | Heterozygous |
| NC_037643.1 | 5657241 | SNV | 1 | C | A | Homozygous   |
| NC_037643.1 | 5657832 | SNV | 1 | T | C | Homozygous   |
| NC_037643.1 | 5658697 | SNV | 1 | A | T | Homozygous   |
| NC_037643.1 | 5658708 | SNV | 1 | T | A | Homozygous   |
| NC_037643.1 | 5662232 | SNV | 1 | A | G | Heterozygous |
| NC_037643.1 | 5662233 | SNV | 1 | T | A | Heterozygous |
| NC_037643.1 | 5662248 | SNV | 1 | T | A | Heterozygous |
| NC_037643.1 | 5662264 | SNV | 1 | A | G | Heterozygous |
| NC_037643.1 | 5666745 | SNV | 1 | A | G | Heterozygous |
| NC_037643.1 | 5666769 | SNV | 1 | T | C | Heterozygous |

|             |         |     |   |   |   |              |
|-------------|---------|-----|---|---|---|--------------|
| NC_037643.1 | 5666826 | SNV | 1 | T | G | Heterozygous |
| NC_037643.1 | 5666961 | SNV | 1 | A | G | Homozygous   |
| NC_037643.1 | 5667070 | SNV | 1 | T | C | Heterozygous |
| NC_037643.1 | 5667113 | SNV | 1 | T | A | Homozygous   |
| NC_037643.1 | 5667532 | SNV | 1 | T | C | Heterozygous |
| NC_037643.1 | 5790567 | SNV | 1 | G | A | Heterozygous |
| NC_037643.1 | 5866044 | SNV | 1 | C | T | Heterozygous |
| NC_037643.1 | 5868928 | SNV | 1 | T | C | Homozygous   |
| NC_037643.1 | 5869004 | SNV | 1 | C | G | Heterozygous |
| NC_037643.1 | 5869642 | SNV | 1 | T | A | Homozygous   |
| NC_037643.1 | 5869645 | SNV | 1 | A | T | Homozygous   |
| NC_037643.1 | 5869647 | SNV | 1 | A | T | Homozygous   |
| NC_037643.1 | 5869649 | SNV | 1 | G | A | Homozygous   |
| NC_037643.1 | 5869653 | SNV | 1 | T | A | Homozygous   |
| NC_037643.1 | 5869663 | SNV | 1 | A | C | Homozygous   |
| NC_037643.1 | 5900572 | SNV | 1 | G | A | Heterozygous |
| NC_037643.1 | 5900576 | SNV | 1 | A | G | Heterozygous |
| NC_037643.1 | 5900616 | SNV | 1 | G | A | Heterozygous |
| NC_037643.1 | 5900930 | SNV | 1 | A | G | Homozygous   |
| NC_037643.1 | 5902130 | SNV | 1 | C | T | Heterozygous |
| NC_037643.1 | 5902246 | SNV | 1 | T | C | Homozygous   |
| NC_037643.1 | 5902280 | SNV | 1 | T | C | Homozygous   |
| NC_037643.1 | 5902501 | SNV | 1 | A | G | Homozygous   |
| NC_037643.1 | 5902555 | SNV | 1 | G | A | Heterozygous |
| NC_037643.1 | 5902640 | SNV | 1 | C | T | Heterozygous |
| NC_037643.1 | 5902695 | SNV | 1 | A | G | Homozygous   |
| NC_037643.1 | 5902779 | SNV | 1 | A | G | Homozygous   |
| NC_037643.1 | 5904281 | SNV | 1 | T | C | Homozygous   |
| NC_037643.1 | 5904373 | SNV | 1 | A | T | Homozygous   |
| NC_037643.1 | 5904452 | SNV | 1 | C | G | Heterozygous |
| NC_037643.1 | 5917167 | SNV | 1 | A | G | Homozygous   |
| NC_037643.1 | 5917172 | SNV | 1 | T | C | Homozygous   |
| NC_037643.1 | 5917187 | SNV | 1 | A | C | Homozygous   |
| NC_037643.1 | 5920082 | SNV | 1 | G | T | Heterozygous |
| NC_037643.1 | 5920085 | SNV | 1 | A | T | Heterozygous |
| NC_037643.1 | 5927706 | SNV | 1 | C | G | Homozygous   |
| NC_037643.1 | 5927712 | SNV | 1 | T | C | Homozygous   |
| NC_037643.1 | 5927714 | SNV | 1 | T | C | Homozygous   |
| NC_037643.1 | 5952316 | SNV | 1 | T | C | Homozygous   |
| NC_037643.1 | 5952400 | SNV | 1 | T | C | Homozygous   |
| NC_037643.1 | 5952404 | SNV | 1 | C | T | Homozygous   |
| NC_037643.1 | 5961890 | SNV | 1 | T | G | Heterozygous |
| NC_037643.1 | 5968992 | SNV | 1 | G | A | Heterozygous |
| NC_037643.1 | 5968996 | SNV | 1 | C | G | Homozygous   |
| NC_037643.1 | 5971853 | SNV | 1 | A | G | Heterozygous |
| NC_037643.1 | 5993286 | SNV | 1 | G | A | Heterozygous |
| NC_037643.1 | 5993436 | SNV | 1 | G | A | Heterozygous |
| NC_037643.1 | 5993485 | SNV | 1 | C | T | Heterozygous |
| NC_037643.1 | 5993634 | SNV | 1 | T | C | Homozygous   |
| NC_037643.1 | 5993700 | SNV | 1 | A | G | Heterozygous |
| NC_037643.1 | 6012851 | SNV | 1 | C | T | Homozygous   |

|             |         |     |   |   |   |              |
|-------------|---------|-----|---|---|---|--------------|
| NC_037643.1 | 6012875 | SNV | 1 | T | C | Homozygous   |
| NC_037643.1 | 6012930 | SNV | 1 | C | G | Heterozygous |
| NC_037643.1 | 6013034 | SNV | 1 | A | G | Homozygous   |
| NC_037643.1 | 6051841 | SNV | 1 | C | A | Homozygous   |
| NC_037643.1 | 6051847 | SNV | 1 | C | A | Homozygous   |
| NC_037643.1 | 6051857 | SNV | 1 | A | G | Homozygous   |
| NC_037643.1 | 6061743 | SNV | 1 | C | A | Homozygous   |
| NC_037643.1 | 6084097 | SNV | 1 | C | T | Heterozygous |
| NC_037643.1 | 6088124 | SNV | 1 | T | C | Heterozygous |
| NC_037643.1 | 6095552 | SNV | 1 | A | G | Heterozygous |
| NC_037643.1 | 6095767 | SNV | 1 | A | G | Homozygous   |
| NC_037643.1 | 6101872 | SNV | 1 | T | G | Homozygous   |
| NC_037643.1 | 6101875 | SNV | 1 | G | C | Homozygous   |
| NC_037643.1 | 6101879 | SNV | 1 | A | T | Homozygous   |
| NC_037643.1 | 6101904 | SNV | 1 | T | C | Homozygous   |
| NC_037643.1 | 6101918 | SNV | 1 | T | C | Homozygous   |
| NC_037643.1 | 6103267 | SNV | 1 | C | T | Heterozygous |
| NC_037643.1 | 6111503 | SNV | 1 | G | A | Homozygous   |
| NC_037643.1 | 6115051 | SNV | 1 | A | T | Homozygous   |
| NC_037643.1 | 6115063 | SNV | 1 | T | C | Heterozygous |
| NC_037643.1 | 6115171 | SNV | 1 | C | G | Heterozygous |
| NC_037643.1 | 6115218 | SNV | 1 | C | T | Homozygous   |
| NC_037643.1 | 6115232 | SNV | 1 | T | C | Homozygous   |
| NC_037643.1 | 6115238 | SNV | 1 | T | C | Homozygous   |
| NC_037643.1 | 6139748 | SNV | 1 | C | T | Heterozygous |
| NC_037643.1 | 6141769 | SNV | 1 | A | G | Heterozygous |
| NC_037643.1 | 6141771 | SNV | 1 | G | A | Heterozygous |
| NC_037643.1 | 6153150 | SNV | 1 | G | A | Heterozygous |
| NC_037643.1 | 6153154 | SNV | 1 | G | A | Heterozygous |
| NC_037643.1 | 6183131 | SNV | 1 | A | G | Homozygous   |
| NC_037643.1 | 6187504 | SNV | 1 | C | T | Homozygous   |
| NC_037643.1 | 6190744 | SNV | 1 | A | G | Homozygous   |
| NC_037643.1 | 6190830 | SNV | 1 | C | T | Heterozygous |
| NC_037643.1 | 6190887 | SNV | 1 | T | C | Heterozygous |
| NC_037643.1 | 6191049 | SNV | 1 | T | C | Homozygous   |
| NC_037643.1 | 6191167 | SNV | 1 | C | T | Heterozygous |
| NC_037643.1 | 6191228 | SNV | 1 | G | A | Heterozygous |
| NC_037643.1 | 6191275 | SNV | 1 | T | C | Homozygous   |
| NC_037643.1 | 6191283 | SNV | 1 | C | G | Homozygous   |
| NC_037643.1 | 6191303 | SNV | 1 | A | G | Homozygous   |
| NC_037643.1 | 6191331 | SNV | 1 | C | T | Heterozygous |
| NC_037643.1 | 6191336 | SNV | 1 | G | A | Heterozygous |
| NC_037643.1 | 6191407 | SNV | 1 | T | C | Heterozygous |
| NC_037643.1 | 6207471 | SNV | 1 | C | G | Heterozygous |
| NC_037643.1 | 6207474 | SNV | 1 | C | G | Heterozygous |
| NC_037643.1 | 6207769 | SNV | 1 | A | G | Homozygous   |
| NC_037643.1 | 6217379 | SNV | 1 | G | A | Heterozygous |
| NC_037643.1 | 6217392 | SNV | 1 | A | G | Heterozygous |
| NC_037643.1 | 6217407 | SNV | 1 | C | G | Heterozygous |
| NC_037643.1 | 6217736 | SNV | 1 | A | G | Homozygous   |
| NC_037643.1 | 6217780 | SNV | 1 | A | G | Homozygous   |



|             |         |     |   |   |   |              |
|-------------|---------|-----|---|---|---|--------------|
| NC_037643.1 | 6218479 | SNV | 1 | G | C | Homozygous   |
| NC_037643.1 | 6219067 | SNV | 1 | G | A | Homozygous   |
| NC_037643.1 | 6219229 | SNV | 1 | T | C | Homozygous   |
| NC_037643.1 | 6237288 | SNV | 1 | A | G | Homozygous   |
| NC_037643.1 | 6237304 | SNV | 1 | T | C | Homozygous   |
| NC_037643.1 | 6237383 | SNV | 1 | C | T | Homozygous   |
| NC_037643.1 | 6237559 | SNV | 1 | A | G | Homozygous   |
| NC_037643.1 | 6237720 | SNV | 1 | T | G | Homozygous   |
| NC_037643.1 | 6238053 | SNV | 1 | C | T | Heterozygous |
| NC_037643.1 | 6238429 | SNV | 1 | T | A | Homozygous   |
| NC_037643.1 | 6238432 | SNV | 1 | C | T | Homozygous   |
| NC_037643.1 | 6241740 | SNV | 1 | A | C | Homozygous   |
| NC_037643.1 | 6249336 | SNV | 1 | T | G | Homozygous   |
| NC_037643.1 | 6249361 | SNV | 1 | A | T | Homozygous   |
| NC_037643.1 | 6249364 | SNV | 1 | G | A | Homozygous   |
| NC_037643.1 | 6249366 | SNV | 1 | T | G | Homozygous   |
| NC_037643.1 | 6249368 | SNV | 1 | T | G | Homozygous   |
| NC_037643.1 | 6254522 | SNV | 1 | T | A | Heterozygous |
| NC_037643.1 | 6259504 | SNV | 1 | C | T | Heterozygous |
| NC_037643.1 | 6259511 | SNV | 1 | G | A | Heterozygous |
| NC_037643.1 | 6259518 | SNV | 1 | C | T | Heterozygous |
| NC_037643.1 | 6259545 | SNV | 1 | T | C | Homozygous   |
| NC_037643.1 | 6259638 | SNV | 1 | T | C | Heterozygous |
| NC_037643.1 | 6259776 | SNV | 1 | G | A | Heterozygous |
| NC_037643.1 | 6259915 | SNV | 1 | G | A | Heterozygous |
| NC_037643.1 | 6269318 | SNV | 1 | G | A | Homozygous   |
| NC_037643.1 | 6269366 | SNV | 1 | G | A | Homozygous   |
| NC_037643.1 | 6287704 | SNV | 1 | C | T | Homozygous   |
| NC_037643.1 | 6287715 | SNV | 1 | A | G | Homozygous   |
| NC_037643.1 | 6287719 | SNV | 1 | A | T | Homozygous   |
| NC_037643.1 | 6287728 | SNV | 1 | T | G | Homozygous   |
| NC_037643.1 | 6287738 | SNV | 1 | A | T | Homozygous   |
| NC_037643.1 | 6287740 | SNV | 1 | C | T | Homozygous   |
| NC_037643.1 | 6287764 | SNV | 1 | C | T | Homozygous   |
| NC_037643.1 | 6287766 | SNV | 1 | T | C | Homozygous   |
| NC_037643.1 | 6287778 | SNV | 1 | G | T | Homozygous   |
| NC_037643.1 | 6287786 | SNV | 1 | T | A | Homozygous   |
| NC_037643.1 | 6287792 | SNV | 1 | A | T | Homozygous   |
| NC_037643.1 | 6287803 | SNV | 1 | T | A | Homozygous   |
| NC_037643.1 | 6287813 | SNV | 1 | G | A | Homozygous   |
| NC_037643.1 | 6301758 | SNV | 1 | C | T | Homozygous   |
| NC_037643.1 | 6301827 | SNV | 1 | T | C | Homozygous   |
| NC_037643.1 | 6301905 | SNV | 1 | T | C | Homozygous   |
| NC_037643.1 | 6301975 | SNV | 1 | T | C | Heterozygous |
| NC_037643.1 | 6306470 | SNV | 1 | A | G | Homozygous   |
| NC_037643.1 | 6306482 | SNV | 1 | G | A | Homozygous   |
| NC_037643.1 | 6314540 | SNV | 1 | C | A | Homozygous   |
| NC_037643.1 | 6314561 | SNV | 1 | C | G | Homozygous   |
| NC_037643.1 | 6323028 | SNV | 1 | G | T | Heterozygous |
| NC_037643.1 | 6323035 | SNV | 1 | A | C | Heterozygous |
| NC_037643.1 | 6327743 | SNV | 1 | C | T | Homozygous   |

|             |         |     |   |   |   |              |
|-------------|---------|-----|---|---|---|--------------|
| NC_037643.1 | 6328108 | SNV | 1 | A | G | Homozygous   |
| NC_037643.1 | 6328809 | SNV | 1 | C | T | Heterozygous |
| NC_037643.1 | 6329132 | SNV | 1 | G | A | Heterozygous |
| NC_037643.1 | 6346295 | SNV | 1 | T | C | Heterozygous |
| NC_037643.1 | 6346312 | SNV | 1 | A | G | Homozygous   |
| NC_037643.1 | 6346356 | SNV | 1 | G | C | Heterozygous |
| NC_037643.1 | 6346366 | SNV | 1 | C | T | Heterozygous |
| NC_037643.1 | 6346380 | SNV | 1 | T | C | Homozygous   |
| NC_037643.1 | 6346412 | SNV | 1 | T | C | Homozygous   |
| NC_037643.1 | 6346462 | SNV | 1 | G | A | Heterozygous |
| NC_037643.1 | 6346538 | SNV | 1 | A | G | Homozygous   |
| NC_037643.1 | 6346550 | SNV | 1 | G | A | Heterozygous |
| NC_037643.1 | 6346573 | SNV | 1 | A | T | Heterozygous |
| NC_037643.1 | 6346574 | SNV | 1 | T | A | Heterozygous |
| NC_037643.1 | 6346668 | SNV | 1 | C | A | Heterozygous |
| NC_037643.1 | 6346697 | SNV | 1 | A | G | Homozygous   |
| NC_037643.1 | 6346722 | SNV | 1 | A | G | Homozygous   |
| NC_037643.1 | 6347194 | SNV | 1 | C | T | Heterozygous |
| NC_037643.1 | 6347557 | SNV | 1 | A | G | Homozygous   |
| NC_037643.1 | 6347644 | SNV | 1 | A | G | Homozygous   |
| NC_037643.1 | 6347904 | SNV | 1 | A | G | Heterozygous |
| NC_037643.1 | 6347936 | SNV | 1 | A | G | Homozygous   |
| NC_037643.1 | 6347940 | SNV | 1 | A | G | Homozygous   |
| NC_037643.1 | 6347992 | SNV | 1 | T | C | Homozygous   |
| NC_037643.1 | 6355058 | SNV | 1 | T | C | Heterozygous |
| NC_037643.1 | 6355081 | SNV | 1 | G | C | Heterozygous |
| NC_037643.1 | 6355140 | SNV | 1 | G | C | Homozygous   |
| NC_037643.1 | 6355148 | SNV | 1 | G | C | Homozygous   |
| NC_037643.1 | 6355160 | SNV | 1 | C | T | Heterozygous |
| NC_037643.1 | 6355183 | SNV | 1 | G | A | Heterozygous |
| NC_037643.1 | 6355204 | SNV | 1 | G | A | Heterozygous |
| NC_037643.1 | 6355246 | SNV | 1 | G | A | Homozygous   |
| NC_037643.1 | 6355284 | SNV | 1 | G | C | Homozygous   |
| NC_037643.1 | 6432677 | SNV | 1 | A | G | Homozygous   |
| NC_037643.1 | 6432681 | SNV | 1 | A | G | Homozygous   |
| NC_037643.1 | 6446473 | SNV | 1 | C | T | Homozygous   |
| NC_037643.1 | 6447300 | SNV | 1 | T | A | Heterozygous |
| NC_037643.1 | 6448581 | SNV | 1 | C | G | Homozygous   |
| NC_037643.1 | 6448605 | SNV | 1 | C | T | Heterozygous |
| NC_037643.1 | 6452903 | SNV | 1 | C | G | Homozygous   |
| NC_037643.1 | 6453183 | SNV | 1 | G | A | Heterozygous |
| NC_037643.1 | 6456203 | SNV | 1 | T | A | Heterozygous |
| NC_037643.1 | 6456304 | SNV | 1 | A | G | Heterozygous |
| NC_037643.1 | 6456401 | SNV | 1 | T | A | Heterozygous |
| NC_037643.1 | 6456466 | SNV | 1 | T | A | Heterozygous |
| NC_037643.1 | 6456608 | SNV | 1 | G | C | Homozygous   |
| NC_037643.1 | 6457033 | SNV | 1 | C | T | Heterozygous |
| NC_037643.1 | 6457073 | SNV | 1 | A | G | Homozygous   |
| NC_037643.1 | 6457110 | SNV | 1 | A | T | Heterozygous |
| NC_037643.1 | 6457113 | SNV | 1 | A | G | Homozygous   |
| NC_037643.1 | 6457618 | SNV | 1 | C | T | Heterozygous |

|             |         |     |   |   |   |              |
|-------------|---------|-----|---|---|---|--------------|
| NC_037643.1 | 6457847 | SNV | 1 | T | G | Homozygous   |
| NC_037643.1 | 6457878 | SNV | 1 | G | A | Homozygous   |
| NC_037643.1 | 6459335 | SNV | 1 | A | G | Heterozygous |
| NC_037643.1 | 6459939 | SNV | 1 | A | T | Heterozygous |
| NC_037643.1 | 6460487 | SNV | 1 | A | G | Homozygous   |
| NC_037643.1 | 6460664 | SNV | 1 | A | G | Homozygous   |
| NC_037643.1 | 6460983 | SNV | 1 | A | G | Heterozygous |
| NC_037643.1 | 6460992 | SNV | 1 | G | C | Homozygous   |
| NC_037643.1 | 6461122 | SNV | 1 | A | C | Homozygous   |
| NC_037643.1 | 6461188 | SNV | 1 | T | C | Homozygous   |
| NC_037643.1 | 6464276 | SNV | 1 | T | C | Homozygous   |
| NC_037643.1 | 6464642 | SNV | 1 | C | T | Heterozygous |
| NC_037643.1 | 6465095 | SNV | 1 | T | C | Homozygous   |
| NC_037643.1 | 6466074 | SNV | 1 | G | A | Heterozygous |
| NC_037643.1 | 6466149 | SNV | 1 | C | T | Heterozygous |
| NC_037643.1 | 6466289 | SNV | 1 | C | T | Homozygous   |
| NC_037643.1 | 6466303 | SNV | 1 | G | A | Homozygous   |
| NC_037643.1 | 6466316 | SNV | 1 | C | T | Homozygous   |
| NC_037643.1 | 6466322 | SNV | 1 | T | A | Homozygous   |
| NC_037643.1 | 6466332 | SNV | 1 | C | T | Homozygous   |
| NC_037643.1 | 6466341 | SNV | 1 | C | T | Homozygous   |
| NC_037643.1 | 6466386 | SNV | 1 | C | T | Heterozygous |
| NC_037643.1 | 6467218 | SNV | 1 | C | T | Homozygous   |
| NC_037643.1 | 6467247 | SNV | 1 | C | T | Homozygous   |
| NC_037643.1 | 6467261 | SNV | 1 | C | T | Homozygous   |
| NC_037643.1 | 6468098 | SNV | 1 | G | A | Heterozygous |
| NC_037643.1 | 6476659 | SNV | 1 | G | A | Heterozygous |
| NC_037643.1 | 6477067 | SNV | 1 | A | T | Homozygous   |
| NC_037643.1 | 6477372 | SNV | 1 | A | T | Homozygous   |
| NC_037643.1 | 6477501 | SNV | 1 | A | G | Homozygous   |
| NC_037643.1 | 6488513 | SNV | 1 | A | G | Homozygous   |
| NC_037643.1 | 6488524 | SNV | 1 | G | A | Homozygous   |
| NC_037643.1 | 6506194 | SNV | 1 | C | T | Homozygous   |
| NC_037643.1 | 6506302 | SNV | 1 | A | G | Homozygous   |
| NC_037643.1 | 6506520 | SNV | 1 | T | C | Homozygous   |
| NC_037643.1 | 6508200 | SNV | 1 | A | G | Heterozygous |
| NC_037643.1 | 6508284 | SNV | 1 | G | A | Heterozygous |
| NC_037643.1 | 6508286 | SNV | 1 | G | A | Heterozygous |
| NC_037643.1 | 6508533 | SNV | 1 | A | C | Heterozygous |
| NC_037643.1 | 6508574 | SNV | 1 | C | G | Heterozygous |
| NC_037643.1 | 6508578 | SNV | 1 | C | G | Heterozygous |
| NC_037643.1 | 6508590 | SNV | 1 | A | G | Heterozygous |
| NC_037643.1 | 6508760 | SNV | 1 | G | A | Heterozygous |
| NC_037643.1 | 6508804 | SNV | 1 | C | T | Homozygous   |
| NC_037643.1 | 6508808 | SNV | 1 | C | T | Heterozygous |
| NC_037643.1 | 6511172 | SNV | 1 | C | G | Homozygous   |
| NC_037643.1 | 6511177 | SNV | 1 | C | G | Homozygous   |
| NC_037643.1 | 6511184 | SNV | 1 | T | A | Homozygous   |
| NC_037643.1 | 6511189 | SNV | 1 | T | A | Heterozygous |
| NC_037643.1 | 6511191 | SNV | 1 | C | T | Heterozygous |
| NC_037643.1 | 6511211 | SNV | 1 | C | T | Heterozygous |

|             |         |     |   |   |   |              |
|-------------|---------|-----|---|---|---|--------------|
| NC_037643.1 | 6511243 | SNV | 1 | A | G | Homozygous   |
| NC_037643.1 | 6511248 | SNV | 1 | A | G | Homozygous   |
| NC_037643.1 | 6511253 | SNV | 1 | A | G | Heterozygous |
| NC_037643.1 | 6511259 | SNV | 1 | C | A | Heterozygous |
| NC_037643.1 | 6514130 | SNV | 1 | C | T | Heterozygous |
| NC_037643.1 | 6514280 | SNV | 1 | T | C | Heterozygous |
| NC_037643.1 | 6514907 | SNV | 1 | C | T | Heterozygous |
| NC_037643.1 | 6514931 | SNV | 1 | C | T | Heterozygous |
| NC_037643.1 | 6515021 | SNV | 1 | C | T | Homozygous   |
| NC_037643.1 | 6515472 | SNV | 1 | A | G | Homozygous   |
| NC_037643.1 | 6516238 | SNV | 1 | T | C | Homozygous   |
| NC_037643.1 | 6516242 | SNV | 1 | C | T | Heterozygous |
| NC_037643.1 | 6516246 | SNV | 1 | T | C | Heterozygous |
| NC_037643.1 | 6516262 | SNV | 1 | G | C | Heterozygous |
| NC_037643.1 | 6516413 | SNV | 1 | T | C | Homozygous   |
| NC_037643.1 | 6516613 | SNV | 1 | C | T | Heterozygous |
| NC_037643.1 | 6516761 | SNV | 1 | T | C | Homozygous   |
| NC_037643.1 | 6517065 | SNV | 1 | A | G | Homozygous   |
| NC_037643.1 | 6518178 | SNV | 1 | A | G | Homozygous   |
| NC_037643.1 | 6518197 | SNV | 1 | G | T | Heterozygous |
| NC_037643.1 | 6518349 | SNV | 1 | G | A | Heterozygous |
| NC_037643.1 | 6518406 | SNV | 1 | C | T | Heterozygous |
| NC_037643.1 | 6519191 | SNV | 1 | A | G | Homozygous   |
| NC_037643.1 | 6519792 | SNV | 1 | A | G | Homozygous   |
| NC_037643.1 | 6519794 | SNV | 1 | T | A | Homozygous   |
| NC_037643.1 | 6519799 | SNV | 1 | A | T | Homozygous   |
| NC_037643.1 | 6519807 | SNV | 1 | T | C | Homozygous   |
| NC_037643.1 | 6522265 | SNV | 1 | T | C | Homozygous   |
| NC_037643.1 | 6522316 | SNV | 1 | T | A | Heterozygous |
| NC_037643.1 | 6522328 | SNV | 1 | T | C | Homozygous   |
| NC_037643.1 | 6522500 | SNV | 1 | T | C | Homozygous   |
| NC_037643.1 | 6523756 | SNV | 1 | A | G | Homozygous   |
| NC_037643.1 | 6523808 | SNV | 1 | G | A | Heterozygous |
| NC_037643.1 | 6523998 | SNV | 1 | A | G | Homozygous   |
| NC_037643.1 | 6524181 | SNV | 1 | A | G | Homozygous   |
| NC_037643.1 | 6524187 | SNV | 1 | A | G | Homozygous   |
| NC_037643.1 | 6524306 | SNV | 1 | G | A | Heterozygous |
| NC_037643.1 | 6524906 | SNV | 1 | C | T | Homozygous   |
| NC_037643.1 | 6524953 | SNV | 1 | A | G | Homozygous   |
| NC_037643.1 | 6525230 | SNV | 1 | C | T | Heterozygous |
| NC_037643.1 | 6526681 | SNV | 1 | T | C | Homozygous   |
| NC_037643.1 | 6526746 | SNV | 1 | A | G | Heterozygous |
| NC_037643.1 | 6528303 | SNV | 1 | A | G | Homozygous   |
| NC_037643.1 | 6530148 | SNV | 1 | A | G | Heterozygous |
| NC_037643.1 | 6530212 | SNV | 1 | G | A | Heterozygous |
| NC_037643.1 | 6530551 | SNV | 1 | T | C | Heterozygous |
| NC_037643.1 | 6530575 | SNV | 1 | C | T | Heterozygous |
| NC_037643.1 | 6530612 | SNV | 1 | A | T | Homozygous   |
| NC_037643.1 | 6530614 | SNV | 1 | A | G | Homozygous   |
| NC_037643.1 | 6530632 | SNV | 1 | C | G | Heterozygous |
| NC_037643.1 | 6533406 | SNV | 1 | G | A | Heterozygous |

|             |         |     |   |   |   |              |
|-------------|---------|-----|---|---|---|--------------|
| NC_037643.1 | 6534715 | SNV | 1 | G | A | Heterozygous |
| NC_037643.1 | 6534718 | SNV | 1 | T | C | Heterozygous |
| NC_037643.1 | 6534734 | SNV | 1 | A | G | Homozygous   |
| NC_037643.1 | 6543788 | SNV | 1 | C | T | Heterozygous |
| NC_037643.1 | 6543838 | SNV | 1 | C | T | Heterozygous |
| NC_037643.1 | 6543859 | SNV | 1 | A | G | Heterozygous |
| NC_037643.1 | 6543944 | SNV | 1 | C | A | Heterozygous |
| NC_037643.1 | 6547931 | SNV | 1 | C | G | Homozygous   |
| NC_037643.1 | 6551462 | SNV | 1 | A | G | Heterozygous |
| NC_037643.1 | 6551537 | SNV | 1 | A | G | Homozygous   |
| NC_037643.1 | 6551583 | SNV | 1 | C | G | Homozygous   |
| NC_037643.1 | 6551628 | SNV | 1 | T | C | Homozygous   |
| NC_037643.1 | 6551704 | SNV | 1 | A | G | Heterozygous |
| NC_037643.1 | 6551921 | SNV | 1 | T | C | Homozygous   |
| NC_037643.1 | 6552083 | SNV | 1 | G | A | Homozygous   |
| NC_037643.1 | 6568776 | SNV | 1 | G | A | Homozygous   |
| NC_037643.1 | 6568779 | SNV | 1 | A | T | Homozygous   |
| NC_037643.1 | 6572967 | SNV | 1 | A | G | Heterozygous |
| NC_037643.1 | 6592029 | SNV | 1 | C | A | Heterozygous |
| NC_037643.1 | 6592474 | SNV | 1 | C | T | Heterozygous |
| NC_037643.1 | 6592501 | SNV | 1 | T | C | Heterozygous |
| NC_037643.1 | 6593896 | SNV | 1 | G | A | Homozygous   |
| NC_037643.1 | 6595586 | SNV | 1 | T | C | Homozygous   |
| NC_037643.1 | 6595787 | SNV | 1 | T | C | Homozygous   |
| NC_037643.1 | 6596541 | SNV | 1 | A | G | Homozygous   |
| NC_037643.1 | 6596927 | SNV | 1 | C | T | Homozygous   |
| NC_037643.1 | 6597459 | SNV | 1 | T | C | Heterozygous |
| NC_037643.1 | 6598251 | SNV | 1 | G | A | Homozygous   |
| NC_037643.1 | 6601799 | SNV | 1 | C | T | Homozygous   |
| NC_037643.1 | 6613246 | SNV | 1 | C | T | Homozygous   |
| NC_037643.1 | 6613665 | SNV | 1 | T | C | Homozygous   |
| NC_037643.1 | 6613912 | SNV | 1 | T | A | Heterozygous |
| NC_037643.1 | 6613922 | SNV | 1 | T | A | Heterozygous |
| NC_037643.1 | 6613956 | SNV | 1 | A | G | Homozygous   |
| NC_037643.1 | 6614089 | SNV | 1 | A | G | Homozygous   |
| NC_037643.1 | 6614138 | SNV | 1 | T | A | Heterozygous |
| NC_037643.1 | 6614147 | SNV | 1 | A | T | Heterozygous |
| NC_037643.1 | 6614756 | SNV | 1 | C | G | Homozygous   |
| NC_037643.1 | 6618024 | SNV | 1 | A | T | Homozygous   |
| NC_037643.1 | 6618030 | SNV | 1 | A | G | Homozygous   |
| NC_037643.1 | 6618033 | SNV | 1 | A | T | Homozygous   |
| NC_037643.1 | 6618035 | SNV | 1 | A | T | Homozygous   |
| NC_037643.1 | 6618044 | SNV | 1 | C | A | Homozygous   |
| NC_037643.1 | 6618050 | SNV | 1 | T | C | Homozygous   |
| NC_037643.1 | 6621120 | SNV | 1 | T | G | Homozygous   |
| NC_037643.1 | 6622511 | SNV | 1 | A | G | Heterozygous |
| NC_037643.1 | 6622577 | SNV | 1 | T | C | Heterozygous |
| NC_037643.1 | 6622773 | SNV | 1 | C | T | Heterozygous |
| NC_037643.1 | 6623047 | SNV | 1 | A | G | Homozygous   |
| NC_037643.1 | 6630538 | SNV | 1 | G | A | Heterozygous |
| NC_037643.1 | 6630620 | SNV | 1 | T | A | Homozygous   |

|             |         |     |   |   |   |              |
|-------------|---------|-----|---|---|---|--------------|
| NC_037643.1 | 6630629 | SNV | 1 | A | G | Homozygous   |
| NC_037643.1 | 6639381 | SNV | 1 | G | A | Heterozygous |
| NC_037643.1 | 6641222 | SNV | 1 | C | A | Homozygous   |
| NC_037643.1 | 6641224 | SNV | 1 | T | A | Homozygous   |
| NC_037643.1 | 6641329 | SNV | 1 | T | C | Homozygous   |
| NC_037643.1 | 6643070 | SNV | 1 | A | G | Homozygous   |
| NC_037643.1 | 6644670 | SNV | 1 | A | T | Homozygous   |
| NC_037643.1 | 6645450 | SNV | 1 | T | A | Homozygous   |
| NC_037643.1 | 6646395 | SNV | 1 | G | A | Heterozygous |
| NC_037643.1 | 6648248 | SNV | 1 | T | C | Heterozygous |
| NC_037643.1 | 6648551 | SNV | 1 | A | T | Homozygous   |
| NC_037643.1 | 6648553 | SNV | 1 | A | G | Homozygous   |
| NC_037643.1 | 6648960 | SNV | 1 | T | G | Homozygous   |
| NC_037643.1 | 6649086 | SNV | 1 | A | G | Homozygous   |
| NC_037643.1 | 6649316 | SNV | 1 | T | A | Homozygous   |
| NC_037643.1 | 6649319 | SNV | 1 | T | A | Homozygous   |
| NC_037643.1 | 6649321 | SNV | 1 | T | G | Homozygous   |
| NC_037643.1 | 6649323 | SNV | 1 | G | A | Heterozygous |
| NC_037643.1 | 6649552 | SNV | 1 | G | A | Homozygous   |
| NC_037643.1 | 6649850 | SNV | 1 | T | C | Homozygous   |
| NC_037643.1 | 6650829 | SNV | 1 | A | G | Heterozygous |
| NC_037643.1 | 6651473 | SNV | 1 | A | G | Heterozygous |
| NC_037643.1 | 6656380 | SNV | 1 | C | G | Heterozygous |
| NC_037643.1 | 6659825 | SNV | 1 | A | G | Heterozygous |
| NC_037643.1 | 6660148 | SNV | 1 | T | A | Heterozygous |
| NC_037643.1 | 6660235 | SNV | 1 | C | T | Heterozygous |
| NC_037643.1 | 6660253 | SNV | 1 | T | G | Heterozygous |
| NC_037643.1 | 6660300 | SNV | 1 | G | A | Homozygous   |
| NC_037643.1 | 6660313 | SNV | 1 | A | G | Homozygous   |
| NC_037643.1 | 6660374 | SNV | 1 | T | C | Homozygous   |
| NC_037643.1 | 6660379 | SNV | 1 | A | G | Homozygous   |
| NC_037643.1 | 6660381 | SNV | 1 | T | A | Homozygous   |
| NC_037643.1 | 6660606 | SNV | 1 | A | G | Heterozygous |
| NC_037643.1 | 6660773 | SNV | 1 | A | G | Homozygous   |
| NC_037643.1 | 6661052 | SNV | 1 | G | A | Homozygous   |
| NC_037643.1 | 6661114 | SNV | 1 | C | G | Heterozygous |
| NC_037643.1 | 6661161 | SNV | 1 | A | G | Homozygous   |
| NC_037643.1 | 6661578 | SNV | 1 | A | T | Homozygous   |
| NC_037643.1 | 6661603 | SNV | 1 | A | G | Homozygous   |
| NC_037643.1 | 6662195 | SNV | 1 | A | G | Homozygous   |
| NC_037643.1 | 6662317 | SNV | 1 | T | C | Heterozygous |
| NC_037643.1 | 6662369 | SNV | 1 | A | G | Homozygous   |
| NC_037643.1 | 6662428 | SNV | 1 | A | G | Homozygous   |
| NC_037643.1 | 6662456 | SNV | 1 | G | C | Homozygous   |
| NC_037643.1 | 6663471 | SNV | 1 | C | G | Homozygous   |
| NC_037643.1 | 6664036 | SNV | 1 | T | C | Heterozygous |
| NC_037643.1 | 6664053 | SNV | 1 | T | C | Heterozygous |
| NC_037643.1 | 6664456 | SNV | 1 | T | C | Homozygous   |
| NC_037643.1 | 6664788 | SNV | 1 | C | G | Heterozygous |
| NC_037643.1 | 6664823 | SNV | 1 | C | T | Heterozygous |
| NC_037643.1 | 6664985 | SNV | 1 | T | C | Homozygous   |

|             |         |     |   |   |   |              |
|-------------|---------|-----|---|---|---|--------------|
| NC_037643.1 | 6664998 | SNV | 1 | A | G | Homozygous   |
| NC_037643.1 | 6665301 | SNV | 1 | G | A | Homozygous   |
| NC_037643.1 | 6665308 | SNV | 1 | A | G | Heterozygous |
| NC_037643.1 | 6665866 | SNV | 1 | A | G | Homozygous   |
| NC_037643.1 | 6665955 | SNV | 1 | T | C | Homozygous   |
| NC_037643.1 | 6667217 | SNV | 1 | C | G | Homozygous   |
| NC_037643.1 | 6667388 | SNV | 1 | A | G | Homozygous   |
| NC_037643.1 | 6667698 | SNV | 1 | G | A | Homozygous   |
| NC_037643.1 | 6667767 | SNV | 1 | T | C | Homozygous   |
| NC_037643.1 | 6667787 | SNV | 1 | G | A | Heterozygous |
| NC_037643.1 | 6667813 | SNV | 1 | T | C | Homozygous   |
| NC_037643.1 | 6668070 | SNV | 1 | C | G | Heterozygous |
| NC_037643.1 | 6669871 | SNV | 1 | C | A | Heterozygous |
| NC_037643.1 | 6669904 | SNV | 1 | A | G | Homozygous   |
| NC_037643.1 | 6670503 | SNV | 1 | T | C | Heterozygous |
| NC_037643.1 | 6670548 | SNV | 1 | T | C | Homozygous   |
| NC_037643.1 | 6671777 | SNV | 1 | A | G | Homozygous   |
| NC_037643.1 | 6671802 | SNV | 1 | G | A | Homozygous   |
| NC_037643.1 | 6671836 | SNV | 1 | A | G | Homozygous   |
| NC_037643.1 | 6671841 | SNV | 1 | G | A | Homozygous   |
| NC_037643.1 | 6671934 | SNV | 1 | A | G | Homozygous   |
| NC_037643.1 | 6672151 | SNV | 1 | T | C | Heterozygous |
| NC_037643.1 | 6672209 | SNV | 1 | G | A | Heterozygous |
| NC_037643.1 | 6672221 | SNV | 1 | T | C | Heterozygous |
| NC_037643.1 | 6672279 | SNV | 1 | T | G | Homozygous   |
| NC_037643.1 | 6676545 | SNV | 1 | T | C | Homozygous   |
| NC_037643.1 | 6679322 | SNV | 1 | C | T | Heterozygous |
| NC_037643.1 | 6679324 | SNV | 1 | A | T | Homozygous   |
| NC_037643.1 | 6679515 | SNV | 1 | C | T | Heterozygous |
| NC_037643.1 | 6679540 | SNV | 1 | C | T | Heterozygous |
| NC_037643.1 | 6679609 | SNV | 1 | A | G | Homozygous   |
| NC_037643.1 | 6679664 | SNV | 1 | G | C | Homozygous   |
| NC_037643.1 | 6679823 | SNV | 1 | A | T | Homozygous   |
| NC_037643.1 | 6679831 | SNV | 1 | A | G | Homozygous   |
| NC_037643.1 | 6702396 | SNV | 1 | C | G | Heterozygous |
| NC_037643.1 | 6702409 | SNV | 1 | A | C | Homozygous   |
| NC_037643.1 | 6702503 | SNV | 1 | C | T | Homozygous   |
| NC_037643.1 | 6714104 | SNV | 1 | A | G | Heterozygous |
| NC_037643.1 | 6714141 | SNV | 1 | C | T | Homozygous   |
| NC_037643.1 | 6714173 | SNV | 1 | C | T | Heterozygous |
| NC_037643.1 | 6714175 | SNV | 1 | C | T | Heterozygous |
| NC_037643.1 | 6723508 | SNV | 1 | T | C | Homozygous   |
| NC_037643.1 | 6723518 | SNV | 1 | C | T | Heterozygous |
| NC_037643.1 | 6723944 | SNV | 1 | G | A | Homozygous   |
| NC_037643.1 | 6725014 | SNV | 1 | T | C | Homozygous   |
| NC_037643.1 | 6725017 | SNV | 1 | T | A | Homozygous   |
| NC_037643.1 | 6725024 | SNV | 1 | A | T | Homozygous   |
| NC_037643.1 | 6725043 | SNV | 1 | A | T | Homozygous   |
| NC_037643.1 | 6725046 | SNV | 1 | G | A | Homozygous   |
| NC_037643.1 | 6725049 | SNV | 1 | A | C | Homozygous   |
| NC_037643.1 | 6725451 | SNV | 1 | T | C | Heterozygous |

|             |         |     |   |   |   |              |
|-------------|---------|-----|---|---|---|--------------|
| NC_037643.1 | 6726566 | SNV | 1 | A | G | Homozygous   |
| NC_037643.1 | 6730048 | SNV | 1 | A | G | Homozygous   |
| NC_037643.1 | 6730122 | SNV | 1 | A | G | Homozygous   |
| NC_037643.1 | 6730143 | SNV | 1 | C | T | Homozygous   |
| NC_037643.1 | 6730211 | SNV | 1 | T | C | Homozygous   |
| NC_037643.1 | 6730255 | SNV | 1 | G | A | Heterozygous |
| NC_037643.1 | 6731683 | SNV | 1 | C | T | Heterozygous |
| NC_037643.1 | 6731798 | SNV | 1 | G | A | Heterozygous |
| NC_037643.1 | 6731814 | SNV | 1 | G | A | Heterozygous |
| NC_037643.1 | 6731820 | SNV | 1 | T | C | Heterozygous |
| NC_037643.1 | 6732454 | SNV | 1 | T | C | Homozygous   |
| NC_037643.1 | 6732672 | SNV | 1 | C | T | Heterozygous |
| NC_037643.1 | 6732939 | SNV | 1 | A | G | Homozygous   |
| NC_037643.1 | 6732999 | SNV | 1 | A | C | Homozygous   |
| NC_037643.1 | 6733029 | SNV | 1 | T | C | Homozygous   |
| NC_037643.1 | 6735158 | SNV | 1 | C | T | Heterozygous |
| NC_037643.1 | 6735176 | SNV | 1 | T | C | Homozygous   |
| NC_037643.1 | 6741322 | SNV | 1 | T | G | Homozygous   |
| NC_037643.1 | 6741325 | SNV | 1 | A | G | Homozygous   |
| NC_037643.1 | 6741421 | SNV | 1 | A | T | Homozygous   |
| NC_037643.1 | 6741423 | SNV | 1 | A | G | Homozygous   |
| NC_037643.1 | 6741452 | SNV | 1 | C | T | Heterozygous |
| NC_037643.1 | 6741494 | SNV | 1 | C | T | Homozygous   |
| NC_037643.1 | 6741520 | SNV | 1 | G | A | Homozygous   |
| NC_037643.1 | 6741721 | SNV | 1 | C | T | Homozygous   |
| NC_037643.1 | 6751610 | SNV | 1 | A | G | Heterozygous |
| NC_037643.1 | 6761480 | SNV | 1 | T | C | Heterozygous |
| NC_037643.1 | 6761481 | SNV | 1 | A | C | Heterozygous |
| NC_037643.1 | 6761483 | SNV | 1 | A | G | Heterozygous |
| NC_037643.1 | 6761489 | SNV | 1 | G | A | Heterozygous |
| NC_037643.1 | 6761500 | SNV | 1 | A | G | Homozygous   |
| NC_037643.1 | 6761510 | SNV | 1 | T | C | Heterozygous |
| NC_037643.1 | 6761518 | SNV | 1 | G | A | Homozygous   |
| NC_037643.1 | 6761521 | SNV | 1 | A | G | Homozygous   |
| NC_037643.1 | 6761524 | SNV | 1 | C | T | Heterozygous |
| NC_037643.1 | 6761530 | SNV | 1 | T | A | Heterozygous |
| NC_037643.1 | 6761532 | SNV | 1 | G | A | Heterozygous |
| NC_037643.1 | 6765173 | SNV | 1 | A | G | Homozygous   |
| NC_037643.1 | 6779424 | SNV | 1 | T | C | Homozygous   |
| NC_037643.1 | 6779486 | SNV | 1 | T | C | Heterozygous |
| NC_037643.1 | 6781074 | SNV | 1 | T | C | Homozygous   |
| NC_037643.1 | 6782512 | SNV | 1 | T | A | Heterozygous |
| NC_037643.1 | 6782518 | SNV | 1 | C | A | Heterozygous |
| NC_037643.1 | 6782534 | SNV | 1 | C | T | Homozygous   |
| NC_037643.1 | 6782553 | SNV | 1 | G | C | Homozygous   |
| NC_037643.1 | 6782829 | SNV | 1 | A | T | Homozygous   |
| NC_037643.1 | 6782857 | SNV | 1 | T | A | Homozygous   |
| NC_037643.1 | 6782864 | SNV | 1 | A | G | Homozygous   |
| NC_037643.1 | 6803682 | SNV | 1 | A | G | Homozygous   |
| NC_037643.1 | 6811388 | SNV | 1 | T | C | Homozygous   |
| NC_037643.1 | 6811415 | SNV | 1 | C | T | Homozygous   |



|             |         |     |   |   |   |              |
|-------------|---------|-----|---|---|---|--------------|
| NC_037643.1 | 6820500 | SNV | 1 | A | T | Heterozygous |
| NC_037643.1 | 6830846 | SNV | 1 | T | C | Heterozygous |
| NC_037643.1 | 6830874 | SNV | 1 | A | G | Homozygous   |
| NC_037643.1 | 6831032 | SNV | 1 | T | C | Homozygous   |
| NC_037643.1 | 6831190 | SNV | 1 | G | A | Homozygous   |
| NC_037643.1 | 6831397 | SNV | 1 | C | A | Homozygous   |
| NC_037643.1 | 6831471 | SNV | 1 | T | C | Homozygous   |
| NC_037643.1 | 6831474 | SNV | 1 | G | A | Homozygous   |
| NC_037643.1 | 6831495 | SNV | 1 | G | T | Homozygous   |
| NC_037643.1 | 6831501 | SNV | 1 | A | G | Homozygous   |
| NC_037643.1 | 6831516 | SNV | 1 | T | C | Homozygous   |
| NC_037643.1 | 6831518 | SNV | 1 | A | T | Homozygous   |
| NC_037643.1 | 6831520 | SNV | 1 | T | C | Homozygous   |
| NC_037643.1 | 6831525 | SNV | 1 | G | A | Homozygous   |
| NC_037643.1 | 6831532 | SNV | 1 | G | A | Homozygous   |
| NC_037643.1 | 6869669 | SNV | 1 | C | T | Heterozygous |
| NC_037643.1 | 6870760 | SNV | 1 | A | T | Heterozygous |
| NC_037643.1 | 6871887 | SNV | 1 | C | T | Homozygous   |
| NC_037643.1 | 6871939 | SNV | 1 | T | C | Heterozygous |
| NC_037643.1 | 6872580 | SNV | 1 | C | A | Heterozygous |
| NC_037643.1 | 6872583 | SNV | 1 | A | T | Heterozygous |
| NC_037643.1 | 6872619 | SNV | 1 | A | G | Heterozygous |
| NC_037643.1 | 6872623 | SNV | 1 | A | G | Heterozygous |
| NC_037643.1 | 6872627 | SNV | 1 | A | G | Heterozygous |
| NC_037643.1 | 6872633 | SNV | 1 | A | T | Heterozygous |
| NC_037643.1 | 6873281 | SNV | 1 | T | G | Homozygous   |
| NC_037643.1 | 6873593 | SNV | 1 | T | A | Heterozygous |
| NC_037643.1 | 6873900 | SNV | 1 | T | A | Homozygous   |
| NC_037643.1 | 6874219 | SNV | 1 | A | G | Homozygous   |
| NC_037643.1 | 6874500 | SNV | 1 | A | T | Homozygous   |
| NC_037643.1 | 6874531 | SNV | 1 | T | G | Homozygous   |
| NC_037643.1 | 6874546 | SNV | 1 | A | T | Homozygous   |
| NC_037643.1 | 6874896 | SNV | 1 | T | C | Homozygous   |
| NC_037643.1 | 6875130 | SNV | 1 | G | A | Homozygous   |
| NC_037643.1 | 6875552 | SNV | 1 | G | A | Homozygous   |
| NC_037643.1 | 6876532 | SNV | 1 | G | A | Heterozygous |
| NC_037643.1 | 6877564 | SNV | 1 | G | A | Heterozygous |
| NC_037643.1 | 6878463 | SNV | 1 | T | C | Homozygous   |
| NC_037643.1 | 6878485 | SNV | 1 | C | T | Heterozygous |
| NC_037643.1 | 6878522 | SNV | 1 | A | G | Homozygous   |
| NC_037643.1 | 6879916 | SNV | 1 | T | C | Homozygous   |
| NC_037643.1 | 6880279 | SNV | 1 | C | T | Homozygous   |
| NC_037643.1 | 6880360 | SNV | 1 | C | T | Heterozygous |
| NC_037643.1 | 6880591 | SNV | 1 | A | G | Homozygous   |
| NC_037643.1 | 6880698 | SNV | 1 | A | C | Homozygous   |
| NC_037643.1 | 6880700 | SNV | 1 | A | C | Homozygous   |
| NC_037643.1 | 6887935 | SNV | 1 | A | G | Homozygous   |
| NC_037643.1 | 6887948 | SNV | 1 | T | C | Heterozygous |
| NC_037643.1 | 6896469 | SNV | 1 | T | C | Homozygous   |
| NC_037643.1 | 6896524 | SNV | 1 | T | A | Heterozygous |
| NC_037643.1 | 6915219 | SNV | 1 | A | G | Homozygous   |

|             |         |     |   |   |   |              |
|-------------|---------|-----|---|---|---|--------------|
| NC_037643.1 | 6915232 | SNV | 1 | A | G | Heterozygous |
| NC_037643.1 | 6929269 | SNV | 1 | T | C | Homozygous   |
| NC_037643.1 | 6944617 | SNV | 1 | A | G | Heterozygous |
| NC_037643.1 | 6944631 | SNV | 1 | G | C | Homozygous   |
| NC_037643.1 | 6944662 | SNV | 1 | T | A | Homozygous   |
| NC_037643.1 | 6944664 | SNV | 1 | G | A | Homozygous   |
| NC_037643.1 | 6988066 | SNV | 1 | T | G | Heterozygous |
| NC_037643.1 | 6988121 | SNV | 1 | G | A | Homozygous   |
| NC_037643.1 | 6988236 | SNV | 1 | G | A | Homozygous   |
| NC_037643.1 | 6988397 | SNV | 1 | T | C | Homozygous   |
| NC_037643.1 | 6988455 | SNV | 1 | C | T | Homozygous   |
| NC_037643.1 | 7055660 | SNV | 1 | G | A | Homozygous   |
| NC_037643.1 | 7060401 | SNV | 1 | C | T | Heterozygous |
| NC_037643.1 | 7060631 | SNV | 1 | T | C | Homozygous   |
| NC_037643.1 | 7062316 | SNV | 1 | A | G | Homozygous   |
| NC_037643.1 | 7062942 | SNV | 1 | A | G | Homozygous   |
| NC_037643.1 | 7066678 | SNV | 1 | T | A | Homozygous   |
| NC_037643.1 | 7066680 | SNV | 1 | C | G | Homozygous   |
| NC_037643.1 | 7066688 | SNV | 1 | A | T | Homozygous   |
| NC_037643.1 | 7066694 | SNV | 1 | A | C | Homozygous   |
| NC_037643.1 | 7066741 | SNV | 1 | A | G | Homozygous   |
| NC_037643.1 | 7068889 | SNV | 1 | T | A | Homozygous   |
| NC_037643.1 | 7068898 | SNV | 1 | T | A | Homozygous   |
| NC_037643.1 | 7070234 | SNV | 1 | C | T | Homozygous   |
| NC_037643.1 | 7070720 | SNV | 1 | A | G | Heterozygous |
| NC_037643.1 | 7070726 | SNV | 1 | A | G | Heterozygous |
| NC_037643.1 | 7070735 | SNV | 1 | T | A | Heterozygous |
| NC_037643.1 | 7070741 | SNV | 1 | T | A | Heterozygous |
| NC_037643.1 | 7070750 | SNV | 1 | A | T | Heterozygous |
| NC_037643.1 | 7070753 | SNV | 1 | A | C | Heterozygous |
| NC_037643.1 | 7070755 | SNV | 1 | G | A | Heterozygous |
| NC_037643.1 | 7070759 | SNV | 1 | A | C | Heterozygous |
| NC_037643.1 | 7070762 | SNV | 1 | T | A | Homozygous   |
| NC_037643.1 | 7070765 | SNV | 1 | T | C | Homozygous   |
| NC_037643.1 | 7070789 | SNV | 1 | T | C | Heterozygous |
| NC_037643.1 | 7070802 | SNV | 1 | A | T | Heterozygous |
| NC_037643.1 | 7070819 | SNV | 1 | T | G | Heterozygous |
| NC_037643.1 | 7070832 | SNV | 1 | T | A | Heterozygous |
| NC_037643.1 | 7070837 | SNV | 1 | A | G | Heterozygous |
| NC_037643.1 | 7070843 | SNV | 1 | T | C | Homozygous   |
| NC_037643.1 | 7070846 | SNV | 1 | T | C | Heterozygous |
| NC_037643.1 | 7070852 | SNV | 1 | A | G | Heterozygous |
| NC_037643.1 | 7070977 | SNV | 1 | A | T | Heterozygous |
| NC_037643.1 | 7071060 | SNV | 1 | C | T | Homozygous   |
| NC_037643.1 | 7071063 | SNV | 1 | A | G | Homozygous   |
| NC_037643.1 | 7071725 | SNV | 1 | A | G | Homozygous   |
| NC_037643.1 | 7071740 | SNV | 1 | A | T | Homozygous   |
| NC_037643.1 | 7071743 | SNV | 1 | A | G | Homozygous   |
| NC_037643.1 | 7071749 | SNV | 1 | A | T | Homozygous   |
| NC_037643.1 | 7071755 | SNV | 1 | A | C | Homozygous   |
| NC_037643.1 | 7071773 | SNV | 1 | T | A | Homozygous   |

|             |         |     |   |   |   |              |
|-------------|---------|-----|---|---|---|--------------|
| NC_037643.1 | 7075570 | SNV | 1 | A | G | Homozygous   |
| NC_037643.1 | 7077934 | SNV | 1 | T | C | Heterozygous |
| NC_037643.1 | 7081780 | SNV | 1 | T | C | Homozygous   |
| NC_037643.1 | 7082018 | SNV | 1 | A | G | Homozygous   |
| NC_037643.1 | 7086508 | SNV | 1 | T | C | Homozygous   |
| NC_037643.1 | 7087501 | SNV | 1 | A | C | Homozygous   |
| NC_037643.1 | 7087504 | SNV | 1 | G | A | Heterozygous |
| NC_037643.1 | 7090622 | SNV | 1 | T | C | Homozygous   |
| NC_037643.1 | 7090637 | SNV | 1 | T | C | Heterozygous |
| NC_037643.1 | 7090922 | SNV | 1 | T | C | Homozygous   |
| NC_037643.1 | 7091083 | SNV | 1 | T | C | Homozygous   |
| NC_037643.1 | 7091170 | SNV | 1 | G | A | Heterozygous |
| NC_037643.1 | 7096840 | SNV | 1 | C | T | Homozygous   |
| NC_037643.1 | 7097026 | SNV | 1 | T | C | Homozygous   |
| NC_037643.1 | 7097279 | SNV | 1 | G | T | Homozygous   |
| NC_037643.1 | 7101755 | SNV | 1 | G | A | Heterozygous |
| NC_037643.1 | 7101769 | SNV | 1 | T | A | Heterozygous |
| NC_037643.1 | 7102084 | SNV | 1 | T | C | Heterozygous |
| NC_037643.1 | 7102089 | SNV | 1 | A | G | Homozygous   |
| NC_037643.1 | 7102094 | SNV | 1 | A | C | Heterozygous |
| NC_037643.1 | 7102108 | SNV | 1 | G | T | Homozygous   |
| NC_037643.1 | 7105148 | SNV | 1 | T | G | Homozygous   |
| NC_037643.1 | 7106827 | SNV | 1 | G | A | Heterozygous |
| NC_037643.1 | 7106918 | SNV | 1 | T | A | Homozygous   |
| NC_037643.1 | 7107609 | SNV | 1 | T | C | Homozygous   |
| NC_037643.1 | 7107639 | SNV | 1 | A | T | Homozygous   |
| NC_037643.1 | 7107641 | SNV | 1 | T | A | Homozygous   |
| NC_037643.1 | 7110343 | SNV | 1 | A | G | Heterozygous |
| NC_037643.1 | 7111563 | SNV | 1 | T | A | Heterozygous |
| NC_037643.1 | 7111567 | SNV | 1 | T | C | Homozygous   |
| NC_037643.1 | 7111578 | SNV | 1 | A | T | Homozygous   |
| NC_037643.1 | 7111581 | SNV | 1 | A | T | Homozygous   |
| NC_037643.1 | 7111599 | SNV | 1 | A | G | Homozygous   |
| NC_037643.1 | 7111601 | SNV | 1 | G | C | Homozygous   |
| NC_037643.1 | 7117238 | SNV | 1 | T | C | Heterozygous |
| NC_037643.1 | 7117455 | SNV | 1 | A | G | Homozygous   |
| NC_037643.1 | 7127475 | SNV | 1 | A | T | Heterozygous |
| NC_037643.1 | 7127505 | SNV | 1 | G | C | Heterozygous |
| NC_037643.1 | 7127515 | SNV | 1 | C | T | Heterozygous |
| NC_037643.1 | 7133162 | SNV | 1 | T | A | Homozygous   |
| NC_037643.1 | 7133169 | SNV | 1 | A | G | Homozygous   |
| NC_037643.1 | 7133174 | SNV | 1 | A | T | Homozygous   |
| NC_037643.1 | 7133176 | SNV | 1 | T | C | Homozygous   |
| NC_037643.1 | 7133279 | SNV | 1 | G | A | Homozygous   |
| NC_037643.1 | 7133285 | SNV | 1 | A | C | Homozygous   |
| NC_037643.1 | 7134093 | SNV | 1 | T | C | Homozygous   |
| NC_037643.1 | 7149584 | SNV | 1 | C | T | Heterozygous |
| NC_037643.1 | 7149608 | SNV | 1 | G | T | Homozygous   |
| NC_037643.1 | 7149625 | SNV | 1 | G | C | Homozygous   |
| NC_037643.1 | 7151227 | SNV | 1 | C | T | Homozygous   |
| NC_037643.1 | 7152357 | SNV | 1 | G | A | Homozygous   |

|             |         |     |   |   |   |              |
|-------------|---------|-----|---|---|---|--------------|
| NC_037643.1 | 7152386 | SNV | 1 | G | A | Heterozygous |
| NC_037643.1 | 7152396 | SNV | 1 | A | G | Heterozygous |
| NC_037643.1 | 7152626 | SNV | 1 | A | G | Heterozygous |
| NC_037643.1 | 7152631 | SNV | 1 | A | G | Heterozygous |
| NC_037643.1 | 7152656 | SNV | 1 | G | A | Heterozygous |
| NC_037643.1 | 7152666 | SNV | 1 | A | G | Heterozygous |
| NC_037643.1 | 7152808 | SNV | 1 | C | T | Homozygous   |
| NC_037643.1 | 7152876 | SNV | 1 | A | C | Homozygous   |
| NC_037643.1 | 7153362 | SNV | 1 | T | C | Homozygous   |
| NC_037643.1 | 7153842 | SNV | 1 | T | C | Homozygous   |
| NC_037643.1 | 7153930 | SNV | 1 | C | T | Heterozygous |
| NC_037643.1 | 7153934 | SNV | 1 | C | T | Homozygous   |
| NC_037643.1 | 7153948 | SNV | 1 | C | T | Heterozygous |
| NC_037643.1 | 7153954 | SNV | 1 | G | A | Homozygous   |
| NC_037643.1 | 7157695 | SNV | 1 | G | A | Heterozygous |
| NC_037643.1 | 7157698 | SNV | 1 | G | T | Heterozygous |
| NC_037643.1 | 7157701 | SNV | 1 | T | A | Heterozygous |
| NC_037643.1 | 7157704 | SNV | 1 | C | G | Homozygous   |
| NC_037643.1 | 7157710 | SNV | 1 | C | G | Heterozygous |
| NC_037643.1 | 7157713 | SNV | 1 | T | A | Heterozygous |
| NC_037643.1 | 7157716 | SNV | 1 | C | G | Heterozygous |
| NC_037643.1 | 7157718 | SNV | 1 | A | G | Heterozygous |
| NC_037643.1 | 7157767 | SNV | 1 | A | G | Heterozygous |
| NC_037643.1 | 7158974 | SNV | 1 | C | T | Heterozygous |
| NC_037643.1 | 7159072 | SNV | 1 | C | G | Homozygous   |
| NC_037643.1 | 7159151 | SNV | 1 | C | T | Homozygous   |
| NC_037643.1 | 7159153 | SNV | 1 | T | C | Homozygous   |
| NC_037643.1 | 7159297 | SNV | 1 | C | T | Heterozygous |
| NC_037643.1 | 7159364 | SNV | 1 | A | G | Homozygous   |
| NC_037643.1 | 7159421 | SNV | 1 | T | C | Heterozygous |
| NC_037643.1 | 7159461 | SNV | 1 | C | G | Homozygous   |
| NC_037643.1 | 7160817 | SNV | 1 | C | T | Heterozygous |
| NC_037643.1 | 7160820 | SNV | 1 | G | C | Heterozygous |
| NC_037643.1 | 7161128 | SNV | 1 | C | T | Heterozygous |
| NC_037643.1 | 7164598 | SNV | 1 | A | C | Homozygous   |
| NC_037643.1 | 7168802 | SNV | 1 | C | T | Homozygous   |
| NC_037643.1 | 7168973 | SNV | 1 | C | T | Heterozygous |
| NC_037643.1 | 7170340 | SNV | 1 | T | C | Homozygous   |
| NC_037643.1 | 7170426 | SNV | 1 | T | G | Heterozygous |
| NC_037643.1 | 7170834 | SNV | 1 | G | C | Homozygous   |
| NC_037643.1 | 7172062 | SNV | 1 | T | C | Homozygous   |
| NC_037643.1 | 7172090 | SNV | 1 | A | G | Homozygous   |
| NC_037643.1 | 7172422 | SNV | 1 | A | G | Homozygous   |
| NC_037643.1 | 7174503 | SNV | 1 | T | C | Heterozygous |
| NC_037643.1 | 7174642 | SNV | 1 | T | A | Homozygous   |
| NC_037643.1 | 7175047 | SNV | 1 | A | G | Heterozygous |
| NC_037643.1 | 7175194 | SNV | 1 | A | G | Homozygous   |
| NC_037643.1 | 7175396 | SNV | 1 | A | G | Homozygous   |
| NC_037643.1 | 7175555 | SNV | 1 | C | T | Heterozygous |
| NC_037643.1 | 7175687 | SNV | 1 | G | A | Homozygous   |
| NC_037643.1 | 7175849 | SNV | 1 | G | A | Homozygous   |

|             |         |     |   |   |   |              |
|-------------|---------|-----|---|---|---|--------------|
| NC_037643.1 | 7177315 | SNV | 1 | G | A | Homozygous   |
| NC_037643.1 | 7179298 | SNV | 1 | C | T | Homozygous   |
| NC_037643.1 | 7179340 | SNV | 1 | A | G | Heterozygous |
| NC_037643.1 | 7179359 | SNV | 1 | G | A | Heterozygous |
| NC_037643.1 | 7181520 | SNV | 1 | C | T | Homozygous   |
| NC_037643.1 | 7181549 | SNV | 1 | G | T | Homozygous   |
| NC_037643.1 | 7194456 | SNV | 1 | A | G | Homozygous   |
| NC_037643.1 | 7194458 | SNV | 1 | A | G | Homozygous   |
| NC_037643.1 | 7194460 | SNV | 1 | A | G | Homozygous   |
| NC_037643.1 | 7194462 | SNV | 1 | A | G | Homozygous   |
| NC_037643.1 | 7194464 | SNV | 1 | A | G | Homozygous   |
| NC_037643.1 | 7196445 | SNV | 1 | G | A | Homozygous   |
| NC_037643.1 | 7199409 | SNV | 1 | T | C | Heterozygous |
| NC_037643.1 | 7199415 | SNV | 1 | T | C | Heterozygous |
| NC_037643.1 | 7199419 | SNV | 1 | A | T | Homozygous   |
| NC_037643.1 | 7199421 | SNV | 1 | T | C | Homozygous   |
| NC_037643.1 | 7199453 | SNV | 1 | C | T | Heterozygous |
| NC_037643.1 | 7214270 | SNV | 1 | G | A | Heterozygous |
| NC_037643.1 | 7214292 | SNV | 1 | G | A | Homozygous   |
| NC_037643.1 | 7215742 | SNV | 1 | T | C | Homozygous   |
| NC_037643.1 | 7216069 | SNV | 1 | T | G | Homozygous   |
| NC_037643.1 | 7216072 | SNV | 1 | A | T | Homozygous   |
| NC_037643.1 | 7216074 | SNV | 1 | A | T | Homozygous   |
| NC_037643.1 | 7218813 | SNV | 1 | G | C | Heterozygous |
| NC_037643.1 | 7218837 | SNV | 1 | C | A | Homozygous   |
| NC_037643.1 | 7223388 | SNV | 1 | C | A | Homozygous   |
| NC_037643.1 | 7226623 | SNV | 1 | A | G | Heterozygous |
| NC_037643.1 | 7226666 | SNV | 1 | A | G | Heterozygous |
| NC_037643.1 | 7226685 | SNV | 1 | G | A | Heterozygous |
| NC_037643.1 | 7237079 | SNV | 1 | A | G | Homozygous   |
| NC_037643.1 | 7237247 | SNV | 1 | T | C | Homozygous   |
| NC_037643.1 | 7245693 | SNV | 1 | G | A | Homozygous   |
| NC_037643.1 | 7245727 | SNV | 1 | A | G | Homozygous   |
| NC_037643.1 | 7245756 | SNV | 1 | A | G | Homozygous   |
| NC_037643.1 | 7245763 | SNV | 1 | G | A | Heterozygous |
| NC_037643.1 | 7245847 | SNV | 1 | G | A | Heterozygous |
| NC_037643.1 | 7245930 | SNV | 1 | T | C | Homozygous   |
| NC_037643.1 | 7247587 | SNV | 1 | C | T | Heterozygous |
| NC_037643.1 | 7247592 | SNV | 1 | T | A | Heterozygous |
| NC_037643.1 | 7249445 | SNV | 1 | T | G | Heterozygous |
| NC_037643.1 | 7249448 | SNV | 1 | T | C | Heterozygous |
| NC_037643.1 | 7249450 | SNV | 1 | G | A | Heterozygous |
| NC_037643.1 | 7249461 | SNV | 1 | C | T | Heterozygous |
| NC_037643.1 | 7249479 | SNV | 1 | C | G | Homozygous   |
| NC_037643.1 | 7249489 | SNV | 1 | T | A | Heterozygous |
| NC_037643.1 | 7249493 | SNV | 1 | T | A | Heterozygous |
| NC_037643.1 | 7261279 | SNV | 1 | A | G | Homozygous   |
| NC_037643.1 | 7261297 | SNV | 1 | A | G | Homozygous   |
| NC_037643.1 | 7261362 | SNV | 1 | G | A | Heterozygous |
| NC_037643.1 | 7261371 | SNV | 1 | G | A | Homozygous   |
| NC_037643.1 | 7261378 | SNV | 1 | G | A | Homozygous   |

|             |         |     |   |   |   |              |
|-------------|---------|-----|---|---|---|--------------|
| NC_037643.1 | 7265046 | SNV | 1 | C | T | Homozygous   |
| NC_037643.1 | 7265098 | SNV | 1 | C | T | Heterozygous |
| NC_037643.1 | 7266550 | SNV | 1 | A | G | Homozygous   |
| NC_037643.1 | 7266828 | SNV | 1 | G | A | Heterozygous |
| NC_037643.1 | 7266899 | SNV | 1 | G | C | Homozygous   |
| NC_037643.1 | 7266961 | SNV | 1 | A | G | Homozygous   |
| NC_037643.1 | 7266972 | SNV | 1 | G | A | Heterozygous |
| NC_037643.1 | 7266978 | SNV | 1 | G | T | Homozygous   |
| NC_037643.1 | 7267052 | SNV | 1 | A | G | Homozygous   |
| NC_037643.1 | 7267107 | SNV | 1 | C | T | Heterozygous |
| NC_037643.1 | 7267148 | SNV | 1 | G | A | Heterozygous |
| NC_037643.1 | 7267182 | SNV | 1 | G | A | Heterozygous |
| NC_037643.1 | 7267360 | SNV | 1 | C | T | Homozygous   |
| NC_037643.1 | 7267374 | SNV | 1 | T | C | Homozygous   |
| NC_037643.1 | 7267389 | SNV | 1 | C | T | Heterozygous |
| NC_037643.1 | 7267730 | SNV | 1 | A | T | Homozygous   |
| NC_037643.1 | 7267735 | SNV | 1 | G | C | Homozygous   |
| NC_037643.1 | 7268134 | SNV | 1 | T | C | Homozygous   |
| NC_037643.1 | 7274170 | SNV | 1 | A | G | Homozygous   |
| NC_037643.1 | 7274344 | SNV | 1 | G | A | Homozygous   |
| NC_037643.1 | 7274358 | SNV | 1 | G | A | Heterozygous |
| NC_037643.1 | 7278915 | SNV | 1 | G | A | Heterozygous |
| NC_037643.1 | 7279073 | SNV | 1 | A | G | Homozygous   |
| NC_037643.1 | 7279095 | SNV | 1 | T | C | Homozygous   |
| NC_037643.1 | 7279131 | SNV | 1 | A | G | Homozygous   |
| NC_037643.1 | 7279316 | SNV | 1 | G | C | Homozygous   |
| NC_037643.1 | 7279333 | SNV | 1 | G | A | Homozygous   |
| NC_037643.1 | 7279499 | SNV | 1 | G | A | Heterozygous |
| NC_037643.1 | 7287712 | SNV | 1 | T | C | Homozygous   |
| NC_037643.1 | 7287767 | SNV | 1 | T | C | Homozygous   |
| NC_037643.1 | 7287771 | SNV | 1 | C | T | Homozygous   |
| NC_037643.1 | 7287819 | SNV | 1 | C | T | Homozygous   |
| NC_037643.1 | 7287821 | SNV | 1 | C | T | Homozygous   |
| NC_037643.1 | 7289250 | SNV | 1 | T | C | Homozygous   |
| NC_037643.1 | 7289342 | SNV | 1 | G | A | Heterozygous |
| NC_037643.1 | 7291673 | SNV | 1 | T | C | Homozygous   |
| NC_037643.1 | 7292507 | SNV | 1 | A | G | Homozygous   |
| NC_037643.1 | 7292640 | SNV | 1 | T | C | Heterozygous |
| NC_037643.1 | 7294524 | SNV | 1 | T | C | Homozygous   |
| NC_037643.1 | 7295035 | SNV | 1 | G | A | Heterozygous |
| NC_037643.1 | 7296269 | SNV | 1 | A | G | Heterozygous |
| NC_037643.1 | 7304072 | SNV | 1 | C | T | Heterozygous |
| NC_037643.1 | 7304591 | SNV | 1 | G | A | Heterozygous |
| NC_037643.1 | 7304622 | SNV | 1 | T | C | Homozygous   |
| NC_037643.1 | 7304632 | SNV | 1 | A | G | Homozygous   |
| NC_037643.1 | 7305759 | SNV | 1 | C | T | Homozygous   |
| NC_037643.1 | 7306126 | SNV | 1 | C | T | Homozygous   |
| NC_037643.1 | 7307149 | SNV | 1 | G | A | Heterozygous |
| NC_037643.1 | 7307502 | SNV | 1 | C | T | Heterozygous |
| NC_037643.1 | 7307653 | SNV | 1 | A | G | Homozygous   |
| NC_037643.1 | 7307858 | SNV | 1 | C | T | Heterozygous |

|             |         |     |   |   |   |              |
|-------------|---------|-----|---|---|---|--------------|
| NC_037643.1 | 7308229 | SNV | 1 | C | T | Heterozygous |
| NC_037643.1 | 7309235 | SNV | 1 | C | T | Heterozygous |
| NC_037643.1 | 7309417 | SNV | 1 | A | G | Heterozygous |
| NC_037643.1 | 7310126 | SNV | 1 | A | G | Homozygous   |
| NC_037643.1 | 7310337 | SNV | 1 | A | G | Homozygous   |
| NC_037643.1 | 7310410 | SNV | 1 | C | T | Heterozygous |
| NC_037643.1 | 7310571 | SNV | 1 | G | A | Heterozygous |
| NC_037643.1 | 7310923 | SNV | 1 | A | G | Heterozygous |
| NC_037643.1 | 7310929 | SNV | 1 | C | T | Heterozygous |
| NC_037643.1 | 7311101 | SNV | 1 | T | C | Homozygous   |
| NC_037643.1 | 7313991 | SNV | 1 | A | G | Homozygous   |
| NC_037643.1 | 7314016 | SNV | 1 | C | G | Heterozygous |
| NC_037643.1 | 7314023 | SNV | 1 | A | T | Heterozygous |
| NC_037643.1 | 7314048 | SNV | 1 | A | T | Heterozygous |
| NC_037643.1 | 7322699 | SNV | 1 | A | C | Heterozygous |
| NC_037643.1 | 7322703 | SNV | 1 | T | A | Heterozygous |
| NC_037643.1 | 7322723 | SNV | 1 | C | T | Homozygous   |
| NC_037643.1 | 7322748 | SNV | 1 | G | A | Homozygous   |
| NC_037643.1 | 7322982 | SNV | 1 | C | A | Homozygous   |
| NC_037643.1 | 7322986 | SNV | 1 | C | A | Homozygous   |
| NC_037643.1 | 7323251 | SNV | 1 | G | T | Homozygous   |
| NC_037643.1 | 7323436 | SNV | 1 | T | C | Homozygous   |
| NC_037643.1 | 7324026 | SNV | 1 | T | C | Homozygous   |
| NC_037643.1 | 7324989 | SNV | 1 | T | C | Homozygous   |
| NC_037643.1 | 7328745 | SNV | 1 | T | A | Homozygous   |
| NC_037643.1 | 7328777 | SNV | 1 | C | A | Homozygous   |
| NC_037643.1 | 7328783 | SNV | 1 | T | A | Homozygous   |
| NC_037643.1 | 7333518 | SNV | 1 | C | T | Heterozygous |
| NC_037643.1 | 7345447 | SNV | 1 | A | T | Homozygous   |
| NC_037643.1 | 7345449 | SNV | 1 | A | T | Homozygous   |
| NC_037643.1 | 7345464 | SNV | 1 | A | T | Homozygous   |
| NC_037643.1 | 7345471 | SNV | 1 | A | G | Homozygous   |
| NC_037643.1 | 7346982 | SNV | 1 | T | C | Heterozygous |
| NC_037643.1 | 7346984 | SNV | 1 | T | C | Heterozygous |
| NC_037643.1 | 7347083 | SNV | 1 | G | A | Heterozygous |
| NC_037643.1 | 7349448 | SNV | 1 | T | C | Homozygous   |
| NC_037643.1 | 7349451 | SNV | 1 | A | T | Homozygous   |
| NC_037643.1 | 7349471 | SNV | 1 | G | T | Homozygous   |
| NC_037643.1 | 7349482 | SNV | 1 | T | G | Homozygous   |
| NC_037643.1 | 7349484 | SNV | 1 | T | A | Homozygous   |
| NC_037643.1 | 7359663 | SNV | 1 | C | T | Heterozygous |
| NC_037643.1 | 7360635 | SNV | 1 | T | A | Heterozygous |
| NC_037643.1 | 7360638 | SNV | 1 | C | A | Homozygous   |
| NC_037643.1 | 7363392 | SNV | 1 | T | A | Heterozygous |
| NC_037643.1 | 7400303 | SNV | 1 | G | A | Homozygous   |
| NC_037643.1 | 7400307 | SNV | 1 | G | A | Homozygous   |
| NC_037643.1 | 7400314 | SNV | 1 | A | G | Heterozygous |
| NC_037643.1 | 7400318 | SNV | 1 | G | A | Heterozygous |
| NC_037643.1 | 7400324 | SNV | 1 | T | G | Homozygous   |
| NC_037643.1 | 7400658 | SNV | 1 | A | G | Homozygous   |
| NC_037643.1 | 7400670 | SNV | 1 | A | G | Homozygous   |

|             |         |     |   |   |   |              |
|-------------|---------|-----|---|---|---|--------------|
| NC_037643.1 | 7403690 | SNV | 1 | A | G | Heterozygous |
| NC_037643.1 | 7410701 | SNV | 1 | A | G | Homozygous   |
| NC_037643.1 | 7410735 | SNV | 1 | C | T | Homozygous   |
| NC_037643.1 | 7421290 | SNV | 1 | A | T | Heterozygous |
| NC_037643.1 | 7421303 | SNV | 1 | A | G | Heterozygous |
| NC_037643.1 | 7422941 | SNV | 1 | G | A | Heterozygous |
| NC_037643.1 | 7423028 | SNV | 1 | C | G | Homozygous   |
| NC_037643.1 | 7423065 | SNV | 1 | T | C | Homozygous   |
| NC_037643.1 | 7423375 | SNV | 1 | C | T | Heterozygous |
| NC_037643.1 | 7423461 | SNV | 1 | T | C | Homozygous   |
| NC_037643.1 | 7423491 | SNV | 1 | G | A | Heterozygous |
| NC_037643.1 | 7423649 | SNV | 1 | A | G | Homozygous   |
| NC_037643.1 | 7423661 | SNV | 1 | T | C | Heterozygous |
| NC_037643.1 | 7426324 | SNV | 1 | C | T | Homozygous   |
| NC_037643.1 | 7426698 | SNV | 1 | T | C | Homozygous   |
| NC_037643.1 | 7426720 | SNV | 1 | T | C | Heterozygous |
| NC_037643.1 | 7427960 | SNV | 1 | T | G | Homozygous   |
| NC_037643.1 | 7429965 | SNV | 1 | A | T | Homozygous   |
| NC_037643.1 | 7429968 | SNV | 1 | A | T | Homozygous   |
| NC_037643.1 | 7429971 | SNV | 1 | A | C | Homozygous   |
| NC_037643.1 | 7429975 | SNV | 1 | T | A | Homozygous   |
| NC_037643.1 | 7429982 | SNV | 1 | C | A | Homozygous   |
| NC_037643.1 | 7435876 | SNV | 1 | T | C | Homozygous   |
| NC_037643.1 | 7435914 | SNV | 1 | G | A | Homozygous   |
| NC_037643.1 | 7436044 | SNV | 1 | C | T | Homozygous   |
| NC_037643.1 | 7436675 | SNV | 1 | A | T | Homozygous   |
| NC_037643.1 | 7439552 | SNV | 1 | G | A | Heterozygous |
| NC_037643.1 | 7439985 | SNV | 1 | A | G | Homozygous   |
| NC_037643.1 | 7440053 | SNV | 1 | T | C | Homozygous   |
| NC_037643.1 | 7441672 | SNV | 1 | A | C | Homozygous   |
| NC_037643.1 | 7441882 | SNV | 1 | T | A | Homozygous   |
| NC_037643.1 | 7441985 | SNV | 1 | G | A | Homozygous   |
| NC_037643.1 | 7442001 | SNV | 1 | G | A | Homozygous   |
| NC_037643.1 | 7442041 | SNV | 1 | T | C | Homozygous   |
| NC_037643.1 | 7442576 | SNV | 1 | T | C | Homozygous   |
| NC_037643.1 | 7443283 | SNV | 1 | C | T | Heterozygous |
| NC_037643.1 | 7443573 | SNV | 1 | T | C | Homozygous   |
| NC_037643.1 | 7443697 | SNV | 1 | C | T | Heterozygous |
| NC_037643.1 | 7443729 | SNV | 1 | T | C | Homozygous   |
| NC_037643.1 | 7444045 | SNV | 1 | A | G | Homozygous   |
| NC_037643.1 | 7444114 | SNV | 1 | C | T | Homozygous   |
| NC_037643.1 | 7444143 | SNV | 1 | T | C | Homozygous   |
| NC_037643.1 | 7444282 | SNV | 1 | T | C | Homozygous   |
| NC_037643.1 | 7444418 | SNV | 1 | T | C | Homozygous   |
| NC_037643.1 | 7445087 | SNV | 1 | T | C | Heterozygous |
| NC_037643.1 | 7445647 | SNV | 1 | A | G | Homozygous   |
| NC_037643.1 | 7446376 | SNV | 1 | G | A | Heterozygous |
| NC_037643.1 | 7446639 | SNV | 1 | T | G | Homozygous   |
| NC_037643.1 | 7447381 | SNV | 1 | T | A | Homozygous   |
| NC_037643.1 | 7447383 | SNV | 1 | G | A | Homozygous   |
| NC_037643.1 | 7447385 | SNV | 1 | G | A | Homozygous   |



|             |         |     |   |   |   |              |
|-------------|---------|-----|---|---|---|--------------|
| NC_037643.1 | 7447389 | SNV | 1 | A | C | Heterozygous |
| NC_037643.1 | 7448241 | SNV | 1 | A | G | Homozygous   |
| NC_037643.1 | 7448380 | SNV | 1 | C | T | Heterozygous |
| NC_037643.1 | 7448403 | SNV | 1 | T | C | Homozygous   |
| NC_037643.1 | 7449233 | SNV | 1 | C | T | Heterozygous |
| NC_037643.1 | 7449254 | SNV | 1 | C | T | Heterozygous |
| NC_037643.1 | 7449344 | SNV | 1 | T | C | Homozygous   |
| NC_037643.1 | 7449756 | SNV | 1 | T | C | Heterozygous |
| NC_037643.1 | 7449786 | SNV | 1 | T | C | Heterozygous |
| NC_037643.1 | 7449797 | SNV | 1 | A | G | Homozygous   |
| NC_037643.1 | 7450262 | SNV | 1 | A | G | Homozygous   |
| NC_037643.1 | 7450386 | SNV | 1 | T | C | Heterozygous |
| NC_037643.1 | 7453341 | SNV | 1 | T | C | Heterozygous |
| NC_037643.1 | 7453377 | SNV | 1 | C | T | Homozygous   |
| NC_037643.1 | 7453389 | SNV | 1 | G | T | Heterozygous |
| NC_037643.1 | 7454501 | SNV | 1 | C | T | Heterozygous |
| NC_037643.1 | 7454995 | SNV | 1 | A | G | Homozygous   |
| NC_037643.1 | 7458732 | SNV | 1 | G | A | Homozygous   |
| NC_037643.1 | 7461450 | SNV | 1 | C | T | Homozygous   |
| NC_037643.1 | 7461472 | SNV | 1 | A | C | Homozygous   |
| NC_037643.1 | 7461495 | SNV | 1 | A | T | Homozygous   |
| NC_037643.1 | 7463207 | SNV | 1 | A | G | Homozygous   |
| NC_037643.1 | 7463346 | SNV | 1 | T | C | Homozygous   |
| NC_037643.1 | 7463569 | SNV | 1 | A | C | Homozygous   |
| NC_037643.1 | 7465895 | SNV | 1 | T | C | Homozygous   |
| NC_037643.1 | 7465913 | SNV | 1 | T | C | Heterozygous |
| NC_037643.1 | 7465916 | SNV | 1 | C | T | Heterozygous |
| NC_037643.1 | 7476222 | SNV | 1 | A | C | Homozygous   |
| NC_037643.1 | 7476318 | SNV | 1 | G | A | Heterozygous |
| NC_037643.1 | 7476353 | SNV | 1 | T | C | Homozygous   |
| NC_037643.1 | 7476368 | SNV | 1 | T | C | Homozygous   |
| NC_037643.1 | 7476437 | SNV | 1 | A | T | Homozygous   |
| NC_037643.1 | 7476445 | SNV | 1 | C | T | Homozygous   |
| NC_037643.1 | 7476484 | SNV | 1 | G | A | Homozygous   |
| NC_037643.1 | 7476693 | SNV | 1 | C | T | Heterozygous |
| NC_037643.1 | 7476767 | SNV | 1 | A | G | Homozygous   |
| NC_037643.1 | 7476812 | SNV | 1 | T | C | Heterozygous |
| NC_037643.1 | 7476828 | SNV | 1 | C | G | Homozygous   |
| NC_037643.1 | 7476867 | SNV | 1 | A | T | Homozygous   |
| NC_037643.1 | 7476901 | SNV | 1 | A | G | Homozygous   |
| NC_037643.1 | 7476941 | SNV | 1 | C | T | Homozygous   |
| NC_037643.1 | 7477143 | SNV | 1 | C | T | Heterozygous |
| NC_037643.1 | 7477281 | SNV | 1 | T | A | Homozygous   |
| NC_037643.1 | 7477581 | SNV | 1 | T | C | Homozygous   |
| NC_037643.1 | 7477602 | SNV | 1 | C | A | Homozygous   |
| NC_037643.1 | 7477634 | SNV | 1 | A | G | Homozygous   |
| NC_037643.1 | 7477663 | SNV | 1 | T | C | Homozygous   |
| NC_037643.1 | 7477685 | SNV | 1 | T | C | Homozygous   |
| NC_037643.1 | 7482817 | SNV | 1 | A | G | Homozygous   |
| NC_037643.1 | 7482905 | SNV | 1 | T | C | Homozygous   |
| NC_037643.1 | 7482907 | SNV | 1 | T | C | Homozygous   |

|             |         |     |   |   |   |              |
|-------------|---------|-----|---|---|---|--------------|
| NC_037643.1 | 7482998 | SNV | 1 | T | C | Homozygous   |
| NC_037643.1 | 7483166 | SNV | 1 | T | C | Homozygous   |
| NC_037643.1 | 7483169 | SNV | 1 | T | C | Homozygous   |
| NC_037643.1 | 7489701 | SNV | 1 | A | G | Homozygous   |
| NC_037643.1 | 7490077 | SNV | 1 | A | G | Homozygous   |
| NC_037643.1 | 7490132 | SNV | 1 | T | C | Homozygous   |
| NC_037643.1 | 7490136 | SNV | 1 | C | T | Heterozygous |
| NC_037643.1 | 7490151 | SNV | 1 | G | A | Heterozygous |
| NC_037643.1 | 7490157 | SNV | 1 | T | C | Homozygous   |
| NC_037643.1 | 7490169 | SNV | 1 | C | T | Heterozygous |
| NC_037643.1 | 7490220 | SNV | 1 | A | G | Homozygous   |
| NC_037643.1 | 7490247 | SNV | 1 | G | A | Heterozygous |
| NC_037643.1 | 7490250 | SNV | 1 | A | G | Homozygous   |
| NC_037643.1 | 7490288 | SNV | 1 | A | G | Homozygous   |
| NC_037643.1 | 7491030 | SNV | 1 | C | G | Homozygous   |
| NC_037643.1 | 7492387 | SNV | 1 | C | G | Heterozygous |
| NC_037643.1 | 7492423 | SNV | 1 | A | G | Homozygous   |
| NC_037643.1 | 7496893 | SNV | 1 | C | T | Heterozygous |
| NC_037643.1 | 7497216 | SNV | 1 | G | A | Heterozygous |
| NC_037643.1 | 7497262 | SNV | 1 | G | C | Heterozygous |
| NC_037643.1 | 7497278 | SNV | 1 | T | C | Heterozygous |
| NC_037643.1 | 7497360 | SNV | 1 | G | A | Homozygous   |
| NC_037643.1 | 7497366 | SNV | 1 | A | T | Homozygous   |
| NC_037643.1 | 7497400 | SNV | 1 | T | C | Homozygous   |
| NC_037643.1 | 7500760 | SNV | 1 | T | C | Homozygous   |
| NC_037643.1 | 7500782 | SNV | 1 | C | T | Homozygous   |
| NC_037643.1 | 7501032 | SNV | 1 | T | C | Homozygous   |
| NC_037643.1 | 7501547 | SNV | 1 | A | G | Homozygous   |
| NC_037643.1 | 7501551 | SNV | 1 | T | C | Homozygous   |
| NC_037643.1 | 7503804 | SNV | 1 | A | G | Homozygous   |
| NC_037643.1 | 7503884 | SNV | 1 | A | G | Homozygous   |
| NC_037643.1 | 7503902 | SNV | 1 | A | G | Heterozygous |
| NC_037643.1 | 7503929 | SNV | 1 | T | C | Homozygous   |
| NC_037643.1 | 7503940 | SNV | 1 | A | G | Homozygous   |
| NC_037643.1 | 7503944 | SNV | 1 | A | G | Heterozygous |
| NC_037643.1 | 7510163 | SNV | 1 | T | C | Heterozygous |
| NC_037643.1 | 7510237 | SNV | 1 | T | C | Heterozygous |
| NC_037643.1 | 7511311 | SNV | 1 | C | G | Heterozygous |
| NC_037643.1 | 7511532 | SNV | 1 | G | A | Heterozygous |
| NC_037643.1 | 7511535 | SNV | 1 | A | G | Heterozygous |
| NC_037643.1 | 7511566 | SNV | 1 | A | C | Heterozygous |
| NC_037643.1 | 7511577 | SNV | 1 | A | T | Heterozygous |
| NC_037643.1 | 7511671 | SNV | 1 | T | G | Homozygous   |
| NC_037643.1 | 7511691 | SNV | 1 | A | C | Heterozygous |
| NC_037643.1 | 7511780 | SNV | 1 | G | A | Homozygous   |
| NC_037643.1 | 7511805 | SNV | 1 | T | C | Homozygous   |
| NC_037643.1 | 7512110 | SNV | 1 | C | T | Homozygous   |
| NC_037643.1 | 7512128 | SNV | 1 | C | T | Homozygous   |
| NC_037643.1 | 7512225 | SNV | 1 | T | C | Homozygous   |
| NC_037643.1 | 7512276 | SNV | 1 | C | T | Heterozygous |
| NC_037643.1 | 7512316 | SNV | 1 | C | G | Heterozygous |

|             |         |     |   |   |   |              |
|-------------|---------|-----|---|---|---|--------------|
| NC_037643.1 | 7512320 | SNV | 1 | T | C | Homozygous   |
| NC_037643.1 | 7512554 | SNV | 1 | G | A | Heterozygous |
| NC_037643.1 | 7512582 | SNV | 1 | T | C | Homozygous   |
| NC_037643.1 | 7512589 | SNV | 1 | T | C | Homozygous   |
| NC_037643.1 | 7512896 | SNV | 1 | T | C | Heterozygous |
| NC_037643.1 | 7512900 | SNV | 1 | T | C | Homozygous   |
| NC_037643.1 | 7513207 | SNV | 1 | G | A | Heterozygous |
| NC_037643.1 | 7513220 | SNV | 1 | A | G | Homozygous   |
| NC_037643.1 | 7513334 | SNV | 1 | C | T | Heterozygous |
| NC_037643.1 | 7513415 | SNV | 1 | G | A | Heterozygous |
| NC_037643.1 | 7513419 | SNV | 1 | C | T | Heterozygous |
| NC_037643.1 | 7513422 | SNV | 1 | A | T | Heterozygous |
| NC_037643.1 | 7513942 | SNV | 1 | C | T | Homozygous   |
| NC_037643.1 | 7516073 | SNV | 1 | C | T | Homozygous   |
| NC_037643.1 | 7518011 | SNV | 1 | A | G | Homozygous   |
| NC_037643.1 | 7519631 | SNV | 1 | A | G | Homozygous   |
| NC_037643.1 | 7519673 | SNV | 1 | T | C | Heterozygous |
| NC_037643.1 | 7522467 | SNV | 1 | C | T | Heterozygous |
| NC_037643.1 | 7522578 | SNV | 1 | C | T | Heterozygous |
| NC_037643.1 | 7522705 | SNV | 1 | C | T | Heterozygous |
| NC_037643.1 | 7523190 | SNV | 1 | G | A | Heterozygous |
| NC_037643.1 | 7523235 | SNV | 1 | G | A | Heterozygous |
| NC_037643.1 | 7523386 | SNV | 1 | T | C | Homozygous   |
| NC_037643.1 | 7523527 | SNV | 1 | A | G | Heterozygous |
| NC_037643.1 | 7523715 | SNV | 1 | T | G | Homozygous   |
| NC_037643.1 | 7523867 | SNV | 1 | T | C | Heterozygous |
| NC_037643.1 | 7523929 | SNV | 1 | T | C | Heterozygous |
| NC_037643.1 | 7523975 | SNV | 1 | C | T | Homozygous   |
| NC_037643.1 | 7524134 | SNV | 1 | G | A | Homozygous   |
| NC_037643.1 | 7524378 | SNV | 1 | T | C | Heterozygous |
| NC_037643.1 | 7524438 | SNV | 1 | T | C | Heterozygous |
| NC_037643.1 | 7524622 | SNV | 1 | C | G | Heterozygous |
| NC_037643.1 | 7532997 | SNV | 1 | A | G | Homozygous   |
| NC_037643.1 | 7533417 | SNV | 1 | C | T | Heterozygous |
| NC_037643.1 | 7534187 | SNV | 1 | G | T | Homozygous   |
| NC_037643.1 | 7534194 | SNV | 1 | A | T | Heterozygous |
| NC_037643.1 | 7534200 | SNV | 1 | T | G | Heterozygous |
| NC_037643.1 | 7534207 | SNV | 1 | T | G | Heterozygous |
| NC_037643.1 | 7534233 | SNV | 1 | T | C | Heterozygous |
| NC_037643.1 | 7537266 | SNV | 1 | T | C | Homozygous   |
| NC_037643.1 | 7538126 | SNV | 1 | G | A | Heterozygous |
| NC_037643.1 | 7538130 | SNV | 1 | C | G | Homozygous   |
| NC_037643.1 | 7538224 | SNV | 1 | T | C | Homozygous   |
| NC_037643.1 | 7538365 | SNV | 1 | T | C | Homozygous   |
| NC_037643.1 | 7538476 | SNV | 1 | A | G | Homozygous   |
| NC_037643.1 | 7542114 | SNV | 1 | T | G | Homozygous   |
| NC_037643.1 | 7542118 | SNV | 1 | T | G | Homozygous   |
| NC_037643.1 | 7555425 | SNV | 1 | C | T | Heterozygous |
| NC_037643.1 | 7555427 | SNV | 1 | T | C | Heterozygous |
| NC_037643.1 | 7555431 | SNV | 1 | T | C | Heterozygous |
| NC_037643.1 | 7555436 | SNV | 1 | G | A | Heterozygous |

|             |         |     |   |   |   |              |
|-------------|---------|-----|---|---|---|--------------|
| NC_037643.1 | 7555485 | SNV | 1 | A | C | Homozygous   |
| NC_037643.1 | 7555496 | SNV | 1 | T | C | Homozygous   |
| NC_037643.1 | 7555543 | SNV | 1 | C | T | Homozygous   |
| NC_037643.1 | 7555552 | SNV | 1 | A | G | Homozygous   |
| NC_037643.1 | 7562195 | SNV | 1 | A | C | Homozygous   |
| NC_037643.1 | 7562244 | SNV | 1 | T | C | Homozygous   |
| NC_037643.1 | 7562264 | SNV | 1 | T | C | Heterozygous |
| NC_037643.1 | 7562300 | SNV | 1 | T | C | Homozygous   |
| NC_037643.1 | 7562322 | SNV | 1 | G | A | Homozygous   |
| NC_037643.1 | 7562439 | SNV | 1 | T | C | Homozygous   |
| NC_037643.1 | 7562498 | SNV | 1 | T | C | Homozygous   |
| NC_037643.1 | 7562686 | SNV | 1 | C | T | Heterozygous |
| NC_037643.1 | 7562728 | SNV | 1 | T | C | Heterozygous |
| NC_037643.1 | 7562767 | SNV | 1 | T | C | Heterozygous |
| NC_037643.1 | 7562917 | SNV | 1 | A | C | Heterozygous |
| NC_037643.1 | 7562920 | SNV | 1 | T | A | Heterozygous |
| NC_037643.1 | 7562920 | SNV | 1 | T | C | Heterozygous |
| NC_037643.1 | 7562992 | SNV | 1 | C | T | Heterozygous |
| NC_037643.1 | 7563001 | SNV | 1 | C | T | Heterozygous |
| NC_037643.1 | 7563048 | SNV | 1 | T | C | Heterozygous |
| NC_037643.1 | 7563075 | SNV | 1 | A | G | Heterozygous |
| NC_037643.1 | 7563147 | SNV | 1 | C | T | Homozygous   |
| NC_037643.1 | 7563267 | SNV | 1 | T | G | Heterozygous |
| NC_037643.1 | 7563276 | SNV | 1 | T | A | Heterozygous |
| NC_037643.1 | 7563905 | SNV | 1 | A | G | Homozygous   |
| NC_037643.1 | 7563907 | SNV | 1 | A | G | Homozygous   |
| NC_037643.1 | 7563911 | SNV | 1 | A | G | Homozygous   |
| NC_037643.1 | 7565322 | SNV | 1 | C | T | Heterozygous |
| NC_037643.1 | 7565477 | SNV | 1 | G | A | Homozygous   |
| NC_037643.1 | 7565717 | SNV | 1 | A | G | Homozygous   |
| NC_037643.1 | 7565788 | SNV | 1 | C | T | Heterozygous |
| NC_037643.1 | 7565855 | SNV | 1 | C | T | Heterozygous |
| NC_037643.1 | 7565896 | SNV | 1 | T | A | Homozygous   |
| NC_037643.1 | 7565940 | SNV | 1 | A | G | Homozygous   |
| NC_037643.1 | 7566149 | SNV | 1 | A | G | Homozygous   |
| NC_037643.1 | 7571212 | SNV | 1 | T | C | Homozygous   |
| NC_037643.1 | 7571235 | SNV | 1 | G | A | Heterozygous |
| NC_037643.1 | 7581839 | SNV | 1 | T | C | Heterozygous |
| NC_037643.1 | 7581841 | SNV | 1 | A | C | Heterozygous |
| NC_037643.1 | 7581930 | SNV | 1 | G | A | Heterozygous |
| NC_037643.1 | 7582368 | SNV | 1 | A | G | Heterozygous |
| NC_037643.1 | 7585729 | SNV | 1 | A | G | Homozygous   |
| NC_037643.1 | 7585923 | SNV | 1 | A | G | Heterozygous |
| NC_037643.1 | 7585925 | SNV | 1 | G | C | Heterozygous |
| NC_037643.1 | 7585927 | SNV | 1 | C | T | Heterozygous |
| NC_037643.1 | 7585945 | SNV | 1 | G | A | Homozygous   |
| NC_037643.1 | 7586040 | SNV | 1 | G | A | Homozygous   |
| NC_037643.1 | 7588720 | SNV | 1 | T | C | Homozygous   |
| NC_037643.1 | 7589262 | SNV | 1 | C | G | Homozygous   |
| NC_037643.1 | 7589289 | SNV | 1 | G | A | Heterozygous |
| NC_037643.1 | 7589376 | SNV | 1 | C | T | Heterozygous |

|             |         |     |   |   |   |              |
|-------------|---------|-----|---|---|---|--------------|
| NC_037643.1 | 7611667 | SNV | 1 | A | G | Homozygous   |
| NC_037643.1 | 7625851 | SNV | 1 | G | A | Heterozygous |
| NC_037643.1 | 7626104 | SNV | 1 | G | T | Heterozygous |
| NC_037643.1 | 7626110 | SNV | 1 | C | T | Heterozygous |
| NC_037643.1 | 7626171 | SNV | 1 | A | G | Homozygous   |
| NC_037643.1 | 7626282 | SNV | 1 | T | C | Heterozygous |
| NC_037643.1 | 7626305 | SNV | 1 | C | T | Heterozygous |
| NC_037643.1 | 7626468 | SNV | 1 | C | T | Heterozygous |
| NC_037643.1 | 7626660 | SNV | 1 | A | G | Homozygous   |
| NC_037643.1 | 7626996 | SNV | 1 | T | C | Homozygous   |
| NC_037643.1 | 7627019 | SNV | 1 | C | T | Heterozygous |
| NC_037643.1 | 7627134 | SNV | 1 | T | C | Homozygous   |
| NC_037643.1 | 7627662 | SNV | 1 | T | C | Homozygous   |
| NC_037643.1 | 7627737 | SNV | 1 | C | T | Heterozygous |
| NC_037643.1 | 7627783 | SNV | 1 | T | C | Homozygous   |
| NC_037643.1 | 7627823 | SNV | 1 | T | A | Heterozygous |
| NC_037643.1 | 7627825 | SNV | 1 | T | G | Heterozygous |
| NC_037643.1 | 7627931 | SNV | 1 | A | T | Homozygous   |
| NC_037643.1 | 7628133 | SNV | 1 | A | G | Homozygous   |
| NC_037643.1 | 7628219 | SNV | 1 | T | G | Homozygous   |
| NC_037643.1 | 7628240 | SNV | 1 | T | C | Homozygous   |
| NC_037643.1 | 7628464 | SNV | 1 | C | A | Heterozygous |
| NC_037643.1 | 7628502 | SNV | 1 | A | G | Homozygous   |
| NC_037643.1 | 7628615 | SNV | 1 | C | T | Heterozygous |
| NC_037643.1 | 7628730 | SNV | 1 | T | C | Heterozygous |
| NC_037643.1 | 7628798 | SNV | 1 | T | C | Homozygous   |
| NC_037643.1 | 7630951 | SNV | 1 | G | T | Heterozygous |
| NC_037643.1 | 7630991 | SNV | 1 | G | A | Heterozygous |
| NC_037643.1 | 7631153 | SNV | 1 | G | A | Heterozygous |
| NC_037643.1 | 7631164 | SNV | 1 | T | C | Homozygous   |
| NC_037643.1 | 7631235 | SNV | 1 | T | C | Homozygous   |
| NC_037643.1 | 7631313 | SNV | 1 | G | A | Homozygous   |
| NC_037643.1 | 7631359 | SNV | 1 | C | T | Homozygous   |
| NC_037643.1 | 7631415 | SNV | 1 | G | A | Homozygous   |
| NC_037643.1 | 7631424 | SNV | 1 | T | C | Homozygous   |
| NC_037643.1 | 7631488 | SNV | 1 | T | C | Heterozygous |
| NC_037643.1 | 7631495 | SNV | 1 | A | G | Heterozygous |
| NC_037643.1 | 7631531 | SNV | 1 | T | C | Homozygous   |
| NC_037643.1 | 7632240 | SNV | 1 | C | T | Homozygous   |
| NC_037643.1 | 7632378 | SNV | 1 | A | G | Homozygous   |
| NC_037643.1 | 7665378 | SNV | 1 | C | T | Heterozygous |
| NC_037643.1 | 7665481 | SNV | 1 | T | C | Homozygous   |
| NC_037643.1 | 7665483 | SNV | 1 | G | A | Homozygous   |
| NC_037643.1 | 7665491 | SNV | 1 | C | T | Heterozygous |
| NC_037643.1 | 7665780 | SNV | 1 | A | G | Homozygous   |
| NC_037643.1 | 7665795 | SNV | 1 | A | T | Heterozygous |
| NC_037643.1 | 7666018 | SNV | 1 | G | C | Heterozygous |
| NC_037643.1 | 7667169 | SNV | 1 | A | G | Heterozygous |
| NC_037643.1 | 7667173 | SNV | 1 | A | G | Heterozygous |
| NC_037643.1 | 7667178 | SNV | 1 | T | G | Heterozygous |
| NC_037643.1 | 7667182 | SNV | 1 | A | G | Heterozygous |

|             |         |     |   |   |   |              |
|-------------|---------|-----|---|---|---|--------------|
| NC_037643.1 | 7667187 | SNV | 1 | A | G | Heterozygous |
| NC_037643.1 | 7667192 | SNV | 1 | C | A | Heterozygous |
| NC_037643.1 | 7667194 | SNV | 1 | A | G | Heterozygous |
| NC_037643.1 | 7667196 | SNV | 1 | A | G | Heterozygous |
| NC_037643.1 | 7667198 | SNV | 1 | A | G | Heterozygous |
| NC_037643.1 | 7667201 | SNV | 1 | C | G | Heterozygous |
| NC_037643.1 | 7667206 | SNV | 1 | G | A | Heterozygous |
| NC_037643.1 | 7688669 | SNV | 1 | T | A | Homozygous   |
| NC_037643.1 | 7689590 | SNV | 1 | A | G | Heterozygous |
| NC_037643.1 | 7690831 | SNV | 1 | A | G | Homozygous   |
| NC_037643.1 | 7691086 | SNV | 1 | T | C | Homozygous   |
| NC_037643.1 | 7691155 | SNV | 1 | G | A | Homozygous   |
| NC_037643.1 | 7691379 | SNV | 1 | T | A | Heterozygous |
| NC_037643.1 | 7788524 | SNV | 1 | T | A | Homozygous   |
| NC_037643.1 | 7795729 | SNV | 1 | A | C | Homozygous   |
| NC_037643.1 | 7795822 | SNV | 1 | T | G | Homozygous   |
| NC_037643.1 | 7795966 | SNV | 1 | T | C | Homozygous   |
| NC_037643.1 | 7796823 | SNV | 1 | T | C | Homozygous   |
| NC_037643.1 | 7797106 | SNV | 1 | G | C | Homozygous   |
| NC_037643.1 | 7797141 | SNV | 1 | A | T | Heterozygous |
| NC_037643.1 | 7828800 | SNV | 1 | A | C | Heterozygous |
| NC_037643.1 | 7833086 | SNV | 1 | T | C | Homozygous   |
| NC_037643.1 | 7833088 | SNV | 1 | G | T | Homozygous   |
| NC_037643.1 | 7833091 | SNV | 1 | T | C | Homozygous   |
| NC_037643.1 | 7833104 | SNV | 1 | A | T | Homozygous   |
| NC_037643.1 | 7909268 | SNV | 1 | A | G | Homozygous   |
| NC_037643.1 | 7910728 | SNV | 1 | C | T | Heterozygous |
| NC_037643.1 | 7942963 | SNV | 1 | T | C | Heterozygous |
| NC_037643.1 | 7942972 | SNV | 1 | G | C | Heterozygous |
| NC_037643.1 | 7944761 | SNV | 1 | C | T | Homozygous   |
| NC_037643.1 | 7950748 | SNV | 1 | C | T | Homozygous   |
| NC_037643.1 | 7950793 | SNV | 1 | C | T | Homozygous   |
| NC_037643.1 | 7950796 | SNV | 1 | G | T | Homozygous   |
| NC_037643.1 | 7950956 | SNV | 1 | C | T | Heterozygous |
| NC_037643.1 | 7951155 | SNV | 1 | G | A | Heterozygous |
| NC_037643.1 | 7951490 | SNV | 1 | C | T | Heterozygous |
| NC_037643.1 | 7952309 | SNV | 1 | G | A | Heterozygous |
| NC_037643.1 | 7952326 | SNV | 1 | A | G | Heterozygous |
| NC_037643.1 | 7952630 | SNV | 1 | T | C | Homozygous   |
| NC_037643.1 | 7952698 | SNV | 1 | T | G | Homozygous   |
| NC_037643.1 | 7958555 | SNV | 1 | C | T | Homozygous   |
| NC_037643.1 | 7958622 | SNV | 1 | G | A | Heterozygous |
| NC_037643.1 | 7958715 | SNV | 1 | C | T | Heterozygous |
| NC_037643.1 | 7958739 | SNV | 1 | G | A | Heterozygous |
| NC_037643.1 | 7958941 | SNV | 1 | A | G | Homozygous   |
| NC_037643.1 | 7958947 | SNV | 1 | G | A | Homozygous   |
| NC_037643.1 | 7958995 | SNV | 1 | A | G | Homozygous   |
| NC_037643.1 | 7959548 | SNV | 1 | G | A | Heterozygous |
| NC_037643.1 | 7959551 | SNV | 1 | T | C | Homozygous   |
| NC_037643.1 | 7959737 | SNV | 1 | C | T | Heterozygous |
| NC_037643.1 | 7959746 | SNV | 1 | T | C | Heterozygous |

|             |         |     |   |   |   |              |
|-------------|---------|-----|---|---|---|--------------|
| NC_037643.1 | 7959935 | SNV | 1 | C | A | Heterozygous |
| NC_037643.1 | 7960000 | SNV | 1 | G | A | Heterozygous |
| NC_037643.1 | 7960124 | SNV | 1 | G | A | Heterozygous |
| NC_037643.1 | 7960288 | SNV | 1 | G | A | Homozygous   |
| NC_037643.1 | 7961361 | SNV | 1 | C | T | Homozygous   |
| NC_037643.1 | 7961380 | SNV | 1 | A | G | Heterozygous |
| NC_037643.1 | 7963752 | SNV | 1 | A | G | Heterozygous |
| NC_037643.1 | 7964024 | SNV | 1 | G | A | Heterozygous |
| NC_037643.1 | 7964532 | SNV | 1 | A | G | Homozygous   |
| NC_037643.1 | 7964910 | SNV | 1 | T | C | Homozygous   |
| NC_037643.1 | 7964970 | SNV | 1 | T | C | Homozygous   |
| NC_037643.1 | 7965587 | SNV | 1 | A | C | Heterozygous |
| NC_037643.1 | 7965640 | SNV | 1 | T | A | Heterozygous |
| NC_037643.1 | 7965672 | SNV | 1 | C | G | Heterozygous |
| NC_037643.1 | 7966711 | SNV | 1 | A | G | Homozygous   |
| NC_037643.1 | 7966913 | SNV | 1 | G | A | Heterozygous |
| NC_037643.1 | 7966932 | SNV | 1 | C | T | Heterozygous |
| NC_037643.1 | 7966977 | SNV | 1 | A | G | Heterozygous |
| NC_037643.1 | 7966996 | SNV | 1 | A | G | Homozygous   |
| NC_037643.1 | 7967065 | SNV | 1 | G | A | Heterozygous |
| NC_037643.1 | 7967742 | SNV | 1 | A | G | Heterozygous |
| NC_037643.1 | 7968122 | SNV | 1 | A | G | Homozygous   |
| NC_037643.1 | 7968411 | SNV | 1 | T | C | Homozygous   |
| NC_037643.1 | 7968457 | SNV | 1 | C | T | Heterozygous |
| NC_037643.1 | 8077990 | SNV | 1 | T | C | Homozygous   |
| NC_037643.1 | 8132282 | SNV | 1 | T | C | Homozygous   |
| NC_037643.1 | 8132985 | SNV | 1 | G | A | Homozygous   |
| NC_037643.1 | 8133064 | SNV | 1 | T | C | Heterozygous |
| NC_037643.1 | 8133170 | SNV | 1 | T | C | Homozygous   |
| NC_037643.1 | 8133410 | SNV | 1 | C | A | Homozygous   |
| NC_037643.1 | 8136263 | SNV | 1 | G | A | Heterozygous |
| NC_037643.1 | 8136274 | SNV | 1 | A | G | Heterozygous |
| NC_037643.1 | 8136684 | SNV | 1 | T | C | Homozygous   |
| NC_037643.1 | 8137143 | SNV | 1 | G | T | Heterozygous |
| NC_037643.1 | 8138542 | SNV | 1 | G | A | Homozygous   |
| NC_037643.1 | 8138768 | SNV | 1 | C | T | Heterozygous |
| NC_037643.1 | 8138786 | SNV | 1 | T | C | Homozygous   |
| NC_037643.1 | 8144443 | SNV | 1 | T | C | Homozygous   |
| NC_037643.1 | 8144850 | SNV | 1 | A | G | Heterozygous |
| NC_037643.1 | 8144910 | SNV | 1 | T | C | Homozygous   |
| NC_037643.1 | 8146857 | SNV | 1 | G | A | Heterozygous |
| NC_037643.1 | 8146980 | SNV | 1 | A | G | Heterozygous |
| NC_037643.1 | 8147351 | SNV | 1 | T | C | Homozygous   |
| NC_037643.1 | 8149996 | SNV | 1 | T | C | Heterozygous |
| NC_037643.1 | 8149999 | SNV | 1 | C | T | Heterozygous |
| NC_037643.1 | 8150003 | SNV | 1 | C | T | Heterozygous |
| NC_037643.1 | 8150005 | SNV | 1 | C | T | Heterozygous |
| NC_037643.1 | 8150009 | SNV | 1 | T | C | Heterozygous |
| NC_037643.1 | 8151757 | SNV | 1 | A | G | Homozygous   |
| NC_037643.1 | 8151769 | SNV | 1 | G | A | Heterozygous |
| NC_037643.1 | 8152831 | SNV | 1 | A | C | Heterozygous |

|             |         |     |   |   |   |              |
|-------------|---------|-----|---|---|---|--------------|
| NC_037643.1 | 8156528 | SNV | 1 | T | C | Homozygous   |
| NC_037643.1 | 8156816 | SNV | 1 | G | A | Homozygous   |
| NC_037643.1 | 8156821 | SNV | 1 | A | G | Homozygous   |
| NC_037643.1 | 8214875 | SNV | 1 | A | C | Homozygous   |
| NC_037643.1 | 8214882 | SNV | 1 | G | A | Homozygous   |
| NC_037643.1 | 8218827 | SNV | 1 | T | A | Homozygous   |
| NC_037643.1 | 8231385 | SNV | 1 | G | T | Homozygous   |
| NC_037643.1 | 8231411 | SNV | 1 | T | C | Homozygous   |
| NC_037643.1 | 8231582 | SNV | 1 | T | C | Heterozygous |
| NC_037643.1 | 8231589 | SNV | 1 | C | T | Homozygous   |
| NC_037643.1 | 8231651 | SNV | 1 | T | A | Heterozygous |
| NC_037643.1 | 8231737 | SNV | 1 | C | G | Homozygous   |
| NC_037643.1 | 8249124 | SNV | 1 | G | T | Heterozygous |
| NC_037643.1 | 8253060 | SNV | 1 | T | A | Homozygous   |
| NC_037643.1 | 8253062 | SNV | 1 | T | A | Heterozygous |
| NC_037643.1 | 8253064 | SNV | 1 | T | A | Heterozygous |
| NC_037643.1 | 8253414 | SNV | 1 | C | T | Homozygous   |
| NC_037643.1 | 8253421 | SNV | 1 | G | T | Heterozygous |
| NC_037643.1 | 8253424 | SNV | 1 | T | C | Heterozygous |
| NC_037643.1 | 8257647 | SNV | 1 | C | T | Homozygous   |
| NC_037643.1 | 8257659 | SNV | 1 | C | T | Homozygous   |
| NC_037643.1 | 8257688 | SNV | 1 | C | T | Homozygous   |
| NC_037643.1 | 8257690 | SNV | 1 | T | C | Homozygous   |
| NC_037643.1 | 8257695 | SNV | 1 | G | T | Homozygous   |
| NC_037643.1 | 8261758 | SNV | 1 | G | T | Homozygous   |
| NC_037643.1 | 8261760 | SNV | 1 | C | T | Homozygous   |
| NC_037643.1 | 8261767 | SNV | 1 | C | A | Homozygous   |
| NC_037643.1 | 8261772 | SNV | 1 | G | A | Homozygous   |
| NC_037643.1 | 8261775 | SNV | 1 | C | A | Homozygous   |
| NC_037643.1 | 8261783 | SNV | 1 | G | C | Homozygous   |
| NC_037643.1 | 8261816 | SNV | 1 | G | A | Heterozygous |
| NC_037643.1 | 8261818 | SNV | 1 | G | A | Heterozygous |
| NC_037643.1 | 8261827 | SNV | 1 | C | G | Heterozygous |
| NC_037643.1 | 8286704 | SNV | 1 | A | G | Heterozygous |
| NC_037643.1 | 8286723 | SNV | 1 | T | C | Homozygous   |
| NC_037643.1 | 8286746 | SNV | 1 | G | A | Homozygous   |
| NC_037643.1 | 8286750 | SNV | 1 | A | G | Homozygous   |
| NC_037643.1 | 8326921 | SNV | 1 | C | T | Heterozygous |
| NC_037643.1 | 8326923 | SNV | 1 | T | G | Heterozygous |
| NC_037643.1 | 8327589 | SNV | 1 | T | C | Heterozygous |
| NC_037643.1 | 8327726 | SNV | 1 | A | C | Homozygous   |
| NC_037643.1 | 8327739 | SNV | 1 | A | T | Homozygous   |
| NC_037643.1 | 8327990 | SNV | 1 | G | C | Homozygous   |
| NC_037643.1 | 8328011 | SNV | 1 | T | C | Homozygous   |
| NC_037643.1 | 8328015 | SNV | 1 | A | C | Homozygous   |
| NC_037643.1 | 8359568 | SNV | 1 | A | G | Heterozygous |
| NC_037643.1 | 8359582 | SNV | 1 | T | A | Heterozygous |
| NC_037643.1 | 8359584 | SNV | 1 | T | A | Heterozygous |
| NC_037643.1 | 8359588 | SNV | 1 | A | C | Heterozygous |
| NC_037643.1 | 8359592 | SNV | 1 | A | T | Heterozygous |
| NC_037643.1 | 8359597 | SNV | 1 | A | G | Heterozygous |



|             |         |     |   |   |   |              |
|-------------|---------|-----|---|---|---|--------------|
| NC_037643.1 | 8360650 | SNV | 1 | G | C | Homozygous   |
| NC_037643.1 | 8360652 | SNV | 1 | T | C | Heterozygous |
| NC_037643.1 | 8360655 | SNV | 1 | A | G | Homozygous   |
| NC_037643.1 | 8360734 | SNV | 1 | G | A | Homozygous   |
| NC_037643.1 | 8360736 | SNV | 1 | G | A | Heterozygous |
| NC_037643.1 | 8360743 | SNV | 1 | C | A | Homozygous   |
| NC_037643.1 | 8360747 | SNV | 1 | A | G | Heterozygous |
| NC_037643.1 | 8367148 | SNV | 1 | C | T | Homozygous   |
| NC_037643.1 | 8369182 | SNV | 1 | C | T | Homozygous   |
| NC_037643.1 | 8369430 | SNV | 1 | C | G | Heterozygous |
| NC_037643.1 | 8369782 | SNV | 1 | G | A | Heterozygous |
| NC_037643.1 | 8369795 | SNV | 1 | T | C | Homozygous   |
| NC_037643.1 | 8369876 | SNV | 1 | T | C | Heterozygous |
| NC_037643.1 | 8385505 | SNV | 1 | T | A | Heterozygous |
| NC_037643.1 | 8385960 | SNV | 1 | T | C | Homozygous   |
| NC_037643.1 | 8401914 | SNV | 1 | G | A | Homozygous   |
| NC_037643.1 | 8403031 | SNV | 1 | A | G | Homozygous   |
| NC_037643.1 | 8403136 | SNV | 1 | C | A | Homozygous   |
| NC_037643.1 | 8413091 | SNV | 1 | A | C | Homozygous   |
| NC_037643.1 | 8413278 | SNV | 1 | A | C | Heterozygous |
| NC_037643.1 | 8415928 | SNV | 1 | A | C | Homozygous   |
| NC_037643.1 | 8415937 | SNV | 1 | T | A | Homozygous   |
| NC_037643.1 | 8417050 | SNV | 1 | C | A | Homozygous   |
| NC_037643.1 | 8417052 | SNV | 1 | T | A | Homozygous   |
| NC_037643.1 | 8425586 | SNV | 1 | A | T | Heterozygous |
| NC_037643.1 | 8425591 | SNV | 1 | A | T | Heterozygous |
| NC_037643.1 | 8425601 | SNV | 1 | A | T | Heterozygous |
| NC_037643.1 | 8425628 | SNV | 1 | G | A | Heterozygous |
| NC_037643.1 | 8428082 | SNV | 1 | C | A | Heterozygous |
| NC_037643.1 | 8435595 | SNV | 1 | A | G | Homozygous   |
| NC_037643.1 | 8454722 | SNV | 1 | A | G | Homozygous   |
| NC_037643.1 | 8455111 | SNV | 1 | T | C | Homozygous   |
| NC_037643.1 | 8455230 | SNV | 1 | A | C | Heterozygous |
| NC_037643.1 | 8455259 | SNV | 1 | G | A | Heterozygous |
| NC_037643.1 | 8455351 | SNV | 1 | C | T | Heterozygous |
| NC_037643.1 | 8455405 | SNV | 1 | C | G | Homozygous   |
| NC_037643.1 | 8473153 | SNV | 1 | C | G | Homozygous   |
| NC_037643.1 | 8474683 | SNV | 1 | T | A | Homozygous   |
| NC_037643.1 | 8474693 | SNV | 1 | A | G | Heterozygous |
| NC_037643.1 | 8474927 | SNV | 1 | C | G | Homozygous   |
| NC_037643.1 | 8475240 | SNV | 1 | C | T | Heterozygous |
| NC_037643.1 | 8475864 | SNV | 1 | C | G | Homozygous   |
| NC_037643.1 | 8476983 | SNV | 1 | G | T | Heterozygous |
| NC_037643.1 | 8476986 | SNV | 1 | G | T | Heterozygous |
| NC_037643.1 | 8477003 | SNV | 1 | T | C | Heterozygous |
| NC_037643.1 | 8478530 | SNV | 1 | G | C | Homozygous   |
| NC_037643.1 | 8478554 | SNV | 1 | T | G | Homozygous   |
| NC_037643.1 | 8478571 | SNV | 1 | G | C | Homozygous   |
| NC_037643.1 | 8478573 | SNV | 1 | G | A | Homozygous   |
| NC_037643.1 | 8478585 | SNV | 1 | T | A | Homozygous   |
| NC_037643.1 | 8478734 | SNV | 1 | T | C | Homozygous   |

|             |         |     |   |   |   |              |
|-------------|---------|-----|---|---|---|--------------|
| NC_037643.1 | 8490412 | SNV | 1 | C | T | Heterozygous |
| NC_037643.1 | 8491169 | SNV | 1 | C | A | Heterozygous |
| NC_037643.1 | 8491171 | SNV | 1 | A | T | Homozygous   |
| NC_037643.1 | 8491175 | SNV | 1 | G | A | Homozygous   |
| NC_037643.1 | 8491178 | SNV | 1 | T | G | Heterozygous |
| NC_037643.1 | 8491183 | SNV | 1 | T | C | Heterozygous |
| NC_037643.1 | 8491188 | SNV | 1 | T | C | Heterozygous |
| NC_037643.1 | 8491190 | SNV | 1 | T | A | Heterozygous |
| NC_037643.1 | 8491207 | SNV | 1 | C | T | Heterozygous |
| NC_037643.1 | 8491211 | SNV | 1 | C | T | Heterozygous |
| NC_037643.1 | 8492888 | SNV | 1 | T | G | Homozygous   |
| NC_037643.1 | 8492890 | SNV | 1 | A | T | Homozygous   |
| NC_037643.1 | 8492914 | SNV | 1 | T | A | Homozygous   |
| NC_037643.1 | 8492918 | SNV | 1 | G | T | Homozygous   |
| NC_037643.1 | 8492927 | SNV | 1 | C | A | Homozygous   |
| NC_037643.1 | 8494493 | SNV | 1 | T | C | Homozygous   |
| NC_037643.1 | 8497937 | SNV | 1 | T | C | Homozygous   |
| NC_037643.1 | 8500290 | SNV | 1 | C | G | Homozygous   |
| NC_037643.1 | 8500555 | SNV | 1 | G | A | Homozygous   |
| NC_037643.1 | 8501076 | SNV | 1 | G | T | Homozygous   |
| NC_037643.1 | 8501079 | SNV | 1 | A | T | Homozygous   |
| NC_037643.1 | 8501082 | SNV | 1 | A | G | Homozygous   |
| NC_037643.1 | 8501092 | SNV | 1 | G | A | Homozygous   |
| NC_037643.1 | 8501110 | SNV | 1 | T | A | Homozygous   |
| NC_037643.1 | 8505787 | SNV | 1 | C | G | Heterozygous |
| NC_037643.1 | 8505847 | SNV | 1 | C | T | Homozygous   |
| NC_037643.1 | 8507771 | SNV | 1 | A | C | Homozygous   |
| NC_037643.1 | 8507842 | SNV | 1 | G | A | Homozygous   |
| NC_037643.1 | 8533892 | SNV | 1 | T | A | Heterozygous |
| NC_037643.1 | 8533892 | SNV | 1 | T | C | Heterozygous |
| NC_037643.1 | 8533904 | SNV | 1 | G | A | Homozygous   |
| NC_037643.1 | 8533925 | SNV | 1 | A | G | Heterozygous |
| NC_037643.1 | 8544836 | SNV | 1 | C | T | Homozygous   |
| NC_037643.1 | 8552712 | SNV | 1 | A | T | Heterozygous |
| NC_037643.1 | 8555103 | SNV | 1 | G | A | Heterozygous |
| NC_037643.1 | 8577204 | SNV | 1 | A | G | Homozygous   |
| NC_037643.1 | 8578302 | SNV | 1 | T | C | Homozygous   |
| NC_037643.1 | 8578307 | SNV | 1 | G | A | Homozygous   |
| NC_037643.1 | 8578312 | SNV | 1 | G | C | Heterozygous |
| NC_037643.1 | 8578365 | SNV | 1 | A | C | Heterozygous |
| NC_037643.1 | 8580371 | SNV | 1 | C | T | Heterozygous |
| NC_037643.1 | 8580374 | SNV | 1 | C | T | Heterozygous |
| NC_037643.1 | 8580380 | SNV | 1 | C | T | Homozygous   |
| NC_037643.1 | 8580410 | SNV | 1 | G | A | Homozygous   |
| NC_037643.1 | 8580412 | SNV | 1 | T | C | Homozygous   |
| NC_037643.1 | 8587021 | SNV | 1 | T | C | Homozygous   |
| NC_037643.1 | 8587222 | SNV | 1 | T | C | Homozygous   |
| NC_037643.1 | 8587269 | SNV | 1 | C | T | Heterozygous |
| NC_037643.1 | 8590903 | SNV | 1 | A | G | Heterozygous |
| NC_037643.1 | 8593432 | SNV | 1 | A | G | Heterozygous |
| NC_037643.1 | 8593438 | SNV | 1 | G | C | Homozygous   |

|             |         |     |   |   |   |              |
|-------------|---------|-----|---|---|---|--------------|
| NC_037643.1 | 8600638 | SNV | 1 | T | C | Homozygous   |
| NC_037643.1 | 8601074 | SNV | 1 | C | G | Homozygous   |
| NC_037643.1 | 8601118 | SNV | 1 | C | T | Homozygous   |
| NC_037643.1 | 8601531 | SNV | 1 | A | G | Homozygous   |
| NC_037643.1 | 8601563 | SNV | 1 | T | C | Homozygous   |
| NC_037643.1 | 8601577 | SNV | 1 | A | G | Heterozygous |
| NC_037643.1 | 8601588 | SNV | 1 | T | A | Heterozygous |
| NC_037643.1 | 8601757 | SNV | 1 | T | C | Homozygous   |
| NC_037643.1 | 8601878 | SNV | 1 | C | T | Heterozygous |
| NC_037643.1 | 8603281 | SNV | 1 | A | T | Heterozygous |
| NC_037643.1 | 8605724 | SNV | 1 | A | G | Heterozygous |
| NC_037643.1 | 8605729 | SNV | 1 | T | G | Homozygous   |
| NC_037643.1 | 8608782 | SNV | 1 | A | G | Heterozygous |
| NC_037643.1 | 8608816 | SNV | 1 | C | T | Homozygous   |
| NC_037643.1 | 8608909 | SNV | 1 | C | T | Homozygous   |
| NC_037643.1 | 8609061 | SNV | 1 | C | T | Heterozygous |
| NC_037643.1 | 8609216 | SNV | 1 | G | T | Heterozygous |
| NC_037643.1 | 8609267 | SNV | 1 | G | A | Heterozygous |
| NC_037643.1 | 8609304 | SNV | 1 | A | G | Heterozygous |
| NC_037643.1 | 8609524 | SNV | 1 | C | T | Homozygous   |
| NC_037643.1 | 8609601 | SNV | 1 | C | T | Homozygous   |
| NC_037643.1 | 8609802 | SNV | 1 | T | C | Homozygous   |
| NC_037643.1 | 8610847 | SNV | 1 | T | C | Heterozygous |
| NC_037643.1 | 8610851 | SNV | 1 | T | C | Heterozygous |
| NC_037643.1 | 8610854 | SNV | 1 | C | T | Heterozygous |
| NC_037643.1 | 8614813 | SNV | 1 | G | C | Homozygous   |
| NC_037643.1 | 8614828 | SNV | 1 | C | T | Homozygous   |
| NC_037643.1 | 8614984 | SNV | 1 | G | A | Homozygous   |
| NC_037643.1 | 8617352 | SNV | 1 | A | C | Homozygous   |
| NC_037643.1 | 8617455 | SNV | 1 | T | C | Homozygous   |
| NC_037643.1 | 8620197 | SNV | 1 | A | C | Heterozygous |
| NC_037643.1 | 8620207 | SNV | 1 | A | G | Homozygous   |
| NC_037643.1 | 8620937 | SNV | 1 | A | G | Homozygous   |
| NC_037643.1 | 8620977 | SNV | 1 | A | G | Homozygous   |
| NC_037643.1 | 8623214 | SNV | 1 | A | G | Homozygous   |
| NC_037643.1 | 8630332 | SNV | 1 | T | C | Homozygous   |
| NC_037643.1 | 8632894 | SNV | 1 | C | T | Homozygous   |
| NC_037643.1 | 8633205 | SNV | 1 | T | A | Heterozygous |
| NC_037643.1 | 8633223 | SNV | 1 | A | C | Heterozygous |
| NC_037643.1 | 8633905 | SNV | 1 | C | T | Homozygous   |
| NC_037643.1 | 8637893 | SNV | 1 | G | A | Homozygous   |
| NC_037643.1 | 8641514 | SNV | 1 | G | A | Heterozygous |
| NC_037643.1 | 8641522 | SNV | 1 | T | A | Heterozygous |
| NC_037643.1 | 8641524 | SNV | 1 | A | T | Heterozygous |
| NC_037643.1 | 8642202 | SNV | 1 | A | T | Heterozygous |
| NC_037643.1 | 8642241 | SNV | 1 | T | C | Homozygous   |
| NC_037643.1 | 8642689 | SNV | 1 | G | A | Heterozygous |
| NC_037643.1 | 8643415 | SNV | 1 | T | A | Heterozygous |
| NC_037643.1 | 8643419 | SNV | 1 | G | T | Heterozygous |
| NC_037643.1 | 8643669 | SNV | 1 | T | C | Heterozygous |
| NC_037643.1 | 8649293 | SNV | 1 | A | G | Homozygous   |

|             |         |     |   |   |   |              |
|-------------|---------|-----|---|---|---|--------------|
| NC_037643.1 | 8651505 | SNV | 1 | C | T | Heterozygous |
| NC_037643.1 | 8651509 | SNV | 1 | C | T | Homozygous   |
| NC_037643.1 | 8651542 | SNV | 1 | G | T | Heterozygous |
| NC_037643.1 | 8651629 | SNV | 1 | C | T | Homozygous   |
| NC_037643.1 | 8652833 | SNV | 1 | A | G | Homozygous   |
| NC_037643.1 | 8654531 | SNV | 1 | A | G | Homozygous   |
| NC_037643.1 | 8654659 | SNV | 1 | T | C | Homozygous   |
| NC_037643.1 | 8654759 | SNV | 1 | A | G | Homozygous   |
| NC_037643.1 | 8659873 | SNV | 1 | G | T | Heterozygous |
| NC_037643.1 | 8668592 | SNV | 1 | T | A | Homozygous   |
| NC_037643.1 | 8668645 | SNV | 1 | T | C | Heterozygous |
| NC_037643.1 | 8669706 | SNV | 1 | T | A | Homozygous   |
| NC_037643.1 | 8670495 | SNV | 1 | T | C | Homozygous   |
| NC_037643.1 | 8674395 | SNV | 1 | C | T | Homozygous   |
| NC_037643.1 | 8674779 | SNV | 1 | G | A | Heterozygous |
| NC_037643.1 | 8674794 | SNV | 1 | C | T | Heterozygous |
| NC_037643.1 | 8674797 | SNV | 1 | T | C | Homozygous   |
| NC_037643.1 | 8674812 | SNV | 1 | C | T | Homozygous   |
| NC_037643.1 | 8757314 | SNV | 1 | T | C | Homozygous   |
| NC_037643.1 | 8758972 | SNV | 1 | A | G | Homozygous   |
| NC_037643.1 | 8763953 | SNV | 1 | C | A | Heterozygous |
| NC_037643.1 | 8765347 | SNV | 1 | A | T | Homozygous   |
| NC_037643.1 | 8765994 | SNV | 1 | T | G | Heterozygous |
| NC_037643.1 | 8765996 | SNV | 1 | C | T | Heterozygous |
| NC_037643.1 | 8766005 | SNV | 1 | C | T | Heterozygous |
| NC_037643.1 | 8766111 | SNV | 1 | G | A | Heterozygous |
| NC_037643.1 | 8766206 | SNV | 1 | T | C | Homozygous   |
| NC_037643.1 | 8768897 | SNV | 1 | C | T | Homozygous   |
| NC_037643.1 | 8769164 | SNV | 1 | C | T | Homozygous   |
| NC_037643.1 | 8769209 | SNV | 1 | A | G | Heterozygous |
| NC_037643.1 | 8769458 | SNV | 1 | A | G | Homozygous   |
| NC_037643.1 | 8769506 | SNV | 1 | C | T | Heterozygous |
| NC_037643.1 | 8769615 | SNV | 1 | A | G | Homozygous   |
| NC_037643.1 | 8778690 | SNV | 1 | A | G | Homozygous   |
| NC_037643.1 | 8779722 | SNV | 1 | G | A | Heterozygous |
| NC_037643.1 | 8788591 | SNV | 1 | C | T | Heterozygous |
| NC_037643.1 | 8788630 | SNV | 1 | A | G | Homozygous   |
| NC_037643.1 | 8789124 | SNV | 1 | G | A | Homozygous   |
| NC_037643.1 | 8790577 | SNV | 1 | G | A | Homozygous   |
| NC_037643.1 | 8790731 | SNV | 1 | A | G | Homozygous   |
| NC_037643.1 | 8790754 | SNV | 1 | T | C | Homozygous   |
| NC_037643.1 | 8790784 | SNV | 1 | G | A | Homozygous   |
| NC_037643.1 | 8790832 | SNV | 1 | G | A | Homozygous   |
| NC_037643.1 | 8793110 | SNV | 1 | T | A | Homozygous   |
| NC_037643.1 | 8793118 | SNV | 1 | T | A | Homozygous   |
| NC_037643.1 | 8793139 | SNV | 1 | G | T | Homozygous   |
| NC_037643.1 | 8793149 | SNV | 1 | T | C | Homozygous   |
| NC_037643.1 | 8800695 | SNV | 1 | C | T | Heterozygous |
| NC_037643.1 | 8802699 | SNV | 1 | G | A | Homozygous   |
| NC_037643.1 | 8802705 | SNV | 1 | C | A | Heterozygous |
| NC_037643.1 | 8802707 | SNV | 1 | A | T | Heterozygous |

|             |         |     |   |   |   |              |
|-------------|---------|-----|---|---|---|--------------|
| NC_037643.1 | 8802711 | SNV | 1 | A | T | Heterozygous |
| NC_037643.1 | 8802714 | SNV | 1 | A | G | Heterozygous |
| NC_037643.1 | 8802746 | SNV | 1 | G | A | Heterozygous |
| NC_037643.1 | 8802773 | SNV | 1 | C | A | Homozygous   |
| NC_037643.1 | 8803052 | SNV | 1 | A | C | Heterozygous |
| NC_037643.1 | 8803105 | SNV | 1 | C | T | Homozygous   |
| NC_037643.1 | 8803376 | SNV | 1 | A | G | Homozygous   |
| NC_037643.1 | 8804280 | SNV | 1 | C | T | Heterozygous |
| NC_037643.1 | 8804300 | SNV | 1 | C | T | Homozygous   |
| NC_037643.1 | 8804452 | SNV | 1 | T | C | Heterozygous |
| NC_037643.1 | 8804465 | SNV | 1 | A | C | Heterozygous |
| NC_037643.1 | 8804467 | SNV | 1 | A | C | Heterozygous |
| NC_037643.1 | 8806717 | SNV | 1 | C | T | Homozygous   |
| NC_037643.1 | 8806719 | SNV | 1 | A | C | Homozygous   |
| NC_037643.1 | 8806799 | SNV | 1 | G | A | Homozygous   |
| NC_037643.1 | 8806819 | SNV | 1 | C | T | Heterozygous |
| NC_037643.1 | 8809184 | SNV | 1 | A | G | Homozygous   |
| NC_037643.1 | 8809189 | SNV | 1 | G | A | Homozygous   |
| NC_037643.1 | 8809196 | SNV | 1 | A | G | Homozygous   |
| NC_037643.1 | 8810292 | SNV | 1 | T | C | Homozygous   |
| NC_037643.1 | 8810302 | SNV | 1 | C | G | Heterozygous |
| NC_037643.1 | 8814936 | SNV | 1 | A | G | Homozygous   |
| NC_037643.1 | 8814950 | SNV | 1 | G | A | Heterozygous |
| NC_037643.1 | 8814955 | SNV | 1 | A | G | Heterozygous |
| NC_037643.1 | 8814968 | SNV | 1 | T | C | Heterozygous |
| NC_037643.1 | 8814971 | SNV | 1 | A | G | Homozygous   |
| NC_037643.1 | 8821066 | SNV | 1 | A | G | Homozygous   |
| NC_037643.1 | 8821070 | SNV | 1 | A | G | Heterozygous |
| NC_037643.1 | 8821093 | SNV | 1 | G | A | Heterozygous |
| NC_037643.1 | 8821402 | SNV | 1 | G | A | Heterozygous |
| NC_037643.1 | 8821786 | SNV | 1 | A | G | Homozygous   |
| NC_037643.1 | 8822051 | SNV | 1 | T | C | Heterozygous |
| NC_037643.1 | 8822366 | SNV | 1 | A | G | Heterozygous |
| NC_037643.1 | 8822374 | SNV | 1 | T | C | Heterozygous |
| NC_037643.1 | 8822414 | SNV | 1 | G | C | Homozygous   |
| NC_037643.1 | 8822416 | SNV | 1 | A | G | Heterozygous |
| NC_037643.1 | 8827752 | SNV | 1 | A | G | Homozygous   |
| NC_037643.1 | 8827838 | SNV | 1 | G | A | Homozygous   |
| NC_037643.1 | 8830137 | SNV | 1 | G | A | Heterozygous |
| NC_037643.1 | 8830266 | SNV | 1 | G | T | Homozygous   |
| NC_037643.1 | 8830778 | SNV | 1 | G | A | Homozygous   |
| NC_037643.1 | 8831623 | SNV | 1 | T | C | Homozygous   |
| NC_037643.1 | 8831630 | SNV | 1 | C | T | Homozygous   |
| NC_037643.1 | 8831746 | SNV | 1 | C | T | Homozygous   |
| NC_037643.1 | 8831907 | SNV | 1 | G | A | Homozygous   |
| NC_037643.1 | 8831927 | SNV | 1 | G | A | Homozygous   |
| NC_037643.1 | 8831934 | SNV | 1 | G | A | Homozygous   |
| NC_037643.1 | 8831941 | SNV | 1 | A | G | Homozygous   |
| NC_037643.1 | 8832140 | SNV | 1 | T | C | Heterozygous |
| NC_037643.1 | 8832206 | SNV | 1 | G | A | Heterozygous |
| NC_037643.1 | 8832213 | SNV | 1 | T | G | Homozygous   |

|             |         |     |   |   |   |              |
|-------------|---------|-----|---|---|---|--------------|
| NC_037643.1 | 8832220 | SNV | 1 | A | G | Homozygous   |
| NC_037643.1 | 8832227 | SNV | 1 | C | T | Heterozygous |
| NC_037643.1 | 8832328 | SNV | 1 | G | A | Heterozygous |
| NC_037643.1 | 8832332 | SNV | 1 | C | T | Heterozygous |
| NC_037643.1 | 8849879 | SNV | 1 | G | C | Homozygous   |
| NC_037643.1 | 8865774 | SNV | 1 | A | G | Homozygous   |
| NC_037643.1 | 8865862 | SNV | 1 | C | T | Homozygous   |
| NC_037643.1 | 8865874 | SNV | 1 | C | T | Heterozygous |
| NC_037643.1 | 8874245 | SNV | 1 | G | A | Homozygous   |
| NC_037643.1 | 8874247 | SNV | 1 | C | T | Homozygous   |
| NC_037643.1 | 8883592 | SNV | 1 | T | C | Homozygous   |
| NC_037643.1 | 8883594 | SNV | 1 | A | T | Heterozygous |
| NC_037643.1 | 8883810 | SNV | 1 | C | T | Homozygous   |
| NC_037643.1 | 8883820 | SNV | 1 | C | T | Heterozygous |
| NC_037643.1 | 8884890 | SNV | 1 | T | A | Homozygous   |
| NC_037643.1 | 8884896 | SNV | 1 | T | C | Homozygous   |
| NC_037643.1 | 8884906 | SNV | 1 | T | A | Homozygous   |
| NC_037643.1 | 8884912 | SNV | 1 | A | T | Homozygous   |
| NC_037643.1 | 8884921 | SNV | 1 | T | A | Homozygous   |
| NC_037643.1 | 8885334 | SNV | 1 | T | C | Heterozygous |
| NC_037643.1 | 8885447 | SNV | 1 | G | A | Homozygous   |
| NC_037643.1 | 8891854 | SNV | 1 | C | A | Heterozygous |
| NC_037643.1 | 8893727 | SNV | 1 | A | G | Homozygous   |
| NC_037643.1 | 8893765 | SNV | 1 | C | T | Heterozygous |
| NC_037643.1 | 8893767 | SNV | 1 | A | G | Homozygous   |
| NC_037643.1 | 8897109 | SNV | 1 | G | A | Heterozygous |
| NC_037643.1 | 8897178 | SNV | 1 | A | G | Homozygous   |
| NC_037643.1 | 8898492 | SNV | 1 | T | G | Heterozygous |
| NC_037643.1 | 8898786 | SNV | 1 | A | G | Heterozygous |
| NC_037643.1 | 8898790 | SNV | 1 | T | G | Heterozygous |
| NC_037643.1 | 8898796 | SNV | 1 | A | G | Homozygous   |
| NC_037643.1 | 8898812 | SNV | 1 | T | A | Heterozygous |
| NC_037643.1 | 8898815 | SNV | 1 | T | C | Homozygous   |
| NC_037643.1 | 8898841 | SNV | 1 | A | G | Homozygous   |
| NC_037643.1 | 8898852 | SNV | 1 | C | T | Homozygous   |
| NC_037643.1 | 8898859 | SNV | 1 | G | A | Heterozygous |
| NC_037643.1 | 8898861 | SNV | 1 | C | T | Heterozygous |
| NC_037643.1 | 8913423 | SNV | 1 | T | A | Homozygous   |
| NC_037643.1 | 8913426 | SNV | 1 | G | T | Homozygous   |
| NC_037643.1 | 8913429 | SNV | 1 | T | G | Homozygous   |
| NC_037643.1 | 8938310 | SNV | 1 | G | A | Homozygous   |
| NC_037643.1 | 8960000 | SNV | 1 | T | C | Heterozygous |
| NC_037643.1 | 8960046 | SNV | 1 | C | T | Heterozygous |
| NC_037643.1 | 8960324 | SNV | 1 | A | T | Homozygous   |
| NC_037643.1 | 8960332 | SNV | 1 | G | A | Homozygous   |
| NC_037643.1 | 8960369 | SNV | 1 | T | C | Homozygous   |
| NC_037643.1 | 8972118 | SNV | 1 | C | A | Heterozygous |
| NC_037643.1 | 8972147 | SNV | 1 | T | A | Heterozygous |
| NC_037643.1 | 8972151 | SNV | 1 | T | A | Homozygous   |
| NC_037643.1 | 8972153 | SNV | 1 | T | A | Homozygous   |
| NC_037643.1 | 8972196 | SNV | 1 | G | A | Heterozygous |

|             |         |     |   |   |   |              |
|-------------|---------|-----|---|---|---|--------------|
| NC_037643.1 | 8975468 | SNV | 1 | T | C | Homozygous   |
| NC_037643.1 | 8977400 | SNV | 1 | C | T | Heterozygous |
| NC_037643.1 | 8977991 | SNV | 1 | A | G | Homozygous   |
| NC_037643.1 | 8978001 | SNV | 1 | T | C | Homozygous   |
| NC_037643.1 | 8978036 | SNV | 1 | C | T | Heterozygous |
| NC_037643.1 | 8979419 | SNV | 1 | C | T | Heterozygous |
| NC_037643.1 | 8979439 | SNV | 1 | T | G | Homozygous   |
| NC_037643.1 | 8979453 | SNV | 1 | C | T | Heterozygous |
| NC_037643.1 | 8979458 | SNV | 1 | A | G | Heterozygous |
| NC_037643.1 | 8979483 | SNV | 1 | C | T | Heterozygous |
| NC_037643.1 | 8997738 | SNV | 1 | C | T | Heterozygous |
| NC_037643.1 | 8998357 | SNV | 1 | A | G | Heterozygous |
| NC_037643.1 | 9002585 | SNV | 1 | C | G | Homozygous   |
| NC_037643.1 | 9002593 | SNV | 1 | T | A | Heterozygous |
| NC_037643.1 | 9002598 | SNV | 1 | G | T | Homozygous   |
| NC_037643.1 | 9002627 | SNV | 1 | A | G | Homozygous   |
| NC_037643.1 | 9006591 | SNV | 1 | C | T | Homozygous   |
| NC_037643.1 | 9007197 | SNV | 1 | C | T | Heterozygous |
| NC_037643.1 | 9007316 | SNV | 1 | A | T | Homozygous   |
| NC_037643.1 | 9007522 | SNV | 1 | A | G | Homozygous   |
| NC_037643.1 | 9008128 | SNV | 1 | G | A | Heterozygous |
| NC_037643.1 | 9017269 | SNV | 1 | G | A | Homozygous   |
| NC_037643.1 | 9017590 | SNV | 1 | A | G | Homozygous   |
| NC_037643.1 | 9017641 | SNV | 1 | G | A | Heterozygous |
| NC_037643.1 | 9017848 | SNV | 1 | G | A | Heterozygous |
| NC_037643.1 | 9019207 | SNV | 1 | T | C | Homozygous   |
| NC_037643.1 | 9019684 | SNV | 1 | G | T | Heterozygous |
| NC_037643.1 | 9022535 | SNV | 1 | T | A | Heterozygous |
| NC_037643.1 | 9022554 | SNV | 1 | C | T | Homozygous   |
| NC_037643.1 | 9029466 | SNV | 1 | A | G | Homozygous   |
| NC_037643.1 | 9029475 | SNV | 1 | C | T | Heterozygous |
| NC_037643.1 | 9030049 | SNV | 1 | T | C | Heterozygous |
| NC_037643.1 | 9030055 | SNV | 1 | C | A | Heterozygous |
| NC_037643.1 | 9030075 | SNV | 1 | T | C | Heterozygous |
| NC_037643.1 | 9030105 | SNV | 1 | A | G | Homozygous   |
| NC_037643.1 | 9053307 | SNV | 1 | A | G | Heterozygous |
| NC_037643.1 | 9054194 | SNV | 1 | T | A | Homozygous   |
| NC_037643.1 | 9054615 | SNV | 1 | A | T | Homozygous   |
| NC_037643.1 | 9057665 | SNV | 1 | T | G | Homozygous   |
| NC_037643.1 | 9057679 | SNV | 1 | A | G | Homozygous   |
| NC_037643.1 | 9057698 | SNV | 1 | A | C | Homozygous   |
| NC_037643.1 | 9057700 | SNV | 1 | A | C | Homozygous   |
| NC_037643.1 | 9060588 | SNV | 1 | T | C | Homozygous   |
| NC_037643.1 | 9060728 | SNV | 1 | G | A | Homozygous   |
| NC_037643.1 | 9060753 | SNV | 1 | T | A | Homozygous   |
| NC_037643.1 | 9060779 | SNV | 1 | A | T | Homozygous   |
| NC_037643.1 | 9060788 | SNV | 1 | T | A | Homozygous   |
| NC_037643.1 | 9060802 | SNV | 1 | A | G | Homozygous   |
| NC_037643.1 | 9060811 | SNV | 1 | T | G | Homozygous   |
| NC_037643.1 | 9060861 | SNV | 1 | A | G | Homozygous   |
| NC_037643.1 | 9061804 | SNV | 1 | T | C | Homozygous   |

|             |         |     |   |   |   |              |
|-------------|---------|-----|---|---|---|--------------|
| NC_037643.1 | 9061806 | SNV | 1 | T | A | Homozygous   |
| NC_037643.1 | 9062226 | SNV | 1 | T | C | Homozygous   |
| NC_037643.1 | 9062733 | SNV | 1 | T | C | Homozygous   |
| NC_037643.1 | 9065702 | SNV | 1 | G | A | Heterozygous |
| NC_037643.1 | 9069101 | SNV | 1 | T | C | Heterozygous |
| NC_037643.1 | 9069121 | SNV | 1 | A | T | Heterozygous |
| NC_037643.1 | 9076217 | SNV | 1 | T | A | Homozygous   |
| NC_037643.1 | 9077281 | SNV | 1 | T | G | Homozygous   |
| NC_037643.1 | 9079322 | SNV | 1 | A | G | Homozygous   |
| NC_037643.1 | 9080373 | SNV | 1 | A | G | Homozygous   |
| NC_037643.1 | 9084653 | SNV | 1 | A | G | Heterozygous |
| NC_037643.1 | 9086357 | SNV | 1 | T | C | Homozygous   |
| NC_037643.1 | 9091437 | SNV | 1 | T | C | Homozygous   |
| NC_037643.1 | 9091444 | SNV | 1 | A | T | Homozygous   |
| NC_037643.1 | 9091447 | SNV | 1 | T | C | Homozygous   |
| NC_037643.1 | 9091454 | SNV | 1 | A | C | Homozygous   |
| NC_037643.1 | 9091464 | SNV | 1 | T | A | Homozygous   |
| NC_037643.1 | 9092470 | SNV | 1 | T | A | Homozygous   |
| NC_037643.1 | 9092474 | SNV | 1 | C | A | Homozygous   |
| NC_037643.1 | 9092480 | SNV | 1 | T | C | Homozygous   |
| NC_037643.1 | 9092485 | SNV | 1 | T | A | Homozygous   |
| NC_037643.1 | 9092488 | SNV | 1 | A | T | Homozygous   |
| NC_037643.1 | 9092492 | SNV | 1 | C | A | Homozygous   |
| NC_037643.1 | 9092494 | SNV | 1 | T | C | Homozygous   |
| NC_037643.1 | 9092496 | SNV | 1 | T | A | Homozygous   |
| NC_037643.1 | 9092500 | SNV | 1 | A | T | Homozygous   |
| NC_037643.1 | 9092502 | SNV | 1 | A | T | Homozygous   |
| NC_037643.1 | 9092506 | SNV | 1 | A | C | Homozygous   |
| NC_037643.1 | 9092513 | SNV | 1 | T | G | Homozygous   |
| NC_037643.1 | 9092521 | SNV | 1 | T | A | Homozygous   |
| NC_037643.1 | 9092524 | SNV | 1 | T | A | Homozygous   |
| NC_037643.1 | 9096350 | SNV | 1 | G | T | Heterozygous |
| NC_037643.1 | 9096366 | SNV | 1 | G | T | Heterozygous |
| NC_037643.1 | 9096876 | SNV | 1 | C | A | Homozygous   |
| NC_037643.1 | 9097036 | SNV | 1 | T | C | Homozygous   |
| NC_037643.1 | 9097649 | SNV | 1 | T | A | Homozygous   |
| NC_037643.1 | 9097684 | SNV | 1 | T | C | Heterozygous |
| NC_037643.1 | 9097926 | SNV | 1 | A | G | Homozygous   |
| NC_037643.1 | 9110593 | SNV | 1 | G | A | Homozygous   |
| NC_037643.1 | 9111847 | SNV | 1 | T | C | Heterozygous |
| NC_037643.1 | 9111858 | SNV | 1 | A | G | Heterozygous |
| NC_037643.1 | 9111867 | SNV | 1 | T | C | Heterozygous |
| NC_037643.1 | 9111888 | SNV | 1 | A | C | Heterozygous |
| NC_037643.1 | 9112808 | SNV | 1 | T | C | Homozygous   |
| NC_037643.1 | 9114622 | SNV | 1 | T | A | Homozygous   |
| NC_037643.1 | 9114635 | SNV | 1 | A | T | Homozygous   |
| NC_037643.1 | 9114873 | SNV | 1 | G | C | Homozygous   |
| NC_037643.1 | 9114876 | SNV | 1 | C | T | Homozygous   |
| NC_037643.1 | 9115229 | SNV | 1 | C | A | Heterozygous |
| NC_037643.1 | 9115239 | SNV | 1 | T | C | Homozygous   |
| NC_037643.1 | 9115269 | SNV | 1 | A | G | Homozygous   |



|             |         |     |   |   |   |              |
|-------------|---------|-----|---|---|---|--------------|
| NC_037643.1 | 9115283 | SNV | 1 | C | G | Homozygous   |
| NC_037643.1 | 9115660 | SNV | 1 | A | G | Heterozygous |
| NC_037643.1 | 9115698 | SNV | 1 | A | G | Heterozygous |
| NC_037643.1 | 9115715 | SNV | 1 | A | G | Heterozygous |
| NC_037643.1 | 9116734 | SNV | 1 | T | G | Homozygous   |
| NC_037643.1 | 9116747 | SNV | 1 | T | C | Homozygous   |
| NC_037643.1 | 9116752 | SNV | 1 | G | T | Homozygous   |
| NC_037643.1 | 9116777 | SNV | 1 | T | A | Homozygous   |
| NC_037643.1 | 9121758 | SNV | 1 | A | T | Homozygous   |
| NC_037643.1 | 9121761 | SNV | 1 | A | T | Homozygous   |
| NC_037643.1 | 9121790 | SNV | 1 | T | A | Homozygous   |
| NC_037643.1 | 9121793 | SNV | 1 | T | C | Homozygous   |
| NC_037643.1 | 9121798 | SNV | 1 | A | G | Homozygous   |
| NC_037643.1 | 9124405 | SNV | 1 | A | G | Homozygous   |
| NC_037643.1 | 9127002 | SNV | 1 | A | C | Homozygous   |
| NC_037643.1 | 9127043 | SNV | 1 | C | T | Homozygous   |
| NC_037643.1 | 9127489 | SNV | 1 | T | C | Homozygous   |
| NC_037643.1 | 9127497 | SNV | 1 | C | T | Homozygous   |
| NC_037643.1 | 9127510 | SNV | 1 | T | A | Homozygous   |
| NC_037643.1 | 9127515 | SNV | 1 | T | C | Homozygous   |
| NC_037643.1 | 9127519 | SNV | 1 | A | C | Homozygous   |
| NC_037643.1 | 9127524 | SNV | 1 | A | G | Homozygous   |
| NC_037643.1 | 9132232 | SNV | 1 | G | A | Homozygous   |
| NC_037643.1 | 9132235 | SNV | 1 | A | C | Homozygous   |
| NC_037643.1 | 9132238 | SNV | 1 | A | C | Homozygous   |
| NC_037643.1 | 9132708 | SNV | 1 | T | G | Homozygous   |
| NC_037643.1 | 9132716 | SNV | 1 | C | G | Homozygous   |
| NC_037643.1 | 9132936 | SNV | 1 | G | A | Homozygous   |
| NC_037643.1 | 9139368 | SNV | 1 | C | T | Homozygous   |
| NC_037643.1 | 9139400 | SNV | 1 | T | C | Heterozygous |
| NC_037643.1 | 9140426 | SNV | 1 | A | G | Homozygous   |
| NC_037643.1 | 9145194 | SNV | 1 | T | A | Homozygous   |
| NC_037643.1 | 9145197 | SNV | 1 | T | C | Homozygous   |
| NC_037643.1 | 9145199 | SNV | 1 | T | A | Homozygous   |
| NC_037643.1 | 9145930 | SNV | 1 | A | C | Homozygous   |
| NC_037643.1 | 9146135 | SNV | 1 | G | A | Homozygous   |
| NC_037643.1 | 9150134 | SNV | 1 | T | G | Homozygous   |
| NC_037643.1 | 9150240 | SNV | 1 | T | A | Homozygous   |
| NC_037643.1 | 9150800 | SNV | 1 | A | T | Heterozygous |
| NC_037643.1 | 9150978 | SNV | 1 | G | A | Homozygous   |
| NC_037643.1 | 9151539 | SNV | 1 | T | C | Heterozygous |
| NC_037643.1 | 9152911 | SNV | 1 | T | G | Heterozygous |
| NC_037643.1 | 9154589 | SNV | 1 | G | A | Homozygous   |
| NC_037643.1 | 9157389 | SNV | 1 | G | A | Heterozygous |
| NC_037643.1 | 9157528 | SNV | 1 | C | G | Homozygous   |
| NC_037643.1 | 9160161 | SNV | 1 | A | T | Homozygous   |
| NC_037643.1 | 9160186 | SNV | 1 | T | G | Homozygous   |
| NC_037643.1 | 9187244 | SNV | 1 | T | C | Heterozygous |
| NC_037643.1 | 9189424 | SNV | 1 | T | C | Heterozygous |
| NC_037643.1 | 9189479 | SNV | 1 | T | C | Homozygous   |
| NC_037643.1 | 9193498 | SNV | 1 | G | C | Heterozygous |

|             |         |     |   |   |   |              |
|-------------|---------|-----|---|---|---|--------------|
| NC_037643.1 | 9193515 | SNV | 1 | G | C | Heterozygous |
| NC_037643.1 | 9194675 | SNV | 1 | T | C | Homozygous   |
| NC_037643.1 | 9194713 | SNV | 1 | T | C | Heterozygous |
| NC_037643.1 | 9194934 | SNV | 1 | G | T | Homozygous   |
| NC_037643.1 | 9194936 | SNV | 1 | A | T | Homozygous   |
| NC_037643.1 | 9194939 | SNV | 1 | T | A | Homozygous   |
| NC_037643.1 | 9194942 | SNV | 1 | T | A | Homozygous   |
| NC_037643.1 | 9194949 | SNV | 1 | G | A | Homozygous   |
| NC_037643.1 | 9194951 | SNV | 1 | C | T | Homozygous   |
| NC_037643.1 | 9200448 | SNV | 1 | C | A | Heterozygous |
| NC_037643.1 | 9200479 | SNV | 1 | A | G | Heterozygous |
| NC_037643.1 | 9200485 | SNV | 1 | C | G | Heterozygous |
| NC_037643.1 | 9200572 | SNV | 1 | G | A | Heterozygous |
| NC_037643.1 | 9256680 | SNV | 1 | T | C | Homozygous   |
| NC_037643.1 | 9256682 | SNV | 1 | C | T | Homozygous   |
| NC_037643.1 | 9256717 | SNV | 1 | G | A | Homozygous   |
| NC_037643.1 | 9256721 | SNV | 1 | A | G | Homozygous   |
| NC_037643.1 | 9256729 | SNV | 1 | C | T | Homozygous   |
| NC_037643.1 | 9256736 | SNV | 1 | T | C | Homozygous   |
| NC_037643.1 | 9256757 | SNV | 1 | C | T | Homozygous   |
| NC_037643.1 | 9256810 | SNV | 1 | G | T | Homozygous   |
| NC_037643.1 | 9256825 | SNV | 1 | G | C | Homozygous   |
| NC_037643.1 | 9256833 | SNV | 1 | A | G | Homozygous   |
| NC_037643.1 | 9260955 | SNV | 1 | A | C | Homozygous   |
| NC_037643.1 | 9260991 | SNV | 1 | A | G | Homozygous   |
| NC_037643.1 | 9320423 | SNV | 1 | T | G | Homozygous   |
| NC_037643.1 | 9320426 | SNV | 1 | A | C | Homozygous   |
| NC_037643.1 | 9320432 | SNV | 1 | G | A | Heterozygous |
| NC_037643.1 | 9320441 | SNV | 1 | A | G | Homozygous   |
| NC_037643.1 | 9320448 | SNV | 1 | A | G | Heterozygous |
| NC_037643.1 | 9320450 | SNV | 1 | A | C | Homozygous   |
| NC_037643.1 | 9321502 | SNV | 1 | A | G | Homozygous   |
| NC_037643.1 | 9321505 | SNV | 1 | A | T | Homozygous   |
| NC_037643.1 | 9321545 | SNV | 1 | A | G | Homozygous   |
| NC_037643.1 | 9358858 | SNV | 1 | A | G | Homozygous   |
| NC_037643.1 | 9373383 | SNV | 1 | A | T | Heterozygous |
| NC_037643.1 | 9386001 | SNV | 1 | A | C | Homozygous   |
| NC_037643.1 | 9386007 | SNV | 1 | T | A | Homozygous   |
| NC_037643.1 | 9386009 | SNV | 1 | T | A | Homozygous   |
| NC_037643.1 | 9386022 | SNV | 1 | T | C | Heterozygous |
| NC_037643.1 | 9386025 | SNV | 1 | C | T | Heterozygous |
| NC_037643.1 | 9386047 | SNV | 1 | G | C | Homozygous   |
| NC_037643.1 | 9386055 | SNV | 1 | A | G | Homozygous   |
| NC_037643.1 | 9388814 | SNV | 1 | G | C | Heterozygous |
| NC_037643.1 | 9389575 | SNV | 1 | A | G | Homozygous   |
| NC_037643.1 | 9389585 | SNV | 1 | T | C | Homozygous   |
| NC_037643.1 | 9389623 | SNV | 1 | G | A | Heterozygous |
| NC_037643.1 | 9530811 | SNV | 1 | A | T | Homozygous   |
| NC_037643.1 | 9530814 | SNV | 1 | C | T | Homozygous   |
| NC_037643.1 | 9530819 | SNV | 1 | T | G | Heterozygous |
| NC_037643.1 | 9568655 | SNV | 1 | C | T | Homozygous   |

|             |         |     |   |   |   |              |
|-------------|---------|-----|---|---|---|--------------|
| NC_037643.1 | 9575112 | SNV | 1 | T | A | Homozygous   |
| NC_037643.1 | 9584818 | SNV | 1 | T | C | Homozygous   |
| NC_037643.1 | 9589001 | SNV | 1 | A | C | Homozygous   |
| NC_037643.1 | 9589016 | SNV | 1 | A | T | Homozygous   |
| NC_037643.1 | 9589022 | SNV | 1 | A | T | Homozygous   |
| NC_037643.1 | 9589193 | SNV | 1 | T | G | Heterozygous |
| NC_037643.1 | 9590506 | SNV | 1 | T | C | Heterozygous |
| NC_037643.1 | 9590517 | SNV | 1 | A | G | Homozygous   |
| NC_037643.1 | 9590520 | SNV | 1 | C | T | Homozygous   |
| NC_037643.1 | 9590709 | SNV | 1 | G | A | Homozygous   |
| NC_037643.1 | 9590857 | SNV | 1 | G | C | Homozygous   |
| NC_037643.1 | 9591193 | SNV | 1 | T | C | Heterozygous |
| NC_037643.1 | 9591205 | SNV | 1 | T | C | Homozygous   |
| NC_037643.1 | 9591255 | SNV | 1 | A | G | Homozygous   |
| NC_037643.1 | 9601019 | SNV | 1 | G | C | Homozygous   |
| NC_037643.1 | 9603744 | SNV | 1 | G | A | Homozygous   |
| NC_037643.1 | 9603765 | SNV | 1 | A | G | Heterozygous |
| NC_037643.1 | 9611793 | SNV | 1 | G | A | Homozygous   |
| NC_037643.1 | 9612098 | SNV | 1 | A | C | Homozygous   |
| NC_037643.1 | 9612107 | SNV | 1 | T | C | Homozygous   |
| NC_037643.1 | 9612130 | SNV | 1 | T | G | Homozygous   |
| NC_037643.1 | 9612314 | SNV | 1 | A | G | Homozygous   |
| NC_037643.1 | 9612340 | SNV | 1 | C | T | Homozygous   |
| NC_037643.1 | 9612822 | SNV | 1 | T | C | Homozygous   |
| NC_037643.1 | 9612869 | SNV | 1 | C | T | Homozygous   |
| NC_037643.1 | 9614944 | SNV | 1 | T | C | Homozygous   |
| NC_037643.1 | 9628721 | SNV | 1 | C | A | Homozygous   |
| NC_037643.1 | 9628725 | SNV | 1 | T | C | Homozygous   |
| NC_037643.1 | 9631328 | SNV | 1 | C | G | Homozygous   |
| NC_037643.1 | 9631334 | SNV | 1 | C | A | Homozygous   |
| NC_037643.1 | 9631340 | SNV | 1 | T | A | Homozygous   |
| NC_037643.1 | 9633693 | SNV | 1 | G | A | Heterozygous |
| NC_037643.1 | 9633904 | SNV | 1 | G | A | Heterozygous |
| NC_037643.1 | 9634064 | SNV | 1 | A | G | Homozygous   |
| NC_037643.1 | 9634148 | SNV | 1 | A | G | Homozygous   |
| NC_037643.1 | 9635442 | SNV | 1 | T | C | Heterozygous |
| NC_037643.1 | 9635591 | SNV | 1 | G | A | Heterozygous |
| NC_037643.1 | 9640164 | SNV | 1 | G | T | Heterozygous |
| NC_037643.1 | 9640176 | SNV | 1 | A | G | Heterozygous |
| NC_037643.1 | 9641403 | SNV | 1 | C | G | Homozygous   |
| NC_037643.1 | 9641406 | SNV | 1 | C | T | Homozygous   |
| NC_037643.1 | 9648794 | SNV | 1 | A | G | Heterozygous |
| NC_037643.1 | 9648801 | SNV | 1 | A | G | Homozygous   |
| NC_037643.1 | 9653733 | SNV | 1 | C | T | Homozygous   |
| NC_037643.1 | 9658014 | SNV | 1 | G | A | Heterozygous |
| NC_037643.1 | 9658019 | SNV | 1 | G | A | Heterozygous |
| NC_037643.1 | 9658060 | SNV | 1 | T | C | Homozygous   |
| NC_037643.1 | 9658126 | SNV | 1 | C | G | Heterozygous |
| NC_037643.1 | 9659486 | SNV | 1 | A | G | Heterozygous |
| NC_037643.1 | 9659492 | SNV | 1 | G | A | Homozygous   |
| NC_037643.1 | 9659496 | SNV | 1 | G | A | Homozygous   |

|             |         |     |   |   |   |              |
|-------------|---------|-----|---|---|---|--------------|
| NC_037643.1 | 9659506 | SNV | 1 | G | A | Heterozygous |
| NC_037643.1 | 9661788 | SNV | 1 | T | C | Homozygous   |
| NC_037643.1 | 9663214 | SNV | 1 | T | C | Heterozygous |
| NC_037643.1 | 9664675 | SNV | 1 | T | C | Homozygous   |
| NC_037643.1 | 9664824 | SNV | 1 | A | T | Homozygous   |
| NC_037643.1 | 9664854 | SNV | 1 | C | T | Heterozygous |
| NC_037643.1 | 9664861 | SNV | 1 | T | C | Heterozygous |
| NC_037643.1 | 9664869 | SNV | 1 | T | C | Homozygous   |
| NC_037643.1 | 9665095 | SNV | 1 | C | T | Homozygous   |
| NC_037643.1 | 9666882 | SNV | 1 | G | A | Homozygous   |
| NC_037643.1 | 9667190 | SNV | 1 | T | C | Heterozygous |
| NC_037643.1 | 9669202 | SNV | 1 | C | T | Heterozygous |
| NC_037643.1 | 9669567 | SNV | 1 | C | T | Heterozygous |
| NC_037643.1 | 9669916 | SNV | 1 | T | C | Homozygous   |
| NC_037643.1 | 9670291 | SNV | 1 | C | T | Homozygous   |
| NC_037643.1 | 9670398 | SNV | 1 | A | G | Homozygous   |
| NC_037643.1 | 9675896 | SNV | 1 | A | G | Homozygous   |
| NC_037643.1 | 9677085 | SNV | 1 | A | G | Homozygous   |
| NC_037643.1 | 9677112 | SNV | 1 | T | G | Homozygous   |
| NC_037643.1 | 9677318 | SNV | 1 | G | A | Homozygous   |
| NC_037643.1 | 9677744 | SNV | 1 | A | G | Heterozygous |
| NC_037643.1 | 9677939 | SNV | 1 | A | G | Homozygous   |
| NC_037643.1 | 9678048 | SNV | 1 | T | A | Homozygous   |
| NC_037643.1 | 9678087 | SNV | 1 | A | G | Heterozygous |
| NC_037643.1 | 9678275 | SNV | 1 | T | C | Homozygous   |
| NC_037643.1 | 9678333 | SNV | 1 | A | G | Heterozygous |
| NC_037643.1 | 9678633 | SNV | 1 | C | T | Heterozygous |
| NC_037643.1 | 9678687 | SNV | 1 | T | C | Homozygous   |
| NC_037643.1 | 9678975 | SNV | 1 | G | C | Homozygous   |
| NC_037643.1 | 9678993 | SNV | 1 | A | G | Heterozygous |
| NC_037643.1 | 9679020 | SNV | 1 | C | G | Heterozygous |
| NC_037643.1 | 9685924 | SNV | 1 | G | A | Heterozygous |
| NC_037643.1 | 9686705 | SNV | 1 | A | G | Heterozygous |
| NC_037643.1 | 9707875 | SNV | 1 | A | T | Heterozygous |
| NC_037643.1 | 9717414 | SNV | 1 | G | A | Homozygous   |
| NC_037643.1 | 9718102 | SNV | 1 | A | G | Heterozygous |
| NC_037643.1 | 9718984 | SNV | 1 | C | T | Heterozygous |
| NC_037643.1 | 9719014 | SNV | 1 | T | C | Heterozygous |
| NC_037643.1 | 9720412 | SNV | 1 | T | A | Homozygous   |
| NC_037643.1 | 9721440 | SNV | 1 | T | C | Heterozygous |
| NC_037643.1 | 9721529 | SNV | 1 | T | C | Homozygous   |
| NC_037643.1 | 9722202 | SNV | 1 | A | G | Heterozygous |
| NC_037643.1 | 9730408 | SNV | 1 | C | A | Homozygous   |
| NC_037643.1 | 9755716 | SNV | 1 | T | C | Homozygous   |
| NC_037643.1 | 9755936 | SNV | 1 | T | G | Heterozygous |
| NC_037643.1 | 9758776 | SNV | 1 | T | C | Heterozygous |
| NC_037643.1 | 9758994 | SNV | 1 | A | G | Homozygous   |
| NC_037643.1 | 9759924 | SNV | 1 | C | T | Homozygous   |
| NC_037643.1 | 9760398 | SNV | 1 | T | C | Heterozygous |
| NC_037643.1 | 9760697 | SNV | 1 | A | G | Heterozygous |
| NC_037643.1 | 9761031 | SNV | 1 | G | T | Homozygous   |

|             |         |     |   |   |   |              |
|-------------|---------|-----|---|---|---|--------------|
| NC_037643.1 | 9761087 | SNV | 1 | A | G | Heterozygous |
| NC_037643.1 | 9761446 | SNV | 1 | G | T | Heterozygous |
| NC_037643.1 | 9762280 | SNV | 1 | A | G | Homozygous   |
| NC_037643.1 | 9762406 | SNV | 1 | A | C | Homozygous   |
| NC_037643.1 | 9762412 | SNV | 1 | A | C | Homozygous   |
| NC_037643.1 | 9762604 | SNV | 1 | T | C | Homozygous   |
| NC_037643.1 | 9762609 | SNV | 1 | A | T | Homozygous   |
| NC_037643.1 | 9772725 | SNV | 1 | A | G | Homozygous   |
| NC_037643.1 | 9772733 | SNV | 1 | G | A | Homozygous   |
| NC_037643.1 | 9772755 | SNV | 1 | C | T | Homozygous   |
| NC_037643.1 | 9772783 | SNV | 1 | G | A | Heterozygous |
| NC_037643.1 | 9772783 | SNV | 1 | G | C | Heterozygous |
| NC_037643.1 | 9772785 | SNV | 1 | G | C | Homozygous   |
| NC_037643.1 | 9772809 | SNV | 1 | T | C | Homozygous   |
| NC_037643.1 | 9773056 | SNV | 1 | C | T | Homozygous   |
| NC_037643.1 | 9779389 | SNV | 1 | A | C | Heterozygous |
| NC_037643.1 | 9779481 | SNV | 1 | T | A | Heterozygous |
| NC_037643.1 | 9779668 | SNV | 1 | T | C | Homozygous   |
| NC_037643.1 | 9779802 | SNV | 1 | G | A | Heterozygous |
| NC_037643.1 | 9779816 | SNV | 1 | A | C | Homozygous   |
| NC_037643.1 | 9779858 | SNV | 1 | A | G | Homozygous   |
| NC_037643.1 | 9785427 | SNV | 1 | T | C | Homozygous   |
| NC_037643.1 | 9785556 | SNV | 1 | C | T | Heterozygous |
| NC_037643.1 | 9785581 | SNV | 1 | A | G | Homozygous   |
| NC_037643.1 | 9785746 | SNV | 1 | G | A | Homozygous   |
| NC_037643.1 | 9785916 | SNV | 1 | C | G | Heterozygous |
| NC_037643.1 | 9786011 | SNV | 1 | C | T | Heterozygous |
| NC_037643.1 | 9787506 | SNV | 1 | A | G | Heterozygous |
| NC_037643.1 | 9787603 | SNV | 1 | G | A | Heterozygous |
| NC_037643.1 | 9787653 | SNV | 1 | A | G | Homozygous   |
| NC_037643.1 | 9787786 | SNV | 1 | C | T | Homozygous   |
| NC_037643.1 | 9799172 | SNV | 1 | A | T | Heterozygous |
| NC_037643.1 | 9801437 | SNV | 1 | T | C | Homozygous   |
| NC_037643.1 | 9801453 | SNV | 1 | G | A | Homozygous   |
| NC_037643.1 | 9801460 | SNV | 1 | T | A | Homozygous   |
| NC_037643.1 | 9804118 | SNV | 1 | A | G | Homozygous   |
| NC_037643.1 | 9804138 | SNV | 1 | G | A | Homozygous   |
| NC_037643.1 | 9804148 | SNV | 1 | G | A | Heterozygous |
| NC_037643.1 | 9813036 | SNV | 1 | A | G | Homozygous   |
| NC_037643.1 | 9813046 | SNV | 1 | T | C | Homozygous   |
| NC_037643.1 | 9813072 | SNV | 1 | T | C | Homozygous   |
| NC_037643.1 | 9813137 | SNV | 1 | G | C | Heterozygous |
| NC_037643.1 | 9813156 | SNV | 1 | A | C | Homozygous   |
| NC_037643.1 | 9813168 | SNV | 1 | A | G | Heterozygous |
| NC_037643.1 | 9824352 | SNV | 1 | T | C | Heterozygous |
| NC_037643.1 | 9826460 | SNV | 1 | T | C | Homozygous   |
| NC_037643.1 | 9826496 | SNV | 1 | A | G | Homozygous   |
| NC_037643.1 | 9826778 | SNV | 1 | G | A | Homozygous   |
| NC_037643.1 | 9826805 | SNV | 1 | G | A | Heterozygous |
| NC_037643.1 | 9826842 | SNV | 1 | G | A | Homozygous   |
| NC_037643.1 | 9826847 | SNV | 1 | C | A | Homozygous   |

|             |         |     |   |   |   |              |
|-------------|---------|-----|---|---|---|--------------|
| NC_037643.1 | 9829219 | SNV | 1 | A | G | Heterozygous |
| NC_037643.1 | 9834657 | SNV | 1 | C | T | Homozygous   |
| NC_037643.1 | 9834660 | SNV | 1 | T | C | Heterozygous |
| NC_037643.1 | 9836974 | SNV | 1 | A | G | Homozygous   |
| NC_037643.1 | 9836976 | SNV | 1 | A | G | Heterozygous |
| NC_037643.1 | 9837169 | SNV | 1 | A | G | Heterozygous |
| NC_037643.1 | 9837216 | SNV | 1 | C | A | Homozygous   |
| NC_037643.1 | 9837406 | SNV | 1 | C | A | Homozygous   |
| NC_037643.1 | 9842233 | SNV | 1 | C | G | Heterozygous |
| NC_037643.1 | 9842273 | SNV | 1 | A | C | Homozygous   |
| NC_037643.1 | 9842306 | SNV | 1 | A | G | Homozygous   |
| NC_037643.1 | 9842311 | SNV | 1 | G | C | Homozygous   |
| NC_037643.1 | 9842492 | SNV | 1 | C | T | Heterozygous |
| NC_037643.1 | 9842543 | SNV | 1 | T | C | Homozygous   |
| NC_037643.1 | 9842607 | SNV | 1 | A | G | Heterozygous |
| NC_037643.1 | 9842630 | SNV | 1 | T | C | Homozygous   |
| NC_037643.1 | 9842768 | SNV | 1 | G | A | Heterozygous |
| NC_037643.1 | 9842769 | SNV | 1 | G | A | Heterozygous |
| NC_037643.1 | 9842778 | SNV | 1 | G | A | Heterozygous |
| NC_037643.1 | 9855071 | SNV | 1 | A | G | Homozygous   |
| NC_037643.1 | 9855182 | SNV | 1 | A | G | Homozygous   |
| NC_037643.1 | 9862651 | SNV | 1 | C | T | Heterozygous |
| NC_037643.1 | 9874559 | SNV | 1 | A | G | Homozygous   |
| NC_037643.1 | 9875436 | SNV | 1 | T | C | Homozygous   |
| NC_037643.1 | 9875474 | SNV | 1 | T | C | Heterozygous |
| NC_037643.1 | 9875538 | SNV | 1 | T | C | Homozygous   |
| NC_037643.1 | 9875578 | SNV | 1 | A | G | Homozygous   |
| NC_037643.1 | 9875675 | SNV | 1 | T | C | Homozygous   |
| NC_037643.1 | 9876662 | SNV | 1 | G | A | Homozygous   |
| NC_037643.1 | 9876666 | SNV | 1 | T | C | Homozygous   |
| NC_037643.1 | 9876673 | SNV | 1 | A | G | Homozygous   |
| NC_037643.1 | 9876679 | SNV | 1 | A | C | Homozygous   |
| NC_037643.1 | 9876694 | SNV | 1 | A | T | Homozygous   |
| NC_037643.1 | 9879495 | SNV | 1 | A | T | Heterozygous |
| NC_037643.1 | 9879532 | SNV | 1 | A | T | Homozygous   |
| NC_037643.1 | 9883040 | SNV | 1 | G | A | Heterozygous |
| NC_037643.1 | 9883554 | SNV | 1 | G | A | Homozygous   |
| NC_037643.1 | 9883961 | SNV | 1 | C | T | Heterozygous |
| NC_037643.1 | 9883982 | SNV | 1 | A | G | Homozygous   |
| NC_037643.1 | 9891058 | SNV | 1 | T | G | Homozygous   |
| NC_037643.1 | 9897951 | SNV | 1 | A | G | Homozygous   |
| NC_037643.1 | 9897958 | SNV | 1 | T | C | Homozygous   |
| NC_037643.1 | 9897966 | SNV | 1 | G | C | Homozygous   |
| NC_037643.1 | 9898011 | SNV | 1 | T | C | Homozygous   |
| NC_037643.1 | 9898082 | SNV | 1 | C | G | Homozygous   |
| NC_037643.1 | 9898092 | SNV | 1 | C | T | Heterozygous |
| NC_037643.1 | 9898155 | SNV | 1 | T | C | Homozygous   |
| NC_037643.1 | 9898170 | SNV | 1 | A | G | Heterozygous |
| NC_037643.1 | 9898183 | SNV | 1 | A | T | Homozygous   |
| NC_037643.1 | 9898230 | SNV | 1 | A | G | Homozygous   |
| NC_037643.1 | 9898353 | SNV | 1 | A | G | Homozygous   |

|             |         |     |   |   |   |              |
|-------------|---------|-----|---|---|---|--------------|
| NC_037643.1 | 9898521 | SNV | 1 | G | A | Heterozygous |
| NC_037643.1 | 9898524 | SNV | 1 | G | A | Homozygous   |
| NC_037643.1 | 9898526 | SNV | 1 | G | A | Heterozygous |
| NC_037643.1 | 9900910 | SNV | 1 | T | G | Homozygous   |
| NC_037643.1 | 9900916 | SNV | 1 | A | C | Homozygous   |
| NC_037643.1 | 9930364 | SNV | 1 | T | C | Homozygous   |
| NC_037643.1 | 9936264 | SNV | 1 | G | A | Homozygous   |
| NC_037643.1 | 9936270 | SNV | 1 | T | A | Homozygous   |
| NC_037643.1 | 9936283 | SNV | 1 | C | T | Homozygous   |
| NC_037643.1 | 9936285 | SNV | 1 | C | A | Heterozygous |
| NC_037643.1 | 9936290 | SNV | 1 | C | A | Homozygous   |
| NC_037643.1 | 9936293 | SNV | 1 | C | A | Heterozygous |
| NC_037643.1 | 9936298 | SNV | 1 | C | A | Heterozygous |
| NC_037643.1 | 9936354 | SNV | 1 | C | T | Homozygous   |
| NC_037643.1 | 9936452 | SNV | 1 | T | C | Homozygous   |
| NC_037643.1 | 9948976 | SNV | 1 | C | T | Heterozygous |
| NC_037643.1 | 9948980 | SNV | 1 | C | A | Heterozygous |
| NC_037643.1 | 9950063 | SNV | 1 | G | T | Heterozygous |
| NC_037643.1 | 9950434 | SNV | 1 | C | T | Heterozygous |
| NC_037643.1 | 9952604 | SNV | 1 | T | A | Homozygous   |
| NC_037643.1 | 9955396 | SNV | 1 | A | G | Homozygous   |
| NC_037643.1 | 9955433 | SNV | 1 | G | A | Homozygous   |
| NC_037643.1 | 9957538 | SNV | 1 | C | T | Homozygous   |
| NC_037643.1 | 9957579 | SNV | 1 | G | A | Heterozygous |
| NC_037643.1 | 9957589 | SNV | 1 | A | G | Heterozygous |
| NC_037643.1 | 9957602 | SNV | 1 | A | G | Homozygous   |
| NC_037643.1 | 9957750 | SNV | 1 | G | A | Heterozygous |
| NC_037643.1 | 9957809 | SNV | 1 | G | A | Heterozygous |
| NC_037643.1 | 9957830 | SNV | 1 | G | A | Heterozygous |
| NC_037643.1 | 9959861 | SNV | 1 | G | A | Heterozygous |
| NC_037643.1 | 9961272 | SNV | 1 | C | A | Heterozygous |
| NC_037643.1 | 9961371 | SNV | 1 | G | A | Homozygous   |
| NC_037643.1 | 9964370 | SNV | 1 | T | C | Heterozygous |
| NC_037643.1 | 9983733 | SNV | 1 | A | G | Homozygous   |
| NC_037643.1 | 9984022 | SNV | 1 | A | G | Homozygous   |
| NC_037643.1 | 9984096 | SNV | 1 | G | T | Heterozygous |
| NC_037643.1 | 9984159 | SNV | 1 | G | C | Homozygous   |
| NC_037643.1 | 9984214 | SNV | 1 | C | G | Heterozygous |
| NC_037643.1 | 9984233 | SNV | 1 | T | A | Homozygous   |
| NC_037643.1 | 9984337 | SNV | 1 | A | G | Homozygous   |
| NC_037643.1 | 9993511 | SNV | 1 | C | G | Homozygous   |
| NC_037643.1 | 9994621 | SNV | 1 | C | T | Homozygous   |
| NC_037643.1 | 9995801 | SNV | 1 | T | C | Homozygous   |
| NC_037643.1 | 9996104 | SNV | 1 | T | G | Homozygous   |
| NC_037643.1 | 9996135 | SNV | 1 | C | T | Homozygous   |
| NC_037643.1 | 9996146 | SNV | 1 | C | T | Homozygous   |
| NC_037643.1 | 9997302 | SNV | 1 | C | T | Heterozygous |
| NC_037643.1 | 9997323 | SNV | 1 | A | G | Homozygous   |
| NC_037643.1 | 9997535 | SNV | 1 | T | C | Homozygous   |
| NC_037643.1 | 9997543 | SNV | 1 | A | G | Homozygous   |
| NC_037643.1 | 9997546 | SNV | 1 | G | A | Heterozygous |

|             |          |     |   |   |   |              |
|-------------|----------|-----|---|---|---|--------------|
| NC_037643.1 | 9997681  | SNV | 1 | T | C | Homozygous   |
| NC_037643.1 | 9997752  | SNV | 1 | G | A | Heterozygous |
| NC_037643.1 | 10005351 | SNV | 1 | G | A | Heterozygous |
| NC_037643.1 | 10005378 | SNV | 1 | C | T | Heterozygous |
| NC_037643.1 | 10005681 | SNV | 1 | G | T | Homozygous   |
| NC_037643.1 | 10005689 | SNV | 1 | C | G | Homozygous   |
| NC_037643.1 | 10023907 | SNV | 1 | T | A | Heterozygous |
| NC_037643.1 | 10023943 | SNV | 1 | G | A | Homozygous   |
| NC_037643.1 | 10024493 | SNV | 1 | T | C | Heterozygous |
| NC_037643.1 | 10024495 | SNV | 1 | C | T | Heterozygous |
| NC_037643.1 | 10079298 | SNV | 1 | G | A | Heterozygous |
| NC_037643.1 | 10079568 | SNV | 1 | C | T | Homozygous   |
| NC_037643.1 | 10079595 | SNV | 1 | G | C | Homozygous   |
| NC_037643.1 | 10081345 | SNV | 1 | A | G | Homozygous   |
| NC_037643.1 | 10081349 | SNV | 1 | A | T | Homozygous   |
| NC_037643.1 | 10081375 | SNV | 1 | T | G | Homozygous   |
| NC_037643.1 | 10091065 | SNV | 1 | T | G | Homozygous   |
| NC_037643.1 | 10097565 | SNV | 1 | A | G | Homozygous   |
| NC_037643.1 | 10098380 | SNV | 1 | T | C | Homozygous   |
| NC_037643.1 | 10098496 | SNV | 1 | T | C | Homozygous   |
| NC_037643.1 | 10098553 | SNV | 1 | T | C | Heterozygous |
| NC_037643.1 | 10098555 | SNV | 1 | G | A | Heterozygous |
| NC_037643.1 | 10098614 | SNV | 1 | A | G | Heterozygous |
| NC_037643.1 | 10098723 | SNV | 1 | A | G | Homozygous   |
| NC_037643.1 | 10102051 | SNV | 1 | T | C | Homozygous   |
| NC_037643.1 | 10102063 | SNV | 1 | T | C | Homozygous   |
| NC_037643.1 | 10102093 | SNV | 1 | C | T | Heterozygous |
| NC_037643.1 | 10102201 | SNV | 1 | G | T | Homozygous   |
| NC_037643.1 | 10102330 | SNV | 1 | A | T | Heterozygous |
| NC_037643.1 | 10102430 | SNV | 1 | T | C | Homozygous   |
| NC_037643.1 | 10102460 | SNV | 1 | T | C | Homozygous   |
| NC_037643.1 | 10102481 | SNV | 1 | C | T | Heterozygous |
| NC_037643.1 | 10102502 | SNV | 1 | T | C | Heterozygous |
| NC_037643.1 | 10102598 | SNV | 1 | A | G | Homozygous   |
| NC_037643.1 | 10102669 | SNV | 1 | G | C | Heterozygous |
| NC_037643.1 | 10102864 | SNV | 1 | C | T | Heterozygous |
| NC_037643.1 | 10103806 | SNV | 1 | T | C | Homozygous   |
| NC_037643.1 | 10104748 | SNV | 1 | C | T | Homozygous   |
| NC_037643.1 | 10104962 | SNV | 1 | A | G | Homozygous   |
| NC_037643.1 | 10107122 | SNV | 1 | A | G | Heterozygous |
| NC_037643.1 | 10108058 | SNV | 1 | G | T | Heterozygous |
| NC_037643.1 | 10108347 | SNV | 1 | A | C | Heterozygous |
| NC_037643.1 | 10108476 | SNV | 1 | G | T | Homozygous   |
| NC_037643.1 | 10108497 | SNV | 1 | T | C | Homozygous   |
| NC_037643.1 | 10108878 | SNV | 1 | T | C | Homozygous   |
| NC_037643.1 | 10110353 | SNV | 1 | T | C | Heterozygous |
| NC_037643.1 | 10110439 | SNV | 1 | A | T | Homozygous   |
| NC_037643.1 | 10110624 | SNV | 1 | C | T | Heterozygous |
| NC_037643.1 | 10110751 | SNV | 1 | A | G | Homozygous   |
| NC_037643.1 | 10110788 | SNV | 1 | A | G | Homozygous   |
| NC_037643.1 | 10111010 | SNV | 1 | G | T | Heterozygous |



|             |          |     |   |   |   |              |
|-------------|----------|-----|---|---|---|--------------|
| NC_037643.1 | 10111017 | SNV | 1 | G | A | Heterozygous |
| NC_037643.1 | 10113370 | SNV | 1 | T | A | Homozygous   |
| NC_037643.1 | 10113387 | SNV | 1 | C | T | Homozygous   |
| NC_037643.1 | 10113403 | SNV | 1 | C | T | Homozygous   |
| NC_037643.1 | 10113408 | SNV | 1 | G | C | Homozygous   |
| NC_037643.1 | 10113411 | SNV | 1 | A | T | Homozygous   |
| NC_037643.1 | 10113642 | SNV | 1 | T | C | Homozygous   |
| NC_037643.1 | 10115758 | SNV | 1 | A | G | Heterozygous |
| NC_037643.1 | 10116586 | SNV | 1 | T | C | Homozygous   |
| NC_037643.1 | 10122444 | SNV | 1 | A | G | Homozygous   |
| NC_037643.1 | 10125010 | SNV | 1 | G | T | Homozygous   |
| NC_037643.1 | 10131648 | SNV | 1 | G | A | Heterozygous |
| NC_037643.1 | 10131897 | SNV | 1 | A | G | Heterozygous |
| NC_037643.1 | 10131913 | SNV | 1 | C | T | Homozygous   |
| NC_037643.1 | 10132050 | SNV | 1 | A | T | Heterozygous |
| NC_037643.1 | 10132061 | SNV | 1 | T | C | Homozygous   |
| NC_037643.1 | 10132071 | SNV | 1 | G | A | Heterozygous |
| NC_037643.1 | 10132074 | SNV | 1 | A | T | Homozygous   |
| NC_037643.1 | 10132084 | SNV | 1 | C | T | Homozygous   |
| NC_037643.1 | 10132120 | SNV | 1 | C | T | Heterozygous |
| NC_037643.1 | 10132123 | SNV | 1 | G | A | Heterozygous |
| NC_037643.1 | 10132132 | SNV | 1 | C | T | Heterozygous |
| NC_037643.1 | 10132133 | SNV | 1 | T | C | Heterozygous |
| NC_037643.1 | 10132135 | SNV | 1 | C | T | Heterozygous |
| NC_037643.1 | 10132138 | SNV | 1 | C | A | Heterozygous |
| NC_037643.1 | 10132186 | SNV | 1 | A | G | Homozygous   |
| NC_037643.1 | 10132206 | SNV | 1 | A | G | Homozygous   |
| NC_037643.1 | 10132284 | SNV | 1 | C | G | Homozygous   |
| NC_037643.1 | 10132619 | SNV | 1 | G | A | Heterozygous |
| NC_037643.1 | 10136937 | SNV | 1 | G | T | Homozygous   |
| NC_037643.1 | 10136965 | SNV | 1 | T | G | Homozygous   |
| NC_037643.1 | 10137137 | SNV | 1 | T | C | Heterozygous |
| NC_037643.1 | 10137153 | SNV | 1 | G | A | Homozygous   |
| NC_037643.1 | 10137251 | SNV | 1 | A | G | Heterozygous |
| NC_037643.1 | 10137331 | SNV | 1 | A | T | Heterozygous |
| NC_037643.1 | 10137344 | SNV | 1 | C | T | Heterozygous |
| NC_037643.1 | 10137723 | SNV | 1 | G | A | Homozygous   |
| NC_037643.1 | 10137756 | SNV | 1 | G | A | Heterozygous |
| NC_037643.1 | 10138032 | SNV | 1 | A | T | Homozygous   |
| NC_037643.1 | 10138041 | SNV | 1 | T | C | Heterozygous |
| NC_037643.1 | 10138051 | SNV | 1 | C | T | Homozygous   |
| NC_037643.1 | 10141304 | SNV | 1 | T | C | Homozygous   |
| NC_037643.1 | 10141314 | SNV | 1 | C | T | Homozygous   |
| NC_037643.1 | 10141392 | SNV | 1 | C | T | Heterozygous |
| NC_037643.1 | 10141490 | SNV | 1 | A | G | Homozygous   |
| NC_037643.1 | 10141577 | SNV | 1 | A | G | Homozygous   |
| NC_037643.1 | 10141601 | SNV | 1 | T | C | Homozygous   |
| NC_037643.1 | 10141628 | SNV | 1 | A | G | Heterozygous |
| NC_037643.1 | 10149782 | SNV | 1 | A | G | Homozygous   |
| NC_037643.1 | 10152842 | SNV | 1 | T | C | Homozygous   |
| NC_037643.1 | 10152849 | SNV | 1 | C | T | Homozygous   |

|             |          |     |   |   |   |              |
|-------------|----------|-----|---|---|---|--------------|
| NC_037643.1 | 10152856 | SNV | 1 | C | T | Homozygous   |
| NC_037643.1 | 10152871 | SNV | 1 | G | A | Homozygous   |
| NC_037643.1 | 10156632 | SNV | 1 | A | G | Homozygous   |
| NC_037643.1 | 10157031 | SNV | 1 | G | A | Homozygous   |
| NC_037643.1 | 10157079 | SNV | 1 | T | A | Homozygous   |
| NC_037643.1 | 10157085 | SNV | 1 | T | C | Homozygous   |
| NC_037643.1 | 10160152 | SNV | 1 | C | G | Homozygous   |
| NC_037643.1 | 10160604 | SNV | 1 | A | G | Heterozygous |
| NC_037643.1 | 10163611 | SNV | 1 | G | T | Heterozygous |
| NC_037643.1 | 10163667 | SNV | 1 | C | T | Heterozygous |
| NC_037643.1 | 10164014 | SNV | 1 | G | A | Heterozygous |
| NC_037643.1 | 10164025 | SNV | 1 | C | T | Heterozygous |
| NC_037643.1 | 10164061 | SNV | 1 | G | A | Heterozygous |
| NC_037643.1 | 10164117 | SNV | 1 | T | C | Homozygous   |
| NC_037643.1 | 10164362 | SNV | 1 | A | G | Homozygous   |
| NC_037643.1 | 10164369 | SNV | 1 | G | A | Homozygous   |
| NC_037643.1 | 10164708 | SNV | 1 | A | G | Homozygous   |
| NC_037643.1 | 10164810 | SNV | 1 | G | A | Homozygous   |
| NC_037643.1 | 10164813 | SNV | 1 | A | G | Homozygous   |
| NC_037643.1 | 10175979 | SNV | 1 | G | A | Homozygous   |
| NC_037643.1 | 10175984 | SNV | 1 | T | A | Heterozygous |
| NC_037643.1 | 10175993 | SNV | 1 | A | G | Homozygous   |
| NC_037643.1 | 10176098 | SNV | 1 | G | A | Homozygous   |
| NC_037643.1 | 10188100 | SNV | 1 | T | A | Heterozygous |
| NC_037643.1 | 10188100 | SNV | 1 | T | G | Heterozygous |
| NC_037643.1 | 10188103 | SNV | 1 | T | C | Heterozygous |
| NC_037643.1 | 10188330 | SNV | 1 | C | T | Heterozygous |
| NC_037643.1 | 10190465 | SNV | 1 | C | T | Homozygous   |
| NC_037643.1 | 10193116 | SNV | 1 | G | T | Homozygous   |
| NC_037643.1 | 10193690 | SNV | 1 | A | G | Heterozygous |
| NC_037643.1 | 10193929 | SNV | 1 | C | A | Homozygous   |
| NC_037643.1 | 10193931 | SNV | 1 | G | A | Homozygous   |
| NC_037643.1 | 10194107 | SNV | 1 | G | C | Heterozygous |
| NC_037643.1 | 10194437 | SNV | 1 | A | G | Homozygous   |
| NC_037643.1 | 10194638 | SNV | 1 | C | T | Heterozygous |
| NC_037643.1 | 10195033 | SNV | 1 | A | C | Homozygous   |
| NC_037643.1 | 10195152 | SNV | 1 | A | T | Homozygous   |
| NC_037643.1 | 10195181 | SNV | 1 | A | G | Homozygous   |
| NC_037643.1 | 10195211 | SNV | 1 | G | A | Heterozygous |
| NC_037643.1 | 10195516 | SNV | 1 | A | G | Homozygous   |
| NC_037643.1 | 10195572 | SNV | 1 | A | G | Homozygous   |
| NC_037643.1 | 10195578 | SNV | 1 | C | T | Heterozygous |
| NC_037643.1 | 10195635 | SNV | 1 | C | T | Homozygous   |
| NC_037643.1 | 10195874 | SNV | 1 | C | T | Heterozygous |
| NC_037643.1 | 10195914 | SNV | 1 | T | G | Homozygous   |
| NC_037643.1 | 10195960 | SNV | 1 | G | A | Homozygous   |
| NC_037643.1 | 10195997 | SNV | 1 | A | G | Homozygous   |
| NC_037643.1 | 10196007 | SNV | 1 | T | C | Homozygous   |
| NC_037643.1 | 10196017 | SNV | 1 | A | G | Homozygous   |
| NC_037643.1 | 10196030 | SNV | 1 | A | G | Heterozygous |
| NC_037643.1 | 10196088 | SNV | 1 | A | G | Homozygous   |

|             |          |     |   |   |   |              |
|-------------|----------|-----|---|---|---|--------------|
| NC_037643.1 | 10196100 | SNV | 1 | A | G | Homozygous   |
| NC_037643.1 | 10196131 | SNV | 1 | G | A | Heterozygous |
| NC_037643.1 | 10196137 | SNV | 1 | T | C | Homozygous   |
| NC_037643.1 | 10196171 | SNV | 1 | C | A | Heterozygous |
| NC_037643.1 | 10196264 | SNV | 1 | G | A | Homozygous   |
| NC_037643.1 | 10196268 | SNV | 1 | A | G | Homozygous   |
| NC_037643.1 | 10196277 | SNV | 1 | A | G | Homozygous   |
| NC_037643.1 | 10196286 | SNV | 1 | C | T | Heterozygous |
| NC_037643.1 | 10196297 | SNV | 1 | C | G | Homozygous   |
| NC_037643.1 | 10196331 | SNV | 1 | T | C | Homozygous   |
| NC_037643.1 | 10196367 | SNV | 1 | A | G | Heterozygous |
| NC_037643.1 | 10196396 | SNV | 1 | T | C | Homozygous   |
| NC_037643.1 | 10196413 | SNV | 1 | A | G | Homozygous   |
| NC_037643.1 | 10196415 | SNV | 1 | A | G | Heterozygous |
| NC_037643.1 | 10196439 | SNV | 1 | G | A | Heterozygous |
| NC_037643.1 | 10196458 | SNV | 1 | T | C | Heterozygous |
| NC_037643.1 | 10196470 | SNV | 1 | A | G | Homozygous   |
| NC_037643.1 | 10196507 | SNV | 1 | A | G | Homozygous   |
| NC_037643.1 | 10196515 | SNV | 1 | A | G | Homozygous   |
| NC_037643.1 | 10196555 | SNV | 1 | G | A | Homozygous   |
| NC_037643.1 | 10197272 | SNV | 1 | A | G | Homozygous   |
| NC_037643.1 | 10197306 | SNV | 1 | A | G | Heterozygous |
| NC_037643.1 | 10197675 | SNV | 1 | C | T | Heterozygous |
| NC_037643.1 | 10197818 | SNV | 1 | A | G | Homozygous   |
| NC_037643.1 | 10198383 | SNV | 1 | C | A | Homozygous   |
| NC_037643.1 | 10198432 | SNV | 1 | A | G | Homozygous   |
| NC_037643.1 | 10198436 | SNV | 1 | G | T | Homozygous   |
| NC_037643.1 | 10198506 | SNV | 1 | G | C | Homozygous   |
| NC_037643.1 | 10198531 | SNV | 1 | A | G | Homozygous   |
| NC_037643.1 | 10198616 | SNV | 1 | A | G | Heterozygous |
| NC_037643.1 | 10198637 | SNV | 1 | C | T | Heterozygous |
| NC_037643.1 | 10198672 | SNV | 1 | T | C | Heterozygous |
| NC_037643.1 | 10198708 | SNV | 1 | T | C | Homozygous   |
| NC_037643.1 | 10199004 | SNV | 1 | T | C | Homozygous   |
| NC_037643.1 | 10199022 | SNV | 1 | A | G | Homozygous   |
| NC_037643.1 | 10199375 | SNV | 1 | A | G | Homozygous   |
| NC_037643.1 | 10199589 | SNV | 1 | T | G | Heterozygous |
| NC_037643.1 | 10199600 | SNV | 1 | T | C | Heterozygous |
| NC_037643.1 | 10199875 | SNV | 1 | A | G | Homozygous   |
| NC_037643.1 | 10200780 | SNV | 1 | G | A | Heterozygous |
| NC_037643.1 | 10200785 | SNV | 1 | T | C | Homozygous   |
| NC_037643.1 | 10201101 | SNV | 1 | A | G | Homozygous   |
| NC_037643.1 | 10201130 | SNV | 1 | C | T | Homozygous   |
| NC_037643.1 | 10201215 | SNV | 1 | T | A | Heterozygous |
| NC_037643.1 | 10201245 | SNV | 1 | G | A | Homozygous   |
| NC_037643.1 | 10201247 | SNV | 1 | A | G | Homozygous   |
| NC_037643.1 | 10201305 | SNV | 1 | G | A | Homozygous   |
| NC_037643.1 | 10201308 | SNV | 1 | A | G | Heterozygous |
| NC_037643.1 | 10201312 | SNV | 1 | T | C | Homozygous   |
| NC_037643.1 | 10201314 | SNV | 1 | A | G | Homozygous   |
| NC_037643.1 | 10201331 | SNV | 1 | A | G | Homozygous   |

|             |          |     |   |   |   |              |
|-------------|----------|-----|---|---|---|--------------|
| NC_037643.1 | 10201345 | SNV | 1 | T | C | Homozygous   |
| NC_037643.1 | 10202007 | SNV | 1 | C | T | Homozygous   |
| NC_037643.1 | 10202104 | SNV | 1 | T | C | Homozygous   |
| NC_037643.1 | 10202161 | SNV | 1 | G | A | Heterozygous |
| NC_037643.1 | 10202206 | SNV | 1 | T | C | Homozygous   |
| NC_037643.1 | 10202266 | SNV | 1 | C | T | Heterozygous |
| NC_037643.1 | 10202679 | SNV | 1 | G | A | Heterozygous |
| NC_037643.1 | 10203072 | SNV | 1 | C | T | Heterozygous |
| NC_037643.1 | 10203117 | SNV | 1 | A | G | Heterozygous |
| NC_037643.1 | 10203278 | SNV | 1 | T | C | Homozygous   |
| NC_037643.1 | 10203287 | SNV | 1 | C | T | Heterozygous |
| NC_037643.1 | 10203423 | SNV | 1 | T | C | Homozygous   |
| NC_037643.1 | 10203797 | SNV | 1 | A | G | Homozygous   |
| NC_037643.1 | 10203835 | SNV | 1 | A | G | Homozygous   |
| NC_037643.1 | 10204171 | SNV | 1 | A | G | Homozygous   |
| NC_037643.1 | 10204194 | SNV | 1 | G | A | Heterozygous |
| NC_037643.1 | 10204246 | SNV | 1 | A | T | Heterozygous |
| NC_037643.1 | 10204249 | SNV | 1 | A | G | Heterozygous |
| NC_037643.1 | 10204413 | SNV | 1 | G | T | Homozygous   |
| NC_037643.1 | 10204557 | SNV | 1 | T | C | Homozygous   |
| NC_037643.1 | 10204605 | SNV | 1 | C | T | Heterozygous |
| NC_037643.1 | 10204644 | SNV | 1 | A | G | Homozygous   |
| NC_037643.1 | 10204687 | SNV | 1 | G | A | Heterozygous |
| NC_037643.1 | 10204822 | SNV | 1 | A | G | Homozygous   |
| NC_037643.1 | 10205052 | SNV | 1 | C | T | Homozygous   |
| NC_037643.1 | 10205060 | SNV | 1 | T | C | Homozygous   |
| NC_037643.1 | 10205123 | SNV | 1 | G | A | Homozygous   |
| NC_037643.1 | 10205280 | SNV | 1 | A | T | Homozygous   |
| NC_037643.1 | 10205781 | SNV | 1 | C | T | Heterozygous |
| NC_037643.1 | 10205794 | SNV | 1 | G | A | Homozygous   |
| NC_037643.1 | 10205803 | SNV | 1 | C | A | Heterozygous |
| NC_037643.1 | 10205811 | SNV | 1 | T | C | Homozygous   |
| NC_037643.1 | 10205950 | SNV | 1 | T | C | Homozygous   |
| NC_037643.1 | 10205953 | SNV | 1 | C | T | Homozygous   |
| NC_037643.1 | 10205965 | SNV | 1 | A | G | Homozygous   |
| NC_037643.1 | 10206019 | SNV | 1 | C | T | Homozygous   |
| NC_037643.1 | 10207711 | SNV | 1 | A | G | Heterozygous |
| NC_037643.1 | 10207725 | SNV | 1 | A | G | Homozygous   |
| NC_037643.1 | 10212011 | SNV | 1 | C | T | Homozygous   |
| NC_037643.1 | 10212124 | SNV | 1 | G | T | Homozygous   |
| NC_037643.1 | 10214123 | SNV | 1 | T | C | Homozygous   |
| NC_037643.1 | 10214757 | SNV | 1 | C | T | Homozygous   |
| NC_037643.1 | 10218456 | SNV | 1 | T | A | Homozygous   |
| NC_037643.1 | 10218475 | SNV | 1 | G | A | Homozygous   |
| NC_037643.1 | 10218491 | SNV | 1 | C | A | Homozygous   |
| NC_037643.1 | 10218494 | SNV | 1 | A | C | Homozygous   |
| NC_037643.1 | 10226667 | SNV | 1 | G | A | Homozygous   |
| NC_037643.1 | 10226707 | SNV | 1 | A | G | Homozygous   |
| NC_037643.1 | 10226721 | SNV | 1 | T | A | Homozygous   |
| NC_037643.1 | 10226724 | SNV | 1 | C | A | Homozygous   |
| NC_037643.1 | 10226736 | SNV | 1 | G | A | Homozygous   |

|             |          |     |   |   |   |              |
|-------------|----------|-----|---|---|---|--------------|
| NC_037643.1 | 10226739 | SNV | 1 | C | G | Homozygous   |
| NC_037643.1 | 10227023 | SNV | 1 | T | C | Homozygous   |
| NC_037643.1 | 10227173 | SNV | 1 | T | C | Homozygous   |
| NC_037643.1 | 10245179 | SNV | 1 | T | C | Homozygous   |
| NC_037643.1 | 10269400 | SNV | 1 | T | C | Homozygous   |
| NC_037643.1 | 10282667 | SNV | 1 | G | A | Heterozygous |
| NC_037643.1 | 10288990 | SNV | 1 | G | A | Homozygous   |
| NC_037643.1 | 10288993 | SNV | 1 | G | A | Homozygous   |
| NC_037643.1 | 10288998 | SNV | 1 | A | G | Heterozygous |
| NC_037643.1 | 10289002 | SNV | 1 | A | G | Homozygous   |
| NC_037643.1 | 10289004 | SNV | 1 | A | G | Heterozygous |
| NC_037643.1 | 10289025 | SNV | 1 | A | G | Homozygous   |
| NC_037643.1 | 10289027 | SNV | 1 | A | G | Homozygous   |
| NC_037643.1 | 10289312 | SNV | 1 | T | A | Homozygous   |
| NC_037643.1 | 10289316 | SNV | 1 | G | A | Heterozygous |
| NC_037643.1 | 10289374 | SNV | 1 | T | C | Heterozygous |
| NC_037643.1 | 10289384 | SNV | 1 | T | C | Heterozygous |
| NC_037643.1 | 10326037 | SNV | 1 | G | A | Heterozygous |
| NC_037643.1 | 10326068 | SNV | 1 | A | C | Homozygous   |
| NC_037643.1 | 10326101 | SNV | 1 | T | C | Heterozygous |
| NC_037643.1 | 10326352 | SNV | 1 | G | A | Heterozygous |
| NC_037643.1 | 10326430 | SNV | 1 | C | T | Heterozygous |
| NC_037643.1 | 10326888 | SNV | 1 | C | T | Homozygous   |
| NC_037643.1 | 10327702 | SNV | 1 | A | T | Homozygous   |
| NC_037643.1 | 10327705 | SNV | 1 | C | A | Homozygous   |
| NC_037643.1 | 10334175 | SNV | 1 | A | G | Homozygous   |
| NC_037643.1 | 10339545 | SNV | 1 | A | G | Homozygous   |
| NC_037643.1 | 10339570 | SNV | 1 | A | T | Homozygous   |
| NC_037643.1 | 10340871 | SNV | 1 | G | A | Homozygous   |
| NC_037643.1 | 10340935 | SNV | 1 | G | T | Heterozygous |
| NC_037643.1 | 10341198 | SNV | 1 | G | T | Heterozygous |
| NC_037643.1 | 10341240 | SNV | 1 | C | A | Heterozygous |
| NC_037643.1 | 10347380 | SNV | 1 | T | C | Homozygous   |
| NC_037643.1 | 10347532 | SNV | 1 | A | G | Heterozygous |
| NC_037643.1 | 10379557 | SNV | 1 | A | G | Homozygous   |
| NC_037643.1 | 10379579 | SNV | 1 | C | T | Heterozygous |
| NC_037643.1 | 10379659 | SNV | 1 | C | G | Heterozygous |
| NC_037643.1 | 10379680 | SNV | 1 | A | G | Homozygous   |
| NC_037643.1 | 10386066 | SNV | 1 | G | A | Homozygous   |
| NC_037643.1 | 10386227 | SNV | 1 | G | A | Heterozygous |
| NC_037643.1 | 10386304 | SNV | 1 | A | G | Homozygous   |
| NC_037643.1 | 10386341 | SNV | 1 | C | T | Heterozygous |
| NC_037643.1 | 10386391 | SNV | 1 | A | G | Homozygous   |
| NC_037643.1 | 10389375 | SNV | 1 | C | T | Heterozygous |
| NC_037643.1 | 10389487 | SNV | 1 | C | T | Heterozygous |
| NC_037643.1 | 10389504 | SNV | 1 | C | T | Heterozygous |
| NC_037643.1 | 10389579 | SNV | 1 | A | G | Homozygous   |
| NC_037643.1 | 10389594 | SNV | 1 | A | G | Heterozygous |
| NC_037643.1 | 10389610 | SNV | 1 | A | G | Heterozygous |
| NC_037643.1 | 10390442 | SNV | 1 | A | G | Homozygous   |
| NC_037643.1 | 10390511 | SNV | 1 | C | T | Heterozygous |

|             |          |     |   |   |   |              |
|-------------|----------|-----|---|---|---|--------------|
| NC_037643.1 | 10390536 | SNV | 1 | G | A | Homozygous   |
| NC_037643.1 | 10390552 | SNV | 1 | G | A | Homozygous   |
| NC_037643.1 | 10390731 | SNV | 1 | T | C | Homozygous   |
| NC_037643.1 | 10397652 | SNV | 1 | A | T | Heterozygous |
| NC_037643.1 | 10397695 | SNV | 1 | G | A | Homozygous   |
| NC_037643.1 | 10408207 | SNV | 1 | A | G | Homozygous   |
| NC_037643.1 | 10409866 | SNV | 1 | G | A | Heterozygous |
| NC_037643.1 | 10409877 | SNV | 1 | G | A | Heterozygous |
| NC_037643.1 | 10409878 | SNV | 1 | G | A | Heterozygous |
| NC_037643.1 | 10409897 | SNV | 1 | G | A | Homozygous   |
| NC_037643.1 | 10410328 | SNV | 1 | C | T | Heterozygous |
| NC_037643.1 | 10410387 | SNV | 1 | G | A | Heterozygous |
| NC_037643.1 | 10416725 | SNV | 1 | T | G | Homozygous   |
| NC_037643.1 | 10416731 | SNV | 1 | T | A | Homozygous   |
| NC_037643.1 | 10416793 | SNV | 1 | A | G | Heterozygous |
| NC_037643.1 | 10417576 | SNV | 1 | A | G | Heterozygous |
| NC_037643.1 | 10417603 | SNV | 1 | G | A | Heterozygous |
| NC_037643.1 | 10418621 | SNV | 1 | T | C | Homozygous   |
| NC_037643.1 | 10418626 | SNV | 1 | A | G | Homozygous   |
| NC_037643.1 | 10418759 | SNV | 1 | A | G | Homozygous   |
| NC_037643.1 | 10418882 | SNV | 1 | T | C | Homozygous   |
| NC_037643.1 | 10418946 | SNV | 1 | T | C | Homozygous   |
| NC_037643.1 | 10418950 | SNV | 1 | A | C | Homozygous   |
| NC_037643.1 | 10419017 | SNV | 1 | G | A | Heterozygous |
| NC_037643.1 | 10419033 | SNV | 1 | C | T | Heterozygous |
| NC_037643.1 | 10419223 | SNV | 1 | G | A | Homozygous   |
| NC_037643.1 | 10419225 | SNV | 1 | C | A | Homozygous   |
| NC_037643.1 | 10419243 | SNV | 1 | G | A | Homozygous   |
| NC_037643.1 | 10419259 | SNV | 1 | C | T | Homozygous   |
| NC_037643.1 | 10419312 | SNV | 1 | A | T | Heterozygous |
| NC_037643.1 | 10419316 | SNV | 1 | A | G | Heterozygous |
| NC_037643.1 | 10419339 | SNV | 1 | G | A | Homozygous   |
| NC_037643.1 | 10422774 | SNV | 1 | G | C | Homozygous   |
| NC_037643.1 | 10423135 | SNV | 1 | T | C | Homozygous   |
| NC_037643.1 | 10424426 | SNV | 1 | A | T | Homozygous   |
| NC_037643.1 | 10425717 | SNV | 1 | A | G | Homozygous   |
| NC_037643.1 | 10425759 | SNV | 1 | A | G | Homozygous   |
| NC_037643.1 | 10425809 | SNV | 1 | G | C | Homozygous   |
| NC_037643.1 | 10426059 | SNV | 1 | A | G | Homozygous   |
| NC_037643.1 | 10427486 | SNV | 1 | C | T | Homozygous   |
| NC_037643.1 | 10427678 | SNV | 1 | T | C | Homozygous   |
| NC_037643.1 | 10427949 | SNV | 1 | C | T | Heterozygous |
| NC_037643.1 | 10428553 | SNV | 1 | T | C | Homozygous   |
| NC_037643.1 | 10428943 | SNV | 1 | T | C | Homozygous   |
| NC_037643.1 | 10428951 | SNV | 1 | T | C | Heterozygous |
| NC_037643.1 | 10574656 | SNV | 1 | T | G | Homozygous   |
| NC_037643.1 | 10574759 | SNV | 1 | A | G | Homozygous   |
| NC_037643.1 | 10575016 | SNV | 1 | T | G | Heterozygous |
| NC_037643.1 | 10575410 | SNV | 1 | C | G | Heterozygous |
| NC_037643.1 | 10575613 | SNV | 1 | G | A | Homozygous   |
| NC_037643.1 | 10575706 | SNV | 1 | C | T | Heterozygous |

|             |          |     |   |   |   |              |
|-------------|----------|-----|---|---|---|--------------|
| NC_037643.1 | 10575708 | SNV | 1 | C | T | Heterozygous |
| NC_037643.1 | 10575733 | SNV | 1 | C | T | Heterozygous |
| NC_037643.1 | 10590847 | SNV | 1 | C | G | Homozygous   |
| NC_037643.1 | 10590849 | SNV | 1 | T | C | Homozygous   |
| NC_037643.1 | 10599762 | SNV | 1 | T | G | Heterozygous |
| NC_037643.1 | 10599835 | SNV | 1 | T | C | Homozygous   |
| NC_037643.1 | 10600059 | SNV | 1 | G | A | Heterozygous |
| NC_037643.1 | 10602115 | SNV | 1 | G | A | Heterozygous |
| NC_037643.1 | 10602324 | SNV | 1 | G | A | Heterozygous |
| NC_037643.1 | 10602331 | SNV | 1 | A | T | Homozygous   |
| NC_037643.1 | 10604293 | SNV | 1 | G | T | Heterozygous |
| NC_037643.1 | 10604297 | SNV | 1 | C | T | Homozygous   |
| NC_037643.1 | 10604305 | SNV | 1 | C | T | Heterozygous |
| NC_037643.1 | 10604364 | SNV | 1 | A | G | Heterozygous |
| NC_037643.1 | 10604404 | SNV | 1 | G | A | Homozygous   |
| NC_037643.1 | 10604420 | SNV | 1 | A | G | Homozygous   |
| NC_037643.1 | 10604480 | SNV | 1 | G | C | Homozygous   |
| NC_037643.1 | 10604500 | SNV | 1 | T | C | Heterozygous |
| NC_037643.1 | 10604513 | SNV | 1 | C | T | Heterozygous |
| NC_037643.1 | 10604541 | SNV | 1 | C | A | Heterozygous |
| NC_037643.1 | 10606422 | SNV | 1 | T | C | Homozygous   |
| NC_037643.1 | 10613910 | SNV | 1 | G | A | Homozygous   |
| NC_037643.1 | 10614097 | SNV | 1 | A | G | Homozygous   |
| NC_037643.1 | 10614145 | SNV | 1 | A | G | Homozygous   |
| NC_037643.1 | 10625338 | SNV | 1 | T | C | Homozygous   |
| NC_037643.1 | 10625341 | SNV | 1 | A | G | Homozygous   |
| NC_037643.1 | 10625360 | SNV | 1 | T | C | Homozygous   |
| NC_037643.1 | 10625410 | SNV | 1 | A | G | Homozygous   |
| NC_037643.1 | 10625459 | SNV | 1 | C | T | Heterozygous |
| NC_037643.1 | 10625464 | SNV | 1 | A | G | Heterozygous |
| NC_037643.1 | 10625472 | SNV | 1 | T | C | Heterozygous |
| NC_037643.1 | 10625503 | SNV | 1 | T | C | Homozygous   |
| NC_037643.1 | 10625606 | SNV | 1 | A | G | Heterozygous |
| NC_037643.1 | 10625613 | SNV | 1 | T | C | Homozygous   |
| NC_037643.1 | 10625646 | SNV | 1 | T | C | Homozygous   |
| NC_037643.1 | 10625648 | SNV | 1 | G | A | Heterozygous |
| NC_037643.1 | 10625688 | SNV | 1 | A | G | Homozygous   |
| NC_037643.1 | 10625917 | SNV | 1 | A | G | Heterozygous |
| NC_037643.1 | 10625948 | SNV | 1 | G | T | Heterozygous |
| NC_037643.1 | 10626101 | SNV | 1 | T | A | Heterozygous |
| NC_037643.1 | 10626188 | SNV | 1 | C | A | Homozygous   |
| NC_037643.1 | 10626228 | SNV | 1 | T | G | Homozygous   |
| NC_037643.1 | 10626251 | SNV | 1 | T | C | Homozygous   |
| NC_037643.1 | 10626253 | SNV | 1 | T | C | Homozygous   |
| NC_037643.1 | 10626256 | SNV | 1 | A | G | Homozygous   |
| NC_037643.1 | 10626354 | SNV | 1 | A | G | Heterozygous |
| NC_037643.1 | 10626404 | SNV | 1 | T | C | Heterozygous |
| NC_037643.1 | 10626554 | SNV | 1 | G | A | Homozygous   |
| NC_037643.1 | 10626568 | SNV | 1 | A | G | Homozygous   |
| NC_037643.1 | 10626571 | SNV | 1 | T | C | Homozygous   |
| NC_037643.1 | 10626683 | SNV | 1 | A | G | Homozygous   |

|             |          |     |   |   |   |              |
|-------------|----------|-----|---|---|---|--------------|
| NC_037643.1 | 10626831 | SNV | 1 | A | T | Heterozygous |
| NC_037643.1 | 10629871 | SNV | 1 | G | C | Homozygous   |
| NC_037643.1 | 10629874 | SNV | 1 | T | C | Homozygous   |
| NC_037643.1 | 10629923 | SNV | 1 | C | T | Heterozygous |
| NC_037643.1 | 10629932 | SNV | 1 | C | T | Heterozygous |
| NC_037643.1 | 10629934 | SNV | 1 | T | C | Homozygous   |
| NC_037643.1 | 10629948 | SNV | 1 | G | A | Homozygous   |
| NC_037643.1 | 10629963 | SNV | 1 | A | G | Homozygous   |
| NC_037643.1 | 10629974 | SNV | 1 | T | C | Homozygous   |
| NC_037643.1 | 10630013 | SNV | 1 | C | T | Homozygous   |
| NC_037643.1 | 10630041 | SNV | 1 | C | T | Homozygous   |
| NC_037643.1 | 10630057 | SNV | 1 | T | C | Homozygous   |
| NC_037643.1 | 10630060 | SNV | 1 | T | C | Heterozygous |
| NC_037643.1 | 10630071 | SNV | 1 | C | T | Heterozygous |
| NC_037643.1 | 10630116 | SNV | 1 | T | C | Heterozygous |
| NC_037643.1 | 10630122 | SNV | 1 | T | C | Heterozygous |
| NC_037643.1 | 10630128 | SNV | 1 | T | C | Homozygous   |
| NC_037643.1 | 10630134 | SNV | 1 | A | G | Heterozygous |
| NC_037643.1 | 10630154 | SNV | 1 | C | A | Heterozygous |
| NC_037643.1 | 10630165 | SNV | 1 | T | C | Homozygous   |
| NC_037643.1 | 10630203 | SNV | 1 | A | G | Heterozygous |
| NC_037643.1 | 10630275 | SNV | 1 | C | T | Heterozygous |
| NC_037643.1 | 10630303 | SNV | 1 | C | G | Heterozygous |
| NC_037643.1 | 10630317 | SNV | 1 | G | A | Heterozygous |
| NC_037643.1 | 10630326 | SNV | 1 | C | A | Heterozygous |
| NC_037643.1 | 10630343 | SNV | 1 | C | T | Homozygous   |
| NC_037643.1 | 10630350 | SNV | 1 | A | G | Heterozygous |
| NC_037643.1 | 10630390 | SNV | 1 | C | T | Homozygous   |
| NC_037643.1 | 10630392 | SNV | 1 | T | C | Heterozygous |
| NC_037643.1 | 10630393 | SNV | 1 | A | G | Heterozygous |
| NC_037643.1 | 10630407 | SNV | 1 | G | A | Heterozygous |
| NC_037643.1 | 10630420 | SNV | 1 | C | T | Heterozygous |
| NC_037643.1 | 10630429 | SNV | 1 | C | T | Heterozygous |
| NC_037643.1 | 10630521 | SNV | 1 | G | C | Homozygous   |
| NC_037643.1 | 10630641 | SNV | 1 | A | G | Homozygous   |
| NC_037643.1 | 10630680 | SNV | 1 | T | C | Homozygous   |
| NC_037643.1 | 10630707 | SNV | 1 | G | T | Heterozygous |
| NC_037643.1 | 10630708 | SNV | 1 | G | A | Heterozygous |
| NC_037643.1 | 10630727 | SNV | 1 | G | A | Heterozygous |
| NC_037643.1 | 10643422 | SNV | 1 | A | G | Homozygous   |
| NC_037643.1 | 10643431 | SNV | 1 | A | G | Homozygous   |
| NC_037643.1 | 10643441 | SNV | 1 | A | G | Homozygous   |
| NC_037643.1 | 10643453 | SNV | 1 | C | T | Heterozygous |
| NC_037643.1 | 10643486 | SNV | 1 | T | C | Homozygous   |
| NC_037643.1 | 10643498 | SNV | 1 | C | T | Heterozygous |
| NC_037643.1 | 10647109 | SNV | 1 | C | T | Heterozygous |
| NC_037643.1 | 10647237 | SNV | 1 | C | T | Homozygous   |
| NC_037643.1 | 10647489 | SNV | 1 | T | C | Homozygous   |
| NC_037643.1 | 10647545 | SNV | 1 | A | G | Homozygous   |
| NC_037643.1 | 10650030 | SNV | 1 | T | G | Heterozygous |
| NC_037643.1 | 10650032 | SNV | 1 | C | A | Heterozygous |



|             |          |     |   |   |   |              |
|-------------|----------|-----|---|---|---|--------------|
| NC_037643.1 | 10650584 | SNV | 1 | G | A | Homozygous   |
| NC_037643.1 | 10661655 | SNV | 1 | G | A | Homozygous   |
| NC_037643.1 | 10661676 | SNV | 1 | T | C | Homozygous   |
| NC_037643.1 | 10661715 | SNV | 1 | C | T | Homozygous   |
| NC_037643.1 | 10661737 | SNV | 1 | T | A | Homozygous   |
| NC_037643.1 | 10661800 | SNV | 1 | T | C | Heterozygous |
| NC_037643.1 | 10661841 | SNV | 1 | A | G | Heterozygous |
| NC_037643.1 | 10661977 | SNV | 1 | T | C | Heterozygous |
| NC_037643.1 | 10662172 | SNV | 1 | T | C | Homozygous   |
| NC_037643.1 | 10662261 | SNV | 1 | T | C | Homozygous   |
| NC_037643.1 | 10666106 | SNV | 1 | T | C | Homozygous   |
| NC_037643.1 | 10666288 | SNV | 1 | C | T | Heterozygous |
| NC_037643.1 | 10666349 | SNV | 1 | G | A | Homozygous   |
| NC_037643.1 | 10666430 | SNV | 1 | G | A | Heterozygous |
| NC_037643.1 | 10667354 | SNV | 1 | G | A | Homozygous   |
| NC_037643.1 | 10667696 | SNV | 1 | G | A | Heterozygous |
| NC_037643.1 | 10667765 | SNV | 1 | C | T | Heterozygous |
| NC_037643.1 | 10667995 | SNV | 1 | C | G | Homozygous   |
| NC_037643.1 | 10668012 | SNV | 1 | A | G | Homozygous   |
| NC_037643.1 | 10671871 | SNV | 1 | C | T | Homozygous   |
| NC_037643.1 | 10672328 | SNV | 1 | A | G | Homozygous   |
| NC_037643.1 | 10672433 | SNV | 1 | A | G | Homozygous   |
| NC_037643.1 | 10672927 | SNV | 1 | T | C | Homozygous   |
| NC_037643.1 | 10673003 | SNV | 1 | A | G | Homozygous   |
| NC_037643.1 | 10676570 | SNV | 1 | A | G | Heterozygous |
| NC_037643.1 | 10688944 | SNV | 1 | C | T | Heterozygous |
| NC_037643.1 | 10688945 | SNV | 1 | G | A | Heterozygous |
| NC_037643.1 | 10688960 | SNV | 1 | A | G | Homozygous   |
| NC_037643.1 | 10688976 | SNV | 1 | G | A | Homozygous   |
| NC_037643.1 | 10689039 | SNV | 1 | C | T | Heterozygous |
| NC_037643.1 | 10689223 | SNV | 1 | G | A | Heterozygous |
| NC_037643.1 | 10691446 | SNV | 1 | C | A | Homozygous   |
| NC_037643.1 | 10691777 | SNV | 1 | G | A | Heterozygous |
| NC_037643.1 | 10691787 | SNV | 1 | T | A | Homozygous   |
| NC_037643.1 | 10691961 | SNV | 1 | C | A | Heterozygous |
| NC_037643.1 | 10691963 | SNV | 1 | T | A | Heterozygous |
| NC_037643.1 | 10691965 | SNV | 1 | C | A | Heterozygous |
| NC_037643.1 | 10691967 | SNV | 1 | T | G | Heterozygous |
| NC_037643.1 | 10691969 | SNV | 1 | T | A | Heterozygous |
| NC_037643.1 | 10692222 | SNV | 1 | G | A | Heterozygous |
| NC_037643.1 | 10692225 | SNV | 1 | G | A | Heterozygous |
| NC_037643.1 | 10703982 | SNV | 1 | A | T | Homozygous   |
| NC_037643.1 | 10708568 | SNV | 1 | G | A | Homozygous   |
| NC_037643.1 | 10709183 | SNV | 1 | T | C | Homozygous   |
| NC_037643.1 | 10709187 | SNV | 1 | T | C | Heterozygous |
| NC_037643.1 | 10709220 | SNV | 1 | C | T | Heterozygous |
| NC_037643.1 | 10709679 | SNV | 1 | C | T | Homozygous   |
| NC_037643.1 | 10709690 | SNV | 1 | T | G | Heterozygous |
| NC_037643.1 | 10726330 | SNV | 1 | A | G | Heterozygous |
| NC_037643.1 | 10726454 | SNV | 1 | G | C | Heterozygous |
| NC_037643.1 | 10726517 | SNV | 1 | A | G | Heterozygous |

|             |          |     |   |   |   |              |
|-------------|----------|-----|---|---|---|--------------|
| NC_037643.1 | 10726562 | SNV | 1 | G | C | Homozygous   |
| NC_037643.1 | 10726674 | SNV | 1 | G | A | Homozygous   |
| NC_037643.1 | 10739409 | SNV | 1 | A | G | Homozygous   |
| NC_037643.1 | 10739497 | SNV | 1 | T | G | Homozygous   |
| NC_037643.1 | 10757547 | SNV | 1 | C | T | Heterozygous |
| NC_037643.1 | 10757577 | SNV | 1 | A | G | Heterozygous |
| NC_037643.1 | 10757833 | SNV | 1 | A | T | Homozygous   |
| NC_037643.1 | 10772847 | SNV | 1 | G | A | Homozygous   |
| NC_037643.1 | 10783414 | SNV | 1 | G | A | Homozygous   |
| NC_037643.1 | 10793827 | SNV | 1 | T | C | Homozygous   |
| NC_037643.1 | 10794057 | SNV | 1 | A | G | Homozygous   |
| NC_037643.1 | 10794082 | SNV | 1 | A | G | Homozygous   |
| NC_037643.1 | 10801424 | SNV | 1 | C | T | Heterozygous |
| NC_037643.1 | 10807933 | SNV | 1 | G | A | Homozygous   |
| NC_037643.1 | 10808045 | SNV | 1 | C | T | Heterozygous |
| NC_037643.1 | 10808054 | SNV | 1 | A | G | Homozygous   |
| NC_037643.1 | 10808081 | SNV | 1 | A | G | Heterozygous |
| NC_037643.1 | 10808183 | SNV | 1 | G | A | Heterozygous |
| NC_037643.1 | 10808584 | SNV | 1 | G | C | Heterozygous |
| NC_037643.1 | 10808588 | SNV | 1 | G | T | Heterozygous |
| NC_037643.1 | 10822608 | SNV | 1 | G | A | Heterozygous |
| NC_037643.1 | 10822657 | SNV | 1 | G | A | Heterozygous |
| NC_037643.1 | 10822696 | SNV | 1 | T | C | Homozygous   |
| NC_037643.1 | 10828421 | SNV | 1 | T | C | Homozygous   |
| NC_037643.1 | 10828801 | SNV | 1 | C | T | Homozygous   |
| NC_037643.1 | 10828918 | SNV | 1 | G | A | Heterozygous |
| NC_037643.1 | 10828957 | SNV | 1 | T | C | Homozygous   |
| NC_037643.1 | 10829432 | SNV | 1 | T | C | Heterozygous |
| NC_037643.1 | 10829439 | SNV | 1 | T | C | Heterozygous |
| NC_037643.1 | 10829442 | SNV | 1 | T | C | Heterozygous |
| NC_037643.1 | 10829544 | SNV | 1 | C | T | Homozygous   |
| NC_037643.1 | 10829579 | SNV | 1 | C | T | Heterozygous |
| NC_037643.1 | 10843498 | SNV | 1 | A | G | Homozygous   |
| NC_037643.1 | 10843562 | SNV | 1 | G | A | Homozygous   |
| NC_037643.1 | 10843595 | SNV | 1 | A | G | Heterozygous |
| NC_037643.1 | 10843630 | SNV | 1 | G | A | Heterozygous |
| NC_037643.1 | 10843648 | SNV | 1 | A | G | Heterozygous |
| NC_037643.1 | 10849592 | SNV | 1 | T | C | Homozygous   |
| NC_037643.1 | 10849689 | SNV | 1 | C | T | Heterozygous |
| NC_037643.1 | 10849761 | SNV | 1 | A | G | Heterozygous |
| NC_037643.1 | 10849838 | SNV | 1 | T | A | Heterozygous |
| NC_037643.1 | 10849991 | SNV | 1 | C | T | Heterozygous |
| NC_037643.1 | 10850423 | SNV | 1 | A | T | Homozygous   |
| NC_037643.1 | 10850541 | SNV | 1 | A | G | Homozygous   |
| NC_037643.1 | 10850553 | SNV | 1 | C | G | Homozygous   |
| NC_037643.1 | 10850622 | SNV | 1 | T | C | Homozygous   |
| NC_037643.1 | 10850637 | SNV | 1 | T | C | Heterozygous |
| NC_037643.1 | 10851831 | SNV | 1 | A | G | Homozygous   |
| NC_037643.1 | 10852161 | SNV | 1 | T | C | Homozygous   |
| NC_037643.1 | 10856249 | SNV | 1 | T | G | Heterozygous |
| NC_037643.1 | 10856280 | SNV | 1 | G | A | Heterozygous |

|             |          |     |   |   |   |              |
|-------------|----------|-----|---|---|---|--------------|
| NC_037643.1 | 10864920 | SNV | 1 | G | A | Homozygous   |
| NC_037643.1 | 11046839 | SNV | 1 | T | C | Homozygous   |
| NC_037643.1 | 11046854 | SNV | 1 | C | T | Homozygous   |
| NC_037643.1 | 11048380 | SNV | 1 | C | T | Heterozygous |
| NC_037643.1 | 11053261 | SNV | 1 | C | T | Homozygous   |
| NC_037643.1 | 11053264 | SNV | 1 | G | T | Homozygous   |
| NC_037643.1 | 11053267 | SNV | 1 | T | A | Homozygous   |
| NC_037643.1 | 11053270 | SNV | 1 | A | T | Homozygous   |
| NC_037643.1 | 11053312 | SNV | 1 | A | T | Homozygous   |
| NC_037643.1 | 11053318 | SNV | 1 | A | G | Homozygous   |
| NC_037643.1 | 11124119 | SNV | 1 | G | A | Heterozygous |
| NC_037643.1 | 11124136 | SNV | 1 | A | G | Heterozygous |
| NC_037643.1 | 11124145 | SNV | 1 | A | C | Heterozygous |
| NC_037643.1 | 11124154 | SNV | 1 | A | T | Heterozygous |
| NC_037643.1 | 11124475 | SNV | 1 | G | A | Homozygous   |
| NC_037643.1 | 11130787 | SNV | 1 | A | G | Homozygous   |
| NC_037643.1 | 11134239 | SNV | 1 | T | C | Heterozygous |
| NC_037643.1 | 11134269 | SNV | 1 | T | C | Heterozygous |
| NC_037643.1 | 11137832 | SNV | 1 | A | G | Homozygous   |
| NC_037643.1 | 11137846 | SNV | 1 | T | A | Homozygous   |
| NC_037643.1 | 11137848 | SNV | 1 | T | G | Homozygous   |
| NC_037643.1 | 11137875 | SNV | 1 | G | T | Homozygous   |
| NC_037643.1 | 11139529 | SNV | 1 | A | T | Homozygous   |
| NC_037643.1 | 11139537 | SNV | 1 | G | T | Homozygous   |
| NC_037643.1 | 11142792 | SNV | 1 | T | C | Homozygous   |
| NC_037643.1 | 11142881 | SNV | 1 | T | C | Heterozygous |
| NC_037643.1 | 11142894 | SNV | 1 | T | C | Homozygous   |
| NC_037643.1 | 11143062 | SNV | 1 | T | C | Heterozygous |
| NC_037643.1 | 11143114 | SNV | 1 | A | G | Homozygous   |
| NC_037643.1 | 11143123 | SNV | 1 | A | G | Heterozygous |
| NC_037643.1 | 11143138 | SNV | 1 | A | G | Homozygous   |
| NC_037643.1 | 11151688 | SNV | 1 | T | C | Heterozygous |
| NC_037643.1 | 11151694 | SNV | 1 | G | T | Homozygous   |
| NC_037643.1 | 11153090 | SNV | 1 | A | G | Homozygous   |
| NC_037643.1 | 11153093 | SNV | 1 | T | A | Heterozygous |
| NC_037643.1 | 11153093 | SNV | 1 | T | C | Heterozygous |
| NC_037643.1 | 11153112 | SNV | 1 | A | G | Heterozygous |
| NC_037643.1 | 11153114 | SNV | 1 | G | A | Heterozygous |
| NC_037643.1 | 11153116 | SNV | 1 | G | A | Heterozygous |
| NC_037643.1 | 11163936 | SNV | 1 | A | T | Heterozygous |
| NC_037643.1 | 11163955 | SNV | 1 | G | A | Heterozygous |
| NC_037643.1 | 11163986 | SNV | 1 | G | A | Heterozygous |
| NC_037643.1 | 11163987 | SNV | 1 | A | G | Heterozygous |
| NC_037643.1 | 11165989 | SNV | 1 | G | A | Heterozygous |
| NC_037643.1 | 11165996 | SNV | 1 | G | C | Homozygous   |
| NC_037643.1 | 11166350 | SNV | 1 | G | A | Homozygous   |
| NC_037643.1 | 11166367 | SNV | 1 | G | C | Homozygous   |
| NC_037643.1 | 11166388 | SNV | 1 | A | G | Homozygous   |
| NC_037643.1 | 11174719 | SNV | 1 | T | C | Homozygous   |
| NC_037643.1 | 11174726 | SNV | 1 | G | T | Homozygous   |
| NC_037643.1 | 11174732 | SNV | 1 | G | T | Homozygous   |

|             |          |     |   |   |   |              |
|-------------|----------|-----|---|---|---|--------------|
| NC_037643.1 | 11177419 | SNV | 1 | A | G | Heterozygous |
| NC_037643.1 | 11178145 | SNV | 1 | T | C | Heterozygous |
| NC_037643.1 | 11183618 | SNV | 1 | G | T | Heterozygous |
| NC_037643.1 | 11183636 | SNV | 1 | G | T | Homozygous   |
| NC_037643.1 | 11183648 | SNV | 1 | G | T | Homozygous   |
| NC_037643.1 | 11183651 | SNV | 1 | T | G | Homozygous   |
| NC_037643.1 | 11183657 | SNV | 1 | T | A | Homozygous   |
| NC_037643.1 | 11183666 | SNV | 1 | G | T | Homozygous   |
| NC_037643.1 | 11183669 | SNV | 1 | C | G | Homozygous   |
| NC_037643.1 | 11184540 | SNV | 1 | A | G | Homozygous   |
| NC_037643.1 | 11184621 | SNV | 1 | G | C | Heterozygous |
| NC_037643.1 | 11184628 | SNV | 1 | T | G | Heterozygous |
| NC_037643.1 | 11184634 | SNV | 1 | T | G | Heterozygous |
| NC_037643.1 | 11184638 | SNV | 1 | T | G | Heterozygous |
| NC_037643.1 | 11187556 | SNV | 1 | A | G | Heterozygous |
| NC_037643.1 | 11187564 | SNV | 1 | A | G | Heterozygous |
| NC_037643.1 | 11187570 | SNV | 1 | A | T | Heterozygous |
| NC_037643.1 | 11187574 | SNV | 1 | A | G | Heterozygous |
| NC_037643.1 | 11190367 | SNV | 1 | A | G | Heterozygous |
| NC_037643.1 | 11190441 | SNV | 1 | G | A | Heterozygous |
| NC_037643.1 | 11353160 | SNV | 1 | T | C | Homozygous   |
| NC_037643.1 | 11353215 | SNV | 1 | C | T | Homozygous   |
| NC_037643.1 | 11353221 | SNV | 1 | T | G | Heterozygous |
| NC_037643.1 | 11353241 | SNV | 1 | A | G | Homozygous   |
| NC_037643.1 | 11353244 | SNV | 1 | C | T | Heterozygous |
| NC_037643.1 | 11353269 | SNV | 1 | G | A | Homozygous   |
| NC_037643.1 | 11353278 | SNV | 1 | G | A | Homozygous   |
| NC_037643.1 | 11359677 | SNV | 1 | T | C | Heterozygous |
| NC_037643.1 | 11359685 | SNV | 1 | C | T | Homozygous   |
| NC_037643.1 | 11359688 | SNV | 1 | C | A | Homozygous   |
| NC_037643.1 | 11359692 | SNV | 1 | T | C | Homozygous   |
| NC_037643.1 | 11359706 | SNV | 1 | T | G | Homozygous   |
| NC_037643.1 | 11376373 | SNV | 1 | A | G | Homozygous   |
| NC_037643.1 | 11380086 | SNV | 1 | C | T | Heterozygous |
| NC_037643.1 | 11380304 | SNV | 1 | G | C | Homozygous   |
| NC_037643.1 | 11380410 | SNV | 1 | C | T | Homozygous   |
| NC_037643.1 | 11380508 | SNV | 1 | G | T | Heterozygous |
| NC_037643.1 | 11380523 | SNV | 1 | C | T | Heterozygous |
| NC_037643.1 | 11380585 | SNV | 1 | A | G | Heterozygous |
| NC_037643.1 | 11380591 | SNV | 1 | A | G | Heterozygous |
| NC_037643.1 | 11380593 | SNV | 1 | A | T | Heterozygous |
| NC_037643.1 | 11380620 | SNV | 1 | T | C | Homozygous   |
| NC_037643.1 | 11382707 | SNV | 1 | C | T | Heterozygous |
| NC_037643.1 | 11386319 | SNV | 1 | C | A | Heterozygous |
| NC_037643.1 | 11386527 | SNV | 1 | T | A | Heterozygous |
| NC_037643.1 | 11386529 | SNV | 1 | T | A | Heterozygous |
| NC_037643.1 | 11386532 | SNV | 1 | T | C | Heterozygous |
| NC_037643.1 | 11386537 | SNV | 1 | A | T | Homozygous   |
| NC_037643.1 | 11386540 | SNV | 1 | A | T | Heterozygous |
| NC_037643.1 | 11400455 | SNV | 1 | T | A | Heterozygous |
| NC_037643.1 | 11409377 | SNV | 1 | G | C | Heterozygous |

|             |          |     |   |   |   |              |
|-------------|----------|-----|---|---|---|--------------|
| NC_037643.1 | 11409624 | SNV | 1 | G | A | Homozygous   |
| NC_037643.1 | 11409840 | SNV | 1 | C | G | Homozygous   |
| NC_037643.1 | 11410276 | SNV | 1 | G | A | Heterozygous |
| NC_037643.1 | 11410318 | SNV | 1 | A | T | Heterozygous |
| NC_037643.1 | 11410343 | SNV | 1 | G | A | Homozygous   |
| NC_037643.1 | 11415108 | SNV | 1 | C | A | Homozygous   |
| NC_037643.1 | 11441713 | SNV | 1 | A | G | Homozygous   |
| NC_037643.1 | 11441718 | SNV | 1 | C | T | Homozygous   |
| NC_037643.1 | 11441735 | SNV | 1 | A | G | Homozygous   |
| NC_037643.1 | 11442848 | SNV | 1 | G | A | Homozygous   |
| NC_037643.1 | 11447962 | SNV | 1 | C | T | Heterozygous |
| NC_037643.1 | 11447965 | SNV | 1 | C | T | Homozygous   |
| NC_037643.1 | 11447987 | SNV | 1 | C | A | Homozygous   |
| NC_037643.1 | 11448000 | SNV | 1 | C | T | Homozygous   |
| NC_037643.1 | 11477497 | SNV | 1 | T | A | Homozygous   |
| NC_037643.1 | 11478402 | SNV | 1 | T | A | Homozygous   |
| NC_037643.1 | 11478545 | SNV | 1 | G | C | Homozygous   |
| NC_037643.1 | 11478632 | SNV | 1 | A | G | Homozygous   |
| NC_037643.1 | 11478661 | SNV | 1 | A | G | Homozygous   |
| NC_037643.1 | 11487176 | SNV | 1 | G | T | Homozygous   |
| NC_037643.1 | 11487213 | SNV | 1 | G | T | Heterozygous |
| NC_037643.1 | 11487271 | SNV | 1 | G | A | Heterozygous |
| NC_037643.1 | 11488578 | SNV | 1 | G | A | Heterozygous |
| NC_037643.1 | 11488665 | SNV | 1 | G | A | Heterozygous |
| NC_037643.1 | 11488700 | SNV | 1 | T | C | Homozygous   |
| NC_037643.1 | 11512382 | SNV | 1 | T | C | Homozygous   |
| NC_037643.1 | 11512662 | SNV | 1 | T | C | Homozygous   |
| NC_037643.1 | 11512676 | SNV | 1 | A | G | Homozygous   |
| NC_037643.1 | 11512799 | SNV | 1 | A | G | Homozygous   |
| NC_037643.1 | 11512833 | SNV | 1 | T | A | Heterozygous |
| NC_037643.1 | 11519546 | SNV | 1 | A | G | Homozygous   |
| NC_037643.1 | 11519584 | SNV | 1 | C | T | Heterozygous |
| NC_037643.1 | 11519589 | SNV | 1 | C | T | Homozygous   |
| NC_037643.1 | 11519651 | SNV | 1 | T | C | Homozygous   |
| NC_037643.1 | 11519669 | SNV | 1 | A | G | Homozygous   |
| NC_037643.1 | 11519784 | SNV | 1 | C | T | Heterozygous |
| NC_037643.1 | 11519849 | SNV | 1 | T | C | Homozygous   |
| NC_037643.1 | 11519932 | SNV | 1 | T | G | Heterozygous |
| NC_037643.1 | 11519945 | SNV | 1 | A | G | Homozygous   |
| NC_037643.1 | 11520017 | SNV | 1 | G | A | Heterozygous |
| NC_037643.1 | 11520030 | SNV | 1 | A | G | Homozygous   |
| NC_037643.1 | 11520192 | SNV | 1 | T | G | Homozygous   |
| NC_037643.1 | 11520194 | SNV | 1 | T | G | Homozygous   |
| NC_037643.1 | 11520200 | SNV | 1 | A | G | Homozygous   |
| NC_037643.1 | 11520203 | SNV | 1 | T | C | Homozygous   |
| NC_037643.1 | 11520219 | SNV | 1 | A | G | Homozygous   |
| NC_037643.1 | 11520227 | SNV | 1 | C | T | Homozygous   |
| NC_037643.1 | 11520276 | SNV | 1 | C | T | Heterozygous |
| NC_037643.1 | 11523411 | SNV | 1 | G | A | Heterozygous |
| NC_037643.1 | 11526204 | SNV | 1 | C | T | Homozygous   |
| NC_037643.1 | 11526206 | SNV | 1 | G | A | Heterozygous |

|             |          |     |   |   |   |              |
|-------------|----------|-----|---|---|---|--------------|
| NC_037643.1 | 11526228 | SNV | 1 | T | C | Homozygous   |
| NC_037643.1 | 11526264 | SNV | 1 | G | A | Heterozygous |
| NC_037643.1 | 11526272 | SNV | 1 | A | T | Homozygous   |
| NC_037643.1 | 11526281 | SNV | 1 | T | C | Heterozygous |
| NC_037643.1 | 11526284 | SNV | 1 | C | T | Heterozygous |
| NC_037643.1 | 11526625 | SNV | 1 | A | G | Homozygous   |
| NC_037643.1 | 11531768 | SNV | 1 | T | C | Homozygous   |
| NC_037643.1 | 11535883 | SNV | 1 | C | T | Homozygous   |
| NC_037643.1 | 11535892 | SNV | 1 | A | G | Homozygous   |
| NC_037643.1 | 11548311 | SNV | 1 | G | A | Heterozygous |
| NC_037643.1 | 11548446 | SNV | 1 | G | A | Homozygous   |
| NC_037643.1 | 11573066 | SNV | 1 | A | G | Homozygous   |
| NC_037643.1 | 11573073 | SNV | 1 | A | G | Heterozygous |
| NC_037643.1 | 11573100 | SNV | 1 | G | T | Homozygous   |
| NC_037643.1 | 11573103 | SNV | 1 | T | C | Homozygous   |
| NC_037643.1 | 11573118 | SNV | 1 | G | T | Homozygous   |
| NC_037643.1 | 11573143 | SNV | 1 | T | C | Heterozygous |
| NC_037643.1 | 11573173 | SNV | 1 | G | A | Heterozygous |
| NC_037643.1 | 11573223 | SNV | 1 | T | C | Homozygous   |
| NC_037643.1 | 11573275 | SNV | 1 | A | G | Homozygous   |
| NC_037643.1 | 11573334 | SNV | 1 | T | C | Homozygous   |
| NC_037643.1 | 11573453 | SNV | 1 | A | G | Heterozygous |
| NC_037643.1 | 11573486 | SNV | 1 | A | G | Homozygous   |
| NC_037643.1 | 11573693 | SNV | 1 | G | A | Heterozygous |
| NC_037643.1 | 11573923 | SNV | 1 | G | T | Heterozygous |
| NC_037643.1 | 11578979 | SNV | 1 | A | G | Heterozygous |
| NC_037643.1 | 11578981 | SNV | 1 | G | A | Heterozygous |
| NC_037643.1 | 11579025 | SNV | 1 | C | T | Heterozygous |
| NC_037643.1 | 11579037 | SNV | 1 | A | C | Heterozygous |
| NC_037643.1 | 11583613 | SNV | 1 | T | G | Heterozygous |
| NC_037643.1 | 11583618 | SNV | 1 | G | C | Heterozygous |
| NC_037643.1 | 11596385 | SNV | 1 | T | C | Heterozygous |
| NC_037643.1 | 11596393 | SNV | 1 | T | C | Heterozygous |
| NC_037643.1 | 11596412 | SNV | 1 | T | C | Heterozygous |
| NC_037643.1 | 11596414 | SNV | 1 | C | T | Heterozygous |
| NC_037643.1 | 11596418 | SNV | 1 | C | T | Heterozygous |
| NC_037643.1 | 11596428 | SNV | 1 | T | A | Heterozygous |
| NC_037643.1 | 11604343 | SNV | 1 | T | C | Homozygous   |
| NC_037643.1 | 11604610 | SNV | 1 | A | G | Heterozygous |
| NC_037643.1 | 11604631 | SNV | 1 | A | G | Homozygous   |
| NC_037643.1 | 11604856 | SNV | 1 | A | G | Homozygous   |
| NC_037643.1 | 11609617 | SNV | 1 | T | C | Homozygous   |
| NC_037643.1 | 11609635 | SNV | 1 | T | A | Homozygous   |
| NC_037643.1 | 11609650 | SNV | 1 | T | A | Homozygous   |
| NC_037643.1 | 11609653 | SNV | 1 | G | A | Homozygous   |
| NC_037643.1 | 11609707 | SNV | 1 | A | G | Heterozygous |
| NC_037643.1 | 11609718 | SNV | 1 | T | C | Homozygous   |
| NC_037643.1 | 11614840 | SNV | 1 | C | G | Homozygous   |
| NC_037643.1 | 11614843 | SNV | 1 | T | C | Homozygous   |
| NC_037643.1 | 11614846 | SNV | 1 | T | C | Homozygous   |
| NC_037643.1 | 11614874 | SNV | 1 | C | G | Homozygous   |

|             |          |     |   |   |   |              |
|-------------|----------|-----|---|---|---|--------------|
| NC_037643.1 | 11619464 | SNV | 1 | C | A | Homozygous   |
| NC_037643.1 | 11619468 | SNV | 1 | C | T | Homozygous   |
| NC_037643.1 | 11629062 | SNV | 1 | C | T | Homozygous   |
| NC_037643.1 | 11634251 | SNV | 1 | C | A | Heterozygous |
| NC_037643.1 | 11634390 | SNV | 1 | T | A | Homozygous   |
| NC_037643.1 | 11634396 | SNV | 1 | A | G | Homozygous   |
| NC_037643.1 | 11634400 | SNV | 1 | T | C | Heterozygous |
| NC_037643.1 | 11634413 | SNV | 1 | C | T | Heterozygous |
| NC_037643.1 | 11634422 | SNV | 1 | C | T | Heterozygous |
| NC_037643.1 | 11634431 | SNV | 1 | C | T | Heterozygous |
| NC_037643.1 | 11634483 | SNV | 1 | A | G | Homozygous   |
| NC_037643.1 | 11634494 | SNV | 1 | C | A | Heterozygous |
| NC_037643.1 | 11634523 | SNV | 1 | C | T | Heterozygous |
| NC_037643.1 | 11634579 | SNV | 1 | G | A | Homozygous   |
| NC_037643.1 | 11634635 | SNV | 1 | C | T | Heterozygous |
| NC_037643.1 | 11634639 | SNV | 1 | G | A | Heterozygous |
| NC_037643.1 | 11634653 | SNV | 1 | C | T | Homozygous   |
| NC_037643.1 | 11634677 | SNV | 1 | A | G | Heterozygous |
| NC_037643.1 | 11634690 | SNV | 1 | C | T | Homozygous   |
| NC_037643.1 | 11634794 | SNV | 1 | G | A | Homozygous   |
| NC_037643.1 | 11634809 | SNV | 1 | C | T | Heterozygous |
| NC_037643.1 | 11641678 | SNV | 1 | G | A | Heterozygous |
| NC_037643.1 | 11641728 | SNV | 1 | C | A | Homozygous   |
| NC_037643.1 | 11641741 | SNV | 1 | C | T | Heterozygous |
| NC_037643.1 | 11641790 | SNV | 1 | T | C | Homozygous   |
| NC_037643.1 | 11641808 | SNV | 1 | G | A | Homozygous   |
| NC_037643.1 | 11641832 | SNV | 1 | A | G | Heterozygous |
| NC_037643.1 | 11648492 | SNV | 1 | G | A | Heterozygous |
| NC_037643.1 | 11648554 | SNV | 1 | G | A | Homozygous   |
| NC_037643.1 | 11650799 | SNV | 1 | A | G | Homozygous   |
| NC_037643.1 | 11650804 | SNV | 1 | T | G | Heterozygous |
| NC_037643.1 | 11650823 | SNV | 1 | T | C | Homozygous   |
| NC_037643.1 | 11650900 | SNV | 1 | A | G | Homozygous   |
| NC_037643.1 | 11650919 | SNV | 1 | G | A | Heterozygous |
| NC_037643.1 | 11650970 | SNV | 1 | C | T | Homozygous   |
| NC_037643.1 | 11651012 | SNV | 1 | A | G | Homozygous   |
| NC_037643.1 | 11651035 | SNV | 1 | A | C | Homozygous   |
| NC_037643.1 | 11651045 | SNV | 1 | C | T | Heterozygous |
| NC_037643.1 | 11653524 | SNV | 1 | C | T | Heterozygous |
| NC_037643.1 | 11685397 | SNV | 1 | C | T | Heterozygous |
| NC_037643.1 | 11685421 | SNV | 1 | T | A | Heterozygous |
| NC_037643.1 | 11687661 | SNV | 1 | T | C | Homozygous   |
| NC_037643.1 | 11687681 | SNV | 1 | T | C | Homozygous   |
| NC_037643.1 | 11687687 | SNV | 1 | T | C | Homozygous   |
| NC_037643.1 | 11687691 | SNV | 1 | C | A | Homozygous   |
| NC_037643.1 | 11687700 | SNV | 1 | C | A | Homozygous   |
| NC_037643.1 | 11690276 | SNV | 1 | A | G | Homozygous   |
| NC_037643.1 | 11702180 | SNV | 1 | A | G | Homozygous   |
| NC_037643.1 | 11705878 | SNV | 1 | T | C | Homozygous   |
| NC_037643.1 | 11710300 | SNV | 1 | C | G | Homozygous   |
| NC_037643.1 | 11710400 | SNV | 1 | G | A | Homozygous   |

|             |          |     |   |   |   |              |
|-------------|----------|-----|---|---|---|--------------|
| NC_037643.1 | 11710441 | SNV | 1 | A | G | Homozygous   |
| NC_037643.1 | 11711228 | SNV | 1 | T | G | Homozygous   |
| NC_037643.1 | 11711231 | SNV | 1 | G | A | Homozygous   |
| NC_037643.1 | 11711234 | SNV | 1 | G | A | Homozygous   |
| NC_037643.1 | 11711319 | SNV | 1 | T | C | Heterozygous |
| NC_037643.1 | 11711410 | SNV | 1 | A | T | Homozygous   |
| NC_037643.1 | 11711442 | SNV | 1 | G | A | Heterozygous |
| NC_037643.1 | 11711467 | SNV | 1 | G | A | Heterozygous |
| NC_037643.1 | 11711469 | SNV | 1 | G | T | Heterozygous |
| NC_037643.1 | 11711560 | SNV | 1 | C | T | Homozygous   |
| NC_037643.1 | 11711607 | SNV | 1 | G | A | Homozygous   |
| NC_037643.1 | 11711865 | SNV | 1 | T | C | Homozygous   |
| NC_037643.1 | 11711910 | SNV | 1 | G | T | Heterozygous |
| NC_037643.1 | 11712122 | SNV | 1 | A | G | Homozygous   |
| NC_037643.1 | 11712268 | SNV | 1 | A | G | Heterozygous |
| NC_037643.1 | 11712280 | SNV | 1 | A | G | Heterozygous |
| NC_037643.1 | 11712284 | SNV | 1 | T | A | Homozygous   |
| NC_037643.1 | 11712292 | SNV | 1 | G | A | Homozygous   |
| NC_037643.1 | 11712307 | SNV | 1 | G | A | Heterozygous |
| NC_037643.1 | 11712316 | SNV | 1 | T | A | Heterozygous |
| NC_037643.1 | 11712337 | SNV | 1 | A | G | Heterozygous |
| NC_037643.1 | 11712341 | SNV | 1 | A | G | Homozygous   |
| NC_037643.1 | 11712376 | SNV | 1 | A | G | Heterozygous |
| NC_037643.1 | 11712430 | SNV | 1 | A | G | Heterozygous |
| NC_037643.1 | 11712550 | SNV | 1 | C | G | Homozygous   |
| NC_037643.1 | 11712554 | SNV | 1 | A | T | Homozygous   |
| NC_037643.1 | 11712569 | SNV | 1 | A | G | Heterozygous |
| NC_037643.1 | 11712571 | SNV | 1 | C | A | Homozygous   |
| NC_037643.1 | 11712634 | SNV | 1 | G | T | Homozygous   |
| NC_037643.1 | 11712642 | SNV | 1 | A | G | Heterozygous |
| NC_037643.1 | 11712673 | SNV | 1 | A | T | Heterozygous |
| NC_037643.1 | 11712753 | SNV | 1 | A | T | Heterozygous |
| NC_037643.1 | 11712814 | SNV | 1 | A | G | Homozygous   |
| NC_037643.1 | 11712855 | SNV | 1 | A | G | Homozygous   |
| NC_037643.1 | 11712888 | SNV | 1 | G | A | Heterozygous |
| NC_037643.1 | 11712921 | SNV | 1 | T | C | Heterozygous |
| NC_037643.1 | 11712923 | SNV | 1 | G | C | Heterozygous |
| NC_037643.1 | 11713401 | SNV | 1 | C | G | Heterozygous |
| NC_037643.1 | 11713820 | SNV | 1 | A | G | Homozygous   |
| NC_037643.1 | 11713841 | SNV | 1 | G | A | Heterozygous |
| NC_037643.1 | 11713868 | SNV | 1 | G | A | Homozygous   |
| NC_037643.1 | 11714158 | SNV | 1 | T | C | Homozygous   |
| NC_037643.1 | 11714588 | SNV | 1 | G | A | Heterozygous |
| NC_037643.1 | 11714596 | SNV | 1 | G | A | Homozygous   |
| NC_037643.1 | 11714737 | SNV | 1 | G | A | Heterozygous |
| NC_037643.1 | 11714906 | SNV | 1 | T | G | Heterozygous |
| NC_037643.1 | 11714980 | SNV | 1 | C | T | Heterozygous |
| NC_037643.1 | 11715029 | SNV | 1 | T | C | Homozygous   |
| NC_037643.1 | 11715082 | SNV | 1 | A | T | Homozygous   |
| NC_037643.1 | 11715138 | SNV | 1 | T | C | Heterozygous |
| NC_037643.1 | 11715834 | SNV | 1 | T | C | Heterozygous |



|             |          |     |   |   |   |              |
|-------------|----------|-----|---|---|---|--------------|
| NC_037643.1 | 11715836 | SNV | 1 | T | C | Heterozygous |
| NC_037643.1 | 11715842 | SNV | 1 | C | T | Heterozygous |
| NC_037643.1 | 11717417 | SNV | 1 | C | T | Homozygous   |
| NC_037643.1 | 11717419 | SNV | 1 | T | C | Homozygous   |
| NC_037643.1 | 11751020 | SNV | 1 | A | G | Homozygous   |
| NC_037643.1 | 11751070 | SNV | 1 | G | A | Heterozygous |
| NC_037643.1 | 11756042 | SNV | 1 | C | T | Homozygous   |
| NC_037643.1 | 11756047 | SNV | 1 | C | T | Homozygous   |
| NC_037643.1 | 11756050 | SNV | 1 | T | G | Homozygous   |
| NC_037643.1 | 11756052 | SNV | 1 | T | C | Homozygous   |
| NC_037643.1 | 11756059 | SNV | 1 | C | T | Homozygous   |
| NC_037643.1 | 11756063 | SNV | 1 | T | G | Homozygous   |
| NC_037643.1 | 11761126 | SNV | 1 | C | T | Heterozygous |
| NC_037643.1 | 11761142 | SNV | 1 | T | C | Heterozygous |
| NC_037643.1 | 11761273 | SNV | 1 | T | C | Homozygous   |
| NC_037643.1 | 11761559 | SNV | 1 | A | T | Heterozygous |
| NC_037643.1 | 11761628 | SNV | 1 | T | C | Heterozygous |
| NC_037643.1 | 11767345 | SNV | 1 | C | A | Homozygous   |
| NC_037643.1 | 11767356 | SNV | 1 | T | G | Heterozygous |
| NC_037643.1 | 11771680 | SNV | 1 | C | T | Heterozygous |
| NC_037643.1 | 11771687 | SNV | 1 | C | T | Heterozygous |
| NC_037643.1 | 11771701 | SNV | 1 | C | T | Homozygous   |
| NC_037643.1 | 11771840 | SNV | 1 | C | T | Homozygous   |
| NC_037643.1 | 11771908 | SNV | 1 | T | C | Homozygous   |
| NC_037643.1 | 11776111 | SNV | 1 | C | T | Heterozygous |
| NC_037643.1 | 11776157 | SNV | 1 | C | T | Heterozygous |
| NC_037643.1 | 11776178 | SNV | 1 | A | G | Homozygous   |
| NC_037643.1 | 11776185 | SNV | 1 | C | T | Heterozygous |
| NC_037643.1 | 11776200 | SNV | 1 | C | T | Homozygous   |
| NC_037643.1 | 11776230 | SNV | 1 | T | C | Homozygous   |
| NC_037643.1 | 11778883 | SNV | 1 | C | A | Heterozygous |
| NC_037643.1 | 11778950 | SNV | 1 | G | A | Heterozygous |
| NC_037643.1 | 11793513 | SNV | 1 | C | T | Homozygous   |
| NC_037643.1 | 11793707 | SNV | 1 | A | G | Heterozygous |
| NC_037643.1 | 11793841 | SNV | 1 | T | C | Homozygous   |
| NC_037643.1 | 11793919 | SNV | 1 | T | C | Homozygous   |
| NC_037643.1 | 11793943 | SNV | 1 | C | T | Homozygous   |
| NC_037643.1 | 11793949 | SNV | 1 | C | T | Homozygous   |
| NC_037643.1 | 11794049 | SNV | 1 | A | T | Heterozygous |
| NC_037643.1 | 11794062 | SNV | 1 | G | A | Homozygous   |
| NC_037643.1 | 11794103 | SNV | 1 | T | C | Heterozygous |
| NC_037643.1 | 11794160 | SNV | 1 | A | G | Homozygous   |
| NC_037643.1 | 11800990 | SNV | 1 | A | G | Homozygous   |
| NC_037643.1 | 11812953 | SNV | 1 | C | T | Heterozygous |
| NC_037643.1 | 11812959 | SNV | 1 | C | G | Heterozygous |
| NC_037643.1 | 11812963 | SNV | 1 | C | G | Heterozygous |
| NC_037643.1 | 11813009 | SNV | 1 | G | C | Homozygous   |
| NC_037643.1 | 11813031 | SNV | 1 | G | C | Heterozygous |
| NC_037643.1 | 11822875 | SNV | 1 | G | A | Homozygous   |
| NC_037643.1 | 11822958 | SNV | 1 | A | G | Homozygous   |
| NC_037643.1 | 11822991 | SNV | 1 | G | A | Heterozygous |

|             |          |     |   |   |   |              |
|-------------|----------|-----|---|---|---|--------------|
| NC_037643.1 | 11823002 | SNV | 1 | G | A | Heterozygous |
| NC_037643.1 | 11836496 | SNV | 1 | A | T | Homozygous   |
| NC_037643.1 | 11836637 | SNV | 1 | T | C | Homozygous   |
| NC_037643.1 | 11836723 | SNV | 1 | G | A | Heterozygous |
| NC_037643.1 | 11837190 | SNV | 1 | T | C | Homozygous   |
| NC_037643.1 | 11837331 | SNV | 1 | C | T | Heterozygous |
| NC_037643.1 | 11837367 | SNV | 1 | A | T | Heterozygous |
| NC_037643.1 | 11839955 | SNV | 1 | T | C | Homozygous   |
| NC_037643.1 | 11839976 | SNV | 1 | C | T | Heterozygous |
| NC_037643.1 | 11841013 | SNV | 1 | C | T | Homozygous   |
| NC_037643.1 | 11841017 | SNV | 1 | A | G | Homozygous   |
| NC_037643.1 | 11842907 | SNV | 1 | T | C | Homozygous   |
| NC_037643.1 | 11843366 | SNV | 1 | T | C | Heterozygous |
| NC_037643.1 | 11843999 | SNV | 1 | A | G | Heterozygous |
| NC_037643.1 | 11856149 | SNV | 1 | A | G | Heterozygous |
| NC_037643.1 | 11856448 | SNV | 1 | G | A | Heterozygous |
| NC_037643.1 | 11857256 | SNV | 1 | C | T | Heterozygous |
| NC_037643.1 | 11859627 | SNV | 1 | C | A | Homozygous   |
| NC_037643.1 | 11860010 | SNV | 1 | C | T | Homozygous   |
| NC_037643.1 | 11861648 | SNV | 1 | A | G | Homozygous   |
| NC_037643.1 | 11862145 | SNV | 1 | C | T | Heterozygous |
| NC_037643.1 | 11862303 | SNV | 1 | G | A | Homozygous   |
| NC_037643.1 | 11871303 | SNV | 1 | T | C | Homozygous   |
| NC_037643.1 | 11871378 | SNV | 1 | A | T | Homozygous   |
| NC_037643.1 | 11871502 | SNV | 1 | A | G | Homozygous   |
| NC_037643.1 | 11871600 | SNV | 1 | C | T | Homozygous   |
| NC_037643.1 | 11871662 | SNV | 1 | T | C | Homozygous   |
| NC_037643.1 | 11871791 | SNV | 1 | T | C | Heterozygous |
| NC_037643.1 | 11871963 | SNV | 1 | A | G | Heterozygous |
| NC_037643.1 | 11880681 | SNV | 1 | T | G | Heterozygous |
| NC_037643.1 | 11880727 | SNV | 1 | C | A | Heterozygous |
| NC_037643.1 | 11880729 | SNV | 1 | C | A | Heterozygous |
| NC_037643.1 | 11880793 | SNV | 1 | A | G | Heterozygous |
| NC_037643.1 | 11911403 | SNV | 1 | T | C | Heterozygous |
| NC_037643.1 | 11911465 | SNV | 1 | T | A | Heterozygous |
| NC_037643.1 | 11911514 | SNV | 1 | T | C | Homozygous   |
| NC_037643.1 | 11911519 | SNV | 1 | T | A | Heterozygous |
| NC_037643.1 | 11911649 | SNV | 1 | A | T | Homozygous   |
| NC_037643.1 | 11911662 | SNV | 1 | C | T | Homozygous   |
| NC_037643.1 | 11911672 | SNV | 1 | G | A | Homozygous   |
| NC_037643.1 | 11911869 | SNV | 1 | T | C | Heterozygous |
| NC_037643.1 | 11911901 | SNV | 1 | T | A | Heterozygous |
| NC_037643.1 | 11911904 | SNV | 1 | T | A | Heterozygous |
| NC_037643.1 | 11918745 | SNV | 1 | A | G | Heterozygous |
| NC_037643.1 | 11918826 | SNV | 1 | A | G | Heterozygous |
| NC_037643.1 | 11927332 | SNV | 1 | T | C | Homozygous   |
| NC_037643.1 | 11937565 | SNV | 1 | G | A | Homozygous   |
| NC_037643.1 | 11937600 | SNV | 1 | G | A | Heterozygous |
| NC_037643.1 | 11937611 | SNV | 1 | G | C | Heterozygous |
| NC_037643.1 | 11937615 | SNV | 1 | T | C | Heterozygous |
| NC_037643.1 | 11937629 | SNV | 1 | T | C | Homozygous   |

|             |          |     |   |   |   |              |
|-------------|----------|-----|---|---|---|--------------|
| NC_037643.1 | 11937669 | SNV | 1 | G | A | Heterozygous |
| NC_037643.1 | 11937672 | SNV | 1 | A | G | Homozygous   |
| NC_037643.1 | 11944140 | SNV | 1 | T | G | Homozygous   |
| NC_037643.1 | 11949594 | SNV | 1 | G | A | Heterozygous |
| NC_037643.1 | 11949635 | SNV | 1 | A | G | Homozygous   |
| NC_037643.1 | 11949985 | SNV | 1 | T | C | Homozygous   |
| NC_037643.1 | 11964961 | SNV | 1 | A | G | Homozygous   |
| NC_037643.1 | 11964971 | SNV | 1 | T | C | Homozygous   |
| NC_037643.1 | 11966926 | SNV | 1 | A | G | Homozygous   |
| NC_037643.1 | 11974609 | SNV | 1 | G | A | Homozygous   |
| NC_037643.1 | 11974618 | SNV | 1 | A | G | Homozygous   |
| NC_037643.1 | 11974699 | SNV | 1 | G | A | Homozygous   |
| NC_037643.1 | 11974726 | SNV | 1 | A | T | Homozygous   |
| NC_037643.1 | 11978084 | SNV | 1 | T | A | Homozygous   |
| NC_037643.1 | 11978089 | SNV | 1 | T | G | Homozygous   |
| NC_037643.1 | 11978093 | SNV | 1 | T | G | Homozygous   |
| NC_037643.1 | 11978102 | SNV | 1 | T | G | Homozygous   |
| NC_037643.1 | 11978104 | SNV | 1 | T | G | Homozygous   |
| NC_037643.1 | 11978107 | SNV | 1 | T | A | Homozygous   |
| NC_037643.1 | 11978113 | SNV | 1 | A | T | Homozygous   |
| NC_037643.1 | 11984179 | SNV | 1 | A | T | Heterozygous |
| NC_037643.1 | 11985165 | SNV | 1 | C | A | Homozygous   |
| NC_037643.1 | 11985170 | SNV | 1 | G | A | Homozygous   |
| NC_037643.1 | 11985175 | SNV | 1 | G | A | Homozygous   |
| NC_037643.1 | 11985180 | SNV | 1 | T | A | Homozygous   |
| NC_037643.1 | 11987349 | SNV | 1 | G | C | Homozygous   |
| NC_037643.1 | 11987397 | SNV | 1 | T | C | Heterozygous |
| NC_037643.1 | 11998183 | SNV | 1 | A | G | Homozygous   |
| NC_037643.1 | 11998186 | SNV | 1 | G | A | Homozygous   |
| NC_037643.1 | 11998203 | SNV | 1 | A | T | Homozygous   |
| NC_037643.1 | 11998207 | SNV | 1 | C | T | Homozygous   |
| NC_037643.1 | 11998215 | SNV | 1 | G | A | Homozygous   |
| NC_037643.1 | 11998219 | SNV | 1 | G | A | Homozygous   |
| NC_037643.1 | 11998228 | SNV | 1 | G | A | Homozygous   |
| NC_037643.1 | 11998259 | SNV | 1 | G | T | Heterozygous |
| NC_037643.1 | 11998261 | SNV | 1 | A | T | Homozygous   |
| NC_037643.1 | 12027304 | SNV | 1 | T | C | Homozygous   |
| NC_037643.1 | 12027306 | SNV | 1 | A | T | Homozygous   |
| NC_037643.1 | 12027308 | SNV | 1 | A | T | Homozygous   |
| NC_037643.1 | 12036273 | SNV | 1 | G | A | Heterozygous |
| NC_037643.1 | 12036775 | SNV | 1 | A | G | Homozygous   |
| NC_037643.1 | 12036786 | SNV | 1 | G | T | Homozygous   |
| NC_037643.1 | 12036816 | SNV | 1 | T | C | Homozygous   |
| NC_037643.1 | 12040158 | SNV | 1 | A | G | Homozygous   |
| NC_037643.1 | 12040234 | SNV | 1 | C | T | Homozygous   |
| NC_037643.1 | 12040369 | SNV | 1 | A | T | Heterozygous |
| NC_037643.1 | 12040410 | SNV | 1 | C | A | Heterozygous |
| NC_037643.1 | 12040412 | SNV | 1 | G | A | Heterozygous |
| NC_037643.1 | 12040414 | SNV | 1 | C | A | Heterozygous |
| NC_037643.1 | 12040414 | SNV | 1 | C | T | Heterozygous |
| NC_037643.1 | 12040417 | SNV | 1 | A | T | Heterozygous |

|             |          |     |   |   |   |              |
|-------------|----------|-----|---|---|---|--------------|
| NC_037643.1 | 12040420 | SNV | 1 | T | A | Homozygous   |
| NC_037643.1 | 12040422 | SNV | 1 | G | A | Heterozygous |
| NC_037643.1 | 12040425 | SNV | 1 | A | G | Homozygous   |
| NC_037643.1 | 12048457 | SNV | 1 | C | T | Heterozygous |
| NC_037643.1 | 12048473 | SNV | 1 | C | T | Heterozygous |
| NC_037643.1 | 12048488 | SNV | 1 | T | G | Heterozygous |
| NC_037643.1 | 12048490 | SNV | 1 | T | A | Heterozygous |
| NC_037643.1 | 12048492 | SNV | 1 | T | A | Heterozygous |
| NC_037643.1 | 12048495 | SNV | 1 | C | T | Heterozygous |
| NC_037643.1 | 12053567 | SNV | 1 | A | G | Heterozygous |
| NC_037643.1 | 12053573 | SNV | 1 | G | C | Homozygous   |
| NC_037643.1 | 12057636 | SNV | 1 | G | A | Heterozygous |
| NC_037643.1 | 12057639 | SNV | 1 | G | A | Heterozygous |
| NC_037643.1 | 12057667 | SNV | 1 | G | A | Homozygous   |
| NC_037643.1 | 12057921 | SNV | 1 | C | A | Heterozygous |
| NC_037643.1 | 12058078 | SNV | 1 | G | A | Heterozygous |
| NC_037643.1 | 12058284 | SNV | 1 | T | C | Homozygous   |
| NC_037643.1 | 12058301 | SNV | 1 | G | A | Homozygous   |
| NC_037643.1 | 12058303 | SNV | 1 | C | T | Homozygous   |
| NC_037643.1 | 12058540 | SNV | 1 | T | G | Homozygous   |
| NC_037643.1 | 12058558 | SNV | 1 | A | G | Homozygous   |
| NC_037643.1 | 12058632 | SNV | 1 | T | C | Heterozygous |
| NC_037643.1 | 12058713 | SNV | 1 | A | G | Homozygous   |
| NC_037643.1 | 12058726 | SNV | 1 | A | G | Homozygous   |
| NC_037643.1 | 12058739 | SNV | 1 | G | A | Heterozygous |
| NC_037643.1 | 12059409 | SNV | 1 | A | G | Homozygous   |
| NC_037643.1 | 12059423 | SNV | 1 | A | G | Homozygous   |
| NC_037643.1 | 12059430 | SNV | 1 | G | A | Homozygous   |
| NC_037643.1 | 12059435 | SNV | 1 | A | T | Homozygous   |
| NC_037643.1 | 12059437 | SNV | 1 | A | G | Homozygous   |
| NC_037643.1 | 12059444 | SNV | 1 | G | A | Homozygous   |
| NC_037643.1 | 12059470 | SNV | 1 | T | A | Homozygous   |
| NC_037643.1 | 12064001 | SNV | 1 | A | G | Homozygous   |
| NC_037643.1 | 12067893 | SNV | 1 | T | C | Homozygous   |
| NC_037643.1 | 12067907 | SNV | 1 | C | T | Heterozygous |
| NC_037643.1 | 12067925 | SNV | 1 | G | A | Heterozygous |
| NC_037643.1 | 12067998 | SNV | 1 | A | G | Homozygous   |
| NC_037643.1 | 12068176 | SNV | 1 | A | G | Heterozygous |
| NC_037643.1 | 12068483 | SNV | 1 | T | C | Homozygous   |
| NC_037643.1 | 12071493 | SNV | 1 | G | A | Homozygous   |
| NC_037643.1 | 12071582 | SNV | 1 | T | C | Heterozygous |
| NC_037643.1 | 12071729 | SNV | 1 | T | C | Homozygous   |
| NC_037643.1 | 12071793 | SNV | 1 | C | A | Heterozygous |
| NC_037643.1 | 12071814 | SNV | 1 | A | G | Heterozygous |
| NC_037643.1 | 12071832 | SNV | 1 | C | T | Heterozygous |
| NC_037643.1 | 12071874 | SNV | 1 | G | A | Heterozygous |
| NC_037643.1 | 12071883 | SNV | 1 | T | C | Heterozygous |
| NC_037643.1 | 12071946 | SNV | 1 | T | C | Homozygous   |
| NC_037643.1 | 12071960 | SNV | 1 | C | T | Heterozygous |
| NC_037643.1 | 12071969 | SNV | 1 | A | G | Heterozygous |
| NC_037643.1 | 12072142 | SNV | 1 | C | T | Heterozygous |

|             |          |     |   |   |   |              |
|-------------|----------|-----|---|---|---|--------------|
| NC_037643.1 | 12072149 | SNV | 1 | T | C | Heterozygous |
| NC_037643.1 | 12072162 | SNV | 1 | A | G | Heterozygous |
| NC_037643.1 | 12072179 | SNV | 1 | C | A | Heterozygous |
| NC_037643.1 | 12072319 | SNV | 1 | T | C | Homozygous   |
| NC_037643.1 | 12072327 | SNV | 1 | G | A | Heterozygous |
| NC_037643.1 | 12072368 | SNV | 1 | G | C | Heterozygous |
| NC_037643.1 | 12072916 | SNV | 1 | C | T | Heterozygous |
| NC_037643.1 | 12085949 | SNV | 1 | C | T | Homozygous   |
| NC_037643.1 | 12085970 | SNV | 1 | T | C | Homozygous   |
| NC_037643.1 | 12085975 | SNV | 1 | T | A | Homozygous   |
| NC_037643.1 | 12093284 | SNV | 1 | C | T | Homozygous   |
| NC_037643.1 | 12095013 | SNV | 1 | T | C | Homozygous   |
| NC_037643.1 | 12097533 | SNV | 1 | G | A | Heterozygous |
| NC_037643.1 | 12097561 | SNV | 1 | T | C | Homozygous   |
| NC_037643.1 | 12098102 | SNV | 1 | T | C | Homozygous   |
| NC_037643.1 | 12098735 | SNV | 1 | G | A | Homozygous   |
| NC_037643.1 | 12099246 | SNV | 1 | T | C | Homozygous   |
| NC_037643.1 | 12099370 | SNV | 1 | T | G | Heterozygous |
| NC_037643.1 | 12099467 | SNV | 1 | A | G | Homozygous   |
| NC_037643.1 | 12099823 | SNV | 1 | A | G | Homozygous   |
| NC_037643.1 | 12099952 | SNV | 1 | G | A | Heterozygous |
| NC_037643.1 | 12099995 | SNV | 1 | T | C | Homozygous   |
| NC_037643.1 | 12100679 | SNV | 1 | A | G | Heterozygous |
| NC_037643.1 | 12100702 | SNV | 1 | C | T | Heterozygous |
| NC_037643.1 | 12100943 | SNV | 1 | T | C | Heterozygous |
| NC_037643.1 | 12109972 | SNV | 1 | A | G | Homozygous   |
| NC_037643.1 | 12109997 | SNV | 1 | C | T | Homozygous   |
| NC_037643.1 | 12110017 | SNV | 1 | A | G | Heterozygous |
| NC_037643.1 | 12110335 | SNV | 1 | A | G | Homozygous   |
| NC_037643.1 | 12110450 | SNV | 1 | G | C | Homozygous   |
| NC_037643.1 | 12110454 | SNV | 1 | A | G | Heterozygous |
| NC_037643.1 | 12110459 | SNV | 1 | T | A | Heterozygous |
| NC_037643.1 | 12111174 | SNV | 1 | A | G | Heterozygous |
| NC_037643.1 | 12111244 | SNV | 1 | C | T | Heterozygous |
| NC_037643.1 | 12111547 | SNV | 1 | A | G | Homozygous   |
| NC_037643.1 | 12111590 | SNV | 1 | A | G | Homozygous   |
| NC_037643.1 | 12111653 | SNV | 1 | C | T | Heterozygous |
| NC_037643.1 | 12111664 | SNV | 1 | T | C | Heterozygous |
| NC_037643.1 | 12112081 | SNV | 1 | G | A | Heterozygous |
| NC_037643.1 | 12112423 | SNV | 1 | G | A | Homozygous   |
| NC_037643.1 | 12113010 | SNV | 1 | C | T | Homozygous   |
| NC_037643.1 | 12113074 | SNV | 1 | G | A | Heterozygous |
| NC_037643.1 | 12113135 | SNV | 1 | T | C | Heterozygous |
| NC_037643.1 | 12113665 | SNV | 1 | C | T | Homozygous   |
| NC_037643.1 | 12113778 | SNV | 1 | C | T | Heterozygous |
| NC_037643.1 | 12113886 | SNV | 1 | A | G | Heterozygous |
| NC_037643.1 | 12114129 | SNV | 1 | A | G | Heterozygous |
| NC_037643.1 | 12114144 | SNV | 1 | C | A | Heterozygous |
| NC_037643.1 | 12114162 | SNV | 1 | G | A | Heterozygous |
| NC_037643.1 | 12114252 | SNV | 1 | A | T | Homozygous   |
| NC_037643.1 | 12114780 | SNV | 1 | G | A | Homozygous   |

|             |          |     |   |   |   |              |
|-------------|----------|-----|---|---|---|--------------|
| NC_037643.1 | 12115575 | SNV | 1 | T | C | Homozygous   |
| NC_037643.1 | 12120772 | SNV | 1 | T | A | Heterozygous |
| NC_037643.1 | 12136865 | SNV | 1 | A | G | Heterozygous |
| NC_037643.1 | 12138045 | SNV | 1 | G | C | Heterozygous |
| NC_037643.1 | 12143143 | SNV | 1 | A | G | Homozygous   |
| NC_037643.1 | 12145892 | SNV | 1 | C | T | Heterozygous |
| NC_037643.1 | 12146097 | SNV | 1 | C | T | Homozygous   |
| NC_037643.1 | 12154759 | SNV | 1 | G | A | Heterozygous |
| NC_037643.1 | 12155499 | SNV | 1 | G | T | Homozygous   |
| NC_037643.1 | 12157406 | SNV | 1 | T | C | Homozygous   |
| NC_037643.1 | 12157452 | SNV | 1 | T | C | Homozygous   |
| NC_037643.1 | 12157459 | SNV | 1 | A | T | Heterozygous |
| NC_037643.1 | 12157537 | SNV | 1 | C | T | Homozygous   |
| NC_037643.1 | 12160760 | SNV | 1 | T | C | Homozygous   |
| NC_037643.1 | 12162179 | SNV | 1 | T | A | Homozygous   |
| NC_037643.1 | 12162184 | SNV | 1 | G | A | Heterozygous |
| NC_037643.1 | 12165937 | SNV | 1 | A | C | Heterozygous |
| NC_037643.1 | 12166499 | SNV | 1 | T | C | Homozygous   |
| NC_037643.1 | 12166661 | SNV | 1 | A | T | Heterozygous |
| NC_037643.1 | 12166664 | SNV | 1 | A | G | Heterozygous |
| NC_037643.1 | 12167176 | SNV | 1 | A | G | Heterozygous |
| NC_037643.1 | 12167180 | SNV | 1 | A | G | Homozygous   |
| NC_037643.1 | 12167367 | SNV | 1 | A | G | Homozygous   |
| NC_037643.1 | 12167487 | SNV | 1 | G | T | Homozygous   |
| NC_037643.1 | 12167711 | SNV | 1 | G | C | Homozygous   |
| NC_037643.1 | 12167718 | SNV | 1 | T | C | Heterozygous |
| NC_037643.1 | 12168288 | SNV | 1 | A | G | Homozygous   |
| NC_037643.1 | 12181931 | SNV | 1 | T | C | Heterozygous |
| NC_037643.1 | 12182665 | SNV | 1 | T | C | Homozygous   |
| NC_037643.1 | 12183482 | SNV | 1 | C | T | Heterozygous |
| NC_037643.1 | 12184004 | SNV | 1 | T | A | Homozygous   |
| NC_037643.1 | 12184008 | SNV | 1 | C | A | Homozygous   |
| NC_037643.1 | 12184016 | SNV | 1 | T | A | Homozygous   |
| NC_037643.1 | 12184020 | SNV | 1 | G | A | Homozygous   |
| NC_037643.1 | 12184024 | SNV | 1 | T | A | Homozygous   |
| NC_037643.1 | 12184050 | SNV | 1 | T | C | Heterozygous |
| NC_037643.1 | 12184052 | SNV | 1 | T | C | Heterozygous |
| NC_037643.1 | 12185626 | SNV | 1 | T | A | Homozygous   |
| NC_037643.1 | 12185865 | SNV | 1 | T | A | Homozygous   |
| NC_037643.1 | 12186409 | SNV | 1 | T | C | Homozygous   |
| NC_037643.1 | 12186575 | SNV | 1 | G | A | Homozygous   |
| NC_037643.1 | 12186578 | SNV | 1 | A | T | Homozygous   |
| NC_037643.1 | 12186581 | SNV | 1 | T | G | Homozygous   |
| NC_037643.1 | 12186583 | SNV | 1 | A | T | Homozygous   |
| NC_037643.1 | 12186969 | SNV | 1 | A | G | Homozygous   |
| NC_037643.1 | 12191147 | SNV | 1 | A | C | Homozygous   |
| NC_037643.1 | 12191157 | SNV | 1 | T | A | Homozygous   |
| NC_037643.1 | 12191168 | SNV | 1 | C | T | Homozygous   |
| NC_037643.1 | 12191765 | SNV | 1 | A | G | Homozygous   |
| NC_037643.1 | 12192423 | SNV | 1 | C | G | Homozygous   |
| NC_037643.1 | 12193055 | SNV | 1 | G | T | Homozygous   |

|             |          |     |   |   |   |              |
|-------------|----------|-----|---|---|---|--------------|
| NC_037643.1 | 12193106 | SNV | 1 | C | T | Homozygous   |
| NC_037643.1 | 12193124 | SNV | 1 | T | C | Heterozygous |
| NC_037643.1 | 12195960 | SNV | 1 | A | G | Heterozygous |
| NC_037643.1 | 12196032 | SNV | 1 | T | A | Homozygous   |
| NC_037643.1 | 12196129 | SNV | 1 | C | A | Homozygous   |
| NC_037643.1 | 12197216 | SNV | 1 | T | C | Homozygous   |
| NC_037643.1 | 12197538 | SNV | 1 | C | G | Homozygous   |
| NC_037643.1 | 12197541 | SNV | 1 | A | T | Homozygous   |
| NC_037643.1 | 12198248 | SNV | 1 | A | G | Homozygous   |
| NC_037643.1 | 12203380 | SNV | 1 | C | A | Homozygous   |
| NC_037643.1 | 12203579 | SNV | 1 | A | C | Homozygous   |
| NC_037643.1 | 12204214 | SNV | 1 | T | G | Homozygous   |
| NC_037643.1 | 12204219 | SNV | 1 | T | G | Homozygous   |
| NC_037643.1 | 12204228 | SNV | 1 | T | A | Homozygous   |
| NC_037643.1 | 12204233 | SNV | 1 | G | A | Homozygous   |
| NC_037643.1 | 12204451 | SNV | 1 | G | C | Homozygous   |
| NC_037643.1 | 12205153 | SNV | 1 | A | T | Homozygous   |
| NC_037643.1 | 12211449 | SNV | 1 | C | T | Heterozygous |
| NC_037643.1 | 12211947 | SNV | 1 | G | T | Homozygous   |
| NC_037643.1 | 12212030 | SNV | 1 | A | G | Homozygous   |
| NC_037643.1 | 12212544 | SNV | 1 | C | A | Homozygous   |
| NC_037643.1 | 12212718 | SNV | 1 | T | A | Homozygous   |
| NC_037643.1 | 12212721 | SNV | 1 | T | A | Homozygous   |
| NC_037643.1 | 12212752 | SNV | 1 | A | T | Heterozygous |
| NC_037643.1 | 12212754 | SNV | 1 | T | A | Homozygous   |
| NC_037643.1 | 12212760 | SNV | 1 | C | G | Homozygous   |
| NC_037643.1 | 12212768 | SNV | 1 | T | A | Homozygous   |
| NC_037643.1 | 12212828 | SNV | 1 | T | C | Homozygous   |
| NC_037643.1 | 12212957 | SNV | 1 | G | A | Heterozygous |
| NC_037643.1 | 12213409 | SNV | 1 | C | A | Homozygous   |
| NC_037643.1 | 12213651 | SNV | 1 | A | T | Heterozygous |
| NC_037643.1 | 12213940 | SNV | 1 | C | T | Homozygous   |
| NC_037643.1 | 12217109 | SNV | 1 | C | T | Homozygous   |
| NC_037643.1 | 12217386 | SNV | 1 | C | T | Homozygous   |
| NC_037643.1 | 12217937 | SNV | 1 | C | G | Homozygous   |
| NC_037643.1 | 12218281 | SNV | 1 | C | T | Homozygous   |
| NC_037643.1 | 12218944 | SNV | 1 | C | T | Homozygous   |
| NC_037643.1 | 12219633 | SNV | 1 | T | A | Homozygous   |
| NC_037643.1 | 12226733 | SNV | 1 | A | G | Homozygous   |
| NC_037643.1 | 12226842 | SNV | 1 | T | G | Homozygous   |
| NC_037643.1 | 12226845 | SNV | 1 | G | T | Homozygous   |
| NC_037643.1 | 12227292 | SNV | 1 | A | T | Homozygous   |
| NC_037643.1 | 12227352 | SNV | 1 | T | C | Homozygous   |
| NC_037643.1 | 12228557 | SNV | 1 | C | G | Heterozygous |
| NC_037643.1 | 12228813 | SNV | 1 | T | C | Heterozygous |
| NC_037643.1 | 12260723 | SNV | 1 | T | C | Homozygous   |
| NC_037643.1 | 12260824 | SNV | 1 | A | G | Heterozygous |
| NC_037643.1 | 12260849 | SNV | 1 | A | G | Heterozygous |
| NC_037643.1 | 12261254 | SNV | 1 | T | C | Homozygous   |
| NC_037643.1 | 12282381 | SNV | 1 | A | G | Homozygous   |
| NC_037643.1 | 12282404 | SNV | 1 | T | C | Homozygous   |

|             |          |     |   |   |   |              |
|-------------|----------|-----|---|---|---|--------------|
| NC_037643.1 | 12292456 | SNV | 1 | A | G | Homozygous   |
| NC_037643.1 | 12292491 | SNV | 1 | G | C | Heterozygous |
| NC_037643.1 | 12312786 | SNV | 1 | G | A | Heterozygous |
| NC_037643.1 | 12313080 | SNV | 1 | G | A | Heterozygous |
| NC_037643.1 | 12313226 | SNV | 1 | G | A | Heterozygous |
| NC_037643.1 | 12313357 | SNV | 1 | G | A | Heterozygous |
| NC_037643.1 | 12313512 | SNV | 1 | T | C | Heterozygous |
| NC_037643.1 | 12313569 | SNV | 1 | G | A | Heterozygous |
| NC_037643.1 | 12315607 | SNV | 1 | G | A | Homozygous   |
| NC_037643.1 | 12315741 | SNV | 1 | G | A | Heterozygous |
| NC_037643.1 | 12327518 | SNV | 1 | T | A | Homozygous   |
| NC_037643.1 | 12327523 | SNV | 1 | T | C | Homozygous   |
| NC_037643.1 | 12327551 | SNV | 1 | A | C | Heterozygous |
| NC_037643.1 | 12327562 | SNV | 1 | T | A | Homozygous   |
| NC_037643.1 | 12327565 | SNV | 1 | A | G | Homozygous   |
| NC_037643.1 | 12328325 | SNV | 1 | G | A | Homozygous   |
| NC_037643.1 | 12329912 | SNV | 1 | T | A | Homozygous   |
| NC_037643.1 | 12330104 | SNV | 1 | C | T | Homozygous   |
| NC_037643.1 | 12330154 | SNV | 1 | T | C | Homozygous   |
| NC_037643.1 | 12330758 | SNV | 1 | C | T | Heterozygous |
| NC_037643.1 | 12330764 | SNV | 1 | T | C | Homozygous   |
| NC_037643.1 | 12330824 | SNV | 1 | G | A | Heterozygous |
| NC_037643.1 | 12330867 | SNV | 1 | A | G | Homozygous   |
| NC_037643.1 | 12330887 | SNV | 1 | A | G | Heterozygous |
| NC_037643.1 | 12330891 | SNV | 1 | A | G | Heterozygous |
| NC_037643.1 | 12330957 | SNV | 1 | T | C | Homozygous   |
| NC_037643.1 | 12330965 | SNV | 1 | T | C | Homozygous   |
| NC_037643.1 | 12330967 | SNV | 1 | G | A | Homozygous   |
| NC_037643.1 | 12330988 | SNV | 1 | G | A | Heterozygous |
| NC_037643.1 | 12332054 | SNV | 1 | C | G | Homozygous   |
| NC_037643.1 | 12332178 | SNV | 1 | A | C | Heterozygous |
| NC_037643.1 | 12332182 | SNV | 1 | A | C | Heterozygous |
| NC_037643.1 | 12332186 | SNV | 1 | A | C | Heterozygous |
| NC_037643.1 | 12339850 | SNV | 1 | A | G | Homozygous   |
| NC_037643.1 | 12340281 | SNV | 1 | A | G | Heterozygous |
| NC_037643.1 | 12340314 | SNV | 1 | A | G | Heterozygous |
| NC_037643.1 | 12340724 | SNV | 1 | T | G | Homozygous   |
| NC_037643.1 | 12341215 | SNV | 1 | G | A | Heterozygous |
| NC_037643.1 | 12341226 | SNV | 1 | A | G | Heterozygous |
| NC_037643.1 | 12341238 | SNV | 1 | A | G | Heterozygous |
| NC_037643.1 | 12345310 | SNV | 1 | T | C | Homozygous   |
| NC_037643.1 | 12345316 | SNV | 1 | T | C | Homozygous   |
| NC_037643.1 | 12345322 | SNV | 1 | T | G | Homozygous   |
| NC_037643.1 | 12353574 | SNV | 1 | C | T | Heterozygous |
| NC_037643.1 | 12353581 | SNV | 1 | T | A | Heterozygous |
| NC_037643.1 | 12353601 | SNV | 1 | T | C | Homozygous   |
| NC_037643.1 | 12353645 | SNV | 1 | G | A | Heterozygous |
| NC_037643.1 | 12353669 | SNV | 1 | C | T | Heterozygous |
| NC_037643.1 | 12353670 | SNV | 1 | C | T | Heterozygous |
| NC_037643.1 | 12354408 | SNV | 1 | G | A | Homozygous   |
| NC_037643.1 | 12354498 | SNV | 1 | G | A | Heterozygous |



|             |          |     |   |   |   |              |
|-------------|----------|-----|---|---|---|--------------|
| NC_037643.1 | 12354718 | SNV | 1 | T | C | Homozygous   |
| NC_037643.1 | 12358684 | SNV | 1 | T | C | Homozygous   |
| NC_037643.1 | 12364505 | SNV | 1 | A | G | Homozygous   |
| NC_037643.1 | 12364512 | SNV | 1 | A | G | Heterozygous |
| NC_037643.1 | 12364542 | SNV | 1 | A | C | Homozygous   |
| NC_037643.1 | 12364547 | SNV | 1 | A | G | Homozygous   |
| NC_037643.1 | 12364552 | SNV | 1 | A | G | Homozygous   |
| NC_037643.1 | 12371283 | SNV | 1 | C | T | Heterozygous |
| NC_037643.1 | 12371539 | SNV | 1 | C | T | Homozygous   |
| NC_037643.1 | 12371581 | SNV | 1 | T | C | Homozygous   |
| NC_037643.1 | 12371587 | SNV | 1 | A | G | Homozygous   |
| NC_037643.1 | 12371593 | SNV | 1 | G | A | Homozygous   |
| NC_037643.1 | 12371634 | SNV | 1 | C | T | Homozygous   |
| NC_037643.1 | 12371641 | SNV | 1 | C | T | Homozygous   |
| NC_037643.1 | 12371694 | SNV | 1 | A | G | Heterozygous |
| NC_037643.1 | 12371787 | SNV | 1 | A | T | Homozygous   |
| NC_037643.1 | 12371790 | SNV | 1 | A | T | Homozygous   |
| NC_037643.1 | 12385545 | SNV | 1 | T | C | Homozygous   |
| NC_037643.1 | 12385548 | SNV | 1 | T | C | Homozygous   |
| NC_037643.1 | 12385550 | SNV | 1 | T | C | Homozygous   |
| NC_037643.1 | 12399777 | SNV | 1 | G | A | Heterozygous |
| NC_037643.1 | 12399909 | SNV | 1 | T | C | Homozygous   |
| NC_037643.1 | 12399951 | SNV | 1 | C | A | Homozygous   |
| NC_037643.1 | 12400072 | SNV | 1 | G | A | Heterozygous |
| NC_037643.1 | 12400098 | SNV | 1 | T | C | Heterozygous |
| NC_037643.1 | 12400133 | SNV | 1 | T | C | Homozygous   |
| NC_037643.1 | 12400149 | SNV | 1 | T | C | Homozygous   |
| NC_037643.1 | 12400172 | SNV | 1 | G | A | Heterozygous |
| NC_037643.1 | 12400225 | SNV | 1 | G | A | Heterozygous |
| NC_037643.1 | 12400228 | SNV | 1 | T | C | Homozygous   |
| NC_037643.1 | 12400236 | SNV | 1 | A | C | Homozygous   |
| NC_037643.1 | 12400276 | SNV | 1 | C | G | Heterozygous |
| NC_037643.1 | 12400327 | SNV | 1 | T | C | Homozygous   |
| NC_037643.1 | 12400334 | SNV | 1 | T | C | Heterozygous |
| NC_037643.1 | 12400363 | SNV | 1 | T | G | Homozygous   |
| NC_037643.1 | 12400386 | SNV | 1 | A | G | Heterozygous |
| NC_037643.1 | 12400389 | SNV | 1 | A | G | Homozygous   |
| NC_037643.1 | 12401593 | SNV | 1 | G | A | Homozygous   |
| NC_037643.1 | 12401612 | SNV | 1 | G | A | Homozygous   |
| NC_037643.1 | 12401691 | SNV | 1 | T | A | Homozygous   |
| NC_037643.1 | 12401746 | SNV | 1 | C | T | Homozygous   |
| NC_037643.1 | 12401790 | SNV | 1 | C | A | Homozygous   |
| NC_037643.1 | 12401799 | SNV | 1 | A | G | Heterozygous |
| NC_037643.1 | 12401808 | SNV | 1 | C | A | Homozygous   |
| NC_037643.1 | 12401818 | SNV | 1 | T | A | Heterozygous |
| NC_037643.1 | 12401828 | SNV | 1 | T | A | Homozygous   |
| NC_037643.1 | 12401872 | SNV | 1 | A | G | Homozygous   |
| NC_037643.1 | 12401916 | SNV | 1 | G | A | Heterozygous |
| NC_037643.1 | 12401918 | SNV | 1 | A | G | Heterozygous |
| NC_037643.1 | 12401943 | SNV | 1 | G | A | Homozygous   |
| NC_037643.1 | 12404142 | SNV | 1 | A | G | Homozygous   |

|             |          |     |   |   |   |              |
|-------------|----------|-----|---|---|---|--------------|
| NC_037643.1 | 12404166 | SNV | 1 | C | T | Homozygous   |
| NC_037643.1 | 12404198 | SNV | 1 | C | T | Homozygous   |
| NC_037643.1 | 12404324 | SNV | 1 | C | T | Homozygous   |
| NC_037643.1 | 12404380 | SNV | 1 | G | C | Homozygous   |
| NC_037643.1 | 12404484 | SNV | 1 | T | C | Homozygous   |
| NC_037643.1 | 12416198 | SNV | 1 | G | T | Homozygous   |
| NC_037643.1 | 12416408 | SNV | 1 | C | T | Homozygous   |
| NC_037643.1 | 12420895 | SNV | 1 | C | T | Heterozygous |
| NC_037643.1 | 12420931 | SNV | 1 | C | T | Heterozygous |
| NC_037643.1 | 12420950 | SNV | 1 | A | G | Homozygous   |
| NC_037643.1 | 12420989 | SNV | 1 | C | G | Homozygous   |
| NC_037643.1 | 12421399 | SNV | 1 | A | G | Heterozygous |
| NC_037643.1 | 12421494 | SNV | 1 | G | A | Heterozygous |
| NC_037643.1 | 12424245 | SNV | 1 | A | G | Homozygous   |
| NC_037643.1 | 12424252 | SNV | 1 | G | A | Homozygous   |
| NC_037643.1 | 12424262 | SNV | 1 | G | T | Heterozygous |
| NC_037643.1 | 12424283 | SNV | 1 | G | A | Heterozygous |
| NC_037643.1 | 12424285 | SNV | 1 | T | G | Heterozygous |
| NC_037643.1 | 12424382 | SNV | 1 | T | C | Homozygous   |
| NC_037643.1 | 12424433 | SNV | 1 | T | C | Heterozygous |
| NC_037643.1 | 12424494 | SNV | 1 | A | G | Homozygous   |
| NC_037643.1 | 12424498 | SNV | 1 | A | G | Heterozygous |
| NC_037643.1 | 12424506 | SNV | 1 | A | G | Homozygous   |
| NC_037643.1 | 12425280 | SNV | 1 | A | G | Homozygous   |
| NC_037643.1 | 12425285 | SNV | 1 | A | C | Heterozygous |
| NC_037643.1 | 12425297 | SNV | 1 | G | C | Homozygous   |
| NC_037643.1 | 12425548 | SNV | 1 | G | A | Heterozygous |
| NC_037643.1 | 12428417 | SNV | 1 | T | C | Homozygous   |
| NC_037643.1 | 12428427 | SNV | 1 | T | C | Homozygous   |
| NC_037643.1 | 12428457 | SNV | 1 | A | G | Heterozygous |
| NC_037643.1 | 12428508 | SNV | 1 | T | C | Homozygous   |
| NC_037643.1 | 12428630 | SNV | 1 | G | A | Heterozygous |
| NC_037643.1 | 12436785 | SNV | 1 | G | A | Heterozygous |
| NC_037643.1 | 12436892 | SNV | 1 | A | G | Homozygous   |
| NC_037643.1 | 12437111 | SNV | 1 | G | T | Homozygous   |
| NC_037643.1 | 12437132 | SNV | 1 | C | T | Homozygous   |
| NC_037643.1 | 12444438 | SNV | 1 | T | C | Heterozygous |
| NC_037643.1 | 12444448 | SNV | 1 | G | A | Heterozygous |
| NC_037643.1 | 12444527 | SNV | 1 | A | G | Heterozygous |
| NC_037643.1 | 12444577 | SNV | 1 | T | C | Heterozygous |
| NC_037643.1 | 12452443 | SNV | 1 | A | G | Homozygous   |
| NC_037643.1 | 12463820 | SNV | 1 | G | C | Homozygous   |
| NC_037643.1 | 12464339 | SNV | 1 | G | A | Homozygous   |
| NC_037643.1 | 12464343 | SNV | 1 | A | T | Homozygous   |
| NC_037643.1 | 12464346 | SNV | 1 | G | A | Homozygous   |
| NC_037643.1 | 12487320 | SNV | 1 | A | G | Heterozygous |
| NC_037643.1 | 12487320 | SNV | 1 | A | T | Heterozygous |
| NC_037643.1 | 12487564 | SNV | 1 | A | G | Heterozygous |
| NC_037643.1 | 12487572 | SNV | 1 | A | G | Heterozygous |
| NC_037643.1 | 12490270 | SNV | 1 | G | A | Homozygous   |
| NC_037643.1 | 12490414 | SNV | 1 | C | T | Heterozygous |

|             |          |     |   |   |   |              |
|-------------|----------|-----|---|---|---|--------------|
| NC_037643.1 | 12490451 | SNV | 1 | G | T | Heterozygous |
| NC_037643.1 | 12490474 | SNV | 1 | T | C | Heterozygous |
| NC_037643.1 | 12490480 | SNV | 1 | C | T | Heterozygous |
| NC_037643.1 | 12490489 | SNV | 1 | C | T | Heterozygous |
| NC_037643.1 | 12490643 | SNV | 1 | C | T | Homozygous   |
| NC_037643.1 | 12490748 | SNV | 1 | G | A | Heterozygous |
| NC_037643.1 | 12490947 | SNV | 1 | G | A | Homozygous   |
| NC_037643.1 | 12490983 | SNV | 1 | A | G | Homozygous   |
| NC_037643.1 | 12495928 | SNV | 1 | C | T | Heterozygous |
| NC_037643.1 | 12496252 | SNV | 1 | T | C | Homozygous   |
| NC_037643.1 | 12496302 | SNV | 1 | C | T | Heterozygous |
| NC_037643.1 | 12496328 | SNV | 1 | C | G | Heterozygous |
| NC_037643.1 | 12496328 | SNV | 1 | C | T | Heterozygous |
| NC_037643.1 | 12496387 | SNV | 1 | G | C | Homozygous   |
| NC_037643.1 | 12496440 | SNV | 1 | C | T | Homozygous   |
| NC_037643.1 | 12496532 | SNV | 1 | A | T | Heterozygous |
| NC_037643.1 | 12496891 | SNV | 1 | C | T | Heterozygous |
| NC_037643.1 | 12508395 | SNV | 1 | C | T | Homozygous   |
| NC_037643.1 | 12508453 | SNV | 1 | A | C | Heterozygous |
| NC_037643.1 | 12508630 | SNV | 1 | A | G | Heterozygous |
| NC_037643.1 | 12508647 | SNV | 1 | G | A | Heterozygous |
| NC_037643.1 | 12508690 | SNV | 1 | G | A | Heterozygous |
| NC_037643.1 | 12508716 | SNV | 1 | T | C | Homozygous   |
| NC_037643.1 | 12508732 | SNV | 1 | G | A | Heterozygous |
| NC_037643.1 | 12508738 | SNV | 1 | A | G | Heterozygous |
| NC_037643.1 | 12508763 | SNV | 1 | A | G | Heterozygous |
| NC_037643.1 | 12508768 | SNV | 1 | G | A | Heterozygous |
| NC_037643.1 | 12513014 | SNV | 1 | A | G | Heterozygous |
| NC_037643.1 | 12513109 | SNV | 1 | G | A | Heterozygous |
| NC_037643.1 | 12513155 | SNV | 1 | A | G | Homozygous   |
| NC_037643.1 | 12537654 | SNV | 1 | A | G | Homozygous   |
| NC_037643.1 | 12537659 | SNV | 1 | G | T | Homozygous   |
| NC_037643.1 | 12540440 | SNV | 1 | G | A | Homozygous   |
| NC_037643.1 | 12540562 | SNV | 1 | T | C | Heterozygous |
| NC_037643.1 | 12540566 | SNV | 1 | G | C | Homozygous   |
| NC_037643.1 | 12540570 | SNV | 1 | C | T | Heterozygous |
| NC_037643.1 | 12545742 | SNV | 1 | G | A | Heterozygous |
| NC_037643.1 | 12545797 | SNV | 1 | T | C | Homozygous   |
| NC_037643.1 | 12545811 | SNV | 1 | T | C | Homozygous   |
| NC_037643.1 | 12545817 | SNV | 1 | A | G | Homozygous   |
| NC_037643.1 | 12545827 | SNV | 1 | G | A | Homozygous   |
| NC_037643.1 | 12545978 | SNV | 1 | G | A | Heterozygous |
| NC_037643.1 | 12549439 | SNV | 1 | A | G | Homozygous   |
| NC_037643.1 | 12554785 | SNV | 1 | A | G | Homozygous   |
| NC_037643.1 | 12554905 | SNV | 1 | C | T | Heterozygous |
| NC_037643.1 | 12554926 | SNV | 1 | T | A | Heterozygous |
| NC_037643.1 | 12555270 | SNV | 1 | A | G | Homozygous   |
| NC_037643.1 | 12571648 | SNV | 1 | A | T | Homozygous   |
| NC_037643.1 | 12571653 | SNV | 1 | T | A | Heterozygous |
| NC_037643.1 | 12571656 | SNV | 1 | T | C | Heterozygous |
| NC_037643.1 | 12583550 | SNV | 1 | G | A | Homozygous   |

|             |          |     |   |   |   |              |
|-------------|----------|-----|---|---|---|--------------|
| NC_037643.1 | 12583642 | SNV | 1 | G | A | Heterozygous |
| NC_037643.1 | 12583931 | SNV | 1 | A | C | Heterozygous |
| NC_037643.1 | 12587793 | SNV | 1 | C | T | Homozygous   |
| NC_037643.1 | 12587895 | SNV | 1 | A | G | Heterozygous |
| NC_037643.1 | 12588069 | SNV | 1 | T | C | Homozygous   |
| NC_037643.1 | 12588117 | SNV | 1 | A | G | Homozygous   |
| NC_037643.1 | 12588185 | SNV | 1 | A | G | Homozygous   |
| NC_037643.1 | 12590891 | SNV | 1 | G | A | Heterozygous |
| NC_037643.1 | 12598317 | SNV | 1 | T | G | Heterozygous |
| NC_037643.1 | 12598323 | SNV | 1 | G | A | Heterozygous |
| NC_037643.1 | 12598624 | SNV | 1 | A | G | Homozygous   |
| NC_037643.1 | 12598665 | SNV | 1 | A | C | Heterozygous |
| NC_037643.1 | 12598709 | SNV | 1 | G | C | Heterozygous |
| NC_037643.1 | 12598715 | SNV | 1 | A | G | Heterozygous |
| NC_037643.1 | 12598757 | SNV | 1 | A | C | Homozygous   |
| NC_037643.1 | 12599498 | SNV | 1 | G | A | Heterozygous |
| NC_037643.1 | 12599533 | SNV | 1 | A | T | Heterozygous |
| NC_037643.1 | 12599539 | SNV | 1 | T | C | Homozygous   |
| NC_037643.1 | 12599561 | SNV | 1 | G | A | Heterozygous |
| NC_037643.1 | 12612212 | SNV | 1 | C | A | Homozygous   |
| NC_037643.1 | 12612244 | SNV | 1 | G | A | Homozygous   |
| NC_037643.1 | 12612269 | SNV | 1 | C | T | Heterozygous |
| NC_037643.1 | 12612275 | SNV | 1 | A | G | Homozygous   |
| NC_037643.1 | 12612319 | SNV | 1 | A | G | Homozygous   |
| NC_037643.1 | 12612325 | SNV | 1 | A | G | Homozygous   |
| NC_037643.1 | 12612329 | SNV | 1 | G | A | Homozygous   |
| NC_037643.1 | 12612339 | SNV | 1 | A | G | Homozygous   |
| NC_037643.1 | 12615816 | SNV | 1 | G | A | Heterozygous |
| NC_037643.1 | 12615829 | SNV | 1 | T | C | Homozygous   |
| NC_037643.1 | 12616445 | SNV | 1 | A | G | Heterozygous |
| NC_037643.1 | 12616453 | SNV | 1 | A | G | Heterozygous |
| NC_037643.1 | 12621969 | SNV | 1 | G | A | Homozygous   |
| NC_037643.1 | 12622055 | SNV | 1 | C | T | Heterozygous |
| NC_037643.1 | 12622080 | SNV | 1 | G | A | Heterozygous |
| NC_037643.1 | 12622120 | SNV | 1 | C | T | Heterozygous |
| NC_037643.1 | 12622145 | SNV | 1 | G | A | Heterozygous |
| NC_037643.1 | 12638018 | SNV | 1 | C | T | Heterozygous |
| NC_037643.1 | 12638068 | SNV | 1 | T | C | Homozygous   |
| NC_037643.1 | 12638368 | SNV | 1 | G | A | Heterozygous |
| NC_037643.1 | 12638407 | SNV | 1 | A | T | Heterozygous |
| NC_037643.1 | 12638443 | SNV | 1 | T | C | Heterozygous |
| NC_037643.1 | 12638818 | SNV | 1 | A | G | Homozygous   |
| NC_037643.1 | 12638831 | SNV | 1 | A | G | Homozygous   |
| NC_037643.1 | 12639092 | SNV | 1 | A | G | Homozygous   |
| NC_037643.1 | 12639140 | SNV | 1 | G | A | Homozygous   |
| NC_037643.1 | 12643791 | SNV | 1 | A | G | Homozygous   |
| NC_037643.1 | 12643980 | SNV | 1 | G | A | Homozygous   |
| NC_037643.1 | 12644185 | SNV | 1 | T | C | Homozygous   |
| NC_037643.1 | 12654636 | SNV | 1 | T | C | Homozygous   |
| NC_037643.1 | 12660533 | SNV | 1 | T | A | Homozygous   |
| NC_037643.1 | 12660756 | SNV | 1 | G | A | Heterozygous |

|             |          |     |   |   |   |              |
|-------------|----------|-----|---|---|---|--------------|
| NC_037643.1 | 12661101 | SNV | 1 | A | G | Homozygous   |
| NC_037643.1 | 12661352 | SNV | 1 | T | C | Homozygous   |
| NC_037643.1 | 12661814 | SNV | 1 | A | G | Homozygous   |
| NC_037643.1 | 12662193 | SNV | 1 | T | C | Homozygous   |
| NC_037643.1 | 12662642 | SNV | 1 | G | A | Homozygous   |
| NC_037643.1 | 12662941 | SNV | 1 | A | G | Homozygous   |
| NC_037643.1 | 12672744 | SNV | 1 | A | G | Homozygous   |
| NC_037643.1 | 12690880 | SNV | 1 | C | T | Heterozygous |
| NC_037643.1 | 12690960 | SNV | 1 | G | A | Homozygous   |
| NC_037643.1 | 12690963 | SNV | 1 | T | A | Homozygous   |
| NC_037643.1 | 12690965 | SNV | 1 | A | T | Heterozygous |
| NC_037643.1 | 12696515 | SNV | 1 | T | C | Homozygous   |
| NC_037643.1 | 12696534 | SNV | 1 | A | G | Homozygous   |
| NC_037643.1 | 12696571 | SNV | 1 | G | T | Homozygous   |
| NC_037643.1 | 12701500 | SNV | 1 | A | G | Homozygous   |
| NC_037643.1 | 12708398 | SNV | 1 | T | C | Heterozygous |
| NC_037643.1 | 12708477 | SNV | 1 | A | G | Heterozygous |
| NC_037643.1 | 12708811 | SNV | 1 | A | G | Homozygous   |
| NC_037643.1 | 12708966 | SNV | 1 | G | A | Heterozygous |
| NC_037643.1 | 12709102 | SNV | 1 | G | A | Heterozygous |
| NC_037643.1 | 12709117 | SNV | 1 | A | G | Homozygous   |
| NC_037643.1 | 12709274 | SNV | 1 | T | C | Homozygous   |
| NC_037643.1 | 12715167 | SNV | 1 | T | C | Homozygous   |
| NC_037643.1 | 12723397 | SNV | 1 | C | T | Homozygous   |
| NC_037643.1 | 12723541 | SNV | 1 | A | G | Homozygous   |
| NC_037643.1 | 12723732 | SNV | 1 | G | A | Homozygous   |
| NC_037643.1 | 12725016 | SNV | 1 | T | C | Homozygous   |
| NC_037643.1 | 12725140 | SNV | 1 | C | T | Heterozygous |
| NC_037643.1 | 12725169 | SNV | 1 | G | A | Homozygous   |
| NC_037643.1 | 12725179 | SNV | 1 | A | G | Homozygous   |
| NC_037643.1 | 12725229 | SNV | 1 | T | C | Heterozygous |
| NC_037643.1 | 12725648 | SNV | 1 | T | C | Homozygous   |
| NC_037643.1 | 12725709 | SNV | 1 | T | C | Homozygous   |
| NC_037643.1 | 12725714 | SNV | 1 | T | C | Homozygous   |
| NC_037643.1 | 12725725 | SNV | 1 | G | A | Homozygous   |
| NC_037643.1 | 12725777 | SNV | 1 | G | A | Homozygous   |
| NC_037643.1 | 12725780 | SNV | 1 | G | A | Heterozygous |
| NC_037643.1 | 12736125 | SNV | 1 | C | T | Heterozygous |
| NC_037643.1 | 12736293 | SNV | 1 | C | T | Homozygous   |
| NC_037643.1 | 12736301 | SNV | 1 | A | G | Heterozygous |
| NC_037643.1 | 12736329 | SNV | 1 | T | C | Homozygous   |
| NC_037643.1 | 12736339 | SNV | 1 | T | C | Homozygous   |
| NC_037643.1 | 12736386 | SNV | 1 | A | G | Heterozygous |
| NC_037643.1 | 12736434 | SNV | 1 | T | C | Heterozygous |
| NC_037643.1 | 12736451 | SNV | 1 | A | G | Heterozygous |
| NC_037643.1 | 12736456 | SNV | 1 | A | T | Heterozygous |
| NC_037643.1 | 12736461 | SNV | 1 | A | G | Homozygous   |
| NC_037643.1 | 12736489 | SNV | 1 | A | G | Homozygous   |
| NC_037643.1 | 12750277 | SNV | 1 | C | T | Heterozygous |
| NC_037643.1 | 12750279 | SNV | 1 | T | C | Heterozygous |
| NC_037643.1 | 12750282 | SNV | 1 | C | T | Heterozygous |

|             |          |     |   |   |   |              |
|-------------|----------|-----|---|---|---|--------------|
| NC_037643.1 | 12750285 | SNV | 1 | C | T | Heterozygous |
| NC_037643.1 | 12750288 | SNV | 1 | T | C | Heterozygous |
| NC_037643.1 | 12750290 | SNV | 1 | G | T | Homozygous   |
| NC_037643.1 | 12755721 | SNV | 1 | C | T | Heterozygous |
| NC_037643.1 | 12755768 | SNV | 1 | A | G | Heterozygous |
| NC_037643.1 | 12755770 | SNV | 1 | A | G | Heterozygous |
| NC_037643.1 | 12755783 | SNV | 1 | C | G | Heterozygous |
| NC_037643.1 | 12755788 | SNV | 1 | G | T | Heterozygous |
| NC_037643.1 | 12755790 | SNV | 1 | A | G | Heterozygous |
| NC_037643.1 | 12757263 | SNV | 1 | C | T | Heterozygous |
| NC_037643.1 | 12759462 | SNV | 1 | C | T | Heterozygous |
| NC_037643.1 | 12759476 | SNV | 1 | G | C | Heterozygous |
| NC_037643.1 | 12759492 | SNV | 1 | G | C | Heterozygous |
| NC_037643.1 | 12759492 | SNV | 1 | G | T | Heterozygous |
| NC_037643.1 | 12759510 | SNV | 1 | G | C | Homozygous   |
| NC_037643.1 | 12759550 | SNV | 1 | A | C | Homozygous   |
| NC_037643.1 | 12760589 | SNV | 1 | G | A | Homozygous   |
| NC_037643.1 | 12762588 | SNV | 1 | A | G | Homozygous   |
| NC_037643.1 | 12779063 | SNV | 1 | G | A | Homozygous   |
| NC_037643.1 | 12779115 | SNV | 1 | C | A | Homozygous   |
| NC_037643.1 | 12796872 | SNV | 1 | G | A | Heterozygous |
| NC_037643.1 | 12796958 | SNV | 1 | G | A | Heterozygous |
| NC_037643.1 | 12797074 | SNV | 1 | G | A | Homozygous   |
| NC_037643.1 | 12797110 | SNV | 1 | G | A | Heterozygous |
| NC_037643.1 | 12797129 | SNV | 1 | G | A | Heterozygous |
| NC_037643.1 | 12797135 | SNV | 1 | A | G | Homozygous   |
| NC_037643.1 | 12797139 | SNV | 1 | G | A | Heterozygous |
| NC_037643.1 | 12797162 | SNV | 1 | C | T | Heterozygous |
| NC_037643.1 | 12797177 | SNV | 1 | T | A | Heterozygous |
| NC_037643.1 | 12797187 | SNV | 1 | G | A | Heterozygous |
| NC_037643.1 | 12797199 | SNV | 1 | G | A | Heterozygous |
| NC_037643.1 | 12797470 | SNV | 1 | C | T | Homozygous   |
| NC_037643.1 | 12801091 | SNV | 1 | C | T | Homozygous   |
| NC_037643.1 | 12802595 | SNV | 1 | G | A | Heterozygous |
| NC_037643.1 | 12802598 | SNV | 1 | G | A | Heterozygous |
| NC_037643.1 | 12802602 | SNV | 1 | G | C | Heterozygous |
| NC_037643.1 | 12813115 | SNV | 1 | G | A | Homozygous   |
| NC_037643.1 | 12813192 | SNV | 1 | A | G | Homozygous   |
| NC_037643.1 | 12813230 | SNV | 1 | A | G | Homozygous   |
| NC_037643.1 | 12813237 | SNV | 1 | A | G | Homozygous   |
| NC_037643.1 | 12813262 | SNV | 1 | G | A | Homozygous   |
| NC_037643.1 | 12813284 | SNV | 1 | A | G | Homozygous   |
| NC_037643.1 | 12813288 | SNV | 1 | G | A | Homozygous   |
| NC_037643.1 | 12813417 | SNV | 1 | C | T | Homozygous   |
| NC_037643.1 | 12813704 | SNV | 1 | G | C | Heterozygous |
| NC_037643.1 | 12818389 | SNV | 1 | G | A | Heterozygous |
| NC_037643.1 | 12821956 | SNV | 1 | T | C | Heterozygous |
| NC_037643.1 | 12822013 | SNV | 1 | T | C | Homozygous   |
| NC_037643.1 | 12831808 | SNV | 1 | C | T | Homozygous   |
| NC_037643.1 | 12831823 | SNV | 1 | G | A | Homozygous   |
| NC_037643.1 | 12831851 | SNV | 1 | C | T | Homozygous   |

|             |          |     |   |   |   |              |
|-------------|----------|-----|---|---|---|--------------|
| NC_037643.1 | 12835378 | SNV | 1 | T | C | Homozygous   |
| NC_037643.1 | 12835423 | SNV | 1 | C | T | Homozygous   |
| NC_037643.1 | 12835655 | SNV | 1 | C | T | Homozygous   |
| NC_037643.1 | 12835719 | SNV | 1 | T | C | Homozygous   |
| NC_037643.1 | 12835791 | SNV | 1 | A | G | Homozygous   |
| NC_037643.1 | 12846800 | SNV | 1 | T | A | Heterozygous |
| NC_037643.1 | 12846918 | SNV | 1 | T | C | Heterozygous |
| NC_037643.1 | 12846941 | SNV | 1 | G | A | Heterozygous |
| NC_037643.1 | 12846964 | SNV | 1 | A | T | Homozygous   |
| NC_037643.1 | 12846966 | SNV | 1 | T | C | Homozygous   |
| NC_037643.1 | 12847082 | SNV | 1 | T | C | Heterozygous |
| NC_037643.1 | 12847143 | SNV | 1 | G | A | Heterozygous |
| NC_037643.1 | 12847199 | SNV | 1 | G | A | Heterozygous |
| NC_037643.1 | 12847270 | SNV | 1 | G | A | Heterozygous |
| NC_037643.1 | 12847274 | SNV | 1 | G | A | Heterozygous |
| NC_037643.1 | 12847294 | SNV | 1 | T | A | Homozygous   |
| NC_037643.1 | 12847543 | SNV | 1 | G | A | Homozygous   |
| NC_037643.1 | 12847550 | SNV | 1 | T | A | Homozygous   |
| NC_037643.1 | 12847553 | SNV | 1 | G | A | Heterozygous |
| NC_037643.1 | 12847587 | SNV | 1 | C | T | Heterozygous |
| NC_037643.1 | 12847591 | SNV | 1 | G | A | Homozygous   |
| NC_037643.1 | 12847603 | SNV | 1 | C | A | Heterozygous |
| NC_037643.1 | 12847638 | SNV | 1 | A | G | Homozygous   |
| NC_037643.1 | 12850769 | SNV | 1 | C | T | Heterozygous |
| NC_037643.1 | 12850785 | SNV | 1 | A | G | Heterozygous |
| NC_037643.1 | 12850798 | SNV | 1 | A | G | Homozygous   |
| NC_037643.1 | 12850809 | SNV | 1 | T | C | Heterozygous |
| NC_037643.1 | 12850819 | SNV | 1 | T | A | Homozygous   |
| NC_037643.1 | 12877477 | SNV | 1 | G | A | Homozygous   |
| NC_037643.1 | 12894223 | SNV | 1 | A | G | Homozygous   |
| NC_037643.1 | 12894340 | SNV | 1 | A | G | Homozygous   |
| NC_037643.1 | 12894352 | SNV | 1 | G | T | Heterozygous |
| NC_037643.1 | 12894379 | SNV | 1 | T | C | Homozygous   |
| NC_037643.1 | 12894386 | SNV | 1 | G | A | Heterozygous |
| NC_037643.1 | 12894400 | SNV | 1 | A | G | Homozygous   |
| NC_037643.1 | 12894547 | SNV | 1 | T | G | Heterozygous |
| NC_037643.1 | 12894579 | SNV | 1 | T | C | Heterozygous |
| NC_037643.1 | 12894795 | SNV | 1 | A | G | Homozygous   |
| NC_037643.1 | 12894804 | SNV | 1 | T | C | Homozygous   |
| NC_037643.1 | 12895172 | SNV | 1 | G | A | Heterozygous |
| NC_037643.1 | 12895356 | SNV | 1 | T | C | Heterozygous |
| NC_037643.1 | 12895480 | SNV | 1 | G | C | Homozygous   |
| NC_037643.1 | 12895492 | SNV | 1 | G | A | Heterozygous |
| NC_037643.1 | 12895748 | SNV | 1 | C | G | Heterozygous |
| NC_037643.1 | 12895757 | SNV | 1 | T | C | Homozygous   |
| NC_037643.1 | 12897818 | SNV | 1 | G | A | Heterozygous |
| NC_037643.1 | 12898937 | SNV | 1 | G | A | Heterozygous |
| NC_037643.1 | 12899093 | SNV | 1 | C | T | Homozygous   |
| NC_037643.1 | 12899096 | SNV | 1 | C | T | Heterozygous |
| NC_037643.1 | 12899124 | SNV | 1 | C | T | Heterozygous |
| NC_037643.1 | 12899134 | SNV | 1 | C | T | Heterozygous |

|             |          |     |   |   |   |              |
|-------------|----------|-----|---|---|---|--------------|
| NC_037643.1 | 12899144 | SNV | 1 | C | G | Heterozygous |
| NC_037643.1 | 12899183 | SNV | 1 | G | T | Homozygous   |
| NC_037643.1 | 12900979 | SNV | 1 | T | G | Homozygous   |
| NC_037643.1 | 12901703 | SNV | 1 | C | A | Heterozygous |
| NC_037643.1 | 12901721 | SNV | 1 | T | G | Heterozygous |
| NC_037643.1 | 12901731 | SNV | 1 | A | T | Heterozygous |
| NC_037643.1 | 12903752 | SNV | 1 | A | G | Heterozygous |
| NC_037643.1 | 12903756 | SNV | 1 | T | A | Homozygous   |
| NC_037643.1 | 12903787 | SNV | 1 | T | G | Homozygous   |
| NC_037643.1 | 12903789 | SNV | 1 | T | G | Homozygous   |
| NC_037643.1 | 12903791 | SNV | 1 | T | G | Homozygous   |
| NC_037643.1 | 12903794 | SNV | 1 | C | T | Homozygous   |
| NC_037643.1 | 12903798 | SNV | 1 | C | T | Homozygous   |
| NC_037643.1 | 12904665 | SNV | 1 | C | T | Heterozygous |
| NC_037643.1 | 12904852 | SNV | 1 | C | T | Homozygous   |
| NC_037643.1 | 12904876 | SNV | 1 | T | A | Heterozygous |
| NC_037643.1 | 12905154 | SNV | 1 | A | G | Homozygous   |
| NC_037643.1 | 12905277 | SNV | 1 | G | T | Heterozygous |
| NC_037643.1 | 12905283 | SNV | 1 | T | A | Homozygous   |
| NC_037643.1 | 12905286 | SNV | 1 | G | A | Heterozygous |
| NC_037643.1 | 12905290 | SNV | 1 | C | T | Heterozygous |
| NC_037643.1 | 12905312 | SNV | 1 | C | T | Heterozygous |
| NC_037643.1 | 12905381 | SNV | 1 | T | C | Heterozygous |
| NC_037643.1 | 12905417 | SNV | 1 | T | C | Heterozygous |
| NC_037643.1 | 12905483 | SNV | 1 | T | C | Homozygous   |
| NC_037643.1 | 12905606 | SNV | 1 | A | G | Homozygous   |
| NC_037643.1 | 12905819 | SNV | 1 | G | A | Homozygous   |
| NC_037643.1 | 12906315 | SNV | 1 | C | T | Homozygous   |
| NC_037643.1 | 12908126 | SNV | 1 | C | T | Heterozygous |
| NC_037643.1 | 12908135 | SNV | 1 | C | T | Heterozygous |
| NC_037643.1 | 12908198 | SNV | 1 | C | T | Heterozygous |
| NC_037643.1 | 12908234 | SNV | 1 | A | G | Heterozygous |
| NC_037643.1 | 12908240 | SNV | 1 | T | C | Homozygous   |
| NC_037643.1 | 12909665 | SNV | 1 | C | T | Homozygous   |
| NC_037643.1 | 12909927 | SNV | 1 | G | A | Homozygous   |
| NC_037643.1 | 12909957 | SNV | 1 | A | G | Homozygous   |
| NC_037643.1 | 12910367 | SNV | 1 | C | T | Heterozygous |
| NC_037643.1 | 12911165 | SNV | 1 | T | C | Homozygous   |
| NC_037643.1 | 12911200 | SNV | 1 | A | G | Homozygous   |
| NC_037643.1 | 12911246 | SNV | 1 | C | T | Homozygous   |
| NC_037643.1 | 12911248 | SNV | 1 | A | T | Heterozygous |
| NC_037643.1 | 12911259 | SNV | 1 | G | C | Heterozygous |
| NC_037643.1 | 12911673 | SNV | 1 | A | G | Homozygous   |
| NC_037643.1 | 12911731 | SNV | 1 | A | G | Homozygous   |
| NC_037643.1 | 12911869 | SNV | 1 | A | T | Heterozygous |
| NC_037643.1 | 12912294 | SNV | 1 | G | A | Heterozygous |
| NC_037643.1 | 12912316 | SNV | 1 | G | C | Heterozygous |
| NC_037643.1 | 12912617 | SNV | 1 | G | A | Heterozygous |
| NC_037643.1 | 12912622 | SNV | 1 | C | T | Heterozygous |
| NC_037643.1 | 12912627 | SNV | 1 | A | G | Homozygous   |
| NC_037643.1 | 12912637 | SNV | 1 | A | G | Heterozygous |



|             |          |     |   |   |   |              |
|-------------|----------|-----|---|---|---|--------------|
| NC_037643.1 | 12912638 | SNV | 1 | A | T | Heterozygous |
| NC_037643.1 | 12912639 | SNV | 1 | G | A | Heterozygous |
| NC_037643.1 | 12912657 | SNV | 1 | T | C | Heterozygous |
| NC_037643.1 | 12912769 | SNV | 1 | A | G | Homozygous   |
| NC_037643.1 | 12912815 | SNV | 1 | A | G | Homozygous   |
| NC_037643.1 | 12912856 | SNV | 1 | C | T | Heterozygous |
| NC_037643.1 | 12913126 | SNV | 1 | C | G | Homozygous   |
| NC_037643.1 | 12913210 | SNV | 1 | C | T | Heterozygous |
| NC_037643.1 | 12913568 | SNV | 1 | A | G | Homozygous   |
| NC_037643.1 | 12913652 | SNV | 1 | C | T | Homozygous   |
| NC_037643.1 | 12913721 | SNV | 1 | T | C | Homozygous   |
| NC_037643.1 | 12913764 | SNV | 1 | T | C | Homozygous   |
| NC_037643.1 | 12913840 | SNV | 1 | C | T | Homozygous   |
| NC_037643.1 | 12913846 | SNV | 1 | A | G | Homozygous   |
| NC_037643.1 | 12914028 | SNV | 1 | G | A | Heterozygous |
| NC_037643.1 | 12914068 | SNV | 1 | T | A | Homozygous   |
| NC_037643.1 | 12914089 | SNV | 1 | C | T | Heterozygous |
| NC_037643.1 | 12916125 | SNV | 1 | G | A | Heterozygous |
| NC_037643.1 | 12916129 | SNV | 1 | C | T | Heterozygous |
| NC_037643.1 | 12916216 | SNV | 1 | C | T | Heterozygous |
| NC_037643.1 | 12916401 | SNV | 1 | T | C | Homozygous   |
| NC_037643.1 | 12916446 | SNV | 1 | A | G | Homozygous   |
| NC_037643.1 | 12916748 | SNV | 1 | G | A | Homozygous   |
| NC_037643.1 | 12923929 | SNV | 1 | G | A | Heterozygous |
| NC_037643.1 | 12925743 | SNV | 1 | G | C | Heterozygous |
| NC_037643.1 | 12925849 | SNV | 1 | T | C | Homozygous   |
| NC_037643.1 | 12925876 | SNV | 1 | A | G | Homozygous   |
| NC_037643.1 | 12926036 | SNV | 1 | A | G | Heterozygous |
| NC_037643.1 | 12926045 | SNV | 1 | A | T | Heterozygous |
| NC_037643.1 | 12926047 | SNV | 1 | C | G | Heterozygous |
| NC_037643.1 | 12926056 | SNV | 1 | A | G | Heterozygous |
| NC_037643.1 | 12926058 | SNV | 1 | T | A | Heterozygous |
| NC_037643.1 | 12926060 | SNV | 1 | A | G | Heterozygous |
| NC_037643.1 | 12926078 | SNV | 1 | T | C | Heterozygous |
| NC_037643.1 | 12926359 | SNV | 1 | T | C | Homozygous   |
| NC_037643.1 | 12935062 | SNV | 1 | A | T | Homozygous   |
| NC_037643.1 | 12935067 | SNV | 1 | T | C | Homozygous   |
| NC_037643.1 | 12935069 | SNV | 1 | A | G | Homozygous   |
| NC_037643.1 | 12935073 | SNV | 1 | G | A | Homozygous   |
| NC_037643.1 | 12935803 | SNV | 1 | T | A | Homozygous   |
| NC_037643.1 | 12935819 | SNV | 1 | C | T | Homozygous   |
| NC_037643.1 | 12935821 | SNV | 1 | A | T | Homozygous   |
| NC_037643.1 | 12935824 | SNV | 1 | A | T | Homozygous   |
| NC_037643.1 | 12941488 | SNV | 1 | A | G | Homozygous   |
| NC_037643.1 | 12941494 | SNV | 1 | T | C | Homozygous   |
| NC_037643.1 | 12941496 | SNV | 1 | T | C | Homozygous   |
| NC_037643.1 | 12943714 | SNV | 1 | G | A | Homozygous   |
| NC_037643.1 | 12943726 | SNV | 1 | G | C | Homozygous   |
| NC_037643.1 | 12943732 | SNV | 1 | T | A | Homozygous   |
| NC_037643.1 | 12951722 | SNV | 1 | T | C | Heterozygous |
| NC_037643.1 | 12951743 | SNV | 1 | C | T | Heterozygous |

|             |          |     |   |   |   |              |
|-------------|----------|-----|---|---|---|--------------|
| NC_037643.1 | 12955332 | SNV | 1 | T | C | Homozygous   |
| NC_037643.1 | 12955334 | SNV | 1 | A | T | Homozygous   |
| NC_037643.1 | 12955336 | SNV | 1 | T | A | Homozygous   |
| NC_037643.1 | 12966285 | SNV | 1 | G | A | Homozygous   |
| NC_037643.1 | 12966491 | SNV | 1 | G | A | Homozygous   |
| NC_037643.1 | 12966493 | SNV | 1 | A | C | Homozygous   |
| NC_037643.1 | 12976997 | SNV | 1 | C | T | Heterozygous |
| NC_037643.1 | 12977530 | SNV | 1 | A | G | Heterozygous |
| NC_037643.1 | 12977536 | SNV | 1 | C | A | Heterozygous |
| NC_037643.1 | 12977732 | SNV | 1 | T | A | Homozygous   |
| NC_037643.1 | 12977745 | SNV | 1 | A | G | Heterozygous |
| NC_037643.1 | 12981887 | SNV | 1 | C | T | Homozygous   |
| NC_037643.1 | 12984370 | SNV | 1 | T | C | Homozygous   |
| NC_037643.1 | 12984416 | SNV | 1 | C | T | Heterozygous |
| NC_037643.1 | 12984427 | SNV | 1 | A | T | Heterozygous |
| NC_037643.1 | 12984765 | SNV | 1 | G | T | Homozygous   |
| NC_037643.1 | 12984767 | SNV | 1 | A | G | Homozygous   |
| NC_037643.1 | 12984769 | SNV | 1 | G | T | Homozygous   |
| NC_037643.1 | 12985433 | SNV | 1 | T | C | Heterozygous |
| NC_037643.1 | 12987623 | SNV | 1 | C | T | Homozygous   |
| NC_037643.1 | 12999225 | SNV | 1 | G | A | Heterozygous |
| NC_037643.1 | 12999618 | SNV | 1 | A | G | Heterozygous |
| NC_037643.1 | 13000035 | SNV | 1 | C | T | Heterozygous |
| NC_037643.1 | 13002575 | SNV | 1 | T | C | Homozygous   |
| NC_037643.1 | 13002596 | SNV | 1 | A | G | Homozygous   |
| NC_037643.1 | 13004647 | SNV | 1 | T | C | Heterozygous |
| NC_037643.1 | 13004851 | SNV | 1 | C | G | Homozygous   |
| NC_037643.1 | 13004856 | SNV | 1 | A | G | Homozygous   |
| NC_037643.1 | 13004867 | SNV | 1 | G | A | Heterozygous |
| NC_037643.1 | 13004873 | SNV | 1 | G | A | Homozygous   |
| NC_037643.1 | 13004879 | SNV | 1 | A | G | Heterozygous |
| NC_037643.1 | 13004903 | SNV | 1 | C | T | Heterozygous |
| NC_037643.1 | 13004911 | SNV | 1 | A | G | Heterozygous |
| NC_037643.1 | 13005294 | SNV | 1 | T | C | Homozygous   |
| NC_037643.1 | 13006897 | SNV | 1 | G | A | Heterozygous |
| NC_037643.1 | 13006899 | SNV | 1 | A | G | Heterozygous |
| NC_037643.1 | 13006903 | SNV | 1 | A | G | Heterozygous |
| NC_037643.1 | 13006907 | SNV | 1 | A | G | Heterozygous |
| NC_037643.1 | 13006911 | SNV | 1 | A | G | Heterozygous |
| NC_037643.1 | 13012447 | SNV | 1 | T | C | Heterozygous |
| NC_037643.1 | 13012668 | SNV | 1 | T | C | Homozygous   |
| NC_037643.1 | 13013453 | SNV | 1 | A | G | Heterozygous |
| NC_037643.1 | 13013524 | SNV | 1 | C | G | Homozygous   |
| NC_037643.1 | 13013791 | SNV | 1 | A | G | Heterozygous |
| NC_037643.1 | 13015249 | SNV | 1 | G | A | Homozygous   |
| NC_037643.1 | 13021095 | SNV | 1 | T | C | Heterozygous |
| NC_037643.1 | 13021107 | SNV | 1 | A | C | Heterozygous |
| NC_037643.1 | 13021110 | SNV | 1 | T | C | Heterozygous |
| NC_037643.1 | 13021118 | SNV | 1 | A | T | Heterozygous |
| NC_037643.1 | 13021128 | SNV | 1 | C | T | Heterozygous |
| NC_037643.1 | 13021137 | SNV | 1 | A | C | Heterozygous |

|             |          |     |   |   |   |              |
|-------------|----------|-----|---|---|---|--------------|
| NC_037643.1 | 13021149 | SNV | 1 | A | G | Heterozygous |
| NC_037643.1 | 13021155 | SNV | 1 | A | T | Heterozygous |
| NC_037643.1 | 13021545 | SNV | 1 | C | T | Heterozygous |
| NC_037643.1 | 13021557 | SNV | 1 | C | T | Heterozygous |
| NC_037643.1 | 13021560 | SNV | 1 | T | G | Heterozygous |
| NC_037643.1 | 13021564 | SNV | 1 | T | G | Heterozygous |
| NC_037643.1 | 13021581 | SNV | 1 | A | C | Heterozygous |
| NC_037643.1 | 13021590 | SNV | 1 | A | C | Heterozygous |
| NC_037643.1 | 13021593 | SNV | 1 | T | A | Heterozygous |
| NC_037643.1 | 13021605 | SNV | 1 | T | C | Heterozygous |
| NC_037643.1 | 13021759 | SNV | 1 | A | C | Heterozygous |
| NC_037643.1 | 13021767 | SNV | 1 | T | C | Heterozygous |
| NC_037643.1 | 13021782 | SNV | 1 | A | G | Heterozygous |
| NC_037643.1 | 13021785 | SNV | 1 | C | T | Heterozygous |
| NC_037643.1 | 13021794 | SNV | 1 | A | T | Heterozygous |
| NC_037643.1 | 13021815 | SNV | 1 | A | C | Heterozygous |
| NC_037643.1 | 13021818 | SNV | 1 | A | G | Heterozygous |
| NC_037643.1 | 13021821 | SNV | 1 | A | C | Heterozygous |
| NC_037643.1 | 13021824 | SNV | 1 | A | G | Heterozygous |
| NC_037643.1 | 13021827 | SNV | 1 | T | C | Heterozygous |
| NC_037643.1 | 13021845 | SNV | 1 | T | C | Heterozygous |
| NC_037643.1 | 13021854 | SNV | 1 | A | C | Heterozygous |
| NC_037643.1 | 13023259 | SNV | 1 | T | C | Homozygous   |
| NC_037643.1 | 13024438 | SNV | 1 | C | T | Homozygous   |
| NC_037643.1 | 13028756 | SNV | 1 | T | C | Homozygous   |
| NC_037643.1 | 13031483 | SNV | 1 | T | A | Homozygous   |
| NC_037643.1 | 13032944 | SNV | 1 | A | C | Homozygous   |
| NC_037643.1 | 13038597 | SNV | 1 | T | A | Homozygous   |
| NC_037643.1 | 13039206 | SNV | 1 | G | A | Homozygous   |
| NC_037643.1 | 13039435 | SNV | 1 | G | A | Heterozygous |
| NC_037643.1 | 13039672 | SNV | 1 | T | C | Homozygous   |
| NC_037643.1 | 13051733 | SNV | 1 | C | T | Heterozygous |
| NC_037643.1 | 13051782 | SNV | 1 | A | G | Homozygous   |
| NC_037643.1 | 13051785 | SNV | 1 | T | C | Homozygous   |
| NC_037643.1 | 13051806 | SNV | 1 | T | C | Homozygous   |
| NC_037643.1 | 13051847 | SNV | 1 | A | T | Heterozygous |
| NC_037643.1 | 13052255 | SNV | 1 | A | T | Homozygous   |
| NC_037643.1 | 13052258 | SNV | 1 | A | C | Homozygous   |
| NC_037643.1 | 13052395 | SNV | 1 | G | A | Heterozygous |
| NC_037643.1 | 13052555 | SNV | 1 | T | C | Homozygous   |
| NC_037643.1 | 13052826 | SNV | 1 | A | C | Homozygous   |
| NC_037643.1 | 13058100 | SNV | 1 | A | G | Heterozygous |
| NC_037643.1 | 13059939 | SNV | 1 | T | C | Homozygous   |
| NC_037643.1 | 13060311 | SNV | 1 | A | G | Heterozygous |
| NC_037643.1 | 13068552 | SNV | 1 | A | G | Heterozygous |
| NC_037643.1 | 13073976 | SNV | 1 | C | T | Heterozygous |
| NC_037643.1 | 13074284 | SNV | 1 | A | G | Homozygous   |
| NC_037643.1 | 13074300 | SNV | 1 | T | C | Homozygous   |
| NC_037643.1 | 13074330 | SNV | 1 | G | A | Heterozygous |
| NC_037643.1 | 13074333 | SNV | 1 | A | G | Homozygous   |
| NC_037643.1 | 13074337 | SNV | 1 | C | T | Homozygous   |

|             |          |     |   |   |   |              |
|-------------|----------|-----|---|---|---|--------------|
| NC_037643.1 | 13074447 | SNV | 1 | T | C | Homozygous   |
| NC_037643.1 | 13078970 | SNV | 1 | T | A | Homozygous   |
| NC_037643.1 | 13078993 | SNV | 1 | G | A | Homozygous   |
| NC_037643.1 | 13079016 | SNV | 1 | T | A | Homozygous   |
| NC_037643.1 | 13079020 | SNV | 1 | G | T | Homozygous   |
| NC_037643.1 | 13079055 | SNV | 1 | A | T | Heterozygous |
| NC_037643.1 | 13079057 | SNV | 1 | A | G | Heterozygous |
| NC_037643.1 | 13079063 | SNV | 1 | T | G | Heterozygous |
| NC_037643.1 | 13079079 | SNV | 1 | T | A | Heterozygous |
| NC_037643.1 | 13079079 | SNV | 1 | T | C | Heterozygous |
| NC_037643.1 | 13079081 | SNV | 1 | A | T | Heterozygous |
| NC_037643.1 | 13079084 | SNV | 1 | A | C | Heterozygous |
| NC_037643.1 | 13079094 | SNV | 1 | T | A | Heterozygous |
| NC_037643.1 | 13081054 | SNV | 1 | T | C | Homozygous   |
| NC_037643.1 | 13081820 | SNV | 1 | G | A | Homozygous   |
| NC_037643.1 | 13085575 | SNV | 1 | T | A | Homozygous   |
| NC_037643.1 | 13091913 | SNV | 1 | A | C | Homozygous   |
| NC_037643.1 | 13110634 | SNV | 1 | T | C | Homozygous   |
| NC_037643.1 | 13110639 | SNV | 1 | A | T | Homozygous   |
| NC_037643.1 | 13110673 | SNV | 1 | G | T | Homozygous   |
| NC_037643.1 | 13110676 | SNV | 1 | G | T | Homozygous   |
| NC_037643.1 | 13110683 | SNV | 1 | T | C | Homozygous   |
| NC_037643.1 | 13110693 | SNV | 1 | T | A | Homozygous   |
| NC_037643.1 | 13111029 | SNV | 1 | T | C | Homozygous   |
| NC_037643.1 | 13113106 | SNV | 1 | C | T | Homozygous   |
| NC_037643.1 | 13116344 | SNV | 1 | G | A | Heterozygous |
| NC_037643.1 | 13163130 | SNV | 1 | T | C | Homozygous   |
| NC_037643.1 | 13163133 | SNV | 1 | C | T | Heterozygous |
| NC_037643.1 | 13163205 | SNV | 1 | T | C | Homozygous   |
| NC_037643.1 | 13163302 | SNV | 1 | T | C | Heterozygous |
| NC_037643.1 | 13163721 | SNV | 1 | C | T | Heterozygous |
| NC_037643.1 | 13163802 | SNV | 1 | A | G | Heterozygous |
| NC_037643.1 | 13164123 | SNV | 1 | T | C | Homozygous   |
| NC_037643.1 | 13164149 | SNV | 1 | C | T | Homozygous   |
| NC_037643.1 | 13166142 | SNV | 1 | C | T | Heterozygous |
| NC_037643.1 | 13166358 | SNV | 1 | T | C | Heterozygous |
| NC_037643.1 | 13166475 | SNV | 1 | G | A | Heterozygous |
| NC_037643.1 | 13168030 | SNV | 1 | A | G | Heterozygous |
| NC_037643.1 | 13169284 | SNV | 1 | T | C | Heterozygous |
| NC_037643.1 | 13169575 | SNV | 1 | G | T | Heterozygous |
| NC_037643.1 | 13169580 | SNV | 1 | G | T | Heterozygous |
| NC_037643.1 | 13169587 | SNV | 1 | G | T | Heterozygous |
| NC_037643.1 | 13170665 | SNV | 1 | A | G | Heterozygous |
| NC_037643.1 | 13170686 | SNV | 1 | T | C | Heterozygous |
| NC_037643.1 | 13181190 | SNV | 1 | G | A | Homozygous   |
| NC_037643.1 | 13181200 | SNV | 1 | T | A | Homozygous   |
| NC_037643.1 | 13187341 | SNV | 1 | A | T | Homozygous   |
| NC_037643.1 | 13187380 | SNV | 1 | A | C | Homozygous   |
| NC_037643.1 | 13192075 | SNV | 1 | A | G | Heterozygous |
| NC_037643.1 | 13192201 | SNV | 1 | G | A | Homozygous   |
| NC_037643.1 | 13192543 | SNV | 1 | G | A | Homozygous   |

|             |          |     |   |   |   |              |
|-------------|----------|-----|---|---|---|--------------|
| NC_037643.1 | 13193877 | SNV | 1 | A | G | Homozygous   |
| NC_037643.1 | 13194214 | SNV | 1 | T | A | Homozygous   |
| NC_037643.1 | 13194225 | SNV | 1 | T | A | Homozygous   |
| NC_037643.1 | 13194231 | SNV | 1 | T | G | Homozygous   |
| NC_037643.1 | 13194233 | SNV | 1 | T | A | Homozygous   |
| NC_037643.1 | 13196248 | SNV | 1 | G | A | Heterozygous |
| NC_037643.1 | 13198210 | SNV | 1 | G | T | Heterozygous |
| NC_037643.1 | 13199769 | SNV | 1 | G | C | Heterozygous |
| NC_037643.1 | 13199902 | SNV | 1 | A | T | Homozygous   |
| NC_037643.1 | 13199904 | SNV | 1 | A | T | Homozygous   |
| NC_037643.1 | 13199908 | SNV | 1 | A | G | Homozygous   |
| NC_037643.1 | 13200797 | SNV | 1 | T | C | Heterozygous |
| NC_037643.1 | 13209867 | SNV | 1 | G | A | Heterozygous |
| NC_037643.1 | 13209970 | SNV | 1 | G | A | Homozygous   |
| NC_037643.1 | 13210161 | SNV | 1 | T | A | Heterozygous |
| NC_037643.1 | 13210462 | SNV | 1 | T | C | Heterozygous |
| NC_037643.1 | 13210464 | SNV | 1 | C | A | Heterozygous |
| NC_037643.1 | 13210467 | SNV | 1 | T | A | Heterozygous |
| NC_037643.1 | 13210473 | SNV | 1 | T | G | Homozygous   |
| NC_037643.1 | 13210480 | SNV | 1 | T | C | Homozygous   |
| NC_037643.1 | 13210482 | SNV | 1 | A | T | Homozygous   |
| NC_037643.1 | 13210661 | SNV | 1 | T | C | Homozygous   |
| NC_037643.1 | 13210669 | SNV | 1 | G | A | Homozygous   |
| NC_037643.1 | 13210769 | SNV | 1 | T | C | Homozygous   |
| NC_037643.1 | 13210827 | SNV | 1 | G | C | Homozygous   |
| NC_037643.1 | 13210831 | SNV | 1 | G | C | Homozygous   |
| NC_037643.1 | 13210834 | SNV | 1 | G | A | Homozygous   |
| NC_037643.1 | 13211512 | SNV | 1 | A | G | Homozygous   |
| NC_037643.1 | 13211608 | SNV | 1 | A | G | Heterozygous |
| NC_037643.1 | 13212357 | SNV | 1 | T | G | Homozygous   |
| NC_037643.1 | 13212359 | SNV | 1 | A | G | Homozygous   |
| NC_037643.1 | 13216249 | SNV | 1 | G | T | Homozygous   |
| NC_037643.1 | 13216282 | SNV | 1 | A | G | Homozygous   |
| NC_037643.1 | 13217307 | SNV | 1 | T | G | Heterozygous |
| NC_037643.1 | 13222577 | SNV | 1 | T | C | Homozygous   |
| NC_037643.1 | 13238069 | SNV | 1 | A | G | Heterozygous |
| NC_037643.1 | 13238857 | SNV | 1 | T | C | Homozygous   |
| NC_037643.1 | 13242002 | SNV | 1 | G | T | Heterozygous |
| NC_037643.1 | 13242033 | SNV | 1 | T | A | Heterozygous |
| NC_037643.1 | 13243754 | SNV | 1 | A | T | Heterozygous |
| NC_037643.1 | 13244246 | SNV | 1 | A | T | Homozygous   |
| NC_037643.1 | 13244254 | SNV | 1 | T | C | Homozygous   |
| NC_037643.1 | 13244694 | SNV | 1 | T | C | Homozygous   |
| NC_037643.1 | 13246746 | SNV | 1 | C | T | Heterozygous |
| NC_037643.1 | 13247824 | SNV | 1 | T | A | Heterozygous |
| NC_037643.1 | 13251679 | SNV | 1 | C | G | Homozygous   |
| NC_037643.1 | 13257867 | SNV | 1 | A | G | Homozygous   |
| NC_037643.1 | 13269529 | SNV | 1 | G | A | Heterozygous |
| NC_037643.1 | 13269545 | SNV | 1 | G | A | Heterozygous |
| NC_037643.1 | 13269553 | SNV | 1 | A | T | Heterozygous |
| NC_037643.1 | 13269556 | SNV | 1 | T | C | Heterozygous |

|             |          |     |   |   |   |              |
|-------------|----------|-----|---|---|---|--------------|
| NC_037643.1 | 13269558 | SNV | 1 | T | C | Heterozygous |
| NC_037643.1 | 13273448 | SNV | 1 | T | C | Homozygous   |
| NC_037643.1 | 13273869 | SNV | 1 | C | A | Homozygous   |
| NC_037643.1 | 13276349 | SNV | 1 | A | G | Heterozygous |
| NC_037643.1 | 13276660 | SNV | 1 | T | C | Homozygous   |
| NC_037643.1 | 13276674 | SNV | 1 | T | C | Homozygous   |
| NC_037643.1 | 13276890 | SNV | 1 | A | T | Homozygous   |
| NC_037643.1 | 13277065 | SNV | 1 | T | C | Homozygous   |
| NC_037643.1 | 13278556 | SNV | 1 | T | C | Homozygous   |
| NC_037643.1 | 13279871 | SNV | 1 | T | C | Heterozygous |
| NC_037643.1 | 13279885 | SNV | 1 | A | G | Homozygous   |
| NC_037643.1 | 13280066 | SNV | 1 | T | C | Homozygous   |
| NC_037643.1 | 13280074 | SNV | 1 | T | A | Homozygous   |
| NC_037643.1 | 13280081 | SNV | 1 | A | T | Homozygous   |
| NC_037643.1 | 13280089 | SNV | 1 | A | T | Homozygous   |
| NC_037643.1 | 13282320 | SNV | 1 | A | G | Heterozygous |
| NC_037643.1 | 13285159 | SNV | 1 | A | T | Homozygous   |
| NC_037643.1 | 13285162 | SNV | 1 | A | T | Homozygous   |
| NC_037643.1 | 13285164 | SNV | 1 | T | A | Homozygous   |
| NC_037643.1 | 13285186 | SNV | 1 | T | A | Homozygous   |
| NC_037643.1 | 13290342 | SNV | 1 | G | A | Heterozygous |
| NC_037643.1 | 13290409 | SNV | 1 | T | C | Homozygous   |
| NC_037643.1 | 13290972 | SNV | 1 | A | T | Homozygous   |
| NC_037643.1 | 13294392 | SNV | 1 | T | G | Homozygous   |
| NC_037643.1 | 13294394 | SNV | 1 | T | A | Homozygous   |
| NC_037643.1 | 13294396 | SNV | 1 | A | T | Homozygous   |
| NC_037643.1 | 13294399 | SNV | 1 | T | A | Homozygous   |
| NC_037643.1 | 13304108 | SNV | 1 | T | C | Heterozygous |
| NC_037643.1 | 13305082 | SNV | 1 | A | T | Homozygous   |
| NC_037643.1 | 13305084 | SNV | 1 | A | T | Homozygous   |
| NC_037643.1 | 13305089 | SNV | 1 | T | A | Homozygous   |
| NC_037643.1 | 13305091 | SNV | 1 | T | A | Homozygous   |
| NC_037643.1 | 13308654 | SNV | 1 | A | G | Homozygous   |
| NC_037643.1 | 13309223 | SNV | 1 | T | C | Heterozygous |
| NC_037643.1 | 13309582 | SNV | 1 | T | C | Heterozygous |
| NC_037643.1 | 13310899 | SNV | 1 | T | C | Homozygous   |
| NC_037643.1 | 13315198 | SNV | 1 | T | C | Heterozygous |
| NC_037643.1 | 13315822 | SNV | 1 | T | C | Homozygous   |
| NC_037643.1 | 13320733 | SNV | 1 | T | A | Homozygous   |
| NC_037643.1 | 13328375 | SNV | 1 | A | G | Heterozygous |
| NC_037643.1 | 13328443 | SNV | 1 | A | G | Heterozygous |
| NC_037643.1 | 13328474 | SNV | 1 | A | G | Heterozygous |
| NC_037643.1 | 13330151 | SNV | 1 | T | G | Heterozygous |
| NC_037643.1 | 13331046 | SNV | 1 | T | A | Heterozygous |
| NC_037643.1 | 13331049 | SNV | 1 | T | A | Heterozygous |
| NC_037643.1 | 13331056 | SNV | 1 | T | G | Heterozygous |
| NC_037643.1 | 13331081 | SNV | 1 | T | C | Heterozygous |
| NC_037643.1 | 13331157 | SNV | 1 | A | G | Homozygous   |
| NC_037643.1 | 13332631 | SNV | 1 | T | C | Heterozygous |
| NC_037643.1 | 13335530 | SNV | 1 | G | C | Heterozygous |
| NC_037643.1 | 13339214 | SNV | 1 | A | G | Homozygous   |

|             |          |     |   |   |   |              |
|-------------|----------|-----|---|---|---|--------------|
| NC_037643.1 | 13339333 | SNV | 1 | T | G | Homozygous   |
| NC_037643.1 | 13340061 | SNV | 1 | C | T | Homozygous   |
| NC_037643.1 | 13344895 | SNV | 1 | T | C | Homozygous   |
| NC_037643.1 | 13345245 | SNV | 1 | A | G | Heterozygous |
| NC_037643.1 | 13347728 | SNV | 1 | A | G | Homozygous   |
| NC_037643.1 | 13352343 | SNV | 1 | G | A | Heterozygous |
| NC_037643.1 | 13352421 | SNV | 1 | G | A | Heterozygous |
| NC_037643.1 | 13352675 | SNV | 1 | A | G | Heterozygous |
| NC_037643.1 | 13356964 | SNV | 1 | A | G | Heterozygous |
| NC_037643.1 | 13358741 | SNV | 1 | G | T | Homozygous   |
| NC_037643.1 | 13358993 | SNV | 1 | T | C | Heterozygous |
| NC_037643.1 | 13359195 | SNV | 1 | A | T | Homozygous   |
| NC_037643.1 | 13359301 | SNV | 1 | T | G | Homozygous   |
| NC_037643.1 | 13359305 | SNV | 1 | T | A | Homozygous   |
| NC_037643.1 | 13359308 | SNV | 1 | G | T | Homozygous   |
| NC_037643.1 | 13359310 | SNV | 1 | T | G | Homozygous   |
| NC_037643.1 | 13359321 | SNV | 1 | G | C | Homozygous   |
| NC_037643.1 | 13359546 | SNV | 1 | G | A | Heterozygous |
| NC_037643.1 | 13359714 | SNV | 1 | G | A | Homozygous   |
| NC_037643.1 | 13359814 | SNV | 1 | G | A | Heterozygous |
| NC_037643.1 | 13359824 | SNV | 1 | G | A | Heterozygous |
| NC_037643.1 | 13359884 | SNV | 1 | A | G | Homozygous   |
| NC_037643.1 | 13359936 | SNV | 1 | A | G | Heterozygous |
| NC_037643.1 | 13361094 | SNV | 1 | G | T | Homozygous   |
| NC_037643.1 | 13361109 | SNV | 1 | G | A | Homozygous   |
| NC_037643.1 | 13361112 | SNV | 1 | A | T | Homozygous   |
| NC_037643.1 | 13361135 | SNV | 1 | C | G | Homozygous   |
| NC_037643.1 | 13361895 | SNV | 1 | C | T | Homozygous   |
| NC_037643.1 | 13361927 | SNV | 1 | T | C | Heterozygous |
| NC_037643.1 | 13366277 | SNV | 1 | T | C | Homozygous   |
| NC_037643.1 | 13368348 | SNV | 1 | A | G | Heterozygous |
| NC_037643.1 | 13368374 | SNV | 1 | T | C | Homozygous   |
| NC_037643.1 | 13372587 | SNV | 1 | A | T | Homozygous   |
| NC_037643.1 | 13372768 | SNV | 1 | C | T | Heterozygous |
| NC_037643.1 | 13377490 | SNV | 1 | A | G | Homozygous   |
| NC_037643.1 | 13378226 | SNV | 1 | T | C | Heterozygous |
| NC_037643.1 | 13388324 | SNV | 1 | G | A | Heterozygous |
| NC_037643.1 | 13388379 | SNV | 1 | G | A | Homozygous   |
| NC_037643.1 | 13388405 | SNV | 1 | C | A | Homozygous   |
| NC_037643.1 | 13388711 | SNV | 1 | G | A | Heterozygous |
| NC_037643.1 | 13388803 | SNV | 1 | A | T | Heterozygous |
| NC_037643.1 | 13388816 | SNV | 1 | T | A | Heterozygous |
| NC_037643.1 | 13388865 | SNV | 1 | A | T | Heterozygous |
| NC_037643.1 | 13388873 | SNV | 1 | C | T | Heterozygous |
| NC_037643.1 | 13389179 | SNV | 1 | T | C | Homozygous   |
| NC_037643.1 | 13389690 | SNV | 1 | C | T | Homozygous   |
| NC_037643.1 | 13389692 | SNV | 1 | C | T | Homozygous   |
| NC_037643.1 | 13389701 | SNV | 1 | C | T | Homozygous   |
| NC_037643.1 | 13390501 | SNV | 1 | C | T | Homozygous   |
| NC_037643.1 | 13391527 | SNV | 1 | C | T | Homozygous   |
| NC_037643.1 | 13391545 | SNV | 1 | A | G | Homozygous   |

|             |          |     |   |   |   |              |
|-------------|----------|-----|---|---|---|--------------|
| NC_037643.1 | 13392563 | SNV | 1 | C | T | Heterozygous |
| NC_037643.1 | 13392845 | SNV | 1 | A | G | Homozygous   |
| NC_037643.1 | 13398754 | SNV | 1 | T | C | Heterozygous |
| NC_037643.1 | 13398763 | SNV | 1 | G | A | Heterozygous |
| NC_037643.1 | 13400545 | SNV | 1 | G | A | Homozygous   |
| NC_037643.1 | 13400568 | SNV | 1 | C | G | Heterozygous |
| NC_037643.1 | 13400577 | SNV | 1 | A | T | Heterozygous |
| NC_037643.1 | 13405394 | SNV | 1 | T | G | Homozygous   |
| NC_037643.1 | 13405401 | SNV | 1 | C | G | Homozygous   |
| NC_037643.1 | 13405420 | SNV | 1 | C | T | Homozygous   |
| NC_037643.1 | 13405425 | SNV | 1 | T | A | Homozygous   |
| NC_037643.1 | 13405436 | SNV | 1 | A | T | Homozygous   |
| NC_037643.1 | 13405438 | SNV | 1 | A | G | Homozygous   |
| NC_037643.1 | 13693162 | SNV | 1 | T | C | Homozygous   |
| NC_037643.1 | 13693178 | SNV | 1 | T | A | Homozygous   |
| NC_037643.1 | 13693224 | SNV | 1 | A | T | Homozygous   |
| NC_037643.1 | 13693254 | SNV | 1 | T | A | Homozygous   |
| NC_037643.1 | 13693264 | SNV | 1 | A | T | Homozygous   |
| NC_037643.1 | 13693266 | SNV | 1 | T | A | Homozygous   |
| NC_037643.1 | 13699082 | SNV | 1 | T | A | Homozygous   |
| NC_037643.1 | 13699257 | SNV | 1 | T | C | Homozygous   |
| NC_037643.1 | 13699872 | SNV | 1 | T | A | Homozygous   |
| NC_037643.1 | 13699876 | SNV | 1 | T | A | Homozygous   |
| NC_037643.1 | 13699973 | SNV | 1 | T | C | Homozygous   |
| NC_037643.1 | 13700017 | SNV | 1 | T | C | Homozygous   |
| NC_037643.1 | 13700094 | SNV | 1 | G | A | Homozygous   |
| NC_037643.1 | 13724643 | SNV | 1 | T | A | Heterozygous |
| NC_037643.1 | 13724697 | SNV | 1 | C | T | Homozygous   |
| NC_037643.1 | 13724730 | SNV | 1 | A | T | Homozygous   |
| NC_037643.1 | 13725175 | SNV | 1 | C | T | Homozygous   |
| NC_037643.1 | 13725179 | SNV | 1 | G | A | Homozygous   |
| NC_037643.1 | 13725188 | SNV | 1 | T | C | Heterozygous |
| NC_037643.1 | 13725404 | SNV | 1 | T | C | Homozygous   |
| NC_037643.1 | 13725416 | SNV | 1 | T | C | Homozygous   |
| NC_037643.1 | 13725418 | SNV | 1 | A | G | Homozygous   |
| NC_037643.1 | 13725449 | SNV | 1 | A | T | Homozygous   |
| NC_037643.1 | 13725453 | SNV | 1 | A | T | Homozygous   |
| NC_037643.1 | 13738554 | SNV | 1 | A | T | Homozygous   |
| NC_037643.1 | 13738557 | SNV | 1 | T | G | Homozygous   |
| NC_037643.1 | 13738562 | SNV | 1 | G | C | Homozygous   |
| NC_037643.1 | 13771593 | SNV | 1 | C | T | Homozygous   |
| NC_037643.1 | 13771603 | SNV | 1 | A | T | Heterozygous |
| NC_037643.1 | 13771609 | SNV | 1 | C | T | Homozygous   |
| NC_037643.1 | 13771625 | SNV | 1 | T | C | Homozygous   |
| NC_037643.1 | 13771627 | SNV | 1 | C | T | Heterozygous |
| NC_037643.1 | 13771629 | SNV | 1 | A | G | Homozygous   |
| NC_037643.1 | 13771634 | SNV | 1 | C | T | Homozygous   |
| NC_037643.1 | 13771639 | SNV | 1 | T | A | Heterozygous |
| NC_037643.1 | 13785581 | SNV | 1 | A | T | Heterozygous |
| NC_037643.1 | 13785585 | SNV | 1 | A | C | Homozygous   |
| NC_037643.1 | 13785593 | SNV | 1 | G | A | Homozygous   |



|             |          |     |   |   |   |              |
|-------------|----------|-----|---|---|---|--------------|
| NC_037643.1 | 13785598 | SNV | 1 | C | G | Homozygous   |
| NC_037643.1 | 13858065 | SNV | 1 | T | G | Heterozygous |
| NC_037643.1 | 13858067 | SNV | 1 | G | A | Homozygous   |
| NC_037643.1 | 13858101 | SNV | 1 | A | G | Heterozygous |
| NC_037643.1 | 13858120 | SNV | 1 | T | C | Heterozygous |
| NC_037643.1 | 13858125 | SNV | 1 | T | A | Homozygous   |
| NC_037643.1 | 13858132 | SNV | 1 | A | G | Heterozygous |
| NC_037643.1 | 13859059 | SNV | 1 | G | T | Homozygous   |
| NC_037643.1 | 13859082 | SNV | 1 | A | G | Homozygous   |
| NC_037643.1 | 13877351 | SNV | 1 | T | C | Heterozygous |
| NC_037643.1 | 13877389 | SNV | 1 | T | C | Heterozygous |
| NC_037643.1 | 13877396 | SNV | 1 | C | T | Homozygous   |
| NC_037643.1 | 13894340 | SNV | 1 | A | G | Homozygous   |
| NC_037643.1 | 13894363 | SNV | 1 | T | A | Homozygous   |
| NC_037643.1 | 13961563 | SNV | 1 | T | C | Homozygous   |
| NC_037643.1 | 14004369 | SNV | 1 | A | G | Heterozygous |
| NC_037643.1 | 14004371 | SNV | 1 | T | C | Homozygous   |
| NC_037643.1 | 14004373 | SNV | 1 | G | A | Heterozygous |
| NC_037643.1 | 14030317 | SNV | 1 | A | G | Heterozygous |
| NC_037643.1 | 14046203 | SNV | 1 | A | T | Homozygous   |
| NC_037643.1 | 14046234 | SNV | 1 | T | A | Homozygous   |
| NC_037643.1 | 14046260 | SNV | 1 | A | G | Homozygous   |
| NC_037643.1 | 14046275 | SNV | 1 | A | T | Homozygous   |
| NC_037643.1 | 14047087 | SNV | 1 | G | C | Heterozygous |
| NC_037643.1 | 14047090 | SNV | 1 | G | C | Heterozygous |
| NC_037643.1 | 14047093 | SNV | 1 | G | C | Homozygous   |
| NC_037643.1 | 14047096 | SNV | 1 | T | C | Heterozygous |
| NC_037643.1 | 14047102 | SNV | 1 | G | C | Heterozygous |
| NC_037643.1 | 14049379 | SNV | 1 | G | A | Homozygous   |
| NC_037643.1 | 14049382 | SNV | 1 | G | T | Homozygous   |
| NC_037643.1 | 14049638 | SNV | 1 | C | A | Homozygous   |
| NC_037643.1 | 14049690 | SNV | 1 | C | A | Homozygous   |
| NC_037643.1 | 14049696 | SNV | 1 | A | C | Homozygous   |
| NC_037643.1 | 14049717 | SNV | 1 | A | T | Homozygous   |
| NC_037643.1 | 14049723 | SNV | 1 | A | C | Homozygous   |
| NC_037643.1 | 14052166 | SNV | 1 | A | T | Homozygous   |
| NC_037643.1 | 14052177 | SNV | 1 | A | C | Homozygous   |
| NC_037643.1 | 14052371 | SNV | 1 | G | A | Heterozygous |
| NC_037643.1 | 14112984 | SNV | 1 | C | A | Heterozygous |
| NC_037643.1 | 14113001 | SNV | 1 | G | A | Homozygous   |
| NC_037643.1 | 14113198 | SNV | 1 | A | T | Homozygous   |
| NC_037643.1 | 14113299 | SNV | 1 | A | G | Homozygous   |
| NC_037643.1 | 14113367 | SNV | 1 | T | A | Heterozygous |
| NC_037643.1 | 14113490 | SNV | 1 | C | T | Heterozygous |
| NC_037643.1 | 14113492 | SNV | 1 | T | C | Heterozygous |
| NC_037643.1 | 14113758 | SNV | 1 | T | C | Homozygous   |
| NC_037643.1 | 14113905 | SNV | 1 | A | G | Homozygous   |
| NC_037643.1 | 14113987 | SNV | 1 | A | G | Heterozygous |
| NC_037643.1 | 14114671 | SNV | 1 | C | T | Heterozygous |
| NC_037643.1 | 14114731 | SNV | 1 | T | C | Homozygous   |
| NC_037643.1 | 14114806 | SNV | 1 | C | T | Heterozygous |

|             |          |     |   |   |   |              |
|-------------|----------|-----|---|---|---|--------------|
| NC_037643.1 | 14115023 | SNV | 1 | G | A | Homozygous   |
| NC_037643.1 | 14115039 | SNV | 1 | T | C | Homozygous   |
| NC_037643.1 | 14115392 | SNV | 1 | A | G | Homozygous   |
| NC_037643.1 | 14115620 | SNV | 1 | T | G | Heterozygous |
| NC_037643.1 | 14115677 | SNV | 1 | A | G | Homozygous   |
| NC_037643.1 | 14115680 | SNV | 1 | G | A | Heterozygous |
| NC_037643.1 | 14116609 | SNV | 1 | A | G | Heterozygous |
| NC_037643.1 | 14126904 | SNV | 1 | C | A | Heterozygous |
| NC_037643.1 | 14128605 | SNV | 1 | G | A | Homozygous   |
| NC_037643.1 | 14129291 | SNV | 1 | T | C | Homozygous   |
| NC_037643.1 | 14129306 | SNV | 1 | A | G | Heterozygous |
| NC_037643.1 | 14129373 | SNV | 1 | T | G | Heterozygous |
| NC_037643.1 | 14129640 | SNV | 1 | T | C | Heterozygous |
| NC_037643.1 | 14129716 | SNV | 1 | A | G | Heterozygous |
| NC_037643.1 | 14129969 | SNV | 1 | C | T | Heterozygous |
| NC_037643.1 | 14130002 | SNV | 1 | C | T | Homozygous   |
| NC_037643.1 | 14130154 | SNV | 1 | T | C | Homozygous   |
| NC_037643.1 | 14130277 | SNV | 1 | T | C | Homozygous   |
| NC_037643.1 | 14130327 | SNV | 1 | T | C | Heterozygous |
| NC_037643.1 | 14130393 | SNV | 1 | T | C | Homozygous   |
| NC_037643.1 | 14130600 | SNV | 1 | G | A | Heterozygous |
| NC_037643.1 | 14140666 | SNV | 1 | C | T | Homozygous   |
| NC_037643.1 | 14141325 | SNV | 1 | A | G | Homozygous   |
| NC_037643.1 | 14141463 | SNV | 1 | T | C | Homozygous   |
| NC_037643.1 | 14142493 | SNV | 1 | G | A | Homozygous   |
| NC_037643.1 | 14143321 | SNV | 1 | A | G | Homozygous   |
| NC_037643.1 | 14143570 | SNV | 1 | T | C | Heterozygous |
| NC_037643.1 | 14143665 | SNV | 1 | A | G | Homozygous   |
| NC_037643.1 | 14143787 | SNV | 1 | C | T | Heterozygous |
| NC_037643.1 | 14143793 | SNV | 1 | T | C | Heterozygous |
| NC_037643.1 | 14143800 | SNV | 1 | T | C | Homozygous   |
| NC_037643.1 | 14143822 | SNV | 1 | T | C | Homozygous   |
| NC_037643.1 | 14144754 | SNV | 1 | G | T | Homozygous   |
| NC_037643.1 | 14145514 | SNV | 1 | A | G | Homozygous   |
| NC_037643.1 | 14155141 | SNV | 1 | A | G | Homozygous   |
| NC_037643.1 | 14155476 | SNV | 1 | C | A | Homozygous   |
| NC_037643.1 | 14157425 | SNV | 1 | C | A | Homozygous   |
| NC_037643.1 | 14157446 | SNV | 1 | T | A | Heterozygous |
| NC_037643.1 | 14157450 | SNV | 1 | T | A | Homozygous   |
| NC_037643.1 | 14157452 | SNV | 1 | T | A | Homozygous   |
| NC_037643.1 | 14157454 | SNV | 1 | T | G | Homozygous   |
| NC_037643.1 | 14157462 | SNV | 1 | C | T | Homozygous   |
| NC_037643.1 | 14165278 | SNV | 1 | T | C | Homozygous   |
| NC_037643.1 | 14165300 | SNV | 1 | C | T | Homozygous   |
| NC_037643.1 | 14174886 | SNV | 1 | G | A | Heterozygous |
| NC_037643.1 | 14174910 | SNV | 1 | G | A | Heterozygous |
| NC_037643.1 | 14174943 | SNV | 1 | G | A | Heterozygous |
| NC_037643.1 | 14191484 | SNV | 1 | G | A | Homozygous   |
| NC_037643.1 | 14191543 | SNV | 1 | G | A | Homozygous   |
| NC_037643.1 | 14191577 | SNV | 1 | C | T | Heterozygous |
| NC_037643.1 | 14191594 | SNV | 1 | G | A | Homozygous   |

|             |          |     |   |   |   |              |
|-------------|----------|-----|---|---|---|--------------|
| NC_037643.1 | 14193365 | SNV | 1 | A | G | Homozygous   |
| NC_037643.1 | 14193367 | SNV | 1 | A | T | Homozygous   |
| NC_037643.1 | 14193374 | SNV | 1 | G | T | Homozygous   |
| NC_037643.1 | 14193378 | SNV | 1 | G | A | Homozygous   |
| NC_037643.1 | 14193400 | SNV | 1 | G | A | Homozygous   |
| NC_037643.1 | 14193404 | SNV | 1 | G | A | Homozygous   |
| NC_037643.1 | 14196402 | SNV | 1 | C | T | Homozygous   |
| NC_037643.1 | 14196409 | SNV | 1 | G | A | Heterozygous |
| NC_037643.1 | 14196577 | SNV | 1 | T | C | Homozygous   |
| NC_037643.1 | 14196600 | SNV | 1 | T | C | Heterozygous |
| NC_037643.1 | 14196781 | SNV | 1 | C | G | Homozygous   |
| NC_037643.1 | 14196980 | SNV | 1 | C | G | Homozygous   |
| NC_037643.1 | 14196992 | SNV | 1 | C | T | Homozygous   |
| NC_037643.1 | 14197012 | SNV | 1 | C | T | Heterozygous |
| NC_037643.1 | 14205724 | SNV | 1 | T | C | Homozygous   |
| NC_037643.1 | 14205819 | SNV | 1 | C | T | Heterozygous |
| NC_037643.1 | 14206437 | SNV | 1 | T | C | Homozygous   |
| NC_037643.1 | 14206440 | SNV | 1 | T | C | Homozygous   |
| NC_037643.1 | 14206539 | SNV | 1 | G | A | Heterozygous |
| NC_037643.1 | 14206588 | SNV | 1 | G | A | Homozygous   |
| NC_037643.1 | 14206592 | SNV | 1 | G | A | Heterozygous |
| NC_037643.1 | 14206962 | SNV | 1 | A | T | Heterozygous |
| NC_037643.1 | 14206983 | SNV | 1 | G | A | Heterozygous |
| NC_037643.1 | 14207168 | SNV | 1 | A | C | Heterozygous |
| NC_037643.1 | 14207170 | SNV | 1 | G | C | Heterozygous |
| NC_037643.1 | 14207172 | SNV | 1 | G | A | Heterozygous |
| NC_037643.1 | 14207174 | SNV | 1 | G | A | Heterozygous |
| NC_037643.1 | 14207210 | SNV | 1 | A | T | Heterozygous |
| NC_037643.1 | 14207212 | SNV | 1 | T | G | Heterozygous |
| NC_037643.1 | 14207244 | SNV | 1 | A | C | Homozygous   |
| NC_037643.1 | 14207254 | SNV | 1 | A | C | Homozygous   |
| NC_037643.1 | 14211037 | SNV | 1 | A | G | Homozygous   |
| NC_037643.1 | 14211045 | SNV | 1 | T | G | Heterozygous |
| NC_037643.1 | 14211106 | SNV | 1 | C | T | Homozygous   |
| NC_037643.1 | 14211157 | SNV | 1 | A | G | Homozygous   |
| NC_037643.1 | 14211163 | SNV | 1 | A | G | Homozygous   |
| NC_037643.1 | 14211356 | SNV | 1 | C | G | Heterozygous |
| NC_037643.1 | 14211384 | SNV | 1 | C | T | Heterozygous |
| NC_037643.1 | 14211461 | SNV | 1 | A | G | Homozygous   |
| NC_037643.1 | 14211465 | SNV | 1 | T | C | Homozygous   |
| NC_037643.1 | 14211476 | SNV | 1 | A | T | Homozygous   |
| NC_037643.1 | 14211496 | SNV | 1 | C | T | Homozygous   |
| NC_037643.1 | 14211498 | SNV | 1 | G | T | Heterozygous |
| NC_037643.1 | 14211606 | SNV | 1 | C | T | Heterozygous |
| NC_037643.1 | 14211748 | SNV | 1 | C | T | Heterozygous |
| NC_037643.1 | 14211956 | SNV | 1 | G | A | Heterozygous |
| NC_037643.1 | 14211959 | SNV | 1 | A | G | Homozygous   |
| NC_037643.1 | 14212205 | SNV | 1 | G | A | Homozygous   |
| NC_037643.1 | 14212328 | SNV | 1 | A | G | Homozygous   |
| NC_037643.1 | 14212393 | SNV | 1 | G | A | Heterozygous |
| NC_037643.1 | 14212519 | SNV | 1 | A | G | Homozygous   |

|             |          |     |   |   |   |              |
|-------------|----------|-----|---|---|---|--------------|
| NC_037643.1 | 14212571 | SNV | 1 | A | G | Homozygous   |
| NC_037643.1 | 14212723 | SNV | 1 | C | G | Homozygous   |
| NC_037643.1 | 14213781 | SNV | 1 | C | T | Homozygous   |
| NC_037643.1 | 14213793 | SNV | 1 | A | G | Homozygous   |
| NC_037643.1 | 14213808 | SNV | 1 | A | G | Homozygous   |
| NC_037643.1 | 14215264 | SNV | 1 | A | G | Homozygous   |
| NC_037643.1 | 14215332 | SNV | 1 | A | G | Homozygous   |
| NC_037643.1 | 14216145 | SNV | 1 | T | C | Homozygous   |
| NC_037643.1 | 14220450 | SNV | 1 | T | C | Heterozygous |
| NC_037643.1 | 14220464 | SNV | 1 | A | G | Heterozygous |
| NC_037643.1 | 14220523 | SNV | 1 | A | G | Homozygous   |
| NC_037643.1 | 14220774 | SNV | 1 | C | G | Heterozygous |
| NC_037643.1 | 14221059 | SNV | 1 | T | C | Heterozygous |
| NC_037643.1 | 14221065 | SNV | 1 | T | A | Heterozygous |
| NC_037643.1 | 14221092 | SNV | 1 | C | G | Homozygous   |
| NC_037643.1 | 14221122 | SNV | 1 | T | C | Homozygous   |
| NC_037643.1 | 14221360 | SNV | 1 | T | C | Homozygous   |
| NC_037643.1 | 14221362 | SNV | 1 | A | G | Heterozygous |
| NC_037643.1 | 14221371 | SNV | 1 | T | C | Heterozygous |
| NC_037643.1 | 14221441 | SNV | 1 | G | C | Heterozygous |
| NC_037643.1 | 14221446 | SNV | 1 | T | C | Homozygous   |
| NC_037643.1 | 14221475 | SNV | 1 | A | G | Heterozygous |
| NC_037643.1 | 14223844 | SNV | 1 | A | G | Homozygous   |
| NC_037643.1 | 14223865 | SNV | 1 | C | T | Heterozygous |
| NC_037643.1 | 14224050 | SNV | 1 | C | A | Heterozygous |
| NC_037643.1 | 14224238 | SNV | 1 | T | A | Heterozygous |
| NC_037643.1 | 14224404 | SNV | 1 | T | C | Homozygous   |
| NC_037643.1 | 14224421 | SNV | 1 | C | T | Homozygous   |
| NC_037643.1 | 14225235 | SNV | 1 | C | T | Heterozygous |
| NC_037643.1 | 14225309 | SNV | 1 | C | T | Homozygous   |
| NC_037643.1 | 14225363 | SNV | 1 | G | A | Heterozygous |
| NC_037643.1 | 14225482 | SNV | 1 | G | A | Homozygous   |
| NC_037643.1 | 14225489 | SNV | 1 | T | C | Heterozygous |
| NC_037643.1 | 14225492 | SNV | 1 | A | G | Heterozygous |
| NC_037643.1 | 14225515 | SNV | 1 | A | G | Homozygous   |
| NC_037643.1 | 14225522 | SNV | 1 | T | C | Homozygous   |
| NC_037643.1 | 14225954 | SNV | 1 | T | C | Homozygous   |
| NC_037643.1 | 14226931 | SNV | 1 | G | A | Homozygous   |
| NC_037643.1 | 14226933 | SNV | 1 | A | G | Homozygous   |
| NC_037643.1 | 14227351 | SNV | 1 | T | A | Heterozygous |
| NC_037643.1 | 14227406 | SNV | 1 | A | G | Heterozygous |
| NC_037643.1 | 14227425 | SNV | 1 | C | T | Heterozygous |
| NC_037643.1 | 14227585 | SNV | 1 | C | T | Homozygous   |
| NC_037643.1 | 14228777 | SNV | 1 | T | A | Homozygous   |
| NC_037643.1 | 14228808 | SNV | 1 | T | A | Homozygous   |
| NC_037643.1 | 14228811 | SNV | 1 | T | C | Homozygous   |
| NC_037643.1 | 14228815 | SNV | 1 | T | C | Homozygous   |
| NC_037643.1 | 14228833 | SNV | 1 | A | T | Homozygous   |
| NC_037643.1 | 14229527 | SNV | 1 | G | A | Homozygous   |
| NC_037643.1 | 14229531 | SNV | 1 | C | T | Heterozygous |
| NC_037643.1 | 14230254 | SNV | 1 | T | A | Homozygous   |

|             |          |     |   |   |   |              |
|-------------|----------|-----|---|---|---|--------------|
| NC_037643.1 | 14230769 | SNV | 1 | T | C | Homozygous   |
| NC_037643.1 | 14232462 | SNV | 1 | G | A | Homozygous   |
| NC_037643.1 | 14232468 | SNV | 1 | A | T | Homozygous   |
| NC_037643.1 | 14232473 | SNV | 1 | G | A | Homozygous   |
| NC_037643.1 | 14232475 | SNV | 1 | T | C | Homozygous   |
| NC_037643.1 | 14233133 | SNV | 1 | G | A | Heterozygous |
| NC_037643.1 | 14236726 | SNV | 1 | G | A | Heterozygous |
| NC_037643.1 | 14236794 | SNV | 1 | T | G | Homozygous   |
| NC_037643.1 | 14236933 | SNV | 1 | C | A | Homozygous   |
| NC_037643.1 | 14236971 | SNV | 1 | C | T | Heterozygous |
| NC_037643.1 | 14245966 | SNV | 1 | G | A | Heterozygous |
| NC_037643.1 | 14246257 | SNV | 1 | G | A | Heterozygous |
| NC_037643.1 | 14250042 | SNV | 1 | C | A | Heterozygous |
| NC_037643.1 | 14252415 | SNV | 1 | T | A | Homozygous   |
| NC_037643.1 | 14252749 | SNV | 1 | A | G | Homozygous   |
| NC_037643.1 | 14262645 | SNV | 1 | T | C | Homozygous   |
| NC_037643.1 | 14262970 | SNV | 1 | T | A | Homozygous   |
| NC_037643.1 | 14263019 | SNV | 1 | G | A | Homozygous   |
| NC_037643.1 | 14266719 | SNV | 1 | A | G | Homozygous   |
| NC_037643.1 | 14266929 | SNV | 1 | C | T | Homozygous   |
| NC_037643.1 | 14266976 | SNV | 1 | C | T | Heterozygous |
| NC_037643.1 | 14267096 | SNV | 1 | A | T | Heterozygous |
| NC_037643.1 | 14267127 | SNV | 1 | A | G | Heterozygous |
| NC_037643.1 | 14267282 | SNV | 1 | A | G | Heterozygous |
| NC_037643.1 | 14267956 | SNV | 1 | A | T | Heterozygous |
| NC_037643.1 | 14269779 | SNV | 1 | T | C | Homozygous   |
| NC_037643.1 | 14270049 | SNV | 1 | T | G | Homozygous   |
| NC_037643.1 | 14270493 | SNV | 1 | G | A | Homozygous   |
| NC_037643.1 | 14270586 | SNV | 1 | C | T | Homozygous   |
| NC_037643.1 | 14280484 | SNV | 1 | A | T | Homozygous   |
| NC_037643.1 | 14280497 | SNV | 1 | A | T | Homozygous   |
| NC_037643.1 | 14280557 | SNV | 1 | G | A | Homozygous   |
| NC_037643.1 | 14280890 | SNV | 1 | A | G | Homozygous   |
| NC_037643.1 | 14280923 | SNV | 1 | G | C | Homozygous   |
| NC_037643.1 | 14281079 | SNV | 1 | C | T | Homozygous   |
| NC_037643.1 | 14281512 | SNV | 1 | C | T | Heterozygous |
| NC_037643.1 | 14281608 | SNV | 1 | G | A | Heterozygous |
| NC_037643.1 | 14281679 | SNV | 1 | T | C | Homozygous   |
| NC_037643.1 | 14281760 | SNV | 1 | C | T | Heterozygous |
| NC_037643.1 | 14282753 | SNV | 1 | G | A | Homozygous   |
| NC_037643.1 | 14282762 | SNV | 1 | G | A | Homozygous   |
| NC_037643.1 | 14282777 | SNV | 1 | G | A | Homozygous   |
| NC_037643.1 | 14282863 | SNV | 1 | G | A | Heterozygous |
| NC_037643.1 | 14282959 | SNV | 1 | T | G | Homozygous   |
| NC_037643.1 | 14283391 | SNV | 1 | C | T | Heterozygous |
| NC_037643.1 | 14283539 | SNV | 1 | A | G | Heterozygous |
| NC_037643.1 | 14283545 | SNV | 1 | C | T | Heterozygous |
| NC_037643.1 | 14283549 | SNV | 1 | T | C | Heterozygous |
| NC_037643.1 | 14283558 | SNV | 1 | C | T | Homozygous   |
| NC_037643.1 | 14283569 | SNV | 1 | C | T | Heterozygous |
| NC_037643.1 | 14283589 | SNV | 1 | T | C | Heterozygous |

|             |          |     |   |   |   |              |
|-------------|----------|-----|---|---|---|--------------|
| NC_037643.1 | 14283596 | SNV | 1 | G | A | Heterozygous |
| NC_037643.1 | 14287134 | SNV | 1 | C | T | Heterozygous |
| NC_037643.1 | 14287144 | SNV | 1 | C | A | Heterozygous |
| NC_037643.1 | 14287159 | SNV | 1 | T | G | Heterozygous |
| NC_037643.1 | 14287167 | SNV | 1 | T | C | Heterozygous |
| NC_037643.1 | 14287170 | SNV | 1 | C | T | Heterozygous |
| NC_037643.1 | 14287180 | SNV | 1 | T | A | Homozygous   |
| NC_037643.1 | 14287182 | SNV | 1 | T | G | Homozygous   |
| NC_037643.1 | 14303930 | SNV | 1 | C | G | Homozygous   |
| NC_037643.1 | 14304085 | SNV | 1 | C | G | Heterozygous |
| NC_037643.1 | 14310663 | SNV | 1 | T | G | Heterozygous |
| NC_037643.1 | 14311422 | SNV | 1 | T | C | Homozygous   |
| NC_037643.1 | 14311424 | SNV | 1 | A | G | Homozygous   |
| NC_037643.1 | 14311436 | SNV | 1 | A | G | Homozygous   |
| NC_037643.1 | 14311480 | SNV | 1 | T | A | Homozygous   |
| NC_037643.1 | 14311482 | SNV | 1 | T | A | Homozygous   |
| NC_037643.1 | 14313190 | SNV | 1 | C | T | Heterozygous |
| NC_037643.1 | 14313229 | SNV | 1 | A | C | Homozygous   |
| NC_037643.1 | 14313244 | SNV | 1 | A | G | Homozygous   |
| NC_037643.1 | 14313791 | SNV | 1 | C | T | Homozygous   |
| NC_037643.1 | 14314397 | SNV | 1 | C | T | Heterozygous |
| NC_037643.1 | 14314491 | SNV | 1 | T | C | Homozygous   |
| NC_037643.1 | 14314603 | SNV | 1 | A | G | Heterozygous |
| NC_037643.1 | 14314793 | SNV | 1 | G | A | Heterozygous |
| NC_037643.1 | 14314798 | SNV | 1 | A | G | Homozygous   |
| NC_037643.1 | 14314952 | SNV | 1 | C | T | Homozygous   |
| NC_037643.1 | 14315232 | SNV | 1 | G | C | Homozygous   |
| NC_037643.1 | 14315347 | SNV | 1 | C | T | Heterozygous |
| NC_037643.1 | 14315362 | SNV | 1 | G | C | Homozygous   |
| NC_037643.1 | 14315456 | SNV | 1 | A | T | Homozygous   |
| NC_037643.1 | 14315470 | SNV | 1 | C | A | Homozygous   |
| NC_037643.1 | 14315473 | SNV | 1 | T | C | Heterozygous |
| NC_037643.1 | 14315511 | SNV | 1 | C | T | Heterozygous |
| NC_037643.1 | 14315599 | SNV | 1 | C | A | Heterozygous |
| NC_037643.1 | 14315631 | SNV | 1 | A | G | Homozygous   |
| NC_037643.1 | 14315668 | SNV | 1 | G | A | Homozygous   |
| NC_037643.1 | 14315964 | SNV | 1 | A | G | Homozygous   |
| NC_037643.1 | 14316680 | SNV | 1 | G | A | Homozygous   |
| NC_037643.1 | 14316685 | SNV | 1 | G | A | Heterozygous |
| NC_037643.1 | 14316689 | SNV | 1 | G | A | Heterozygous |
| NC_037643.1 | 14316695 | SNV | 1 | G | A | Heterozygous |
| NC_037643.1 | 14316732 | SNV | 1 | G | A | Heterozygous |
| NC_037643.1 | 14316741 | SNV | 1 | G | A | Heterozygous |
| NC_037643.1 | 14316782 | SNV | 1 | A | G | Heterozygous |
| NC_037643.1 | 14316836 | SNV | 1 | C | T | Heterozygous |
| NC_037643.1 | 14316946 | SNV | 1 | A | T | Heterozygous |
| NC_037643.1 | 14322147 | SNV | 1 | G | A | Homozygous   |
| NC_037643.1 | 14322756 | SNV | 1 | A | G | Homozygous   |
| NC_037643.1 | 14322828 | SNV | 1 | C | G | Homozygous   |
| NC_037643.1 | 14322905 | SNV | 1 | A | G | Heterozygous |
| NC_037643.1 | 14322907 | SNV | 1 | G | A | Heterozygous |

|             |          |     |   |   |   |              |
|-------------|----------|-----|---|---|---|--------------|
| NC_037643.1 | 14322966 | SNV | 1 | A | G | Homozygous   |
| NC_037643.1 | 14327914 | SNV | 1 | T | C | Homozygous   |
| NC_037643.1 | 14327940 | SNV | 1 | T | C | Heterozygous |
| NC_037643.1 | 14327956 | SNV | 1 | A | G | Homozygous   |
| NC_037643.1 | 14328040 | SNV | 1 | G | A | Homozygous   |
| NC_037643.1 | 14330750 | SNV | 1 | C | T | Homozygous   |
| NC_037643.1 | 14330768 | SNV | 1 | G | A | Homozygous   |
| NC_037643.1 | 14330848 | SNV | 1 | A | G | Homozygous   |
| NC_037643.1 | 14330853 | SNV | 1 | C | T | Heterozygous |
| NC_037643.1 | 14330862 | SNV | 1 | T | C | Heterozygous |
| NC_037643.1 | 14341258 | SNV | 1 | G | A | Homozygous   |
| NC_037643.1 | 14341268 | SNV | 1 | T | C | Homozygous   |
| NC_037643.1 | 14341389 | SNV | 1 | A | G | Heterozygous |
| NC_037643.1 | 14341401 | SNV | 1 | T | G | Heterozygous |
| NC_037643.1 | 14341416 | SNV | 1 | T | C | Heterozygous |
| NC_037643.1 | 14343537 | SNV | 1 | A | G | Heterozygous |
| NC_037643.1 | 14343603 | SNV | 1 | T | C | Heterozygous |
| NC_037643.1 | 14343651 | SNV | 1 | G | A | Homozygous   |
| NC_037643.1 | 14343784 | SNV | 1 | A | G | Homozygous   |
| NC_037643.1 | 14344191 | SNV | 1 | G | A | Homozygous   |
| NC_037643.1 | 14345186 | SNV | 1 | G | A | Homozygous   |
| NC_037643.1 | 14349581 | SNV | 1 | A | G | Homozygous   |
| NC_037643.1 | 14351005 | SNV | 1 | A | C | Heterozygous |
| NC_037643.1 | 14351124 | SNV | 1 | A | G | Homozygous   |
| NC_037643.1 | 14351234 | SNV | 1 | A | G | Heterozygous |
| NC_037643.1 | 14353241 | SNV | 1 | A | T | Homozygous   |
| NC_037643.1 | 14362240 | SNV | 1 | T | G | Homozygous   |
| NC_037643.1 | 14362244 | SNV | 1 | T | A | Homozygous   |
| NC_037643.1 | 14369515 | SNV | 1 | C | T | Heterozygous |
| NC_037643.1 | 14371183 | SNV | 1 | A | G | Homozygous   |
| NC_037643.1 | 14371186 | SNV | 1 | G | A | Homozygous   |
| NC_037643.1 | 14371234 | SNV | 1 | T | C | Heterozygous |
| NC_037643.1 | 14371246 | SNV | 1 | G | A | Homozygous   |
| NC_037643.1 | 14371258 | SNV | 1 | A | G | Homozygous   |
| NC_037643.1 | 14371292 | SNV | 1 | A | T | Homozygous   |
| NC_037643.1 | 14371294 | SNV | 1 | A | G | Homozygous   |
| NC_037643.1 | 14371322 | SNV | 1 | A | G | Homozygous   |
| NC_037643.1 | 14371348 | SNV | 1 | A | T | Homozygous   |
| NC_037643.1 | 14371364 | SNV | 1 | G | A | Homozygous   |
| NC_037643.1 | 14371425 | SNV | 1 | T | G | Homozygous   |
| NC_037643.1 | 14371439 | SNV | 1 | T | C | Heterozygous |
| NC_037643.1 | 14371444 | SNV | 1 | T | G | Homozygous   |
| NC_037643.1 | 14371460 | SNV | 1 | A | T | Homozygous   |
| NC_037643.1 | 14371556 | SNV | 1 | G | T | Homozygous   |
| NC_037643.1 | 14374413 | SNV | 1 | T | C | Homozygous   |
| NC_037643.1 | 14374417 | SNV | 1 | T | C | Heterozygous |
| NC_037643.1 | 14374461 | SNV | 1 | C | T | Heterozygous |
| NC_037643.1 | 14374470 | SNV | 1 | G | A | Heterozygous |
| NC_037643.1 | 14374509 | SNV | 1 | T | C | Homozygous   |
| NC_037643.1 | 14374547 | SNV | 1 | T | C | Homozygous   |
| NC_037643.1 | 14374652 | SNV | 1 | G | A | Heterozygous |

|             |          |     |   |   |   |              |
|-------------|----------|-----|---|---|---|--------------|
| NC_037643.1 | 14374656 | SNV | 1 | C | A | Heterozygous |
| NC_037643.1 | 14374678 | SNV | 1 | T | G | Homozygous   |
| NC_037643.1 | 14374686 | SNV | 1 | T | A | Heterozygous |
| NC_037643.1 | 14374686 | SNV | 1 | T | G | Heterozygous |
| NC_037643.1 | 14374688 | SNV | 1 | G | A | Heterozygous |
| NC_037643.1 | 14374695 | SNV | 1 | C | T | Heterozygous |
| NC_037643.1 | 14374706 | SNV | 1 | C | T | Homozygous   |
| NC_037643.1 | 14374709 | SNV | 1 | T | C | Heterozygous |
| NC_037643.1 | 14374807 | SNV | 1 | C | G | Homozygous   |
| NC_037643.1 | 14374812 | SNV | 1 | G | A | Heterozygous |
| NC_037643.1 | 14374819 | SNV | 1 | G | A | Homozygous   |
| NC_037643.1 | 14375073 | SNV | 1 | A | G | Heterozygous |
| NC_037643.1 | 14375084 | SNV | 1 | T | C | Homozygous   |
| NC_037643.1 | 14375087 | SNV | 1 | G | A | Homozygous   |
| NC_037643.1 | 14375362 | SNV | 1 | A | G | Homozygous   |
| NC_037643.1 | 14375373 | SNV | 1 | T | A | Homozygous   |
| NC_037643.1 | 14375458 | SNV | 1 | G | A | Heterozygous |
| NC_037643.1 | 14375511 | SNV | 1 | G | A | Homozygous   |
| NC_037643.1 | 14375560 | SNV | 1 | T | C | Homozygous   |
| NC_037643.1 | 14375566 | SNV | 1 | G | A | Heterozygous |
| NC_037643.1 | 14375599 | SNV | 1 | C | T | Heterozygous |
| NC_037643.1 | 14375602 | SNV | 1 | C | T | Heterozygous |
| NC_037643.1 | 14375700 | SNV | 1 | T | C | Homozygous   |
| NC_037643.1 | 14376268 | SNV | 1 | T | C | Homozygous   |
| NC_037643.1 | 14376283 | SNV | 1 | A | T | Homozygous   |
| NC_037643.1 | 14376288 | SNV | 1 | T | A | Homozygous   |
| NC_037643.1 | 14376293 | SNV | 1 | A | T | Homozygous   |
| NC_037643.1 | 14377097 | SNV | 1 | G | A | Heterozygous |
| NC_037643.1 | 14383411 | SNV | 1 | A | T | Heterozygous |
| NC_037643.1 | 14383432 | SNV | 1 | C | T | Homozygous   |
| NC_037643.1 | 14383450 | SNV | 1 | T | A | Heterozygous |
| NC_037643.1 | 14383460 | SNV | 1 | G | T | Heterozygous |
| NC_037643.1 | 14387428 | SNV | 1 | A | G | Homozygous   |
| NC_037643.1 | 14406058 | SNV | 1 | T | C | Homozygous   |
| NC_037643.1 | 14411969 | SNV | 1 | T | C | Homozygous   |
| NC_037643.1 | 14411981 | SNV | 1 | G | T | Homozygous   |
| NC_037643.1 | 14411985 | SNV | 1 | G | C | Homozygous   |
| NC_037643.1 | 14411991 | SNV | 1 | T | C | Heterozygous |
| NC_037643.1 | 14415191 | SNV | 1 | T | C | Homozygous   |
| NC_037643.1 | 14415276 | SNV | 1 | A | G | Homozygous   |
| NC_037643.1 | 14415440 | SNV | 1 | G | A | Heterozygous |
| NC_037643.1 | 14415485 | SNV | 1 | A | G | Heterozygous |
| NC_037643.1 | 14419205 | SNV | 1 | G | A | Heterozygous |
| NC_037643.1 | 14419233 | SNV | 1 | C | T | Homozygous   |
| NC_037643.1 | 14419248 | SNV | 1 | A | G | Homozygous   |
| NC_037643.1 | 14419281 | SNV | 1 | G | A | Heterozygous |
| NC_037643.1 | 14425896 | SNV | 1 | G | A | Heterozygous |
| NC_037643.1 | 14427422 | SNV | 1 | C | T | Homozygous   |
| NC_037643.1 | 14427427 | SNV | 1 | C | T | Homozygous   |
| NC_037643.1 | 14427437 | SNV | 1 | C | T | Homozygous   |
| NC_037643.1 | 14428971 | SNV | 1 | A | G | Homozygous   |



|             |          |     |   |   |   |              |
|-------------|----------|-----|---|---|---|--------------|
| NC_037643.1 | 14428993 | SNV | 1 | T | A | Homozygous   |
| NC_037643.1 | 14429000 | SNV | 1 | T | A | Heterozygous |
| NC_037643.1 | 14429002 | SNV | 1 | A | T | Homozygous   |
| NC_037643.1 | 14429863 | SNV | 1 | T | C | Homozygous   |
| NC_037643.1 | 14433069 | SNV | 1 | A | G | Heterozygous |
| NC_037643.1 | 14433071 | SNV | 1 | A | T | Heterozygous |
| NC_037643.1 | 14436321 | SNV | 1 | C | T | Heterozygous |
| NC_037643.1 | 14436372 | SNV | 1 | C | G | Heterozygous |
| NC_037643.1 | 14436572 | SNV | 1 | G | A | Homozygous   |
| NC_037643.1 | 14436728 | SNV | 1 | C | A | Homozygous   |
| NC_037643.1 | 14436764 | SNV | 1 | G | A | Heterozygous |
| NC_037643.1 | 14438463 | SNV | 1 | T | G | Heterozygous |
| NC_037643.1 | 14438469 | SNV | 1 | T | G | Heterozygous |
| NC_037643.1 | 14438474 | SNV | 1 | C | T | Heterozygous |
| NC_037643.1 | 14438484 | SNV | 1 | C | G | Heterozygous |
| NC_037643.1 | 14438495 | SNV | 1 | T | C | Heterozygous |
| NC_037643.1 | 14438557 | SNV | 1 | A | G | Heterozygous |
| NC_037643.1 | 14438567 | SNV | 1 | G | A | Homozygous   |
| NC_037643.1 | 14438572 | SNV | 1 | C | T | Heterozygous |
| NC_037643.1 | 14438575 | SNV | 1 | A | G | Homozygous   |
| NC_037643.1 | 14438655 | SNV | 1 | C | A | Heterozygous |
| NC_037643.1 | 14438808 | SNV | 1 | C | T | Heterozygous |
| NC_037643.1 | 14438834 | SNV | 1 | C | T | Heterozygous |
| NC_037643.1 | 14440002 | SNV | 1 | C | A | Homozygous   |
| NC_037643.1 | 14440193 | SNV | 1 | G | A | Heterozygous |
| NC_037643.1 | 14440264 | SNV | 1 | G | A | Homozygous   |
| NC_037643.1 | 14440273 | SNV | 1 | C | A | Homozygous   |
| NC_037643.1 | 14440623 | SNV | 1 | C | T | Heterozygous |
| NC_037643.1 | 14448547 | SNV | 1 | A | G | Homozygous   |
| NC_037643.1 | 14448553 | SNV | 1 | G | A | Heterozygous |
| NC_037643.1 | 14448567 | SNV | 1 | G | T | Homozygous   |
| NC_037643.1 | 14448642 | SNV | 1 | T | C | Homozygous   |
| NC_037643.1 | 14448696 | SNV | 1 | G | A | Heterozygous |
| NC_037643.1 | 14448721 | SNV | 1 | G | T | Heterozygous |
| NC_037643.1 | 14448730 | SNV | 1 | C | T | Heterozygous |
| NC_037643.1 | 14449151 | SNV | 1 | A | G | Heterozygous |
| NC_037643.1 | 14449325 | SNV | 1 | C | T | Heterozygous |
| NC_037643.1 | 14450937 | SNV | 1 | C | T | Homozygous   |
| NC_037643.1 | 14450946 | SNV | 1 | C | T | Heterozygous |
| NC_037643.1 | 14450976 | SNV | 1 | G | A | Homozygous   |
| NC_037643.1 | 14451322 | SNV | 1 | T | C | Homozygous   |
| NC_037643.1 | 14451374 | SNV | 1 | A | G | Homozygous   |
| NC_037643.1 | 14459253 | SNV | 1 | G | A | Homozygous   |
| NC_037643.1 | 14459257 | SNV | 1 | A | G | Homozygous   |
| NC_037643.1 | 14459274 | SNV | 1 | G | A | Homozygous   |
| NC_037643.1 | 14460502 | SNV | 1 | A | C | Heterozygous |
| NC_037643.1 | 14460521 | SNV | 1 | A | C | Homozygous   |
| NC_037643.1 | 14461843 | SNV | 1 | G | C | Heterozygous |
| NC_037643.1 | 14461941 | SNV | 1 | A | G | Heterozygous |
| NC_037643.1 | 14462051 | SNV | 1 | T | C | Homozygous   |
| NC_037643.1 | 14462084 | SNV | 1 | G | C | Heterozygous |

|             |          |     |   |   |   |              |
|-------------|----------|-----|---|---|---|--------------|
| NC_037643.1 | 14465367 | SNV | 1 | A | G | Heterozygous |
| NC_037643.1 | 14465481 | SNV | 1 | G | A | Heterozygous |
| NC_037643.1 | 14465484 | SNV | 1 | T | C | Homozygous   |
| NC_037643.1 | 14465556 | SNV | 1 | A | G | Heterozygous |
| NC_037643.1 | 14465559 | SNV | 1 | G | A | Heterozygous |
| NC_037643.1 | 14481721 | SNV | 1 | T | A | Homozygous   |
| NC_037643.1 | 14481803 | SNV | 1 | A | G | Homozygous   |
| NC_037643.1 | 14481854 | SNV | 1 | G | A | Heterozygous |
| NC_037643.1 | 14481856 | SNV | 1 | T | C | Heterozygous |
| NC_037643.1 | 14481927 | SNV | 1 | G | C | Homozygous   |
| NC_037643.1 | 14483875 | SNV | 1 | A | G | Heterozygous |
| NC_037643.1 | 14484195 | SNV | 1 | C | T | Homozygous   |
| NC_037643.1 | 14484206 | SNV | 1 | T | C | Homozygous   |
| NC_037643.1 | 14484212 | SNV | 1 | G | A | Heterozygous |
| NC_037643.1 | 14484240 | SNV | 1 | G | A | Homozygous   |
| NC_037643.1 | 14484282 | SNV | 1 | G | A | Heterozygous |
| NC_037643.1 | 14484310 | SNV | 1 | G | A | Heterozygous |
| NC_037643.1 | 14484329 | SNV | 1 | T | C | Homozygous   |
| NC_037643.1 | 14484335 | SNV | 1 | T | C | Homozygous   |
| NC_037643.1 | 14484344 | SNV | 1 | T | A | Homozygous   |
| NC_037643.1 | 14484371 | SNV | 1 | T | C | Homozygous   |
| NC_037643.1 | 14484399 | SNV | 1 | A | G | Heterozygous |
| NC_037643.1 | 14484411 | SNV | 1 | C | T | Homozygous   |
| NC_037643.1 | 14484476 | SNV | 1 | T | C | Homozygous   |
| NC_037643.1 | 14484819 | SNV | 1 | C | T | Homozygous   |
| NC_037643.1 | 14485034 | SNV | 1 | C | T | Homozygous   |
| NC_037643.1 | 14485354 | SNV | 1 | C | A | Homozygous   |
| NC_037643.1 | 14485845 | SNV | 1 | C | T | Heterozygous |
| NC_037643.1 | 14486003 | SNV | 1 | G | A | Homozygous   |
| NC_037643.1 | 14486046 | SNV | 1 | G | A | Homozygous   |
| NC_037643.1 | 14486051 | SNV | 1 | G | C | Homozygous   |
| NC_037643.1 | 14486669 | SNV | 1 | A | C | Homozygous   |
| NC_037643.1 | 14488300 | SNV | 1 | A | G | Heterozygous |
| NC_037643.1 | 14488324 | SNV | 1 | G | A | Heterozygous |
| NC_037643.1 | 14488432 | SNV | 1 | T | C | Heterozygous |
| NC_037643.1 | 14488987 | SNV | 1 | T | C | Homozygous   |
| NC_037643.1 | 14489950 | SNV | 1 | T | G | Homozygous   |
| NC_037643.1 | 14491139 | SNV | 1 | T | C | Homozygous   |
| NC_037643.1 | 14491182 | SNV | 1 | T | C | Homozygous   |
| NC_037643.1 | 14491210 | SNV | 1 | T | C | Heterozygous |
| NC_037643.1 | 14491258 | SNV | 1 | A | G | Homozygous   |
| NC_037643.1 | 14491404 | SNV | 1 | T | A | Homozygous   |
| NC_037643.1 | 14491662 | SNV | 1 | G | A | Heterozygous |
| NC_037643.1 | 14492900 | SNV | 1 | A | G | Heterozygous |
| NC_037643.1 | 14493410 | SNV | 1 | C | T | Heterozygous |
| NC_037643.1 | 14494826 | SNV | 1 | A | T | Heterozygous |
| NC_037643.1 | 14494985 | SNV | 1 | A | G | Heterozygous |
| NC_037643.1 | 14495417 | SNV | 1 | A | T | Homozygous   |
| NC_037643.1 | 14495580 | SNV | 1 | A | G | Heterozygous |
| NC_037643.1 | 14496002 | SNV | 1 | A | G | Homozygous   |
| NC_037643.1 | 14496183 | SNV | 1 | C | T | Heterozygous |

|             |          |     |   |   |   |              |
|-------------|----------|-----|---|---|---|--------------|
| NC_037643.1 | 14496325 | SNV | 1 | A | G | Heterozygous |
| NC_037643.1 | 14496328 | SNV | 1 | G | A | Heterozygous |
| NC_037643.1 | 14503769 | SNV | 1 | G | A | Heterozygous |
| NC_037643.1 | 14504036 | SNV | 1 | C | T | Heterozygous |
| NC_037643.1 | 14504042 | SNV | 1 | G | A | Heterozygous |
| NC_037643.1 | 14505431 | SNV | 1 | G | C | Homozygous   |
| NC_037643.1 | 14505440 | SNV | 1 | T | A | Homozygous   |
| NC_037643.1 | 14505447 | SNV | 1 | A | G | Homozygous   |
| NC_037643.1 | 14505454 | SNV | 1 | C | A | Homozygous   |
| NC_037643.1 | 14505463 | SNV | 1 | A | G | Homozygous   |
| NC_037643.1 | 14505468 | SNV | 1 | A | T | Homozygous   |
| NC_037643.1 | 14505470 | SNV | 1 | C | G | Homozygous   |
| NC_037643.1 | 14506056 | SNV | 1 | G | T | Heterozygous |
| NC_037643.1 | 14506151 | SNV | 1 | C | T | Homozygous   |
| NC_037643.1 | 14506398 | SNV | 1 | G | A | Heterozygous |
| NC_037643.1 | 14507934 | SNV | 1 | T | C | Homozygous   |
| NC_037643.1 | 14508191 | SNV | 1 | C | A | Heterozygous |
| NC_037643.1 | 14508195 | SNV | 1 | C | A | Heterozygous |
| NC_037643.1 | 14508200 | SNV | 1 | C | A | Heterozygous |
| NC_037643.1 | 14508202 | SNV | 1 | T | A | Heterozygous |
| NC_037643.1 | 14515135 | SNV | 1 | A | G | Homozygous   |
| NC_037643.1 | 14515223 | SNV | 1 | A | G | Heterozygous |
| NC_037643.1 | 14515295 | SNV | 1 | G | A | Heterozygous |
| NC_037643.1 | 14515303 | SNV | 1 | A | G | Homozygous   |
| NC_037643.1 | 14515315 | SNV | 1 | G | A | Heterozygous |
| NC_037643.1 | 14515337 | SNV | 1 | T | C | Homozygous   |
| NC_037643.1 | 14515357 | SNV | 1 | C | T | Heterozygous |
| NC_037643.1 | 14515361 | SNV | 1 | T | C | Homozygous   |
| NC_037643.1 | 14515450 | SNV | 1 | C | T | Heterozygous |
| NC_037643.1 | 14515639 | SNV | 1 | C | T | Homozygous   |
| NC_037643.1 | 14515652 | SNV | 1 | T | C | Homozygous   |
| NC_037643.1 | 14515655 | SNV | 1 | A | C | Homozygous   |
| NC_037643.1 | 14515662 | SNV | 1 | A | C | Homozygous   |
| NC_037643.1 | 14515673 | SNV | 1 | G | A | Homozygous   |
| NC_037643.1 | 14521666 | SNV | 1 | G | T | Homozygous   |
| NC_037643.1 | 14523310 | SNV | 1 | T | A | Homozygous   |
| NC_037643.1 | 14526439 | SNV | 1 | A | C | Homozygous   |
| NC_037643.1 | 14526532 | SNV | 1 | C | G | Homozygous   |
| NC_037643.1 | 14526861 | SNV | 1 | A | T | Homozygous   |
| NC_037643.1 | 14526865 | SNV | 1 | G | A | Homozygous   |
| NC_037643.1 | 14526873 | SNV | 1 | T | G | Homozygous   |
| NC_037643.1 | 14526876 | SNV | 1 | T | A | Homozygous   |
| NC_037643.1 | 14531121 | SNV | 1 | T | C | Heterozygous |
| NC_037643.1 | 14533718 | SNV | 1 | A | G | Homozygous   |
| NC_037643.1 | 14533721 | SNV | 1 | T | A | Homozygous   |
| NC_037643.1 | 14533750 | SNV | 1 | T | A | Homozygous   |
| NC_037643.1 | 14533991 | SNV | 1 | G | A | Homozygous   |
| NC_037643.1 | 14533999 | SNV | 1 | G | T | Homozygous   |
| NC_037643.1 | 14535668 | SNV | 1 | G | A | Heterozygous |
| NC_037643.1 | 14535687 | SNV | 1 | G | A | Heterozygous |
| NC_037643.1 | 14535689 | SNV | 1 | G | A | Heterozygous |

|             |          |     |   |   |   |              |
|-------------|----------|-----|---|---|---|--------------|
| NC_037643.1 | 14535911 | SNV | 1 | T | A | Homozygous   |
| NC_037643.1 | 14556507 | SNV | 1 | A | G | Heterozygous |
| NC_037643.1 | 14556511 | SNV | 1 | T | C | Heterozygous |
| NC_037643.1 | 14556634 | SNV | 1 | T | C | Homozygous   |
| NC_037643.1 | 14556636 | SNV | 1 | A | G | Homozygous   |
| NC_037643.1 | 14556725 | SNV | 1 | G | A | Heterozygous |
| NC_037643.1 | 14556729 | SNV | 1 | A | T | Heterozygous |
| NC_037643.1 | 14557093 | SNV | 1 | G | A | Heterozygous |
| NC_037643.1 | 14557097 | SNV | 1 | G | A | Heterozygous |
| NC_037643.1 | 14557101 | SNV | 1 | G | T | Homozygous   |
| NC_037643.1 | 14557116 | SNV | 1 | T | C | Homozygous   |
| NC_037643.1 | 14557168 | SNV | 1 | G | T | Heterozygous |
| NC_037643.1 | 14557173 | SNV | 1 | C | T | Heterozygous |
| NC_037643.1 | 14557245 | SNV | 1 | C | G | Homozygous   |
| NC_037643.1 | 14557252 | SNV | 1 | C | T | Homozygous   |
| NC_037643.1 | 14557256 | SNV | 1 | A | G | Homozygous   |
| NC_037643.1 | 14562875 | SNV | 1 | G | A | Homozygous   |
| NC_037643.1 | 14562877 | SNV | 1 | G | A | Homozygous   |
| NC_037643.1 | 14562881 | SNV | 1 | T | A | Homozygous   |
| NC_037643.1 | 14562883 | SNV | 1 | A | T | Homozygous   |
| NC_037643.1 | 14562915 | SNV | 1 | C | G | Homozygous   |
| NC_037643.1 | 14565904 | SNV | 1 | T | A | Homozygous   |
| NC_037643.1 | 14565947 | SNV | 1 | T | A | Homozygous   |
| NC_037643.1 | 14565963 | SNV | 1 | A | C | Homozygous   |
| NC_037643.1 | 14565976 | SNV | 1 | C | T | Homozygous   |
| NC_037643.1 | 14566035 | SNV | 1 | T | A | Homozygous   |
| NC_037643.1 | 14577113 | SNV | 1 | A | C | Heterozygous |
| NC_037643.1 | 14577121 | SNV | 1 | A | C | Heterozygous |
| NC_037643.1 | 14577212 | SNV | 1 | C | T | Homozygous   |
| NC_037643.1 | 14577359 | SNV | 1 | T | A | Heterozygous |
| NC_037643.1 | 14577363 | SNV | 1 | T | A | Heterozygous |
| NC_037643.1 | 14593202 | SNV | 1 | C | T | Homozygous   |
| NC_037643.1 | 14615793 | SNV | 1 | A | C | Homozygous   |
| NC_037643.1 | 14615803 | SNV | 1 | C | G | Homozygous   |
| NC_037643.1 | 14618236 | SNV | 1 | A | T | Homozygous   |
| NC_037643.1 | 14618239 | SNV | 1 | T | A | Homozygous   |
| NC_037643.1 | 14623809 | SNV | 1 | T | C | Homozygous   |
| NC_037643.1 | 14628225 | SNV | 1 | A | G | Homozygous   |
| NC_037643.1 | 14628296 | SNV | 1 | C | T | Homozygous   |
| NC_037643.1 | 14628308 | SNV | 1 | C | T | Homozygous   |
| NC_037643.1 | 14628341 | SNV | 1 | T | C | Heterozygous |
| NC_037643.1 | 14628343 | SNV | 1 | T | C | Heterozygous |
| NC_037643.1 | 14628422 | SNV | 1 | G | T | Homozygous   |
| NC_037643.1 | 14632694 | SNV | 1 | T | C | Heterozygous |
| NC_037643.1 | 14632733 | SNV | 1 | A | G | Homozygous   |
| NC_037643.1 | 14634101 | SNV | 1 | G | A | Heterozygous |
| NC_037643.1 | 14634105 | SNV | 1 | A | G | Heterozygous |
| NC_037643.1 | 14634196 | SNV | 1 | C | A | Heterozygous |
| NC_037643.1 | 14634312 | SNV | 1 | G | A | Homozygous   |
| NC_037643.1 | 14634561 | SNV | 1 | C | T | Homozygous   |
| NC_037643.1 | 14634877 | SNV | 1 | T | C | Homozygous   |

|             |          |     |   |   |   |              |
|-------------|----------|-----|---|---|---|--------------|
| NC_037643.1 | 14635092 | SNV | 1 | C | T | Homozygous   |
| NC_037643.1 | 14635099 | SNV | 1 | T | C | Homozygous   |
| NC_037643.1 | 14635102 | SNV | 1 | T | C | Homozygous   |
| NC_037643.1 | 14635155 | SNV | 1 | T | G | Homozygous   |
| NC_037643.1 | 14636213 | SNV | 1 | T | C | Heterozygous |
| NC_037643.1 | 14636294 | SNV | 1 | G | A | Heterozygous |
| NC_037643.1 | 14639417 | SNV | 1 | A | T | Homozygous   |
| NC_037643.1 | 14639419 | SNV | 1 | C | A | Homozygous   |
| NC_037643.1 | 14639435 | SNV | 1 | T | A | Heterozygous |
| NC_037643.1 | 14644505 | SNV | 1 | T | A | Heterozygous |
| NC_037643.1 | 14644831 | SNV | 1 | T | A | Homozygous   |
| NC_037643.1 | 14666685 | SNV | 1 | C | T | Homozygous   |
| NC_037643.1 | 14666692 | SNV | 1 | A | C | Homozygous   |
| NC_037643.1 | 14666912 | SNV | 1 | A | G | Heterozygous |
| NC_037643.1 | 14666915 | SNV | 1 | G | A | Heterozygous |
| NC_037643.1 | 14666925 | SNV | 1 | G | C | Heterozygous |
| NC_037643.1 | 14666937 | SNV | 1 | G | A | Heterozygous |
| NC_037643.1 | 14671340 | SNV | 1 | C | T | Heterozygous |
| NC_037643.1 | 14671352 | SNV | 1 | T | C | Heterozygous |
| NC_037643.1 | 14672130 | SNV | 1 | C | G | Heterozygous |
| NC_037643.1 | 14672142 | SNV | 1 | T | C | Heterozygous |
| NC_037643.1 | 14672147 | SNV | 1 | G | A | Homozygous   |
| NC_037643.1 | 14672173 | SNV | 1 | G | A | Heterozygous |
| NC_037643.1 | 14674493 | SNV | 1 | C | T | Homozygous   |
| NC_037643.1 | 14674515 | SNV | 1 | T | C | Heterozygous |
| NC_037643.1 | 14674523 | SNV | 1 | C | T | Homozygous   |
| NC_037643.1 | 14675046 | SNV | 1 | G | C | Heterozygous |
| NC_037643.1 | 14675168 | SNV | 1 | C | T | Homozygous   |
| NC_037643.1 | 14680823 | SNV | 1 | T | C | Homozygous   |
| NC_037643.1 | 14680827 | SNV | 1 | C | T | Heterozygous |
| NC_037643.1 | 14681839 | SNV | 1 | C | T | Heterozygous |
| NC_037643.1 | 14681841 | SNV | 1 | A | G | Homozygous   |
| NC_037643.1 | 14681845 | SNV | 1 | T | C | Homozygous   |
| NC_037643.1 | 14681853 | SNV | 1 | A | G | Homozygous   |
| NC_037643.1 | 14681857 | SNV | 1 | C | T | Heterozygous |
| NC_037643.1 | 14681859 | SNV | 1 | G | A | Homozygous   |
| NC_037643.1 | 14681861 | SNV | 1 | C | A | Heterozygous |
| NC_037643.1 | 14681885 | SNV | 1 | C | A | Heterozygous |
| NC_037643.1 | 14681887 | SNV | 1 | C | G | Heterozygous |
| NC_037643.1 | 14681894 | SNV | 1 | T | C | Heterozygous |
| NC_037643.1 | 14681896 | SNV | 1 | C | T | Homozygous   |
| NC_037643.1 | 14681907 | SNV | 1 | A | G | Heterozygous |
| NC_037643.1 | 14699760 | SNV | 1 | C | A | Homozygous   |
| NC_037643.1 | 14699764 | SNV | 1 | T | A | Homozygous   |
| NC_037643.1 | 14699782 | SNV | 1 | A | G | Homozygous   |
| NC_037643.1 | 14702496 | SNV | 1 | G | A | Heterozygous |
| NC_037643.1 | 14704251 | SNV | 1 | G | A | Homozygous   |
| NC_037643.1 | 14704492 | SNV | 1 | T | A | Heterozygous |
| NC_037643.1 | 14704498 | SNV | 1 | C | T | Heterozygous |
| NC_037643.1 | 14704599 | SNV | 1 | A | G | Heterozygous |
| NC_037643.1 | 14711336 | SNV | 1 | C | T | Heterozygous |

|             |          |     |   |   |   |              |
|-------------|----------|-----|---|---|---|--------------|
| NC_037643.1 | 14715993 | SNV | 1 | T | G | Heterozygous |
| NC_037643.1 | 14716386 | SNV | 1 | A | T | Heterozygous |
| NC_037643.1 | 14716595 | SNV | 1 | C | T | Heterozygous |
| NC_037643.1 | 14716644 | SNV | 1 | G | A | Homozygous   |
| NC_037643.1 | 14717226 | SNV | 1 | T | C | Homozygous   |
| NC_037643.1 | 14717351 | SNV | 1 | G | A | Heterozygous |
| NC_037643.1 | 14717359 | SNV | 1 | T | A | Heterozygous |
| NC_037643.1 | 14717399 | SNV | 1 | T | C | Heterozygous |
| NC_037643.1 | 14717790 | SNV | 1 | C | T | Heterozygous |
| NC_037643.1 | 14717855 | SNV | 1 | C | G | Heterozygous |
| NC_037643.1 | 14719810 | SNV | 1 | T | C | Homozygous   |
| NC_037643.1 | 14719885 | SNV | 1 | T | C | Homozygous   |
| NC_037643.1 | 14720285 | SNV | 1 | A | G | Homozygous   |
| NC_037643.1 | 14720342 | SNV | 1 | C | T | Heterozygous |
| NC_037643.1 | 14720398 | SNV | 1 | A | G | Homozygous   |
| NC_037643.1 | 14720425 | SNV | 1 | G | A | Heterozygous |
| NC_037643.1 | 14720437 | SNV | 1 | C | T | Heterozygous |
| NC_037643.1 | 14720771 | SNV | 1 | C | T | Heterozygous |
| NC_037643.1 | 14729980 | SNV | 1 | T | C | Homozygous   |
| NC_037643.1 | 14735024 | SNV | 1 | C | G | Heterozygous |
| NC_037643.1 | 14735290 | SNV | 1 | T | C | Heterozygous |
| NC_037643.1 | 14735296 | SNV | 1 | C | T | Heterozygous |
| NC_037643.1 | 14735743 | SNV | 1 | C | T | Heterozygous |
| NC_037643.1 | 14735925 | SNV | 1 | G | A | Heterozygous |
| NC_037643.1 | 14744861 | SNV | 1 | C | T | Homozygous   |
| NC_037643.1 | 14744863 | SNV | 1 | C | T | Homozygous   |
| NC_037643.1 | 14744867 | SNV | 1 | C | T | Homozygous   |
| NC_037643.1 | 14744916 | SNV | 1 | T | A | Heterozygous |
| NC_037643.1 | 14744918 | SNV | 1 | T | A | Heterozygous |
| NC_037643.1 | 14744934 | SNV | 1 | T | A | Heterozygous |
| NC_037643.1 | 14745928 | SNV | 1 | A | G | Heterozygous |
| NC_037643.1 | 14745941 | SNV | 1 | A | G | Heterozygous |
| NC_037643.1 | 14746003 | SNV | 1 | C | T | Heterozygous |
| NC_037643.1 | 14746073 | SNV | 1 | C | T | Heterozygous |
| NC_037643.1 | 14746086 | SNV | 1 | G | A | Heterozygous |
| NC_037643.1 | 14746099 | SNV | 1 | G | A | Heterozygous |
| NC_037643.1 | 14749606 | SNV | 1 | G | A | Homozygous   |
| NC_037643.1 | 14749622 | SNV | 1 | G | A | Heterozygous |
| NC_037643.1 | 14749661 | SNV | 1 | G | T | Heterozygous |
| NC_037643.1 | 14749670 | SNV | 1 | T | G | Heterozygous |
| NC_037643.1 | 14749672 | SNV | 1 | T | G | Heterozygous |
| NC_037643.1 | 14749675 | SNV | 1 | G | A | Heterozygous |
| NC_037643.1 | 14749756 | SNV | 1 | T | G | Homozygous   |
| NC_037643.1 | 14749765 | SNV | 1 | G | T | Heterozygous |
| NC_037643.1 | 14749767 | SNV | 1 | G | T | Homozygous   |
| NC_037643.1 | 14749771 | SNV | 1 | G | A | Heterozygous |
| NC_037643.1 | 14749783 | SNV | 1 | G | C | Heterozygous |
| NC_037643.1 | 14749795 | SNV | 1 | G | C | Homozygous   |
| NC_037643.1 | 14749800 | SNV | 1 | G | C | Heterozygous |
| NC_037643.1 | 14749810 | SNV | 1 | G | C | Homozygous   |
| NC_037643.1 | 14749812 | SNV | 1 | G | T | Heterozygous |

|             |          |     |   |   |   |              |
|-------------|----------|-----|---|---|---|--------------|
| NC_037643.1 | 14751332 | SNV | 1 | T | G | Homozygous   |
| NC_037643.1 | 14758269 | SNV | 1 | T | C | Homozygous   |
| NC_037643.1 | 14758271 | SNV | 1 | C | G | Homozygous   |
| NC_037643.1 | 14758278 | SNV | 1 | T | G | Homozygous   |
| NC_037643.1 | 14758300 | SNV | 1 | T | A | Homozygous   |
| NC_037643.1 | 14758303 | SNV | 1 | G | A | Homozygous   |
| NC_037643.1 | 14760086 | SNV | 1 | T | A | Homozygous   |
| NC_037643.1 | 14760093 | SNV | 1 | T | A | Homozygous   |
| NC_037643.1 | 14760100 | SNV | 1 | A | T | Homozygous   |
| NC_037643.1 | 14760103 | SNV | 1 | T | A | Homozygous   |
| NC_037643.1 | 14760108 | SNV | 1 | A | T | Homozygous   |
| NC_037643.1 | 14774356 | SNV | 1 | T | G | Homozygous   |
| NC_037643.1 | 14774407 | SNV | 1 | C | T | Homozygous   |
| NC_037643.1 | 14774588 | SNV | 1 | G | C | Heterozygous |
| NC_037643.1 | 14774622 | SNV | 1 | G | A | Homozygous   |
| NC_037643.1 | 14774660 | SNV | 1 | T | G | Homozygous   |
| NC_037643.1 | 14784083 | SNV | 1 | C | T | Homozygous   |
| NC_037643.1 | 14784182 | SNV | 1 | G | A | Heterozygous |
| NC_037643.1 | 14784185 | SNV | 1 | G | A | Homozygous   |
| NC_037643.1 | 14784200 | SNV | 1 | A | G | Homozygous   |
| NC_037643.1 | 14784271 | SNV | 1 | T | A | Heterozygous |
| NC_037643.1 | 14784310 | SNV | 1 | C | T | Homozygous   |
| NC_037643.1 | 14784500 | SNV | 1 | G | A | Heterozygous |
| NC_037643.1 | 14784556 | SNV | 1 | G | A | Heterozygous |
| NC_037643.1 | 14784610 | SNV | 1 | T | C | Heterozygous |
| NC_037643.1 | 14784615 | SNV | 1 | T | C | Homozygous   |
| NC_037643.1 | 14790008 | SNV | 1 | G | A | Heterozygous |
| NC_037643.1 | 14790012 | SNV | 1 | G | A | Heterozygous |
| NC_037643.1 | 14790016 | SNV | 1 | G | A | Heterozygous |
| NC_037643.1 | 14790018 | SNV | 1 | G | A | Heterozygous |
| NC_037643.1 | 14790020 | SNV | 1 | G | A | Heterozygous |
| NC_037643.1 | 14790042 | SNV | 1 | G | A | Heterozygous |
| NC_037643.1 | 14790051 | SNV | 1 | C | T | Heterozygous |
| NC_037643.1 | 14790057 | SNV | 1 | T | C | Heterozygous |
| NC_037643.1 | 14790061 | SNV | 1 | T | C | Homozygous   |
| NC_037643.1 | 14790067 | SNV | 1 | C | T | Heterozygous |
| NC_037643.1 | 14790071 | SNV | 1 | C | T | Heterozygous |
| NC_037643.1 | 14790075 | SNV | 1 | C | T | Heterozygous |
| NC_037643.1 | 14790162 | SNV | 1 | T | G | Heterozygous |
| NC_037643.1 | 14790187 | SNV | 1 | G | T | Heterozygous |
| NC_037643.1 | 14790191 | SNV | 1 | G | T | Heterozygous |
| NC_037643.1 | 14790195 | SNV | 1 | G | T | Heterozygous |
| NC_037643.1 | 14790199 | SNV | 1 | G | T | Heterozygous |
| NC_037643.1 | 14796215 | SNV | 1 | T | G | Heterozygous |
| NC_037643.1 | 14796297 | SNV | 1 | G | T | Heterozygous |
| NC_037643.1 | 14822188 | SNV | 1 | A | T | Homozygous   |
| NC_037643.1 | 14822194 | SNV | 1 | C | A | Homozygous   |
| NC_037643.1 | 14822198 | SNV | 1 | G | A | Homozygous   |
| NC_037643.1 | 14822205 | SNV | 1 | G | A | Homozygous   |
| NC_037643.1 | 14822216 | SNV | 1 | G | A | Homozygous   |
| NC_037643.1 | 14847477 | SNV | 1 | T | C | Homozygous   |

|             |          |     |   |   |   |              |
|-------------|----------|-----|---|---|---|--------------|
| NC_037643.1 | 14847492 | SNV | 1 | A | G | Homozygous   |
| NC_037643.1 | 14851635 | SNV | 1 | T | C | Heterozygous |
| NC_037643.1 | 14855625 | SNV | 1 | T | C | Heterozygous |
| NC_037643.1 | 14855693 | SNV | 1 | G | T | Heterozygous |
| NC_037643.1 | 14855703 | SNV | 1 | G | A | Heterozygous |
| NC_037643.1 | 14855720 | SNV | 1 | G | A | Heterozygous |
| NC_037643.1 | 14855742 | SNV | 1 | G | A | Homozygous   |
| NC_037643.1 | 14855787 | SNV | 1 | T | A | Heterozygous |
| NC_037643.1 | 14855791 | SNV | 1 | T | G | Heterozygous |
| NC_037643.1 | 14865922 | SNV | 1 | A | G | Heterozygous |
| NC_037643.1 | 14866057 | SNV | 1 | T | C | Heterozygous |
| NC_037643.1 | 14866063 | SNV | 1 | C | T | Heterozygous |
| NC_037643.1 | 14866100 | SNV | 1 | C | T | Homozygous   |
| NC_037643.1 | 14913398 | SNV | 1 | A | G | Homozygous   |
| NC_037643.1 | 14915378 | SNV | 1 | G | A | Heterozygous |
| NC_037643.1 | 14915449 | SNV | 1 | C | G | Heterozygous |
| NC_037643.1 | 14930168 | SNV | 1 | C | T | Heterozygous |
| NC_037643.1 | 14930195 | SNV | 1 | G | T | Homozygous   |
| NC_037643.1 | 14930197 | SNV | 1 | A | G | Homozygous   |
| NC_037643.1 | 14930204 | SNV | 1 | C | T | Heterozygous |
| NC_037643.1 | 14930471 | SNV | 1 | C | G | Heterozygous |
| NC_037643.1 | 14936881 | SNV | 1 | G | C | Heterozygous |
| NC_037643.1 | 14938455 | SNV | 1 | T | G | Homozygous   |
| NC_037643.1 | 14940903 | SNV | 1 | G | A | Heterozygous |
| NC_037643.1 | 14941063 | SNV | 1 | G | A | Heterozygous |
| NC_037643.1 | 14958920 | SNV | 1 | A | G | Homozygous   |
| NC_037643.1 | 14959019 | SNV | 1 | A | G | Homozygous   |
| NC_037643.1 | 14959056 | SNV | 1 | T | C | Homozygous   |
| NC_037643.1 | 14959175 | SNV | 1 | A | G | Heterozygous |
| NC_037643.1 | 14959226 | SNV | 1 | G | A | Homozygous   |
| NC_037643.1 | 14959243 | SNV | 1 | T | C | Heterozygous |
| NC_037643.1 | 14959319 | SNV | 1 | G | A | Heterozygous |
| NC_037643.1 | 14959361 | SNV | 1 | A | G | Homozygous   |
| NC_037643.1 | 14959525 | SNV | 1 | A | T | Heterozygous |
| NC_037643.1 | 14959815 | SNV | 1 | G | C | Homozygous   |
| NC_037643.1 | 14959948 | SNV | 1 | C | T | Homozygous   |
| NC_037643.1 | 14959956 | SNV | 1 | C | T | Homozygous   |
| NC_037643.1 | 14960308 | SNV | 1 | G | A | Homozygous   |
| NC_037643.1 | 14961395 | SNV | 1 | A | T | Homozygous   |
| NC_037643.1 | 14973475 | SNV | 1 | G | C | Heterozygous |
| NC_037643.1 | 14973481 | SNV | 1 | G | A | Heterozygous |
| NC_037643.1 | 14973488 | SNV | 1 | A | G | Homozygous   |
| NC_037643.1 | 14976238 | SNV | 1 | T | A | Heterozygous |
| NC_037643.1 | 14976246 | SNV | 1 | T | A | Heterozygous |
| NC_037643.1 | 14976250 | SNV | 1 | T | G | Heterozygous |
| NC_037643.1 | 14976254 | SNV | 1 | T | A | Heterozygous |
| NC_037643.1 | 14976258 | SNV | 1 | T | G | Heterozygous |
| NC_037643.1 | 14976262 | SNV | 1 | T | A | Heterozygous |
| NC_037643.1 | 14976270 | SNV | 1 | T | A | Heterozygous |
| NC_037643.1 | 14976274 | SNV | 1 | T | G | Heterozygous |
| NC_037643.1 | 14976278 | SNV | 1 | T | A | Heterozygous |



|             |          |     |   |   |   |              |
|-------------|----------|-----|---|---|---|--------------|
| NC_037643.1 | 14976400 | SNV | 1 | A | G | Homozygous   |
| NC_037643.1 | 14976408 | SNV | 1 | A | G | Homozygous   |
| NC_037643.1 | 14976430 | SNV | 1 | C | G | Heterozygous |
| NC_037643.1 | 14976436 | SNV | 1 | C | A | Heterozygous |
| NC_037643.1 | 14976438 | SNV | 1 | C | A | Homozygous   |
| NC_037643.1 | 14976456 | SNV | 1 | C | G | Homozygous   |
| NC_037643.1 | 14976474 | SNV | 1 | C | G | Heterozygous |
| NC_037643.1 | 14976928 | SNV | 1 | T | C | Heterozygous |
| NC_037643.1 | 14976934 | SNV | 1 | G | A | Heterozygous |
| NC_037643.1 | 14976962 | SNV | 1 | C | A | Homozygous   |
| NC_037643.1 | 14977880 | SNV | 1 | A | T | Homozygous   |
| NC_037643.1 | 14979437 | SNV | 1 | T | C | Heterozygous |
| NC_037643.1 | 14982555 | SNV | 1 | A | G | Heterozygous |
| NC_037643.1 | 14982684 | SNV | 1 | T | C | Homozygous   |
| NC_037643.1 | 14985282 | SNV | 1 | G | A | Heterozygous |
| NC_037643.1 | 14986275 | SNV | 1 | C | T | Heterozygous |
| NC_037643.1 | 14986384 | SNV | 1 | C | T | Homozygous   |
| NC_037643.1 | 14986451 | SNV | 1 | A | G | Heterozygous |
| NC_037643.1 | 14986766 | SNV | 1 | T | C | Homozygous   |
| NC_037643.1 | 14986830 | SNV | 1 | T | C | Heterozygous |
| NC_037643.1 | 14986833 | SNV | 1 | C | T | Heterozygous |
| NC_037643.1 | 14986865 | SNV | 1 | G | A | Heterozygous |
| NC_037643.1 | 14986867 | SNV | 1 | A | G | Homozygous   |
| NC_037643.1 | 14987047 | SNV | 1 | C | T | Heterozygous |
| NC_037643.1 | 14987146 | SNV | 1 | A | G | Heterozygous |
| NC_037643.1 | 14987173 | SNV | 1 | G | C | Homozygous   |
| NC_037643.1 | 14987179 | SNV | 1 | A | G | Homozygous   |
| NC_037643.1 | 14987199 | SNV | 1 | T | C | Homozygous   |
| NC_037643.1 | 14987211 | SNV | 1 | G | A | Homozygous   |
| NC_037643.1 | 14990559 | SNV | 1 | T | G | Homozygous   |
| NC_037643.1 | 14990623 | SNV | 1 | G | A | Homozygous   |
| NC_037643.1 | 14990639 | SNV | 1 | T | C | Homozygous   |
| NC_037643.1 | 14990657 | SNV | 1 | A | G | Heterozygous |
| NC_037643.1 | 14990657 | SNV | 1 | A | T | Heterozygous |
| NC_037643.1 | 14990917 | SNV | 1 | G | C | Homozygous   |
| NC_037643.1 | 14993848 | SNV | 1 | G | A | Homozygous   |
| NC_037643.1 | 15011390 | SNV | 1 | T | G | Homozygous   |
| NC_037643.1 | 15011395 | SNV | 1 | G | A | Heterozygous |
| NC_037643.1 | 15011419 | SNV | 1 | A | G | Heterozygous |
| NC_037643.1 | 15011422 | SNV | 1 | G | T | Homozygous   |
| NC_037643.1 | 15011431 | SNV | 1 | C | T | Heterozygous |
| NC_037643.1 | 15011461 | SNV | 1 | C | T | Heterozygous |
| NC_037643.1 | 15011475 | SNV | 1 | T | C | Homozygous   |
| NC_037643.1 | 15011480 | SNV | 1 | A | G | Heterozygous |
| NC_037643.1 | 15011482 | SNV | 1 | A | G | Homozygous   |
| NC_037643.1 | 15011498 | SNV | 1 | T | C | Heterozygous |
| NC_037643.1 | 15011533 | SNV | 1 | C | T | Heterozygous |
| NC_037643.1 | 15011604 | SNV | 1 | T | A | Heterozygous |
| NC_037643.1 | 15011634 | SNV | 1 | T | C | Homozygous   |
| NC_037643.1 | 15011800 | SNV | 1 | A | G | Homozygous   |
| NC_037643.1 | 15011950 | SNV | 1 | G | A | Heterozygous |

|             |          |     |   |   |   |              |
|-------------|----------|-----|---|---|---|--------------|
| NC_037643.1 | 15012429 | SNV | 1 | A | G | Homozygous   |
| NC_037643.1 | 15012431 | SNV | 1 | A | G | Homozygous   |
| NC_037643.1 | 15012439 | SNV | 1 | A | G | Homozygous   |
| NC_037643.1 | 15012450 | SNV | 1 | C | T | Homozygous   |
| NC_037643.1 | 15012455 | SNV | 1 | G | A | Homozygous   |
| NC_037643.1 | 15012460 | SNV | 1 | G | A | Homozygous   |
| NC_037643.1 | 15012947 | SNV | 1 | T | C | Homozygous   |
| NC_037643.1 | 15012963 | SNV | 1 | T | C | Homozygous   |
| NC_037643.1 | 15012991 | SNV | 1 | A | G | Homozygous   |
| NC_037643.1 | 15013023 | SNV | 1 | A | G | Homozygous   |
| NC_037643.1 | 15013038 | SNV | 1 | T | C | Homozygous   |
| NC_037643.1 | 15024797 | SNV | 1 | T | C | Heterozygous |
| NC_037643.1 | 15024876 | SNV | 1 | A | G | Homozygous   |
| NC_037643.1 | 15024991 | SNV | 1 | G | A | Homozygous   |
| NC_037643.1 | 15024994 | SNV | 1 | A | G | Homozygous   |
| NC_037643.1 | 15025084 | SNV | 1 | T | G | Heterozygous |
| NC_037643.1 | 15025096 | SNV | 1 | T | C | Heterozygous |
| NC_037643.1 | 15025102 | SNV | 1 | C | T | Heterozygous |
| NC_037643.1 | 15025104 | SNV | 1 | A | G | Heterozygous |
| NC_037643.1 | 15025111 | SNV | 1 | C | T | Heterozygous |
| NC_037643.1 | 15028382 | SNV | 1 | T | C | Heterozygous |
| NC_037643.1 | 15029808 | SNV | 1 | C | T | Heterozygous |
| NC_037643.1 | 15030418 | SNV | 1 | A | G | Homozygous   |
| NC_037643.1 | 15031058 | SNV | 1 | T | C | Homozygous   |
| NC_037643.1 | 15034533 | SNV | 1 | A | G | Heterozygous |
| NC_037643.1 | 15034914 | SNV | 1 | T | A | Heterozygous |
| NC_037643.1 | 15035331 | SNV | 1 | C | T | Homozygous   |
| NC_037643.1 | 15035400 | SNV | 1 | T | C | Heterozygous |
| NC_037643.1 | 15035427 | SNV | 1 | G | A | Homozygous   |
| NC_037643.1 | 15035495 | SNV | 1 | C | G | Heterozygous |
| NC_037643.1 | 15035597 | SNV | 1 | T | C | Homozygous   |
| NC_037643.1 | 15035718 | SNV | 1 | C | T | Heterozygous |
| NC_037643.1 | 15037621 | SNV | 1 | C | T | Heterozygous |
| NC_037643.1 | 15037647 | SNV | 1 | G | A | Homozygous   |
| NC_037643.1 | 15037735 | SNV | 1 | G | C | Heterozygous |
| NC_037643.1 | 15037797 | SNV | 1 | A | G | Heterozygous |
| NC_037643.1 | 15037945 | SNV | 1 | T | A | Homozygous   |
| NC_037643.1 | 15037948 | SNV | 1 | A | C | Homozygous   |
| NC_037643.1 | 15037983 | SNV | 1 | T | C | Homozygous   |
| NC_037643.1 | 15038166 | SNV | 1 | A | G | Heterozygous |
| NC_037643.1 | 15038202 | SNV | 1 | C | T | Homozygous   |
| NC_037643.1 | 15038376 | SNV | 1 | G | A | Homozygous   |
| NC_037643.1 | 15038380 | SNV | 1 | G | A | Homozygous   |
| NC_037643.1 | 15038533 | SNV | 1 | A | G | Homozygous   |
| NC_037643.1 | 15038592 | SNV | 1 | T | C | Homozygous   |
| NC_037643.1 | 15038689 | SNV | 1 | A | G | Heterozygous |
| NC_037643.1 | 15038795 | SNV | 1 | G | T | Homozygous   |
| NC_037643.1 | 15038891 | SNV | 1 | G | T | Homozygous   |
| NC_037643.1 | 15039471 | SNV | 1 | T | G | Homozygous   |
| NC_037643.1 | 15039478 | SNV | 1 | T | A | Homozygous   |
| NC_037643.1 | 15039483 | SNV | 1 | A | G | Homozygous   |

|             |          |     |   |   |   |              |
|-------------|----------|-----|---|---|---|--------------|
| NC_037643.1 | 15039502 | SNV | 1 | A | G | Homozygous   |
| NC_037643.1 | 15039528 | SNV | 1 | G | T | Heterozygous |
| NC_037643.1 | 15039623 | SNV | 1 | A | G | Homozygous   |
| NC_037643.1 | 15040176 | SNV | 1 | C | T | Heterozygous |
| NC_037643.1 | 15040839 | SNV | 1 | G | A | Homozygous   |
| NC_037643.1 | 15045159 | SNV | 1 | G | A | Heterozygous |
| NC_037643.1 | 15045749 | SNV | 1 | T | C | Homozygous   |
| NC_037643.1 | 15046020 | SNV | 1 | C | A | Homozygous   |
| NC_037643.1 | 15046190 | SNV | 1 | A | T | Homozygous   |
| NC_037643.1 | 15047156 | SNV | 1 | C | T | Homozygous   |
| NC_037643.1 | 15047552 | SNV | 1 | G | A | Heterozygous |
| NC_037643.1 | 15047981 | SNV | 1 | A | G | Homozygous   |
| NC_037643.1 | 15048603 | SNV | 1 | A | G | Homozygous   |
| NC_037643.1 | 15048633 | SNV | 1 | A | G | Homozygous   |
| NC_037643.1 | 15049047 | SNV | 1 | G | T | Heterozygous |
| NC_037643.1 | 15049128 | SNV | 1 | T | C | Heterozygous |
| NC_037643.1 | 15049221 | SNV | 1 | T | C | Homozygous   |
| NC_037643.1 | 15049574 | SNV | 1 | G | C | Homozygous   |
| NC_037643.1 | 15049782 | SNV | 1 | A | T | Homozygous   |
| NC_037643.1 | 15049953 | SNV | 1 | T | C | Heterozygous |
| NC_037643.1 | 15050105 | SNV | 1 | G | A | Homozygous   |
| NC_037643.1 | 15050213 | SNV | 1 | T | C | Heterozygous |
| NC_037643.1 | 15050297 | SNV | 1 | A | G | Homozygous   |
| NC_037643.1 | 15050610 | SNV | 1 | C | T | Heterozygous |
| NC_037643.1 | 15050634 | SNV | 1 | T | C | Homozygous   |
| NC_037643.1 | 15051545 | SNV | 1 | G | A | Homozygous   |
| NC_037643.1 | 15057559 | SNV | 1 | T | C | Heterozygous |
| NC_037643.1 | 15057993 | SNV | 1 | A | G | Homozygous   |
| NC_037643.1 | 15058020 | SNV | 1 | A | G | Homozygous   |
| NC_037643.1 | 15066132 | SNV | 1 | A | G | Homozygous   |
| NC_037643.1 | 15066140 | SNV | 1 | A | G | Homozygous   |
| NC_037643.1 | 15066237 | SNV | 1 | C | A | Heterozygous |
| NC_037643.1 | 15066292 | SNV | 1 | G | A | Heterozygous |
| NC_037643.1 | 15066300 | SNV | 1 | T | A | Homozygous   |
| NC_037643.1 | 15066345 | SNV | 1 | G | A | Homozygous   |
| NC_037643.1 | 15066451 | SNV | 1 | T | C | Homozygous   |
| NC_037643.1 | 15066507 | SNV | 1 | A | G | Heterozygous |
| NC_037643.1 | 15066613 | SNV | 1 | C | G | Heterozygous |
| NC_037643.1 | 15066721 | SNV | 1 | T | C | Homozygous   |
| NC_037643.1 | 15066777 | SNV | 1 | A | G | Homozygous   |
| NC_037643.1 | 15066971 | SNV | 1 | G | A | Heterozygous |
| NC_037643.1 | 15066986 | SNV | 1 | T | C | Heterozygous |
| NC_037643.1 | 15067422 | SNV | 1 | A | G | Homozygous   |
| NC_037643.1 | 15067511 | SNV | 1 | C | G | Heterozygous |
| NC_037643.1 | 15067738 | SNV | 1 | C | G | Homozygous   |
| NC_037643.1 | 15067756 | SNV | 1 | T | C | Homozygous   |
| NC_037643.1 | 15067844 | SNV | 1 | A | G | Homozygous   |
| NC_037643.1 | 15067986 | SNV | 1 | G | A | Heterozygous |
| NC_037643.1 | 15068085 | SNV | 1 | A | G | Homozygous   |
| NC_037643.1 | 15068161 | SNV | 1 | C | G | Homozygous   |
| NC_037643.1 | 15075152 | SNV | 1 | T | G | Homozygous   |

|             |          |     |   |   |   |              |
|-------------|----------|-----|---|---|---|--------------|
| NC_037643.1 | 15075156 | SNV | 1 | A | T | Homozygous   |
| NC_037643.1 | 15075184 | SNV | 1 | C | T | Heterozygous |
| NC_037643.1 | 15075229 | SNV | 1 | T | C | Heterozygous |
| NC_037643.1 | 15075262 | SNV | 1 | T | C | Homozygous   |
| NC_037643.1 | 15075540 | SNV | 1 | G | C | Homozygous   |
| NC_037643.1 | 15075556 | SNV | 1 | A | G | Homozygous   |
| NC_037643.1 | 15075698 | SNV | 1 | A | C | Homozygous   |
| NC_037643.1 | 15078750 | SNV | 1 | C | T | Heterozygous |
| NC_037643.1 | 15079300 | SNV | 1 | C | A | Homozygous   |
| NC_037643.1 | 15079730 | SNV | 1 | A | G | Heterozygous |
| NC_037643.1 | 15079878 | SNV | 1 | C | T | Homozygous   |
| NC_037643.1 | 15086495 | SNV | 1 | T | C | Homozygous   |
| NC_037643.1 | 15086501 | SNV | 1 | G | A | Homozygous   |
| NC_037643.1 | 15086503 | SNV | 1 | T | A | Homozygous   |
| NC_037643.1 | 15086505 | SNV | 1 | C | T | Homozygous   |
| NC_037643.1 | 15092201 | SNV | 1 | T | C | Homozygous   |
| NC_037643.1 | 15101321 | SNV | 1 | A | T | Homozygous   |
| NC_037643.1 | 15101333 | SNV | 1 | A | T | Homozygous   |
| NC_037643.1 | 15101339 | SNV | 1 | A | G | Heterozygous |
| NC_037643.1 | 15101364 | SNV | 1 | A | C | Homozygous   |
| NC_037643.1 | 15106665 | SNV | 1 | C | G | Heterozygous |
| NC_037643.1 | 15110550 | SNV | 1 | G | A | Heterozygous |
| NC_037643.1 | 15110570 | SNV | 1 | T | C | Homozygous   |
| NC_037643.1 | 15110647 | SNV | 1 | A | G | Heterozygous |
| NC_037643.1 | 15115801 | SNV | 1 | T | C | Heterozygous |
| NC_037643.1 | 15117044 | SNV | 1 | A | C | Homozygous   |
| NC_037643.1 | 15117046 | SNV | 1 | T | A | Homozygous   |
| NC_037643.1 | 15117055 | SNV | 1 | T | A | Homozygous   |
| NC_037643.1 | 15117061 | SNV | 1 | A | G | Homozygous   |
| NC_037643.1 | 15117066 | SNV | 1 | T | A | Homozygous   |
| NC_037643.1 | 15121173 | SNV | 1 | A | C | Heterozygous |
| NC_037643.1 | 15121197 | SNV | 1 | T | C | Homozygous   |
| NC_037643.1 | 15121246 | SNV | 1 | A | G | Homozygous   |
| NC_037643.1 | 15121482 | SNV | 1 | A | G | Heterozygous |
| NC_037643.1 | 15121541 | SNV | 1 | G | A | Homozygous   |
| NC_037643.1 | 15121921 | SNV | 1 | T | C | Heterozygous |
| NC_037643.1 | 15122663 | SNV | 1 | A | G | Heterozygous |
| NC_037643.1 | 15122746 | SNV | 1 | G | A | Homozygous   |
| NC_037643.1 | 15122959 | SNV | 1 | T | C | Heterozygous |
| NC_037643.1 | 15123152 | SNV | 1 | T | C | Heterozygous |
| NC_037643.1 | 15123329 | SNV | 1 | A | G | Homozygous   |
| NC_037643.1 | 15124514 | SNV | 1 | A | G | Homozygous   |
| NC_037643.1 | 15124516 | SNV | 1 | A | G | Heterozygous |
| NC_037643.1 | 15124555 | SNV | 1 | A | G | Homozygous   |
| NC_037643.1 | 15124979 | SNV | 1 | G | A | Homozygous   |
| NC_037643.1 | 15129999 | SNV | 1 | A | C | Heterozygous |
| NC_037643.1 | 15130009 | SNV | 1 | A | C | Heterozygous |
| NC_037643.1 | 15130019 | SNV | 1 | A | C | Heterozygous |
| NC_037643.1 | 15130019 | SNV | 1 | A | T | Heterozygous |
| NC_037643.1 | 15130029 | SNV | 1 | A | T | Homozygous   |
| NC_037643.1 | 15130049 | SNV | 1 | T | C | Heterozygous |

|             |          |     |   |   |   |              |
|-------------|----------|-----|---|---|---|--------------|
| NC_037643.1 | 15130224 | SNV | 1 | T | A | Homozygous   |
| NC_037643.1 | 15130475 | SNV | 1 | T | C | Heterozygous |
| NC_037643.1 | 15130479 | SNV | 1 | T | C | Heterozygous |
| NC_037643.1 | 15130483 | SNV | 1 | T | C | Heterozygous |
| NC_037643.1 | 15130491 | SNV | 1 | C | T | Heterozygous |
| NC_037643.1 | 15130495 | SNV | 1 | C | T | Homozygous   |
| NC_037643.1 | 15130621 | SNV | 1 | T | A | Homozygous   |
| NC_037643.1 | 15130890 | SNV | 1 | T | C | Heterozygous |
| NC_037643.1 | 15130958 | SNV | 1 | T | C | Heterozygous |
| NC_037643.1 | 15131042 | SNV | 1 | T | G | Heterozygous |
| NC_037643.1 | 15131378 | SNV | 1 | A | G | Homozygous   |
| NC_037643.1 | 15150805 | SNV | 1 | G | A | Heterozygous |
| NC_037643.1 | 15150827 | SNV | 1 | G | A | Heterozygous |
| NC_037643.1 | 15153094 | SNV | 1 | C | G | Homozygous   |
| NC_037643.1 | 15153097 | SNV | 1 | A | T | Homozygous   |
| NC_037643.1 | 15153101 | SNV | 1 | T | A | Homozygous   |
| NC_037643.1 | 15153134 | SNV | 1 | T | A | Heterozygous |
| NC_037643.1 | 15153139 | SNV | 1 | G | A | Heterozygous |
| NC_037643.1 | 15155110 | SNV | 1 | G | T | Heterozygous |
| NC_037643.1 | 15155123 | SNV | 1 | G | T | Heterozygous |
| NC_037643.1 | 15155582 | SNV | 1 | T | C | Homozygous   |
| NC_037643.1 | 15155600 | SNV | 1 | C | T | Homozygous   |
| NC_037643.1 | 15155610 | SNV | 1 | C | T | Homozygous   |
| NC_037643.1 | 15155628 | SNV | 1 | T | C | Heterozygous |
| NC_037643.1 | 15155634 | SNV | 1 | T | C | Homozygous   |
| NC_037643.1 | 15155648 | SNV | 1 | T | C | Homozygous   |
| NC_037643.1 | 15155660 | SNV | 1 | C | T | Heterozygous |
| NC_037643.1 | 15156208 | SNV | 1 | C | T | Heterozygous |
| NC_037643.1 | 15156289 | SNV | 1 | T | G | Heterozygous |
| NC_037643.1 | 15156314 | SNV | 1 | C | T | Heterozygous |
| NC_037643.1 | 15156323 | SNV | 1 | T | G | Heterozygous |
| NC_037643.1 | 15156341 | SNV | 1 | T | C | Heterozygous |
| NC_037643.1 | 15156358 | SNV | 1 | C | G | Heterozygous |
| NC_037643.1 | 15156358 | SNV | 1 | C | T | Heterozygous |
| NC_037643.1 | 15156366 | SNV | 1 | C | G | Homozygous   |
| NC_037643.1 | 15156377 | SNV | 1 | G | A | Homozygous   |
| NC_037643.1 | 15156463 | SNV | 1 | C | T | Heterozygous |
| NC_037643.1 | 15156467 | SNV | 1 | C | T | Homozygous   |
| NC_037643.1 | 15156469 | SNV | 1 | T | C | Heterozygous |
| NC_037643.1 | 15156471 | SNV | 1 | C | T | Homozygous   |
| NC_037643.1 | 15156477 | SNV | 1 | G | A | Heterozygous |
| NC_037643.1 | 15156490 | SNV | 1 | T | C | Heterozygous |
| NC_037643.1 | 15156531 | SNV | 1 | G | A | Homozygous   |
| NC_037643.1 | 15156535 | SNV | 1 | C | T | Heterozygous |
| NC_037643.1 | 15156544 | SNV | 1 | C | T | Homozygous   |
| NC_037643.1 | 15156561 | SNV | 1 | C | T | Heterozygous |
| NC_037643.1 | 15156575 | SNV | 1 | A | G | Heterozygous |
| NC_037643.1 | 15156612 | SNV | 1 | T | C | Homozygous   |
| NC_037643.1 | 15156615 | SNV | 1 | T | G | Homozygous   |
| NC_037643.1 | 15156631 | SNV | 1 | T | C | Homozygous   |
| NC_037643.1 | 15156635 | SNV | 1 | T | C | Homozygous   |

|             |          |     |   |   |   |              |
|-------------|----------|-----|---|---|---|--------------|
| NC_037643.1 | 15156654 | SNV | 1 | C | G | Heterozygous |
| NC_037643.1 | 15156654 | SNV | 1 | C | T | Heterozygous |
| NC_037643.1 | 15156673 | SNV | 1 | G | A | Homozygous   |
| NC_037643.1 | 15156685 | SNV | 1 | T | C | Heterozygous |
| NC_037643.1 | 15156686 | SNV | 1 | T | C | Heterozygous |
| NC_037643.1 | 15156792 | SNV | 1 | G | A | Homozygous   |
| NC_037643.1 | 15156809 | SNV | 1 | A | G | Homozygous   |
| NC_037643.1 | 15156833 | SNV | 1 | C | T | Homozygous   |
| NC_037643.1 | 15156847 | SNV | 1 | C | G | Homozygous   |
| NC_037643.1 | 15158689 | SNV | 1 | C | G | Homozygous   |
| NC_037643.1 | 15158717 | SNV | 1 | G | T | Homozygous   |
| NC_037643.1 | 15158738 | SNV | 1 | T | C | Heterozygous |
| NC_037643.1 | 15158837 | SNV | 1 | T | C | Heterozygous |
| NC_037643.1 | 15158840 | SNV | 1 | A | T | Heterozygous |
| NC_037643.1 | 15158842 | SNV | 1 | A | G | Heterozygous |
| NC_037643.1 | 15158846 | SNV | 1 | C | T | Heterozygous |
| NC_037643.1 | 15158860 | SNV | 1 | C | T | Heterozygous |
| NC_037643.1 | 15158969 | SNV | 1 | C | T | Heterozygous |
| NC_037643.1 | 15158975 | SNV | 1 | C | T | Heterozygous |
| NC_037643.1 | 15158977 | SNV | 1 | T | C | Heterozygous |
| NC_037643.1 | 15158985 | SNV | 1 | T | G | Heterozygous |
| NC_037643.1 | 15158996 | SNV | 1 | A | G | Heterozygous |
| NC_037643.1 | 15159020 | SNV | 1 | G | A | Heterozygous |
| NC_037643.1 | 15159023 | SNV | 1 | T | A | Heterozygous |
| NC_037643.1 | 15159029 | SNV | 1 | T | C | Heterozygous |
| NC_037643.1 | 15159033 | SNV | 1 | C | T | Heterozygous |
| NC_037643.1 | 15159038 | SNV | 1 | T | C | Heterozygous |
| NC_037643.1 | 15159054 | SNV | 1 | C | T | Heterozygous |
| NC_037643.1 | 15159064 | SNV | 1 | G | T | Heterozygous |
| NC_037643.1 | 15159075 | SNV | 1 | C | T | Heterozygous |
| NC_037643.1 | 15159078 | SNV | 1 | T | C | Heterozygous |
| NC_037643.1 | 15159093 | SNV | 1 | C | T | Homozygous   |
| NC_037643.1 | 15159108 | SNV | 1 | A | G | Heterozygous |
| NC_037643.1 | 15159122 | SNV | 1 | G | A | Heterozygous |
| NC_037643.1 | 15159133 | SNV | 1 | A | G | Heterozygous |
| NC_037643.1 | 15159137 | SNV | 1 | G | T | Homozygous   |
| NC_037643.1 | 15159162 | SNV | 1 | T | C | Heterozygous |
| NC_037643.1 | 15159166 | SNV | 1 | T | C | Heterozygous |
| NC_037643.1 | 15159176 | SNV | 1 | C | T | Heterozygous |
| NC_037643.1 | 15159184 | SNV | 1 | T | C | Heterozygous |
| NC_037643.1 | 15159185 | SNV | 1 | C | T | Heterozygous |
| NC_037643.1 | 15159188 | SNV | 1 | A | G | Heterozygous |
| NC_037643.1 | 15159191 | SNV | 1 | T | C | Heterozygous |
| NC_037643.1 | 15159203 | SNV | 1 | A | G | Homozygous   |
| NC_037643.1 | 15159241 | SNV | 1 | G | A | Homozygous   |
| NC_037643.1 | 15159247 | SNV | 1 | A | T | Homozygous   |
| NC_037643.1 | 15159250 | SNV | 1 | A | G | Homozygous   |
| NC_037643.1 | 15159259 | SNV | 1 | T | C | Homozygous   |
| NC_037643.1 | 15159265 | SNV | 1 | T | C | Homozygous   |
| NC_037643.1 | 15159320 | SNV | 1 | C | T | Homozygous   |
| NC_037643.1 | 15159328 | SNV | 1 | A | G | Homozygous   |

|             |          |     |   |   |   |              |
|-------------|----------|-----|---|---|---|--------------|
| NC_037643.1 | 15159346 | SNV | 1 | A | G | Homozygous   |
| NC_037643.1 | 15159366 | SNV | 1 | T | A | Homozygous   |
| NC_037643.1 | 15159380 | SNV | 1 | G | A | Heterozygous |
| NC_037643.1 | 15159382 | SNV | 1 | G | A | Heterozygous |
| NC_037643.1 | 15159407 | SNV | 1 | C | T | Heterozygous |
| NC_037643.1 | 15159422 | SNV | 1 | T | C | Heterozygous |
| NC_037643.1 | 15159424 | SNV | 1 | C | T | Heterozygous |
| NC_037643.1 | 15159442 | SNV | 1 | C | T | Homozygous   |
| NC_037643.1 | 15159457 | SNV | 1 | G | T | Homozygous   |
| NC_037643.1 | 15159465 | SNV | 1 | A | G | Homozygous   |
| NC_037643.1 | 15159468 | SNV | 1 | T | A | Homozygous   |
| NC_037643.1 | 15159479 | SNV | 1 | A | G | Homozygous   |
| NC_037643.1 | 15159484 | SNV | 1 | A | G | Homozygous   |
| NC_037643.1 | 15159492 | SNV | 1 | G | A | Homozygous   |
| NC_037643.1 | 15159495 | SNV | 1 | T | C | Homozygous   |
| NC_037643.1 | 15159633 | SNV | 1 | C | T | Homozygous   |
| NC_037643.1 | 15159659 | SNV | 1 | G | A | Homozygous   |
| NC_037643.1 | 15159688 | SNV | 1 | C | T | Homozygous   |
| NC_037643.1 | 15159698 | SNV | 1 | G | A | Homozygous   |
| NC_037643.1 | 15159718 | SNV | 1 | A | G | Heterozygous |
| NC_037643.1 | 15159778 | SNV | 1 | G | C | Homozygous   |
| NC_037643.1 | 15159794 | SNV | 1 | G | T | Homozygous   |
| NC_037643.1 | 15164209 | SNV | 1 | T | G | Heterozygous |
| NC_037643.1 | 15164213 | SNV | 1 | T | G | Heterozygous |
| NC_037643.1 | 15164217 | SNV | 1 | T | G | Heterozygous |
| NC_037643.1 | 15164223 | SNV | 1 | A | G | Heterozygous |
| NC_037643.1 | 15164227 | SNV | 1 | T | C | Heterozygous |
| NC_037643.1 | 15164236 | SNV | 1 | A | T | Heterozygous |
| NC_037643.1 | 15164253 | SNV | 1 | T | C | Heterozygous |
| NC_037643.1 | 15164263 | SNV | 1 | G | A | Heterozygous |
| NC_037643.1 | 15164582 | SNV | 1 | C | G | Homozygous   |
| NC_037643.1 | 15164594 | SNV | 1 | A | G | Heterozygous |
| NC_037643.1 | 15164609 | SNV | 1 | T | G | Heterozygous |
| NC_037643.1 | 15164612 | SNV | 1 | A | T | Heterozygous |
| NC_037643.1 | 15164618 | SNV | 1 | A | T | Heterozygous |
| NC_037643.1 | 15164630 | SNV | 1 | G | T | Heterozygous |
| NC_037643.1 | 15164654 | SNV | 1 | G | T | Heterozygous |
| NC_037643.1 | 15164658 | SNV | 1 | A | C | Homozygous   |
| NC_037643.1 | 15164677 | SNV | 1 | T | A | Homozygous   |
| NC_037643.1 | 15175273 | SNV | 1 | C | T | Heterozygous |
| NC_037643.1 | 15175283 | SNV | 1 | C | T | Heterozygous |
| NC_037643.1 | 15175295 | SNV | 1 | A | G | Homozygous   |
| NC_037643.1 | 15175398 | SNV | 1 | T | C | Homozygous   |
| NC_037643.1 | 15175620 | SNV | 1 | C | T | Heterozygous |
| NC_037643.1 | 15175688 | SNV | 1 | G | A | Homozygous   |
| NC_037643.1 | 15182622 | SNV | 1 | T | C | Heterozygous |
| NC_037643.1 | 15182677 | SNV | 1 | A | G | Homozygous   |
| NC_037643.1 | 15182698 | SNV | 1 | A | T | Homozygous   |
| NC_037643.1 | 15182709 | SNV | 1 | G | T | Homozygous   |
| NC_037643.1 | 15182723 | SNV | 1 | G | T | Heterozygous |
| NC_037643.1 | 15182733 | SNV | 1 | G | A | Heterozygous |

|             |          |     |   |   |   |              |
|-------------|----------|-----|---|---|---|--------------|
| NC_037643.1 | 15182749 | SNV | 1 | G | A | Heterozygous |
| NC_037643.1 | 15182926 | SNV | 1 | G | C | Homozygous   |
| NC_037643.1 | 15184589 | SNV | 1 | C | T | Heterozygous |
| NC_037643.1 | 15184607 | SNV | 1 | C | T | Heterozygous |
| NC_037643.1 | 15184617 | SNV | 1 | G | T | Heterozygous |
| NC_037643.1 | 15184624 | SNV | 1 | T | C | Heterozygous |
| NC_037643.1 | 15184633 | SNV | 1 | C | A | Heterozygous |
| NC_037643.1 | 15186236 | SNV | 1 | T | C | Heterozygous |
| NC_037643.1 | 15186238 | SNV | 1 | C | T | Heterozygous |
| NC_037643.1 | 15186244 | SNV | 1 | T | G | Homozygous   |
| NC_037643.1 | 15186284 | SNV | 1 | G | C | Homozygous   |
| NC_037643.1 | 15186375 | SNV | 1 | C | T | Homozygous   |
| NC_037643.1 | 15186398 | SNV | 1 | C | T | Heterozygous |
| NC_037643.1 | 15186436 | SNV | 1 | C | A | Heterozygous |
| NC_037643.1 | 15186447 | SNV | 1 | T | C | Heterozygous |
| NC_037643.1 | 15186471 | SNV | 1 | G | A | Heterozygous |
| NC_037643.1 | 15186570 | SNV | 1 | G | T | Heterozygous |
| NC_037643.1 | 15186581 | SNV | 1 | A | G | Homozygous   |
| NC_037643.1 | 15186601 | SNV | 1 | T | C | Heterozygous |
| NC_037643.1 | 15186648 | SNV | 1 | G | A | Heterozygous |
| NC_037643.1 | 15186691 | SNV | 1 | T | C | Homozygous   |
| NC_037643.1 | 15186710 | SNV | 1 | G | A | Heterozygous |
| NC_037643.1 | 15186723 | SNV | 1 | T | G | Homozygous   |
| NC_037643.1 | 15186732 | SNV | 1 | T | C | Homozygous   |
| NC_037643.1 | 15186817 | SNV | 1 | C | T | Homozygous   |
| NC_037643.1 | 15186912 | SNV | 1 | A | G | Heterozygous |
| NC_037643.1 | 15186959 | SNV | 1 | T | C | Homozygous   |
| NC_037643.1 | 15186963 | SNV | 1 | C | A | Heterozygous |
| NC_037643.1 | 15186981 | SNV | 1 | T | C | Heterozygous |
| NC_037643.1 | 15187040 | SNV | 1 | A | G | Heterozygous |
| NC_037643.1 | 15187045 | SNV | 1 | T | C | Homozygous   |
| NC_037643.1 | 15187070 | SNV | 1 | T | C | Heterozygous |
| NC_037643.1 | 15187266 | SNV | 1 | T | C | Heterozygous |
| NC_037643.1 | 15187298 | SNV | 1 | C | T | Heterozygous |
| NC_037643.1 | 15187305 | SNV | 1 | A | G | Homozygous   |
| NC_037643.1 | 15187347 | SNV | 1 | C | T | Heterozygous |
| NC_037643.1 | 15187349 | SNV | 1 | A | C | Heterozygous |
| NC_037643.1 | 15187574 | SNV | 1 | T | C | Heterozygous |
| NC_037643.1 | 15187616 | SNV | 1 | G | T | Homozygous   |
| NC_037643.1 | 15187621 | SNV | 1 | A | G | Homozygous   |
| NC_037643.1 | 15187625 | SNV | 1 | C | T | Homozygous   |
| NC_037643.1 | 15187663 | SNV | 1 | A | C | Heterozygous |
| NC_037643.1 | 15187671 | SNV | 1 | T | C | Heterozygous |
| NC_037643.1 | 15187685 | SNV | 1 | A | G | Heterozygous |
| NC_037643.1 | 15187798 | SNV | 1 | T | C | Heterozygous |
| NC_037643.1 | 15187809 | SNV | 1 | T | C | Heterozygous |
| NC_037643.1 | 15187817 | SNV | 1 | T | C | Heterozygous |
| NC_037643.1 | 15187829 | SNV | 1 | T | C | Homozygous   |
| NC_037643.1 | 15187922 | SNV | 1 | C | T | Homozygous   |
| NC_037643.1 | 15187946 | SNV | 1 | T | C | Heterozygous |
| NC_037643.1 | 15201495 | SNV | 1 | G | A | Heterozygous |



|             |          |     |   |   |   |              |
|-------------|----------|-----|---|---|---|--------------|
| NC_037643.1 | 15301625 | SNV | 1 | A | C | Heterozygous |
| NC_037643.1 | 15301629 | SNV | 1 | A | C | Homozygous   |
| NC_037643.1 | 15301635 | SNV | 1 | A | C | Heterozygous |
| NC_037643.1 | 15321557 | SNV | 1 | C | T | Heterozygous |
| NC_037643.1 | 15330761 | SNV | 1 | G | A | Homozygous   |
| NC_037643.1 | 15330788 | SNV | 1 | G | A | Homozygous   |
| NC_037643.1 | 15330825 | SNV | 1 | G | A | Homozygous   |
| NC_037643.1 | 15330985 | SNV | 1 | A | G | Heterozygous |
| NC_037643.1 | 15331075 | SNV | 1 | T | A | Homozygous   |
| NC_037643.1 | 15331083 | SNV | 1 | A | T | Heterozygous |
| NC_037643.1 | 15331182 | SNV | 1 | C | G | Homozygous   |
| NC_037643.1 | 15331301 | SNV | 1 | T | C | Homozygous   |
| NC_037643.1 | 15331536 | SNV | 1 | T | C | Heterozygous |
| NC_037643.1 | 15331602 | SNV | 1 | A | G | Homozygous   |
| NC_037643.1 | 15332031 | SNV | 1 | C | A | Homozygous   |
| NC_037643.1 | 15332291 | SNV | 1 | T | C | Homozygous   |
| NC_037643.1 | 15332974 | SNV | 1 | C | T | Homozygous   |
| NC_037643.1 | 15333977 | SNV | 1 | G | A | Homozygous   |
| NC_037643.1 | 15340633 | SNV | 1 | A | C | Homozygous   |
| NC_037643.1 | 15340646 | SNV | 1 | T | A | Homozygous   |
| NC_037643.1 | 15340662 | SNV | 1 | T | C | Homozygous   |
| NC_037643.1 | 15340813 | SNV | 1 | G | A | Homozygous   |
| NC_037643.1 | 15341062 | SNV | 1 | T | C | Heterozygous |
| NC_037643.1 | 15341355 | SNV | 1 | T | C | Homozygous   |
| NC_037643.1 | 15341997 | SNV | 1 | A | G | Homozygous   |
| NC_037643.1 | 15342290 | SNV | 1 | C | T | Homozygous   |
| NC_037643.1 | 15343723 | SNV | 1 | T | C | Homozygous   |
| NC_037643.1 | 15349508 | SNV | 1 | A | G | Homozygous   |
| NC_037643.1 | 15349795 | SNV | 1 | C | A | Heterozygous |
| NC_037643.1 | 15354336 | SNV | 1 | C | T | Homozygous   |
| NC_037643.1 | 15364129 | SNV | 1 | C | T | Homozygous   |
| NC_037643.1 | 15370194 | SNV | 1 | C | G | Homozygous   |
| NC_037643.1 | 15371322 | SNV | 1 | C | G | Homozygous   |
| NC_037643.1 | 15372570 | SNV | 1 | A | G | Homozygous   |
| NC_037643.1 | 15373879 | SNV | 1 | A | G | Homozygous   |
| NC_037643.1 | 15373959 | SNV | 1 | A | G | Homozygous   |
| NC_037643.1 | 15375505 | SNV | 1 | C | A | Heterozygous |
| NC_037643.1 | 15376555 | SNV | 1 | T | G | Homozygous   |
| NC_037643.1 | 15376704 | SNV | 1 | T | C | Homozygous   |
| NC_037643.1 | 15376797 | SNV | 1 | C | T | Heterozygous |
| NC_037643.1 | 15376903 | SNV | 1 | T | A | Homozygous   |
| NC_037643.1 | 15379123 | SNV | 1 | C | T | Homozygous   |
| NC_037643.1 | 15379130 | SNV | 1 | G | A | Homozygous   |
| NC_037643.1 | 15383042 | SNV | 1 | G | A | Heterozygous |
| NC_037643.1 | 15383065 | SNV | 1 | A | G | Homozygous   |
| NC_037643.1 | 15383763 | SNV | 1 | C | T | Homozygous   |
| NC_037643.1 | 15383922 | SNV | 1 | A | G | Homozygous   |
| NC_037643.1 | 15383934 | SNV | 1 | A | C | Heterozygous |
| NC_037643.1 | 15384582 | SNV | 1 | T | G | Homozygous   |
| NC_037643.1 | 15384982 | SNV | 1 | T | C | Homozygous   |
| NC_037643.1 | 15385213 | SNV | 1 | C | T | Heterozygous |

|             |          |     |   |   |   |              |
|-------------|----------|-----|---|---|---|--------------|
| NC_037643.1 | 15385269 | SNV | 1 | G | A | Homozygous   |
| NC_037643.1 | 15385282 | SNV | 1 | G | A | Homozygous   |
| NC_037643.1 | 15385287 | SNV | 1 | T | G | Homozygous   |
| NC_037643.1 | 15385482 | SNV | 1 | T | C | Homozygous   |
| NC_037643.1 | 15385743 | SNV | 1 | A | G | Homozygous   |
| NC_037643.1 | 15386284 | SNV | 1 | T | A | Homozygous   |
| NC_037643.1 | 15386496 | SNV | 1 | T | C | Homozygous   |
| NC_037643.1 | 15386846 | SNV | 1 | G | A | Heterozygous |
| NC_037643.1 | 15387557 | SNV | 1 | A | G | Heterozygous |
| NC_037643.1 | 15387593 | SNV | 1 | G | A | Homozygous   |
| NC_037643.1 | 15387780 | SNV | 1 | A | G | Homozygous   |
| NC_037643.1 | 15390065 | SNV | 1 | T | C | Heterozygous |
| NC_037643.1 | 15397615 | SNV | 1 | A | G | Homozygous   |
| NC_037643.1 | 15397671 | SNV | 1 | T | A | Homozygous   |
| NC_037643.1 | 15397688 | SNV | 1 | A | G | Homozygous   |
| NC_037643.1 | 15397713 | SNV | 1 | A | G | Homozygous   |
| NC_037643.1 | 15397767 | SNV | 1 | T | C | Heterozygous |
| NC_037643.1 | 15398013 | SNV | 1 | C | T | Heterozygous |
| NC_037643.1 | 15398806 | SNV | 1 | G | C | Homozygous   |
| NC_037643.1 | 15398963 | SNV | 1 | C | T | Homozygous   |
| NC_037643.1 | 15399269 | SNV | 1 | C | T | Heterozygous |
| NC_037643.1 | 15399320 | SNV | 1 | G | A | Homozygous   |
| NC_037643.1 | 15402237 | SNV | 1 | T | C | Homozygous   |
| NC_037643.1 | 15402521 | SNV | 1 | T | C | Homozygous   |
| NC_037643.1 | 15403431 | SNV | 1 | G | A | Homozygous   |
| NC_037643.1 | 15403438 | SNV | 1 | A | T | Homozygous   |
| NC_037643.1 | 15403440 | SNV | 1 | T | C | Homozygous   |
| NC_037643.1 | 15403443 | SNV | 1 | C | T | Homozygous   |
| NC_037643.1 | 15403453 | SNV | 1 | C | T | Homozygous   |
| NC_037643.1 | 15403484 | SNV | 1 | T | C | Homozygous   |
| NC_037643.1 | 15403488 | SNV | 1 | A | C | Homozygous   |
| NC_037643.1 | 15403494 | SNV | 1 | T | C | Heterozygous |
| NC_037643.1 | 15403506 | SNV | 1 | C | T | Heterozygous |
| NC_037643.1 | 15403537 | SNV | 1 | C | T | Heterozygous |
| NC_037643.1 | 15403545 | SNV | 1 | T | C | Heterozygous |
| NC_037643.1 | 15403567 | SNV | 1 | A | T | Heterozygous |
| NC_037643.1 | 15403572 | SNV | 1 | A | T | Homozygous   |
| NC_037643.1 | 15403577 | SNV | 1 | A | T | Homozygous   |
| NC_037643.1 | 15403582 | SNV | 1 | A | T | Homozygous   |
| NC_037643.1 | 15403594 | SNV | 1 | T | C | Heterozygous |
| NC_037643.1 | 15403606 | SNV | 1 | A | C | Heterozygous |
| NC_037643.1 | 15403606 | SNV | 1 | A | T | Heterozygous |
| NC_037643.1 | 15403609 | SNV | 1 | T | C | Heterozygous |
| NC_037643.1 | 15403611 | SNV | 1 | C | T | Heterozygous |
| NC_037643.1 | 15403636 | SNV | 1 | G | A | Heterozygous |
| NC_037643.1 | 15404474 | SNV | 1 | A | T | Homozygous   |
| NC_037643.1 | 15407078 | SNV | 1 | C | G | Homozygous   |
| NC_037643.1 | 15407080 | SNV | 1 | T | G | Homozygous   |
| NC_037643.1 | 15409359 | SNV | 1 | C | T | Heterozygous |
| NC_037643.1 | 15409382 | SNV | 1 | T | C | Homozygous   |
| NC_037643.1 | 15413016 | SNV | 1 | A | G | Homozygous   |

|             |          |     |   |   |   |              |
|-------------|----------|-----|---|---|---|--------------|
| NC_037643.1 | 15413251 | SNV | 1 | C | T | Heterozygous |
| NC_037643.1 | 15414613 | SNV | 1 | T | C | Homozygous   |
| NC_037643.1 | 15416170 | SNV | 1 | A | T | Heterozygous |
| NC_037643.1 | 15416292 | SNV | 1 | A | T | Homozygous   |
| NC_037643.1 | 15416296 | SNV | 1 | T | A | Homozygous   |
| NC_037643.1 | 15416304 | SNV | 1 | T | G | Homozygous   |
| NC_037643.1 | 15416308 | SNV | 1 | A | T | Homozygous   |
| NC_037643.1 | 15419709 | SNV | 1 | T | C | Homozygous   |
| NC_037643.1 | 15419791 | SNV | 1 | A | G | Homozygous   |
| NC_037643.1 | 15420424 | SNV | 1 | C | A | Heterozygous |
| NC_037643.1 | 15420427 | SNV | 1 | T | C | Heterozygous |
| NC_037643.1 | 15420508 | SNV | 1 | A | T | Homozygous   |
| NC_037643.1 | 15420510 | SNV | 1 | A | G | Homozygous   |
| NC_037643.1 | 15420641 | SNV | 1 | G | A | Homozygous   |
| NC_037643.1 | 15420750 | SNV | 1 | T | G | Homozygous   |
| NC_037643.1 | 15421553 | SNV | 1 | A | G | Heterozygous |
| NC_037643.1 | 15423170 | SNV | 1 | G | A | Homozygous   |
| NC_037643.1 | 15423222 | SNV | 1 | A | G | Homozygous   |
| NC_037643.1 | 15423285 | SNV | 1 | G | A | Heterozygous |
| NC_037643.1 | 15423370 | SNV | 1 | C | T | Homozygous   |
| NC_037643.1 | 15424361 | SNV | 1 | T | G | Homozygous   |
| NC_037643.1 | 15424364 | SNV | 1 | A | T | Homozygous   |
| NC_037643.1 | 15424366 | SNV | 1 | A | C | Homozygous   |
| NC_037643.1 | 15426233 | SNV | 1 | A | T | Heterozygous |
| NC_037643.1 | 15426253 | SNV | 1 | T | A | Heterozygous |
| NC_037643.1 | 15426365 | SNV | 1 | C | T | Homozygous   |
| NC_037643.1 | 15427498 | SNV | 1 | A | C | Heterozygous |
| NC_037643.1 | 15428533 | SNV | 1 | G | A | Heterozygous |
| NC_037643.1 | 15428773 | SNV | 1 | C | T | Heterozygous |
| NC_037643.1 | 15429187 | SNV | 1 | T | C | Homozygous   |
| NC_037643.1 | 15429908 | SNV | 1 | G | A | Heterozygous |
| NC_037643.1 | 15430590 | SNV | 1 | T | C | Homozygous   |
| NC_037643.1 | 15431076 | SNV | 1 | C | T | Homozygous   |
| NC_037643.1 | 15433299 | SNV | 1 | T | C | Homozygous   |
| NC_037643.1 | 15434769 | SNV | 1 | A | G | Heterozygous |
| NC_037643.1 | 15436386 | SNV | 1 | T | C | Heterozygous |
| NC_037643.1 | 15436728 | SNV | 1 | C | T | Homozygous   |
| NC_037643.1 | 15436887 | SNV | 1 | C | T | Homozygous   |
| NC_037643.1 | 15437208 | SNV | 1 | A | G | Homozygous   |
| NC_037643.1 | 15437567 | SNV | 1 | A | G | Homozygous   |
| NC_037643.1 | 15437712 | SNV | 1 | C | T | Homozygous   |
| NC_037643.1 | 15444087 | SNV | 1 | G | A | Homozygous   |
| NC_037643.1 | 15460927 | SNV | 1 | A | T | Homozygous   |
| NC_037643.1 | 15460930 | SNV | 1 | G | A | Homozygous   |
| NC_037643.1 | 15460938 | SNV | 1 | A | T | Heterozygous |
| NC_037643.1 | 15460940 | SNV | 1 | A | T | Homozygous   |
| NC_037643.1 | 15461988 | SNV | 1 | A | G | Homozygous   |
| NC_037643.1 | 15462211 | SNV | 1 | T | C | Homozygous   |
| NC_037643.1 | 15462503 | SNV | 1 | T | C | Homozygous   |
| NC_037643.1 | 15462570 | SNV | 1 | C | G | Homozygous   |
| NC_037643.1 | 15463331 | SNV | 1 | C | T | Homozygous   |

|             |          |     |   |   |   |              |
|-------------|----------|-----|---|---|---|--------------|
| NC_037643.1 | 15464414 | SNV | 1 | A | T | Homozygous   |
| NC_037643.1 | 15464695 | SNV | 1 | G | A | Heterozygous |
| NC_037643.1 | 15464710 | SNV | 1 | A | G | Homozygous   |
| NC_037643.1 | 15464916 | SNV | 1 | A | G | Heterozygous |
| NC_037643.1 | 15465040 | SNV | 1 | G | C | Homozygous   |
| NC_037643.1 | 15465057 | SNV | 1 | G | T | Homozygous   |
| NC_037643.1 | 15465158 | SNV | 1 | G | T | Heterozygous |
| NC_037643.1 | 15465549 | SNV | 1 | A | T | Homozygous   |
| NC_037643.1 | 15465894 | SNV | 1 | T | C | Homozygous   |
| NC_037643.1 | 15465943 | SNV | 1 | T | C | Homozygous   |
| NC_037643.1 | 15467992 | SNV | 1 | T | C | Heterozygous |
| NC_037643.1 | 15470141 | SNV | 1 | G | A | Homozygous   |
| NC_037643.1 | 15470619 | SNV | 1 | T | C | Homozygous   |
| NC_037643.1 | 15471001 | SNV | 1 | T | C | Heterozygous |
| NC_037643.1 | 15471378 | SNV | 1 | T | C | Homozygous   |
| NC_037643.1 | 15471636 | SNV | 1 | A | G | Homozygous   |
| NC_037643.1 | 15471871 | SNV | 1 | C | T | Heterozygous |
| NC_037643.1 | 15472879 | SNV | 1 | T | C | Heterozygous |
| NC_037643.1 | 15473186 | SNV | 1 | G | A | Homozygous   |
| NC_037643.1 | 15473375 | SNV | 1 | C | T | Heterozygous |
| NC_037643.1 | 15473391 | SNV | 1 | G | A | Homozygous   |
| NC_037643.1 | 15473394 | SNV | 1 | T | A | Homozygous   |
| NC_037643.1 | 15473565 | SNV | 1 | T | C | Homozygous   |
| NC_037643.1 | 15473829 | SNV | 1 | C | A | Homozygous   |
| NC_037643.1 | 15473838 | SNV | 1 | A | G | Homozygous   |
| NC_037643.1 | 15473847 | SNV | 1 | C | T | Homozygous   |
| NC_037643.1 | 15473850 | SNV | 1 | T | G | Homozygous   |
| NC_037643.1 | 15473859 | SNV | 1 | T | C | Homozygous   |
| NC_037643.1 | 15473907 | SNV | 1 | A | G | Homozygous   |
| NC_037643.1 | 15474204 | SNV | 1 | C | T | Homozygous   |
| NC_037643.1 | 15474206 | SNV | 1 | G | A | Homozygous   |
| NC_037643.1 | 15474345 | SNV | 1 | A | C | Homozygous   |
| NC_037643.1 | 15474413 | SNV | 1 | T | C | Homozygous   |
| NC_037643.1 | 15477432 | SNV | 1 | T | C | Homozygous   |
| NC_037643.1 | 15477436 | SNV | 1 | T | C | Homozygous   |
| NC_037643.1 | 15477440 | SNV | 1 | T | C | Homozygous   |
| NC_037643.1 | 15477447 | SNV | 1 | T | C | Homozygous   |
| NC_037643.1 | 15477452 | SNV | 1 | T | G | Homozygous   |
| NC_037643.1 | 15477456 | SNV | 1 | C | A | Homozygous   |
| NC_037643.1 | 15477462 | SNV | 1 | T | G | Heterozygous |
| NC_037643.1 | 15477466 | SNV | 1 | T | G | Heterozygous |
| NC_037643.1 | 15477515 | SNV | 1 | C | T | Heterozygous |
| NC_037643.1 | 15480974 | SNV | 1 | T | G | Heterozygous |
| NC_037643.1 | 15491742 | SNV | 1 | G | T | Heterozygous |
| NC_037643.1 | 15514465 | SNV | 1 | A | C | Heterozygous |
| NC_037643.1 | 15514469 | SNV | 1 | T | A | Homozygous   |
| NC_037643.1 | 15514498 | SNV | 1 | T | C | Homozygous   |
| NC_037643.1 | 15514501 | SNV | 1 | A | G | Heterozygous |
| NC_037643.1 | 15514505 | SNV | 1 | A | G | Homozygous   |
| NC_037643.1 | 15516310 | SNV | 1 | T | C | Homozygous   |
| NC_037643.1 | 15516315 | SNV | 1 | T | C | Homozygous   |

|             |          |     |   |   |   |              |
|-------------|----------|-----|---|---|---|--------------|
| NC_037643.1 | 15516761 | SNV | 1 | T | C | Homozygous   |
| NC_037643.1 | 15516765 | SNV | 1 | T | C | Homozygous   |
| NC_037643.1 | 15516786 | SNV | 1 | A | G | Heterozygous |
| NC_037643.1 | 15516794 | SNV | 1 | A | T | Heterozygous |
| NC_037643.1 | 15516797 | SNV | 1 | A | G | Heterozygous |
| NC_037643.1 | 15516801 | SNV | 1 | A | G | Heterozygous |
| NC_037643.1 | 15531769 | SNV | 1 | A | C | Homozygous   |
| NC_037643.1 | 15531801 | SNV | 1 | A | G | Homozygous   |
| NC_037643.1 | 15531804 | SNV | 1 | T | G | Homozygous   |
| NC_037643.1 | 15531807 | SNV | 1 | A | T | Homozygous   |
| NC_037643.1 | 15534418 | SNV | 1 | A | C | Heterozygous |
| NC_037643.1 | 15539634 | SNV | 1 | A | T | Heterozygous |
| NC_037643.1 | 15539640 | SNV | 1 | A | T | Heterozygous |
| NC_037643.1 | 15539645 | SNV | 1 | T | C | Heterozygous |
| NC_037643.1 | 15539649 | SNV | 1 | T | C | Heterozygous |
| NC_037643.1 | 15546700 | SNV | 1 | C | T | Heterozygous |
| NC_037643.1 | 15546703 | SNV | 1 | T | C | Heterozygous |
| NC_037643.1 | 15546715 | SNV | 1 | C | T | Heterozygous |
| NC_037643.1 | 15547321 | SNV | 1 | A | G | Heterozygous |
| NC_037643.1 | 15547336 | SNV | 1 | G | A | Homozygous   |
| NC_037643.1 | 15547339 | SNV | 1 | T | C | Homozygous   |
| NC_037643.1 | 15547345 | SNV | 1 | C | T | Heterozygous |
| NC_037643.1 | 15547396 | SNV | 1 | C | T | Heterozygous |
| NC_037643.1 | 15547411 | SNV | 1 | T | C | Heterozygous |
| NC_037643.1 | 15547435 | SNV | 1 | C | T | Heterozygous |
| NC_037643.1 | 15549115 | SNV | 1 | C | T | Homozygous   |
| NC_037643.1 | 15549159 | SNV | 1 | T | A | Heterozygous |
| NC_037643.1 | 15549180 | SNV | 1 | T | A | Heterozygous |
| NC_037643.1 | 15550757 | SNV | 1 | C | T | Homozygous   |
| NC_037643.1 | 15551060 | SNV | 1 | C | T | Heterozygous |
| NC_037643.1 | 15551596 | SNV | 1 | G | A | Homozygous   |
| NC_037643.1 | 15552050 | SNV | 1 | A | G | Heterozygous |
| NC_037643.1 | 15552077 | SNV | 1 | A | G | Homozygous   |
| NC_037643.1 | 15552092 | SNV | 1 | G | A | Homozygous   |
| NC_037643.1 | 15553007 | SNV | 1 | G | A | Homozygous   |
| NC_037643.1 | 15553634 | SNV | 1 | T | C | Homozygous   |
| NC_037643.1 | 15555698 | SNV | 1 | T | C | Homozygous   |
| NC_037643.1 | 15555855 | SNV | 1 | T | C | Homozygous   |
| NC_037643.1 | 15555867 | SNV | 1 | G | A | Homozygous   |
| NC_037643.1 | 15556368 | SNV | 1 | A | G | Heterozygous |
| NC_037643.1 | 15557712 | SNV | 1 | T | C | Homozygous   |
| NC_037643.1 | 15561246 | SNV | 1 | G | A | Homozygous   |
| NC_037643.1 | 15568644 | SNV | 1 | T | C | Homozygous   |
| NC_037643.1 | 15573396 | SNV | 1 | T | G | Homozygous   |
| NC_037643.1 | 15573404 | SNV | 1 | T | A | Homozygous   |
| NC_037643.1 | 15573407 | SNV | 1 | T | A | Homozygous   |
| NC_037643.1 | 15577754 | SNV | 1 | G | A | Heterozygous |
| NC_037643.1 | 15577968 | SNV | 1 | A | T | Homozygous   |
| NC_037643.1 | 15577976 | SNV | 1 | C | G | Heterozygous |
| NC_037643.1 | 15577997 | SNV | 1 | A | G | Heterozygous |
| NC_037643.1 | 15578065 | SNV | 1 | A | G | Homozygous   |

|             |          |     |   |   |   |              |
|-------------|----------|-----|---|---|---|--------------|
| NC_037643.1 | 15579018 | SNV | 1 | C | G | Homozygous   |
| NC_037643.1 | 15582230 | SNV | 1 | C | A | Homozygous   |
| NC_037643.1 | 15582241 | SNV | 1 | A | C | Homozygous   |
| NC_037643.1 | 15582243 | SNV | 1 | A | G | Homozygous   |
| NC_037643.1 | 15582250 | SNV | 1 | A | T | Homozygous   |
| NC_037643.1 | 15585341 | SNV | 1 | G | A | Homozygous   |
| NC_037643.1 | 15585346 | SNV | 1 | A | T | Homozygous   |
| NC_037643.1 | 15585348 | SNV | 1 | T | A | Homozygous   |
| NC_037643.1 | 15585360 | SNV | 1 | T | C | Homozygous   |
| NC_037643.1 | 15585370 | SNV | 1 | T | C | Homozygous   |
| NC_037643.1 | 15585401 | SNV | 1 | T | C | Homozygous   |
| NC_037643.1 | 15598800 | SNV | 1 | A | T | Heterozygous |
| NC_037643.1 | 15604981 | SNV | 1 | C | T | Homozygous   |
| NC_037643.1 | 15605092 | SNV | 1 | G | C | Homozygous   |
| NC_037643.1 | 15605122 | SNV | 1 | G | A | Homozygous   |
| NC_037643.1 | 15605176 | SNV | 1 | A | G | Homozygous   |
| NC_037643.1 | 15605693 | SNV | 1 | A | G | Homozygous   |
| NC_037643.1 | 15605972 | SNV | 1 | T | C | Homozygous   |
| NC_037643.1 | 15609328 | SNV | 1 | C | G | Homozygous   |
| NC_037643.1 | 15612427 | SNV | 1 | C | T | Heterozygous |
| NC_037643.1 | 15613054 | SNV | 1 | A | G | Heterozygous |
| NC_037643.1 | 15613080 | SNV | 1 | T | C | Homozygous   |
| NC_037643.1 | 15613231 | SNV | 1 | A | G | Homozygous   |
| NC_037643.1 | 15613257 | SNV | 1 | C | T | Homozygous   |
| NC_037643.1 | 15613376 | SNV | 1 | C | T | Homozygous   |
| NC_037643.1 | 15616055 | SNV | 1 | C | T | Heterozygous |
| NC_037643.1 | 15616354 | SNV | 1 | A | G | Homozygous   |
| NC_037643.1 | 15617068 | SNV | 1 | T | C | Homozygous   |
| NC_037643.1 | 15619469 | SNV | 1 | T | C | Heterozygous |
| NC_037643.1 | 15619667 | SNV | 1 | A | G | Heterozygous |
| NC_037643.1 | 15619718 | SNV | 1 | T | C | Heterozygous |
| NC_037643.1 | 15620008 | SNV | 1 | G | A | Homozygous   |
| NC_037643.1 | 15620347 | SNV | 1 | C | T | Heterozygous |
| NC_037643.1 | 15620355 | SNV | 1 | G | A | Homozygous   |
| NC_037643.1 | 15620359 | SNV | 1 | T | A | Homozygous   |
| NC_037643.1 | 15620486 | SNV | 1 | T | A | Homozygous   |
| NC_037643.1 | 15620524 | SNV | 1 | T | A | Heterozygous |
| NC_037643.1 | 15620527 | SNV | 1 | G | A | Heterozygous |
| NC_037643.1 | 15620622 | SNV | 1 | A | C | Heterozygous |
| NC_037643.1 | 15620628 | SNV | 1 | A | C | Homozygous   |
| NC_037643.1 | 15620657 | SNV | 1 | T | A | Homozygous   |
| NC_037643.1 | 15621855 | SNV | 1 | G | A | Homozygous   |
| NC_037643.1 | 15622173 | SNV | 1 | G | A | Homozygous   |
| NC_037643.1 | 15622349 | SNV | 1 | G | C | Homozygous   |
| NC_037643.1 | 15622419 | SNV | 1 | G | T | Heterozygous |
| NC_037643.1 | 15622426 | SNV | 1 | T | C | Homozygous   |
| NC_037643.1 | 15622435 | SNV | 1 | T | C | Homozygous   |
| NC_037643.1 | 15622664 | SNV | 1 | G | C | Heterozygous |
| NC_037643.1 | 15622964 | SNV | 1 | T | C | Heterozygous |
| NC_037643.1 | 15623087 | SNV | 1 | G | A | Heterozygous |
| NC_037643.1 | 15623171 | SNV | 1 | G | A | Heterozygous |

|             |          |     |   |   |   |              |
|-------------|----------|-----|---|---|---|--------------|
| NC_037643.1 | 15623242 | SNV | 1 | A | G | Homozygous   |
| NC_037643.1 | 15623375 | SNV | 1 | C | T | Heterozygous |
| NC_037643.1 | 15623394 | SNV | 1 | C | T | Homozygous   |
| NC_037643.1 | 15623634 | SNV | 1 | A | C | Heterozygous |
| NC_037643.1 | 15623737 | SNV | 1 | T | C | Heterozygous |
| NC_037643.1 | 15624286 | SNV | 1 | T | C | Heterozygous |
| NC_037643.1 | 15625120 | SNV | 1 | G | A | Homozygous   |
| NC_037643.1 | 15625261 | SNV | 1 | T | C | Homozygous   |
| NC_037643.1 | 15625315 | SNV | 1 | T | C | Homozygous   |
| NC_037643.1 | 15625743 | SNV | 1 | G | A | Homozygous   |
| NC_037643.1 | 15626985 | SNV | 1 | G | A | Heterozygous |
| NC_037643.1 | 15627353 | SNV | 1 | C | T | Homozygous   |
| NC_037643.1 | 15627379 | SNV | 1 | G | T | Homozygous   |
| NC_037643.1 | 15629305 | SNV | 1 | C | T | Homozygous   |
| NC_037643.1 | 15629499 | SNV | 1 | T | C | Homozygous   |
| NC_037643.1 | 15629557 | SNV | 1 | G | A | Homozygous   |
| NC_037643.1 | 15632057 | SNV | 1 | T | G | Homozygous   |
| NC_037643.1 | 15632694 | SNV | 1 | C | T | Homozygous   |
| NC_037643.1 | 15640544 | SNV | 1 | A | G | Homozygous   |
| NC_037643.1 | 15640675 | SNV | 1 | T | A | Heterozygous |
| NC_037643.1 | 15640929 | SNV | 1 | G | T | Homozygous   |
| NC_037643.1 | 15641074 | SNV | 1 | T | C | Homozygous   |
| NC_037643.1 | 15641076 | SNV | 1 | G | T | Homozygous   |
| NC_037643.1 | 15643248 | SNV | 1 | A | G | Heterozygous |
| NC_037643.1 | 15645471 | SNV | 1 | T | C | Homozygous   |
| NC_037643.1 | 15647248 | SNV | 1 | A | T | Heterozygous |
| NC_037643.1 | 15647279 | SNV | 1 | C | T | Homozygous   |
| NC_037643.1 | 15647288 | SNV | 1 | A | T | Heterozygous |
| NC_037643.1 | 15647290 | SNV | 1 | T | A | Homozygous   |
| NC_037643.1 | 15647294 | SNV | 1 | A | G | Heterozygous |
| NC_037643.1 | 15647300 | SNV | 1 | A | T | Heterozygous |
| NC_037643.1 | 15647302 | SNV | 1 | A | T | Heterozygous |
| NC_037643.1 | 15647309 | SNV | 1 | T | A | Heterozygous |
| NC_037643.1 | 15647313 | SNV | 1 | T | G | Heterozygous |
| NC_037643.1 | 15647333 | SNV | 1 | G | A | Heterozygous |
| NC_037643.1 | 15647336 | SNV | 1 | C | A | Heterozygous |
| NC_037643.1 | 15647640 | SNV | 1 | C | T | Homozygous   |
| NC_037643.1 | 15647814 | SNV | 1 | T | A | Heterozygous |
| NC_037643.1 | 15647850 | SNV | 1 | A | G | Heterozygous |
| NC_037643.1 | 15647865 | SNV | 1 | A | G | Heterozygous |
| NC_037643.1 | 15648098 | SNV | 1 | T | C | Heterozygous |
| NC_037643.1 | 15649939 | SNV | 1 | C | G | Homozygous   |
| NC_037643.1 | 15650074 | SNV | 1 | A | G | Homozygous   |
| NC_037643.1 | 15650098 | SNV | 1 | A | G | Homozygous   |
| NC_037643.1 | 15650405 | SNV | 1 | C | T | Heterozygous |
| NC_037643.1 | 15654649 | SNV | 1 | A | T | Homozygous   |
| NC_037643.1 | 15654868 | SNV | 1 | C | T | Homozygous   |
| NC_037643.1 | 15654913 | SNV | 1 | G | T | Heterozygous |
| NC_037643.1 | 15656103 | SNV | 1 | A | G | Homozygous   |
| NC_037643.1 | 15657117 | SNV | 1 | C | A | Heterozygous |
| NC_037643.1 | 15657275 | SNV | 1 | A | G | Heterozygous |

|             |          |     |   |   |   |              |
|-------------|----------|-----|---|---|---|--------------|
| NC_037643.1 | 15657283 | SNV | 1 | T | C | Homozygous   |
| NC_037643.1 | 15658640 | SNV | 1 | C | T | Heterozygous |
| NC_037643.1 | 15659803 | SNV | 1 | C | T | Heterozygous |
| NC_037643.1 | 15659811 | SNV | 1 | G | C | Heterozygous |
| NC_037643.1 | 15666311 | SNV | 1 | C | T | Heterozygous |
| NC_037643.1 | 15668444 | SNV | 1 | C | T | Homozygous   |
| NC_037643.1 | 15676545 | SNV | 1 | T | C | Homozygous   |
| NC_037643.1 | 15676733 | SNV | 1 | T | C | Homozygous   |
| NC_037643.1 | 15676738 | SNV | 1 | T | G | Homozygous   |
| NC_037643.1 | 15676748 | SNV | 1 | A | T | Heterozygous |
| NC_037643.1 | 15676752 | SNV | 1 | A | G | Heterozygous |
| NC_037643.1 | 15676754 | SNV | 1 | A | G | Heterozygous |
| NC_037643.1 | 15676762 | SNV | 1 | T | G | Heterozygous |
| NC_037643.1 | 15676797 | SNV | 1 | T | C | Homozygous   |
| NC_037643.1 | 15676799 | SNV | 1 | T | G | Heterozygous |
| NC_037643.1 | 15676824 | SNV | 1 | A | T | Homozygous   |
| NC_037643.1 | 15676827 | SNV | 1 | A | C | Homozygous   |
| NC_037643.1 | 15676829 | SNV | 1 | A | T | Homozygous   |
| NC_037643.1 | 15676839 | SNV | 1 | A | G | Homozygous   |
| NC_037643.1 | 15700862 | SNV | 1 | A | G | Homozygous   |
| NC_037643.1 | 15701608 | SNV | 1 | G | A | Homozygous   |
| NC_037643.1 | 15701631 | SNV | 1 | C | G | Homozygous   |
| NC_037643.1 | 15701672 | SNV | 1 | G | A | Homozygous   |
| NC_037643.1 | 15704041 | SNV | 1 | A | G | Homozygous   |
| NC_037643.1 | 15704060 | SNV | 1 | C | T | Homozygous   |
| NC_037643.1 | 15704066 | SNV | 1 | T | C | Homozygous   |
| NC_037643.1 | 15704068 | SNV | 1 | G | A | Homozygous   |
| NC_037643.1 | 15705925 | SNV | 1 | T | C | Homozygous   |
| NC_037643.1 | 15717733 | SNV | 1 | A | G | Homozygous   |
| NC_037643.1 | 15717765 | SNV | 1 | C | T | Heterozygous |
| NC_037643.1 | 15717842 | SNV | 1 | T | C | Heterozygous |
| NC_037643.1 | 15717910 | SNV | 1 | T | C | Homozygous   |
| NC_037643.1 | 15718335 | SNV | 1 | G | T | Homozygous   |
| NC_037643.1 | 15739317 | SNV | 1 | C | T | Homozygous   |
| NC_037643.1 | 15742333 | SNV | 1 | G | A | Heterozygous |
| NC_037643.1 | 15742676 | SNV | 1 | C | T | Heterozygous |
| NC_037643.1 | 15742682 | SNV | 1 | C | T | Heterozygous |
| NC_037643.1 | 15743292 | SNV | 1 | G | A | Homozygous   |
| NC_037643.1 | 15743335 | SNV | 1 | G | A | Heterozygous |
| NC_037643.1 | 15743466 | SNV | 1 | A | G | Homozygous   |
| NC_037643.1 | 15743632 | SNV | 1 | C | T | Heterozygous |
| NC_037643.1 | 15744175 | SNV | 1 | G | T | Heterozygous |
| NC_037643.1 | 15744384 | SNV | 1 | T | C | Homozygous   |
| NC_037643.1 | 15744461 | SNV | 1 | T | C | Homozygous   |
| NC_037643.1 | 15744971 | SNV | 1 | A | G | Homozygous   |
| NC_037643.1 | 15749987 | SNV | 1 | A | G | Homozygous   |
| NC_037643.1 | 15750032 | SNV | 1 | C | T | Heterozygous |
| NC_037643.1 | 15750046 | SNV | 1 | T | C | Heterozygous |
| NC_037643.1 | 15750077 | SNV | 1 | G | A | Heterozygous |
| NC_037643.1 | 15750249 | SNV | 1 | C | T | Heterozygous |
| NC_037643.1 | 15750294 | SNV | 1 | T | C | Homozygous   |



|             |          |     |   |   |   |              |
|-------------|----------|-----|---|---|---|--------------|
| NC_037643.1 | 15750402 | SNV | 1 | C | T | Heterozygous |
| NC_037643.1 | 15750912 | SNV | 1 | A | G | Homozygous   |
| NC_037643.1 | 15750993 | SNV | 1 | A | G | Heterozygous |
| NC_037643.1 | 15754993 | SNV | 1 | G | A | Homozygous   |
| NC_037643.1 | 15754997 | SNV | 1 | A | G | Homozygous   |
| NC_037643.1 | 15755229 | SNV | 1 | C | T | Heterozygous |
| NC_037643.1 | 15755244 | SNV | 1 | G | A | Heterozygous |
| NC_037643.1 | 15758208 | SNV | 1 | C | T | Heterozygous |
| NC_037643.1 | 15758279 | SNV | 1 | T | C | Heterozygous |
| NC_037643.1 | 15763776 | SNV | 1 | G | A | Homozygous   |
| NC_037643.1 | 15764233 | SNV | 1 | A | C | Homozygous   |
| NC_037643.1 | 15782836 | SNV | 1 | G | A | Heterozygous |
| NC_037643.1 | 15783191 | SNV | 1 | G | T | Homozygous   |
| NC_037643.1 | 15783193 | SNV | 1 | A | G | Homozygous   |
| NC_037643.1 | 15783197 | SNV | 1 | G | C | Homozygous   |
| NC_037643.1 | 15783229 | SNV | 1 | T | G | Homozygous   |
| NC_037643.1 | 15786390 | SNV | 1 | C | A | Homozygous   |
| NC_037643.1 | 15786452 | SNV | 1 | G | A | Heterozygous |
| NC_037643.1 | 15788003 | SNV | 1 | A | G | Homozygous   |
| NC_037643.1 | 15791071 | SNV | 1 | C | T | Heterozygous |
| NC_037643.1 | 15791135 | SNV | 1 | G | A | Homozygous   |
| NC_037643.1 | 15791213 | SNV | 1 | C | T | Heterozygous |
| NC_037643.1 | 15791224 | SNV | 1 | A | C | Homozygous   |
| NC_037643.1 | 15791704 | SNV | 1 | C | T | Heterozygous |
| NC_037643.1 | 15791889 | SNV | 1 | T | C | Heterozygous |
| NC_037643.1 | 15791892 | SNV | 1 | C | T | Heterozygous |
| NC_037643.1 | 15822320 | SNV | 1 | C | T | Heterozygous |
| NC_037643.1 | 15822322 | SNV | 1 | G | T | Homozygous   |
| NC_037643.1 | 15822376 | SNV | 1 | A | G | Homozygous   |
| NC_037643.1 | 15822378 | SNV | 1 | C | T | Heterozygous |
| NC_037643.1 | 15822385 | SNV | 1 | G | A | Heterozygous |
| NC_037643.1 | 15828728 | SNV | 1 | C | T | Homozygous   |
| NC_037643.1 | 15828784 | SNV | 1 | T | C | Homozygous   |
| NC_037643.1 | 15829142 | SNV | 1 | A | G | Homozygous   |
| NC_037643.1 | 15829173 | SNV | 1 | T | C | Heterozygous |
| NC_037643.1 | 15829547 | SNV | 1 | A | G | Homozygous   |
| NC_037643.1 | 15830105 | SNV | 1 | G | A | Heterozygous |
| NC_037643.1 | 15830108 | SNV | 1 | A | G | Homozygous   |
| NC_037643.1 | 15830241 | SNV | 1 | C | T | Homozygous   |
| NC_037643.1 | 15848815 | SNV | 1 | C | T | Heterozygous |
| NC_037643.1 | 15866665 | SNV | 1 | G | T | Homozygous   |
| NC_037643.1 | 15866668 | SNV | 1 | T | A | Homozygous   |
| NC_037643.1 | 15866670 | SNV | 1 | G | A | Homozygous   |
| NC_037643.1 | 15866674 | SNV | 1 | T | G | Homozygous   |
| NC_037643.1 | 15868415 | SNV | 1 | T | C | Heterozygous |
| NC_037643.1 | 15868591 | SNV | 1 | A | G | Homozygous   |
| NC_037643.1 | 15868601 | SNV | 1 | T | C | Heterozygous |
| NC_037643.1 | 15881246 | SNV | 1 | A | G | Homozygous   |
| NC_037643.1 | 15881326 | SNV | 1 | T | C | Heterozygous |
| NC_037643.1 | 15881345 | SNV | 1 | T | C | Homozygous   |
| NC_037643.1 | 15881466 | SNV | 1 | G | A | Homozygous   |

|             |          |     |   |   |   |              |
|-------------|----------|-----|---|---|---|--------------|
| NC_037643.1 | 15881585 | SNV | 1 | A | G | Homozygous   |
| NC_037643.1 | 15881600 | SNV | 1 | G | A | Homozygous   |
| NC_037643.1 | 15881752 | SNV | 1 | G | T | Homozygous   |
| NC_037643.1 | 15881767 | SNV | 1 | C | T | Heterozygous |
| NC_037643.1 | 15884130 | SNV | 1 | T | C | Homozygous   |
| NC_037643.1 | 15884132 | SNV | 1 | T | C | Homozygous   |
| NC_037643.1 | 15884251 | SNV | 1 | C | G | Homozygous   |
| NC_037643.1 | 15884285 | SNV | 1 | G | T | Heterozygous |
| NC_037643.1 | 15884338 | SNV | 1 | A | T | Heterozygous |
| NC_037643.1 | 15900386 | SNV | 1 | A | C | Heterozygous |
| NC_037643.1 | 15900415 | SNV | 1 | T | C | Heterozygous |
| NC_037643.1 | 15900453 | SNV | 1 | T | C | Homozygous   |
| NC_037643.1 | 15900465 | SNV | 1 | T | C | Homozygous   |
| NC_037643.1 | 15900521 | SNV | 1 | T | C | Homozygous   |
| NC_037643.1 | 15902488 | SNV | 1 | T | A | Homozygous   |
| NC_037643.1 | 15902515 | SNV | 1 | A | T | Homozygous   |
| NC_037643.1 | 15902519 | SNV | 1 | T | G | Homozygous   |
| NC_037643.1 | 15912482 | SNV | 1 | A | G | Homozygous   |
| NC_037643.1 | 15912499 | SNV | 1 | C | T | Heterozygous |
| NC_037643.1 | 15912521 | SNV | 1 | A | G | Heterozygous |
| NC_037643.1 | 15912523 | SNV | 1 | A | G | Homozygous   |
| NC_037643.1 | 15912526 | SNV | 1 | A | G | Homozygous   |
| NC_037643.1 | 15912619 | SNV | 1 | T | C | Heterozygous |
| NC_037643.1 | 15912663 | SNV | 1 | A | T | Homozygous   |
| NC_037643.1 | 15913063 | SNV | 1 | C | T | Heterozygous |
| NC_037643.1 | 15913592 | SNV | 1 | C | T | Homozygous   |
| NC_037643.1 | 15913645 | SNV | 1 | G | T | Homozygous   |
| NC_037643.1 | 15922826 | SNV | 1 | T | C | Homozygous   |
| NC_037643.1 | 15922838 | SNV | 1 | T | A | Homozygous   |
| NC_037643.1 | 15922881 | SNV | 1 | T | C | Homozygous   |
| NC_037643.1 | 15922934 | SNV | 1 | T | C | Homozygous   |
| NC_037643.1 | 15922937 | SNV | 1 | C | A | Heterozygous |
| NC_037643.1 | 15922943 | SNV | 1 | G | A | Homozygous   |
| NC_037643.1 | 15923063 | SNV | 1 | G | T | Homozygous   |
| NC_037643.1 | 15923112 | SNV | 1 | A | G | Homozygous   |
| NC_037643.1 | 15923186 | SNV | 1 | T | C | Homozygous   |
| NC_037643.1 | 15923243 | SNV | 1 | T | C | Homozygous   |
| NC_037643.1 | 15923337 | SNV | 1 | T | G | Homozygous   |
| NC_037643.1 | 15923350 | SNV | 1 | T | C | Homozygous   |
| NC_037643.1 | 15923422 | SNV | 1 | C | T | Heterozygous |
| NC_037643.1 | 15923770 | SNV | 1 | C | T | Heterozygous |
| NC_037643.1 | 15923783 | SNV | 1 | C | T | Heterozygous |
| NC_037643.1 | 15923816 | SNV | 1 | C | A | Heterozygous |
| NC_037643.1 | 15923859 | SNV | 1 | T | C | Homozygous   |
| NC_037643.1 | 15923862 | SNV | 1 | A | G | Homozygous   |
| NC_037643.1 | 15938391 | SNV | 1 | T | C | Heterozygous |
| NC_037643.1 | 15938441 | SNV | 1 | T | G | Homozygous   |
| NC_037643.1 | 15938876 | SNV | 1 | A | G | Homozygous   |
| NC_037643.1 | 15942821 | SNV | 1 | G | A | Heterozygous |
| NC_037643.1 | 15942910 | SNV | 1 | C | T | Heterozygous |
| NC_037643.1 | 15943329 | SNV | 1 | G | C | Homozygous   |

|             |          |     |   |   |   |              |
|-------------|----------|-----|---|---|---|--------------|
| NC_037643.1 | 15943476 | SNV | 1 | T | C | Heterozygous |
| NC_037643.1 | 15945009 | SNV | 1 | C | A | Heterozygous |
| NC_037643.1 | 15948138 | SNV | 1 | G | A | Homozygous   |
| NC_037643.1 | 15956534 | SNV | 1 | G | A | Heterozygous |
| NC_037643.1 | 15956538 | SNV | 1 | C | T | Heterozygous |
| NC_037643.1 | 15956835 | SNV | 1 | G | C | Heterozygous |
| NC_037643.1 | 15956990 | SNV | 1 | A | G | Heterozygous |
| NC_037643.1 | 15957041 | SNV | 1 | A | G | Homozygous   |
| NC_037643.1 | 15957290 | SNV | 1 | G | T | Heterozygous |
| NC_037643.1 | 15960337 | SNV | 1 | G | A | Homozygous   |
| NC_037643.1 | 15960653 | SNV | 1 | A | T | Heterozygous |
| NC_037643.1 | 15960655 | SNV | 1 | G | T | Heterozygous |
| NC_037643.1 | 15960677 | SNV | 1 | A | G | Homozygous   |
| NC_037643.1 | 15960700 | SNV | 1 | A | T | Heterozygous |
| NC_037643.1 | 15960714 | SNV | 1 | A | G | Heterozygous |
| NC_037643.1 | 15964057 | SNV | 1 | T | G | Heterozygous |
| NC_037643.1 | 15965132 | SNV | 1 | C | T | Heterozygous |
| NC_037643.1 | 15967608 | SNV | 1 | G | A | Homozygous   |
| NC_037643.1 | 15967613 | SNV | 1 | G | C | Homozygous   |
| NC_037643.1 | 15967615 | SNV | 1 | A | T | Homozygous   |
| NC_037643.1 | 15967622 | SNV | 1 | C | A | Homozygous   |
| NC_037643.1 | 15967624 | SNV | 1 | G | A | Homozygous   |
| NC_037643.1 | 15968661 | SNV | 1 | A | G | Homozygous   |
| NC_037643.1 | 15968786 | SNV | 1 | T | C | Homozygous   |
| NC_037643.1 | 15968957 | SNV | 1 | G | A | Homozygous   |
| NC_037643.1 | 15968999 | SNV | 1 | G | A | Homozygous   |
| NC_037643.1 | 15969004 | SNV | 1 | A | G | Homozygous   |
| NC_037643.1 | 15969008 | SNV | 1 | A | G | Heterozygous |
| NC_037643.1 | 15980005 | SNV | 1 | T | C | Heterozygous |
| NC_037643.1 | 15989871 | SNV | 1 | A | T | Homozygous   |
| NC_037643.1 | 15989875 | SNV | 1 | T | A | Homozygous   |
| NC_037643.1 | 15991840 | SNV | 1 | C | A | Homozygous   |
| NC_037643.1 | 15991845 | SNV | 1 | A | G | Homozygous   |
| NC_037643.1 | 15991883 | SNV | 1 | T | C | Homozygous   |
| NC_037643.1 | 15991895 | SNV | 1 | G | T | Homozygous   |
| NC_037643.1 | 15993467 | SNV | 1 | C | G | Homozygous   |
| NC_037643.1 | 15993502 | SNV | 1 | G | T | Homozygous   |
| NC_037643.1 | 15993505 | SNV | 1 | A | C | Homozygous   |
| NC_037643.1 | 16066395 | SNV | 1 | A | G | Homozygous   |
| NC_037643.1 | 16067752 | SNV | 1 | A | G | Homozygous   |
| NC_037643.1 | 16069098 | SNV | 1 | T | G | Homozygous   |
| NC_037643.1 | 16069101 | SNV | 1 | T | G | Homozygous   |
| NC_037643.1 | 16069132 | SNV | 1 | A | T | Homozygous   |
| NC_037643.1 | 16069134 | SNV | 1 | A | G | Homozygous   |
| NC_037643.1 | 16070064 | SNV | 1 | C | T | Homozygous   |
| NC_037643.1 | 16070159 | SNV | 1 | A | G | Heterozygous |
| NC_037643.1 | 16070358 | SNV | 1 | T | C | Homozygous   |
| NC_037643.1 | 16070516 | SNV | 1 | A | G | Homozygous   |
| NC_037643.1 | 16070523 | SNV | 1 | T | C | Homozygous   |
| NC_037643.1 | 16070958 | SNV | 1 | G | A | Homozygous   |
| NC_037643.1 | 16071173 | SNV | 1 | A | T | Heterozygous |

|             |          |     |   |   |   |              |
|-------------|----------|-----|---|---|---|--------------|
| NC_037643.1 | 16074515 | SNV | 1 | A | T | Homozygous   |
| NC_037643.1 | 16074745 | SNV | 1 | C | T | Heterozygous |
| NC_037643.1 | 16077057 | SNV | 1 | A | G | Homozygous   |
| NC_037643.1 | 16077059 | SNV | 1 | A | G | Homozygous   |
| NC_037643.1 | 16077154 | SNV | 1 | A | G | Homozygous   |
| NC_037643.1 | 16079105 | SNV | 1 | A | G | Homozygous   |
| NC_037643.1 | 16079162 | SNV | 1 | A | G | Homozygous   |
| NC_037643.1 | 16079716 | SNV | 1 | A | G | Heterozygous |
| NC_037643.1 | 16079724 | SNV | 1 | T | C | Homozygous   |
| NC_037643.1 | 16079728 | SNV | 1 | G | A | Heterozygous |
| NC_037643.1 | 16079733 | SNV | 1 | A | G | Heterozygous |
| NC_037643.1 | 16079869 | SNV | 1 | A | C | Heterozygous |
| NC_037643.1 | 16080961 | SNV | 1 | T | G | Homozygous   |
| NC_037643.1 | 16081205 | SNV | 1 | T | G | Heterozygous |
| NC_037643.1 | 16081214 | SNV | 1 | A | G | Heterozygous |
| NC_037643.1 | 16081430 | SNV | 1 | C | T | Heterozygous |
| NC_037643.1 | 16083601 | SNV | 1 | A | G | Heterozygous |
| NC_037643.1 | 16083604 | SNV | 1 | T | G | Heterozygous |
| NC_037643.1 | 16083608 | SNV | 1 | T | A | Heterozygous |
| NC_037643.1 | 16083999 | SNV | 1 | T | G | Heterozygous |
| NC_037643.1 | 16084007 | SNV | 1 | C | G | Homozygous   |
| NC_037643.1 | 16084032 | SNV | 1 | G | A | Heterozygous |
| NC_037643.1 | 16084034 | SNV | 1 | G | A | Heterozygous |
| NC_037643.1 | 16085207 | SNV | 1 | G | A | Homozygous   |
| NC_037643.1 | 16085429 | SNV | 1 | A | G | Heterozygous |
| NC_037643.1 | 16086002 | SNV | 1 | G | C | Heterozygous |
| NC_037643.1 | 16088496 | SNV | 1 | G | C | Homozygous   |
| NC_037643.1 | 16095672 | SNV | 1 | G | A | Homozygous   |
| NC_037643.1 | 16097426 | SNV | 1 | A | G | Homozygous   |
| NC_037643.1 | 16105033 | SNV | 1 | C | T | Heterozygous |
| NC_037643.1 | 16105099 | SNV | 1 | G | T | Heterozygous |
| NC_037643.1 | 16105223 | SNV | 1 | C | A | Homozygous   |
| NC_037643.1 | 16105277 | SNV | 1 | G | A | Heterozygous |
| NC_037643.1 | 16106079 | SNV | 1 | C | T | Heterozygous |
| NC_037643.1 | 16106780 | SNV | 1 | G | A | Homozygous   |
| NC_037643.1 | 16106782 | SNV | 1 | T | G | Homozygous   |
| NC_037643.1 | 16106789 | SNV | 1 | G | A | Homozygous   |
| NC_037643.1 | 16106792 | SNV | 1 | G | A | Homozygous   |
| NC_037643.1 | 16107070 | SNV | 1 | G | C | Homozygous   |
| NC_037643.1 | 16107073 | SNV | 1 | A | T | Homozygous   |
| NC_037643.1 | 16107139 | SNV | 1 | A | G | Homozygous   |
| NC_037643.1 | 16107897 | SNV | 1 | T | G | Homozygous   |
| NC_037643.1 | 16108047 | SNV | 1 | T | A | Homozygous   |
| NC_037643.1 | 16108834 | SNV | 1 | G | A | Homozygous   |
| NC_037643.1 | 16108837 | SNV | 1 | A | G | Homozygous   |
| NC_037643.1 | 16108842 | SNV | 1 | G | A | Homozygous   |
| NC_037643.1 | 16108844 | SNV | 1 | G | C | Homozygous   |
| NC_037643.1 | 16108852 | SNV | 1 | G | A | Homozygous   |
| NC_037643.1 | 16108855 | SNV | 1 | A | G | Homozygous   |
| NC_037643.1 | 16109146 | SNV | 1 | T | C | Homozygous   |
| NC_037643.1 | 16109407 | SNV | 1 | C | A | Heterozygous |

|             |          |     |   |   |   |              |
|-------------|----------|-----|---|---|---|--------------|
| NC_037643.1 | 16109413 | SNV | 1 | G | A | Heterozygous |
| NC_037643.1 | 16109415 | SNV | 1 | T | C | Heterozygous |
| NC_037643.1 | 16109421 | SNV | 1 | G | C | Heterozygous |
| NC_037643.1 | 16109434 | SNV | 1 | T | C | Homozygous   |
| NC_037643.1 | 16109446 | SNV | 1 | C | G | Heterozygous |
| NC_037643.1 | 16109451 | SNV | 1 | T | C | Heterozygous |
| NC_037643.1 | 16109461 | SNV | 1 | T | A | Heterozygous |
| NC_037643.1 | 16109464 | SNV | 1 | A | C | Heterozygous |
| NC_037643.1 | 16109482 | SNV | 1 | G | A | Heterozygous |
| NC_037643.1 | 16109487 | SNV | 1 | C | A | Heterozygous |
| NC_037643.1 | 16109494 | SNV | 1 | T | C | Heterozygous |
| NC_037643.1 | 16111871 | SNV | 1 | A | G | Homozygous   |
| NC_037643.1 | 16113314 | SNV | 1 | T | C | Homozygous   |
| NC_037643.1 | 16113437 | SNV | 1 | T | C | Homozygous   |
| NC_037643.1 | 16113510 | SNV | 1 | A | G | Homozygous   |
| NC_037643.1 | 16114094 | SNV | 1 | A | G | Homozygous   |
| NC_037643.1 | 16114373 | SNV | 1 | C | T | Homozygous   |
| NC_037643.1 | 16114377 | SNV | 1 | A | G | Homozygous   |
| NC_037643.1 | 16114384 | SNV | 1 | A | T | Homozygous   |
| NC_037643.1 | 16114961 | SNV | 1 | T | C | Heterozygous |
| NC_037643.1 | 16115213 | SNV | 1 | C | T | Heterozygous |
| NC_037643.1 | 16115298 | SNV | 1 | A | G | Homozygous   |
| NC_037643.1 | 16115604 | SNV | 1 | A | G | Homozygous   |
| NC_037643.1 | 16119132 | SNV | 1 | C | G | Homozygous   |
| NC_037643.1 | 16121842 | SNV | 1 | G | T | Homozygous   |
| NC_037643.1 | 16135587 | SNV | 1 | T | G | Homozygous   |
| NC_037643.1 | 16136990 | SNV | 1 | C | T | Homozygous   |
| NC_037643.1 | 16137059 | SNV | 1 | C | T | Homozygous   |
| NC_037643.1 | 16139317 | SNV | 1 | A | G | Heterozygous |
| NC_037643.1 | 16139341 | SNV | 1 | G | A | Heterozygous |
| NC_037643.1 | 16139347 | SNV | 1 | T | C | Homozygous   |
| NC_037643.1 | 16139695 | SNV | 1 | G | A | Homozygous   |
| NC_037643.1 | 16140057 | SNV | 1 | C | T | Heterozygous |
| NC_037643.1 | 16149520 | SNV | 1 | G | A | Heterozygous |
| NC_037643.1 | 16149582 | SNV | 1 | G | A | Heterozygous |
| NC_037643.1 | 16149707 | SNV | 1 | C | T | Heterozygous |
| NC_037643.1 | 16149884 | SNV | 1 | A | T | Homozygous   |
| NC_037643.1 | 16153413 | SNV | 1 | A | C | Heterozygous |
| NC_037643.1 | 16153852 | SNV | 1 | C | A | Homozygous   |
| NC_037643.1 | 16155124 | SNV | 1 | T | C | Homozygous   |
| NC_037643.1 | 16160839 | SNV | 1 | G | A | Heterozygous |
| NC_037643.1 | 16164211 | SNV | 1 | A | G | Heterozygous |
| NC_037643.1 | 16164297 | SNV | 1 | A | T | Heterozygous |
| NC_037643.1 | 16164329 | SNV | 1 | A | G | Homozygous   |
| NC_037643.1 | 16173615 | SNV | 1 | T | G | Homozygous   |
| NC_037643.1 | 16173619 | SNV | 1 | G | A | Homozygous   |
| NC_037643.1 | 16173659 | SNV | 1 | T | A | Homozygous   |
| NC_037643.1 | 16173662 | SNV | 1 | T | G | Homozygous   |
| NC_037643.1 | 16173664 | SNV | 1 | A | T | Heterozygous |
| NC_037643.1 | 16173673 | SNV | 1 | C | T | Homozygous   |
| NC_037643.1 | 16173979 | SNV | 1 | A | G | Heterozygous |

|             |          |     |   |   |   |              |
|-------------|----------|-----|---|---|---|--------------|
| NC_037643.1 | 16174576 | SNV | 1 | C | T | Heterozygous |
| NC_037643.1 | 16174744 | SNV | 1 | A | G | Homozygous   |
| NC_037643.1 | 16176050 | SNV | 1 | C | G | Homozygous   |
| NC_037643.1 | 16176200 | SNV | 1 | G | A | Heterozygous |
| NC_037643.1 | 16176203 | SNV | 1 | A | G | Heterozygous |
| NC_037643.1 | 16176207 | SNV | 1 | A | G | Heterozygous |
| NC_037643.1 | 16176307 | SNV | 1 | T | C | Homozygous   |
| NC_037643.1 | 16176536 | SNV | 1 | T | C | Homozygous   |
| NC_037643.1 | 16176587 | SNV | 1 | C | T | Homozygous   |
| NC_037643.1 | 16176712 | SNV | 1 | A | C | Homozygous   |
| NC_037643.1 | 16177179 | SNV | 1 | A | G | Homozygous   |
| NC_037643.1 | 16177181 | SNV | 1 | A | T | Homozygous   |
| NC_037643.1 | 16177215 | SNV | 1 | T | G | Homozygous   |
| NC_037643.1 | 16184307 | SNV | 1 | A | T | Heterozygous |
| NC_037643.1 | 16186347 | SNV | 1 | A | C | Heterozygous |
| NC_037643.1 | 16186353 | SNV | 1 | A | C | Homozygous   |
| NC_037643.1 | 16197388 | SNV | 1 | G | A | Homozygous   |
| NC_037643.1 | 16197703 | SNV | 1 | A | G | Heterozygous |
| NC_037643.1 | 16197709 | SNV | 1 | G | A | Heterozygous |
| NC_037643.1 | 16197953 | SNV | 1 | C | T | Homozygous   |
| NC_037643.1 | 16197956 | SNV | 1 | T | C | Homozygous   |
| NC_037643.1 | 16198064 | SNV | 1 | G | T | Homozygous   |
| NC_037643.1 | 16198072 | SNV | 1 | C | T | Homozygous   |
| NC_037643.1 | 16198077 | SNV | 1 | C | T | Heterozygous |
| NC_037643.1 | 16198113 | SNV | 1 | A | G | Heterozygous |
| NC_037643.1 | 16198148 | SNV | 1 | T | C | Homozygous   |
| NC_037643.1 | 16199592 | SNV | 1 | C | G | Homozygous   |
| NC_037643.1 | 16199609 | SNV | 1 | A | G | Homozygous   |
| NC_037643.1 | 16208320 | SNV | 1 | C | T | Homozygous   |
| NC_037643.1 | 16208358 | SNV | 1 | A | T | Homozygous   |
| NC_037643.1 | 16208374 | SNV | 1 | T | C | Homozygous   |
| NC_037643.1 | 16208377 | SNV | 1 | T | A | Homozygous   |
| NC_037643.1 | 16212205 | SNV | 1 | T | G | Homozygous   |
| NC_037643.1 | 16212207 | SNV | 1 | A | T | Homozygous   |
| NC_037643.1 | 16214026 | SNV | 1 | T | C | Homozygous   |
| NC_037643.1 | 16216491 | SNV | 1 | C | T | Homozygous   |
| NC_037643.1 | 16216565 | SNV | 1 | A | G | Homozygous   |
| NC_037643.1 | 16235001 | SNV | 1 | G | T | Heterozygous |
| NC_037643.1 | 16235006 | SNV | 1 | T | G | Heterozygous |
| NC_037643.1 | 16238218 | SNV | 1 | G | A | Homozygous   |
| NC_037643.1 | 16238281 | SNV | 1 | A | G | Homozygous   |
| NC_037643.1 | 16238567 | SNV | 1 | T | C | Heterozygous |
| NC_037643.1 | 16243923 | SNV | 1 | C | T | Heterozygous |
| NC_037643.1 | 16244024 | SNV | 1 | A | G | Homozygous   |
| NC_037643.1 | 16244041 | SNV | 1 | C | T | Homozygous   |
| NC_037643.1 | 16244227 | SNV | 1 | T | C | Homozygous   |
| NC_037643.1 | 16244259 | SNV | 1 | A | G | Heterozygous |
| NC_037643.1 | 16245467 | SNV | 1 | C | T | Heterozygous |
| NC_037643.1 | 16245469 | SNV | 1 | A | T | Heterozygous |
| NC_037643.1 | 16245471 | SNV | 1 | G | T | Heterozygous |
| NC_037643.1 | 16245486 | SNV | 1 | G | T | Heterozygous |

|             |          |     |   |   |   |              |
|-------------|----------|-----|---|---|---|--------------|
| NC_037643.1 | 16254180 | SNV | 1 | T | C | Homozygous   |
| NC_037643.1 | 16254443 | SNV | 1 | T | C | Homozygous   |
| NC_037643.1 | 16254490 | SNV | 1 | G | A | Homozygous   |
| NC_037643.1 | 16255807 | SNV | 1 | T | G | Heterozygous |
| NC_037643.1 | 16255809 | SNV | 1 | G | A | Heterozygous |
| NC_037643.1 | 16255815 | SNV | 1 | A | C | Heterozygous |
| NC_037643.1 | 16255825 | SNV | 1 | T | G | Heterozygous |
| NC_037643.1 | 16255829 | SNV | 1 | C | A | Heterozygous |
| NC_037643.1 | 16255834 | SNV | 1 | T | C | Homozygous   |
| NC_037643.1 | 16258235 | SNV | 1 | T | A | Heterozygous |
| NC_037643.1 | 16258730 | SNV | 1 | G | A | Homozygous   |
| NC_037643.1 | 16261073 | SNV | 1 | A | T | Homozygous   |
| NC_037643.1 | 16261076 | SNV | 1 | T | G | Homozygous   |
| NC_037643.1 | 16261102 | SNV | 1 | C | T | Heterozygous |
| NC_037643.1 | 16261675 | SNV | 1 | T | A | Homozygous   |
| NC_037643.1 | 16262810 | SNV | 1 | A | T | Heterozygous |
| NC_037643.1 | 16263180 | SNV | 1 | A | G | Homozygous   |
| NC_037643.1 | 16263228 | SNV | 1 | C | A | Homozygous   |
| NC_037643.1 | 16263310 | SNV | 1 | A | C | Homozygous   |
| NC_037643.1 | 16263318 | SNV | 1 | C | T | Homozygous   |
| NC_037643.1 | 16263479 | SNV | 1 | C | T | Homozygous   |
| NC_037643.1 | 16263482 | SNV | 1 | T | G | Homozygous   |
| NC_037643.1 | 16264100 | SNV | 1 | A | T | Homozygous   |
| NC_037643.1 | 16264102 | SNV | 1 | A | G | Homozygous   |
| NC_037643.1 | 16264104 | SNV | 1 | T | A | Homozygous   |
| NC_037643.1 | 16264108 | SNV | 1 | T | A | Homozygous   |
| NC_037643.1 | 16264117 | SNV | 1 | A | T | Homozygous   |
| NC_037643.1 | 16265276 | SNV | 1 | T | A | Homozygous   |
| NC_037643.1 | 16265283 | SNV | 1 | G | C | Homozygous   |
| NC_037643.1 | 16265298 | SNV | 1 | A | C | Homozygous   |
| NC_037643.1 | 16266600 | SNV | 1 | G | A | Heterozygous |
| NC_037643.1 | 16267357 | SNV | 1 | G | A | Homozygous   |
| NC_037643.1 | 16267360 | SNV | 1 | T | A | Homozygous   |
| NC_037643.1 | 16267365 | SNV | 1 | T | A | Homozygous   |
| NC_037643.1 | 16267370 | SNV | 1 | C | A | Homozygous   |
| NC_037643.1 | 16267381 | SNV | 1 | G | T | Homozygous   |
| NC_037643.1 | 16268251 | SNV | 1 | G | A | Heterozygous |
| NC_037643.1 | 16269466 | SNV | 1 | C | T | Homozygous   |
| NC_037643.1 | 16269905 | SNV | 1 | A | G | Homozygous   |
| NC_037643.1 | 16270097 | SNV | 1 | C | T | Homozygous   |
| NC_037643.1 | 16274064 | SNV | 1 | G | T | Homozygous   |
| NC_037643.1 | 16274439 | SNV | 1 | G | A | Heterozygous |
| NC_037643.1 | 16278106 | SNV | 1 | G | A | Heterozygous |
| NC_037643.1 | 16279100 | SNV | 1 | A | T | Homozygous   |
| NC_037643.1 | 16279151 | SNV | 1 | G | A | Homozygous   |
| NC_037643.1 | 16279154 | SNV | 1 | T | A | Homozygous   |
| NC_037643.1 | 16279403 | SNV | 1 | A | T | Homozygous   |
| NC_037643.1 | 16279580 | SNV | 1 | A | G | Homozygous   |
| NC_037643.1 | 16281416 | SNV | 1 | T | C | Heterozygous |
| NC_037643.1 | 16281427 | SNV | 1 | T | G | Homozygous   |
| NC_037643.1 | 16281504 | SNV | 1 | A | T | Homozygous   |

|             |          |     |   |   |   |              |
|-------------|----------|-----|---|---|---|--------------|
| NC_037643.1 | 16283323 | SNV | 1 | G | T | Heterozygous |
| NC_037643.1 | 16283641 | SNV | 1 | T | G | Heterozygous |
| NC_037643.1 | 16283646 | SNV | 1 | T | A | Homozygous   |
| NC_037643.1 | 16283650 | SNV | 1 | T | A | Homozygous   |
| NC_037643.1 | 16283656 | SNV | 1 | A | C | Homozygous   |
| NC_037643.1 | 16284526 | SNV | 1 | T | A | Homozygous   |
| NC_037643.1 | 16284543 | SNV | 1 | T | A | Homozygous   |
| NC_037643.1 | 16286890 | SNV | 1 | T | G | Homozygous   |
| NC_037643.1 | 16286901 | SNV | 1 | T | G | Homozygous   |
| NC_037643.1 | 16290288 | SNV | 1 | A | C | Homozygous   |
| NC_037643.1 | 16290293 | SNV | 1 | C | T | Heterozygous |
| NC_037643.1 | 16290299 | SNV | 1 | A | T | Homozygous   |
| NC_037643.1 | 16290304 | SNV | 1 | A | T | Homozygous   |
| NC_037643.1 | 16300610 | SNV | 1 | T | G | Homozygous   |
| NC_037643.1 | 16300620 | SNV | 1 | A | G | Homozygous   |
| NC_037643.1 | 16305696 | SNV | 1 | T | G | Homozygous   |
| NC_037643.1 | 16305713 | SNV | 1 | A | G | Homozygous   |
| NC_037643.1 | 16305716 | SNV | 1 | T | G | Homozygous   |
| NC_037643.1 | 16306716 | SNV | 1 | G | A | Homozygous   |
| NC_037643.1 | 16315034 | SNV | 1 | G | A | Heterozygous |
| NC_037643.1 | 16315148 | SNV | 1 | G | A | Heterozygous |
| NC_037643.1 | 16315256 | SNV | 1 | G | A | Heterozygous |
| NC_037643.1 | 16316273 | SNV | 1 | C | T | Heterozygous |
| NC_037643.1 | 16316628 | SNV | 1 | T | A | Homozygous   |
| NC_037643.1 | 16317247 | SNV | 1 | T | A | Homozygous   |
| NC_037643.1 | 16318179 | SNV | 1 | A | G | Homozygous   |
| NC_037643.1 | 16318245 | SNV | 1 | A | G | Homozygous   |
| NC_037643.1 | 16319636 | SNV | 1 | T | C | Homozygous   |
| NC_037643.1 | 16319675 | SNV | 1 | G | A | Homozygous   |
| NC_037643.1 | 16319973 | SNV | 1 | A | G | Homozygous   |
| NC_037643.1 | 16320670 | SNV | 1 | T | A | Homozygous   |
| NC_037643.1 | 16321060 | SNV | 1 | T | C | Homozygous   |
| NC_037643.1 | 16324840 | SNV | 1 | G | A | Homozygous   |
| NC_037643.1 | 16328892 | SNV | 1 | G | A | Heterozygous |
| NC_037643.1 | 16329123 | SNV | 1 | T | C | Homozygous   |
| NC_037643.1 | 16335033 | SNV | 1 | A | T | Homozygous   |
| NC_037643.1 | 16335251 | SNV | 1 | T | C | Homozygous   |
| NC_037643.1 | 16338940 | SNV | 1 | A | G | Homozygous   |
| NC_037643.1 | 16342415 | SNV | 1 | A | G | Heterozygous |
| NC_037643.1 | 16342472 | SNV | 1 | T | C | Heterozygous |
| NC_037643.1 | 16342478 | SNV | 1 | T | C | Heterozygous |
| NC_037643.1 | 16342920 | SNV | 1 | C | A | Homozygous   |
| NC_037643.1 | 16343189 | SNV | 1 | T | A | Homozygous   |
| NC_037643.1 | 16343192 | SNV | 1 | A | G | Homozygous   |
| NC_037643.1 | 16343213 | SNV | 1 | T | G | Homozygous   |
| NC_037643.1 | 16343215 | SNV | 1 | T | A | Homozygous   |
| NC_037643.1 | 16343217 | SNV | 1 | T | A | Homozygous   |
| NC_037643.1 | 16343232 | SNV | 1 | G | T | Homozygous   |
| NC_037643.1 | 16345253 | SNV | 1 | C | T | Homozygous   |
| NC_037643.1 | 16359684 | SNV | 1 | A | T | Homozygous   |
| NC_037643.1 | 16359686 | SNV | 1 | A | G | Homozygous   |



|             |          |     |   |   |   |              |
|-------------|----------|-----|---|---|---|--------------|
| NC_037643.1 | 16359703 | SNV | 1 | A | T | Homozygous   |
| NC_037643.1 | 16359726 | SNV | 1 | A | G | Heterozygous |
| NC_037643.1 | 16359953 | SNV | 1 | A | T | Homozygous   |
| NC_037643.1 | 16359968 | SNV | 1 | C | A | Homozygous   |
| NC_037643.1 | 16363115 | SNV | 1 | C | T | Heterozygous |
| NC_037643.1 | 16364328 | SNV | 1 | T | A | Homozygous   |
| NC_037643.1 | 16365406 | SNV | 1 | T | C | Heterozygous |
| NC_037643.1 | 16366170 | SNV | 1 | T | C | Homozygous   |
| NC_037643.1 | 16366400 | SNV | 1 | G | T | Homozygous   |
| NC_037643.1 | 16367898 | SNV | 1 | A | G | Heterozygous |
| NC_037643.1 | 16387724 | SNV | 1 | A | G | Homozygous   |
| NC_037643.1 | 16387727 | SNV | 1 | G | A | Homozygous   |
| NC_037643.1 | 16387729 | SNV | 1 | T | C | Homozygous   |
| NC_037643.1 | 16387750 | SNV | 1 | C | T | Heterozygous |
| NC_037643.1 | 16388059 | SNV | 1 | G | A | Homozygous   |
| NC_037643.1 | 16388071 | SNV | 1 | T | C | Homozygous   |
| NC_037643.1 | 16388400 | SNV | 1 | C | T | Homozygous   |
| NC_037643.1 | 16406943 | SNV | 1 | C | G | Heterozygous |
| NC_037643.1 | 16407076 | SNV | 1 | T | C | Homozygous   |
| NC_037643.1 | 16407345 | SNV | 1 | T | C | Heterozygous |
| NC_037643.1 | 16407514 | SNV | 1 | G | A | Heterozygous |
| NC_037643.1 | 16407951 | SNV | 1 | A | C | Homozygous   |
| NC_037643.1 | 16407953 | SNV | 1 | G | A | Heterozygous |
| NC_037643.1 | 16408019 | SNV | 1 | A | G | Heterozygous |
| NC_037643.1 | 16410353 | SNV | 1 | G | C | Heterozygous |
| NC_037643.1 | 16410476 | SNV | 1 | T | C | Homozygous   |
| NC_037643.1 | 16410484 | SNV | 1 | T | C | Homozygous   |
| NC_037643.1 | 16410541 | SNV | 1 | T | C | Homozygous   |
| NC_037643.1 | 16410593 | SNV | 1 | G | A | Homozygous   |
| NC_037643.1 | 16410609 | SNV | 1 | G | A | Heterozygous |
| NC_037643.1 | 16410972 | SNV | 1 | T | C | Heterozygous |
| NC_037643.1 | 16410988 | SNV | 1 | A | G | Homozygous   |
| NC_037643.1 | 16411019 | SNV | 1 | G | A | Homozygous   |
| NC_037643.1 | 16411054 | SNV | 1 | G | A | Heterozygous |
| NC_037643.1 | 16411078 | SNV | 1 | T | C | Homozygous   |
| NC_037643.1 | 16411088 | SNV | 1 | G | A | Heterozygous |
| NC_037643.1 | 16411099 | SNV | 1 | A | G | Heterozygous |
| NC_037643.1 | 16411105 | SNV | 1 | T | C | Heterozygous |
| NC_037643.1 | 16411121 | SNV | 1 | T | G | Heterozygous |
| NC_037643.1 | 16411304 | SNV | 1 | C | A | Heterozygous |
| NC_037643.1 | 16411390 | SNV | 1 | G | A | Heterozygous |
| NC_037643.1 | 16413792 | SNV | 1 | T | C | Heterozygous |
| NC_037643.1 | 16413981 | SNV | 1 | A | G | Homozygous   |
| NC_037643.1 | 16414010 | SNV | 1 | G | T | Homozygous   |
| NC_037643.1 | 16432932 | SNV | 1 | C | A | Homozygous   |
| NC_037643.1 | 16433939 | SNV | 1 | A | C | Homozygous   |
| NC_037643.1 | 16433951 | SNV | 1 | A | C | Homozygous   |
| NC_037643.1 | 16434208 | SNV | 1 | A | T | Homozygous   |
| NC_037643.1 | 16434214 | SNV | 1 | T | A | Homozygous   |
| NC_037643.1 | 16434234 | SNV | 1 | A | C | Homozygous   |
| NC_037643.1 | 16435639 | SNV | 1 | A | G | Homozygous   |

|             |          |     |   |   |   |              |
|-------------|----------|-----|---|---|---|--------------|
| NC_037643.1 | 16435653 | SNV | 1 | A | T | Homozygous   |
| NC_037643.1 | 16435658 | SNV | 1 | C | A | Homozygous   |
| NC_037643.1 | 16435662 | SNV | 1 | T | A | Homozygous   |
| NC_037643.1 | 16435669 | SNV | 1 | T | A | Homozygous   |
| NC_037643.1 | 16435691 | SNV | 1 | A | T | Homozygous   |
| NC_037643.1 | 16435841 | SNV | 1 | C | T | Homozygous   |
| NC_037643.1 | 16436257 | SNV | 1 | T | C | Homozygous   |
| NC_037643.1 | 16438475 | SNV | 1 | G | A | Homozygous   |
| NC_037643.1 | 16439640 | SNV | 1 | T | A | Homozygous   |
| NC_037643.1 | 16439642 | SNV | 1 | A | T | Homozygous   |
| NC_037643.1 | 16442480 | SNV | 1 | A | G | Homozygous   |
| NC_037643.1 | 16442612 | SNV | 1 | A | C | Heterozygous |
| NC_037643.1 | 16442622 | SNV | 1 | A | C | Heterozygous |
| NC_037643.1 | 16442629 | SNV | 1 | A | C | Homozygous   |
| NC_037643.1 | 16442662 | SNV | 1 | A | G | Homozygous   |
| NC_037643.1 | 16443560 | SNV | 1 | G | A | Homozygous   |
| NC_037643.1 | 16448706 | SNV | 1 | G | A | Homozygous   |
| NC_037643.1 | 16448996 | SNV | 1 | A | G | Homozygous   |
| NC_037643.1 | 16449140 | SNV | 1 | T | C | Homozygous   |
| NC_037643.1 | 16450862 | SNV | 1 | T | G | Homozygous   |
| NC_037643.1 | 16452335 | SNV | 1 | A | G | Homozygous   |
| NC_037643.1 | 16452714 | SNV | 1 | C | A | Heterozygous |
| NC_037643.1 | 16452719 | SNV | 1 | G | A | Heterozygous |
| NC_037643.1 | 16456643 | SNV | 1 | G | T | Homozygous   |
| NC_037643.1 | 16458090 | SNV | 1 | A | G | Homozygous   |
| NC_037643.1 | 16458415 | SNV | 1 | G | A | Homozygous   |
| NC_037643.1 | 16458630 | SNV | 1 | T | C | Homozygous   |
| NC_037643.1 | 16458639 | SNV | 1 | G | A | Homozygous   |
| NC_037643.1 | 16461565 | SNV | 1 | T | C | Homozygous   |
| NC_037643.1 | 16462502 | SNV | 1 | T | C | Homozygous   |
| NC_037643.1 | 16464375 | SNV | 1 | T | A | Heterozygous |
| NC_037643.1 | 16464378 | SNV | 1 | T | A | Heterozygous |
| NC_037643.1 | 16466713 | SNV | 1 | T | G | Heterozygous |
| NC_037643.1 | 16466733 | SNV | 1 | C | A | Heterozygous |
| NC_037643.1 | 16466735 | SNV | 1 | A | T | Heterozygous |
| NC_037643.1 | 16469905 | SNV | 1 | A | T | Homozygous   |
| NC_037643.1 | 16470029 | SNV | 1 | G | A | Heterozygous |
| NC_037643.1 | 16480462 | SNV | 1 | G | A | Homozygous   |
| NC_037643.1 | 16481577 | SNV | 1 | G | C | Homozygous   |
| NC_037643.1 | 16482244 | SNV | 1 | C | T | Heterozygous |
| NC_037643.1 | 16484962 | SNV | 1 | G | T | Homozygous   |
| NC_037643.1 | 16485369 | SNV | 1 | C | T | Homozygous   |
| NC_037643.1 | 16485476 | SNV | 1 | G | A | Homozygous   |
| NC_037643.1 | 16486213 | SNV | 1 | T | A | Homozygous   |
| NC_037643.1 | 16486531 | SNV | 1 | C | G | Heterozygous |
| NC_037643.1 | 16487504 | SNV | 1 | G | A | Homozygous   |
| NC_037643.1 | 16487519 | SNV | 1 | A | C | Homozygous   |
| NC_037643.1 | 16487545 | SNV | 1 | T | A | Homozygous   |
| NC_037643.1 | 16487549 | SNV | 1 | T | A | Homozygous   |
| NC_037643.1 | 16487792 | SNV | 1 | C | T | Heterozygous |
| NC_037643.1 | 16487799 | SNV | 1 | A | T | Heterozygous |

|             |          |     |   |   |   |              |
|-------------|----------|-----|---|---|---|--------------|
| NC_037643.1 | 16487807 | SNV | 1 | A | T | Heterozygous |
| NC_037643.1 | 16487809 | SNV | 1 | A | G | Heterozygous |
| NC_037643.1 | 16487818 | SNV | 1 | G | A | Heterozygous |
| NC_037643.1 | 16487822 | SNV | 1 | T | G | Heterozygous |
| NC_037643.1 | 16487828 | SNV | 1 | C | T | Homozygous   |
| NC_037643.1 | 16487842 | SNV | 1 | A | T | Homozygous   |
| NC_037643.1 | 16487849 | SNV | 1 | A | T | Homozygous   |
| NC_037643.1 | 16488899 | SNV | 1 | T | C | Homozygous   |
| NC_037643.1 | 16489171 | SNV | 1 | T | C | Homozygous   |
| NC_037643.1 | 16492354 | SNV | 1 | A | G | Homozygous   |
| NC_037643.1 | 16492882 | SNV | 1 | T | C | Homozygous   |
| NC_037643.1 | 16493045 | SNV | 1 | A | G | Homozygous   |
| NC_037643.1 | 16494214 | SNV | 1 | T | G | Homozygous   |
| NC_037643.1 | 16494527 | SNV | 1 | A | G | Homozygous   |
| NC_037643.1 | 16495337 | SNV | 1 | C | T | Homozygous   |
| NC_037643.1 | 16495601 | SNV | 1 | A | T | Homozygous   |
| NC_037643.1 | 16495960 | SNV | 1 | G | C | Homozygous   |
| NC_037643.1 | 16496158 | SNV | 1 | A | G | Homozygous   |
| NC_037643.1 | 16505901 | SNV | 1 | T | C | Homozygous   |
| NC_037643.1 | 16506163 | SNV | 1 | A | G | Homozygous   |
| NC_037643.1 | 16506252 | SNV | 1 | T | C | Homozygous   |
| NC_037643.1 | 16506345 | SNV | 1 | G | A | Heterozygous |
| NC_037643.1 | 16509117 | SNV | 1 | A | T | Homozygous   |
| NC_037643.1 | 16509121 | SNV | 1 | A | T | Homozygous   |
| NC_037643.1 | 16524110 | SNV | 1 | T | G | Heterozygous |
| NC_037643.1 | 16524689 | SNV | 1 | A | G | Homozygous   |
| NC_037643.1 | 16524839 | SNV | 1 | T | A | Homozygous   |
| NC_037643.1 | 16525081 | SNV | 1 | A | G | Homozygous   |
| NC_037643.1 | 16525234 | SNV | 1 | A | G | Homozygous   |
| NC_037643.1 | 16525486 | SNV | 1 | A | C | Homozygous   |
| NC_037643.1 | 16525488 | SNV | 1 | A | T | Homozygous   |
| NC_037643.1 | 16525495 | SNV | 1 | T | A | Homozygous   |
| NC_037643.1 | 16525498 | SNV | 1 | T | A | Homozygous   |
| NC_037643.1 | 16525504 | SNV | 1 | A | G | Homozygous   |
| NC_037643.1 | 16525646 | SNV | 1 | T | A | Heterozygous |
| NC_037643.1 | 16525793 | SNV | 1 | T | C | Homozygous   |
| NC_037643.1 | 16526041 | SNV | 1 | G | A | Heterozygous |
| NC_037643.1 | 16526565 | SNV | 1 | A | C | Heterozygous |
| NC_037643.1 | 16527254 | SNV | 1 | A | T | Homozygous   |
| NC_037643.1 | 16527276 | SNV | 1 | A | T | Homozygous   |
| NC_037643.1 | 16527279 | SNV | 1 | A | G | Homozygous   |
| NC_037643.1 | 16527284 | SNV | 1 | T | A | Homozygous   |
| NC_037643.1 | 16527304 | SNV | 1 | A | T | Homozygous   |
| NC_037643.1 | 16527306 | SNV | 1 | A | T | Homozygous   |
| NC_037643.1 | 16530454 | SNV | 1 | C | T | Homozygous   |
| NC_037643.1 | 16530485 | SNV | 1 | T | A | Heterozygous |
| NC_037643.1 | 16530486 | SNV | 1 | T | C | Heterozygous |
| NC_037643.1 | 16530495 | SNV | 1 | A | C | Heterozygous |
| NC_037643.1 | 16530497 | SNV | 1 | T | A | Heterozygous |
| NC_037643.1 | 16530675 | SNV | 1 | G | C | Homozygous   |
| NC_037643.1 | 16530864 | SNV | 1 | T | C | Homozygous   |

|             |          |     |   |   |   |              |
|-------------|----------|-----|---|---|---|--------------|
| NC_037643.1 | 16530867 | SNV | 1 | G | T | Homozygous   |
| NC_037643.1 | 16530871 | SNV | 1 | C | T | Homozygous   |
| NC_037643.1 | 16530878 | SNV | 1 | G | A | Heterozygous |
| NC_037643.1 | 16530904 | SNV | 1 | G | A | Heterozygous |
| NC_037643.1 | 16530935 | SNV | 1 | T | C | Heterozygous |
| NC_037643.1 | 16530982 | SNV | 1 | T | C | Homozygous   |
| NC_037643.1 | 16531013 | SNV | 1 | T | C | Homozygous   |
| NC_037643.1 | 16533227 | SNV | 1 | A | G | Heterozygous |
| NC_037643.1 | 16533236 | SNV | 1 | A | G | Heterozygous |
| NC_037643.1 | 16538620 | SNV | 1 | A | G | Homozygous   |
| NC_037643.1 | 16538634 | SNV | 1 | G | T | Heterozygous |
| NC_037643.1 | 16538663 | SNV | 1 | A | G | Homozygous   |
| NC_037643.1 | 16542692 | SNV | 1 | A | G | Homozygous   |
| NC_037643.1 | 16544221 | SNV | 1 | T | C | Heterozygous |
| NC_037643.1 | 16544386 | SNV | 1 | T | C | Homozygous   |
| NC_037643.1 | 16544458 | SNV | 1 | C | T | Homozygous   |
| NC_037643.1 | 16555956 | SNV | 1 | T | C | Homozygous   |
| NC_037643.1 | 16555963 | SNV | 1 | G | A | Homozygous   |
| NC_037643.1 | 16557973 | SNV | 1 | A | T | Heterozygous |
| NC_037643.1 | 16558876 | SNV | 1 | G | A | Homozygous   |
| NC_037643.1 | 16559405 | SNV | 1 | A | G | Heterozygous |
| NC_037643.1 | 16565059 | SNV | 1 | T | C | Homozygous   |
| NC_037643.1 | 16568922 | SNV | 1 | G | A | Homozygous   |
| NC_037643.1 | 16571326 | SNV | 1 | T | A | Homozygous   |
| NC_037643.1 | 16572275 | SNV | 1 | A | G | Homozygous   |
| NC_037643.1 | 16580278 | SNV | 1 | A | T | Homozygous   |
| NC_037643.1 | 16587760 | SNV | 1 | T | C | Homozygous   |
| NC_037643.1 | 16589447 | SNV | 1 | T | A | Heterozygous |
| NC_037643.1 | 16589450 | SNV | 1 | C | T | Heterozygous |
| NC_037643.1 | 16589456 | SNV | 1 | A | T | Heterozygous |
| NC_037643.1 | 16589459 | SNV | 1 | C | T | Heterozygous |
| NC_037643.1 | 16589649 | SNV | 1 | A | T | Homozygous   |
| NC_037643.1 | 16589653 | SNV | 1 | A | C | Heterozygous |
| NC_037643.1 | 16589659 | SNV | 1 | A | C | Homozygous   |
| NC_037643.1 | 16589661 | SNV | 1 | A | T | Homozygous   |
| NC_037643.1 | 16589664 | SNV | 1 | T | A | Homozygous   |
| NC_037643.1 | 16589667 | SNV | 1 | T | C | Heterozygous |
| NC_037643.1 | 16589683 | SNV | 1 | A | T | Homozygous   |
| NC_037643.1 | 16589685 | SNV | 1 | T | A | Homozygous   |
| NC_037643.1 | 16589694 | SNV | 1 | A | C | Homozygous   |
| NC_037643.1 | 16589719 | SNV | 1 | C | A | Homozygous   |
| NC_037643.1 | 16589721 | SNV | 1 | T | G | Homozygous   |
| NC_037643.1 | 16589724 | SNV | 1 | A | G | Homozygous   |
| NC_037643.1 | 16590234 | SNV | 1 | T | A | Homozygous   |
| NC_037643.1 | 16590237 | SNV | 1 | A | T | Homozygous   |
| NC_037643.1 | 16590392 | SNV | 1 | T | A | Heterozygous |
| NC_037643.1 | 16590497 | SNV | 1 | A | T | Homozygous   |
| NC_037643.1 | 16590505 | SNV | 1 | A | T | Homozygous   |
| NC_037643.1 | 16596836 | SNV | 1 | T | A | Heterozygous |
| NC_037643.1 | 16597662 | SNV | 1 | A | C | Heterozygous |
| NC_037643.1 | 16597665 | SNV | 1 | T | C | Heterozygous |

|             |          |     |   |   |   |              |
|-------------|----------|-----|---|---|---|--------------|
| NC_037643.1 | 16601006 | SNV | 1 | T | G | Heterozygous |
| NC_037643.1 | 16602103 | SNV | 1 | G | A | Homozygous   |
| NC_037643.1 | 16604312 | SNV | 1 | G | A | Homozygous   |
| NC_037643.1 | 16605398 | SNV | 1 | T | C | Heterozygous |
| NC_037643.1 | 16605472 | SNV | 1 | C | T | Homozygous   |
| NC_037643.1 | 16606618 | SNV | 1 | G | A | Homozygous   |
| NC_037643.1 | 16606776 | SNV | 1 | C | A | Homozygous   |
| NC_037643.1 | 16606780 | SNV | 1 | A | T | Homozygous   |
| NC_037643.1 | 16606785 | SNV | 1 | T | A | Homozygous   |
| NC_037643.1 | 16607212 | SNV | 1 | G | A | Heterozygous |
| NC_037643.1 | 16607551 | SNV | 1 | T | A | Homozygous   |
| NC_037643.1 | 16607727 | SNV | 1 | C | A | Homozygous   |
| NC_037643.1 | 16608061 | SNV | 1 | C | T | Homozygous   |
| NC_037643.1 | 16609096 | SNV | 1 | C | T | Heterozygous |
| NC_037643.1 | 16609427 | SNV | 1 | T | C | Homozygous   |
| NC_037643.1 | 16612540 | SNV | 1 | A | G | Heterozygous |
| NC_037643.1 | 16612555 | SNV | 1 | A | G | Heterozygous |
| NC_037643.1 | 16617563 | SNV | 1 | A | G | Homozygous   |
| NC_037643.1 | 16625844 | SNV | 1 | G | T | Homozygous   |
| NC_037643.1 | 16625848 | SNV | 1 | T | C | Homozygous   |
| NC_037643.1 | 16626716 | SNV | 1 | G | A | Homozygous   |
| NC_037643.1 | 16626911 | SNV | 1 | G | T | Homozygous   |
| NC_037643.1 | 16626988 | SNV | 1 | A | T | Homozygous   |
| NC_037643.1 | 16627593 | SNV | 1 | A | C | Homozygous   |
| NC_037643.1 | 16627597 | SNV | 1 | T | A | Heterozygous |
| NC_037643.1 | 16627597 | SNV | 1 | T | C | Heterozygous |
| NC_037643.1 | 16627599 | SNV | 1 | A | T | Heterozygous |
| NC_037643.1 | 16627758 | SNV | 1 | G | C | Homozygous   |
| NC_037643.1 | 16628130 | SNV | 1 | C | T | Homozygous   |
| NC_037643.1 | 16628135 | SNV | 1 | A | G | Homozygous   |
| NC_037643.1 | 16628156 | SNV | 1 | C | T | Homozygous   |
| NC_037643.1 | 16629616 | SNV | 1 | T | A | Homozygous   |
| NC_037643.1 | 16629622 | SNV | 1 | A | C | Homozygous   |
| NC_037643.1 | 16630392 | SNV | 1 | C | T | Homozygous   |
| NC_037643.1 | 16630486 | SNV | 1 | T | A | Heterozygous |
| NC_037643.1 | 16631930 | SNV | 1 | A | G | Homozygous   |
| NC_037643.1 | 16632682 | SNV | 1 | T | C | Homozygous   |
| NC_037643.1 | 16633336 | SNV | 1 | C | T | Homozygous   |
| NC_037643.1 | 16643736 | SNV | 1 | A | G | Heterozygous |
| NC_037643.1 | 16645275 | SNV | 1 | T | A | Homozygous   |
| NC_037643.1 | 16645300 | SNV | 1 | A | G | Homozygous   |
| NC_037643.1 | 16645302 | SNV | 1 | G | T | Homozygous   |
| NC_037643.1 | 16645312 | SNV | 1 | A | T | Homozygous   |
| NC_037643.1 | 16650676 | SNV | 1 | T | A | Homozygous   |
| NC_037643.1 | 16650678 | SNV | 1 | T | A | Homozygous   |
| NC_037643.1 | 16650715 | SNV | 1 | G | A | Heterozygous |
| NC_037643.1 | 16650720 | SNV | 1 | T | C | Heterozygous |
| NC_037643.1 | 16650952 | SNV | 1 | A | G | Heterozygous |
| NC_037643.1 | 16651016 | SNV | 1 | C | A | Heterozygous |
| NC_037643.1 | 16653936 | SNV | 1 | A | G | Homozygous   |
| NC_037643.1 | 16654007 | SNV | 1 | C | A | Heterozygous |

|             |          |     |   |   |   |              |
|-------------|----------|-----|---|---|---|--------------|
| NC_037643.1 | 16654315 | SNV | 1 | T | C | Homozygous   |
| NC_037643.1 | 16655502 | SNV | 1 | T | C | Heterozygous |
| NC_037643.1 | 16655572 | SNV | 1 | G | A | Homozygous   |
| NC_037643.1 | 16656202 | SNV | 1 | G | A | Homozygous   |
| NC_037643.1 | 16656211 | SNV | 1 | T | G | Homozygous   |
| NC_037643.1 | 16656215 | SNV | 1 | G | A | Homozygous   |
| NC_037643.1 | 16656219 | SNV | 1 | T | C | Homozygous   |
| NC_037643.1 | 16656224 | SNV | 1 | A | T | Homozygous   |
| NC_037643.1 | 16656718 | SNV | 1 | T | C | Homozygous   |
| NC_037643.1 | 16656727 | SNV | 1 | A | T | Homozygous   |
| NC_037643.1 | 16657094 | SNV | 1 | G | A | Homozygous   |
| NC_037643.1 | 16657103 | SNV | 1 | T | C | Homozygous   |
| NC_037643.1 | 16657144 | SNV | 1 | T | C | Homozygous   |
| NC_037643.1 | 16657188 | SNV | 1 | C | T | Homozygous   |
| NC_037643.1 | 16658003 | SNV | 1 | A | G | Heterozygous |
| NC_037643.1 | 16658074 | SNV | 1 | G | A | Homozygous   |
| NC_037643.1 | 16658448 | SNV | 1 | A | G | Homozygous   |
| NC_037643.1 | 16658519 | SNV | 1 | G | A | Heterozygous |
| NC_037643.1 | 16659076 | SNV | 1 | C | T | Homozygous   |
| NC_037643.1 | 16659309 | SNV | 1 | A | G | Homozygous   |
| NC_037643.1 | 16660083 | SNV | 1 | T | C | Homozygous   |
| NC_037643.1 | 16660358 | SNV | 1 | T | C | Heterozygous |
| NC_037643.1 | 16660433 | SNV | 1 | C | A | Homozygous   |
| NC_037643.1 | 16660436 | SNV | 1 | C | T | Homozygous   |
| NC_037643.1 | 16660646 | SNV | 1 | A | G | Homozygous   |
| NC_037643.1 | 16661516 | SNV | 1 | T | C | Homozygous   |
| NC_037643.1 | 16661636 | SNV | 1 | T | C | Heterozygous |
| NC_037643.1 | 16661660 | SNV | 1 | A | G | Homozygous   |
| NC_037643.1 | 16663397 | SNV | 1 | T | C | Homozygous   |
| NC_037643.1 | 16663953 | SNV | 1 | A | G | Homozygous   |
| NC_037643.1 | 16664285 | SNV | 1 | T | C | Homozygous   |
| NC_037643.1 | 16668304 | SNV | 1 | C | T | Heterozygous |
| NC_037643.1 | 16668348 | SNV | 1 | G | A | Homozygous   |
| NC_037643.1 | 16669208 | SNV | 1 | C | T | Homozygous   |
| NC_037643.1 | 16681597 | SNV | 1 | G | A | Homozygous   |
| NC_037643.1 | 16681634 | SNV | 1 | T | C | Homozygous   |
| NC_037643.1 | 16683073 | SNV | 1 | A | G | Homozygous   |
| NC_037643.1 | 16683527 | SNV | 1 | T | C | Heterozygous |
| NC_037643.1 | 16684973 | SNV | 1 | T | C | Homozygous   |
| NC_037643.1 | 16685063 | SNV | 1 | C | T | Heterozygous |
| NC_037643.1 | 16685077 | SNV | 1 | C | G | Homozygous   |
| NC_037643.1 | 16685159 | SNV | 1 | A | G | Heterozygous |
| NC_037643.1 | 16685233 | SNV | 1 | A | G | Homozygous   |
| NC_037643.1 | 16687291 | SNV | 1 | C | T | Homozygous   |
| NC_037643.1 | 16687312 | SNV | 1 | T | C | Homozygous   |
| NC_037643.1 | 16688142 | SNV | 1 | C | T | Heterozygous |
| NC_037643.1 | 16688277 | SNV | 1 | A | G | Homozygous   |
| NC_037643.1 | 16688823 | SNV | 1 | C | T | Heterozygous |
| NC_037643.1 | 16689186 | SNV | 1 | A | G | Heterozygous |
| NC_037643.1 | 16689447 | SNV | 1 | A | G | Heterozygous |
| NC_037643.1 | 16689592 | SNV | 1 | C | T | Homozygous   |

|             |          |     |   |   |   |              |
|-------------|----------|-----|---|---|---|--------------|
| NC_037643.1 | 16689963 | SNV | 1 | T | C | Homozygous   |
| NC_037643.1 | 16692773 | SNV | 1 | A | G | Homozygous   |
| NC_037643.1 | 16693888 | SNV | 1 | A | G | Homozygous   |
| NC_037643.1 | 16693918 | SNV | 1 | G | A | Homozygous   |
| NC_037643.1 | 16694261 | SNV | 1 | G | A | Homozygous   |
| NC_037643.1 | 16694293 | SNV | 1 | C | T | Homozygous   |
| NC_037643.1 | 16694296 | SNV | 1 | C | T | Heterozygous |
| NC_037643.1 | 16694317 | SNV | 1 | G | A | Heterozygous |
| NC_037643.1 | 16694372 | SNV | 1 | C | T | Homozygous   |
| NC_037643.1 | 16697029 | SNV | 1 | C | G | Heterozygous |
| NC_037643.1 | 16697032 | SNV | 1 | C | T | Heterozygous |
| NC_037643.1 | 16711577 | SNV | 1 | A | G | Homozygous   |
| NC_037643.1 | 16711595 | SNV | 1 | A | T | Heterozygous |
| NC_037643.1 | 16711597 | SNV | 1 | G | T | Homozygous   |
| NC_037643.1 | 16711599 | SNV | 1 | C | T | Homozygous   |
| NC_037643.1 | 16711609 | SNV | 1 | G | T | Homozygous   |
| NC_037643.1 | 16711613 | SNV | 1 | A | T | Homozygous   |
| NC_037643.1 | 16738532 | SNV | 1 | T | C | Homozygous   |
| NC_037643.1 | 16738590 | SNV | 1 | A | T | Heterozygous |
| NC_037643.1 | 16738948 | SNV | 1 | T | C | Homozygous   |
| NC_037643.1 | 16739090 | SNV | 1 | C | T | Homozygous   |
| NC_037643.1 | 16739885 | SNV | 1 | G | C | Heterozygous |
| NC_037643.1 | 16739900 | SNV | 1 | A | G | Homozygous   |
| NC_037643.1 | 16740123 | SNV | 1 | G | A | Homozygous   |
| NC_037643.1 | 16740133 | SNV | 1 | C | T | Homozygous   |
| NC_037643.1 | 16740145 | SNV | 1 | T | C | Homozygous   |
| NC_037643.1 | 16740673 | SNV | 1 | A | G | Homozygous   |
| NC_037643.1 | 16740727 | SNV | 1 | T | A | Heterozygous |
| NC_037643.1 | 16753652 | SNV | 1 | T | C | Homozygous   |
| NC_037643.1 | 16758762 | SNV | 1 | A | C | Homozygous   |
| NC_037643.1 | 16758785 | SNV | 1 | T | C | Homozygous   |
| NC_037643.1 | 16758805 | SNV | 1 | T | C | Homozygous   |
| NC_037643.1 | 16766302 | SNV | 1 | T | C | Homozygous   |
| NC_037643.1 | 16766305 | SNV | 1 | T | C | Homozygous   |
| NC_037643.1 | 16766375 | SNV | 1 | A | G | Homozygous   |
| NC_037643.1 | 16771889 | SNV | 1 | C | T | Homozygous   |
| NC_037643.1 | 16776470 | SNV | 1 | C | A | Homozygous   |
| NC_037643.1 | 16776497 | SNV | 1 | A | G | Heterozygous |
| NC_037643.1 | 16776505 | SNV | 1 | A | G | Heterozygous |
| NC_037643.1 | 16776514 | SNV | 1 | A | G | Heterozygous |
| NC_037643.1 | 16778831 | SNV | 1 | A | C | Homozygous   |
| NC_037643.1 | 16778924 | SNV | 1 | G | T | Heterozygous |
| NC_037643.1 | 16779070 | SNV | 1 | T | A | Homozygous   |
| NC_037643.1 | 16779460 | SNV | 1 | G | T | Heterozygous |
| NC_037643.1 | 16779465 | SNV | 1 | T | C | Heterozygous |
| NC_037643.1 | 16780229 | SNV | 1 | C | T | Heterozygous |
| NC_037643.1 | 16783224 | SNV | 1 | A | G | Homozygous   |
| NC_037643.1 | 16792356 | SNV | 1 | A | G | Heterozygous |
| NC_037643.1 | 16793042 | SNV | 1 | A | G | Homozygous   |
| NC_037643.1 | 16793275 | SNV | 1 | T | C | Homozygous   |
| NC_037643.1 | 16793711 | SNV | 1 | T | C | Homozygous   |

|             |          |     |   |   |   |              |
|-------------|----------|-----|---|---|---|--------------|
| NC_037643.1 | 16796337 | SNV | 1 | A | G | Homozygous   |
| NC_037643.1 | 16796382 | SNV | 1 | A | G | Homozygous   |
| NC_037643.1 | 16796423 | SNV | 1 | A | G | Homozygous   |
| NC_037643.1 | 16799840 | SNV | 1 | A | G | Homozygous   |
| NC_037643.1 | 16800499 | SNV | 1 | T | C | Homozygous   |
| NC_037643.1 | 16802081 | SNV | 1 | C | T | Homozygous   |
| NC_037643.1 | 16802103 | SNV | 1 | T | A | Homozygous   |
| NC_037643.1 | 16802115 | SNV | 1 | T | A | Homozygous   |
| NC_037643.1 | 16802119 | SNV | 1 | T | A | Homozygous   |
| NC_037643.1 | 16805997 | SNV | 1 | G | T | Heterozygous |
| NC_037643.1 | 16807349 | SNV | 1 | A | G | Homozygous   |
| NC_037643.1 | 16809265 | SNV | 1 | G | A | Homozygous   |
| NC_037643.1 | 16809431 | SNV | 1 | C | G | Heterozygous |
| NC_037643.1 | 16816029 | SNV | 1 | A | C | Heterozygous |
| NC_037643.1 | 16816235 | SNV | 1 | T | C | Homozygous   |
| NC_037643.1 | 16823258 | SNV | 1 | G | A | Heterozygous |
| NC_037643.1 | 16829221 | SNV | 1 | C | G | Homozygous   |
| NC_037643.1 | 16829258 | SNV | 1 | T | C | Heterozygous |
| NC_037643.1 | 16830801 | SNV | 1 | T | C | Homozygous   |
| NC_037643.1 | 16830805 | SNV | 1 | A | T | Homozygous   |
| NC_037643.1 | 16830827 | SNV | 1 | T | A | Homozygous   |
| NC_037643.1 | 16840763 | SNV | 1 | G | A | Homozygous   |
| NC_037643.1 | 16842602 | SNV | 1 | T | C | Heterozygous |
| NC_037643.1 | 16842725 | SNV | 1 | C | T | Heterozygous |
| NC_037643.1 | 16842941 | SNV | 1 | T | C | Heterozygous |
| NC_037643.1 | 16856446 | SNV | 1 | T | C | Homozygous   |
| NC_037643.1 | 16857119 | SNV | 1 | A | C | Heterozygous |
| NC_037643.1 | 16864116 | SNV | 1 | G | A | Heterozygous |
| NC_037643.1 | 16866715 | SNV | 1 | T | A | Heterozygous |
| NC_037643.1 | 16867323 | SNV | 1 | A | G | Homozygous   |
| NC_037643.1 | 16868386 | SNV | 1 | C | G | Homozygous   |
| NC_037643.1 | 16868658 | SNV | 1 | A | G | Homozygous   |
| NC_037643.1 | 16868831 | SNV | 1 | G | A | Heterozygous |
| NC_037643.1 | 16868918 | SNV | 1 | T | C | Homozygous   |
| NC_037643.1 | 16868979 | SNV | 1 | T | C | Heterozygous |
| NC_037643.1 | 16868986 | SNV | 1 | G | A | Heterozygous |
| NC_037643.1 | 16868992 | SNV | 1 | G | A | Heterozygous |
| NC_037643.1 | 16869098 | SNV | 1 | A | G | Heterozygous |
| NC_037643.1 | 16869124 | SNV | 1 | G | A | Heterozygous |
| NC_037643.1 | 16869174 | SNV | 1 | C | G | Heterozygous |
| NC_037643.1 | 16869180 | SNV | 1 | A | G | Heterozygous |
| NC_037643.1 | 16869211 | SNV | 1 | C | G | Homozygous   |
| NC_037643.1 | 16869287 | SNV | 1 | A | G | Homozygous   |
| NC_037643.1 | 16869313 | SNV | 1 | G | A | Homozygous   |
| NC_037643.1 | 16870460 | SNV | 1 | G | T | Homozygous   |
| NC_037643.1 | 16873304 | SNV | 1 | T | C | Homozygous   |
| NC_037643.1 | 16875874 | SNV | 1 | G | A | Homozygous   |
| NC_037643.1 | 16875927 | SNV | 1 | G | A | Heterozygous |
| NC_037643.1 | 16877994 | SNV | 1 | C | T | Heterozygous |
| NC_037643.1 | 16878078 | SNV | 1 | T | C | Heterozygous |
| NC_037643.1 | 16878091 | SNV | 1 | C | T | Heterozygous |



|             |          |     |   |   |   |              |
|-------------|----------|-----|---|---|---|--------------|
| NC_037643.1 | 16878116 | SNV | 1 | G | A | Heterozygous |
| NC_037643.1 | 16878138 | SNV | 1 | G | A | Homozygous   |
| NC_037643.1 | 16879296 | SNV | 1 | C | A | Homozygous   |
| NC_037643.1 | 16879743 | SNV | 1 | T | A | Homozygous   |
| NC_037643.1 | 16883376 | SNV | 1 | C | T | Homozygous   |
| NC_037643.1 | 16883380 | SNV | 1 | A | C | Homozygous   |
| NC_037643.1 | 16883487 | SNV | 1 | T | C | Homozygous   |
| NC_037643.1 | 16884461 | SNV | 1 | A | G | Homozygous   |
| NC_037643.1 | 16885352 | SNV | 1 | A | G | Heterozygous |
| NC_037643.1 | 16885354 | SNV | 1 | A | T | Heterozygous |
| NC_037643.1 | 16885365 | SNV | 1 | T | A | Heterozygous |
| NC_037643.1 | 16886351 | SNV | 1 | T | C | Heterozygous |
| NC_037643.1 | 16886354 | SNV | 1 | A | G | Homozygous   |
| NC_037643.1 | 16886480 | SNV | 1 | T | C | Homozygous   |
| NC_037643.1 | 16894167 | SNV | 1 | G | A | Heterozygous |
| NC_037643.1 | 16894199 | SNV | 1 | C | T | Heterozygous |
| NC_037643.1 | 16894326 | SNV | 1 | G | A | Homozygous   |
| NC_037643.1 | 16894474 | SNV | 1 | C | A | Homozygous   |
| NC_037643.1 | 16895425 | SNV | 1 | G | A | Heterozygous |
| NC_037643.1 | 16895434 | SNV | 1 | A | C | Heterozygous |
| NC_037643.1 | 16897291 | SNV | 1 | A | G | Homozygous   |
| NC_037643.1 | 16898933 | SNV | 1 | C | G | Heterozygous |
| NC_037643.1 | 16900969 | SNV | 1 | A | G | Heterozygous |
| NC_037643.1 | 16901698 | SNV | 1 | T | C | Homozygous   |
| NC_037643.1 | 16902252 | SNV | 1 | C | A | Heterozygous |
| NC_037643.1 | 16904293 | SNV | 1 | C | T | Homozygous   |
| NC_037643.1 | 16904344 | SNV | 1 | T | C | Homozygous   |
| NC_037643.1 | 16904373 | SNV | 1 | T | A | Homozygous   |
| NC_037643.1 | 16904472 | SNV | 1 | A | G | Homozygous   |
| NC_037643.1 | 16904633 | SNV | 1 | G | A | Homozygous   |
| NC_037643.1 | 16905811 | SNV | 1 | C | T | Heterozygous |
| NC_037643.1 | 16905877 | SNV | 1 | A | G | Heterozygous |
| NC_037643.1 | 16906354 | SNV | 1 | C | T | Heterozygous |
| NC_037643.1 | 16908597 | SNV | 1 | A | T | Heterozygous |
| NC_037643.1 | 16908831 | SNV | 1 | A | G | Homozygous   |
| NC_037643.1 | 16910374 | SNV | 1 | A | T | Heterozygous |
| NC_037643.1 | 16910571 | SNV | 1 | A | G | Homozygous   |
| NC_037643.1 | 16911064 | SNV | 1 | A | G | Heterozygous |
| NC_037643.1 | 16911462 | SNV | 1 | G | A | Heterozygous |
| NC_037643.1 | 16911542 | SNV | 1 | A | G | Homozygous   |
| NC_037643.1 | 16911544 | SNV | 1 | A | G | Homozygous   |
| NC_037643.1 | 16911892 | SNV | 1 | G | A | Heterozygous |
| NC_037643.1 | 16911919 | SNV | 1 | T | C | Homozygous   |
| NC_037643.1 | 16912054 | SNV | 1 | A | G | Heterozygous |
| NC_037643.1 | 16912096 | SNV | 1 | T | C | Heterozygous |
| NC_037643.1 | 16912659 | SNV | 1 | T | C | Homozygous   |
| NC_037643.1 | 16912794 | SNV | 1 | C | A | Homozygous   |
| NC_037643.1 | 16912796 | SNV | 1 | G | C | Homozygous   |
| NC_037643.1 | 16912799 | SNV | 1 | A | T | Homozygous   |
| NC_037643.1 | 16915460 | SNV | 1 | A | G | Homozygous   |
| NC_037643.1 | 16916085 | SNV | 1 | A | G | Homozygous   |

|             |          |     |   |   |   |              |
|-------------|----------|-----|---|---|---|--------------|
| NC_037643.1 | 16916108 | SNV | 1 | T | A | Homozygous   |
| NC_037643.1 | 16920124 | SNV | 1 | C | T | Heterozygous |
| NC_037643.1 | 16921063 | SNV | 1 | T | C | Homozygous   |
| NC_037643.1 | 16921105 | SNV | 1 | C | T | Heterozygous |
| NC_037643.1 | 16921139 | SNV | 1 | T | C | Homozygous   |
| NC_037643.1 | 16921179 | SNV | 1 | T | C | Heterozygous |
| NC_037643.1 | 16921205 | SNV | 1 | T | C | Heterozygous |
| NC_037643.1 | 16922583 | SNV | 1 | C | T | Heterozygous |
| NC_037643.1 | 16923728 | SNV | 1 | A | G | Heterozygous |
| NC_037643.1 | 16930876 | SNV | 1 | C | A | Heterozygous |
| NC_037643.1 | 16930883 | SNV | 1 | A | G | Heterozygous |
| NC_037643.1 | 16930885 | SNV | 1 | G | A | Heterozygous |
| NC_037643.1 | 16930915 | SNV | 1 | G | A | Heterozygous |
| NC_037643.1 | 16930926 | SNV | 1 | G | A | Heterozygous |
| NC_037643.1 | 16930930 | SNV | 1 | G | T | Heterozygous |
| NC_037643.1 | 16930933 | SNV | 1 | C | A | Heterozygous |
| NC_037643.1 | 16931249 | SNV | 1 | A | G | Homozygous   |
| NC_037643.1 | 16931453 | SNV | 1 | A | G | Homozygous   |
| NC_037643.1 | 16931455 | SNV | 1 | T | C | Homozygous   |
| NC_037643.1 | 16931673 | SNV | 1 | A | G | Heterozygous |
| NC_037643.1 | 16932359 | SNV | 1 | C | A | Heterozygous |
| NC_037643.1 | 16932361 | SNV | 1 | T | A | Heterozygous |
| NC_037643.1 | 16933291 | SNV | 1 | T | C | Homozygous   |
| NC_037643.1 | 16941813 | SNV | 1 | G | A | Heterozygous |
| NC_037643.1 | 16941822 | SNV | 1 | A | G | Homozygous   |
| NC_037643.1 | 16942170 | SNV | 1 | A | G | Homozygous   |
| NC_037643.1 | 16942665 | SNV | 1 | G | A | Heterozygous |
| NC_037643.1 | 16943112 | SNV | 1 | A | G | Homozygous   |
| NC_037643.1 | 17012965 | SNV | 1 | C | T | Heterozygous |
| NC_037643.1 | 17013094 | SNV | 1 | T | C | Homozygous   |
| NC_037643.1 | 17016807 | SNV | 1 | G | C | Homozygous   |
| NC_037643.1 | 17016810 | SNV | 1 | T | C | Homozygous   |
| NC_037643.1 | 17016813 | SNV | 1 | A | T | Heterozygous |
| NC_037643.1 | 17016815 | SNV | 1 | A | C | Heterozygous |
| NC_037643.1 | 17016815 | SNV | 1 | A | T | Heterozygous |
| NC_037643.1 | 17016840 | SNV | 1 | C | T | Homozygous   |
| NC_037643.1 | 17018467 | SNV | 1 | T | C | Homozygous   |
| NC_037643.1 | 17018471 | SNV | 1 | T | G | Homozygous   |
| NC_037643.1 | 17018514 | SNV | 1 | T | A | Homozygous   |
| NC_037643.1 | 17018523 | SNV | 1 | T | C | Homozygous   |
| NC_037643.1 | 17018538 | SNV | 1 | C | T | Homozygous   |
| NC_037643.1 | 17018543 | SNV | 1 | A | C | Heterozygous |
| NC_037643.1 | 17018543 | SNV | 1 | A | T | Heterozygous |
| NC_037643.1 | 17019145 | SNV | 1 | T | G | Homozygous   |
| NC_037643.1 | 17019433 | SNV | 1 | T | C | Homozygous   |
| NC_037643.1 | 17019933 | SNV | 1 | C | T | Heterozygous |
| NC_037643.1 | 17021194 | SNV | 1 | T | C | Homozygous   |
| NC_037643.1 | 17021951 | SNV | 1 | T | C | Heterozygous |
| NC_037643.1 | 17021999 | SNV | 1 | C | T | Heterozygous |
| NC_037643.1 | 17024051 | SNV | 1 | A | G | Homozygous   |
| NC_037643.1 | 17024332 | SNV | 1 | G | A | Heterozygous |

|             |          |     |   |   |   |              |
|-------------|----------|-----|---|---|---|--------------|
| NC_037643.1 | 17024841 | SNV | 1 | C | T | Heterozygous |
| NC_037643.1 | 17024977 | SNV | 1 | C | T | Heterozygous |
| NC_037643.1 | 17025205 | SNV | 1 | A | G | Homozygous   |
| NC_037643.1 | 17025414 | SNV | 1 | G | A | Heterozygous |
| NC_037643.1 | 17025416 | SNV | 1 | A | G | Homozygous   |
| NC_037643.1 | 17025464 | SNV | 1 | A | G | Homozygous   |
| NC_037643.1 | 17025477 | SNV | 1 | A | T | Homozygous   |
| NC_037643.1 | 17025519 | SNV | 1 | C | T | Homozygous   |
| NC_037643.1 | 17025549 | SNV | 1 | T | C | Homozygous   |
| NC_037643.1 | 17025560 | SNV | 1 | G | A | Homozygous   |
| NC_037643.1 | 17025565 | SNV | 1 | T | C | Homozygous   |
| NC_037643.1 | 17025628 | SNV | 1 | G | A | Homozygous   |
| NC_037643.1 | 17025748 | SNV | 1 | C | T | Homozygous   |
| NC_037643.1 | 17025804 | SNV | 1 | A | G | Heterozygous |
| NC_037643.1 | 17026657 | SNV | 1 | A | G | Heterozygous |
| NC_037643.1 | 17026808 | SNV | 1 | G | A | Heterozygous |
| NC_037643.1 | 17031261 | SNV | 1 | G | A | Homozygous   |
| NC_037643.1 | 17032005 | SNV | 1 | A | G | Homozygous   |
| NC_037643.1 | 17032674 | SNV | 1 | T | C | Homozygous   |
| NC_037643.1 | 17032695 | SNV | 1 | C | G | Homozygous   |
| NC_037643.1 | 17032727 | SNV | 1 | A | G | Heterozygous |
| NC_037643.1 | 17034682 | SNV | 1 | C | T | Heterozygous |
| NC_037643.1 | 17034686 | SNV | 1 | G | A | Heterozygous |
| NC_037643.1 | 17034689 | SNV | 1 | A | G | Heterozygous |
| NC_037643.1 | 17034691 | SNV | 1 | G | A | Heterozygous |
| NC_037643.1 | 17034696 | SNV | 1 | A | G | Heterozygous |
| NC_037643.1 | 17034702 | SNV | 1 | C | T | Heterozygous |
| NC_037643.1 | 17034709 | SNV | 1 | T | C | Homozygous   |
| NC_037643.1 | 17043922 | SNV | 1 | A | C | Homozygous   |
| NC_037643.1 | 17043925 | SNV | 1 | G | C | Homozygous   |
| NC_037643.1 | 17043929 | SNV | 1 | A | G | Homozygous   |
| NC_037643.1 | 17043937 | SNV | 1 | A | T | Homozygous   |
| NC_037643.1 | 17043948 | SNV | 1 | T | C | Homozygous   |
| NC_037643.1 | 17045361 | SNV | 1 | T | C | Homozygous   |
| NC_037643.1 | 17045743 | SNV | 1 | C | T | Heterozygous |
| NC_037643.1 | 17050512 | SNV | 1 | T | C | Heterozygous |
| NC_037643.1 | 17050995 | SNV | 1 | T | C | Homozygous   |
| NC_037643.1 | 17051040 | SNV | 1 | A | G | Homozygous   |
| NC_037643.1 | 17051106 | SNV | 1 | T | C | Heterozygous |
| NC_037643.1 | 17051172 | SNV | 1 | G | T | Homozygous   |
| NC_037643.1 | 17057156 | SNV | 1 | T | C | Homozygous   |
| NC_037643.1 | 17057163 | SNV | 1 | A | T | Heterozygous |
| NC_037643.1 | 17057193 | SNV | 1 | T | C | Homozygous   |
| NC_037643.1 | 17057226 | SNV | 1 | A | G | Heterozygous |
| NC_037643.1 | 17057240 | SNV | 1 | T | C | Heterozygous |
| NC_037643.1 | 17057262 | SNV | 1 | A | G | Heterozygous |
| NC_037643.1 | 17057270 | SNV | 1 | T | C | Homozygous   |
| NC_037643.1 | 17057297 | SNV | 1 | A | G | Homozygous   |
| NC_037643.1 | 17057976 | SNV | 1 | G | A | Heterozygous |
| NC_037643.1 | 17058446 | SNV | 1 | T | C | Homozygous   |
| NC_037643.1 | 17060062 | SNV | 1 | T | A | Heterozygous |

|             |          |     |   |   |   |              |
|-------------|----------|-----|---|---|---|--------------|
| NC_037643.1 | 17060072 | SNV | 1 | A | G | Heterozygous |
| NC_037643.1 | 17062031 | SNV | 1 | T | C | Homozygous   |
| NC_037643.1 | 17062054 | SNV | 1 | A | G | Homozygous   |
| NC_037643.1 | 17062112 | SNV | 1 | A | G | Homozygous   |
| NC_037643.1 | 17062121 | SNV | 1 | A | T | Heterozygous |
| NC_037643.1 | 17062241 | SNV | 1 | A | G | Homozygous   |
| NC_037643.1 | 17065751 | SNV | 1 | A | G | Heterozygous |
| NC_037643.1 | 17065776 | SNV | 1 | C | T | Homozygous   |
| NC_037643.1 | 17065787 | SNV | 1 | G | A | Heterozygous |
| NC_037643.1 | 17065949 | SNV | 1 | G | A | Heterozygous |
| NC_037643.1 | 17066062 | SNV | 1 | G | A | Heterozygous |
| NC_037643.1 | 17066098 | SNV | 1 | C | T | Heterozygous |
| NC_037643.1 | 17069533 | SNV | 1 | T | C | Homozygous   |
| NC_037643.1 | 17073517 | SNV | 1 | C | T | Heterozygous |
| NC_037643.1 | 17073782 | SNV | 1 | T | C | Heterozygous |
| NC_037643.1 | 17076874 | SNV | 1 | T | A | Homozygous   |
| NC_037643.1 | 17076882 | SNV | 1 | T | A | Homozygous   |
| NC_037643.1 | 17077711 | SNV | 1 | G | A | Homozygous   |
| NC_037643.1 | 17078051 | SNV | 1 | A | T | Homozygous   |
| NC_037643.1 | 17078757 | SNV | 1 | T | A | Heterozygous |
| NC_037643.1 | 17079759 | SNV | 1 | T | C | Homozygous   |
| NC_037643.1 | 17079764 | SNV | 1 | A | G | Homozygous   |
| NC_037643.1 | 17092147 | SNV | 1 | A | C | Heterozygous |
| NC_037643.1 | 17092150 | SNV | 1 | A | T | Heterozygous |
| NC_037643.1 | 17092154 | SNV | 1 | A | T | Heterozygous |
| NC_037643.1 | 17093027 | SNV | 1 | T | C | Heterozygous |
| NC_037643.1 | 17093053 | SNV | 1 | A | G | Heterozygous |
| NC_037643.1 | 17094120 | SNV | 1 | C | A | Homozygous   |
| NC_037643.1 | 17094143 | SNV | 1 | C | T | Heterozygous |
| NC_037643.1 | 17094164 | SNV | 1 | A | G | Heterozygous |
| NC_037643.1 | 17094380 | SNV | 1 | C | A | Homozygous   |
| NC_037643.1 | 17094778 | SNV | 1 | C | T | Heterozygous |
| NC_037643.1 | 17096015 | SNV | 1 | C | T | Homozygous   |
| NC_037643.1 | 17096095 | SNV | 1 | A | C | Homozygous   |
| NC_037643.1 | 17096252 | SNV | 1 | T | C | Homozygous   |
| NC_037643.1 | 17096263 | SNV | 1 | A | T | Homozygous   |
| NC_037643.1 | 17096866 | SNV | 1 | A | G | Heterozygous |
| NC_037643.1 | 17097254 | SNV | 1 | T | C | Homozygous   |
| NC_037643.1 | 17097482 | SNV | 1 | T | C | Homozygous   |
| NC_037643.1 | 17097947 | SNV | 1 | T | C | Heterozygous |
| NC_037643.1 | 17098067 | SNV | 1 | G | C | Heterozygous |
| NC_037643.1 | 17106810 | SNV | 1 | A | G | Homozygous   |
| NC_037643.1 | 17106903 | SNV | 1 | A | G | Homozygous   |
| NC_037643.1 | 17107130 | SNV | 1 | C | T | Heterozygous |
| NC_037643.1 | 17107177 | SNV | 1 | G | T | Heterozygous |
| NC_037643.1 | 17107181 | SNV | 1 | G | T | Heterozygous |
| NC_037643.1 | 17107222 | SNV | 1 | G | C | Heterozygous |
| NC_037643.1 | 17107226 | SNV | 1 | G | C | Heterozygous |
| NC_037643.1 | 17107375 | SNV | 1 | T | C | Homozygous   |
| NC_037643.1 | 17108089 | SNV | 1 | C | G | Heterozygous |
| NC_037643.1 | 17108299 | SNV | 1 | C | G | Heterozygous |

|             |          |     |   |   |   |              |
|-------------|----------|-----|---|---|---|--------------|
| NC_037643.1 | 17108773 | SNV | 1 | T | C | Homozygous   |
| NC_037643.1 | 17118563 | SNV | 1 | T | C | Homozygous   |
| NC_037643.1 | 17119761 | SNV | 1 | A | G | Homozygous   |
| NC_037643.1 | 17119924 | SNV | 1 | T | C | Homozygous   |
| NC_037643.1 | 17119927 | SNV | 1 | A | G | Homozygous   |
| NC_037643.1 | 17120519 | SNV | 1 | T | C | Homozygous   |
| NC_037643.1 | 17120580 | SNV | 1 | A | G | Homozygous   |
| NC_037643.1 | 17122953 | SNV | 1 | G | C | Homozygous   |
| NC_037643.1 | 17124120 | SNV | 1 | A | G | Homozygous   |
| NC_037643.1 | 17124450 | SNV | 1 | T | C | Heterozygous |
| NC_037643.1 | 17124530 | SNV | 1 | T | C | Heterozygous |
| NC_037643.1 | 17124773 | SNV | 1 | A | G | Heterozygous |
| NC_037643.1 | 17125021 | SNV | 1 | C | T | Homozygous   |
| NC_037643.1 | 17125026 | SNV | 1 | A | G | Homozygous   |
| NC_037643.1 | 17125029 | SNV | 1 | T | G | Heterozygous |
| NC_037643.1 | 17125407 | SNV | 1 | T | C | Heterozygous |
| NC_037643.1 | 17125854 | SNV | 1 | A | G | Heterozygous |
| NC_037643.1 | 17125863 | SNV | 1 | A | G | Heterozygous |
| NC_037643.1 | 17125872 | SNV | 1 | A | G | Heterozygous |
| NC_037643.1 | 17126327 | SNV | 1 | T | C | Heterozygous |
| NC_037643.1 | 17126347 | SNV | 1 | T | C | Homozygous   |
| NC_037643.1 | 17126728 | SNV | 1 | T | C | Homozygous   |
| NC_037643.1 | 17130342 | SNV | 1 | T | C | Heterozygous |
| NC_037643.1 | 17130346 | SNV | 1 | C | A | Heterozygous |
| NC_037643.1 | 17130353 | SNV | 1 | C | A | Heterozygous |
| NC_037643.1 | 17130357 | SNV | 1 | T | A | Heterozygous |
| NC_037643.1 | 17130374 | SNV | 1 | C | G | Heterozygous |
| NC_037643.1 | 17141254 | SNV | 1 | T | G | Homozygous   |
| NC_037643.1 | 17141291 | SNV | 1 | A | G | Homozygous   |
| NC_037643.1 | 17141488 | SNV | 1 | A | T | Homozygous   |
| NC_037643.1 | 17141492 | SNV | 1 | T | C | Homozygous   |
| NC_037643.1 | 17141589 | SNV | 1 | C | T | Heterozygous |
| NC_037643.1 | 17141626 | SNV | 1 | C | T | Homozygous   |
| NC_037643.1 | 17141628 | SNV | 1 | T | G | Homozygous   |
| NC_037643.1 | 17141631 | SNV | 1 | C | A | Heterozygous |
| NC_037643.1 | 17141634 | SNV | 1 | T | C | Heterozygous |
| NC_037643.1 | 17141637 | SNV | 1 | A | C | Heterozygous |
| NC_037643.1 | 17141638 | SNV | 1 | C | T | Heterozygous |
| NC_037643.1 | 17141668 | SNV | 1 | G | C | Homozygous   |
| NC_037643.1 | 17141706 | SNV | 1 | T | C | Heterozygous |
| NC_037643.1 | 17141722 | SNV | 1 | C | T | Heterozygous |
| NC_037643.1 | 17141725 | SNV | 1 | T | C | Homozygous   |
| NC_037643.1 | 17141745 | SNV | 1 | G | C | Homozygous   |
| NC_037643.1 | 17141752 | SNV | 1 | T | C | Homozygous   |
| NC_037643.1 | 17141760 | SNV | 1 | T | C | Homozygous   |
| NC_037643.1 | 17141795 | SNV | 1 | T | A | Homozygous   |
| NC_037643.1 | 17141820 | SNV | 1 | T | C | Heterozygous |
| NC_037643.1 | 17141840 | SNV | 1 | C | T | Heterozygous |
| NC_037643.1 | 17141859 | SNV | 1 | T | C | Homozygous   |
| NC_037643.1 | 17141865 | SNV | 1 | A | C | Homozygous   |
| NC_037643.1 | 17141867 | SNV | 1 | A | G | Heterozygous |

|             |          |     |   |   |   |              |
|-------------|----------|-----|---|---|---|--------------|
| NC_037643.1 | 17141892 | SNV | 1 | T | C | Heterozygous |
| NC_037643.1 | 17141894 | SNV | 1 | G | C | Heterozygous |
| NC_037643.1 | 17141936 | SNV | 1 | T | C | Heterozygous |
| NC_037643.1 | 17142003 | SNV | 1 | T | C | Heterozygous |
| NC_037643.1 | 17142024 | SNV | 1 | T | C | Heterozygous |
| NC_037643.1 | 17142043 | SNV | 1 | C | T | Heterozygous |
| NC_037643.1 | 17142051 | SNV | 1 | A | C | Heterozygous |
| NC_037643.1 | 17142074 | SNV | 1 | T | C | Homozygous   |
| NC_037643.1 | 17142263 | SNV | 1 | C | T | Heterozygous |
| NC_037643.1 | 17142269 | SNV | 1 | C | T | Heterozygous |
| NC_037643.1 | 17142282 | SNV | 1 | A | T | Heterozygous |
| NC_037643.1 | 17142331 | SNV | 1 | A | T | Heterozygous |
| NC_037643.1 | 17142359 | SNV | 1 | T | C | Heterozygous |
| NC_037643.1 | 17142425 | SNV | 1 | C | T | Heterozygous |
| NC_037643.1 | 17142460 | SNV | 1 | A | T | Heterozygous |
| NC_037643.1 | 17142473 | SNV | 1 | T | C | Heterozygous |
| NC_037643.1 | 17142480 | SNV | 1 | G | C | Heterozygous |
| NC_037643.1 | 17142607 | SNV | 1 | G | T | Heterozygous |
| NC_037643.1 | 17142630 | SNV | 1 | T | C | Homozygous   |
| NC_037643.1 | 17142635 | SNV | 1 | G | C | Heterozygous |
| NC_037643.1 | 17142647 | SNV | 1 | A | G | Homozygous   |
| NC_037643.1 | 17142672 | SNV | 1 | T | C | Heterozygous |
| NC_037643.1 | 17142698 | SNV | 1 | A | T | Heterozygous |
| NC_037643.1 | 17142701 | SNV | 1 | C | A | Heterozygous |
| NC_037643.1 | 17142723 | SNV | 1 | T | C | Heterozygous |
| NC_037643.1 | 17142735 | SNV | 1 | T | C | Heterozygous |
| NC_037643.1 | 17142849 | SNV | 1 | C | T | Heterozygous |
| NC_037643.1 | 17142855 | SNV | 1 | C | T | Homozygous   |
| NC_037643.1 | 17142860 | SNV | 1 | G | C | Homozygous   |
| NC_037643.1 | 17142875 | SNV | 1 | C | T | Heterozygous |
| NC_037643.1 | 17143076 | SNV | 1 | T | C | Homozygous   |
| NC_037643.1 | 17143200 | SNV | 1 | C | T | Heterozygous |
| NC_037643.1 | 17143212 | SNV | 1 | T | C | Homozygous   |
| NC_037643.1 | 17143258 | SNV | 1 | A | G | Heterozygous |
| NC_037643.1 | 17143300 | SNV | 1 | G | A | Heterozygous |
| NC_037643.1 | 17146152 | SNV | 1 | A | T | Heterozygous |
| NC_037643.1 | 17148821 | SNV | 1 | T | C | Heterozygous |
| NC_037643.1 | 17148824 | SNV | 1 | A | G | Heterozygous |
| NC_037643.1 | 17148828 | SNV | 1 | A | G | Heterozygous |
| NC_037643.1 | 17148838 | SNV | 1 | A | G | Homozygous   |
| NC_037643.1 | 17148864 | SNV | 1 | A | G | Heterozygous |
| NC_037643.1 | 17156873 | SNV | 1 | A | G | Homozygous   |
| NC_037643.1 | 17164662 | SNV | 1 | C | T | Homozygous   |
| NC_037643.1 | 17175551 | SNV | 1 | T | C | Heterozygous |
| NC_037643.1 | 17175562 | SNV | 1 | C | T | Homozygous   |
| NC_037643.1 | 17175566 | SNV | 1 | T | C | Heterozygous |
| NC_037643.1 | 17175596 | SNV | 1 | C | T | Heterozygous |
| NC_037643.1 | 17185603 | SNV | 1 | C | T | Homozygous   |
| NC_037643.1 | 17208463 | SNV | 1 | A | G | Homozygous   |
| NC_037643.1 | 17208471 | SNV | 1 | A | T | Heterozygous |
| NC_037643.1 | 17208475 | SNV | 1 | A | T | Heterozygous |

|             |          |     |   |   |   |              |
|-------------|----------|-----|---|---|---|--------------|
| NC_037643.1 | 17208487 | SNV | 1 | A | T | Heterozygous |
| NC_037643.1 | 17208493 | SNV | 1 | A | C | Heterozygous |
| NC_037643.1 | 17212511 | SNV | 1 | G | T | Homozygous   |
| NC_037643.1 | 17212763 | SNV | 1 | G | T | Homozygous   |
| NC_037643.1 | 17212772 | SNV | 1 | C | T | Homozygous   |
| NC_037643.1 | 17213055 | SNV | 1 | A | C | Heterozygous |
| NC_037643.1 | 17213080 | SNV | 1 | T | C | Heterozygous |
| NC_037643.1 | 17213081 | SNV | 1 | A | C | Heterozygous |
| NC_037643.1 | 17213163 | SNV | 1 | G | A | Homozygous   |
| NC_037643.1 | 17213472 | SNV | 1 | A | G | Heterozygous |
| NC_037643.1 | 17503002 | SNV | 1 | T | G | Homozygous   |
| NC_037643.1 | 17503008 | SNV | 1 | C | A | Heterozygous |
| NC_037643.1 | 17503014 | SNV | 1 | C | A | Homozygous   |
| NC_037643.1 | 17503020 | SNV | 1 | C | A | Homozygous   |
| NC_037643.1 | 17503032 | SNV | 1 | C | G | Heterozygous |
| NC_037643.1 | 17503041 | SNV | 1 | C | T | Heterozygous |
| NC_037643.1 | 17503059 | SNV | 1 | G | C | Homozygous   |
| NC_037643.1 | 17503062 | SNV | 1 | G | A | Homozygous   |
| NC_037643.1 | 17503065 | SNV | 1 | C | T | Homozygous   |
| NC_037643.1 | 17503068 | SNV | 1 | G | A | Heterozygous |
| NC_037643.1 | 17503072 | SNV | 1 | A | T | Homozygous   |
| NC_037643.1 | 17503074 | SNV | 1 | G | A | Homozygous   |
| NC_037643.1 | 17503077 | SNV | 1 | A | T | Heterozygous |
| NC_037643.1 | 17503080 | SNV | 1 | C | G | Homozygous   |
| NC_037643.1 | 17503083 | SNV | 1 | G | C | Heterozygous |
| NC_037643.1 | 17503086 | SNV | 1 | G | A | Homozygous   |
| NC_037643.1 | 17622123 | SNV | 1 | T | C | Homozygous   |
| NC_037643.1 | 17626061 | SNV | 1 | T | C | Homozygous   |
| NC_037643.1 | 17626127 | SNV | 1 | T | C | Homozygous   |
| NC_037643.1 | 17626203 | SNV | 1 | A | G | Heterozygous |
| NC_037643.1 | 17626344 | SNV | 1 | A | G | Heterozygous |
| NC_037643.1 | 17626347 | SNV | 1 | G | A | Homozygous   |
| NC_037643.1 | 17626504 | SNV | 1 | G | A | Homozygous   |
| NC_037643.1 | 17626506 | SNV | 1 | A | G | Heterozygous |
| NC_037643.1 | 17636211 | SNV | 1 | G | T | Heterozygous |
| NC_037643.1 | 17636219 | SNV | 1 | A | G | Heterozygous |
| NC_037643.1 | 17636230 | SNV | 1 | C | T | Homozygous   |
| NC_037643.1 | 17645862 | SNV | 1 | C | T | Heterozygous |
| NC_037643.1 | 17645919 | SNV | 1 | C | T | Heterozygous |
| NC_037643.1 | 17645923 | SNV | 1 | T | C | Heterozygous |
| NC_037643.1 | 17645927 | SNV | 1 | T | C | Heterozygous |
| NC_037643.1 | 17645931 | SNV | 1 | C | T | Heterozygous |
| NC_037643.1 | 17645933 | SNV | 1 | C | T | Heterozygous |
| NC_037643.1 | 17647876 | SNV | 1 | A | G | Heterozygous |
| NC_037643.1 | 17649258 | SNV | 1 | C | G | Homozygous   |
| NC_037643.1 | 17649283 | SNV | 1 | C | T | Heterozygous |
| NC_037643.1 | 17649304 | SNV | 1 | C | A | Heterozygous |
| NC_037643.1 | 17651293 | SNV | 1 | C | T | Heterozygous |
| NC_037643.1 | 17651322 | SNV | 1 | C | T | Heterozygous |
| NC_037643.1 | 17651331 | SNV | 1 | G | T | Heterozygous |
| NC_037643.1 | 17668508 | SNV | 1 | A | T | Heterozygous |

|             |          |     |   |   |   |              |
|-------------|----------|-----|---|---|---|--------------|
| NC_037643.1 | 17668518 | SNV | 1 | C | T | Heterozygous |
| NC_037643.1 | 17668538 | SNV | 1 | G | A | Heterozygous |
| NC_037643.1 | 17668547 | SNV | 1 | A | T | Heterozygous |
| NC_037643.1 | 17672677 | SNV | 1 | A | G | Heterozygous |
| NC_037643.1 | 17672688 | SNV | 1 | A | G | Heterozygous |
| NC_037643.1 | 17672690 | SNV | 1 | A | G | Heterozygous |
| NC_037643.1 | 17672717 | SNV | 1 | G | A | Homozygous   |
| NC_037643.1 | 17672724 | SNV | 1 | G | A | Homozygous   |
| NC_037643.1 | 17672731 | SNV | 1 | T | A | Homozygous   |
| NC_037643.1 | 17672736 | SNV | 1 | A | C | Homozygous   |
| NC_037643.1 | 17672740 | SNV | 1 | A | C | Homozygous   |
| NC_037643.1 | 17672790 | SNV | 1 | G | A | Homozygous   |
| NC_037643.1 | 17680343 | SNV | 1 | A | G | Homozygous   |
| NC_037643.1 | 17680345 | SNV | 1 | C | G | Homozygous   |
| NC_037643.1 | 17680349 | SNV | 1 | A | G | Homozygous   |
| NC_037643.1 | 17680369 | SNV | 1 | A | G | Homozygous   |
| NC_037643.1 | 17680375 | SNV | 1 | A | G | Homozygous   |
| NC_037643.1 | 17680386 | SNV | 1 | T | C | Homozygous   |
| NC_037643.1 | 17706914 | SNV | 1 | T | C | Homozygous   |
| NC_037643.1 | 17707046 | SNV | 1 | G | T | Homozygous   |
| NC_037643.1 | 17723621 | SNV | 1 | A | G | Homozygous   |
| NC_037643.1 | 17732680 | SNV | 1 | T | A | Homozygous   |
| NC_037643.1 | 17732682 | SNV | 1 | T | A | Homozygous   |
| NC_037643.1 | 17732684 | SNV | 1 | T | A | Homozygous   |
| NC_037643.1 | 17739645 | SNV | 1 | C | T | Heterozygous |
| NC_037643.1 | 17739693 | SNV | 1 | C | G | Homozygous   |
| NC_037643.1 | 17739722 | SNV | 1 | A | G | Homozygous   |
| NC_037643.1 | 17744595 | SNV | 1 | C | T | Heterozygous |
| NC_037643.1 | 17744599 | SNV | 1 | T | C | Heterozygous |
| NC_037643.1 | 17744602 | SNV | 1 | C | T | Heterozygous |
| NC_037643.1 | 17744631 | SNV | 1 | T | C | Heterozygous |
| NC_037643.1 | 17744632 | SNV | 1 | T | C | Heterozygous |
| NC_037643.1 | 17746414 | SNV | 1 | T | G | Homozygous   |
| NC_037643.1 | 17746417 | SNV | 1 | G | T | Homozygous   |
| NC_037643.1 | 17747020 | SNV | 1 | A | G | Homozygous   |
| NC_037643.1 | 17747027 | SNV | 1 | C | A | Homozygous   |
| NC_037643.1 | 17748852 | SNV | 1 | T | C | Heterozygous |
| NC_037643.1 | 17748944 | SNV | 1 | G | A | Homozygous   |
| NC_037643.1 | 17750080 | SNV | 1 | G | A | Homozygous   |
| NC_037643.1 | 17750146 | SNV | 1 | T | C | Heterozygous |
| NC_037643.1 | 17751763 | SNV | 1 | C | T | Heterozygous |
| NC_037643.1 | 17752120 | SNV | 1 | T | C | Homozygous   |
| NC_037643.1 | 17752210 | SNV | 1 | C | T | Homozygous   |
| NC_037643.1 | 17755393 | SNV | 1 | T | C | Homozygous   |
| NC_037643.1 | 17755991 | SNV | 1 | T | A | Homozygous   |
| NC_037643.1 | 17755993 | SNV | 1 | C | A | Homozygous   |
| NC_037643.1 | 17756263 | SNV | 1 | T | A | Homozygous   |
| NC_037643.1 | 17756265 | SNV | 1 | C | T | Homozygous   |
| NC_037643.1 | 17756389 | SNV | 1 | T | C | Heterozygous |
| NC_037643.1 | 17757007 | SNV | 1 | C | T | Homozygous   |
| NC_037643.1 | 17762703 | SNV | 1 | T | A | Homozygous   |



|             |          |     |   |   |   |              |
|-------------|----------|-----|---|---|---|--------------|
| NC_037643.1 | 17762715 | SNV | 1 | T | A | Homozygous   |
| NC_037643.1 | 17762719 | SNV | 1 | A | T | Homozygous   |
| NC_037643.1 | 17765673 | SNV | 1 | A | G | Homozygous   |
| NC_037643.1 | 17766603 | SNV | 1 | C | T | Heterozygous |
| NC_037643.1 | 17766836 | SNV | 1 | T | A | Homozygous   |
| NC_037643.1 | 17767178 | SNV | 1 | A | C | Homozygous   |
| NC_037643.1 | 17770704 | SNV | 1 | G | A | Homozygous   |
| NC_037643.1 | 17770710 | SNV | 1 | T | G | Homozygous   |
| NC_037643.1 | 17770846 | SNV | 1 | A | G | Heterozygous |
| NC_037644.1 | 9264     | SNV | 1 | T | A | Homozygous   |
| NC_037644.1 | 9273     | SNV | 1 | A | T | Homozygous   |
| NC_037644.1 | 11486    | SNV | 1 | C | T | Homozygous   |
| NC_037644.1 | 11544    | SNV | 1 | A | G | Homozygous   |
| NC_037644.1 | 11728    | SNV | 1 | C | T | Homozygous   |
| NC_037644.1 | 16689    | SNV | 1 | G | A | Homozygous   |
| NC_037644.1 | 16696    | SNV | 1 | T | G | Homozygous   |
| NC_037644.1 | 20443    | SNV | 1 | G | A | Heterozygous |
| NC_037644.1 | 22974    | SNV | 1 | T | C | Homozygous   |
| NC_037644.1 | 23755    | SNV | 1 | A | T | Homozygous   |
| NC_037644.1 | 26621    | SNV | 1 | A | T | Homozygous   |
| NC_037644.1 | 27125    | SNV | 1 | A | G | Heterozygous |
| NC_037644.1 | 27180    | SNV | 1 | T | C | Homozygous   |
| NC_037644.1 | 27364    | SNV | 1 | T | A | Heterozygous |
| NC_037644.1 | 27587    | SNV | 1 | A | G | Homozygous   |
| NC_037644.1 | 27693    | SNV | 1 | A | T | Homozygous   |
| NC_037644.1 | 27745    | SNV | 1 | A | G | Heterozygous |
| NC_037644.1 | 27766    | SNV | 1 | A | G | Heterozygous |
| NC_037644.1 | 27781    | SNV | 1 | G | A | Heterozygous |
| NC_037644.1 | 27871    | SNV | 1 | A | G | Heterozygous |
| NC_037644.1 | 27874    | SNV | 1 | A | G | Heterozygous |
| NC_037644.1 | 27896    | SNV | 1 | A | T | Heterozygous |
| NC_037644.1 | 27985    | SNV | 1 | A | G | Heterozygous |
| NC_037644.1 | 28048    | SNV | 1 | G | A | Heterozygous |
| NC_037644.1 | 28069    | SNV | 1 | G | A | Heterozygous |
| NC_037644.1 | 28093    | SNV | 1 | A | T | Homozygous   |
| NC_037644.1 | 28095    | SNV | 1 | G | T | Heterozygous |
| NC_037644.1 | 28101    | SNV | 1 | G | T | Heterozygous |
| NC_037644.1 | 28129    | SNV | 1 | C | T | Heterozygous |
| NC_037644.1 | 28174    | SNV | 1 | C | T | Heterozygous |
| NC_037644.1 | 28179    | SNV | 1 | A | G | Heterozygous |
| NC_037644.1 | 28212    | SNV | 1 | A | G | Heterozygous |
| NC_037644.1 | 28239    | SNV | 1 | G | A | Heterozygous |
| NC_037644.1 | 28285    | SNV | 1 | G | T | Heterozygous |
| NC_037644.1 | 28818    | SNV | 1 | C | T | Homozygous   |
| NC_037644.1 | 28904    | SNV | 1 | G | T | Homozygous   |
| NC_037644.1 | 29978    | SNV | 1 | A | C | Homozygous   |
| NC_037644.1 | 30874    | SNV | 1 | C | T | Homozygous   |
| NC_037644.1 | 30977    | SNV | 1 | A | G | Heterozygous |
| NC_037644.1 | 31258    | SNV | 1 | C | T | Heterozygous |
| NC_037644.1 | 31262    | SNV | 1 | C | T | Homozygous   |
| NC_037644.1 | 31424    | SNV | 1 | A | G | Homozygous   |

|             |       |     |   |   |   |              |
|-------------|-------|-----|---|---|---|--------------|
| NC_037644.1 | 31644 | SNV | 1 | G | A | Heterozygous |
| NC_037644.1 | 32958 | SNV | 1 | T | C | Homozygous   |
| NC_037644.1 | 33448 | SNV | 1 | T | C | Heterozygous |
| NC_037644.1 | 33460 | SNV | 1 | C | T | Heterozygous |
| NC_037644.1 | 33468 | SNV | 1 | A | C | Heterozygous |
| NC_037644.1 | 33564 | SNV | 1 | A | G | Homozygous   |
| NC_037644.1 | 33814 | SNV | 1 | C | T | Heterozygous |
| NC_037644.1 | 35545 | SNV | 1 | T | C | Homozygous   |
| NC_037644.1 | 35758 | SNV | 1 | C | T | Homozygous   |
| NC_037644.1 | 36029 | SNV | 1 | A | G | Homozygous   |
| NC_037644.1 | 36153 | SNV | 1 | A | T | Heterozygous |
| NC_037644.1 | 36421 | SNV | 1 | T | C | Homozygous   |
| NC_037644.1 | 36430 | SNV | 1 | A | C | Heterozygous |
| NC_037644.1 | 36436 | SNV | 1 | T | C | Homozygous   |
| NC_037644.1 | 38871 | SNV | 1 | C | T | Homozygous   |
| NC_037644.1 | 39186 | SNV | 1 | T | C | Homozygous   |
| NC_037644.1 | 39200 | SNV | 1 | C | T | Heterozygous |
| NC_037644.1 | 39225 | SNV | 1 | C | T | Homozygous   |
| NC_037644.1 | 39430 | SNV | 1 | A | G | Homozygous   |
| NC_037644.1 | 40723 | SNV | 1 | T | C | Homozygous   |
| NC_037644.1 | 42046 | SNV | 1 | A | C | Heterozygous |
| NC_037644.1 | 53341 | SNV | 1 | G | C | Heterozygous |
| NC_037644.1 | 53524 | SNV | 1 | C | T | Homozygous   |
| NC_037644.1 | 53610 | SNV | 1 | A | G | Homozygous   |
| NC_037644.1 | 54166 | SNV | 1 | G | C | Heterozygous |
| NC_037644.1 | 54514 | SNV | 1 | G | A | Heterozygous |
| NC_037644.1 | 54517 | SNV | 1 | A | C | Homozygous   |
| NC_037644.1 | 54989 | SNV | 1 | A | G | Homozygous   |
| NC_037644.1 | 55216 | SNV | 1 | G | A | Homozygous   |
| NC_037644.1 | 55334 | SNV | 1 | C | G | Homozygous   |
| NC_037644.1 | 56073 | SNV | 1 | T | A | Heterozygous |
| NC_037644.1 | 56076 | SNV | 1 | T | G | Heterozygous |
| NC_037644.1 | 56087 | SNV | 1 | C | T | Heterozygous |
| NC_037644.1 | 56092 | SNV | 1 | A | C | Heterozygous |
| NC_037644.1 | 56095 | SNV | 1 | T | A | Heterozygous |
| NC_037644.1 | 56152 | SNV | 1 | C | T | Heterozygous |
| NC_037644.1 | 56886 | SNV | 1 | G | A | Homozygous   |
| NC_037644.1 | 57377 | SNV | 1 | G | A | Heterozygous |
| NC_037644.1 | 57393 | SNV | 1 | C | A | Homozygous   |
| NC_037644.1 | 57435 | SNV | 1 | T | C | Heterozygous |
| NC_037644.1 | 57458 | SNV | 1 | T | C | Heterozygous |
| NC_037644.1 | 57540 | SNV | 1 | T | C | Homozygous   |
| NC_037644.1 | 58331 | SNV | 1 | A | G | Homozygous   |
| NC_037644.1 | 58556 | SNV | 1 | G | A | Heterozygous |
| NC_037644.1 | 58614 | SNV | 1 | A | G | Homozygous   |
| NC_037644.1 | 58690 | SNV | 1 | A | G | Heterozygous |
| NC_037644.1 | 58712 | SNV | 1 | C | T | Homozygous   |
| NC_037644.1 | 58760 | SNV | 1 | C | T | Homozygous   |
| NC_037644.1 | 59633 | SNV | 1 | A | C | Homozygous   |
| NC_037644.1 | 67484 | SNV | 1 | A | G | Homozygous   |
| NC_037644.1 | 67630 | SNV | 1 | A | G | Homozygous   |

|             |       |     |   |   |   |              |
|-------------|-------|-----|---|---|---|--------------|
| NC_037644.1 | 67938 | SNV | 1 | T | C | Heterozygous |
| NC_037644.1 | 68015 | SNV | 1 | A | T | Heterozygous |
| NC_037644.1 | 68040 | SNV | 1 | G | A | Homozygous   |
| NC_037644.1 | 68046 | SNV | 1 | C | A | Homozygous   |
| NC_037644.1 | 68055 | SNV | 1 | G | A | Homozygous   |
| NC_037644.1 | 68067 | SNV | 1 | G | A | Homozygous   |
| NC_037644.1 | 68080 | SNV | 1 | C | T | Homozygous   |
| NC_037644.1 | 68105 | SNV | 1 | T | C | Heterozygous |
| NC_037644.1 | 68126 | SNV | 1 | G | A | Heterozygous |
| NC_037644.1 | 68160 | SNV | 1 | A | T | Homozygous   |
| NC_037644.1 | 68166 | SNV | 1 | C | G | Homozygous   |
| NC_037644.1 | 68188 | SNV | 1 | G | A | Homozygous   |
| NC_037644.1 | 68280 | SNV | 1 | G | C | Heterozygous |
| NC_037644.1 | 68294 | SNV | 1 | T | C | Homozygous   |
| NC_037644.1 | 68315 | SNV | 1 | G | A | Homozygous   |
| NC_037644.1 | 68873 | SNV | 1 | C | T | Heterozygous |
| NC_037644.1 | 68891 | SNV | 1 | A | T | Heterozygous |
| NC_037644.1 | 68897 | SNV | 1 | A | G | Homozygous   |
| NC_037644.1 | 68926 | SNV | 1 | A | T | Heterozygous |
| NC_037644.1 | 69004 | SNV | 1 | T | C | Homozygous   |
| NC_037644.1 | 74585 | SNV | 1 | G | A | Heterozygous |
| NC_037644.1 | 74590 | SNV | 1 | G | C | Heterozygous |
| NC_037644.1 | 74604 | SNV | 1 | A | G | Homozygous   |
| NC_037644.1 | 74835 | SNV | 1 | T | A | Homozygous   |
| NC_037644.1 | 74879 | SNV | 1 | A | T | Homozygous   |
| NC_037644.1 | 74883 | SNV | 1 | A | T | Homozygous   |
| NC_037644.1 | 74946 | SNV | 1 | A | G | Homozygous   |
| NC_037644.1 | 76636 | SNV | 1 | A | T | Heterozygous |
| NC_037644.1 | 77377 | SNV | 1 | T | C | Homozygous   |
| NC_037644.1 | 77479 | SNV | 1 | A | G | Homozygous   |
| NC_037644.1 | 77601 | SNV | 1 | A | G | Homozygous   |
| NC_037644.1 | 77620 | SNV | 1 | C | T | Heterozygous |
| NC_037644.1 | 77627 | SNV | 1 | G | A | Homozygous   |
| NC_037644.1 | 77733 | SNV | 1 | A | G | Homozygous   |
| NC_037644.1 | 77897 | SNV | 1 | G | A | Heterozygous |
| NC_037644.1 | 77934 | SNV | 1 | A | G | Homozygous   |
| NC_037644.1 | 78155 | SNV | 1 | A | G | Homozygous   |
| NC_037644.1 | 78186 | SNV | 1 | C | T | Homozygous   |
| NC_037644.1 | 78398 | SNV | 1 | C | T | Homozygous   |
| NC_037644.1 | 78403 | SNV | 1 | A | G | Homozygous   |
| NC_037644.1 | 78458 | SNV | 1 | T | A | Homozygous   |
| NC_037644.1 | 78479 | SNV | 1 | C | T | Heterozygous |
| NC_037644.1 | 78514 | SNV | 1 | C | T | Heterozygous |
| NC_037644.1 | 78548 | SNV | 1 | A | G | Heterozygous |
| NC_037644.1 | 78585 | SNV | 1 | T | C | Heterozygous |
| NC_037644.1 | 79008 | SNV | 1 | T | C | Homozygous   |
| NC_037644.1 | 79079 | SNV | 1 | C | T | Heterozygous |
| NC_037644.1 | 79215 | SNV | 1 | C | T | Homozygous   |
| NC_037644.1 | 79334 | SNV | 1 | T | C | Homozygous   |
| NC_037644.1 | 79388 | SNV | 1 | T | C | Heterozygous |
| NC_037644.1 | 79406 | SNV | 1 | A | C | Heterozygous |

|             |        |     |   |   |   |              |
|-------------|--------|-----|---|---|---|--------------|
| NC_037644.1 | 79428  | SNV | 1 | C | T | Heterozygous |
| NC_037644.1 | 79436  | SNV | 1 | T | C | Homozygous   |
| NC_037644.1 | 79445  | SNV | 1 | C | G | Heterozygous |
| NC_037644.1 | 79449  | SNV | 1 | T | C | Homozygous   |
| NC_037644.1 | 79477  | SNV | 1 | C | T | Heterozygous |
| NC_037644.1 | 79727  | SNV | 1 | C | T | Heterozygous |
| NC_037644.1 | 79952  | SNV | 1 | A | C | Heterozygous |
| NC_037644.1 | 80049  | SNV | 1 | A | G | Heterozygous |
| NC_037644.1 | 80102  | SNV | 1 | A | G | Homozygous   |
| NC_037644.1 | 80104  | SNV | 1 | T | C | Homozygous   |
| NC_037644.1 | 80109  | SNV | 1 | T | C | Homozygous   |
| NC_037644.1 | 80161  | SNV | 1 | A | T | Homozygous   |
| NC_037644.1 | 80378  | SNV | 1 | A | T | Homozygous   |
| NC_037644.1 | 80380  | SNV | 1 | T | C | Homozygous   |
| NC_037644.1 | 81762  | SNV | 1 | A | G | Heterozygous |
| NC_037644.1 | 81765  | SNV | 1 | A | G | Heterozygous |
| NC_037644.1 | 81789  | SNV | 1 | T | A | Homozygous   |
| NC_037644.1 | 86118  | SNV | 1 | C | G | Homozygous   |
| NC_037644.1 | 86154  | SNV | 1 | T | A | Homozygous   |
| NC_037644.1 | 92718  | SNV | 1 | T | C | Heterozygous |
| NC_037644.1 | 92906  | SNV | 1 | C | G | Homozygous   |
| NC_037644.1 | 94419  | SNV | 1 | A | C | Heterozygous |
| NC_037644.1 | 94452  | SNV | 1 | A | G | Heterozygous |
| NC_037644.1 | 94454  | SNV | 1 | C | G | Homozygous   |
| NC_037644.1 | 98246  | SNV | 1 | A | T | Homozygous   |
| NC_037644.1 | 98254  | SNV | 1 | A | T | Homozygous   |
| NC_037644.1 | 98256  | SNV | 1 | G | T | Homozygous   |
| NC_037644.1 | 98265  | SNV | 1 | A | T | Homozygous   |
| NC_037644.1 | 102470 | SNV | 1 | C | T | Homozygous   |
| NC_037644.1 | 102474 | SNV | 1 | T | C | Heterozygous |
| NC_037644.1 | 104248 | SNV | 1 | A | T | Homozygous   |
| NC_037644.1 | 104262 | SNV | 1 | A | G | Homozygous   |
| NC_037644.1 | 114037 | SNV | 1 | G | A | Heterozygous |
| NC_037644.1 | 114310 | SNV | 1 | G | A | Homozygous   |
| NC_037644.1 | 114340 | SNV | 1 | C | T | Homozygous   |
| NC_037644.1 | 114366 | SNV | 1 | G | A | Homozygous   |
| NC_037644.1 | 114984 | SNV | 1 | C | A | Homozygous   |
| NC_037644.1 | 114992 | SNV | 1 | C | T | Heterozygous |
| NC_037644.1 | 115028 | SNV | 1 | G | A | Heterozygous |
| NC_037644.1 | 115956 | SNV | 1 | A | G | Homozygous   |
| NC_037644.1 | 116165 | SNV | 1 | T | G | Homozygous   |
| NC_037644.1 | 116194 | SNV | 1 | T | G | Homozygous   |
| NC_037644.1 | 116197 | SNV | 1 | T | A | Homozygous   |
| NC_037644.1 | 116201 | SNV | 1 | A | G | Homozygous   |
| NC_037644.1 | 116205 | SNV | 1 | A | C | Homozygous   |
| NC_037644.1 | 116211 | SNV | 1 | C | T | Homozygous   |
| NC_037644.1 | 116218 | SNV | 1 | T | A | Homozygous   |
| NC_037644.1 | 119311 | SNV | 1 | T | C | Homozygous   |
| NC_037644.1 | 119315 | SNV | 1 | G | A | Homozygous   |
| NC_037644.1 | 119327 | SNV | 1 | C | G | Homozygous   |
| NC_037644.1 | 119431 | SNV | 1 | A | G | Homozygous   |

|             |        |     |   |   |   |              |
|-------------|--------|-----|---|---|---|--------------|
| NC_037644.1 | 119472 | SNV | 1 | T | C | Homozygous   |
| NC_037644.1 | 120083 | SNV | 1 | G | A | Heterozygous |
| NC_037644.1 | 122812 | SNV | 1 | A | G | Homozygous   |
| NC_037644.1 | 122817 | SNV | 1 | A | T | Homozygous   |
| NC_037644.1 | 122843 | SNV | 1 | A | T | Homozygous   |
| NC_037644.1 | 122848 | SNV | 1 | A | G | Homozygous   |
| NC_037644.1 | 123987 | SNV | 1 | A | T | Homozygous   |
| NC_037644.1 | 123992 | SNV | 1 | C | T | Homozygous   |
| NC_037644.1 | 124010 | SNV | 1 | A | T | Homozygous   |
| NC_037644.1 | 124016 | SNV | 1 | C | A | Homozygous   |
| NC_037644.1 | 124020 | SNV | 1 | G | T | Homozygous   |
| NC_037644.1 | 128575 | SNV | 1 | C | T | Heterozygous |
| NC_037644.1 | 131444 | SNV | 1 | T | A | Homozygous   |
| NC_037644.1 | 131451 | SNV | 1 | A | T | Homozygous   |
| NC_037644.1 | 131464 | SNV | 1 | A | C | Homozygous   |
| NC_037644.1 | 135244 | SNV | 1 | A | C | Homozygous   |
| NC_037644.1 | 153404 | SNV | 1 | G | A | Heterozygous |
| NC_037644.1 | 153461 | SNV | 1 | T | C | Homozygous   |
| NC_037644.1 | 153604 | SNV | 1 | T | A | Homozygous   |
| NC_037644.1 | 153719 | SNV | 1 | G | C | Homozygous   |
| NC_037644.1 | 153740 | SNV | 1 | A | G | Homozygous   |
| NC_037644.1 | 172346 | SNV | 1 | A | G | Heterozygous |
| NC_037644.1 | 184568 | SNV | 1 | C | A | Homozygous   |
| NC_037644.1 | 184575 | SNV | 1 | T | A | Homozygous   |
| NC_037644.1 | 184580 | SNV | 1 | A | C | Homozygous   |
| NC_037644.1 | 184587 | SNV | 1 | C | A | Homozygous   |
| NC_037644.1 | 185696 | SNV | 1 | A | G | Heterozygous |
| NC_037644.1 | 186115 | SNV | 1 | G | A | Heterozygous |
| NC_037644.1 | 186124 | SNV | 1 | T | C | Heterozygous |
| NC_037644.1 | 188040 | SNV | 1 | C | T | Heterozygous |
| NC_037644.1 | 196458 | SNV | 1 | T | A | Heterozygous |
| NC_037644.1 | 196460 | SNV | 1 | G | A | Heterozygous |
| NC_037644.1 | 199887 | SNV | 1 | G | T | Heterozygous |
| NC_037644.1 | 199890 | SNV | 1 | A | G | Heterozygous |
| NC_037644.1 | 199892 | SNV | 1 | T | G | Heterozygous |
| NC_037644.1 | 200003 | SNV | 1 | G | A | Homozygous   |
| NC_037644.1 | 203037 | SNV | 1 | T | C | Heterozygous |
| NC_037644.1 | 203179 | SNV | 1 | C | T | Heterozygous |
| NC_037644.1 | 203619 | SNV | 1 | T | C | Homozygous   |
| NC_037644.1 | 203797 | SNV | 1 | C | T | Heterozygous |
| NC_037644.1 | 203884 | SNV | 1 | T | C | Heterozygous |
| NC_037644.1 | 204708 | SNV | 1 | T | C | Homozygous   |
| NC_037644.1 | 205239 | SNV | 1 | C | T | Homozygous   |
| NC_037644.1 | 207145 | SNV | 1 | T | C | Homozygous   |
| NC_037644.1 | 207192 | SNV | 1 | G | C | Homozygous   |
| NC_037644.1 | 207201 | SNV | 1 | C | G | Homozygous   |
| NC_037644.1 | 207893 | SNV | 1 | A | G | Heterozygous |
| NC_037644.1 | 208975 | SNV | 1 | A | G | Heterozygous |
| NC_037644.1 | 209093 | SNV | 1 | C | T | Heterozygous |
| NC_037644.1 | 209138 | SNV | 1 | A | G | Homozygous   |
| NC_037644.1 | 209146 | SNV | 1 | T | C | Heterozygous |

|             |        |     |   |   |   |              |
|-------------|--------|-----|---|---|---|--------------|
| NC_037644.1 | 209152 | SNV | 1 | G | A | Homozygous   |
| NC_037644.1 | 209155 | SNV | 1 | T | C | Heterozygous |
| NC_037644.1 | 209161 | SNV | 1 | T | C | Homozygous   |
| NC_037644.1 | 209189 | SNV | 1 | C | T | Homozygous   |
| NC_037644.1 | 209612 | SNV | 1 | T | A | Homozygous   |
| NC_037644.1 | 209615 | SNV | 1 | C | T | Homozygous   |
| NC_037644.1 | 209965 | SNV | 1 | T | C | Homozygous   |
| NC_037644.1 | 210269 | SNV | 1 | T | C | Heterozygous |
| NC_037644.1 | 210928 | SNV | 1 | A | G | Heterozygous |
| NC_037644.1 | 211678 | SNV | 1 | C | T | Heterozygous |
| NC_037644.1 | 211783 | SNV | 1 | C | G | Homozygous   |
| NC_037644.1 | 217581 | SNV | 1 | G | A | Homozygous   |
| NC_037644.1 | 217928 | SNV | 1 | C | T | Heterozygous |
| NC_037644.1 | 217958 | SNV | 1 | C | G | Heterozygous |
| NC_037644.1 | 217966 | SNV | 1 | T | G | Heterozygous |
| NC_037644.1 | 217974 | SNV | 1 | G | A | Heterozygous |
| NC_037644.1 | 217978 | SNV | 1 | G | T | Homozygous   |
| NC_037644.1 | 218201 | SNV | 1 | A | G | Homozygous   |
| NC_037644.1 | 218237 | SNV | 1 | T | C | Homozygous   |
| NC_037644.1 | 218798 | SNV | 1 | C | A | Heterozygous |
| NC_037644.1 | 218906 | SNV | 1 | T | A | Heterozygous |
| NC_037644.1 | 218926 | SNV | 1 | C | T | Homozygous   |
| NC_037644.1 | 218929 | SNV | 1 | T | C | Homozygous   |
| NC_037644.1 | 218936 | SNV | 1 | A | C | Homozygous   |
| NC_037644.1 | 218978 | SNV | 1 | C | G | Heterozygous |
| NC_037644.1 | 219134 | SNV | 1 | C | A | Homozygous   |
| NC_037644.1 | 229430 | SNV | 1 | G | A | Heterozygous |
| NC_037644.1 | 229478 | SNV | 1 | G | A | Homozygous   |
| NC_037644.1 | 236450 | SNV | 1 | G | C | Heterozygous |
| NC_037644.1 | 236468 | SNV | 1 | G | A | Heterozygous |
| NC_037644.1 | 236512 | SNV | 1 | G | A | Heterozygous |
| NC_037644.1 | 236524 | SNV | 1 | G | A | Heterozygous |
| NC_037644.1 | 236537 | SNV | 1 | C | G | Homozygous   |
| NC_037644.1 | 236624 | SNV | 1 | C | T | Heterozygous |
| NC_037644.1 | 236639 | SNV | 1 | T | C | Homozygous   |
| NC_037644.1 | 236682 | SNV | 1 | A | G | Homozygous   |
| NC_037644.1 | 236759 | SNV | 1 | T | C | Heterozygous |
| NC_037644.1 | 239025 | SNV | 1 | A | G | Homozygous   |
| NC_037644.1 | 239273 | SNV | 1 | T | C | Heterozygous |
| NC_037644.1 | 251425 | SNV | 1 | G | C | Homozygous   |
| NC_037644.1 | 254477 | SNV | 1 | C | T | Homozygous   |
| NC_037644.1 | 254482 | SNV | 1 | T | A | Homozygous   |
| NC_037644.1 | 254486 | SNV | 1 | C | T | Homozygous   |
| NC_037644.1 | 254497 | SNV | 1 | G | T | Homozygous   |
| NC_037644.1 | 257434 | SNV | 1 | C | T | Homozygous   |
| NC_037644.1 | 257495 | SNV | 1 | A | T | Homozygous   |
| NC_037644.1 | 257505 | SNV | 1 | C | A | Heterozygous |
| NC_037644.1 | 257532 | SNV | 1 | G | A | Homozygous   |
| NC_037644.1 | 257568 | SNV | 1 | A | G | Homozygous   |
| NC_037644.1 | 257729 | SNV | 1 | A | G | Heterozygous |
| NC_037644.1 | 257753 | SNV | 1 | C | T | Homozygous   |

|             |        |     |   |   |   |              |
|-------------|--------|-----|---|---|---|--------------|
| NC_037644.1 | 257758 | SNV | 1 | T | G | Homozygous   |
| NC_037644.1 | 257765 | SNV | 1 | G | A | Homozygous   |
| NC_037644.1 | 257790 | SNV | 1 | G | A | Heterozygous |
| NC_037644.1 | 257897 | SNV | 1 | A | G | Homozygous   |
| NC_037644.1 | 257901 | SNV | 1 | A | G | Homozygous   |
| NC_037644.1 | 257928 | SNV | 1 | T | C | Homozygous   |
| NC_037644.1 | 257985 | SNV | 1 | C | G | Heterozygous |
| NC_037644.1 | 270935 | SNV | 1 | T | C | Homozygous   |
| NC_037644.1 | 272199 | SNV | 1 | C | T | Heterozygous |
| NC_037644.1 | 272219 | SNV | 1 | C | T | Heterozygous |
| NC_037644.1 | 286482 | SNV | 1 | A | G | Heterozygous |
| NC_037644.1 | 330527 | SNV | 1 | A | C | Homozygous   |
| NC_037644.1 | 330530 | SNV | 1 | T | C | Homozygous   |
| NC_037644.1 | 330537 | SNV | 1 | C | T | Homozygous   |
| NC_037644.1 | 330560 | SNV | 1 | T | A | Homozygous   |
| NC_037644.1 | 330570 | SNV | 1 | C | A | Homozygous   |
| NC_037644.1 | 330572 | SNV | 1 | T | C | Homozygous   |
| NC_037644.1 | 338349 | SNV | 1 | G | C | Homozygous   |
| NC_037644.1 | 338351 | SNV | 1 | T | G | Homozygous   |
| NC_037644.1 | 338354 | SNV | 1 | A | G | Homozygous   |
| NC_037644.1 | 338361 | SNV | 1 | C | A | Homozygous   |
| NC_037644.1 | 373244 | SNV | 1 | G | A | Homozygous   |
| NC_037644.1 | 398906 | SNV | 1 | A | G | Heterozygous |
| NC_037644.1 | 399263 | SNV | 1 | T | C | Heterozygous |
| NC_037644.1 | 399678 | SNV | 1 | G | A | Heterozygous |
| NC_037644.1 | 399759 | SNV | 1 | C | T | Homozygous   |
| NC_037644.1 | 399855 | SNV | 1 | T | C | Heterozygous |
| NC_037644.1 | 399864 | SNV | 1 | G | A | Homozygous   |
| NC_037644.1 | 399870 | SNV | 1 | A | G | Homozygous   |
| NC_037644.1 | 399878 | SNV | 1 | C | T | Heterozygous |
| NC_037644.1 | 399980 | SNV | 1 | T | C | Homozygous   |
| NC_037644.1 | 400071 | SNV | 1 | C | T | Heterozygous |
| NC_037644.1 | 400075 | SNV | 1 | C | T | Heterozygous |
| NC_037644.1 | 400106 | SNV | 1 | C | T | Heterozygous |
| NC_037644.1 | 400182 | SNV | 1 | A | G | Homozygous   |
| NC_037644.1 | 401636 | SNV | 1 | G | A | Homozygous   |
| NC_037644.1 | 401838 | SNV | 1 | T | A | Homozygous   |
| NC_037644.1 | 402100 | SNV | 1 | C | T | Heterozygous |
| NC_037644.1 | 402267 | SNV | 1 | A | G | Homozygous   |
| NC_037644.1 | 403429 | SNV | 1 | T | C | Heterozygous |
| NC_037644.1 | 404204 | SNV | 1 | A | G | Homozygous   |
| NC_037644.1 | 404537 | SNV | 1 | T | G | Homozygous   |
| NC_037644.1 | 404564 | SNV | 1 | T | C | Homozygous   |
| NC_037644.1 | 404856 | SNV | 1 | C | T | Homozygous   |
| NC_037644.1 | 421233 | SNV | 1 | C | T | Homozygous   |
| NC_037644.1 | 437425 | SNV | 1 | T | C | Homozygous   |
| NC_037644.1 | 437568 | SNV | 1 | T | C | Homozygous   |
| NC_037644.1 | 437664 | SNV | 1 | T | C | Homozygous   |
| NC_037644.1 | 437750 | SNV | 1 | A | G | Homozygous   |
| NC_037644.1 | 437862 | SNV | 1 | A | G | Homozygous   |
| NC_037644.1 | 438278 | SNV | 1 | C | T | Homozygous   |

|             |        |     |   |   |   |              |
|-------------|--------|-----|---|---|---|--------------|
| NC_037644.1 | 438306 | SNV | 1 | A | C | Heterozygous |
| NC_037644.1 | 438324 | SNV | 1 | T | C | Homozygous   |
| NC_037644.1 | 438344 | SNV | 1 | A | G | Homozygous   |
| NC_037644.1 | 439984 | SNV | 1 | A | G | Homozygous   |
| NC_037644.1 | 440067 | SNV | 1 | C | T | Heterozygous |
| NC_037644.1 | 440112 | SNV | 1 | C | T | Homozygous   |
| NC_037644.1 | 440239 | SNV | 1 | C | T | Homozygous   |
| NC_037644.1 | 440254 | SNV | 1 | C | T | Heterozygous |
| NC_037644.1 | 440347 | SNV | 1 | C | T | Heterozygous |
| NC_037644.1 | 440395 | SNV | 1 | G | A | Homozygous   |
| NC_037644.1 | 440420 | SNV | 1 | A | G | Heterozygous |
| NC_037644.1 | 440442 | SNV | 1 | G | A | Heterozygous |
| NC_037644.1 | 440452 | SNV | 1 | G | A | Heterozygous |
| NC_037644.1 | 440491 | SNV | 1 | A | G | Heterozygous |
| NC_037644.1 | 443567 | SNV | 1 | G | T | Heterozygous |
| NC_037644.1 | 443588 | SNV | 1 | T | G | Heterozygous |
| NC_037644.1 | 443602 | SNV | 1 | T | C | Heterozygous |
| NC_037644.1 | 445234 | SNV | 1 | A | T | Homozygous   |
| NC_037644.1 | 445274 | SNV | 1 | G | A | Heterozygous |
| NC_037644.1 | 445373 | SNV | 1 | G | A | Heterozygous |
| NC_037644.1 | 459261 | SNV | 1 | G | A | Heterozygous |
| NC_037644.1 | 459436 | SNV | 1 | A | G | Heterozygous |
| NC_037644.1 | 459459 | SNV | 1 | G | A | Heterozygous |
| NC_037644.1 | 463061 | SNV | 1 | C | T | Heterozygous |
| NC_037644.1 | 463110 | SNV | 1 | G | A | Heterozygous |
| NC_037644.1 | 463146 | SNV | 1 | C | T | Heterozygous |
| NC_037644.1 | 463174 | SNV | 1 | T | C | Homozygous   |
| NC_037644.1 | 463245 | SNV | 1 | A | G | Homozygous   |
| NC_037644.1 | 463251 | SNV | 1 | C | T | Homozygous   |
| NC_037644.1 | 463257 | SNV | 1 | A | G | Homozygous   |
| NC_037644.1 | 463303 | SNV | 1 | A | G | Heterozygous |
| NC_037644.1 | 463626 | SNV | 1 | A | G | Homozygous   |
| NC_037644.1 | 463650 | SNV | 1 | A | G | Heterozygous |
| NC_037644.1 | 463910 | SNV | 1 | C | T | Heterozygous |
| NC_037644.1 | 477382 | SNV | 1 | A | T | Homozygous   |
| NC_037644.1 | 477386 | SNV | 1 | C | A | Homozygous   |
| NC_037644.1 | 477396 | SNV | 1 | A | T | Homozygous   |
| NC_037644.1 | 477399 | SNV | 1 | G | T | Homozygous   |
| NC_037644.1 | 564436 | SNV | 1 | G | T | Homozygous   |
| NC_037644.1 | 564576 | SNV | 1 | T | C | Homozygous   |
| NC_037644.1 | 564781 | SNV | 1 | G | A | Homozygous   |
| NC_037644.1 | 564797 | SNV | 1 | G | A | Homozygous   |
| NC_037644.1 | 565010 | SNV | 1 | G | T | Heterozygous |
| NC_037644.1 | 567107 | SNV | 1 | T | C | Homozygous   |
| NC_037644.1 | 569247 | SNV | 1 | C | G | Heterozygous |
| NC_037644.1 | 569250 | SNV | 1 | T | C | Homozygous   |
| NC_037644.1 | 569543 | SNV | 1 | G | A | Heterozygous |
| NC_037644.1 | 569557 | SNV | 1 | G | T | Homozygous   |
| NC_037644.1 | 569594 | SNV | 1 | C | T | Homozygous   |
| NC_037644.1 | 569634 | SNV | 1 | T | C | Homozygous   |
| NC_037644.1 | 569668 | SNV | 1 | T | C | Homozygous   |



|             |        |     |   |   |   |              |
|-------------|--------|-----|---|---|---|--------------|
| NC_037644.1 | 570058 | SNV | 1 | G | A | Homozygous   |
| NC_037644.1 | 570364 | SNV | 1 | C | T | Heterozygous |
| NC_037644.1 | 570385 | SNV | 1 | A | G | Homozygous   |
| NC_037644.1 | 570540 | SNV | 1 | G | A | Heterozygous |
| NC_037644.1 | 570612 | SNV | 1 | C | G | Homozygous   |
| NC_037644.1 | 570659 | SNV | 1 | G | A | Heterozygous |
| NC_037644.1 | 570707 | SNV | 1 | G | C | Homozygous   |
| NC_037644.1 | 570764 | SNV | 1 | C | T | Homozygous   |
| NC_037644.1 | 570769 | SNV | 1 | C | G | Heterozygous |
| NC_037644.1 | 570783 | SNV | 1 | A | G | Heterozygous |
| NC_037644.1 | 570819 | SNV | 1 | C | T | Heterozygous |
| NC_037644.1 | 570917 | SNV | 1 | T | C | Homozygous   |
| NC_037644.1 | 570948 | SNV | 1 | G | C | Heterozygous |
| NC_037644.1 | 570996 | SNV | 1 | C | T | Homozygous   |
| NC_037644.1 | 571129 | SNV | 1 | T | G | Heterozygous |
| NC_037644.1 | 572014 | SNV | 1 | G | A | Homozygous   |
| NC_037644.1 | 572062 | SNV | 1 | T | C | Heterozygous |
| NC_037644.1 | 572064 | SNV | 1 | A | G | Heterozygous |
| NC_037644.1 | 572878 | SNV | 1 | C | T | Heterozygous |
| NC_037644.1 | 573667 | SNV | 1 | G | T | Heterozygous |
| NC_037644.1 | 573731 | SNV | 1 | C | G | Heterozygous |
| NC_037644.1 | 573809 | SNV | 1 | C | T | Heterozygous |
| NC_037644.1 | 573832 | SNV | 1 | T | G | Heterozygous |
| NC_037644.1 | 573890 | SNV | 1 | C | T | Heterozygous |
| NC_037644.1 | 573958 | SNV | 1 | T | C | Heterozygous |
| NC_037644.1 | 573975 | SNV | 1 | A | T | Homozygous   |
| NC_037644.1 | 573977 | SNV | 1 | G | A | Homozygous   |
| NC_037644.1 | 574032 | SNV | 1 | G | C | Homozygous   |
| NC_037644.1 | 574166 | SNV | 1 | A | G | Homozygous   |
| NC_037644.1 | 574318 | SNV | 1 | T | G | Homozygous   |
| NC_037644.1 | 575892 | SNV | 1 | T | C | Heterozygous |
| NC_037644.1 | 575981 | SNV | 1 | T | C | Homozygous   |
| NC_037644.1 | 576117 | SNV | 1 | A | T | Heterozygous |
| NC_037644.1 | 576135 | SNV | 1 | T | C | Homozygous   |
| NC_037644.1 | 576224 | SNV | 1 | G | A | Heterozygous |
| NC_037644.1 | 576996 | SNV | 1 | T | C | Homozygous   |
| NC_037644.1 | 577476 | SNV | 1 | C | T | Heterozygous |
| NC_037644.1 | 577499 | SNV | 1 | C | T | Homozygous   |
| NC_037644.1 | 577536 | SNV | 1 | G | T | Heterozygous |
| NC_037644.1 | 578818 | SNV | 1 | A | T | Heterozygous |
| NC_037644.1 | 593555 | SNV | 1 | C | T | Homozygous   |
| NC_037644.1 | 593992 | SNV | 1 | T | C | Homozygous   |
| NC_037644.1 | 594009 | SNV | 1 | T | C | Heterozygous |
| NC_037644.1 | 594029 | SNV | 1 | G | A | Heterozygous |
| NC_037644.1 | 600651 | SNV | 1 | T | C | Homozygous   |
| NC_037644.1 | 600687 | SNV | 1 | A | T | Homozygous   |
| NC_037644.1 | 600703 | SNV | 1 | C | T | Heterozygous |
| NC_037644.1 | 600707 | SNV | 1 | A | C | Heterozygous |
| NC_037644.1 | 600714 | SNV | 1 | A | G | Homozygous   |
| NC_037644.1 | 600764 | SNV | 1 | A | G | Homozygous   |
| NC_037644.1 | 600768 | SNV | 1 | A | G | Homozygous   |

|             |        |     |   |   |   |              |
|-------------|--------|-----|---|---|---|--------------|
| NC_037644.1 | 600773 | SNV | 1 | C | T | Heterozygous |
| NC_037644.1 | 600852 | SNV | 1 | A | C | Homozygous   |
| NC_037644.1 | 601182 | SNV | 1 | T | C | Homozygous   |
| NC_037644.1 | 601207 | SNV | 1 | A | G | Heterozygous |
| NC_037644.1 | 608623 | SNV | 1 | G | A | Homozygous   |
| NC_037644.1 | 611152 | SNV | 1 | C | T | Heterozygous |
| NC_037644.1 | 611167 | SNV | 1 | C | A | Heterozygous |
| NC_037644.1 | 611179 | SNV | 1 | C | T | Heterozygous |
| NC_037644.1 | 611181 | SNV | 1 | C | T | Heterozygous |
| NC_037644.1 | 611191 | SNV | 1 | T | A | Heterozygous |
| NC_037644.1 | 611313 | SNV | 1 | G | A | Heterozygous |
| NC_037644.1 | 613091 | SNV | 1 | A | G | Homozygous   |
| NC_037644.1 | 613132 | SNV | 1 | A | G | Homozygous   |
| NC_037644.1 | 613305 | SNV | 1 | G | A | Heterozygous |
| NC_037644.1 | 613428 | SNV | 1 | C | T | Heterozygous |
| NC_037644.1 | 613432 | SNV | 1 | C | T | Homozygous   |
| NC_037644.1 | 613448 | SNV | 1 | C | T | Heterozygous |
| NC_037644.1 | 613474 | SNV | 1 | G | C | Heterozygous |
| NC_037644.1 | 613536 | SNV | 1 | T | C | Homozygous   |
| NC_037644.1 | 613577 | SNV | 1 | A | G | Homozygous   |
| NC_037644.1 | 613579 | SNV | 1 | A | G | Homozygous   |
| NC_037644.1 | 613589 | SNV | 1 | G | A | Heterozygous |
| NC_037644.1 | 613649 | SNV | 1 | A | G | Heterozygous |
| NC_037644.1 | 613653 | SNV | 1 | A | C | Homozygous   |
| NC_037644.1 | 613674 | SNV | 1 | A | G | Homozygous   |
| NC_037644.1 | 613759 | SNV | 1 | T | C | Homozygous   |
| NC_037644.1 | 613855 | SNV | 1 | C | T | Heterozygous |
| NC_037644.1 | 613969 | SNV | 1 | A | G | Heterozygous |
| NC_037644.1 | 613973 | SNV | 1 | T | C | Heterozygous |
| NC_037644.1 | 613975 | SNV | 1 | C | G | Heterozygous |
| NC_037644.1 | 613980 | SNV | 1 | T | C | Homozygous   |
| NC_037644.1 | 614035 | SNV | 1 | C | T | Heterozygous |
| NC_037644.1 | 614101 | SNV | 1 | G | A | Homozygous   |
| NC_037644.1 | 614181 | SNV | 1 | T | C | Homozygous   |
| NC_037644.1 | 614195 | SNV | 1 | T | C | Heterozygous |
| NC_037644.1 | 614358 | SNV | 1 | T | C | Homozygous   |
| NC_037644.1 | 614381 | SNV | 1 | C | T | Heterozygous |
| NC_037644.1 | 614398 | SNV | 1 | G | A | Heterozygous |
| NC_037644.1 | 614462 | SNV | 1 | T | C | Heterozygous |
| NC_037644.1 | 614470 | SNV | 1 | A | G | Homozygous   |
| NC_037644.1 | 614496 | SNV | 1 | A | G | Homozygous   |
| NC_037644.1 | 614508 | SNV | 1 | A | G | Homozygous   |
| NC_037644.1 | 614549 | SNV | 1 | C | T | Heterozygous |
| NC_037644.1 | 622265 | SNV | 1 | C | T | Homozygous   |
| NC_037644.1 | 646736 | SNV | 1 | C | T | Homozygous   |
| NC_037644.1 | 646889 | SNV | 1 | T | C | Heterozygous |
| NC_037644.1 | 647133 | SNV | 1 | A | G | Homozygous   |
| NC_037644.1 | 647191 | SNV | 1 | T | C | Homozygous   |
| NC_037644.1 | 657984 | SNV | 1 | G | A | Heterozygous |
| NC_037644.1 | 659080 | SNV | 1 | T | C | Homozygous   |
| NC_037644.1 | 663756 | SNV | 1 | C | T | Heterozygous |

|             |        |     |   |   |   |              |
|-------------|--------|-----|---|---|---|--------------|
| NC_037644.1 | 663791 | SNV | 1 | T | A | Homozygous   |
| NC_037644.1 | 663801 | SNV | 1 | G | A | Heterozygous |
| NC_037644.1 | 663938 | SNV | 1 | T | C | Homozygous   |
| NC_037644.1 | 663944 | SNV | 1 | A | G | Heterozygous |
| NC_037644.1 | 664170 | SNV | 1 | G | A | Homozygous   |
| NC_037644.1 | 664521 | SNV | 1 | C | T | Homozygous   |
| NC_037644.1 | 664696 | SNV | 1 | A | G | Heterozygous |
| NC_037644.1 | 664790 | SNV | 1 | C | T | Heterozygous |
| NC_037644.1 | 664937 | SNV | 1 | T | A | Heterozygous |
| NC_037644.1 | 665031 | SNV | 1 | T | A | Heterozygous |
| NC_037644.1 | 671650 | SNV | 1 | A | T | Homozygous   |
| NC_037644.1 | 671658 | SNV | 1 | A | G | Homozygous   |
| NC_037644.1 | 671661 | SNV | 1 | C | A | Homozygous   |
| NC_037644.1 | 671679 | SNV | 1 | G | C | Homozygous   |
| NC_037644.1 | 680450 | SNV | 1 | A | T | Homozygous   |
| NC_037644.1 | 680574 | SNV | 1 | C | G | Homozygous   |
| NC_037644.1 | 680621 | SNV | 1 | T | A | Heterozygous |
| NC_037644.1 | 680798 | SNV | 1 | C | G | Heterozygous |
| NC_037644.1 | 681060 | SNV | 1 | C | T | Heterozygous |
| NC_037644.1 | 681089 | SNV | 1 | A | G | Heterozygous |
| NC_037644.1 | 681108 | SNV | 1 | T | C | Homozygous   |
| NC_037644.1 | 681111 | SNV | 1 | T | C | Homozygous   |
| NC_037644.1 | 681128 | SNV | 1 | T | A | Homozygous   |
| NC_037644.1 | 681153 | SNV | 1 | A | G | Homozygous   |
| NC_037644.1 | 681389 | SNV | 1 | T | G | Heterozygous |
| NC_037644.1 | 681400 | SNV | 1 | A | T | Heterozygous |
| NC_037644.1 | 681405 | SNV | 1 | T | C | Homozygous   |
| NC_037644.1 | 681427 | SNV | 1 | A | T | Heterozygous |
| NC_037644.1 | 681447 | SNV | 1 | T | C | Homozygous   |
| NC_037644.1 | 681480 | SNV | 1 | A | G | Homozygous   |
| NC_037644.1 | 681484 | SNV | 1 | A | G | Homozygous   |
| NC_037644.1 | 681510 | SNV | 1 | A | G | Heterozygous |
| NC_037644.1 | 681588 | SNV | 1 | G | T | Heterozygous |
| NC_037644.1 | 681603 | SNV | 1 | A | C | Heterozygous |
| NC_037644.1 | 681623 | SNV | 1 | T | C | Homozygous   |
| NC_037644.1 | 681644 | SNV | 1 | G | C | Homozygous   |
| NC_037644.1 | 681646 | SNV | 1 | A | G | Homozygous   |
| NC_037644.1 | 681737 | SNV | 1 | C | T | Homozygous   |
| NC_037644.1 | 681739 | SNV | 1 | C | T | Homozygous   |
| NC_037644.1 | 681768 | SNV | 1 | C | T | Heterozygous |
| NC_037644.1 | 681813 | SNV | 1 | G | A | Heterozygous |
| NC_037644.1 | 681815 | SNV | 1 | A | G | Homozygous   |
| NC_037644.1 | 682554 | SNV | 1 | C | T | Heterozygous |
| NC_037644.1 | 682558 | SNV | 1 | G | A | Heterozygous |
| NC_037644.1 | 682594 | SNV | 1 | T | C | Homozygous   |
| NC_037644.1 | 682734 | SNV | 1 | T | C | Homozygous   |
| NC_037644.1 | 682742 | SNV | 1 | A | G | Homozygous   |
| NC_037644.1 | 682744 | SNV | 1 | A | G | Homozygous   |
| NC_037644.1 | 682819 | SNV | 1 | A | G | Homozygous   |
| NC_037644.1 | 682823 | SNV | 1 | T | C | Homozygous   |
| NC_037644.1 | 682910 | SNV | 1 | T | C | Homozygous   |

|             |        |     |   |   |   |              |
|-------------|--------|-----|---|---|---|--------------|
| NC_037644.1 | 682925 | SNV | 1 | G | A | Homozygous   |
| NC_037644.1 | 682942 | SNV | 1 | G | A | Homozygous   |
| NC_037644.1 | 682947 | SNV | 1 | C | T | Homozygous   |
| NC_037644.1 | 682961 | SNV | 1 | G | A | Homozygous   |
| NC_037644.1 | 693176 | SNV | 1 | G | C | Homozygous   |
| NC_037644.1 | 693187 | SNV | 1 | C | T | Heterozygous |
| NC_037644.1 | 693327 | SNV | 1 | C | T | Heterozygous |
| NC_037644.1 | 693359 | SNV | 1 | T | C | Heterozygous |
| NC_037644.1 | 694096 | SNV | 1 | G | A | Heterozygous |
| NC_037644.1 | 719754 | SNV | 1 | A | G | Homozygous   |
| NC_037644.1 | 719821 | SNV | 1 | A | G | Homozygous   |
| NC_037644.1 | 719858 | SNV | 1 | C | T | Heterozygous |
| NC_037644.1 | 719882 | SNV | 1 | T | C | Heterozygous |
| NC_037644.1 | 719917 | SNV | 1 | C | G | Heterozygous |
| NC_037644.1 | 719942 | SNV | 1 | G | A | Heterozygous |
| NC_037644.1 | 719988 | SNV | 1 | A | G | Homozygous   |
| NC_037644.1 | 720032 | SNV | 1 | C | A | Homozygous   |
| NC_037644.1 | 720070 | SNV | 1 | A | G | Heterozygous |
| NC_037644.1 | 720080 | SNV | 1 | T | C | Homozygous   |
| NC_037644.1 | 720082 | SNV | 1 | C | A | Heterozygous |
| NC_037644.1 | 720087 | SNV | 1 | A | G | Homozygous   |
| NC_037644.1 | 720111 | SNV | 1 | T | A | Homozygous   |
| NC_037644.1 | 720122 | SNV | 1 | C | A | Homozygous   |
| NC_037644.1 | 720135 | SNV | 1 | A | G | Homozygous   |
| NC_037644.1 | 720148 | SNV | 1 | G | A | Homozygous   |
| NC_037644.1 | 733194 | SNV | 1 | T | C | Homozygous   |
| NC_037644.1 | 733201 | SNV | 1 | A | C | Homozygous   |
| NC_037644.1 | 733231 | SNV | 1 | T | C | Heterozygous |
| NC_037644.1 | 733241 | SNV | 1 | C | T | Heterozygous |
| NC_037644.1 | 733257 | SNV | 1 | A | G | Homozygous   |
| NC_037644.1 | 733281 | SNV | 1 | T | A | Heterozygous |
| NC_037644.1 | 733293 | SNV | 1 | A | G | Homozygous   |
| NC_037644.1 | 733303 | SNV | 1 | T | C | Homozygous   |
| NC_037644.1 | 733370 | SNV | 1 | G | A | Homozygous   |
| NC_037644.1 | 733416 | SNV | 1 | G | A | Heterozygous |
| NC_037644.1 | 733433 | SNV | 1 | C | T | Heterozygous |
| NC_037644.1 | 733440 | SNV | 1 | C | T | Heterozygous |
| NC_037644.1 | 733452 | SNV | 1 | C | T | Heterozygous |
| NC_037644.1 | 733627 | SNV | 1 | A | G | Homozygous   |
| NC_037644.1 | 733669 | SNV | 1 | T | C | Homozygous   |
| NC_037644.1 | 733704 | SNV | 1 | T | C | Homozygous   |
| NC_037644.1 | 733870 | SNV | 1 | C | T | Homozygous   |
| NC_037644.1 | 733876 | SNV | 1 | T | C | Heterozygous |
| NC_037644.1 | 734083 | SNV | 1 | A | G | Homozygous   |
| NC_037644.1 | 734103 | SNV | 1 | T | C | Heterozygous |
| NC_037644.1 | 734119 | SNV | 1 | T | G | Homozygous   |
| NC_037644.1 | 734202 | SNV | 1 | G | A | Homozygous   |
| NC_037644.1 | 750131 | SNV | 1 | G | A | Homozygous   |
| NC_037644.1 | 750608 | SNV | 1 | A | G | Homozygous   |
| NC_037644.1 | 752718 | SNV | 1 | T | C | Heterozygous |
| NC_037644.1 | 752725 | SNV | 1 | T | G | Homozygous   |

|             |        |     |   |   |   |              |
|-------------|--------|-----|---|---|---|--------------|
| NC_037644.1 | 752744 | SNV | 1 | T | C | Homozygous   |
| NC_037644.1 | 752754 | SNV | 1 | T | G | Homozygous   |
| NC_037644.1 | 752782 | SNV | 1 | A | G | Homozygous   |
| NC_037644.1 | 752785 | SNV | 1 | T | A | Homozygous   |
| NC_037644.1 | 752788 | SNV | 1 | A | T | Homozygous   |
| NC_037644.1 | 755891 | SNV | 1 | G | A | Heterozygous |
| NC_037644.1 | 758388 | SNV | 1 | A | G | Homozygous   |
| NC_037644.1 | 758406 | SNV | 1 | C | T | Heterozygous |
| NC_037644.1 | 758409 | SNV | 1 | A | T | Homozygous   |
| NC_037644.1 | 758432 | SNV | 1 | A | C | Homozygous   |
| NC_037644.1 | 758435 | SNV | 1 | A | T | Homozygous   |
| NC_037644.1 | 758447 | SNV | 1 | T | C | Homozygous   |
| NC_037644.1 | 758462 | SNV | 1 | A | T | Homozygous   |
| NC_037644.1 | 764308 | SNV | 1 | C | A | Homozygous   |
| NC_037644.1 | 764330 | SNV | 1 | T | C | Homozygous   |
| NC_037644.1 | 764333 | SNV | 1 | A | T | Homozygous   |
| NC_037644.1 | 767644 | SNV | 1 | C | A | Heterozygous |
| NC_037644.1 | 768649 | SNV | 1 | A | G | Homozygous   |
| NC_037644.1 | 768715 | SNV | 1 | A | G | Heterozygous |
| NC_037644.1 | 768779 | SNV | 1 | C | T | Heterozygous |
| NC_037644.1 | 768821 | SNV | 1 | G | A | Heterozygous |
| NC_037644.1 | 776140 | SNV | 1 | A | G | Homozygous   |
| NC_037644.1 | 776773 | SNV | 1 | G | C | Homozygous   |
| NC_037644.1 | 776840 | SNV | 1 | G | T | Homozygous   |
| NC_037644.1 | 776963 | SNV | 1 | T | C | Homozygous   |
| NC_037644.1 | 777115 | SNV | 1 | T | C | Homozygous   |
| NC_037644.1 | 777172 | SNV | 1 | G | A | Homozygous   |
| NC_037644.1 | 778187 | SNV | 1 | A | T | Homozygous   |
| NC_037644.1 | 778189 | SNV | 1 | A | G | Homozygous   |
| NC_037644.1 | 778192 | SNV | 1 | A | T | Homozygous   |
| NC_037644.1 | 789946 | SNV | 1 | T | C | Heterozygous |
| NC_037644.1 | 789956 | SNV | 1 | T | C | Homozygous   |
| NC_037644.1 | 793007 | SNV | 1 | T | C | Homozygous   |
| NC_037644.1 | 793225 | SNV | 1 | C | T | Homozygous   |
| NC_037644.1 | 793294 | SNV | 1 | T | C | Homozygous   |
| NC_037644.1 | 793325 | SNV | 1 | A | G | Homozygous   |
| NC_037644.1 | 793347 | SNV | 1 | G | C | Heterozygous |
| NC_037644.1 | 801636 | SNV | 1 | C | A | Heterozygous |
| NC_037644.1 | 807572 | SNV | 1 | T | C | Homozygous   |
| NC_037644.1 | 807587 | SNV | 1 | T | C | Homozygous   |
| NC_037644.1 | 807711 | SNV | 1 | T | C | Homozygous   |
| NC_037644.1 | 807839 | SNV | 1 | T | C | Heterozygous |
| NC_037644.1 | 807890 | SNV | 1 | G | A | Heterozygous |
| NC_037644.1 | 807954 | SNV | 1 | T | C | Heterozygous |
| NC_037644.1 | 808124 | SNV | 1 | T | C | Homozygous   |
| NC_037644.1 | 808165 | SNV | 1 | T | C | Homozygous   |
| NC_037644.1 | 808171 | SNV | 1 | T | C | Homozygous   |
| NC_037644.1 | 813248 | SNV | 1 | A | T | Homozygous   |
| NC_037644.1 | 813255 | SNV | 1 | A | T | Heterozygous |
| NC_037644.1 | 816515 | SNV | 1 | A | G | Homozygous   |
| NC_037644.1 | 816560 | SNV | 1 | G | A | Homozygous   |

|             |        |     |   |   |   |              |
|-------------|--------|-----|---|---|---|--------------|
| NC_037644.1 | 827307 | SNV | 1 | C | A | Heterozygous |
| NC_037644.1 | 827473 | SNV | 1 | A | C | Homozygous   |
| NC_037644.1 | 827482 | SNV | 1 | T | C | Heterozygous |
| NC_037644.1 | 830580 | SNV | 1 | A | G | Homozygous   |
| NC_037644.1 | 830705 | SNV | 1 | T | A | Heterozygous |
| NC_037644.1 | 830727 | SNV | 1 | T | C | Homozygous   |
| NC_037644.1 | 830733 | SNV | 1 | G | A | Homozygous   |
| NC_037644.1 | 830742 | SNV | 1 | A | G | Heterozygous |
| NC_037644.1 | 830819 | SNV | 1 | A | G | Homozygous   |
| NC_037644.1 | 830845 | SNV | 1 | T | G | Homozygous   |
| NC_037644.1 | 830857 | SNV | 1 | A | G | Heterozygous |
| NC_037644.1 | 830866 | SNV | 1 | T | A | Homozygous   |
| NC_037644.1 | 830870 | SNV | 1 | T | A | Homozygous   |
| NC_037644.1 | 830907 | SNV | 1 | T | A | Heterozygous |
| NC_037644.1 | 830942 | SNV | 1 | C | T | Homozygous   |
| NC_037644.1 | 830955 | SNV | 1 | C | T | Heterozygous |
| NC_037644.1 | 830985 | SNV | 1 | G | A | Heterozygous |
| NC_037644.1 | 831036 | SNV | 1 | G | A | Homozygous   |
| NC_037644.1 | 831199 | SNV | 1 | G | A | Heterozygous |
| NC_037644.1 | 831231 | SNV | 1 | G | A | Heterozygous |
| NC_037644.1 | 837243 | SNV | 1 | C | T | Homozygous   |
| NC_037644.1 | 837245 | SNV | 1 | A | C | Homozygous   |
| NC_037644.1 | 837468 | SNV | 1 | G | A | Heterozygous |
| NC_037644.1 | 837691 | SNV | 1 | C | T | Homozygous   |
| NC_037644.1 | 837736 | SNV | 1 | G | A | Homozygous   |
| NC_037644.1 | 838276 | SNV | 1 | A | C | Homozygous   |
| NC_037644.1 | 838743 | SNV | 1 | A | G | Homozygous   |
| NC_037644.1 | 838749 | SNV | 1 | A | C | Homozygous   |
| NC_037644.1 | 838902 | SNV | 1 | T | C | Heterozygous |
| NC_037644.1 | 839156 | SNV | 1 | C | T | Homozygous   |
| NC_037644.1 | 839326 | SNV | 1 | G | A | Homozygous   |
| NC_037644.1 | 839499 | SNV | 1 | G | A | Homozygous   |
| NC_037644.1 | 845014 | SNV | 1 | C | T | Heterozygous |
| NC_037644.1 | 845413 | SNV | 1 | C | T | Homozygous   |
| NC_037644.1 | 845536 | SNV | 1 | C | T | Heterozygous |
| NC_037644.1 | 845922 | SNV | 1 | C | T | Heterozygous |
| NC_037644.1 | 846058 | SNV | 1 | T | A | Homozygous   |
| NC_037644.1 | 846061 | SNV | 1 | C | T | Homozygous   |
| NC_037644.1 | 848740 | SNV | 1 | A | T | Homozygous   |
| NC_037644.1 | 848750 | SNV | 1 | T | A | Homozygous   |
| NC_037644.1 | 848754 | SNV | 1 | T | A | Homozygous   |
| NC_037644.1 | 848760 | SNV | 1 | A | G | Homozygous   |
| NC_037644.1 | 885891 | SNV | 1 | A | G | Heterozygous |
| NC_037644.1 | 886198 | SNV | 1 | T | A | Homozygous   |
| NC_037644.1 | 886341 | SNV | 1 | T | C | Heterozygous |
| NC_037644.1 | 886348 | SNV | 1 | A | G | Homozygous   |
| NC_037644.1 | 886361 | SNV | 1 | A | G | Homozygous   |
| NC_037644.1 | 886387 | SNV | 1 | T | C | Homozygous   |
| NC_037644.1 | 886394 | SNV | 1 | T | C | Homozygous   |
| NC_037644.1 | 886397 | SNV | 1 | G | A | Homozygous   |
| NC_037644.1 | 886493 | SNV | 1 | A | G | Homozygous   |

|             |        |     |   |   |   |              |
|-------------|--------|-----|---|---|---|--------------|
| NC_037644.1 | 886501 | SNV | 1 | C | T | Heterozygous |
| NC_037644.1 | 886603 | SNV | 1 | A | G | Heterozygous |
| NC_037644.1 | 886620 | SNV | 1 | G | A | Heterozygous |
| NC_037644.1 | 886633 | SNV | 1 | A | G | Heterozygous |
| NC_037644.1 | 886752 | SNV | 1 | A | G | Homozygous   |
| NC_037644.1 | 887022 | SNV | 1 | C | T | Heterozygous |
| NC_037644.1 | 887092 | SNV | 1 | T | C | Heterozygous |
| NC_037644.1 | 887168 | SNV | 1 | G | A | Heterozygous |
| NC_037644.1 | 887277 | SNV | 1 | T | C | Heterozygous |
| NC_037644.1 | 887324 | SNV | 1 | T | C | Heterozygous |
| NC_037644.1 | 887445 | SNV | 1 | G | A | Heterozygous |
| NC_037644.1 | 887471 | SNV | 1 | A | G | Homozygous   |
| NC_037644.1 | 887579 | SNV | 1 | C | G | Homozygous   |
| NC_037644.1 | 887584 | SNV | 1 | G | A | Homozygous   |
| NC_037644.1 | 888153 | SNV | 1 | T | C | Homozygous   |
| NC_037644.1 | 888207 | SNV | 1 | T | G | Homozygous   |
| NC_037644.1 | 888274 | SNV | 1 | C | G | Heterozygous |
| NC_037644.1 | 888292 | SNV | 1 | A | T | Homozygous   |
| NC_037644.1 | 888357 | SNV | 1 | T | C | Heterozygous |
| NC_037644.1 | 889362 | SNV | 1 | T | G | Homozygous   |
| NC_037644.1 | 889674 | SNV | 1 | A | G | Homozygous   |
| NC_037644.1 | 889700 | SNV | 1 | G | C | Homozygous   |
| NC_037644.1 | 889705 | SNV | 1 | C | G | Heterozygous |
| NC_037644.1 | 889709 | SNV | 1 | A | G | Heterozygous |
| NC_037644.1 | 889765 | SNV | 1 | A | G | Homozygous   |
| NC_037644.1 | 889945 | SNV | 1 | G | A | Heterozygous |
| NC_037644.1 | 890434 | SNV | 1 | T | A | Homozygous   |
| NC_037644.1 | 890707 | SNV | 1 | G | T | Heterozygous |
| NC_037644.1 | 891333 | SNV | 1 | G | A | Heterozygous |
| NC_037644.1 | 891574 | SNV | 1 | G | A | Homozygous   |
| NC_037644.1 | 891601 | SNV | 1 | A | C | Heterozygous |
| NC_037644.1 | 891646 | SNV | 1 | T | C | Homozygous   |
| NC_037644.1 | 891707 | SNV | 1 | T | C | Homozygous   |
| NC_037644.1 | 891887 | SNV | 1 | C | T | Homozygous   |
| NC_037644.1 | 891901 | SNV | 1 | G | C | Homozygous   |
| NC_037644.1 | 891934 | SNV | 1 | A | G | Homozygous   |
| NC_037644.1 | 891940 | SNV | 1 | G | A | Homozygous   |
| NC_037644.1 | 891960 | SNV | 1 | T | C | Homozygous   |
| NC_037644.1 | 891971 | SNV | 1 | T | C | Homozygous   |
| NC_037644.1 | 891977 | SNV | 1 | T | A | Heterozygous |
| NC_037644.1 | 892183 | SNV | 1 | A | G | Homozygous   |
| NC_037644.1 | 892217 | SNV | 1 | G | A | Heterozygous |
| NC_037644.1 | 892395 | SNV | 1 | G | A | Heterozygous |
| NC_037644.1 | 892978 | SNV | 1 | T | G | Heterozygous |
| NC_037644.1 | 892986 | SNV | 1 | T | C | Homozygous   |
| NC_037644.1 | 893005 | SNV | 1 | T | C | Heterozygous |
| NC_037644.1 | 893034 | SNV | 1 | A | C | Homozygous   |
| NC_037644.1 | 893037 | SNV | 1 | T | C | Homozygous   |
| NC_037644.1 | 893122 | SNV | 1 | A | G | Heterozygous |
| NC_037644.1 | 893168 | SNV | 1 | G | A | Heterozygous |
| NC_037644.1 | 893467 | SNV | 1 | T | C | Homozygous   |

|             |        |     |   |   |   |              |
|-------------|--------|-----|---|---|---|--------------|
| NC_037644.1 | 893577 | SNV | 1 | A | T | Heterozygous |
| NC_037644.1 | 893594 | SNV | 1 | T | C | Homozygous   |
| NC_037644.1 | 893621 | SNV | 1 | G | T | Heterozygous |
| NC_037644.1 | 895240 | SNV | 1 | T | C | Heterozygous |
| NC_037644.1 | 895389 | SNV | 1 | A | G | Homozygous   |
| NC_037644.1 | 895437 | SNV | 1 | A | G | Heterozygous |
| NC_037644.1 | 895520 | SNV | 1 | A | G | Heterozygous |
| NC_037644.1 | 895586 | SNV | 1 | A | G | Heterozygous |
| NC_037644.1 | 895606 | SNV | 1 | G | C | Heterozygous |
| NC_037644.1 | 897568 | SNV | 1 | A | C | Heterozygous |
| NC_037644.1 | 897576 | SNV | 1 | T | C | Homozygous   |
| NC_037644.1 | 897595 | SNV | 1 | T | A | Heterozygous |
| NC_037644.1 | 898220 | SNV | 1 | A | G | Homozygous   |
| NC_037644.1 | 899348 | SNV | 1 | T | C | Heterozygous |
| NC_037644.1 | 899372 | SNV | 1 | G | A | Homozygous   |
| NC_037644.1 | 899398 | SNV | 1 | A | T | Homozygous   |
| NC_037644.1 | 899591 | SNV | 1 | A | G | Heterozygous |
| NC_037644.1 | 899719 | SNV | 1 | T | C | Heterozygous |
| NC_037644.1 | 899724 | SNV | 1 | G | A | Homozygous   |
| NC_037644.1 | 899734 | SNV | 1 | G | A | Homozygous   |
| NC_037644.1 | 899753 | SNV | 1 | A | G | Homozygous   |
| NC_037644.1 | 899981 | SNV | 1 | A | G | Homozygous   |
| NC_037644.1 | 901013 | SNV | 1 | C | T | Homozygous   |
| NC_037644.1 | 901070 | SNV | 1 | C | T | Heterozygous |
| NC_037644.1 | 901110 | SNV | 1 | A | G | Homozygous   |
| NC_037644.1 | 901189 | SNV | 1 | A | T | Homozygous   |
| NC_037644.1 | 901202 | SNV | 1 | C | T | Heterozygous |
| NC_037644.1 | 901707 | SNV | 1 | C | T | Heterozygous |
| NC_037644.1 | 901710 | SNV | 1 | C | T | Heterozygous |
| NC_037644.1 | 901713 | SNV | 1 | C | T | Heterozygous |
| NC_037644.1 | 901747 | SNV | 1 | G | A | Heterozygous |
| NC_037644.1 | 902932 | SNV | 1 | G | A | Heterozygous |
| NC_037644.1 | 902938 | SNV | 1 | A | G | Homozygous   |
| NC_037644.1 | 902985 | SNV | 1 | C | G | Homozygous   |
| NC_037644.1 | 903038 | SNV | 1 | A | T | Homozygous   |
| NC_037644.1 | 903886 | SNV | 1 | G | A | Heterozygous |
| NC_037644.1 | 903890 | SNV | 1 | A | G | Heterozygous |
| NC_037644.1 | 903905 | SNV | 1 | T | A | Heterozygous |
| NC_037644.1 | 903910 | SNV | 1 | A | T | Heterozygous |
| NC_037644.1 | 904357 | SNV | 1 | A | T | Heterozygous |
| NC_037644.1 | 904361 | SNV | 1 | G | T | Heterozygous |
| NC_037644.1 | 906463 | SNV | 1 | A | G | Heterozygous |
| NC_037644.1 | 911979 | SNV | 1 | A | G | Homozygous   |
| NC_037644.1 | 938669 | SNV | 1 | C | T | Heterozygous |
| NC_037644.1 | 940102 | SNV | 1 | G | A | Homozygous   |
| NC_037644.1 | 940104 | SNV | 1 | A | G | Homozygous   |
| NC_037644.1 | 940192 | SNV | 1 | G | A | Heterozygous |
| NC_037644.1 | 940224 | SNV | 1 | T | C | Homozygous   |
| NC_037644.1 | 940281 | SNV | 1 | T | C | Homozygous   |
| NC_037644.1 | 940433 | SNV | 1 | A | G | Homozygous   |
| NC_037644.1 | 940469 | SNV | 1 | A | G | Homozygous   |



|             |         |     |   |   |   |              |
|-------------|---------|-----|---|---|---|--------------|
| NC_037644.1 | 940899  | SNV | 1 | A | G | Homozygous   |
| NC_037644.1 | 940917  | SNV | 1 | C | T | Heterozygous |
| NC_037644.1 | 940919  | SNV | 1 | T | G | Homozygous   |
| NC_037644.1 | 940939  | SNV | 1 | C | T | Heterozygous |
| NC_037644.1 | 940968  | SNV | 1 | T | C | Heterozygous |
| NC_037644.1 | 940970  | SNV | 1 | A | G | Heterozygous |
| NC_037644.1 | 941071  | SNV | 1 | T | G | Homozygous   |
| NC_037644.1 | 941075  | SNV | 1 | G | A | Homozygous   |
| NC_037644.1 | 941085  | SNV | 1 | T | C | Homozygous   |
| NC_037644.1 | 941297  | SNV | 1 | T | C | Heterozygous |
| NC_037644.1 | 941904  | SNV | 1 | C | T | Homozygous   |
| NC_037644.1 | 941973  | SNV | 1 | T | C | Homozygous   |
| NC_037644.1 | 942090  | SNV | 1 | C | T | Heterozygous |
| NC_037644.1 | 942096  | SNV | 1 | A | T | Heterozygous |
| NC_037644.1 | 942243  | SNV | 1 | C | T | Homozygous   |
| NC_037644.1 | 942261  | SNV | 1 | C | T | Homozygous   |
| NC_037644.1 | 942263  | SNV | 1 | G | A | Heterozygous |
| NC_037644.1 | 943268  | SNV | 1 | T | C | Homozygous   |
| NC_037644.1 | 948173  | SNV | 1 | C | A | Heterozygous |
| NC_037644.1 | 948344  | SNV | 1 | T | C | Homozygous   |
| NC_037644.1 | 948350  | SNV | 1 | C | T | Heterozygous |
| NC_037644.1 | 949551  | SNV | 1 | A | G | Homozygous   |
| NC_037644.1 | 949583  | SNV | 1 | A | G | Heterozygous |
| NC_037644.1 | 953620  | SNV | 1 | T | G | Homozygous   |
| NC_037644.1 | 953625  | SNV | 1 | C | T | Heterozygous |
| NC_037644.1 | 953627  | SNV | 1 | C | T | Homozygous   |
| NC_037644.1 | 953636  | SNV | 1 | A | T | Heterozygous |
| NC_037644.1 | 961764  | SNV | 1 | C | A | Homozygous   |
| NC_037644.1 | 961769  | SNV | 1 | G | C | Homozygous   |
| NC_037644.1 | 970128  | SNV | 1 | A | T | Homozygous   |
| NC_037644.1 | 970153  | SNV | 1 | C | G | Homozygous   |
| NC_037644.1 | 970162  | SNV | 1 | T | C | Homozygous   |
| NC_037644.1 | 980890  | SNV | 1 | A | T | Homozygous   |
| NC_037644.1 | 981114  | SNV | 1 | C | A | Homozygous   |
| NC_037644.1 | 987280  | SNV | 1 | G | A | Heterozygous |
| NC_037644.1 | 987325  | SNV | 1 | C | T | Homozygous   |
| NC_037644.1 | 987378  | SNV | 1 | C | T | Homozygous   |
| NC_037644.1 | 994850  | SNV | 1 | C | A | Heterozygous |
| NC_037644.1 | 997510  | SNV | 1 | C | T | Homozygous   |
| NC_037644.1 | 997514  | SNV | 1 | T | C | Homozygous   |
| NC_037644.1 | 997591  | SNV | 1 | T | C | Homozygous   |
| NC_037644.1 | 1004449 | SNV | 1 | C | T | Homozygous   |
| NC_037644.1 | 1004452 | SNV | 1 | T | C | Homozygous   |
| NC_037644.1 | 1004487 | SNV | 1 | A | G | Homozygous   |
| NC_037644.1 | 1068185 | SNV | 1 | G | A | Homozygous   |
| NC_037644.1 | 1069723 | SNV | 1 | C | G | Homozygous   |
| NC_037644.1 | 1069853 | SNV | 1 | C | A | Heterozygous |
| NC_037644.1 | 1069859 | SNV | 1 | A | T | Heterozygous |
| NC_037644.1 | 1069861 | SNV | 1 | G | T | Heterozygous |
| NC_037644.1 | 1070196 | SNV | 1 | C | G | Homozygous   |
| NC_037644.1 | 1084218 | SNV | 1 | G | A | Homozygous   |

|             |         |     |   |   |   |              |
|-------------|---------|-----|---|---|---|--------------|
| NC_037644.1 | 1104100 | SNV | 1 | G | A | Homozygous   |
| NC_037644.1 | 1130389 | SNV | 1 | T | C | Heterozygous |
| NC_037644.1 | 1136749 | SNV | 1 | T | C | Homozygous   |
| NC_037644.1 | 1180841 | SNV | 1 | G | A | Heterozygous |
| NC_037644.1 | 1180916 | SNV | 1 | C | T | Homozygous   |
| NC_037644.1 | 1180922 | SNV | 1 | C | T | Heterozygous |
| NC_037644.1 | 1180951 | SNV | 1 | G | C | Heterozygous |
| NC_037644.1 | 1181094 | SNV | 1 | T | C | Homozygous   |
| NC_037644.1 | 1181096 | SNV | 1 | C | G | Homozygous   |
| NC_037644.1 | 1181203 | SNV | 1 | G | C | Heterozygous |
| NC_037644.1 | 1181304 | SNV | 1 | C | T | Homozygous   |
| NC_037644.1 | 1181329 | SNV | 1 | C | T | Heterozygous |
| NC_037644.1 | 1181363 | SNV | 1 | C | T | Homozygous   |
| NC_037644.1 | 1181415 | SNV | 1 | T | C | Homozygous   |
| NC_037644.1 | 1181472 | SNV | 1 | C | G | Homozygous   |
| NC_037644.1 | 1181484 | SNV | 1 | C | T | Homozygous   |
| NC_037644.1 | 1181597 | SNV | 1 | T | C | Heterozygous |
| NC_037644.1 | 1312440 | SNV | 1 | A | T | Heterozygous |
| NC_037644.1 | 1312464 | SNV | 1 | T | C | Heterozygous |
| NC_037644.1 | 1312532 | SNV | 1 | T | C | Heterozygous |
| NC_037644.1 | 1312545 | SNV | 1 | T | C | Homozygous   |
| NC_037644.1 | 1312577 | SNV | 1 | T | C | Heterozygous |
| NC_037644.1 | 1312589 | SNV | 1 | A | G | Heterozygous |
| NC_037644.1 | 1312678 | SNV | 1 | A | T | Homozygous   |
| NC_037644.1 | 1312727 | SNV | 1 | T | C | Heterozygous |
| NC_037644.1 | 1312739 | SNV | 1 | A | G | Homozygous   |
| NC_037644.1 | 1312752 | SNV | 1 | A | G | Heterozygous |
| NC_037644.1 | 1312760 | SNV | 1 | T | C | Heterozygous |
| NC_037644.1 | 1313085 | SNV | 1 | G | T | Homozygous   |
| NC_037644.1 | 1314364 | SNV | 1 | A | G | Homozygous   |
| NC_037644.1 | 1314367 | SNV | 1 | C | G | Homozygous   |
| NC_037644.1 | 1314374 | SNV | 1 | T | C | Homozygous   |
| NC_037644.1 | 1314424 | SNV | 1 | A | G | Homozygous   |
| NC_037644.1 | 1315073 | SNV | 1 | T | A | Homozygous   |
| NC_037644.1 | 1315077 | SNV | 1 | T | A | Homozygous   |
| NC_037644.1 | 1318512 | SNV | 1 | A | G | Homozygous   |
| NC_037644.1 | 1319147 | SNV | 1 | C | T | Heterozygous |
| NC_037644.1 | 1319668 | SNV | 1 | A | G | Homozygous   |
| NC_037644.1 | 1320233 | SNV | 1 | G | A | Heterozygous |
| NC_037644.1 | 1320530 | SNV | 1 | C | G | Heterozygous |
| NC_037644.1 | 1320793 | SNV | 1 | A | G | Heterozygous |
| NC_037644.1 | 1321675 | SNV | 1 | G | A | Heterozygous |
| NC_037644.1 | 1325357 | SNV | 1 | C | T | Homozygous   |
| NC_037644.1 | 1326815 | SNV | 1 | T | C | Homozygous   |
| NC_037644.1 | 1327632 | SNV | 1 | C | T | Heterozygous |
| NC_037644.1 | 1327907 | SNV | 1 | G | A | Heterozygous |
| NC_037644.1 | 1328103 | SNV | 1 | C | T | Heterozygous |
| NC_037644.1 | 1328136 | SNV | 1 | A | T | Homozygous   |
| NC_037644.1 | 1329110 | SNV | 1 | G | A | Heterozygous |
| NC_037644.1 | 1329984 | SNV | 1 | C | A | Homozygous   |
| NC_037644.1 | 1330509 | SNV | 1 | T | G | Heterozygous |

|             |         |     |   |   |   |              |
|-------------|---------|-----|---|---|---|--------------|
| NC_037644.1 | 1332447 | SNV | 1 | T | C | Homozygous   |
| NC_037644.1 | 1332456 | SNV | 1 | G | A | Heterozygous |
| NC_037644.1 | 1342930 | SNV | 1 | C | T | Homozygous   |
| NC_037644.1 | 1343666 | SNV | 1 | G | A | Heterozygous |
| NC_037644.1 | 1344794 | SNV | 1 | T | A | Heterozygous |
| NC_037644.1 | 1344971 | SNV | 1 | A | G | Homozygous   |
| NC_037644.1 | 1345127 | SNV | 1 | C | T | Heterozygous |
| NC_037644.1 | 1348347 | SNV | 1 | G | A | Heterozygous |
| NC_037644.1 | 1348416 | SNV | 1 | A | G | Homozygous   |
| NC_037644.1 | 1349235 | SNV | 1 | A | G | Heterozygous |
| NC_037644.1 | 1350419 | SNV | 1 | T | G | Homozygous   |
| NC_037644.1 | 1350422 | SNV | 1 | A | T | Homozygous   |
| NC_037644.1 | 1350428 | SNV | 1 | A | T | Homozygous   |
| NC_037644.1 | 1352667 | SNV | 1 | G | A | Homozygous   |
| NC_037644.1 | 1352769 | SNV | 1 | C | T | Homozygous   |
| NC_037644.1 | 1353496 | SNV | 1 | G | A | Homozygous   |
| NC_037644.1 | 1354110 | SNV | 1 | C | T | Homozygous   |
| NC_037644.1 | 1361283 | SNV | 1 | G | C | Homozygous   |
| NC_037644.1 | 1361285 | SNV | 1 | A | G | Homozygous   |
| NC_037644.1 | 1365130 | SNV | 1 | A | T | Homozygous   |
| NC_037644.1 | 1365265 | SNV | 1 | G | C | Homozygous   |
| NC_037644.1 | 1368361 | SNV | 1 | A | G | Homozygous   |
| NC_037644.1 | 1370371 | SNV | 1 | G | A | Homozygous   |
| NC_037644.1 | 1372432 | SNV | 1 | A | G | Homozygous   |
| NC_037644.1 | 1373930 | SNV | 1 | G | A | Homozygous   |
| NC_037644.1 | 1374025 | SNV | 1 | C | T | Homozygous   |
| NC_037644.1 | 1374878 | SNV | 1 | A | G | Homozygous   |
| NC_037644.1 | 1374891 | SNV | 1 | C | G | Heterozygous |
| NC_037644.1 | 1374894 | SNV | 1 | A | G | Heterozygous |
| NC_037644.1 | 1374896 | SNV | 1 | A | T | Heterozygous |
| NC_037644.1 | 1379106 | SNV | 1 | G | C | Homozygous   |
| NC_037644.1 | 1380217 | SNV | 1 | G | A | Homozygous   |
| NC_037644.1 | 1396542 | SNV | 1 | T | C | Homozygous   |
| NC_037644.1 | 1407950 | SNV | 1 | A | C | Homozygous   |
| NC_037644.1 | 1415885 | SNV | 1 | T | C | Heterozygous |
| NC_037644.1 | 1416108 | SNV | 1 | A | G | Heterozygous |
| NC_037644.1 | 1421707 | SNV | 1 | T | C | Homozygous   |
| NC_037644.1 | 1421796 | SNV | 1 | C | T | Heterozygous |
| NC_037644.1 | 1422115 | SNV | 1 | A | G | Heterozygous |
| NC_037644.1 | 1422119 | SNV | 1 | A | G | Heterozygous |
| NC_037644.1 | 1422348 | SNV | 1 | A | G | Heterozygous |
| NC_037644.1 | 1422769 | SNV | 1 | G | T | Homozygous   |
| NC_037644.1 | 1422771 | SNV | 1 | A | C | Homozygous   |
| NC_037644.1 | 1422775 | SNV | 1 | A | T | Homozygous   |
| NC_037644.1 | 1430091 | SNV | 1 | A | T | Heterozygous |
| NC_037644.1 | 1434616 | SNV | 1 | G | C | Homozygous   |
| NC_037644.1 | 1435581 | SNV | 1 | T | C | Homozygous   |
| NC_037644.1 | 1442025 | SNV | 1 | T | A | Homozygous   |
| NC_037644.1 | 1442044 | SNV | 1 | T | G | Homozygous   |
| NC_037644.1 | 1442052 | SNV | 1 | A | T | Homozygous   |
| NC_037644.1 | 1444421 | SNV | 1 | T | C | Homozygous   |

|             |         |     |   |   |   |              |
|-------------|---------|-----|---|---|---|--------------|
| NC_037644.1 | 1444425 | SNV | 1 | T | C | Homozygous   |
| NC_037644.1 | 1444450 | SNV | 1 | T | G | Homozygous   |
| NC_037644.1 | 1444455 | SNV | 1 | C | A | Homozygous   |
| NC_037644.1 | 1444474 | SNV | 1 | T | C | Homozygous   |
| NC_037644.1 | 1444478 | SNV | 1 | C | T | Homozygous   |
| NC_037644.1 | 1444483 | SNV | 1 | A | G | Homozygous   |
| NC_037644.1 | 1444488 | SNV | 1 | T | C | Homozygous   |
| NC_037644.1 | 1444490 | SNV | 1 | C | T | Homozygous   |
| NC_037644.1 | 1452440 | SNV | 1 | T | C | Homozygous   |
| NC_037644.1 | 1456115 | SNV | 1 | T | A | Homozygous   |
| NC_037644.1 | 1456117 | SNV | 1 | C | A | Homozygous   |
| NC_037644.1 | 1456132 | SNV | 1 | T | A | Homozygous   |
| NC_037644.1 | 1456135 | SNV | 1 | A | T | Homozygous   |
| NC_037644.1 | 1463407 | SNV | 1 | A | G | Homozygous   |
| NC_037644.1 | 1463410 | SNV | 1 | G | A | Homozygous   |
| NC_037644.1 | 1463414 | SNV | 1 | T | A | Homozygous   |
| NC_037644.1 | 1463421 | SNV | 1 | T | A | Homozygous   |
| NC_037644.1 | 1463431 | SNV | 1 | C | G | Homozygous   |
| NC_037644.1 | 1477077 | SNV | 1 | A | T | Homozygous   |
| NC_037644.1 | 1477081 | SNV | 1 | A | T | Homozygous   |
| NC_037644.1 | 1477781 | SNV | 1 | T | A | Homozygous   |
| NC_037644.1 | 1478474 | SNV | 1 | A | G | Homozygous   |
| NC_037644.1 | 1480236 | SNV | 1 | T | C | Homozygous   |
| NC_037644.1 | 1480238 | SNV | 1 | G | A | Homozygous   |
| NC_037644.1 | 1480262 | SNV | 1 | T | A | Heterozygous |
| NC_037644.1 | 1480275 | SNV | 1 | A | C | Heterozygous |
| NC_037644.1 | 1480284 | SNV | 1 | T | A | Heterozygous |
| NC_037644.1 | 1481528 | SNV | 1 | A | G | Homozygous   |
| NC_037644.1 | 1481715 | SNV | 1 | G | A | Homozygous   |
| NC_037644.1 | 1481934 | SNV | 1 | T | C | Homozygous   |
| NC_037644.1 | 1482537 | SNV | 1 | T | A | Heterozygous |
| NC_037644.1 | 1482560 | SNV | 1 | C | T | Homozygous   |
| NC_037644.1 | 1483261 | SNV | 1 | G | T | Homozygous   |
| NC_037644.1 | 1483839 | SNV | 1 | A | G | Homozygous   |
| NC_037644.1 | 1484346 | SNV | 1 | G | A | Homozygous   |
| NC_037644.1 | 1484627 | SNV | 1 | G | A | Homozygous   |
| NC_037644.1 | 1484841 | SNV | 1 | T | C | Homozygous   |
| NC_037644.1 | 1485233 | SNV | 1 | A | G | Homozygous   |
| NC_037644.1 | 1485977 | SNV | 1 | C | T | Homozygous   |
| NC_037644.1 | 1486128 | SNV | 1 | A | G | Homozygous   |
| NC_037644.1 | 1487300 | SNV | 1 | A | G | Homozygous   |
| NC_037644.1 | 1487615 | SNV | 1 | T | C | Homozygous   |
| NC_037644.1 | 1487864 | SNV | 1 | G | T | Heterozygous |
| NC_037644.1 | 1488364 | SNV | 1 | G | A | Homozygous   |
| NC_037644.1 | 1490078 | SNV | 1 | C | T | Heterozygous |
| NC_037644.1 | 1490082 | SNV | 1 | A | C | Homozygous   |
| NC_037644.1 | 1490089 | SNV | 1 | C | T | Heterozygous |
| NC_037644.1 | 1490612 | SNV | 1 | G | A | Homozygous   |
| NC_037644.1 | 1490682 | SNV | 1 | T | C | Heterozygous |
| NC_037644.1 | 1496773 | SNV | 1 | G | A | Heterozygous |
| NC_037644.1 | 1496825 | SNV | 1 | G | A | Heterozygous |

|             |         |     |   |   |   |              |
|-------------|---------|-----|---|---|---|--------------|
| NC_037644.1 | 1496827 | SNV | 1 | G | A | Heterozygous |
| NC_037644.1 | 1496829 | SNV | 1 | T | A | Heterozygous |
| NC_037644.1 | 1501818 | SNV | 1 | G | A | Heterozygous |
| NC_037644.1 | 1503593 | SNV | 1 | A | G | Homozygous   |
| NC_037644.1 | 1503609 | SNV | 1 | T | C | Homozygous   |
| NC_037644.1 | 1503703 | SNV | 1 | C | T | Heterozygous |
| NC_037644.1 | 1503717 | SNV | 1 | T | C | Heterozygous |
| NC_037644.1 | 1503722 | SNV | 1 | C | T | Heterozygous |
| NC_037644.1 | 1503727 | SNV | 1 | T | C | Heterozygous |
| NC_037644.1 | 1503799 | SNV | 1 | T | C | Homozygous   |
| NC_037644.1 | 1504595 | SNV | 1 | C | T | Heterozygous |
| NC_037644.1 | 1504600 | SNV | 1 | C | T | Heterozygous |
| NC_037644.1 | 1509270 | SNV | 1 | C | T | Homozygous   |
| NC_037644.1 | 1509279 | SNV | 1 | C | T | Heterozygous |
| NC_037644.1 | 1509672 | SNV | 1 | G | A | Heterozygous |
| NC_037644.1 | 1509720 | SNV | 1 | G | A | Homozygous   |
| NC_037644.1 | 1509725 | SNV | 1 | T | C | Homozygous   |
| NC_037644.1 | 1509742 | SNV | 1 | T | C | Homozygous   |
| NC_037644.1 | 1517809 | SNV | 1 | C | T | Heterozygous |
| NC_037644.1 | 1526562 | SNV | 1 | T | C | Heterozygous |
| NC_037644.1 | 1526577 | SNV | 1 | A | C | Homozygous   |
| NC_037644.1 | 1526839 | SNV | 1 | T | A | Homozygous   |
| NC_037644.1 | 1526971 | SNV | 1 | T | C | Homozygous   |
| NC_037644.1 | 1528042 | SNV | 1 | G | A | Homozygous   |
| NC_037644.1 | 1528313 | SNV | 1 | T | C | Homozygous   |
| NC_037644.1 | 1530395 | SNV | 1 | A | C | Homozygous   |
| NC_037644.1 | 1533726 | SNV | 1 | A | G | Heterozygous |
| NC_037644.1 | 1533737 | SNV | 1 | C | T | Heterozygous |
| NC_037644.1 | 1533748 | SNV | 1 | A | G | Heterozygous |
| NC_037644.1 | 1533750 | SNV | 1 | A | G | Heterozygous |
| NC_037644.1 | 1533751 | SNV | 1 | T | G | Heterozygous |
| NC_037644.1 | 1533754 | SNV | 1 | A | G | Heterozygous |
| NC_037644.1 | 1533765 | SNV | 1 | T | C | Homozygous   |
| NC_037644.1 | 1537342 | SNV | 1 | A | G | Homozygous   |
| NC_037644.1 | 1537344 | SNV | 1 | T | A | Homozygous   |
| NC_037644.1 | 1537685 | SNV | 1 | C | A | Heterozygous |
| NC_037644.1 | 1537687 | SNV | 1 | A | T | Heterozygous |
| NC_037644.1 | 1537698 | SNV | 1 | C | G | Heterozygous |
| NC_037644.1 | 1542234 | SNV | 1 | G | A | Heterozygous |
| NC_037644.1 | 1542241 | SNV | 1 | G | A | Heterozygous |
| NC_037644.1 | 1548054 | SNV | 1 | G | A | Homozygous   |
| NC_037644.1 | 1548062 | SNV | 1 | G | A | Homozygous   |
| NC_037644.1 | 1548064 | SNV | 1 | T | C | Homozygous   |
| NC_037644.1 | 1548091 | SNV | 1 | C | T | Homozygous   |
| NC_037644.1 | 1548096 | SNV | 1 | C | T | Homozygous   |
| NC_037644.1 | 1548104 | SNV | 1 | T | C | Homozygous   |
| NC_037644.1 | 1548827 | SNV | 1 | G | C | Heterozygous |
| NC_037644.1 | 1548839 | SNV | 1 | C | T | Homozygous   |
| NC_037644.1 | 1548849 | SNV | 1 | G | T | Heterozygous |
| NC_037644.1 | 1548868 | SNV | 1 | T | C | Homozygous   |
| NC_037644.1 | 1548871 | SNV | 1 | G | A | Heterozygous |

|             |         |     |   |   |   |              |
|-------------|---------|-----|---|---|---|--------------|
| NC_037644.1 | 1548917 | SNV | 1 | T | C | Homozygous   |
| NC_037644.1 | 1554207 | SNV | 1 | G | C | Homozygous   |
| NC_037644.1 | 1562668 | SNV | 1 | C | T | Homozygous   |
| NC_037644.1 | 1562683 | SNV | 1 | G | T | Homozygous   |
| NC_037644.1 | 1562696 | SNV | 1 | A | C | Homozygous   |
| NC_037644.1 | 1562700 | SNV | 1 | A | T | Homozygous   |
| NC_037644.1 | 1562721 | SNV | 1 | T | C | Homozygous   |
| NC_037644.1 | 1562727 | SNV | 1 | A | T | Homozygous   |
| NC_037644.1 | 1562730 | SNV | 1 | T | C | Homozygous   |
| NC_037644.1 | 1562733 | SNV | 1 | T | A | Homozygous   |
| NC_037644.1 | 1562735 | SNV | 1 | T | G | Homozygous   |
| NC_037644.1 | 1569600 | SNV | 1 | T | C | Homozygous   |
| NC_037644.1 | 1569708 | SNV | 1 | T | C | Homozygous   |
| NC_037644.1 | 1571727 | SNV | 1 | A | G | Homozygous   |
| NC_037644.1 | 1572155 | SNV | 1 | T | C | Heterozygous |
| NC_037644.1 | 1572569 | SNV | 1 | G | A | Heterozygous |
| NC_037644.1 | 1573900 | SNV | 1 | C | T | Heterozygous |
| NC_037644.1 | 1600689 | SNV | 1 | A | C | Heterozygous |
| NC_037644.1 | 1600703 | SNV | 1 | T | G | Heterozygous |
| NC_037644.1 | 1600755 | SNV | 1 | T | C | Heterozygous |
| NC_037644.1 | 1601243 | SNV | 1 | C | T | Heterozygous |
| NC_037644.1 | 1601244 | SNV | 1 | C | T | Heterozygous |
| NC_037644.1 | 1601248 | SNV | 1 | G | A | Heterozygous |
| NC_037644.1 | 1601250 | SNV | 1 | C | T | Heterozygous |
| NC_037644.1 | 1601258 | SNV | 1 | C | T | Heterozygous |
| NC_037644.1 | 1601273 | SNV | 1 | G | C | Heterozygous |
| NC_037644.1 | 1601275 | SNV | 1 | G | T | Heterozygous |
| NC_037644.1 | 1601285 | SNV | 1 | T | G | Heterozygous |
| NC_037644.1 | 1601309 | SNV | 1 | C | T | Heterozygous |
| NC_037644.1 | 1601371 | SNV | 1 | G | A | Heterozygous |
| NC_037644.1 | 1601373 | SNV | 1 | G | A | Heterozygous |
| NC_037644.1 | 1601394 | SNV | 1 | G | A | Heterozygous |
| NC_037644.1 | 1601431 | SNV | 1 | A | G | Homozygous   |
| NC_037644.1 | 1601443 | SNV | 1 | G | A | Heterozygous |
| NC_037644.1 | 1601476 | SNV | 1 | G | A | Heterozygous |
| NC_037644.1 | 1601479 | SNV | 1 | A | G | Homozygous   |
| NC_037644.1 | 1601486 | SNV | 1 | T | C | Homozygous   |
| NC_037644.1 | 1601526 | SNV | 1 | T | C | Homozygous   |
| NC_037644.1 | 1601558 | SNV | 1 | C | T | Homozygous   |
| NC_037644.1 | 1601571 | SNV | 1 | G | A | Homozygous   |
| NC_037644.1 | 1601605 | SNV | 1 | T | C | Homozygous   |
| NC_037644.1 | 1601691 | SNV | 1 | T | C | Homozygous   |
| NC_037644.1 | 1601728 | SNV | 1 | T | C | Homozygous   |
| NC_037644.1 | 1601733 | SNV | 1 | A | G | Homozygous   |
| NC_037644.1 | 1601805 | SNV | 1 | A | G | Homozygous   |
| NC_037644.1 | 1601908 | SNV | 1 | C | T | Heterozygous |
| NC_037644.1 | 1603214 | SNV | 1 | A | G | Homozygous   |
| NC_037644.1 | 1603256 | SNV | 1 | C | T | Heterozygous |
| NC_037644.1 | 1603372 | SNV | 1 | A | G | Homozygous   |
| NC_037644.1 | 1603388 | SNV | 1 | G | A | Heterozygous |
| NC_037644.1 | 1603431 | SNV | 1 | A | G | Homozygous   |

|             |         |     |   |   |   |              |
|-------------|---------|-----|---|---|---|--------------|
| NC_037644.1 | 1603555 | SNV | 1 | C | T | Heterozygous |
| NC_037644.1 | 1603557 | SNV | 1 | C | T | Heterozygous |
| NC_037644.1 | 1603559 | SNV | 1 | C | T | Heterozygous |
| NC_037644.1 | 1603561 | SNV | 1 | C | T | Heterozygous |
| NC_037644.1 | 1603575 | SNV | 1 | A | G | Homozygous   |
| NC_037644.1 | 1603585 | SNV | 1 | C | T | Homozygous   |
| NC_037644.1 | 1603634 | SNV | 1 | G | A | Heterozygous |
| NC_037644.1 | 1603651 | SNV | 1 | G | A | Heterozygous |
| NC_037644.1 | 1603690 | SNV | 1 | T | A | Homozygous   |
| NC_037644.1 | 1603706 | SNV | 1 | A | G | Homozygous   |
| NC_037644.1 | 1603718 | SNV | 1 | T | C | Homozygous   |
| NC_037644.1 | 1603730 | SNV | 1 | A | T | Homozygous   |
| NC_037644.1 | 1603778 | SNV | 1 | T | C | Heterozygous |
| NC_037644.1 | 1603833 | SNV | 1 | A | G | Heterozygous |
| NC_037644.1 | 1603926 | SNV | 1 | G | A | Homozygous   |
| NC_037644.1 | 1604095 | SNV | 1 | T | C | Homozygous   |
| NC_037644.1 | 1604098 | SNV | 1 | T | G | Heterozygous |
| NC_037644.1 | 1604105 | SNV | 1 | C | T | Heterozygous |
| NC_037644.1 | 1604209 | SNV | 1 | T | C | Homozygous   |
| NC_037644.1 | 1605162 | SNV | 1 | G | T | Heterozygous |
| NC_037644.1 | 1605166 | SNV | 1 | G | A | Heterozygous |
| NC_037644.1 | 1605170 | SNV | 1 | C | A | Heterozygous |
| NC_037644.1 | 1605172 | SNV | 1 | T | C | Heterozygous |
| NC_037644.1 | 1605177 | SNV | 1 | A | G | Heterozygous |
| NC_037644.1 | 1605477 | SNV | 1 | A | T | Homozygous   |
| NC_037644.1 | 1605561 | SNV | 1 | T | A | Heterozygous |
| NC_037644.1 | 1605570 | SNV | 1 | C | T | Heterozygous |
| NC_037644.1 | 1605654 | SNV | 1 | G | T | Homozygous   |
| NC_037644.1 | 1605761 | SNV | 1 | T | C | Homozygous   |
| NC_037644.1 | 1606108 | SNV | 1 | A | G | Heterozygous |
| NC_037644.1 | 1606309 | SNV | 1 | A | G | Homozygous   |
| NC_037644.1 | 1606342 | SNV | 1 | A | G | Homozygous   |
| NC_037644.1 | 1606603 | SNV | 1 | T | C | Homozygous   |
| NC_037644.1 | 1606609 | SNV | 1 | C | G | Heterozygous |
| NC_037644.1 | 1606637 | SNV | 1 | A | G | Heterozygous |
| NC_037644.1 | 1606665 | SNV | 1 | A | G | Heterozygous |
| NC_037644.1 | 1606713 | SNV | 1 | A | G | Homozygous   |
| NC_037644.1 | 1606794 | SNV | 1 | T | A | Heterozygous |
| NC_037644.1 | 1606880 | SNV | 1 | C | T | Homozygous   |
| NC_037644.1 | 1606901 | SNV | 1 | G | A | Homozygous   |
| NC_037644.1 | 1607191 | SNV | 1 | A | G | Heterozygous |
| NC_037644.1 | 1607199 | SNV | 1 | A | G | Homozygous   |
| NC_037644.1 | 1607219 | SNV | 1 | G | A | Heterozygous |
| NC_037644.1 | 1607288 | SNV | 1 | C | T | Homozygous   |
| NC_037644.1 | 1607290 | SNV | 1 | A | G | Homozygous   |
| NC_037644.1 | 1607302 | SNV | 1 | T | C | Homozygous   |
| NC_037644.1 | 1608684 | SNV | 1 | T | C | Heterozygous |
| NC_037644.1 | 1608686 | SNV | 1 | T | A | Homozygous   |
| NC_037644.1 | 1608703 | SNV | 1 | T | A | Heterozygous |
| NC_037644.1 | 1608705 | SNV | 1 | G | A | Heterozygous |
| NC_037644.1 | 1608709 | SNV | 1 | C | T | Homozygous   |

|             |         |     |   |   |   |              |
|-------------|---------|-----|---|---|---|--------------|
| NC_037644.1 | 1608720 | SNV | 1 | G | A | Homozygous   |
| NC_037644.1 | 1608757 | SNV | 1 | A | T | Heterozygous |
| NC_037644.1 | 1608784 | SNV | 1 | T | C | Heterozygous |
| NC_037644.1 | 1608788 | SNV | 1 | T | A | Heterozygous |
| NC_037644.1 | 1608793 | SNV | 1 | C | T | Homozygous   |
| NC_037644.1 | 1609418 | SNV | 1 | C | A | Homozygous   |
| NC_037644.1 | 1609436 | SNV | 1 | G | C | Homozygous   |
| NC_037644.1 | 1614544 | SNV | 1 | C | G | Homozygous   |
| NC_037644.1 | 1614592 | SNV | 1 | T | C | Homozygous   |
| NC_037644.1 | 1614751 | SNV | 1 | A | G | Homozygous   |
| NC_037644.1 | 1614866 | SNV | 1 | T | C | Heterozygous |
| NC_037644.1 | 1616845 | SNV | 1 | C | T | Homozygous   |
| NC_037644.1 | 1616895 | SNV | 1 | G | A | Homozygous   |
| NC_037644.1 | 1617009 | SNV | 1 | T | C | Homozygous   |
| NC_037644.1 | 1617021 | SNV | 1 | C | T | Homozygous   |
| NC_037644.1 | 1617775 | SNV | 1 | A | G | Heterozygous |
| NC_037644.1 | 1617881 | SNV | 1 | G | C | Homozygous   |
| NC_037644.1 | 1619384 | SNV | 1 | T | C | Heterozygous |
| NC_037644.1 | 1619427 | SNV | 1 | T | G | Homozygous   |
| NC_037644.1 | 1619431 | SNV | 1 | A | G | Homozygous   |
| NC_037644.1 | 1619495 | SNV | 1 | A | C | Homozygous   |
| NC_037644.1 | 1619908 | SNV | 1 | G | A | Heterozygous |
| NC_037644.1 | 1620077 | SNV | 1 | T | A | Heterozygous |
| NC_037644.1 | 1620529 | SNV | 1 | G | A | Heterozygous |
| NC_037644.1 | 1620539 | SNV | 1 | A | G | Homozygous   |
| NC_037644.1 | 1621495 | SNV | 1 | A | G | Heterozygous |
| NC_037644.1 | 1621935 | SNV | 1 | A | T | Heterozygous |
| NC_037644.1 | 1622082 | SNV | 1 | G | A | Heterozygous |
| NC_037644.1 | 1622142 | SNV | 1 | A | G | Heterozygous |
| NC_037644.1 | 1622301 | SNV | 1 | A | G | Homozygous   |
| NC_037644.1 | 1623391 | SNV | 1 | C | G | Heterozygous |
| NC_037644.1 | 1623426 | SNV | 1 | G | A | Heterozygous |
| NC_037644.1 | 1623800 | SNV | 1 | C | G | Homozygous   |
| NC_037644.1 | 1623891 | SNV | 1 | A | G | Homozygous   |
| NC_037644.1 | 1624240 | SNV | 1 | T | C | Heterozygous |
| NC_037644.1 | 1624299 | SNV | 1 | C | G | Homozygous   |
| NC_037644.1 | 1624833 | SNV | 1 | C | T | Heterozygous |
| NC_037644.1 | 1625203 | SNV | 1 | C | T | Heterozygous |
| NC_037644.1 | 1625336 | SNV | 1 | A | G | Homozygous   |
| NC_037644.1 | 1626040 | SNV | 1 | T | A | Heterozygous |
| NC_037644.1 | 1631450 | SNV | 1 | G | A | Homozygous   |
| NC_037644.1 | 1631452 | SNV | 1 | C | A | Homozygous   |
| NC_037644.1 | 1631455 | SNV | 1 | C | A | Homozygous   |
| NC_037644.1 | 1631460 | SNV | 1 | T | A | Homozygous   |
| NC_037644.1 | 1632573 | SNV | 1 | T | A | Heterozygous |
| NC_037644.1 | 1632575 | SNV | 1 | C | T | Heterozygous |
| NC_037644.1 | 1632578 | SNV | 1 | A | C | Heterozygous |
| NC_037644.1 | 1632585 | SNV | 1 | T | A | Heterozygous |
| NC_037644.1 | 1632590 | SNV | 1 | T | A | Heterozygous |
| NC_037644.1 | 1639909 | SNV | 1 | C | T | Homozygous   |
| NC_037644.1 | 1640059 | SNV | 1 | T | A | Homozygous   |



|             |         |     |   |   |   |              |
|-------------|---------|-----|---|---|---|--------------|
| NC_037644.1 | 1640447 | SNV | 1 | C | T | Heterozygous |
| NC_037644.1 | 1640452 | SNV | 1 | C | T | Homozygous   |
| NC_037644.1 | 1640457 | SNV | 1 | A | G | Heterozygous |
| NC_037644.1 | 1640477 | SNV | 1 | G | A | Homozygous   |
| NC_037644.1 | 1640793 | SNV | 1 | G | A | Homozygous   |
| NC_037644.1 | 1640809 | SNV | 1 | A | G | Homozygous   |
| NC_037644.1 | 1640973 | SNV | 1 | A | T | Homozygous   |
| NC_037644.1 | 1641136 | SNV | 1 | A | G | Homozygous   |
| NC_037644.1 | 1641356 | SNV | 1 | C | T | Homozygous   |
| NC_037644.1 | 1641375 | SNV | 1 | A | G | Homozygous   |
| NC_037644.1 | 1641396 | SNV | 1 | T | C | Heterozygous |
| NC_037644.1 | 1641413 | SNV | 1 | C | T | Homozygous   |
| NC_037644.1 | 1641516 | SNV | 1 | C | G | Heterozygous |
| NC_037644.1 | 1641750 | SNV | 1 | A | G | Homozygous   |
| NC_037644.1 | 1641790 | SNV | 1 | G | A | Homozygous   |
| NC_037644.1 | 1641792 | SNV | 1 | G | A | Homozygous   |
| NC_037644.1 | 1641937 | SNV | 1 | A | G | Homozygous   |
| NC_037644.1 | 1642001 | SNV | 1 | G | A | Homozygous   |
| NC_037644.1 | 1642003 | SNV | 1 | A | C | Homozygous   |
| NC_037644.1 | 1642072 | SNV | 1 | G | A | Heterozygous |
| NC_037644.1 | 1642096 | SNV | 1 | A | G | Homozygous   |
| NC_037644.1 | 1642133 | SNV | 1 | G | A | Homozygous   |
| NC_037644.1 | 1642163 | SNV | 1 | G | A | Homozygous   |
| NC_037644.1 | 1642275 | SNV | 1 | A | T | Homozygous   |
| NC_037644.1 | 1642277 | SNV | 1 | A | C | Homozygous   |
| NC_037644.1 | 1642301 | SNV | 1 | G | A | Homozygous   |
| NC_037644.1 | 1642312 | SNV | 1 | G | A | Homozygous   |
| NC_037644.1 | 1644270 | SNV | 1 | G | T | Heterozygous |
| NC_037644.1 | 1648739 | SNV | 1 | C | T | Homozygous   |
| NC_037644.1 | 1648766 | SNV | 1 | T | C | Heterozygous |
| NC_037644.1 | 1648806 | SNV | 1 | G | A | Heterozygous |
| NC_037644.1 | 1649076 | SNV | 1 | A | G | Heterozygous |
| NC_037644.1 | 1649113 | SNV | 1 | C | T | Heterozygous |
| NC_037644.1 | 1652770 | SNV | 1 | G | A | Homozygous   |
| NC_037644.1 | 1652881 | SNV | 1 | G | A | Homozygous   |
| NC_037644.1 | 1653026 | SNV | 1 | T | C | Homozygous   |
| NC_037644.1 | 1653136 | SNV | 1 | T | A | Homozygous   |
| NC_037644.1 | 1653301 | SNV | 1 | G | C | Homozygous   |
| NC_037644.1 | 1653446 | SNV | 1 | A | G | Homozygous   |
| NC_037644.1 | 1653465 | SNV | 1 | A | C | Heterozygous |
| NC_037644.1 | 1653561 | SNV | 1 | G | C | Homozygous   |
| NC_037644.1 | 1653657 | SNV | 1 | A | G | Homozygous   |
| NC_037644.1 | 1653673 | SNV | 1 | A | G | Homozygous   |
| NC_037644.1 | 1654064 | SNV | 1 | C | T | Heterozygous |
| NC_037644.1 | 1654460 | SNV | 1 | C | T | Heterozygous |
| NC_037644.1 | 1654563 | SNV | 1 | C | T | Homozygous   |
| NC_037644.1 | 1654647 | SNV | 1 | A | G | Homozygous   |
| NC_037644.1 | 1654711 | SNV | 1 | T | C | Homozygous   |
| NC_037644.1 | 1654916 | SNV | 1 | C | T | Homozygous   |
| NC_037644.1 | 1654942 | SNV | 1 | A | G | Homozygous   |
| NC_037644.1 | 1654983 | SNV | 1 | T | C | Homozygous   |

|             |         |     |   |   |   |              |
|-------------|---------|-----|---|---|---|--------------|
| NC_037644.1 | 1655260 | SNV | 1 | C | T | Heterozygous |
| NC_037644.1 | 1656349 | SNV | 1 | T | C | Homozygous   |
| NC_037644.1 | 1656441 | SNV | 1 | T | C | Homozygous   |
| NC_037644.1 | 1656484 | SNV | 1 | A | G | Heterozygous |
| NC_037644.1 | 1656529 | SNV | 1 | G | C | Heterozygous |
| NC_037644.1 | 1656529 | SNV | 1 | G | T | Heterozygous |
| NC_037644.1 | 1656558 | SNV | 1 | C | T | Homozygous   |
| NC_037644.1 | 1656571 | SNV | 1 | T | G | Homozygous   |
| NC_037644.1 | 1657346 | SNV | 1 | C | A | Homozygous   |
| NC_037644.1 | 1657349 | SNV | 1 | C | G | Homozygous   |
| NC_037644.1 | 1657367 | SNV | 1 | T | C | Homozygous   |
| NC_037644.1 | 1657491 | SNV | 1 | T | C | Homozygous   |
| NC_037644.1 | 1657494 | SNV | 1 | G | A | Homozygous   |
| NC_037644.1 | 1657559 | SNV | 1 | C | T | Homozygous   |
| NC_037644.1 | 1661315 | SNV | 1 | C | T | Homozygous   |
| NC_037644.1 | 1662510 | SNV | 1 | A | G | Homozygous   |
| NC_037644.1 | 1662519 | SNV | 1 | T | A | Heterozygous |
| NC_037644.1 | 1662906 | SNV | 1 | T | C | Homozygous   |
| NC_037644.1 | 1663495 | SNV | 1 | C | A | Heterozygous |
| NC_037644.1 | 1664101 | SNV | 1 | G | A | Heterozygous |
| NC_037644.1 | 1664156 | SNV | 1 | T | A | Heterozygous |
| NC_037644.1 | 1664160 | SNV | 1 | T | G | Heterozygous |
| NC_037644.1 | 1664242 | SNV | 1 | A | G | Homozygous   |
| NC_037644.1 | 1664391 | SNV | 1 | G | A | Heterozygous |
| NC_037644.1 | 1664414 | SNV | 1 | T | C | Homozygous   |
| NC_037644.1 | 1664442 | SNV | 1 | C | T | Homozygous   |
| NC_037644.1 | 1665080 | SNV | 1 | A | G | Homozygous   |
| NC_037644.1 | 1665284 | SNV | 1 | T | C | Homozygous   |
| NC_037644.1 | 1665876 | SNV | 1 | T | C | Homozygous   |
| NC_037644.1 | 1665995 | SNV | 1 | A | T | Homozygous   |
| NC_037644.1 | 1667794 | SNV | 1 | C | G | Homozygous   |
| NC_037644.1 | 1667967 | SNV | 1 | A | G | Homozygous   |
| NC_037644.1 | 1667990 | SNV | 1 | T | C | Homozygous   |
| NC_037644.1 | 1668068 | SNV | 1 | C | T | Heterozygous |
| NC_037644.1 | 1670509 | SNV | 1 | G | A | Homozygous   |
| NC_037644.1 | 1670658 | SNV | 1 | A | G | Homozygous   |
| NC_037644.1 | 1670964 | SNV | 1 | A | G | Homozygous   |
| NC_037644.1 | 1682246 | SNV | 1 | G | A | Heterozygous |
| NC_037644.1 | 1682716 | SNV | 1 | G | A | Heterozygous |
| NC_037644.1 | 1682750 | SNV | 1 | A | G | Heterozygous |
| NC_037644.1 | 1682787 | SNV | 1 | G | A | Heterozygous |
| NC_037644.1 | 1682866 | SNV | 1 | G | A | Heterozygous |
| NC_037644.1 | 1682868 | SNV | 1 | G | C | Heterozygous |
| NC_037644.1 | 1682882 | SNV | 1 | G | A | Heterozygous |
| NC_037644.1 | 1682887 | SNV | 1 | T | C | Homozygous   |
| NC_037644.1 | 1684193 | SNV | 1 | T | C | Homozygous   |
| NC_037644.1 | 1684215 | SNV | 1 | C | T | Heterozygous |
| NC_037644.1 | 1684245 | SNV | 1 | T | C | Homozygous   |
| NC_037644.1 | 1684296 | SNV | 1 | T | C | Homozygous   |
| NC_037644.1 | 1684491 | SNV | 1 | A | G | Homozygous   |
| NC_037644.1 | 1684503 | SNV | 1 | A | G | Homozygous   |

|             |         |     |   |   |   |              |
|-------------|---------|-----|---|---|---|--------------|
| NC_037644.1 | 1684586 | SNV | 1 | A | G | Homozygous   |
| NC_037644.1 | 1684853 | SNV | 1 | A | G | Homozygous   |
| NC_037644.1 | 1684866 | SNV | 1 | A | G | Homozygous   |
| NC_037644.1 | 1684869 | SNV | 1 | A | G | Heterozygous |
| NC_037644.1 | 1686194 | SNV | 1 | A | G | Homozygous   |
| NC_037644.1 | 1691259 | SNV | 1 | T | C | Homozygous   |
| NC_037644.1 | 1691636 | SNV | 1 | C | A | Heterozygous |
| NC_037644.1 | 1691676 | SNV | 1 | A | G | Heterozygous |
| NC_037644.1 | 1691681 | SNV | 1 | A | T | Heterozygous |
| NC_037644.1 | 1692747 | SNV | 1 | G | A | Heterozygous |
| NC_037644.1 | 1693068 | SNV | 1 | A | G | Homozygous   |
| NC_037644.1 | 1693315 | SNV | 1 | T | C | Homozygous   |
| NC_037644.1 | 1693627 | SNV | 1 | T | C | Homozygous   |
| NC_037644.1 | 1693739 | SNV | 1 | A | G | Heterozygous |
| NC_037644.1 | 1693757 | SNV | 1 | C | T | Homozygous   |
| NC_037644.1 | 1693759 | SNV | 1 | T | A | Homozygous   |
| NC_037644.1 | 1702751 | SNV | 1 | A | C | Homozygous   |
| NC_037644.1 | 1702758 | SNV | 1 | A | T | Homozygous   |
| NC_037644.1 | 1702791 | SNV | 1 | T | A | Homozygous   |
| NC_037644.1 | 1702798 | SNV | 1 | A | C | Homozygous   |
| NC_037644.1 | 1720078 | SNV | 1 | T | C | Homozygous   |
| NC_037644.1 | 1720935 | SNV | 1 | C | T | Homozygous   |
| NC_037644.1 | 1730350 | SNV | 1 | G | A | Homozygous   |
| NC_037644.1 | 1742268 | SNV | 1 | T | A | Homozygous   |
| NC_037644.1 | 1749562 | SNV | 1 | A | G | Homozygous   |
| NC_037644.1 | 1750345 | SNV | 1 | T | C | Homozygous   |
| NC_037644.1 | 1750386 | SNV | 1 | C | T | Heterozygous |
| NC_037644.1 | 1750399 | SNV | 1 | T | C | Homozygous   |
| NC_037644.1 | 1750510 | SNV | 1 | T | C | Homozygous   |
| NC_037644.1 | 1757322 | SNV | 1 | A | G | Heterozygous |
| NC_037644.1 | 1757322 | SNV | 1 | A | T | Heterozygous |
| NC_037644.1 | 1757410 | SNV | 1 | G | A | Heterozygous |
| NC_037644.1 | 1757943 | SNV | 1 | G | A | Homozygous   |
| NC_037644.1 | 1757967 | SNV | 1 | T | C | Homozygous   |
| NC_037644.1 | 1758024 | SNV | 1 | G | A | Homozygous   |
| NC_037644.1 | 1765518 | SNV | 1 | T | C | Homozygous   |
| NC_037644.1 | 1766232 | SNV | 1 | T | C | Homozygous   |
| NC_037644.1 | 1766870 | SNV | 1 | A | G | Homozygous   |
| NC_037644.1 | 1767949 | SNV | 1 | T | C | Heterozygous |
| NC_037644.1 | 1767953 | SNV | 1 | T | C | Heterozygous |
| NC_037644.1 | 1769549 | SNV | 1 | A | T | Homozygous   |
| NC_037644.1 | 1769781 | SNV | 1 | C | T | Homozygous   |
| NC_037644.1 | 1769787 | SNV | 1 | C | A | Homozygous   |
| NC_037644.1 | 1777438 | SNV | 1 | A | G | Homozygous   |
| NC_037644.1 | 1777443 | SNV | 1 | T | C | Homozygous   |
| NC_037644.1 | 1777447 | SNV | 1 | T | C | Homozygous   |
| NC_037644.1 | 1777471 | SNV | 1 | C | T | Homozygous   |
| NC_037644.1 | 1777477 | SNV | 1 | A | T | Homozygous   |
| NC_037644.1 | 1777484 | SNV | 1 | A | T | Homozygous   |
| NC_037644.1 | 1777487 | SNV | 1 | T | C | Homozygous   |
| NC_037644.1 | 1777491 | SNV | 1 | T | C | Homozygous   |

|             |         |     |   |   |   |              |
|-------------|---------|-----|---|---|---|--------------|
| NC_037644.1 | 1777495 | SNV | 1 | T | C | Homozygous   |
| NC_037644.1 | 1777497 | SNV | 1 | T | C | Homozygous   |
| NC_037644.1 | 1798668 | SNV | 1 | A | G | Heterozygous |
| NC_037644.1 | 1799811 | SNV | 1 | A | T | Homozygous   |
| NC_037644.1 | 1799813 | SNV | 1 | A | C | Homozygous   |
| NC_037644.1 | 1815776 | SNV | 1 | T | C | Heterozygous |
| NC_037644.1 | 1815788 | SNV | 1 | T | C | Heterozygous |
| NC_037644.1 | 1815794 | SNV | 1 | G | T | Homozygous   |
| NC_037644.1 | 1815807 | SNV | 1 | G | A | Heterozygous |
| NC_037644.1 | 1815814 | SNV | 1 | C | T | Heterozygous |
| NC_037644.1 | 1815835 | SNV | 1 | C | T | Heterozygous |
| NC_037644.1 | 1815838 | SNV | 1 | G | A | Heterozygous |
| NC_037644.1 | 1815867 | SNV | 1 | T | C | Heterozygous |
| NC_037644.1 | 1815874 | SNV | 1 | A | T | Heterozygous |
| NC_037644.1 | 1825762 | SNV | 1 | A | G | Homozygous   |
| NC_037644.1 | 1826120 | SNV | 1 | T | C | Homozygous   |
| NC_037644.1 | 1826726 | SNV | 1 | T | C | Heterozygous |
| NC_037644.1 | 1826903 | SNV | 1 | A | T | Heterozygous |
| NC_037644.1 | 1826913 | SNV | 1 | A | G | Heterozygous |
| NC_037644.1 | 1827638 | SNV | 1 | G | A | Homozygous   |
| NC_037644.1 | 1827961 | SNV | 1 | T | C | Heterozygous |
| NC_037644.1 | 1828029 | SNV | 1 | T | C | Heterozygous |
| NC_037644.1 | 1828116 | SNV | 1 | A | G | Heterozygous |
| NC_037644.1 | 1828476 | SNV | 1 | G | A | Homozygous   |
| NC_037644.1 | 1828672 | SNV | 1 | C | T | Heterozygous |
| NC_037644.1 | 1828692 | SNV | 1 | A | G | Heterozygous |
| NC_037644.1 | 1829060 | SNV | 1 | A | T | Heterozygous |
| NC_037644.1 | 1829188 | SNV | 1 | T | C | Heterozygous |
| NC_037644.1 | 1829280 | SNV | 1 | C | G | Homozygous   |
| NC_037644.1 | 1829430 | SNV | 1 | A | T | Homozygous   |
| NC_037644.1 | 1829899 | SNV | 1 | A | G | Heterozygous |
| NC_037644.1 | 1830003 | SNV | 1 | T | C | Homozygous   |
| NC_037644.1 | 1830054 | SNV | 1 | G | A | Heterozygous |
| NC_037644.1 | 1830103 | SNV | 1 | A | G | Heterozygous |
| NC_037644.1 | 1861601 | SNV | 1 | C | T | Heterozygous |
| NC_037644.1 | 1862323 | SNV | 1 | G | T | Heterozygous |
| NC_037644.1 | 1862412 | SNV | 1 | C | G | Homozygous   |
| NC_037644.1 | 1862634 | SNV | 1 | T | C | Heterozygous |
| NC_037644.1 | 1862729 | SNV | 1 | C | T | Homozygous   |
| NC_037644.1 | 1862957 | SNV | 1 | T | C | Homozygous   |
| NC_037644.1 | 1863002 | SNV | 1 | T | C | Homozygous   |
| NC_037644.1 | 1863017 | SNV | 1 | G | A | Heterozygous |
| NC_037644.1 | 1863061 | SNV | 1 | A | G | Homozygous   |
| NC_037644.1 | 1863079 | SNV | 1 | C | T | Homozygous   |
| NC_037644.1 | 1863130 | SNV | 1 | C | T | Heterozygous |
| NC_037644.1 | 1863195 | SNV | 1 | G | T | Homozygous   |
| NC_037644.1 | 1863209 | SNV | 1 | C | T | Homozygous   |
| NC_037644.1 | 1863448 | SNV | 1 | C | G | Homozygous   |
| NC_037644.1 | 1863580 | SNV | 1 | G | T | Heterozygous |
| NC_037644.1 | 1863583 | SNV | 1 | T | A | Heterozygous |
| NC_037644.1 | 1863696 | SNV | 1 | G | C | Homozygous   |

|             |         |     |   |   |   |              |
|-------------|---------|-----|---|---|---|--------------|
| NC_037644.1 | 1863865 | SNV | 1 | C | T | Homozygous   |
| NC_037644.1 | 1863981 | SNV | 1 | T | C | Heterozygous |
| NC_037644.1 | 1864010 | SNV | 1 | T | C | Homozygous   |
| NC_037644.1 | 1864018 | SNV | 1 | A | G | Homozygous   |
| NC_037644.1 | 1864031 | SNV | 1 | A | G | Homozygous   |
| NC_037644.1 | 1864071 | SNV | 1 | C | T | Heterozygous |
| NC_037644.1 | 1864238 | SNV | 1 | A | G | Heterozygous |
| NC_037644.1 | 1864255 | SNV | 1 | T | C | Homozygous   |
| NC_037644.1 | 1864264 | SNV | 1 | C | T | Heterozygous |
| NC_037644.1 | 1864465 | SNV | 1 | A | G | Heterozygous |
| NC_037644.1 | 1864523 | SNV | 1 | G | A | Heterozygous |
| NC_037644.1 | 1864560 | SNV | 1 | A | G | Heterozygous |
| NC_037644.1 | 1864694 | SNV | 1 | A | C | Homozygous   |
| NC_037644.1 | 1864870 | SNV | 1 | G | A | Homozygous   |
| NC_037644.1 | 1865364 | SNV | 1 | A | G | Heterozygous |
| NC_037644.1 | 1865400 | SNV | 1 | T | C | Homozygous   |
| NC_037644.1 | 1865439 | SNV | 1 | A | C | Homozygous   |
| NC_037644.1 | 1865442 | SNV | 1 | C | A | Heterozygous |
| NC_037644.1 | 1865563 | SNV | 1 | A | G | Homozygous   |
| NC_037644.1 | 1865612 | SNV | 1 | G | A | Heterozygous |
| NC_037644.1 | 1865619 | SNV | 1 | C | A | Heterozygous |
| NC_037644.1 | 1871442 | SNV | 1 | A | T | Homozygous   |
| NC_037644.1 | 1871576 | SNV | 1 | T | C | Heterozygous |
| NC_037644.1 | 1871779 | SNV | 1 | G | C | Homozygous   |
| NC_037644.1 | 1871781 | SNV | 1 | G | A | Homozygous   |
| NC_037644.1 | 1872625 | SNV | 1 | A | C | Homozygous   |
| NC_037644.1 | 1885939 | SNV | 1 | G | A | Homozygous   |
| NC_037644.1 | 1885980 | SNV | 1 | C | T | Heterozygous |
| NC_037644.1 | 1886117 | SNV | 1 | G | A | Heterozygous |
| NC_037644.1 | 1886153 | SNV | 1 | T | C | Heterozygous |
| NC_037644.1 | 1886285 | SNV | 1 | C | A | Homozygous   |
| NC_037644.1 | 1896532 | SNV | 1 | A | G | Heterozygous |
| NC_037644.1 | 1896713 | SNV | 1 | G | A | Heterozygous |
| NC_037644.1 | 1901217 | SNV | 1 | T | G | Homozygous   |
| NC_037644.1 | 1901220 | SNV | 1 | T | C | Homozygous   |
| NC_037644.1 | 1922906 | SNV | 1 | T | A | Homozygous   |
| NC_037644.1 | 1922972 | SNV | 1 | C | T | Homozygous   |
| NC_037644.1 | 1922996 | SNV | 1 | A | T | Homozygous   |
| NC_037644.1 | 1931668 | SNV | 1 | C | T | Heterozygous |
| NC_037644.1 | 1931675 | SNV | 1 | C | T | Homozygous   |
| NC_037644.1 | 1931679 | SNV | 1 | C | T | Homozygous   |
| NC_037644.1 | 1937374 | SNV | 1 | A | G | Heterozygous |
| NC_037644.1 | 1966536 | SNV | 1 | A | T | Homozygous   |
| NC_037644.1 | 1966540 | SNV | 1 | A | G | Homozygous   |
| NC_037644.1 | 1967157 | SNV | 1 | C | T | Homozygous   |
| NC_037644.1 | 1971794 | SNV | 1 | T | C | Homozygous   |
| NC_037644.1 | 1978328 | SNV | 1 | C | T | Heterozygous |
| NC_037644.1 | 1982074 | SNV | 1 | T | C | Homozygous   |
| NC_037644.1 | 1982119 | SNV | 1 | G | A | Homozygous   |
| NC_037644.1 | 1985967 | SNV | 1 | T | C | Homozygous   |
| NC_037644.1 | 1985987 | SNV | 1 | G | C | Homozygous   |

|             |         |     |   |   |   |              |
|-------------|---------|-----|---|---|---|--------------|
| NC_037644.1 | 1988194 | SNV | 1 | A | G | Heterozygous |
| NC_037644.1 | 2010229 | SNV | 1 | C | T | Heterozygous |
| NC_037644.1 | 2010414 | SNV | 1 | A | G | Heterozygous |
| NC_037644.1 | 2010482 | SNV | 1 | T | C | Heterozygous |
| NC_037644.1 | 2010523 | SNV | 1 | C | T | Heterozygous |
| NC_037644.1 | 2010610 | SNV | 1 | A | G | Heterozygous |
| NC_037644.1 | 2056546 | SNV | 1 | T | G | Heterozygous |
| NC_037644.1 | 2073800 | SNV | 1 | A | G | Homozygous   |
| NC_037644.1 | 2073856 | SNV | 1 | G | C | Homozygous   |
| NC_037644.1 | 2074421 | SNV | 1 | G | A | Heterozygous |
| NC_037644.1 | 2074572 | SNV | 1 | C | T | Heterozygous |
| NC_037644.1 | 2074582 | SNV | 1 | C | T | Heterozygous |
| NC_037644.1 | 2080947 | SNV | 1 | A | T | Heterozygous |
| NC_037644.1 | 2081193 | SNV | 1 | A | G | Homozygous   |
| NC_037644.1 | 2081229 | SNV | 1 | C | A | Homozygous   |
| NC_037644.1 | 2081419 | SNV | 1 | A | G | Homozygous   |
| NC_037644.1 | 2081471 | SNV | 1 | T | C | Homozygous   |
| NC_037644.1 | 2081651 | SNV | 1 | T | C | Heterozygous |
| NC_037644.1 | 2081666 | SNV | 1 | C | T | Heterozygous |
| NC_037644.1 | 2082179 | SNV | 1 | T | C | Heterozygous |
| NC_037644.1 | 2082212 | SNV | 1 | G | A | Homozygous   |
| NC_037644.1 | 2082287 | SNV | 1 | A | G | Homozygous   |
| NC_037644.1 | 2082593 | SNV | 1 | T | C | Heterozygous |
| NC_037644.1 | 2082698 | SNV | 1 | T | C | Homozygous   |
| NC_037644.1 | 2082708 | SNV | 1 | A | G | Homozygous   |
| NC_037644.1 | 2082792 | SNV | 1 | C | T | Homozygous   |
| NC_037644.1 | 2082905 | SNV | 1 | A | G | Homozygous   |
| NC_037644.1 | 2082983 | SNV | 1 | T | C | Homozygous   |
| NC_037644.1 | 2082987 | SNV | 1 | G | A | Heterozygous |
| NC_037644.1 | 2082993 | SNV | 1 | C | T | Homozygous   |
| NC_037644.1 | 2083112 | SNV | 1 | G | A | Homozygous   |
| NC_037644.1 | 2083118 | SNV | 1 | C | G | Homozygous   |
| NC_037644.1 | 2083125 | SNV | 1 | G | A | Heterozygous |
| NC_037644.1 | 2083128 | SNV | 1 | A | G | Homozygous   |
| NC_037644.1 | 2083203 | SNV | 1 | G | A | Heterozygous |
| NC_037644.1 | 2083386 | SNV | 1 | C | T | Heterozygous |
| NC_037644.1 | 2083447 | SNV | 1 | C | G | Homozygous   |
| NC_037644.1 | 2084324 | SNV | 1 | G | A | Homozygous   |
| NC_037644.1 | 2084564 | SNV | 1 | T | C | Heterozygous |
| NC_037644.1 | 2084582 | SNV | 1 | T | A | Heterozygous |
| NC_037644.1 | 2084586 | SNV | 1 | T | C | Heterozygous |
| NC_037644.1 | 2084869 | SNV | 1 | C | T | Homozygous   |
| NC_037644.1 | 2086797 | SNV | 1 | A | G | Homozygous   |
| NC_037644.1 | 2087722 | SNV | 1 | A | G | Homozygous   |
| NC_037644.1 | 2087846 | SNV | 1 | A | G | Homozygous   |
| NC_037644.1 | 2087878 | SNV | 1 | A | G | Homozygous   |
| NC_037644.1 | 2088068 | SNV | 1 | T | C | Homozygous   |
| NC_037644.1 | 2088096 | SNV | 1 | C | T | Heterozygous |
| NC_037644.1 | 2088145 | SNV | 1 | A | G | Homozygous   |
| NC_037644.1 | 2088171 | SNV | 1 | T | C | Heterozygous |
| NC_037644.1 | 2090496 | SNV | 1 | C | T | Heterozygous |

|             |         |     |   |   |   |              |
|-------------|---------|-----|---|---|---|--------------|
| NC_037644.1 | 2090514 | SNV | 1 | G | A | Homozygous   |
| NC_037644.1 | 2090636 | SNV | 1 | A | G | Homozygous   |
| NC_037644.1 | 2090641 | SNV | 1 | T | A | Heterozygous |
| NC_037644.1 | 2090754 | SNV | 1 | A | G | Homozygous   |
| NC_037644.1 | 2090766 | SNV | 1 | A | G | Homozygous   |
| NC_037644.1 | 2091382 | SNV | 1 | G | A | Heterozygous |
| NC_037644.1 | 2091699 | SNV | 1 | C | T | Homozygous   |
| NC_037644.1 | 2091735 | SNV | 1 | G | A | Heterozygous |
| NC_037644.1 | 2091771 | SNV | 1 | G | A | Heterozygous |
| NC_037644.1 | 2094379 | SNV | 1 | G | A | Heterozygous |
| NC_037644.1 | 2094448 | SNV | 1 | G | A | Heterozygous |
| NC_037644.1 | 2094468 | SNV | 1 | T | C | Heterozygous |
| NC_037644.1 | 2094566 | SNV | 1 | C | T | Homozygous   |
| NC_037644.1 | 2097038 | SNV | 1 | A | G | Homozygous   |
| NC_037644.1 | 2097340 | SNV | 1 | A | G | Homozygous   |
| NC_037644.1 | 2098161 | SNV | 1 | A | G | Homozygous   |
| NC_037644.1 | 2110304 | SNV | 1 | C | T | Heterozygous |
| NC_037644.1 | 2110348 | SNV | 1 | T | C | Homozygous   |
| NC_037644.1 | 2110459 | SNV | 1 | T | C | Heterozygous |
| NC_037644.1 | 2110746 | SNV | 1 | C | G | Homozygous   |
| NC_037644.1 | 2110791 | SNV | 1 | A | G | Heterozygous |
| NC_037644.1 | 2110882 | SNV | 1 | T | C | Homozygous   |
| NC_037644.1 | 2111281 | SNV | 1 | G | A | Heterozygous |
| NC_037644.1 | 2111722 | SNV | 1 | A | G | Homozygous   |
| NC_037644.1 | 2112186 | SNV | 1 | A | T | Heterozygous |
| NC_037644.1 | 2113956 | SNV | 1 | T | C | Heterozygous |
| NC_037644.1 | 2114123 | SNV | 1 | G | A | Heterozygous |
| NC_037644.1 | 2114180 | SNV | 1 | A | G | Heterozygous |
| NC_037644.1 | 2114183 | SNV | 1 | A | T | Heterozygous |
| NC_037644.1 | 2114359 | SNV | 1 | C | A | Heterozygous |
| NC_037644.1 | 2115371 | SNV | 1 | C | T | Heterozygous |
| NC_037644.1 | 2115536 | SNV | 1 | G | A | Heterozygous |
| NC_037644.1 | 2116096 | SNV | 1 | C | T | Homozygous   |
| NC_037644.1 | 2116106 | SNV | 1 | G | A | Homozygous   |
| NC_037644.1 | 2116261 | SNV | 1 | T | C | Homozygous   |
| NC_037644.1 | 2116705 | SNV | 1 | G | T | Homozygous   |
| NC_037644.1 | 2116725 | SNV | 1 | C | T | Homozygous   |
| NC_037644.1 | 2116737 | SNV | 1 | T | C | Heterozygous |
| NC_037644.1 | 2117668 | SNV | 1 | T | A | Heterozygous |
| NC_037644.1 | 2117716 | SNV | 1 | C | A | Heterozygous |
| NC_037644.1 | 2117720 | SNV | 1 | T | A | Heterozygous |
| NC_037644.1 | 2118131 | SNV | 1 | C | T | Heterozygous |
| NC_037644.1 | 2118465 | SNV | 1 | T | C | Homozygous   |
| NC_037644.1 | 2118697 | SNV | 1 | A | G | Heterozygous |
| NC_037644.1 | 2121241 | SNV | 1 | A | G | Homozygous   |
| NC_037644.1 | 2121694 | SNV | 1 | G | A | Homozygous   |
| NC_037644.1 | 2121722 | SNV | 1 | A | G | Homozygous   |
| NC_037644.1 | 2121863 | SNV | 1 | A | T | Homozygous   |
| NC_037644.1 | 2121916 | SNV | 1 | A | G | Homozygous   |
| NC_037644.1 | 2121942 | SNV | 1 | A | T | Homozygous   |
| NC_037644.1 | 2121944 | SNV | 1 | T | A | Homozygous   |

|             |         |     |   |   |   |              |
|-------------|---------|-----|---|---|---|--------------|
| NC_037644.1 | 2121947 | SNV | 1 | A | T | Homozygous   |
| NC_037644.1 | 2124417 | SNV | 1 | T | C | Homozygous   |
| NC_037644.1 | 2124429 | SNV | 1 | A | G | Homozygous   |
| NC_037644.1 | 2124513 | SNV | 1 | A | G | Homozygous   |
| NC_037644.1 | 2124672 | SNV | 1 | T | C | Homozygous   |
| NC_037644.1 | 2124781 | SNV | 1 | C | T | Heterozygous |
| NC_037644.1 | 2124993 | SNV | 1 | G | A | Heterozygous |
| NC_037644.1 | 2154493 | SNV | 1 | A | G | Homozygous   |
| NC_037644.1 | 2157036 | SNV | 1 | G | A | Homozygous   |
| NC_037644.1 | 2157057 | SNV | 1 | T | A | Heterozygous |
| NC_037644.1 | 2157067 | SNV | 1 | A | G | Homozygous   |
| NC_037644.1 | 2157071 | SNV | 1 | T | A | Homozygous   |
| NC_037644.1 | 2176097 | SNV | 1 | G | A | Heterozygous |
| NC_037644.1 | 2184044 | SNV | 1 | T | C | Homozygous   |
| NC_037644.1 | 2184057 | SNV | 1 | C | T | Heterozygous |
| NC_037644.1 | 2184061 | SNV | 1 | C | T | Homozygous   |
| NC_037644.1 | 2184133 | SNV | 1 | G | C | Heterozygous |
| NC_037644.1 | 2192254 | SNV | 1 | T | C | Heterozygous |
| NC_037644.1 | 2192478 | SNV | 1 | T | C | Homozygous   |
| NC_037644.1 | 2193658 | SNV | 1 | C | T | Homozygous   |
| NC_037644.1 | 2193661 | SNV | 1 | T | C | Heterozygous |
| NC_037644.1 | 2198925 | SNV | 1 | C | T | Homozygous   |
| NC_037644.1 | 2199084 | SNV | 1 | A | T | Heterozygous |
| NC_037644.1 | 2200256 | SNV | 1 | T | C | Homozygous   |
| NC_037644.1 | 2200840 | SNV | 1 | A | C | Homozygous   |
| NC_037644.1 | 2201045 | SNV | 1 | G | A | Heterozygous |
| NC_037644.1 | 2216647 | SNV | 1 | G | A | Heterozygous |
| NC_037644.1 | 2216689 | SNV | 1 | C | T | Heterozygous |
| NC_037644.1 | 2216720 | SNV | 1 | A | G | Heterozygous |
| NC_037644.1 | 2221136 | SNV | 1 | C | A | Homozygous   |
| NC_037644.1 | 2224210 | SNV | 1 | A | G | Homozygous   |
| NC_037644.1 | 2224233 | SNV | 1 | C | T | Heterozygous |
| NC_037644.1 | 2224241 | SNV | 1 | C | T | Heterozygous |
| NC_037644.1 | 2224246 | SNV | 1 | A | G | Heterozygous |
| NC_037644.1 | 2227466 | SNV | 1 | C | T | Homozygous   |
| NC_037644.1 | 2227557 | SNV | 1 | T | A | Heterozygous |
| NC_037644.1 | 2227603 | SNV | 1 | T | C | Homozygous   |
| NC_037644.1 | 2240090 | SNV | 1 | C | T | Heterozygous |
| NC_037644.1 | 2240097 | SNV | 1 | C | T | Heterozygous |
| NC_037644.1 | 2240397 | SNV | 1 | T | C | Heterozygous |
| NC_037644.1 | 2240447 | SNV | 1 | A | G | Heterozygous |
| NC_037644.1 | 2240459 | SNV | 1 | A | G | Homozygous   |
| NC_037644.1 | 2241052 | SNV | 1 | C | T | Heterozygous |
| NC_037644.1 | 2241388 | SNV | 1 | C | T | Homozygous   |
| NC_037644.1 | 2241540 | SNV | 1 | T | A | Heterozygous |
| NC_037644.1 | 2241547 | SNV | 1 | A | T | Heterozygous |
| NC_037644.1 | 2241567 | SNV | 1 | G | T | Homozygous   |
| NC_037644.1 | 2241595 | SNV | 1 | C | T | Homozygous   |
| NC_037644.1 | 2241600 | SNV | 1 | T | C | Homozygous   |
| NC_037644.1 | 2241625 | SNV | 1 | G | A | Heterozygous |
| NC_037644.1 | 2241883 | SNV | 1 | C | A | Heterozygous |



|             |         |     |   |   |   |              |
|-------------|---------|-----|---|---|---|--------------|
| NC_037644.1 | 2241891 | SNV | 1 | C | T | Heterozygous |
| NC_037644.1 | 2241897 | SNV | 1 | T | C | Heterozygous |
| NC_037644.1 | 2241920 | SNV | 1 | T | C | Homozygous   |
| NC_037644.1 | 2241992 | SNV | 1 | G | A | Homozygous   |
| NC_037644.1 | 2242489 | SNV | 1 | G | A | Homozygous   |
| NC_037644.1 | 2242492 | SNV | 1 | T | C | Heterozygous |
| NC_037644.1 | 2242515 | SNV | 1 | C | T | Homozygous   |
| NC_037644.1 | 2242542 | SNV | 1 | G | T | Heterozygous |
| NC_037644.1 | 2242544 | SNV | 1 | G | A | Heterozygous |
| NC_037644.1 | 2242565 | SNV | 1 | G | A | Heterozygous |
| NC_037644.1 | 2243700 | SNV | 1 | A | T | Homozygous   |
| NC_037644.1 | 2243705 | SNV | 1 | G | T | Homozygous   |
| NC_037644.1 | 2243713 | SNV | 1 | T | A | Homozygous   |
| NC_037644.1 | 2243717 | SNV | 1 | A | T | Homozygous   |
| NC_037644.1 | 2243738 | SNV | 1 | C | A | Homozygous   |
| NC_037644.1 | 2245255 | SNV | 1 | A | G | Homozygous   |
| NC_037644.1 | 2248113 | SNV | 1 | C | T | Homozygous   |
| NC_037644.1 | 2248171 | SNV | 1 | A | G | Homozygous   |
| NC_037644.1 | 2248421 | SNV | 1 | C | T | Heterozygous |
| NC_037644.1 | 2249599 | SNV | 1 | A | G | Heterozygous |
| NC_037644.1 | 2249615 | SNV | 1 | G | C | Homozygous   |
| NC_037644.1 | 2251650 | SNV | 1 | G | A | Heterozygous |
| NC_037644.1 | 2255148 | SNV | 1 | C | A | Homozygous   |
| NC_037644.1 | 2255200 | SNV | 1 | A | G | Homozygous   |
| NC_037644.1 | 2255317 | SNV | 1 | C | A | Homozygous   |
| NC_037644.1 | 2255416 | SNV | 1 | T | C | Homozygous   |
| NC_037644.1 | 2257210 | SNV | 1 | C | T | Homozygous   |
| NC_037644.1 | 2257218 | SNV | 1 | C | T | Homozygous   |
| NC_037644.1 | 2257519 | SNV | 1 | T | C | Homozygous   |
| NC_037644.1 | 2257623 | SNV | 1 | T | C | Heterozygous |
| NC_037644.1 | 2257625 | SNV | 1 | T | C | Heterozygous |
| NC_037644.1 | 2257743 | SNV | 1 | C | T | Homozygous   |
| NC_037644.1 | 2261368 | SNV | 1 | T | C | Heterozygous |
| NC_037644.1 | 2261415 | SNV | 1 | T | C | Heterozygous |
| NC_037644.1 | 2272849 | SNV | 1 | T | C | Homozygous   |
| NC_037644.1 | 2273249 | SNV | 1 | G | A | Homozygous   |
| NC_037644.1 | 2273265 | SNV | 1 | T | A | Homozygous   |
| NC_037644.1 | 2273735 | SNV | 1 | A | G | Homozygous   |
| NC_037644.1 | 2307248 | SNV | 1 | T | C | Homozygous   |
| NC_037644.1 | 2307356 | SNV | 1 | A | G | Heterozygous |
| NC_037644.1 | 2307359 | SNV | 1 | C | T | Homozygous   |
| NC_037644.1 | 2318486 | SNV | 1 | A | G | Heterozygous |
| NC_037644.1 | 2320292 | SNV | 1 | A | C | Heterozygous |
| NC_037644.1 | 2326911 | SNV | 1 | A | T | Homozygous   |
| NC_037644.1 | 2327307 | SNV | 1 | T | C | Homozygous   |
| NC_037644.1 | 2327476 | SNV | 1 | T | C | Heterozygous |
| NC_037644.1 | 2328792 | SNV | 1 | T | C | Heterozygous |
| NC_037644.1 | 2328831 | SNV | 1 | C | T | Heterozygous |
| NC_037644.1 | 2330954 | SNV | 1 | C | G | Homozygous   |
| NC_037644.1 | 2332033 | SNV | 1 | G | C | Heterozygous |
| NC_037644.1 | 2332307 | SNV | 1 | C | A | Heterozygous |

|             |         |     |   |   |   |              |
|-------------|---------|-----|---|---|---|--------------|
| NC_037644.1 | 2332417 | SNV | 1 | G | A | Heterozygous |
| NC_037644.1 | 2332736 | SNV | 1 | A | G | Homozygous   |
| NC_037644.1 | 2333939 | SNV | 1 | A | T | Heterozygous |
| NC_037644.1 | 2333940 | SNV | 1 | T | C | Heterozygous |
| NC_037644.1 | 2334487 | SNV | 1 | C | T | Heterozygous |
| NC_037644.1 | 2334523 | SNV | 1 | G | A | Heterozygous |
| NC_037644.1 | 2334534 | SNV | 1 | A | T | Homozygous   |
| NC_037644.1 | 2334662 | SNV | 1 | G | T | Heterozygous |
| NC_037644.1 | 2334922 | SNV | 1 | T | C | Homozygous   |
| NC_037644.1 | 2334950 | SNV | 1 | T | C | Heterozygous |
| NC_037644.1 | 2334967 | SNV | 1 | C | G | Heterozygous |
| NC_037644.1 | 2334971 | SNV | 1 | T | C | Homozygous   |
| NC_037644.1 | 2335546 | SNV | 1 | C | T | Homozygous   |
| NC_037644.1 | 2335582 | SNV | 1 | G | A | Homozygous   |
| NC_037644.1 | 2335587 | SNV | 1 | A | G | Heterozygous |
| NC_037644.1 | 2335940 | SNV | 1 | A | G | Homozygous   |
| NC_037644.1 | 2336186 | SNV | 1 | A | G | Homozygous   |
| NC_037644.1 | 2337850 | SNV | 1 | A | T | Homozygous   |
| NC_037644.1 | 2338008 | SNV | 1 | C | T | Homozygous   |
| NC_037644.1 | 2338041 | SNV | 1 | C | T | Heterozygous |
| NC_037644.1 | 2338127 | SNV | 1 | G | A | Heterozygous |
| NC_037644.1 | 2338317 | SNV | 1 | G | A | Homozygous   |
| NC_037644.1 | 2338824 | SNV | 1 | A | T | Heterozygous |
| NC_037644.1 | 2339034 | SNV | 1 | A | G | Homozygous   |
| NC_037644.1 | 2339064 | SNV | 1 | C | T | Homozygous   |
| NC_037644.1 | 2339067 | SNV | 1 | C | T | Homozygous   |
| NC_037644.1 | 2339636 | SNV | 1 | A | G | Heterozygous |
| NC_037644.1 | 2339653 | SNV | 1 | A | G | Homozygous   |
| NC_037644.1 | 2340083 | SNV | 1 | T | C | Heterozygous |
| NC_037644.1 | 2340094 | SNV | 1 | G | A | Heterozygous |
| NC_037644.1 | 2340134 | SNV | 1 | G | A | Heterozygous |
| NC_037644.1 | 2340444 | SNV | 1 | G | A | Heterozygous |
| NC_037644.1 | 2340462 | SNV | 1 | T | C | Homozygous   |
| NC_037644.1 | 2340715 | SNV | 1 | C | A | Homozygous   |
| NC_037644.1 | 2340718 | SNV | 1 | T | A | Homozygous   |
| NC_037644.1 | 2341039 | SNV | 1 | T | C | Homozygous   |
| NC_037644.1 | 2341055 | SNV | 1 | A | C | Heterozygous |
| NC_037644.1 | 2341140 | SNV | 1 | C | T | Heterozygous |
| NC_037644.1 | 2341228 | SNV | 1 | G | A | Homozygous   |
| NC_037644.1 | 2341448 | SNV | 1 | T | A | Heterozygous |
| NC_037644.1 | 2341530 | SNV | 1 | A | G | Homozygous   |
| NC_037644.1 | 2341680 | SNV | 1 | T | A | Heterozygous |
| NC_037644.1 | 2341682 | SNV | 1 | T | G | Heterozygous |
| NC_037644.1 | 2341695 | SNV | 1 | A | G | Homozygous   |
| NC_037644.1 | 2341741 | SNV | 1 | C | T | Heterozygous |
| NC_037644.1 | 2341831 | SNV | 1 | G | A | Heterozygous |
| NC_037644.1 | 2342005 | SNV | 1 | T | C | Heterozygous |
| NC_037644.1 | 2343675 | SNV | 1 | G | A | Homozygous   |
| NC_037644.1 | 2343959 | SNV | 1 | G | A | Homozygous   |
| NC_037644.1 | 2344039 | SNV | 1 | A | G | Heterozygous |
| NC_037644.1 | 2344102 | SNV | 1 | G | A | Heterozygous |

|             |         |     |   |   |   |              |
|-------------|---------|-----|---|---|---|--------------|
| NC_037644.1 | 2344427 | SNV | 1 | G | A | Heterozygous |
| NC_037644.1 | 2344454 | SNV | 1 | A | T | Heterozygous |
| NC_037644.1 | 2344473 | SNV | 1 | T | C | Homozygous   |
| NC_037644.1 | 2347414 | SNV | 1 | T | A | Homozygous   |
| NC_037644.1 | 2347416 | SNV | 1 | A | T | Homozygous   |
| NC_037644.1 | 2347671 | SNV | 1 | T | A | Homozygous   |
| NC_037644.1 | 2350989 | SNV | 1 | C | T | Homozygous   |
| NC_037644.1 | 2351099 | SNV | 1 | A | G | Heterozygous |
| NC_037644.1 | 2351158 | SNV | 1 | C | T | Heterozygous |
| NC_037644.1 | 2351181 | SNV | 1 | A | T | Heterozygous |
| NC_037644.1 | 2351188 | SNV | 1 | A | T | Heterozygous |
| NC_037644.1 | 2351191 | SNV | 1 | C | A | Heterozygous |
| NC_037644.1 | 2351207 | SNV | 1 | A | G | Heterozygous |
| NC_037644.1 | 2351269 | SNV | 1 | G | C | Heterozygous |
| NC_037644.1 | 2353993 | SNV | 1 | G | A | Homozygous   |
| NC_037644.1 | 2355334 | SNV | 1 | T | C | Homozygous   |
| NC_037644.1 | 2356144 | SNV | 1 | A | G | Homozygous   |
| NC_037644.1 | 2357705 | SNV | 1 | C | T | Heterozygous |
| NC_037644.1 | 2358093 | SNV | 1 | T | G | Heterozygous |
| NC_037644.1 | 2358166 | SNV | 1 | C | A | Homozygous   |
| NC_037644.1 | 2358192 | SNV | 1 | G | T | Homozygous   |
| NC_037644.1 | 2358215 | SNV | 1 | T | C | Homozygous   |
| NC_037644.1 | 2358255 | SNV | 1 | G | A | Homozygous   |
| NC_037644.1 | 2358379 | SNV | 1 | A | G | Homozygous   |
| NC_037644.1 | 2358675 | SNV | 1 | C | T | Heterozygous |
| NC_037644.1 | 2358698 | SNV | 1 | A | G | Heterozygous |
| NC_037644.1 | 2359959 | SNV | 1 | A | G | Heterozygous |
| NC_037644.1 | 2361088 | SNV | 1 | A | G | Homozygous   |
| NC_037644.1 | 2365468 | SNV | 1 | G | C | Homozygous   |
| NC_037644.1 | 2365493 | SNV | 1 | G | A | Heterozygous |
| NC_037644.1 | 2365630 | SNV | 1 | A | G | Homozygous   |
| NC_037644.1 | 2368206 | SNV | 1 | T | C | Homozygous   |
| NC_037644.1 | 2368829 | SNV | 1 | A | G | Heterozygous |
| NC_037644.1 | 2368895 | SNV | 1 | A | G | Homozygous   |
| NC_037644.1 | 2369046 | SNV | 1 | C | T | Heterozygous |
| NC_037644.1 | 2369805 | SNV | 1 | C | T | Heterozygous |
| NC_037644.1 | 2369806 | SNV | 1 | C | T | Heterozygous |
| NC_037644.1 | 2369839 | SNV | 1 | A | T | Heterozygous |
| NC_037644.1 | 2369953 | SNV | 1 | C | T | Homozygous   |
| NC_037644.1 | 2369986 | SNV | 1 | C | A | Homozygous   |
| NC_037644.1 | 2370016 | SNV | 1 | C | G | Homozygous   |
| NC_037644.1 | 2370253 | SNV | 1 | A | G | Homozygous   |
| NC_037644.1 | 2370256 | SNV | 1 | G | A | Heterozygous |
| NC_037644.1 | 2370286 | SNV | 1 | T | G | Homozygous   |
| NC_037644.1 | 2371752 | SNV | 1 | G | C | Heterozygous |
| NC_037644.1 | 2372794 | SNV | 1 | C | T | Heterozygous |
| NC_037644.1 | 2372878 | SNV | 1 | G | C | Heterozygous |
| NC_037644.1 | 2373798 | SNV | 1 | C | T | Heterozygous |
| NC_037644.1 | 2373889 | SNV | 1 | T | C | Homozygous   |
| NC_037644.1 | 2374012 | SNV | 1 | G | C | Homozygous   |
| NC_037644.1 | 2403472 | SNV | 1 | T | C | Heterozygous |

|             |         |     |   |   |   |              |
|-------------|---------|-----|---|---|---|--------------|
| NC_037644.1 | 2403542 | SNV | 1 | G | A | Heterozygous |
| NC_037644.1 | 2403549 | SNV | 1 | T | C | Homozygous   |
| NC_037644.1 | 2403618 | SNV | 1 | G | A | Heterozygous |
| NC_037644.1 | 2403635 | SNV | 1 | T | C | Heterozygous |
| NC_037644.1 | 2403641 | SNV | 1 | C | T | Heterozygous |
| NC_037644.1 | 2403649 | SNV | 1 | T | C | Homozygous   |
| NC_037644.1 | 2403654 | SNV | 1 | C | G | Heterozygous |
| NC_037644.1 | 2403713 | SNV | 1 | T | C | Homozygous   |
| NC_037644.1 | 2403810 | SNV | 1 | A | G | Homozygous   |
| NC_037644.1 | 2403819 | SNV | 1 | A | G | Heterozygous |
| NC_037644.1 | 2403834 | SNV | 1 | T | C | Homozygous   |
| NC_037644.1 | 2403892 | SNV | 1 | T | C | Homozygous   |
| NC_037644.1 | 2403906 | SNV | 1 | T | C | Homozygous   |
| NC_037644.1 | 2403908 | SNV | 1 | C | T | Homozygous   |
| NC_037644.1 | 2403911 | SNV | 1 | C | G | Homozygous   |
| NC_037644.1 | 2403921 | SNV | 1 | T | C | Heterozygous |
| NC_037644.1 | 2403924 | SNV | 1 | C | T | Heterozygous |
| NC_037644.1 | 2403928 | SNV | 1 | C | T | Heterozygous |
| NC_037644.1 | 2403945 | SNV | 1 | T | C | Homozygous   |
| NC_037644.1 | 2403949 | SNV | 1 | T | C | Heterozygous |
| NC_037644.1 | 2403952 | SNV | 1 | T | C | Homozygous   |
| NC_037644.1 | 2404032 | SNV | 1 | G | A | Heterozygous |
| NC_037644.1 | 2404042 | SNV | 1 | G | A | Heterozygous |
| NC_037644.1 | 2404093 | SNV | 1 | A | G | Heterozygous |
| NC_037644.1 | 2404103 | SNV | 1 | G | C | Homozygous   |
| NC_037644.1 | 2404119 | SNV | 1 | A | G | Homozygous   |
| NC_037644.1 | 2404133 | SNV | 1 | A | G | Heterozygous |
| NC_037644.1 | 2404169 | SNV | 1 | C | T | Homozygous   |
| NC_037644.1 | 2404201 | SNV | 1 | A | G | Homozygous   |
| NC_037644.1 | 2404208 | SNV | 1 | T | C | Homozygous   |
| NC_037644.1 | 2404216 | SNV | 1 | T | C | Homozygous   |
| NC_037644.1 | 2404238 | SNV | 1 | T | C | Homozygous   |
| NC_037644.1 | 2404243 | SNV | 1 | T | C | Homozygous   |
| NC_037644.1 | 2404357 | SNV | 1 | G | A | Heterozygous |
| NC_037644.1 | 2404395 | SNV | 1 | G | A | Heterozygous |
| NC_037644.1 | 2404689 | SNV | 1 | C | T | Heterozygous |
| NC_037644.1 | 2404742 | SNV | 1 | A | C | Heterozygous |
| NC_037644.1 | 2415035 | SNV | 1 | T | A | Homozygous   |
| NC_037644.1 | 2415067 | SNV | 1 | A | C | Homozygous   |
| NC_037644.1 | 2419613 | SNV | 1 | A | C | Heterozygous |
| NC_037644.1 | 2419631 | SNV | 1 | C | T | Homozygous   |
| NC_037644.1 | 2419637 | SNV | 1 | C | T | Homozygous   |
| NC_037644.1 | 2419639 | SNV | 1 | T | C | Homozygous   |
| NC_037644.1 | 2419642 | SNV | 1 | A | T | Heterozygous |
| NC_037644.1 | 2419645 | SNV | 1 | A | G | Homozygous   |
| NC_037644.1 | 2419744 | SNV | 1 | G | A | Homozygous   |
| NC_037644.1 | 2419752 | SNV | 1 | G | A | Homozygous   |
| NC_037644.1 | 2422893 | SNV | 1 | T | C | Heterozygous |
| NC_037644.1 | 2428231 | SNV | 1 | C | A | Heterozygous |
| NC_037644.1 | 2428340 | SNV | 1 | A | G | Homozygous   |
| NC_037644.1 | 2428346 | SNV | 1 | C | T | Homozygous   |

|             |         |     |   |   |   |              |
|-------------|---------|-----|---|---|---|--------------|
| NC_037644.1 | 2440305 | SNV | 1 | T | C | Homozygous   |
| NC_037644.1 | 2445493 | SNV | 1 | A | G | Heterozygous |
| NC_037644.1 | 2451059 | SNV | 1 | C | A | Homozygous   |
| NC_037644.1 | 2451083 | SNV | 1 | T | A | Homozygous   |
| NC_037644.1 | 2451089 | SNV | 1 | T | C | Homozygous   |
| NC_037644.1 | 2451733 | SNV | 1 | A | G | Heterozygous |
| NC_037644.1 | 2457557 | SNV | 1 | C | T | Heterozygous |
| NC_037644.1 | 2457624 | SNV | 1 | T | C | Heterozygous |
| NC_037644.1 | 2457709 | SNV | 1 | C | T | Heterozygous |
| NC_037644.1 | 2457746 | SNV | 1 | A | G | Homozygous   |
| NC_037644.1 | 2457764 | SNV | 1 | G | A | Homozygous   |
| NC_037644.1 | 2457803 | SNV | 1 | T | C | Heterozygous |
| NC_037644.1 | 2468122 | SNV | 1 | T | A | Homozygous   |
| NC_037644.1 | 2468170 | SNV | 1 | G | A | Homozygous   |
| NC_037644.1 | 2468187 | SNV | 1 | T | A | Homozygous   |
| NC_037644.1 | 2514312 | SNV | 1 | G | A | Heterozygous |
| NC_037644.1 | 2514850 | SNV | 1 | C | T | Heterozygous |
| NC_037644.1 | 2514859 | SNV | 1 | T | C | Heterozygous |
| NC_037644.1 | 2514902 | SNV | 1 | T | C | Homozygous   |
| NC_037644.1 | 2514904 | SNV | 1 | A | G | Homozygous   |
| NC_037644.1 | 2527228 | SNV | 1 | T | C | Homozygous   |
| NC_037644.1 | 2553353 | SNV | 1 | G | C | Heterozygous |
| NC_037644.1 | 2553359 | SNV | 1 | G | A | Heterozygous |
| NC_037644.1 | 2553423 | SNV | 1 | C | T | Heterozygous |
| NC_037644.1 | 2556061 | SNV | 1 | A | G | Heterozygous |
| NC_037644.1 | 2568930 | SNV | 1 | G | A | Heterozygous |
| NC_037644.1 | 2576430 | SNV | 1 | T | C | Homozygous   |
| NC_037644.1 | 2576447 | SNV | 1 | T | C | Homozygous   |
| NC_037644.1 | 2594970 | SNV | 1 | A | G | Homozygous   |
| NC_037644.1 | 2595037 | SNV | 1 | G | C | Homozygous   |
| NC_037644.1 | 2595070 | SNV | 1 | A | G | Homozygous   |
| NC_037644.1 | 2595231 | SNV | 1 | C | G | Homozygous   |
| NC_037644.1 | 2595238 | SNV | 1 | G | A | Heterozygous |
| NC_037644.1 | 2595241 | SNV | 1 | A | G | Homozygous   |
| NC_037644.1 | 2595292 | SNV | 1 | C | T | Homozygous   |
| NC_037644.1 | 2595347 | SNV | 1 | C | A | Homozygous   |
| NC_037644.1 | 2602355 | SNV | 1 | C | A | Homozygous   |
| NC_037644.1 | 2602364 | SNV | 1 | T | A | Homozygous   |
| NC_037644.1 | 2602366 | SNV | 1 | T | C | Homozygous   |
| NC_037644.1 | 2602368 | SNV | 1 | C | G | Homozygous   |
| NC_037644.1 | 2602375 | SNV | 1 | C | G | Homozygous   |
| NC_037644.1 | 2604894 | SNV | 1 | T | C | Homozygous   |
| NC_037644.1 | 2605903 | SNV | 1 | T | C | Homozygous   |
| NC_037644.1 | 2606117 | SNV | 1 | T | C | Homozygous   |
| NC_037644.1 | 2606201 | SNV | 1 | G | A | Heterozygous |
| NC_037644.1 | 2606301 | SNV | 1 | A | C | Homozygous   |
| NC_037644.1 | 2606593 | SNV | 1 | T | G | Heterozygous |
| NC_037644.1 | 2606599 | SNV | 1 | C | T | Homozygous   |
| NC_037644.1 | 2606602 | SNV | 1 | C | T | Heterozygous |
| NC_037644.1 | 2606605 | SNV | 1 | T | A | Heterozygous |
| NC_037644.1 | 2606615 | SNV | 1 | T | A | Heterozygous |

|             |         |     |   |   |   |              |
|-------------|---------|-----|---|---|---|--------------|
| NC_037644.1 | 2606623 | SNV | 1 | C | G | Heterozygous |
| NC_037644.1 | 2606623 | SNV | 1 | C | T | Heterozygous |
| NC_037644.1 | 2606695 | SNV | 1 | A | G | Homozygous   |
| NC_037644.1 | 2606739 | SNV | 1 | G | A | Heterozygous |
| NC_037644.1 | 2606835 | SNV | 1 | C | T | Homozygous   |
| NC_037644.1 | 2606860 | SNV | 1 | T | C | Homozygous   |
| NC_037644.1 | 2606916 | SNV | 1 | T | C | Heterozygous |
| NC_037644.1 | 2606995 | SNV | 1 | G | A | Heterozygous |
| NC_037644.1 | 2610027 | SNV | 1 | C | T | Heterozygous |
| NC_037644.1 | 2610556 | SNV | 1 | A | G | Homozygous   |
| NC_037644.1 | 2610715 | SNV | 1 | G | A | Heterozygous |
| NC_037644.1 | 2610732 | SNV | 1 | G | C | Heterozygous |
| NC_037644.1 | 2610754 | SNV | 1 | G | A | Heterozygous |
| NC_037644.1 | 2610932 | SNV | 1 | A | G | Heterozygous |
| NC_037644.1 | 2610936 | SNV | 1 | G | A | Heterozygous |
| NC_037644.1 | 2611278 | SNV | 1 | G | A | Heterozygous |
| NC_037644.1 | 2611426 | SNV | 1 | C | T | Heterozygous |
| NC_037644.1 | 2611566 | SNV | 1 | A | G | Homozygous   |
| NC_037644.1 | 2611751 | SNV | 1 | A | G | Homozygous   |
| NC_037644.1 | 2613376 | SNV | 1 | T | C | Homozygous   |
| NC_037644.1 | 2613638 | SNV | 1 | G | T | Heterozygous |
| NC_037644.1 | 2613934 | SNV | 1 | T | C | Heterozygous |
| NC_037644.1 | 2614605 | SNV | 1 | T | C | Heterozygous |
| NC_037644.1 | 2614647 | SNV | 1 | A | G | Heterozygous |
| NC_037644.1 | 2614749 | SNV | 1 | C | T | Homozygous   |
| NC_037644.1 | 2641632 | SNV | 1 | A | G | Heterozygous |
| NC_037644.1 | 2641641 | SNV | 1 | T | C | Homozygous   |
| NC_037644.1 | 2641720 | SNV | 1 | G | A | Homozygous   |
| NC_037644.1 | 2641830 | SNV | 1 | A | G | Homozygous   |
| NC_037644.1 | 2641833 | SNV | 1 | C | G | Homozygous   |
| NC_037644.1 | 2641837 | SNV | 1 | C | G | Homozygous   |
| NC_037644.1 | 2641851 | SNV | 1 | A | G | Homozygous   |
| NC_037644.1 | 2641885 | SNV | 1 | T | C | Homozygous   |
| NC_037644.1 | 2642030 | SNV | 1 | A | C | Homozygous   |
| NC_037644.1 | 2642198 | SNV | 1 | T | C | Homozygous   |
| NC_037644.1 | 2642243 | SNV | 1 | T | C | Homozygous   |
| NC_037644.1 | 2642371 | SNV | 1 | A | G | Heterozygous |
| NC_037644.1 | 2642399 | SNV | 1 | A | G | Heterozygous |
| NC_037644.1 | 2642594 | SNV | 1 | G | A | Heterozygous |
| NC_037644.1 | 2643202 | SNV | 1 | T | A | Heterozygous |
| NC_037644.1 | 2643220 | SNV | 1 | G | A | Heterozygous |
| NC_037644.1 | 2643334 | SNV | 1 | C | T | Homozygous   |
| NC_037644.1 | 2643425 | SNV | 1 | G | A | Homozygous   |
| NC_037644.1 | 2643563 | SNV | 1 | G | A | Homozygous   |
| NC_037644.1 | 2643582 | SNV | 1 | A | C | Homozygous   |
| NC_037644.1 | 2643594 | SNV | 1 | C | A | Heterozygous |
| NC_037644.1 | 2643618 | SNV | 1 | T | C | Heterozygous |
| NC_037644.1 | 2643623 | SNV | 1 | T | C | Homozygous   |
| NC_037644.1 | 2643636 | SNV | 1 | G | A | Heterozygous |
| NC_037644.1 | 2648851 | SNV | 1 | A | G | Homozygous   |
| NC_037644.1 | 2648855 | SNV | 1 | A | G | Homozygous   |

|             |         |     |   |   |   |              |
|-------------|---------|-----|---|---|---|--------------|
| NC_037644.1 | 2649100 | SNV | 1 | A | G | Homozygous   |
| NC_037644.1 | 2649383 | SNV | 1 | T | C | Heterozygous |
| NC_037644.1 | 2649864 | SNV | 1 | A | G | Heterozygous |
| NC_037644.1 | 2650043 | SNV | 1 | A | C | Heterozygous |
| NC_037644.1 | 2650064 | SNV | 1 | G | A | Homozygous   |
| NC_037644.1 | 2650067 | SNV | 1 | A | C | Homozygous   |
| NC_037644.1 | 2650111 | SNV | 1 | T | C | Heterozygous |
| NC_037644.1 | 2650243 | SNV | 1 | G | A | Heterozygous |
| NC_037644.1 | 2650507 | SNV | 1 | C | T | Heterozygous |
| NC_037644.1 | 2650633 | SNV | 1 | A | G | Homozygous   |
| NC_037644.1 | 2650742 | SNV | 1 | G | C | Homozygous   |
| NC_037644.1 | 2650922 | SNV | 1 | A | G | Heterozygous |
| NC_037644.1 | 2651182 | SNV | 1 | A | T | Heterozygous |
| NC_037644.1 | 2651185 | SNV | 1 | T | G | Heterozygous |
| NC_037644.1 | 2651445 | SNV | 1 | A | G | Heterozygous |
| NC_037644.1 | 2651537 | SNV | 1 | T | A | Homozygous   |
| NC_037644.1 | 2651542 | SNV | 1 | G | T | Homozygous   |
| NC_037644.1 | 2651690 | SNV | 1 | A | G | Homozygous   |
| NC_037644.1 | 2651813 | SNV | 1 | C | T | Heterozygous |
| NC_037644.1 | 2671163 | SNV | 1 | T | C | Homozygous   |
| NC_037644.1 | 2671238 | SNV | 1 | T | C | Homozygous   |
| NC_037644.1 | 2671323 | SNV | 1 | A | G | Heterozygous |
| NC_037644.1 | 2671326 | SNV | 1 | T | C | Heterozygous |
| NC_037644.1 | 2673407 | SNV | 1 | C | T | Homozygous   |
| NC_037644.1 | 2673539 | SNV | 1 | A | G | Heterozygous |
| NC_037644.1 | 2673613 | SNV | 1 | C | T | Homozygous   |
| NC_037644.1 | 2673667 | SNV | 1 | A | G | Heterozygous |
| NC_037644.1 | 2673673 | SNV | 1 | A | G | Heterozygous |
| NC_037644.1 | 2673783 | SNV | 1 | A | G | Homozygous   |
| NC_037644.1 | 2673832 | SNV | 1 | A | G | Heterozygous |
| NC_037644.1 | 2681632 | SNV | 1 | T | G | Heterozygous |
| NC_037644.1 | 2681637 | SNV | 1 | T | C | Heterozygous |
| NC_037644.1 | 2681641 | SNV | 1 | T | C | Homozygous   |
| NC_037644.1 | 2685895 | SNV | 1 | G | C | Heterozygous |
| NC_037644.1 | 2685920 | SNV | 1 | T | C | Homozygous   |
| NC_037644.1 | 2686022 | SNV | 1 | T | C | Heterozygous |
| NC_037644.1 | 2686069 | SNV | 1 | C | A | Homozygous   |
| NC_037644.1 | 2696716 | SNV | 1 | C | T | Homozygous   |
| NC_037644.1 | 2696924 | SNV | 1 | T | A | Homozygous   |
| NC_037644.1 | 2699902 | SNV | 1 | T | G | Heterozygous |
| NC_037644.1 | 2699903 | SNV | 1 | C | T | Heterozygous |
| NC_037644.1 | 2720011 | SNV | 1 | G | A | Heterozygous |
| NC_037644.1 | 2720025 | SNV | 1 | C | T | Heterozygous |
| NC_037644.1 | 2720068 | SNV | 1 | A | G | Heterozygous |
| NC_037644.1 | 2720232 | SNV | 1 | G | A | Homozygous   |
| NC_037644.1 | 2720837 | SNV | 1 | A | G | Heterozygous |
| NC_037644.1 | 2720863 | SNV | 1 | T | C | Heterozygous |
| NC_037644.1 | 2720884 | SNV | 1 | T | C | Heterozygous |
| NC_037644.1 | 2720894 | SNV | 1 | C | T | Homozygous   |
| NC_037644.1 | 2720912 | SNV | 1 | G | A | Homozygous   |
| NC_037644.1 | 2720915 | SNV | 1 | C | T | Homozygous   |

|             |         |     |   |   |   |              |
|-------------|---------|-----|---|---|---|--------------|
| NC_037644.1 | 2721285 | SNV | 1 | A | G | Heterozygous |
| NC_037644.1 | 2721290 | SNV | 1 | G | A | Heterozygous |
| NC_037644.1 | 2721293 | SNV | 1 | G | A | Heterozygous |
| NC_037644.1 | 2721301 | SNV | 1 | C | T | Homozygous   |
| NC_037644.1 | 2721333 | SNV | 1 | A | G | Heterozygous |
| NC_037644.1 | 2721788 | SNV | 1 | G | A | Homozygous   |
| NC_037644.1 | 2721801 | SNV | 1 | G | C | Heterozygous |
| NC_037644.1 | 2721923 | SNV | 1 | A | T | Homozygous   |
| NC_037644.1 | 2721926 | SNV | 1 | T | C | Heterozygous |
| NC_037644.1 | 2723104 | SNV | 1 | T | G | Homozygous   |
| NC_037644.1 | 2723280 | SNV | 1 | A | G | Homozygous   |
| NC_037644.1 | 2723300 | SNV | 1 | A | G | Homozygous   |
| NC_037644.1 | 2723313 | SNV | 1 | C | T | Homozygous   |
| NC_037644.1 | 2723453 | SNV | 1 | G | A | Homozygous   |
| NC_037644.1 | 2723497 | SNV | 1 | A | G | Homozygous   |
| NC_037644.1 | 2723520 | SNV | 1 | G | A | Heterozygous |
| NC_037644.1 | 2723599 | SNV | 1 | C | T | Heterozygous |
| NC_037644.1 | 2723651 | SNV | 1 | A | G | Homozygous   |
| NC_037644.1 | 2723667 | SNV | 1 | A | G | Homozygous   |
| NC_037644.1 | 2723684 | SNV | 1 | G | A | Homozygous   |
| NC_037644.1 | 2723691 | SNV | 1 | G | A | Homozygous   |
| NC_037644.1 | 2723712 | SNV | 1 | G | A | Homozygous   |
| NC_037644.1 | 2723765 | SNV | 1 | T | C | Heterozygous |
| NC_037644.1 | 2723777 | SNV | 1 | A | G | Homozygous   |
| NC_037644.1 | 2723802 | SNV | 1 | C | T | Homozygous   |
| NC_037644.1 | 2723844 | SNV | 1 | A | G | Homozygous   |
| NC_037644.1 | 2723847 | SNV | 1 | G | A | Homozygous   |
| NC_037644.1 | 2723854 | SNV | 1 | G | A | Homozygous   |
| NC_037644.1 | 2723867 | SNV | 1 | A | C | Homozygous   |
| NC_037644.1 | 2723870 | SNV | 1 | G | A | Heterozygous |
| NC_037644.1 | 2723873 | SNV | 1 | A | G | Homozygous   |
| NC_037644.1 | 2723924 | SNV | 1 | A | T | Homozygous   |
| NC_037644.1 | 2723972 | SNV | 1 | G | A | Homozygous   |
| NC_037644.1 | 2723980 | SNV | 1 | A | G | Heterozygous |
| NC_037644.1 | 2723997 | SNV | 1 | G | A | Heterozygous |
| NC_037644.1 | 2724004 | SNV | 1 | G | A | Heterozygous |
| NC_037644.1 | 2724017 | SNV | 1 | G | C | Homozygous   |
| NC_037644.1 | 2724020 | SNV | 1 | G | A | Homozygous   |
| NC_037644.1 | 2724023 | SNV | 1 | A | G | Homozygous   |
| NC_037644.1 | 2724027 | SNV | 1 | G | A | Homozygous   |
| NC_037644.1 | 2724076 | SNV | 1 | A | G | Homozygous   |
| NC_037644.1 | 2724101 | SNV | 1 | T | C | Heterozygous |
| NC_037644.1 | 2724127 | SNV | 1 | C | G | Homozygous   |
| NC_037644.1 | 2724171 | SNV | 1 | C | T | Heterozygous |
| NC_037644.1 | 2724174 | SNV | 1 | T | C | Homozygous   |
| NC_037644.1 | 2724199 | SNV | 1 | A | G | Homozygous   |
| NC_037644.1 | 2724239 | SNV | 1 | G | A | Heterozygous |
| NC_037644.1 | 2724254 | SNV | 1 | T | C | Homozygous   |
| NC_037644.1 | 2724360 | SNV | 1 | G | A | Homozygous   |
| NC_037644.1 | 2724365 | SNV | 1 | G | A | Heterozygous |
| NC_037644.1 | 2727536 | SNV | 1 | C | T | Heterozygous |



|             |         |     |   |   |   |              |
|-------------|---------|-----|---|---|---|--------------|
| NC_037644.1 | 2727700 | SNV | 1 | A | G | Homozygous   |
| NC_037644.1 | 2727819 | SNV | 1 | A | G | Homozygous   |
| NC_037644.1 | 2727871 | SNV | 1 | C | G | Homozygous   |
| NC_037644.1 | 2727978 | SNV | 1 | T | C | Heterozygous |
| NC_037644.1 | 2728129 | SNV | 1 | C | T | Homozygous   |
| NC_037644.1 | 2728184 | SNV | 1 | T | C | Homozygous   |
| NC_037644.1 | 2730004 | SNV | 1 | A | T | Homozygous   |
| NC_037644.1 | 2730062 | SNV | 1 | A | G | Homozygous   |
| NC_037644.1 | 2730134 | SNV | 1 | A | G | Homozygous   |
| NC_037644.1 | 2730276 | SNV | 1 | A | G | Heterozygous |
| NC_037644.1 | 2735228 | SNV | 1 | C | T | Homozygous   |
| NC_037644.1 | 2735242 | SNV | 1 | C | T | Homozygous   |
| NC_037644.1 | 2735244 | SNV | 1 | C | A | Homozygous   |
| NC_037644.1 | 2735279 | SNV | 1 | A | G | Homozygous   |
| NC_037644.1 | 2735302 | SNV | 1 | A | G | Homozygous   |
| NC_037644.1 | 2735317 | SNV | 1 | T | C | Homozygous   |
| NC_037644.1 | 2735376 | SNV | 1 | C | T | Heterozygous |
| NC_037644.1 | 2735479 | SNV | 1 | C | T | Homozygous   |
| NC_037644.1 | 2735523 | SNV | 1 | G | A | Homozygous   |
| NC_037644.1 | 2735537 | SNV | 1 | G | A | Heterozygous |
| NC_037644.1 | 2735656 | SNV | 1 | C | T | Heterozygous |
| NC_037644.1 | 2735951 | SNV | 1 | G | A | Heterozygous |
| NC_037644.1 | 2735963 | SNV | 1 | A | G | Homozygous   |
| NC_037644.1 | 2746271 | SNV | 1 | G | A | Heterozygous |
| NC_037644.1 | 2760634 | SNV | 1 | T | A | Homozygous   |
| NC_037644.1 | 2760653 | SNV | 1 | T | A | Homozygous   |
| NC_037644.1 | 2760655 | SNV | 1 | A | T | Homozygous   |
| NC_037644.1 | 2769284 | SNV | 1 | G | A | Heterozygous |
| NC_037644.1 | 2769427 | SNV | 1 | G | C | Homozygous   |
| NC_037644.1 | 2769483 | SNV | 1 | A | T | Heterozygous |
| NC_037644.1 | 2769486 | SNV | 1 | T | A | Heterozygous |
| NC_037644.1 | 2769503 | SNV | 1 | T | G | Heterozygous |
| NC_037644.1 | 2773957 | SNV | 1 | G | A | Homozygous   |
| NC_037644.1 | 2774027 | SNV | 1 | A | G | Homozygous   |
| NC_037644.1 | 2774033 | SNV | 1 | T | C | Homozygous   |
| NC_037644.1 | 2777257 | SNV | 1 | A | G | Homozygous   |
| NC_037644.1 | 2777685 | SNV | 1 | A | G | Homozygous   |
| NC_037644.1 | 2805703 | SNV | 1 | G | A | Heterozygous |
| NC_037644.1 | 2828064 | SNV | 1 | G | C | Homozygous   |
| NC_037644.1 | 2828257 | SNV | 1 | A | G | Heterozygous |
| NC_037644.1 | 2828261 | SNV | 1 | G | A | Heterozygous |
| NC_037644.1 | 2828339 | SNV | 1 | T | C | Homozygous   |
| NC_037644.1 | 2835464 | SNV | 1 | T | C | Heterozygous |
| NC_037644.1 | 2835474 | SNV | 1 | T | C | Heterozygous |
| NC_037644.1 | 2835476 | SNV | 1 | C | G | Heterozygous |
| NC_037644.1 | 2835480 | SNV | 1 | C | T | Heterozygous |
| NC_037644.1 | 2835483 | SNV | 1 | C | T | Heterozygous |
| NC_037644.1 | 2835486 | SNV | 1 | C | T | Heterozygous |
| NC_037644.1 | 2835489 | SNV | 1 | T | C | Heterozygous |
| NC_037644.1 | 2835505 | SNV | 1 | G | A | Homozygous   |
| NC_037644.1 | 2835573 | SNV | 1 | A | G | Heterozygous |

|             |         |     |   |   |   |              |
|-------------|---------|-----|---|---|---|--------------|
| NC_037644.1 | 2835813 | SNV | 1 | G | A | Heterozygous |
| NC_037644.1 | 2836950 | SNV | 1 | A | G | Homozygous   |
| NC_037644.1 | 2837025 | SNV | 1 | A | G | Heterozygous |
| NC_037644.1 | 2837583 | SNV | 1 | G | A | Homozygous   |
| NC_037644.1 | 2843340 | SNV | 1 | C | T | Homozygous   |
| NC_037644.1 | 2843348 | SNV | 1 | T | C | Homozygous   |
| NC_037644.1 | 2843363 | SNV | 1 | T | C | Homozygous   |
| NC_037644.1 | 2843410 | SNV | 1 | G | A | Homozygous   |
| NC_037644.1 | 2843797 | SNV | 1 | A | G | Heterozygous |
| NC_037644.1 | 2843916 | SNV | 1 | C | T | Heterozygous |
| NC_037644.1 | 2844106 | SNV | 1 | G | A | Heterozygous |
| NC_037644.1 | 2853086 | SNV | 1 | C | A | Homozygous   |
| NC_037644.1 | 2854896 | SNV | 1 | T | A | Heterozygous |
| NC_037644.1 | 2854906 | SNV | 1 | T | C | Heterozygous |
| NC_037644.1 | 2854910 | SNV | 1 | T | C | Heterozygous |
| NC_037644.1 | 2854912 | SNV | 1 | T | A | Heterozygous |
| NC_037644.1 | 2854914 | SNV | 1 | T | A | Heterozygous |
| NC_037644.1 | 2864391 | SNV | 1 | C | T | Homozygous   |
| NC_037644.1 | 2865375 | SNV | 1 | G | A | Homozygous   |
| NC_037644.1 | 2871264 | SNV | 1 | A | T | Heterozygous |
| NC_037644.1 | 2876118 | SNV | 1 | G | A | Homozygous   |
| NC_037644.1 | 2876124 | SNV | 1 | G | A | Homozygous   |
| NC_037644.1 | 2876127 | SNV | 1 | A | G | Homozygous   |
| NC_037644.1 | 2876133 | SNV | 1 | G | T | Homozygous   |
| NC_037644.1 | 2900076 | SNV | 1 | A | G | Heterozygous |
| NC_037644.1 | 2900082 | SNV | 1 | T | C | Homozygous   |
| NC_037644.1 | 2900099 | SNV | 1 | T | C | Homozygous   |
| NC_037644.1 | 2900281 | SNV | 1 | T | C | Heterozygous |
| NC_037644.1 | 2900323 | SNV | 1 | C | T | Heterozygous |
| NC_037644.1 | 2900326 | SNV | 1 | A | G | Homozygous   |
| NC_037644.1 | 2900596 | SNV | 1 | A | G | Homozygous   |
| NC_037644.1 | 2901056 | SNV | 1 | A | G | Heterozygous |
| NC_037644.1 | 2901079 | SNV | 1 | A | G | Heterozygous |
| NC_037644.1 | 2901083 | SNV | 1 | A | G | Heterozygous |
| NC_037644.1 | 2906237 | SNV | 1 | A | G | Homozygous   |
| NC_037644.1 | 2909173 | SNV | 1 | G | T | Homozygous   |
| NC_037644.1 | 2909176 | SNV | 1 | G | T | Homozygous   |
| NC_037644.1 | 2911089 | SNV | 1 | G | A | Homozygous   |
| NC_037644.1 | 2911290 | SNV | 1 | A | G | Homozygous   |
| NC_037644.1 | 2925028 | SNV | 1 | C | A | Homozygous   |
| NC_037644.1 | 2925280 | SNV | 1 | A | G | Homozygous   |
| NC_037644.1 | 2928545 | SNV | 1 | A | T | Homozygous   |
| NC_037644.1 | 2930139 | SNV | 1 | T | A | Homozygous   |
| NC_037644.1 | 2931411 | SNV | 1 | A | G | Homozygous   |
| NC_037644.1 | 2931525 | SNV | 1 | G | A | Heterozygous |
| NC_037644.1 | 2932029 | SNV | 1 | C | T | Heterozygous |
| NC_037644.1 | 2932035 | SNV | 1 | C | A | Heterozygous |
| NC_037644.1 | 2932548 | SNV | 1 | C | T | Homozygous   |
| NC_037644.1 | 2932554 | SNV | 1 | C | T | Heterozygous |
| NC_037644.1 | 2933429 | SNV | 1 | T | A | Homozygous   |
| NC_037644.1 | 2937723 | SNV | 1 | T | C | Heterozygous |

|             |         |     |   |   |   |              |
|-------------|---------|-----|---|---|---|--------------|
| NC_037644.1 | 2937730 | SNV | 1 | G | A | Heterozygous |
| NC_037644.1 | 2939696 | SNV | 1 | A | G | Homozygous   |
| NC_037644.1 | 2939699 | SNV | 1 | G | A | Homozygous   |
| NC_037644.1 | 2942886 | SNV | 1 | C | T | Heterozygous |
| NC_037644.1 | 2943501 | SNV | 1 | T | A | Heterozygous |
| NC_037644.1 | 2945840 | SNV | 1 | G | A | Heterozygous |
| NC_037644.1 | 2945872 | SNV | 1 | G | A | Heterozygous |
| NC_037644.1 | 2945960 | SNV | 1 | A | T | Heterozygous |
| NC_037644.1 | 2945997 | SNV | 1 | A | G | Homozygous   |
| NC_037644.1 | 2946207 | SNV | 1 | T | A | Heterozygous |
| NC_037644.1 | 2946320 | SNV | 1 | G | A | Heterozygous |
| NC_037644.1 | 2946328 | SNV | 1 | T | A | Heterozygous |
| NC_037644.1 | 2946673 | SNV | 1 | A | G | Homozygous   |
| NC_037644.1 | 2946742 | SNV | 1 | A | G | Homozygous   |
| NC_037644.1 | 2947509 | SNV | 1 | G | A | Homozygous   |
| NC_037644.1 | 2953102 | SNV | 1 | A | G | Homozygous   |
| NC_037644.1 | 2953137 | SNV | 1 | A | C | Homozygous   |
| NC_037644.1 | 2953143 | SNV | 1 | G | A | Heterozygous |
| NC_037644.1 | 2953149 | SNV | 1 | A | C | Homozygous   |
| NC_037644.1 | 2954137 | SNV | 1 | G | A | Heterozygous |
| NC_037644.1 | 2954139 | SNV | 1 | A | G | Heterozygous |
| NC_037644.1 | 2954306 | SNV | 1 | A | G | Homozygous   |
| NC_037644.1 | 2954341 | SNV | 1 | G | A | Homozygous   |
| NC_037644.1 | 2957634 | SNV | 1 | G | A | Heterozygous |
| NC_037644.1 | 2957658 | SNV | 1 | C | T | Heterozygous |
| NC_037644.1 | 2957769 | SNV | 1 | A | C | Heterozygous |
| NC_037644.1 | 2960040 | SNV | 1 | G | A | Homozygous   |
| NC_037644.1 | 2960064 | SNV | 1 | T | C | Homozygous   |
| NC_037644.1 | 2960411 | SNV | 1 | G | T | Heterozygous |
| NC_037644.1 | 2960859 | SNV | 1 | T | A | Heterozygous |
| NC_037644.1 | 2961504 | SNV | 1 | G | A | Homozygous   |
| NC_037644.1 | 2961522 | SNV | 1 | C | T | Homozygous   |
| NC_037644.1 | 2961560 | SNV | 1 | A | G | Heterozygous |
| NC_037644.1 | 2961603 | SNV | 1 | T | C | Homozygous   |
| NC_037644.1 | 2961941 | SNV | 1 | C | T | Homozygous   |
| NC_037644.1 | 2962033 | SNV | 1 | A | G | Homozygous   |
| NC_037644.1 | 2962347 | SNV | 1 | A | G | Homozygous   |
| NC_037644.1 | 2962435 | SNV | 1 | T | C | Heterozygous |
| NC_037644.1 | 2962700 | SNV | 1 | A | G | Heterozygous |
| NC_037644.1 | 2962750 | SNV | 1 | A | G | Homozygous   |
| NC_037644.1 | 2962805 | SNV | 1 | A | T | Heterozygous |
| NC_037644.1 | 2962825 | SNV | 1 | A | G | Homozygous   |
| NC_037644.1 | 2963083 | SNV | 1 | A | G | Homozygous   |
| NC_037644.1 | 2963616 | SNV | 1 | T | C | Homozygous   |
| NC_037644.1 | 2963628 | SNV | 1 | A | G | Homozygous   |
| NC_037644.1 | 2963646 | SNV | 1 | G | A | Homozygous   |
| NC_037644.1 | 2963679 | SNV | 1 | C | T | Homozygous   |
| NC_037644.1 | 2963760 | SNV | 1 | G | A | Heterozygous |
| NC_037644.1 | 2963831 | SNV | 1 | A | G | Heterozygous |
| NC_037644.1 | 2963963 | SNV | 1 | T | C | Heterozygous |
| NC_037644.1 | 2964000 | SNV | 1 | C | T | Heterozygous |

|             |         |     |   |   |   |              |
|-------------|---------|-----|---|---|---|--------------|
| NC_037644.1 | 2964389 | SNV | 1 | T | C | Heterozygous |
| NC_037644.1 | 2964396 | SNV | 1 | T | C | Heterozygous |
| NC_037644.1 | 2964402 | SNV | 1 | A | G | Heterozygous |
| NC_037644.1 | 2964584 | SNV | 1 | T | G | Homozygous   |
| NC_037644.1 | 2964604 | SNV | 1 | A | G | Heterozygous |
| NC_037644.1 | 2964699 | SNV | 1 | T | A | Heterozygous |
| NC_037644.1 | 2964795 | SNV | 1 | G | A | Heterozygous |
| NC_037644.1 | 2964976 | SNV | 1 | T | C | Heterozygous |
| NC_037644.1 | 2965065 | SNV | 1 | T | C | Heterozygous |
| NC_037644.1 | 2965162 | SNV | 1 | A | C | Heterozygous |
| NC_037644.1 | 2968415 | SNV | 1 | T | C | Homozygous   |
| NC_037644.1 | 2968449 | SNV | 1 | G | C | Heterozygous |
| NC_037644.1 | 2968541 | SNV | 1 | C | T | Heterozygous |
| NC_037644.1 | 2968925 | SNV | 1 | G | T | Heterozygous |
| NC_037644.1 | 2969136 | SNV | 1 | T | C | Homozygous   |
| NC_037644.1 | 2969138 | SNV | 1 | T | C | Homozygous   |
| NC_037644.1 | 2969172 | SNV | 1 | G | A | Heterozygous |
| NC_037644.1 | 2969195 | SNV | 1 | A | G | Homozygous   |
| NC_037644.1 | 2969205 | SNV | 1 | A | G | Heterozygous |
| NC_037644.1 | 2969245 | SNV | 1 | G | A | Homozygous   |
| NC_037644.1 | 2969374 | SNV | 1 | A | G | Homozygous   |
| NC_037644.1 | 2969643 | SNV | 1 | T | C | Homozygous   |
| NC_037644.1 | 2970025 | SNV | 1 | A | G | Homozygous   |
| NC_037644.1 | 2970136 | SNV | 1 | A | G | Homozygous   |
| NC_037644.1 | 2970166 | SNV | 1 | T | C | Heterozygous |
| NC_037644.1 | 2970335 | SNV | 1 | G | A | Heterozygous |
| NC_037644.1 | 2970355 | SNV | 1 | G | A | Homozygous   |
| NC_037644.1 | 2970953 | SNV | 1 | T | C | Heterozygous |
| NC_037644.1 | 2971153 | SNV | 1 | A | G | Homozygous   |
| NC_037644.1 | 2972405 | SNV | 1 | T | C | Homozygous   |
| NC_037644.1 | 2972504 | SNV | 1 | C | A | Homozygous   |
| NC_037644.1 | 2973788 | SNV | 1 | G | A | Heterozygous |
| NC_037644.1 | 2973836 | SNV | 1 | A | G | Heterozygous |
| NC_037644.1 | 2973845 | SNV | 1 | T | C | Heterozygous |
| NC_037644.1 | 2973865 | SNV | 1 | C | T | Homozygous   |
| NC_037644.1 | 2973915 | SNV | 1 | G | A | Homozygous   |
| NC_037644.1 | 2975056 | SNV | 1 | C | T | Heterozygous |
| NC_037644.1 | 2975083 | SNV | 1 | G | A | Homozygous   |
| NC_037644.1 | 2975464 | SNV | 1 | T | C | Homozygous   |
| NC_037644.1 | 2975637 | SNV | 1 | A | T | Homozygous   |
| NC_037644.1 | 2975913 | SNV | 1 | A | C | Heterozygous |
| NC_037644.1 | 2975980 | SNV | 1 | A | G | Homozygous   |
| NC_037644.1 | 2976108 | SNV | 1 | C | A | Homozygous   |
| NC_037644.1 | 2976147 | SNV | 1 | G | C | Homozygous   |
| NC_037644.1 | 2976411 | SNV | 1 | A | G | Homozygous   |
| NC_037644.1 | 2976543 | SNV | 1 | A | C | Homozygous   |
| NC_037644.1 | 2976814 | SNV | 1 | G | A | Heterozygous |
| NC_037644.1 | 2976826 | SNV | 1 | C | T | Heterozygous |
| NC_037644.1 | 2976832 | SNV | 1 | T | C | Heterozygous |
| NC_037644.1 | 2976985 | SNV | 1 | T | C | Heterozygous |
| NC_037644.1 | 2977228 | SNV | 1 | A | G | Heterozygous |

|             |         |     |   |   |   |              |
|-------------|---------|-----|---|---|---|--------------|
| NC_037644.1 | 2977237 | SNV | 1 | G | C | Heterozygous |
| NC_037644.1 | 2977285 | SNV | 1 | C | T | Heterozygous |
| NC_037644.1 | 2977667 | SNV | 1 | A | T | Homozygous   |
| NC_037644.1 | 2977691 | SNV | 1 | A | G | Heterozygous |
| NC_037644.1 | 2977941 | SNV | 1 | C | T | Heterozygous |
| NC_037644.1 | 2978292 | SNV | 1 | A | G | Heterozygous |
| NC_037644.1 | 2978319 | SNV | 1 | A | G | Heterozygous |
| NC_037644.1 | 2978614 | SNV | 1 | A | C | Homozygous   |
| NC_037644.1 | 2978791 | SNV | 1 | A | G | Heterozygous |
| NC_037644.1 | 2978801 | SNV | 1 | A | T | Heterozygous |
| NC_037644.1 | 2978806 | SNV | 1 | G | A | Homozygous   |
| NC_037644.1 | 2978820 | SNV | 1 | T | C | Homozygous   |
| NC_037644.1 | 2978840 | SNV | 1 | G | A | Heterozygous |
| NC_037644.1 | 2978843 | SNV | 1 | T | A | Heterozygous |
| NC_037644.1 | 2978887 | SNV | 1 | T | C | Heterozygous |
| NC_037644.1 | 2978897 | SNV | 1 | G | A | Heterozygous |
| NC_037644.1 | 2978938 | SNV | 1 | A | G | Heterozygous |
| NC_037644.1 | 2978951 | SNV | 1 | T | A | Heterozygous |
| NC_037644.1 | 2978957 | SNV | 1 | G | A | Homozygous   |
| NC_037644.1 | 2978999 | SNV | 1 | T | A | Homozygous   |
| NC_037644.1 | 2984118 | SNV | 1 | C | T | Homozygous   |
| NC_037644.1 | 2984583 | SNV | 1 | T | G | Homozygous   |
| NC_037644.1 | 2984587 | SNV | 1 | C | A | Homozygous   |
| NC_037644.1 | 2984755 | SNV | 1 | T | A | Homozygous   |
| NC_037644.1 | 2984757 | SNV | 1 | C | T | Homozygous   |
| NC_037644.1 | 2984826 | SNV | 1 | G | A | Heterozygous |
| NC_037644.1 | 2985315 | SNV | 1 | C | G | Heterozygous |
| NC_037644.1 | 2985402 | SNV | 1 | A | T | Heterozygous |
| NC_037644.1 | 2986026 | SNV | 1 | C | T | Heterozygous |
| NC_037644.1 | 2986107 | SNV | 1 | T | C | Homozygous   |
| NC_037644.1 | 2986379 | SNV | 1 | G | A | Homozygous   |
| NC_037644.1 | 2986733 | SNV | 1 | A | G | Homozygous   |
| NC_037644.1 | 2986952 | SNV | 1 | A | G | Homozygous   |
| NC_037644.1 | 2988314 | SNV | 1 | T | C | Homozygous   |
| NC_037644.1 | 2998623 | SNV | 1 | A | G | Homozygous   |
| NC_037644.1 | 3000242 | SNV | 1 | C | T | Homozygous   |
| NC_037644.1 | 3001078 | SNV | 1 | T | A | Heterozygous |
| NC_037644.1 | 3001080 | SNV | 1 | A | T | Heterozygous |
| NC_037644.1 | 3001082 | SNV | 1 | A | C | Heterozygous |
| NC_037644.1 | 3001711 | SNV | 1 | G | A | Heterozygous |
| NC_037644.1 | 3003890 | SNV | 1 | A | G | Heterozygous |
| NC_037644.1 | 3005447 | SNV | 1 | A | G | Heterozygous |
| NC_037644.1 | 3005458 | SNV | 1 | C | T | Heterozygous |
| NC_037644.1 | 3005739 | SNV | 1 | C | T | Homozygous   |
| NC_037644.1 | 3005819 | SNV | 1 | T | C | Heterozygous |
| NC_037644.1 | 3005902 | SNV | 1 | A | T | Homozygous   |
| NC_037644.1 | 3005904 | SNV | 1 | A | C | Homozygous   |
| NC_037644.1 | 3005910 | SNV | 1 | T | A | Homozygous   |
| NC_037644.1 | 3005921 | SNV | 1 | T | A | Homozygous   |
| NC_037644.1 | 3005926 | SNV | 1 | A | T | Homozygous   |
| NC_037644.1 | 3005928 | SNV | 1 | A | T | Homozygous   |

|             |         |     |   |   |   |              |
|-------------|---------|-----|---|---|---|--------------|
| NC_037644.1 | 3005936 | SNV | 1 | G | T | Homozygous   |
| NC_037644.1 | 3006375 | SNV | 1 | T | C | Homozygous   |
| NC_037644.1 | 3006696 | SNV | 1 | T | C | Homozygous   |
| NC_037644.1 | 3006873 | SNV | 1 | T | C | Homozygous   |
| NC_037644.1 | 3006909 | SNV | 1 | T | C | Heterozygous |
| NC_037644.1 | 3006937 | SNV | 1 | A | C | Heterozygous |
| NC_037644.1 | 3007143 | SNV | 1 | G | A | Heterozygous |
| NC_037644.1 | 3011579 | SNV | 1 | G | A | Heterozygous |
| NC_037644.1 | 3011716 | SNV | 1 | G | A | Homozygous   |
| NC_037644.1 | 3011723 | SNV | 1 | A | C | Homozygous   |
| NC_037644.1 | 3011726 | SNV | 1 | T | A | Homozygous   |
| NC_037644.1 | 3011742 | SNV | 1 | G | A | Heterozygous |
| NC_037644.1 | 3011807 | SNV | 1 | T | C | Heterozygous |
| NC_037644.1 | 3011853 | SNV | 1 | A | G | Homozygous   |
| NC_037644.1 | 3012923 | SNV | 1 | G | A | Homozygous   |
| NC_037644.1 | 3012926 | SNV | 1 | A | T | Homozygous   |
| NC_037644.1 | 3012932 | SNV | 1 | A | G | Homozygous   |
| NC_037644.1 | 3012954 | SNV | 1 | A | C | Homozygous   |
| NC_037644.1 | 3012957 | SNV | 1 | G | A | Homozygous   |
| NC_037644.1 | 3016321 | SNV | 1 | A | G | Homozygous   |
| NC_037644.1 | 3016329 | SNV | 1 | A | G | Homozygous   |
| NC_037644.1 | 3016370 | SNV | 1 | T | C | Homozygous   |
| NC_037644.1 | 3016503 | SNV | 1 | G | A | Heterozygous |
| NC_037644.1 | 3016508 | SNV | 1 | A | G | Homozygous   |
| NC_037644.1 | 3016527 | SNV | 1 | C | G | Heterozygous |
| NC_037644.1 | 3016557 | SNV | 1 | A | G | Homozygous   |
| NC_037644.1 | 3016573 | SNV | 1 | A | G | Homozygous   |
| NC_037644.1 | 3016622 | SNV | 1 | T | G | Homozygous   |
| NC_037644.1 | 3016655 | SNV | 1 | G | A | Homozygous   |
| NC_037644.1 | 3016701 | SNV | 1 | T | C | Homozygous   |
| NC_037644.1 | 3018098 | SNV | 1 | A | G | Homozygous   |
| NC_037644.1 | 3018665 | SNV | 1 | G | C | Homozygous   |
| NC_037644.1 | 3018869 | SNV | 1 | T | C | Homozygous   |
| NC_037644.1 | 3018872 | SNV | 1 | A | T | Homozygous   |
| NC_037644.1 | 3018905 | SNV | 1 | T | C | Homozygous   |
| NC_037644.1 | 3018918 | SNV | 1 | A | G | Homozygous   |
| NC_037644.1 | 3020792 | SNV | 1 | A | G | Homozygous   |
| NC_037644.1 | 3020812 | SNV | 1 | A | G | Heterozygous |
| NC_037644.1 | 3021507 | SNV | 1 | A | G | Heterozygous |
| NC_037644.1 | 3021683 | SNV | 1 | A | G | Heterozygous |
| NC_037644.1 | 3021686 | SNV | 1 | A | G | Heterozygous |
| NC_037644.1 | 3021689 | SNV | 1 | T | C | Heterozygous |
| NC_037644.1 | 3021774 | SNV | 1 | A | G | Heterozygous |
| NC_037644.1 | 3022800 | SNV | 1 | C | T | Heterozygous |
| NC_037644.1 | 3022839 | SNV | 1 | G | A | Heterozygous |
| NC_037644.1 | 3023562 | SNV | 1 | A | G | Heterozygous |
| NC_037644.1 | 3023613 | SNV | 1 | G | T | Heterozygous |
| NC_037644.1 | 3023809 | SNV | 1 | A | G | Heterozygous |
| NC_037644.1 | 3024156 | SNV | 1 | G | A | Homozygous   |
| NC_037644.1 | 3029498 | SNV | 1 | T | C | Homozygous   |
| NC_037644.1 | 3031132 | SNV | 1 | A | T | Homozygous   |

|             |         |     |   |   |   |              |
|-------------|---------|-----|---|---|---|--------------|
| NC_037644.1 | 3031225 | SNV | 1 | C | T | Heterozygous |
| NC_037644.1 | 3031306 | SNV | 1 | A | G | Homozygous   |
| NC_037644.1 | 3031744 | SNV | 1 | A | G | Homozygous   |
| NC_037644.1 | 3061258 | SNV | 1 | C | T | Heterozygous |
| NC_037644.1 | 3061320 | SNV | 1 | G | A | Heterozygous |
| NC_037644.1 | 3062215 | SNV | 1 | G | A | Heterozygous |
| NC_037644.1 | 3062401 | SNV | 1 | A | T | Homozygous   |
| NC_037644.1 | 3062406 | SNV | 1 | A | G | Homozygous   |
| NC_037644.1 | 3068485 | SNV | 1 | A | T | Homozygous   |
| NC_037644.1 | 3068489 | SNV | 1 | C | T | Homozygous   |
| NC_037644.1 | 3068495 | SNV | 1 | G | A | Heterozygous |
| NC_037644.1 | 3068505 | SNV | 1 | A | G | Heterozygous |
| NC_037644.1 | 3071964 | SNV | 1 | G | A | Homozygous   |
| NC_037644.1 | 3071995 | SNV | 1 | T | C | Homozygous   |
| NC_037644.1 | 3072200 | SNV | 1 | G | T | Heterozygous |
| NC_037644.1 | 3073299 | SNV | 1 | T | C | Heterozygous |
| NC_037644.1 | 3090195 | SNV | 1 | G | A | Homozygous   |
| NC_037644.1 | 3091998 | SNV | 1 | G | T | Homozygous   |
| NC_037644.1 | 3097659 | SNV | 1 | A | G | Heterozygous |
| NC_037644.1 | 3097661 | SNV | 1 | T | C | Heterozygous |
| NC_037644.1 | 3097709 | SNV | 1 | A | G | Heterozygous |
| NC_037644.1 | 3106201 | SNV | 1 | A | G | Homozygous   |
| NC_037644.1 | 3106585 | SNV | 1 | C | T | Heterozygous |
| NC_037644.1 | 3106594 | SNV | 1 | T | G | Homozygous   |
| NC_037644.1 | 3106615 | SNV | 1 | T | G | Homozygous   |
| NC_037644.1 | 3106777 | SNV | 1 | T | C | Heterozygous |
| NC_037644.1 | 3108386 | SNV | 1 | A | G | Homozygous   |
| NC_037644.1 | 3110328 | SNV | 1 | A | G | Homozygous   |
| NC_037644.1 | 3110392 | SNV | 1 | G | A | Heterozygous |
| NC_037644.1 | 3110430 | SNV | 1 | C | T | Homozygous   |
| NC_037644.1 | 3110653 | SNV | 1 | T | C | Homozygous   |
| NC_037644.1 | 3110699 | SNV | 1 | A | G | Homozygous   |
| NC_037644.1 | 3113142 | SNV | 1 | T | A | Heterozygous |
| NC_037644.1 | 3113154 | SNV | 1 | T | A | Heterozygous |
| NC_037644.1 | 3113176 | SNV | 1 | T | G | Heterozygous |
| NC_037644.1 | 3113188 | SNV | 1 | T | C | Heterozygous |
| NC_037644.1 | 3113292 | SNV | 1 | A | G | Heterozygous |
| NC_037644.1 | 3113296 | SNV | 1 | A | G | Heterozygous |
| NC_037644.1 | 3113320 | SNV | 1 | A | G | Homozygous   |
| NC_037644.1 | 3113508 | SNV | 1 | G | C | Homozygous   |
| NC_037644.1 | 3114834 | SNV | 1 | G | T | Heterozygous |
| NC_037644.1 | 3117201 | SNV | 1 | A | G | Heterozygous |
| NC_037644.1 | 3117206 | SNV | 1 | G | A | Heterozygous |
| NC_037644.1 | 3117209 | SNV | 1 | A | G | Homozygous   |
| NC_037644.1 | 3117481 | SNV | 1 | T | C | Homozygous   |
| NC_037644.1 | 3121721 | SNV | 1 | G | A | Heterozygous |
| NC_037644.1 | 3121778 | SNV | 1 | G | A | Homozygous   |
| NC_037644.1 | 3121795 | SNV | 1 | A | G | Homozygous   |
| NC_037644.1 | 3121798 | SNV | 1 | A | C | Homozygous   |
| NC_037644.1 | 3121807 | SNV | 1 | C | G | Homozygous   |
| NC_037644.1 | 3123424 | SNV | 1 | T | A | Homozygous   |

|             |         |     |   |   |   |              |
|-------------|---------|-----|---|---|---|--------------|
| NC_037644.1 | 3123434 | SNV | 1 | A | T | Homozygous   |
| NC_037644.1 | 3123457 | SNV | 1 | T | A | Homozygous   |
| NC_037644.1 | 3126689 | SNV | 1 | T | C | Heterozygous |
| NC_037644.1 | 3126740 | SNV | 1 | T | C | Heterozygous |
| NC_037644.1 | 3126742 | SNV | 1 | T | A | Heterozygous |
| NC_037644.1 | 3126744 | SNV | 1 | T | C | Heterozygous |
| NC_037644.1 | 3127754 | SNV | 1 | G | C | Heterozygous |
| NC_037644.1 | 3127756 | SNV | 1 | T | G | Heterozygous |
| NC_037644.1 | 3127760 | SNV | 1 | G | T | Heterozygous |
| NC_037644.1 | 3127762 | SNV | 1 | T | C | Heterozygous |
| NC_037644.1 | 3127796 | SNV | 1 | G | T | Heterozygous |
| NC_037644.1 | 3128031 | SNV | 1 | A | T | Heterozygous |
| NC_037644.1 | 3128054 | SNV | 1 | G | C | Heterozygous |
| NC_037644.1 | 3128067 | SNV | 1 | A | C | Heterozygous |
| NC_037644.1 | 3128069 | SNV | 1 | A | G | Heterozygous |
| NC_037644.1 | 3128074 | SNV | 1 | T | C | Heterozygous |
| NC_037644.1 | 3128082 | SNV | 1 | A | C | Heterozygous |
| NC_037644.1 | 3128174 | SNV | 1 | G | T | Heterozygous |
| NC_037644.1 | 3128180 | SNV | 1 | A | G | Heterozygous |
| NC_037644.1 | 3128190 | SNV | 1 | T | G | Heterozygous |
| NC_037644.1 | 3128192 | SNV | 1 | A | G | Heterozygous |
| NC_037644.1 | 3128196 | SNV | 1 | C | G | Homozygous   |
| NC_037644.1 | 3128316 | SNV | 1 | G | T | Heterozygous |
| NC_037644.1 | 3128320 | SNV | 1 | G | T | Homozygous   |
| NC_037644.1 | 3128348 | SNV | 1 | G | A | Heterozygous |
| NC_037644.1 | 3128875 | SNV | 1 | G | A | Heterozygous |
| NC_037644.1 | 3128882 | SNV | 1 | A | G | Heterozygous |
| NC_037644.1 | 3128884 | SNV | 1 | T | C | Homozygous   |
| NC_037644.1 | 3128964 | SNV | 1 | C | T | Homozygous   |
| NC_037644.1 | 3128996 | SNV | 1 | G | A | Homozygous   |
| NC_037644.1 | 3134545 | SNV | 1 | G | C | Heterozygous |
| NC_037644.1 | 3134582 | SNV | 1 | T | C | Heterozygous |
| NC_037644.1 | 3134680 | SNV | 1 | G | C | Homozygous   |
| NC_037644.1 | 3138809 | SNV | 1 | C | T | Homozygous   |
| NC_037644.1 | 3138816 | SNV | 1 | G | T | Homozygous   |
| NC_037644.1 | 3148196 | SNV | 1 | C | T | Homozygous   |
| NC_037644.1 | 3148198 | SNV | 1 | A | G | Homozygous   |
| NC_037644.1 | 3148202 | SNV | 1 | G | A | Homozygous   |
| NC_037644.1 | 3148239 | SNV | 1 | C | T | Heterozygous |
| NC_037644.1 | 3148308 | SNV | 1 | A | G | Homozygous   |
| NC_037644.1 | 3148565 | SNV | 1 | T | G | Homozygous   |
| NC_037644.1 | 3148579 | SNV | 1 | T | G | Homozygous   |
| NC_037644.1 | 3148629 | SNV | 1 | T | C | Homozygous   |
| NC_037644.1 | 3148874 | SNV | 1 | G | A | Homozygous   |
| NC_037644.1 | 3173964 | SNV | 1 | A | G | Heterozygous |
| NC_037644.1 | 3173967 | SNV | 1 | G | A | Heterozygous |
| NC_037644.1 | 3173982 | SNV | 1 | C | A | Heterozygous |
| NC_037644.1 | 3174258 | SNV | 1 | C | T | Homozygous   |
| NC_037644.1 | 3174632 | SNV | 1 | T | C | Homozygous   |
| NC_037644.1 | 3175037 | SNV | 1 | C | G | Heterozygous |
| NC_037644.1 | 3176500 | SNV | 1 | G | A | Heterozygous |



|             |         |     |   |   |   |              |
|-------------|---------|-----|---|---|---|--------------|
| NC_037644.1 | 3178837 | SNV | 1 | T | A | Heterozygous |
| NC_037644.1 | 3178865 | SNV | 1 | C | T | Heterozygous |
| NC_037644.1 | 3178881 | SNV | 1 | A | G | Heterozygous |
| NC_037644.1 | 3178940 | SNV | 1 | T | C | Homozygous   |
| NC_037644.1 | 3178971 | SNV | 1 | A | G | Homozygous   |
| NC_037644.1 | 3179283 | SNV | 1 | G | C | Homozygous   |
| NC_037644.1 | 3179309 | SNV | 1 | C | G | Heterozygous |
| NC_037644.1 | 3179311 | SNV | 1 | T | C | Heterozygous |
| NC_037644.1 | 3179650 | SNV | 1 | T | C | Homozygous   |
| NC_037644.1 | 3179791 | SNV | 1 | A | T | Homozygous   |
| NC_037644.1 | 3179830 | SNV | 1 | G | A | Homozygous   |
| NC_037644.1 | 3179962 | SNV | 1 | G | A | Homozygous   |
| NC_037644.1 | 3180149 | SNV | 1 | A | T | Homozygous   |
| NC_037644.1 | 3180181 | SNV | 1 | A | T | Homozygous   |
| NC_037644.1 | 3180224 | SNV | 1 | G | A | Homozygous   |
| NC_037644.1 | 3181040 | SNV | 1 | A | T | Homozygous   |
| NC_037644.1 | 3181044 | SNV | 1 | T | G | Homozygous   |
| NC_037644.1 | 3181508 | SNV | 1 | T | C | Homozygous   |
| NC_037644.1 | 3181513 | SNV | 1 | A | G | Homozygous   |
| NC_037644.1 | 3181528 | SNV | 1 | A | G | Homozygous   |
| NC_037644.1 | 3182186 | SNV | 1 | C | T | Homozygous   |
| NC_037644.1 | 3184797 | SNV | 1 | G | A | Heterozygous |
| NC_037644.1 | 3184819 | SNV | 1 | G | A | Heterozygous |
| NC_037644.1 | 3189906 | SNV | 1 | G | A | Homozygous   |
| NC_037644.1 | 3189920 | SNV | 1 | G | A | Homozygous   |
| NC_037644.1 | 3189974 | SNV | 1 | T | C | Homozygous   |
| NC_037644.1 | 3190047 | SNV | 1 | T | C | Homozygous   |
| NC_037644.1 | 3190080 | SNV | 1 | G | A | Heterozygous |
| NC_037644.1 | 3190204 | SNV | 1 | T | C | Homozygous   |
| NC_037644.1 | 3190605 | SNV | 1 | A | G | Homozygous   |
| NC_037644.1 | 3190803 | SNV | 1 | G | A | Heterozygous |
| NC_037644.1 | 3191722 | SNV | 1 | G | A | Heterozygous |
| NC_037644.1 | 3193125 | SNV | 1 | T | C | Homozygous   |
| NC_037644.1 | 3193267 | SNV | 1 | A | C | Heterozygous |
| NC_037644.1 | 3193268 | SNV | 1 | C | T | Heterozygous |
| NC_037644.1 | 3193270 | SNV | 1 | A | G | Homozygous   |
| NC_037644.1 | 3193282 | SNV | 1 | C | T | Heterozygous |
| NC_037644.1 | 3196342 | SNV | 1 | T | C | Homozygous   |
| NC_037644.1 | 3196386 | SNV | 1 | C | T | Homozygous   |
| NC_037644.1 | 3196388 | SNV | 1 | C | T | Homozygous   |
| NC_037644.1 | 3196390 | SNV | 1 | C | T | Homozygous   |
| NC_037644.1 | 3196394 | SNV | 1 | C | T | Homozygous   |
| NC_037644.1 | 3196399 | SNV | 1 | C | T | Homozygous   |
| NC_037644.1 | 3196404 | SNV | 1 | C | T | Homozygous   |
| NC_037644.1 | 3196512 | SNV | 1 | T | C | Homozygous   |
| NC_037644.1 | 3196529 | SNV | 1 | G | A | Homozygous   |
| NC_037644.1 | 3196546 | SNV | 1 | C | T | Homozygous   |
| NC_037644.1 | 3196591 | SNV | 1 | T | A | Homozygous   |
| NC_037644.1 | 3196611 | SNV | 1 | A | G | Heterozygous |
| NC_037644.1 | 3196611 | SNV | 1 | A | T | Heterozygous |
| NC_037644.1 | 3196613 | SNV | 1 | A | T | Heterozygous |

|             |         |     |   |   |   |              |
|-------------|---------|-----|---|---|---|--------------|
| NC_037644.1 | 3196625 | SNV | 1 | G | T | Heterozygous |
| NC_037644.1 | 3198046 | SNV | 1 | C | T | Heterozygous |
| NC_037644.1 | 3198057 | SNV | 1 | G | T | Heterozygous |
| NC_037644.1 | 3198066 | SNV | 1 | A | G | Homozygous   |
| NC_037644.1 | 3198116 | SNV | 1 | T | C | Homozygous   |
| NC_037644.1 | 3198316 | SNV | 1 | A | G | Heterozygous |
| NC_037644.1 | 3198406 | SNV | 1 | A | G | Heterozygous |
| NC_037644.1 | 3198575 | SNV | 1 | C | A | Homozygous   |
| NC_037644.1 | 3198579 | SNV | 1 | A | T | Homozygous   |
| NC_037644.1 | 3199121 | SNV | 1 | A | G | Homozygous   |
| NC_037644.1 | 3199649 | SNV | 1 | T | G | Homozygous   |
| NC_037644.1 | 3199664 | SNV | 1 | G | A | Homozygous   |
| NC_037644.1 | 3199684 | SNV | 1 | A | G | Homozygous   |
| NC_037644.1 | 3199686 | SNV | 1 | A | G | Homozygous   |
| NC_037644.1 | 3199752 | SNV | 1 | T | C | Homozygous   |
| NC_037644.1 | 3199879 | SNV | 1 | T | C | Homozygous   |
| NC_037644.1 | 3200073 | SNV | 1 | G | A | Homozygous   |
| NC_037644.1 | 3200329 | SNV | 1 | C | T | Heterozygous |
| NC_037644.1 | 3200503 | SNV | 1 | C | T | Heterozygous |
| NC_037644.1 | 3200506 | SNV | 1 | A | G | Heterozygous |
| NC_037644.1 | 3200521 | SNV | 1 | T | C | Heterozygous |
| NC_037644.1 | 3200538 | SNV | 1 | A | G | Homozygous   |
| NC_037644.1 | 3200607 | SNV | 1 | G | C | Homozygous   |
| NC_037644.1 | 3200852 | SNV | 1 | C | T | Heterozygous |
| NC_037644.1 | 3200897 | SNV | 1 | G | A | Homozygous   |
| NC_037644.1 | 3201099 | SNV | 1 | C | T | Heterozygous |
| NC_037644.1 | 3201209 | SNV | 1 | A | G | Heterozygous |
| NC_037644.1 | 3201215 | SNV | 1 | T | C | Homozygous   |
| NC_037644.1 | 3201327 | SNV | 1 | T | C | Homozygous   |
| NC_037644.1 | 3201362 | SNV | 1 | T | C | Homozygous   |
| NC_037644.1 | 3201367 | SNV | 1 | T | C | Heterozygous |
| NC_037644.1 | 3201404 | SNV | 1 | A | G | Homozygous   |
| NC_037644.1 | 3201429 | SNV | 1 | C | T | Homozygous   |
| NC_037644.1 | 3201431 | SNV | 1 | T | C | Homozygous   |
| NC_037644.1 | 3201440 | SNV | 1 | A | G | Homozygous   |
| NC_037644.1 | 3201442 | SNV | 1 | G | A | Homozygous   |
| NC_037644.1 | 3201459 | SNV | 1 | C | T | Homozygous   |
| NC_037644.1 | 3201462 | SNV | 1 | G | A | Homozygous   |
| NC_037644.1 | 3201466 | SNV | 1 | G | C | Homozygous   |
| NC_037644.1 | 3201560 | SNV | 1 | G | A | Heterozygous |
| NC_037644.1 | 3201610 | SNV | 1 | A | C | Heterozygous |
| NC_037644.1 | 3201795 | SNV | 1 | T | C | Homozygous   |
| NC_037644.1 | 3202030 | SNV | 1 | C | T | Heterozygous |
| NC_037644.1 | 3202051 | SNV | 1 | A | G | Homozygous   |
| NC_037644.1 | 3202105 | SNV | 1 | A | G | Homozygous   |
| NC_037644.1 | 3202224 | SNV | 1 | C | G | Heterozygous |
| NC_037644.1 | 3202350 | SNV | 1 | T | A | Homozygous   |
| NC_037644.1 | 3202357 | SNV | 1 | C | G | Homozygous   |
| NC_037644.1 | 3202395 | SNV | 1 | T | C | Homozygous   |
| NC_037644.1 | 3202754 | SNV | 1 | G | C | Homozygous   |
| NC_037644.1 | 3204900 | SNV | 1 | G | C | Homozygous   |

|             |         |     |   |   |   |              |
|-------------|---------|-----|---|---|---|--------------|
| NC_037644.1 | 3204906 | SNV | 1 | T | C | Heterozygous |
| NC_037644.1 | 3205172 | SNV | 1 | G | C | Heterozygous |
| NC_037644.1 | 3208836 | SNV | 1 | A | T | Homozygous   |
| NC_037644.1 | 3208866 | SNV | 1 | A | C | Homozygous   |
| NC_037644.1 | 3208932 | SNV | 1 | T | A | Heterozygous |
| NC_037644.1 | 3208935 | SNV | 1 | A | T | Heterozygous |
| NC_037644.1 | 3208958 | SNV | 1 | G | A | Homozygous   |
| NC_037644.1 | 3209003 | SNV | 1 | T | C | Heterozygous |
| NC_037644.1 | 3209006 | SNV | 1 | A | T | Heterozygous |
| NC_037644.1 | 3209326 | SNV | 1 | C | G | Heterozygous |
| NC_037644.1 | 3209376 | SNV | 1 | G | A | Homozygous   |
| NC_037644.1 | 3209511 | SNV | 1 | T | C | Homozygous   |
| NC_037644.1 | 3210220 | SNV | 1 | C | T | Heterozygous |
| NC_037644.1 | 3210224 | SNV | 1 | A | T | Homozygous   |
| NC_037644.1 | 3210432 | SNV | 1 | T | C | Heterozygous |
| NC_037644.1 | 3210663 | SNV | 1 | A | G | Homozygous   |
| NC_037644.1 | 3210667 | SNV | 1 | G | A | Homozygous   |
| NC_037644.1 | 3210700 | SNV | 1 | T | C | Heterozygous |
| NC_037644.1 | 3210925 | SNV | 1 | A | G | Heterozygous |
| NC_037644.1 | 3210988 | SNV | 1 | C | T | Heterozygous |
| NC_037644.1 | 3211399 | SNV | 1 | A | C | Homozygous   |
| NC_037644.1 | 3213505 | SNV | 1 | C | T | Heterozygous |
| NC_037644.1 | 3213570 | SNV | 1 | T | C | Heterozygous |
| NC_037644.1 | 3213610 | SNV | 1 | T | C | Homozygous   |
| NC_037644.1 | 3213614 | SNV | 1 | A | G | Homozygous   |
| NC_037644.1 | 3213660 | SNV | 1 | C | T | Heterozygous |
| NC_037644.1 | 3213678 | SNV | 1 | A | G | Heterozygous |
| NC_037644.1 | 3214011 | SNV | 1 | C | A | Heterozygous |
| NC_037644.1 | 3214013 | SNV | 1 | T | C | Heterozygous |
| NC_037644.1 | 3214016 | SNV | 1 | A | G | Homozygous   |
| NC_037644.1 | 3214056 | SNV | 1 | A | G | Heterozygous |
| NC_037644.1 | 3214061 | SNV | 1 | T | C | Heterozygous |
| NC_037644.1 | 3214550 | SNV | 1 | G | A | Homozygous   |
| NC_037644.1 | 3214558 | SNV | 1 | G | A | Heterozygous |
| NC_037644.1 | 3214635 | SNV | 1 | T | C | Homozygous   |
| NC_037644.1 | 3214750 | SNV | 1 | G | C | Homozygous   |
| NC_037644.1 | 3215291 | SNV | 1 | A | G | Heterozygous |
| NC_037644.1 | 3240187 | SNV | 1 | C | G | Heterozygous |
| NC_037644.1 | 3241078 | SNV | 1 | G | T | Heterozygous |
| NC_037644.1 | 3245095 | SNV | 1 | T | C | Homozygous   |
| NC_037644.1 | 3245100 | SNV | 1 | C | A | Homozygous   |
| NC_037644.1 | 3245102 | SNV | 1 | G | A | Homozygous   |
| NC_037644.1 | 3245240 | SNV | 1 | C | T | Homozygous   |
| NC_037644.1 | 3245376 | SNV | 1 | G | T | Homozygous   |
| NC_037644.1 | 3245552 | SNV | 1 | C | A | Homozygous   |
| NC_037644.1 | 3245698 | SNV | 1 | A | G | Homozygous   |
| NC_037644.1 | 3246581 | SNV | 1 | G | A | Homozygous   |
| NC_037644.1 | 3247357 | SNV | 1 | C | T | Homozygous   |
| NC_037644.1 | 3251137 | SNV | 1 | A | C | Homozygous   |
| NC_037644.1 | 3251146 | SNV | 1 | A | C | Homozygous   |
| NC_037644.1 | 3251150 | SNV | 1 | T | A | Homozygous   |

|             |         |     |   |   |   |              |
|-------------|---------|-----|---|---|---|--------------|
| NC_037644.1 | 3251181 | SNV | 1 | C | A | Homozygous   |
| NC_037644.1 | 3255750 | SNV | 1 | C | T | Heterozygous |
| NC_037644.1 | 3261585 | SNV | 1 | A | C | Heterozygous |
| NC_037644.1 | 3261815 | SNV | 1 | A | G | Homozygous   |
| NC_037644.1 | 3262285 | SNV | 1 | T | C | Homozygous   |
| NC_037644.1 | 3262302 | SNV | 1 | C | T | Heterozygous |
| NC_037644.1 | 3263665 | SNV | 1 | C | A | Homozygous   |
| NC_037644.1 | 3263792 | SNV | 1 | A | G | Homozygous   |
| NC_037644.1 | 3265412 | SNV | 1 | T | C | Homozygous   |
| NC_037644.1 | 3265627 | SNV | 1 | G | A | Homozygous   |
| NC_037644.1 | 3266753 | SNV | 1 | G | A | Homozygous   |
| NC_037644.1 | 3266766 | SNV | 1 | T | C | Heterozygous |
| NC_037644.1 | 3266965 | SNV | 1 | T | C | Heterozygous |
| NC_037644.1 | 3267267 | SNV | 1 | G | A | Homozygous   |
| NC_037644.1 | 3267439 | SNV | 1 | G | T | Heterozygous |
| NC_037644.1 | 3267522 | SNV | 1 | A | G | Homozygous   |
| NC_037644.1 | 3268011 | SNV | 1 | C | A | Homozygous   |
| NC_037644.1 | 3268179 | SNV | 1 | T | C | Homozygous   |
| NC_037644.1 | 3268218 | SNV | 1 | A | G | Homozygous   |
| NC_037644.1 | 3268254 | SNV | 1 | T | C | Homozygous   |
| NC_037644.1 | 3268296 | SNV | 1 | T | C | Homozygous   |
| NC_037644.1 | 3268395 | SNV | 1 | C | G | Heterozygous |
| NC_037644.1 | 3269663 | SNV | 1 | A | G | Heterozygous |
| NC_037644.1 | 3271470 | SNV | 1 | T | C | Homozygous   |
| NC_037644.1 | 3274949 | SNV | 1 | C | G | Heterozygous |
| NC_037644.1 | 3274959 | SNV | 1 | C | T | Heterozygous |
| NC_037644.1 | 3275046 | SNV | 1 | G | A | Homozygous   |
| NC_037644.1 | 3275075 | SNV | 1 | G | A | Homozygous   |
| NC_037644.1 | 3282372 | SNV | 1 | A | G | Heterozygous |
| NC_037644.1 | 3282374 | SNV | 1 | A | G | Heterozygous |
| NC_037644.1 | 3282376 | SNV | 1 | G | A | Heterozygous |
| NC_037644.1 | 3298325 | SNV | 1 | T | C | Homozygous   |
| NC_037644.1 | 3298327 | SNV | 1 | T | C | Homozygous   |
| NC_037644.1 | 3298329 | SNV | 1 | T | C | Homozygous   |
| NC_037644.1 | 3298348 | SNV | 1 | A | G | Homozygous   |
| NC_037644.1 | 3303797 | SNV | 1 | C | A | Heterozygous |
| NC_037644.1 | 3303800 | SNV | 1 | G | T | Homozygous   |
| NC_037644.1 | 3305046 | SNV | 1 | T | C | Homozygous   |
| NC_037644.1 | 3305088 | SNV | 1 | C | T | Homozygous   |
| NC_037644.1 | 3305091 | SNV | 1 | C | T | Heterozygous |
| NC_037644.1 | 3305093 | SNV | 1 | G | A | Heterozygous |
| NC_037644.1 | 3305115 | SNV | 1 | A | T | Homozygous   |
| NC_037644.1 | 3305129 | SNV | 1 | G | A | Heterozygous |
| NC_037644.1 | 3308233 | SNV | 1 | A | G | Homozygous   |
| NC_037644.1 | 3308236 | SNV | 1 | T | C | Homozygous   |
| NC_037644.1 | 3308241 | SNV | 1 | T | A | Homozygous   |
| NC_037644.1 | 3308269 | SNV | 1 | T | A | Homozygous   |
| NC_037644.1 | 3309397 | SNV | 1 | G | A | Heterozygous |
| NC_037644.1 | 3310639 | SNV | 1 | A | G | Homozygous   |
| NC_037644.1 | 3310737 | SNV | 1 | T | C | Homozygous   |
| NC_037644.1 | 3310911 | SNV | 1 | A | G | Homozygous   |

|             |         |     |   |   |   |              |
|-------------|---------|-----|---|---|---|--------------|
| NC_037644.1 | 3311257 | SNV | 1 | G | A | Homozygous   |
| NC_037644.1 | 3311374 | SNV | 1 | A | G | Heterozygous |
| NC_037644.1 | 3311435 | SNV | 1 | A | G | Homozygous   |
| NC_037644.1 | 3311484 | SNV | 1 | T | C | Homozygous   |
| NC_037644.1 | 3311583 | SNV | 1 | G | A | Homozygous   |
| NC_037644.1 | 3311657 | SNV | 1 | T | C | Homozygous   |
| NC_037644.1 | 3319081 | SNV | 1 | G | A | Heterozygous |
| NC_037644.1 | 3319099 | SNV | 1 | G | A | Heterozygous |
| NC_037644.1 | 3326704 | SNV | 1 | T | C | Homozygous   |
| NC_037644.1 | 3326850 | SNV | 1 | T | C | Homozygous   |
| NC_037644.1 | 3327252 | SNV | 1 | A | G | Homozygous   |
| NC_037644.1 | 3327304 | SNV | 1 | G | A | Heterozygous |
| NC_037644.1 | 3327308 | SNV | 1 | G | A | Heterozygous |
| NC_037644.1 | 3327395 | SNV | 1 | T | C | Homozygous   |
| NC_037644.1 | 3327747 | SNV | 1 | C | T | Heterozygous |
| NC_037644.1 | 3329559 | SNV | 1 | A | T | Homozygous   |
| NC_037644.1 | 3329966 | SNV | 1 | A | C | Homozygous   |
| NC_037644.1 | 3329986 | SNV | 1 | T | G | Homozygous   |
| NC_037644.1 | 3329991 | SNV | 1 | A | T | Homozygous   |
| NC_037644.1 | 3329997 | SNV | 1 | G | T | Homozygous   |
| NC_037644.1 | 3333906 | SNV | 1 | T | A | Homozygous   |
| NC_037644.1 | 3333920 | SNV | 1 | G | C | Homozygous   |
| NC_037644.1 | 3334238 | SNV | 1 | T | C | Homozygous   |
| NC_037644.1 | 3334338 | SNV | 1 | A | G | Homozygous   |
| NC_037644.1 | 3334354 | SNV | 1 | T | C | Heterozygous |
| NC_037644.1 | 3339490 | SNV | 1 | G | A | Heterozygous |
| NC_037644.1 | 3339627 | SNV | 1 | G | A | Homozygous   |
| NC_037644.1 | 3339734 | SNV | 1 | G | A | Homozygous   |
| NC_037644.1 | 3339786 | SNV | 1 | A | G | Homozygous   |
| NC_037644.1 | 3339869 | SNV | 1 | G | A | Homozygous   |
| NC_037644.1 | 3340850 | SNV | 1 | T | C | Heterozygous |
| NC_037644.1 | 3343770 | SNV | 1 | C | T | Heterozygous |
| NC_037644.1 | 3343808 | SNV | 1 | G | A | Heterozygous |
| NC_037644.1 | 3344213 | SNV | 1 | A | G | Homozygous   |
| NC_037644.1 | 3345538 | SNV | 1 | G | A | Heterozygous |
| NC_037644.1 | 3347283 | SNV | 1 | A | G | Homozygous   |
| NC_037644.1 | 3347364 | SNV | 1 | A | G | Heterozygous |
| NC_037644.1 | 3348212 | SNV | 1 | C | G | Heterozygous |
| NC_037644.1 | 3348570 | SNV | 1 | T | C | Homozygous   |
| NC_037644.1 | 3348758 | SNV | 1 | C | T | Heterozygous |
| NC_037644.1 | 3348865 | SNV | 1 | C | T | Heterozygous |
| NC_037644.1 | 3348886 | SNV | 1 | G | A | Heterozygous |
| NC_037644.1 | 3348904 | SNV | 1 | C | G | Homozygous   |
| NC_037644.1 | 3348907 | SNV | 1 | T | C | Heterozygous |
| NC_037644.1 | 3348921 | SNV | 1 | G | A | Homozygous   |
| NC_037644.1 | 3351130 | SNV | 1 | A | G | Homozygous   |
| NC_037644.1 | 3351160 | SNV | 1 | C | T | Heterozygous |
| NC_037644.1 | 3351182 | SNV | 1 | A | G | Homozygous   |
| NC_037644.1 | 3351245 | SNV | 1 | G | A | Heterozygous |
| NC_037644.1 | 3351262 | SNV | 1 | G | A | Heterozygous |
| NC_037644.1 | 3351364 | SNV | 1 | C | T | Heterozygous |

|             |         |     |   |   |   |              |
|-------------|---------|-----|---|---|---|--------------|
| NC_037644.1 | 3351400 | SNV | 1 | G | A | Homozygous   |
| NC_037644.1 | 3357397 | SNV | 1 | C | T | Heterozygous |
| NC_037644.1 | 3372592 | SNV | 1 | A | T | Heterozygous |
| NC_037644.1 | 3372600 | SNV | 1 | A | T | Homozygous   |
| NC_037644.1 | 3372606 | SNV | 1 | A | T | Heterozygous |
| NC_037644.1 | 3372640 | SNV | 1 | A | T | Heterozygous |
| NC_037644.1 | 3378773 | SNV | 1 | C | A | Homozygous   |
| NC_037644.1 | 3379133 | SNV | 1 | T | C | Homozygous   |
| NC_037644.1 | 3382610 | SNV | 1 | A | T | Heterozygous |
| NC_037644.1 | 3382689 | SNV | 1 | T | C | Homozygous   |
| NC_037644.1 | 3382694 | SNV | 1 | G | A | Homozygous   |
| NC_037644.1 | 3382733 | SNV | 1 | T | C | Homozygous   |
| NC_037644.1 | 3396194 | SNV | 1 | T | C | Heterozygous |
| NC_037644.1 | 3396277 | SNV | 1 | A | G | Homozygous   |
| NC_037644.1 | 3396362 | SNV | 1 | C | T | Heterozygous |
| NC_037644.1 | 3405905 | SNV | 1 | A | G | Heterozygous |
| NC_037644.1 | 3418145 | SNV | 1 | G | A | Heterozygous |
| NC_037644.1 | 3423067 | SNV | 1 | C | A | Homozygous   |
| NC_037644.1 | 3423069 | SNV | 1 | G | C | Homozygous   |
| NC_037644.1 | 3423096 | SNV | 1 | T | G | Homozygous   |
| NC_037644.1 | 3428371 | SNV | 1 | T | C | Homozygous   |
| NC_037644.1 | 3428389 | SNV | 1 | T | A | Homozygous   |
| NC_037644.1 | 3428399 | SNV | 1 | T | A | Homozygous   |
| NC_037644.1 | 3428402 | SNV | 1 | T | A | Homozygous   |
| NC_037644.1 | 3428414 | SNV | 1 | C | T | Homozygous   |
| NC_037644.1 | 3428452 | SNV | 1 | A | T | Heterozygous |
| NC_037644.1 | 3428485 | SNV | 1 | C | T | Homozygous   |
| NC_037644.1 | 3432502 | SNV | 1 | G | A | Homozygous   |
| NC_037644.1 | 3432529 | SNV | 1 | T | C | Heterozygous |
| NC_037644.1 | 3432737 | SNV | 1 | A | G | Heterozygous |
| NC_037644.1 | 3432798 | SNV | 1 | C | A | Heterozygous |
| NC_037644.1 | 3437204 | SNV | 1 | T | C | Homozygous   |
| NC_037644.1 | 3437254 | SNV | 1 | T | A | Homozygous   |
| NC_037644.1 | 3437304 | SNV | 1 | C | G | Homozygous   |
| NC_037644.1 | 3437398 | SNV | 1 | G | A | Heterozygous |
| NC_037644.1 | 3439780 | SNV | 1 | A | G | Homozygous   |
| NC_037644.1 | 3439817 | SNV | 1 | A | C | Homozygous   |
| NC_037644.1 | 3440916 | SNV | 1 | C | A | Homozygous   |
| NC_037644.1 | 3440943 | SNV | 1 | T | A | Homozygous   |
| NC_037644.1 | 3440946 | SNV | 1 | A | T | Homozygous   |
| NC_037644.1 | 3446209 | SNV | 1 | A | G | Homozygous   |
| NC_037644.1 | 3456503 | SNV | 1 | A | G | Heterozygous |
| NC_037644.1 | 3456506 | SNV | 1 | A | G | Homozygous   |
| NC_037644.1 | 3456529 | SNV | 1 | A | G | Homozygous   |
| NC_037644.1 | 3459910 | SNV | 1 | C | A | Heterozygous |
| NC_037644.1 | 3459913 | SNV | 1 | T | A | Heterozygous |
| NC_037644.1 | 3459913 | SNV | 1 | T | C | Heterozygous |
| NC_037644.1 | 3459953 | SNV | 1 | G | A | Homozygous   |
| NC_037644.1 | 3459985 | SNV | 1 | C | A | Homozygous   |
| NC_037644.1 | 3460052 | SNV | 1 | T | A | Heterozygous |
| NC_037644.1 | 3460054 | SNV | 1 | G | T | Homozygous   |

|             |         |     |   |   |   |              |
|-------------|---------|-----|---|---|---|--------------|
| NC_037644.1 | 3460076 | SNV | 1 | T | G | Heterozygous |
| NC_037644.1 | 3460083 | SNV | 1 | G | A | Heterozygous |
| NC_037644.1 | 3460088 | SNV | 1 | T | C | Heterozygous |
| NC_037644.1 | 3467521 | SNV | 1 | T | G | Homozygous   |
| NC_037644.1 | 3467523 | SNV | 1 | C | T | Homozygous   |
| NC_037644.1 | 3467744 | SNV | 1 | C | A | Homozygous   |
| NC_037644.1 | 3467754 | SNV | 1 | T | A | Heterozygous |
| NC_037644.1 | 3467756 | SNV | 1 | T | C | Heterozygous |
| NC_037644.1 | 3467836 | SNV | 1 | C | T | Homozygous   |
| NC_037644.1 | 3467867 | SNV | 1 | C | G | Homozygous   |
| NC_037644.1 | 3475084 | SNV | 1 | C | T | Homozygous   |
| NC_037644.1 | 3475094 | SNV | 1 | A | T | Homozygous   |
| NC_037644.1 | 3476989 | SNV | 1 | G | A | Heterozygous |
| NC_037644.1 | 3476993 | SNV | 1 | G | A | Heterozygous |
| NC_037644.1 | 3476995 | SNV | 1 | G | C | Heterozygous |
| NC_037644.1 | 3477035 | SNV | 1 | G | A | Heterozygous |
| NC_037644.1 | 3477037 | SNV | 1 | G | C | Heterozygous |
| NC_037644.1 | 3477047 | SNV | 1 | T | C | Heterozygous |
| NC_037644.1 | 3477048 | SNV | 1 | G | A | Heterozygous |
| NC_037644.1 | 3477058 | SNV | 1 | G | C | Heterozygous |
| NC_037644.1 | 3477059 | SNV | 1 | T | C | Heterozygous |
| NC_037644.1 | 3477204 | SNV | 1 | T | A | Homozygous   |
| NC_037644.1 | 3477330 | SNV | 1 | G | A | Heterozygous |
| NC_037644.1 | 3481278 | SNV | 1 | G | A | Heterozygous |
| NC_037644.1 | 3481282 | SNV | 1 | A | G | Homozygous   |
| NC_037644.1 | 3481310 | SNV | 1 | A | C | Homozygous   |
| NC_037644.1 | 3482393 | SNV | 1 | A | G | Homozygous   |
| NC_037644.1 | 3482598 | SNV | 1 | A | G | Homozygous   |
| NC_037644.1 | 3482655 | SNV | 1 | A | G | Homozygous   |
| NC_037644.1 | 3482660 | SNV | 1 | T | G | Heterozygous |
| NC_037644.1 | 3482724 | SNV | 1 | G | A | Heterozygous |
| NC_037644.1 | 3483047 | SNV | 1 | A | G | Heterozygous |
| NC_037644.1 | 3486255 | SNV | 1 | C | T | Homozygous   |
| NC_037644.1 | 3489600 | SNV | 1 | T | A | Heterozygous |
| NC_037644.1 | 3489838 | SNV | 1 | T | C | Homozygous   |
| NC_037644.1 | 3489973 | SNV | 1 | C | T | Heterozygous |
| NC_037644.1 | 3489998 | SNV | 1 | A | G | Homozygous   |
| NC_037644.1 | 3490542 | SNV | 1 | T | C | Heterozygous |
| NC_037644.1 | 3493118 | SNV | 1 | T | A | Homozygous   |
| NC_037644.1 | 3498771 | SNV | 1 | A | T | Homozygous   |
| NC_037644.1 | 3498781 | SNV | 1 | A | T | Homozygous   |
| NC_037644.1 | 3498784 | SNV | 1 | T | C | Homozygous   |
| NC_037644.1 | 3498805 | SNV | 1 | A | T | Homozygous   |
| NC_037644.1 | 3498808 | SNV | 1 | A | T | Homozygous   |
| NC_037644.1 | 3498812 | SNV | 1 | G | C | Homozygous   |
| NC_037644.1 | 3498815 | SNV | 1 | T | A | Homozygous   |
| NC_037644.1 | 3498820 | SNV | 1 | G | A | Homozygous   |
| NC_037644.1 | 3502100 | SNV | 1 | A | T | Homozygous   |
| NC_037644.1 | 3502339 | SNV | 1 | T | C | Heterozygous |
| NC_037644.1 | 3503135 | SNV | 1 | T | C | Heterozygous |
| NC_037644.1 | 3503330 | SNV | 1 | T | A | Homozygous   |

|             |         |     |   |   |   |              |
|-------------|---------|-----|---|---|---|--------------|
| NC_037644.1 | 3504195 | SNV | 1 | T | C | Homozygous   |
| NC_037644.1 | 3504201 | SNV | 1 | G | A | Homozygous   |
| NC_037644.1 | 3504253 | SNV | 1 | T | C | Homozygous   |
| NC_037644.1 | 3504394 | SNV | 1 | T | C | Heterozygous |
| NC_037644.1 | 3504418 | SNV | 1 | T | C | Homozygous   |
| NC_037644.1 | 3504448 | SNV | 1 | A | G | Heterozygous |
| NC_037644.1 | 3504563 | SNV | 1 | T | C | Heterozygous |
| NC_037644.1 | 3504823 | SNV | 1 | C | T | Heterozygous |
| NC_037644.1 | 3504895 | SNV | 1 | T | C | Homozygous   |
| NC_037644.1 | 3505344 | SNV | 1 | C | T | Homozygous   |
| NC_037644.1 | 3505615 | SNV | 1 | T | C | Homozygous   |
| NC_037644.1 | 3505850 | SNV | 1 | T | G | Homozygous   |
| NC_037644.1 | 3505925 | SNV | 1 | G | T | Homozygous   |
| NC_037644.1 | 3505930 | SNV | 1 | T | A | Homozygous   |
| NC_037644.1 | 3505933 | SNV | 1 | C | A | Homozygous   |
| NC_037644.1 | 3512995 | SNV | 1 | A | T | Heterozygous |
| NC_037644.1 | 3513192 | SNV | 1 | T | C | Homozygous   |
| NC_037644.1 | 3513565 | SNV | 1 | C | T | Homozygous   |
| NC_037644.1 | 3513570 | SNV | 1 | A | G | Homozygous   |
| NC_037644.1 | 3513755 | SNV | 1 | T | C | Heterozygous |
| NC_037644.1 | 3533846 | SNV | 1 | T | C | Homozygous   |
| NC_037644.1 | 3533979 | SNV | 1 | T | A | Heterozygous |
| NC_037644.1 | 3534165 | SNV | 1 | T | G | Homozygous   |
| NC_037644.1 | 3534451 | SNV | 1 | T | C | Heterozygous |
| NC_037644.1 | 3534851 | SNV | 1 | T | C | Heterozygous |
| NC_037644.1 | 3535068 | SNV | 1 | G | A | Homozygous   |
| NC_037644.1 | 3535675 | SNV | 1 | C | G | Homozygous   |
| NC_037644.1 | 3535908 | SNV | 1 | T | C | Heterozygous |
| NC_037644.1 | 3535946 | SNV | 1 | C | T | Homozygous   |
| NC_037644.1 | 3535949 | SNV | 1 | G | T | Homozygous   |
| NC_037644.1 | 3535966 | SNV | 1 | C | G | Heterozygous |
| NC_037644.1 | 3535969 | SNV | 1 | T | G | Heterozygous |
| NC_037644.1 | 3536225 | SNV | 1 | T | C | Homozygous   |
| NC_037644.1 | 3536243 | SNV | 1 | G | A | Homozygous   |
| NC_037644.1 | 3536773 | SNV | 1 | A | G | Homozygous   |
| NC_037644.1 | 3537461 | SNV | 1 | A | G | Homozygous   |
| NC_037644.1 | 3538148 | SNV | 1 | A | G | Heterozygous |
| NC_037644.1 | 3538172 | SNV | 1 | A | G | Heterozygous |
| NC_037644.1 | 3538208 | SNV | 1 | C | G | Heterozygous |
| NC_037644.1 | 3538214 | SNV | 1 | C | G | Heterozygous |
| NC_037644.1 | 3538220 | SNV | 1 | C | G | Heterozygous |
| NC_037644.1 | 3544937 | SNV | 1 | A | C | Homozygous   |
| NC_037644.1 | 3544940 | SNV | 1 | A | T | Homozygous   |
| NC_037644.1 | 3544960 | SNV | 1 | A | G | Homozygous   |
| NC_037644.1 | 3544974 | SNV | 1 | A | C | Homozygous   |
| NC_037644.1 | 3544976 | SNV | 1 | A | T | Homozygous   |
| NC_037644.1 | 3544981 | SNV | 1 | A | T | Homozygous   |
| NC_037644.1 | 3552006 | SNV | 1 | T | G | Heterozygous |
| NC_037644.1 | 3552018 | SNV | 1 | T | C | Homozygous   |
| NC_037644.1 | 3552193 | SNV | 1 | A | G | Heterozygous |
| NC_037644.1 | 3552406 | SNV | 1 | A | G | Homozygous   |



|             |         |     |   |   |   |              |
|-------------|---------|-----|---|---|---|--------------|
| NC_037644.1 | 3552427 | SNV | 1 | T | C | Heterozygous |
| NC_037644.1 | 3552438 | SNV | 1 | C | T | Homozygous   |
| NC_037644.1 | 3553658 | SNV | 1 | C | T | Homozygous   |
| NC_037644.1 | 3553706 | SNV | 1 | C | G | Heterozygous |
| NC_037644.1 | 3565148 | SNV | 1 | A | G | Heterozygous |
| NC_037644.1 | 3565150 | SNV | 1 | T | C | Heterozygous |
| NC_037644.1 | 3565275 | SNV | 1 | A | T | Homozygous   |
| NC_037644.1 | 3570250 | SNV | 1 | C | T | Heterozygous |
| NC_037644.1 | 3570465 | SNV | 1 | C | T | Heterozygous |
| NC_037644.1 | 3575447 | SNV | 1 | C | T | Heterozygous |
| NC_037644.1 | 3575614 | SNV | 1 | G | A | Homozygous   |
| NC_037644.1 | 3575645 | SNV | 1 | A | G | Homozygous   |
| NC_037644.1 | 3576071 | SNV | 1 | C | T | Heterozygous |
| NC_037644.1 | 3576089 | SNV | 1 | C | T | Heterozygous |
| NC_037644.1 | 3576094 | SNV | 1 | G | T | Homozygous   |
| NC_037644.1 | 3576122 | SNV | 1 | G | A | Heterozygous |
| NC_037644.1 | 3577783 | SNV | 1 | C | T | Heterozygous |
| NC_037644.1 | 3577855 | SNV | 1 | T | C | Heterozygous |
| NC_037644.1 | 3577927 | SNV | 1 | C | A | Heterozygous |
| NC_037644.1 | 3583795 | SNV | 1 | A | C | Homozygous   |
| NC_037644.1 | 3583840 | SNV | 1 | G | A | Homozygous   |
| NC_037644.1 | 3586013 | SNV | 1 | T | C | Heterozygous |
| NC_037644.1 | 3586103 | SNV | 1 | T | C | Heterozygous |
| NC_037644.1 | 3590384 | SNV | 1 | C | T | Heterozygous |
| NC_037644.1 | 3590417 | SNV | 1 | G | A | Heterozygous |
| NC_037644.1 | 3590879 | SNV | 1 | T | A | Homozygous   |
| NC_037644.1 | 3590882 | SNV | 1 | A | T | Homozygous   |
| NC_037644.1 | 3590885 | SNV | 1 | A | C | Heterozygous |
| NC_037644.1 | 3592191 | SNV | 1 | A | G | Homozygous   |
| NC_037644.1 | 3592322 | SNV | 1 | G | A | Homozygous   |
| NC_037644.1 | 3592481 | SNV | 1 | A | T | Homozygous   |
| NC_037644.1 | 3594201 | SNV | 1 | A | G | Homozygous   |
| NC_037644.1 | 3594213 | SNV | 1 | A | C | Heterozygous |
| NC_037644.1 | 3594415 | SNV | 1 | G | C | Heterozygous |
| NC_037644.1 | 3594622 | SNV | 1 | C | T | Heterozygous |
| NC_037644.1 | 3595258 | SNV | 1 | A | G | Homozygous   |
| NC_037644.1 | 3595372 | SNV | 1 | G | A | Heterozygous |
| NC_037644.1 | 3595375 | SNV | 1 | G | T | Heterozygous |
| NC_037644.1 | 3595440 | SNV | 1 | C | G | Heterozygous |
| NC_037644.1 | 3595469 | SNV | 1 | A | G | Heterozygous |
| NC_037644.1 | 3595476 | SNV | 1 | T | G | Heterozygous |
| NC_037644.1 | 3595536 | SNV | 1 | T | C | Homozygous   |
| NC_037644.1 | 3595939 | SNV | 1 | A | G | Heterozygous |
| NC_037644.1 | 3595949 | SNV | 1 | A | G | Heterozygous |
| NC_037644.1 | 3601441 | SNV | 1 | T | A | Homozygous   |
| NC_037644.1 | 3606716 | SNV | 1 | C | A | Heterozygous |
| NC_037644.1 | 3607395 | SNV | 1 | G | A | Heterozygous |
| NC_037644.1 | 3607433 | SNV | 1 | A | G | Heterozygous |
| NC_037644.1 | 3607465 | SNV | 1 | A | G | Homozygous   |
| NC_037644.1 | 3607474 | SNV | 1 | T | C | Heterozygous |
| NC_037644.1 | 3607485 | SNV | 1 | T | C | Heterozygous |

|             |         |     |   |   |   |              |
|-------------|---------|-----|---|---|---|--------------|
| NC_037644.1 | 3607712 | SNV | 1 | C | T | Homozygous   |
| NC_037644.1 | 3607746 | SNV | 1 | G | A | Homozygous   |
| NC_037644.1 | 3607785 | SNV | 1 | A | T | Homozygous   |
| NC_037644.1 | 3607787 | SNV | 1 | T | A | Homozygous   |
| NC_037644.1 | 3607796 | SNV | 1 | G | A | Homozygous   |
| NC_037644.1 | 3607821 | SNV | 1 | G | A | Homozygous   |
| NC_037644.1 | 3607832 | SNV | 1 | A | T | Heterozygous |
| NC_037644.1 | 3608063 | SNV | 1 | A | G | Heterozygous |
| NC_037644.1 | 3610783 | SNV | 1 | T | C | Heterozygous |
| NC_037644.1 | 3611047 | SNV | 1 | C | T | Homozygous   |
| NC_037644.1 | 3611060 | SNV | 1 | T | A | Homozygous   |
| NC_037644.1 | 3611071 | SNV | 1 | T | C | Homozygous   |
| NC_037644.1 | 3611074 | SNV | 1 | C | T | Homozygous   |
| NC_037644.1 | 3611078 | SNV | 1 | T | A | Homozygous   |
| NC_037644.1 | 3611096 | SNV | 1 | T | A | Heterozygous |
| NC_037644.1 | 3611107 | SNV | 1 | T | C | Homozygous   |
| NC_037644.1 | 3611433 | SNV | 1 | T | C | Homozygous   |
| NC_037644.1 | 3613160 | SNV | 1 | A | G | Heterozygous |
| NC_037644.1 | 3614663 | SNV | 1 | G | T | Heterozygous |
| NC_037644.1 | 3614693 | SNV | 1 | T | C | Heterozygous |
| NC_037644.1 | 3614843 | SNV | 1 | A | G | Heterozygous |
| NC_037644.1 | 3614915 | SNV | 1 | C | T | Heterozygous |
| NC_037644.1 | 3615620 | SNV | 1 | T | C | Homozygous   |
| NC_037644.1 | 3615688 | SNV | 1 | C | A | Heterozygous |
| NC_037644.1 | 3615701 | SNV | 1 | G | A | Heterozygous |
| NC_037644.1 | 3615922 | SNV | 1 | G | A | Heterozygous |
| NC_037644.1 | 3615964 | SNV | 1 | G | A | Heterozygous |
| NC_037644.1 | 3616087 | SNV | 1 | A | G | Heterozygous |
| NC_037644.1 | 3616306 | SNV | 1 | T | C | Homozygous   |
| NC_037644.1 | 3616354 | SNV | 1 | T | C | Homozygous   |
| NC_037644.1 | 3616596 | SNV | 1 | T | C | Homozygous   |
| NC_037644.1 | 3616825 | SNV | 1 | A | T | Heterozygous |
| NC_037644.1 | 3616949 | SNV | 1 | T | C | Heterozygous |
| NC_037644.1 | 3617048 | SNV | 1 | C | T | Heterozygous |
| NC_037644.1 | 3617127 | SNV | 1 | T | C | Heterozygous |
| NC_037644.1 | 3617153 | SNV | 1 | G | A | Heterozygous |
| NC_037644.1 | 3617155 | SNV | 1 | C | G | Homozygous   |
| NC_037644.1 | 3619714 | SNV | 1 | C | T | Heterozygous |
| NC_037644.1 | 3620719 | SNV | 1 | C | T | Heterozygous |
| NC_037644.1 | 3621309 | SNV | 1 | G | A | Homozygous   |
| NC_037644.1 | 3631601 | SNV | 1 | C | A | Homozygous   |
| NC_037644.1 | 3640837 | SNV | 1 | A | G | Homozygous   |
| NC_037644.1 | 3640839 | SNV | 1 | T | C | Homozygous   |
| NC_037644.1 | 3657904 | SNV | 1 | A | G | Heterozygous |
| NC_037644.1 | 3657907 | SNV | 1 | C | T | Heterozygous |
| NC_037644.1 | 3663836 | SNV | 1 | C | A | Heterozygous |
| NC_037644.1 | 3663841 | SNV | 1 | T | C | Heterozygous |
| NC_037644.1 | 3666710 | SNV | 1 | G | T | Homozygous   |
| NC_037644.1 | 3673172 | SNV | 1 | G | A | Homozygous   |
| NC_037644.1 | 3673177 | SNV | 1 | G | A | Homozygous   |
| NC_037644.1 | 3673182 | SNV | 1 | G | A | Homozygous   |

|             |         |     |   |   |   |              |
|-------------|---------|-----|---|---|---|--------------|
| NC_037644.1 | 3673197 | SNV | 1 | G | A | Homozygous   |
| NC_037644.1 | 3673207 | SNV | 1 | G | A | Homozygous   |
| NC_037644.1 | 3673212 | SNV | 1 | G | A | Homozygous   |
| NC_037644.1 | 3673242 | SNV | 1 | G | A | Homozygous   |
| NC_037644.1 | 3673252 | SNV | 1 | G | A | Homozygous   |
| NC_037644.1 | 3673257 | SNV | 1 | G | A | Homozygous   |
| NC_037644.1 | 3673262 | SNV | 1 | G | A | Homozygous   |
| NC_037644.1 | 3673266 | SNV | 1 | T | C | Homozygous   |
| NC_037644.1 | 3673272 | SNV | 1 | G | A | Homozygous   |
| NC_037644.1 | 3673282 | SNV | 1 | G | A | Homozygous   |
| NC_037644.1 | 3676166 | SNV | 1 | G | A | Heterozygous |
| NC_037644.1 | 3676190 | SNV | 1 | T | C | Homozygous   |
| NC_037644.1 | 3676194 | SNV | 1 | T | C | Heterozygous |
| NC_037644.1 | 3676198 | SNV | 1 | C | T | Heterozygous |
| NC_037644.1 | 3676437 | SNV | 1 | A | G | Homozygous   |
| NC_037644.1 | 3676458 | SNV | 1 | G | A | Homozygous   |
| NC_037644.1 | 3676462 | SNV | 1 | T | C | Homozygous   |
| NC_037644.1 | 3676491 | SNV | 1 | C | T | Homozygous   |
| NC_037644.1 | 3677486 | SNV | 1 | T | C | Homozygous   |
| NC_037644.1 | 3679094 | SNV | 1 | C | T | Heterozygous |
| NC_037644.1 | 3679150 | SNV | 1 | C | T | Heterozygous |
| NC_037644.1 | 3679734 | SNV | 1 | A | G | Homozygous   |
| NC_037644.1 | 3679800 | SNV | 1 | A | G | Heterozygous |
| NC_037644.1 | 3680097 | SNV | 1 | G | A | Homozygous   |
| NC_037644.1 | 3680136 | SNV | 1 | T | A | Homozygous   |
| NC_037644.1 | 3680281 | SNV | 1 | G | A | Heterozygous |
| NC_037644.1 | 3680435 | SNV | 1 | T | C | Homozygous   |
| NC_037644.1 | 3682817 | SNV | 1 | T | C | Heterozygous |
| NC_037644.1 | 3682916 | SNV | 1 | T | C | Homozygous   |
| NC_037644.1 | 3683736 | SNV | 1 | C | A | Homozygous   |
| NC_037644.1 | 3683846 | SNV | 1 | T | C | Homozygous   |
| NC_037644.1 | 3684034 | SNV | 1 | A | G | Homozygous   |
| NC_037644.1 | 3684233 | SNV | 1 | T | C | Homozygous   |
| NC_037644.1 | 3684595 | SNV | 1 | A | G | Homozygous   |
| NC_037644.1 | 3684636 | SNV | 1 | A | T | Homozygous   |
| NC_037644.1 | 3684684 | SNV | 1 | C | T | Heterozygous |
| NC_037644.1 | 3684806 | SNV | 1 | A | T | Heterozygous |
| NC_037644.1 | 3685013 | SNV | 1 | G | A | Heterozygous |
| NC_037644.1 | 3685252 | SNV | 1 | G | A | Homozygous   |
| NC_037644.1 | 3685305 | SNV | 1 | C | T | Heterozygous |
| NC_037644.1 | 3685309 | SNV | 1 | C | G | Homozygous   |
| NC_037644.1 | 3685380 | SNV | 1 | G | A | Heterozygous |
| NC_037644.1 | 3685382 | SNV | 1 | A | G | Heterozygous |
| NC_037644.1 | 3685399 | SNV | 1 | G | A | Homozygous   |
| NC_037644.1 | 3685448 | SNV | 1 | G | T | Heterozygous |
| NC_037644.1 | 3685472 | SNV | 1 | T | C | Heterozygous |
| NC_037644.1 | 3685474 | SNV | 1 | G | A | Heterozygous |
| NC_037644.1 | 3692617 | SNV | 1 | G | A | Homozygous   |
| NC_037644.1 | 3692711 | SNV | 1 | C | T | Heterozygous |
| NC_037644.1 | 3692861 | SNV | 1 | G | A | Heterozygous |
| NC_037644.1 | 3693131 | SNV | 1 | T | C | Heterozygous |

|             |         |     |   |   |   |              |
|-------------|---------|-----|---|---|---|--------------|
| NC_037644.1 | 3693875 | SNV | 1 | G | A | Heterozygous |
| NC_037644.1 | 3693899 | SNV | 1 | G | A | Heterozygous |
| NC_037644.1 | 3693902 | SNV | 1 | G | A | Heterozygous |
| NC_037644.1 | 3695648 | SNV | 1 | G | A | Heterozygous |
| NC_037644.1 | 3695714 | SNV | 1 | C | T | Heterozygous |
| NC_037644.1 | 3695792 | SNV | 1 | C | T | Heterozygous |
| NC_037644.1 | 3700171 | SNV | 1 | T | C | Homozygous   |
| NC_037644.1 | 3724965 | SNV | 1 | T | C | Homozygous   |
| NC_037644.1 | 3725080 | SNV | 1 | C | T | Heterozygous |
| NC_037644.1 | 3727468 | SNV | 1 | G | T | Homozygous   |
| NC_037644.1 | 3728604 | SNV | 1 | A | T | Homozygous   |
| NC_037644.1 | 3728606 | SNV | 1 | C | G | Homozygous   |
| NC_037644.1 | 3728628 | SNV | 1 | T | A | Homozygous   |
| NC_037644.1 | 3728635 | SNV | 1 | T | A | Homozygous   |
| NC_037644.1 | 3728641 | SNV | 1 | A | C | Homozygous   |
| NC_037644.1 | 3730171 | SNV | 1 | C | A | Heterozygous |
| NC_037644.1 | 3735064 | SNV | 1 | T | C | Homozygous   |
| NC_037644.1 | 3736195 | SNV | 1 | C | T | Homozygous   |
| NC_037644.1 | 3736232 | SNV | 1 | C | T | Homozygous   |
| NC_037644.1 | 3736263 | SNV | 1 | T | C | Heterozygous |
| NC_037644.1 | 3736668 | SNV | 1 | G | A | Homozygous   |
| NC_037644.1 | 3736761 | SNV | 1 | G | A | Homozygous   |
| NC_037644.1 | 3743936 | SNV | 1 | C | T | Homozygous   |
| NC_037644.1 | 3743939 | SNV | 1 | C | T | Homozygous   |
| NC_037644.1 | 3743961 | SNV | 1 | T | C | Homozygous   |
| NC_037644.1 | 3743982 | SNV | 1 | C | T | Homozygous   |
| NC_037644.1 | 3746436 | SNV | 1 | C | A | Homozygous   |
| NC_037644.1 | 3746438 | SNV | 1 | A | T | Homozygous   |
| NC_037644.1 | 3746442 | SNV | 1 | T | A | Homozygous   |
| NC_037644.1 | 3746446 | SNV | 1 | T | A | Homozygous   |
| NC_037644.1 | 3746448 | SNV | 1 | T | A | Homozygous   |
| NC_037644.1 | 3746453 | SNV | 1 | A | G | Homozygous   |
| NC_037644.1 | 3746479 | SNV | 1 | A | G | Homozygous   |
| NC_037644.1 | 3748190 | SNV | 1 | C | T | Homozygous   |
| NC_037644.1 | 3748202 | SNV | 1 | C | T | Homozygous   |
| NC_037644.1 | 3753564 | SNV | 1 | A | G | Heterozygous |
| NC_037644.1 | 3753594 | SNV | 1 | T | A | Homozygous   |
| NC_037644.1 | 3753596 | SNV | 1 | T | A | Homozygous   |
| NC_037644.1 | 3753979 | SNV | 1 | T | C | Heterozygous |
| NC_037644.1 | 3754008 | SNV | 1 | T | C | Homozygous   |
| NC_037644.1 | 3754077 | SNV | 1 | C | T | Heterozygous |
| NC_037644.1 | 3754095 | SNV | 1 | G | A | Heterozygous |
| NC_037644.1 | 3754098 | SNV | 1 | A | G | Homozygous   |
| NC_037644.1 | 3754203 | SNV | 1 | T | G | Heterozygous |
| NC_037644.1 | 3754664 | SNV | 1 | C | T | Homozygous   |
| NC_037644.1 | 3758288 | SNV | 1 | T | C | Homozygous   |
| NC_037644.1 | 3759218 | SNV | 1 | C | T | Homozygous   |
| NC_037644.1 | 3759596 | SNV | 1 | A | G | Heterozygous |
| NC_037644.1 | 3759613 | SNV | 1 | T | C | Heterozygous |
| NC_037644.1 | 3759622 | SNV | 1 | A | G | Homozygous   |
| NC_037644.1 | 3759626 | SNV | 1 | A | G | Homozygous   |

|             |         |     |   |   |   |              |
|-------------|---------|-----|---|---|---|--------------|
| NC_037644.1 | 3759659 | SNV | 1 | A | G | Homozygous   |
| NC_037644.1 | 3761345 | SNV | 1 | C | G | Heterozygous |
| NC_037644.1 | 3761429 | SNV | 1 | A | G | Heterozygous |
| NC_037644.1 | 3761501 | SNV | 1 | C | T | Heterozygous |
| NC_037644.1 | 3762047 | SNV | 1 | A | G | Homozygous   |
| NC_037644.1 | 3762152 | SNV | 1 | T | C | Heterozygous |
| NC_037644.1 | 3762345 | SNV | 1 | A | G | Homozygous   |
| NC_037644.1 | 3762494 | SNV | 1 | G | A | Heterozygous |
| NC_037644.1 | 3762685 | SNV | 1 | A | T | Heterozygous |
| NC_037644.1 | 3762703 | SNV | 1 | C | T | Heterozygous |
| NC_037644.1 | 3762748 | SNV | 1 | A | G | Heterozygous |
| NC_037644.1 | 3762878 | SNV | 1 | T | C | Homozygous   |
| NC_037644.1 | 3762907 | SNV | 1 | C | T | Heterozygous |
| NC_037644.1 | 3762917 | SNV | 1 | T | C | Homozygous   |
| NC_037644.1 | 3762940 | SNV | 1 | G | A | Heterozygous |
| NC_037644.1 | 3763082 | SNV | 1 | A | C | Homozygous   |
| NC_037644.1 | 3763262 | SNV | 1 | A | T | Heterozygous |
| NC_037644.1 | 3763853 | SNV | 1 | T | C | Homozygous   |
| NC_037644.1 | 3763975 | SNV | 1 | C | T | Heterozygous |
| NC_037644.1 | 3763976 | SNV | 1 | C | T | Heterozygous |
| NC_037644.1 | 3764042 | SNV | 1 | T | C | Homozygous   |
| NC_037644.1 | 3764055 | SNV | 1 | C | T | Heterozygous |
| NC_037644.1 | 3764086 | SNV | 1 | T | C | Homozygous   |
| NC_037644.1 | 3764124 | SNV | 1 | C | T | Heterozygous |
| NC_037644.1 | 3764140 | SNV | 1 | G | A | Heterozygous |
| NC_037644.1 | 3764152 | SNV | 1 | A | C | Heterozygous |
| NC_037644.1 | 3764201 | SNV | 1 | T | G | Homozygous   |
| NC_037644.1 | 3764242 | SNV | 1 | T | A | Homozygous   |
| NC_037644.1 | 3764281 | SNV | 1 | T | A | Homozygous   |
| NC_037644.1 | 3764411 | SNV | 1 | C | A | Homozygous   |
| NC_037644.1 | 3764559 | SNV | 1 | T | C | Homozygous   |
| NC_037644.1 | 3764673 | SNV | 1 | A | G | Homozygous   |
| NC_037644.1 | 3764907 | SNV | 1 | A | G | Homozygous   |
| NC_037644.1 | 3764999 | SNV | 1 | T | C | Homozygous   |
| NC_037644.1 | 3765074 | SNV | 1 | A | G | Heterozygous |
| NC_037644.1 | 3765362 | SNV | 1 | T | C | Heterozygous |
| NC_037644.1 | 3765569 | SNV | 1 | T | C | Homozygous   |
| NC_037644.1 | 3765633 | SNV | 1 | A | G | Homozygous   |
| NC_037644.1 | 3765685 | SNV | 1 | T | C | Homozygous   |
| NC_037644.1 | 3765689 | SNV | 1 | A | G | Heterozygous |
| NC_037644.1 | 3765799 | SNV | 1 | C | T | Heterozygous |
| NC_037644.1 | 3765811 | SNV | 1 | T | C | Homozygous   |
| NC_037644.1 | 3765820 | SNV | 1 | A | C | Homozygous   |
| NC_037644.1 | 3766004 | SNV | 1 | C | T | Heterozygous |
| NC_037644.1 | 3766067 | SNV | 1 | T | C | Homozygous   |
| NC_037644.1 | 3766113 | SNV | 1 | A | G | Homozygous   |
| NC_037644.1 | 3766136 | SNV | 1 | G | A | Heterozygous |
| NC_037644.1 | 3766187 | SNV | 1 | T | C | Heterozygous |
| NC_037644.1 | 3766332 | SNV | 1 | G | A | Heterozygous |
| NC_037644.1 | 3766484 | SNV | 1 | C | T | Heterozygous |
| NC_037644.1 | 3766588 | SNV | 1 | C | T | Heterozygous |

|             |         |     |   |   |   |              |
|-------------|---------|-----|---|---|---|--------------|
| NC_037644.1 | 3766650 | SNV | 1 | A | G | Homozygous   |
| NC_037644.1 | 3766721 | SNV | 1 | A | T | Homozygous   |
| NC_037644.1 | 3766724 | SNV | 1 | T | C | Homozygous   |
| NC_037644.1 | 3766751 | SNV | 1 | C | T | Homozygous   |
| NC_037644.1 | 3766787 | SNV | 1 | T | C | Homozygous   |
| NC_037644.1 | 3767169 | SNV | 1 | A | G | Homozygous   |
| NC_037644.1 | 3767372 | SNV | 1 | T | C | Heterozygous |
| NC_037644.1 | 3767549 | SNV | 1 | G | A | Homozygous   |
| NC_037644.1 | 3767558 | SNV | 1 | T | C | Homozygous   |
| NC_037644.1 | 3767692 | SNV | 1 | A | T | Homozygous   |
| NC_037644.1 | 3767773 | SNV | 1 | C | T | Homozygous   |
| NC_037644.1 | 3767849 | SNV | 1 | A | T | Heterozygous |
| NC_037644.1 | 3767905 | SNV | 1 | C | T | Homozygous   |
| NC_037644.1 | 3767963 | SNV | 1 | C | T | Homozygous   |
| NC_037644.1 | 3767966 | SNV | 1 | C | T | Heterozygous |
| NC_037644.1 | 3767973 | SNV | 1 | A | G | Homozygous   |
| NC_037644.1 | 3767977 | SNV | 1 | T | C | Heterozygous |
| NC_037644.1 | 3768025 | SNV | 1 | T | C | Heterozygous |
| NC_037644.1 | 3768035 | SNV | 1 | A | G | Homozygous   |
| NC_037644.1 | 3768072 | SNV | 1 | C | T | Heterozygous |
| NC_037644.1 | 3768108 | SNV | 1 | T | C | Heterozygous |
| NC_037644.1 | 3768112 | SNV | 1 | T | A | Homozygous   |
| NC_037644.1 | 3768115 | SNV | 1 | C | T | Homozygous   |
| NC_037644.1 | 3768119 | SNV | 1 | T | A | Homozygous   |
| NC_037644.1 | 3768122 | SNV | 1 | T | C | Homozygous   |
| NC_037644.1 | 3768125 | SNV | 1 | C | T | Homozygous   |
| NC_037644.1 | 3768128 | SNV | 1 | T | C | Homozygous   |
| NC_037644.1 | 3768523 | SNV | 1 | T | C | Homozygous   |
| NC_037644.1 | 3768749 | SNV | 1 | G | A | Heterozygous |
| NC_037644.1 | 3768787 | SNV | 1 | C | T | Homozygous   |
| NC_037644.1 | 3768821 | SNV | 1 | T | C | Homozygous   |
| NC_037644.1 | 3768844 | SNV | 1 | C | G | Homozygous   |
| NC_037644.1 | 3769060 | SNV | 1 | T | C | Homozygous   |
| NC_037644.1 | 3769075 | SNV | 1 | T | C | Homozygous   |
| NC_037644.1 | 3769162 | SNV | 1 | T | C | Homozygous   |
| NC_037644.1 | 3769316 | SNV | 1 | T | C | Homozygous   |
| NC_037644.1 | 3769335 | SNV | 1 | A | G | Heterozygous |
| NC_037644.1 | 3769351 | SNV | 1 | C | T | Heterozygous |
| NC_037644.1 | 3769387 | SNV | 1 | G | A | Heterozygous |
| NC_037644.1 | 3769468 | SNV | 1 | T | C | Homozygous   |
| NC_037644.1 | 3769765 | SNV | 1 | C | T | Heterozygous |
| NC_037644.1 | 3769790 | SNV | 1 | C | T | Heterozygous |
| NC_037644.1 | 3769798 | SNV | 1 | C | T | Heterozygous |
| NC_037644.1 | 3769834 | SNV | 1 | T | C | Heterozygous |
| NC_037644.1 | 3769841 | SNV | 1 | G | A | Heterozygous |
| NC_037644.1 | 3769847 | SNV | 1 | A | G | Homozygous   |
| NC_037644.1 | 3769930 | SNV | 1 | C | T | Heterozygous |
| NC_037644.1 | 3770102 | SNV | 1 | C | T | Heterozygous |
| NC_037644.1 | 3770143 | SNV | 1 | C | T | Heterozygous |
| NC_037644.1 | 3770151 | SNV | 1 | A | G | Homozygous   |
| NC_037644.1 | 3770202 | SNV | 1 | A | G | Homozygous   |

|             |         |     |   |   |   |              |
|-------------|---------|-----|---|---|---|--------------|
| NC_037644.1 | 3770210 | SNV | 1 | T | C | Heterozygous |
| NC_037644.1 | 3770390 | SNV | 1 | C | T | Homozygous   |
| NC_037644.1 | 3770410 | SNV | 1 | A | G | Heterozygous |
| NC_037644.1 | 3770416 | SNV | 1 | C | T | Heterozygous |
| NC_037644.1 | 3770537 | SNV | 1 | A | T | Homozygous   |
| NC_037644.1 | 3770576 | SNV | 1 | T | C | Homozygous   |
| NC_037644.1 | 3770638 | SNV | 1 | T | C | Homozygous   |
| NC_037644.1 | 3770735 | SNV | 1 | A | G | Homozygous   |
| NC_037644.1 | 3770758 | SNV | 1 | T | C | Homozygous   |
| NC_037644.1 | 3770788 | SNV | 1 | G | A | Heterozygous |
| NC_037644.1 | 3770843 | SNV | 1 | G | A | Homozygous   |
| NC_037644.1 | 3770891 | SNV | 1 | A | G | Homozygous   |
| NC_037644.1 | 3770945 | SNV | 1 | A | G | Homozygous   |
| NC_037644.1 | 3770953 | SNV | 1 | C | T | Heterozygous |
| NC_037644.1 | 3770959 | SNV | 1 | A | G | Homozygous   |
| NC_037644.1 | 3771055 | SNV | 1 | T | C | Homozygous   |
| NC_037644.1 | 3771220 | SNV | 1 | T | C | Homozygous   |
| NC_037644.1 | 3771391 | SNV | 1 | A | G | Homozygous   |
| NC_037644.1 | 3771519 | SNV | 1 | G | A | Homozygous   |
| NC_037644.1 | 3771763 | SNV | 1 | G | C | Heterozygous |
| NC_037644.1 | 3771899 | SNV | 1 | A | G | Homozygous   |
| NC_037644.1 | 3771968 | SNV | 1 | T | C | Homozygous   |
| NC_037644.1 | 3771977 | SNV | 1 | C | T | Homozygous   |
| NC_037644.1 | 3772008 | SNV | 1 | T | C | Homozygous   |
| NC_037644.1 | 3772130 | SNV | 1 | A | G | Homozygous   |
| NC_037644.1 | 3772160 | SNV | 1 | G | A | Heterozygous |
| NC_037644.1 | 3772305 | SNV | 1 | C | T | Heterozygous |
| NC_037644.1 | 3772400 | SNV | 1 | A | G | Heterozygous |
| NC_037644.1 | 3772489 | SNV | 1 | T | C | Homozygous   |
| NC_037644.1 | 3772535 | SNV | 1 | C | T | Heterozygous |
| NC_037644.1 | 3772567 | SNV | 1 | T | C | Homozygous   |
| NC_037644.1 | 3772655 | SNV | 1 | T | C | Homozygous   |
| NC_037644.1 | 3772666 | SNV | 1 | T | C | Homozygous   |
| NC_037644.1 | 3772706 | SNV | 1 | C | T | Heterozygous |
| NC_037644.1 | 3772884 | SNV | 1 | A | T | Homozygous   |
| NC_037644.1 | 3772976 | SNV | 1 | T | C | Heterozygous |
| NC_037644.1 | 3773346 | SNV | 1 | C | T | Homozygous   |
| NC_037644.1 | 3773924 | SNV | 1 | T | C | Heterozygous |
| NC_037644.1 | 3774050 | SNV | 1 | C | T | Heterozygous |
| NC_037644.1 | 3774308 | SNV | 1 | C | T | Homozygous   |
| NC_037644.1 | 3774320 | SNV | 1 | C | T | Heterozygous |
| NC_037644.1 | 3774322 | SNV | 1 | A | C | Heterozygous |
| NC_037644.1 | 3774557 | SNV | 1 | G | T | Heterozygous |
| NC_037644.1 | 3774569 | SNV | 1 | A | T | Heterozygous |
| NC_037644.1 | 3774719 | SNV | 1 | T | C | Homozygous   |
| NC_037644.1 | 3775043 | SNV | 1 | A | G | Homozygous   |
| NC_037644.1 | 3775181 | SNV | 1 | C | T | Heterozygous |
| NC_037644.1 | 3775313 | SNV | 1 | C | T | Heterozygous |
| NC_037644.1 | 3775479 | SNV | 1 | A | G | Homozygous   |
| NC_037644.1 | 3776033 | SNV | 1 | T | A | Homozygous   |
| NC_037644.1 | 3776087 | SNV | 1 | C | T | Homozygous   |

|             |         |     |   |   |   |              |
|-------------|---------|-----|---|---|---|--------------|
| NC_037644.1 | 3776339 | SNV | 1 | A | G | Homozygous   |
| NC_037644.1 | 3776425 | SNV | 1 | T | C | Heterozygous |
| NC_037644.1 | 3776428 | SNV | 1 | T | C | Homozygous   |
| NC_037644.1 | 3776435 | SNV | 1 | T | C | Homozygous   |
| NC_037644.1 | 3776437 | SNV | 1 | C | T | Heterozygous |
| NC_037644.1 | 3776585 | SNV | 1 | T | C | Heterozygous |
| NC_037644.1 | 3776819 | SNV | 1 | G | C | Heterozygous |
| NC_037644.1 | 3776855 | SNV | 1 | T | C | Homozygous   |
| NC_037644.1 | 3776936 | SNV | 1 | C | T | Heterozygous |
| NC_037644.1 | 3776960 | SNV | 1 | A | G | Homozygous   |
| NC_037644.1 | 3777014 | SNV | 1 | G | C | Heterozygous |
| NC_037644.1 | 3777413 | SNV | 1 | C | T | Homozygous   |
| NC_037644.1 | 3777518 | SNV | 1 | T | C | Homozygous   |
| NC_037644.1 | 3778142 | SNV | 1 | A | G | Heterozygous |
| NC_037644.1 | 3778307 | SNV | 1 | A | C | Homozygous   |
| NC_037644.1 | 3778337 | SNV | 1 | G | C | Homozygous   |
| NC_037644.1 | 3778718 | SNV | 1 | C | T | Homozygous   |
| NC_037644.1 | 3778901 | SNV | 1 | T | G | Homozygous   |
| NC_037644.1 | 3779285 | SNV | 1 | C | T | Homozygous   |
| NC_037644.1 | 3779983 | SNV | 1 | G | A | Homozygous   |
| NC_037644.1 | 3780402 | SNV | 1 | G | T | Heterozygous |
| NC_037644.1 | 3786174 | SNV | 1 | G | A | Heterozygous |
| NC_037644.1 | 3786257 | SNV | 1 | A | G | Heterozygous |
| NC_037644.1 | 3786530 | SNV | 1 | A | G | Heterozygous |
| NC_037644.1 | 3787075 | SNV | 1 | A | G | Homozygous   |
| NC_037644.1 | 3787078 | SNV | 1 | A | G | Homozygous   |
| NC_037644.1 | 3787092 | SNV | 1 | A | G | Homozygous   |
| NC_037644.1 | 3787137 | SNV | 1 | G | A | Homozygous   |
| NC_037644.1 | 3787173 | SNV | 1 | G | C | Heterozygous |
| NC_037644.1 | 3787298 | SNV | 1 | G | A | Heterozygous |
| NC_037644.1 | 3788158 | SNV | 1 | A | G | Homozygous   |
| NC_037644.1 | 3788858 | SNV | 1 | A | G | Heterozygous |
| NC_037644.1 | 3788871 | SNV | 1 | T | C | Heterozygous |
| NC_037644.1 | 3788901 | SNV | 1 | T | G | Heterozygous |
| NC_037644.1 | 3788934 | SNV | 1 | C | A | Homozygous   |
| NC_037644.1 | 3788937 | SNV | 1 | C | T | Homozygous   |
| NC_037644.1 | 3788939 | SNV | 1 | C | G | Homozygous   |
| NC_037644.1 | 3790213 | SNV | 1 | A | T | Homozygous   |
| NC_037644.1 | 3796421 | SNV | 1 | G | A | Homozygous   |
| NC_037644.1 | 3796901 | SNV | 1 | T | C | Homozygous   |
| NC_037644.1 | 3797072 | SNV | 1 | T | C | Homozygous   |
| NC_037644.1 | 3797235 | SNV | 1 | A | G | Homozygous   |
| NC_037644.1 | 3798493 | SNV | 1 | A | G | Homozygous   |
| NC_037644.1 | 3798867 | SNV | 1 | C | T | Heterozygous |
| NC_037644.1 | 3798899 | SNV | 1 | A | G | Homozygous   |
| NC_037644.1 | 3803120 | SNV | 1 | T | G | Heterozygous |
| NC_037644.1 | 3805646 | SNV | 1 | A | G | Homozygous   |
| NC_037644.1 | 3805902 | SNV | 1 | G | A | Homozygous   |
| NC_037644.1 | 3805943 | SNV | 1 | T | C | Homozygous   |
| NC_037644.1 | 3805964 | SNV | 1 | G | A | Homozygous   |
| NC_037644.1 | 3868278 | SNV | 1 | G | T | Homozygous   |



|             |         |     |   |   |   |              |
|-------------|---------|-----|---|---|---|--------------|
| NC_037644.1 | 3868280 | SNV | 1 | T | C | Homozygous   |
| NC_037644.1 | 3868283 | SNV | 1 | A | T | Homozygous   |
| NC_037644.1 | 3868286 | SNV | 1 | A | T | Homozygous   |
| NC_037644.1 | 3868300 | SNV | 1 | C | T | Homozygous   |
| NC_037644.1 | 3887002 | SNV | 1 | C | G | Heterozygous |
| NC_037644.1 | 3887032 | SNV | 1 | A | T | Homozygous   |
| NC_037644.1 | 3894245 | SNV | 1 | A | C | Heterozygous |
| NC_037644.1 | 3894288 | SNV | 1 | G | T | Heterozygous |
| NC_037644.1 | 3907923 | SNV | 1 | C | G | Homozygous   |
| NC_037644.1 | 3907938 | SNV | 1 | T | G | Homozygous   |
| NC_037644.1 | 3907940 | SNV | 1 | T | A | Homozygous   |
| NC_037644.1 | 3907942 | SNV | 1 | A | T | Homozygous   |
| NC_037644.1 | 3909185 | SNV | 1 | A | T | Heterozygous |
| NC_037644.1 | 3912595 | SNV | 1 | T | G | Homozygous   |
| NC_037644.1 | 3921484 | SNV | 1 | T | C | Homozygous   |
| NC_037644.1 | 3921520 | SNV | 1 | G | A | Heterozygous |
| NC_037644.1 | 3921584 | SNV | 1 | G | A | Heterozygous |
| NC_037644.1 | 3921587 | SNV | 1 | C | A | Homozygous   |
| NC_037644.1 | 3921596 | SNV | 1 | G | A | Homozygous   |
| NC_037644.1 | 3922026 | SNV | 1 | C | T | Heterozygous |
| NC_037644.1 | 3926112 | SNV | 1 | A | T | Homozygous   |
| NC_037644.1 | 3926153 | SNV | 1 | C | T | Heterozygous |
| NC_037644.1 | 3930183 | SNV | 1 | T | G | Heterozygous |
| NC_037644.1 | 3930207 | SNV | 1 | A | G | Heterozygous |
| NC_037644.1 | 3930444 | SNV | 1 | G | A | Heterozygous |
| NC_037644.1 | 3930510 | SNV | 1 | A | G | Homozygous   |
| NC_037644.1 | 3930526 | SNV | 1 | G | A | Heterozygous |
| NC_037644.1 | 3930654 | SNV | 1 | A | G | Homozygous   |
| NC_037644.1 | 3930747 | SNV | 1 | G | C | Homozygous   |
| NC_037644.1 | 3931352 | SNV | 1 | T | C | Heterozygous |
| NC_037644.1 | 3931434 | SNV | 1 | A | G | Homozygous   |
| NC_037644.1 | 3931455 | SNV | 1 | A | G | Homozygous   |
| NC_037644.1 | 3931491 | SNV | 1 | T | C | Homozygous   |
| NC_037644.1 | 3931508 | SNV | 1 | T | C | Homozygous   |
| NC_037644.1 | 3931565 | SNV | 1 | A | T | Heterozygous |
| NC_037644.1 | 3931588 | SNV | 1 | T | C | Heterozygous |
| NC_037644.1 | 3942440 | SNV | 1 | C | T | Heterozygous |
| NC_037644.1 | 3942446 | SNV | 1 | G | A | Heterozygous |
| NC_037644.1 | 3942499 | SNV | 1 | G | A | Heterozygous |
| NC_037644.1 | 3945886 | SNV | 1 | A | G | Homozygous   |
| NC_037644.1 | 4316695 | SNV | 1 | A | G | Homozygous   |
| NC_037644.1 | 4316711 | SNV | 1 | T | A | Homozygous   |
| NC_037644.1 | 4325335 | SNV | 1 | C | G | Homozygous   |
| NC_037644.1 | 4325482 | SNV | 1 | C | T | Homozygous   |
| NC_037644.1 | 4325575 | SNV | 1 | G | C | Homozygous   |
| NC_037644.1 | 4325939 | SNV | 1 | T | C | Heterozygous |
| NC_037644.1 | 4325953 | SNV | 1 | A | G | Homozygous   |
| NC_037644.1 | 4326462 | SNV | 1 | A | G | Homozygous   |
| NC_037644.1 | 4326777 | SNV | 1 | A | G | Homozygous   |
| NC_037644.1 | 4328286 | SNV | 1 | T | C | Homozygous   |
| NC_037644.1 | 4328571 | SNV | 1 | T | A | Heterozygous |

|             |         |     |   |   |   |              |
|-------------|---------|-----|---|---|---|--------------|
| NC_037644.1 | 4328573 | SNV | 1 | T | A | Heterozygous |
| NC_037644.1 | 4328575 | SNV | 1 | T | A | Heterozygous |
| NC_037644.1 | 4328663 | SNV | 1 | T | C | Homozygous   |
| NC_037644.1 | 4328685 | SNV | 1 | A | G | Homozygous   |
| NC_037644.1 | 4328920 | SNV | 1 | G | A | Homozygous   |
| NC_037644.1 | 4329281 | SNV | 1 | A | G | Homozygous   |
| NC_037644.1 | 4329459 | SNV | 1 | C | T | Homozygous   |
| NC_037644.1 | 4329479 | SNV | 1 | C | T | Homozygous   |
| NC_037644.1 | 4329496 | SNV | 1 | C | T | Homozygous   |
| NC_037644.1 | 4329743 | SNV | 1 | A | G | Homozygous   |
| NC_037644.1 | 4330012 | SNV | 1 | T | G | Homozygous   |
| NC_037644.1 | 4335281 | SNV | 1 | A | G | Homozygous   |
| NC_037644.1 | 4373030 | SNV | 1 | G | A | Heterozygous |
| NC_037644.1 | 4373044 | SNV | 1 | G | A | Heterozygous |
| NC_037644.1 | 4373089 | SNV | 1 | G | A | Heterozygous |
| NC_037644.1 | 4373096 | SNV | 1 | G | A | Heterozygous |
| NC_037644.1 | 4373101 | SNV | 1 | G | A | Homozygous   |
| NC_037644.1 | 4373675 | SNV | 1 | A | G | Homozygous   |
| NC_037644.1 | 4373757 | SNV | 1 | T | C | Homozygous   |
| NC_037644.1 | 4373784 | SNV | 1 | A | G | Homozygous   |
| NC_037644.1 | 4398771 | SNV | 1 | T | C | Homozygous   |
| NC_037644.1 | 4398798 | SNV | 1 | A | G | Homozygous   |
| NC_037644.1 | 4398908 | SNV | 1 | C | T | Heterozygous |
| NC_037644.1 | 4399253 | SNV | 1 | T | C | Homozygous   |
| NC_037644.1 | 4400142 | SNV | 1 | G | A | Homozygous   |
| NC_037644.1 | 4400147 | SNV | 1 | T | C | Homozygous   |
| NC_037644.1 | 4400151 | SNV | 1 | T | A | Homozygous   |
| NC_037644.1 | 4400153 | SNV | 1 | T | A | Homozygous   |
| NC_037644.1 | 4400156 | SNV | 1 | A | T | Homozygous   |
| NC_037644.1 | 4404499 | SNV | 1 | A | T | Homozygous   |
| NC_037644.1 | 4404508 | SNV | 1 | T | A | Homozygous   |
| NC_037644.1 | 4404515 | SNV | 1 | A | T | Homozygous   |
| NC_037644.1 | 4408959 | SNV | 1 | T | G | Homozygous   |
| NC_037644.1 | 4408972 | SNV | 1 | A | C | Homozygous   |
| NC_037644.1 | 4408978 | SNV | 1 | A | C | Heterozygous |
| NC_037644.1 | 4408978 | SNV | 1 | A | T | Heterozygous |
| NC_037644.1 | 4423011 | SNV | 1 | A | C | Homozygous   |
| NC_037644.1 | 4423044 | SNV | 1 | A | T | Homozygous   |
| NC_037644.1 | 4423051 | SNV | 1 | T | C | Homozygous   |
| NC_037644.1 | 4443156 | SNV | 1 | T | A | Homozygous   |
| NC_037644.1 | 4443194 | SNV | 1 | T | G | Homozygous   |
| NC_037644.1 | 4446548 | SNV | 1 | T | C | Homozygous   |
| NC_037644.1 | 4446560 | SNV | 1 | A | T | Homozygous   |
| NC_037644.1 | 4449491 | SNV | 1 | A | T | Heterozygous |
| NC_037644.1 | 4449495 | SNV | 1 | A | G | Heterozygous |
| NC_037644.1 | 4449498 | SNV | 1 | A | T | Heterozygous |
| NC_037644.1 | 4449505 | SNV | 1 | T | A | Heterozygous |
| NC_037644.1 | 4449511 | SNV | 1 | T | A | Heterozygous |
| NC_037644.1 | 4451590 | SNV | 1 | C | A | Heterozygous |
| NC_037644.1 | 4451592 | SNV | 1 | A | T | Heterozygous |
| NC_037644.1 | 4451598 | SNV | 1 | C | T | Heterozygous |

|             |         |     |   |   |   |              |
|-------------|---------|-----|---|---|---|--------------|
| NC_037644.1 | 4451656 | SNV | 1 | T | C | Homozygous   |
| NC_037644.1 | 4458372 | SNV | 1 | A | G | Homozygous   |
| NC_037644.1 | 4458441 | SNV | 1 | C | T | Homozygous   |
| NC_037644.1 | 4458467 | SNV | 1 | C | T | Homozygous   |
| NC_037644.1 | 4459192 | SNV | 1 | C | T | Homozygous   |
| NC_037644.1 | 4459221 | SNV | 1 | A | G | Homozygous   |
| NC_037644.1 | 4459238 | SNV | 1 | G | A | Homozygous   |
| NC_037644.1 | 4459263 | SNV | 1 | A | G | Homozygous   |
| NC_037644.1 | 4460734 | SNV | 1 | A | T | Homozygous   |
| NC_037644.1 | 4460751 | SNV | 1 | T | A | Homozygous   |
| NC_037644.1 | 4460758 | SNV | 1 | A | G | Homozygous   |
| NC_037644.1 | 4463143 | SNV | 1 | T | A | Homozygous   |
| NC_037644.1 | 4463172 | SNV | 1 | A | T | Homozygous   |
| NC_037644.1 | 4470329 | SNV | 1 | T | C | Heterozygous |
| NC_037644.1 | 4470350 | SNV | 1 | C | T | Heterozygous |
| NC_037644.1 | 4470355 | SNV | 1 | T | C | Heterozygous |
| NC_037644.1 | 4470386 | SNV | 1 | G | A | Heterozygous |
| NC_037644.1 | 4472667 | SNV | 1 | T | A | Homozygous   |
| NC_037644.1 | 4472677 | SNV | 1 | T | A | Homozygous   |
| NC_037644.1 | 4476254 | SNV | 1 | C | T | Homozygous   |
| NC_037644.1 | 4476321 | SNV | 1 | C | T | Heterozygous |
| NC_037644.1 | 4476333 | SNV | 1 | A | G | Homozygous   |
| NC_037644.1 | 4476906 | SNV | 1 | C | T | Heterozygous |
| NC_037644.1 | 4476915 | SNV | 1 | C | T | Heterozygous |
| NC_037644.1 | 4477125 | SNV | 1 | C | T | Homozygous   |
| NC_037644.1 | 4477219 | SNV | 1 | C | T | Homozygous   |
| NC_037644.1 | 4477225 | SNV | 1 | C | T | Homozygous   |
| NC_037644.1 | 4477249 | SNV | 1 | T | C | Homozygous   |
| NC_037644.1 | 4477290 | SNV | 1 | C | T | Heterozygous |
| NC_037644.1 | 4477391 | SNV | 1 | T | C | Homozygous   |
| NC_037644.1 | 4477487 | SNV | 1 | T | C | Homozygous   |
| NC_037644.1 | 4477511 | SNV | 1 | G | A | Homozygous   |
| NC_037644.1 | 4477532 | SNV | 1 | C | T | Homozygous   |
| NC_037644.1 | 4477552 | SNV | 1 | A | T | Homozygous   |
| NC_037644.1 | 4477757 | SNV | 1 | T | C | Homozygous   |
| NC_037644.1 | 4477808 | SNV | 1 | A | G | Heterozygous |
| NC_037644.1 | 4478134 | SNV | 1 | C | T | Homozygous   |
| NC_037644.1 | 4478180 | SNV | 1 | T | C | Homozygous   |
| NC_037644.1 | 4478268 | SNV | 1 | G | A | Homozygous   |
| NC_037644.1 | 4478288 | SNV | 1 | C | T | Homozygous   |
| NC_037644.1 | 4478386 | SNV | 1 | C | G | Heterozygous |
| NC_037644.1 | 4478406 | SNV | 1 | C | T | Homozygous   |
| NC_037644.1 | 4478478 | SNV | 1 | A | C | Heterozygous |
| NC_037644.1 | 4491865 | SNV | 1 | A | G | Homozygous   |
| NC_037644.1 | 4491869 | SNV | 1 | A | G | Homozygous   |
| NC_037644.1 | 4493763 | SNV | 1 | T | A | Homozygous   |
| NC_037644.1 | 4493766 | SNV | 1 | T | C | Homozygous   |
| NC_037644.1 | 4493795 | SNV | 1 | T | A | Homozygous   |
| NC_037644.1 | 4493812 | SNV | 1 | T | A | Homozygous   |
| NC_037644.1 | 4505513 | SNV | 1 | C | T | Homozygous   |
| NC_037644.1 | 4510910 | SNV | 1 | T | C | Homozygous   |

|             |         |     |   |   |   |              |
|-------------|---------|-----|---|---|---|--------------|
| NC_037644.1 | 4510915 | SNV | 1 | A | G | Homozygous   |
| NC_037644.1 | 4510928 | SNV | 1 | T | A | Homozygous   |
| NC_037644.1 | 4510941 | SNV | 1 | A | T | Homozygous   |
| NC_037644.1 | 4510970 | SNV | 1 | C | A | Homozygous   |
| NC_037644.1 | 4515165 | SNV | 1 | T | A | Homozygous   |
| NC_037644.1 | 4515202 | SNV | 1 | G | T | Homozygous   |
| NC_037644.1 | 4532732 | SNV | 1 | T | A | Homozygous   |
| NC_037644.1 | 4532737 | SNV | 1 | A | T | Homozygous   |
| NC_037644.1 | 4532739 | SNV | 1 | A | G | Homozygous   |
| NC_037644.1 | 4532759 | SNV | 1 | T | G | Homozygous   |
| NC_037644.1 | 4532773 | SNV | 1 | A | C | Homozygous   |
| NC_037644.1 | 4543469 | SNV | 1 | A | T | Homozygous   |
| NC_037644.1 | 4543493 | SNV | 1 | C | A | Heterozygous |
| NC_037644.1 | 4543498 | SNV | 1 | A | G | Heterozygous |
| NC_037644.1 | 4543502 | SNV | 1 | A | G | Homozygous   |
| NC_037644.1 | 4543505 | SNV | 1 | C | T | Heterozygous |
| NC_037644.1 | 4543617 | SNV | 1 | C | G | Homozygous   |
| NC_037644.1 | 4543690 | SNV | 1 | A | T | Heterozygous |
| NC_037644.1 | 4543693 | SNV | 1 | C | T | Homozygous   |
| NC_037644.1 | 4543714 | SNV | 1 | C | T | Heterozygous |
| NC_037644.1 | 4543717 | SNV | 1 | C | T | Heterozygous |
| NC_037644.1 | 4543719 | SNV | 1 | C | T | Heterozygous |
| NC_037644.1 | 4545177 | SNV | 1 | T | A | Heterozygous |
| NC_037644.1 | 4545195 | SNV | 1 | T | G | Heterozygous |
| NC_037644.1 | 4545199 | SNV | 1 | A | T | Heterozygous |
| NC_037644.1 | 4549100 | SNV | 1 | A | G | Homozygous   |
| NC_037644.1 | 4549231 | SNV | 1 | G | A | Heterozygous |
| NC_037644.1 | 4549296 | SNV | 1 | T | C | Homozygous   |
| NC_037644.1 | 4549431 | SNV | 1 | A | G | Heterozygous |
| NC_037644.1 | 4563825 | SNV | 1 | C | T | Homozygous   |
| NC_037644.1 | 4563837 | SNV | 1 | C | T | Homozygous   |
| NC_037644.1 | 4563902 | SNV | 1 | A | T | Heterozygous |
| NC_037644.1 | 4563909 | SNV | 1 | T | A | Heterozygous |
| NC_037644.1 | 4563912 | SNV | 1 | T | C | Heterozygous |
| NC_037644.1 | 4563919 | SNV | 1 | A | T | Heterozygous |
| NC_037644.1 | 4563927 | SNV | 1 | T | C | Heterozygous |
| NC_037644.1 | 4563930 | SNV | 1 | C | A | Heterozygous |
| NC_037644.1 | 4563939 | SNV | 1 | C | A | Heterozygous |
| NC_037644.1 | 4563944 | SNV | 1 | A | C | Heterozygous |
| NC_037644.1 | 4563950 | SNV | 1 | C | T | Homozygous   |
| NC_037644.1 | 4563971 | SNV | 1 | C | A | Homozygous   |
| NC_037644.1 | 4575202 | SNV | 1 | T | A | Homozygous   |
| NC_037644.1 | 4575211 | SNV | 1 | T | G | Homozygous   |
| NC_037644.1 | 4575237 | SNV | 1 | T | A | Homozygous   |
| NC_037644.1 | 4575274 | SNV | 1 | T | C | Homozygous   |
| NC_037644.1 | 4575276 | SNV | 1 | T | A | Homozygous   |
| NC_037644.1 | 4575280 | SNV | 1 | T | C | Homozygous   |
| NC_037644.1 | 4580066 | SNV | 1 | G | A | Homozygous   |
| NC_037644.1 | 4580070 | SNV | 1 | A | C | Homozygous   |
| NC_037644.1 | 4580100 | SNV | 1 | T | A | Homozygous   |
| NC_037644.1 | 4581197 | SNV | 1 | A | C | Homozygous   |

|             |         |     |   |   |   |              |
|-------------|---------|-----|---|---|---|--------------|
| NC_037644.1 | 4581203 | SNV | 1 | T | G | Homozygous   |
| NC_037644.1 | 4581228 | SNV | 1 | T | A | Homozygous   |
| NC_037644.1 | 4581244 | SNV | 1 | T | A | Homozygous   |
| NC_037644.1 | 4581246 | SNV | 1 | T | A | Homozygous   |
| NC_037644.1 | 4581296 | SNV | 1 | T | A | Homozygous   |
| NC_037644.1 | 4589781 | SNV | 1 | A | C | Homozygous   |
| NC_037644.1 | 4589784 | SNV | 1 | A | T | Homozygous   |
| NC_037644.1 | 4589808 | SNV | 1 | T | C | Homozygous   |
| NC_037644.1 | 4613751 | SNV | 1 | A | T | Homozygous   |
| NC_037644.1 | 4613760 | SNV | 1 | A | T | Homozygous   |
| NC_037644.1 | 4613763 | SNV | 1 | T | A | Homozygous   |
| NC_037644.1 | 4613790 | SNV | 1 | T | A | Homozygous   |
| NC_037644.1 | 4613792 | SNV | 1 | T | A | Homozygous   |
| NC_037644.1 | 4623954 | SNV | 1 | A | T | Homozygous   |
| NC_037644.1 | 4623966 | SNV | 1 | T | C | Homozygous   |
| NC_037644.1 | 4623968 | SNV | 1 | A | G | Homozygous   |
| NC_037644.1 | 4623991 | SNV | 1 | A | T | Homozygous   |
| NC_037644.1 | 4623998 | SNV | 1 | A | T | Homozygous   |
| NC_037644.1 | 4624000 | SNV | 1 | A | T | Homozygous   |
| NC_037644.1 | 4628749 | SNV | 1 | A | G | Homozygous   |
| NC_037644.1 | 4628753 | SNV | 1 | T | G | Homozygous   |
| NC_037644.1 | 4628756 | SNV | 1 | G | A | Homozygous   |
| NC_037644.1 | 4628764 | SNV | 1 | A | G | Homozygous   |
| NC_037644.1 | 4628768 | SNV | 1 | G | T | Homozygous   |
| NC_037644.1 | 4628770 | SNV | 1 | A | T | Homozygous   |
| NC_037644.1 | 4628773 | SNV | 1 | C | T | Homozygous   |
| NC_037644.1 | 4637338 | SNV | 1 | A | T | Homozygous   |
| NC_037644.1 | 4637342 | SNV | 1 | T | A | Homozygous   |
| NC_037644.1 | 4637344 | SNV | 1 | T | C | Homozygous   |
| NC_037644.1 | 4637375 | SNV | 1 | T | C | Homozygous   |
| NC_037644.1 | 4643359 | SNV | 1 | A | T | Homozygous   |
| NC_037644.1 | 4643364 | SNV | 1 | T | C | Homozygous   |
| NC_037644.1 | 4643388 | SNV | 1 | C | A | Homozygous   |
| NC_037644.1 | 4643393 | SNV | 1 | A | T | Homozygous   |
| NC_037644.1 | 4643399 | SNV | 1 | A | T | Homozygous   |
| NC_037644.1 | 4643401 | SNV | 1 | A | T | Homozygous   |
| NC_037644.1 | 4643407 | SNV | 1 | T | A | Homozygous   |
| NC_037644.1 | 4644143 | SNV | 1 | C | T | Homozygous   |
| NC_037644.1 | 4644146 | SNV | 1 | A | T | Homozygous   |
| NC_037644.1 | 4644151 | SNV | 1 | A | T | Homozygous   |
| NC_037644.1 | 4644154 | SNV | 1 | A | C | Homozygous   |
| NC_037644.1 | 4644161 | SNV | 1 | T | A | Homozygous   |
| NC_037644.1 | 4656157 | SNV | 1 | A | T | Heterozygous |
| NC_037644.1 | 4656252 | SNV | 1 | A | C | Heterozygous |
| NC_037644.1 | 4656334 | SNV | 1 | G | A | Homozygous   |
| NC_037644.1 | 4656407 | SNV | 1 | T | A | Heterozygous |
| NC_037644.1 | 4656411 | SNV | 1 | A | T | Heterozygous |
| NC_037644.1 | 4658621 | SNV | 1 | G | A | Homozygous   |
| NC_037644.1 | 4659097 | SNV | 1 | A | G | Homozygous   |
| NC_037644.1 | 4659595 | SNV | 1 | C | T | Homozygous   |
| NC_037644.1 | 4661184 | SNV | 1 | G | A | Homozygous   |

|             |         |     |   |   |   |              |
|-------------|---------|-----|---|---|---|--------------|
| NC_037644.1 | 4661438 | SNV | 1 | A | G | Homozygous   |
| NC_037644.1 | 4662583 | SNV | 1 | T | C | Homozygous   |
| NC_037644.1 | 4662592 | SNV | 1 | T | C | Homozygous   |
| NC_037644.1 | 4662595 | SNV | 1 | T | C | Homozygous   |
| NC_037644.1 | 4662606 | SNV | 1 | T | C | Homozygous   |
| NC_037644.1 | 4662614 | SNV | 1 | T | C | Homozygous   |
| NC_037644.1 | 4662661 | SNV | 1 | T | C | Heterozygous |
| NC_037644.1 | 4662672 | SNV | 1 | T | C | Heterozygous |
| NC_037644.1 | 4668245 | SNV | 1 | T | C | Homozygous   |
| NC_037644.1 | 4670701 | SNV | 1 | G | A | Homozygous   |
| NC_037644.1 | 4673193 | SNV | 1 | A | G | Homozygous   |
| NC_037644.1 | 4673270 | SNV | 1 | C | A | Homozygous   |
| NC_037644.1 | 4681197 | SNV | 1 | A | T | Homozygous   |
| NC_037644.1 | 4681224 | SNV | 1 | A | T | Homozygous   |
| NC_037644.1 | 4688079 | SNV | 1 | G | A | Heterozygous |
| NC_037644.1 | 4688084 | SNV | 1 | C | G | Heterozygous |
| NC_037644.1 | 4688086 | SNV | 1 | G | A | Heterozygous |
| NC_037644.1 | 4688091 | SNV | 1 | A | G | Heterozygous |
| NC_037644.1 | 4688096 | SNV | 1 | C | T | Heterozygous |
| NC_037644.1 | 4688101 | SNV | 1 | A | G | Heterozygous |
| NC_037644.1 | 4688110 | SNV | 1 | G | A | Heterozygous |
| NC_037644.1 | 4688487 | SNV | 1 | G | A | Homozygous   |
| NC_037644.1 | 4688492 | SNV | 1 | A | G | Homozygous   |
| NC_037644.1 | 4688494 | SNV | 1 | T | C | Homozygous   |
| NC_037644.1 | 4688508 | SNV | 1 | C | T | Homozygous   |
| NC_037644.1 | 4688521 | SNV | 1 | A | G | Homozygous   |
| NC_037644.1 | 4688570 | SNV | 1 | T | C | Homozygous   |
| NC_037644.1 | 4688577 | SNV | 1 | T | C | Homozygous   |
| NC_037644.1 | 4688583 | SNV | 1 | T | G | Homozygous   |
| NC_037644.1 | 4688590 | SNV | 1 | G | A | Homozygous   |
| NC_037644.1 | 4697811 | SNV | 1 | C | A | Homozygous   |
| NC_037644.1 | 4697819 | SNV | 1 | T | A | Heterozygous |
| NC_037644.1 | 4697824 | SNV | 1 | G | A | Heterozygous |
| NC_037644.1 | 4697829 | SNV | 1 | G | A | Heterozygous |
| NC_037644.1 | 4697832 | SNV | 1 | C | T | Heterozygous |
| NC_037644.1 | 4697841 | SNV | 1 | T | G | Heterozygous |
| NC_037644.1 | 4697845 | SNV | 1 | C | T | Heterozygous |
| NC_037644.1 | 4697849 | SNV | 1 | C | T | Heterozygous |
| NC_037644.1 | 4698262 | SNV | 1 | A | C | Homozygous   |
| NC_037644.1 | 4698268 | SNV | 1 | A | T | Homozygous   |
| NC_037644.1 | 4698287 | SNV | 1 | T | C | Homozygous   |
| NC_037644.1 | 4698298 | SNV | 1 | A | G | Heterozygous |
| NC_037644.1 | 4708505 | SNV | 1 | A | T | Homozygous   |
| NC_037644.1 | 4708510 | SNV | 1 | G | A | Homozygous   |
| NC_037644.1 | 4708577 | SNV | 1 | T | A | Homozygous   |
| NC_037644.1 | 4708579 | SNV | 1 | A | G | Homozygous   |
| NC_037644.1 | 4708581 | SNV | 1 | T | A | Homozygous   |
| NC_037644.1 | 4708589 | SNV | 1 | T | A | Homozygous   |
| NC_037644.1 | 4708593 | SNV | 1 | T | A | Homozygous   |
| NC_037644.1 | 4708597 | SNV | 1 | T | G | Homozygous   |
| NC_037644.1 | 4708601 | SNV | 1 | T | C | Homozygous   |

|             |         |     |   |   |   |              |
|-------------|---------|-----|---|---|---|--------------|
| NC_037644.1 | 4708606 | SNV | 1 | G | A | Heterozygous |
| NC_037644.1 | 4708641 | SNV | 1 | A | C | Heterozygous |
| NC_037644.1 | 4708671 | SNV | 1 | T | A | Homozygous   |
| NC_037644.1 | 4708673 | SNV | 1 | T | G | Homozygous   |
| NC_037644.1 | 4726576 | SNV | 1 | C | T | Homozygous   |
| NC_037644.1 | 4727081 | SNV | 1 | C | T | Heterozygous |
| NC_037644.1 | 4727210 | SNV | 1 | G | A | Homozygous   |
| NC_037644.1 | 4728844 | SNV | 1 | G | A | Homozygous   |
| NC_037644.1 | 4730065 | SNV | 1 | A | G | Homozygous   |
| NC_037644.1 | 4731139 | SNV | 1 | T | C | Homozygous   |
| NC_037644.1 | 4731282 | SNV | 1 | A | T | Heterozygous |
| NC_037644.1 | 4743577 | SNV | 1 | C | T | Homozygous   |
| NC_037644.1 | 4745787 | SNV | 1 | A | G | Homozygous   |
| NC_037644.1 | 4745790 | SNV | 1 | A | G | Homozygous   |
| NC_037644.1 | 4745792 | SNV | 1 | G | A | Homozygous   |
| NC_037644.1 | 4745796 | SNV | 1 | A | C | Homozygous   |
| NC_037644.1 | 4747933 | SNV | 1 | G | A | Homozygous   |
| NC_037644.1 | 4748173 | SNV | 1 | T | G | Homozygous   |
| NC_037644.1 | 4748176 | SNV | 1 | T | A | Homozygous   |
| NC_037644.1 | 4748179 | SNV | 1 | T | A | Homozygous   |
| NC_037644.1 | 4748183 | SNV | 1 | A | T | Homozygous   |
| NC_037644.1 | 4748196 | SNV | 1 | A | T | Homozygous   |
| NC_037644.1 | 4748333 | SNV | 1 | T | C | Homozygous   |
| NC_037644.1 | 4748336 | SNV | 1 | A | C | Homozygous   |
| NC_037644.1 | 4748338 | SNV | 1 | A | T | Homozygous   |
| NC_037644.1 | 4748342 | SNV | 1 | T | C | Homozygous   |
| NC_037644.1 | 4748347 | SNV | 1 | T | A | Homozygous   |
| NC_037644.1 | 4748351 | SNV | 1 | T | A | Homozygous   |
| NC_037644.1 | 4748355 | SNV | 1 | T | A | Homozygous   |
| NC_037644.1 | 4748361 | SNV | 1 | T | A | Homozygous   |
| NC_037644.1 | 4748372 | SNV | 1 | T | G | Homozygous   |
| NC_037644.1 | 4748374 | SNV | 1 | T | A | Homozygous   |
| NC_037644.1 | 4748757 | SNV | 1 | A | C | Homozygous   |
| NC_037644.1 | 4749251 | SNV | 1 | T | C | Homozygous   |
| NC_037644.1 | 4749285 | SNV | 1 | C | A | Homozygous   |
| NC_037644.1 | 4749775 | SNV | 1 | T | A | Homozygous   |
| NC_037644.1 | 4749787 | SNV | 1 | T | A | Homozygous   |
| NC_037644.1 | 4749789 | SNV | 1 | T | A | Homozygous   |
| NC_037644.1 | 4753546 | SNV | 1 | G | T | Homozygous   |
| NC_037644.1 | 4754058 | SNV | 1 | A | T | Homozygous   |
| NC_037644.1 | 4757459 | SNV | 1 | C | T | Homozygous   |
| NC_037644.1 | 4758409 | SNV | 1 | T | A | Homozygous   |
| NC_037644.1 | 4758424 | SNV | 1 | A | T | Homozygous   |
| NC_037644.1 | 4758426 | SNV | 1 | A | C | Homozygous   |
| NC_037644.1 | 4758428 | SNV | 1 | A | G | Homozygous   |
| NC_037644.1 | 4759032 | SNV | 1 | A | T | Homozygous   |
| NC_037644.1 | 4759039 | SNV | 1 | T | A | Homozygous   |
| NC_037644.1 | 4759490 | SNV | 1 | T | A | Homozygous   |
| NC_037644.1 | 4759497 | SNV | 1 | T | C | Homozygous   |
| NC_037644.1 | 4759514 | SNV | 1 | A | G | Homozygous   |
| NC_037644.1 | 4759516 | SNV | 1 | A | T | Homozygous   |

|             |         |     |   |   |   |              |
|-------------|---------|-----|---|---|---|--------------|
| NC_037644.1 | 4759522 | SNV | 1 | A | T | Homozygous   |
| NC_037644.1 | 4759525 | SNV | 1 | T | C | Homozygous   |
| NC_037644.1 | 4759528 | SNV | 1 | A | T | Homozygous   |
| NC_037644.1 | 4764617 | SNV | 1 | A | C | Heterozygous |
| NC_037644.1 | 4764629 | SNV | 1 | A | T | Heterozygous |
| NC_037644.1 | 4764636 | SNV | 1 | A | C | Heterozygous |
| NC_037644.1 | 4764654 | SNV | 1 | A | T | Heterozygous |
| NC_037644.1 | 4764678 | SNV | 1 | A | C | Heterozygous |
| NC_037644.1 | 4764689 | SNV | 1 | T | A | Heterozygous |
| NC_037644.1 | 4764693 | SNV | 1 | T | A | Heterozygous |
| NC_037644.1 | 4764697 | SNV | 1 | T | C | Heterozygous |
| NC_037644.1 | 4783236 | SNV | 1 | G | A | Homozygous   |
| NC_037644.1 | 4783259 | SNV | 1 | T | A | Homozygous   |
| NC_037644.1 | 4783286 | SNV | 1 | A | T | Homozygous   |
| NC_037644.1 | 4792433 | SNV | 1 | T | C | Heterozygous |
| NC_037644.1 | 4792491 | SNV | 1 | T | C | Heterozygous |
| NC_037644.1 | 4792511 | SNV | 1 | T | C | Heterozygous |
| NC_037644.1 | 4792515 | SNV | 1 | T | C | Heterozygous |
| NC_037644.1 | 4792898 | SNV | 1 | T | A | Heterozygous |
| NC_037644.1 | 4792935 | SNV | 1 | C | A | Heterozygous |
| NC_037644.1 | 4792937 | SNV | 1 | T | A | Heterozygous |
| NC_037644.1 | 4793963 | SNV | 1 | T | C | Homozygous   |
| NC_037644.1 | 4794439 | SNV | 1 | T | C | Heterozygous |
| NC_037644.1 | 4797965 | SNV | 1 | C | T | Heterozygous |
| NC_037644.1 | 4798309 | SNV | 1 | A | G | Homozygous   |
| NC_037644.1 | 4800541 | SNV | 1 | T | A | Homozygous   |
| NC_037644.1 | 4800545 | SNV | 1 | A | T | Homozygous   |
| NC_037644.1 | 4800549 | SNV | 1 | A | C | Heterozygous |
| NC_037644.1 | 4800549 | SNV | 1 | A | T | Heterozygous |
| NC_037644.1 | 4802001 | SNV | 1 | G | A | Homozygous   |
| NC_037644.1 | 4802006 | SNV | 1 | T | A | Homozygous   |
| NC_037644.1 | 4802011 | SNV | 1 | A | T | Homozygous   |
| NC_037644.1 | 4802014 | SNV | 1 | G | A | Homozygous   |
| NC_037644.1 | 4802041 | SNV | 1 | T | G | Homozygous   |
| NC_037644.1 | 4802057 | SNV | 1 | A | T | Homozygous   |
| NC_037644.1 | 4802499 | SNV | 1 | T | G | Homozygous   |
| NC_037644.1 | 4810109 | SNV | 1 | T | C | Homozygous   |
| NC_037644.1 | 4810597 | SNV | 1 | C | T | Heterozygous |
| NC_037644.1 | 4810599 | SNV | 1 | C | T | Heterozygous |
| NC_037644.1 | 4810601 | SNV | 1 | C | T | Homozygous   |
| NC_037644.1 | 4811681 | SNV | 1 | C | T | Homozygous   |
| NC_037644.1 | 4812099 | SNV | 1 | A | C | Homozygous   |
| NC_037644.1 | 4813005 | SNV | 1 | C | T | Homozygous   |
| NC_037644.1 | 4817450 | SNV | 1 | T | G | Homozygous   |
| NC_037644.1 | 4817454 | SNV | 1 | A | C | Homozygous   |
| NC_037644.1 | 4817479 | SNV | 1 | T | A | Homozygous   |
| NC_037644.1 | 4817482 | SNV | 1 | A | T | Homozygous   |
| NC_037644.1 | 4817490 | SNV | 1 | A | G | Homozygous   |
| NC_037644.1 | 4817495 | SNV | 1 | A | T | Homozygous   |
| NC_037644.1 | 4831970 | SNV | 1 | C | T | Heterozygous |
| NC_037644.1 | 4831973 | SNV | 1 | C | T | Heterozygous |



|             |         |     |   |   |   |              |
|-------------|---------|-----|---|---|---|--------------|
| NC_037644.1 | 4831979 | SNV | 1 | C | T | Heterozygous |
| NC_037644.1 | 4832006 | SNV | 1 | C | T | Homozygous   |
| NC_037644.1 | 4832033 | SNV | 1 | A | T | Homozygous   |
| NC_037644.1 | 4832039 | SNV | 1 | G | T | Homozygous   |
| NC_037644.1 | 4836085 | SNV | 1 | C | T | Homozygous   |
| NC_037644.1 | 4836115 | SNV | 1 | C | G | Homozygous   |
| NC_037644.1 | 4836120 | SNV | 1 | A | T | Homozygous   |
| NC_037644.1 | 4836122 | SNV | 1 | A | G | Homozygous   |
| NC_037644.1 | 4836125 | SNV | 1 | A | C | Homozygous   |
| NC_037644.1 | 4836132 | SNV | 1 | G | C | Homozygous   |
| NC_037644.1 | 4836157 | SNV | 1 | C | T | Homozygous   |
| NC_037644.1 | 4836161 | SNV | 1 | A | C | Homozygous   |
| NC_037644.1 | 4836164 | SNV | 1 | A | T | Homozygous   |
| NC_037644.1 | 4836175 | SNV | 1 | T | C | Homozygous   |
| NC_037644.1 | 4836179 | SNV | 1 | T | C | Homozygous   |
| NC_037644.1 | 4836181 | SNV | 1 | T | G | Homozygous   |
| NC_037644.1 | 4837604 | SNV | 1 | A | T | Heterozygous |
| NC_037644.1 | 4838048 | SNV | 1 | A | C | Homozygous   |
| NC_037644.1 | 4838075 | SNV | 1 | A | G | Homozygous   |
| NC_037644.1 | 4838077 | SNV | 1 | T | A | Homozygous   |
| NC_037644.1 | 4839298 | SNV | 1 | T | C | Heterozygous |
| NC_037644.1 | 4839336 | SNV | 1 | A | C | Heterozygous |
| NC_037644.1 | 4839340 | SNV | 1 | C | T | Heterozygous |
| NC_037644.1 | 4843256 | SNV | 1 | C | T | Homozygous   |
| NC_037644.1 | 4843259 | SNV | 1 | A | T | Homozygous   |
| NC_037644.1 | 4843275 | SNV | 1 | T | G | Homozygous   |
| NC_037644.1 | 4852848 | SNV | 1 | A | T | Homozygous   |
| NC_037644.1 | 4852868 | SNV | 1 | A | C | Homozygous   |
| NC_037644.1 | 4852876 | SNV | 1 | A | T | Homozygous   |
| NC_037644.1 | 4852880 | SNV | 1 | A | T | Homozygous   |
| NC_037644.1 | 4853325 | SNV | 1 | T | A | Homozygous   |
| NC_037644.1 | 4853350 | SNV | 1 | A | T | Homozygous   |
| NC_037644.1 | 4853352 | SNV | 1 | T | A | Homozygous   |
| NC_037644.1 | 4854872 | SNV | 1 | T | A | Homozygous   |
| NC_037644.1 | 4855146 | SNV | 1 | A | C | Homozygous   |
| NC_037644.1 | 4855148 | SNV | 1 | T | A | Homozygous   |
| NC_037644.1 | 4857756 | SNV | 1 | T | C | Homozygous   |
| NC_037644.1 | 4858077 | SNV | 1 | T | A | Homozygous   |
| NC_037644.1 | 4858099 | SNV | 1 | G | A | Homozygous   |
| NC_037644.1 | 4858367 | SNV | 1 | A | T | Heterozygous |
| NC_037644.1 | 4858372 | SNV | 1 | T | C | Heterozygous |
| NC_037644.1 | 4858384 | SNV | 1 | T | A | Homozygous   |
| NC_037644.1 | 4858622 | SNV | 1 | T | C | Homozygous   |
| NC_037644.1 | 4858940 | SNV | 1 | T | G | Homozygous   |
| NC_037644.1 | 4858943 | SNV | 1 | A | C | Homozygous   |
| NC_037644.1 | 4859876 | SNV | 1 | C | T | Heterozygous |
| NC_037644.1 | 4859878 | SNV | 1 | C | T | Heterozygous |
| NC_037644.1 | 4859880 | SNV | 1 | C | T | Heterozygous |
| NC_037644.1 | 4859882 | SNV | 1 | C | T | Heterozygous |
| NC_037644.1 | 4859890 | SNV | 1 | C | T | Heterozygous |
| NC_037644.1 | 4859969 | SNV | 1 | T | C | Homozygous   |

|             |         |     |   |   |   |              |
|-------------|---------|-----|---|---|---|--------------|
| NC_037644.1 | 4859977 | SNV | 1 | T | C | Heterozygous |
| NC_037644.1 | 4859982 | SNV | 1 | T | C | Heterozygous |
| NC_037644.1 | 4860011 | SNV | 1 | T | C | Heterozygous |
| NC_037644.1 | 4860658 | SNV | 1 | A | G | Homozygous   |
| NC_037644.1 | 4860667 | SNV | 1 | T | C | Homozygous   |
| NC_037644.1 | 4863522 | SNV | 1 | C | A | Homozygous   |
| NC_037644.1 | 4867889 | SNV | 1 | T | C | Homozygous   |
| NC_037644.1 | 4867951 | SNV | 1 | A | T | Homozygous   |
| NC_037644.1 | 4885559 | SNV | 1 | T | G | Homozygous   |
| NC_037644.1 | 4885584 | SNV | 1 | C | T | Homozygous   |
| NC_037644.1 | 4885603 | SNV | 1 | T | C | Homozygous   |
| NC_037644.1 | 4885618 | SNV | 1 | A | C | Homozygous   |
| NC_037644.1 | 4885621 | SNV | 1 | A | T | Homozygous   |
| NC_037644.1 | 4889107 | SNV | 1 | C | T | Homozygous   |
| NC_037644.1 | 4889119 | SNV | 1 | A | T | Homozygous   |
| NC_037644.1 | 4889154 | SNV | 1 | A | T | Homozygous   |
| NC_037644.1 | 4891357 | SNV | 1 | C | T | Homozygous   |
| NC_037644.1 | 4891374 | SNV | 1 | C | T | Homozygous   |
| NC_037644.1 | 4891385 | SNV | 1 | A | T | Homozygous   |
| NC_037644.1 | 4891393 | SNV | 1 | T | A | Homozygous   |
| NC_037644.1 | 4908057 | SNV | 1 | T | A | Homozygous   |
| NC_037644.1 | 4908059 | SNV | 1 | A | G | Homozygous   |
| NC_037644.1 | 4908061 | SNV | 1 | T | A | Homozygous   |
| NC_037644.1 | 4908064 | SNV | 1 | T | C | Homozygous   |
| NC_037644.1 | 4908069 | SNV | 1 | T | A | Homozygous   |
| NC_037644.1 | 4908078 | SNV | 1 | T | C | Homozygous   |
| NC_037644.1 | 4908089 | SNV | 1 | T | A | Homozygous   |
| NC_037644.1 | 4908103 | SNV | 1 | T | A | Homozygous   |
| NC_037644.1 | 4919399 | SNV | 1 | A | G | Homozygous   |
| NC_037644.1 | 4919401 | SNV | 1 | A | T | Homozygous   |
| NC_037644.1 | 4919408 | SNV | 1 | A | C | Homozygous   |
| NC_037644.1 | 4919419 | SNV | 1 | A | T | Homozygous   |
| NC_037644.1 | 4919426 | SNV | 1 | A | T | Homozygous   |
| NC_037644.1 | 4919793 | SNV | 1 | A | G | Heterozygous |
| NC_037644.1 | 4919798 | SNV | 1 | A | G | Homozygous   |
| NC_037644.1 | 4919801 | SNV | 1 | C | T | Homozygous   |
| NC_037644.1 | 4919808 | SNV | 1 | G | T | Heterozygous |
| NC_037644.1 | 4919810 | SNV | 1 | T | C | Heterozygous |
| NC_037644.1 | 4919815 | SNV | 1 | G | A | Homozygous   |
| NC_037644.1 | 4919817 | SNV | 1 | C | T | Homozygous   |
| NC_037644.1 | 4919838 | SNV | 1 | C | T | Homozygous   |
| NC_037644.1 | 4955094 | SNV | 1 | T | C | Homozygous   |
| NC_037644.1 | 4955112 | SNV | 1 | T | C | Heterozygous |
| NC_037644.1 | 4955150 | SNV | 1 | T | A | Heterozygous |
| NC_037644.1 | 4955176 | SNV | 1 | A | G | Heterozygous |
| NC_037644.1 | 4969368 | SNV | 1 | T | C | Homozygous   |
| NC_037644.1 | 4969374 | SNV | 1 | A | T | Homozygous   |
| NC_037644.1 | 4969376 | SNV | 1 | C | T | Homozygous   |
| NC_037644.1 | 4969411 | SNV | 1 | C | T | Homozygous   |
| NC_037644.1 | 4976275 | SNV | 1 | C | T | Homozygous   |
| NC_037644.1 | 4976280 | SNV | 1 | A | G | Homozygous   |

|             |         |     |   |   |   |              |
|-------------|---------|-----|---|---|---|--------------|
| NC_037644.1 | 4985996 | SNV | 1 | T | A | Homozygous   |
| NC_037644.1 | 4985998 | SNV | 1 | T | C | Homozygous   |
| NC_037644.1 | 4986001 | SNV | 1 | A | T | Homozygous   |
| NC_037644.1 | 4986009 | SNV | 1 | T | A | Homozygous   |
| NC_037644.1 | 4986013 | SNV | 1 | T | A | Homozygous   |
| NC_037644.1 | 4995524 | SNV | 1 | G | T | Homozygous   |
| NC_037644.1 | 4995526 | SNV | 1 | T | C | Homozygous   |
| NC_037644.1 | 4998190 | SNV | 1 | T | A | Homozygous   |
| NC_037644.1 | 4998200 | SNV | 1 | T | A | Homozygous   |
| NC_037644.1 | 4998206 | SNV | 1 | T | G | Homozygous   |
| NC_037644.1 | 4998210 | SNV | 1 | A | G | Heterozygous |
| NC_037644.1 | 5011155 | SNV | 1 | G | A | Heterozygous |
| NC_037644.1 | 5011179 | SNV | 1 | C | T | Heterozygous |
| NC_037644.1 | 5013317 | SNV | 1 | A | C | Heterozygous |
| NC_037644.1 | 5013320 | SNV | 1 | T | A | Heterozygous |
| NC_037644.1 | 5013324 | SNV | 1 | A | T | Heterozygous |
| NC_037644.1 | 5013327 | SNV | 1 | G | A | Heterozygous |
| NC_037644.1 | 5013353 | SNV | 1 | T | C | Homozygous   |
| NC_037644.1 | 5013355 | SNV | 1 | C | A | Heterozygous |
| NC_037644.1 | 5013361 | SNV | 1 | T | C | Heterozygous |
| NC_037644.1 | 5013365 | SNV | 1 | A | T | Heterozygous |
| NC_037644.1 | 5013367 | SNV | 1 | A | T | Heterozygous |
| NC_037644.1 | 5013377 | SNV | 1 | T | A | Homozygous   |
| NC_037644.1 | 5014649 | SNV | 1 | A | C | Homozygous   |
| NC_037644.1 | 5014651 | SNV | 1 | A | T | Homozygous   |
| NC_037644.1 | 5014657 | SNV | 1 | C | G | Homozygous   |
| NC_037644.1 | 5014678 | SNV | 1 | T | A | Homozygous   |
| NC_037644.1 | 5015765 | SNV | 1 | A | G | Homozygous   |
| NC_037644.1 | 5015776 | SNV | 1 | T | G | Homozygous   |
| NC_037644.1 | 5015801 | SNV | 1 | A | G | Homozygous   |
| NC_037644.1 | 5027316 | SNV | 1 | T | C | Homozygous   |
| NC_037644.1 | 5027845 | SNV | 1 | G | A | Homozygous   |
| NC_037644.1 | 5031068 | SNV | 1 | T | A | Homozygous   |
| NC_037644.1 | 5035996 | SNV | 1 | A | T | Homozygous   |
| NC_037644.1 | 5036003 | SNV | 1 | T | A | Homozygous   |
| NC_037644.1 | 5036013 | SNV | 1 | T | C | Homozygous   |
| NC_037644.1 | 5036035 | SNV | 1 | A | T | Homozygous   |
| NC_037644.1 | 5037347 | SNV | 1 | C | T | Homozygous   |
| NC_037644.1 | 5037440 | SNV | 1 | C | T | Homozygous   |
| NC_037644.1 | 5039049 | SNV | 1 | G | A | Homozygous   |
| NC_037644.1 | 5039420 | SNV | 1 | A | G | Homozygous   |
| NC_037644.1 | 5040047 | SNV | 1 | T | C | Homozygous   |
| NC_037644.1 | 5041688 | SNV | 1 | C | T | Homozygous   |
| NC_037644.1 | 5041941 | SNV | 1 | C | A | Homozygous   |
| NC_037644.1 | 5042239 | SNV | 1 | T | C | Homozygous   |
| NC_037644.1 | 5042377 | SNV | 1 | C | T | Heterozygous |
| NC_037644.1 | 5042705 | SNV | 1 | A | T | Homozygous   |
| NC_037644.1 | 5043792 | SNV | 1 | G | A | Heterozygous |
| NC_037644.1 | 5044251 | SNV | 1 | C | A | Homozygous   |
| NC_037644.1 | 5044261 | SNV | 1 | T | C | Homozygous   |
| NC_037644.1 | 5044355 | SNV | 1 | G | T | Heterozygous |

|             |         |     |   |   |   |              |
|-------------|---------|-----|---|---|---|--------------|
| NC_037644.1 | 5044624 | SNV | 1 | G | A | Heterozygous |
| NC_037644.1 | 5044901 | SNV | 1 | T | C | Heterozygous |
| NC_037644.1 | 5046099 | SNV | 1 | C | T | Homozygous   |
| NC_037644.1 | 5046314 | SNV | 1 | T | C | Homozygous   |
| NC_037644.1 | 5046316 | SNV | 1 | C | T | Homozygous   |
| NC_037644.1 | 5190207 | SNV | 1 | A | T | Homozygous   |
| NC_037644.1 | 5190243 | SNV | 1 | T | C | Homozygous   |
| NC_037644.1 | 5190327 | SNV | 1 | T | A | Homozygous   |
| NC_037644.1 | 5190348 | SNV | 1 | T | C | Homozygous   |
| NC_037644.1 | 5190355 | SNV | 1 | A | G | Homozygous   |
| NC_037644.1 | 5194945 | SNV | 1 | C | T | Homozygous   |
| NC_037644.1 | 5206040 | SNV | 1 | A | C | Homozygous   |
| NC_037644.1 | 5206060 | SNV | 1 | A | T | Homozygous   |
| NC_037644.1 | 5206066 | SNV | 1 | T | A | Homozygous   |
| NC_037644.1 | 5217541 | SNV | 1 | T | G | Homozygous   |
| NC_037644.1 | 5217552 | SNV | 1 | A | T | Homozygous   |
| NC_037644.1 | 5217579 | SNV | 1 | T | G | Homozygous   |
| NC_037644.1 | 5219961 | SNV | 1 | G | T | Heterozygous |
| NC_037644.1 | 5219968 | SNV | 1 | T | A | Heterozygous |
| NC_037644.1 | 5219977 | SNV | 1 | T | C | Heterozygous |
| NC_037644.1 | 5229552 | SNV | 1 | A | T | Homozygous   |
| NC_037644.1 | 5229569 | SNV | 1 | G | T | Homozygous   |
| NC_037644.1 | 5229573 | SNV | 1 | C | T | Homozygous   |
| NC_037644.1 | 5229575 | SNV | 1 | T | A | Homozygous   |
| NC_037644.1 | 5229577 | SNV | 1 | T | G | Homozygous   |
| NC_037644.1 | 5229580 | SNV | 1 | T | C | Homozygous   |
| NC_037644.1 | 5229590 | SNV | 1 | A | T | Homozygous   |
| NC_037644.1 | 5231463 | SNV | 1 | C | A | Homozygous   |
| NC_037644.1 | 5231468 | SNV | 1 | T | A | Homozygous   |
| NC_037644.1 | 5231484 | SNV | 1 | T | G | Homozygous   |
| NC_037644.1 | 5231490 | SNV | 1 | C | T | Homozygous   |
| NC_037644.1 | 5231495 | SNV | 1 | A | T | Homozygous   |
| NC_037644.1 | 5250640 | SNV | 1 | T | G | Homozygous   |
| NC_037644.1 | 5250655 | SNV | 1 | A | T | Homozygous   |
| NC_037644.1 | 5250667 | SNV | 1 | T | A | Homozygous   |
| NC_037644.1 | 5250673 | SNV | 1 | A | T | Homozygous   |
| NC_037644.1 | 5253741 | SNV | 1 | T | A | Homozygous   |
| NC_037644.1 | 5253751 | SNV | 1 | A | C | Homozygous   |
| NC_037644.1 | 5253770 | SNV | 1 | T | C | Homozygous   |
| NC_037644.1 | 5255998 | SNV | 1 | C | T | Homozygous   |
| NC_037644.1 | 5256029 | SNV | 1 | A | G | Homozygous   |
| NC_037644.1 | 5256109 | SNV | 1 | C | T | Homozygous   |
| NC_037644.1 | 5256145 | SNV | 1 | A | G | Homozygous   |
| NC_037644.1 | 5256226 | SNV | 1 | A | G | Homozygous   |
| NC_037644.1 | 5256323 | SNV | 1 | T | C | Homozygous   |
| NC_037644.1 | 5256452 | SNV | 1 | T | C | Homozygous   |
| NC_037644.1 | 5256583 | SNV | 1 | T | C | Homozygous   |
| NC_037644.1 | 5256945 | SNV | 1 | T | C | Homozygous   |
| NC_037644.1 | 5256984 | SNV | 1 | G | A | Homozygous   |
| NC_037644.1 | 5257202 | SNV | 1 | T | C | Homozygous   |
| NC_037644.1 | 5257359 | SNV | 1 | G | A | Homozygous   |

|             |         |     |   |   |   |              |
|-------------|---------|-----|---|---|---|--------------|
| NC_037644.1 | 5257660 | SNV | 1 | G | A | Homozygous   |
| NC_037644.1 | 5258011 | SNV | 1 | A | G | Homozygous   |
| NC_037644.1 | 5258058 | SNV | 1 | C | A | Homozygous   |
| NC_037644.1 | 5258124 | SNV | 1 | G | C | Homozygous   |
| NC_037644.1 | 5258311 | SNV | 1 | C | T | Homozygous   |
| NC_037644.1 | 5258314 | SNV | 1 | C | T | Homozygous   |
| NC_037644.1 | 5258394 | SNV | 1 | G | A | Homozygous   |
| NC_037644.1 | 5258534 | SNV | 1 | A | G | Homozygous   |
| NC_037644.1 | 5258714 | SNV | 1 | G | C | Heterozygous |
| NC_037644.1 | 5258717 | SNV | 1 | A | T | Heterozygous |
| NC_037644.1 | 5258726 | SNV | 1 | T | A | Heterozygous |
| NC_037644.1 | 5258729 | SNV | 1 | G | A | Heterozygous |
| NC_037644.1 | 5258732 | SNV | 1 | T | A | Heterozygous |
| NC_037644.1 | 5258734 | SNV | 1 | A | C | Heterozygous |
| NC_037644.1 | 5258738 | SNV | 1 | G | A | Heterozygous |
| NC_037644.1 | 5258743 | SNV | 1 | A | G | Heterozygous |
| NC_037644.1 | 5258828 | SNV | 1 | A | G | Homozygous   |
| NC_037644.1 | 5258985 | SNV | 1 | G | A | Homozygous   |
| NC_037644.1 | 5259262 | SNV | 1 | C | A | Heterozygous |
| NC_037644.1 | 5259268 | SNV | 1 | A | G | Homozygous   |
| NC_037644.1 | 5259307 | SNV | 1 | C | A | Heterozygous |
| NC_037644.1 | 5262109 | SNV | 1 | A | G | Homozygous   |
| NC_037644.1 | 5262114 | SNV | 1 | A | T | Homozygous   |
| NC_037644.1 | 5262118 | SNV | 1 | A | G | Homozygous   |
| NC_037644.1 | 5262122 | SNV | 1 | T | A | Homozygous   |
| NC_037644.1 | 5275484 | SNV | 1 | T | C | Homozygous   |
| NC_037644.1 | 5278964 | SNV | 1 | T | C | Homozygous   |
| NC_037644.1 | 5278984 | SNV | 1 | A | T | Homozygous   |
| NC_037644.1 | 5278986 | SNV | 1 | G | C | Homozygous   |
| NC_037644.1 | 5278995 | SNV | 1 | T | A | Homozygous   |
| NC_037644.1 | 5278997 | SNV | 1 | T | C | Homozygous   |
| NC_037644.1 | 5287189 | SNV | 1 | T | A | Homozygous   |
| NC_037644.1 | 5287202 | SNV | 1 | A | T | Homozygous   |
| NC_037644.1 | 5287209 | SNV | 1 | C | T | Homozygous   |
| NC_037644.1 | 5334155 | SNV | 1 | T | A | Homozygous   |
| NC_037644.1 | 5334159 | SNV | 1 | A | C | Homozygous   |
| NC_037644.1 | 5334168 | SNV | 1 | T | C | Homozygous   |
| NC_037644.1 | 5334193 | SNV | 1 | G | T | Homozygous   |
| NC_037644.1 | 5349119 | SNV | 1 | T | A | Homozygous   |
| NC_037644.1 | 5349121 | SNV | 1 | T | C | Homozygous   |
| NC_037644.1 | 5349126 | SNV | 1 | A | T | Homozygous   |
| NC_037644.1 | 5349133 | SNV | 1 | G | A | Homozygous   |
| NC_037644.1 | 5350640 | SNV | 1 | G | A | Homozygous   |
| NC_037644.1 | 5350642 | SNV | 1 | T | A | Homozygous   |
| NC_037644.1 | 5350649 | SNV | 1 | G | T | Homozygous   |
| NC_037644.1 | 5350664 | SNV | 1 | A | T | Heterozygous |
| NC_037644.1 | 5350670 | SNV | 1 | G | T | Homozygous   |
| NC_037644.1 | 5350682 | SNV | 1 | A | T | Homozygous   |
| NC_037644.1 | 5350709 | SNV | 1 | C | T | Homozygous   |
| NC_037644.1 | 5350721 | SNV | 1 | A | G | Homozygous   |
| NC_037644.1 | 5362295 | SNV | 1 | A | C | Homozygous   |

|             |         |     |   |   |   |              |
|-------------|---------|-----|---|---|---|--------------|
| NC_037644.1 | 5362302 | SNV | 1 | G | A | Homozygous   |
| NC_037644.1 | 5362309 | SNV | 1 | A | T | Heterozygous |
| NC_037644.1 | 5383702 | SNV | 1 | T | A | Homozygous   |
| NC_037644.1 | 5383705 | SNV | 1 | T | A | Homozygous   |
| NC_037644.1 | 5383710 | SNV | 1 | A | T | Homozygous   |
| NC_037644.1 | 5383723 | SNV | 1 | A | C | Homozygous   |
| NC_037644.1 | 5383725 | SNV | 1 | A | C | Homozygous   |
| NC_037644.1 | 5403830 | SNV | 1 | A | G | Heterozygous |
| NC_037644.1 | 5403837 | SNV | 1 | C | T | Heterozygous |
| NC_037644.1 | 5403846 | SNV | 1 | A | G | Heterozygous |
| NC_037644.1 | 5403848 | SNV | 1 | A | C | Heterozygous |
| NC_037644.1 | 5403851 | SNV | 1 | C | T | Heterozygous |
| NC_037644.1 | 5403853 | SNV | 1 | C | T | Heterozygous |
| NC_037644.1 | 5404464 | SNV | 1 | T | A | Heterozygous |
| NC_037644.1 | 5422113 | SNV | 1 | A | T | Homozygous   |
| NC_037644.1 | 5422121 | SNV | 1 | A | T | Homozygous   |
| NC_037644.1 | 5447288 | SNV | 1 | A | C | Heterozygous |
| NC_037644.1 | 5447483 | SNV | 1 | A | T | Homozygous   |
| NC_037644.1 | 5447491 | SNV | 1 | A | C | Heterozygous |
| NC_037644.1 | 5447549 | SNV | 1 | T | G | Homozygous   |
| NC_037644.1 | 5447551 | SNV | 1 | T | A | Homozygous   |
| NC_037644.1 | 5447553 | SNV | 1 | T | A | Homozygous   |
| NC_037644.1 | 5447564 | SNV | 1 | T | G | Homozygous   |
| NC_037644.1 | 5464805 | SNV | 1 | A | T | Homozygous   |
| NC_037644.1 | 5464813 | SNV | 1 | G | A | Homozygous   |
| NC_037644.1 | 5464825 | SNV | 1 | C | A | Homozygous   |
| NC_037644.1 | 5464829 | SNV | 1 | G | T | Homozygous   |
| NC_037644.1 | 5467546 | SNV | 1 | T | A | Heterozygous |
| NC_037644.1 | 5474578 | SNV | 1 | A | C | Heterozygous |
| NC_037644.1 | 5474586 | SNV | 1 | A | C | Heterozygous |
| NC_037644.1 | 5474592 | SNV | 1 | A | T | Homozygous   |
| NC_037644.1 | 5474595 | SNV | 1 | G | A | Homozygous   |
| NC_037644.1 | 5474598 | SNV | 1 | A | C | Homozygous   |
| NC_037644.1 | 5500018 | SNV | 1 | T | A | Homozygous   |
| NC_037644.1 | 5500047 | SNV | 1 | A | G | Homozygous   |
| NC_037644.1 | 5500051 | SNV | 1 | A | G | Homozygous   |
| NC_037644.1 | 5500059 | SNV | 1 | A | G | Homozygous   |
| NC_037644.1 | 5507852 | SNV | 1 | T | G | Heterozygous |
| NC_037644.1 | 5511763 | SNV | 1 | A | T | Heterozygous |
| NC_037644.1 | 5511767 | SNV | 1 | A | C | Heterozygous |
| NC_037644.1 | 5513690 | SNV | 1 | T | A | Homozygous   |
| NC_037644.1 | 5523356 | SNV | 1 | C | T | Homozygous   |
| NC_037644.1 | 5523368 | SNV | 1 | C | T | Homozygous   |
| NC_037644.1 | 5608578 | SNV | 1 | T | C | Homozygous   |
| NC_037644.1 | 5608580 | SNV | 1 | A | T | Homozygous   |
| NC_037644.1 | 5608604 | SNV | 1 | A | T | Homozygous   |
| NC_037644.1 | 5608606 | SNV | 1 | A | T | Homozygous   |
| NC_037644.1 | 5608610 | SNV | 1 | A | G | Homozygous   |
| NC_037644.1 | 5611617 | SNV | 1 | T | A | Heterozygous |
| NC_037644.1 | 5611619 | SNV | 1 | T | C | Homozygous   |
| NC_037644.1 | 5611632 | SNV | 1 | A | G | Heterozygous |

|             |         |     |   |   |   |              |
|-------------|---------|-----|---|---|---|--------------|
| NC_037644.1 | 5611634 | SNV | 1 | A | G | Heterozygous |
| NC_037644.1 | 5611638 | SNV | 1 | A | G | Heterozygous |
| NC_037644.1 | 5611645 | SNV | 1 | T | A | Heterozygous |
| NC_037644.1 | 5622172 | SNV | 1 | T | A | Homozygous   |
| NC_037644.1 | 5622180 | SNV | 1 | T | A | Homozygous   |
| NC_037644.1 | 5622182 | SNV | 1 | A | T | Homozygous   |
| NC_037644.1 | 5622190 | SNV | 1 | T | A | Homozygous   |
| NC_037644.1 | 5622193 | SNV | 1 | A | C | Homozygous   |
| NC_037644.1 | 5630990 | SNV | 1 | G | A | Homozygous   |
| NC_037644.1 | 5630992 | SNV | 1 | A | G | Homozygous   |
| NC_037644.1 | 5630997 | SNV | 1 | A | G | Homozygous   |
| NC_037644.1 | 5631002 | SNV | 1 | A | G | Homozygous   |
| NC_037644.1 | 5631004 | SNV | 1 | T | A | Homozygous   |
| NC_037644.1 | 5631017 | SNV | 1 | A | G | Homozygous   |
| NC_037644.1 | 5631022 | SNV | 1 | A | T | Homozygous   |
| NC_037644.1 | 5631050 | SNV | 1 | G | A | Heterozygous |
| NC_037644.1 | 5631058 | SNV | 1 | T | A | Homozygous   |
| NC_037644.1 | 5631080 | SNV | 1 | T | G | Homozygous   |
| NC_037644.1 | 5631082 | SNV | 1 | G | T | Homozygous   |
| NC_037644.1 | 5692938 | SNV | 1 | T | C | Heterozygous |
| NC_037644.1 | 5701865 | SNV | 1 | G | A | Heterozygous |
| NC_037644.1 | 5706722 | SNV | 1 | G | A | Homozygous   |
| NC_037644.1 | 5706724 | SNV | 1 | T | C | Homozygous   |
| NC_037644.1 | 5706730 | SNV | 1 | T | C | Homozygous   |
| NC_037644.1 | 5706742 | SNV | 1 | A | G | Homozygous   |
| NC_037644.1 | 5706766 | SNV | 1 | T | C | Homozygous   |
| NC_037644.1 | 5723222 | SNV | 1 | G | A | Homozygous   |
| NC_037644.1 | 5723229 | SNV | 1 | A | G | Homozygous   |
| NC_037644.1 | 5723235 | SNV | 1 | T | G | Homozygous   |
| NC_037644.1 | 5727820 | SNV | 1 | C | G | Homozygous   |
| NC_037644.1 | 5733555 | SNV | 1 | T | A | Homozygous   |
| NC_037644.1 | 5733582 | SNV | 1 | T | A | Homozygous   |
| NC_037644.1 | 5733585 | SNV | 1 | G | A | Homozygous   |
| NC_037644.1 | 5733588 | SNV | 1 | T | C | Homozygous   |
| NC_037644.1 | 5734363 | SNV | 1 | A | T | Homozygous   |
| NC_037644.1 | 5735484 | SNV | 1 | A | G | Homozygous   |
| NC_037644.1 | 5756996 | SNV | 1 | A | T | Heterozygous |
| NC_037644.1 | 5756998 | SNV | 1 | G | T | Homozygous   |
| NC_037644.1 | 5757016 | SNV | 1 | G | T | Heterozygous |
| NC_037644.1 | 5757023 | SNV | 1 | A | T | Heterozygous |
| NC_037644.1 | 5757025 | SNV | 1 | A | T | Heterozygous |
| NC_037644.1 | 5757027 | SNV | 1 | G | T | Heterozygous |
| NC_037644.1 | 5759545 | SNV | 1 | A | T | Homozygous   |
| NC_037644.1 | 5759548 | SNV | 1 | T | A | Homozygous   |
| NC_037644.1 | 5759556 | SNV | 1 | A | G | Homozygous   |
| NC_037644.1 | 5759560 | SNV | 1 | A | G | Homozygous   |
| NC_037644.1 | 5759566 | SNV | 1 | G | A | Homozygous   |
| NC_037644.1 | 5823803 | SNV | 1 | T | C | Homozygous   |
| NC_037644.1 | 5824333 | SNV | 1 | C | T | Homozygous   |
| NC_037644.1 | 5837045 | SNV | 1 | A | T | Homozygous   |
| NC_037644.1 | 5837052 | SNV | 1 | T | A | Homozygous   |

|             |         |     |   |   |   |              |
|-------------|---------|-----|---|---|---|--------------|
| NC_037644.1 | 5837055 | SNV | 1 | T | A | Homozygous   |
| NC_037644.1 | 5837063 | SNV | 1 | T | A | Homozygous   |
| NC_037644.1 | 5837068 | SNV | 1 | T | A | Homozygous   |
| NC_037644.1 | 5837079 | SNV | 1 | T | G | Homozygous   |
| NC_037644.1 | 5837083 | SNV | 1 | A | G | Homozygous   |
| NC_037644.1 | 5837085 | SNV | 1 | A | G | Homozygous   |
| NC_037644.1 | 5837098 | SNV | 1 | T | A | Homozygous   |
| NC_037644.1 | 5837125 | SNV | 1 | T | A | Homozygous   |
| NC_037644.1 | 5838121 | SNV | 1 | A | C | Homozygous   |
| NC_037644.1 | 5838132 | SNV | 1 | A | C | Homozygous   |
| NC_037644.1 | 5853399 | SNV | 1 | G | A | Heterozygous |
| NC_037644.1 | 5853401 | SNV | 1 | G | A | Homozygous   |
| NC_037644.1 | 5853406 | SNV | 1 | G | A | Homozygous   |
| NC_037644.1 | 5855028 | SNV | 1 | G | A | Heterozygous |
| NC_037644.1 | 5855033 | SNV | 1 | G | A | Homozygous   |
| NC_037644.1 | 5855075 | SNV | 1 | T | A | Homozygous   |
| NC_037644.1 | 5863633 | SNV | 1 | C | T | Heterozygous |
| NC_037644.1 | 5863637 | SNV | 1 | A | T | Heterozygous |
| NC_037644.1 | 5871829 | SNV | 1 | T | G | Homozygous   |
| NC_037644.1 | 5871834 | SNV | 1 | C | A | Homozygous   |
| NC_037644.1 | 5871850 | SNV | 1 | A | C | Homozygous   |
| NC_037644.1 | 5877086 | SNV | 1 | T | C | Homozygous   |
| NC_037644.1 | 5877576 | SNV | 1 | T | A | Heterozygous |
| NC_037644.1 | 5877585 | SNV | 1 | T | C | Heterozygous |
| NC_037644.1 | 5877588 | SNV | 1 | C | T | Heterozygous |
| NC_037644.1 | 5877591 | SNV | 1 | T | G | Heterozygous |
| NC_037644.1 | 5877597 | SNV | 1 | C | T | Homozygous   |
| NC_037644.1 | 5877612 | SNV | 1 | T | C | Heterozygous |
| NC_037644.1 | 5877618 | SNV | 1 | A | G | Heterozygous |
| NC_037644.1 | 5877624 | SNV | 1 | A | C | Heterozygous |
| NC_037644.1 | 5877627 | SNV | 1 | A | T | Heterozygous |
| NC_037644.1 | 5877642 | SNV | 1 | A | T | Heterozygous |
| NC_037644.1 | 5877648 | SNV | 1 | A | T | Heterozygous |
| NC_037644.1 | 5877666 | SNV | 1 | T | C | Heterozygous |
| NC_037644.1 | 5878707 | SNV | 1 | A | T | Heterozygous |
| NC_037644.1 | 5878709 | SNV | 1 | T | C | Heterozygous |
| NC_037644.1 | 5878719 | SNV | 1 | T | G | Heterozygous |
| NC_037644.1 | 5878722 | SNV | 1 | G | T | Heterozygous |
| NC_037644.1 | 5878726 | SNV | 1 | A | C | Heterozygous |
| NC_037644.1 | 5878727 | SNV | 1 | A | G | Heterozygous |
| NC_037644.1 | 5878729 | SNV | 1 | T | A | Heterozygous |
| NC_037644.1 | 5902851 | SNV | 1 | T | C | Homozygous   |
| NC_037644.1 | 5902856 | SNV | 1 | A | G | Homozygous   |
| NC_037644.1 | 5902865 | SNV | 1 | T | A | Homozygous   |
| NC_037644.1 | 5902868 | SNV | 1 | C | T | Homozygous   |
| NC_037644.1 | 5902874 | SNV | 1 | T | C | Homozygous   |
| NC_037644.1 | 5902881 | SNV | 1 | A | T | Homozygous   |
| NC_037644.1 | 5904585 | SNV | 1 | T | C | Homozygous   |
| NC_037644.1 | 5904619 | SNV | 1 | T | C | Homozygous   |
| NC_037644.1 | 5905687 | SNV | 1 | T | A | Homozygous   |
| NC_037644.1 | 5905691 | SNV | 1 | A | G | Homozygous   |



|             |         |     |   |   |   |              |
|-------------|---------|-----|---|---|---|--------------|
| NC_037644.1 | 5905699 | SNV | 1 | G | A | Homozygous   |
| NC_037644.1 | 5905703 | SNV | 1 | C | T | Homozygous   |
| NC_037644.1 | 5905720 | SNV | 1 | A | G | Homozygous   |
| NC_037644.1 | 5905724 | SNV | 1 | C | T | Homozygous   |
| NC_037644.1 | 5905732 | SNV | 1 | T | A | Homozygous   |
| NC_037644.1 | 5918972 | SNV | 1 | A | C | Homozygous   |
| NC_037644.1 | 5918980 | SNV | 1 | T | G | Homozygous   |
| NC_037644.1 | 5918982 | SNV | 1 | T | A | Homozygous   |
| NC_037644.1 | 5918988 | SNV | 1 | C | T | Homozygous   |
| NC_037644.1 | 5918991 | SNV | 1 | C | G | Homozygous   |
| NC_037644.1 | 5919011 | SNV | 1 | C | T | Homozygous   |
| NC_037644.1 | 5919017 | SNV | 1 | T | A | Homozygous   |
| NC_037644.1 | 5931086 | SNV | 1 | A | G | Homozygous   |
| NC_037644.1 | 5931092 | SNV | 1 | G | C | Homozygous   |
| NC_037644.1 | 5931140 | SNV | 1 | T | C | Homozygous   |
| NC_037644.1 | 5931142 | SNV | 1 | T | C | Homozygous   |
| NC_037644.1 | 5931146 | SNV | 1 | G | C | Heterozygous |
| NC_037644.1 | 5931152 | SNV | 1 | G | A | Heterozygous |
| NC_037644.1 | 5931212 | SNV | 1 | C | T | Heterozygous |
| NC_037644.1 | 5931222 | SNV | 1 | C | A | Homozygous   |
| NC_037644.1 | 5931226 | SNV | 1 | T | C | Homozygous   |
| NC_037644.1 | 5931229 | SNV | 1 | A | G | Homozygous   |
| NC_037644.1 | 5931289 | SNV | 1 | G | A | Heterozygous |
| NC_037644.1 | 5931308 | SNV | 1 | T | A | Homozygous   |
| NC_037644.1 | 5931319 | SNV | 1 | G | A | Homozygous   |
| NC_037644.1 | 5931436 | SNV | 1 | T | C | Homozygous   |
| NC_037644.1 | 5931460 | SNV | 1 | G | A | Homozygous   |
| NC_037644.1 | 5931475 | SNV | 1 | C | T | Homozygous   |
| NC_037644.1 | 5931500 | SNV | 1 | T | C | Homozygous   |
| NC_037644.1 | 5931542 | SNV | 1 | A | C | Heterozygous |
| NC_037644.1 | 5931558 | SNV | 1 | A | G | Homozygous   |
| NC_037644.1 | 5931570 | SNV | 1 | T | C | Homozygous   |
| NC_037644.1 | 5936954 | SNV | 1 | G | T | Homozygous   |
| NC_037644.1 | 5936958 | SNV | 1 | G | T | Homozygous   |
| NC_037644.1 | 5943962 | SNV | 1 | A | T | Homozygous   |
| NC_037644.1 | 5943966 | SNV | 1 | A | T | Homozygous   |
| NC_037644.1 | 5943970 | SNV | 1 | T | A | Heterozygous |
| NC_037644.1 | 5943977 | SNV | 1 | A | G | Heterozygous |
| NC_037644.1 | 5943986 | SNV | 1 | A | T | Homozygous   |
| NC_037644.1 | 5943988 | SNV | 1 | C | T | Homozygous   |
| NC_037644.1 | 5944038 | SNV | 1 | C | A | Homozygous   |
| NC_037644.1 | 5944045 | SNV | 1 | G | A | Homozygous   |
| NC_037644.1 | 5950742 | SNV | 1 | T | C | Heterozygous |
| NC_037644.1 | 5951177 | SNV | 1 | T | A | Homozygous   |
| NC_037644.1 | 5951190 | SNV | 1 | A | G | Homozygous   |
| NC_037644.1 | 5951192 | SNV | 1 | G | A | Homozygous   |
| NC_037644.1 | 5951194 | SNV | 1 | A | T | Homozygous   |
| NC_037644.1 | 5952558 | SNV | 1 | A | T | Homozygous   |
| NC_037644.1 | 5952560 | SNV | 1 | T | A | Homozygous   |
| NC_037644.1 | 5957211 | SNV | 1 | A | T | Homozygous   |
| NC_037644.1 | 5957242 | SNV | 1 | G | A | Homozygous   |

|             |         |     |   |   |   |              |
|-------------|---------|-----|---|---|---|--------------|
| NC_037644.1 | 5958088 | SNV | 1 | T | A | Heterozygous |
| NC_037644.1 | 5958090 | SNV | 1 | T | A | Heterozygous |
| NC_037644.1 | 5958092 | SNV | 1 | T | A | Heterozygous |
| NC_037644.1 | 5959946 | SNV | 1 | T | A | Heterozygous |
| NC_037644.1 | 5959973 | SNV | 1 | A | G | Heterozygous |
| NC_037644.1 | 5960015 | SNV | 1 | A | G | Heterozygous |
| NC_037644.1 | 5960134 | SNV | 1 | C | T | Heterozygous |
| NC_037644.1 | 5960186 | SNV | 1 | A | G | Heterozygous |
| NC_037644.1 | 5962408 | SNV | 1 | T | C | Heterozygous |
| NC_037644.1 | 5962411 | SNV | 1 | T | C | Homozygous   |
| NC_037644.1 | 5962418 | SNV | 1 | T | C | Heterozygous |
| NC_037644.1 | 5962500 | SNV | 1 | C | T | Heterozygous |
| NC_037644.1 | 5962524 | SNV | 1 | T | C | Heterozygous |
| NC_037644.1 | 5962527 | SNV | 1 | T | C | Heterozygous |
| NC_037644.1 | 5962533 | SNV | 1 | T | C | Homozygous   |
| NC_037644.1 | 5962536 | SNV | 1 | T | C | Heterozygous |
| NC_037644.1 | 5962693 | SNV | 1 | A | T | Heterozygous |
| NC_037644.1 | 5962699 | SNV | 1 | A | T | Heterozygous |
| NC_037644.1 | 5962702 | SNV | 1 | A | T | Heterozygous |
| NC_037644.1 | 5962707 | SNV | 1 | C | A | Homozygous   |
| NC_037644.1 | 5962714 | SNV | 1 | A | T | Heterozygous |
| NC_037644.1 | 5962774 | SNV | 1 | A | T | Heterozygous |
| NC_037644.1 | 5962818 | SNV | 1 | T | C | Heterozygous |
| NC_037644.1 | 5962854 | SNV | 1 | T | C | Homozygous   |
| NC_037644.1 | 5962860 | SNV | 1 | C | T | Heterozygous |
| NC_037644.1 | 5962866 | SNV | 1 | C | T | Heterozygous |
| NC_037644.1 | 5962869 | SNV | 1 | C | T | Heterozygous |
| NC_037644.1 | 5962872 | SNV | 1 | T | C | Homozygous   |
| NC_037644.1 | 5962880 | SNV | 1 | T | A | Heterozygous |
| NC_037644.1 | 5962884 | SNV | 1 | C | T | Homozygous   |
| NC_037644.1 | 5963026 | SNV | 1 | A | C | Heterozygous |
| NC_037644.1 | 5963039 | SNV | 1 | T | A | Heterozygous |
| NC_037644.1 | 5966334 | SNV | 1 | G | A | Homozygous   |
| NC_037644.1 | 5966657 | SNV | 1 | G | A | Homozygous   |
| NC_037644.1 | 5966669 | SNV | 1 | A | G | Homozygous   |
| NC_037644.1 | 5966674 | SNV | 1 | T | A | Homozygous   |
| NC_037644.1 | 5966710 | SNV | 1 | T | A | Homozygous   |
| NC_037644.1 | 5966715 | SNV | 1 | A | G | Homozygous   |
| NC_037644.1 | 5966909 | SNV | 1 | T | A | Homozygous   |
| NC_037644.1 | 5966920 | SNV | 1 | A | T | Homozygous   |
| NC_037644.1 | 5966964 | SNV | 1 | T | A | Homozygous   |
| NC_037644.1 | 5966970 | SNV | 1 | A | G | Homozygous   |
| NC_037644.1 | 5966979 | SNV | 1 | T | G | Homozygous   |
| NC_037644.1 | 5967086 | SNV | 1 | T | A | Heterozygous |
| NC_037644.1 | 5967092 | SNV | 1 | T | A | Heterozygous |
| NC_037644.1 | 5967308 | SNV | 1 | T | A | Heterozygous |
| NC_037644.1 | 5967323 | SNV | 1 | T | C | Heterozygous |
| NC_037644.1 | 5967563 | SNV | 1 | T | A | Heterozygous |
| NC_037644.1 | 5967760 | SNV | 1 | T | A | Heterozygous |
| NC_037644.1 | 5967785 | SNV | 1 | T | C | Homozygous   |
| NC_037644.1 | 5967882 | SNV | 1 | A | C | Heterozygous |

|             |         |     |   |   |   |              |
|-------------|---------|-----|---|---|---|--------------|
| NC_037644.1 | 5967888 | SNV | 1 | T | A | Heterozygous |
| NC_037644.1 | 5967890 | SNV | 1 | A | T | Heterozygous |
| NC_037644.1 | 5967999 | SNV | 1 | T | A | Homozygous   |
| NC_037644.1 | 5968013 | SNV | 1 | T | C | Homozygous   |
| NC_037644.1 | 5968078 | SNV | 1 | T | G | Homozygous   |
| NC_037644.1 | 5968083 | SNV | 1 | T | G | Homozygous   |
| NC_037644.1 | 5968129 | SNV | 1 | A | T | Heterozygous |
| NC_037644.1 | 5968132 | SNV | 1 | A | T | Heterozygous |
| NC_037644.1 | 5968140 | SNV | 1 | A | T | Heterozygous |
| NC_037644.1 | 5968149 | SNV | 1 | A | C | Homozygous   |
| NC_037644.1 | 5968446 | SNV | 1 | T | G | Homozygous   |
| NC_037644.1 | 5968451 | SNV | 1 | T | G | Homozygous   |
| NC_037644.1 | 5968463 | SNV | 1 | A | T | Heterozygous |
| NC_037644.1 | 5968469 | SNV | 1 | T | A | Homozygous   |
| NC_037644.1 | 5968477 | SNV | 1 | T | A | Heterozygous |
| NC_037644.1 | 5968568 | SNV | 1 | A | G | Heterozygous |
| NC_037644.1 | 5968591 | SNV | 1 | A | G | Heterozygous |
| NC_037644.1 | 5968648 | SNV | 1 | A | G | Homozygous   |
| NC_037644.1 | 5968658 | SNV | 1 | T | A | Homozygous   |
| NC_037644.1 | 5968663 | SNV | 1 | T | A | Homozygous   |
| NC_037644.1 | 5968668 | SNV | 1 | T | G | Homozygous   |
| NC_037644.1 | 5968687 | SNV | 1 | T | A | Heterozygous |
| NC_037644.1 | 5968697 | SNV | 1 | T | A | Homozygous   |
| NC_037644.1 | 5968705 | SNV | 1 | A | T | Heterozygous |
| NC_037644.1 | 5968711 | SNV | 1 | T | A | Homozygous   |
| NC_037644.1 | 5968746 | SNV | 1 | A | G | Homozygous   |
| NC_037644.1 | 5968780 | SNV | 1 | A | G | Heterozygous |
| NC_037644.1 | 5968786 | SNV | 1 | A | T | Homozygous   |
| NC_037644.1 | 5968790 | SNV | 1 | T | A | Homozygous   |
| NC_037644.1 | 5968792 | SNV | 1 | A | C | Homozygous   |
| NC_037644.1 | 5968802 | SNV | 1 | A | T | Homozygous   |
| NC_037644.1 | 5968807 | SNV | 1 | A | T | Homozygous   |
| NC_037644.1 | 5969116 | SNV | 1 | A | T | Heterozygous |
| NC_037644.1 | 5969126 | SNV | 1 | A | T | Heterozygous |
| NC_037644.1 | 5969129 | SNV | 1 | A | T | Homozygous   |
| NC_037644.1 | 5969183 | SNV | 1 | T | G | Heterozygous |
| NC_037644.1 | 5969198 | SNV | 1 | T | A | Homozygous   |
| NC_037644.1 | 5969241 | SNV | 1 | T | A | Homozygous   |
| NC_037644.1 | 5969327 | SNV | 1 | T | A | Homozygous   |
| NC_037644.1 | 5969375 | SNV | 1 | A | T | Heterozygous |
| NC_037644.1 | 5969378 | SNV | 1 | A | T | Heterozygous |
| NC_037644.1 | 5969384 | SNV | 1 | A | T | Heterozygous |
| NC_037644.1 | 5969424 | SNV | 1 | T | G | Homozygous   |
| NC_037644.1 | 5969432 | SNV | 1 | A | G | Heterozygous |
| NC_037644.1 | 5969517 | SNV | 1 | T | A | Heterozygous |
| NC_037644.1 | 5969691 | SNV | 1 | T | A | Homozygous   |
| NC_037644.1 | 5969695 | SNV | 1 | T | A | Homozygous   |
| NC_037644.1 | 5969735 | SNV | 1 | T | A | Heterozygous |
| NC_037644.1 | 5969739 | SNV | 1 | T | A | Heterozygous |
| NC_037644.1 | 5969755 | SNV | 1 | C | A | Heterozygous |
| NC_037644.1 | 5969859 | SNV | 1 | A | G | Homozygous   |

|             |         |     |   |   |   |              |
|-------------|---------|-----|---|---|---|--------------|
| NC_037644.1 | 5969992 | SNV | 1 | A | G | Homozygous   |
| NC_037644.1 | 5969997 | SNV | 1 | A | G | Homozygous   |
| NC_037644.1 | 5970002 | SNV | 1 | A | G | Heterozygous |
| NC_037644.1 | 5970011 | SNV | 1 | A | G | Heterozygous |
| NC_037644.1 | 5970021 | SNV | 1 | A | G | Heterozygous |
| NC_037644.1 | 5970052 | SNV | 1 | T | G | Homozygous   |
| NC_037644.1 | 5970089 | SNV | 1 | T | A | Homozygous   |
| NC_037644.1 | 5970092 | SNV | 1 | T | A | Homozygous   |
| NC_037644.1 | 5970098 | SNV | 1 | A | T | Heterozygous |
| NC_037644.1 | 5970105 | SNV | 1 | A | T | Homozygous   |
| NC_037644.1 | 5970197 | SNV | 1 | A | G | Homozygous   |
| NC_037644.1 | 5972922 | SNV | 1 | G | A | Homozygous   |
| NC_037644.1 | 5972942 | SNV | 1 | T | G | Homozygous   |
| NC_037644.1 | 5972944 | SNV | 1 | A | T | Homozygous   |
| NC_037644.1 | 5972947 | SNV | 1 | C | G | Homozygous   |
| NC_037644.1 | 5972952 | SNV | 1 | T | A | Homozygous   |
| NC_037644.1 | 5974716 | SNV | 1 | G | A | Homozygous   |
| NC_037644.1 | 5974719 | SNV | 1 | A | G | Homozygous   |
| NC_037644.1 | 5974726 | SNV | 1 | A | T | Homozygous   |
| NC_037644.1 | 5982114 | SNV | 1 | G | T | Homozygous   |
| NC_037644.1 | 5983264 | SNV | 1 | C | T | Heterozygous |
| NC_037644.1 | 5983268 | SNV | 1 | G | C | Heterozygous |
| NC_037644.1 | 5995527 | SNV | 1 | A | T | Heterozygous |
| NC_037644.1 | 6011844 | SNV | 1 | T | A | Heterozygous |
| NC_037644.1 | 6011853 | SNV | 1 | A | G | Heterozygous |
| NC_037644.1 | 6011860 | SNV | 1 | T | A | Heterozygous |
| NC_037644.1 | 6011879 | SNV | 1 | A | T | Heterozygous |
| NC_037644.1 | 6011895 | SNV | 1 | A | G | Heterozygous |
| NC_037644.1 | 6011933 | SNV | 1 | T | A | Homozygous   |
| NC_037644.1 | 6011961 | SNV | 1 | A | T | Heterozygous |
| NC_037644.1 | 6011966 | SNV | 1 | C | T | Homozygous   |
| NC_037644.1 | 6012020 | SNV | 1 | A | G | Heterozygous |
| NC_037644.1 | 6016607 | SNV | 1 | T | C | Heterozygous |
| NC_037644.1 | 6017250 | SNV | 1 | A | G | Heterozygous |
| NC_037644.1 | 6017430 | SNV | 1 | T | C | Heterozygous |
| NC_037644.1 | 6023717 | SNV | 1 | C | T | Homozygous   |
| NC_037644.1 | 6028064 | SNV | 1 | A | G | Homozygous   |
| NC_037644.1 | 6033640 | SNV | 1 | C | T | Homozygous   |
| NC_037644.1 | 6033883 | SNV | 1 | C | T | Homozygous   |
| NC_037644.1 | 6036035 | SNV | 1 | G | A | Homozygous   |
| NC_037644.1 | 6036669 | SNV | 1 | G | A | Homozygous   |
| NC_037644.1 | 6038123 | SNV | 1 | T | C | Homozygous   |
| NC_037644.1 | 6038144 | SNV | 1 | A | G | Homozygous   |
| NC_037644.1 | 6038170 | SNV | 1 | C | T | Homozygous   |
| NC_037644.1 | 6038214 | SNV | 1 | G | A | Homozygous   |
| NC_037644.1 | 6040463 | SNV | 1 | T | A | Homozygous   |
| NC_037644.1 | 6040732 | SNV | 1 | T | C | Homozygous   |
| NC_037644.1 | 6043414 | SNV | 1 | A | T | Homozygous   |
| NC_037644.1 | 6043417 | SNV | 1 | A | T | Homozygous   |
| NC_037644.1 | 6043426 | SNV | 1 | T | G | Homozygous   |
| NC_037644.1 | 6047291 | SNV | 1 | A | G | Homozygous   |

|             |         |     |   |   |   |              |
|-------------|---------|-----|---|---|---|--------------|
| NC_037644.1 | 6047305 | SNV | 1 | G | T | Homozygous   |
| NC_037644.1 | 6047310 | SNV | 1 | A | T | Homozygous   |
| NC_037644.1 | 6047335 | SNV | 1 | A | C | Homozygous   |
| NC_037644.1 | 6047342 | SNV | 1 | T | A | Homozygous   |
| NC_037644.1 | 6047524 | SNV | 1 | C | T | Heterozygous |
| NC_037644.1 | 6047527 | SNV | 1 | A | G | Heterozygous |
| NC_037644.1 | 6047529 | SNV | 1 | T | G | Heterozygous |
| NC_037644.1 | 6047561 | SNV | 1 | A | G | Heterozygous |
| NC_037644.1 | 6047563 | SNV | 1 | T | G | Heterozygous |
| NC_037644.1 | 6047692 | SNV | 1 | A | C | Heterozygous |
| NC_037644.1 | 6049065 | SNV | 1 | A | G | Homozygous   |
| NC_037644.1 | 6049631 | SNV | 1 | T | C | Homozygous   |
| NC_037644.1 | 6049670 | SNV | 1 | C | A | Homozygous   |
| NC_037644.1 | 6049851 | SNV | 1 | G | A | Heterozygous |
| NC_037644.1 | 6108429 | SNV | 1 | T | A | Heterozygous |
| NC_037644.1 | 6108435 | SNV | 1 | A | T | Heterozygous |
| NC_037644.1 | 6108779 | SNV | 1 | T | G | Homozygous   |
| NC_037644.1 | 6108787 | SNV | 1 | A | T | Homozygous   |
| NC_037644.1 | 6167586 | SNV | 1 | A | G | Homozygous   |
| NC_037644.1 | 6168795 | SNV | 1 | T | A | Homozygous   |
| NC_037644.1 | 6168801 | SNV | 1 | A | T | Homozygous   |
| NC_037644.1 | 6168804 | SNV | 1 | A | T | Homozygous   |
| NC_037644.1 | 6168811 | SNV | 1 | T | A | Heterozygous |
| NC_037644.1 | 6168813 | SNV | 1 | T | A | Homozygous   |
| NC_037644.1 | 6176516 | SNV | 1 | A | C | Heterozygous |
| NC_037644.1 | 6176520 | SNV | 1 | A | T | Heterozygous |
| NC_037644.1 | 6176526 | SNV | 1 | A | T | Heterozygous |
| NC_037644.1 | 6176581 | SNV | 1 | A | T | Heterozygous |
| NC_037644.1 | 6189833 | SNV | 1 | A | T | Homozygous   |
| NC_037644.1 | 6189845 | SNV | 1 | A | C | Homozygous   |
| NC_037644.1 | 6189876 | SNV | 1 | A | C | Homozygous   |
| NC_037644.1 | 6189887 | SNV | 1 | T | A | Homozygous   |
| NC_037644.1 | 6189892 | SNV | 1 | A | T | Homozygous   |
| NC_037644.1 | 6192686 | SNV | 1 | T | C | Homozygous   |
| NC_037644.1 | 6192691 | SNV | 1 | G | A | Homozygous   |
| NC_037644.1 | 6192715 | SNV | 1 | T | G | Homozygous   |
| NC_037644.1 | 6192721 | SNV | 1 | G | A | Homozygous   |
| NC_037644.1 | 6192860 | SNV | 1 | T | A | Homozygous   |
| NC_037644.1 | 6192886 | SNV | 1 | G | A | Homozygous   |
| NC_037644.1 | 6192893 | SNV | 1 | T | A | Homozygous   |
| NC_037644.1 | 6192898 | SNV | 1 | G | A | Homozygous   |
| NC_037644.1 | 6196450 | SNV | 1 | G | A | Heterozygous |
| NC_037644.1 | 6196504 | SNV | 1 | T | A | Heterozygous |
| NC_037644.1 | 6196511 | SNV | 1 | T | C | Homozygous   |
| NC_037644.1 | 6209686 | SNV | 1 | T | C | Homozygous   |
| NC_037644.1 | 6213098 | SNV | 1 | T | A | Homozygous   |
| NC_037644.1 | 6216757 | SNV | 1 | T | C | Homozygous   |
| NC_037644.1 | 6216769 | SNV | 1 | A | C | Homozygous   |
| NC_037644.1 | 6216781 | SNV | 1 | T | A | Homozygous   |
| NC_037644.1 | 6216783 | SNV | 1 | T | C | Homozygous   |
| NC_037644.1 | 6216788 | SNV | 1 | T | A | Homozygous   |

|             |         |     |   |   |   |              |
|-------------|---------|-----|---|---|---|--------------|
| NC_037644.1 | 6216791 | SNV | 1 | T | A | Homozygous   |
| NC_037644.1 | 6216797 | SNV | 1 | T | G | Homozygous   |
| NC_037644.1 | 6223809 | SNV | 1 | A | T | Homozygous   |
| NC_037644.1 | 6223845 | SNV | 1 | A | T | Homozygous   |
| NC_037644.1 | 6223854 | SNV | 1 | A | T | Homozygous   |
| NC_037644.1 | 6223857 | SNV | 1 | A | T | Homozygous   |
| NC_037644.1 | 6223863 | SNV | 1 | A | C | Homozygous   |
| NC_037644.1 | 6237299 | SNV | 1 | A | T | Homozygous   |
| NC_037644.1 | 6247180 | SNV | 1 | T | A | Homozygous   |
| NC_037644.1 | 6247189 | SNV | 1 | T | A | Homozygous   |
| NC_037644.1 | 6247196 | SNV | 1 | A | G | Homozygous   |
| NC_037644.1 | 6247200 | SNV | 1 | T | A | Homozygous   |
| NC_037644.1 | 6253817 | SNV | 1 | G | A | Homozygous   |
| NC_037644.1 | 6253831 | SNV | 1 | A | T | Homozygous   |
| NC_037644.1 | 6253851 | SNV | 1 | A | G | Homozygous   |
| NC_037644.1 | 6274380 | SNV | 1 | A | C | Homozygous   |
| NC_037644.1 | 6274393 | SNV | 1 | T | C | Homozygous   |
| NC_037644.1 | 6281885 | SNV | 1 | A | G | Homozygous   |
| NC_037644.1 | 6281889 | SNV | 1 | G | A | Homozygous   |
| NC_037644.1 | 6281920 | SNV | 1 | T | A | Homozygous   |
| NC_037644.1 | 6282008 | SNV | 1 | C | G | Homozygous   |
| NC_037644.1 | 6282011 | SNV | 1 | T | A | Homozygous   |
| NC_037644.1 | 6282037 | SNV | 1 | T | C | Homozygous   |
| NC_037644.1 | 6308011 | SNV | 1 | A | G | Homozygous   |
| NC_037644.1 | 6317183 | SNV | 1 | A | T | Homozygous   |
| NC_037644.1 | 6317221 | SNV | 1 | A | T | Homozygous   |
| NC_037644.1 | 6317223 | SNV | 1 | T | C | Homozygous   |
| NC_037644.1 | 6319817 | SNV | 1 | C | A | Heterozygous |
| NC_037644.1 | 6332021 | SNV | 1 | A | T | Heterozygous |
| NC_037644.1 | 6332077 | SNV | 1 | T | A | Homozygous   |
| NC_037644.1 | 6335194 | SNV | 1 | A | T | Homozygous   |
| NC_037644.1 | 6335197 | SNV | 1 | T | A | Homozygous   |
| NC_037644.1 | 6335200 | SNV | 1 | A | T | Homozygous   |
| NC_037644.1 | 6335231 | SNV | 1 | A | G | Homozygous   |
| NC_037644.1 | 6335241 | SNV | 1 | T | A | Homozygous   |
| NC_037644.1 | 6335243 | SNV | 1 | A | G | Homozygous   |
| NC_037644.1 | 6341483 | SNV | 1 | A | C | Homozygous   |
| NC_037644.1 | 6341518 | SNV | 1 | T | G | Homozygous   |
| NC_037644.1 | 6341520 | SNV | 1 | T | G | Homozygous   |
| NC_037644.1 | 6341525 | SNV | 1 | A | C | Homozygous   |
| NC_037644.1 | 6341541 | SNV | 1 | A | C | Heterozygous |
| NC_037644.1 | 6341582 | SNV | 1 | T | G | Heterozygous |
| NC_037644.1 | 6344089 | SNV | 1 | T | C | Homozygous   |
| NC_037644.1 | 6344109 | SNV | 1 | A | G | Homozygous   |
| NC_037644.1 | 6344123 | SNV | 1 | T | C | Homozygous   |
| NC_037644.1 | 6344127 | SNV | 1 | T | G | Homozygous   |
| NC_037644.1 | 6344133 | SNV | 1 | T | A | Homozygous   |
| NC_037644.1 | 6344136 | SNV | 1 | T | G | Homozygous   |
| NC_037644.1 | 6344141 | SNV | 1 | T | A | Heterozygous |
| NC_037644.1 | 6344143 | SNV | 1 | A | T | Heterozygous |
| NC_037644.1 | 6344148 | SNV | 1 | A | G | Heterozygous |

|             |         |     |   |   |   |              |
|-------------|---------|-----|---|---|---|--------------|
| NC_037644.1 | 6344150 | SNV | 1 | A | G | Heterozygous |
| NC_037644.1 | 6344378 | SNV | 1 | A | G | Homozygous   |
| NC_037644.1 | 6344412 | SNV | 1 | T | A | Homozygous   |
| NC_037644.1 | 6344419 | SNV | 1 | G | A | Homozygous   |
| NC_037644.1 | 6352752 | SNV | 1 | T | G | Homozygous   |
| NC_037644.1 | 6352757 | SNV | 1 | T | A | Heterozygous |
| NC_037644.1 | 6352757 | SNV | 1 | T | G | Heterozygous |
| NC_037644.1 | 6352762 | SNV | 1 | T | G | Heterozygous |
| NC_037644.1 | 6352772 | SNV | 1 | T | G | Heterozygous |
| NC_037644.1 | 6352777 | SNV | 1 | T | G | Homozygous   |
| NC_037644.1 | 6352780 | SNV | 1 | C | T | Homozygous   |
| NC_037644.1 | 6352782 | SNV | 1 | T | G | Heterozygous |
| NC_037644.1 | 6352807 | SNV | 1 | T | G | Heterozygous |
| NC_037644.1 | 6352817 | SNV | 1 | T | G | Homozygous   |
| NC_037644.1 | 6352822 | SNV | 1 | T | G | Homozygous   |
| NC_037644.1 | 6371214 | SNV | 1 | C | A | Heterozygous |
| NC_037644.1 | 6371216 | SNV | 1 | A | G | Heterozygous |
| NC_037644.1 | 6371221 | SNV | 1 | A | G | Heterozygous |
| NC_037644.1 | 6371225 | SNV | 1 | A | T | Heterozygous |
| NC_037644.1 | 6371242 | SNV | 1 | A | G | Heterozygous |
| NC_037644.1 | 6371244 | SNV | 1 | C | T | Heterozygous |
| NC_037644.1 | 6371507 | SNV | 1 | A | G | Homozygous   |
| NC_037644.1 | 6371676 | SNV | 1 | A | G | Heterozygous |
| NC_037644.1 | 6371684 | SNV | 1 | A | G | Heterozygous |
| NC_037644.1 | 6371700 | SNV | 1 | G | A | Homozygous   |
| NC_037644.1 | 6371735 | SNV | 1 | A | G | Homozygous   |
| NC_037644.1 | 6371748 | SNV | 1 | G | A | Homozygous   |
| NC_037644.1 | 6371751 | SNV | 1 | G | C | Homozygous   |
| NC_037644.1 | 6371787 | SNV | 1 | G | A | Heterozygous |
| NC_037644.1 | 6371806 | SNV | 1 | C | A | Homozygous   |
| NC_037644.1 | 6371814 | SNV | 1 | A | G | Homozygous   |
| NC_037644.1 | 6371817 | SNV | 1 | G | A | Homozygous   |
| NC_037644.1 | 6371888 | SNV | 1 | G | A | Homozygous   |
| NC_037644.1 | 6371908 | SNV | 1 | C | T | Homozygous   |
| NC_037644.1 | 6371917 | SNV | 1 | T | C | Homozygous   |
| NC_037644.1 | 6371925 | SNV | 1 | G | A | Homozygous   |
| NC_037644.1 | 6371940 | SNV | 1 | T | C | Homozygous   |
| NC_037644.1 | 6371948 | SNV | 1 | A | G | Heterozygous |
| NC_037644.1 | 6371959 | SNV | 1 | G | A | Heterozygous |
| NC_037644.1 | 6375750 | SNV | 1 | G | A | Homozygous   |
| NC_037644.1 | 6375771 | SNV | 1 | T | A | Homozygous   |
| NC_037644.1 | 6375782 | SNV | 1 | A | T | Homozygous   |
| NC_037644.1 | 6375793 | SNV | 1 | C | T | Homozygous   |
| NC_037644.1 | 6375856 | SNV | 1 | T | C | Homozygous   |
| NC_037644.1 | 6375861 | SNV | 1 | T | C | Homozygous   |
| NC_037644.1 | 6375865 | SNV | 1 | T | C | Homozygous   |
| NC_037644.1 | 6376223 | SNV | 1 | T | A | Homozygous   |
| NC_037644.1 | 6376256 | SNV | 1 | A | G | Homozygous   |
| NC_037644.1 | 6376261 | SNV | 1 | T | C | Homozygous   |
| NC_037644.1 | 6376265 | SNV | 1 | T | C | Heterozygous |
| NC_037644.1 | 6378957 | SNV | 1 | A | G | Homozygous   |

|             |         |     |   |   |   |              |
|-------------|---------|-----|---|---|---|--------------|
| NC_037644.1 | 6378962 | SNV | 1 | A | T | Homozygous   |
| NC_037644.1 | 6378985 | SNV | 1 | T | A | Homozygous   |
| NC_037644.1 | 6378994 | SNV | 1 | T | G | Homozygous   |
| NC_037644.1 | 6383485 | SNV | 1 | T | A | Homozygous   |
| NC_037644.1 | 6383520 | SNV | 1 | T | A | Heterozygous |
| NC_037644.1 | 6383525 | SNV | 1 | A | T | Heterozygous |
| NC_037644.1 | 6383530 | SNV | 1 | T | A | Heterozygous |
| NC_037644.1 | 6383547 | SNV | 1 | A | T | Heterozygous |
| NC_037644.1 | 6383551 | SNV | 1 | C | A | Homozygous   |
| NC_037644.1 | 6383553 | SNV | 1 | A | G | Heterozygous |
| NC_037644.1 | 6395709 | SNV | 1 | T | G | Heterozygous |
| NC_037644.1 | 6395727 | SNV | 1 | T | C | Homozygous   |
| NC_037644.1 | 6395729 | SNV | 1 | C | A | Homozygous   |
| NC_037644.1 | 6395746 | SNV | 1 | A | G | Homozygous   |
| NC_037644.1 | 6413960 | SNV | 1 | T | A | Heterozygous |
| NC_037644.1 | 6413964 | SNV | 1 | T | A | Heterozygous |
| NC_037644.1 | 6413986 | SNV | 1 | A | T | Heterozygous |
| NC_037644.1 | 6413988 | SNV | 1 | A | T | Heterozygous |
| NC_037644.1 | 6414003 | SNV | 1 | A | T | Homozygous   |
| NC_037644.1 | 6414262 | SNV | 1 | T | A | Homozygous   |
| NC_037644.1 | 6414266 | SNV | 1 | A | T | Homozygous   |
| NC_037644.1 | 6414269 | SNV | 1 | T | A | Homozygous   |
| NC_037644.1 | 6414276 | SNV | 1 | G | A | Homozygous   |
| NC_037644.1 | 6414283 | SNV | 1 | T | C | Homozygous   |
| NC_037644.1 | 6414299 | SNV | 1 | A | T | Homozygous   |
| NC_037644.1 | 6414303 | SNV | 1 | T | A | Homozygous   |
| NC_037644.1 | 6414310 | SNV | 1 | T | A | Homozygous   |
| NC_037644.1 | 6414337 | SNV | 1 | A | G | Homozygous   |
| NC_037644.1 | 6419532 | SNV | 1 | A | G | Heterozygous |
| NC_037644.1 | 6419537 | SNV | 1 | A | T | Homozygous   |
| NC_037644.1 | 6419540 | SNV | 1 | G | A | Homozygous   |
| NC_037644.1 | 6428487 | SNV | 1 | T | A | Homozygous   |
| NC_037644.1 | 6430459 | SNV | 1 | C | T | Homozygous   |
| NC_037644.1 | 6430464 | SNV | 1 | A | C | Homozygous   |
| NC_037644.1 | 6430476 | SNV | 1 | T | C | Homozygous   |
| NC_037644.1 | 6430485 | SNV | 1 | C | T | Homozygous   |
| NC_037644.1 | 6430506 | SNV | 1 | C | T | Homozygous   |
| NC_037644.1 | 6430508 | SNV | 1 | T | G | Homozygous   |
| NC_037644.1 | 6463992 | SNV | 1 | A | G | Homozygous   |
| NC_037644.1 | 6463994 | SNV | 1 | T | C | Homozygous   |
| NC_037644.1 | 6464037 | SNV | 1 | A | G | Homozygous   |
| NC_037644.1 | 6464042 | SNV | 1 | T | C | Homozygous   |
| NC_037644.1 | 6464054 | SNV | 1 | G | A | Homozygous   |
| NC_037644.1 | 6464060 | SNV | 1 | T | C | Homozygous   |
| NC_037644.1 | 6464067 | SNV | 1 | G | A | Homozygous   |
| NC_037644.1 | 6467028 | SNV | 1 | G | C | Homozygous   |
| NC_037644.1 | 6467037 | SNV | 1 | A | G | Homozygous   |
| NC_037644.1 | 6467046 | SNV | 1 | T | A | Homozygous   |
| NC_037644.1 | 6467073 | SNV | 1 | C | T | Homozygous   |
| NC_037644.1 | 6467695 | SNV | 1 | T | G | Homozygous   |
| NC_037644.1 | 6467701 | SNV | 1 | A | T | Homozygous   |



|             |         |     |   |   |   |              |
|-------------|---------|-----|---|---|---|--------------|
| NC_037644.1 | 6467715 | SNV | 1 | T | A | Homozygous   |
| NC_037644.1 | 6467735 | SNV | 1 | T | C | Homozygous   |
| NC_037644.1 | 6467738 | SNV | 1 | A | T | Homozygous   |
| NC_037644.1 | 6467745 | SNV | 1 | T | A | Homozygous   |
| NC_037644.1 | 6467750 | SNV | 1 | A | T | Homozygous   |
| NC_037644.1 | 6467753 | SNV | 1 | T | A | Homozygous   |
| NC_037644.1 | 6478786 | SNV | 1 | T | A | Heterozygous |
| NC_037644.1 | 6478788 | SNV | 1 | T | A | Heterozygous |
| NC_037644.1 | 6478791 | SNV | 1 | A | T | Heterozygous |
| NC_037644.1 | 6478793 | SNV | 1 | A | T | Heterozygous |
| NC_037644.1 | 6478802 | SNV | 1 | T | A | Heterozygous |
| NC_037644.1 | 6478804 | SNV | 1 | T | A | Heterozygous |
| NC_037644.1 | 6754460 | SNV | 1 | C | A | Heterozygous |
| NC_037644.1 | 6754513 | SNV | 1 | C | A | Heterozygous |
| NC_037644.1 | 6759908 | SNV | 1 | C | G | Homozygous   |
| NC_037644.1 | 6759929 | SNV | 1 | T | A | Homozygous   |
| NC_037644.1 | 6760271 | SNV | 1 | A | T | Heterozygous |
| NC_037644.1 | 6760273 | SNV | 1 | A | T | Heterozygous |
| NC_037644.1 | 6760275 | SNV | 1 | A | T | Heterozygous |
| NC_037644.1 | 6760285 | SNV | 1 | A | T | Heterozygous |
| NC_037644.1 | 6760289 | SNV | 1 | A | G | Heterozygous |
| NC_037644.1 | 6762207 | SNV | 1 | T | A | Homozygous   |
| NC_037644.1 | 6762214 | SNV | 1 | G | A | Homozygous   |
| NC_037644.1 | 6762217 | SNV | 1 | T | G | Homozygous   |
| NC_037644.1 | 6762220 | SNV | 1 | T | A | Homozygous   |
| NC_037644.1 | 6762223 | SNV | 1 | T | A | Homozygous   |
| NC_037644.1 | 7131789 | SNV | 1 | A | C | Homozygous   |
| NC_037644.1 | 7131792 | SNV | 1 | G | T | Homozygous   |
| NC_037644.1 | 7131803 | SNV | 1 | A | T | Homozygous   |
| NC_037644.1 | 7131808 | SNV | 1 | C | T | Homozygous   |
| NC_037644.1 | 7131813 | SNV | 1 | A | T | Homozygous   |
| NC_037644.1 | 7131816 | SNV | 1 | C | T | Homozygous   |
| NC_037644.1 | 7131818 | SNV | 1 | A | C | Homozygous   |
| NC_037644.1 | 7139073 | SNV | 1 | T | G | Homozygous   |
| NC_037644.1 | 7139086 | SNV | 1 | G | T | Homozygous   |
| NC_037644.1 | 7139089 | SNV | 1 | A | G | Homozygous   |
| NC_037644.1 | 7139096 | SNV | 1 | T | A | Homozygous   |
| NC_037644.1 | 7139100 | SNV | 1 | T | A | Homozygous   |
| NC_037644.1 | 7139103 | SNV | 1 | G | C | Homozygous   |
| NC_037644.1 | 7141322 | SNV | 1 | T | G | Homozygous   |
| NC_037644.1 | 7142210 | SNV | 1 | G | A | Homozygous   |
| NC_037644.1 | 7142214 | SNV | 1 | T | A | Homozygous   |
| NC_037644.1 | 7142224 | SNV | 1 | T | A | Homozygous   |
| NC_037644.1 | 7142226 | SNV | 1 | A | T | Homozygous   |
| NC_037644.1 | 7142228 | SNV | 1 | T | G | Homozygous   |
| NC_037644.1 | 7142233 | SNV | 1 | T | A | Homozygous   |
| NC_037644.1 | 7160488 | SNV | 1 | T | C | Homozygous   |
| NC_037644.1 | 7160490 | SNV | 1 | T | A | Homozygous   |
| NC_037644.1 | 7160494 | SNV | 1 | A | G | Homozygous   |
| NC_037644.1 | 7160496 | SNV | 1 | T | A | Homozygous   |
| NC_037644.1 | 7160508 | SNV | 1 | A | T | Homozygous   |

|             |         |     |   |   |   |              |
|-------------|---------|-----|---|---|---|--------------|
| NC_037644.1 | 7160514 | SNV | 1 | C | T | Homozygous   |
| NC_037644.1 | 7163746 | SNV | 1 | G | A | Homozygous   |
| NC_037644.1 | 7163834 | SNV | 1 | A | C | Homozygous   |
| NC_037644.1 | 7166364 | SNV | 1 | T | C | Homozygous   |
| NC_037644.1 | 7166622 | SNV | 1 | A | G | Homozygous   |
| NC_037644.1 | 7166624 | SNV | 1 | A | C | Homozygous   |
| NC_037644.1 | 7166628 | SNV | 1 | G | A | Homozygous   |
| NC_037644.1 | 7166633 | SNV | 1 | G | A | Homozygous   |
| NC_037644.1 | 7166642 | SNV | 1 | A | C | Homozygous   |
| NC_037644.1 | 7166667 | SNV | 1 | G | A | Homozygous   |
| NC_037644.1 | 7166673 | SNV | 1 | G | A | Heterozygous |
| NC_037644.1 | 7166679 | SNV | 1 | G | A | Heterozygous |
| NC_037644.1 | 7166684 | SNV | 1 | A | G | Homozygous   |
| NC_037644.1 | 7166695 | SNV | 1 | G | A | Heterozygous |
| NC_037644.1 | 7166698 | SNV | 1 | A | G | Heterozygous |
| NC_037644.1 | 7166700 | SNV | 1 | A | G | Heterozygous |
| NC_037644.1 | 7166706 | SNV | 1 | G | A | Heterozygous |
| NC_037644.1 | 7166711 | SNV | 1 | T | A | Heterozygous |
| NC_037644.1 | 7194263 | SNV | 1 | T | A | Homozygous   |
| NC_037644.1 | 7194271 | SNV | 1 | T | C | Homozygous   |
| NC_037644.1 | 7194285 | SNV | 1 | T | A | Homozygous   |
| NC_037644.1 | 7194290 | SNV | 1 | A | G | Homozygous   |
| NC_037644.1 | 7206916 | SNV | 1 | T | A | Heterozygous |
| NC_037644.1 | 7206920 | SNV | 1 | A | T | Homozygous   |
| NC_037644.1 | 7206926 | SNV | 1 | A | G | Homozygous   |
| NC_037644.1 | 7206932 | SNV | 1 | A | T | Homozygous   |
| NC_037644.1 | 7206934 | SNV | 1 | T | C | Homozygous   |
| NC_037644.1 | 7206937 | SNV | 1 | G | A | Homozygous   |
| NC_037644.1 | 7215593 | SNV | 1 | T | A | Homozygous   |
| NC_037644.1 | 7215596 | SNV | 1 | G | C | Homozygous   |
| NC_037644.1 | 7215617 | SNV | 1 | A | T | Homozygous   |
| NC_037644.1 | 7215621 | SNV | 1 | T | G | Homozygous   |
| NC_037644.1 | 7215627 | SNV | 1 | T | G | Homozygous   |
| NC_037644.1 | 7226519 | SNV | 1 | A | T | Homozygous   |
| NC_037644.1 | 7226554 | SNV | 1 | A | C | Homozygous   |
| NC_037644.1 | 7226567 | SNV | 1 | C | T | Homozygous   |
| NC_037644.1 | 7228299 | SNV | 1 | T | A | Homozygous   |
| NC_037644.1 | 7228332 | SNV | 1 | G | A | Heterozygous |
| NC_037644.1 | 7228337 | SNV | 1 | A | T | Heterozygous |
| NC_037644.1 | 7228340 | SNV | 1 | G | A | Heterozygous |
| NC_037644.1 | 7230480 | SNV | 1 | T | C | Homozygous   |
| NC_037644.1 | 7230505 | SNV | 1 | T | C | Homozygous   |
| NC_037644.1 | 7230531 | SNV | 1 | G | A | Homozygous   |
| NC_037644.1 | 7232449 | SNV | 1 | T | C | Heterozygous |
| NC_037644.1 | 7232456 | SNV | 1 | A | C | Heterozygous |
| NC_037644.1 | 7232460 | SNV | 1 | A | G | Heterozygous |
| NC_037644.1 | 7232464 | SNV | 1 | A | G | Heterozygous |
| NC_037644.1 | 7232464 | SNV | 1 | A | T | Heterozygous |
| NC_037644.1 | 7232466 | SNV | 1 | A | G | Homozygous   |
| NC_037644.1 | 7232472 | SNV | 1 | A | G | Heterozygous |
| NC_037644.1 | 7232476 | SNV | 1 | A | G | Heterozygous |

|             |         |     |   |   |   |              |
|-------------|---------|-----|---|---|---|--------------|
| NC_037644.1 | 7232479 | SNV | 1 | T | G | Heterozygous |
| NC_037644.1 | 7232482 | SNV | 1 | A | G | Heterozygous |
| NC_037644.1 | 7249909 | SNV | 1 | A | T | Homozygous   |
| NC_037644.1 | 7249940 | SNV | 1 | G | T | Homozygous   |
| NC_037644.1 | 7249942 | SNV | 1 | T | A | Homozygous   |
| NC_037644.1 | 7249944 | SNV | 1 | T | A | Homozygous   |
| NC_037644.1 | 7252192 | SNV | 1 | G | A | Heterozygous |
| NC_037644.1 | 7252225 | SNV | 1 | T | A | Heterozygous |
| NC_037644.1 | 7252227 | SNV | 1 | G | A | Homozygous   |
| NC_037644.1 | 7262427 | SNV | 1 | A | G | Heterozygous |
| NC_037644.1 | 7276035 | SNV | 1 | T | A | Homozygous   |
| NC_037644.1 | 7276042 | SNV | 1 | T | C | Homozygous   |
| NC_037644.1 | 7276065 | SNV | 1 | T | C | Homozygous   |
| NC_037644.1 | 7277960 | SNV | 1 | T | C | Homozygous   |
| NC_037644.1 | 7277973 | SNV | 1 | G | A | Homozygous   |
| NC_037644.1 | 7277976 | SNV | 1 | C | G | Homozygous   |
| NC_037644.1 | 7292172 | SNV | 1 | G | A | Heterozygous |
| NC_037644.1 | 7292774 | SNV | 1 | T | C | Heterozygous |
| NC_037644.1 | 7292777 | SNV | 1 | C | G | Heterozygous |
| NC_037644.1 | 7292785 | SNV | 1 | A | G | Heterozygous |
| NC_037644.1 | 7294194 | SNV | 1 | A | T | Homozygous   |
| NC_037644.1 | 7294201 | SNV | 1 | T | A | Homozygous   |
| NC_037644.1 | 7294207 | SNV | 1 | G | A | Homozygous   |
| NC_037644.1 | 7306107 | SNV | 1 | G | T | Homozygous   |
| NC_037644.1 | 7324431 | SNV | 1 | C | T | Heterozygous |
| NC_037644.1 | 7324645 | SNV | 1 | T | C | Homozygous   |
| NC_037644.1 | 7324729 | SNV | 1 | C | T | Homozygous   |
| NC_037644.1 | 7324958 | SNV | 1 | C | G | Homozygous   |
| NC_037644.1 | 7324972 | SNV | 1 | T | C | Homozygous   |
| NC_037644.1 | 7325068 | SNV | 1 | A | G | Homozygous   |
| NC_037644.1 | 7325088 | SNV | 1 | G | A | Heterozygous |
| NC_037644.1 | 7325090 | SNV | 1 | T | G | Heterozygous |
| NC_037644.1 | 7325119 | SNV | 1 | A | G | Homozygous   |
| NC_037644.1 | 7325124 | SNV | 1 | A | T | Homozygous   |
| NC_037644.1 | 7325235 | SNV | 1 | A | G | Heterozygous |
| NC_037644.1 | 7325301 | SNV | 1 | T | C | Homozygous   |
| NC_037644.1 | 7345898 | SNV | 1 | A | T | Homozygous   |
| NC_037644.1 | 7345905 | SNV | 1 | T | A | Homozygous   |
| NC_037644.1 | 7345911 | SNV | 1 | A | G | Homozygous   |
| NC_037644.1 | 7358837 | SNV | 1 | G | A | Homozygous   |
| NC_037644.1 | 7358858 | SNV | 1 | C | T | Homozygous   |
| NC_037644.1 | 7358873 | SNV | 1 | A | C | Homozygous   |
| NC_037644.1 | 7367030 | SNV | 1 | A | G | Homozygous   |
| NC_037644.1 | 7367056 | SNV | 1 | G | T | Homozygous   |
| NC_037644.1 | 7367062 | SNV | 1 | A | T | Homozygous   |
| NC_037644.1 | 7367064 | SNV | 1 | A | T | Homozygous   |
| NC_037644.1 | 7372865 | SNV | 1 | G | T | Homozygous   |
| NC_037644.1 | 7372902 | SNV | 1 | T | C | Homozygous   |
| NC_037644.1 | 7387219 | SNV | 1 | A | T | Homozygous   |
| NC_037644.1 | 7387232 | SNV | 1 | T | C | Homozygous   |
| NC_037644.1 | 7387234 | SNV | 1 | A | T | Homozygous   |

|             |         |     |   |   |   |              |
|-------------|---------|-----|---|---|---|--------------|
| NC_037644.1 | 7387236 | SNV | 1 | T | A | Homozygous   |
| NC_037644.1 | 7387245 | SNV | 1 | T | C | Homozygous   |
| NC_037644.1 | 7398374 | SNV | 1 | G | A | Heterozygous |
| NC_037644.1 | 7398737 | SNV | 1 | A | G | Homozygous   |
| NC_037644.1 | 7398781 | SNV | 1 | A | G | Homozygous   |
| NC_037644.1 | 7398817 | SNV | 1 | T | C | Homozygous   |
| NC_037644.1 | 7398836 | SNV | 1 | A | G | Homozygous   |
| NC_037644.1 | 7400627 | SNV | 1 | A | G | Homozygous   |
| NC_037644.1 | 7401114 | SNV | 1 | G | A | Homozygous   |
| NC_037644.1 | 7401251 | SNV | 1 | A | T | Homozygous   |
| NC_037644.1 | 7401253 | SNV | 1 | A | T | Homozygous   |
| NC_037644.1 | 7401261 | SNV | 1 | T | A | Heterozygous |
| NC_037644.1 | 7401264 | SNV | 1 | T | A | Heterozygous |
| NC_037644.1 | 7401272 | SNV | 1 | T | A | Heterozygous |
| NC_037644.1 | 7401274 | SNV | 1 | T | A | Heterozygous |
| NC_037644.1 | 7401317 | SNV | 1 | A | G | Homozygous   |
| NC_037644.1 | 7404395 | SNV | 1 | A | T | Heterozygous |
| NC_037644.1 | 7404812 | SNV | 1 | T | C | Homozygous   |
| NC_037644.1 | 7404816 | SNV | 1 | A | G | Homozygous   |
| NC_037644.1 | 7404979 | SNV | 1 | A | G | Homozygous   |
| NC_037644.1 | 7404983 | SNV | 1 | A | G | Heterozygous |
| NC_037644.1 | 7404991 | SNV | 1 | A | G | Heterozygous |
| NC_037644.1 | 7405097 | SNV | 1 | A | G | Homozygous   |
| NC_037644.1 | 7405938 | SNV | 1 | A | T | Homozygous   |
| NC_037644.1 | 7405941 | SNV | 1 | T | A | Homozygous   |
| NC_037644.1 | 7405951 | SNV | 1 | G | A | Heterozygous |
| NC_037644.1 | 7409928 | SNV | 1 | T | C | Homozygous   |
| NC_037644.1 | 7427663 | SNV | 1 | C | T | Homozygous   |
| NC_037644.1 | 7427666 | SNV | 1 | A | G | Homozygous   |
| NC_037644.1 | 7427668 | SNV | 1 | C | G | Homozygous   |
| NC_037644.1 | 7427679 | SNV | 1 | T | C | Homozygous   |
| NC_037644.1 | 7427681 | SNV | 1 | A | G | Homozygous   |
| NC_037644.1 | 7427690 | SNV | 1 | C | T | Homozygous   |
| NC_037644.1 | 7427701 | SNV | 1 | G | A | Homozygous   |
| NC_037644.1 | 7427720 | SNV | 1 | C | T | Homozygous   |
| NC_037644.1 | 7427724 | SNV | 1 | T | C | Homozygous   |
| NC_037644.1 | 7427749 | SNV | 1 | T | C | Homozygous   |
| NC_037644.1 | 7427756 | SNV | 1 | A | G | Homozygous   |
| NC_037644.1 | 7427758 | SNV | 1 | G | A | Homozygous   |
| NC_037644.1 | 7427774 | SNV | 1 | T | C | Homozygous   |
| NC_037644.1 | 7427785 | SNV | 1 | T | C | Homozygous   |
| NC_037644.1 | 7427787 | SNV | 1 | C | G | Homozygous   |
| NC_037644.1 | 7427793 | SNV | 1 | G | C | Homozygous   |
| NC_037644.1 | 7427798 | SNV | 1 | G | A | Homozygous   |
| NC_037644.1 | 7427810 | SNV | 1 | G | A | Homozygous   |
| NC_037644.1 | 7447727 | SNV | 1 | T | A | Homozygous   |
| NC_037644.1 | 7447729 | SNV | 1 | C | A | Homozygous   |
| NC_037644.1 | 7447734 | SNV | 1 | G | C | Homozygous   |
| NC_037644.1 | 7471075 | SNV | 1 | C | A | Homozygous   |
| NC_037644.1 | 7471111 | SNV | 1 | T | G | Homozygous   |
| NC_037644.1 | 7471116 | SNV | 1 | A | T | Heterozygous |

|             |         |     |   |   |   |              |
|-------------|---------|-----|---|---|---|--------------|
| NC_037644.1 | 7491592 | SNV | 1 | G | A | Heterozygous |
| NC_037644.1 | 7491765 | SNV | 1 | T | C | Heterozygous |
| NC_037644.1 | 7491768 | SNV | 1 | G | A | Homozygous   |
| NC_037644.1 | 7491774 | SNV | 1 | T | A | Heterozygous |
| NC_037644.1 | 7491782 | SNV | 1 | A | T | Heterozygous |
| NC_037644.1 | 7491787 | SNV | 1 | G | A | Heterozygous |
| NC_037644.1 | 7500606 | SNV | 1 | C | T | Homozygous   |
| NC_037644.1 | 7500612 | SNV | 1 | T | C | Homozygous   |
| NC_037644.1 | 7500619 | SNV | 1 | A | T | Homozygous   |
| NC_037644.1 | 7500624 | SNV | 1 | A | T | Homozygous   |
| NC_037644.1 | 7500633 | SNV | 1 | T | C | Homozygous   |
| NC_037644.1 | 7500639 | SNV | 1 | A | G | Homozygous   |
| NC_037644.1 | 7501216 | SNV | 1 | A | G | Homozygous   |
| NC_037644.1 | 7501221 | SNV | 1 | T | C | Homozygous   |
| NC_037644.1 | 7501230 | SNV | 1 | A | G | Homozygous   |
| NC_037644.1 | 7501237 | SNV | 1 | C | T | Homozygous   |
| NC_037644.1 | 7501258 | SNV | 1 | T | A | Homozygous   |
| NC_037644.1 | 7501261 | SNV | 1 | A | G | Homozygous   |
| NC_037644.1 | 7501308 | SNV | 1 | G | A | Heterozygous |
| NC_037644.1 | 7501811 | SNV | 1 | A | C | Homozygous   |
| NC_037644.1 | 7501814 | SNV | 1 | C | G | Homozygous   |
| NC_037644.1 | 7501820 | SNV | 1 | G | A | Homozygous   |
| NC_037644.1 | 7501829 | SNV | 1 | T | A | Homozygous   |
| NC_037644.1 | 7505875 | SNV | 1 | C | A | Heterozygous |
| NC_037644.1 | 7505892 | SNV | 1 | G | A | Heterozygous |
| NC_037644.1 | 7505896 | SNV | 1 | T | A | Heterozygous |
| NC_037644.1 | 7505901 | SNV | 1 | C | T | Heterozygous |
| NC_037644.1 | 7506912 | SNV | 1 | C | A | Heterozygous |
| NC_037644.1 | 7506918 | SNV | 1 | G | T | Heterozygous |
| NC_037644.1 | 7507113 | SNV | 1 | G | A | Heterozygous |
| NC_037644.1 | 7509100 | SNV | 1 | C | T | Heterozygous |
| NC_037644.1 | 7509192 | SNV | 1 | G | A | Heterozygous |
| NC_037644.1 | 7533967 | SNV | 1 | T | G | Heterozygous |
| NC_037644.1 | 7534001 | SNV | 1 | G | A | Heterozygous |
| NC_037644.1 | 7534147 | SNV | 1 | A | G | Homozygous   |
| NC_037644.1 | 7534421 | SNV | 1 | G | A | Heterozygous |
| NC_037644.1 | 7544247 | SNV | 1 | C | T | Homozygous   |
| NC_037644.1 | 7544270 | SNV | 1 | T | G | Homozygous   |
| NC_037644.1 | 7544277 | SNV | 1 | A | T | Homozygous   |
| NC_037644.1 | 7544294 | SNV | 1 | G | A | Homozygous   |
| NC_037644.1 | 7544299 | SNV | 1 | G | T | Homozygous   |
| NC_037644.1 | 7544310 | SNV | 1 | G | A | Homozygous   |
| NC_037644.1 | 7554955 | SNV | 1 | A | G | Homozygous   |
| NC_037644.1 | 7554979 | SNV | 1 | T | G | Homozygous   |
| NC_037644.1 | 7555001 | SNV | 1 | A | G | Heterozygous |
| NC_037644.1 | 7555047 | SNV | 1 | A | G | Homozygous   |
| NC_037644.1 | 7555110 | SNV | 1 | A | G | Homozygous   |
| NC_037644.1 | 7555132 | SNV | 1 | T | C | Homozygous   |
| NC_037644.1 | 7555135 | SNV | 1 | A | T | Homozygous   |
| NC_037644.1 | 7555240 | SNV | 1 | A | G | Homozygous   |
| NC_037644.1 | 7555313 | SNV | 1 | G | A | Heterozygous |

|             |         |     |   |   |   |              |
|-------------|---------|-----|---|---|---|--------------|
| NC_037644.1 | 7555318 | SNV | 1 | C | T | Heterozygous |
| NC_037644.1 | 7555329 | SNV | 1 | C | T | Heterozygous |
| NC_037644.1 | 7555359 | SNV | 1 | C | T | Homozygous   |
| NC_037644.1 | 7555380 | SNV | 1 | T | C | Homozygous   |
| NC_037644.1 | 7555454 | SNV | 1 | T | C | Homozygous   |
| NC_037644.1 | 7555471 | SNV | 1 | C | T | Heterozygous |
| NC_037644.1 | 7555749 | SNV | 1 | T | C | Heterozygous |
| NC_037644.1 | 7557590 | SNV | 1 | A | C | Homozygous   |
| NC_037644.1 | 7557592 | SNV | 1 | A | T | Homozygous   |
| NC_037644.1 | 7557594 | SNV | 1 | A | G | Homozygous   |
| NC_037644.1 | 7569324 | SNV | 1 | C | A | Heterozygous |
| NC_037644.1 | 7569345 | SNV | 1 | C | T | Heterozygous |
| NC_037644.1 | 7569360 | SNV | 1 | C | A | Homozygous   |
| NC_037644.1 | 7580643 | SNV | 1 | T | C | Homozygous   |
| NC_037644.1 | 7580667 | SNV | 1 | T | A | Homozygous   |
| NC_037644.1 | 7580710 | SNV | 1 | G | A | Homozygous   |
| NC_037644.1 | 7580717 | SNV | 1 | G | C | Homozygous   |
| NC_037644.1 | 7580730 | SNV | 1 | A | G | Homozygous   |
| NC_037644.1 | 7580821 | SNV | 1 | G | A | Heterozygous |
| NC_037644.1 | 7580829 | SNV | 1 | T | C | Homozygous   |
| NC_037644.1 | 7580898 | SNV | 1 | A | G | Homozygous   |
| NC_037644.1 | 7580929 | SNV | 1 | T | C | Homozygous   |
| NC_037644.1 | 7581019 | SNV | 1 | G | A | Heterozygous |
| NC_037644.1 | 7617679 | SNV | 1 | T | C | Homozygous   |
| NC_037644.1 | 7617729 | SNV | 1 | A | G | Homozygous   |
| NC_037644.1 | 7618090 | SNV | 1 | A | G | Heterozygous |
| NC_037644.1 | 7618139 | SNV | 1 | C | T | Heterozygous |
| NC_037644.1 | 7620740 | SNV | 1 | A | G | Homozygous   |
| NC_037644.1 | 7620748 | SNV | 1 | C | G | Heterozygous |
| NC_037644.1 | 7620799 | SNV | 1 | C | T | Homozygous   |
| NC_037644.1 | 7620808 | SNV | 1 | C | A | Homozygous   |
| NC_037644.1 | 7620816 | SNV | 1 | C | T | Homozygous   |
| NC_037644.1 | 7620822 | SNV | 1 | A | C | Homozygous   |
| NC_037644.1 | 7623197 | SNV | 1 | T | C | Homozygous   |
| NC_037644.1 | 7623199 | SNV | 1 | G | A | Homozygous   |
| NC_037644.1 | 7623645 | SNV | 1 | T | C | Homozygous   |
| NC_037644.1 | 7623767 | SNV | 1 | A | G | Heterozygous |
| NC_037644.1 | 7623835 | SNV | 1 | G | A | Heterozygous |
| NC_037644.1 | 7623839 | SNV | 1 | T | A | Homozygous   |
| NC_037644.1 | 7623892 | SNV | 1 | T | C | Homozygous   |
| NC_037644.1 | 7623938 | SNV | 1 | T | A | Homozygous   |
| NC_037644.1 | 7624007 | SNV | 1 | C | T | Homozygous   |
| NC_037644.1 | 7624040 | SNV | 1 | A | T | Heterozygous |
| NC_037644.1 | 7624046 | SNV | 1 | A | C | Heterozygous |
| NC_037644.1 | 7624060 | SNV | 1 | C | T | Heterozygous |
| NC_037644.1 | 7624090 | SNV | 1 | A | G | Homozygous   |
| NC_037644.1 | 7624381 | SNV | 1 | C | T | Homozygous   |
| NC_037644.1 | 7624392 | SNV | 1 | T | C | Homozygous   |
| NC_037644.1 | 7624402 | SNV | 1 | T | C | Homozygous   |
| NC_037644.1 | 7632586 | SNV | 1 | A | T | Homozygous   |
| NC_037644.1 | 7632603 | SNV | 1 | A | T | Homozygous   |

|             |         |     |   |   |   |              |
|-------------|---------|-----|---|---|---|--------------|
| NC_037644.1 | 7632610 | SNV | 1 | A | T | Homozygous   |
| NC_037644.1 | 7632631 | SNV | 1 | T | G | Homozygous   |
| NC_037644.1 | 7632635 | SNV | 1 | A | T | Homozygous   |
| NC_037644.1 | 7632638 | SNV | 1 | A | T | Homozygous   |
| NC_037644.1 | 7632641 | SNV | 1 | A | G | Homozygous   |
| NC_037644.1 | 7632661 | SNV | 1 | A | T | Homozygous   |
| NC_037644.1 | 7632663 | SNV | 1 | G | T | Homozygous   |
| NC_037644.1 | 7642207 | SNV | 1 | A | G | Homozygous   |
| NC_037644.1 | 7642262 | SNV | 1 | A | C | Homozygous   |
| NC_037644.1 | 7642273 | SNV | 1 | G | A | Heterozygous |
| NC_037644.1 | 7642281 | SNV | 1 | G | C | Homozygous   |
| NC_037644.1 | 7642345 | SNV | 1 | T | C | Homozygous   |
| NC_037644.1 | 7642636 | SNV | 1 | A | G | Heterozygous |
| NC_037644.1 | 7642640 | SNV | 1 | G | A | Heterozygous |
| NC_037644.1 | 7642650 | SNV | 1 | G | A | Heterozygous |
| NC_037644.1 | 7642748 | SNV | 1 | A | G | Homozygous   |
| NC_037644.1 | 7642768 | SNV | 1 | G | C | Homozygous   |
| NC_037644.1 | 7642801 | SNV | 1 | G | A | Heterozygous |
| NC_037644.1 | 7643123 | SNV | 1 | C | G | Homozygous   |
| NC_037644.1 | 7643230 | SNV | 1 | C | G | Heterozygous |
| NC_037644.1 | 7643261 | SNV | 1 | T | A | Homozygous   |
| NC_037644.1 | 7645119 | SNV | 1 | G | C | Homozygous   |
| NC_037644.1 | 7645165 | SNV | 1 | C | T | Homozygous   |
| NC_037644.1 | 7645393 | SNV | 1 | T | C | Heterozygous |
| NC_037644.1 | 7645403 | SNV | 1 | A | G | Heterozygous |
| NC_037644.1 | 7645408 | SNV | 1 | A | G | Homozygous   |
| NC_037644.1 | 7645417 | SNV | 1 | A | C | Heterozygous |
| NC_037644.1 | 7645442 | SNV | 1 | A | G | Homozygous   |
| NC_037644.1 | 7645454 | SNV | 1 | G | A | Homozygous   |
| NC_037644.1 | 7645459 | SNV | 1 | T | C | Homozygous   |
| NC_037644.1 | 7645461 | SNV | 1 | G | A | Homozygous   |
| NC_037644.1 | 7645471 | SNV | 1 | A | G | Heterozygous |
| NC_037644.1 | 7645481 | SNV | 1 | C | T | Heterozygous |
| NC_037644.1 | 7645522 | SNV | 1 | T | C | Homozygous   |
| NC_037644.1 | 7645526 | SNV | 1 | T | G | Heterozygous |
| NC_037644.1 | 7645547 | SNV | 1 | C | T | Heterozygous |
| NC_037644.1 | 7645555 | SNV | 1 | C | T | Heterozygous |
| NC_037644.1 | 7645596 | SNV | 1 | A | G | Heterozygous |
| NC_037644.1 | 7645691 | SNV | 1 | A | G | Heterozygous |
| NC_037644.1 | 7645814 | SNV | 1 | A | G | Homozygous   |
| NC_037644.1 | 7646162 | SNV | 1 | T | C | Heterozygous |
| NC_037644.1 | 7646197 | SNV | 1 | G | A | Heterozygous |
| NC_037644.1 | 7646231 | SNV | 1 | A | G | Heterozygous |
| NC_037644.1 | 7646468 | SNV | 1 | A | G | Homozygous   |
| NC_037644.1 | 7664753 | SNV | 1 | G | A | Heterozygous |
| NC_037644.1 | 7664766 | SNV | 1 | A | G | Homozygous   |
| NC_037644.1 | 7664806 | SNV | 1 | T | C | Homozygous   |
| NC_037644.1 | 7664811 | SNV | 1 | T | C | Homozygous   |
| NC_037644.1 | 7664819 | SNV | 1 | C | T | Homozygous   |
| NC_037644.1 | 7664864 | SNV | 1 | A | G | Homozygous   |
| NC_037644.1 | 7664877 | SNV | 1 | C | T | Heterozygous |

|             |         |     |   |   |   |              |
|-------------|---------|-----|---|---|---|--------------|
| NC_037644.1 | 7665193 | SNV | 1 | C | A | Heterozygous |
| NC_037644.1 | 7665238 | SNV | 1 | G | A | Heterozygous |
| NC_037644.1 | 7665306 | SNV | 1 | C | A | Heterozygous |
| NC_037644.1 | 7665318 | SNV | 1 | T | A | Homozygous   |
| NC_037644.1 | 7665637 | SNV | 1 | T | C | Homozygous   |
| NC_037644.1 | 7665643 | SNV | 1 | C | G | Homozygous   |
| NC_037644.1 | 7666041 | SNV | 1 | A | G | Homozygous   |
| NC_037644.1 | 7666215 | SNV | 1 | A | T | Heterozygous |
| NC_037644.1 | 7666441 | SNV | 1 | A | G | Homozygous   |
| NC_037644.1 | 7666466 | SNV | 1 | A | T | Homozygous   |
| NC_037644.1 | 7666468 | SNV | 1 | T | G | Homozygous   |
| NC_037644.1 | 7667731 | SNV | 1 | C | A | Homozygous   |
| NC_037644.1 | 7667798 | SNV | 1 | T | C | Heterozygous |
| NC_037644.1 | 7668085 | SNV | 1 | G | A | Heterozygous |
| NC_037644.1 | 7668218 | SNV | 1 | A | G | Homozygous   |
| NC_037644.1 | 7668252 | SNV | 1 | C | T | Heterozygous |
| NC_037644.1 | 7668274 | SNV | 1 | A | G | Heterozygous |
| NC_037644.1 | 7677493 | SNV | 1 | T | A | Heterozygous |
| NC_037644.1 | 7677510 | SNV | 1 | A | T | Homozygous   |
| NC_037644.1 | 7677544 | SNV | 1 | A | C | Homozygous   |
| NC_037644.1 | 7677548 | SNV | 1 | A | G | Homozygous   |
| NC_037644.1 | 7677552 | SNV | 1 | A | T | Homozygous   |
| NC_037644.1 | 7677558 | SNV | 1 | A | G | Homozygous   |
| NC_037644.1 | 7677562 | SNV | 1 | A | G | Homozygous   |
| NC_037644.1 | 7677576 | SNV | 1 | A | T | Homozygous   |
| NC_037644.1 | 7677580 | SNV | 1 | A | T | Homozygous   |
| NC_037644.1 | 7692160 | SNV | 1 | G | C | Heterozygous |
| NC_037644.1 | 7692202 | SNV | 1 | T | C | Homozygous   |
| NC_037644.1 | 7692309 | SNV | 1 | T | C | Heterozygous |
| NC_037644.1 | 7692310 | SNV | 1 | G | A | Heterozygous |
| NC_037644.1 | 7692314 | SNV | 1 | G | A | Homozygous   |
| NC_037644.1 | 7692319 | SNV | 1 | G | A | Heterozygous |
| NC_037644.1 | 7693521 | SNV | 1 | C | T | Homozygous   |
| NC_037644.1 | 7693523 | SNV | 1 | G | A | Homozygous   |
| NC_037644.1 | 7693601 | SNV | 1 | C | T | Homozygous   |
| NC_037644.1 | 7693703 | SNV | 1 | T | C | Heterozygous |
| NC_037644.1 | 7706736 | SNV | 1 | G | A | Homozygous   |
| NC_037644.1 | 7706783 | SNV | 1 | G | A | Homozygous   |
| NC_037644.1 | 7706990 | SNV | 1 | T | C | Homozygous   |
| NC_037644.1 | 7709930 | SNV | 1 | G | A | Homozygous   |
| NC_037644.1 | 7709947 | SNV | 1 | G | A | Heterozygous |
| NC_037644.1 | 7709950 | SNV | 1 | T | C | Homozygous   |
| NC_037644.1 | 7709997 | SNV | 1 | G | C | Heterozygous |
| NC_037644.1 | 7710278 | SNV | 1 | A | G | Homozygous   |
| NC_037644.1 | 7710465 | SNV | 1 | T | A | Heterozygous |
| NC_037644.1 | 7710483 | SNV | 1 | A | G | Homozygous   |
| NC_037644.1 | 7710534 | SNV | 1 | A | G | Homozygous   |
| NC_037644.1 | 7713030 | SNV | 1 | C | G | Heterozygous |
| NC_037644.1 | 7713035 | SNV | 1 | T | C | Heterozygous |
| NC_037644.1 | 7713038 | SNV | 1 | T | C | Heterozygous |
| NC_037644.1 | 7714200 | SNV | 1 | G | C | Homozygous   |



|             |         |     |   |   |   |              |
|-------------|---------|-----|---|---|---|--------------|
| NC_037644.1 | 7714489 | SNV | 1 | A | G | Homozygous   |
| NC_037644.1 | 7714553 | SNV | 1 | A | G | Heterozygous |
| NC_037644.1 | 7714828 | SNV | 1 | G | C | Homozygous   |
| NC_037644.1 | 7714931 | SNV | 1 | T | C | Homozygous   |
| NC_037644.1 | 7715119 | SNV | 1 | G | A | Heterozygous |
| NC_037644.1 | 7715164 | SNV | 1 | C | T | Heterozygous |
| NC_037644.1 | 7725433 | SNV | 1 | A | T | Homozygous   |
| NC_037644.1 | 7725435 | SNV | 1 | A | C | Homozygous   |
| NC_037644.1 | 7725443 | SNV | 1 | A | C | Homozygous   |
| NC_037644.1 | 7733301 | SNV | 1 | T | A | Homozygous   |
| NC_037644.1 | 7733304 | SNV | 1 | T | A | Homozygous   |
| NC_037644.1 | 7733307 | SNV | 1 | T | G | Homozygous   |
| NC_037644.1 | 7733318 | SNV | 1 | T | G | Homozygous   |
| NC_037644.1 | 7733325 | SNV | 1 | G | A | Homozygous   |
| NC_037644.1 | 7733329 | SNV | 1 | T | A | Homozygous   |
| NC_037644.1 | 7738410 | SNV | 1 | T | C | Homozygous   |
| NC_037644.1 | 7741569 | SNV | 1 | A | G | Heterozygous |
| NC_037644.1 | 7741601 | SNV | 1 | G | A | Heterozygous |
| NC_037644.1 | 7741606 | SNV | 1 | A | G | Heterozygous |
| NC_037644.1 | 7741646 | SNV | 1 | C | G | Homozygous   |
| NC_037644.1 | 7758305 | SNV | 1 | G | A | Homozygous   |
| NC_037644.1 | 7758316 | SNV | 1 | A | G | Homozygous   |
| NC_037644.1 | 7758334 | SNV | 1 | T | C | Heterozygous |
| NC_037644.1 | 7758336 | SNV | 1 | G | A | Heterozygous |
| NC_037644.1 | 7758341 | SNV | 1 | T | C | Homozygous   |
| NC_037644.1 | 7758347 | SNV | 1 | A | G | Heterozygous |
| NC_037644.1 | 7758357 | SNV | 1 | T | A | Homozygous   |
| NC_037644.1 | 7758515 | SNV | 1 | A | G | Heterozygous |
| NC_037644.1 | 7758524 | SNV | 1 | G | A | Homozygous   |
| NC_037644.1 | 7758612 | SNV | 1 | G | A | Homozygous   |
| NC_037644.1 | 7758711 | SNV | 1 | G | C | Homozygous   |
| NC_037644.1 | 7758820 | SNV | 1 | C | G | Homozygous   |
| NC_037644.1 | 7759886 | SNV | 1 | A | T | Heterozygous |
| NC_037644.1 | 7759986 | SNV | 1 | A | G | Heterozygous |
| NC_037644.1 | 7759991 | SNV | 1 | G | A | Heterozygous |
| NC_037644.1 | 7760009 | SNV | 1 | G | A | Homozygous   |
| NC_037644.1 | 7760025 | SNV | 1 | C | T | Heterozygous |
| NC_037644.1 | 7760080 | SNV | 1 | C | A | Heterozygous |
| NC_037644.1 | 7760087 | SNV | 1 | T | C | Homozygous   |
| NC_037644.1 | 7760126 | SNV | 1 | T | C | Homozygous   |
| NC_037644.1 | 7760157 | SNV | 1 | G | T | Homozygous   |
| NC_037644.1 | 7760344 | SNV | 1 | C | G | Heterozygous |
| NC_037644.1 | 7760526 | SNV | 1 | T | C | Homozygous   |
| NC_037644.1 | 7760815 | SNV | 1 | T | G | Homozygous   |
| NC_037644.1 | 7763453 | SNV | 1 | T | C | Homozygous   |
| NC_037644.1 | 7770110 | SNV | 1 | A | C | Homozygous   |
| NC_037644.1 | 7772845 | SNV | 1 | C | A | Homozygous   |
| NC_037644.1 | 7775376 | SNV | 1 | A | C | Homozygous   |
| NC_037644.1 | 7775381 | SNV | 1 | T | A | Homozygous   |
| NC_037644.1 | 7775431 | SNV | 1 | A | T | Homozygous   |
| NC_037644.1 | 7777398 | SNV | 1 | T | C | Homozygous   |

|             |         |     |   |   |   |              |
|-------------|---------|-----|---|---|---|--------------|
| NC_037644.1 | 7800283 | SNV | 1 | T | A | Homozygous   |
| NC_037644.1 | 7814963 | SNV | 1 | G | A | Homozygous   |
| NC_037644.1 | 7815445 | SNV | 1 | C | T | Homozygous   |
| NC_037644.1 | 7815478 | SNV | 1 | T | C | Homozygous   |
| NC_037644.1 | 7818259 | SNV | 1 | T | C | Homozygous   |
| NC_037644.1 | 7818774 | SNV | 1 | A | T | Homozygous   |
| NC_037644.1 | 7818788 | SNV | 1 | T | C | Homozygous   |
| NC_037644.1 | 7818800 | SNV | 1 | A | T | Homozygous   |
| NC_037644.1 | 7818806 | SNV | 1 | C | T | Homozygous   |
| NC_037644.1 | 7819820 | SNV | 1 | A | T | Heterozygous |
| NC_037644.1 | 7819821 | SNV | 1 | G | A | Heterozygous |
| NC_037644.1 | 7821907 | SNV | 1 | T | C | Homozygous   |
| NC_037644.1 | 7823115 | SNV | 1 | A | G | Homozygous   |
| NC_037644.1 | 7823289 | SNV | 1 | T | C | Homozygous   |
| NC_037644.1 | 7823810 | SNV | 1 | G | C | Homozygous   |
| NC_037644.1 | 7823831 | SNV | 1 | T | C | Homozygous   |
| NC_037644.1 | 7825131 | SNV | 1 | A | G | Heterozygous |
| NC_037644.1 | 7825135 | SNV | 1 | T | A | Homozygous   |
| NC_037644.1 | 7830574 | SNV | 1 | A | G | Heterozygous |
| NC_037644.1 | 7830586 | SNV | 1 | A | G | Heterozygous |
| NC_037644.1 | 7831211 | SNV | 1 | G | T | Homozygous   |
| NC_037644.1 | 7831229 | SNV | 1 | T | A | Homozygous   |
| NC_037644.1 | 7831237 | SNV | 1 | T | C | Homozygous   |
| NC_037644.1 | 7835167 | SNV | 1 | G | T | Heterozygous |
| NC_037644.1 | 7835169 | SNV | 1 | T | A | Heterozygous |
| NC_037644.1 | 7835172 | SNV | 1 | A | C | Heterozygous |
| NC_037644.1 | 7835196 | SNV | 1 | A | G | Heterozygous |
| NC_037644.1 | 7835199 | SNV | 1 | T | C | Heterozygous |
| NC_037644.1 | 7835449 | SNV | 1 | C | A | Homozygous   |
| NC_037644.1 | 7835454 | SNV | 1 | T | A | Homozygous   |
| NC_037644.1 | 7835461 | SNV | 1 | T | A | Homozygous   |
| NC_037644.1 | 7835468 | SNV | 1 | C | A | Homozygous   |
| NC_037644.1 | 7835470 | SNV | 1 | C | A | Homozygous   |
| NC_037644.1 | 7835488 | SNV | 1 | T | G | Homozygous   |
| NC_037644.1 | 7836204 | SNV | 1 | T | A | Homozygous   |
| NC_037644.1 | 7836206 | SNV | 1 | T | A | Homozygous   |
| NC_037644.1 | 7836624 | SNV | 1 | A | G | Homozygous   |
| NC_037644.1 | 7836707 | SNV | 1 | T | A | Heterozygous |
| NC_037644.1 | 7837790 | SNV | 1 | T | C | Homozygous   |
| NC_037644.1 | 7841567 | SNV | 1 | T | C | Homozygous   |
| NC_037644.1 | 7844508 | SNV | 1 | G | T | Homozygous   |
| NC_037644.1 | 7890346 | SNV | 1 | C | A | Homozygous   |
| NC_037644.1 | 7890361 | SNV | 1 | G | A | Heterozygous |
| NC_037644.1 | 7890403 | SNV | 1 | A | G | Homozygous   |
| NC_037644.1 | 7906311 | SNV | 1 | C | G | Heterozygous |
| NC_037644.1 | 7906464 | SNV | 1 | A | G | Heterozygous |
| NC_037644.1 | 7906469 | SNV | 1 | A | G | Heterozygous |
| NC_037644.1 | 7906471 | SNV | 1 | G | A | Heterozygous |
| NC_037644.1 | 7906475 | SNV | 1 | A | G | Heterozygous |
| NC_037644.1 | 7908736 | SNV | 1 | A | T | Heterozygous |
| NC_037644.1 | 7909465 | SNV | 1 | T | A | Homozygous   |

|             |         |     |   |   |   |              |
|-------------|---------|-----|---|---|---|--------------|
| NC_037644.1 | 7909557 | SNV | 1 | G | A | Homozygous   |
| NC_037644.1 | 7917166 | SNV | 1 | T | C | Homozygous   |
| NC_037644.1 | 7918063 | SNV | 1 | A | C | Heterozygous |
| NC_037644.1 | 7918068 | SNV | 1 | G | A | Heterozygous |
| NC_037644.1 | 7918071 | SNV | 1 | G | A | Heterozygous |
| NC_037644.1 | 7918079 | SNV | 1 | A | C | Heterozygous |
| NC_037644.1 | 7921737 | SNV | 1 | A | T | Homozygous   |
| NC_037644.1 | 7930720 | SNV | 1 | T | C | Homozygous   |
| NC_037644.1 | 7930724 | SNV | 1 | T | A | Homozygous   |
| NC_037644.1 | 7930731 | SNV | 1 | A | G | Homozygous   |
| NC_037644.1 | 7930733 | SNV | 1 | A | T | Homozygous   |
| NC_037644.1 | 7932683 | SNV | 1 | A | T | Homozygous   |
| NC_037644.1 | 7932690 | SNV | 1 | T | A | Homozygous   |
| NC_037644.1 | 7935057 | SNV | 1 | T | A | Homozygous   |
| NC_037644.1 | 7935062 | SNV | 1 | A | C | Homozygous   |
| NC_037644.1 | 7935067 | SNV | 1 | T | A | Homozygous   |
| NC_037644.1 | 7935069 | SNV | 1 | T | C | Homozygous   |
| NC_037644.1 | 7936834 | SNV | 1 | G | C | Heterozygous |
| NC_037644.1 | 7936849 | SNV | 1 | A | G | Homozygous   |
| NC_037644.1 | 7936939 | SNV | 1 | C | G | Heterozygous |
| NC_037644.1 | 7936944 | SNV | 1 | G | A | Heterozygous |
| NC_037644.1 | 7937094 | SNV | 1 | T | C | Homozygous   |
| NC_037644.1 | 7939832 | SNV | 1 | G | A | Homozygous   |
| NC_037644.1 | 7939846 | SNV | 1 | G | A | Homozygous   |
| NC_037644.1 | 7939850 | SNV | 1 | T | C | Heterozygous |
| NC_037644.1 | 7939902 | SNV | 1 | T | C | Homozygous   |
| NC_037644.1 | 7939952 | SNV | 1 | G | A | Heterozygous |
| NC_037644.1 | 7940545 | SNV | 1 | C | A | Heterozygous |
| NC_037644.1 | 7940547 | SNV | 1 | G | A | Heterozygous |
| NC_037644.1 | 7955047 | SNV | 1 | T | C | Homozygous   |
| NC_037644.1 | 7958226 | SNV | 1 | T | A | Homozygous   |
| NC_037644.1 | 7958246 | SNV | 1 | G | C | Homozygous   |
| NC_037644.1 | 7958254 | SNV | 1 | T | A | Homozygous   |
| NC_037644.1 | 7959069 | SNV | 1 | G | T | Homozygous   |
| NC_037644.1 | 7959074 | SNV | 1 | T | G | Homozygous   |
| NC_037644.1 | 7959076 | SNV | 1 | T | G | Homozygous   |
| NC_037644.1 | 7959095 | SNV | 1 | T | A | Homozygous   |
| NC_037644.1 | 7959636 | SNV | 1 | A | C | Homozygous   |
| NC_037644.1 | 7959638 | SNV | 1 | C | T | Homozygous   |
| NC_037644.1 | 7959643 | SNV | 1 | A | T | Homozygous   |
| NC_037644.1 | 7959645 | SNV | 1 | A | T | Homozygous   |
| NC_037644.1 | 7963780 | SNV | 1 | A | T | Heterozygous |
| NC_037644.1 | 7963819 | SNV | 1 | T | A | Homozygous   |
| NC_037644.1 | 7963823 | SNV | 1 | T | A | Homozygous   |
| NC_037644.1 | 7963855 | SNV | 1 | A | T | Heterozygous |
| NC_037644.1 | 7967410 | SNV | 1 | C | T | Homozygous   |
| NC_037644.1 | 7967722 | SNV | 1 | T | C | Heterozygous |
| NC_037644.1 | 7969208 | SNV | 1 | T | C | Homozygous   |
| NC_037644.1 | 7969211 | SNV | 1 | T | C | Homozygous   |
| NC_037644.1 | 7969215 | SNV | 1 | A | G | Homozygous   |
| NC_037644.1 | 7969225 | SNV | 1 | T | A | Homozygous   |

|             |         |     |   |   |   |              |
|-------------|---------|-----|---|---|---|--------------|
| NC_037644.1 | 7969228 | SNV | 1 | A | C | Homozygous   |
| NC_037644.1 | 7983070 | SNV | 1 | T | C | Homozygous   |
| NC_037644.1 | 7983092 | SNV | 1 | C | T | Heterozygous |
| NC_037644.1 | 7983197 | SNV | 1 | A | G | Homozygous   |
| NC_037644.1 | 7983314 | SNV | 1 | C | T | Heterozygous |
| NC_037644.1 | 7983319 | SNV | 1 | T | G | Homozygous   |
| NC_037644.1 | 7983356 | SNV | 1 | A | G | Homozygous   |
| NC_037644.1 | 7983368 | SNV | 1 | G | A | Homozygous   |
| NC_037644.1 | 7983416 | SNV | 1 | G | C | Heterozygous |
| NC_037644.1 | 7983449 | SNV | 1 | G | A | Homozygous   |
| NC_037644.1 | 7983564 | SNV | 1 | C | A | Heterozygous |
| NC_037644.1 | 7992783 | SNV | 1 | C | T | Heterozygous |
| NC_037644.1 | 7992807 | SNV | 1 | C | T | Heterozygous |
| NC_037644.1 | 7997578 | SNV | 1 | T | C | Homozygous   |
| NC_037644.1 | 7997865 | SNV | 1 | T | C | Heterozygous |
| NC_037644.1 | 7997924 | SNV | 1 | G | A | Homozygous   |
| NC_037644.1 | 7998050 | SNV | 1 | C | T | Homozygous   |
| NC_037644.1 | 7998362 | SNV | 1 | T | C | Homozygous   |
| NC_037644.1 | 7998365 | SNV | 1 | G | A | Homozygous   |
| NC_037644.1 | 8006276 | SNV | 1 | A | C | Homozygous   |
| NC_037644.1 | 8017858 | SNV | 1 | T | C | Homozygous   |
| NC_037644.1 | 8017943 | SNV | 1 | C | T | Heterozygous |
| NC_037644.1 | 8018108 | SNV | 1 | A | T | Heterozygous |
| NC_037644.1 | 8018229 | SNV | 1 | A | G | Heterozygous |
| NC_037644.1 | 8018246 | SNV | 1 | A | G | Homozygous   |
| NC_037644.1 | 8018809 | SNV | 1 | C | A | Heterozygous |
| NC_037644.1 | 8018826 | SNV | 1 | C | T | Heterozygous |
| NC_037644.1 | 8018916 | SNV | 1 | C | T | Heterozygous |
| NC_037644.1 | 8019000 | SNV | 1 | A | G | Homozygous   |
| NC_037644.1 | 8019024 | SNV | 1 | C | T | Heterozygous |
| NC_037644.1 | 8019129 | SNV | 1 | A | G | Homozygous   |
| NC_037644.1 | 8019200 | SNV | 1 | T | C | Homozygous   |
| NC_037644.1 | 8019252 | SNV | 1 | G | A | Homozygous   |
| NC_037644.1 | 8019512 | SNV | 1 | C | G | Homozygous   |
| NC_037644.1 | 8019591 | SNV | 1 | T | C | Homozygous   |
| NC_037644.1 | 8019774 | SNV | 1 | C | T | Homozygous   |
| NC_037644.1 | 8019968 | SNV | 1 | G | T | Heterozygous |
| NC_037644.1 | 8020202 | SNV | 1 | C | T | Homozygous   |
| NC_037644.1 | 8020422 | SNV | 1 | G | T | Homozygous   |
| NC_037644.1 | 8020457 | SNV | 1 | A | C | Homozygous   |
| NC_037644.1 | 8052713 | SNV | 1 | C | T | Homozygous   |
| NC_037644.1 | 8052718 | SNV | 1 | C | A | Homozygous   |
| NC_037644.1 | 8052723 | SNV | 1 | C | T | Homozygous   |
| NC_037644.1 | 8052725 | SNV | 1 | A | G | Homozygous   |
| NC_037644.1 | 8052728 | SNV | 1 | C | T | Homozygous   |
| NC_037644.1 | 8052731 | SNV | 1 | A | T | Homozygous   |
| NC_037644.1 | 8055843 | SNV | 1 | T | C | Homozygous   |
| NC_037644.1 | 8055873 | SNV | 1 | C | G | Homozygous   |
| NC_037644.1 | 8055895 | SNV | 1 | G | A | Heterozygous |
| NC_037644.1 | 8055914 | SNV | 1 | A | T | Homozygous   |
| NC_037644.1 | 8055920 | SNV | 1 | T | C | Homozygous   |

|             |         |     |   |   |   |              |
|-------------|---------|-----|---|---|---|--------------|
| NC_037644.1 | 8055925 | SNV | 1 | A | G | Homozygous   |
| NC_037644.1 | 8055930 | SNV | 1 | G | A | Heterozygous |
| NC_037644.1 | 8055938 | SNV | 1 | C | T | Homozygous   |
| NC_037644.1 | 8056081 | SNV | 1 | T | C | Homozygous   |
| NC_037644.1 | 8056127 | SNV | 1 | T | C | Heterozygous |
| NC_037644.1 | 8065177 | SNV | 1 | C | T | Homozygous   |
| NC_037644.1 | 8070826 | SNV | 1 | T | C | Heterozygous |
| NC_037644.1 | 8070848 | SNV | 1 | A | T | Homozygous   |
| NC_037644.1 | 8070851 | SNV | 1 | A | T | Heterozygous |
| NC_037644.1 | 8070854 | SNV | 1 | A | T | Heterozygous |
| NC_037644.1 | 8070920 | SNV | 1 | A | G | Homozygous   |
| NC_037644.1 | 8070936 | SNV | 1 | C | T | Heterozygous |
| NC_037644.1 | 8070995 | SNV | 1 | C | T | Heterozygous |
| NC_037644.1 | 8071043 | SNV | 1 | G | A | Heterozygous |
| NC_037644.1 | 8071150 | SNV | 1 | A | G | Heterozygous |
| NC_037644.1 | 8071227 | SNV | 1 | A | T | Heterozygous |
| NC_037644.1 | 8078618 | SNV | 1 | C | T | Heterozygous |
| NC_037644.1 | 8078672 | SNV | 1 | C | T | Heterozygous |
| NC_037644.1 | 8084275 | SNV | 1 | T | A | Homozygous   |
| NC_037644.1 | 8084287 | SNV | 1 | A | T | Homozygous   |
| NC_037644.1 | 8084313 | SNV | 1 | T | A | Homozygous   |
| NC_037644.1 | 8084317 | SNV | 1 | T | C | Homozygous   |
| NC_037644.1 | 8084339 | SNV | 1 | G | T | Homozygous   |
| NC_037644.1 | 8084342 | SNV | 1 | A | G | Homozygous   |
| NC_037644.1 | 8087261 | SNV | 1 | A | G | Homozygous   |
| NC_037644.1 | 8087265 | SNV | 1 | G | A | Homozygous   |
| NC_037644.1 | 8087271 | SNV | 1 | C | A | Homozygous   |
| NC_037644.1 | 8087273 | SNV | 1 | G | T | Homozygous   |
| NC_037644.1 | 8106421 | SNV | 1 | A | C | Homozygous   |
| NC_037644.1 | 8106424 | SNV | 1 | T | A | Homozygous   |
| NC_037644.1 | 8117184 | SNV | 1 | A | C | Homozygous   |
| NC_037644.1 | 8117187 | SNV | 1 | T | C | Homozygous   |
| NC_037644.1 | 8117209 | SNV | 1 | T | A | Homozygous   |
| NC_037644.1 | 8117211 | SNV | 1 | T | A | Homozygous   |
| NC_037644.1 | 8131713 | SNV | 1 | T | C | Homozygous   |
| NC_037644.1 | 8132326 | SNV | 1 | A | G | Heterozygous |
| NC_037644.1 | 8132646 | SNV | 1 | T | G | Homozygous   |
| NC_037644.1 | 8132945 | SNV | 1 | C | T | Homozygous   |
| NC_037644.1 | 8134915 | SNV | 1 | G | C | Homozygous   |
| NC_037644.1 | 8135070 | SNV | 1 | A | G | Heterozygous |
| NC_037644.1 | 8135428 | SNV | 1 | A | T | Homozygous   |
| NC_037644.1 | 8135432 | SNV | 1 | A | T | Homozygous   |
| NC_037644.1 | 8135456 | SNV | 1 | A | T | Homozygous   |
| NC_037644.1 | 8136656 | SNV | 1 | T | C | Homozygous   |
| NC_037644.1 | 8137352 | SNV | 1 | A | G | Homozygous   |
| NC_037644.1 | 8138332 | SNV | 1 | T | G | Homozygous   |
| NC_037644.1 | 8138339 | SNV | 1 | A | G | Homozygous   |
| NC_037644.1 | 8138404 | SNV | 1 | T | C | Homozygous   |
| NC_037644.1 | 8138934 | SNV | 1 | G | T | Heterozygous |
| NC_037644.1 | 8139566 | SNV | 1 | G | A | Heterozygous |
| NC_037644.1 | 8141046 | SNV | 1 | T | A | Heterozygous |

|             |         |     |   |   |   |              |
|-------------|---------|-----|---|---|---|--------------|
| NC_037644.1 | 8141048 | SNV | 1 | C | G | Heterozygous |
| NC_037644.1 | 8141866 | SNV | 1 | A | C | Homozygous   |
| NC_037644.1 | 8142087 | SNV | 1 | G | A | Heterozygous |
| NC_037644.1 | 8142219 | SNV | 1 | A | G | Homozygous   |
| NC_037644.1 | 8142449 | SNV | 1 | G | A | Homozygous   |
| NC_037644.1 | 8143676 | SNV | 1 | A | G | Homozygous   |
| NC_037644.1 | 8143706 | SNV | 1 | A | G | Homozygous   |
| NC_037644.1 | 8147168 | SNV | 1 | G | A | Homozygous   |
| NC_037644.1 | 8147186 | SNV | 1 | A | G | Homozygous   |
| NC_037644.1 | 8147188 | SNV | 1 | T | G | Homozygous   |
| NC_037644.1 | 8147203 | SNV | 1 | G | A | Homozygous   |
| NC_037644.1 | 8147205 | SNV | 1 | C | T | Homozygous   |
| NC_037644.1 | 8147210 | SNV | 1 | C | T | Homozygous   |
| NC_037644.1 | 8158092 | SNV | 1 | T | G | Homozygous   |
| NC_037644.1 | 8158115 | SNV | 1 | T | A | Homozygous   |
| NC_037644.1 | 8178415 | SNV | 1 | T | C | Homozygous   |
| NC_037644.1 | 8178441 | SNV | 1 | T | C | Homozygous   |
| NC_037644.1 | 8178465 | SNV | 1 | A | G | Homozygous   |
| NC_037644.1 | 8178475 | SNV | 1 | G | C | Homozygous   |
| NC_037644.1 | 8178527 | SNV | 1 | C | G | Homozygous   |
| NC_037644.1 | 8178532 | SNV | 1 | C | T | Homozygous   |
| NC_037644.1 | 8178555 | SNV | 1 | C | T | Heterozygous |
| NC_037644.1 | 8178600 | SNV | 1 | A | G | Homozygous   |
| NC_037644.1 | 8178608 | SNV | 1 | C | G | Heterozygous |
| NC_037644.1 | 8178632 | SNV | 1 | G | C | Homozygous   |
| NC_037644.1 | 8182700 | SNV | 1 | A | G | Heterozygous |
| NC_037644.1 | 8206696 | SNV | 1 | T | C | Heterozygous |
| NC_037644.1 | 8206815 | SNV | 1 | C | G | Heterozygous |
| NC_037644.1 | 8214929 | SNV | 1 | T | G | Homozygous   |
| NC_037644.1 | 8215964 | SNV | 1 | T | C | Heterozygous |
| NC_037644.1 | 8223307 | SNV | 1 | G | A | Heterozygous |
| NC_037644.1 | 8240326 | SNV | 1 | A | G | Heterozygous |
| NC_037644.1 | 8240331 | SNV | 1 | A | C | Heterozygous |
| NC_037644.1 | 8240331 | SNV | 1 | A | G | Heterozygous |
| NC_037644.1 | 8240352 | SNV | 1 | G | A | Homozygous   |
| NC_037644.1 | 8240354 | SNV | 1 | A | G | Homozygous   |
| NC_037644.1 | 8252865 | SNV | 1 | T | C | Heterozygous |
| NC_037644.1 | 8252938 | SNV | 1 | C | T | Heterozygous |
| NC_037644.1 | 8253098 | SNV | 1 | A | G | Homozygous   |
| NC_037644.1 | 8263275 | SNV | 1 | C | T | Heterozygous |
| NC_037644.1 | 8278283 | SNV | 1 | A | G | Homozygous   |
| NC_037644.1 | 8278307 | SNV | 1 | A | G | Homozygous   |
| NC_037644.1 | 8278403 | SNV | 1 | C | T | Heterozygous |
| NC_037644.1 | 8278516 | SNV | 1 | A | G | Homozygous   |
| NC_037644.1 | 8281610 | SNV | 1 | G | A | Heterozygous |
| NC_037644.1 | 8281613 | SNV | 1 | A | G | Homozygous   |
| NC_037644.1 | 8281620 | SNV | 1 | G | C | Heterozygous |
| NC_037644.1 | 8281640 | SNV | 1 | G | A | Heterozygous |
| NC_037644.1 | 8287371 | SNV | 1 | T | C | Homozygous   |
| NC_037644.1 | 8287410 | SNV | 1 | C | T | Homozygous   |
| NC_037644.1 | 8287530 | SNV | 1 | A | G | Homozygous   |

|             |         |     |   |   |   |              |
|-------------|---------|-----|---|---|---|--------------|
| NC_037644.1 | 8287550 | SNV | 1 | T | C | Homozygous   |
| NC_037644.1 | 8288416 | SNV | 1 | C | T | Homozygous   |
| NC_037644.1 | 8288422 | SNV | 1 | C | T | Homozygous   |
| NC_037644.1 | 8288434 | SNV | 1 | G | A | Homozygous   |
| NC_037644.1 | 8288614 | SNV | 1 | A | G | Homozygous   |
| NC_037644.1 | 8288724 | SNV | 1 | C | T | Homozygous   |
| NC_037644.1 | 8292617 | SNV | 1 | A | G | Homozygous   |
| NC_037644.1 | 8292798 | SNV | 1 | T | C | Homozygous   |
| NC_037644.1 | 8292863 | SNV | 1 | G | A | Homozygous   |
| NC_037644.1 | 8292869 | SNV | 1 | T | C | Homozygous   |
| NC_037644.1 | 8292893 | SNV | 1 | G | A | Homozygous   |
| NC_037644.1 | 8292899 | SNV | 1 | C | T | Homozygous   |
| NC_037644.1 | 8300450 | SNV | 1 | G | T | Heterozygous |
| NC_037644.1 | 8300922 | SNV | 1 | G | A | Heterozygous |
| NC_037644.1 | 8301044 | SNV | 1 | A | G | Homozygous   |
| NC_037644.1 | 8301062 | SNV | 1 | A | G | Homozygous   |
| NC_037644.1 | 8301108 | SNV | 1 | G | A | Heterozygous |
| NC_037644.1 | 8303169 | SNV | 1 | T | C | Homozygous   |
| NC_037644.1 | 8306740 | SNV | 1 | T | G | Homozygous   |
| NC_037644.1 | 8313421 | SNV | 1 | T | C | Homozygous   |
| NC_037644.1 | 8318203 | SNV | 1 | C | T | Homozygous   |
| NC_037644.1 | 8318264 | SNV | 1 | G | T | Homozygous   |
| NC_037644.1 | 8321929 | SNV | 1 | T | C | Homozygous   |
| NC_037644.1 | 8322000 | SNV | 1 | T | A | Homozygous   |
| NC_037644.1 | 8328147 | SNV | 1 | A | T | Homozygous   |
| NC_037644.1 | 8328151 | SNV | 1 | T | A | Homozygous   |
| NC_037644.1 | 8328154 | SNV | 1 | A | T | Homozygous   |
| NC_037644.1 | 8328738 | SNV | 1 | C | T | Heterozygous |
| NC_037644.1 | 8329060 | SNV | 1 | T | C | Homozygous   |
| NC_037644.1 | 8334483 | SNV | 1 | T | C | Heterozygous |
| NC_037644.1 | 8334492 | SNV | 1 | A | C | Heterozygous |
| NC_037644.1 | 8334524 | SNV | 1 | C | G | Homozygous   |
| NC_037644.1 | 8336095 | SNV | 1 | A | G | Homozygous   |
| NC_037644.1 | 8344958 | SNV | 1 | T | A | Homozygous   |
| NC_037644.1 | 8344969 | SNV | 1 | G | T | Homozygous   |
| NC_037644.1 | 8344972 | SNV | 1 | T | A | Homozygous   |
| NC_037644.1 | 8344981 | SNV | 1 | G | A | Homozygous   |
| NC_037644.1 | 8347790 | SNV | 1 | C | T | Homozygous   |
| NC_037644.1 | 8347807 | SNV | 1 | C | T | Homozygous   |
| NC_037644.1 | 8356241 | SNV | 1 | A | C | Heterozygous |
| NC_037644.1 | 8356270 | SNV | 1 | G | A | Heterozygous |
| NC_037644.1 | 8356695 | SNV | 1 | G | A | Homozygous   |
| NC_037644.1 | 8356721 | SNV | 1 | T | C | Homozygous   |
| NC_037644.1 | 8356731 | SNV | 1 | C | T | Homozygous   |
| NC_037644.1 | 8356803 | SNV | 1 | T | C | Homozygous   |
| NC_037644.1 | 8356889 | SNV | 1 | G | A | Heterozygous |
| NC_037644.1 | 8357052 | SNV | 1 | A | G | Homozygous   |
| NC_037644.1 | 8357080 | SNV | 1 | G | A | Heterozygous |
| NC_037644.1 | 8357101 | SNV | 1 | T | C | Homozygous   |
| NC_037644.1 | 8357199 | SNV | 1 | A | G | Homozygous   |
| NC_037644.1 | 8357639 | SNV | 1 | A | G | Heterozygous |

|             |         |     |   |   |   |              |
|-------------|---------|-----|---|---|---|--------------|
| NC_037644.1 | 8357661 | SNV | 1 | T | C | Homozygous   |
| NC_037644.1 | 8358101 | SNV | 1 | A | T | Heterozygous |
| NC_037644.1 | 8361561 | SNV | 1 | A | G | Homozygous   |
| NC_037644.1 | 8361590 | SNV | 1 | C | T | Homozygous   |
| NC_037644.1 | 8361727 | SNV | 1 | A | G | Homozygous   |
| NC_037644.1 | 8371457 | SNV | 1 | A | G | Heterozygous |
| NC_037644.1 | 8373027 | SNV | 1 | T | A | Homozygous   |
| NC_037644.1 | 8373036 | SNV | 1 | T | A | Homozygous   |
| NC_037644.1 | 8373039 | SNV | 1 | A | T | Homozygous   |
| NC_037644.1 | 8373042 | SNV | 1 | T | A | Homozygous   |
| NC_037644.1 | 8373049 | SNV | 1 | A | T | Homozygous   |
| NC_037644.1 | 8373086 | SNV | 1 | T | G | Homozygous   |
| NC_037644.1 | 8373701 | SNV | 1 | G | C | Homozygous   |
| NC_037644.1 | 8374350 | SNV | 1 | G | A | Heterozygous |
| NC_037644.1 | 8374376 | SNV | 1 | T | C | Heterozygous |
| NC_037644.1 | 8374392 | SNV | 1 | G | A | Heterozygous |
| NC_037644.1 | 8374403 | SNV | 1 | T | C | Heterozygous |
| NC_037644.1 | 8374550 | SNV | 1 | T | C | Homozygous   |
| NC_037644.1 | 8383831 | SNV | 1 | C | T | Heterozygous |
| NC_037644.1 | 8383833 | SNV | 1 | A | G | Heterozygous |
| NC_037644.1 | 8392225 | SNV | 1 | G | A | Homozygous   |
| NC_037644.1 | 8401076 | SNV | 1 | C | T | Heterozygous |
| NC_037644.1 | 8402590 | SNV | 1 | A | T | Homozygous   |
| NC_037644.1 | 8402745 | SNV | 1 | T | C | Homozygous   |
| NC_037644.1 | 8413555 | SNV | 1 | A | G | Homozygous   |
| NC_037644.1 | 8415038 | SNV | 1 | A | G | Heterozygous |
| NC_037644.1 | 8426495 | SNV | 1 | C | T | Homozygous   |
| NC_037644.1 | 8426497 | SNV | 1 | A | C | Homozygous   |
| NC_037644.1 | 8428108 | SNV | 1 | A | T | Homozygous   |
| NC_037644.1 | 8428114 | SNV | 1 | A | T | Homozygous   |
| NC_037644.1 | 8440465 | SNV | 1 | A | G | Heterozygous |
| NC_037644.1 | 8440655 | SNV | 1 | A | G | Heterozygous |
| NC_037644.1 | 8440753 | SNV | 1 | C | T | Heterozygous |
| NC_037644.1 | 8440807 | SNV | 1 | G | A | Homozygous   |
| NC_037644.1 | 8440902 | SNV | 1 | C | T | Heterozygous |
| NC_037644.1 | 8440914 | SNV | 1 | A | G | Heterozygous |
| NC_037644.1 | 8441125 | SNV | 1 | G | A | Heterozygous |
| NC_037644.1 | 8441151 | SNV | 1 | T | C | Heterozygous |
| NC_037644.1 | 8441163 | SNV | 1 | C | T | Heterozygous |
| NC_037644.1 | 8441187 | SNV | 1 | G | A | Heterozygous |
| NC_037644.1 | 8441236 | SNV | 1 | T | C | Homozygous   |
| NC_037644.1 | 8441270 | SNV | 1 | A | G | Homozygous   |
| NC_037644.1 | 8441297 | SNV | 1 | G | A | Heterozygous |
| NC_037644.1 | 8441424 | SNV | 1 | C | T | Heterozygous |
| NC_037644.1 | 8441446 | SNV | 1 | A | G | Heterozygous |
| NC_037644.1 | 8441480 | SNV | 1 | A | G | Heterozygous |
| NC_037644.1 | 8441482 | SNV | 1 | A | G | Heterozygous |
| NC_037644.1 | 8441508 | SNV | 1 | A | G | Heterozygous |
| NC_037644.1 | 8441512 | SNV | 1 | T | C | Heterozygous |
| NC_037644.1 | 8441514 | SNV | 1 | T | C | Heterozygous |
| NC_037644.1 | 8441637 | SNV | 1 | T | A | Heterozygous |



|             |         |     |   |   |   |              |
|-------------|---------|-----|---|---|---|--------------|
| NC_037644.1 | 8441660 | SNV | 1 | G | A | Heterozygous |
| NC_037644.1 | 8441662 | SNV | 1 | C | T | Heterozygous |
| NC_037644.1 | 8441664 | SNV | 1 | C | T | Heterozygous |
| NC_037644.1 | 8441668 | SNV | 1 | C | T | Heterozygous |
| NC_037644.1 | 8442007 | SNV | 1 | G | C | Heterozygous |
| NC_037644.1 | 8442075 | SNV | 1 | T | C | Homozygous   |
| NC_037644.1 | 8442143 | SNV | 1 | T | C | Homozygous   |
| NC_037644.1 | 8442166 | SNV | 1 | A | G | Homozygous   |
| NC_037644.1 | 8442210 | SNV | 1 | A | G | Heterozygous |
| NC_037644.1 | 8442218 | SNV | 1 | C | T | Heterozygous |
| NC_037644.1 | 8442241 | SNV | 1 | A | G | Heterozygous |
| NC_037644.1 | 8442244 | SNV | 1 | A | G | Heterozygous |
| NC_037644.1 | 8442379 | SNV | 1 | A | G | Homozygous   |
| NC_037644.1 | 8442391 | SNV | 1 | G | C | Homozygous   |
| NC_037644.1 | 8442420 | SNV | 1 | T | C | Homozygous   |
| NC_037644.1 | 8442473 | SNV | 1 | C | A | Homozygous   |
| NC_037644.1 | 8442540 | SNV | 1 | G | A | Homozygous   |
| NC_037644.1 | 8442542 | SNV | 1 | C | T | Homozygous   |
| NC_037644.1 | 8442544 | SNV | 1 | C | A | Homozygous   |
| NC_037644.1 | 8442603 | SNV | 1 | T | A | Homozygous   |
| NC_037644.1 | 8442608 | SNV | 1 | A | C | Homozygous   |
| NC_037644.1 | 8442631 | SNV | 1 | G | A | Homozygous   |
| NC_037644.1 | 8442692 | SNV | 1 | T | C | Homozygous   |
| NC_037644.1 | 8442696 | SNV | 1 | G | T | Heterozygous |
| NC_037644.1 | 8442725 | SNV | 1 | A | G | Homozygous   |
| NC_037644.1 | 8442761 | SNV | 1 | A | T | Heterozygous |
| NC_037644.1 | 8442783 | SNV | 1 | T | C | Homozygous   |
| NC_037644.1 | 8443090 | SNV | 1 | C | T | Heterozygous |
| NC_037644.1 | 8443139 | SNV | 1 | T | C | Heterozygous |
| NC_037644.1 | 8443141 | SNV | 1 | T | C | Heterozygous |
| NC_037644.1 | 8443149 | SNV | 1 | T | C | Heterozygous |
| NC_037644.1 | 8443272 | SNV | 1 | T | C | Homozygous   |
| NC_037644.1 | 8443277 | SNV | 1 | A | G | Homozygous   |
| NC_037644.1 | 8443290 | SNV | 1 | T | C | Homozygous   |
| NC_037644.1 | 8443298 | SNV | 1 | C | T | Homozygous   |
| NC_037644.1 | 8443324 | SNV | 1 | A | T | Heterozygous |
| NC_037644.1 | 8443401 | SNV | 1 | C | T | Homozygous   |
| NC_037644.1 | 8443802 | SNV | 1 | T | C | Homozygous   |
| NC_037644.1 | 8443972 | SNV | 1 | T | C | Homozygous   |
| NC_037644.1 | 8444052 | SNV | 1 | C | T | Heterozygous |
| NC_037644.1 | 8444470 | SNV | 1 | G | A | Heterozygous |
| NC_037644.1 | 8445220 | SNV | 1 | G | C | Homozygous   |
| NC_037644.1 | 8445256 | SNV | 1 | T | A | Homozygous   |
| NC_037644.1 | 8452578 | SNV | 1 | C | T | Heterozygous |
| NC_037644.1 | 8453644 | SNV | 1 | A | G | Heterozygous |
| NC_037644.1 | 8453917 | SNV | 1 | C | T | Homozygous   |
| NC_037644.1 | 8454110 | SNV | 1 | G | T | Homozygous   |
| NC_037644.1 | 8454384 | SNV | 1 | C | T | Homozygous   |
| NC_037644.1 | 8454541 | SNV | 1 | T | C | Heterozygous |
| NC_037644.1 | 8454602 | SNV | 1 | C | T | Homozygous   |
| NC_037644.1 | 8454609 | SNV | 1 | T | C | Heterozygous |

|             |         |     |   |   |   |              |
|-------------|---------|-----|---|---|---|--------------|
| NC_037644.1 | 8454755 | SNV | 1 | T | C | Homozygous   |
| NC_037644.1 | 8455100 | SNV | 1 | A | G | Homozygous   |
| NC_037644.1 | 8455135 | SNV | 1 | T | C | Homozygous   |
| NC_037644.1 | 8455376 | SNV | 1 | C | T | Homozygous   |
| NC_037644.1 | 8455389 | SNV | 1 | T | C | Heterozygous |
| NC_037644.1 | 8455481 | SNV | 1 | A | G | Homozygous   |
| NC_037644.1 | 8455499 | SNV | 1 | T | G | Heterozygous |
| NC_037644.1 | 8455620 | SNV | 1 | G | C | Heterozygous |
| NC_037644.1 | 8455649 | SNV | 1 | T | C | Homozygous   |
| NC_037644.1 | 8455686 | SNV | 1 | C | T | Heterozygous |
| NC_037644.1 | 8456040 | SNV | 1 | T | C | Homozygous   |
| NC_037644.1 | 8456203 | SNV | 1 | T | C | Homozygous   |
| NC_037644.1 | 8456313 | SNV | 1 | A | G | Homozygous   |
| NC_037644.1 | 8456504 | SNV | 1 | A | T | Heterozygous |
| NC_037644.1 | 8458521 | SNV | 1 | T | C | Homozygous   |
| NC_037644.1 | 8469984 | SNV | 1 | A | G | Heterozygous |
| NC_037644.1 | 8469988 | SNV | 1 | G | A | Heterozygous |
| NC_037644.1 | 8469990 | SNV | 1 | T | G | Homozygous   |
| NC_037644.1 | 8470024 | SNV | 1 | C | G | Homozygous   |
| NC_037644.1 | 8471692 | SNV | 1 | G | A | Homozygous   |
| NC_037644.1 | 8471741 | SNV | 1 | C | T | Homozygous   |
| NC_037644.1 | 8477911 | SNV | 1 | T | C | Homozygous   |
| NC_037644.1 | 8477962 | SNV | 1 | A | G | Homozygous   |
| NC_037644.1 | 8478016 | SNV | 1 | T | C | Homozygous   |
| NC_037644.1 | 8478089 | SNV | 1 | A | C | Homozygous   |
| NC_037644.1 | 8495881 | SNV | 1 | G | A | Heterozygous |
| NC_037644.1 | 8496456 | SNV | 1 | C | A | Homozygous   |
| NC_037644.1 | 8496735 | SNV | 1 | A | G | Heterozygous |
| NC_037644.1 | 8497290 | SNV | 1 | G | C | Heterozygous |
| NC_037644.1 | 8497546 | SNV | 1 | A | G | Homozygous   |
| NC_037644.1 | 8498244 | SNV | 1 | T | C | Homozygous   |
| NC_037644.1 | 8499379 | SNV | 1 | A | G | Heterozygous |
| NC_037644.1 | 8536316 | SNV | 1 | C | T | Homozygous   |
| NC_037644.1 | 8539191 | SNV | 1 | T | C | Homozygous   |
| NC_037644.1 | 8539198 | SNV | 1 | G | A | Homozygous   |
| NC_037644.1 | 8539218 | SNV | 1 | C | T | Heterozygous |
| NC_037644.1 | 8539703 | SNV | 1 | A | G | Homozygous   |
| NC_037644.1 | 8548608 | SNV | 1 | G | A | Homozygous   |
| NC_037644.1 | 8549248 | SNV | 1 | C | T | Homozygous   |
| NC_037644.1 | 8549281 | SNV | 1 | T | C | Homozygous   |
| NC_037644.1 | 8549284 | SNV | 1 | G | A | Homozygous   |
| NC_037644.1 | 8549386 | SNV | 1 | C | T | Homozygous   |
| NC_037644.1 | 8549428 | SNV | 1 | T | C | Homozygous   |
| NC_037644.1 | 8549437 | SNV | 1 | T | C | Homozygous   |
| NC_037644.1 | 8551776 | SNV | 1 | C | T | Heterozygous |
| NC_037644.1 | 8555863 | SNV | 1 | T | C | Homozygous   |
| NC_037644.1 | 8555871 | SNV | 1 | A | G | Homozygous   |
| NC_037644.1 | 8555885 | SNV | 1 | C | T | Homozygous   |
| NC_037644.1 | 8555891 | SNV | 1 | T | C | Homozygous   |
| NC_037644.1 | 8556158 | SNV | 1 | C | G | Heterozygous |
| NC_037644.1 | 8556190 | SNV | 1 | G | A | Heterozygous |

|             |         |     |   |   |   |              |
|-------------|---------|-----|---|---|---|--------------|
| NC_037644.1 | 8556239 | SNV | 1 | C | T | Heterozygous |
| NC_037644.1 | 8556265 | SNV | 1 | C | T | Heterozygous |
| NC_037644.1 | 8558115 | SNV | 1 | A | G | Homozygous   |
| NC_037644.1 | 8558134 | SNV | 1 | C | T | Homozygous   |
| NC_037644.1 | 8568058 | SNV | 1 | C | T | Heterozygous |
| NC_037644.1 | 8568061 | SNV | 1 | T | C | Homozygous   |
| NC_037644.1 | 8568131 | SNV | 1 | T | C | Heterozygous |
| NC_037644.1 | 8572981 | SNV | 1 | A | G | Homozygous   |
| NC_037644.1 | 8573116 | SNV | 1 | C | T | Heterozygous |
| NC_037644.1 | 8573120 | SNV | 1 | C | A | Heterozygous |
| NC_037644.1 | 8577976 | SNV | 1 | C | T | Heterozygous |
| NC_037644.1 | 8578001 | SNV | 1 | T | C | Heterozygous |
| NC_037644.1 | 8578209 | SNV | 1 | A | T | Homozygous   |
| NC_037644.1 | 8578645 | SNV | 1 | C | G | Homozygous   |
| NC_037644.1 | 8578769 | SNV | 1 | C | G | Homozygous   |
| NC_037644.1 | 8578771 | SNV | 1 | A | T | Homozygous   |
| NC_037644.1 | 8579126 | SNV | 1 | T | C | Heterozygous |
| NC_037644.1 | 8581112 | SNV | 1 | G | A | Homozygous   |
| NC_037644.1 | 8588488 | SNV | 1 | T | C | Heterozygous |
| NC_037644.1 | 8589290 | SNV | 1 | T | C | Homozygous   |
| NC_037644.1 | 8589911 | SNV | 1 | G | A | Homozygous   |
| NC_037644.1 | 8589913 | SNV | 1 | A | G | Homozygous   |
| NC_037644.1 | 8590393 | SNV | 1 | C | T | Homozygous   |
| NC_037644.1 | 8591435 | SNV | 1 | T | C | Heterozygous |
| NC_037644.1 | 8594431 | SNV | 1 | G | A | Homozygous   |
| NC_037644.1 | 8594445 | SNV | 1 | G | C | Heterozygous |
| NC_037644.1 | 8598743 | SNV | 1 | C | A | Homozygous   |
| NC_037644.1 | 8598748 | SNV | 1 | T | C | Homozygous   |
| NC_037644.1 | 8607708 | SNV | 1 | T | C | Homozygous   |
| NC_037644.1 | 8607774 | SNV | 1 | C | A | Heterozygous |
| NC_037644.1 | 8619183 | SNV | 1 | A | T | Homozygous   |
| NC_037644.1 | 8624027 | SNV | 1 | G | T | Heterozygous |
| NC_037644.1 | 8624029 | SNV | 1 | A | T | Heterozygous |
| NC_037644.1 | 8624034 | SNV | 1 | A | T | Heterozygous |
| NC_037644.1 | 8624777 | SNV | 1 | G | T | Homozygous   |
| NC_037644.1 | 8625063 | SNV | 1 | G | A | Homozygous   |
| NC_037644.1 | 8625450 | SNV | 1 | C | T | Homozygous   |
| NC_037644.1 | 8625585 | SNV | 1 | C | T | Heterozygous |
| NC_037644.1 | 8626218 | SNV | 1 | C | T | Heterozygous |
| NC_037644.1 | 8626221 | SNV | 1 | T | A | Heterozygous |
| NC_037644.1 | 8626838 | SNV | 1 | C | T | Heterozygous |
| NC_037644.1 | 8628465 | SNV | 1 | C | T | Heterozygous |
| NC_037644.1 | 8640200 | SNV | 1 | A | G | Heterozygous |
| NC_037644.1 | 8640204 | SNV | 1 | A | G | Heterozygous |
| NC_037644.1 | 8640219 | SNV | 1 | A | G | Heterozygous |
| NC_037644.1 | 8640222 | SNV | 1 | A | G | Heterozygous |
| NC_037644.1 | 8640234 | SNV | 1 | A | G | Heterozygous |
| NC_037644.1 | 8640241 | SNV | 1 | A | G | Heterozygous |
| NC_037644.1 | 8640272 | SNV | 1 | A | G | Heterozygous |
| NC_037644.1 | 8641309 | SNV | 1 | T | G | Homozygous   |
| NC_037644.1 | 8641371 | SNV | 1 | A | G | Homozygous   |

|             |         |     |   |   |   |              |
|-------------|---------|-----|---|---|---|--------------|
| NC_037644.1 | 8642424 | SNV | 1 | C | T | Heterozygous |
| NC_037644.1 | 8645576 | SNV | 1 | T | C | Homozygous   |
| NC_037644.1 | 8649538 | SNV | 1 | T | A | Homozygous   |
| NC_037644.1 | 8649543 | SNV | 1 | T | G | Homozygous   |
| NC_037644.1 | 8649572 | SNV | 1 | T | C | Homozygous   |
| NC_037644.1 | 8651799 | SNV | 1 | A | G | Homozygous   |
| NC_037644.1 | 8652399 | SNV | 1 | A | T | Homozygous   |
| NC_037644.1 | 8652411 | SNV | 1 | A | T | Homozygous   |
| NC_037644.1 | 8652413 | SNV | 1 | T | A | Homozygous   |
| NC_037644.1 | 8652416 | SNV | 1 | T | A | Homozygous   |
| NC_037644.1 | 8652425 | SNV | 1 | A | G | Homozygous   |
| NC_037644.1 | 8652431 | SNV | 1 | T | A | Homozygous   |
| NC_037644.1 | 8652468 | SNV | 1 | A | C | Homozygous   |
| NC_037644.1 | 8652480 | SNV | 1 | T | G | Heterozygous |
| NC_037644.1 | 8662579 | SNV | 1 | G | A | Heterozygous |
| NC_037644.1 | 8663135 | SNV | 1 | G | C | Heterozygous |
| NC_037644.1 | 8663140 | SNV | 1 | A | C | Heterozygous |
| NC_037644.1 | 8663148 | SNV | 1 | T | G | Heterozygous |
| NC_037644.1 | 8663152 | SNV | 1 | C | G | Heterozygous |
| NC_037644.1 | 8668412 | SNV | 1 | T | C | Heterozygous |
| NC_037644.1 | 8668421 | SNV | 1 | T | C | Homozygous   |
| NC_037644.1 | 8668534 | SNV | 1 | A | T | Homozygous   |
| NC_037644.1 | 8668553 | SNV | 1 | A | C | Homozygous   |
| NC_037644.1 | 8688373 | SNV | 1 | G | A | Homozygous   |
| NC_037644.1 | 8688376 | SNV | 1 | T | A | Homozygous   |
| NC_037644.1 | 8688379 | SNV | 1 | A | T | Homozygous   |
| NC_037644.1 | 8688382 | SNV | 1 | G | T | Homozygous   |
| NC_037644.1 | 8688388 | SNV | 1 | C | T | Homozygous   |
| NC_037644.1 | 8688392 | SNV | 1 | A | G | Homozygous   |
| NC_037644.1 | 8688725 | SNV | 1 | G | A | Homozygous   |
| NC_037644.1 | 8688741 | SNV | 1 | C | T | Homozygous   |
| NC_037644.1 | 8688744 | SNV | 1 | G | A | Homozygous   |
| NC_037644.1 | 8688758 | SNV | 1 | T | A | Homozygous   |
| NC_037644.1 | 8688760 | SNV | 1 | T | A | Homozygous   |
| NC_037644.1 | 8688787 | SNV | 1 | C | T | Homozygous   |
| NC_037644.1 | 8688793 | SNV | 1 | A | G | Homozygous   |
| NC_037644.1 | 8688928 | SNV | 1 | C | T | Heterozygous |
| NC_037644.1 | 8688930 | SNV | 1 | C | T | Heterozygous |
| NC_037644.1 | 8699872 | SNV | 1 | C | A | Homozygous   |
| NC_037644.1 | 8700099 | SNV | 1 | T | C | Homozygous   |
| NC_037644.1 | 8700287 | SNV | 1 | A | C | Heterozygous |
| NC_037644.1 | 8705573 | SNV | 1 | T | C | Homozygous   |
| NC_037644.1 | 8708478 | SNV | 1 | A | G | Homozygous   |
| NC_037644.1 | 8708523 | SNV | 1 | A | G | Homozygous   |
| NC_037644.1 | 8708640 | SNV | 1 | C | T | Heterozygous |
| NC_037644.1 | 8713157 | SNV | 1 | T | C | Heterozygous |
| NC_037644.1 | 8713334 | SNV | 1 | C | T | Heterozygous |
| NC_037644.1 | 8714054 | SNV | 1 | A | G | Homozygous   |
| NC_037644.1 | 8718814 | SNV | 1 | G | A | Heterozygous |
| NC_037644.1 | 8719394 | SNV | 1 | G | T | Heterozygous |
| NC_037644.1 | 8719398 | SNV | 1 | G | A | Heterozygous |

|             |         |     |   |   |   |              |
|-------------|---------|-----|---|---|---|--------------|
| NC_037644.1 | 8721449 | SNV | 1 | C | T | Homozygous   |
| NC_037644.1 | 8721518 | SNV | 1 | G | A | Heterozygous |
| NC_037644.1 | 8721641 | SNV | 1 | G | A | Heterozygous |
| NC_037644.1 | 8721702 | SNV | 1 | T | C | Homozygous   |
| NC_037644.1 | 8732874 | SNV | 1 | C | T | Heterozygous |
| NC_037644.1 | 8732961 | SNV | 1 | T | C | Homozygous   |
| NC_037644.1 | 8733022 | SNV | 1 | G | T | Homozygous   |
| NC_037644.1 | 8733034 | SNV | 1 | A | G | Homozygous   |
| NC_037644.1 | 8734015 | SNV | 1 | A | T | Homozygous   |
| NC_037644.1 | 8734056 | SNV | 1 | T | C | Homozygous   |
| NC_037644.1 | 8734264 | SNV | 1 | A | T | Heterozygous |
| NC_037644.1 | 8734278 | SNV | 1 | T | A | Heterozygous |
| NC_037644.1 | 8734292 | SNV | 1 | C | T | Heterozygous |
| NC_037644.1 | 8734418 | SNV | 1 | T | C | Heterozygous |
| NC_037644.1 | 8734438 | SNV | 1 | T | A | Heterozygous |
| NC_037644.1 | 8734627 | SNV | 1 | C | T | Homozygous   |
| NC_037644.1 | 8734643 | SNV | 1 | C | A | Homozygous   |
| NC_037644.1 | 8734665 | SNV | 1 | A | G | Heterozygous |
| NC_037644.1 | 8734673 | SNV | 1 | T | C | Heterozygous |
| NC_037644.1 | 8734717 | SNV | 1 | C | T | Heterozygous |
| NC_037644.1 | 8734752 | SNV | 1 | A | G | Homozygous   |
| NC_037644.1 | 8734761 | SNV | 1 | A | C | Homozygous   |
| NC_037644.1 | 8734784 | SNV | 1 | T | C | Heterozygous |
| NC_037644.1 | 8735203 | SNV | 1 | T | C | Homozygous   |
| NC_037644.1 | 8735232 | SNV | 1 | A | G | Homozygous   |
| NC_037644.1 | 8735524 | SNV | 1 | A | T | Homozygous   |
| NC_037644.1 | 8735612 | SNV | 1 | T | C | Homozygous   |
| NC_037644.1 | 8735653 | SNV | 1 | A | G | Homozygous   |
| NC_037644.1 | 8737513 | SNV | 1 | A | G | Homozygous   |
| NC_037644.1 | 8737516 | SNV | 1 | A | G | Homozygous   |
| NC_037644.1 | 8737743 | SNV | 1 | T | C | Heterozygous |
| NC_037644.1 | 8738232 | SNV | 1 | C | T | Heterozygous |
| NC_037644.1 | 8739554 | SNV | 1 | T | C | Homozygous   |
| NC_037644.1 | 8739596 | SNV | 1 | T | C | Homozygous   |
| NC_037644.1 | 8740710 | SNV | 1 | G | A | Homozygous   |
| NC_037644.1 | 8741030 | SNV | 1 | C | T | Homozygous   |
| NC_037644.1 | 8742045 | SNV | 1 | A | G | Homozygous   |
| NC_037644.1 | 8747536 | SNV | 1 | A | T | Homozygous   |
| NC_037644.1 | 8748937 | SNV | 1 | C | T | Heterozygous |
| NC_037644.1 | 8749096 | SNV | 1 | T | C | Heterozygous |
| NC_037644.1 | 8749372 | SNV | 1 | G | A | Heterozygous |
| NC_037644.1 | 8761984 | SNV | 1 | A | T | Homozygous   |
| NC_037644.1 | 8761995 | SNV | 1 | A | G | Homozygous   |
| NC_037644.1 | 8762024 | SNV | 1 | T | C | Homozygous   |
| NC_037644.1 | 8762026 | SNV | 1 | A | T | Homozygous   |
| NC_037644.1 | 8762033 | SNV | 1 | T | C | Homozygous   |
| NC_037644.1 | 8762041 | SNV | 1 | G | T | Homozygous   |
| NC_037644.1 | 8764852 | SNV | 1 | T | C | Homozygous   |
| NC_037644.1 | 8764883 | SNV | 1 | T | C | Homozygous   |
| NC_037644.1 | 8765883 | SNV | 1 | A | G | Homozygous   |
| NC_037644.1 | 8765936 | SNV | 1 | T | A | Heterozygous |

|             |         |     |   |   |   |              |
|-------------|---------|-----|---|---|---|--------------|
| NC_037644.1 | 8767478 | SNV | 1 | A | G | Heterozygous |
| NC_037644.1 | 8767484 | SNV | 1 | A | G | Heterozygous |
| NC_037644.1 | 8767960 | SNV | 1 | C | T | Heterozygous |
| NC_037644.1 | 8768216 | SNV | 1 | C | T | Heterozygous |
| NC_037644.1 | 8768261 | SNV | 1 | C | T | Heterozygous |
| NC_037644.1 | 8768354 | SNV | 1 | C | T | Homozygous   |
| NC_037644.1 | 8768424 | SNV | 1 | A | G | Heterozygous |
| NC_037644.1 | 8768724 | SNV | 1 | G | A | Homozygous   |
| NC_037644.1 | 8768842 | SNV | 1 | T | C | Heterozygous |
| NC_037644.1 | 8768868 | SNV | 1 | C | A | Heterozygous |
| NC_037644.1 | 8768916 | SNV | 1 | G | C | Heterozygous |
| NC_037644.1 | 8768946 | SNV | 1 | G | A | Homozygous   |
| NC_037644.1 | 8769078 | SNV | 1 | T | C | Homozygous   |
| NC_037644.1 | 8769084 | SNV | 1 | C | A | Heterozygous |
| NC_037644.1 | 8769090 | SNV | 1 | C | G | Homozygous   |
| NC_037644.1 | 8769094 | SNV | 1 | T | A | Heterozygous |
| NC_037644.1 | 8769225 | SNV | 1 | T | C | Homozygous   |
| NC_037644.1 | 8769250 | SNV | 1 | C | T | Homozygous   |
| NC_037644.1 | 8769253 | SNV | 1 | T | C | Homozygous   |
| NC_037644.1 | 8769338 | SNV | 1 | G | A | Homozygous   |
| NC_037644.1 | 8769373 | SNV | 1 | T | C | Homozygous   |
| NC_037644.1 | 8769377 | SNV | 1 | T | C | Heterozygous |
| NC_037644.1 | 8769401 | SNV | 1 | G | T | Heterozygous |
| NC_037644.1 | 8769407 | SNV | 1 | T | C | Heterozygous |
| NC_037644.1 | 8769436 | SNV | 1 | G | A | Homozygous   |
| NC_037644.1 | 8769486 | SNV | 1 | A | G | Heterozygous |
| NC_037644.1 | 8769531 | SNV | 1 | T | C | Homozygous   |
| NC_037644.1 | 8769604 | SNV | 1 | T | C | Homozygous   |
| NC_037644.1 | 8769642 | SNV | 1 | T | C | Homozygous   |
| NC_037644.1 | 8769689 | SNV | 1 | C | T | Homozygous   |
| NC_037644.1 | 8769693 | SNV | 1 | G | A | Homozygous   |
| NC_037644.1 | 8769714 | SNV | 1 | T | C | Homozygous   |
| NC_037644.1 | 8770308 | SNV | 1 | A | G | Homozygous   |
| NC_037644.1 | 8771738 | SNV | 1 | T | C | Heterozygous |
| NC_037644.1 | 8771873 | SNV | 1 | G | A | Heterozygous |
| NC_037644.1 | 8771910 | SNV | 1 | T | A | Heterozygous |
| NC_037644.1 | 8771910 | SNV | 1 | T | C | Heterozygous |
| NC_037644.1 | 8772331 | SNV | 1 | C | G | Homozygous   |
| NC_037644.1 | 8777107 | SNV | 1 | C | T | Heterozygous |
| NC_037644.1 | 8777376 | SNV | 1 | C | T | Homozygous   |
| NC_037644.1 | 8777616 | SNV | 1 | G | A | Homozygous   |
| NC_037644.1 | 8777640 | SNV | 1 | T | C | Homozygous   |
| NC_037644.1 | 8778297 | SNV | 1 | G | A | Heterozygous |
| NC_037644.1 | 8778690 | SNV | 1 | T | C | Homozygous   |
| NC_037644.1 | 8779991 | SNV | 1 | A | G | Homozygous   |
| NC_037644.1 | 8780033 | SNV | 1 | A | G | Homozygous   |
| NC_037644.1 | 8801176 | SNV | 1 | G | A | Homozygous   |
| NC_037644.1 | 8801272 | SNV | 1 | G | A | Heterozygous |
| NC_037644.1 | 8801280 | SNV | 1 | C | T | Heterozygous |
| NC_037644.1 | 8801489 | SNV | 1 | C | T | Homozygous   |
| NC_037644.1 | 8801559 | SNV | 1 | G | A | Heterozygous |

|             |         |     |   |   |   |              |
|-------------|---------|-----|---|---|---|--------------|
| NC_037644.1 | 8801675 | SNV | 1 | C | T | Heterozygous |
| NC_037644.1 | 8801894 | SNV | 1 | C | A | Heterozygous |
| NC_037644.1 | 8802242 | SNV | 1 | C | T | Homozygous   |
| NC_037644.1 | 8802272 | SNV | 1 | T | C | Heterozygous |
| NC_037644.1 | 8802461 | SNV | 1 | C | T | Heterozygous |
| NC_037644.1 | 8802527 | SNV | 1 | T | C | Homozygous   |
| NC_037644.1 | 8802587 | SNV | 1 | C | T | Heterozygous |
| NC_037644.1 | 8802643 | SNV | 1 | G | C | Homozygous   |
| NC_037644.1 | 8802653 | SNV | 1 | A | C | Heterozygous |
| NC_037644.1 | 8802728 | SNV | 1 | T | C | Heterozygous |
| NC_037644.1 | 8802909 | SNV | 1 | A | T | Homozygous   |
| NC_037644.1 | 8803039 | SNV | 1 | T | C | Heterozygous |
| NC_037644.1 | 8803133 | SNV | 1 | T | C | Homozygous   |
| NC_037644.1 | 8803151 | SNV | 1 | C | T | Homozygous   |
| NC_037644.1 | 8803156 | SNV | 1 | T | C | Homozygous   |
| NC_037644.1 | 8803167 | SNV | 1 | A | C | Heterozygous |
| NC_037644.1 | 8803177 | SNV | 1 | C | T | Heterozygous |
| NC_037644.1 | 8803230 | SNV | 1 | C | T | Heterozygous |
| NC_037644.1 | 8803313 | SNV | 1 | C | T | Heterozygous |
| NC_037644.1 | 8803316 | SNV | 1 | T | C | Heterozygous |
| NC_037644.1 | 8803330 | SNV | 1 | A | G | Homozygous   |
| NC_037644.1 | 8803361 | SNV | 1 | A | C | Heterozygous |
| NC_037644.1 | 8803369 | SNV | 1 | C | T | Homozygous   |
| NC_037644.1 | 8803610 | SNV | 1 | T | C | Heterozygous |
| NC_037644.1 | 8803741 | SNV | 1 | T | C | Homozygous   |
| NC_037644.1 | 8803746 | SNV | 1 | C | T | Homozygous   |
| NC_037644.1 | 8803880 | SNV | 1 | C | T | Homozygous   |
| NC_037644.1 | 8803888 | SNV | 1 | G | A | Homozygous   |
| NC_037644.1 | 8803892 | SNV | 1 | C | T | Homozygous   |
| NC_037644.1 | 8803898 | SNV | 1 | T | C | Homozygous   |
| NC_037644.1 | 8803908 | SNV | 1 | T | C | Homozygous   |
| NC_037644.1 | 8804150 | SNV | 1 | C | T | Heterozygous |
| NC_037644.1 | 8804170 | SNV | 1 | T | C | Heterozygous |
| NC_037644.1 | 8804183 | SNV | 1 | A | G | Heterozygous |
| NC_037644.1 | 8804240 | SNV | 1 | C | T | Heterozygous |
| NC_037644.1 | 8804261 | SNV | 1 | C | T | Heterozygous |
| NC_037644.1 | 8804269 | SNV | 1 | C | T | Heterozygous |
| NC_037644.1 | 8804448 | SNV | 1 | T | C | Heterozygous |
| NC_037644.1 | 8804485 | SNV | 1 | T | C | Heterozygous |
| NC_037644.1 | 8804618 | SNV | 1 | C | T | Homozygous   |
| NC_037644.1 | 8804842 | SNV | 1 | C | T | Heterozygous |
| NC_037644.1 | 8804888 | SNV | 1 | A | C | Homozygous   |
| NC_037644.1 | 8805040 | SNV | 1 | A | G | Homozygous   |
| NC_037644.1 | 8805071 | SNV | 1 | T | C | Homozygous   |
| NC_037644.1 | 8805135 | SNV | 1 | A | C | Homozygous   |
| NC_037644.1 | 8805498 | SNV | 1 | A | G | Homozygous   |
| NC_037644.1 | 8805740 | SNV | 1 | C | T | Homozygous   |
| NC_037644.1 | 8805925 | SNV | 1 | C | T | Heterozygous |
| NC_037644.1 | 8806337 | SNV | 1 | T | C | Homozygous   |
| NC_037644.1 | 8806520 | SNV | 1 | T | C | Homozygous   |
| NC_037644.1 | 8806613 | SNV | 1 | T | C | Heterozygous |

|             |         |     |   |   |   |              |
|-------------|---------|-----|---|---|---|--------------|
| NC_037644.1 | 8806979 | SNV | 1 | T | G | Homozygous   |
| NC_037644.1 | 8807368 | SNV | 1 | C | T | Homozygous   |
| NC_037644.1 | 8807442 | SNV | 1 | G | A | Homozygous   |
| NC_037644.1 | 8807447 | SNV | 1 | A | G | Homozygous   |
| NC_037644.1 | 8807674 | SNV | 1 | T | C | Homozygous   |
| NC_037644.1 | 8807684 | SNV | 1 | G | A | Heterozygous |
| NC_037644.1 | 8807705 | SNV | 1 | C | T | Heterozygous |
| NC_037644.1 | 8807711 | SNV | 1 | G | A | Heterozygous |
| NC_037644.1 | 8807780 | SNV | 1 | C | T | Homozygous   |
| NC_037644.1 | 8811800 | SNV | 1 | A | G | Heterozygous |
| NC_037644.1 | 8811893 | SNV | 1 | T | C | Homozygous   |
| NC_037644.1 | 8812001 | SNV | 1 | A | G | Homozygous   |
| NC_037644.1 | 8812094 | SNV | 1 | C | T | Heterozygous |
| NC_037644.1 | 8812282 | SNV | 1 | G | A | Heterozygous |
| NC_037644.1 | 8812322 | SNV | 1 | T | C | Homozygous   |
| NC_037644.1 | 8812481 | SNV | 1 | C | T | Heterozygous |
| NC_037644.1 | 8812484 | SNV | 1 | G | A | Heterozygous |
| NC_037644.1 | 8812740 | SNV | 1 | T | C | Heterozygous |
| NC_037644.1 | 8812828 | SNV | 1 | G | C | Homozygous   |
| NC_037644.1 | 8812979 | SNV | 1 | C | T | Homozygous   |
| NC_037644.1 | 8812983 | SNV | 1 | T | C | Homozygous   |
| NC_037644.1 | 8813077 | SNV | 1 | G | A | Heterozygous |
| NC_037644.1 | 8813079 | SNV | 1 | A | T | Heterozygous |
| NC_037644.1 | 8813139 | SNV | 1 | T | C | Homozygous   |
| NC_037644.1 | 8813144 | SNV | 1 | C | T | Heterozygous |
| NC_037644.1 | 8813210 | SNV | 1 | A | C | Homozygous   |
| NC_037644.1 | 8813355 | SNV | 1 | T | C | Heterozygous |
| NC_037644.1 | 8813364 | SNV | 1 | A | G | Homozygous   |
| NC_037644.1 | 8813397 | SNV | 1 | G | A | Heterozygous |
| NC_037644.1 | 8813419 | SNV | 1 | G | T | Heterozygous |
| NC_037644.1 | 8813461 | SNV | 1 | C | T | Heterozygous |
| NC_037644.1 | 8813484 | SNV | 1 | A | G | Heterozygous |
| NC_037644.1 | 8813589 | SNV | 1 | G | A | Heterozygous |
| NC_037644.1 | 8813706 | SNV | 1 | A | G | Heterozygous |
| NC_037644.1 | 8813944 | SNV | 1 | T | C | Homozygous   |
| NC_037644.1 | 8814085 | SNV | 1 | T | C | Homozygous   |
| NC_037644.1 | 8814106 | SNV | 1 | T | G | Heterozygous |
| NC_037644.1 | 8814176 | SNV | 1 | T | C | Homozygous   |
| NC_037644.1 | 8814212 | SNV | 1 | C | T | Heterozygous |
| NC_037644.1 | 8814259 | SNV | 1 | G | C | Homozygous   |
| NC_037644.1 | 8814294 | SNV | 1 | T | C | Heterozygous |
| NC_037644.1 | 8814305 | SNV | 1 | T | C | Homozygous   |
| NC_037644.1 | 8814353 | SNV | 1 | T | A | Heterozygous |
| NC_037644.1 | 8814383 | SNV | 1 | T | C | Heterozygous |
| NC_037644.1 | 8814408 | SNV | 1 | G | A | Heterozygous |
| NC_037644.1 | 8814423 | SNV | 1 | A | G | Heterozygous |
| NC_037644.1 | 8814539 | SNV | 1 | T | C | Homozygous   |
| NC_037644.1 | 8814671 | SNV | 1 | T | C | Homozygous   |
| NC_037644.1 | 8814732 | SNV | 1 | A | G | Homozygous   |
| NC_037644.1 | 8814791 | SNV | 1 | T | C | Homozygous   |
| NC_037644.1 | 8814893 | SNV | 1 | C | T | Homozygous   |



|             |         |     |   |   |   |              |
|-------------|---------|-----|---|---|---|--------------|
| NC_037644.1 | 8818011 | SNV | 1 | A | G | Homozygous   |
| NC_037644.1 | 8821268 | SNV | 1 | A | T | Heterozygous |
| NC_037644.1 | 8821273 | SNV | 1 | A | T | Heterozygous |
| NC_037644.1 | 8830953 | SNV | 1 | A | G | Heterozygous |
| NC_037644.1 | 8831012 | SNV | 1 | A | T | Homozygous   |
| NC_037644.1 | 8831046 | SNV | 1 | T | C | Homozygous   |
| NC_037644.1 | 8831755 | SNV | 1 | G | A | Homozygous   |
| NC_037644.1 | 8831757 | SNV | 1 | G | A | Homozygous   |
| NC_037644.1 | 8831804 | SNV | 1 | A | G | Heterozygous |
| NC_037644.1 | 8875857 | SNV | 1 | G | A | Heterozygous |
| NC_037644.1 | 8875862 | SNV | 1 | A | G | Heterozygous |
| NC_037644.1 | 8876800 | SNV | 1 | A | G | Homozygous   |
| NC_037644.1 | 8876806 | SNV | 1 | G | A | Heterozygous |
| NC_037644.1 | 8876880 | SNV | 1 | C | T | Homozygous   |
| NC_037644.1 | 8886627 | SNV | 1 | T | C | Homozygous   |
| NC_037644.1 | 8888036 | SNV | 1 | A | T | Heterozygous |
| NC_037644.1 | 8888040 | SNV | 1 | T | A | Heterozygous |
| NC_037644.1 | 8892195 | SNV | 1 | A | C | Homozygous   |
| NC_037644.1 | 8895747 | SNV | 1 | G | A | Homozygous   |
| NC_037644.1 | 8895753 | SNV | 1 | C | G | Homozygous   |
| NC_037644.1 | 8895761 | SNV | 1 | A | T | Homozygous   |
| NC_037644.1 | 8895781 | SNV | 1 | G | A | Heterozygous |
| NC_037644.1 | 8895783 | SNV | 1 | T | C | Homozygous   |
| NC_037644.1 | 8895787 | SNV | 1 | T | G | Homozygous   |
| NC_037644.1 | 8896290 | SNV | 1 | A | G | Homozygous   |
| NC_037644.1 | 8896371 | SNV | 1 | G | A | Heterozygous |
| NC_037644.1 | 8898866 | SNV | 1 | C | T | Homozygous   |
| NC_037644.1 | 8898893 | SNV | 1 | C | T | Heterozygous |
| NC_037644.1 | 8900160 | SNV | 1 | A | T | Homozygous   |
| NC_037644.1 | 8900173 | SNV | 1 | G | A | Heterozygous |
| NC_037644.1 | 8900224 | SNV | 1 | G | A | Heterozygous |
| NC_037644.1 | 8910206 | SNV | 1 | C | T | Heterozygous |
| NC_037644.1 | 8910321 | SNV | 1 | G | A | Heterozygous |
| NC_037644.1 | 8910417 | SNV | 1 | C | T | Heterozygous |
| NC_037644.1 | 8911006 | SNV | 1 | A | C | Homozygous   |
| NC_037644.1 | 8911138 | SNV | 1 | C | T | Heterozygous |
| NC_037644.1 | 8911539 | SNV | 1 | A | G | Homozygous   |
| NC_037644.1 | 8911599 | SNV | 1 | C | T | Homozygous   |
| NC_037644.1 | 8911957 | SNV | 1 | G | A | Homozygous   |
| NC_037644.1 | 8911987 | SNV | 1 | C | T | Heterozygous |
| NC_037644.1 | 8911993 | SNV | 1 | C | A | Homozygous   |
| NC_037644.1 | 8912029 | SNV | 1 | A | G | Heterozygous |
| NC_037644.1 | 8912213 | SNV | 1 | A | G | Heterozygous |
| NC_037644.1 | 8912257 | SNV | 1 | A | C | Homozygous   |
| NC_037644.1 | 8915569 | SNV | 1 | A | G | Homozygous   |
| NC_037644.1 | 8916398 | SNV | 1 | C | T | Heterozygous |
| NC_037644.1 | 8917271 | SNV | 1 | C | G | Homozygous   |
| NC_037644.1 | 8917889 | SNV | 1 | C | T | Homozygous   |
| NC_037644.1 | 8918039 | SNV | 1 | T | C | Homozygous   |
| NC_037644.1 | 8918204 | SNV | 1 | A | G | Homozygous   |
| NC_037644.1 | 8920000 | SNV | 1 | A | G | Heterozygous |

|             |         |     |   |   |   |              |
|-------------|---------|-----|---|---|---|--------------|
| NC_037644.1 | 8920148 | SNV | 1 | T | C | Heterozygous |
| NC_037644.1 | 8920215 | SNV | 1 | C | T | Homozygous   |
| NC_037644.1 | 8920314 | SNV | 1 | G | A | Homozygous   |
| NC_037644.1 | 8922303 | SNV | 1 | A | T | Homozygous   |
| NC_037644.1 | 8922516 | SNV | 1 | T | C | Homozygous   |
| NC_037644.1 | 8922585 | SNV | 1 | A | G | Homozygous   |
| NC_037644.1 | 8922618 | SNV | 1 | G | A | Heterozygous |
| NC_037644.1 | 8923212 | SNV | 1 | C | T | Homozygous   |
| NC_037644.1 | 8923238 | SNV | 1 | T | C | Homozygous   |
| NC_037644.1 | 8923392 | SNV | 1 | C | T | Heterozygous |
| NC_037644.1 | 8923621 | SNV | 1 | A | G | Homozygous   |
| NC_037644.1 | 8940145 | SNV | 1 | A | G | Homozygous   |
| NC_037644.1 | 8940150 | SNV | 1 | G | A | Homozygous   |
| NC_037644.1 | 8940179 | SNV | 1 | A | G | Heterozygous |
| NC_037644.1 | 8940184 | SNV | 1 | A | G | Heterozygous |
| NC_037644.1 | 8949011 | SNV | 1 | T | C | Heterozygous |
| NC_037644.1 | 8954882 | SNV | 1 | C | T | Homozygous   |
| NC_037644.1 | 8969163 | SNV | 1 | A | T | Heterozygous |
| NC_037644.1 | 8975123 | SNV | 1 | C | T | Homozygous   |
| NC_037644.1 | 8975133 | SNV | 1 | G | C | Homozygous   |
| NC_037644.1 | 8979805 | SNV | 1 | T | C | Homozygous   |
| NC_037644.1 | 8980099 | SNV | 1 | G | A | Heterozygous |
| NC_037644.1 | 8980150 | SNV | 1 | T | C | Homozygous   |
| NC_037644.1 | 8980153 | SNV | 1 | T | C | Homozygous   |
| NC_037644.1 | 8980695 | SNV | 1 | A | G | Homozygous   |
| NC_037644.1 | 8981006 | SNV | 1 | T | C | Homozygous   |
| NC_037644.1 | 8981024 | SNV | 1 | T | C | Homozygous   |
| NC_037644.1 | 8982083 | SNV | 1 | T | C | Homozygous   |
| NC_037644.1 | 8982123 | SNV | 1 | C | G | Heterozygous |
| NC_037644.1 | 8982146 | SNV | 1 | A | G | Homozygous   |
| NC_037644.1 | 8982193 | SNV | 1 | A | T | Homozygous   |
| NC_037644.1 | 8982202 | SNV | 1 | G | A | Homozygous   |
| NC_037644.1 | 8982261 | SNV | 1 | A | G | Homozygous   |
| NC_037644.1 | 8982322 | SNV | 1 | A | G | Homozygous   |
| NC_037644.1 | 8982399 | SNV | 1 | T | C | Heterozygous |
| NC_037644.1 | 8982477 | SNV | 1 | A | G | Homozygous   |
| NC_037644.1 | 8982624 | SNV | 1 | T | C | Homozygous   |
| NC_037644.1 | 8982721 | SNV | 1 | C | T | Heterozygous |
| NC_037644.1 | 8983452 | SNV | 1 | T | C | Heterozygous |
| NC_037644.1 | 8983464 | SNV | 1 | T | C | Heterozygous |
| NC_037644.1 | 8983534 | SNV | 1 | A | G | Heterozygous |
| NC_037644.1 | 8983581 | SNV | 1 | C | T | Homozygous   |
| NC_037644.1 | 8983586 | SNV | 1 | A | G | Heterozygous |
| NC_037644.1 | 8983687 | SNV | 1 | G | A | Heterozygous |
| NC_037644.1 | 8983731 | SNV | 1 | T | C | Homozygous   |
| NC_037644.1 | 8983844 | SNV | 1 | A | G | Homozygous   |
| NC_037644.1 | 8983868 | SNV | 1 | A | G | Homozygous   |
| NC_037644.1 | 8983924 | SNV | 1 | G | A | Heterozygous |
| NC_037644.1 | 8990721 | SNV | 1 | C | T | Heterozygous |
| NC_037644.1 | 8990823 | SNV | 1 | A | T | Homozygous   |
| NC_037644.1 | 8991135 | SNV | 1 | A | G | Homozygous   |

|             |         |     |   |   |   |              |
|-------------|---------|-----|---|---|---|--------------|
| NC_037644.1 | 8991148 | SNV | 1 | C | T | Heterozygous |
| NC_037644.1 | 8991209 | SNV | 1 | T | C | Homozygous   |
| NC_037644.1 | 8996514 | SNV | 1 | A | G | Homozygous   |
| NC_037644.1 | 8996799 | SNV | 1 | A | G | Homozygous   |
| NC_037644.1 | 8996876 | SNV | 1 | G | A | Heterozygous |
| NC_037644.1 | 8997119 | SNV | 1 | A | G | Homozygous   |
| NC_037644.1 | 8997209 | SNV | 1 | A | G | Homozygous   |
| NC_037644.1 | 8997632 | SNV | 1 | G | A | Heterozygous |
| NC_037644.1 | 8997665 | SNV | 1 | C | T | Heterozygous |
| NC_037644.1 | 8997798 | SNV | 1 | A | G | Homozygous   |
| NC_037644.1 | 8997821 | SNV | 1 | G | A | Homozygous   |
| NC_037644.1 | 8997943 | SNV | 1 | T | C | Homozygous   |
| NC_037644.1 | 8997947 | SNV | 1 | A | G | Homozygous   |
| NC_037644.1 | 8997990 | SNV | 1 | A | G | Homozygous   |
| NC_037644.1 | 8998183 | SNV | 1 | A | G | Heterozygous |
| NC_037644.1 | 8998194 | SNV | 1 | T | C | Homozygous   |
| NC_037644.1 | 8998467 | SNV | 1 | A | G | Homozygous   |
| NC_037644.1 | 8998694 | SNV | 1 | A | G | Homozygous   |
| NC_037644.1 | 8998745 | SNV | 1 | G | A | Heterozygous |
| NC_037644.1 | 8998828 | SNV | 1 | C | G | Heterozygous |
| NC_037644.1 | 8998886 | SNV | 1 | C | T | Homozygous   |
| NC_037644.1 | 8998896 | SNV | 1 | T | C | Homozygous   |
| NC_037644.1 | 8999034 | SNV | 1 | A | G | Homozygous   |
| NC_037644.1 | 8999216 | SNV | 1 | G | A | Homozygous   |
| NC_037644.1 | 8999272 | SNV | 1 | T | C | Homozygous   |
| NC_037644.1 | 8999290 | SNV | 1 | T | A | Heterozygous |
| NC_037644.1 | 8999298 | SNV | 1 | C | G | Homozygous   |
| NC_037644.1 | 8999326 | SNV | 1 | T | C | Heterozygous |
| NC_037644.1 | 8999544 | SNV | 1 | C | T | Heterozygous |
| NC_037644.1 | 8999571 | SNV | 1 | C | A | Heterozygous |
| NC_037644.1 | 8999644 | SNV | 1 | A | G | Homozygous   |
| NC_037644.1 | 8999719 | SNV | 1 | C | T | Homozygous   |
| NC_037644.1 | 8999779 | SNV | 1 | G | A | Heterozygous |
| NC_037644.1 | 8999897 | SNV | 1 | G | A | Heterozygous |
| NC_037644.1 | 8999934 | SNV | 1 | G | A | Homozygous   |
| NC_037644.1 | 9000557 | SNV | 1 | G | A | Heterozygous |
| NC_037644.1 | 9001122 | SNV | 1 | T | C | Homozygous   |
| NC_037644.1 | 9001125 | SNV | 1 | G | A | Heterozygous |
| NC_037644.1 | 9001301 | SNV | 1 | G | A | Homozygous   |
| NC_037644.1 | 9001679 | SNV | 1 | G | A | Homozygous   |
| NC_037644.1 | 9001694 | SNV | 1 | G | A | Homozygous   |
| NC_037644.1 | 9001776 | SNV | 1 | G | A | Heterozygous |
| NC_037644.1 | 9001794 | SNV | 1 | A | G | Heterozygous |
| NC_037644.1 | 9001850 | SNV | 1 | A | G | Heterozygous |
| NC_037644.1 | 9002190 | SNV | 1 | A | G | Heterozygous |
| NC_037644.1 | 9002193 | SNV | 1 | C | T | Heterozygous |
| NC_037644.1 | 9002195 | SNV | 1 | T | C | Heterozygous |
| NC_037644.1 | 9002329 | SNV | 1 | T | C | Homozygous   |
| NC_037644.1 | 9005437 | SNV | 1 | C | T | Homozygous   |
| NC_037644.1 | 9005470 | SNV | 1 | C | T | Homozygous   |
| NC_037644.1 | 9005473 | SNV | 1 | A | G | Homozygous   |

|             |         |     |   |   |   |              |
|-------------|---------|-----|---|---|---|--------------|
| NC_037644.1 | 9009965 | SNV | 1 | G | A | Heterozygous |
| NC_037644.1 | 9010031 | SNV | 1 | G | A | Heterozygous |
| NC_037644.1 | 9010115 | SNV | 1 | G | T | Heterozygous |
| NC_037644.1 | 9010271 | SNV | 1 | C | T | Heterozygous |
| NC_037644.1 | 9010322 | SNV | 1 | G | A | Heterozygous |
| NC_037644.1 | 9010382 | SNV | 1 | A | G | Homozygous   |
| NC_037644.1 | 9010421 | SNV | 1 | G | A | Heterozygous |
| NC_037644.1 | 9010574 | SNV | 1 | C | T | Homozygous   |
| NC_037644.1 | 9011073 | SNV | 1 | T | C | Homozygous   |
| NC_037644.1 | 9011112 | SNV | 1 | A | T | Homozygous   |
| NC_037644.1 | 9011115 | SNV | 1 | C | T | Homozygous   |
| NC_037644.1 | 9032112 | SNV | 1 | C | T | Heterozygous |
| NC_037644.1 | 9035316 | SNV | 1 | G | A | Homozygous   |
| NC_037644.1 | 9038447 | SNV | 1 | G | A | Homozygous   |
| NC_037644.1 | 9039153 | SNV | 1 | C | T | Homozygous   |
| NC_037644.1 | 9039916 | SNV | 1 | A | G | Homozygous   |
| NC_037644.1 | 9040361 | SNV | 1 | T | C | Homozygous   |
| NC_037644.1 | 9040773 | SNV | 1 | A | G | Homozygous   |
| NC_037644.1 | 9040915 | SNV | 1 | G | A | Homozygous   |
| NC_037644.1 | 9041015 | SNV | 1 | T | A | Homozygous   |
| NC_037644.1 | 9041330 | SNV | 1 | T | C | Homozygous   |
| NC_037644.1 | 9041687 | SNV | 1 | G | A | Homozygous   |
| NC_037644.1 | 9041809 | SNV | 1 | A | G | Homozygous   |
| NC_037644.1 | 9041813 | SNV | 1 | C | T | Homozygous   |
| NC_037644.1 | 9042986 | SNV | 1 | C | T | Homozygous   |
| NC_037644.1 | 9042993 | SNV | 1 | A | G | Homozygous   |
| NC_037644.1 | 9043020 | SNV | 1 | A | G | Homozygous   |
| NC_037644.1 | 9043163 | SNV | 1 | C | T | Heterozygous |
| NC_037644.1 | 9043278 | SNV | 1 | T | C | Homozygous   |
| NC_037644.1 | 9043347 | SNV | 1 | A | G | Homozygous   |
| NC_037644.1 | 9043391 | SNV | 1 | C | T | Heterozygous |
| NC_037644.1 | 9043693 | SNV | 1 | A | G | Homozygous   |
| NC_037644.1 | 9044005 | SNV | 1 | C | G | Heterozygous |
| NC_037644.1 | 9044130 | SNV | 1 | A | G | Homozygous   |
| NC_037644.1 | 9044160 | SNV | 1 | A | G | Homozygous   |
| NC_037644.1 | 9044182 | SNV | 1 | G | A | Homozygous   |
| NC_037644.1 | 9044317 | SNV | 1 | G | C | Homozygous   |
| NC_037644.1 | 9044320 | SNV | 1 | G | A | Homozygous   |
| NC_037644.1 | 9044349 | SNV | 1 | G | A | Homozygous   |
| NC_037644.1 | 9044361 | SNV | 1 | A | G | Homozygous   |
| NC_037644.1 | 9044388 | SNV | 1 | G | A | Homozygous   |
| NC_037644.1 | 9045174 | SNV | 1 | A | G | Heterozygous |
| NC_037644.1 | 9045474 | SNV | 1 | T | G | Homozygous   |
| NC_037644.1 | 9045534 | SNV | 1 | A | C | Heterozygous |
| NC_037644.1 | 9045577 | SNV | 1 | G | A | Heterozygous |
| NC_037644.1 | 9045691 | SNV | 1 | G | A | Heterozygous |
| NC_037644.1 | 9045792 | SNV | 1 | G | A | Heterozygous |
| NC_037644.1 | 9045814 | SNV | 1 | A | G | Homozygous   |
| NC_037644.1 | 9046449 | SNV | 1 | T | C | Homozygous   |
| NC_037644.1 | 9046581 | SNV | 1 | T | C | Homozygous   |
| NC_037644.1 | 9049462 | SNV | 1 | T | C | Homozygous   |

|             |         |     |   |   |   |              |
|-------------|---------|-----|---|---|---|--------------|
| NC_037644.1 | 9049492 | SNV | 1 | C | A | Homozygous   |
| NC_037644.1 | 9051988 | SNV | 1 | T | C | Homozygous   |
| NC_037644.1 | 9052983 | SNV | 1 | T | C | Homozygous   |
| NC_037644.1 | 9053430 | SNV | 1 | C | T | Homozygous   |
| NC_037644.1 | 9053722 | SNV | 1 | C | T | Heterozygous |
| NC_037644.1 | 9054307 | SNV | 1 | T | C | Homozygous   |
| NC_037644.1 | 9054365 | SNV | 1 | A | G | Heterozygous |
| NC_037644.1 | 9054373 | SNV | 1 | C | T | Homozygous   |
| NC_037644.1 | 9055046 | SNV | 1 | A | T | Homozygous   |
| NC_037644.1 | 9055061 | SNV | 1 | G | A | Heterozygous |
| NC_037644.1 | 9055431 | SNV | 1 | G | A | Homozygous   |
| NC_037644.1 | 9055517 | SNV | 1 | T | C | Homozygous   |
| NC_037644.1 | 9056378 | SNV | 1 | A | G | Homozygous   |
| NC_037644.1 | 9057632 | SNV | 1 | G | A | Heterozygous |
| NC_037644.1 | 9057638 | SNV | 1 | T | C | Heterozygous |
| NC_037644.1 | 9057809 | SNV | 1 | T | C | Homozygous   |
| NC_037644.1 | 9058175 | SNV | 1 | A | C | Homozygous   |
| NC_037644.1 | 9058322 | SNV | 1 | T | C | Homozygous   |
| NC_037644.1 | 9058389 | SNV | 1 | C | T | Heterozygous |
| NC_037644.1 | 9058833 | SNV | 1 | A | G | Homozygous   |
| NC_037644.1 | 9058870 | SNV | 1 | T | C | Heterozygous |
| NC_037644.1 | 9058900 | SNV | 1 | T | C | Homozygous   |
| NC_037644.1 | 9111167 | SNV | 1 | C | T | Homozygous   |
| NC_037644.1 | 9111305 | SNV | 1 | G | A | Homozygous   |
| NC_037644.1 | 9111358 | SNV | 1 | A | T | Heterozygous |
| NC_037644.1 | 9113634 | SNV | 1 | T | A | Heterozygous |
| NC_037644.1 | 9113639 | SNV | 1 | A | T | Homozygous   |
| NC_037644.1 | 9115287 | SNV | 1 | T | C | Homozygous   |
| NC_037644.1 | 9123326 | SNV | 1 | G | C | Homozygous   |
| NC_037644.1 | 9123455 | SNV | 1 | A | C | Homozygous   |
| NC_037644.1 | 9123646 | SNV | 1 | G | A | Homozygous   |
| NC_037644.1 | 9123912 | SNV | 1 | T | C | Homozygous   |
| NC_037644.1 | 9125430 | SNV | 1 | A | G | Heterozygous |
| NC_037644.1 | 9130888 | SNV | 1 | C | A | Heterozygous |
| NC_037644.1 | 9130894 | SNV | 1 | T | C | Homozygous   |
| NC_037644.1 | 9130970 | SNV | 1 | C | T | Heterozygous |
| NC_037644.1 | 9137747 | SNV | 1 | G | A | Heterozygous |
| NC_037644.1 | 9137771 | SNV | 1 | C | G | Heterozygous |
| NC_037644.1 | 9137808 | SNV | 1 | G | A | Heterozygous |
| NC_037644.1 | 9137845 | SNV | 1 | T | C | Homozygous   |
| NC_037644.1 | 9137967 | SNV | 1 | G | A | Heterozygous |
| NC_037644.1 | 9138058 | SNV | 1 | A | G | Heterozygous |
| NC_037644.1 | 9138074 | SNV | 1 | A | G | Heterozygous |
| NC_037644.1 | 9143260 | SNV | 1 | G | A | Homozygous   |
| NC_037644.1 | 9143443 | SNV | 1 | A | G | Homozygous   |
| NC_037644.1 | 9143447 | SNV | 1 | G | A | Homozygous   |
| NC_037644.1 | 9160123 | SNV | 1 | A | G | Homozygous   |
| NC_037644.1 | 9160127 | SNV | 1 | A | G | Homozygous   |
| NC_037644.1 | 9160131 | SNV | 1 | A | G | Heterozygous |
| NC_037644.1 | 9160137 | SNV | 1 | A | G | Heterozygous |
| NC_037644.1 | 9160144 | SNV | 1 | C | T | Homozygous   |

|             |         |     |   |   |   |              |
|-------------|---------|-----|---|---|---|--------------|
| NC_037644.1 | 9161358 | SNV | 1 | T | A | Heterozygous |
| NC_037644.1 | 9161508 | SNV | 1 | T | C | Homozygous   |
| NC_037644.1 | 9161519 | SNV | 1 | A | G | Homozygous   |
| NC_037644.1 | 9161634 | SNV | 1 | A | G | Homozygous   |
| NC_037644.1 | 9161651 | SNV | 1 | G | A | Heterozygous |
| NC_037644.1 | 9162163 | SNV | 1 | T | C | Homozygous   |
| NC_037644.1 | 9162184 | SNV | 1 | T | C | Homozygous   |
| NC_037644.1 | 9162191 | SNV | 1 | G | A | Homozygous   |
| NC_037644.1 | 9162209 | SNV | 1 | A | G | Homozygous   |
| NC_037644.1 | 9169092 | SNV | 1 | G | T | Homozygous   |
| NC_037644.1 | 9169211 | SNV | 1 | T | C | Homozygous   |
| NC_037644.1 | 9169219 | SNV | 1 | C | A | Heterozygous |
| NC_037644.1 | 9169278 | SNV | 1 | C | A | Homozygous   |
| NC_037644.1 | 9169467 | SNV | 1 | C | T | Homozygous   |
| NC_037644.1 | 9169516 | SNV | 1 | G | A | Heterozygous |
| NC_037644.1 | 9171860 | SNV | 1 | G | A | Homozygous   |
| NC_037644.1 | 9171866 | SNV | 1 | T | G | Homozygous   |
| NC_037644.1 | 9188545 | SNV | 1 | A | G | Homozygous   |
| NC_037644.1 | 9188607 | SNV | 1 | A | G | Heterozygous |
| NC_037644.1 | 9199891 | SNV | 1 | G | C | Homozygous   |
| NC_037644.1 | 9199896 | SNV | 1 | T | C | Homozygous   |
| NC_037644.1 | 9199903 | SNV | 1 | T | C | Homozygous   |
| NC_037644.1 | 9199925 | SNV | 1 | T | C | Homozygous   |
| NC_037644.1 | 9200014 | SNV | 1 | C | G | Homozygous   |
| NC_037644.1 | 9200304 | SNV | 1 | A | G | Homozygous   |
| NC_037644.1 | 9200414 | SNV | 1 | G | A | Heterozygous |
| NC_037644.1 | 9201287 | SNV | 1 | C | T | Homozygous   |
| NC_037644.1 | 9208723 | SNV | 1 | C | T | Homozygous   |
| NC_037644.1 | 9214941 | SNV | 1 | A | C | Homozygous   |
| NC_037644.1 | 9214950 | SNV | 1 | A | G | Heterozygous |
| NC_037644.1 | 9214957 | SNV | 1 | T | C | Homozygous   |
| NC_037644.1 | 9214963 | SNV | 1 | C | T | Homozygous   |
| NC_037644.1 | 9215233 | SNV | 1 | A | G | Homozygous   |
| NC_037644.1 | 9220847 | SNV | 1 | A | G | Heterozygous |
| NC_037644.1 | 9220897 | SNV | 1 | A | G | Heterozygous |
| NC_037644.1 | 9220906 | SNV | 1 | A | G | Heterozygous |
| NC_037644.1 | 9221192 | SNV | 1 | A | G | Heterozygous |
| NC_037644.1 | 9228041 | SNV | 1 | T | C | Homozygous   |
| NC_037644.1 | 9229502 | SNV | 1 | T | C | Heterozygous |
| NC_037644.1 | 9230572 | SNV | 1 | A | T | Homozygous   |
| NC_037644.1 | 9230574 | SNV | 1 | T | C | Homozygous   |
| NC_037644.1 | 9230598 | SNV | 1 | A | T | Homozygous   |
| NC_037644.1 | 9238038 | SNV | 1 | A | G | Homozygous   |
| NC_037644.1 | 9238058 | SNV | 1 | G | A | Heterozygous |
| NC_037644.1 | 9238118 | SNV | 1 | A | G | Homozygous   |
| NC_037644.1 | 9238217 | SNV | 1 | A | G | Homozygous   |
| NC_037644.1 | 9250764 | SNV | 1 | T | C | Homozygous   |
| NC_037644.1 | 9250774 | SNV | 1 | A | T | Homozygous   |
| NC_037644.1 | 9250780 | SNV | 1 | T | C | Homozygous   |
| NC_037644.1 | 9250784 | SNV | 1 | T | C | Homozygous   |
| NC_037644.1 | 9270372 | SNV | 1 | A | G | Heterozygous |

|             |         |     |   |   |   |              |
|-------------|---------|-----|---|---|---|--------------|
| NC_037644.1 | 9270380 | SNV | 1 | G | A | Heterozygous |
| NC_037644.1 | 9270411 | SNV | 1 | C | T | Heterozygous |
| NC_037644.1 | 9271028 | SNV | 1 | C | T | Homozygous   |
| NC_037644.1 | 9271085 | SNV | 1 | C | A | Homozygous   |
| NC_037644.1 | 9271116 | SNV | 1 | A | G | Homozygous   |
| NC_037644.1 | 9271128 | SNV | 1 | G | A | Homozygous   |
| NC_037644.1 | 9271131 | SNV | 1 | A | G | Homozygous   |
| NC_037644.1 | 9271204 | SNV | 1 | A | G | Homozygous   |
| NC_037644.1 | 9280032 | SNV | 1 | A | G | Homozygous   |
| NC_037644.1 | 9280045 | SNV | 1 | G | A | Heterozygous |
| NC_037644.1 | 9280148 | SNV | 1 | T | C | Heterozygous |
| NC_037644.1 | 9280190 | SNV | 1 | C | T | Heterozygous |
| NC_037644.1 | 9280256 | SNV | 1 | A | G | Homozygous   |
| NC_037644.1 | 9280287 | SNV | 1 | C | G | Homozygous   |
| NC_037644.1 | 9280290 | SNV | 1 | C | G | Homozygous   |
| NC_037644.1 | 9280292 | SNV | 1 | G | T | Homozygous   |
| NC_037644.1 | 9280309 | SNV | 1 | G | T | Heterozygous |
| NC_037644.1 | 9283637 | SNV | 1 | C | T | Homozygous   |
| NC_037644.1 | 9300120 | SNV | 1 | C | T | Heterozygous |
| NC_037644.1 | 9300745 | SNV | 1 | C | A | Heterozygous |
| NC_037644.1 | 9300752 | SNV | 1 | C | A | Homozygous   |
| NC_037644.1 | 9301095 | SNV | 1 | T | C | Heterozygous |
| NC_037644.1 | 9301550 | SNV | 1 | C | A | Heterozygous |
| NC_037644.1 | 9301566 | SNV | 1 | T | C | Homozygous   |
| NC_037644.1 | 9303916 | SNV | 1 | G | A | Heterozygous |
| NC_037644.1 | 9303954 | SNV | 1 | A | G | Heterozygous |
| NC_037644.1 | 9304081 | SNV | 1 | C | G | Heterozygous |
| NC_037644.1 | 9304512 | SNV | 1 | C | T | Homozygous   |
| NC_037644.1 | 9312680 | SNV | 1 | A | T | Heterozygous |
| NC_037644.1 | 9312682 | SNV | 1 | A | T | Heterozygous |
| NC_037644.1 | 9316445 | SNV | 1 | C | T | Heterozygous |
| NC_037644.1 | 9318302 | SNV | 1 | A | G | Homozygous   |
| NC_037644.1 | 9318580 | SNV | 1 | A | C | Heterozygous |
| NC_037644.1 | 9318610 | SNV | 1 | C | T | Heterozygous |
| NC_037644.1 | 9318643 | SNV | 1 | A | G | Heterozygous |
| NC_037644.1 | 9318726 | SNV | 1 | A | G | Homozygous   |
| NC_037644.1 | 9318772 | SNV | 1 | A | T | Homozygous   |
| NC_037644.1 | 9319652 | SNV | 1 | C | G | Homozygous   |
| NC_037644.1 | 9338438 | SNV | 1 | A | G | Homozygous   |
| NC_037644.1 | 9338441 | SNV | 1 | T | C | Homozygous   |
| NC_037644.1 | 9338544 | SNV | 1 | A | G | Heterozygous |
| NC_037644.1 | 9338558 | SNV | 1 | A | G | Homozygous   |
| NC_037644.1 | 9340137 | SNV | 1 | C | G | Homozygous   |
| NC_037644.1 | 9340149 | SNV | 1 | A | G | Homozygous   |
| NC_037644.1 | 9340500 | SNV | 1 | G | A | Heterozygous |
| NC_037644.1 | 9340596 | SNV | 1 | C | T | Heterozygous |
| NC_037644.1 | 9341340 | SNV | 1 | C | T | Homozygous   |
| NC_037644.1 | 9341357 | SNV | 1 | C | T | Homozygous   |
| NC_037644.1 | 9342612 | SNV | 1 | T | C | Heterozygous |
| NC_037644.1 | 9342628 | SNV | 1 | T | C | Heterozygous |
| NC_037644.1 | 9342631 | SNV | 1 | T | C | Heterozygous |

|             |         |     |   |   |   |              |
|-------------|---------|-----|---|---|---|--------------|
| NC_037644.1 | 9344097 | SNV | 1 | G | T | Homozygous   |
| NC_037644.1 | 9344107 | SNV | 1 | T | A | Heterozygous |
| NC_037644.1 | 9344111 | SNV | 1 | T | A | Heterozygous |
| NC_037644.1 | 9349009 | SNV | 1 | T | C | Homozygous   |
| NC_037644.1 | 9349016 | SNV | 1 | C | T | Homozygous   |
| NC_037644.1 | 9349040 | SNV | 1 | G | A | Heterozygous |
| NC_037644.1 | 9349045 | SNV | 1 | A | C | Homozygous   |
| NC_037644.1 | 9351364 | SNV | 1 | T | C | Homozygous   |
| NC_037644.1 | 9351380 | SNV | 1 | T | G | Homozygous   |
| NC_037644.1 | 9351383 | SNV | 1 | C | G | Homozygous   |
| NC_037644.1 | 9351395 | SNV | 1 | C | A | Homozygous   |
| NC_037644.1 | 9351400 | SNV | 1 | C | A | Homozygous   |
| NC_037644.1 | 9351405 | SNV | 1 | C | A | Homozygous   |
| NC_037644.1 | 9351410 | SNV | 1 | A | G | Homozygous   |
| NC_037644.1 | 9351615 | SNV | 1 | A | T | Heterozygous |
| NC_037644.1 | 9351623 | SNV | 1 | T | A | Heterozygous |
| NC_037644.1 | 9351720 | SNV | 1 | T | G | Heterozygous |
| NC_037644.1 | 9351757 | SNV | 1 | G | A | Heterozygous |
| NC_037644.1 | 9352136 | SNV | 1 | C | T | Homozygous   |
| NC_037644.1 | 9356626 | SNV | 1 | G | A | Heterozygous |
| NC_037644.1 | 9356628 | SNV | 1 | G | A | Homozygous   |
| NC_037644.1 | 9356674 | SNV | 1 | C | T | Heterozygous |
| NC_037644.1 | 9401040 | SNV | 1 | T | C | Heterozygous |
| NC_037644.1 | 9466776 | SNV | 1 | G | A | Homozygous   |
| NC_037644.1 | 9466961 | SNV | 1 | G | C | Homozygous   |
| NC_037644.1 | 9467094 | SNV | 1 | A | G | Heterozygous |
| NC_037644.1 | 9467181 | SNV | 1 | G | A | Heterozygous |
| NC_037644.1 | 9467191 | SNV | 1 | A | G | Heterozygous |
| NC_037644.1 | 9467563 | SNV | 1 | C | G | Homozygous   |
| NC_037644.1 | 9467865 | SNV | 1 | C | T | Heterozygous |
| NC_037644.1 | 9467884 | SNV | 1 | C | T | Heterozygous |
| NC_037644.1 | 9467888 | SNV | 1 | A | G | Heterozygous |
| NC_037644.1 | 9467984 | SNV | 1 | C | T | Heterozygous |
| NC_037644.1 | 9468035 | SNV | 1 | G | A | Heterozygous |
| NC_037644.1 | 9468137 | SNV | 1 | T | A | Heterozygous |
| NC_037644.1 | 9468147 | SNV | 1 | G | A | Heterozygous |
| NC_037644.1 | 9468150 | SNV | 1 | A | C | Heterozygous |
| NC_037644.1 | 9468152 | SNV | 1 | A | G | Heterozygous |
| NC_037644.1 | 9468159 | SNV | 1 | A | G | Homozygous   |
| NC_037644.1 | 9468163 | SNV | 1 | C | G | Homozygous   |
| NC_037644.1 | 9468199 | SNV | 1 | A | G | Homozygous   |
| NC_037644.1 | 9468230 | SNV | 1 | C | T | Heterozygous |
| NC_037644.1 | 9468889 | SNV | 1 | A | G | Heterozygous |
| NC_037644.1 | 9481178 | SNV | 1 | C | T | Homozygous   |
| NC_037644.1 | 9481184 | SNV | 1 | G | A | Homozygous   |
| NC_037644.1 | 9481283 | SNV | 1 | G | T | Homozygous   |
| NC_037644.1 | 9490377 | SNV | 1 | C | T | Homozygous   |
| NC_037644.1 | 9490392 | SNV | 1 | A | T | Homozygous   |
| NC_037644.1 | 9490449 | SNV | 1 | T | A | Homozygous   |
| NC_037644.1 | 9490458 | SNV | 1 | T | A | Homozygous   |
| NC_037644.1 | 9490476 | SNV | 1 | C | T | Homozygous   |



|             |         |     |   |   |   |              |
|-------------|---------|-----|---|---|---|--------------|
| NC_037644.1 | 9490482 | SNV | 1 | T | C | Heterozygous |
| NC_037644.1 | 9498379 | SNV | 1 | A | G | Homozygous   |
| NC_037644.1 | 9498398 | SNV | 1 | C | T | Homozygous   |
| NC_037644.1 | 9498416 | SNV | 1 | G | A | Heterozygous |
| NC_037644.1 | 9498444 | SNV | 1 | A | G | Heterozygous |
| NC_037644.1 | 9498758 | SNV | 1 | G | A | Homozygous   |
| NC_037644.1 | 9499441 | SNV | 1 | G | A | Homozygous   |
| NC_037644.1 | 9503915 | SNV | 1 | G | A | Heterozygous |
| NC_037644.1 | 9503937 | SNV | 1 | T | C | Heterozygous |
| NC_037644.1 | 9504163 | SNV | 1 | T | C | Heterozygous |
| NC_037644.1 | 9504259 | SNV | 1 | T | C | Heterozygous |
| NC_037644.1 | 9504317 | SNV | 1 | T | C | Heterozygous |
| NC_037644.1 | 9504421 | SNV | 1 | T | C | Homozygous   |
| NC_037644.1 | 9504565 | SNV | 1 | T | C | Heterozygous |
| NC_037644.1 | 9504769 | SNV | 1 | A | G | Homozygous   |
| NC_037644.1 | 9504803 | SNV | 1 | T | A | Heterozygous |
| NC_037644.1 | 9504805 | SNV | 1 | A | G | Heterozygous |
| NC_037644.1 | 9504853 | SNV | 1 | T | C | Homozygous   |
| NC_037644.1 | 9505098 | SNV | 1 | T | C | Homozygous   |
| NC_037644.1 | 9505626 | SNV | 1 | A | G | Heterozygous |
| NC_037644.1 | 9505840 | SNV | 1 | G | A | Heterozygous |
| NC_037644.1 | 9505897 | SNV | 1 | T | C | Heterozygous |
| NC_037644.1 | 9505903 | SNV | 1 | T | C | Heterozygous |
| NC_037644.1 | 9505988 | SNV | 1 | G | A | Heterozygous |
| NC_037644.1 | 9506210 | SNV | 1 | C | T | Heterozygous |
| NC_037644.1 | 9506653 | SNV | 1 | T | C | Homozygous   |
| NC_037644.1 | 9506746 | SNV | 1 | G | A | Heterozygous |
| NC_037644.1 | 9507593 | SNV | 1 | G | A | Homozygous   |
| NC_037644.1 | 9507637 | SNV | 1 | A | G | Homozygous   |
| NC_037644.1 | 9507664 | SNV | 1 | T | C | Homozygous   |
| NC_037644.1 | 9507666 | SNV | 1 | T | C | Homozygous   |
| NC_037644.1 | 9507929 | SNV | 1 | T | C | Homozygous   |
| NC_037644.1 | 9507955 | SNV | 1 | G | A | Heterozygous |
| NC_037644.1 | 9508386 | SNV | 1 | T | C | Heterozygous |
| NC_037644.1 | 9508429 | SNV | 1 | C | T | Heterozygous |
| NC_037644.1 | 9508433 | SNV | 1 | C | T | Heterozygous |
| NC_037644.1 | 9508437 | SNV | 1 | T | C | Heterozygous |
| NC_037644.1 | 9508913 | SNV | 1 | C | A | Heterozygous |
| NC_037644.1 | 9509078 | SNV | 1 | A | C | Homozygous   |
| NC_037644.1 | 9509083 | SNV | 1 | A | C | Heterozygous |
| NC_037644.1 | 9509088 | SNV | 1 | G | C | Heterozygous |
| NC_037644.1 | 9509485 | SNV | 1 | G | C | Homozygous   |
| NC_037644.1 | 9509724 | SNV | 1 | G | A | Heterozygous |
| NC_037644.1 | 9509809 | SNV | 1 | A | G | Heterozygous |
| NC_037644.1 | 9509811 | SNV | 1 | A | G | Heterozygous |
| NC_037644.1 | 9509813 | SNV | 1 | A | G | Heterozygous |
| NC_037644.1 | 9509903 | SNV | 1 | A | G | Homozygous   |
| NC_037644.1 | 9510174 | SNV | 1 | C | T | Heterozygous |
| NC_037644.1 | 9512857 | SNV | 1 | T | C | Heterozygous |
| NC_037644.1 | 9513554 | SNV | 1 | G | A | Heterozygous |
| NC_037644.1 | 9514186 | SNV | 1 | A | T | Homozygous   |

|             |         |     |   |   |   |              |
|-------------|---------|-----|---|---|---|--------------|
| NC_037644.1 | 9514201 | SNV | 1 | A | T | Homozygous   |
| NC_037644.1 | 9514229 | SNV | 1 | C | T | Homozygous   |
| NC_037644.1 | 9517794 | SNV | 1 | G | C | Homozygous   |
| NC_037644.1 | 9517836 | SNV | 1 | T | C | Homozygous   |
| NC_037644.1 | 9517865 | SNV | 1 | C | T | Heterozygous |
| NC_037644.1 | 9517891 | SNV | 1 | T | C | Heterozygous |
| NC_037644.1 | 9517911 | SNV | 1 | C | T | Heterozygous |
| NC_037644.1 | 9517986 | SNV | 1 | A | G | Heterozygous |
| NC_037644.1 | 9518067 | SNV | 1 | T | A | Heterozygous |
| NC_037644.1 | 9518147 | SNV | 1 | C | T | Heterozygous |
| NC_037644.1 | 9518156 | SNV | 1 | T | C | Homozygous   |
| NC_037644.1 | 9518159 | SNV | 1 | A | T | Homozygous   |
| NC_037644.1 | 9518258 | SNV | 1 | T | C | Homozygous   |
| NC_037644.1 | 9518374 | SNV | 1 | A | G | Heterozygous |
| NC_037644.1 | 9518546 | SNV | 1 | C | T | Heterozygous |
| NC_037644.1 | 9518556 | SNV | 1 | T | C | Heterozygous |
| NC_037644.1 | 9518683 | SNV | 1 | G | T | Heterozygous |
| NC_037644.1 | 9518730 | SNV | 1 | G | C | Heterozygous |
| NC_037644.1 | 9518795 | SNV | 1 | A | T | Homozygous   |
| NC_037644.1 | 9518834 | SNV | 1 | T | C | Homozygous   |
| NC_037644.1 | 9518862 | SNV | 1 | A | G | Heterozygous |
| NC_037644.1 | 9518932 | SNV | 1 | A | G | Heterozygous |
| NC_037644.1 | 9519000 | SNV | 1 | T | C | Heterozygous |
| NC_037644.1 | 9519012 | SNV | 1 | A | G | Homozygous   |
| NC_037644.1 | 9519098 | SNV | 1 | G | C | Homozygous   |
| NC_037644.1 | 9519110 | SNV | 1 | T | C | Heterozygous |
| NC_037644.1 | 9519112 | SNV | 1 | A | G | Heterozygous |
| NC_037644.1 | 9519133 | SNV | 1 | G | T | Heterozygous |
| NC_037644.1 | 9519314 | SNV | 1 | T | C | Homozygous   |
| NC_037644.1 | 9519340 | SNV | 1 | T | C | Heterozygous |
| NC_037644.1 | 9519351 | SNV | 1 | T | C | Homozygous   |
| NC_037644.1 | 9519429 | SNV | 1 | C | T | Heterozygous |
| NC_037644.1 | 9519434 | SNV | 1 | A | T | Heterozygous |
| NC_037644.1 | 9519491 | SNV | 1 | G | A | Heterozygous |
| NC_037644.1 | 9519522 | SNV | 1 | A | T | Homozygous   |
| NC_037644.1 | 9519581 | SNV | 1 | A | G | Homozygous   |
| NC_037644.1 | 9519729 | SNV | 1 | C | T | Heterozygous |
| NC_037644.1 | 9519740 | SNV | 1 | C | T | Heterozygous |
| NC_037644.1 | 9519742 | SNV | 1 | T | C | Heterozygous |
| NC_037644.1 | 9520130 | SNV | 1 | G | T | Heterozygous |
| NC_037644.1 | 9520135 | SNV | 1 | T | C | Homozygous   |
| NC_037644.1 | 9520139 | SNV | 1 | C | T | Heterozygous |
| NC_037644.1 | 9520141 | SNV | 1 | A | G | Homozygous   |
| NC_037644.1 | 9520153 | SNV | 1 | T | C | Homozygous   |
| NC_037644.1 | 9520155 | SNV | 1 | T | C | Homozygous   |
| NC_037644.1 | 9520157 | SNV | 1 | T | C | Heterozygous |
| NC_037644.1 | 9520167 | SNV | 1 | T | C | Heterozygous |
| NC_037644.1 | 9520170 | SNV | 1 | T | G | Heterozygous |
| NC_037644.1 | 9520180 | SNV | 1 | T | G | Heterozygous |
| NC_037644.1 | 9520184 | SNV | 1 | A | G | Heterozygous |
| NC_037644.1 | 9520239 | SNV | 1 | A | G | Homozygous   |

|             |         |     |   |   |   |              |
|-------------|---------|-----|---|---|---|--------------|
| NC_037644.1 | 9520249 | SNV | 1 | A | G | Heterozygous |
| NC_037644.1 | 9520377 | SNV | 1 | T | C | Homozygous   |
| NC_037644.1 | 9520419 | SNV | 1 | A | G | Homozygous   |
| NC_037644.1 | 9520449 | SNV | 1 | A | G | Homozygous   |
| NC_037644.1 | 9520465 | SNV | 1 | T | C | Homozygous   |
| NC_037644.1 | 9520475 | SNV | 1 | T | C | Heterozygous |
| NC_037644.1 | 9520496 | SNV | 1 | A | C | Heterozygous |
| NC_037644.1 | 9520518 | SNV | 1 | C | G | Heterozygous |
| NC_037644.1 | 9520536 | SNV | 1 | T | C | Homozygous   |
| NC_037644.1 | 9520543 | SNV | 1 | T | C | Heterozygous |
| NC_037644.1 | 9520625 | SNV | 1 | T | C | Heterozygous |
| NC_037644.1 | 9520668 | SNV | 1 | A | G | Homozygous   |
| NC_037644.1 | 9520846 | SNV | 1 | T | C | Heterozygous |
| NC_037644.1 | 9521451 | SNV | 1 | C | T | Homozygous   |
| NC_037644.1 | 9521860 | SNV | 1 | T | C | Homozygous   |
| NC_037644.1 | 9522148 | SNV | 1 | C | T | Heterozygous |
| NC_037644.1 | 9522328 | SNV | 1 | A | G | Homozygous   |
| NC_037644.1 | 9523930 | SNV | 1 | C | T | Heterozygous |
| NC_037644.1 | 9523951 | SNV | 1 | C | A | Heterozygous |
| NC_037644.1 | 9523981 | SNV | 1 | C | G | Homozygous   |
| NC_037644.1 | 9523989 | SNV | 1 | C | G | Homozygous   |
| NC_037644.1 | 9524014 | SNV | 1 | T | C | Homozygous   |
| NC_037644.1 | 9524824 | SNV | 1 | G | A | Heterozygous |
| NC_037644.1 | 9524865 | SNV | 1 | T | A | Homozygous   |
| NC_037644.1 | 9525328 | SNV | 1 | T | C | Homozygous   |
| NC_037644.1 | 9525817 | SNV | 1 | T | C | Homozygous   |
| NC_037644.1 | 9525819 | SNV | 1 | C | T | Heterozygous |
| NC_037644.1 | 9525826 | SNV | 1 | C | G | Heterozygous |
| NC_037644.1 | 9525850 | SNV | 1 | C | T | Heterozygous |
| NC_037644.1 | 9526303 | SNV | 1 | A | G | Heterozygous |
| NC_037644.1 | 9526434 | SNV | 1 | G | A | Heterozygous |
| NC_037644.1 | 9526590 | SNV | 1 | T | A | Homozygous   |
| NC_037644.1 | 9526965 | SNV | 1 | A | G | Homozygous   |
| NC_037644.1 | 9527004 | SNV | 1 | A | G | Homozygous   |
| NC_037644.1 | 9527065 | SNV | 1 | A | G | Homozygous   |
| NC_037644.1 | 9527209 | SNV | 1 | T | C | Heterozygous |
| NC_037644.1 | 9527746 | SNV | 1 | G | A | Heterozygous |
| NC_037644.1 | 9527770 | SNV | 1 | G | A | Heterozygous |
| NC_037644.1 | 9527772 | SNV | 1 | A | C | Heterozygous |
| NC_037644.1 | 9527777 | SNV | 1 | A | T | Heterozygous |
| NC_037644.1 | 9528653 | SNV | 1 | C | T | Heterozygous |
| NC_037644.1 | 9528702 | SNV | 1 | A | G | Homozygous   |
| NC_037644.1 | 9528752 | SNV | 1 | C | T | Heterozygous |
| NC_037644.1 | 9531294 | SNV | 1 | T | C | Homozygous   |
| NC_037644.1 | 9531300 | SNV | 1 | T | C | Homozygous   |
| NC_037644.1 | 9531314 | SNV | 1 | T | C | Homozygous   |
| NC_037644.1 | 9531520 | SNV | 1 | G | A | Heterozygous |
| NC_037644.1 | 9531640 | SNV | 1 | A | G | Homozygous   |
| NC_037644.1 | 9531670 | SNV | 1 | C | G | Heterozygous |
| NC_037644.1 | 9532122 | SNV | 1 | C | T | Homozygous   |
| NC_037644.1 | 9532128 | SNV | 1 | T | C | Homozygous   |

|             |         |     |   |   |   |              |
|-------------|---------|-----|---|---|---|--------------|
| NC_037644.1 | 9532130 | SNV | 1 | T | C | Homozygous   |
| NC_037644.1 | 9532132 | SNV | 1 | A | T | Homozygous   |
| NC_037644.1 | 9532222 | SNV | 1 | T | C | Homozygous   |
| NC_037644.1 | 9532239 | SNV | 1 | G | A | Heterozygous |
| NC_037644.1 | 9532375 | SNV | 1 | C | A | Homozygous   |
| NC_037644.1 | 9532397 | SNV | 1 | A | G | Homozygous   |
| NC_037644.1 | 9532417 | SNV | 1 | T | C | Homozygous   |
| NC_037644.1 | 9532503 | SNV | 1 | G | C | Homozygous   |
| NC_037644.1 | 9532590 | SNV | 1 | C | T | Heterozygous |
| NC_037644.1 | 9532593 | SNV | 1 | T | A | Heterozygous |
| NC_037644.1 | 9532608 | SNV | 1 | C | T | Heterozygous |
| NC_037644.1 | 9532707 | SNV | 1 | A | G | Heterozygous |
| NC_037644.1 | 9532973 | SNV | 1 | A | G | Heterozygous |
| NC_037644.1 | 9533150 | SNV | 1 | A | G | Homozygous   |
| NC_037644.1 | 9533965 | SNV | 1 | T | C | Heterozygous |
| NC_037644.1 | 9534089 | SNV | 1 | C | T | Heterozygous |
| NC_037644.1 | 9534583 | SNV | 1 | A | G | Heterozygous |
| NC_037644.1 | 9534606 | SNV | 1 | T | C | Heterozygous |
| NC_037644.1 | 9534655 | SNV | 1 | G | A | Homozygous   |
| NC_037644.1 | 9534671 | SNV | 1 | A | G | Homozygous   |
| NC_037644.1 | 9535021 | SNV | 1 | G | A | Homozygous   |
| NC_037644.1 | 9535717 | SNV | 1 | A | G | Heterozygous |
| NC_037644.1 | 9536424 | SNV | 1 | A | G | Homozygous   |
| NC_037644.1 | 9536550 | SNV | 1 | T | A | Heterozygous |
| NC_037644.1 | 9536734 | SNV | 1 | T | C | Homozygous   |
| NC_037644.1 | 9536747 | SNV | 1 | T | C | Heterozygous |
| NC_037644.1 | 9536763 | SNV | 1 | T | C | Homozygous   |
| NC_037644.1 | 9537123 | SNV | 1 | T | C | Heterozygous |
| NC_037644.1 | 9537318 | SNV | 1 | G | A | Heterozygous |
| NC_037644.1 | 9537320 | SNV | 1 | G | A | Heterozygous |
| NC_037644.1 | 9537323 | SNV | 1 | A | G | Heterozygous |
| NC_037644.1 | 9537711 | SNV | 1 | A | G | Heterozygous |
| NC_037644.1 | 9537907 | SNV | 1 | C | G | Heterozygous |
| NC_037644.1 | 9538029 | SNV | 1 | C | A | Heterozygous |
| NC_037644.1 | 9538146 | SNV | 1 | A | C | Heterozygous |
| NC_037644.1 | 9538157 | SNV | 1 | A | G | Homozygous   |
| NC_037644.1 | 9538174 | SNV | 1 | T | C | Homozygous   |
| NC_037644.1 | 9538521 | SNV | 1 | T | C | Homozygous   |
| NC_037644.1 | 9538543 | SNV | 1 | T | C | Heterozygous |
| NC_037644.1 | 9538677 | SNV | 1 | T | C | Homozygous   |
| NC_037644.1 | 9538763 | SNV | 1 | A | G | Homozygous   |
| NC_037644.1 | 9538834 | SNV | 1 | A | G | Heterozygous |
| NC_037644.1 | 9539166 | SNV | 1 | T | C | Heterozygous |
| NC_037644.1 | 9539430 | SNV | 1 | T | C | Homozygous   |
| NC_037644.1 | 9539432 | SNV | 1 | A | G | Homozygous   |
| NC_037644.1 | 9539947 | SNV | 1 | C | T | Homozygous   |
| NC_037644.1 | 9539994 | SNV | 1 | T | G | Homozygous   |
| NC_037644.1 | 9540232 | SNV | 1 | A | G | Homozygous   |
| NC_037644.1 | 9540238 | SNV | 1 | T | C | Homozygous   |
| NC_037644.1 | 9540310 | SNV | 1 | C | T | Heterozygous |
| NC_037644.1 | 9540315 | SNV | 1 | A | G | Heterozygous |

|             |         |     |   |   |   |              |
|-------------|---------|-----|---|---|---|--------------|
| NC_037644.1 | 9540347 | SNV | 1 | T | C | Heterozygous |
| NC_037644.1 | 9540357 | SNV | 1 | T | C | Heterozygous |
| NC_037644.1 | 9540572 | SNV | 1 | T | G | Heterozygous |
| NC_037644.1 | 9540789 | SNV | 1 | G | A | Heterozygous |
| NC_037644.1 | 9541381 | SNV | 1 | A | G | Homozygous   |
| NC_037644.1 | 9541395 | SNV | 1 | A | G | Homozygous   |
| NC_037644.1 | 9541739 | SNV | 1 | G | A | Heterozygous |
| NC_037644.1 | 9542004 | SNV | 1 | A | G | Homozygous   |
| NC_037644.1 | 9542026 | SNV | 1 | C | T | Homozygous   |
| NC_037644.1 | 9542071 | SNV | 1 | T | C | Heterozygous |
| NC_037644.1 | 9542085 | SNV | 1 | T | C | Heterozygous |
| NC_037644.1 | 9542154 | SNV | 1 | G | A | Homozygous   |
| NC_037644.1 | 9551753 | SNV | 1 | T | C | Heterozygous |
| NC_037644.1 | 9551756 | SNV | 1 | T | C | Heterozygous |
| NC_037644.1 | 9551774 | SNV | 1 | A | T | Heterozygous |
| NC_037644.1 | 9551780 | SNV | 1 | A | G | Heterozygous |
| NC_037644.1 | 9551784 | SNV | 1 | G | A | Heterozygous |
| NC_037644.1 | 9551789 | SNV | 1 | A | T | Heterozygous |
| NC_037644.1 | 9551791 | SNV | 1 | T | C | Heterozygous |
| NC_037644.1 | 9551793 | SNV | 1 | T | A | Heterozygous |
| NC_037644.1 | 9551816 | SNV | 1 | A | G | Heterozygous |
| NC_037644.1 | 9551828 | SNV | 1 | A | G | Heterozygous |
| NC_037644.1 | 9552386 | SNV | 1 | A | C | Heterozygous |
| NC_037644.1 | 9552404 | SNV | 1 | T | C | Heterozygous |
| NC_037644.1 | 9552437 | SNV | 1 | T | C | Heterozygous |
| NC_037644.1 | 9552608 | SNV | 1 | A | G | Heterozygous |
| NC_037644.1 | 9553118 | SNV | 1 | T | C | Heterozygous |
| NC_037644.1 | 9556509 | SNV | 1 | T | A | Homozygous   |
| NC_037644.1 | 9556558 | SNV | 1 | G | A | Heterozygous |
| NC_037644.1 | 9558464 | SNV | 1 | G | T | Homozygous   |
| NC_037644.1 | 9558809 | SNV | 1 | A | T | Homozygous   |
| NC_037644.1 | 9561509 | SNV | 1 | T | C | Homozygous   |
| NC_037644.1 | 9565835 | SNV | 1 | T | A | Homozygous   |
| NC_037644.1 | 9566144 | SNV | 1 | T | C | Homozygous   |
| NC_037644.1 | 9570778 | SNV | 1 | G | A | Homozygous   |
| NC_037644.1 | 9570806 | SNV | 1 | G | T | Homozygous   |
| NC_037644.1 | 9570810 | SNV | 1 | G | T | Homozygous   |
| NC_037644.1 | 9579276 | SNV | 1 | G | A | Homozygous   |
| NC_037644.1 | 9579339 | SNV | 1 | G | C | Heterozygous |
| NC_037644.1 | 9580181 | SNV | 1 | T | A | Homozygous   |
| NC_037644.1 | 9580242 | SNV | 1 | A | C | Heterozygous |
| NC_037644.1 | 9580304 | SNV | 1 | A | T | Homozygous   |
| NC_037644.1 | 9580624 | SNV | 1 | A | G | Homozygous   |
| NC_037644.1 | 9581303 | SNV | 1 | A | G | Homozygous   |
| NC_037644.1 | 9582960 | SNV | 1 | T | A | Heterozygous |
| NC_037644.1 | 9583977 | SNV | 1 | G | A | Homozygous   |
| NC_037644.1 | 9584026 | SNV | 1 | A | G | Homozygous   |
| NC_037644.1 | 9584427 | SNV | 1 | T | A | Homozygous   |
| NC_037644.1 | 9584976 | SNV | 1 | C | A | Heterozygous |
| NC_037644.1 | 9585355 | SNV | 1 | T | C | Heterozygous |
| NC_037644.1 | 9585528 | SNV | 1 | C | A | Heterozygous |

|             |         |     |   |   |   |              |
|-------------|---------|-----|---|---|---|--------------|
| NC_037644.1 | 9585687 | SNV | 1 | A | G | Heterozygous |
| NC_037644.1 | 9587744 | SNV | 1 | A | G | Homozygous   |
| NC_037644.1 | 9588562 | SNV | 1 | C | T | Homozygous   |
| NC_037644.1 | 9588906 | SNV | 1 | A | G | Heterozygous |
| NC_037644.1 | 9589243 | SNV | 1 | G | A | Homozygous   |
| NC_037644.1 | 9590166 | SNV | 1 | T | C | Heterozygous |
| NC_037644.1 | 9590241 | SNV | 1 | G | A | Heterozygous |
| NC_037644.1 | 9590521 | SNV | 1 | T | C | Homozygous   |
| NC_037644.1 | 9590616 | SNV | 1 | G | A | Heterozygous |
| NC_037644.1 | 9590643 | SNV | 1 | G | A | Heterozygous |
| NC_037644.1 | 9590659 | SNV | 1 | A | G | Heterozygous |
| NC_037644.1 | 9590929 | SNV | 1 | G | A | Homozygous   |
| NC_037644.1 | 9590982 | SNV | 1 | T | C | Homozygous   |
| NC_037644.1 | 9591023 | SNV | 1 | C | T | Homozygous   |
| NC_037644.1 | 9591066 | SNV | 1 | G | A | Heterozygous |
| NC_037644.1 | 9591070 | SNV | 1 | T | C | Homozygous   |
| NC_037644.1 | 9591072 | SNV | 1 | C | T | Homozygous   |
| NC_037644.1 | 9591078 | SNV | 1 | G | A | Heterozygous |
| NC_037644.1 | 9591087 | SNV | 1 | G | A | Homozygous   |
| NC_037644.1 | 9591104 | SNV | 1 | A | G | Homozygous   |
| NC_037644.1 | 9591106 | SNV | 1 | G | A | Homozygous   |
| NC_037644.1 | 9591111 | SNV | 1 | T | C | Homozygous   |
| NC_037644.1 | 9591116 | SNV | 1 | C | T | Homozygous   |
| NC_037644.1 | 9591214 | SNV | 1 | T | C | Homozygous   |
| NC_037644.1 | 9591393 | SNV | 1 | A | G | Heterozygous |
| NC_037644.1 | 9591586 | SNV | 1 | T | C | Heterozygous |
| NC_037644.1 | 9591945 | SNV | 1 | C | A | Homozygous   |
| NC_037644.1 | 9592183 | SNV | 1 | T | C | Homozygous   |
| NC_037644.1 | 9592216 | SNV | 1 | T | A | Homozygous   |
| NC_037644.1 | 9592355 | SNV | 1 | T | G | Homozygous   |
| NC_037644.1 | 9592504 | SNV | 1 | T | C | Homozygous   |
| NC_037644.1 | 9592545 | SNV | 1 | T | C | Heterozygous |
| NC_037644.1 | 9592726 | SNV | 1 | A | G | Homozygous   |
| NC_037644.1 | 9592749 | SNV | 1 | A | T | Heterozygous |
| NC_037644.1 | 9592753 | SNV | 1 | A | G | Homozygous   |
| NC_037644.1 | 9593478 | SNV | 1 | T | C | Heterozygous |
| NC_037644.1 | 9593494 | SNV | 1 | C | T | Heterozygous |
| NC_037644.1 | 9593501 | SNV | 1 | A | G | Homozygous   |
| NC_037644.1 | 9593817 | SNV | 1 | C | T | Homozygous   |
| NC_037644.1 | 9595141 | SNV | 1 | T | C | Heterozygous |
| NC_037644.1 | 9595242 | SNV | 1 | T | A | Homozygous   |
| NC_037644.1 | 9595337 | SNV | 1 | T | C | Homozygous   |
| NC_037644.1 | 9595845 | SNV | 1 | C | T | Heterozygous |
| NC_037644.1 | 9595850 | SNV | 1 | C | T | Heterozygous |
| NC_037644.1 | 9595891 | SNV | 1 | C | A | Heterozygous |
| NC_037644.1 | 9595901 | SNV | 1 | T | A | Heterozygous |
| NC_037644.1 | 9595908 | SNV | 1 | T | A | Heterozygous |
| NC_037644.1 | 9595915 | SNV | 1 | T | A | Heterozygous |
| NC_037644.1 | 9596468 | SNV | 1 | A | C | Homozygous   |
| NC_037644.1 | 9596588 | SNV | 1 | T | C | Homozygous   |
| NC_037644.1 | 9596591 | SNV | 1 | A | G | Homozygous   |

|             |         |     |   |   |   |              |
|-------------|---------|-----|---|---|---|--------------|
| NC_037644.1 | 9596606 | SNV | 1 | A | G | Homozygous   |
| NC_037644.1 | 9596712 | SNV | 1 | C | T | Heterozygous |
| NC_037644.1 | 9596910 | SNV | 1 | C | T | Heterozygous |
| NC_037644.1 | 9596993 | SNV | 1 | T | C | Homozygous   |
| NC_037644.1 | 9597276 | SNV | 1 | T | C | Homozygous   |
| NC_037644.1 | 9597381 | SNV | 1 | T | A | Homozygous   |
| NC_037644.1 | 9597639 | SNV | 1 | T | C | Heterozygous |
| NC_037644.1 | 9597673 | SNV | 1 | C | A | Homozygous   |
| NC_037644.1 | 9597901 | SNV | 1 | G | A | Heterozygous |
| NC_037644.1 | 9598986 | SNV | 1 | G | T | Homozygous   |
| NC_037644.1 | 9599653 | SNV | 1 | T | C | Heterozygous |
| NC_037644.1 | 9599657 | SNV | 1 | T | C | Heterozygous |
| NC_037644.1 | 9599661 | SNV | 1 | T | C | Heterozygous |
| NC_037644.1 | 9599663 | SNV | 1 | T | C | Heterozygous |
| NC_037644.1 | 9599682 | SNV | 1 | T | C | Heterozygous |
| NC_037644.1 | 9599704 | SNV | 1 | T | C | Heterozygous |
| NC_037644.1 | 9600459 | SNV | 1 | C | T | Homozygous   |
| NC_037644.1 | 9600540 | SNV | 1 | A | G | Heterozygous |
| NC_037644.1 | 9600553 | SNV | 1 | A | G | Homozygous   |
| NC_037644.1 | 9600557 | SNV | 1 | C | T | Homozygous   |
| NC_037644.1 | 9600598 | SNV | 1 | A | G | Homozygous   |
| NC_037644.1 | 9600615 | SNV | 1 | A | G | Heterozygous |
| NC_037644.1 | 9603242 | SNV | 1 | A | G | Homozygous   |
| NC_037644.1 | 9603401 | SNV | 1 | A | G | Homozygous   |
| NC_037644.1 | 9604032 | SNV | 1 | A | G | Homozygous   |
| NC_037644.1 | 9607426 | SNV | 1 | T | G | Homozygous   |
| NC_037644.1 | 9607432 | SNV | 1 | A | T | Homozygous   |
| NC_037644.1 | 9607437 | SNV | 1 | A | G | Homozygous   |
| NC_037644.1 | 9607711 | SNV | 1 | A | T | Homozygous   |
| NC_037644.1 | 9609949 | SNV | 1 | C | A | Heterozygous |
| NC_037644.1 | 9610224 | SNV | 1 | A | G | Homozygous   |
| NC_037644.1 | 9610759 | SNV | 1 | T | C | Heterozygous |
| NC_037644.1 | 9618338 | SNV | 1 | G | C | Heterozygous |
| NC_037644.1 | 9618355 | SNV | 1 | C | T | Heterozygous |
| NC_037644.1 | 9618387 | SNV | 1 | A | G | Heterozygous |
| NC_037644.1 | 9618483 | SNV | 1 | T | C | Homozygous   |
| NC_037644.1 | 9620341 | SNV | 1 | G | A | Homozygous   |
| NC_037644.1 | 9620392 | SNV | 1 | G | A | Homozygous   |
| NC_037644.1 | 9621277 | SNV | 1 | G | T | Heterozygous |
| NC_037644.1 | 9621286 | SNV | 1 | C | T | Heterozygous |
| NC_037644.1 | 9621520 | SNV | 1 | A | G | Heterozygous |
| NC_037644.1 | 9621532 | SNV | 1 | C | T | Heterozygous |
| NC_037644.1 | 9621568 | SNV | 1 | T | C | Homozygous   |
| NC_037644.1 | 9622637 | SNV | 1 | C | T | Heterozygous |
| NC_037644.1 | 9623497 | SNV | 1 | C | T | Heterozygous |
| NC_037644.1 | 9623500 | SNV | 1 | C | T | Heterozygous |
| NC_037644.1 | 9624062 | SNV | 1 | T | C | Homozygous   |
| NC_037644.1 | 9624077 | SNV | 1 | T | C | Homozygous   |
| NC_037644.1 | 9624099 | SNV | 1 | T | C | Homozygous   |
| NC_037644.1 | 9625169 | SNV | 1 | G | A | Homozygous   |
| NC_037644.1 | 9625343 | SNV | 1 | C | T | Heterozygous |

|             |         |     |   |   |   |              |
|-------------|---------|-----|---|---|---|--------------|
| NC_037644.1 | 9625376 | SNV | 1 | G | A | Heterozygous |
| NC_037644.1 | 9625379 | SNV | 1 | G | A | Heterozygous |
| NC_037644.1 | 9625406 | SNV | 1 | T | C | Homozygous   |
| NC_037644.1 | 9625427 | SNV | 1 | C | T | Homozygous   |
| NC_037644.1 | 9625478 | SNV | 1 | C | T | Heterozygous |
| NC_037644.1 | 9625830 | SNV | 1 | A | G | Heterozygous |
| NC_037644.1 | 9625833 | SNV | 1 | C | G | Heterozygous |
| NC_037644.1 | 9626288 | SNV | 1 | A | G | Homozygous   |
| NC_037644.1 | 9626297 | SNV | 1 | T | C | Homozygous   |
| NC_037644.1 | 9626538 | SNV | 1 | G | A | Homozygous   |
| NC_037644.1 | 9626541 | SNV | 1 | C | G | Homozygous   |
| NC_037644.1 | 9628276 | SNV | 1 | T | C | Homozygous   |
| NC_037644.1 | 9628455 | SNV | 1 | A | G | Homozygous   |
| NC_037644.1 | 9637263 | SNV | 1 | C | T | Heterozygous |
| NC_037644.1 | 9639666 | SNV | 1 | T | A | Homozygous   |
| NC_037644.1 | 9640160 | SNV | 1 | T | C | Homozygous   |
| NC_037644.1 | 9640564 | SNV | 1 | A | C | Homozygous   |
| NC_037644.1 | 9640576 | SNV | 1 | T | A | Homozygous   |
| NC_037644.1 | 9640578 | SNV | 1 | T | G | Homozygous   |
| NC_037644.1 | 9640582 | SNV | 1 | G | A | Homozygous   |
| NC_037644.1 | 9640852 | SNV | 1 | T | C | Homozygous   |
| NC_037644.1 | 9641191 | SNV | 1 | C | T | Homozygous   |
| NC_037644.1 | 9643148 | SNV | 1 | G | A | Heterozygous |
| NC_037644.1 | 9643241 | SNV | 1 | C | T | Homozygous   |
| NC_037644.1 | 9644505 | SNV | 1 | C | A | Homozygous   |
| NC_037644.1 | 9644511 | SNV | 1 | T | A | Homozygous   |
| NC_037644.1 | 9644516 | SNV | 1 | T | A | Homozygous   |
| NC_037644.1 | 9644529 | SNV | 1 | A | G | Heterozygous |
| NC_037644.1 | 9644533 | SNV | 1 | T | A | Heterozygous |
| NC_037644.1 | 9644537 | SNV | 1 | T | A | Homozygous   |
| NC_037644.1 | 9644720 | SNV | 1 | C | T | Homozygous   |
| NC_037644.1 | 9645853 | SNV | 1 | C | A | Homozygous   |
| NC_037644.1 | 9646007 | SNV | 1 | A | G | Heterozygous |
| NC_037644.1 | 9649248 | SNV | 1 | A | T | Homozygous   |
| NC_037644.1 | 9653953 | SNV | 1 | C | T | Homozygous   |
| NC_037644.1 | 9653956 | SNV | 1 | A | G | Heterozygous |
| NC_037644.1 | 9653959 | SNV | 1 | T | A | Homozygous   |
| NC_037644.1 | 9653967 | SNV | 1 | T | A | Homozygous   |
| NC_037644.1 | 9654008 | SNV | 1 | A | T | Heterozygous |
| NC_037644.1 | 9657896 | SNV | 1 | T | C | Homozygous   |
| NC_037644.1 | 9657928 | SNV | 1 | A | T | Homozygous   |
| NC_037644.1 | 9661194 | SNV | 1 | A | T | Homozygous   |
| NC_037644.1 | 9661196 | SNV | 1 | T | A | Homozygous   |
| NC_037644.1 | 9661199 | SNV | 1 | G | A | Homozygous   |
| NC_037644.1 | 9661202 | SNV | 1 | C | T | Homozygous   |
| NC_037644.1 | 9666957 | SNV | 1 | C | A | Heterozygous |
| NC_037644.1 | 9666994 | SNV | 1 | C | G | Homozygous   |
| NC_037644.1 | 9680478 | SNV | 1 | A | G | Homozygous   |
| NC_037644.1 | 9680502 | SNV | 1 | T | A | Homozygous   |
| NC_037644.1 | 9680579 | SNV | 1 | T | C | Homozygous   |
| NC_037644.1 | 9680952 | SNV | 1 | A | G | Heterozygous |



|             |         |     |   |   |   |              |
|-------------|---------|-----|---|---|---|--------------|
| NC_037644.1 | 9681000 | SNV | 1 | G | C | Homozygous   |
| NC_037644.1 | 9696314 | SNV | 1 | C | T | Homozygous   |
| NC_037644.1 | 9696378 | SNV | 1 | T | C | Homozygous   |
| NC_037644.1 | 9696404 | SNV | 1 | T | C | Heterozygous |
| NC_037644.1 | 9696511 | SNV | 1 | C | T | Homozygous   |
| NC_037644.1 | 9696513 | SNV | 1 | T | G | Homozygous   |
| NC_037644.1 | 9696545 | SNV | 1 | G | A | Heterozygous |
| NC_037644.1 | 9696692 | SNV | 1 | A | G | Heterozygous |
| NC_037644.1 | 9696742 | SNV | 1 | T | G | Heterozygous |
| NC_037644.1 | 9696959 | SNV | 1 | T | C | Homozygous   |
| NC_037644.1 | 9696974 | SNV | 1 | A | G | Heterozygous |
| NC_037644.1 | 9697167 | SNV | 1 | A | G | Homozygous   |
| NC_037644.1 | 9697271 | SNV | 1 | A | G | Homozygous   |
| NC_037644.1 | 9697273 | SNV | 1 | A | T | Homozygous   |
| NC_037644.1 | 9697379 | SNV | 1 | C | T | Homozygous   |
| NC_037644.1 | 9708436 | SNV | 1 | C | A | Homozygous   |
| NC_037644.1 | 9708440 | SNV | 1 | C | G | Homozygous   |
| NC_037644.1 | 9708444 | SNV | 1 | C | T | Heterozygous |
| NC_037644.1 | 9708453 | SNV | 1 | C | T | Heterozygous |
| NC_037644.1 | 9708467 | SNV | 1 | A | C | Homozygous   |
| NC_037644.1 | 9708574 | SNV | 1 | A | G | Homozygous   |
| NC_037644.1 | 9708776 | SNV | 1 | A | G | Heterozygous |
| NC_037644.1 | 9737960 | SNV | 1 | T | C | Homozygous   |
| NC_037644.1 | 9737974 | SNV | 1 | G | T | Homozygous   |
| NC_037644.1 | 9737978 | SNV | 1 | T | C | Homozygous   |
| NC_037644.1 | 9738183 | SNV | 1 | A | G | Homozygous   |
| NC_037644.1 | 9738449 | SNV | 1 | A | G | Heterozygous |
| NC_037644.1 | 9738461 | SNV | 1 | G | C | Heterozygous |
| NC_037644.1 | 9738487 | SNV | 1 | A | G | Homozygous   |
| NC_037644.1 | 9738517 | SNV | 1 | T | C | Homozygous   |
| NC_037644.1 | 9738519 | SNV | 1 | G | A | Homozygous   |
| NC_037644.1 | 9738609 | SNV | 1 | T | C | Homozygous   |
| NC_037644.1 | 9739984 | SNV | 1 | T | C | Homozygous   |
| NC_037644.1 | 9740022 | SNV | 1 | G | A | Heterozygous |
| NC_037644.1 | 9740264 | SNV | 1 | G | A | Homozygous   |
| NC_037644.1 | 9740323 | SNV | 1 | C | T | Homozygous   |
| NC_037644.1 | 9740618 | SNV | 1 | C | T | Homozygous   |
| NC_037644.1 | 9740621 | SNV | 1 | A | T | Homozygous   |
| NC_037644.1 | 9740623 | SNV | 1 | C | A | Homozygous   |
| NC_037644.1 | 9740801 | SNV | 1 | A | T | Homozygous   |
| NC_037644.1 | 9740920 | SNV | 1 | C | T | Heterozygous |
| NC_037644.1 | 9740922 | SNV | 1 | C | T | Heterozygous |
| NC_037644.1 | 9740927 | SNV | 1 | C | T | Homozygous   |
| NC_037644.1 | 9740930 | SNV | 1 | C | T | Homozygous   |
| NC_037644.1 | 9741492 | SNV | 1 | T | C | Heterozygous |
| NC_037644.1 | 9741719 | SNV | 1 | T | C | Homozygous   |
| NC_037644.1 | 9743702 | SNV | 1 | T | C | Homozygous   |
| NC_037644.1 | 9743779 | SNV | 1 | A | T | Heterozygous |
| NC_037644.1 | 9744009 | SNV | 1 | A | G | Homozygous   |
| NC_037644.1 | 9753190 | SNV | 1 | A | G | Heterozygous |
| NC_037644.1 | 9753193 | SNV | 1 | A | G | Heterozygous |

|             |         |     |   |   |   |              |
|-------------|---------|-----|---|---|---|--------------|
| NC_037644.1 | 9753222 | SNV | 1 | A | G | Heterozygous |
| NC_037644.1 | 9753231 | SNV | 1 | T | A | Heterozygous |
| NC_037644.1 | 9753231 | SNV | 1 | T | G | Heterozygous |
| NC_037644.1 | 9753237 | SNV | 1 | A | G | Homozygous   |
| NC_037644.1 | 9753249 | SNV | 1 | T | G | Homozygous   |
| NC_037644.1 | 9753258 | SNV | 1 | A | G | Heterozygous |
| NC_037644.1 | 9753270 | SNV | 1 | T | C | Heterozygous |
| NC_037644.1 | 9753273 | SNV | 1 | A | G | Heterozygous |
| NC_037644.1 | 9753353 | SNV | 1 | A | T | Homozygous   |
| NC_037644.1 | 9753359 | SNV | 1 | A | T | Heterozygous |
| NC_037644.1 | 9762096 | SNV | 1 | G | A | Heterozygous |
| NC_037644.1 | 9762143 | SNV | 1 | G | A | Homozygous   |
| NC_037644.1 | 9768368 | SNV | 1 | A | C | Homozygous   |
| NC_037644.1 | 9768370 | SNV | 1 | C | G | Homozygous   |
| NC_037644.1 | 9768372 | SNV | 1 | G | T | Homozygous   |
| NC_037644.1 | 9768388 | SNV | 1 | G | C | Homozygous   |
| NC_037644.1 | 9768390 | SNV | 1 | G | C | Homozygous   |
| NC_037644.1 | 9768394 | SNV | 1 | G | C | Homozygous   |
| NC_037644.1 | 9768396 | SNV | 1 | G | A | Homozygous   |
| NC_037644.1 | 9768401 | SNV | 1 | C | T | Homozygous   |
| NC_037644.1 | 9768407 | SNV | 1 | G | A | Homozygous   |
| NC_037644.1 | 9768412 | SNV | 1 | C | G | Homozygous   |
| NC_037644.1 | 9768422 | SNV | 1 | G | A | Homozygous   |
| NC_037644.1 | 9768432 | SNV | 1 | G | C | Homozygous   |
| NC_037644.1 | 9784914 | SNV | 1 | A | T | Homozygous   |
| NC_037644.1 | 9784922 | SNV | 1 | G | A | Homozygous   |
| NC_037644.1 | 9784938 | SNV | 1 | G | A | Homozygous   |
| NC_037644.1 | 9784942 | SNV | 1 | C | T | Heterozygous |
| NC_037644.1 | 9787505 | SNV | 1 | C | T | Homozygous   |
| NC_037644.1 | 9787553 | SNV | 1 | A | T | Homozygous   |
| NC_037644.1 | 9788853 | SNV | 1 | A | C | Heterozygous |
| NC_037644.1 | 9788889 | SNV | 1 | A | G | Heterozygous |
| NC_037644.1 | 9796865 | SNV | 1 | A | G | Homozygous   |
| NC_037644.1 | 9796882 | SNV | 1 | T | A | Homozygous   |
| NC_037644.1 | 9796888 | SNV | 1 | G | A | Homozygous   |
| NC_037644.1 | 9801104 | SNV | 1 | C | T | Homozygous   |
| NC_037644.1 | 9801145 | SNV | 1 | T | C | Homozygous   |
| NC_037644.1 | 9803806 | SNV | 1 | C | T | Heterozygous |
| NC_037644.1 | 9803810 | SNV | 1 | T | C | Heterozygous |
| NC_037644.1 | 9803822 | SNV | 1 | T | C | Heterozygous |
| NC_037644.1 | 9803827 | SNV | 1 | T | C | Homozygous   |
| NC_037644.1 | 9803885 | SNV | 1 | T | C | Heterozygous |
| NC_037644.1 | 9803887 | SNV | 1 | G | C | Homozygous   |
| NC_037644.1 | 9803891 | SNV | 1 | T | C | Heterozygous |
| NC_037644.1 | 9803897 | SNV | 1 | T | C | Heterozygous |
| NC_037644.1 | 9803899 | SNV | 1 | G | C | Homozygous   |
| NC_037644.1 | 9803903 | SNV | 1 | T | C | Heterozygous |
| NC_037644.1 | 9803912 | SNV | 1 | C | T | Homozygous   |
| NC_037644.1 | 9803915 | SNV | 1 | T | C | Heterozygous |
| NC_037644.1 | 9803921 | SNV | 1 | T | C | Heterozygous |
| NC_037644.1 | 9803923 | SNV | 1 | G | C | Homozygous   |

|             |         |     |   |   |   |              |
|-------------|---------|-----|---|---|---|--------------|
| NC_037644.1 | 9803927 | SNV | 1 | T | C | Heterozygous |
| NC_037644.1 | 9803936 | SNV | 1 | G | T | Homozygous   |
| NC_037644.1 | 9803939 | SNV | 1 | C | T | Heterozygous |
| NC_037644.1 | 9804366 | SNV | 1 | A | T | Homozygous   |
| NC_037644.1 | 9804396 | SNV | 1 | A | T | Heterozygous |
| NC_037644.1 | 9804400 | SNV | 1 | A | T | Heterozygous |
| NC_037644.1 | 9804402 | SNV | 1 | A | G | Heterozygous |
| NC_037644.1 | 9804406 | SNV | 1 | A | G | Heterozygous |
| NC_037644.1 | 9804408 | SNV | 1 | A | T | Heterozygous |
| NC_037644.1 | 9804412 | SNV | 1 | A | T | Heterozygous |
| NC_037644.1 | 9808324 | SNV | 1 | G | A | Heterozygous |
| NC_037644.1 | 9808355 | SNV | 1 | T | C | Homozygous   |
| NC_037644.1 | 9812884 | SNV | 1 | G | A | Heterozygous |
| NC_037644.1 | 9812912 | SNV | 1 | C | A | Heterozygous |
| NC_037644.1 | 9812912 | SNV | 1 | C | G | Heterozygous |
| NC_037644.1 | 9812935 | SNV | 1 | A | G | Homozygous   |
| NC_037644.1 | 9813978 | SNV | 1 | C | T | Heterozygous |
| NC_037644.1 | 9814045 | SNV | 1 | G | A | Heterozygous |
| NC_037644.1 | 9814054 | SNV | 1 | A | G | Homozygous   |
| NC_037644.1 | 9814111 | SNV | 1 | T | C | Homozygous   |
| NC_037644.1 | 9814207 | SNV | 1 | T | C | Homozygous   |
| NC_037644.1 | 9814214 | SNV | 1 | A | G | Homozygous   |
| NC_037644.1 | 9814220 | SNV | 1 | A | G | Homozygous   |
| NC_037644.1 | 9814236 | SNV | 1 | G | C | Homozygous   |
| NC_037644.1 | 9814252 | SNV | 1 | C | T | Homozygous   |
| NC_037644.1 | 9817755 | SNV | 1 | A | T | Homozygous   |
| NC_037644.1 | 9817759 | SNV | 1 | A | G | Homozygous   |
| NC_037644.1 | 9819867 | SNV | 1 | T | G | Homozygous   |
| NC_037644.1 | 9827567 | SNV | 1 | T | C | Homozygous   |
| NC_037644.1 | 9827574 | SNV | 1 | T | A | Homozygous   |
| NC_037644.1 | 9827576 | SNV | 1 | T | A | Homozygous   |
| NC_037644.1 | 9827582 | SNV | 1 | T | A | Homozygous   |
| NC_037644.1 | 9827584 | SNV | 1 | T | C | Homozygous   |
| NC_037644.1 | 9827590 | SNV | 1 | C | G | Homozygous   |
| NC_037644.1 | 9833413 | SNV | 1 | T | C | Homozygous   |
| NC_037644.1 | 9833462 | SNV | 1 | T | C | Homozygous   |
| NC_037644.1 | 9834811 | SNV | 1 | T | C | Heterozygous |
| NC_037644.1 | 9847555 | SNV | 1 | G | A | Heterozygous |
| NC_037644.1 | 9847578 | SNV | 1 | A | G | Homozygous   |
| NC_037644.1 | 9847606 | SNV | 1 | A | G | Homozygous   |
| NC_037644.1 | 9847617 | SNV | 1 | G | A | Homozygous   |
| NC_037644.1 | 9847622 | SNV | 1 | A | G | Homozygous   |
| NC_037644.1 | 9847683 | SNV | 1 | G | A | Homozygous   |
| NC_037644.1 | 9848418 | SNV | 1 | C | A | Heterozygous |
| NC_037644.1 | 9848533 | SNV | 1 | C | T | Homozygous   |
| NC_037644.1 | 9848537 | SNV | 1 | A | G | Homozygous   |
| NC_037644.1 | 9848601 | SNV | 1 | A | G | Heterozygous |
| NC_037644.1 | 9848662 | SNV | 1 | C | T | Heterozygous |
| NC_037644.1 | 9848744 | SNV | 1 | A | G | Homozygous   |
| NC_037644.1 | 9848775 | SNV | 1 | T | C | Homozygous   |
| NC_037644.1 | 9848881 | SNV | 1 | T | C | Homozygous   |

|             |         |     |   |   |   |              |
|-------------|---------|-----|---|---|---|--------------|
| NC_037644.1 | 9853264 | SNV | 1 | A | C | Heterozygous |
| NC_037644.1 | 9853311 | SNV | 1 | C | T | Heterozygous |
| NC_037644.1 | 9853594 | SNV | 1 | G | A | Heterozygous |
| NC_037644.1 | 9853656 | SNV | 1 | C | T | Heterozygous |
| NC_037644.1 | 9858362 | SNV | 1 | A | T | Heterozygous |
| NC_037644.1 | 9858534 | SNV | 1 | T | A | Homozygous   |
| NC_037644.1 | 9858569 | SNV | 1 | A | G | Homozygous   |
| NC_037644.1 | 9858607 | SNV | 1 | G | A | Heterozygous |
| NC_037644.1 | 9861137 | SNV | 1 | C | A | Homozygous   |
| NC_037644.1 | 9861140 | SNV | 1 | A | T | Homozygous   |
| NC_037644.1 | 9861177 | SNV | 1 | G | T | Homozygous   |
| NC_037644.1 | 9869403 | SNV | 1 | G | A | Homozygous   |
| NC_037644.1 | 9871752 | SNV | 1 | G | A | Homozygous   |
| NC_037644.1 | 9871770 | SNV | 1 | C | T | Heterozygous |
| NC_037644.1 | 9871806 | SNV | 1 | A | G | Heterozygous |
| NC_037644.1 | 9871812 | SNV | 1 | A | G | Heterozygous |
| NC_037644.1 | 9874664 | SNV | 1 | C | T | Homozygous   |
| NC_037644.1 | 9874666 | SNV | 1 | G | C | Homozygous   |
| NC_037644.1 | 9879728 | SNV | 1 | G | T | Homozygous   |
| NC_037644.1 | 9879736 | SNV | 1 | C | A | Homozygous   |
| NC_037644.1 | 9879739 | SNV | 1 | C | A | Homozygous   |
| NC_037644.1 | 9887268 | SNV | 1 | A | T | Homozygous   |
| NC_037644.1 | 9900807 | SNV | 1 | C | T | Heterozygous |
| NC_037644.1 | 9900809 | SNV | 1 | C | T | Heterozygous |
| NC_037644.1 | 9901913 | SNV | 1 | G | A | Homozygous   |
| NC_037644.1 | 9902284 | SNV | 1 | G | A | Heterozygous |
| NC_037644.1 | 9902400 | SNV | 1 | G | A | Homozygous   |
| NC_037644.1 | 9904396 | SNV | 1 | T | C | Homozygous   |
| NC_037644.1 | 9904705 | SNV | 1 | G | A | Homozygous   |
| NC_037644.1 | 9914228 | SNV | 1 | A | G | Heterozygous |
| NC_037644.1 | 9914232 | SNV | 1 | T | C | Homozygous   |
| NC_037644.1 | 9914254 | SNV | 1 | C | G | Heterozygous |
| NC_037644.1 | 9914295 | SNV | 1 | A | G | Heterozygous |
| NC_037644.1 | 9914298 | SNV | 1 | A | G | Homozygous   |
| NC_037644.1 | 9914326 | SNV | 1 | T | C | Homozygous   |
| NC_037644.1 | 9921088 | SNV | 1 | A | G | Homozygous   |
| NC_037644.1 | 9921257 | SNV | 1 | G | A | Homozygous   |
| NC_037644.1 | 9925699 | SNV | 1 | A | G | Heterozygous |
| NC_037644.1 | 9930671 | SNV | 1 | T | C | Homozygous   |
| NC_037644.1 | 9930694 | SNV | 1 | C | A | Heterozygous |
| NC_037644.1 | 9930701 | SNV | 1 | G | A | Homozygous   |
| NC_037644.1 | 9930705 | SNV | 1 | G | A | Homozygous   |
| NC_037644.1 | 9932785 | SNV | 1 | A | T | Heterozygous |
| NC_037644.1 | 9932835 | SNV | 1 | T | A | Homozygous   |
| NC_037644.1 | 9932854 | SNV | 1 | G | A | Homozygous   |
| NC_037644.1 | 9933055 | SNV | 1 | T | A | Homozygous   |
| NC_037644.1 | 9933059 | SNV | 1 | T | A | Homozygous   |
| NC_037644.1 | 9933063 | SNV | 1 | T | C | Homozygous   |
| NC_037644.1 | 9933091 | SNV | 1 | G | A | Heterozygous |
| NC_037644.1 | 9933111 | SNV | 1 | G | A | Homozygous   |
| NC_037644.1 | 9935658 | SNV | 1 | A | C | Homozygous   |

|             |          |     |   |   |   |              |
|-------------|----------|-----|---|---|---|--------------|
| NC_037644.1 | 9941749  | SNV | 1 | A | G | Heterozygous |
| NC_037644.1 | 9941762  | SNV | 1 | A | T | Heterozygous |
| NC_037644.1 | 9941780  | SNV | 1 | A | G | Heterozygous |
| NC_037644.1 | 9941783  | SNV | 1 | A | G | Heterozygous |
| NC_037644.1 | 9941868  | SNV | 1 | C | T | Heterozygous |
| NC_037644.1 | 9941896  | SNV | 1 | G | A | Heterozygous |
| NC_037644.1 | 9942105  | SNV | 1 | A | G | Homozygous   |
| NC_037644.1 | 9952252  | SNV | 1 | G | C | Heterozygous |
| NC_037644.1 | 9953627  | SNV | 1 | C | A | Heterozygous |
| NC_037644.1 | 9974261  | SNV | 1 | A | G | Homozygous   |
| NC_037644.1 | 9974278  | SNV | 1 | T | A | Homozygous   |
| NC_037644.1 | 9974282  | SNV | 1 | G | A | Homozygous   |
| NC_037644.1 | 9974288  | SNV | 1 | C | A | Homozygous   |
| NC_037644.1 | 9974292  | SNV | 1 | T | C | Homozygous   |
| NC_037644.1 | 9974299  | SNV | 1 | G | T | Homozygous   |
| NC_037644.1 | 9981185  | SNV | 1 | G | T | Heterozygous |
| NC_037644.1 | 9998601  | SNV | 1 | G | A | Heterozygous |
| NC_037644.1 | 10016425 | SNV | 1 | T | G | Heterozygous |
| NC_037644.1 | 10016430 | SNV | 1 | T | A | Homozygous   |
| NC_037644.1 | 10016436 | SNV | 1 | G | A | Homozygous   |
| NC_037644.1 | 10048161 | SNV | 1 | C | T | Homozygous   |
| NC_037644.1 | 10055463 | SNV | 1 | C | T | Heterozygous |
| NC_037644.1 | 10056400 | SNV | 1 | A | T | Heterozygous |
| NC_037644.1 | 10063915 | SNV | 1 | A | G | Heterozygous |
| NC_037644.1 | 10063922 | SNV | 1 | A | T | Heterozygous |
| NC_037644.1 | 10063931 | SNV | 1 | A | G | Heterozygous |
| NC_037644.1 | 10073079 | SNV | 1 | T | C | Homozygous   |
| NC_037644.1 | 10073084 | SNV | 1 | T | C | Homozygous   |
| NC_037644.1 | 10073095 | SNV | 1 | T | C | Homozygous   |
| NC_037644.1 | 10073149 | SNV | 1 | A | G | Homozygous   |
| NC_037644.1 | 10073195 | SNV | 1 | A | G | Homozygous   |
| NC_037644.1 | 10073201 | SNV | 1 | T | C | Homozygous   |
| NC_037644.1 | 10073211 | SNV | 1 | G | A | Heterozygous |
| NC_037644.1 | 10073227 | SNV | 1 | G | A | Heterozygous |
| NC_037644.1 | 10073233 | SNV | 1 | T | C | Homozygous   |
| NC_037644.1 | 10073404 | SNV | 1 | A | G | Homozygous   |
| NC_037644.1 | 10088805 | SNV | 1 | G | A | Homozygous   |
| NC_037644.1 | 10088883 | SNV | 1 | C | T | Heterozygous |
| NC_037644.1 | 10088915 | SNV | 1 | T | C | Homozygous   |
| NC_037644.1 | 10091743 | SNV | 1 | G | C | Homozygous   |
| NC_037644.1 | 10098487 | SNV | 1 | A | G | Heterozygous |
| NC_037644.1 | 10098497 | SNV | 1 | A | G | Heterozygous |
| NC_037644.1 | 10098501 | SNV | 1 | A | T | Heterozygous |
| NC_037644.1 | 10101994 | SNV | 1 | G | A | Heterozygous |
| NC_037644.1 | 10101999 | SNV | 1 | A | G | Heterozygous |
| NC_037644.1 | 10102439 | SNV | 1 | C | T | Homozygous   |
| NC_037644.1 | 10102446 | SNV | 1 | A | T | Homozygous   |
| NC_037644.1 | 10102451 | SNV | 1 | A | T | Heterozygous |
| NC_037644.1 | 10102632 | SNV | 1 | G | A | Homozygous   |
| NC_037644.1 | 10102648 | SNV | 1 | T | C | Homozygous   |
| NC_037644.1 | 10102667 | SNV | 1 | C | T | Heterozygous |

|             |          |     |   |   |   |              |
|-------------|----------|-----|---|---|---|--------------|
| NC_037644.1 | 10102713 | SNV | 1 | T | C | Homozygous   |
| NC_037644.1 | 10102746 | SNV | 1 | C | T | Heterozygous |
| NC_037644.1 | 10102754 | SNV | 1 | G | A | Heterozygous |
| NC_037644.1 | 10102892 | SNV | 1 | T | C | Homozygous   |
| NC_037644.1 | 10103052 | SNV | 1 | A | G | Homozygous   |
| NC_037644.1 | 10103073 | SNV | 1 | A | T | Heterozygous |
| NC_037644.1 | 10103082 | SNV | 1 | A | T | Homozygous   |
| NC_037644.1 | 10103269 | SNV | 1 | T | C | Homozygous   |
| NC_037644.1 | 10103336 | SNV | 1 | C | T | Heterozygous |
| NC_037644.1 | 10103670 | SNV | 1 | T | C | Homozygous   |
| NC_037644.1 | 10106181 | SNV | 1 | C | T | Heterozygous |
| NC_037644.1 | 10106203 | SNV | 1 | C | A | Heterozygous |
| NC_037644.1 | 10106246 | SNV | 1 | G | A | Heterozygous |
| NC_037644.1 | 10106836 | SNV | 1 | T | C | Homozygous   |
| NC_037644.1 | 10106922 | SNV | 1 | G | A | Heterozygous |
| NC_037644.1 | 10106924 | SNV | 1 | G | A | Homozygous   |
| NC_037644.1 | 10107232 | SNV | 1 | T | C | Homozygous   |
| NC_037644.1 | 10113115 | SNV | 1 | G | A | Heterozygous |
| NC_037644.1 | 10136061 | SNV | 1 | G | T | Homozygous   |
| NC_037644.1 | 10139587 | SNV | 1 | T | A | Heterozygous |
| NC_037644.1 | 10139618 | SNV | 1 | C | T | Homozygous   |
| NC_037644.1 | 10139621 | SNV | 1 | G | C | Homozygous   |
| NC_037644.1 | 10139624 | SNV | 1 | T | C | Heterozygous |
| NC_037644.1 | 10139631 | SNV | 1 | T | C | Homozygous   |
| NC_037644.1 | 10142976 | SNV | 1 | G | A | Heterozygous |
| NC_037644.1 | 10142988 | SNV | 1 | G | A | Homozygous   |
| NC_037644.1 | 10150587 | SNV | 1 | A | G | Homozygous   |
| NC_037644.1 | 10156545 | SNV | 1 | C | T | Homozygous   |
| NC_037644.1 | 10170899 | SNV | 1 | C | A | Heterozygous |
| NC_037644.1 | 10171244 | SNV | 1 | T | C | Homozygous   |
| NC_037644.1 | 10178525 | SNV | 1 | C | T | Homozygous   |
| NC_037644.1 | 10179261 | SNV | 1 | G | T | Heterozygous |
| NC_037644.1 | 10179275 | SNV | 1 | C | T | Heterozygous |
| NC_037644.1 | 10180964 | SNV | 1 | A | G | Homozygous   |
| NC_037644.1 | 10180985 | SNV | 1 | C | T | Homozygous   |
| NC_037644.1 | 10182430 | SNV | 1 | C | T | Homozygous   |
| NC_037644.1 | 10183997 | SNV | 1 | C | T | Homozygous   |
| NC_037644.1 | 10184003 | SNV | 1 | G | A | Homozygous   |
| NC_037644.1 | 10184016 | SNV | 1 | A | T | Homozygous   |
| NC_037644.1 | 10191108 | SNV | 1 | T | G | Heterozygous |
| NC_037644.1 | 10191113 | SNV | 1 | C | A | Heterozygous |
| NC_037644.1 | 10191121 | SNV | 1 | T | G | Heterozygous |
| NC_037644.1 | 10191166 | SNV | 1 | A | G | Heterozygous |
| NC_037644.1 | 10191413 | SNV | 1 | C | T | Homozygous   |
| NC_037644.1 | 10195475 | SNV | 1 | A | T | Homozygous   |
| NC_037644.1 | 10195488 | SNV | 1 | A | G | Homozygous   |
| NC_037644.1 | 10195512 | SNV | 1 | A | T | Homozygous   |
| NC_037644.1 | 10195529 | SNV | 1 | C | T | Heterozygous |
| NC_037644.1 | 10195538 | SNV | 1 | G | A | Homozygous   |
| NC_037644.1 | 10201117 | SNV | 1 | A | G | Heterozygous |
| NC_037644.1 | 10201162 | SNV | 1 | A | G | Homozygous   |

|             |          |     |   |   |   |              |
|-------------|----------|-----|---|---|---|--------------|
| NC_037644.1 | 10201744 | SNV | 1 | G | T | Heterozygous |
| NC_037644.1 | 10201747 | SNV | 1 | G | T | Heterozygous |
| NC_037644.1 | 10201774 | SNV | 1 | A | G | Homozygous   |
| NC_037644.1 | 10204949 | SNV | 1 | C | T | Heterozygous |
| NC_037644.1 | 10205074 | SNV | 1 | A | T | Heterozygous |
| NC_037644.1 | 10205077 | SNV | 1 | T | G | Heterozygous |
| NC_037644.1 | 10205093 | SNV | 1 | G | A | Homozygous   |
| NC_037644.1 | 10205099 | SNV | 1 | A | C | Heterozygous |
| NC_037644.1 | 10205102 | SNV | 1 | T | A | Homozygous   |
| NC_037644.1 | 10205109 | SNV | 1 | G | A | Homozygous   |
| NC_037644.1 | 10205636 | SNV | 1 | T | C | Homozygous   |
| NC_037644.1 | 10205799 | SNV | 1 | C | T | Heterozygous |
| NC_037644.1 | 10205825 | SNV | 1 | G | A | Heterozygous |
| NC_037644.1 | 10205845 | SNV | 1 | A | T | Homozygous   |
| NC_037644.1 | 10205850 | SNV | 1 | T | C | Heterozygous |
| NC_037644.1 | 10205868 | SNV | 1 | A | G | Homozygous   |
| NC_037644.1 | 10205876 | SNV | 1 | C | T | Homozygous   |
| NC_037644.1 | 10205880 | SNV | 1 | C | T | Homozygous   |
| NC_037644.1 | 10205885 | SNV | 1 | C | T | Homozygous   |
| NC_037644.1 | 10205986 | SNV | 1 | C | T | Heterozygous |
| NC_037644.1 | 10206296 | SNV | 1 | T | A | Homozygous   |
| NC_037644.1 | 10206299 | SNV | 1 | C | A | Homozygous   |
| NC_037644.1 | 10206839 | SNV | 1 | A | G | Homozygous   |
| NC_037644.1 | 10206901 | SNV | 1 | A | G | Homozygous   |
| NC_037644.1 | 10206937 | SNV | 1 | G | A | Heterozygous |
| NC_037644.1 | 10206939 | SNV | 1 | C | T | Heterozygous |
| NC_037644.1 | 10206946 | SNV | 1 | C | T | Heterozygous |
| NC_037644.1 | 10206949 | SNV | 1 | A | G | Homozygous   |
| NC_037644.1 | 10207050 | SNV | 1 | G | T | Homozygous   |
| NC_037644.1 | 10207073 | SNV | 1 | T | C | Heterozygous |
| NC_037644.1 | 10207142 | SNV | 1 | T | A | Heterozygous |
| NC_037644.1 | 10207659 | SNV | 1 | C | A | Heterozygous |
| NC_037644.1 | 10207668 | SNV | 1 | A | G | Homozygous   |
| NC_037644.1 | 10207701 | SNV | 1 | T | A | Homozygous   |
| NC_037644.1 | 10208574 | SNV | 1 | C | A | Heterozygous |
| NC_037644.1 | 10208616 | SNV | 1 | T | C | Homozygous   |
| NC_037644.1 | 10208626 | SNV | 1 | A | T | Homozygous   |
| NC_037644.1 | 10208707 | SNV | 1 | T | C | Homozygous   |
| NC_037644.1 | 10208726 | SNV | 1 | C | T | Heterozygous |
| NC_037644.1 | 10208755 | SNV | 1 | G | C | Heterozygous |
| NC_037644.1 | 10208810 | SNV | 1 | C | T | Homozygous   |
| NC_037644.1 | 10208855 | SNV | 1 | C | G | Homozygous   |
| NC_037644.1 | 10208871 | SNV | 1 | T | C | Homozygous   |
| NC_037644.1 | 10209090 | SNV | 1 | G | A | Heterozygous |
| NC_037644.1 | 10209125 | SNV | 1 | A | G | Heterozygous |
| NC_037644.1 | 10209561 | SNV | 1 | C | T | Heterozygous |
| NC_037644.1 | 10209591 | SNV | 1 | T | C | Heterozygous |
| NC_037644.1 | 10212234 | SNV | 1 | T | C | Homozygous   |
| NC_037644.1 | 10212469 | SNV | 1 | C | T | Homozygous   |
| NC_037644.1 | 10212628 | SNV | 1 | G | A | Heterozygous |
| NC_037644.1 | 10212707 | SNV | 1 | A | G | Heterozygous |

|             |          |     |   |   |   |              |
|-------------|----------|-----|---|---|---|--------------|
| NC_037644.1 | 10212715 | SNV | 1 | G | A | Homozygous   |
| NC_037644.1 | 10212804 | SNV | 1 | G | A | Heterozygous |
| NC_037644.1 | 10213140 | SNV | 1 | A | G | Homozygous   |
| NC_037644.1 | 10214723 | SNV | 1 | T | C | Heterozygous |
| NC_037644.1 | 10214727 | SNV | 1 | C | T | Heterozygous |
| NC_037644.1 | 10214764 | SNV | 1 | T | C | Heterozygous |
| NC_037644.1 | 10217138 | SNV | 1 | T | C | Heterozygous |
| NC_037644.1 | 10217356 | SNV | 1 | T | A | Heterozygous |
| NC_037644.1 | 10217376 | SNV | 1 | C | T | Heterozygous |
| NC_037644.1 | 10217414 | SNV | 1 | A | C | Homozygous   |
| NC_037644.1 | 10218595 | SNV | 1 | A | G | Heterozygous |
| NC_037644.1 | 10218643 | SNV | 1 | T | G | Heterozygous |
| NC_037644.1 | 10218649 | SNV | 1 | A | G | Heterozygous |
| NC_037644.1 | 10219010 | SNV | 1 | C | T | Heterozygous |
| NC_037644.1 | 10219355 | SNV | 1 | C | T | Heterozygous |
| NC_037644.1 | 10219362 | SNV | 1 | A | T | Heterozygous |
| NC_037644.1 | 10219371 | SNV | 1 | T | C | Heterozygous |
| NC_037644.1 | 10219851 | SNV | 1 | A | G | Homozygous   |
| NC_037644.1 | 10221877 | SNV | 1 | C | T | Heterozygous |
| NC_037644.1 | 10221953 | SNV | 1 | T | A | Heterozygous |
| NC_037644.1 | 10221971 | SNV | 1 | T | C | Heterozygous |
| NC_037644.1 | 10221993 | SNV | 1 | T | C | Heterozygous |
| NC_037644.1 | 10221997 | SNV | 1 | C | T | Heterozygous |
| NC_037644.1 | 10222000 | SNV | 1 | C | T | Heterozygous |
| NC_037644.1 | 10222028 | SNV | 1 | T | G | Heterozygous |
| NC_037644.1 | 10222042 | SNV | 1 | G | A | Heterozygous |
| NC_037644.1 | 10222093 | SNV | 1 | C | T | Heterozygous |
| NC_037644.1 | 10222128 | SNV | 1 | C | T | Heterozygous |
| NC_037644.1 | 10222375 | SNV | 1 | T | C | Heterozygous |
| NC_037644.1 | 10222495 | SNV | 1 | T | A | Heterozygous |
| NC_037644.1 | 10222503 | SNV | 1 | G | A | Homozygous   |
| NC_037644.1 | 10222530 | SNV | 1 | G | T | Homozygous   |
| NC_037644.1 | 10222533 | SNV | 1 | G | T | Homozygous   |
| NC_037644.1 | 10222537 | SNV | 1 | A | T | Homozygous   |
| NC_037644.1 | 10227665 | SNV | 1 | G | A | Heterozygous |
| NC_037644.1 | 10229939 | SNV | 1 | A | G | Homozygous   |
| NC_037644.1 | 10229974 | SNV | 1 | A | G | Heterozygous |
| NC_037644.1 | 10230020 | SNV | 1 | C | T | Homozygous   |
| NC_037644.1 | 10233761 | SNV | 1 | G | A | Heterozygous |
| NC_037644.1 | 10233970 | SNV | 1 | T | A | Heterozygous |
| NC_037644.1 | 10234000 | SNV | 1 | A | C | Homozygous   |
| NC_037644.1 | 10234004 | SNV | 1 | G | C | Homozygous   |
| NC_037644.1 | 10234313 | SNV | 1 | T | C | Heterozygous |
| NC_037644.1 | 10234315 | SNV | 1 | C | T | Heterozygous |
| NC_037644.1 | 10234396 | SNV | 1 | A | G | Homozygous   |
| NC_037644.1 | 10234410 | SNV | 1 | A | G | Homozygous   |
| NC_037644.1 | 10239604 | SNV | 1 | C | T | Homozygous   |
| NC_037644.1 | 10239629 | SNV | 1 | C | T | Homozygous   |
| NC_037644.1 | 10239642 | SNV | 1 | C | T | Homozygous   |
| NC_037644.1 | 10240109 | SNV | 1 | T | C | Homozygous   |
| NC_037644.1 | 10240175 | SNV | 1 | A | C | Homozygous   |



|             |          |     |   |   |   |              |
|-------------|----------|-----|---|---|---|--------------|
| NC_037644.1 | 10240303 | SNV | 1 | C | T | Heterozygous |
| NC_037644.1 | 10240335 | SNV | 1 | T | G | Heterozygous |
| NC_037644.1 | 10240617 | SNV | 1 | A | G | Homozygous   |
| NC_037644.1 | 10240779 | SNV | 1 | T | G | Homozygous   |
| NC_037644.1 | 10240817 | SNV | 1 | C | T | Heterozygous |
| NC_037644.1 | 10241264 | SNV | 1 | C | T | Heterozygous |
| NC_037644.1 | 10241809 | SNV | 1 | G | A | Heterozygous |
| NC_037644.1 | 10241844 | SNV | 1 | G | A | Heterozygous |
| NC_037644.1 | 10242187 | SNV | 1 | G | A | Homozygous   |
| NC_037644.1 | 10242246 | SNV | 1 | A | C | Heterozygous |
| NC_037644.1 | 10242649 | SNV | 1 | G | A | Homozygous   |
| NC_037644.1 | 10242672 | SNV | 1 | A | G | Homozygous   |
| NC_037644.1 | 10242726 | SNV | 1 | C | T | Heterozygous |
| NC_037644.1 | 10243430 | SNV | 1 | G | A | Heterozygous |
| NC_037644.1 | 10243585 | SNV | 1 | C | T | Homozygous   |
| NC_037644.1 | 10243593 | SNV | 1 | T | C | Homozygous   |
| NC_037644.1 | 10243624 | SNV | 1 | T | A | Heterozygous |
| NC_037644.1 | 10243667 | SNV | 1 | A | G | Heterozygous |
| NC_037644.1 | 10245414 | SNV | 1 | T | A | Homozygous   |
| NC_037644.1 | 10245494 | SNV | 1 | C | T | Heterozygous |
| NC_037644.1 | 10245785 | SNV | 1 | G | C | Heterozygous |
| NC_037644.1 | 10245818 | SNV | 1 | T | C | Homozygous   |
| NC_037644.1 | 10245893 | SNV | 1 | C | T | Homozygous   |
| NC_037644.1 | 10245945 | SNV | 1 | C | T | Heterozygous |
| NC_037644.1 | 10246303 | SNV | 1 | T | C | Homozygous   |
| NC_037644.1 | 10246323 | SNV | 1 | T | C | Homozygous   |
| NC_037644.1 | 10247736 | SNV | 1 | C | T | Heterozygous |
| NC_037644.1 | 10247750 | SNV | 1 | A | G | Homozygous   |
| NC_037644.1 | 10247796 | SNV | 1 | C | T | Homozygous   |
| NC_037644.1 | 10247845 | SNV | 1 | C | T | Heterozygous |
| NC_037644.1 | 10247866 | SNV | 1 | T | C | Heterozygous |
| NC_037644.1 | 10248114 | SNV | 1 | G | A | Heterozygous |
| NC_037644.1 | 10248348 | SNV | 1 | G | A | Homozygous   |
| NC_037644.1 | 10248536 | SNV | 1 | G | A | Heterozygous |
| NC_037644.1 | 10248539 | SNV | 1 | A | G | Heterozygous |
| NC_037644.1 | 10248570 | SNV | 1 | C | T | Homozygous   |
| NC_037644.1 | 10248598 | SNV | 1 | C | T | Homozygous   |
| NC_037644.1 | 10248648 | SNV | 1 | C | T | Heterozygous |
| NC_037644.1 | 10248654 | SNV | 1 | G | T | Heterozygous |
| NC_037644.1 | 10248676 | SNV | 1 | A | G | Homozygous   |
| NC_037644.1 | 10248742 | SNV | 1 | T | G | Homozygous   |
| NC_037644.1 | 10248924 | SNV | 1 | A | G | Homozygous   |
| NC_037644.1 | 10250288 | SNV | 1 | G | A | Heterozygous |
| NC_037644.1 | 10250602 | SNV | 1 | C | T | Heterozygous |
| NC_037644.1 | 10250632 | SNV | 1 | T | G | Heterozygous |
| NC_037644.1 | 10250634 | SNV | 1 | T | G | Heterozygous |
| NC_037644.1 | 10250643 | SNV | 1 | C | T | Heterozygous |
| NC_037644.1 | 10250647 | SNV | 1 | A | C | Heterozygous |
| NC_037644.1 | 10250657 | SNV | 1 | C | T | Heterozygous |
| NC_037644.1 | 10251098 | SNV | 1 | T | C | Homozygous   |
| NC_037644.1 | 10251119 | SNV | 1 | A | G | Heterozygous |

|             |          |     |   |   |   |              |
|-------------|----------|-----|---|---|---|--------------|
| NC_037644.1 | 10251138 | SNV | 1 | T | C | Heterozygous |
| NC_037644.1 | 10251216 | SNV | 1 | G | A | Heterozygous |
| NC_037644.1 | 10251258 | SNV | 1 | C | T | Heterozygous |
| NC_037644.1 | 10251268 | SNV | 1 | C | T | Heterozygous |
| NC_037644.1 | 10251290 | SNV | 1 | G | A | Heterozygous |
| NC_037644.1 | 10251327 | SNV | 1 | C | T | Heterozygous |
| NC_037644.1 | 10251415 | SNV | 1 | C | T | Homozygous   |
| NC_037644.1 | 10251422 | SNV | 1 | C | G | Homozygous   |
| NC_037644.1 | 10258665 | SNV | 1 | G | A | Heterozygous |
| NC_037644.1 | 10258673 | SNV | 1 | G | A | Heterozygous |
| NC_037644.1 | 10258692 | SNV | 1 | G | T | Heterozygous |
| NC_037644.1 | 10258693 | SNV | 1 | G | A | Heterozygous |
| NC_037644.1 | 10259551 | SNV | 1 | T | C | Homozygous   |
| NC_037644.1 | 10259602 | SNV | 1 | T | C | Homozygous   |
| NC_037644.1 | 10259712 | SNV | 1 | C | A | Heterozygous |
| NC_037644.1 | 10259819 | SNV | 1 | A | G | Homozygous   |
| NC_037644.1 | 10260106 | SNV | 1 | T | A | Homozygous   |
| NC_037644.1 | 10260115 | SNV | 1 | C | T | Homozygous   |
| NC_037644.1 | 10260226 | SNV | 1 | A | G | Homozygous   |
| NC_037644.1 | 10260230 | SNV | 1 | T | C | Heterozygous |
| NC_037644.1 | 10260252 | SNV | 1 | A | G | Heterozygous |
| NC_037644.1 | 10260314 | SNV | 1 | A | G | Homozygous   |
| NC_037644.1 | 10260384 | SNV | 1 | G | A | Heterozygous |
| NC_037644.1 | 10260511 | SNV | 1 | A | G | Heterozygous |
| NC_037644.1 | 10260535 | SNV | 1 | G | A | Heterozygous |
| NC_037644.1 | 10260595 | SNV | 1 | T | C | Heterozygous |
| NC_037644.1 | 10260708 | SNV | 1 | A | G | Homozygous   |
| NC_037644.1 | 10260713 | SNV | 1 | A | G | Heterozygous |
| NC_037644.1 | 10260793 | SNV | 1 | C | T | Homozygous   |
| NC_037644.1 | 10260797 | SNV | 1 | G | A | Heterozygous |
| NC_037644.1 | 10260828 | SNV | 1 | G | A | Heterozygous |
| NC_037644.1 | 10260842 | SNV | 1 | G | A | Homozygous   |
| NC_037644.1 | 10260852 | SNV | 1 | T | C | Homozygous   |
| NC_037644.1 | 10261382 | SNV | 1 | A | G | Homozygous   |
| NC_037644.1 | 10261473 | SNV | 1 | G | A | Homozygous   |
| NC_037644.1 | 10261780 | SNV | 1 | G | A | Heterozygous |
| NC_037644.1 | 10261847 | SNV | 1 | T | C | Heterozygous |
| NC_037644.1 | 10261941 | SNV | 1 | T | C | Homozygous   |
| NC_037644.1 | 10262120 | SNV | 1 | C | G | Heterozygous |
| NC_037644.1 | 10262135 | SNV | 1 | T | C | Heterozygous |
| NC_037644.1 | 10262461 | SNV | 1 | A | T | Homozygous   |
| NC_037644.1 | 10262464 | SNV | 1 | A | T | Homozygous   |
| NC_037644.1 | 10262469 | SNV | 1 | G | A | Heterozygous |
| NC_037644.1 | 10262489 | SNV | 1 | C | G | Homozygous   |
| NC_037644.1 | 10262492 | SNV | 1 | A | C | Heterozygous |
| NC_037644.1 | 10262690 | SNV | 1 | C | T | Heterozygous |
| NC_037644.1 | 10262743 | SNV | 1 | A | G | Heterozygous |
| NC_037644.1 | 10263279 | SNV | 1 | A | G | Heterozygous |
| NC_037644.1 | 10263306 | SNV | 1 | A | G | Heterozygous |
| NC_037644.1 | 10263916 | SNV | 1 | G | A | Heterozygous |
| NC_037644.1 | 10266714 | SNV | 1 | A | G | Heterozygous |

|             |          |     |   |   |   |              |
|-------------|----------|-----|---|---|---|--------------|
| NC_037644.1 | 10266719 | SNV | 1 | A | C | Heterozygous |
| NC_037644.1 | 10267231 | SNV | 1 | T | C | Heterozygous |
| NC_037644.1 | 10267233 | SNV | 1 | T | C | Heterozygous |
| NC_037644.1 | 10267528 | SNV | 1 | T | A | Heterozygous |
| NC_037644.1 | 10267532 | SNV | 1 | A | G | Heterozygous |
| NC_037644.1 | 10267549 | SNV | 1 | C | T | Heterozygous |
| NC_037644.1 | 10267603 | SNV | 1 | C | T | Heterozygous |
| NC_037644.1 | 10267611 | SNV | 1 | C | T | Heterozygous |
| NC_037644.1 | 10267646 | SNV | 1 | T | C | Heterozygous |
| NC_037644.1 | 10267648 | SNV | 1 | T | C | Homozygous   |
| NC_037644.1 | 10267708 | SNV | 1 | T | A | Homozygous   |
| NC_037644.1 | 10267726 | SNV | 1 | A | T | Heterozygous |
| NC_037644.1 | 10267784 | SNV | 1 | C | T | Homozygous   |
| NC_037644.1 | 10267793 | SNV | 1 | A | G | Homozygous   |
| NC_037644.1 | 10267796 | SNV | 1 | G | C | Heterozygous |
| NC_037644.1 | 10267887 | SNV | 1 | A | G | Heterozygous |
| NC_037644.1 | 10267896 | SNV | 1 | A | G | Homozygous   |
| NC_037644.1 | 10267903 | SNV | 1 | C | T | Homozygous   |
| NC_037644.1 | 10267921 | SNV | 1 | A | G | Homozygous   |
| NC_037644.1 | 10267925 | SNV | 1 | A | T | Heterozygous |
| NC_037644.1 | 10268034 | SNV | 1 | G | T | Heterozygous |
| NC_037644.1 | 10268112 | SNV | 1 | A | G | Heterozygous |
| NC_037644.1 | 10271958 | SNV | 1 | A | T | Heterozygous |
| NC_037644.1 | 10273249 | SNV | 1 | C | T | Heterozygous |
| NC_037644.1 | 10276679 | SNV | 1 | C | T | Heterozygous |
| NC_037644.1 | 10276796 | SNV | 1 | T | C | Heterozygous |
| NC_037644.1 | 10276801 | SNV | 1 | C | T | Homozygous   |
| NC_037644.1 | 10276807 | SNV | 1 | G | T | Heterozygous |
| NC_037644.1 | 10279759 | SNV | 1 | T | C | Homozygous   |
| NC_037644.1 | 10280851 | SNV | 1 | T | A | Homozygous   |
| NC_037644.1 | 10280875 | SNV | 1 | C | A | Homozygous   |
| NC_037644.1 | 10280880 | SNV | 1 | C | A | Homozygous   |
| NC_037644.1 | 10280886 | SNV | 1 | G | A | Homozygous   |
| NC_037644.1 | 10280888 | SNV | 1 | G | A | Homozygous   |
| NC_037644.1 | 10286071 | SNV | 1 | C | T | Heterozygous |
| NC_037644.1 | 10286238 | SNV | 1 | G | A | Heterozygous |
| NC_037644.1 | 10286309 | SNV | 1 | G | A | Heterozygous |
| NC_037644.1 | 10286333 | SNV | 1 | G | A | Heterozygous |
| NC_037644.1 | 10286340 | SNV | 1 | T | C | Heterozygous |
| NC_037644.1 | 10286391 | SNV | 1 | A | G | Homozygous   |
| NC_037644.1 | 10286400 | SNV | 1 | G | A | Heterozygous |
| NC_037644.1 | 10287882 | SNV | 1 | A | C | Homozygous   |
| NC_037644.1 | 10290116 | SNV | 1 | C | T | Homozygous   |
| NC_037644.1 | 10290119 | SNV | 1 | C | T | Heterozygous |
| NC_037644.1 | 10290125 | SNV | 1 | C | T | Homozygous   |
| NC_037644.1 | 10290149 | SNV | 1 | A | T | Heterozygous |
| NC_037644.1 | 10290151 | SNV | 1 | C | T | Heterozygous |
| NC_037644.1 | 10292845 | SNV | 1 | G | A | Homozygous   |
| NC_037644.1 | 10292847 | SNV | 1 | T | C | Homozygous   |
| NC_037644.1 | 10292854 | SNV | 1 | C | T | Homozygous   |
| NC_037644.1 | 10292871 | SNV | 1 | A | G | Homozygous   |

|             |          |     |   |   |   |              |
|-------------|----------|-----|---|---|---|--------------|
| NC_037644.1 | 10292894 | SNV | 1 | T | C | Heterozygous |
| NC_037644.1 | 10293917 | SNV | 1 | C | T | Heterozygous |
| NC_037644.1 | 10297076 | SNV | 1 | A | T | Heterozygous |
| NC_037644.1 | 10297082 | SNV | 1 | A | T | Heterozygous |
| NC_037644.1 | 10297091 | SNV | 1 | A | C | Homozygous   |
| NC_037644.1 | 10297112 | SNV | 1 | A | T | Homozygous   |
| NC_037644.1 | 10305030 | SNV | 1 | A | G | Homozygous   |
| NC_037644.1 | 10305304 | SNV | 1 | A | G | Homozygous   |
| NC_037644.1 | 10314986 | SNV | 1 | T | G | Heterozygous |
| NC_037644.1 | 10315004 | SNV | 1 | A | G | Heterozygous |
| NC_037644.1 | 10315034 | SNV | 1 | A | G | Homozygous   |
| NC_037644.1 | 10315041 | SNV | 1 | G | A | Homozygous   |
| NC_037644.1 | 10316110 | SNV | 1 | T | C | Homozygous   |
| NC_037644.1 | 10323063 | SNV | 1 | G | A | Homozygous   |
| NC_037644.1 | 10323087 | SNV | 1 | G | A | Heterozygous |
| NC_037644.1 | 10323092 | SNV | 1 | T | A | Homozygous   |
| NC_037644.1 | 10323101 | SNV | 1 | T | A | Homozygous   |
| NC_037644.1 | 10323107 | SNV | 1 | T | A | Heterozygous |
| NC_037644.1 | 10323109 | SNV | 1 | C | A | Homozygous   |
| NC_037644.1 | 10323112 | SNV | 1 | T | A | Homozygous   |
| NC_037644.1 | 10323117 | SNV | 1 | T | A | Heterozygous |
| NC_037644.1 | 10323122 | SNV | 1 | A | G | Homozygous   |
| NC_037644.1 | 10323128 | SNV | 1 | T | A | Heterozygous |
| NC_037644.1 | 10323140 | SNV | 1 | T | A | Homozygous   |
| NC_037644.1 | 10323283 | SNV | 1 | T | A | Heterozygous |
| NC_037644.1 | 10338704 | SNV | 1 | G | A | Heterozygous |
| NC_037644.1 | 10338730 | SNV | 1 | C | T | Heterozygous |
| NC_037644.1 | 10338754 | SNV | 1 | C | T | Heterozygous |
| NC_037644.1 | 10338825 | SNV | 1 | C | T | Heterozygous |
| NC_037644.1 | 10344125 | SNV | 1 | T | C | Homozygous   |
| NC_037644.1 | 10360480 | SNV | 1 | A | G | Heterozygous |
| NC_037644.1 | 10360818 | SNV | 1 | C | T | Homozygous   |
| NC_037644.1 | 10361046 | SNV | 1 | G | C | Heterozygous |
| NC_037644.1 | 10361055 | SNV | 1 | T | A | Heterozygous |
| NC_037644.1 | 10361166 | SNV | 1 | A | G | Homozygous   |
| NC_037644.1 | 10361212 | SNV | 1 | A | C | Homozygous   |
| NC_037644.1 | 10361230 | SNV | 1 | A | G | Heterozygous |
| NC_037644.1 | 10361236 | SNV | 1 | T | C | Heterozygous |
| NC_037644.1 | 10361281 | SNV | 1 | A | G | Homozygous   |
| NC_037644.1 | 10368958 | SNV | 1 | G | A | Homozygous   |
| NC_037644.1 | 10368964 | SNV | 1 | A | G | Heterozygous |
| NC_037644.1 | 10379367 | SNV | 1 | C | A | Homozygous   |
| NC_037644.1 | 10379396 | SNV | 1 | A | T | Homozygous   |
| NC_037644.1 | 10379398 | SNV | 1 | A | T | Homozygous   |
| NC_037644.1 | 10379404 | SNV | 1 | G | T | Homozygous   |
| NC_037644.1 | 10382764 | SNV | 1 | T | C | Homozygous   |
| NC_037644.1 | 10382957 | SNV | 1 | T | C | Heterozygous |
| NC_037644.1 | 10390695 | SNV | 1 | G | A | Heterozygous |
| NC_037644.1 | 10390735 | SNV | 1 | G | A | Homozygous   |
| NC_037644.1 | 10397249 | SNV | 1 | G | C | Homozygous   |
| NC_037644.1 | 10397668 | SNV | 1 | A | G | Heterozygous |

|             |          |     |   |   |   |              |
|-------------|----------|-----|---|---|---|--------------|
| NC_037644.1 | 10397694 | SNV | 1 | G | A | Homozygous   |
| NC_037644.1 | 10397840 | SNV | 1 | A | G | Homozygous   |
| NC_037644.1 | 10398881 | SNV | 1 | A | G | Homozygous   |
| NC_037644.1 | 10398892 | SNV | 1 | C | G | Homozygous   |
| NC_037644.1 | 10398894 | SNV | 1 | C | T | Homozygous   |
| NC_037644.1 | 10398914 | SNV | 1 | C | T | Heterozygous |
| NC_037644.1 | 10398916 | SNV | 1 | A | G | Homozygous   |
| NC_037644.1 | 10398921 | SNV | 1 | T | G | Homozygous   |
| NC_037644.1 | 10398934 | SNV | 1 | G | T | Homozygous   |
| NC_037644.1 | 10399013 | SNV | 1 | G | A | Heterozygous |
| NC_037644.1 | 10399072 | SNV | 1 | T | C | Homozygous   |
| NC_037644.1 | 10399093 | SNV | 1 | G | A | Heterozygous |
| NC_037644.1 | 10399100 | SNV | 1 | A | G | Homozygous   |
| NC_037644.1 | 10399245 | SNV | 1 | A | G | Homozygous   |
| NC_037644.1 | 10399268 | SNV | 1 | T | G | Homozygous   |
| NC_037644.1 | 10399486 | SNV | 1 | C | T | Heterozygous |
| NC_037644.1 | 10399565 | SNV | 1 | T | C | Homozygous   |
| NC_037644.1 | 10399595 | SNV | 1 | T | C | Homozygous   |
| NC_037644.1 | 10399598 | SNV | 1 | T | C | Homozygous   |
| NC_037644.1 | 10411614 | SNV | 1 | A | G | Heterozygous |
| NC_037644.1 | 10426530 | SNV | 1 | T | C | Heterozygous |
| NC_037644.1 | 10432566 | SNV | 1 | T | C | Heterozygous |
| NC_037644.1 | 10442639 | SNV | 1 | T | C | Heterozygous |
| NC_037644.1 | 10442651 | SNV | 1 | G | A | Heterozygous |
| NC_037644.1 | 10442746 | SNV | 1 | T | A | Heterozygous |
| NC_037644.1 | 10442752 | SNV | 1 | C | G | Heterozygous |
| NC_037644.1 | 10444441 | SNV | 1 | T | C | Heterozygous |
| NC_037644.1 | 10444563 | SNV | 1 | C | T | Homozygous   |
| NC_037644.1 | 10444608 | SNV | 1 | T | C | Homozygous   |
| NC_037644.1 | 10444648 | SNV | 1 | G | A | Heterozygous |
| NC_037644.1 | 10444654 | SNV | 1 | G | A | Heterozygous |
| NC_037644.1 | 10444974 | SNV | 1 | C | T | Homozygous   |
| NC_037644.1 | 10445031 | SNV | 1 | A | G | Homozygous   |
| NC_037644.1 | 10447829 | SNV | 1 | T | C | Homozygous   |
| NC_037644.1 | 10452459 | SNV | 1 | A | G | Homozygous   |
| NC_037644.1 | 10452551 | SNV | 1 | A | G | Homozygous   |
| NC_037644.1 | 10452714 | SNV | 1 | A | G | Heterozygous |
| NC_037644.1 | 10452837 | SNV | 1 | T | G | Homozygous   |
| NC_037644.1 | 10456848 | SNV | 1 | A | G | Homozygous   |
| NC_037644.1 | 10456855 | SNV | 1 | A | G | Homozygous   |
| NC_037644.1 | 10456868 | SNV | 1 | A | G | Homozygous   |
| NC_037644.1 | 10458825 | SNV | 1 | T | A | Homozygous   |
| NC_037644.1 | 10464868 | SNV | 1 | A | G | Homozygous   |
| NC_037644.1 | 10480818 | SNV | 1 | T | C | Homozygous   |
| NC_037644.1 | 10480839 | SNV | 1 | T | A | Homozygous   |
| NC_037644.1 | 10485384 | SNV | 1 | A | G | Homozygous   |
| NC_037644.1 | 10485387 | SNV | 1 | G | A | Heterozygous |
| NC_037644.1 | 10485547 | SNV | 1 | C | T | Heterozygous |
| NC_037644.1 | 10485625 | SNV | 1 | A | G | Homozygous   |
| NC_037644.1 | 10485804 | SNV | 1 | T | C | Heterozygous |
| NC_037644.1 | 10486092 | SNV | 1 | T | C | Heterozygous |

|             |          |     |   |   |   |              |
|-------------|----------|-----|---|---|---|--------------|
| NC_037644.1 | 10486123 | SNV | 1 | C | T | Homozygous   |
| NC_037644.1 | 10487201 | SNV | 1 | A | G | Heterozygous |
| NC_037644.1 | 10487817 | SNV | 1 | G | A | Heterozygous |
| NC_037644.1 | 10487960 | SNV | 1 | C | T | Homozygous   |
| NC_037644.1 | 10488413 | SNV | 1 | T | C | Heterozygous |
| NC_037644.1 | 10490966 | SNV | 1 | G | A | Heterozygous |
| NC_037644.1 | 10499681 | SNV | 1 | T | G | Homozygous   |
| NC_037644.1 | 10500895 | SNV | 1 | T | G | Homozygous   |
| NC_037644.1 | 10500924 | SNV | 1 | A | T | Homozygous   |
| NC_037644.1 | 10518986 | SNV | 1 | T | A | Homozygous   |
| NC_037644.1 | 10518992 | SNV | 1 | T | C | Homozygous   |
| NC_037644.1 | 10519010 | SNV | 1 | T | C | Homozygous   |
| NC_037644.1 | 10535354 | SNV | 1 | T | C | Heterozygous |
| NC_037644.1 | 10535415 | SNV | 1 | C | T | Heterozygous |
| NC_037644.1 | 10535419 | SNV | 1 | A | T | Heterozygous |
| NC_037644.1 | 10536005 | SNV | 1 | A | G | Homozygous   |
| NC_037644.1 | 10536013 | SNV | 1 | T | G | Heterozygous |
| NC_037644.1 | 10536987 | SNV | 1 | A | G | Heterozygous |
| NC_037644.1 | 10536995 | SNV | 1 | G | A | Homozygous   |
| NC_037644.1 | 10536997 | SNV | 1 | G | A | Heterozygous |
| NC_037644.1 | 10537000 | SNV | 1 | A | C | Heterozygous |
| NC_037644.1 | 10537004 | SNV | 1 | T | A | Heterozygous |
| NC_037644.1 | 10550818 | SNV | 1 | G | A | Heterozygous |
| NC_037644.1 | 10551484 | SNV | 1 | C | T | Heterozygous |
| NC_037644.1 | 10551931 | SNV | 1 | G | T | Homozygous   |
| NC_037644.1 | 10552211 | SNV | 1 | T | C | Heterozygous |
| NC_037644.1 | 10552232 | SNV | 1 | T | C | Homozygous   |
| NC_037644.1 | 10552355 | SNV | 1 | T | C | Homozygous   |
| NC_037644.1 | 10552380 | SNV | 1 | A | G | Homozygous   |
| NC_037644.1 | 10552412 | SNV | 1 | T | C | Homozygous   |
| NC_037644.1 | 10552415 | SNV | 1 | A | G | Homozygous   |
| NC_037644.1 | 10553076 | SNV | 1 | G | A | Heterozygous |
| NC_037644.1 | 10553184 | SNV | 1 | A | G | Homozygous   |
| NC_037644.1 | 10553376 | SNV | 1 | C | T | Homozygous   |
| NC_037644.1 | 10558200 | SNV | 1 | T | C | Homozygous   |
| NC_037644.1 | 10558522 | SNV | 1 | A | G | Heterozygous |
| NC_037644.1 | 10560177 | SNV | 1 | A | G | Homozygous   |
| NC_037644.1 | 10560942 | SNV | 1 | T | C | Heterozygous |
| NC_037644.1 | 10560980 | SNV | 1 | G | T | Heterozygous |
| NC_037644.1 | 10561085 | SNV | 1 | G | A | Homozygous   |
| NC_037644.1 | 10561088 | SNV | 1 | A | G | Homozygous   |
| NC_037644.1 | 10561281 | SNV | 1 | T | C | Homozygous   |
| NC_037644.1 | 10561391 | SNV | 1 | G | A | Heterozygous |
| NC_037644.1 | 10561444 | SNV | 1 | C | T | Heterozygous |
| NC_037644.1 | 10561716 | SNV | 1 | C | T | Homozygous   |
| NC_037644.1 | 10561719 | SNV | 1 | T | A | Homozygous   |
| NC_037644.1 | 10561723 | SNV | 1 | T | C | Homozygous   |
| NC_037644.1 | 10573854 | SNV | 1 | T | C | Homozygous   |
| NC_037644.1 | 10573896 | SNV | 1 | A | G | Homozygous   |
| NC_037644.1 | 10573899 | SNV | 1 | G | A | Homozygous   |
| NC_037644.1 | 10586407 | SNV | 1 | G | A | Homozygous   |

|             |          |     |   |   |   |              |
|-------------|----------|-----|---|---|---|--------------|
| NC_037644.1 | 10586423 | SNV | 1 | G | T | Homozygous   |
| NC_037644.1 | 10591972 | SNV | 1 | C | T | Homozygous   |
| NC_037644.1 | 10592185 | SNV | 1 | G | T | Heterozygous |
| NC_037644.1 | 10596400 | SNV | 1 | C | A | Homozygous   |
| NC_037644.1 | 10596419 | SNV | 1 | C | T | Heterozygous |
| NC_037644.1 | 10596423 | SNV | 1 | T | C | Homozygous   |
| NC_037644.1 | 10596595 | SNV | 1 | A | T | Heterozygous |
| NC_037644.1 | 10596604 | SNV | 1 | T | G | Heterozygous |
| NC_037644.1 | 10596991 | SNV | 1 | A | T | Homozygous   |
| NC_037644.1 | 10597029 | SNV | 1 | C | T | Heterozygous |
| NC_037644.1 | 10597108 | SNV | 1 | T | C | Homozygous   |
| NC_037644.1 | 10597221 | SNV | 1 | G | A | Homozygous   |
| NC_037644.1 | 10598111 | SNV | 1 | C | T | Heterozygous |
| NC_037644.1 | 10598325 | SNV | 1 | T | C | Heterozygous |
| NC_037644.1 | 10598370 | SNV | 1 | T | A | Heterozygous |
| NC_037644.1 | 10598375 | SNV | 1 | G | A | Homozygous   |
| NC_037644.1 | 10598414 | SNV | 1 | C | A | Homozygous   |
| NC_037644.1 | 10598435 | SNV | 1 | C | T | Homozygous   |
| NC_037644.1 | 10599396 | SNV | 1 | T | C | Homozygous   |
| NC_037644.1 | 10599400 | SNV | 1 | T | C | Homozygous   |
| NC_037644.1 | 10599582 | SNV | 1 | C | T | Heterozygous |
| NC_037644.1 | 10600257 | SNV | 1 | A | G | Homozygous   |
| NC_037644.1 | 10601396 | SNV | 1 | T | C | Homozygous   |
| NC_037644.1 | 10601432 | SNV | 1 | T | C | Homozygous   |
| NC_037644.1 | 10601440 | SNV | 1 | T | C | Heterozygous |
| NC_037644.1 | 10601471 | SNV | 1 | G | A | Homozygous   |
| NC_037644.1 | 10601517 | SNV | 1 | T | C | Homozygous   |
| NC_037644.1 | 10601524 | SNV | 1 | A | G | Homozygous   |
| NC_037644.1 | 10601531 | SNV | 1 | G | A | Homozygous   |
| NC_037644.1 | 10601725 | SNV | 1 | A | G | Homozygous   |
| NC_037644.1 | 10606798 | SNV | 1 | A | G | Homozygous   |
| NC_037644.1 | 10606803 | SNV | 1 | T | C | Homozygous   |
| NC_037644.1 | 10606805 | SNV | 1 | T | C | Homozygous   |
| NC_037644.1 | 10606812 | SNV | 1 | A | C | Homozygous   |
| NC_037644.1 | 10606814 | SNV | 1 | A | G | Homozygous   |
| NC_037644.1 | 10606816 | SNV | 1 | A | T | Homozygous   |
| NC_037644.1 | 10606821 | SNV | 1 | T | A | Homozygous   |
| NC_037644.1 | 10606823 | SNV | 1 | T | C | Homozygous   |
| NC_037644.1 | 10606831 | SNV | 1 | T | C | Homozygous   |
| NC_037644.1 | 10611667 | SNV | 1 | A | G | Homozygous   |
| NC_037644.1 | 10611712 | SNV | 1 | G | A | Heterozygous |
| NC_037644.1 | 10611726 | SNV | 1 | C | T | Heterozygous |
| NC_037644.1 | 10612050 | SNV | 1 | T | C | Homozygous   |
| NC_037644.1 | 10612698 | SNV | 1 | T | C | Homozygous   |
| NC_037644.1 | 10613608 | SNV | 1 | T | C | Homozygous   |
| NC_037644.1 | 10623319 | SNV | 1 | T | C | Heterozygous |
| NC_037644.1 | 10625218 | SNV | 1 | T | C | Homozygous   |
| NC_037644.1 | 10625406 | SNV | 1 | A | G | Heterozygous |
| NC_037644.1 | 10626009 | SNV | 1 | G | A | Heterozygous |
| NC_037644.1 | 10626028 | SNV | 1 | A | G | Homozygous   |
| NC_037644.1 | 10626129 | SNV | 1 | G | A | Homozygous   |

|             |          |     |   |   |   |              |
|-------------|----------|-----|---|---|---|--------------|
| NC_037644.1 | 10626135 | SNV | 1 | A | G | Homozygous   |
| NC_037644.1 | 10626570 | SNV | 1 | C | T | Homozygous   |
| NC_037644.1 | 10626587 | SNV | 1 | A | G | Heterozygous |
| NC_037644.1 | 10626916 | SNV | 1 | T | C | Homozygous   |
| NC_037644.1 | 10627549 | SNV | 1 | A | G | Homozygous   |
| NC_037644.1 | 10628306 | SNV | 1 | T | C | Heterozygous |
| NC_037644.1 | 10628592 | SNV | 1 | C | T | Heterozygous |
| NC_037644.1 | 10628621 | SNV | 1 | A | G | Homozygous   |
| NC_037644.1 | 10628959 | SNV | 1 | A | G | Homozygous   |
| NC_037644.1 | 10637952 | SNV | 1 | G | A | Heterozygous |
| NC_037644.1 | 10638457 | SNV | 1 | T | C | Homozygous   |
| NC_037644.1 | 10643306 | SNV | 1 | T | A | Heterozygous |
| NC_037644.1 | 10650893 | SNV | 1 | T | C | Homozygous   |
| NC_037644.1 | 10650972 | SNV | 1 | A | T | Homozygous   |
| NC_037644.1 | 10651356 | SNV | 1 | T | C | Heterozygous |
| NC_037644.1 | 10651631 | SNV | 1 | T | C | Homozygous   |
| NC_037644.1 | 10651821 | SNV | 1 | C | T | Heterozygous |
| NC_037644.1 | 10651949 | SNV | 1 | A | G | Homozygous   |
| NC_037644.1 | 10652128 | SNV | 1 | A | G | Homozygous   |
| NC_037644.1 | 10652172 | SNV | 1 | A | G | Homozygous   |
| NC_037644.1 | 10652453 | SNV | 1 | A | G | Homozygous   |
| NC_037644.1 | 10654721 | SNV | 1 | G | A | Homozygous   |
| NC_037644.1 | 10690689 | SNV | 1 | T | A | Homozygous   |
| NC_037644.1 | 10690950 | SNV | 1 | C | T | Heterozygous |
| NC_037644.1 | 10691697 | SNV | 1 | C | T | Homozygous   |
| NC_037644.1 | 10691712 | SNV | 1 | C | A | Heterozygous |
| NC_037644.1 | 10691715 | SNV | 1 | A | G | Homozygous   |
| NC_037644.1 | 10693026 | SNV | 1 | A | T | Homozygous   |
| NC_037644.1 | 10697907 | SNV | 1 | A | G | Homozygous   |
| NC_037644.1 | 10697928 | SNV | 1 | A | G | Homozygous   |
| NC_037644.1 | 10698006 | SNV | 1 | A | G | Heterozygous |
| NC_037644.1 | 10702000 | SNV | 1 | C | T | Homozygous   |
| NC_037644.1 | 10707121 | SNV | 1 | T | C | Homozygous   |
| NC_037644.1 | 10707193 | SNV | 1 | A | G | Homozygous   |
| NC_037644.1 | 10707210 | SNV | 1 | C | T | Homozygous   |
| NC_037644.1 | 10710685 | SNV | 1 | A | C | Heterozygous |
| NC_037644.1 | 10710690 | SNV | 1 | G | A | Heterozygous |
| NC_037644.1 | 10710707 | SNV | 1 | G | A | Heterozygous |
| NC_037644.1 | 10710710 | SNV | 1 | T | G | Homozygous   |
| NC_037644.1 | 10710719 | SNV | 1 | A | G | Heterozygous |
| NC_037644.1 | 10711055 | SNV | 1 | C | T | Heterozygous |
| NC_037644.1 | 10718794 | SNV | 1 | A | G | Heterozygous |
| NC_037644.1 | 10718815 | SNV | 1 | A | G | Heterozygous |
| NC_037644.1 | 10719531 | SNV | 1 | G | A | Heterozygous |
| NC_037644.1 | 10719535 | SNV | 1 | G | A | Heterozygous |
| NC_037644.1 | 10719709 | SNV | 1 | C | T | Heterozygous |
| NC_037644.1 | 10719714 | SNV | 1 | C | T | Homozygous   |
| NC_037644.1 | 10719717 | SNV | 1 | T | C | Heterozygous |
| NC_037644.1 | 10729095 | SNV | 1 | A | G | Homozygous   |
| NC_037644.1 | 10730110 | SNV | 1 | G | C | Heterozygous |
| NC_037644.1 | 10730191 | SNV | 1 | T | C | Homozygous   |



|             |          |     |   |   |   |              |
|-------------|----------|-----|---|---|---|--------------|
| NC_037644.1 | 10730499 | SNV | 1 | A | T | Homozygous   |
| NC_037644.1 | 10730574 | SNV | 1 | G | C | Homozygous   |
| NC_037644.1 | 10731056 | SNV | 1 | C | T | Homozygous   |
| NC_037644.1 | 10731097 | SNV | 1 | A | G | Homozygous   |
| NC_037644.1 | 10731148 | SNV | 1 | T | G | Heterozygous |
| NC_037644.1 | 10731225 | SNV | 1 | T | C | Homozygous   |
| NC_037644.1 | 10731260 | SNV | 1 | T | C | Heterozygous |
| NC_037644.1 | 10731317 | SNV | 1 | G | A | Heterozygous |
| NC_037644.1 | 10731476 | SNV | 1 | A | T | Heterozygous |
| NC_037644.1 | 10731516 | SNV | 1 | T | C | Homozygous   |
| NC_037644.1 | 10731596 | SNV | 1 | A | G | Homozygous   |
| NC_037644.1 | 10731639 | SNV | 1 | T | C | Heterozygous |
| NC_037644.1 | 10731692 | SNV | 1 | A | G | Heterozygous |
| NC_037644.1 | 10731817 | SNV | 1 | A | G | Homozygous   |
| NC_037644.1 | 10731894 | SNV | 1 | G | C | Homozygous   |
| NC_037644.1 | 10731986 | SNV | 1 | G | C | Homozygous   |
| NC_037644.1 | 10732040 | SNV | 1 | G | A | Homozygous   |
| NC_037644.1 | 10732141 | SNV | 1 | C | T | Heterozygous |
| NC_037644.1 | 10732170 | SNV | 1 | T | A | Homozygous   |
| NC_037644.1 | 10732382 | SNV | 1 | G | A | Heterozygous |
| NC_037644.1 | 10732463 | SNV | 1 | G | A | Homozygous   |
| NC_037644.1 | 10732472 | SNV | 1 | T | C | Homozygous   |
| NC_037644.1 | 10759611 | SNV | 1 | T | G | Homozygous   |
| NC_037644.1 | 10759780 | SNV | 1 | A | G | Homozygous   |
| NC_037644.1 | 10759786 | SNV | 1 | T | C | Homozygous   |
| NC_037644.1 | 10759843 | SNV | 1 | T | G | Homozygous   |
| NC_037644.1 | 10760041 | SNV | 1 | A | G | Homozygous   |
| NC_037644.1 | 10760340 | SNV | 1 | T | A | Homozygous   |
| NC_037644.1 | 10760358 | SNV | 1 | A | G | Homozygous   |
| NC_037644.1 | 10760364 | SNV | 1 | G | A | Homozygous   |
| NC_037644.1 | 10760396 | SNV | 1 | A | G | Homozygous   |
| NC_037644.1 | 10760417 | SNV | 1 | T | C | Heterozygous |
| NC_037644.1 | 10760427 | SNV | 1 | A | T | Heterozygous |
| NC_037644.1 | 10760432 | SNV | 1 | A | G | Heterozygous |
| NC_037644.1 | 10760453 | SNV | 1 | C | T | Heterozygous |
| NC_037644.1 | 10760501 | SNV | 1 | G | A | Homozygous   |
| NC_037644.1 | 10760526 | SNV | 1 | A | T | Heterozygous |
| NC_037644.1 | 10760529 | SNV | 1 | A | G | Heterozygous |
| NC_037644.1 | 10760532 | SNV | 1 | A | G | Heterozygous |
| NC_037644.1 | 10760538 | SNV | 1 | A | G | Heterozygous |
| NC_037644.1 | 10760544 | SNV | 1 | G | A | Homozygous   |
| NC_037644.1 | 10760550 | SNV | 1 | A | G | Heterozygous |
| NC_037644.1 | 10760556 | SNV | 1 | A | T | Heterozygous |
| NC_037644.1 | 10760559 | SNV | 1 | A | T | Heterozygous |
| NC_037644.1 | 10760568 | SNV | 1 | A | T | Heterozygous |
| NC_037644.1 | 10760571 | SNV | 1 | T | A | Heterozygous |
| NC_037644.1 | 10760583 | SNV | 1 | A | G | Heterozygous |
| NC_037644.1 | 10760592 | SNV | 1 | A | T | Heterozygous |
| NC_037644.1 | 10760949 | SNV | 1 | A | T | Homozygous   |
| NC_037644.1 | 10760961 | SNV | 1 | G | T | Homozygous   |
| NC_037644.1 | 10760982 | SNV | 1 | T | A | Heterozygous |

|             |          |     |   |   |   |              |
|-------------|----------|-----|---|---|---|--------------|
| NC_037644.1 | 10761009 | SNV | 1 | G | A | Homozygous   |
| NC_037644.1 | 10778018 | SNV | 1 | T | C | Homozygous   |
| NC_037644.1 | 10778180 | SNV | 1 | T | A | Heterozygous |
| NC_037644.1 | 10778192 | SNV | 1 | T | A | Homozygous   |
| NC_037644.1 | 10778357 | SNV | 1 | A | G | Heterozygous |
| NC_037644.1 | 10778503 | SNV | 1 | C | T | Homozygous   |
| NC_037644.1 | 10778543 | SNV | 1 | T | C | Heterozygous |
| NC_037644.1 | 10778545 | SNV | 1 | C | T | Heterozygous |
| NC_037644.1 | 10778598 | SNV | 1 | T | C | Homozygous   |
| NC_037644.1 | 10779968 | SNV | 1 | T | C | Homozygous   |
| NC_037644.1 | 10779975 | SNV | 1 | G | A | Homozygous   |
| NC_037644.1 | 10780243 | SNV | 1 | C | T | Heterozygous |
| NC_037644.1 | 10780250 | SNV | 1 | T | C | Homozygous   |
| NC_037644.1 | 10780630 | SNV | 1 | A | G | Homozygous   |
| NC_037644.1 | 10780798 | SNV | 1 | C | T | Heterozygous |
| NC_037644.1 | 10780849 | SNV | 1 | A | G | Homozygous   |
| NC_037644.1 | 10781180 | SNV | 1 | T | C | Heterozygous |
| NC_037644.1 | 10782424 | SNV | 1 | A | C | Homozygous   |
| NC_037644.1 | 10782429 | SNV | 1 | T | A | Homozygous   |
| NC_037644.1 | 10782453 | SNV | 1 | T | A | Homozygous   |
| NC_037644.1 | 10782455 | SNV | 1 | A | T | Homozygous   |
| NC_037644.1 | 10782464 | SNV | 1 | A | G | Homozygous   |
| NC_037644.1 | 10782484 | SNV | 1 | A | T | Homozygous   |
| NC_037644.1 | 10782487 | SNV | 1 | T | G | Homozygous   |
| NC_037644.1 | 10782491 | SNV | 1 | T | A | Homozygous   |
| NC_037644.1 | 10782559 | SNV | 1 | T | C | Heterozygous |
| NC_037644.1 | 10782570 | SNV | 1 | T | C | Heterozygous |
| NC_037644.1 | 10782577 | SNV | 1 | T | C | Heterozygous |
| NC_037644.1 | 10782580 | SNV | 1 | T | C | Homozygous   |
| NC_037644.1 | 10782584 | SNV | 1 | T | C | Heterozygous |
| NC_037644.1 | 10782598 | SNV | 1 | T | C | Homozygous   |
| NC_037644.1 | 10782607 | SNV | 1 | C | T | Heterozygous |
| NC_037644.1 | 10782628 | SNV | 1 | T | C | Homozygous   |
| NC_037644.1 | 10782654 | SNV | 1 | C | T | Homozygous   |
| NC_037644.1 | 10782709 | SNV | 1 | A | T | Homozygous   |
| NC_037644.1 | 10782734 | SNV | 1 | T | A | Homozygous   |
| NC_037644.1 | 10782949 | SNV | 1 | T | C | Homozygous   |
| NC_037644.1 | 10783438 | SNV | 1 | A | G | Homozygous   |
| NC_037644.1 | 10783444 | SNV | 1 | A | G | Homozygous   |
| NC_037644.1 | 10783616 | SNV | 1 | C | G | Homozygous   |
| NC_037644.1 | 10783710 | SNV | 1 | G | A | Homozygous   |
| NC_037644.1 | 10783922 | SNV | 1 | A | G | Homozygous   |
| NC_037644.1 | 10783946 | SNV | 1 | T | A | Heterozygous |
| NC_037644.1 | 10783981 | SNV | 1 | A | T | Heterozygous |
| NC_037644.1 | 10785495 | SNV | 1 | G | A | Heterozygous |
| NC_037644.1 | 10785556 | SNV | 1 | A | G | Heterozygous |
| NC_037644.1 | 10785562 | SNV | 1 | A | G | Homozygous   |
| NC_037644.1 | 10787456 | SNV | 1 | G | C | Heterozygous |
| NC_037644.1 | 10787511 | SNV | 1 | A | C | Homozygous   |
| NC_037644.1 | 10787570 | SNV | 1 | T | A | Heterozygous |
| NC_037644.1 | 10792994 | SNV | 1 | G | A | Heterozygous |

|             |          |     |   |   |   |              |
|-------------|----------|-----|---|---|---|--------------|
| NC_037644.1 | 10793017 | SNV | 1 | G | C | Heterozygous |
| NC_037644.1 | 10793058 | SNV | 1 | A | G | Heterozygous |
| NC_037644.1 | 10793089 | SNV | 1 | A | G | Homozygous   |
| NC_037644.1 | 10793122 | SNV | 1 | C | T | Heterozygous |
| NC_037644.1 | 10795433 | SNV | 1 | T | C | Homozygous   |
| NC_037644.1 | 10795474 | SNV | 1 | A | G | Heterozygous |
| NC_037644.1 | 10795691 | SNV | 1 | C | G | Heterozygous |
| NC_037644.1 | 10814132 | SNV | 1 | G | C | Homozygous   |
| NC_037644.1 | 10814182 | SNV | 1 | C | A | Homozygous   |
| NC_037644.1 | 10814202 | SNV | 1 | T | C | Homozygous   |
| NC_037644.1 | 10814322 | SNV | 1 | G | A | Heterozygous |
| NC_037644.1 | 10827208 | SNV | 1 | T | G | Heterozygous |
| NC_037644.1 | 10827210 | SNV | 1 | A | G | Heterozygous |
| NC_037644.1 | 10827213 | SNV | 1 | G | A | Heterozygous |
| NC_037644.1 | 10829378 | SNV | 1 | C | T | Homozygous   |
| NC_037644.1 | 10847265 | SNV | 1 | G | T | Homozygous   |
| NC_037644.1 | 10849130 | SNV | 1 | T | C | Heterozygous |
| NC_037644.1 | 10849134 | SNV | 1 | T | C | Heterozygous |
| NC_037644.1 | 10849167 | SNV | 1 | C | G | Heterozygous |
| NC_037644.1 | 10849295 | SNV | 1 | T | C | Heterozygous |
| NC_037644.1 | 10849371 | SNV | 1 | T | A | Homozygous   |
| NC_037644.1 | 10849374 | SNV | 1 | A | G | Homozygous   |
| NC_037644.1 | 10849402 | SNV | 1 | C | A | Homozygous   |
| NC_037644.1 | 10849404 | SNV | 1 | G | T | Homozygous   |
| NC_037644.1 | 10849406 | SNV | 1 | T | C | Homozygous   |
| NC_037644.1 | 10849411 | SNV | 1 | A | T | Heterozygous |
| NC_037644.1 | 10849421 | SNV | 1 | T | A | Heterozygous |
| NC_037644.1 | 10849443 | SNV | 1 | A | G | Heterozygous |
| NC_037644.1 | 10849498 | SNV | 1 | G | A | Homozygous   |
| NC_037644.1 | 10857055 | SNV | 1 | A | G | Homozygous   |
| NC_037644.1 | 10887210 | SNV | 1 | G | A | Heterozygous |
| NC_037644.1 | 10890122 | SNV | 1 | T | G | Homozygous   |
| NC_037644.1 | 10890126 | SNV | 1 | C | A | Homozygous   |
| NC_037644.1 | 10890128 | SNV | 1 | T | A | Homozygous   |
| NC_037644.1 | 10890134 | SNV | 1 | C | T | Homozygous   |
| NC_037644.1 | 10890140 | SNV | 1 | A | C | Homozygous   |
| NC_037644.1 | 10890208 | SNV | 1 | C | T | Heterozygous |
| NC_037644.1 | 10905091 | SNV | 1 | G | A | Heterozygous |
| NC_037644.1 | 10905102 | SNV | 1 | A | G | Heterozygous |
| NC_037644.1 | 10905117 | SNV | 1 | G | A | Heterozygous |
| NC_037644.1 | 10905123 | SNV | 1 | G | A | Heterozygous |
| NC_037644.1 | 10924216 | SNV | 1 | C | T | Heterozygous |
| NC_037644.1 | 10925893 | SNV | 1 | T | C | Heterozygous |
| NC_037644.1 | 10925899 | SNV | 1 | T | A | Heterozygous |
| NC_037644.1 | 10925929 | SNV | 1 | T | C | Heterozygous |
| NC_037644.1 | 10931628 | SNV | 1 | A | G | Heterozygous |
| NC_037644.1 | 10931655 | SNV | 1 | G | A | Homozygous   |
| NC_037644.1 | 10932187 | SNV | 1 | G | A | Heterozygous |
| NC_037644.1 | 10932494 | SNV | 1 | A | G | Homozygous   |
| NC_037644.1 | 10932664 | SNV | 1 | T | C | Heterozygous |
| NC_037644.1 | 10933106 | SNV | 1 | G | A | Homozygous   |

|             |          |     |   |   |   |              |
|-------------|----------|-----|---|---|---|--------------|
| NC_037644.1 | 10933845 | SNV | 1 | T | A | Heterozygous |
| NC_037644.1 | 10934009 | SNV | 1 | G | A | Homozygous   |
| NC_037644.1 | 10934155 | SNV | 1 | G | A | Homozygous   |
| NC_037644.1 | 10938500 | SNV | 1 | A | T | Heterozygous |
| NC_037644.1 | 10938523 | SNV | 1 | C | A | Heterozygous |
| NC_037644.1 | 10938526 | SNV | 1 | A | G | Heterozygous |
| NC_037644.1 | 10938531 | SNV | 1 | T | A | Heterozygous |
| NC_037644.1 | 10938562 | SNV | 1 | T | G | Heterozygous |
| NC_037644.1 | 10954866 | SNV | 1 | T | A | Heterozygous |
| NC_037644.1 | 10954895 | SNV | 1 | A | T | Homozygous   |
| NC_037644.1 | 10958735 | SNV | 1 | A | T | Homozygous   |
| NC_037644.1 | 10958741 | SNV | 1 | A | G | Homozygous   |
| NC_037644.1 | 10958783 | SNV | 1 | T | G | Homozygous   |
| NC_037644.1 | 10958841 | SNV | 1 | A | G | Homozygous   |
| NC_037644.1 | 10959994 | SNV | 1 | T | G | Homozygous   |
| NC_037644.1 | 10959996 | SNV | 1 | A | G | Homozygous   |
| NC_037644.1 | 10963222 | SNV | 1 | G | A | Homozygous   |
| NC_037644.1 | 10963326 | SNV | 1 | A | G | Homozygous   |
| NC_037644.1 | 10963608 | SNV | 1 | T | C | Homozygous   |
| NC_037644.1 | 10969539 | SNV | 1 | T | C | Heterozygous |
| NC_037644.1 | 10969573 | SNV | 1 | A | G | Homozygous   |
| NC_037644.1 | 10969952 | SNV | 1 | T | C | Heterozygous |
| NC_037644.1 | 10972227 | SNV | 1 | C | T | Heterozygous |
| NC_037644.1 | 10975586 | SNV | 1 | T | C | Homozygous   |
| NC_037644.1 | 10982007 | SNV | 1 | A | C | Heterozygous |
| NC_037644.1 | 10982010 | SNV | 1 | A | G | Heterozygous |
| NC_037644.1 | 10982013 | SNV | 1 | A | G | Heterozygous |
| NC_037644.1 | 10982016 | SNV | 1 | G | A | Heterozygous |
| NC_037644.1 | 10982017 | SNV | 1 | A | C | Heterozygous |
| NC_037644.1 | 10982018 | SNV | 1 | A | T | Heterozygous |
| NC_037644.1 | 10982026 | SNV | 1 | G | T | Heterozygous |
| NC_037644.1 | 10982045 | SNV | 1 | A | T | Homozygous   |
| NC_037644.1 | 10985679 | SNV | 1 | C | T | Heterozygous |
| NC_037644.1 | 10985780 | SNV | 1 | C | A | Homozygous   |
| NC_037644.1 | 10986303 | SNV | 1 | T | C | Homozygous   |
| NC_037644.1 | 10986413 | SNV | 1 | G | A | Heterozygous |
| NC_037644.1 | 10986431 | SNV | 1 | G | A | Heterozygous |
| NC_037644.1 | 10986459 | SNV | 1 | A | G | Heterozygous |
| NC_037644.1 | 10986764 | SNV | 1 | A | G | Homozygous   |
| NC_037644.1 | 10986820 | SNV | 1 | G | A | Heterozygous |
| NC_037644.1 | 10986917 | SNV | 1 | A | C | Homozygous   |
| NC_037644.1 | 10987039 | SNV | 1 | A | G | Homozygous   |
| NC_037644.1 | 10991672 | SNV | 1 | C | A | Homozygous   |
| NC_037644.1 | 10995445 | SNV | 1 | T | C | Heterozygous |
| NC_037644.1 | 10999118 | SNV | 1 | C | A | Homozygous   |
| NC_037644.1 | 11006143 | SNV | 1 | C | T | Heterozygous |
| NC_037644.1 | 11010474 | SNV | 1 | G | A | Heterozygous |
| NC_037644.1 | 11011334 | SNV | 1 | C | A | Homozygous   |
| NC_037644.1 | 11015933 | SNV | 1 | C | T | Homozygous   |
| NC_037644.1 | 11016090 | SNV | 1 | T | A | Heterozygous |
| NC_037644.1 | 11016539 | SNV | 1 | C | T | Homozygous   |

|             |          |     |   |   |   |              |
|-------------|----------|-----|---|---|---|--------------|
| NC_037644.1 | 11018001 | SNV | 1 | A | T | Homozygous   |
| NC_037644.1 | 11018011 | SNV | 1 | A | T | Homozygous   |
| NC_037644.1 | 11018018 | SNV | 1 | T | C | Homozygous   |
| NC_037644.1 | 11021770 | SNV | 1 | A | T | Homozygous   |
| NC_037644.1 | 11022886 | SNV | 1 | T | G | Homozygous   |
| NC_037644.1 | 11022889 | SNV | 1 | C | A | Heterozygous |
| NC_037644.1 | 11022891 | SNV | 1 | G | A | Heterozygous |
| NC_037644.1 | 11023204 | SNV | 1 | A | G | Homozygous   |
| NC_037644.1 | 11023287 | SNV | 1 | A | G | Homozygous   |
| NC_037644.1 | 11024249 | SNV | 1 | G | A | Heterozygous |
| NC_037644.1 | 11029204 | SNV | 1 | G | A | Homozygous   |
| NC_037644.1 | 11030652 | SNV | 1 | G | A | Heterozygous |
| NC_037644.1 | 11036339 | SNV | 1 | A | G | Homozygous   |
| NC_037644.1 | 11036735 | SNV | 1 | C | T | Homozygous   |
| NC_037644.1 | 11037447 | SNV | 1 | T | G | Homozygous   |
| NC_037644.1 | 11037450 | SNV | 1 | T | A | Heterozygous |
| NC_037644.1 | 11037475 | SNV | 1 | A | T | Homozygous   |
| NC_037644.1 | 11037795 | SNV | 1 | A | C | Heterozygous |
| NC_037644.1 | 11046250 | SNV | 1 | T | C | Homozygous   |
| NC_037644.1 | 11046512 | SNV | 1 | A | G | Heterozygous |
| NC_037644.1 | 11047805 | SNV | 1 | T | C | Homozygous   |
| NC_037644.1 | 11048172 | SNV | 1 | T | A | Homozygous   |
| NC_037644.1 | 11048178 | SNV | 1 | A | T | Homozygous   |
| NC_037644.1 | 11048183 | SNV | 1 | A | C | Homozygous   |
| NC_037644.1 | 11050638 | SNV | 1 | T | C | Homozygous   |
| NC_037644.1 | 11050675 | SNV | 1 | C | T | Homozygous   |
| NC_037644.1 | 11050715 | SNV | 1 | C | T | Homozygous   |
| NC_037644.1 | 11052505 | SNV | 1 | T | C | Heterozygous |
| NC_037644.1 | 11052546 | SNV | 1 | A | G | Heterozygous |
| NC_037644.1 | 11052580 | SNV | 1 | C | T | Homozygous   |
| NC_037644.1 | 11052943 | SNV | 1 | A | T | Homozygous   |
| NC_037644.1 | 11052965 | SNV | 1 | A | C | Homozygous   |
| NC_037644.1 | 11052967 | SNV | 1 | T | G | Homozygous   |
| NC_037644.1 | 11052972 | SNV | 1 | C | T | Homozygous   |
| NC_037644.1 | 11052983 | SNV | 1 | G | T | Homozygous   |
| NC_037644.1 | 11052988 | SNV | 1 | A | T | Homozygous   |
| NC_037644.1 | 11052995 | SNV | 1 | T | C | Homozygous   |
| NC_037644.1 | 11054481 | SNV | 1 | C | G | Homozygous   |
| NC_037644.1 | 11055434 | SNV | 1 | C | G | Homozygous   |
| NC_037644.1 | 11055719 | SNV | 1 | A | T | Homozygous   |
| NC_037644.1 | 11063054 | SNV | 1 | C | T | Heterozygous |
| NC_037644.1 | 11064257 | SNV | 1 | T | A | Heterozygous |
| NC_037644.1 | 11064259 | SNV | 1 | T | A | Heterozygous |
| NC_037644.1 | 11068487 | SNV | 1 | T | C | Homozygous   |
| NC_037644.1 | 11068659 | SNV | 1 | A | G | Homozygous   |
| NC_037644.1 | 11068715 | SNV | 1 | G | A | Heterozygous |
| NC_037644.1 | 11069007 | SNV | 1 | C | T | Homozygous   |
| NC_037644.1 | 11120826 | SNV | 1 | C | T | Heterozygous |
| NC_037644.1 | 11120892 | SNV | 1 | C | G | Homozygous   |
| NC_037644.1 | 11120990 | SNV | 1 | G | A | Homozygous   |
| NC_037644.1 | 11120996 | SNV | 1 | G | T | Homozygous   |

|             |          |     |   |   |   |              |
|-------------|----------|-----|---|---|---|--------------|
| NC_037644.1 | 11121024 | SNV | 1 | G | A | Heterozygous |
| NC_037644.1 | 11121134 | SNV | 1 | G | A | Heterozygous |
| NC_037644.1 | 11121137 | SNV | 1 | G | A | Heterozygous |
| NC_037644.1 | 11121141 | SNV | 1 | A | G | Homozygous   |
| NC_037644.1 | 11122596 | SNV | 1 | C | T | Heterozygous |
| NC_037644.1 | 11122656 | SNV | 1 | A | C | Homozygous   |
| NC_037644.1 | 11125795 | SNV | 1 | A | C | Heterozygous |
| NC_037644.1 | 11125806 | SNV | 1 | A | G | Homozygous   |
| NC_037644.1 | 11125860 | SNV | 1 | C | T | Homozygous   |
| NC_037644.1 | 11125906 | SNV | 1 | A | G | Heterozygous |
| NC_037644.1 | 11125943 | SNV | 1 | G | C | Heterozygous |
| NC_037644.1 | 11125995 | SNV | 1 | A | G | Heterozygous |
| NC_037644.1 | 11126046 | SNV | 1 | G | A | Homozygous   |
| NC_037644.1 | 11126060 | SNV | 1 | G | T | Homozygous   |
| NC_037644.1 | 11126064 | SNV | 1 | A | G | Homozygous   |
| NC_037644.1 | 11126173 | SNV | 1 | T | C | Heterozygous |
| NC_037644.1 | 11126179 | SNV | 1 | A | G | Homozygous   |
| NC_037644.1 | 11126194 | SNV | 1 | T | C | Homozygous   |
| NC_037644.1 | 11126462 | SNV | 1 | C | T | Heterozygous |
| NC_037644.1 | 11126478 | SNV | 1 | T | C | Heterozygous |
| NC_037644.1 | 11126584 | SNV | 1 | T | G | Homozygous   |
| NC_037644.1 | 11126601 | SNV | 1 | A | G | Homozygous   |
| NC_037644.1 | 11126625 | SNV | 1 | T | C | Heterozygous |
| NC_037644.1 | 11126627 | SNV | 1 | C | A | Homozygous   |
| NC_037644.1 | 11126653 | SNV | 1 | T | C | Homozygous   |
| NC_037644.1 | 11126663 | SNV | 1 | C | T | Heterozygous |
| NC_037644.1 | 11126690 | SNV | 1 | G | A | Heterozygous |
| NC_037644.1 | 11126776 | SNV | 1 | A | G | Homozygous   |
| NC_037644.1 | 11126813 | SNV | 1 | T | C | Homozygous   |
| NC_037644.1 | 11126837 | SNV | 1 | C | G | Heterozygous |
| NC_037644.1 | 11126839 | SNV | 1 | T | G | Heterozygous |
| NC_037644.1 | 11126862 | SNV | 1 | A | G | Homozygous   |
| NC_037644.1 | 11126880 | SNV | 1 | G | C | Heterozygous |
| NC_037644.1 | 11126906 | SNV | 1 | C | G | Homozygous   |
| NC_037644.1 | 11127577 | SNV | 1 | A | C | Homozygous   |
| NC_037644.1 | 11128051 | SNV | 1 | C | T | Homozygous   |
| NC_037644.1 | 11128406 | SNV | 1 | T | G | Homozygous   |
| NC_037644.1 | 11129357 | SNV | 1 | A | G | Homozygous   |
| NC_037644.1 | 11134511 | SNV | 1 | G | A | Heterozygous |
| NC_037644.1 | 11134543 | SNV | 1 | G | C | Homozygous   |
| NC_037644.1 | 11134582 | SNV | 1 | C | T | Heterozygous |
| NC_037644.1 | 11134631 | SNV | 1 | C | T | Heterozygous |
| NC_037644.1 | 11135589 | SNV | 1 | T | A | Heterozygous |
| NC_037644.1 | 11135693 | SNV | 1 | T | C | Homozygous   |
| NC_037644.1 | 11135704 | SNV | 1 | T | C | Homozygous   |
| NC_037644.1 | 11135739 | SNV | 1 | C | T | Homozygous   |
| NC_037644.1 | 11136332 | SNV | 1 | A | G | Heterozygous |
| NC_037644.1 | 11136338 | SNV | 1 | G | A | Heterozygous |
| NC_037644.1 | 11136341 | SNV | 1 | A | G | Homozygous   |
| NC_037644.1 | 11148020 | SNV | 1 | C | T | Heterozygous |
| NC_037644.1 | 11148030 | SNV | 1 | A | G | Homozygous   |

|             |          |     |   |   |   |              |
|-------------|----------|-----|---|---|---|--------------|
| NC_037644.1 | 11148035 | SNV | 1 | A | G | Homozygous   |
| NC_037644.1 | 11148063 | SNV | 1 | G | A | Heterozygous |
| NC_037644.1 | 11148116 | SNV | 1 | T | C | Heterozygous |
| NC_037644.1 | 11148140 | SNV | 1 | G | A | Heterozygous |
| NC_037644.1 | 11148286 | SNV | 1 | C | T | Homozygous   |
| NC_037644.1 | 11148393 | SNV | 1 | G | A | Homozygous   |
| NC_037644.1 | 11162953 | SNV | 1 | G | C | Homozygous   |
| NC_037644.1 | 11162962 | SNV | 1 | T | C | Homozygous   |
| NC_037644.1 | 11162964 | SNV | 1 | C | T | Homozygous   |
| NC_037644.1 | 11162981 | SNV | 1 | T | C | Homozygous   |
| NC_037644.1 | 11163047 | SNV | 1 | C | T | Homozygous   |
| NC_037644.1 | 11165917 | SNV | 1 | C | T | Homozygous   |
| NC_037644.1 | 11165936 | SNV | 1 | T | C | Homozygous   |
| NC_037644.1 | 11165940 | SNV | 1 | A | G | Homozygous   |
| NC_037644.1 | 11166091 | SNV | 1 | T | C | Heterozygous |
| NC_037644.1 | 11166150 | SNV | 1 | C | A | Homozygous   |
| NC_037644.1 | 11167357 | SNV | 1 | T | C | Homozygous   |
| NC_037644.1 | 11167374 | SNV | 1 | T | C | Homozygous   |
| NC_037644.1 | 11185964 | SNV | 1 | C | T | Homozygous   |
| NC_037644.1 | 11185968 | SNV | 1 | C | T | Homozygous   |
| NC_037644.1 | 11186009 | SNV | 1 | C | T | Homozygous   |
| NC_037644.1 | 11203737 | SNV | 1 | G | C | Homozygous   |
| NC_037644.1 | 11203740 | SNV | 1 | C | T | Heterozygous |
| NC_037644.1 | 11203744 | SNV | 1 | A | G | Heterozygous |
| NC_037644.1 | 11203805 | SNV | 1 | G | A | Homozygous   |
| NC_037644.1 | 11203892 | SNV | 1 | A | G | Homozygous   |
| NC_037644.1 | 11203895 | SNV | 1 | T | C | Homozygous   |
| NC_037644.1 | 11203898 | SNV | 1 | T | C | Homozygous   |
| NC_037644.1 | 11203911 | SNV | 1 | A | G | Homozygous   |
| NC_037644.1 | 11216060 | SNV | 1 | G | A | Heterozygous |
| NC_037644.1 | 11216078 | SNV | 1 | G | A | Homozygous   |
| NC_037644.1 | 11216081 | SNV | 1 | T | C | Homozygous   |
| NC_037644.1 | 11216129 | SNV | 1 | C | T | Heterozygous |
| NC_037644.1 | 11216151 | SNV | 1 | T | C | Homozygous   |
| NC_037644.1 | 11216335 | SNV | 1 | C | T | Homozygous   |
| NC_037644.1 | 11216443 | SNV | 1 | T | G | Heterozygous |
| NC_037644.1 | 11216482 | SNV | 1 | G | A | Homozygous   |
| NC_037644.1 | 11216501 | SNV | 1 | A | G | Homozygous   |
| NC_037644.1 | 11216558 | SNV | 1 | C | T | Heterozygous |
| NC_037644.1 | 11216596 | SNV | 1 | G | A | Heterozygous |
| NC_037644.1 | 11216600 | SNV | 1 | T | C | Heterozygous |
| NC_037644.1 | 11224684 | SNV | 1 | T | C | Heterozygous |
| NC_037644.1 | 11224702 | SNV | 1 | G | T | Heterozygous |
| NC_037644.1 | 11224722 | SNV | 1 | C | T | Homozygous   |
| NC_037644.1 | 11224729 | SNV | 1 | C | T | Homozygous   |
| NC_037644.1 | 11224737 | SNV | 1 | C | T | Homozygous   |
| NC_037644.1 | 11227680 | SNV | 1 | C | T | Heterozygous |
| NC_037644.1 | 11227741 | SNV | 1 | A | G | Homozygous   |
| NC_037644.1 | 11227761 | SNV | 1 | A | G | Homozygous   |
| NC_037644.1 | 11231270 | SNV | 1 | A | G | Homozygous   |
| NC_037644.1 | 11231494 | SNV | 1 | T | C | Homozygous   |

|             |          |     |   |   |   |              |
|-------------|----------|-----|---|---|---|--------------|
| NC_037644.1 | 11231500 | SNV | 1 | T | C | Heterozygous |
| NC_037644.1 | 11231508 | SNV | 1 | T | C | Homozygous   |
| NC_037644.1 | 11231571 | SNV | 1 | G | A | Homozygous   |
| NC_037644.1 | 11231660 | SNV | 1 | A | T | Homozygous   |
| NC_037644.1 | 11231672 | SNV | 1 | T | C | Homozygous   |
| NC_037644.1 | 11231920 | SNV | 1 | C | T | Heterozygous |
| NC_037644.1 | 11235985 | SNV | 1 | T | C | Homozygous   |
| NC_037644.1 | 11236215 | SNV | 1 | C | T | Heterozygous |
| NC_037644.1 | 11236259 | SNV | 1 | G | A | Heterozygous |
| NC_037644.1 | 11236596 | SNV | 1 | T | C | Heterozygous |
| NC_037644.1 | 11236601 | SNV | 1 | A | T | Heterozygous |
| NC_037644.1 | 11236605 | SNV | 1 | A | T | Heterozygous |
| NC_037644.1 | 11239585 | SNV | 1 | A | G | Homozygous   |
| NC_037644.1 | 11239695 | SNV | 1 | C | T | Homozygous   |
| NC_037644.1 | 11239726 | SNV | 1 | C | T | Heterozygous |
| NC_037644.1 | 11239731 | SNV | 1 | T | C | Heterozygous |
| NC_037644.1 | 11242407 | SNV | 1 | G | C | Heterozygous |
| NC_037644.1 | 11242566 | SNV | 1 | T | C | Heterozygous |
| NC_037644.1 | 11242599 | SNV | 1 | G | A | Heterozygous |
| NC_037644.1 | 11242676 | SNV | 1 | T | C | Heterozygous |
| NC_037644.1 | 11242692 | SNV | 1 | G | C | Homozygous   |
| NC_037644.1 | 11242695 | SNV | 1 | T | C | Homozygous   |
| NC_037644.1 | 11242708 | SNV | 1 | G | A | Heterozygous |
| NC_037644.1 | 11242832 | SNV | 1 | T | C | Homozygous   |
| NC_037644.1 | 11242869 | SNV | 1 | T | C | Homozygous   |
| NC_037644.1 | 11243026 | SNV | 1 | G | A | Homozygous   |
| NC_037644.1 | 11243115 | SNV | 1 | C | G | Heterozygous |
| NC_037644.1 | 11243445 | SNV | 1 | A | G | Homozygous   |
| NC_037644.1 | 11243626 | SNV | 1 | C | T | Heterozygous |
| NC_037644.1 | 11243634 | SNV | 1 | T | G | Heterozygous |
| NC_037644.1 | 11243659 | SNV | 1 | G | A | Homozygous   |
| NC_037644.1 | 11252535 | SNV | 1 | T | C | Heterozygous |
| NC_037644.1 | 11252538 | SNV | 1 | C | T | Heterozygous |
| NC_037644.1 | 11252626 | SNV | 1 | G | A | Homozygous   |
| NC_037644.1 | 11252693 | SNV | 1 | T | C | Heterozygous |
| NC_037644.1 | 11252721 | SNV | 1 | C | T | Homozygous   |
| NC_037644.1 | 11253034 | SNV | 1 | T | A | Homozygous   |
| NC_037644.1 | 11258245 | SNV | 1 | G | A | Heterozygous |
| NC_037644.1 | 11258264 | SNV | 1 | G | A | Heterozygous |
| NC_037644.1 | 11258709 | SNV | 1 | C | T | Heterozygous |
| NC_037644.1 | 11258720 | SNV | 1 | C | T | Heterozygous |
| NC_037644.1 | 11258746 | SNV | 1 | A | G | Homozygous   |
| NC_037644.1 | 11258798 | SNV | 1 | C | T | Heterozygous |
| NC_037644.1 | 11258819 | SNV | 1 | A | T | Heterozygous |
| NC_037644.1 | 11258824 | SNV | 1 | A | G | Homozygous   |
| NC_037644.1 | 11258827 | SNV | 1 | G | A | Heterozygous |
| NC_037644.1 | 11258834 | SNV | 1 | T | C | Homozygous   |
| NC_037644.1 | 11258837 | SNV | 1 | G | A | Heterozygous |
| NC_037644.1 | 11258861 | SNV | 1 | A | G | Homozygous   |
| NC_037644.1 | 11258875 | SNV | 1 | A | G | Homozygous   |
| NC_037644.1 | 11258879 | SNV | 1 | A | G | Homozygous   |



|             |          |     |   |   |   |              |
|-------------|----------|-----|---|---|---|--------------|
| NC_037644.1 | 11258888 | SNV | 1 | A | T | Homozygous   |
| NC_037644.1 | 11258897 | SNV | 1 | A | G | Homozygous   |
| NC_037644.1 | 11259126 | SNV | 1 | G | A | Homozygous   |
| NC_037644.1 | 11259199 | SNV | 1 | T | C | Homozygous   |
| NC_037644.1 | 11259222 | SNV | 1 | C | T | Heterozygous |
| NC_037644.1 | 11259226 | SNV | 1 | A | G | Heterozygous |
| NC_037644.1 | 11335657 | SNV | 1 | A | G | Homozygous   |
| NC_037644.1 | 11335669 | SNV | 1 | G | A | Homozygous   |
| NC_037644.1 | 11364075 | SNV | 1 | T | C | Homozygous   |
| NC_037644.1 | 11364280 | SNV | 1 | T | C | Heterozygous |
| NC_037644.1 | 11371909 | SNV | 1 | G | A | Homozygous   |
| NC_037644.1 | 11371945 | SNV | 1 | A | G | Heterozygous |
| NC_037644.1 | 11371947 | SNV | 1 | A | C | Heterozygous |
| NC_037644.1 | 11373059 | SNV | 1 | A | G | Homozygous   |
| NC_037644.1 | 11373467 | SNV | 1 | A | G | Homozygous   |
| NC_037644.1 | 11373648 | SNV | 1 | T | C | Homozygous   |
| NC_037644.1 | 11375901 | SNV | 1 | C | T | Homozygous   |
| NC_037644.1 | 11376224 | SNV | 1 | G | C | Heterozygous |
| NC_037644.1 | 11381645 | SNV | 1 | G | A | Homozygous   |
| NC_037644.1 | 11381710 | SNV | 1 | C | T | Heterozygous |
| NC_037644.1 | 11381731 | SNV | 1 | C | T | Homozygous   |
| NC_037644.1 | 11388663 | SNV | 1 | A | G | Homozygous   |
| NC_037644.1 | 11388666 | SNV | 1 | G | A | Homozygous   |
| NC_037644.1 | 11388677 | SNV | 1 | T | C | Homozygous   |
| NC_037644.1 | 11388694 | SNV | 1 | C | T | Heterozygous |
| NC_037644.1 | 11388806 | SNV | 1 | T | A | Heterozygous |
| NC_037644.1 | 11389387 | SNV | 1 | T | C | Homozygous   |
| NC_037644.1 | 11389477 | SNV | 1 | G | A | Heterozygous |
| NC_037644.1 | 11389479 | SNV | 1 | C | T | Heterozygous |
| NC_037644.1 | 11389482 | SNV | 1 | G | A | Heterozygous |
| NC_037644.1 | 11389503 | SNV | 1 | T | C | Heterozygous |
| NC_037644.1 | 11389505 | SNV | 1 | C | T | Heterozygous |
| NC_037644.1 | 11389519 | SNV | 1 | C | T | Heterozygous |
| NC_037644.1 | 11389524 | SNV | 1 | C | T | Heterozygous |
| NC_037644.1 | 11389606 | SNV | 1 | C | G | Homozygous   |
| NC_037644.1 | 11389610 | SNV | 1 | G | A | Homozygous   |
| NC_037644.1 | 11389657 | SNV | 1 | T | C | Homozygous   |
| NC_037644.1 | 11389718 | SNV | 1 | A | G | Homozygous   |
| NC_037644.1 | 11390696 | SNV | 1 | C | T | Heterozygous |
| NC_037644.1 | 11390750 | SNV | 1 | C | T | Heterozygous |
| NC_037644.1 | 11435438 | SNV | 1 | A | C | Heterozygous |
| NC_037644.1 | 11435545 | SNV | 1 | T | C | Homozygous   |
| NC_037644.1 | 11435584 | SNV | 1 | T | C | Homozygous   |
| NC_037644.1 | 11435622 | SNV | 1 | C | T | Homozygous   |
| NC_037644.1 | 11435683 | SNV | 1 | C | T | Heterozygous |
| NC_037644.1 | 11435690 | SNV | 1 | C | T | Heterozygous |
| NC_037644.1 | 11435709 | SNV | 1 | G | A | Heterozygous |
| NC_037644.1 | 11435877 | SNV | 1 | C | T | Homozygous   |
| NC_037644.1 | 11436151 | SNV | 1 | T | C | Heterozygous |
| NC_037644.1 | 11436192 | SNV | 1 | C | G | Heterozygous |
| NC_037644.1 | 11436331 | SNV | 1 | T | G | Homozygous   |

|             |          |     |   |   |   |              |
|-------------|----------|-----|---|---|---|--------------|
| NC_037644.1 | 11439495 | SNV | 1 | G | A | Heterozygous |
| NC_037644.1 | 11439982 | SNV | 1 | T | C | Homozygous   |
| NC_037644.1 | 11440141 | SNV | 1 | T | C | Homozygous   |
| NC_037644.1 | 11480854 | SNV | 1 | A | G | Homozygous   |
| NC_037644.1 | 11481127 | SNV | 1 | C | T | Homozygous   |
| NC_037644.1 | 11481266 | SNV | 1 | T | C | Homozygous   |
| NC_037644.1 | 11481318 | SNV | 1 | T | C | Homozygous   |
| NC_037644.1 | 11481330 | SNV | 1 | G | A | Heterozygous |
| NC_037644.1 | 11483030 | SNV | 1 | C | T | Heterozygous |
| NC_037644.1 | 11483043 | SNV | 1 | C | T | Homozygous   |
| NC_037644.1 | 11483180 | SNV | 1 | C | T | Heterozygous |
| NC_037644.1 | 11486266 | SNV | 1 | T | C | Homozygous   |
| NC_037644.1 | 11486515 | SNV | 1 | C | T | Homozygous   |
| NC_037644.1 | 11487428 | SNV | 1 | C | T | Heterozygous |
| NC_037644.1 | 11487482 | SNV | 1 | C | T | Heterozygous |
| NC_037644.1 | 11520177 | SNV | 1 | A | G | Heterozygous |
| NC_037644.1 | 11520182 | SNV | 1 | A | G | Heterozygous |
| NC_037644.1 | 11520269 | SNV | 1 | G | A | Heterozygous |
| NC_037644.1 | 11520474 | SNV | 1 | A | G | Homozygous   |
| NC_037644.1 | 11520498 | SNV | 1 | G | T | Homozygous   |
| NC_037644.1 | 11520500 | SNV | 1 | G | A | Homozygous   |
| NC_037644.1 | 11520507 | SNV | 1 | G | A | Homozygous   |
| NC_037644.1 | 11520510 | SNV | 1 | A | G | Homozygous   |
| NC_037644.1 | 11520512 | SNV | 1 | A | G | Homozygous   |
| NC_037644.1 | 11520518 | SNV | 1 | G | A | Homozygous   |
| NC_037644.1 | 11520544 | SNV | 1 | G | A | Homozygous   |
| NC_037644.1 | 11520546 | SNV | 1 | G | C | Homozygous   |
| NC_037644.1 | 11520560 | SNV | 1 | A | G | Homozygous   |
| NC_037644.1 | 11520562 | SNV | 1 | G | T | Homozygous   |
| NC_037644.1 | 11520647 | SNV | 1 | G | T | Homozygous   |
| NC_037644.1 | 11520649 | SNV | 1 | G | A | Homozygous   |
| NC_037644.1 | 11520662 | SNV | 1 | G | A | Homozygous   |
| NC_037644.1 | 11520664 | SNV | 1 | A | G | Homozygous   |
| NC_037644.1 | 11520667 | SNV | 1 | A | G | Homozygous   |
| NC_037644.1 | 11520669 | SNV | 1 | A | G | Homozygous   |
| NC_037644.1 | 11520694 | SNV | 1 | A | G | Heterozygous |
| NC_037644.1 | 11520731 | SNV | 1 | G | C | Homozygous   |
| NC_037644.1 | 11520733 | SNV | 1 | G | A | Homozygous   |
| NC_037644.1 | 11520735 | SNV | 1 | A | C | Homozygous   |
| NC_037644.1 | 11542630 | SNV | 1 | A | G | Heterozygous |
| NC_037644.1 | 11542636 | SNV | 1 | G | A | Homozygous   |
| NC_037644.1 | 11550469 | SNV | 1 | G | C | Heterozygous |
| NC_037644.1 | 11550501 | SNV | 1 | C | T | Homozygous   |
| NC_037644.1 | 11555849 | SNV | 1 | T | G | Heterozygous |
| NC_037644.1 | 11556141 | SNV | 1 | G | A | Heterozygous |
| NC_037644.1 | 11692806 | SNV | 1 | C | T | Heterozygous |
| NC_037644.1 | 11693315 | SNV | 1 | T | C | Heterozygous |
| NC_037644.1 | 11693328 | SNV | 1 | T | C | Heterozygous |
| NC_037644.1 | 11693343 | SNV | 1 | C | T | Heterozygous |
| NC_037644.1 | 11693360 | SNV | 1 | C | T | Heterozygous |
| NC_037644.1 | 11693373 | SNV | 1 | C | T | Heterozygous |

|             |          |     |   |   |   |              |
|-------------|----------|-----|---|---|---|--------------|
| NC_037644.1 | 11693375 | SNV | 1 | C | T | Heterozygous |
| NC_037644.1 | 11693623 | SNV | 1 | T | C | Heterozygous |
| NC_037644.1 | 11693634 | SNV | 1 | C | A | Heterozygous |
| NC_037644.1 | 11693662 | SNV | 1 | T | C | Heterozygous |
| NC_037644.1 | 11693665 | SNV | 1 | T | G | Heterozygous |
| NC_037644.1 | 11693669 | SNV | 1 | T | C | Heterozygous |
| NC_037644.1 | 11693676 | SNV | 1 | T | C | Heterozygous |
| NC_037644.1 | 11693680 | SNV | 1 | T | C | Heterozygous |
| NC_037644.1 | 11693682 | SNV | 1 | G | A | Heterozygous |
| NC_037644.1 | 11693720 | SNV | 1 | T | C | Heterozygous |
| NC_037644.1 | 11693767 | SNV | 1 | G | A | Heterozygous |
| NC_037644.1 | 11693785 | SNV | 1 | C | T | Homozygous   |
| NC_037644.1 | 11693793 | SNV | 1 | A | G | Homozygous   |
| NC_037644.1 | 11693832 | SNV | 1 | T | C | Homozygous   |
| NC_037644.1 | 11693845 | SNV | 1 | C | T | Homozygous   |
| NC_037644.1 | 11693926 | SNV | 1 | G | A | Heterozygous |
| NC_037644.1 | 11694052 | SNV | 1 | T | C | Heterozygous |
| NC_037644.1 | 11697758 | SNV | 1 | T | C | Homozygous   |
| NC_037644.1 | 11697915 | SNV | 1 | T | C | Homozygous   |
| NC_037644.1 | 11703094 | SNV | 1 | C | T | Heterozygous |
| NC_037644.1 | 11703311 | SNV | 1 | T | C | Homozygous   |
| NC_037644.1 | 11703575 | SNV | 1 | G | A | Heterozygous |
| NC_037644.1 | 11703595 | SNV | 1 | T | C | Homozygous   |
| NC_037644.1 | 11703606 | SNV | 1 | A | G | Homozygous   |
| NC_037644.1 | 11703612 | SNV | 1 | G | A | Heterozygous |
| NC_037644.1 | 11704328 | SNV | 1 | A | G | Homozygous   |
| NC_037644.1 | 11704330 | SNV | 1 | T | C | Homozygous   |
| NC_037644.1 | 11704341 | SNV | 1 | C | T | Heterozygous |
| NC_037644.1 | 11704398 | SNV | 1 | A | C | Homozygous   |
| NC_037644.1 | 11704431 | SNV | 1 | G | A | Heterozygous |
| NC_037644.1 | 11704471 | SNV | 1 | G | A | Homozygous   |
| NC_037644.1 | 11704493 | SNV | 1 | C | T | Homozygous   |
| NC_037644.1 | 11704512 | SNV | 1 | A | T | Heterozygous |
| NC_037644.1 | 11704519 | SNV | 1 | G | A | Heterozygous |
| NC_037644.1 | 11704521 | SNV | 1 | G | A | Homozygous   |
| NC_037644.1 | 11704547 | SNV | 1 | T | C | Heterozygous |
| NC_037644.1 | 11704569 | SNV | 1 | G | A | Heterozygous |
| NC_037644.1 | 11704598 | SNV | 1 | C | T | Heterozygous |
| NC_037644.1 | 11704617 | SNV | 1 | T | C | Homozygous   |
| NC_037644.1 | 11704655 | SNV | 1 | T | C | Heterozygous |
| NC_037644.1 | 11704681 | SNV | 1 | T | C | Heterozygous |
| NC_037644.1 | 11704689 | SNV | 1 | C | T | Heterozygous |
| NC_037644.1 | 11704710 | SNV | 1 | G | C | Heterozygous |
| NC_037644.1 | 11704710 | SNV | 1 | G | T | Heterozygous |
| NC_037644.1 | 11704718 | SNV | 1 | T | A | Homozygous   |
| NC_037644.1 | 11704724 | SNV | 1 | A | G | Homozygous   |
| NC_037644.1 | 11704733 | SNV | 1 | G | A | Heterozygous |
| NC_037644.1 | 11704748 | SNV | 1 | A | G | Homozygous   |
| NC_037644.1 | 11704788 | SNV | 1 | T | C | Heterozygous |
| NC_037644.1 | 11704792 | SNV | 1 | A | G | Heterozygous |
| NC_037644.1 | 11704838 | SNV | 1 | A | G | Heterozygous |

|             |          |     |   |   |   |              |
|-------------|----------|-----|---|---|---|--------------|
| NC_037644.1 | 11704842 | SNV | 1 | T | A | Heterozygous |
| NC_037644.1 | 11704923 | SNV | 1 | T | C | Homozygous   |
| NC_037644.1 | 11704935 | SNV | 1 | T | C | Heterozygous |
| NC_037644.1 | 11714844 | SNV | 1 | C | T | Homozygous   |
| NC_037644.1 | 11714889 | SNV | 1 | C | T | Homozygous   |
| NC_037644.1 | 11714898 | SNV | 1 | T | C | Homozygous   |
| NC_037644.1 | 11714952 | SNV | 1 | G | A | Homozygous   |
| NC_037644.1 | 11714989 | SNV | 1 | T | C | Homozygous   |
| NC_037644.1 | 11715083 | SNV | 1 | A | G | Homozygous   |
| NC_037644.1 | 11717933 | SNV | 1 | C | G | Heterozygous |
| NC_037644.1 | 11717943 | SNV | 1 | G | A | Heterozygous |
| NC_037644.1 | 11717985 | SNV | 1 | C | T | Heterozygous |
| NC_037644.1 | 11718075 | SNV | 1 | G | A | Heterozygous |
| NC_037644.1 | 11718131 | SNV | 1 | T | C | Heterozygous |
| NC_037644.1 | 11718150 | SNV | 1 | C | T | Heterozygous |
| NC_037644.1 | 11718157 | SNV | 1 | C | T | Heterozygous |
| NC_037644.1 | 11718310 | SNV | 1 | G | C | Homozygous   |
| NC_037644.1 | 11718321 | SNV | 1 | G | A | Heterozygous |
| NC_037644.1 | 11718323 | SNV | 1 | G | A | Heterozygous |
| NC_037644.1 | 11718393 | SNV | 1 | G | A | Heterozygous |
| NC_037644.1 | 11718403 | SNV | 1 | G | A | Heterozygous |
| NC_037644.1 | 11718482 | SNV | 1 | C | G | Homozygous   |
| NC_037644.1 | 11719621 | SNV | 1 | T | G | Homozygous   |
| NC_037644.1 | 11719794 | SNV | 1 | T | C | Homozygous   |
| NC_037644.1 | 11719818 | SNV | 1 | G | A | Homozygous   |
| NC_037644.1 | 11719824 | SNV | 1 | G | A | Heterozygous |
| NC_037644.1 | 11719921 | SNV | 1 | G | A | Homozygous   |
| NC_037644.1 | 11719923 | SNV | 1 | A | G | Homozygous   |
| NC_037644.1 | 11720040 | SNV | 1 | C | T | Heterozygous |
| NC_037644.1 | 11720121 | SNV | 1 | G | A | Homozygous   |
| NC_037644.1 | 11727317 | SNV | 1 | C | T | Heterozygous |
| NC_037644.1 | 11727389 | SNV | 1 | G | T | Heterozygous |
| NC_037644.1 | 11727445 | SNV | 1 | A | G | Homozygous   |
| NC_037644.1 | 11742332 | SNV | 1 | T | C | Heterozygous |
| NC_037644.1 | 11751318 | SNV | 1 | A | G | Heterozygous |
| NC_037644.1 | 11759424 | SNV | 1 | T | C | Heterozygous |
| NC_037644.1 | 11759459 | SNV | 1 | G | T | Homozygous   |
| NC_037644.1 | 11766730 | SNV | 1 | A | G | Heterozygous |
| NC_037644.1 | 11766734 | SNV | 1 | T | A | Heterozygous |
| NC_037644.1 | 11766736 | SNV | 1 | G | A | Heterozygous |
| NC_037644.1 | 11766746 | SNV | 1 | A | G | Heterozygous |
| NC_037644.1 | 11766755 | SNV | 1 | A | G | Homozygous   |
| NC_037644.1 | 11781422 | SNV | 1 | A | G | Homozygous   |
| NC_037644.1 | 11781461 | SNV | 1 | G | A | Heterozygous |
| NC_037644.1 | 11781472 | SNV | 1 | A | G | Homozygous   |
| NC_037644.1 | 11785525 | SNV | 1 | G | A | Heterozygous |
| NC_037644.1 | 11785527 | SNV | 1 | T | C | Homozygous   |
| NC_037644.1 | 11786702 | SNV | 1 | T | C | Homozygous   |
| NC_037644.1 | 11788922 | SNV | 1 | T | C | Homozygous   |
| NC_037644.1 | 11788928 | SNV | 1 | T | C | Heterozygous |
| NC_037644.1 | 11790067 | SNV | 1 | G | A | Heterozygous |

|             |          |     |   |   |   |              |
|-------------|----------|-----|---|---|---|--------------|
| NC_037644.1 | 11790098 | SNV | 1 | C | T | Heterozygous |
| NC_037644.1 | 11790181 | SNV | 1 | G | A | Heterozygous |
| NC_037644.1 | 11790511 | SNV | 1 | C | T | Heterozygous |
| NC_037644.1 | 11800154 | SNV | 1 | G | A | Heterozygous |
| NC_037644.1 | 11800156 | SNV | 1 | A | G | Heterozygous |
| NC_037644.1 | 11800194 | SNV | 1 | G | A | Heterozygous |
| NC_037644.1 | 11800201 | SNV | 1 | G | A | Heterozygous |
| NC_037644.1 | 11800506 | SNV | 1 | A | G | Homozygous   |
| NC_037644.1 | 11800509 | SNV | 1 | T | C | Heterozygous |
| NC_037644.1 | 11800529 | SNV | 1 | T | C | Homozygous   |
| NC_037644.1 | 11804883 | SNV | 1 | G | A | Heterozygous |
| NC_037644.1 | 11804947 | SNV | 1 | A | T | Homozygous   |
| NC_037644.1 | 11804956 | SNV | 1 | T | C | Homozygous   |
| NC_037644.1 | 11805312 | SNV | 1 | C | T | Heterozygous |
| NC_037644.1 | 11805590 | SNV | 1 | G | A | Heterozygous |
| NC_037644.1 | 11805597 | SNV | 1 | T | C | Homozygous   |
| NC_037644.1 | 11805689 | SNV | 1 | C | T | Heterozygous |
| NC_037644.1 | 11805873 | SNV | 1 | T | C | Homozygous   |
| NC_037644.1 | 11806061 | SNV | 1 | C | T | Heterozygous |
| NC_037644.1 | 11806096 | SNV | 1 | G | A | Heterozygous |
| NC_037644.1 | 11806212 | SNV | 1 | T | C | Heterozygous |
| NC_037644.1 | 11806419 | SNV | 1 | A | G | Homozygous   |
| NC_037644.1 | 11806525 | SNV | 1 | T | C | Heterozygous |
| NC_037644.1 | 11806582 | SNV | 1 | A | G | Homozygous   |
| NC_037644.1 | 11806591 | SNV | 1 | A | G | Homozygous   |
| NC_037644.1 | 11806903 | SNV | 1 | A | C | Homozygous   |
| NC_037644.1 | 11807287 | SNV | 1 | G | A | Heterozygous |
| NC_037644.1 | 11807543 | SNV | 1 | T | C | Homozygous   |
| NC_037644.1 | 11808151 | SNV | 1 | C | A | Heterozygous |
| NC_037644.1 | 11808826 | SNV | 1 | T | C | Heterozygous |
| NC_037644.1 | 11808857 | SNV | 1 | T | C | Homozygous   |
| NC_037644.1 | 11809239 | SNV | 1 | A | G | Heterozygous |
| NC_037644.1 | 11809242 | SNV | 1 | T | C | Heterozygous |
| NC_037644.1 | 11809632 | SNV | 1 | A | G | Homozygous   |
| NC_037644.1 | 11809655 | SNV | 1 | G | A | Heterozygous |
| NC_037644.1 | 11810046 | SNV | 1 | A | G | Homozygous   |
| NC_037644.1 | 11810191 | SNV | 1 | A | C | Heterozygous |
| NC_037644.1 | 11810244 | SNV | 1 | A | G | Heterozygous |
| NC_037644.1 | 11810250 | SNV | 1 | T | C | Heterozygous |
| NC_037644.1 | 11810258 | SNV | 1 | G | A | Heterozygous |
| NC_037644.1 | 11810707 | SNV | 1 | T | C | Heterozygous |
| NC_037644.1 | 11810891 | SNV | 1 | A | G | Homozygous   |
| NC_037644.1 | 11811272 | SNV | 1 | G | C | Homozygous   |
| NC_037644.1 | 11811799 | SNV | 1 | T | C | Homozygous   |
| NC_037644.1 | 11815972 | SNV | 1 | G | A | Homozygous   |
| NC_037644.1 | 11816026 | SNV | 1 | G | T | Homozygous   |
| NC_037644.1 | 11839429 | SNV | 1 | G | A | Heterozygous |
| NC_037644.1 | 11839436 | SNV | 1 | A | G | Heterozygous |
| NC_037644.1 | 11839476 | SNV | 1 | G | A | Homozygous   |
| NC_037644.1 | 11878538 | SNV | 1 | A | C | Homozygous   |
| NC_037644.1 | 11895979 | SNV | 1 | A | T | Heterozygous |

|             |          |     |   |   |   |              |
|-------------|----------|-----|---|---|---|--------------|
| NC_037644.1 | 11896000 | SNV | 1 | T | C | Heterozygous |
| NC_037644.1 | 11896015 | SNV | 1 | C | G | Homozygous   |
| NC_037644.1 | 11896021 | SNV | 1 | C | T | Homozygous   |
| NC_037644.1 | 11896023 | SNV | 1 | T | G | Homozygous   |
| NC_037644.1 | 11896048 | SNV | 1 | T | A | Heterozygous |
| NC_037644.1 | 11896051 | SNV | 1 | A | T | Homozygous   |
| NC_037644.1 | 11896054 | SNV | 1 | T | C | Heterozygous |
| NC_037644.1 | 11896061 | SNV | 1 | A | T | Homozygous   |
| NC_037644.1 | 11896232 | SNV | 1 | T | C | Heterozygous |
| NC_037644.1 | 11896235 | SNV | 1 | T | A | Heterozygous |
| NC_037644.1 | 11896238 | SNV | 1 | C | G | Homozygous   |
| NC_037644.1 | 11896251 | SNV | 1 | A | T | Homozygous   |
| NC_037644.1 | 11896253 | SNV | 1 | A | T | Heterozygous |
| NC_037644.1 | 11913056 | SNV | 1 | C | A | Heterozygous |
| NC_037644.1 | 11913096 | SNV | 1 | C | T | Heterozygous |
| NC_037644.1 | 11913109 | SNV | 1 | T | C | Heterozygous |
| NC_037644.1 | 11930750 | SNV | 1 | C | T | Homozygous   |
| NC_037644.1 | 11931173 | SNV | 1 | A | G | Homozygous   |
| NC_037644.1 | 11932572 | SNV | 1 | G | A | Heterozygous |
| NC_037644.1 | 11932725 | SNV | 1 | T | A | Heterozygous |
| NC_037644.1 | 11932735 | SNV | 1 | C | G | Heterozygous |
| NC_037644.1 | 11947527 | SNV | 1 | G | A | Homozygous   |
| NC_037644.1 | 11947533 | SNV | 1 | A | G | Heterozygous |
| NC_037644.1 | 11947656 | SNV | 1 | A | T | Heterozygous |
| NC_037644.1 | 11960542 | SNV | 1 | A | G | Homozygous   |
| NC_037644.1 | 11960544 | SNV | 1 | A | G | Homozygous   |
| NC_037644.1 | 11960570 | SNV | 1 | C | T | Homozygous   |
| NC_037644.1 | 11960667 | SNV | 1 | T | C | Homozygous   |
| NC_037644.1 | 11960694 | SNV | 1 | T | C | Homozygous   |
| NC_037644.1 | 11970486 | SNV | 1 | G | A | Heterozygous |
| NC_037644.1 | 11970530 | SNV | 1 | G | A | Homozygous   |
| NC_037644.1 | 11970547 | SNV | 1 | G | A | Heterozygous |
| NC_037644.1 | 11971146 | SNV | 1 | A | C | Homozygous   |
| NC_037644.1 | 11971160 | SNV | 1 | A | C | Homozygous   |
| NC_037644.1 | 11971316 | SNV | 1 | C | T | Heterozygous |
| NC_037644.1 | 11971339 | SNV | 1 | T | A | Heterozygous |
| NC_037644.1 | 11971346 | SNV | 1 | T | C | Homozygous   |
| NC_037644.1 | 11971379 | SNV | 1 | T | A | Heterozygous |
| NC_037644.1 | 11971392 | SNV | 1 | T | C | Homozygous   |
| NC_037644.1 | 11971406 | SNV | 1 | C | T | Heterozygous |
| NC_037644.1 | 11971415 | SNV | 1 | T | C | Heterozygous |
| NC_037644.1 | 11971419 | SNV | 1 | T | G | Heterozygous |
| NC_037644.1 | 11971424 | SNV | 1 | T | C | Homozygous   |
| NC_037644.1 | 11971434 | SNV | 1 | T | C | Homozygous   |
| NC_037644.1 | 11971440 | SNV | 1 | A | C | Heterozygous |
| NC_037644.1 | 11971518 | SNV | 1 | A | C | Homozygous   |
| NC_037644.1 | 11971582 | SNV | 1 | C | T | Heterozygous |
| NC_037644.1 | 11971606 | SNV | 1 | A | C | Homozygous   |
| NC_037644.1 | 11971608 | SNV | 1 | T | C | Heterozygous |
| NC_037644.1 | 11971646 | SNV | 1 | C | T | Heterozygous |
| NC_037644.1 | 11971658 | SNV | 1 | A | C | Homozygous   |

|             |          |     |   |   |   |              |
|-------------|----------|-----|---|---|---|--------------|
| NC_037644.1 | 11971712 | SNV | 1 | T | A | Heterozygous |
| NC_037644.1 | 11972179 | SNV | 1 | G | A | Heterozygous |
| NC_037644.1 | 11980069 | SNV | 1 | C | T | Heterozygous |
| NC_037644.1 | 11980081 | SNV | 1 | C | T | Heterozygous |
| NC_037644.1 | 11980092 | SNV | 1 | G | T | Homozygous   |
| NC_037644.1 | 11980096 | SNV | 1 | A | T | Homozygous   |
| NC_037644.1 | 11980100 | SNV | 1 | T | C | Heterozygous |
| NC_037644.1 | 11980110 | SNV | 1 | C | T | Homozygous   |
| NC_037644.1 | 11980114 | SNV | 1 | C | T | Homozygous   |
| NC_037644.1 | 11980144 | SNV | 1 | C | T | Homozygous   |
| NC_037644.1 | 11980150 | SNV | 1 | C | T | Homozygous   |
| NC_037644.1 | 11980168 | SNV | 1 | T | C | Heterozygous |
| NC_037644.1 | 11980196 | SNV | 1 | G | C | Homozygous   |
| NC_037644.1 | 11980259 | SNV | 1 | C | T | Heterozygous |
| NC_037644.1 | 11980264 | SNV | 1 | T | C | Heterozygous |
| NC_037644.1 | 11980270 | SNV | 1 | T | C | Heterozygous |
| NC_037644.1 | 11980288 | SNV | 1 | T | C | Heterozygous |
| NC_037644.1 | 11980295 | SNV | 1 | A | T | Homozygous   |
| NC_037644.1 | 11980466 | SNV | 1 | T | C | Homozygous   |
| NC_037644.1 | 12028303 | SNV | 1 | G | A | Homozygous   |
| NC_037644.1 | 12028310 | SNV | 1 | G | A | Heterozygous |
| NC_037644.1 | 12028320 | SNV | 1 | A | G | Heterozygous |
| NC_037644.1 | 12042224 | SNV | 1 | C | T | Homozygous   |
| NC_037644.1 | 12051714 | SNV | 1 | C | T | Heterozygous |
| NC_037644.1 | 12051738 | SNV | 1 | G | T | Heterozygous |
| NC_037644.1 | 12051782 | SNV | 1 | G | A | Homozygous   |
| NC_037644.1 | 12051900 | SNV | 1 | T | C | Heterozygous |
| NC_037644.1 | 12052217 | SNV | 1 | A | G | Homozygous   |
| NC_037644.1 | 12052326 | SNV | 1 | T | A | Heterozygous |
| NC_037644.1 | 12052710 | SNV | 1 | C | T | Heterozygous |
| NC_037644.1 | 12052722 | SNV | 1 | T | C | Heterozygous |
| NC_037644.1 | 12053950 | SNV | 1 | T | C | Homozygous   |
| NC_037644.1 | 12054282 | SNV | 1 | A | G | Homozygous   |
| NC_037644.1 | 12061122 | SNV | 1 | G | A | Homozygous   |
| NC_037644.1 | 12061124 | SNV | 1 | A | G | Homozygous   |
| NC_037644.1 | 12061634 | SNV | 1 | A | G | Homozygous   |
| NC_037644.1 | 12061730 | SNV | 1 | A | G | Homozygous   |
| NC_037644.1 | 12061739 | SNV | 1 | A | T | Heterozygous |
| NC_037644.1 | 12061741 | SNV | 1 | T | G | Homozygous   |
| NC_037644.1 | 12061750 | SNV | 1 | T | A | Heterozygous |
| NC_037644.1 | 12061770 | SNV | 1 | T | A | Heterozygous |
| NC_037644.1 | 12062064 | SNV | 1 | C | T | Homozygous   |
| NC_037644.1 | 12064076 | SNV | 1 | G | A | Homozygous   |
| NC_037644.1 | 12070542 | SNV | 1 | T | C | Heterozygous |
| NC_037644.1 | 12071489 | SNV | 1 | T | C | Homozygous   |
| NC_037644.1 | 12084465 | SNV | 1 | T | A | Homozygous   |
| NC_037644.1 | 12084472 | SNV | 1 | T | A | Homozygous   |
| NC_037644.1 | 12085221 | SNV | 1 | G | A | Homozygous   |
| NC_037644.1 | 12085284 | SNV | 1 | T | A | Heterozygous |
| NC_037644.1 | 12085286 | SNV | 1 | A | G | Heterozygous |
| NC_037644.1 | 12085288 | SNV | 1 | T | G | Heterozygous |

|             |          |     |   |   |   |              |
|-------------|----------|-----|---|---|---|--------------|
| NC_037644.1 | 12085290 | SNV | 1 | A | C | Heterozygous |
| NC_037644.1 | 12085294 | SNV | 1 | T | C | Heterozygous |
| NC_037644.1 | 12085296 | SNV | 1 | T | A | Heterozygous |
| NC_037644.1 | 12085298 | SNV | 1 | A | C | Heterozygous |
| NC_037644.1 | 12085298 | SNV | 1 | A | T | Heterozygous |
| NC_037644.1 | 12087251 | SNV | 1 | A | T | Heterozygous |
| NC_037644.1 | 12092136 | SNV | 1 | T | C | Homozygous   |
| NC_037644.1 | 12092850 | SNV | 1 | G | A | Homozygous   |
| NC_037644.1 | 12093223 | SNV | 1 | G | A | Homozygous   |
| NC_037644.1 | 12097275 | SNV | 1 | A | C | Homozygous   |
| NC_037644.1 | 12097285 | SNV | 1 | A | T | Homozygous   |
| NC_037644.1 | 12097842 | SNV | 1 | A | G | Homozygous   |
| NC_037644.1 | 12109874 | SNV | 1 | A | T | Homozygous   |
| NC_037644.1 | 12114315 | SNV | 1 | T | G | Homozygous   |
| NC_037644.1 | 12116066 | SNV | 1 | T | C | Homozygous   |
| NC_037644.1 | 12118642 | SNV | 1 | C | G | Homozygous   |
| NC_037644.1 | 12119067 | SNV | 1 | T | A | Heterozygous |
| NC_037644.1 | 12122367 | SNV | 1 | G | A | Heterozygous |
| NC_037644.1 | 12122602 | SNV | 1 | T | C | Heterozygous |
| NC_037644.1 | 12129814 | SNV | 1 | A | G | Homozygous   |
| NC_037644.1 | 12131607 | SNV | 1 | A | G | Homozygous   |
| NC_037644.1 | 12132277 | SNV | 1 | A | G | Homozygous   |
| NC_037644.1 | 12132286 | SNV | 1 | A | G | Homozygous   |
| NC_037644.1 | 12133524 | SNV | 1 | A | G | Homozygous   |
| NC_037644.1 | 12135289 | SNV | 1 | G | A | Homozygous   |
| NC_037644.1 | 12136427 | SNV | 1 | T | C | Heterozygous |
| NC_037644.1 | 12136457 | SNV | 1 | G | T | Heterozygous |
| NC_037644.1 | 12136658 | SNV | 1 | G | T | Homozygous   |
| NC_037644.1 | 12139124 | SNV | 1 | A | G | Homozygous   |
| NC_037644.1 | 12140009 | SNV | 1 | T | A | Homozygous   |
| NC_037644.1 | 12140462 | SNV | 1 | T | C | Heterozygous |
| NC_037644.1 | 12140722 | SNV | 1 | G | A | Homozygous   |
| NC_037644.1 | 12140882 | SNV | 1 | A | C | Homozygous   |
| NC_037644.1 | 12140915 | SNV | 1 | T | C | Heterozygous |
| NC_037644.1 | 12141007 | SNV | 1 | A | G | Homozygous   |
| NC_037644.1 | 12141702 | SNV | 1 | T | C | Homozygous   |
| NC_037644.1 | 12141775 | SNV | 1 | G | C | Homozygous   |
| NC_037644.1 | 12141950 | SNV | 1 | T | C | Heterozygous |
| NC_037644.1 | 12141956 | SNV | 1 | C | T | Heterozygous |
| NC_037644.1 | 12141965 | SNV | 1 | G | A | Heterozygous |
| NC_037644.1 | 12141968 | SNV | 1 | T | C | Heterozygous |
| NC_037644.1 | 12141976 | SNV | 1 | T | C | Heterozygous |
| NC_037644.1 | 12144394 | SNV | 1 | G | C | Heterozygous |
| NC_037644.1 | 12144409 | SNV | 1 | T | C | Homozygous   |
| NC_037644.1 | 12145527 | SNV | 1 | C | T | Heterozygous |
| NC_037644.1 | 12147286 | SNV | 1 | G | A | Homozygous   |
| NC_037644.1 | 12149204 | SNV | 1 | C | G | Homozygous   |
| NC_037644.1 | 12149241 | SNV | 1 | T | C | Heterozygous |
| NC_037644.1 | 12149246 | SNV | 1 | A | C | Homozygous   |
| NC_037644.1 | 12151054 | SNV | 1 | C | G | Homozygous   |
| NC_037644.1 | 12160738 | SNV | 1 | G | A | Heterozygous |



|             |          |     |   |   |   |              |
|-------------|----------|-----|---|---|---|--------------|
| NC_037644.1 | 12160797 | SNV | 1 | A | C | Heterozygous |
| NC_037644.1 | 12160873 | SNV | 1 | T | G | Homozygous   |
| NC_037644.1 | 12160878 | SNV | 1 | T | C | Homozygous   |
| NC_037644.1 | 12160958 | SNV | 1 | A | G | Homozygous   |
| NC_037644.1 | 12161124 | SNV | 1 | T | C | Homozygous   |
| NC_037644.1 | 12166077 | SNV | 1 | G | A | Homozygous   |
| NC_037644.1 | 12166095 | SNV | 1 | G | A | Homozygous   |
| NC_037644.1 | 12166216 | SNV | 1 | A | G | Homozygous   |
| NC_037644.1 | 12166644 | SNV | 1 | C | T | Heterozygous |
| NC_037644.1 | 12167010 | SNV | 1 | T | A | Homozygous   |
| NC_037644.1 | 12167298 | SNV | 1 | A | G | Homozygous   |
| NC_037644.1 | 12167330 | SNV | 1 | C | T | Homozygous   |
| NC_037644.1 | 12167367 | SNV | 1 | T | C | Heterozygous |
| NC_037644.1 | 12167383 | SNV | 1 | T | C | Heterozygous |
| NC_037644.1 | 12172011 | SNV | 1 | A | G | Heterozygous |
| NC_037644.1 | 12172036 | SNV | 1 | G | A | Homozygous   |
| NC_037644.1 | 12172268 | SNV | 1 | G | A | Homozygous   |
| NC_037644.1 | 12172273 | SNV | 1 | G | A | Homozygous   |
| NC_037644.1 | 12172376 | SNV | 1 | C | A | Homozygous   |
| NC_037644.1 | 12172465 | SNV | 1 | G | A | Heterozygous |
| NC_037644.1 | 12174387 | SNV | 1 | G | A | Heterozygous |
| NC_037644.1 | 12176782 | SNV | 1 | G | A | Heterozygous |
| NC_037644.1 | 12176782 | SNV | 1 | G | T | Heterozygous |
| NC_037644.1 | 12176818 | SNV | 1 | C | A | Homozygous   |
| NC_037644.1 | 12177002 | SNV | 1 | T | C | Homozygous   |
| NC_037644.1 | 12177005 | SNV | 1 | T | C | Homozygous   |
| NC_037644.1 | 12177106 | SNV | 1 | G | A | Heterozygous |
| NC_037644.1 | 12177168 | SNV | 1 | A | C | Homozygous   |
| NC_037644.1 | 12177223 | SNV | 1 | G | T | Homozygous   |
| NC_037644.1 | 12177338 | SNV | 1 | T | C | Homozygous   |
| NC_037644.1 | 12177665 | SNV | 1 | A | G | Heterozygous |
| NC_037644.1 | 12177722 | SNV | 1 | G | A | Heterozygous |
| NC_037644.1 | 12178005 | SNV | 1 | G | A | Heterozygous |
| NC_037644.1 | 12178073 | SNV | 1 | A | T | Heterozygous |
| NC_037644.1 | 12181949 | SNV | 1 | A | T | Heterozygous |
| NC_037644.1 | 12181952 | SNV | 1 | G | T | Heterozygous |
| NC_037644.1 | 12181998 | SNV | 1 | C | A | Homozygous   |
| NC_037644.1 | 12182695 | SNV | 1 | C | G | Heterozygous |
| NC_037644.1 | 12185252 | SNV | 1 | G | A | Homozygous   |
| NC_037644.1 | 12185449 | SNV | 1 | C | A | Heterozygous |
| NC_037644.1 | 12193146 | SNV | 1 | G | C | Heterozygous |
| NC_037644.1 | 12194438 | SNV | 1 | T | C | Homozygous   |
| NC_037644.1 | 12194449 | SNV | 1 | C | T | Heterozygous |
| NC_037644.1 | 12194507 | SNV | 1 | A | G | Heterozygous |
| NC_037644.1 | 12194967 | SNV | 1 | T | C | Homozygous   |
| NC_037644.1 | 12195718 | SNV | 1 | C | T | Heterozygous |
| NC_037644.1 | 12195723 | SNV | 1 | G | A | Heterozygous |
| NC_037644.1 | 12199450 | SNV | 1 | A | T | Homozygous   |
| NC_037644.1 | 12200484 | SNV | 1 | T | C | Homozygous   |
| NC_037644.1 | 12200545 | SNV | 1 | G | A | Heterozygous |
| NC_037644.1 | 12200664 | SNV | 1 | T | C | Homozygous   |

|             |          |     |   |   |   |              |
|-------------|----------|-----|---|---|---|--------------|
| NC_037644.1 | 12200964 | SNV | 1 | A | G | Homozygous   |
| NC_037644.1 | 12200967 | SNV | 1 | G | A | Heterozygous |
| NC_037644.1 | 12202092 | SNV | 1 | C | G | Heterozygous |
| NC_037644.1 | 12203461 | SNV | 1 | C | T | Heterozygous |
| NC_037644.1 | 12204171 | SNV | 1 | T | C | Homozygous   |
| NC_037644.1 | 12204500 | SNV | 1 | A | G | Homozygous   |
| NC_037644.1 | 12204582 | SNV | 1 | T | C | Homozygous   |
| NC_037644.1 | 12204706 | SNV | 1 | C | T | Heterozygous |
| NC_037644.1 | 12205238 | SNV | 1 | T | A | Heterozygous |
| NC_037644.1 | 12206334 | SNV | 1 | T | C | Homozygous   |
| NC_037644.1 | 12207763 | SNV | 1 | G | A | Homozygous   |
| NC_037644.1 | 12207775 | SNV | 1 | C | T | Homozygous   |
| NC_037644.1 | 12208479 | SNV | 1 | A | C | Homozygous   |
| NC_037644.1 | 12209160 | SNV | 1 | A | T | Homozygous   |
| NC_037644.1 | 12209165 | SNV | 1 | T | A | Homozygous   |
| NC_037644.1 | 12229620 | SNV | 1 | A | G | Heterozygous |
| NC_037644.1 | 12247174 | SNV | 1 | T | C | Heterozygous |
| NC_037644.1 | 12247180 | SNV | 1 | C | T | Homozygous   |
| NC_037644.1 | 12247204 | SNV | 1 | C | T | Heterozygous |
| NC_037644.1 | 12247302 | SNV | 1 | G | A | Homozygous   |
| NC_037644.1 | 12249825 | SNV | 1 | T | C | Homozygous   |
| NC_037644.1 | 12249833 | SNV | 1 | C | T | Heterozygous |
| NC_037644.1 | 12249859 | SNV | 1 | T | C | Homozygous   |
| NC_037644.1 | 12250288 | SNV | 1 | T | C | Homozygous   |
| NC_037644.1 | 12250354 | SNV | 1 | C | T | Heterozygous |
| NC_037644.1 | 12250582 | SNV | 1 | A | G | Homozygous   |
| NC_037644.1 | 12250616 | SNV | 1 | C | T | Heterozygous |
| NC_037644.1 | 12250862 | SNV | 1 | A | G | Heterozygous |
| NC_037644.1 | 12250948 | SNV | 1 | C | T | Homozygous   |
| NC_037644.1 | 12253562 | SNV | 1 | A | T | Homozygous   |
| NC_037644.1 | 12253592 | SNV | 1 | T | C | Homozygous   |
| NC_037644.1 | 12253617 | SNV | 1 | T | C | Homozygous   |
| NC_037644.1 | 12253621 | SNV | 1 | C | T | Homozygous   |
| NC_037644.1 | 12253829 | SNV | 1 | C | T | Homozygous   |
| NC_037644.1 | 12253845 | SNV | 1 | A | G | Homozygous   |
| NC_037644.1 | 12253864 | SNV | 1 | C | T | Heterozygous |
| NC_037644.1 | 12253937 | SNV | 1 | G | A | Heterozygous |
| NC_037644.1 | 12254045 | SNV | 1 | C | T | Homozygous   |
| NC_037644.1 | 12254073 | SNV | 1 | T | C | Heterozygous |
| NC_037644.1 | 12254174 | SNV | 1 | A | G | Homozygous   |
| NC_037644.1 | 12258676 | SNV | 1 | G | A | Homozygous   |
| NC_037644.1 | 12262186 | SNV | 1 | T | A | Homozygous   |
| NC_037644.1 | 12262192 | SNV | 1 | G | A | Homozygous   |
| NC_037644.1 | 12262203 | SNV | 1 | G | A | Heterozygous |
| NC_037644.1 | 12262206 | SNV | 1 | G | T | Homozygous   |
| NC_037644.1 | 12262245 | SNV | 1 | A | G | Heterozygous |
| NC_037644.1 | 12262253 | SNV | 1 | A | G | Heterozygous |
| NC_037644.1 | 12262281 | SNV | 1 | T | G | Homozygous   |
| NC_037644.1 | 12262296 | SNV | 1 | T | G | Homozygous   |
| NC_037644.1 | 12262299 | SNV | 1 | A | G | Homozygous   |
| NC_037644.1 | 12262302 | SNV | 1 | A | G | Heterozygous |

|             |          |     |   |   |   |              |
|-------------|----------|-----|---|---|---|--------------|
| NC_037644.1 | 12262313 | SNV | 1 | A | G | Homozygous   |
| NC_037644.1 | 12262322 | SNV | 1 | A | G | Homozygous   |
| NC_037644.1 | 12262325 | SNV | 1 | A | C | Homozygous   |
| NC_037644.1 | 12262374 | SNV | 1 | A | G | Heterozygous |
| NC_037644.1 | 12262407 | SNV | 1 | A | T | Homozygous   |
| NC_037644.1 | 12262429 | SNV | 1 | A | G | Homozygous   |
| NC_037644.1 | 12262447 | SNV | 1 | T | A | Heterozygous |
| NC_037644.1 | 12262462 | SNV | 1 | G | A | Homozygous   |
| NC_037644.1 | 12262486 | SNV | 1 | C | A | Homozygous   |
| NC_037644.1 | 12262545 | SNV | 1 | A | C | Heterozygous |
| NC_037644.1 | 12262551 | SNV | 1 | A | G | Heterozygous |
| NC_037644.1 | 12262556 | SNV | 1 | A | G | Homozygous   |
| NC_037644.1 | 12262588 | SNV | 1 | A | G | Homozygous   |
| NC_037644.1 | 12262595 | SNV | 1 | A | C | Homozygous   |
| NC_037644.1 | 12267611 | SNV | 1 | A | G | Heterozygous |
| NC_037644.1 | 12267627 | SNV | 1 | A | G | Homozygous   |
| NC_037644.1 | 12267631 | SNV | 1 | A | G | Heterozygous |
| NC_037644.1 | 12267634 | SNV | 1 | G | A | Homozygous   |
| NC_037644.1 | 12274034 | SNV | 1 | A | G | Homozygous   |
| NC_037644.1 | 12277056 | SNV | 1 | C | T | Homozygous   |
| NC_037644.1 | 12277195 | SNV | 1 | C | T | Homozygous   |
| NC_037644.1 | 12277342 | SNV | 1 | C | T | Homozygous   |
| NC_037644.1 | 12277353 | SNV | 1 | T | A | Homozygous   |
| NC_037644.1 | 12277359 | SNV | 1 | C | A | Homozygous   |
| NC_037644.1 | 12277383 | SNV | 1 | A | T | Homozygous   |
| NC_037644.1 | 12277468 | SNV | 1 | T | A | Homozygous   |
| NC_037644.1 | 12277681 | SNV | 1 | C | T | Heterozygous |
| NC_037644.1 | 12284357 | SNV | 1 | C | A | Heterozygous |
| NC_037644.1 | 12284527 | SNV | 1 | T | A | Heterozygous |
| NC_037644.1 | 12285558 | SNV | 1 | G | A | Heterozygous |
| NC_037644.1 | 12285651 | SNV | 1 | A | G | Homozygous   |
| NC_037644.1 | 12285671 | SNV | 1 | T | C | Homozygous   |
| NC_037644.1 | 12285680 | SNV | 1 | C | G | Heterozygous |
| NC_037644.1 | 12285723 | SNV | 1 | G | A | Homozygous   |
| NC_037644.1 | 12285732 | SNV | 1 | A | G | Heterozygous |
| NC_037644.1 | 12285864 | SNV | 1 | T | C | Heterozygous |
| NC_037644.1 | 12289802 | SNV | 1 | A | T | Homozygous   |
| NC_037644.1 | 12289822 | SNV | 1 | G | A | Homozygous   |
| NC_037644.1 | 12289827 | SNV | 1 | G | T | Heterozygous |
| NC_037644.1 | 12289846 | SNV | 1 | C | T | Heterozygous |
| NC_037644.1 | 12289876 | SNV | 1 | A | G | Homozygous   |
| NC_037644.1 | 12290795 | SNV | 1 | A | G | Heterozygous |
| NC_037644.1 | 12292214 | SNV | 1 | T | C | Homozygous   |
| NC_037644.1 | 12292857 | SNV | 1 | T | C | Heterozygous |
| NC_037644.1 | 12293430 | SNV | 1 | A | G | Homozygous   |
| NC_037644.1 | 12293858 | SNV | 1 | G | A | Homozygous   |
| NC_037644.1 | 12294100 | SNV | 1 | T | C | Homozygous   |
| NC_037644.1 | 12296323 | SNV | 1 | C | T | Homozygous   |
| NC_037644.1 | 12299400 | SNV | 1 | C | G | Homozygous   |
| NC_037644.1 | 12300794 | SNV | 1 | A | G | Homozygous   |
| NC_037644.1 | 12305058 | SNV | 1 | A | T | Homozygous   |

|             |          |     |   |   |   |              |
|-------------|----------|-----|---|---|---|--------------|
| NC_037644.1 | 12305068 | SNV | 1 | C | A | Homozygous   |
| NC_037644.1 | 12305073 | SNV | 1 | A | G | Homozygous   |
| NC_037644.1 | 12305078 | SNV | 1 | A | T | Homozygous   |
| NC_037644.1 | 12307933 | SNV | 1 | G | A | Homozygous   |
| NC_037644.1 | 12308001 | SNV | 1 | T | C | Homozygous   |
| NC_037644.1 | 12308027 | SNV | 1 | A | G | Homozygous   |
| NC_037644.1 | 12308077 | SNV | 1 | A | G | Homozygous   |
| NC_037644.1 | 12308389 | SNV | 1 | A | T | Homozygous   |
| NC_037644.1 | 12308407 | SNV | 1 | T | G | Heterozygous |
| NC_037644.1 | 12308488 | SNV | 1 | G | T | Heterozygous |
| NC_037644.1 | 12308504 | SNV | 1 | T | C | Heterozygous |
| NC_037644.1 | 12308517 | SNV | 1 | C | T | Heterozygous |
| NC_037644.1 | 12308749 | SNV | 1 | T | C | Heterozygous |
| NC_037644.1 | 12308766 | SNV | 1 | G | T | Homozygous   |
| NC_037644.1 | 12308882 | SNV | 1 | G | A | Heterozygous |
| NC_037644.1 | 12308912 | SNV | 1 | T | C | Heterozygous |
| NC_037644.1 | 12309018 | SNV | 1 | C | G | Heterozygous |
| NC_037644.1 | 12309421 | SNV | 1 | T | A | Homozygous   |
| NC_037644.1 | 12309427 | SNV | 1 | T | A | Homozygous   |
| NC_037644.1 | 12309446 | SNV | 1 | A | C | Homozygous   |
| NC_037644.1 | 12310775 | SNV | 1 | T | A | Homozygous   |
| NC_037644.1 | 12310829 | SNV | 1 | A | T | Homozygous   |
| NC_037644.1 | 12315388 | SNV | 1 | T | C | Homozygous   |
| NC_037644.1 | 12316061 | SNV | 1 | C | T | Heterozygous |
| NC_037644.1 | 12316240 | SNV | 1 | G | A | Heterozygous |
| NC_037644.1 | 12319129 | SNV | 1 | A | G | Homozygous   |
| NC_037644.1 | 12319137 | SNV | 1 | G | T | Homozygous   |
| NC_037644.1 | 12323345 | SNV | 1 | A | G | Homozygous   |
| NC_037644.1 | 12323352 | SNV | 1 | A | G | Homozygous   |
| NC_037644.1 | 12323363 | SNV | 1 | A | G | Homozygous   |
| NC_037644.1 | 12323391 | SNV | 1 | A | G | Heterozygous |
| NC_037644.1 | 12323395 | SNV | 1 | A | G | Homozygous   |
| NC_037644.1 | 12323435 | SNV | 1 | T | C | Heterozygous |
| NC_037644.1 | 12323437 | SNV | 1 | G | T | Heterozygous |
| NC_037644.1 | 12324629 | SNV | 1 | A | T | Heterozygous |
| NC_037644.1 | 12325243 | SNV | 1 | T | A | Homozygous   |
| NC_037644.1 | 12326489 | SNV | 1 | A | G | Homozygous   |
| NC_037644.1 | 12328881 | SNV | 1 | T | A | Homozygous   |
| NC_037644.1 | 12328885 | SNV | 1 | A | T | Homozygous   |
| NC_037644.1 | 12328996 | SNV | 1 | A | T | Homozygous   |
| NC_037644.1 | 12330673 | SNV | 1 | T | A | Homozygous   |
| NC_037644.1 | 12332013 | SNV | 1 | A | G | Homozygous   |
| NC_037644.1 | 12332092 | SNV | 1 | C | T | Heterozygous |
| NC_037644.1 | 12332567 | SNV | 1 | T | A | Heterozygous |
| NC_037644.1 | 12332569 | SNV | 1 | C | T | Heterozygous |
| NC_037644.1 | 12343454 | SNV | 1 | T | A | Heterozygous |
| NC_037644.1 | 12343470 | SNV | 1 | T | C | Heterozygous |
| NC_037644.1 | 12346245 | SNV | 1 | C | T | Heterozygous |
| NC_037644.1 | 12347826 | SNV | 1 | C | T | Homozygous   |
| NC_037644.1 | 12354749 | SNV | 1 | A | G | Heterozygous |
| NC_037644.1 | 12356175 | SNV | 1 | T | A | Homozygous   |

|             |          |     |   |   |   |              |
|-------------|----------|-----|---|---|---|--------------|
| NC_037644.1 | 12356602 | SNV | 1 | G | A | Heterozygous |
| NC_037644.1 | 12363590 | SNV | 1 | A | T | Homozygous   |
| NC_037644.1 | 12369244 | SNV | 1 | A | G | Heterozygous |
| NC_037644.1 | 12369254 | SNV | 1 | C | T | Homozygous   |
| NC_037644.1 | 12369259 | SNV | 1 | A | T | Heterozygous |
| NC_037644.1 | 12369324 | SNV | 1 | G | T | Homozygous   |
| NC_037644.1 | 12371540 | SNV | 1 | G | A | Homozygous   |
| NC_037644.1 | 12372578 | SNV | 1 | G | A | Homozygous   |
| NC_037644.1 | 12374022 | SNV | 1 | C | T | Heterozygous |
| NC_037644.1 | 12394146 | SNV | 1 | G | A | Heterozygous |
| NC_037644.1 | 12394698 | SNV | 1 | A | G | Heterozygous |
| NC_037644.1 | 12395338 | SNV | 1 | C | T | Heterozygous |
| NC_037644.1 | 12397074 | SNV | 1 | C | T | Heterozygous |
| NC_037644.1 | 12398676 | SNV | 1 | G | A | Heterozygous |
| NC_037644.1 | 12398678 | SNV | 1 | A | G | Heterozygous |
| NC_037644.1 | 12398685 | SNV | 1 | A | T | Heterozygous |
| NC_037644.1 | 12399258 | SNV | 1 | C | T | Heterozygous |
| NC_037644.1 | 12399288 | SNV | 1 | T | C | Heterozygous |
| NC_037644.1 | 12400407 | SNV | 1 | T | C | Heterozygous |
| NC_037644.1 | 12400419 | SNV | 1 | T | C | Heterozygous |
| NC_037644.1 | 12404072 | SNV | 1 | T | C | Homozygous   |
| NC_037644.1 | 12405285 | SNV | 1 | C | T | Homozygous   |
| NC_037644.1 | 12405639 | SNV | 1 | G | A | Heterozygous |
| NC_037644.1 | 12413665 | SNV | 1 | G | A | Heterozygous |
| NC_037644.1 | 12415947 | SNV | 1 | G | C | Heterozygous |
| NC_037644.1 | 12415995 | SNV | 1 | C | T | Homozygous   |
| NC_037644.1 | 12424832 | SNV | 1 | G | T | Homozygous   |
| NC_037644.1 | 12424843 | SNV | 1 | G | A | Homozygous   |
| NC_037644.1 | 12427125 | SNV | 1 | T | C | Homozygous   |
| NC_037644.1 | 12427127 | SNV | 1 | T | A | Homozygous   |
| NC_037644.1 | 12427129 | SNV | 1 | C | A | Homozygous   |
| NC_037644.1 | 12427350 | SNV | 1 | C | T | Heterozygous |
| NC_037644.1 | 12427382 | SNV | 1 | C | G | Heterozygous |
| NC_037644.1 | 12427395 | SNV | 1 | T | C | Heterozygous |
| NC_037644.1 | 12427404 | SNV | 1 | A | G | Heterozygous |
| NC_037644.1 | 12427407 | SNV | 1 | T | C | Heterozygous |
| NC_037644.1 | 12427437 | SNV | 1 | A | T | Heterozygous |
| NC_037644.1 | 12427512 | SNV | 1 | A | T | Heterozygous |
| NC_037644.1 | 12427515 | SNV | 1 | A | G | Heterozygous |
| NC_037644.1 | 12427518 | SNV | 1 | T | C | Heterozygous |
| NC_037644.1 | 12427524 | SNV | 1 | C | T | Heterozygous |
| NC_037644.1 | 12427527 | SNV | 1 | A | G | Heterozygous |
| NC_037644.1 | 12427530 | SNV | 1 | G | C | Heterozygous |
| NC_037644.1 | 12427533 | SNV | 1 | T | C | Heterozygous |
| NC_037644.1 | 12427557 | SNV | 1 | C | T | Heterozygous |
| NC_037644.1 | 12427560 | SNV | 1 | T | C | Heterozygous |
| NC_037644.1 | 12427563 | SNV | 1 | A | G | Heterozygous |
| NC_037644.1 | 12427566 | SNV | 1 | T | C | Heterozygous |
| NC_037644.1 | 12427569 | SNV | 1 | A | G | Heterozygous |
| NC_037644.1 | 12427575 | SNV | 1 | A | C | Heterozygous |
| NC_037644.1 | 12427578 | SNV | 1 | A | T | Heterozygous |

|             |          |     |   |   |   |              |
|-------------|----------|-----|---|---|---|--------------|
| NC_037644.1 | 12427581 | SNV | 1 | C | T | Heterozygous |
| NC_037644.1 | 12427590 | SNV | 1 | A | C | Heterozygous |
| NC_037644.1 | 12427596 | SNV | 1 | T | A | Heterozygous |
| NC_037644.1 | 12427755 | SNV | 1 | T | C | Heterozygous |
| NC_037644.1 | 12427761 | SNV | 1 | G | T | Heterozygous |
| NC_037644.1 | 12427767 | SNV | 1 | A | G | Heterozygous |
| NC_037644.1 | 12427770 | SNV | 1 | T | G | Heterozygous |
| NC_037644.1 | 12427788 | SNV | 1 | T | G | Heterozygous |
| NC_037644.1 | 12427791 | SNV | 1 | A | G | Heterozygous |
| NC_037644.1 | 12427794 | SNV | 1 | A | G | Heterozygous |
| NC_037644.1 | 12427797 | SNV | 1 | A | G | Heterozygous |
| NC_037644.1 | 12427806 | SNV | 1 | C | T | Heterozygous |
| NC_037644.1 | 12427931 | SNV | 1 | C | T | Heterozygous |
| NC_037644.1 | 12427935 | SNV | 1 | T | G | Heterozygous |
| NC_037644.1 | 12427948 | SNV | 1 | T | A | Heterozygous |
| NC_037644.1 | 12427992 | SNV | 1 | T | C | Heterozygous |
| NC_037644.1 | 12428238 | SNV | 1 | C | T | Heterozygous |
| NC_037644.1 | 12428241 | SNV | 1 | C | T | Heterozygous |
| NC_037644.1 | 12428630 | SNV | 1 | A | G | Heterozygous |
| NC_037644.1 | 12428637 | SNV | 1 | A | G | Heterozygous |
| NC_037644.1 | 12428642 | SNV | 1 | A | G | Heterozygous |
| NC_037644.1 | 12428644 | SNV | 1 | A | G | Heterozygous |
| NC_037644.1 | 12428667 | SNV | 1 | T | C | Homozygous   |
| NC_037644.1 | 12428672 | SNV | 1 | A | G | Heterozygous |
| NC_037644.1 | 12432179 | SNV | 1 | T | C | Homozygous   |
| NC_037644.1 | 12434010 | SNV | 1 | T | C | Heterozygous |
| NC_037644.1 | 12434546 | SNV | 1 | T | C | Heterozygous |
| NC_037644.1 | 12434849 | SNV | 1 | A | G | Heterozygous |
| NC_037644.1 | 12434902 | SNV | 1 | A | G | Heterozygous |
| NC_037644.1 | 12434911 | SNV | 1 | A | G | Heterozygous |
| NC_037644.1 | 12436565 | SNV | 1 | A | G | Homozygous   |
| NC_037644.1 | 12437648 | SNV | 1 | A | G | Homozygous   |
| NC_037644.1 | 12438092 | SNV | 1 | A | G | Homozygous   |
| NC_037644.1 | 12438924 | SNV | 1 | G | A | Homozygous   |
| NC_037644.1 | 12439230 | SNV | 1 | T | C | Homozygous   |
| NC_037644.1 | 12440372 | SNV | 1 | T | A | Heterozygous |
| NC_037644.1 | 12440374 | SNV | 1 | A | G | Heterozygous |
| NC_037644.1 | 12440479 | SNV | 1 | A | G | Heterozygous |
| NC_037644.1 | 12440854 | SNV | 1 | A | G | Heterozygous |
| NC_037644.1 | 12440862 | SNV | 1 | A | G | Homozygous   |
| NC_037644.1 | 12442952 | SNV | 1 | G | A | Heterozygous |
| NC_037644.1 | 12443293 | SNV | 1 | C | T | Homozygous   |
| NC_037644.1 | 12444178 | SNV | 1 | C | T | Heterozygous |
| NC_037644.1 | 12444522 | SNV | 1 | C | T | Homozygous   |
| NC_037644.1 | 12465926 | SNV | 1 | C | T | Homozygous   |
| NC_037644.1 | 12466822 | SNV | 1 | C | G | Homozygous   |
| NC_037644.1 | 12466884 | SNV | 1 | G | A | Heterozygous |
| NC_037644.1 | 12467058 | SNV | 1 | A | G | Homozygous   |
| NC_037644.1 | 12467128 | SNV | 1 | C | T | Heterozygous |
| NC_037644.1 | 12467144 | SNV | 1 | G | A | Homozygous   |
| NC_037644.1 | 12467267 | SNV | 1 | T | C | Homozygous   |

|             |          |     |   |   |   |              |
|-------------|----------|-----|---|---|---|--------------|
| NC_037644.1 | 12467619 | SNV | 1 | T | G | Homozygous   |
| NC_037644.1 | 12467753 | SNV | 1 | A | T | Homozygous   |
| NC_037644.1 | 12468682 | SNV | 1 | T | C | Homozygous   |
| NC_037644.1 | 12469094 | SNV | 1 | A | G | Homozygous   |
| NC_037644.1 | 12469108 | SNV | 1 | C | G | Homozygous   |
| NC_037644.1 | 12469603 | SNV | 1 | C | T | Heterozygous |
| NC_037644.1 | 12470077 | SNV | 1 | A | G | Homozygous   |
| NC_037644.1 | 12470092 | SNV | 1 | A | G | Heterozygous |
| NC_037644.1 | 12470126 | SNV | 1 | G | A | Heterozygous |
| NC_037644.1 | 12470244 | SNV | 1 | T | A | Heterozygous |
| NC_037644.1 | 12470261 | SNV | 1 | A | G | Homozygous   |
| NC_037644.1 | 12470321 | SNV | 1 | C | G | Homozygous   |
| NC_037644.1 | 12479832 | SNV | 1 | C | T | Homozygous   |
| NC_037644.1 | 12480349 | SNV | 1 | C | T | Homozygous   |
| NC_037644.1 | 12484309 | SNV | 1 | C | T | Homozygous   |
| NC_037644.1 | 12491012 | SNV | 1 | T | C | Homozygous   |
| NC_037644.1 | 12492154 | SNV | 1 | C | T | Heterozygous |
| NC_037644.1 | 12498745 | SNV | 1 | T | C | Heterozygous |
| NC_037644.1 | 12498756 | SNV | 1 | T | A | Heterozygous |
| NC_037644.1 | 12498760 | SNV | 1 | A | C | Heterozygous |
| NC_037644.1 | 12498769 | SNV | 1 | T | A | Heterozygous |
| NC_037644.1 | 12506665 | SNV | 1 | A | T | Homozygous   |
| NC_037644.1 | 12507783 | SNV | 1 | A | G | Homozygous   |
| NC_037644.1 | 12516748 | SNV | 1 | T | C | Homozygous   |
| NC_037644.1 | 12525850 | SNV | 1 | G | T | Homozygous   |
| NC_037644.1 | 12526680 | SNV | 1 | T | A | Homozygous   |
| NC_037644.1 | 12531034 | SNV | 1 | A | G | Heterozygous |
| NC_037644.1 | 12531684 | SNV | 1 | C | T | Heterozygous |
| NC_037644.1 | 12538952 | SNV | 1 | T | C | Homozygous   |
| NC_037644.1 | 12538959 | SNV | 1 | T | C | Heterozygous |
| NC_037644.1 | 12538969 | SNV | 1 | T | C | Heterozygous |
| NC_037644.1 | 12539234 | SNV | 1 | A | T | Heterozygous |
| NC_037644.1 | 12539344 | SNV | 1 | C | T | Heterozygous |
| NC_037644.1 | 12539376 | SNV | 1 | G | T | Heterozygous |
| NC_037644.1 | 12540254 | SNV | 1 | T | C | Heterozygous |
| NC_037644.1 | 12540713 | SNV | 1 | A | G | Heterozygous |
| NC_037644.1 | 12540722 | SNV | 1 | G | A | Heterozygous |
| NC_037644.1 | 12541441 | SNV | 1 | T | C | Homozygous   |
| NC_037644.1 | 12541546 | SNV | 1 | T | C | Heterozygous |
| NC_037644.1 | 12541570 | SNV | 1 | T | C | Homozygous   |
| NC_037644.1 | 12541585 | SNV | 1 | A | G | Heterozygous |
| NC_037644.1 | 12541848 | SNV | 1 | T | C | Heterozygous |
| NC_037644.1 | 12541892 | SNV | 1 | A | T | Heterozygous |
| NC_037644.1 | 12541912 | SNV | 1 | A | G | Homozygous   |
| NC_037644.1 | 12542099 | SNV | 1 | T | C | Heterozygous |
| NC_037644.1 | 12542127 | SNV | 1 | C | T | Heterozygous |
| NC_037644.1 | 12542177 | SNV | 1 | T | C | Heterozygous |
| NC_037644.1 | 12542183 | SNV | 1 | T | C | Heterozygous |
| NC_037644.1 | 12542835 | SNV | 1 | T | C | Heterozygous |
| NC_037644.1 | 12542842 | SNV | 1 | A | G | Heterozygous |
| NC_037644.1 | 12542935 | SNV | 1 | T | C | Homozygous   |

|             |          |     |   |   |   |              |
|-------------|----------|-----|---|---|---|--------------|
| NC_037644.1 | 12543027 | SNV | 1 | C | G | Heterozygous |
| NC_037644.1 | 12543033 | SNV | 1 | A | G | Heterozygous |
| NC_037644.1 | 12543336 | SNV | 1 | T | C | Homozygous   |
| NC_037644.1 | 12543595 | SNV | 1 | A | T | Homozygous   |
| NC_037644.1 | 12543766 | SNV | 1 | C | T | Heterozygous |
| NC_037644.1 | 12544079 | SNV | 1 | C | T | Heterozygous |
| NC_037644.1 | 12544626 | SNV | 1 | A | G | Heterozygous |
| NC_037644.1 | 12544671 | SNV | 1 | A | G | Heterozygous |
| NC_037644.1 | 12544804 | SNV | 1 | C | G | Heterozygous |
| NC_037644.1 | 12544807 | SNV | 1 | C | T | Heterozygous |
| NC_037644.1 | 12544877 | SNV | 1 | T | C | Heterozygous |
| NC_037644.1 | 12545019 | SNV | 1 | T | C | Homozygous   |
| NC_037644.1 | 12545373 | SNV | 1 | G | T | Heterozygous |
| NC_037644.1 | 12545999 | SNV | 1 | C | T | Homozygous   |
| NC_037644.1 | 12546831 | SNV | 1 | T | C | Heterozygous |
| NC_037644.1 | 12546839 | SNV | 1 | T | C | Homozygous   |
| NC_037644.1 | 12547070 | SNV | 1 | T | C | Heterozygous |
| NC_037644.1 | 12547297 | SNV | 1 | T | C | Heterozygous |
| NC_037644.1 | 12547828 | SNV | 1 | T | C | Heterozygous |
| NC_037644.1 | 12547839 | SNV | 1 | A | G | Homozygous   |
| NC_037644.1 | 12547878 | SNV | 1 | T | C | Homozygous   |
| NC_037644.1 | 12547892 | SNV | 1 | A | G | Homozygous   |
| NC_037644.1 | 12547909 | SNV | 1 | A | G | Heterozygous |
| NC_037644.1 | 12547955 | SNV | 1 | T | C | Heterozygous |
| NC_037644.1 | 12548050 | SNV | 1 | A | G | Heterozygous |
| NC_037644.1 | 12548719 | SNV | 1 | T | C | Homozygous   |
| NC_037644.1 | 12548886 | SNV | 1 | T | C | Heterozygous |
| NC_037644.1 | 12549251 | SNV | 1 | C | T | Homozygous   |
| NC_037644.1 | 12549254 | SNV | 1 | T | C | Homozygous   |
| NC_037644.1 | 12549281 | SNV | 1 | T | C | Heterozygous |
| NC_037644.1 | 12549330 | SNV | 1 | A | G | Heterozygous |
| NC_037644.1 | 12550043 | SNV | 1 | A | C | Heterozygous |
| NC_037644.1 | 12550092 | SNV | 1 | T | A | Homozygous   |
| NC_037644.1 | 12550481 | SNV | 1 | T | C | Heterozygous |
| NC_037644.1 | 12550585 | SNV | 1 | C | T | Heterozygous |
| NC_037644.1 | 12550701 | SNV | 1 | T | C | Homozygous   |
| NC_037644.1 | 12550763 | SNV | 1 | T | A | Heterozygous |
| NC_037644.1 | 12550788 | SNV | 1 | C | T | Homozygous   |
| NC_037644.1 | 12550898 | SNV | 1 | C | T | Homozygous   |
| NC_037644.1 | 12551102 | SNV | 1 | C | T | Heterozygous |
| NC_037644.1 | 12551135 | SNV | 1 | T | C | Homozygous   |
| NC_037644.1 | 12551223 | SNV | 1 | T | C | Heterozygous |
| NC_037644.1 | 12551272 | SNV | 1 | A | T | Heterozygous |
| NC_037644.1 | 12551276 | SNV | 1 | C | G | Heterozygous |
| NC_037644.1 | 12551404 | SNV | 1 | C | T | Heterozygous |
| NC_037644.1 | 12551422 | SNV | 1 | T | C | Heterozygous |
| NC_037644.1 | 12551459 | SNV | 1 | T | C | Homozygous   |
| NC_037644.1 | 12551462 | SNV | 1 | C | T | Homozygous   |
| NC_037644.1 | 12551466 | SNV | 1 | T | C | Homozygous   |
| NC_037644.1 | 12551723 | SNV | 1 | G | A | Heterozygous |
| NC_037644.1 | 12551761 | SNV | 1 | G | T | Heterozygous |



|             |          |     |   |   |   |              |
|-------------|----------|-----|---|---|---|--------------|
| NC_037644.1 | 12551804 | SNV | 1 | T | C | Heterozygous |
| NC_037644.1 | 12551833 | SNV | 1 | T | C | Homozygous   |
| NC_037644.1 | 12551846 | SNV | 1 | A | G | Heterozygous |
| NC_037644.1 | 12551874 | SNV | 1 | G | A | Homozygous   |
| NC_037644.1 | 12551876 | SNV | 1 | G | A | Homozygous   |
| NC_037644.1 | 12551886 | SNV | 1 | G | A | Heterozygous |
| NC_037644.1 | 12551916 | SNV | 1 | A | G | Homozygous   |
| NC_037644.1 | 12551944 | SNV | 1 | T | C | Heterozygous |
| NC_037644.1 | 12551973 | SNV | 1 | T | C | Heterozygous |
| NC_037644.1 | 12551980 | SNV | 1 | T | C | Heterozygous |
| NC_037644.1 | 12551986 | SNV | 1 | A | G | Heterozygous |
| NC_037644.1 | 12552059 | SNV | 1 | T | C | Heterozygous |
| NC_037644.1 | 12552066 | SNV | 1 | G | A | Heterozygous |
| NC_037644.1 | 12552075 | SNV | 1 | A | G | Heterozygous |
| NC_037644.1 | 12552077 | SNV | 1 | G | A | Homozygous   |
| NC_037644.1 | 12552117 | SNV | 1 | C | T | Homozygous   |
| NC_037644.1 | 12552121 | SNV | 1 | C | T | Homozygous   |
| NC_037644.1 | 12552124 | SNV | 1 | T | G | Homozygous   |
| NC_037644.1 | 12552152 | SNV | 1 | C | G | Heterozygous |
| NC_037644.1 | 12552154 | SNV | 1 | G | A | Heterozygous |
| NC_037644.1 | 12552162 | SNV | 1 | G | A | Homozygous   |
| NC_037644.1 | 12552165 | SNV | 1 | T | C | Heterozygous |
| NC_037644.1 | 12552196 | SNV | 1 | A | T | Heterozygous |
| NC_037644.1 | 12552233 | SNV | 1 | T | C | Heterozygous |
| NC_037644.1 | 12552235 | SNV | 1 | T | C | Heterozygous |
| NC_037644.1 | 12552288 | SNV | 1 | G | C | Heterozygous |
| NC_037644.1 | 12552290 | SNV | 1 | A | G | Heterozygous |
| NC_037644.1 | 12552306 | SNV | 1 | A | G | Heterozygous |
| NC_037644.1 | 12552324 | SNV | 1 | A | G | Heterozygous |
| NC_037644.1 | 12552342 | SNV | 1 | A | T | Homozygous   |
| NC_037644.1 | 12552386 | SNV | 1 | T | C | Homozygous   |
| NC_037644.1 | 12552388 | SNV | 1 | T | C | Homozygous   |
| NC_037644.1 | 12552393 | SNV | 1 | T | C | Homozygous   |
| NC_037644.1 | 12552399 | SNV | 1 | A | G | Homozygous   |
| NC_037644.1 | 12552468 | SNV | 1 | A | G | Heterozygous |
| NC_037644.1 | 12552468 | SNV | 1 | A | T | Heterozygous |
| NC_037644.1 | 12552496 | SNV | 1 | T | C | Heterozygous |
| NC_037644.1 | 12552527 | SNV | 1 | T | C | Homozygous   |
| NC_037644.1 | 12552532 | SNV | 1 | T | G | Homozygous   |
| NC_037644.1 | 12552560 | SNV | 1 | G | C | Homozygous   |
| NC_037644.1 | 12552562 | SNV | 1 | A | G | Homozygous   |
| NC_037644.1 | 12552566 | SNV | 1 | G | A | Homozygous   |
| NC_037644.1 | 12552606 | SNV | 1 | C | T | Homozygous   |
| NC_037644.1 | 12552613 | SNV | 1 | G | A | Homozygous   |
| NC_037644.1 | 12552680 | SNV | 1 | G | T | Homozygous   |
| NC_037644.1 | 12552682 | SNV | 1 | C | G | Homozygous   |
| NC_037644.1 | 12552694 | SNV | 1 | T | C | Heterozygous |
| NC_037644.1 | 12552707 | SNV | 1 | C | T | Homozygous   |
| NC_037644.1 | 12552710 | SNV | 1 | C | T | Heterozygous |
| NC_037644.1 | 12553310 | SNV | 1 | T | A | Heterozygous |
| NC_037644.1 | 12553494 | SNV | 1 | C | T | Heterozygous |

|             |          |     |   |   |   |              |
|-------------|----------|-----|---|---|---|--------------|
| NC_037644.1 | 12553556 | SNV | 1 | T | C | Homozygous   |
| NC_037644.1 | 12553949 | SNV | 1 | T | A | Heterozygous |
| NC_037644.1 | 12554002 | SNV | 1 | A | G | Heterozygous |
| NC_037644.1 | 12554104 | SNV | 1 | A | G | Homozygous   |
| NC_037644.1 | 12554107 | SNV | 1 | T | C | Homozygous   |
| NC_037644.1 | 12555925 | SNV | 1 | T | C | Homozygous   |
| NC_037644.1 | 12556225 | SNV | 1 | T | C | Heterozygous |
| NC_037644.1 | 12556243 | SNV | 1 | G | A | Homozygous   |
| NC_037644.1 | 12556356 | SNV | 1 | C | G | Homozygous   |
| NC_037644.1 | 12556359 | SNV | 1 | A | T | Homozygous   |
| NC_037644.1 | 12556394 | SNV | 1 | G | A | Homozygous   |
| NC_037644.1 | 12556421 | SNV | 1 | C | T | Heterozygous |
| NC_037644.1 | 12556439 | SNV | 1 | C | T | Homozygous   |
| NC_037644.1 | 12556480 | SNV | 1 | G | A | Homozygous   |
| NC_037644.1 | 12556483 | SNV | 1 | G | A | Homozygous   |
| NC_037644.1 | 12557861 | SNV | 1 | A | G | Heterozygous |
| NC_037644.1 | 12557881 | SNV | 1 | C | T | Heterozygous |
| NC_037644.1 | 12561822 | SNV | 1 | A | G | Heterozygous |
| NC_037644.1 | 12561867 | SNV | 1 | C | T | Heterozygous |
| NC_037644.1 | 12561879 | SNV | 1 | G | A | Heterozygous |
| NC_037644.1 | 12569956 | SNV | 1 | C | G | Homozygous   |
| NC_037644.1 | 12571140 | SNV | 1 | C | T | Homozygous   |
| NC_037644.1 | 12573395 | SNV | 1 | T | C | Heterozygous |
| NC_037644.1 | 12573399 | SNV | 1 | T | C | Heterozygous |
| NC_037644.1 | 12573403 | SNV | 1 | T | C | Heterozygous |
| NC_037644.1 | 12573407 | SNV | 1 | T | C | Heterozygous |
| NC_037644.1 | 12582795 | SNV | 1 | A | G | Homozygous   |
| NC_037644.1 | 12582800 | SNV | 1 | G | A | Homozygous   |
| NC_037644.1 | 12583124 | SNV | 1 | A | G | Heterozygous |
| NC_037644.1 | 12583137 | SNV | 1 | C | T | Heterozygous |
| NC_037644.1 | 12583240 | SNV | 1 | G | C | Heterozygous |
| NC_037644.1 | 12583844 | SNV | 1 | T | C | Heterozygous |
| NC_037644.1 | 12583945 | SNV | 1 | T | C | Heterozygous |
| NC_037644.1 | 12583982 | SNV | 1 | T | C | Heterozygous |
| NC_037644.1 | 12584048 | SNV | 1 | C | T | Heterozygous |
| NC_037644.1 | 12584055 | SNV | 1 | T | C | Homozygous   |
| NC_037644.1 | 12584084 | SNV | 1 | T | A | Homozygous   |
| NC_037644.1 | 12584105 | SNV | 1 | G | A | Heterozygous |
| NC_037644.1 | 12584109 | SNV | 1 | A | G | Homozygous   |
| NC_037644.1 | 12584127 | SNV | 1 | C | T | Homozygous   |
| NC_037644.1 | 12584146 | SNV | 1 | T | C | Homozygous   |
| NC_037644.1 | 12584186 | SNV | 1 | G | A | Heterozygous |
| NC_037644.1 | 12584214 | SNV | 1 | T | C | Homozygous   |
| NC_037644.1 | 12584222 | SNV | 1 | G | A | Heterozygous |
| NC_037644.1 | 12584427 | SNV | 1 | C | T | Homozygous   |
| NC_037644.1 | 12584444 | SNV | 1 | T | C | Homozygous   |
| NC_037644.1 | 12584558 | SNV | 1 | C | T | Homozygous   |
| NC_037644.1 | 12584666 | SNV | 1 | A | G | Homozygous   |
| NC_037644.1 | 12584676 | SNV | 1 | T | C | Homozygous   |
| NC_037644.1 | 12586857 | SNV | 1 | T | C | Homozygous   |
| NC_037644.1 | 12586871 | SNV | 1 | A | G | Homozygous   |

|             |          |     |   |   |   |              |
|-------------|----------|-----|---|---|---|--------------|
| NC_037644.1 | 12589667 | SNV | 1 | A | G | Homozygous   |
| NC_037644.1 | 12589697 | SNV | 1 | C | T | Heterozygous |
| NC_037644.1 | 12589702 | SNV | 1 | G | A | Homozygous   |
| NC_037644.1 | 12591724 | SNV | 1 | A | C | Homozygous   |
| NC_037644.1 | 12591841 | SNV | 1 | T | C | Homozygous   |
| NC_037644.1 | 12591935 | SNV | 1 | C | T | Heterozygous |
| NC_037644.1 | 12591950 | SNV | 1 | C | A | Heterozygous |
| NC_037644.1 | 12598257 | SNV | 1 | C | T | Homozygous   |
| NC_037644.1 | 12598882 | SNV | 1 | G | A | Heterozygous |
| NC_037644.1 | 12599205 | SNV | 1 | G | A | Heterozygous |
| NC_037644.1 | 12600205 | SNV | 1 | A | T | Heterozygous |
| NC_037644.1 | 12600857 | SNV | 1 | T | C | Homozygous   |
| NC_037644.1 | 12604037 | SNV | 1 | A | G | Homozygous   |
| NC_037644.1 | 12604283 | SNV | 1 | C | T | Homozygous   |
| NC_037644.1 | 12604332 | SNV | 1 | T | C | Heterozygous |
| NC_037644.1 | 12604540 | SNV | 1 | T | C | Homozygous   |
| NC_037644.1 | 12604548 | SNV | 1 | A | G | Heterozygous |
| NC_037644.1 | 12604585 | SNV | 1 | T | C | Heterozygous |
| NC_037644.1 | 12604618 | SNV | 1 | T | C | Homozygous   |
| NC_037644.1 | 12604651 | SNV | 1 | A | G | Homozygous   |
| NC_037644.1 | 12604690 | SNV | 1 | C | T | Heterozygous |
| NC_037644.1 | 12604706 | SNV | 1 | A | G | Heterozygous |
| NC_037644.1 | 12604792 | SNV | 1 | G | C | Heterozygous |
| NC_037644.1 | 12605248 | SNV | 1 | C | A | Heterozygous |
| NC_037644.1 | 12605251 | SNV | 1 | C | T | Heterozygous |
| NC_037644.1 | 12605258 | SNV | 1 | G | C | Heterozygous |
| NC_037644.1 | 12605308 | SNV | 1 | A | T | Homozygous   |
| NC_037644.1 | 12605411 | SNV | 1 | C | T | Heterozygous |
| NC_037644.1 | 12605422 | SNV | 1 | A | G | Heterozygous |
| NC_037644.1 | 12605464 | SNV | 1 | T | C | Heterozygous |
| NC_037644.1 | 12605468 | SNV | 1 | A | C | Homozygous   |
| NC_037644.1 | 12605548 | SNV | 1 | T | C | Heterozygous |
| NC_037644.1 | 12605566 | SNV | 1 | T | C | Homozygous   |
| NC_037644.1 | 12605655 | SNV | 1 | T | C | Heterozygous |
| NC_037644.1 | 12605706 | SNV | 1 | C | A | Heterozygous |
| NC_037644.1 | 12605747 | SNV | 1 | G | A | Heterozygous |
| NC_037644.1 | 12605831 | SNV | 1 | T | C | Homozygous   |
| NC_037644.1 | 12606016 | SNV | 1 | T | C | Heterozygous |
| NC_037644.1 | 12606042 | SNV | 1 | T | C | Heterozygous |
| NC_037644.1 | 12606120 | SNV | 1 | G | A | Heterozygous |
| NC_037644.1 | 12606180 | SNV | 1 | T | C | Homozygous   |
| NC_037644.1 | 12606387 | SNV | 1 | T | C | Homozygous   |
| NC_037644.1 | 12606450 | SNV | 1 | C | G | Homozygous   |
| NC_037644.1 | 12606522 | SNV | 1 | A | G | Heterozygous |
| NC_037644.1 | 12606529 | SNV | 1 | G | A | Homozygous   |
| NC_037644.1 | 12613077 | SNV | 1 | C | G | Heterozygous |
| NC_037644.1 | 12613203 | SNV | 1 | T | A | Heterozygous |
| NC_037644.1 | 12617581 | SNV | 1 | A | G | Homozygous   |
| NC_037644.1 | 12617624 | SNV | 1 | G | T | Homozygous   |
| NC_037644.1 | 12617631 | SNV | 1 | G | T | Homozygous   |
| NC_037644.1 | 12617646 | SNV | 1 | A | T | Homozygous   |

|             |          |     |   |   |   |              |
|-------------|----------|-----|---|---|---|--------------|
| NC_037644.1 | 12621411 | SNV | 1 | C | T | Heterozygous |
| NC_037644.1 | 12623247 | SNV | 1 | T | C | Heterozygous |
| NC_037644.1 | 12623419 | SNV | 1 | T | C | Homozygous   |
| NC_037644.1 | 12623432 | SNV | 1 | G | C | Homozygous   |
| NC_037644.1 | 12623446 | SNV | 1 | T | C | Heterozygous |
| NC_037644.1 | 12623493 | SNV | 1 | A | G | Heterozygous |
| NC_037644.1 | 12623496 | SNV | 1 | A | G | Homozygous   |
| NC_037644.1 | 12623753 | SNV | 1 | A | G | Heterozygous |
| NC_037644.1 | 12623755 | SNV | 1 | G | A | Heterozygous |
| NC_037644.1 | 12623911 | SNV | 1 | A | G | Homozygous   |
| NC_037644.1 | 12624018 | SNV | 1 | T | C | Homozygous   |
| NC_037644.1 | 12624077 | SNV | 1 | T | A | Heterozygous |
| NC_037644.1 | 12624089 | SNV | 1 | G | A | Homozygous   |
| NC_037644.1 | 12624895 | SNV | 1 | T | A | Homozygous   |
| NC_037644.1 | 12624973 | SNV | 1 | C | T | Heterozygous |
| NC_037644.1 | 12624984 | SNV | 1 | G | A | Heterozygous |
| NC_037644.1 | 12640456 | SNV | 1 | G | A | Homozygous   |
| NC_037644.1 | 12640793 | SNV | 1 | T | C | Homozygous   |
| NC_037644.1 | 12640803 | SNV | 1 | A | G | Homozygous   |
| NC_037644.1 | 12640814 | SNV | 1 | T | C | Homozygous   |
| NC_037644.1 | 12640816 | SNV | 1 | G | A | Homozygous   |
| NC_037644.1 | 12640853 | SNV | 1 | G | A | Homozygous   |
| NC_037644.1 | 12652281 | SNV | 1 | A | G | Heterozygous |
| NC_037644.1 | 12657586 | SNV | 1 | A | G | Homozygous   |
| NC_037644.1 | 12667898 | SNV | 1 | A | G | Heterozygous |
| NC_037644.1 | 12667907 | SNV | 1 | G | T | Heterozygous |
| NC_037644.1 | 12667909 | SNV | 1 | A | G | Heterozygous |
| NC_037644.1 | 12667909 | SNV | 1 | A | T | Heterozygous |
| NC_037644.1 | 12667911 | SNV | 1 | A | G | Heterozygous |
| NC_037644.1 | 12667913 | SNV | 1 | G | A | Heterozygous |
| NC_037644.1 | 12667921 | SNV | 1 | G | A | Heterozygous |
| NC_037644.1 | 12667925 | SNV | 1 | A | G | Heterozygous |
| NC_037644.1 | 12667934 | SNV | 1 | T | A | Homozygous   |
| NC_037644.1 | 12669323 | SNV | 1 | A | C | Homozygous   |
| NC_037644.1 | 12669332 | SNV | 1 | A | T | Heterozygous |
| NC_037644.1 | 12669341 | SNV | 1 | G | A | Heterozygous |
| NC_037644.1 | 12669397 | SNV | 1 | G | T | Heterozygous |
| NC_037644.1 | 12669417 | SNV | 1 | G | T | Heterozygous |
| NC_037644.1 | 12669420 | SNV | 1 | A | C | Heterozygous |
| NC_037644.1 | 12669424 | SNV | 1 | A | G | Heterozygous |
| NC_037644.1 | 12669441 | SNV | 1 | G | A | Heterozygous |
| NC_037644.1 | 12669443 | SNV | 1 | G | T | Homozygous   |
| NC_037644.1 | 12669446 | SNV | 1 | A | C | Homozygous   |
| NC_037644.1 | 12669527 | SNV | 1 | A | C | Homozygous   |
| NC_037644.1 | 12669538 | SNV | 1 | A | G | Homozygous   |
| NC_037644.1 | 12669552 | SNV | 1 | G | A | Homozygous   |
| NC_037644.1 | 12669562 | SNV | 1 | A | G | Homozygous   |
| NC_037644.1 | 12669564 | SNV | 1 | G | A | Homozygous   |
| NC_037644.1 | 12669569 | SNV | 1 | A | G | Homozygous   |
| NC_037644.1 | 12669572 | SNV | 1 | C | A | Homozygous   |
| NC_037644.1 | 12669606 | SNV | 1 | G | A | Heterozygous |

|             |          |     |   |   |   |              |
|-------------|----------|-----|---|---|---|--------------|
| NC_037644.1 | 12669608 | SNV | 1 | A | G | Homozygous   |
| NC_037644.1 | 12669614 | SNV | 1 | A | G | Heterozygous |
| NC_037644.1 | 12669628 | SNV | 1 | A | G | Homozygous   |
| NC_037644.1 | 12670445 | SNV | 1 | C | T | Homozygous   |
| NC_037644.1 | 12670450 | SNV | 1 | C | T | Homozygous   |
| NC_037644.1 | 12670454 | SNV | 1 | G | A | Homozygous   |
| NC_037644.1 | 12670472 | SNV | 1 | T | C | Homozygous   |
| NC_037644.1 | 12670475 | SNV | 1 | A | T | Homozygous   |
| NC_037644.1 | 12670485 | SNV | 1 | G | A | Homozygous   |
| NC_037644.1 | 12679150 | SNV | 1 | C | T | Heterozygous |
| NC_037644.1 | 12679179 | SNV | 1 | G | A | Heterozygous |
| NC_037644.1 | 12679236 | SNV | 1 | C | T | Homozygous   |
| NC_037644.1 | 12679243 | SNV | 1 | C | T | Homozygous   |
| NC_037644.1 | 12679245 | SNV | 1 | C | T | Homozygous   |
| NC_037644.1 | 12679255 | SNV | 1 | C | T | Heterozygous |
| NC_037644.1 | 12679257 | SNV | 1 | C | T | Heterozygous |
| NC_037644.1 | 12679258 | SNV | 1 | T | G | Heterozygous |
| NC_037644.1 | 12679265 | SNV | 1 | C | T | Heterozygous |
| NC_037644.1 | 12679267 | SNV | 1 | C | T | Homozygous   |
| NC_037644.1 | 12679292 | SNV | 1 | C | T | Homozygous   |
| NC_037644.1 | 12679393 | SNV | 1 | G | C | Homozygous   |
| NC_037644.1 | 12679419 | SNV | 1 | G | A | Heterozygous |
| NC_037644.1 | 12679423 | SNV | 1 | C | A | Heterozygous |
| NC_037644.1 | 12679524 | SNV | 1 | T | G | Homozygous   |
| NC_037644.1 | 12679532 | SNV | 1 | T | A | Heterozygous |
| NC_037644.1 | 12679539 | SNV | 1 | A | G | Homozygous   |
| NC_037644.1 | 12684659 | SNV | 1 | T | C | Homozygous   |
| NC_037644.1 | 12684857 | SNV | 1 | G | A | Heterozygous |
| NC_037644.1 | 12684923 | SNV | 1 | T | C | Homozygous   |
| NC_037644.1 | 12686871 | SNV | 1 | A | T | Homozygous   |
| NC_037644.1 | 12686878 | SNV | 1 | G | T | Homozygous   |
| NC_037644.1 | 12686890 | SNV | 1 | C | T | Homozygous   |
| NC_037644.1 | 12689594 | SNV | 1 | A | T | Heterozygous |
| NC_037644.1 | 12689603 | SNV | 1 | G | T | Heterozygous |
| NC_037644.1 | 12689617 | SNV | 1 | G | A | Heterozygous |
| NC_037644.1 | 12700592 | SNV | 1 | C | T | Heterozygous |
| NC_037644.1 | 12700621 | SNV | 1 | T | C | Heterozygous |
| NC_037644.1 | 12700967 | SNV | 1 | A | G | Heterozygous |
| NC_037644.1 | 12700993 | SNV | 1 | A | G | Homozygous   |
| NC_037644.1 | 12701048 | SNV | 1 | G | A | Heterozygous |
| NC_037644.1 | 12701877 | SNV | 1 | T | C | Homozygous   |
| NC_037644.1 | 12702014 | SNV | 1 | G | A | Homozygous   |
| NC_037644.1 | 12702109 | SNV | 1 | G | A | Heterozygous |
| NC_037644.1 | 12702170 | SNV | 1 | G | A | Homozygous   |
| NC_037644.1 | 12702208 | SNV | 1 | A | T | Homozygous   |
| NC_037644.1 | 12702549 | SNV | 1 | C | T | Heterozygous |
| NC_037644.1 | 12702561 | SNV | 1 | G | A | Heterozygous |
| NC_037644.1 | 12702573 | SNV | 1 | A | G | Homozygous   |
| NC_037644.1 | 12702640 | SNV | 1 | G | A | Heterozygous |
| NC_037644.1 | 12706660 | SNV | 1 | C | A | Heterozygous |
| NC_037644.1 | 12707108 | SNV | 1 | A | G | Homozygous   |

|             |          |     |   |   |   |              |
|-------------|----------|-----|---|---|---|--------------|
| NC_037644.1 | 12710870 | SNV | 1 | G | T | Heterozygous |
| NC_037644.1 | 12711094 | SNV | 1 | G | T | Heterozygous |
| NC_037644.1 | 12711096 | SNV | 1 | A | T | Heterozygous |
| NC_037644.1 | 12711099 | SNV | 1 | G | T | Heterozygous |
| NC_037644.1 | 12711107 | SNV | 1 | G | T | Heterozygous |
| NC_037644.1 | 12711640 | SNV | 1 | C | T | Heterozygous |
| NC_037644.1 | 12716992 | SNV | 1 | T | C | Heterozygous |
| NC_037644.1 | 12717132 | SNV | 1 | C | T | Heterozygous |
| NC_037644.1 | 12717237 | SNV | 1 | T | C | Heterozygous |
| NC_037644.1 | 12717283 | SNV | 1 | C | T | Heterozygous |
| NC_037644.1 | 12717462 | SNV | 1 | C | T | Heterozygous |
| NC_037644.1 | 12717513 | SNV | 1 | C | A | Homozygous   |
| NC_037644.1 | 12717728 | SNV | 1 | A | G | Heterozygous |
| NC_037644.1 | 12717838 | SNV | 1 | C | T | Heterozygous |
| NC_037644.1 | 12717951 | SNV | 1 | A | G | Homozygous   |
| NC_037644.1 | 12717984 | SNV | 1 | G | A | Homozygous   |
| NC_037644.1 | 12718011 | SNV | 1 | C | T | Homozygous   |
| NC_037644.1 | 12720429 | SNV | 1 | A | G | Homozygous   |
| NC_037644.1 | 12720432 | SNV | 1 | T | C | Homozygous   |
| NC_037644.1 | 12720480 | SNV | 1 | T | C | Heterozygous |
| NC_037644.1 | 12724399 | SNV | 1 | A | T | Heterozygous |
| NC_037644.1 | 12735250 | SNV | 1 | C | T | Heterozygous |
| NC_037644.1 | 12735253 | SNV | 1 | C | A | Homozygous   |
| NC_037644.1 | 12735257 | SNV | 1 | T | C | Heterozygous |
| NC_037644.1 | 12735265 | SNV | 1 | C | G | Heterozygous |
| NC_037644.1 | 12735269 | SNV | 1 | A | G | Homozygous   |
| NC_037644.1 | 12735272 | SNV | 1 | A | G | Homozygous   |
| NC_037644.1 | 12735275 | SNV | 1 | A | T | Heterozygous |
| NC_037644.1 | 12735293 | SNV | 1 | T | G | Homozygous   |
| NC_037644.1 | 12735296 | SNV | 1 | A | T | Homozygous   |
| NC_037644.1 | 12735298 | SNV | 1 | C | T | Homozygous   |
| NC_037644.1 | 12735803 | SNV | 1 | T | A | Heterozygous |
| NC_037644.1 | 12735806 | SNV | 1 | A | C | Heterozygous |
| NC_037644.1 | 12735812 | SNV | 1 | G | T | Heterozygous |
| NC_037644.1 | 12735821 | SNV | 1 | T | A | Heterozygous |
| NC_037644.1 | 12735833 | SNV | 1 | A | C | Homozygous   |
| NC_037644.1 | 12735842 | SNV | 1 | T | A | Homozygous   |
| NC_037644.1 | 12735851 | SNV | 1 | A | G | Homozygous   |
| NC_037644.1 | 12735869 | SNV | 1 | A | T | Homozygous   |
| NC_037644.1 | 12735875 | SNV | 1 | T | C | Homozygous   |
| NC_037644.1 | 12735880 | SNV | 1 | T | C | Homozygous   |
| NC_037644.1 | 12739311 | SNV | 1 | A | G | Homozygous   |
| NC_037644.1 | 12739325 | SNV | 1 | G | A | Heterozygous |
| NC_037644.1 | 12739449 | SNV | 1 | T | C | Homozygous   |
| NC_037644.1 | 12739770 | SNV | 1 | G | A | Heterozygous |
| NC_037644.1 | 12740038 | SNV | 1 | G | A | Heterozygous |
| NC_037644.1 | 12741006 | SNV | 1 | T | C | Homozygous   |
| NC_037644.1 | 12741201 | SNV | 1 | T | C | Heterozygous |
| NC_037644.1 | 12741387 | SNV | 1 | T | C | Homozygous   |
| NC_037644.1 | 12743553 | SNV | 1 | C | T | Homozygous   |
| NC_037644.1 | 12743816 | SNV | 1 | C | A | Homozygous   |

|             |          |     |   |   |   |              |
|-------------|----------|-----|---|---|---|--------------|
| NC_037644.1 | 12743948 | SNV | 1 | A | C | Homozygous   |
| NC_037644.1 | 12744079 | SNV | 1 | T | C | Homozygous   |
| NC_037644.1 | 12744220 | SNV | 1 | A | G | Homozygous   |
| NC_037644.1 | 12744691 | SNV | 1 | A | G | Homozygous   |
| NC_037644.1 | 12744924 | SNV | 1 | A | G | Heterozygous |
| NC_037644.1 | 12744928 | SNV | 1 | A | G | Homozygous   |
| NC_037644.1 | 12745068 | SNV | 1 | G | A | Homozygous   |
| NC_037644.1 | 12745091 | SNV | 1 | C | A | Heterozygous |
| NC_037644.1 | 12745201 | SNV | 1 | A | G | Homozygous   |
| NC_037644.1 | 12745308 | SNV | 1 | T | C | Homozygous   |
| NC_037644.1 | 12745424 | SNV | 1 | G | A | Heterozygous |
| NC_037644.1 | 12745435 | SNV | 1 | C | G | Homozygous   |
| NC_037644.1 | 12745455 | SNV | 1 | T | C | Homozygous   |
| NC_037644.1 | 12745762 | SNV | 1 | G | T | Homozygous   |
| NC_037644.1 | 12745872 | SNV | 1 | G | A | Heterozygous |
| NC_037644.1 | 12747260 | SNV | 1 | A | T | Homozygous   |
| NC_037644.1 | 12747281 | SNV | 1 | C | T | Homozygous   |
| NC_037644.1 | 12756791 | SNV | 1 | C | G | Homozygous   |
| NC_037644.1 | 12757205 | SNV | 1 | T | C | Homozygous   |
| NC_037644.1 | 12757526 | SNV | 1 | A | T | Homozygous   |
| NC_037644.1 | 12757578 | SNV | 1 | T | G | Homozygous   |
| NC_037644.1 | 12757648 | SNV | 1 | G | A | Heterozygous |
| NC_037644.1 | 12757711 | SNV | 1 | T | C | Heterozygous |
| NC_037644.1 | 12757891 | SNV | 1 | A | G | Homozygous   |
| NC_037644.1 | 12758938 | SNV | 1 | G | T | Heterozygous |
| NC_037644.1 | 12758953 | SNV | 1 | T | C | Heterozygous |
| NC_037644.1 | 12758968 | SNV | 1 | G | A | Heterozygous |
| NC_037644.1 | 12759084 | SNV | 1 | A | G | Homozygous   |
| NC_037644.1 | 12759087 | SNV | 1 | G | A | Heterozygous |
| NC_037644.1 | 12759358 | SNV | 1 | T | A | Homozygous   |
| NC_037644.1 | 12759360 | SNV | 1 | T | C | Homozygous   |
| NC_037644.1 | 12759363 | SNV | 1 | T | C | Homozygous   |
| NC_037644.1 | 12759373 | SNV | 1 | A | T | Homozygous   |
| NC_037644.1 | 12759377 | SNV | 1 | G | T | Homozygous   |
| NC_037644.1 | 12759380 | SNV | 1 | T | G | Homozygous   |
| NC_037644.1 | 12761575 | SNV | 1 | C | T | Heterozygous |
| NC_037644.1 | 12761835 | SNV | 1 | T | C | Heterozygous |
| NC_037644.1 | 12762458 | SNV | 1 | A | C | Heterozygous |
| NC_037644.1 | 12762686 | SNV | 1 | A | G | Heterozygous |
| NC_037644.1 | 12763009 | SNV | 1 | G | A | Homozygous   |
| NC_037644.1 | 12763030 | SNV | 1 | C | T | Homozygous   |
| NC_037644.1 | 12776319 | SNV | 1 | T | A | Heterozygous |
| NC_037644.1 | 12776453 | SNV | 1 | G | T | Homozygous   |
| NC_037644.1 | 12806941 | SNV | 1 | G | T | Heterozygous |
| NC_037644.1 | 12811817 | SNV | 1 | G | C | Homozygous   |
| NC_037644.1 | 12815404 | SNV | 1 | A | G | Homozygous   |
| NC_037644.1 | 12815422 | SNV | 1 | C | G | Homozygous   |
| NC_037644.1 | 12815426 | SNV | 1 | C | G | Homozygous   |
| NC_037644.1 | 12815444 | SNV | 1 | C | T | Heterozygous |
| NC_037644.1 | 12815460 | SNV | 1 | C | T | Homozygous   |
| NC_037644.1 | 12815485 | SNV | 1 | G | C | Homozygous   |

|             |          |     |   |   |   |              |
|-------------|----------|-----|---|---|---|--------------|
| NC_037644.1 | 12815489 | SNV | 1 | C | T | Heterozygous |
| NC_037644.1 | 12815495 | SNV | 1 | C | T | Homozygous   |
| NC_037644.1 | 12815499 | SNV | 1 | C | G | Heterozygous |
| NC_037644.1 | 12815501 | SNV | 1 | C | G | Heterozygous |
| NC_037644.1 | 12815510 | SNV | 1 | C | T | Homozygous   |
| NC_037644.1 | 12815529 | SNV | 1 | C | A | Homozygous   |
| NC_037644.1 | 12815531 | SNV | 1 | G | C | Homozygous   |
| NC_037644.1 | 12815537 | SNV | 1 | C | G | Homozygous   |
| NC_037644.1 | 12815549 | SNV | 1 | C | T | Homozygous   |
| NC_037644.1 | 12815559 | SNV | 1 | C | G | Homozygous   |
| NC_037644.1 | 12815569 | SNV | 1 | C | G | Homozygous   |
| NC_037644.1 | 12815585 | SNV | 1 | T | G | Heterozygous |
| NC_037644.1 | 12815589 | SNV | 1 | T | A | Heterozygous |
| NC_037644.1 | 12815590 | SNV | 1 | C | T | Heterozygous |
| NC_037644.1 | 12815591 | SNV | 1 | T | A | Heterozygous |
| NC_037644.1 | 12815593 | SNV | 1 | T | A | Heterozygous |
| NC_037644.1 | 12815642 | SNV | 1 | A | C | Heterozygous |
| NC_037644.1 | 12815644 | SNV | 1 | A | T | Homozygous   |
| NC_037644.1 | 12828885 | SNV | 1 | T | C | Homozygous   |
| NC_037644.1 | 12829001 | SNV | 1 | G | A | Homozygous   |
| NC_037644.1 | 12829154 | SNV | 1 | C | T | Homozygous   |
| NC_037644.1 | 12829269 | SNV | 1 | A | G | Homozygous   |
| NC_037644.1 | 12829271 | SNV | 1 | A | C | Homozygous   |
| NC_037644.1 | 12829359 | SNV | 1 | C | T | Homozygous   |
| NC_037644.1 | 12832050 | SNV | 1 | C | T | Heterozygous |
| NC_037644.1 | 12836182 | SNV | 1 | C | T | Heterozygous |
| NC_037644.1 | 12836233 | SNV | 1 | G | A | Homozygous   |
| NC_037644.1 | 12836236 | SNV | 1 | T | C | Heterozygous |
| NC_037644.1 | 12836517 | SNV | 1 | A | G | Heterozygous |
| NC_037644.1 | 12836603 | SNV | 1 | G | T | Heterozygous |
| NC_037644.1 | 12836782 | SNV | 1 | C | T | Homozygous   |
| NC_037644.1 | 12836788 | SNV | 1 | G | T | Heterozygous |
| NC_037644.1 | 12836791 | SNV | 1 | T | G | Heterozygous |
| NC_037644.1 | 12836793 | SNV | 1 | T | A | Heterozygous |
| NC_037644.1 | 12836797 | SNV | 1 | C | T | Heterozygous |
| NC_037644.1 | 12836802 | SNV | 1 | T | G | Heterozygous |
| NC_037644.1 | 12836822 | SNV | 1 | A | C | Homozygous   |
| NC_037644.1 | 12836887 | SNV | 1 | A | G | Heterozygous |
| NC_037644.1 | 12836982 | SNV | 1 | G | A | Heterozygous |
| NC_037644.1 | 12837098 | SNV | 1 | G | A | Heterozygous |
| NC_037644.1 | 12837270 | SNV | 1 | A | G | Homozygous   |
| NC_037644.1 | 12837337 | SNV | 1 | G | A | Heterozygous |
| NC_037644.1 | 12837351 | SNV | 1 | G | A | Heterozygous |
| NC_037644.1 | 12837614 | SNV | 1 | C | T | Homozygous   |
| NC_037644.1 | 12837777 | SNV | 1 | G | A | Heterozygous |
| NC_037644.1 | 12837847 | SNV | 1 | G | A | Homozygous   |
| NC_037644.1 | 12837875 | SNV | 1 | T | C | Homozygous   |
| NC_037644.1 | 12837990 | SNV | 1 | A | G | Homozygous   |
| NC_037644.1 | 12838288 | SNV | 1 | A | G | Homozygous   |
| NC_037644.1 | 12838361 | SNV | 1 | A | G | Homozygous   |
| NC_037644.1 | 12840946 | SNV | 1 | A | G | Homozygous   |



|             |          |     |   |   |   |              |
|-------------|----------|-----|---|---|---|--------------|
| NC_037644.1 | 12840952 | SNV | 1 | C | T | Heterozygous |
| NC_037644.1 | 12841677 | SNV | 1 | T | C | Homozygous   |
| NC_037644.1 | 12841681 | SNV | 1 | C | T | Homozygous   |
| NC_037644.1 | 12841686 | SNV | 1 | G | A | Heterozygous |
| NC_037644.1 | 12841704 | SNV | 1 | T | C | Homozygous   |
| NC_037644.1 | 12841812 | SNV | 1 | G | A | Homozygous   |
| NC_037644.1 | 12841815 | SNV | 1 | C | T | Heterozygous |
| NC_037644.1 | 12841839 | SNV | 1 | T | C | Homozygous   |
| NC_037644.1 | 12841842 | SNV | 1 | T | C | Homozygous   |
| NC_037644.1 | 12842006 | SNV | 1 | A | G | Heterozygous |
| NC_037644.1 | 12843805 | SNV | 1 | C | G | Heterozygous |
| NC_037644.1 | 12843885 | SNV | 1 | C | T | Homozygous   |
| NC_037644.1 | 12843940 | SNV | 1 | G | A | Heterozygous |
| NC_037644.1 | 12843988 | SNV | 1 | A | G | Homozygous   |
| NC_037644.1 | 12844161 | SNV | 1 | C | T | Heterozygous |
| NC_037644.1 | 12844166 | SNV | 1 | T | C | Homozygous   |
| NC_037644.1 | 12844388 | SNV | 1 | T | C | Homozygous   |
| NC_037644.1 | 12844802 | SNV | 1 | C | T | Heterozygous |
| NC_037644.1 | 12844842 | SNV | 1 | G | C | Homozygous   |
| NC_037644.1 | 12845023 | SNV | 1 | T | C | Heterozygous |
| NC_037644.1 | 12845178 | SNV | 1 | C | T | Heterozygous |
| NC_037644.1 | 12845567 | SNV | 1 | T | C | Heterozygous |
| NC_037644.1 | 12845583 | SNV | 1 | C | T | Heterozygous |
| NC_037644.1 | 12847404 | SNV | 1 | T | G | Heterozygous |
| NC_037644.1 | 12847461 | SNV | 1 | A | G | Homozygous   |
| NC_037644.1 | 12847771 | SNV | 1 | T | C | Homozygous   |
| NC_037644.1 | 12848159 | SNV | 1 | G | A | Heterozygous |
| NC_037644.1 | 12848195 | SNV | 1 | A | G | Heterozygous |
| NC_037644.1 | 12848705 | SNV | 1 | T | C | Homozygous   |
| NC_037644.1 | 12848738 | SNV | 1 | T | C | Homozygous   |
| NC_037644.1 | 12849022 | SNV | 1 | T | C | Heterozygous |
| NC_037644.1 | 12849076 | SNV | 1 | A | G | Heterozygous |
| NC_037644.1 | 12849625 | SNV | 1 | T | C | Heterozygous |
| NC_037644.1 | 12850026 | SNV | 1 | G | A | Heterozygous |
| NC_037644.1 | 12850146 | SNV | 1 | T | C | Homozygous   |
| NC_037644.1 | 12851114 | SNV | 1 | T | G | Homozygous   |
| NC_037644.1 | 12854883 | SNV | 1 | C | T | Homozygous   |
| NC_037644.1 | 12856494 | SNV | 1 | T | C | Heterozygous |
| NC_037644.1 | 12856554 | SNV | 1 | C | G | Homozygous   |
| NC_037644.1 | 12858121 | SNV | 1 | G | A | Heterozygous |
| NC_037644.1 | 12858527 | SNV | 1 | G | A | Heterozygous |
| NC_037644.1 | 12858769 | SNV | 1 | A | G | Homozygous   |
| NC_037644.1 | 12858813 | SNV | 1 | G | A | Heterozygous |
| NC_037644.1 | 12863233 | SNV | 1 | G | A | Heterozygous |
| NC_037644.1 | 12868552 | SNV | 1 | C | T | Heterozygous |
| NC_037644.1 | 12870003 | SNV | 1 | C | T | Homozygous   |
| NC_037644.1 | 12870006 | SNV | 1 | C | T | Homozygous   |
| NC_037644.1 | 12889864 | SNV | 1 | C | T | Heterozygous |
| NC_037644.1 | 12890043 | SNV | 1 | C | T | Heterozygous |
| NC_037644.1 | 12897666 | SNV | 1 | A | G | Homozygous   |
| NC_037644.1 | 12897697 | SNV | 1 | C | G | Homozygous   |

|             |          |     |   |   |   |              |
|-------------|----------|-----|---|---|---|--------------|
| NC_037644.1 | 12897758 | SNV | 1 | T | C | Homozygous   |
| NC_037644.1 | 12897798 | SNV | 1 | T | G | Heterozygous |
| NC_037644.1 | 12897814 | SNV | 1 | A | G | Homozygous   |
| NC_037644.1 | 12897824 | SNV | 1 | T | C | Heterozygous |
| NC_037644.1 | 12899465 | SNV | 1 | A | C | Homozygous   |
| NC_037644.1 | 12899573 | SNV | 1 | A | C | Homozygous   |
| NC_037644.1 | 12903090 | SNV | 1 | A | G | Homozygous   |
| NC_037644.1 | 12903111 | SNV | 1 | A | G | Heterozygous |
| NC_037644.1 | 12903138 | SNV | 1 | G | A | Homozygous   |
| NC_037644.1 | 12903183 | SNV | 1 | C | T | Heterozygous |
| NC_037644.1 | 12903191 | SNV | 1 | T | C | Homozygous   |
| NC_037644.1 | 12903228 | SNV | 1 | A | G | Homozygous   |
| NC_037644.1 | 12912783 | SNV | 1 | T | C | Heterozygous |
| NC_037644.1 | 12912849 | SNV | 1 | C | T | Homozygous   |
| NC_037644.1 | 12913256 | SNV | 1 | A | G | Homozygous   |
| NC_037644.1 | 12913385 | SNV | 1 | G | A | Homozygous   |
| NC_037644.1 | 12913438 | SNV | 1 | C | G | Homozygous   |
| NC_037644.1 | 12923750 | SNV | 1 | G | C | Homozygous   |
| NC_037644.1 | 12923786 | SNV | 1 | C | T | Homozygous   |
| NC_037644.1 | 12923836 | SNV | 1 | C | T | Homozygous   |
| NC_037644.1 | 12923844 | SNV | 1 | G | A | Homozygous   |
| NC_037644.1 | 12923962 | SNV | 1 | C | T | Homozygous   |
| NC_037644.1 | 12923993 | SNV | 1 | G | T | Homozygous   |
| NC_037644.1 | 12924023 | SNV | 1 | T | C | Homozygous   |
| NC_037644.1 | 12924050 | SNV | 1 | T | C | Homozygous   |
| NC_037644.1 | 12924065 | SNV | 1 | G | A | Heterozygous |
| NC_037644.1 | 12924125 | SNV | 1 | C | T | Homozygous   |
| NC_037644.1 | 12927738 | SNV | 1 | A | G | Heterozygous |
| NC_037644.1 | 12927748 | SNV | 1 | G | T | Heterozygous |
| NC_037644.1 | 12927752 | SNV | 1 | A | T | Heterozygous |
| NC_037644.1 | 12927777 | SNV | 1 | A | T | Heterozygous |
| NC_037644.1 | 12927786 | SNV | 1 | A | G | Homozygous   |
| NC_037644.1 | 12927790 | SNV | 1 | A | G | Homozygous   |
| NC_037644.1 | 12929356 | SNV | 1 | T | G | Heterozygous |
| NC_037644.1 | 12940923 | SNV | 1 | T | C | Heterozygous |
| NC_037644.1 | 12940989 | SNV | 1 | C | T | Homozygous   |
| NC_037644.1 | 12945759 | SNV | 1 | G | A | Heterozygous |
| NC_037644.1 | 12947283 | SNV | 1 | G | T | Homozygous   |
| NC_037644.1 | 12947310 | SNV | 1 | A | G | Homozygous   |
| NC_037644.1 | 12947382 | SNV | 1 | T | G | Homozygous   |
| NC_037644.1 | 12947384 | SNV | 1 | A | T | Homozygous   |
| NC_037644.1 | 12947389 | SNV | 1 | T | G | Homozygous   |
| NC_037644.1 | 12947404 | SNV | 1 | A | G | Homozygous   |
| NC_037644.1 | 12947407 | SNV | 1 | T | A | Heterozygous |
| NC_037644.1 | 12948403 | SNV | 1 | G | A | Homozygous   |
| NC_037644.1 | 12948420 | SNV | 1 | C | T | Homozygous   |
| NC_037644.1 | 12948427 | SNV | 1 | A | T | Heterozygous |
| NC_037644.1 | 12948574 | SNV | 1 | G | A | Homozygous   |
| NC_037644.1 | 12948581 | SNV | 1 | T | A | Homozygous   |
| NC_037644.1 | 12948665 | SNV | 1 | T | A | Homozygous   |
| NC_037644.1 | 12948668 | SNV | 1 | A | G | Heterozygous |

|             |          |     |   |   |   |              |
|-------------|----------|-----|---|---|---|--------------|
| NC_037644.1 | 12948677 | SNV | 1 | G | A | Homozygous   |
| NC_037644.1 | 12969257 | SNV | 1 | C | T | Heterozygous |
| NC_037644.1 | 12970071 | SNV | 1 | G | A | Homozygous   |
| NC_037644.1 | 12970074 | SNV | 1 | A | G | Heterozygous |
| NC_037644.1 | 12996958 | SNV | 1 | T | C | Homozygous   |
| NC_037644.1 | 13015600 | SNV | 1 | G | A | Heterozygous |
| NC_037644.1 | 13015663 | SNV | 1 | G | A | Heterozygous |
| NC_037644.1 | 13015666 | SNV | 1 | G | A | Heterozygous |
| NC_037644.1 | 13015669 | SNV | 1 | G | A | Heterozygous |
| NC_037644.1 | 13015672 | SNV | 1 | G | A | Heterozygous |
| NC_037644.1 | 13015940 | SNV | 1 | G | A | Heterozygous |
| NC_037644.1 | 13029700 | SNV | 1 | C | A | Heterozygous |
| NC_037644.1 | 13042556 | SNV | 1 | A | G | Homozygous   |
| NC_037644.1 | 13042563 | SNV | 1 | C | T | Homozygous   |
| NC_037644.1 | 13042566 | SNV | 1 | C | T | Homozygous   |
| NC_037644.1 | 13042578 | SNV | 1 | T | C | Homozygous   |
| NC_037644.1 | 13042581 | SNV | 1 | T | C | Homozygous   |
| NC_037644.1 | 13050030 | SNV | 1 | G | A | Heterozygous |
| NC_037644.1 | 13050032 | SNV | 1 | G | A | Heterozygous |
| NC_037644.1 | 13050037 | SNV | 1 | C | T | Heterozygous |
| NC_037644.1 | 13050041 | SNV | 1 | A | G | Heterozygous |
| NC_037644.1 | 13050075 | SNV | 1 | A | G | Heterozygous |
| NC_037644.1 | 13050093 | SNV | 1 | C | T | Heterozygous |
| NC_037644.1 | 13050135 | SNV | 1 | A | G | Homozygous   |
| NC_037644.1 | 13051902 | SNV | 1 | T | C | Homozygous   |
| NC_037644.1 | 13051947 | SNV | 1 | C | T | Homozygous   |
| NC_037644.1 | 13069468 | SNV | 1 | C | T | Homozygous   |
| NC_037644.1 | 13069691 | SNV | 1 | A | G | Homozygous   |
| NC_037644.1 | 13069731 | SNV | 1 | A | G | Homozygous   |
| NC_037644.1 | 13069750 | SNV | 1 | T | C | Homozygous   |
| NC_037644.1 | 13069752 | SNV | 1 | A | G | Homozygous   |
| NC_037644.1 | 13069821 | SNV | 1 | G | A | Heterozygous |
| NC_037644.1 | 13069874 | SNV | 1 | G | C | Heterozygous |
| NC_037644.1 | 13069881 | SNV | 1 | G | T | Heterozygous |
| NC_037644.1 | 13070103 | SNV | 1 | G | A | Homozygous   |
| NC_037644.1 | 13070111 | SNV | 1 | G | A | Homozygous   |
| NC_037644.1 | 13073729 | SNV | 1 | T | C | Homozygous   |
| NC_037644.1 | 13073771 | SNV | 1 | A | G | Homozygous   |
| NC_037644.1 | 13073939 | SNV | 1 | G | A | Heterozygous |
| NC_037644.1 | 13073972 | SNV | 1 | T | C | Homozygous   |
| NC_037644.1 | 13074058 | SNV | 1 | G | A | Homozygous   |
| NC_037644.1 | 13074062 | SNV | 1 | G | A | Homozygous   |
| NC_037644.1 | 13092107 | SNV | 1 | T | C | Homozygous   |
| NC_037644.1 | 13093334 | SNV | 1 | A | G | Homozygous   |
| NC_037644.1 | 13095726 | SNV | 1 | A | G | Heterozygous |
| NC_037644.1 | 13095922 | SNV | 1 | C | T | Heterozygous |
| NC_037644.1 | 13095933 | SNV | 1 | T | C | Homozygous   |
| NC_037644.1 | 13095941 | SNV | 1 | C | T | Heterozygous |
| NC_037644.1 | 13096129 | SNV | 1 | C | G | Heterozygous |
| NC_037644.1 | 13096162 | SNV | 1 | G | A | Heterozygous |
| NC_037644.1 | 13096195 | SNV | 1 | C | T | Homozygous   |

|             |          |     |   |   |   |              |
|-------------|----------|-----|---|---|---|--------------|
| NC_037644.1 | 13096223 | SNV | 1 | A | G | Heterozygous |
| NC_037644.1 | 13096248 | SNV | 1 | T | C | Homozygous   |
| NC_037644.1 | 13096252 | SNV | 1 | A | G | Homozygous   |
| NC_037644.1 | 13097193 | SNV | 1 | A | G | Homozygous   |
| NC_037644.1 | 13097376 | SNV | 1 | G | A | Heterozygous |
| NC_037644.1 | 13097417 | SNV | 1 | A | G | Heterozygous |
| NC_037644.1 | 13097430 | SNV | 1 | G | A | Heterozygous |
| NC_037644.1 | 13097440 | SNV | 1 | G | A | Homozygous   |
| NC_037644.1 | 13097584 | SNV | 1 | T | C | Heterozygous |
| NC_037644.1 | 13097585 | SNV | 1 | G | A | Heterozygous |
| NC_037644.1 | 13097592 | SNV | 1 | C | T | Heterozygous |
| NC_037644.1 | 13097598 | SNV | 1 | C | T | Heterozygous |
| NC_037644.1 | 13097927 | SNV | 1 | A | G | Homozygous   |
| NC_037644.1 | 13098083 | SNV | 1 | T | A | Homozygous   |
| NC_037644.1 | 13098104 | SNV | 1 | T | A | Heterozygous |
| NC_037644.1 | 13098238 | SNV | 1 | C | A | Heterozygous |
| NC_037644.1 | 13098324 | SNV | 1 | G | C | Homozygous   |
| NC_037644.1 | 13100027 | SNV | 1 | A | T | Heterozygous |
| NC_037644.1 | 13100038 | SNV | 1 | A | G | Homozygous   |
| NC_037644.1 | 13100294 | SNV | 1 | A | G | Heterozygous |
| NC_037644.1 | 13100313 | SNV | 1 | A | G | Homozygous   |
| NC_037644.1 | 13100473 | SNV | 1 | C | G | Heterozygous |
| NC_037644.1 | 13100585 | SNV | 1 | C | T | Homozygous   |
| NC_037644.1 | 13100605 | SNV | 1 | A | G | Homozygous   |
| NC_037644.1 | 13106492 | SNV | 1 | C | G | Homozygous   |
| NC_037644.1 | 13110917 | SNV | 1 | T | C | Heterozygous |
| NC_037644.1 | 13110931 | SNV | 1 | C | T | Heterozygous |
| NC_037644.1 | 13110938 | SNV | 1 | T | C | Heterozygous |
| NC_037644.1 | 13110955 | SNV | 1 | C | T | Homozygous   |
| NC_037644.1 | 13118090 | SNV | 1 | T | A | Heterozygous |
| NC_037644.1 | 13118226 | SNV | 1 | G | A | Heterozygous |
| NC_037644.1 | 13118426 | SNV | 1 | T | C | Homozygous   |
| NC_037644.1 | 13118464 | SNV | 1 | C | A | Heterozygous |
| NC_037644.1 | 13118476 | SNV | 1 | A | G | Homozygous   |
| NC_037644.1 | 13118510 | SNV | 1 | G | A | Heterozygous |
| NC_037644.1 | 13118561 | SNV | 1 | C | T | Heterozygous |
| NC_037644.1 | 13118567 | SNV | 1 | A | G | Heterozygous |
| NC_037644.1 | 13118588 | SNV | 1 | A | G | Homozygous   |
| NC_037644.1 | 13118592 | SNV | 1 | G | A | Homozygous   |
| NC_037644.1 | 13118606 | SNV | 1 | A | G | Homozygous   |
| NC_037644.1 | 13118608 | SNV | 1 | G | A | Homozygous   |
| NC_037644.1 | 13124874 | SNV | 1 | A | G | Homozygous   |
| NC_037644.1 | 13125007 | SNV | 1 | T | C | Homozygous   |
| NC_037644.1 | 13125027 | SNV | 1 | T | C | Homozygous   |
| NC_037644.1 | 13125156 | SNV | 1 | A | G | Heterozygous |
| NC_037644.1 | 13125160 | SNV | 1 | C | T | Heterozygous |
| NC_037644.1 | 13125194 | SNV | 1 | T | C | Homozygous   |
| NC_037644.1 | 13125261 | SNV | 1 | A | G | Homozygous   |
| NC_037644.1 | 13125303 | SNV | 1 | C | T | Heterozygous |
| NC_037644.1 | 13125310 | SNV | 1 | A | G | Heterozygous |
| NC_037644.1 | 13125322 | SNV | 1 | G | C | Heterozygous |

|             |          |     |   |   |   |              |
|-------------|----------|-----|---|---|---|--------------|
| NC_037644.1 | 13125349 | SNV | 1 | T | G | Homozygous   |
| NC_037644.1 | 13125355 | SNV | 1 | C | G | Homozygous   |
| NC_037644.1 | 13125361 | SNV | 1 | T | G | Homozygous   |
| NC_037644.1 | 13125367 | SNV | 1 | G | A | Heterozygous |
| NC_037644.1 | 13125370 | SNV | 1 | T | A | Homozygous   |
| NC_037644.1 | 13125375 | SNV | 1 | A | G | Heterozygous |
| NC_037644.1 | 13125391 | SNV | 1 | G | A | Heterozygous |
| NC_037644.1 | 13125427 | SNV | 1 | T | G | Homozygous   |
| NC_037644.1 | 13125462 | SNV | 1 | G | A | Homozygous   |
| NC_037644.1 | 13125465 | SNV | 1 | G | A | Heterozygous |
| NC_037644.1 | 13125478 | SNV | 1 | G | A | Heterozygous |
| NC_037644.1 | 13125481 | SNV | 1 | G | A | Heterozygous |
| NC_037644.1 | 13125484 | SNV | 1 | A | C | Homozygous   |
| NC_037644.1 | 13125508 | SNV | 1 | T | G | Homozygous   |
| NC_037644.1 | 13125540 | SNV | 1 | G | A | Homozygous   |
| NC_037644.1 | 13125555 | SNV | 1 | A | G | Heterozygous |
| NC_037644.1 | 13125558 | SNV | 1 | G | A | Heterozygous |
| NC_037644.1 | 13125579 | SNV | 1 | A | G | Heterozygous |
| NC_037644.1 | 13125610 | SNV | 1 | A | G | Heterozygous |
| NC_037644.1 | 13125613 | SNV | 1 | A | G | Heterozygous |
| NC_037644.1 | 13125621 | SNV | 1 | G | A | Heterozygous |
| NC_037644.1 | 13125754 | SNV | 1 | A | G | Homozygous   |
| NC_037644.1 | 13126008 | SNV | 1 | G | A | Heterozygous |
| NC_037644.1 | 13143637 | SNV | 1 | G | A | Homozygous   |
| NC_037644.1 | 13143826 | SNV | 1 | A | G | Homozygous   |
| NC_037644.1 | 13143836 | SNV | 1 | G | A | Homozygous   |
| NC_037644.1 | 13143924 | SNV | 1 | T | C | Homozygous   |
| NC_037644.1 | 13144056 | SNV | 1 | G | A | Heterozygous |
| NC_037644.1 | 13148344 | SNV | 1 | C | T | Heterozygous |
| NC_037644.1 | 13148379 | SNV | 1 | T | C | Homozygous   |
| NC_037644.1 | 13149375 | SNV | 1 | G | A | Homozygous   |
| NC_037644.1 | 13149394 | SNV | 1 | A | C | Heterozygous |
| NC_037644.1 | 13149398 | SNV | 1 | A | C | Heterozygous |
| NC_037644.1 | 13149405 | SNV | 1 | A | C | Homozygous   |
| NC_037644.1 | 13149538 | SNV | 1 | A | G | Heterozygous |
| NC_037644.1 | 13149549 | SNV | 1 | G | A | Heterozygous |
| NC_037644.1 | 13149938 | SNV | 1 | G | A | Homozygous   |
| NC_037644.1 | 13149963 | SNV | 1 | C | G | Heterozygous |
| NC_037644.1 | 13163957 | SNV | 1 | A | G | Homozygous   |
| NC_037644.1 | 13163964 | SNV | 1 | C | T | Homozygous   |
| NC_037644.1 | 13163995 | SNV | 1 | C | A | Homozygous   |
| NC_037644.1 | 13180774 | SNV | 1 | C | G | Homozygous   |
| NC_037644.1 | 13180776 | SNV | 1 | C | T | Homozygous   |
| NC_037644.1 | 13180788 | SNV | 1 | A | C | Homozygous   |
| NC_037644.1 | 13180795 | SNV | 1 | A | T | Homozygous   |
| NC_037644.1 | 13180798 | SNV | 1 | A | C | Homozygous   |
| NC_037644.1 | 13181160 | SNV | 1 | G | A | Homozygous   |
| NC_037644.1 | 13189355 | SNV | 1 | C | T | Homozygous   |
| NC_037644.1 | 13189419 | SNV | 1 | C | G | Homozygous   |
| NC_037644.1 | 13189426 | SNV | 1 | A | G | Homozygous   |
| NC_037644.1 | 13189457 | SNV | 1 | C | T | Homozygous   |

|             |          |     |   |   |   |              |
|-------------|----------|-----|---|---|---|--------------|
| NC_037644.1 | 13189804 | SNV | 1 | A | G | Homozygous   |
| NC_037644.1 | 13189978 | SNV | 1 | T | C | Homozygous   |
| NC_037644.1 | 13195919 | SNV | 1 | T | A | Homozygous   |
| NC_037644.1 | 13195951 | SNV | 1 | T | G | Homozygous   |
| NC_037644.1 | 13196082 | SNV | 1 | T | A | Homozygous   |
| NC_037644.1 | 13196084 | SNV | 1 | C | G | Homozygous   |
| NC_037644.1 | 13196144 | SNV | 1 | C | T | Heterozygous |
| NC_037644.1 | 13196193 | SNV | 1 | T | G | Heterozygous |
| NC_037644.1 | 13196367 | SNV | 1 | G | A | Heterozygous |
| NC_037644.1 | 13203027 | SNV | 1 | G | A | Homozygous   |
| NC_037644.1 | 13231725 | SNV | 1 | T | C | Homozygous   |
| NC_037644.1 | 13231761 | SNV | 1 | A | G | Homozygous   |
| NC_037644.1 | 13231763 | SNV | 1 | C | G | Homozygous   |
| NC_037644.1 | 13231772 | SNV | 1 | A | G | Homozygous   |
| NC_037644.1 | 13231782 | SNV | 1 | G | A | Heterozygous |
| NC_037644.1 | 13231816 | SNV | 1 | A | G | Heterozygous |
| NC_037644.1 | 13231832 | SNV | 1 | G | A | Homozygous   |
| NC_037644.1 | 13231845 | SNV | 1 | C | T | Heterozygous |
| NC_037644.1 | 13231867 | SNV | 1 | A | G | Heterozygous |
| NC_037644.1 | 13231908 | SNV | 1 | A | G | Homozygous   |
| NC_037644.1 | 13231916 | SNV | 1 | A | C | Heterozygous |
| NC_037644.1 | 13231924 | SNV | 1 | C | A | Heterozygous |
| NC_037644.1 | 13231932 | SNV | 1 | A | T | Heterozygous |
| NC_037644.1 | 13236824 | SNV | 1 | C | T | Homozygous   |
| NC_037644.1 | 13261117 | SNV | 1 | G | A | Heterozygous |
| NC_037644.1 | 13270199 | SNV | 1 | A | G | Homozygous   |
| NC_037644.1 | 13270203 | SNV | 1 | A | G | Homozygous   |
| NC_037644.1 | 13270212 | SNV | 1 | A | G | Homozygous   |
| NC_037644.1 | 13270298 | SNV | 1 | G | A | Heterozygous |
| NC_037644.1 | 13270301 | SNV | 1 | G | A | Homozygous   |
| NC_037644.1 | 13270431 | SNV | 1 | G | A | Heterozygous |
| NC_037644.1 | 13270510 | SNV | 1 | A | G | Homozygous   |
| NC_037644.1 | 13270527 | SNV | 1 | G | T | Heterozygous |
| NC_037644.1 | 13270645 | SNV | 1 | A | G | Homozygous   |
| NC_037644.1 | 13270779 | SNV | 1 | T | C | Homozygous   |
| NC_037644.1 | 13270824 | SNV | 1 | G | A | Heterozygous |
| NC_037644.1 | 13270891 | SNV | 1 | A | G | Heterozygous |
| NC_037644.1 | 13270902 | SNV | 1 | G | A | Heterozygous |
| NC_037644.1 | 13270923 | SNV | 1 | G | A | Heterozygous |
| NC_037644.1 | 13270985 | SNV | 1 | G | A | Heterozygous |
| NC_037644.1 | 13271091 | SNV | 1 | A | G | Heterozygous |
| NC_037644.1 | 13271100 | SNV | 1 | A | G | Heterozygous |
| NC_037644.1 | 13271203 | SNV | 1 | T | C | Homozygous   |
| NC_037644.1 | 13271279 | SNV | 1 | A | T | Homozygous   |
| NC_037644.1 | 13271309 | SNV | 1 | G | A | Heterozygous |
| NC_037644.1 | 13271323 | SNV | 1 | G | A | Homozygous   |
| NC_037644.1 | 13271328 | SNV | 1 | G | A | Homozygous   |
| NC_037644.1 | 13271368 | SNV | 1 | A | G | Homozygous   |
| NC_037644.1 | 13271412 | SNV | 1 | T | C | Homozygous   |
| NC_037644.1 | 13271433 | SNV | 1 | T | C | Homozygous   |
| NC_037644.1 | 13271592 | SNV | 1 | T | C | Homozygous   |

|             |          |     |   |   |   |              |
|-------------|----------|-----|---|---|---|--------------|
| NC_037644.1 | 13271606 | SNV | 1 | C | T | Heterozygous |
| NC_037644.1 | 13274018 | SNV | 1 | G | T | Heterozygous |
| NC_037644.1 | 13282853 | SNV | 1 | T | C | Homozygous   |
| NC_037644.1 | 13282959 | SNV | 1 | T | G | Heterozygous |
| NC_037644.1 | 13282961 | SNV | 1 | G | C | Heterozygous |
| NC_037644.1 | 13282971 | SNV | 1 | A | G | Heterozygous |
| NC_037644.1 | 13282972 | SNV | 1 | A | G | Heterozygous |
| NC_037644.1 | 13282982 | SNV | 1 | A | G | Heterozygous |
| NC_037644.1 | 13283095 | SNV | 1 | A | G | Homozygous   |
| NC_037644.1 | 13283099 | SNV | 1 | A | G | Homozygous   |
| NC_037644.1 | 13283235 | SNV | 1 | G | A | Heterozygous |
| NC_037644.1 | 13283259 | SNV | 1 | A | G | Heterozygous |
| NC_037644.1 | 13283349 | SNV | 1 | A | C | Homozygous   |
| NC_037644.1 | 13283536 | SNV | 1 | T | C | Heterozygous |
| NC_037644.1 | 13283581 | SNV | 1 | T | C | Homozygous   |
| NC_037644.1 | 13283619 | SNV | 1 | T | C | Homozygous   |
| NC_037644.1 | 13283651 | SNV | 1 | T | C | Heterozygous |
| NC_037644.1 | 13283677 | SNV | 1 | A | G | Heterozygous |
| NC_037644.1 | 13283685 | SNV | 1 | A | G | Homozygous   |
| NC_037644.1 | 13283725 | SNV | 1 | T | C | Homozygous   |
| NC_037644.1 | 13380847 | SNV | 1 | G | A | Homozygous   |
| NC_037644.1 | 13380866 | SNV | 1 | G | A | Homozygous   |
| NC_037644.1 | 13380871 | SNV | 1 | T | C | Homozygous   |
| NC_037644.1 | 13380879 | SNV | 1 | C | T | Homozygous   |
| NC_037644.1 | 13380944 | SNV | 1 | T | A | Homozygous   |
| NC_037644.1 | 13380948 | SNV | 1 | T | A | Homozygous   |
| NC_037644.1 | 13380961 | SNV | 1 | T | C | Homozygous   |
| NC_037644.1 | 13380965 | SNV | 1 | G | A | Homozygous   |
| NC_037644.1 | 13380987 | SNV | 1 | A | C | Homozygous   |
| NC_037644.1 | 13381006 | SNV | 1 | T | C | Homozygous   |
| NC_037644.1 | 13381015 | SNV | 1 | G | C | Homozygous   |
| NC_037644.1 | 13381019 | SNV | 1 | C | T | Heterozygous |
| NC_037644.1 | 13381161 | SNV | 1 | G | A | Homozygous   |
| NC_037644.1 | 13381185 | SNV | 1 | C | T | Homozygous   |
| NC_037644.1 | 13388489 | SNV | 1 | A | G | Heterozygous |
| NC_037644.1 | 13388528 | SNV | 1 | A | G | Homozygous   |
| NC_037644.1 | 13389459 | SNV | 1 | C | A | Homozygous   |
| NC_037644.1 | 13393841 | SNV | 1 | T | C | Homozygous   |
| NC_037644.1 | 13393843 | SNV | 1 | G | A | Homozygous   |
| NC_037644.1 | 13394290 | SNV | 1 | A | G | Homozygous   |
| NC_037644.1 | 13394807 | SNV | 1 | A | G | Heterozygous |
| NC_037644.1 | 13396086 | SNV | 1 | C | T | Heterozygous |
| NC_037644.1 | 13396186 | SNV | 1 | T | A | Homozygous   |
| NC_037644.1 | 13396542 | SNV | 1 | G | A | Homozygous   |
| NC_037644.1 | 13399206 | SNV | 1 | T | C | Homozygous   |
| NC_037644.1 | 13400640 | SNV | 1 | G | A | Homozygous   |
| NC_037644.1 | 13401923 | SNV | 1 | A | C | Homozygous   |
| NC_037644.1 | 13402010 | SNV | 1 | A | T | Homozygous   |
| NC_037644.1 | 13402158 | SNV | 1 | T | G | Homozygous   |
| NC_037644.1 | 13402262 | SNV | 1 | T | A | Homozygous   |
| NC_037644.1 | 13403519 | SNV | 1 | C | A | Homozygous   |

|             |          |     |   |   |   |              |
|-------------|----------|-----|---|---|---|--------------|
| NC_037644.1 | 13403684 | SNV | 1 | G | A | Heterozygous |
| NC_037644.1 | 13404619 | SNV | 1 | G | C | Homozygous   |
| NC_037644.1 | 13410982 | SNV | 1 | A | G | Heterozygous |
| NC_037644.1 | 13412858 | SNV | 1 | A | G | Homozygous   |
| NC_037644.1 | 13413356 | SNV | 1 | G | A | Homozygous   |
| NC_037644.1 | 13413693 | SNV | 1 | G | A | Heterozygous |
| NC_037644.1 | 13413884 | SNV | 1 | A | G | Homozygous   |
| NC_037644.1 | 13414410 | SNV | 1 | T | C | Heterozygous |
| NC_037644.1 | 13416835 | SNV | 1 | C | G | Heterozygous |
| NC_037644.1 | 13419586 | SNV | 1 | T | C | Homozygous   |
| NC_037644.1 | 13419857 | SNV | 1 | G | A | Heterozygous |
| NC_037644.1 | 13420051 | SNV | 1 | T | C | Homozygous   |
| NC_037644.1 | 13421186 | SNV | 1 | T | C | Homozygous   |
| NC_037644.1 | 13421577 | SNV | 1 | T | C | Homozygous   |
| NC_037644.1 | 13421807 | SNV | 1 | C | T | Homozygous   |
| NC_037644.1 | 13427451 | SNV | 1 | T | A | Homozygous   |
| NC_037644.1 | 13427468 | SNV | 1 | T | A | Homozygous   |
| NC_037644.1 | 13427636 | SNV | 1 | C | T | Homozygous   |
| NC_037644.1 | 13427652 | SNV | 1 | A | G | Homozygous   |
| NC_037644.1 | 13437861 | SNV | 1 | T | A | Homozygous   |
| NC_037644.1 | 13443328 | SNV | 1 | G | A | Homozygous   |
| NC_037644.1 | 13443391 | SNV | 1 | T | G | Homozygous   |
| NC_037644.1 | 13443541 | SNV | 1 | A | G | Heterozygous |
| NC_037644.1 | 13443686 | SNV | 1 | G | A | Heterozygous |
| NC_037644.1 | 13443727 | SNV | 1 | A | G | Heterozygous |
| NC_037644.1 | 13443729 | SNV | 1 | C | G | Heterozygous |
| NC_037644.1 | 13444367 | SNV | 1 | T | C | Homozygous   |
| NC_037644.1 | 13444379 | SNV | 1 | T | C | Homozygous   |
| NC_037644.1 | 13444390 | SNV | 1 | G | C | Homozygous   |
| NC_037644.1 | 13444676 | SNV | 1 | A | G | Homozygous   |
| NC_037644.1 | 13444721 | SNV | 1 | A | G | Heterozygous |
| NC_037644.1 | 13444748 | SNV | 1 | G | A | Homozygous   |
| NC_037644.1 | 13444754 | SNV | 1 | G | A | Homozygous   |
| NC_037644.1 | 13444757 | SNV | 1 | A | G | Homozygous   |
| NC_037644.1 | 13444763 | SNV | 1 | G | A | Heterozygous |
| NC_037644.1 | 13444768 | SNV | 1 | G | A | Heterozygous |
| NC_037644.1 | 13444850 | SNV | 1 | A | G | Homozygous   |
| NC_037644.1 | 13444862 | SNV | 1 | T | G | Heterozygous |
| NC_037644.1 | 13444880 | SNV | 1 | G | A | Heterozygous |
| NC_037644.1 | 13444885 | SNV | 1 | C | G | Heterozygous |
| NC_037644.1 | 13446506 | SNV | 1 | A | T | Heterozygous |
| NC_037644.1 | 13446515 | SNV | 1 | T | A | Heterozygous |
| NC_037644.1 | 13448109 | SNV | 1 | A | C | Heterozygous |
| NC_037644.1 | 13448112 | SNV | 1 | G | A | Heterozygous |
| NC_037644.1 | 13453398 | SNV | 1 | T | G | Homozygous   |
| NC_037644.1 | 13455164 | SNV | 1 | G | A | Heterozygous |
| NC_037644.1 | 13455185 | SNV | 1 | G | A | Heterozygous |
| NC_037644.1 | 13455188 | SNV | 1 | C | T | Homozygous   |
| NC_037644.1 | 13455201 | SNV | 1 | G | A | Homozygous   |
| NC_037644.1 | 13455218 | SNV | 1 | C | T | Homozygous   |
| NC_037644.1 | 13455244 | SNV | 1 | G | A | Homozygous   |



|             |          |     |   |   |   |              |
|-------------|----------|-----|---|---|---|--------------|
| NC_037644.1 | 13455369 | SNV | 1 | A | G | Homozygous   |
| NC_037644.1 | 13455371 | SNV | 1 | A | G | Homozygous   |
| NC_037644.1 | 13464122 | SNV | 1 | T | C | Heterozygous |
| NC_037644.1 | 13464130 | SNV | 1 | C | T | Heterozygous |
| NC_037644.1 | 13464433 | SNV | 1 | C | A | Homozygous   |
| NC_037644.1 | 13464436 | SNV | 1 | G | T | Homozygous   |
| NC_037644.1 | 13466011 | SNV | 1 | A | G | Homozygous   |
| NC_037644.1 | 13466320 | SNV | 1 | G | C | Homozygous   |
| NC_037644.1 | 13466433 | SNV | 1 | A | G | Homozygous   |
| NC_037644.1 | 13466614 | SNV | 1 | T | C | Homozygous   |
| NC_037644.1 | 13470542 | SNV | 1 | G | A | Heterozygous |
| NC_037644.1 | 13470947 | SNV | 1 | G | C | Homozygous   |
| NC_037644.1 | 13470952 | SNV | 1 | A | G | Homozygous   |
| NC_037644.1 | 13471504 | SNV | 1 | A | G | Homozygous   |
| NC_037644.1 | 13474525 | SNV | 1 | C | T | Heterozygous |
| NC_037644.1 | 13476297 | SNV | 1 | T | G | Homozygous   |
| NC_037644.1 | 13476510 | SNV | 1 | C | T | Homozygous   |
| NC_037644.1 | 13479608 | SNV | 1 | C | T | Heterozygous |
| NC_037644.1 | 13479656 | SNV | 1 | G | A | Homozygous   |
| NC_037644.1 | 13479660 | SNV | 1 | T | A | Homozygous   |
| NC_037644.1 | 13480244 | SNV | 1 | G | A | Heterozygous |
| NC_037644.1 | 13480334 | SNV | 1 | A | T | Homozygous   |
| NC_037644.1 | 13481194 | SNV | 1 | C | T | Heterozygous |
| NC_037644.1 | 13481452 | SNV | 1 | A | G | Homozygous   |
| NC_037644.1 | 13487895 | SNV | 1 | T | C | Homozygous   |
| NC_037644.1 | 13488165 | SNV | 1 | G | A | Heterozygous |
| NC_037644.1 | 13488174 | SNV | 1 | T | C | Heterozygous |
| NC_037644.1 | 13488226 | SNV | 1 | C | T | Homozygous   |
| NC_037644.1 | 13488304 | SNV | 1 | G | A | Homozygous   |
| NC_037644.1 | 13490455 | SNV | 1 | A | G | Heterozygous |
| NC_037644.1 | 13490614 | SNV | 1 | G | A | Heterozygous |
| NC_037644.1 | 13490752 | SNV | 1 | T | A | Homozygous   |
| NC_037644.1 | 13491124 | SNV | 1 | A | G | Heterozygous |
| NC_037644.1 | 13491601 | SNV | 1 | A | G | Homozygous   |
| NC_037644.1 | 13491631 | SNV | 1 | T | G | Heterozygous |
| NC_037644.1 | 13492716 | SNV | 1 | A | G | Homozygous   |
| NC_037644.1 | 13492844 | SNV | 1 | A | G | Homozygous   |
| NC_037644.1 | 13492981 | SNV | 1 | A | G | Heterozygous |
| NC_037644.1 | 13493369 | SNV | 1 | T | C | Homozygous   |
| NC_037644.1 | 13493765 | SNV | 1 | A | G | Homozygous   |
| NC_037644.1 | 13493816 | SNV | 1 | A | G | Heterozygous |
| NC_037644.1 | 13493821 | SNV | 1 | C | G | Heterozygous |
| NC_037644.1 | 13493838 | SNV | 1 | T | C | Heterozygous |
| NC_037644.1 | 13493897 | SNV | 1 | G | A | Heterozygous |
| NC_037644.1 | 13494840 | SNV | 1 | A | G | Heterozygous |
| NC_037644.1 | 13497364 | SNV | 1 | G | A | Heterozygous |
| NC_037644.1 | 13497524 | SNV | 1 | A | G | Homozygous   |
| NC_037644.1 | 13498539 | SNV | 1 | C | T | Heterozygous |
| NC_037644.1 | 13500360 | SNV | 1 | G | A | Heterozygous |
| NC_037644.1 | 13501251 | SNV | 1 | C | T | Heterozygous |
| NC_037644.1 | 13501337 | SNV | 1 | T | G | Homozygous   |

|             |          |     |   |   |   |              |
|-------------|----------|-----|---|---|---|--------------|
| NC_037644.1 | 13501987 | SNV | 1 | T | C | Homozygous   |
| NC_037644.1 | 13509893 | SNV | 1 | A | G | Homozygous   |
| NC_037644.1 | 13510691 | SNV | 1 | G | A | Homozygous   |
| NC_037644.1 | 13511238 | SNV | 1 | G | A | Heterozygous |
| NC_037644.1 | 13512506 | SNV | 1 | A | G | Homozygous   |
| NC_037644.1 | 13512881 | SNV | 1 | C | A | Heterozygous |
| NC_037644.1 | 13512888 | SNV | 1 | C | A | Heterozygous |
| NC_037644.1 | 13512893 | SNV | 1 | C | A | Heterozygous |
| NC_037644.1 | 13512914 | SNV | 1 | G | A | Heterozygous |
| NC_037644.1 | 13512917 | SNV | 1 | T | A | Heterozygous |
| NC_037644.1 | 13512920 | SNV | 1 | G | A | Homozygous   |
| NC_037644.1 | 13514129 | SNV | 1 | G | A | Heterozygous |
| NC_037644.1 | 13517546 | SNV | 1 | T | C | Homozygous   |
| NC_037644.1 | 13517932 | SNV | 1 | T | C | Homozygous   |
| NC_037644.1 | 13518105 | SNV | 1 | T | A | Heterozygous |
| NC_037644.1 | 13518159 | SNV | 1 | G | A | Heterozygous |
| NC_037644.1 | 13518327 | SNV | 1 | G | A | Heterozygous |
| NC_037644.1 | 13518771 | SNV | 1 | A | G | Homozygous   |
| NC_037644.1 | 13518975 | SNV | 1 | A | G | Heterozygous |
| NC_037644.1 | 13519005 | SNV | 1 | C | G | Homozygous   |
| NC_037644.1 | 13519449 | SNV | 1 | G | C | Heterozygous |
| NC_037644.1 | 13519471 | SNV | 1 | T | C | Homozygous   |
| NC_037644.1 | 13519609 | SNV | 1 | C | G | Homozygous   |
| NC_037644.1 | 13519685 | SNV | 1 | T | C | Homozygous   |
| NC_037644.1 | 13519799 | SNV | 1 | C | G | Heterozygous |
| NC_037644.1 | 13520220 | SNV | 1 | A | G | Homozygous   |
| NC_037644.1 | 13520505 | SNV | 1 | T | C | Homozygous   |
| NC_037644.1 | 13521204 | SNV | 1 | C | T | Heterozygous |
| NC_037644.1 | 13521222 | SNV | 1 | T | C | Heterozygous |
| NC_037644.1 | 13524261 | SNV | 1 | G | T | Homozygous   |
| NC_037644.1 | 13524370 | SNV | 1 | T | C | Homozygous   |
| NC_037644.1 | 13524458 | SNV | 1 | T | C | Homozygous   |
| NC_037644.1 | 13525436 | SNV | 1 | G | A | Homozygous   |
| NC_037644.1 | 13525662 | SNV | 1 | G | A | Heterozygous |
| NC_037644.1 | 13533176 | SNV | 1 | A | G | Homozygous   |
| NC_037644.1 | 13533232 | SNV | 1 | T | C | Heterozygous |
| NC_037644.1 | 13533294 | SNV | 1 | A | G | Homozygous   |
| NC_037644.1 | 13533313 | SNV | 1 | T | C | Homozygous   |
| NC_037644.1 | 13533420 | SNV | 1 | G | A | Homozygous   |
| NC_037644.1 | 13533524 | SNV | 1 | C | G | Heterozygous |
| NC_037644.1 | 13533725 | SNV | 1 | T | C | Homozygous   |
| NC_037644.1 | 13533826 | SNV | 1 | C | T | Homozygous   |
| NC_037644.1 | 13533901 | SNV | 1 | C | T | Heterozygous |
| NC_037644.1 | 13533907 | SNV | 1 | C | T | Homozygous   |
| NC_037644.1 | 13534025 | SNV | 1 | A | G | Homozygous   |
| NC_037644.1 | 13534790 | SNV | 1 | A | G | Homozygous   |
| NC_037644.1 | 13534792 | SNV | 1 | G | T | Homozygous   |
| NC_037644.1 | 13535404 | SNV | 1 | T | C | Homozygous   |
| NC_037644.1 | 13535452 | SNV | 1 | G | C | Heterozygous |
| NC_037644.1 | 13535548 | SNV | 1 | A | G | Heterozygous |
| NC_037644.1 | 13535551 | SNV | 1 | G | A | Heterozygous |

|             |          |     |   |   |   |              |
|-------------|----------|-----|---|---|---|--------------|
| NC_037644.1 | 13535655 | SNV | 1 | C | T | Homozygous   |
| NC_037644.1 | 13535686 | SNV | 1 | T | C | Homozygous   |
| NC_037644.1 | 13535770 | SNV | 1 | T | C | Heterozygous |
| NC_037644.1 | 13535831 | SNV | 1 | G | A | Heterozygous |
| NC_037644.1 | 13535856 | SNV | 1 | T | C | Homozygous   |
| NC_037644.1 | 13535977 | SNV | 1 | A | G | Homozygous   |
| NC_037644.1 | 13536020 | SNV | 1 | T | C | Homozygous   |
| NC_037644.1 | 13536132 | SNV | 1 | C | A | Homozygous   |
| NC_037644.1 | 13536219 | SNV | 1 | A | C | Heterozygous |
| NC_037644.1 | 13536221 | SNV | 1 | C | T | Heterozygous |
| NC_037644.1 | 13536224 | SNV | 1 | T | C | Heterozygous |
| NC_037644.1 | 13536304 | SNV | 1 | A | G | Homozygous   |
| NC_037644.1 | 13536336 | SNV | 1 | A | G | Homozygous   |
| NC_037644.1 | 13536371 | SNV | 1 | G | A | Heterozygous |
| NC_037644.1 | 13536385 | SNV | 1 | G | A | Homozygous   |
| NC_037644.1 | 13536451 | SNV | 1 | T | C | Homozygous   |
| NC_037644.1 | 13536466 | SNV | 1 | T | C | Heterozygous |
| NC_037644.1 | 13537065 | SNV | 1 | G | A | Heterozygous |
| NC_037644.1 | 13537070 | SNV | 1 | C | T | Heterozygous |
| NC_037644.1 | 13537365 | SNV | 1 | A | G | Homozygous   |
| NC_037644.1 | 13537367 | SNV | 1 | A | G | Homozygous   |
| NC_037644.1 | 13537642 | SNV | 1 | A | G | Homozygous   |
| NC_037644.1 | 13538021 | SNV | 1 | A | G | Homozygous   |
| NC_037644.1 | 13538094 | SNV | 1 | G | C | Homozygous   |
| NC_037644.1 | 13538335 | SNV | 1 | C | T | Homozygous   |
| NC_037644.1 | 13538725 | SNV | 1 | C | T | Heterozygous |
| NC_037644.1 | 13538784 | SNV | 1 | T | C | Heterozygous |
| NC_037644.1 | 13539157 | SNV | 1 | C | T | Heterozygous |
| NC_037644.1 | 13541718 | SNV | 1 | A | T | Heterozygous |
| NC_037644.1 | 13542906 | SNV | 1 | T | C | Homozygous   |
| NC_037644.1 | 13543020 | SNV | 1 | A | G | Heterozygous |
| NC_037644.1 | 13544993 | SNV | 1 | T | C | Homozygous   |
| NC_037644.1 | 13544995 | SNV | 1 | C | T | Homozygous   |
| NC_037644.1 | 13549934 | SNV | 1 | G | A | Heterozygous |
| NC_037644.1 | 13555545 | SNV | 1 | C | T | Heterozygous |
| NC_037644.1 | 13555548 | SNV | 1 | T | G | Heterozygous |
| NC_037644.1 | 13555552 | SNV | 1 | T | A | Heterozygous |
| NC_037644.1 | 13555561 | SNV | 1 | C | T | Heterozygous |
| NC_037644.1 | 13555567 | SNV | 1 | A | C | Heterozygous |
| NC_037644.1 | 13555571 | SNV | 1 | A | C | Heterozygous |
| NC_037644.1 | 13555575 | SNV | 1 | C | T | Heterozygous |
| NC_037644.1 | 13555583 | SNV | 1 | C | T | Heterozygous |
| NC_037644.1 | 13555586 | SNV | 1 | G | T | Homozygous   |
| NC_037644.1 | 13557318 | SNV | 1 | A | G | Heterozygous |
| NC_037644.1 | 13563664 | SNV | 1 | G | T | Heterozygous |
| NC_037644.1 | 13563670 | SNV | 1 | G | C | Heterozygous |
| NC_037644.1 | 13591651 | SNV | 1 | T | C | Heterozygous |
| NC_037644.1 | 13591653 | SNV | 1 | T | C | Homozygous   |
| NC_037644.1 | 13591656 | SNV | 1 | A | G | Heterozygous |
| NC_037644.1 | 13591685 | SNV | 1 | G | C | Heterozygous |
| NC_037644.1 | 13591693 | SNV | 1 | T | C | Heterozygous |

|             |          |     |   |   |   |              |
|-------------|----------|-----|---|---|---|--------------|
| NC_037644.1 | 13591700 | SNV | 1 | T | C | Heterozygous |
| NC_037644.1 | 13591725 | SNV | 1 | C | T | Heterozygous |
| NC_037644.1 | 13591764 | SNV | 1 | C | T | Heterozygous |
| NC_037644.1 | 13591798 | SNV | 1 | C | T | Heterozygous |
| NC_037644.1 | 13591818 | SNV | 1 | A | G | Homozygous   |
| NC_037644.1 | 13591825 | SNV | 1 | C | T | Homozygous   |
| NC_037644.1 | 13591827 | SNV | 1 | T | A | Heterozygous |
| NC_037644.1 | 13591833 | SNV | 1 | T | C | Homozygous   |
| NC_037644.1 | 13591835 | SNV | 1 | C | A | Heterozygous |
| NC_037644.1 | 13591846 | SNV | 1 | C | T | Heterozygous |
| NC_037644.1 | 13591852 | SNV | 1 | C | G | Heterozygous |
| NC_037644.1 | 13591855 | SNV | 1 | C | T | Heterozygous |
| NC_037644.1 | 13591857 | SNV | 1 | T | C | Heterozygous |
| NC_037644.1 | 13591868 | SNV | 1 | T | C | Heterozygous |
| NC_037644.1 | 13591876 | SNV | 1 | T | C | Heterozygous |
| NC_037644.1 | 13591885 | SNV | 1 | T | C | Homozygous   |
| NC_037644.1 | 13591887 | SNV | 1 | T | C | Heterozygous |
| NC_037644.1 | 13591913 | SNV | 1 | T | C | Heterozygous |
| NC_037644.1 | 13591926 | SNV | 1 | C | A | Homozygous   |
| NC_037644.1 | 13591932 | SNV | 1 | A | G | Homozygous   |
| NC_037644.1 | 13591935 | SNV | 1 | C | A | Homozygous   |
| NC_037644.1 | 13591937 | SNV | 1 | C | G | Homozygous   |
| NC_037644.1 | 13591943 | SNV | 1 | T | C | Homozygous   |
| NC_037644.1 | 13591966 | SNV | 1 | T | C | Homozygous   |
| NC_037644.1 | 13600428 | SNV | 1 | A | G | Homozygous   |
| NC_037644.1 | 13600454 | SNV | 1 | A | G | Homozygous   |
| NC_037644.1 | 13614983 | SNV | 1 | C | G | Heterozygous |
| NC_037644.1 | 13614986 | SNV | 1 | C | T | Heterozygous |
| NC_037644.1 | 13614989 | SNV | 1 | G | C | Heterozygous |
| NC_037644.1 | 13614993 | SNV | 1 | A | C | Heterozygous |
| NC_037644.1 | 13614995 | SNV | 1 | G | C | Heterozygous |
| NC_037644.1 | 13615001 | SNV | 1 | G | C | Heterozygous |
| NC_037644.1 | 13615741 | SNV | 1 | G | A | Heterozygous |
| NC_037644.1 | 13615783 | SNV | 1 | C | T | Heterozygous |
| NC_037644.1 | 13615791 | SNV | 1 | A | G | Homozygous   |
| NC_037644.1 | 13615817 | SNV | 1 | A | G | Homozygous   |
| NC_037644.1 | 13616076 | SNV | 1 | G | A | Heterozygous |
| NC_037644.1 | 13616681 | SNV | 1 | A | G | Homozygous   |
| NC_037644.1 | 13626861 | SNV | 1 | C | T | Homozygous   |
| NC_037644.1 | 13627130 | SNV | 1 | C | T | Heterozygous |
| NC_037644.1 | 13627703 | SNV | 1 | C | G | Homozygous   |
| NC_037644.1 | 13627705 | SNV | 1 | A | G | Homozygous   |
| NC_037644.1 | 13627710 | SNV | 1 | A | C | Homozygous   |
| NC_037644.1 | 13627712 | SNV | 1 | A | C | Homozygous   |
| NC_037644.1 | 13629528 | SNV | 1 | T | C | Homozygous   |
| NC_037644.1 | 13629891 | SNV | 1 | C | T | Heterozygous |
| NC_037644.1 | 13629999 | SNV | 1 | T | C | Homozygous   |
| NC_037644.1 | 13630128 | SNV | 1 | G | A | Homozygous   |
| NC_037644.1 | 13630669 | SNV | 1 | T | C | Homozygous   |
| NC_037644.1 | 13631283 | SNV | 1 | A | T | Heterozygous |
| NC_037644.1 | 13631415 | SNV | 1 | C | T | Heterozygous |

|             |          |     |   |   |   |              |
|-------------|----------|-----|---|---|---|--------------|
| NC_037644.1 | 13631551 | SNV | 1 | T | C | Heterozygous |
| NC_037644.1 | 13631590 | SNV | 1 | G | A | Heterozygous |
| NC_037644.1 | 13631689 | SNV | 1 | G | A | Homozygous   |
| NC_037644.1 | 13631695 | SNV | 1 | G | A | Heterozygous |
| NC_037644.1 | 13631698 | SNV | 1 | A | G | Heterozygous |
| NC_037644.1 | 13632865 | SNV | 1 | C | T | Heterozygous |
| NC_037644.1 | 13632874 | SNV | 1 | A | C | Heterozygous |
| NC_037644.1 | 13632934 | SNV | 1 | G | C | Homozygous   |
| NC_037644.1 | 13633054 | SNV | 1 | T | C | Homozygous   |
| NC_037644.1 | 13633066 | SNV | 1 | A | G | Homozygous   |
| NC_037644.1 | 13633431 | SNV | 1 | G | A | Heterozygous |
| NC_037644.1 | 13634748 | SNV | 1 | A | G | Homozygous   |
| NC_037644.1 | 13634865 | SNV | 1 | T | C | Homozygous   |
| NC_037644.1 | 13635350 | SNV | 1 | T | C | Homozygous   |
| NC_037644.1 | 13636415 | SNV | 1 | G | A | Heterozygous |
| NC_037644.1 | 13636786 | SNV | 1 | G | A | Heterozygous |
| NC_037644.1 | 13638398 | SNV | 1 | T | C | Homozygous   |
| NC_037644.1 | 13638779 | SNV | 1 | A | G | Homozygous   |
| NC_037644.1 | 13639100 | SNV | 1 | A | G | Heterozygous |
| NC_037644.1 | 13639109 | SNV | 1 | A | G | Homozygous   |
| NC_037644.1 | 13653891 | SNV | 1 | T | C | Heterozygous |
| NC_037644.1 | 13653918 | SNV | 1 | T | G | Homozygous   |
| NC_037644.1 | 13653935 | SNV | 1 | T | A | Heterozygous |
| NC_037644.1 | 13653940 | SNV | 1 | G | T | Homozygous   |
| NC_037644.1 | 13657045 | SNV | 1 | T | C | Heterozygous |
| NC_037644.1 | 13657120 | SNV | 1 | C | G | Homozygous   |
| NC_037644.1 | 13657140 | SNV | 1 | A | G | Heterozygous |
| NC_037644.1 | 13657319 | SNV | 1 | G | A | Homozygous   |
| NC_037644.1 | 13657688 | SNV | 1 | A | G | Homozygous   |
| NC_037644.1 | 13657961 | SNV | 1 | C | T | Heterozygous |
| NC_037644.1 | 13658155 | SNV | 1 | C | T | Heterozygous |
| NC_037644.1 | 13658171 | SNV | 1 | C | T | Heterozygous |
| NC_037644.1 | 13658173 | SNV | 1 | T | A | Heterozygous |
| NC_037644.1 | 13658177 | SNV | 1 | T | C | Heterozygous |
| NC_037644.1 | 13658210 | SNV | 1 | T | C | Homozygous   |
| NC_037644.1 | 13658369 | SNV | 1 | T | C | Heterozygous |
| NC_037644.1 | 13658372 | SNV | 1 | T | G | Heterozygous |
| NC_037644.1 | 13658824 | SNV | 1 | T | G | Homozygous   |
| NC_037644.1 | 13658827 | SNV | 1 | T | C | Homozygous   |
| NC_037644.1 | 13658881 | SNV | 1 | A | G | Homozygous   |
| NC_037644.1 | 13660141 | SNV | 1 | A | C | Heterozygous |
| NC_037644.1 | 13660145 | SNV | 1 | T | C | Heterozygous |
| NC_037644.1 | 13660162 | SNV | 1 | A | G | Homozygous   |
| NC_037644.1 | 13660690 | SNV | 1 | G | A | Heterozygous |
| NC_037644.1 | 13668180 | SNV | 1 | T | C | Homozygous   |
| NC_037644.1 | 13668900 | SNV | 1 | A | G | Homozygous   |
| NC_037644.1 | 13669038 | SNV | 1 | C | G | Homozygous   |
| NC_037644.1 | 13669068 | SNV | 1 | G | C | Homozygous   |
| NC_037644.1 | 13669071 | SNV | 1 | A | T | Heterozygous |
| NC_037644.1 | 13669106 | SNV | 1 | T | C | Heterozygous |
| NC_037644.1 | 13669131 | SNV | 1 | G | A | Heterozygous |

|             |          |     |   |   |   |              |
|-------------|----------|-----|---|---|---|--------------|
| NC_037644.1 | 13669673 | SNV | 1 | T | C | Heterozygous |
| NC_037644.1 | 13669746 | SNV | 1 | G | A | Heterozygous |
| NC_037644.1 | 13676037 | SNV | 1 | T | G | Homozygous   |
| NC_037644.1 | 13676632 | SNV | 1 | G | A | Homozygous   |
| NC_037644.1 | 13677983 | SNV | 1 | T | C | Homozygous   |
| NC_037644.1 | 13677985 | SNV | 1 | C | G | Homozygous   |
| NC_037644.1 | 13679437 | SNV | 1 | A | G | Heterozygous |
| NC_037644.1 | 13679458 | SNV | 1 | C | T | Heterozygous |
| NC_037644.1 | 13681056 | SNV | 1 | A | T | Homozygous   |
| NC_037644.1 | 13681278 | SNV | 1 | G | T | Homozygous   |
| NC_037644.1 | 13684905 | SNV | 1 | T | C | Heterozygous |
| NC_037644.1 | 13684939 | SNV | 1 | G | A | Heterozygous |
| NC_037644.1 | 13684960 | SNV | 1 | A | G | Homozygous   |
| NC_037644.1 | 13685168 | SNV | 1 | T | C | Heterozygous |
| NC_037644.1 | 13685378 | SNV | 1 | G | C | Heterozygous |
| NC_037644.1 | 13685619 | SNV | 1 | G | A | Homozygous   |
| NC_037644.1 | 13685683 | SNV | 1 | G | A | Heterozygous |
| NC_037644.1 | 13685738 | SNV | 1 | C | T | Heterozygous |
| NC_037644.1 | 13686247 | SNV | 1 | C | T | Homozygous   |
| NC_037644.1 | 13686383 | SNV | 1 | T | C | Homozygous   |
| NC_037644.1 | 13686522 | SNV | 1 | C | T | Homozygous   |
| NC_037644.1 | 13686819 | SNV | 1 | C | T | Heterozygous |
| NC_037644.1 | 13686841 | SNV | 1 | A | T | Heterozygous |
| NC_037644.1 | 13686842 | SNV | 1 | T | A | Heterozygous |
| NC_037644.1 | 13686844 | SNV | 1 | T | A | Heterozygous |
| NC_037644.1 | 13686846 | SNV | 1 | T | A | Heterozygous |
| NC_037644.1 | 13686898 | SNV | 1 | T | C | Heterozygous |
| NC_037644.1 | 13686913 | SNV | 1 | G | A | Heterozygous |
| NC_037644.1 | 13686922 | SNV | 1 | G | A | Heterozygous |
| NC_037644.1 | 13686945 | SNV | 1 | A | G | Homozygous   |
| NC_037644.1 | 13687033 | SNV | 1 | T | C | Homozygous   |
| NC_037644.1 | 13687380 | SNV | 1 | G | A | Homozygous   |
| NC_037644.1 | 13687431 | SNV | 1 | C | A | Homozygous   |
| NC_037644.1 | 13687628 | SNV | 1 | T | C | Homozygous   |
| NC_037644.1 | 13687669 | SNV | 1 | G | T | Heterozygous |
| NC_037644.1 | 13687738 | SNV | 1 | T | C | Homozygous   |
| NC_037644.1 | 13687801 | SNV | 1 | T | C | Homozygous   |
| NC_037644.1 | 13687816 | SNV | 1 | G | A | Heterozygous |
| NC_037644.1 | 13688398 | SNV | 1 | G | C | Homozygous   |
| NC_037644.1 | 13688540 | SNV | 1 | A | G | Homozygous   |
| NC_037644.1 | 13689047 | SNV | 1 | A | G | Heterozygous |
| NC_037644.1 | 13689074 | SNV | 1 | T | C | Heterozygous |
| NC_037644.1 | 13689098 | SNV | 1 | T | C | Homozygous   |
| NC_037644.1 | 13689114 | SNV | 1 | T | C | Homozygous   |
| NC_037644.1 | 13689116 | SNV | 1 | C | T | Homozygous   |
| NC_037644.1 | 13689118 | SNV | 1 | A | T | Homozygous   |
| NC_037644.1 | 13689120 | SNV | 1 | G | T | Homozygous   |
| NC_037644.1 | 13689127 | SNV | 1 | T | C | Homozygous   |
| NC_037644.1 | 13689135 | SNV | 1 | G | A | Homozygous   |
| NC_037644.1 | 13689137 | SNV | 1 | T | C | Homozygous   |
| NC_037644.1 | 13689142 | SNV | 1 | G | A | Homozygous   |

|             |          |     |   |   |   |              |
|-------------|----------|-----|---|---|---|--------------|
| NC_037644.1 | 13689310 | SNV | 1 | A | G | Heterozygous |
| NC_037644.1 | 13689321 | SNV | 1 | A | T | Heterozygous |
| NC_037644.1 | 13689323 | SNV | 1 | T | C | Heterozygous |
| NC_037644.1 | 13689326 | SNV | 1 | A | G | Heterozygous |
| NC_037644.1 | 13689344 | SNV | 1 | T | C | Heterozygous |
| NC_037644.1 | 13689345 | SNV | 1 | A | G | Heterozygous |
| NC_037644.1 | 13689358 | SNV | 1 | C | A | Heterozygous |
| NC_037644.1 | 13689362 | SNV | 1 | A | G | Heterozygous |
| NC_037644.1 | 13689375 | SNV | 1 | C | T | Heterozygous |
| NC_037644.1 | 13689380 | SNV | 1 | G | C | Heterozygous |
| NC_037644.1 | 13689586 | SNV | 1 | G | A | Heterozygous |
| NC_037644.1 | 13689596 | SNV | 1 | G | A | Heterozygous |
| NC_037644.1 | 13690009 | SNV | 1 | T | G | Homozygous   |
| NC_037644.1 | 13690043 | SNV | 1 | A | C | Homozygous   |
| NC_037644.1 | 13690081 | SNV | 1 | A | G | Homozygous   |
| NC_037644.1 | 13690095 | SNV | 1 | A | G | Homozygous   |
| NC_037644.1 | 13690297 | SNV | 1 | A | T | Heterozygous |
| NC_037644.1 | 13690416 | SNV | 1 | A | C | Homozygous   |
| NC_037644.1 | 13691246 | SNV | 1 | C | T | Heterozygous |
| NC_037644.1 | 13691507 | SNV | 1 | C | T | Heterozygous |
| NC_037644.1 | 13691547 | SNV | 1 | A | G | Homozygous   |
| NC_037644.1 | 13691564 | SNV | 1 | T | G | Heterozygous |
| NC_037644.1 | 13691721 | SNV | 1 | A | G | Homozygous   |
| NC_037644.1 | 13691726 | SNV | 1 | A | G | Heterozygous |
| NC_037644.1 | 13691731 | SNV | 1 | A | G | Homozygous   |
| NC_037644.1 | 13691826 | SNV | 1 | T | C | Heterozygous |
| NC_037644.1 | 13691860 | SNV | 1 | T | C | Homozygous   |
| NC_037644.1 | 13691872 | SNV | 1 | A | G | Homozygous   |
| NC_037644.1 | 13691916 | SNV | 1 | G | A | Homozygous   |
| NC_037644.1 | 13691922 | SNV | 1 | A | G | Homozygous   |
| NC_037644.1 | 13692052 | SNV | 1 | C | T | Heterozygous |
| NC_037644.1 | 13692117 | SNV | 1 | T | C | Homozygous   |
| NC_037644.1 | 13692156 | SNV | 1 | C | T | Heterozygous |
| NC_037644.1 | 13692197 | SNV | 1 | T | C | Heterozygous |
| NC_037644.1 | 13692332 | SNV | 1 | G | A | Heterozygous |
| NC_037644.1 | 13692344 | SNV | 1 | G | A | Heterozygous |
| NC_037644.1 | 13692760 | SNV | 1 | G | T | Heterozygous |
| NC_037644.1 | 13692766 | SNV | 1 | A | G | Homozygous   |
| NC_037644.1 | 13692859 | SNV | 1 | C | T | Heterozygous |
| NC_037644.1 | 13692863 | SNV | 1 | C | T | Homozygous   |
| NC_037644.1 | 13693330 | SNV | 1 | C | T | Heterozygous |
| NC_037644.1 | 13693396 | SNV | 1 | T | G | Heterozygous |
| NC_037644.1 | 13693417 | SNV | 1 | T | C | Homozygous   |
| NC_037644.1 | 13693456 | SNV | 1 | A | G | Heterozygous |
| NC_037644.1 | 13693540 | SNV | 1 | G | T | Heterozygous |
| NC_037644.1 | 13693921 | SNV | 1 | G | A | Heterozygous |
| NC_037644.1 | 13694094 | SNV | 1 | T | C | Homozygous   |
| NC_037644.1 | 13694110 | SNV | 1 | A | G | Homozygous   |
| NC_037644.1 | 13694114 | SNV | 1 | A | G | Homozygous   |
| NC_037644.1 | 13694195 | SNV | 1 | A | T | Homozygous   |
| NC_037644.1 | 13694214 | SNV | 1 | C | T | Heterozygous |

|             |          |     |   |   |   |              |
|-------------|----------|-----|---|---|---|--------------|
| NC_037644.1 | 13694246 | SNV | 1 | G | A | Heterozygous |
| NC_037644.1 | 13694313 | SNV | 1 | T | C | Homozygous   |
| NC_037644.1 | 13694540 | SNV | 1 | G | A | Homozygous   |
| NC_037644.1 | 13694554 | SNV | 1 | A | G | Heterozygous |
| NC_037644.1 | 13694615 | SNV | 1 | C | G | Heterozygous |
| NC_037644.1 | 13694640 | SNV | 1 | A | G | Homozygous   |
| NC_037644.1 | 13694687 | SNV | 1 | C | T | Homozygous   |
| NC_037644.1 | 13694800 | SNV | 1 | A | T | Homozygous   |
| NC_037644.1 | 13695145 | SNV | 1 | T | C | Homozygous   |
| NC_037644.1 | 13695277 | SNV | 1 | A | G | Heterozygous |
| NC_037644.1 | 13695310 | SNV | 1 | T | A | Heterozygous |
| NC_037644.1 | 13695427 | SNV | 1 | C | T | Heterozygous |
| NC_037644.1 | 13695431 | SNV | 1 | G | A | Heterozygous |
| NC_037644.1 | 13699034 | SNV | 1 | T | C | Homozygous   |
| NC_037644.1 | 13699079 | SNV | 1 | T | C | Homozygous   |
| NC_037644.1 | 13699085 | SNV | 1 | G | C | Heterozygous |
| NC_037644.1 | 13701669 | SNV | 1 | A | G | Homozygous   |
| NC_037644.1 | 13704979 | SNV | 1 | C | T | Heterozygous |
| NC_037644.1 | 13705054 | SNV | 1 | C | A | Homozygous   |
| NC_037644.1 | 13705066 | SNV | 1 | G | A | Heterozygous |
| NC_037644.1 | 13705088 | SNV | 1 | T | C | Heterozygous |
| NC_037644.1 | 13705393 | SNV | 1 | C | T | Heterozygous |
| NC_037644.1 | 13705407 | SNV | 1 | G | A | Heterozygous |
| NC_037644.1 | 13705463 | SNV | 1 | G | A | Homozygous   |
| NC_037644.1 | 13705483 | SNV | 1 | A | T | Homozygous   |
| NC_037644.1 | 13705508 | SNV | 1 | C | T | Heterozygous |
| NC_037644.1 | 13705918 | SNV | 1 | T | C | Heterozygous |
| NC_037644.1 | 13705920 | SNV | 1 | A | G | Homozygous   |
| NC_037644.1 | 13705955 | SNV | 1 | T | C | Homozygous   |
| NC_037644.1 | 13705997 | SNV | 1 | A | G | Heterozygous |
| NC_037644.1 | 13706136 | SNV | 1 | G | T | Homozygous   |
| NC_037644.1 | 13706204 | SNV | 1 | G | A | Heterozygous |
| NC_037644.1 | 13722450 | SNV | 1 | T | G | Homozygous   |
| NC_037644.1 | 13722490 | SNV | 1 | G | A | Homozygous   |
| NC_037644.1 | 13722704 | SNV | 1 | C | T | Heterozygous |
| NC_037644.1 | 13722784 | SNV | 1 | C | A | Homozygous   |
| NC_037644.1 | 13723585 | SNV | 1 | C | T | Heterozygous |
| NC_037644.1 | 13726926 | SNV | 1 | C | T | Heterozygous |
| NC_037644.1 | 13726934 | SNV | 1 | G | A | Heterozygous |
| NC_037644.1 | 13726958 | SNV | 1 | T | C | Heterozygous |
| NC_037644.1 | 13727199 | SNV | 1 | A | G | Homozygous   |
| NC_037644.1 | 13727222 | SNV | 1 | T | A | Homozygous   |
| NC_037644.1 | 13727467 | SNV | 1 | A | G | Heterozygous |
| NC_037644.1 | 13728349 | SNV | 1 | T | A | Heterozygous |
| NC_037644.1 | 13728547 | SNV | 1 | A | G | Heterozygous |
| NC_037644.1 | 13728550 | SNV | 1 | C | G | Homozygous   |
| NC_037644.1 | 13728561 | SNV | 1 | T | A | Heterozygous |
| NC_037644.1 | 13728578 | SNV | 1 | C | T | Heterozygous |
| NC_037644.1 | 13728689 | SNV | 1 | G | A | Heterozygous |
| NC_037644.1 | 13728807 | SNV | 1 | T | C | Homozygous   |
| NC_037644.1 | 13729245 | SNV | 1 | A | G | Homozygous   |



|             |          |     |   |   |   |              |
|-------------|----------|-----|---|---|---|--------------|
| NC_037644.1 | 13729371 | SNV | 1 | A | G | Homozygous   |
| NC_037644.1 | 13729392 | SNV | 1 | G | C | Homozygous   |
| NC_037644.1 | 13729623 | SNV | 1 | A | G | Homozygous   |
| NC_037644.1 | 13730154 | SNV | 1 | G | A | Heterozygous |
| NC_037644.1 | 13730478 | SNV | 1 | T | C | Heterozygous |
| NC_037644.1 | 13731443 | SNV | 1 | T | C | Homozygous   |
| NC_037644.1 | 13735972 | SNV | 1 | A | G | Heterozygous |
| NC_037644.1 | 13735993 | SNV | 1 | A | G | Heterozygous |
| NC_037644.1 | 13735995 | SNV | 1 | A | G | Heterozygous |
| NC_037644.1 | 13736027 | SNV | 1 | A | G | Heterozygous |
| NC_037644.1 | 13739449 | SNV | 1 | A | G | Homozygous   |
| NC_037644.1 | 13740820 | SNV | 1 | T | C | Homozygous   |
| NC_037644.1 | 13740933 | SNV | 1 | T | C | Homozygous   |
| NC_037644.1 | 13741039 | SNV | 1 | A | G | Homozygous   |
| NC_037644.1 | 13741093 | SNV | 1 | C | T | Heterozygous |
| NC_037644.1 | 13741351 | SNV | 1 | T | A | Heterozygous |
| NC_037644.1 | 13741409 | SNV | 1 | T | C | Heterozygous |
| NC_037644.1 | 13741836 | SNV | 1 | G | C | Heterozygous |
| NC_037644.1 | 13741838 | SNV | 1 | T | C | Heterozygous |
| NC_037644.1 | 13741897 | SNV | 1 | A | G | Heterozygous |
| NC_037644.1 | 13741913 | SNV | 1 | G | A | Heterozygous |
| NC_037644.1 | 13742318 | SNV | 1 | G | A | Heterozygous |
| NC_037644.1 | 13743422 | SNV | 1 | T | C | Homozygous   |
| NC_037644.1 | 13743487 | SNV | 1 | A | G | Homozygous   |
| NC_037644.1 | 13743877 | SNV | 1 | A | G | Homozygous   |
| NC_037644.1 | 13744470 | SNV | 1 | A | G | Homozygous   |
| NC_037644.1 | 13744514 | SNV | 1 | T | A | Homozygous   |
| NC_037644.1 | 13744637 | SNV | 1 | A | G | Homozygous   |
| NC_037644.1 | 13744705 | SNV | 1 | G | A | Heterozygous |
| NC_037644.1 | 13744952 | SNV | 1 | C | T | Heterozygous |
| NC_037644.1 | 13745219 | SNV | 1 | A | G | Homozygous   |
| NC_037644.1 | 13745221 | SNV | 1 | T | C | Homozygous   |
| NC_037644.1 | 13745575 | SNV | 1 | A | G | Heterozygous |
| NC_037644.1 | 13745789 | SNV | 1 | A | G | Homozygous   |
| NC_037644.1 | 13746156 | SNV | 1 | A | G | Homozygous   |
| NC_037644.1 | 13746256 | SNV | 1 | A | G | Heterozygous |
| NC_037644.1 | 13746354 | SNV | 1 | T | A | Heterozygous |
| NC_037644.1 | 13746527 | SNV | 1 | G | A | Heterozygous |
| NC_037644.1 | 13746530 | SNV | 1 | A | G | Homozygous   |
| NC_037644.1 | 13746584 | SNV | 1 | A | G | Heterozygous |
| NC_037644.1 | 13747044 | SNV | 1 | A | G | Homozygous   |
| NC_037644.1 | 13747365 | SNV | 1 | A | G | Heterozygous |
| NC_037644.1 | 13747785 | SNV | 1 | T | C | Heterozygous |
| NC_037644.1 | 13748015 | SNV | 1 | A | G | Heterozygous |
| NC_037644.1 | 13748787 | SNV | 1 | G | A | Homozygous   |
| NC_037644.1 | 13748965 | SNV | 1 | T | G | Homozygous   |
| NC_037644.1 | 13748969 | SNV | 1 | T | G | Homozygous   |
| NC_037644.1 | 13749187 | SNV | 1 | T | C | Heterozygous |
| NC_037644.1 | 13750843 | SNV | 1 | A | G | Homozygous   |
| NC_037644.1 | 13751132 | SNV | 1 | T | C | Heterozygous |
| NC_037644.1 | 13751311 | SNV | 1 | C | T | Homozygous   |

|             |          |     |   |   |   |              |
|-------------|----------|-----|---|---|---|--------------|
| NC_037644.1 | 13751973 | SNV | 1 | T | C | Homozygous   |
| NC_037644.1 | 13753172 | SNV | 1 | G | A | Homozygous   |
| NC_037644.1 | 13757659 | SNV | 1 | C | T | Homozygous   |
| NC_037644.1 | 13758295 | SNV | 1 | A | G | Homozygous   |
| NC_037644.1 | 13759197 | SNV | 1 | T | C | Homozygous   |
| NC_037644.1 | 13759266 | SNV | 1 | T | C | Heterozygous |
| NC_037644.1 | 13761295 | SNV | 1 | G | A | Heterozygous |
| NC_037644.1 | 13761886 | SNV | 1 | A | G | Homozygous   |
| NC_037644.1 | 13762165 | SNV | 1 | T | C | Homozygous   |
| NC_037644.1 | 13762240 | SNV | 1 | C | T | Homozygous   |
| NC_037644.1 | 13763134 | SNV | 1 | T | C | Heterozygous |
| NC_037644.1 | 13763484 | SNV | 1 | C | T | Homozygous   |
| NC_037644.1 | 13764853 | SNV | 1 | T | C | Homozygous   |
| NC_037644.1 | 13764895 | SNV | 1 | A | G | Homozygous   |
| NC_037644.1 | 13765372 | SNV | 1 | T | C | Homozygous   |
| NC_037644.1 | 13765396 | SNV | 1 | C | T | Homozygous   |
| NC_037644.1 | 13765646 | SNV | 1 | A | G | Homozygous   |
| NC_037644.1 | 13766032 | SNV | 1 | T | C | Homozygous   |
| NC_037644.1 | 13766049 | SNV | 1 | A | G | Homozygous   |
| NC_037644.1 | 13767127 | SNV | 1 | T | A | Heterozygous |
| NC_037644.1 | 13767485 | SNV | 1 | C | T | Heterozygous |
| NC_037644.1 | 13768267 | SNV | 1 | T | C | Heterozygous |
| NC_037644.1 | 13770119 | SNV | 1 | T | C | Homozygous   |
| NC_037644.1 | 13770336 | SNV | 1 | A | C | Homozygous   |
| NC_037644.1 | 13770451 | SNV | 1 | T | C | Heterozygous |
| NC_037644.1 | 13771991 | SNV | 1 | A | G | Homozygous   |
| NC_037644.1 | 13772084 | SNV | 1 | A | T | Homozygous   |
| NC_037644.1 | 13772340 | SNV | 1 | T | C | Homozygous   |
| NC_037644.1 | 13772449 | SNV | 1 | T | C | Heterozygous |
| NC_037644.1 | 13773998 | SNV | 1 | T | C | Homozygous   |
| NC_037644.1 | 13776016 | SNV | 1 | C | T | Homozygous   |
| NC_037644.1 | 13776268 | SNV | 1 | T | C | Homozygous   |
| NC_037644.1 | 13776283 | SNV | 1 | C | T | Homozygous   |
| NC_037644.1 | 13776903 | SNV | 1 | A | G | Heterozygous |
| NC_037644.1 | 13777179 | SNV | 1 | C | T | Homozygous   |
| NC_037644.1 | 13777182 | SNV | 1 | A | C | Homozygous   |
| NC_037644.1 | 13777953 | SNV | 1 | A | G | Heterozygous |
| NC_037644.1 | 13779389 | SNV | 1 | T | C | Heterozygous |
| NC_037644.1 | 13782768 | SNV | 1 | G | A | Heterozygous |
| NC_037644.1 | 13783229 | SNV | 1 | C | T | Homozygous   |
| NC_037644.1 | 13783282 | SNV | 1 | C | T | Homozygous   |
| NC_037644.1 | 13783987 | SNV | 1 | A | T | Homozygous   |
| NC_037644.1 | 13784351 | SNV | 1 | G | A | Heterozygous |
| NC_037644.1 | 13784451 | SNV | 1 | A | C | Homozygous   |
| NC_037644.1 | 13784645 | SNV | 1 | A | G | Heterozygous |
| NC_037644.1 | 13784649 | SNV | 1 | T | G | Heterozygous |
| NC_037644.1 | 13784652 | SNV | 1 | T | A | Heterozygous |
| NC_037644.1 | 13784659 | SNV | 1 | A | T | Heterozygous |
| NC_037644.1 | 13784849 | SNV | 1 | T | C | Homozygous   |
| NC_037644.1 | 13784951 | SNV | 1 | T | C | Homozygous   |
| NC_037644.1 | 13789821 | SNV | 1 | A | T | Homozygous   |

|             |          |     |   |   |   |              |
|-------------|----------|-----|---|---|---|--------------|
| NC_037644.1 | 13789833 | SNV | 1 | T | C | Homozygous   |
| NC_037644.1 | 13790088 | SNV | 1 | A | G | Heterozygous |
| NC_037644.1 | 13790119 | SNV | 1 | G | A | Heterozygous |
| NC_037644.1 | 13790333 | SNV | 1 | A | G | Homozygous   |
| NC_037644.1 | 13790381 | SNV | 1 | C | G | Heterozygous |
| NC_037644.1 | 13790676 | SNV | 1 | T | C | Homozygous   |
| NC_037644.1 | 13790787 | SNV | 1 | C | G | Heterozygous |
| NC_037644.1 | 13790841 | SNV | 1 | T | C | Homozygous   |
| NC_037644.1 | 13790853 | SNV | 1 | T | C | Heterozygous |
| NC_037644.1 | 13790903 | SNV | 1 | A | G | Homozygous   |
| NC_037644.1 | 13794076 | SNV | 1 | G | A | Heterozygous |
| NC_037644.1 | 13794183 | SNV | 1 | T | C | Heterozygous |
| NC_037644.1 | 13794186 | SNV | 1 | T | C | Homozygous   |
| NC_037644.1 | 13794511 | SNV | 1 | T | C | Homozygous   |
| NC_037644.1 | 13794584 | SNV | 1 | A | G | Heterozygous |
| NC_037644.1 | 13794875 | SNV | 1 | A | G | Homozygous   |
| NC_037644.1 | 13794878 | SNV | 1 | T | C | Heterozygous |
| NC_037644.1 | 13794977 | SNV | 1 | C | G | Homozygous   |
| NC_037644.1 | 13795075 | SNV | 1 | T | C | Homozygous   |
| NC_037644.1 | 13795085 | SNV | 1 | A | G | Heterozygous |
| NC_037644.1 | 13795375 | SNV | 1 | G | C | Homozygous   |
| NC_037644.1 | 13798200 | SNV | 1 | A | G | Homozygous   |
| NC_037644.1 | 13798226 | SNV | 1 | G | A | Homozygous   |
| NC_037644.1 | 13798246 | SNV | 1 | C | G | Homozygous   |
| NC_037644.1 | 13798264 | SNV | 1 | G | A | Heterozygous |
| NC_037644.1 | 13798735 | SNV | 1 | C | T | Heterozygous |
| NC_037644.1 | 13798839 | SNV | 1 | T | C | Heterozygous |
| NC_037644.1 | 13799147 | SNV | 1 | T | C | Homozygous   |
| NC_037644.1 | 13799261 | SNV | 1 | T | A | Heterozygous |
| NC_037644.1 | 13799308 | SNV | 1 | A | G | Homozygous   |
| NC_037644.1 | 13799318 | SNV | 1 | C | A | Heterozygous |
| NC_037644.1 | 13799363 | SNV | 1 | A | G | Heterozygous |
| NC_037644.1 | 13799413 | SNV | 1 | T | C | Homozygous   |
| NC_037644.1 | 13799562 | SNV | 1 | T | C | Homozygous   |
| NC_037644.1 | 13799931 | SNV | 1 | G | A | Homozygous   |
| NC_037644.1 | 13799943 | SNV | 1 | T | C | Heterozygous |
| NC_037644.1 | 13807675 | SNV | 1 | C | T | Homozygous   |
| NC_037644.1 | 13808045 | SNV | 1 | C | T | Homozygous   |
| NC_037644.1 | 13808157 | SNV | 1 | C | A | Homozygous   |
| NC_037644.1 | 13808241 | SNV | 1 | A | T | Homozygous   |
| NC_037644.1 | 13808501 | SNV | 1 | T | A | Heterozygous |
| NC_037644.1 | 13811851 | SNV | 1 | G | T | Homozygous   |
| NC_037644.1 | 13812121 | SNV | 1 | C | A | Heterozygous |
| NC_037644.1 | 13812124 | SNV | 1 | T | G | Heterozygous |
| NC_037644.1 | 13812217 | SNV | 1 | T | C | Homozygous   |
| NC_037644.1 | 13812304 | SNV | 1 | C | T | Heterozygous |
| NC_037644.1 | 13812558 | SNV | 1 | G | A | Heterozygous |
| NC_037644.1 | 13815122 | SNV | 1 | T | C | Heterozygous |
| NC_037644.1 | 13815179 | SNV | 1 | A | G | Heterozygous |
| NC_037644.1 | 13826911 | SNV | 1 | G | A | Homozygous   |
| NC_037644.1 | 13826919 | SNV | 1 | T | C | Homozygous   |

|             |          |     |   |   |   |              |
|-------------|----------|-----|---|---|---|--------------|
| NC_037644.1 | 13842187 | SNV | 1 | A | G | Heterozygous |
| NC_037644.1 | 13842192 | SNV | 1 | G | C | Heterozygous |
| NC_037644.1 | 13897628 | SNV | 1 | C | T | Heterozygous |
| NC_037644.1 | 13909460 | SNV | 1 | C | T | Homozygous   |
| NC_037644.1 | 13909464 | SNV | 1 | T | C | Homozygous   |
| NC_037644.1 | 13909652 | SNV | 1 | C | T | Heterozygous |
| NC_037644.1 | 13909664 | SNV | 1 | C | T | Heterozygous |
| NC_037644.1 | 13909672 | SNV | 1 | C | T | Heterozygous |
| NC_037644.1 | 13909691 | SNV | 1 | A | C | Homozygous   |
| NC_037644.1 | 13909903 | SNV | 1 | C | T | Heterozygous |
| NC_037644.1 | 13929800 | SNV | 1 | T | A | Homozygous   |
| NC_037644.1 | 13929808 | SNV | 1 | T | A | Homozygous   |
| NC_037644.1 | 13929810 | SNV | 1 | T | C | Homozygous   |
| NC_037644.1 | 13929812 | SNV | 1 | A | C | Homozygous   |
| NC_037644.1 | 13929816 | SNV | 1 | C | T | Homozygous   |
| NC_037644.1 | 13940659 | SNV | 1 | G | C | Heterozygous |
| NC_037644.1 | 13941512 | SNV | 1 | T | C | Homozygous   |
| NC_037644.1 | 13941961 | SNV | 1 | T | A | Homozygous   |
| NC_037644.1 | 13942448 | SNV | 1 | C | T | Homozygous   |
| NC_037644.1 | 13943653 | SNV | 1 | C | T | Homozygous   |
| NC_037644.1 | 13943656 | SNV | 1 | G | A | Heterozygous |
| NC_037644.1 | 13943672 | SNV | 1 | A | G | Homozygous   |
| NC_037644.1 | 13943809 | SNV | 1 | A | C | Heterozygous |
| NC_037644.1 | 13943837 | SNV | 1 | T | A | Heterozygous |
| NC_037644.1 | 13943841 | SNV | 1 | G | A | Homozygous   |
| NC_037644.1 | 13943844 | SNV | 1 | T | C | Heterozygous |
| NC_037644.1 | 13943854 | SNV | 1 | A | C | Heterozygous |
| NC_037644.1 | 13944104 | SNV | 1 | G | C | Heterozygous |
| NC_037644.1 | 13944117 | SNV | 1 | A | G | Homozygous   |
| NC_037644.1 | 13944119 | SNV | 1 | A | C | Homozygous   |
| NC_037644.1 | 13944136 | SNV | 1 | T | C | Homozygous   |
| NC_037644.1 | 13947936 | SNV | 1 | T | C | Homozygous   |
| NC_037644.1 | 13947960 | SNV | 1 | T | C | Homozygous   |
| NC_037644.1 | 13948100 | SNV | 1 | T | A | Homozygous   |
| NC_037644.1 | 13948117 | SNV | 1 | T | C | Heterozygous |
| NC_037644.1 | 13948141 | SNV | 1 | T | C | Homozygous   |
| NC_037644.1 | 13948171 | SNV | 1 | G | C | Heterozygous |
| NC_037644.1 | 13948196 | SNV | 1 | G | A | Homozygous   |
| NC_037644.1 | 13957170 | SNV | 1 | T | A | Heterozygous |
| NC_037644.1 | 13957190 | SNV | 1 | A | T | Heterozygous |
| NC_037644.1 | 13957218 | SNV | 1 | T | A | Heterozygous |
| NC_037644.1 | 13958726 | SNV | 1 | T | C | Homozygous   |
| NC_037644.1 | 13958732 | SNV | 1 | C | T | Homozygous   |
| NC_037644.1 | 13958735 | SNV | 1 | G | C | Homozygous   |
| NC_037644.1 | 13958738 | SNV | 1 | T | C | Homozygous   |
| NC_037644.1 | 13958741 | SNV | 1 | G | C | Homozygous   |
| NC_037644.1 | 13958748 | SNV | 1 | A | G | Heterozygous |
| NC_037644.1 | 13958750 | SNV | 1 | T | C | Heterozygous |
| NC_037644.1 | 13958771 | SNV | 1 | A | G | Heterozygous |
| NC_037644.1 | 13958774 | SNV | 1 | T | C | Homozygous   |
| NC_037644.1 | 13971963 | SNV | 1 | A | G | Heterozygous |

|             |          |     |   |   |   |              |
|-------------|----------|-----|---|---|---|--------------|
| NC_037644.1 | 13981661 | SNV | 1 | C | A | Heterozygous |
| NC_037644.1 | 13981662 | SNV | 1 | T | C | Heterozygous |
| NC_037644.1 | 13981690 | SNV | 1 | T | C | Heterozygous |
| NC_037644.1 | 13989927 | SNV | 1 | T | C | Homozygous   |
| NC_037644.1 | 13999358 | SNV | 1 | T | C | Homozygous   |
| NC_037644.1 | 14001293 | SNV | 1 | C | T | Heterozygous |
| NC_037644.1 | 14001295 | SNV | 1 | T | C | Heterozygous |
| NC_037644.1 | 14001299 | SNV | 1 | T | C | Heterozygous |
| NC_037644.1 | 14001303 | SNV | 1 | C | T | Heterozygous |
| NC_037644.1 | 14001305 | SNV | 1 | T | C | Homozygous   |
| NC_037644.1 | 14002269 | SNV | 1 | T | A | Heterozygous |
| NC_037644.1 | 14002274 | SNV | 1 | A | T | Heterozygous |
| NC_037644.1 | 14002277 | SNV | 1 | A | T | Heterozygous |
| NC_037644.1 | 14002282 | SNV | 1 | T | C | Heterozygous |
| NC_037644.1 | 14002338 | SNV | 1 | C | T | Homozygous   |
| NC_037644.1 | 14002340 | SNV | 1 | G | A | Heterozygous |
| NC_037644.1 | 14003161 | SNV | 1 | G | A | Homozygous   |
| NC_037644.1 | 14003258 | SNV | 1 | C | A | Heterozygous |
| NC_037644.1 | 14003286 | SNV | 1 | A | G | Homozygous   |
| NC_037644.1 | 14003394 | SNV | 1 | A | G | Homozygous   |
| NC_037644.1 | 14027780 | SNV | 1 | G | A | Heterozygous |
| NC_037644.1 | 14027817 | SNV | 1 | G | A | Heterozygous |
| NC_037644.1 | 14032043 | SNV | 1 | A | G | Heterozygous |
| NC_037644.1 | 14032052 | SNV | 1 | G | A | Heterozygous |
| NC_037644.1 | 14032061 | SNV | 1 | A | T | Heterozygous |
| NC_037644.1 | 14032063 | SNV | 1 | G | A | Homozygous   |
| NC_037644.1 | 14032065 | SNV | 1 | G | T | Homozygous   |
| NC_037644.1 | 14032071 | SNV | 1 | A | T | Heterozygous |
| NC_037644.1 | 14037474 | SNV | 1 | A | C | Heterozygous |
| NC_037644.1 | 14037478 | SNV | 1 | A | C | Heterozygous |
| NC_037644.1 | 14037497 | SNV | 1 | A | G | Heterozygous |
| NC_037644.1 | 14037504 | SNV | 1 | G | A | Heterozygous |
| NC_037644.1 | 14037509 | SNV | 1 | A | G | Homozygous   |
| NC_037644.1 | 14040311 | SNV | 1 | A | T | Homozygous   |
| NC_037644.1 | 14040328 | SNV | 1 | A | G | Homozygous   |
| NC_037644.1 | 14040330 | SNV | 1 | G | A | Heterozygous |
| NC_037644.1 | 14040345 | SNV | 1 | G | A | Heterozygous |
| NC_037644.1 | 14040352 | SNV | 1 | G | C | Heterozygous |
| NC_037644.1 | 14040400 | SNV | 1 | A | G | Heterozygous |
| NC_037644.1 | 14049465 | SNV | 1 | C | T | Heterozygous |
| NC_037644.1 | 14063026 | SNV | 1 | G | C | Heterozygous |
| NC_037644.1 | 14077785 | SNV | 1 | T | G | Homozygous   |
| NC_037644.1 | 14077817 | SNV | 1 | C | T | Homozygous   |
| NC_037644.1 | 14077821 | SNV | 1 | T | C | Homozygous   |
| NC_037644.1 | 14106705 | SNV | 1 | T | A | Homozygous   |
| NC_037644.1 | 14106708 | SNV | 1 | T | C | Homozygous   |
| NC_037644.1 | 14106714 | SNV | 1 | T | A | Homozygous   |
| NC_037644.1 | 14106744 | SNV | 1 | T | C | Homozygous   |
| NC_037644.1 | 14130666 | SNV | 1 | A | C | Homozygous   |
| NC_037644.1 | 14130708 | SNV | 1 | G | A | Homozygous   |
| NC_037644.1 | 14130739 | SNV | 1 | C | T | Heterozygous |

|             |          |     |   |   |   |              |
|-------------|----------|-----|---|---|---|--------------|
| NC_037644.1 | 14130840 | SNV | 1 | G | A | Heterozygous |
| NC_037644.1 | 14130845 | SNV | 1 | A | G | Homozygous   |
| NC_037644.1 | 14130969 | SNV | 1 | A | G | Homozygous   |
| NC_037644.1 | 14168071 | SNV | 1 | G | A | Homozygous   |
| NC_037644.1 | 14168180 | SNV | 1 | C | T | Homozygous   |
| NC_037644.1 | 14168238 | SNV | 1 | C | A | Heterozygous |
| NC_037644.1 | 14168324 | SNV | 1 | C | T | Heterozygous |
| NC_037644.1 | 14168340 | SNV | 1 | G | A | Homozygous   |
| NC_037644.1 | 14173614 | SNV | 1 | G | A | Heterozygous |
| NC_037644.1 | 14173620 | SNV | 1 | G | A | Heterozygous |
| NC_037644.1 | 14173633 | SNV | 1 | C | T | Heterozygous |
| NC_037644.1 | 14173669 | SNV | 1 | C | T | Homozygous   |
| NC_037644.1 | 14183268 | SNV | 1 | T | C | Homozygous   |
| NC_037644.1 | 14184009 | SNV | 1 | T | C | Homozygous   |
| NC_037644.1 | 14184091 | SNV | 1 | T | C | Homozygous   |
| NC_037645.1 | 18344    | SNV | 1 | A | G | Homozygous   |
| NC_037645.1 | 18863    | SNV | 1 | G | T | Homozygous   |
| NC_037645.1 | 21598    | SNV | 1 | T | C | Homozygous   |
| NC_037645.1 | 21635    | SNV | 1 | A | G | Heterozygous |
| NC_037645.1 | 21756    | SNV | 1 | A | T | Homozygous   |
| NC_037645.1 | 25433    | SNV | 1 | G | A | Heterozygous |
| NC_037645.1 | 34739    | SNV | 1 | T | C | Homozygous   |
| NC_037645.1 | 34751    | SNV | 1 | T | C | Heterozygous |
| NC_037645.1 | 35091    | SNV | 1 | T | C | Homozygous   |
| NC_037645.1 | 35208    | SNV | 1 | A | G | Heterozygous |
| NC_037645.1 | 36857    | SNV | 1 | T | C | Homozygous   |
| NC_037645.1 | 36901    | SNV | 1 | T | C | Homozygous   |
| NC_037645.1 | 37611    | SNV | 1 | C | T | Heterozygous |
| NC_037645.1 | 37641    | SNV | 1 | G | A | Heterozygous |
| NC_037645.1 | 37686    | SNV | 1 | A | G | Homozygous   |
| NC_037645.1 | 37688    | SNV | 1 | T | C | Homozygous   |
| NC_037645.1 | 37695    | SNV | 1 | A | T | Homozygous   |
| NC_037645.1 | 37703    | SNV | 1 | C | T | Heterozygous |
| NC_037645.1 | 37922    | SNV | 1 | T | C | Heterozygous |
| NC_037645.1 | 37938    | SNV | 1 | A | G | Heterozygous |
| NC_037645.1 | 38076    | SNV | 1 | T | C | Homozygous   |
| NC_037645.1 | 45915    | SNV | 1 | C | T | Heterozygous |
| NC_037645.1 | 46439    | SNV | 1 | G | A | Heterozygous |
| NC_037645.1 | 46463    | SNV | 1 | T | C | Homozygous   |
| NC_037645.1 | 46467    | SNV | 1 | C | T | Heterozygous |
| NC_037645.1 | 46578    | SNV | 1 | C | T | Heterozygous |
| NC_037645.1 | 49048    | SNV | 1 | T | C | Homozygous   |
| NC_037645.1 | 49078    | SNV | 1 | C | A | Heterozygous |
| NC_037645.1 | 49478    | SNV | 1 | C | T | Heterozygous |
| NC_037645.1 | 49489    | SNV | 1 | C | T | Heterozygous |
| NC_037645.1 | 104672   | SNV | 1 | G | A | Homozygous   |
| NC_037645.1 | 104803   | SNV | 1 | T | C | Heterozygous |
| NC_037645.1 | 104815   | SNV | 1 | G | A | Heterozygous |
| NC_037645.1 | 105239   | SNV | 1 | A | G | Homozygous   |
| NC_037645.1 | 105321   | SNV | 1 | G | A | Heterozygous |
| NC_037645.1 | 105969   | SNV | 1 | A | C | Heterozygous |

|             |        |     |   |   |   |              |
|-------------|--------|-----|---|---|---|--------------|
| NC_037645.1 | 105975 | SNV | 1 | A | G | Heterozygous |
| NC_037645.1 | 105977 | SNV | 1 | G | A | Heterozygous |
| NC_037645.1 | 105979 | SNV | 1 | G | A | Heterozygous |
| NC_037645.1 | 105984 | SNV | 1 | A | T | Heterozygous |
| NC_037645.1 | 112664 | SNV | 1 | C | T | Heterozygous |
| NC_037645.1 | 112929 | SNV | 1 | T | C | Homozygous   |
| NC_037645.1 | 116061 | SNV | 1 | A | T | Homozygous   |
| NC_037645.1 | 116064 | SNV | 1 | T | C | Homozygous   |
| NC_037645.1 | 116090 | SNV | 1 | C | A | Homozygous   |
| NC_037645.1 | 116095 | SNV | 1 | T | G | Homozygous   |
| NC_037645.1 | 121953 | SNV | 1 | A | T | Heterozygous |
| NC_037645.1 | 121975 | SNV | 1 | A | G | Homozygous   |
| NC_037645.1 | 121983 | SNV | 1 | G | A | Homozygous   |
| NC_037645.1 | 121989 | SNV | 1 | G | A | Homozygous   |
| NC_037645.1 | 140524 | SNV | 1 | T | C | Homozygous   |
| NC_037645.1 | 140615 | SNV | 1 | A | G | Heterozygous |
| NC_037645.1 | 140748 | SNV | 1 | A | G | Heterozygous |
| NC_037645.1 | 140806 | SNV | 1 | T | C | Heterozygous |
| NC_037645.1 | 140973 | SNV | 1 | T | C | Homozygous   |
| NC_037645.1 | 140978 | SNV | 1 | A | C | Homozygous   |
| NC_037645.1 | 141132 | SNV | 1 | C | T | Homozygous   |
| NC_037645.1 | 141134 | SNV | 1 | T | C | Homozygous   |
| NC_037645.1 | 141181 | SNV | 1 | T | C | Homozygous   |
| NC_037645.1 | 141222 | SNV | 1 | C | T | Heterozygous |
| NC_037645.1 | 141243 | SNV | 1 | A | T | Heterozygous |
| NC_037645.1 | 141252 | SNV | 1 | T | C | Homozygous   |
| NC_037645.1 | 141261 | SNV | 1 | A | G | Homozygous   |
| NC_037645.1 | 141275 | SNV | 1 | T | C | Homozygous   |
| NC_037645.1 | 141307 | SNV | 1 | T | C | Homozygous   |
| NC_037645.1 | 141310 | SNV | 1 | T | C | Homozygous   |
| NC_037645.1 | 141335 | SNV | 1 | T | C | Homozygous   |
| NC_037645.1 | 141344 | SNV | 1 | T | C | Heterozygous |
| NC_037645.1 | 141399 | SNV | 1 | C | T | Homozygous   |
| NC_037645.1 | 141416 | SNV | 1 | T | C | Homozygous   |
| NC_037645.1 | 141481 | SNV | 1 | C | A | Homozygous   |
| NC_037645.1 | 141488 | SNV | 1 | T | C | Heterozygous |
| NC_037645.1 | 141494 | SNV | 1 | T | A | Heterozygous |
| NC_037645.1 | 141522 | SNV | 1 | C | T | Homozygous   |
| NC_037645.1 | 141774 | SNV | 1 | T | C | Homozygous   |
| NC_037645.1 | 141776 | SNV | 1 | T | C | Homozygous   |
| NC_037645.1 | 142032 | SNV | 1 | A | G | Homozygous   |
| NC_037645.1 | 142274 | SNV | 1 | T | C | Homozygous   |
| NC_037645.1 | 142278 | SNV | 1 | G | C | Heterozygous |
| NC_037645.1 | 142282 | SNV | 1 | C | T | Heterozygous |
| NC_037645.1 | 142306 | SNV | 1 | A | G | Heterozygous |
| NC_037645.1 | 142308 | SNV | 1 | A | G | Heterozygous |
| NC_037645.1 | 142310 | SNV | 1 | A | G | Heterozygous |
| NC_037645.1 | 142317 | SNV | 1 | A | G | Homozygous   |
| NC_037645.1 | 142386 | SNV | 1 | T | G | Heterozygous |
| NC_037645.1 | 144199 | SNV | 1 | A | C | Heterozygous |
| NC_037645.1 | 144203 | SNV | 1 | A | G | Heterozygous |

|             |        |     |   |   |   |              |
|-------------|--------|-----|---|---|---|--------------|
| NC_037645.1 | 144206 | SNV | 1 | A | G | Heterozygous |
| NC_037645.1 | 153248 | SNV | 1 | A | G | Heterozygous |
| NC_037645.1 | 153259 | SNV | 1 | T | C | Heterozygous |
| NC_037645.1 | 153266 | SNV | 1 | C | T | Homozygous   |
| NC_037645.1 | 153312 | SNV | 1 | G | A | Heterozygous |
| NC_037645.1 | 153351 | SNV | 1 | C | T | Homozygous   |
| NC_037645.1 | 153369 | SNV | 1 | A | G | Homozygous   |
| NC_037645.1 | 174786 | SNV | 1 | T | C | Homozygous   |
| NC_037645.1 | 177300 | SNV | 1 | G | T | Homozygous   |
| NC_037645.1 | 177350 | SNV | 1 | A | G | Heterozygous |
| NC_037645.1 | 177446 | SNV | 1 | A | G | Heterozygous |
| NC_037645.1 | 178223 | SNV | 1 | G | A | Heterozygous |
| NC_037645.1 | 178225 | SNV | 1 | A | G | Heterozygous |
| NC_037645.1 | 178232 | SNV | 1 | C | T | Heterozygous |
| NC_037645.1 | 178233 | SNV | 1 | G | A | Heterozygous |
| NC_037645.1 | 184589 | SNV | 1 | C | T | Heterozygous |
| NC_037645.1 | 185228 | SNV | 1 | T | C | Homozygous   |
| NC_037645.1 | 185268 | SNV | 1 | C | T | Heterozygous |
| NC_037645.1 | 185363 | SNV | 1 | C | T | Homozygous   |
| NC_037645.1 | 185390 | SNV | 1 | T | G | Homozygous   |
| NC_037645.1 | 185512 | SNV | 1 | G | A | Heterozygous |
| NC_037645.1 | 185658 | SNV | 1 | T | C | Homozygous   |
| NC_037645.1 | 185817 | SNV | 1 | A | T | Heterozygous |
| NC_037645.1 | 185986 | SNV | 1 | C | T | Heterozygous |
| NC_037645.1 | 185989 | SNV | 1 | T | C | Homozygous   |
| NC_037645.1 | 186040 | SNV | 1 | C | T | Homozygous   |
| NC_037645.1 | 186048 | SNV | 1 | G | A | Homozygous   |
| NC_037645.1 | 186056 | SNV | 1 | C | T | Homozygous   |
| NC_037645.1 | 186066 | SNV | 1 | G | A | Homozygous   |
| NC_037645.1 | 186092 | SNV | 1 | G | A | Homozygous   |
| NC_037645.1 | 186251 | SNV | 1 | C | T | Heterozygous |
| NC_037645.1 | 186302 | SNV | 1 | C | T | Heterozygous |
| NC_037645.1 | 186321 | SNV | 1 | T | C | Heterozygous |
| NC_037645.1 | 186355 | SNV | 1 | C | T | Heterozygous |
| NC_037645.1 | 186518 | SNV | 1 | G | A | Homozygous   |
| NC_037645.1 | 186520 | SNV | 1 | G | A | Homozygous   |
| NC_037645.1 | 186561 | SNV | 1 | T | C | Homozygous   |
| NC_037645.1 | 186600 | SNV | 1 | C | T | Homozygous   |
| NC_037645.1 | 186660 | SNV | 1 | T | C | Homozygous   |
| NC_037645.1 | 186666 | SNV | 1 | G | C | Heterozygous |
| NC_037645.1 | 187648 | SNV | 1 | G | C | Heterozygous |
| NC_037645.1 | 187935 | SNV | 1 | C | T | Heterozygous |
| NC_037645.1 | 188020 | SNV | 1 | C | T | Heterozygous |
| NC_037645.1 | 188027 | SNV | 1 | T | G | Homozygous   |
| NC_037645.1 | 188034 | SNV | 1 | G | A | Homozygous   |
| NC_037645.1 | 188036 | SNV | 1 | G | A | Homozygous   |
| NC_037645.1 | 189013 | SNV | 1 | C | T | Homozygous   |
| NC_037645.1 | 189015 | SNV | 1 | A | C | Homozygous   |
| NC_037645.1 | 189028 | SNV | 1 | T | C | Homozygous   |
| NC_037645.1 | 189048 | SNV | 1 | T | C | Homozygous   |
| NC_037645.1 | 189089 | SNV | 1 | G | A | Homozygous   |



|             |        |     |   |   |   |              |
|-------------|--------|-----|---|---|---|--------------|
| NC_037645.1 | 189130 | SNV | 1 | C | T | Heterozygous |
| NC_037645.1 | 190586 | SNV | 1 | G | T | Heterozygous |
| NC_037645.1 | 190852 | SNV | 1 | A | G | Heterozygous |
| NC_037645.1 | 190911 | SNV | 1 | G | C | Heterozygous |
| NC_037645.1 | 191082 | SNV | 1 | C | T | Homozygous   |
| NC_037645.1 | 191109 | SNV | 1 | A | G | Homozygous   |
| NC_037645.1 | 191115 | SNV | 1 | C | T | Homozygous   |
| NC_037645.1 | 201013 | SNV | 1 | C | G | Heterozygous |
| NC_037645.1 | 207795 | SNV | 1 | T | C | Homozygous   |
| NC_037645.1 | 207940 | SNV | 1 | A | C | Homozygous   |
| NC_037645.1 | 218770 | SNV | 1 | A | G | Homozygous   |
| NC_037645.1 | 218795 | SNV | 1 | C | T | Homozygous   |
| NC_037645.1 | 218807 | SNV | 1 | C | T | Homozygous   |
| NC_037645.1 | 218809 | SNV | 1 | A | C | Homozygous   |
| NC_037645.1 | 218826 | SNV | 1 | T | A | Homozygous   |
| NC_037645.1 | 218828 | SNV | 1 | G | A | Heterozygous |
| NC_037645.1 | 219608 | SNV | 1 | A | G | Heterozygous |
| NC_037645.1 | 219614 | SNV | 1 | A | G | Heterozygous |
| NC_037645.1 | 219620 | SNV | 1 | A | G | Homozygous   |
| NC_037645.1 | 219640 | SNV | 1 | T | C | Homozygous   |
| NC_037645.1 | 219642 | SNV | 1 | T | C | Heterozygous |
| NC_037645.1 | 219652 | SNV | 1 | T | C | Homozygous   |
| NC_037645.1 | 219665 | SNV | 1 | T | C | Heterozygous |
| NC_037645.1 | 219681 | SNV | 1 | A | T | Homozygous   |
| NC_037645.1 | 219690 | SNV | 1 | C | T | Homozygous   |
| NC_037645.1 | 219693 | SNV | 1 | A | G | Homozygous   |
| NC_037645.1 | 219700 | SNV | 1 | C | T | Heterozygous |
| NC_037645.1 | 219702 | SNV | 1 | C | A | Homozygous   |
| NC_037645.1 | 219709 | SNV | 1 | T | A | Homozygous   |
| NC_037645.1 | 238162 | SNV | 1 | C | G | Homozygous   |
| NC_037645.1 | 238407 | SNV | 1 | G | A | Heterozygous |
| NC_037645.1 | 238415 | SNV | 1 | A | G | Homozygous   |
| NC_037645.1 | 238444 | SNV | 1 | G | A | Heterozygous |
| NC_037645.1 | 238476 | SNV | 1 | G | C | Homozygous   |
| NC_037645.1 | 238504 | SNV | 1 | A | G | Heterozygous |
| NC_037645.1 | 251708 | SNV | 1 | G | A | Homozygous   |
| NC_037645.1 | 251780 | SNV | 1 | G | A | Homozygous   |
| NC_037645.1 | 259239 | SNV | 1 | C | T | Homozygous   |
| NC_037645.1 | 259243 | SNV | 1 | T | C | Heterozygous |
| NC_037645.1 | 259411 | SNV | 1 | C | T | Heterozygous |
| NC_037645.1 | 261306 | SNV | 1 | A | G | Homozygous   |
| NC_037645.1 | 261308 | SNV | 1 | G | C | Homozygous   |
| NC_037645.1 | 261336 | SNV | 1 | G | T | Homozygous   |
| NC_037645.1 | 261342 | SNV | 1 | G | A | Homozygous   |
| NC_037645.1 | 262170 | SNV | 1 | A | G | Homozygous   |
| NC_037645.1 | 262209 | SNV | 1 | T | A | Homozygous   |
| NC_037645.1 | 262227 | SNV | 1 | A | G | Homozygous   |
| NC_037645.1 | 262233 | SNV | 1 | A | G | Homozygous   |
| NC_037645.1 | 262269 | SNV | 1 | A | T | Homozygous   |
| NC_037645.1 | 281188 | SNV | 1 | G | A | Homozygous   |
| NC_037645.1 | 281194 | SNV | 1 | G | A | Homozygous   |

|             |        |     |   |   |   |              |
|-------------|--------|-----|---|---|---|--------------|
| NC_037645.1 | 281216 | SNV | 1 | G | A | Heterozygous |
| NC_037645.1 | 282883 | SNV | 1 | A | G | Homozygous   |
| NC_037645.1 | 283186 | SNV | 1 | A | G | Heterozygous |
| NC_037645.1 | 283807 | SNV | 1 | A | G | Homozygous   |
| NC_037645.1 | 283809 | SNV | 1 | A | G | Homozygous   |
| NC_037645.1 | 283811 | SNV | 1 | A | G | Homozygous   |
| NC_037645.1 | 295956 | SNV | 1 | A | G | Homozygous   |
| NC_037645.1 | 296129 | SNV | 1 | G | A | Homozygous   |
| NC_037645.1 | 299552 | SNV | 1 | A | G | Heterozygous |
| NC_037645.1 | 304688 | SNV | 1 | G | A | Homozygous   |
| NC_037645.1 | 304696 | SNV | 1 | A | T | Homozygous   |
| NC_037645.1 | 304728 | SNV | 1 | T | A | Homozygous   |
| NC_037645.1 | 307147 | SNV | 1 | G | A | Homozygous   |
| NC_037645.1 | 307507 | SNV | 1 | T | C | Heterozygous |
| NC_037645.1 | 309018 | SNV | 1 | C | A | Heterozygous |
| NC_037645.1 | 315360 | SNV | 1 | G | A | Homozygous   |
| NC_037645.1 | 315504 | SNV | 1 | G | A | Homozygous   |
| NC_037645.1 | 325247 | SNV | 1 | A | T | Homozygous   |
| NC_037645.1 | 325285 | SNV | 1 | A | C | Homozygous   |
| NC_037645.1 | 325287 | SNV | 1 | T | A | Homozygous   |
| NC_037645.1 | 325291 | SNV | 1 | A | T | Homozygous   |
| NC_037645.1 | 325294 | SNV | 1 | A | T | Homozygous   |
| NC_037645.1 | 325296 | SNV | 1 | T | A | Homozygous   |
| NC_037645.1 | 325298 | SNV | 1 | T | A | Homozygous   |
| NC_037645.1 | 325303 | SNV | 1 | A | T | Homozygous   |
| NC_037645.1 | 325308 | SNV | 1 | A | C | Homozygous   |
| NC_037645.1 | 332504 | SNV | 1 | A | G | Heterozygous |
| NC_037645.1 | 332508 | SNV | 1 | G | T | Heterozygous |
| NC_037645.1 | 342261 | SNV | 1 | T | C | Homozygous   |
| NC_037645.1 | 342270 | SNV | 1 | T | C | Homozygous   |
| NC_037645.1 | 342347 | SNV | 1 | A | T | Heterozygous |
| NC_037645.1 | 342564 | SNV | 1 | A | G | Homozygous   |
| NC_037645.1 | 342623 | SNV | 1 | G | A | Heterozygous |
| NC_037645.1 | 342646 | SNV | 1 | C | T | Heterozygous |
| NC_037645.1 | 342652 | SNV | 1 | A | G | Homozygous   |
| NC_037645.1 | 342725 | SNV | 1 | G | A | Heterozygous |
| NC_037645.1 | 342961 | SNV | 1 | A | G | Homozygous   |
| NC_037645.1 | 342979 | SNV | 1 | A | G | Heterozygous |
| NC_037645.1 | 343066 | SNV | 1 | A | G | Homozygous   |
| NC_037645.1 | 343269 | SNV | 1 | T | C | Heterozygous |
| NC_037645.1 | 343271 | SNV | 1 | T | C | Heterozygous |
| NC_037645.1 | 343277 | SNV | 1 | T | A | Heterozygous |
| NC_037645.1 | 343353 | SNV | 1 | T | C | Homozygous   |
| NC_037645.1 | 343534 | SNV | 1 | C | T | Homozygous   |
| NC_037645.1 | 343652 | SNV | 1 | C | T | Heterozygous |
| NC_037645.1 | 343791 | SNV | 1 | A | G | Homozygous   |
| NC_037645.1 | 346912 | SNV | 1 | G | C | Homozygous   |
| NC_037645.1 | 346923 | SNV | 1 | T | C | Homozygous   |
| NC_037645.1 | 346947 | SNV | 1 | C | T | Homozygous   |
| NC_037645.1 | 356477 | SNV | 1 | A | G | Homozygous   |
| NC_037645.1 | 356500 | SNV | 1 | A | G | Heterozygous |

|             |        |     |   |   |   |              |
|-------------|--------|-----|---|---|---|--------------|
| NC_037645.1 | 356530 | SNV | 1 | A | G | Heterozygous |
| NC_037645.1 | 356988 | SNV | 1 | T | C | Homozygous   |
| NC_037645.1 | 357497 | SNV | 1 | T | C | Homozygous   |
| NC_037645.1 | 357728 | SNV | 1 | C | T | Heterozygous |
| NC_037645.1 | 357769 | SNV | 1 | C | T | Heterozygous |
| NC_037645.1 | 357774 | SNV | 1 | A | G | Heterozygous |
| NC_037645.1 | 357817 | SNV | 1 | A | G | Homozygous   |
| NC_037645.1 | 357835 | SNV | 1 | A | G | Homozygous   |
| NC_037645.1 | 357855 | SNV | 1 | A | G | Heterozygous |
| NC_037645.1 | 357864 | SNV | 1 | A | G | Homozygous   |
| NC_037645.1 | 357870 | SNV | 1 | A | G | Heterozygous |
| NC_037645.1 | 357881 | SNV | 1 | C | T | Heterozygous |
| NC_037645.1 | 357932 | SNV | 1 | C | G | Heterozygous |
| NC_037645.1 | 357936 | SNV | 1 | T | C | Heterozygous |
| NC_037645.1 | 357938 | SNV | 1 | A | G | Heterozygous |
| NC_037645.1 | 358460 | SNV | 1 | A | G | Homozygous   |
| NC_037645.1 | 358536 | SNV | 1 | A | G | Heterozygous |
| NC_037645.1 | 358793 | SNV | 1 | A | G | Homozygous   |
| NC_037645.1 | 358805 | SNV | 1 | A | G | Homozygous   |
| NC_037645.1 | 358883 | SNV | 1 | G | A | Homozygous   |
| NC_037645.1 | 359063 | SNV | 1 | C | T | Heterozygous |
| NC_037645.1 | 359117 | SNV | 1 | T | C | Homozygous   |
| NC_037645.1 | 359481 | SNV | 1 | T | C | Heterozygous |
| NC_037645.1 | 359592 | SNV | 1 | C | T | Homozygous   |
| NC_037645.1 | 359679 | SNV | 1 | G | A | Homozygous   |
| NC_037645.1 | 359686 | SNV | 1 | G | A | Homozygous   |
| NC_037645.1 | 361516 | SNV | 1 | T | C | Homozygous   |
| NC_037645.1 | 361578 | SNV | 1 | C | A | Heterozygous |
| NC_037645.1 | 361582 | SNV | 1 | C | G | Heterozygous |
| NC_037645.1 | 361603 | SNV | 1 | T | G | Heterozygous |
| NC_037645.1 | 361670 | SNV | 1 | G | C | Heterozygous |
| NC_037645.1 | 362204 | SNV | 1 | G | A | Homozygous   |
| NC_037645.1 | 362239 | SNV | 1 | C | T | Homozygous   |
| NC_037645.1 | 362261 | SNV | 1 | T | C | Heterozygous |
| NC_037645.1 | 362734 | SNV | 1 | A | G | Heterozygous |
| NC_037645.1 | 362738 | SNV | 1 | T | C | Heterozygous |
| NC_037645.1 | 366187 | SNV | 1 | A | G | Heterozygous |
| NC_037645.1 | 366205 | SNV | 1 | G | C | Heterozygous |
| NC_037645.1 | 366860 | SNV | 1 | A | G | Homozygous   |
| NC_037645.1 | 366973 | SNV | 1 | T | C | Homozygous   |
| NC_037645.1 | 367479 | SNV | 1 | A | G | Heterozygous |
| NC_037645.1 | 367568 | SNV | 1 | A | G | Homozygous   |
| NC_037645.1 | 367644 | SNV | 1 | T | G | Heterozygous |
| NC_037645.1 | 368054 | SNV | 1 | G | A | Heterozygous |
| NC_037645.1 | 368210 | SNV | 1 | T | C | Heterozygous |
| NC_037645.1 | 368939 | SNV | 1 | C | G | Homozygous   |
| NC_037645.1 | 369433 | SNV | 1 | A | G | Homozygous   |
| NC_037645.1 | 369516 | SNV | 1 | A | G | Homozygous   |
| NC_037645.1 | 369864 | SNV | 1 | A | G | Homozygous   |
| NC_037645.1 | 370067 | SNV | 1 | G | A | Heterozygous |
| NC_037645.1 | 370225 | SNV | 1 | T | G | Homozygous   |

|             |        |     |   |   |   |              |
|-------------|--------|-----|---|---|---|--------------|
| NC_037645.1 | 370415 | SNV | 1 | G | A | Homozygous   |
| NC_037645.1 | 373903 | SNV | 1 | C | T | Homozygous   |
| NC_037645.1 | 379570 | SNV | 1 | C | T | Homozygous   |
| NC_037645.1 | 382786 | SNV | 1 | G | C | Homozygous   |
| NC_037645.1 | 385725 | SNV | 1 | A | G | Homozygous   |
| NC_037645.1 | 385858 | SNV | 1 | T | C | Homozygous   |
| NC_037645.1 | 386978 | SNV | 1 | A | G | Homozygous   |
| NC_037645.1 | 387067 | SNV | 1 | A | G | Homozygous   |
| NC_037645.1 | 387229 | SNV | 1 | G | A | Heterozygous |
| NC_037645.1 | 387399 | SNV | 1 | G | A | Heterozygous |
| NC_037645.1 | 387428 | SNV | 1 | T | C | Homozygous   |
| NC_037645.1 | 388408 | SNV | 1 | T | A | Heterozygous |
| NC_037645.1 | 399384 | SNV | 1 | A | G | Homozygous   |
| NC_037645.1 | 399463 | SNV | 1 | C | G | Homozygous   |
| NC_037645.1 | 399532 | SNV | 1 | G | A | Homozygous   |
| NC_037645.1 | 401329 | SNV | 1 | G | A | Heterozygous |
| NC_037645.1 | 401499 | SNV | 1 | T | G | Heterozygous |
| NC_037645.1 | 401552 | SNV | 1 | G | A | Homozygous   |
| NC_037645.1 | 401564 | SNV | 1 | A | G | Homozygous   |
| NC_037645.1 | 401947 | SNV | 1 | T | C | Heterozygous |
| NC_037645.1 | 401984 | SNV | 1 | T | A | Heterozygous |
| NC_037645.1 | 405358 | SNV | 1 | A | G | Heterozygous |
| NC_037645.1 | 405360 | SNV | 1 | A | G | Heterozygous |
| NC_037645.1 | 405362 | SNV | 1 | G | A | Homozygous   |
| NC_037645.1 | 405365 | SNV | 1 | C | A | Heterozygous |
| NC_037645.1 | 412363 | SNV | 1 | G | A | Heterozygous |
| NC_037645.1 | 412385 | SNV | 1 | T | C | Homozygous   |
| NC_037645.1 | 412668 | SNV | 1 | T | C | Homozygous   |
| NC_037645.1 | 419142 | SNV | 1 | A | T | Heterozygous |
| NC_037645.1 | 423944 | SNV | 1 | A | T | Homozygous   |
| NC_037645.1 | 424502 | SNV | 1 | C | G | Heterozygous |
| NC_037645.1 | 427405 | SNV | 1 | A | T | Homozygous   |
| NC_037645.1 | 427432 | SNV | 1 | C | T | Homozygous   |
| NC_037645.1 | 450270 | SNV | 1 | T | C | Heterozygous |
| NC_037645.1 | 450286 | SNV | 1 | T | A | Homozygous   |
| NC_037645.1 | 450322 | SNV | 1 | G | A | Heterozygous |
| NC_037645.1 | 453554 | SNV | 1 | C | T | Homozygous   |
| NC_037645.1 | 453564 | SNV | 1 | A | G | Heterozygous |
| NC_037645.1 | 453584 | SNV | 1 | G | C | Heterozygous |
| NC_037645.1 | 453611 | SNV | 1 | T | C | Homozygous   |
| NC_037645.1 | 453694 | SNV | 1 | G | A | Heterozygous |
| NC_037645.1 | 453780 | SNV | 1 | C | T | Homozygous   |
| NC_037645.1 | 453952 | SNV | 1 | T | C | Homozygous   |
| NC_037645.1 | 454002 | SNV | 1 | C | T | Heterozygous |
| NC_037645.1 | 454016 | SNV | 1 | A | G | Homozygous   |
| NC_037645.1 | 454035 | SNV | 1 | A | G | Heterozygous |
| NC_037645.1 | 454042 | SNV | 1 | A | G | Heterozygous |
| NC_037645.1 | 473434 | SNV | 1 | T | C | Heterozygous |
| NC_037645.1 | 473698 | SNV | 1 | G | A | Heterozygous |
| NC_037645.1 | 474011 | SNV | 1 | G | T | Heterozygous |
| NC_037645.1 | 474460 | SNV | 1 | A | G | Homozygous   |

|             |        |     |   |   |   |              |
|-------------|--------|-----|---|---|---|--------------|
| NC_037645.1 | 478955 | SNV | 1 | T | C | Heterozygous |
| NC_037645.1 | 479379 | SNV | 1 | G | A | Heterozygous |
| NC_037645.1 | 479585 | SNV | 1 | A | T | Heterozygous |
| NC_037645.1 | 479603 | SNV | 1 | T | C | Heterozygous |
| NC_037645.1 | 479692 | SNV | 1 | T | C | Homozygous   |
| NC_037645.1 | 479971 | SNV | 1 | C | T | Homozygous   |
| NC_037645.1 | 480011 | SNV | 1 | A | G | Homozygous   |
| NC_037645.1 | 480015 | SNV | 1 | G | A | Homozygous   |
| NC_037645.1 | 480018 | SNV | 1 | G | A | Homozygous   |
| NC_037645.1 | 480026 | SNV | 1 | C | T | Homozygous   |
| NC_037645.1 | 480065 | SNV | 1 | A | G | Homozygous   |
| NC_037645.1 | 480132 | SNV | 1 | T | C | Homozygous   |
| NC_037645.1 | 480147 | SNV | 1 | A | G | Homozygous   |
| NC_037645.1 | 480800 | SNV | 1 | G | T | Homozygous   |
| NC_037645.1 | 480823 | SNV | 1 | C | T | Heterozygous |
| NC_037645.1 | 480848 | SNV | 1 | G | T | Heterozygous |
| NC_037645.1 | 481029 | SNV | 1 | C | G | Heterozygous |
| NC_037645.1 | 481041 | SNV | 1 | T | G | Heterozygous |
| NC_037645.1 | 481042 | SNV | 1 | A | T | Heterozygous |
| NC_037645.1 | 482138 | SNV | 1 | A | G | Homozygous   |
| NC_037645.1 | 482303 | SNV | 1 | T | C | Heterozygous |
| NC_037645.1 | 482313 | SNV | 1 | A | G | Heterozygous |
| NC_037645.1 | 482331 | SNV | 1 | G | A | Heterozygous |
| NC_037645.1 | 483861 | SNV | 1 | C | T | Heterozygous |
| NC_037645.1 | 483907 | SNV | 1 | T | C | Homozygous   |
| NC_037645.1 | 484287 | SNV | 1 | T | C | Heterozygous |
| NC_037645.1 | 484299 | SNV | 1 | T | C | Homozygous   |
| NC_037645.1 | 484602 | SNV | 1 | A | G | Heterozygous |
| NC_037645.1 | 484666 | SNV | 1 | A | G | Heterozygous |
| NC_037645.1 | 484711 | SNV | 1 | T | C | Heterozygous |
| NC_037645.1 | 484924 | SNV | 1 | T | C | Homozygous   |
| NC_037645.1 | 485602 | SNV | 1 | T | C | Homozygous   |
| NC_037645.1 | 485696 | SNV | 1 | T | A | Homozygous   |
| NC_037645.1 | 485772 | SNV | 1 | A | G | Heterozygous |
| NC_037645.1 | 485797 | SNV | 1 | G | T | Heterozygous |
| NC_037645.1 | 485818 | SNV | 1 | T | A | Homozygous   |
| NC_037645.1 | 486011 | SNV | 1 | G | A | Heterozygous |
| NC_037645.1 | 486058 | SNV | 1 | T | C | Homozygous   |
| NC_037645.1 | 486268 | SNV | 1 | T | C | Homozygous   |
| NC_037645.1 | 486270 | SNV | 1 | T | C | Heterozygous |
| NC_037645.1 | 486280 | SNV | 1 | C | T | Heterozygous |
| NC_037645.1 | 486454 | SNV | 1 | C | T | Heterozygous |
| NC_037645.1 | 486473 | SNV | 1 | C | T | Heterozygous |
| NC_037645.1 | 486575 | SNV | 1 | T | A | Heterozygous |
| NC_037645.1 | 486873 | SNV | 1 | A | G | Heterozygous |
| NC_037645.1 | 486944 | SNV | 1 | A | G | Homozygous   |
| NC_037645.1 | 487219 | SNV | 1 | A | G | Heterozygous |
| NC_037645.1 | 487275 | SNV | 1 | A | G | Heterozygous |
| NC_037645.1 | 487479 | SNV | 1 | A | G | Homozygous   |
| NC_037645.1 | 487531 | SNV | 1 | G | A | Homozygous   |
| NC_037645.1 | 487623 | SNV | 1 | T | C | Heterozygous |

|             |        |     |   |   |   |              |
|-------------|--------|-----|---|---|---|--------------|
| NC_037645.1 | 487652 | SNV | 1 | C | T | Homozygous   |
| NC_037645.1 | 487658 | SNV | 1 | T | C | Homozygous   |
| NC_037645.1 | 487675 | SNV | 1 | G | C | Heterozygous |
| NC_037645.1 | 487702 | SNV | 1 | A | G | Homozygous   |
| NC_037645.1 | 487732 | SNV | 1 | G | A | Heterozygous |
| NC_037645.1 | 487771 | SNV | 1 | A | G | Homozygous   |
| NC_037645.1 | 488289 | SNV | 1 | A | G | Heterozygous |
| NC_037645.1 | 488291 | SNV | 1 | A | G | Heterozygous |
| NC_037645.1 | 488303 | SNV | 1 | A | G | Heterozygous |
| NC_037645.1 | 488308 | SNV | 1 | C | T | Homozygous   |
| NC_037645.1 | 488314 | SNV | 1 | T | A | Heterozygous |
| NC_037645.1 | 488321 | SNV | 1 | A | T | Homozygous   |
| NC_037645.1 | 488325 | SNV | 1 | A | G | Homozygous   |
| NC_037645.1 | 488850 | SNV | 1 | G | T | Homozygous   |
| NC_037645.1 | 488855 | SNV | 1 | T | A | Homozygous   |
| NC_037645.1 | 488857 | SNV | 1 | A | C | Homozygous   |
| NC_037645.1 | 489174 | SNV | 1 | T | C | Homozygous   |
| NC_037645.1 | 489363 | SNV | 1 | T | C | Homozygous   |
| NC_037645.1 | 489382 | SNV | 1 | G | A | Heterozygous |
| NC_037645.1 | 489401 | SNV | 1 | T | C | Homozygous   |
| NC_037645.1 | 489424 | SNV | 1 | T | C | Homozygous   |
| NC_037645.1 | 489436 | SNV | 1 | C | T | Homozygous   |
| NC_037645.1 | 489485 | SNV | 1 | C | T | Heterozygous |
| NC_037645.1 | 489494 | SNV | 1 | G | A | Heterozygous |
| NC_037645.1 | 489522 | SNV | 1 | C | A | Heterozygous |
| NC_037645.1 | 489538 | SNV | 1 | A | G | Homozygous   |
| NC_037645.1 | 489579 | SNV | 1 | T | C | Homozygous   |
| NC_037645.1 | 489832 | SNV | 1 | C | G | Homozygous   |
| NC_037645.1 | 490098 | SNV | 1 | C | T | Heterozygous |
| NC_037645.1 | 490119 | SNV | 1 | A | C | Homozygous   |
| NC_037645.1 | 490190 | SNV | 1 | C | T | Homozygous   |
| NC_037645.1 | 490379 | SNV | 1 | C | T | Heterozygous |
| NC_037645.1 | 490507 | SNV | 1 | G | A | Heterozygous |
| NC_037645.1 | 490570 | SNV | 1 | T | C | Heterozygous |
| NC_037645.1 | 490594 | SNV | 1 | C | T | Heterozygous |
| NC_037645.1 | 492014 | SNV | 1 | C | T | Heterozygous |
| NC_037645.1 | 492016 | SNV | 1 | T | C | Homozygous   |
| NC_037645.1 | 498009 | SNV | 1 | T | C | Homozygous   |
| NC_037645.1 | 498330 | SNV | 1 | C | A | Homozygous   |
| NC_037645.1 | 498333 | SNV | 1 | G | A | Homozygous   |
| NC_037645.1 | 499551 | SNV | 1 | T | C | Heterozygous |
| NC_037645.1 | 499553 | SNV | 1 | G | C | Heterozygous |
| NC_037645.1 | 499556 | SNV | 1 | C | G | Heterozygous |
| NC_037645.1 | 500912 | SNV | 1 | T | C | Heterozygous |
| NC_037645.1 | 500926 | SNV | 1 | C | T | Heterozygous |
| NC_037645.1 | 501718 | SNV | 1 | T | C | Homozygous   |
| NC_037645.1 | 501727 | SNV | 1 | G | A | Homozygous   |
| NC_037645.1 | 502614 | SNV | 1 | C | G | Homozygous   |
| NC_037645.1 | 503799 | SNV | 1 | C | A | Homozygous   |
| NC_037645.1 | 503807 | SNV | 1 | A | G | Heterozygous |
| NC_037645.1 | 503904 | SNV | 1 | G | C | Homozygous   |

|             |        |     |   |   |   |              |
|-------------|--------|-----|---|---|---|--------------|
| NC_037645.1 | 505159 | SNV | 1 | C | T | Heterozygous |
| NC_037645.1 | 505171 | SNV | 1 | A | G | Homozygous   |
| NC_037645.1 | 505262 | SNV | 1 | G | A | Homozygous   |
| NC_037645.1 | 505511 | SNV | 1 | A | G | Homozygous   |
| NC_037645.1 | 505888 | SNV | 1 | A | G | Heterozygous |
| NC_037645.1 | 505974 | SNV | 1 | C | T | Homozygous   |
| NC_037645.1 | 505979 | SNV | 1 | T | C | Homozygous   |
| NC_037645.1 | 506010 | SNV | 1 | C | T | Homozygous   |
| NC_037645.1 | 506019 | SNV | 1 | T | C | Homozygous   |
| NC_037645.1 | 506022 | SNV | 1 | T | C | Homozygous   |
| NC_037645.1 | 506029 | SNV | 1 | A | C | Homozygous   |
| NC_037645.1 | 506032 | SNV | 1 | A | C | Homozygous   |
| NC_037645.1 | 506164 | SNV | 1 | C | T | Heterozygous |
| NC_037645.1 | 506212 | SNV | 1 | A | C | Heterozygous |
| NC_037645.1 | 506293 | SNV | 1 | G | A | Heterozygous |
| NC_037645.1 | 506303 | SNV | 1 | G | A | Heterozygous |
| NC_037645.1 | 506430 | SNV | 1 | C | T | Homozygous   |
| NC_037645.1 | 506891 | SNV | 1 | T | C | Homozygous   |
| NC_037645.1 | 506973 | SNV | 1 | A | G | Homozygous   |
| NC_037645.1 | 507020 | SNV | 1 | A | T | Heterozygous |
| NC_037645.1 | 507027 | SNV | 1 | C | T | Homozygous   |
| NC_037645.1 | 507033 | SNV | 1 | C | T | Homozygous   |
| NC_037645.1 | 507084 | SNV | 1 | T | A | Heterozygous |
| NC_037645.1 | 507096 | SNV | 1 | C | T | Homozygous   |
| NC_037645.1 | 507204 | SNV | 1 | G | A | Heterozygous |
| NC_037645.1 | 507877 | SNV | 1 | A | G | Heterozygous |
| NC_037645.1 | 508057 | SNV | 1 | T | A | Homozygous   |
| NC_037645.1 | 508277 | SNV | 1 | A | G | Homozygous   |
| NC_037645.1 | 508378 | SNV | 1 | G | A | Homozygous   |
| NC_037645.1 | 508393 | SNV | 1 | A | G | Homozygous   |
| NC_037645.1 | 508409 | SNV | 1 | G | A | Homozygous   |
| NC_037645.1 | 508412 | SNV | 1 | A | G | Heterozygous |
| NC_037645.1 | 508525 | SNV | 1 | C | T | Heterozygous |
| NC_037645.1 | 508598 | SNV | 1 | A | G | Homozygous   |
| NC_037645.1 | 508604 | SNV | 1 | A | G | Heterozygous |
| NC_037645.1 | 508614 | SNV | 1 | T | C | Homozygous   |
| NC_037645.1 | 508637 | SNV | 1 | T | C | Heterozygous |
| NC_037645.1 | 508659 | SNV | 1 | T | C | Homozygous   |
| NC_037645.1 | 508685 | SNV | 1 | C | T | Heterozygous |
| NC_037645.1 | 508694 | SNV | 1 | G | A | Heterozygous |
| NC_037645.1 | 508758 | SNV | 1 | G | A | Heterozygous |
| NC_037645.1 | 508786 | SNV | 1 | T | C | Homozygous   |
| NC_037645.1 | 508886 | SNV | 1 | C | T | Heterozygous |
| NC_037645.1 | 508927 | SNV | 1 | T | C | Heterozygous |
| NC_037645.1 | 508974 | SNV | 1 | A | G | Homozygous   |
| NC_037645.1 | 509035 | SNV | 1 | T | C | Heterozygous |
| NC_037645.1 | 509158 | SNV | 1 | A | G | Homozygous   |
| NC_037645.1 | 509169 | SNV | 1 | T | C | Homozygous   |
| NC_037645.1 | 509186 | SNV | 1 | A | G | Homozygous   |
| NC_037645.1 | 509343 | SNV | 1 | G | A | Homozygous   |
| NC_037645.1 | 509480 | SNV | 1 | G | A | Homozygous   |

|             |        |     |   |   |   |              |
|-------------|--------|-----|---|---|---|--------------|
| NC_037645.1 | 509497 | SNV | 1 | G | A | Homozygous   |
| NC_037645.1 | 509671 | SNV | 1 | T | C | Heterozygous |
| NC_037645.1 | 509684 | SNV | 1 | T | C | Homozygous   |
| NC_037645.1 | 509720 | SNV | 1 | C | T | Homozygous   |
| NC_037645.1 | 509730 | SNV | 1 | T | C | Homozygous   |
| NC_037645.1 | 509736 | SNV | 1 | A | G | Homozygous   |
| NC_037645.1 | 509820 | SNV | 1 | A | G | Homozygous   |
| NC_037645.1 | 509826 | SNV | 1 | C | T | Heterozygous |
| NC_037645.1 | 509850 | SNV | 1 | G | A | Heterozygous |
| NC_037645.1 | 509884 | SNV | 1 | C | T | Homozygous   |
| NC_037645.1 | 509937 | SNV | 1 | G | A | Heterozygous |
| NC_037645.1 | 509981 | SNV | 1 | A | G | Heterozygous |
| NC_037645.1 | 510055 | SNV | 1 | T | C | Heterozygous |
| NC_037645.1 | 510057 | SNV | 1 | T | C | Heterozygous |
| NC_037645.1 | 510286 | SNV | 1 | A | T | Heterozygous |
| NC_037645.1 | 510308 | SNV | 1 | G | A | Homozygous   |
| NC_037645.1 | 510781 | SNV | 1 | A | G | Homozygous   |
| NC_037645.1 | 511013 | SNV | 1 | G | A | Heterozygous |
| NC_037645.1 | 511120 | SNV | 1 | C | T | Heterozygous |
| NC_037645.1 | 511174 | SNV | 1 | T | C | Homozygous   |
| NC_037645.1 | 511205 | SNV | 1 | T | C | Homozygous   |
| NC_037645.1 | 511377 | SNV | 1 | C | T | Homozygous   |
| NC_037645.1 | 511513 | SNV | 1 | C | T | Heterozygous |
| NC_037645.1 | 511583 | SNV | 1 | A | G | Homozygous   |
| NC_037645.1 | 511589 | SNV | 1 | C | T | Heterozygous |
| NC_037645.1 | 511621 | SNV | 1 | A | G | Homozygous   |
| NC_037645.1 | 511623 | SNV | 1 | A | G | Heterozygous |
| NC_037645.1 | 511632 | SNV | 1 | T | C | Homozygous   |
| NC_037645.1 | 511639 | SNV | 1 | C | A | Heterozygous |
| NC_037645.1 | 511657 | SNV | 1 | G | A | Heterozygous |
| NC_037645.1 | 511700 | SNV | 1 | A | G | Homozygous   |
| NC_037645.1 | 511741 | SNV | 1 | T | C | Homozygous   |
| NC_037645.1 | 511746 | SNV | 1 | A | G | Homozygous   |
| NC_037645.1 | 511767 | SNV | 1 | G | C | Homozygous   |
| NC_037645.1 | 511945 | SNV | 1 | A | G | Homozygous   |
| NC_037645.1 | 512057 | SNV | 1 | G | A | Homozygous   |
| NC_037645.1 | 512285 | SNV | 1 | C | A | Homozygous   |
| NC_037645.1 | 512309 | SNV | 1 | A | G | Homozygous   |
| NC_037645.1 | 512439 | SNV | 1 | G | A | Heterozygous |
| NC_037645.1 | 512842 | SNV | 1 | T | C | Homozygous   |
| NC_037645.1 | 513140 | SNV | 1 | A | G | Heterozygous |
| NC_037645.1 | 513180 | SNV | 1 | T | C | Heterozygous |
| NC_037645.1 | 513399 | SNV | 1 | G | A | Homozygous   |
| NC_037645.1 | 513631 | SNV | 1 | C | T | Heterozygous |
| NC_037645.1 | 513942 | SNV | 1 | A | G | Homozygous   |
| NC_037645.1 | 514103 | SNV | 1 | T | C | Homozygous   |
| NC_037645.1 | 514289 | SNV | 1 | T | C | Heterozygous |
| NC_037645.1 | 514305 | SNV | 1 | C | G | Heterozygous |
| NC_037645.1 | 515166 | SNV | 1 | A | G | Homozygous   |
| NC_037645.1 | 517189 | SNV | 1 | G | A | Heterozygous |
| NC_037645.1 | 517390 | SNV | 1 | A | C | Heterozygous |



|             |        |     |   |   |   |              |
|-------------|--------|-----|---|---|---|--------------|
| NC_037645.1 | 517421 | SNV | 1 | A | G | Heterozygous |
| NC_037645.1 | 522166 | SNV | 1 | A | T | Homozygous   |
| NC_037645.1 | 522179 | SNV | 1 | T | G | Homozygous   |
| NC_037645.1 | 522181 | SNV | 1 | T | C | Homozygous   |
| NC_037645.1 | 522183 | SNV | 1 | G | C | Homozygous   |
| NC_037645.1 | 522208 | SNV | 1 | T | A | Homozygous   |
| NC_037645.1 | 522210 | SNV | 1 | A | T | Homozygous   |
| NC_037645.1 | 522219 | SNV | 1 | A | T | Homozygous   |
| NC_037645.1 | 522803 | SNV | 1 | T | C | Heterozygous |
| NC_037645.1 | 522946 | SNV | 1 | G | A | Heterozygous |
| NC_037645.1 | 525988 | SNV | 1 | C | T | Heterozygous |
| NC_037645.1 | 526580 | SNV | 1 | A | G | Homozygous   |
| NC_037645.1 | 527219 | SNV | 1 | T | C | Homozygous   |
| NC_037645.1 | 530044 | SNV | 1 | G | A | Homozygous   |
| NC_037645.1 | 534427 | SNV | 1 | T | C | Homozygous   |
| NC_037645.1 | 540746 | SNV | 1 | T | C | Homozygous   |
| NC_037645.1 | 541678 | SNV | 1 | C | T | Homozygous   |
| NC_037645.1 | 541759 | SNV | 1 | C | T | Heterozygous |
| NC_037645.1 | 541786 | SNV | 1 | C | T | Homozygous   |
| NC_037645.1 | 541809 | SNV | 1 | T | C | Homozygous   |
| NC_037645.1 | 541927 | SNV | 1 | C | T | Heterozygous |
| NC_037645.1 | 542468 | SNV | 1 | T | C | Heterozygous |
| NC_037645.1 | 542718 | SNV | 1 | A | G | Homozygous   |
| NC_037645.1 | 542841 | SNV | 1 | A | G | Homozygous   |
| NC_037645.1 | 543020 | SNV | 1 | C | T | Heterozygous |
| NC_037645.1 | 668216 | SNV | 1 | A | G | Heterozygous |
| NC_037645.1 | 680546 | SNV | 1 | G | C | Heterozygous |
| NC_037645.1 | 681056 | SNV | 1 | G | A | Heterozygous |
| NC_037645.1 | 681063 | SNV | 1 | A | G | Heterozygous |
| NC_037645.1 | 684075 | SNV | 1 | G | A | Heterozygous |
| NC_037645.1 | 684130 | SNV | 1 | C | T | Homozygous   |
| NC_037645.1 | 684259 | SNV | 1 | A | G | Homozygous   |
| NC_037645.1 | 684374 | SNV | 1 | G | A | Heterozygous |
| NC_037645.1 | 684401 | SNV | 1 | A | G | Homozygous   |
| NC_037645.1 | 688102 | SNV | 1 | C | A | Heterozygous |
| NC_037645.1 | 688133 | SNV | 1 | C | T | Homozygous   |
| NC_037645.1 | 688146 | SNV | 1 | C | T | Homozygous   |
| NC_037645.1 | 688149 | SNV | 1 | T | C | Homozygous   |
| NC_037645.1 | 688158 | SNV | 1 | T | A | Homozygous   |
| NC_037645.1 | 688166 | SNV | 1 | C | A | Homozygous   |
| NC_037645.1 | 688170 | SNV | 1 | A | G | Heterozygous |
| NC_037645.1 | 688175 | SNV | 1 | A | T | Homozygous   |
| NC_037645.1 | 688178 | SNV | 1 | T | C | Homozygous   |
| NC_037645.1 | 688187 | SNV | 1 | A | T | Homozygous   |
| NC_037645.1 | 704833 | SNV | 1 | A | T | Homozygous   |
| NC_037645.1 | 704835 | SNV | 1 | C | A | Homozygous   |
| NC_037645.1 | 704844 | SNV | 1 | T | C | Heterozygous |
| NC_037645.1 | 704986 | SNV | 1 | A | T | Homozygous   |
| NC_037645.1 | 705040 | SNV | 1 | T | C | Homozygous   |
| NC_037645.1 | 705043 | SNV | 1 | T | C | Homozygous   |
| NC_037645.1 | 705061 | SNV | 1 | T | C | Homozygous   |

|             |        |     |   |   |   |              |
|-------------|--------|-----|---|---|---|--------------|
| NC_037645.1 | 705087 | SNV | 1 | C | T | Homozygous   |
| NC_037645.1 | 705258 | SNV | 1 | T | C | Heterozygous |
| NC_037645.1 | 705267 | SNV | 1 | A | C | Heterozygous |
| NC_037645.1 | 705270 | SNV | 1 | C | T | Homozygous   |
| NC_037645.1 | 705273 | SNV | 1 | T | C | Homozygous   |
| NC_037645.1 | 705288 | SNV | 1 | T | A | Homozygous   |
| NC_037645.1 | 705408 | SNV | 1 | C | T | Heterozygous |
| NC_037645.1 | 705417 | SNV | 1 | T | C | Heterozygous |
| NC_037645.1 | 705459 | SNV | 1 | T | C | Heterozygous |
| NC_037645.1 | 712390 | SNV | 1 | T | C | Homozygous   |
| NC_037645.1 | 712427 | SNV | 1 | T | C | Homozygous   |
| NC_037645.1 | 712438 | SNV | 1 | T | C | Homozygous   |
| NC_037645.1 | 714196 | SNV | 1 | C | T | Homozygous   |
| NC_037645.1 | 714199 | SNV | 1 | T | C | Heterozygous |
| NC_037645.1 | 714205 | SNV | 1 | C | A | Homozygous   |
| NC_037645.1 | 714208 | SNV | 1 | A | T | Homozygous   |
| NC_037645.1 | 714216 | SNV | 1 | C | T | Homozygous   |
| NC_037645.1 | 721666 | SNV | 1 | A | G | Heterozygous |
| NC_037645.1 | 721682 | SNV | 1 | T | A | Heterozygous |
| NC_037645.1 | 721691 | SNV | 1 | A | G | Heterozygous |
| NC_037645.1 | 723965 | SNV | 1 | T | C | Homozygous   |
| NC_037645.1 | 724016 | SNV | 1 | C | T | Heterozygous |
| NC_037645.1 | 724018 | SNV | 1 | T | C | Homozygous   |
| NC_037645.1 | 724041 | SNV | 1 | A | G | Heterozygous |
| NC_037645.1 | 724059 | SNV | 1 | T | C | Heterozygous |
| NC_037645.1 | 724084 | SNV | 1 | G | A | Heterozygous |
| NC_037645.1 | 724092 | SNV | 1 | T | G | Homozygous   |
| NC_037645.1 | 724118 | SNV | 1 | C | T | Heterozygous |
| NC_037645.1 | 724180 | SNV | 1 | C | T | Homozygous   |
| NC_037645.1 | 724182 | SNV | 1 | A | G | Homozygous   |
| NC_037645.1 | 732048 | SNV | 1 | C | T | Homozygous   |
| NC_037645.1 | 732185 | SNV | 1 | T | C | Homozygous   |
| NC_037645.1 | 733228 | SNV | 1 | G | A | Homozygous   |
| NC_037645.1 | 738263 | SNV | 1 | C | T | Heterozygous |
| NC_037645.1 | 742198 | SNV | 1 | G | A | Heterozygous |
| NC_037645.1 | 748670 | SNV | 1 | A | G | Heterozygous |
| NC_037645.1 | 748688 | SNV | 1 | G | A | Heterozygous |
| NC_037645.1 | 749073 | SNV | 1 | T | C | Heterozygous |
| NC_037645.1 | 749075 | SNV | 1 | T | C | Heterozygous |
| NC_037645.1 | 749077 | SNV | 1 | T | C | Heterozygous |
| NC_037645.1 | 766583 | SNV | 1 | A | C | Homozygous   |
| NC_037645.1 | 766592 | SNV | 1 | T | G | Homozygous   |
| NC_037645.1 | 766598 | SNV | 1 | T | C | Homozygous   |
| NC_037645.1 | 766601 | SNV | 1 | T | G | Homozygous   |
| NC_037645.1 | 766605 | SNV | 1 | A | G | Homozygous   |
| NC_037645.1 | 766625 | SNV | 1 | T | A | Homozygous   |
| NC_037645.1 | 766629 | SNV | 1 | T | A | Homozygous   |
| NC_037645.1 | 766634 | SNV | 1 | T | C | Homozygous   |
| NC_037645.1 | 766637 | SNV | 1 | T | A | Homozygous   |
| NC_037645.1 | 766746 | SNV | 1 | G | A | Homozygous   |
| NC_037645.1 | 766811 | SNV | 1 | T | A | Heterozygous |

|             |        |     |   |   |   |              |
|-------------|--------|-----|---|---|---|--------------|
| NC_037645.1 | 766820 | SNV | 1 | A | T | Homozygous   |
| NC_037645.1 | 766826 | SNV | 1 | C | T | Homozygous   |
| NC_037645.1 | 773001 | SNV | 1 | A | G | Homozygous   |
| NC_037645.1 | 773022 | SNV | 1 | A | T | Heterozygous |
| NC_037645.1 | 773064 | SNV | 1 | A | T | Homozygous   |
| NC_037645.1 | 773068 | SNV | 1 | A | T | Homozygous   |
| NC_037645.1 | 778037 | SNV | 1 | G | A | Heterozygous |
| NC_037645.1 | 781682 | SNV | 1 | T | C | Homozygous   |
| NC_037645.1 | 785296 | SNV | 1 | T | G | Homozygous   |
| NC_037645.1 | 790831 | SNV | 1 | A | G | Heterozygous |
| NC_037645.1 | 790886 | SNV | 1 | G | A | Heterozygous |
| NC_037645.1 | 790897 | SNV | 1 | G | A | Homozygous   |
| NC_037645.1 | 790901 | SNV | 1 | G | A | Heterozygous |
| NC_037645.1 | 801099 | SNV | 1 | A | T | Homozygous   |
| NC_037645.1 | 801104 | SNV | 1 | T | A | Homozygous   |
| NC_037645.1 | 801141 | SNV | 1 | A | G | Homozygous   |
| NC_037645.1 | 806299 | SNV | 1 | G | C | Homozygous   |
| NC_037645.1 | 806330 | SNV | 1 | A | G | Heterozygous |
| NC_037645.1 | 806376 | SNV | 1 | C | T | Heterozygous |
| NC_037645.1 | 809518 | SNV | 1 | C | T | Heterozygous |
| NC_037645.1 | 811486 | SNV | 1 | T | C | Homozygous   |
| NC_037645.1 | 811493 | SNV | 1 | A | G | Heterozygous |
| NC_037645.1 | 811829 | SNV | 1 | G | A | Heterozygous |
| NC_037645.1 | 811882 | SNV | 1 | G | C | Homozygous   |
| NC_037645.1 | 812023 | SNV | 1 | T | C | Homozygous   |
| NC_037645.1 | 812066 | SNV | 1 | A | G | Homozygous   |
| NC_037645.1 | 848137 | SNV | 1 | A | G | Homozygous   |
| NC_037645.1 | 857587 | SNV | 1 | C | T | Heterozygous |
| NC_037645.1 | 858351 | SNV | 1 | G | T | Heterozygous |
| NC_037645.1 | 858356 | SNV | 1 | G | T | Heterozygous |
| NC_037645.1 | 858358 | SNV | 1 | A | T | Heterozygous |
| NC_037645.1 | 859744 | SNV | 1 | C | T | Heterozygous |
| NC_037645.1 | 859764 | SNV | 1 | T | C | Homozygous   |
| NC_037645.1 | 859767 | SNV | 1 | C | A | Homozygous   |
| NC_037645.1 | 859776 | SNV | 1 | T | C | Homozygous   |
| NC_037645.1 | 860306 | SNV | 1 | G | A | Homozygous   |
| NC_037645.1 | 860333 | SNV | 1 | G | A | Heterozygous |
| NC_037645.1 | 860351 | SNV | 1 | A | G | Homozygous   |
| NC_037645.1 | 861270 | SNV | 1 | G | A | Homozygous   |
| NC_037645.1 | 865218 | SNV | 1 | A | G | Homozygous   |
| NC_037645.1 | 865293 | SNV | 1 | C | T | Heterozygous |
| NC_037645.1 | 865547 | SNV | 1 | C | T | Homozygous   |
| NC_037645.1 | 865557 | SNV | 1 | C | T | Homozygous   |
| NC_037645.1 | 865693 | SNV | 1 | T | G | Homozygous   |
| NC_037645.1 | 866072 | SNV | 1 | G | A | Heterozygous |
| NC_037645.1 | 866078 | SNV | 1 | G | A | Heterozygous |
| NC_037645.1 | 877679 | SNV | 1 | G | A | Homozygous   |
| NC_037645.1 | 878368 | SNV | 1 | C | T | Homozygous   |
| NC_037645.1 | 878393 | SNV | 1 | C | T | Homozygous   |
| NC_037645.1 | 878452 | SNV | 1 | T | C | Homozygous   |
| NC_037645.1 | 878558 | SNV | 1 | C | G | Heterozygous |

|             |        |     |   |   |   |              |
|-------------|--------|-----|---|---|---|--------------|
| NC_037645.1 | 878576 | SNV | 1 | T | A | Homozygous   |
| NC_037645.1 | 882745 | SNV | 1 | A | G | Homozygous   |
| NC_037645.1 | 882861 | SNV | 1 | A | G | Homozygous   |
| NC_037645.1 | 882988 | SNV | 1 | A | G | Heterozygous |
| NC_037645.1 | 896200 | SNV | 1 | G | A | Heterozygous |
| NC_037645.1 | 896204 | SNV | 1 | C | A | Heterozygous |
| NC_037645.1 | 896231 | SNV | 1 | G | A | Heterozygous |
| NC_037645.1 | 896246 | SNV | 1 | C | T | Homozygous   |
| NC_037645.1 | 896259 | SNV | 1 | A | G | Homozygous   |
| NC_037645.1 | 896411 | SNV | 1 | C | T | Heterozygous |
| NC_037645.1 | 896735 | SNV | 1 | A | G | Homozygous   |
| NC_037645.1 | 896783 | SNV | 1 | A | G | Heterozygous |
| NC_037645.1 | 896916 | SNV | 1 | G | A | Heterozygous |
| NC_037645.1 | 897976 | SNV | 1 | G | A | Heterozygous |
| NC_037645.1 | 899100 | SNV | 1 | A | G | Homozygous   |
| NC_037645.1 | 899536 | SNV | 1 | G | C | Heterozygous |
| NC_037645.1 | 901553 | SNV | 1 | G | A | Heterozygous |
| NC_037645.1 | 901610 | SNV | 1 | T | C | Homozygous   |
| NC_037645.1 | 901800 | SNV | 1 | C | T | Heterozygous |
| NC_037645.1 | 901804 | SNV | 1 | T | C | Homozygous   |
| NC_037645.1 | 901808 | SNV | 1 | C | T | Homozygous   |
| NC_037645.1 | 902085 | SNV | 1 | A | T | Heterozygous |
| NC_037645.1 | 902093 | SNV | 1 | A | T | Heterozygous |
| NC_037645.1 | 902323 | SNV | 1 | T | C | Heterozygous |
| NC_037645.1 | 902326 | SNV | 1 | C | T | Homozygous   |
| NC_037645.1 | 903115 | SNV | 1 | A | T | Homozygous   |
| NC_037645.1 | 917522 | SNV | 1 | G | A | Homozygous   |
| NC_037645.1 | 917918 | SNV | 1 | G | A | Homozygous   |
| NC_037645.1 | 918044 | SNV | 1 | C | T | Homozygous   |
| NC_037645.1 | 918139 | SNV | 1 | C | T | Heterozygous |
| NC_037645.1 | 926869 | SNV | 1 | G | A | Heterozygous |
| NC_037645.1 | 933230 | SNV | 1 | T | G | Heterozygous |
| NC_037645.1 | 933236 | SNV | 1 | C | G | Homozygous   |
| NC_037645.1 | 933241 | SNV | 1 | C | G | Heterozygous |
| NC_037645.1 | 933260 | SNV | 1 | C | T | Homozygous   |
| NC_037645.1 | 963516 | SNV | 1 | G | C | Heterozygous |
| NC_037645.1 | 963521 | SNV | 1 | A | G | Homozygous   |
| NC_037645.1 | 974662 | SNV | 1 | T | C | Homozygous   |
| NC_037645.1 | 975153 | SNV | 1 | G | A | Heterozygous |
| NC_037645.1 | 975650 | SNV | 1 | C | T | Heterozygous |
| NC_037645.1 | 975660 | SNV | 1 | C | T | Heterozygous |
| NC_037645.1 | 975664 | SNV | 1 | A | G | Homozygous   |
| NC_037645.1 | 977244 | SNV | 1 | C | T | Heterozygous |
| NC_037645.1 | 977247 | SNV | 1 | T | A | Heterozygous |
| NC_037645.1 | 979041 | SNV | 1 | T | C | Homozygous   |
| NC_037645.1 | 979105 | SNV | 1 | A | G | Homozygous   |
| NC_037645.1 | 979211 | SNV | 1 | T | C | Heterozygous |
| NC_037645.1 | 981164 | SNV | 1 | G | T | Heterozygous |
| NC_037645.1 | 981170 | SNV | 1 | G | T | Heterozygous |
| NC_037645.1 | 981185 | SNV | 1 | G | C | Heterozygous |
| NC_037645.1 | 982138 | SNV | 1 | C | T | Heterozygous |

|             |         |     |   |   |   |              |
|-------------|---------|-----|---|---|---|--------------|
| NC_037645.1 | 986794  | SNV | 1 | T | C | Homozygous   |
| NC_037645.1 | 986803  | SNV | 1 | C | T | Heterozygous |
| NC_037645.1 | 986903  | SNV | 1 | T | A | Heterozygous |
| NC_037645.1 | 986911  | SNV | 1 | T | C | Homozygous   |
| NC_037645.1 | 986969  | SNV | 1 | T | C | Homozygous   |
| NC_037645.1 | 991399  | SNV | 1 | C | T | Homozygous   |
| NC_037645.1 | 996867  | SNV | 1 | C | T | Heterozygous |
| NC_037645.1 | 996868  | SNV | 1 | A | G | Heterozygous |
| NC_037645.1 | 996924  | SNV | 1 | T | C | Heterozygous |
| NC_037645.1 | 997151  | SNV | 1 | G | T | Homozygous   |
| NC_037645.1 | 997161  | SNV | 1 | A | G | Heterozygous |
| NC_037645.1 | 997169  | SNV | 1 | C | T | Homozygous   |
| NC_037645.1 | 997171  | SNV | 1 | C | G | Homozygous   |
| NC_037645.1 | 1006597 | SNV | 1 | T | C | Heterozygous |
| NC_037645.1 | 1008027 | SNV | 1 | C | A | Homozygous   |
| NC_037645.1 | 1008030 | SNV | 1 | T | C | Homozygous   |
| NC_037645.1 | 1008033 | SNV | 1 | T | C | Homozygous   |
| NC_037645.1 | 1008039 | SNV | 1 | G | C | Homozygous   |
| NC_037645.1 | 1008043 | SNV | 1 | T | A | Homozygous   |
| NC_037645.1 | 1008045 | SNV | 1 | C | G | Homozygous   |
| NC_037645.1 | 1008048 | SNV | 1 | T | G | Homozygous   |
| NC_037645.1 | 1008050 | SNV | 1 | T | A | Homozygous   |
| NC_037645.1 | 1008055 | SNV | 1 | G | A | Homozygous   |
| NC_037645.1 | 1009039 | SNV | 1 | T | A | Homozygous   |
| NC_037645.1 | 1009045 | SNV | 1 | T | C | Homozygous   |
| NC_037645.1 | 1009075 | SNV | 1 | A | T | Homozygous   |
| NC_037645.1 | 1010479 | SNV | 1 | A | T | Homozygous   |
| NC_037645.1 | 1017045 | SNV | 1 | A | G | Heterozygous |
| NC_037645.1 | 1017047 | SNV | 1 | G | A | Heterozygous |
| NC_037645.1 | 1018018 | SNV | 1 | C | T | Heterozygous |
| NC_037645.1 | 1018233 | SNV | 1 | A | G | Heterozygous |
| NC_037645.1 | 1018504 | SNV | 1 | C | T | Heterozygous |
| NC_037645.1 | 1018615 | SNV | 1 | C | T | Homozygous   |
| NC_037645.1 | 1020187 | SNV | 1 | G | A | Homozygous   |
| NC_037645.1 | 1021001 | SNV | 1 | T | C | Homozygous   |
| NC_037645.1 | 1021012 | SNV | 1 | T | C | Heterozygous |
| NC_037645.1 | 1021026 | SNV | 1 | T | C | Heterozygous |
| NC_037645.1 | 1021134 | SNV | 1 | C | T | Heterozygous |
| NC_037645.1 | 1021766 | SNV | 1 | A | T | Heterozygous |
| NC_037645.1 | 1021768 | SNV | 1 | C | T | Heterozygous |
| NC_037645.1 | 1024539 | SNV | 1 | T | A | Homozygous   |
| NC_037645.1 | 1024545 | SNV | 1 | C | T | Heterozygous |
| NC_037645.1 | 1027432 | SNV | 1 | C | T | Heterozygous |
| NC_037645.1 | 1029906 | SNV | 1 | A | G | Homozygous   |
| NC_037645.1 | 1031869 | SNV | 1 | A | T | Homozygous   |
| NC_037645.1 | 1031873 | SNV | 1 | A | T | Homozygous   |
| NC_037645.1 | 1031877 | SNV | 1 | C | A | Homozygous   |
| NC_037645.1 | 1031900 | SNV | 1 | G | A | Homozygous   |
| NC_037645.1 | 1037761 | SNV | 1 | A | T | Heterozygous |
| NC_037645.1 | 1037765 | SNV | 1 | A | T | Heterozygous |
| NC_037645.1 | 1041524 | SNV | 1 | G | T | Heterozygous |

|             |         |     |   |   |   |              |
|-------------|---------|-----|---|---|---|--------------|
| NC_037645.1 | 1041528 | SNV | 1 | C | G | Heterozygous |
| NC_037645.1 | 1041534 | SNV | 1 | T | G | Heterozygous |
| NC_037645.1 | 1041543 | SNV | 1 | A | G | Heterozygous |
| NC_037645.1 | 1043983 | SNV | 1 | C | T | Heterozygous |
| NC_037645.1 | 1044010 | SNV | 1 | C | T | Heterozygous |
| NC_037645.1 | 1063555 | SNV | 1 | C | T | Homozygous   |
| NC_037645.1 | 1070207 | SNV | 1 | T | C | Heterozygous |
| NC_037645.1 | 1070246 | SNV | 1 | A | T | Heterozygous |
| NC_037645.1 | 1070543 | SNV | 1 | A | G | Heterozygous |
| NC_037645.1 | 1080268 | SNV | 1 | A | T | Homozygous   |
| NC_037645.1 | 1080276 | SNV | 1 | G | A | Homozygous   |
| NC_037645.1 | 1080278 | SNV | 1 | G | T | Homozygous   |
| NC_037645.1 | 1080283 | SNV | 1 | A | T | Heterozygous |
| NC_037645.1 | 1080285 | SNV | 1 | A | T | Homozygous   |
| NC_037645.1 | 1080290 | SNV | 1 | A | T | Heterozygous |
| NC_037645.1 | 1080587 | SNV | 1 | A | G | Homozygous   |
| NC_037645.1 | 1080662 | SNV | 1 | G | A | Homozygous   |
| NC_037645.1 | 1080667 | SNV | 1 | A | G | Homozygous   |
| NC_037645.1 | 1080673 | SNV | 1 | A | G | Homozygous   |
| NC_037645.1 | 1080682 | SNV | 1 | A | G | Heterozygous |
| NC_037645.1 | 1081859 | SNV | 1 | C | G | Heterozygous |
| NC_037645.1 | 1081864 | SNV | 1 | C | A | Heterozygous |
| NC_037645.1 | 1084214 | SNV | 1 | G | A | Homozygous   |
| NC_037645.1 | 1092696 | SNV | 1 | T | C | Heterozygous |
| NC_037645.1 | 1092715 | SNV | 1 | A | G | Heterozygous |
| NC_037645.1 | 1093290 | SNV | 1 | C | T | Homozygous   |
| NC_037645.1 | 1093334 | SNV | 1 | C | T | Homozygous   |
| NC_037645.1 | 1093369 | SNV | 1 | A | G | Heterozygous |
| NC_037645.1 | 1093371 | SNV | 1 | G | A | Heterozygous |
| NC_037645.1 | 1093442 | SNV | 1 | A | G | Homozygous   |
| NC_037645.1 | 1103748 | SNV | 1 | G | A | Homozygous   |
| NC_037645.1 | 1104247 | SNV | 1 | A | T | Heterozygous |
| NC_037645.1 | 1104370 | SNV | 1 | A | T | Heterozygous |
| NC_037645.1 | 1104766 | SNV | 1 | C | A | Heterozygous |
| NC_037645.1 | 1105176 | SNV | 1 | C | T | Heterozygous |
| NC_037645.1 | 1106987 | SNV | 1 | C | T | Heterozygous |
| NC_037645.1 | 1107054 | SNV | 1 | T | C | Heterozygous |
| NC_037645.1 | 1110869 | SNV | 1 | C | G | Heterozygous |
| NC_037645.1 | 1110874 | SNV | 1 | G | A | Homozygous   |
| NC_037645.1 | 1110876 | SNV | 1 | T | A | Homozygous   |
| NC_037645.1 | 1115520 | SNV | 1 | A | G | Homozygous   |
| NC_037645.1 | 1115533 | SNV | 1 | A | T | Homozygous   |
| NC_037645.1 | 1115542 | SNV | 1 | T | G | Homozygous   |
| NC_037645.1 | 1115544 | SNV | 1 | T | A | Homozygous   |
| NC_037645.1 | 1117816 | SNV | 1 | T | G | Homozygous   |
| NC_037645.1 | 1117820 | SNV | 1 | T | A | Homozygous   |
| NC_037645.1 | 1117825 | SNV | 1 | A | T | Homozygous   |
| NC_037645.1 | 1119184 | SNV | 1 | T | A | Homozygous   |
| NC_037645.1 | 1119201 | SNV | 1 | T | A | Heterozygous |
| NC_037645.1 | 1119214 | SNV | 1 | G | A | Homozygous   |
| NC_037645.1 | 1119221 | SNV | 1 | C | T | Homozygous   |

|             |         |     |   |   |   |              |
|-------------|---------|-----|---|---|---|--------------|
| NC_037645.1 | 1119617 | SNV | 1 | T | C | Heterozygous |
| NC_037645.1 | 1123353 | SNV | 1 | T | G | Heterozygous |
| NC_037645.1 | 1123400 | SNV | 1 | A | G | Heterozygous |
| NC_037645.1 | 1128728 | SNV | 1 | A | G | Homozygous   |
| NC_037645.1 | 1129795 | SNV | 1 | A | G | Homozygous   |
| NC_037645.1 | 1131608 | SNV | 1 | C | T | Homozygous   |
| NC_037645.1 | 1131660 | SNV | 1 | C | T | Heterozygous |
| NC_037645.1 | 1131663 | SNV | 1 | C | T | Heterozygous |
| NC_037645.1 | 1131667 | SNV | 1 | T | C | Heterozygous |
| NC_037645.1 | 1133069 | SNV | 1 | G | A | Heterozygous |
| NC_037645.1 | 1133118 | SNV | 1 | T | A | Heterozygous |
| NC_037645.1 | 1133119 | SNV | 1 | A | G | Heterozygous |
| NC_037645.1 | 1133122 | SNV | 1 | T | C | Homozygous   |
| NC_037645.1 | 1134255 | SNV | 1 | A | G | Homozygous   |
| NC_037645.1 | 1134468 | SNV | 1 | T | C | Homozygous   |
| NC_037645.1 | 1134595 | SNV | 1 | T | A | Heterozygous |
| NC_037645.1 | 1137844 | SNV | 1 | C | T | Heterozygous |
| NC_037645.1 | 1137847 | SNV | 1 | C | T | Heterozygous |
| NC_037645.1 | 1138103 | SNV | 1 | C | G | Homozygous   |
| NC_037645.1 | 1138816 | SNV | 1 | C | A | Homozygous   |
| NC_037645.1 | 1138819 | SNV | 1 | T | C | Homozygous   |
| NC_037645.1 | 1142122 | SNV | 1 | C | T | Homozygous   |
| NC_037645.1 | 1145828 | SNV | 1 | A | G | Homozygous   |
| NC_037645.1 | 1145854 | SNV | 1 | C | T | Heterozygous |
| NC_037645.1 | 1145862 | SNV | 1 | T | C | Heterozygous |
| NC_037645.1 | 1145906 | SNV | 1 | T | A | Heterozygous |
| NC_037645.1 | 1146528 | SNV | 1 | G | A | Homozygous   |
| NC_037645.1 | 1146540 | SNV | 1 | T | A | Homozygous   |
| NC_037645.1 | 1153489 | SNV | 1 | C | T | Heterozygous |
| NC_037645.1 | 1153495 | SNV | 1 | C | T | Heterozygous |
| NC_037645.1 | 1155184 | SNV | 1 | C | T | Heterozygous |
| NC_037645.1 | 1155806 | SNV | 1 | A | G | Homozygous   |
| NC_037645.1 | 1155810 | SNV | 1 | A | G | Homozygous   |
| NC_037645.1 | 1156237 | SNV | 1 | C | T | Homozygous   |
| NC_037645.1 | 1156396 | SNV | 1 | C | T | Homozygous   |
| NC_037645.1 | 1156399 | SNV | 1 | C | T | Heterozygous |
| NC_037645.1 | 1156416 | SNV | 1 | C | T | Heterozygous |
| NC_037645.1 | 1164323 | SNV | 1 | C | T | Heterozygous |
| NC_037645.1 | 1164464 | SNV | 1 | G | T | Homozygous   |
| NC_037645.1 | 1164534 | SNV | 1 | G | T | Homozygous   |
| NC_037645.1 | 1164614 | SNV | 1 | C | T | Heterozygous |
| NC_037645.1 | 1168935 | SNV | 1 | A | G | Homozygous   |
| NC_037645.1 | 1169537 | SNV | 1 | G | A | Homozygous   |
| NC_037645.1 | 1170149 | SNV | 1 | G | C | Homozygous   |
| NC_037645.1 | 1171287 | SNV | 1 | G | C | Heterozygous |
| NC_037645.1 | 1174148 | SNV | 1 | A | G | Heterozygous |
| NC_037645.1 | 1174568 | SNV | 1 | A | T | Homozygous   |
| NC_037645.1 | 1174947 | SNV | 1 | G | A | Heterozygous |
| NC_037645.1 | 1175905 | SNV | 1 | A | G | Homozygous   |
| NC_037645.1 | 1176121 | SNV | 1 | C | T | Heterozygous |
| NC_037645.1 | 1176331 | SNV | 1 | G | A | Homozygous   |

|             |         |     |   |   |   |              |
|-------------|---------|-----|---|---|---|--------------|
| NC_037645.1 | 1181476 | SNV | 1 | T | C | Homozygous   |
| NC_037645.1 | 1181527 | SNV | 1 | G | A | Homozygous   |
| NC_037645.1 | 1181529 | SNV | 1 | A | T | Homozygous   |
| NC_037645.1 | 1182447 | SNV | 1 | G | T | Homozygous   |
| NC_037645.1 | 1183232 | SNV | 1 | T | C | Homozygous   |
| NC_037645.1 | 1189883 | SNV | 1 | T | C | Homozygous   |
| NC_037645.1 | 1190284 | SNV | 1 | T | A | Heterozygous |
| NC_037645.1 | 1190500 | SNV | 1 | A | G | Homozygous   |
| NC_037645.1 | 1190543 | SNV | 1 | T | C | Homozygous   |
| NC_037645.1 | 1196133 | SNV | 1 | A | G | Homozygous   |
| NC_037645.1 | 1196174 | SNV | 1 | A | G | Heterozygous |
| NC_037645.1 | 1196190 | SNV | 1 | G | A | Heterozygous |
| NC_037645.1 | 1196213 | SNV | 1 | G | A | Homozygous   |
| NC_037645.1 | 1196231 | SNV | 1 | A | G | Heterozygous |
| NC_037645.1 | 1196255 | SNV | 1 | C | T | Homozygous   |
| NC_037645.1 | 1196588 | SNV | 1 | A | G | Homozygous   |
| NC_037645.1 | 1196621 | SNV | 1 | T | C | Homozygous   |
| NC_037645.1 | 1198500 | SNV | 1 | G | A | Heterozygous |
| NC_037645.1 | 1207564 | SNV | 1 | A | G | Homozygous   |
| NC_037645.1 | 1207623 | SNV | 1 | T | C | Heterozygous |
| NC_037645.1 | 1207909 | SNV | 1 | T | C | Homozygous   |
| NC_037645.1 | 1207951 | SNV | 1 | C | T | Homozygous   |
| NC_037645.1 | 1210999 | SNV | 1 | C | T | Homozygous   |
| NC_037645.1 | 1211199 | SNV | 1 | T | C | Homozygous   |
| NC_037645.1 | 1211216 | SNV | 1 | G | A | Homozygous   |
| NC_037645.1 | 1211563 | SNV | 1 | T | A | Homozygous   |
| NC_037645.1 | 1211568 | SNV | 1 | G | A | Homozygous   |
| NC_037645.1 | 1211992 | SNV | 1 | T | A | Heterozygous |
| NC_037645.1 | 1211995 | SNV | 1 | C | A | Homozygous   |
| NC_037645.1 | 1211998 | SNV | 1 | T | A | Homozygous   |
| NC_037645.1 | 1212010 | SNV | 1 | T | G | Homozygous   |
| NC_037645.1 | 1212013 | SNV | 1 | T | G | Homozygous   |
| NC_037645.1 | 1213870 | SNV | 1 | C | A | Homozygous   |
| NC_037645.1 | 1214984 | SNV | 1 | A | G | Homozygous   |
| NC_037645.1 | 1215003 | SNV | 1 | T | C | Homozygous   |
| NC_037645.1 | 1215104 | SNV | 1 | T | C | Heterozygous |
| NC_037645.1 | 1215111 | SNV | 1 | T | C | Homozygous   |
| NC_037645.1 | 1215170 | SNV | 1 | T | C | Heterozygous |
| NC_037645.1 | 1217811 | SNV | 1 | T | C | Homozygous   |
| NC_037645.1 | 1217868 | SNV | 1 | A | T | Heterozygous |
| NC_037645.1 | 1217870 | SNV | 1 | A | T | Heterozygous |
| NC_037645.1 | 1217873 | SNV | 1 | A | T | Heterozygous |
| NC_037645.1 | 1228644 | SNV | 1 | A | G | Heterozygous |
| NC_037645.1 | 1228660 | SNV | 1 | A | G | Heterozygous |
| NC_037645.1 | 1228813 | SNV | 1 | A | G | Heterozygous |
| NC_037645.1 | 1231620 | SNV | 1 | G | A | Homozygous   |
| NC_037645.1 | 1233529 | SNV | 1 | A | T | Homozygous   |
| NC_037645.1 | 1233531 | SNV | 1 | A | C | Heterozygous |
| NC_037645.1 | 1233556 | SNV | 1 | A | G | Heterozygous |
| NC_037645.1 | 1234208 | SNV | 1 | C | T | Homozygous   |
| NC_037645.1 | 1234499 | SNV | 1 | G | A | Heterozygous |



|             |         |     |   |   |   |              |
|-------------|---------|-----|---|---|---|--------------|
| NC_037645.1 | 1234504 | SNV | 1 | G | A | Heterozygous |
| NC_037645.1 | 1234562 | SNV | 1 | C | T | Heterozygous |
| NC_037645.1 | 1234686 | SNV | 1 | G | T | Homozygous   |
| NC_037645.1 | 1238070 | SNV | 1 | G | A | Heterozygous |
| NC_037645.1 | 1238295 | SNV | 1 | G | C | Heterozygous |
| NC_037645.1 | 1238316 | SNV | 1 | G | C | Heterozygous |
| NC_037645.1 | 1246370 | SNV | 1 | T | C | Heterozygous |
| NC_037645.1 | 1250103 | SNV | 1 | G | A | Heterozygous |
| NC_037645.1 | 1250144 | SNV | 1 | A | G | Homozygous   |
| NC_037645.1 | 1250634 | SNV | 1 | T | C | Heterozygous |
| NC_037645.1 | 1252177 | SNV | 1 | A | C | Homozygous   |
| NC_037645.1 | 1252197 | SNV | 1 | G | A | Homozygous   |
| NC_037645.1 | 1256657 | SNV | 1 | A | G | Homozygous   |
| NC_037645.1 | 1267238 | SNV | 1 | A | G | Homozygous   |
| NC_037645.1 | 1267242 | SNV | 1 | A | T | Homozygous   |
| NC_037645.1 | 1267246 | SNV | 1 | G | T | Homozygous   |
| NC_037645.1 | 1267278 | SNV | 1 | C | T | Homozygous   |
| NC_037645.1 | 1267606 | SNV | 1 | A | G | Heterozygous |
| NC_037645.1 | 1267614 | SNV | 1 | C | T | Heterozygous |
| NC_037645.1 | 1267618 | SNV | 1 | G | A | Homozygous   |
| NC_037645.1 | 1267623 | SNV | 1 | C | G | Heterozygous |
| NC_037645.1 | 1267625 | SNV | 1 | C | G | Heterozygous |
| NC_037645.1 | 1267648 | SNV | 1 | G | A | Homozygous   |
| NC_037645.1 | 1267651 | SNV | 1 | G | A | Homozygous   |
| NC_037645.1 | 1272809 | SNV | 1 | T | C | Heterozygous |
| NC_037645.1 | 1272831 | SNV | 1 | T | C | Heterozygous |
| NC_037645.1 | 1272833 | SNV | 1 | C | T | Heterozygous |
| NC_037645.1 | 1272849 | SNV | 1 | A | T | Heterozygous |
| NC_037645.1 | 1276152 | SNV | 1 | T | C | Heterozygous |
| NC_037645.1 | 1279857 | SNV | 1 | T | C | Homozygous   |
| NC_037645.1 | 1279890 | SNV | 1 | C | G | Homozygous   |
| NC_037645.1 | 1279899 | SNV | 1 | C | T | Heterozygous |
| NC_037645.1 | 1279937 | SNV | 1 | T | C | Heterozygous |
| NC_037645.1 | 1280006 | SNV | 1 | T | A | Homozygous   |
| NC_037645.1 | 1280014 | SNV | 1 | G | C | Homozygous   |
| NC_037645.1 | 1280087 | SNV | 1 | G | A | Heterozygous |
| NC_037645.1 | 1280111 | SNV | 1 | C | T | Homozygous   |
| NC_037645.1 | 1283311 | SNV | 1 | A | G | Homozygous   |
| NC_037645.1 | 1283577 | SNV | 1 | C | T | Heterozygous |
| NC_037645.1 | 1283580 | SNV | 1 | C | T | Heterozygous |
| NC_037645.1 | 1283837 | SNV | 1 | A | G | Homozygous   |
| NC_037645.1 | 1283860 | SNV | 1 | G | A | Heterozygous |
| NC_037645.1 | 1284245 | SNV | 1 | A | G | Homozygous   |
| NC_037645.1 | 1284269 | SNV | 1 | T | C | Homozygous   |
| NC_037645.1 | 1284275 | SNV | 1 | A | G | Homozygous   |
| NC_037645.1 | 1286371 | SNV | 1 | G | C | Homozygous   |
| NC_037645.1 | 1286381 | SNV | 1 | A | G | Homozygous   |
| NC_037645.1 | 1288663 | SNV | 1 | C | A | Homozygous   |
| NC_037645.1 | 1289386 | SNV | 1 | C | T | Homozygous   |
| NC_037645.1 | 1291754 | SNV | 1 | T | C | Heterozygous |
| NC_037645.1 | 1293260 | SNV | 1 | A | C | Heterozygous |

|             |         |     |   |   |   |              |
|-------------|---------|-----|---|---|---|--------------|
| NC_037645.1 | 1293265 | SNV | 1 | T | A | Heterozygous |
| NC_037645.1 | 1293271 | SNV | 1 | A | T | Heterozygous |
| NC_037645.1 | 1293673 | SNV | 1 | A | G | Homozygous   |
| NC_037645.1 | 1293743 | SNV | 1 | A | G | Heterozygous |
| NC_037645.1 | 1294558 | SNV | 1 | C | T | Homozygous   |
| NC_037645.1 | 1294592 | SNV | 1 | G | A | Heterozygous |
| NC_037645.1 | 1294605 | SNV | 1 | G | A | Homozygous   |
| NC_037645.1 | 1294739 | SNV | 1 | G | A | Heterozygous |
| NC_037645.1 | 1296287 | SNV | 1 | C | T | Homozygous   |
| NC_037645.1 | 1296321 | SNV | 1 | C | T | Homozygous   |
| NC_037645.1 | 1297567 | SNV | 1 | A | G | Heterozygous |
| NC_037645.1 | 1299833 | SNV | 1 | A | T | Homozygous   |
| NC_037645.1 | 1299840 | SNV | 1 | A | C | Homozygous   |
| NC_037645.1 | 1299842 | SNV | 1 | A | T | Homozygous   |
| NC_037645.1 | 1299844 | SNV | 1 | A | T | Homozygous   |
| NC_037645.1 | 1299847 | SNV | 1 | T | A | Homozygous   |
| NC_037645.1 | 1299853 | SNV | 1 | A | T | Homozygous   |
| NC_037645.1 | 1299862 | SNV | 1 | A | T | Homozygous   |
| NC_037645.1 | 1300393 | SNV | 1 | T | C | Homozygous   |
| NC_037645.1 | 1301727 | SNV | 1 | T | C | Heterozygous |
| NC_037645.1 | 1302618 | SNV | 1 | T | A | Homozygous   |
| NC_037645.1 | 1302621 | SNV | 1 | T | G | Homozygous   |
| NC_037645.1 | 1302631 | SNV | 1 | T | A | Homozygous   |
| NC_037645.1 | 1302657 | SNV | 1 | T | A | Homozygous   |
| NC_037645.1 | 1302666 | SNV | 1 | A | G | Homozygous   |
| NC_037645.1 | 1302669 | SNV | 1 | C | T | Homozygous   |
| NC_037645.1 | 1304415 | SNV | 1 | T | C | Homozygous   |
| NC_037645.1 | 1304837 | SNV | 1 | A | G | Homozygous   |
| NC_037645.1 | 1309053 | SNV | 1 | G | A | Heterozygous |
| NC_037645.1 | 1313783 | SNV | 1 | C | T | Heterozygous |
| NC_037645.1 | 1314211 | SNV | 1 | C | G | Homozygous   |
| NC_037645.1 | 1314568 | SNV | 1 | C | A | Heterozygous |
| NC_037645.1 | 1314583 | SNV | 1 | G | A | Heterozygous |
| NC_037645.1 | 1314586 | SNV | 1 | C | A | Homozygous   |
| NC_037645.1 | 1314589 | SNV | 1 | G | A | Heterozygous |
| NC_037645.1 | 1314602 | SNV | 1 | T | A | Heterozygous |
| NC_037645.1 | 1316812 | SNV | 1 | T | A | Heterozygous |
| NC_037645.1 | 1327902 | SNV | 1 | G | A | Homozygous   |
| NC_037645.1 | 1328237 | SNV | 1 | C | T | Heterozygous |
| NC_037645.1 | 1328536 | SNV | 1 | G | A | Heterozygous |
| NC_037645.1 | 1329000 | SNV | 1 | G | A | Heterozygous |
| NC_037645.1 | 1329027 | SNV | 1 | T | C | Homozygous   |
| NC_037645.1 | 1329040 | SNV | 1 | T | C | Heterozygous |
| NC_037645.1 | 1329064 | SNV | 1 | T | C | Homozygous   |
| NC_037645.1 | 1331188 | SNV | 1 | A | G | Homozygous   |
| NC_037645.1 | 1331668 | SNV | 1 | G | A | Heterozygous |
| NC_037645.1 | 1396060 | SNV | 1 | T | C | Homozygous   |
| NC_037645.1 | 1398613 | SNV | 1 | G | A | Homozygous   |
| NC_037645.1 | 1398617 | SNV | 1 | C | G | Homozygous   |
| NC_037645.1 | 1398635 | SNV | 1 | G | C | Homozygous   |
| NC_037645.1 | 1398641 | SNV | 1 | A | C | Homozygous   |

|             |         |     |   |   |   |              |
|-------------|---------|-----|---|---|---|--------------|
| NC_037645.1 | 1398645 | SNV | 1 | C | A | Homozygous   |
| NC_037645.1 | 1398647 | SNV | 1 | T | A | Homozygous   |
| NC_037645.1 | 1398659 | SNV | 1 | G | C | Homozygous   |
| NC_037645.1 | 1399038 | SNV | 1 | T | C | Homozygous   |
| NC_037645.1 | 1407696 | SNV | 1 | T | C | Homozygous   |
| NC_037645.1 | 1407714 | SNV | 1 | G | A | Homozygous   |
| NC_037645.1 | 1407717 | SNV | 1 | G | T | Homozygous   |
| NC_037645.1 | 1407722 | SNV | 1 | A | C | Homozygous   |
| NC_037645.1 | 1418218 | SNV | 1 | C | T | Heterozygous |
| NC_037645.1 | 1429528 | SNV | 1 | T | C | Homozygous   |
| NC_037645.1 | 1439802 | SNV | 1 | G | A | Heterozygous |
| NC_037645.1 | 1439803 | SNV | 1 | G | A | Heterozygous |
| NC_037645.1 | 1439834 | SNV | 1 | A | G | Heterozygous |
| NC_037645.1 | 1440033 | SNV | 1 | A | G | Homozygous   |
| NC_037645.1 | 1440122 | SNV | 1 | A | G | Homozygous   |
| NC_037645.1 | 1440132 | SNV | 1 | A | G | Heterozygous |
| NC_037645.1 | 1440650 | SNV | 1 | G | A | Homozygous   |
| NC_037645.1 | 1441192 | SNV | 1 | G | A | Homozygous   |
| NC_037645.1 | 1441225 | SNV | 1 | C | T | Heterozygous |
| NC_037645.1 | 1441767 | SNV | 1 | T | G | Homozygous   |
| NC_037645.1 | 1441772 | SNV | 1 | A | G | Homozygous   |
| NC_037645.1 | 1441812 | SNV | 1 | T | C | Homozygous   |
| NC_037645.1 | 1442145 | SNV | 1 | A | C | Heterozygous |
| NC_037645.1 | 1442147 | SNV | 1 | A | G | Heterozygous |
| NC_037645.1 | 1445425 | SNV | 1 | G | A | Homozygous   |
| NC_037645.1 | 1446007 | SNV | 1 | T | A | Homozygous   |
| NC_037645.1 | 1446010 | SNV | 1 | A | C | Homozygous   |
| NC_037645.1 | 1446926 | SNV | 1 | T | C | Heterozygous |
| NC_037645.1 | 1446941 | SNV | 1 | T | A | Homozygous   |
| NC_037645.1 | 1448723 | SNV | 1 | C | T | Heterozygous |
| NC_037645.1 | 1454700 | SNV | 1 | G | C | Homozygous   |
| NC_037645.1 | 1457583 | SNV | 1 | C | T | Homozygous   |
| NC_037645.1 | 1459607 | SNV | 1 | T | C | Homozygous   |
| NC_037645.1 | 1461077 | SNV | 1 | C | T | Homozygous   |
| NC_037645.1 | 1461568 | SNV | 1 | C | G | Homozygous   |
| NC_037645.1 | 1462995 | SNV | 1 | A | G | Homozygous   |
| NC_037645.1 | 1463390 | SNV | 1 | C | T | Homozygous   |
| NC_037645.1 | 1463769 | SNV | 1 | A | T | Heterozygous |
| NC_037645.1 | 1463775 | SNV | 1 | T | A | Heterozygous |
| NC_037645.1 | 1463790 | SNV | 1 | C | A | Heterozygous |
| NC_037645.1 | 1463816 | SNV | 1 | A | G | Heterozygous |
| NC_037645.1 | 1463841 | SNV | 1 | A | G | Heterozygous |
| NC_037645.1 | 1464183 | SNV | 1 | G | A | Homozygous   |
| NC_037645.1 | 1465630 | SNV | 1 | T | G | Homozygous   |
| NC_037645.1 | 1482387 | SNV | 1 | A | C | Homozygous   |
| NC_037645.1 | 1482996 | SNV | 1 | A | G | Homozygous   |
| NC_037645.1 | 1483440 | SNV | 1 | G | C | Heterozygous |
| NC_037645.1 | 1483552 | SNV | 1 | A | G | Homozygous   |
| NC_037645.1 | 1490870 | SNV | 1 | G | A | Heterozygous |
| NC_037645.1 | 1491103 | SNV | 1 | A | G | Homozygous   |
| NC_037645.1 | 1511979 | SNV | 1 | T | C | Homozygous   |

|             |         |     |   |   |   |              |
|-------------|---------|-----|---|---|---|--------------|
| NC_037645.1 | 1513421 | SNV | 1 | A | G | Homozygous   |
| NC_037645.1 | 1518224 | SNV | 1 | C | T | Homozygous   |
| NC_037645.1 | 1526303 | SNV | 1 | C | T | Homozygous   |
| NC_037645.1 | 1531501 | SNV | 1 | A | T | Homozygous   |
| NC_037645.1 | 1531542 | SNV | 1 | A | C | Homozygous   |
| NC_037645.1 | 1531559 | SNV | 1 | C | A | Homozygous   |
| NC_037645.1 | 1531567 | SNV | 1 | A | T | Homozygous   |
| NC_037645.1 | 1531570 | SNV | 1 | T | A | Homozygous   |
| NC_037645.1 | 1531576 | SNV | 1 | G | A | Homozygous   |
| NC_037645.1 | 1531581 | SNV | 1 | A | C | Homozygous   |
| NC_037645.1 | 1532453 | SNV | 1 | T | C | Homozygous   |
| NC_037645.1 | 1532766 | SNV | 1 | G | A | Homozygous   |
| NC_037645.1 | 1532890 | SNV | 1 | C | T | Homozygous   |
| NC_037645.1 | 1533874 | SNV | 1 | T | A | Homozygous   |
| NC_037645.1 | 1533883 | SNV | 1 | T | A | Homozygous   |
| NC_037645.1 | 1533885 | SNV | 1 | T | A | Homozygous   |
| NC_037645.1 | 1533887 | SNV | 1 | T | G | Homozygous   |
| NC_037645.1 | 1539882 | SNV | 1 | G | A | Homozygous   |
| NC_037645.1 | 1540304 | SNV | 1 | G | A | Heterozygous |
| NC_037645.1 | 1540563 | SNV | 1 | G | A | Homozygous   |
| NC_037645.1 | 1543179 | SNV | 1 | C | T | Homozygous   |
| NC_037645.1 | 1545150 | SNV | 1 | A | G | Heterozygous |
| NC_037645.1 | 1551058 | SNV | 1 | G | T | Homozygous   |
| NC_037645.1 | 1551338 | SNV | 1 | T | C | Homozygous   |
| NC_037645.1 | 1551340 | SNV | 1 | T | A | Homozygous   |
| NC_037645.1 | 1551342 | SNV | 1 | T | A | Homozygous   |
| NC_037645.1 | 1551344 | SNV | 1 | A | G | Homozygous   |
| NC_037645.1 | 1551346 | SNV | 1 | T | A | Homozygous   |
| NC_037645.1 | 1551349 | SNV | 1 | A | G | Homozygous   |
| NC_037645.1 | 1551821 | SNV | 1 | A | T | Homozygous   |
| NC_037645.1 | 1551830 | SNV | 1 | T | A | Homozygous   |
| NC_037645.1 | 1551835 | SNV | 1 | T | A | Homozygous   |
| NC_037645.1 | 1557195 | SNV | 1 | A | G | Homozygous   |
| NC_037645.1 | 1570156 | SNV | 1 | T | C | Heterozygous |
| NC_037645.1 | 1570158 | SNV | 1 | T | C | Heterozygous |
| NC_037645.1 | 1570995 | SNV | 1 | A | T | Homozygous   |
| NC_037645.1 | 1571596 | SNV | 1 | G | A | Heterozygous |
| NC_037645.1 | 1572567 | SNV | 1 | A | G | Heterozygous |
| NC_037645.1 | 1575046 | SNV | 1 | T | A | Homozygous   |
| NC_037645.1 | 1578008 | SNV | 1 | A | G | Homozygous   |
| NC_037645.1 | 1578325 | SNV | 1 | T | A | Homozygous   |
| NC_037645.1 | 1578329 | SNV | 1 | T | A | Homozygous   |
| NC_037645.1 | 1579761 | SNV | 1 | G | A | Homozygous   |
| NC_037645.1 | 1580116 | SNV | 1 | A | G | Homozygous   |
| NC_037645.1 | 1581005 | SNV | 1 | A | T | Homozygous   |
| NC_037645.1 | 1581008 | SNV | 1 | G | C | Homozygous   |
| NC_037645.1 | 1581769 | SNV | 1 | T | C | Heterozygous |
| NC_037645.1 | 1581781 | SNV | 1 | T | C | Heterozygous |
| NC_037645.1 | 1583326 | SNV | 1 | C | T | Homozygous   |
| NC_037645.1 | 1583538 | SNV | 1 | C | T | Homozygous   |
| NC_037645.1 | 1583605 | SNV | 1 | A | G | Homozygous   |

|             |         |     |   |   |   |              |
|-------------|---------|-----|---|---|---|--------------|
| NC_037645.1 | 1612907 | SNV | 1 | C | T | Heterozygous |
| NC_037645.1 | 1625341 | SNV | 1 | A | G | Homozygous   |
| NC_037645.1 | 1625832 | SNV | 1 | A | T | Homozygous   |
| NC_037645.1 | 1625834 | SNV | 1 | A | C | Homozygous   |
| NC_037645.1 | 1625837 | SNV | 1 | C | A | Homozygous   |
| NC_037645.1 | 1625843 | SNV | 1 | T | A | Homozygous   |
| NC_037645.1 | 1625860 | SNV | 1 | T | A | Heterozygous |
| NC_037645.1 | 1625864 | SNV | 1 | A | T | Heterozygous |
| NC_037645.1 | 1633883 | SNV | 1 | T | C | Homozygous   |
| NC_037645.1 | 1634300 | SNV | 1 | C | T | Heterozygous |
| NC_037645.1 | 1634369 | SNV | 1 | A | G | Heterozygous |
| NC_037645.1 | 1638387 | SNV | 1 | G | A | Homozygous   |
| NC_037645.1 | 1638751 | SNV | 1 | A | G | Homozygous   |
| NC_037645.1 | 1641526 | SNV | 1 | T | A | Heterozygous |
| NC_037645.1 | 1643099 | SNV | 1 | C | T | Homozygous   |
| NC_037645.1 | 1643378 | SNV | 1 | C | T | Heterozygous |
| NC_037645.1 | 1644335 | SNV | 1 | T | C | Homozygous   |
| NC_037645.1 | 1644492 | SNV | 1 | G | A | Heterozygous |
| NC_037645.1 | 1644668 | SNV | 1 | G | T | Heterozygous |
| NC_037645.1 | 1644961 | SNV | 1 | G | C | Heterozygous |
| NC_037645.1 | 1649403 | SNV | 1 | A | T | Homozygous   |
| NC_037645.1 | 1649406 | SNV | 1 | T | A | Homozygous   |
| NC_037645.1 | 1649408 | SNV | 1 | T | A | Homozygous   |
| NC_037645.1 | 1649414 | SNV | 1 | T | A | Homozygous   |
| NC_037645.1 | 1654699 | SNV | 1 | G | A | Homozygous   |
| NC_037645.1 | 1658203 | SNV | 1 | T | G | Homozygous   |
| NC_037645.1 | 1658206 | SNV | 1 | T | A | Homozygous   |
| NC_037645.1 | 1658237 | SNV | 1 | A | T | Homozygous   |
| NC_037645.1 | 1658241 | SNV | 1 | A | T | Homozygous   |
| NC_037645.1 | 1662853 | SNV | 1 | G | A | Homozygous   |
| NC_037645.1 | 1665273 | SNV | 1 | G | A | Homozygous   |
| NC_037645.1 | 1673288 | SNV | 1 | C | T | Heterozygous |
| NC_037645.1 | 1673710 | SNV | 1 | G | A | Heterozygous |
| NC_037645.1 | 1675047 | SNV | 1 | G | A | Homozygous   |
| NC_037645.1 | 1675049 | SNV | 1 | T | G | Homozygous   |
| NC_037645.1 | 1675052 | SNV | 1 | A | C | Homozygous   |
| NC_037645.1 | 1675095 | SNV | 1 | A | G | Homozygous   |
| NC_037645.1 | 1675102 | SNV | 1 | G | A | Homozygous   |
| NC_037645.1 | 1675104 | SNV | 1 | T | A | Homozygous   |
| NC_037645.1 | 1675115 | SNV | 1 | A | C | Homozygous   |
| NC_037645.1 | 1677806 | SNV | 1 | T | C | Homozygous   |
| NC_037645.1 | 1678382 | SNV | 1 | A | G | Homozygous   |
| NC_037645.1 | 1679050 | SNV | 1 | A | G | Homozygous   |
| NC_037645.1 | 1679170 | SNV | 1 | G | A | Heterozygous |
| NC_037645.1 | 1679282 | SNV | 1 | C | G | Heterozygous |
| NC_037645.1 | 1680086 | SNV | 1 | C | T | Homozygous   |
| NC_037645.1 | 1680405 | SNV | 1 | A | G | Homozygous   |
| NC_037645.1 | 1689015 | SNV | 1 | A | G | Heterozygous |
| NC_037645.1 | 1689053 | SNV | 1 | T | A | Heterozygous |
| NC_037645.1 | 1689058 | SNV | 1 | A | G | Homozygous   |
| NC_037645.1 | 1689064 | SNV | 1 | G | A | Heterozygous |

|             |         |     |   |   |   |              |
|-------------|---------|-----|---|---|---|--------------|
| NC_037645.1 | 1690721 | SNV | 1 | A | T | Heterozygous |
| NC_037645.1 | 1690734 | SNV | 1 | A | T | Homozygous   |
| NC_037645.1 | 1690742 | SNV | 1 | T | G | Homozygous   |
| NC_037645.1 | 1690763 | SNV | 1 | A | T | Homozygous   |
| NC_037645.1 | 1690773 | SNV | 1 | A | T | Homozygous   |
| NC_037645.1 | 1698808 | SNV | 1 | T | C | Homozygous   |
| NC_037645.1 | 1698812 | SNV | 1 | A | C | Homozygous   |
| NC_037645.1 | 1698816 | SNV | 1 | T | C | Homozygous   |
| NC_037645.1 | 1698823 | SNV | 1 | A | T | Homozygous   |
| NC_037645.1 | 1698825 | SNV | 1 | T | C | Homozygous   |
| NC_037645.1 | 1698843 | SNV | 1 | A | G | Homozygous   |
| NC_037645.1 | 1698845 | SNV | 1 | A | T | Homozygous   |
| NC_037645.1 | 1699863 | SNV | 1 | T | A | Heterozygous |
| NC_037645.1 | 1699886 | SNV | 1 | T | C | Heterozygous |
| NC_037645.1 | 1699894 | SNV | 1 | A | T | Homozygous   |
| NC_037645.1 | 1699897 | SNV | 1 | A | C | Heterozygous |
| NC_037645.1 | 1700947 | SNV | 1 | G | A | Homozygous   |
| NC_037645.1 | 1701221 | SNV | 1 | T | G | Heterozygous |
| NC_037645.1 | 1701230 | SNV | 1 | C | T | Heterozygous |
| NC_037645.1 | 1701234 | SNV | 1 | T | A | Heterozygous |
| NC_037645.1 | 1707033 | SNV | 1 | A | G | Homozygous   |
| NC_037645.1 | 1707111 | SNV | 1 | G | C | Homozygous   |
| NC_037645.1 | 1707296 | SNV | 1 | C | T | Heterozygous |
| NC_037645.1 | 1718884 | SNV | 1 | A | G | Heterozygous |
| NC_037645.1 | 1718928 | SNV | 1 | A | G | Heterozygous |
| NC_037645.1 | 1718972 | SNV | 1 | G | A | Heterozygous |
| NC_037645.1 | 1719002 | SNV | 1 | C | T | Heterozygous |
| NC_037645.1 | 1719030 | SNV | 1 | A | G | Heterozygous |
| NC_037645.1 | 1719063 | SNV | 1 | G | C | Heterozygous |
| NC_037645.1 | 1724709 | SNV | 1 | A | T | Homozygous   |
| NC_037645.1 | 1724722 | SNV | 1 | G | A | Heterozygous |
| NC_037645.1 | 1724860 | SNV | 1 | C | T | Heterozygous |
| NC_037645.1 | 1725186 | SNV | 1 | A | T | Heterozygous |
| NC_037645.1 | 1725253 | SNV | 1 | T | C | Heterozygous |
| NC_037645.1 | 1725267 | SNV | 1 | G | A | Heterozygous |
| NC_037645.1 | 1725377 | SNV | 1 | A | C | Heterozygous |
| NC_037645.1 | 1725384 | SNV | 1 | A | G | Heterozygous |
| NC_037645.1 | 1725394 | SNV | 1 | A | T | Heterozygous |
| NC_037645.1 | 1726282 | SNV | 1 | G | T | Homozygous   |
| NC_037645.1 | 1726452 | SNV | 1 | A | G | Homozygous   |
| NC_037645.1 | 1726521 | SNV | 1 | T | C | Homozygous   |
| NC_037645.1 | 1726558 | SNV | 1 | T | A | Homozygous   |
| NC_037645.1 | 1726560 | SNV | 1 | T | C | Heterozygous |
| NC_037645.1 | 1726564 | SNV | 1 | T | C | Homozygous   |
| NC_037645.1 | 1726589 | SNV | 1 | A | G | Heterozygous |
| NC_037645.1 | 1726608 | SNV | 1 | T | A | Heterozygous |
| NC_037645.1 | 1726610 | SNV | 1 | T | C | Heterozygous |
| NC_037645.1 | 1726612 | SNV | 1 | A | T | Heterozygous |
| NC_037645.1 | 1726643 | SNV | 1 | A | T | Homozygous   |
| NC_037645.1 | 1726705 | SNV | 1 | T | C | Homozygous   |
| NC_037645.1 | 1726720 | SNV | 1 | C | A | Homozygous   |

|             |         |     |   |   |   |              |
|-------------|---------|-----|---|---|---|--------------|
| NC_037645.1 | 1726790 | SNV | 1 | A | G | Homozygous   |
| NC_037645.1 | 1726793 | SNV | 1 | T | C | Homozygous   |
| NC_037645.1 | 1726861 | SNV | 1 | G | A | Homozygous   |
| NC_037645.1 | 1726918 | SNV | 1 | C | T | Heterozygous |
| NC_037645.1 | 1727076 | SNV | 1 | A | G | Homozygous   |
| NC_037645.1 | 1728633 | SNV | 1 | C | T | Homozygous   |
| NC_037645.1 | 1728636 | SNV | 1 | T | A | Homozygous   |
| NC_037645.1 | 1730153 | SNV | 1 | A | G | Homozygous   |
| NC_037645.1 | 1734597 | SNV | 1 | A | C | Homozygous   |
| NC_037645.1 | 1738505 | SNV | 1 | A | G | Heterozygous |
| NC_037645.1 | 1742529 | SNV | 1 | T | C | Heterozygous |
| NC_037645.1 | 1742622 | SNV | 1 | G | T | Homozygous   |
| NC_037645.1 | 1743012 | SNV | 1 | A | G | Homozygous   |
| NC_037645.1 | 1743027 | SNV | 1 | G | A | Heterozygous |
| NC_037645.1 | 1744491 | SNV | 1 | C | T | Homozygous   |
| NC_037645.1 | 1748138 | SNV | 1 | A | G | Heterozygous |
| NC_037645.1 | 1748298 | SNV | 1 | T | C | Heterozygous |
| NC_037645.1 | 1748577 | SNV | 1 | T | C | Homozygous   |
| NC_037645.1 | 1748751 | SNV | 1 | C | T | Homozygous   |
| NC_037645.1 | 1748754 | SNV | 1 | G | A | Heterozygous |
| NC_037645.1 | 1748796 | SNV | 1 | G | A | Heterozygous |
| NC_037645.1 | 1748894 | SNV | 1 | A | G | Homozygous   |
| NC_037645.1 | 1749508 | SNV | 1 | C | T | Homozygous   |
| NC_037645.1 | 1750494 | SNV | 1 | G | A | Heterozygous |
| NC_037645.1 | 1750770 | SNV | 1 | C | T | Homozygous   |
| NC_037645.1 | 1750780 | SNV | 1 | A | T | Homozygous   |
| NC_037645.1 | 1750900 | SNV | 1 | T | C | Homozygous   |
| NC_037645.1 | 1750905 | SNV | 1 | A | T | Homozygous   |
| NC_037645.1 | 1750971 | SNV | 1 | A | G | Homozygous   |
| NC_037645.1 | 1754014 | SNV | 1 | T | C | Homozygous   |
| NC_037645.1 | 1754069 | SNV | 1 | A | G | Homozygous   |
| NC_037645.1 | 1754745 | SNV | 1 | G | A | Heterozygous |
| NC_037645.1 | 1774434 | SNV | 1 | A | G | Homozygous   |
| NC_037645.1 | 1778068 | SNV | 1 | T | A | Homozygous   |
| NC_037645.1 | 1778081 | SNV | 1 | A | G | Homozygous   |
| NC_037645.1 | 1780554 | SNV | 1 | A | G | Homozygous   |
| NC_037645.1 | 1781223 | SNV | 1 | T | A | Homozygous   |
| NC_037645.1 | 1781225 | SNV | 1 | A | C | Homozygous   |
| NC_037645.1 | 1783813 | SNV | 1 | G | T | Homozygous   |
| NC_037645.1 | 1785928 | SNV | 1 | C | T | Homozygous   |
| NC_037645.1 | 1786801 | SNV | 1 | C | T | Homozygous   |
| NC_037645.1 | 1788597 | SNV | 1 | T | C | Homozygous   |
| NC_037645.1 | 1792472 | SNV | 1 | G | A | Heterozygous |
| NC_037645.1 | 1795493 | SNV | 1 | A | G | Heterozygous |
| NC_037645.1 | 1795624 | SNV | 1 | C | T | Homozygous   |
| NC_037645.1 | 1798560 | SNV | 1 | G | A | Homozygous   |
| NC_037645.1 | 1800979 | SNV | 1 | A | C | Homozygous   |
| NC_037645.1 | 1801163 | SNV | 1 | G | A | Heterozygous |
| NC_037645.1 | 1804404 | SNV | 1 | G | C | Homozygous   |
| NC_037645.1 | 1805362 | SNV | 1 | A | C | Homozygous   |
| NC_037645.1 | 1805367 | SNV | 1 | C | T | Homozygous   |

|             |         |     |   |   |   |              |
|-------------|---------|-----|---|---|---|--------------|
| NC_037645.1 | 1808195 | SNV | 1 | A | G | Heterozygous |
| NC_037645.1 | 1815011 | SNV | 1 | T | A | Homozygous   |
| NC_037645.1 | 1816210 | SNV | 1 | T | C | Homozygous   |
| NC_037645.1 | 1817856 | SNV | 1 | T | C | Homozygous   |
| NC_037645.1 | 1818311 | SNV | 1 | T | G | Homozygous   |
| NC_037645.1 | 1818530 | SNV | 1 | T | C | Homozygous   |
| NC_037645.1 | 1819446 | SNV | 1 | A | G | Heterozygous |
| NC_037645.1 | 1821764 | SNV | 1 | G | T | Homozygous   |
| NC_037645.1 | 1821769 | SNV | 1 | T | A | Homozygous   |
| NC_037645.1 | 1831733 | SNV | 1 | A | G | Homozygous   |
| NC_037645.1 | 1831736 | SNV | 1 | C | A | Homozygous   |
| NC_037645.1 | 1831895 | SNV | 1 | G | C | Homozygous   |
| NC_037645.1 | 1832626 | SNV | 1 | T | C | Heterozygous |
| NC_037645.1 | 1832631 | SNV | 1 | A | T | Heterozygous |
| NC_037645.1 | 1832635 | SNV | 1 | A | G | Heterozygous |
| NC_037645.1 | 1832645 | SNV | 1 | A | T | Heterozygous |
| NC_037645.1 | 1832647 | SNV | 1 | A | T | Heterozygous |
| NC_037645.1 | 1832649 | SNV | 1 | A | T | Heterozygous |
| NC_037645.1 | 1836499 | SNV | 1 | T | C | Homozygous   |
| NC_037645.1 | 1847115 | SNV | 1 | G | A | Homozygous   |
| NC_037645.1 | 1847138 | SNV | 1 | A | G | Heterozygous |
| NC_037645.1 | 1847240 | SNV | 1 | G | A | Homozygous   |
| NC_037645.1 | 1847318 | SNV | 1 | G | C | Homozygous   |
| NC_037645.1 | 1847399 | SNV | 1 | G | A | Heterozygous |
| NC_037645.1 | 1847506 | SNV | 1 | C | T | Heterozygous |
| NC_037645.1 | 1847518 | SNV | 1 | T | G | Heterozygous |
| NC_037645.1 | 1850847 | SNV | 1 | A | G | Heterozygous |
| NC_037645.1 | 1850851 | SNV | 1 | A | G | Homozygous   |
| NC_037645.1 | 1853723 | SNV | 1 | A | G | Heterozygous |
| NC_037645.1 | 1855834 | SNV | 1 | A | G | Homozygous   |
| NC_037645.1 | 1855868 | SNV | 1 | G | A | Heterozygous |
| NC_037645.1 | 1855871 | SNV | 1 | C | T | Heterozygous |
| NC_037645.1 | 1857996 | SNV | 1 | T | C | Homozygous   |
| NC_037645.1 | 1869421 | SNV | 1 | T | C | Homozygous   |
| NC_037645.1 | 1869455 | SNV | 1 | A | T | Heterozygous |
| NC_037645.1 | 1869490 | SNV | 1 | G | A | Heterozygous |
| NC_037645.1 | 1869511 | SNV | 1 | G | T | Homozygous   |
| NC_037645.1 | 1880900 | SNV | 1 | T | A | Homozygous   |
| NC_037645.1 | 1880907 | SNV | 1 | T | G | Homozygous   |
| NC_037645.1 | 1880968 | SNV | 1 | A | G | Homozygous   |
| NC_037645.1 | 1880970 | SNV | 1 | A | G | Heterozygous |
| NC_037645.1 | 1896951 | SNV | 1 | G | A | Homozygous   |
| NC_037645.1 | 1897045 | SNV | 1 | C | T | Homozygous   |
| NC_037645.1 | 1897207 | SNV | 1 | T | A | Homozygous   |
| NC_037645.1 | 1898042 | SNV | 1 | T | A | Homozygous   |
| NC_037645.1 | 1899252 | SNV | 1 | A | G | Homozygous   |
| NC_037645.1 | 1899888 | SNV | 1 | A | G | Homozygous   |
| NC_037645.1 | 1900254 | SNV | 1 | C | T | Heterozygous |
| NC_037645.1 | 1900482 | SNV | 1 | T | A | Homozygous   |
| NC_037645.1 | 1902065 | SNV | 1 | G | A | Homozygous   |
| NC_037645.1 | 1903578 | SNV | 1 | A | G | Heterozygous |



|             |         |     |   |   |   |              |
|-------------|---------|-----|---|---|---|--------------|
| NC_037645.1 | 1903757 | SNV | 1 | T | A | Homozygous   |
| NC_037645.1 | 1903985 | SNV | 1 | T | C | Homozygous   |
| NC_037645.1 | 1904500 | SNV | 1 | G | A | Homozygous   |
| NC_037645.1 | 1904619 | SNV | 1 | G | A | Homozygous   |
| NC_037645.1 | 1904726 | SNV | 1 | A | G | Homozygous   |
| NC_037645.1 | 1904880 | SNV | 1 | T | C | Homozygous   |
| NC_037645.1 | 1904904 | SNV | 1 | G | A | Heterozygous |
| NC_037645.1 | 1905014 | SNV | 1 | G | A | Heterozygous |
| NC_037645.1 | 1905079 | SNV | 1 | A | G | Homozygous   |
| NC_037645.1 | 1908251 | SNV | 1 | G | A | Heterozygous |
| NC_037645.1 | 1908836 | SNV | 1 | T | C | Heterozygous |
| NC_037645.1 | 1909088 | SNV | 1 | C | T | Heterozygous |
| NC_037645.1 | 1910001 | SNV | 1 | A | T | Homozygous   |
| NC_037645.1 | 1910554 | SNV | 1 | G | A | Homozygous   |
| NC_037645.1 | 1910676 | SNV | 1 | T | C | Heterozygous |
| NC_037645.1 | 1910679 | SNV | 1 | T | C | Heterozygous |
| NC_037645.1 | 1910729 | SNV | 1 | T | C | Heterozygous |
| NC_037645.1 | 1911386 | SNV | 1 | G | A | Heterozygous |
| NC_037645.1 | 1912836 | SNV | 1 | G | A | Heterozygous |
| NC_037645.1 | 1913576 | SNV | 1 | A | G | Homozygous   |
| NC_037645.1 | 1913590 | SNV | 1 | T | C | Homozygous   |
| NC_037645.1 | 1913780 | SNV | 1 | G | A | Homozygous   |
| NC_037645.1 | 1913811 | SNV | 1 | G | A | Homozygous   |
| NC_037645.1 | 1914030 | SNV | 1 | T | C | Heterozygous |
| NC_037645.1 | 1916252 | SNV | 1 | G | A | Homozygous   |
| NC_037645.1 | 1916264 | SNV | 1 | G | A | Homozygous   |
| NC_037645.1 | 1916540 | SNV | 1 | T | C | Heterozygous |
| NC_037645.1 | 1917976 | SNV | 1 | A | C | Homozygous   |
| NC_037645.1 | 1934496 | SNV | 1 | T | A | Heterozygous |
| NC_037645.1 | 1935029 | SNV | 1 | G | T | Heterozygous |
| NC_037645.1 | 1935709 | SNV | 1 | G | A | Homozygous   |
| NC_037645.1 | 1936515 | SNV | 1 | T | C | Homozygous   |
| NC_037645.1 | 1948181 | SNV | 1 | A | T | Homozygous   |
| NC_037645.1 | 1948185 | SNV | 1 | A | C | Homozygous   |
| NC_037645.1 | 1953412 | SNV | 1 | A | G | Homozygous   |
| NC_037645.1 | 1953541 | SNV | 1 | A | G | Homozygous   |
| NC_037645.1 | 1953989 | SNV | 1 | G | C | Homozygous   |
| NC_037645.1 | 1954362 | SNV | 1 | T | C | Heterozygous |
| NC_037645.1 | 1954371 | SNV | 1 | A | G | Heterozygous |
| NC_037645.1 | 1954377 | SNV | 1 | T | A | Heterozygous |
| NC_037645.1 | 1956002 | SNV | 1 | T | A | Homozygous   |
| NC_037645.1 | 1958273 | SNV | 1 | C | G | Homozygous   |
| NC_037645.1 | 1958489 | SNV | 1 | C | T | Homozygous   |
| NC_037645.1 | 1958491 | SNV | 1 | A | T | Homozygous   |
| NC_037645.1 | 1958493 | SNV | 1 | A | G | Homozygous   |
| NC_037645.1 | 1958822 | SNV | 1 | A | T | Homozygous   |
| NC_037645.1 | 1959801 | SNV | 1 | A | C | Homozygous   |
| NC_037645.1 | 1959803 | SNV | 1 | A | T | Homozygous   |
| NC_037645.1 | 1961679 | SNV | 1 | T | C | Homozygous   |
| NC_037645.1 | 1961719 | SNV | 1 | T | C | Heterozygous |
| NC_037645.1 | 1963048 | SNV | 1 | C | T | Homozygous   |

|             |         |     |   |   |   |              |
|-------------|---------|-----|---|---|---|--------------|
| NC_037645.1 | 1963448 | SNV | 1 | C | T | Homozygous   |
| NC_037645.1 | 1968731 | SNV | 1 | A | G | Homozygous   |
| NC_037645.1 | 1969231 | SNV | 1 | G | A | Homozygous   |
| NC_037645.1 | 1969235 | SNV | 1 | G | A | Homozygous   |
| NC_037645.1 | 1969484 | SNV | 1 | T | A | Heterozygous |
| NC_037645.1 | 1969489 | SNV | 1 | A | T | Homozygous   |
| NC_037645.1 | 1974594 | SNV | 1 | T | C | Homozygous   |
| NC_037645.1 | 1977429 | SNV | 1 | T | C | Homozygous   |
| NC_037645.1 | 1985233 | SNV | 1 | G | A | Heterozygous |
| NC_037645.1 | 1985888 | SNV | 1 | A | G | Heterozygous |
| NC_037645.1 | 1985923 | SNV | 1 | A | G | Heterozygous |
| NC_037645.1 | 1985932 | SNV | 1 | T | C | Heterozygous |
| NC_037645.1 | 1987339 | SNV | 1 | C | T | Heterozygous |
| NC_037645.1 | 1989176 | SNV | 1 | A | G | Homozygous   |
| NC_037645.1 | 1990440 | SNV | 1 | T | C | Homozygous   |
| NC_037645.1 | 1990679 | SNV | 1 | A | G | Homozygous   |
| NC_037645.1 | 1990681 | SNV | 1 | A | T | Homozygous   |
| NC_037645.1 | 1994041 | SNV | 1 | C | T | Homozygous   |
| NC_037645.1 | 1995960 | SNV | 1 | T | C | Homozygous   |
| NC_037645.1 | 1997138 | SNV | 1 | T | C | Heterozygous |
| NC_037645.1 | 1999031 | SNV | 1 | T | C | Homozygous   |
| NC_037645.1 | 2003522 | SNV | 1 | T | C | Heterozygous |
| NC_037645.1 | 2008722 | SNV | 1 | C | A | Heterozygous |
| NC_037645.1 | 2015243 | SNV | 1 | A | G | Homozygous   |
| NC_037645.1 | 2015276 | SNV | 1 | G | A | Homozygous   |
| NC_037645.1 | 2017520 | SNV | 1 | G | A | Heterozygous |
| NC_037645.1 | 2020732 | SNV | 1 | A | G | Heterozygous |
| NC_037645.1 | 2021899 | SNV | 1 | A | G | Heterozygous |
| NC_037645.1 | 2022196 | SNV | 1 | G | A | Heterozygous |
| NC_037645.1 | 2023549 | SNV | 1 | T | C | Homozygous   |
| NC_037645.1 | 2027119 | SNV | 1 | A | G | Heterozygous |
| NC_037645.1 | 2027185 | SNV | 1 | G | A | Heterozygous |
| NC_037645.1 | 2027537 | SNV | 1 | A | G | Homozygous   |
| NC_037645.1 | 2027599 | SNV | 1 | T | C | Homozygous   |
| NC_037645.1 | 2034412 | SNV | 1 | T | C | Homozygous   |
| NC_037645.1 | 2034475 | SNV | 1 | C | T | Heterozygous |
| NC_037645.1 | 2035247 | SNV | 1 | T | A | Homozygous   |
| NC_037645.1 | 2035349 | SNV | 1 | T | A | Heterozygous |
| NC_037645.1 | 2035872 | SNV | 1 | T | C | Homozygous   |
| NC_037645.1 | 2036308 | SNV | 1 | T | C | Heterozygous |
| NC_037645.1 | 2117534 | SNV | 1 | A | T | Homozygous   |
| NC_037645.1 | 2117538 | SNV | 1 | A | G | Homozygous   |
| NC_037645.1 | 2117540 | SNV | 1 | T | G | Homozygous   |
| NC_037645.1 | 2117566 | SNV | 1 | A | G | Heterozygous |
| NC_037645.1 | 2117571 | SNV | 1 | T | A | Homozygous   |
| NC_037645.1 | 2117575 | SNV | 1 | T | A | Heterozygous |
| NC_037645.1 | 2130347 | SNV | 1 | A | C | Homozygous   |
| NC_037645.1 | 2130355 | SNV | 1 | A | T | Homozygous   |
| NC_037645.1 | 2130363 | SNV | 1 | A | T | Homozygous   |
| NC_037645.1 | 2130365 | SNV | 1 | A | G | Homozygous   |
| NC_037645.1 | 2130367 | SNV | 1 | A | C | Homozygous   |

|             |         |     |   |   |   |              |
|-------------|---------|-----|---|---|---|--------------|
| NC_037645.1 | 2130373 | SNV | 1 | A | T | Homozygous   |
| NC_037645.1 | 2130375 | SNV | 1 | A | G | Homozygous   |
| NC_037645.1 | 2130377 | SNV | 1 | A | C | Homozygous   |
| NC_037645.1 | 2138255 | SNV | 1 | A | C | Homozygous   |
| NC_037645.1 | 2138486 | SNV | 1 | A | G | Heterozygous |
| NC_037645.1 | 2138566 | SNV | 1 | T | C | Heterozygous |
| NC_037645.1 | 2138958 | SNV | 1 | C | T | Heterozygous |
| NC_037645.1 | 2138969 | SNV | 1 | T | C | Heterozygous |
| NC_037645.1 | 2139830 | SNV | 1 | A | C | Heterozygous |
| NC_037645.1 | 2140736 | SNV | 1 | T | A | Homozygous   |
| NC_037645.1 | 2140750 | SNV | 1 | A | T | Homozygous   |
| NC_037645.1 | 2140754 | SNV | 1 | A | T | Homozygous   |
| NC_037645.1 | 2140759 | SNV | 1 | T | A | Homozygous   |
| NC_037645.1 | 2140761 | SNV | 1 | T | A | Homozygous   |
| NC_037645.1 | 2141681 | SNV | 1 | T | C | Homozygous   |
| NC_037645.1 | 2142965 | SNV | 1 | C | T | Heterozygous |
| NC_037645.1 | 2145340 | SNV | 1 | G | A | Heterozygous |
| NC_037645.1 | 2148074 | SNV | 1 | A | G | Homozygous   |
| NC_037645.1 | 2148332 | SNV | 1 | C | T | Homozygous   |
| NC_037645.1 | 2148607 | SNV | 1 | T | A | Homozygous   |
| NC_037645.1 | 2155351 | SNV | 1 | A | C | Homozygous   |
| NC_037645.1 | 2155357 | SNV | 1 | A | T | Homozygous   |
| NC_037645.1 | 2155368 | SNV | 1 | T | A | Homozygous   |
| NC_037645.1 | 2155370 | SNV | 1 | C | A | Homozygous   |
| NC_037645.1 | 2155382 | SNV | 1 | G | A | Heterozygous |
| NC_037645.1 | 2155382 | SNV | 1 | G | C | Heterozygous |
| NC_037645.1 | 2156665 | SNV | 1 | T | A | Homozygous   |
| NC_037645.1 | 2156667 | SNV | 1 | T | A | Homozygous   |
| NC_037645.1 | 2156670 | SNV | 1 | T | A | Homozygous   |
| NC_037645.1 | 2160990 | SNV | 1 | T | C | Heterozygous |
| NC_037645.1 | 2161206 | SNV | 1 | C | T | Heterozygous |
| NC_037645.1 | 2162857 | SNV | 1 | A | G | Heterozygous |
| NC_037645.1 | 2162953 | SNV | 1 | G | C | Homozygous   |
| NC_037645.1 | 2164002 | SNV | 1 | A | G | Homozygous   |
| NC_037645.1 | 2166769 | SNV | 1 | A | G | Homozygous   |
| NC_037645.1 | 2172531 | SNV | 1 | T | A | Homozygous   |
| NC_037645.1 | 2172535 | SNV | 1 | C | A | Homozygous   |
| NC_037645.1 | 2172538 | SNV | 1 | T | C | Homozygous   |
| NC_037645.1 | 2172540 | SNV | 1 | A | G | Homozygous   |
| NC_037645.1 | 2172549 | SNV | 1 | A | G | Homozygous   |
| NC_037645.1 | 2172558 | SNV | 1 | G | A | Homozygous   |
| NC_037645.1 | 2172565 | SNV | 1 | C | A | Homozygous   |
| NC_037645.1 | 2172570 | SNV | 1 | A | C | Homozygous   |
| NC_037645.1 | 2172588 | SNV | 1 | C | A | Homozygous   |
| NC_037645.1 | 2172591 | SNV | 1 | A | T | Homozygous   |
| NC_037645.1 | 2172598 | SNV | 1 | G | A | Homozygous   |
| NC_037645.1 | 2174598 | SNV | 1 | G | A | Homozygous   |
| NC_037645.1 | 2174600 | SNV | 1 | A | G | Homozygous   |
| NC_037645.1 | 2175796 | SNV | 1 | A | G | Homozygous   |
| NC_037645.1 | 2188795 | SNV | 1 | C | T | Homozygous   |
| NC_037645.1 | 2188799 | SNV | 1 | C | T | Homozygous   |

|             |         |     |   |   |   |              |
|-------------|---------|-----|---|---|---|--------------|
| NC_037645.1 | 2191461 | SNV | 1 | A | T | Homozygous   |
| NC_037645.1 | 2191470 | SNV | 1 | A | G | Homozygous   |
| NC_037645.1 | 2191497 | SNV | 1 | T | A | Homozygous   |
| NC_037645.1 | 2191502 | SNV | 1 | A | T | Homozygous   |
| NC_037645.1 | 2191506 | SNV | 1 | A | G | Homozygous   |
| NC_037645.1 | 2191513 | SNV | 1 | A | T | Homozygous   |
| NC_037645.1 | 2191520 | SNV | 1 | A | C | Homozygous   |
| NC_037645.1 | 2206988 | SNV | 1 | A | G | Heterozygous |
| NC_037645.1 | 2210852 | SNV | 1 | C | A | Homozygous   |
| NC_037645.1 | 2210854 | SNV | 1 | A | C | Heterozygous |
| NC_037645.1 | 2210974 | SNV | 1 | T | C | Homozygous   |
| NC_037645.1 | 2211263 | SNV | 1 | T | C | Homozygous   |
| NC_037645.1 | 2211675 | SNV | 1 | T | C | Homozygous   |
| NC_037645.1 | 2211678 | SNV | 1 | T | C | Homozygous   |
| NC_037645.1 | 2212130 | SNV | 1 | C | T | Homozygous   |
| NC_037645.1 | 2212423 | SNV | 1 | A | G | Homozygous   |
| NC_037645.1 | 2218783 | SNV | 1 | C | T | Heterozygous |
| NC_037645.1 | 2223592 | SNV | 1 | T | C | Homozygous   |
| NC_037645.1 | 2223733 | SNV | 1 | A | G | Homozygous   |
| NC_037645.1 | 2224286 | SNV | 1 | G | A | Heterozygous |
| NC_037645.1 | 2228609 | SNV | 1 | G | T | Homozygous   |
| NC_037645.1 | 2228896 | SNV | 1 | T | C | Homozygous   |
| NC_037645.1 | 2236645 | SNV | 1 | T | C | Heterozygous |
| NC_037645.1 | 2236648 | SNV | 1 | T | A | Heterozygous |
| NC_037645.1 | 2236651 | SNV | 1 | T | C | Heterozygous |
| NC_037645.1 | 2236654 | SNV | 1 | T | A | Heterozygous |
| NC_037645.1 | 2236675 | SNV | 1 | T | A | Heterozygous |
| NC_037645.1 | 2236681 | SNV | 1 | T | C | Heterozygous |
| NC_037645.1 | 2236684 | SNV | 1 | T | C | Heterozygous |
| NC_037645.1 | 2236817 | SNV | 1 | G | T | Homozygous   |
| NC_037645.1 | 2238058 | SNV | 1 | G | A | Heterozygous |
| NC_037645.1 | 2239411 | SNV | 1 | G | T | Homozygous   |
| NC_037645.1 | 2239888 | SNV | 1 | A | T | Homozygous   |
| NC_037645.1 | 2240374 | SNV | 1 | G | A | Homozygous   |
| NC_037645.1 | 2240403 | SNV | 1 | G | A | Heterozygous |
| NC_037645.1 | 2240532 | SNV | 1 | G | A | Homozygous   |
| NC_037645.1 | 2241554 | SNV | 1 | G | A | Homozygous   |
| NC_037645.1 | 2241995 | SNV | 1 | A | T | Homozygous   |
| NC_037645.1 | 2243349 | SNV | 1 | A | G | Homozygous   |
| NC_037645.1 | 2246092 | SNV | 1 | T | C | Homozygous   |
| NC_037645.1 | 2246656 | SNV | 1 | T | C | Homozygous   |
| NC_037645.1 | 2247108 | SNV | 1 | T | C | Heterozygous |
| NC_037645.1 | 2248821 | SNV | 1 | G | C | Homozygous   |
| NC_037645.1 | 2259233 | SNV | 1 | G | T | Homozygous   |
| NC_037645.1 | 2259236 | SNV | 1 | A | G | Homozygous   |
| NC_037645.1 | 2259824 | SNV | 1 | T | A | Heterozygous |
| NC_037645.1 | 2262766 | SNV | 1 | A | T | Heterozygous |
| NC_037645.1 | 2262767 | SNV | 1 | A | T | Heterozygous |
| NC_037645.1 | 2262768 | SNV | 1 | A | T | Heterozygous |
| NC_037645.1 | 2276850 | SNV | 1 | C | A | Homozygous   |
| NC_037645.1 | 2277667 | SNV | 1 | C | A | Homozygous   |

|             |         |     |   |   |   |              |
|-------------|---------|-----|---|---|---|--------------|
| NC_037645.1 | 2282888 | SNV | 1 | G | A | Homozygous   |
| NC_037645.1 | 2283127 | SNV | 1 | T | A | Homozygous   |
| NC_037645.1 | 2283129 | SNV | 1 | A | G | Homozygous   |
| NC_037645.1 | 2283132 | SNV | 1 | A | G | Homozygous   |
| NC_037645.1 | 2283500 | SNV | 1 | G | A | Heterozygous |
| NC_037645.1 | 2285708 | SNV | 1 | T | C | Homozygous   |
| NC_037645.1 | 2286268 | SNV | 1 | C | A | Homozygous   |
| NC_037645.1 | 2288387 | SNV | 1 | A | T | Heterozygous |
| NC_037645.1 | 2288390 | SNV | 1 | T | A | Heterozygous |
| NC_037645.1 | 2294515 | SNV | 1 | T | C | Homozygous   |
| NC_037645.1 | 2294583 | SNV | 1 | A | G | Heterozygous |
| NC_037645.1 | 2298651 | SNV | 1 | T | C | Homozygous   |
| NC_037645.1 | 2299468 | SNV | 1 | C | T | Homozygous   |
| NC_037645.1 | 2299471 | SNV | 1 | A | T | Homozygous   |
| NC_037645.1 | 2309360 | SNV | 1 | T | C | Homozygous   |
| NC_037645.1 | 2309416 | SNV | 1 | A | G | Homozygous   |
| NC_037645.1 | 2309916 | SNV | 1 | A | G | Homozygous   |
| NC_037645.1 | 2310355 | SNV | 1 | G | T | Homozygous   |
| NC_037645.1 | 2310598 | SNV | 1 | G | A | Heterozygous |
| NC_037645.1 | 2310856 | SNV | 1 | T | C | Homozygous   |
| NC_037645.1 | 2310906 | SNV | 1 | G | C | Homozygous   |
| NC_037645.1 | 2311497 | SNV | 1 | G | T | Homozygous   |
| NC_037645.1 | 2311524 | SNV | 1 | C | T | Homozygous   |
| NC_037645.1 | 2311532 | SNV | 1 | C | G | Homozygous   |
| NC_037645.1 | 2311720 | SNV | 1 | A | G | Homozygous   |
| NC_037645.1 | 2312153 | SNV | 1 | C | T | Heterozygous |
| NC_037645.1 | 2313189 | SNV | 1 | C | T | Heterozygous |
| NC_037645.1 | 2315241 | SNV | 1 | A | G | Homozygous   |
| NC_037645.1 | 2315258 | SNV | 1 | C | T | Heterozygous |
| NC_037645.1 | 2315705 | SNV | 1 | T | C | Heterozygous |
| NC_037645.1 | 2315855 | SNV | 1 | A | G | Homozygous   |
| NC_037645.1 | 2318037 | SNV | 1 | C | T | Heterozygous |
| NC_037645.1 | 2318267 | SNV | 1 | A | G | Homozygous   |
| NC_037645.1 | 2318679 | SNV | 1 | T | C | Homozygous   |
| NC_037645.1 | 2319098 | SNV | 1 | C | T | Heterozygous |
| NC_037645.1 | 2320178 | SNV | 1 | A | G | Homozygous   |
| NC_037645.1 | 2322602 | SNV | 1 | T | A | Homozygous   |
| NC_037645.1 | 2322740 | SNV | 1 | T | A | Homozygous   |
| NC_037645.1 | 2322789 | SNV | 1 | A | T | Homozygous   |
| NC_037645.1 | 2322791 | SNV | 1 | A | T | Homozygous   |
| NC_037645.1 | 2322793 | SNV | 1 | A | T | Homozygous   |
| NC_037645.1 | 2322795 | SNV | 1 | A | T | Homozygous   |
| NC_037645.1 | 2322797 | SNV | 1 | A | T | Homozygous   |
| NC_037645.1 | 2322799 | SNV | 1 | A | T | Homozygous   |
| NC_037645.1 | 2322805 | SNV | 1 | A | C | Heterozygous |
| NC_037645.1 | 2322811 | SNV | 1 | A | T | Homozygous   |
| NC_037645.1 | 2328790 | SNV | 1 | G | A | Homozygous   |
| NC_037645.1 | 2332142 | SNV | 1 | C | A | Heterozygous |
| NC_037645.1 | 2332144 | SNV | 1 | C | T | Heterozygous |
| NC_037645.1 | 2332155 | SNV | 1 | T | C | Heterozygous |
| NC_037645.1 | 2332159 | SNV | 1 | T | C | Heterozygous |

|             |         |     |   |   |   |              |
|-------------|---------|-----|---|---|---|--------------|
| NC_037645.1 | 2333247 | SNV | 1 | C | T | Homozygous   |
| NC_037645.1 | 2333253 | SNV | 1 | G | A | Heterozygous |
| NC_037645.1 | 2333262 | SNV | 1 | A | G | Homozygous   |
| NC_037645.1 | 2333561 | SNV | 1 | G | A | Heterozygous |
| NC_037645.1 | 2333658 | SNV | 1 | G | A | Heterozygous |
| NC_037645.1 | 2333662 | SNV | 1 | A | G | Homozygous   |
| NC_037645.1 | 2334306 | SNV | 1 | A | G | Homozygous   |
| NC_037645.1 | 2334378 | SNV | 1 | C | T | Heterozygous |
| NC_037645.1 | 2334397 | SNV | 1 | A | T | Homozygous   |
| NC_037645.1 | 2334446 | SNV | 1 | C | T | Heterozygous |
| NC_037645.1 | 2334542 | SNV | 1 | T | C | Homozygous   |
| NC_037645.1 | 2335815 | SNV | 1 | A | G | Heterozygous |
| NC_037645.1 | 2335907 | SNV | 1 | A | G | Heterozygous |
| NC_037645.1 | 2336604 | SNV | 1 | C | T | Homozygous   |
| NC_037645.1 | 2336774 | SNV | 1 | A | G | Homozygous   |
| NC_037645.1 | 2336932 | SNV | 1 | A | G | Homozygous   |
| NC_037645.1 | 2337135 | SNV | 1 | T | G | Homozygous   |
| NC_037645.1 | 2337357 | SNV | 1 | T | A | Homozygous   |
| NC_037645.1 | 2337418 | SNV | 1 | G | A | Heterozygous |
| NC_037645.1 | 2337573 | SNV | 1 | G | A | Heterozygous |
| NC_037645.1 | 2337577 | SNV | 1 | G | A | Heterozygous |
| NC_037645.1 | 2339994 | SNV | 1 | G | A | Heterozygous |
| NC_037645.1 | 2340037 | SNV | 1 | A | C | Homozygous   |
| NC_037645.1 | 2340041 | SNV | 1 | T | G | Homozygous   |
| NC_037645.1 | 2340047 | SNV | 1 | A | C | Homozygous   |
| NC_037645.1 | 2340057 | SNV | 1 | A | T | Homozygous   |
| NC_037645.1 | 2340067 | SNV | 1 | G | A | Homozygous   |
| NC_037645.1 | 2341383 | SNV | 1 | G | A | Homozygous   |
| NC_037645.1 | 2344325 | SNV | 1 | C | T | Heterozygous |
| NC_037645.1 | 2344486 | SNV | 1 | G | A | Heterozygous |
| NC_037645.1 | 2344493 | SNV | 1 | C | T | Heterozygous |
| NC_037645.1 | 2344563 | SNV | 1 | C | T | Heterozygous |
| NC_037645.1 | 2344647 | SNV | 1 | G | A | Heterozygous |
| NC_037645.1 | 2344652 | SNV | 1 | T | C | Heterozygous |
| NC_037645.1 | 2344674 | SNV | 1 | T | C | Homozygous   |
| NC_037645.1 | 2344718 | SNV | 1 | C | T | Heterozygous |
| NC_037645.1 | 2344772 | SNV | 1 | C | T | Heterozygous |
| NC_037645.1 | 2344873 | SNV | 1 | C | T | Heterozygous |
| NC_037645.1 | 2345209 | SNV | 1 | A | G | Homozygous   |
| NC_037645.1 | 2345259 | SNV | 1 | T | C | Homozygous   |
| NC_037645.1 | 2345267 | SNV | 1 | A | G | Homozygous   |
| NC_037645.1 | 2345318 | SNV | 1 | C | G | Homozygous   |
| NC_037645.1 | 2345671 | SNV | 1 | C | T | Homozygous   |
| NC_037645.1 | 2360661 | SNV | 1 | A | G | Homozygous   |
| NC_037645.1 | 2374775 | SNV | 1 | T | G | Homozygous   |
| NC_037645.1 | 2374783 | SNV | 1 | T | A | Homozygous   |
| NC_037645.1 | 2374795 | SNV | 1 | A | T | Homozygous   |
| NC_037645.1 | 2374803 | SNV | 1 | T | A | Homozygous   |
| NC_037645.1 | 2374809 | SNV | 1 | T | A | Homozygous   |
| NC_037645.1 | 2375096 | SNV | 1 | A | G | Homozygous   |
| NC_037645.1 | 2375893 | SNV | 1 | C | T | Heterozygous |

|             |         |     |   |   |   |              |
|-------------|---------|-----|---|---|---|--------------|
| NC_037645.1 | 2376142 | SNV | 1 | T | C | Homozygous   |
| NC_037645.1 | 2376249 | SNV | 1 | C | T | Homozygous   |
| NC_037645.1 | 2376643 | SNV | 1 | T | G | Heterozygous |
| NC_037645.1 | 2376657 | SNV | 1 | C | A | Heterozygous |
| NC_037645.1 | 2376686 | SNV | 1 | C | A | Heterozygous |
| NC_037645.1 | 2383077 | SNV | 1 | A | G | Homozygous   |
| NC_037645.1 | 2383276 | SNV | 1 | G | A | Homozygous   |
| NC_037645.1 | 2387437 | SNV | 1 | C | A | Heterozygous |
| NC_037645.1 | 2397955 | SNV | 1 | A | C | Heterozygous |
| NC_037645.1 | 2397957 | SNV | 1 | A | T | Heterozygous |
| NC_037645.1 | 2409921 | SNV | 1 | G | A | Homozygous   |
| NC_037645.1 | 2415093 | SNV | 1 | C | T | Homozygous   |
| NC_037645.1 | 2415123 | SNV | 1 | T | C | Homozygous   |
| NC_037645.1 | 2416338 | SNV | 1 | G | A | Heterozygous |
| NC_037645.1 | 2416409 | SNV | 1 | G | A | Heterozygous |
| NC_037645.1 | 2416611 | SNV | 1 | C | T | Homozygous   |
| NC_037645.1 | 2417729 | SNV | 1 | A | G | Homozygous   |
| NC_037645.1 | 2419850 | SNV | 1 | G | A | Heterozygous |
| NC_037645.1 | 2420717 | SNV | 1 | A | G | Homozygous   |
| NC_037645.1 | 2420773 | SNV | 1 | G | T | Homozygous   |
| NC_037645.1 | 2421439 | SNV | 1 | C | T | Heterozygous |
| NC_037645.1 | 2421808 | SNV | 1 | T | C | Homozygous   |
| NC_037645.1 | 2421819 | SNV | 1 | T | C | Homozygous   |
| NC_037645.1 | 2428414 | SNV | 1 | C | T | Homozygous   |
| NC_037645.1 | 2428422 | SNV | 1 | A | G | Homozygous   |
| NC_037645.1 | 2428431 | SNV | 1 | T | A | Homozygous   |
| NC_037645.1 | 2428446 | SNV | 1 | C | A | Homozygous   |
| NC_037645.1 | 2428469 | SNV | 1 | T | C | Homozygous   |
| NC_037645.1 | 2437601 | SNV | 1 | C | T | Homozygous   |
| NC_037645.1 | 2437680 | SNV | 1 | G | A | Heterozygous |
| NC_037645.1 | 2437728 | SNV | 1 | G | A | Homozygous   |
| NC_037645.1 | 2437766 | SNV | 1 | C | T | Homozygous   |
| NC_037645.1 | 2437832 | SNV | 1 | G | C | Heterozygous |
| NC_037645.1 | 2438764 | SNV | 1 | C | T | Homozygous   |
| NC_037645.1 | 2438768 | SNV | 1 | C | T | Heterozygous |
| NC_037645.1 | 2438773 | SNV | 1 | C | A | Homozygous   |
| NC_037645.1 | 2442812 | SNV | 1 | T | C | Homozygous   |
| NC_037645.1 | 2442850 | SNV | 1 | T | C | Homozygous   |
| NC_037645.1 | 2442852 | SNV | 1 | G | A | Homozygous   |
| NC_037645.1 | 2442864 | SNV | 1 | G | A | Homozygous   |
| NC_037645.1 | 2442878 | SNV | 1 | T | C | Homozygous   |
| NC_037645.1 | 2442944 | SNV | 1 | G | A | Heterozygous |
| NC_037645.1 | 2442979 | SNV | 1 | A | G | Homozygous   |
| NC_037645.1 | 2443024 | SNV | 1 | A | G | Homozygous   |
| NC_037645.1 | 2450580 | SNV | 1 | G | A | Homozygous   |
| NC_037645.1 | 2453850 | SNV | 1 | T | C | Homozygous   |
| NC_037645.1 | 2454121 | SNV | 1 | T | C | Homozygous   |
| NC_037645.1 | 2454125 | SNV | 1 | C | A | Homozygous   |
| NC_037645.1 | 2454138 | SNV | 1 | G | A | Homozygous   |
| NC_037645.1 | 2454146 | SNV | 1 | A | T | Homozygous   |
| NC_037645.1 | 2454167 | SNV | 1 | A | T | Homozygous   |

|             |         |     |   |   |   |              |
|-------------|---------|-----|---|---|---|--------------|
| NC_037645.1 | 2454171 | SNV | 1 | T | G | Homozygous   |
| NC_037645.1 | 2454325 | SNV | 1 | A | G | Homozygous   |
| NC_037645.1 | 2454330 | SNV | 1 | T | C | Homozygous   |
| NC_037645.1 | 2456983 | SNV | 1 | C | A | Heterozygous |
| NC_037645.1 | 2456984 | SNV | 1 | A | T | Heterozygous |
| NC_037645.1 | 2456987 | SNV | 1 | A | T | Heterozygous |
| NC_037645.1 | 2456990 | SNV | 1 | T | G | Heterozygous |
| NC_037645.1 | 2457228 | SNV | 1 | A | T | Homozygous   |
| NC_037645.1 | 2457247 | SNV | 1 | T | C | Homozygous   |
| NC_037645.1 | 2457257 | SNV | 1 | A | G | Homozygous   |
| NC_037645.1 | 2457262 | SNV | 1 | A | T | Homozygous   |
| NC_037645.1 | 2457267 | SNV | 1 | A | G | Homozygous   |
| NC_037645.1 | 2457271 | SNV | 1 | A | T | Homozygous   |
| NC_037645.1 | 2457614 | SNV | 1 | G | A | Heterozygous |
| NC_037645.1 | 2458777 | SNV | 1 | T | A | Heterozygous |
| NC_037645.1 | 2458785 | SNV | 1 | T | A | Heterozygous |
| NC_037645.1 | 2458788 | SNV | 1 | G | A | Heterozygous |
| NC_037645.1 | 2461757 | SNV | 1 | G | A | Homozygous   |
| NC_037645.1 | 2461775 | SNV | 1 | T | C | Heterozygous |
| NC_037645.1 | 2461798 | SNV | 1 | G | A | Heterozygous |
| NC_037645.1 | 2461813 | SNV | 1 | G | A | Heterozygous |
| NC_037645.1 | 2461817 | SNV | 1 | T | C | Heterozygous |
| NC_037645.1 | 2461859 | SNV | 1 | G | A | Heterozygous |
| NC_037645.1 | 2461920 | SNV | 1 | T | A | Homozygous   |
| NC_037645.1 | 2462032 | SNV | 1 | C | T | Homozygous   |
| NC_037645.1 | 2462106 | SNV | 1 | G | A | Heterozygous |
| NC_037645.1 | 2462220 | SNV | 1 | T | G | Homozygous   |
| NC_037645.1 | 2462668 | SNV | 1 | G | A | Homozygous   |
| NC_037645.1 | 2462833 | SNV | 1 | G | A | Heterozygous |
| NC_037645.1 | 2464291 | SNV | 1 | A | T | Homozygous   |
| NC_037645.1 | 2468815 | SNV | 1 | A | G | Homozygous   |
| NC_037645.1 | 2468983 | SNV | 1 | T | C | Homozygous   |
| NC_037645.1 | 2469165 | SNV | 1 | A | G | Homozygous   |
| NC_037645.1 | 2469510 | SNV | 1 | T | G | Heterozygous |
| NC_037645.1 | 2472385 | SNV | 1 | T | C | Homozygous   |
| NC_037645.1 | 2472506 | SNV | 1 | C | T | Homozygous   |
| NC_037645.1 | 2477751 | SNV | 1 | A | G | Homozygous   |
| NC_037645.1 | 2477986 | SNV | 1 | C | A | Homozygous   |
| NC_037645.1 | 2477989 | SNV | 1 | A | T | Homozygous   |
| NC_037645.1 | 2478049 | SNV | 1 | A | G | Homozygous   |
| NC_037645.1 | 2478061 | SNV | 1 | C | T | Homozygous   |
| NC_037645.1 | 2478218 | SNV | 1 | C | T | Heterozygous |
| NC_037645.1 | 2478220 | SNV | 1 | A | G | Heterozygous |
| NC_037645.1 | 2478352 | SNV | 1 | C | T | Heterozygous |
| NC_037645.1 | 2478800 | SNV | 1 | C | T | Heterozygous |
| NC_037645.1 | 2479253 | SNV | 1 | A | G | Heterozygous |
| NC_037645.1 | 2479264 | SNV | 1 | A | G | Heterozygous |
| NC_037645.1 | 2479275 | SNV | 1 | A | G | Homozygous   |
| NC_037645.1 | 2479280 | SNV | 1 | A | G | Heterozygous |
| NC_037645.1 | 2479316 | SNV | 1 | A | G | Heterozygous |
| NC_037645.1 | 2479322 | SNV | 1 | A | G | Heterozygous |



|             |         |     |   |   |   |              |
|-------------|---------|-----|---|---|---|--------------|
| NC_037645.1 | 2479325 | SNV | 1 | A | G | Heterozygous |
| NC_037645.1 | 2479333 | SNV | 1 | A | G | Heterozygous |
| NC_037645.1 | 2483405 | SNV | 1 | A | G | Homozygous   |
| NC_037645.1 | 2485133 | SNV | 1 | G | A | Heterozygous |
| NC_037645.1 | 2486937 | SNV | 1 | A | G | Heterozygous |
| NC_037645.1 | 2487099 | SNV | 1 | A | T | Homozygous   |
| NC_037645.1 | 2487270 | SNV | 1 | G | C | Heterozygous |
| NC_037645.1 | 2487372 | SNV | 1 | T | C | Homozygous   |
| NC_037645.1 | 2487440 | SNV | 1 | G | A | Heterozygous |
| NC_037645.1 | 2491566 | SNV | 1 | A | G | Homozygous   |
| NC_037645.1 | 2493054 | SNV | 1 | A | G | Homozygous   |
| NC_037645.1 | 2496054 | SNV | 1 | A | T | Heterozygous |
| NC_037645.1 | 2496076 | SNV | 1 | T | A | Heterozygous |
| NC_037645.1 | 2498492 | SNV | 1 | G | A | Heterozygous |
| NC_037645.1 | 2498585 | SNV | 1 | G | T | Homozygous   |
| NC_037645.1 | 2499088 | SNV | 1 | T | C | Homozygous   |
| NC_037645.1 | 2499642 | SNV | 1 | A | C | Homozygous   |
| NC_037645.1 | 2499650 | SNV | 1 | A | G | Homozygous   |
| NC_037645.1 | 2509799 | SNV | 1 | G | C | Homozygous   |
| NC_037645.1 | 2510081 | SNV | 1 | T | C | Homozygous   |
| NC_037645.1 | 2510581 | SNV | 1 | G | A | Homozygous   |
| NC_037645.1 | 2510608 | SNV | 1 | A | G | Homozygous   |
| NC_037645.1 | 2510629 | SNV | 1 | C | T | Homozygous   |
| NC_037645.1 | 2510905 | SNV | 1 | C | T | Homozygous   |
| NC_037645.1 | 2510941 | SNV | 1 | G | A | Heterozygous |
| NC_037645.1 | 2524247 | SNV | 1 | T | C | Homozygous   |
| NC_037645.1 | 2525359 | SNV | 1 | C | T | Heterozygous |
| NC_037645.1 | 2525486 | SNV | 1 | C | T | Heterozygous |
| NC_037645.1 | 2525505 | SNV | 1 | C | A | Heterozygous |
| NC_037645.1 | 2526545 | SNV | 1 | A | G | Homozygous   |
| NC_037645.1 | 2526550 | SNV | 1 | T | C | Homozygous   |
| NC_037645.1 | 2526686 | SNV | 1 | G | A | Heterozygous |
| NC_037645.1 | 2527357 | SNV | 1 | A | G | Homozygous   |
| NC_037645.1 | 2528579 | SNV | 1 | T | C | Heterozygous |
| NC_037645.1 | 2528627 | SNV | 1 | T | C | Homozygous   |
| NC_037645.1 | 2528764 | SNV | 1 | A | G | Homozygous   |
| NC_037645.1 | 2532419 | SNV | 1 | G | A | Homozygous   |
| NC_037645.1 | 2532615 | SNV | 1 | A | G | Homozygous   |
| NC_037645.1 | 2532618 | SNV | 1 | A | G | Homozygous   |
| NC_037645.1 | 2532885 | SNV | 1 | T | C | Homozygous   |
| NC_037645.1 | 2533047 | SNV | 1 | G | A | Homozygous   |
| NC_037645.1 | 2533059 | SNV | 1 | T | C | Homozygous   |
| NC_037645.1 | 2533495 | SNV | 1 | C | T | Heterozygous |
| NC_037645.1 | 2536616 | SNV | 1 | G | A | Homozygous   |
| NC_037645.1 | 2538013 | SNV | 1 | A | T | Homozygous   |
| NC_037645.1 | 2548241 | SNV | 1 | G | A | Heterozygous |
| NC_037645.1 | 2548339 | SNV | 1 | G | A | Heterozygous |
| NC_037645.1 | 2559904 | SNV | 1 | C | T | Homozygous   |
| NC_037645.1 | 2560136 | SNV | 1 | G | A | Heterozygous |
| NC_037645.1 | 2560188 | SNV | 1 | T | C | Homozygous   |
| NC_037645.1 | 2560191 | SNV | 1 | G | A | Homozygous   |

|             |         |     |   |   |   |              |
|-------------|---------|-----|---|---|---|--------------|
| NC_037645.1 | 2560215 | SNV | 1 | A | G | Homozygous   |
| NC_037645.1 | 2577571 | SNV | 1 | A | G | Heterozygous |
| NC_037645.1 | 2578113 | SNV | 1 | C | T | Heterozygous |
| NC_037645.1 | 2579403 | SNV | 1 | A | C | Heterozygous |
| NC_037645.1 | 2579440 | SNV | 1 | G | A | Heterozygous |
| NC_037645.1 | 2579443 | SNV | 1 | A | G | Heterozygous |
| NC_037645.1 | 2580614 | SNV | 1 | T | G | Homozygous   |
| NC_037645.1 | 2580619 | SNV | 1 | C | T | Heterozygous |
| NC_037645.1 | 2581684 | SNV | 1 | A | G | Heterozygous |
| NC_037645.1 | 2581972 | SNV | 1 | G | A | Homozygous   |
| NC_037645.1 | 2604344 | SNV | 1 | T | A | Homozygous   |
| NC_037645.1 | 2607121 | SNV | 1 | A | T | Heterozygous |
| NC_037645.1 | 2608788 | SNV | 1 | G | A | Heterozygous |
| NC_037645.1 | 2611199 | SNV | 1 | C | T | Homozygous   |
| NC_037645.1 | 2611201 | SNV | 1 | A | G | Homozygous   |
| NC_037645.1 | 2616959 | SNV | 1 | G | A | Homozygous   |
| NC_037645.1 | 2616988 | SNV | 1 | T | C | Homozygous   |
| NC_037645.1 | 2617144 | SNV | 1 | G | T | Homozygous   |
| NC_037645.1 | 2617332 | SNV | 1 | G | A | Homozygous   |
| NC_037645.1 | 2618174 | SNV | 1 | A | C | Homozygous   |
| NC_037645.1 | 2622748 | SNV | 1 | C | T | Homozygous   |
| NC_037645.1 | 2625813 | SNV | 1 | G | T | Homozygous   |
| NC_037645.1 | 2625816 | SNV | 1 | T | A | Homozygous   |
| NC_037645.1 | 2626662 | SNV | 1 | A | T | Homozygous   |
| NC_037645.1 | 2626666 | SNV | 1 | T | A | Homozygous   |
| NC_037645.1 | 2626690 | SNV | 1 | A | T | Homozygous   |
| NC_037645.1 | 2626694 | SNV | 1 | T | G | Homozygous   |
| NC_037645.1 | 2628987 | SNV | 1 | C | T | Homozygous   |
| NC_037645.1 | 2640166 | SNV | 1 | C | T | Homozygous   |
| NC_037645.1 | 2640168 | SNV | 1 | T | C | Heterozygous |
| NC_037645.1 | 2640175 | SNV | 1 | C | A | Heterozygous |
| NC_037645.1 | 2658773 | SNV | 1 | C | T | Homozygous   |
| NC_037645.1 | 2659232 | SNV | 1 | G | A | Heterozygous |
| NC_037645.1 | 2659252 | SNV | 1 | G | C | Homozygous   |
| NC_037645.1 | 2659254 | SNV | 1 | T | A | Homozygous   |
| NC_037645.1 | 2659267 | SNV | 1 | A | C | Homozygous   |
| NC_037645.1 | 2667531 | SNV | 1 | G | T | Heterozygous |
| NC_037645.1 | 2668115 | SNV | 1 | A | G | Homozygous   |
| NC_037645.1 | 2668302 | SNV | 1 | A | G | Homozygous   |
| NC_037645.1 | 2669580 | SNV | 1 | C | T | Homozygous   |
| NC_037645.1 | 2669622 | SNV | 1 | T | C | Homozygous   |
| NC_037645.1 | 2669827 | SNV | 1 | G | A | Homozygous   |
| NC_037645.1 | 2670154 | SNV | 1 | T | C | Homozygous   |
| NC_037645.1 | 2670166 | SNV | 1 | T | A | Homozygous   |
| NC_037645.1 | 2670854 | SNV | 1 | T | A | Heterozygous |
| NC_037645.1 | 2681057 | SNV | 1 | G | A | Homozygous   |
| NC_037645.1 | 2686616 | SNV | 1 | T | A | Heterozygous |
| NC_037645.1 | 2686618 | SNV | 1 | T | A | Heterozygous |
| NC_037645.1 | 2686668 | SNV | 1 | C | T | Homozygous   |
| NC_037645.1 | 2686679 | SNV | 1 | A | G | Heterozygous |
| NC_037645.1 | 2686685 | SNV | 1 | A | G | Heterozygous |

|             |         |     |   |   |   |              |
|-------------|---------|-----|---|---|---|--------------|
| NC_037645.1 | 2687130 | SNV | 1 | T | C | Heterozygous |
| NC_037645.1 | 2688075 | SNV | 1 | T | C | Homozygous   |
| NC_037645.1 | 2690225 | SNV | 1 | G | A | Homozygous   |
| NC_037645.1 | 2692700 | SNV | 1 | T | A | Homozygous   |
| NC_037645.1 | 2693202 | SNV | 1 | T | C | Homozygous   |
| NC_037645.1 | 2693217 | SNV | 1 | C | T | Heterozygous |
| NC_037645.1 | 2706479 | SNV | 1 | A | G | Heterozygous |
| NC_037645.1 | 2707228 | SNV | 1 | C | T | Homozygous   |
| NC_037645.1 | 2707527 | SNV | 1 | A | C | Homozygous   |
| NC_037645.1 | 2707715 | SNV | 1 | T | C | Homozygous   |
| NC_037645.1 | 2707733 | SNV | 1 | C | T | Homozygous   |
| NC_037645.1 | 2707956 | SNV | 1 | C | T | Homozygous   |
| NC_037645.1 | 2708456 | SNV | 1 | A | G | Homozygous   |
| NC_037645.1 | 2709204 | SNV | 1 | T | A | Homozygous   |
| NC_037645.1 | 2720837 | SNV | 1 | G | A | Homozygous   |
| NC_037645.1 | 2721246 | SNV | 1 | G | A | Heterozygous |
| NC_037645.1 | 2723399 | SNV | 1 | G | A | Heterozygous |
| NC_037645.1 | 2729973 | SNV | 1 | T | C | Homozygous   |
| NC_037645.1 | 2729988 | SNV | 1 | A | G | Heterozygous |
| NC_037645.1 | 2730579 | SNV | 1 | C | T | Heterozygous |
| NC_037645.1 | 2730581 | SNV | 1 | C | T | Heterozygous |
| NC_037645.1 | 2735144 | SNV | 1 | T | A | Heterozygous |
| NC_037645.1 | 2735756 | SNV | 1 | A | G | Homozygous   |
| NC_037645.1 | 2735930 | SNV | 1 | A | G | Homozygous   |
| NC_037645.1 | 2736635 | SNV | 1 | C | T | Homozygous   |
| NC_037645.1 | 2737056 | SNV | 1 | A | T | Heterozygous |
| NC_037645.1 | 2737062 | SNV | 1 | C | T | Heterozygous |
| NC_037645.1 | 2737110 | SNV | 1 | G | A | Homozygous   |
| NC_037645.1 | 2737214 | SNV | 1 | A | G | Homozygous   |
| NC_037645.1 | 2740062 | SNV | 1 | C | T | Homozygous   |
| NC_037645.1 | 2741533 | SNV | 1 | T | C | Homozygous   |
| NC_037645.1 | 2741598 | SNV | 1 | T | C | Heterozygous |
| NC_037645.1 | 2741600 | SNV | 1 | T | G | Heterozygous |
| NC_037645.1 | 2741607 | SNV | 1 | C | T | Homozygous   |
| NC_037645.1 | 2741611 | SNV | 1 | T | C | Homozygous   |
| NC_037645.1 | 2741618 | SNV | 1 | T | C | Homozygous   |
| NC_037645.1 | 2742527 | SNV | 1 | G | A | Heterozygous |
| NC_037645.1 | 2743472 | SNV | 1 | A | C | Homozygous   |
| NC_037645.1 | 2743476 | SNV | 1 | T | A | Homozygous   |
| NC_037645.1 | 2743481 | SNV | 1 | A | C | Homozygous   |
| NC_037645.1 | 2745336 | SNV | 1 | A | G | Homozygous   |
| NC_037645.1 | 2745343 | SNV | 1 | C | T | Homozygous   |
| NC_037645.1 | 2745529 | SNV | 1 | A | G | Homozygous   |
| NC_037645.1 | 2746124 | SNV | 1 | A | G | Homozygous   |
| NC_037645.1 | 2746310 | SNV | 1 | T | C | Homozygous   |
| NC_037645.1 | 2746316 | SNV | 1 | C | T | Homozygous   |
| NC_037645.1 | 2746407 | SNV | 1 | A | G | Homozygous   |
| NC_037645.1 | 2747521 | SNV | 1 | G | A | Homozygous   |
| NC_037645.1 | 2747950 | SNV | 1 | G | T | Heterozygous |
| NC_037645.1 | 2748053 | SNV | 1 | A | G | Heterozygous |
| NC_037645.1 | 2748139 | SNV | 1 | A | G | Homozygous   |

|             |         |     |   |   |   |              |
|-------------|---------|-----|---|---|---|--------------|
| NC_037645.1 | 2748388 | SNV | 1 | T | C | Heterozygous |
| NC_037645.1 | 2748665 | SNV | 1 | G | A | Heterozygous |
| NC_037645.1 | 2748701 | SNV | 1 | C | T | Homozygous   |
| NC_037645.1 | 2748847 | SNV | 1 | T | C | Heterozygous |
| NC_037645.1 | 2749228 | SNV | 1 | G | A | Homozygous   |
| NC_037645.1 | 2749479 | SNV | 1 | T | C | Homozygous   |
| NC_037645.1 | 2750069 | SNV | 1 | A | G | Heterozygous |
| NC_037645.1 | 2750138 | SNV | 1 | A | G | Homozygous   |
| NC_037645.1 | 2750506 | SNV | 1 | C | A | Heterozygous |
| NC_037645.1 | 2750544 | SNV | 1 | A | G | Homozygous   |
| NC_037645.1 | 2750574 | SNV | 1 | T | C | Homozygous   |
| NC_037645.1 | 2750678 | SNV | 1 | G | A | Homozygous   |
| NC_037645.1 | 2750974 | SNV | 1 | A | G | Homozygous   |
| NC_037645.1 | 2751112 | SNV | 1 | T | A | Heterozygous |
| NC_037645.1 | 2754498 | SNV | 1 | T | C | Homozygous   |
| NC_037645.1 | 2755025 | SNV | 1 | T | C | Heterozygous |
| NC_037645.1 | 2755879 | SNV | 1 | A | G | Homozygous   |
| NC_037645.1 | 2758815 | SNV | 1 | A | G | Homozygous   |
| NC_037645.1 | 2758827 | SNV | 1 | A | G | Heterozygous |
| NC_037645.1 | 2758833 | SNV | 1 | A | T | Heterozygous |
| NC_037645.1 | 2758835 | SNV | 1 | A | T | Heterozygous |
| NC_037645.1 | 2758837 | SNV | 1 | A | G | Heterozygous |
| NC_037645.1 | 2758840 | SNV | 1 | T | G | Heterozygous |
| NC_037645.1 | 2758842 | SNV | 1 | T | G | Heterozygous |
| NC_037645.1 | 2758849 | SNV | 1 | A | G | Heterozygous |
| NC_037645.1 | 2758876 | SNV | 1 | A | T | Heterozygous |
| NC_037645.1 | 2758886 | SNV | 1 | A | G | Heterozygous |
| NC_037645.1 | 2759246 | SNV | 1 | C | T | Homozygous   |
| NC_037645.1 | 2762103 | SNV | 1 | T | C | Homozygous   |
| NC_037645.1 | 2762398 | SNV | 1 | G | A | Homozygous   |
| NC_037645.1 | 2762400 | SNV | 1 | T | A | Homozygous   |
| NC_037645.1 | 2764196 | SNV | 1 | T | A | Homozygous   |
| NC_037645.1 | 2764213 | SNV | 1 | T | G | Homozygous   |
| NC_037645.1 | 2764237 | SNV | 1 | A | T | Homozygous   |
| NC_037645.1 | 2764566 | SNV | 1 | A | C | Homozygous   |
| NC_037645.1 | 2766036 | SNV | 1 | A | G | Homozygous   |
| NC_037645.1 | 2766043 | SNV | 1 | A | G | Homozygous   |
| NC_037645.1 | 2766094 | SNV | 1 | C | T | Heterozygous |
| NC_037645.1 | 2768976 | SNV | 1 | A | G | Heterozygous |
| NC_037645.1 | 2769577 | SNV | 1 | C | T | Heterozygous |
| NC_037645.1 | 2769918 | SNV | 1 | A | G | Homozygous   |
| NC_037645.1 | 2771964 | SNV | 1 | G | A | Homozygous   |
| NC_037645.1 | 2772171 | SNV | 1 | G | C | Homozygous   |
| NC_037645.1 | 2773366 | SNV | 1 | T | A | Heterozygous |
| NC_037645.1 | 2773369 | SNV | 1 | T | A | Heterozygous |
| NC_037645.1 | 2778363 | SNV | 1 | T | C | Heterozygous |
| NC_037645.1 | 2778479 | SNV | 1 | T | C | Heterozygous |
| NC_037645.1 | 2778665 | SNV | 1 | G | A | Heterozygous |
| NC_037645.1 | 2778682 | SNV | 1 | G | A | Heterozygous |
| NC_037645.1 | 2778848 | SNV | 1 | C | T | Heterozygous |
| NC_037645.1 | 2779265 | SNV | 1 | G | A | Heterozygous |

|             |         |     |   |   |   |              |
|-------------|---------|-----|---|---|---|--------------|
| NC_037645.1 | 2779673 | SNV | 1 | G | A | Heterozygous |
| NC_037645.1 | 2780301 | SNV | 1 | T | C | Homozygous   |
| NC_037645.1 | 2780433 | SNV | 1 | T | A | Homozygous   |
| NC_037645.1 | 2780723 | SNV | 1 | A | G | Heterozygous |
| NC_037645.1 | 2780743 | SNV | 1 | A | G | Homozygous   |
| NC_037645.1 | 2780754 | SNV | 1 | A | G | Homozygous   |
| NC_037645.1 | 2780878 | SNV | 1 | T | A | Heterozygous |
| NC_037645.1 | 2780882 | SNV | 1 | A | T | Heterozygous |
| NC_037645.1 | 2780884 | SNV | 1 | A | T | Heterozygous |
| NC_037645.1 | 2780890 | SNV | 1 | T | A | Heterozygous |
| NC_037645.1 | 2780895 | SNV | 1 | A | T | Heterozygous |
| NC_037645.1 | 2781012 | SNV | 1 | A | G | Homozygous   |
| NC_037645.1 | 2781022 | SNV | 1 | A | G | Heterozygous |
| NC_037645.1 | 2781030 | SNV | 1 | A | G | Homozygous   |
| NC_037645.1 | 2781047 | SNV | 1 | A | G | Heterozygous |
| NC_037645.1 | 2781092 | SNV | 1 | C | T | Homozygous   |
| NC_037645.1 | 2781102 | SNV | 1 | G | A | Homozygous   |
| NC_037645.1 | 2781168 | SNV | 1 | C | T | Heterozygous |
| NC_037645.1 | 2781195 | SNV | 1 | A | G | Heterozygous |
| NC_037645.1 | 2781551 | SNV | 1 | A | G | Homozygous   |
| NC_037645.1 | 2781665 | SNV | 1 | G | A | Heterozygous |
| NC_037645.1 | 2781960 | SNV | 1 | A | G | Heterozygous |
| NC_037645.1 | 2781970 | SNV | 1 | G | C | Heterozygous |
| NC_037645.1 | 2781973 | SNV | 1 | T | C | Homozygous   |
| NC_037645.1 | 2782253 | SNV | 1 | C | G | Heterozygous |
| NC_037645.1 | 2782328 | SNV | 1 | A | G | Heterozygous |
| NC_037645.1 | 2782373 | SNV | 1 | C | T | Homozygous   |
| NC_037645.1 | 2783753 | SNV | 1 | T | C | Homozygous   |
| NC_037645.1 | 2784579 | SNV | 1 | A | G | Heterozygous |
| NC_037645.1 | 2784613 | SNV | 1 | G | A | Heterozygous |
| NC_037645.1 | 2784615 | SNV | 1 | A | G | Heterozygous |
| NC_037645.1 | 2786334 | SNV | 1 | T | C | Homozygous   |
| NC_037645.1 | 2786337 | SNV | 1 | T | C | Heterozygous |
| NC_037645.1 | 2786361 | SNV | 1 | C | T | Heterozygous |
| NC_037645.1 | 2786391 | SNV | 1 | A | G | Homozygous   |
| NC_037645.1 | 2786852 | SNV | 1 | C | T | Heterozygous |
| NC_037645.1 | 2786947 | SNV | 1 | T | C | Homozygous   |
| NC_037645.1 | 2786960 | SNV | 1 | G | A | Homozygous   |
| NC_037645.1 | 2786964 | SNV | 1 | C | T | Homozygous   |
| NC_037645.1 | 2787105 | SNV | 1 | A | G | Homozygous   |
| NC_037645.1 | 2787279 | SNV | 1 | G | A | Homozygous   |
| NC_037645.1 | 2787300 | SNV | 1 | T | C | Homozygous   |
| NC_037645.1 | 2788411 | SNV | 1 | G | A | Homozygous   |
| NC_037645.1 | 2788522 | SNV | 1 | G | A | Homozygous   |
| NC_037645.1 | 2789585 | SNV | 1 | A | G | Homozygous   |
| NC_037645.1 | 2789933 | SNV | 1 | C | G | Homozygous   |
| NC_037645.1 | 2790040 | SNV | 1 | G | A | Homozygous   |
| NC_037645.1 | 2790042 | SNV | 1 | A | G | Homozygous   |
| NC_037645.1 | 2790082 | SNV | 1 | G | A | Heterozygous |
| NC_037645.1 | 2790484 | SNV | 1 | C | G | Homozygous   |
| NC_037645.1 | 2790526 | SNV | 1 | T | C | Homozygous   |

|             |         |     |   |   |   |              |
|-------------|---------|-----|---|---|---|--------------|
| NC_037645.1 | 2791480 | SNV | 1 | A | G | Homozygous   |
| NC_037645.1 | 2797529 | SNV | 1 | T | C | Homozygous   |
| NC_037645.1 | 2797726 | SNV | 1 | T | C | Homozygous   |
| NC_037645.1 | 2801514 | SNV | 1 | T | G | Homozygous   |
| NC_037645.1 | 2801517 | SNV | 1 | G | T | Homozygous   |
| NC_037645.1 | 2802397 | SNV | 1 | T | C | Homozygous   |
| NC_037645.1 | 2802512 | SNV | 1 | A | T | Homozygous   |
| NC_037645.1 | 2802515 | SNV | 1 | G | C | Homozygous   |
| NC_037645.1 | 2802517 | SNV | 1 | A | T | Homozygous   |
| NC_037645.1 | 2802526 | SNV | 1 | T | A | Homozygous   |
| NC_037645.1 | 2802544 | SNV | 1 | C | G | Homozygous   |
| NC_037645.1 | 2802718 | SNV | 1 | A | G | Homozygous   |
| NC_037645.1 | 2803084 | SNV | 1 | T | C | Homozygous   |
| NC_037645.1 | 2803310 | SNV | 1 | A | G | Homozygous   |
| NC_037645.1 | 2803573 | SNV | 1 | G | A | Heterozygous |
| NC_037645.1 | 2803583 | SNV | 1 | C | T | Heterozygous |
| NC_037645.1 | 2803588 | SNV | 1 | A | G | Homozygous   |
| NC_037645.1 | 2803623 | SNV | 1 | T | A | Homozygous   |
| NC_037645.1 | 2803648 | SNV | 1 | A | G | Heterozygous |
| NC_037645.1 | 2803650 | SNV | 1 | G | A | Homozygous   |
| NC_037645.1 | 2803778 | SNV | 1 | A | G | Heterozygous |
| NC_037645.1 | 2804635 | SNV | 1 | A | G | Homozygous   |
| NC_037645.1 | 2804696 | SNV | 1 | T | C | Heterozygous |
| NC_037645.1 | 2805311 | SNV | 1 | T | C | Heterozygous |
| NC_037645.1 | 2805656 | SNV | 1 | C | T | Heterozygous |
| NC_037645.1 | 2808750 | SNV | 1 | T | C | Heterozygous |
| NC_037645.1 | 2808875 | SNV | 1 | T | C | Homozygous   |
| NC_037645.1 | 2809358 | SNV | 1 | G | A | Homozygous   |
| NC_037645.1 | 2809504 | SNV | 1 | A | G | Heterozygous |
| NC_037645.1 | 2809540 | SNV | 1 | C | T | Heterozygous |
| NC_037645.1 | 2810454 | SNV | 1 | G | A | Heterozygous |
| NC_037645.1 | 2811258 | SNV | 1 | C | G | Homozygous   |
| NC_037645.1 | 2811287 | SNV | 1 | C | T | Heterozygous |
| NC_037645.1 | 2811321 | SNV | 1 | C | T | Heterozygous |
| NC_037645.1 | 2811337 | SNV | 1 | G | C | Homozygous   |
| NC_037645.1 | 2811344 | SNV | 1 | C | T | Homozygous   |
| NC_037645.1 | 2811348 | SNV | 1 | A | T | Homozygous   |
| NC_037645.1 | 2815513 | SNV | 1 | G | A | Homozygous   |
| NC_037645.1 | 2815769 | SNV | 1 | T | C | Homozygous   |
| NC_037645.1 | 2815866 | SNV | 1 | G | C | Homozygous   |
| NC_037645.1 | 2816167 | SNV | 1 | A | T | Homozygous   |
| NC_037645.1 | 2816185 | SNV | 1 | A | G | Homozygous   |
| NC_037645.1 | 2816287 | SNV | 1 | T | C | Homozygous   |
| NC_037645.1 | 2816516 | SNV | 1 | A | G | Heterozygous |
| NC_037645.1 | 2816552 | SNV | 1 | T | C | Heterozygous |
| NC_037645.1 | 2816753 | SNV | 1 | T | C | Homozygous   |
| NC_037645.1 | 2816924 | SNV | 1 | C | G | Homozygous   |
| NC_037645.1 | 2817397 | SNV | 1 | A | G | Homozygous   |
| NC_037645.1 | 2818217 | SNV | 1 | A | G | Homozygous   |
| NC_037645.1 | 2822978 | SNV | 1 | A | G | Homozygous   |
| NC_037645.1 | 2823313 | SNV | 1 | T | C | Heterozygous |

|             |         |     |   |   |   |              |
|-------------|---------|-----|---|---|---|--------------|
| NC_037645.1 | 2825869 | SNV | 1 | C | A | Heterozygous |
| NC_037645.1 | 2837777 | SNV | 1 | G | A | Homozygous   |
| NC_037645.1 | 2838251 | SNV | 1 | C | A | Homozygous   |
| NC_037645.1 | 2838255 | SNV | 1 | C | A | Homozygous   |
| NC_037645.1 | 2838257 | SNV | 1 | T | C | Homozygous   |
| NC_037645.1 | 2838260 | SNV | 1 | A | G | Homozygous   |
| NC_037645.1 | 2838262 | SNV | 1 | G | C | Homozygous   |
| NC_037645.1 | 2838365 | SNV | 1 | T | G | Heterozygous |
| NC_037645.1 | 2838525 | SNV | 1 | C | T | Heterozygous |
| NC_037645.1 | 2838529 | SNV | 1 | G | A | Heterozygous |
| NC_037645.1 | 2839845 | SNV | 1 | A | G | Homozygous   |
| NC_037645.1 | 2840430 | SNV | 1 | A | G | Homozygous   |
| NC_037645.1 | 2840439 | SNV | 1 | A | G | Heterozygous |
| NC_037645.1 | 2840623 | SNV | 1 | A | G | Heterozygous |
| NC_037645.1 | 2841428 | SNV | 1 | A | G | Homozygous   |
| NC_037645.1 | 2841916 | SNV | 1 | T | G | Heterozygous |
| NC_037645.1 | 2846313 | SNV | 1 | C | T | Homozygous   |
| NC_037645.1 | 2862841 | SNV | 1 | G | T | Homozygous   |
| NC_037645.1 | 2862880 | SNV | 1 | A | T | Homozygous   |
| NC_037645.1 | 2984669 | SNV | 1 | C | T | Homozygous   |
| NC_037645.1 | 2984713 | SNV | 1 | C | A | Homozygous   |
| NC_037645.1 | 2984717 | SNV | 1 | C | T | Homozygous   |
| NC_037645.1 | 2984729 | SNV | 1 | C | A | Homozygous   |
| NC_037645.1 | 2984735 | SNV | 1 | G | A | Homozygous   |
| NC_037645.1 | 2984743 | SNV | 1 | G | A | Heterozygous |
| NC_037645.1 | 2984760 | SNV | 1 | A | T | Heterozygous |
| NC_037645.1 | 2984782 | SNV | 1 | G | T | Homozygous   |
| NC_037645.1 | 2984790 | SNV | 1 | G | A | Homozygous   |
| NC_037645.1 | 2984795 | SNV | 1 | A | G | Homozygous   |
| NC_037645.1 | 2984804 | SNV | 1 | A | T | Homozygous   |
| NC_037645.1 | 2984809 | SNV | 1 | C | A | Homozygous   |
| NC_037645.1 | 2984816 | SNV | 1 | A | C | Homozygous   |
| NC_037645.1 | 2985999 | SNV | 1 | G | A | Heterozygous |
| NC_037645.1 | 2986003 | SNV | 1 | A | G | Heterozygous |
| NC_037645.1 | 2986272 | SNV | 1 | A | G | Heterozygous |
| NC_037645.1 | 2986291 | SNV | 1 | A | G | Homozygous   |
| NC_037645.1 | 2986628 | SNV | 1 | C | T | Heterozygous |
| NC_037645.1 | 2987069 | SNV | 1 | C | T | Heterozygous |
| NC_037645.1 | 2987078 | SNV | 1 | G | T | Homozygous   |
| NC_037645.1 | 2990390 | SNV | 1 | G | A | Homozygous   |
| NC_037645.1 | 2990396 | SNV | 1 | G | A | Homozygous   |
| NC_037645.1 | 2990405 | SNV | 1 | T | C | Homozygous   |
| NC_037645.1 | 2990407 | SNV | 1 | C | G | Homozygous   |
| NC_037645.1 | 2990423 | SNV | 1 | A | G | Homozygous   |
| NC_037645.1 | 2992343 | SNV | 1 | G | A | Heterozygous |
| NC_037645.1 | 2998341 | SNV | 1 | A | G | Homozygous   |
| NC_037645.1 | 3005563 | SNV | 1 | G | A | Homozygous   |
| NC_037645.1 | 3005715 | SNV | 1 | C | A | Heterozygous |
| NC_037645.1 | 3007677 | SNV | 1 | G | T | Homozygous   |
| NC_037645.1 | 3007904 | SNV | 1 | G | T | Homozygous   |
| NC_037645.1 | 3007933 | SNV | 1 | T | C | Heterozygous |

|             |         |     |   |   |   |              |
|-------------|---------|-----|---|---|---|--------------|
| NC_037645.1 | 3007938 | SNV | 1 | A | T | Homozygous   |
| NC_037645.1 | 3007942 | SNV | 1 | A | T | Homozygous   |
| NC_037645.1 | 3007948 | SNV | 1 | T | A | Heterozygous |
| NC_037645.1 | 3007963 | SNV | 1 | A | T | Heterozygous |
| NC_037645.1 | 3013938 | SNV | 1 | C | T | Homozygous   |
| NC_037645.1 | 3014061 | SNV | 1 | A | T | Homozygous   |
| NC_037645.1 | 3014119 | SNV | 1 | G | T | Heterozygous |
| NC_037645.1 | 3014145 | SNV | 1 | A | G | Homozygous   |
| NC_037645.1 | 3031368 | SNV | 1 | C | G | Heterozygous |
| NC_037645.1 | 3034035 | SNV | 1 | T | C | Heterozygous |
| NC_037645.1 | 3034058 | SNV | 1 | T | C | Heterozygous |
| NC_037645.1 | 3034060 | SNV | 1 | C | T | Heterozygous |
| NC_037645.1 | 3034082 | SNV | 1 | A | G | Homozygous   |
| NC_037645.1 | 3034909 | SNV | 1 | G | C | Homozygous   |
| NC_037645.1 | 3034915 | SNV | 1 | G | T | Homozygous   |
| NC_037645.1 | 3034939 | SNV | 1 | T | G | Homozygous   |
| NC_037645.1 | 3045912 | SNV | 1 | T | C | Heterozygous |
| NC_037645.1 | 3048842 | SNV | 1 | C | G | Heterozygous |
| NC_037645.1 | 3049319 | SNV | 1 | T | A | Heterozygous |
| NC_037645.1 | 3049322 | SNV | 1 | C | G | Homozygous   |
| NC_037645.1 | 3049325 | SNV | 1 | C | T | Homozygous   |
| NC_037645.1 | 3049328 | SNV | 1 | C | T | Homozygous   |
| NC_037645.1 | 3049535 | SNV | 1 | T | C | Homozygous   |
| NC_037645.1 | 3049538 | SNV | 1 | G | C | Homozygous   |
| NC_037645.1 | 3050129 | SNV | 1 | G | T | Heterozygous |
| NC_037645.1 | 3050192 | SNV | 1 | A | G | Homozygous   |
| NC_037645.1 | 3050407 | SNV | 1 | A | T | Heterozygous |
| NC_037645.1 | 3050443 | SNV | 1 | G | A | Heterozygous |
| NC_037645.1 | 3050557 | SNV | 1 | T | C | Heterozygous |
| NC_037645.1 | 3050618 | SNV | 1 | A | G | Homozygous   |
| NC_037645.1 | 3050669 | SNV | 1 | C | T | Heterozygous |
| NC_037645.1 | 3050776 | SNV | 1 | C | T | Heterozygous |
| NC_037645.1 | 3050930 | SNV | 1 | G | A | Heterozygous |
| NC_037645.1 | 3055230 | SNV | 1 | A | G | Homozygous   |
| NC_037645.1 | 3055240 | SNV | 1 | T | A | Homozygous   |
| NC_037645.1 | 3055243 | SNV | 1 | G | T | Heterozygous |
| NC_037645.1 | 3057731 | SNV | 1 | A | G | Heterozygous |
| NC_037645.1 | 3057798 | SNV | 1 | G | A | Heterozygous |
| NC_037645.1 | 3069253 | SNV | 1 | T | C | Heterozygous |
| NC_037645.1 | 3069261 | SNV | 1 | A | C | Homozygous   |
| NC_037645.1 | 3069269 | SNV | 1 | T | C | Homozygous   |
| NC_037645.1 | 3069295 | SNV | 1 | T | C | Heterozygous |
| NC_037645.1 | 3069305 | SNV | 1 | T | C | Homozygous   |
| NC_037645.1 | 3069309 | SNV | 1 | C | T | Homozygous   |
| NC_037645.1 | 3086336 | SNV | 1 | C | T | Homozygous   |
| NC_037645.1 | 3086348 | SNV | 1 | A | T | Homozygous   |
| NC_037645.1 | 3086350 | SNV | 1 | A | G | Homozygous   |
| NC_037645.1 | 3086367 | SNV | 1 | T | C | Homozygous   |
| NC_037645.1 | 3086373 | SNV | 1 | T | A | Heterozygous |
| NC_037645.1 | 3086375 | SNV | 1 | T | A | Heterozygous |
| NC_037645.1 | 3086386 | SNV | 1 | A | G | Heterozygous |



|             |         |     |   |   |   |              |
|-------------|---------|-----|---|---|---|--------------|
| NC_037645.1 | 3086405 | SNV | 1 | T | A | Heterozygous |
| NC_037645.1 | 3108867 | SNV | 1 | C | T | Homozygous   |
| NC_037645.1 | 3119098 | SNV | 1 | T | A | Homozygous   |
| NC_037645.1 | 3119124 | SNV | 1 | G | T | Homozygous   |
| NC_037645.1 | 3132647 | SNV | 1 | G | A | Heterozygous |
| NC_037645.1 | 3132727 | SNV | 1 | T | C | Homozygous   |
| NC_037645.1 | 3133103 | SNV | 1 | T | C | Heterozygous |
| NC_037645.1 | 3141193 | SNV | 1 | C | T | Homozygous   |
| NC_037645.1 | 3146244 | SNV | 1 | G | A | Heterozygous |
| NC_037645.1 | 3146262 | SNV | 1 | A | G | Heterozygous |
| NC_037645.1 | 3146285 | SNV | 1 | A | T | Heterozygous |
| NC_037645.1 | 3148923 | SNV | 1 | A | G | Homozygous   |
| NC_037645.1 | 3149109 | SNV | 1 | G | A | Homozygous   |
| NC_037645.1 | 3149496 | SNV | 1 | C | T | Heterozygous |
| NC_037645.1 | 3149520 | SNV | 1 | A | T | Heterozygous |
| NC_037645.1 | 3149527 | SNV | 1 | A | T | Heterozygous |
| NC_037645.1 | 3149942 | SNV | 1 | C | T | Heterozygous |
| NC_037645.1 | 3150651 | SNV | 1 | C | T | Heterozygous |
| NC_037645.1 | 3150653 | SNV | 1 | C | T | Heterozygous |
| NC_037645.1 | 3150660 | SNV | 1 | A | C | Heterozygous |
| NC_037645.1 | 3150665 | SNV | 1 | A | T | Heterozygous |
| NC_037645.1 | 3150781 | SNV | 1 | C | T | Heterozygous |
| NC_037645.1 | 3151167 | SNV | 1 | G | A | Heterozygous |
| NC_037645.1 | 3151247 | SNV | 1 | C | T | Heterozygous |
| NC_037645.1 | 3160467 | SNV | 1 | T | C | Homozygous   |
| NC_037645.1 | 3160473 | SNV | 1 | C | T | Homozygous   |
| NC_037645.1 | 3160479 | SNV | 1 | A | C | Homozygous   |
| NC_037645.1 | 3177446 | SNV | 1 | T | G | Homozygous   |
| NC_037645.1 | 3177801 | SNV | 1 | T | C | Homozygous   |
| NC_037645.1 | 3177869 | SNV | 1 | C | T | Heterozygous |
| NC_037645.1 | 3178015 | SNV | 1 | C | G | Heterozygous |
| NC_037645.1 | 3178233 | SNV | 1 | A | T | Heterozygous |
| NC_037645.1 | 3178259 | SNV | 1 | G | A | Heterozygous |
| NC_037645.1 | 3178404 | SNV | 1 | G | A | Heterozygous |
| NC_037645.1 | 3178629 | SNV | 1 | A | G | Heterozygous |
| NC_037645.1 | 3184127 | SNV | 1 | G | A | Heterozygous |
| NC_037645.1 | 3184362 | SNV | 1 | C | G | Heterozygous |
| NC_037645.1 | 3185412 | SNV | 1 | T | C | Heterozygous |
| NC_037645.1 | 3185660 | SNV | 1 | T | C | Homozygous   |
| NC_037645.1 | 3185750 | SNV | 1 | G | C | Heterozygous |
| NC_037645.1 | 3186530 | SNV | 1 | T | C | Heterozygous |
| NC_037645.1 | 3186548 | SNV | 1 | C | T | Heterozygous |
| NC_037645.1 | 3186615 | SNV | 1 | A | G | Heterozygous |
| NC_037645.1 | 3186798 | SNV | 1 | T | C | Homozygous   |
| NC_037645.1 | 3211051 | SNV | 1 | A | C | Homozygous   |
| NC_037645.1 | 3211056 | SNV | 1 | T | C | Heterozygous |
| NC_037645.1 | 3211060 | SNV | 1 | T | C | Heterozygous |
| NC_037645.1 | 3211092 | SNV | 1 | T | C | Heterozygous |
| NC_037645.1 | 3212870 | SNV | 1 | T | C | Homozygous   |
| NC_037645.1 | 3212976 | SNV | 1 | T | C | Homozygous   |
| NC_037645.1 | 3213214 | SNV | 1 | C | T | Heterozygous |

|             |         |     |   |   |   |              |
|-------------|---------|-----|---|---|---|--------------|
| NC_037645.1 | 3213221 | SNV | 1 | G | A | Heterozygous |
| NC_037645.1 | 3214349 | SNV | 1 | G | A | Homozygous   |
| NC_037645.1 | 3214353 | SNV | 1 | G | A | Homozygous   |
| NC_037645.1 | 3214360 | SNV | 1 | A | T | Homozygous   |
| NC_037645.1 | 3216444 | SNV | 1 | A | G | Homozygous   |
| NC_037645.1 | 3218340 | SNV | 1 | T | C | Homozygous   |
| NC_037645.1 | 3219016 | SNV | 1 | G | A | Heterozygous |
| NC_037645.1 | 3219167 | SNV | 1 | A | T | Heterozygous |
| NC_037645.1 | 3219244 | SNV | 1 | C | T | Homozygous   |
| NC_037645.1 | 3219271 | SNV | 1 | C | A | Homozygous   |
| NC_037645.1 | 3219280 | SNV | 1 | G | T | Homozygous   |
| NC_037645.1 | 3219285 | SNV | 1 | A | T | Homozygous   |
| NC_037645.1 | 3227329 | SNV | 1 | T | C | Homozygous   |
| NC_037645.1 | 3227395 | SNV | 1 | T | C | Homozygous   |
| NC_037645.1 | 3227417 | SNV | 1 | G | A | Heterozygous |
| NC_037645.1 | 3230480 | SNV | 1 | G | A | Homozygous   |
| NC_037645.1 | 3231134 | SNV | 1 | C | G | Homozygous   |
| NC_037645.1 | 3231146 | SNV | 1 | C | T | Homozygous   |
| NC_037645.1 | 3231162 | SNV | 1 | G | A | Homozygous   |
| NC_037645.1 | 3231181 | SNV | 1 | C | T | Heterozygous |
| NC_037645.1 | 3231183 | SNV | 1 | T | C | Heterozygous |
| NC_037645.1 | 3231403 | SNV | 1 | G | A | Heterozygous |
| NC_037645.1 | 3238674 | SNV | 1 | T | C | Heterozygous |
| NC_037645.1 | 3238703 | SNV | 1 | G | A | Heterozygous |
| NC_037645.1 | 3238710 | SNV | 1 | G | T | Heterozygous |
| NC_037645.1 | 3238843 | SNV | 1 | C | T | Heterozygous |
| NC_037645.1 | 3240187 | SNV | 1 | T | C | Homozygous   |
| NC_037645.1 | 3240226 | SNV | 1 | T | C | Homozygous   |
| NC_037645.1 | 3244208 | SNV | 1 | G | A | Heterozygous |
| NC_037645.1 | 3247685 | SNV | 1 | G | C | Heterozygous |
| NC_037645.1 | 3247718 | SNV | 1 | A | G | Homozygous   |
| NC_037645.1 | 3247728 | SNV | 1 | A | T | Homozygous   |
| NC_037645.1 | 3247870 | SNV | 1 | C | T | Homozygous   |
| NC_037645.1 | 3248864 | SNV | 1 | G | A | Heterozygous |
| NC_037645.1 | 3248879 | SNV | 1 | C | T | Heterozygous |
| NC_037645.1 | 3249422 | SNV | 1 | G | A | Heterozygous |
| NC_037645.1 | 3250105 | SNV | 1 | C | T | Homozygous   |
| NC_037645.1 | 3250221 | SNV | 1 | T | C | Heterozygous |
| NC_037645.1 | 3289030 | SNV | 1 | G | A | Heterozygous |
| NC_037645.1 | 3289130 | SNV | 1 | C | T | Homozygous   |
| NC_037645.1 | 3289144 | SNV | 1 | T | C | Homozygous   |
| NC_037645.1 | 3299141 | SNV | 1 | A | G | Heterozygous |
| NC_037645.1 | 3299150 | SNV | 1 | A | G | Heterozygous |
| NC_037645.1 | 3306521 | SNV | 1 | T | A | Homozygous   |
| NC_037645.1 | 3306531 | SNV | 1 | T | C | Homozygous   |
| NC_037645.1 | 3306556 | SNV | 1 | A | G | Homozygous   |
| NC_037645.1 | 3306558 | SNV | 1 | A | G | Homozygous   |
| NC_037645.1 | 3309935 | SNV | 1 | T | A | Heterozygous |
| NC_037645.1 | 3310021 | SNV | 1 | G | A | Homozygous   |
| NC_037645.1 | 3310176 | SNV | 1 | T | C | Heterozygous |
| NC_037645.1 | 3310422 | SNV | 1 | C | T | Heterozygous |

|             |         |     |   |   |   |              |
|-------------|---------|-----|---|---|---|--------------|
| NC_037645.1 | 3310425 | SNV | 1 | T | C | Homozygous   |
| NC_037645.1 | 3310428 | SNV | 1 | T | C | Homozygous   |
| NC_037645.1 | 3310482 | SNV | 1 | G | C | Homozygous   |
| NC_037645.1 | 3310722 | SNV | 1 | T | C | Homozygous   |
| NC_037645.1 | 3310728 | SNV | 1 | G | C | Homozygous   |
| NC_037645.1 | 3310755 | SNV | 1 | G | C | Heterozygous |
| NC_037645.1 | 3310780 | SNV | 1 | C | T | Heterozygous |
| NC_037645.1 | 3310824 | SNV | 1 | A | G | Homozygous   |
| NC_037645.1 | 3310920 | SNV | 1 | G | C | Heterozygous |
| NC_037645.1 | 3311654 | SNV | 1 | T | C | Homozygous   |
| NC_037645.1 | 3312061 | SNV | 1 | G | A | Heterozygous |
| NC_037645.1 | 3312073 | SNV | 1 | G | A | Homozygous   |
| NC_037645.1 | 3312274 | SNV | 1 | T | C | Heterozygous |
| NC_037645.1 | 3312339 | SNV | 1 | A | G | Homozygous   |
| NC_037645.1 | 3312348 | SNV | 1 | T | C | Homozygous   |
| NC_037645.1 | 3312401 | SNV | 1 | A | G | Homozygous   |
| NC_037645.1 | 3312468 | SNV | 1 | C | T | Heterozygous |
| NC_037645.1 | 3312470 | SNV | 1 | A | G | Homozygous   |
| NC_037645.1 | 3312478 | SNV | 1 | G | A | Homozygous   |
| NC_037645.1 | 3312486 | SNV | 1 | A | T | Homozygous   |
| NC_037645.1 | 3312724 | SNV | 1 | C | T | Homozygous   |
| NC_037645.1 | 3315230 | SNV | 1 | T | C | Heterozygous |
| NC_037645.1 | 3315238 | SNV | 1 | C | T | Heterozygous |
| NC_037645.1 | 3315252 | SNV | 1 | T | C | Homozygous   |
| NC_037645.1 | 3315260 | SNV | 1 | G | A | Heterozygous |
| NC_037645.1 | 3315264 | SNV | 1 | G | A | Heterozygous |
| NC_037645.1 | 3315362 | SNV | 1 | C | T | Homozygous   |
| NC_037645.1 | 3315423 | SNV | 1 | G | A | Heterozygous |
| NC_037645.1 | 3315518 | SNV | 1 | T | C | Heterozygous |
| NC_037645.1 | 3315531 | SNV | 1 | G | A | Homozygous   |
| NC_037645.1 | 3316093 | SNV | 1 | C | G | Homozygous   |
| NC_037645.1 | 3316104 | SNV | 1 | A | G | Heterozygous |
| NC_037645.1 | 3316104 | SNV | 1 | A | T | Heterozygous |
| NC_037645.1 | 3316122 | SNV | 1 | T | C | Homozygous   |
| NC_037645.1 | 3316182 | SNV | 1 | T | C | Homozygous   |
| NC_037645.1 | 3316201 | SNV | 1 | T | C | Homozygous   |
| NC_037645.1 | 3316335 | SNV | 1 | C | T | Homozygous   |
| NC_037645.1 | 3316447 | SNV | 1 | A | G | Homozygous   |
| NC_037645.1 | 3316459 | SNV | 1 | C | T | Homozygous   |
| NC_037645.1 | 3316979 | SNV | 1 | A | G | Homozygous   |
| NC_037645.1 | 3317174 | SNV | 1 | A | G | Homozygous   |
| NC_037645.1 | 3317242 | SNV | 1 | C | T | Heterozygous |
| NC_037645.1 | 3317284 | SNV | 1 | C | T | Heterozygous |
| NC_037645.1 | 3318884 | SNV | 1 | G | T | Homozygous   |
| NC_037645.1 | 3318903 | SNV | 1 | T | A | Homozygous   |
| NC_037645.1 | 3318919 | SNV | 1 | A | C | Homozygous   |
| NC_037645.1 | 3320653 | SNV | 1 | T | C | Homozygous   |
| NC_037645.1 | 3329870 | SNV | 1 | G | C | Homozygous   |
| NC_037645.1 | 3329874 | SNV | 1 | A | G | Homozygous   |
| NC_037645.1 | 3331222 | SNV | 1 | T | C | Homozygous   |
| NC_037645.1 | 3331299 | SNV | 1 | G | A | Homozygous   |

|             |         |     |   |   |   |              |
|-------------|---------|-----|---|---|---|--------------|
| NC_037645.1 | 3383369 | SNV | 1 | A | G | Homozygous   |
| NC_037645.1 | 3383371 | SNV | 1 | G | A | Homozygous   |
| NC_037645.1 | 3383408 | SNV | 1 | A | G | Homozygous   |
| NC_037645.1 | 3383410 | SNV | 1 | A | G | Homozygous   |
| NC_037645.1 | 3399619 | SNV | 1 | A | G | Heterozygous |
| NC_037645.1 | 3401020 | SNV | 1 | T | C | Homozygous   |
| NC_037645.1 | 3403443 | SNV | 1 | G | A | Heterozygous |
| NC_037645.1 | 3403518 | SNV | 1 | C | T | Heterozygous |
| NC_037645.1 | 3404047 | SNV | 1 | T | C | Homozygous   |
| NC_037645.1 | 3404826 | SNV | 1 | C | T | Homozygous   |
| NC_037645.1 | 3405002 | SNV | 1 | C | T | Homozygous   |
| NC_037645.1 | 3408087 | SNV | 1 | A | C | Heterozygous |
| NC_037645.1 | 3408099 | SNV | 1 | T | G | Heterozygous |
| NC_037645.1 | 3408104 | SNV | 1 | A | C | Heterozygous |
| NC_037645.1 | 3408262 | SNV | 1 | C | T | Homozygous   |
| NC_037645.1 | 3408599 | SNV | 1 | A | T | Homozygous   |
| NC_037645.1 | 3408805 | SNV | 1 | T | C | Homozygous   |
| NC_037645.1 | 3408952 | SNV | 1 | C | T | Heterozygous |
| NC_037645.1 | 3410651 | SNV | 1 | T | C | Homozygous   |
| NC_037645.1 | 3410679 | SNV | 1 | A | G | Homozygous   |
| NC_037645.1 | 3410684 | SNV | 1 | A | T | Homozygous   |
| NC_037645.1 | 3410686 | SNV | 1 | T | A | Homozygous   |
| NC_037645.1 | 3410694 | SNV | 1 | A | T | Homozygous   |
| NC_037645.1 | 3411301 | SNV | 1 | T | A | Homozygous   |
| NC_037645.1 | 3411303 | SNV | 1 | T | A | Homozygous   |
| NC_037645.1 | 3411327 | SNV | 1 | T | C | Homozygous   |
| NC_037645.1 | 3412432 | SNV | 1 | A | G | Homozygous   |
| NC_037645.1 | 3412484 | SNV | 1 | T | A | Heterozygous |
| NC_037645.1 | 3412493 | SNV | 1 | A | G | Heterozygous |
| NC_037645.1 | 3412496 | SNV | 1 | A | T | Heterozygous |
| NC_037645.1 | 3412499 | SNV | 1 | G | T | Heterozygous |
| NC_037645.1 | 3413696 | SNV | 1 | A | G | Homozygous   |
| NC_037645.1 | 3414207 | SNV | 1 | C | G | Heterozygous |
| NC_037645.1 | 3416168 | SNV | 1 | C | T | Homozygous   |
| NC_037645.1 | 3438319 | SNV | 1 | T | A | Homozygous   |
| NC_037645.1 | 3439891 | SNV | 1 | C | T | Heterozygous |
| NC_037645.1 | 3439959 | SNV | 1 | A | G | Heterozygous |
| NC_037645.1 | 3440882 | SNV | 1 | C | G | Heterozygous |
| NC_037645.1 | 3440979 | SNV | 1 | C | T | Homozygous   |
| NC_037645.1 | 3441374 | SNV | 1 | C | A | Heterozygous |
| NC_037645.1 | 3445089 | SNV | 1 | G | A | Homozygous   |
| NC_037645.1 | 3446507 | SNV | 1 | A | G | Homozygous   |
| NC_037645.1 | 3446516 | SNV | 1 | T | C | Homozygous   |
| NC_037645.1 | 3446854 | SNV | 1 | T | C | Homozygous   |
| NC_037645.1 | 3450875 | SNV | 1 | C | G | Heterozygous |
| NC_037645.1 | 3456379 | SNV | 1 | G | A | Heterozygous |
| NC_037645.1 | 3457908 | SNV | 1 | A | G | Homozygous   |
| NC_037645.1 | 3457973 | SNV | 1 | C | A | Heterozygous |
| NC_037645.1 | 3458639 | SNV | 1 | T | C | Homozygous   |
| NC_037645.1 | 3462146 | SNV | 1 | G | C | Homozygous   |
| NC_037645.1 | 3467618 | SNV | 1 | T | C | Heterozygous |

|             |         |     |   |   |   |              |
|-------------|---------|-----|---|---|---|--------------|
| NC_037645.1 | 3467908 | SNV | 1 | G | A | Homozygous   |
| NC_037645.1 | 3468408 | SNV | 1 | G | T | Homozygous   |
| NC_037645.1 | 3468578 | SNV | 1 | A | G | Heterozygous |
| NC_037645.1 | 3474797 | SNV | 1 | G | A | Homozygous   |
| NC_037645.1 | 3478692 | SNV | 1 | A | T | Homozygous   |
| NC_037645.1 | 3479450 | SNV | 1 | T | G | Homozygous   |
| NC_037645.1 | 3481256 | SNV | 1 | T | G | Homozygous   |
| NC_037645.1 | 3481742 | SNV | 1 | T | A | Homozygous   |
| NC_037645.1 | 3488591 | SNV | 1 | A | T | Homozygous   |
| NC_037645.1 | 3492879 | SNV | 1 | C | A | Homozygous   |
| NC_037645.1 | 3493651 | SNV | 1 | A | T | Homozygous   |
| NC_037645.1 | 3498565 | SNV | 1 | C | T | Homozygous   |
| NC_037645.1 | 3501313 | SNV | 1 | T | A | Homozygous   |
| NC_037645.1 | 3501319 | SNV | 1 | A | G | Homozygous   |
| NC_037645.1 | 3501343 | SNV | 1 | A | C | Homozygous   |
| NC_037645.1 | 3501347 | SNV | 1 | A | T | Homozygous   |
| NC_037645.1 | 3501350 | SNV | 1 | T | A | Homozygous   |
| NC_037645.1 | 3507413 | SNV | 1 | G | A | Homozygous   |
| NC_037645.1 | 3510840 | SNV | 1 | T | A | Homozygous   |
| NC_037645.1 | 3510947 | SNV | 1 | A | G | Homozygous   |
| NC_037645.1 | 3511583 | SNV | 1 | C | T | Heterozygous |
| NC_037645.1 | 3516135 | SNV | 1 | C | T | Heterozygous |
| NC_037645.1 | 3516890 | SNV | 1 | T | C | Homozygous   |
| NC_037645.1 | 3517970 | SNV | 1 | A | G | Homozygous   |
| NC_037645.1 | 3527710 | SNV | 1 | G | T | Homozygous   |
| NC_037645.1 | 3527727 | SNV | 1 | G | T | Heterozygous |
| NC_037645.1 | 3527728 | SNV | 1 | G | A | Heterozygous |
| NC_037645.1 | 3527731 | SNV | 1 | T | A | Homozygous   |
| NC_037645.1 | 3527741 | SNV | 1 | T | A | Homozygous   |
| NC_037645.1 | 3529268 | SNV | 1 | T | G | Homozygous   |
| NC_037645.1 | 3529278 | SNV | 1 | A | G | Homozygous   |
| NC_037645.1 | 3530665 | SNV | 1 | A | T | Heterozygous |
| NC_037645.1 | 3530669 | SNV | 1 | G | C | Heterozygous |
| NC_037645.1 | 3530674 | SNV | 1 | G | C | Heterozygous |
| NC_037645.1 | 3538315 | SNV | 1 | A | C | Homozygous   |
| NC_037645.1 | 3538317 | SNV | 1 | A | T | Homozygous   |
| NC_037645.1 | 3538349 | SNV | 1 | A | C | Homozygous   |
| NC_037645.1 | 3538361 | SNV | 1 | G | T | Homozygous   |
| NC_037645.1 | 3549270 | SNV | 1 | C | T | Homozygous   |
| NC_037645.1 | 3549377 | SNV | 1 | C | T | Heterozygous |
| NC_037645.1 | 3550233 | SNV | 1 | A | G | Homozygous   |
| NC_037645.1 | 3572456 | SNV | 1 | T | C | Heterozygous |
| NC_037645.1 | 3572467 | SNV | 1 | T | C | Heterozygous |
| NC_037645.1 | 3577740 | SNV | 1 | A | G | Homozygous   |
| NC_037645.1 | 3584502 | SNV | 1 | C | G | Homozygous   |
| NC_037645.1 | 3584546 | SNV | 1 | T | C | Heterozygous |
| NC_037645.1 | 3584568 | SNV | 1 | T | C | Heterozygous |
| NC_037645.1 | 3584937 | SNV | 1 | C | T | Homozygous   |
| NC_037645.1 | 3585008 | SNV | 1 | C | T | Heterozygous |
| NC_037645.1 | 3585186 | SNV | 1 | G | C | Heterozygous |
| NC_037645.1 | 3585648 | SNV | 1 | C | G | Heterozygous |

|             |         |     |   |   |   |              |
|-------------|---------|-----|---|---|---|--------------|
| NC_037645.1 | 3588822 | SNV | 1 | T | C | Homozygous   |
| NC_037645.1 | 3588841 | SNV | 1 | G | A | Heterozygous |
| NC_037645.1 | 3588899 | SNV | 1 | T | C | Homozygous   |
| NC_037645.1 | 3589165 | SNV | 1 | T | C | Homozygous   |
| NC_037645.1 | 3589210 | SNV | 1 | T | C | Heterozygous |
| NC_037645.1 | 3589277 | SNV | 1 | G | A | Homozygous   |
| NC_037645.1 | 3589816 | SNV | 1 | T | C | Homozygous   |
| NC_037645.1 | 3589938 | SNV | 1 | T | C | Heterozygous |
| NC_037645.1 | 3590138 | SNV | 1 | A | G | Heterozygous |
| NC_037645.1 | 3590394 | SNV | 1 | C | T | Heterozygous |
| NC_037645.1 | 3591117 | SNV | 1 | C | T | Heterozygous |
| NC_037645.1 | 3592841 | SNV | 1 | G | A | Homozygous   |
| NC_037645.1 | 3592892 | SNV | 1 | A | G | Homozygous   |
| NC_037645.1 | 3592940 | SNV | 1 | G | A | Heterozygous |
| NC_037645.1 | 3593403 | SNV | 1 | G | A | Heterozygous |
| NC_037645.1 | 3593447 | SNV | 1 | C | T | Homozygous   |
| NC_037645.1 | 3593605 | SNV | 1 | A | G | Homozygous   |
| NC_037645.1 | 3593611 | SNV | 1 | G | A | Heterozygous |
| NC_037645.1 | 3593674 | SNV | 1 | C | G | Heterozygous |
| NC_037645.1 | 3593681 | SNV | 1 | T | C | Homozygous   |
| NC_037645.1 | 3594030 | SNV | 1 | G | C | Heterozygous |
| NC_037645.1 | 3594033 | SNV | 1 | C | T | Homozygous   |
| NC_037645.1 | 3594038 | SNV | 1 | C | A | Homozygous   |
| NC_037645.1 | 3594064 | SNV | 1 | C | T | Homozygous   |
| NC_037645.1 | 3594194 | SNV | 1 | C | A | Heterozygous |
| NC_037645.1 | 3594194 | SNV | 1 | C | G | Heterozygous |
| NC_037645.1 | 3594615 | SNV | 1 | C | T | Homozygous   |
| NC_037645.1 | 3594687 | SNV | 1 | A | T | Heterozygous |
| NC_037645.1 | 3594756 | SNV | 1 | G | A | Heterozygous |
| NC_037645.1 | 3594769 | SNV | 1 | A | G | Heterozygous |
| NC_037645.1 | 3595123 | SNV | 1 | G | A | Heterozygous |
| NC_037645.1 | 3595201 | SNV | 1 | A | G | Heterozygous |
| NC_037645.1 | 3596028 | SNV | 1 | T | C | Homozygous   |
| NC_037645.1 | 3599563 | SNV | 1 | T | C | Homozygous   |
| NC_037645.1 | 3599596 | SNV | 1 | C | T | Heterozygous |
| NC_037645.1 | 3599709 | SNV | 1 | G | A | Heterozygous |
| NC_037645.1 | 3599772 | SNV | 1 | A | G | Homozygous   |
| NC_037645.1 | 3600045 | SNV | 1 | T | C | Homozygous   |
| NC_037645.1 | 3600275 | SNV | 1 | C | T | Heterozygous |
| NC_037645.1 | 3600281 | SNV | 1 | C | T | Heterozygous |
| NC_037645.1 | 3600318 | SNV | 1 | T | C | Heterozygous |
| NC_037645.1 | 3600321 | SNV | 1 | T | C | Heterozygous |
| NC_037645.1 | 3600324 | SNV | 1 | T | A | Heterozygous |
| NC_037645.1 | 3600329 | SNV | 1 | C | T | Heterozygous |
| NC_037645.1 | 3601942 | SNV | 1 | A | G | Heterozygous |
| NC_037645.1 | 3601944 | SNV | 1 | A | T | Heterozygous |
| NC_037645.1 | 3602076 | SNV | 1 | G | A | Homozygous   |
| NC_037645.1 | 3602079 | SNV | 1 | T | C | Heterozygous |
| NC_037645.1 | 3603108 | SNV | 1 | T | A | Homozygous   |
| NC_037645.1 | 3603413 | SNV | 1 | T | C | Homozygous   |
| NC_037645.1 | 3603476 | SNV | 1 | A | G | Heterozygous |

|             |         |     |   |   |   |              |
|-------------|---------|-----|---|---|---|--------------|
| NC_037645.1 | 3603508 | SNV | 1 | A | G | Homozygous   |
| NC_037645.1 | 3603549 | SNV | 1 | G | A | Homozygous   |
| NC_037645.1 | 3603551 | SNV | 1 | G | A | Homozygous   |
| NC_037645.1 | 3603582 | SNV | 1 | G | A | Homozygous   |
| NC_037645.1 | 3603611 | SNV | 1 | G | A | Heterozygous |
| NC_037645.1 | 3603671 | SNV | 1 | A | G | Homozygous   |
| NC_037645.1 | 3603830 | SNV | 1 | T | C | Homozygous   |
| NC_037645.1 | 3603833 | SNV | 1 | T | C | Homozygous   |
| NC_037645.1 | 3603930 | SNV | 1 | A | G | Homozygous   |
| NC_037645.1 | 3604104 | SNV | 1 | A | G | Homozygous   |
| NC_037645.1 | 3604413 | SNV | 1 | A | T | Homozygous   |
| NC_037645.1 | 3604849 | SNV | 1 | G | A | Heterozygous |
| NC_037645.1 | 3604883 | SNV | 1 | A | G | Homozygous   |
| NC_037645.1 | 3604914 | SNV | 1 | C | G | Heterozygous |
| NC_037645.1 | 3604946 | SNV | 1 | C | A | Heterozygous |
| NC_037645.1 | 3604955 | SNV | 1 | C | T | Heterozygous |
| NC_037645.1 | 3605007 | SNV | 1 | T | C | Homozygous   |
| NC_037645.1 | 3605015 | SNV | 1 | G | A | Heterozygous |
| NC_037645.1 | 3605019 | SNV | 1 | T | C | Heterozygous |
| NC_037645.1 | 3605055 | SNV | 1 | A | G | Homozygous   |
| NC_037645.1 | 3605088 | SNV | 1 | G | T | Heterozygous |
| NC_037645.1 | 3605092 | SNV | 1 | T | C | Homozygous   |
| NC_037645.1 | 3605188 | SNV | 1 | G | A | Heterozygous |
| NC_037645.1 | 3605195 | SNV | 1 | C | T | Heterozygous |
| NC_037645.1 | 3605197 | SNV | 1 | G | A | Homozygous   |
| NC_037645.1 | 3605285 | SNV | 1 | G | A | Heterozygous |
| NC_037645.1 | 3605349 | SNV | 1 | A | G | Heterozygous |
| NC_037645.1 | 3605556 | SNV | 1 | G | A | Heterozygous |
| NC_037645.1 | 3605957 | SNV | 1 | A | G | Homozygous   |
| NC_037645.1 | 3606438 | SNV | 1 | C | G | Homozygous   |
| NC_037645.1 | 3606509 | SNV | 1 | T | C | Heterozygous |
| NC_037645.1 | 3606521 | SNV | 1 | A | G | Homozygous   |
| NC_037645.1 | 3606601 | SNV | 1 | G | C | Homozygous   |
| NC_037645.1 | 3606608 | SNV | 1 | T | C | Homozygous   |
| NC_037645.1 | 3606614 | SNV | 1 | G | C | Heterozygous |
| NC_037645.1 | 3606651 | SNV | 1 | G | T | Homozygous   |
| NC_037645.1 | 3606704 | SNV | 1 | G | C | Homozygous   |
| NC_037645.1 | 3606857 | SNV | 1 | C | T | Homozygous   |
| NC_037645.1 | 3607037 | SNV | 1 | T | C | Heterozygous |
| NC_037645.1 | 3607064 | SNV | 1 | T | C | Heterozygous |
| NC_037645.1 | 3607179 | SNV | 1 | C | G | Heterozygous |
| NC_037645.1 | 3607182 | SNV | 1 | G | A | Heterozygous |
| NC_037645.1 | 3607287 | SNV | 1 | T | C | Homozygous   |
| NC_037645.1 | 3607289 | SNV | 1 | G | A | Heterozygous |
| NC_037645.1 | 3607292 | SNV | 1 | A | C | Heterozygous |
| NC_037645.1 | 3607320 | SNV | 1 | G | A | Heterozygous |
| NC_037645.1 | 3607333 | SNV | 1 | C | T | Homozygous   |
| NC_037645.1 | 3607342 | SNV | 1 | T | A | Homozygous   |
| NC_037645.1 | 3607392 | SNV | 1 | A | G | Homozygous   |
| NC_037645.1 | 3607429 | SNV | 1 | T | C | Homozygous   |
| NC_037645.1 | 3607573 | SNV | 1 | G | A | Homozygous   |

|             |         |     |   |   |   |              |
|-------------|---------|-----|---|---|---|--------------|
| NC_037645.1 | 3607791 | SNV | 1 | G | T | Homozygous   |
| NC_037645.1 | 3607809 | SNV | 1 | G | A | Homozygous   |
| NC_037645.1 | 3607867 | SNV | 1 | G | A | Homozygous   |
| NC_037645.1 | 3608273 | SNV | 1 | A | G | Heterozygous |
| NC_037645.1 | 3608634 | SNV | 1 | C | G | Homozygous   |
| NC_037645.1 | 3608658 | SNV | 1 | A | T | Heterozygous |
| NC_037645.1 | 3608688 | SNV | 1 | T | C | Homozygous   |
| NC_037645.1 | 3608787 | SNV | 1 | T | A | Heterozygous |
| NC_037645.1 | 3608792 | SNV | 1 | T | C | Heterozygous |
| NC_037645.1 | 3608797 | SNV | 1 | A | T | Heterozygous |
| NC_037645.1 | 3615729 | SNV | 1 | G | A | Heterozygous |
| NC_037645.1 | 3616382 | SNV | 1 | G | A | Heterozygous |
| NC_037645.1 | 3616396 | SNV | 1 | A | C | Homozygous   |
| NC_037645.1 | 3616406 | SNV | 1 | G | A | Heterozygous |
| NC_037645.1 | 3616415 | SNV | 1 | C | A | Heterozygous |
| NC_037645.1 | 3616419 | SNV | 1 | G | T | Heterozygous |
| NC_037645.1 | 3616852 | SNV | 1 | G | A | Heterozygous |
| NC_037645.1 | 3618698 | SNV | 1 | T | C | Homozygous   |
| NC_037645.1 | 3619575 | SNV | 1 | C | A | Homozygous   |
| NC_037645.1 | 3619609 | SNV | 1 | C | T | Homozygous   |
| NC_037645.1 | 3620171 | SNV | 1 | G | A | Homozygous   |
| NC_037645.1 | 3620521 | SNV | 1 | C | T | Heterozygous |
| NC_037645.1 | 3620523 | SNV | 1 | T | C | Homozygous   |
| NC_037645.1 | 3620627 | SNV | 1 | C | G | Homozygous   |
| NC_037645.1 | 3620631 | SNV | 1 | T | A | Homozygous   |
| NC_037645.1 | 3620732 | SNV | 1 | G | A | Heterozygous |
| NC_037645.1 | 3620947 | SNV | 1 | G | A | Heterozygous |
| NC_037645.1 | 3620950 | SNV | 1 | A | G | Heterozygous |
| NC_037645.1 | 3620997 | SNV | 1 | G | T | Heterozygous |
| NC_037645.1 | 3622545 | SNV | 1 | G | C | Heterozygous |
| NC_037645.1 | 3623169 | SNV | 1 | T | C | Heterozygous |
| NC_037645.1 | 3624168 | SNV | 1 | T | C | Heterozygous |
| NC_037645.1 | 3624185 | SNV | 1 | C | T | Heterozygous |
| NC_037645.1 | 3624278 | SNV | 1 | C | A | Heterozygous |
| NC_037645.1 | 3624298 | SNV | 1 | G | A | Heterozygous |
| NC_037645.1 | 3624339 | SNV | 1 | A | G | Homozygous   |
| NC_037645.1 | 3625840 | SNV | 1 | G | A | Heterozygous |
| NC_037645.1 | 3626047 | SNV | 1 | T | C | Homozygous   |
| NC_037645.1 | 3632922 | SNV | 1 | C | T | Homozygous   |
| NC_037645.1 | 3632930 | SNV | 1 | C | T | Homozygous   |
| NC_037645.1 | 3646423 | SNV | 1 | A | G | Homozygous   |
| NC_037645.1 | 3646458 | SNV | 1 | C | T | Heterozygous |
| NC_037645.1 | 3646506 | SNV | 1 | A | T | Homozygous   |
| NC_037645.1 | 3647693 | SNV | 1 | T | A | Heterozygous |
| NC_037645.1 | 3662530 | SNV | 1 | T | C | Homozygous   |
| NC_037645.1 | 3662994 | SNV | 1 | T | C | Homozygous   |
| NC_037645.1 | 3663398 | SNV | 1 | A | T | Homozygous   |
| NC_037645.1 | 3669195 | SNV | 1 | T | C | Homozygous   |
| NC_037645.1 | 3674652 | SNV | 1 | C | T | Homozygous   |
| NC_037645.1 | 3674672 | SNV | 1 | T | C | Homozygous   |
| NC_037645.1 | 3674760 | SNV | 1 | G | A | Homozygous   |



|             |         |     |   |   |   |              |
|-------------|---------|-----|---|---|---|--------------|
| NC_037645.1 | 3674786 | SNV | 1 | T | A | Homozygous   |
| NC_037645.1 | 3678171 | SNV | 1 | C | T | Homozygous   |
| NC_037645.1 | 3678173 | SNV | 1 | C | A | Homozygous   |
| NC_037645.1 | 3678179 | SNV | 1 | C | T | Homozygous   |
| NC_037645.1 | 3678319 | SNV | 1 | G | A | Heterozygous |
| NC_037645.1 | 3678472 | SNV | 1 | C | T | Heterozygous |
| NC_037645.1 | 3678500 | SNV | 1 | G | A | Homozygous   |
| NC_037645.1 | 3678621 | SNV | 1 | A | G | Homozygous   |
| NC_037645.1 | 3678649 | SNV | 1 | A | G | Homozygous   |
| NC_037645.1 | 3678702 | SNV | 1 | A | G | Heterozygous |
| NC_037645.1 | 3678747 | SNV | 1 | A | G | Homozygous   |
| NC_037645.1 | 3682716 | SNV | 1 | T | C | Homozygous   |
| NC_037645.1 | 3689680 | SNV | 1 | G | A | Heterozygous |
| NC_037645.1 | 3689927 | SNV | 1 | T | C | Homozygous   |
| NC_037645.1 | 3693685 | SNV | 1 | C | T | Heterozygous |
| NC_037645.1 | 3693691 | SNV | 1 | A | G | Homozygous   |
| NC_037645.1 | 3696694 | SNV | 1 | T | C | Homozygous   |
| NC_037645.1 | 3697356 | SNV | 1 | A | G | Heterozygous |
| NC_037645.1 | 3698227 | SNV | 1 | T | G | Homozygous   |
| NC_037645.1 | 3698254 | SNV | 1 | T | C | Homozygous   |
| NC_037645.1 | 3698266 | SNV | 1 | T | C | Homozygous   |
| NC_037645.1 | 3698272 | SNV | 1 | T | A | Homozygous   |
| NC_037645.1 | 3698286 | SNV | 1 | T | C | Homozygous   |
| NC_037645.1 | 3698293 | SNV | 1 | A | G | Homozygous   |
| NC_037645.1 | 3699773 | SNV | 1 | A | T | Homozygous   |
| NC_037645.1 | 3700232 | SNV | 1 | G | A | Heterozygous |
| NC_037645.1 | 3712246 | SNV | 1 | T | G | Heterozygous |
| NC_037645.1 | 3712615 | SNV | 1 | T | C | Heterozygous |
| NC_037645.1 | 3712928 | SNV | 1 | A | G | Heterozygous |
| NC_037645.1 | 3712934 | SNV | 1 | A | G | Homozygous   |
| NC_037645.1 | 3712973 | SNV | 1 | G | A | Heterozygous |
| NC_037645.1 | 3714385 | SNV | 1 | G | T | Homozygous   |
| NC_037645.1 | 3714396 | SNV | 1 | A | T | Homozygous   |
| NC_037645.1 | 3714399 | SNV | 1 | C | T | Homozygous   |
| NC_037645.1 | 3714401 | SNV | 1 | A | T | Homozygous   |
| NC_037645.1 | 3717067 | SNV | 1 | A | G | Heterozygous |
| NC_037645.1 | 3717080 | SNV | 1 | C | T | Homozygous   |
| NC_037645.1 | 3717111 | SNV | 1 | T | C | Homozygous   |
| NC_037645.1 | 3717117 | SNV | 1 | T | C | Homozygous   |
| NC_037645.1 | 3717184 | SNV | 1 | G | A | Heterozygous |
| NC_037645.1 | 3730471 | SNV | 1 | G | A | Homozygous   |
| NC_037645.1 | 3733384 | SNV | 1 | G | T | Homozygous   |
| NC_037645.1 | 3734092 | SNV | 1 | A | G | Homozygous   |
| NC_037645.1 | 3735032 | SNV | 1 | T | C | Homozygous   |
| NC_037645.1 | 3736282 | SNV | 1 | T | C | Homozygous   |
| NC_037645.1 | 3736323 | SNV | 1 | A | G | Homozygous   |
| NC_037645.1 | 3737224 | SNV | 1 | A | G | Homozygous   |
| NC_037645.1 | 3738070 | SNV | 1 | T | C | Homozygous   |
| NC_037645.1 | 3738677 | SNV | 1 | T | C | Homozygous   |
| NC_037645.1 | 3738866 | SNV | 1 | C | T | Homozygous   |
| NC_037645.1 | 3739385 | SNV | 1 | G | A | Heterozygous |

|             |         |     |   |   |   |              |
|-------------|---------|-----|---|---|---|--------------|
| NC_037645.1 | 3739412 | SNV | 1 | T | C | Homozygous   |
| NC_037645.1 | 3740293 | SNV | 1 | C | T | Heterozygous |
| NC_037645.1 | 3741331 | SNV | 1 | T | C | Homozygous   |
| NC_037645.1 | 3743786 | SNV | 1 | C | T | Homozygous   |
| NC_037645.1 | 3743828 | SNV | 1 | C | T | Homozygous   |
| NC_037645.1 | 3745110 | SNV | 1 | C | T | Heterozygous |
| NC_037645.1 | 3752079 | SNV | 1 | G | A | Heterozygous |
| NC_037645.1 | 3752485 | SNV | 1 | G | A | Heterozygous |
| NC_037645.1 | 3752521 | SNV | 1 | T | C | Heterozygous |
| NC_037645.1 | 3752539 | SNV | 1 | G | T | Homozygous   |
| NC_037645.1 | 3752566 | SNV | 1 | C | T | Heterozygous |
| NC_037645.1 | 3758284 | SNV | 1 | A | G | Homozygous   |
| NC_037645.1 | 3758701 | SNV | 1 | C | T | Heterozygous |
| NC_037645.1 | 3758900 | SNV | 1 | A | T | Heterozygous |
| NC_037645.1 | 3759111 | SNV | 1 | A | G | Homozygous   |
| NC_037645.1 | 3761135 | SNV | 1 | C | G | Homozygous   |
| NC_037645.1 | 3761162 | SNV | 1 | A | G | Heterozygous |
| NC_037645.1 | 3761164 | SNV | 1 | C | T | Homozygous   |
| NC_037645.1 | 3761169 | SNV | 1 | T | C | Heterozygous |
| NC_037645.1 | 3761301 | SNV | 1 | A | G | Homozygous   |
| NC_037645.1 | 3761390 | SNV | 1 | T | C | Heterozygous |
| NC_037645.1 | 3761418 | SNV | 1 | A | G | Homozygous   |
| NC_037645.1 | 3761454 | SNV | 1 | A | T | Heterozygous |
| NC_037645.1 | 3783457 | SNV | 1 | T | A | Heterozygous |
| NC_037645.1 | 3783702 | SNV | 1 | C | T | Homozygous   |
| NC_037645.1 | 3783887 | SNV | 1 | G | C | Homozygous   |
| NC_037645.1 | 3784092 | SNV | 1 | C | T | Heterozygous |
| NC_037645.1 | 3784229 | SNV | 1 | G | A | Homozygous   |
| NC_037645.1 | 3784808 | SNV | 1 | T | C | Homozygous   |
| NC_037645.1 | 3785052 | SNV | 1 | T | C | Homozygous   |
| NC_037645.1 | 3785103 | SNV | 1 | G | A | Heterozygous |
| NC_037645.1 | 3785113 | SNV | 1 | T | C | Homozygous   |
| NC_037645.1 | 3785172 | SNV | 1 | T | C | Heterozygous |
| NC_037645.1 | 3797208 | SNV | 1 | A | G | Homozygous   |
| NC_037645.1 | 3801904 | SNV | 1 | C | T | Heterozygous |
| NC_037645.1 | 3806286 | SNV | 1 | C | G | Homozygous   |
| NC_037645.1 | 3808403 | SNV | 1 | G | A | Homozygous   |
| NC_037645.1 | 3808413 | SNV | 1 | A | T | Heterozygous |
| NC_037645.1 | 3841561 | SNV | 1 | A | T | Homozygous   |
| NC_037645.1 | 3841565 | SNV | 1 | T | G | Homozygous   |
| NC_037645.1 | 3841577 | SNV | 1 | C | T | Homozygous   |
| NC_037645.1 | 3844445 | SNV | 1 | G | C | Heterozygous |
| NC_037645.1 | 3844665 | SNV | 1 | G | A | Homozygous   |
| NC_037645.1 | 3845344 | SNV | 1 | A | G | Heterozygous |
| NC_037645.1 | 3845350 | SNV | 1 | T | C | Homozygous   |
| NC_037645.1 | 3845916 | SNV | 1 | C | T | Heterozygous |
| NC_037645.1 | 3846303 | SNV | 1 | C | T | Heterozygous |
| NC_037645.1 | 3847403 | SNV | 1 | A | G | Heterozygous |
| NC_037645.1 | 3848507 | SNV | 1 | T | C | Homozygous   |
| NC_037645.1 | 3848801 | SNV | 1 | T | C | Homozygous   |
| NC_037645.1 | 3848812 | SNV | 1 | A | G | Homozygous   |

|             |         |     |   |   |   |              |
|-------------|---------|-----|---|---|---|--------------|
| NC_037645.1 | 3849044 | SNV | 1 | C | T | Homozygous   |
| NC_037645.1 | 3849833 | SNV | 1 | A | G | Homozygous   |
| NC_037645.1 | 3852490 | SNV | 1 | C | T | Homozygous   |
| NC_037645.1 | 3853664 | SNV | 1 | T | C | Heterozygous |
| NC_037645.1 | 3854124 | SNV | 1 | A | G | Homozygous   |
| NC_037645.1 | 3858492 | SNV | 1 | C | T | Heterozygous |
| NC_037645.1 | 3858562 | SNV | 1 | G | A | Homozygous   |
| NC_037645.1 | 3858580 | SNV | 1 | G | A | Heterozygous |
| NC_037645.1 | 3858916 | SNV | 1 | A | G | Homozygous   |
| NC_037645.1 | 3858979 | SNV | 1 | G | A | Heterozygous |
| NC_037645.1 | 3859467 | SNV | 1 | T | C | Heterozygous |
| NC_037645.1 | 3863151 | SNV | 1 | T | G | Homozygous   |
| NC_037645.1 | 3863160 | SNV | 1 | T | A | Homozygous   |
| NC_037645.1 | 3863430 | SNV | 1 | C | T | Heterozygous |
| NC_037645.1 | 3863936 | SNV | 1 | C | T | Heterozygous |
| NC_037645.1 | 3864434 | SNV | 1 | T | C | Homozygous   |
| NC_037645.1 | 3864816 | SNV | 1 | T | C | Homozygous   |
| NC_037645.1 | 3868042 | SNV | 1 | T | C | Homozygous   |
| NC_037645.1 | 3873552 | SNV | 1 | A | T | Homozygous   |
| NC_037645.1 | 3876549 | SNV | 1 | C | T | Homozygous   |
| NC_037645.1 | 3876855 | SNV | 1 | T | C | Homozygous   |
| NC_037645.1 | 3877168 | SNV | 1 | G | A | Homozygous   |
| NC_037645.1 | 3878548 | SNV | 1 | G | A | Heterozygous |
| NC_037645.1 | 3878746 | SNV | 1 | G | T | Heterozygous |
| NC_037645.1 | 3879560 | SNV | 1 | A | G | Heterozygous |
| NC_037645.1 | 3880509 | SNV | 1 | A | G | Heterozygous |
| NC_037645.1 | 3881694 | SNV | 1 | G | T | Homozygous   |
| NC_037645.1 | 3881713 | SNV | 1 | A | G | Homozygous   |
| NC_037645.1 | 3881715 | SNV | 1 | T | G | Homozygous   |
| NC_037645.1 | 3881718 | SNV | 1 | T | C | Homozygous   |
| NC_037645.1 | 3881724 | SNV | 1 | A | C | Homozygous   |
| NC_037645.1 | 3893408 | SNV | 1 | T | A | Heterozygous |
| NC_037645.1 | 3893410 | SNV | 1 | C | A | Homozygous   |
| NC_037645.1 | 3893414 | SNV | 1 | T | A | Homozygous   |
| NC_037645.1 | 3893445 | SNV | 1 | G | A | Heterozygous |
| NC_037645.1 | 3893462 | SNV | 1 | G | A | Heterozygous |
| NC_037645.1 | 3901337 | SNV | 1 | T | G | Homozygous   |
| NC_037645.1 | 3901351 | SNV | 1 | A | C | Homozygous   |
| NC_037645.1 | 3901356 | SNV | 1 | T | G | Homozygous   |
| NC_037645.1 | 3901385 | SNV | 1 | T | C | Heterozygous |
| NC_037645.1 | 3901518 | SNV | 1 | T | A | Heterozygous |
| NC_037645.1 | 3901552 | SNV | 1 | C | T | Heterozygous |
| NC_037645.1 | 3901560 | SNV | 1 | T | A | Heterozygous |
| NC_037645.1 | 3901682 | SNV | 1 | A | C | Heterozygous |
| NC_037645.1 | 3904569 | SNV | 1 | A | G | Homozygous   |
| NC_037645.1 | 3906969 | SNV | 1 | A | C | Homozygous   |
| NC_037645.1 | 3907005 | SNV | 1 | A | G | Heterozygous |
| NC_037645.1 | 3907110 | SNV | 1 | T | C | Homozygous   |
| NC_037645.1 | 3907115 | SNV | 1 | A | G | Homozygous   |
| NC_037645.1 | 3907181 | SNV | 1 | C | T | Homozygous   |
| NC_037645.1 | 3907486 | SNV | 1 | T | C | Homozygous   |

|             |         |     |   |   |   |              |
|-------------|---------|-----|---|---|---|--------------|
| NC_037645.1 | 3907528 | SNV | 1 | G | A | Heterozygous |
| NC_037645.1 | 3907554 | SNV | 1 | A | G | Heterozygous |
| NC_037645.1 | 3907589 | SNV | 1 | A | G | Heterozygous |
| NC_037645.1 | 3907601 | SNV | 1 | T | C | Heterozygous |
| NC_037645.1 | 3907620 | SNV | 1 | T | C | Heterozygous |
| NC_037645.1 | 3907624 | SNV | 1 | C | T | Heterozygous |
| NC_037645.1 | 3907630 | SNV | 1 | A | G | Heterozygous |
| NC_037645.1 | 3907632 | SNV | 1 | A | G | Heterozygous |
| NC_037645.1 | 3907853 | SNV | 1 | A | G | Homozygous   |
| NC_037645.1 | 3908270 | SNV | 1 | A | C | Heterozygous |
| NC_037645.1 | 3911282 | SNV | 1 | C | T | Homozygous   |
| NC_037645.1 | 3911655 | SNV | 1 | A | G | Homozygous   |
| NC_037645.1 | 3911840 | SNV | 1 | T | C | Homozygous   |
| NC_037645.1 | 3917132 | SNV | 1 | T | G | Homozygous   |
| NC_037645.1 | 3917280 | SNV | 1 | A | G | Heterozygous |
| NC_037645.1 | 3917360 | SNV | 1 | G | C | Heterozygous |
| NC_037645.1 | 3917382 | SNV | 1 | G | A | Homozygous   |
| NC_037645.1 | 3918092 | SNV | 1 | C | T | Heterozygous |
| NC_037645.1 | 3922070 | SNV | 1 | A | C | Heterozygous |
| NC_037645.1 | 3922888 | SNV | 1 | C | A | Heterozygous |
| NC_037645.1 | 3932612 | SNV | 1 | G | A | Heterozygous |
| NC_037645.1 | 3945448 | SNV | 1 | G | A | Homozygous   |
| NC_037645.1 | 3945455 | SNV | 1 | A | C | Homozygous   |
| NC_037645.1 | 3945474 | SNV | 1 | A | C | Homozygous   |
| NC_037645.1 | 3945479 | SNV | 1 | G | C | Homozygous   |
| NC_037645.1 | 3955549 | SNV | 1 | A | G | Homozygous   |
| NC_037645.1 | 3956668 | SNV | 1 | T | A | Homozygous   |
| NC_037645.1 | 3956781 | SNV | 1 | T | A | Heterozygous |
| NC_037645.1 | 3957338 | SNV | 1 | C | T | Homozygous   |
| NC_037645.1 | 3957348 | SNV | 1 | A | G | Homozygous   |
| NC_037645.1 | 3957703 | SNV | 1 | C | T | Homozygous   |
| NC_037645.1 | 3958111 | SNV | 1 | C | G | Homozygous   |
| NC_037645.1 | 3967248 | SNV | 1 | A | G | Homozygous   |
| NC_037645.1 | 3967387 | SNV | 1 | T | C | Homozygous   |
| NC_037645.1 | 3967456 | SNV | 1 | C | T | Heterozygous |
| NC_037645.1 | 3974733 | SNV | 1 | G | A | Heterozygous |
| NC_037645.1 | 3974733 | SNV | 1 | G | T | Heterozygous |
| NC_037645.1 | 3974782 | SNV | 1 | A | G | Homozygous   |
| NC_037645.1 | 3974800 | SNV | 1 | A | G | Homozygous   |
| NC_037645.1 | 3975376 | SNV | 1 | C | G | Homozygous   |
| NC_037645.1 | 3977044 | SNV | 1 | T | C | Homozygous   |
| NC_037645.1 | 3978139 | SNV | 1 | C | T | Heterozygous |
| NC_037645.1 | 3978142 | SNV | 1 | G | A | Heterozygous |
| NC_037645.1 | 3978273 | SNV | 1 | T | C | Heterozygous |
| NC_037645.1 | 3978280 | SNV | 1 | A | G | Heterozygous |
| NC_037645.1 | 3978657 | SNV | 1 | A | G | Heterozygous |
| NC_037645.1 | 3986586 | SNV | 1 | C | G | Heterozygous |
| NC_037645.1 | 4000882 | SNV | 1 | C | T | Heterozygous |
| NC_037645.1 | 4001127 | SNV | 1 | G | A | Heterozygous |
| NC_037645.1 | 4001162 | SNV | 1 | C | T | Heterozygous |
| NC_037645.1 | 4001420 | SNV | 1 | T | C | Heterozygous |

|             |         |     |   |   |   |              |
|-------------|---------|-----|---|---|---|--------------|
| NC_037645.1 | 4001447 | SNV | 1 | T | C | Homozygous   |
| NC_037645.1 | 4002557 | SNV | 1 | A | G | Homozygous   |
| NC_037645.1 | 4056244 | SNV | 1 | C | T | Heterozygous |
| NC_037645.1 | 4056289 | SNV | 1 | T | C | Heterozygous |
| NC_037645.1 | 4056332 | SNV | 1 | G | A | Heterozygous |
| NC_037645.1 | 4056350 | SNV | 1 | C | T | Heterozygous |
| NC_037645.1 | 4056401 | SNV | 1 | T | C | Heterozygous |
| NC_037645.1 | 4057418 | SNV | 1 | A | G | Heterozygous |
| NC_037645.1 | 4057421 | SNV | 1 | T | C | Heterozygous |
| NC_037645.1 | 4060776 | SNV | 1 | T | C | Homozygous   |
| NC_037645.1 | 4061002 | SNV | 1 | T | A | Homozygous   |
| NC_037645.1 | 4061437 | SNV | 1 | A | G | Homozygous   |
| NC_037645.1 | 4061654 | SNV | 1 | C | A | Homozygous   |
| NC_037645.1 | 4062243 | SNV | 1 | T | C | Homozygous   |
| NC_037645.1 | 4062271 | SNV | 1 | T | C | Heterozygous |
| NC_037645.1 | 4063072 | SNV | 1 | C | A | Heterozygous |
| NC_037645.1 | 4072091 | SNV | 1 | T | C | Homozygous   |
| NC_037645.1 | 4093846 | SNV | 1 | A | G | Heterozygous |
| NC_037645.1 | 4093852 | SNV | 1 | G | A | Heterozygous |
| NC_037645.1 | 4093860 | SNV | 1 | G | A | Heterozygous |
| NC_037645.1 | 4093862 | SNV | 1 | A | G | Heterozygous |
| NC_037645.1 | 4097462 | SNV | 1 | T | C | Homozygous   |
| NC_037645.1 | 4097469 | SNV | 1 | A | C | Homozygous   |
| NC_037645.1 | 4098662 | SNV | 1 | A | G | Homozygous   |
| NC_037645.1 | 4113618 | SNV | 1 | T | C | Homozygous   |
| NC_037645.1 | 4113663 | SNV | 1 | A | G | Homozygous   |
| NC_037645.1 | 4113798 | SNV | 1 | A | G | Homozygous   |
| NC_037645.1 | 4113891 | SNV | 1 | A | G | Homozygous   |
| NC_037645.1 | 4114978 | SNV | 1 | C | A | Homozygous   |
| NC_037645.1 | 4115008 | SNV | 1 | C | T | Heterozygous |
| NC_037645.1 | 4115057 | SNV | 1 | A | G | Homozygous   |
| NC_037645.1 | 4115098 | SNV | 1 | A | G | Heterozygous |
| NC_037645.1 | 4158686 | SNV | 1 | T | C | Homozygous   |
| NC_037645.1 | 4158788 | SNV | 1 | T | C | Homozygous   |
| NC_037645.1 | 4159305 | SNV | 1 | G | A | Homozygous   |
| NC_037645.1 | 4159308 | SNV | 1 | A | G | Homozygous   |
| NC_037645.1 | 4159696 | SNV | 1 | C | T | Homozygous   |
| NC_037645.1 | 4160385 | SNV | 1 | A | G | Heterozygous |
| NC_037645.1 | 4160389 | SNV | 1 | G | A | Heterozygous |
| NC_037645.1 | 4160393 | SNV | 1 | G | A | Heterozygous |
| NC_037645.1 | 4160395 | SNV | 1 | G | A | Heterozygous |
| NC_037645.1 | 4160399 | SNV | 1 | G | A | Heterozygous |
| NC_037645.1 | 4160410 | SNV | 1 | A | T | Heterozygous |
| NC_037645.1 | 4160413 | SNV | 1 | G | A | Heterozygous |
| NC_037645.1 | 4160417 | SNV | 1 | C | T | Heterozygous |
| NC_037645.1 | 4160420 | SNV | 1 | C | T | Heterozygous |
| NC_037645.1 | 4160510 | SNV | 1 | A | C | Homozygous   |
| NC_037645.1 | 4160512 | SNV | 1 | C | A | Homozygous   |
| NC_037645.1 | 4160518 | SNV | 1 | C | T | Homozygous   |
| NC_037645.1 | 4160533 | SNV | 1 | T | C | Homozygous   |
| NC_037645.1 | 4161381 | SNV | 1 | G | A | Heterozygous |

|             |         |     |   |   |   |              |
|-------------|---------|-----|---|---|---|--------------|
| NC_037645.1 | 4161456 | SNV | 1 | T | C | Heterozygous |
| NC_037645.1 | 4161468 | SNV | 1 | C | T | Heterozygous |
| NC_037645.1 | 4161660 | SNV | 1 | G | A | Homozygous   |
| NC_037645.1 | 4162316 | SNV | 1 | A | G | Homozygous   |
| NC_037645.1 | 4169311 | SNV | 1 | A | C | Homozygous   |
| NC_037645.1 | 4169580 | SNV | 1 | T | G | Homozygous   |
| NC_037645.1 | 4169593 | SNV | 1 | G | T | Homozygous   |
| NC_037645.1 | 4169653 | SNV | 1 | G | A | Heterozygous |
| NC_037645.1 | 4170343 | SNV | 1 | C | T | Heterozygous |
| NC_037645.1 | 4175945 | SNV | 1 | T | A | Homozygous   |
| NC_037645.1 | 4176385 | SNV | 1 | C | T | Heterozygous |
| NC_037645.1 | 4176388 | SNV | 1 | T | C | Homozygous   |
| NC_037645.1 | 4178301 | SNV | 1 | A | C | Heterozygous |
| NC_037645.1 | 4178322 | SNV | 1 | C | A | Heterozygous |
| NC_037645.1 | 4178324 | SNV | 1 | C | T | Heterozygous |
| NC_037645.1 | 4178629 | SNV | 1 | C | T | Homozygous   |
| NC_037645.1 | 4178786 | SNV | 1 | A | G | Homozygous   |
| NC_037645.1 | 4188560 | SNV | 1 | A | T | Homozygous   |
| NC_037645.1 | 4188567 | SNV | 1 | C | T | Homozygous   |
| NC_037645.1 | 4202671 | SNV | 1 | T | C | Heterozygous |
| NC_037645.1 | 4202704 | SNV | 1 | A | G | Homozygous   |
| NC_037645.1 | 4202725 | SNV | 1 | G | A | Heterozygous |
| NC_037645.1 | 4202778 | SNV | 1 | C | T | Homozygous   |
| NC_037645.1 | 4202848 | SNV | 1 | G | A | Homozygous   |
| NC_037645.1 | 4203228 | SNV | 1 | C | T | Heterozygous |
| NC_037645.1 | 4203594 | SNV | 1 | A | C | Heterozygous |
| NC_037645.1 | 4203617 | SNV | 1 | G | A | Homozygous   |
| NC_037645.1 | 4203704 | SNV | 1 | C | T | Heterozygous |
| NC_037645.1 | 4203776 | SNV | 1 | C | T | Homozygous   |
| NC_037645.1 | 4203830 | SNV | 1 | C | T | Heterozygous |
| NC_037645.1 | 4203874 | SNV | 1 | A | T | Heterozygous |
| NC_037645.1 | 4203959 | SNV | 1 | G | A | Homozygous   |
| NC_037645.1 | 4204022 | SNV | 1 | T | A | Homozygous   |
| NC_037645.1 | 4204564 | SNV | 1 | T | C | Heterozygous |
| NC_037645.1 | 4205413 | SNV | 1 | G | C | Homozygous   |
| NC_037645.1 | 4205732 | SNV | 1 | T | C | Heterozygous |
| NC_037645.1 | 4205767 | SNV | 1 | T | C | Homozygous   |
| NC_037645.1 | 4205774 | SNV | 1 | G | A | Heterozygous |
| NC_037645.1 | 4205783 | SNV | 1 | C | T | Heterozygous |
| NC_037645.1 | 4205803 | SNV | 1 | T | C | Homozygous   |
| NC_037645.1 | 4206034 | SNV | 1 | A | C | Homozygous   |
| NC_037645.1 | 4206229 | SNV | 1 | T | C | Heterozygous |
| NC_037645.1 | 4206278 | SNV | 1 | T | C | Heterozygous |
| NC_037645.1 | 4206293 | SNV | 1 | C | T | Heterozygous |
| NC_037645.1 | 4206396 | SNV | 1 | G | A | Homozygous   |
| NC_037645.1 | 4206428 | SNV | 1 | A | G | Homozygous   |
| NC_037645.1 | 4206478 | SNV | 1 | T | C | Heterozygous |
| NC_037645.1 | 4206509 | SNV | 1 | T | C | Homozygous   |
| NC_037645.1 | 4206588 | SNV | 1 | A | T | Heterozygous |
| NC_037645.1 | 4206664 | SNV | 1 | T | C | Homozygous   |
| NC_037645.1 | 4207058 | SNV | 1 | A | C | Heterozygous |

|             |         |     |   |   |   |              |
|-------------|---------|-----|---|---|---|--------------|
| NC_037645.1 | 4207060 | SNV | 1 | A | T | Heterozygous |
| NC_037645.1 | 4207064 | SNV | 1 | A | G | Heterozygous |
| NC_037645.1 | 4207295 | SNV | 1 | T | C | Heterozygous |
| NC_037645.1 | 4207566 | SNV | 1 | A | G | Heterozygous |
| NC_037645.1 | 4207581 | SNV | 1 | C | T | Homozygous   |
| NC_037645.1 | 4207587 | SNV | 1 | A | T | Homozygous   |
| NC_037645.1 | 4207663 | SNV | 1 | G | A | Homozygous   |
| NC_037645.1 | 4207684 | SNV | 1 | T | C | Homozygous   |
| NC_037645.1 | 4207720 | SNV | 1 | T | A | Homozygous   |
| NC_037645.1 | 4207786 | SNV | 1 | C | T | Heterozygous |
| NC_037645.1 | 4207950 | SNV | 1 | T | C | Homozygous   |
| NC_037645.1 | 4207992 | SNV | 1 | G | A | Homozygous   |
| NC_037645.1 | 4209339 | SNV | 1 | G | A | Heterozygous |
| NC_037645.1 | 4209361 | SNV | 1 | G | A | Heterozygous |
| NC_037645.1 | 4209868 | SNV | 1 | G | A | Homozygous   |
| NC_037645.1 | 4210406 | SNV | 1 | G | A | Homozygous   |
| NC_037645.1 | 4212117 | SNV | 1 | T | A | Heterozygous |
| NC_037645.1 | 4212120 | SNV | 1 | A | T | Heterozygous |
| NC_037645.1 | 4212122 | SNV | 1 | G | A | Heterozygous |
| NC_037645.1 | 4212126 | SNV | 1 | T | C | Heterozygous |
| NC_037645.1 | 4212134 | SNV | 1 | T | A | Homozygous   |
| NC_037645.1 | 4212142 | SNV | 1 | G | T | Homozygous   |
| NC_037645.1 | 4212157 | SNV | 1 | A | G | Homozygous   |
| NC_037645.1 | 4212177 | SNV | 1 | T | C | Heterozygous |
| NC_037645.1 | 4212184 | SNV | 1 | T | C | Heterozygous |
| NC_037645.1 | 4215035 | SNV | 1 | G | A | Homozygous   |
| NC_037645.1 | 4215329 | SNV | 1 | A | G | Homozygous   |
| NC_037645.1 | 4215377 | SNV | 1 | T | C | Heterozygous |
| NC_037645.1 | 4217185 | SNV | 1 | T | C | Homozygous   |
| NC_037645.1 | 4218549 | SNV | 1 | A | G | Heterozygous |
| NC_037645.1 | 4218584 | SNV | 1 | A | G | Homozygous   |
| NC_037645.1 | 4222116 | SNV | 1 | A | G | Heterozygous |
| NC_037645.1 | 4222168 | SNV | 1 | T | C | Heterozygous |
| NC_037645.1 | 4231064 | SNV | 1 | C | T | Homozygous   |
| NC_037645.1 | 4231450 | SNV | 1 | A | G | Heterozygous |
| NC_037645.1 | 4231478 | SNV | 1 | C | T | Heterozygous |
| NC_037645.1 | 4231482 | SNV | 1 | T | A | Heterozygous |
| NC_037645.1 | 4231487 | SNV | 1 | T | A | Heterozygous |
| NC_037645.1 | 4254690 | SNV | 1 | A | G | Homozygous   |
| NC_037645.1 | 4254692 | SNV | 1 | A | G | Homozygous   |
| NC_037645.1 | 4254696 | SNV | 1 | A | G | Homozygous   |
| NC_037645.1 | 4270516 | SNV | 1 | G | T | Homozygous   |
| NC_037645.1 | 4270533 | SNV | 1 | A | T | Homozygous   |
| NC_037645.1 | 4276113 | SNV | 1 | C | T | Homozygous   |
| NC_037645.1 | 4276209 | SNV | 1 | G | A | Heterozygous |
| NC_037645.1 | 4287895 | SNV | 1 | G | C | Heterozygous |
| NC_037645.1 | 4287905 | SNV | 1 | C | T | Heterozygous |
| NC_037645.1 | 4287971 | SNV | 1 | G | A | Heterozygous |
| NC_037645.1 | 4292412 | SNV | 1 | A | G | Homozygous   |
| NC_037645.1 | 4292526 | SNV | 1 | A | G | Homozygous   |
| NC_037645.1 | 4292653 | SNV | 1 | G | A | Homozygous   |

|             |         |     |   |   |   |              |
|-------------|---------|-----|---|---|---|--------------|
| NC_037645.1 | 4292842 | SNV | 1 | A | G | Homozygous   |
| NC_037645.1 | 4293226 | SNV | 1 | A | G | Homozygous   |
| NC_037645.1 | 4293267 | SNV | 1 | T | A | Heterozygous |
| NC_037645.1 | 4293401 | SNV | 1 | A | G | Homozygous   |
| NC_037645.1 | 4294456 | SNV | 1 | C | T | Heterozygous |
| NC_037645.1 | 4294696 | SNV | 1 | A | C | Heterozygous |
| NC_037645.1 | 4294700 | SNV | 1 | G | A | Heterozygous |
| NC_037645.1 | 4294703 | SNV | 1 | G | A | Heterozygous |
| NC_037645.1 | 4294746 | SNV | 1 | G | A | Homozygous   |
| NC_037645.1 | 4294843 | SNV | 1 | A | G | Heterozygous |
| NC_037645.1 | 4294849 | SNV | 1 | G | A | Heterozygous |
| NC_037645.1 | 4294863 | SNV | 1 | A | G | Homozygous   |
| NC_037645.1 | 4294998 | SNV | 1 | T | C | Heterozygous |
| NC_037645.1 | 4298897 | SNV | 1 | G | T | Heterozygous |
| NC_037645.1 | 4298953 | SNV | 1 | T | C | Homozygous   |
| NC_037645.1 | 4298968 | SNV | 1 | G | A | Heterozygous |
| NC_037645.1 | 4303340 | SNV | 1 | T | A | Heterozygous |
| NC_037645.1 | 4303350 | SNV | 1 | T | C | Homozygous   |
| NC_037645.1 | 4309654 | SNV | 1 | A | G | Homozygous   |
| NC_037645.1 | 4309660 | SNV | 1 | C | T | Homozygous   |
| NC_037645.1 | 4309662 | SNV | 1 | T | C | Homozygous   |
| NC_037645.1 | 4309664 | SNV | 1 | G | A | Homozygous   |
| NC_037645.1 | 4309668 | SNV | 1 | G | C | Homozygous   |
| NC_037645.1 | 4309670 | SNV | 1 | G | C | Homozygous   |
| NC_037645.1 | 4309692 | SNV | 1 | G | T | Homozygous   |
| NC_037645.1 | 4309699 | SNV | 1 | T | C | Homozygous   |
| NC_037645.1 | 4310115 | SNV | 1 | A | G | Homozygous   |
| NC_037645.1 | 4310220 | SNV | 1 | T | C | Homozygous   |
| NC_037645.1 | 4312890 | SNV | 1 | T | C | Homozygous   |
| NC_037645.1 | 4312962 | SNV | 1 | G | A | Heterozygous |
| NC_037645.1 | 4313069 | SNV | 1 | T | C | Heterozygous |
| NC_037645.1 | 4313113 | SNV | 1 | C | T | Heterozygous |
| NC_037645.1 | 4313162 | SNV | 1 | A | T | Homozygous   |
| NC_037645.1 | 4313168 | SNV | 1 | G | T | Heterozygous |
| NC_037645.1 | 4313288 | SNV | 1 | C | T | Heterozygous |
| NC_037645.1 | 4315964 | SNV | 1 | A | G | Heterozygous |
| NC_037645.1 | 4320219 | SNV | 1 | T | A | Heterozygous |
| NC_037645.1 | 4320413 | SNV | 1 | T | C | Homozygous   |
| NC_037645.1 | 4320795 | SNV | 1 | G | A | Heterozygous |
| NC_037645.1 | 4320813 | SNV | 1 | C | G | Homozygous   |
| NC_037645.1 | 4320824 | SNV | 1 | G | A | Heterozygous |
| NC_037645.1 | 4320947 | SNV | 1 | A | C | Homozygous   |
| NC_037645.1 | 4321054 | SNV | 1 | A | G | Homozygous   |
| NC_037645.1 | 4321094 | SNV | 1 | C | T | Heterozygous |
| NC_037645.1 | 4321101 | SNV | 1 | T | C | Heterozygous |
| NC_037645.1 | 4321129 | SNV | 1 | T | C | Heterozygous |
| NC_037645.1 | 4321241 | SNV | 1 | A | G | Homozygous   |
| NC_037645.1 | 4321501 | SNV | 1 | C | T | Heterozygous |
| NC_037645.1 | 4321598 | SNV | 1 | G | A | Heterozygous |
| NC_037645.1 | 4321620 | SNV | 1 | T | C | Homozygous   |
| NC_037645.1 | 4321622 | SNV | 1 | C | T | Heterozygous |



|             |         |     |   |   |   |              |
|-------------|---------|-----|---|---|---|--------------|
| NC_037645.1 | 4321627 | SNV | 1 | C | A | Homozygous   |
| NC_037645.1 | 4321632 | SNV | 1 | C | T | Heterozygous |
| NC_037645.1 | 4321660 | SNV | 1 | G | A | Homozygous   |
| NC_037645.1 | 4321695 | SNV | 1 | C | T | Heterozygous |
| NC_037645.1 | 4321773 | SNV | 1 | G | A | Homozygous   |
| NC_037645.1 | 4321838 | SNV | 1 | T | C | Homozygous   |
| NC_037645.1 | 4321908 | SNV | 1 | C | T | Homozygous   |
| NC_037645.1 | 4321912 | SNV | 1 | T | C | Homozygous   |
| NC_037645.1 | 4321920 | SNV | 1 | T | C | Homozygous   |
| NC_037645.1 | 4322364 | SNV | 1 | C | T | Heterozygous |
| NC_037645.1 | 4323196 | SNV | 1 | A | G | Heterozygous |
| NC_037645.1 | 4323198 | SNV | 1 | G | A | Heterozygous |
| NC_037645.1 | 4323225 | SNV | 1 | C | T | Heterozygous |
| NC_037645.1 | 4323266 | SNV | 1 | A | G | Homozygous   |
| NC_037645.1 | 4324667 | SNV | 1 | G | T | Homozygous   |
| NC_037645.1 | 4324674 | SNV | 1 | T | C | Homozygous   |
| NC_037645.1 | 4324703 | SNV | 1 | T | G | Homozygous   |
| NC_037645.1 | 4327360 | SNV | 1 | T | C | Homozygous   |
| NC_037645.1 | 4327415 | SNV | 1 | A | G | Heterozygous |
| NC_037645.1 | 4327517 | SNV | 1 | G | A | Heterozygous |
| NC_037645.1 | 4331907 | SNV | 1 | A | T | Heterozygous |
| NC_037645.1 | 4331945 | SNV | 1 | G | A | Homozygous   |
| NC_037645.1 | 4331965 | SNV | 1 | C | T | Heterozygous |
| NC_037645.1 | 4331999 | SNV | 1 | T | C | Heterozygous |
| NC_037645.1 | 4332018 | SNV | 1 | A | G | Homozygous   |
| NC_037645.1 | 4332063 | SNV | 1 | C | T | Homozygous   |
| NC_037645.1 | 4332117 | SNV | 1 | G | A | Homozygous   |
| NC_037645.1 | 4332213 | SNV | 1 | A | G | Heterozygous |
| NC_037645.1 | 4332356 | SNV | 1 | T | A | Heterozygous |
| NC_037645.1 | 4332487 | SNV | 1 | G | C | Heterozygous |
| NC_037645.1 | 4332501 | SNV | 1 | T | C | Homozygous   |
| NC_037645.1 | 4332517 | SNV | 1 | T | C | Homozygous   |
| NC_037645.1 | 4332528 | SNV | 1 | A | T | Heterozygous |
| NC_037645.1 | 4332749 | SNV | 1 | A | G | Homozygous   |
| NC_037645.1 | 4332785 | SNV | 1 | A | G | Homozygous   |
| NC_037645.1 | 4346275 | SNV | 1 | C | A | Heterozygous |
| NC_037645.1 | 4346291 | SNV | 1 | G | A | Heterozygous |
| NC_037645.1 | 4351853 | SNV | 1 | G | A | Homozygous   |
| NC_037645.1 | 4351872 | SNV | 1 | G | A | Heterozygous |
| NC_037645.1 | 4351888 | SNV | 1 | A | G | Heterozygous |
| NC_037645.1 | 4352229 | SNV | 1 | G | A | Heterozygous |
| NC_037645.1 | 4361523 | SNV | 1 | G | A | Heterozygous |
| NC_037645.1 | 4362737 | SNV | 1 | A | T | Heterozygous |
| NC_037645.1 | 4362779 | SNV | 1 | C | G | Heterozygous |
| NC_037645.1 | 4362982 | SNV | 1 | C | T | Homozygous   |
| NC_037645.1 | 4367745 | SNV | 1 | G | A | Homozygous   |
| NC_037645.1 | 4367801 | SNV | 1 | T | C | Homozygous   |
| NC_037645.1 | 4367819 | SNV | 1 | A | C | Homozygous   |
| NC_037645.1 | 4368324 | SNV | 1 | A | G | Homozygous   |
| NC_037645.1 | 4368735 | SNV | 1 | G | A | Heterozygous |
| NC_037645.1 | 4368943 | SNV | 1 | A | G | Homozygous   |

|             |         |     |   |   |   |              |
|-------------|---------|-----|---|---|---|--------------|
| NC_037645.1 | 4368963 | SNV | 1 | G | T | Homozygous   |
| NC_037645.1 | 4369014 | SNV | 1 | A | G | Homozygous   |
| NC_037645.1 | 4369039 | SNV | 1 | A | G | Homozygous   |
| NC_037645.1 | 4369073 | SNV | 1 | G | A | Heterozygous |
| NC_037645.1 | 4483408 | SNV | 1 | T | C | Homozygous   |
| NC_037645.1 | 4483512 | SNV | 1 | G | A | Heterozygous |
| NC_037645.1 | 4483710 | SNV | 1 | A | G | Homozygous   |
| NC_037645.1 | 4517348 | SNV | 1 | A | G | Heterozygous |
| NC_037645.1 | 4517374 | SNV | 1 | A | G | Homozygous   |
| NC_037645.1 | 4518237 | SNV | 1 | C | T | Heterozygous |
| NC_037645.1 | 4519341 | SNV | 1 | T | A | Homozygous   |
| NC_037645.1 | 4519351 | SNV | 1 | A | G | Heterozygous |
| NC_037645.1 | 4519381 | SNV | 1 | C | T | Heterozygous |
| NC_037645.1 | 4519441 | SNV | 1 | C | T | Heterozygous |
| NC_037645.1 | 4519466 | SNV | 1 | G | C | Homozygous   |
| NC_037645.1 | 4519574 | SNV | 1 | A | G | Homozygous   |
| NC_037645.1 | 4519610 | SNV | 1 | C | T | Homozygous   |
| NC_037645.1 | 4519614 | SNV | 1 | A | G | Homozygous   |
| NC_037645.1 | 4519637 | SNV | 1 | C | T | Homozygous   |
| NC_037645.1 | 4519707 | SNV | 1 | A | G | Heterozygous |
| NC_037645.1 | 4519725 | SNV | 1 | C | T | Heterozygous |
| NC_037645.1 | 4520456 | SNV | 1 | C | T | Homozygous   |
| NC_037645.1 | 4520469 | SNV | 1 | G | A | Homozygous   |
| NC_037645.1 | 4520492 | SNV | 1 | T | C | Homozygous   |
| NC_037645.1 | 4521142 | SNV | 1 | A | G | Homozygous   |
| NC_037645.1 | 4521191 | SNV | 1 | A | C | Homozygous   |
| NC_037645.1 | 4522814 | SNV | 1 | A | T | Homozygous   |
| NC_037645.1 | 4522821 | SNV | 1 | C | G | Homozygous   |
| NC_037645.1 | 4522830 | SNV | 1 | C | T | Homozygous   |
| NC_037645.1 | 4522835 | SNV | 1 | A | C | Homozygous   |
| NC_037645.1 | 4529748 | SNV | 1 | A | G | Homozygous   |
| NC_037645.1 | 4532218 | SNV | 1 | C | T | Heterozygous |
| NC_037645.1 | 4532368 | SNV | 1 | A | T | Homozygous   |
| NC_037645.1 | 4532716 | SNV | 1 | T | C | Homozygous   |
| NC_037645.1 | 4533208 | SNV | 1 | C | G | Homozygous   |
| NC_037645.1 | 4533590 | SNV | 1 | C | T | Heterozygous |
| NC_037645.1 | 4533824 | SNV | 1 | T | A | Homozygous   |
| NC_037645.1 | 4533827 | SNV | 1 | T | A | Homozygous   |
| NC_037645.1 | 4533831 | SNV | 1 | G | C | Homozygous   |
| NC_037645.1 | 4533909 | SNV | 1 | G | A | Heterozygous |
| NC_037645.1 | 4533924 | SNV | 1 | G | A | Homozygous   |
| NC_037645.1 | 4534140 | SNV | 1 | T | C | Heterozygous |
| NC_037645.1 | 4534383 | SNV | 1 | G | A | Homozygous   |
| NC_037645.1 | 4534473 | SNV | 1 | T | C | Homozygous   |
| NC_037645.1 | 4534515 | SNV | 1 | G | A | Heterozygous |
| NC_037645.1 | 4536087 | SNV | 1 | G | A | Homozygous   |
| NC_037645.1 | 4536364 | SNV | 1 | G | T | Homozygous   |
| NC_037645.1 | 4536742 | SNV | 1 | C | T | Heterozygous |
| NC_037645.1 | 4537284 | SNV | 1 | G | C | Homozygous   |
| NC_037645.1 | 4537346 | SNV | 1 | A | G | Homozygous   |
| NC_037645.1 | 4537390 | SNV | 1 | T | C | Homozygous   |

|             |         |     |   |   |   |              |
|-------------|---------|-----|---|---|---|--------------|
| NC_037645.1 | 4537423 | SNV | 1 | A | G | Homozygous   |
| NC_037645.1 | 4537520 | SNV | 1 | C | T | Heterozygous |
| NC_037645.1 | 4537536 | SNV | 1 | A | G | Heterozygous |
| NC_037645.1 | 4537592 | SNV | 1 | G | A | Heterozygous |
| NC_037645.1 | 4562365 | SNV | 1 | C | T | Homozygous   |
| NC_037645.1 | 4575198 | SNV | 1 | C | G | Homozygous   |
| NC_037645.1 | 4575417 | SNV | 1 | A | G | Homozygous   |
| NC_037645.1 | 4575488 | SNV | 1 | A | G | Homozygous   |
| NC_037645.1 | 4583534 | SNV | 1 | C | T | Homozygous   |
| NC_037645.1 | 4590169 | SNV | 1 | T | C | Homozygous   |
| NC_037645.1 | 4590177 | SNV | 1 | A | T | Homozygous   |
| NC_037645.1 | 4590179 | SNV | 1 | A | G | Homozygous   |
| NC_037645.1 | 4590199 | SNV | 1 | G | T | Homozygous   |
| NC_037645.1 | 4591977 | SNV | 1 | G | A | Homozygous   |
| NC_037645.1 | 4594031 | SNV | 1 | T | C | Homozygous   |
| NC_037645.1 | 4607176 | SNV | 1 | T | C | Heterozygous |
| NC_037645.1 | 4607183 | SNV | 1 | A | G | Heterozygous |
| NC_037645.1 | 4607193 | SNV | 1 | T | C | Heterozygous |
| NC_037645.1 | 4614120 | SNV | 1 | T | C | Heterozygous |
| NC_037645.1 | 4614145 | SNV | 1 | G | A | Heterozygous |
| NC_037645.1 | 4614202 | SNV | 1 | C | T | Heterozygous |
| NC_037645.1 | 4614351 | SNV | 1 | G | C | Heterozygous |
| NC_037645.1 | 4624074 | SNV | 1 | A | G | Heterozygous |
| NC_037645.1 | 4624090 | SNV | 1 | A | G | Homozygous   |
| NC_037645.1 | 4624095 | SNV | 1 | A | G | Homozygous   |
| NC_037645.1 | 4624100 | SNV | 1 | A | G | Heterozygous |
| NC_037645.1 | 4624290 | SNV | 1 | A | T | Homozygous   |
| NC_037645.1 | 4624339 | SNV | 1 | G | A | Homozygous   |
| NC_037645.1 | 4637433 | SNV | 1 | T | A | Heterozygous |
| NC_037645.1 | 4637551 | SNV | 1 | A | G | Homozygous   |
| NC_037645.1 | 4637580 | SNV | 1 | G | A | Heterozygous |
| NC_037645.1 | 4637599 | SNV | 1 | T | C | Homozygous   |
| NC_037645.1 | 4651915 | SNV | 1 | G | A | Heterozygous |
| NC_037645.1 | 4651922 | SNV | 1 | A | G | Heterozygous |
| NC_037645.1 | 4656385 | SNV | 1 | C | T | Homozygous   |
| NC_037645.1 | 4656388 | SNV | 1 | T | A | Heterozygous |
| NC_037645.1 | 4656390 | SNV | 1 | C | G | Homozygous   |
| NC_037645.1 | 4656395 | SNV | 1 | C | T | Homozygous   |
| NC_037645.1 | 4656423 | SNV | 1 | C | T | Homozygous   |
| NC_037645.1 | 4656500 | SNV | 1 | C | T | Heterozygous |
| NC_037645.1 | 4656544 | SNV | 1 | T | C | Heterozygous |
| NC_037645.1 | 4657088 | SNV | 1 | T | G | Homozygous   |
| NC_037645.1 | 4657100 | SNV | 1 | G | A | Heterozygous |
| NC_037645.1 | 4657104 | SNV | 1 | T | A | Heterozygous |
| NC_037645.1 | 4677206 | SNV | 1 | G | A | Heterozygous |
| NC_037645.1 | 4677537 | SNV | 1 | T | C | Heterozygous |
| NC_037645.1 | 4677539 | SNV | 1 | C | T | Homozygous   |
| NC_037645.1 | 4677618 | SNV | 1 | A | G | Homozygous   |
| NC_037645.1 | 4677685 | SNV | 1 | A | G | Heterozygous |
| NC_037645.1 | 4684219 | SNV | 1 | A | T | Homozygous   |
| NC_037645.1 | 4684222 | SNV | 1 | A | T | Homozygous   |

|             |         |     |   |   |   |              |
|-------------|---------|-----|---|---|---|--------------|
| NC_037645.1 | 4699390 | SNV | 1 | G | C | Homozygous   |
| NC_037645.1 | 4699412 | SNV | 1 | G | A | Homozygous   |
| NC_037645.1 | 4699455 | SNV | 1 | A | G | Homozygous   |
| NC_037645.1 | 4700000 | SNV | 1 | C | G | Homozygous   |
| NC_037645.1 | 4702022 | SNV | 1 | A | G | Homozygous   |
| NC_037645.1 | 4702070 | SNV | 1 | T | C | Heterozygous |
| NC_037645.1 | 4702408 | SNV | 1 | T | C | Homozygous   |
| NC_037645.1 | 4702503 | SNV | 1 | A | G | Heterozygous |
| NC_037645.1 | 4702778 | SNV | 1 | C | T | Heterozygous |
| NC_037645.1 | 4712125 | SNV | 1 | G | A | Homozygous   |
| NC_037645.1 | 4712422 | SNV | 1 | A | G | Heterozygous |
| NC_037645.1 | 4713447 | SNV | 1 | T | C | Heterozygous |
| NC_037645.1 | 4713462 | SNV | 1 | A | G | Homozygous   |
| NC_037645.1 | 4713483 | SNV | 1 | G | A | Homozygous   |
| NC_037645.1 | 4713486 | SNV | 1 | A | G | Homozygous   |
| NC_037645.1 | 4713492 | SNV | 1 | G | A | Homozygous   |
| NC_037645.1 | 4713501 | SNV | 1 | A | G | Homozygous   |
| NC_037645.1 | 4714801 | SNV | 1 | G | A | Homozygous   |
| NC_037645.1 | 4714822 | SNV | 1 | A | G | Homozygous   |
| NC_037645.1 | 4714867 | SNV | 1 | G | A | Homozygous   |
| NC_037645.1 | 4718005 | SNV | 1 | G | A | Homozygous   |
| NC_037645.1 | 4718023 | SNV | 1 | A | G | Homozygous   |
| NC_037645.1 | 4732271 | SNV | 1 | A | G | Heterozygous |
| NC_037645.1 | 4736134 | SNV | 1 | C | T | Homozygous   |
| NC_037645.1 | 4736140 | SNV | 1 | C | T | Homozygous   |
| NC_037645.1 | 4736149 | SNV | 1 | T | C | Homozygous   |
| NC_037645.1 | 4736174 | SNV | 1 | C | T | Homozygous   |
| NC_037645.1 | 4755501 | SNV | 1 | T | G | Heterozygous |
| NC_037645.1 | 4759410 | SNV | 1 | C | T | Homozygous   |
| NC_037645.1 | 4759548 | SNV | 1 | T | C | Homozygous   |
| NC_037645.1 | 4763489 | SNV | 1 | A | T | Heterozygous |
| NC_037645.1 | 4763495 | SNV | 1 | A | G | Heterozygous |
| NC_037645.1 | 4763590 | SNV | 1 | G | A | Homozygous   |
| NC_037645.1 | 4763603 | SNV | 1 | G | A | Heterozygous |
| NC_037645.1 | 4763628 | SNV | 1 | T | G | Homozygous   |
| NC_037645.1 | 4763825 | SNV | 1 | A | G | Heterozygous |
| NC_037645.1 | 4763827 | SNV | 1 | C | A | Homozygous   |
| NC_037645.1 | 4764190 | SNV | 1 | C | G | Heterozygous |
| NC_037645.1 | 4764234 | SNV | 1 | T | A | Heterozygous |
| NC_037645.1 | 4764285 | SNV | 1 | C | T | Homozygous   |
| NC_037645.1 | 4764376 | SNV | 1 | G | C | Heterozygous |
| NC_037645.1 | 4764379 | SNV | 1 | C | T | Heterozygous |
| NC_037645.1 | 4764574 | SNV | 1 | A | G | Homozygous   |
| NC_037645.1 | 4769493 | SNV | 1 | A | T | Homozygous   |
| NC_037645.1 | 4769498 | SNV | 1 | A | G | Homozygous   |
| NC_037645.1 | 4769535 | SNV | 1 | C | A | Homozygous   |
| NC_037645.1 | 4769537 | SNV | 1 | T | C | Homozygous   |
| NC_037645.1 | 4781836 | SNV | 1 | G | A | Homozygous   |
| NC_037645.1 | 4781853 | SNV | 1 | C | G | Homozygous   |
| NC_037645.1 | 4781859 | SNV | 1 | T | C | Homozygous   |
| NC_037645.1 | 4781935 | SNV | 1 | A | G | Heterozygous |

|             |         |     |   |   |   |              |
|-------------|---------|-----|---|---|---|--------------|
| NC_037645.1 | 4781980 | SNV | 1 | T | C | Heterozygous |
| NC_037645.1 | 4782030 | SNV | 1 | C | A | Heterozygous |
| NC_037645.1 | 4782099 | SNV | 1 | T | C | Homozygous   |
| NC_037645.1 | 4782163 | SNV | 1 | A | G | Homozygous   |
| NC_037645.1 | 4782248 | SNV | 1 | C | T | Homozygous   |
| NC_037645.1 | 4782371 | SNV | 1 | C | T | Heterozygous |
| NC_037645.1 | 4782595 | SNV | 1 | A | G | Heterozygous |
| NC_037645.1 | 4782601 | SNV | 1 | A | G | Homozygous   |
| NC_037645.1 | 4782747 | SNV | 1 | A | G | Heterozygous |
| NC_037645.1 | 4782777 | SNV | 1 | C | G | Heterozygous |
| NC_037645.1 | 4784017 | SNV | 1 | A | T | Heterozygous |
| NC_037645.1 | 4792673 | SNV | 1 | T | A | Heterozygous |
| NC_037645.1 | 4801242 | SNV | 1 | T | C | Homozygous   |
| NC_037645.1 | 4801280 | SNV | 1 | G | A | Heterozygous |
| NC_037645.1 | 4801380 | SNV | 1 | C | T | Heterozygous |
| NC_037645.1 | 4801625 | SNV | 1 | T | G | Homozygous   |
| NC_037645.1 | 4805450 | SNV | 1 | G | A | Homozygous   |
| NC_037645.1 | 4805456 | SNV | 1 | A | G | Homozygous   |
| NC_037645.1 | 4805481 | SNV | 1 | C | T | Homozygous   |
| NC_037645.1 | 4808517 | SNV | 1 | T | A | Homozygous   |
| NC_037645.1 | 4808520 | SNV | 1 | C | A | Homozygous   |
| NC_037645.1 | 4814698 | SNV | 1 | T | C | Homozygous   |
| NC_037645.1 | 4814719 | SNV | 1 | G | A | Homozygous   |
| NC_037645.1 | 4820710 | SNV | 1 | C | T | Heterozygous |
| NC_037645.1 | 4852051 | SNV | 1 | A | G | Homozygous   |
| NC_037645.1 | 4852062 | SNV | 1 | A | G | Homozygous   |
| NC_037645.1 | 4852172 | SNV | 1 | G | C | Homozygous   |
| NC_037645.1 | 4852282 | SNV | 1 | A | G | Homozygous   |
| NC_037645.1 | 4865231 | SNV | 1 | T | A | Homozygous   |
| NC_037645.1 | 4865235 | SNV | 1 | C | A | Homozygous   |
| NC_037645.1 | 4865245 | SNV | 1 | C | T | Homozygous   |
| NC_037645.1 | 4865564 | SNV | 1 | G | A | Homozygous   |
| NC_037645.1 | 4865633 | SNV | 1 | G | A | Homozygous   |
| NC_037645.1 | 4865764 | SNV | 1 | T | C | Heterozygous |
| NC_037645.1 | 4866983 | SNV | 1 | T | C | Homozygous   |
| NC_037645.1 | 4867010 | SNV | 1 | C | T | Heterozygous |
| NC_037645.1 | 4867030 | SNV | 1 | C | G | Heterozygous |
| NC_037645.1 | 4870875 | SNV | 1 | T | C | Homozygous   |
| NC_037645.1 | 4876508 | SNV | 1 | A | G | Homozygous   |
| NC_037645.1 | 4876538 | SNV | 1 | G | A | Homozygous   |
| NC_037645.1 | 4888934 | SNV | 1 | T | C | Homozygous   |
| NC_037645.1 | 4888946 | SNV | 1 | T | A | Heterozygous |
| NC_037645.1 | 4890507 | SNV | 1 | T | C | Homozygous   |
| NC_037645.1 | 4890543 | SNV | 1 | C | T | Homozygous   |
| NC_037645.1 | 4890810 | SNV | 1 | G | A | Homozygous   |
| NC_037645.1 | 4916846 | SNV | 1 | C | T | Homozygous   |
| NC_037645.1 | 4917014 | SNV | 1 | T | C | Heterozygous |
| NC_037645.1 | 4917090 | SNV | 1 | T | C | Homozygous   |
| NC_037645.1 | 4917130 | SNV | 1 | T | C | Homozygous   |
| NC_037645.1 | 4917174 | SNV | 1 | A | G | Homozygous   |
| NC_037645.1 | 4917176 | SNV | 1 | G | A | Homozygous   |

|             |         |     |   |   |   |              |
|-------------|---------|-----|---|---|---|--------------|
| NC_037645.1 | 4917518 | SNV | 1 | A | G | Homozygous   |
| NC_037645.1 | 4919099 | SNV | 1 | C | G | Heterozygous |
| NC_037645.1 | 4919197 | SNV | 1 | A | G | Homozygous   |
| NC_037645.1 | 4919234 | SNV | 1 | A | T | Homozygous   |
| NC_037645.1 | 4919293 | SNV | 1 | A | C | Homozygous   |
| NC_037645.1 | 4919309 | SNV | 1 | G | A | Homozygous   |
| NC_037645.1 | 4919324 | SNV | 1 | A | T | Homozygous   |
| NC_037645.1 | 4919330 | SNV | 1 | A | T | Heterozygous |
| NC_037645.1 | 4919342 | SNV | 1 | T | A | Homozygous   |
| NC_037645.1 | 4919348 | SNV | 1 | A | G | Heterozygous |
| NC_037645.1 | 4927486 | SNV | 1 | G | A | Homozygous   |
| NC_037645.1 | 4941267 | SNV | 1 | A | G | Heterozygous |
| NC_037645.1 | 4941279 | SNV | 1 | T | G | Heterozygous |
| NC_037645.1 | 4941300 | SNV | 1 | C | G | Heterozygous |
| NC_037645.1 | 4941302 | SNV | 1 | T | C | Heterozygous |
| NC_037645.1 | 4947998 | SNV | 1 | A | G | Heterozygous |
| NC_037645.1 | 4948174 | SNV | 1 | C | T | Heterozygous |
| NC_037645.1 | 4948200 | SNV | 1 | C | G | Homozygous   |
| NC_037645.1 | 4948229 | SNV | 1 | G | A | Homozygous   |
| NC_037645.1 | 4948254 | SNV | 1 | T | C | Homozygous   |
| NC_037645.1 | 4948265 | SNV | 1 | T | C | Homozygous   |
| NC_037645.1 | 4949447 | SNV | 1 | T | A | Homozygous   |
| NC_037645.1 | 4949449 | SNV | 1 | C | T | Homozygous   |
| NC_037645.1 | 4949451 | SNV | 1 | C | T | Homozygous   |
| NC_037645.1 | 4949457 | SNV | 1 | C | T | Homozygous   |
| NC_037645.1 | 4949462 | SNV | 1 | C | G | Homozygous   |
| NC_037645.1 | 4949468 | SNV | 1 | G | T | Homozygous   |
| NC_037645.1 | 4961129 | SNV | 1 | G | A | Heterozygous |
| NC_037645.1 | 4961134 | SNV | 1 | G | A | Homozygous   |
| NC_037645.1 | 4961213 | SNV | 1 | C | T | Heterozygous |
| NC_037645.1 | 4961348 | SNV | 1 | A | T | Heterozygous |
| NC_037645.1 | 4961358 | SNV | 1 | T | A | Homozygous   |
| NC_037645.1 | 4961545 | SNV | 1 | A | G | Homozygous   |
| NC_037645.1 | 4961568 | SNV | 1 | T | C | Homozygous   |
| NC_037645.1 | 4961784 | SNV | 1 | C | T | Homozygous   |
| NC_037645.1 | 4961878 | SNV | 1 | A | G | Homozygous   |
| NC_037645.1 | 4961903 | SNV | 1 | A | G | Heterozygous |
| NC_037645.1 | 4962115 | SNV | 1 | G | A | Heterozygous |
| NC_037645.1 | 4962127 | SNV | 1 | G | A | Heterozygous |
| NC_037645.1 | 4962327 | SNV | 1 | T | C | Homozygous   |
| NC_037645.1 | 4962384 | SNV | 1 | T | C | Homozygous   |
| NC_037645.1 | 4962472 | SNV | 1 | A | G | Homozygous   |
| NC_037645.1 | 4962498 | SNV | 1 | A | G | Homozygous   |
| NC_037645.1 | 4962602 | SNV | 1 | A | G | Homozygous   |
| NC_037645.1 | 4962619 | SNV | 1 | A | G | Homozygous   |
| NC_037645.1 | 4962634 | SNV | 1 | A | G | Heterozygous |
| NC_037645.1 | 4962649 | SNV | 1 | A | G | Heterozygous |
| NC_037645.1 | 4962823 | SNV | 1 | T | C | Homozygous   |
| NC_037645.1 | 4962857 | SNV | 1 | G | A | Heterozygous |
| NC_037645.1 | 4974013 | SNV | 1 | G | A | Heterozygous |
| NC_037645.1 | 4974018 | SNV | 1 | G | A | Homozygous   |

|             |         |     |   |   |   |              |
|-------------|---------|-----|---|---|---|--------------|
| NC_037645.1 | 4974025 | SNV | 1 | A | G | Heterozygous |
| NC_037645.1 | 4995100 | SNV | 1 | A | C | Heterozygous |
| NC_037645.1 | 4995104 | SNV | 1 | T | C | Heterozygous |
| NC_037645.1 | 4995106 | SNV | 1 | A | G | Homozygous   |
| NC_037645.1 | 4995140 | SNV | 1 | T | C | Homozygous   |
| NC_037645.1 | 4995453 | SNV | 1 | G | A | Homozygous   |
| NC_037645.1 | 4995490 | SNV | 1 | G | A | Heterozygous |
| NC_037645.1 | 4995715 | SNV | 1 | G | A | Heterozygous |
| NC_037645.1 | 4995788 | SNV | 1 | C | T | Heterozygous |
| NC_037645.1 | 5001410 | SNV | 1 | A | G | Heterozygous |
| NC_037645.1 | 5001452 | SNV | 1 | G | A | Heterozygous |
| NC_037645.1 | 5001508 | SNV | 1 | G | A | Heterozygous |
| NC_037645.1 | 5001529 | SNV | 1 | G | A | Heterozygous |
| NC_037645.1 | 5008707 | SNV | 1 | A | G | Homozygous   |
| NC_037645.1 | 5014395 | SNV | 1 | C | A | Homozygous   |
| NC_037645.1 | 5014421 | SNV | 1 | C | G | Homozygous   |
| NC_037645.1 | 5014433 | SNV | 1 | T | G | Heterozygous |
| NC_037645.1 | 5017426 | SNV | 1 | G | A | Homozygous   |
| NC_037645.1 | 5017456 | SNV | 1 | A | C | Homozygous   |
| NC_037645.1 | 5029444 | SNV | 1 | T | C | Heterozygous |
| NC_037645.1 | 5045711 | SNV | 1 | A | G | Heterozygous |
| NC_037645.1 | 5047697 | SNV | 1 | A | G | Homozygous   |
| NC_037645.1 | 5047724 | SNV | 1 | C | T | Homozygous   |
| NC_037645.1 | 5047733 | SNV | 1 | G | A | Heterozygous |
| NC_037645.1 | 5047737 | SNV | 1 | G | C | Heterozygous |
| NC_037645.1 | 5047948 | SNV | 1 | G | A | Homozygous   |
| NC_037645.1 | 5055918 | SNV | 1 | A | G | Homozygous   |
| NC_037645.1 | 5061083 | SNV | 1 | G | A | Heterozygous |
| NC_037645.1 | 5061132 | SNV | 1 | C | T | Homozygous   |
| NC_037645.1 | 5064154 | SNV | 1 | A | G | Homozygous   |
| NC_037645.1 | 5064821 | SNV | 1 | T | C | Homozygous   |
| NC_037645.1 | 5067338 | SNV | 1 | T | C | Homozygous   |
| NC_037645.1 | 5067389 | SNV | 1 | C | T | Heterozygous |
| NC_037645.1 | 5068055 | SNV | 1 | T | C | Homozygous   |
| NC_037645.1 | 5068113 | SNV | 1 | A | G | Homozygous   |
| NC_037645.1 | 5068150 | SNV | 1 | A | T | Homozygous   |
| NC_037645.1 | 5068419 | SNV | 1 | T | C | Homozygous   |
| NC_037645.1 | 5068524 | SNV | 1 | C | T | Heterozygous |
| NC_037645.1 | 5068678 | SNV | 1 | A | G | Homozygous   |
| NC_037645.1 | 5068690 | SNV | 1 | C | T | Homozygous   |
| NC_037645.1 | 5068799 | SNV | 1 | T | C | Heterozygous |
| NC_037645.1 | 5068996 | SNV | 1 | T | C | Homozygous   |
| NC_037645.1 | 5069006 | SNV | 1 | G | A | Heterozygous |
| NC_037645.1 | 5070319 | SNV | 1 | G | A | Heterozygous |
| NC_037645.1 | 5071581 | SNV | 1 | G | A | Heterozygous |
| NC_037645.1 | 5071824 | SNV | 1 | A | G | Homozygous   |
| NC_037645.1 | 5071857 | SNV | 1 | A | G | Homozygous   |
| NC_037645.1 | 5072956 | SNV | 1 | A | G | Heterozygous |
| NC_037645.1 | 5073022 | SNV | 1 | T | C | Homozygous   |
| NC_037645.1 | 5073079 | SNV | 1 | A | G | Homozygous   |
| NC_037645.1 | 5073081 | SNV | 1 | T | C | Heterozygous |

|             |         |     |   |   |   |              |
|-------------|---------|-----|---|---|---|--------------|
| NC_037645.1 | 5073156 | SNV | 1 | A | G | Homozygous   |
| NC_037645.1 | 5075561 | SNV | 1 | T | C | Homozygous   |
| NC_037645.1 | 5075720 | SNV | 1 | T | C | Heterozygous |
| NC_037645.1 | 5075755 | SNV | 1 | A | G | Homozygous   |
| NC_037645.1 | 5077074 | SNV | 1 | G | A | Homozygous   |
| NC_037645.1 | 5077949 | SNV | 1 | G | A | Heterozygous |
| NC_037645.1 | 5079498 | SNV | 1 | T | C | Homozygous   |
| NC_037645.1 | 5079906 | SNV | 1 | C | T | Heterozygous |
| NC_037645.1 | 5080071 | SNV | 1 | G | A | Homozygous   |
| NC_037645.1 | 5082669 | SNV | 1 | T | G | Homozygous   |
| NC_037645.1 | 5082857 | SNV | 1 | G | A | Heterozygous |
| NC_037645.1 | 5086830 | SNV | 1 | C | T | Heterozygous |
| NC_037645.1 | 5087426 | SNV | 1 | T | G | Heterozygous |
| NC_037645.1 | 5087429 | SNV | 1 | T | A | Heterozygous |
| NC_037645.1 | 5087433 | SNV | 1 | A | T | Heterozygous |
| NC_037645.1 | 5087435 | SNV | 1 | A | C | Heterozygous |
| NC_037645.1 | 5087439 | SNV | 1 | G | T | Heterozygous |
| NC_037645.1 | 5087793 | SNV | 1 | C | G | Heterozygous |
| NC_037645.1 | 5087959 | SNV | 1 | A | G | Heterozygous |
| NC_037645.1 | 5088551 | SNV | 1 | T | C | Heterozygous |
| NC_037645.1 | 5093126 | SNV | 1 | C | T | Homozygous   |
| NC_037645.1 | 5093288 | SNV | 1 | T | C | Homozygous   |
| NC_037645.1 | 5093669 | SNV | 1 | G | A | Heterozygous |
| NC_037645.1 | 5093675 | SNV | 1 | A | G | Homozygous   |
| NC_037645.1 | 5093744 | SNV | 1 | A | G | Homozygous   |
| NC_037645.1 | 5093861 | SNV | 1 | G | A | Heterozygous |
| NC_037645.1 | 5094143 | SNV | 1 | G | A | Heterozygous |
| NC_037645.1 | 5095963 | SNV | 1 | A | G | Heterozygous |
| NC_037645.1 | 5098248 | SNV | 1 | C | G | Homozygous   |
| NC_037645.1 | 5100278 | SNV | 1 | A | G | Homozygous   |
| NC_037645.1 | 5100857 | SNV | 1 | T | A | Homozygous   |
| NC_037645.1 | 5100859 | SNV | 1 | T | C | Homozygous   |
| NC_037645.1 | 5100865 | SNV | 1 | C | T | Homozygous   |
| NC_037645.1 | 5100867 | SNV | 1 | C | T | Homozygous   |
| NC_037645.1 | 5100872 | SNV | 1 | T | C | Homozygous   |
| NC_037645.1 | 5104590 | SNV | 1 | T | G | Homozygous   |
| NC_037645.1 | 5104592 | SNV | 1 | T | C | Homozygous   |
| NC_037645.1 | 5104604 | SNV | 1 | A | G | Homozygous   |
| NC_037645.1 | 5104606 | SNV | 1 | A | T | Homozygous   |
| NC_037645.1 | 5104609 | SNV | 1 | G | C | Homozygous   |
| NC_037645.1 | 5104615 | SNV | 1 | A | T | Homozygous   |
| NC_037645.1 | 5106171 | SNV | 1 | G | A | Homozygous   |
| NC_037645.1 | 5106262 | SNV | 1 | T | A | Heterozygous |
| NC_037645.1 | 5107546 | SNV | 1 | T | C | Homozygous   |
| NC_037645.1 | 5107599 | SNV | 1 | A | G | Homozygous   |
| NC_037645.1 | 5107668 | SNV | 1 | A | G | Homozygous   |
| NC_037645.1 | 5107685 | SNV | 1 | C | T | Heterozygous |
| NC_037645.1 | 5107788 | SNV | 1 | G | A | Heterozygous |
| NC_037645.1 | 5107963 | SNV | 1 | G | A | Heterozygous |
| NC_037645.1 | 5108657 | SNV | 1 | T | G | Homozygous   |
| NC_037645.1 | 5108722 | SNV | 1 | T | C | Homozygous   |



|             |         |     |   |   |   |              |
|-------------|---------|-----|---|---|---|--------------|
| NC_037645.1 | 5108747 | SNV | 1 | G | A | Heterozygous |
| NC_037645.1 | 5108857 | SNV | 1 | C | T | Homozygous   |
| NC_037645.1 | 5108966 | SNV | 1 | T | A | Heterozygous |
| NC_037645.1 | 5109376 | SNV | 1 | G | A | Heterozygous |
| NC_037645.1 | 5109659 | SNV | 1 | C | A | Heterozygous |
| NC_037645.1 | 5109720 | SNV | 1 | C | T | Homozygous   |
| NC_037645.1 | 5109917 | SNV | 1 | C | T | Homozygous   |
| NC_037645.1 | 5109943 | SNV | 1 | T | C | Homozygous   |
| NC_037645.1 | 5109963 | SNV | 1 | T | C | Homozygous   |
| NC_037645.1 | 5110333 | SNV | 1 | A | G | Homozygous   |
| NC_037645.1 | 5110337 | SNV | 1 | G | A | Heterozygous |
| NC_037645.1 | 5110415 | SNV | 1 | A | G | Homozygous   |
| NC_037645.1 | 5110509 | SNV | 1 | C | T | Homozygous   |
| NC_037645.1 | 5110941 | SNV | 1 | A | G | Homozygous   |
| NC_037645.1 | 5111777 | SNV | 1 | A | T | Homozygous   |
| NC_037645.1 | 5118433 | SNV | 1 | G | T | Homozygous   |
| NC_037645.1 | 5118442 | SNV | 1 | G | A | Homozygous   |
| NC_037645.1 | 5118451 | SNV | 1 | A | T | Homozygous   |
| NC_037645.1 | 5118470 | SNV | 1 | G | T | Homozygous   |
| NC_037645.1 | 5123805 | SNV | 1 | A | C | Heterozygous |
| NC_037645.1 | 5124155 | SNV | 1 | T | G | Homozygous   |
| NC_037645.1 | 5124189 | SNV | 1 | T | C | Homozygous   |
| NC_037645.1 | 5124527 | SNV | 1 | T | C | Heterozygous |
| NC_037645.1 | 5124578 | SNV | 1 | C | A | Heterozygous |
| NC_037645.1 | 5124587 | SNV | 1 | T | C | Homozygous   |
| NC_037645.1 | 5124618 | SNV | 1 | C | T | Homozygous   |
| NC_037645.1 | 5124690 | SNV | 1 | A | G | Homozygous   |
| NC_037645.1 | 5124741 | SNV | 1 | T | C | Homozygous   |
| NC_037645.1 | 5124789 | SNV | 1 | T | C | Homozygous   |
| NC_037645.1 | 5127670 | SNV | 1 | T | A | Homozygous   |
| NC_037645.1 | 5127673 | SNV | 1 | A | G | Homozygous   |
| NC_037645.1 | 5127704 | SNV | 1 | A | G | Homozygous   |
| NC_037645.1 | 5137196 | SNV | 1 | G | A | Heterozygous |
| NC_037645.1 | 5138138 | SNV | 1 | T | C | Homozygous   |
| NC_037645.1 | 5138597 | SNV | 1 | A | G | Homozygous   |
| NC_037645.1 | 5143286 | SNV | 1 | T | C | Homozygous   |
| NC_037645.1 | 5143466 | SNV | 1 | T | G | Homozygous   |
| NC_037645.1 | 5146680 | SNV | 1 | A | G | Homozygous   |
| NC_037645.1 | 5146793 | SNV | 1 | A | C | Homozygous   |
| NC_037645.1 | 5149032 | SNV | 1 | A | G | Homozygous   |
| NC_037645.1 | 5149171 | SNV | 1 | A | T | Homozygous   |
| NC_037645.1 | 5150495 | SNV | 1 | C | G | Homozygous   |
| NC_037645.1 | 5150735 | SNV | 1 | T | A | Heterozygous |
| NC_037645.1 | 5150780 | SNV | 1 | G | A | Heterozygous |
| NC_037645.1 | 5150849 | SNV | 1 | C | T | Homozygous   |
| NC_037645.1 | 5150878 | SNV | 1 | A | G | Heterozygous |
| NC_037645.1 | 5150881 | SNV | 1 | A | T | Heterozygous |
| NC_037645.1 | 5150891 | SNV | 1 | T | C | Homozygous   |
| NC_037645.1 | 5152241 | SNV | 1 | A | G | Homozygous   |
| NC_037645.1 | 5152406 | SNV | 1 | C | T | Heterozygous |
| NC_037645.1 | 5152472 | SNV | 1 | T | C | Homozygous   |

|             |         |     |   |   |   |              |
|-------------|---------|-----|---|---|---|--------------|
| NC_037645.1 | 5152814 | SNV | 1 | T | C | Homozygous   |
| NC_037645.1 | 5153108 | SNV | 1 | C | T | Homozygous   |
| NC_037645.1 | 5153878 | SNV | 1 | T | C | Homozygous   |
| NC_037645.1 | 5154446 | SNV | 1 | G | A | Homozygous   |
| NC_037645.1 | 5154517 | SNV | 1 | C | T | Homozygous   |
| NC_037645.1 | 5154920 | SNV | 1 | A | G | Heterozygous |
| NC_037645.1 | 5155204 | SNV | 1 | G | A | Heterozygous |
| NC_037645.1 | 5155906 | SNV | 1 | G | A | Heterozygous |
| NC_037645.1 | 5155984 | SNV | 1 | G | C | Heterozygous |
| NC_037645.1 | 5156356 | SNV | 1 | A | G | Heterozygous |
| NC_037645.1 | 5156832 | SNV | 1 | T | C | Homozygous   |
| NC_037645.1 | 5156890 | SNV | 1 | C | T | Heterozygous |
| NC_037645.1 | 5157022 | SNV | 1 | G | A | Heterozygous |
| NC_037645.1 | 5157128 | SNV | 1 | T | C | Homozygous   |
| NC_037645.1 | 5157310 | SNV | 1 | G | A | Homozygous   |
| NC_037645.1 | 5157333 | SNV | 1 | G | C | Heterozygous |
| NC_037645.1 | 5157505 | SNV | 1 | C | A | Homozygous   |
| NC_037645.1 | 5157631 | SNV | 1 | G | A | Homozygous   |
| NC_037645.1 | 5158105 | SNV | 1 | C | G | Heterozygous |
| NC_037645.1 | 5158539 | SNV | 1 | G | A | Homozygous   |
| NC_037645.1 | 5158588 | SNV | 1 | A | G | Heterozygous |
| NC_037645.1 | 5158843 | SNV | 1 | A | G | Homozygous   |
| NC_037645.1 | 5158854 | SNV | 1 | A | G | Homozygous   |
| NC_037645.1 | 5159047 | SNV | 1 | C | T | Heterozygous |
| NC_037645.1 | 5159128 | SNV | 1 | C | G | Homozygous   |
| NC_037645.1 | 5159131 | SNV | 1 | C | A | Heterozygous |
| NC_037645.1 | 5159152 | SNV | 1 | T | A | Homozygous   |
| NC_037645.1 | 5159155 | SNV | 1 | C | T | Homozygous   |
| NC_037645.1 | 5159692 | SNV | 1 | G | T | Heterozygous |
| NC_037645.1 | 5159701 | SNV | 1 | T | A | Homozygous   |
| NC_037645.1 | 5159733 | SNV | 1 | G | A | Homozygous   |
| NC_037645.1 | 5159951 | SNV | 1 | C | T | Homozygous   |
| NC_037645.1 | 5159956 | SNV | 1 | C | G | Heterozygous |
| NC_037645.1 | 5160031 | SNV | 1 | T | G | Homozygous   |
| NC_037645.1 | 5161383 | SNV | 1 | T | C | Homozygous   |
| NC_037645.1 | 5165215 | SNV | 1 | T | A | Homozygous   |
| NC_037645.1 | 5165297 | SNV | 1 | C | T | Homozygous   |
| NC_037645.1 | 5173926 | SNV | 1 | A | G | Heterozygous |
| NC_037645.1 | 5173975 | SNV | 1 | T | A | Homozygous   |
| NC_037645.1 | 5175865 | SNV | 1 | G | A | Homozygous   |
| NC_037645.1 | 5175911 | SNV | 1 | T | C | Homozygous   |
| NC_037645.1 | 5175931 | SNV | 1 | G | A | Homozygous   |
| NC_037645.1 | 5175994 | SNV | 1 | T | A | Heterozygous |
| NC_037645.1 | 5181905 | SNV | 1 | T | C | Homozygous   |
| NC_037645.1 | 5181927 | SNV | 1 | A | C | Homozygous   |
| NC_037645.1 | 5181932 | SNV | 1 | C | G | Homozygous   |
| NC_037645.1 | 5181951 | SNV | 1 | C | T | Homozygous   |
| NC_037645.1 | 5215313 | SNV | 1 | C | T | Homozygous   |
| NC_037645.1 | 5215345 | SNV | 1 | A | T | Homozygous   |
| NC_037645.1 | 5215349 | SNV | 1 | A | T | Homozygous   |
| NC_037645.1 | 5215353 | SNV | 1 | C | T | Homozygous   |

|             |         |     |   |   |   |              |
|-------------|---------|-----|---|---|---|--------------|
| NC_037645.1 | 5216234 | SNV | 1 | T | A | Homozygous   |
| NC_037645.1 | 5216236 | SNV | 1 | C | G | Heterozygous |
| NC_037645.1 | 5216244 | SNV | 1 | T | A | Homozygous   |
| NC_037645.1 | 5232868 | SNV | 1 | C | T | Heterozygous |
| NC_037645.1 | 5232995 | SNV | 1 | A | C | Heterozygous |
| NC_037645.1 | 5233120 | SNV | 1 | A | G | Homozygous   |
| NC_037645.1 | 5233125 | SNV | 1 | A | G | Heterozygous |
| NC_037645.1 | 5233209 | SNV | 1 | A | G | Homozygous   |
| NC_037645.1 | 5238583 | SNV | 1 | A | G | Heterozygous |
| NC_037645.1 | 5242884 | SNV | 1 | G | A | Homozygous   |
| NC_037645.1 | 5242903 | SNV | 1 | T | C | Homozygous   |
| NC_037645.1 | 5243308 | SNV | 1 | A | G | Homozygous   |
| NC_037645.1 | 5243379 | SNV | 1 | T | C | Homozygous   |
| NC_037645.1 | 5243423 | SNV | 1 | A | G | Homozygous   |
| NC_037645.1 | 5243956 | SNV | 1 | A | G | Homozygous   |
| NC_037645.1 | 5244005 | SNV | 1 | A | G | Homozygous   |
| NC_037645.1 | 5244790 | SNV | 1 | G | T | Heterozygous |
| NC_037645.1 | 5244831 | SNV | 1 | G | A | Homozygous   |
| NC_037645.1 | 5244845 | SNV | 1 | G | T | Heterozygous |
| NC_037645.1 | 5244911 | SNV | 1 | C | T | Heterozygous |
| NC_037645.1 | 5244978 | SNV | 1 | G | A | Heterozygous |
| NC_037645.1 | 5245003 | SNV | 1 | T | C | Homozygous   |
| NC_037645.1 | 5245023 | SNV | 1 | A | G | Heterozygous |
| NC_037645.1 | 5245155 | SNV | 1 | T | C | Homozygous   |
| NC_037645.1 | 5245344 | SNV | 1 | C | T | Heterozygous |
| NC_037645.1 | 5245401 | SNV | 1 | C | T | Homozygous   |
| NC_037645.1 | 5245468 | SNV | 1 | C | G | Homozygous   |
| NC_037645.1 | 5245482 | SNV | 1 | G | A | Heterozygous |
| NC_037645.1 | 5245485 | SNV | 1 | C | T | Heterozygous |
| NC_037645.1 | 5245535 | SNV | 1 | T | G | Heterozygous |
| NC_037645.1 | 5245581 | SNV | 1 | A | G | Homozygous   |
| NC_037645.1 | 5246096 | SNV | 1 | T | C | Homozygous   |
| NC_037645.1 | 5246099 | SNV | 1 | A | G | Heterozygous |
| NC_037645.1 | 5246114 | SNV | 1 | T | C | Homozygous   |
| NC_037645.1 | 5246159 | SNV | 1 | A | G | Homozygous   |
| NC_037645.1 | 5246337 | SNV | 1 | G | A | Homozygous   |
| NC_037645.1 | 5246358 | SNV | 1 | A | T | Heterozygous |
| NC_037645.1 | 5246547 | SNV | 1 | T | C | Heterozygous |
| NC_037645.1 | 5246549 | SNV | 1 | C | T | Heterozygous |
| NC_037645.1 | 5246561 | SNV | 1 | C | T | Homozygous   |
| NC_037645.1 | 5247029 | SNV | 1 | T | C | Homozygous   |
| NC_037645.1 | 5247081 | SNV | 1 | C | G | Homozygous   |
| NC_037645.1 | 5247086 | SNV | 1 | G | T | Homozygous   |
| NC_037645.1 | 5247117 | SNV | 1 | C | G | Homozygous   |
| NC_037645.1 | 5247120 | SNV | 1 | C | T | Heterozygous |
| NC_037645.1 | 5247391 | SNV | 1 | A | C | Heterozygous |
| NC_037645.1 | 5247583 | SNV | 1 | T | G | Homozygous   |
| NC_037645.1 | 5247945 | SNV | 1 | A | G | Homozygous   |
| NC_037645.1 | 5247984 | SNV | 1 | G | A | Homozygous   |
| NC_037645.1 | 5248315 | SNV | 1 | T | C | Heterozygous |
| NC_037645.1 | 5249178 | SNV | 1 | T | C | Homozygous   |

|             |         |     |   |   |   |              |
|-------------|---------|-----|---|---|---|--------------|
| NC_037645.1 | 5249234 | SNV | 1 | A | C | Heterozygous |
| NC_037645.1 | 5249467 | SNV | 1 | G | T | Homozygous   |
| NC_037645.1 | 5249469 | SNV | 1 | G | T | Heterozygous |
| NC_037645.1 | 5249586 | SNV | 1 | T | C | Homozygous   |
| NC_037645.1 | 5249626 | SNV | 1 | G | A | Heterozygous |
| NC_037645.1 | 5249634 | SNV | 1 | A | G | Homozygous   |
| NC_037645.1 | 5257526 | SNV | 1 | T | C | Heterozygous |
| NC_037645.1 | 5257549 | SNV | 1 | C | T | Homozygous   |
| NC_037645.1 | 5257589 | SNV | 1 | C | G | Heterozygous |
| NC_037645.1 | 5257643 | SNV | 1 | G | A | Heterozygous |
| NC_037645.1 | 5257787 | SNV | 1 | G | A | Heterozygous |
| NC_037645.1 | 5258098 | SNV | 1 | A | T | Heterozygous |
| NC_037645.1 | 5258279 | SNV | 1 | T | C | Homozygous   |
| NC_037645.1 | 5258282 | SNV | 1 | C | G | Heterozygous |
| NC_037645.1 | 5258607 | SNV | 1 | T | A | Homozygous   |
| NC_037645.1 | 5258618 | SNV | 1 | A | G | Homozygous   |
| NC_037645.1 | 5259008 | SNV | 1 | G | A | Heterozygous |
| NC_037645.1 | 5259015 | SNV | 1 | G | A | Heterozygous |
| NC_037645.1 | 5259161 | SNV | 1 | T | C | Heterozygous |
| NC_037645.1 | 5266822 | SNV | 1 | T | C | Homozygous   |
| NC_037645.1 | 5267471 | SNV | 1 | C | T | Heterozygous |
| NC_037645.1 | 5268638 | SNV | 1 | T | C | Heterozygous |
| NC_037645.1 | 5273988 | SNV | 1 | T | C | Heterozygous |
| NC_037645.1 | 5274013 | SNV | 1 | A | G | Heterozygous |
| NC_037645.1 | 5274066 | SNV | 1 | A | G | Homozygous   |
| NC_037645.1 | 5275555 | SNV | 1 | A | G | Homozygous   |
| NC_037645.1 | 5276370 | SNV | 1 | C | A | Homozygous   |
| NC_037645.1 | 5276626 | SNV | 1 | C | G | Homozygous   |
| NC_037645.1 | 5277077 | SNV | 1 | C | T | Homozygous   |
| NC_037645.1 | 5277100 | SNV | 1 | A | G | Heterozygous |
| NC_037645.1 | 5277104 | SNV | 1 | A | G | Heterozygous |
| NC_037645.1 | 5284809 | SNV | 1 | T | A | Heterozygous |
| NC_037645.1 | 5284981 | SNV | 1 | G | T | Heterozygous |
| NC_037645.1 | 5295064 | SNV | 1 | A | G | Homozygous   |
| NC_037645.1 | 5295479 | SNV | 1 | A | C | Heterozygous |
| NC_037645.1 | 5295490 | SNV | 1 | T | C | Homozygous   |
| NC_037645.1 | 5295517 | SNV | 1 | G | C | Heterozygous |
| NC_037645.1 | 5295524 | SNV | 1 | G | A | Homozygous   |
| NC_037645.1 | 5296663 | SNV | 1 | G | A | Heterozygous |
| NC_037645.1 | 5296707 | SNV | 1 | C | G | Heterozygous |
| NC_037645.1 | 5296748 | SNV | 1 | T | C | Heterozygous |
| NC_037645.1 | 5296767 | SNV | 1 | G | A | Heterozygous |
| NC_037645.1 | 5297268 | SNV | 1 | C | T | Heterozygous |
| NC_037645.1 | 5297287 | SNV | 1 | T | C | Homozygous   |
| NC_037645.1 | 5297565 | SNV | 1 | T | C | Homozygous   |
| NC_037645.1 | 5297597 | SNV | 1 | C | T | Heterozygous |
| NC_037645.1 | 5312228 | SNV | 1 | A | G | Homozygous   |
| NC_037645.1 | 5312461 | SNV | 1 | C | T | Heterozygous |
| NC_037645.1 | 5312471 | SNV | 1 | G | T | Heterozygous |
| NC_037645.1 | 5312739 | SNV | 1 | A | T | Heterozygous |
| NC_037645.1 | 5312958 | SNV | 1 | T | C | Homozygous   |

|             |         |     |   |   |   |              |
|-------------|---------|-----|---|---|---|--------------|
| NC_037645.1 | 5313159 | SNV | 1 | C | T | Heterozygous |
| NC_037645.1 | 5313607 | SNV | 1 | G | A | Heterozygous |
| NC_037645.1 | 5313630 | SNV | 1 | T | C | Heterozygous |
| NC_037645.1 | 5313632 | SNV | 1 | T | C | Heterozygous |
| NC_037645.1 | 5314218 | SNV | 1 | C | A | Homozygous   |
| NC_037645.1 | 5314976 | SNV | 1 | G | A | Homozygous   |
| NC_037645.1 | 5315519 | SNV | 1 | G | C | Heterozygous |
| NC_037645.1 | 5315561 | SNV | 1 | C | T | Heterozygous |
| NC_037645.1 | 5319044 | SNV | 1 | C | T | Heterozygous |
| NC_037645.1 | 5319053 | SNV | 1 | G | A | Heterozygous |
| NC_037645.1 | 5323347 | SNV | 1 | T | C | Homozygous   |
| NC_037645.1 | 5323361 | SNV | 1 | T | C | Homozygous   |
| NC_037645.1 | 5323399 | SNV | 1 | A | C | Homozygous   |
| NC_037645.1 | 5323420 | SNV | 1 | C | T | Homozygous   |
| NC_037645.1 | 5323469 | SNV | 1 | A | G | Homozygous   |
| NC_037645.1 | 5325238 | SNV | 1 | C | T | Homozygous   |
| NC_037645.1 | 5325244 | SNV | 1 | T | C | Homozygous   |
| NC_037645.1 | 5325258 | SNV | 1 | A | G | Homozygous   |
| NC_037645.1 | 5325296 | SNV | 1 | T | C | Homozygous   |
| NC_037645.1 | 5328657 | SNV | 1 | A | C | Homozygous   |
| NC_037645.1 | 5328833 | SNV | 1 | C | T | Heterozygous |
| NC_037645.1 | 5328866 | SNV | 1 | A | G | Homozygous   |
| NC_037645.1 | 5328876 | SNV | 1 | A | G | Heterozygous |
| NC_037645.1 | 5328930 | SNV | 1 | T | C | Homozygous   |
| NC_037645.1 | 5328999 | SNV | 1 | A | T | Heterozygous |
| NC_037645.1 | 5331072 | SNV | 1 | C | T | Heterozygous |
| NC_037645.1 | 5331075 | SNV | 1 | C | A | Heterozygous |
| NC_037645.1 | 5331168 | SNV | 1 | C | T | Heterozygous |
| NC_037645.1 | 5331254 | SNV | 1 | A | G | Homozygous   |
| NC_037645.1 | 5331455 | SNV | 1 | T | C | Heterozygous |
| NC_037645.1 | 5331481 | SNV | 1 | T | C | Homozygous   |
| NC_037645.1 | 5331706 | SNV | 1 | A | G | Heterozygous |
| NC_037645.1 | 5331722 | SNV | 1 | G | C | Homozygous   |
| NC_037645.1 | 5331909 | SNV | 1 | C | A | Heterozygous |
| NC_037645.1 | 5331916 | SNV | 1 | G | A | Heterozygous |
| NC_037645.1 | 5331967 | SNV | 1 | T | C | Homozygous   |
| NC_037645.1 | 5331976 | SNV | 1 | C | T | Heterozygous |
| NC_037645.1 | 5332015 | SNV | 1 | T | A | Heterozygous |
| NC_037645.1 | 5332043 | SNV | 1 | A | G | Heterozygous |
| NC_037645.1 | 5332066 | SNV | 1 | A | C | Homozygous   |
| NC_037645.1 | 5353080 | SNV | 1 | G | A | Heterozygous |
| NC_037645.1 | 5353140 | SNV | 1 | A | G | Homozygous   |
| NC_037645.1 | 5353186 | SNV | 1 | A | T | Homozygous   |
| NC_037645.1 | 5353585 | SNV | 1 | T | C | Homozygous   |
| NC_037645.1 | 5353767 | SNV | 1 | C | T | Heterozygous |
| NC_037645.1 | 5358348 | SNV | 1 | A | G | Homozygous   |
| NC_037645.1 | 5358363 | SNV | 1 | T | C | Homozygous   |
| NC_037645.1 | 5358474 | SNV | 1 | T | C | Homozygous   |
| NC_037645.1 | 5360087 | SNV | 1 | C | T | Homozygous   |
| NC_037645.1 | 5364290 | SNV | 1 | A | G | Homozygous   |
| NC_037645.1 | 5364302 | SNV | 1 | T | C | Homozygous   |

|             |         |     |   |   |   |              |
|-------------|---------|-----|---|---|---|--------------|
| NC_037645.1 | 5364308 | SNV | 1 | G | C | Homozygous   |
| NC_037645.1 | 5364646 | SNV | 1 | T | C | Heterozygous |
| NC_037645.1 | 5364670 | SNV | 1 | C | T | Homozygous   |
| NC_037645.1 | 5364705 | SNV | 1 | T | C | Homozygous   |
| NC_037645.1 | 5364708 | SNV | 1 | A | G | Heterozygous |
| NC_037645.1 | 5364784 | SNV | 1 | T | C | Homozygous   |
| NC_037645.1 | 5364926 | SNV | 1 | T | C | Homozygous   |
| NC_037645.1 | 5364974 | SNV | 1 | C | T | Heterozygous |
| NC_037645.1 | 5364978 | SNV | 1 | C | T | Heterozygous |
| NC_037645.1 | 5365023 | SNV | 1 | C | G | Heterozygous |
| NC_037645.1 | 5365099 | SNV | 1 | G | C | Homozygous   |
| NC_037645.1 | 5365103 | SNV | 1 | C | T | Heterozygous |
| NC_037645.1 | 5365147 | SNV | 1 | G | A | Heterozygous |
| NC_037645.1 | 5365606 | SNV | 1 | C | A | Heterozygous |
| NC_037645.1 | 5365634 | SNV | 1 | G | T | Heterozygous |
| NC_037645.1 | 5365654 | SNV | 1 | A | G | Homozygous   |
| NC_037645.1 | 5365736 | SNV | 1 | A | G | Homozygous   |
| NC_037645.1 | 5365754 | SNV | 1 | T | C | Homozygous   |
| NC_037645.1 | 5365790 | SNV | 1 | A | G | Homozygous   |
| NC_037645.1 | 5365801 | SNV | 1 | A | G | Homozygous   |
| NC_037645.1 | 5365853 | SNV | 1 | T | C | Heterozygous |
| NC_037645.1 | 5365854 | SNV | 1 | A | G | Heterozygous |
| NC_037645.1 | 5365882 | SNV | 1 | G | A | Homozygous   |
| NC_037645.1 | 5365886 | SNV | 1 | A | G | Homozygous   |
| NC_037645.1 | 5365925 | SNV | 1 | A | G | Homozygous   |
| NC_037645.1 | 5365947 | SNV | 1 | T | C | Homozygous   |
| NC_037645.1 | 5365949 | SNV | 1 | C | T | Homozygous   |
| NC_037645.1 | 5365960 | SNV | 1 | G | C | Homozygous   |
| NC_037645.1 | 5366016 | SNV | 1 | C | T | Homozygous   |
| NC_037645.1 | 5366041 | SNV | 1 | T | C | Homozygous   |
| NC_037645.1 | 5366142 | SNV | 1 | G | A | Homozygous   |
| NC_037645.1 | 5366190 | SNV | 1 | A | G | Homozygous   |
| NC_037645.1 | 5366388 | SNV | 1 | T | C | Homozygous   |
| NC_037645.1 | 5366568 | SNV | 1 | A | G | Heterozygous |
| NC_037645.1 | 5366646 | SNV | 1 | T | A | Homozygous   |
| NC_037645.1 | 5366785 | SNV | 1 | C | T | Homozygous   |
| NC_037645.1 | 5366789 | SNV | 1 | A | C | Homozygous   |
| NC_037645.1 | 5366842 | SNV | 1 | G | A | Homozygous   |
| NC_037645.1 | 5366848 | SNV | 1 | C | T | Heterozygous |
| NC_037645.1 | 5367137 | SNV | 1 | G | T | Heterozygous |
| NC_037645.1 | 5374573 | SNV | 1 | A | C | Heterozygous |
| NC_037645.1 | 5374578 | SNV | 1 | G | A | Homozygous   |
| NC_037645.1 | 5374764 | SNV | 1 | G | A | Heterozygous |
| NC_037645.1 | 5374797 | SNV | 1 | T | C | Heterozygous |
| NC_037645.1 | 5385110 | SNV | 1 | C | T | Heterozygous |
| NC_037645.1 | 5385133 | SNV | 1 | A | T | Heterozygous |
| NC_037645.1 | 5385189 | SNV | 1 | C | T | Homozygous   |
| NC_037645.1 | 5385192 | SNV | 1 | A | G | Heterozygous |
| NC_037645.1 | 5385215 | SNV | 1 | C | T | Homozygous   |
| NC_037645.1 | 5385222 | SNV | 1 | G | A | Homozygous   |
| NC_037645.1 | 5385233 | SNV | 1 | G | A | Homozygous   |

|             |         |     |   |   |   |              |
|-------------|---------|-----|---|---|---|--------------|
| NC_037645.1 | 5385245 | SNV | 1 | G | A | Heterozygous |
| NC_037645.1 | 5385389 | SNV | 1 | C | T | Homozygous   |
| NC_037645.1 | 5385408 | SNV | 1 | T | C | Homozygous   |
| NC_037645.1 | 5385421 | SNV | 1 | G | C | Homozygous   |
| NC_037645.1 | 5385733 | SNV | 1 | G | A | Homozygous   |
| NC_037645.1 | 5390170 | SNV | 1 | C | T | Heterozygous |
| NC_037645.1 | 5390173 | SNV | 1 | T | C | Heterozygous |
| NC_037645.1 | 5390202 | SNV | 1 | G | C | Heterozygous |
| NC_037645.1 | 5390374 | SNV | 1 | C | T | Homozygous   |
| NC_037645.1 | 5390586 | SNV | 1 | C | T | Homozygous   |
| NC_037645.1 | 5390723 | SNV | 1 | G | A | Homozygous   |
| NC_037645.1 | 5390836 | SNV | 1 | A | G | Homozygous   |
| NC_037645.1 | 5390942 | SNV | 1 | C | T | Homozygous   |
| NC_037645.1 | 5390974 | SNV | 1 | G | A | Homozygous   |
| NC_037645.1 | 5391011 | SNV | 1 | T | C | Heterozygous |
| NC_037645.1 | 5391098 | SNV | 1 | G | A | Heterozygous |
| NC_037645.1 | 5391111 | SNV | 1 | G | A | Homozygous   |
| NC_037645.1 | 5391119 | SNV | 1 | G | A | Heterozygous |
| NC_037645.1 | 5391147 | SNV | 1 | G | C | Homozygous   |
| NC_037645.1 | 5391153 | SNV | 1 | T | C | Homozygous   |
| NC_037645.1 | 5391167 | SNV | 1 | G | A | Homozygous   |
| NC_037645.1 | 5391179 | SNV | 1 | G | A | Heterozygous |
| NC_037645.1 | 5391229 | SNV | 1 | T | C | Homozygous   |
| NC_037645.1 | 5391277 | SNV | 1 | G | A | Homozygous   |
| NC_037645.1 | 5391305 | SNV | 1 | C | T | Homozygous   |
| NC_037645.1 | 5391323 | SNV | 1 | C | T | Heterozygous |
| NC_037645.1 | 5391426 | SNV | 1 | A | G | Homozygous   |
| NC_037645.1 | 5391477 | SNV | 1 | A | G | Homozygous   |
| NC_037645.1 | 5391515 | SNV | 1 | A | C | Homozygous   |
| NC_037645.1 | 5391622 | SNV | 1 | T | C | Homozygous   |
| NC_037645.1 | 5391669 | SNV | 1 | G | A | Homozygous   |
| NC_037645.1 | 5391726 | SNV | 1 | G | A | Heterozygous |
| NC_037645.1 | 5391874 | SNV | 1 | G | A | Heterozygous |
| NC_037645.1 | 5391903 | SNV | 1 | G | A | Heterozygous |
| NC_037645.1 | 5391932 | SNV | 1 | G | A | Homozygous   |
| NC_037645.1 | 5398292 | SNV | 1 | C | T | Heterozygous |
| NC_037645.1 | 5398341 | SNV | 1 | G | A | Homozygous   |
| NC_037645.1 | 5398559 | SNV | 1 | G | A | Homozygous   |
| NC_037645.1 | 5407401 | SNV | 1 | T | C | Homozygous   |
| NC_037645.1 | 5407427 | SNV | 1 | G | C | Heterozygous |
| NC_037645.1 | 5407522 | SNV | 1 | A | G | Homozygous   |
| NC_037645.1 | 5407612 | SNV | 1 | A | G | Homozygous   |
| NC_037645.1 | 5410728 | SNV | 1 | C | T | Heterozygous |
| NC_037645.1 | 5410738 | SNV | 1 | C | T | Homozygous   |
| NC_037645.1 | 5411342 | SNV | 1 | T | C | Homozygous   |
| NC_037645.1 | 5413827 | SNV | 1 | C | T | Heterozygous |
| NC_037645.1 | 5413830 | SNV | 1 | G | T | Heterozygous |
| NC_037645.1 | 5416010 | SNV | 1 | T | C | Heterozygous |
| NC_037645.1 | 5416178 | SNV | 1 | C | T | Heterozygous |
| NC_037645.1 | 5416207 | SNV | 1 | A | G | Heterozygous |
| NC_037645.1 | 5416432 | SNV | 1 | A | G | Heterozygous |

|             |         |     |   |   |   |              |
|-------------|---------|-----|---|---|---|--------------|
| NC_037645.1 | 5416628 | SNV | 1 | T | C | Homozygous   |
| NC_037645.1 | 5416700 | SNV | 1 | T | C | Homozygous   |
| NC_037645.1 | 5416764 | SNV | 1 | A | G | Homozygous   |
| NC_037645.1 | 5416923 | SNV | 1 | G | T | Homozygous   |
| NC_037645.1 | 5416930 | SNV | 1 | C | T | Heterozygous |
| NC_037645.1 | 5416974 | SNV | 1 | C | T | Homozygous   |
| NC_037645.1 | 5416988 | SNV | 1 | A | G | Homozygous   |
| NC_037645.1 | 5417030 | SNV | 1 | T | C | Homozygous   |
| NC_037645.1 | 5417050 | SNV | 1 | T | C | Heterozygous |
| NC_037645.1 | 5417052 | SNV | 1 | A | G | Heterozygous |
| NC_037645.1 | 5417073 | SNV | 1 | T | C | Homozygous   |
| NC_037645.1 | 5417111 | SNV | 1 | T | C | Homozygous   |
| NC_037645.1 | 5417395 | SNV | 1 | G | A | Homozygous   |
| NC_037645.1 | 5417712 | SNV | 1 | A | G | Homozygous   |
| NC_037645.1 | 5419585 | SNV | 1 | G | A | Heterozygous |
| NC_037645.1 | 5419589 | SNV | 1 | T | C | Homozygous   |
| NC_037645.1 | 5419601 | SNV | 1 | C | T | Heterozygous |
| NC_037645.1 | 5419630 | SNV | 1 | A | C | Homozygous   |
| NC_037645.1 | 5419936 | SNV | 1 | T | C | Heterozygous |
| NC_037645.1 | 5419938 | SNV | 1 | G | A | Heterozygous |
| NC_037645.1 | 5419942 | SNV | 1 | T | A | Homozygous   |
| NC_037645.1 | 5420347 | SNV | 1 | G | C | Heterozygous |
| NC_037645.1 | 5420459 | SNV | 1 | T | C | Homozygous   |
| NC_037645.1 | 5420469 | SNV | 1 | T | C | Heterozygous |
| NC_037645.1 | 5420604 | SNV | 1 | A | G | Heterozygous |
| NC_037645.1 | 5420719 | SNV | 1 | G | A | Heterozygous |
| NC_037645.1 | 5424032 | SNV | 1 | A | G | Heterozygous |
| NC_037645.1 | 5424430 | SNV | 1 | G | A | Heterozygous |
| NC_037645.1 | 5424489 | SNV | 1 | A | C | Heterozygous |
| NC_037645.1 | 5424493 | SNV | 1 | C | T | Homozygous   |
| NC_037645.1 | 5426969 | SNV | 1 | C | G | Homozygous   |
| NC_037645.1 | 5433629 | SNV | 1 | C | T | Homozygous   |
| NC_037645.1 | 5433644 | SNV | 1 | T | C | Homozygous   |
| NC_037645.1 | 5446512 | SNV | 1 | A | G | Homozygous   |
| NC_037645.1 | 5446517 | SNV | 1 | A | T | Homozygous   |
| NC_037645.1 | 5463225 | SNV | 1 | T | G | Heterozygous |
| NC_037645.1 | 5466573 | SNV | 1 | T | C | Heterozygous |
| NC_037645.1 | 5479412 | SNV | 1 | A | G | Heterozygous |
| NC_037645.1 | 5497958 | SNV | 1 | A | G | Homozygous   |
| NC_037645.1 | 5503760 | SNV | 1 | A | T | Heterozygous |
| NC_037645.1 | 5503765 | SNV | 1 | G | A | Homozygous   |
| NC_037645.1 | 5508737 | SNV | 1 | A | G | Heterozygous |
| NC_037645.1 | 5508801 | SNV | 1 | T | C | Homozygous   |
| NC_037645.1 | 5508971 | SNV | 1 | A | G | Heterozygous |
| NC_037645.1 | 5545213 | SNV | 1 | C | A | Homozygous   |
| NC_037645.1 | 5545232 | SNV | 1 | A | G | Homozygous   |
| NC_037645.1 | 5709196 | SNV | 1 | G | A | Homozygous   |
| NC_037645.1 | 5709251 | SNV | 1 | G | A | Heterozygous |
| NC_037645.1 | 5709333 | SNV | 1 | C | T | Heterozygous |
| NC_037645.1 | 5709426 | SNV | 1 | G | A | Heterozygous |
| NC_037645.1 | 5709476 | SNV | 1 | G | A | Heterozygous |



|             |         |     |   |   |   |              |
|-------------|---------|-----|---|---|---|--------------|
| NC_037645.1 | 5710114 | SNV | 1 | A | G | Homozygous   |
| NC_037645.1 | 5714445 | SNV | 1 | A | G | Homozygous   |
| NC_037645.1 | 5714451 | SNV | 1 | G | A | Heterozygous |
| NC_037645.1 | 5717825 | SNV | 1 | T | C | Heterozygous |
| NC_037645.1 | 5717945 | SNV | 1 | G | A | Homozygous   |
| NC_037645.1 | 5717966 | SNV | 1 | G | A | Homozygous   |
| NC_037645.1 | 5739060 | SNV | 1 | A | G | Heterozygous |
| NC_037645.1 | 5739061 | SNV | 1 | C | T | Heterozygous |
| NC_037645.1 | 5749882 | SNV | 1 | G | A | Homozygous   |
| NC_037645.1 | 5750436 | SNV | 1 | G | A | Heterozygous |
| NC_037645.1 | 5750452 | SNV | 1 | G | A | Homozygous   |
| NC_037645.1 | 5750554 | SNV | 1 | T | A | Heterozygous |
| NC_037645.1 | 5750625 | SNV | 1 | A | G | Heterozygous |
| NC_037645.1 | 5750671 | SNV | 1 | C | T | Homozygous   |
| NC_037645.1 | 5750761 | SNV | 1 | G | C | Homozygous   |
| NC_037645.1 | 5750815 | SNV | 1 | G | A | Homozygous   |
| NC_037645.1 | 5750878 | SNV | 1 | G | A | Homozygous   |
| NC_037645.1 | 5763769 | SNV | 1 | G | A | Heterozygous |
| NC_037645.1 | 5767237 | SNV | 1 | C | T | Heterozygous |
| NC_037645.1 | 5767410 | SNV | 1 | T | A | Heterozygous |
| NC_037645.1 | 5767416 | SNV | 1 | T | A | Heterozygous |
| NC_037645.1 | 5767483 | SNV | 1 | T | C | Homozygous   |
| NC_037645.1 | 5781019 | SNV | 1 | T | C | Homozygous   |
| NC_037645.1 | 5781078 | SNV | 1 | G | A | Heterozygous |
| NC_037645.1 | 5789620 | SNV | 1 | A | T | Heterozygous |
| NC_037645.1 | 5870032 | SNV | 1 | G | A | Heterozygous |
| NC_037645.1 | 5870202 | SNV | 1 | T | G | Homozygous   |
| NC_037645.1 | 5870922 | SNV | 1 | A | G | Homozygous   |
| NC_037645.1 | 5872644 | SNV | 1 | C | T | Homozygous   |
| NC_037645.1 | 5872663 | SNV | 1 | A | G | Heterozygous |
| NC_037645.1 | 5873894 | SNV | 1 | T | C | Homozygous   |
| NC_037645.1 | 5874025 | SNV | 1 | C | T | Homozygous   |
| NC_037645.1 | 5874071 | SNV | 1 | T | C | Homozygous   |
| NC_037645.1 | 5874150 | SNV | 1 | C | T | Homozygous   |
| NC_037645.1 | 5874416 | SNV | 1 | A | G | Homozygous   |
| NC_037645.1 | 5875446 | SNV | 1 | G | A | Homozygous   |
| NC_037645.1 | 5876447 | SNV | 1 | C | T | Homozygous   |
| NC_037645.1 | 5885175 | SNV | 1 | G | A | Heterozygous |
| NC_037645.1 | 5886177 | SNV | 1 | A | G | Homozygous   |
| NC_037645.1 | 5886218 | SNV | 1 | T | C | Homozygous   |
| NC_037645.1 | 5886417 | SNV | 1 | T | C | Homozygous   |
| NC_037645.1 | 5888889 | SNV | 1 | T | A | Homozygous   |
| NC_037645.1 | 5888894 | SNV | 1 | T | C | Homozygous   |
| NC_037645.1 | 5888967 | SNV | 1 | G | A | Homozygous   |
| NC_037645.1 | 5889145 | SNV | 1 | G | A | Homozygous   |
| NC_037645.1 | 5889193 | SNV | 1 | T | C | Homozygous   |
| NC_037645.1 | 5889581 | SNV | 1 | T | A | Homozygous   |
| NC_037645.1 | 5890107 | SNV | 1 | A | G | Heterozygous |
| NC_037645.1 | 5890481 | SNV | 1 | T | C | Homozygous   |
| NC_037645.1 | 5890730 | SNV | 1 | A | G | Homozygous   |
| NC_037645.1 | 5891440 | SNV | 1 | A | G | Homozygous   |

|             |         |     |   |   |   |              |
|-------------|---------|-----|---|---|---|--------------|
| NC_037645.1 | 5891478 | SNV | 1 | T | C | Homozygous   |
| NC_037645.1 | 5891519 | SNV | 1 | T | C | Homozygous   |
| NC_037645.1 | 5891522 | SNV | 1 | T | C | Homozygous   |
| NC_037645.1 | 5891656 | SNV | 1 | A | G | Heterozygous |
| NC_037645.1 | 5892435 | SNV | 1 | T | C | Homozygous   |
| NC_037645.1 | 5893221 | SNV | 1 | A | C | Heterozygous |
| NC_037645.1 | 5893833 | SNV | 1 | A | G | Homozygous   |
| NC_037645.1 | 5894538 | SNV | 1 | T | C | Homozygous   |
| NC_037645.1 | 5894926 | SNV | 1 | G | A | Heterozygous |
| NC_037645.1 | 5894944 | SNV | 1 | G | A | Heterozygous |
| NC_037645.1 | 5894951 | SNV | 1 | G | C | Heterozygous |
| NC_037645.1 | 5894973 | SNV | 1 | G | A | Homozygous   |
| NC_037645.1 | 5895009 | SNV | 1 | G | A | Homozygous   |
| NC_037645.1 | 5895086 | SNV | 1 | G | A | Heterozygous |
| NC_037645.1 | 5895102 | SNV | 1 | G | C | Heterozygous |
| NC_037645.1 | 5895128 | SNV | 1 | A | G | Heterozygous |
| NC_037645.1 | 5895130 | SNV | 1 | C | A | Heterozygous |
| NC_037645.1 | 5895197 | SNV | 1 | G | A | Heterozygous |
| NC_037645.1 | 5895224 | SNV | 1 | A | G | Homozygous   |
| NC_037645.1 | 5895485 | SNV | 1 | A | G | Homozygous   |
| NC_037645.1 | 5896260 | SNV | 1 | A | G | Heterozygous |
| NC_037645.1 | 5896282 | SNV | 1 | T | C | Heterozygous |
| NC_037645.1 | 5902825 | SNV | 1 | C | T | Heterozygous |
| NC_037645.1 | 5902832 | SNV | 1 | T | C | Homozygous   |
| NC_037645.1 | 5911813 | SNV | 1 | T | A | Heterozygous |
| NC_037645.1 | 5913122 | SNV | 1 | A | G | Homozygous   |
| NC_037645.1 | 5913963 | SNV | 1 | A | G | Homozygous   |
| NC_037645.1 | 5921569 | SNV | 1 | A | G | Homozygous   |
| NC_037645.1 | 5929633 | SNV | 1 | T | C | Heterozygous |
| NC_037645.1 | 5929644 | SNV | 1 | G | A | Heterozygous |
| NC_037645.1 | 5929674 | SNV | 1 | A | G | Homozygous   |
| NC_037645.1 | 5940641 | SNV | 1 | G | A | Homozygous   |
| NC_037645.1 | 5940650 | SNV | 1 | T | G | Homozygous   |
| NC_037645.1 | 5940653 | SNV | 1 | A | T | Heterozygous |
| NC_037645.1 | 5940656 | SNV | 1 | T | A | Heterozygous |
| NC_037645.1 | 5940656 | SNV | 1 | T | G | Heterozygous |
| NC_037645.1 | 5940658 | SNV | 1 | C | G | Heterozygous |
| NC_037645.1 | 5940660 | SNV | 1 | C | T | Heterozygous |
| NC_037645.1 | 5940665 | SNV | 1 | T | A | Heterozygous |
| NC_037645.1 | 5940689 | SNV | 1 | G | T | Homozygous   |
| NC_037645.1 | 5940698 | SNV | 1 | G | A | Homozygous   |
| NC_037645.1 | 5941160 | SNV | 1 | C | G | Homozygous   |
| NC_037645.1 | 5941218 | SNV | 1 | T | C | Heterozygous |
| NC_037645.1 | 5941224 | SNV | 1 | A | G | Homozygous   |
| NC_037645.1 | 5941350 | SNV | 1 | A | G | Homozygous   |
| NC_037645.1 | 5941686 | SNV | 1 | T | C | Heterozygous |
| NC_037645.1 | 5941758 | SNV | 1 | G | A | Homozygous   |
| NC_037645.1 | 5941821 | SNV | 1 | G | A | Homozygous   |
| NC_037645.1 | 5941844 | SNV | 1 | C | T | Heterozygous |
| NC_037645.1 | 5941887 | SNV | 1 | T | C | Heterozygous |
| NC_037645.1 | 5942009 | SNV | 1 | G | T | Heterozygous |

|             |         |     |   |   |   |              |
|-------------|---------|-----|---|---|---|--------------|
| NC_037645.1 | 5947289 | SNV | 1 | T | C | Heterozygous |
| NC_037645.1 | 5947338 | SNV | 1 | G | A | Heterozygous |
| NC_037645.1 | 5947441 | SNV | 1 | T | C | Heterozygous |
| NC_037645.1 | 5947441 | SNV | 1 | T | G | Heterozygous |
| NC_037645.1 | 5947458 | SNV | 1 | A | G | Heterozygous |
| NC_037645.1 | 5947477 | SNV | 1 | A | G | Heterozygous |
| NC_037645.1 | 5950375 | SNV | 1 | A | G | Heterozygous |
| NC_037645.1 | 5950524 | SNV | 1 | G | A | Homozygous   |
| NC_037645.1 | 5950554 | SNV | 1 | A | G | Heterozygous |
| NC_037645.1 | 5951040 | SNV | 1 | C | T | Homozygous   |
| NC_037645.1 | 5951142 | SNV | 1 | C | T | Homozygous   |
| NC_037645.1 | 5951187 | SNV | 1 | A | G | Heterozygous |
| NC_037645.1 | 5958467 | SNV | 1 | T | C | Homozygous   |
| NC_037645.1 | 5958586 | SNV | 1 | T | A | Homozygous   |
| NC_037645.1 | 5958589 | SNV | 1 | C | A | Homozygous   |
| NC_037645.1 | 5981050 | SNV | 1 | C | T | Homozygous   |
| NC_037645.1 | 5981054 | SNV | 1 | T | G | Heterozygous |
| NC_037645.1 | 5981056 | SNV | 1 | T | C | Heterozygous |
| NC_037645.1 | 5982068 | SNV | 1 | G | A | Homozygous   |
| NC_037645.1 | 5983703 | SNV | 1 | G | A | Homozygous   |
| NC_037645.1 | 5983816 | SNV | 1 | A | G | Homozygous   |
| NC_037645.1 | 5983958 | SNV | 1 | A | G | Homozygous   |
| NC_037645.1 | 5984126 | SNV | 1 | G | C | Homozygous   |
| NC_037645.1 | 5984620 | SNV | 1 | T | C | Homozygous   |
| NC_037645.1 | 5984719 | SNV | 1 | C | T | Heterozygous |
| NC_037645.1 | 5985093 | SNV | 1 | G | A | Heterozygous |
| NC_037645.1 | 5985103 | SNV | 1 | T | A | Heterozygous |
| NC_037645.1 | 5985658 | SNV | 1 | A | G | Homozygous   |
| NC_037645.1 | 5985684 | SNV | 1 | A | G | Heterozygous |
| NC_037645.1 | 5985740 | SNV | 1 | G | A | Homozygous   |
| NC_037645.1 | 5986803 | SNV | 1 | C | T | Heterozygous |
| NC_037645.1 | 5986817 | SNV | 1 | C | T | Heterozygous |
| NC_037645.1 | 5986842 | SNV | 1 | A | G | Homozygous   |
| NC_037645.1 | 5986866 | SNV | 1 | T | A | Homozygous   |
| NC_037645.1 | 5987578 | SNV | 1 | G | A | Heterozygous |
| NC_037645.1 | 5987715 | SNV | 1 | G | A | Heterozygous |
| NC_037645.1 | 5988138 | SNV | 1 | T | C | Homozygous   |
| NC_037645.1 | 5988201 | SNV | 1 | A | G | Homozygous   |
| NC_037645.1 | 5988209 | SNV | 1 | G | A | Heterozygous |
| NC_037645.1 | 5988272 | SNV | 1 | G | A | Homozygous   |
| NC_037645.1 | 5989321 | SNV | 1 | C | T | Heterozygous |
| NC_037645.1 | 5989492 | SNV | 1 | G | C | Homozygous   |
| NC_037645.1 | 5989697 | SNV | 1 | A | C | Homozygous   |
| NC_037645.1 | 5989724 | SNV | 1 | C | G | Homozygous   |
| NC_037645.1 | 5989764 | SNV | 1 | T | C | Heterozygous |
| NC_037645.1 | 5989961 | SNV | 1 | G | A | Heterozygous |
| NC_037645.1 | 5989985 | SNV | 1 | T | C | Homozygous   |
| NC_037645.1 | 5990021 | SNV | 1 | C | T | Heterozygous |
| NC_037645.1 | 5990115 | SNV | 1 | T | C | Homozygous   |
| NC_037645.1 | 5990162 | SNV | 1 | T | C | Homozygous   |
| NC_037645.1 | 5990358 | SNV | 1 | C | G | Homozygous   |

|             |         |     |   |   |   |              |
|-------------|---------|-----|---|---|---|--------------|
| NC_037645.1 | 5990413 | SNV | 1 | A | G | Homozygous   |
| NC_037645.1 | 5990585 | SNV | 1 | C | T | Heterozygous |
| NC_037645.1 | 5990597 | SNV | 1 | G | C | Homozygous   |
| NC_037645.1 | 5990624 | SNV | 1 | A | C | Homozygous   |
| NC_037645.1 | 5990640 | SNV | 1 | T | C | Homozygous   |
| NC_037645.1 | 5995961 | SNV | 1 | G | A | Homozygous   |
| NC_037645.1 | 5995974 | SNV | 1 | T | A | Homozygous   |
| NC_037645.1 | 5995982 | SNV | 1 | G | T | Homozygous   |
| NC_037645.1 | 5995989 | SNV | 1 | T | C | Homozygous   |
| NC_037645.1 | 5995992 | SNV | 1 | T | G | Homozygous   |
| NC_037645.1 | 6021807 | SNV | 1 | A | T | Heterozygous |
| NC_037645.1 | 6050653 | SNV | 1 | A | T | Heterozygous |
| NC_037645.1 | 6050657 | SNV | 1 | A | T | Heterozygous |
| NC_037645.1 | 6050659 | SNV | 1 | A | T | Heterozygous |
| NC_037645.1 | 6050663 | SNV | 1 | A | T | Heterozygous |
| NC_037645.1 | 6050664 | SNV | 1 | T | C | Heterozygous |
| NC_037645.1 | 6050668 | SNV | 1 | T | C | Homozygous   |
| NC_037645.1 | 6050672 | SNV | 1 | T | C | Heterozygous |
| NC_037645.1 | 6050688 | SNV | 1 | T | G | Heterozygous |
| NC_037645.1 | 6050694 | SNV | 1 | G | T | Homozygous   |
| NC_037645.1 | 6075806 | SNV | 1 | A | C | Homozygous   |
| NC_037645.1 | 6075838 | SNV | 1 | A | C | Homozygous   |
| NC_037645.1 | 6075842 | SNV | 1 | C | A | Homozygous   |
| NC_037645.1 | 6075846 | SNV | 1 | T | A | Homozygous   |
| NC_037645.1 | 6081303 | SNV | 1 | A | T | Homozygous   |
| NC_037645.1 | 6091146 | SNV | 1 | G | A | Heterozygous |
| NC_037645.1 | 6098910 | SNV | 1 | C | T | Heterozygous |
| NC_037645.1 | 6098913 | SNV | 1 | T | G | Heterozygous |
| NC_037645.1 | 6098925 | SNV | 1 | T | G | Heterozygous |
| NC_037645.1 | 6110043 | SNV | 1 | C | T | Heterozygous |
| NC_037645.1 | 6116920 | SNV | 1 | T | C | Homozygous   |
| NC_037645.1 | 6116936 | SNV | 1 | A | G | Homozygous   |
| NC_037645.1 | 6191813 | SNV | 1 | G | C | Heterozygous |
| NC_037645.1 | 6201059 | SNV | 1 | C | T | Homozygous   |
| NC_037645.1 | 6201061 | SNV | 1 | A | T | Homozygous   |
| NC_037645.1 | 6201078 | SNV | 1 | T | A | Homozygous   |
| NC_037645.1 | 6201080 | SNV | 1 | T | A | Homozygous   |
| NC_037645.1 | 6201834 | SNV | 1 | T | C | Homozygous   |
| NC_037645.1 | 6201842 | SNV | 1 | A | C | Homozygous   |
| NC_037645.1 | 6226820 | SNV | 1 | G | A | Homozygous   |
| NC_037645.1 | 6249247 | SNV | 1 | T | C | Homozygous   |
| NC_037645.1 | 6249397 | SNV | 1 | T | C | Homozygous   |
| NC_037645.1 | 6251339 | SNV | 1 | T | A | Heterozygous |
| NC_037645.1 | 6251364 | SNV | 1 | C | A | Heterozygous |
| NC_037645.1 | 6251369 | SNV | 1 | T | A | Heterozygous |
| NC_037645.1 | 6252317 | SNV | 1 | C | T | Heterozygous |
| NC_037645.1 | 6258836 | SNV | 1 | A | G | Homozygous   |
| NC_037645.1 | 6266367 | SNV | 1 | A | T | Homozygous   |
| NC_037645.1 | 6266372 | SNV | 1 | T | A | Homozygous   |
| NC_037645.1 | 6267051 | SNV | 1 | A | G | Heterozygous |
| NC_037645.1 | 6267140 | SNV | 1 | C | T | Heterozygous |

|             |         |     |   |   |   |              |
|-------------|---------|-----|---|---|---|--------------|
| NC_037645.1 | 6267329 | SNV | 1 | G | A | Heterozygous |
| NC_037645.1 | 6267565 | SNV | 1 | A | G | Homozygous   |
| NC_037645.1 | 6267571 | SNV | 1 | G | A | Heterozygous |
| NC_037645.1 | 6268208 | SNV | 1 | G | C | Homozygous   |
| NC_037645.1 | 6268372 | SNV | 1 | A | G | Heterozygous |
| NC_037645.1 | 6268378 | SNV | 1 | T | C | Homozygous   |
| NC_037645.1 | 6268501 | SNV | 1 | T | A | Heterozygous |
| NC_037645.1 | 6269154 | SNV | 1 | C | T | Homozygous   |
| NC_037645.1 | 6269239 | SNV | 1 | A | T | Homozygous   |
| NC_037645.1 | 6269538 | SNV | 1 | C | T | Homozygous   |
| NC_037645.1 | 6269596 | SNV | 1 | T | G | Homozygous   |
| NC_037645.1 | 6269602 | SNV | 1 | A | G | Homozygous   |
| NC_037645.1 | 6269609 | SNV | 1 | T | A | Homozygous   |
| NC_037645.1 | 6269611 | SNV | 1 | C | A | Homozygous   |
| NC_037645.1 | 6269615 | SNV | 1 | C | A | Homozygous   |
| NC_037645.1 | 6270059 | SNV | 1 | G | A | Homozygous   |
| NC_037645.1 | 6270186 | SNV | 1 | A | G | Homozygous   |
| NC_037645.1 | 6270666 | SNV | 1 | T | C | Homozygous   |
| NC_037645.1 | 6276330 | SNV | 1 | T | C | Homozygous   |
| NC_037645.1 | 6276371 | SNV | 1 | C | T | Homozygous   |
| NC_037645.1 | 6277375 | SNV | 1 | A | G | Homozygous   |
| NC_037645.1 | 6277447 | SNV | 1 | C | A | Homozygous   |
| NC_037645.1 | 6277696 | SNV | 1 | C | T | Heterozygous |
| NC_037645.1 | 6278417 | SNV | 1 | C | A | Homozygous   |
| NC_037645.1 | 6278555 | SNV | 1 | C | T | Heterozygous |
| NC_037645.1 | 6282851 | SNV | 1 | T | C | Homozygous   |
| NC_037645.1 | 6283097 | SNV | 1 | G | A | Homozygous   |
| NC_037645.1 | 6283823 | SNV | 1 | G | A | Heterozygous |
| NC_037645.1 | 6283840 | SNV | 1 | A | G | Homozygous   |
| NC_037645.1 | 6284406 | SNV | 1 | T | A | Homozygous   |
| NC_037645.1 | 6284408 | SNV | 1 | T | G | Homozygous   |
| NC_037645.1 | 6284707 | SNV | 1 | T | A | Heterozygous |
| NC_037645.1 | 6284813 | SNV | 1 | T | G | Heterozygous |
| NC_037645.1 | 6288473 | SNV | 1 | C | T | Heterozygous |
| NC_037645.1 | 6288666 | SNV | 1 | A | G | Homozygous   |
| NC_037645.1 | 6288849 | SNV | 1 | T | C | Homozygous   |
| NC_037645.1 | 6289062 | SNV | 1 | G | T | Homozygous   |
| NC_037645.1 | 6289085 | SNV | 1 | G | C | Homozygous   |
| NC_037645.1 | 6289089 | SNV | 1 | A | C | Heterozygous |
| NC_037645.1 | 6289096 | SNV | 1 | T | A | Homozygous   |
| NC_037645.1 | 6289100 | SNV | 1 | A | G | Heterozygous |
| NC_037645.1 | 6290147 | SNV | 1 | C | T | Heterozygous |
| NC_037645.1 | 6290661 | SNV | 1 | T | C | Heterozygous |
| NC_037645.1 | 6299115 | SNV | 1 | C | T | Heterozygous |
| NC_037645.1 | 6299805 | SNV | 1 | A | T | Heterozygous |
| NC_037645.1 | 6300735 | SNV | 1 | C | T | Heterozygous |
| NC_037645.1 | 6301044 | SNV | 1 | T | A | Homozygous   |
| NC_037645.1 | 6301048 | SNV | 1 | C | T | Homozygous   |
| NC_037645.1 | 6301052 | SNV | 1 | C | T | Homozygous   |
| NC_037645.1 | 6301251 | SNV | 1 | A | G | Heterozygous |
| NC_037645.1 | 6303242 | SNV | 1 | T | A | Homozygous   |

|             |         |     |   |   |   |              |
|-------------|---------|-----|---|---|---|--------------|
| NC_037645.1 | 6303245 | SNV | 1 | A | T | Homozygous   |
| NC_037645.1 | 6303249 | SNV | 1 | A | T | Homozygous   |
| NC_037645.1 | 6303253 | SNV | 1 | A | T | Homozygous   |
| NC_037645.1 | 6303256 | SNV | 1 | T | A | Homozygous   |
| NC_037645.1 | 6303258 | SNV | 1 | T | A | Homozygous   |
| NC_037645.1 | 6303260 | SNV | 1 | T | A | Homozygous   |
| NC_037645.1 | 6303267 | SNV | 1 | T | A | Homozygous   |
| NC_037645.1 | 6303277 | SNV | 1 | T | A | Homozygous   |
| NC_037645.1 | 6303282 | SNV | 1 | A | T | Homozygous   |
| NC_037645.1 | 6305880 | SNV | 1 | T | C | Homozygous   |
| NC_037645.1 | 6309000 | SNV | 1 | C | G | Heterozygous |
| NC_037645.1 | 6309409 | SNV | 1 | A | G | Heterozygous |
| NC_037645.1 | 6309483 | SNV | 1 | G | A | Homozygous   |
| NC_037645.1 | 6309538 | SNV | 1 | A | G | Homozygous   |
| NC_037645.1 | 6310448 | SNV | 1 | A | G | Homozygous   |
| NC_037645.1 | 6310829 | SNV | 1 | C | T | Heterozygous |
| NC_037645.1 | 6311811 | SNV | 1 | T | G | Homozygous   |
| NC_037645.1 | 6311838 | SNV | 1 | T | A | Homozygous   |
| NC_037645.1 | 6314506 | SNV | 1 | T | G | Heterozygous |
| NC_037645.1 | 6314519 | SNV | 1 | A | T | Heterozygous |
| NC_037645.1 | 6314529 | SNV | 1 | C | T | Heterozygous |
| NC_037645.1 | 6314532 | SNV | 1 | G | A | Heterozygous |
| NC_037645.1 | 6315478 | SNV | 1 | C | A | Heterozygous |
| NC_037645.1 | 6316020 | SNV | 1 | T | G | Homozygous   |
| NC_037645.1 | 6316025 | SNV | 1 | T | G | Homozygous   |
| NC_037645.1 | 6316027 | SNV | 1 | T | G | Homozygous   |
| NC_037645.1 | 6316029 | SNV | 1 | T | C | Homozygous   |
| NC_037645.1 | 6317628 | SNV | 1 | C | T | Homozygous   |
| NC_037645.1 | 6318063 | SNV | 1 | C | G | Homozygous   |
| NC_037645.1 | 6318472 | SNV | 1 | A | G | Homozygous   |
| NC_037645.1 | 6318956 | SNV | 1 | A | T | Homozygous   |
| NC_037645.1 | 6318960 | SNV | 1 | A | G | Homozygous   |
| NC_037645.1 | 6319513 | SNV | 1 | C | T | Homozygous   |
| NC_037645.1 | 6319539 | SNV | 1 | C | T | Homozygous   |
| NC_037645.1 | 6319649 | SNV | 1 | C | A | Homozygous   |
| NC_037645.1 | 6319817 | SNV | 1 | A | G | Homozygous   |
| NC_037645.1 | 6322894 | SNV | 1 | G | A | Homozygous   |
| NC_037645.1 | 6322897 | SNV | 1 | A | G | Homozygous   |
| NC_037645.1 | 6323114 | SNV | 1 | G | A | Homozygous   |
| NC_037645.1 | 6323491 | SNV | 1 | G | A | Homozygous   |
| NC_037645.1 | 6323511 | SNV | 1 | T | A | Homozygous   |
| NC_037645.1 | 6324165 | SNV | 1 | T | A | Heterozygous |
| NC_037645.1 | 6327857 | SNV | 1 | C | T | Homozygous   |
| NC_037645.1 | 6328242 | SNV | 1 | A | C | Homozygous   |
| NC_037645.1 | 6328477 | SNV | 1 | A | G | Homozygous   |
| NC_037645.1 | 6331053 | SNV | 1 | G | A | Homozygous   |
| NC_037645.1 | 6331224 | SNV | 1 | T | C | Heterozygous |
| NC_037645.1 | 6331287 | SNV | 1 | A | G | Homozygous   |
| NC_037645.1 | 6331540 | SNV | 1 | T | C | Homozygous   |
| NC_037645.1 | 6341415 | SNV | 1 | A | T | Heterozygous |
| NC_037645.1 | 6341938 | SNV | 1 | C | T | Heterozygous |

|             |         |     |   |   |   |              |
|-------------|---------|-----|---|---|---|--------------|
| NC_037645.1 | 6341969 | SNV | 1 | T | C | Homozygous   |
| NC_037645.1 | 6341988 | SNV | 1 | T | C | Heterozygous |
| NC_037645.1 | 6342130 | SNV | 1 | A | G | Homozygous   |
| NC_037645.1 | 6342189 | SNV | 1 | C | T | Heterozygous |
| NC_037645.1 | 6342560 | SNV | 1 | T | C | Homozygous   |
| NC_037645.1 | 6342589 | SNV | 1 | G | A | Heterozygous |
| NC_037645.1 | 6343106 | SNV | 1 | T | C | Heterozygous |
| NC_037645.1 | 6343139 | SNV | 1 | T | C | Homozygous   |
| NC_037645.1 | 6344005 | SNV | 1 | A | G | Homozygous   |
| NC_037645.1 | 6344061 | SNV | 1 | T | G | Homozygous   |
| NC_037645.1 | 6344063 | SNV | 1 | G | T | Heterozygous |
| NC_037645.1 | 6344564 | SNV | 1 | T | A | Homozygous   |
| NC_037645.1 | 6344589 | SNV | 1 | C | T | Heterozygous |
| NC_037645.1 | 6344596 | SNV | 1 | G | A | Heterozygous |
| NC_037645.1 | 6344754 | SNV | 1 | T | C | Homozygous   |
| NC_037645.1 | 6344809 | SNV | 1 | G | A | Heterozygous |
| NC_037645.1 | 6344834 | SNV | 1 | T | G | Heterozygous |
| NC_037645.1 | 6345046 | SNV | 1 | A | G | Homozygous   |
| NC_037645.1 | 6347719 | SNV | 1 | G | C | Homozygous   |
| NC_037645.1 | 6347721 | SNV | 1 | T | A | Homozygous   |
| NC_037645.1 | 6347728 | SNV | 1 | A | G | Heterozygous |
| NC_037645.1 | 6348364 | SNV | 1 | A | C | Homozygous   |
| NC_037645.1 | 6348391 | SNV | 1 | C | T | Heterozygous |
| NC_037645.1 | 6348457 | SNV | 1 | C | T | Homozygous   |
| NC_037645.1 | 6348727 | SNV | 1 | G | A | Homozygous   |
| NC_037645.1 | 6348920 | SNV | 1 | C | G | Homozygous   |
| NC_037645.1 | 6348949 | SNV | 1 | G | T | Homozygous   |
| NC_037645.1 | 6349719 | SNV | 1 | C | T | Heterozygous |
| NC_037645.1 | 6350265 | SNV | 1 | A | G | Heterozygous |
| NC_037645.1 | 6350269 | SNV | 1 | T | A | Homozygous   |
| NC_037645.1 | 6350272 | SNV | 1 | T | A | Homozygous   |
| NC_037645.1 | 6350282 | SNV | 1 | T | C | Homozygous   |
| NC_037645.1 | 6350291 | SNV | 1 | C | T | Heterozygous |
| NC_037645.1 | 6350322 | SNV | 1 | A | G | Heterozygous |
| NC_037645.1 | 6350336 | SNV | 1 | A | G | Heterozygous |
| NC_037645.1 | 6350351 | SNV | 1 | G | A | Heterozygous |
| NC_037645.1 | 6350436 | SNV | 1 | G | T | Heterozygous |
| NC_037645.1 | 6350579 | SNV | 1 | A | G | Heterozygous |
| NC_037645.1 | 6350588 | SNV | 1 | T | A | Heterozygous |
| NC_037645.1 | 6350606 | SNV | 1 | T | C | Heterozygous |
| NC_037645.1 | 6350609 | SNV | 1 | A | G | Heterozygous |
| NC_037645.1 | 6350612 | SNV | 1 | T | C | Heterozygous |
| NC_037645.1 | 6350619 | SNV | 1 | A | G | Heterozygous |
| NC_037645.1 | 6351655 | SNV | 1 | T | A | Heterozygous |
| NC_037645.1 | 6351681 | SNV | 1 | T | A | Heterozygous |
| NC_037645.1 | 6351684 | SNV | 1 | C | T | Heterozygous |
| NC_037645.1 | 6351687 | SNV | 1 | T | C | Homozygous   |
| NC_037645.1 | 6351690 | SNV | 1 | G | T | Heterozygous |
| NC_037645.1 | 6351707 | SNV | 1 | G | T | Heterozygous |
| NC_037645.1 | 6351711 | SNV | 1 | T | A | Heterozygous |
| NC_037645.1 | 6355053 | SNV | 1 | A | G | Heterozygous |

|             |         |     |   |   |   |              |
|-------------|---------|-----|---|---|---|--------------|
| NC_037645.1 | 6358765 | SNV | 1 | T | C | Homozygous   |
| NC_037645.1 | 6358960 | SNV | 1 | A | G | Homozygous   |
| NC_037645.1 | 6359495 | SNV | 1 | T | C | Homozygous   |
| NC_037645.1 | 6359652 | SNV | 1 | A | G | Homozygous   |
| NC_037645.1 | 6359896 | SNV | 1 | C | T | Heterozygous |
| NC_037645.1 | 6359923 | SNV | 1 | C | T | Heterozygous |
| NC_037645.1 | 6360032 | SNV | 1 | A | G | Heterozygous |
| NC_037645.1 | 6360688 | SNV | 1 | T | G | Heterozygous |
| NC_037645.1 | 6360692 | SNV | 1 | T | C | Heterozygous |
| NC_037645.1 | 6360899 | SNV | 1 | G | A | Heterozygous |
| NC_037645.1 | 6361337 | SNV | 1 | T | C | Homozygous   |
| NC_037645.1 | 6363033 | SNV | 1 | G | C | Homozygous   |
| NC_037645.1 | 6363037 | SNV | 1 | T | A | Homozygous   |
| NC_037645.1 | 6363043 | SNV | 1 | T | A | Homozygous   |
| NC_037645.1 | 6363046 | SNV | 1 | A | C | Homozygous   |
| NC_037645.1 | 6363049 | SNV | 1 | C | A | Homozygous   |
| NC_037645.1 | 6363653 | SNV | 1 | A | C | Homozygous   |
| NC_037645.1 | 6363674 | SNV | 1 | A | G | Homozygous   |
| NC_037645.1 | 6363680 | SNV | 1 | A | T | Homozygous   |
| NC_037645.1 | 6363682 | SNV | 1 | T | G | Homozygous   |
| NC_037645.1 | 6363687 | SNV | 1 | C | T | Homozygous   |
| NC_037645.1 | 6363693 | SNV | 1 | C | G | Homozygous   |
| NC_037645.1 | 6364557 | SNV | 1 | T | A | Heterozygous |
| NC_037645.1 | 6364564 | SNV | 1 | T | A | Heterozygous |
| NC_037645.1 | 6365878 | SNV | 1 | A | T | Homozygous   |
| NC_037645.1 | 6367268 | SNV | 1 | C | A | Homozygous   |
| NC_037645.1 | 6367310 | SNV | 1 | A | G | Heterozygous |
| NC_037645.1 | 6367600 | SNV | 1 | C | T | Heterozygous |
| NC_037645.1 | 6368315 | SNV | 1 | G | A | Heterozygous |
| NC_037645.1 | 6368330 | SNV | 1 | G | A | Heterozygous |
| NC_037645.1 | 6368347 | SNV | 1 | C | T | Homozygous   |
| NC_037645.1 | 6368359 | SNV | 1 | T | G | Homozygous   |
| NC_037645.1 | 6368398 | SNV | 1 | A | G | Heterozygous |
| NC_037645.1 | 6368408 | SNV | 1 | C | T | Heterozygous |
| NC_037645.1 | 6368410 | SNV | 1 | T | C | Heterozygous |
| NC_037645.1 | 6368695 | SNV | 1 | C | T | Heterozygous |
| NC_037645.1 | 6368726 | SNV | 1 | G | A | Heterozygous |
| NC_037645.1 | 6368917 | SNV | 1 | G | C | Heterozygous |
| NC_037645.1 | 6368949 | SNV | 1 | A | G | Homozygous   |
| NC_037645.1 | 6369009 | SNV | 1 | G | A | Heterozygous |
| NC_037645.1 | 6369421 | SNV | 1 | C | T | Heterozygous |
| NC_037645.1 | 6369456 | SNV | 1 | A | C | Heterozygous |
| NC_037645.1 | 6369538 | SNV | 1 | C | T | Heterozygous |
| NC_037645.1 | 6369597 | SNV | 1 | A | G | Homozygous   |
| NC_037645.1 | 6369708 | SNV | 1 | C | T | Homozygous   |
| NC_037645.1 | 6369719 | SNV | 1 | G | A | Homozygous   |
| NC_037645.1 | 6369721 | SNV | 1 | G | A | Homozygous   |
| NC_037645.1 | 6369786 | SNV | 1 | A | G | Homozygous   |
| NC_037645.1 | 6373156 | SNV | 1 | A | T | Homozygous   |
| NC_037645.1 | 6375006 | SNV | 1 | G | T | Homozygous   |
| NC_037645.1 | 6375025 | SNV | 1 | A | G | Homozygous   |



|             |         |     |   |   |   |              |
|-------------|---------|-----|---|---|---|--------------|
| NC_037645.1 | 6375035 | SNV | 1 | A | G | Homozygous   |
| NC_037645.1 | 6375134 | SNV | 1 | A | T | Homozygous   |
| NC_037645.1 | 6375166 | SNV | 1 | T | G | Heterozygous |
| NC_037645.1 | 6375168 | SNV | 1 | A | G | Homozygous   |
| NC_037645.1 | 6376617 | SNV | 1 | T | C | Heterozygous |
| NC_037645.1 | 6376632 | SNV | 1 | T | C | Heterozygous |
| NC_037645.1 | 6376652 | SNV | 1 | G | A | Heterozygous |
| NC_037645.1 | 6376726 | SNV | 1 | C | T | Homozygous   |
| NC_037645.1 | 6376746 | SNV | 1 | T | C | Homozygous   |
| NC_037645.1 | 6376769 | SNV | 1 | T | C | Heterozygous |
| NC_037645.1 | 6376777 | SNV | 1 | C | T | Heterozygous |
| NC_037645.1 | 6376890 | SNV | 1 | C | T | Heterozygous |
| NC_037645.1 | 6376902 | SNV | 1 | C | T | Heterozygous |
| NC_037645.1 | 6379243 | SNV | 1 | G | A | Heterozygous |
| NC_037645.1 | 6379248 | SNV | 1 | G | A | Heterozygous |
| NC_037645.1 | 6379262 | SNV | 1 | C | A | Homozygous   |
| NC_037645.1 | 6399768 | SNV | 1 | A | G | Homozygous   |
| NC_037645.1 | 6399793 | SNV | 1 | T | A | Homozygous   |
| NC_037645.1 | 6399800 | SNV | 1 | T | A | Homozygous   |
| NC_037645.1 | 6409538 | SNV | 1 | G | A | Heterozygous |
| NC_037645.1 | 6409692 | SNV | 1 | C | G | Homozygous   |
| NC_037645.1 | 6410338 | SNV | 1 | C | A | Heterozygous |
| NC_037645.1 | 6410341 | SNV | 1 | A | T | Heterozygous |
| NC_037645.1 | 6411016 | SNV | 1 | A | G | Homozygous   |
| NC_037645.1 | 6411456 | SNV | 1 | A | T | Homozygous   |
| NC_037645.1 | 6411515 | SNV | 1 | C | T | Heterozygous |
| NC_037645.1 | 6411574 | SNV | 1 | C | T | Heterozygous |
| NC_037645.1 | 6411654 | SNV | 1 | A | G | Homozygous   |
| NC_037645.1 | 6412601 | SNV | 1 | A | G | Heterozygous |
| NC_037645.1 | 6413936 | SNV | 1 | T | C | Homozygous   |
| NC_037645.1 | 6414221 | SNV | 1 | C | T | Heterozygous |
| NC_037645.1 | 6414385 | SNV | 1 | C | G | Homozygous   |
| NC_037645.1 | 6414470 | SNV | 1 | A | G | Homozygous   |
| NC_037645.1 | 6414584 | SNV | 1 | C | T | Homozygous   |
| NC_037645.1 | 6414624 | SNV | 1 | C | T | Heterozygous |
| NC_037645.1 | 6423792 | SNV | 1 | G | A | Heterozygous |
| NC_037645.1 | 6423975 | SNV | 1 | G | T | Homozygous   |
| NC_037645.1 | 6423979 | SNV | 1 | G | T | Homozygous   |
| NC_037645.1 | 6423983 | SNV | 1 | G | T | Heterozygous |
| NC_037645.1 | 6424138 | SNV | 1 | C | T | Heterozygous |
| NC_037645.1 | 6424486 | SNV | 1 | A | G | Heterozygous |
| NC_037645.1 | 6424511 | SNV | 1 | A | G | Heterozygous |
| NC_037645.1 | 6424513 | SNV | 1 | G | C | Heterozygous |
| NC_037645.1 | 6426096 | SNV | 1 | T | C | Homozygous   |
| NC_037645.1 | 6426535 | SNV | 1 | A | G | Homozygous   |
| NC_037645.1 | 6426545 | SNV | 1 | A | G | Homozygous   |
| NC_037645.1 | 6428165 | SNV | 1 | G | A | Homozygous   |
| NC_037645.1 | 6428850 | SNV | 1 | C | T | Heterozygous |
| NC_037645.1 | 6428860 | SNV | 1 | A | G | Heterozygous |
| NC_037645.1 | 6429796 | SNV | 1 | A | C | Heterozygous |
| NC_037645.1 | 6430557 | SNV | 1 | A | C | Homozygous   |

|             |         |     |   |   |   |              |
|-------------|---------|-----|---|---|---|--------------|
| NC_037645.1 | 6433100 | SNV | 1 | T | C | Homozygous   |
| NC_037645.1 | 6433136 | SNV | 1 | G | A | Heterozygous |
| NC_037645.1 | 6433221 | SNV | 1 | T | C | Homozygous   |
| NC_037645.1 | 6434396 | SNV | 1 | C | T | Homozygous   |
| NC_037645.1 | 6434402 | SNV | 1 | C | T | Heterozygous |
| NC_037645.1 | 6434724 | SNV | 1 | A | T | Homozygous   |
| NC_037645.1 | 6437606 | SNV | 1 | T | G | Homozygous   |
| NC_037645.1 | 6440008 | SNV | 1 | T | C | Heterozygous |
| NC_037645.1 | 6440009 | SNV | 1 | G | C | Heterozygous |
| NC_037645.1 | 6440011 | SNV | 1 | T | G | Heterozygous |
| NC_037645.1 | 6440013 | SNV | 1 | A | T | Heterozygous |
| NC_037645.1 | 6449167 | SNV | 1 | A | T | Heterozygous |
| NC_037645.1 | 6449388 | SNV | 1 | G | T | Homozygous   |
| NC_037645.1 | 6449395 | SNV | 1 | A | T | Homozygous   |
| NC_037645.1 | 6449398 | SNV | 1 | T | C | Homozygous   |
| NC_037645.1 | 6449400 | SNV | 1 | A | C | Homozygous   |
| NC_037645.1 | 6449403 | SNV | 1 | T | A | Homozygous   |
| NC_037645.1 | 6449683 | SNV | 1 | C | T | Homozygous   |
| NC_037645.1 | 6450060 | SNV | 1 | A | G | Homozygous   |
| NC_037645.1 | 6450231 | SNV | 1 | A | G | Heterozygous |
| NC_037645.1 | 6450339 | SNV | 1 | A | T | Heterozygous |
| NC_037645.1 | 6450369 | SNV | 1 | T | C | Heterozygous |
| NC_037645.1 | 6450556 | SNV | 1 | C | G | Homozygous   |
| NC_037645.1 | 6450561 | SNV | 1 | A | T | Homozygous   |
| NC_037645.1 | 6450989 | SNV | 1 | C | T | Heterozygous |
| NC_037645.1 | 6453973 | SNV | 1 | C | T | Heterozygous |
| NC_037645.1 | 6457068 | SNV | 1 | T | G | Homozygous   |
| NC_037645.1 | 6457469 | SNV | 1 | T | C | Homozygous   |
| NC_037645.1 | 6458200 | SNV | 1 | C | T | Homozygous   |
| NC_037645.1 | 6458416 | SNV | 1 | G | A | Heterozygous |
| NC_037645.1 | 6461011 | SNV | 1 | A | T | Homozygous   |
| NC_037645.1 | 6462640 | SNV | 1 | A | T | Homozygous   |
| NC_037645.1 | 6462646 | SNV | 1 | T | G | Homozygous   |
| NC_037645.1 | 6462648 | SNV | 1 | T | G | Homozygous   |
| NC_037645.1 | 6462668 | SNV | 1 | A | T | Homozygous   |
| NC_037645.1 | 6462930 | SNV | 1 | T | C | Heterozygous |
| NC_037645.1 | 6462937 | SNV | 1 | C | T | Heterozygous |
| NC_037645.1 | 6463560 | SNV | 1 | T | A | Homozygous   |
| NC_037645.1 | 6464306 | SNV | 1 | A | G | Homozygous   |
| NC_037645.1 | 6466088 | SNV | 1 | A | T | Homozygous   |
| NC_037645.1 | 6467099 | SNV | 1 | C | T | Heterozygous |
| NC_037645.1 | 6467113 | SNV | 1 | T | C | Heterozygous |
| NC_037645.1 | 6467115 | SNV | 1 | C | T | Heterozygous |
| NC_037645.1 | 6467361 | SNV | 1 | A | G | Homozygous   |
| NC_037645.1 | 6468666 | SNV | 1 | A | G | Homozygous   |
| NC_037645.1 | 6472359 | SNV | 1 | T | G | Heterozygous |
| NC_037645.1 | 6472384 | SNV | 1 | A | G | Heterozygous |
| NC_037645.1 | 6473249 | SNV | 1 | A | T | Homozygous   |
| NC_037645.1 | 6473251 | SNV | 1 | G | C | Homozygous   |
| NC_037645.1 | 6473368 | SNV | 1 | A | G | Homozygous   |
| NC_037645.1 | 6474473 | SNV | 1 | A | T | Homozygous   |

|             |         |     |   |   |   |              |
|-------------|---------|-----|---|---|---|--------------|
| NC_037645.1 | 6474476 | SNV | 1 | A | G | Homozygous   |
| NC_037645.1 | 6476445 | SNV | 1 | A | G | Homozygous   |
| NC_037645.1 | 6477037 | SNV | 1 | C | T | Homozygous   |
| NC_037645.1 | 6482841 | SNV | 1 | T | G | Homozygous   |
| NC_037645.1 | 6482843 | SNV | 1 | C | A | Homozygous   |
| NC_037645.1 | 6484789 | SNV | 1 | A | T | Heterozygous |
| NC_037645.1 | 6487774 | SNV | 1 | G | A | Homozygous   |
| NC_037645.1 | 6487916 | SNV | 1 | G | T | Homozygous   |
| NC_037645.1 | 6487918 | SNV | 1 | A | C | Homozygous   |
| NC_037645.1 | 6489063 | SNV | 1 | G | T | Heterozygous |
| NC_037645.1 | 6490343 | SNV | 1 | T | C | Heterozygous |
| NC_037645.1 | 6490839 | SNV | 1 | A | G | Homozygous   |
| NC_037645.1 | 6506463 | SNV | 1 | T | C | Homozygous   |
| NC_037645.1 | 6507422 | SNV | 1 | C | T | Homozygous   |
| NC_037645.1 | 6507457 | SNV | 1 | G | A | Heterozygous |
| NC_037645.1 | 6508855 | SNV | 1 | C | T | Homozygous   |
| NC_037645.1 | 6516625 | SNV | 1 | T | C | Homozygous   |
| NC_037645.1 | 6517947 | SNV | 1 | C | T | Heterozygous |
| NC_037645.1 | 6524905 | SNV | 1 | A | C | Heterozygous |
| NC_037645.1 | 6524905 | SNV | 1 | A | T | Heterozygous |
| NC_037645.1 | 6525153 | SNV | 1 | C | T | Heterozygous |
| NC_037645.1 | 6525358 | SNV | 1 | G | A | Heterozygous |
| NC_037645.1 | 6531696 | SNV | 1 | G | T | Homozygous   |
| NC_037645.1 | 6536030 | SNV | 1 | G | T | Homozygous   |
| NC_037645.1 | 6536535 | SNV | 1 | A | G | Homozygous   |
| NC_037645.1 | 6537156 | SNV | 1 | G | A | Heterozygous |
| NC_037645.1 | 6537748 | SNV | 1 | A | C | Homozygous   |
| NC_037645.1 | 6538149 | SNV | 1 | G | A | Heterozygous |
| NC_037645.1 | 6542773 | SNV | 1 | A | T | Heterozygous |
| NC_037645.1 | 6549511 | SNV | 1 | G | T | Heterozygous |
| NC_037645.1 | 6549519 | SNV | 1 | G | T | Heterozygous |
| NC_037645.1 | 6559051 | SNV | 1 | T | C | Heterozygous |
| NC_037645.1 | 6559053 | SNV | 1 | C | T | Heterozygous |
| NC_037645.1 | 6559054 | SNV | 1 | G | C | Heterozygous |
| NC_037645.1 | 6559056 | SNV | 1 | C | T | Heterozygous |
| NC_037645.1 | 6559064 | SNV | 1 | C | G | Heterozygous |
| NC_037645.1 | 6559065 | SNV | 1 | G | A | Heterozygous |
| NC_037645.1 | 6559075 | SNV | 1 | C | T | Heterozygous |
| NC_037645.1 | 6559076 | SNV | 1 | G | A | Heterozygous |
| NC_037645.1 | 6559083 | SNV | 1 | A | T | Heterozygous |
| NC_037645.1 | 6559084 | SNV | 1 | C | T | Heterozygous |
| NC_037645.1 | 6566717 | SNV | 1 | G | A | Heterozygous |
| NC_037645.1 | 6566923 | SNV | 1 | G | A | Homozygous   |
| NC_037645.1 | 6568775 | SNV | 1 | T | C | Heterozygous |
| NC_037645.1 | 6568951 | SNV | 1 | C | T | Heterozygous |
| NC_037645.1 | 6570162 | SNV | 1 | G | C | Homozygous   |
| NC_037645.1 | 6575555 | SNV | 1 | A | G | Heterozygous |
| NC_037645.1 | 6575805 | SNV | 1 | A | G | Homozygous   |
| NC_037645.1 | 6577433 | SNV | 1 | A | T | Homozygous   |
| NC_037645.1 | 6577450 | SNV | 1 | T | A | Homozygous   |
| NC_037645.1 | 6577477 | SNV | 1 | T | A | Homozygous   |

|             |         |     |   |   |   |              |
|-------------|---------|-----|---|---|---|--------------|
| NC_037645.1 | 6577479 | SNV | 1 | T | A | Homozygous   |
| NC_037645.1 | 6577483 | SNV | 1 | T | A | Homozygous   |
| NC_037645.1 | 6578554 | SNV | 1 | G | A | Heterozygous |
| NC_037645.1 | 6579286 | SNV | 1 | C | T | Heterozygous |
| NC_037645.1 | 6585605 | SNV | 1 | T | A | Heterozygous |
| NC_037645.1 | 6585609 | SNV | 1 | T | A | Heterozygous |
| NC_037645.1 | 6585613 | SNV | 1 | T | G | Heterozygous |
| NC_037645.1 | 6585636 | SNV | 1 | A | G | Homozygous   |
| NC_037645.1 | 6585638 | SNV | 1 | A | C | Heterozygous |
| NC_037645.1 | 6585639 | SNV | 1 | C | T | Heterozygous |
| NC_037645.1 | 6585643 | SNV | 1 | T | A | Homozygous   |
| NC_037645.1 | 6585647 | SNV | 1 | T | A | Heterozygous |
| NC_037645.1 | 6585652 | SNV | 1 | G | A | Homozygous   |
| NC_037645.1 | 6585657 | SNV | 1 | T | A | Heterozygous |
| NC_037645.1 | 6588052 | SNV | 1 | C | T | Homozygous   |
| NC_037645.1 | 6588079 | SNV | 1 | C | T | Homozygous   |
| NC_037645.1 | 6588354 | SNV | 1 | T | C | Homozygous   |
| NC_037645.1 | 6588356 | SNV | 1 | A | T | Homozygous   |
| NC_037645.1 | 6588362 | SNV | 1 | A | T | Homozygous   |
| NC_037645.1 | 6588372 | SNV | 1 | T | A | Homozygous   |
| NC_037645.1 | 6588788 | SNV | 1 | C | T | Homozygous   |
| NC_037645.1 | 6593839 | SNV | 1 | C | T | Heterozygous |
| NC_037645.1 | 6595981 | SNV | 1 | C | A | Homozygous   |
| NC_037645.1 | 6600443 | SNV | 1 | T | C | Homozygous   |
| NC_037645.1 | 6600499 | SNV | 1 | A | G | Homozygous   |
| NC_037645.1 | 6600670 | SNV | 1 | G | A | Heterozygous |
| NC_037645.1 | 6601112 | SNV | 1 | C | T | Heterozygous |
| NC_037645.1 | 6601376 | SNV | 1 | C | T | Homozygous   |
| NC_037645.1 | 6602835 | SNV | 1 | G | A | Homozygous   |
| NC_037645.1 | 6602844 | SNV | 1 | G | A | Heterozygous |
| NC_037645.1 | 6602871 | SNV | 1 | T | C | Homozygous   |
| NC_037645.1 | 6602873 | SNV | 1 | A | G | Homozygous   |
| NC_037645.1 | 6606259 | SNV | 1 | C | T | Heterozygous |
| NC_037645.1 | 6607903 | SNV | 1 | G | A | Heterozygous |
| NC_037645.1 | 6607963 | SNV | 1 | T | C | Homozygous   |
| NC_037645.1 | 6607967 | SNV | 1 | C | T | Heterozygous |
| NC_037645.1 | 6608280 | SNV | 1 | T | C | Homozygous   |
| NC_037645.1 | 6608810 | SNV | 1 | T | C | Heterozygous |
| NC_037645.1 | 6611152 | SNV | 1 | A | T | Homozygous   |
| NC_037645.1 | 6611183 | SNV | 1 | G | A | Heterozygous |
| NC_037645.1 | 6612236 | SNV | 1 | C | T | Homozygous   |
| NC_037645.1 | 6612533 | SNV | 1 | T | C | Heterozygous |
| NC_037645.1 | 6612793 | SNV | 1 | C | T | Heterozygous |
| NC_037645.1 | 6613113 | SNV | 1 | C | T | Heterozygous |
| NC_037645.1 | 6613302 | SNV | 1 | G | A | Heterozygous |
| NC_037645.1 | 6613391 | SNV | 1 | T | C | Heterozygous |
| NC_037645.1 | 6613966 | SNV | 1 | C | T | Homozygous   |
| NC_037645.1 | 6614128 | SNV | 1 | A | G | Homozygous   |
| NC_037645.1 | 6614573 | SNV | 1 | G | A | Heterozygous |
| NC_037645.1 | 6615728 | SNV | 1 | T | C | Homozygous   |
| NC_037645.1 | 6615979 | SNV | 1 | A | G | Homozygous   |

|             |         |     |   |   |   |              |
|-------------|---------|-----|---|---|---|--------------|
| NC_037645.1 | 6616058 | SNV | 1 | T | C | Heterozygous |
| NC_037645.1 | 6616593 | SNV | 1 | G | A | Homozygous   |
| NC_037645.1 | 6618520 | SNV | 1 | T | A | Homozygous   |
| NC_037645.1 | 6620301 | SNV | 1 | A | G | Homozygous   |
| NC_037645.1 | 6620371 | SNV | 1 | G | A | Heterozygous |
| NC_037645.1 | 6620612 | SNV | 1 | T | C | Homozygous   |
| NC_037645.1 | 6622135 | SNV | 1 | A | G | Homozygous   |
| NC_037645.1 | 6622787 | SNV | 1 | A | G | Homozygous   |
| NC_037645.1 | 6632095 | SNV | 1 | T | C | Homozygous   |
| NC_037645.1 | 6632314 | SNV | 1 | C | G | Heterozygous |
| NC_037645.1 | 6632413 | SNV | 1 | T | C | Homozygous   |
| NC_037645.1 | 6632737 | SNV | 1 | G | A | Heterozygous |
| NC_037645.1 | 6633792 | SNV | 1 | C | T | Heterozygous |
| NC_037645.1 | 6633846 | SNV | 1 | A | T | Heterozygous |
| NC_037645.1 | 6634112 | SNV | 1 | C | T | Heterozygous |
| NC_037645.1 | 6634269 | SNV | 1 | T | C | Heterozygous |
| NC_037645.1 | 6635063 | SNV | 1 | C | T | Homozygous   |
| NC_037645.1 | 6636779 | SNV | 1 | G | A | Heterozygous |
| NC_037645.1 | 6637069 | SNV | 1 | A | T | Homozygous   |
| NC_037645.1 | 6637074 | SNV | 1 | T | A | Homozygous   |
| NC_037645.1 | 6637079 | SNV | 1 | T | C | Homozygous   |
| NC_037645.1 | 6637477 | SNV | 1 | G | A | Homozygous   |
| NC_037645.1 | 6637628 | SNV | 1 | A | T | Heterozygous |
| NC_037645.1 | 6637630 | SNV | 1 | A | T | Heterozygous |
| NC_037645.1 | 6637632 | SNV | 1 | A | T | Heterozygous |
| NC_037645.1 | 6637634 | SNV | 1 | G | A | Heterozygous |
| NC_037645.1 | 6637697 | SNV | 1 | A | G | Homozygous   |
| NC_037645.1 | 6638229 | SNV | 1 | A | G | Homozygous   |
| NC_037645.1 | 6639235 | SNV | 1 | A | G | Heterozygous |
| NC_037645.1 | 6639819 | SNV | 1 | A | T | Homozygous   |
| NC_037645.1 | 6639822 | SNV | 1 | T | G | Homozygous   |
| NC_037645.1 | 6639860 | SNV | 1 | C | T | Homozygous   |
| NC_037645.1 | 6639864 | SNV | 1 | T | A | Homozygous   |
| NC_037645.1 | 6642339 | SNV | 1 | T | C | Heterozygous |
| NC_037645.1 | 6643284 | SNV | 1 | T | C | Homozygous   |
| NC_037645.1 | 6644157 | SNV | 1 | C | T | Homozygous   |
| NC_037645.1 | 6646417 | SNV | 1 | C | T | Heterozygous |
| NC_037645.1 | 6646574 | SNV | 1 | C | T | Heterozygous |
| NC_037645.1 | 6646754 | SNV | 1 | A | G | Homozygous   |
| NC_037645.1 | 6646775 | SNV | 1 | C | T | Heterozygous |
| NC_037645.1 | 6647357 | SNV | 1 | A | G | Homozygous   |
| NC_037645.1 | 6651223 | SNV | 1 | A | G | Homozygous   |
| NC_037645.1 | 6651260 | SNV | 1 | C | T | Homozygous   |
| NC_037645.1 | 6653035 | SNV | 1 | T | C | Homozygous   |
| NC_037645.1 | 6669637 | SNV | 1 | G | A | Heterozygous |
| NC_037645.1 | 6669641 | SNV | 1 | G | A | Heterozygous |
| NC_037645.1 | 6669648 | SNV | 1 | A | C | Heterozygous |
| NC_037645.1 | 6669696 | SNV | 1 | T | G | Homozygous   |
| NC_037645.1 | 6688490 | SNV | 1 | T | C | Homozygous   |
| NC_037645.1 | 6688493 | SNV | 1 | C | T | Homozygous   |
| NC_037645.1 | 6688496 | SNV | 1 | C | T | Homozygous   |

|             |         |     |   |   |   |              |
|-------------|---------|-----|---|---|---|--------------|
| NC_037645.1 | 6688498 | SNV | 1 | C | T | Heterozygous |
| NC_037645.1 | 6688505 | SNV | 1 | T | A | Heterozygous |
| NC_037645.1 | 6688507 | SNV | 1 | C | T | Homozygous   |
| NC_037645.1 | 6688511 | SNV | 1 | T | C | Heterozygous |
| NC_037645.1 | 6688519 | SNV | 1 | A | C | Heterozygous |
| NC_037645.1 | 6688521 | SNV | 1 | T | C | Heterozygous |
| NC_037645.1 | 6690799 | SNV | 1 | A | G | Heterozygous |
| NC_037645.1 | 6695218 | SNV | 1 | C | A | Homozygous   |
| NC_037645.1 | 6695229 | SNV | 1 | T | C | Homozygous   |
| NC_037645.1 | 6695245 | SNV | 1 | A | G | Heterozygous |
| NC_037645.1 | 6695250 | SNV | 1 | T | C | Homozygous   |
| NC_037645.1 | 6695646 | SNV | 1 | T | C | Heterozygous |
| NC_037645.1 | 6699899 | SNV | 1 | A | G | Homozygous   |
| NC_037645.1 | 6699964 | SNV | 1 | A | G | Homozygous   |
| NC_037645.1 | 6700060 | SNV | 1 | A | G | Homozygous   |
| NC_037645.1 | 6700140 | SNV | 1 | G | A | Heterozygous |
| NC_037645.1 | 6706233 | SNV | 1 | A | G | Homozygous   |
| NC_037645.1 | 6720898 | SNV | 1 | T | C | Homozygous   |
| NC_037645.1 | 6721145 | SNV | 1 | C | T | Homozygous   |
| NC_037645.1 | 6721176 | SNV | 1 | G | A | Homozygous   |
| NC_037645.1 | 6723077 | SNV | 1 | T | A | Homozygous   |
| NC_037645.1 | 6723104 | SNV | 1 | A | C | Homozygous   |
| NC_037645.1 | 6723111 | SNV | 1 | T | A | Homozygous   |
| NC_037645.1 | 6723115 | SNV | 1 | T | G | Homozygous   |
| NC_037645.1 | 6723359 | SNV | 1 | T | G | Heterozygous |
| NC_037645.1 | 6726713 | SNV | 1 | G | A | Heterozygous |
| NC_037645.1 | 6726718 | SNV | 1 | A | G | Homozygous   |
| NC_037645.1 | 6727120 | SNV | 1 | G | A | Homozygous   |
| NC_037645.1 | 6727736 | SNV | 1 | C | T | Homozygous   |
| NC_037645.1 | 6727768 | SNV | 1 | C | T | Heterozygous |
| NC_037645.1 | 6729026 | SNV | 1 | C | G | Homozygous   |
| NC_037645.1 | 6729033 | SNV | 1 | G | T | Homozygous   |
| NC_037645.1 | 6729082 | SNV | 1 | A | T | Heterozygous |
| NC_037645.1 | 6736500 | SNV | 1 | A | G | Heterozygous |
| NC_037645.1 | 6739537 | SNV | 1 | T | C | Homozygous   |
| NC_037645.1 | 6741203 | SNV | 1 | A | G | Homozygous   |
| NC_037645.1 | 6741737 | SNV | 1 | C | T | Heterozygous |
| NC_037645.1 | 6741800 | SNV | 1 | T | C | Homozygous   |
| NC_037645.1 | 6742159 | SNV | 1 | C | T | Heterozygous |
| NC_037645.1 | 6743112 | SNV | 1 | A | G | Homozygous   |
| NC_037645.1 | 6743296 | SNV | 1 | T | A | Homozygous   |
| NC_037645.1 | 6743298 | SNV | 1 | T | A | Homozygous   |
| NC_037645.1 | 6743310 | SNV | 1 | C | T | Homozygous   |
| NC_037645.1 | 6744891 | SNV | 1 | G | A | Homozygous   |
| NC_037645.1 | 6752319 | SNV | 1 | T | C | Homozygous   |
| NC_037645.1 | 6776227 | SNV | 1 | C | T | Homozygous   |
| NC_037645.1 | 6776246 | SNV | 1 | C | T | Heterozygous |
| NC_037645.1 | 6784371 | SNV | 1 | T | A | Homozygous   |
| NC_037645.1 | 6784376 | SNV | 1 | T | A | Homozygous   |
| NC_037645.1 | 6784398 | SNV | 1 | T | G | Homozygous   |
| NC_037645.1 | 6805512 | SNV | 1 | A | T | Homozygous   |

|             |         |     |   |   |   |              |
|-------------|---------|-----|---|---|---|--------------|
| NC_037645.1 | 6805573 | SNV | 1 | C | T | Heterozygous |
| NC_037645.1 | 6805581 | SNV | 1 | C | T | Heterozygous |
| NC_037645.1 | 6805598 | SNV | 1 | C | T | Heterozygous |
| NC_037645.1 | 6815665 | SNV | 1 | G | A | Heterozygous |
| NC_037645.1 | 6815675 | SNV | 1 | T | C | Heterozygous |
| NC_037645.1 | 6825982 | SNV | 1 | C | T | Homozygous   |
| NC_037645.1 | 6828938 | SNV | 1 | A | G | Homozygous   |
| NC_037645.1 | 6828945 | SNV | 1 | C | A | Homozygous   |
| NC_037645.1 | 6828951 | SNV | 1 | G | A | Homozygous   |
| NC_037645.1 | 6828954 | SNV | 1 | A | C | Homozygous   |
| NC_037645.1 | 6829005 | SNV | 1 | G | A | Heterozygous |
| NC_037645.1 | 6829009 | SNV | 1 | C | T | Homozygous   |
| NC_037645.1 | 6829017 | SNV | 1 | T | A | Homozygous   |
| NC_037645.1 | 6829023 | SNV | 1 | A | G | Heterozygous |
| NC_037645.1 | 6829041 | SNV | 1 | T | G | Homozygous   |
| NC_037645.1 | 6829045 | SNV | 1 | A | G | Heterozygous |
| NC_037645.1 | 6829047 | SNV | 1 | A | G | Heterozygous |
| NC_037645.1 | 6829056 | SNV | 1 | A | G | Heterozygous |
| NC_037645.1 | 6829061 | SNV | 1 | G | C | Heterozygous |
| NC_037645.1 | 6829073 | SNV | 1 | T | G | Heterozygous |
| NC_037645.1 | 6829077 | SNV | 1 | A | T | Heterozygous |
| NC_037645.1 | 6829089 | SNV | 1 | C | G | Heterozygous |
| NC_037645.1 | 6829810 | SNV | 1 | G | A | Heterozygous |
| NC_037645.1 | 6837941 | SNV | 1 | A | G | Homozygous   |
| NC_037645.1 | 6844101 | SNV | 1 | T | C | Homozygous   |
| NC_037645.1 | 6844290 | SNV | 1 | T | A | Homozygous   |
| NC_037645.1 | 6844302 | SNV | 1 | C | T | Homozygous   |
| NC_037645.1 | 6844307 | SNV | 1 | T | C | Heterozygous |
| NC_037645.1 | 6844324 | SNV | 1 | T | C | Homozygous   |
| NC_037645.1 | 6844379 | SNV | 1 | T | C | Homozygous   |
| NC_037645.1 | 6865416 | SNV | 1 | T | A | Homozygous   |
| NC_037645.1 | 6865419 | SNV | 1 | G | A | Heterozygous |
| NC_037645.1 | 6865425 | SNV | 1 | A | G | Heterozygous |
| NC_037645.1 | 6865427 | SNV | 1 | A | C | Heterozygous |
| NC_037645.1 | 6865428 | SNV | 1 | C | T | Heterozygous |
| NC_037645.1 | 6865436 | SNV | 1 | T | C | Heterozygous |
| NC_037645.1 | 6865440 | SNV | 1 | T | C | Heterozygous |
| NC_037645.1 | 6865445 | SNV | 1 | A | G | Homozygous   |
| NC_037645.1 | 6865452 | SNV | 1 | C | T | Homozygous   |
| NC_037645.1 | 6865456 | SNV | 1 | T | A | Homozygous   |
| NC_037645.1 | 6865459 | SNV | 1 | G | A | Homozygous   |
| NC_037645.1 | 6865464 | SNV | 1 | C | T | Homozygous   |
| NC_037645.1 | 6865857 | SNV | 1 | T | C | Homozygous   |
| NC_037645.1 | 6866355 | SNV | 1 | T | C | Homozygous   |
| NC_037645.1 | 6866416 | SNV | 1 | A | G | Homozygous   |
| NC_037645.1 | 6866420 | SNV | 1 | G | A | Homozygous   |
| NC_037645.1 | 6866423 | SNV | 1 | T | C | Homozygous   |
| NC_037645.1 | 6866481 | SNV | 1 | C | T | Homozygous   |
| NC_037645.1 | 6866497 | SNV | 1 | A | G | Heterozygous |
| NC_037645.1 | 6866531 | SNV | 1 | A | G | Heterozygous |
| NC_037645.1 | 6866540 | SNV | 1 | C | T | Heterozygous |

|             |         |     |   |   |   |              |
|-------------|---------|-----|---|---|---|--------------|
| NC_037645.1 | 6866556 | SNV | 1 | A | G | Heterozygous |
| NC_037645.1 | 6866609 | SNV | 1 | C | G | Homozygous   |
| NC_037645.1 | 6866612 | SNV | 1 | G | C | Homozygous   |
| NC_037645.1 | 6867078 | SNV | 1 | G | A | Heterozygous |
| NC_037645.1 | 6867103 | SNV | 1 | A | G | Homozygous   |
| NC_037645.1 | 6867165 | SNV | 1 | C | T | Heterozygous |
| NC_037645.1 | 6887628 | SNV | 1 | C | T | Heterozygous |
| NC_037645.1 | 6887632 | SNV | 1 | A | T | Heterozygous |
| NC_037645.1 | 6898670 | SNV | 1 | A | G | Homozygous   |
| NC_037645.1 | 6898684 | SNV | 1 | G | A | Homozygous   |
| NC_037645.1 | 6898697 | SNV | 1 | G | A | Heterozygous |
| NC_037645.1 | 6899340 | SNV | 1 | G | A | Heterozygous |
| NC_037645.1 | 6903335 | SNV | 1 | T | G | Heterozygous |
| NC_037645.1 | 6903349 | SNV | 1 | C | G | Homozygous   |
| NC_037645.1 | 6903355 | SNV | 1 | A | G | Homozygous   |
| NC_037645.1 | 6903375 | SNV | 1 | A | G | Heterozygous |
| NC_037645.1 | 6903377 | SNV | 1 | C | T | Heterozygous |
| NC_037645.1 | 6903381 | SNV | 1 | C | T | Heterozygous |
| NC_037645.1 | 6903385 | SNV | 1 | T | C | Heterozygous |
| NC_037645.1 | 6920613 | SNV | 1 | A | G | Heterozygous |
| NC_037645.1 | 6920629 | SNV | 1 | A | G | Heterozygous |
| NC_037645.1 | 6941281 | SNV | 1 | A | C | Heterozygous |
| NC_037645.1 | 6941285 | SNV | 1 | T | C | Heterozygous |
| NC_037645.1 | 6941299 | SNV | 1 | C | T | Heterozygous |
| NC_037645.1 | 6941302 | SNV | 1 | T | A | Heterozygous |
| NC_037645.1 | 6941305 | SNV | 1 | A | G | Heterozygous |
| NC_037645.1 | 6941315 | SNV | 1 | G | C | Heterozygous |
| NC_037645.1 | 6941323 | SNV | 1 | T | A | Homozygous   |
| NC_037645.1 | 6941326 | SNV | 1 | A | G | Heterozygous |
| NC_037645.1 | 6941343 | SNV | 1 | A | T | Heterozygous |
| NC_037645.1 | 6941353 | SNV | 1 | A | T | Heterozygous |
| NC_037645.1 | 6941359 | SNV | 1 | A | G | Heterozygous |
| NC_037645.1 | 6941362 | SNV | 1 | A | T | Homozygous   |
| NC_037645.1 | 6941372 | SNV | 1 | T | A | Homozygous   |
| NC_037645.1 | 6941374 | SNV | 1 | A | T | Heterozygous |
| NC_037645.1 | 6941380 | SNV | 1 | G | T | Heterozygous |
| NC_037645.1 | 6941387 | SNV | 1 | A | C | Heterozygous |
| NC_037645.1 | 6941773 | SNV | 1 | T | G | Heterozygous |
| NC_037645.1 | 6941848 | SNV | 1 | A | G | Heterozygous |
| NC_037645.1 | 6941854 | SNV | 1 | A | G | Homozygous   |
| NC_037645.1 | 6941857 | SNV | 1 | A | G | Homozygous   |
| NC_037645.1 | 6941863 | SNV | 1 | A | T | Homozygous   |
| NC_037645.1 | 6941881 | SNV | 1 | A | G | Homozygous   |
| NC_037645.1 | 6941893 | SNV | 1 | T | A | Homozygous   |
| NC_037645.1 | 6941903 | SNV | 1 | A | T | Heterozygous |
| NC_037645.1 | 6942960 | SNV | 1 | T | C | Homozygous   |
| NC_037645.1 | 6942984 | SNV | 1 | T | C | Homozygous   |
| NC_037645.1 | 6942987 | SNV | 1 | C | T | Heterozygous |
| NC_037645.1 | 6944525 | SNV | 1 | T | C | Homozygous   |
| NC_037645.1 | 6945502 | SNV | 1 | T | A | Heterozygous |
| NC_037645.1 | 6945528 | SNV | 1 | G | A | Heterozygous |



|             |         |     |   |   |   |              |
|-------------|---------|-----|---|---|---|--------------|
| NC_037645.1 | 6945571 | SNV | 1 | A | T | Homozygous   |
| NC_037645.1 | 6969023 | SNV | 1 | T | C | Heterozygous |
| NC_037645.1 | 6969815 | SNV | 1 | G | A | Heterozygous |
| NC_037645.1 | 6977987 | SNV | 1 | C | A | Homozygous   |
| NC_037645.1 | 6977989 | SNV | 1 | G | C | Homozygous   |
| NC_037645.1 | 6978232 | SNV | 1 | T | G | Homozygous   |
| NC_037645.1 | 6984626 | SNV | 1 | T | G | Homozygous   |
| NC_037645.1 | 6984849 | SNV | 1 | T | A | Homozygous   |
| NC_037645.1 | 6984854 | SNV | 1 | G | T | Homozygous   |
| NC_037645.1 | 6985469 | SNV | 1 | T | A | Homozygous   |
| NC_037645.1 | 6985479 | SNV | 1 | T | A | Homozygous   |
| NC_037645.1 | 6987717 | SNV | 1 | G | A | Homozygous   |
| NC_037645.1 | 6987941 | SNV | 1 | C | T | Homozygous   |
| NC_037645.1 | 6988278 | SNV | 1 | C | T | Homozygous   |
| NC_037645.1 | 6997695 | SNV | 1 | T | A | Heterozygous |
| NC_037645.1 | 6999529 | SNV | 1 | C | A | Homozygous   |
| NC_037645.1 | 7003462 | SNV | 1 | G | T | Homozygous   |
| NC_037645.1 | 7003883 | SNV | 1 | C | T | Heterozygous |
| NC_037645.1 | 7009036 | SNV | 1 | A | G | Homozygous   |
| NC_037645.1 | 7010661 | SNV | 1 | A | G | Homozygous   |
| NC_037645.1 | 7010671 | SNV | 1 | A | G | Heterozygous |
| NC_037645.1 | 7014025 | SNV | 1 | A | C | Heterozygous |
| NC_037645.1 | 7017235 | SNV | 1 | C | T | Homozygous   |
| NC_037645.1 | 7018711 | SNV | 1 | A | T | Homozygous   |
| NC_037645.1 | 7018714 | SNV | 1 | A | G | Homozygous   |
| NC_037645.1 | 7019450 | SNV | 1 | G | T | Homozygous   |
| NC_037645.1 | 7019458 | SNV | 1 | A | G | Homozygous   |
| NC_037645.1 | 7024021 | SNV | 1 | T | G | Homozygous   |
| NC_037645.1 | 7024028 | SNV | 1 | A | G | Homozygous   |
| NC_037645.1 | 7024062 | SNV | 1 | G | A | Heterozygous |
| NC_037645.1 | 7024082 | SNV | 1 | A | G | Homozygous   |
| NC_037645.1 | 7046663 | SNV | 1 | C | G | Heterozygous |
| NC_037645.1 | 7054983 | SNV | 1 | T | C | Homozygous   |
| NC_037645.1 | 7055013 | SNV | 1 | T | C | Homozygous   |
| NC_037645.1 | 7060818 | SNV | 1 | C | T | Homozygous   |
| NC_037645.1 | 7060971 | SNV | 1 | A | T | Homozygous   |
| NC_037645.1 | 7061187 | SNV | 1 | A | C | Homozygous   |
| NC_037645.1 | 7061207 | SNV | 1 | T | G | Homozygous   |
| NC_037645.1 | 7061515 | SNV | 1 | G | A | Heterozygous |
| NC_037645.1 | 7061523 | SNV | 1 | A | G | Heterozygous |
| NC_037645.1 | 7068219 | SNV | 1 | G | A | Heterozygous |
| NC_037645.1 | 7068344 | SNV | 1 | T | C | Homozygous   |
| NC_037645.1 | 7068400 | SNV | 1 | G | A | Homozygous   |
| NC_037645.1 | 7068423 | SNV | 1 | T | C | Homozygous   |
| NC_037645.1 | 7068474 | SNV | 1 | T | C | Homozygous   |
| NC_037645.1 | 7068508 | SNV | 1 | G | C | Homozygous   |
| NC_037645.1 | 7068588 | SNV | 1 | C | T | Heterozygous |
| NC_037645.1 | 7068590 | SNV | 1 | G | T | Heterozygous |
| NC_037645.1 | 7068638 | SNV | 1 | G | T | Homozygous   |
| NC_037645.1 | 7068774 | SNV | 1 | T | C | Homozygous   |
| NC_037645.1 | 7068850 | SNV | 1 | T | C | Homozygous   |

|             |         |     |   |   |   |              |
|-------------|---------|-----|---|---|---|--------------|
| NC_037645.1 | 7069002 | SNV | 1 | G | A | Homozygous   |
| NC_037645.1 | 7069093 | SNV | 1 | T | C | Homozygous   |
| NC_037645.1 | 7069124 | SNV | 1 | G | A | Heterozygous |
| NC_037645.1 | 7069126 | SNV | 1 | G | A | Heterozygous |
| NC_037645.1 | 7090722 | SNV | 1 | G | T | Homozygous   |
| NC_037645.1 | 7090730 | SNV | 1 | A | C | Homozygous   |
| NC_037645.1 | 7095201 | SNV | 1 | A | G | Heterozygous |
| NC_037645.1 | 7095429 | SNV | 1 | G | A | Heterozygous |
| NC_037645.1 | 7095450 | SNV | 1 | C | T | Heterozygous |
| NC_037645.1 | 7095460 | SNV | 1 | T | G | Heterozygous |
| NC_037645.1 | 7095522 | SNV | 1 | C | T | Heterozygous |
| NC_037645.1 | 7095528 | SNV | 1 | A | G | Heterozygous |
| NC_037645.1 | 7095538 | SNV | 1 | T | C | Heterozygous |
| NC_037645.1 | 7095562 | SNV | 1 | T | C | Heterozygous |
| NC_037645.1 | 7095588 | SNV | 1 | A | G | Homozygous   |
| NC_037645.1 | 7095613 | SNV | 1 | G | A | Homozygous   |
| NC_037645.1 | 7095673 | SNV | 1 | A | G | Homozygous   |
| NC_037645.1 | 7095767 | SNV | 1 | C | A | Heterozygous |
| NC_037645.1 | 7095768 | SNV | 1 | T | C | Heterozygous |
| NC_037645.1 | 7095775 | SNV | 1 | G | A | Heterozygous |
| NC_037645.1 | 7095817 | SNV | 1 | G | A | Heterozygous |
| NC_037645.1 | 7095820 | SNV | 1 | G | A | Homozygous   |
| NC_037645.1 | 7095822 | SNV | 1 | A | G | Homozygous   |
| NC_037645.1 | 7103469 | SNV | 1 | G | A | Homozygous   |
| NC_037645.1 | 7103497 | SNV | 1 | A | G | Homozygous   |
| NC_037645.1 | 7129043 | SNV | 1 | T | C | Heterozygous |
| NC_037645.1 | 7129078 | SNV | 1 | G | C | Homozygous   |
| NC_037645.1 | 7129342 | SNV | 1 | C | T | Heterozygous |
| NC_037645.1 | 7131402 | SNV | 1 | G | A | Heterozygous |
| NC_037645.1 | 7131410 | SNV | 1 | C | A | Homozygous   |
| NC_037645.1 | 7131412 | SNV | 1 | G | A | Heterozygous |
| NC_037645.1 | 7131438 | SNV | 1 | C | A | Homozygous   |
| NC_037645.1 | 7131453 | SNV | 1 | A | C | Homozygous   |
| NC_037645.1 | 7131468 | SNV | 1 | A | G | Heterozygous |
| NC_037645.1 | 7133067 | SNV | 1 | T | A | Heterozygous |
| NC_037645.1 | 7133071 | SNV | 1 | T | A | Homozygous   |
| NC_037645.1 | 7133079 | SNV | 1 | G | A | Heterozygous |
| NC_037645.1 | 7167019 | SNV | 1 | G | C | Homozygous   |
| NC_037645.1 | 7167653 | SNV | 1 | C | T | Heterozygous |
| NC_037645.1 | 7171758 | SNV | 1 | G | A | Heterozygous |
| NC_037645.1 | 7171901 | SNV | 1 | T | A | Homozygous   |
| NC_037645.1 | 7172656 | SNV | 1 | A | T | Homozygous   |
| NC_037645.1 | 7172864 | SNV | 1 | A | G | Homozygous   |
| NC_037645.1 | 7174342 | SNV | 1 | C | T | Heterozygous |
| NC_037645.1 | 7174418 | SNV | 1 | C | T | Heterozygous |
| NC_037645.1 | 7183770 | SNV | 1 | T | G | Homozygous   |
| NC_037645.1 | 7183803 | SNV | 1 | T | A | Homozygous   |
| NC_037645.1 | 7188370 | SNV | 1 | T | C | Homozygous   |
| NC_037645.1 | 7191261 | SNV | 1 | G | A | Heterozygous |
| NC_037645.1 | 7191264 | SNV | 1 | A | T | Heterozygous |
| NC_037645.1 | 7191826 | SNV | 1 | G | A | Homozygous   |

|             |         |     |   |   |   |              |
|-------------|---------|-----|---|---|---|--------------|
| NC_037645.1 | 7191917 | SNV | 1 | G | A | Heterozygous |
| NC_037645.1 | 7192151 | SNV | 1 | C | T | Heterozygous |
| NC_037645.1 | 7195078 | SNV | 1 | T | C | Heterozygous |
| NC_037645.1 | 7196248 | SNV | 1 | T | C | Homozygous   |
| NC_037645.1 | 7196530 | SNV | 1 | C | T | Heterozygous |
| NC_037645.1 | 7196552 | SNV | 1 | G | A | Homozygous   |
| NC_037645.1 | 7196652 | SNV | 1 | A | C | Homozygous   |
| NC_037645.1 | 7196676 | SNV | 1 | A | C | Homozygous   |
| NC_037645.1 | 7196686 | SNV | 1 | A | C | Homozygous   |
| NC_037645.1 | 7196689 | SNV | 1 | T | A | Homozygous   |
| NC_037645.1 | 7196829 | SNV | 1 | C | T | Heterozygous |
| NC_037645.1 | 7197364 | SNV | 1 | G | A | Homozygous   |
| NC_037645.1 | 7197578 | SNV | 1 | C | T | Homozygous   |
| NC_037645.1 | 7197829 | SNV | 1 | C | T | Homozygous   |
| NC_037645.1 | 7203379 | SNV | 1 | G | C | Homozygous   |
| NC_037645.1 | 7204068 | SNV | 1 | A | G | Homozygous   |
| NC_037645.1 | 7204241 | SNV | 1 | T | C | Heterozygous |
| NC_037645.1 | 7205127 | SNV | 1 | T | A | Homozygous   |
| NC_037645.1 | 7205175 | SNV | 1 | A | G | Homozygous   |
| NC_037645.1 | 7205194 | SNV | 1 | T | C | Homozygous   |
| NC_037645.1 | 7205278 | SNV | 1 | C | A | Homozygous   |
| NC_037645.1 | 7205291 | SNV | 1 | G | T | Heterozygous |
| NC_037645.1 | 7205603 | SNV | 1 | A | G | Homozygous   |
| NC_037645.1 | 7205739 | SNV | 1 | C | G | Heterozygous |
| NC_037645.1 | 7205959 | SNV | 1 | T | A | Homozygous   |
| NC_037645.1 | 7206897 | SNV | 1 | T | C | Homozygous   |
| NC_037645.1 | 7207242 | SNV | 1 | T | A | Homozygous   |
| NC_037645.1 | 7209629 | SNV | 1 | A | G | Heterozygous |
| NC_037645.1 | 7212527 | SNV | 1 | T | C | Homozygous   |
| NC_037645.1 | 7212836 | SNV | 1 | T | A | Heterozygous |
| NC_037645.1 | 7215316 | SNV | 1 | T | C | Homozygous   |
| NC_037645.1 | 7215351 | SNV | 1 | A | G | Homozygous   |
| NC_037645.1 | 7215684 | SNV | 1 | A | T | Heterozygous |
| NC_037645.1 | 7217085 | SNV | 1 | T | A | Homozygous   |
| NC_037645.1 | 7218037 | SNV | 1 | C | A | Heterozygous |
| NC_037645.1 | 7220386 | SNV | 1 | G | A | Homozygous   |
| NC_037645.1 | 7221420 | SNV | 1 | T | G | Homozygous   |
| NC_037645.1 | 7221544 | SNV | 1 | A | G | Heterozygous |
| NC_037645.1 | 7221567 | SNV | 1 | A | G | Heterozygous |
| NC_037645.1 | 7221570 | SNV | 1 | A | G | Heterozygous |
| NC_037645.1 | 7221572 | SNV | 1 | A | T | Heterozygous |
| NC_037645.1 | 7221578 | SNV | 1 | C | A | Heterozygous |
| NC_037645.1 | 7221582 | SNV | 1 | T | A | Heterozygous |
| NC_037645.1 | 7221585 | SNV | 1 | T | A | Heterozygous |
| NC_037645.1 | 7222900 | SNV | 1 | C | T | Heterozygous |
| NC_037645.1 | 7222912 | SNV | 1 | A | G | Heterozygous |
| NC_037645.1 | 7224076 | SNV | 1 | C | T | Heterozygous |
| NC_037645.1 | 7224084 | SNV | 1 | C | A | Heterozygous |
| NC_037645.1 | 7224086 | SNV | 1 | A | T | Heterozygous |
| NC_037645.1 | 7224088 | SNV | 1 | A | G | Heterozygous |
| NC_037645.1 | 7224098 | SNV | 1 | A | T | Homozygous   |

|             |         |     |   |   |   |              |
|-------------|---------|-----|---|---|---|--------------|
| NC_037645.1 | 7224105 | SNV | 1 | A | C | Homozygous   |
| NC_037645.1 | 7227810 | SNV | 1 | A | T | Heterozygous |
| NC_037645.1 | 7229306 | SNV | 1 | C | A | Homozygous   |
| NC_037645.1 | 7229308 | SNV | 1 | T | G | Homozygous   |
| NC_037645.1 | 7229319 | SNV | 1 | A | T | Homozygous   |
| NC_037645.1 | 7230951 | SNV | 1 | T | C | Heterozygous |
| NC_037645.1 | 7230954 | SNV | 1 | T | C | Homozygous   |
| NC_037645.1 | 7231294 | SNV | 1 | T | C | Homozygous   |
| NC_037645.1 | 7232046 | SNV | 1 | T | C | Homozygous   |
| NC_037645.1 | 7233846 | SNV | 1 | T | C | Homozygous   |
| NC_037645.1 | 7234041 | SNV | 1 | A | G | Homozygous   |
| NC_037645.1 | 7234878 | SNV | 1 | T | C | Homozygous   |
| NC_037645.1 | 7235397 | SNV | 1 | C | T | Heterozygous |
| NC_037645.1 | 7235865 | SNV | 1 | A | G | Heterozygous |
| NC_037645.1 | 7235887 | SNV | 1 | C | T | Heterozygous |
| NC_037645.1 | 7238209 | SNV | 1 | T | C | Heterozygous |
| NC_037645.1 | 7238228 | SNV | 1 | C | T | Heterozygous |
| NC_037645.1 | 7239817 | SNV | 1 | A | G | Heterozygous |
| NC_037645.1 | 7239912 | SNV | 1 | G | A | Homozygous   |
| NC_037645.1 | 7242710 | SNV | 1 | G | A | Homozygous   |
| NC_037645.1 | 7242714 | SNV | 1 | A | C | Homozygous   |
| NC_037645.1 | 7242717 | SNV | 1 | A | C | Homozygous   |
| NC_037645.1 | 7243173 | SNV | 1 | C | A | Homozygous   |
| NC_037645.1 | 7243521 | SNV | 1 | T | C | Heterozygous |
| NC_037645.1 | 7245045 | SNV | 1 | T | A | Heterozygous |
| NC_037645.1 | 7246868 | SNV | 1 | T | C | Homozygous   |
| NC_037645.1 | 7247124 | SNV | 1 | T | A | Homozygous   |
| NC_037645.1 | 7247131 | SNV | 1 | T | A | Homozygous   |
| NC_037645.1 | 7247160 | SNV | 1 | A | C | Homozygous   |
| NC_037645.1 | 7247167 | SNV | 1 | C | A | Homozygous   |
| NC_037645.1 | 7247233 | SNV | 1 | C | T | Heterozygous |
| NC_037645.1 | 7247277 | SNV | 1 | G | C | Homozygous   |
| NC_037645.1 | 7247280 | SNV | 1 | T | C | Homozygous   |
| NC_037645.1 | 7247397 | SNV | 1 | A | T | Heterozygous |
| NC_037645.1 | 7247621 | SNV | 1 | T | C | Homozygous   |
| NC_037645.1 | 7247625 | SNV | 1 | T | C | Heterozygous |
| NC_037645.1 | 7247743 | SNV | 1 | T | A | Homozygous   |
| NC_037645.1 | 7247746 | SNV | 1 | A | G | Homozygous   |
| NC_037645.1 | 7247753 | SNV | 1 | T | A | Homozygous   |
| NC_037645.1 | 7247780 | SNV | 1 | T | A | Homozygous   |
| NC_037645.1 | 7247793 | SNV | 1 | T | G | Homozygous   |
| NC_037645.1 | 7249115 | SNV | 1 | G | A | Heterozygous |
| NC_037645.1 | 7249850 | SNV | 1 | A | G | Heterozygous |
| NC_037645.1 | 7251609 | SNV | 1 | G | A | Heterozygous |
| NC_037645.1 | 7251752 | SNV | 1 | C | T | Heterozygous |
| NC_037645.1 | 7255689 | SNV | 1 | T | A | Heterozygous |
| NC_037645.1 | 7255725 | SNV | 1 | C | T | Homozygous   |
| NC_037645.1 | 7255727 | SNV | 1 | T | A | Homozygous   |
| NC_037645.1 | 7272982 | SNV | 1 | G | T | Homozygous   |
| NC_037645.1 | 7272990 | SNV | 1 | T | A | Homozygous   |
| NC_037645.1 | 7272992 | SNV | 1 | T | G | Homozygous   |

|             |         |     |   |   |   |              |
|-------------|---------|-----|---|---|---|--------------|
| NC_037645.1 | 7273743 | SNV | 1 | G | T | Homozygous   |
| NC_037645.1 | 7278394 | SNV | 1 | T | C | Homozygous   |
| NC_037645.1 | 7278553 | SNV | 1 | T | C | Homozygous   |
| NC_037645.1 | 7278569 | SNV | 1 | A | G | Homozygous   |
| NC_037645.1 | 7279349 | SNV | 1 | G | A | Homozygous   |
| NC_037645.1 | 7283103 | SNV | 1 | T | A | Homozygous   |
| NC_037645.1 | 7283120 | SNV | 1 | A | T | Homozygous   |
| NC_037645.1 | 7283122 | SNV | 1 | A | T | Homozygous   |
| NC_037645.1 | 7283124 | SNV | 1 | A | T | Homozygous   |
| NC_037645.1 | 7291711 | SNV | 1 | A | G | Homozygous   |
| NC_037645.1 | 7295277 | SNV | 1 | G | C | Homozygous   |
| NC_037645.1 | 7296004 | SNV | 1 | T | A | Homozygous   |
| NC_037645.1 | 7296007 | SNV | 1 | G | T | Homozygous   |
| NC_037645.1 | 7296699 | SNV | 1 | A | G | Homozygous   |
| NC_037645.1 | 7296759 | SNV | 1 | T | C | Homozygous   |
| NC_037645.1 | 7297481 | SNV | 1 | A | G | Homozygous   |
| NC_037645.1 | 7303023 | SNV | 1 | C | T | Homozygous   |
| NC_037645.1 | 7316216 | SNV | 1 | T | C | Homozygous   |
| NC_037645.1 | 7316238 | SNV | 1 | A | G | Heterozygous |
| NC_037645.1 | 7318649 | SNV | 1 | T | C | Homozygous   |
| NC_037645.1 | 7321002 | SNV | 1 | C | T | Heterozygous |
| NC_037645.1 | 7342267 | SNV | 1 | T | A | Homozygous   |
| NC_037645.1 | 7342275 | SNV | 1 | T | G | Homozygous   |
| NC_037645.1 | 7342290 | SNV | 1 | A | T | Homozygous   |
| NC_037645.1 | 7342295 | SNV | 1 | A | C | Homozygous   |
| NC_037645.1 | 7342297 | SNV | 1 | T | C | Homozygous   |
| NC_037645.1 | 7346172 | SNV | 1 | T | C | Homozygous   |
| NC_037645.1 | 7346247 | SNV | 1 | C | T | Homozygous   |
| NC_037645.1 | 7347477 | SNV | 1 | T | C | Homozygous   |
| NC_037645.1 | 7347743 | SNV | 1 | A | G | Homozygous   |
| NC_037645.1 | 7347949 | SNV | 1 | T | C | Homozygous   |
| NC_037645.1 | 7348548 | SNV | 1 | C | G | Heterozygous |
| NC_037645.1 | 7349639 | SNV | 1 | T | C | Homozygous   |
| NC_037645.1 | 7349857 | SNV | 1 | A | T | Homozygous   |
| NC_037645.1 | 7349915 | SNV | 1 | A | T | Homozygous   |
| NC_037645.1 | 7350589 | SNV | 1 | T | C | Homozygous   |
| NC_037645.1 | 7350591 | SNV | 1 | T | A | Homozygous   |
| NC_037645.1 | 7350596 | SNV | 1 | A | T | Homozygous   |
| NC_037645.1 | 7358350 | SNV | 1 | A | T | Homozygous   |
| NC_037645.1 | 7362251 | SNV | 1 | A | G | Homozygous   |
| NC_037645.1 | 7362255 | SNV | 1 | A | G | Homozygous   |
| NC_037645.1 | 7367265 | SNV | 1 | T | A | Homozygous   |
| NC_037645.1 | 7367286 | SNV | 1 | A | C | Homozygous   |
| NC_037645.1 | 7381405 | SNV | 1 | C | T | Heterozygous |
| NC_037645.1 | 7382002 | SNV | 1 | C | T | Heterozygous |
| NC_037645.1 | 7382155 | SNV | 1 | A | G | Homozygous   |
| NC_037645.1 | 7382629 | SNV | 1 | T | C | Homozygous   |
| NC_037645.1 | 7382804 | SNV | 1 | A | T | Homozygous   |
| NC_037645.1 | 7383011 | SNV | 1 | C | A | Heterozygous |
| NC_037645.1 | 7383037 | SNV | 1 | T | C | Homozygous   |
| NC_037645.1 | 7383056 | SNV | 1 | A | G | Homozygous   |

|             |         |     |   |   |   |              |
|-------------|---------|-----|---|---|---|--------------|
| NC_037645.1 | 7383059 | SNV | 1 | C | T | Homozygous   |
| NC_037645.1 | 7383284 | SNV | 1 | G | T | Heterozygous |
| NC_037645.1 | 7383301 | SNV | 1 | A | G | Homozygous   |
| NC_037645.1 | 7383326 | SNV | 1 | T | C | Homozygous   |
| NC_037645.1 | 7383693 | SNV | 1 | G | T | Homozygous   |
| NC_037645.1 | 7427043 | SNV | 1 | T | C | Homozygous   |
| NC_037645.1 | 7427045 | SNV | 1 | T | C | Homozygous   |
| NC_037645.1 | 7427047 | SNV | 1 | T | C | Homozygous   |
| NC_037645.1 | 7427793 | SNV | 1 | G | C | Heterozygous |
| NC_037645.1 | 7427826 | SNV | 1 | G | C | Heterozygous |
| NC_037645.1 | 7428036 | SNV | 1 | G | T | Homozygous   |
| NC_037645.1 | 7442498 | SNV | 1 | C | T | Homozygous   |
| NC_037645.1 | 7446568 | SNV | 1 | G | A | Heterozygous |
| NC_037645.1 | 7446588 | SNV | 1 | G | A | Heterozygous |
| NC_037645.1 | 7446590 | SNV | 1 | G | A | Heterozygous |
| NC_037645.1 | 7446609 | SNV | 1 | G | A | Heterozygous |
| NC_037645.1 | 7446625 | SNV | 1 | G | A | Heterozygous |
| NC_037645.1 | 7446630 | SNV | 1 | A | G | Heterozygous |
| NC_037645.1 | 7446632 | SNV | 1 | C | G | Heterozygous |
| NC_037645.1 | 7446863 | SNV | 1 | G | A | Heterozygous |
| NC_037645.1 | 7446876 | SNV | 1 | G | A | Heterozygous |
| NC_037645.1 | 7446892 | SNV | 1 | G | A | Homozygous   |
| NC_037645.1 | 7446903 | SNV | 1 | G | A | Homozygous   |
| NC_037645.1 | 7449382 | SNV | 1 | T | A | Homozygous   |
| NC_037645.1 | 7449386 | SNV | 1 | T | A | Homozygous   |
| NC_037645.1 | 7449396 | SNV | 1 | C | T | Heterozygous |
| NC_037645.1 | 7449399 | SNV | 1 | A | G | Homozygous   |
| NC_037645.1 | 7449445 | SNV | 1 | A | G | Heterozygous |
| NC_037645.1 | 7449447 | SNV | 1 | G | A | Heterozygous |
| NC_037645.1 | 7449466 | SNV | 1 | T | G | Homozygous   |
| NC_037645.1 | 7449489 | SNV | 1 | T | C | Homozygous   |
| NC_037645.1 | 7449516 | SNV | 1 | T | C | Homozygous   |
| NC_037645.1 | 7449712 | SNV | 1 | G | A | Homozygous   |
| NC_037645.1 | 7449733 | SNV | 1 | A | G | Heterozygous |
| NC_037645.1 | 7451157 | SNV | 1 | C | T | Heterozygous |
| NC_037645.1 | 7453429 | SNV | 1 | A | G | Heterozygous |
| NC_037645.1 | 7453437 | SNV | 1 | G | A | Homozygous   |
| NC_037645.1 | 7453473 | SNV | 1 | T | A | Heterozygous |
| NC_037645.1 | 7453515 | SNV | 1 | C | T | Heterozygous |
| NC_037645.1 | 7453570 | SNV | 1 | A | G | Homozygous   |
| NC_037645.1 | 7453692 | SNV | 1 | C | G | Heterozygous |
| NC_037645.1 | 7453945 | SNV | 1 | A | G | Heterozygous |
| NC_037645.1 | 7455799 | SNV | 1 | G | A | Heterozygous |
| NC_037645.1 | 7455840 | SNV | 1 | T | C | Heterozygous |
| NC_037645.1 | 7455891 | SNV | 1 | C | A | Heterozygous |
| NC_037645.1 | 7455942 | SNV | 1 | T | C | Homozygous   |
| NC_037645.1 | 7456055 | SNV | 1 | A | G | Homozygous   |
| NC_037645.1 | 7456102 | SNV | 1 | A | G | Heterozygous |
| NC_037645.1 | 7456435 | SNV | 1 | T | C | Heterozygous |
| NC_037645.1 | 7456507 | SNV | 1 | G | A | Heterozygous |
| NC_037645.1 | 7456648 | SNV | 1 | G | A | Homozygous   |

|             |         |     |   |   |   |              |
|-------------|---------|-----|---|---|---|--------------|
| NC_037645.1 | 7456651 | SNV | 1 | G | C | Homozygous   |
| NC_037645.1 | 7456919 | SNV | 1 | T | C | Homozygous   |
| NC_037645.1 | 7457064 | SNV | 1 | T | C | Homozygous   |
| NC_037645.1 | 7465011 | SNV | 1 | A | T | Heterozygous |
| NC_037645.1 | 7465018 | SNV | 1 | C | T | Homozygous   |
| NC_037645.1 | 7465046 | SNV | 1 | C | G | Homozygous   |
| NC_037645.1 | 7465131 | SNV | 1 | C | T | Heterozygous |
| NC_037645.1 | 7465206 | SNV | 1 | T | C | Homozygous   |
| NC_037645.1 | 7465211 | SNV | 1 | C | T | Heterozygous |
| NC_037645.1 | 7465230 | SNV | 1 | T | C | Homozygous   |
| NC_037645.1 | 7465270 | SNV | 1 | C | T | Heterozygous |
| NC_037645.1 | 7465281 | SNV | 1 | T | C | Homozygous   |
| NC_037645.1 | 7465297 | SNV | 1 | T | G | Homozygous   |
| NC_037645.1 | 7465313 | SNV | 1 | C | T | Homozygous   |
| NC_037645.1 | 7465356 | SNV | 1 | A | G | Homozygous   |
| NC_037645.1 | 7465362 | SNV | 1 | T | C | Homozygous   |
| NC_037645.1 | 7465384 | SNV | 1 | C | T | Homozygous   |
| NC_037645.1 | 7465403 | SNV | 1 | T | C | Homozygous   |
| NC_037645.1 | 7465447 | SNV | 1 | A | G | Heterozygous |
| NC_037645.1 | 7465451 | SNV | 1 | T | A | Heterozygous |
| NC_037645.1 | 7465556 | SNV | 1 | C | T | Heterozygous |
| NC_037645.1 | 7465564 | SNV | 1 | T | C | Heterozygous |
| NC_037645.1 | 7465684 | SNV | 1 | A | G | Homozygous   |
| NC_037645.1 | 7465746 | SNV | 1 | T | C | Homozygous   |
| NC_037645.1 | 7465796 | SNV | 1 | G | A | Homozygous   |
| NC_037645.1 | 7465816 | SNV | 1 | T | C | Heterozygous |
| NC_037645.1 | 7465935 | SNV | 1 | T | C | Heterozygous |
| NC_037645.1 | 7465949 | SNV | 1 | G | A | Heterozygous |
| NC_037645.1 | 7466720 | SNV | 1 | G | A | Heterozygous |
| NC_037645.1 | 7466727 | SNV | 1 | G | A | Heterozygous |
| NC_037645.1 | 7467084 | SNV | 1 | A | G | Homozygous   |
| NC_037645.1 | 7467101 | SNV | 1 | T | C | Homozygous   |
| NC_037645.1 | 7467146 | SNV | 1 | A | G | Heterozygous |
| NC_037645.1 | 7467177 | SNV | 1 | C | T | Homozygous   |
| NC_037645.1 | 7467204 | SNV | 1 | T | C | Homozygous   |
| NC_037645.1 | 7467566 | SNV | 1 | A | G | Homozygous   |
| NC_037645.1 | 7467577 | SNV | 1 | T | C | Homozygous   |
| NC_037645.1 | 7467762 | SNV | 1 | C | T | Homozygous   |
| NC_037645.1 | 7467797 | SNV | 1 | T | C | Homozygous   |
| NC_037645.1 | 7477134 | SNV | 1 | G | A | Homozygous   |
| NC_037645.1 | 7477137 | SNV | 1 | G | A | Homozygous   |
| NC_037645.1 | 7477143 | SNV | 1 | A | G | Homozygous   |
| NC_037645.1 | 7477147 | SNV | 1 | G | A | Homozygous   |
| NC_037645.1 | 7477167 | SNV | 1 | G | T | Heterozygous |
| NC_037645.1 | 7477216 | SNV | 1 | T | G | Homozygous   |
| NC_037645.1 | 7477224 | SNV | 1 | A | G | Heterozygous |
| NC_037645.1 | 7477227 | SNV | 1 | A | G | Homozygous   |
| NC_037645.1 | 7477240 | SNV | 1 | T | G | Homozygous   |
| NC_037645.1 | 7477245 | SNV | 1 | G | A | Heterozygous |
| NC_037645.1 | 7477254 | SNV | 1 | A | G | Homozygous   |
| NC_037645.1 | 7477260 | SNV | 1 | G | A | Heterozygous |

|             |         |     |   |   |   |              |
|-------------|---------|-----|---|---|---|--------------|
| NC_037645.1 | 7477263 | SNV | 1 | A | G | Homozygous   |
| NC_037645.1 | 7477276 | SNV | 1 | G | A | Homozygous   |
| NC_037645.1 | 7481672 | SNV | 1 | A | T | Homozygous   |
| NC_037645.1 | 7481676 | SNV | 1 | T | C | Homozygous   |
| NC_037645.1 | 7481679 | SNV | 1 | T | C | Homozygous   |
| NC_037645.1 | 7481734 | SNV | 1 | G | A | Homozygous   |
| NC_037645.1 | 7481756 | SNV | 1 | A | G | Homozygous   |
| NC_037645.1 | 7481776 | SNV | 1 | C | T | Homozygous   |
| NC_037645.1 | 7481792 | SNV | 1 | A | G | Homozygous   |
| NC_037645.1 | 7481808 | SNV | 1 | G | C | Homozygous   |
| NC_037645.1 | 7481823 | SNV | 1 | G | A | Homozygous   |
| NC_037645.1 | 7481827 | SNV | 1 | C | T | Homozygous   |
| NC_037645.1 | 7481873 | SNV | 1 | A | G | Homozygous   |
| NC_037645.1 | 7495100 | SNV | 1 | C | A | Homozygous   |
| NC_037645.1 | 7495106 | SNV | 1 | T | A | Homozygous   |
| NC_037645.1 | 7495110 | SNV | 1 | T | A | Homozygous   |
| NC_037645.1 | 7495116 | SNV | 1 | T | A | Heterozygous |
| NC_037645.1 | 7495192 | SNV | 1 | C | A | Homozygous   |
| NC_037645.1 | 7495196 | SNV | 1 | T | A | Homozygous   |
| NC_037645.1 | 7495198 | SNV | 1 | T | A | Heterozygous |
| NC_037645.1 | 7495202 | SNV | 1 | T | A | Heterozygous |
| NC_037645.1 | 7495204 | SNV | 1 | G | A | Heterozygous |
| NC_037645.1 | 7507549 | SNV | 1 | G | A | Homozygous   |
| NC_037645.1 | 7507555 | SNV | 1 | G | A | Heterozygous |
| NC_037645.1 | 7513047 | SNV | 1 | A | C | Homozygous   |
| NC_037645.1 | 7513052 | SNV | 1 | T | A | Homozygous   |
| NC_037645.1 | 7513066 | SNV | 1 | C | A | Homozygous   |
| NC_037645.1 | 7513070 | SNV | 1 | T | A | Homozygous   |
| NC_037645.1 | 7513072 | SNV | 1 | T | A | Homozygous   |
| NC_037645.1 | 7513543 | SNV | 1 | T | C | Heterozygous |
| NC_037645.1 | 7513683 | SNV | 1 | C | T | Heterozygous |
| NC_037645.1 | 7513715 | SNV | 1 | T | A | Homozygous   |
| NC_037645.1 | 7513957 | SNV | 1 | G | T | Heterozygous |
| NC_037645.1 | 7513973 | SNV | 1 | T | G | Homozygous   |
| NC_037645.1 | 7514038 | SNV | 1 | G | C | Homozygous   |
| NC_037645.1 | 7514043 | SNV | 1 | T | C | Homozygous   |
| NC_037645.1 | 7519534 | SNV | 1 | A | G | Homozygous   |
| NC_037645.1 | 7519574 | SNV | 1 | G | A | Heterozygous |
| NC_037645.1 | 7519596 | SNV | 1 | A | G | Homozygous   |
| NC_037645.1 | 7519616 | SNV | 1 | T | C | Heterozygous |
| NC_037645.1 | 7519679 | SNV | 1 | T | C | Homozygous   |
| NC_037645.1 | 7519708 | SNV | 1 | G | A | Homozygous   |
| NC_037645.1 | 7519723 | SNV | 1 | A | G | Heterozygous |
| NC_037645.1 | 7519761 | SNV | 1 | A | G | Homozygous   |
| NC_037645.1 | 7519775 | SNV | 1 | G | A | Homozygous   |
| NC_037645.1 | 7519801 | SNV | 1 | A | G | Homozygous   |
| NC_037645.1 | 7519818 | SNV | 1 | C | T | Heterozygous |
| NC_037645.1 | 7519934 | SNV | 1 | A | G | Homozygous   |
| NC_037645.1 | 7519986 | SNV | 1 | T | C | Homozygous   |
| NC_037645.1 | 7519990 | SNV | 1 | A | G | Homozygous   |
| NC_037645.1 | 7520069 | SNV | 1 | A | G | Heterozygous |



|             |         |     |   |   |   |              |
|-------------|---------|-----|---|---|---|--------------|
| NC_037645.1 | 7520230 | SNV | 1 | C | T | Heterozygous |
| NC_037645.1 | 7520238 | SNV | 1 | A | G | Homozygous   |
| NC_037645.1 | 7520288 | SNV | 1 | G | A | Heterozygous |
| NC_037645.1 | 7521503 | SNV | 1 | G | A | Heterozygous |
| NC_037645.1 | 7527631 | SNV | 1 | G | T | Homozygous   |
| NC_037645.1 | 7527836 | SNV | 1 | A | G | Homozygous   |
| NC_037645.1 | 7528000 | SNV | 1 | A | G | Heterozygous |
| NC_037645.1 | 7528032 | SNV | 1 | A | G | Heterozygous |
| NC_037645.1 | 7528830 | SNV | 1 | T | C | Homozygous   |
| NC_037645.1 | 7528866 | SNV | 1 | T | C | Homozygous   |
| NC_037645.1 | 7528929 | SNV | 1 | T | C | Homozygous   |
| NC_037645.1 | 7537635 | SNV | 1 | C | G | Homozygous   |
| NC_037645.1 | 7537638 | SNV | 1 | T | C | Homozygous   |
| NC_037645.1 | 7539019 | SNV | 1 | A | G | Homozygous   |
| NC_037645.1 | 7539037 | SNV | 1 | C | T | Heterozygous |
| NC_037645.1 | 7539050 | SNV | 1 | G | A | Homozygous   |
| NC_037645.1 | 7539081 | SNV | 1 | C | A | Heterozygous |
| NC_037645.1 | 7539083 | SNV | 1 | G | A | Homozygous   |
| NC_037645.1 | 7539279 | SNV | 1 | A | G | Heterozygous |
| NC_037645.1 | 7539299 | SNV | 1 | T | C | Homozygous   |
| NC_037645.1 | 7539313 | SNV | 1 | A | G | Homozygous   |
| NC_037645.1 | 7539318 | SNV | 1 | G | A | Homozygous   |
| NC_037645.1 | 7539497 | SNV | 1 | A | G | Heterozygous |
| NC_037645.1 | 7539583 | SNV | 1 | G | A | Heterozygous |
| NC_037645.1 | 7539609 | SNV | 1 | T | C | Heterozygous |
| NC_037645.1 | 7539928 | SNV | 1 | C | T | Heterozygous |
| NC_037645.1 | 7540155 | SNV | 1 | G | A | Homozygous   |
| NC_037645.1 | 7547442 | SNV | 1 | T | C | Homozygous   |
| NC_037645.1 | 7547490 | SNV | 1 | A | G | Homozygous   |
| NC_037645.1 | 7547971 | SNV | 1 | A | G | Homozygous   |
| NC_037645.1 | 7547975 | SNV | 1 | C | G | Homozygous   |
| NC_037645.1 | 7547982 | SNV | 1 | C | A | Homozygous   |
| NC_037645.1 | 7547992 | SNV | 1 | T | C | Homozygous   |
| NC_037645.1 | 7547994 | SNV | 1 | C | A | Homozygous   |
| NC_037645.1 | 7547996 | SNV | 1 | C | T | Homozygous   |
| NC_037645.1 | 7548001 | SNV | 1 | A | T | Homozygous   |
| NC_037645.1 | 7548004 | SNV | 1 | T | A | Homozygous   |
| NC_037645.1 | 7548006 | SNV | 1 | T | C | Homozygous   |
| NC_037645.1 | 7550911 | SNV | 1 | G | A | Heterozygous |
| NC_037645.1 | 7551070 | SNV | 1 | A | G | Homozygous   |
| NC_037645.1 | 7551079 | SNV | 1 | A | C | Homozygous   |
| NC_037645.1 | 7551098 | SNV | 1 | G | A | Heterozygous |
| NC_037645.1 | 7551209 | SNV | 1 | T | C | Heterozygous |
| NC_037645.1 | 7551233 | SNV | 1 | C | T | Heterozygous |
| NC_037645.1 | 7551235 | SNV | 1 | T | C | Heterozygous |
| NC_037645.1 | 7551334 | SNV | 1 | G | A | Heterozygous |
| NC_037645.1 | 7551347 | SNV | 1 | A | G | Homozygous   |
| NC_037645.1 | 7551360 | SNV | 1 | A | C | Heterozygous |
| NC_037645.1 | 7551365 | SNV | 1 | A | G | Homozygous   |
| NC_037645.1 | 7551391 | SNV | 1 | C | T | Heterozygous |
| NC_037645.1 | 7551402 | SNV | 1 | T | C | Heterozygous |

|             |         |     |   |   |   |              |
|-------------|---------|-----|---|---|---|--------------|
| NC_037645.1 | 7551429 | SNV | 1 | G | A | Heterozygous |
| NC_037645.1 | 7551517 | SNV | 1 | A | G | Heterozygous |
| NC_037645.1 | 7551604 | SNV | 1 | A | G | Homozygous   |
| NC_037645.1 | 7551617 | SNV | 1 | G | A | Heterozygous |
| NC_037645.1 | 7551651 | SNV | 1 | G | T | Heterozygous |
| NC_037645.1 | 7551661 | SNV | 1 | A | G | Heterozygous |
| NC_037645.1 | 7551665 | SNV | 1 | A | G | Homozygous   |
| NC_037645.1 | 7551670 | SNV | 1 | A | G | Homozygous   |
| NC_037645.1 | 7551687 | SNV | 1 | T | A | Homozygous   |
| NC_037645.1 | 7551695 | SNV | 1 | G | A | Heterozygous |
| NC_037645.1 | 7551715 | SNV | 1 | T | C | Homozygous   |
| NC_037645.1 | 7551993 | SNV | 1 | G | A | Heterozygous |
| NC_037645.1 | 7552002 | SNV | 1 | T | C | Homozygous   |
| NC_037645.1 | 7552049 | SNV | 1 | A | G | Homozygous   |
| NC_037645.1 | 7552054 | SNV | 1 | A | G | Homozygous   |
| NC_037645.1 | 7552094 | SNV | 1 | C | T | Heterozygous |
| NC_037645.1 | 7552267 | SNV | 1 | T | C | Heterozygous |
| NC_037645.1 | 7552720 | SNV | 1 | A | G | Homozygous   |
| NC_037645.1 | 7552722 | SNV | 1 | T | C | Homozygous   |
| NC_037645.1 | 7552741 | SNV | 1 | G | T | Homozygous   |
| NC_037645.1 | 7552860 | SNV | 1 | G | A | Heterozygous |
| NC_037645.1 | 7552929 | SNV | 1 | G | A | Heterozygous |
| NC_037645.1 | 7553061 | SNV | 1 | A | G | Homozygous   |
| NC_037645.1 | 7553075 | SNV | 1 | T | C | Homozygous   |
| NC_037645.1 | 7553084 | SNV | 1 | C | T | Heterozygous |
| NC_037645.1 | 7553196 | SNV | 1 | C | T | Heterozygous |
| NC_037645.1 | 7553219 | SNV | 1 | A | G | Heterozygous |
| NC_037645.1 | 7553229 | SNV | 1 | G | A | Heterozygous |
| NC_037645.1 | 7553245 | SNV | 1 | G | A | Heterozygous |
| NC_037645.1 | 7553249 | SNV | 1 | T | C | Homozygous   |
| NC_037645.1 | 7553280 | SNV | 1 | C | A | Heterozygous |
| NC_037645.1 | 7553343 | SNV | 1 | A | G | Heterozygous |
| NC_037645.1 | 7553346 | SNV | 1 | G | T | Homozygous   |
| NC_037645.1 | 7553348 | SNV | 1 | C | T | Heterozygous |
| NC_037645.1 | 7553382 | SNV | 1 | A | G | Homozygous   |
| NC_037645.1 | 7553447 | SNV | 1 | T | C | Homozygous   |
| NC_037645.1 | 7553799 | SNV | 1 | A | G | Heterozygous |
| NC_037645.1 | 7553803 | SNV | 1 | C | T | Homozygous   |
| NC_037645.1 | 7553811 | SNV | 1 | A | G | Heterozygous |
| NC_037645.1 | 7553838 | SNV | 1 | G | A | Homozygous   |
| NC_037645.1 | 7553899 | SNV | 1 | T | C | Homozygous   |
| NC_037645.1 | 7554370 | SNV | 1 | A | G | Homozygous   |
| NC_037645.1 | 7554885 | SNV | 1 | G | A | Homozygous   |
| NC_037645.1 | 7554899 | SNV | 1 | A | G | Homozygous   |
| NC_037645.1 | 7554926 | SNV | 1 | C | T | Homozygous   |
| NC_037645.1 | 7555216 | SNV | 1 | A | G | Homozygous   |
| NC_037645.1 | 7555269 | SNV | 1 | G | A | Heterozygous |
| NC_037645.1 | 7555576 | SNV | 1 | G | A | Heterozygous |
| NC_037645.1 | 7555651 | SNV | 1 | T | C | Heterozygous |
| NC_037645.1 | 7555692 | SNV | 1 | A | G | Heterozygous |
| NC_037645.1 | 7555736 | SNV | 1 | G | A | Heterozygous |

|             |         |     |   |   |   |              |
|-------------|---------|-----|---|---|---|--------------|
| NC_037645.1 | 7555819 | SNV | 1 | A | G | Homozygous   |
| NC_037645.1 | 7555882 | SNV | 1 | G | A | Heterozygous |
| NC_037645.1 | 7556064 | SNV | 1 | T | C | Heterozygous |
| NC_037645.1 | 7556180 | SNV | 1 | G | A | Heterozygous |
| NC_037645.1 | 7556185 | SNV | 1 | A | G | Homozygous   |
| NC_037645.1 | 7556326 | SNV | 1 | T | C | Homozygous   |
| NC_037645.1 | 7556341 | SNV | 1 | A | G | Heterozygous |
| NC_037645.1 | 7556360 | SNV | 1 | T | C | Homozygous   |
| NC_037645.1 | 7556369 | SNV | 1 | T | C | Homozygous   |
| NC_037645.1 | 7556374 | SNV | 1 | C | G | Heterozygous |
| NC_037645.1 | 7556380 | SNV | 1 | C | T | Heterozygous |
| NC_037645.1 | 7556392 | SNV | 1 | C | G | Heterozygous |
| NC_037645.1 | 7556423 | SNV | 1 | G | C | Heterozygous |
| NC_037645.1 | 7556477 | SNV | 1 | G | A | Homozygous   |
| NC_037645.1 | 7556523 | SNV | 1 | G | A | Heterozygous |
| NC_037645.1 | 7556538 | SNV | 1 | A | G | Heterozygous |
| NC_037645.1 | 7556542 | SNV | 1 | T | G | Heterozygous |
| NC_037645.1 | 7556569 | SNV | 1 | T | A | Heterozygous |
| NC_037645.1 | 7556577 | SNV | 1 | G | C | Heterozygous |
| NC_037645.1 | 7556599 | SNV | 1 | A | G | Homozygous   |
| NC_037645.1 | 7556606 | SNV | 1 | A | G | Homozygous   |
| NC_037645.1 | 7556608 | SNV | 1 | A | G | Homozygous   |
| NC_037645.1 | 7556626 | SNV | 1 | G | A | Heterozygous |
| NC_037645.1 | 7556634 | SNV | 1 | G | A | Heterozygous |
| NC_037645.1 | 7557309 | SNV | 1 | G | A | Homozygous   |
| NC_037645.1 | 7557336 | SNV | 1 | C | T | Heterozygous |
| NC_037645.1 | 7557362 | SNV | 1 | T | C | Heterozygous |
| NC_037645.1 | 7557364 | SNV | 1 | T | C | Heterozygous |
| NC_037645.1 | 7557375 | SNV | 1 | T | C | Homozygous   |
| NC_037645.1 | 7557604 | SNV | 1 | G | A | Heterozygous |
| NC_037645.1 | 7557608 | SNV | 1 | G | A | Heterozygous |
| NC_037645.1 | 7557757 | SNV | 1 | A | G | Homozygous   |
| NC_037645.1 | 7557787 | SNV | 1 | C | T | Heterozygous |
| NC_037645.1 | 7557835 | SNV | 1 | A | G | Homozygous   |
| NC_037645.1 | 7557960 | SNV | 1 | T | C | Homozygous   |
| NC_037645.1 | 7557995 | SNV | 1 | G | A | Heterozygous |
| NC_037645.1 | 7558034 | SNV | 1 | A | C | Heterozygous |
| NC_037645.1 | 7558216 | SNV | 1 | G | A | Heterozygous |
| NC_037645.1 | 7558308 | SNV | 1 | A | G | Homozygous   |
| NC_037645.1 | 7558368 | SNV | 1 | A | G | Homozygous   |
| NC_037645.1 | 7558749 | SNV | 1 | C | T | Heterozygous |
| NC_037645.1 | 7558756 | SNV | 1 | C | T | Homozygous   |
| NC_037645.1 | 7558758 | SNV | 1 | T | C | Homozygous   |
| NC_037645.1 | 7558772 | SNV | 1 | A | G | Homozygous   |
| NC_037645.1 | 7558886 | SNV | 1 | A | G | Homozygous   |
| NC_037645.1 | 7558900 | SNV | 1 | A | G | Homozygous   |
| NC_037645.1 | 7559129 | SNV | 1 | G | T | Homozygous   |
| NC_037645.1 | 7559338 | SNV | 1 | G | C | Heterozygous |
| NC_037645.1 | 7559357 | SNV | 1 | C | G | Heterozygous |
| NC_037645.1 | 7559648 | SNV | 1 | T | C | Homozygous   |
| NC_037645.1 | 7559659 | SNV | 1 | T | A | Homozygous   |

|             |         |     |   |   |   |              |
|-------------|---------|-----|---|---|---|--------------|
| NC_037645.1 | 7560116 | SNV | 1 | C | T | Homozygous   |
| NC_037645.1 | 7560165 | SNV | 1 | A | G | Homozygous   |
| NC_037645.1 | 7560477 | SNV | 1 | T | A | Homozygous   |
| NC_037645.1 | 7560542 | SNV | 1 | C | T | Homozygous   |
| NC_037645.1 | 7560544 | SNV | 1 | G | T | Homozygous   |
| NC_037645.1 | 7560719 | SNV | 1 | C | T | Heterozygous |
| NC_037645.1 | 7560935 | SNV | 1 | A | G | Homozygous   |
| NC_037645.1 | 7560953 | SNV | 1 | A | G | Homozygous   |
| NC_037645.1 | 7560978 | SNV | 1 | T | G | Heterozygous |
| NC_037645.1 | 7561026 | SNV | 1 | A | G | Homozygous   |
| NC_037645.1 | 7561056 | SNV | 1 | T | A | Heterozygous |
| NC_037645.1 | 7561094 | SNV | 1 | A | G | Homozygous   |
| NC_037645.1 | 7561533 | SNV | 1 | C | T | Heterozygous |
| NC_037645.1 | 7561554 | SNV | 1 | A | G | Heterozygous |
| NC_037645.1 | 7561558 | SNV | 1 | G | C | Heterozygous |
| NC_037645.1 | 7561596 | SNV | 1 | A | G | Heterozygous |
| NC_037645.1 | 7561610 | SNV | 1 | T | C | Heterozygous |
| NC_037645.1 | 7561619 | SNV | 1 | G | A | Heterozygous |
| NC_037645.1 | 7561643 | SNV | 1 | T | C | Homozygous   |
| NC_037645.1 | 7561758 | SNV | 1 | C | T | Homozygous   |
| NC_037645.1 | 7581599 | SNV | 1 | A | G | Homozygous   |
| NC_037645.1 | 7587051 | SNV | 1 | A | G | Homozygous   |
| NC_037645.1 | 7587109 | SNV | 1 | A | G | Homozygous   |
| NC_037645.1 | 7587138 | SNV | 1 | A | G | Heterozygous |
| NC_037645.1 | 7587190 | SNV | 1 | T | C | Homozygous   |
| NC_037645.1 | 7587222 | SNV | 1 | C | T | Heterozygous |
| NC_037645.1 | 7587293 | SNV | 1 | T | C | Homozygous   |
| NC_037645.1 | 7587397 | SNV | 1 | G | A | Heterozygous |
| NC_037645.1 | 7587675 | SNV | 1 | T | C | Homozygous   |
| NC_037645.1 | 7587930 | SNV | 1 | G | A | Heterozygous |
| NC_037645.1 | 7588373 | SNV | 1 | C | T | Homozygous   |
| NC_037645.1 | 7588521 | SNV | 1 | C | T | Homozygous   |
| NC_037645.1 | 7588545 | SNV | 1 | C | T | Heterozygous |
| NC_037645.1 | 7588977 | SNV | 1 | T | C | Homozygous   |
| NC_037645.1 | 7589381 | SNV | 1 | T | C | Homozygous   |
| NC_037645.1 | 7589563 | SNV | 1 | A | G | Homozygous   |
| NC_037645.1 | 7590040 | SNV | 1 | C | T | Heterozygous |
| NC_037645.1 | 7590359 | SNV | 1 | A | G | Homozygous   |
| NC_037645.1 | 7590535 | SNV | 1 | C | T | Homozygous   |
| NC_037645.1 | 7590938 | SNV | 1 | G | A | Homozygous   |
| NC_037645.1 | 7591294 | SNV | 1 | A | T | Homozygous   |
| NC_037645.1 | 7591340 | SNV | 1 | T | C | Homozygous   |
| NC_037645.1 | 7591351 | SNV | 1 | C | T | Homozygous   |
| NC_037645.1 | 7591791 | SNV | 1 | T | C | Homozygous   |
| NC_037645.1 | 7593220 | SNV | 1 | A | T | Heterozygous |
| NC_037645.1 | 7593391 | SNV | 1 | T | C | Homozygous   |
| NC_037645.1 | 7596821 | SNV | 1 | A | T | Heterozygous |
| NC_037645.1 | 7599224 | SNV | 1 | A | G | Heterozygous |
| NC_037645.1 | 7599228 | SNV | 1 | C | T | Heterozygous |
| NC_037645.1 | 7599239 | SNV | 1 | C | T | Heterozygous |
| NC_037645.1 | 7600103 | SNV | 1 | A | C | Heterozygous |

|             |         |     |   |   |   |              |
|-------------|---------|-----|---|---|---|--------------|
| NC_037645.1 | 7600117 | SNV | 1 | C | A | Heterozygous |
| NC_037645.1 | 7600147 | SNV | 1 | T | A | Heterozygous |
| NC_037645.1 | 7602580 | SNV | 1 | G | A | Homozygous   |
| NC_037645.1 | 7606825 | SNV | 1 | T | C | Homozygous   |
| NC_037645.1 | 7606897 | SNV | 1 | A | G | Heterozygous |
| NC_037645.1 | 7614134 | SNV | 1 | A | G | Homozygous   |
| NC_037645.1 | 7614225 | SNV | 1 | G | A | Homozygous   |
| NC_037645.1 | 7614229 | SNV | 1 | G | A | Homozygous   |
| NC_037645.1 | 7614277 | SNV | 1 | C | T | Homozygous   |
| NC_037645.1 | 7615912 | SNV | 1 | T | C | Homozygous   |
| NC_037645.1 | 7615936 | SNV | 1 | G | A | Homozygous   |
| NC_037645.1 | 7617113 | SNV | 1 | A | G | Heterozygous |
| NC_037645.1 | 7618460 | SNV | 1 | A | C | Homozygous   |
| NC_037645.1 | 7618516 | SNV | 1 | C | T | Homozygous   |
| NC_037645.1 | 7620398 | SNV | 1 | A | G | Homozygous   |
| NC_037645.1 | 7620412 | SNV | 1 | A | G | Homozygous   |
| NC_037645.1 | 7620928 | SNV | 1 | T | C | Heterozygous |
| NC_037645.1 | 7620970 | SNV | 1 | A | G | Heterozygous |
| NC_037645.1 | 7622097 | SNV | 1 | A | G | Homozygous   |
| NC_037645.1 | 7622386 | SNV | 1 | C | G | Homozygous   |
| NC_037645.1 | 7625089 | SNV | 1 | T | C | Heterozygous |
| NC_037645.1 | 7625158 | SNV | 1 | C | T | Homozygous   |
| NC_037645.1 | 7625336 | SNV | 1 | A | G | Homozygous   |
| NC_037645.1 | 7625361 | SNV | 1 | C | T | Homozygous   |
| NC_037645.1 | 7625734 | SNV | 1 | A | G | Homozygous   |
| NC_037645.1 | 7625758 | SNV | 1 | T | C | Homozygous   |
| NC_037645.1 | 7626111 | SNV | 1 | A | G | Heterozygous |
| NC_037645.1 | 7626334 | SNV | 1 | C | A | Heterozygous |
| NC_037645.1 | 7626336 | SNV | 1 | T | A | Heterozygous |
| NC_037645.1 | 7626425 | SNV | 1 | T | C | Homozygous   |
| NC_037645.1 | 7626447 | SNV | 1 | T | C | Homozygous   |
| NC_037645.1 | 7626559 | SNV | 1 | C | T | Heterozygous |
| NC_037645.1 | 7626816 | SNV | 1 | T | C | Homozygous   |
| NC_037645.1 | 7626958 | SNV | 1 | A | G | Heterozygous |
| NC_037645.1 | 7627708 | SNV | 1 | A | G | Homozygous   |
| NC_037645.1 | 7627852 | SNV | 1 | A | G | Homozygous   |
| NC_037645.1 | 7628138 | SNV | 1 | C | T | Homozygous   |
| NC_037645.1 | 7628752 | SNV | 1 | T | G | Heterozygous |
| NC_037645.1 | 7628760 | SNV | 1 | C | T | Heterozygous |
| NC_037645.1 | 7628823 | SNV | 1 | A | G | Homozygous   |
| NC_037645.1 | 7628838 | SNV | 1 | C | T | Homozygous   |
| NC_037645.1 | 7628901 | SNV | 1 | T | C | Homozygous   |
| NC_037645.1 | 7628903 | SNV | 1 | A | G | Homozygous   |
| NC_037645.1 | 7629277 | SNV | 1 | C | G | Heterozygous |
| NC_037645.1 | 7629313 | SNV | 1 | A | G | Heterozygous |
| NC_037645.1 | 7629346 | SNV | 1 | A | G | Homozygous   |
| NC_037645.1 | 7629385 | SNV | 1 | A | C | Heterozygous |
| NC_037645.1 | 7629470 | SNV | 1 | T | C | Heterozygous |
| NC_037645.1 | 7630123 | SNV | 1 | A | G | Heterozygous |
| NC_037645.1 | 7630190 | SNV | 1 | T | C | Homozygous   |
| NC_037645.1 | 7630275 | SNV | 1 | A | G | Homozygous   |

|             |         |     |   |   |   |              |
|-------------|---------|-----|---|---|---|--------------|
| NC_037645.1 | 7630330 | SNV | 1 | C | T | Heterozygous |
| NC_037645.1 | 7630521 | SNV | 1 | C | T | Heterozygous |
| NC_037645.1 | 7630533 | SNV | 1 | C | T | Heterozygous |
| NC_037645.1 | 7630956 | SNV | 1 | C | T | Homozygous   |
| NC_037645.1 | 7631008 | SNV | 1 | T | C | Homozygous   |
| NC_037645.1 | 7631530 | SNV | 1 | A | G | Homozygous   |
| NC_037645.1 | 7631553 | SNV | 1 | C | T | Heterozygous |
| NC_037645.1 | 7631622 | SNV | 1 | G | A | Heterozygous |
| NC_037645.1 | 7631721 | SNV | 1 | T | G | Heterozygous |
| NC_037645.1 | 7631747 | SNV | 1 | A | G | Homozygous   |
| NC_037645.1 | 7631784 | SNV | 1 | G | A | Heterozygous |
| NC_037645.1 | 7631789 | SNV | 1 | G | A | Heterozygous |
| NC_037645.1 | 7631827 | SNV | 1 | A | G | Heterozygous |
| NC_037645.1 | 7631871 | SNV | 1 | C | A | Heterozygous |
| NC_037645.1 | 7631908 | SNV | 1 | T | C | Homozygous   |
| NC_037645.1 | 7632267 | SNV | 1 | A | G | Heterozygous |
| NC_037645.1 | 7632390 | SNV | 1 | A | T | Homozygous   |
| NC_037645.1 | 7632810 | SNV | 1 | A | G | Homozygous   |
| NC_037645.1 | 7633147 | SNV | 1 | C | A | Heterozygous |
| NC_037645.1 | 7633149 | SNV | 1 | T | C | Homozygous   |
| NC_037645.1 | 7633560 | SNV | 1 | T | C | Homozygous   |
| NC_037645.1 | 7633585 | SNV | 1 | T | C | Homozygous   |
| NC_037645.1 | 7633609 | SNV | 1 | C | T | Heterozygous |
| NC_037645.1 | 7633636 | SNV | 1 | C | T | Heterozygous |
| NC_037645.1 | 7633645 | SNV | 1 | T | C | Homozygous   |
| NC_037645.1 | 7633668 | SNV | 1 | T | C | Homozygous   |
| NC_037645.1 | 7633676 | SNV | 1 | T | C | Homozygous   |
| NC_037645.1 | 7633711 | SNV | 1 | A | G | Homozygous   |
| NC_037645.1 | 7633787 | SNV | 1 | T | C | Heterozygous |
| NC_037645.1 | 7633791 | SNV | 1 | G | T | Heterozygous |
| NC_037645.1 | 7633826 | SNV | 1 | T | C | Homozygous   |
| NC_037645.1 | 7633829 | SNV | 1 | T | C | Homozygous   |
| NC_037645.1 | 7633837 | SNV | 1 | T | C | Homozygous   |
| NC_037645.1 | 7634202 | SNV | 1 | T | C | Heterozygous |
| NC_037645.1 | 7634276 | SNV | 1 | T | C | Homozygous   |
| NC_037645.1 | 7634309 | SNV | 1 | T | C | Homozygous   |
| NC_037645.1 | 7634314 | SNV | 1 | T | C | Heterozygous |
| NC_037645.1 | 7634387 | SNV | 1 | A | C | Heterozygous |
| NC_037645.1 | 7634390 | SNV | 1 | C | T | Heterozygous |
| NC_037645.1 | 7634483 | SNV | 1 | G | T | Heterozygous |
| NC_037645.1 | 7634501 | SNV | 1 | C | A | Homozygous   |
| NC_037645.1 | 7634513 | SNV | 1 | C | T | Heterozygous |
| NC_037645.1 | 7634564 | SNV | 1 | G | C | Homozygous   |
| NC_037645.1 | 7634661 | SNV | 1 | A | G | Homozygous   |
| NC_037645.1 | 7634663 | SNV | 1 | G | A | Heterozygous |
| NC_037645.1 | 7634667 | SNV | 1 | G | C | Heterozygous |
| NC_037645.1 | 7634690 | SNV | 1 | A | G | Homozygous   |
| NC_037645.1 | 7635044 | SNV | 1 | G | A | Heterozygous |
| NC_037645.1 | 7635053 | SNV | 1 | C | G | Homozygous   |
| NC_037645.1 | 7635092 | SNV | 1 | A | G | Homozygous   |
| NC_037645.1 | 7635108 | SNV | 1 | A | G | Homozygous   |

|             |         |     |   |   |   |              |
|-------------|---------|-----|---|---|---|--------------|
| NC_037645.1 | 7635230 | SNV | 1 | A | G | Heterozygous |
| NC_037645.1 | 7635233 | SNV | 1 | A | C | Heterozygous |
| NC_037645.1 | 7638832 | SNV | 1 | C | T | Heterozygous |
| NC_037645.1 | 7638898 | SNV | 1 | C | T | Heterozygous |
| NC_037645.1 | 7639019 | SNV | 1 | G | T | Homozygous   |
| NC_037645.1 | 7640636 | SNV | 1 | G | A | Heterozygous |
| NC_037645.1 | 7640687 | SNV | 1 | T | C | Heterozygous |
| NC_037645.1 | 7640690 | SNV | 1 | A | T | Heterozygous |
| NC_037645.1 | 7640697 | SNV | 1 | C | T | Heterozygous |
| NC_037645.1 | 7640801 | SNV | 1 | T | A | Homozygous   |
| NC_037645.1 | 7640804 | SNV | 1 | C | T | Homozygous   |
| NC_037645.1 | 7640818 | SNV | 1 | T | C | Heterozygous |
| NC_037645.1 | 7640830 | SNV | 1 | T | A | Heterozygous |
| NC_037645.1 | 7640858 | SNV | 1 | T | C | Heterozygous |
| NC_037645.1 | 7640864 | SNV | 1 | G | A | Homozygous   |
| NC_037645.1 | 7640899 | SNV | 1 | C | T | Heterozygous |
| NC_037645.1 | 7641062 | SNV | 1 | C | T | Heterozygous |
| NC_037645.1 | 7641269 | SNV | 1 | T | C | Homozygous   |
| NC_037645.1 | 7641473 | SNV | 1 | G | A | Heterozygous |
| NC_037645.1 | 7641583 | SNV | 1 | A | G | Homozygous   |
| NC_037645.1 | 7641712 | SNV | 1 | C | T | Heterozygous |
| NC_037645.1 | 7647809 | SNV | 1 | A | G | Homozygous   |
| NC_037645.1 | 7649317 | SNV | 1 | A | G | Homozygous   |
| NC_037645.1 | 7653522 | SNV | 1 | A | C | Homozygous   |
| NC_037645.1 | 7653528 | SNV | 1 | A | C | Homozygous   |
| NC_037645.1 | 7653537 | SNV | 1 | T | A | Homozygous   |
| NC_037645.1 | 7653542 | SNV | 1 | T | A | Homozygous   |
| NC_037645.1 | 7658519 | SNV | 1 | C | T | Heterozygous |
| NC_037645.1 | 7658525 | SNV | 1 | T | C | Heterozygous |
| NC_037645.1 | 7680991 | SNV | 1 | A | T | Heterozygous |
| NC_037645.1 | 7682918 | SNV | 1 | T | G | Heterozygous |
| NC_037645.1 | 7684285 | SNV | 1 | A | T | Heterozygous |
| NC_037645.1 | 7684344 | SNV | 1 | A | G | Homozygous   |
| NC_037645.1 | 7684476 | SNV | 1 | C | T | Heterozygous |
| NC_037645.1 | 7687891 | SNV | 1 | G | C | Heterozygous |
| NC_037645.1 | 7688278 | SNV | 1 | G | C | Homozygous   |
| NC_037645.1 | 7697019 | SNV | 1 | A | T | Homozygous   |
| NC_037645.1 | 7697581 | SNV | 1 | A | G | Heterozygous |
| NC_037645.1 | 7697714 | SNV | 1 | C | T | Homozygous   |
| NC_037645.1 | 7698993 | SNV | 1 | A | C | Homozygous   |
| NC_037645.1 | 7703459 | SNV | 1 | G | A | Homozygous   |
| NC_037645.1 | 7703641 | SNV | 1 | T | C | Homozygous   |
| NC_037645.1 | 7704657 | SNV | 1 | C | T | Heterozygous |
| NC_037645.1 | 7705397 | SNV | 1 | G | A | Heterozygous |
| NC_037645.1 | 7715362 | SNV | 1 | A | T | Homozygous   |
| NC_037645.1 | 7720166 | SNV | 1 | G | A | Homozygous   |
| NC_037645.1 | 7720782 | SNV | 1 | T | A | Heterozygous |
| NC_037645.1 | 7721132 | SNV | 1 | G | A | Homozygous   |
| NC_037645.1 | 7721155 | SNV | 1 | A | T | Homozygous   |
| NC_037645.1 | 7721159 | SNV | 1 | A | G | Homozygous   |
| NC_037645.1 | 7721162 | SNV | 1 | C | G | Homozygous   |

|             |         |     |   |   |   |              |
|-------------|---------|-----|---|---|---|--------------|
| NC_037645.1 | 7721172 | SNV | 1 | A | G | Homozygous   |
| NC_037645.1 | 7721174 | SNV | 1 | G | A | Homozygous   |
| NC_037645.1 | 7721176 | SNV | 1 | T | A | Homozygous   |
| NC_037645.1 | 7721190 | SNV | 1 | A | T | Homozygous   |
| NC_037645.1 | 7721599 | SNV | 1 | T | C | Homozygous   |
| NC_037645.1 | 7728280 | SNV | 1 | G | A | Heterozygous |
| NC_037645.1 | 7728661 | SNV | 1 | T | G | Heterozygous |
| NC_037645.1 | 7730013 | SNV | 1 | A | G | Homozygous   |
| NC_037645.1 | 7736501 | SNV | 1 | C | G | Homozygous   |
| NC_037645.1 | 7737829 | SNV | 1 | G | A | Heterozygous |
| NC_037645.1 | 7743606 | SNV | 1 | T | C | Heterozygous |
| NC_037645.1 | 7744246 | SNV | 1 | T | C | Homozygous   |
| NC_037645.1 | 7745315 | SNV | 1 | T | C | Homozygous   |
| NC_037645.1 | 7746985 | SNV | 1 | A | T | Homozygous   |
| NC_037645.1 | 7748709 | SNV | 1 | C | T | Heterozygous |
| NC_037645.1 | 7748749 | SNV | 1 | G | A | Heterozygous |
| NC_037645.1 | 7748774 | SNV | 1 | T | A | Heterozygous |
| NC_037645.1 | 7748776 | SNV | 1 | A | T | Heterozygous |
| NC_037645.1 | 7748779 | SNV | 1 | G | T | Heterozygous |
| NC_037645.1 | 7748782 | SNV | 1 | T | A | Heterozygous |
| NC_037645.1 | 7748814 | SNV | 1 | A | G | Heterozygous |
| NC_037645.1 | 7752771 | SNV | 1 | A | C | Homozygous   |
| NC_037645.1 | 7752774 | SNV | 1 | A | T | Homozygous   |
| NC_037645.1 | 7753318 | SNV | 1 | G | A | Homozygous   |
| NC_037645.1 | 7753323 | SNV | 1 | T | A | Heterozygous |
| NC_037645.1 | 7753332 | SNV | 1 | A | G | Heterozygous |
| NC_037645.1 | 7753340 | SNV | 1 | A | G | Homozygous   |
| NC_037645.1 | 7753344 | SNV | 1 | A | G | Homozygous   |
| NC_037645.1 | 7753346 | SNV | 1 | G | A | Homozygous   |
| NC_037645.1 | 7753351 | SNV | 1 | C | T | Homozygous   |
| NC_037645.1 | 7753402 | SNV | 1 | A | G | Heterozygous |
| NC_037645.1 | 7753416 | SNV | 1 | A | T | Heterozygous |
| NC_037645.1 | 7753564 | SNV | 1 | A | G | Homozygous   |
| NC_037645.1 | 7753570 | SNV | 1 | A | G | Heterozygous |
| NC_037645.1 | 7753572 | SNV | 1 | A | G | Heterozygous |
| NC_037645.1 | 7753584 | SNV | 1 | A | G | Heterozygous |
| NC_037645.1 | 7753615 | SNV | 1 | C | G | Homozygous   |
| NC_037645.1 | 7753634 | SNV | 1 | G | A | Homozygous   |
| NC_037645.1 | 7753644 | SNV | 1 | A | G | Heterozygous |
| NC_037645.1 | 7757708 | SNV | 1 | T | C | Heterozygous |
| NC_037645.1 | 7758763 | SNV | 1 | A | T | Homozygous   |
| NC_037645.1 | 7761240 | SNV | 1 | G | A | Heterozygous |
| NC_037645.1 | 7761289 | SNV | 1 | T | C | Homozygous   |
| NC_037645.1 | 7762433 | SNV | 1 | T | C | Heterozygous |
| NC_037645.1 | 7763152 | SNV | 1 | A | G | Homozygous   |
| NC_037645.1 | 7763918 | SNV | 1 | T | G | Homozygous   |
| NC_037645.1 | 7764622 | SNV | 1 | A | G | Heterozygous |
| NC_037645.1 | 7765863 | SNV | 1 | C | T | Homozygous   |
| NC_037645.1 | 7767168 | SNV | 1 | A | G | Homozygous   |
| NC_037645.1 | 7767356 | SNV | 1 | C | A | Homozygous   |
| NC_037645.1 | 7767358 | SNV | 1 | T | A | Heterozygous |



|             |         |     |   |   |   |              |
|-------------|---------|-----|---|---|---|--------------|
| NC_037645.1 | 7768651 | SNV | 1 | G | A | Heterozygous |
| NC_037645.1 | 7771329 | SNV | 1 | C | T | Heterozygous |
| NC_037645.1 | 7773000 | SNV | 1 | G | A | Heterozygous |
| NC_037645.1 | 7773012 | SNV | 1 | C | T | Heterozygous |
| NC_037645.1 | 7774295 | SNV | 1 | G | A | Heterozygous |
| NC_037645.1 | 7784256 | SNV | 1 | C | T | Heterozygous |
| NC_037645.1 | 7788347 | SNV | 1 | T | C | Homozygous   |
| NC_037645.1 | 7788845 | SNV | 1 | T | G | Homozygous   |
| NC_037645.1 | 7792787 | SNV | 1 | C | T | Homozygous   |
| NC_037645.1 | 7793036 | SNV | 1 | C | A | Homozygous   |
| NC_037645.1 | 7793342 | SNV | 1 | T | C | Homozygous   |
| NC_037645.1 | 7796629 | SNV | 1 | G | C | Homozygous   |
| NC_037645.1 | 7796868 | SNV | 1 | A | C | Homozygous   |
| NC_037645.1 | 7796872 | SNV | 1 | T | A | Homozygous   |
| NC_037645.1 | 7797084 | SNV | 1 | T | A | Homozygous   |
| NC_037645.1 | 7797086 | SNV | 1 | A | C | Homozygous   |
| NC_037645.1 | 7797089 | SNV | 1 | T | A | Homozygous   |
| NC_037645.1 | 7797091 | SNV | 1 | G | A | Homozygous   |
| NC_037645.1 | 7798349 | SNV | 1 | G | A | Heterozygous |
| NC_037645.1 | 7799194 | SNV | 1 | C | T | Heterozygous |
| NC_037645.1 | 7799233 | SNV | 1 | T | A | Homozygous   |
| NC_037645.1 | 7800722 | SNV | 1 | A | G | Homozygous   |
| NC_037645.1 | 7801364 | SNV | 1 | C | T | Heterozygous |
| NC_037645.1 | 7801690 | SNV | 1 | A | G | Homozygous   |
| NC_037645.1 | 7803807 | SNV | 1 | T | C | Heterozygous |
| NC_037645.1 | 7804503 | SNV | 1 | T | C | Homozygous   |
| NC_037645.1 | 7804630 | SNV | 1 | A | G | Homozygous   |
| NC_037645.1 | 7805284 | SNV | 1 | T | C | Homozygous   |
| NC_037645.1 | 7805309 | SNV | 1 | G | A | Heterozygous |
| NC_037645.1 | 7805729 | SNV | 1 | T | C | Heterozygous |
| NC_037645.1 | 7805909 | SNV | 1 | T | C | Heterozygous |
| NC_037645.1 | 7806648 | SNV | 1 | G | A | Heterozygous |
| NC_037645.1 | 7806970 | SNV | 1 | A | G | Homozygous   |
| NC_037645.1 | 7807422 | SNV | 1 | C | A | Homozygous   |
| NC_037645.1 | 7807951 | SNV | 1 | A | G | Homozygous   |
| NC_037645.1 | 7808968 | SNV | 1 | C | T | Homozygous   |
| NC_037645.1 | 7812509 | SNV | 1 | T | C | Homozygous   |
| NC_037645.1 | 7825731 | SNV | 1 | G | A | Homozygous   |
| NC_037645.1 | 7825806 | SNV | 1 | T | A | Homozygous   |
| NC_037645.1 | 7825961 | SNV | 1 | A | C | Homozygous   |
| NC_037645.1 | 7826295 | SNV | 1 | T | C | Homozygous   |
| NC_037645.1 | 7826648 | SNV | 1 | T | G | Homozygous   |
| NC_037645.1 | 7830080 | SNV | 1 | C | T | Homozygous   |
| NC_037645.1 | 7830977 | SNV | 1 | A | T | Homozygous   |
| NC_037645.1 | 7832130 | SNV | 1 | A | G | Homozygous   |
| NC_037645.1 | 7832803 | SNV | 1 | A | G | Homozygous   |
| NC_037645.1 | 7832917 | SNV | 1 | G | A | Heterozygous |
| NC_037645.1 | 7833175 | SNV | 1 | T | G | Homozygous   |
| NC_037645.1 | 7833453 | SNV | 1 | C | T | Homozygous   |
| NC_037645.1 | 7833550 | SNV | 1 | G | A | Heterozygous |
| NC_037645.1 | 7833653 | SNV | 1 | T | C | Homozygous   |

|             |         |     |   |   |   |              |
|-------------|---------|-----|---|---|---|--------------|
| NC_037645.1 | 7833763 | SNV | 1 | C | T | Heterozygous |
| NC_037645.1 | 7837200 | SNV | 1 | C | T | Homozygous   |
| NC_037645.1 | 7837212 | SNV | 1 | A | G | Homozygous   |
| NC_037645.1 | 7837269 | SNV | 1 | A | G | Homozygous   |
| NC_037645.1 | 7837757 | SNV | 1 | T | G | Homozygous   |
| NC_037645.1 | 7837944 | SNV | 1 | A | G | Homozygous   |
| NC_037645.1 | 7839235 | SNV | 1 | A | G | Homozygous   |
| NC_037645.1 | 7839832 | SNV | 1 | T | C | Homozygous   |
| NC_037645.1 | 7839996 | SNV | 1 | C | T | Homozygous   |
| NC_037645.1 | 7840020 | SNV | 1 | C | T | Homozygous   |
| NC_037645.1 | 7840041 | SNV | 1 | G | A | Homozygous   |
| NC_037645.1 | 7840258 | SNV | 1 | C | T | Heterozygous |
| NC_037645.1 | 7842007 | SNV | 1 | A | T | Homozygous   |
| NC_037645.1 | 7842046 | SNV | 1 | G | A | Heterozygous |
| NC_037645.1 | 7849707 | SNV | 1 | A | C | Heterozygous |
| NC_037645.1 | 7849709 | SNV | 1 | A | G | Heterozygous |
| NC_037645.1 | 7849712 | SNV | 1 | A | G | Heterozygous |
| NC_037645.1 | 7849718 | SNV | 1 | A | G | Heterozygous |
| NC_037645.1 | 7849813 | SNV | 1 | A | G | Homozygous   |
| NC_037645.1 | 7849870 | SNV | 1 | A | G | Heterozygous |
| NC_037645.1 | 7849874 | SNV | 1 | A | G | Heterozygous |
| NC_037645.1 | 7849942 | SNV | 1 | G | A | Homozygous   |
| NC_037645.1 | 7850922 | SNV | 1 | G | A | Heterozygous |
| NC_037645.1 | 7851090 | SNV | 1 | C | T | Heterozygous |
| NC_037645.1 | 7851098 | SNV | 1 | C | T | Heterozygous |
| NC_037645.1 | 7851241 | SNV | 1 | C | T | Heterozygous |
| NC_037645.1 | 7989707 | SNV | 1 | A | G | Heterozygous |
| NC_037645.1 | 7989774 | SNV | 1 | T | C | Homozygous   |
| NC_037645.1 | 7989951 | SNV | 1 | A | G | Homozygous   |
| NC_037645.1 | 7990100 | SNV | 1 | G | T | Homozygous   |
| NC_037645.1 | 7990122 | SNV | 1 | T | C | Heterozygous |
| NC_037645.1 | 7990124 | SNV | 1 | C | T | Heterozygous |
| NC_037645.1 | 7990184 | SNV | 1 | T | C | Homozygous   |
| NC_037645.1 | 7990187 | SNV | 1 | T | C | Homozygous   |
| NC_037645.1 | 7990189 | SNV | 1 | G | A | Homozygous   |
| NC_037645.1 | 7990418 | SNV | 1 | A | G | Heterozygous |
| NC_037645.1 | 7990459 | SNV | 1 | A | T | Heterozygous |
| NC_037645.1 | 7990460 | SNV | 1 | T | C | Heterozygous |
| NC_037645.1 | 7990468 | SNV | 1 | A | G | Heterozygous |
| NC_037645.1 | 7990566 | SNV | 1 | A | T | Homozygous   |
| NC_037645.1 | 7990751 | SNV | 1 | T | C | Homozygous   |
| NC_037645.1 | 7991038 | SNV | 1 | T | C | Homozygous   |
| NC_037645.1 | 7991200 | SNV | 1 | G | A | Homozygous   |
| NC_037645.1 | 7991203 | SNV | 1 | C | A | Homozygous   |
| NC_037645.1 | 7991426 | SNV | 1 | C | T | Heterozygous |
| NC_037645.1 | 7991433 | SNV | 1 | T | C | Homozygous   |
| NC_037645.1 | 7991497 | SNV | 1 | C | T | Homozygous   |
| NC_037645.1 | 7991519 | SNV | 1 | T | C | Heterozygous |
| NC_037645.1 | 7991777 | SNV | 1 | T | C | Heterozygous |
| NC_037645.1 | 7991817 | SNV | 1 | A | G | Heterozygous |
| NC_037645.1 | 7991820 | SNV | 1 | G | C | Heterozygous |

|             |         |     |   |   |   |              |
|-------------|---------|-----|---|---|---|--------------|
| NC_037645.1 | 7991898 | SNV | 1 | C | T | Heterozygous |
| NC_037645.1 | 7991937 | SNV | 1 | G | A | Heterozygous |
| NC_037645.1 | 7992355 | SNV | 1 | T | C | Homozygous   |
| NC_037645.1 | 7992603 | SNV | 1 | T | C | Homozygous   |
| NC_037645.1 | 7993290 | SNV | 1 | T | C | Homozygous   |
| NC_037645.1 | 7993327 | SNV | 1 | G | A | Heterozygous |
| NC_037645.1 | 7993361 | SNV | 1 | T | A | Heterozygous |
| NC_037645.1 | 7993450 | SNV | 1 | C | T | Heterozygous |
| NC_037645.1 | 7993455 | SNV | 1 | C | A | Heterozygous |
| NC_037645.1 | 7993474 | SNV | 1 | T | C | Homozygous   |
| NC_037645.1 | 7993533 | SNV | 1 | A | G | Homozygous   |
| NC_037645.1 | 7993692 | SNV | 1 | C | A | Heterozygous |
| NC_037645.1 | 7993728 | SNV | 1 | A | G | Homozygous   |
| NC_037645.1 | 7993867 | SNV | 1 | C | T | Heterozygous |
| NC_037645.1 | 7993910 | SNV | 1 | C | T | Homozygous   |
| NC_037645.1 | 7993976 | SNV | 1 | C | T | Heterozygous |
| NC_037645.1 | 7993979 | SNV | 1 | T | C | Heterozygous |
| NC_037645.1 | 7994015 | SNV | 1 | G | A | Homozygous   |
| NC_037645.1 | 7994172 | SNV | 1 | C | T | Heterozygous |
| NC_037645.1 | 7994217 | SNV | 1 | A | C | Homozygous   |
| NC_037645.1 | 7994261 | SNV | 1 | A | G | Homozygous   |
| NC_037645.1 | 7994263 | SNV | 1 | G | A | Heterozygous |
| NC_037645.1 | 7994268 | SNV | 1 | G | T | Homozygous   |
| NC_037645.1 | 7994403 | SNV | 1 | A | G | Homozygous   |
| NC_037645.1 | 7994450 | SNV | 1 | T | C | Heterozygous |
| NC_037645.1 | 7994475 | SNV | 1 | T | C | Homozygous   |
| NC_037645.1 | 7994498 | SNV | 1 | T | C | Heterozygous |
| NC_037645.1 | 7994508 | SNV | 1 | A | G | Heterozygous |
| NC_037645.1 | 7994518 | SNV | 1 | T | C | Homozygous   |
| NC_037645.1 | 7994532 | SNV | 1 | T | C | Heterozygous |
| NC_037645.1 | 7994595 | SNV | 1 | A | G | Homozygous   |
| NC_037645.1 | 7994600 | SNV | 1 | C | T | Heterozygous |
| NC_037645.1 | 7994604 | SNV | 1 | A | G | Heterozygous |
| NC_037645.1 | 7994618 | SNV | 1 | G | C | Homozygous   |
| NC_037645.1 | 7994637 | SNV | 1 | A | G | Heterozygous |
| NC_037645.1 | 7994661 | SNV | 1 | C | T | Homozygous   |
| NC_037645.1 | 7994667 | SNV | 1 | A | G | Heterozygous |
| NC_037645.1 | 7994839 | SNV | 1 | T | G | Heterozygous |
| NC_037645.1 | 8016796 | SNV | 1 | A | G | Homozygous   |
| NC_037645.1 | 8016801 | SNV | 1 | A | G | Homozygous   |
| NC_037645.1 | 8016804 | SNV | 1 | G | A | Homozygous   |
| NC_037645.1 | 8016835 | SNV | 1 | A | G | Homozygous   |
| NC_037645.1 | 8016841 | SNV | 1 | A | G | Homozygous   |
| NC_037645.1 | 8016857 | SNV | 1 | G | A | Homozygous   |
| NC_037645.1 | 8016861 | SNV | 1 | G | A | Homozygous   |
| NC_037645.1 | 8021863 | SNV | 1 | A | G | Homozygous   |
| NC_037645.1 | 8021866 | SNV | 1 | A | C | Homozygous   |
| NC_037645.1 | 8041507 | SNV | 1 | A | G | Homozygous   |
| NC_037645.1 | 8041598 | SNV | 1 | C | T | Heterozygous |
| NC_037645.1 | 8041748 | SNV | 1 | C | T | Heterozygous |
| NC_037645.1 | 8042085 | SNV | 1 | T | A | Homozygous   |

|             |         |     |   |   |   |              |
|-------------|---------|-----|---|---|---|--------------|
| NC_037645.1 | 8042111 | SNV | 1 | C | T | Heterozygous |
| NC_037645.1 | 8042862 | SNV | 1 | G | A | Homozygous   |
| NC_037645.1 | 8043754 | SNV | 1 | T | C | Homozygous   |
| NC_037645.1 | 8043757 | SNV | 1 | A | G | Heterozygous |
| NC_037645.1 | 8043796 | SNV | 1 | T | C | Homozygous   |
| NC_037645.1 | 8043847 | SNV | 1 | T | C | Homozygous   |
| NC_037645.1 | 8043904 | SNV | 1 | G | A | Homozygous   |
| NC_037645.1 | 8043975 | SNV | 1 | A | G | Homozygous   |
| NC_037645.1 | 8044010 | SNV | 1 | T | C | Homozygous   |
| NC_037645.1 | 8044651 | SNV | 1 | T | C | Homozygous   |
| NC_037645.1 | 8047891 | SNV | 1 | T | C | Homozygous   |
| NC_037645.1 | 8047919 | SNV | 1 | T | A | Homozygous   |
| NC_037645.1 | 8048765 | SNV | 1 | T | C | Homozygous   |
| NC_037645.1 | 8049169 | SNV | 1 | C | T | Heterozygous |
| NC_037645.1 | 8053316 | SNV | 1 | C | G | Homozygous   |
| NC_037645.1 | 8109255 | SNV | 1 | G | A | Heterozygous |
| NC_037645.1 | 8109278 | SNV | 1 | A | T | Heterozygous |
| NC_037645.1 | 8109286 | SNV | 1 | A | G | Heterozygous |
| NC_037645.1 | 8109417 | SNV | 1 | A | G | Homozygous   |
| NC_037645.1 | 8109431 | SNV | 1 | A | G | Heterozygous |
| NC_037645.1 | 8109449 | SNV | 1 | A | G | Heterozygous |
| NC_037645.1 | 8109455 | SNV | 1 | G | A | Heterozygous |
| NC_037645.1 | 8109485 | SNV | 1 | G | A | Homozygous   |
| NC_037645.1 | 8109541 | SNV | 1 | T | C | Heterozygous |
| NC_037645.1 | 8109563 | SNV | 1 | T | A | Heterozygous |
| NC_037645.1 | 8109603 | SNV | 1 | A | G | Homozygous   |
| NC_037645.1 | 8109621 | SNV | 1 | A | G | Heterozygous |
| NC_037645.1 | 8110346 | SNV | 1 | C | T | Heterozygous |
| NC_037645.1 | 8110357 | SNV | 1 | T | C | Heterozygous |
| NC_037645.1 | 8110358 | SNV | 1 | C | A | Heterozygous |
| NC_037645.1 | 8110362 | SNV | 1 | C | T | Heterozygous |
| NC_037645.1 | 8110368 | SNV | 1 | G | A | Heterozygous |
| NC_037645.1 | 8110381 | SNV | 1 | A | C | Heterozygous |
| NC_037645.1 | 8110392 | SNV | 1 | C | A | Heterozygous |
| NC_037645.1 | 8206340 | SNV | 1 | A | T | Homozygous   |
| NC_037645.1 | 8206529 | SNV | 1 | T | C | Heterozygous |
| NC_037645.1 | 8207434 | SNV | 1 | C | T | Heterozygous |
| NC_037645.1 | 8207652 | SNV | 1 | G | A | Heterozygous |
| NC_037645.1 | 8208012 | SNV | 1 | A | G | Homozygous   |
| NC_037645.1 | 8208597 | SNV | 1 | C | A | Heterozygous |
| NC_037645.1 | 8208600 | SNV | 1 | A | T | Heterozygous |
| NC_037645.1 | 8208605 | SNV | 1 | A | C | Heterozygous |
| NC_037645.1 | 8208612 | SNV | 1 | T | C | Heterozygous |
| NC_037645.1 | 8209230 | SNV | 1 | T | A | Heterozygous |
| NC_037645.1 | 8209232 | SNV | 1 | T | G | Heterozygous |
| NC_037645.1 | 8209263 | SNV | 1 | T | A | Heterozygous |
| NC_037645.1 | 8209268 | SNV | 1 | A | C | Heterozygous |
| NC_037645.1 | 8209272 | SNV | 1 | A | G | Heterozygous |
| NC_037645.1 | 8209278 | SNV | 1 | C | A | Heterozygous |
| NC_037645.1 | 8209281 | SNV | 1 | T | C | Heterozygous |
| NC_037645.1 | 8209283 | SNV | 1 | A | G | Heterozygous |

|             |         |     |   |   |   |              |
|-------------|---------|-----|---|---|---|--------------|
| NC_037645.1 | 8209287 | SNV | 1 | T | C | Heterozygous |
| NC_037645.1 | 8209290 | SNV | 1 | T | A | Heterozygous |
| NC_037645.1 | 8209293 | SNV | 1 | G | A | Heterozygous |
| NC_037645.1 | 8209296 | SNV | 1 | A | G | Heterozygous |
| NC_037645.1 | 8209302 | SNV | 1 | A | G | Heterozygous |
| NC_037645.1 | 8209311 | SNV | 1 | A | G | Heterozygous |
| NC_037645.1 | 8209314 | SNV | 1 | T | C | Heterozygous |
| NC_037645.1 | 8209320 | SNV | 1 | T | C | Heterozygous |
| NC_037645.1 | 8212110 | SNV | 1 | A | G | Heterozygous |
| NC_037645.1 | 8212203 | SNV | 1 | C | T | Homozygous   |
| NC_037645.1 | 8222613 | SNV | 1 | C | T | Heterozygous |
| NC_037645.1 | 8230201 | SNV | 1 | C | T | Homozygous   |
| NC_037645.1 | 8231193 | SNV | 1 | A | T | Homozygous   |
| NC_037645.1 | 8231198 | SNV | 1 | T | A | Homozygous   |
| NC_037645.1 | 8231212 | SNV | 1 | T | C | Homozygous   |
| NC_037645.1 | 8231218 | SNV | 1 | G | T | Homozygous   |
| NC_037645.1 | 8233050 | SNV | 1 | G | C | Homozygous   |
| NC_037645.1 | 8233111 | SNV | 1 | T | C | Homozygous   |
| NC_037645.1 | 8233171 | SNV | 1 | T | C | Homozygous   |
| NC_037645.1 | 8233474 | SNV | 1 | T | C | Homozygous   |
| NC_037645.1 | 8235523 | SNV | 1 | C | A | Homozygous   |
| NC_037645.1 | 8236909 | SNV | 1 | A | T | Heterozygous |
| NC_037645.1 | 8237009 | SNV | 1 | G | T | Homozygous   |
| NC_037645.1 | 8237048 | SNV | 1 | G | A | Homozygous   |
| NC_037645.1 | 8237094 | SNV | 1 | A | G | Heterozygous |
| NC_037645.1 | 8237156 | SNV | 1 | C | T | Heterozygous |
| NC_037645.1 | 8237571 | SNV | 1 | C | G | Homozygous   |
| NC_037645.1 | 8241120 | SNV | 1 | A | T | Homozygous   |
| NC_037645.1 | 8241141 | SNV | 1 | A | G | Homozygous   |
| NC_037645.1 | 8241156 | SNV | 1 | A | C | Homozygous   |
| NC_037645.1 | 8241162 | SNV | 1 | T | C | Homozygous   |
| NC_037645.1 | 8241165 | SNV | 1 | T | A | Heterozygous |
| NC_037645.1 | 8241168 | SNV | 1 | T | A | Homozygous   |
| NC_037645.1 | 8241171 | SNV | 1 | A | T | Homozygous   |
| NC_037645.1 | 8241177 | SNV | 1 | T | C | Homozygous   |
| NC_037645.1 | 8241190 | SNV | 1 | G | A | Homozygous   |
| NC_037645.1 | 8241198 | SNV | 1 | A | G | Heterozygous |
| NC_037645.1 | 8241213 | SNV | 1 | T | C | Heterozygous |
| NC_037645.1 | 8241303 | SNV | 1 | A | T | Heterozygous |
| NC_037645.1 | 8241327 | SNV | 1 | A | T | Heterozygous |
| NC_037645.1 | 8241333 | SNV | 1 | T | C | Heterozygous |
| NC_037645.1 | 8241336 | SNV | 1 | C | T | Heterozygous |
| NC_037645.1 | 8241339 | SNV | 1 | A | G | Heterozygous |
| NC_037645.1 | 8241357 | SNV | 1 | T | C | Heterozygous |
| NC_037645.1 | 8241360 | SNV | 1 | A | G | Heterozygous |
| NC_037645.1 | 8241363 | SNV | 1 | T | C | Heterozygous |
| NC_037645.1 | 8241366 | SNV | 1 | A | T | Heterozygous |
| NC_037645.1 | 8241390 | SNV | 1 | A | G | Heterozygous |
| NC_037645.1 | 8241393 | SNV | 1 | A | G | Heterozygous |
| NC_037645.1 | 8241402 | SNV | 1 | T | C | Heterozygous |
| NC_037645.1 | 8241406 | SNV | 1 | C | G | Heterozygous |

|             |         |     |   |   |   |              |
|-------------|---------|-----|---|---|---|--------------|
| NC_037645.1 | 8241408 | SNV | 1 | T | G | Heterozygous |
| NC_037645.1 | 8241417 | SNV | 1 | A | G | Heterozygous |
| NC_037645.1 | 8241874 | SNV | 1 | A | G | Homozygous   |
| NC_037645.1 | 8242508 | SNV | 1 | G | T | Heterozygous |
| NC_037645.1 | 8242513 | SNV | 1 | C | T | Heterozygous |
| NC_037645.1 | 8242536 | SNV | 1 | A | T | Heterozygous |
| NC_037645.1 | 8242772 | SNV | 1 | T | C | Homozygous   |
| NC_037645.1 | 8243625 | SNV | 1 | T | C | Heterozygous |
| NC_037645.1 | 8244123 | SNV | 1 | A | G | Heterozygous |
| NC_037645.1 | 8244294 | SNV | 1 | T | C | Heterozygous |
| NC_037645.1 | 8248177 | SNV | 1 | G | T | Homozygous   |
| NC_037645.1 | 8260052 | SNV | 1 | C | T | Heterozygous |
| NC_037645.1 | 8260063 | SNV | 1 | A | G | Homozygous   |
| NC_037645.1 | 8260639 | SNV | 1 | C | T | Heterozygous |
| NC_037645.1 | 8261180 | SNV | 1 | C | T | Heterozygous |
| NC_037645.1 | 8261217 | SNV | 1 | C | T | Heterozygous |
| NC_037645.1 | 8261258 | SNV | 1 | G | T | Homozygous   |
| NC_037645.1 | 8263056 | SNV | 1 | A | G | Heterozygous |
| NC_037645.1 | 8264445 | SNV | 1 | C | T | Heterozygous |
| NC_037645.1 | 8266182 | SNV | 1 | C | T | Heterozygous |
| NC_037645.1 | 8268851 | SNV | 1 | A | G | Homozygous   |
| NC_037645.1 | 8268861 | SNV | 1 | A | G | Homozygous   |
| NC_037645.1 | 8269328 | SNV | 1 | A | T | Heterozygous |
| NC_037645.1 | 8269336 | SNV | 1 | A | T | Heterozygous |
| NC_037645.1 | 8269341 | SNV | 1 | T | C | Heterozygous |
| NC_037645.1 | 8269350 | SNV | 1 | G | A | Homozygous   |
| NC_037645.1 | 8269359 | SNV | 1 | T | C | Heterozygous |
| NC_037645.1 | 8269395 | SNV | 1 | C | A | Heterozygous |
| NC_037645.1 | 8269400 | SNV | 1 | C | A | Heterozygous |
| NC_037645.1 | 8269403 | SNV | 1 | T | C | Heterozygous |
| NC_037645.1 | 8270021 | SNV | 1 | G | A | Homozygous   |
| NC_037645.1 | 8270656 | SNV | 1 | T | C | Homozygous   |
| NC_037645.1 | 8271073 | SNV | 1 | A | G | Homozygous   |
| NC_037645.1 | 8271258 | SNV | 1 | T | C | Homozygous   |
| NC_037645.1 | 8271352 | SNV | 1 | A | T | Homozygous   |
| NC_037645.1 | 8275761 | SNV | 1 | T | A | Homozygous   |
| NC_037645.1 | 8276076 | SNV | 1 | T | G | Homozygous   |
| NC_037645.1 | 8276078 | SNV | 1 | G | A | Homozygous   |
| NC_037645.1 | 8276584 | SNV | 1 | T | A | Homozygous   |
| NC_037645.1 | 8276586 | SNV | 1 | T | A | Homozygous   |
| NC_037645.1 | 8276885 | SNV | 1 | T | A | Heterozygous |
| NC_037645.1 | 8278735 | SNV | 1 | A | G | Homozygous   |
| NC_037645.1 | 8280302 | SNV | 1 | A | G | Homozygous   |
| NC_037645.1 | 8289532 | SNV | 1 | C | T | Homozygous   |
| NC_037645.1 | 8289538 | SNV | 1 | C | T | Homozygous   |
| NC_037645.1 | 8289541 | SNV | 1 | C | T | Homozygous   |
| NC_037645.1 | 8289548 | SNV | 1 | C | T | Homozygous   |
| NC_037645.1 | 8289591 | SNV | 1 | T | C | Heterozygous |
| NC_037645.1 | 8289620 | SNV | 1 | A | G | Homozygous   |
| NC_037645.1 | 8289637 | SNV | 1 | A | T | Heterozygous |
| NC_037645.1 | 8289641 | SNV | 1 | T | C | Homozygous   |

|             |         |     |   |   |   |              |
|-------------|---------|-----|---|---|---|--------------|
| NC_037645.1 | 8302588 | SNV | 1 | A | G | Homozygous   |
| NC_037645.1 | 8303036 | SNV | 1 | A | G | Homozygous   |
| NC_037645.1 | 8303093 | SNV | 1 | A | G | Heterozygous |
| NC_037645.1 | 8303122 | SNV | 1 | A | G | Homozygous   |
| NC_037645.1 | 8303430 | SNV | 1 | T | A | Homozygous   |
| NC_037645.1 | 8303465 | SNV | 1 | G | A | Homozygous   |
| NC_037645.1 | 8303829 | SNV | 1 | G | A | Homozygous   |
| NC_037645.1 | 8303874 | SNV | 1 | C | T | Heterozygous |
| NC_037645.1 | 8303997 | SNV | 1 | C | T | Homozygous   |
| NC_037645.1 | 8305403 | SNV | 1 | G | A | Heterozygous |
| NC_037645.1 | 8305418 | SNV | 1 | C | T | Heterozygous |
| NC_037645.1 | 8305556 | SNV | 1 | G | A | Heterozygous |
| NC_037645.1 | 8306376 | SNV | 1 | T | C | Heterozygous |
| NC_037645.1 | 8309527 | SNV | 1 | A | G | Homozygous   |
| NC_037645.1 | 8309529 | SNV | 1 | T | A | Homozygous   |
| NC_037645.1 | 8309550 | SNV | 1 | T | G | Homozygous   |
| NC_037645.1 | 8309553 | SNV | 1 | G | A | Homozygous   |
| NC_037645.1 | 8309562 | SNV | 1 | A | T | Homozygous   |
| NC_037645.1 | 8312172 | SNV | 1 | G | A | Homozygous   |
| NC_037645.1 | 8312194 | SNV | 1 | A | T | Homozygous   |
| NC_037645.1 | 8312199 | SNV | 1 | A | G | Homozygous   |
| NC_037645.1 | 8324095 | SNV | 1 | A | G | Heterozygous |
| NC_037645.1 | 8324096 | SNV | 1 | A | G | Heterozygous |
| NC_037645.1 | 8329864 | SNV | 1 | T | G | Homozygous   |
| NC_037645.1 | 8329887 | SNV | 1 | G | C | Homozygous   |
| NC_037645.1 | 8329889 | SNV | 1 | A | G | Homozygous   |
| NC_037645.1 | 8329903 | SNV | 1 | T | A | Homozygous   |
| NC_037645.1 | 8341200 | SNV | 1 | A | T | Homozygous   |
| NC_037645.1 | 8366890 | SNV | 1 | C | T | Heterozygous |
| NC_037645.1 | 8366925 | SNV | 1 | T | C | Homozygous   |
| NC_037645.1 | 8367062 | SNV | 1 | A | T | Heterozygous |
| NC_037645.1 | 8373253 | SNV | 1 | T | A | Homozygous   |
| NC_037645.1 | 8386792 | SNV | 1 | A | T | Homozygous   |
| NC_037645.1 | 8386794 | SNV | 1 | G | A | Homozygous   |
| NC_037645.1 | 8387005 | SNV | 1 | C | T | Heterozygous |
| NC_037645.1 | 8393068 | SNV | 1 | T | G | Homozygous   |
| NC_037645.1 | 8393075 | SNV | 1 | C | A | Homozygous   |
| NC_037645.1 | 8393081 | SNV | 1 | C | A | Homozygous   |
| NC_037645.1 | 8393116 | SNV | 1 | A | G | Homozygous   |
| NC_037645.1 | 8393149 | SNV | 1 | C | A | Heterozygous |
| NC_037645.1 | 8393155 | SNV | 1 | C | A | Heterozygous |
| NC_037645.1 | 8394993 | SNV | 1 | A | T | Heterozygous |
| NC_037645.1 | 8395236 | SNV | 1 | A | G | Homozygous   |
| NC_037645.1 | 8395239 | SNV | 1 | A | G | Homozygous   |
| NC_037645.1 | 8405169 | SNV | 1 | C | T | Homozygous   |
| NC_037645.1 | 8409384 | SNV | 1 | C | T | Heterozygous |
| NC_037645.1 | 8411842 | SNV | 1 | G | A | Heterozygous |
| NC_037645.1 | 8413087 | SNV | 1 | T | C | Homozygous   |
| NC_037645.1 | 8419257 | SNV | 1 | T | C | Homozygous   |
| NC_037645.1 | 8419566 | SNV | 1 | T | G | Homozygous   |
| NC_037645.1 | 8419632 | SNV | 1 | T | A | Homozygous   |

|             |         |     |   |   |   |              |
|-------------|---------|-----|---|---|---|--------------|
| NC_037645.1 | 8419683 | SNV | 1 | C | T | Homozygous   |
| NC_037645.1 | 8419687 | SNV | 1 | T | C | Homozygous   |
| NC_037645.1 | 8420496 | SNV | 1 | G | A | Heterozygous |
| NC_037645.1 | 8420499 | SNV | 1 | G | A | Heterozygous |
| NC_037645.1 | 8421485 | SNV | 1 | C | T | Homozygous   |
| NC_037645.1 | 8422079 | SNV | 1 | T | C | Homozygous   |
| NC_037645.1 | 8422129 | SNV | 1 | A | T | Homozygous   |
| NC_037645.1 | 8422141 | SNV | 1 | G | C | Heterozygous |
| NC_037645.1 | 8422149 | SNV | 1 | T | C | Homozygous   |
| NC_037645.1 | 8422151 | SNV | 1 | A | G | Heterozygous |
| NC_037645.1 | 8422156 | SNV | 1 | T | C | Homozygous   |
| NC_037645.1 | 8422185 | SNV | 1 | T | C | Heterozygous |
| NC_037645.1 | 8422602 | SNV | 1 | G | A | Homozygous   |
| NC_037645.1 | 8423337 | SNV | 1 | G | A | Heterozygous |
| NC_037645.1 | 8423464 | SNV | 1 | T | C | Homozygous   |
| NC_037645.1 | 8424067 | SNV | 1 | T | C | Homozygous   |
| NC_037645.1 | 8424180 | SNV | 1 | T | C | Heterozygous |
| NC_037645.1 | 8424202 | SNV | 1 | C | G | Heterozygous |
| NC_037645.1 | 8424245 | SNV | 1 | T | C | Homozygous   |
| NC_037645.1 | 8425472 | SNV | 1 | G | A | Heterozygous |
| NC_037645.1 | 8425740 | SNV | 1 | A | G | Homozygous   |
| NC_037645.1 | 8426109 | SNV | 1 | G | A | Heterozygous |
| NC_037645.1 | 8426255 | SNV | 1 | C | T | Heterozygous |
| NC_037645.1 | 8426363 | SNV | 1 | C | T | Homozygous   |
| NC_037645.1 | 8426381 | SNV | 1 | A | G | Homozygous   |
| NC_037645.1 | 8426445 | SNV | 1 | C | T | Heterozygous |
| NC_037645.1 | 8426664 | SNV | 1 | A | G | Homozygous   |
| NC_037645.1 | 8429506 | SNV | 1 | A | G | Heterozygous |
| NC_037645.1 | 8429650 | SNV | 1 | G | A | Homozygous   |
| NC_037645.1 | 8429770 | SNV | 1 | A | C | Heterozygous |
| NC_037645.1 | 8429773 | SNV | 1 | A | G | Heterozygous |
| NC_037645.1 | 8430126 | SNV | 1 | T | C | Heterozygous |
| NC_037645.1 | 8430500 | SNV | 1 | T | C | Homozygous   |
| NC_037645.1 | 8430903 | SNV | 1 | T | C | Homozygous   |
| NC_037645.1 | 8430965 | SNV | 1 | G | T | Homozygous   |
| NC_037645.1 | 8431323 | SNV | 1 | T | C | Homozygous   |
| NC_037645.1 | 8431405 | SNV | 1 | A | G | Homozygous   |
| NC_037645.1 | 8431416 | SNV | 1 | G | A | Heterozygous |
| NC_037645.1 | 8431441 | SNV | 1 | T | C | Heterozygous |
| NC_037645.1 | 8431458 | SNV | 1 | A | G | Homozygous   |
| NC_037645.1 | 8431663 | SNV | 1 | A | G | Heterozygous |
| NC_037645.1 | 8431791 | SNV | 1 | C | T | Homozygous   |
| NC_037645.1 | 8432641 | SNV | 1 | A | G | Homozygous   |
| NC_037645.1 | 8433303 | SNV | 1 | G | A | Homozygous   |
| NC_037645.1 | 8433582 | SNV | 1 | A | T | Homozygous   |
| NC_037645.1 | 8434001 | SNV | 1 | C | A | Homozygous   |
| NC_037645.1 | 8434232 | SNV | 1 | C | T | Homozygous   |
| NC_037645.1 | 8435078 | SNV | 1 | A | G | Homozygous   |
| NC_037645.1 | 8435312 | SNV | 1 | A | G | Heterozygous |
| NC_037645.1 | 8435467 | SNV | 1 | T | G | Homozygous   |
| NC_037645.1 | 8435469 | SNV | 1 | T | A | Homozygous   |



|             |         |     |   |   |   |              |
|-------------|---------|-----|---|---|---|--------------|
| NC_037645.1 | 8435472 | SNV | 1 | A | T | Homozygous   |
| NC_037645.1 | 8435611 | SNV | 1 | G | A | Heterozygous |
| NC_037645.1 | 8436192 | SNV | 1 | T | C | Heterozygous |
| NC_037645.1 | 8436196 | SNV | 1 | T | C | Heterozygous |
| NC_037645.1 | 8437771 | SNV | 1 | A | G | Homozygous   |
| NC_037645.1 | 8439754 | SNV | 1 | T | A | Homozygous   |
| NC_037645.1 | 8439759 | SNV | 1 | A | T | Homozygous   |
| NC_037645.1 | 8439765 | SNV | 1 | C | T | Homozygous   |
| NC_037645.1 | 8439767 | SNV | 1 | A | G | Homozygous   |
| NC_037645.1 | 8439775 | SNV | 1 | A | C | Homozygous   |
| NC_037645.1 | 8440791 | SNV | 1 | G | T | Homozygous   |
| NC_037645.1 | 8441136 | SNV | 1 | T | C | Homozygous   |
| NC_037645.1 | 8441335 | SNV | 1 | T | C | Homozygous   |
| NC_037645.1 | 8441340 | SNV | 1 | G | A | Homozygous   |
| NC_037645.1 | 8441366 | SNV | 1 | G | A | Heterozygous |
| NC_037645.1 | 8441587 | SNV | 1 | G | A | Homozygous   |
| NC_037645.1 | 8441599 | SNV | 1 | T | A | Homozygous   |
| NC_037645.1 | 8441614 | SNV | 1 | C | T | Heterozygous |
| NC_037645.1 | 8442113 | SNV | 1 | G | A | Homozygous   |
| NC_037645.1 | 8442137 | SNV | 1 | G | A | Homozygous   |
| NC_037645.1 | 8442368 | SNV | 1 | T | G | Homozygous   |
| NC_037645.1 | 8442397 | SNV | 1 | C | T | Homozygous   |
| NC_037645.1 | 8442510 | SNV | 1 | C | T | Homozygous   |
| NC_037645.1 | 8442579 | SNV | 1 | T | C | Heterozygous |
| NC_037645.1 | 8442662 | SNV | 1 | A | G | Homozygous   |
| NC_037645.1 | 8442803 | SNV | 1 | A | G | Homozygous   |
| NC_037645.1 | 8442855 | SNV | 1 | T | A | Homozygous   |
| NC_037645.1 | 8443125 | SNV | 1 | T | C | Homozygous   |
| NC_037645.1 | 8443158 | SNV | 1 | T | C | Heterozygous |
| NC_037645.1 | 8443314 | SNV | 1 | C | T | Heterozygous |
| NC_037645.1 | 8443333 | SNV | 1 | C | T | Homozygous   |
| NC_037645.1 | 8443614 | SNV | 1 | A | G | Homozygous   |
| NC_037645.1 | 8443709 | SNV | 1 | A | G | Heterozygous |
| NC_037645.1 | 8443768 | SNV | 1 | T | C | Homozygous   |
| NC_037645.1 | 8444222 | SNV | 1 | G | A | Heterozygous |
| NC_037645.1 | 8444249 | SNV | 1 | G | A | Heterozygous |
| NC_037645.1 | 8447091 | SNV | 1 | G | A | Homozygous   |
| NC_037645.1 | 8447323 | SNV | 1 | G | A | Heterozygous |
| NC_037645.1 | 8447440 | SNV | 1 | A | T | Heterozygous |
| NC_037645.1 | 8447454 | SNV | 1 | G | A | Heterozygous |
| NC_037645.1 | 8448478 | SNV | 1 | C | G | Heterozygous |
| NC_037645.1 | 8448534 | SNV | 1 | G | T | Heterozygous |
| NC_037645.1 | 8450277 | SNV | 1 | A | G | Heterozygous |
| NC_037645.1 | 8450615 | SNV | 1 | C | T | Heterozygous |
| NC_037645.1 | 8450701 | SNV | 1 | A | G | Heterozygous |
| NC_037645.1 | 8450772 | SNV | 1 | A | G | Homozygous   |
| NC_037645.1 | 8450845 | SNV | 1 | T | C | Homozygous   |
| NC_037645.1 | 8451458 | SNV | 1 | T | C | Homozygous   |
| NC_037645.1 | 8451462 | SNV | 1 | G | A | Homozygous   |
| NC_037645.1 | 8451465 | SNV | 1 | G | A | Homozygous   |
| NC_037645.1 | 8451479 | SNV | 1 | C | T | Homozygous   |

|             |         |     |   |   |   |              |
|-------------|---------|-----|---|---|---|--------------|
| NC_037645.1 | 8451481 | SNV | 1 | A | G | Homozygous   |
| NC_037645.1 | 8451706 | SNV | 1 | A | T | Homozygous   |
| NC_037645.1 | 8453782 | SNV | 1 | A | T | Homozygous   |
| NC_037645.1 | 8454085 | SNV | 1 | C | A | Homozygous   |
| NC_037645.1 | 8454106 | SNV | 1 | T | C | Homozygous   |
| NC_037645.1 | 8454777 | SNV | 1 | A | G | Heterozygous |
| NC_037645.1 | 8454807 | SNV | 1 | C | A | Homozygous   |
| NC_037645.1 | 8454918 | SNV | 1 | A | G | Heterozygous |
| NC_037645.1 | 8454925 | SNV | 1 | A | G | Heterozygous |
| NC_037645.1 | 8454962 | SNV | 1 | C | T | Heterozygous |
| NC_037645.1 | 8455362 | SNV | 1 | A | G | Homozygous   |
| NC_037645.1 | 8455452 | SNV | 1 | G | A | Heterozygous |
| NC_037645.1 | 8455509 | SNV | 1 | A | G | Homozygous   |
| NC_037645.1 | 8455641 | SNV | 1 | T | C | Homozygous   |
| NC_037645.1 | 8455671 | SNV | 1 | T | C | Homozygous   |
| NC_037645.1 | 8455695 | SNV | 1 | C | T | Homozygous   |
| NC_037645.1 | 8455827 | SNV | 1 | T | C | Homozygous   |
| NC_037645.1 | 8456127 | SNV | 1 | A | T | Heterozygous |
| NC_037645.1 | 8456230 | SNV | 1 | G | A | Heterozygous |
| NC_037645.1 | 8456239 | SNV | 1 | T | A | Homozygous   |
| NC_037645.1 | 8456256 | SNV | 1 | G | A | Heterozygous |
| NC_037645.1 | 8456388 | SNV | 1 | T | C | Homozygous   |
| NC_037645.1 | 8456909 | SNV | 1 | T | C | Homozygous   |
| NC_037645.1 | 8457066 | SNV | 1 | A | G | Heterozygous |
| NC_037645.1 | 8457302 | SNV | 1 | T | C | Heterozygous |
| NC_037645.1 | 8457317 | SNV | 1 | C | T | Heterozygous |
| NC_037645.1 | 8457656 | SNV | 1 | G | A | Heterozygous |
| NC_037645.1 | 8457946 | SNV | 1 | A | G | Homozygous   |
| NC_037645.1 | 8457990 | SNV | 1 | T | C | Homozygous   |
| NC_037645.1 | 8458023 | SNV | 1 | A | G | Homozygous   |
| NC_037645.1 | 8458147 | SNV | 1 | A | G | Heterozygous |
| NC_037645.1 | 8458748 | SNV | 1 | A | G | Homozygous   |
| NC_037645.1 | 8458806 | SNV | 1 | C | T | Heterozygous |
| NC_037645.1 | 8458993 | SNV | 1 | T | C | Homozygous   |
| NC_037645.1 | 8459030 | SNV | 1 | A | G | Heterozygous |
| NC_037645.1 | 8459101 | SNV | 1 | T | C | Homozygous   |
| NC_037645.1 | 8459114 | SNV | 1 | G | A | Heterozygous |
| NC_037645.1 | 8459315 | SNV | 1 | C | G | Homozygous   |
| NC_037645.1 | 8459462 | SNV | 1 | T | C | Homozygous   |
| NC_037645.1 | 8459526 | SNV | 1 | T | G | Homozygous   |
| NC_037645.1 | 8459715 | SNV | 1 | G | A | Homozygous   |
| NC_037645.1 | 8459864 | SNV | 1 | T | C | Homozygous   |
| NC_037645.1 | 8477741 | SNV | 1 | T | C | Homozygous   |
| NC_037645.1 | 8477983 | SNV | 1 | A | G | Homozygous   |
| NC_037645.1 | 8477985 | SNV | 1 | A | G | Homozygous   |
| NC_037645.1 | 8478015 | SNV | 1 | G | A | Homozygous   |
| NC_037645.1 | 8478019 | SNV | 1 | A | G | Homozygous   |
| NC_037645.1 | 8478090 | SNV | 1 | G | A | Homozygous   |
| NC_037645.1 | 8485754 | SNV | 1 | A | G | Heterozygous |
| NC_037645.1 | 8487993 | SNV | 1 | G | A | Heterozygous |
| NC_037645.1 | 8488019 | SNV | 1 | C | T | Heterozygous |

|             |         |     |   |   |   |              |
|-------------|---------|-----|---|---|---|--------------|
| NC_037645.1 | 8488609 | SNV | 1 | A | G | Heterozygous |
| NC_037645.1 | 8488773 | SNV | 1 | G | A | Heterozygous |
| NC_037645.1 | 8489084 | SNV | 1 | C | T | Homozygous   |
| NC_037645.1 | 8491114 | SNV | 1 | C | T | Homozygous   |
| NC_037645.1 | 8491128 | SNV | 1 | A | C | Homozygous   |
| NC_037645.1 | 8491152 | SNV | 1 | A | G | Homozygous   |
| NC_037645.1 | 8491352 | SNV | 1 | G | A | Heterozygous |
| NC_037645.1 | 8491362 | SNV | 1 | G | A | Heterozygous |
| NC_037645.1 | 8496845 | SNV | 1 | G | A | Heterozygous |
| NC_037645.1 | 8496902 | SNV | 1 | T | C | Homozygous   |
| NC_037645.1 | 8498205 | SNV | 1 | G | A | Heterozygous |
| NC_037645.1 | 8498369 | SNV | 1 | G | A | Homozygous   |
| NC_037645.1 | 8500111 | SNV | 1 | T | C | Homozygous   |
| NC_037645.1 | 8502355 | SNV | 1 | C | T | Homozygous   |
| NC_037645.1 | 8502371 | SNV | 1 | A | G | Homozygous   |
| NC_037645.1 | 8502804 | SNV | 1 | C | T | Heterozygous |
| NC_037645.1 | 8505902 | SNV | 1 | C | T | Heterozygous |
| NC_037645.1 | 8511084 | SNV | 1 | T | C | Homozygous   |
| NC_037645.1 | 8511131 | SNV | 1 | T | C | Homozygous   |
| NC_037645.1 | 8512624 | SNV | 1 | A | T | Homozygous   |
| NC_037645.1 | 8512626 | SNV | 1 | G | C | Homozygous   |
| NC_037645.1 | 8515689 | SNV | 1 | C | T | Heterozygous |
| NC_037645.1 | 8515725 | SNV | 1 | A | G | Homozygous   |
| NC_037645.1 | 8515815 | SNV | 1 | G | A | Heterozygous |
| NC_037645.1 | 8516274 | SNV | 1 | A | G | Heterozygous |
| NC_037645.1 | 8516462 | SNV | 1 | C | T | Heterozygous |
| NC_037645.1 | 8516603 | SNV | 1 | A | G | Heterozygous |
| NC_037645.1 | 8516620 | SNV | 1 | T | C | Heterozygous |
| NC_037645.1 | 8519235 | SNV | 1 | G | T | Homozygous   |
| NC_037645.1 | 8519249 | SNV | 1 | C | T | Heterozygous |
| NC_037645.1 | 8519295 | SNV | 1 | A | G | Heterozygous |
| NC_037645.1 | 8519610 | SNV | 1 | T | C | Homozygous   |
| NC_037645.1 | 8526347 | SNV | 1 | A | G | Homozygous   |
| NC_037645.1 | 8527924 | SNV | 1 | G | C | Homozygous   |
| NC_037645.1 | 8528022 | SNV | 1 | G | T | Homozygous   |
| NC_037645.1 | 8532214 | SNV | 1 | A | G | Homozygous   |
| NC_037645.1 | 8532339 | SNV | 1 | T | C | Homozygous   |
| NC_037645.1 | 8532358 | SNV | 1 | T | C | Homozygous   |
| NC_037645.1 | 8535244 | SNV | 1 | T | C | Homozygous   |
| NC_037645.1 | 8535401 | SNV | 1 | T | A | Homozygous   |
| NC_037645.1 | 8535595 | SNV | 1 | T | C | Homozygous   |
| NC_037645.1 | 8536179 | SNV | 1 | A | G | Homozygous   |
| NC_037645.1 | 8536214 | SNV | 1 | A | G | Homozygous   |
| NC_037645.1 | 8536533 | SNV | 1 | T | C | Heterozygous |
| NC_037645.1 | 8536652 | SNV | 1 | A | G | Heterozygous |
| NC_037645.1 | 8536674 | SNV | 1 | A | G | Homozygous   |
| NC_037645.1 | 8536685 | SNV | 1 | G | A | Heterozygous |
| NC_037645.1 | 8536691 | SNV | 1 | T | C | Homozygous   |
| NC_037645.1 | 8536718 | SNV | 1 | A | G | Heterozygous |
| NC_037645.1 | 8536733 | SNV | 1 | A | G | Homozygous   |
| NC_037645.1 | 8536736 | SNV | 1 | T | A | Homozygous   |

|             |         |     |   |   |   |              |
|-------------|---------|-----|---|---|---|--------------|
| NC_037645.1 | 8536745 | SNV | 1 | T | C | Heterozygous |
| NC_037645.1 | 8536768 | SNV | 1 | G | T | Homozygous   |
| NC_037645.1 | 8536783 | SNV | 1 | G | A | Homozygous   |
| NC_037645.1 | 8536785 | SNV | 1 | C | A | Heterozygous |
| NC_037645.1 | 8536795 | SNV | 1 | C | T | Homozygous   |
| NC_037645.1 | 8536805 | SNV | 1 | G | A | Heterozygous |
| NC_037645.1 | 8536970 | SNV | 1 | T | C | Homozygous   |
| NC_037645.1 | 8537105 | SNV | 1 | A | G | Homozygous   |
| NC_037645.1 | 8537507 | SNV | 1 | T | C | Homozygous   |
| NC_037645.1 | 8538989 | SNV | 1 | A | T | Homozygous   |
| NC_037645.1 | 8538992 | SNV | 1 | G | C | Homozygous   |
| NC_037645.1 | 8539068 | SNV | 1 | C | T | Heterozygous |
| NC_037645.1 | 8539110 | SNV | 1 | T | C | Heterozygous |
| NC_037645.1 | 8541690 | SNV | 1 | T | C | Homozygous   |
| NC_037645.1 | 8541970 | SNV | 1 | T | C | Homozygous   |
| NC_037645.1 | 8541997 | SNV | 1 | C | T | Homozygous   |
| NC_037645.1 | 8544682 | SNV | 1 | T | C | Homozygous   |
| NC_037645.1 | 8546611 | SNV | 1 | A | G | Heterozygous |
| NC_037645.1 | 8547175 | SNV | 1 | C | T | Heterozygous |
| NC_037645.1 | 8547248 | SNV | 1 | T | C | Homozygous   |
| NC_037645.1 | 8547333 | SNV | 1 | A | G | Homozygous   |
| NC_037645.1 | 8547382 | SNV | 1 | T | C | Homozygous   |
| NC_037645.1 | 8547388 | SNV | 1 | T | C | Homozygous   |
| NC_037645.1 | 8547709 | SNV | 1 | C | G | Heterozygous |
| NC_037645.1 | 8547772 | SNV | 1 | G | A | Homozygous   |
| NC_037645.1 | 8547872 | SNV | 1 | T | C | Homozygous   |
| NC_037645.1 | 8548218 | SNV | 1 | T | C | Heterozygous |
| NC_037645.1 | 8548362 | SNV | 1 | T | A | Heterozygous |
| NC_037645.1 | 8548413 | SNV | 1 | G | A | Heterozygous |
| NC_037645.1 | 8548452 | SNV | 1 | C | T | Homozygous   |
| NC_037645.1 | 8548468 | SNV | 1 | A | G | Homozygous   |
| NC_037645.1 | 8548539 | SNV | 1 | C | T | Heterozygous |
| NC_037645.1 | 8548635 | SNV | 1 | T | A | Heterozygous |
| NC_037645.1 | 8548646 | SNV | 1 | T | C | Homozygous   |
| NC_037645.1 | 8548751 | SNV | 1 | T | C | Homozygous   |
| NC_037645.1 | 8548995 | SNV | 1 | A | C | Homozygous   |
| NC_037645.1 | 8549603 | SNV | 1 | A | G | Homozygous   |
| NC_037645.1 | 8549616 | SNV | 1 | A | G | Heterozygous |
| NC_037645.1 | 8549657 | SNV | 1 | G | A | Heterozygous |
| NC_037645.1 | 8549661 | SNV | 1 | G | A | Heterozygous |
| NC_037645.1 | 8549878 | SNV | 1 | C | A | Homozygous   |
| NC_037645.1 | 8549892 | SNV | 1 | T | C | Heterozygous |
| NC_037645.1 | 8549894 | SNV | 1 | A | T | Heterozygous |
| NC_037645.1 | 8549921 | SNV | 1 | A | C | Homozygous   |
| NC_037645.1 | 8549979 | SNV | 1 | C | T | Homozygous   |
| NC_037645.1 | 8550456 | SNV | 1 | G | A | Heterozygous |
| NC_037645.1 | 8550484 | SNV | 1 | C | A | Heterozygous |
| NC_037645.1 | 8550505 | SNV | 1 | A | G | Homozygous   |
| NC_037645.1 | 8550897 | SNV | 1 | G | A | Heterozygous |
| NC_037645.1 | 8552297 | SNV | 1 | T | C | Homozygous   |
| NC_037645.1 | 8552326 | SNV | 1 | G | A | Homozygous   |

|             |         |     |   |   |   |              |
|-------------|---------|-----|---|---|---|--------------|
| NC_037645.1 | 8552333 | SNV | 1 | A | G | Homozygous   |
| NC_037645.1 | 8552447 | SNV | 1 | T | C | Homozygous   |
| NC_037645.1 | 8552593 | SNV | 1 | T | A | Heterozygous |
| NC_037645.1 | 8552716 | SNV | 1 | G | A | Heterozygous |
| NC_037645.1 | 8552801 | SNV | 1 | G | A | Heterozygous |
| NC_037645.1 | 8552980 | SNV | 1 | C | T | Heterozygous |
| NC_037645.1 | 8553169 | SNV | 1 | G | A | Homozygous   |
| NC_037645.1 | 8553253 | SNV | 1 | G | A | Homozygous   |
| NC_037645.1 | 8553264 | SNV | 1 | A | G | Homozygous   |
| NC_037645.1 | 8553275 | SNV | 1 | A | G | Homozygous   |
| NC_037645.1 | 8553290 | SNV | 1 | T | G | Homozygous   |
| NC_037645.1 | 8553310 | SNV | 1 | T | G | Heterozygous |
| NC_037645.1 | 8553673 | SNV | 1 | T | C | Homozygous   |
| NC_037645.1 | 8553697 | SNV | 1 | C | T | Heterozygous |
| NC_037645.1 | 8553710 | SNV | 1 | C | T | Heterozygous |
| NC_037645.1 | 8553717 | SNV | 1 | T | C | Heterozygous |
| NC_037645.1 | 8553750 | SNV | 1 | A | G | Heterozygous |
| NC_037645.1 | 8553797 | SNV | 1 | C | T | Heterozygous |
| NC_037645.1 | 8553857 | SNV | 1 | A | G | Heterozygous |
| NC_037645.1 | 8553868 | SNV | 1 | C | A | Heterozygous |
| NC_037645.1 | 8553908 | SNV | 1 | T | G | Heterozygous |
| NC_037645.1 | 8553915 | SNV | 1 | T | A | Heterozygous |
| NC_037645.1 | 8554004 | SNV | 1 | C | A | Heterozygous |
| NC_037645.1 | 8554110 | SNV | 1 | A | G | Homozygous   |
| NC_037645.1 | 8554168 | SNV | 1 | C | T | Heterozygous |
| NC_037645.1 | 8554588 | SNV | 1 | G | T | Homozygous   |
| NC_037645.1 | 8554756 | SNV | 1 | G | C | Heterozygous |
| NC_037645.1 | 8554760 | SNV | 1 | G | C | Homozygous   |
| NC_037645.1 | 8554960 | SNV | 1 | G | A | Heterozygous |
| NC_037645.1 | 8554969 | SNV | 1 | C | G | Heterozygous |
| NC_037645.1 | 8555280 | SNV | 1 | A | G | Homozygous   |
| NC_037645.1 | 8555610 | SNV | 1 | A | C | Heterozygous |
| NC_037645.1 | 8555616 | SNV | 1 | C | A | Heterozygous |
| NC_037645.1 | 8555880 | SNV | 1 | T | C | Heterozygous |
| NC_037645.1 | 8555891 | SNV | 1 | A | G | Homozygous   |
| NC_037645.1 | 8555896 | SNV | 1 | T | C | Homozygous   |
| NC_037645.1 | 8556344 | SNV | 1 | A | G | Heterozygous |
| NC_037645.1 | 8556762 | SNV | 1 | T | C | Homozygous   |
| NC_037645.1 | 8556793 | SNV | 1 | A | G | Heterozygous |
| NC_037645.1 | 8556855 | SNV | 1 | G | A | Heterozygous |
| NC_037645.1 | 8557626 | SNV | 1 | C | T | Heterozygous |
| NC_037645.1 | 8557678 | SNV | 1 | T | C | Homozygous   |
| NC_037645.1 | 8557720 | SNV | 1 | G | A | Heterozygous |
| NC_037645.1 | 8557989 | SNV | 1 | C | T | Heterozygous |
| NC_037645.1 | 8558143 | SNV | 1 | T | A | Homozygous   |
| NC_037645.1 | 8558373 | SNV | 1 | T | C | Heterozygous |
| NC_037645.1 | 8558590 | SNV | 1 | A | G | Heterozygous |
| NC_037645.1 | 8558762 | SNV | 1 | A | G | Homozygous   |
| NC_037645.1 | 8558776 | SNV | 1 | A | G | Homozygous   |
| NC_037645.1 | 8558798 | SNV | 1 | C | A | Heterozygous |
| NC_037645.1 | 8558808 | SNV | 1 | A | G | Heterozygous |

|             |         |     |   |   |   |              |
|-------------|---------|-----|---|---|---|--------------|
| NC_037645.1 | 8558844 | SNV | 1 | A | G | Homozygous   |
| NC_037645.1 | 8562631 | SNV | 1 | C | T | Heterozygous |
| NC_037645.1 | 8562729 | SNV | 1 | C | T | Heterozygous |
| NC_037645.1 | 8562836 | SNV | 1 | C | T | Homozygous   |
| NC_037645.1 | 8565162 | SNV | 1 | T | C | Homozygous   |
| NC_037645.1 | 8565289 | SNV | 1 | A | C | Homozygous   |
| NC_037645.1 | 8565307 | SNV | 1 | T | C | Homozygous   |
| NC_037645.1 | 8565309 | SNV | 1 | T | A | Homozygous   |
| NC_037645.1 | 8565311 | SNV | 1 | A | C | Homozygous   |
| NC_037645.1 | 8568036 | SNV | 1 | T | G | Heterozygous |
| NC_037645.1 | 8568039 | SNV | 1 | A | T | Heterozygous |
| NC_037645.1 | 8568041 | SNV | 1 | C | T | Heterozygous |
| NC_037645.1 | 8568045 | SNV | 1 | A | C | Heterozygous |
| NC_037645.1 | 8568051 | SNV | 1 | G | T | Heterozygous |
| NC_037645.1 | 8568055 | SNV | 1 | G | C | Heterozygous |
| NC_037645.1 | 8568057 | SNV | 1 | A | G | Heterozygous |
| NC_037645.1 | 8568063 | SNV | 1 | T | A | Heterozygous |
| NC_037645.1 | 8569249 | SNV | 1 | A | G | Heterozygous |
| NC_037645.1 | 8570155 | SNV | 1 | A | T | Homozygous   |
| NC_037645.1 | 8570204 | SNV | 1 | A | G | Homozygous   |
| NC_037645.1 | 8570454 | SNV | 1 | T | C | Homozygous   |
| NC_037645.1 | 8571937 | SNV | 1 | T | C | Homozygous   |
| NC_037645.1 | 8572436 | SNV | 1 | T | C | Homozygous   |
| NC_037645.1 | 8572453 | SNV | 1 | T | C | Homozygous   |
| NC_037645.1 | 8572455 | SNV | 1 | A | G | Homozygous   |
| NC_037645.1 | 8573666 | SNV | 1 | A | G | Homozygous   |
| NC_037645.1 | 8573841 | SNV | 1 | A | T | Homozygous   |
| NC_037645.1 | 8574072 | SNV | 1 | C | T | Homozygous   |
| NC_037645.1 | 8577272 | SNV | 1 | G | A | Heterozygous |
| NC_037645.1 | 8577549 | SNV | 1 | A | T | Homozygous   |
| NC_037645.1 | 8577892 | SNV | 1 | G | A | Heterozygous |
| NC_037645.1 | 8579478 | SNV | 1 | G | A | Heterozygous |
| NC_037645.1 | 8581668 | SNV | 1 | T | C | Heterozygous |
| NC_037645.1 | 8582393 | SNV | 1 | T | A | Homozygous   |
| NC_037645.1 | 8582880 | SNV | 1 | G | A | Heterozygous |
| NC_037645.1 | 8590956 | SNV | 1 | G | T | Homozygous   |
| NC_037645.1 | 8590971 | SNV | 1 | T | A | Homozygous   |
| NC_037645.1 | 8590985 | SNV | 1 | T | C | Homozygous   |
| NC_037645.1 | 8591004 | SNV | 1 | A | G | Homozygous   |
| NC_037645.1 | 8592031 | SNV | 1 | A | T | Homozygous   |
| NC_037645.1 | 8593332 | SNV | 1 | A | G | Homozygous   |
| NC_037645.1 | 8595178 | SNV | 1 | G | A | Homozygous   |
| NC_037645.1 | 8596575 | SNV | 1 | A | G | Homozygous   |
| NC_037645.1 | 8597274 | SNV | 1 | C | A | Homozygous   |
| NC_037645.1 | 8597450 | SNV | 1 | T | C | Heterozygous |
| NC_037645.1 | 8597585 | SNV | 1 | C | T | Homozygous   |
| NC_037645.1 | 8597590 | SNV | 1 | A | G | Homozygous   |
| NC_037645.1 | 8597596 | SNV | 1 | A | T | Homozygous   |
| NC_037645.1 | 8601722 | SNV | 1 | T | C | Heterozygous |
| NC_037645.1 | 8601726 | SNV | 1 | T | C | Heterozygous |
| NC_037645.1 | 8601728 | SNV | 1 | T | C | Heterozygous |

|             |         |     |   |   |   |              |
|-------------|---------|-----|---|---|---|--------------|
| NC_037645.1 | 8601731 | SNV | 1 | A | G | Heterozygous |
| NC_037645.1 | 8601738 | SNV | 1 | T | A | Heterozygous |
| NC_037645.1 | 8605215 | SNV | 1 | A | G | Homozygous   |
| NC_037645.1 | 8606495 | SNV | 1 | C | T | Homozygous   |
| NC_037645.1 | 8607343 | SNV | 1 | A | T | Heterozygous |
| NC_037645.1 | 8607353 | SNV | 1 | T | A | Heterozygous |
| NC_037645.1 | 8607357 | SNV | 1 | T | A | Homozygous   |
| NC_037645.1 | 8607360 | SNV | 1 | T | A | Homozygous   |
| NC_037645.1 | 8607364 | SNV | 1 | A | C | Homozygous   |
| NC_037645.1 | 8607367 | SNV | 1 | A | T | Heterozygous |
| NC_037645.1 | 8607509 | SNV | 1 | T | A | Heterozygous |
| NC_037645.1 | 8608662 | SNV | 1 | G | A | Heterozygous |
| NC_037645.1 | 8608870 | SNV | 1 | C | T | Heterozygous |
| NC_037645.1 | 8608924 | SNV | 1 | T | C | Homozygous   |
| NC_037645.1 | 8610565 | SNV | 1 | G | A | Homozygous   |
| NC_037645.1 | 8613662 | SNV | 1 | A | G | Homozygous   |
| NC_037645.1 | 8613722 | SNV | 1 | T | C | Heterozygous |
| NC_037645.1 | 8613756 | SNV | 1 | C | T | Heterozygous |
| NC_037645.1 | 8614480 | SNV | 1 | A | G | Homozygous   |
| NC_037645.1 | 8614494 | SNV | 1 | A | G | Heterozygous |
| NC_037645.1 | 8615363 | SNV | 1 | A | C | Heterozygous |
| NC_037645.1 | 8615410 | SNV | 1 | C | T | Heterozygous |
| NC_037645.1 | 8615534 | SNV | 1 | C | G | Homozygous   |
| NC_037645.1 | 8615916 | SNV | 1 | G | T | Heterozygous |
| NC_037645.1 | 8616007 | SNV | 1 | A | G | Homozygous   |
| NC_037645.1 | 8616042 | SNV | 1 | C | G | Homozygous   |
| NC_037645.1 | 8616191 | SNV | 1 | A | G | Homozygous   |
| NC_037645.1 | 8616458 | SNV | 1 | A | G | Heterozygous |
| NC_037645.1 | 8616530 | SNV | 1 | C | T | Heterozygous |
| NC_037645.1 | 8616563 | SNV | 1 | T | C | Heterozygous |
| NC_037645.1 | 8616574 | SNV | 1 | T | C | Heterozygous |
| NC_037645.1 | 8616586 | SNV | 1 | T | C | Heterozygous |
| NC_037645.1 | 8616594 | SNV | 1 | T | C | Heterozygous |
| NC_037645.1 | 8617367 | SNV | 1 | T | C | Homozygous   |
| NC_037645.1 | 8617571 | SNV | 1 | T | C | Heterozygous |
| NC_037645.1 | 8617649 | SNV | 1 | A | G | Homozygous   |
| NC_037645.1 | 8617817 | SNV | 1 | T | C | Homozygous   |
| NC_037645.1 | 8617832 | SNV | 1 | T | G | Homozygous   |
| NC_037645.1 | 8617844 | SNV | 1 | T | C | Homozygous   |
| NC_037645.1 | 8617938 | SNV | 1 | T | C | Homozygous   |
| NC_037645.1 | 8617943 | SNV | 1 | T | A | Homozygous   |
| NC_037645.1 | 8617945 | SNV | 1 | G | C | Homozygous   |
| NC_037645.1 | 8617951 | SNV | 1 | T | C | Homozygous   |
| NC_037645.1 | 8618016 | SNV | 1 | G | A | Heterozygous |
| NC_037645.1 | 8618150 | SNV | 1 | C | T | Homozygous   |
| NC_037645.1 | 8618181 | SNV | 1 | A | G | Homozygous   |
| NC_037645.1 | 8618238 | SNV | 1 | A | G | Heterozygous |
| NC_037645.1 | 8618791 | SNV | 1 | A | T | Homozygous   |
| NC_037645.1 | 8618823 | SNV | 1 | A | G | Homozygous   |
| NC_037645.1 | 8618922 | SNV | 1 | A | G | Homozygous   |
| NC_037645.1 | 8619619 | SNV | 1 | A | G | Homozygous   |

|             |         |     |   |   |   |              |
|-------------|---------|-----|---|---|---|--------------|
| NC_037645.1 | 8619623 | SNV | 1 | T | C | Homozygous   |
| NC_037645.1 | 8620148 | SNV | 1 | T | A | Heterozygous |
| NC_037645.1 | 8620173 | SNV | 1 | G | A | Heterozygous |
| NC_037645.1 | 8621389 | SNV | 1 | A | G | Homozygous   |
| NC_037645.1 | 8626572 | SNV | 1 | A | G | Heterozygous |
| NC_037645.1 | 8626591 | SNV | 1 | C | G | Homozygous   |
| NC_037645.1 | 8626747 | SNV | 1 | A | G | Heterozygous |
| NC_037645.1 | 8627080 | SNV | 1 | A | G | Heterozygous |
| NC_037645.1 | 8627548 | SNV | 1 | C | T | Heterozygous |
| NC_037645.1 | 8627578 | SNV | 1 | G | T | Heterozygous |
| NC_037645.1 | 8627587 | SNV | 1 | C | T | Heterozygous |
| NC_037645.1 | 8627590 | SNV | 1 | A | G | Homozygous   |
| NC_037645.1 | 8628256 | SNV | 1 | T | C | Homozygous   |
| NC_037645.1 | 8628403 | SNV | 1 | T | C | Homozygous   |
| NC_037645.1 | 8628610 | SNV | 1 | C | T | Heterozygous |
| NC_037645.1 | 8628910 | SNV | 1 | T | C | Homozygous   |
| NC_037645.1 | 8628954 | SNV | 1 | A | G | Heterozygous |
| NC_037645.1 | 8629572 | SNV | 1 | G | A | Heterozygous |
| NC_037645.1 | 8629754 | SNV | 1 | A | G | Homozygous   |
| NC_037645.1 | 8629798 | SNV | 1 | G | A | Homozygous   |
| NC_037645.1 | 8629846 | SNV | 1 | T | C | Homozygous   |
| NC_037645.1 | 8629888 | SNV | 1 | C | T | Heterozygous |
| NC_037645.1 | 8645511 | SNV | 1 | G | T | Heterozygous |
| NC_037645.1 | 8645523 | SNV | 1 | T | C | Homozygous   |
| NC_037645.1 | 8645572 | SNV | 1 | T | C | Homozygous   |
| NC_037645.1 | 8645656 | SNV | 1 | T | C | Heterozygous |
| NC_037645.1 | 8645743 | SNV | 1 | G | A | Heterozygous |
| NC_037645.1 | 8645785 | SNV | 1 | A | G | Homozygous   |
| NC_037645.1 | 8645845 | SNV | 1 | A | T | Heterozygous |
| NC_037645.1 | 8645847 | SNV | 1 | T | C | Heterozygous |
| NC_037645.1 | 8646054 | SNV | 1 | C | T | Homozygous   |
| NC_037645.1 | 8646173 | SNV | 1 | A | G | Heterozygous |
| NC_037645.1 | 8646198 | SNV | 1 | T | A | Heterozygous |
| NC_037645.1 | 8646207 | SNV | 1 | G | A | Homozygous   |
| NC_037645.1 | 8646209 | SNV | 1 | A | G | Heterozygous |
| NC_037645.1 | 8646213 | SNV | 1 | A | C | Heterozygous |
| NC_037645.1 | 8646562 | SNV | 1 | G | A | Homozygous   |
| NC_037645.1 | 8646661 | SNV | 1 | C | G | Heterozygous |
| NC_037645.1 | 8647036 | SNV | 1 | T | C | Homozygous   |
| NC_037645.1 | 8647503 | SNV | 1 | T | A | Heterozygous |
| NC_037645.1 | 8647743 | SNV | 1 | G | T | Homozygous   |
| NC_037645.1 | 8647772 | SNV | 1 | G | A | Homozygous   |
| NC_037645.1 | 8647781 | SNV | 1 | T | G | Homozygous   |
| NC_037645.1 | 8647961 | SNV | 1 | T | C | Homozygous   |
| NC_037645.1 | 8647969 | SNV | 1 | C | T | Heterozygous |
| NC_037645.1 | 8648765 | SNV | 1 | C | T | Homozygous   |
| NC_037645.1 | 8649032 | SNV | 1 | A | T | Heterozygous |
| NC_037645.1 | 8649212 | SNV | 1 | C | T | Homozygous   |
| NC_037645.1 | 8649387 | SNV | 1 | T | A | Heterozygous |
| NC_037645.1 | 8649859 | SNV | 1 | G | C | Heterozygous |
| NC_037645.1 | 8651073 | SNV | 1 | G | A | Heterozygous |



|             |         |     |   |   |   |              |
|-------------|---------|-----|---|---|---|--------------|
| NC_037645.1 | 8656841 | SNV | 1 | T | C | Homozygous   |
| NC_037645.1 | 8656874 | SNV | 1 | T | C | Homozygous   |
| NC_037645.1 | 8657249 | SNV | 1 | T | C | Heterozygous |
| NC_037645.1 | 8657352 | SNV | 1 | A | T | Homozygous   |
| NC_037645.1 | 8659117 | SNV | 1 | C | T | Homozygous   |
| NC_037645.1 | 8659409 | SNV | 1 | T | G | Homozygous   |
| NC_037645.1 | 8659464 | SNV | 1 | C | A | Homozygous   |
| NC_037645.1 | 8659653 | SNV | 1 | A | G | Heterozygous |
| NC_037645.1 | 8659792 | SNV | 1 | T | C | Homozygous   |
| NC_037645.1 | 8660175 | SNV | 1 | T | C | Homozygous   |
| NC_037645.1 | 8660366 | SNV | 1 | G | A | Heterozygous |
| NC_037645.1 | 8660396 | SNV | 1 | C | T | Homozygous   |
| NC_037645.1 | 8660490 | SNV | 1 | A | G | Homozygous   |
| NC_037645.1 | 8660663 | SNV | 1 | G | T | Homozygous   |
| NC_037645.1 | 8661282 | SNV | 1 | T | C | Heterozygous |
| NC_037645.1 | 8661289 | SNV | 1 | C | G | Heterozygous |
| NC_037645.1 | 8661633 | SNV | 1 | C | T | Heterozygous |
| NC_037645.1 | 8661845 | SNV | 1 | C | T | Heterozygous |
| NC_037645.1 | 8666042 | SNV | 1 | T | C | Heterozygous |
| NC_037645.1 | 8666167 | SNV | 1 | T | C | Heterozygous |
| NC_037645.1 | 8666487 | SNV | 1 | T | C | Homozygous   |
| NC_037645.1 | 8666506 | SNV | 1 | T | C | Homozygous   |
| NC_037645.1 | 8666514 | SNV | 1 | A | G | Homozygous   |
| NC_037645.1 | 8666678 | SNV | 1 | C | T | Homozygous   |
| NC_037645.1 | 8667242 | SNV | 1 | G | A | Heterozygous |
| NC_037645.1 | 8667311 | SNV | 1 | C | G | Homozygous   |
| NC_037645.1 | 8668037 | SNV | 1 | T | C | Homozygous   |
| NC_037645.1 | 8668599 | SNV | 1 | A | G | Homozygous   |
| NC_037645.1 | 8670606 | SNV | 1 | G | A | Heterozygous |
| NC_037645.1 | 8681664 | SNV | 1 | A | T | Homozygous   |
| NC_037645.1 | 8681667 | SNV | 1 | G | A | Homozygous   |
| NC_037645.1 | 8681675 | SNV | 1 | A | T | Homozygous   |
| NC_037645.1 | 8681680 | SNV | 1 | G | T | Homozygous   |
| NC_037645.1 | 8681683 | SNV | 1 | T | A | Homozygous   |
| NC_037645.1 | 8681687 | SNV | 1 | T | G | Homozygous   |
| NC_037645.1 | 8681690 | SNV | 1 | A | C | Homozygous   |
| NC_037645.1 | 8681713 | SNV | 1 | T | A | Homozygous   |
| NC_037645.1 | 8681715 | SNV | 1 | T | A | Homozygous   |
| NC_037645.1 | 8681719 | SNV | 1 | A | T | Homozygous   |
| NC_037645.1 | 8684364 | SNV | 1 | A | T | Homozygous   |
| NC_037645.1 | 8684367 | SNV | 1 | G | C | Heterozygous |
| NC_037645.1 | 8686486 | SNV | 1 | A | G | Heterozygous |
| NC_037645.1 | 8693677 | SNV | 1 | A | G | Homozygous   |
| NC_037645.1 | 8693679 | SNV | 1 | C | G | Homozygous   |
| NC_037645.1 | 8693681 | SNV | 1 | A | G | Homozygous   |
| NC_037645.1 | 8693685 | SNV | 1 | A | C | Homozygous   |
| NC_037645.1 | 8693690 | SNV | 1 | T | C | Homozygous   |
| NC_037645.1 | 8693692 | SNV | 1 | T | C | Homozygous   |
| NC_037645.1 | 8693729 | SNV | 1 | C | G | Heterozygous |
| NC_037645.1 | 8693731 | SNV | 1 | C | G | Heterozygous |
| NC_037645.1 | 8693800 | SNV | 1 | T | C | Homozygous   |

|             |         |     |   |   |   |              |
|-------------|---------|-----|---|---|---|--------------|
| NC_037645.1 | 8693869 | SNV | 1 | A | C | Homozygous   |
| NC_037645.1 | 8693879 | SNV | 1 | C | G | Heterozygous |
| NC_037645.1 | 8693881 | SNV | 1 | A | G | Homozygous   |
| NC_037645.1 | 8693885 | SNV | 1 | A | G | Homozygous   |
| NC_037645.1 | 8693893 | SNV | 1 | C | G | Heterozygous |
| NC_037645.1 | 8693909 | SNV | 1 | A | C | Homozygous   |
| NC_037645.1 | 8693914 | SNV | 1 | T | C | Homozygous   |
| NC_037645.1 | 8693917 | SNV | 1 | A | G | Homozygous   |
| NC_037645.1 | 8693920 | SNV | 1 | T | C | Homozygous   |
| NC_037645.1 | 8693954 | SNV | 1 | T | A | Heterozygous |
| NC_037645.1 | 8693956 | SNV | 1 | G | T | Heterozygous |
| NC_037645.1 | 8693965 | SNV | 1 | G | C | Heterozygous |
| NC_037645.1 | 8693967 | SNV | 1 | T | C | Heterozygous |
| NC_037645.1 | 8693969 | SNV | 1 | A | C | Heterozygous |
| NC_037645.1 | 8693973 | SNV | 1 | A | C | Heterozygous |
| NC_037645.1 | 8693974 | SNV | 1 | T | G | Heterozygous |
| NC_037645.1 | 8693977 | SNV | 1 | G | C | Heterozygous |
| NC_037645.1 | 8693993 | SNV | 1 | T | C | Homozygous   |
| NC_037645.1 | 8694007 | SNV | 1 | G | C | Homozygous   |
| NC_037645.1 | 8694011 | SNV | 1 | A | T | Homozygous   |
| NC_037645.1 | 8694015 | SNV | 1 | G | C | Homozygous   |
| NC_037645.1 | 8694079 | SNV | 1 | C | G | Homozygous   |
| NC_037645.1 | 8694097 | SNV | 1 | T | G | Homozygous   |
| NC_037645.1 | 8694101 | SNV | 1 | G | C | Homozygous   |
| NC_037645.1 | 8694113 | SNV | 1 | T | C | Homozygous   |
| NC_037645.1 | 8694118 | SNV | 1 | G | A | Homozygous   |
| NC_037645.1 | 8694127 | SNV | 1 | T | G | Homozygous   |
| NC_037645.1 | 8694131 | SNV | 1 | G | C | Homozygous   |
| NC_037645.1 | 8694134 | SNV | 1 | T | C | Homozygous   |
| NC_037645.1 | 8697088 | SNV | 1 | A | C | Homozygous   |
| NC_037645.1 | 8697090 | SNV | 1 | T | C | Heterozygous |
| NC_037645.1 | 8697098 | SNV | 1 | T | C | Heterozygous |
| NC_037645.1 | 8697102 | SNV | 1 | T | C | Heterozygous |
| NC_037645.1 | 8697105 | SNV | 1 | C | T | Heterozygous |
| NC_037645.1 | 8697109 | SNV | 1 | C | G | Heterozygous |
| NC_037645.1 | 8697137 | SNV | 1 | G | T | Homozygous   |
| NC_037645.1 | 8697145 | SNV | 1 | G | T | Homozygous   |
| NC_037645.1 | 8701562 | SNV | 1 | G | A | Homozygous   |
| NC_037645.1 | 8701573 | SNV | 1 | A | G | Homozygous   |
| NC_037645.1 | 8703224 | SNV | 1 | A | G | Heterozygous |
| NC_037645.1 | 8703465 | SNV | 1 | T | C | Homozygous   |
| NC_037645.1 | 8703574 | SNV | 1 | G | A | Heterozygous |
| NC_037645.1 | 8703581 | SNV | 1 | A | G | Homozygous   |
| NC_037645.1 | 8703586 | SNV | 1 | T | C | Homozygous   |
| NC_037645.1 | 8703597 | SNV | 1 | C | G | Homozygous   |
| NC_037645.1 | 8703614 | SNV | 1 | C | T | Homozygous   |
| NC_037645.1 | 8703616 | SNV | 1 | T | G | Homozygous   |
| NC_037645.1 | 8703622 | SNV | 1 | C | T | Heterozygous |
| NC_037645.1 | 8703628 | SNV | 1 | C | T | Homozygous   |
| NC_037645.1 | 8703649 | SNV | 1 | A | T | Heterozygous |
| NC_037645.1 | 8703739 | SNV | 1 | G | A | Heterozygous |

|             |         |     |   |   |   |              |
|-------------|---------|-----|---|---|---|--------------|
| NC_037645.1 | 8714814 | SNV | 1 | G | C | Homozygous   |
| NC_037645.1 | 8714835 | SNV | 1 | A | G | Homozygous   |
| NC_037645.1 | 8714843 | SNV | 1 | G | A | Heterozygous |
| NC_037645.1 | 8722188 | SNV | 1 | C | T | Heterozygous |
| NC_037645.1 | 8722212 | SNV | 1 | T | C | Homozygous   |
| NC_037645.1 | 8722224 | SNV | 1 | G | A | Heterozygous |
| NC_037645.1 | 8728027 | SNV | 1 | G | A | Homozygous   |
| NC_037645.1 | 8728029 | SNV | 1 | T | A | Homozygous   |
| NC_037645.1 | 8728072 | SNV | 1 | T | G | Homozygous   |
| NC_037645.1 | 8730595 | SNV | 1 | C | T | Heterozygous |
| NC_037645.1 | 8730690 | SNV | 1 | T | C | Homozygous   |
| NC_037645.1 | 8730725 | SNV | 1 | G | A | Heterozygous |
| NC_037645.1 | 8730794 | SNV | 1 | C | T | Heterozygous |
| NC_037645.1 | 8730796 | SNV | 1 | C | T | Heterozygous |
| NC_037645.1 | 8730822 | SNV | 1 | T | C | Heterozygous |
| NC_037645.1 | 8730841 | SNV | 1 | G | A | Homozygous   |
| NC_037645.1 | 8730948 | SNV | 1 | G | A | Homozygous   |
| NC_037645.1 | 8730997 | SNV | 1 | A | G | Heterozygous |
| NC_037645.1 | 8731003 | SNV | 1 | A | G | Homozygous   |
| NC_037645.1 | 8731086 | SNV | 1 | C | G | Homozygous   |
| NC_037645.1 | 8731092 | SNV | 1 | G | A | Homozygous   |
| NC_037645.1 | 8731165 | SNV | 1 | T | C | Heterozygous |
| NC_037645.1 | 8731172 | SNV | 1 | T | C | Heterozygous |
| NC_037645.1 | 8731177 | SNV | 1 | C | A | Heterozygous |
| NC_037645.1 | 8731456 | SNV | 1 | C | T | Homozygous   |
| NC_037645.1 | 8732393 | SNV | 1 | C | T | Heterozygous |
| NC_037645.1 | 8732412 | SNV | 1 | C | T | Heterozygous |
| NC_037645.1 | 8732621 | SNV | 1 | A | G | Homozygous   |
| NC_037645.1 | 8732629 | SNV | 1 | G | T | Heterozygous |
| NC_037645.1 | 8732731 | SNV | 1 | A | G | Heterozygous |
| NC_037645.1 | 8732756 | SNV | 1 | T | A | Heterozygous |
| NC_037645.1 | 8732761 | SNV | 1 | A | T | Heterozygous |
| NC_037645.1 | 8732766 | SNV | 1 | T | A | Homozygous   |
| NC_037645.1 | 8732768 | SNV | 1 | T | A | Heterozygous |
| NC_037645.1 | 8732770 | SNV | 1 | G | T | Heterozygous |
| NC_037645.1 | 8732772 | SNV | 1 | G | A | Heterozygous |
| NC_037645.1 | 8732775 | SNV | 1 | C | T | Heterozygous |
| NC_037645.1 | 8732780 | SNV | 1 | G | A | Heterozygous |
| NC_037645.1 | 8732835 | SNV | 1 | T | A | Heterozygous |
| NC_037645.1 | 8732835 | SNV | 1 | T | C | Heterozygous |
| NC_037645.1 | 8732840 | SNV | 1 | A | G | Heterozygous |
| NC_037645.1 | 8732875 | SNV | 1 | T | C | Heterozygous |
| NC_037645.1 | 8732910 | SNV | 1 | A | G | Heterozygous |
| NC_037645.1 | 8732915 | SNV | 1 | C | T | Homozygous   |
| NC_037645.1 | 8732925 | SNV | 1 | G | A | Heterozygous |
| NC_037645.1 | 8732929 | SNV | 1 | T | A | Homozygous   |
| NC_037645.1 | 8732945 | SNV | 1 | T | C | Homozygous   |
| NC_037645.1 | 8733000 | SNV | 1 | T | C | Heterozygous |
| NC_037645.1 | 8733020 | SNV | 1 | A | G | Homozygous   |
| NC_037645.1 | 8733069 | SNV | 1 | G | A | Heterozygous |
| NC_037645.1 | 8733071 | SNV | 1 | G | A | Heterozygous |

|             |         |     |   |   |   |              |
|-------------|---------|-----|---|---|---|--------------|
| NC_037645.1 | 8733117 | SNV | 1 | G | A | Heterozygous |
| NC_037645.1 | 8733119 | SNV | 1 | T | A | Heterozygous |
| NC_037645.1 | 8733166 | SNV | 1 | T | C | Heterozygous |
| NC_037645.1 | 8733186 | SNV | 1 | T | C | Homozygous   |
| NC_037645.1 | 8733251 | SNV | 1 | T | C | Homozygous   |
| NC_037645.1 | 8733263 | SNV | 1 | A | G | Heterozygous |
| NC_037645.1 | 8733325 | SNV | 1 | T | C | Heterozygous |
| NC_037645.1 | 8733327 | SNV | 1 | T | C | Homozygous   |
| NC_037645.1 | 8733344 | SNV | 1 | C | T | Heterozygous |
| NC_037645.1 | 8733392 | SNV | 1 | A | G | Homozygous   |
| NC_037645.1 | 8733395 | SNV | 1 | T | C | Homozygous   |
| NC_037645.1 | 8733397 | SNV | 1 | G | A | Heterozygous |
| NC_037645.1 | 8733409 | SNV | 1 | G | A | Heterozygous |
| NC_037645.1 | 8733424 | SNV | 1 | G | A | Heterozygous |
| NC_037645.1 | 8733435 | SNV | 1 | A | G | Heterozygous |
| NC_037645.1 | 8733443 | SNV | 1 | G | A | Heterozygous |
| NC_037645.1 | 8733485 | SNV | 1 | T | C | Homozygous   |
| NC_037645.1 | 8733487 | SNV | 1 | G | A | Heterozygous |
| NC_037645.1 | 8733490 | SNV | 1 | G | A | Homozygous   |
| NC_037645.1 | 8733650 | SNV | 1 | C | T | Heterozygous |
| NC_037645.1 | 8733654 | SNV | 1 | G | A | Heterozygous |
| NC_037645.1 | 8733726 | SNV | 1 | G | A | Heterozygous |
| NC_037645.1 | 8734015 | SNV | 1 | G | A | Heterozygous |
| NC_037645.1 | 8738137 | SNV | 1 | A | T | Heterozygous |
| NC_037645.1 | 8738139 | SNV | 1 | T | C | Heterozygous |
| NC_037645.1 | 8738151 | SNV | 1 | T | C | Heterozygous |
| NC_037645.1 | 8738155 | SNV | 1 | T | G | Homozygous   |
| NC_037645.1 | 8738450 | SNV | 1 | T | C | Homozygous   |
| NC_037645.1 | 8738487 | SNV | 1 | G | A | Heterozygous |
| NC_037645.1 | 8741542 | SNV | 1 | T | C | Homozygous   |
| NC_037645.1 | 8741545 | SNV | 1 | T | C | Homozygous   |
| NC_037645.1 | 8741882 | SNV | 1 | A | G | Heterozygous |
| NC_037645.1 | 8741894 | SNV | 1 | T | C | Homozygous   |
| NC_037645.1 | 8741929 | SNV | 1 | T | C | Homozygous   |
| NC_037645.1 | 8741972 | SNV | 1 | A | C | Homozygous   |
| NC_037645.1 | 8742032 | SNV | 1 | G | A | Heterozygous |
| NC_037645.1 | 8746148 | SNV | 1 | G | C | Homozygous   |
| NC_037645.1 | 8746284 | SNV | 1 | C | T | Homozygous   |
| NC_037645.1 | 8746317 | SNV | 1 | C | T | Heterozygous |
| NC_037645.1 | 8746319 | SNV | 1 | G | A | Heterozygous |
| NC_037645.1 | 8746433 | SNV | 1 | T | C | Homozygous   |
| NC_037645.1 | 8753333 | SNV | 1 | T | G | Heterozygous |
| NC_037645.1 | 8753342 | SNV | 1 | C | G | Homozygous   |
| NC_037645.1 | 8753349 | SNV | 1 | C | A | Heterozygous |
| NC_037645.1 | 8753369 | SNV | 1 | G | A | Heterozygous |
| NC_037645.1 | 8753374 | SNV | 1 | T | A | Heterozygous |
| NC_037645.1 | 8753464 | SNV | 1 | A | G | Homozygous   |
| NC_037645.1 | 8756151 | SNV | 1 | G | C | Homozygous   |
| NC_037645.1 | 8756876 | SNV | 1 | C | T | Heterozygous |
| NC_037645.1 | 8761916 | SNV | 1 | A | C | Homozygous   |
| NC_037645.1 | 8761937 | SNV | 1 | T | C | Homozygous   |

|             |         |     |   |   |   |              |
|-------------|---------|-----|---|---|---|--------------|
| NC_037645.1 | 8761950 | SNV | 1 | A | G | Homozygous   |
| NC_037645.1 | 8761953 | SNV | 1 | C | T | Heterozygous |
| NC_037645.1 | 8761957 | SNV | 1 | A | G | Heterozygous |
| NC_037645.1 | 8762340 | SNV | 1 | T | C | Homozygous   |
| NC_037645.1 | 8762560 | SNV | 1 | T | C | Homozygous   |
| NC_037645.1 | 8762582 | SNV | 1 | G | A | Homozygous   |
| NC_037645.1 | 8762588 | SNV | 1 | G | A | Homozygous   |
| NC_037645.1 | 8762704 | SNV | 1 | A | G | Heterozygous |
| NC_037645.1 | 8762774 | SNV | 1 | G | A | Heterozygous |
| NC_037645.1 | 8763079 | SNV | 1 | A | G | Homozygous   |
| NC_037645.1 | 8763518 | SNV | 1 | G | A | Heterozygous |
| NC_037645.1 | 8763524 | SNV | 1 | G | A | Heterozygous |
| NC_037645.1 | 8763535 | SNV | 1 | G | C | Homozygous   |
| NC_037645.1 | 8763913 | SNV | 1 | C | T | Homozygous   |
| NC_037645.1 | 8763922 | SNV | 1 | G | A | Homozygous   |
| NC_037645.1 | 8763928 | SNV | 1 | G | A | Homozygous   |
| NC_037645.1 | 8764022 | SNV | 1 | T | C | Homozygous   |
| NC_037645.1 | 8764025 | SNV | 1 | A | G | Homozygous   |
| NC_037645.1 | 8764102 | SNV | 1 | C | T | Heterozygous |
| NC_037645.1 | 8764107 | SNV | 1 | C | T | Heterozygous |
| NC_037645.1 | 8764178 | SNV | 1 | A | G | Heterozygous |
| NC_037645.1 | 8764180 | SNV | 1 | A | G | Heterozygous |
| NC_037645.1 | 8764186 | SNV | 1 | T | C | Homozygous   |
| NC_037645.1 | 8764195 | SNV | 1 | G | C | Heterozygous |
| NC_037645.1 | 8764266 | SNV | 1 | T | C | Heterozygous |
| NC_037645.1 | 8764514 | SNV | 1 | G | A | Homozygous   |
| NC_037645.1 | 8764526 | SNV | 1 | G | A | Homozygous   |
| NC_037645.1 | 8764674 | SNV | 1 | A | C | Homozygous   |
| NC_037645.1 | 8764681 | SNV | 1 | A | C | Heterozygous |
| NC_037645.1 | 8764713 | SNV | 1 | G | A | Homozygous   |
| NC_037645.1 | 8765046 | SNV | 1 | C | T | Heterozygous |
| NC_037645.1 | 8765092 | SNV | 1 | A | T | Heterozygous |
| NC_037645.1 | 8768609 | SNV | 1 | C | T | Homozygous   |
| NC_037645.1 | 8771835 | SNV | 1 | C | T | Heterozygous |
| NC_037645.1 | 8772559 | SNV | 1 | A | T | Homozygous   |
| NC_037645.1 | 8772794 | SNV | 1 | T | C | Heterozygous |
| NC_037645.1 | 8772916 | SNV | 1 | G | A | Heterozygous |
| NC_037645.1 | 8772919 | SNV | 1 | G | A | Heterozygous |
| NC_037645.1 | 8772939 | SNV | 1 | C | T | Heterozygous |
| NC_037645.1 | 8784434 | SNV | 1 | G | T | Homozygous   |
| NC_037645.1 | 8785212 | SNV | 1 | T | C | Homozygous   |
| NC_037645.1 | 8785218 | SNV | 1 | A | T | Homozygous   |
| NC_037645.1 | 8785534 | SNV | 1 | G | A | Heterozygous |
| NC_037645.1 | 8785591 | SNV | 1 | A | G | Homozygous   |
| NC_037645.1 | 8785756 | SNV | 1 | C | T | Heterozygous |
| NC_037645.1 | 8785862 | SNV | 1 | C | T | Heterozygous |
| NC_037645.1 | 8786138 | SNV | 1 | A | G | Homozygous   |
| NC_037645.1 | 8786433 | SNV | 1 | A | G | Homozygous   |
| NC_037645.1 | 8786948 | SNV | 1 | A | G | Homozygous   |
| NC_037645.1 | 8787459 | SNV | 1 | T | C | Homozygous   |
| NC_037645.1 | 8787467 | SNV | 1 | G | A | Homozygous   |

|             |         |     |   |   |   |              |
|-------------|---------|-----|---|---|---|--------------|
| NC_037645.1 | 8787518 | SNV | 1 | T | C | Homozygous   |
| NC_037645.1 | 8787540 | SNV | 1 | T | C | Homozygous   |
| NC_037645.1 | 8787675 | SNV | 1 | T | G | Homozygous   |
| NC_037645.1 | 8787713 | SNV | 1 | C | A | Homozygous   |
| NC_037645.1 | 8787814 | SNV | 1 | C | T | Heterozygous |
| NC_037645.1 | 8787820 | SNV | 1 | T | C | Homozygous   |
| NC_037645.1 | 8801761 | SNV | 1 | G | A | Heterozygous |
| NC_037645.1 | 8801830 | SNV | 1 | A | T | Homozygous   |
| NC_037645.1 | 8831152 | SNV | 1 | C | T | Heterozygous |
| NC_037645.1 | 8833836 | SNV | 1 | A | G | Homozygous   |
| NC_037645.1 | 8835776 | SNV | 1 | T | A | Homozygous   |
| NC_037645.1 | 8835779 | SNV | 1 | A | T | Homozygous   |
| NC_037645.1 | 8835794 | SNV | 1 | T | A | Homozygous   |
| NC_037645.1 | 8835821 | SNV | 1 | T | C | Homozygous   |
| NC_037645.1 | 8842414 | SNV | 1 | C | T | Homozygous   |
| NC_037645.1 | 8842422 | SNV | 1 | A | C | Homozygous   |
| NC_037645.1 | 8862797 | SNV | 1 | G | A | Heterozygous |
| NC_037645.1 | 8862997 | SNV | 1 | T | C | Heterozygous |
| NC_037645.1 | 8864657 | SNV | 1 | G | T | Homozygous   |
| NC_037645.1 | 8864699 | SNV | 1 | T | C | Homozygous   |
| NC_037645.1 | 8865340 | SNV | 1 | G | A | Homozygous   |
| NC_037645.1 | 8865640 | SNV | 1 | T | C | Homozygous   |
| NC_037645.1 | 8865673 | SNV | 1 | G | C | Heterozygous |
| NC_037645.1 | 8865988 | SNV | 1 | A | G | Heterozygous |
| NC_037645.1 | 8866015 | SNV | 1 | C | T | Homozygous   |
| NC_037645.1 | 8866042 | SNV | 1 | C | T | Heterozygous |
| NC_037645.1 | 8866413 | SNV | 1 | C | G | Heterozygous |
| NC_037645.1 | 8867739 | SNV | 1 | G | A | Heterozygous |
| NC_037645.1 | 8867817 | SNV | 1 | T | C | Homozygous   |
| NC_037645.1 | 8867977 | SNV | 1 | C | T | Heterozygous |
| NC_037645.1 | 8867981 | SNV | 1 | G | A | Heterozygous |
| NC_037645.1 | 8868070 | SNV | 1 | T | C | Heterozygous |
| NC_037645.1 | 8868243 | SNV | 1 | A | G | Homozygous   |
| NC_037645.1 | 8868695 | SNV | 1 | G | A | Heterozygous |
| NC_037645.1 | 8868989 | SNV | 1 | T | C | Homozygous   |
| NC_037645.1 | 8870978 | SNV | 1 | T | G | Heterozygous |
| NC_037645.1 | 8870997 | SNV | 1 | G | T | Homozygous   |
| NC_037645.1 | 8871223 | SNV | 1 | T | A | Heterozygous |
| NC_037645.1 | 8871227 | SNV | 1 | G | A | Homozygous   |
| NC_037645.1 | 8871257 | SNV | 1 | C | G | Homozygous   |
| NC_037645.1 | 8871750 | SNV | 1 | G | A | Heterozygous |
| NC_037645.1 | 8871870 | SNV | 1 | C | G | Homozygous   |
| NC_037645.1 | 8871883 | SNV | 1 | C | T | Homozygous   |
| NC_037645.1 | 8871899 | SNV | 1 | A | T | Homozygous   |
| NC_037645.1 | 8871943 | SNV | 1 | C | T | Homozygous   |
| NC_037645.1 | 8872325 | SNV | 1 | C | T | Heterozygous |
| NC_037645.1 | 8872349 | SNV | 1 | T | C | Homozygous   |
| NC_037645.1 | 8872781 | SNV | 1 | C | G | Heterozygous |
| NC_037645.1 | 8872787 | SNV | 1 | A | C | Heterozygous |
| NC_037645.1 | 8872794 | SNV | 1 | C | G | Heterozygous |
| NC_037645.1 | 8872801 | SNV | 1 | G | T | Heterozygous |

|             |         |     |   |   |   |              |
|-------------|---------|-----|---|---|---|--------------|
| NC_037645.1 | 8873757 | SNV | 1 | T | C | Heterozygous |
| NC_037645.1 | 8880118 | SNV | 1 | A | G | Heterozygous |
| NC_037645.1 | 8881028 | SNV | 1 | G | A | Homozygous   |
| NC_037645.1 | 8881066 | SNV | 1 | G | A | Homozygous   |
| NC_037645.1 | 8881248 | SNV | 1 | C | G | Homozygous   |
| NC_037645.1 | 8881315 | SNV | 1 | C | T | Homozygous   |
| NC_037645.1 | 8881329 | SNV | 1 | T | A | Heterozygous |
| NC_037645.1 | 8881647 | SNV | 1 | T | A | Heterozygous |
| NC_037645.1 | 8881656 | SNV | 1 | C | T | Heterozygous |
| NC_037645.1 | 8882534 | SNV | 1 | C | T | Homozygous   |
| NC_037645.1 | 8882724 | SNV | 1 | T | C | Homozygous   |
| NC_037645.1 | 8883052 | SNV | 1 | C | T | Homozygous   |
| NC_037645.1 | 8883662 | SNV | 1 | C | G | Homozygous   |
| NC_037645.1 | 8883710 | SNV | 1 | A | C | Homozygous   |
| NC_037645.1 | 8883722 | SNV | 1 | A | C | Homozygous   |
| NC_037645.1 | 8883788 | SNV | 1 | A | T | Homozygous   |
| NC_037645.1 | 8884067 | SNV | 1 | A | G | Heterozygous |
| NC_037645.1 | 8884174 | SNV | 1 | C | T | Homozygous   |
| NC_037645.1 | 8884243 | SNV | 1 | A | G | Homozygous   |
| NC_037645.1 | 8884934 | SNV | 1 | G | A | Homozygous   |
| NC_037645.1 | 8884988 | SNV | 1 | A | T | Heterozygous |
| NC_037645.1 | 8885460 | SNV | 1 | C | T | Homozygous   |
| NC_037645.1 | 8886318 | SNV | 1 | T | A | Homozygous   |
| NC_037645.1 | 8892191 | SNV | 1 | T | C | Heterozygous |
| NC_037645.1 | 8892222 | SNV | 1 | T | C | Heterozygous |
| NC_037645.1 | 8892327 | SNV | 1 | G | A | Heterozygous |
| NC_037645.1 | 8892571 | SNV | 1 | C | T | Heterozygous |
| NC_037645.1 | 8892670 | SNV | 1 | A | G | Heterozygous |
| NC_037645.1 | 8892694 | SNV | 1 | A | G | Heterozygous |
| NC_037645.1 | 8892841 | SNV | 1 | C | T | Heterozygous |
| NC_037645.1 | 8893192 | SNV | 1 | C | T | Heterozygous |
| NC_037645.1 | 8893282 | SNV | 1 | A | G | Homozygous   |
| NC_037645.1 | 8893480 | SNV | 1 | G | A | Heterozygous |
| NC_037645.1 | 8893605 | SNV | 1 | A | G | Heterozygous |
| NC_037645.1 | 8893782 | SNV | 1 | G | T | Heterozygous |
| NC_037645.1 | 8893792 | SNV | 1 | A | G | Heterozygous |
| NC_037645.1 | 8894008 | SNV | 1 | T | C | Heterozygous |
| NC_037645.1 | 8894107 | SNV | 1 | T | C | Homozygous   |
| NC_037645.1 | 8894296 | SNV | 1 | C | T | Heterozygous |
| NC_037645.1 | 8894313 | SNV | 1 | T | G | Heterozygous |
| NC_037645.1 | 8894812 | SNV | 1 | T | C | Homozygous   |
| NC_037645.1 | 8894959 | SNV | 1 | G | A | Heterozygous |
| NC_037645.1 | 8895019 | SNV | 1 | A | T | Heterozygous |
| NC_037645.1 | 8897351 | SNV | 1 | C | T | Heterozygous |
| NC_037645.1 | 8897359 | SNV | 1 | C | T | Heterozygous |
| NC_037645.1 | 8897476 | SNV | 1 | A | G | Heterozygous |
| NC_037645.1 | 8900539 | SNV | 1 | T | C | Heterozygous |
| NC_037645.1 | 8900542 | SNV | 1 | C | T | Heterozygous |
| NC_037645.1 | 8900652 | SNV | 1 | G | A | Homozygous   |
| NC_037645.1 | 8901628 | SNV | 1 | C | G | Heterozygous |
| NC_037645.1 | 8903255 | SNV | 1 | T | C | Heterozygous |

|             |         |     |   |   |   |              |
|-------------|---------|-----|---|---|---|--------------|
| NC_037645.1 | 8903257 | SNV | 1 | G | C | Heterozygous |
| NC_037645.1 | 8903257 | SNV | 1 | G | T | Heterozygous |
| NC_037645.1 | 8903260 | SNV | 1 | G | C | Homozygous   |
| NC_037645.1 | 8903263 | SNV | 1 | C | T | Heterozygous |
| NC_037645.1 | 8903272 | SNV | 1 | C | A | Heterozygous |
| NC_037645.1 | 8903273 | SNV | 1 | T | A | Heterozygous |
| NC_037645.1 | 8903276 | SNV | 1 | T | G | Heterozygous |
| NC_037645.1 | 8903278 | SNV | 1 | C | T | Heterozygous |
| NC_037645.1 | 8903449 | SNV | 1 | T | C | Homozygous   |
| NC_037645.1 | 8903575 | SNV | 1 | G | A | Heterozygous |
| NC_037645.1 | 8903753 | SNV | 1 | C | G | Heterozygous |
| NC_037645.1 | 8903755 | SNV | 1 | C | T | Heterozygous |
| NC_037645.1 | 8903858 | SNV | 1 | A | G | Heterozygous |
| NC_037645.1 | 8903867 | SNV | 1 | G | C | Homozygous   |
| NC_037645.1 | 8904022 | SNV | 1 | C | T | Homozygous   |
| NC_037645.1 | 8904262 | SNV | 1 | G | A | Heterozygous |
| NC_037645.1 | 8904340 | SNV | 1 | C | T | Heterozygous |
| NC_037645.1 | 8904342 | SNV | 1 | T | C | Homozygous   |
| NC_037645.1 | 8905163 | SNV | 1 | T | C | Heterozygous |
| NC_037645.1 | 8905180 | SNV | 1 | T | C | Heterozygous |
| NC_037645.1 | 8905229 | SNV | 1 | C | T | Heterozygous |
| NC_037645.1 | 8906917 | SNV | 1 | G | A | Heterozygous |
| NC_037645.1 | 8906941 | SNV | 1 | G | A | Heterozygous |
| NC_037645.1 | 8907043 | SNV | 1 | A | G | Heterozygous |
| NC_037645.1 | 8907070 | SNV | 1 | G | A | Heterozygous |
| NC_037645.1 | 8908241 | SNV | 1 | C | T | Heterozygous |
| NC_037645.1 | 8913777 | SNV | 1 | C | G | Homozygous   |
| NC_037645.1 | 8914263 | SNV | 1 | C | T | Heterozygous |
| NC_037645.1 | 8914352 | SNV | 1 | A | G | Heterozygous |
| NC_037645.1 | 8914368 | SNV | 1 | G | A | Heterozygous |
| NC_037645.1 | 8914392 | SNV | 1 | T | C | Homozygous   |
| NC_037645.1 | 8916748 | SNV | 1 | A | G | Homozygous   |
| NC_037645.1 | 8916752 | SNV | 1 | A | G | Homozygous   |
| NC_037645.1 | 8916757 | SNV | 1 | C | T | Heterozygous |
| NC_037645.1 | 8916942 | SNV | 1 | G | A | Homozygous   |
| NC_037645.1 | 8917010 | SNV | 1 | G | A | Heterozygous |
| NC_037645.1 | 8917027 | SNV | 1 | G | C | Heterozygous |
| NC_037645.1 | 8917076 | SNV | 1 | C | T | Heterozygous |
| NC_037645.1 | 8917106 | SNV | 1 | C | G | Homozygous   |
| NC_037645.1 | 8917208 | SNV | 1 | C | G | Heterozygous |
| NC_037645.1 | 8917210 | SNV | 1 | T | C | Heterozygous |
| NC_037645.1 | 8917214 | SNV | 1 | C | T | Heterozygous |
| NC_037645.1 | 8917233 | SNV | 1 | T | C | Heterozygous |
| NC_037645.1 | 8924101 | SNV | 1 | C | T | Homozygous   |
| NC_037645.1 | 8924155 | SNV | 1 | C | T | Heterozygous |
| NC_037645.1 | 8924159 | SNV | 1 | T | C | Homozygous   |
| NC_037645.1 | 8924304 | SNV | 1 | T | C | Heterozygous |
| NC_037645.1 | 8924310 | SNV | 1 | T | C | Heterozygous |
| NC_037645.1 | 8924312 | SNV | 1 | C | G | Heterozygous |
| NC_037645.1 | 8924428 | SNV | 1 | T | C | Homozygous   |
| NC_037645.1 | 8924454 | SNV | 1 | T | C | Homozygous   |



|             |         |     |   |   |   |              |
|-------------|---------|-----|---|---|---|--------------|
| NC_037645.1 | 8924461 | SNV | 1 | A | G | Homozygous   |
| NC_037645.1 | 8924489 | SNV | 1 | G | A | Heterozygous |
| NC_037645.1 | 8924512 | SNV | 1 | G | A | Homozygous   |
| NC_037645.1 | 8924514 | SNV | 1 | A | G | Homozygous   |
| NC_037645.1 | 8924639 | SNV | 1 | T | C | Homozygous   |
| NC_037645.1 | 8924718 | SNV | 1 | T | C | Homozygous   |
| NC_037645.1 | 8924739 | SNV | 1 | C | T | Heterozygous |
| NC_037645.1 | 8924780 | SNV | 1 | A | T | Homozygous   |
| NC_037645.1 | 8924782 | SNV | 1 | T | G | Homozygous   |
| NC_037645.1 | 8924787 | SNV | 1 | T | C | Homozygous   |
| NC_037645.1 | 8924793 | SNV | 1 | C | T | Homozygous   |
| NC_037645.1 | 8924810 | SNV | 1 | A | T | Heterozygous |
| NC_037645.1 | 8924861 | SNV | 1 | T | C | Heterozygous |
| NC_037645.1 | 8924890 | SNV | 1 | G | A | Homozygous   |
| NC_037645.1 | 8924924 | SNV | 1 | C | G | Heterozygous |
| NC_037645.1 | 8924977 | SNV | 1 | T | C | Homozygous   |
| NC_037645.1 | 8925005 | SNV | 1 | C | T | Heterozygous |
| NC_037645.1 | 8925067 | SNV | 1 | C | G | Heterozygous |
| NC_037645.1 | 8925071 | SNV | 1 | G | A | Heterozygous |
| NC_037645.1 | 8925257 | SNV | 1 | G | A | Heterozygous |
| NC_037645.1 | 8925848 | SNV | 1 | G | A | Homozygous   |
| NC_037645.1 | 8925858 | SNV | 1 | T | C | Homozygous   |
| NC_037645.1 | 8925860 | SNV | 1 | T | G | Homozygous   |
| NC_037645.1 | 8943042 | SNV | 1 | G | A | Heterozygous |
| NC_037645.1 | 8951510 | SNV | 1 | A | C | Homozygous   |
| NC_037645.1 | 8957392 | SNV | 1 | C | T | Heterozygous |
| NC_037645.1 | 8957434 | SNV | 1 | G | C | Homozygous   |
| NC_037645.1 | 8957666 | SNV | 1 | G | A | Heterozygous |
| NC_037645.1 | 8969761 | SNV | 1 | G | A | Heterozygous |
| NC_037645.1 | 8970616 | SNV | 1 | T | C | Homozygous   |
| NC_037645.1 | 8975735 | SNV | 1 | C | A | Homozygous   |
| NC_037645.1 | 8975746 | SNV | 1 | G | A | Homozygous   |
| NC_037645.1 | 8975748 | SNV | 1 | A | G | Homozygous   |
| NC_037645.1 | 8975752 | SNV | 1 | A | G | Homozygous   |
| NC_037645.1 | 8975764 | SNV | 1 | T | A | Homozygous   |
| NC_037645.1 | 8977488 | SNV | 1 | C | T | Homozygous   |
| NC_037645.1 | 8977491 | SNV | 1 | G | A | Homozygous   |
| NC_037645.1 | 8980804 | SNV | 1 | C | T | Heterozygous |
| NC_037645.1 | 8981208 | SNV | 1 | C | T | Homozygous   |
| NC_037645.1 | 8982442 | SNV | 1 | G | A | Homozygous   |
| NC_037645.1 | 8983918 | SNV | 1 | T | A | Heterozygous |
| NC_037645.1 | 8983925 | SNV | 1 | G | A | Heterozygous |
| NC_037645.1 | 8983935 | SNV | 1 | T | A | Homozygous   |
| NC_037645.1 | 8985351 | SNV | 1 | C | T | Heterozygous |
| NC_037645.1 | 8985366 | SNV | 1 | C | T | Heterozygous |
| NC_037645.1 | 8985386 | SNV | 1 | A | C | Heterozygous |
| NC_037645.1 | 8985393 | SNV | 1 | C | G | Homozygous   |
| NC_037645.1 | 8986188 | SNV | 1 | A | T | Homozygous   |
| NC_037645.1 | 8986190 | SNV | 1 | A | T | Homozygous   |
| NC_037645.1 | 8986192 | SNV | 1 | T | C | Heterozygous |
| NC_037645.1 | 8986197 | SNV | 1 | C | T | Homozygous   |

|             |         |     |   |   |   |              |
|-------------|---------|-----|---|---|---|--------------|
| NC_037645.1 | 8986359 | SNV | 1 | T | C | Heterozygous |
| NC_037645.1 | 8993366 | SNV | 1 | T | C | Homozygous   |
| NC_037645.1 | 8993390 | SNV | 1 | G | C | Heterozygous |
| NC_037645.1 | 8993692 | SNV | 1 | A | G | Heterozygous |
| NC_037645.1 | 8993948 | SNV | 1 | T | G | Heterozygous |
| NC_037645.1 | 8994040 | SNV | 1 | T | C | Homozygous   |
| NC_037645.1 | 8994527 | SNV | 1 | T | C | Heterozygous |
| NC_037645.1 | 8994803 | SNV | 1 | C | T | Homozygous   |
| NC_037645.1 | 8995212 | SNV | 1 | T | C | Homozygous   |
| NC_037645.1 | 8995257 | SNV | 1 | C | G | Homozygous   |
| NC_037645.1 | 8995340 | SNV | 1 | C | T | Heterozygous |
| NC_037645.1 | 8995364 | SNV | 1 | T | A | Heterozygous |
| NC_037645.1 | 8999593 | SNV | 1 | A | G | Homozygous   |
| NC_037645.1 | 8999800 | SNV | 1 | C | T | Homozygous   |
| NC_037645.1 | 8999886 | SNV | 1 | T | C | Homozygous   |
| NC_037645.1 | 9000360 | SNV | 1 | A | C | Homozygous   |
| NC_037645.1 | 9000716 | SNV | 1 | T | C | Homozygous   |
| NC_037645.1 | 9000761 | SNV | 1 | A | T | Homozygous   |
| NC_037645.1 | 9000836 | SNV | 1 | T | C | Homozygous   |
| NC_037645.1 | 9000874 | SNV | 1 | T | C | Homozygous   |
| NC_037645.1 | 9000926 | SNV | 1 | C | T | Heterozygous |
| NC_037645.1 | 9000932 | SNV | 1 | G | A | Heterozygous |
| NC_037645.1 | 9000935 | SNV | 1 | T | C | Heterozygous |
| NC_037645.1 | 9001236 | SNV | 1 | T | C | Homozygous   |
| NC_037645.1 | 9001391 | SNV | 1 | C | G | Homozygous   |
| NC_037645.1 | 9001504 | SNV | 1 | A | G | Homozygous   |
| NC_037645.1 | 9001610 | SNV | 1 | T | C | Heterozygous |
| NC_037645.1 | 9001616 | SNV | 1 | G | A | Heterozygous |
| NC_037645.1 | 9001845 | SNV | 1 | T | C | Homozygous   |
| NC_037645.1 | 9002225 | SNV | 1 | G | A | Heterozygous |
| NC_037645.1 | 9002234 | SNV | 1 | A | G | Heterozygous |
| NC_037645.1 | 9002265 | SNV | 1 | A | G | Homozygous   |
| NC_037645.1 | 9002356 | SNV | 1 | C | T | Heterozygous |
| NC_037645.1 | 9002499 | SNV | 1 | T | A | Homozygous   |
| NC_037645.1 | 9002785 | SNV | 1 | G | A | Homozygous   |
| NC_037645.1 | 9002868 | SNV | 1 | C | T | Heterozygous |
| NC_037645.1 | 9002934 | SNV | 1 | T | C | Heterozygous |
| NC_037645.1 | 9002999 | SNV | 1 | T | A | Heterozygous |
| NC_037645.1 | 9003035 | SNV | 1 | T | C | Heterozygous |
| NC_037645.1 | 9003082 | SNV | 1 | C | A | Heterozygous |
| NC_037645.1 | 9003242 | SNV | 1 | G | A | Heterozygous |
| NC_037645.1 | 9003247 | SNV | 1 | T | C | Homozygous   |
| NC_037645.1 | 9003660 | SNV | 1 | A | T | Heterozygous |
| NC_037645.1 | 9003689 | SNV | 1 | G | T | Homozygous   |
| NC_037645.1 | 9004126 | SNV | 1 | A | G | Homozygous   |
| NC_037645.1 | 9004131 | SNV | 1 | T | C | Heterozygous |
| NC_037645.1 | 9004162 | SNV | 1 | T | C | Homozygous   |
| NC_037645.1 | 9004240 | SNV | 1 | G | A | Homozygous   |
| NC_037645.1 | 9004272 | SNV | 1 | A | T | Homozygous   |
| NC_037645.1 | 9004356 | SNV | 1 | A | G | Homozygous   |
| NC_037645.1 | 9004372 | SNV | 1 | C | T | Heterozygous |

|             |         |     |   |   |   |              |
|-------------|---------|-----|---|---|---|--------------|
| NC_037645.1 | 9004443 | SNV | 1 | T | C | Homozygous   |
| NC_037645.1 | 9004450 | SNV | 1 | A | G | Homozygous   |
| NC_037645.1 | 9004471 | SNV | 1 | C | G | Homozygous   |
| NC_037645.1 | 9004731 | SNV | 1 | G | A | Homozygous   |
| NC_037645.1 | 9004961 | SNV | 1 | T | C | Heterozygous |
| NC_037645.1 | 9004977 | SNV | 1 | C | T | Heterozygous |
| NC_037645.1 | 9005105 | SNV | 1 | G | A | Heterozygous |
| NC_037645.1 | 9005136 | SNV | 1 | C | T | Heterozygous |
| NC_037645.1 | 9005262 | SNV | 1 | A | C | Homozygous   |
| NC_037645.1 | 9005444 | SNV | 1 | A | G | Homozygous   |
| NC_037645.1 | 9005552 | SNV | 1 | C | T | Heterozygous |
| NC_037645.1 | 9007424 | SNV | 1 | A | G | Homozygous   |
| NC_037645.1 | 9007442 | SNV | 1 | C | T | Heterozygous |
| NC_037645.1 | 9007447 | SNV | 1 | C | T | Heterozygous |
| NC_037645.1 | 9007449 | SNV | 1 | C | G | Heterozygous |
| NC_037645.1 | 9007465 | SNV | 1 | C | T | Heterozygous |
| NC_037645.1 | 9007468 | SNV | 1 | T | G | Heterozygous |
| NC_037645.1 | 9008158 | SNV | 1 | A | G | Homozygous   |
| NC_037645.1 | 9008345 | SNV | 1 | A | G | Homozygous   |
| NC_037645.1 | 9008394 | SNV | 1 | A | T | Heterozygous |
| NC_037645.1 | 9008951 | SNV | 1 | T | C | Homozygous   |
| NC_037645.1 | 9008974 | SNV | 1 | C | T | Homozygous   |
| NC_037645.1 | 9008989 | SNV | 1 | T | C | Homozygous   |
| NC_037645.1 | 9012645 | SNV | 1 | C | T | Heterozygous |
| NC_037645.1 | 9012669 | SNV | 1 | C | T | Heterozygous |
| NC_037645.1 | 9012672 | SNV | 1 | C | G | Heterozygous |
| NC_037645.1 | 9012674 | SNV | 1 | C | T | Heterozygous |
| NC_037645.1 | 9012683 | SNV | 1 | C | A | Heterozygous |
| NC_037645.1 | 9014528 | SNV | 1 | G | T | Heterozygous |
| NC_037645.1 | 9014804 | SNV | 1 | T | C | Heterozygous |
| NC_037645.1 | 9014822 | SNV | 1 | C | T | Heterozygous |
| NC_037645.1 | 9018266 | SNV | 1 | G | A | Homozygous   |
| NC_037645.1 | 9018305 | SNV | 1 | T | C | Homozygous   |
| NC_037645.1 | 9018343 | SNV | 1 | T | C | Homozygous   |
| NC_037645.1 | 9018358 | SNV | 1 | G | A | Heterozygous |
| NC_037645.1 | 9023959 | SNV | 1 | A | G | Homozygous   |
| NC_037645.1 | 9036658 | SNV | 1 | A | G | Heterozygous |
| NC_037645.1 | 9041404 | SNV | 1 | T | C | Homozygous   |
| NC_037645.1 | 9041427 | SNV | 1 | G | A | Homozygous   |
| NC_037645.1 | 9041483 | SNV | 1 | G | A | Homozygous   |
| NC_037645.1 | 9041494 | SNV | 1 | C | T | Heterozygous |
| NC_037645.1 | 9041497 | SNV | 1 | A | G | Homozygous   |
| NC_037645.1 | 9041499 | SNV | 1 | G | A | Homozygous   |
| NC_037645.1 | 9041603 | SNV | 1 | G | A | Homozygous   |
| NC_037645.1 | 9041637 | SNV | 1 | G | A | Heterozygous |
| NC_037645.1 | 9041643 | SNV | 1 | T | A | Homozygous   |
| NC_037645.1 | 9041959 | SNV | 1 | C | T | Homozygous   |
| NC_037645.1 | 9041981 | SNV | 1 | A | G | Homozygous   |
| NC_037645.1 | 9042007 | SNV | 1 | A | T | Homozygous   |
| NC_037645.1 | 9045538 | SNV | 1 | G | A | Heterozygous |
| NC_037645.1 | 9045760 | SNV | 1 | A | G | Homozygous   |

|             |         |     |   |   |   |              |
|-------------|---------|-----|---|---|---|--------------|
| NC_037645.1 | 9047071 | SNV | 1 | G | C | Homozygous   |
| NC_037645.1 | 9047106 | SNV | 1 | C | T | Heterozygous |
| NC_037645.1 | 9047108 | SNV | 1 | A | G | Heterozygous |
| NC_037645.1 | 9047120 | SNV | 1 | G | A | Heterozygous |
| NC_037645.1 | 9047204 | SNV | 1 | C | T | Heterozygous |
| NC_037645.1 | 9047639 | SNV | 1 | A | G | Heterozygous |
| NC_037645.1 | 9049497 | SNV | 1 | A | T | Heterozygous |
| NC_037645.1 | 9049500 | SNV | 1 | T | A | Homozygous   |
| NC_037645.1 | 9049503 | SNV | 1 | G | A | Homozygous   |
| NC_037645.1 | 9049510 | SNV | 1 | T | A | Heterozygous |
| NC_037645.1 | 9049696 | SNV | 1 | G | A | Heterozygous |
| NC_037645.1 | 9049709 | SNV | 1 | A | G | Homozygous   |
| NC_037645.1 | 9049828 | SNV | 1 | G | A | Heterozygous |
| NC_037645.1 | 9054275 | SNV | 1 | C | T | Homozygous   |
| NC_037645.1 | 9054365 | SNV | 1 | G | A | Heterozygous |
| NC_037645.1 | 9054375 | SNV | 1 | C | G | Homozygous   |
| NC_037645.1 | 9054408 | SNV | 1 | T | C | Homozygous   |
| NC_037645.1 | 9054415 | SNV | 1 | C | T | Heterozygous |
| NC_037645.1 | 9054424 | SNV | 1 | T | C | Homozygous   |
| NC_037645.1 | 9072685 | SNV | 1 | G | C | Heterozygous |
| NC_037645.1 | 9072694 | SNV | 1 | G | A | Heterozygous |
| NC_037645.1 | 9072697 | SNV | 1 | G | C | Heterozygous |
| NC_037645.1 | 9074002 | SNV | 1 | G | A | Homozygous   |
| NC_037645.1 | 9074006 | SNV | 1 | G | C | Heterozygous |
| NC_037645.1 | 9074008 | SNV | 1 | G | A | Homozygous   |
| NC_037645.1 | 9074012 | SNV | 1 | G | C | Homozygous   |
| NC_037645.1 | 9074034 | SNV | 1 | G | A | Homozygous   |
| NC_037645.1 | 9074036 | SNV | 1 | G | C | Homozygous   |
| NC_037645.1 | 9074040 | SNV | 1 | G | C | Homozygous   |
| NC_037645.1 | 9074043 | SNV | 1 | A | G | Homozygous   |
| NC_037645.1 | 9074045 | SNV | 1 | A | G | Homozygous   |
| NC_037645.1 | 9074062 | SNV | 1 | G | C | Homozygous   |
| NC_037645.1 | 9074066 | SNV | 1 | G | C | Homozygous   |
| NC_037645.1 | 9074070 | SNV | 1 | G | C | Homozygous   |
| NC_037645.1 | 9074073 | SNV | 1 | A | G | Homozygous   |
| NC_037645.1 | 9085037 | SNV | 1 | G | A | Homozygous   |
| NC_037645.1 | 9085062 | SNV | 1 | C | T | Heterozygous |
| NC_037645.1 | 9085066 | SNV | 1 | G | A | Homozygous   |
| NC_037645.1 | 9085150 | SNV | 1 | A | G | Homozygous   |
| NC_037645.1 | 9085376 | SNV | 1 | G | A | Heterozygous |
| NC_037645.1 | 9085760 | SNV | 1 | T | C | Homozygous   |
| NC_037645.1 | 9085848 | SNV | 1 | T | C | Heterozygous |
| NC_037645.1 | 9086023 | SNV | 1 | G | A | Heterozygous |
| NC_037645.1 | 9086427 | SNV | 1 | T | G | Homozygous   |
| NC_037645.1 | 9086483 | SNV | 1 | T | A | Heterozygous |
| NC_037645.1 | 9086491 | SNV | 1 | C | T | Heterozygous |
| NC_037645.1 | 9086635 | SNV | 1 | A | G | Homozygous   |
| NC_037645.1 | 9086665 | SNV | 1 | A | G | Homozygous   |
| NC_037645.1 | 9086686 | SNV | 1 | T | C | Homozygous   |
| NC_037645.1 | 9086695 | SNV | 1 | A | G | Homozygous   |
| NC_037645.1 | 9086719 | SNV | 1 | T | A | Heterozygous |

|             |         |     |   |   |   |              |
|-------------|---------|-----|---|---|---|--------------|
| NC_037645.1 | 9086742 | SNV | 1 | A | T | Heterozygous |
| NC_037645.1 | 9086745 | SNV | 1 | A | T | Heterozygous |
| NC_037645.1 | 9086780 | SNV | 1 | T | C | Homozygous   |
| NC_037645.1 | 9086910 | SNV | 1 | C | A | Heterozygous |
| NC_037645.1 | 9086944 | SNV | 1 | A | G | Homozygous   |
| NC_037645.1 | 9086957 | SNV | 1 | T | A | Homozygous   |
| NC_037645.1 | 9087110 | SNV | 1 | T | C | Heterozygous |
| NC_037645.1 | 9087190 | SNV | 1 | T | A | Homozygous   |
| NC_037645.1 | 9087265 | SNV | 1 | T | A | Heterozygous |
| NC_037645.1 | 9088047 | SNV | 1 | G | C | Homozygous   |
| NC_037645.1 | 9088152 | SNV | 1 | G | T | Heterozygous |
| NC_037645.1 | 9088158 | SNV | 1 | G | T | Homozygous   |
| NC_037645.1 | 9088572 | SNV | 1 | G | A | Heterozygous |
| NC_037645.1 | 9088574 | SNV | 1 | A | G | Heterozygous |
| NC_037645.1 | 9088620 | SNV | 1 | A | T | Homozygous   |
| NC_037645.1 | 9088623 | SNV | 1 | T | C | Heterozygous |
| NC_037645.1 | 9088624 | SNV | 1 | T | A | Heterozygous |
| NC_037645.1 | 9088670 | SNV | 1 | C | T | Homozygous   |
| NC_037645.1 | 9088674 | SNV | 1 | C | T | Heterozygous |
| NC_037645.1 | 9088690 | SNV | 1 | A | G | Homozygous   |
| NC_037645.1 | 9088722 | SNV | 1 | G | A | Heterozygous |
| NC_037645.1 | 9090225 | SNV | 1 | A | T | Heterozygous |
| NC_037645.1 | 9090227 | SNV | 1 | A | T | Heterozygous |
| NC_037645.1 | 9090231 | SNV | 1 | T | C | Heterozygous |
| NC_037645.1 | 9090297 | SNV | 1 | C | T | Homozygous   |
| NC_037645.1 | 9090303 | SNV | 1 | T | C | Homozygous   |
| NC_037645.1 | 9090333 | SNV | 1 | T | C | Homozygous   |
| NC_037645.1 | 9090338 | SNV | 1 | G | A | Homozygous   |
| NC_037645.1 | 9090342 | SNV | 1 | G | A | Homozygous   |
| NC_037645.1 | 9090350 | SNV | 1 | A | T | Heterozygous |
| NC_037645.1 | 9090460 | SNV | 1 | G | A | Heterozygous |
| NC_037645.1 | 9093291 | SNV | 1 | A | T | Homozygous   |
| NC_037645.1 | 9120503 | SNV | 1 | A | G | Homozygous   |
| NC_037645.1 | 9161699 | SNV | 1 | A | G | Homozygous   |
| NC_037645.1 | 9161731 | SNV | 1 | A | C | Heterozygous |
| NC_037645.1 | 9161745 | SNV | 1 | A | G | Homozygous   |
| NC_037645.1 | 9162018 | SNV | 1 | T | C | Homozygous   |
| NC_037645.1 | 9162153 | SNV | 1 | G | A | Homozygous   |
| NC_037645.1 | 9162243 | SNV | 1 | T | C | Homozygous   |
| NC_037645.1 | 9162650 | SNV | 1 | A | G | Homozygous   |
| NC_037645.1 | 9162653 | SNV | 1 | A | G | Homozygous   |
| NC_037645.1 | 9162686 | SNV | 1 | A | T | Heterozygous |
| NC_037645.1 | 9162701 | SNV | 1 | T | C | Homozygous   |
| NC_037645.1 | 9171372 | SNV | 1 | A | G | Heterozygous |
| NC_037645.1 | 9171379 | SNV | 1 | A | C | Heterozygous |
| NC_037645.1 | 9176776 | SNV | 1 | T | A | Homozygous   |
| NC_037645.1 | 9176785 | SNV | 1 | C | A | Homozygous   |
| NC_037645.1 | 9176800 | SNV | 1 | C | A | Homozygous   |
| NC_037645.1 | 9176804 | SNV | 1 | T | G | Homozygous   |
| NC_037645.1 | 9180095 | SNV | 1 | C | A | Homozygous   |
| NC_037645.1 | 9180099 | SNV | 1 | T | C | Heterozygous |

|             |         |     |   |   |   |              |
|-------------|---------|-----|---|---|---|--------------|
| NC_037645.1 | 9180135 | SNV | 1 | T | A | Homozygous   |
| NC_037645.1 | 9185687 | SNV | 1 | G | A | Heterozygous |
| NC_037645.1 | 9185689 | SNV | 1 | C | T | Homozygous   |
| NC_037645.1 | 9185697 | SNV | 1 | C | T | Homozygous   |
| NC_037645.1 | 9194253 | SNV | 1 | A | C | Heterozygous |
| NC_037645.1 | 9194260 | SNV | 1 | A | G | Heterozygous |
| NC_037645.1 | 9201725 | SNV | 1 | T | C | Homozygous   |
| NC_037645.1 | 9201727 | SNV | 1 | A | T | Homozygous   |
| NC_037645.1 | 9201730 | SNV | 1 | A | T | Homozygous   |
| NC_037645.1 | 9201746 | SNV | 1 | A | T | Homozygous   |
| NC_037645.1 | 9201749 | SNV | 1 | A | T | Homozygous   |
| NC_037645.1 | 9201753 | SNV | 1 | A | T | Homozygous   |
| NC_037645.1 | 9201756 | SNV | 1 | A | T | Heterozygous |
| NC_037645.1 | 9204492 | SNV | 1 | C | T | Homozygous   |
| NC_037645.1 | 9204502 | SNV | 1 | C | A | Homozygous   |
| NC_037645.1 | 9204519 | SNV | 1 | T | G | Heterozygous |
| NC_037645.1 | 9204527 | SNV | 1 | T | C | Heterozygous |
| NC_037645.1 | 9204530 | SNV | 1 | C | T | Heterozygous |
| NC_037645.1 | 9204543 | SNV | 1 | T | A | Heterozygous |
| NC_037645.1 | 9204545 | SNV | 1 | T | G | Heterozygous |
| NC_037645.1 | 9223858 | SNV | 1 | A | T | Homozygous   |
| NC_037645.1 | 9223879 | SNV | 1 | T | A | Heterozygous |
| NC_037645.1 | 9223882 | SNV | 1 | G | A | Homozygous   |
| NC_037645.1 | 9223885 | SNV | 1 | A | G | Heterozygous |
| NC_037645.1 | 9223888 | SNV | 1 | G | A | Homozygous   |
| NC_037645.1 | 9224681 | SNV | 1 | A | G | Heterozygous |
| NC_037645.1 | 9224694 | SNV | 1 | C | T | Homozygous   |
| NC_037645.1 | 9231654 | SNV | 1 | C | G | Heterozygous |
| NC_037645.1 | 9251273 | SNV | 1 | T | A | Homozygous   |
| NC_037645.1 | 9251275 | SNV | 1 | G | C | Homozygous   |
| NC_037645.1 | 9251301 | SNV | 1 | G | A | Heterozygous |
| NC_037645.1 | 9251307 | SNV | 1 | G | C | Homozygous   |
| NC_037645.1 | 9251314 | SNV | 1 | A | G | Homozygous   |
| NC_037645.1 | 9251327 | SNV | 1 | G | C | Heterozygous |
| NC_037645.1 | 9251331 | SNV | 1 | G | C | Heterozygous |
| NC_037645.1 | 9251333 | SNV | 1 | A | G | Homozygous   |
| NC_037645.1 | 9251335 | SNV | 1 | T | C | Homozygous   |
| NC_037645.1 | 9251337 | SNV | 1 | A | G | Homozygous   |
| NC_037645.1 | 9251351 | SNV | 1 | A | G | Homozygous   |
| NC_037645.1 | 9251450 | SNV | 1 | A | T | Heterozygous |
| NC_037645.1 | 9251455 | SNV | 1 | G | A | Heterozygous |
| NC_037645.1 | 9251457 | SNV | 1 | G | C | Heterozygous |
| NC_037645.1 | 9251463 | SNV | 1 | A | G | Heterozygous |
| NC_037645.1 | 9251465 | SNV | 1 | C | G | Heterozygous |
| NC_037645.1 | 9251479 | SNV | 1 | G | C | Heterozygous |
| NC_037645.1 | 9251481 | SNV | 1 | A | G | Heterozygous |
| NC_037645.1 | 9251485 | SNV | 1 | A | G | Homozygous   |
| NC_037645.1 | 9251489 | SNV | 1 | C | G | Homozygous   |
| NC_037645.1 | 9251493 | SNV | 1 | A | C | Homozygous   |
| NC_037645.1 | 9251496 | SNV | 1 | A | T | Heterozygous |
| NC_037645.1 | 9251507 | SNV | 1 | G | C | Heterozygous |

|             |         |     |   |   |   |              |
|-------------|---------|-----|---|---|---|--------------|
| NC_037645.1 | 9251513 | SNV | 1 | C | G | Heterozygous |
| NC_037645.1 | 9251515 | SNV | 1 | A | G | Heterozygous |
| NC_037645.1 | 9251589 | SNV | 1 | G | C | Heterozygous |
| NC_037645.1 | 9251591 | SNV | 1 | A | G | Homozygous   |
| NC_037645.1 | 9251599 | SNV | 1 | C | G | Heterozygous |
| NC_037645.1 | 9251616 | SNV | 1 | G | T | Homozygous   |
| NC_037645.1 | 9251628 | SNV | 1 | A | G | Heterozygous |
| NC_037645.1 | 9251631 | SNV | 1 | G | C | Heterozygous |
| NC_037645.1 | 9253025 | SNV | 1 | G | C | Homozygous   |
| NC_037645.1 | 9253033 | SNV | 1 | C | A | Heterozygous |
| NC_037645.1 | 9253036 | SNV | 1 | T | C | Heterozygous |
| NC_037645.1 | 9253038 | SNV | 1 | T | G | Heterozygous |
| NC_037645.1 | 9253040 | SNV | 1 | T | A | Heterozygous |
| NC_037645.1 | 9253055 | SNV | 1 | T | C | Homozygous   |
| NC_037645.1 | 9253073 | SNV | 1 | C | T | Heterozygous |
| NC_037645.1 | 9253075 | SNV | 1 | C | T | Heterozygous |
| NC_037645.1 | 9253079 | SNV | 1 | C | T | Homozygous   |
| NC_037645.1 | 9253081 | SNV | 1 | C | T | Heterozygous |
| NC_037645.1 | 9263209 | SNV | 1 | T | G | Homozygous   |
| NC_037645.1 | 9263212 | SNV | 1 | A | T | Homozygous   |
| NC_037645.1 | 9263220 | SNV | 1 | A | T | Homozygous   |
| NC_037645.1 | 9263233 | SNV | 1 | A | G | Homozygous   |
| NC_037645.1 | 9263265 | SNV | 1 | A | G | Heterozygous |
| NC_037645.1 | 9267797 | SNV | 1 | A | G | Heterozygous |
| NC_037645.1 | 9267819 | SNV | 1 | G | T | Heterozygous |
| NC_037645.1 | 9267831 | SNV | 1 | G | A | Heterozygous |
| NC_037645.1 | 9267834 | SNV | 1 | C | G | Homozygous   |
| NC_037645.1 | 9267837 | SNV | 1 | A | G | Heterozygous |
| NC_037645.1 | 9267855 | SNV | 1 | G | A | Heterozygous |
| NC_037645.1 | 9267861 | SNV | 1 | G | A | Heterozygous |
| NC_037645.1 | 9268028 | SNV | 1 | G | T | Heterozygous |
| NC_037645.1 | 9268153 | SNV | 1 | G | A | Homozygous   |
| NC_037645.1 | 9268156 | SNV | 1 | G | A | Homozygous   |
| NC_037645.1 | 9268162 | SNV | 1 | A | G | Homozygous   |
| NC_037645.1 | 9268167 | SNV | 1 | G | A | Heterozygous |
| NC_037645.1 | 9268172 | SNV | 1 | G | A | Heterozygous |
| NC_037645.1 | 9268176 | SNV | 1 | G | C | Heterozygous |
| NC_037645.1 | 9268187 | SNV | 1 | A | G | Heterozygous |
| NC_037645.1 | 9268189 | SNV | 1 | G | T | Heterozygous |
| NC_037645.1 | 9268191 | SNV | 1 | G | C | Heterozygous |
| NC_037645.1 | 9268193 | SNV | 1 | A | G | Heterozygous |
| NC_037645.1 | 9268213 | SNV | 1 | G | A | Heterozygous |
| NC_037645.1 | 9268221 | SNV | 1 | A | G | Homozygous   |
| NC_037645.1 | 9268225 | SNV | 1 | A | G | Heterozygous |
| NC_037645.1 | 9268255 | SNV | 1 | G | A | Homozygous   |
| NC_037645.1 | 9271655 | SNV | 1 | A | T | Heterozygous |
| NC_037645.1 | 9271661 | SNV | 1 | A | T | Heterozygous |
| NC_037645.1 | 9271674 | SNV | 1 | T | A | Homozygous   |
| NC_037645.1 | 9272066 | SNV | 1 | C | T | Heterozygous |
| NC_037645.1 | 9278550 | SNV | 1 | G | T | Homozygous   |
| NC_037645.1 | 9285701 | SNV | 1 | A | G | Heterozygous |

|             |         |     |   |   |   |              |
|-------------|---------|-----|---|---|---|--------------|
| NC_037645.1 | 9285731 | SNV | 1 | G | A | Heterozygous |
| NC_037645.1 | 9285756 | SNV | 1 | A | G | Heterozygous |
| NC_037645.1 | 9288601 | SNV | 1 | G | T | Homozygous   |
| NC_037645.1 | 9288615 | SNV | 1 | C | T | Homozygous   |
| NC_037645.1 | 9289564 | SNV | 1 | T | C | Homozygous   |
| NC_037645.1 | 9289600 | SNV | 1 | C | T | Homozygous   |
| NC_037645.1 | 9289604 | SNV | 1 | C | T | Homozygous   |
| NC_037645.1 | 9290138 | SNV | 1 | A | T | Homozygous   |
| NC_037645.1 | 9303757 | SNV | 1 | A | T | Heterozygous |
| NC_037645.1 | 9304593 | SNV | 1 | A | T | Heterozygous |
| NC_037645.1 | 9304595 | SNV | 1 | T | A | Heterozygous |
| NC_037645.1 | 9304598 | SNV | 1 | A | T | Heterozygous |
| NC_037645.1 | 9304603 | SNV | 1 | A | T | Heterozygous |
| NC_037645.1 | 9304606 | SNV | 1 | A | G | Heterozygous |
| NC_037645.1 | 9304608 | SNV | 1 | A | T | Heterozygous |
| NC_037645.1 | 9304611 | SNV | 1 | A | G | Heterozygous |
| NC_037645.1 | 9304616 | SNV | 1 | A | G | Heterozygous |
| NC_037645.1 | 9304627 | SNV | 1 | T | A | Heterozygous |
| NC_037645.1 | 9304682 | SNV | 1 | A | T | Homozygous   |
| NC_037645.1 | 9304690 | SNV | 1 | T | G | Homozygous   |
| NC_037645.1 | 9305537 | SNV | 1 | C | T | Heterozygous |
| NC_037645.1 | 9311379 | SNV | 1 | T | A | Heterozygous |
| NC_037645.1 | 9312395 | SNV | 1 | A | C | Heterozygous |
| NC_037645.1 | 9323099 | SNV | 1 | C | A | Homozygous   |
| NC_037645.1 | 9323103 | SNV | 1 | A | G | Heterozygous |
| NC_037645.1 | 9323137 | SNV | 1 | A | T | Heterozygous |
| NC_037645.1 | 9323159 | SNV | 1 | T | A | Heterozygous |
| NC_037645.1 | 9323168 | SNV | 1 | A | T | Homozygous   |
| NC_037645.1 | 9323300 | SNV | 1 | A | G | Heterozygous |
| NC_037645.1 | 9323315 | SNV | 1 | A | T | Heterozygous |
| NC_037645.1 | 9323324 | SNV | 1 | A | G | Heterozygous |
| NC_037645.1 | 9323346 | SNV | 1 | G | A | Heterozygous |
| NC_037645.1 | 9323354 | SNV | 1 | A | G | Heterozygous |
| NC_037645.1 | 9323384 | SNV | 1 | A | G | Homozygous   |
| NC_037645.1 | 9323411 | SNV | 1 | A | T | Homozygous   |
| NC_037645.1 | 9323494 | SNV | 1 | T | C | Homozygous   |
| NC_037645.1 | 9323496 | SNV | 1 | T | G | Homozygous   |
| NC_037645.1 | 9323498 | SNV | 1 | G | A | Homozygous   |
| NC_037645.1 | 9323500 | SNV | 1 | A | T | Homozygous   |
| NC_037645.1 | 9323504 | SNV | 1 | A | T | Homozygous   |
| NC_037645.1 | 9323511 | SNV | 1 | A | G | Homozygous   |
| NC_037645.1 | 9323514 | SNV | 1 | A | C | Homozygous   |
| NC_037645.1 | 9323520 | SNV | 1 | T | G | Homozygous   |
| NC_037645.1 | 9323522 | SNV | 1 | T | C | Homozygous   |
| NC_037645.1 | 9344264 | SNV | 1 | G | A | Homozygous   |
| NC_037645.1 | 9350004 | SNV | 1 | T | G | Heterozygous |
| NC_037645.1 | 9350873 | SNV | 1 | G | A | Heterozygous |
| NC_037645.1 | 9350884 | SNV | 1 | T | C | Homozygous   |
| NC_037645.1 | 9351025 | SNV | 1 | A | G | Homozygous   |
| NC_037645.1 | 9351111 | SNV | 1 | T | C | Homozygous   |
| NC_037645.1 | 9351195 | SNV | 1 | G | C | Heterozygous |



|             |         |     |   |   |   |              |
|-------------|---------|-----|---|---|---|--------------|
| NC_037645.1 | 9351840 | SNV | 1 | T | C | Homozygous   |
| NC_037645.1 | 9352278 | SNV | 1 | G | A | Heterozygous |
| NC_037645.1 | 9355006 | SNV | 1 | T | A | Heterozygous |
| NC_037645.1 | 9355831 | SNV | 1 | A | G | Homozygous   |
| NC_037645.1 | 9355894 | SNV | 1 | G | A | Homozygous   |
| NC_037645.1 | 9358921 | SNV | 1 | T | A | Heterozygous |
| NC_037645.1 | 9358926 | SNV | 1 | C | T | Homozygous   |
| NC_037645.1 | 9358953 | SNV | 1 | T | C | Homozygous   |
| NC_037645.1 | 9358966 | SNV | 1 | A | G | Homozygous   |
| NC_037645.1 | 9359089 | SNV | 1 | T | A | Heterozygous |
| NC_037645.1 | 9359112 | SNV | 1 | G | T | Heterozygous |
| NC_037645.1 | 9359126 | SNV | 1 | T | C | Homozygous   |
| NC_037645.1 | 9360046 | SNV | 1 | G | A | Heterozygous |
| NC_037645.1 | 9362515 | SNV | 1 | C | T | Homozygous   |
| NC_037645.1 | 9362570 | SNV | 1 | A | G | Homozygous   |
| NC_037645.1 | 9362576 | SNV | 1 | C | A | Homozygous   |
| NC_037645.1 | 9362712 | SNV | 1 | A | G | Homozygous   |
| NC_037645.1 | 9364112 | SNV | 1 | G | T | Homozygous   |
| NC_037645.1 | 9364148 | SNV | 1 | A | G | Homozygous   |
| NC_037645.1 | 9364346 | SNV | 1 | T | C | Heterozygous |
| NC_037645.1 | 9364407 | SNV | 1 | T | C | Heterozygous |
| NC_037645.1 | 9364996 | SNV | 1 | G | A | Homozygous   |
| NC_037645.1 | 9365030 | SNV | 1 | C | T | Homozygous   |
| NC_037645.1 | 9365076 | SNV | 1 | T | C | Homozygous   |
| NC_037645.1 | 9365478 | SNV | 1 | T | C | Homozygous   |
| NC_037645.1 | 9366119 | SNV | 1 | T | C | Heterozygous |
| NC_037645.1 | 9366254 | SNV | 1 | T | C | Homozygous   |
| NC_037645.1 | 9366524 | SNV | 1 | C | G | Heterozygous |
| NC_037645.1 | 9366940 | SNV | 1 | T | C | Homozygous   |
| NC_037645.1 | 9367007 | SNV | 1 | T | C | Homozygous   |
| NC_037645.1 | 9368371 | SNV | 1 | G | A | Homozygous   |
| NC_037645.1 | 9368384 | SNV | 1 | G | A | Heterozygous |
| NC_037645.1 | 9368446 | SNV | 1 | G | A | Heterozygous |
| NC_037645.1 | 9369756 | SNV | 1 | G | A | Heterozygous |
| NC_037645.1 | 9370140 | SNV | 1 | T | G | Heterozygous |
| NC_037645.1 | 9374050 | SNV | 1 | T | C | Heterozygous |
| NC_037645.1 | 9375487 | SNV | 1 | G | C | Homozygous   |
| NC_037645.1 | 9375491 | SNV | 1 | G | A | Homozygous   |
| NC_037645.1 | 9376145 | SNV | 1 | T | G | Homozygous   |
| NC_037645.1 | 9376169 | SNV | 1 | C | G | Homozygous   |
| NC_037645.1 | 9376178 | SNV | 1 | A | T | Homozygous   |
| NC_037645.1 | 9376180 | SNV | 1 | C | G | Homozygous   |
| NC_037645.1 | 9385784 | SNV | 1 | G | A | Homozygous   |
| NC_037645.1 | 9385955 | SNV | 1 | A | G | Heterozygous |
| NC_037645.1 | 9386149 | SNV | 1 | T | A | Homozygous   |
| NC_037645.1 | 9386154 | SNV | 1 | C | T | Homozygous   |
| NC_037645.1 | 9386178 | SNV | 1 | G | A | Homozygous   |
| NC_037645.1 | 9386181 | SNV | 1 | C | T | Homozygous   |
| NC_037645.1 | 9387258 | SNV | 1 | G | A | Heterozygous |
| NC_037645.1 | 9392046 | SNV | 1 | C | T | Heterozygous |
| NC_037645.1 | 9392406 | SNV | 1 | A | T | Heterozygous |

|             |         |     |   |   |   |              |
|-------------|---------|-----|---|---|---|--------------|
| NC_037645.1 | 9392583 | SNV | 1 | C | A | Homozygous   |
| NC_037645.1 | 9393022 | SNV | 1 | C | G | Homozygous   |
| NC_037645.1 | 9393776 | SNV | 1 | A | G | Homozygous   |
| NC_037645.1 | 9397222 | SNV | 1 | T | C | Homozygous   |
| NC_037645.1 | 9397713 | SNV | 1 | C | G | Heterozygous |
| NC_037645.1 | 9410848 | SNV | 1 | C | T | Homozygous   |
| NC_037645.1 | 9414793 | SNV | 1 | T | C | Heterozygous |
| NC_037645.1 | 9414815 | SNV | 1 | T | C | Homozygous   |
| NC_037645.1 | 9418960 | SNV | 1 | G | C | Homozygous   |
| NC_037645.1 | 9418988 | SNV | 1 | A | G | Homozygous   |
| NC_037645.1 | 9418991 | SNV | 1 | A | G | Homozygous   |
| NC_037645.1 | 9418997 | SNV | 1 | T | A | Homozygous   |
| NC_037645.1 | 9420465 | SNV | 1 | T | A | Homozygous   |
| NC_037645.1 | 9420524 | SNV | 1 | T | C | Homozygous   |
| NC_037645.1 | 9420541 | SNV | 1 | T | C | Heterozygous |
| NC_037645.1 | 9420559 | SNV | 1 | C | T | Homozygous   |
| NC_037645.1 | 9435074 | SNV | 1 | C | T | Homozygous   |
| NC_037645.1 | 9435146 | SNV | 1 | T | A | Heterozygous |
| NC_037645.1 | 9436060 | SNV | 1 | A | G | Homozygous   |
| NC_037645.1 | 9436068 | SNV | 1 | G | A | Heterozygous |
| NC_037645.1 | 9436170 | SNV | 1 | T | C | Homozygous   |
| NC_037645.1 | 9436324 | SNV | 1 | A | G | Heterozygous |
| NC_037645.1 | 9436425 | SNV | 1 | A | T | Heterozygous |
| NC_037645.1 | 9436442 | SNV | 1 | T | A | Heterozygous |
| NC_037645.1 | 9436462 | SNV | 1 | G | A | Homozygous   |
| NC_037645.1 | 9436771 | SNV | 1 | T | C | Homozygous   |
| NC_037645.1 | 9439629 | SNV | 1 | A | G | Homozygous   |
| NC_037645.1 | 9439721 | SNV | 1 | C | T | Homozygous   |
| NC_037645.1 | 9451182 | SNV | 1 | T | A | Homozygous   |
| NC_037645.1 | 9451214 | SNV | 1 | A | T | Homozygous   |
| NC_037645.1 | 9451221 | SNV | 1 | A | C | Homozygous   |
| NC_037645.1 | 9452957 | SNV | 1 | A | G | Homozygous   |
| NC_037645.1 | 9457208 | SNV | 1 | T | A | Heterozygous |
| NC_037645.1 | 9457210 | SNV | 1 | G | A | Heterozygous |
| NC_037645.1 | 9457221 | SNV | 1 | G | A | Heterozygous |
| NC_037645.1 | 9457478 | SNV | 1 | A | T | Homozygous   |
| NC_037645.1 | 9457482 | SNV | 1 | A | T | Homozygous   |
| NC_037645.1 | 9459863 | SNV | 1 | G | A | Heterozygous |
| NC_037645.1 | 9460661 | SNV | 1 | C | A | Homozygous   |
| NC_037645.1 | 9460711 | SNV | 1 | G | A | Homozygous   |
| NC_037645.1 | 9460884 | SNV | 1 | G | A | Heterozygous |
| NC_037645.1 | 9462283 | SNV | 1 | C | T | Heterozygous |
| NC_037645.1 | 9463801 | SNV | 1 | A | G | Homozygous   |
| NC_037645.1 | 9463821 | SNV | 1 | A | T | Homozygous   |
| NC_037645.1 | 9463827 | SNV | 1 | T | A | Homozygous   |
| NC_037645.1 | 9463829 | SNV | 1 | A | G | Homozygous   |
| NC_037645.1 | 9463834 | SNV | 1 | A | T | Homozygous   |
| NC_037645.1 | 9463837 | SNV | 1 | T | A | Homozygous   |
| NC_037645.1 | 9463841 | SNV | 1 | T | A | Homozygous   |
| NC_037645.1 | 9464747 | SNV | 1 | G | A | Homozygous   |
| NC_037645.1 | 9464869 | SNV | 1 | A | C | Homozygous   |

|             |         |     |   |   |   |              |
|-------------|---------|-----|---|---|---|--------------|
| NC_037645.1 | 9466740 | SNV | 1 | T | C | Homozygous   |
| NC_037645.1 | 9466919 | SNV | 1 | A | T | Homozygous   |
| NC_037645.1 | 9467144 | SNV | 1 | C | T | Homozygous   |
| NC_037645.1 | 9467332 | SNV | 1 | T | A | Heterozygous |
| NC_037645.1 | 9467357 | SNV | 1 | A | T | Heterozygous |
| NC_037645.1 | 9467361 | SNV | 1 | T | A | Heterozygous |
| NC_037645.1 | 9467366 | SNV | 1 | A | T | Heterozygous |
| NC_037645.1 | 9467812 | SNV | 1 | T | A | Heterozygous |
| NC_037645.1 | 9468789 | SNV | 1 | A | T | Homozygous   |
| NC_037645.1 | 9468791 | SNV | 1 | T | G | Homozygous   |
| NC_037645.1 | 9469756 | SNV | 1 | A | T | Homozygous   |
| NC_037645.1 | 9471275 | SNV | 1 | A | T | Homozygous   |
| NC_037645.1 | 9474393 | SNV | 1 | T | A | Heterozygous |
| NC_037645.1 | 9474398 | SNV | 1 | G | C | Heterozygous |
| NC_037645.1 | 9474404 | SNV | 1 | A | C | Heterozygous |
| NC_037645.1 | 9474408 | SNV | 1 | T | A | Heterozygous |
| NC_037645.1 | 9474425 | SNV | 1 | G | T | Heterozygous |
| NC_037645.1 | 9474435 | SNV | 1 | A | G | Homozygous   |
| NC_037645.1 | 9474441 | SNV | 1 | C | A | Homozygous   |
| NC_037645.1 | 9480541 | SNV | 1 | C | T | Homozygous   |
| NC_037645.1 | 9480641 | SNV | 1 | A | G | Homozygous   |
| NC_037645.1 | 9480841 | SNV | 1 | C | T | Homozygous   |
| NC_037645.1 | 9481260 | SNV | 1 | G | A | Homozygous   |
| NC_037645.1 | 9481879 | SNV | 1 | A | G | Homozygous   |
| NC_037645.1 | 9482284 | SNV | 1 | C | T | Heterozygous |
| NC_037645.1 | 9482320 | SNV | 1 | T | C | Homozygous   |
| NC_037645.1 | 9482343 | SNV | 1 | T | C | Heterozygous |
| NC_037645.1 | 9484528 | SNV | 1 | C | T | Heterozygous |
| NC_037645.1 | 9486772 | SNV | 1 | G | T | Heterozygous |
| NC_037645.1 | 9490423 | SNV | 1 | C | T | Heterozygous |
| NC_037645.1 | 9491177 | SNV | 1 | A | G | Heterozygous |
| NC_037645.1 | 9491180 | SNV | 1 | T | C | Homozygous   |
| NC_037645.1 | 9510129 | SNV | 1 | A | G | Homozygous   |
| NC_037645.1 | 9510806 | SNV | 1 | C | T | Homozygous   |
| NC_037645.1 | 9511051 | SNV | 1 | G | A | Heterozygous |
| NC_037645.1 | 9511082 | SNV | 1 | A | C | Heterozygous |
| NC_037645.1 | 9511094 | SNV | 1 | T | C | Heterozygous |
| NC_037645.1 | 9511128 | SNV | 1 | T | A | Homozygous   |
| NC_037645.1 | 9511132 | SNV | 1 | A | T | Homozygous   |
| NC_037645.1 | 9511186 | SNV | 1 | G | A | Heterozygous |
| NC_037645.1 | 9511826 | SNV | 1 | G | A | Heterozygous |
| NC_037645.1 | 9511987 | SNV | 1 | T | A | Heterozygous |
| NC_037645.1 | 9513049 | SNV | 1 | G | C | Heterozygous |
| NC_037645.1 | 9513059 | SNV | 1 | G | T | Heterozygous |
| NC_037645.1 | 9513324 | SNV | 1 | C | T | Heterozygous |
| NC_037645.1 | 9513333 | SNV | 1 | C | T | Heterozygous |
| NC_037645.1 | 9518577 | SNV | 1 | C | T | Heterozygous |
| NC_037645.1 | 9518619 | SNV | 1 | C | T | Homozygous   |
| NC_037645.1 | 9518629 | SNV | 1 | C | T | Homozygous   |
| NC_037645.1 | 9521234 | SNV | 1 | G | A | Heterozygous |
| NC_037645.1 | 9523996 | SNV | 1 | T | C | Heterozygous |

|             |         |     |   |   |   |              |
|-------------|---------|-----|---|---|---|--------------|
| NC_037645.1 | 9524766 | SNV | 1 | T | C | Homozygous   |
| NC_037645.1 | 9524774 | SNV | 1 | T | A | Homozygous   |
| NC_037645.1 | 9524786 | SNV | 1 | T | A | Homozygous   |
| NC_037645.1 | 9525242 | SNV | 1 | T | C | Heterozygous |
| NC_037645.1 | 9525522 | SNV | 1 | T | C | Heterozygous |
| NC_037645.1 | 9525523 | SNV | 1 | A | G | Heterozygous |
| NC_037645.1 | 9525533 | SNV | 1 | G | A | Heterozygous |
| NC_037645.1 | 9525538 | SNV | 1 | T | C | Heterozygous |
| NC_037645.1 | 9525539 | SNV | 1 | A | G | Heterozygous |
| NC_037645.1 | 9525560 | SNV | 1 | T | C | Heterozygous |
| NC_037645.1 | 9525582 | SNV | 1 | T | C | Heterozygous |
| NC_037645.1 | 9525636 | SNV | 1 | A | G | Homozygous   |
| NC_037645.1 | 9527831 | SNV | 1 | A | C | Heterozygous |
| NC_037645.1 | 9527838 | SNV | 1 | A | G | Heterozygous |
| NC_037645.1 | 9527843 | SNV | 1 | C | G | Homozygous   |
| NC_037645.1 | 9527849 | SNV | 1 | A | G | Heterozygous |
| NC_037645.1 | 9527864 | SNV | 1 | C | T | Heterozygous |
| NC_037645.1 | 9527904 | SNV | 1 | A | G | Heterozygous |
| NC_037645.1 | 9527927 | SNV | 1 | G | C | Homozygous   |
| NC_037645.1 | 9527932 | SNV | 1 | T | C | Heterozygous |
| NC_037645.1 | 9528029 | SNV | 1 | A | G | Heterozygous |
| NC_037645.1 | 9528039 | SNV | 1 | A | G | Heterozygous |
| NC_037645.1 | 9528051 | SNV | 1 | C | T | Heterozygous |
| NC_037645.1 | 9528063 | SNV | 1 | C | T | Heterozygous |
| NC_037645.1 | 9528091 | SNV | 1 | C | T | Heterozygous |
| NC_037645.1 | 9528093 | SNV | 1 | G | A | Homozygous   |
| NC_037645.1 | 9528116 | SNV | 1 | T | C | Heterozygous |
| NC_037645.1 | 9539915 | SNV | 1 | T | C | Heterozygous |
| NC_037645.1 | 9539918 | SNV | 1 | T | C | Heterozygous |
| NC_037645.1 | 9602862 | SNV | 1 | A | G | Heterozygous |
| NC_037645.1 | 9627370 | SNV | 1 | T | C | Heterozygous |
| NC_037645.1 | 9627478 | SNV | 1 | G | A | Heterozygous |
| NC_037645.1 | 9627651 | SNV | 1 | A | G | Heterozygous |
| NC_037645.1 | 9639623 | SNV | 1 | A | G | Homozygous   |
| NC_037645.1 | 9639633 | SNV | 1 | G | A | Homozygous   |
| NC_037645.1 | 9639644 | SNV | 1 | C | T | Homozygous   |
| NC_037645.1 | 9639888 | SNV | 1 | G | A | Heterozygous |
| NC_037645.1 | 9640595 | SNV | 1 | G | A | Homozygous   |
| NC_037645.1 | 9642662 | SNV | 1 | T | C | Heterozygous |
| NC_037645.1 | 9642679 | SNV | 1 | C | T | Heterozygous |
| NC_037645.1 | 9648165 | SNV | 1 | C | A | Homozygous   |
| NC_037645.1 | 9648171 | SNV | 1 | T | C | Homozygous   |
| NC_037645.1 | 9648195 | SNV | 1 | T | C | Heterozygous |
| NC_037645.1 | 9648197 | SNV | 1 | C | T | Heterozygous |
| NC_037645.1 | 9648297 | SNV | 1 | T | C | Homozygous   |
| NC_037645.1 | 9648312 | SNV | 1 | G | A | Homozygous   |
| NC_037645.1 | 9648317 | SNV | 1 | G | A | Homozygous   |
| NC_037645.1 | 9648375 | SNV | 1 | C | G | Heterozygous |
| NC_037645.1 | 9648606 | SNV | 1 | T | A | Homozygous   |
| NC_037645.1 | 9648609 | SNV | 1 | G | A | Homozygous   |
| NC_037645.1 | 9648619 | SNV | 1 | A | G | Heterozygous |

|             |         |     |   |   |   |              |
|-------------|---------|-----|---|---|---|--------------|
| NC_037645.1 | 9648626 | SNV | 1 | A | G | Heterozygous |
| NC_037645.1 | 9648635 | SNV | 1 | A | G | Heterozygous |
| NC_037645.1 | 9648687 | SNV | 1 | T | A | Heterozygous |
| NC_037645.1 | 9648696 | SNV | 1 | A | G | Homozygous   |
| NC_037645.1 | 9648780 | SNV | 1 | G | A | Heterozygous |
| NC_037645.1 | 9648816 | SNV | 1 | C | G | Homozygous   |
| NC_037645.1 | 9648821 | SNV | 1 | G | A | Heterozygous |
| NC_037645.1 | 9648857 | SNV | 1 | C | G | Homozygous   |
| NC_037645.1 | 9648861 | SNV | 1 | T | C | Heterozygous |
| NC_037645.1 | 9649028 | SNV | 1 | G | A | Heterozygous |
| NC_037645.1 | 9649134 | SNV | 1 | A | G | Heterozygous |
| NC_037645.1 | 9649164 | SNV | 1 | G | A | Heterozygous |
| NC_037645.1 | 9649178 | SNV | 1 | G | A | Homozygous   |
| NC_037645.1 | 9649213 | SNV | 1 | G | A | Heterozygous |
| NC_037645.1 | 9649223 | SNV | 1 | T | C | Heterozygous |
| NC_037645.1 | 9649522 | SNV | 1 | A | G | Homozygous   |
| NC_037645.1 | 9649566 | SNV | 1 | T | C | Homozygous   |
| NC_037645.1 | 9653348 | SNV | 1 | T | C | Heterozygous |
| NC_037645.1 | 9653360 | SNV | 1 | T | C | Heterozygous |
| NC_037645.1 | 9656215 | SNV | 1 | C | G | Homozygous   |
| NC_037645.1 | 9656220 | SNV | 1 | A | G | Homozygous   |
| NC_037645.1 | 9656225 | SNV | 1 | T | G | Heterozygous |
| NC_037645.1 | 9656230 | SNV | 1 | T | G | Heterozygous |
| NC_037645.1 | 9656241 | SNV | 1 | T | G | Heterozygous |
| NC_037645.1 | 9656245 | SNV | 1 | T | G | Heterozygous |
| NC_037645.1 | 9664511 | SNV | 1 | G | A | Heterozygous |
| NC_037645.1 | 9666525 | SNV | 1 | C | T | Heterozygous |
| NC_037645.1 | 9666535 | SNV | 1 | C | T | Heterozygous |
| NC_037645.1 | 9666645 | SNV | 1 | A | T | Heterozygous |
| NC_037645.1 | 9666654 | SNV | 1 | C | T | Heterozygous |
| NC_037645.1 | 9666666 | SNV | 1 | C | T | Heterozygous |
| NC_037645.1 | 9666674 | SNV | 1 | T | C | Heterozygous |
| NC_037645.1 | 9666675 | SNV | 1 | C | T | Heterozygous |
| NC_037645.1 | 9666678 | SNV | 1 | C | T | Homozygous   |
| NC_037645.1 | 9666683 | SNV | 1 | C | T | Heterozygous |
| NC_037645.1 | 9666684 | SNV | 1 | G | C | Heterozygous |
| NC_037645.1 | 9669308 | SNV | 1 | C | T | Heterozygous |
| NC_037645.1 | 9669763 | SNV | 1 | G | A | Heterozygous |
| NC_037645.1 | 9669851 | SNV | 1 | G | T | Heterozygous |
| NC_037645.1 | 9669853 | SNV | 1 | G | T | Heterozygous |
| NC_037645.1 | 9669859 | SNV | 1 | G | T | Heterozygous |
| NC_037645.1 | 9669863 | SNV | 1 | G | T | Homozygous   |
| NC_037645.1 | 9669867 | SNV | 1 | G | T | Homozygous   |
| NC_037645.1 | 9669871 | SNV | 1 | G | T | Homozygous   |
| NC_037645.1 | 9669985 | SNV | 1 | G | T | Homozygous   |
| NC_037645.1 | 9669989 | SNV | 1 | G | A | Heterozygous |
| NC_037645.1 | 9669989 | SNV | 1 | G | T | Heterozygous |
| NC_037645.1 | 9669993 | SNV | 1 | G | T | Homozygous   |
| NC_037645.1 | 9669997 | SNV | 1 | G | T | Homozygous   |
| NC_037645.1 | 9670013 | SNV | 1 | A | G | Homozygous   |
| NC_037645.1 | 9670016 | SNV | 1 | A | C | Heterozygous |

|             |         |     |   |   |   |              |
|-------------|---------|-----|---|---|---|--------------|
| NC_037645.1 | 9670020 | SNV | 1 | A | C | Heterozygous |
| NC_037645.1 | 9670055 | SNV | 1 | T | G | Homozygous   |
| NC_037645.1 | 9670062 | SNV | 1 | A | T | Homozygous   |
| NC_037645.1 | 9670066 | SNV | 1 | A | C | Homozygous   |
| NC_037645.1 | 9670072 | SNV | 1 | A | T | Homozygous   |
| NC_037645.1 | 9670075 | SNV | 1 | G | A | Homozygous   |
| NC_037645.1 | 9670078 | SNV | 1 | A | C | Homozygous   |
| NC_037645.1 | 9670083 | SNV | 1 | G | A | Homozygous   |
| NC_037645.1 | 9670098 | SNV | 1 | A | G | Heterozygous |
| NC_037645.1 | 9670103 | SNV | 1 | T | G | Homozygous   |
| NC_037645.1 | 9670107 | SNV | 1 | T | G | Homozygous   |
| NC_037645.1 | 9670111 | SNV | 1 | T | G | Homozygous   |
| NC_037645.1 | 9670115 | SNV | 1 | T | A | Homozygous   |
| NC_037645.1 | 9670119 | SNV | 1 | T | A | Heterozygous |
| NC_037645.1 | 9670243 | SNV | 1 | T | G | Heterozygous |
| NC_037645.1 | 9670247 | SNV | 1 | T | G | Heterozygous |
| NC_037645.1 | 9670251 | SNV | 1 | T | G | Heterozygous |
| NC_037645.1 | 9670255 | SNV | 1 | T | G | Heterozygous |
| NC_037645.1 | 9670259 | SNV | 1 | T | G | Homozygous   |
| NC_037645.1 | 9670263 | SNV | 1 | T | G | Heterozygous |
| NC_037645.1 | 9670584 | SNV | 1 | T | C | Homozygous   |
| NC_037645.1 | 9670605 | SNV | 1 | A | G | Heterozygous |
| NC_037645.1 | 9670627 | SNV | 1 | C | T | Homozygous   |
| NC_037645.1 | 9671334 | SNV | 1 | T | C | Homozygous   |
| NC_037645.1 | 9671336 | SNV | 1 | A | G | Homozygous   |
| NC_037645.1 | 9671338 | SNV | 1 | T | A | Homozygous   |
| NC_037645.1 | 9671446 | SNV | 1 | T | C | Homozygous   |
| NC_037645.1 | 9671825 | SNV | 1 | C | T | Homozygous   |
| NC_037645.1 | 9671982 | SNV | 1 | T | A | Homozygous   |
| NC_037645.1 | 9672000 | SNV | 1 | A | G | Homozygous   |
| NC_037645.1 | 9672038 | SNV | 1 | A | G | Heterozygous |
| NC_037645.1 | 9672069 | SNV | 1 | A | T | Heterozygous |
| NC_037645.1 | 9672074 | SNV | 1 | A | G | Heterozygous |
| NC_037645.1 | 9672081 | SNV | 1 | T | A | Homozygous   |
| NC_037645.1 | 9672389 | SNV | 1 | C | T | Heterozygous |
| NC_037645.1 | 9679515 | SNV | 1 | T | A | Homozygous   |
| NC_037645.1 | 9679518 | SNV | 1 | C | A | Homozygous   |
| NC_037645.1 | 9679653 | SNV | 1 | A | G | Homozygous   |
| NC_037645.1 | 9679835 | SNV | 1 | T | C | Heterozygous |
| NC_037645.1 | 9680646 | SNV | 1 | G | A | Homozygous   |
| NC_037645.1 | 9680660 | SNV | 1 | C | A | Heterozygous |
| NC_037645.1 | 9682024 | SNV | 1 | C | T | Homozygous   |
| NC_037645.1 | 9687247 | SNV | 1 | A | T | Homozygous   |
| NC_037645.1 | 9687265 | SNV | 1 | A | C | Homozygous   |
| NC_037645.1 | 9688765 | SNV | 1 | C | T | Heterozygous |
| NC_037645.1 | 9688810 | SNV | 1 | A | G | Homozygous   |
| NC_037645.1 | 9688907 | SNV | 1 | C | A | Homozygous   |
| NC_037645.1 | 9691973 | SNV | 1 | A | G | Homozygous   |
| NC_037645.1 | 9692123 | SNV | 1 | T | A | Heterozygous |
| NC_037645.1 | 9692174 | SNV | 1 | A | G | Heterozygous |
| NC_037645.1 | 9692585 | SNV | 1 | A | G | Homozygous   |

|             |         |     |   |   |   |              |
|-------------|---------|-----|---|---|---|--------------|
| NC_037645.1 | 9697691 | SNV | 1 | G | A | Homozygous   |
| NC_037645.1 | 9707105 | SNV | 1 | T | C | Homozygous   |
| NC_037645.1 | 9707331 | SNV | 1 | T | C | Heterozygous |
| NC_037645.1 | 9707349 | SNV | 1 | T | C | Homozygous   |
| NC_037645.1 | 9707353 | SNV | 1 | T | C | Heterozygous |
| NC_037645.1 | 9718933 | SNV | 1 | A | G | Heterozygous |
| NC_037645.1 | 9719122 | SNV | 1 | T | C | Homozygous   |
| NC_037645.1 | 9719124 | SNV | 1 | T | C | Homozygous   |
| NC_037645.1 | 9719129 | SNV | 1 | T | C | Homozygous   |
| NC_037645.1 | 9719131 | SNV | 1 | T | C | Homozygous   |
| NC_037645.1 | 9719136 | SNV | 1 | A | G | Homozygous   |
| NC_037645.1 | 9719166 | SNV | 1 | A | G | Heterozygous |
| NC_037645.1 | 9719229 | SNV | 1 | G | A | Homozygous   |
| NC_037645.1 | 9719256 | SNV | 1 | A | G | Homozygous   |
| NC_037645.1 | 9719276 | SNV | 1 | A | G | Homozygous   |
| NC_037645.1 | 9719295 | SNV | 1 | C | T | Homozygous   |
| NC_037645.1 | 9719299 | SNV | 1 | C | T | Homozygous   |
| NC_037645.1 | 9719353 | SNV | 1 | A | G | Homozygous   |
| NC_037645.1 | 9719402 | SNV | 1 | C | T | Heterozygous |
| NC_037645.1 | 9719420 | SNV | 1 | G | A | Heterozygous |
| NC_037645.1 | 9719490 | SNV | 1 | T | C | Heterozygous |
| NC_037645.1 | 9719515 | SNV | 1 | G | A | Homozygous   |
| NC_037645.1 | 9719564 | SNV | 1 | A | G | Heterozygous |
| NC_037645.1 | 9719583 | SNV | 1 | C | T | Heterozygous |
| NC_037645.1 | 9719613 | SNV | 1 | G | A | Homozygous   |
| NC_037645.1 | 9719658 | SNV | 1 | T | C | Homozygous   |
| NC_037645.1 | 9719713 | SNV | 1 | G | A | Heterozygous |
| NC_037645.1 | 9719717 | SNV | 1 | G | A | Heterozygous |
| NC_037645.1 | 9719726 | SNV | 1 | C | T | Heterozygous |
| NC_037645.1 | 9719732 | SNV | 1 | A | G | Homozygous   |
| NC_037645.1 | 9719734 | SNV | 1 | C | T | Heterozygous |
| NC_037645.1 | 9719749 | SNV | 1 | C | T | Heterozygous |
| NC_037645.1 | 9719758 | SNV | 1 | T | A | Heterozygous |
| NC_037645.1 | 9719763 | SNV | 1 | T | C | Heterozygous |
| NC_037645.1 | 9719799 | SNV | 1 | T | C | Heterozygous |
| NC_037645.1 | 9719836 | SNV | 1 | T | A | Heterozygous |
| NC_037645.1 | 9719868 | SNV | 1 | C | T | Heterozygous |
| NC_037645.1 | 9719904 | SNV | 1 | G | A | Homozygous   |
| NC_037645.1 | 9719973 | SNV | 1 | A | G | Heterozygous |
| NC_037645.1 | 9719986 | SNV | 1 | C | T | Heterozygous |
| NC_037645.1 | 9719996 | SNV | 1 | T | A | Heterozygous |
| NC_037645.1 | 9720047 | SNV | 1 | T | C | Homozygous   |
| NC_037645.1 | 9720097 | SNV | 1 | C | G | Heterozygous |
| NC_037645.1 | 9720229 | SNV | 1 | A | G | Homozygous   |
| NC_037645.1 | 9720272 | SNV | 1 | C | T | Homozygous   |
| NC_037645.1 | 9720275 | SNV | 1 | T | A | Homozygous   |
| NC_037645.1 | 9720283 | SNV | 1 | G | A | Homozygous   |
| NC_037645.1 | 9720308 | SNV | 1 | T | C | Homozygous   |
| NC_037645.1 | 9720319 | SNV | 1 | T | C | Homozygous   |
| NC_037645.1 | 9720336 | SNV | 1 | C | T | Heterozygous |
| NC_037645.1 | 9720338 | SNV | 1 | C | T | Homozygous   |

|             |         |     |   |   |   |              |
|-------------|---------|-----|---|---|---|--------------|
| NC_037645.1 | 9720396 | SNV | 1 | G | A | Heterozygous |
| NC_037645.1 | 9720399 | SNV | 1 | A | G | Heterozygous |
| NC_037645.1 | 9720407 | SNV | 1 | A | G | Heterozygous |
| NC_037645.1 | 9720409 | SNV | 1 | G | A | Heterozygous |
| NC_037645.1 | 9720425 | SNV | 1 | A | G | Homozygous   |
| NC_037645.1 | 9720439 | SNV | 1 | G | T | Heterozygous |
| NC_037645.1 | 9720441 | SNV | 1 | C | T | Heterozygous |
| NC_037645.1 | 9720448 | SNV | 1 | T | A | Heterozygous |
| NC_037645.1 | 9720456 | SNV | 1 | C | T | Heterozygous |
| NC_037645.1 | 9720581 | SNV | 1 | T | C | Homozygous   |
| NC_037645.1 | 9720604 | SNV | 1 | C | G | Heterozygous |
| NC_037645.1 | 9720662 | SNV | 1 | A | G | Homozygous   |
| NC_037645.1 | 9720671 | SNV | 1 | A | G | Heterozygous |
| NC_037645.1 | 9720705 | SNV | 1 | A | G | Homozygous   |
| NC_037645.1 | 9720766 | SNV | 1 | A | G | Heterozygous |
| NC_037645.1 | 9720830 | SNV | 1 | G | A | Homozygous   |
| NC_037645.1 | 9720832 | SNV | 1 | T | G | Heterozygous |
| NC_037645.1 | 9720834 | SNV | 1 | G | A | Heterozygous |
| NC_037645.1 | 9720841 | SNV | 1 | T | G | Homozygous   |
| NC_037645.1 | 9720844 | SNV | 1 | C | G | Heterozygous |
| NC_037645.1 | 9720850 | SNV | 1 | C | T | Homozygous   |
| NC_037645.1 | 9720874 | SNV | 1 | T | C | Homozygous   |
| NC_037645.1 | 9720895 | SNV | 1 | A | G | Homozygous   |
| NC_037645.1 | 9720903 | SNV | 1 | T | C | Homozygous   |
| NC_037645.1 | 9720920 | SNV | 1 | A | T | Homozygous   |
| NC_037645.1 | 9720926 | SNV | 1 | T | C | Homozygous   |
| NC_037645.1 | 9720940 | SNV | 1 | T | C | Heterozygous |
| NC_037645.1 | 9720948 | SNV | 1 | C | T | Heterozygous |
| NC_037645.1 | 9720978 | SNV | 1 | G | A | Homozygous   |
| NC_037645.1 | 9720980 | SNV | 1 | G | A | Homozygous   |
| NC_037645.1 | 9720982 | SNV | 1 | G | A | Heterozygous |
| NC_037645.1 | 9721007 | SNV | 1 | T | G | Homozygous   |
| NC_037645.1 | 9721021 | SNV | 1 | G | A | Homozygous   |
| NC_037645.1 | 9721225 | SNV | 1 | T | C | Homozygous   |
| NC_037645.1 | 9721307 | SNV | 1 | T | C | Heterozygous |
| NC_037645.1 | 9721348 | SNV | 1 | T | C | Homozygous   |
| NC_037645.1 | 9721461 | SNV | 1 | G | A | Homozygous   |
| NC_037645.1 | 9721470 | SNV | 1 | G | A | Heterozygous |
| NC_037645.1 | 9721515 | SNV | 1 | C | G | Heterozygous |
| NC_037645.1 | 9721518 | SNV | 1 | C | A | Heterozygous |
| NC_037645.1 | 9721641 | SNV | 1 | A | G | Heterozygous |
| NC_037645.1 | 9721654 | SNV | 1 | T | C | Heterozygous |
| NC_037645.1 | 9721697 | SNV | 1 | A | G | Heterozygous |
| NC_037645.1 | 9721842 | SNV | 1 | T | C | Homozygous   |
| NC_037645.1 | 9721862 | SNV | 1 | A | G | Homozygous   |
| NC_037645.1 | 9721908 | SNV | 1 | G | A | Homozygous   |
| NC_037645.1 | 9722007 | SNV | 1 | C | A | Heterozygous |
| NC_037645.1 | 9722012 | SNV | 1 | G | A | Heterozygous |
| NC_037645.1 | 9722014 | SNV | 1 | G | A | Heterozygous |
| NC_037645.1 | 9722018 | SNV | 1 | T | A | Homozygous   |
| NC_037645.1 | 9722041 | SNV | 1 | G | C | Heterozygous |



|             |         |     |   |   |   |              |
|-------------|---------|-----|---|---|---|--------------|
| NC_037645.1 | 9722053 | SNV | 1 | T | C | Homozygous   |
| NC_037645.1 | 9722055 | SNV | 1 | G | T | Heterozygous |
| NC_037645.1 | 9722071 | SNV | 1 | T | C | Homozygous   |
| NC_037645.1 | 9722202 | SNV | 1 | C | G | Homozygous   |
| NC_037645.1 | 9722595 | SNV | 1 | T | C | Homozygous   |
| NC_037645.1 | 9722633 | SNV | 1 | T | C | Homozygous   |
| NC_037645.1 | 9722653 | SNV | 1 | A | G | Homozygous   |
| NC_037645.1 | 9727686 | SNV | 1 | G | T | Homozygous   |
| NC_037645.1 | 9727689 | SNV | 1 | G | T | Homozygous   |
| NC_037645.1 | 9727694 | SNV | 1 | C | T | Homozygous   |
| NC_037645.1 | 9733691 | SNV | 1 | A | G | Heterozygous |
| NC_037645.1 | 9734449 | SNV | 1 | T | A | Heterozygous |
| NC_037645.1 | 9734453 | SNV | 1 | G | A | Heterozygous |
| NC_037645.1 | 9734464 | SNV | 1 | G | A | Homozygous   |
| NC_037645.1 | 9734467 | SNV | 1 | A | C | Homozygous   |
| NC_037645.1 | 9734497 | SNV | 1 | A | C | Heterozygous |
| NC_037645.1 | 9740651 | SNV | 1 | T | A | Homozygous   |
| NC_037645.1 | 9740720 | SNV | 1 | T | A | Heterozygous |
| NC_037645.1 | 9740726 | SNV | 1 | A | G | Homozygous   |
| NC_037645.1 | 9740738 | SNV | 1 | C | A | Heterozygous |
| NC_037645.1 | 9741166 | SNV | 1 | T | A | Heterozygous |
| NC_037645.1 | 9741169 | SNV | 1 | T | A | Homozygous   |
| NC_037645.1 | 9741172 | SNV | 1 | C | A | Homozygous   |
| NC_037645.1 | 9741184 | SNV | 1 | T | C | Homozygous   |
| NC_037645.1 | 9741194 | SNV | 1 | A | G | Homozygous   |
| NC_037645.1 | 9741219 | SNV | 1 | A | T | Homozygous   |
| NC_037645.1 | 9741237 | SNV | 1 | A | G | Homozygous   |
| NC_037645.1 | 9741243 | SNV | 1 | C | T | Homozygous   |
| NC_037645.1 | 9742048 | SNV | 1 | T | C | Homozygous   |
| NC_037645.1 | 9742104 | SNV | 1 | A | G | Homozygous   |
| NC_037645.1 | 9742108 | SNV | 1 | A | G | Homozygous   |
| NC_037645.1 | 9742111 | SNV | 1 | G | T | Homozygous   |
| NC_037645.1 | 9745073 | SNV | 1 | A | G | Homozygous   |
| NC_037645.1 | 9745088 | SNV | 1 | G | C | Homozygous   |
| NC_037645.1 | 9747716 | SNV | 1 | C | T | Heterozygous |
| NC_037645.1 | 9764326 | SNV | 1 | G | A | Homozygous   |
| NC_037645.1 | 9764386 | SNV | 1 | T | C | Homozygous   |
| NC_037645.1 | 9764523 | SNV | 1 | G | A | Homozygous   |
| NC_037645.1 | 9765186 | SNV | 1 | A | G | Homozygous   |
| NC_037645.1 | 9765339 | SNV | 1 | T | C | Homozygous   |
| NC_037645.1 | 9765378 | SNV | 1 | T | C | Heterozygous |
| NC_037645.1 | 9765466 | SNV | 1 | A | G | Homozygous   |
| NC_037645.1 | 9765496 | SNV | 1 | C | T | Homozygous   |
| NC_037645.1 | 9765547 | SNV | 1 | T | C | Homozygous   |
| NC_037645.1 | 9765568 | SNV | 1 | A | G | Homozygous   |
| NC_037645.1 | 9765601 | SNV | 1 | G | A | Homozygous   |
| NC_037645.1 | 9765698 | SNV | 1 | C | A | Homozygous   |
| NC_037645.1 | 9765792 | SNV | 1 | G | A | Heterozygous |
| NC_037645.1 | 9765843 | SNV | 1 | T | C | Homozygous   |
| NC_037645.1 | 9766085 | SNV | 1 | A | T | Homozygous   |
| NC_037645.1 | 9766204 | SNV | 1 | T | C | Homozygous   |

|             |         |     |   |   |   |              |
|-------------|---------|-----|---|---|---|--------------|
| NC_037645.1 | 9766472 | SNV | 1 | T | C | Heterozygous |
| NC_037645.1 | 9766843 | SNV | 1 | T | G | Heterozygous |
| NC_037645.1 | 9767463 | SNV | 1 | T | C | Homozygous   |
| NC_037645.1 | 9768634 | SNV | 1 | G | A | Heterozygous |
| NC_037645.1 | 9774172 | SNV | 1 | C | T | Heterozygous |
| NC_037645.1 | 9776024 | SNV | 1 | G | A | Homozygous   |
| NC_037645.1 | 9788568 | SNV | 1 | A | G | Heterozygous |
| NC_037645.1 | 9788714 | SNV | 1 | A | G | Homozygous   |
| NC_037645.1 | 9788771 | SNV | 1 | C | T | Heterozygous |
| NC_037645.1 | 9788776 | SNV | 1 | C | T | Heterozygous |
| NC_037645.1 | 9788787 | SNV | 1 | C | T | Heterozygous |
| NC_037645.1 | 9788994 | SNV | 1 | G | A | Homozygous   |
| NC_037645.1 | 9789013 | SNV | 1 | T | C | Homozygous   |
| NC_037645.1 | 9789025 | SNV | 1 | A | G | Homozygous   |
| NC_037645.1 | 9789088 | SNV | 1 | T | A | Homozygous   |
| NC_037645.1 | 9791335 | SNV | 1 | G | A | Homozygous   |
| NC_037645.1 | 9792038 | SNV | 1 | T | C | Homozygous   |
| NC_037645.1 | 9792056 | SNV | 1 | T | C | Heterozygous |
| NC_037645.1 | 9792199 | SNV | 1 | T | C | Heterozygous |
| NC_037645.1 | 9792219 | SNV | 1 | T | C | Homozygous   |
| NC_037645.1 | 9792831 | SNV | 1 | G | A | Homozygous   |
| NC_037645.1 | 9794594 | SNV | 1 | C | G | Heterozygous |
| NC_037645.1 | 9794909 | SNV | 1 | C | T | Homozygous   |
| NC_037645.1 | 9794959 | SNV | 1 | A | G | Homozygous   |
| NC_037645.1 | 9794968 | SNV | 1 | T | C | Homozygous   |
| NC_037645.1 | 9795175 | SNV | 1 | G | A | Homozygous   |
| NC_037645.1 | 9797628 | SNV | 1 | G | C | Homozygous   |
| NC_037645.1 | 9797660 | SNV | 1 | A | G | Heterozygous |
| NC_037645.1 | 9797665 | SNV | 1 | A | G | Heterozygous |
| NC_037645.1 | 9798664 | SNV | 1 | T | C | Homozygous   |
| NC_037645.1 | 9804268 | SNV | 1 | A | T | Homozygous   |
| NC_037645.1 | 9804275 | SNV | 1 | T | A | Heterozygous |
| NC_037645.1 | 9804279 | SNV | 1 | A | G | Heterozygous |
| NC_037645.1 | 9810012 | SNV | 1 | C | T | Homozygous   |
| NC_037645.1 | 9810679 | SNV | 1 | A | G | Heterozygous |
| NC_037645.1 | 9811453 | SNV | 1 | C | T | Heterozygous |
| NC_037645.1 | 9811548 | SNV | 1 | C | T | Homozygous   |
| NC_037645.1 | 9811550 | SNV | 1 | A | G | Heterozygous |
| NC_037645.1 | 9812050 | SNV | 1 | T | C | Heterozygous |
| NC_037645.1 | 9812052 | SNV | 1 | A | T | Homozygous   |
| NC_037645.1 | 9812062 | SNV | 1 | T | C | Homozygous   |
| NC_037645.1 | 9812251 | SNV | 1 | T | C | Heterozygous |
| NC_037645.1 | 9817736 | SNV | 1 | A | G | Heterozygous |
| NC_037645.1 | 9817763 | SNV | 1 | A | G | Homozygous   |
| NC_037645.1 | 9818677 | SNV | 1 | G | A | Homozygous   |
| NC_037645.1 | 9818682 | SNV | 1 | T | C | Heterozygous |
| NC_037645.1 | 9818745 | SNV | 1 | A | G | Heterozygous |
| NC_037645.1 | 9820297 | SNV | 1 | C | T | Homozygous   |
| NC_037645.1 | 9820579 | SNV | 1 | A | T | Homozygous   |
| NC_037645.1 | 9821690 | SNV | 1 | C | T | Heterozygous |
| NC_037645.1 | 9821696 | SNV | 1 | C | T | Homozygous   |

|             |         |     |   |   |   |              |
|-------------|---------|-----|---|---|---|--------------|
| NC_037645.1 | 9821740 | SNV | 1 | C | T | Heterozygous |
| NC_037645.1 | 9821770 | SNV | 1 | G | T | Heterozygous |
| NC_037645.1 | 9821882 | SNV | 1 | C | G | Heterozygous |
| NC_037645.1 | 9821932 | SNV | 1 | C | T | Heterozygous |
| NC_037645.1 | 9822008 | SNV | 1 | T | C | Homozygous   |
| NC_037645.1 | 9822057 | SNV | 1 | C | A | Homozygous   |
| NC_037645.1 | 9822070 | SNV | 1 | T | C | Heterozygous |
| NC_037645.1 | 9822087 | SNV | 1 | C | A | Homozygous   |
| NC_037645.1 | 9822146 | SNV | 1 | T | C | Homozygous   |
| NC_037645.1 | 9822198 | SNV | 1 | C | G | Heterozygous |
| NC_037645.1 | 9822309 | SNV | 1 | C | T | Homozygous   |
| NC_037645.1 | 9822311 | SNV | 1 | A | T | Heterozygous |
| NC_037645.1 | 9822357 | SNV | 1 | T | C | Homozygous   |
| NC_037645.1 | 9822374 | SNV | 1 | C | T | Heterozygous |
| NC_037645.1 | 9822405 | SNV | 1 | A | T | Homozygous   |
| NC_037645.1 | 9822407 | SNV | 1 | C | T | Heterozygous |
| NC_037645.1 | 9822412 | SNV | 1 | G | A | Homozygous   |
| NC_037645.1 | 9822415 | SNV | 1 | C | T | Heterozygous |
| NC_037645.1 | 9822439 | SNV | 1 | A | G | Homozygous   |
| NC_037645.1 | 9823000 | SNV | 1 | G | A | Heterozygous |
| NC_037645.1 | 9823043 | SNV | 1 | A | G | Homozygous   |
| NC_037645.1 | 9823049 | SNV | 1 | T | C | Homozygous   |
| NC_037645.1 | 9823057 | SNV | 1 | A | G | Heterozygous |
| NC_037645.1 | 9823106 | SNV | 1 | G | A | Heterozygous |
| NC_037645.1 | 9823109 | SNV | 1 | T | C | Homozygous   |
| NC_037645.1 | 9823112 | SNV | 1 | T | C | Homozygous   |
| NC_037645.1 | 9823129 | SNV | 1 | T | C | Homozygous   |
| NC_037645.1 | 9828681 | SNV | 1 | T | C | Homozygous   |
| NC_037645.1 | 9829136 | SNV | 1 | A | G | Homozygous   |
| NC_037645.1 | 9831391 | SNV | 1 | T | C | Heterozygous |
| NC_037645.1 | 9831393 | SNV | 1 | A | G | Heterozygous |
| NC_037645.1 | 9831776 | SNV | 1 | T | C | Homozygous   |
| NC_037645.1 | 9831876 | SNV | 1 | A | T | Heterozygous |
| NC_037645.1 | 9831891 | SNV | 1 | A | T | Heterozygous |
| NC_037645.1 | 9831894 | SNV | 1 | A | C | Heterozygous |
| NC_037645.1 | 9831905 | SNV | 1 | T | A | Heterozygous |
| NC_037645.1 | 9832011 | SNV | 1 | T | C | Homozygous   |
| NC_037645.1 | 9832026 | SNV | 1 | G | C | Homozygous   |
| NC_037645.1 | 9832277 | SNV | 1 | G | A | Homozygous   |
| NC_037645.1 | 9832475 | SNV | 1 | G | A | Homozygous   |
| NC_037645.1 | 9834736 | SNV | 1 | T | C | Heterozygous |
| NC_037645.1 | 9834981 | SNV | 1 | C | T | Homozygous   |
| NC_037645.1 | 9835344 | SNV | 1 | A | T | Heterozygous |
| NC_037645.1 | 9835409 | SNV | 1 | T | A | Heterozygous |
| NC_037645.1 | 9835414 | SNV | 1 | A | G | Homozygous   |
| NC_037645.1 | 9835417 | SNV | 1 | G | T | Homozygous   |
| NC_037645.1 | 9839456 | SNV | 1 | A | C | Heterozygous |
| NC_037645.1 | 9840433 | SNV | 1 | T | C | Homozygous   |
| NC_037645.1 | 9840493 | SNV | 1 | T | G | Heterozygous |
| NC_037645.1 | 9841172 | SNV | 1 | T | C | Heterozygous |
| NC_037645.1 | 9842282 | SNV | 1 | C | T | Homozygous   |

|             |         |     |   |   |   |              |
|-------------|---------|-----|---|---|---|--------------|
| NC_037645.1 | 9842917 | SNV | 1 | T | C | Heterozygous |
| NC_037645.1 | 9842950 | SNV | 1 | C | T | Heterozygous |
| NC_037645.1 | 9850773 | SNV | 1 | T | A | Homozygous   |
| NC_037645.1 | 9850814 | SNV | 1 | T | A | Homozygous   |
| NC_037645.1 | 9851158 | SNV | 1 | T | C | Homozygous   |
| NC_037645.1 | 9851214 | SNV | 1 | T | C | Heterozygous |
| NC_037645.1 | 9851423 | SNV | 1 | A | G | Heterozygous |
| NC_037645.1 | 9865542 | SNV | 1 | C | T | Heterozygous |
| NC_037645.1 | 9880530 | SNV | 1 | G | T | Homozygous   |
| NC_037645.1 | 9880549 | SNV | 1 | C | T | Homozygous   |
| NC_037645.1 | 9882201 | SNV | 1 | T | A | Heterozygous |
| NC_037645.1 | 9882206 | SNV | 1 | T | A | Heterozygous |
| NC_037645.1 | 9882210 | SNV | 1 | T | G | Heterozygous |
| NC_037645.1 | 9882221 | SNV | 1 | C | T | Heterozygous |
| NC_037645.1 | 9882225 | SNV | 1 | C | T | Heterozygous |
| NC_037645.1 | 9882233 | SNV | 1 | T | C | Heterozygous |
| NC_037645.1 | 9882277 | SNV | 1 | T | C | Heterozygous |
| NC_037645.1 | 9882285 | SNV | 1 | G | C | Heterozygous |
| NC_037645.1 | 9882285 | SNV | 1 | G | T | Heterozygous |
| NC_037645.1 | 9882289 | SNV | 1 | C | G | Heterozygous |
| NC_037645.1 | 9882304 | SNV | 1 | T | C | Heterozygous |
| NC_037645.1 | 9882323 | SNV | 1 | T | C | Heterozygous |
| NC_037645.1 | 9882331 | SNV | 1 | C | T | Heterozygous |
| NC_037645.1 | 9882361 | SNV | 1 | T | C | Heterozygous |
| NC_037645.1 | 9882367 | SNV | 1 | T | C | Homozygous   |
| NC_037645.1 | 9882371 | SNV | 1 | C | T | Heterozygous |
| NC_037645.1 | 9882486 | SNV | 1 | T | A | Homozygous   |
| NC_037645.1 | 9882498 | SNV | 1 | T | A | Homozygous   |
| NC_037645.1 | 9882501 | SNV | 1 | C | T | Homozygous   |
| NC_037645.1 | 9882504 | SNV | 1 | T | G | Homozygous   |
| NC_037645.1 | 9882506 | SNV | 1 | T | A | Homozygous   |
| NC_037645.1 | 9882570 | SNV | 1 | T | G | Heterozygous |
| NC_037645.1 | 9882572 | SNV | 1 | T | A | Heterozygous |
| NC_037645.1 | 9882588 | SNV | 1 | T | G | Heterozygous |
| NC_037645.1 | 9882597 | SNV | 1 | T | A | Homozygous   |
| NC_037645.1 | 9882599 | SNV | 1 | C | A | Heterozygous |
| NC_037645.1 | 9882608 | SNV | 1 | T | A | Homozygous   |
| NC_037645.1 | 9882617 | SNV | 1 | T | C | Homozygous   |
| NC_037645.1 | 9882621 | SNV | 1 | G | C | Homozygous   |
| NC_037645.1 | 9882627 | SNV | 1 | A | T | Homozygous   |
| NC_037645.1 | 9882655 | SNV | 1 | C | T | Heterozygous |
| NC_037645.1 | 9882666 | SNV | 1 | C | T | Homozygous   |
| NC_037645.1 | 9882669 | SNV | 1 | A | C | Homozygous   |
| NC_037645.1 | 9882681 | SNV | 1 | C | T | Heterozygous |
| NC_037645.1 | 9882717 | SNV | 1 | T | C | Heterozygous |
| NC_037645.1 | 9882774 | SNV | 1 | C | T | Heterozygous |
| NC_037645.1 | 9882776 | SNV | 1 | T | C | Heterozygous |
| NC_037645.1 | 9882784 | SNV | 1 | C | T | Homozygous   |
| NC_037645.1 | 9882805 | SNV | 1 | T | A | Homozygous   |
| NC_037645.1 | 9882816 | SNV | 1 | C | T | Heterozygous |
| NC_037645.1 | 9888225 | SNV | 1 | A | T | Heterozygous |

|             |         |     |   |   |   |              |
|-------------|---------|-----|---|---|---|--------------|
| NC_037645.1 | 9891419 | SNV | 1 | C | T | Homozygous   |
| NC_037645.1 | 9891442 | SNV | 1 | C | T | Heterozygous |
| NC_037645.1 | 9891646 | SNV | 1 | T | C | Homozygous   |
| NC_037645.1 | 9891808 | SNV | 1 | T | C | Homozygous   |
| NC_037645.1 | 9892303 | SNV | 1 | A | G | Homozygous   |
| NC_037645.1 | 9892335 | SNV | 1 | A | G | Homozygous   |
| NC_037645.1 | 9892428 | SNV | 1 | C | A | Homozygous   |
| NC_037645.1 | 9892441 | SNV | 1 | C | G | Homozygous   |
| NC_037645.1 | 9892447 | SNV | 1 | A | G | Homozygous   |
| NC_037645.1 | 9892457 | SNV | 1 | T | G | Homozygous   |
| NC_037645.1 | 9894609 | SNV | 1 | C | T | Homozygous   |
| NC_037645.1 | 9894614 | SNV | 1 | T | C | Heterozygous |
| NC_037645.1 | 9896424 | SNV | 1 | T | G | Homozygous   |
| NC_037645.1 | 9896428 | SNV | 1 | C | T | Homozygous   |
| NC_037645.1 | 9896450 | SNV | 1 | C | T | Heterozygous |
| NC_037645.1 | 9896490 | SNV | 1 | C | T | Homozygous   |
| NC_037645.1 | 9896517 | SNV | 1 | G | A | Heterozygous |
| NC_037645.1 | 9896538 | SNV | 1 | G | A | Homozygous   |
| NC_037645.1 | 9896545 | SNV | 1 | G | A | Homozygous   |
| NC_037645.1 | 9896588 | SNV | 1 | T | C | Heterozygous |
| NC_037645.1 | 9899611 | SNV | 1 | T | C | Homozygous   |
| NC_037645.1 | 9899630 | SNV | 1 | G | A | Heterozygous |
| NC_037645.1 | 9899651 | SNV | 1 | A | G | Homozygous   |
| NC_037645.1 | 9906773 | SNV | 1 | T | C | Homozygous   |
| NC_037645.1 | 9906875 | SNV | 1 | T | C | Homozygous   |
| NC_037645.1 | 9907100 | SNV | 1 | A | T | Heterozygous |
| NC_037645.1 | 9908049 | SNV | 1 | G | A | Homozygous   |
| NC_037645.1 | 9908054 | SNV | 1 | A | G | Heterozygous |
| NC_037645.1 | 9908056 | SNV | 1 | T | C | Heterozygous |
| NC_037645.1 | 9908247 | SNV | 1 | G | A | Homozygous   |
| NC_037645.1 | 9908271 | SNV | 1 | A | G | Heterozygous |
| NC_037645.1 | 9908453 | SNV | 1 | C | T | Heterozygous |
| NC_037645.1 | 9920057 | SNV | 1 | T | G | Heterozygous |
| NC_037645.1 | 9920064 | SNV | 1 | T | C | Heterozygous |
| NC_037645.1 | 9920103 | SNV | 1 | T | C | Homozygous   |
| NC_037645.1 | 9930192 | SNV | 1 | G | A | Homozygous   |
| NC_037645.1 | 9930197 | SNV | 1 | A | G | Homozygous   |
| NC_037645.1 | 9930206 | SNV | 1 | G | A | Homozygous   |
| NC_037645.1 | 9930327 | SNV | 1 | G | A | Heterozygous |
| NC_037645.1 | 9930504 | SNV | 1 | T | C | Homozygous   |
| NC_037645.1 | 9930529 | SNV | 1 | A | G | Heterozygous |
| NC_037645.1 | 9930659 | SNV | 1 | G | A | Heterozygous |
| NC_037645.1 | 9930668 | SNV | 1 | G | A | Heterozygous |
| NC_037645.1 | 9930672 | SNV | 1 | A | G | Heterozygous |
| NC_037645.1 | 9930835 | SNV | 1 | G | A | Homozygous   |
| NC_037645.1 | 9930845 | SNV | 1 | T | A | Homozygous   |
| NC_037645.1 | 9930861 | SNV | 1 | A | G | Homozygous   |
| NC_037645.1 | 9930977 | SNV | 1 | G | A | Homozygous   |
| NC_037645.1 | 9931022 | SNV | 1 | A | G | Heterozygous |
| NC_037645.1 | 9931033 | SNV | 1 | C | T | Heterozygous |
| NC_037645.1 | 9931128 | SNV | 1 | T | C | Homozygous   |

|             |          |     |   |   |   |              |
|-------------|----------|-----|---|---|---|--------------|
| NC_037645.1 | 9931155  | SNV | 1 | G | C | Heterozygous |
| NC_037645.1 | 9931170  | SNV | 1 | C | G | Heterozygous |
| NC_037645.1 | 9931179  | SNV | 1 | C | T | Homozygous   |
| NC_037645.1 | 9931263  | SNV | 1 | C | G | Homozygous   |
| NC_037645.1 | 9931495  | SNV | 1 | A | G | Heterozygous |
| NC_037645.1 | 9931505  | SNV | 1 | G | A | Heterozygous |
| NC_037645.1 | 9938195  | SNV | 1 | C | G | Homozygous   |
| NC_037645.1 | 9949196  | SNV | 1 | T | C | Homozygous   |
| NC_037645.1 | 9949202  | SNV | 1 | T | C | Homozygous   |
| NC_037645.1 | 9949208  | SNV | 1 | A | T | Homozygous   |
| NC_037645.1 | 9949210  | SNV | 1 | A | T | Homozygous   |
| NC_037645.1 | 9949217  | SNV | 1 | T | G | Homozygous   |
| NC_037645.1 | 9949219  | SNV | 1 | A | C | Homozygous   |
| NC_037645.1 | 9965400  | SNV | 1 | A | C | Homozygous   |
| NC_037645.1 | 9965564  | SNV | 1 | C | A | Homozygous   |
| NC_037645.1 | 9965568  | SNV | 1 | A | G | Homozygous   |
| NC_037645.1 | 9965577  | SNV | 1 | T | C | Heterozygous |
| NC_037645.1 | 9965603  | SNV | 1 | T | C | Homozygous   |
| NC_037645.1 | 9969097  | SNV | 1 | A | G | Heterozygous |
| NC_037645.1 | 9969204  | SNV | 1 | G | A | Heterozygous |
| NC_037645.1 | 9969219  | SNV | 1 | A | G | Homozygous   |
| NC_037645.1 | 9969221  | SNV | 1 | T | C | Homozygous   |
| NC_037645.1 | 9969297  | SNV | 1 | C | T | Heterozygous |
| NC_037645.1 | 9969343  | SNV | 1 | T | C | Heterozygous |
| NC_037645.1 | 9969355  | SNV | 1 | A | G | Heterozygous |
| NC_037645.1 | 9969358  | SNV | 1 | A | C | Heterozygous |
| NC_037645.1 | 9969365  | SNV | 1 | T | C | Homozygous   |
| NC_037645.1 | 9969372  | SNV | 1 | A | G | Homozygous   |
| NC_037645.1 | 9969436  | SNV | 1 | A | G | Heterozygous |
| NC_037645.1 | 9969471  | SNV | 1 | A | G | Heterozygous |
| NC_037645.1 | 9969473  | SNV | 1 | C | T | Heterozygous |
| NC_037645.1 | 9969484  | SNV | 1 | T | C | Homozygous   |
| NC_037645.1 | 9969495  | SNV | 1 | G | C | Heterozygous |
| NC_037645.1 | 9969529  | SNV | 1 | A | G | Homozygous   |
| NC_037645.1 | 9969537  | SNV | 1 | C | A | Homozygous   |
| NC_037645.1 | 9969784  | SNV | 1 | G | A | Homozygous   |
| NC_037645.1 | 9969789  | SNV | 1 | A | G | Homozygous   |
| NC_037645.1 | 9969831  | SNV | 1 | A | G | Homozygous   |
| NC_037645.1 | 9969865  | SNV | 1 | A | C | Heterozygous |
| NC_037645.1 | 9969870  | SNV | 1 | A | G | Homozygous   |
| NC_037645.1 | 9982263  | SNV | 1 | T | G | Heterozygous |
| NC_037645.1 | 9984416  | SNV | 1 | G | C | Homozygous   |
| NC_037645.1 | 9984430  | SNV | 1 | G | A | Heterozygous |
| NC_037645.1 | 9984439  | SNV | 1 | A | G | Homozygous   |
| NC_037645.1 | 9984477  | SNV | 1 | A | G | Homozygous   |
| NC_037645.1 | 9984756  | SNV | 1 | T | C | Heterozygous |
| NC_037645.1 | 9986763  | SNV | 1 | C | G | Homozygous   |
| NC_037645.1 | 9986766  | SNV | 1 | C | A | Homozygous   |
| NC_037645.1 | 9986771  | SNV | 1 | C | T | Homozygous   |
| NC_037645.1 | 9986797  | SNV | 1 | C | T | Homozygous   |
| NC_037645.1 | 10000650 | SNV | 1 | C | G | Homozygous   |

|             |          |     |   |   |   |              |
|-------------|----------|-----|---|---|---|--------------|
| NC_037645.1 | 10000697 | SNV | 1 | C | T | Homozygous   |
| NC_037645.1 | 10008137 | SNV | 1 | C | G | Homozygous   |
| NC_037645.1 | 10008188 | SNV | 1 | G | A | Homozygous   |
| NC_037645.1 | 10008249 | SNV | 1 | G | A | Homozygous   |
| NC_037645.1 | 10008251 | SNV | 1 | T | C | Homozygous   |
| NC_037645.1 | 10008264 | SNV | 1 | A | G | Heterozygous |
| NC_037645.1 | 10008275 | SNV | 1 | C | T | Homozygous   |
| NC_037645.1 | 10010982 | SNV | 1 | G | A | Homozygous   |
| NC_037645.1 | 10016381 | SNV | 1 | A | T | Homozygous   |
| NC_037645.1 | 10016393 | SNV | 1 | C | A | Homozygous   |
| NC_037645.1 | 10016395 | SNV | 1 | A | G | Homozygous   |
| NC_037645.1 | 10016404 | SNV | 1 | T | A | Homozygous   |
| NC_037645.1 | 10021276 | SNV | 1 | A | T | Heterozygous |
| NC_037645.1 | 10023113 | SNV | 1 | A | T | Homozygous   |
| NC_037645.1 | 10023123 | SNV | 1 | A | C | Homozygous   |
| NC_037645.1 | 10023126 | SNV | 1 | T | G | Homozygous   |
| NC_037645.1 | 10028219 | SNV | 1 | G | T | Homozygous   |
| NC_037645.1 | 10028227 | SNV | 1 | T | C | Heterozygous |
| NC_037645.1 | 10031262 | SNV | 1 | C | G | Homozygous   |
| NC_037645.1 | 10031265 | SNV | 1 | T | C | Homozygous   |
| NC_037645.1 | 10031270 | SNV | 1 | T | A | Heterozygous |
| NC_037645.1 | 10031292 | SNV | 1 | T | C | Heterozygous |
| NC_037645.1 | 10031301 | SNV | 1 | T | A | Homozygous   |
| NC_037645.1 | 10031303 | SNV | 1 | A | T | Homozygous   |
| NC_037645.1 | 10032082 | SNV | 1 | G | C | Homozygous   |
| NC_037645.1 | 10032084 | SNV | 1 | G | A | Homozygous   |
| NC_037645.1 | 10032086 | SNV | 1 | T | A | Homozygous   |
| NC_037645.1 | 10032093 | SNV | 1 | G | A | Heterozygous |
| NC_037645.1 | 10032095 | SNV | 1 | G | A | Homozygous   |
| NC_037645.1 | 10034620 | SNV | 1 | A | G | Homozygous   |
| NC_037645.1 | 10056776 | SNV | 1 | T | A | Homozygous   |
| NC_037645.1 | 10056801 | SNV | 1 | C | T | Heterozygous |
| NC_037645.1 | 10056807 | SNV | 1 | C | T | Heterozygous |
| NC_037645.1 | 10056819 | SNV | 1 | C | T | Heterozygous |
| NC_037645.1 | 10056884 | SNV | 1 | A | C | Homozygous   |
| NC_037645.1 | 10056887 | SNV | 1 | T | C | Homozygous   |
| NC_037645.1 | 10056897 | SNV | 1 | T | C | Heterozygous |
| NC_037645.1 | 10056927 | SNV | 1 | T | C | Homozygous   |
| NC_037645.1 | 10056932 | SNV | 1 | T | C | Homozygous   |
| NC_037645.1 | 10056970 | SNV | 1 | C | T | Homozygous   |
| NC_037645.1 | 10056974 | SNV | 1 | T | G | Homozygous   |
| NC_037645.1 | 10056979 | SNV | 1 | T | C | Homozygous   |
| NC_037645.1 | 10057005 | SNV | 1 | A | C | Homozygous   |
| NC_037645.1 | 10057019 | SNV | 1 | T | C | Heterozygous |
| NC_037645.1 | 10057024 | SNV | 1 | C | T | Homozygous   |
| NC_037645.1 | 10057033 | SNV | 1 | T | C | Heterozygous |
| NC_037645.1 | 10057041 | SNV | 1 | T | A | Heterozygous |
| NC_037645.1 | 10057047 | SNV | 1 | C | A | Heterozygous |
| NC_037645.1 | 10057059 | SNV | 1 | T | C | Heterozygous |
| NC_037645.1 | 10057086 | SNV | 1 | T | G | Homozygous   |
| NC_037645.1 | 10057120 | SNV | 1 | T | C | Heterozygous |

|             |          |     |   |   |   |              |
|-------------|----------|-----|---|---|---|--------------|
| NC_037645.1 | 10057123 | SNV | 1 | T | C | Heterozygous |
| NC_037645.1 | 10057129 | SNV | 1 | T | C | Heterozygous |
| NC_037645.1 | 10057136 | SNV | 1 | T | C | Heterozygous |
| NC_037645.1 | 10062606 | SNV | 1 | T | C | Homozygous   |
| NC_037645.1 | 10062824 | SNV | 1 | G | A | Homozygous   |
| NC_037645.1 | 10062842 | SNV | 1 | G | A | Heterozygous |
| NC_037645.1 | 10062962 | SNV | 1 | G | A | Heterozygous |
| NC_037645.1 | 10063062 | SNV | 1 | G | A | Heterozygous |
| NC_037645.1 | 10063068 | SNV | 1 | A | G | Homozygous   |
| NC_037645.1 | 10063090 | SNV | 1 | A | G | Homozygous   |
| NC_037645.1 | 10064739 | SNV | 1 | G | A | Homozygous   |
| NC_037645.1 | 10066293 | SNV | 1 | C | G | Homozygous   |
| NC_037645.1 | 10066305 | SNV | 1 | T | G | Homozygous   |
| NC_037645.1 | 10066307 | SNV | 1 | C | T | Homozygous   |
| NC_037645.1 | 10066311 | SNV | 1 | T | C | Homozygous   |
| NC_037645.1 | 10066317 | SNV | 1 | C | T | Homozygous   |
| NC_037645.1 | 10066324 | SNV | 1 | G | A | Homozygous   |
| NC_037645.1 | 10066327 | SNV | 1 | C | T | Homozygous   |
| NC_037645.1 | 10066337 | SNV | 1 | C | T | Homozygous   |
| NC_037645.1 | 10066340 | SNV | 1 | T | C | Homozygous   |
| NC_037645.1 | 10066345 | SNV | 1 | C | T | Homozygous   |
| NC_037645.1 | 10068272 | SNV | 1 | A | T | Heterozygous |
| NC_037645.1 | 10088923 | SNV | 1 | A | T | Heterozygous |
| NC_037645.1 | 10088931 | SNV | 1 | A | T | Heterozygous |
| NC_037645.1 | 10088937 | SNV | 1 | C | T | Homozygous   |
| NC_037645.1 | 10088966 | SNV | 1 | C | T | Homozygous   |
| NC_037645.1 | 10088971 | SNV | 1 | G | A | Homozygous   |
| NC_037645.1 | 10103111 | SNV | 1 | A | T | Homozygous   |
| NC_037645.1 | 10103113 | SNV | 1 | A | T | Homozygous   |
| NC_037645.1 | 10103122 | SNV | 1 | G | A | Homozygous   |
| NC_037645.1 | 10103124 | SNV | 1 | C | G | Homozygous   |
| NC_037645.1 | 10103128 | SNV | 1 | G | A | Homozygous   |
| NC_037645.1 | 10103342 | SNV | 1 | G | A | Heterozygous |
| NC_037645.1 | 10103368 | SNV | 1 | C | G | Homozygous   |
| NC_037645.1 | 10106811 | SNV | 1 | G | A | Homozygous   |
| NC_037645.1 | 10106904 | SNV | 1 | A | G | Homozygous   |
| NC_037645.1 | 10106911 | SNV | 1 | T | C | Homozygous   |
| NC_037645.1 | 10106952 | SNV | 1 | A | T | Homozygous   |
| NC_037645.1 | 10106955 | SNV | 1 | A | G | Homozygous   |
| NC_037645.1 | 10121179 | SNV | 1 | T | A | Homozygous   |
| NC_037645.1 | 10121182 | SNV | 1 | T | C | Homozygous   |
| NC_037645.1 | 10121185 | SNV | 1 | T | A | Homozygous   |
| NC_037645.1 | 10123342 | SNV | 1 | T | C | Homozygous   |
| NC_037645.1 | 10123352 | SNV | 1 | T | C | Homozygous   |
| NC_037645.1 | 10123355 | SNV | 1 | A | G | Homozygous   |
| NC_037645.1 | 10131065 | SNV | 1 | C | A | Heterozygous |
| NC_037645.1 | 10131080 | SNV | 1 | T | C | Heterozygous |
| NC_037645.1 | 10131085 | SNV | 1 | T | A | Heterozygous |
| NC_037645.1 | 10131088 | SNV | 1 | C | T | Heterozygous |
| NC_037645.1 | 10132101 | SNV | 1 | G | T | Heterozygous |
| NC_037645.1 | 10132701 | SNV | 1 | A | G | Heterozygous |



|             |          |     |   |   |   |              |
|-------------|----------|-----|---|---|---|--------------|
| NC_037645.1 | 10132898 | SNV | 1 | A | G | Homozygous   |
| NC_037645.1 | 10133909 | SNV | 1 | T | C | Homozygous   |
| NC_037645.1 | 10133914 | SNV | 1 | C | T | Heterozygous |
| NC_037645.1 | 10134666 | SNV | 1 | A | G | Heterozygous |
| NC_037645.1 | 10134699 | SNV | 1 | A | G | Homozygous   |
| NC_037645.1 | 10134747 | SNV | 1 | A | G | Homozygous   |
| NC_037645.1 | 10140315 | SNV | 1 | A | G | Homozygous   |
| NC_037645.1 | 10144253 | SNV | 1 | G | A | Homozygous   |
| NC_037645.1 | 10144371 | SNV | 1 | C | A | Homozygous   |
| NC_037645.1 | 10144376 | SNV | 1 | G | A | Homozygous   |
| NC_037645.1 | 10144887 | SNV | 1 | C | T | Heterozygous |
| NC_037645.1 | 10144904 | SNV | 1 | C | T | Heterozygous |
| NC_037645.1 | 10144909 | SNV | 1 | T | C | Homozygous   |
| NC_037645.1 | 10144915 | SNV | 1 | T | C | Homozygous   |
| NC_037645.1 | 10144923 | SNV | 1 | T | C | Homozygous   |
| NC_037645.1 | 10144932 | SNV | 1 | C | G | Homozygous   |
| NC_037645.1 | 10144937 | SNV | 1 | T | G | Homozygous   |
| NC_037645.1 | 10144942 | SNV | 1 | G | A | Homozygous   |
| NC_037645.1 | 10144944 | SNV | 1 | T | A | Homozygous   |
| NC_037645.1 | 10144975 | SNV | 1 | T | C | Homozygous   |
| NC_037645.1 | 10145283 | SNV | 1 | A | G | Heterozygous |
| NC_037645.1 | 10145293 | SNV | 1 | T | A | Heterozygous |
| NC_037645.1 | 10145295 | SNV | 1 | A | G | Heterozygous |
| NC_037645.1 | 10145339 | SNV | 1 | T | C | Heterozygous |
| NC_037645.1 | 10145358 | SNV | 1 | G | C | Homozygous   |
| NC_037645.1 | 10156774 | SNV | 1 | C | G | Homozygous   |
| NC_037645.1 | 10156789 | SNV | 1 | A | G | Homozygous   |
| NC_037645.1 | 10159572 | SNV | 1 | C | T | Heterozygous |
| NC_037645.1 | 10160015 | SNV | 1 | C | A | Heterozygous |
| NC_037645.1 | 10160017 | SNV | 1 | C | A | Heterozygous |
| NC_037645.1 | 10160021 | SNV | 1 | C | A | Heterozygous |
| NC_037645.1 | 10160023 | SNV | 1 | T | A | Homozygous   |
| NC_037645.1 | 10160321 | SNV | 1 | C | A | Heterozygous |
| NC_037645.1 | 10160327 | SNV | 1 | C | A | Homozygous   |
| NC_037645.1 | 10160367 | SNV | 1 | C | A | Homozygous   |
| NC_037645.1 | 10160375 | SNV | 1 | C | A | Homozygous   |
| NC_037645.1 | 10160380 | SNV | 1 | T | C | Homozygous   |
| NC_037645.1 | 10160384 | SNV | 1 | T | C | Homozygous   |
| NC_037645.1 | 10160663 | SNV | 1 | C | A | Heterozygous |
| NC_037645.1 | 10160669 | SNV | 1 | C | A | Heterozygous |
| NC_037645.1 | 10160692 | SNV | 1 | A | C | Heterozygous |
| NC_037645.1 | 10160734 | SNV | 1 | T | C | Homozygous   |
| NC_037645.1 | 10161606 | SNV | 1 | T | A | Homozygous   |
| NC_037645.1 | 10161614 | SNV | 1 | A | C | Homozygous   |
| NC_037645.1 | 10161619 | SNV | 1 | C | A | Homozygous   |
| NC_037645.1 | 10161627 | SNV | 1 | C | A | Homozygous   |
| NC_037645.1 | 10161651 | SNV | 1 | A | T | Homozygous   |
| NC_037645.1 | 10168847 | SNV | 1 | C | A | Homozygous   |
| NC_037645.1 | 10168851 | SNV | 1 | C | A | Homozygous   |
| NC_037645.1 | 10169673 | SNV | 1 | T | A | Homozygous   |
| NC_037645.1 | 10169709 | SNV | 1 | T | C | Homozygous   |

|             |          |     |   |   |   |              |
|-------------|----------|-----|---|---|---|--------------|
| NC_037645.1 | 10169720 | SNV | 1 | G | A | Homozygous   |
| NC_037645.1 | 10175114 | SNV | 1 | C | T | Homozygous   |
| NC_037645.1 | 10195329 | SNV | 1 | A | G | Homozygous   |
| NC_037645.1 | 10195332 | SNV | 1 | G | A | Homozygous   |
| NC_037645.1 | 10195346 | SNV | 1 | C | T | Heterozygous |
| NC_037645.1 | 10195411 | SNV | 1 | T | G | Homozygous   |
| NC_037645.1 | 10195417 | SNV | 1 | G | A | Homozygous   |
| NC_037645.1 | 10200278 | SNV | 1 | G | A | Heterozygous |
| NC_037645.1 | 10200518 | SNV | 1 | T | C | Heterozygous |
| NC_037645.1 | 10200663 | SNV | 1 | C | T | Homozygous   |
| NC_037645.1 | 10200674 | SNV | 1 | C | T | Homozygous   |
| NC_037645.1 | 10200682 | SNV | 1 | A | G | Homozygous   |
| NC_037645.1 | 10200700 | SNV | 1 | A | G | Homozygous   |
| NC_037645.1 | 10200706 | SNV | 1 | A | G | Heterozygous |
| NC_037645.1 | 10200747 | SNV | 1 | G | C | Homozygous   |
| NC_037645.1 | 10200807 | SNV | 1 | T | C | Homozygous   |
| NC_037645.1 | 10200826 | SNV | 1 | G | A | Heterozygous |
| NC_037645.1 | 10200848 | SNV | 1 | C | T | Heterozygous |
| NC_037645.1 | 10200895 | SNV | 1 | A | G | Heterozygous |
| NC_037645.1 | 10200926 | SNV | 1 | C | T | Homozygous   |
| NC_037645.1 | 10200928 | SNV | 1 | A | G | Heterozygous |
| NC_037645.1 | 10200938 | SNV | 1 | G | A | Heterozygous |
| NC_037645.1 | 10200947 | SNV | 1 | A | G | Heterozygous |
| NC_037645.1 | 10200997 | SNV | 1 | A | G | Homozygous   |
| NC_037645.1 | 10201003 | SNV | 1 | G | A | Heterozygous |
| NC_037645.1 | 10201007 | SNV | 1 | A | G | Heterozygous |
| NC_037645.1 | 10201086 | SNV | 1 | T | C | Heterozygous |
| NC_037645.1 | 10201089 | SNV | 1 | A | G | Heterozygous |
| NC_037645.1 | 10201099 | SNV | 1 | A | G | Heterozygous |
| NC_037645.1 | 10201141 | SNV | 1 | T | C | Homozygous   |
| NC_037645.1 | 10201144 | SNV | 1 | C | T | Heterozygous |
| NC_037645.1 | 10201158 | SNV | 1 | C | G | Homozygous   |
| NC_037645.1 | 10201170 | SNV | 1 | A | G | Heterozygous |
| NC_037645.1 | 10201232 | SNV | 1 | A | G | Heterozygous |
| NC_037645.1 | 10201247 | SNV | 1 | A | G | Homozygous   |
| NC_037645.1 | 10201249 | SNV | 1 | C | T | Heterozygous |
| NC_037645.1 | 10201270 | SNV | 1 | C | T | Heterozygous |
| NC_037645.1 | 10201314 | SNV | 1 | C | T | Homozygous   |
| NC_037645.1 | 10201319 | SNV | 1 | C | T | Homozygous   |
| NC_037645.1 | 10201341 | SNV | 1 | T | C | Homozygous   |
| NC_037645.1 | 10201359 | SNV | 1 | T | C | Homozygous   |
| NC_037645.1 | 10203739 | SNV | 1 | C | G | Homozygous   |
| NC_037645.1 | 10203748 | SNV | 1 | A | G | Heterozygous |
| NC_037645.1 | 10203760 | SNV | 1 | G | A | Heterozygous |
| NC_037645.1 | 10239061 | SNV | 1 | G | A | Homozygous   |
| NC_037645.1 | 10239064 | SNV | 1 | A | T | Homozygous   |
| NC_037645.1 | 10239095 | SNV | 1 | T | G | Homozygous   |
| NC_037645.1 | 10248074 | SNV | 1 | A | G | Homozygous   |
| NC_037645.1 | 10248195 | SNV | 1 | G | A | Heterozygous |
| NC_037645.1 | 10248243 | SNV | 1 | A | G | Homozygous   |
| NC_037645.1 | 10248246 | SNV | 1 | A | G | Homozygous   |

|             |          |     |   |   |   |              |
|-------------|----------|-----|---|---|---|--------------|
| NC_037645.1 | 10248333 | SNV | 1 | A | G | Homozygous   |
| NC_037645.1 | 10248357 | SNV | 1 | G | A | Heterozygous |
| NC_037645.1 | 10248397 | SNV | 1 | A | G | Heterozygous |
| NC_037645.1 | 10248428 | SNV | 1 | G | A | Homozygous   |
| NC_037645.1 | 10248475 | SNV | 1 | G | A | Heterozygous |
| NC_037645.1 | 10248487 | SNV | 1 | A | G | Homozygous   |
| NC_037645.1 | 10248586 | SNV | 1 | G | A | Heterozygous |
| NC_037645.1 | 10248644 | SNV | 1 | A | G | Homozygous   |
| NC_037645.1 | 10248751 | SNV | 1 | T | C | Homozygous   |
| NC_037645.1 | 10248807 | SNV | 1 | A | G | Homozygous   |
| NC_037645.1 | 10248933 | SNV | 1 | G | A | Heterozygous |
| NC_037645.1 | 10249028 | SNV | 1 | T | C | Heterozygous |
| NC_037645.1 | 10257046 | SNV | 1 | C | T | Homozygous   |
| NC_037645.1 | 10257071 | SNV | 1 | T | A | Homozygous   |
| NC_037645.1 | 10257179 | SNV | 1 | T | C | Heterozygous |
| NC_037645.1 | 10257195 | SNV | 1 | T | A | Heterozygous |
| NC_037645.1 | 10257721 | SNV | 1 | A | C | Homozygous   |
| NC_037645.1 | 10257724 | SNV | 1 | C | A | Heterozygous |
| NC_037645.1 | 10257880 | SNV | 1 | G | A | Heterozygous |
| NC_037645.1 | 10258565 | SNV | 1 | G | A | Heterozygous |
| NC_037645.1 | 10258579 | SNV | 1 | C | A | Heterozygous |
| NC_037645.1 | 10258582 | SNV | 1 | G | A | Heterozygous |
| NC_037645.1 | 10258594 | SNV | 1 | A | G | Heterozygous |
| NC_037645.1 | 10258606 | SNV | 1 | A | G | Heterozygous |
| NC_037645.1 | 10258651 | SNV | 1 | A | G | Homozygous   |
| NC_037645.1 | 10260898 | SNV | 1 | C | T | Heterozygous |
| NC_037645.1 | 10260929 | SNV | 1 | C | G | Homozygous   |
| NC_037645.1 | 10261014 | SNV | 1 | G | C | Heterozygous |
| NC_037645.1 | 10261419 | SNV | 1 | A | G | Heterozygous |
| NC_037645.1 | 10261547 | SNV | 1 | G | T | Homozygous   |
| NC_037645.1 | 10261550 | SNV | 1 | G | A | Homozygous   |
| NC_037645.1 | 10261730 | SNV | 1 | T | C | Heterozygous |
| NC_037645.1 | 10261745 | SNV | 1 | G | T | Heterozygous |
| NC_037645.1 | 10261758 | SNV | 1 | G | A | Heterozygous |
| NC_037645.1 | 10261762 | SNV | 1 | G | A | Heterozygous |
| NC_037645.1 | 10261923 | SNV | 1 | G | A | Heterozygous |
| NC_037645.1 | 10261936 | SNV | 1 | G | A | Homozygous   |
| NC_037645.1 | 10261938 | SNV | 1 | G | A | Homozygous   |
| NC_037645.1 | 10261940 | SNV | 1 | G | A | Heterozygous |
| NC_037645.1 | 10262019 | SNV | 1 | C | T | Homozygous   |
| NC_037645.1 | 10262109 | SNV | 1 | A | G | Heterozygous |
| NC_037645.1 | 10262121 | SNV | 1 | A | G | Heterozygous |
| NC_037645.1 | 10262144 | SNV | 1 | T | A | Homozygous   |
| NC_037645.1 | 10262600 | SNV | 1 | G | A | Heterozygous |
| NC_037645.1 | 10262603 | SNV | 1 | A | C | Heterozygous |
| NC_037645.1 | 10265346 | SNV | 1 | G | A | Homozygous   |
| NC_037645.1 | 10265358 | SNV | 1 | T | A | Heterozygous |
| NC_037645.1 | 10265360 | SNV | 1 | C | A | Heterozygous |
| NC_037645.1 | 10265943 | SNV | 1 | C | T | Heterozygous |
| NC_037645.1 | 10265950 | SNV | 1 | T | C | Heterozygous |
| NC_037645.1 | 10265955 | SNV | 1 | C | T | Heterozygous |

|             |          |     |   |   |   |              |
|-------------|----------|-----|---|---|---|--------------|
| NC_037645.1 | 10265987 | SNV | 1 | A | T | Homozygous   |
| NC_037645.1 | 10265990 | SNV | 1 | C | T | Homozygous   |
| NC_037645.1 | 10265992 | SNV | 1 | C | T | Homozygous   |
| NC_037645.1 | 10271156 | SNV | 1 | T | C | Heterozygous |
| NC_037645.1 | 10271163 | SNV | 1 | G | T | Homozygous   |
| NC_037645.1 | 10271242 | SNV | 1 | C | T | Homozygous   |
| NC_037645.1 | 10277904 | SNV | 1 | G | T | Homozygous   |
| NC_037645.1 | 10277909 | SNV | 1 | G | T | Homozygous   |
| NC_037645.1 | 10277912 | SNV | 1 | T | A | Homozygous   |
| NC_037645.1 | 10279239 | SNV | 1 | A | G | Heterozygous |
| NC_037645.1 | 10279244 | SNV | 1 | G | A | Heterozygous |
| NC_037645.1 | 10279246 | SNV | 1 | G | A | Heterozygous |
| NC_037645.1 | 10279257 | SNV | 1 | A | G | Homozygous   |
| NC_037645.1 | 10279711 | SNV | 1 | A | G | Heterozygous |
| NC_037645.1 | 10279802 | SNV | 1 | G | A | Heterozygous |
| NC_037645.1 | 10279889 | SNV | 1 | G | A | Heterozygous |
| NC_037645.1 | 10279929 | SNV | 1 | G | A | Heterozygous |
| NC_037645.1 | 10279986 | SNV | 1 | A | G | Homozygous   |
| NC_037645.1 | 10288458 | SNV | 1 | T | A | Heterozygous |
| NC_037645.1 | 10288471 | SNV | 1 | C | A | Homozygous   |
| NC_037645.1 | 10296418 | SNV | 1 | C | T | Heterozygous |
| NC_037645.1 | 10296422 | SNV | 1 | C | T | Heterozygous |
| NC_037645.1 | 10296563 | SNV | 1 | T | C | Homozygous   |
| NC_037645.1 | 10311570 | SNV | 1 | C | T | Homozygous   |
| NC_037645.1 | 10312438 | SNV | 1 | G | C | Heterozygous |
| NC_037645.1 | 10312618 | SNV | 1 | G | C | Homozygous   |
| NC_037645.1 | 10312622 | SNV | 1 | C | G | Homozygous   |
| NC_037645.1 | 10312644 | SNV | 1 | G | C | Homozygous   |
| NC_037645.1 | 10312647 | SNV | 1 | T | C | Homozygous   |
| NC_037645.1 | 10312652 | SNV | 1 | A | G | Homozygous   |
| NC_037645.1 | 10312656 | SNV | 1 | A | C | Homozygous   |
| NC_037645.1 | 10312680 | SNV | 1 | C | G | Heterozygous |
| NC_037645.1 | 10312686 | SNV | 1 | C | T | Heterozygous |
| NC_037645.1 | 10312688 | SNV | 1 | C | A | Homozygous   |
| NC_037645.1 | 10312692 | SNV | 1 | C | G | Heterozygous |
| NC_037645.1 | 10312700 | SNV | 1 | G | C | Homozygous   |
| NC_037645.1 | 10312714 | SNV | 1 | C | T | Heterozygous |
| NC_037645.1 | 10312719 | SNV | 1 | T | C | Heterozygous |
| NC_037645.1 | 10312724 | SNV | 1 | A | C | Homozygous   |
| NC_037645.1 | 10312746 | SNV | 1 | A | C | Homozygous   |
| NC_037645.1 | 10312751 | SNV | 1 | T | C | Homozygous   |
| NC_037645.1 | 10312787 | SNV | 1 | T | C | Heterozygous |
| NC_037645.1 | 10314038 | SNV | 1 | C | T | Homozygous   |
| NC_037645.1 | 10314114 | SNV | 1 | C | T | Homozygous   |
| NC_037645.1 | 10318569 | SNV | 1 | G | C | Homozygous   |
| NC_037645.1 | 10321214 | SNV | 1 | T | C | Heterozygous |
| NC_037645.1 | 10321226 | SNV | 1 | C | T | Homozygous   |
| NC_037645.1 | 10321234 | SNV | 1 | C | T | Homozygous   |
| NC_037645.1 | 10321258 | SNV | 1 | T | C | Homozygous   |
| NC_037645.1 | 10323700 | SNV | 1 | C | T | Homozygous   |
| NC_037645.1 | 10326123 | SNV | 1 | T | C | Homozygous   |

|             |          |     |   |   |   |              |
|-------------|----------|-----|---|---|---|--------------|
| NC_037645.1 | 10327460 | SNV | 1 | C | G | Homozygous   |
| NC_037645.1 | 10327468 | SNV | 1 | A | G | Homozygous   |
| NC_037645.1 | 10327568 | SNV | 1 | A | G | Homozygous   |
| NC_037645.1 | 10327729 | SNV | 1 | C | A | Heterozygous |
| NC_037645.1 | 10328054 | SNV | 1 | C | T | Heterozygous |
| NC_037645.1 | 10328087 | SNV | 1 | C | T | Heterozygous |
| NC_037645.1 | 10328129 | SNV | 1 | T | C | Heterozygous |
| NC_037645.1 | 10328481 | SNV | 1 | A | G | Homozygous   |
| NC_037645.1 | 10328531 | SNV | 1 | T | C | Heterozygous |
| NC_037645.1 | 10328898 | SNV | 1 | T | C | Heterozygous |
| NC_037645.1 | 10328927 | SNV | 1 | G | A | Homozygous   |
| NC_037645.1 | 10328930 | SNV | 1 | C | T | Homozygous   |
| NC_037645.1 | 10328950 | SNV | 1 | C | T | Heterozygous |
| NC_037645.1 | 10328989 | SNV | 1 | T | A | Heterozygous |
| NC_037645.1 | 10329727 | SNV | 1 | T | C | Homozygous   |
| NC_037645.1 | 10329736 | SNV | 1 | T | C | Homozygous   |
| NC_037645.1 | 10329748 | SNV | 1 | G | A | Homozygous   |
| NC_037645.1 | 10329750 | SNV | 1 | C | T | Homozygous   |
| NC_037645.1 | 10329768 | SNV | 1 | C | G | Homozygous   |
| NC_037645.1 | 10329777 | SNV | 1 | G | A | Homozygous   |
| NC_037645.1 | 10329791 | SNV | 1 | G | A | Homozygous   |
| NC_037645.1 | 10329796 | SNV | 1 | C | T | Heterozygous |
| NC_037645.1 | 10329798 | SNV | 1 | G | T | Heterozygous |
| NC_037645.1 | 10329806 | SNV | 1 | C | T | Homozygous   |
| NC_037645.1 | 10329827 | SNV | 1 | C | A | Homozygous   |
| NC_037645.1 | 10330184 | SNV | 1 | G | A | Homozygous   |
| NC_037645.1 | 10330211 | SNV | 1 | G | T | Homozygous   |
| NC_037645.1 | 10330243 | SNV | 1 | C | T | Homozygous   |
| NC_037645.1 | 10330249 | SNV | 1 | C | T | Heterozygous |
| NC_037645.1 | 10330303 | SNV | 1 | A | G | Heterozygous |
| NC_037645.1 | 10330343 | SNV | 1 | G | C | Homozygous   |
| NC_037645.1 | 10330351 | SNV | 1 | T | C | Homozygous   |
| NC_037645.1 | 10330356 | SNV | 1 | A | T | Homozygous   |
| NC_037645.1 | 10330395 | SNV | 1 | G | C | Homozygous   |
| NC_037645.1 | 10330431 | SNV | 1 | C | T | Heterozygous |
| NC_037645.1 | 10330477 | SNV | 1 | C | T | Heterozygous |
| NC_037645.1 | 10330529 | SNV | 1 | C | T | Heterozygous |
| NC_037645.1 | 10330537 | SNV | 1 | G | A | Heterozygous |
| NC_037645.1 | 10330555 | SNV | 1 | C | T | Homozygous   |
| NC_037645.1 | 10330659 | SNV | 1 | C | T | Homozygous   |
| NC_037645.1 | 10330661 | SNV | 1 | C | T | Heterozygous |
| NC_037645.1 | 10330711 | SNV | 1 | C | T | Heterozygous |
| NC_037645.1 | 10330717 | SNV | 1 | C | T | Heterozygous |
| NC_037645.1 | 10340874 | SNV | 1 | C | T | Homozygous   |
| NC_037645.1 | 10340882 | SNV | 1 | T | A | Homozygous   |
| NC_037645.1 | 10353146 | SNV | 1 | A | G | Homozygous   |
| NC_037645.1 | 10353170 | SNV | 1 | T | A | Heterozygous |
| NC_037645.1 | 10353247 | SNV | 1 | A | T | Homozygous   |
| NC_037645.1 | 10357043 | SNV | 1 | C | T | Homozygous   |
| NC_037645.1 | 10361741 | SNV | 1 | A | T | Homozygous   |
| NC_037645.1 | 10368950 | SNV | 1 | A | G | Homozygous   |

|             |          |     |   |   |   |              |
|-------------|----------|-----|---|---|---|--------------|
| NC_037645.1 | 10368966 | SNV | 1 | T | A | Homozygous   |
| NC_037645.1 | 10369056 | SNV | 1 | T | C | Homozygous   |
| NC_037645.1 | 10369060 | SNV | 1 | A | C | Homozygous   |
| NC_037645.1 | 10373793 | SNV | 1 | G | A | Homozygous   |
| NC_037645.1 | 10376554 | SNV | 1 | G | A | Heterozygous |
| NC_037645.1 | 10388927 | SNV | 1 | G | A | Heterozygous |
| NC_037645.1 | 10390529 | SNV | 1 | T | A | Homozygous   |
| NC_037645.1 | 10390531 | SNV | 1 | C | T | Homozygous   |
| NC_037645.1 | 10390535 | SNV | 1 | C | A | Homozygous   |
| NC_037645.1 | 10390573 | SNV | 1 | G | A | Homozygous   |
| NC_037645.1 | 10390585 | SNV | 1 | G | A | Homozygous   |
| NC_037645.1 | 10390587 | SNV | 1 | G | A | Homozygous   |
| NC_037645.1 | 10390591 | SNV | 1 | G | A | Homozygous   |
| NC_037645.1 | 10400175 | SNV | 1 | G | A | Homozygous   |
| NC_037645.1 | 10401088 | SNV | 1 | T | A | Homozygous   |
| NC_037645.1 | 10401092 | SNV | 1 | T | C | Homozygous   |
| NC_037645.1 | 10401099 | SNV | 1 | A | T | Homozygous   |
| NC_037645.1 | 10401102 | SNV | 1 | C | T | Homozygous   |
| NC_037645.1 | 10402237 | SNV | 1 | T | A | Heterozygous |
| NC_037645.1 | 10402241 | SNV | 1 | A | T | Heterozygous |
| NC_037645.1 | 10402255 | SNV | 1 | C | T | Heterozygous |
| NC_037645.1 | 10403257 | SNV | 1 | C | T | Heterozygous |
| NC_037645.1 | 10403272 | SNV | 1 | A | G | Homozygous   |
| NC_037645.1 | 10403388 | SNV | 1 | T | C | Homozygous   |
| NC_037645.1 | 10403412 | SNV | 1 | A | G | Homozygous   |
| NC_037645.1 | 10403542 | SNV | 1 | A | T | Heterozygous |
| NC_037645.1 | 10403547 | SNV | 1 | T | C | Heterozygous |
| NC_037645.1 | 10403553 | SNV | 1 | T | C | Heterozygous |
| NC_037645.1 | 10403557 | SNV | 1 | T | G | Heterozygous |
| NC_037645.1 | 10403707 | SNV | 1 | C | T | Homozygous   |
| NC_037645.1 | 10403723 | SNV | 1 | T | A | Homozygous   |
| NC_037645.1 | 10403735 | SNV | 1 | A | T | Homozygous   |
| NC_037645.1 | 10403771 | SNV | 1 | G | A | Homozygous   |
| NC_037645.1 | 10403780 | SNV | 1 | A | T | Heterozygous |
| NC_037645.1 | 10407356 | SNV | 1 | G | A | Heterozygous |
| NC_037645.1 | 10407721 | SNV | 1 | G | C | Homozygous   |
| NC_037645.1 | 10407831 | SNV | 1 | G | A | Homozygous   |
| NC_037645.1 | 10407927 | SNV | 1 | A | G | Heterozygous |
| NC_037645.1 | 10408513 | SNV | 1 | A | G | Homozygous   |
| NC_037645.1 | 10408634 | SNV | 1 | T | A | Homozygous   |
| NC_037645.1 | 10408813 | SNV | 1 | G | A | Homozygous   |
| NC_037645.1 | 10409408 | SNV | 1 | T | G | Heterozygous |
| NC_037645.1 | 10409745 | SNV | 1 | T | C | Homozygous   |
| NC_037645.1 | 10409753 | SNV | 1 | T | C | Homozygous   |
| NC_037645.1 | 10409825 | SNV | 1 | T | C | Homozygous   |
| NC_037645.1 | 10409926 | SNV | 1 | A | G | Heterozygous |
| NC_037645.1 | 10411014 | SNV | 1 | G | A | Heterozygous |
| NC_037645.1 | 10411040 | SNV | 1 | C | T | Homozygous   |
| NC_037645.1 | 10411685 | SNV | 1 | C | T | Homozygous   |
| NC_037645.1 | 10411967 | SNV | 1 | T | C | Homozygous   |
| NC_037645.1 | 10411998 | SNV | 1 | C | T | Homozygous   |

|             |          |     |   |   |   |              |
|-------------|----------|-----|---|---|---|--------------|
| NC_037645.1 | 10412002 | SNV | 1 | G | A | Homozygous   |
| NC_037645.1 | 10412056 | SNV | 1 | T | C | Heterozygous |
| NC_037645.1 | 10412066 | SNV | 1 | G | C | Heterozygous |
| NC_037645.1 | 10412213 | SNV | 1 | T | C | Homozygous   |
| NC_037645.1 | 10412784 | SNV | 1 | T | C | Heterozygous |
| NC_037645.1 | 10412795 | SNV | 1 | T | C | Heterozygous |
| NC_037645.1 | 10412807 | SNV | 1 | T | C | Homozygous   |
| NC_037645.1 | 10412809 | SNV | 1 | T | C | Homozygous   |
| NC_037645.1 | 10412813 | SNV | 1 | C | A | Homozygous   |
| NC_037645.1 | 10412820 | SNV | 1 | G | A | Homozygous   |
| NC_037645.1 | 10436453 | SNV | 1 | C | A | Homozygous   |
| NC_037645.1 | 10444158 | SNV | 1 | G | A | Heterozygous |
| NC_037645.1 | 10444251 | SNV | 1 | T | C | Homozygous   |
| NC_037645.1 | 10444266 | SNV | 1 | C | T | Homozygous   |
| NC_037645.1 | 10444660 | SNV | 1 | T | C | Heterozygous |
| NC_037645.1 | 10468134 | SNV | 1 | G | A | Heterozygous |
| NC_037645.1 | 10468149 | SNV | 1 | C | T | Heterozygous |
| NC_037645.1 | 10468155 | SNV | 1 | T | C | Homozygous   |
| NC_037645.1 | 10469276 | SNV | 1 | G | A | Homozygous   |
| NC_037645.1 | 10470223 | SNV | 1 | A | G | Heterozygous |
| NC_037645.1 | 10470421 | SNV | 1 | T | C | Homozygous   |
| NC_037645.1 | 10470509 | SNV | 1 | T | A | Homozygous   |
| NC_037645.1 | 10470795 | SNV | 1 | G | A | Homozygous   |
| NC_037645.1 | 10471164 | SNV | 1 | T | G | Homozygous   |
| NC_037645.1 | 10471169 | SNV | 1 | C | T | Homozygous   |
| NC_037645.1 | 10471257 | SNV | 1 | C | T | Homozygous   |
| NC_037645.1 | 10471494 | SNV | 1 | A | C | Homozygous   |
| NC_037645.1 | 10471617 | SNV | 1 | C | T | Heterozygous |
| NC_037645.1 | 10472321 | SNV | 1 | A | G | Heterozygous |
| NC_037645.1 | 10472365 | SNV | 1 | T | G | Heterozygous |
| NC_037645.1 | 10472373 | SNV | 1 | T | C | Heterozygous |
| NC_037645.1 | 10472378 | SNV | 1 | A | T | Heterozygous |
| NC_037645.1 | 10472381 | SNV | 1 | A | G | Heterozygous |
| NC_037645.1 | 10474108 | SNV | 1 | A | G | Homozygous   |
| NC_037645.1 | 10474141 | SNV | 1 | C | G | Heterozygous |
| NC_037645.1 | 10475697 | SNV | 1 | G | A | Homozygous   |
| NC_037645.1 | 10475717 | SNV | 1 | T | C | Homozygous   |
| NC_037645.1 | 10475749 | SNV | 1 | A | G | Homozygous   |
| NC_037645.1 | 10476138 | SNV | 1 | C | T | Heterozygous |
| NC_037645.1 | 10476147 | SNV | 1 | T | G | Heterozygous |
| NC_037645.1 | 10476150 | SNV | 1 | T | C | Heterozygous |
| NC_037645.1 | 10476454 | SNV | 1 | G | A | Homozygous   |
| NC_037645.1 | 10476459 | SNV | 1 | C | G | Homozygous   |
| NC_037645.1 | 10476480 | SNV | 1 | C | T | Homozygous   |
| NC_037645.1 | 10476583 | SNV | 1 | T | C | Homozygous   |
| NC_037645.1 | 10476594 | SNV | 1 | G | A | Homozygous   |
| NC_037645.1 | 10476743 | SNV | 1 | T | G | Homozygous   |
| NC_037645.1 | 10476803 | SNV | 1 | G | A | Homozygous   |
| NC_037645.1 | 10477773 | SNV | 1 | T | C | Heterozygous |
| NC_037645.1 | 10477781 | SNV | 1 | T | C | Heterozygous |
| NC_037645.1 | 10477795 | SNV | 1 | G | A | Heterozygous |

|             |          |     |   |   |   |              |
|-------------|----------|-----|---|---|---|--------------|
| NC_037645.1 | 10484670 | SNV | 1 | A | G | Homozygous   |
| NC_037645.1 | 10487446 | SNV | 1 | T | C | Heterozygous |
| NC_037645.1 | 10487689 | SNV | 1 | C | T | Heterozygous |
| NC_037645.1 | 10487700 | SNV | 1 | T | C | Heterozygous |
| NC_037645.1 | 10487711 | SNV | 1 | T | C | Heterozygous |
| NC_037645.1 | 10487741 | SNV | 1 | C | T | Homozygous   |
| NC_037645.1 | 10487745 | SNV | 1 | G | T | Heterozygous |
| NC_037645.1 | 10487912 | SNV | 1 | C | G | Heterozygous |
| NC_037645.1 | 10487926 | SNV | 1 | C | G | Homozygous   |
| NC_037645.1 | 10490037 | SNV | 1 | A | T | Homozygous   |
| NC_037645.1 | 10490041 | SNV | 1 | A | G | Heterozygous |
| NC_037645.1 | 10490045 | SNV | 1 | A | G | Heterozygous |
| NC_037645.1 | 10490065 | SNV | 1 | T | C | Heterozygous |
| NC_037645.1 | 10490096 | SNV | 1 | T | C | Heterozygous |
| NC_037645.1 | 10490134 | SNV | 1 | G | A | Homozygous   |
| NC_037645.1 | 10492943 | SNV | 1 | T | C | Homozygous   |
| NC_037645.1 | 10493211 | SNV | 1 | G | A | Homozygous   |
| NC_037645.1 | 10493239 | SNV | 1 | C | T | Homozygous   |
| NC_037645.1 | 10493438 | SNV | 1 | T | C | Heterozygous |
| NC_037645.1 | 10493454 | SNV | 1 | C | T | Heterozygous |
| NC_037645.1 | 10493496 | SNV | 1 | C | T | Heterozygous |
| NC_037645.1 | 10493509 | SNV | 1 | C | A | Heterozygous |
| NC_037645.1 | 10493510 | SNV | 1 | C | T | Heterozygous |
| NC_037645.1 | 10493521 | SNV | 1 | T | G | Heterozygous |
| NC_037645.1 | 10493701 | SNV | 1 | A | C | Homozygous   |
| NC_037645.1 | 10493771 | SNV | 1 | T | G | Homozygous   |
| NC_037645.1 | 10493822 | SNV | 1 | T | C | Homozygous   |
| NC_037645.1 | 10493839 | SNV | 1 | T | A | Heterozygous |
| NC_037645.1 | 10493855 | SNV | 1 | C | T | Heterozygous |
| NC_037645.1 | 10493867 | SNV | 1 | T | G | Heterozygous |
| NC_037645.1 | 10493969 | SNV | 1 | T | C | Heterozygous |
| NC_037645.1 | 10493974 | SNV | 1 | C | T | Heterozygous |
| NC_037645.1 | 10494014 | SNV | 1 | C | T | Homozygous   |
| NC_037645.1 | 10494017 | SNV | 1 | A | T | Homozygous   |
| NC_037645.1 | 10494029 | SNV | 1 | T | C | Homozygous   |
| NC_037645.1 | 10494045 | SNV | 1 | C | A | Heterozygous |
| NC_037645.1 | 10494065 | SNV | 1 | G | T | Homozygous   |
| NC_037645.1 | 10494094 | SNV | 1 | C | T | Homozygous   |
| NC_037645.1 | 10494103 | SNV | 1 | C | T | Heterozygous |
| NC_037645.1 | 10494109 | SNV | 1 | T | C | Homozygous   |
| NC_037645.1 | 10494123 | SNV | 1 | T | C | Homozygous   |
| NC_037645.1 | 10494128 | SNV | 1 | T | C | Homozygous   |
| NC_037645.1 | 10494171 | SNV | 1 | T | C | Homozygous   |
| NC_037645.1 | 10494178 | SNV | 1 | C | T | Homozygous   |
| NC_037645.1 | 10494186 | SNV | 1 | G | T | Homozygous   |
| NC_037645.1 | 10494222 | SNV | 1 | T | C | Homozygous   |
| NC_037645.1 | 10494230 | SNV | 1 | T | A | Homozygous   |
| NC_037645.1 | 10494247 | SNV | 1 | G | T | Homozygous   |
| NC_037645.1 | 10494254 | SNV | 1 | C | T | Heterozygous |
| NC_037645.1 | 10494258 | SNV | 1 | C | T | Heterozygous |
| NC_037645.1 | 10494262 | SNV | 1 | C | T | Heterozygous |



|             |          |     |   |   |   |              |
|-------------|----------|-----|---|---|---|--------------|
| NC_037645.1 | 10494560 | SNV | 1 | A | G | Homozygous   |
| NC_037645.1 | 10494582 | SNV | 1 | A | T | Heterozygous |
| NC_037645.1 | 10494589 | SNV | 1 | T | A | Homozygous   |
| NC_037645.1 | 10494685 | SNV | 1 | T | C | Heterozygous |
| NC_037645.1 | 10494738 | SNV | 1 | T | C | Homozygous   |
| NC_037645.1 | 10495022 | SNV | 1 | T | C | Homozygous   |
| NC_037645.1 | 10496171 | SNV | 1 | C | T | Heterozygous |
| NC_037645.1 | 10497366 | SNV | 1 | T | C | Heterozygous |
| NC_037645.1 | 10497377 | SNV | 1 | G | A | Homozygous   |
| NC_037645.1 | 10497465 | SNV | 1 | T | G | Homozygous   |
| NC_037645.1 | 10497467 | SNV | 1 | A | C | Homozygous   |
| NC_037645.1 | 10497485 | SNV | 1 | T | C | Homozygous   |
| NC_037645.1 | 10497489 | SNV | 1 | T | A | Homozygous   |
| NC_037645.1 | 10497506 | SNV | 1 | A | C | Homozygous   |
| NC_037645.1 | 10497509 | SNV | 1 | T | C | Homozygous   |
| NC_037645.1 | 10497530 | SNV | 1 | A | C | Homozygous   |
| NC_037645.1 | 10497536 | SNV | 1 | T | A | Homozygous   |
| NC_037645.1 | 10497567 | SNV | 1 | A | T | Homozygous   |
| NC_037645.1 | 10497571 | SNV | 1 | T | C | Homozygous   |
| NC_037645.1 | 10497577 | SNV | 1 | A | T | Heterozygous |
| NC_037645.1 | 10497579 | SNV | 1 | A | T | Heterozygous |
| NC_037645.1 | 10497596 | SNV | 1 | A | T | Heterozygous |
| NC_037645.1 | 10497614 | SNV | 1 | T | C | Homozygous   |
| NC_037645.1 | 10497619 | SNV | 1 | A | T | Homozygous   |
| NC_037645.1 | 10497644 | SNV | 1 | A | T | Homozygous   |
| NC_037645.1 | 10497648 | SNV | 1 | A | T | Homozygous   |
| NC_037645.1 | 10497756 | SNV | 1 | A | G | Heterozygous |
| NC_037645.1 | 10497785 | SNV | 1 | C | G | Homozygous   |
| NC_037645.1 | 10499225 | SNV | 1 | T | C | Heterozygous |
| NC_037645.1 | 10500958 | SNV | 1 | A | G | Homozygous   |
| NC_037645.1 | 10500981 | SNV | 1 | A | T | Homozygous   |
| NC_037645.1 | 10501011 | SNV | 1 | C | T | Homozygous   |
| NC_037645.1 | 10501027 | SNV | 1 | T | C | Homozygous   |
| NC_037645.1 | 10503715 | SNV | 1 | T | C | Homozygous   |
| NC_037645.1 | 10503921 | SNV | 1 | G | A | Homozygous   |
| NC_037645.1 | 10504018 | SNV | 1 | C | T | Heterozygous |
| NC_037645.1 | 10504957 | SNV | 1 | T | C | Homozygous   |
| NC_037645.1 | 10505008 | SNV | 1 | A | G | Homozygous   |
| NC_037645.1 | 10505031 | SNV | 1 | G | A | Homozygous   |
| NC_037645.1 | 10505034 | SNV | 1 | C | T | Homozygous   |
| NC_037645.1 | 10505041 | SNV | 1 | C | G | Heterozygous |
| NC_037645.1 | 10505087 | SNV | 1 | C | T | Heterozygous |
| NC_037645.1 | 10505091 | SNV | 1 | C | T | Heterozygous |
| NC_037645.1 | 10505194 | SNV | 1 | G | A | Heterozygous |
| NC_037645.1 | 10505570 | SNV | 1 | G | A | Heterozygous |
| NC_037645.1 | 10505572 | SNV | 1 | G | A | Heterozygous |
| NC_037645.1 | 10505582 | SNV | 1 | G | A | Homozygous   |
| NC_037645.1 | 10505584 | SNV | 1 | G | A | Heterozygous |
| NC_037645.1 | 10505586 | SNV | 1 | A | G | Homozygous   |
| NC_037645.1 | 10505594 | SNV | 1 | A | G | Heterozygous |
| NC_037645.1 | 10505746 | SNV | 1 | T | C | Homozygous   |

|             |          |     |   |   |   |              |
|-------------|----------|-----|---|---|---|--------------|
| NC_037645.1 | 10505838 | SNV | 1 | C | G | Heterozygous |
| NC_037645.1 | 10505842 | SNV | 1 | T | C | Heterozygous |
| NC_037645.1 | 10505847 | SNV | 1 | T | G | Heterozygous |
| NC_037645.1 | 10505882 | SNV | 1 | T | C | Heterozygous |
| NC_037645.1 | 10505885 | SNV | 1 | T | G | Heterozygous |
| NC_037645.1 | 10505903 | SNV | 1 | A | C | Homozygous   |
| NC_037645.1 | 10505941 | SNV | 1 | T | C | Heterozygous |
| NC_037645.1 | 10508547 | SNV | 1 | A | C | Homozygous   |
| NC_037645.1 | 10508551 | SNV | 1 | A | T | Homozygous   |
| NC_037645.1 | 10508553 | SNV | 1 | T | G | Homozygous   |
| NC_037645.1 | 10508556 | SNV | 1 | T | C | Homozygous   |
| NC_037645.1 | 10508567 | SNV | 1 | T | A | Homozygous   |
| NC_037645.1 | 10508964 | SNV | 1 | A | G | Heterozygous |
| NC_037645.1 | 10508969 | SNV | 1 | G | A | Heterozygous |
| NC_037645.1 | 10509137 | SNV | 1 | C | T | Heterozygous |
| NC_037645.1 | 10509346 | SNV | 1 | T | C | Homozygous   |
| NC_037645.1 | 10509348 | SNV | 1 | C | T | Heterozygous |
| NC_037645.1 | 10509390 | SNV | 1 | G | A | Heterozygous |
| NC_037645.1 | 10523440 | SNV | 1 | T | A | Heterozygous |
| NC_037645.1 | 10523523 | SNV | 1 | T | A | Heterozygous |
| NC_037645.1 | 10523689 | SNV | 1 | G | A | Heterozygous |
| NC_037645.1 | 10523721 | SNV | 1 | A | G | Heterozygous |
| NC_037645.1 | 10523730 | SNV | 1 | A | G | Heterozygous |
| NC_037645.1 | 10523732 | SNV | 1 | A | G | Heterozygous |
| NC_037645.1 | 10523736 | SNV | 1 | A | G | Heterozygous |
| NC_037645.1 | 10523742 | SNV | 1 | A | G | Homozygous   |
| NC_037645.1 | 10523960 | SNV | 1 | T | C | Heterozygous |
| NC_037645.1 | 10524095 | SNV | 1 | A | G | Homozygous   |
| NC_037645.1 | 10524312 | SNV | 1 | C | T | Heterozygous |
| NC_037645.1 | 10524476 | SNV | 1 | C | T | Homozygous   |
| NC_037645.1 | 10524638 | SNV | 1 | A | G | Homozygous   |
| NC_037645.1 | 10524932 | SNV | 1 | G | C | Heterozygous |
| NC_037645.1 | 10525043 | SNV | 1 | G | A | Homozygous   |
| NC_037645.1 | 10533555 | SNV | 1 | A | T | Homozygous   |
| NC_037645.1 | 10533563 | SNV | 1 | T | C | Heterozygous |
| NC_037645.1 | 10533565 | SNV | 1 | T | C | Heterozygous |
| NC_037645.1 | 10533569 | SNV | 1 | T | C | Heterozygous |
| NC_037645.1 | 10533571 | SNV | 1 | T | C | Heterozygous |
| NC_037645.1 | 10533573 | SNV | 1 | T | C | Heterozygous |
| NC_037645.1 | 10533575 | SNV | 1 | T | C | Heterozygous |
| NC_037645.1 | 10533579 | SNV | 1 | T | C | Heterozygous |
| NC_037645.1 | 10533581 | SNV | 1 | T | C | Homozygous   |
| NC_037645.1 | 10533583 | SNV | 1 | T | C | Heterozygous |
| NC_037645.1 | 10533585 | SNV | 1 | T | C | Heterozygous |
| NC_037645.1 | 10533587 | SNV | 1 | T | C | Heterozygous |
| NC_037645.1 | 10533591 | SNV | 1 | T | C | Heterozygous |
| NC_037645.1 | 10535303 | SNV | 1 | A | G | Homozygous   |
| NC_037645.1 | 10535411 | SNV | 1 | C | T | Heterozygous |
| NC_037645.1 | 10535489 | SNV | 1 | T | A | Homozygous   |
| NC_037645.1 | 10535497 | SNV | 1 | C | A | Homozygous   |
| NC_037645.1 | 10535499 | SNV | 1 | C | T | Homozygous   |

|             |          |     |   |   |   |              |
|-------------|----------|-----|---|---|---|--------------|
| NC_037645.1 | 10535528 | SNV | 1 | T | C | Heterozygous |
| NC_037645.1 | 10539762 | SNV | 1 | A | G | Heterozygous |
| NC_037645.1 | 10540105 | SNV | 1 | T | C | Homozygous   |
| NC_037645.1 | 10540772 | SNV | 1 | G | T | Heterozygous |
| NC_037645.1 | 10545701 | SNV | 1 | A | G | Heterozygous |
| NC_037645.1 | 10556105 | SNV | 1 | T | A | Homozygous   |
| NC_037645.1 | 10575658 | SNV | 1 | C | T | Homozygous   |
| NC_037645.1 | 10575697 | SNV | 1 | T | C | Homozygous   |
| NC_037645.1 | 10575708 | SNV | 1 | A | G | Homozygous   |
| NC_037645.1 | 10575725 | SNV | 1 | C | T | Homozygous   |
| NC_037645.1 | 10578697 | SNV | 1 | A | G | Heterozygous |
| NC_037645.1 | 10578737 | SNV | 1 | G | A | Heterozygous |
| NC_037645.1 | 10589237 | SNV | 1 | C | A | Heterozygous |
| NC_037645.1 | 10612186 | SNV | 1 | C | T | Homozygous   |
| NC_037645.1 | 10612189 | SNV | 1 | T | C | Homozygous   |
| NC_037645.1 | 10612191 | SNV | 1 | T | C | Homozygous   |
| NC_037645.1 | 10612199 | SNV | 1 | A | C | Homozygous   |
| NC_037645.1 | 10612218 | SNV | 1 | T | A | Homozygous   |
| NC_037645.1 | 10612234 | SNV | 1 | T | A | Homozygous   |
| NC_037645.1 | 10618278 | SNV | 1 | G | A | Heterozygous |
| NC_037645.1 | 10618281 | SNV | 1 | A | G | Heterozygous |
| NC_037645.1 | 10618333 | SNV | 1 | T | A | Heterozygous |
| NC_037645.1 | 10625024 | SNV | 1 | A | T | Heterozygous |
| NC_037645.1 | 10625029 | SNV | 1 | A | T | Homozygous   |
| NC_037645.1 | 10625163 | SNV | 1 | G | A | Homozygous   |
| NC_037645.1 | 10625172 | SNV | 1 | A | G | Homozygous   |
| NC_037645.1 | 10625177 | SNV | 1 | G | A | Homozygous   |
| NC_037645.1 | 10625189 | SNV | 1 | G | A | Heterozygous |
| NC_037645.1 | 10625206 | SNV | 1 | T | G | Homozygous   |
| NC_037645.1 | 10625243 | SNV | 1 | T | C | Homozygous   |
| NC_037645.1 | 10625259 | SNV | 1 | A | C | Homozygous   |
| NC_037645.1 | 10625264 | SNV | 1 | T | C | Homozygous   |
| NC_037645.1 | 10625276 | SNV | 1 | G | A | Homozygous   |
| NC_037645.1 | 10625278 | SNV | 1 | G | T | Heterozygous |
| NC_037645.1 | 10625289 | SNV | 1 | T | A | Homozygous   |
| NC_037645.1 | 10625295 | SNV | 1 | G | A | Heterozygous |
| NC_037645.1 | 10625311 | SNV | 1 | G | A | Homozygous   |
| NC_037645.1 | 10625322 | SNV | 1 | G | A | Heterozygous |
| NC_037645.1 | 10625330 | SNV | 1 | G | T | Heterozygous |
| NC_037645.1 | 10625353 | SNV | 1 | A | G | Heterozygous |
| NC_037645.1 | 10625360 | SNV | 1 | G | A | Heterozygous |
| NC_037645.1 | 10639555 | SNV | 1 | G | A | Heterozygous |
| NC_037645.1 | 10639571 | SNV | 1 | G | C | Heterozygous |
| NC_037645.1 | 10639585 | SNV | 1 | G | A | Heterozygous |
| NC_037645.1 | 10639614 | SNV | 1 | A | T | Homozygous   |
| NC_037645.1 | 10639852 | SNV | 1 | A | G | Homozygous   |
| NC_037645.1 | 10639867 | SNV | 1 | T | A | Homozygous   |
| NC_037645.1 | 10639873 | SNV | 1 | T | A | Heterozygous |
| NC_037645.1 | 10648275 | SNV | 1 | G | A | Homozygous   |
| NC_037645.1 | 10648280 | SNV | 1 | T | A | Heterozygous |
| NC_037645.1 | 10648290 | SNV | 1 | A | T | Heterozygous |

|             |          |     |   |   |   |              |
|-------------|----------|-----|---|---|---|--------------|
| NC_037645.1 | 10648298 | SNV | 1 | A | C | Heterozygous |
| NC_037645.1 | 10648302 | SNV | 1 | C | A | Homozygous   |
| NC_037645.1 | 10648311 | SNV | 1 | A | G | Homozygous   |
| NC_037645.1 | 10648314 | SNV | 1 | A | T | Homozygous   |
| NC_037645.1 | 10648329 | SNV | 1 | G | T | Homozygous   |
| NC_037645.1 | 10648335 | SNV | 1 | G | A | Homozygous   |
| NC_037645.1 | 10648350 | SNV | 1 | G | A | Homozygous   |
| NC_037645.1 | 10648380 | SNV | 1 | A | T | Heterozygous |
| NC_037645.1 | 10659036 | SNV | 1 | G | A | Homozygous   |
| NC_037645.1 | 10659038 | SNV | 1 | G | A | Homozygous   |
| NC_037645.1 | 10660604 | SNV | 1 | G | A | Homozygous   |
| NC_037645.1 | 10660608 | SNV | 1 | G | T | Homozygous   |
| NC_037645.1 | 10660610 | SNV | 1 | T | A | Homozygous   |
| NC_037645.1 | 10660621 | SNV | 1 | A | T | Homozygous   |
| NC_037645.1 | 10660624 | SNV | 1 | G | A | Homozygous   |
| NC_037645.1 | 10675515 | SNV | 1 | T | A | Heterozygous |
| NC_037645.1 | 10675565 | SNV | 1 | G | A | Heterozygous |
| NC_037645.1 | 10675680 | SNV | 1 | A | G | Homozygous   |
| NC_037645.1 | 10679641 | SNV | 1 | C | A | Homozygous   |
| NC_037645.1 | 10679664 | SNV | 1 | T | G | Homozygous   |
| NC_037645.1 | 10679666 | SNV | 1 | T | G | Homozygous   |
| NC_037645.1 | 10679670 | SNV | 1 | T | C | Homozygous   |
| NC_037645.1 | 10679673 | SNV | 1 | T | C | Homozygous   |
| NC_037645.1 | 10679675 | SNV | 1 | A | T | Homozygous   |
| NC_037645.1 | 10679681 | SNV | 1 | T | C | Homozygous   |
| NC_037645.1 | 10688680 | SNV | 1 | A | G | Homozygous   |
| NC_037645.1 | 10691351 | SNV | 1 | G | A | Homozygous   |
| NC_037645.1 | 10691385 | SNV | 1 | A | G | Homozygous   |
| NC_037645.1 | 10691599 | SNV | 1 | A | G | Homozygous   |
| NC_037645.1 | 10697328 | SNV | 1 | A | G | Homozygous   |
| NC_037645.1 | 10697360 | SNV | 1 | A | T | Homozygous   |
| NC_037645.1 | 10698529 | SNV | 1 | T | C | Homozygous   |
| NC_037645.1 | 10698571 | SNV | 1 | C | T | Homozygous   |
| NC_037645.1 | 10698586 | SNV | 1 | C | T | Homozygous   |
| NC_037645.1 | 10698596 | SNV | 1 | C | T | Homozygous   |
| NC_037645.1 | 10698619 | SNV | 1 | G | C | Homozygous   |
| NC_037645.1 | 10699195 | SNV | 1 | T | C | Heterozygous |
| NC_037645.1 | 10699204 | SNV | 1 | A | G | Heterozygous |
| NC_037645.1 | 10699207 | SNV | 1 | T | G | Heterozygous |
| NC_037645.1 | 10699213 | SNV | 1 | T | G | Heterozygous |
| NC_037645.1 | 10699219 | SNV | 1 | T | G | Homozygous   |
| NC_037645.1 | 10699223 | SNV | 1 | T | G | Heterozygous |
| NC_037645.1 | 10699228 | SNV | 1 | A | G | Heterozygous |
| NC_037645.1 | 10699230 | SNV | 1 | A | G | Heterozygous |
| NC_037645.1 | 10699232 | SNV | 1 | A | G | Heterozygous |
| NC_037645.1 | 10699234 | SNV | 1 | A | G | Heterozygous |
| NC_037645.1 | 10699236 | SNV | 1 | C | A | Heterozygous |
| NC_037645.1 | 10699236 | SNV | 1 | C | G | Heterozygous |
| NC_037645.1 | 10699244 | SNV | 1 | T | A | Heterozygous |
| NC_037645.1 | 10703401 | SNV | 1 | G | A | Homozygous   |
| NC_037645.1 | 10703438 | SNV | 1 | G | A | Heterozygous |

|             |          |     |   |   |   |              |
|-------------|----------|-----|---|---|---|--------------|
| NC_037645.1 | 10709846 | SNV | 1 | C | T | Heterozygous |
| NC_037645.1 | 10710510 | SNV | 1 | G | A | Heterozygous |
| NC_037645.1 | 10710514 | SNV | 1 | A | G | Homozygous   |
| NC_037645.1 | 10710528 | SNV | 1 | G | A | Homozygous   |
| NC_037645.1 | 10710532 | SNV | 1 | A | G | Heterozygous |
| NC_037645.1 | 10710537 | SNV | 1 | G | A | Homozygous   |
| NC_037645.1 | 10724898 | SNV | 1 | G | A | Homozygous   |
| NC_037645.1 | 10724916 | SNV | 1 | G | A | Heterozygous |
| NC_037645.1 | 10724921 | SNV | 1 | G | T | Heterozygous |
| NC_037645.1 | 10724928 | SNV | 1 | A | G | Heterozygous |
| NC_037645.1 | 10728434 | SNV | 1 | A | G | Heterozygous |
| NC_037645.1 | 10732968 | SNV | 1 | G | T | Heterozygous |
| NC_037645.1 | 10732977 | SNV | 1 | G | A | Heterozygous |
| NC_037645.1 | 10732995 | SNV | 1 | T | C | Homozygous   |
| NC_037645.1 | 10733025 | SNV | 1 | A | G | Homozygous   |
| NC_037645.1 | 10733073 | SNV | 1 | A | G | Homozygous   |
| NC_037645.1 | 10738449 | SNV | 1 | T | A | Heterozygous |
| NC_037645.1 | 10752722 | SNV | 1 | G | A | Heterozygous |
| NC_037645.1 | 10752725 | SNV | 1 | A | G | Homozygous   |
| NC_037645.1 | 10753200 | SNV | 1 | A | G | Homozygous   |
| NC_037645.1 | 10753351 | SNV | 1 | G | A | Homozygous   |
| NC_037645.1 | 10753379 | SNV | 1 | C | T | Homozygous   |
| NC_037645.1 | 10753811 | SNV | 1 | C | T | Homozygous   |
| NC_037645.1 | 10753830 | SNV | 1 | C | T | Homozygous   |
| NC_037645.1 | 10753864 | SNV | 1 | C | T | Homozygous   |
| NC_037645.1 | 10766350 | SNV | 1 | A | G | Heterozygous |
| NC_037645.1 | 10766373 | SNV | 1 | T | G | Homozygous   |
| NC_037645.1 | 10766375 | SNV | 1 | G | T | Homozygous   |
| NC_037645.1 | 10766380 | SNV | 1 | A | G | Heterozygous |
| NC_037645.1 | 10766389 | SNV | 1 | G | A | Homozygous   |
| NC_037645.1 | 10766397 | SNV | 1 | G | A | Heterozygous |
| NC_037645.1 | 10766406 | SNV | 1 | A | G | Heterozygous |
| NC_037645.1 | 10766414 | SNV | 1 | A | G | Heterozygous |
| NC_037645.1 | 10766495 | SNV | 1 | G | T | Homozygous   |
| NC_037645.1 | 10766509 | SNV | 1 | T | A | Heterozygous |
| NC_037645.1 | 10766513 | SNV | 1 | T | A | Heterozygous |
| NC_037645.1 | 10766523 | SNV | 1 | T | G | Heterozygous |
| NC_037645.1 | 10766549 | SNV | 1 | G | T | Heterozygous |
| NC_037645.1 | 10766567 | SNV | 1 | G | C | Heterozygous |
| NC_037645.1 | 10766569 | SNV | 1 | T | G | Heterozygous |
| NC_037645.1 | 10766572 | SNV | 1 | A | G | Heterozygous |
| NC_037645.1 | 10766597 | SNV | 1 | G | A | Homozygous   |
| NC_037645.1 | 10766608 | SNV | 1 | A | G | Homozygous   |
| NC_037645.1 | 10766651 | SNV | 1 | T | A | Homozygous   |
| NC_037645.1 | 10766655 | SNV | 1 | T | A | Homozygous   |
| NC_037645.1 | 10766657 | SNV | 1 | G | A | Homozygous   |
| NC_037645.1 | 10766659 | SNV | 1 | T | A | Homozygous   |
| NC_037645.1 | 10766691 | SNV | 1 | T | G | Homozygous   |
| NC_037645.1 | 10766695 | SNV | 1 | T | G | Homozygous   |
| NC_037645.1 | 10766697 | SNV | 1 | G | A | Homozygous   |
| NC_037645.1 | 10766701 | SNV | 1 | C | G | Homozygous   |

|             |          |     |   |   |   |              |
|-------------|----------|-----|---|---|---|--------------|
| NC_037645.1 | 10777057 | SNV | 1 | C | T | Homozygous   |
| NC_037645.1 | 10777059 | SNV | 1 | T | C | Homozygous   |
| NC_037645.1 | 10777082 | SNV | 1 | T | C | Homozygous   |
| NC_037645.1 | 10777110 | SNV | 1 | G | A | Heterozygous |
| NC_037645.1 | 10777187 | SNV | 1 | G | A | Heterozygous |
| NC_037645.1 | 10777206 | SNV | 1 | G | T | Heterozygous |
| NC_037645.1 | 10777262 | SNV | 1 | G | A | Heterozygous |
| NC_037645.1 | 10777311 | SNV | 1 | A | G | Homozygous   |
| NC_037645.1 | 10777315 | SNV | 1 | G | A | Heterozygous |
| NC_037645.1 | 10777322 | SNV | 1 | G | A | Heterozygous |
| NC_037645.1 | 10777328 | SNV | 1 | A | G | Homozygous   |
| NC_037645.1 | 10777333 | SNV | 1 | A | G | Homozygous   |
| NC_037645.1 | 10785595 | SNV | 1 | A | G | Heterozygous |
| NC_037645.1 | 10785603 | SNV | 1 | T | C | Heterozygous |
| NC_037645.1 | 10785606 | SNV | 1 | A | C | Heterozygous |
| NC_037645.1 | 10785615 | SNV | 1 | T | C | Heterozygous |
| NC_037645.1 | 10785635 | SNV | 1 | T | A | Homozygous   |
| NC_037645.1 | 10785675 | SNV | 1 | C | G | Heterozygous |
| NC_037645.1 | 10785682 | SNV | 1 | T | C | Homozygous   |
| NC_037645.1 | 10796504 | SNV | 1 | C | T | Homozygous   |
| NC_037645.1 | 10796515 | SNV | 1 | T | C | Homozygous   |
| NC_037645.1 | 10797732 | SNV | 1 | C | T | Heterozygous |
| NC_037645.1 | 10797886 | SNV | 1 | G | A | Heterozygous |
| NC_037645.1 | 10797916 | SNV | 1 | C | T | Homozygous   |
| NC_037645.1 | 10797935 | SNV | 1 | T | C | Homozygous   |
| NC_037645.1 | 10798329 | SNV | 1 | G | A | Homozygous   |
| NC_037645.1 | 10804693 | SNV | 1 | A | C | Homozygous   |
| NC_037645.1 | 10804723 | SNV | 1 | A | T | Homozygous   |
| NC_037645.1 | 10804733 | SNV | 1 | A | T | Homozygous   |
| NC_037645.1 | 10814367 | SNV | 1 | A | T | Homozygous   |
| NC_037645.1 | 10814377 | SNV | 1 | A | T | Heterozygous |
| NC_037645.1 | 10814617 | SNV | 1 | A | G | Homozygous   |
| NC_037645.1 | 10814791 | SNV | 1 | G | A | Heterozygous |
| NC_037645.1 | 10814815 | SNV | 1 | T | C | Heterozygous |
| NC_037645.1 | 10814826 | SNV | 1 | G | A | Homozygous   |
| NC_037645.1 | 10814831 | SNV | 1 | G | A | Homozygous   |
| NC_037645.1 | 10814881 | SNV | 1 | T | C | Heterozygous |
| NC_037645.1 | 10815048 | SNV | 1 | A | G | Homozygous   |
| NC_037645.1 | 10815505 | SNV | 1 | T | G | Heterozygous |
| NC_037645.1 | 10815512 | SNV | 1 | A | G | Heterozygous |
| NC_037645.1 | 10815599 | SNV | 1 | T | C | Homozygous   |
| NC_037645.1 | 10822905 | SNV | 1 | T | C | Homozygous   |
| NC_037645.1 | 10824582 | SNV | 1 | T | C | Homozygous   |
| NC_037645.1 | 10826194 | SNV | 1 | T | C | Homozygous   |
| NC_037645.1 | 10826205 | SNV | 1 | C | T | Homozygous   |
| NC_037645.1 | 10826208 | SNV | 1 | T | C | Heterozygous |
| NC_037645.1 | 10838817 | SNV | 1 | A | G | Homozygous   |
| NC_037645.1 | 10839133 | SNV | 1 | G | C | Homozygous   |
| NC_037645.1 | 10839194 | SNV | 1 | A | G | Heterozygous |
| NC_037645.1 | 10839207 | SNV | 1 | G | A | Heterozygous |
| NC_037645.1 | 10839235 | SNV | 1 | C | T | Heterozygous |

|             |          |     |   |   |   |              |
|-------------|----------|-----|---|---|---|--------------|
| NC_037645.1 | 10839261 | SNV | 1 | T | C | Homozygous   |
| NC_037645.1 | 10839322 | SNV | 1 | C | G | Homozygous   |
| NC_037645.1 | 10839472 | SNV | 1 | A | G | Homozygous   |
| NC_037645.1 | 10839577 | SNV | 1 | A | G | Homozygous   |
| NC_037645.1 | 10839646 | SNV | 1 | G | A | Heterozygous |
| NC_037645.1 | 10839675 | SNV | 1 | T | C | Homozygous   |
| NC_037645.1 | 10839685 | SNV | 1 | C | T | Heterozygous |
| NC_037645.1 | 10844826 | SNV | 1 | T | C | Homozygous   |
| NC_037645.1 | 10844838 | SNV | 1 | A | T | Homozygous   |
| NC_037645.1 | 10846134 | SNV | 1 | C | T | Homozygous   |
| NC_037645.1 | 10846141 | SNV | 1 | T | A | Homozygous   |
| NC_037645.1 | 10846152 | SNV | 1 | T | A | Homozygous   |
| NC_037645.1 | 10847391 | SNV | 1 | T | C | Homozygous   |
| NC_037645.1 | 10847404 | SNV | 1 | C | T | Heterozygous |
| NC_037645.1 | 10847436 | SNV | 1 | C | T | Heterozygous |
| NC_037645.1 | 10847485 | SNV | 1 | C | G | Heterozygous |
| NC_037645.1 | 10847915 | SNV | 1 | T | C | Homozygous   |
| NC_037645.1 | 10847917 | SNV | 1 | C | T | Heterozygous |
| NC_037645.1 | 10856859 | SNV | 1 | G | A | Heterozygous |
| NC_037645.1 | 10856877 | SNV | 1 | A | G | Heterozygous |
| NC_037645.1 | 10863097 | SNV | 1 | G | A | Homozygous   |
| NC_037645.1 | 10863101 | SNV | 1 | G | A | Heterozygous |
| NC_037645.1 | 10863102 | SNV | 1 | G | T | Heterozygous |
| NC_037645.1 | 10863109 | SNV | 1 | G | A | Heterozygous |
| NC_037645.1 | 10863109 | SNV | 1 | G | C | Heterozygous |
| NC_037645.1 | 10863112 | SNV | 1 | G | C | Heterozygous |
| NC_037645.1 | 10863291 | SNV | 1 | G | A | Heterozygous |
| NC_037645.1 | 10863294 | SNV | 1 | C | A | Homozygous   |
| NC_037645.1 | 10863465 | SNV | 1 | A | G | Homozygous   |
| NC_037645.1 | 10863760 | SNV | 1 | G | A | Homozygous   |
| NC_037645.1 | 10863854 | SNV | 1 | A | G | Homozygous   |
| NC_037645.1 | 10863887 | SNV | 1 | T | C | Homozygous   |
| NC_037645.1 | 10863901 | SNV | 1 | A | G | Homozygous   |
| NC_037645.1 | 10863931 | SNV | 1 | G | A | Heterozygous |
| NC_037645.1 | 10863942 | SNV | 1 | C | G | Heterozygous |
| NC_037645.1 | 10863957 | SNV | 1 | C | A | Heterozygous |
| NC_037645.1 | 10864002 | SNV | 1 | C | T | Heterozygous |
| NC_037645.1 | 10864025 | SNV | 1 | C | T | Homozygous   |
| NC_037645.1 | 10864053 | SNV | 1 | A | G | Homozygous   |
| NC_037645.1 | 10864087 | SNV | 1 | C | A | Heterozygous |
| NC_037645.1 | 10864187 | SNV | 1 | A | G | Homozygous   |
| NC_037645.1 | 10864189 | SNV | 1 | T | C | Homozygous   |
| NC_037645.1 | 10864272 | SNV | 1 | G | A | Heterozygous |
| NC_037645.1 | 10864337 | SNV | 1 | C | G | Homozygous   |
| NC_037645.1 | 10864346 | SNV | 1 | G | A | Heterozygous |
| NC_037645.1 | 10872571 | SNV | 1 | T | C | Homozygous   |
| NC_037645.1 | 10872612 | SNV | 1 | C | G | Heterozygous |
| NC_037645.1 | 10872904 | SNV | 1 | G | A | Heterozygous |
| NC_037645.1 | 10872909 | SNV | 1 | T | C | Heterozygous |
| NC_037645.1 | 10872911 | SNV | 1 | G | A | Heterozygous |
| NC_037645.1 | 10872913 | SNV | 1 | A | G | Heterozygous |

|             |          |     |   |   |   |              |
|-------------|----------|-----|---|---|---|--------------|
| NC_037645.1 | 10872917 | SNV | 1 | C | T | Heterozygous |
| NC_037645.1 | 10872946 | SNV | 1 | T | C | Heterozygous |
| NC_037645.1 | 10873057 | SNV | 1 | C | T | Heterozygous |
| NC_037645.1 | 10873268 | SNV | 1 | A | G | Heterozygous |
| NC_037645.1 | 10873282 | SNV | 1 | T | C | Heterozygous |
| NC_037645.1 | 10873303 | SNV | 1 | T | G | Homozygous   |
| NC_037645.1 | 10873313 | SNV | 1 | G | A | Heterozygous |
| NC_037645.1 | 10873331 | SNV | 1 | T | A | Heterozygous |
| NC_037645.1 | 10873434 | SNV | 1 | A | T | Homozygous   |
| NC_037645.1 | 10873442 | SNV | 1 | T | A | Homozygous   |
| NC_037645.1 | 10873451 | SNV | 1 | A | G | Heterozygous |
| NC_037645.1 | 10873462 | SNV | 1 | A | G | Heterozygous |
| NC_037645.1 | 10873694 | SNV | 1 | T | C | Homozygous   |
| NC_037645.1 | 10873780 | SNV | 1 | T | C | Homozygous   |
| NC_037645.1 | 10878540 | SNV | 1 | A | G | Heterozygous |
| NC_037645.1 | 10878606 | SNV | 1 | G | C | Homozygous   |
| NC_037645.1 | 10878615 | SNV | 1 | A | T | Heterozygous |
| NC_037645.1 | 10878689 | SNV | 1 | C | T | Heterozygous |
| NC_037645.1 | 10878824 | SNV | 1 | A | G | Homozygous   |
| NC_037645.1 | 10878900 | SNV | 1 | C | G | Homozygous   |
| NC_037645.1 | 10879208 | SNV | 1 | C | T | Heterozygous |
| NC_037645.1 | 10879261 | SNV | 1 | C | T | Heterozygous |
| NC_037645.1 | 10881882 | SNV | 1 | G | A | Heterozygous |
| NC_037645.1 | 10881883 | SNV | 1 | G | A | Heterozygous |
| NC_037645.1 | 10886480 | SNV | 1 | G | C | Homozygous   |
| NC_037645.1 | 10886485 | SNV | 1 | T | C | Homozygous   |
| NC_037645.1 | 10886511 | SNV | 1 | A | G | Homozygous   |
| NC_037645.1 | 10886749 | SNV | 1 | T | C | Heterozygous |
| NC_037645.1 | 10886759 | SNV | 1 | C | T | Homozygous   |
| NC_037645.1 | 10886763 | SNV | 1 | C | T | Heterozygous |
| NC_037645.1 | 10886768 | SNV | 1 | A | G | Heterozygous |
| NC_037645.1 | 10886776 | SNV | 1 | A | C | Heterozygous |
| NC_037645.1 | 10886782 | SNV | 1 | A | G | Homozygous   |
| NC_037645.1 | 10886785 | SNV | 1 | C | T | Homozygous   |
| NC_037645.1 | 10886788 | SNV | 1 | A | G | Homozygous   |
| NC_037645.1 | 10887032 | SNV | 1 | C | T | Homozygous   |
| NC_037645.1 | 10894014 | SNV | 1 | A | G | Heterozygous |
| NC_037645.1 | 10894023 | SNV | 1 | G | T | Heterozygous |
| NC_037645.1 | 10900803 | SNV | 1 | T | C | Heterozygous |
| NC_037645.1 | 10900992 | SNV | 1 | G | A | Homozygous   |
| NC_037645.1 | 10903371 | SNV | 1 | C | A | Heterozygous |
| NC_037645.1 | 10903469 | SNV | 1 | C | T | Heterozygous |
| NC_037645.1 | 10903577 | SNV | 1 | T | C | Homozygous   |
| NC_037645.1 | 10903600 | SNV | 1 | T | C | Heterozygous |
| NC_037645.1 | 10903603 | SNV | 1 | T | G | Heterozygous |
| NC_037645.1 | 10903635 | SNV | 1 | A | G | Homozygous   |
| NC_037645.1 | 10903980 | SNV | 1 | G | A | Homozygous   |
| NC_037645.1 | 10904572 | SNV | 1 | G | C | Homozygous   |
| NC_037645.1 | 10905112 | SNV | 1 | T | A | Homozygous   |
| NC_037645.1 | 10905117 | SNV | 1 | G | C | Homozygous   |
| NC_037645.1 | 10905121 | SNV | 1 | C | A | Homozygous   |



|             |          |     |   |   |   |              |
|-------------|----------|-----|---|---|---|--------------|
| NC_037645.1 | 10905132 | SNV | 1 | A | T | Heterozygous |
| NC_037645.1 | 10905146 | SNV | 1 | T | A | Heterozygous |
| NC_037645.1 | 10909304 | SNV | 1 | T | C | Heterozygous |
| NC_037645.1 | 10909323 | SNV | 1 | A | G | Heterozygous |
| NC_037645.1 | 10909326 | SNV | 1 | A | T | Homozygous   |
| NC_037645.1 | 10914718 | SNV | 1 | C | G | Heterozygous |
| NC_037645.1 | 10922614 | SNV | 1 | A | C | Heterozygous |
| NC_037645.1 | 10922618 | SNV | 1 | A | C | Heterozygous |
| NC_037645.1 | 10922622 | SNV | 1 | A | C | Heterozygous |
| NC_037645.1 | 10923314 | SNV | 1 | G | A | Homozygous   |
| NC_037645.1 | 10923456 | SNV | 1 | T | G | Heterozygous |
| NC_037645.1 | 10923458 | SNV | 1 | T | C | Heterozygous |
| NC_037645.1 | 10934375 | SNV | 1 | A | T | Homozygous   |
| NC_037645.1 | 10934378 | SNV | 1 | T | C | Homozygous   |
| NC_037645.1 | 10934384 | SNV | 1 | T | C | Homozygous   |
| NC_037645.1 | 10934413 | SNV | 1 | A | G | Homozygous   |
| NC_037645.1 | 10934417 | SNV | 1 | T | A | Homozygous   |
| NC_037645.1 | 10936668 | SNV | 1 | T | G | Homozygous   |
| NC_037645.1 | 10937044 | SNV | 1 | A | T | Homozygous   |
| NC_037645.1 | 10938825 | SNV | 1 | G | A | Heterozygous |
| NC_037645.1 | 10938906 | SNV | 1 | G | A | Heterozygous |
| NC_037645.1 | 10938913 | SNV | 1 | T | C | Heterozygous |
| NC_037645.1 | 10939103 | SNV | 1 | T | A | Heterozygous |
| NC_037645.1 | 10939126 | SNV | 1 | C | T | Heterozygous |
| NC_037645.1 | 10939155 | SNV | 1 | T | C | Homozygous   |
| NC_037645.1 | 10939157 | SNV | 1 | C | T | Heterozygous |
| NC_037645.1 | 10939174 | SNV | 1 | T | C | Homozygous   |
| NC_037645.1 | 10939184 | SNV | 1 | C | T | Homozygous   |
| NC_037645.1 | 10939248 | SNV | 1 | A | G | Homozygous   |
| NC_037645.1 | 10939340 | SNV | 1 | A | C | Homozygous   |
| NC_037645.1 | 10939347 | SNV | 1 | G | A | Homozygous   |
| NC_037645.1 | 10939361 | SNV | 1 | C | T | Heterozygous |
| NC_037645.1 | 10939383 | SNV | 1 | T | C | Homozygous   |
| NC_037645.1 | 10939469 | SNV | 1 | T | C | Homozygous   |
| NC_037645.1 | 10939540 | SNV | 1 | C | A | Homozygous   |
| NC_037645.1 | 10939552 | SNV | 1 | T | A | Homozygous   |
| NC_037645.1 | 10939581 | SNV | 1 | G | A | Heterozygous |
| NC_037645.1 | 10939645 | SNV | 1 | A | G | Homozygous   |
| NC_037645.1 | 10939738 | SNV | 1 | T | C | Homozygous   |
| NC_037645.1 | 10939758 | SNV | 1 | T | C | Heterozygous |
| NC_037645.1 | 10939780 | SNV | 1 | T | C | Homozygous   |
| NC_037645.1 | 10939913 | SNV | 1 | T | C | Homozygous   |
| NC_037645.1 | 10940001 | SNV | 1 | G | A | Heterozygous |
| NC_037645.1 | 10940041 | SNV | 1 | A | G | Homozygous   |
| NC_037645.1 | 10940266 | SNV | 1 | C | T | Heterozygous |
| NC_037645.1 | 10940276 | SNV | 1 | C | T | Heterozygous |
| NC_037645.1 | 10940359 | SNV | 1 | T | C | Homozygous   |
| NC_037645.1 | 10940378 | SNV | 1 | A | G | Homozygous   |
| NC_037645.1 | 10940461 | SNV | 1 | C | T | Homozygous   |
| NC_037645.1 | 10940475 | SNV | 1 | T | C | Homozygous   |
| NC_037645.1 | 10940488 | SNV | 1 | T | C | Homozygous   |

|             |          |     |   |   |   |              |
|-------------|----------|-----|---|---|---|--------------|
| NC_037645.1 | 10940637 | SNV | 1 | T | C | Homozygous   |
| NC_037645.1 | 10940678 | SNV | 1 | T | C | Homozygous   |
| NC_037645.1 | 10940680 | SNV | 1 | A | G | Homozygous   |
| NC_037645.1 | 10940855 | SNV | 1 | T | A | Heterozygous |
| NC_037645.1 | 10940895 | SNV | 1 | G | A | Homozygous   |
| NC_037645.1 | 10948760 | SNV | 1 | A | G | Homozygous   |
| NC_037645.1 | 10948783 | SNV | 1 | C | T | Homozygous   |
| NC_037645.1 | 10948785 | SNV | 1 | A | C | Heterozygous |
| NC_037645.1 | 10948786 | SNV | 1 | A | T | Heterozygous |
| NC_037645.1 | 10948787 | SNV | 1 | A | T | Heterozygous |
| NC_037645.1 | 10948789 | SNV | 1 | A | T | Heterozygous |
| NC_037645.1 | 10948795 | SNV | 1 | T | A | Heterozygous |
| NC_037645.1 | 10948837 | SNV | 1 | A | G | Heterozygous |
| NC_037645.1 | 10949022 | SNV | 1 | T | C | Homozygous   |
| NC_037645.1 | 10949057 | SNV | 1 | T | C | Homozygous   |
| NC_037645.1 | 10949163 | SNV | 1 | A | G | Homozygous   |
| NC_037645.1 | 10949191 | SNV | 1 | A | G | Homozygous   |
| NC_037645.1 | 10949217 | SNV | 1 | G | C | Heterozygous |
| NC_037645.1 | 10949257 | SNV | 1 | G | A | Heterozygous |
| NC_037645.1 | 10949261 | SNV | 1 | T | C | Heterozygous |
| NC_037645.1 | 10949289 | SNV | 1 | G | A | Homozygous   |
| NC_037645.1 | 10949330 | SNV | 1 | G | A | Heterozygous |
| NC_037645.1 | 10949356 | SNV | 1 | G | A | Heterozygous |
| NC_037645.1 | 10949374 | SNV | 1 | G | C | Homozygous   |
| NC_037645.1 | 10949382 | SNV | 1 | A | G | Heterozygous |
| NC_037645.1 | 10949397 | SNV | 1 | T | C | Homozygous   |
| NC_037645.1 | 10949484 | SNV | 1 | T | C | Homozygous   |
| NC_037645.1 | 10949525 | SNV | 1 | C | T | Heterozygous |
| NC_037645.1 | 10949785 | SNV | 1 | T | C | Homozygous   |
| NC_037645.1 | 10949901 | SNV | 1 | C | T | Heterozygous |
| NC_037645.1 | 10950032 | SNV | 1 | G | A | Heterozygous |
| NC_037645.1 | 10950046 | SNV | 1 | G | A | Heterozygous |
| NC_037645.1 | 10950057 | SNV | 1 | G | A | Heterozygous |
| NC_037645.1 | 10950370 | SNV | 1 | T | C | Heterozygous |
| NC_037645.1 | 10950391 | SNV | 1 | G | A | Homozygous   |
| NC_037645.1 | 10950557 | SNV | 1 | A | G | Homozygous   |
| NC_037645.1 | 10950662 | SNV | 1 | A | C | Heterozygous |
| NC_037645.1 | 10950675 | SNV | 1 | C | T | Heterozygous |
| NC_037645.1 | 10950726 | SNV | 1 | G | A | Heterozygous |
| NC_037645.1 | 10950742 | SNV | 1 | C | T | Homozygous   |
| NC_037645.1 | 10950751 | SNV | 1 | G | A | Heterozygous |
| NC_037645.1 | 10950770 | SNV | 1 | T | C | Heterozygous |
| NC_037645.1 | 10950867 | SNV | 1 | A | G | Heterozygous |
| NC_037645.1 | 10950916 | SNV | 1 | T | C | Homozygous   |
| NC_037645.1 | 10950929 | SNV | 1 | C | T | Heterozygous |
| NC_037645.1 | 10950955 | SNV | 1 | G | C | Heterozygous |
| NC_037645.1 | 10950958 | SNV | 1 | A | G | Heterozygous |
| NC_037645.1 | 10951313 | SNV | 1 | A | G | Heterozygous |
| NC_037645.1 | 10956160 | SNV | 1 | C | T | Heterozygous |
| NC_037645.1 | 10956164 | SNV | 1 | C | A | Heterozygous |
| NC_037645.1 | 10956183 | SNV | 1 | A | T | Homozygous   |

|             |          |     |   |   |   |              |
|-------------|----------|-----|---|---|---|--------------|
| NC_037645.1 | 10956187 | SNV | 1 | T | A | Heterozygous |
| NC_037645.1 | 10956269 | SNV | 1 | A | G | Heterozygous |
| NC_037645.1 | 10956516 | SNV | 1 | A | T | Heterozygous |
| NC_037645.1 | 10957217 | SNV | 1 | A | G | Homozygous   |
| NC_037645.1 | 10957272 | SNV | 1 | T | C | Homozygous   |
| NC_037645.1 | 10957776 | SNV | 1 | A | G | Homozygous   |
| NC_037645.1 | 10957792 | SNV | 1 | A | G | Heterozygous |
| NC_037645.1 | 10957812 | SNV | 1 | T | C | Heterozygous |
| NC_037645.1 | 10958009 | SNV | 1 | C | T | Heterozygous |
| NC_037645.1 | 10958178 | SNV | 1 | G | A | Heterozygous |
| NC_037645.1 | 10958211 | SNV | 1 | T | C | Homozygous   |
| NC_037645.1 | 10958220 | SNV | 1 | G | A | Homozygous   |
| NC_037645.1 | 10958229 | SNV | 1 | T | C | Homozygous   |
| NC_037645.1 | 10958250 | SNV | 1 | C | T | Homozygous   |
| NC_037645.1 | 10958275 | SNV | 1 | T | G | Heterozygous |
| NC_037645.1 | 10958277 | SNV | 1 | T | A | Homozygous   |
| NC_037645.1 | 10958293 | SNV | 1 | A | G | Heterozygous |
| NC_037645.1 | 10958327 | SNV | 1 | A | G | Homozygous   |
| NC_037645.1 | 10958498 | SNV | 1 | C | T | Homozygous   |
| NC_037645.1 | 10958574 | SNV | 1 | A | G | Homozygous   |
| NC_037645.1 | 10958590 | SNV | 1 | C | G | Heterozygous |
| NC_037645.1 | 10958794 | SNV | 1 | C | T | Homozygous   |
| NC_037645.1 | 10958920 | SNV | 1 | C | T | Homozygous   |
| NC_037645.1 | 10959919 | SNV | 1 | A | G | Heterozygous |
| NC_037645.1 | 10959925 | SNV | 1 | T | C | Heterozygous |
| NC_037645.1 | 10960027 | SNV | 1 | A | G | Homozygous   |
| NC_037645.1 | 10960553 | SNV | 1 | A | T | Heterozygous |
| NC_037645.1 | 10960555 | SNV | 1 | C | T | Heterozygous |
| NC_037645.1 | 10960579 | SNV | 1 | G | T | Heterozygous |
| NC_037645.1 | 10960586 | SNV | 1 | A | T | Heterozygous |
| NC_037645.1 | 10961700 | SNV | 1 | A | G | Homozygous   |
| NC_037645.1 | 10962191 | SNV | 1 | C | T | Heterozygous |
| NC_037645.1 | 10962337 | SNV | 1 | C | T | Heterozygous |
| NC_037645.1 | 10962410 | SNV | 1 | G | A | Homozygous   |
| NC_037645.1 | 10962473 | SNV | 1 | A | T | Heterozygous |
| NC_037645.1 | 10962478 | SNV | 1 | A | T | Heterozygous |
| NC_037645.1 | 10962842 | SNV | 1 | T | A | Homozygous   |
| NC_037645.1 | 10962849 | SNV | 1 | G | A | Homozygous   |
| NC_037645.1 | 10962854 | SNV | 1 | C | T | Heterozygous |
| NC_037645.1 | 10963067 | SNV | 1 | A | T | Heterozygous |
| NC_037645.1 | 10963098 | SNV | 1 | T | C | Heterozygous |
| NC_037645.1 | 10963219 | SNV | 1 | G | T | Heterozygous |
| NC_037645.1 | 10963236 | SNV | 1 | A | G | Heterozygous |
| NC_037645.1 | 10963396 | SNV | 1 | C | T | Heterozygous |
| NC_037645.1 | 10966046 | SNV | 1 | G | A | Heterozygous |
| NC_037645.1 | 10966052 | SNV | 1 | C | T | Heterozygous |
| NC_037645.1 | 10968303 | SNV | 1 | C | T | Heterozygous |
| NC_037645.1 | 10968326 | SNV | 1 | C | T | Heterozygous |
| NC_037645.1 | 10968330 | SNV | 1 | C | T | Heterozygous |
| NC_037645.1 | 10968337 | SNV | 1 | T | C | Homozygous   |
| NC_037645.1 | 10968729 | SNV | 1 | G | A | Heterozygous |

|             |          |     |   |   |   |              |
|-------------|----------|-----|---|---|---|--------------|
| NC_037645.1 | 10968758 | SNV | 1 | A | T | Homozygous   |
| NC_037645.1 | 10968772 | SNV | 1 | G | A | Heterozygous |
| NC_037645.1 | 10968774 | SNV | 1 | G | A | Heterozygous |
| NC_037645.1 | 10968780 | SNV | 1 | T | A | Heterozygous |
| NC_037645.1 | 10968784 | SNV | 1 | G | A | Heterozygous |
| NC_037645.1 | 10970326 | SNV | 1 | A | G | Homozygous   |
| NC_037645.1 | 10970356 | SNV | 1 | T | C | Homozygous   |
| NC_037645.1 | 10970377 | SNV | 1 | C | T | Heterozygous |
| NC_037645.1 | 10970382 | SNV | 1 | G | A | Heterozygous |
| NC_037645.1 | 10970673 | SNV | 1 | A | G | Homozygous   |
| NC_037645.1 | 10970711 | SNV | 1 | T | C | Homozygous   |
| NC_037645.1 | 10970721 | SNV | 1 | T | C | Homozygous   |
| NC_037645.1 | 10970738 | SNV | 1 | T | C | Homozygous   |
| NC_037645.1 | 10972921 | SNV | 1 | C | T | Heterozygous |
| NC_037645.1 | 10973079 | SNV | 1 | T | C | Homozygous   |
| NC_037645.1 | 10973107 | SNV | 1 | A | G | Homozygous   |
| NC_037645.1 | 10973118 | SNV | 1 | T | C | Heterozygous |
| NC_037645.1 | 10973129 | SNV | 1 | A | G | Homozygous   |
| NC_037645.1 | 10973138 | SNV | 1 | T | G | Homozygous   |
| NC_037645.1 | 10974689 | SNV | 1 | A | C | Homozygous   |
| NC_037645.1 | 10974888 | SNV | 1 | A | G | Heterozygous |
| NC_037645.1 | 10979337 | SNV | 1 | T | C | Heterozygous |
| NC_037645.1 | 10979339 | SNV | 1 | A | T | Homozygous   |
| NC_037645.1 | 10982920 | SNV | 1 | T | A | Heterozygous |
| NC_037645.1 | 10982923 | SNV | 1 | A | T | Heterozygous |
| NC_037645.1 | 10982933 | SNV | 1 | A | T | Heterozygous |
| NC_037645.1 | 10982941 | SNV | 1 | A | G | Heterozygous |
| NC_037645.1 | 10984897 | SNV | 1 | T | C | Homozygous   |
| NC_037645.1 | 10985127 | SNV | 1 | C | T | Homozygous   |
| NC_037645.1 | 10985134 | SNV | 1 | T | C | Homozygous   |
| NC_037645.1 | 10985144 | SNV | 1 | T | C | Homozygous   |
| NC_037645.1 | 10985262 | SNV | 1 | G | C | Heterozygous |
| NC_037645.1 | 10985263 | SNV | 1 | C | T | Heterozygous |
| NC_037645.1 | 10985270 | SNV | 1 | T | C | Homozygous   |
| NC_037645.1 | 10985334 | SNV | 1 | C | T | Heterozygous |
| NC_037645.1 | 10985352 | SNV | 1 | G | A | Heterozygous |
| NC_037645.1 | 10985424 | SNV | 1 | T | C | Homozygous   |
| NC_037645.1 | 10985427 | SNV | 1 | A | G | Homozygous   |
| NC_037645.1 | 10985520 | SNV | 1 | C | T | Homozygous   |
| NC_037645.1 | 10985524 | SNV | 1 | G | A | Homozygous   |
| NC_037645.1 | 10985529 | SNV | 1 | A | G | Homozygous   |
| NC_037645.1 | 10985558 | SNV | 1 | C | T | Heterozygous |
| NC_037645.1 | 10985563 | SNV | 1 | C | T | Homozygous   |
| NC_037645.1 | 10985633 | SNV | 1 | G | A | Heterozygous |
| NC_037645.1 | 10985639 | SNV | 1 | G | C | Heterozygous |
| NC_037645.1 | 10985693 | SNV | 1 | A | G | Homozygous   |
| NC_037645.1 | 10985699 | SNV | 1 | G | A | Homozygous   |
| NC_037645.1 | 10985728 | SNV | 1 | C | A | Homozygous   |
| NC_037645.1 | 10985753 | SNV | 1 | A | G | Homozygous   |
| NC_037645.1 | 10985835 | SNV | 1 | G | A | Heterozygous |
| NC_037645.1 | 10985858 | SNV | 1 | T | A | Heterozygous |

|             |          |     |   |   |   |              |
|-------------|----------|-----|---|---|---|--------------|
| NC_037645.1 | 10985932 | SNV | 1 | G | A | Heterozygous |
| NC_037645.1 | 10985938 | SNV | 1 | G | A | Homozygous   |
| NC_037645.1 | 10989183 | SNV | 1 | G | A | Homozygous   |
| NC_037645.1 | 10989194 | SNV | 1 | T | C | Homozygous   |
| NC_037645.1 | 10989204 | SNV | 1 | C | T | Homozygous   |
| NC_037645.1 | 10989211 | SNV | 1 | T | C | Homozygous   |
| NC_037645.1 | 10992376 | SNV | 1 | C | T | Heterozygous |
| NC_037645.1 | 10992381 | SNV | 1 | A | T | Heterozygous |
| NC_037645.1 | 10992618 | SNV | 1 | G | A | Heterozygous |
| NC_037645.1 | 10992745 | SNV | 1 | C | T | Homozygous   |
| NC_037645.1 | 10992751 | SNV | 1 | G | A | Heterozygous |
| NC_037645.1 | 10992754 | SNV | 1 | C | T | Homozygous   |
| NC_037645.1 | 10992839 | SNV | 1 | A | G | Homozygous   |
| NC_037645.1 | 10992856 | SNV | 1 | T | C | Homozygous   |
| NC_037645.1 | 10993024 | SNV | 1 | A | T | Heterozygous |
| NC_037645.1 | 10993087 | SNV | 1 | T | C | Heterozygous |
| NC_037645.1 | 10993228 | SNV | 1 | T | C | Homozygous   |
| NC_037645.1 | 10993489 | SNV | 1 | C | T | Heterozygous |
| NC_037645.1 | 10993496 | SNV | 1 | G | A | Homozygous   |
| NC_037645.1 | 10993541 | SNV | 1 | G | T | Homozygous   |
| NC_037645.1 | 10993545 | SNV | 1 | A | T | Heterozygous |
| NC_037645.1 | 10993551 | SNV | 1 | T | C | Heterozygous |
| NC_037645.1 | 10993556 | SNV | 1 | G | T | Heterozygous |
| NC_037645.1 | 10993566 | SNV | 1 | G | T | Heterozygous |
| NC_037645.1 | 10993611 | SNV | 1 | G | T | Heterozygous |
| NC_037645.1 | 10993642 | SNV | 1 | C | A | Heterozygous |
| NC_037645.1 | 10993693 | SNV | 1 | C | T | Homozygous   |
| NC_037645.1 | 10993701 | SNV | 1 | G | A | Heterozygous |
| NC_037645.1 | 10996248 | SNV | 1 | G | A | Heterozygous |
| NC_037645.1 | 10996254 | SNV | 1 | G | A | Heterozygous |
| NC_037645.1 | 10996268 | SNV | 1 | G | C | Heterozygous |
| NC_037645.1 | 11000265 | SNV | 1 | G | A | Heterozygous |
| NC_037645.1 | 11004694 | SNV | 1 | T | G | Heterozygous |
| NC_037645.1 | 11004864 | SNV | 1 | G | A | Homozygous   |
| NC_037645.1 | 11005044 | SNV | 1 | C | T | Heterozygous |
| NC_037645.1 | 11005151 | SNV | 1 | A | G | Heterozygous |
| NC_037645.1 | 11006288 | SNV | 1 | A | G | Homozygous   |
| NC_037645.1 | 11006556 | SNV | 1 | T | A | Heterozygous |
| NC_037645.1 | 11006569 | SNV | 1 | T | A | Heterozygous |
| NC_037645.1 | 11006787 | SNV | 1 | G | A | Heterozygous |
| NC_037645.1 | 11006904 | SNV | 1 | A | G | Homozygous   |
| NC_037645.1 | 11012561 | SNV | 1 | T | C | Homozygous   |
| NC_037645.1 | 11012623 | SNV | 1 | G | C | Heterozygous |
| NC_037645.1 | 11012646 | SNV | 1 | T | C | Homozygous   |
| NC_037645.1 | 11012715 | SNV | 1 | C | T | Homozygous   |
| NC_037645.1 | 11020338 | SNV | 1 | C | T | Heterozygous |
| NC_037645.1 | 11020430 | SNV | 1 | G | A | Homozygous   |
| NC_037645.1 | 11023472 | SNV | 1 | A | G | Homozygous   |
| NC_037645.1 | 11026312 | SNV | 1 | C | T | Homozygous   |
| NC_037645.1 | 11026314 | SNV | 1 | A | T | Homozygous   |
| NC_037645.1 | 11027924 | SNV | 1 | C | T | Homozygous   |

|             |          |     |   |   |   |              |
|-------------|----------|-----|---|---|---|--------------|
| NC_037645.1 | 11027955 | SNV | 1 | C | T | Heterozygous |
| NC_037645.1 | 11027996 | SNV | 1 | C | T | Heterozygous |
| NC_037645.1 | 11028003 | SNV | 1 | G | T | Heterozygous |
| NC_037645.1 | 11028020 | SNV | 1 | C | T | Heterozygous |
| NC_037645.1 | 11028291 | SNV | 1 | G | A | Homozygous   |
| NC_037645.1 | 11028311 | SNV | 1 | T | C | Homozygous   |
| NC_037645.1 | 11028322 | SNV | 1 | G | A | Homozygous   |
| NC_037645.1 | 11028359 | SNV | 1 | A | G | Homozygous   |
| NC_037645.1 | 11028641 | SNV | 1 | G | A | Homozygous   |
| NC_037645.1 | 11028751 | SNV | 1 | G | A | Heterozygous |
| NC_037645.1 | 11029085 | SNV | 1 | A | G | Homozygous   |
| NC_037645.1 | 11029089 | SNV | 1 | T | C | Homozygous   |
| NC_037645.1 | 11029118 | SNV | 1 | T | C | Heterozygous |
| NC_037645.1 | 11029124 | SNV | 1 | T | C | Heterozygous |
| NC_037645.1 | 11029147 | SNV | 1 | G | A | Heterozygous |
| NC_037645.1 | 11029223 | SNV | 1 | C | T | Heterozygous |
| NC_037645.1 | 11029256 | SNV | 1 | T | A | Heterozygous |
| NC_037645.1 | 11029258 | SNV | 1 | C | A | Heterozygous |
| NC_037645.1 | 11029266 | SNV | 1 | G | A | Heterozygous |
| NC_037645.1 | 11029299 | SNV | 1 | A | G | Heterozygous |
| NC_037645.1 | 11029307 | SNV | 1 | T | C | Heterozygous |
| NC_037645.1 | 11029328 | SNV | 1 | A | G | Heterozygous |
| NC_037645.1 | 11030650 | SNV | 1 | C | T | Heterozygous |
| NC_037645.1 | 11032989 | SNV | 1 | A | G | Homozygous   |
| NC_037645.1 | 11033023 | SNV | 1 | G | T | Homozygous   |
| NC_037645.1 | 11033084 | SNV | 1 | C | T | Heterozygous |
| NC_037645.1 | 11033545 | SNV | 1 | A | G | Heterozygous |
| NC_037645.1 | 11033871 | SNV | 1 | G | A | Homozygous   |
| NC_037645.1 | 11033950 | SNV | 1 | A | G | Homozygous   |
| NC_037645.1 | 11034149 | SNV | 1 | T | C | Heterozygous |
| NC_037645.1 | 11034178 | SNV | 1 | C | T | Heterozygous |
| NC_037645.1 | 11034215 | SNV | 1 | G | C | Homozygous   |
| NC_037645.1 | 11034226 | SNV | 1 | C | T | Heterozygous |
| NC_037645.1 | 11034232 | SNV | 1 | C | T | Homozygous   |
| NC_037645.1 | 11034244 | SNV | 1 | C | T | Heterozygous |
| NC_037645.1 | 11034275 | SNV | 1 | G | C | Homozygous   |
| NC_037645.1 | 11034286 | SNV | 1 | C | T | Heterozygous |
| NC_037645.1 | 11034301 | SNV | 1 | C | T | Heterozygous |
| NC_037645.1 | 11034307 | SNV | 1 | C | T | Heterozygous |
| NC_037645.1 | 11034322 | SNV | 1 | T | C | Heterozygous |
| NC_037645.1 | 11034328 | SNV | 1 | C | T | Heterozygous |
| NC_037645.1 | 11034334 | SNV | 1 | C | T | Heterozygous |
| NC_037645.1 | 11034365 | SNV | 1 | T | C | Heterozygous |
| NC_037645.1 | 11034379 | SNV | 1 | C | T | Heterozygous |
| NC_037645.1 | 11034382 | SNV | 1 | C | T | Homozygous   |
| NC_037645.1 | 11034401 | SNV | 1 | G | C | Heterozygous |
| NC_037645.1 | 11034412 | SNV | 1 | C | T | Heterozygous |
| NC_037645.1 | 11034428 | SNV | 1 | C | T | Heterozygous |
| NC_037645.1 | 11034437 | SNV | 1 | T | C | Heterozygous |
| NC_037645.1 | 11034495 | SNV | 1 | G | A | Homozygous   |
| NC_037645.1 | 11034714 | SNV | 1 | T | C | Homozygous   |

|             |          |     |   |   |   |              |
|-------------|----------|-----|---|---|---|--------------|
| NC_037645.1 | 11034979 | SNV | 1 | G | A | Homozygous   |
| NC_037645.1 | 11035004 | SNV | 1 | A | G | Homozygous   |
| NC_037645.1 | 11035022 | SNV | 1 | A | G | Homozygous   |
| NC_037645.1 | 11035044 | SNV | 1 | T | C | Heterozygous |
| NC_037645.1 | 11035061 | SNV | 1 | C | T | Heterozygous |
| NC_037645.1 | 11035070 | SNV | 1 | C | T | Heterozygous |
| NC_037645.1 | 11035151 | SNV | 1 | A | G | Homozygous   |
| NC_037645.1 | 11035169 | SNV | 1 | A | C | Heterozygous |
| NC_037645.1 | 11035183 | SNV | 1 | A | G | Heterozygous |
| NC_037645.1 | 11035184 | SNV | 1 | T | A | Heterozygous |
| NC_037645.1 | 11035216 | SNV | 1 | A | G | Homozygous   |
| NC_037645.1 | 11035222 | SNV | 1 | A | G | Homozygous   |
| NC_037645.1 | 11035328 | SNV | 1 | T | C | Homozygous   |
| NC_037645.1 | 11035606 | SNV | 1 | A | G | Homozygous   |
| NC_037645.1 | 11035608 | SNV | 1 | G | A | Heterozygous |
| NC_037645.1 | 11035851 | SNV | 1 | G | A | Homozygous   |
| NC_037645.1 | 11035860 | SNV | 1 | C | G | Heterozygous |
| NC_037645.1 | 11035863 | SNV | 1 | T | C | Heterozygous |
| NC_037645.1 | 11037218 | SNV | 1 | A | G | Heterozygous |
| NC_037645.1 | 11037223 | SNV | 1 | T | A | Heterozygous |
| NC_037645.1 | 11037227 | SNV | 1 | T | G | Homozygous   |
| NC_037645.1 | 11037659 | SNV | 1 | C | A | Homozygous   |
| NC_037645.1 | 11037905 | SNV | 1 | A | G | Heterozygous |
| NC_037645.1 | 11037926 | SNV | 1 | G | A | Heterozygous |
| NC_037645.1 | 11037936 | SNV | 1 | C | T | Heterozygous |
| NC_037645.1 | 11037949 | SNV | 1 | C | T | Heterozygous |
| NC_037645.1 | 11037956 | SNV | 1 | G | C | Heterozygous |
| NC_037645.1 | 11037961 | SNV | 1 | C | T | Homozygous   |
| NC_037645.1 | 11038183 | SNV | 1 | A | C | Heterozygous |
| NC_037645.1 | 11038211 | SNV | 1 | C | T | Heterozygous |
| NC_037645.1 | 11038308 | SNV | 1 | C | G | Heterozygous |
| NC_037645.1 | 11038438 | SNV | 1 | T | C | Heterozygous |
| NC_037645.1 | 11038464 | SNV | 1 | T | C | Homozygous   |
| NC_037645.1 | 11038481 | SNV | 1 | G | A | Homozygous   |
| NC_037645.1 | 11041665 | SNV | 1 | C | T | Homozygous   |
| NC_037645.1 | 11047996 | SNV | 1 | A | T | Homozygous   |
| NC_037645.1 | 11048021 | SNV | 1 | T | G | Homozygous   |
| NC_037645.1 | 11048023 | SNV | 1 | T | A | Homozygous   |
| NC_037645.1 | 11048763 | SNV | 1 | A | G | Homozygous   |
| NC_037645.1 | 11048771 | SNV | 1 | T | A | Homozygous   |
| NC_037645.1 | 11048773 | SNV | 1 | A | G | Homozygous   |
| NC_037645.1 | 11048775 | SNV | 1 | C | A | Homozygous   |
| NC_037645.1 | 11048785 | SNV | 1 | A | G | Homozygous   |
| NC_037645.1 | 11048788 | SNV | 1 | A | C | Homozygous   |
| NC_037645.1 | 11048818 | SNV | 1 | A | C | Homozygous   |
| NC_037645.1 | 11048829 | SNV | 1 | G | A | Heterozygous |
| NC_037645.1 | 11048833 | SNV | 1 | T | G | Heterozygous |
| NC_037645.1 | 11048836 | SNV | 1 | A | C | Heterozygous |
| NC_037645.1 | 11048854 | SNV | 1 | A | C | Homozygous   |
| NC_037645.1 | 11048861 | SNV | 1 | G | A | Homozygous   |
| NC_037645.1 | 11048865 | SNV | 1 | T | G | Homozygous   |

|             |          |     |   |   |   |              |
|-------------|----------|-----|---|---|---|--------------|
| NC_037645.1 | 11048867 | SNV | 1 | A | G | Homozygous   |
| NC_037645.1 | 11048869 | SNV | 1 | T | G | Homozygous   |
| NC_037645.1 | 11048913 | SNV | 1 | C | T | Homozygous   |
| NC_037645.1 | 11048925 | SNV | 1 | A | G | Heterozygous |
| NC_037645.1 | 11048935 | SNV | 1 | T | C | Homozygous   |
| NC_037645.1 | 11048947 | SNV | 1 | A | G | Homozygous   |
| NC_037645.1 | 11048954 | SNV | 1 | A | C | Homozygous   |
| NC_037645.1 | 11048958 | SNV | 1 | A | C | Homozygous   |
| NC_037645.1 | 11048961 | SNV | 1 | T | A | Homozygous   |
| NC_037645.1 | 11048963 | SNV | 1 | A | G | Homozygous   |
| NC_037645.1 | 11048965 | SNV | 1 | C | A | Homozygous   |
| NC_037645.1 | 11048983 | SNV | 1 | G | A | Heterozygous |
| NC_037645.1 | 11048985 | SNV | 1 | T | A | Heterozygous |
| NC_037645.1 | 11048989 | SNV | 1 | C | A | Heterozygous |
| NC_037645.1 | 11048996 | SNV | 1 | A | C | Heterozygous |
| NC_037645.1 | 11049001 | SNV | 1 | A | G | Homozygous   |
| NC_037645.1 | 11049003 | SNV | 1 | A | G | Homozygous   |
| NC_037645.1 | 11049013 | SNV | 1 | C | G | Homozygous   |
| NC_037645.1 | 11049017 | SNV | 1 | C | G | Homozygous   |
| NC_037645.1 | 11049025 | SNV | 1 | G | A | Heterozygous |
| NC_037645.1 | 11049059 | SNV | 1 | A | G | Heterozygous |
| NC_037645.1 | 11049091 | SNV | 1 | T | A | Homozygous   |
| NC_037645.1 | 11049093 | SNV | 1 | A | T | Homozygous   |
| NC_037645.1 | 11056196 | SNV | 1 | T | C | Homozygous   |
| NC_037645.1 | 11056546 | SNV | 1 | C | T | Homozygous   |
| NC_037645.1 | 11056766 | SNV | 1 | T | C | Heterozygous |
| NC_037645.1 | 11056788 | SNV | 1 | T | C | Homozygous   |
| NC_037645.1 | 11056813 | SNV | 1 | T | C | Homozygous   |
| NC_037645.1 | 11056908 | SNV | 1 | G | A | Heterozygous |
| NC_037645.1 | 11057257 | SNV | 1 | G | A | Heterozygous |
| NC_037645.1 | 11057315 | SNV | 1 | C | T | Homozygous   |
| NC_037645.1 | 11057499 | SNV | 1 | C | G | Heterozygous |
| NC_037645.1 | 11058673 | SNV | 1 | T | A | Homozygous   |
| NC_037645.1 | 11058708 | SNV | 1 | C | T | Homozygous   |
| NC_037645.1 | 11061294 | SNV | 1 | C | T | Homozygous   |
| NC_037645.1 | 11061299 | SNV | 1 | T | A | Homozygous   |
| NC_037645.1 | 11061329 | SNV | 1 | A | G | Heterozygous |
| NC_037645.1 | 11061344 | SNV | 1 | T | A | Homozygous   |
| NC_037645.1 | 11061346 | SNV | 1 | A | G | Heterozygous |
| NC_037645.1 | 11061368 | SNV | 1 | A | T | Homozygous   |
| NC_037645.1 | 11061370 | SNV | 1 | A | G | Heterozygous |
| NC_037645.1 | 11068081 | SNV | 1 | T | C | Homozygous   |
| NC_037645.1 | 11068211 | SNV | 1 | T | C | Homozygous   |
| NC_037645.1 | 11068846 | SNV | 1 | G | A | Homozygous   |
| NC_037645.1 | 11068861 | SNV | 1 | C | T | Homozygous   |
| NC_037645.1 | 11068873 | SNV | 1 | A | T | Heterozygous |
| NC_037645.1 | 11068878 | SNV | 1 | T | C | Heterozygous |
| NC_037645.1 | 11068886 | SNV | 1 | G | A | Heterozygous |
| NC_037645.1 | 11068896 | SNV | 1 | C | T | Homozygous   |
| NC_037645.1 | 11068907 | SNV | 1 | C | T | Heterozygous |
| NC_037645.1 | 11068934 | SNV | 1 | T | C | Homozygous   |



|             |          |     |   |   |   |              |
|-------------|----------|-----|---|---|---|--------------|
| NC_037645.1 | 11068946 | SNV | 1 | C | G | Homozygous   |
| NC_037645.1 | 11069290 | SNV | 1 | G | A | Heterozygous |
| NC_037645.1 | 11069396 | SNV | 1 | T | C | Heterozygous |
| NC_037645.1 | 11069422 | SNV | 1 | A | G | Heterozygous |
| NC_037645.1 | 11076896 | SNV | 1 | A | G | Heterozygous |
| NC_037645.1 | 11077697 | SNV | 1 | C | T | Heterozygous |
| NC_037645.1 | 11077725 | SNV | 1 | T | C | Homozygous   |
| NC_037645.1 | 11077738 | SNV | 1 | A | G | Heterozygous |
| NC_037645.1 | 11078928 | SNV | 1 | T | A | Heterozygous |
| NC_037645.1 | 11078937 | SNV | 1 | T | C | Heterozygous |
| NC_037645.1 | 11078942 | SNV | 1 | C | T | Heterozygous |
| NC_037645.1 | 11078947 | SNV | 1 | T | C | Heterozygous |
| NC_037645.1 | 11079081 | SNV | 1 | A | G | Heterozygous |
| NC_037645.1 | 11079109 | SNV | 1 | G | A | Heterozygous |
| NC_037645.1 | 11079113 | SNV | 1 | C | G | Homozygous   |
| NC_037645.1 | 11079135 | SNV | 1 | A | G | Heterozygous |
| NC_037645.1 | 11079139 | SNV | 1 | C | T | Heterozygous |
| NC_037645.1 | 11079157 | SNV | 1 | G | A | Homozygous   |
| NC_037645.1 | 11079202 | SNV | 1 | T | C | Homozygous   |
| NC_037645.1 | 11079543 | SNV | 1 | A | G | Homozygous   |
| NC_037645.1 | 11079605 | SNV | 1 | T | C | Homozygous   |
| NC_037645.1 | 11080335 | SNV | 1 | T | C | Heterozygous |
| NC_037645.1 | 11093228 | SNV | 1 | C | T | Homozygous   |
| NC_037645.1 | 11093275 | SNV | 1 | G | C | Heterozygous |
| NC_037645.1 | 11093305 | SNV | 1 | A | T | Homozygous   |
| NC_037645.1 | 11093342 | SNV | 1 | C | T | Heterozygous |
| NC_037645.1 | 11093430 | SNV | 1 | T | C | Heterozygous |
| NC_037645.1 | 11094254 | SNV | 1 | A | G | Heterozygous |
| NC_037645.1 | 11099853 | SNV | 1 | C | A | Homozygous   |
| NC_037645.1 | 11099881 | SNV | 1 | C | T | Homozygous   |
| NC_037645.1 | 11099888 | SNV | 1 | T | A | Homozygous   |
| NC_037645.1 | 11114434 | SNV | 1 | T | C | Homozygous   |
| NC_037645.1 | 11116006 | SNV | 1 | T | C | Homozygous   |
| NC_037645.1 | 11116008 | SNV | 1 | C | T | Homozygous   |
| NC_037645.1 | 11116189 | SNV | 1 | C | T | Homozygous   |
| NC_037645.1 | 11124234 | SNV | 1 | G | T | Heterozygous |
| NC_037645.1 | 11124413 | SNV | 1 | G | A | Heterozygous |
| NC_037645.1 | 11124415 | SNV | 1 | C | G | Heterozygous |
| NC_037645.1 | 11124441 | SNV | 1 | A | G | Homozygous   |
| NC_037645.1 | 11124488 | SNV | 1 | A | G | Heterozygous |
| NC_037645.1 | 11124525 | SNV | 1 | A | G | Heterozygous |
| NC_037645.1 | 11124555 | SNV | 1 | A | G | Heterozygous |
| NC_037645.1 | 11124557 | SNV | 1 | A | G | Homozygous   |
| NC_037645.1 | 11124570 | SNV | 1 | G | C | Homozygous   |
| NC_037645.1 | 11124577 | SNV | 1 | G | C | Homozygous   |
| NC_037645.1 | 11124634 | SNV | 1 | C | T | Homozygous   |
| NC_037645.1 | 11124803 | SNV | 1 | A | G | Homozygous   |
| NC_037645.1 | 11124868 | SNV | 1 | T | A | Homozygous   |
| NC_037645.1 | 11125021 | SNV | 1 | G | A | Heterozygous |
| NC_037645.1 | 11129987 | SNV | 1 | T | C | Homozygous   |
| NC_037645.1 | 11130345 | SNV | 1 | T | C | Homozygous   |

|             |          |     |   |   |   |              |
|-------------|----------|-----|---|---|---|--------------|
| NC_037645.1 | 11130355 | SNV | 1 | A | C | Homozygous   |
| NC_037645.1 | 11130383 | SNV | 1 | G | C | Homozygous   |
| NC_037645.1 | 11130449 | SNV | 1 | A | G | Homozygous   |
| NC_037645.1 | 11130459 | SNV | 1 | A | G | Homozygous   |
| NC_037645.1 | 11130462 | SNV | 1 | G | A | Homozygous   |
| NC_037645.1 | 11130533 | SNV | 1 | C | T | Heterozygous |
| NC_037645.1 | 11130807 | SNV | 1 | T | C | Homozygous   |
| NC_037645.1 | 11130821 | SNV | 1 | T | C | Homozygous   |
| NC_037645.1 | 11131131 | SNV | 1 | G | A | Heterozygous |
| NC_037645.1 | 11131278 | SNV | 1 | C | T | Homozygous   |
| NC_037645.1 | 11131280 | SNV | 1 | C | T | Heterozygous |
| NC_037645.1 | 11131283 | SNV | 1 | G | A | Heterozygous |
| NC_037645.1 | 11131287 | SNV | 1 | G | A | Homozygous   |
| NC_037645.1 | 11131329 | SNV | 1 | T | C | Homozygous   |
| NC_037645.1 | 11131385 | SNV | 1 | G | A | Heterozygous |
| NC_037645.1 | 11131401 | SNV | 1 | G | A | Homozygous   |
| NC_037645.1 | 11131417 | SNV | 1 | A | G | Homozygous   |
| NC_037645.1 | 11131468 | SNV | 1 | T | C | Heterozygous |
| NC_037645.1 | 11131520 | SNV | 1 | A | G | Homozygous   |
| NC_037645.1 | 11131791 | SNV | 1 | G | A | Homozygous   |
| NC_037645.1 | 11133930 | SNV | 1 | G | C | Homozygous   |
| NC_037645.1 | 11134224 | SNV | 1 | A | G | Homozygous   |
| NC_037645.1 | 11134234 | SNV | 1 | C | T | Homozygous   |
| NC_037645.1 | 11134241 | SNV | 1 | C | T | Homozygous   |
| NC_037645.1 | 11134335 | SNV | 1 | C | T | Homozygous   |
| NC_037645.1 | 11134371 | SNV | 1 | T | C | Homozygous   |
| NC_037645.1 | 11134420 | SNV | 1 | G | A | Heterozygous |
| NC_037645.1 | 11134499 | SNV | 1 | C | T | Heterozygous |
| NC_037645.1 | 11134710 | SNV | 1 | T | A | Homozygous   |
| NC_037645.1 | 11137127 | SNV | 1 | C | T | Heterozygous |
| NC_037645.1 | 11140398 | SNV | 1 | A | T | Homozygous   |
| NC_037645.1 | 11140401 | SNV | 1 | A | T | Homozygous   |
| NC_037645.1 | 11145756 | SNV | 1 | T | C | Homozygous   |
| NC_037645.1 | 11148277 | SNV | 1 | A | G | Homozygous   |
| NC_037645.1 | 11148403 | SNV | 1 | G | T | Heterozygous |
| NC_037645.1 | 11148642 | SNV | 1 | G | A | Heterozygous |
| NC_037645.1 | 11148701 | SNV | 1 | T | A | Heterozygous |
| NC_037645.1 | 11156093 | SNV | 1 | G | A | Heterozygous |
| NC_037645.1 | 11156109 | SNV | 1 | G | A | Homozygous   |
| NC_037645.1 | 11156163 | SNV | 1 | T | C | Homozygous   |
| NC_037645.1 | 11156178 | SNV | 1 | A | T | Heterozygous |
| NC_037645.1 | 11156239 | SNV | 1 | G | A | Homozygous   |
| NC_037645.1 | 11156261 | SNV | 1 | A | G | Homozygous   |
| NC_037645.1 | 11156277 | SNV | 1 | C | T | Homozygous   |
| NC_037645.1 | 11161997 | SNV | 1 | A | C | Homozygous   |
| NC_037645.1 | 11162196 | SNV | 1 | C | T | Heterozygous |
| NC_037645.1 | 11162211 | SNV | 1 | T | C | Heterozygous |
| NC_037645.1 | 11162232 | SNV | 1 | G | A | Heterozygous |
| NC_037645.1 | 11162242 | SNV | 1 | A | G | Homozygous   |
| NC_037645.1 | 11165145 | SNV | 1 | T | C | Homozygous   |
| NC_037645.1 | 11165441 | SNV | 1 | A | G | Homozygous   |

|             |          |     |   |   |   |              |
|-------------|----------|-----|---|---|---|--------------|
| NC_037645.1 | 11165473 | SNV | 1 | C | T | Heterozygous |
| NC_037645.1 | 11165486 | SNV | 1 | C | G | Homozygous   |
| NC_037645.1 | 11165578 | SNV | 1 | T | C | Homozygous   |
| NC_037645.1 | 11165752 | SNV | 1 | T | C | Homozygous   |
| NC_037645.1 | 11165844 | SNV | 1 | C | T | Heterozygous |
| NC_037645.1 | 11165858 | SNV | 1 | A | G | Heterozygous |
| NC_037645.1 | 11173348 | SNV | 1 | C | T | Heterozygous |
| NC_037645.1 | 11174763 | SNV | 1 | T | A | Homozygous   |
| NC_037645.1 | 11174767 | SNV | 1 | T | A | Homozygous   |
| NC_037645.1 | 11174769 | SNV | 1 | T | A | Homozygous   |
| NC_037645.1 | 11183897 | SNV | 1 | G | A | Homozygous   |
| NC_037645.1 | 11183985 | SNV | 1 | A | G | Homozygous   |
| NC_037645.1 | 11184103 | SNV | 1 | G | A | Heterozygous |
| NC_037645.1 | 11184157 | SNV | 1 | C | T | Homozygous   |
| NC_037645.1 | 11184244 | SNV | 1 | T | A | Heterozygous |
| NC_037645.1 | 11184372 | SNV | 1 | A | T | Homozygous   |
| NC_037645.1 | 11197639 | SNV | 1 | T | C | Heterozygous |
| NC_037645.1 | 11197649 | SNV | 1 | T | C | Heterozygous |
| NC_037645.1 | 11197663 | SNV | 1 | C | G | Heterozygous |
| NC_037645.1 | 11197671 | SNV | 1 | T | C | Heterozygous |
| NC_037645.1 | 11197674 | SNV | 1 | T | C | Heterozygous |
| NC_037645.1 | 11197679 | SNV | 1 | G | A | Heterozygous |
| NC_037645.1 | 11197682 | SNV | 1 | G | C | Homozygous   |
| NC_037645.1 | 11197690 | SNV | 1 | G | C | Homozygous   |
| NC_037645.1 | 11197692 | SNV | 1 | A | C | Homozygous   |
| NC_037645.1 | 11197727 | SNV | 1 | T | C | Heterozygous |
| NC_037645.1 | 11197738 | SNV | 1 | G | C | Heterozygous |
| NC_037645.1 | 11197742 | SNV | 1 | G | T | Homozygous   |
| NC_037645.1 | 11197748 | SNV | 1 | A | C | Heterozygous |
| NC_037645.1 | 11197774 | SNV | 1 | C | T | Heterozygous |
| NC_037645.1 | 11197778 | SNV | 1 | T | C | Heterozygous |
| NC_037645.1 | 11197826 | SNV | 1 | C | G | Heterozygous |
| NC_037645.1 | 11197832 | SNV | 1 | T | C | Heterozygous |
| NC_037645.1 | 11197844 | SNV | 1 | G | C | Homozygous   |
| NC_037645.1 | 11197858 | SNV | 1 | T | G | Homozygous   |
| NC_037645.1 | 11197866 | SNV | 1 | C | G | Heterozygous |
| NC_037645.1 | 11197872 | SNV | 1 | G | C | Heterozygous |
| NC_037645.1 | 11197920 | SNV | 1 | T | C | Homozygous   |
| NC_037645.1 | 11197932 | SNV | 1 | T | C | Heterozygous |
| NC_037645.1 | 11197940 | SNV | 1 | G | C | Heterozygous |
| NC_037645.1 | 11197948 | SNV | 1 | G | C | Heterozygous |
| NC_037645.1 | 11197964 | SNV | 1 | G | C | Heterozygous |
| NC_037645.1 | 11197972 | SNV | 1 | A | C | Heterozygous |
| NC_037645.1 | 11197974 | SNV | 1 | C | T | Heterozygous |
| NC_037645.1 | 11197976 | SNV | 1 | A | T | Heterozygous |
| NC_037645.1 | 11197992 | SNV | 1 | T | C | Homozygous   |
| NC_037645.1 | 11198052 | SNV | 1 | C | T | Heterozygous |
| NC_037645.1 | 11198054 | SNV | 1 | G | C | Homozygous   |
| NC_037645.1 | 11198059 | SNV | 1 | T | C | Heterozygous |
| NC_037645.1 | 11198063 | SNV | 1 | T | C | Heterozygous |
| NC_037645.1 | 11198098 | SNV | 1 | G | C | Homozygous   |

|             |          |     |   |   |   |              |
|-------------|----------|-----|---|---|---|--------------|
| NC_037645.1 | 11198102 | SNV | 1 | G | C | Homozygous   |
| NC_037645.1 | 11198156 | SNV | 1 | T | C | Homozygous   |
| NC_037645.1 | 11198160 | SNV | 1 | A | C | Homozygous   |
| NC_037645.1 | 11198174 | SNV | 1 | G | C | Heterozygous |
| NC_037645.1 | 11198178 | SNV | 1 | A | C | Homozygous   |
| NC_037645.1 | 11198190 | SNV | 1 | G | C | Heterozygous |
| NC_037645.1 | 11198195 | SNV | 1 | T | A | Heterozygous |
| NC_037645.1 | 11198202 | SNV | 1 | G | C | Heterozygous |
| NC_037645.1 | 11198246 | SNV | 1 | A | G | Homozygous   |
| NC_037645.1 | 11198254 | SNV | 1 | G | C | Homozygous   |
| NC_037645.1 | 11198256 | SNV | 1 | T | C | Homozygous   |
| NC_037645.1 | 11198272 | SNV | 1 | C | T | Homozygous   |
| NC_037645.1 | 11198278 | SNV | 1 | C | G | Homozygous   |
| NC_037645.1 | 11198282 | SNV | 1 | C | G | Homozygous   |
| NC_037645.1 | 11198288 | SNV | 1 | C | T | Homozygous   |
| NC_037645.1 | 11198290 | SNV | 1 | G | C | Homozygous   |
| NC_037645.1 | 11198294 | SNV | 1 | T | G | Homozygous   |
| NC_037645.1 | 11198310 | SNV | 1 | A | T | Homozygous   |
| NC_037645.1 | 11198314 | SNV | 1 | C | T | Homozygous   |
| NC_037645.1 | 11198316 | SNV | 1 | C | T | Homozygous   |
| NC_037645.1 | 11198318 | SNV | 1 | G | C | Homozygous   |
| NC_037645.1 | 11198320 | SNV | 1 | T | G | Homozygous   |
| NC_037645.1 | 11198324 | SNV | 1 | A | C | Homozygous   |
| NC_037645.1 | 11200090 | SNV | 1 | A | G | Heterozygous |
| NC_037645.1 | 11200096 | SNV | 1 | A | G | Homozygous   |
| NC_037645.1 | 11200105 | SNV | 1 | A | G | Heterozygous |
| NC_037645.1 | 11200160 | SNV | 1 | G | A | Heterozygous |
| NC_037645.1 | 11200169 | SNV | 1 | G | A | Heterozygous |
| NC_037645.1 | 11200192 | SNV | 1 | G | T | Homozygous   |
| NC_037645.1 | 11200195 | SNV | 1 | G | T | Heterozygous |
| NC_037645.1 | 11200229 | SNV | 1 | G | A | Homozygous   |
| NC_037645.1 | 11200234 | SNV | 1 | G | A | Heterozygous |
| NC_037645.1 | 11200235 | SNV | 1 | G | A | Heterozygous |
| NC_037645.1 | 11200238 | SNV | 1 | G | A | Homozygous   |
| NC_037645.1 | 11200241 | SNV | 1 | G | A | Heterozygous |
| NC_037645.1 | 11200285 | SNV | 1 | A | G | Heterozygous |
| NC_037645.1 | 11200309 | SNV | 1 | G | A | Heterozygous |
| NC_037645.1 | 11200324 | SNV | 1 | G | A | Heterozygous |
| NC_037645.1 | 11200327 | SNV | 1 | G | A | Heterozygous |
| NC_037645.1 | 11200330 | SNV | 1 | G | A | Heterozygous |
| NC_037645.1 | 11200333 | SNV | 1 | G | A | Heterozygous |
| NC_037645.1 | 11203117 | SNV | 1 | T | C | Homozygous   |
| NC_037645.1 | 11203139 | SNV | 1 | C | T | Homozygous   |
| NC_037645.1 | 11203261 | SNV | 1 | C | T | Homozygous   |
| NC_037645.1 | 11203287 | SNV | 1 | A | G | Homozygous   |
| NC_037645.1 | 11203394 | SNV | 1 | C | G | Homozygous   |
| NC_037645.1 | 11204731 | SNV | 1 | C | T | Heterozygous |
| NC_037645.1 | 11204806 | SNV | 1 | T | C | Homozygous   |
| NC_037645.1 | 11204818 | SNV | 1 | G | C | Homozygous   |
| NC_037645.1 | 11204872 | SNV | 1 | G | A | Heterozygous |
| NC_037645.1 | 11204939 | SNV | 1 | T | C | Homozygous   |

|             |          |     |   |   |   |              |
|-------------|----------|-----|---|---|---|--------------|
| NC_037645.1 | 11204996 | SNV | 1 | G | A | Heterozygous |
| NC_037645.1 | 11205031 | SNV | 1 | C | T | Homozygous   |
| NC_037645.1 | 11205035 | SNV | 1 | G | A | Homozygous   |
| NC_037645.1 | 11205086 | SNV | 1 | A | G | Homozygous   |
| NC_037645.1 | 11205194 | SNV | 1 | T | C | Heterozygous |
| NC_037645.1 | 11205368 | SNV | 1 | A | C | Homozygous   |
| NC_037645.1 | 11205441 | SNV | 1 | C | T | Heterozygous |
| NC_037645.1 | 11205452 | SNV | 1 | G | A | Heterozygous |
| NC_037645.1 | 11205460 | SNV | 1 | A | G | Homozygous   |
| NC_037645.1 | 11205480 | SNV | 1 | C | T | Homozygous   |
| NC_037645.1 | 11205497 | SNV | 1 | T | G | Heterozygous |
| NC_037645.1 | 11205544 | SNV | 1 | C | T | Heterozygous |
| NC_037645.1 | 11205547 | SNV | 1 | A | C | Heterozygous |
| NC_037645.1 | 11205550 | SNV | 1 | C | A | Heterozygous |
| NC_037645.1 | 11205560 | SNV | 1 | T | C | Heterozygous |
| NC_037645.1 | 11278959 | SNV | 1 | C | A | Heterozygous |
| NC_037645.1 | 11286033 | SNV | 1 | T | C | Homozygous   |
| NC_037645.1 | 11293641 | SNV | 1 | G | A | Heterozygous |
| NC_037645.1 | 11293665 | SNV | 1 | T | C | Homozygous   |
| NC_037645.1 | 11293755 | SNV | 1 | A | G | Homozygous   |
| NC_037645.1 | 11293780 | SNV | 1 | A | G | Homozygous   |
| NC_037645.1 | 11293804 | SNV | 1 | T | C | Heterozygous |
| NC_037645.1 | 11294027 | SNV | 1 | T | C | Heterozygous |
| NC_037645.1 | 11294048 | SNV | 1 | C | T | Homozygous   |
| NC_037645.1 | 11294163 | SNV | 1 | C | T | Homozygous   |
| NC_037645.1 | 11297780 | SNV | 1 | T | C | Homozygous   |
| NC_037645.1 | 11304028 | SNV | 1 | A | G | Heterozygous |
| NC_037645.1 | 11304031 | SNV | 1 | G | A | Heterozygous |
| NC_037645.1 | 11304063 | SNV | 1 | C | T | Heterozygous |
| NC_037645.1 | 11304090 | SNV | 1 | T | C | Homozygous   |
| NC_037645.1 | 11304358 | SNV | 1 | A | G | Homozygous   |
| NC_037645.1 | 11304402 | SNV | 1 | T | C | Heterozygous |
| NC_037645.1 | 11304451 | SNV | 1 | A | G | Homozygous   |
| NC_037645.1 | 11304627 | SNV | 1 | A | G | Homozygous   |
| NC_037645.1 | 11305029 | SNV | 1 | T | C | Homozygous   |
| NC_037645.1 | 11305254 | SNV | 1 | G | A | Homozygous   |
| NC_037645.1 | 11305301 | SNV | 1 | C | T | Heterozygous |
| NC_037645.1 | 11308649 | SNV | 1 | A | G | Homozygous   |
| NC_037645.1 | 11308651 | SNV | 1 | A | T | Homozygous   |
| NC_037645.1 | 11308670 | SNV | 1 | A | C | Heterozygous |
| NC_037645.1 | 11308678 | SNV | 1 | A | G | Heterozygous |
| NC_037645.1 | 11308681 | SNV | 1 | G | A | Homozygous   |
| NC_037645.1 | 11312950 | SNV | 1 | T | C | Heterozygous |
| NC_037645.1 | 11312952 | SNV | 1 | C | A | Heterozygous |
| NC_037645.1 | 11313343 | SNV | 1 | C | T | Heterozygous |
| NC_037645.1 | 11313353 | SNV | 1 | T | C | Heterozygous |
| NC_037645.1 | 11313403 | SNV | 1 | T | C | Homozygous   |
| NC_037645.1 | 11313472 | SNV | 1 | C | T | Heterozygous |
| NC_037645.1 | 11313774 | SNV | 1 | C | T | Homozygous   |
| NC_037645.1 | 11313834 | SNV | 1 | A | G | Homozygous   |
| NC_037645.1 | 11313867 | SNV | 1 | G | A | Homozygous   |

|             |          |     |   |   |   |              |
|-------------|----------|-----|---|---|---|--------------|
| NC_037645.1 | 11314577 | SNV | 1 | A | G | Homozygous   |
| NC_037645.1 | 11314579 | SNV | 1 | A | G | Homozygous   |
| NC_037645.1 | 11314652 | SNV | 1 | A | G | Heterozygous |
| NC_037645.1 | 11314663 | SNV | 1 | G | A | Heterozygous |
| NC_037645.1 | 11314681 | SNV | 1 | C | T | Heterozygous |
| NC_037645.1 | 11315009 | SNV | 1 | G | A | Homozygous   |
| NC_037645.1 | 11315027 | SNV | 1 | A | G | Heterozygous |
| NC_037645.1 | 11315040 | SNV | 1 | T | C | Homozygous   |
| NC_037645.1 | 11437101 | SNV | 1 | C | T | Heterozygous |
| NC_037645.1 | 11437154 | SNV | 1 | C | G | Homozygous   |
| NC_037645.1 | 11437168 | SNV | 1 | T | C | Homozygous   |
| NC_037645.1 | 11437212 | SNV | 1 | A | G | Homozygous   |
| NC_037645.1 | 11437278 | SNV | 1 | T | A | Heterozygous |
| NC_037645.1 | 11437284 | SNV | 1 | G | A | Heterozygous |
| NC_037645.1 | 11437319 | SNV | 1 | A | G | Heterozygous |
| NC_037645.1 | 11437375 | SNV | 1 | T | C | Homozygous   |
| NC_037645.1 | 11437409 | SNV | 1 | A | T | Homozygous   |
| NC_037645.1 | 11437450 | SNV | 1 | T | A | Homozygous   |
| NC_037645.1 | 11437466 | SNV | 1 | T | A | Heterozygous |
| NC_037645.1 | 11437506 | SNV | 1 | C | T | Homozygous   |
| NC_037645.1 | 11437545 | SNV | 1 | C | T | Homozygous   |
| NC_037645.1 | 11437552 | SNV | 1 | T | C | Heterozygous |
| NC_037645.1 | 11437608 | SNV | 1 | C | T | Heterozygous |
| NC_037645.1 | 11437617 | SNV | 1 | A | G | Homozygous   |
| NC_037645.1 | 11437660 | SNV | 1 | A | G | Homozygous   |
| NC_037645.1 | 11437743 | SNV | 1 | G | A | Homozygous   |
| NC_037645.1 | 11437856 | SNV | 1 | T | C | Homozygous   |
| NC_037645.1 | 11438927 | SNV | 1 | T | G | Heterozygous |
| NC_037645.1 | 11439459 | SNV | 1 | G | C | Homozygous   |
| NC_037645.1 | 11492413 | SNV | 1 | G | A | Homozygous   |
| NC_037645.1 | 11493655 | SNV | 1 | C | T | Homozygous   |
| NC_037645.1 | 11493666 | SNV | 1 | G | A | Heterozygous |
| NC_037645.1 | 11493673 | SNV | 1 | A | G | Homozygous   |
| NC_037645.1 | 11493681 | SNV | 1 | A | C | Heterozygous |
| NC_037645.1 | 11493682 | SNV | 1 | T | C | Heterozygous |
| NC_037645.1 | 11493777 | SNV | 1 | A | G | Heterozygous |
| NC_037645.1 | 11493786 | SNV | 1 | A | G | Heterozygous |
| NC_037645.1 | 11493821 | SNV | 1 | G | A | Homozygous   |
| NC_037645.1 | 11493963 | SNV | 1 | C | A | Heterozygous |
| NC_037645.1 | 11493975 | SNV | 1 | T | C | Heterozygous |
| NC_037645.1 | 11493980 | SNV | 1 | A | G | Homozygous   |
| NC_037645.1 | 11493983 | SNV | 1 | A | G | Homozygous   |
| NC_037645.1 | 11494131 | SNV | 1 | A | G | Homozygous   |
| NC_037645.1 | 11503495 | SNV | 1 | G | A | Heterozygous |
| NC_037645.1 | 11503737 | SNV | 1 | C | T | Homozygous   |
| NC_037645.1 | 11503749 | SNV | 1 | T | C | Homozygous   |
| NC_037645.1 | 11503792 | SNV | 1 | G | A | Heterozygous |
| NC_037645.1 | 11503913 | SNV | 1 | A | G | Homozygous   |
| NC_037645.1 | 11503942 | SNV | 1 | A | G | Homozygous   |
| NC_037645.1 | 11504164 | SNV | 1 | A | T | Heterozygous |
| NC_037645.1 | 11504166 | SNV | 1 | G | A | Homozygous   |

|             |          |     |   |   |   |              |
|-------------|----------|-----|---|---|---|--------------|
| NC_037645.1 | 11504213 | SNV | 1 | G | A | Heterozygous |
| NC_037645.1 | 11504225 | SNV | 1 | T | C | Heterozygous |
| NC_037645.1 | 11504236 | SNV | 1 | A | G | Heterozygous |
| NC_037645.1 | 11504239 | SNV | 1 | A | G | Heterozygous |
| NC_037645.1 | 11504247 | SNV | 1 | G | A | Homozygous   |
| NC_037645.1 | 11504267 | SNV | 1 | G | A | Homozygous   |
| NC_037645.1 | 11504306 | SNV | 1 | G | A | Homozygous   |
| NC_037645.1 | 11504330 | SNV | 1 | G | A | Heterozygous |
| NC_037645.1 | 11504358 | SNV | 1 | G | T | Homozygous   |
| NC_037645.1 | 11504426 | SNV | 1 | C | T | Heterozygous |
| NC_037645.1 | 11504503 | SNV | 1 | T | G | Homozygous   |
| NC_037645.1 | 11504525 | SNV | 1 | G | A | Heterozygous |
| NC_037645.1 | 11504583 | SNV | 1 | G | A | Heterozygous |
| NC_037645.1 | 11504799 | SNV | 1 | A | G | Heterozygous |
| NC_037645.1 | 11505080 | SNV | 1 | A | G | Homozygous   |
| NC_037645.1 | 11516643 | SNV | 1 | A | G | Homozygous   |
| NC_037645.1 | 11527757 | SNV | 1 | C | T | Homozygous   |
| NC_037645.1 | 11528126 | SNV | 1 | G | A | Heterozygous |
| NC_037645.1 | 11532103 | SNV | 1 | T | C | Heterozygous |
| NC_037645.1 | 11532108 | SNV | 1 | C | T | Heterozygous |
| NC_037645.1 | 11532625 | SNV | 1 | G | A | Heterozygous |
| NC_037645.1 | 11532653 | SNV | 1 | C | T | Heterozygous |
| NC_037645.1 | 11532973 | SNV | 1 | G | A | Heterozygous |
| NC_037645.1 | 11532979 | SNV | 1 | G | A | Heterozygous |
| NC_037645.1 | 11533005 | SNV | 1 | T | C | Heterozygous |
| NC_037645.1 | 11535608 | SNV | 1 | G | A | Heterozygous |
| NC_037645.1 | 11535648 | SNV | 1 | G | A | Heterozygous |
| NC_037645.1 | 11535911 | SNV | 1 | A | C | Homozygous   |
| NC_037645.1 | 11535916 | SNV | 1 | A | C | Homozygous   |
| NC_037645.1 | 11535918 | SNV | 1 | G | A | Heterozygous |
| NC_037645.1 | 11535921 | SNV | 1 | A | C | Homozygous   |
| NC_037645.1 | 11535926 | SNV | 1 | A | C | Homozygous   |
| NC_037645.1 | 11536001 | SNV | 1 | T | C | Homozygous   |
| NC_037645.1 | 11536050 | SNV | 1 | A | G | Heterozygous |
| NC_037645.1 | 11536063 | SNV | 1 | T | C | Homozygous   |
| NC_037645.1 | 11536073 | SNV | 1 | C | T | Heterozygous |
| NC_037645.1 | 11536344 | SNV | 1 | C | T | Homozygous   |
| NC_037645.1 | 11536926 | SNV | 1 | G | A | Heterozygous |
| NC_037645.1 | 11536975 | SNV | 1 | C | T | Homozygous   |
| NC_037645.1 | 11536983 | SNV | 1 | T | C | Homozygous   |
| NC_037645.1 | 11536993 | SNV | 1 | A | G | Homozygous   |
| NC_037645.1 | 11538186 | SNV | 1 | T | C | Homozygous   |
| NC_037645.1 | 11538441 | SNV | 1 | C | G | Heterozygous |
| NC_037645.1 | 11538478 | SNV | 1 | C | G | Heterozygous |
| NC_037645.1 | 11538484 | SNV | 1 | G | C | Heterozygous |
| NC_037645.1 | 11538517 | SNV | 1 | A | G | Homozygous   |
| NC_037645.1 | 11538612 | SNV | 1 | G | A | Heterozygous |
| NC_037645.1 | 11538684 | SNV | 1 | C | T | Homozygous   |
| NC_037645.1 | 11538693 | SNV | 1 | A | G | Homozygous   |
| NC_037645.1 | 11538835 | SNV | 1 | A | G | Heterozygous |
| NC_037645.1 | 11539222 | SNV | 1 | A | G | Heterozygous |

|             |          |     |   |   |   |              |
|-------------|----------|-----|---|---|---|--------------|
| NC_037645.1 | 11540286 | SNV | 1 | C | A | Homozygous   |
| NC_037645.1 | 11540294 | SNV | 1 | C | G | Homozygous   |
| NC_037645.1 | 11540388 | SNV | 1 | G | C | Heterozygous |
| NC_037645.1 | 11540827 | SNV | 1 | T | C | Homozygous   |
| NC_037645.1 | 11540866 | SNV | 1 | A | G | Heterozygous |
| NC_037645.1 | 11542836 | SNV | 1 | G | A | Homozygous   |
| NC_037645.1 | 11542893 | SNV | 1 | G | A | Homozygous   |
| NC_037645.1 | 11543233 | SNV | 1 | G | A | Heterozygous |
| NC_037645.1 | 11545045 | SNV | 1 | A | G | Homozygous   |
| NC_037645.1 | 11545183 | SNV | 1 | A | T | Homozygous   |
| NC_037645.1 | 11545301 | SNV | 1 | G | A | Heterozygous |
| NC_037645.1 | 11545610 | SNV | 1 | G | A | Homozygous   |
| NC_037645.1 | 11545726 | SNV | 1 | C | T | Heterozygous |
| NC_037645.1 | 11545799 | SNV | 1 | G | A | Heterozygous |
| NC_037645.1 | 11545858 | SNV | 1 | C | T | Heterozygous |
| NC_037645.1 | 11548740 | SNV | 1 | C | T | Homozygous   |
| NC_037645.1 | 11549039 | SNV | 1 | T | C | Heterozygous |
| NC_037645.1 | 11550822 | SNV | 1 | A | T | Homozygous   |
| NC_037645.1 | 11625098 | SNV | 1 | A | C | Homozygous   |
| NC_037645.1 | 11625104 | SNV | 1 | C | T | Homozygous   |
| NC_037645.1 | 11625118 | SNV | 1 | C | T | Homozygous   |
| NC_037645.1 | 11626049 | SNV | 1 | T | C | Homozygous   |
| NC_037645.1 | 11626062 | SNV | 1 | T | G | Homozygous   |
| NC_037645.1 | 11626865 | SNV | 1 | G | A | Heterozygous |
| NC_037645.1 | 11626881 | SNV | 1 | A | G | Heterozygous |
| NC_037645.1 | 11626898 | SNV | 1 | C | T | Homozygous   |
| NC_037645.1 | 11626920 | SNV | 1 | C | T | Heterozygous |
| NC_037645.1 | 11626922 | SNV | 1 | C | A | Heterozygous |
| NC_037645.1 | 11627133 | SNV | 1 | G | A | Homozygous   |
| NC_037645.1 | 11627135 | SNV | 1 | G | C | Homozygous   |
| NC_037645.1 | 11627139 | SNV | 1 | G | A | Homozygous   |
| NC_037645.1 | 11627153 | SNV | 1 | G | C | Homozygous   |
| NC_037645.1 | 11627159 | SNV | 1 | G | C | Homozygous   |
| NC_037645.1 | 11627167 | SNV | 1 | G | A | Homozygous   |
| NC_037645.1 | 11627169 | SNV | 1 | G | C | Homozygous   |
| NC_037645.1 | 11627171 | SNV | 1 | G | T | Homozygous   |
| NC_037645.1 | 11627173 | SNV | 1 | G | C | Homozygous   |
| NC_037645.1 | 11627177 | SNV | 1 | G | C | Homozygous   |
| NC_037645.1 | 11627180 | SNV | 1 | A | G | Homozygous   |
| NC_037645.1 | 11627203 | SNV | 1 | A | C | Homozygous   |
| NC_037645.1 | 11638697 | SNV | 1 | G | A | Homozygous   |
| NC_037645.1 | 11638933 | SNV | 1 | G | T | Homozygous   |
| NC_037645.1 | 11646172 | SNV | 1 | C | T | Homozygous   |
| NC_037645.1 | 11646379 | SNV | 1 | C | A | Homozygous   |
| NC_037645.1 | 11647078 | SNV | 1 | A | G | Homozygous   |
| NC_037645.1 | 11652297 | SNV | 1 | T | A | Homozygous   |
| NC_037645.1 | 11652302 | SNV | 1 | G | A | Homozygous   |
| NC_037645.1 | 11659150 | SNV | 1 | G | C | Heterozygous |
| NC_037645.1 | 11659441 | SNV | 1 | C | T | Heterozygous |
| NC_037645.1 | 11660124 | SNV | 1 | T | C | Homozygous   |
| NC_037645.1 | 11660152 | SNV | 1 | C | T | Homozygous   |



|             |          |     |   |   |   |              |
|-------------|----------|-----|---|---|---|--------------|
| NC_037645.1 | 11660154 | SNV | 1 | C | T | Heterozygous |
| NC_037645.1 | 11660375 | SNV | 1 | C | A | Heterozygous |
| NC_037645.1 | 11661959 | SNV | 1 | G | A | Homozygous   |
| NC_037645.1 | 11665035 | SNV | 1 | A | G | Homozygous   |
| NC_037645.1 | 11665183 | SNV | 1 | C | T | Heterozygous |
| NC_037645.1 | 11665282 | SNV | 1 | G | A | Heterozygous |
| NC_037645.1 | 11665517 | SNV | 1 | T | C | Heterozygous |
| NC_037645.1 | 11665563 | SNV | 1 | A | T | Heterozygous |
| NC_037645.1 | 11665566 | SNV | 1 | T | A | Heterozygous |
| NC_037645.1 | 11666574 | SNV | 1 | C | T | Homozygous   |
| NC_037645.1 | 11667023 | SNV | 1 | T | C | Homozygous   |
| NC_037645.1 | 11667035 | SNV | 1 | A | G | Heterozygous |
| NC_037645.1 | 11667056 | SNV | 1 | A | G | Homozygous   |
| NC_037645.1 | 11667120 | SNV | 1 | T | C | Heterozygous |
| NC_037645.1 | 11667446 | SNV | 1 | A | T | Heterozygous |
| NC_037645.1 | 11674750 | SNV | 1 | A | G | Heterozygous |
| NC_037645.1 | 11674848 | SNV | 1 | C | T | Heterozygous |
| NC_037645.1 | 11676013 | SNV | 1 | A | G | Homozygous   |
| NC_037645.1 | 11676189 | SNV | 1 | G | A | Homozygous   |
| NC_037645.1 | 11676706 | SNV | 1 | T | C | Homozygous   |
| NC_037645.1 | 11676764 | SNV | 1 | T | A | Homozygous   |
| NC_037645.1 | 11677038 | SNV | 1 | G | A | Homozygous   |
| NC_037645.1 | 11685081 | SNV | 1 | C | A | Homozygous   |
| NC_037645.1 | 11685090 | SNV | 1 | A | T | Homozygous   |
| NC_037645.1 | 11685288 | SNV | 1 | C | T | Heterozygous |
| NC_037645.1 | 11687745 | SNV | 1 | A | G | Homozygous   |
| NC_037645.1 | 11691630 | SNV | 1 | A | G | Homozygous   |
| NC_037645.1 | 11691633 | SNV | 1 | A | G | Homozygous   |
| NC_037645.1 | 11691659 | SNV | 1 | A | T | Homozygous   |
| NC_037645.1 | 11693103 | SNV | 1 | G | A | Homozygous   |
| NC_037645.1 | 11693107 | SNV | 1 | C | T | Homozygous   |
| NC_037645.1 | 11693111 | SNV | 1 | G | T | Homozygous   |
| NC_037645.1 | 11693118 | SNV | 1 | A | C | Homozygous   |
| NC_037645.1 | 11702148 | SNV | 1 | A | G | Homozygous   |
| NC_037645.1 | 11702317 | SNV | 1 | C | A | Homozygous   |
| NC_037645.1 | 11703496 | SNV | 1 | A | T | Homozygous   |
| NC_037645.1 | 11703498 | SNV | 1 | T | A | Homozygous   |
| NC_037645.1 | 11703505 | SNV | 1 | A | T | Homozygous   |
| NC_037645.1 | 11703507 | SNV | 1 | A | G | Homozygous   |
| NC_037645.1 | 11703529 | SNV | 1 | T | A | Homozygous   |
| NC_037645.1 | 11703536 | SNV | 1 | T | A | Homozygous   |
| NC_037645.1 | 11703695 | SNV | 1 | A | T | Homozygous   |
| NC_037645.1 | 11704162 | SNV | 1 | A | G | Heterozygous |
| NC_037645.1 | 11710461 | SNV | 1 | T | A | Homozygous   |
| NC_037645.1 | 11710500 | SNV | 1 | T | C | Heterozygous |
| NC_037645.1 | 11718748 | SNV | 1 | T | C | Heterozygous |
| NC_037645.1 | 11718754 | SNV | 1 | C | T | Heterozygous |
| NC_037645.1 | 11718760 | SNV | 1 | T | A | Heterozygous |
| NC_037645.1 | 11718763 | SNV | 1 | A | T | Heterozygous |
| NC_037645.1 | 11718769 | SNV | 1 | A | T | Heterozygous |
| NC_037645.1 | 11718775 | SNV | 1 | T | G | Heterozygous |

|             |          |     |   |   |   |              |
|-------------|----------|-----|---|---|---|--------------|
| NC_037645.1 | 11718778 | SNV | 1 | A | G | Heterozygous |
| NC_037645.1 | 11718784 | SNV | 1 | T | C | Heterozygous |
| NC_037645.1 | 11718791 | SNV | 1 | C | T | Heterozygous |
| NC_037645.1 | 11718793 | SNV | 1 | T | A | Heterozygous |
| NC_037645.1 | 11718805 | SNV | 1 | A | T | Heterozygous |
| NC_037645.1 | 11718811 | SNV | 1 | A | C | Heterozygous |
| NC_037645.1 | 11725262 | SNV | 1 | T | C | Heterozygous |
| NC_037645.1 | 11725942 | SNV | 1 | A | G | Homozygous   |
| NC_037645.1 | 11727976 | SNV | 1 | C | T | Homozygous   |
| NC_037645.1 | 11728073 | SNV | 1 | A | G | Homozygous   |
| NC_037645.1 | 11729865 | SNV | 1 | G | A | Homozygous   |
| NC_037645.1 | 11734633 | SNV | 1 | T | A | Homozygous   |
| NC_037645.1 | 11734754 | SNV | 1 | T | A | Homozygous   |
| NC_037645.1 | 11734959 | SNV | 1 | C | G | Homozygous   |
| NC_037645.1 | 11734970 | SNV | 1 | T | C | Heterozygous |
| NC_037645.1 | 11734972 | SNV | 1 | T | C | Heterozygous |
| NC_037645.1 | 11734976 | SNV | 1 | T | C | Heterozygous |
| NC_037645.1 | 11735872 | SNV | 1 | T | A | Homozygous   |
| NC_037645.1 | 11735879 | SNV | 1 | A | C | Homozygous   |
| NC_037645.1 | 11735883 | SNV | 1 | A | T | Homozygous   |
| NC_037645.1 | 11735885 | SNV | 1 | A | T | Homozygous   |
| NC_037645.1 | 11735887 | SNV | 1 | A | C | Homozygous   |
| NC_037645.1 | 11735894 | SNV | 1 | T | A | Homozygous   |
| NC_037645.1 | 11736480 | SNV | 1 | T | C | Homozygous   |
| NC_037645.1 | 11736488 | SNV | 1 | C | T | Homozygous   |
| NC_037645.1 | 11736771 | SNV | 1 | C | T | Homozygous   |
| NC_037645.1 | 11736868 | SNV | 1 | G | A | Heterozygous |
| NC_037645.1 | 11736977 | SNV | 1 | C | T | Heterozygous |
| NC_037645.1 | 11744054 | SNV | 1 | C | T | Homozygous   |
| NC_037645.1 | 11744059 | SNV | 1 | T | A | Heterozygous |
| NC_037645.1 | 11744090 | SNV | 1 | A | T | Homozygous   |
| NC_037645.1 | 11744092 | SNV | 1 | T | A | Homozygous   |
| NC_037645.1 | 11744095 | SNV | 1 | T | A | Homozygous   |
| NC_037645.1 | 11744105 | SNV | 1 | C | T | Homozygous   |
| NC_037645.1 | 11744242 | SNV | 1 | T | A | Homozygous   |
| NC_037645.1 | 11744244 | SNV | 1 | A | T | Homozygous   |
| NC_037645.1 | 11744250 | SNV | 1 | T | G | Homozygous   |
| NC_037645.1 | 11744252 | SNV | 1 | T | A | Homozygous   |
| NC_037645.1 | 11744255 | SNV | 1 | T | A | Homozygous   |
| NC_037645.1 | 11744262 | SNV | 1 | A | C | Homozygous   |
| NC_037645.1 | 11744264 | SNV | 1 | A | T | Homozygous   |
| NC_037645.1 | 11761458 | SNV | 1 | T | A | Homozygous   |
| NC_037645.1 | 11762815 | SNV | 1 | T | C | Homozygous   |
| NC_037645.1 | 11763139 | SNV | 1 | A | G | Homozygous   |
| NC_037645.1 | 11763815 | SNV | 1 | G | T | Homozygous   |
| NC_037645.1 | 11764346 | SNV | 1 | G | A | Homozygous   |
| NC_037645.1 | 11764500 | SNV | 1 | G | C | Homozygous   |
| NC_037645.1 | 11776405 | SNV | 1 | T | C | Homozygous   |
| NC_037645.1 | 11778605 | SNV | 1 | A | G | Homozygous   |
| NC_037645.1 | 11782214 | SNV | 1 | G | T | Homozygous   |
| NC_037645.1 | 11783061 | SNV | 1 | G | A | Heterozygous |

|             |          |     |   |   |   |              |
|-------------|----------|-----|---|---|---|--------------|
| NC_037645.1 | 11783187 | SNV | 1 | T | A | Homozygous   |
| NC_037645.1 | 11783592 | SNV | 1 | T | G | Homozygous   |
| NC_037645.1 | 11787815 | SNV | 1 | C | T | Heterozygous |
| NC_037645.1 | 11787902 | SNV | 1 | T | C | Homozygous   |
| NC_037645.1 | 11788818 | SNV | 1 | A | G | Homozygous   |
| NC_037645.1 | 11788880 | SNV | 1 | C | G | Homozygous   |
| NC_037645.1 | 11789304 | SNV | 1 | A | T | Heterozygous |
| NC_037645.1 | 11790232 | SNV | 1 | C | T | Heterozygous |
| NC_037645.1 | 11792096 | SNV | 1 | C | T | Heterozygous |
| NC_037645.1 | 11801250 | SNV | 1 | C | G | Homozygous   |
| NC_037645.1 | 11801254 | SNV | 1 | C | T | Homozygous   |
| NC_037645.1 | 11801397 | SNV | 1 | T | C | Homozygous   |
| NC_037645.1 | 11801913 | SNV | 1 | T | G | Heterozygous |
| NC_037645.1 | 11801919 | SNV | 1 | T | A | Heterozygous |
| NC_037645.1 | 11801923 | SNV | 1 | T | A | Heterozygous |
| NC_037645.1 | 11801928 | SNV | 1 | T | A | Heterozygous |
| NC_037645.1 | 11801941 | SNV | 1 | A | T | Homozygous   |
| NC_037645.1 | 11801943 | SNV | 1 | T | C | Heterozygous |
| NC_037645.1 | 11802463 | SNV | 1 | A | T | Homozygous   |
| NC_037645.1 | 11803035 | SNV | 1 | C | A | Homozygous   |
| NC_037645.1 | 11803951 | SNV | 1 | C | T | Homozygous   |
| NC_037645.1 | 11804394 | SNV | 1 | T | G | Homozygous   |
| NC_037645.1 | 11804424 | SNV | 1 | T | A | Homozygous   |
| NC_037645.1 | 11805471 | SNV | 1 | G | A | Homozygous   |
| NC_037645.1 | 11805492 | SNV | 1 | G | C | Heterozygous |
| NC_037645.1 | 11806270 | SNV | 1 | G | A | Homozygous   |
| NC_037645.1 | 11806903 | SNV | 1 | A | G | Heterozygous |
| NC_037645.1 | 11806946 | SNV | 1 | T | C | Homozygous   |
| NC_037645.1 | 11807483 | SNV | 1 | G | A | Homozygous   |
| NC_037645.1 | 11807487 | SNV | 1 | C | T | Homozygous   |
| NC_037645.1 | 11807693 | SNV | 1 | T | C | Homozygous   |
| NC_037645.1 | 11807754 | SNV | 1 | A | G | Homozygous   |
| NC_037645.1 | 11813423 | SNV | 1 | G | C | Heterozygous |
| NC_037645.1 | 11824388 | SNV | 1 | T | C | Heterozygous |
| NC_037645.1 | 11824394 | SNV | 1 | G | T | Homozygous   |
| NC_037645.1 | 11824399 | SNV | 1 | C | T | Heterozygous |
| NC_037645.1 | 11825771 | SNV | 1 | A | G | Homozygous   |
| NC_037645.1 | 11826188 | SNV | 1 | A | G | Homozygous   |
| NC_037645.1 | 11833574 | SNV | 1 | T | C | Homozygous   |
| NC_037645.1 | 11836507 | SNV | 1 | A | C | Homozygous   |
| NC_037645.1 | 11838867 | SNV | 1 | T | G | Homozygous   |
| NC_037645.1 | 11841427 | SNV | 1 | A | G | Homozygous   |
| NC_037645.1 | 11841432 | SNV | 1 | C | T | Homozygous   |
| NC_037645.1 | 11841544 | SNV | 1 | T | C | Homozygous   |
| NC_037645.1 | 11842065 | SNV | 1 | C | A | Homozygous   |
| NC_037645.1 | 11843120 | SNV | 1 | C | T | Heterozygous |
| NC_037645.1 | 11843126 | SNV | 1 | C | T | Heterozygous |
| NC_037645.1 | 11843754 | SNV | 1 | C | T | Homozygous   |
| NC_037645.1 | 11844000 | SNV | 1 | C | G | Heterozygous |
| NC_037645.1 | 11844002 | SNV | 1 | A | G | Heterozygous |
| NC_037645.1 | 11849427 | SNV | 1 | C | T | Heterozygous |

|             |          |     |   |   |   |              |
|-------------|----------|-----|---|---|---|--------------|
| NC_037645.1 | 11849995 | SNV | 1 | A | G | Homozygous   |
| NC_037645.1 | 11850040 | SNV | 1 | C | G | Heterozygous |
| NC_037645.1 | 11850334 | SNV | 1 | C | G | Homozygous   |
| NC_037645.1 | 11850337 | SNV | 1 | G | A | Heterozygous |
| NC_037645.1 | 11850565 | SNV | 1 | G | A | Heterozygous |
| NC_037645.1 | 11851102 | SNV | 1 | A | T | Homozygous   |
| NC_037645.1 | 11851167 | SNV | 1 | T | C | Heterozygous |
| NC_037645.1 | 11851281 | SNV | 1 | C | T | Heterozygous |
| NC_037645.1 | 11851410 | SNV | 1 | A | G | Heterozygous |
| NC_037645.1 | 11851494 | SNV | 1 | T | C | Heterozygous |
| NC_037645.1 | 11852025 | SNV | 1 | A | G | Homozygous   |
| NC_037645.1 | 11852178 | SNV | 1 | A | G | Homozygous   |
| NC_037645.1 | 11852193 | SNV | 1 | G | C | Heterozygous |
| NC_037645.1 | 11852205 | SNV | 1 | C | T | Heterozygous |
| NC_037645.1 | 11855643 | SNV | 1 | G | A | Heterozygous |
| NC_037645.1 | 11856258 | SNV | 1 | G | A | Heterozygous |
| NC_037645.1 | 11856303 | SNV | 1 | T | C | Homozygous   |
| NC_037645.1 | 11861957 | SNV | 1 | T | C | Heterozygous |
| NC_037645.1 | 11861982 | SNV | 1 | T | C | Homozygous   |
| NC_037645.1 | 11865373 | SNV | 1 | A | G | Homozygous   |
| NC_037645.1 | 11879354 | SNV | 1 | G | A | Heterozygous |
| NC_037645.1 | 11889162 | SNV | 1 | A | G | Heterozygous |
| NC_037645.1 | 11889223 | SNV | 1 | G | A | Heterozygous |
| NC_037645.1 | 11889571 | SNV | 1 | T | A | Heterozygous |
| NC_037645.1 | 11889574 | SNV | 1 | T | C | Heterozygous |
| NC_037645.1 | 11889953 | SNV | 1 | A | T | Heterozygous |
| NC_037645.1 | 11890279 | SNV | 1 | G | T | Homozygous   |
| NC_037645.1 | 11890598 | SNV | 1 | A | G | Homozygous   |
| NC_037645.1 | 11890906 | SNV | 1 | G | A | Heterozygous |
| NC_037645.1 | 11891242 | SNV | 1 | T | A | Homozygous   |
| NC_037645.1 | 11891244 | SNV | 1 | G | A | Homozygous   |
| NC_037645.1 | 11893340 | SNV | 1 | A | G | Homozygous   |
| NC_037645.1 | 11893343 | SNV | 1 | C | A | Homozygous   |
| NC_037645.1 | 11895119 | SNV | 1 | T | A | Homozygous   |
| NC_037645.1 | 11895157 | SNV | 1 | T | C | Heterozygous |
| NC_037645.1 | 11895160 | SNV | 1 | A | T | Heterozygous |
| NC_037645.1 | 11895163 | SNV | 1 | A | T | Homozygous   |
| NC_037645.1 | 11895166 | SNV | 1 | A | T | Homozygous   |
| NC_037645.1 | 11896402 | SNV | 1 | A | G | Homozygous   |
| NC_037645.1 | 11902408 | SNV | 1 | T | A | Homozygous   |
| NC_037645.1 | 11902437 | SNV | 1 | A | T | Homozygous   |
| NC_037645.1 | 11902443 | SNV | 1 | A | T | Homozygous   |
| NC_037645.1 | 11902450 | SNV | 1 | A | T | Homozygous   |
| NC_037645.1 | 11902459 | SNV | 1 | A | T | Homozygous   |
| NC_037645.1 | 11906089 | SNV | 1 | C | T | Homozygous   |
| NC_037645.1 | 11907359 | SNV | 1 | C | T | Heterozygous |
| NC_037645.1 | 11907450 | SNV | 1 | G | T | Heterozygous |
| NC_037645.1 | 11907977 | SNV | 1 | G | C | Homozygous   |
| NC_037645.1 | 11907980 | SNV | 1 | T | C | Homozygous   |
| NC_037645.1 | 11907982 | SNV | 1 | C | T | Homozygous   |
| NC_037645.1 | 11908022 | SNV | 1 | A | T | Homozygous   |

|             |          |     |   |   |   |              |
|-------------|----------|-----|---|---|---|--------------|
| NC_037645.1 | 11908025 | SNV | 1 | A | T | Homozygous   |
| NC_037645.1 | 11916305 | SNV | 1 | C | T | Heterozygous |
| NC_037645.1 | 11916350 | SNV | 1 | G | A | Homozygous   |
| NC_037645.1 | 11916603 | SNV | 1 | C | T | Homozygous   |
| NC_037645.1 | 11917283 | SNV | 1 | T | A | Homozygous   |
| NC_037645.1 | 11917285 | SNV | 1 | C | G | Homozygous   |
| NC_037645.1 | 11917302 | SNV | 1 | A | G | Homozygous   |
| NC_037645.1 | 11928456 | SNV | 1 | T | A | Homozygous   |
| NC_037645.1 | 11929056 | SNV | 1 | T | C | Homozygous   |
| NC_037645.1 | 11930081 | SNV | 1 | G | A | Homozygous   |
| NC_037645.1 | 11930473 | SNV | 1 | G | A | Homozygous   |
| NC_037645.1 | 11936935 | SNV | 1 | C | T | Homozygous   |
| NC_037645.1 | 11937472 | SNV | 1 | G | A | Heterozygous |
| NC_037645.1 | 11937638 | SNV | 1 | C | A | Heterozygous |
| NC_037645.1 | 11942063 | SNV | 1 | G | T | Homozygous   |
| NC_037645.1 | 11942372 | SNV | 1 | G | A | Heterozygous |
| NC_037645.1 | 11944360 | SNV | 1 | T | C | Homozygous   |
| NC_037645.1 | 11944367 | SNV | 1 | A | T | Homozygous   |
| NC_037645.1 | 11945883 | SNV | 1 | C | T | Homozygous   |
| NC_037645.1 | 11946532 | SNV | 1 | G | T | Heterozygous |
| NC_037645.1 | 11946539 | SNV | 1 | G | C | Heterozygous |
| NC_037645.1 | 11946541 | SNV | 1 | T | G | Heterozygous |
| NC_037645.1 | 11946556 | SNV | 1 | G | T | Homozygous   |
| NC_037645.1 | 11946579 | SNV | 1 | T | C | Homozygous   |
| NC_037645.1 | 11952102 | SNV | 1 | A | C | Homozygous   |
| NC_037645.1 | 11952417 | SNV | 1 | C | T | Heterozygous |
| NC_037645.1 | 11963303 | SNV | 1 | G | A | Homozygous   |
| NC_037645.1 | 11964930 | SNV | 1 | T | C | Homozygous   |
| NC_037645.1 | 11964935 | SNV | 1 | G | T | Homozygous   |
| NC_037645.1 | 11965422 | SNV | 1 | T | C | Homozygous   |
| NC_037645.1 | 11965622 | SNV | 1 | C | T | Heterozygous |
| NC_037645.1 | 11965651 | SNV | 1 | C | T | Heterozygous |
| NC_037645.1 | 11965740 | SNV | 1 | T | C | Homozygous   |
| NC_037645.1 | 11966133 | SNV | 1 | T | C | Homozygous   |
| NC_037645.1 | 11966210 | SNV | 1 | A | G | Homozygous   |
| NC_037645.1 | 11966301 | SNV | 1 | T | C | Heterozygous |
| NC_037645.1 | 11966350 | SNV | 1 | C | T | Heterozygous |
| NC_037645.1 | 11966665 | SNV | 1 | T | C | Homozygous   |
| NC_037645.1 | 11967054 | SNV | 1 | C | T | Homozygous   |
| NC_037645.1 | 11967076 | SNV | 1 | T | C | Homozygous   |
| NC_037645.1 | 11967123 | SNV | 1 | T | C | Homozygous   |
| NC_037645.1 | 11970341 | SNV | 1 | A | G | Homozygous   |
| NC_037645.1 | 11970449 | SNV | 1 | A | G | Homozygous   |
| NC_037645.1 | 11970576 | SNV | 1 | G | A | Heterozygous |
| NC_037645.1 | 11970623 | SNV | 1 | T | C | Heterozygous |
| NC_037645.1 | 11975857 | SNV | 1 | G | A | Homozygous   |
| NC_037645.1 | 11975883 | SNV | 1 | A | G | Homozygous   |
| NC_037645.1 | 11982420 | SNV | 1 | A | T | Heterozygous |
| NC_037645.1 | 11982542 | SNV | 1 | T | C | Homozygous   |
| NC_037645.1 | 11983028 | SNV | 1 | T | C | Heterozygous |
| NC_037645.1 | 11983286 | SNV | 1 | C | T | Homozygous   |

|             |          |     |   |   |   |              |
|-------------|----------|-----|---|---|---|--------------|
| NC_037645.1 | 11983468 | SNV | 1 | A | G | Heterozygous |
| NC_037645.1 | 11983559 | SNV | 1 | A | G | Homozygous   |
| NC_037645.1 | 11987794 | SNV | 1 | G | C | Homozygous   |
| NC_037645.1 | 11989170 | SNV | 1 | A | G | Heterozygous |
| NC_037645.1 | 11992473 | SNV | 1 | T | A | Homozygous   |
| NC_037645.1 | 11992475 | SNV | 1 | A | T | Homozygous   |
| NC_037645.1 | 11992482 | SNV | 1 | T | C | Homozygous   |
| NC_037645.1 | 11992485 | SNV | 1 | A | G | Homozygous   |
| NC_037645.1 | 11992507 | SNV | 1 | T | C | Homozygous   |
| NC_037645.1 | 11992523 | SNV | 1 | A | C | Homozygous   |
| NC_037645.1 | 11992532 | SNV | 1 | T | C | Homozygous   |
| NC_037645.1 | 11992534 | SNV | 1 | A | C | Homozygous   |
| NC_037645.1 | 11992545 | SNV | 1 | G | A | Homozygous   |
| NC_037645.1 | 11992549 | SNV | 1 | T | A | Homozygous   |
| NC_037645.1 | 11993098 | SNV | 1 | T | C | Homozygous   |
| NC_037645.1 | 11993385 | SNV | 1 | T | C | Homozygous   |
| NC_037645.1 | 11994229 | SNV | 1 | C | T | Homozygous   |
| NC_037645.1 | 11994244 | SNV | 1 | C | G | Homozygous   |
| NC_037645.1 | 11994372 | SNV | 1 | T | C | Homozygous   |
| NC_037645.1 | 11994375 | SNV | 1 | G | A | Homozygous   |
| NC_037645.1 | 11995482 | SNV | 1 | C | T | Heterozygous |
| NC_037645.1 | 11996633 | SNV | 1 | G | A | Homozygous   |
| NC_037645.1 | 11996966 | SNV | 1 | T | C | Homozygous   |
| NC_037645.1 | 11996982 | SNV | 1 | A | G | Homozygous   |
| NC_037645.1 | 11997031 | SNV | 1 | A | G | Homozygous   |
| NC_037645.1 | 11997605 | SNV | 1 | T | C | Heterozygous |
| NC_037645.1 | 11997613 | SNV | 1 | C | T | Heterozygous |
| NC_037645.1 | 11998472 | SNV | 1 | C | G | Heterozygous |
| NC_037645.1 | 11999302 | SNV | 1 | C | T | Homozygous   |
| NC_037645.1 | 11999488 | SNV | 1 | G | A | Heterozygous |
| NC_037645.1 | 11999524 | SNV | 1 | A | G | Heterozygous |
| NC_037645.1 | 12000258 | SNV | 1 | A | G | Homozygous   |
| NC_037645.1 | 12000286 | SNV | 1 | A | G | Heterozygous |
| NC_037645.1 | 12000391 | SNV | 1 | C | T | Homozygous   |
| NC_037645.1 | 12001023 | SNV | 1 | G | A | Heterozygous |
| NC_037645.1 | 12002579 | SNV | 1 | C | G | Homozygous   |
| NC_037645.1 | 12004639 | SNV | 1 | G | A | Homozygous   |
| NC_037645.1 | 12006809 | SNV | 1 | T | A | Homozygous   |
| NC_037645.1 | 12006811 | SNV | 1 | T | A | Homozygous   |
| NC_037645.1 | 12006833 | SNV | 1 | G | A | Homozygous   |
| NC_037645.1 | 12006835 | SNV | 1 | C | A | Heterozygous |
| NC_037645.1 | 12007724 | SNV | 1 | C | T | Heterozygous |
| NC_037645.1 | 12016805 | SNV | 1 | G | A | Homozygous   |
| NC_037645.1 | 12016812 | SNV | 1 | T | C | Homozygous   |
| NC_037645.1 | 12017979 | SNV | 1 | A | G | Homozygous   |
| NC_037645.1 | 12017998 | SNV | 1 | A | C | Homozygous   |
| NC_037645.1 | 12018009 | SNV | 1 | G | A | Heterozygous |
| NC_037645.1 | 12018013 | SNV | 1 | G | A | Homozygous   |
| NC_037645.1 | 12026177 | SNV | 1 | A | G | Homozygous   |
| NC_037645.1 | 12026206 | SNV | 1 | C | T | Homozygous   |
| NC_037645.1 | 12028147 | SNV | 1 | T | G | Homozygous   |

|             |          |     |   |   |   |              |
|-------------|----------|-----|---|---|---|--------------|
| NC_037645.1 | 12029120 | SNV | 1 | G | A | Heterozygous |
| NC_037645.1 | 12029187 | SNV | 1 | T | C | Homozygous   |
| NC_037645.1 | 12029416 | SNV | 1 | T | A | Homozygous   |
| NC_037645.1 | 12031775 | SNV | 1 | A | G | Homozygous   |
| NC_037645.1 | 12034141 | SNV | 1 | G | T | Heterozygous |
| NC_037645.1 | 12034145 | SNV | 1 | A | T | Heterozygous |
| NC_037645.1 | 12035259 | SNV | 1 | G | A | Heterozygous |
| NC_037645.1 | 12035638 | SNV | 1 | C | G | Homozygous   |
| NC_037645.1 | 12035664 | SNV | 1 | T | G | Homozygous   |
| NC_037645.1 | 12036007 | SNV | 1 | C | T | Homozygous   |
| NC_037645.1 | 12036080 | SNV | 1 | C | T | Heterozygous |
| NC_037645.1 | 12038682 | SNV | 1 | C | T | Heterozygous |
| NC_037645.1 | 12042053 | SNV | 1 | C | T | Heterozygous |
| NC_037645.1 | 12042059 | SNV | 1 | A | T | Heterozygous |
| NC_037645.1 | 12048311 | SNV | 1 | A | G | Homozygous   |
| NC_037645.1 | 12048326 | SNV | 1 | A | T | Heterozygous |
| NC_037645.1 | 12056087 | SNV | 1 | C | G | Heterozygous |
| NC_037645.1 | 12056091 | SNV | 1 | C | G | Heterozygous |
| NC_037645.1 | 12056095 | SNV | 1 | C | G | Heterozygous |
| NC_037645.1 | 12065288 | SNV | 1 | T | C | Heterozygous |
| NC_037645.1 | 12077763 | SNV | 1 | T | A | Homozygous   |
| NC_037645.1 | 12077765 | SNV | 1 | A | G | Homozygous   |
| NC_037645.1 | 12078621 | SNV | 1 | C | A | Homozygous   |
| NC_037645.1 | 12078701 | SNV | 1 | C | T | Heterozygous |
| NC_037645.1 | 12081850 | SNV | 1 | A | T | Homozygous   |
| NC_037645.1 | 12081879 | SNV | 1 | A | C | Homozygous   |
| NC_037645.1 | 12082471 | SNV | 1 | A | G | Homozygous   |
| NC_037645.1 | 12088205 | SNV | 1 | T | C | Homozygous   |
| NC_037645.1 | 12088207 | SNV | 1 | C | T | Homozygous   |
| NC_037645.1 | 12088213 | SNV | 1 | C | T | Homozygous   |
| NC_037645.1 | 12088215 | SNV | 1 | C | A | Homozygous   |
| NC_037645.1 | 12088225 | SNV | 1 | C | T | Homozygous   |
| NC_037645.1 | 12092506 | SNV | 1 | T | C | Heterozygous |
| NC_037645.1 | 12092524 | SNV | 1 | T | C | Heterozygous |
| NC_037645.1 | 12093470 | SNV | 1 | A | C | Homozygous   |
| NC_037645.1 | 12093477 | SNV | 1 | A | C | Homozygous   |
| NC_037645.1 | 12093481 | SNV | 1 | A | T | Homozygous   |
| NC_037645.1 | 12093485 | SNV | 1 | T | G | Homozygous   |
| NC_037645.1 | 12093487 | SNV | 1 | A | G | Homozygous   |
| NC_037645.1 | 12097097 | SNV | 1 | G | A | Heterozygous |
| NC_037645.1 | 12097424 | SNV | 1 | A | G | Heterozygous |
| NC_037645.1 | 12097434 | SNV | 1 | G | A | Heterozygous |
| NC_037645.1 | 12097437 | SNV | 1 | A | G | Homozygous   |
| NC_037645.1 | 12098875 | SNV | 1 | A | C | Heterozygous |
| NC_037645.1 | 12098890 | SNV | 1 | C | T | Heterozygous |
| NC_037645.1 | 12098899 | SNV | 1 | G | A | Heterozygous |
| NC_037645.1 | 12098901 | SNV | 1 | G | C | Heterozygous |
| NC_037645.1 | 12115059 | SNV | 1 | G | A | Heterozygous |
| NC_037645.1 | 12115155 | SNV | 1 | T | C | Heterozygous |
| NC_037645.1 | 12115162 | SNV | 1 | G | C | Homozygous   |
| NC_037645.1 | 12115183 | SNV | 1 | G | A | Heterozygous |

|             |          |     |   |   |   |              |
|-------------|----------|-----|---|---|---|--------------|
| NC_037645.1 | 12115287 | SNV | 1 | T | C | Homozygous   |
| NC_037645.1 | 12116104 | SNV | 1 | G | A | Heterozygous |
| NC_037645.1 | 12116203 | SNV | 1 | T | C | Heterozygous |
| NC_037645.1 | 12116205 | SNV | 1 | A | G | Homozygous   |
| NC_037645.1 | 12116242 | SNV | 1 | T | C | Homozygous   |
| NC_037645.1 | 12116276 | SNV | 1 | A | G | Heterozygous |
| NC_037645.1 | 12116363 | SNV | 1 | A | T | Heterozygous |
| NC_037645.1 | 12116475 | SNV | 1 | A | G | Heterozygous |
| NC_037645.1 | 12116512 | SNV | 1 | A | G | Heterozygous |
| NC_037645.1 | 12117059 | SNV | 1 | G | A | Heterozygous |
| NC_037645.1 | 12117062 | SNV | 1 | G | A | Heterozygous |
| NC_037645.1 | 12117066 | SNV | 1 | G | A | Heterozygous |
| NC_037645.1 | 12117069 | SNV | 1 | G | A | Heterozygous |
| NC_037645.1 | 12117100 | SNV | 1 | A | G | Heterozygous |
| NC_037645.1 | 12118763 | SNV | 1 | G | A | Homozygous   |
| NC_037645.1 | 12118809 | SNV | 1 | A | G | Homozygous   |
| NC_037645.1 | 12118823 | SNV | 1 | G | A | Homozygous   |
| NC_037645.1 | 12118837 | SNV | 1 | T | A | Homozygous   |
| NC_037645.1 | 12119327 | SNV | 1 | A | G | Homozygous   |
| NC_037645.1 | 12119344 | SNV | 1 | T | C | Homozygous   |
| NC_037645.1 | 12119347 | SNV | 1 | C | T | Homozygous   |
| NC_037645.1 | 12119349 | SNV | 1 | G | A | Homozygous   |
| NC_037645.1 | 12122949 | SNV | 1 | A | C | Homozygous   |
| NC_037645.1 | 12123071 | SNV | 1 | A | G | Homozygous   |
| NC_037645.1 | 12125507 | SNV | 1 | A | G | Homozygous   |
| NC_037645.1 | 12125567 | SNV | 1 | T | C | Homozygous   |
| NC_037645.1 | 12125602 | SNV | 1 | C | T | Heterozygous |
| NC_037645.1 | 12125615 | SNV | 1 | G | A | Homozygous   |
| NC_037645.1 | 12126802 | SNV | 1 | T | C | Heterozygous |
| NC_037645.1 | 12127287 | SNV | 1 | A | G | Homozygous   |
| NC_037645.1 | 12127587 | SNV | 1 | A | G | Heterozygous |
| NC_037645.1 | 12127592 | SNV | 1 | G | A | Homozygous   |
| NC_037645.1 | 12127843 | SNV | 1 | C | T | Homozygous   |
| NC_037645.1 | 12127874 | SNV | 1 | T | A | Homozygous   |
| NC_037645.1 | 12136400 | SNV | 1 | C | T | Heterozygous |
| NC_037645.1 | 12136408 | SNV | 1 | C | A | Heterozygous |
| NC_037645.1 | 12136410 | SNV | 1 | C | A | Heterozygous |
| NC_037645.1 | 12136427 | SNV | 1 | T | G | Heterozygous |
| NC_037645.1 | 12136435 | SNV | 1 | T | C | Homozygous   |
| NC_037645.1 | 12136438 | SNV | 1 | C | T | Heterozygous |
| NC_037645.1 | 12137090 | SNV | 1 | A | G | Homozygous   |
| NC_037645.1 | 12137096 | SNV | 1 | A | C | Homozygous   |
| NC_037645.1 | 12144716 | SNV | 1 | G | T | Heterozygous |
| NC_037645.1 | 12144718 | SNV | 1 | A | T | Heterozygous |
| NC_037645.1 | 12146041 | SNV | 1 | T | C | Homozygous   |
| NC_037645.1 | 12146235 | SNV | 1 | C | T | Heterozygous |
| NC_037645.1 | 12146238 | SNV | 1 | C | A | Heterozygous |
| NC_037645.1 | 12146468 | SNV | 1 | G | A | Heterozygous |
| NC_037645.1 | 12150389 | SNV | 1 | G | A | Homozygous   |
| NC_037645.1 | 12150426 | SNV | 1 | T | C | Homozygous   |
| NC_037645.1 | 12150512 | SNV | 1 | G | A | Heterozygous |



|             |          |     |   |   |   |              |
|-------------|----------|-----|---|---|---|--------------|
| NC_037645.1 | 12151443 | SNV | 1 | C | T | Heterozygous |
| NC_037645.1 | 12151445 | SNV | 1 | A | G | Heterozygous |
| NC_037645.1 | 12159242 | SNV | 1 | A | G | Homozygous   |
| NC_037645.1 | 12162355 | SNV | 1 | T | C | Homozygous   |
| NC_037645.1 | 12163307 | SNV | 1 | G | T | Heterozygous |
| NC_037645.1 | 12163309 | SNV | 1 | G | A | Heterozygous |
| NC_037645.1 | 12163659 | SNV | 1 | C | G | Homozygous   |
| NC_037645.1 | 12163779 | SNV | 1 | G | A | Homozygous   |
| NC_037645.1 | 12163839 | SNV | 1 | C | T | Homozygous   |
| NC_037645.1 | 12164326 | SNV | 1 | T | A | Homozygous   |
| NC_037645.1 | 12164344 | SNV | 1 | A | C | Homozygous   |
| NC_037645.1 | 12164346 | SNV | 1 | A | C | Homozygous   |
| NC_037645.1 | 12164698 | SNV | 1 | T | A | Heterozygous |
| NC_037645.1 | 12164903 | SNV | 1 | G | C | Heterozygous |
| NC_037645.1 | 12167073 | SNV | 1 | C | T | Homozygous   |
| NC_037645.1 | 12168842 | SNV | 1 | T | C | Homozygous   |
| NC_037645.1 | 12169741 | SNV | 1 | G | A | Heterozygous |
| NC_037645.1 | 12169759 | SNV | 1 | T | G | Heterozygous |
| NC_037645.1 | 12169765 | SNV | 1 | A | G | Heterozygous |
| NC_037645.1 | 12169769 | SNV | 1 | T | C | Heterozygous |
| NC_037645.1 | 12169774 | SNV | 1 | G | A | Heterozygous |
| NC_037645.1 | 12169777 | SNV | 1 | A | T | Heterozygous |
| NC_037645.1 | 12170755 | SNV | 1 | G | A | Heterozygous |
| NC_037645.1 | 12171396 | SNV | 1 | A | G | Homozygous   |
| NC_037645.1 | 12173112 | SNV | 1 | C | T | Heterozygous |
| NC_037645.1 | 12173293 | SNV | 1 | C | T | Homozygous   |
| NC_037645.1 | 12179559 | SNV | 1 | T | C | Homozygous   |
| NC_037645.1 | 12179661 | SNV | 1 | T | C | Homozygous   |
| NC_037645.1 | 12179845 | SNV | 1 | C | T | Homozygous   |
| NC_037645.1 | 12181303 | SNV | 1 | A | T | Heterozygous |
| NC_037645.1 | 12181397 | SNV | 1 | G | T | Homozygous   |
| NC_037645.1 | 12181403 | SNV | 1 | T | G | Homozygous   |
| NC_037645.1 | 12181692 | SNV | 1 | C | A | Homozygous   |
| NC_037645.1 | 12181801 | SNV | 1 | C | T | Heterozygous |
| NC_037645.1 | 12182830 | SNV | 1 | G | A | Homozygous   |
| NC_037645.1 | 12188000 | SNV | 1 | A | T | Homozygous   |
| NC_037645.1 | 12188007 | SNV | 1 | T | C | Homozygous   |
| NC_037645.1 | 12188012 | SNV | 1 | A | T | Homozygous   |
| NC_037645.1 | 12188015 | SNV | 1 | A | T | Homozygous   |
| NC_037645.1 | 12188021 | SNV | 1 | T | C | Homozygous   |
| NC_037645.1 | 12195514 | SNV | 1 | G | C | Homozygous   |
| NC_037645.1 | 12195523 | SNV | 1 | T | A | Homozygous   |
| NC_037645.1 | 12195525 | SNV | 1 | G | A | Homozygous   |
| NC_037645.1 | 12195538 | SNV | 1 | T | A | Homozygous   |
| NC_037645.1 | 12199146 | SNV | 1 | A | G | Homozygous   |
| NC_037645.1 | 12199188 | SNV | 1 | A | G | Homozygous   |
| NC_037645.1 | 12199278 | SNV | 1 | C | T | Heterozygous |
| NC_037645.1 | 12215452 | SNV | 1 | T | A | Homozygous   |
| NC_037645.1 | 12215572 | SNV | 1 | A | G | Homozygous   |
| NC_037645.1 | 12215641 | SNV | 1 | G | A | Heterozygous |
| NC_037645.1 | 12216178 | SNV | 1 | C | T | Heterozygous |

|             |          |     |   |   |   |              |
|-------------|----------|-----|---|---|---|--------------|
| NC_037645.1 | 12216214 | SNV | 1 | T | C | Homozygous   |
| NC_037645.1 | 12216367 | SNV | 1 | C | T | Heterozygous |
| NC_037645.1 | 12228074 | SNV | 1 | T | C | Homozygous   |
| NC_037645.1 | 12237871 | SNV | 1 | A | G | Homozygous   |
| NC_037645.1 | 12238038 | SNV | 1 | A | C | Heterozygous |
| NC_037645.1 | 12238049 | SNV | 1 | G | T | Heterozygous |
| NC_037645.1 | 12238055 | SNV | 1 | G | A | Heterozygous |
| NC_037645.1 | 12238057 | SNV | 1 | G | A | Heterozygous |
| NC_037645.1 | 12238059 | SNV | 1 | G | A | Heterozygous |
| NC_037645.1 | 12238065 | SNV | 1 | G | A | Heterozygous |
| NC_037645.1 | 12238071 | SNV | 1 | T | A | Heterozygous |
| NC_037645.1 | 12238096 | SNV | 1 | A | G | Heterozygous |
| NC_037645.1 | 12238099 | SNV | 1 | A | G | Heterozygous |
| NC_037645.1 | 12238106 | SNV | 1 | C | G | Homozygous   |
| NC_037645.1 | 12245248 | SNV | 1 | G | A | Heterozygous |
| NC_037645.1 | 12250394 | SNV | 1 | A | G | Heterozygous |
| NC_037645.1 | 12250630 | SNV | 1 | T | C | Homozygous   |
| NC_037645.1 | 12250696 | SNV | 1 | T | C | Heterozygous |
| NC_037645.1 | 12254986 | SNV | 1 | C | T | Heterozygous |
| NC_037645.1 | 12255106 | SNV | 1 | T | C | Heterozygous |
| NC_037645.1 | 12256029 | SNV | 1 | T | C | Heterozygous |
| NC_037645.1 | 12256106 | SNV | 1 | G | C | Homozygous   |
| NC_037645.1 | 12256343 | SNV | 1 | A | G | Homozygous   |
| NC_037645.1 | 12256419 | SNV | 1 | A | T | Heterozygous |
| NC_037645.1 | 12256421 | SNV | 1 | A | C | Heterozygous |
| NC_037645.1 | 12256425 | SNV | 1 | A | G | Heterozygous |
| NC_037645.1 | 12256614 | SNV | 1 | C | G | Heterozygous |
| NC_037645.1 | 12256900 | SNV | 1 | G | A | Heterozygous |
| NC_037645.1 | 12257649 | SNV | 1 | T | C | Homozygous   |
| NC_037645.1 | 12257682 | SNV | 1 | T | C | Heterozygous |
| NC_037645.1 | 12257717 | SNV | 1 | C | T | Heterozygous |
| NC_037645.1 | 12258025 | SNV | 1 | T | C | Homozygous   |
| NC_037645.1 | 12258155 | SNV | 1 | C | G | Homozygous   |
| NC_037645.1 | 12258735 | SNV | 1 | T | C | Homozygous   |
| NC_037645.1 | 12259297 | SNV | 1 | G | C | Homozygous   |
| NC_037645.1 | 12259704 | SNV | 1 | T | C | Homozygous   |
| NC_037645.1 | 12259756 | SNV | 1 | T | C | Heterozygous |
| NC_037645.1 | 12259975 | SNV | 1 | A | T | Homozygous   |
| NC_037645.1 | 12260080 | SNV | 1 | T | C | Homozygous   |
| NC_037645.1 | 12260121 | SNV | 1 | T | G | Heterozygous |
| NC_037645.1 | 12260263 | SNV | 1 | A | T | Heterozygous |
| NC_037645.1 | 12260382 | SNV | 1 | T | C | Homozygous   |
| NC_037645.1 | 12260483 | SNV | 1 | C | T | Homozygous   |
| NC_037645.1 | 12260657 | SNV | 1 | A | G | Heterozygous |
| NC_037645.1 | 12261319 | SNV | 1 | C | T | Homozygous   |
| NC_037645.1 | 12261504 | SNV | 1 | A | G | Homozygous   |
| NC_037645.1 | 12261551 | SNV | 1 | G | A | Homozygous   |
| NC_037645.1 | 12261598 | SNV | 1 | T | C | Homozygous   |
| NC_037645.1 | 12261691 | SNV | 1 | A | G | Homozygous   |
| NC_037645.1 | 12261735 | SNV | 1 | A | G | Homozygous   |
| NC_037645.1 | 12261753 | SNV | 1 | T | C | Homozygous   |

|             |          |     |   |   |   |              |
|-------------|----------|-----|---|---|---|--------------|
| NC_037645.1 | 12261886 | SNV | 1 | T | C | Heterozygous |
| NC_037645.1 | 12261984 | SNV | 1 | C | T | Heterozygous |
| NC_037645.1 | 12262223 | SNV | 1 | C | T | Heterozygous |
| NC_037645.1 | 12262249 | SNV | 1 | G | A | Homozygous   |
| NC_037645.1 | 12262455 | SNV | 1 | C | A | Homozygous   |
| NC_037645.1 | 12263803 | SNV | 1 | A | G | Homozygous   |
| NC_037645.1 | 12263848 | SNV | 1 | C | T | Heterozygous |
| NC_037645.1 | 12264054 | SNV | 1 | G | A | Homozygous   |
| NC_037645.1 | 12264107 | SNV | 1 | A | T | Heterozygous |
| NC_037645.1 | 12264715 | SNV | 1 | A | T | Homozygous   |
| NC_037645.1 | 12265114 | SNV | 1 | A | G | Homozygous   |
| NC_037645.1 | 12265733 | SNV | 1 | T | C | Homozygous   |
| NC_037645.1 | 12266102 | SNV | 1 | G | A | Heterozygous |
| NC_037645.1 | 12271468 | SNV | 1 | A | G | Homozygous   |
| NC_037645.1 | 12273171 | SNV | 1 | A | G | Homozygous   |
| NC_037645.1 | 12273503 | SNV | 1 | T | C | Heterozygous |
| NC_037645.1 | 12273707 | SNV | 1 | T | C | Heterozygous |
| NC_037645.1 | 12273715 | SNV | 1 | A | G | Heterozygous |
| NC_037645.1 | 12273717 | SNV | 1 | C | T | Heterozygous |
| NC_037645.1 | 12273726 | SNV | 1 | T | A | Homozygous   |
| NC_037645.1 | 12273731 | SNV | 1 | T | C | Heterozygous |
| NC_037645.1 | 12273744 | SNV | 1 | C | T | Heterozygous |
| NC_037645.1 | 12273780 | SNV | 1 | A | G | Homozygous   |
| NC_037645.1 | 12273825 | SNV | 1 | G | A | Homozygous   |
| NC_037645.1 | 12273834 | SNV | 1 | G | A | Homozygous   |
| NC_037645.1 | 12273863 | SNV | 1 | C | T | Heterozygous |
| NC_037645.1 | 12273899 | SNV | 1 | A | T | Heterozygous |
| NC_037645.1 | 12273902 | SNV | 1 | C | T | Heterozygous |
| NC_037645.1 | 12273906 | SNV | 1 | A | C | Heterozygous |
| NC_037645.1 | 12273928 | SNV | 1 | T | C | Heterozygous |
| NC_037645.1 | 12273952 | SNV | 1 | T | C | Heterozygous |
| NC_037645.1 | 12274073 | SNV | 1 | A | G | Homozygous   |
| NC_037645.1 | 12274097 | SNV | 1 | A | G | Homozygous   |
| NC_037645.1 | 12274170 | SNV | 1 | C | T | Homozygous   |
| NC_037645.1 | 12274271 | SNV | 1 | T | G | Homozygous   |
| NC_037645.1 | 12274456 | SNV | 1 | T | G | Homozygous   |
| NC_037645.1 | 12274606 | SNV | 1 | T | C | Heterozygous |
| NC_037645.1 | 12274617 | SNV | 1 | T | C | Homozygous   |
| NC_037645.1 | 12274638 | SNV | 1 | G | A | Homozygous   |
| NC_037645.1 | 12274772 | SNV | 1 | T | C | Heterozygous |
| NC_037645.1 | 12274782 | SNV | 1 | T | C | Heterozygous |
| NC_037645.1 | 12274802 | SNV | 1 | T | C | Heterozygous |
| NC_037645.1 | 12274824 | SNV | 1 | T | C | Homozygous   |
| NC_037645.1 | 12274836 | SNV | 1 | T | C | Heterozygous |
| NC_037645.1 | 12275465 | SNV | 1 | T | C | Heterozygous |
| NC_037645.1 | 12275501 | SNV | 1 | C | T | Heterozygous |
| NC_037645.1 | 12275581 | SNV | 1 | A | G | Homozygous   |
| NC_037645.1 | 12275767 | SNV | 1 | G | A | Heterozygous |
| NC_037645.1 | 12275889 | SNV | 1 | C | A | Homozygous   |
| NC_037645.1 | 12275905 | SNV | 1 | A | G | Homozygous   |
| NC_037645.1 | 12276361 | SNV | 1 | G | A | Homozygous   |

|             |          |     |   |   |   |              |
|-------------|----------|-----|---|---|---|--------------|
| NC_037645.1 | 12276648 | SNV | 1 | T | C | Homozygous   |
| NC_037645.1 | 12276715 | SNV | 1 | T | C | Homozygous   |
| NC_037645.1 | 12277339 | SNV | 1 | A | G | Heterozygous |
| NC_037645.1 | 12277397 | SNV | 1 | A | G | Heterozygous |
| NC_037645.1 | 12277429 | SNV | 1 | C | T | Heterozygous |
| NC_037645.1 | 12277496 | SNV | 1 | A | G | Homozygous   |
| NC_037645.1 | 12277521 | SNV | 1 | T | C | Heterozygous |
| NC_037645.1 | 12277523 | SNV | 1 | T | A | Heterozygous |
| NC_037645.1 | 12277668 | SNV | 1 | T | C | Heterozygous |
| NC_037645.1 | 12278071 | SNV | 1 | G | A | Homozygous   |
| NC_037645.1 | 12278139 | SNV | 1 | C | T | Heterozygous |
| NC_037645.1 | 12278417 | SNV | 1 | T | C | Homozygous   |
| NC_037645.1 | 12278433 | SNV | 1 | T | C | Homozygous   |
| NC_037645.1 | 12278547 | SNV | 1 | A | G | Homozygous   |
| NC_037645.1 | 12278666 | SNV | 1 | A | G | Heterozygous |
| NC_037645.1 | 12278672 | SNV | 1 | A | G | Heterozygous |
| NC_037645.1 | 12279534 | SNV | 1 | G | A | Heterozygous |
| NC_037645.1 | 12279555 | SNV | 1 | C | T | Heterozygous |
| NC_037645.1 | 12280120 | SNV | 1 | A | T | Heterozygous |
| NC_037645.1 | 12280755 | SNV | 1 | G | C | Homozygous   |
| NC_037645.1 | 12280764 | SNV | 1 | C | T | Heterozygous |
| NC_037645.1 | 12280845 | SNV | 1 | C | G | Homozygous   |
| NC_037645.1 | 12280930 | SNV | 1 | T | A | Homozygous   |
| NC_037645.1 | 12281017 | SNV | 1 | A | G | Heterozygous |
| NC_037645.1 | 12281031 | SNV | 1 | G | A | Homozygous   |
| NC_037645.1 | 12281074 | SNV | 1 | C | T | Heterozygous |
| NC_037645.1 | 12281076 | SNV | 1 | C | T | Heterozygous |
| NC_037645.1 | 12282284 | SNV | 1 | G | C | Homozygous   |
| NC_037645.1 | 12282288 | SNV | 1 | C | G | Heterozygous |
| NC_037645.1 | 12291816 | SNV | 1 | A | G | Homozygous   |
| NC_037645.1 | 12295712 | SNV | 1 | C | T | Homozygous   |
| NC_037645.1 | 12295721 | SNV | 1 | C | T | Homozygous   |
| NC_037645.1 | 12295728 | SNV | 1 | A | G | Homozygous   |
| NC_037645.1 | 12298974 | SNV | 1 | T | C | Homozygous   |
| NC_037645.1 | 12300208 | SNV | 1 | T | C | Homozygous   |
| NC_037645.1 | 12300220 | SNV | 1 | T | C | Homozygous   |
| NC_037645.1 | 12300224 | SNV | 1 | G | A | Homozygous   |
| NC_037645.1 | 12300226 | SNV | 1 | T | C | Heterozygous |
| NC_037645.1 | 12300292 | SNV | 1 | T | C | Heterozygous |
| NC_037645.1 | 12300300 | SNV | 1 | C | T | Heterozygous |
| NC_037645.1 | 12301709 | SNV | 1 | T | A | Homozygous   |
| NC_037645.1 | 12301717 | SNV | 1 | A | C | Homozygous   |
| NC_037645.1 | 12301726 | SNV | 1 | G | T | Homozygous   |
| NC_037645.1 | 12313090 | SNV | 1 | A | G | Homozygous   |
| NC_037645.1 | 12313135 | SNV | 1 | C | G | Heterozygous |
| NC_037645.1 | 12313274 | SNV | 1 | A | G | Homozygous   |
| NC_037645.1 | 12313297 | SNV | 1 | G | A | Heterozygous |
| NC_037645.1 | 12313425 | SNV | 1 | G | A | Heterozygous |
| NC_037645.1 | 12313432 | SNV | 1 | T | C | Homozygous   |
| NC_037645.1 | 12313482 | SNV | 1 | C | T | Homozygous   |
| NC_037645.1 | 12313540 | SNV | 1 | A | G | Heterozygous |

|             |          |     |   |   |   |              |
|-------------|----------|-----|---|---|---|--------------|
| NC_037645.1 | 12313562 | SNV | 1 | C | T | Homozygous   |
| NC_037645.1 | 12313878 | SNV | 1 | A | G | Homozygous   |
| NC_037645.1 | 12313956 | SNV | 1 | C | T | Heterozygous |
| NC_037645.1 | 12314215 | SNV | 1 | T | C | Homozygous   |
| NC_037645.1 | 12314282 | SNV | 1 | A | G | Homozygous   |
| NC_037645.1 | 12314284 | SNV | 1 | A | G | Heterozygous |
| NC_037645.1 | 12314527 | SNV | 1 | T | C | Homozygous   |
| NC_037645.1 | 12314556 | SNV | 1 | C | T | Heterozygous |
| NC_037645.1 | 12317192 | SNV | 1 | C | T | Heterozygous |
| NC_037645.1 | 12317954 | SNV | 1 | C | A | Homozygous   |
| NC_037645.1 | 12318400 | SNV | 1 | T | C | Homozygous   |
| NC_037645.1 | 12319839 | SNV | 1 | A | T | Heterozygous |
| NC_037645.1 | 12321412 | SNV | 1 | T | C | Homozygous   |
| NC_037645.1 | 12325375 | SNV | 1 | C | G | Homozygous   |
| NC_037645.1 | 12325504 | SNV | 1 | G | C | Heterozygous |
| NC_037645.1 | 12325806 | SNV | 1 | T | A | Homozygous   |
| NC_037645.1 | 12325810 | SNV | 1 | G | A | Heterozygous |
| NC_037645.1 | 12326201 | SNV | 1 | T | C | Homozygous   |
| NC_037645.1 | 12326910 | SNV | 1 | A | G | Homozygous   |
| NC_037645.1 | 12327807 | SNV | 1 | A | G | Heterozygous |
| NC_037645.1 | 12328287 | SNV | 1 | A | G | Homozygous   |
| NC_037645.1 | 12333628 | SNV | 1 | G | A | Heterozygous |
| NC_037645.1 | 12333648 | SNV | 1 | G | A | Heterozygous |
| NC_037645.1 | 12333664 | SNV | 1 | T | C | Heterozygous |
| NC_037645.1 | 12333729 | SNV | 1 | C | A | Homozygous   |
| NC_037645.1 | 12333740 | SNV | 1 | T | C | Homozygous   |
| NC_037645.1 | 12333763 | SNV | 1 | A | C | Homozygous   |
| NC_037645.1 | 12333782 | SNV | 1 | T | C | Homozygous   |
| NC_037645.1 | 12333808 | SNV | 1 | T | A | Homozygous   |
| NC_037645.1 | 12333834 | SNV | 1 | T | G | Homozygous   |
| NC_037645.1 | 12334702 | SNV | 1 | A | G | Homozygous   |
| NC_037645.1 | 12335184 | SNV | 1 | T | C | Homozygous   |
| NC_037645.1 | 12342937 | SNV | 1 | G | T | Heterozygous |
| NC_037645.1 | 12355484 | SNV | 1 | T | A | Homozygous   |
| NC_037645.1 | 12355487 | SNV | 1 | C | G | Homozygous   |
| NC_037645.1 | 12355489 | SNV | 1 | A | C | Homozygous   |
| NC_037645.1 | 12356098 | SNV | 1 | G | A | Homozygous   |
| NC_037645.1 | 12358631 | SNV | 1 | A | C | Homozygous   |
| NC_037645.1 | 12363626 | SNV | 1 | A | T | Homozygous   |
| NC_037645.1 | 12364135 | SNV | 1 | T | G | Heterozygous |
| NC_037645.1 | 12364137 | SNV | 1 | G | C | Heterozygous |
| NC_037645.1 | 12364147 | SNV | 1 | T | A | Heterozygous |
| NC_037645.1 | 12364329 | SNV | 1 | T | A | Homozygous   |
| NC_037645.1 | 12364332 | SNV | 1 | A | T | Homozygous   |
| NC_037645.1 | 12364343 | SNV | 1 | A | T | Homozygous   |
| NC_037645.1 | 12364350 | SNV | 1 | A | G | Homozygous   |
| NC_037645.1 | 12364356 | SNV | 1 | T | C | Homozygous   |
| NC_037645.1 | 12364362 | SNV | 1 | A | T | Heterozygous |
| NC_037645.1 | 12364637 | SNV | 1 | C | G | Heterozygous |
| NC_037645.1 | 12364647 | SNV | 1 | T | A | Heterozygous |
| NC_037645.1 | 12364671 | SNV | 1 | G | A | Heterozygous |

|             |          |     |   |   |   |              |
|-------------|----------|-----|---|---|---|--------------|
| NC_037645.1 | 12364674 | SNV | 1 | C | A | Heterozygous |
| NC_037645.1 | 12364676 | SNV | 1 | A | T | Heterozygous |
| NC_037645.1 | 12364692 | SNV | 1 | T | C | Heterozygous |
| NC_037645.1 | 12364724 | SNV | 1 | A | G | Heterozygous |
| NC_037645.1 | 12364730 | SNV | 1 | A | G | Heterozygous |
| NC_037645.1 | 12365002 | SNV | 1 | C | G | Homozygous   |
| NC_037645.1 | 12368371 | SNV | 1 | A | T | Homozygous   |
| NC_037645.1 | 12371085 | SNV | 1 | A | T | Homozygous   |
| NC_037645.1 | 12371117 | SNV | 1 | A | T | Homozygous   |
| NC_037645.1 | 12371119 | SNV | 1 | T | A | Homozygous   |
| NC_037645.1 | 12371127 | SNV | 1 | T | C | Homozygous   |
| NC_037645.1 | 12371131 | SNV | 1 | T | A | Homozygous   |
| NC_037645.1 | 12388008 | SNV | 1 | G | A | Heterozygous |
| NC_037645.1 | 12388315 | SNV | 1 | T | C | Heterozygous |
| NC_037645.1 | 12388753 | SNV | 1 | C | T | Homozygous   |
| NC_037645.1 | 12388758 | SNV | 1 | A | T | Homozygous   |
| NC_037645.1 | 12388763 | SNV | 1 | C | T | Heterozygous |
| NC_037645.1 | 12388780 | SNV | 1 | C | T | Heterozygous |
| NC_037645.1 | 12388913 | SNV | 1 | C | A | Heterozygous |
| NC_037645.1 | 12390886 | SNV | 1 | A | G | Heterozygous |
| NC_037645.1 | 12391979 | SNV | 1 | A | G | Heterozygous |
| NC_037645.1 | 12391988 | SNV | 1 | G | A | Heterozygous |
| NC_037645.1 | 12392511 | SNV | 1 | A | G | Homozygous   |
| NC_037645.1 | 12392624 | SNV | 1 | A | G | Homozygous   |
| NC_037645.1 | 12392644 | SNV | 1 | C | T | Homozygous   |
| NC_037645.1 | 12392900 | SNV | 1 | T | C | Homozygous   |
| NC_037645.1 | 12393059 | SNV | 1 | C | G | Heterozygous |
| NC_037645.1 | 12393338 | SNV | 1 | G | A | Heterozygous |
| NC_037645.1 | 12397538 | SNV | 1 | C | T | Heterozygous |
| NC_037645.1 | 12397763 | SNV | 1 | G | A | Homozygous   |
| NC_037645.1 | 12400565 | SNV | 1 | G | A | Heterozygous |
| NC_037645.1 | 12404316 | SNV | 1 | A | C | Homozygous   |
| NC_037645.1 | 12404447 | SNV | 1 | T | G | Homozygous   |
| NC_037645.1 | 12404904 | SNV | 1 | A | G | Homozygous   |
| NC_037645.1 | 12405605 | SNV | 1 | T | C | Heterozygous |
| NC_037645.1 | 12405641 | SNV | 1 | A | G | Homozygous   |
| NC_037645.1 | 12405677 | SNV | 1 | T | C | Heterozygous |
| NC_037645.1 | 12415398 | SNV | 1 | T | A | Homozygous   |
| NC_037645.1 | 12415404 | SNV | 1 | A | T | Homozygous   |
| NC_037645.1 | 12417967 | SNV | 1 | T | G | Heterozygous |
| NC_037645.1 | 12417969 | SNV | 1 | C | G | Heterozygous |
| NC_037645.1 | 12418686 | SNV | 1 | G | A | Heterozygous |
| NC_037645.1 | 12419174 | SNV | 1 | G | A | Homozygous   |
| NC_037645.1 | 12420466 | SNV | 1 | G | A | Heterozygous |
| NC_037645.1 | 12423229 | SNV | 1 | A | G | Homozygous   |
| NC_037645.1 | 12429375 | SNV | 1 | A | C | Heterozygous |
| NC_037645.1 | 12429382 | SNV | 1 | G | C | Heterozygous |
| NC_037645.1 | 12429384 | SNV | 1 | C | T | Heterozygous |
| NC_037645.1 | 12434623 | SNV | 1 | C | T | Heterozygous |
| NC_037645.1 | 12434625 | SNV | 1 | C | T | Heterozygous |
| NC_037645.1 | 12434642 | SNV | 1 | G | T | Homozygous   |

|             |          |     |   |   |   |              |
|-------------|----------|-----|---|---|---|--------------|
| NC_037645.1 | 12434648 | SNV | 1 | T | C | Homozygous   |
| NC_037645.1 | 12434650 | SNV | 1 | G | T | Heterozygous |
| NC_037645.1 | 12434674 | SNV | 1 | G | T | Homozygous   |
| NC_037645.1 | 12434712 | SNV | 1 | T | G | Homozygous   |
| NC_037645.1 | 12434730 | SNV | 1 | T | A | Homozygous   |
| NC_037645.1 | 12434736 | SNV | 1 | T | A | Heterozygous |
| NC_037645.1 | 12434738 | SNV | 1 | T | A | Heterozygous |
| NC_037645.1 | 12434742 | SNV | 1 | T | G | Homozygous   |
| NC_037645.1 | 12434766 | SNV | 1 | G | A | Homozygous   |
| NC_037645.1 | 12434772 | SNV | 1 | T | G | Heterozygous |
| NC_037645.1 | 12434791 | SNV | 1 | T | C | Heterozygous |
| NC_037645.1 | 12434793 | SNV | 1 | G | C | Heterozygous |
| NC_037645.1 | 12434805 | SNV | 1 | C | T | Heterozygous |
| NC_037645.1 | 12434811 | SNV | 1 | C | T | Heterozygous |
| NC_037645.1 | 12434872 | SNV | 1 | G | T | Heterozygous |
| NC_037645.1 | 12434898 | SNV | 1 | G | T | Homozygous   |
| NC_037645.1 | 12434903 | SNV | 1 | A | C | Homozygous   |
| NC_037645.1 | 12434906 | SNV | 1 | G | T | Homozygous   |
| NC_037645.1 | 12434915 | SNV | 1 | C | T | Heterozygous |
| NC_037645.1 | 12434922 | SNV | 1 | T | C | Heterozygous |
| NC_037645.1 | 12434936 | SNV | 1 | T | C | Heterozygous |
| NC_037645.1 | 12435179 | SNV | 1 | G | C | Homozygous   |
| NC_037645.1 | 12435198 | SNV | 1 | G | T | Heterozygous |
| NC_037645.1 | 12436594 | SNV | 1 | G | A | Heterozygous |
| NC_037645.1 | 12436596 | SNV | 1 | A | G | Homozygous   |
| NC_037645.1 | 12437351 | SNV | 1 | G | A | Heterozygous |
| NC_037645.1 | 12437503 | SNV | 1 | G | A | Heterozygous |
| NC_037645.1 | 12437509 | SNV | 1 | G | T | Heterozygous |
| NC_037645.1 | 12437536 | SNV | 1 | C | T | Heterozygous |
| NC_037645.1 | 12437592 | SNV | 1 | T | A | Heterozygous |
| NC_037645.1 | 12441251 | SNV | 1 | T | G | Homozygous   |
| NC_037645.1 | 12441253 | SNV | 1 | G | A | Homozygous   |
| NC_037645.1 | 12441272 | SNV | 1 | C | T | Heterozygous |
| NC_037645.1 | 12441274 | SNV | 1 | C | T | Heterozygous |
| NC_037645.1 | 12441276 | SNV | 1 | C | T | Heterozygous |
| NC_037645.1 | 12453571 | SNV | 1 | G | A | Homozygous   |
| NC_037645.1 | 12456828 | SNV | 1 | A | G | Homozygous   |
| NC_037645.1 | 12456923 | SNV | 1 | C | T | Heterozygous |
| NC_037645.1 | 12457042 | SNV | 1 | C | A | Heterozygous |
| NC_037645.1 | 12457348 | SNV | 1 | G | C | Heterozygous |
| NC_037645.1 | 12457351 | SNV | 1 | C | G | Heterozygous |
| NC_037645.1 | 12457353 | SNV | 1 | A | C | Heterozygous |
| NC_037645.1 | 12457424 | SNV | 1 | T | C | Heterozygous |
| NC_037645.1 | 12457816 | SNV | 1 | C | T | Heterozygous |
| NC_037645.1 | 12457822 | SNV | 1 | C | T | Heterozygous |
| NC_037645.1 | 12460519 | SNV | 1 | C | A | Homozygous   |
| NC_037645.1 | 12460568 | SNV | 1 | A | G | Homozygous   |
| NC_037645.1 | 12460572 | SNV | 1 | G | A | Homozygous   |
| NC_037645.1 | 12460583 | SNV | 1 | T | C | Homozygous   |
| NC_037645.1 | 12460594 | SNV | 1 | G | A | Homozygous   |
| NC_037645.1 | 12460953 | SNV | 1 | T | G | Homozygous   |

|             |          |     |   |   |   |              |
|-------------|----------|-----|---|---|---|--------------|
| NC_037645.1 | 12462391 | SNV | 1 | T | C | Homozygous   |
| NC_037645.1 | 12462402 | SNV | 1 | A | G | Homozygous   |
| NC_037645.1 | 12462780 | SNV | 1 | C | T | Homozygous   |
| NC_037645.1 | 12462981 | SNV | 1 | T | C | Homozygous   |
| NC_037645.1 | 12464599 | SNV | 1 | C | T | Heterozygous |
| NC_037645.1 | 12464609 | SNV | 1 | A | C | Heterozygous |
| NC_037645.1 | 12464613 | SNV | 1 | G | T | Heterozygous |
| NC_037645.1 | 12464818 | SNV | 1 | A | G | Heterozygous |
| NC_037645.1 | 12467258 | SNV | 1 | G | A | Heterozygous |
| NC_037645.1 | 12468960 | SNV | 1 | A | T | Heterozygous |
| NC_037645.1 | 12468962 | SNV | 1 | A | C | Heterozygous |
| NC_037645.1 | 12469066 | SNV | 1 | A | G | Homozygous   |
| NC_037645.1 | 12469092 | SNV | 1 | T | C | Homozygous   |
| NC_037645.1 | 12470780 | SNV | 1 | A | T | Heterozygous |
| NC_037645.1 | 12472646 | SNV | 1 | C | T | Heterozygous |
| NC_037645.1 | 12473103 | SNV | 1 | T | C | Heterozygous |
| NC_037645.1 | 12473109 | SNV | 1 | T | C | Homozygous   |
| NC_037645.1 | 12473345 | SNV | 1 | G | A | Homozygous   |
| NC_037645.1 | 12473431 | SNV | 1 | A | T | Heterozygous |
| NC_037645.1 | 12473434 | SNV | 1 | G | T | Heterozygous |
| NC_037645.1 | 12475987 | SNV | 1 | A | G | Heterozygous |
| NC_037645.1 | 12476007 | SNV | 1 | A | G | Heterozygous |
| NC_037645.1 | 12476103 | SNV | 1 | A | G | Homozygous   |
| NC_037645.1 | 12476179 | SNV | 1 | T | C | Homozygous   |
| NC_037645.1 | 12476190 | SNV | 1 | G | A | Homozygous   |
| NC_037645.1 | 12476285 | SNV | 1 | C | T | Homozygous   |
| NC_037645.1 | 12476335 | SNV | 1 | T | C | Homozygous   |
| NC_037645.1 | 12477645 | SNV | 1 | C | A | Homozygous   |
| NC_037645.1 | 12477648 | SNV | 1 | C | A | Homozygous   |
| NC_037645.1 | 12480357 | SNV | 1 | A | T | Heterozygous |
| NC_037645.1 | 12480363 | SNV | 1 | A | G | Heterozygous |
| NC_037645.1 | 12480369 | SNV | 1 | A | T | Heterozygous |
| NC_037645.1 | 12480380 | SNV | 1 | T | A | Heterozygous |
| NC_037645.1 | 12480390 | SNV | 1 | T | A | Heterozygous |
| NC_037645.1 | 12482339 | SNV | 1 | A | G | Heterozygous |
| NC_037645.1 | 12482417 | SNV | 1 | G | C | Heterozygous |
| NC_037645.1 | 12485008 | SNV | 1 | G | T | Homozygous   |
| NC_037645.1 | 12488236 | SNV | 1 | T | C | Heterozygous |
| NC_037645.1 | 12488353 | SNV | 1 | T | C | Homozygous   |
| NC_037645.1 | 12488356 | SNV | 1 | T | C | Homozygous   |
| NC_037645.1 | 12488632 | SNV | 1 | T | A | Homozygous   |
| NC_037645.1 | 12489071 | SNV | 1 | C | T | Heterozygous |
| NC_037645.1 | 12489083 | SNV | 1 | C | T | Heterozygous |
| NC_037645.1 | 12489189 | SNV | 1 | G | A | Heterozygous |
| NC_037645.1 | 12489207 | SNV | 1 | T | A | Homozygous   |
| NC_037645.1 | 12489209 | SNV | 1 | A | C | Heterozygous |
| NC_037645.1 | 12489579 | SNV | 1 | A | G | Homozygous   |
| NC_037645.1 | 12489794 | SNV | 1 | T | C | Homozygous   |
| NC_037645.1 | 12490070 | SNV | 1 | G | A | Heterozygous |
| NC_037645.1 | 12490241 | SNV | 1 | T | C | Homozygous   |
| NC_037645.1 | 12494219 | SNV | 1 | C | T | Heterozygous |



|             |          |     |   |   |   |              |
|-------------|----------|-----|---|---|---|--------------|
| NC_037645.1 | 12494257 | SNV | 1 | A | G | Homozygous   |
| NC_037645.1 | 12496116 | SNV | 1 | A | G | Homozygous   |
| NC_037645.1 | 12496149 | SNV | 1 | T | C | Homozygous   |
| NC_037645.1 | 12496807 | SNV | 1 | C | A | Heterozygous |
| NC_037645.1 | 12497205 | SNV | 1 | G | C | Homozygous   |
| NC_037645.1 | 12498023 | SNV | 1 | C | A | Heterozygous |
| NC_037645.1 | 12498723 | SNV | 1 | A | G | Homozygous   |
| NC_037645.1 | 12498863 | SNV | 1 | C | T | Heterozygous |
| NC_037645.1 | 12498872 | SNV | 1 | G | A | Heterozygous |
| NC_037645.1 | 12498938 | SNV | 1 | G | A | Heterozygous |
| NC_037645.1 | 12499284 | SNV | 1 | G | A | Heterozygous |
| NC_037645.1 | 12499935 | SNV | 1 | A | G | Homozygous   |
| NC_037645.1 | 12500119 | SNV | 1 | A | G | Homozygous   |
| NC_037645.1 | 12500290 | SNV | 1 | C | T | Heterozygous |
| NC_037645.1 | 12500980 | SNV | 1 | G | A | Heterozygous |
| NC_037645.1 | 12500987 | SNV | 1 | T | C | Homozygous   |
| NC_037645.1 | 12501055 | SNV | 1 | T | C | Homozygous   |
| NC_037645.1 | 12501799 | SNV | 1 | T | A | Heterozygous |
| NC_037645.1 | 12511606 | SNV | 1 | T | A | Homozygous   |
| NC_037645.1 | 12511624 | SNV | 1 | A | G | Homozygous   |
| NC_037645.1 | 12511647 | SNV | 1 | G | C | Homozygous   |
| NC_037645.1 | 12511650 | SNV | 1 | T | A | Homozygous   |
| NC_037645.1 | 12511988 | SNV | 1 | G | C | Homozygous   |
| NC_037645.1 | 12512008 | SNV | 1 | T | C | Homozygous   |
| NC_037645.1 | 12512313 | SNV | 1 | A | C | Homozygous   |
| NC_037645.1 | 12512523 | SNV | 1 | A | C | Homozygous   |
| NC_037645.1 | 12512533 | SNV | 1 | T | C | Homozygous   |
| NC_037645.1 | 12512542 | SNV | 1 | A | T | Homozygous   |
| NC_037645.1 | 12512549 | SNV | 1 | A | T | Homozygous   |
| NC_037645.1 | 12512631 | SNV | 1 | A | G | Heterozygous |
| NC_037645.1 | 12512816 | SNV | 1 | T | C | Homozygous   |
| NC_037645.1 | 12512916 | SNV | 1 | T | C | Heterozygous |
| NC_037645.1 | 12512941 | SNV | 1 | A | G | Heterozygous |
| NC_037645.1 | 12512955 | SNV | 1 | G | A | Heterozygous |
| NC_037645.1 | 12513073 | SNV | 1 | A | G | Homozygous   |
| NC_037645.1 | 12513184 | SNV | 1 | T | C | Heterozygous |
| NC_037645.1 | 12513598 | SNV | 1 | G | C | Homozygous   |
| NC_037645.1 | 12514110 | SNV | 1 | C | T | Homozygous   |
| NC_037645.1 | 12514202 | SNV | 1 | T | C | Homozygous   |
| NC_037645.1 | 12514217 | SNV | 1 | A | G | Heterozygous |
| NC_037645.1 | 12514390 | SNV | 1 | G | A | Heterozygous |
| NC_037645.1 | 12514476 | SNV | 1 | C | T | Homozygous   |
| NC_037645.1 | 12514489 | SNV | 1 | G | T | Heterozygous |
| NC_037645.1 | 12516518 | SNV | 1 | C | T | Homozygous   |
| NC_037645.1 | 12516883 | SNV | 1 | G | A | Heterozygous |
| NC_037645.1 | 12517152 | SNV | 1 | A | G | Homozygous   |
| NC_037645.1 | 12520153 | SNV | 1 | T | C | Heterozygous |
| NC_037645.1 | 12520553 | SNV | 1 | T | C | Heterozygous |
| NC_037645.1 | 12520563 | SNV | 1 | T | C | Heterozygous |
| NC_037645.1 | 12520565 | SNV | 1 | T | C | Heterozygous |
| NC_037645.1 | 12520576 | SNV | 1 | T | C | Heterozygous |

|             |          |     |   |   |   |              |
|-------------|----------|-----|---|---|---|--------------|
| NC_037645.1 | 12521595 | SNV | 1 | A | G | Homozygous   |
| NC_037645.1 | 12522704 | SNV | 1 | A | T | Homozygous   |
| NC_037645.1 | 12522706 | SNV | 1 | A | T | Homozygous   |
| NC_037645.1 | 12525731 | SNV | 1 | A | G | Heterozygous |
| NC_037645.1 | 12528440 | SNV | 1 | T | C | Homozygous   |
| NC_037645.1 | 12528516 | SNV | 1 | G | A | Heterozygous |
| NC_037645.1 | 12530694 | SNV | 1 | T | G | Homozygous   |
| NC_037645.1 | 12530698 | SNV | 1 | A | C | Homozygous   |
| NC_037645.1 | 12530703 | SNV | 1 | T | G | Homozygous   |
| NC_037645.1 | 12530765 | SNV | 1 | G | A | Homozygous   |
| NC_037645.1 | 12531002 | SNV | 1 | G | A | Homozygous   |
| NC_037645.1 | 12536133 | SNV | 1 | T | C | Homozygous   |
| NC_037645.1 | 12536136 | SNV | 1 | A | G | Homozygous   |
| NC_037645.1 | 12536139 | SNV | 1 | C | T | Homozygous   |
| NC_037645.1 | 12536142 | SNV | 1 | A | G | Homozygous   |
| NC_037645.1 | 12536187 | SNV | 1 | A | C | Homozygous   |
| NC_037645.1 | 12536241 | SNV | 1 | C | A | Homozygous   |
| NC_037645.1 | 12536256 | SNV | 1 | C | A | Homozygous   |
| NC_037645.1 | 12536271 | SNV | 1 | C | A | Heterozygous |
| NC_037645.1 | 12536275 | SNV | 1 | T | C | Heterozygous |
| NC_037645.1 | 12536277 | SNV | 1 | A | C | Homozygous   |
| NC_037645.1 | 12536280 | SNV | 1 | C | A | Homozygous   |
| NC_037645.1 | 12536342 | SNV | 1 | T | A | Heterozygous |
| NC_037645.1 | 12536358 | SNV | 1 | T | A | Heterozygous |
| NC_037645.1 | 12536430 | SNV | 1 | C | T | Homozygous   |
| NC_037645.1 | 12536442 | SNV | 1 | T | A | Homozygous   |
| NC_037645.1 | 12536448 | SNV | 1 | T | C | Homozygous   |
| NC_037645.1 | 12536454 | SNV | 1 | T | C | Homozygous   |
| NC_037645.1 | 12536456 | SNV | 1 | T | C | Homozygous   |
| NC_037645.1 | 12536459 | SNV | 1 | C | T | Homozygous   |
| NC_037645.1 | 12536510 | SNV | 1 | C | T | Heterozygous |
| NC_037645.1 | 12536512 | SNV | 1 | A | G | Heterozygous |
| NC_037645.1 | 12536515 | SNV | 1 | A | G | Heterozygous |
| NC_037645.1 | 12536525 | SNV | 1 | C | T | Heterozygous |
| NC_037645.1 | 12536528 | SNV | 1 | C | T | Heterozygous |
| NC_037645.1 | 12536533 | SNV | 1 | A | G | Heterozygous |
| NC_037645.1 | 12536594 | SNV | 1 | C | T | Homozygous   |
| NC_037645.1 | 12536616 | SNV | 1 | G | T | Homozygous   |
| NC_037645.1 | 12536622 | SNV | 1 | C | T | Homozygous   |
| NC_037645.1 | 12536626 | SNV | 1 | T | A | Homozygous   |
| NC_037645.1 | 12536689 | SNV | 1 | T | C | Heterozygous |
| NC_037645.1 | 12536694 | SNV | 1 | G | A | Homozygous   |
| NC_037645.1 | 12536712 | SNV | 1 | A | G | Homozygous   |
| NC_037645.1 | 12536739 | SNV | 1 | A | T | Heterozygous |
| NC_037645.1 | 12536741 | SNV | 1 | C | T | Homozygous   |
| NC_037645.1 | 12536771 | SNV | 1 | T | C | Heterozygous |
| NC_037645.1 | 12536797 | SNV | 1 | T | C | Heterozygous |
| NC_037645.1 | 12536799 | SNV | 1 | A | G | Heterozygous |
| NC_037645.1 | 12536860 | SNV | 1 | C | T | Heterozygous |
| NC_037645.1 | 12536884 | SNV | 1 | T | C | Heterozygous |
| NC_037645.1 | 12536952 | SNV | 1 | A | G | Homozygous   |

|             |          |     |   |   |   |              |
|-------------|----------|-----|---|---|---|--------------|
| NC_037645.1 | 12536954 | SNV | 1 | T | C | Homozygous   |
| NC_037645.1 | 12536992 | SNV | 1 | G | T | Homozygous   |
| NC_037645.1 | 12537093 | SNV | 1 | A | T | Heterozygous |
| NC_037645.1 | 12537116 | SNV | 1 | A | T | Homozygous   |
| NC_037645.1 | 12537119 | SNV | 1 | A | T | Homozygous   |
| NC_037645.1 | 12537122 | SNV | 1 | A | T | Homozygous   |
| NC_037645.1 | 12537125 | SNV | 1 | A | G | Heterozygous |
| NC_037645.1 | 12537390 | SNV | 1 | T | G | Heterozygous |
| NC_037645.1 | 12537412 | SNV | 1 | A | G | Heterozygous |
| NC_037645.1 | 12537423 | SNV | 1 | T | C | Heterozygous |
| NC_037645.1 | 12537438 | SNV | 1 | T | G | Heterozygous |
| NC_037645.1 | 12537442 | SNV | 1 | T | A | Homozygous   |
| NC_037645.1 | 12537451 | SNV | 1 | G | A | Homozygous   |
| NC_037645.1 | 12537457 | SNV | 1 | G | A | Homozygous   |
| NC_037645.1 | 12537466 | SNV | 1 | A | G | Homozygous   |
| NC_037645.1 | 12537469 | SNV | 1 | G | A | Homozygous   |
| NC_037645.1 | 12537475 | SNV | 1 | G | A | Homozygous   |
| NC_037645.1 | 12537511 | SNV | 1 | A | G | Homozygous   |
| NC_037645.1 | 12537752 | SNV | 1 | C | T | Heterozygous |
| NC_037645.1 | 12537761 | SNV | 1 | C | T | Heterozygous |
| NC_037645.1 | 12537763 | SNV | 1 | A | G | Heterozygous |
| NC_037645.1 | 12537904 | SNV | 1 | G | A | Homozygous   |
| NC_037645.1 | 12539564 | SNV | 1 | T | A | Heterozygous |
| NC_037645.1 | 12540707 | SNV | 1 | A | G | Heterozygous |
| NC_037645.1 | 12540809 | SNV | 1 | A | T | Heterozygous |
| NC_037645.1 | 12540819 | SNV | 1 | A | G | Homozygous   |
| NC_037645.1 | 12541004 | SNV | 1 | A | G | Homozygous   |
| NC_037645.1 | 12543438 | SNV | 1 | A | G | Heterozygous |
| NC_037645.1 | 12543617 | SNV | 1 | T | C | Heterozygous |
| NC_037645.1 | 12543691 | SNV | 1 | C | T | Homozygous   |
| NC_037645.1 | 12545258 | SNV | 1 | T | C | Homozygous   |
| NC_037645.1 | 12545607 | SNV | 1 | A | G | Homozygous   |
| NC_037645.1 | 12545610 | SNV | 1 | C | T | Heterozygous |
| NC_037645.1 | 12545655 | SNV | 1 | G | A | Homozygous   |
| NC_037645.1 | 12545657 | SNV | 1 | G | A | Heterozygous |
| NC_037645.1 | 12545660 | SNV | 1 | G | A | Homozygous   |
| NC_037645.1 | 12545668 | SNV | 1 | A | G | Heterozygous |
| NC_037645.1 | 12546372 | SNV | 1 | T | C | Heterozygous |
| NC_037645.1 | 12546696 | SNV | 1 | T | C | Homozygous   |
| NC_037645.1 | 12546863 | SNV | 1 | A | G | Heterozygous |
| NC_037645.1 | 12546990 | SNV | 1 | G | A | Heterozygous |
| NC_037645.1 | 12551230 | SNV | 1 | T | C | Heterozygous |
| NC_037645.1 | 12551548 | SNV | 1 | C | T | Heterozygous |
| NC_037645.1 | 12551691 | SNV | 1 | A | G | Homozygous   |
| NC_037645.1 | 12551842 | SNV | 1 | A | G | Homozygous   |
| NC_037645.1 | 12551844 | SNV | 1 | T | C | Homozygous   |
| NC_037645.1 | 12552446 | SNV | 1 | T | C | Heterozygous |
| NC_037645.1 | 12552465 | SNV | 1 | T | C | Homozygous   |
| NC_037645.1 | 12552508 | SNV | 1 | G | A | Heterozygous |
| NC_037645.1 | 12552520 | SNV | 1 | T | C | Homozygous   |
| NC_037645.1 | 12552534 | SNV | 1 | C | T | Heterozygous |

|             |          |     |   |   |   |              |
|-------------|----------|-----|---|---|---|--------------|
| NC_037645.1 | 12552781 | SNV | 1 | A | G | Homozygous   |
| NC_037645.1 | 12552821 | SNV | 1 | C | T | Homozygous   |
| NC_037645.1 | 12552863 | SNV | 1 | G | A | Heterozygous |
| NC_037645.1 | 12552889 | SNV | 1 | G | A | Heterozygous |
| NC_037645.1 | 12552921 | SNV | 1 | A | G | Heterozygous |
| NC_037645.1 | 12552925 | SNV | 1 | A | G | Homozygous   |
| NC_037645.1 | 12553113 | SNV | 1 | A | G | Heterozygous |
| NC_037645.1 | 12553178 | SNV | 1 | T | C | Homozygous   |
| NC_037645.1 | 12553301 | SNV | 1 | T | C | Heterozygous |
| NC_037645.1 | 12553320 | SNV | 1 | T | C | Homozygous   |
| NC_037645.1 | 12553418 | SNV | 1 | C | T | Homozygous   |
| NC_037645.1 | 12553423 | SNV | 1 | A | G | Homozygous   |
| NC_037645.1 | 12556899 | SNV | 1 | A | G | Homozygous   |
| NC_037645.1 | 12556926 | SNV | 1 | A | G | Homozygous   |
| NC_037645.1 | 12557290 | SNV | 1 | A | G | Homozygous   |
| NC_037645.1 | 12557324 | SNV | 1 | T | C | Homozygous   |
| NC_037645.1 | 12557616 | SNV | 1 | T | C | Homozygous   |
| NC_037645.1 | 12557629 | SNV | 1 | T | C | Homozygous   |
| NC_037645.1 | 12557677 | SNV | 1 | C | T | Heterozygous |
| NC_037645.1 | 12557811 | SNV | 1 | T | C | Homozygous   |
| NC_037645.1 | 12557817 | SNV | 1 | T | C | Homozygous   |
| NC_037645.1 | 12557826 | SNV | 1 | C | T | Heterozygous |
| NC_037645.1 | 12558105 | SNV | 1 | A | G | Homozygous   |
| NC_037645.1 | 12558171 | SNV | 1 | T | C | Homozygous   |
| NC_037645.1 | 12558497 | SNV | 1 | T | C | Heterozygous |
| NC_037645.1 | 12558559 | SNV | 1 | C | T | Heterozygous |
| NC_037645.1 | 12559017 | SNV | 1 | A | G | Homozygous   |
| NC_037645.1 | 12559281 | SNV | 1 | C | A | Heterozygous |
| NC_037645.1 | 12560829 | SNV | 1 | A | G | Homozygous   |
| NC_037645.1 | 12560833 | SNV | 1 | G | C | Homozygous   |
| NC_037645.1 | 12561243 | SNV | 1 | A | G | Homozygous   |
| NC_037645.1 | 12561250 | SNV | 1 | C | G | Homozygous   |
| NC_037645.1 | 12562660 | SNV | 1 | G | C | Homozygous   |
| NC_037645.1 | 12562903 | SNV | 1 | A | G | Homozygous   |
| NC_037645.1 | 12564250 | SNV | 1 | G | C | Heterozygous |
| NC_037645.1 | 12564483 | SNV | 1 | G | T | Homozygous   |
| NC_037645.1 | 12564486 | SNV | 1 | C | T | Homozygous   |
| NC_037645.1 | 12564491 | SNV | 1 | A | G | Heterozygous |
| NC_037645.1 | 12575684 | SNV | 1 | C | T | Homozygous   |
| NC_037645.1 | 12575840 | SNV | 1 | C | G | Homozygous   |
| NC_037645.1 | 12575854 | SNV | 1 | G | A | Homozygous   |
| NC_037645.1 | 12576838 | SNV | 1 | G | A | Homozygous   |
| NC_037645.1 | 12576909 | SNV | 1 | A | T | Heterozygous |
| NC_037645.1 | 12576940 | SNV | 1 | T | C | Heterozygous |
| NC_037645.1 | 12579566 | SNV | 1 | T | C | Homozygous   |
| NC_037645.1 | 12579572 | SNV | 1 | A | T | Homozygous   |
| NC_037645.1 | 12579939 | SNV | 1 | T | C | Homozygous   |
| NC_037645.1 | 12579948 | SNV | 1 | C | T | Homozygous   |
| NC_037645.1 | 12579981 | SNV | 1 | C | T | Heterozygous |
| NC_037645.1 | 12580026 | SNV | 1 | G | A | Heterozygous |
| NC_037645.1 | 12580040 | SNV | 1 | T | C | Heterozygous |

|             |          |     |   |   |   |              |
|-------------|----------|-----|---|---|---|--------------|
| NC_037645.1 | 12582279 | SNV | 1 | A | C | Homozygous   |
| NC_037645.1 | 12587395 | SNV | 1 | C | A | Homozygous   |
| NC_037645.1 | 12587928 | SNV | 1 | G | A | Homozygous   |
| NC_037645.1 | 12590632 | SNV | 1 | A | G | Heterozygous |
| NC_037645.1 | 12592827 | SNV | 1 | A | T | Heterozygous |
| NC_037645.1 | 12592948 | SNV | 1 | T | C | Homozygous   |
| NC_037645.1 | 12593061 | SNV | 1 | A | G | Heterozygous |
| NC_037645.1 | 12593091 | SNV | 1 | G | A | Homozygous   |
| NC_037645.1 | 12593094 | SNV | 1 | A | T | Homozygous   |
| NC_037645.1 | 12593096 | SNV | 1 | G | A | Homozygous   |
| NC_037645.1 | 12593104 | SNV | 1 | A | G | Homozygous   |
| NC_037645.1 | 12593111 | SNV | 1 | G | A | Homozygous   |
| NC_037645.1 | 12593116 | SNV | 1 | G | A | Homozygous   |
| NC_037645.1 | 12593119 | SNV | 1 | A | G | Homozygous   |
| NC_037645.1 | 12593121 | SNV | 1 | G | T | Homozygous   |
| NC_037645.1 | 12593141 | SNV | 1 | A | G | Heterozygous |
| NC_037645.1 | 12593150 | SNV | 1 | A | G | Heterozygous |
| NC_037645.1 | 12593155 | SNV | 1 | C | A | Heterozygous |
| NC_037645.1 | 12593178 | SNV | 1 | G | A | Heterozygous |
| NC_037645.1 | 12593180 | SNV | 1 | G | T | Heterozygous |
| NC_037645.1 | 12593195 | SNV | 1 | A | G | Heterozygous |
| NC_037645.1 | 12597776 | SNV | 1 | T | C | Heterozygous |
| NC_037645.1 | 12597778 | SNV | 1 | T | C | Heterozygous |
| NC_037645.1 | 12597788 | SNV | 1 | T | A | Homozygous   |
| NC_037645.1 | 12603018 | SNV | 1 | A | T | Homozygous   |
| NC_037645.1 | 12603032 | SNV | 1 | G | T | Homozygous   |
| NC_037645.1 | 12603036 | SNV | 1 | T | G | Homozygous   |
| NC_037645.1 | 12603038 | SNV | 1 | A | G | Homozygous   |
| NC_037645.1 | 12603516 | SNV | 1 | A | G | Homozygous   |
| NC_037645.1 | 12603686 | SNV | 1 | T | G | Homozygous   |
| NC_037645.1 | 12603774 | SNV | 1 | G | A | Heterozygous |
| NC_037645.1 | 12603855 | SNV | 1 | A | G | Homozygous   |
| NC_037645.1 | 12603878 | SNV | 1 | G | T | Homozygous   |
| NC_037645.1 | 12603907 | SNV | 1 | A | G | Heterozygous |
| NC_037645.1 | 12603945 | SNV | 1 | C | T | Heterozygous |
| NC_037645.1 | 12603983 | SNV | 1 | T | C | Homozygous   |
| NC_037645.1 | 12604241 | SNV | 1 | T | C | Heterozygous |
| NC_037645.1 | 12604916 | SNV | 1 | G | A | Heterozygous |
| NC_037645.1 | 12607100 | SNV | 1 | G | T | Heterozygous |
| NC_037645.1 | 12617367 | SNV | 1 | C | T | Homozygous   |
| NC_037645.1 | 12620507 | SNV | 1 | T | C | Homozygous   |
| NC_037645.1 | 12620521 | SNV | 1 | C | T | Homozygous   |
| NC_037645.1 | 12620537 | SNV | 1 | T | C | Homozygous   |
| NC_037645.1 | 12620556 | SNV | 1 | A | G | Homozygous   |
| NC_037645.1 | 12620782 | SNV | 1 | C | T | Homozygous   |
| NC_037645.1 | 12621209 | SNV | 1 | T | C | Homozygous   |
| NC_037645.1 | 12621248 | SNV | 1 | C | T | Homozygous   |
| NC_037645.1 | 12621557 | SNV | 1 | G | A | Homozygous   |
| NC_037645.1 | 12621560 | SNV | 1 | G | A | Heterozygous |
| NC_037645.1 | 12621563 | SNV | 1 | T | C | Homozygous   |
| NC_037645.1 | 12621572 | SNV | 1 | C | T | Homozygous   |

|             |          |     |   |   |   |              |
|-------------|----------|-----|---|---|---|--------------|
| NC_037645.1 | 12621749 | SNV | 1 | C | T | Homozygous   |
| NC_037645.1 | 12622358 | SNV | 1 | G | A | Heterozygous |
| NC_037645.1 | 12630014 | SNV | 1 | A | G | Homozygous   |
| NC_037645.1 | 12630327 | SNV | 1 | T | C | Homozygous   |
| NC_037645.1 | 12632404 | SNV | 1 | T | C | Homozygous   |
| NC_037645.1 | 12632436 | SNV | 1 | A | G | Homozygous   |
| NC_037645.1 | 12637971 | SNV | 1 | T | C | Heterozygous |
| NC_037645.1 | 12638761 | SNV | 1 | A | G | Heterozygous |
| NC_037645.1 | 12639192 | SNV | 1 | T | C | Homozygous   |
| NC_037645.1 | 12639834 | SNV | 1 | A | G | Homozygous   |
| NC_037645.1 | 12640110 | SNV | 1 | C | T | Homozygous   |
| NC_037645.1 | 12640534 | SNV | 1 | C | G | Homozygous   |
| NC_037645.1 | 12640763 | SNV | 1 | A | G | Heterozygous |
| NC_037645.1 | 12640941 | SNV | 1 | C | T | Homozygous   |
| NC_037645.1 | 12640944 | SNV | 1 | T | A | Heterozygous |
| NC_037645.1 | 12640947 | SNV | 1 | A | G | Heterozygous |
| NC_037645.1 | 12640976 | SNV | 1 | A | G | Homozygous   |
| NC_037645.1 | 12641224 | SNV | 1 | C | T | Homozygous   |
| NC_037645.1 | 12641228 | SNV | 1 | T | C | Homozygous   |
| NC_037645.1 | 12641241 | SNV | 1 | G | A | Heterozygous |
| NC_037645.1 | 12641499 | SNV | 1 | T | C | Heterozygous |
| NC_037645.1 | 12641512 | SNV | 1 | G | A | Heterozygous |
| NC_037645.1 | 12641602 | SNV | 1 | T | C | Heterozygous |
| NC_037645.1 | 12641781 | SNV | 1 | A | C | Heterozygous |
| NC_037645.1 | 12641887 | SNV | 1 | G | A | Heterozygous |
| NC_037645.1 | 12643013 | SNV | 1 | G | A | Homozygous   |
| NC_037645.1 | 12643028 | SNV | 1 | G | A | Heterozygous |
| NC_037645.1 | 12643447 | SNV | 1 | C | T | Homozygous   |
| NC_037645.1 | 12653344 | SNV | 1 | C | T | Heterozygous |
| NC_037645.1 | 12653347 | SNV | 1 | A | G | Heterozygous |
| NC_037645.1 | 12653363 | SNV | 1 | G | A | Heterozygous |
| NC_037645.1 | 12653365 | SNV | 1 | G | A | Heterozygous |
| NC_037645.1 | 12653373 | SNV | 1 | T | C | Heterozygous |
| NC_037645.1 | 12653380 | SNV | 1 | G | A | Heterozygous |
| NC_037645.1 | 12653383 | SNV | 1 | C | T | Heterozygous |
| NC_037645.1 | 12653396 | SNV | 1 | T | C | Heterozygous |
| NC_037645.1 | 12653398 | SNV | 1 | G | T | Heterozygous |
| NC_037645.1 | 12653403 | SNV | 1 | C | G | Heterozygous |
| NC_037645.1 | 12654968 | SNV | 1 | C | T | Heterozygous |
| NC_037645.1 | 12655483 | SNV | 1 | A | C | Heterozygous |
| NC_037645.1 | 12655582 | SNV | 1 | T | G | Heterozygous |
| NC_037645.1 | 12655879 | SNV | 1 | G | A | Heterozygous |
| NC_037645.1 | 12657187 | SNV | 1 | A | G | Heterozygous |
| NC_037645.1 | 12657198 | SNV | 1 | T | C | Homozygous   |
| NC_037645.1 | 12657602 | SNV | 1 | T | C | Homozygous   |
| NC_037645.1 | 12657738 | SNV | 1 | T | C | Homozygous   |
| NC_037645.1 | 12657741 | SNV | 1 | T | C | Homozygous   |
| NC_037645.1 | 12657745 | SNV | 1 | C | T | Homozygous   |
| NC_037645.1 | 12657751 | SNV | 1 | A | G | Homozygous   |
| NC_037645.1 | 12657831 | SNV | 1 | T | C | Heterozygous |
| NC_037645.1 | 12657871 | SNV | 1 | T | C | Homozygous   |

|             |          |     |   |   |   |              |
|-------------|----------|-----|---|---|---|--------------|
| NC_037645.1 | 12657947 | SNV | 1 | C | T | Homozygous   |
| NC_037645.1 | 12657979 | SNV | 1 | A | G | Heterozygous |
| NC_037645.1 | 12658176 | SNV | 1 | T | C | Homozygous   |
| NC_037645.1 | 12658335 | SNV | 1 | A | G | Homozygous   |
| NC_037645.1 | 12658391 | SNV | 1 | C | T | Heterozygous |
| NC_037645.1 | 12658795 | SNV | 1 | G | A | Heterozygous |
| NC_037645.1 | 12658802 | SNV | 1 | G | A | Homozygous   |
| NC_037645.1 | 12658811 | SNV | 1 | A | G | Homozygous   |
| NC_037645.1 | 12658833 | SNV | 1 | C | T | Heterozygous |
| NC_037645.1 | 12658883 | SNV | 1 | G | A | Heterozygous |
| NC_037645.1 | 12658916 | SNV | 1 | G | A | Heterozygous |
| NC_037645.1 | 12659011 | SNV | 1 | G | A | Homozygous   |
| NC_037645.1 | 12659361 | SNV | 1 | G | A | Heterozygous |
| NC_037645.1 | 12659393 | SNV | 1 | A | G | Homozygous   |
| NC_037645.1 | 12659398 | SNV | 1 | C | G | Heterozygous |
| NC_037645.1 | 12659522 | SNV | 1 | T | C | Heterozygous |
| NC_037645.1 | 12659673 | SNV | 1 | G | A | Homozygous   |
| NC_037645.1 | 12659752 | SNV | 1 | A | G | Heterozygous |
| NC_037645.1 | 12660325 | SNV | 1 | A | G | Homozygous   |
| NC_037645.1 | 12660383 | SNV | 1 | G | A | Homozygous   |
| NC_037645.1 | 12660451 | SNV | 1 | C | T | Heterozygous |
| NC_037645.1 | 12660471 | SNV | 1 | T | C | Homozygous   |
| NC_037645.1 | 12660756 | SNV | 1 | A | G | Homozygous   |
| NC_037645.1 | 12660970 | SNV | 1 | T | C | Homozygous   |
| NC_037645.1 | 12660974 | SNV | 1 | A | G | Homozygous   |
| NC_037645.1 | 12660982 | SNV | 1 | A | G | Heterozygous |
| NC_037645.1 | 12661410 | SNV | 1 | T | G | Heterozygous |
| NC_037645.1 | 12661475 | SNV | 1 | T | C | Heterozygous |
| NC_037645.1 | 12661501 | SNV | 1 | T | A | Homozygous   |
| NC_037645.1 | 12661522 | SNV | 1 | A | G | Homozygous   |
| NC_037645.1 | 12661549 | SNV | 1 | T | C | Homozygous   |
| NC_037645.1 | 12661775 | SNV | 1 | G | A | Heterozygous |
| NC_037645.1 | 12661916 | SNV | 1 | T | C | Heterozygous |
| NC_037645.1 | 12661961 | SNV | 1 | A | G | Homozygous   |
| NC_037645.1 | 12662424 | SNV | 1 | T | C | Heterozygous |
| NC_037645.1 | 12662466 | SNV | 1 | T | C | Homozygous   |
| NC_037645.1 | 12662476 | SNV | 1 | C | T | Heterozygous |
| NC_037645.1 | 12662486 | SNV | 1 | A | G | Homozygous   |
| NC_037645.1 | 12662496 | SNV | 1 | T | C | Homozygous   |
| NC_037645.1 | 12662701 | SNV | 1 | G | A | Heterozygous |
| NC_037645.1 | 12663054 | SNV | 1 | A | C | Homozygous   |
| NC_037645.1 | 12663417 | SNV | 1 | G | A | Homozygous   |
| NC_037645.1 | 12663912 | SNV | 1 | G | C | Heterozygous |
| NC_037645.1 | 12666847 | SNV | 1 | T | C | Homozygous   |
| NC_037645.1 | 12668892 | SNV | 1 | T | C | Homozygous   |
| NC_037645.1 | 12668909 | SNV | 1 | C | T | Heterozygous |
| NC_037645.1 | 12668946 | SNV | 1 | C | T | Heterozygous |
| NC_037645.1 | 12668953 | SNV | 1 | C | T | Homozygous   |
| NC_037645.1 | 12670156 | SNV | 1 | A | G | Heterozygous |
| NC_037645.1 | 12670217 | SNV | 1 | A | G | Heterozygous |
| NC_037645.1 | 12670228 | SNV | 1 | C | G | Homozygous   |

|                |          |     |   |   |   |              |
|----------------|----------|-----|---|---|---|--------------|
| NC_037645.1    | 12670231 | SNV | 1 | C | T | Heterozygous |
| NC_037645.1    | 12670236 | SNV | 1 | A | G | Homozygous   |
| NC_037645.1    | 12670244 | SNV | 1 | A | G | Heterozygous |
| NC_037645.1    | 12670252 | SNV | 1 | A | G | Heterozygous |
| NC_037645.1    | 12670256 | SNV | 1 | A | G | Homozygous   |
| NC_037645.1    | 12670273 | SNV | 1 | T | C | Heterozygous |
| NC_037645.1    | 12670285 | SNV | 1 | G | A | Homozygous   |
| NC_037645.1    | 12670305 | SNV | 1 | G | T | Homozygous   |
| NC_037645.1    | 12670309 | SNV | 1 | A | G | Homozygous   |
| NC_037645.1    | 12670314 | SNV | 1 | G | A | Homozygous   |
| NC_037645.1    | 12670938 | SNV | 1 | C | T | Heterozygous |
| NC_037645.1    | 12684388 | SNV | 1 | G | A | Homozygous   |
| NC_037645.1    | 12684697 | SNV | 1 | C | T | Heterozygous |
| NC_037645.1    | 12684973 | SNV | 1 | T | C | Homozygous   |
| NC_037645.1    | 12691802 | SNV | 1 | G | A | Heterozygous |
| NC_037645.1    | 12691805 | SNV | 1 | G | A | Heterozygous |
| NC_037645.1    | 12691811 | SNV | 1 | A | G | Homozygous   |
| NC_037645.1    | 12691835 | SNV | 1 | G | A | Heterozygous |
| NC_037645.1    | 12691837 | SNV | 1 | G | A | Heterozygous |
| NC_037645.1    | 12691846 | SNV | 1 | T | A | Heterozygous |
| NC_037645.1    | 12691852 | SNV | 1 | C | G | Homozygous   |
| NC_037645.1    | 12695672 | SNV | 1 | C | T | Heterozygous |
| NC_037645.1    | 12696087 | SNV | 1 | A | G | Homozygous   |
| NC_037645.1    | 12696112 | SNV | 1 | G | A | Heterozygous |
| NC_037645.1    | 12696220 | SNV | 1 | C | T | Homozygous   |
| NC_037645.1    | 12698333 | SNV | 1 | G | A | Homozygous   |
| NC_037645.1    | 12698840 | SNV | 1 | C | T | Heterozygous |
| NC_037645.1    | 12698843 | SNV | 1 | C | T | Heterozygous |
| NC_037645.1    | 12698947 | SNV | 1 | G | A | Heterozygous |
| NC_037645.1    | 12699409 | SNV | 1 | A | G | Homozygous   |
| NC_037645.1    | 12699418 | SNV | 1 | T | C | Homozygous   |
| NC_037645.1    | 12700573 | SNV | 1 | C | T | Heterozygous |
| NC_037645.1    | 12701167 | SNV | 1 | A | G | Homozygous   |
| NC_037645.1    | 12701356 | SNV | 1 | G | A | Homozygous   |
| NC_037645.1    | 12701404 | SNV | 1 | T | A | Homozygous   |
| NC_037645.1    | 12701407 | SNV | 1 | T | C | Homozygous   |
| NC_037645.1    | 12701763 | SNV | 1 | A | G | Homozygous   |
| NC_037645.1    | 12701800 | SNV | 1 | A | G | Homozygous   |
| NC_037645.1    | 12702320 | SNV | 1 | A | C | Heterozygous |
| NC_037645.1    | 12702335 | SNV | 1 | T | C | Homozygous   |
| NW_020555794.1 | 18686    | SNV | 1 | A | G | Homozygous   |
| NW_020555794.1 | 19899    | SNV | 1 | G | A | Homozygous   |
| NW_020555794.1 | 20337    | SNV | 1 | T | C | Homozygous   |
| NW_020555794.1 | 20908    | SNV | 1 | T | C | Homozygous   |
| NW_020555794.1 | 21242    | SNV | 1 | G | A | Heterozygous |
| NW_020555794.1 | 22145    | SNV | 1 | G | A | Heterozygous |
| NW_020555794.1 | 24817    | SNV | 1 | T | A | Heterozygous |
| NW_020555794.1 | 24842    | SNV | 1 | T | A | Heterozygous |
| NW_020555794.1 | 24847    | SNV | 1 | T | C | Heterozygous |
| NC_037646.1    | 32927    | SNV | 1 | A | T | Heterozygous |
| NC_037646.1    | 32938    | SNV | 1 | T | G | Heterozygous |



|             |       |     |   |   |   |              |
|-------------|-------|-----|---|---|---|--------------|
| NC_037646.1 | 32940 | SNV | 1 | A | T | Heterozygous |
| NC_037646.1 | 32990 | SNV | 1 | C | T | Homozygous   |
| NC_037646.1 | 32998 | SNV | 1 | C | T | Homozygous   |
| NC_037646.1 | 33015 | SNV | 1 | G | A | Homozygous   |
| NC_037646.1 | 33026 | SNV | 1 | C | T | Homozygous   |
| NC_037646.1 | 33042 | SNV | 1 | T | A | Homozygous   |
| NC_037646.1 | 35338 | SNV | 1 | T | A | Homozygous   |
| NC_037646.1 | 35343 | SNV | 1 | T | A | Homozygous   |
| NC_037646.1 | 35445 | SNV | 1 | C | T | Homozygous   |
| NC_037646.1 | 35473 | SNV | 1 | G | A | Homozygous   |
| NC_037646.1 | 35478 | SNV | 1 | A | G | Homozygous   |
| NC_037646.1 | 35676 | SNV | 1 | T | C | Heterozygous |
| NC_037646.1 | 35850 | SNV | 1 | G | A | Heterozygous |
| NC_037646.1 | 37036 | SNV | 1 | C | T | Homozygous   |
| NC_037646.1 | 37054 | SNV | 1 | A | G | Homozygous   |
| NC_037646.1 | 37062 | SNV | 1 | C | G | Homozygous   |
| NC_037646.1 | 37357 | SNV | 1 | C | A | Homozygous   |
| NC_037646.1 | 37361 | SNV | 1 | A | G | Homozygous   |
| NC_037646.1 | 37365 | SNV | 1 | C | T | Homozygous   |
| NC_037646.1 | 37367 | SNV | 1 | A | T | Homozygous   |
| NC_037646.1 | 37370 | SNV | 1 | G | A | Homozygous   |
| NC_037646.1 | 37390 | SNV | 1 | T | G | Homozygous   |
| NC_037646.1 | 37395 | SNV | 1 | A | T | Homozygous   |
| NC_037646.1 | 37789 | SNV | 1 | T | C | Homozygous   |
| NC_037646.1 | 37792 | SNV | 1 | G | A | Homozygous   |
| NC_037646.1 | 37795 | SNV | 1 | T | A | Homozygous   |
| NC_037646.1 | 38430 | SNV | 1 | T | C | Homozygous   |
| NC_037646.1 | 38493 | SNV | 1 | T | C | Homozygous   |
| NC_037646.1 | 47362 | SNV | 1 | A | T | Homozygous   |
| NC_037646.1 | 47369 | SNV | 1 | T | A | Homozygous   |
| NC_037646.1 | 47413 | SNV | 1 | A | T | Homozygous   |
| NC_037646.1 | 47420 | SNV | 1 | T | A | Homozygous   |
| NC_037646.1 | 47422 | SNV | 1 | C | T | Homozygous   |
| NC_037646.1 | 48056 | SNV | 1 | A | T | Homozygous   |
| NC_037646.1 | 51330 | SNV | 1 | A | C | Homozygous   |
| NC_037646.1 | 51359 | SNV | 1 | A | G | Homozygous   |
| NC_037646.1 | 68083 | SNV | 1 | T | A | Homozygous   |
| NC_037646.1 | 68086 | SNV | 1 | A | G | Homozygous   |
| NC_037646.1 | 68112 | SNV | 1 | T | A | Homozygous   |
| NC_037646.1 | 69397 | SNV | 1 | T | A | Homozygous   |
| NC_037646.1 | 69409 | SNV | 1 | T | A | Homozygous   |
| NC_037646.1 | 80704 | SNV | 1 | T | C | Homozygous   |
| NC_037646.1 | 80710 | SNV | 1 | G | C | Homozygous   |
| NC_037646.1 | 80727 | SNV | 1 | C | T | Homozygous   |
| NC_037646.1 | 80762 | SNV | 1 | G | A | Homozygous   |
| NC_037646.1 | 80764 | SNV | 1 | T | C | Homozygous   |
| NC_037646.1 | 80772 | SNV | 1 | T | C | Homozygous   |
| NC_037646.1 | 81187 | SNV | 1 | G | A | Homozygous   |
| NC_037646.1 | 81200 | SNV | 1 | T | A | Homozygous   |
| NC_037646.1 | 81202 | SNV | 1 | A | G | Homozygous   |
| NC_037646.1 | 81221 | SNV | 1 | G | A | Homozygous   |

|             |        |     |   |   |   |              |
|-------------|--------|-----|---|---|---|--------------|
| NC_037646.1 | 81242  | SNV | 1 | C | T | Homozygous   |
| NC_037646.1 | 81247  | SNV | 1 | T | C | Homozygous   |
| NC_037646.1 | 81264  | SNV | 1 | A | G | Homozygous   |
| NC_037646.1 | 81268  | SNV | 1 | A | G | Homozygous   |
| NC_037646.1 | 81270  | SNV | 1 | T | C | Heterozygous |
| NC_037646.1 | 81285  | SNV | 1 | G | A | Homozygous   |
| NC_037646.1 | 81289  | SNV | 1 | T | G | Homozygous   |
| NC_037646.1 | 86086  | SNV | 1 | C | T | Homozygous   |
| NC_037646.1 | 86103  | SNV | 1 | A | G | Homozygous   |
| NC_037646.1 | 86112  | SNV | 1 | A | T | Homozygous   |
| NC_037646.1 | 86125  | SNV | 1 | T | G | Homozygous   |
| NC_037646.1 | 86130  | SNV | 1 | C | A | Homozygous   |
| NC_037646.1 | 87366  | SNV | 1 | A | T | Heterozygous |
| NC_037646.1 | 87378  | SNV | 1 | G | A | Homozygous   |
| NC_037646.1 | 87426  | SNV | 1 | T | A | Heterozygous |
| NC_037646.1 | 87758  | SNV | 1 | G | A | Homozygous   |
| NC_037646.1 | 87767  | SNV | 1 | C | T | Homozygous   |
| NC_037646.1 | 87770  | SNV | 1 | T | G | Homozygous   |
| NC_037646.1 | 87780  | SNV | 1 | A | G | Homozygous   |
| NC_037646.1 | 87786  | SNV | 1 | A | G | Homozygous   |
| NC_037646.1 | 87790  | SNV | 1 | T | C | Homozygous   |
| NC_037646.1 | 96303  | SNV | 1 | A | G | Homozygous   |
| NC_037646.1 | 96331  | SNV | 1 | T | A | Heterozygous |
| NC_037646.1 | 96334  | SNV | 1 | T | G | Heterozygous |
| NC_037646.1 | 96338  | SNV | 1 | A | G | Homozygous   |
| NC_037646.1 | 96359  | SNV | 1 | A | C | Heterozygous |
| NC_037646.1 | 96359  | SNV | 1 | A | G | Heterozygous |
| NC_037646.1 | 96368  | SNV | 1 | A | T | Heterozygous |
| NC_037646.1 | 96371  | SNV | 1 | G | A | Heterozygous |
| NC_037646.1 | 96380  | SNV | 1 | G | A | Heterozygous |
| NC_037646.1 | 96395  | SNV | 1 | A | G | Heterozygous |
| NC_037646.1 | 111213 | SNV | 1 | A | G | Homozygous   |
| NC_037646.1 | 111291 | SNV | 1 | T | A | Homozygous   |
| NC_037646.1 | 178136 | SNV | 1 | C | G | Heterozygous |
| NC_037646.1 | 178138 | SNV | 1 | A | T | Homozygous   |
| NC_037646.1 | 179009 | SNV | 1 | A | T | Heterozygous |
| NC_037646.1 | 179014 | SNV | 1 | A | G | Heterozygous |
| NC_037646.1 | 179065 | SNV | 1 | T | A | Heterozygous |
| NC_037646.1 | 179080 | SNV | 1 | T | A | Heterozygous |
| NC_037646.1 | 187501 | SNV | 1 | A | G | Homozygous   |
| NC_037646.1 | 187509 | SNV | 1 | G | T | Homozygous   |
| NC_037646.1 | 187514 | SNV | 1 | A | T | Homozygous   |
| NC_037646.1 | 187908 | SNV | 1 | A | G | Homozygous   |
| NC_037646.1 | 187942 | SNV | 1 | A | C | Homozygous   |
| NC_037646.1 | 187947 | SNV | 1 | T | A | Homozygous   |
| NC_037646.1 | 195126 | SNV | 1 | T | A | Homozygous   |
| NC_037646.1 | 195198 | SNV | 1 | A | T | Homozygous   |
| NC_037646.1 | 195201 | SNV | 1 | T | A | Heterozygous |
| NC_037646.1 | 195207 | SNV | 1 | A | C | Heterozygous |
| NC_037646.1 | 195226 | SNV | 1 | A | C | Heterozygous |
| NC_037646.1 | 195228 | SNV | 1 | A | G | Heterozygous |

|             |        |     |   |   |   |              |
|-------------|--------|-----|---|---|---|--------------|
| NC_037646.1 | 195241 | SNV | 1 | T | G | Homozygous   |
| NC_037646.1 | 204000 | SNV | 1 | A | T | Homozygous   |
| NC_037646.1 | 204002 | SNV | 1 | A | G | Homozygous   |
| NC_037646.1 | 204028 | SNV | 1 | T | A | Homozygous   |
| NC_037646.1 | 207226 | SNV | 1 | T | G | Homozygous   |
| NC_037646.1 | 207229 | SNV | 1 | T | A | Homozygous   |
| NC_037646.1 | 207233 | SNV | 1 | C | A | Homozygous   |
| NC_037646.1 | 207237 | SNV | 1 | A | T | Homozygous   |
| NC_037646.1 | 207240 | SNV | 1 | T | A | Homozygous   |
| NC_037646.1 | 207244 | SNV | 1 | T | C | Homozygous   |
| NC_037646.1 | 207263 | SNV | 1 | T | G | Homozygous   |
| NC_037646.1 | 207268 | SNV | 1 | A | T | Homozygous   |
| NC_037646.1 | 207272 | SNV | 1 | C | A | Homozygous   |
| NC_037646.1 | 214473 | SNV | 1 | A | G | Heterozygous |
| NC_037646.1 | 214476 | SNV | 1 | T | G | Heterozygous |
| NC_037646.1 | 214484 | SNV | 1 | T | A | Heterozygous |
| NC_037646.1 | 214486 | SNV | 1 | A | C | Heterozygous |
| NC_037646.1 | 214489 | SNV | 1 | T | G | Heterozygous |
| NC_037646.1 | 214498 | SNV | 1 | T | A | Heterozygous |
| NC_037646.1 | 218983 | SNV | 1 | T | C | Homozygous   |
| NC_037646.1 | 218987 | SNV | 1 | C | T | Homozygous   |
| NC_037646.1 | 218992 | SNV | 1 | T | C | Homozygous   |
| NC_037646.1 | 218999 | SNV | 1 | C | T | Homozygous   |
| NC_037646.1 | 219003 | SNV | 1 | C | T | Homozygous   |
| NC_037646.1 | 219012 | SNV | 1 | C | G | Homozygous   |
| NC_037646.1 | 219019 | SNV | 1 | C | T | Homozygous   |
| NC_037646.1 | 219033 | SNV | 1 | T | G | Homozygous   |
| NC_037646.1 | 222082 | SNV | 1 | A | G | Homozygous   |
| NC_037646.1 | 222084 | SNV | 1 | A | T | Heterozygous |
| NC_037646.1 | 222088 | SNV | 1 | A | G | Heterozygous |
| NC_037646.1 | 222090 | SNV | 1 | G | A | Heterozygous |
| NC_037646.1 | 222092 | SNV | 1 | A | G | Heterozygous |
| NC_037646.1 | 222094 | SNV | 1 | A | G | Heterozygous |
| NC_037646.1 | 222100 | SNV | 1 | A | G | Heterozygous |
| NC_037646.1 | 222139 | SNV | 1 | T | C | Heterozygous |
| NC_037646.1 | 222144 | SNV | 1 | A | T | Heterozygous |
| NC_037646.1 | 222158 | SNV | 1 | A | T | Heterozygous |
| NC_037646.1 | 222261 | SNV | 1 | A | C | Heterozygous |
| NC_037646.1 | 222264 | SNV | 1 | G | A | Heterozygous |
| NC_037646.1 | 227580 | SNV | 1 | A | G | Heterozygous |
| NC_037646.1 | 229814 | SNV | 1 | C | T | Homozygous   |
| NC_037646.1 | 230608 | SNV | 1 | A | T | Homozygous   |
| NC_037646.1 | 230613 | SNV | 1 | T | G | Homozygous   |
| NC_037646.1 | 230616 | SNV | 1 | A | C | Homozygous   |
| NC_037646.1 | 230635 | SNV | 1 | A | T | Homozygous   |
| NC_037646.1 | 230641 | SNV | 1 | T | G | Homozygous   |
| NC_037646.1 | 231769 | SNV | 1 | T | G | Heterozygous |
| NC_037646.1 | 231773 | SNV | 1 | G | A | Heterozygous |
| NC_037646.1 | 232072 | SNV | 1 | G | A | Heterozygous |
| NC_037646.1 | 232080 | SNV | 1 | A | G | Homozygous   |
| NC_037646.1 | 232084 | SNV | 1 | G | C | Heterozygous |

|             |        |     |   |   |   |              |
|-------------|--------|-----|---|---|---|--------------|
| NC_037646.1 | 232088 | SNV | 1 | A | G | Homozygous   |
| NC_037646.1 | 232090 | SNV | 1 | A | G | Heterozygous |
| NC_037646.1 | 232099 | SNV | 1 | A | G | Heterozygous |
| NC_037646.1 | 232116 | SNV | 1 | T | C | Heterozygous |
| NC_037646.1 | 232125 | SNV | 1 | G | A | Heterozygous |
| NC_037646.1 | 232131 | SNV | 1 | G | T | Heterozygous |
| NC_037646.1 | 232136 | SNV | 1 | T | C | Heterozygous |
| NC_037646.1 | 233338 | SNV | 1 | T | A | Heterozygous |
| NC_037646.1 | 233340 | SNV | 1 | C | T | Heterozygous |
| NC_037646.1 | 233342 | SNV | 1 | T | A | Heterozygous |
| NC_037646.1 | 233346 | SNV | 1 | T | C | Heterozygous |
| NC_037646.1 | 233381 | SNV | 1 | T | A | Heterozygous |
| NC_037646.1 | 235978 | SNV | 1 | A | G | Homozygous   |
| NC_037646.1 | 235992 | SNV | 1 | A | G | Homozygous   |
| NC_037646.1 | 236015 | SNV | 1 | T | G | Homozygous   |
| NC_037646.1 | 236171 | SNV | 1 | T | A | Homozygous   |
| NC_037646.1 | 236175 | SNV | 1 | T | C | Homozygous   |
| NC_037646.1 | 236185 | SNV | 1 | A | G | Heterozygous |
| NC_037646.1 | 236191 | SNV | 1 | G | A | Homozygous   |
| NC_037646.1 | 253530 | SNV | 1 | C | T | Homozygous   |
| NC_037646.1 | 254244 | SNV | 1 | A | C | Homozygous   |
| NC_037646.1 | 254247 | SNV | 1 | T | A | Homozygous   |
| NC_037646.1 | 254249 | SNV | 1 | G | A | Homozygous   |
| NC_037646.1 | 255979 | SNV | 1 | T | C | Homozygous   |
| NC_037646.1 | 256927 | SNV | 1 | T | A | Homozygous   |
| NC_037646.1 | 256947 | SNV | 1 | T | A | Homozygous   |
| NC_037646.1 | 256980 | SNV | 1 | T | C | Homozygous   |
| NC_037646.1 | 267574 | SNV | 1 | T | A | Heterozygous |
| NC_037646.1 | 267728 | SNV | 1 | A | G | Heterozygous |
| NC_037646.1 | 267733 | SNV | 1 | A | G | Heterozygous |
| NC_037646.1 | 267827 | SNV | 1 | A | G | Homozygous   |
| NC_037646.1 | 267841 | SNV | 1 | A | G | Heterozygous |
| NC_037646.1 | 267846 | SNV | 1 | A | G | Heterozygous |
| NC_037646.1 | 267856 | SNV | 1 | A | G | Heterozygous |
| NC_037646.1 | 267869 | SNV | 1 | A | G | Heterozygous |
| NC_037646.1 | 267877 | SNV | 1 | A | G | Homozygous   |
| NC_037646.1 | 267880 | SNV | 1 | A | G | Heterozygous |
| NC_037646.1 | 268000 | SNV | 1 | T | G | Homozygous   |
| NC_037646.1 | 268672 | SNV | 1 | G | A | Homozygous   |
| NC_037646.1 | 271151 | SNV | 1 | C | T | Heterozygous |
| NC_037646.1 | 271168 | SNV | 1 | G | T | Heterozygous |
| NC_037646.1 | 271216 | SNV | 1 | A | G | Heterozygous |
| NC_037646.1 | 271222 | SNV | 1 | C | T | Heterozygous |
| NC_037646.1 | 271224 | SNV | 1 | G | A | Heterozygous |
| NC_037646.1 | 271226 | SNV | 1 | C | T | Heterozygous |
| NC_037646.1 | 271237 | SNV | 1 | C | T | Heterozygous |
| NC_037646.1 | 273358 | SNV | 1 | A | G | Homozygous   |
| NC_037646.1 | 275174 | SNV | 1 | T | C | Homozygous   |
| NC_037646.1 | 275201 | SNV | 1 | T | C | Homozygous   |
| NC_037646.1 | 275311 | SNV | 1 | T | C | Heterozygous |
| NC_037646.1 | 275370 | SNV | 1 | T | C | Heterozygous |

|             |        |     |   |   |   |              |
|-------------|--------|-----|---|---|---|--------------|
| NC_037646.1 | 275414 | SNV | 1 | T | C | Homozygous   |
| NC_037646.1 | 275419 | SNV | 1 | T | C | Heterozygous |
| NC_037646.1 | 275444 | SNV | 1 | G | A | Homozygous   |
| NC_037646.1 | 275455 | SNV | 1 | T | C | Heterozygous |
| NC_037646.1 | 275606 | SNV | 1 | T | C | Heterozygous |
| NC_037646.1 | 275649 | SNV | 1 | C | T | Homozygous   |
| NC_037646.1 | 275660 | SNV | 1 | T | C | Heterozygous |
| NC_037646.1 | 275663 | SNV | 1 | A | G | Heterozygous |
| NC_037646.1 | 275672 | SNV | 1 | T | C | Heterozygous |
| NC_037646.1 | 275752 | SNV | 1 | T | C | Homozygous   |
| NC_037646.1 | 275788 | SNV | 1 | T | C | Heterozygous |
| NC_037646.1 | 278799 | SNV | 1 | C | T | Homozygous   |
| NC_037646.1 | 281536 | SNV | 1 | C | T | Homozygous   |
| NC_037646.1 | 281667 | SNV | 1 | T | C | Homozygous   |
| NC_037646.1 | 283706 | SNV | 1 | A | G | Heterozygous |
| NC_037646.1 | 284326 | SNV | 1 | A | G | Homozygous   |
| NC_037646.1 | 286614 | SNV | 1 | A | C | Homozygous   |
| NC_037646.1 | 286620 | SNV | 1 | A | T | Homozygous   |
| NC_037646.1 | 286631 | SNV | 1 | A | T | Homozygous   |
| NC_037646.1 | 286634 | SNV | 1 | T | A | Homozygous   |
| NC_037646.1 | 286650 | SNV | 1 | T | G | Homozygous   |
| NC_037646.1 | 286655 | SNV | 1 | A | T | Homozygous   |
| NC_037646.1 | 286657 | SNV | 1 | A | T | Homozygous   |
| NC_037646.1 | 286678 | SNV | 1 | T | A | Homozygous   |
| NC_037646.1 | 286681 | SNV | 1 | T | A | Homozygous   |
| NC_037646.1 | 286683 | SNV | 1 | A | G | Homozygous   |
| NC_037646.1 | 289196 | SNV | 1 | T | A | Homozygous   |
| NC_037646.1 | 289584 | SNV | 1 | G | A | Homozygous   |
| NC_037646.1 | 289589 | SNV | 1 | A | C | Homozygous   |
| NC_037646.1 | 293744 | SNV | 1 | G | A | Homozygous   |
| NC_037646.1 | 294088 | SNV | 1 | G | A | Homozygous   |
| NC_037646.1 | 295836 | SNV | 1 | T | C | Homozygous   |
| NC_037646.1 | 299273 | SNV | 1 | T | A | Heterozygous |
| NC_037646.1 | 299275 | SNV | 1 | G | A | Heterozygous |
| NC_037646.1 | 300443 | SNV | 1 | T | C | Homozygous   |
| NC_037646.1 | 300833 | SNV | 1 | T | G | Homozygous   |
| NC_037646.1 | 300850 | SNV | 1 | T | A | Homozygous   |
| NC_037646.1 | 300854 | SNV | 1 | A | T | Homozygous   |
| NC_037646.1 | 300860 | SNV | 1 | A | C | Homozygous   |
| NC_037646.1 | 301215 | SNV | 1 | A | G | Homozygous   |
| NC_037646.1 | 301825 | SNV | 1 | A | G | Homozygous   |
| NC_037646.1 | 301981 | SNV | 1 | A | C | Homozygous   |
| NC_037646.1 | 311141 | SNV | 1 | C | A | Homozygous   |
| NC_037646.1 | 312092 | SNV | 1 | A | G | Homozygous   |
| NC_037646.1 | 312107 | SNV | 1 | T | C | Homozygous   |
| NC_037646.1 | 312113 | SNV | 1 | T | A | Homozygous   |
| NC_037646.1 | 312117 | SNV | 1 | T | A | Homozygous   |
| NC_037646.1 | 312121 | SNV | 1 | T | A | Homozygous   |
| NC_037646.1 | 312269 | SNV | 1 | G | A | Homozygous   |
| NC_037646.1 | 312271 | SNV | 1 | T | A | Homozygous   |
| NC_037646.1 | 312289 | SNV | 1 | A | G | Homozygous   |

|             |        |     |   |   |   |              |
|-------------|--------|-----|---|---|---|--------------|
| NC_037646.1 | 312529 | SNV | 1 | G | A | Homozygous   |
| NC_037646.1 | 312597 | SNV | 1 | T | A | Homozygous   |
| NC_037646.1 | 312709 | SNV | 1 | T | G | Homozygous   |
| NC_037646.1 | 312713 | SNV | 1 | A | T | Homozygous   |
| NC_037646.1 | 312739 | SNV | 1 | A | T | Homozygous   |
| NC_037646.1 | 312745 | SNV | 1 | T | A | Homozygous   |
| NC_037646.1 | 312763 | SNV | 1 | C | A | Homozygous   |
| NC_037646.1 | 313589 | SNV | 1 | T | G | Homozygous   |
| NC_037646.1 | 313591 | SNV | 1 | T | A | Homozygous   |
| NC_037646.1 | 352345 | SNV | 1 | C | G | Homozygous   |
| NC_037646.1 | 357006 | SNV | 1 | C | T | Homozygous   |
| NC_037646.1 | 363539 | SNV | 1 | T | C | Heterozygous |
| NC_037646.1 | 363541 | SNV | 1 | T | C | Heterozygous |
| NC_037646.1 | 363542 | SNV | 1 | A | G | Heterozygous |
| NC_037646.1 | 363544 | SNV | 1 | A | G | Heterozygous |
| NC_037646.1 | 376115 | SNV | 1 | T | A | Heterozygous |
| NC_037646.1 | 376118 | SNV | 1 | T | G | Heterozygous |
| NC_037646.1 | 376134 | SNV | 1 | A | G | Homozygous   |
| NC_037646.1 | 376146 | SNV | 1 | T | C | Homozygous   |
| NC_037646.1 | 376150 | SNV | 1 | A | T | Homozygous   |
| NC_037646.1 | 376160 | SNV | 1 | A | T | Homozygous   |
| NC_037646.1 | 379544 | SNV | 1 | T | A | Homozygous   |
| NC_037646.1 | 379550 | SNV | 1 | T | A | Homozygous   |
| NC_037646.1 | 379552 | SNV | 1 | T | A | Homozygous   |
| NC_037646.1 | 389709 | SNV | 1 | G | A | Homozygous   |
| NC_037646.1 | 403831 | SNV | 1 | T | A | Homozygous   |
| NC_037646.1 | 403834 | SNV | 1 | T | A | Homozygous   |
| NC_037646.1 | 403843 | SNV | 1 | T | A | Homozygous   |
| NC_037646.1 | 403845 | SNV | 1 | A | C | Homozygous   |
| NC_037646.1 | 404772 | SNV | 1 | A | T | Homozygous   |
| NC_037646.1 | 404782 | SNV | 1 | A | G | Homozygous   |
| NC_037646.1 | 404784 | SNV | 1 | A | G | Homozygous   |
| NC_037646.1 | 404786 | SNV | 1 | A | G | Homozygous   |
| NC_037646.1 | 404796 | SNV | 1 | A | G | Homozygous   |
| NC_037646.1 | 406680 | SNV | 1 | T | A | Homozygous   |
| NC_037646.1 | 406692 | SNV | 1 | A | T | Heterozygous |
| NC_037646.1 | 406694 | SNV | 1 | T | G | Homozygous   |
| NC_037646.1 | 406705 | SNV | 1 | T | A | Heterozygous |
| NC_037646.1 | 406708 | SNV | 1 | T | A | Heterozygous |
| NC_037646.1 | 407022 | SNV | 1 | A | T | Homozygous   |
| NC_037646.1 | 407024 | SNV | 1 | T | A | Homozygous   |
| NC_037646.1 | 407031 | SNV | 1 | T | C | Homozygous   |
| NC_037646.1 | 407033 | SNV | 1 | T | C | Homozygous   |
| NC_037646.1 | 407440 | SNV | 1 | A | T | Heterozygous |
| NC_037646.1 | 410902 | SNV | 1 | A | T | Heterozygous |
| NC_037646.1 | 410903 | SNV | 1 | T | C | Heterozygous |
| NC_037646.1 | 410910 | SNV | 1 | A | G | Homozygous   |
| NC_037646.1 | 410956 | SNV | 1 | T | G | Homozygous   |
| NC_037646.1 | 410965 | SNV | 1 | A | T | Heterozygous |
| NC_037646.1 | 410969 | SNV | 1 | T | G | Heterozygous |
| NC_037646.1 | 414679 | SNV | 1 | A | G | Homozygous   |

|             |        |     |   |   |   |              |
|-------------|--------|-----|---|---|---|--------------|
| NC_037646.1 | 414709 | SNV | 1 | T | C | Homozygous   |
| NC_037646.1 | 414717 | SNV | 1 | C | T | Heterozygous |
| NC_037646.1 | 415434 | SNV | 1 | T | C | Homozygous   |
| NC_037646.1 | 415480 | SNV | 1 | G | A | Homozygous   |
| NC_037646.1 | 415489 | SNV | 1 | C | T | Homozygous   |
| NC_037646.1 | 415491 | SNV | 1 | T | C | Homozygous   |
| NC_037646.1 | 415508 | SNV | 1 | G | A | Homozygous   |
| NC_037646.1 | 415517 | SNV | 1 | C | T | Homozygous   |
| NC_037646.1 | 415678 | SNV | 1 | A | G | Homozygous   |
| NC_037646.1 | 415686 | SNV | 1 | A | G | Homozygous   |
| NC_037646.1 | 415688 | SNV | 1 | G | T | Homozygous   |
| NC_037646.1 | 419337 | SNV | 1 | A | G | Homozygous   |
| NC_037646.1 | 420554 | SNV | 1 | A | G | Homozygous   |
| NC_037646.1 | 426640 | SNV | 1 | T | A | Heterozygous |
| NC_037646.1 | 426652 | SNV | 1 | T | A | Heterozygous |
| NC_037646.1 | 426658 | SNV | 1 | T | A | Heterozygous |
| NC_037646.1 | 429780 | SNV | 1 | A | G | Heterozygous |
| NC_037646.1 | 429785 | SNV | 1 | A | G | Heterozygous |
| NC_037646.1 | 430087 | SNV | 1 | G | A | Homozygous   |
| NC_037646.1 | 430456 | SNV | 1 | G | T | Heterozygous |
| NC_037646.1 | 430585 | SNV | 1 | A | G | Homozygous   |
| NC_037646.1 | 431235 | SNV | 1 | C | G | Homozygous   |
| NC_037646.1 | 431808 | SNV | 1 | C | T | Heterozygous |
| NC_037646.1 | 431817 | SNV | 1 | A | G | Heterozygous |
| NC_037646.1 | 431833 | SNV | 1 | C | T | Heterozygous |
| NC_037646.1 | 434786 | SNV | 1 | T | G | Homozygous   |
| NC_037646.1 | 434803 | SNV | 1 | A | T | Homozygous   |
| NC_037646.1 | 434806 | SNV | 1 | A | C | Homozygous   |
| NC_037646.1 | 434811 | SNV | 1 | T | G | Homozygous   |
| NC_037646.1 | 436890 | SNV | 1 | A | G | Homozygous   |
| NC_037646.1 | 436902 | SNV | 1 | A | G | Homozygous   |
| NC_037646.1 | 436904 | SNV | 1 | A | G | Homozygous   |
| NC_037646.1 | 436910 | SNV | 1 | A | G | Homozygous   |
| NC_037646.1 | 437959 | SNV | 1 | A | T | Homozygous   |
| NC_037646.1 | 437967 | SNV | 1 | A | C | Homozygous   |
| NC_037646.1 | 442970 | SNV | 1 | A | G | Homozygous   |
| NC_037646.1 | 442983 | SNV | 1 | A | G | Homozygous   |
| NC_037646.1 | 442989 | SNV | 1 | T | A | Homozygous   |
| NC_037646.1 | 443003 | SNV | 1 | A | T | Homozygous   |
| NC_037646.1 | 444585 | SNV | 1 | A | T | Heterozygous |
| NC_037646.1 | 444596 | SNV | 1 | A | G | Heterozygous |
| NC_037646.1 | 444615 | SNV | 1 | T | C | Homozygous   |
| NC_037646.1 | 444640 | SNV | 1 | T | A | Heterozygous |
| NC_037646.1 | 444647 | SNV | 1 | A | T | Heterozygous |
| NC_037646.1 | 447141 | SNV | 1 | A | T | Homozygous   |
| NC_037646.1 | 447147 | SNV | 1 | G | A | Homozygous   |
| NC_037646.1 | 447153 | SNV | 1 | G | C | Homozygous   |
| NC_037646.1 | 457677 | SNV | 1 | C | T | Homozygous   |
| NC_037646.1 | 457679 | SNV | 1 | G | A | Heterozygous |
| NC_037646.1 | 457686 | SNV | 1 | T | A | Heterozygous |
| NC_037646.1 | 457688 | SNV | 1 | C | T | Homozygous   |

|             |        |     |   |   |   |              |
|-------------|--------|-----|---|---|---|--------------|
| NC_037646.1 | 457690 | SNV | 1 | A | G | Homozygous   |
| NC_037646.1 | 457692 | SNV | 1 | T | C | Homozygous   |
| NC_037646.1 | 457699 | SNV | 1 | C | T | Heterozygous |
| NC_037646.1 | 457714 | SNV | 1 | G | A | Homozygous   |
| NC_037646.1 | 457735 | SNV | 1 | C | T | Heterozygous |
| NC_037646.1 | 457737 | SNV | 1 | T | C | Heterozygous |
| NC_037646.1 | 464654 | SNV | 1 | A | G | Homozygous   |
| NC_037646.1 | 464732 | SNV | 1 | C | T | Homozygous   |
| NC_037646.1 | 464751 | SNV | 1 | A | G | Heterozygous |
| NC_037646.1 | 464758 | SNV | 1 | A | G | Heterozygous |
| NC_037646.1 | 466339 | SNV | 1 | G | T | Homozygous   |
| NC_037646.1 | 466585 | SNV | 1 | T | A | Homozygous   |
| NC_037646.1 | 474927 | SNV | 1 | A | G | Homozygous   |
| NC_037646.1 | 474930 | SNV | 1 | A | T | Homozygous   |
| NC_037646.1 | 479725 | SNV | 1 | T | A | Homozygous   |
| NC_037646.1 | 479908 | SNV | 1 | G | T | Homozygous   |
| NC_037646.1 | 479916 | SNV | 1 | A | T | Homozygous   |
| NC_037646.1 | 479928 | SNV | 1 | T | C | Homozygous   |
| NC_037646.1 | 479931 | SNV | 1 | A | C | Homozygous   |
| NC_037646.1 | 479951 | SNV | 1 | A | T | Homozygous   |
| NC_037646.1 | 479959 | SNV | 1 | T | A | Homozygous   |
| NC_037646.1 | 480891 | SNV | 1 | T | G | Homozygous   |
| NC_037646.1 | 485071 | SNV | 1 | C | T | Heterozygous |
| NC_037646.1 | 497182 | SNV | 1 | G | A | Homozygous   |
| NC_037646.1 | 497189 | SNV | 1 | C | T | Homozygous   |
| NC_037646.1 | 497223 | SNV | 1 | G | A | Homozygous   |
| NC_037646.1 | 497282 | SNV | 1 | A | G | Heterozygous |
| NC_037646.1 | 497286 | SNV | 1 | A | G | Heterozygous |
| NC_037646.1 | 497296 | SNV | 1 | G | C | Homozygous   |
| NC_037646.1 | 497305 | SNV | 1 | A | T | Homozygous   |
| NC_037646.1 | 500908 | SNV | 1 | T | C | Homozygous   |
| NC_037646.1 | 501122 | SNV | 1 | T | G | Homozygous   |
| NC_037646.1 | 501158 | SNV | 1 | A | T | Homozygous   |
| NC_037646.1 | 520016 | SNV | 1 | A | T | Heterozygous |
| NC_037646.1 | 520023 | SNV | 1 | C | T | Heterozygous |
| NC_037646.1 | 520033 | SNV | 1 | G | T | Heterozygous |
| NC_037646.1 | 521655 | SNV | 1 | T | A | Homozygous   |
| NC_037646.1 | 532071 | SNV | 1 | A | G | Homozygous   |
| NC_037646.1 | 542743 | SNV | 1 | T | A | Heterozygous |
| NC_037646.1 | 542765 | SNV | 1 | C | T | Homozygous   |
| NC_037646.1 | 549556 | SNV | 1 | A | T | Homozygous   |
| NC_037646.1 | 549580 | SNV | 1 | A | T | Homozygous   |
| NC_037646.1 | 553154 | SNV | 1 | A | T | Homozygous   |
| NC_037646.1 | 553171 | SNV | 1 | T | C | Homozygous   |
| NC_037646.1 | 553179 | SNV | 1 | T | C | Heterozygous |
| NC_037646.1 | 553195 | SNV | 1 | T | A | Heterozygous |
| NC_037646.1 | 562949 | SNV | 1 | A | T | Homozygous   |
| NC_037646.1 | 562969 | SNV | 1 | A | G | Homozygous   |
| NC_037646.1 | 562975 | SNV | 1 | T | G | Homozygous   |
| NC_037646.1 | 562983 | SNV | 1 | C | A | Homozygous   |
| NC_037646.1 | 565344 | SNV | 1 | T | C | Homozygous   |



|             |        |     |   |   |   |              |
|-------------|--------|-----|---|---|---|--------------|
| NC_037646.1 | 565369 | SNV | 1 | C | T | Homozygous   |
| NC_037646.1 | 565403 | SNV | 1 | T | C | Homozygous   |
| NC_037646.1 | 565418 | SNV | 1 | T | G | Homozygous   |
| NC_037646.1 | 565421 | SNV | 1 | T | A | Homozygous   |
| NC_037646.1 | 565430 | SNV | 1 | C | T | Homozygous   |
| NC_037646.1 | 565451 | SNV | 1 | T | C | Homozygous   |
| NC_037646.1 | 565522 | SNV | 1 | C | A | Homozygous   |
| NC_037646.1 | 565527 | SNV | 1 | C | T | Homozygous   |
| NC_037646.1 | 565534 | SNV | 1 | A | G | Homozygous   |
| NC_037646.1 | 565537 | SNV | 1 | T | C | Homozygous   |
| NC_037646.1 | 565542 | SNV | 1 | C | T | Homozygous   |
| NC_037646.1 | 565565 | SNV | 1 | G | A | Homozygous   |
| NC_037646.1 | 569825 | SNV | 1 | G | A | Homozygous   |
| NC_037646.1 | 569862 | SNV | 1 | A | T | Homozygous   |
| NC_037646.1 | 571365 | SNV | 1 | T | G | Homozygous   |
| NC_037646.1 | 571368 | SNV | 1 | T | C | Homozygous   |
| NC_037646.1 | 571377 | SNV | 1 | G | A | Heterozygous |
| NC_037646.1 | 571385 | SNV | 1 | G | A | Heterozygous |
| NC_037646.1 | 576340 | SNV | 1 | C | A | Homozygous   |
| NC_037646.1 | 576347 | SNV | 1 | A | T | Homozygous   |
| NC_037646.1 | 576354 | SNV | 1 | A | T | Homozygous   |
| NC_037646.1 | 576357 | SNV | 1 | T | C | Homozygous   |
| NC_037646.1 | 576361 | SNV | 1 | T | C | Homozygous   |
| NC_037646.1 | 580767 | SNV | 1 | T | C | Homozygous   |
| NC_037646.1 | 580778 | SNV | 1 | A | G | Heterozygous |
| NC_037646.1 | 580780 | SNV | 1 | T | A | Heterozygous |
| NC_037646.1 | 580782 | SNV | 1 | T | C | Heterozygous |
| NC_037646.1 | 580789 | SNV | 1 | A | T | Heterozygous |
| NC_037646.1 | 580796 | SNV | 1 | T | C | Heterozygous |
| NC_037646.1 | 580817 | SNV | 1 | A | T | Heterozygous |
| NC_037646.1 | 580822 | SNV | 1 | T | G | Heterozygous |
| NC_037646.1 | 580824 | SNV | 1 | T | C | Heterozygous |
| NC_037646.1 | 598239 | SNV | 1 | T | A | Homozygous   |
| NC_037646.1 | 598242 | SNV | 1 | T | A | Homozygous   |
| NC_037646.1 | 598245 | SNV | 1 | T | C | Homozygous   |
| NC_037646.1 | 598263 | SNV | 1 | C | T | Homozygous   |
| NC_037646.1 | 598778 | SNV | 1 | G | A | Homozygous   |
| NC_037646.1 | 598803 | SNV | 1 | A | T | Homozygous   |
| NC_037646.1 | 598806 | SNV | 1 | T | A | Homozygous   |
| NC_037646.1 | 598815 | SNV | 1 | A | C | Homozygous   |
| NC_037646.1 | 599194 | SNV | 1 | A | T | Homozygous   |
| NC_037646.1 | 599212 | SNV | 1 | A | T | Homozygous   |
| NC_037646.1 | 599214 | SNV | 1 | A | G | Homozygous   |
| NC_037646.1 | 599229 | SNV | 1 | G | A | Homozygous   |
| NC_037646.1 | 606343 | SNV | 1 | T | C | Homozygous   |
| NC_037646.1 | 606349 | SNV | 1 | C | T | Homozygous   |
| NC_037646.1 | 606353 | SNV | 1 | A | T | Homozygous   |
| NC_037646.1 | 613974 | SNV | 1 | T | A | Heterozygous |
| NC_037646.1 | 613979 | SNV | 1 | T | C | Heterozygous |
| NC_037646.1 | 613999 | SNV | 1 | T | A | Homozygous   |
| NC_037646.1 | 614006 | SNV | 1 | A | G | Heterozygous |

|             |        |     |   |   |   |              |
|-------------|--------|-----|---|---|---|--------------|
| NC_037646.1 | 614011 | SNV | 1 | T | C | Homozygous   |
| NC_037646.1 | 619058 | SNV | 1 | C | T | Homozygous   |
| NC_037646.1 | 619060 | SNV | 1 | C | T | Homozygous   |
| NC_037646.1 | 620778 | SNV | 1 | T | A | Heterozygous |
| NC_037646.1 | 620780 | SNV | 1 | C | A | Heterozygous |
| NC_037646.1 | 620783 | SNV | 1 | A | G | Homozygous   |
| NC_037646.1 | 620808 | SNV | 1 | A | G | Homozygous   |
| NC_037646.1 | 620814 | SNV | 1 | A | G | Homozygous   |
| NC_037646.1 | 620841 | SNV | 1 | A | G | Homozygous   |
| NC_037646.1 | 620853 | SNV | 1 | T | C | Homozygous   |
| NC_037646.1 | 620864 | SNV | 1 | T | C | Homozygous   |
| NC_037646.1 | 620867 | SNV | 1 | A | G | Homozygous   |
| NC_037646.1 | 620887 | SNV | 1 | C | T | Homozygous   |
| NC_037646.1 | 621620 | SNV | 1 | A | C | Homozygous   |
| NC_037646.1 | 621623 | SNV | 1 | A | G | Homozygous   |
| NC_037646.1 | 621631 | SNV | 1 | T | A | Homozygous   |
| NC_037646.1 | 621644 | SNV | 1 | T | C | Homozygous   |
| NC_037646.1 | 621665 | SNV | 1 | A | T | Homozygous   |
| NC_037646.1 | 624144 | SNV | 1 | A | T | Homozygous   |
| NC_037646.1 | 624147 | SNV | 1 | A | C | Homozygous   |
| NC_037646.1 | 624150 | SNV | 1 | A | T | Homozygous   |
| NC_037646.1 | 624152 | SNV | 1 | T | A | Homozygous   |
| NC_037646.1 | 624158 | SNV | 1 | A | T | Homozygous   |
| NC_037646.1 | 630414 | SNV | 1 | T | A | Homozygous   |
| NC_037646.1 | 630427 | SNV | 1 | T | C | Homozygous   |
| NC_037646.1 | 630439 | SNV | 1 | T | C | Homozygous   |
| NC_037646.1 | 633417 | SNV | 1 | C | A | Homozygous   |
| NC_037646.1 | 633423 | SNV | 1 | C | A | Homozygous   |
| NC_037646.1 | 633429 | SNV | 1 | T | A | Homozygous   |
| NC_037646.1 | 633433 | SNV | 1 | T | C | Homozygous   |
| NC_037646.1 | 633435 | SNV | 1 | T | A | Homozygous   |
| NC_037646.1 | 633437 | SNV | 1 | T | C | Homozygous   |
| NC_037646.1 | 633441 | SNV | 1 | C | A | Homozygous   |
| NC_037646.1 | 637157 | SNV | 1 | A | T | Homozygous   |
| NC_037646.1 | 637177 | SNV | 1 | A | T | Homozygous   |
| NC_037646.1 | 637187 | SNV | 1 | A | T | Homozygous   |
| NC_037646.1 | 650125 | SNV | 1 | A | T | Homozygous   |
| NC_037646.1 | 659930 | SNV | 1 | A | T | Homozygous   |
| NC_037646.1 | 659934 | SNV | 1 | A | T | Homozygous   |
| NC_037646.1 | 659941 | SNV | 1 | T | A | Homozygous   |
| NC_037646.1 | 659954 | SNV | 1 | A | G | Homozygous   |
| NC_037646.1 | 659962 | SNV | 1 | T | G | Homozygous   |
| NC_037646.1 | 668158 | SNV | 1 | T | A | Homozygous   |
| NC_037646.1 | 668195 | SNV | 1 | T | A | Homozygous   |
| NC_037646.1 | 668197 | SNV | 1 | T | A | Homozygous   |
| NC_037646.1 | 668201 | SNV | 1 | T | C | Homozygous   |
| NC_037646.1 | 668210 | SNV | 1 | A | C | Homozygous   |
| NC_037646.1 | 668976 | SNV | 1 | T | A | Heterozygous |
| NC_037646.1 | 668981 | SNV | 1 | T | C | Homozygous   |
| NC_037646.1 | 669000 | SNV | 1 | T | C | Homozygous   |
| NC_037646.1 | 669022 | SNV | 1 | A | G | Homozygous   |

|             |        |     |   |   |   |              |
|-------------|--------|-----|---|---|---|--------------|
| NC_037646.1 | 669025 | SNV | 1 | A | T | Homozygous   |
| NC_037646.1 | 672184 | SNV | 1 | G | A | Homozygous   |
| NC_037646.1 | 672188 | SNV | 1 | T | A | Homozygous   |
| NC_037646.1 | 672190 | SNV | 1 | C | G | Homozygous   |
| NC_037646.1 | 672199 | SNV | 1 | C | T | Homozygous   |
| NC_037646.1 | 672220 | SNV | 1 | G | A | Homozygous   |
| NC_037646.1 | 672226 | SNV | 1 | T | C | Homozygous   |
| NC_037646.1 | 672291 | SNV | 1 | A | C | Homozygous   |
| NC_037646.1 | 672305 | SNV | 1 | G | A | Homozygous   |
| NC_037646.1 | 672321 | SNV | 1 | A | G | Homozygous   |
| NC_037646.1 | 672327 | SNV | 1 | G | A | Homozygous   |
| NC_037646.1 | 672329 | SNV | 1 | A | G | Homozygous   |
| NC_037646.1 | 672332 | SNV | 1 | T | G | Homozygous   |
| NC_037646.1 | 672338 | SNV | 1 | C | T | Homozygous   |
| NC_037646.1 | 672349 | SNV | 1 | A | G | Homozygous   |
| NC_037646.1 | 672352 | SNV | 1 | C | T | Homozygous   |
| NC_037646.1 | 685154 | SNV | 1 | T | A | Homozygous   |
| NC_037646.1 | 685163 | SNV | 1 | A | T | Homozygous   |
| NC_037646.1 | 685168 | SNV | 1 | T | G | Homozygous   |
| NC_037646.1 | 685218 | SNV | 1 | T | A | Homozygous   |
| NC_037646.1 | 685233 | SNV | 1 | T | A | Homozygous   |
| NC_037646.1 | 687687 | SNV | 1 | C | A | Homozygous   |
| NC_037646.1 | 687689 | SNV | 1 | T | A | Homozygous   |
| NC_037646.1 | 687719 | SNV | 1 | C | G | Homozygous   |
| NC_037646.1 | 687722 | SNV | 1 | A | C | Homozygous   |
| NC_037646.1 | 687725 | SNV | 1 | G | A | Homozygous   |
| NC_037646.1 | 695128 | SNV | 1 | G | A | Homozygous   |
| NC_037646.1 | 695137 | SNV | 1 | A | C | Homozygous   |
| NC_037646.1 | 695143 | SNV | 1 | A | G | Homozygous   |
| NC_037646.1 | 695150 | SNV | 1 | C | G | Homozygous   |
| NC_037646.1 | 695152 | SNV | 1 | T | A | Homozygous   |
| NC_037646.1 | 695157 | SNV | 1 | T | A | Homozygous   |
| NC_037646.1 | 704753 | SNV | 1 | T | A | Heterozygous |
| NC_037646.1 | 704757 | SNV | 1 | T | C | Heterozygous |
| NC_037646.1 | 706352 | SNV | 1 | C | A | Homozygous   |
| NC_037646.1 | 706357 | SNV | 1 | T | A | Homozygous   |
| NC_037646.1 | 706360 | SNV | 1 | C | G | Homozygous   |
| NC_037646.1 | 706367 | SNV | 1 | C | G | Heterozygous |
| NC_037646.1 | 706369 | SNV | 1 | T | A | Heterozygous |
| NC_037646.1 | 706379 | SNV | 1 | A | T | Heterozygous |
| NC_037646.1 | 706384 | SNV | 1 | T | A | Heterozygous |
| NC_037646.1 | 706390 | SNV | 1 | A | C | Heterozygous |
| NC_037646.1 | 706395 | SNV | 1 | A | C | Heterozygous |
| NC_037646.1 | 706397 | SNV | 1 | A | T | Heterozygous |
| NC_037646.1 | 706398 | SNV | 1 | T | C | Heterozygous |
| NC_037646.1 | 706399 | SNV | 1 | A | C | Heterozygous |
| NC_037646.1 | 706403 | SNV | 1 | A | G | Heterozygous |
| NC_037646.1 | 706404 | SNV | 1 | C | T | Heterozygous |
| NC_037646.1 | 706411 | SNV | 1 | A | G | Heterozygous |
| NC_037646.1 | 715250 | SNV | 1 | C | A | Homozygous   |
| NC_037646.1 | 715260 | SNV | 1 | T | C | Homozygous   |

|             |        |     |   |   |   |              |
|-------------|--------|-----|---|---|---|--------------|
| NC_037646.1 | 715264 | SNV | 1 | T | A | Homozygous   |
| NC_037646.1 | 730347 | SNV | 1 | T | A | Homozygous   |
| NC_037646.1 | 730350 | SNV | 1 | A | G | Homozygous   |
| NC_037646.1 | 730360 | SNV | 1 | C | T | Homozygous   |
| NC_037646.1 | 733520 | SNV | 1 | A | G | Homozygous   |
| NC_037646.1 | 733531 | SNV | 1 | A | T | Homozygous   |
| NC_037646.1 | 736900 | SNV | 1 | C | A | Homozygous   |
| NC_037646.1 | 736909 | SNV | 1 | T | C | Homozygous   |
| NC_037646.1 | 736915 | SNV | 1 | A | T | Homozygous   |
| NC_037646.1 | 736939 | SNV | 1 | C | T | Homozygous   |
| NC_037646.1 | 736942 | SNV | 1 | C | G | Homozygous   |
| NC_037646.1 | 736944 | SNV | 1 | T | C | Homozygous   |
| NC_037646.1 | 743470 | SNV | 1 | G | A | Homozygous   |
| NC_037646.1 | 743482 | SNV | 1 | G | A | Homozygous   |
| NC_037646.1 | 743491 | SNV | 1 | A | T | Homozygous   |
| NC_037646.1 | 743496 | SNV | 1 | A | G | Homozygous   |
| NC_037646.1 | 743521 | SNV | 1 | A | T | Homozygous   |
| NC_037646.1 | 743544 | SNV | 1 | G | A | Homozygous   |
| NC_037646.1 | 743559 | SNV | 1 | A | G | Homozygous   |
| NC_037646.1 | 754643 | SNV | 1 | A | T | Heterozygous |
| NC_037646.1 | 754677 | SNV | 1 | A | C | Homozygous   |
| NC_037646.1 | 754680 | SNV | 1 | A | T | Homozygous   |
| NC_037646.1 | 754766 | SNV | 1 | A | T | Homozygous   |
| NC_037646.1 | 767037 | SNV | 1 | A | G | Homozygous   |
| NC_037646.1 | 767039 | SNV | 1 | A | G | Homozygous   |
| NC_037646.1 | 767041 | SNV | 1 | A | T | Homozygous   |
| NC_037646.1 | 767043 | SNV | 1 | A | G | Homozygous   |
| NC_037646.1 | 767048 | SNV | 1 | T | A | Homozygous   |
| NC_037646.1 | 767050 | SNV | 1 | T | A | Homozygous   |
| NC_037646.1 | 767055 | SNV | 1 | A | T | Homozygous   |
| NC_037646.1 | 767061 | SNV | 1 | A | T | Homozygous   |
| NC_037646.1 | 767066 | SNV | 1 | T | A | Homozygous   |
| NC_037646.1 | 767071 | SNV | 1 | A | G | Homozygous   |
| NC_037646.1 | 772540 | SNV | 1 | T | C | Homozygous   |
| NC_037646.1 | 772589 | SNV | 1 | C | A | Homozygous   |
| NC_037646.1 | 773577 | SNV | 1 | T | C | Homozygous   |
| NC_037646.1 | 773612 | SNV | 1 | G | A | Homozygous   |
| NC_037646.1 | 776603 | SNV | 1 | A | T | Homozygous   |
| NC_037646.1 | 776635 | SNV | 1 | A | C | Homozygous   |
| NC_037646.1 | 785326 | SNV | 1 | T | A | Heterozygous |
| NC_037646.1 | 785330 | SNV | 1 | A | G | Homozygous   |
| NC_037646.1 | 785337 | SNV | 1 | T | A | Homozygous   |
| NC_037646.1 | 785344 | SNV | 1 | T | G | Homozygous   |
| NC_037646.1 | 822438 | SNV | 1 | C | T | Heterozygous |
| NC_037646.1 | 822442 | SNV | 1 | C | T | Heterozygous |
| NC_037646.1 | 822448 | SNV | 1 | A | G | Heterozygous |
| NC_037646.1 | 822460 | SNV | 1 | A | T | Heterozygous |
| NC_037646.1 | 822463 | SNV | 1 | T | G | Heterozygous |
| NC_037646.1 | 822471 | SNV | 1 | T | A | Heterozygous |
| NC_037646.1 | 834768 | SNV | 1 | T | A | Homozygous   |
| NC_037646.1 | 834796 | SNV | 1 | A | T | Homozygous   |

|             |        |     |   |   |   |              |
|-------------|--------|-----|---|---|---|--------------|
| NC_037646.1 | 834802 | SNV | 1 | T | A | Homozygous   |
| NC_037646.1 | 834804 | SNV | 1 | T | A | Homozygous   |
| NC_037646.1 | 836928 | SNV | 1 | T | A | Homozygous   |
| NC_037646.1 | 836931 | SNV | 1 | A | T | Homozygous   |
| NC_037646.1 | 836938 | SNV | 1 | A | G | Homozygous   |
| NC_037646.1 | 836944 | SNV | 1 | T | A | Homozygous   |
| NC_037646.1 | 836947 | SNV | 1 | A | T | Homozygous   |
| NC_037646.1 | 842418 | SNV | 1 | T | A | Homozygous   |
| NC_037646.1 | 842422 | SNV | 1 | T | A | Homozygous   |
| NC_037646.1 | 842427 | SNV | 1 | A | T | Homozygous   |
| NC_037646.1 | 842448 | SNV | 1 | T | C | Homozygous   |
| NC_037646.1 | 850640 | SNV | 1 | A | G | Heterozygous |
| NC_037646.1 | 850642 | SNV | 1 | A | G | Heterozygous |
| NC_037646.1 | 850655 | SNV | 1 | T | C | Heterozygous |
| NC_037646.1 | 862655 | SNV | 1 | T | A | Homozygous   |
| NC_037646.1 | 862662 | SNV | 1 | T | A | Homozygous   |
| NC_037646.1 | 862665 | SNV | 1 | A | T | Homozygous   |
| NC_037646.1 | 862676 | SNV | 1 | T | G | Homozygous   |
| NC_037646.1 | 866080 | SNV | 1 | T | C | Homozygous   |
| NC_037646.1 | 866095 | SNV | 1 | G | A | Heterozygous |
| NC_037646.1 | 866643 | SNV | 1 | A | G | Homozygous   |
| NC_037646.1 | 866649 | SNV | 1 | C | T | Homozygous   |
| NC_037646.1 | 866651 | SNV | 1 | G | A | Homozygous   |
| NC_037646.1 | 866664 | SNV | 1 | C | T | Homozygous   |
| NC_037646.1 | 866766 | SNV | 1 | G | A | Homozygous   |
| NC_037646.1 | 866776 | SNV | 1 | C | T | Heterozygous |
| NC_037646.1 | 866781 | SNV | 1 | A | G | Homozygous   |
| NC_037646.1 | 866811 | SNV | 1 | G | A | Heterozygous |
| NC_037646.1 | 867996 | SNV | 1 | T | G | Homozygous   |
| NC_037646.1 | 868009 | SNV | 1 | C | T | Homozygous   |
| NC_037646.1 | 868031 | SNV | 1 | C | T | Homozygous   |
| NC_037646.1 | 868037 | SNV | 1 | T | C | Homozygous   |
| NC_037646.1 | 868069 | SNV | 1 | T | C | Homozygous   |
| NC_037646.1 | 868079 | SNV | 1 | A | C | Homozygous   |
| NC_037646.1 | 868082 | SNV | 1 | A | G | Homozygous   |
| NC_037646.1 | 868086 | SNV | 1 | G | A | Homozygous   |
| NC_037646.1 | 871555 | SNV | 1 | T | C | Heterozygous |
| NC_037646.1 | 871558 | SNV | 1 | T | C | Heterozygous |
| NC_037646.1 | 871561 | SNV | 1 | T | C | Heterozygous |
| NC_037646.1 | 871564 | SNV | 1 | T | C | Heterozygous |
| NC_037646.1 | 871567 | SNV | 1 | A | C | Homozygous   |
| NC_037646.1 | 871573 | SNV | 1 | T | C | Heterozygous |
| NC_037646.1 | 871576 | SNV | 1 | C | G | Homozygous   |
| NC_037646.1 | 877236 | SNV | 1 | G | T | Homozygous   |
| NC_037646.1 | 882996 | SNV | 1 | A | T | Homozygous   |
| NC_037646.1 | 883001 | SNV | 1 | T | A | Homozygous   |
| NC_037646.1 | 883005 | SNV | 1 | C | A | Heterozygous |
| NC_037646.1 | 883006 | SNV | 1 | T | A | Heterozygous |
| NC_037646.1 | 883009 | SNV | 1 | A | G | Homozygous   |
| NC_037646.1 | 883022 | SNV | 1 | A | T | Homozygous   |
| NC_037646.1 | 883042 | SNV | 1 | A | T | Homozygous   |

|             |        |     |   |   |   |              |
|-------------|--------|-----|---|---|---|--------------|
| NC_037646.1 | 891034 | SNV | 1 | T | G | Heterozygous |
| NC_037646.1 | 897232 | SNV | 1 | T | C | Homozygous   |
| NC_037646.1 | 897948 | SNV | 1 | C | T | Heterozygous |
| NC_037646.1 | 904447 | SNV | 1 | T | A | Homozygous   |
| NC_037646.1 | 908336 | SNV | 1 | C | A | Homozygous   |
| NC_037646.1 | 908348 | SNV | 1 | G | C | Homozygous   |
| NC_037646.1 | 908350 | SNV | 1 | A | G | Homozygous   |
| NC_037646.1 | 908354 | SNV | 1 | G | A | Homozygous   |
| NC_037646.1 | 908360 | SNV | 1 | C | T | Homozygous   |
| NC_037646.1 | 908362 | SNV | 1 | T | A | Homozygous   |
| NC_037646.1 | 908369 | SNV | 1 | G | T | Homozygous   |
| NC_037646.1 | 908372 | SNV | 1 | C | A | Homozygous   |
| NC_037646.1 | 908375 | SNV | 1 | T | A | Homozygous   |
| NC_037646.1 | 908381 | SNV | 1 | A | T | Homozygous   |
| NC_037646.1 | 908393 | SNV | 1 | C | A | Homozygous   |
| NC_037646.1 | 908395 | SNV | 1 | A | G | Homozygous   |
| NC_037646.1 | 908411 | SNV | 1 | A | G | Homozygous   |
| NC_037646.1 | 916951 | SNV | 1 | T | C | Heterozygous |
| NC_037646.1 | 920479 | SNV | 1 | T | C | Homozygous   |
| NC_037646.1 | 920482 | SNV | 1 | T | C | Homozygous   |
| NC_037646.1 | 920484 | SNV | 1 | T | A | Homozygous   |
| NC_037646.1 | 925539 | SNV | 1 | C | T | Homozygous   |
| NC_037646.1 | 928576 | SNV | 1 | T | G | Heterozygous |
| NC_037646.1 | 928579 | SNV | 1 | A | G | Heterozygous |
| NC_037646.1 | 928584 | SNV | 1 | C | G | Homozygous   |
| NC_037646.1 | 928590 | SNV | 1 | C | A | Homozygous   |
| NC_037646.1 | 928594 | SNV | 1 | T | C | Heterozygous |
| NC_037646.1 | 928612 | SNV | 1 | A | T | Heterozygous |
| NC_037646.1 | 928802 | SNV | 1 | A | T | Homozygous   |
| NC_037646.1 | 928806 | SNV | 1 | A | T | Homozygous   |
| NC_037646.1 | 928810 | SNV | 1 | T | C | Homozygous   |
| NC_037646.1 | 928812 | SNV | 1 | T | A | Homozygous   |
| NC_037646.1 | 928847 | SNV | 1 | T | A | Homozygous   |
| NC_037646.1 | 931856 | SNV | 1 | A | G | Homozygous   |
| NC_037646.1 | 938570 | SNV | 1 | G | T | Homozygous   |
| NC_037646.1 | 938593 | SNV | 1 | T | A | Heterozygous |
| NC_037646.1 | 938596 | SNV | 1 | A | T | Homozygous   |
| NC_037646.1 | 938600 | SNV | 1 | A | C | Heterozygous |
| NC_037646.1 | 938603 | SNV | 1 | T | G | Heterozygous |
| NC_037646.1 | 940656 | SNV | 1 | T | C | Homozygous   |
| NC_037646.1 | 940659 | SNV | 1 | A | T | Homozygous   |
| NC_037646.1 | 940665 | SNV | 1 | G | A | Homozygous   |
| NC_037646.1 | 940947 | SNV | 1 | C | T | Homozygous   |
| NC_037646.1 | 945391 | SNV | 1 | A | G | Homozygous   |
| NC_037646.1 | 945394 | SNV | 1 | G | T | Homozygous   |
| NC_037646.1 | 945404 | SNV | 1 | A | T | Homozygous   |
| NC_037646.1 | 945408 | SNV | 1 | T | A | Homozygous   |
| NC_037646.1 | 945428 | SNV | 1 | T | G | Homozygous   |
| NC_037646.1 | 952816 | SNV | 1 | C | T | Heterozygous |
| NC_037646.1 | 955625 | SNV | 1 | C | T | Heterozygous |
| NC_037646.1 | 962119 | SNV | 1 | C | A | Homozygous   |

|             |         |     |   |   |   |              |
|-------------|---------|-----|---|---|---|--------------|
| NC_037646.1 | 962268  | SNV | 1 | C | A | Homozygous   |
| NC_037646.1 | 962271  | SNV | 1 | T | C | Homozygous   |
| NC_037646.1 | 965551  | SNV | 1 | C | T | Heterozygous |
| NC_037646.1 | 965553  | SNV | 1 | T | C | Heterozygous |
| NC_037646.1 | 965556  | SNV | 1 | T | A | Heterozygous |
| NC_037646.1 | 965811  | SNV | 1 | G | A | Heterozygous |
| NC_037646.1 | 967964  | SNV | 1 | A | T | Homozygous   |
| NC_037646.1 | 995229  | SNV | 1 | T | A | Heterozygous |
| NC_037646.1 | 995232  | SNV | 1 | A | T | Heterozygous |
| NC_037646.1 | 995241  | SNV | 1 | T | C | Heterozygous |
| NC_037646.1 | 995243  | SNV | 1 | G | A | Heterozygous |
| NC_037646.1 | 995246  | SNV | 1 | G | A | Heterozygous |
| NC_037646.1 | 995251  | SNV | 1 | T | A | Heterozygous |
| NC_037646.1 | 995769  | SNV | 1 | G | T | Homozygous   |
| NC_037646.1 | 1114988 | SNV | 1 | T | A | Homozygous   |
| NC_037646.1 | 1115007 | SNV | 1 | T | A | Homozygous   |
| NC_037646.1 | 1115024 | SNV | 1 | A | T | Homozygous   |
| NC_037646.1 | 1144870 | SNV | 1 | C | T | Homozygous   |
| NC_037646.1 | 1145629 | SNV | 1 | T | C | Homozygous   |
| NC_037646.1 | 1145656 | SNV | 1 | T | C | Homozygous   |
| NC_037646.1 | 1146673 | SNV | 1 | T | C | Homozygous   |
| NC_037646.1 | 1152188 | SNV | 1 | A | T | Homozygous   |
| NC_037646.1 | 1155584 | SNV | 1 | T | A | Homozygous   |
| NC_037646.1 | 1155586 | SNV | 1 | A | G | Homozygous   |
| NC_037646.1 | 1155593 | SNV | 1 | T | G | Homozygous   |
| NC_037646.1 | 1182875 | SNV | 1 | A | G | Heterozygous |
| NC_037646.1 | 1182889 | SNV | 1 | G | A | Heterozygous |
| NC_037646.1 | 1182893 | SNV | 1 | C | T | Heterozygous |
| NC_037646.1 | 1182910 | SNV | 1 | G | A | Homozygous   |
| NC_037646.1 | 1182918 | SNV | 1 | T | C | Homozygous   |
| NC_037646.1 | 1182920 | SNV | 1 | A | C | Homozygous   |
| NC_037646.1 | 1182926 | SNV | 1 | C | T | Homozygous   |
| NC_037646.1 | 1182930 | SNV | 1 | C | T | Homozygous   |
| NC_037646.1 | 1182932 | SNV | 1 | A | G | Homozygous   |
| NC_037646.1 | 1182949 | SNV | 1 | T | C | Homozygous   |
| NC_037646.1 | 1186735 | SNV | 1 | G | A | Homozygous   |
| NC_037646.1 | 1186747 | SNV | 1 | T | C | Homozygous   |
| NC_037646.1 | 1186758 | SNV | 1 | G | A | Homozygous   |
| NC_037646.1 | 1186779 | SNV | 1 | A | G | Homozygous   |
| NC_037646.1 | 1186788 | SNV | 1 | T | A | Homozygous   |
| NC_037646.1 | 1186799 | SNV | 1 | T | C | Homozygous   |
| NC_037646.1 | 1186804 | SNV | 1 | G | A | Homozygous   |
| NC_037646.1 | 1232674 | SNV | 1 | T | C | Homozygous   |
| NC_037646.1 | 1232710 | SNV | 1 | G | A | Homozygous   |
| NC_037646.1 | 1233535 | SNV | 1 | T | C | Homozygous   |
| NC_037646.1 | 1234603 | SNV | 1 | T | C | Homozygous   |
| NC_037646.1 | 1243332 | SNV | 1 | G | A | Heterozygous |
| NC_037646.1 | 1243818 | SNV | 1 | C | T | Homozygous   |
| NC_037646.1 | 1243854 | SNV | 1 | G | A | Homozygous   |
| NC_037646.1 | 1247103 | SNV | 1 | G | A | Homozygous   |
| NC_037646.1 | 1253314 | SNV | 1 | G | A | Homozygous   |

|             |         |     |   |   |   |              |
|-------------|---------|-----|---|---|---|--------------|
| NC_037646.1 | 1254456 | SNV | 1 | A | G | Heterozygous |
| NC_037646.1 | 1255760 | SNV | 1 | G | C | Homozygous   |
| NC_037646.1 | 1255767 | SNV | 1 | T | A | Homozygous   |
| NC_037646.1 | 1256211 | SNV | 1 | G | A | Homozygous   |
| NC_037646.1 | 1256297 | SNV | 1 | G | A | Homozygous   |
| NC_037646.1 | 1256395 | SNV | 1 | T | C | Homozygous   |
| NC_037646.1 | 1256484 | SNV | 1 | G | A | Homozygous   |
| NC_037646.1 | 1256672 | SNV | 1 | T | C | Heterozygous |
| NC_037646.1 | 1256890 | SNV | 1 | A | T | Homozygous   |
| NC_037646.1 | 1259650 | SNV | 1 | A | T | Homozygous   |
| NC_037646.1 | 1259667 | SNV | 1 | T | C | Homozygous   |
| NC_037646.1 | 1264461 | SNV | 1 | A | G | Homozygous   |
| NC_037646.1 | 1265188 | SNV | 1 | T | A | Homozygous   |
| NC_037646.1 | 1265197 | SNV | 1 | A | T | Homozygous   |
| NC_037646.1 | 1265201 | SNV | 1 | T | G | Homozygous   |
| NC_037646.1 | 1265205 | SNV | 1 | T | G | Homozygous   |
| NC_037646.1 | 1265212 | SNV | 1 | A | G | Homozygous   |
| NC_037646.1 | 1266562 | SNV | 1 | G | T | Homozygous   |
| NC_037646.1 | 1267603 | SNV | 1 | T | C | Homozygous   |
| NC_037646.1 | 1268181 | SNV | 1 | T | C | Heterozygous |
| NC_037646.1 | 1268514 | SNV | 1 | G | A | Heterozygous |
| NC_037646.1 | 1268728 | SNV | 1 | T | A | Homozygous   |
| NC_037646.1 | 1268930 | SNV | 1 | A | G | Homozygous   |
| NC_037646.1 | 1269063 | SNV | 1 | C | T | Homozygous   |
| NC_037646.1 | 1269210 | SNV | 1 | C | T | Homozygous   |
| NC_037646.1 | 1272693 | SNV | 1 | A | T | Homozygous   |
| NC_037646.1 | 1272695 | SNV | 1 | T | A | Homozygous   |
| NC_037646.1 | 1272739 | SNV | 1 | T | A | Homozygous   |
| NC_037646.1 | 1272746 | SNV | 1 | C | A | Homozygous   |
| NC_037646.1 | 1272756 | SNV | 1 | G | A | Homozygous   |
| NC_037646.1 | 1272758 | SNV | 1 | G | A | Homozygous   |
| NC_037646.1 | 1272769 | SNV | 1 | G | A | Heterozygous |
| NC_037646.1 | 1272797 | SNV | 1 | G | A | Homozygous   |
| NC_037646.1 | 1272802 | SNV | 1 | G | A | Homozygous   |
| NC_037646.1 | 1272872 | SNV | 1 | G | A | Homozygous   |
| NC_037646.1 | 1272897 | SNV | 1 | G | A | Homozygous   |
| NC_037646.1 | 1273137 | SNV | 1 | T | C | Homozygous   |
| NC_037646.1 | 1273151 | SNV | 1 | A | G | Homozygous   |
| NC_037646.1 | 1273348 | SNV | 1 | G | T | Homozygous   |
| NC_037646.1 | 1273579 | SNV | 1 | T | C | Homozygous   |
| NC_037646.1 | 1273599 | SNV | 1 | A | G | Homozygous   |
| NC_037646.1 | 1273699 | SNV | 1 | C | T | Homozygous   |
| NC_037646.1 | 1273734 | SNV | 1 | A | G | Homozygous   |
| NC_037646.1 | 1274064 | SNV | 1 | C | A | Homozygous   |
| NC_037646.1 | 1274221 | SNV | 1 | A | G | Homozygous   |
| NC_037646.1 | 1274574 | SNV | 1 | G | A | Homozygous   |
| NC_037646.1 | 1278158 | SNV | 1 | A | T | Heterozygous |
| NC_037646.1 | 1278162 | SNV | 1 | T | C | Heterozygous |
| NC_037646.1 | 1278178 | SNV | 1 | A | T | Heterozygous |
| NC_037646.1 | 1278180 | SNV | 1 | T | A | Heterozygous |
| NC_037646.1 | 1278186 | SNV | 1 | A | G | Heterozygous |



|             |         |     |   |   |   |              |
|-------------|---------|-----|---|---|---|--------------|
| NC_037646.1 | 1278194 | SNV | 1 | A | G | Heterozygous |
| NC_037646.1 | 1283455 | SNV | 1 | G | A | Heterozygous |
| NC_037646.1 | 1283458 | SNV | 1 | G | T | Heterozygous |
| NC_037646.1 | 1283464 | SNV | 1 | A | T | Heterozygous |
| NC_037646.1 | 1283469 | SNV | 1 | T | C | Heterozygous |
| NC_037646.1 | 1283488 | SNV | 1 | A | G | Heterozygous |
| NC_037646.1 | 1283493 | SNV | 1 | T | A | Heterozygous |
| NC_037646.1 | 1283501 | SNV | 1 | A | G | Heterozygous |
| NC_037646.1 | 1288963 | SNV | 1 | C | T | Heterozygous |
| NC_037646.1 | 1289016 | SNV | 1 | A | G | Homozygous   |
| NC_037646.1 | 1289941 | SNV | 1 | T | A | Homozygous   |
| NC_037646.1 | 1290612 | SNV | 1 | C | G | Homozygous   |
| NC_037646.1 | 1291995 | SNV | 1 | G | A | Homozygous   |
| NC_037646.1 | 1292507 | SNV | 1 | T | A | Homozygous   |
| NC_037646.1 | 1294259 | SNV | 1 | A | G | Homozygous   |
| NC_037646.1 | 1294484 | SNV | 1 | G | A | Heterozygous |
| NC_037646.1 | 1294558 | SNV | 1 | C | A | Heterozygous |
| NC_037646.1 | 1294885 | SNV | 1 | A | G | Homozygous   |
| NC_037646.1 | 1295124 | SNV | 1 | G | A | Heterozygous |
| NC_037646.1 | 1295658 | SNV | 1 | A | G | Heterozygous |
| NC_037646.1 | 1295692 | SNV | 1 | A | G | Heterozygous |
| NC_037646.1 | 1295698 | SNV | 1 | A | G | Heterozygous |
| NC_037646.1 | 1295885 | SNV | 1 | T | C | Homozygous   |
| NC_037646.1 | 1295976 | SNV | 1 | T | A | Homozygous   |
| NC_037646.1 | 1296519 | SNV | 1 | T | C | Homozygous   |
| NC_037646.1 | 1296840 | SNV | 1 | C | T | Homozygous   |
| NC_037646.1 | 1297271 | SNV | 1 | C | A | Heterozygous |
| NC_037646.1 | 1297570 | SNV | 1 | A | C | Homozygous   |
| NC_037646.1 | 1299652 | SNV | 1 | G | A | Heterozygous |
| NC_037646.1 | 1302868 | SNV | 1 | T | C | Homozygous   |
| NC_037646.1 | 1302886 | SNV | 1 | T | C | Homozygous   |
| NC_037646.1 | 1302916 | SNV | 1 | A | G | Homozygous   |
| NC_037646.1 | 1302918 | SNV | 1 | C | A | Homozygous   |
| NC_037646.1 | 1302922 | SNV | 1 | A | T | Homozygous   |
| NC_037646.1 | 1302924 | SNV | 1 | C | T | Homozygous   |
| NC_037646.1 | 1302930 | SNV | 1 | A | C | Homozygous   |
| NC_037646.1 | 1302940 | SNV | 1 | T | C | Homozygous   |
| NC_037646.1 | 1302947 | SNV | 1 | T | A | Homozygous   |
| NC_037646.1 | 1304365 | SNV | 1 | T | A | Homozygous   |
| NC_037646.1 | 1304371 | SNV | 1 | C | T | Homozygous   |
| NC_037646.1 | 1304392 | SNV | 1 | A | T | Homozygous   |
| NC_037646.1 | 1304394 | SNV | 1 | T | A | Homozygous   |
| NC_037646.1 | 1309023 | SNV | 1 | A | G | Homozygous   |
| NC_037646.1 | 1309062 | SNV | 1 | A | T | Homozygous   |
| NC_037646.1 | 1309068 | SNV | 1 | T | G | Homozygous   |
| NC_037646.1 | 1309454 | SNV | 1 | G | A | Heterozygous |
| NC_037646.1 | 1319249 | SNV | 1 | A | G | Homozygous   |
| NC_037646.1 | 1320179 | SNV | 1 | A | G | Homozygous   |
| NC_037646.1 | 1323125 | SNV | 1 | G | A | Heterozygous |
| NC_037646.1 | 1329123 | SNV | 1 | G | A | Homozygous   |
| NC_037646.1 | 1330595 | SNV | 1 | A | G | Homozygous   |

|             |         |     |   |   |   |              |
|-------------|---------|-----|---|---|---|--------------|
| NC_037646.1 | 1331957 | SNV | 1 | T | G | Homozygous   |
| NC_037646.1 | 1331963 | SNV | 1 | C | A | Homozygous   |
| NC_037646.1 | 1331975 | SNV | 1 | A | C | Homozygous   |
| NC_037646.1 | 1331986 | SNV | 1 | G | C | Homozygous   |
| NC_037646.1 | 1332475 | SNV | 1 | A | G | Homozygous   |
| NC_037646.1 | 1333942 | SNV | 1 | A | G | Heterozygous |
| NC_037646.1 | 1333982 | SNV | 1 | T | C | Homozygous   |
| NC_037646.1 | 1333987 | SNV | 1 | A | T | Homozygous   |
| NC_037646.1 | 1335606 | SNV | 1 | G | A | Homozygous   |
| NC_037646.1 | 1335612 | SNV | 1 | G | T | Homozygous   |
| NC_037646.1 | 1335615 | SNV | 1 | A | T | Homozygous   |
| NC_037646.1 | 1335628 | SNV | 1 | A | T | Homozygous   |
| NC_037646.1 | 1335667 | SNV | 1 | T | C | Homozygous   |
| NC_037646.1 | 1335672 | SNV | 1 | T | A | Homozygous   |
| NC_037646.1 | 1337131 | SNV | 1 | A | G | Homozygous   |
| NC_037646.1 | 1337137 | SNV | 1 | T | C | Homozygous   |
| NC_037646.1 | 1337147 | SNV | 1 | G | A | Homozygous   |
| NC_037646.1 | 1337559 | SNV | 1 | T | C | Homozygous   |
| NC_037646.1 | 1337776 | SNV | 1 | C | T | Homozygous   |
| NC_037646.1 | 1337819 | SNV | 1 | C | T | Homozygous   |
| NC_037646.1 | 1337901 | SNV | 1 | T | C | Homozygous   |
| NC_037646.1 | 1337952 | SNV | 1 | A | G | Homozygous   |
| NC_037646.1 | 1337963 | SNV | 1 | C | T | Homozygous   |
| NC_037646.1 | 1337987 | SNV | 1 | C | T | Homozygous   |
| NC_037646.1 | 1338031 | SNV | 1 | C | T | Homozygous   |
| NC_037646.1 | 1338076 | SNV | 1 | T | C | Heterozygous |
| NC_037646.1 | 1343745 | SNV | 1 | T | A | Homozygous   |
| NC_037646.1 | 1343772 | SNV | 1 | A | T | Homozygous   |
| NC_037646.1 | 1343776 | SNV | 1 | G | T | Homozygous   |
| NC_037646.1 | 1343782 | SNV | 1 | A | G | Homozygous   |
| NC_037646.1 | 1349504 | SNV | 1 | A | T | Homozygous   |
| NC_037646.1 | 1349510 | SNV | 1 | A | T | Homozygous   |
| NC_037646.1 | 1351092 | SNV | 1 | A | G | Homozygous   |
| NC_037646.1 | 1351119 | SNV | 1 | A | C | Homozygous   |
| NC_037646.1 | 1355575 | SNV | 1 | T | C | Homozygous   |
| NC_037646.1 | 1355583 | SNV | 1 | C | T | Homozygous   |
| NC_037646.1 | 1355594 | SNV | 1 | A | T | Homozygous   |
| NC_037646.1 | 1355596 | SNV | 1 | A | T | Homozygous   |
| NC_037646.1 | 1355599 | SNV | 1 | T | G | Homozygous   |
| NC_037646.1 | 1355616 | SNV | 1 | A | T | Homozygous   |
| NC_037646.1 | 1360634 | SNV | 1 | T | C | Homozygous   |
| NC_037646.1 | 1360653 | SNV | 1 | T | A | Homozygous   |
| NC_037646.1 | 1360658 | SNV | 1 | C | G | Homozygous   |
| NC_037646.1 | 1361264 | SNV | 1 | G | A | Homozygous   |
| NC_037646.1 | 1364584 | SNV | 1 | A | G | Homozygous   |
| NC_037646.1 | 1364638 | SNV | 1 | T | C | Homozygous   |
| NC_037646.1 | 1369109 | SNV | 1 | G | C | Homozygous   |
| NC_037646.1 | 1371405 | SNV | 1 | A | T | Heterozygous |
| NC_037646.1 | 1371446 | SNV | 1 | T | C | Heterozygous |
| NC_037646.1 | 1371456 | SNV | 1 | T | A | Heterozygous |
| NC_037646.1 | 1372911 | SNV | 1 | T | C | Homozygous   |

|             |         |     |   |   |   |              |
|-------------|---------|-----|---|---|---|--------------|
| NC_037646.1 | 1376571 | SNV | 1 | T | C | Homozygous   |
| NC_037646.1 | 1376573 | SNV | 1 | A | G | Homozygous   |
| NC_037646.1 | 1376594 | SNV | 1 | C | T | Homozygous   |
| NC_037646.1 | 1376599 | SNV | 1 | C | T | Homozygous   |
| NC_037646.1 | 1376602 | SNV | 1 | A | G | Homozygous   |
| NC_037646.1 | 1376776 | SNV | 1 | C | T | Homozygous   |
| NC_037646.1 | 1376785 | SNV | 1 | T | C | Homozygous   |
| NC_037646.1 | 1376792 | SNV | 1 | C | G | Homozygous   |
| NC_037646.1 | 1376794 | SNV | 1 | T | C | Homozygous   |
| NC_037646.1 | 1376800 | SNV | 1 | A | G | Homozygous   |
| NC_037646.1 | 1376806 | SNV | 1 | T | G | Homozygous   |
| NC_037646.1 | 1376813 | SNV | 1 | G | A | Homozygous   |
| NC_037646.1 | 1376833 | SNV | 1 | T | C | Homozygous   |
| NC_037646.1 | 1376839 | SNV | 1 | T | C | Homozygous   |
| NC_037646.1 | 1376850 | SNV | 1 | A | G | Homozygous   |
| NC_037646.1 | 1376852 | SNV | 1 | T | C | Homozygous   |
| NC_037646.1 | 1376854 | SNV | 1 | C | T | Homozygous   |
| NC_037646.1 | 1376859 | SNV | 1 | G | A | Homozygous   |
| NC_037646.1 | 1376869 | SNV | 1 | T | C | Homozygous   |
| NC_037646.1 | 1378271 | SNV | 1 | C | T | Heterozygous |
| NC_037646.1 | 1378400 | SNV | 1 | G | A | Heterozygous |
| NC_037646.1 | 1378463 | SNV | 1 | T | C | Homozygous   |
| NC_037646.1 | 1378529 | SNV | 1 | C | T | Heterozygous |
| NC_037646.1 | 1378571 | SNV | 1 | G | A | Homozygous   |
| NC_037646.1 | 1378947 | SNV | 1 | T | C | Heterozygous |
| NC_037646.1 | 1402639 | SNV | 1 | A | T | Heterozygous |
| NC_037646.1 | 1402699 | SNV | 1 | T | C | Heterozygous |
| NC_037646.1 | 1402709 | SNV | 1 | T | C | Heterozygous |
| NC_037646.1 | 1406309 | SNV | 1 | T | G | Homozygous   |
| NC_037646.1 | 1406349 | SNV | 1 | A | C | Homozygous   |
| NC_037646.1 | 1411543 | SNV | 1 | A | G | Homozygous   |
| NC_037646.1 | 1411573 | SNV | 1 | A | G | Homozygous   |
| NC_037646.1 | 1505357 | SNV | 1 | T | C | Homozygous   |
| NC_037646.1 | 1506178 | SNV | 1 | T | A | Homozygous   |
| NC_037646.1 | 1506184 | SNV | 1 | C | T | Homozygous   |
| NC_037646.1 | 1506188 | SNV | 1 | C | T | Homozygous   |
| NC_037646.1 | 1506192 | SNV | 1 | C | T | Homozygous   |
| NC_037646.1 | 1506196 | SNV | 1 | C | T | Homozygous   |
| NC_037646.1 | 1519999 | SNV | 1 | G | A | Homozygous   |
| NC_037646.1 | 1520367 | SNV | 1 | A | T | Homozygous   |
| NC_037646.1 | 1520370 | SNV | 1 | A | C | Homozygous   |
| NC_037646.1 | 1520380 | SNV | 1 | T | A | Homozygous   |
| NC_037646.1 | 1520382 | SNV | 1 | T | G | Homozygous   |
| NC_037646.1 | 1520391 | SNV | 1 | T | A | Homozygous   |
| NC_037646.1 | 1520397 | SNV | 1 | T | G | Homozygous   |
| NC_037646.1 | 1520400 | SNV | 1 | T | A | Homozygous   |
| NC_037646.1 | 1521450 | SNV | 1 | A | T | Homozygous   |
| NC_037646.1 | 1523092 | SNV | 1 | A | G | Homozygous   |
| NC_037646.1 | 1523118 | SNV | 1 | T | A | Homozygous   |
| NC_037646.1 | 1523120 | SNV | 1 | A | G | Homozygous   |
| NC_037646.1 | 1523123 | SNV | 1 | A | T | Homozygous   |

|             |         |     |   |   |   |              |
|-------------|---------|-----|---|---|---|--------------|
| NC_037646.1 | 1524329 | SNV | 1 | T | G | Homozygous   |
| NC_037646.1 | 1524332 | SNV | 1 | T | A | Heterozygous |
| NC_037646.1 | 1524334 | SNV | 1 | T | C | Heterozygous |
| NC_037646.1 | 1524336 | SNV | 1 | T | C | Heterozygous |
| NC_037646.1 | 1525891 | SNV | 1 | C | T | Heterozygous |
| NC_037646.1 | 1525894 | SNV | 1 | C | T | Heterozygous |
| NC_037646.1 | 1525897 | SNV | 1 | A | T | Heterozygous |
| NC_037646.1 | 1526127 | SNV | 1 | G | A | Homozygous   |
| NC_037646.1 | 1532034 | SNV | 1 | T | G | Homozygous   |
| NC_037646.1 | 1532056 | SNV | 1 | C | G | Homozygous   |
| NC_037646.1 | 1532059 | SNV | 1 | A | G | Homozygous   |
| NC_037646.1 | 1532061 | SNV | 1 | A | C | Homozygous   |
| NC_037646.1 | 1532063 | SNV | 1 | T | C | Homozygous   |
| NC_037646.1 | 1532074 | SNV | 1 | T | A | Homozygous   |
| NC_037646.1 | 1536307 | SNV | 1 | A | G | Heterozygous |
| NC_037646.1 | 1536651 | SNV | 1 | T | C | Homozygous   |
| NC_037646.1 | 1537212 | SNV | 1 | C | T | Heterozygous |
| NC_037646.1 | 1537672 | SNV | 1 | A | T | Heterozygous |
| NC_037646.1 | 1537676 | SNV | 1 | C | T | Heterozygous |
| NC_037646.1 | 1537807 | SNV | 1 | G | T | Heterozygous |
| NC_037646.1 | 1545271 | SNV | 1 | A | G | Heterozygous |
| NC_037646.1 | 1545291 | SNV | 1 | T | G | Heterozygous |
| NC_037646.1 | 1545294 | SNV | 1 | A | T | Heterozygous |
| NC_037646.1 | 1545300 | SNV | 1 | A | G | Heterozygous |
| NC_037646.1 | 1545303 | SNV | 1 | A | T | Heterozygous |
| NC_037646.1 | 1545314 | SNV | 1 | G | T | Homozygous   |
| NC_037646.1 | 1547499 | SNV | 1 | C | T | Homozygous   |
| NC_037646.1 | 1556128 | SNV | 1 | T | C | Homozygous   |
| NC_037646.1 | 1556327 | SNV | 1 | G | A | Homozygous   |
| NC_037646.1 | 1556400 | SNV | 1 | G | T | Heterozygous |
| NC_037646.1 | 1556402 | SNV | 1 | C | T | Heterozygous |
| NC_037646.1 | 1557028 | SNV | 1 | C | T | Homozygous   |
| NC_037646.1 | 1557916 | SNV | 1 | C | T | Homozygous   |
| NC_037646.1 | 1559587 | SNV | 1 | C | A | Homozygous   |
| NC_037646.1 | 1561234 | SNV | 1 | A | G | Homozygous   |
| NC_037646.1 | 1569782 | SNV | 1 | A | T | Homozygous   |
| NC_037646.1 | 1569798 | SNV | 1 | T | A | Homozygous   |
| NC_037646.1 | 1569800 | SNV | 1 | T | A | Homozygous   |
| NC_037646.1 | 1569802 | SNV | 1 | T | A | Homozygous   |
| NC_037646.1 | 1569821 | SNV | 1 | T | G | Homozygous   |
| NC_037646.1 | 1569824 | SNV | 1 | A | T | Homozygous   |
| NC_037646.1 | 1569827 | SNV | 1 | T | A | Homozygous   |
| NC_037646.1 | 1569831 | SNV | 1 | A | C | Homozygous   |
| NC_037646.1 | 1575521 | SNV | 1 | A | G | Homozygous   |
| NC_037646.1 | 1575619 | SNV | 1 | C | A | Heterozygous |
| NC_037646.1 | 1575621 | SNV | 1 | T | C | Heterozygous |
| NC_037646.1 | 1575640 | SNV | 1 | A | T | Heterozygous |
| NC_037646.1 | 1576219 | SNV | 1 | T | C | Homozygous   |
| NC_037646.1 | 1581350 | SNV | 1 | C | T | Heterozygous |
| NC_037646.1 | 1582569 | SNV | 1 | T | A | Homozygous   |
| NC_037646.1 | 1582572 | SNV | 1 | A | C | Homozygous   |

|             |         |     |   |   |   |              |
|-------------|---------|-----|---|---|---|--------------|
| NC_037646.1 | 1582578 | SNV | 1 | T | A | Homozygous   |
| NC_037646.1 | 1582587 | SNV | 1 | A | T | Homozygous   |
| NC_037646.1 | 1584723 | SNV | 1 | C | A | Heterozygous |
| NC_037646.1 | 1585874 | SNV | 1 | G | A | Homozygous   |
| NC_037646.1 | 1585984 | SNV | 1 | A | T | Heterozygous |
| NC_037646.1 | 1586903 | SNV | 1 | T | G | Homozygous   |
| NC_037646.1 | 1586906 | SNV | 1 | A | T | Homozygous   |
| NC_037646.1 | 1590766 | SNV | 1 | T | C | Homozygous   |
| NC_037646.1 | 1590834 | SNV | 1 | T | C | Homozygous   |
| NC_037646.1 | 1590918 | SNV | 1 | G | A | Heterozygous |
| NC_037646.1 | 1591851 | SNV | 1 | A | T | Heterozygous |
| NC_037646.1 | 1591854 | SNV | 1 | A | T | Homozygous   |
| NC_037646.1 | 1593533 | SNV | 1 | G | A | Homozygous   |
| NC_037646.1 | 1597605 | SNV | 1 | G | T | Heterozygous |
| NC_037646.1 | 1599786 | SNV | 1 | A | G | Heterozygous |
| NC_037646.1 | 1600488 | SNV | 1 | A | G | Homozygous   |
| NC_037646.1 | 1600703 | SNV | 1 | A | G | Homozygous   |
| NC_037646.1 | 1601617 | SNV | 1 | C | A | Homozygous   |
| NC_037646.1 | 1608730 | SNV | 1 | G | A | Heterozygous |
| NC_037646.1 | 1608934 | SNV | 1 | T | C | Homozygous   |
| NC_037646.1 | 1608998 | SNV | 1 | C | A | Homozygous   |
| NC_037646.1 | 1609069 | SNV | 1 | A | T | Homozygous   |
| NC_037646.1 | 1610357 | SNV | 1 | G | A | Homozygous   |
| NC_037646.1 | 1611831 | SNV | 1 | T | C | Homozygous   |
| NC_037646.1 | 1612211 | SNV | 1 | T | G | Heterozygous |
| NC_037646.1 | 1617189 | SNV | 1 | G | A | Heterozygous |
| NC_037646.1 | 1620035 | SNV | 1 | A | G | Homozygous   |
| NC_037646.1 | 1622773 | SNV | 1 | G | T | Homozygous   |
| NC_037646.1 | 1622802 | SNV | 1 | T | G | Homozygous   |
| NC_037646.1 | 1622822 | SNV | 1 | A | T | Homozygous   |
| NC_037646.1 | 1622825 | SNV | 1 | C | A | Homozygous   |
| NC_037646.1 | 1622836 | SNV | 1 | T | A | Homozygous   |
| NC_037646.1 | 1622840 | SNV | 1 | A | T | Homozygous   |
| NC_037646.1 | 1622862 | SNV | 1 | G | A | Homozygous   |
| NC_037646.1 | 1623942 | SNV | 1 | C | A | Homozygous   |
| NC_037646.1 | 1623946 | SNV | 1 | C | T | Homozygous   |
| NC_037646.1 | 1624190 | SNV | 1 | A | C | Homozygous   |
| NC_037646.1 | 1627758 | SNV | 1 | G | T | Homozygous   |
| NC_037646.1 | 1627762 | SNV | 1 | C | T | Homozygous   |
| NC_037646.1 | 1627764 | SNV | 1 | T | A | Homozygous   |
| NC_037646.1 | 1631820 | SNV | 1 | T | A | Homozygous   |
| NC_037646.1 | 1631848 | SNV | 1 | T | C | Homozygous   |
| NC_037646.1 | 1639018 | SNV | 1 | A | C | Heterozygous |
| NC_037646.1 | 1639022 | SNV | 1 | A | T | Heterozygous |
| NC_037646.1 | 1639025 | SNV | 1 | T | A | Heterozygous |
| NC_037646.1 | 1639031 | SNV | 1 | T | A | Heterozygous |
| NC_037646.1 | 1639035 | SNV | 1 | A | C | Heterozygous |
| NC_037646.1 | 1639037 | SNV | 1 | A | T | Heterozygous |
| NC_037646.1 | 1639043 | SNV | 1 | G | A | Heterozygous |
| NC_037646.1 | 1639046 | SNV | 1 | A | G | Heterozygous |
| NC_037646.1 | 1639049 | SNV | 1 | T | C | Heterozygous |

|             |         |     |   |   |   |              |
|-------------|---------|-----|---|---|---|--------------|
| NC_037646.1 | 1639055 | SNV | 1 | A | C | Heterozygous |
| NC_037646.1 | 1639059 | SNV | 1 | A | C | Heterozygous |
| NC_037646.1 | 1639061 | SNV | 1 | A | T | Heterozygous |
| NC_037646.1 | 1639070 | SNV | 1 | A | T | Heterozygous |
| NC_037646.1 | 1639073 | SNV | 1 | T | C | Heterozygous |
| NC_037646.1 | 1639091 | SNV | 1 | A | T | Heterozygous |
| NC_037646.1 | 1639178 | SNV | 1 | A | G | Heterozygous |
| NC_037646.1 | 1639196 | SNV | 1 | T | C | Heterozygous |
| NC_037646.1 | 1639199 | SNV | 1 | G | A | Heterozygous |
| NC_037646.1 | 1639202 | SNV | 1 | A | G | Heterozygous |
| NC_037646.1 | 1647963 | SNV | 1 | G | A | Homozygous   |
| NC_037646.1 | 1648076 | SNV | 1 | A | G | Homozygous   |
| NC_037646.1 | 1656046 | SNV | 1 | T | C | Heterozygous |
| NC_037646.1 | 1656489 | SNV | 1 | T | C | Heterozygous |
| NC_037646.1 | 1665383 | SNV | 1 | C | T | Heterozygous |
| NC_037646.1 | 1666496 | SNV | 1 | C | A | Heterozygous |
| NC_037646.1 | 1666844 | SNV | 1 | T | C | Heterozygous |
| NC_037646.1 | 1675020 | SNV | 1 | T | C | Homozygous   |
| NC_037646.1 | 1677167 | SNV | 1 | C | T | Homozygous   |
| NC_037646.1 | 1681882 | SNV | 1 | C | T | Homozygous   |
| NC_037646.1 | 1681951 | SNV | 1 | A | C | Homozygous   |
| NC_037646.1 | 1681990 | SNV | 1 | G | C | Heterozygous |
| NC_037646.1 | 1682637 | SNV | 1 | T | C | Homozygous   |
| NC_037646.1 | 1682639 | SNV | 1 | C | T | Homozygous   |
| NC_037646.1 | 1683646 | SNV | 1 | T | C | Homozygous   |
| NC_037646.1 | 1684261 | SNV | 1 | G | A | Heterozygous |
| NC_037646.1 | 1684487 | SNV | 1 | C | G | Heterozygous |
| NC_037646.1 | 1686616 | SNV | 1 | T | C | Homozygous   |
| NC_037646.1 | 1694113 | SNV | 1 | G | A | Heterozygous |
| NC_037646.1 | 1701259 | SNV | 1 | G | A | Heterozygous |
| NC_037646.1 | 1712146 | SNV | 1 | A | G | Homozygous   |
| NC_037646.1 | 1712267 | SNV | 1 | G | A | Homozygous   |
| NC_037646.1 | 1715023 | SNV | 1 | A | T | Heterozygous |
| NC_037646.1 | 1715731 | SNV | 1 | T | G | Homozygous   |
| NC_037646.1 | 1716913 | SNV | 1 | G | A | Heterozygous |
| NC_037646.1 | 1719462 | SNV | 1 | T | C | Homozygous   |
| NC_037646.1 | 1719479 | SNV | 1 | A | G | Homozygous   |
| NC_037646.1 | 1719481 | SNV | 1 | A | T | Homozygous   |
| NC_037646.1 | 1720422 | SNV | 1 | C | T | Homozygous   |
| NC_037646.1 | 1720433 | SNV | 1 | G | A | Homozygous   |
| NC_037646.1 | 1720437 | SNV | 1 | A | T | Homozygous   |
| NC_037646.1 | 1724056 | SNV | 1 | T | G | Homozygous   |
| NC_037646.1 | 1724068 | SNV | 1 | G | T | Heterozygous |
| NC_037646.1 | 1724072 | SNV | 1 | T | A | Heterozygous |
| NC_037646.1 | 1731354 | SNV | 1 | G | A | Homozygous   |
| NC_037646.1 | 1731768 | SNV | 1 | A | G | Heterozygous |
| NC_037646.1 | 1731772 | SNV | 1 | A | G | Heterozygous |
| NC_037646.1 | 1731777 | SNV | 1 | A | G | Heterozygous |
| NC_037646.1 | 1731782 | SNV | 1 | A | G | Heterozygous |
| NC_037646.1 | 1736934 | SNV | 1 | A | C | Homozygous   |
| NC_037646.1 | 1736978 | SNV | 1 | A | G | Heterozygous |

|             |         |     |   |   |   |              |
|-------------|---------|-----|---|---|---|--------------|
| NC_037646.1 | 1736985 | SNV | 1 | T | C | Heterozygous |
| NC_037646.1 | 1736986 | SNV | 1 | A | G | Heterozygous |
| NC_037646.1 | 1741153 | SNV | 1 | A | T | Homozygous   |
| NC_037646.1 | 1741194 | SNV | 1 | T | C | Homozygous   |
| NC_037646.1 | 1741198 | SNV | 1 | A | C | Homozygous   |
| NC_037646.1 | 1742882 | SNV | 1 | T | C | Homozygous   |
| NC_037646.1 | 1742913 | SNV | 1 | T | C | Homozygous   |
| NC_037646.1 | 1742916 | SNV | 1 | T | A | Homozygous   |
| NC_037646.1 | 1742920 | SNV | 1 | T | C | Homozygous   |
| NC_037646.1 | 1742946 | SNV | 1 | A | G | Homozygous   |
| NC_037646.1 | 1750217 | SNV | 1 | A | G | Homozygous   |
| NC_037646.1 | 1750219 | SNV | 1 | T | A | Homozygous   |
| NC_037646.1 | 1750243 | SNV | 1 | G | A | Homozygous   |
| NC_037646.1 | 1769844 | SNV | 1 | T | G | Homozygous   |
| NC_037646.1 | 1769861 | SNV | 1 | T | A | Homozygous   |
| NC_037646.1 | 1791976 | SNV | 1 | C | G | Homozygous   |
| NC_037646.1 | 1791984 | SNV | 1 | A | T | Homozygous   |
| NC_037646.1 | 1791988 | SNV | 1 | T | C | Homozygous   |
| NC_037646.1 | 1793406 | SNV | 1 | T | A | Homozygous   |
| NC_037646.1 | 1793408 | SNV | 1 | G | A | Homozygous   |
| NC_037646.1 | 1793418 | SNV | 1 | T | A | Heterozygous |
| NC_037646.1 | 1793426 | SNV | 1 | G | A | Heterozygous |
| NC_037646.1 | 1793432 | SNV | 1 | G | A | Heterozygous |
| NC_037646.1 | 1804992 | SNV | 1 | A | G | Heterozygous |
| NC_037646.1 | 1805010 | SNV | 1 | T | A | Heterozygous |
| NC_037646.1 | 1805012 | SNV | 1 | T | C | Heterozygous |
| NC_037646.1 | 1805019 | SNV | 1 | T | A | Homozygous   |
| NC_037646.1 | 1805021 | SNV | 1 | T | C | Homozygous   |
| NC_037646.1 | 1805064 | SNV | 1 | T | A | Heterozygous |
| NC_037646.1 | 1806263 | SNV | 1 | A | G | Homozygous   |
| NC_037646.1 | 1806279 | SNV | 1 | C | T | Heterozygous |
| NC_037646.1 | 1806282 | SNV | 1 | A | G | Homozygous   |
| NC_037646.1 | 1806300 | SNV | 1 | C | T | Heterozygous |
| NC_037646.1 | 1806308 | SNV | 1 | A | G | Homozygous   |
| NC_037646.1 | 1806330 | SNV | 1 | T | C | Homozygous   |
| NC_037646.1 | 1806356 | SNV | 1 | A | G | Homozygous   |
| NC_037646.1 | 1806360 | SNV | 1 | A | T | Homozygous   |
| NC_037646.1 | 1806368 | SNV | 1 | T | C | Homozygous   |
| NC_037646.1 | 1806382 | SNV | 1 | G | A | Homozygous   |
| NC_037646.1 | 1806443 | SNV | 1 | T | C | Homozygous   |
| NC_037646.1 | 1806460 | SNV | 1 | T | C | Homozygous   |
| NC_037646.1 | 1806464 | SNV | 1 | G | A | Homozygous   |
| NC_037646.1 | 1806468 | SNV | 1 | C | T | Homozygous   |
| NC_037646.1 | 1806471 | SNV | 1 | T | C | Homozygous   |
| NC_037646.1 | 1806478 | SNV | 1 | G | A | Homozygous   |
| NC_037646.1 | 1812243 | SNV | 1 | G | A | Heterozygous |
| NC_037646.1 | 1825037 | SNV | 1 | T | A | Homozygous   |
| NC_037646.1 | 1825046 | SNV | 1 | T | C | Homozygous   |
| NC_037646.1 | 1825234 | SNV | 1 | G | A | Homozygous   |
| NC_037646.1 | 1832808 | SNV | 1 | A | G | Homozygous   |
| NC_037646.1 | 1835060 | SNV | 1 | C | T | Heterozygous |

|             |         |     |   |   |   |              |
|-------------|---------|-----|---|---|---|--------------|
| NC_037646.1 | 1835109 | SNV | 1 | G | T | Homozygous   |
| NC_037646.1 | 1835207 | SNV | 1 | A | T | Homozygous   |
| NC_037646.1 | 1835223 | SNV | 1 | A | G | Homozygous   |
| NC_037646.1 | 1837198 | SNV | 1 | A | G | Homozygous   |
| NC_037646.1 | 1854783 | SNV | 1 | A | T | Homozygous   |
| NC_037646.1 | 1854794 | SNV | 1 | A | G | Homozygous   |
| NC_037646.1 | 1854798 | SNV | 1 | T | G | Homozygous   |
| NC_037646.1 | 1854819 | SNV | 1 | A | C | Homozygous   |
| NC_037646.1 | 1854821 | SNV | 1 | A | C | Homozygous   |
| NC_037646.1 | 1854823 | SNV | 1 | T | C | Homozygous   |
| NC_037646.1 | 1854834 | SNV | 1 | A | T | Homozygous   |
| NC_037646.1 | 1858994 | SNV | 1 | A | T | Homozygous   |
| NC_037646.1 | 1865044 | SNV | 1 | A | G | Homozygous   |
| NC_037646.1 | 1865051 | SNV | 1 | T | A | Homozygous   |
| NC_037646.1 | 1865054 | SNV | 1 | T | G | Heterozygous |
| NC_037646.1 | 1870972 | SNV | 1 | T | A | Homozygous   |
| NC_037646.1 | 1870981 | SNV | 1 | A | G | Homozygous   |
| NC_037646.1 | 1870992 | SNV | 1 | A | T | Homozygous   |
| NC_037646.1 | 1870994 | SNV | 1 | A | G | Homozygous   |
| NC_037646.1 | 1871002 | SNV | 1 | A | C | Homozygous   |
| NC_037646.1 | 1908419 | SNV | 1 | T | C | Heterozygous |
| NC_037646.1 | 1908850 | SNV | 1 | T | A | Homozygous   |
| NC_037646.1 | 1908853 | SNV | 1 | A | T | Homozygous   |
| NC_037646.1 | 1912529 | SNV | 1 | T | C | Homozygous   |
| NC_037646.1 | 1913278 | SNV | 1 | T | C | Homozygous   |
| NC_037646.1 | 1919903 | SNV | 1 | T | C | Heterozygous |
| NC_037646.1 | 1919914 | SNV | 1 | A | C | Heterozygous |
| NC_037646.1 | 1919921 | SNV | 1 | C | A | Heterozygous |
| NC_037646.1 | 1919935 | SNV | 1 | G | T | Heterozygous |
| NC_037646.1 | 1919956 | SNV | 1 | A | G | Heterozygous |
| NC_037646.1 | 1919959 | SNV | 1 | A | G | Heterozygous |
| NC_037646.1 | 1919980 | SNV | 1 | G | T | Heterozygous |
| NC_037646.1 | 1920973 | SNV | 1 | C | T | Homozygous   |
| NC_037646.1 | 1925333 | SNV | 1 | C | T | Homozygous   |
| NC_037646.1 | 1925724 | SNV | 1 | C | T | Homozygous   |
| NC_037646.1 | 1925728 | SNV | 1 | A | G | Homozygous   |
| NC_037646.1 | 1927017 | SNV | 1 | A | G | Homozygous   |
| NC_037646.1 | 1927481 | SNV | 1 | C | A | Homozygous   |
| NC_037646.1 | 1928459 | SNV | 1 | A | C | Homozygous   |
| NC_037646.1 | 1930554 | SNV | 1 | C | A | Heterozygous |
| NC_037646.1 | 1931041 | SNV | 1 | T | C | Homozygous   |
| NC_037646.1 | 1931043 | SNV | 1 | T | G | Homozygous   |
| NC_037646.1 | 1931632 | SNV | 1 | C | T | Homozygous   |
| NC_037646.1 | 1933563 | SNV | 1 | A | G | Heterozygous |
| NC_037646.1 | 1934869 | SNV | 1 | C | A | Homozygous   |
| NC_037646.1 | 1934874 | SNV | 1 | A | T | Homozygous   |
| NC_037646.1 | 1934879 | SNV | 1 | T | A | Homozygous   |
| NC_037646.1 | 1934883 | SNV | 1 | G | A | Homozygous   |
| NC_037646.1 | 1934904 | SNV | 1 | A | G | Homozygous   |
| NC_037646.1 | 1934908 | SNV | 1 | A | T | Homozygous   |
| NC_037646.1 | 1934912 | SNV | 1 | A | T | Homozygous   |



|             |         |     |   |   |   |              |
|-------------|---------|-----|---|---|---|--------------|
| NC_037646.1 | 1935561 | SNV | 1 | A | G | Heterozygous |
| NC_037646.1 | 1935566 | SNV | 1 | A | G | Heterozygous |
| NC_037646.1 | 1935578 | SNV | 1 | T | C | Heterozygous |
| NC_037646.1 | 1935585 | SNV | 1 | G | T | Heterozygous |
| NC_037646.1 | 1935966 | SNV | 1 | C | A | Homozygous   |
| NC_037646.1 | 1941673 | SNV | 1 | T | C | Homozygous   |
| NC_037646.1 | 1950262 | SNV | 1 | T | C | Homozygous   |
| NC_037646.1 | 1950301 | SNV | 1 | C | T | Homozygous   |
| NC_037646.1 | 1950826 | SNV | 1 | C | T | Homozygous   |
| NC_037646.1 | 2086304 | SNV | 1 | A | C | Heterozygous |
| NC_037646.1 | 2086310 | SNV | 1 | A | C | Homozygous   |
| NC_037646.1 | 2086324 | SNV | 1 | G | A | Homozygous   |
| NC_037646.1 | 2092419 | SNV | 1 | A | T | Homozygous   |
| NC_037646.1 | 2095285 | SNV | 1 | T | G | Homozygous   |
| NC_037646.1 | 2095290 | SNV | 1 | A | G | Homozygous   |
| NC_037646.1 | 2097574 | SNV | 1 | C | T | Heterozygous |
| NC_037646.1 | 2098885 | SNV | 1 | A | T | Homozygous   |
| NC_037646.1 | 2098893 | SNV | 1 | A | T | Homozygous   |
| NC_037646.1 | 2098898 | SNV | 1 | A | G | Homozygous   |
| NC_037646.1 | 2098901 | SNV | 1 | T | G | Homozygous   |
| NC_037646.1 | 2103103 | SNV | 1 | A | C | Homozygous   |
| NC_037646.1 | 2103113 | SNV | 1 | C | T | Homozygous   |
| NC_037646.1 | 2111979 | SNV | 1 | T | G | Heterozygous |
| NC_037646.1 | 2111994 | SNV | 1 | A | G | Homozygous   |
| NC_037646.1 | 2111996 | SNV | 1 | A | T | Homozygous   |
| NC_037646.1 | 2112176 | SNV | 1 | C | A | Homozygous   |
| NC_037646.1 | 2112197 | SNV | 1 | T | A | Homozygous   |
| NC_037646.1 | 2112205 | SNV | 1 | T | A | Homozygous   |
| NC_037646.1 | 2112214 | SNV | 1 | A | G | Homozygous   |
| NC_037646.1 | 2112231 | SNV | 1 | T | C | Homozygous   |
| NC_037646.1 | 2118800 | SNV | 1 | T | A | Homozygous   |
| NC_037646.1 | 2145453 | SNV | 1 | C | T | Heterozygous |
| NC_037646.1 | 2145461 | SNV | 1 | A | C | Homozygous   |
| NC_037646.1 | 2145466 | SNV | 1 | T | C | Heterozygous |
| NC_037646.1 | 2145503 | SNV | 1 | G | T | Homozygous   |
| NC_037646.1 | 2145505 | SNV | 1 | A | C | Homozygous   |
| NC_037646.1 | 2154541 | SNV | 1 | T | C | Homozygous   |
| NC_037646.1 | 2161471 | SNV | 1 | A | G | Homozygous   |
| NC_037646.1 | 2176998 | SNV | 1 | A | G | Homozygous   |
| NC_037646.1 | 2177005 | SNV | 1 | A | C | Homozygous   |
| NC_037646.1 | 2177017 | SNV | 1 | A | G | Heterozygous |
| NC_037646.1 | 2177033 | SNV | 1 | C | T | Homozygous   |
| NC_037646.1 | 2177036 | SNV | 1 | C | T | Homozygous   |
| NC_037646.1 | 2177043 | SNV | 1 | T | C | Homozygous   |
| NC_037646.1 | 2195430 | SNV | 1 | T | G | Homozygous   |
| NC_037646.1 | 2206918 | SNV | 1 | T | C | Homozygous   |
| NC_037646.1 | 2206942 | SNV | 1 | A | G | Homozygous   |
| NC_037646.1 | 2206965 | SNV | 1 | G | A | Homozygous   |
| NC_037646.1 | 2207000 | SNV | 1 | T | C | Homozygous   |
| NC_037646.1 | 2207049 | SNV | 1 | T | C | Homozygous   |
| NC_037646.1 | 2207061 | SNV | 1 | C | G | Homozygous   |

|             |         |     |   |   |   |              |
|-------------|---------|-----|---|---|---|--------------|
| NC_037646.1 | 2207087 | SNV | 1 | T | A | Homozygous   |
| NC_037646.1 | 2208871 | SNV | 1 | T | G | Homozygous   |
| NC_037646.1 | 2208874 | SNV | 1 | T | C | Homozygous   |
| NC_037646.1 | 2224719 | SNV | 1 | T | A | Homozygous   |
| NC_037646.1 | 2225728 | SNV | 1 | T | C | Homozygous   |
| NC_037646.1 | 2225732 | SNV | 1 | G | A | Homozygous   |
| NC_037646.1 | 2225743 | SNV | 1 | C | T | Homozygous   |
| NC_037646.1 | 2225758 | SNV | 1 | C | T | Homozygous   |
| NC_037646.1 | 2225776 | SNV | 1 | A | G | Homozygous   |
| NC_037646.1 | 2232542 | SNV | 1 | A | T | Homozygous   |
| NC_037646.1 | 2232545 | SNV | 1 | T | A | Homozygous   |
| NC_037646.1 | 2232549 | SNV | 1 | A | T | Homozygous   |
| NC_037646.1 | 2232552 | SNV | 1 | A | T | Homozygous   |
| NC_037646.1 | 2232555 | SNV | 1 | T | A | Homozygous   |
| NC_037646.1 | 2241548 | SNV | 1 | T | C | Homozygous   |
| NC_037646.1 | 2248195 | SNV | 1 | C | G | Homozygous   |
| NC_037646.1 | 2248274 | SNV | 1 | C | T | Heterozygous |
| NC_037646.1 | 2248280 | SNV | 1 | T | C | Heterozygous |
| NC_037646.1 | 2248311 | SNV | 1 | C | G | Heterozygous |
| NC_037646.1 | 2248316 | SNV | 1 | A | G | Homozygous   |
| NC_037646.1 | 2248320 | SNV | 1 | A | G | Heterozygous |
| NC_037646.1 | 2248324 | SNV | 1 | A | G | Heterozygous |
| NC_037646.1 | 2261779 | SNV | 1 | T | C | Homozygous   |
| NC_037646.1 | 2261892 | SNV | 1 | G | A | Heterozygous |
| NC_037646.1 | 2261962 | SNV | 1 | A | G | Homozygous   |
| NC_037646.1 | 2282101 | SNV | 1 | C | T | Homozygous   |
| NC_037646.1 | 2282106 | SNV | 1 | A | G | Homozygous   |
| NC_037646.1 | 2282111 | SNV | 1 | A | T | Homozygous   |
| NC_037646.1 | 2287737 | SNV | 1 | A | T | Homozygous   |
| NC_037646.1 | 2287767 | SNV | 1 | T | C | Homozygous   |
| NC_037646.1 | 2302583 | SNV | 1 | T | C | Homozygous   |
| NC_037646.1 | 2302639 | SNV | 1 | A | G | Homozygous   |
| NC_037646.1 | 2302832 | SNV | 1 | G | C | Homozygous   |
| NC_037646.1 | 2327309 | SNV | 1 | T | A | Homozygous   |
| NC_037646.1 | 2327315 | SNV | 1 | A | T | Homozygous   |
| NC_037646.1 | 2327332 | SNV | 1 | T | A | Homozygous   |
| NC_037646.1 | 2332205 | SNV | 1 | A | G | Homozygous   |
| NC_037646.1 | 2332208 | SNV | 1 | T | C | Homozygous   |
| NC_037646.1 | 2332263 | SNV | 1 | C | T | Homozygous   |
| NC_037646.1 | 2332281 | SNV | 1 | A | G | Homozygous   |
| NC_037646.1 | 2332289 | SNV | 1 | T | C | Homozygous   |
| NC_037646.1 | 2333402 | SNV | 1 | T | A | Homozygous   |
| NC_037646.1 | 2333405 | SNV | 1 | T | A | Homozygous   |
| NC_037646.1 | 2352715 | SNV | 1 | A | T | Homozygous   |
| NC_037646.1 | 2352723 | SNV | 1 | A | T | Homozygous   |
| NC_037646.1 | 2361730 | SNV | 1 | C | T | Heterozygous |
| NC_037646.1 | 2361746 | SNV | 1 | T | C | Heterozygous |
| NC_037646.1 | 2361788 | SNV | 1 | T | C | Heterozygous |
| NC_037646.1 | 2361829 | SNV | 1 | C | T | Heterozygous |
| NC_037646.1 | 2361833 | SNV | 1 | C | A | Heterozygous |
| NC_037646.1 | 2361849 | SNV | 1 | T | C | Heterozygous |

|             |         |     |   |   |   |              |
|-------------|---------|-----|---|---|---|--------------|
| NC_037646.1 | 2362480 | SNV | 1 | T | C | Homozygous   |
| NC_037646.1 | 2384415 | SNV | 1 | C | A | Homozygous   |
| NC_037646.1 | 2388167 | SNV | 1 | A | G | Homozygous   |
| NC_037646.1 | 2388248 | SNV | 1 | G | A | Homozygous   |
| NC_037646.1 | 2388337 | SNV | 1 | A | G | Homozygous   |
| NC_037646.1 | 2401885 | SNV | 1 | A | T | Homozygous   |
| NC_037646.1 | 2401900 | SNV | 1 | T | G | Homozygous   |
| NC_037646.1 | 2402921 | SNV | 1 | G | A | Heterozygous |
| NC_037646.1 | 2402927 | SNV | 1 | T | C | Homozygous   |
| NC_037646.1 | 2403017 | SNV | 1 | C | T | Heterozygous |
| NC_037646.1 | 2403058 | SNV | 1 | C | T | Heterozygous |
| NC_037646.1 | 2403062 | SNV | 1 | A | G | Heterozygous |
| NC_037646.1 | 2403089 | SNV | 1 | T | C | Homozygous   |
| NC_037646.1 | 2403107 | SNV | 1 | G | A | Heterozygous |
| NC_037646.1 | 2403699 | SNV | 1 | A | G | Heterozygous |
| NC_037646.1 | 2403713 | SNV | 1 | A | G | Heterozygous |
| NC_037646.1 | 2403715 | SNV | 1 | G | A | Heterozygous |
| NC_037646.1 | 2417514 | SNV | 1 | G | A | Homozygous   |
| NC_037646.1 | 2417517 | SNV | 1 | A | G | Heterozygous |
| NC_037646.1 | 2422009 | SNV | 1 | C | A | Heterozygous |
| NC_037646.1 | 2422035 | SNV | 1 | T | A | Heterozygous |
| NC_037646.1 | 2422040 | SNV | 1 | C | A | Heterozygous |
| NC_037646.1 | 2422056 | SNV | 1 | C | A | Heterozygous |
| NC_037646.1 | 2422179 | SNV | 1 | C | A | Heterozygous |
| NC_037646.1 | 2422182 | SNV | 1 | C | A | Heterozygous |
| NC_037646.1 | 2422218 | SNV | 1 | A | G | Heterozygous |
| NC_037646.1 | 2429413 | SNV | 1 | T | C | Heterozygous |
| NC_037646.1 | 2429425 | SNV | 1 | T | C | Heterozygous |
| NC_037646.1 | 2429437 | SNV | 1 | G | A | Heterozygous |
| NC_037646.1 | 2430632 | SNV | 1 | A | T | Homozygous   |
| NC_037646.1 | 2430658 | SNV | 1 | T | C | Homozygous   |
| NC_037646.1 | 2430675 | SNV | 1 | C | G | Homozygous   |
| NC_037646.1 | 2430693 | SNV | 1 | C | G | Homozygous   |
| NC_037646.1 | 2431496 | SNV | 1 | C | A | Homozygous   |
| NC_037646.1 | 2431551 | SNV | 1 | A | G | Homozygous   |
| NC_037646.1 | 2431587 | SNV | 1 | T | C | Homozygous   |
| NC_037646.1 | 2432840 | SNV | 1 | G | C | Homozygous   |
| NC_037646.1 | 2432844 | SNV | 1 | T | C | Heterozygous |
| NC_037646.1 | 2432849 | SNV | 1 | C | T | Heterozygous |
| NC_037646.1 | 2437981 | SNV | 1 | T | C | Homozygous   |
| NC_037646.1 | 2437984 | SNV | 1 | T | A | Heterozygous |
| NC_037646.1 | 2437985 | SNV | 1 | C | T | Heterozygous |
| NC_037646.1 | 2437994 | SNV | 1 | C | T | Heterozygous |
| NC_037646.1 | 2438001 | SNV | 1 | C | G | Heterozygous |
| NC_037646.1 | 2438011 | SNV | 1 | T | C | Heterozygous |
| NC_037646.1 | 2438015 | SNV | 1 | C | T | Heterozygous |
| NC_037646.1 | 2438017 | SNV | 1 | C | T | Heterozygous |
| NC_037646.1 | 2438025 | SNV | 1 | T | C | Heterozygous |
| NC_037646.1 | 2438025 | SNV | 1 | T | G | Heterozygous |
| NC_037646.1 | 2440479 | SNV | 1 | A | G | Homozygous   |
| NC_037646.1 | 2443859 | SNV | 1 | T | C | Homozygous   |

|             |         |     |   |   |   |              |
|-------------|---------|-----|---|---|---|--------------|
| NC_037646.1 | 2443878 | SNV | 1 | A | G | Heterozygous |
| NC_037646.1 | 2443922 | SNV | 1 | T | C | Heterozygous |
| NC_037646.1 | 2447928 | SNV | 1 | T | G | Homozygous   |
| NC_037646.1 | 2447936 | SNV | 1 | C | A | Homozygous   |
| NC_037646.1 | 2447967 | SNV | 1 | C | A | Homozygous   |
| NC_037646.1 | 2490536 | SNV | 1 | T | C | Homozygous   |
| NC_037646.1 | 2490544 | SNV | 1 | T | C | Homozygous   |
| NC_037646.1 | 2491248 | SNV | 1 | A | T | Homozygous   |
| NC_037646.1 | 2496207 | SNV | 1 | T | A | Homozygous   |
| NC_037646.1 | 2496209 | SNV | 1 | C | A | Homozygous   |
| NC_037646.1 | 2496214 | SNV | 1 | G | T | Homozygous   |
| NC_037646.1 | 2496221 | SNV | 1 | T | A | Heterozygous |
| NC_037646.1 | 2504528 | SNV | 1 | A | C | Homozygous   |
| NC_037646.1 | 2504531 | SNV | 1 | A | T | Homozygous   |
| NC_037646.1 | 2504533 | SNV | 1 | G | A | Homozygous   |
| NC_037646.1 | 2504541 | SNV | 1 | C | A | Homozygous   |
| NC_037646.1 | 2504546 | SNV | 1 | A | C | Homozygous   |
| NC_037646.1 | 2509562 | SNV | 1 | A | G | Heterozygous |
| NC_037646.1 | 2522330 | SNV | 1 | T | A | Homozygous   |
| NC_037646.1 | 2522362 | SNV | 1 | T | G | Homozygous   |
| NC_037646.1 | 2522372 | SNV | 1 | A | T | Homozygous   |
| NC_037646.1 | 2531977 | SNV | 1 | C | A | Heterozygous |
| NC_037646.1 | 2531983 | SNV | 1 | T | C | Heterozygous |
| NC_037646.1 | 2532019 | SNV | 1 | G | T | Homozygous   |
| NC_037646.1 | 2533401 | SNV | 1 | T | C | Homozygous   |
| NC_037646.1 | 2533408 | SNV | 1 | G | T | Homozygous   |
| NC_037646.1 | 2533430 | SNV | 1 | T | C | Homozygous   |
| NC_037646.1 | 2539923 | SNV | 1 | T | C | Heterozygous |
| NC_037646.1 | 2540624 | SNV | 1 | T | C | Homozygous   |
| NC_037646.1 | 2559331 | SNV | 1 | A | G | Homozygous   |
| NC_037646.1 | 2560508 | SNV | 1 | T | A | Heterozygous |
| NC_037646.1 | 2560570 | SNV | 1 | C | T | Homozygous   |
| NC_037646.1 | 2562643 | SNV | 1 | T | C | Homozygous   |
| NC_037646.1 | 2562682 | SNV | 1 | G | A | Heterozygous |
| NC_037646.1 | 2567332 | SNV | 1 | A | G | Homozygous   |
| NC_037646.1 | 2567340 | SNV | 1 | A | G | Homozygous   |
| NC_037646.1 | 2567346 | SNV | 1 | A | C | Homozygous   |
| NC_037646.1 | 2567348 | SNV | 1 | A | T | Homozygous   |
| NC_037646.1 | 2567355 | SNV | 1 | C | T | Homozygous   |
| NC_037646.1 | 2567358 | SNV | 1 | G | A | Heterozygous |
| NC_037646.1 | 2568154 | SNV | 1 | T | C | Heterozygous |
| NC_037646.1 | 2568304 | SNV | 1 | T | C | Heterozygous |
| NC_037646.1 | 2568377 | SNV | 1 | A | G | Homozygous   |
| NC_037646.1 | 2568807 | SNV | 1 | T | C | Heterozygous |
| NC_037646.1 | 2569344 | SNV | 1 | C | T | Homozygous   |
| NC_037646.1 | 2571549 | SNV | 1 | T | A | Homozygous   |
| NC_037646.1 | 2571558 | SNV | 1 | G | A | Homozygous   |
| NC_037646.1 | 2571981 | SNV | 1 | G | T | Homozygous   |
| NC_037646.1 | 2571987 | SNV | 1 | A | T | Heterozygous |
| NC_037646.1 | 2572006 | SNV | 1 | A | G | Homozygous   |
| NC_037646.1 | 2572565 | SNV | 1 | C | T | Heterozygous |

|             |         |     |   |   |   |              |
|-------------|---------|-----|---|---|---|--------------|
| NC_037646.1 | 2572995 | SNV | 1 | G | A | Heterozygous |
| NC_037646.1 | 2573030 | SNV | 1 | C | T | Heterozygous |
| NC_037646.1 | 2573278 | SNV | 1 | T | A | Homozygous   |
| NC_037646.1 | 2573532 | SNV | 1 | C | T | Heterozygous |
| NC_037646.1 | 2573719 | SNV | 1 | C | T | Homozygous   |
| NC_037646.1 | 2574430 | SNV | 1 | C | A | Homozygous   |
| NC_037646.1 | 2576029 | SNV | 1 | T | C | Heterozygous |
| NC_037646.1 | 2576050 | SNV | 1 | C | T | Homozygous   |
| NC_037646.1 | 2576661 | SNV | 1 | A | G | Heterozygous |
| NC_037646.1 | 2576679 | SNV | 1 | G | A | Heterozygous |
| NC_037646.1 | 2585192 | SNV | 1 | A | G | Homozygous   |
| NC_037646.1 | 2585378 | SNV | 1 | A | G | Homozygous   |
| NC_037646.1 | 2585468 | SNV | 1 | A | G | Homozygous   |
| NC_037646.1 | 2585480 | SNV | 1 | C | A | Homozygous   |
| NC_037646.1 | 2585792 | SNV | 1 | G | A | Homozygous   |
| NC_037646.1 | 2586881 | SNV | 1 | A | T | Heterozygous |
| NC_037646.1 | 2587052 | SNV | 1 | G | A | Homozygous   |
| NC_037646.1 | 2587061 | SNV | 1 | T | C | Homozygous   |
| NC_037646.1 | 2587635 | SNV | 1 | T | C | Homozygous   |
| NC_037646.1 | 2587668 | SNV | 1 | A | G | Homozygous   |
| NC_037646.1 | 2587741 | SNV | 1 | G | A | Heterozygous |
| NC_037646.1 | 2587882 | SNV | 1 | T | C | Homozygous   |
| NC_037646.1 | 2590126 | SNV | 1 | T | G | Heterozygous |
| NC_037646.1 | 2590130 | SNV | 1 | T | C | Heterozygous |
| NC_037646.1 | 2590171 | SNV | 1 | G | T | Homozygous   |
| NC_037646.1 | 2590197 | SNV | 1 | A | T | Homozygous   |
| NC_037646.1 | 2590382 | SNV | 1 | T | C | Heterozygous |
| NC_037646.1 | 2590406 | SNV | 1 | C | T | Homozygous   |
| NC_037646.1 | 2590425 | SNV | 1 | G | T | Heterozygous |
| NC_037646.1 | 2590463 | SNV | 1 | A | G | Homozygous   |
| NC_037646.1 | 2590494 | SNV | 1 | G | T | Heterozygous |
| NC_037646.1 | 2590748 | SNV | 1 | G | A | Heterozygous |
| NC_037646.1 | 2591481 | SNV | 1 | A | G | Heterozygous |
| NC_037646.1 | 2591633 | SNV | 1 | A | G | Homozygous   |
| NC_037646.1 | 2592100 | SNV | 1 | A | G | Homozygous   |
| NC_037646.1 | 2592279 | SNV | 1 | T | C | Heterozygous |
| NC_037646.1 | 2592689 | SNV | 1 | T | C | Heterozygous |
| NC_037646.1 | 2592691 | SNV | 1 | T | C | Heterozygous |
| NC_037646.1 | 2593735 | SNV | 1 | G | A | Heterozygous |
| NC_037646.1 | 2594029 | SNV | 1 | C | T | Homozygous   |
| NC_037646.1 | 2596790 | SNV | 1 | C | T | Homozygous   |
| NC_037646.1 | 2597118 | SNV | 1 | A | G | Homozygous   |
| NC_037646.1 | 2597990 | SNV | 1 | A | G | Homozygous   |
| NC_037646.1 | 2604220 | SNV | 1 | T | A | Homozygous   |
| NC_037646.1 | 2604222 | SNV | 1 | T | C | Homozygous   |
| NC_037646.1 | 2604224 | SNV | 1 | A | T | Homozygous   |
| NC_037646.1 | 2604248 | SNV | 1 | A | T | Homozygous   |
| NC_037646.1 | 2604254 | SNV | 1 | T | A | Homozygous   |
| NC_037646.1 | 2604258 | SNV | 1 | T | C | Homozygous   |
| NC_037646.1 | 2605500 | SNV | 1 | T | C | Homozygous   |
| NC_037646.1 | 2607496 | SNV | 1 | A | G | Heterozygous |

|             |         |     |   |   |   |              |
|-------------|---------|-----|---|---|---|--------------|
| NC_037646.1 | 2607951 | SNV | 1 | T | G | Homozygous   |
| NC_037646.1 | 2610399 | SNV | 1 | A | G | Homozygous   |
| NC_037646.1 | 2610402 | SNV | 1 | A | G | Heterozygous |
| NC_037646.1 | 2610408 | SNV | 1 | A | G | Heterozygous |
| NC_037646.1 | 2610425 | SNV | 1 | G | A | Homozygous   |
| NC_037646.1 | 2610450 | SNV | 1 | A | C | Homozygous   |
| NC_037646.1 | 2610455 | SNV | 1 | A | T | Homozygous   |
| NC_037646.1 | 2613664 | SNV | 1 | T | C | Homozygous   |
| NC_037646.1 | 2613695 | SNV | 1 | T | C | Homozygous   |
| NC_037646.1 | 2613767 | SNV | 1 | G | A | Homozygous   |
| NC_037646.1 | 2613770 | SNV | 1 | G | A | Homozygous   |
| NC_037646.1 | 2613780 | SNV | 1 | A | G | Homozygous   |
| NC_037646.1 | 2613785 | SNV | 1 | A | G | Homozygous   |
| NC_037646.1 | 2613829 | SNV | 1 | C | T | Homozygous   |
| NC_037646.1 | 2613880 | SNV | 1 | G | T | Homozygous   |
| NC_037646.1 | 2613908 | SNV | 1 | C | T | Homozygous   |
| NC_037646.1 | 2613929 | SNV | 1 | C | T | Homozygous   |
| NC_037646.1 | 2613966 | SNV | 1 | G | T | Homozygous   |
| NC_037646.1 | 2613994 | SNV | 1 | A | T | Heterozygous |
| NC_037646.1 | 2613997 | SNV | 1 | G | T | Heterozygous |
| NC_037646.1 | 2614006 | SNV | 1 | C | T | Heterozygous |
| NC_037646.1 | 2615951 | SNV | 1 | A | G | Homozygous   |
| NC_037646.1 | 2616294 | SNV | 1 | A | G | Homozygous   |
| NC_037646.1 | 2616673 | SNV | 1 | T | C | Homozygous   |
| NC_037646.1 | 2616707 | SNV | 1 | A | C | Heterozygous |
| NC_037646.1 | 2616780 | SNV | 1 | A | C | Homozygous   |
| NC_037646.1 | 2616792 | SNV | 1 | C | T | Heterozygous |
| NC_037646.1 | 2618324 | SNV | 1 | C | T | Homozygous   |
| NC_037646.1 | 2618388 | SNV | 1 | C | T | Homozygous   |
| NC_037646.1 | 2621278 | SNV | 1 | A | G | Heterozygous |
| NC_037646.1 | 2621702 | SNV | 1 | C | T | Heterozygous |
| NC_037646.1 | 2621787 | SNV | 1 | G | A | Heterozygous |
| NC_037646.1 | 2621789 | SNV | 1 | G | A | Heterozygous |
| NC_037646.1 | 2622296 | SNV | 1 | A | C | Heterozygous |
| NC_037646.1 | 2622342 | SNV | 1 | A | C | Heterozygous |
| NC_037646.1 | 2622364 | SNV | 1 | C | T | Homozygous   |
| NC_037646.1 | 2622511 | SNV | 1 | C | T | Homozygous   |
| NC_037646.1 | 2622549 | SNV | 1 | T | C | Homozygous   |
| NC_037646.1 | 2622643 | SNV | 1 | T | C | Homozygous   |
| NC_037646.1 | 2622687 | SNV | 1 | A | G | Homozygous   |
| NC_037646.1 | 2622792 | SNV | 1 | A | G | Heterozygous |
| NC_037646.1 | 2623197 | SNV | 1 | T | C | Homozygous   |
| NC_037646.1 | 2623220 | SNV | 1 | A | G | Heterozygous |
| NC_037646.1 | 2623251 | SNV | 1 | A | G | Homozygous   |
| NC_037646.1 | 2623259 | SNV | 1 | T | C | Homozygous   |
| NC_037646.1 | 2623312 | SNV | 1 | G | A | Homozygous   |
| NC_037646.1 | 2623400 | SNV | 1 | G | A | Heterozygous |
| NC_037646.1 | 2625124 | SNV | 1 | T | A | Homozygous   |
| NC_037646.1 | 2625134 | SNV | 1 | T | A | Homozygous   |
| NC_037646.1 | 2625144 | SNV | 1 | A | T | Homozygous   |
| NC_037646.1 | 2631449 | SNV | 1 | A | G | Heterozygous |

|             |         |     |   |   |   |              |
|-------------|---------|-----|---|---|---|--------------|
| NC_037646.1 | 2631481 | SNV | 1 | A | G | Heterozygous |
| NC_037646.1 | 2635119 | SNV | 1 | A | G | Homozygous   |
| NC_037646.1 | 2635350 | SNV | 1 | A | G | Homozygous   |
| NC_037646.1 | 2635657 | SNV | 1 | A | G | Homozygous   |
| NC_037646.1 | 2635664 | SNV | 1 | A | G | Heterozygous |
| NC_037646.1 | 2635725 | SNV | 1 | T | C | Homozygous   |
| NC_037646.1 | 2635825 | SNV | 1 | T | A | Homozygous   |
| NC_037646.1 | 2635855 | SNV | 1 | G | A | Heterozygous |
| NC_037646.1 | 2635872 | SNV | 1 | G | A | Heterozygous |
| NC_037646.1 | 2635884 | SNV | 1 | A | G | Heterozygous |
| NC_037646.1 | 2635892 | SNV | 1 | A | T | Homozygous   |
| NC_037646.1 | 2640397 | SNV | 1 | G | A | Heterozygous |
| NC_037646.1 | 2640425 | SNV | 1 | T | A | Heterozygous |
| NC_037646.1 | 2645644 | SNV | 1 | T | A | Homozygous   |
| NC_037646.1 | 2645649 | SNV | 1 | A | C | Heterozygous |
| NC_037646.1 | 2645654 | SNV | 1 | C | A | Homozygous   |
| NC_037646.1 | 2645662 | SNV | 1 | G | A | Homozygous   |
| NC_037646.1 | 2645664 | SNV | 1 | T | A | Homozygous   |
| NC_037646.1 | 2645668 | SNV | 1 | T | A | Homozygous   |
| NC_037646.1 | 2645670 | SNV | 1 | A | G | Heterozygous |
| NC_037646.1 | 2647759 | SNV | 1 | C | T | Heterozygous |
| NC_037646.1 | 2648115 | SNV | 1 | G | A | Homozygous   |
| NC_037646.1 | 2648153 | SNV | 1 | C | A | Homozygous   |
| NC_037646.1 | 2648158 | SNV | 1 | G | A | Homozygous   |
| NC_037646.1 | 2648160 | SNV | 1 | G | A | Homozygous   |
| NC_037646.1 | 2648162 | SNV | 1 | G | A | Homozygous   |
| NC_037646.1 | 2651195 | SNV | 1 | C | T | Heterozygous |
| NC_037646.1 | 2651591 | SNV | 1 | T | G | Heterozygous |
| NC_037646.1 | 2651670 | SNV | 1 | A | G | Homozygous   |
| NC_037646.1 | 2652001 | SNV | 1 | A | G | Homozygous   |
| NC_037646.1 | 2653062 | SNV | 1 | A | G | Homozygous   |
| NC_037646.1 | 2653087 | SNV | 1 | G | C | Heterozygous |
| NC_037646.1 | 2653327 | SNV | 1 | C | T | Homozygous   |
| NC_037646.1 | 2653332 | SNV | 1 | A | G | Homozygous   |
| NC_037646.1 | 2653335 | SNV | 1 | G | A | Homozygous   |
| NC_037646.1 | 2653391 | SNV | 1 | C | T | Homozygous   |
| NC_037646.1 | 2653473 | SNV | 1 | T | A | Homozygous   |
| NC_037646.1 | 2653855 | SNV | 1 | T | G | Heterozygous |
| NC_037646.1 | 2656611 | SNV | 1 | G | A | Homozygous   |
| NC_037646.1 | 2656632 | SNV | 1 | T | C | Homozygous   |
| NC_037646.1 | 2656671 | SNV | 1 | A | G | Homozygous   |
| NC_037646.1 | 2656685 | SNV | 1 | A | G | Homozygous   |
| NC_037646.1 | 2656732 | SNV | 1 | T | C | Homozygous   |
| NC_037646.1 | 2656850 | SNV | 1 | C | T | Heterozygous |
| NC_037646.1 | 2656861 | SNV | 1 | T | G | Homozygous   |
| NC_037646.1 | 2656913 | SNV | 1 | T | C | Homozygous   |
| NC_037646.1 | 2656958 | SNV | 1 | G | A | Heterozygous |
| NC_037646.1 | 2656990 | SNV | 1 | G | A | Heterozygous |
| NC_037646.1 | 2657226 | SNV | 1 | C | T | Heterozygous |
| NC_037646.1 | 2666763 | SNV | 1 | G | T | Homozygous   |
| NC_037646.1 | 2666805 | SNV | 1 | G | A | Heterozygous |

|             |         |     |   |   |   |              |
|-------------|---------|-----|---|---|---|--------------|
| NC_037646.1 | 2666808 | SNV | 1 | A | G | Heterozygous |
| NC_037646.1 | 2670835 | SNV | 1 | A | T | Heterozygous |
| NC_037646.1 | 2670852 | SNV | 1 | G | T | Homozygous   |
| NC_037646.1 | 2670870 | SNV | 1 | G | A | Homozygous   |
| NC_037646.1 | 2670875 | SNV | 1 | A | C | Homozygous   |
| NC_037646.1 | 2670878 | SNV | 1 | G | A | Homozygous   |
| NC_037646.1 | 2671286 | SNV | 1 | T | A | Heterozygous |
| NC_037646.1 | 2671488 | SNV | 1 | T | C | Homozygous   |
| NC_037646.1 | 2671713 | SNV | 1 | T | C | Heterozygous |
| NC_037646.1 | 2671829 | SNV | 1 | A | G | Homozygous   |
| NC_037646.1 | 2671892 | SNV | 1 | A | T | Homozygous   |
| NC_037646.1 | 2671931 | SNV | 1 | C | T | Homozygous   |
| NC_037646.1 | 2671954 | SNV | 1 | G | A | Homozygous   |
| NC_037646.1 | 2672109 | SNV | 1 | T | C | Homozygous   |
| NC_037646.1 | 2672197 | SNV | 1 | C | T | Heterozygous |
| NC_037646.1 | 2672576 | SNV | 1 | A | G | Homozygous   |
| NC_037646.1 | 2673111 | SNV | 1 | A | G | Homozygous   |
| NC_037646.1 | 2673131 | SNV | 1 | A | G | Homozygous   |
| NC_037646.1 | 2673163 | SNV | 1 | T | A | Heterozygous |
| NC_037646.1 | 2673358 | SNV | 1 | A | G | Homozygous   |
| NC_037646.1 | 2673376 | SNV | 1 | T | C | Heterozygous |
| NC_037646.1 | 2673442 | SNV | 1 | A | G | Homozygous   |
| NC_037646.1 | 2673465 | SNV | 1 | G | A | Heterozygous |
| NC_037646.1 | 2673471 | SNV | 1 | T | A | Heterozygous |
| NC_037646.1 | 2673478 | SNV | 1 | T | C | Homozygous   |
| NC_037646.1 | 2673494 | SNV | 1 | C | T | Heterozygous |
| NC_037646.1 | 2673523 | SNV | 1 | C | T | Heterozygous |
| NC_037646.1 | 2711305 | SNV | 1 | A | G | Homozygous   |
| NC_037646.1 | 2714829 | SNV | 1 | G | A | Homozygous   |
| NC_037646.1 | 2717715 | SNV | 1 | C | T | Homozygous   |
| NC_037646.1 | 2718031 | SNV | 1 | A | T | Heterozygous |
| NC_037646.1 | 2718372 | SNV | 1 | A | G | Homozygous   |
| NC_037646.1 | 2718388 | SNV | 1 | T | C | Heterozygous |
| NC_037646.1 | 2718431 | SNV | 1 | A | G | Heterozygous |
| NC_037646.1 | 2718566 | SNV | 1 | G | A | Homozygous   |
| NC_037646.1 | 2718668 | SNV | 1 | C | T | Heterozygous |
| NC_037646.1 | 2721447 | SNV | 1 | A | G | Homozygous   |
| NC_037646.1 | 2725840 | SNV | 1 | A | G | Heterozygous |
| NC_037646.1 | 2725844 | SNV | 1 | G | T | Heterozygous |
| NC_037646.1 | 2725851 | SNV | 1 | G | T | Heterozygous |
| NC_037646.1 | 2725907 | SNV | 1 | G | A | Homozygous   |
| NC_037646.1 | 2725912 | SNV | 1 | T | A | Homozygous   |
| NC_037646.1 | 2726859 | SNV | 1 | A | G | Homozygous   |
| NC_037646.1 | 2731734 | SNV | 1 | A | G | Heterozygous |
| NC_037646.1 | 2731736 | SNV | 1 | T | A | Heterozygous |
| NC_037646.1 | 2731743 | SNV | 1 | T | A | Homozygous   |
| NC_037646.1 | 2731752 | SNV | 1 | C | A | Homozygous   |
| NC_037646.1 | 2731759 | SNV | 1 | T | G | Homozygous   |
| NC_037646.1 | 2731765 | SNV | 1 | A | G | Homozygous   |
| NC_037646.1 | 2733866 | SNV | 1 | G | A | Homozygous   |
| NC_037646.1 | 2733895 | SNV | 1 | A | G | Homozygous   |



|             |         |     |   |   |   |              |
|-------------|---------|-----|---|---|---|--------------|
| NC_037646.1 | 2733900 | SNV | 1 | A | G | Homozygous   |
| NC_037646.1 | 2733905 | SNV | 1 | A | G | Homozygous   |
| NC_037646.1 | 2733911 | SNV | 1 | G | T | Homozygous   |
| NC_037646.1 | 2738634 | SNV | 1 | C | T | Homozygous   |
| NC_037646.1 | 2738645 | SNV | 1 | T | G | Homozygous   |
| NC_037646.1 | 2740998 | SNV | 1 | T | A | Homozygous   |
| NC_037646.1 | 2741028 | SNV | 1 | T | G | Homozygous   |
| NC_037646.1 | 2741030 | SNV | 1 | T | A | Homozygous   |
| NC_037646.1 | 2741039 | SNV | 1 | A | T | Homozygous   |
| NC_037646.1 | 2748445 | SNV | 1 | C | A | Homozygous   |
| NC_037646.1 | 2748448 | SNV | 1 | G | A | Homozygous   |
| NC_037646.1 | 2748451 | SNV | 1 | T | A | Heterozygous |
| NC_037646.1 | 2748457 | SNV | 1 | T | A | Homozygous   |
| NC_037646.1 | 2753742 | SNV | 1 | A | T | Homozygous   |
| NC_037646.1 | 2753746 | SNV | 1 | A | G | Homozygous   |
| NC_037646.1 | 2753751 | SNV | 1 | G | A | Homozygous   |
| NC_037646.1 | 2753756 | SNV | 1 | A | T | Homozygous   |
| NC_037646.1 | 2759212 | SNV | 1 | T | A | Homozygous   |
| NC_037646.1 | 2759248 | SNV | 1 | G | A | Homozygous   |
| NC_037646.1 | 2759354 | SNV | 1 | G | A | Homozygous   |
| NC_037646.1 | 2759415 | SNV | 1 | T | A | Homozygous   |
| NC_037646.1 | 2761476 | SNV | 1 | A | T | Homozygous   |
| NC_037646.1 | 2761478 | SNV | 1 | T | C | Homozygous   |
| NC_037646.1 | 2761485 | SNV | 1 | A | G | Homozygous   |
| NC_037646.1 | 2761505 | SNV | 1 | A | T | Homozygous   |
| NC_037646.1 | 2761509 | SNV | 1 | T | A | Homozygous   |
| NC_037646.1 | 2761512 | SNV | 1 | A | T | Homozygous   |
| NC_037646.1 | 2763700 | SNV | 1 | T | A | Homozygous   |
| NC_037646.1 | 2763711 | SNV | 1 | T | A | Homozygous   |
| NC_037646.1 | 2763715 | SNV | 1 | C | G | Homozygous   |
| NC_037646.1 | 2763720 | SNV | 1 | A | G | Homozygous   |
| NC_037646.1 | 2763726 | SNV | 1 | T | A | Homozygous   |
| NC_037646.1 | 2763763 | SNV | 1 | A | T | Homozygous   |
| NC_037646.1 | 2765794 | SNV | 1 | A | T | Homozygous   |
| NC_037646.1 | 2765798 | SNV | 1 | A | G | Homozygous   |
| NC_037646.1 | 2765802 | SNV | 1 | A | T | Homozygous   |
| NC_037646.1 | 2765808 | SNV | 1 | T | A | Homozygous   |
| NC_037646.1 | 2765810 | SNV | 1 | A | T | Homozygous   |
| NC_037646.1 | 2765817 | SNV | 1 | T | C | Homozygous   |
| NC_037646.1 | 2772330 | SNV | 1 | T | A | Homozygous   |
| NC_037646.1 | 2772340 | SNV | 1 | A | C | Homozygous   |
| NC_037646.1 | 2772342 | SNV | 1 | T | A | Homozygous   |
| NC_037646.1 | 2772352 | SNV | 1 | T | C | Homozygous   |
| NC_037646.1 | 2772355 | SNV | 1 | G | A | Homozygous   |
| NC_037646.1 | 2772360 | SNV | 1 | A | G | Homozygous   |
| NC_037646.1 | 2772376 | SNV | 1 | A | T | Homozygous   |
| NC_037646.1 | 2773938 | SNV | 1 | C | T | Homozygous   |
| NC_037646.1 | 2773949 | SNV | 1 | A | T | Homozygous   |
| NC_037646.1 | 2773988 | SNV | 1 | A | T | Heterozygous |
| NC_037646.1 | 2774001 | SNV | 1 | T | A | Heterozygous |
| NC_037646.1 | 2775254 | SNV | 1 | T | A | Homozygous   |

|             |         |     |   |   |   |              |
|-------------|---------|-----|---|---|---|--------------|
| NC_037646.1 | 2775258 | SNV | 1 | A | T | Homozygous   |
| NC_037646.1 | 2775285 | SNV | 1 | T | C | Homozygous   |
| NC_037646.1 | 2775295 | SNV | 1 | A | T | Homozygous   |
| NC_037646.1 | 2776114 | SNV | 1 | A | T | Heterozygous |
| NC_037646.1 | 2776122 | SNV | 1 | T | C | Heterozygous |
| NC_037646.1 | 2776142 | SNV | 1 | A | T | Heterozygous |
| NC_037646.1 | 2776150 | SNV | 1 | A | G | Heterozygous |
| NC_037646.1 | 2777423 | SNV | 1 | T | A | Homozygous   |
| NC_037646.1 | 2777458 | SNV | 1 | T | A | Homozygous   |
| NC_037646.1 | 2778220 | SNV | 1 | C | T | Heterozygous |
| NC_037646.1 | 2802430 | SNV | 1 | G | T | Homozygous   |
| NC_037646.1 | 2802466 | SNV | 1 | T | C | Homozygous   |
| NC_037646.1 | 2811337 | SNV | 1 | C | G | Homozygous   |
| NC_037646.1 | 2811988 | SNV | 1 | C | A | Homozygous   |
| NC_037646.1 | 2812668 | SNV | 1 | A | G | Heterozygous |
| NC_037646.1 | 2828564 | SNV | 1 | G | A | Heterozygous |
| NC_037646.1 | 2828576 | SNV | 1 | A | T | Homozygous   |
| NC_037646.1 | 2828583 | SNV | 1 | A | G | Homozygous   |
| NC_037646.1 | 2834523 | SNV | 1 | T | C | Homozygous   |
| NC_037646.1 | 2834528 | SNV | 1 | T | A | Homozygous   |
| NC_037646.1 | 2840264 | SNV | 1 | T | A | Homozygous   |
| NC_037646.1 | 2840266 | SNV | 1 | A | G | Homozygous   |
| NC_037646.1 | 2845373 | SNV | 1 | T | C | Homozygous   |
| NC_037646.1 | 2846565 | SNV | 1 | A | G | Heterozygous |
| NC_037646.1 | 2846599 | SNV | 1 | T | C | Homozygous   |
| NC_037646.1 | 2847158 | SNV | 1 | G | A | Homozygous   |
| NC_037646.1 | 2847286 | SNV | 1 | A | T | Homozygous   |
| NC_037646.1 | 2847292 | SNV | 1 | A | G | Homozygous   |
| NC_037646.1 | 2847307 | SNV | 1 | T | A | Homozygous   |
| NC_037646.1 | 2847459 | SNV | 1 | A | T | Homozygous   |
| NC_037646.1 | 2849809 | SNV | 1 | A | T | Homozygous   |
| NC_037646.1 | 2850069 | SNV | 1 | T | A | Homozygous   |
| NC_037646.1 | 2850095 | SNV | 1 | G | A | Homozygous   |
| NC_037646.1 | 2850124 | SNV | 1 | T | C | Homozygous   |
| NC_037646.1 | 2850126 | SNV | 1 | T | C | Homozygous   |
| NC_037646.1 | 2850130 | SNV | 1 | C | T | Homozygous   |
| NC_037646.1 | 2851641 | SNV | 1 | T | C | Heterozygous |
| NC_037646.1 | 2851647 | SNV | 1 | T | A | Heterozygous |
| NC_037646.1 | 2851652 | SNV | 1 | A | G | Heterozygous |
| NC_037646.1 | 2851659 | SNV | 1 | T | A | Heterozygous |
| NC_037646.1 | 2855948 | SNV | 1 | T | C | Homozygous   |
| NC_037646.1 | 2857375 | SNV | 1 | G | C | Homozygous   |
| NC_037646.1 | 2857389 | SNV | 1 | T | A | Homozygous   |
| NC_037646.1 | 2857391 | SNV | 1 | T | A | Homozygous   |
| NC_037646.1 | 2857395 | SNV | 1 | C | T | Homozygous   |
| NC_037646.1 | 2857400 | SNV | 1 | A | T | Homozygous   |
| NC_037646.1 | 2857404 | SNV | 1 | G | T | Homozygous   |
| NC_037646.1 | 2857406 | SNV | 1 | T | A | Homozygous   |
| NC_037646.1 | 2860642 | SNV | 1 | C | T | Heterozygous |
| NC_037646.1 | 2860665 | SNV | 1 | G | T | Heterozygous |
| NC_037646.1 | 2861574 | SNV | 1 | A | T | Homozygous   |

|             |         |     |   |   |   |              |
|-------------|---------|-----|---|---|---|--------------|
| NC_037646.1 | 2861582 | SNV | 1 | T | C | Homozygous   |
| NC_037646.1 | 2861585 | SNV | 1 | A | G | Homozygous   |
| NC_037646.1 | 2861606 | SNV | 1 | C | G | Homozygous   |
| NC_037646.1 | 2862832 | SNV | 1 | T | C | Homozygous   |
| NC_037646.1 | 2863024 | SNV | 1 | C | T | Heterozygous |
| NC_037646.1 | 2864514 | SNV | 1 | C | T | Heterozygous |
| NC_037646.1 | 2864668 | SNV | 1 | T | G | Heterozygous |
| NC_037646.1 | 2866028 | SNV | 1 | A | G | Homozygous   |
| NC_037646.1 | 2869825 | SNV | 1 | A | T | Homozygous   |
| NC_037646.1 | 2872815 | SNV | 1 | T | A | Homozygous   |
| NC_037646.1 | 2872818 | SNV | 1 | C | T | Homozygous   |
| NC_037646.1 | 2872914 | SNV | 1 | T | C | Heterozygous |
| NC_037646.1 | 2872923 | SNV | 1 | T | A | Heterozygous |
| NC_037646.1 | 2872932 | SNV | 1 | T | A | Heterozygous |
| NC_037646.1 | 2872948 | SNV | 1 | T | A | Heterozygous |
| NC_037646.1 | 2872954 | SNV | 1 | A | G | Heterozygous |
| NC_037646.1 | 2872960 | SNV | 1 | A | G | Heterozygous |
| NC_037646.1 | 2873488 | SNV | 1 | A | G | Homozygous   |
| NC_037646.1 | 2873490 | SNV | 1 | A | T | Homozygous   |
| NC_037646.1 | 2873493 | SNV | 1 | A | T | Homozygous   |
| NC_037646.1 | 2873497 | SNV | 1 | T | A | Homozygous   |
| NC_037646.1 | 2874942 | SNV | 1 | G | A | Heterozygous |
| NC_037646.1 | 2875593 | SNV | 1 | A | G | Homozygous   |
| NC_037646.1 | 2875872 | SNV | 1 | G | A | Heterozygous |
| NC_037646.1 | 2876320 | SNV | 1 | A | T | Homozygous   |
| NC_037646.1 | 2876941 | SNV | 1 | C | G | Homozygous   |
| NC_037646.1 | 2878082 | SNV | 1 | C | G | Homozygous   |
| NC_037646.1 | 2878235 | SNV | 1 | C | G | Homozygous   |
| NC_037646.1 | 2881435 | SNV | 1 | A | C | Homozygous   |
| NC_037646.1 | 2881440 | SNV | 1 | T | A | Homozygous   |
| NC_037646.1 | 2881483 | SNV | 1 | T | A | Homozygous   |
| NC_037646.1 | 2881488 | SNV | 1 | A | T | Homozygous   |
| NC_037646.1 | 2881964 | SNV | 1 | A | G | Homozygous   |
| NC_037646.1 | 2881966 | SNV | 1 | T | C | Homozygous   |
| NC_037646.1 | 2881972 | SNV | 1 | T | C | Homozygous   |
| NC_037646.1 | 2886676 | SNV | 1 | A | G | Homozygous   |
| NC_037646.1 | 2889579 | SNV | 1 | T | C | Homozygous   |
| NC_037646.1 | 2889598 | SNV | 1 | G | C | Heterozygous |
| NC_037646.1 | 2938073 | SNV | 1 | T | G | Heterozygous |
| NC_037646.1 | 2945887 | SNV | 1 | G | A | Heterozygous |
| NC_037646.1 | 2945909 | SNV | 1 | G | A | Homozygous   |
| NC_037646.1 | 2945911 | SNV | 1 | G | A | Heterozygous |
| NC_037646.1 | 2945913 | SNV | 1 | G | A | Heterozygous |
| NC_037646.1 | 2945962 | SNV | 1 | T | C | Homozygous   |
| NC_037646.1 | 2946038 | SNV | 1 | C | T | Heterozygous |
| NC_037646.1 | 2946103 | SNV | 1 | T | C | Homozygous   |
| NC_037646.1 | 2946121 | SNV | 1 | A | C | Homozygous   |
| NC_037646.1 | 2946132 | SNV | 1 | A | T | Homozygous   |
| NC_037646.1 | 2946592 | SNV | 1 | T | C | Heterozygous |
| NC_037646.1 | 2953321 | SNV | 1 | C | T | Homozygous   |
| NC_037646.1 | 2953325 | SNV | 1 | C | T | Homozygous   |

|             |         |     |   |   |   |              |
|-------------|---------|-----|---|---|---|--------------|
| NC_037646.1 | 2962806 | SNV | 1 | T | A | Homozygous   |
| NC_037646.1 | 2987811 | SNV | 1 | T | A | Heterozygous |
| NC_037646.1 | 2989649 | SNV | 1 | G | A | Homozygous   |
| NC_037646.1 | 2989844 | SNV | 1 | A | T | Homozygous   |
| NC_037646.1 | 2990007 | SNV | 1 | G | A | Homozygous   |
| NC_037646.1 | 2990158 | SNV | 1 | C | T | Heterozygous |
| NC_037646.1 | 2992578 | SNV | 1 | A | C | Heterozygous |
| NC_037646.1 | 2992707 | SNV | 1 | G | A | Heterozygous |
| NC_037646.1 | 3000189 | SNV | 1 | A | C | Homozygous   |
| NC_037646.1 | 3001814 | SNV | 1 | A | T | Heterozygous |
| NC_037646.1 | 3002879 | SNV | 1 | T | C | Homozygous   |
| NC_037646.1 | 3003144 | SNV | 1 | G | A | Heterozygous |
| NC_037646.1 | 3003227 | SNV | 1 | C | T | Heterozygous |
| NC_037646.1 | 3023579 | SNV | 1 | T | C | Homozygous   |
| NC_037646.1 | 3024255 | SNV | 1 | T | G | Homozygous   |
| NC_037646.1 | 3024444 | SNV | 1 | T | C | Heterozygous |
| NC_037646.1 | 3024633 | SNV | 1 | C | T | Heterozygous |
| NC_037646.1 | 3024670 | SNV | 1 | G | A | Heterozygous |
| NC_037646.1 | 3025524 | SNV | 1 | G | A | Heterozygous |
| NC_037646.1 | 3029016 | SNV | 1 | G | T | Homozygous   |
| NC_037646.1 | 3029030 | SNV | 1 | G | A | Heterozygous |
| NC_037646.1 | 3034190 | SNV | 1 | A | G | Heterozygous |
| NC_037646.1 | 3034191 | SNV | 1 | T | A | Heterozygous |
| NC_037646.1 | 3049447 | SNV | 1 | C | T | Heterozygous |
| NC_037646.1 | 3052154 | SNV | 1 | G | A | Homozygous   |
| NC_037646.1 | 3052820 | SNV | 1 | T | C | Heterozygous |
| NC_037646.1 | 3053118 | SNV | 1 | C | T | Heterozygous |
| NC_037646.1 | 3053230 | SNV | 1 | T | C | Homozygous   |
| NC_037646.1 | 3053287 | SNV | 1 | A | G | Homozygous   |
| NC_037646.1 | 3053314 | SNV | 1 | T | G | Homozygous   |
| NC_037646.1 | 3053349 | SNV | 1 | A | T | Heterozygous |
| NC_037646.1 | 3053682 | SNV | 1 | T | C | Homozygous   |
| NC_037646.1 | 3054292 | SNV | 1 | G | A | Homozygous   |
| NC_037646.1 | 3054328 | SNV | 1 | C | T | Homozygous   |
| NC_037646.1 | 3054411 | SNV | 1 | G | A | Heterozygous |
| NC_037646.1 | 3054415 | SNV | 1 | C | T | Heterozygous |
| NC_037646.1 | 3054516 | SNV | 1 | A | G | Heterozygous |
| NC_037646.1 | 3054528 | SNV | 1 | A | G | Homozygous   |
| NC_037646.1 | 3054530 | SNV | 1 | G | T | Heterozygous |
| NC_037646.1 | 3054726 | SNV | 1 | A | G | Homozygous   |
| NC_037646.1 | 3054745 | SNV | 1 | T | C | Homozygous   |
| NC_037646.1 | 3054750 | SNV | 1 | T | C | Homozygous   |
| NC_037646.1 | 3055025 | SNV | 1 | G | A | Homozygous   |
| NC_037646.1 | 3055203 | SNV | 1 | A | G | Homozygous   |
| NC_037646.1 | 3055208 | SNV | 1 | G | A | Homozygous   |
| NC_037646.1 | 3055468 | SNV | 1 | A | G | Homozygous   |
| NC_037646.1 | 3055477 | SNV | 1 | T | C | Homozygous   |
| NC_037646.1 | 3055498 | SNV | 1 | C | T | Heterozygous |
| NC_037646.1 | 3055567 | SNV | 1 | C | G | Homozygous   |
| NC_037646.1 | 3055575 | SNV | 1 | G | A | Homozygous   |
| NC_037646.1 | 3055578 | SNV | 1 | A | G | Heterozygous |

|             |         |     |   |   |   |              |
|-------------|---------|-----|---|---|---|--------------|
| NC_037646.1 | 3055629 | SNV | 1 | A | G | Homozygous   |
| NC_037646.1 | 3056083 | SNV | 1 | A | C | Homozygous   |
| NC_037646.1 | 3056094 | SNV | 1 | T | C | Homozygous   |
| NC_037646.1 | 3056174 | SNV | 1 | G | A | Heterozygous |
| NC_037646.1 | 3056353 | SNV | 1 | C | G | Heterozygous |
| NC_037646.1 | 3056523 | SNV | 1 | G | A | Homozygous   |
| NC_037646.1 | 3056525 | SNV | 1 | C | T | Homozygous   |
| NC_037646.1 | 3056562 | SNV | 1 | T | C | Heterozygous |
| NC_037646.1 | 3057983 | SNV | 1 | G | T | Homozygous   |
| NC_037646.1 | 3079348 | SNV | 1 | A | G | Homozygous   |
| NC_037646.1 | 3079358 | SNV | 1 | A | G | Homozygous   |
| NC_037646.1 | 3079402 | SNV | 1 | G | C | Homozygous   |
| NC_037646.1 | 3079571 | SNV | 1 | C | G | Heterozygous |
| NC_037646.1 | 3107135 | SNV | 1 | G | A | Homozygous   |
| NC_037646.1 | 3107141 | SNV | 1 | G | A | Heterozygous |
| NC_037646.1 | 3107175 | SNV | 1 | C | G | Homozygous   |
| NC_037646.1 | 3107416 | SNV | 1 | T | C | Heterozygous |
| NC_037646.1 | 3107420 | SNV | 1 | T | C | Homozygous   |
| NC_037646.1 | 3107576 | SNV | 1 | A | G | Heterozygous |
| NC_037646.1 | 3138308 | SNV | 1 | G | A | Heterozygous |
| NC_037646.1 | 3138312 | SNV | 1 | G | A | Heterozygous |
| NC_037646.1 | 3138364 | SNV | 1 | C | T | Homozygous   |
| NC_037646.1 | 3138567 | SNV | 1 | G | T | Heterozygous |
| NC_037646.1 | 3147900 | SNV | 1 | A | G | Homozygous   |
| NC_037646.1 | 3160642 | SNV | 1 | A | T | Homozygous   |
| NC_037646.1 | 3160644 | SNV | 1 | A | G | Homozygous   |
| NC_037646.1 | 3160650 | SNV | 1 | G | A | Homozygous   |
| NC_037646.1 | 3160655 | SNV | 1 | A | C | Homozygous   |
| NC_037646.1 | 3171971 | SNV | 1 | C | G | Heterozygous |
| NC_037646.1 | 3171974 | SNV | 1 | C | T | Homozygous   |
| NC_037646.1 | 3172057 | SNV | 1 | T | C | Heterozygous |
| NC_037646.1 | 3172085 | SNV | 1 | G | A | Homozygous   |
| NC_037646.1 | 3172108 | SNV | 1 | T | C | Homozygous   |
| NC_037646.1 | 3172243 | SNV | 1 | C | G | Homozygous   |
| NC_037646.1 | 3172298 | SNV | 1 | A | G | Homozygous   |
| NC_037646.1 | 3183149 | SNV | 1 | T | G | Homozygous   |
| NC_037646.1 | 3183157 | SNV | 1 | G | C | Heterozygous |
| NC_037646.1 | 3187732 | SNV | 1 | G | A | Heterozygous |
| NC_037646.1 | 3187857 | SNV | 1 | C | T | Homozygous   |
| NC_037646.1 | 3190914 | SNV | 1 | T | A | Homozygous   |
| NC_037646.1 | 3190959 | SNV | 1 | C | T | Heterozygous |
| NC_037646.1 | 3190970 | SNV | 1 | C | T | Heterozygous |
| NC_037646.1 | 3191087 | SNV | 1 | A | G | Heterozygous |
| NC_037646.1 | 3191095 | SNV | 1 | A | C | Heterozygous |
| NC_037646.1 | 3191099 | SNV | 1 | A | C | Heterozygous |
| NC_037646.1 | 3191118 | SNV | 1 | T | A | Heterozygous |
| NC_037646.1 | 3191134 | SNV | 1 | T | G | Heterozygous |
| NC_037646.1 | 3197243 | SNV | 1 | G | A | Heterozygous |
| NC_037646.1 | 3197489 | SNV | 1 | C | A | Homozygous   |
| NC_037646.1 | 3206256 | SNV | 1 | T | C | Homozygous   |
| NC_037646.1 | 3243694 | SNV | 1 | C | G | Heterozygous |

|             |         |     |   |   |   |              |
|-------------|---------|-----|---|---|---|--------------|
| NC_037646.1 | 3245999 | SNV | 1 | C | T | Heterozygous |
| NC_037646.1 | 3246206 | SNV | 1 | G | A | Homozygous   |
| NC_037646.1 | 3246494 | SNV | 1 | T | C | Heterozygous |
| NC_037646.1 | 3246503 | SNV | 1 | A | G | Heterozygous |
| NC_037646.1 | 3247922 | SNV | 1 | A | G | Homozygous   |
| NC_037646.1 | 3247931 | SNV | 1 | A | G | Homozygous   |
| NC_037646.1 | 3247945 | SNV | 1 | A | G | Homozygous   |
| NC_037646.1 | 3249404 | SNV | 1 | C | T | Heterozygous |
| NC_037646.1 | 3249420 | SNV | 1 | T | C | Homozygous   |
| NC_037646.1 | 3290346 | SNV | 1 | A | G | Heterozygous |
| NC_037646.1 | 3290397 | SNV | 1 | T | A | Homozygous   |
| NC_037646.1 | 3290704 | SNV | 1 | T | C | Homozygous   |
| NC_037646.1 | 3290800 | SNV | 1 | G | A | Homozygous   |
| NC_037646.1 | 3290858 | SNV | 1 | A | T | Homozygous   |
| NC_037646.1 | 3296321 | SNV | 1 | A | G | Homozygous   |
| NC_037646.1 | 3296945 | SNV | 1 | T | C | Homozygous   |
| NC_037646.1 | 3297336 | SNV | 1 | T | C | Heterozygous |
| NC_037646.1 | 3297553 | SNV | 1 | T | C | Heterozygous |
| NC_037646.1 | 3298296 | SNV | 1 | C | T | Heterozygous |
| NC_037646.1 | 3300862 | SNV | 1 | T | C | Homozygous   |
| NC_037646.1 | 3303814 | SNV | 1 | C | A | Homozygous   |
| NC_037646.1 | 3312773 | SNV | 1 | T | A | Heterozygous |
| NC_037646.1 | 3336662 | SNV | 1 | T | C | Homozygous   |
| NC_037646.1 | 3336677 | SNV | 1 | T | C | Homozygous   |
| NC_037646.1 | 3336679 | SNV | 1 | G | C | Heterozygous |
| NC_037646.1 | 3336681 | SNV | 1 | C | T | Heterozygous |
| NC_037646.1 | 3336683 | SNV | 1 | T | C | Homozygous   |
| NC_037646.1 | 3340979 | SNV | 1 | T | C | Heterozygous |
| NC_037646.1 | 3341020 | SNV | 1 | C | T | Heterozygous |
| NC_037646.1 | 3341061 | SNV | 1 | T | C | Homozygous   |
| NC_037646.1 | 3341069 | SNV | 1 | G | A | Homozygous   |
| NC_037646.1 | 3341076 | SNV | 1 | G | T | Heterozygous |
| NC_037646.1 | 3341191 | SNV | 1 | A | G | Homozygous   |
| NC_037646.1 | 3341216 | SNV | 1 | A | G | Homozygous   |
| NC_037646.1 | 3342969 | SNV | 1 | G | A | Homozygous   |
| NC_037646.1 | 3343009 | SNV | 1 | C | T | Homozygous   |
| NC_037646.1 | 3344641 | SNV | 1 | G | A | Heterozygous |
| NC_037646.1 | 3344861 | SNV | 1 | C | T | Homozygous   |
| NC_037646.1 | 3345308 | SNV | 1 | C | T | Homozygous   |
| NC_037646.1 | 3345342 | SNV | 1 | C | T | Heterozygous |
| NC_037646.1 | 3345382 | SNV | 1 | G | A | Homozygous   |
| NC_037646.1 | 3345391 | SNV | 1 | C | T | Homozygous   |
| NC_037646.1 | 3345474 | SNV | 1 | A | G | Homozygous   |
| NC_037646.1 | 3345599 | SNV | 1 | T | C | Homozygous   |
| NC_037646.1 | 3346104 | SNV | 1 | C | T | Heterozygous |
| NC_037646.1 | 3348135 | SNV | 1 | A | G | Homozygous   |
| NC_037646.1 | 3348325 | SNV | 1 | T | C | Homozygous   |
| NC_037646.1 | 3348429 | SNV | 1 | C | T | Heterozygous |
| NC_037646.1 | 3348459 | SNV | 1 | G | A | Heterozygous |
| NC_037646.1 | 3348465 | SNV | 1 | T | G | Heterozygous |
| NC_037646.1 | 3348565 | SNV | 1 | A | G | Heterozygous |

|             |         |     |   |   |   |              |
|-------------|---------|-----|---|---|---|--------------|
| NC_037646.1 | 3348830 | SNV | 1 | T | C | Heterozygous |
| NC_037646.1 | 3348836 | SNV | 1 | G | C | Homozygous   |
| NC_037646.1 | 3348944 | SNV | 1 | A | G | Homozygous   |
| NC_037646.1 | 3348959 | SNV | 1 | A | G | Heterozygous |
| NC_037646.1 | 3349041 | SNV | 1 | T | C | Heterozygous |
| NC_037646.1 | 3349044 | SNV | 1 | T | C | Heterozygous |
| NC_037646.1 | 3349046 | SNV | 1 | T | C | Homozygous   |
| NC_037646.1 | 3349059 | SNV | 1 | C | T | Homozygous   |
| NC_037646.1 | 3349064 | SNV | 1 | G | T | Homozygous   |
| NC_037646.1 | 3349095 | SNV | 1 | A | G | Homozygous   |
| NC_037646.1 | 3349274 | SNV | 1 | A | G | Homozygous   |
| NC_037646.1 | 3349284 | SNV | 1 | C | T | Homozygous   |
| NC_037646.1 | 3349368 | SNV | 1 | T | G | Homozygous   |
| NC_037646.1 | 3349378 | SNV | 1 | A | G | Homozygous   |
| NC_037646.1 | 3349388 | SNV | 1 | G | T | Homozygous   |
| NC_037646.1 | 3358516 | SNV | 1 | A | G | Homozygous   |
| NC_037646.1 | 3360725 | SNV | 1 | T | C | Heterozygous |
| NC_037646.1 | 3360795 | SNV | 1 | T | C | Heterozygous |
| NC_037646.1 | 3361065 | SNV | 1 | A | G | Homozygous   |
| NC_037646.1 | 3361097 | SNV | 1 | A | G | Homozygous   |
| NC_037646.1 | 3361319 | SNV | 1 | T | A | Heterozygous |
| NC_037646.1 | 3361431 | SNV | 1 | T | C | Homozygous   |
| NC_037646.1 | 3361486 | SNV | 1 | C | T | Heterozygous |
| NC_037646.1 | 3362001 | SNV | 1 | T | G | Heterozygous |
| NC_037646.1 | 3362007 | SNV | 1 | C | A | Heterozygous |
| NC_037646.1 | 3362009 | SNV | 1 | T | A | Heterozygous |
| NC_037646.1 | 3362013 | SNV | 1 | C | T | Heterozygous |
| NC_037646.1 | 3363092 | SNV | 1 | A | T | Heterozygous |
| NC_037646.1 | 3364446 | SNV | 1 | T | A | Heterozygous |
| NC_037646.1 | 3364520 | SNV | 1 | C | G | Homozygous   |
| NC_037646.1 | 3371104 | SNV | 1 | C | T | Homozygous   |
| NC_037646.1 | 3371131 | SNV | 1 | G | A | Homozygous   |
| NC_037646.1 | 3371175 | SNV | 1 | G | A | Heterozygous |
| NC_037646.1 | 3371182 | SNV | 1 | A | G | Homozygous   |
| NC_037646.1 | 3381745 | SNV | 1 | A | C | Heterozygous |
| NC_037646.1 | 3390816 | SNV | 1 | A | C | Heterozygous |
| NC_037646.1 | 3390823 | SNV | 1 | A | T | Heterozygous |
| NC_037646.1 | 3390847 | SNV | 1 | G | A | Heterozygous |
| NC_037646.1 | 3418059 | SNV | 1 | G | A | Homozygous   |
| NC_037646.1 | 3423718 | SNV | 1 | T | C | Homozygous   |
| NC_037646.1 | 3430091 | SNV | 1 | A | G | Homozygous   |
| NC_037646.1 | 3433804 | SNV | 1 | A | T | Heterozygous |
| NC_037646.1 | 3433806 | SNV | 1 | C | T | Homozygous   |
| NC_037646.1 | 3434580 | SNV | 1 | G | A | Heterozygous |
| NC_037646.1 | 3434580 | SNV | 1 | G | T | Heterozygous |
| NC_037646.1 | 3434594 | SNV | 1 | T | G | Homozygous   |
| NC_037646.1 | 3434606 | SNV | 1 | G | C | Homozygous   |
| NC_037646.1 | 3434612 | SNV | 1 | A | C | Homozygous   |
| NC_037646.1 | 3434632 | SNV | 1 | A | C | Homozygous   |
| NC_037646.1 | 3434648 | SNV | 1 | A | T | Homozygous   |
| NC_037646.1 | 3434652 | SNV | 1 | A | T | Homozygous   |

|             |         |     |   |   |   |              |
|-------------|---------|-----|---|---|---|--------------|
| NC_037646.1 | 3434654 | SNV | 1 | A | T | Homozygous   |
| NC_037646.1 | 3434656 | SNV | 1 | C | A | Homozygous   |
| NC_037646.1 | 3434659 | SNV | 1 | C | G | Homozygous   |
| NC_037646.1 | 3434663 | SNV | 1 | A | C | Homozygous   |
| NC_037646.1 | 3440047 | SNV | 1 | G | T | Heterozygous |
| NC_037646.1 | 3441519 | SNV | 1 | C | T | Heterozygous |
| NC_037646.1 | 3441529 | SNV | 1 | T | C | Heterozygous |
| NC_037646.1 | 3441539 | SNV | 1 | T | C | Homozygous   |
| NC_037646.1 | 3441639 | SNV | 1 | G | A | Heterozygous |
| NC_037646.1 | 3442627 | SNV | 1 | A | C | Heterozygous |
| NC_037646.1 | 3444563 | SNV | 1 | T | C | Homozygous   |
| NC_037646.1 | 3444593 | SNV | 1 | G | A | Homozygous   |
| NC_037646.1 | 3444608 | SNV | 1 | T | C | Homozygous   |
| NC_037646.1 | 3444635 | SNV | 1 | G | A | Homozygous   |
| NC_037646.1 | 3455869 | SNV | 1 | T | C | Homozygous   |
| NC_037646.1 | 3455884 | SNV | 1 | C | T | Homozygous   |
| NC_037646.1 | 3455888 | SNV | 1 | C | T | Homozygous   |
| NC_037646.1 | 3455890 | SNV | 1 | T | C | Heterozygous |
| NC_037646.1 | 3455898 | SNV | 1 | C | T | Homozygous   |
| NC_037646.1 | 3456084 | SNV | 1 | T | A | Homozygous   |
| NC_037646.1 | 3459353 | SNV | 1 | G | C | Homozygous   |
| NC_037646.1 | 3466198 | SNV | 1 | G | A | Heterozygous |
| NC_037646.1 | 3478576 | SNV | 1 | A | G | Heterozygous |
| NC_037646.1 | 3478580 | SNV | 1 | A | G | Heterozygous |
| NC_037646.1 | 3490960 | SNV | 1 | A | G | Homozygous   |
| NC_037646.1 | 3496208 | SNV | 1 | C | A | Homozygous   |
| NC_037646.1 | 3496216 | SNV | 1 | A | G | Homozygous   |
| NC_037646.1 | 3496218 | SNV | 1 | A | T | Homozygous   |
| NC_037646.1 | 3496234 | SNV | 1 | T | A | Homozygous   |
| NC_037646.1 | 3514360 | SNV | 1 | C | T | Homozygous   |
| NC_037646.1 | 3514499 | SNV | 1 | A | G | Heterozygous |
| NC_037646.1 | 3514523 | SNV | 1 | A | G | Heterozygous |
| NC_037646.1 | 3514535 | SNV | 1 | A | G | Homozygous   |
| NC_037646.1 | 3515019 | SNV | 1 | A | G | Homozygous   |
| NC_037646.1 | 3515023 | SNV | 1 | G | A | Homozygous   |
| NC_037646.1 | 3515043 | SNV | 1 | A | G | Homozygous   |
| NC_037646.1 | 3516007 | SNV | 1 | C | T | Heterozygous |
| NC_037646.1 | 3526435 | SNV | 1 | A | G | Heterozygous |
| NC_037646.1 | 3526488 | SNV | 1 | C | T | Homozygous   |
| NC_037646.1 | 3526525 | SNV | 1 | A | G | Homozygous   |
| NC_037646.1 | 3526841 | SNV | 1 | G | A | Homozygous   |
| NC_037646.1 | 3536450 | SNV | 1 | A | G | Homozygous   |
| NC_037646.1 | 3546632 | SNV | 1 | C | T | Homozygous   |
| NC_037646.1 | 3546645 | SNV | 1 | G | C | Homozygous   |
| NC_037646.1 | 3546659 | SNV | 1 | C | T | Heterozygous |
| NC_037646.1 | 3546856 | SNV | 1 | C | T | Homozygous   |
| NC_037646.1 | 3574090 | SNV | 1 | T | C | Heterozygous |
| NC_037646.1 | 3574848 | SNV | 1 | T | C | Heterozygous |
| NC_037646.1 | 3574987 | SNV | 1 | A | G | Homozygous   |
| NC_037646.1 | 3575124 | SNV | 1 | T | C | Heterozygous |
| NC_037646.1 | 3575249 | SNV | 1 | C | T | Homozygous   |



|             |         |     |   |   |   |              |
|-------------|---------|-----|---|---|---|--------------|
| NC_037646.1 | 3581989 | SNV | 1 | A | G | Homozygous   |
| NC_037646.1 | 3581993 | SNV | 1 | A | G | Homozygous   |
| NC_037646.1 | 3581996 | SNV | 1 | G | A | Homozygous   |
| NC_037646.1 | 3582016 | SNV | 1 | A | T | Heterozygous |
| NC_037646.1 | 3582019 | SNV | 1 | G | C | Heterozygous |
| NC_037646.1 | 3582022 | SNV | 1 | G | T | Heterozygous |
| NC_037646.1 | 3582036 | SNV | 1 | A | G | Heterozygous |
| NC_037646.1 | 3584289 | SNV | 1 | G | A | Heterozygous |
| NC_037646.1 | 3584327 | SNV | 1 | A | G | Homozygous   |
| NC_037646.1 | 3584357 | SNV | 1 | G | A | Homozygous   |
| NC_037646.1 | 3584362 | SNV | 1 | A | G | Homozygous   |
| NC_037646.1 | 3584366 | SNV | 1 | G | A | Homozygous   |
| NC_037646.1 | 3584375 | SNV | 1 | G | A | Heterozygous |
| NC_037646.1 | 3584387 | SNV | 1 | G | A | Heterozygous |
| NC_037646.1 | 3584390 | SNV | 1 | A | G | Heterozygous |
| NC_037646.1 | 3584436 | SNV | 1 | A | G | Heterozygous |
| NC_037646.1 | 3586893 | SNV | 1 | T | C | Homozygous   |
| NC_037646.1 | 3588890 | SNV | 1 | C | T | Heterozygous |
| NC_037646.1 | 3588895 | SNV | 1 | A | T | Homozygous   |
| NC_037646.1 | 3588911 | SNV | 1 | T | A | Heterozygous |
| NC_037646.1 | 3588916 | SNV | 1 | G | A | Heterozygous |
| NC_037646.1 | 3592425 | SNV | 1 | A | C | Homozygous   |
| NC_037646.1 | 3592929 | SNV | 1 | G | A | Homozygous   |
| NC_037646.1 | 3624273 | SNV | 1 | C | T | Heterozygous |
| NC_037646.1 | 3624338 | SNV | 1 | T | C | Homozygous   |
| NC_037646.1 | 3624353 | SNV | 1 | A | C | Heterozygous |
| NC_037646.1 | 3638458 | SNV | 1 | G | A | Homozygous   |
| NC_037646.1 | 3638549 | SNV | 1 | C | T | Heterozygous |
| NC_037646.1 | 3639081 | SNV | 1 | C | T | Homozygous   |
| NC_037646.1 | 3639159 | SNV | 1 | C | T | Heterozygous |
| NC_037646.1 | 3639194 | SNV | 1 | T | C | Homozygous   |
| NC_037646.1 | 3639226 | SNV | 1 | C | T | Homozygous   |
| NC_037646.1 | 3639382 | SNV | 1 | T | A | Homozygous   |
| NC_037646.1 | 3639411 | SNV | 1 | A | G | Homozygous   |
| NC_037646.1 | 3639548 | SNV | 1 | G | A | Homozygous   |
| NC_037646.1 | 3639629 | SNV | 1 | T | C | Homozygous   |
| NC_037646.1 | 3639645 | SNV | 1 | G | C | Homozygous   |
| NC_037646.1 | 3639829 | SNV | 1 | C | T | Homozygous   |
| NC_037646.1 | 3639856 | SNV | 1 | C | T | Heterozygous |
| NC_037646.1 | 3639886 | SNV | 1 | C | T | Heterozygous |
| NC_037646.1 | 3639967 | SNV | 1 | T | C | Homozygous   |
| NC_037646.1 | 3640255 | SNV | 1 | A | G | Homozygous   |
| NC_037646.1 | 3640264 | SNV | 1 | T | C | Homozygous   |
| NC_037646.1 | 3640303 | SNV | 1 | G | A | Heterozygous |
| NC_037646.1 | 3640307 | SNV | 1 | G | A | Heterozygous |
| NC_037646.1 | 3640583 | SNV | 1 | C | T | Heterozygous |
| NC_037646.1 | 3640606 | SNV | 1 | T | C | Homozygous   |
| NC_037646.1 | 3640663 | SNV | 1 | G | A | Heterozygous |
| NC_037646.1 | 3640675 | SNV | 1 | G | A | Heterozygous |
| NC_037646.1 | 3640696 | SNV | 1 | C | T | Heterozygous |
| NC_037646.1 | 3640716 | SNV | 1 | C | T | Heterozygous |

|             |         |     |   |   |   |              |
|-------------|---------|-----|---|---|---|--------------|
| NC_037646.1 | 3640948 | SNV | 1 | G | A | Homozygous   |
| NC_037646.1 | 3640956 | SNV | 1 | G | A | Heterozygous |
| NC_037646.1 | 3641023 | SNV | 1 | A | G | Homozygous   |
| NC_037646.1 | 3641152 | SNV | 1 | C | T | Homozygous   |
| NC_037646.1 | 3657315 | SNV | 1 | A | T | Homozygous   |
| NC_037646.1 | 3658270 | SNV | 1 | C | T | Heterozygous |
| NC_037646.1 | 3658381 | SNV | 1 | A | G | Homozygous   |
| NC_037646.1 | 3658396 | SNV | 1 | G | A | Heterozygous |
| NC_037646.1 | 3658632 | SNV | 1 | A | G | Homozygous   |
| NC_037646.1 | 3658723 | SNV | 1 | A | G | Homozygous   |
| NC_037646.1 | 3658731 | SNV | 1 | C | T | Homozygous   |
| NC_037646.1 | 3658890 | SNV | 1 | A | G | Homozygous   |
| NC_037646.1 | 3659023 | SNV | 1 | G | A | Heterozygous |
| NC_037646.1 | 3659118 | SNV | 1 | G | A | Heterozygous |
| NC_037646.1 | 3664058 | SNV | 1 | C | G | Homozygous   |
| NC_037646.1 | 3689375 | SNV | 1 | A | C | Homozygous   |
| NC_037646.1 | 3689377 | SNV | 1 | G | T | Homozygous   |
| NC_037646.1 | 3689387 | SNV | 1 | C | T | Homozygous   |
| NC_037646.1 | 3689390 | SNV | 1 | G | A | Homozygous   |
| NC_037646.1 | 3697524 | SNV | 1 | A | C | Heterozygous |
| NC_037646.1 | 3697583 | SNV | 1 | T | C | Homozygous   |
| NC_037646.1 | 3697676 | SNV | 1 | G | A | Homozygous   |
| NC_037646.1 | 3697747 | SNV | 1 | G | A | Heterozygous |
| NC_037646.1 | 3697777 | SNV | 1 | T | C | Homozygous   |
| NC_037646.1 | 3697899 | SNV | 1 | T | A | Homozygous   |
| NC_037646.1 | 3697958 | SNV | 1 | T | C | Homozygous   |
| NC_037646.1 | 3705054 | SNV | 1 | T | C | Heterozygous |
| NC_037646.1 | 3705221 | SNV | 1 | A | T | Heterozygous |
| NC_037646.1 | 3705224 | SNV | 1 | C | T | Heterozygous |
| NC_037646.1 | 3715923 | SNV | 1 | C | T | Homozygous   |
| NC_037646.1 | 3716012 | SNV | 1 | T | C | Heterozygous |
| NC_037646.1 | 3717382 | SNV | 1 | A | T | Homozygous   |
| NC_037646.1 | 3725950 | SNV | 1 | G | C | Heterozygous |
| NC_037646.1 | 3728212 | SNV | 1 | A | G | Homozygous   |
| NC_037646.1 | 3728217 | SNV | 1 | G | A | Homozygous   |
| NC_037646.1 | 3728226 | SNV | 1 | G | C | Homozygous   |
| NC_037646.1 | 3728228 | SNV | 1 | A | G | Homozygous   |
| NC_037646.1 | 3728236 | SNV | 1 | A | G | Homozygous   |
| NC_037646.1 | 3729761 | SNV | 1 | T | C | Homozygous   |
| NC_037646.1 | 3764463 | SNV | 1 | T | C | Homozygous   |
| NC_037646.1 | 3764467 | SNV | 1 | A | G | Homozygous   |
| NC_037646.1 | 3764489 | SNV | 1 | A | G | Homozygous   |
| NC_037646.1 | 3764493 | SNV | 1 | T | A | Heterozygous |
| NC_037646.1 | 3764493 | SNV | 1 | T | G | Heterozygous |
| NC_037646.1 | 3764499 | SNV | 1 | T | A | Homozygous   |
| NC_037646.1 | 3764501 | SNV | 1 | T | A | Homozygous   |
| NC_037646.1 | 3764503 | SNV | 1 | C | A | Homozygous   |
| NC_037646.1 | 3764509 | SNV | 1 | T | C | Homozygous   |
| NC_037646.1 | 3775309 | SNV | 1 | C | G | Heterozygous |
| NC_037646.1 | 3775314 | SNV | 1 | A | G | Homozygous   |
| NC_037646.1 | 3787700 | SNV | 1 | T | C | Homozygous   |

|             |         |     |   |   |   |              |
|-------------|---------|-----|---|---|---|--------------|
| NC_037646.1 | 3787749 | SNV | 1 | T | C | Heterozygous |
| NC_037646.1 | 3787789 | SNV | 1 | T | A | Heterozygous |
| NC_037646.1 | 3787791 | SNV | 1 | T | A | Heterozygous |
| NC_037646.1 | 3787796 | SNV | 1 | T | A | Heterozygous |
| NC_037646.1 | 3787809 | SNV | 1 | G | T | Homozygous   |
| NC_037646.1 | 3787813 | SNV | 1 | A | T | Homozygous   |
| NC_037646.1 | 3788812 | SNV | 1 | G | A | Homozygous   |
| NC_037646.1 | 3788815 | SNV | 1 | G | A | Homozygous   |
| NC_037646.1 | 3788820 | SNV | 1 | G | C | Homozygous   |
| NC_037646.1 | 3791070 | SNV | 1 | A | G | Heterozygous |
| NC_037646.1 | 3791114 | SNV | 1 | G | A | Homozygous   |
| NC_037646.1 | 3791139 | SNV | 1 | T | C | Homozygous   |
| NC_037646.1 | 3791145 | SNV | 1 | T | C | Homozygous   |
| NC_037646.1 | 3791147 | SNV | 1 | C | G | Homozygous   |
| NC_037646.1 | 3791231 | SNV | 1 | C | T | Heterozygous |
| NC_037646.1 | 3791254 | SNV | 1 | A | G | Homozygous   |
| NC_037646.1 | 3806206 | SNV | 1 | G | A | Homozygous   |
| NC_037646.1 | 3806232 | SNV | 1 | A | T | Heterozygous |
| NC_037646.1 | 3806241 | SNV | 1 | G | T | Homozygous   |
| NC_037646.1 | 3806243 | SNV | 1 | A | T | Homozygous   |
| NC_037646.1 | 3806247 | SNV | 1 | C | T | Homozygous   |
| NC_037646.1 | 3806272 | SNV | 1 | G | T | Heterozygous |
| NC_037646.1 | 3806277 | SNV | 1 | T | C | Homozygous   |
| NC_037646.1 | 3806333 | SNV | 1 | T | C | Homozygous   |
| NC_037646.1 | 3832904 | SNV | 1 | G | A | Homozygous   |
| NC_037646.1 | 3832932 | SNV | 1 | A | G | Homozygous   |
| NC_037646.1 | 3832936 | SNV | 1 | G | C | Homozygous   |
| NC_037646.1 | 3832962 | SNV | 1 | T | C | Homozygous   |
| NC_037646.1 | 3836799 | SNV | 1 | T | C | Homozygous   |
| NC_037646.1 | 3837014 | SNV | 1 | G | A | Homozygous   |
| NC_037646.1 | 3837069 | SNV | 1 | C | T | Homozygous   |
| NC_037646.1 | 3837102 | SNV | 1 | G | A | Homozygous   |
| NC_037646.1 | 3837180 | SNV | 1 | G | A | Homozygous   |
| NC_037646.1 | 3837843 | SNV | 1 | G | T | Homozygous   |
| NC_037646.1 | 3850780 | SNV | 1 | A | C | Homozygous   |
| NC_037646.1 | 3850782 | SNV | 1 | A | T | Homozygous   |
| NC_037646.1 | 3850795 | SNV | 1 | G | A | Homozygous   |
| NC_037646.1 | 3850798 | SNV | 1 | A | G | Homozygous   |
| NC_037646.1 | 3850806 | SNV | 1 | A | C | Homozygous   |
| NC_037646.1 | 3859423 | SNV | 1 | T | C | Heterozygous |
| NC_037646.1 | 3859433 | SNV | 1 | T | C | Heterozygous |
| NC_037646.1 | 3859448 | SNV | 1 | T | C | Heterozygous |
| NC_037646.1 | 3862147 | SNV | 1 | G | A | Heterozygous |
| NC_037646.1 | 3862152 | SNV | 1 | A | T | Heterozygous |
| NC_037646.1 | 3862916 | SNV | 1 | T | C | Homozygous   |
| NC_037646.1 | 3862920 | SNV | 1 | G | A | Heterozygous |
| NC_037646.1 | 3862997 | SNV | 1 | A | G | Homozygous   |
| NC_037646.1 | 3863042 | SNV | 1 | C | T | Heterozygous |
| NC_037646.1 | 3863044 | SNV | 1 | A | C | Homozygous   |
| NC_037646.1 | 3863049 | SNV | 1 | C | T | Heterozygous |
| NC_037646.1 | 3863079 | SNV | 1 | T | C | Homozygous   |

|             |         |     |   |   |   |              |
|-------------|---------|-----|---|---|---|--------------|
| NC_037646.1 | 3863297 | SNV | 1 | G | A | Homozygous   |
| NC_037646.1 | 3863558 | SNV | 1 | T | C | Homozygous   |
| NC_037646.1 | 3863610 | SNV | 1 | T | C | Homozygous   |
| NC_037646.1 | 3869787 | SNV | 1 | G | A | Heterozygous |
| NC_037646.1 | 3937635 | SNV | 1 | C | T | Homozygous   |
| NC_037646.1 | 3937655 | SNV | 1 | G | T | Homozygous   |
| NC_037646.1 | 3937677 | SNV | 1 | T | C | Homozygous   |
| NC_037646.1 | 3937680 | SNV | 1 | A | G | Homozygous   |
| NC_037646.1 | 3937799 | SNV | 1 | A | T | Heterozygous |
| NC_037646.1 | 3937805 | SNV | 1 | T | C | Homozygous   |
| NC_037646.1 | 3941969 | SNV | 1 | A | T | Homozygous   |
| NC_037646.1 | 3941978 | SNV | 1 | A | G | Homozygous   |
| NC_037646.1 | 3941980 | SNV | 1 | T | A | Homozygous   |
| NC_037646.1 | 3941982 | SNV | 1 | A | C | Homozygous   |
| NC_037646.1 | 3942017 | SNV | 1 | G | T | Homozygous   |
| NC_037646.1 | 3942020 | SNV | 1 | A | C | Homozygous   |
| NC_037646.1 | 3951931 | SNV | 1 | C | T | Heterozygous |
| NC_037646.1 | 3951961 | SNV | 1 | A | C | Heterozygous |
| NC_037646.1 | 3984134 | SNV | 1 | G | A | Homozygous   |
| NC_037646.1 | 3984158 | SNV | 1 | G | T | Homozygous   |
| NC_037646.1 | 3984349 | SNV | 1 | A | G | Homozygous   |
| NC_037646.1 | 3984375 | SNV | 1 | C | T | Heterozygous |
| NC_037646.1 | 3984471 | SNV | 1 | A | C | Heterozygous |
| NC_037646.1 | 3984473 | SNV | 1 | A | C | Heterozygous |
| NC_037646.1 | 3984565 | SNV | 1 | T | C | Heterozygous |
| NC_037646.1 | 3984568 | SNV | 1 | T | A | Heterozygous |
| NC_037646.1 | 3984575 | SNV | 1 | T | C | Heterozygous |
| NC_037646.1 | 3984633 | SNV | 1 | C | T | Heterozygous |
| NC_037646.1 | 3984705 | SNV | 1 | G | A | Heterozygous |
| NC_037646.1 | 3990761 | SNV | 1 | G | A | Heterozygous |
| NC_037646.1 | 3996955 | SNV | 1 | A | T | Homozygous   |
| NC_037646.1 | 4000051 | SNV | 1 | G | A | Homozygous   |
| NC_037646.1 | 4000116 | SNV | 1 | C | T | Homozygous   |
| NC_037646.1 | 4000119 | SNV | 1 | C | T | Heterozygous |
| NC_037646.1 | 4000128 | SNV | 1 | T | C | Homozygous   |
| NC_037646.1 | 4000134 | SNV | 1 | T | C | Heterozygous |
| NC_037646.1 | 4000137 | SNV | 1 | T | C | Heterozygous |
| NC_037646.1 | 4000212 | SNV | 1 | T | G | Homozygous   |
| NC_037646.1 | 4000325 | SNV | 1 | A | G | Homozygous   |
| NC_037646.1 | 4004100 | SNV | 1 | C | G | Homozygous   |
| NC_037646.1 | 4004178 | SNV | 1 | G | A | Homozygous   |
| NC_037646.1 | 4004216 | SNV | 1 | A | C | Heterozygous |
| NC_037646.1 | 4004221 | SNV | 1 | C | T | Heterozygous |
| NC_037646.1 | 4004235 | SNV | 1 | G | A | Homozygous   |
| NC_037646.1 | 4004242 | SNV | 1 | C | T | Homozygous   |
| NC_037646.1 | 4004263 | SNV | 1 | C | A | Heterozygous |
| NC_037646.1 | 4004403 | SNV | 1 | A | G | Heterozygous |
| NC_037646.1 | 4004449 | SNV | 1 | C | T | Heterozygous |
| NC_037646.1 | 4004584 | SNV | 1 | T | C | Heterozygous |
| NC_037646.1 | 4005167 | SNV | 1 | T | C | Homozygous   |
| NC_037646.1 | 4005174 | SNV | 1 | T | C | Homozygous   |

|             |         |     |   |   |   |              |
|-------------|---------|-----|---|---|---|--------------|
| NC_037646.1 | 4005213 | SNV | 1 | G | C | Homozygous   |
| NC_037646.1 | 4007531 | SNV | 1 | G | T | Homozygous   |
| NC_037646.1 | 4007593 | SNV | 1 | G | A | Homozygous   |
| NC_037646.1 | 4008445 | SNV | 1 | T | C | Homozygous   |
| NC_037646.1 | 4009807 | SNV | 1 | G | A | Homozygous   |
| NC_037646.1 | 4009968 | SNV | 1 | A | G | Homozygous   |
| NC_037646.1 | 4010008 | SNV | 1 | C | T | Heterozygous |
| NC_037646.1 | 4016460 | SNV | 1 | T | A | Heterozygous |
| NC_037646.1 | 4038676 | SNV | 1 | C | T | Heterozygous |
| NC_037646.1 | 4039030 | SNV | 1 | A | G | Homozygous   |
| NC_037646.1 | 4048774 | SNV | 1 | T | C | Homozygous   |
| NC_037646.1 | 4048780 | SNV | 1 | A | G | Homozygous   |
| NC_037646.1 | 4048883 | SNV | 1 | T | C | Homozygous   |
| NC_037646.1 | 4079382 | SNV | 1 | G | A | Homozygous   |
| NC_037646.1 | 4082187 | SNV | 1 | T | C | Homozygous   |
| NC_037646.1 | 4082217 | SNV | 1 | C | A | Homozygous   |
| NC_037646.1 | 4082219 | SNV | 1 | A | G | Homozygous   |
| NC_037646.1 | 4082276 | SNV | 1 | C | T | Heterozygous |
| NC_037646.1 | 4088312 | SNV | 1 | T | C | Homozygous   |
| NC_037646.1 | 4088335 | SNV | 1 | A | T | Homozygous   |
| NC_037646.1 | 4088339 | SNV | 1 | T | A | Homozygous   |
| NC_037646.1 | 4088341 | SNV | 1 | A | T | Homozygous   |
| NC_037646.1 | 4092653 | SNV | 1 | G | A | Heterozygous |
| NC_037646.1 | 4092677 | SNV | 1 | C | T | Heterozygous |
| NC_037646.1 | 4093019 | SNV | 1 | G | A | Heterozygous |
| NC_037646.1 | 4093026 | SNV | 1 | A | G | Homozygous   |
| NC_037646.1 | 4093089 | SNV | 1 | T | C | Heterozygous |
| NC_037646.1 | 4093997 | SNV | 1 | G | A | Heterozygous |
| NC_037646.1 | 4094026 | SNV | 1 | C | T | Heterozygous |
| NC_037646.1 | 4094079 | SNV | 1 | A | G | Homozygous   |
| NC_037646.1 | 4094095 | SNV | 1 | G | A | Homozygous   |
| NC_037646.1 | 4094105 | SNV | 1 | T | C | Homozygous   |
| NC_037646.1 | 4094115 | SNV | 1 | C | T | Heterozygous |
| NC_037646.1 | 4097621 | SNV | 1 | C | T | Heterozygous |
| NC_037646.1 | 4097630 | SNV | 1 | A | G | Homozygous   |
| NC_037646.1 | 4097706 | SNV | 1 | G | A | Homozygous   |
| NC_037646.1 | 4105940 | SNV | 1 | T | A | Homozygous   |
| NC_037646.1 | 4105943 | SNV | 1 | T | A | Homozygous   |
| NC_037646.1 | 4105959 | SNV | 1 | T | C | Homozygous   |
| NC_037646.1 | 4108365 | SNV | 1 | C | T | Homozygous   |
| NC_037646.1 | 4108375 | SNV | 1 | A | G | Homozygous   |
| NC_037646.1 | 4108378 | SNV | 1 | G | C | Homozygous   |
| NC_037646.1 | 4108411 | SNV | 1 | T | C | Homozygous   |
| NC_037646.1 | 4108422 | SNV | 1 | C | T | Homozygous   |
| NC_037646.1 | 4108504 | SNV | 1 | A | G | Homozygous   |
| NC_037646.1 | 4118147 | SNV | 1 | G | A | Homozygous   |
| NC_037646.1 | 4118355 | SNV | 1 | T | C | Homozygous   |
| NC_037646.1 | 4118414 | SNV | 1 | A | G | Homozygous   |
| NC_037646.1 | 4118575 | SNV | 1 | T | C | Heterozygous |
| NC_037646.1 | 4118601 | SNV | 1 | A | G | Homozygous   |
| NC_037646.1 | 4118639 | SNV | 1 | T | C | Homozygous   |

|             |         |     |   |   |   |              |
|-------------|---------|-----|---|---|---|--------------|
| NC_037646.1 | 4120912 | SNV | 1 | C | A | Homozygous   |
| NC_037646.1 | 4121108 | SNV | 1 | T | G | Homozygous   |
| NC_037646.1 | 4122638 | SNV | 1 | G | A | Homozygous   |
| NC_037646.1 | 4127908 | SNV | 1 | A | G | Heterozygous |
| NC_037646.1 | 4128035 | SNV | 1 | G | A | Homozygous   |
| NC_037646.1 | 4128118 | SNV | 1 | T | C | Homozygous   |
| NC_037646.1 | 4129280 | SNV | 1 | A | T | Heterozygous |
| NC_037646.1 | 4129411 | SNV | 1 | A | G | Heterozygous |
| NC_037646.1 | 4129417 | SNV | 1 | G | C | Homozygous   |
| NC_037646.1 | 4129424 | SNV | 1 | A | G | Homozygous   |
| NC_037646.1 | 4129484 | SNV | 1 | T | C | Homozygous   |
| NC_037646.1 | 4129833 | SNV | 1 | A | G | Heterozygous |
| NC_037646.1 | 4129963 | SNV | 1 | T | C | Homozygous   |
| NC_037646.1 | 4129995 | SNV | 1 | G | A | Heterozygous |
| NC_037646.1 | 4130012 | SNV | 1 | G | A | Homozygous   |
| NC_037646.1 | 4130223 | SNV | 1 | G | A | Heterozygous |
| NC_037646.1 | 4130466 | SNV | 1 | A | G | Homozygous   |
| NC_037646.1 | 4130480 | SNV | 1 | G | A | Heterozygous |
| NC_037646.1 | 4130487 | SNV | 1 | T | C | Homozygous   |
| NC_037646.1 | 4131600 | SNV | 1 | C | T | Homozygous   |
| NC_037646.1 | 4131864 | SNV | 1 | G | A | Homozygous   |
| NC_037646.1 | 4132955 | SNV | 1 | A | G | Homozygous   |
| NC_037646.1 | 4133032 | SNV | 1 | A | C | Heterozygous |
| NC_037646.1 | 4133249 | SNV | 1 | T | C | Homozygous   |
| NC_037646.1 | 4133284 | SNV | 1 | T | C | Homozygous   |
| NC_037646.1 | 4133418 | SNV | 1 | A | T | Heterozygous |
| NC_037646.1 | 4133982 | SNV | 1 | C | T | Heterozygous |
| NC_037646.1 | 4133990 | SNV | 1 | C | A | Homozygous   |
| NC_037646.1 | 4134146 | SNV | 1 | G | A | Heterozygous |
| NC_037646.1 | 4134214 | SNV | 1 | G | A | Heterozygous |
| NC_037646.1 | 4134444 | SNV | 1 | G | A | Heterozygous |
| NC_037646.1 | 4134533 | SNV | 1 | T | C | Heterozygous |
| NC_037646.1 | 4134573 | SNV | 1 | A | G | Homozygous   |
| NC_037646.1 | 4135234 | SNV | 1 | T | G | Heterozygous |
| NC_037646.1 | 4135240 | SNV | 1 | C | T | Heterozygous |
| NC_037646.1 | 4135298 | SNV | 1 | G | A | Heterozygous |
| NC_037646.1 | 4135316 | SNV | 1 | G | A | Heterozygous |
| NC_037646.1 | 4135529 | SNV | 1 | T | C | Heterozygous |
| NC_037646.1 | 4135758 | SNV | 1 | A | G | Heterozygous |
| NC_037646.1 | 4135771 | SNV | 1 | A | G | Homozygous   |
| NC_037646.1 | 4135774 | SNV | 1 | T | C | Homozygous   |
| NC_037646.1 | 4135778 | SNV | 1 | T | C | Heterozygous |
| NC_037646.1 | 4135786 | SNV | 1 | T | C | Heterozygous |
| NC_037646.1 | 4135830 | SNV | 1 | T | C | Homozygous   |
| NC_037646.1 | 4135838 | SNV | 1 | A | G | Homozygous   |
| NC_037646.1 | 4135848 | SNV | 1 | T | C | Homozygous   |
| NC_037646.1 | 4135880 | SNV | 1 | G | A | Heterozygous |
| NC_037646.1 | 4136053 | SNV | 1 | A | G | Homozygous   |
| NC_037646.1 | 4136239 | SNV | 1 | G | A | Homozygous   |
| NC_037646.1 | 4136242 | SNV | 1 | A | G | Homozygous   |
| NC_037646.1 | 4136256 | SNV | 1 | A | C | Heterozygous |

|             |         |     |   |   |   |              |
|-------------|---------|-----|---|---|---|--------------|
| NC_037646.1 | 4136259 | SNV | 1 | G | C | Heterozygous |
| NC_037646.1 | 4136265 | SNV | 1 | G | A | Heterozygous |
| NC_037646.1 | 4136454 | SNV | 1 | G | A | Homozygous   |
| NC_037646.1 | 4137997 | SNV | 1 | G | A | Heterozygous |
| NC_037646.1 | 4138191 | SNV | 1 | G | A | Homozygous   |
| NC_037646.1 | 4138760 | SNV | 1 | C | T | Homozygous   |
| NC_037646.1 | 4138850 | SNV | 1 | T | C | Homozygous   |
| NC_037646.1 | 4138885 | SNV | 1 | C | T | Heterozygous |
| NC_037646.1 | 4138994 | SNV | 1 | T | C | Homozygous   |
| NC_037646.1 | 4140930 | SNV | 1 | G | A | Heterozygous |
| NC_037646.1 | 4146717 | SNV | 1 | C | T | Heterozygous |
| NC_037646.1 | 4146720 | SNV | 1 | G | A | Heterozygous |
| NC_037646.1 | 4146790 | SNV | 1 | A | G | Heterozygous |
| NC_037646.1 | 4146826 | SNV | 1 | T | C | Homozygous   |
| NC_037646.1 | 4147306 | SNV | 1 | G | A | Homozygous   |
| NC_037646.1 | 4147471 | SNV | 1 | C | T | Heterozygous |
| NC_037646.1 | 4147529 | SNV | 1 | G | A | Heterozygous |
| NC_037646.1 | 4147536 | SNV | 1 | G | A | Homozygous   |
| NC_037646.1 | 4147551 | SNV | 1 | T | C | Homozygous   |
| NC_037646.1 | 4147554 | SNV | 1 | G | C | Homozygous   |
| NC_037646.1 | 4147789 | SNV | 1 | G | A | Heterozygous |
| NC_037646.1 | 4147940 | SNV | 1 | C | T | Heterozygous |
| NC_037646.1 | 4148126 | SNV | 1 | A | G | Heterozygous |
| NC_037646.1 | 4148136 | SNV | 1 | G | A | Heterozygous |
| NC_037646.1 | 4148140 | SNV | 1 | G | A | Heterozygous |
| NC_037646.1 | 4148396 | SNV | 1 | C | T | Homozygous   |
| NC_037646.1 | 4148584 | SNV | 1 | T | G | Heterozygous |
| NC_037646.1 | 4149401 | SNV | 1 | T | C | Homozygous   |
| NC_037646.1 | 4149452 | SNV | 1 | T | C | Homozygous   |
| NC_037646.1 | 4149690 | SNV | 1 | T | A | Heterozygous |
| NC_037646.1 | 4149908 | SNV | 1 | A | G | Heterozygous |
| NC_037646.1 | 4149916 | SNV | 1 | G | A | Heterozygous |
| NC_037646.1 | 4149980 | SNV | 1 | G | C | Homozygous   |
| NC_037646.1 | 4150198 | SNV | 1 | G | A | Heterozygous |
| NC_037646.1 | 4150279 | SNV | 1 | C | T | Heterozygous |
| NC_037646.1 | 4150366 | SNV | 1 | C | T | Homozygous   |
| NC_037646.1 | 4150469 | SNV | 1 | C | T | Heterozygous |
| NC_037646.1 | 4150482 | SNV | 1 | T | C | Homozygous   |
| NC_037646.1 | 4150500 | SNV | 1 | T | A | Homozygous   |
| NC_037646.1 | 4150509 | SNV | 1 | G | A | Heterozygous |
| NC_037646.1 | 4150522 | SNV | 1 | A | G | Homozygous   |
| NC_037646.1 | 4150524 | SNV | 1 | A | G | Homozygous   |
| NC_037646.1 | 4151157 | SNV | 1 | T | C | Homozygous   |
| NC_037646.1 | 4151465 | SNV | 1 | T | C | Homozygous   |
| NC_037646.1 | 4151607 | SNV | 1 | A | G | Homozygous   |
| NC_037646.1 | 4151671 | SNV | 1 | A | G | Homozygous   |
| NC_037646.1 | 4151728 | SNV | 1 | A | G | Homozygous   |
| NC_037646.1 | 4157395 | SNV | 1 | A | G | Homozygous   |
| NC_037646.1 | 4160921 | SNV | 1 | A | G | Heterozygous |
| NC_037646.1 | 4163372 | SNV | 1 | C | G | Homozygous   |
| NC_037646.1 | 4163375 | SNV | 1 | A | T | Homozygous   |

|             |         |     |   |   |   |              |
|-------------|---------|-----|---|---|---|--------------|
| NC_037646.1 | 4163593 | SNV | 1 | C | T | Homozygous   |
| NC_037646.1 | 4163699 | SNV | 1 | T | C | Homozygous   |
| NC_037646.1 | 4163925 | SNV | 1 | T | C | Homozygous   |
| NC_037646.1 | 4164131 | SNV | 1 | C | T | Homozygous   |
| NC_037646.1 | 4166093 | SNV | 1 | G | T | Homozygous   |
| NC_037646.1 | 4181214 | SNV | 1 | C | T | Heterozygous |
| NC_037646.1 | 4186973 | SNV | 1 | T | C | Homozygous   |
| NC_037646.1 | 4187258 | SNV | 1 | C | T | Homozygous   |
| NC_037646.1 | 4195183 | SNV | 1 | A | C | Homozygous   |
| NC_037646.1 | 4195193 | SNV | 1 | G | A | Heterozygous |
| NC_037646.1 | 4197696 | SNV | 1 | C | T | Heterozygous |
| NC_037646.1 | 4197739 | SNV | 1 | C | T | Heterozygous |
| NC_037646.1 | 4210265 | SNV | 1 | T | C | Homozygous   |
| NC_037646.1 | 4210365 | SNV | 1 | A | G | Homozygous   |
| NC_037646.1 | 4210597 | SNV | 1 | A | G | Homozygous   |
| NC_037646.1 | 4212568 | SNV | 1 | T | C | Homozygous   |
| NC_037646.1 | 4212721 | SNV | 1 | C | T | Homozygous   |
| NC_037646.1 | 4213195 | SNV | 1 | A | G | Heterozygous |
| NC_037646.1 | 4213344 | SNV | 1 | A | G | Homozygous   |
| NC_037646.1 | 4236098 | SNV | 1 | G | T | Heterozygous |
| NC_037646.1 | 4236101 | SNV | 1 | G | T | Heterozygous |
| NC_037646.1 | 4236174 | SNV | 1 | A | G | Homozygous   |
| NC_037646.1 | 4236302 | SNV | 1 | C | T | Homozygous   |
| NC_037646.1 | 4236322 | SNV | 1 | C | A | Homozygous   |
| NC_037646.1 | 4236394 | SNV | 1 | G | A | Homozygous   |
| NC_037646.1 | 4263813 | SNV | 1 | C | T | Homozygous   |
| NC_037646.1 | 4263856 | SNV | 1 | A | G | Heterozygous |
| NC_037646.1 | 4263893 | SNV | 1 | C | A | Heterozygous |
| NC_037646.1 | 4263930 | SNV | 1 | G | C | Heterozygous |
| NC_037646.1 | 4263935 | SNV | 1 | G | A | Heterozygous |
| NC_037646.1 | 4268734 | SNV | 1 | T | A | Heterozygous |
| NC_037646.1 | 4288726 | SNV | 1 | A | T | Heterozygous |
| NC_037646.1 | 4288729 | SNV | 1 | G | T | Heterozygous |
| NC_037646.1 | 4288732 | SNV | 1 | A | T | Heterozygous |
| NC_037646.1 | 4288784 | SNV | 1 | T | C | Heterozygous |
| NC_037646.1 | 4290938 | SNV | 1 | C | T | Heterozygous |
| NC_037646.1 | 4290945 | SNV | 1 | A | G | Homozygous   |
| NC_037646.1 | 4290948 | SNV | 1 | A | G | Homozygous   |
| NC_037646.1 | 4296416 | SNV | 1 | T | C | Homozygous   |
| NC_037646.1 | 4301570 | SNV | 1 | T | C | Heterozygous |
| NC_037646.1 | 4301659 | SNV | 1 | T | C | Heterozygous |
| NC_037646.1 | 4301940 | SNV | 1 | C | T | Heterozygous |
| NC_037646.1 | 4306773 | SNV | 1 | T | C | Homozygous   |
| NC_037646.1 | 4306782 | SNV | 1 | C | T | Homozygous   |
| NC_037646.1 | 4307113 | SNV | 1 | T | C | Heterozygous |
| NC_037646.1 | 4307149 | SNV | 1 | G | A | Heterozygous |
| NC_037646.1 | 4307201 | SNV | 1 | T | C | Heterozygous |
| NC_037646.1 | 4307327 | SNV | 1 | A | G | Homozygous   |
| NC_037646.1 | 4308494 | SNV | 1 | C | G | Heterozygous |
| NC_037646.1 | 4308531 | SNV | 1 | T | C | Heterozygous |
| NC_037646.1 | 4308624 | SNV | 1 | C | T | Heterozygous |



|             |         |     |   |   |   |              |
|-------------|---------|-----|---|---|---|--------------|
| NC_037646.1 | 4319518 | SNV | 1 | T | C | Heterozygous |
| NC_037646.1 | 4319601 | SNV | 1 | T | C | Homozygous   |
| NC_037646.1 | 4319604 | SNV | 1 | C | T | Heterozygous |
| NC_037646.1 | 4319634 | SNV | 1 | G | T | Homozygous   |
| NC_037646.1 | 4319637 | SNV | 1 | C | T | Homozygous   |
| NC_037646.1 | 4319684 | SNV | 1 | C | G | Homozygous   |
| NC_037646.1 | 4320005 | SNV | 1 | T | C | Homozygous   |
| NC_037646.1 | 4320163 | SNV | 1 | C | T | Heterozygous |
| NC_037646.1 | 4320347 | SNV | 1 | C | T | Heterozygous |
| NC_037646.1 | 4329667 | SNV | 1 | T | A | Homozygous   |
| NC_037646.1 | 4329678 | SNV | 1 | A | G | Homozygous   |
| NC_037646.1 | 4329681 | SNV | 1 | A | G | Homozygous   |
| NC_037646.1 | 4335004 | SNV | 1 | C | G | Homozygous   |
| NC_037646.1 | 4335085 | SNV | 1 | G | T | Heterozygous |
| NC_037646.1 | 4336499 | SNV | 1 | C | T | Heterozygous |
| NC_037646.1 | 4339891 | SNV | 1 | C | T | Homozygous   |
| NC_037646.1 | 4339893 | SNV | 1 | A | C | Homozygous   |
| NC_037646.1 | 4339897 | SNV | 1 | T | A | Homozygous   |
| NC_037646.1 | 4339899 | SNV | 1 | A | T | Homozygous   |
| NC_037646.1 | 4347237 | SNV | 1 | T | C | Homozygous   |
| NC_037646.1 | 4347453 | SNV | 1 | T | C | Homozygous   |
| NC_037646.1 | 4347526 | SNV | 1 | A | C | Heterozygous |
| NC_037646.1 | 4359595 | SNV | 1 | T | C | Heterozygous |
| NC_037646.1 | 4359791 | SNV | 1 | C | T | Heterozygous |
| NC_037646.1 | 4359852 | SNV | 1 | T | C | Homozygous   |
| NC_037646.1 | 4359938 | SNV | 1 | G | A | Heterozygous |
| NC_037646.1 | 4478208 | SNV | 1 | C | T | Homozygous   |
| NC_037646.1 | 4478217 | SNV | 1 | G | A | Heterozygous |
| NC_037646.1 | 4478224 | SNV | 1 | A | G | Heterozygous |
| NC_037646.1 | 4478238 | SNV | 1 | C | T | Homozygous   |
| NC_037646.1 | 4478247 | SNV | 1 | G | A | Homozygous   |
| NC_037646.1 | 4478249 | SNV | 1 | A | G | Heterozygous |
| NC_037646.1 | 4478267 | SNV | 1 | G | A | Heterozygous |
| NC_037646.1 | 4478274 | SNV | 1 | A | G | Heterozygous |
| NC_037646.1 | 4478274 | SNV | 1 | A | T | Heterozygous |
| NC_037646.1 | 4478278 | SNV | 1 | A | T | Homozygous   |
| NC_037646.1 | 4478284 | SNV | 1 | A | G | Homozygous   |
| NC_037646.1 | 4545188 | SNV | 1 | G | T | Heterozygous |
| NC_037646.1 | 4545191 | SNV | 1 | C | A | Homozygous   |
| NC_037646.1 | 4545196 | SNV | 1 | G | A | Heterozygous |
| NC_037646.1 | 4545205 | SNV | 1 | A | T | Homozygous   |
| NC_037646.1 | 4600240 | SNV | 1 | T | C | Homozygous   |
| NC_037646.1 | 4602538 | SNV | 1 | T | C | Homozygous   |
| NC_037646.1 | 4602558 | SNV | 1 | C | T | Heterozygous |
| NC_037646.1 | 4602610 | SNV | 1 | T | C | Heterozygous |
| NC_037646.1 | 4602839 | SNV | 1 | G | A | Homozygous   |
| NC_037646.1 | 4602842 | SNV | 1 | T | G | Homozygous   |
| NC_037646.1 | 4608292 | SNV | 1 | G | C | Homozygous   |
| NC_037646.1 | 4608295 | SNV | 1 | G | A | Homozygous   |
| NC_037646.1 | 4608297 | SNV | 1 | G | A | Homozygous   |
| NC_037646.1 | 4612653 | SNV | 1 | A | C | Homozygous   |

|             |         |     |   |   |   |              |
|-------------|---------|-----|---|---|---|--------------|
| NC_037646.1 | 4612659 | SNV | 1 | C | T | Homozygous   |
| NC_037646.1 | 4612661 | SNV | 1 | T | C | Homozygous   |
| NC_037646.1 | 4612667 | SNV | 1 | C | A | Homozygous   |
| NC_037646.1 | 4612671 | SNV | 1 | T | G | Homozygous   |
| NC_037646.1 | 4612694 | SNV | 1 | G | A | Homozygous   |
| NC_037646.1 | 4635286 | SNV | 1 | G | A | Homozygous   |
| NC_037646.1 | 4635322 | SNV | 1 | G | A | Homozygous   |
| NC_037646.1 | 4635395 | SNV | 1 | A | G | Heterozygous |
| NC_037646.1 | 4644119 | SNV | 1 | A | G | Heterozygous |
| NC_037646.1 | 4644256 | SNV | 1 | A | G | Heterozygous |
| NC_037646.1 | 4647711 | SNV | 1 | A | G | Homozygous   |
| NC_037646.1 | 4647741 | SNV | 1 | T | C | Heterozygous |
| NC_037646.1 | 4647782 | SNV | 1 | G | A | Heterozygous |
| NC_037646.1 | 4651166 | SNV | 1 | C | A | Homozygous   |
| NC_037646.1 | 4651351 | SNV | 1 | G | T | Homozygous   |
| NC_037646.1 | 4651354 | SNV | 1 | C | T | Heterozygous |
| NC_037646.1 | 4662238 | SNV | 1 | G | A | Homozygous   |
| NC_037646.1 | 4662302 | SNV | 1 | T | C | Homozygous   |
| NC_037646.1 | 4688263 | SNV | 1 | G | A | Homozygous   |
| NC_037646.1 | 4688266 | SNV | 1 | T | G | Heterozygous |
| NC_037646.1 | 4688270 | SNV | 1 | T | C | Heterozygous |
| NC_037646.1 | 4688291 | SNV | 1 | T | C | Heterozygous |
| NC_037646.1 | 4688746 | SNV | 1 | A | G | Homozygous   |
| NC_037646.1 | 4690111 | SNV | 1 | C | G | Homozygous   |
| NC_037646.1 | 4690175 | SNV | 1 | A | G | Homozygous   |
| NC_037646.1 | 4690217 | SNV | 1 | A | G | Homozygous   |
| NC_037646.1 | 4690392 | SNV | 1 | T | A | Homozygous   |
| NC_037646.1 | 4690490 | SNV | 1 | G | T | Homozygous   |
| NC_037646.1 | 4690505 | SNV | 1 | A | G | Heterozygous |
| NC_037646.1 | 4690567 | SNV | 1 | A | G | Heterozygous |
| NC_037646.1 | 4691442 | SNV | 1 | T | C | Homozygous   |
| NC_037646.1 | 4691462 | SNV | 1 | T | C | Homozygous   |
| NC_037646.1 | 4691465 | SNV | 1 | C | T | Homozygous   |
| NC_037646.1 | 4696622 | SNV | 1 | T | C | Homozygous   |
| NC_037646.1 | 4698378 | SNV | 1 | A | G | Homozygous   |
| NC_037646.1 | 4698402 | SNV | 1 | A | G | Heterozygous |
| NC_037646.1 | 4698463 | SNV | 1 | G | A | Heterozygous |
| NC_037646.1 | 4698819 | SNV | 1 | T | C | Homozygous   |
| NC_037646.1 | 4698872 | SNV | 1 | T | C | Homozygous   |
| NC_037646.1 | 4699088 | SNV | 1 | G | A | Homozygous   |
| NC_037646.1 | 4705255 | SNV | 1 | G | T | Homozygous   |
| NC_037646.1 | 4714122 | SNV | 1 | T | C | Heterozygous |
| NC_037646.1 | 4714124 | SNV | 1 | T | C | Homozygous   |
| NC_037646.1 | 4714126 | SNV | 1 | T | C | Homozygous   |
| NC_037646.1 | 4714130 | SNV | 1 | T | C | Homozygous   |
| NC_037646.1 | 4714156 | SNV | 1 | T | C | Homozygous   |
| NC_037646.1 | 4725399 | SNV | 1 | G | A | Homozygous   |
| NC_037646.1 | 4725405 | SNV | 1 | G | A | Homozygous   |
| NC_037646.1 | 4725414 | SNV | 1 | T | G | Homozygous   |
| NC_037646.1 | 4743982 | SNV | 1 | T | C | Homozygous   |
| NC_037646.1 | 4752306 | SNV | 1 | C | T | Homozygous   |

|             |         |     |   |   |   |              |
|-------------|---------|-----|---|---|---|--------------|
| NC_037646.1 | 4752312 | SNV | 1 | C | T | Homozygous   |
| NC_037646.1 | 4756267 | SNV | 1 | C | A | Homozygous   |
| NC_037646.1 | 4756320 | SNV | 1 | T | C | Heterozygous |
| NC_037646.1 | 4756322 | SNV | 1 | G | C | Homozygous   |
| NC_037646.1 | 4756325 | SNV | 1 | A | T | Homozygous   |
| NC_037646.1 | 4799445 | SNV | 1 | C | A | Heterozygous |
| NC_037646.1 | 4799453 | SNV | 1 | G | A | Heterozygous |
| NC_037646.1 | 4799461 | SNV | 1 | C | A | Heterozygous |
| NC_037646.1 | 4799493 | SNV | 1 | G | A | Homozygous   |
| NC_037646.1 | 4843895 | SNV | 1 | C | G | Homozygous   |
| NC_037646.1 | 4852893 | SNV | 1 | C | T | Heterozygous |
| NC_037646.1 | 4852915 | SNV | 1 | C | T | Heterozygous |
| NC_037646.1 | 4852920 | SNV | 1 | C | T | Heterozygous |
| NC_037646.1 | 4852938 | SNV | 1 | T | C | Homozygous   |
| NC_037646.1 | 4852966 | SNV | 1 | C | T | Homozygous   |
| NC_037646.1 | 4861125 | SNV | 1 | T | A | Homozygous   |
| NC_037646.1 | 4861182 | SNV | 1 | A | G | Homozygous   |
| NC_037646.1 | 4861611 | SNV | 1 | G | A | Homozygous   |
| NC_037646.1 | 4861933 | SNV | 1 | C | G | Homozygous   |
| NC_037646.1 | 4861973 | SNV | 1 | T | G | Homozygous   |
| NC_037646.1 | 4863902 | SNV | 1 | G | A | Homozygous   |
| NC_037646.1 | 4864720 | SNV | 1 | C | T | Heterozygous |
| NC_037646.1 | 4864795 | SNV | 1 | G | A | Heterozygous |
| NC_037646.1 | 4864805 | SNV | 1 | C | T | Heterozygous |
| NC_037646.1 | 4865517 | SNV | 1 | A | G | Homozygous   |
| NC_037646.1 | 4866255 | SNV | 1 | G | A | Heterozygous |
| NC_037646.1 | 4866279 | SNV | 1 | C | T | Homozygous   |
| NC_037646.1 | 4866974 | SNV | 1 | A | G | Homozygous   |
| NC_037646.1 | 4867199 | SNV | 1 | T | C | Heterozygous |
| NC_037646.1 | 4870510 | SNV | 1 | G | C | Heterozygous |
| NC_037646.1 | 4871682 | SNV | 1 | T | C | Heterozygous |
| NC_037646.1 | 4872028 | SNV | 1 | T | C | Homozygous   |
| NC_037646.1 | 4872073 | SNV | 1 | T | C | Heterozygous |
| NC_037646.1 | 4872099 | SNV | 1 | A | G | Heterozygous |
| NC_037646.1 | 4903384 | SNV | 1 | A | G | Homozygous   |
| NC_037646.1 | 4912419 | SNV | 1 | C | T | Heterozygous |
| NC_037646.1 | 4912431 | SNV | 1 | T | C | Heterozygous |
| NC_037646.1 | 4918943 | SNV | 1 | T | C | Homozygous   |
| NC_037646.1 | 5008177 | SNV | 1 | C | T | Heterozygous |
| NC_037646.1 | 5008424 | SNV | 1 | G | C | Homozygous   |
| NC_037646.1 | 5008773 | SNV | 1 | A | G | Homozygous   |
| NC_037646.1 | 5008897 | SNV | 1 | A | G | Homozygous   |
| NC_037646.1 | 5009013 | SNV | 1 | G | A | Heterozygous |
| NC_037646.1 | 5009520 | SNV | 1 | T | C | Heterozygous |
| NC_037646.1 | 5009580 | SNV | 1 | C | T | Homozygous   |
| NC_037646.1 | 5010249 | SNV | 1 | T | A | Heterozygous |
| NC_037646.1 | 5010527 | SNV | 1 | T | C | Homozygous   |
| NC_037646.1 | 5010590 | SNV | 1 | A | T | Heterozygous |
| NC_037646.1 | 5010704 | SNV | 1 | G | T | Homozygous   |
| NC_037646.1 | 5010706 | SNV | 1 | T | C | Homozygous   |
| NC_037646.1 | 5011158 | SNV | 1 | G | A | Homozygous   |

|             |         |     |   |   |   |              |
|-------------|---------|-----|---|---|---|--------------|
| NC_037646.1 | 5011274 | SNV | 1 | A | G | Homozygous   |
| NC_037646.1 | 5014662 | SNV | 1 | G | A | Homozygous   |
| NC_037646.1 | 5027702 | SNV | 1 | C | A | Heterozygous |
| NC_037646.1 | 5027711 | SNV | 1 | T | A | Heterozygous |
| NC_037646.1 | 5032498 | SNV | 1 | T | C | Homozygous   |
| NC_037646.1 | 5032615 | SNV | 1 | A | G | Homozygous   |
| NC_037646.1 | 5033191 | SNV | 1 | A | G | Homozygous   |
| NC_037646.1 | 5033756 | SNV | 1 | G | A | Heterozygous |
| NC_037646.1 | 5033763 | SNV | 1 | T | A | Homozygous   |
| NC_037646.1 | 5034893 | SNV | 1 | C | T | Heterozygous |
| NC_037646.1 | 5034946 | SNV | 1 | G | A | Heterozygous |
| NC_037646.1 | 5035066 | SNV | 1 | T | C | Homozygous   |
| NC_037646.1 | 5035303 | SNV | 1 | G | C | Homozygous   |
| NC_037646.1 | 5035392 | SNV | 1 | T | C | Heterozygous |
| NC_037646.1 | 5037362 | SNV | 1 | T | A | Homozygous   |
| NC_037646.1 | 5037372 | SNV | 1 | T | C | Homozygous   |
| NC_037646.1 | 5037398 | SNV | 1 | G | C | Homozygous   |
| NC_037646.1 | 5037400 | SNV | 1 | G | T | Homozygous   |
| NC_037646.1 | 5037428 | SNV | 1 | C | T | Heterozygous |
| NC_037646.1 | 5038608 | SNV | 1 | A | G | Homozygous   |
| NC_037646.1 | 5039067 | SNV | 1 | G | A | Heterozygous |
| NC_037646.1 | 5039136 | SNV | 1 | T | C | Homozygous   |
| NC_037646.1 | 5045470 | SNV | 1 | A | T | Homozygous   |
| NC_037646.1 | 5045651 | SNV | 1 | G | C | Heterozygous |
| NC_037646.1 | 5045662 | SNV | 1 | A | G | Homozygous   |
| NC_037646.1 | 5045785 | SNV | 1 | G | A | Homozygous   |
| NC_037646.1 | 5045837 | SNV | 1 | A | G | Homozygous   |
| NC_037646.1 | 5045899 | SNV | 1 | G | A | Homozygous   |
| NC_037646.1 | 5050798 | SNV | 1 | A | G | Homozygous   |
| NC_037646.1 | 5062780 | SNV | 1 | A | G | Homozygous   |
| NC_037646.1 | 5063058 | SNV | 1 | A | G | Homozygous   |
| NC_037646.1 | 5065774 | SNV | 1 | T | C | Homozygous   |
| NC_037646.1 | 5065842 | SNV | 1 | G | C | Heterozygous |
| NC_037646.1 | 5065923 | SNV | 1 | C | T | Heterozygous |
| NC_037646.1 | 5066066 | SNV | 1 | T | C | Homozygous   |
| NC_037646.1 | 5096060 | SNV | 1 | T | C | Heterozygous |
| NC_037646.1 | 5099014 | SNV | 1 | T | C | Homozygous   |
| NC_037646.1 | 5099154 | SNV | 1 | A | G | Heterozygous |
| NC_037646.1 | 5099215 | SNV | 1 | A | G | Homozygous   |
| NC_037646.1 | 5099730 | SNV | 1 | T | C | Heterozygous |
| NC_037646.1 | 5099811 | SNV | 1 | A | G | Heterozygous |
| NC_037646.1 | 5099819 | SNV | 1 | G | A | Heterozygous |
| NC_037646.1 | 5099880 | SNV | 1 | A | C | Heterozygous |
| NC_037646.1 | 5099902 | SNV | 1 | T | G | Heterozygous |
| NC_037646.1 | 5099980 | SNV | 1 | G | A | Heterozygous |
| NC_037646.1 | 5099985 | SNV | 1 | A | G | Heterozygous |
| NC_037646.1 | 5099996 | SNV | 1 | A | G | Homozygous   |
| NC_037646.1 | 5100047 | SNV | 1 | T | C | Heterozygous |
| NC_037646.1 | 5100050 | SNV | 1 | C | T | Heterozygous |
| NC_037646.1 | 5100100 | SNV | 1 | G | A | Homozygous   |
| NC_037646.1 | 5100251 | SNV | 1 | T | C | Heterozygous |

|             |         |     |   |   |   |              |
|-------------|---------|-----|---|---|---|--------------|
| NC_037646.1 | 5105973 | SNV | 1 | G | C | Heterozygous |
| NC_037646.1 | 5106408 | SNV | 1 | G | T | Homozygous   |
| NC_037646.1 | 5106414 | SNV | 1 | T | C | Heterozygous |
| NC_037646.1 | 5116236 | SNV | 1 | A | T | Homozygous   |
| NC_037646.1 | 5116347 | SNV | 1 | G | A | Heterozygous |
| NC_037646.1 | 5128852 | SNV | 1 | A | G | Heterozygous |
| NC_037646.1 | 5129930 | SNV | 1 | T | C | Homozygous   |
| NC_037646.1 | 5131574 | SNV | 1 | G | A | Heterozygous |
| NC_037646.1 | 5131718 | SNV | 1 | T | C | Homozygous   |
| NC_037646.1 | 5131863 | SNV | 1 | A | G | Heterozygous |
| NC_037646.1 | 5131874 | SNV | 1 | A | G | Heterozygous |
| NC_037646.1 | 5135208 | SNV | 1 | G | A | Homozygous   |
| NC_037646.1 | 5135297 | SNV | 1 | C | G | Heterozygous |
| NC_037646.1 | 5139171 | SNV | 1 | A | T | Homozygous   |
| NC_037646.1 | 5139176 | SNV | 1 | A | C | Homozygous   |
| NC_037646.1 | 5146645 | SNV | 1 | G | C | Homozygous   |
| NC_037646.1 | 5146823 | SNV | 1 | G | A | Heterozygous |
| NC_037646.1 | 5171319 | SNV | 1 | G | A | Heterozygous |
| NC_037646.1 | 5171624 | SNV | 1 | T | C | Homozygous   |
| NC_037646.1 | 5171639 | SNV | 1 | T | C | Homozygous   |
| NC_037646.1 | 5172166 | SNV | 1 | C | T | Heterozygous |
| NC_037646.1 | 5172355 | SNV | 1 | C | T | Heterozygous |
| NC_037646.1 | 5172627 | SNV | 1 | A | G | Homozygous   |
| NC_037646.1 | 5172787 | SNV | 1 | T | C | Homozygous   |
| NC_037646.1 | 5182273 | SNV | 1 | A | G | Homozygous   |
| NC_037646.1 | 5190835 | SNV | 1 | C | T | Heterozygous |
| NC_037646.1 | 5190910 | SNV | 1 | C | T | Heterozygous |
| NC_037646.1 | 5190932 | SNV | 1 | C | G | Heterozygous |
| NC_037646.1 | 5190935 | SNV | 1 | T | C | Homozygous   |
| NC_037646.1 | 5191080 | SNV | 1 | T | A | Heterozygous |
| NC_037646.1 | 5191083 | SNV | 1 | T | C | Heterozygous |
| NC_037646.1 | 5191146 | SNV | 1 | C | T | Homozygous   |
| NC_037646.1 | 5194366 | SNV | 1 | C | T | Heterozygous |
| NC_037646.1 | 5194401 | SNV | 1 | G | C | Heterozygous |
| NC_037646.1 | 5194411 | SNV | 1 | T | G | Heterozygous |
| NC_037646.1 | 5194421 | SNV | 1 | G | A | Heterozygous |
| NC_037646.1 | 5194528 | SNV | 1 | T | C | Heterozygous |
| NC_037646.1 | 5194639 | SNV | 1 | T | C | Homozygous   |
| NC_037646.1 | 5194657 | SNV | 1 | T | C | Homozygous   |
| NC_037646.1 | 5194822 | SNV | 1 | C | T | Heterozygous |
| NC_037646.1 | 5194842 | SNV | 1 | C | T | Homozygous   |
| NC_037646.1 | 5195102 | SNV | 1 | A | T | Homozygous   |
| NC_037646.1 | 5195186 | SNV | 1 | C | T | Heterozygous |
| NC_037646.1 | 5195233 | SNV | 1 | G | A | Homozygous   |
| NC_037646.1 | 5195333 | SNV | 1 | C | T | Homozygous   |
| NC_037646.1 | 5195552 | SNV | 1 | A | G | Homozygous   |
| NC_037646.1 | 5200179 | SNV | 1 | C | T | Homozygous   |
| NC_037646.1 | 5209172 | SNV | 1 | A | G | Heterozygous |
| NC_037646.1 | 5209233 | SNV | 1 | T | C | Homozygous   |
| NC_037646.1 | 5209401 | SNV | 1 | T | C | Homozygous   |
| NC_037646.1 | 5209458 | SNV | 1 | T | C | Homozygous   |

|             |         |     |   |   |   |              |
|-------------|---------|-----|---|---|---|--------------|
| NC_037646.1 | 5209515 | SNV | 1 | A | T | Homozygous   |
| NC_037646.1 | 5209585 | SNV | 1 | A | G | Homozygous   |
| NC_037646.1 | 5209865 | SNV | 1 | G | A | Heterozygous |
| NC_037646.1 | 5221555 | SNV | 1 | A | G | Homozygous   |
| NC_037646.1 | 5221563 | SNV | 1 | C | T | Homozygous   |
| NC_037646.1 | 5221566 | SNV | 1 | C | T | Homozygous   |
| NC_037646.1 | 5221657 | SNV | 1 | A | G | Heterozygous |
| NC_037646.1 | 5221701 | SNV | 1 | A | G | Homozygous   |
| NC_037646.1 | 5226827 | SNV | 1 | A | G | Homozygous   |
| NC_037646.1 | 5226874 | SNV | 1 | C | T | Heterozygous |
| NC_037646.1 | 5227141 | SNV | 1 | C | G | Homozygous   |
| NC_037646.1 | 5227143 | SNV | 1 | A | G | Homozygous   |
| NC_037646.1 | 5227168 | SNV | 1 | T | C | Homozygous   |
| NC_037646.1 | 5227356 | SNV | 1 | A | T | Heterozygous |
| NC_037646.1 | 5234480 | SNV | 1 | T | C | Homozygous   |
| NC_037646.1 | 5237205 | SNV | 1 | A | G | Heterozygous |
| NC_037646.1 | 5237219 | SNV | 1 | A | G | Heterozygous |
| NC_037646.1 | 5237233 | SNV | 1 | T | C | Heterozygous |
| NC_037646.1 | 5237393 | SNV | 1 | T | C | Homozygous   |
| NC_037646.1 | 5237593 | SNV | 1 | A | G | Homozygous   |
| NC_037646.1 | 5282518 | SNV | 1 | A | T | Homozygous   |
| NC_037646.1 | 5282569 | SNV | 1 | T | C | Heterozygous |
| NC_037646.1 | 5282571 | SNV | 1 | A | C | Heterozygous |
| NC_037646.1 | 5282736 | SNV | 1 | A | G | Homozygous   |
| NC_037646.1 | 5282975 | SNV | 1 | T | G | Homozygous   |
| NC_037646.1 | 5282995 | SNV | 1 | G | A | Heterozygous |
| NC_037646.1 | 5283019 | SNV | 1 | A | G | Homozygous   |
| NC_037646.1 | 5283022 | SNV | 1 | C | T | Heterozygous |
| NC_037646.1 | 5283371 | SNV | 1 | T | A | Heterozygous |
| NC_037646.1 | 5283384 | SNV | 1 | A | G | Homozygous   |
| NC_037646.1 | 5283394 | SNV | 1 | C | G | Homozygous   |
| NC_037646.1 | 5283417 | SNV | 1 | G | A | Heterozygous |
| NC_037646.1 | 5283429 | SNV | 1 | A | G | Homozygous   |
| NC_037646.1 | 5283450 | SNV | 1 | T | C | Homozygous   |
| NC_037646.1 | 5283982 | SNV | 1 | A | G | Heterozygous |
| NC_037646.1 | 5284010 | SNV | 1 | G | A | Homozygous   |
| NC_037646.1 | 5284081 | SNV | 1 | A | G | Homozygous   |
| NC_037646.1 | 5284146 | SNV | 1 | A | G | Heterozygous |
| NC_037646.1 | 5284154 | SNV | 1 | C | T | Heterozygous |
| NC_037646.1 | 5284218 | SNV | 1 | G | C | Homozygous   |
| NC_037646.1 | 5284347 | SNV | 1 | C | T | Heterozygous |
| NC_037646.1 | 5284519 | SNV | 1 | C | A | Heterozygous |
| NC_037646.1 | 5284624 | SNV | 1 | A | G | Homozygous   |
| NC_037646.1 | 5284802 | SNV | 1 | C | T | Homozygous   |
| NC_037646.1 | 5284819 | SNV | 1 | A | G | Homozygous   |
| NC_037646.1 | 5284825 | SNV | 1 | T | C | Homozygous   |
| NC_037646.1 | 5284850 | SNV | 1 | T | G | Homozygous   |
| NC_037646.1 | 5285332 | SNV | 1 | G | T | Heterozygous |
| NC_037646.1 | 5285387 | SNV | 1 | T | C | Homozygous   |
| NC_037646.1 | 5285430 | SNV | 1 | T | A | Heterozygous |
| NC_037646.1 | 5285430 | SNV | 1 | T | G | Heterozygous |

|             |         |     |   |   |   |              |
|-------------|---------|-----|---|---|---|--------------|
| NC_037646.1 | 5285471 | SNV | 1 | G | T | Heterozygous |
| NC_037646.1 | 5285522 | SNV | 1 | A | G | Heterozygous |
| NC_037646.1 | 5285567 | SNV | 1 | C | T | Homozygous   |
| NC_037646.1 | 5285756 | SNV | 1 | A | G | Heterozygous |
| NC_037646.1 | 5285766 | SNV | 1 | A | G | Heterozygous |
| NC_037646.1 | 5285825 | SNV | 1 | T | C | Heterozygous |
| NC_037646.1 | 5285833 | SNV | 1 | G | A | Heterozygous |
| NC_037646.1 | 5285900 | SNV | 1 | C | T | Heterozygous |
| NC_037646.1 | 5287949 | SNV | 1 | A | G | Homozygous   |
| NC_037646.1 | 5289726 | SNV | 1 | C | T | Homozygous   |
| NC_037646.1 | 5318609 | SNV | 1 | C | T | Homozygous   |
| NC_037646.1 | 5318619 | SNV | 1 | T | A | Homozygous   |
| NC_037646.1 | 5318639 | SNV | 1 | A | G | Homozygous   |
| NC_037646.1 | 5318644 | SNV | 1 | T | A | Homozygous   |
| NC_037646.1 | 5319674 | SNV | 1 | T | C | Homozygous   |
| NC_037646.1 | 5319904 | SNV | 1 | C | T | Heterozygous |
| NC_037646.1 | 5353581 | SNV | 1 | G | T | Heterozygous |
| NC_037646.1 | 5354568 | SNV | 1 | C | T | Homozygous   |
| NC_037646.1 | 5364501 | SNV | 1 | A | G | Heterozygous |
| NC_037646.1 | 5364503 | SNV | 1 | A | C | Heterozygous |
| NC_037646.1 | 5364579 | SNV | 1 | C | T | Homozygous   |
| NC_037646.1 | 5366278 | SNV | 1 | A | T | Homozygous   |
| NC_037646.1 | 5371883 | SNV | 1 | C | T | Heterozygous |
| NC_037646.1 | 5374490 | SNV | 1 | T | C | Homozygous   |
| NC_037646.1 | 5374622 | SNV | 1 | C | T | Homozygous   |
| NC_037646.1 | 5374640 | SNV | 1 | T | C | Homozygous   |
| NC_037646.1 | 5374740 | SNV | 1 | A | T | Homozygous   |
| NC_037646.1 | 5374806 | SNV | 1 | A | G | Homozygous   |
| NC_037646.1 | 5374818 | SNV | 1 | A | G | Homozygous   |
| NC_037646.1 | 5374820 | SNV | 1 | C | T | Heterozygous |
| NC_037646.1 | 5375006 | SNV | 1 | A | G | Heterozygous |
| NC_037646.1 | 5375067 | SNV | 1 | T | C | Heterozygous |
| NC_037646.1 | 5375170 | SNV | 1 | T | C | Homozygous   |
| NC_037646.1 | 5375222 | SNV | 1 | A | G | Homozygous   |
| NC_037646.1 | 5375250 | SNV | 1 | C | T | Heterozygous |
| NC_037646.1 | 5375284 | SNV | 1 | G | A | Homozygous   |
| NC_037646.1 | 5375319 | SNV | 1 | A | G | Homozygous   |
| NC_037646.1 | 5375374 | SNV | 1 | T | C | Homozygous   |
| NC_037646.1 | 5375377 | SNV | 1 | T | C | Homozygous   |
| NC_037646.1 | 5375407 | SNV | 1 | G | C | Heterozygous |
| NC_037646.1 | 5375412 | SNV | 1 | C | A | Heterozygous |
| NC_037646.1 | 5375431 | SNV | 1 | C | T | Heterozygous |
| NC_037646.1 | 5375442 | SNV | 1 | G | A | Heterozygous |
| NC_037646.1 | 5375453 | SNV | 1 | T | C | Homozygous   |
| NC_037646.1 | 5375552 | SNV | 1 | G | A | Heterozygous |
| NC_037646.1 | 5375570 | SNV | 1 | G | A | Heterozygous |
| NC_037646.1 | 5375676 | SNV | 1 | G | A | Heterozygous |
| NC_037646.1 | 5376200 | SNV | 1 | G | A | Homozygous   |
| NC_037646.1 | 5376247 | SNV | 1 | A | G | Homozygous   |
| NC_037646.1 | 5376250 | SNV | 1 | T | C | Homozygous   |
| NC_037646.1 | 5376272 | SNV | 1 | C | T | Heterozygous |

|             |         |     |   |   |   |              |
|-------------|---------|-----|---|---|---|--------------|
| NC_037646.1 | 5376403 | SNV | 1 | G | A | Heterozygous |
| NC_037646.1 | 5376425 | SNV | 1 | A | G | Heterozygous |
| NC_037646.1 | 5377976 | SNV | 1 | C | T | Homozygous   |
| NC_037646.1 | 5378024 | SNV | 1 | C | T | Homozygous   |
| NC_037646.1 | 5378053 | SNV | 1 | A | C | Homozygous   |
| NC_037646.1 | 5378055 | SNV | 1 | T | C | Homozygous   |
| NC_037646.1 | 5378710 | SNV | 1 | G | A | Heterozygous |
| NC_037646.1 | 5379103 | SNV | 1 | G | C | Homozygous   |
| NC_037646.1 | 5379219 | SNV | 1 | T | C | Homozygous   |
| NC_037646.1 | 5379530 | SNV | 1 | A | G | Heterozygous |
| NC_037646.1 | 5379571 | SNV | 1 | T | C | Heterozygous |
| NC_037646.1 | 5379646 | SNV | 1 | C | T | Heterozygous |
| NC_037646.1 | 5382971 | SNV | 1 | G | A | Heterozygous |
| NC_037646.1 | 5382983 | SNV | 1 | G | A | Homozygous   |
| NC_037646.1 | 5383342 | SNV | 1 | A | G | Homozygous   |
| NC_037646.1 | 5383388 | SNV | 1 | G | A | Heterozygous |
| NC_037646.1 | 5383390 | SNV | 1 | A | G | Homozygous   |
| NC_037646.1 | 5383480 | SNV | 1 | T | G | Heterozygous |
| NC_037646.1 | 5383523 | SNV | 1 | T | C | Heterozygous |
| NC_037646.1 | 5383586 | SNV | 1 | G | A | Heterozygous |
| NC_037646.1 | 5383603 | SNV | 1 | T | A | Homozygous   |
| NC_037646.1 | 5383605 | SNV | 1 | T | G | Homozygous   |
| NC_037646.1 | 5383611 | SNV | 1 | C | T | Heterozygous |
| NC_037646.1 | 5383631 | SNV | 1 | T | C | Heterozygous |
| NC_037646.1 | 5384259 | SNV | 1 | A | G | Homozygous   |
| NC_037646.1 | 5384271 | SNV | 1 | G | A | Homozygous   |
| NC_037646.1 | 5384306 | SNV | 1 | G | A | Homozygous   |
| NC_037646.1 | 5385351 | SNV | 1 | T | A | Homozygous   |
| NC_037646.1 | 5385484 | SNV | 1 | G | A | Heterozygous |
| NC_037646.1 | 5385490 | SNV | 1 | A | G | Homozygous   |
| NC_037646.1 | 5386438 | SNV | 1 | A | G | Heterozygous |
| NC_037646.1 | 5386659 | SNV | 1 | G | A | Heterozygous |
| NC_037646.1 | 5386950 | SNV | 1 | G | A | Homozygous   |
| NC_037646.1 | 5386954 | SNV | 1 | A | G | Homozygous   |
| NC_037646.1 | 5387322 | SNV | 1 | A | G | Homozygous   |
| NC_037646.1 | 5387371 | SNV | 1 | A | T | Homozygous   |
| NC_037646.1 | 5387419 | SNV | 1 | A | G | Homozygous   |
| NC_037646.1 | 5387711 | SNV | 1 | G | C | Heterozygous |
| NC_037646.1 | 5387807 | SNV | 1 | C | T | Heterozygous |
| NC_037646.1 | 5389128 | SNV | 1 | T | A | Heterozygous |
| NC_037646.1 | 5389134 | SNV | 1 | G | A | Heterozygous |
| NC_037646.1 | 5389176 | SNV | 1 | A | G | Heterozygous |
| NC_037646.1 | 5389220 | SNV | 1 | G | A | Heterozygous |
| NC_037646.1 | 5389252 | SNV | 1 | C | T | Heterozygous |
| NC_037646.1 | 5389287 | SNV | 1 | G | A | Heterozygous |
| NC_037646.1 | 5389315 | SNV | 1 | C | G | Heterozygous |
| NC_037646.1 | 5389332 | SNV | 1 | A | C | Homozygous   |
| NC_037646.1 | 5389591 | SNV | 1 | G | A | Heterozygous |
| NC_037646.1 | 5391344 | SNV | 1 | A | G | Heterozygous |
| NC_037646.1 | 5391433 | SNV | 1 | C | T | Heterozygous |
| NC_037646.1 | 5391436 | SNV | 1 | A | T | Heterozygous |



|             |         |     |   |   |   |              |
|-------------|---------|-----|---|---|---|--------------|
| NC_037646.1 | 5391821 | SNV | 1 | C | T | Heterozygous |
| NC_037646.1 | 5392626 | SNV | 1 | T | C | Homozygous   |
| NC_037646.1 | 5393245 | SNV | 1 | A | G | Homozygous   |
| NC_037646.1 | 5393306 | SNV | 1 | T | C | Homozygous   |
| NC_037646.1 | 5393373 | SNV | 1 | G | A | Heterozygous |
| NC_037646.1 | 5393618 | SNV | 1 | T | C | Homozygous   |
| NC_037646.1 | 5393659 | SNV | 1 | C | T | Heterozygous |
| NC_037646.1 | 5393819 | SNV | 1 | C | T | Heterozygous |
| NC_037646.1 | 5393834 | SNV | 1 | T | C | Heterozygous |
| NC_037646.1 | 5393841 | SNV | 1 | T | C | Homozygous   |
| NC_037646.1 | 5394220 | SNV | 1 | G | C | Heterozygous |
| NC_037646.1 | 5394277 | SNV | 1 | T | C | Heterozygous |
| NC_037646.1 | 5394280 | SNV | 1 | C | A | Heterozygous |
| NC_037646.1 | 5394447 | SNV | 1 | A | G | Heterozygous |
| NC_037646.1 | 5394599 | SNV | 1 | G | A | Homozygous   |
| NC_037646.1 | 5395001 | SNV | 1 | G | C | Homozygous   |
| NC_037646.1 | 5395006 | SNV | 1 | T | C | Heterozygous |
| NC_037646.1 | 5395007 | SNV | 1 | G | T | Heterozygous |
| NC_037646.1 | 5395044 | SNV | 1 | A | G | Heterozygous |
| NC_037646.1 | 5396014 | SNV | 1 | T | C | Homozygous   |
| NC_037646.1 | 5396184 | SNV | 1 | T | C | Heterozygous |
| NC_037646.1 | 5396229 | SNV | 1 | G | A | Homozygous   |
| NC_037646.1 | 5398067 | SNV | 1 | A | G | Homozygous   |
| NC_037646.1 | 5398091 | SNV | 1 | T | A | Homozygous   |
| NC_037646.1 | 5399187 | SNV | 1 | T | C | Heterozygous |
| NC_037646.1 | 5399532 | SNV | 1 | G | A | Heterozygous |
| NC_037646.1 | 5400996 | SNV | 1 | T | C | Homozygous   |
| NC_037646.1 | 5401011 | SNV | 1 | C | T | Heterozygous |
| NC_037646.1 | 5401158 | SNV | 1 | T | C | Homozygous   |
| NC_037646.1 | 5401421 | SNV | 1 | A | G | Homozygous   |
| NC_037646.1 | 5401685 | SNV | 1 | C | G | Homozygous   |
| NC_037646.1 | 5402021 | SNV | 1 | G | A | Heterozygous |
| NC_037646.1 | 5402978 | SNV | 1 | G | A | Heterozygous |
| NC_037646.1 | 5402996 | SNV | 1 | G | C | Heterozygous |
| NC_037646.1 | 5404258 | SNV | 1 | T | C | Homozygous   |
| NC_037646.1 | 5405262 | SNV | 1 | G | A | Homozygous   |
| NC_037646.1 | 5405432 | SNV | 1 | T | C | Homozygous   |
| NC_037646.1 | 5407772 | SNV | 1 | T | C | Homozygous   |
| NC_037646.1 | 5407806 | SNV | 1 | A | G | Homozygous   |
| NC_037646.1 | 5409151 | SNV | 1 | C | T | Heterozygous |
| NC_037646.1 | 5409228 | SNV | 1 | A | G | Heterozygous |
| NC_037646.1 | 5410967 | SNV | 1 | T | G | Homozygous   |
| NC_037646.1 | 5410999 | SNV | 1 | G | A | Homozygous   |
| NC_037646.1 | 5411136 | SNV | 1 | C | G | Heterozygous |
| NC_037646.1 | 5411195 | SNV | 1 | G | A | Heterozygous |
| NC_037646.1 | 5411195 | SNV | 1 | G | C | Heterozygous |
| NC_037646.1 | 5411248 | SNV | 1 | A | G | Homozygous   |
| NC_037646.1 | 5411370 | SNV | 1 | C | T | Heterozygous |
| NC_037646.1 | 5411417 | SNV | 1 | A | G | Heterozygous |
| NC_037646.1 | 5413146 | SNV | 1 | G | A | Homozygous   |
| NC_037646.1 | 5413713 | SNV | 1 | G | C | Heterozygous |

|             |         |     |   |   |   |              |
|-------------|---------|-----|---|---|---|--------------|
| NC_037646.1 | 5413729 | SNV | 1 | G | A | Heterozygous |
| NC_037646.1 | 5417288 | SNV | 1 | T | C | Heterozygous |
| NC_037646.1 | 5446029 | SNV | 1 | G | A | Homozygous   |
| NC_037646.1 | 5446165 | SNV | 1 | C | T | Homozygous   |
| NC_037646.1 | 5448208 | SNV | 1 | T | A | Homozygous   |
| NC_037646.1 | 5448230 | SNV | 1 | T | A | Homozygous   |
| NC_037646.1 | 5448233 | SNV | 1 | T | C | Homozygous   |
| NC_037646.1 | 5455077 | SNV | 1 | C | T | Heterozygous |
| NC_037646.1 | 5455137 | SNV | 1 | A | G | Homozygous   |
| NC_037646.1 | 5455156 | SNV | 1 | T | C | Heterozygous |
| NC_037646.1 | 5463823 | SNV | 1 | A | G | Heterozygous |
| NC_037646.1 | 5463905 | SNV | 1 | T | C | Homozygous   |
| NC_037646.1 | 5470638 | SNV | 1 | A | T | Heterozygous |
| NC_037646.1 | 5471005 | SNV | 1 | T | C | Homozygous   |
| NC_037646.1 | 5471008 | SNV | 1 | A | G | Homozygous   |
| NC_037646.1 | 5471022 | SNV | 1 | A | G | Homozygous   |
| NC_037646.1 | 5471048 | SNV | 1 | A | G | Homozygous   |
| NC_037646.1 | 5471051 | SNV | 1 | G | A | Heterozygous |
| NC_037646.1 | 5471056 | SNV | 1 | T | C | Heterozygous |
| NC_037646.1 | 5471059 | SNV | 1 | A | G | Heterozygous |
| NC_037646.1 | 5471070 | SNV | 1 | G | C | Heterozygous |
| NC_037646.1 | 5471089 | SNV | 1 | T | C | Homozygous   |
| NC_037646.1 | 5471105 | SNV | 1 | A | G | Homozygous   |
| NC_037646.1 | 5471143 | SNV | 1 | T | C | Homozygous   |
| NC_037646.1 | 5471210 | SNV | 1 | T | C | Homozygous   |
| NC_037646.1 | 5471234 | SNV | 1 | C | T | Homozygous   |
| NC_037646.1 | 5471245 | SNV | 1 | C | T | Heterozygous |
| NC_037646.1 | 5471341 | SNV | 1 | T | C | Heterozygous |
| NC_037646.1 | 5471381 | SNV | 1 | T | C | Homozygous   |
| NC_037646.1 | 5471605 | SNV | 1 | C | T | Homozygous   |
| NC_037646.1 | 5474245 | SNV | 1 | T | C | Homozygous   |
| NC_037646.1 | 5476577 | SNV | 1 | C | T | Heterozygous |
| NC_037646.1 | 5479784 | SNV | 1 | T | G | Heterozygous |
| NC_037646.1 | 5479811 | SNV | 1 | C | G | Homozygous   |
| NC_037646.1 | 5480226 | SNV | 1 | G | A | Homozygous   |
| NC_037646.1 | 5480296 | SNV | 1 | T | C | Homozygous   |
| NC_037646.1 | 5480543 | SNV | 1 | T | C | Homozygous   |
| NC_037646.1 | 5481215 | SNV | 1 | A | T | Homozygous   |
| NC_037646.1 | 5481450 | SNV | 1 | T | C | Heterozygous |
| NC_037646.1 | 5481998 | SNV | 1 | T | C | Homozygous   |
| NC_037646.1 | 5482176 | SNV | 1 | G | A | Homozygous   |
| NC_037646.1 | 5482202 | SNV | 1 | C | T | Heterozygous |
| NC_037646.1 | 5482786 | SNV | 1 | T | C | Homozygous   |
| NC_037646.1 | 5482908 | SNV | 1 | T | A | Heterozygous |
| NC_037646.1 | 5482975 | SNV | 1 | G | A | Homozygous   |
| NC_037646.1 | 5484987 | SNV | 1 | A | T | Heterozygous |
| NC_037646.1 | 5484996 | SNV | 1 | A | T | Heterozygous |
| NC_037646.1 | 5487318 | SNV | 1 | C | T | Heterozygous |
| NC_037646.1 | 5487327 | SNV | 1 | A | G | Homozygous   |
| NC_037646.1 | 5487340 | SNV | 1 | T | C | Homozygous   |
| NC_037646.1 | 5487442 | SNV | 1 | T | C | Heterozygous |

|             |         |     |   |   |   |              |
|-------------|---------|-----|---|---|---|--------------|
| NC_037646.1 | 5487565 | SNV | 1 | T | C | Heterozygous |
| NC_037646.1 | 5487627 | SNV | 1 | G | A | Homozygous   |
| NC_037646.1 | 5487708 | SNV | 1 | G | A | Heterozygous |
| NC_037646.1 | 5487733 | SNV | 1 | T | C | Heterozygous |
| NC_037646.1 | 5487747 | SNV | 1 | G | C | Heterozygous |
| NC_037646.1 | 5488000 | SNV | 1 | T | C | Homozygous   |
| NC_037646.1 | 5488097 | SNV | 1 | A | G | Heterozygous |
| NC_037646.1 | 5488327 | SNV | 1 | T | A | Homozygous   |
| NC_037646.1 | 5488332 | SNV | 1 | C | T | Heterozygous |
| NC_037646.1 | 5488368 | SNV | 1 | G | A | Heterozygous |
| NC_037646.1 | 5488472 | SNV | 1 | C | T | Heterozygous |
| NC_037646.1 | 5488606 | SNV | 1 | A | C | Heterozygous |
| NC_037646.1 | 5488620 | SNV | 1 | G | A | Homozygous   |
| NC_037646.1 | 5488631 | SNV | 1 | A | G | Homozygous   |
| NC_037646.1 | 5488639 | SNV | 1 | C | T | Homozygous   |
| NC_037646.1 | 5488645 | SNV | 1 | G | A | Homozygous   |
| NC_037646.1 | 5488651 | SNV | 1 | C | T | Heterozygous |
| NC_037646.1 | 5488670 | SNV | 1 | C | T | Heterozygous |
| NC_037646.1 | 5488674 | SNV | 1 | G | A | Heterozygous |
| NC_037646.1 | 5488677 | SNV | 1 | T | C | Heterozygous |
| NC_037646.1 | 5488777 | SNV | 1 | A | T | Homozygous   |
| NC_037646.1 | 5488780 | SNV | 1 | C | G | Homozygous   |
| NC_037646.1 | 5488796 | SNV | 1 | T | C | Homozygous   |
| NC_037646.1 | 5488818 | SNV | 1 | A | G | Homozygous   |
| NC_037646.1 | 5488935 | SNV | 1 | G | A | Heterozygous |
| NC_037646.1 | 5489076 | SNV | 1 | C | T | Homozygous   |
| NC_037646.1 | 5489462 | SNV | 1 | A | T | Heterozygous |
| NC_037646.1 | 5489466 | SNV | 1 | A | G | Heterozygous |
| NC_037646.1 | 5489471 | SNV | 1 | T | C | Homozygous   |
| NC_037646.1 | 5489485 | SNV | 1 | T | A | Heterozygous |
| NC_037646.1 | 5489506 | SNV | 1 | G | A | Heterozygous |
| NC_037646.1 | 5491137 | SNV | 1 | C | T | Homozygous   |
| NC_037646.1 | 5491139 | SNV | 1 | T | C | Heterozygous |
| NC_037646.1 | 5493037 | SNV | 1 | G | A | Homozygous   |
| NC_037646.1 | 5493164 | SNV | 1 | G | C | Homozygous   |
| NC_037646.1 | 5493310 | SNV | 1 | G | A | Heterozygous |
| NC_037646.1 | 5493338 | SNV | 1 | T | C | Heterozygous |
| NC_037646.1 | 5493477 | SNV | 1 | A | G | Heterozygous |
| NC_037646.1 | 5493498 | SNV | 1 | T | C | Homozygous   |
| NC_037646.1 | 5493782 | SNV | 1 | C | T | Homozygous   |
| NC_037646.1 | 5494184 | SNV | 1 | A | G | Heterozygous |
| NC_037646.1 | 5494206 | SNV | 1 | T | C | Homozygous   |
| NC_037646.1 | 5494679 | SNV | 1 | T | C | Heterozygous |
| NC_037646.1 | 5494728 | SNV | 1 | A | G | Homozygous   |
| NC_037646.1 | 5494787 | SNV | 1 | G | A | Homozygous   |
| NC_037646.1 | 5494801 | SNV | 1 | A | T | Homozygous   |
| NC_037646.1 | 5495046 | SNV | 1 | T | C | Homozygous   |
| NC_037646.1 | 5495165 | SNV | 1 | T | C | Homozygous   |
| NC_037646.1 | 5495231 | SNV | 1 | C | T | Heterozygous |
| NC_037646.1 | 5495310 | SNV | 1 | G | A | Heterozygous |
| NC_037646.1 | 5495435 | SNV | 1 | T | C | Heterozygous |

|             |         |     |   |   |   |              |
|-------------|---------|-----|---|---|---|--------------|
| NC_037646.1 | 5496411 | SNV | 1 | T | C | Homozygous   |
| NC_037646.1 | 5496995 | SNV | 1 | C | T | Homozygous   |
| NC_037646.1 | 5497168 | SNV | 1 | T | C | Homozygous   |
| NC_037646.1 | 5497176 | SNV | 1 | T | C | Heterozygous |
| NC_037646.1 | 5497189 | SNV | 1 | A | G | Homozygous   |
| NC_037646.1 | 5497204 | SNV | 1 | C | A | Heterozygous |
| NC_037646.1 | 5497244 | SNV | 1 | T | C | Heterozygous |
| NC_037646.1 | 5497314 | SNV | 1 | G | A | Heterozygous |
| NC_037646.1 | 5497316 | SNV | 1 | C | T | Homozygous   |
| NC_037646.1 | 5497387 | SNV | 1 | T | A | Homozygous   |
| NC_037646.1 | 5497394 | SNV | 1 | T | C | Homozygous   |
| NC_037646.1 | 5497398 | SNV | 1 | A | G | Homozygous   |
| NC_037646.1 | 5497572 | SNV | 1 | A | G | Heterozygous |
| NC_037646.1 | 5497589 | SNV | 1 | C | G | Heterozygous |
| NC_037646.1 | 5497617 | SNV | 1 | T | C | Homozygous   |
| NC_037646.1 | 5497629 | SNV | 1 | A | G | Homozygous   |
| NC_037646.1 | 5497945 | SNV | 1 | T | G | Homozygous   |
| NC_037646.1 | 5497947 | SNV | 1 | G | A | Heterozygous |
| NC_037646.1 | 5498573 | SNV | 1 | T | C | Homozygous   |
| NC_037646.1 | 5499172 | SNV | 1 | A | G | Heterozygous |
| NC_037646.1 | 5499245 | SNV | 1 | T | C | Heterozygous |
| NC_037646.1 | 5499249 | SNV | 1 | T | C | Heterozygous |
| NC_037646.1 | 5499335 | SNV | 1 | T | C | Heterozygous |
| NC_037646.1 | 5499573 | SNV | 1 | A | G | Homozygous   |
| NC_037646.1 | 5499787 | SNV | 1 | A | C | Homozygous   |
| NC_037646.1 | 5500116 | SNV | 1 | T | C | Homozygous   |
| NC_037646.1 | 5500309 | SNV | 1 | T | C | Heterozygous |
| NC_037646.1 | 5500507 | SNV | 1 | T | C | Homozygous   |
| NC_037646.1 | 5515998 | SNV | 1 | C | T | Heterozygous |
| NC_037646.1 | 5516377 | SNV | 1 | T | C | Heterozygous |
| NC_037646.1 | 5516477 | SNV | 1 | C | T | Heterozygous |
| NC_037646.1 | 5516578 | SNV | 1 | T | G | Homozygous   |
| NC_037646.1 | 5517600 | SNV | 1 | G | T | Heterozygous |
| NC_037646.1 | 5517607 | SNV | 1 | T | A | Heterozygous |
| NC_037646.1 | 5517796 | SNV | 1 | G | A | Heterozygous |
| NC_037646.1 | 5517799 | SNV | 1 | A | G | Heterozygous |
| NC_037646.1 | 5517801 | SNV | 1 | A | G | Heterozygous |
| NC_037646.1 | 5519043 | SNV | 1 | A | T | Heterozygous |
| NC_037646.1 | 5519289 | SNV | 1 | A | G | Homozygous   |
| NC_037646.1 | 5519345 | SNV | 1 | T | A | Homozygous   |
| NC_037646.1 | 5519588 | SNV | 1 | G | A | Heterozygous |
| NC_037646.1 | 5519603 | SNV | 1 | C | T | Heterozygous |
| NC_037646.1 | 5519607 | SNV | 1 | T | C | Homozygous   |
| NC_037646.1 | 5520756 | SNV | 1 | G | A | Homozygous   |
| NC_037646.1 | 5521084 | SNV | 1 | T | C | Homozygous   |
| NC_037646.1 | 5521103 | SNV | 1 | T | C | Homozygous   |
| NC_037646.1 | 5521171 | SNV | 1 | G | A | Heterozygous |
| NC_037646.1 | 5521182 | SNV | 1 | G | A | Heterozygous |
| NC_037646.1 | 5521191 | SNV | 1 | T | G | Homozygous   |
| NC_037646.1 | 5521753 | SNV | 1 | G | A | Heterozygous |
| NC_037646.1 | 5524112 | SNV | 1 | T | C | Homozygous   |

|             |         |     |   |   |   |              |
|-------------|---------|-----|---|---|---|--------------|
| NC_037646.1 | 5524394 | SNV | 1 | A | G | Heterozygous |
| NC_037646.1 | 5524396 | SNV | 1 | T | C | Heterozygous |
| NC_037646.1 | 5524396 | SNV | 1 | T | G | Heterozygous |
| NC_037646.1 | 5524412 | SNV | 1 | T | C | Heterozygous |
| NC_037646.1 | 5524500 | SNV | 1 | G | A | Heterozygous |
| NC_037646.1 | 5524671 | SNV | 1 | A | T | Heterozygous |
| NC_037646.1 | 5524919 | SNV | 1 | T | C | Heterozygous |
| NC_037646.1 | 5525140 | SNV | 1 | A | G | Heterozygous |
| NC_037646.1 | 5525377 | SNV | 1 | G | A | Heterozygous |
| NC_037646.1 | 5525639 | SNV | 1 | A | G | Homozygous   |
| NC_037646.1 | 5525641 | SNV | 1 | A | G | Homozygous   |
| NC_037646.1 | 5525829 | SNV | 1 | T | C | Homozygous   |
| NC_037646.1 | 5525846 | SNV | 1 | T | C | Homozygous   |
| NC_037646.1 | 5525888 | SNV | 1 | C | T | Heterozygous |
| NC_037646.1 | 5526111 | SNV | 1 | A | G | Homozygous   |
| NC_037646.1 | 5526253 | SNV | 1 | C | T | Heterozygous |
| NC_037646.1 | 5526294 | SNV | 1 | T | A | Heterozygous |
| NC_037646.1 | 5526323 | SNV | 1 | G | C | Heterozygous |
| NC_037646.1 | 5526339 | SNV | 1 | G | A | Homozygous   |
| NC_037646.1 | 5526374 | SNV | 1 | C | G | Homozygous   |
| NC_037646.1 | 5526399 | SNV | 1 | C | T | Heterozygous |
| NC_037646.1 | 5526402 | SNV | 1 | G | A | Heterozygous |
| NC_037646.1 | 5526420 | SNV | 1 | A | G | Homozygous   |
| NC_037646.1 | 5526789 | SNV | 1 | T | C | Heterozygous |
| NC_037646.1 | 5527103 | SNV | 1 | A | G | Homozygous   |
| NC_037646.1 | 5527297 | SNV | 1 | A | G | Heterozygous |
| NC_037646.1 | 5533388 | SNV | 1 | G | T | Heterozygous |
| NC_037646.1 | 5533749 | SNV | 1 | A | G | Homozygous   |
| NC_037646.1 | 5533787 | SNV | 1 | G | T | Homozygous   |
| NC_037646.1 | 5533791 | SNV | 1 | C | T | Homozygous   |
| NC_037646.1 | 5533796 | SNV | 1 | T | C | Homozygous   |
| NC_037646.1 | 5533798 | SNV | 1 | C | T | Homozygous   |
| NC_037646.1 | 5534010 | SNV | 1 | G | C | Homozygous   |
| NC_037646.1 | 5534608 | SNV | 1 | G | A | Heterozygous |
| NC_037646.1 | 5536027 | SNV | 1 | A | G | Heterozygous |
| NC_037646.1 | 5536029 | SNV | 1 | A | G | Heterozygous |
| NC_037646.1 | 5536057 | SNV | 1 | T | G | Homozygous   |
| NC_037646.1 | 5536117 | SNV | 1 | T | A | Homozygous   |
| NC_037646.1 | 5536120 | SNV | 1 | A | G | Homozygous   |
| NC_037646.1 | 5536155 | SNV | 1 | A | G | Homozygous   |
| NC_037646.1 | 5536306 | SNV | 1 | A | C | Heterozygous |
| NC_037646.1 | 5536329 | SNV | 1 | T | G | Homozygous   |
| NC_037646.1 | 5536343 | SNV | 1 | A | G | Heterozygous |
| NC_037646.1 | 5537603 | SNV | 1 | C | T | Homozygous   |
| NC_037646.1 | 5537606 | SNV | 1 | G | A | Homozygous   |
| NC_037646.1 | 5537634 | SNV | 1 | A | G | Heterozygous |
| NC_037646.1 | 5537867 | SNV | 1 | G | C | Homozygous   |
| NC_037646.1 | 5537900 | SNV | 1 | C | G | Heterozygous |
| NC_037646.1 | 5542038 | SNV | 1 | A | G | Homozygous   |
| NC_037646.1 | 5545484 | SNV | 1 | T | C | Homozygous   |
| NC_037646.1 | 5545641 | SNV | 1 | C | T | Heterozygous |

|             |         |     |   |   |   |              |
|-------------|---------|-----|---|---|---|--------------|
| NC_037646.1 | 5545698 | SNV | 1 | G | A | Heterozygous |
| NC_037646.1 | 5545704 | SNV | 1 | G | A | Heterozygous |
| NC_037646.1 | 5546474 | SNV | 1 | C | T | Heterozygous |
| NC_037646.1 | 5547101 | SNV | 1 | A | G | Heterozygous |
| NC_037646.1 | 5547104 | SNV | 1 | A | C | Heterozygous |
| NC_037646.1 | 5558762 | SNV | 1 | G | A | Heterozygous |
| NC_037646.1 | 5558815 | SNV | 1 | C | A | Homozygous   |
| NC_037646.1 | 5560076 | SNV | 1 | C | T | Homozygous   |
| NC_037646.1 | 5560079 | SNV | 1 | G | A | Homozygous   |
| NC_037646.1 | 5560082 | SNV | 1 | T | C | Homozygous   |
| NC_037646.1 | 5560090 | SNV | 1 | T | C | Homozygous   |
| NC_037646.1 | 5560094 | SNV | 1 | T | C | Homozygous   |
| NC_037646.1 | 5560098 | SNV | 1 | A | C | Homozygous   |
| NC_037646.1 | 5560101 | SNV | 1 | T | A | Homozygous   |
| NC_037646.1 | 5564474 | SNV | 1 | T | G | Homozygous   |
| NC_037646.1 | 5564645 | SNV | 1 | A | G | Homozygous   |
| NC_037646.1 | 5569820 | SNV | 1 | C | T | Heterozygous |
| NC_037646.1 | 5593436 | SNV | 1 | A | G | Homozygous   |
| NC_037646.1 | 5593548 | SNV | 1 | C | A | Heterozygous |
| NC_037646.1 | 5593548 | SNV | 1 | C | T | Heterozygous |
| NC_037646.1 | 5593557 | SNV | 1 | T | C | Homozygous   |
| NC_037646.1 | 5593577 | SNV | 1 | A | C | Homozygous   |
| NC_037646.1 | 5593583 | SNV | 1 | T | C | Homozygous   |
| NC_037646.1 | 5593853 | SNV | 1 | G | A | Homozygous   |
| NC_037646.1 | 5594009 | SNV | 1 | G | A | Homozygous   |
| NC_037646.1 | 5601120 | SNV | 1 | T | C | Homozygous   |
| NC_037646.1 | 5601139 | SNV | 1 | T | C | Homozygous   |
| NC_037646.1 | 5610254 | SNV | 1 | C | T | Homozygous   |
| NC_037646.1 | 5610257 | SNV | 1 | C | T | Homozygous   |
| NC_037646.1 | 5616539 | SNV | 1 | T | C | Homozygous   |
| NC_037646.1 | 5622017 | SNV | 1 | C | T | Heterozygous |
| NC_037646.1 | 5622179 | SNV | 1 | A | G | Heterozygous |
| NC_037646.1 | 5622436 | SNV | 1 | T | C | Homozygous   |
| NC_037646.1 | 5622466 | SNV | 1 | T | C | Homozygous   |
| NC_037646.1 | 5624399 | SNV | 1 | T | C | Heterozygous |
| NC_037646.1 | 5629095 | SNV | 1 | C | T | Homozygous   |
| NC_037646.1 | 5629386 | SNV | 1 | C | T | Heterozygous |
| NC_037646.1 | 5629394 | SNV | 1 | T | C | Homozygous   |
| NC_037646.1 | 5629469 | SNV | 1 | A | G | Homozygous   |
| NC_037646.1 | 5631511 | SNV | 1 | G | A | Homozygous   |
| NC_037646.1 | 5631583 | SNV | 1 | T | C | Heterozygous |
| NC_037646.1 | 5631596 | SNV | 1 | A | G | Heterozygous |
| NC_037646.1 | 5631602 | SNV | 1 | G | A | Heterozygous |
| NC_037646.1 | 5631621 | SNV | 1 | T | C | Heterozygous |
| NC_037646.1 | 5643239 | SNV | 1 | T | C | Heterozygous |
| NC_037646.1 | 5643350 | SNV | 1 | C | T | Heterozygous |
| NC_037646.1 | 5643355 | SNV | 1 | A | G | Homozygous   |
| NC_037646.1 | 5643359 | SNV | 1 | T | C | Homozygous   |
| NC_037646.1 | 5643366 | SNV | 1 | C | T | Heterozygous |
| NC_037646.1 | 5643369 | SNV | 1 | C | T | Heterozygous |
| NC_037646.1 | 5643424 | SNV | 1 | G | A | Heterozygous |

|             |         |     |   |   |   |              |
|-------------|---------|-----|---|---|---|--------------|
| NC_037646.1 | 5655898 | SNV | 1 | G | A | Heterozygous |
| NC_037646.1 | 5670080 | SNV | 1 | G | A | Heterozygous |
| NC_037646.1 | 5670171 | SNV | 1 | A | C | Heterozygous |
| NC_037646.1 | 5670245 | SNV | 1 | C | T | Homozygous   |
| NC_037646.1 | 5670484 | SNV | 1 | G | A | Homozygous   |
| NC_037646.1 | 5674531 | SNV | 1 | G | C | Heterozygous |
| NC_037646.1 | 5674531 | SNV | 1 | G | T | Heterozygous |
| NC_037646.1 | 5674563 | SNV | 1 | C | T | Homozygous   |
| NC_037646.1 | 5674572 | SNV | 1 | C | T | Heterozygous |
| NC_037646.1 | 5674619 | SNV | 1 | G | A | Homozygous   |
| NC_037646.1 | 5674744 | SNV | 1 | C | G | Heterozygous |
| NC_037646.1 | 5674846 | SNV | 1 | G | C | Homozygous   |
| NC_037646.1 | 5674848 | SNV | 1 | T | G | Homozygous   |
| NC_037646.1 | 5674890 | SNV | 1 | C | T | Heterozygous |
| NC_037646.1 | 5674894 | SNV | 1 | C | T | Heterozygous |
| NC_037646.1 | 5682125 | SNV | 1 | C | T | Homozygous   |
| NC_037646.1 | 5682141 | SNV | 1 | T | C | Homozygous   |
| NC_037646.1 | 5682164 | SNV | 1 | A | C | Homozygous   |
| NC_037646.1 | 5682194 | SNV | 1 | C | T | Heterozygous |
| NC_037646.1 | 5684311 | SNV | 1 | T | C | Heterozygous |
| NC_037646.1 | 5684394 | SNV | 1 | C | G | Homozygous   |
| NC_037646.1 | 5685804 | SNV | 1 | A | G | Homozygous   |
| NC_037646.1 | 5685990 | SNV | 1 | C | G | Homozygous   |
| NC_037646.1 | 5686029 | SNV | 1 | T | C | Homozygous   |
| NC_037646.1 | 5686285 | SNV | 1 | A | G | Homozygous   |
| NC_037646.1 | 5686568 | SNV | 1 | A | G | Homozygous   |
| NC_037646.1 | 5686786 | SNV | 1 | C | G | Heterozygous |
| NC_037646.1 | 5686814 | SNV | 1 | C | T | Homozygous   |
| NC_037646.1 | 5686821 | SNV | 1 | A | G | Homozygous   |
| NC_037646.1 | 5686903 | SNV | 1 | C | A | Heterozygous |
| NC_037646.1 | 5688457 | SNV | 1 | G | A | Heterozygous |
| NC_037646.1 | 5688631 | SNV | 1 | C | G | Homozygous   |
| NC_037646.1 | 5688704 | SNV | 1 | A | G | Heterozygous |
| NC_037646.1 | 5688809 | SNV | 1 | C | T | Heterozygous |
| NC_037646.1 | 5688811 | SNV | 1 | G | C | Heterozygous |
| NC_037646.1 | 5688826 | SNV | 1 | T | C | Homozygous   |
| NC_037646.1 | 5689626 | SNV | 1 | T | C | Homozygous   |
| NC_037646.1 | 5689932 | SNV | 1 | A | G | Heterozygous |
| NC_037646.1 | 5689948 | SNV | 1 | G | A | Homozygous   |
| NC_037646.1 | 5689953 | SNV | 1 | A | T | Heterozygous |
| NC_037646.1 | 5689956 | SNV | 1 | C | T | Heterozygous |
| NC_037646.1 | 5690007 | SNV | 1 | G | C | Heterozygous |
| NC_037646.1 | 5690008 | SNV | 1 | G | T | Heterozygous |
| NC_037646.1 | 5690114 | SNV | 1 | G | A | Heterozygous |
| NC_037646.1 | 5710194 | SNV | 1 | C | T | Heterozygous |
| NC_037646.1 | 5710200 | SNV | 1 | C | T | Homozygous   |
| NC_037646.1 | 5710215 | SNV | 1 | A | T | Heterozygous |
| NC_037646.1 | 5711310 | SNV | 1 | C | T | Homozygous   |
| NC_037646.1 | 5711326 | SNV | 1 | C | T | Heterozygous |
| NC_037646.1 | 5711636 | SNV | 1 | C | T | Heterozygous |
| NC_037646.1 | 5739314 | SNV | 1 | G | T | Homozygous   |

|             |         |     |   |   |   |              |
|-------------|---------|-----|---|---|---|--------------|
| NC_037646.1 | 5739319 | SNV | 1 | T | A | Homozygous   |
| NC_037646.1 | 5752056 | SNV | 1 | G | C | Homozygous   |
| NC_037646.1 | 5754586 | SNV | 1 | G | A | Homozygous   |
| NC_037646.1 | 5754620 | SNV | 1 | G | C | Homozygous   |
| NC_037646.1 | 5762393 | SNV | 1 | A | T | Homozygous   |
| NC_037646.1 | 5763522 | SNV | 1 | T | G | Homozygous   |
| NC_037646.1 | 5763525 | SNV | 1 | G | A | Homozygous   |
| NC_037646.1 | 5765062 | SNV | 1 | T | A | Homozygous   |
| NC_037646.1 | 5765275 | SNV | 1 | T | A | Heterozygous |
| NC_037646.1 | 5767559 | SNV | 1 | C | T | Homozygous   |
| NC_037646.1 | 5767930 | SNV | 1 | T | A | Homozygous   |
| NC_037646.1 | 5767932 | SNV | 1 | C | T | Homozygous   |
| NC_037646.1 | 5774008 | SNV | 1 | A | G | Homozygous   |
| NC_037646.1 | 5783122 | SNV | 1 | A | G | Homozygous   |
| NC_037646.1 | 5783301 | SNV | 1 | G | A | Homozygous   |
| NC_037646.1 | 5784900 | SNV | 1 | T | G | Heterozygous |
| NC_037646.1 | 5784902 | SNV | 1 | A | T | Heterozygous |
| NC_037646.1 | 5785549 | SNV | 1 | T | C | Homozygous   |
| NC_037646.1 | 5785583 | SNV | 1 | T | A | Homozygous   |
| NC_037646.1 | 5785585 | SNV | 1 | T | A | Homozygous   |
| NC_037646.1 | 5795905 | SNV | 1 | G | A | Heterozygous |
| NC_037646.1 | 5795908 | SNV | 1 | G | T | Heterozygous |
| NC_037646.1 | 5796052 | SNV | 1 | A | G | Heterozygous |
| NC_037646.1 | 5796056 | SNV | 1 | G | A | Heterozygous |
| NC_037646.1 | 5796062 | SNV | 1 | G | A | Homozygous   |
| NC_037646.1 | 5796069 | SNV | 1 | C | T | Homozygous   |
| NC_037646.1 | 5796100 | SNV | 1 | A | G | Heterozygous |
| NC_037646.1 | 5796285 | SNV | 1 | A | T | Heterozygous |
| NC_037646.1 | 5796347 | SNV | 1 | G | A | Heterozygous |
| NC_037646.1 | 5796360 | SNV | 1 | T | G | Heterozygous |
| NC_037646.1 | 5796387 | SNV | 1 | T | C | Heterozygous |
| NC_037646.1 | 5797131 | SNV | 1 | T | C | Heterozygous |
| NC_037646.1 | 5797141 | SNV | 1 | T | C | Heterozygous |
| NC_037646.1 | 5797151 | SNV | 1 | T | C | Heterozygous |
| NC_037646.1 | 5797301 | SNV | 1 | A | T | Homozygous   |
| NC_037646.1 | 5797336 | SNV | 1 | T | A | Homozygous   |
| NC_037646.1 | 5797361 | SNV | 1 | A | T | Homozygous   |
| NC_037646.1 | 5797371 | SNV | 1 | A | T | Homozygous   |
| NC_037646.1 | 5797382 | SNV | 1 | A | G | Homozygous   |
| NC_037646.1 | 5797569 | SNV | 1 | G | A | Heterozygous |
| NC_037646.1 | 5797662 | SNV | 1 | C | G | Homozygous   |
| NC_037646.1 | 5797668 | SNV | 1 | A | G | Homozygous   |
| NC_037646.1 | 5797681 | SNV | 1 | G | T | Homozygous   |
| NC_037646.1 | 5797687 | SNV | 1 | T | C | Heterozygous |
| NC_037646.1 | 5797692 | SNV | 1 | A | G | Heterozygous |
| NC_037646.1 | 5797725 | SNV | 1 | A | G | Heterozygous |
| NC_037646.1 | 5797731 | SNV | 1 | G | T | Homozygous   |
| NC_037646.1 | 5797746 | SNV | 1 | G | A | Heterozygous |
| NC_037646.1 | 5797812 | SNV | 1 | A | G | Heterozygous |
| NC_037646.1 | 5797815 | SNV | 1 | G | A | Heterozygous |
| NC_037646.1 | 5797865 | SNV | 1 | A | G | Homozygous   |



|             |         |     |   |   |   |              |
|-------------|---------|-----|---|---|---|--------------|
| NC_037646.1 | 5797999 | SNV | 1 | A | C | Heterozygous |
| NC_037646.1 | 5798005 | SNV | 1 | A | G | Heterozygous |
| NC_037646.1 | 5798016 | SNV | 1 | A | T | Homozygous   |
| NC_037646.1 | 5798053 | SNV | 1 | A | T | Heterozygous |
| NC_037646.1 | 5798065 | SNV | 1 | A | T | Heterozygous |
| NC_037646.1 | 5798074 | SNV | 1 | A | T | Heterozygous |
| NC_037646.1 | 5798108 | SNV | 1 | G | A | Homozygous   |
| NC_037646.1 | 5798138 | SNV | 1 | A | G | Heterozygous |
| NC_037646.1 | 5798153 | SNV | 1 | G | A | Heterozygous |
| NC_037646.1 | 5798314 | SNV | 1 | A | T | Homozygous   |
| NC_037646.1 | 5798362 | SNV | 1 | A | T | Heterozygous |
| NC_037646.1 | 5798368 | SNV | 1 | G | A | Homozygous   |
| NC_037646.1 | 5798371 | SNV | 1 | G | A | Homozygous   |
| NC_037646.1 | 5798377 | SNV | 1 | G | A | Homozygous   |
| NC_037646.1 | 5798485 | SNV | 1 | G | A | Heterozygous |
| NC_037646.1 | 5798487 | SNV | 1 | T | A | Heterozygous |
| NC_037646.1 | 5798516 | SNV | 1 | A | T | Homozygous   |
| NC_037646.1 | 5798522 | SNV | 1 | A | T | Heterozygous |
| NC_037646.1 | 5798525 | SNV | 1 | A | T | Homozygous   |
| NC_037646.1 | 5798558 | SNV | 1 | C | T | Homozygous   |
| NC_037646.1 | 5798570 | SNV | 1 | G | A | Heterozygous |
| NC_037646.1 | 5798570 | SNV | 1 | G | C | Heterozygous |
| NC_037646.1 | 5798574 | SNV | 1 | C | T | Homozygous   |
| NC_037646.1 | 5798582 | SNV | 1 | C | A | Homozygous   |
| NC_037646.1 | 5798585 | SNV | 1 | A | C | Heterozygous |
| NC_037646.1 | 5798588 | SNV | 1 | C | A | Homozygous   |
| NC_037646.1 | 5798594 | SNV | 1 | C | A | Homozygous   |
| NC_037646.1 | 5798712 | SNV | 1 | T | G | Heterozygous |
| NC_037646.1 | 5798719 | SNV | 1 | G | A | Homozygous   |
| NC_037646.1 | 5798721 | SNV | 1 | G | T | Homozygous   |
| NC_037646.1 | 5798727 | SNV | 1 | T | A | Homozygous   |
| NC_037646.1 | 5798810 | SNV | 1 | A | G | Heterozygous |
| NC_037646.1 | 5798848 | SNV | 1 | A | G | Heterozygous |
| NC_037646.1 | 5798856 | SNV | 1 | T | C | Heterozygous |
| NC_037646.1 | 5798965 | SNV | 1 | A | G | Heterozygous |
| NC_037646.1 | 5798968 | SNV | 1 | A | G | Heterozygous |
| NC_037646.1 | 5798971 | SNV | 1 | A | G | Heterozygous |
| NC_037646.1 | 5798976 | SNV | 1 | A | C | Homozygous   |
| NC_037646.1 | 5798980 | SNV | 1 | G | A | Homozygous   |
| NC_037646.1 | 5798985 | SNV | 1 | T | C | Heterozygous |
| NC_037646.1 | 5799188 | SNV | 1 | A | G | Homozygous   |
| NC_037646.1 | 5799263 | SNV | 1 | G | T | Homozygous   |
| NC_037646.1 | 5799271 | SNV | 1 | A | G | Homozygous   |
| NC_037646.1 | 5799322 | SNV | 1 | T | G | Homozygous   |
| NC_037646.1 | 5799325 | SNV | 1 | T | A | Homozygous   |
| NC_037646.1 | 5799366 | SNV | 1 | A | G | Homozygous   |
| NC_037646.1 | 5799487 | SNV | 1 | T | A | Homozygous   |
| NC_037646.1 | 5799571 | SNV | 1 | T | A | Homozygous   |
| NC_037646.1 | 5799576 | SNV | 1 | A | T | Homozygous   |
| NC_037646.1 | 5799579 | SNV | 1 | A | G | Homozygous   |
| NC_037646.1 | 5799582 | SNV | 1 | A | C | Homozygous   |

|             |         |     |   |   |   |              |
|-------------|---------|-----|---|---|---|--------------|
| NC_037646.1 | 5799601 | SNV | 1 | T | A | Heterozygous |
| NC_037646.1 | 5799607 | SNV | 1 | T | C | Heterozygous |
| NC_037646.1 | 5799646 | SNV | 1 | A | C | Heterozygous |
| NC_037646.1 | 5799649 | SNV | 1 | A | G | Heterozygous |
| NC_037646.1 | 5799690 | SNV | 1 | T | G | Heterozygous |
| NC_037646.1 | 5799696 | SNV | 1 | T | A | Heterozygous |
| NC_037646.1 | 5799744 | SNV | 1 | T | A | Homozygous   |
| NC_037646.1 | 5799776 | SNV | 1 | A | G | Heterozygous |
| NC_037646.1 | 5799997 | SNV | 1 | A | T | Homozygous   |
| NC_037646.1 | 5800082 | SNV | 1 | T | A | Homozygous   |
| NC_037646.1 | 5800123 | SNV | 1 | T | A | Heterozygous |
| NC_037646.1 | 5800129 | SNV | 1 | T | A | Heterozygous |
| NC_037646.1 | 5800189 | SNV | 1 | T | A | Homozygous   |
| NC_037646.1 | 5800192 | SNV | 1 | T | C | Homozygous   |
| NC_037646.1 | 5800195 | SNV | 1 | T | C | Homozygous   |
| NC_037646.1 | 5800233 | SNV | 1 | A | T | Heterozygous |
| NC_037646.1 | 5800238 | SNV | 1 | T | C | Heterozygous |
| NC_037646.1 | 5800243 | SNV | 1 | A | G | Heterozygous |
| NC_037646.1 | 5800316 | SNV | 1 | A | G | Heterozygous |
| NC_037646.1 | 5800329 | SNV | 1 | A | T | Heterozygous |
| NC_037646.1 | 5800477 | SNV | 1 | C | T | Heterozygous |
| NC_037646.1 | 5800479 | SNV | 1 | A | C | Heterozygous |
| NC_037646.1 | 5800507 | SNV | 1 | A | C | Homozygous   |
| NC_037646.1 | 5800517 | SNV | 1 | C | T | Homozygous   |
| NC_037646.1 | 5800527 | SNV | 1 | A | T | Homozygous   |
| NC_037646.1 | 5800556 | SNV | 1 | A | T | Homozygous   |
| NC_037646.1 | 5800566 | SNV | 1 | G | T | Homozygous   |
| NC_037646.1 | 5800604 | SNV | 1 | A | G | Heterozygous |
| NC_037646.1 | 5800644 | SNV | 1 | A | G | Heterozygous |
| NC_037646.1 | 5800649 | SNV | 1 | T | C | Homozygous   |
| NC_037646.1 | 5800668 | SNV | 1 | G | T | Heterozygous |
| NC_037646.1 | 5800721 | SNV | 1 | G | T | Homozygous   |
| NC_037646.1 | 5800734 | SNV | 1 | A | G | Homozygous   |
| NC_037646.1 | 5800743 | SNV | 1 | A | G | Homozygous   |
| NC_037646.1 | 5804185 | SNV | 1 | C | T | Homozygous   |
| NC_037646.1 | 5804205 | SNV | 1 | T | C | Homozygous   |
| NC_037646.1 | 5804212 | SNV | 1 | G | C | Homozygous   |
| NC_037646.1 | 5804222 | SNV | 1 | T | A | Homozygous   |
| NC_037646.1 | 5804224 | SNV | 1 | A | G | Homozygous   |
| NC_037646.1 | 5804227 | SNV | 1 | T | A | Homozygous   |
| NC_037646.1 | 5812047 | SNV | 1 | A | T | Homozygous   |
| NC_037646.1 | 5812053 | SNV | 1 | A | C | Heterozygous |
| NC_037646.1 | 5812062 | SNV | 1 | A | G | Homozygous   |
| NC_037646.1 | 5812068 | SNV | 1 | T | A | Homozygous   |
| NC_037646.1 | 5814876 | SNV | 1 | C | T | Homozygous   |
| NC_037646.1 | 5816460 | SNV | 1 | T | C | Homozygous   |
| NC_037646.1 | 5819215 | SNV | 1 | A | C | Homozygous   |
| NC_037646.1 | 5819229 | SNV | 1 | A | T | Homozygous   |
| NC_037646.1 | 5819235 | SNV | 1 | A | T | Homozygous   |
| NC_037646.1 | 5819237 | SNV | 1 | T | C | Homozygous   |
| NC_037646.1 | 5819241 | SNV | 1 | A | T | Homozygous   |

|             |         |     |   |   |   |              |
|-------------|---------|-----|---|---|---|--------------|
| NC_037646.1 | 5821329 | SNV | 1 | G | A | Homozygous   |
| NC_037646.1 | 5821798 | SNV | 1 | G | T | Homozygous   |
| NC_037646.1 | 5821923 | SNV | 1 | T | G | Homozygous   |
| NC_037646.1 | 5827878 | SNV | 1 | T | A | Heterozygous |
| NC_037646.1 | 5827890 | SNV | 1 | G | T | Homozygous   |
| NC_037646.1 | 5836684 | SNV | 1 | T | G | Homozygous   |
| NC_037646.1 | 5839177 | SNV | 1 | C | G | Homozygous   |
| NC_037646.1 | 5839237 | SNV | 1 | A | C | Homozygous   |
| NC_037646.1 | 5839729 | SNV | 1 | G | A | Homozygous   |
| NC_037646.1 | 5841730 | SNV | 1 | A | G | Homozygous   |
| NC_037646.1 | 5847631 | SNV | 1 | A | T | Heterozygous |
| NC_037646.1 | 5847634 | SNV | 1 | T | A | Heterozygous |
| NC_037646.1 | 5847637 | SNV | 1 | A | T | Heterozygous |
| NC_037646.1 | 5847640 | SNV | 1 | T | A | Heterozygous |
| NC_037646.1 | 5847641 | SNV | 1 | A | C | Heterozygous |
| NC_037646.1 | 5847643 | SNV | 1 | A | T | Heterozygous |
| NC_037646.1 | 5847645 | SNV | 1 | A | G | Heterozygous |
| NC_037646.1 | 5847646 | SNV | 1 | A | T | Heterozygous |
| NC_037646.1 | 5847667 | SNV | 1 | A | T | Heterozygous |
| NC_037646.1 | 5851621 | SNV | 1 | T | G | Homozygous   |
| NC_037646.1 | 5851629 | SNV | 1 | T | A | Homozygous   |
| NC_037646.1 | 5851854 | SNV | 1 | T | A | Heterozygous |
| NC_037646.1 | 5851857 | SNV | 1 | T | G | Heterozygous |
| NC_037646.1 | 5852078 | SNV | 1 | T | C | Homozygous   |
| NC_037646.1 | 5852087 | SNV | 1 | G | A | Homozygous   |
| NC_037646.1 | 5852090 | SNV | 1 | T | C | Homozygous   |
| NC_037646.1 | 5852094 | SNV | 1 | T | G | Homozygous   |
| NC_037646.1 | 5852096 | SNV | 1 | T | C | Homozygous   |
| NC_037646.1 | 5852102 | SNV | 1 | T | A | Homozygous   |
| NC_037646.1 | 5852117 | SNV | 1 | A | T | Homozygous   |
| NC_037646.1 | 5852135 | SNV | 1 | A | T | Homozygous   |
| NC_037646.1 | 5852143 | SNV | 1 | T | A | Homozygous   |
| NC_037646.1 | 5852293 | SNV | 1 | G | C | Homozygous   |
| NC_037646.1 | 5852296 | SNV | 1 | T | A | Homozygous   |
| NC_037646.1 | 5852299 | SNV | 1 | A | T | Homozygous   |
| NC_037646.1 | 5852301 | SNV | 1 | T | C | Heterozygous |
| NC_037646.1 | 5852305 | SNV | 1 | G | A | Homozygous   |
| NC_037646.1 | 5852308 | SNV | 1 | A | T | Heterozygous |
| NC_037646.1 | 5852314 | SNV | 1 | T | A | Heterozygous |
| NC_037646.1 | 5852448 | SNV | 1 | T | A | Homozygous   |
| NC_037646.1 | 5852472 | SNV | 1 | A | G | Homozygous   |
| NC_037646.1 | 5852481 | SNV | 1 | T | C | Homozygous   |
| NC_037646.1 | 5852503 | SNV | 1 | C | G | Homozygous   |
| NC_037646.1 | 5852508 | SNV | 1 | T | A | Homozygous   |
| NC_037646.1 | 5852557 | SNV | 1 | C | T | Homozygous   |
| NC_037646.1 | 5858005 | SNV | 1 | A | G | Heterozygous |
| NC_037646.1 | 5858351 | SNV | 1 | T | C | Homozygous   |
| NC_037646.1 | 5858415 | SNV | 1 | A | T | Homozygous   |
| NC_037646.1 | 5858873 | SNV | 1 | A | T | Homozygous   |
| NC_037646.1 | 5863948 | SNV | 1 | A | T | Heterozygous |
| NC_037646.1 | 5863955 | SNV | 1 | T | G | Heterozygous |

|             |         |     |   |   |   |              |
|-------------|---------|-----|---|---|---|--------------|
| NC_037646.1 | 5865084 | SNV | 1 | A | G | Homozygous   |
| NC_037646.1 | 5865659 | SNV | 1 | T | A | Homozygous   |
| NC_037646.1 | 5865662 | SNV | 1 | A | T | Homozygous   |
| NC_037646.1 | 5865681 | SNV | 1 | T | A | Homozygous   |
| NC_037646.1 | 5865694 | SNV | 1 | A | T | Homozygous   |
| NC_037646.1 | 5872047 | SNV | 1 | A | T | Homozygous   |
| NC_037646.1 | 5872062 | SNV | 1 | T | C | Heterozygous |
| NC_037646.1 | 5875548 | SNV | 1 | T | C | Homozygous   |
| NC_037646.1 | 5879663 | SNV | 1 | C | T | Homozygous   |
| NC_037646.1 | 5880496 | SNV | 1 | A | G | Heterozygous |
| NC_037646.1 | 5884318 | SNV | 1 | C | T | Homozygous   |
| NC_037646.1 | 5884335 | SNV | 1 | G | T | Homozygous   |
| NC_037646.1 | 5884338 | SNV | 1 | A | G | Homozygous   |
| NC_037646.1 | 5884355 | SNV | 1 | T | C | Homozygous   |
| NC_037646.1 | 5889275 | SNV | 1 | G | A | Homozygous   |
| NC_037646.1 | 5889293 | SNV | 1 | G | A | Homozygous   |
| NC_037646.1 | 5889311 | SNV | 1 | G | A | Homozygous   |
| NC_037646.1 | 5889320 | SNV | 1 | G | A | Homozygous   |
| NC_037646.1 | 5889358 | SNV | 1 | A | G | Homozygous   |
| NC_037646.1 | 5889364 | SNV | 1 | C | T | Homozygous   |
| NC_037646.1 | 5889370 | SNV | 1 | C | G | Homozygous   |
| NC_037646.1 | 5889374 | SNV | 1 | T | A | Homozygous   |
| NC_037646.1 | 5889390 | SNV | 1 | C | A | Homozygous   |
| NC_037646.1 | 5889396 | SNV | 1 | T | A | Heterozygous |
| NC_037646.1 | 5889407 | SNV | 1 | C | T | Homozygous   |
| NC_037646.1 | 5889419 | SNV | 1 | G | A | Homozygous   |
| NC_037646.1 | 5889425 | SNV | 1 | G | A | Homozygous   |
| NC_037646.1 | 5890982 | SNV | 1 | G | A | Heterozygous |
| NC_037646.1 | 5890986 | SNV | 1 | G | A | Heterozygous |
| NC_037646.1 | 5890992 | SNV | 1 | G | A | Heterozygous |
| NC_037646.1 | 5893690 | SNV | 1 | C | T | Heterozygous |
| NC_037646.1 | 5893736 | SNV | 1 | C | G | Homozygous   |
| NC_037646.1 | 5896602 | SNV | 1 | C | T | Heterozygous |
| NC_037646.1 | 5896610 | SNV | 1 | C | T | Homozygous   |
| NC_037646.1 | 5896629 | SNV | 1 | G | C | Homozygous   |
| NC_037646.1 | 5896724 | SNV | 1 | T | C | Homozygous   |
| NC_037646.1 | 5897835 | SNV | 1 | C | T | Heterozygous |
| NC_037646.1 | 5905498 | SNV | 1 | G | A | Homozygous   |
| NC_037646.1 | 5905548 | SNV | 1 | A | T | Homozygous   |
| NC_037646.1 | 5905551 | SNV | 1 | G | A | Homozygous   |
| NC_037646.1 | 5910492 | SNV | 1 | A | T | Homozygous   |
| NC_037646.1 | 5910494 | SNV | 1 | A | T | Homozygous   |
| NC_037646.1 | 5910496 | SNV | 1 | A | C | Homozygous   |
| NC_037646.1 | 5910509 | SNV | 1 | A | G | Homozygous   |
| NC_037646.1 | 5910532 | SNV | 1 | G | A | Heterozygous |
| NC_037646.1 | 5910535 | SNV | 1 | A | G | Homozygous   |
| NC_037646.1 | 5911529 | SNV | 1 | G | T | Heterozygous |
| NC_037646.1 | 5911547 | SNV | 1 | T | C | Heterozygous |
| NC_037646.1 | 5935423 | SNV | 1 | T | A | Heterozygous |
| NC_037646.1 | 5935427 | SNV | 1 | T | A | Heterozygous |
| NC_037646.1 | 5936921 | SNV | 1 | G | C | Homozygous   |

|             |         |     |   |   |   |              |
|-------------|---------|-----|---|---|---|--------------|
| NC_037646.1 | 5936955 | SNV | 1 | C | G | Homozygous   |
| NC_037646.1 | 5936959 | SNV | 1 | T | A | Homozygous   |
| NC_037646.1 | 5936961 | SNV | 1 | C | A | Homozygous   |
| NC_037646.1 | 5937421 | SNV | 1 | A | G | Homozygous   |
| NC_037646.1 | 5937449 | SNV | 1 | G | A | Homozygous   |
| NC_037646.1 | 5937458 | SNV | 1 | A | G | Homozygous   |
| NC_037646.1 | 5954987 | SNV | 1 | G | A | Homozygous   |
| NC_037646.1 | 5958734 | SNV | 1 | C | T | Heterozygous |
| NC_037646.1 | 5958737 | SNV | 1 | T | G | Heterozygous |
| NC_037646.1 | 5958838 | SNV | 1 | C | T | Heterozygous |
| NC_037646.1 | 5959213 | SNV | 1 | C | G | Heterozygous |
| NC_037646.1 | 5960194 | SNV | 1 | C | G | Heterozygous |
| NC_037646.1 | 5972556 | SNV | 1 | T | C | Homozygous   |
| NC_037646.1 | 5972561 | SNV | 1 | T | A | Heterozygous |
| NC_037646.1 | 5972595 | SNV | 1 | T | G | Homozygous   |
| NC_037646.1 | 5972603 | SNV | 1 | A | T | Homozygous   |
| NC_037646.1 | 5976189 | SNV | 1 | A | G | Homozygous   |
| NC_037646.1 | 5976290 | SNV | 1 | A | G | Homozygous   |
| NC_037646.1 | 5976729 | SNV | 1 | A | T | Heterozygous |
| NC_037646.1 | 5977228 | SNV | 1 | A | G | Heterozygous |
| NC_037646.1 | 5977231 | SNV | 1 | G | T | Heterozygous |
| NC_037646.1 | 5977236 | SNV | 1 | T | A | Heterozygous |
| NC_037646.1 | 5977236 | SNV | 1 | T | G | Heterozygous |
| NC_037646.1 | 5977280 | SNV | 1 | G | T | Homozygous   |
| NC_037646.1 | 5991934 | SNV | 1 | T | G | Heterozygous |
| NC_037646.1 | 5991936 | SNV | 1 | A | G | Heterozygous |
| NC_037646.1 | 5991942 | SNV | 1 | T | A | Heterozygous |
| NC_037646.1 | 5991955 | SNV | 1 | C | A | Heterozygous |
| NC_037646.1 | 5991966 | SNV | 1 | G | A | Heterozygous |
| NC_037646.1 | 5992454 | SNV | 1 | T | G | Homozygous   |
| NC_037646.1 | 5992671 | SNV | 1 | T | C | Heterozygous |
| NC_037646.1 | 5994512 | SNV | 1 | T | C | Homozygous   |
| NC_037646.1 | 5994667 | SNV | 1 | C | A | Homozygous   |
| NC_037646.1 | 5994670 | SNV | 1 | T | A | Homozygous   |
| NC_037646.1 | 5994764 | SNV | 1 | C | T | Homozygous   |
| NC_037646.1 | 5994837 | SNV | 1 | G | A | Homozygous   |
| NC_037646.1 | 5995050 | SNV | 1 | C | T | Homozygous   |
| NC_037646.1 | 5995088 | SNV | 1 | A | C | Homozygous   |
| NC_037646.1 | 5995694 | SNV | 1 | A | G | Homozygous   |
| NC_037646.1 | 5996690 | SNV | 1 | C | T | Heterozygous |
| NC_037646.1 | 5996706 | SNV | 1 | C | T | Heterozygous |
| NC_037646.1 | 5996754 | SNV | 1 | A | G | Homozygous   |
| NC_037646.1 | 5998807 | SNV | 1 | T | C | Homozygous   |
| NC_037646.1 | 5999192 | SNV | 1 | T | A | Homozygous   |
| NC_037646.1 | 5999195 | SNV | 1 | A | T | Homozygous   |
| NC_037646.1 | 5999230 | SNV | 1 | A | G | Homozygous   |
| NC_037646.1 | 5999234 | SNV | 1 | T | A | Homozygous   |
| NC_037646.1 | 5999237 | SNV | 1 | A | C | Homozygous   |
| NC_037646.1 | 5999243 | SNV | 1 | T | C | Homozygous   |
| NC_037646.1 | 5999248 | SNV | 1 | G | C | Homozygous   |
| NC_037646.1 | 6004163 | SNV | 1 | C | T | Heterozygous |

|             |         |     |   |   |   |              |
|-------------|---------|-----|---|---|---|--------------|
| NC_037646.1 | 6004421 | SNV | 1 | T | C | Heterozygous |
| NC_037646.1 | 6005096 | SNV | 1 | T | A | Heterozygous |
| NC_037646.1 | 6005107 | SNV | 1 | C | A | Homozygous   |
| NC_037646.1 | 6005785 | SNV | 1 | T | A | Homozygous   |
| NC_037646.1 | 6006063 | SNV | 1 | A | G | Heterozygous |
| NC_037646.1 | 6009284 | SNV | 1 | T | C | Heterozygous |
| NC_037646.1 | 6009304 | SNV | 1 | T | C | Homozygous   |
| NC_037646.1 | 6010054 | SNV | 1 | C | T | Homozygous   |
| NC_037646.1 | 6011342 | SNV | 1 | A | G | Heterozygous |
| NC_037646.1 | 6011551 | SNV | 1 | A | G | Homozygous   |
| NC_037646.1 | 6011741 | SNV | 1 | G | A | Heterozygous |
| NC_037646.1 | 6011774 | SNV | 1 | A | T | Homozygous   |
| NC_037646.1 | 6011780 | SNV | 1 | G | A | Heterozygous |
| NC_037646.1 | 6011906 | SNV | 1 | T | C | Homozygous   |
| NC_037646.1 | 6014613 | SNV | 1 | T | G | Homozygous   |
| NC_037646.1 | 6014648 | SNV | 1 | T | A | Homozygous   |
| NC_037646.1 | 6019311 | SNV | 1 | A | G | Heterozygous |
| NC_037646.1 | 6019438 | SNV | 1 | C | T | Heterozygous |
| NC_037646.1 | 6019496 | SNV | 1 | A | G | Heterozygous |
| NC_037646.1 | 6022059 | SNV | 1 | T | C | Heterozygous |
| NC_037646.1 | 6023783 | SNV | 1 | T | C | Heterozygous |
| NC_037646.1 | 6024272 | SNV | 1 | T | C | Homozygous   |
| NC_037646.1 | 6031072 | SNV | 1 | A | G | Heterozygous |
| NC_037646.1 | 6031105 | SNV | 1 | T | C | Heterozygous |
| NC_037646.1 | 6031594 | SNV | 1 | A | C | Homozygous   |
| NC_037646.1 | 6032250 | SNV | 1 | A | G | Homozygous   |
| NC_037646.1 | 6032742 | SNV | 1 | G | A | Homozygous   |
| NC_037646.1 | 6032948 | SNV | 1 | C | T | Heterozygous |
| NC_037646.1 | 6032963 | SNV | 1 | T | C | Homozygous   |
| NC_037646.1 | 6033070 | SNV | 1 | C | T | Homozygous   |
| NC_037646.1 | 6033119 | SNV | 1 | A | G | Homozygous   |
| NC_037646.1 | 6033428 | SNV | 1 | T | C | Homozygous   |
| NC_037646.1 | 6033464 | SNV | 1 | A | G | Homozygous   |
| NC_037646.1 | 6033601 | SNV | 1 | T | C | Heterozygous |
| NC_037646.1 | 6033603 | SNV | 1 | T | C | Heterozygous |
| NC_037646.1 | 6033672 | SNV | 1 | T | C | Homozygous   |
| NC_037646.1 | 6033699 | SNV | 1 | T | C | Heterozygous |
| NC_037646.1 | 6033741 | SNV | 1 | T | C | Homozygous   |
| NC_037646.1 | 6033793 | SNV | 1 | C | T | Homozygous   |
| NC_037646.1 | 6033798 | SNV | 1 | C | T | Heterozygous |
| NC_037646.1 | 6033850 | SNV | 1 | A | G | Heterozygous |
| NC_037646.1 | 6033905 | SNV | 1 | G | C | Heterozygous |
| NC_037646.1 | 6033926 | SNV | 1 | T | C | Heterozygous |
| NC_037646.1 | 6034005 | SNV | 1 | A | G | Homozygous   |
| NC_037646.1 | 6034147 | SNV | 1 | T | C | Heterozygous |
| NC_037646.1 | 6034226 | SNV | 1 | A | G | Homozygous   |
| NC_037646.1 | 6034248 | SNV | 1 | T | C | Homozygous   |
| NC_037646.1 | 6034411 | SNV | 1 | A | G | Heterozygous |
| NC_037646.1 | 6045747 | SNV | 1 | G | T | Heterozygous |
| NC_037646.1 | 6045750 | SNV | 1 | G | A | Heterozygous |
| NC_037646.1 | 6045757 | SNV | 1 | G | A | Heterozygous |

|             |         |     |   |   |   |              |
|-------------|---------|-----|---|---|---|--------------|
| NC_037646.1 | 6045759 | SNV | 1 | T | C | Homozygous   |
| NC_037646.1 | 6045840 | SNV | 1 | G | T | Heterozygous |
| NC_037646.1 | 6045881 | SNV | 1 | G | A | Heterozygous |
| NC_037646.1 | 6045900 | SNV | 1 | C | T | Heterozygous |
| NC_037646.1 | 6046104 | SNV | 1 | G | A | Homozygous   |
| NC_037646.1 | 6046119 | SNV | 1 | A | G | Heterozygous |
| NC_037646.1 | 6046126 | SNV | 1 | G | T | Heterozygous |
| NC_037646.1 | 6046133 | SNV | 1 | A | G | Heterozygous |
| NC_037646.1 | 6046244 | SNV | 1 | C | T | Homozygous   |
| NC_037646.1 | 6046270 | SNV | 1 | C | T | Heterozygous |
| NC_037646.1 | 6046350 | SNV | 1 | G | A | Heterozygous |
| NC_037646.1 | 6046414 | SNV | 1 | C | T | Heterozygous |
| NC_037646.1 | 6046454 | SNV | 1 | T | C | Homozygous   |
| NC_037646.1 | 6046540 | SNV | 1 | A | G | Homozygous   |
| NC_037646.1 | 6076765 | SNV | 1 | T | A | Homozygous   |
| NC_037646.1 | 6076767 | SNV | 1 | T | G | Homozygous   |
| NC_037646.1 | 6077437 | SNV | 1 | G | A | Homozygous   |
| NC_037646.1 | 6077443 | SNV | 1 | T | A | Homozygous   |
| NC_037646.1 | 6077859 | SNV | 1 | A | G | Homozygous   |
| NC_037646.1 | 6077917 | SNV | 1 | G | A | Heterozygous |
| NC_037646.1 | 6078204 | SNV | 1 | A | G | Homozygous   |
| NC_037646.1 | 6078449 | SNV | 1 | C | T | Heterozygous |
| NC_037646.1 | 6104742 | SNV | 1 | C | T | Homozygous   |
| NC_037646.1 | 6105111 | SNV | 1 | G | A | Homozygous   |
| NC_037646.1 | 6106256 | SNV | 1 | A | G | Homozygous   |
| NC_037646.1 | 6106258 | SNV | 1 | G | A | Heterozygous |
| NC_037646.1 | 6106275 | SNV | 1 | T | C | Homozygous   |
| NC_037646.1 | 6106396 | SNV | 1 | A | C | Homozygous   |
| NC_037646.1 | 6106418 | SNV | 1 | A | G | Homozygous   |
| NC_037646.1 | 6106447 | SNV | 1 | A | G | Heterozygous |
| NC_037646.1 | 6107234 | SNV | 1 | G | T | Homozygous   |
| NC_037646.1 | 6107240 | SNV | 1 | A | G | Homozygous   |
| NC_037646.1 | 6107271 | SNV | 1 | G | A | Heterozygous |
| NC_037646.1 | 6121353 | SNV | 1 | C | T | Heterozygous |
| NC_037646.1 | 6121373 | SNV | 1 | C | G | Heterozygous |
| NC_037646.1 | 6121388 | SNV | 1 | T | C | Heterozygous |
| NC_037646.1 | 6121485 | SNV | 1 | C | T | Heterozygous |
| NC_037646.1 | 6121614 | SNV | 1 | C | T | Homozygous   |
| NC_037646.1 | 6121665 | SNV | 1 | G | A | Heterozygous |
| NC_037646.1 | 6121698 | SNV | 1 | A | G | Heterozygous |
| NC_037646.1 | 6121722 | SNV | 1 | A | G | Heterozygous |
| NC_037646.1 | 6121807 | SNV | 1 | T | C | Homozygous   |
| NC_037646.1 | 6121915 | SNV | 1 | A | G | Homozygous   |
| NC_037646.1 | 6122037 | SNV | 1 | A | G | Homozygous   |
| NC_037646.1 | 6122154 | SNV | 1 | T | C | Heterozygous |
| NC_037646.1 | 6122156 | SNV | 1 | A | G | Homozygous   |
| NC_037646.1 | 6122160 | SNV | 1 | T | A | Homozygous   |
| NC_037646.1 | 6122455 | SNV | 1 | A | G | Homozygous   |
| NC_037646.1 | 6122504 | SNV | 1 | T | C | Homozygous   |
| NC_037646.1 | 6122904 | SNV | 1 | C | T | Homozygous   |
| NC_037646.1 | 6126871 | SNV | 1 | T | C | Homozygous   |

|             |         |     |   |   |   |              |
|-------------|---------|-----|---|---|---|--------------|
| NC_037646.1 | 6126891 | SNV | 1 | A | G | Heterozygous |
| NC_037646.1 | 6126892 | SNV | 1 | A | G | Heterozygous |
| NC_037646.1 | 6126896 | SNV | 1 | C | T | Heterozygous |
| NC_037646.1 | 6126973 | SNV | 1 | A | G | Homozygous   |
| NC_037646.1 | 6127195 | SNV | 1 | C | A | Heterozygous |
| NC_037646.1 | 6127297 | SNV | 1 | T | C | Homozygous   |
| NC_037646.1 | 6127489 | SNV | 1 | A | G | Homozygous   |
| NC_037646.1 | 6127513 | SNV | 1 | C | G | Homozygous   |
| NC_037646.1 | 6127580 | SNV | 1 | G | C | Heterozygous |
| NC_037646.1 | 6127585 | SNV | 1 | C | G | Heterozygous |
| NC_037646.1 | 6127589 | SNV | 1 | T | C | Heterozygous |
| NC_037646.1 | 6133462 | SNV | 1 | G | A | Heterozygous |
| NC_037646.1 | 6133474 | SNV | 1 | A | G | Homozygous   |
| NC_037646.1 | 6137720 | SNV | 1 | G | A | Heterozygous |
| NC_037646.1 | 6150782 | SNV | 1 | A | G | Homozygous   |
| NC_037646.1 | 6150895 | SNV | 1 | C | G | Heterozygous |
| NC_037646.1 | 6151037 | SNV | 1 | A | G | Homozygous   |
| NC_037646.1 | 6151039 | SNV | 1 | T | C | Homozygous   |
| NC_037646.1 | 6151138 | SNV | 1 | G | T | Heterozygous |
| NC_037646.1 | 6151151 | SNV | 1 | A | G | Homozygous   |
| NC_037646.1 | 6151209 | SNV | 1 | A | G | Homozygous   |
| NC_037646.1 | 6151263 | SNV | 1 | A | G | Homozygous   |
| NC_037646.1 | 6151293 | SNV | 1 | G | A | Homozygous   |
| NC_037646.1 | 6151299 | SNV | 1 | A | T | Heterozygous |
| NC_037646.1 | 6151303 | SNV | 1 | G | A | Homozygous   |
| NC_037646.1 | 6151306 | SNV | 1 | G | A | Homozygous   |
| NC_037646.1 | 6151851 | SNV | 1 | C | T | Heterozygous |
| NC_037646.1 | 6151858 | SNV | 1 | A | G | Homozygous   |
| NC_037646.1 | 6151861 | SNV | 1 | A | G | Heterozygous |
| NC_037646.1 | 6151869 | SNV | 1 | C | A | Heterozygous |
| NC_037646.1 | 6151875 | SNV | 1 | A | G | Homozygous   |
| NC_037646.1 | 6157190 | SNV | 1 | A | G | Homozygous   |
| NC_037646.1 | 6157263 | SNV | 1 | A | G | Heterozygous |
| NC_037646.1 | 6160243 | SNV | 1 | A | G | Homozygous   |
| NC_037646.1 | 6160290 | SNV | 1 | G | A | Heterozygous |
| NC_037646.1 | 6160319 | SNV | 1 | A | G | Homozygous   |
| NC_037646.1 | 6160333 | SNV | 1 | C | T | Heterozygous |
| NC_037646.1 | 6160340 | SNV | 1 | G | A | Heterozygous |
| NC_037646.1 | 6160435 | SNV | 1 | C | T | Heterozygous |
| NC_037646.1 | 6160442 | SNV | 1 | G | A | Heterozygous |
| NC_037646.1 | 6165653 | SNV | 1 | A | G | Homozygous   |
| NC_037646.1 | 6166936 | SNV | 1 | C | T | Heterozygous |
| NC_037646.1 | 6167374 | SNV | 1 | T | G | Homozygous   |
| NC_037646.1 | 6167473 | SNV | 1 | C | A | Heterozygous |
| NC_037646.1 | 6167714 | SNV | 1 | A | G | Homozygous   |
| NC_037646.1 | 6167756 | SNV | 1 | T | C | Homozygous   |
| NC_037646.1 | 6167837 | SNV | 1 | T | C | Homozygous   |
| NC_037646.1 | 6169039 | SNV | 1 | C | T | Heterozygous |
| NC_037646.1 | 6169048 | SNV | 1 | A | G | Heterozygous |
| NC_037646.1 | 6169180 | SNV | 1 | T | G | Homozygous   |
| NC_037646.1 | 6169240 | SNV | 1 | A | G | Heterozygous |



|             |         |     |   |   |   |              |
|-------------|---------|-----|---|---|---|--------------|
| NC_037646.1 | 6169314 | SNV | 1 | T | C | Homozygous   |
| NC_037646.1 | 6169340 | SNV | 1 | A | G | Homozygous   |
| NC_037646.1 | 6170134 | SNV | 1 | G | C | Heterozygous |
| NC_037646.1 | 6170227 | SNV | 1 | C | T | Heterozygous |
| NC_037646.1 | 6170230 | SNV | 1 | C | G | Heterozygous |
| NC_037646.1 | 6171962 | SNV | 1 | C | T | Homozygous   |
| NC_037646.1 | 6173345 | SNV | 1 | G | A | Homozygous   |
| NC_037646.1 | 6174025 | SNV | 1 | G | T | Heterozygous |
| NC_037646.1 | 6174068 | SNV | 1 | A | G | Heterozygous |
| NC_037646.1 | 6174217 | SNV | 1 | T | C | Heterozygous |
| NC_037646.1 | 6174241 | SNV | 1 | T | C | Homozygous   |
| NC_037646.1 | 6174246 | SNV | 1 | A | G | Homozygous   |
| NC_037646.1 | 6174364 | SNV | 1 | A | G | Homozygous   |
| NC_037646.1 | 6175977 | SNV | 1 | G | A | Homozygous   |
| NC_037646.1 | 6176054 | SNV | 1 | C | T | Heterozygous |
| NC_037646.1 | 6176057 | SNV | 1 | C | T | Heterozygous |
| NC_037646.1 | 6176065 | SNV | 1 | T | A | Homozygous   |
| NC_037646.1 | 6176068 | SNV | 1 | C | A | Heterozygous |
| NC_037646.1 | 6176098 | SNV | 1 | C | A | Heterozygous |
| NC_037646.1 | 6176151 | SNV | 1 | C | A | Heterozygous |
| NC_037646.1 | 6176369 | SNV | 1 | T | C | Homozygous   |
| NC_037646.1 | 6176402 | SNV | 1 | T | C | Heterozygous |
| NC_037646.1 | 6176694 | SNV | 1 | A | T | Homozygous   |
| NC_037646.1 | 6176700 | SNV | 1 | T | A | Homozygous   |
| NC_037646.1 | 6176708 | SNV | 1 | A | T | Homozygous   |
| NC_037646.1 | 6176776 | SNV | 1 | T | C | Homozygous   |
| NC_037646.1 | 6178195 | SNV | 1 | C | A | Homozygous   |
| NC_037646.1 | 6178199 | SNV | 1 | G | T | Heterozygous |
| NC_037646.1 | 6178866 | SNV | 1 | T | A | Heterozygous |
| NC_037646.1 | 6178874 | SNV | 1 | C | T | Heterozygous |
| NC_037646.1 | 6179905 | SNV | 1 | C | A | Homozygous   |
| NC_037646.1 | 6179909 | SNV | 1 | A | C | Homozygous   |
| NC_037646.1 | 6180188 | SNV | 1 | G | C | Heterozygous |
| NC_037646.1 | 6180278 | SNV | 1 | C | T | Heterozygous |
| NC_037646.1 | 6180294 | SNV | 1 | A | G | Heterozygous |
| NC_037646.1 | 6180371 | SNV | 1 | T | C | Homozygous   |
| NC_037646.1 | 6180386 | SNV | 1 | A | T | Homozygous   |
| NC_037646.1 | 6180401 | SNV | 1 | C | T | Homozygous   |
| NC_037646.1 | 6182700 | SNV | 1 | A | G | Homozygous   |
| NC_037646.1 | 6184308 | SNV | 1 | C | T | Heterozygous |
| NC_037646.1 | 6187641 | SNV | 1 | C | T | Heterozygous |
| NC_037646.1 | 6187644 | SNV | 1 | C | T | Heterozygous |
| NC_037646.1 | 6187660 | SNV | 1 | A | G | Heterozygous |
| NC_037646.1 | 6187687 | SNV | 1 | C | T | Homozygous   |
| NC_037646.1 | 6187708 | SNV | 1 | C | G | Homozygous   |
| NC_037646.1 | 6187751 | SNV | 1 | A | G | Homozygous   |
| NC_037646.1 | 6187757 | SNV | 1 | C | G | Homozygous   |
| NC_037646.1 | 6187909 | SNV | 1 | C | T | Homozygous   |
| NC_037646.1 | 6187922 | SNV | 1 | G | A | Heterozygous |
| NC_037646.1 | 6187926 | SNV | 1 | G | A | Homozygous   |
| NC_037646.1 | 6193135 | SNV | 1 | C | T | Homozygous   |

|             |         |     |   |   |   |              |
|-------------|---------|-----|---|---|---|--------------|
| NC_037646.1 | 6193318 | SNV | 1 | G | A | Homozygous   |
| NC_037646.1 | 6193354 | SNV | 1 | A | G | Homozygous   |
| NC_037646.1 | 6193357 | SNV | 1 | T | C | Homozygous   |
| NC_037646.1 | 6193363 | SNV | 1 | G | A | Homozygous   |
| NC_037646.1 | 6193410 | SNV | 1 | A | G | Homozygous   |
| NC_037646.1 | 6193495 | SNV | 1 | A | G | Homozygous   |
| NC_037646.1 | 6193504 | SNV | 1 | C | G | Heterozygous |
| NC_037646.1 | 6193553 | SNV | 1 | C | T | Heterozygous |
| NC_037646.1 | 6193577 | SNV | 1 | G | C | Heterozygous |
| NC_037646.1 | 6193675 | SNV | 1 | T | C | Homozygous   |
| NC_037646.1 | 6193919 | SNV | 1 | A | G | Homozygous   |
| NC_037646.1 | 6193929 | SNV | 1 | A | G | Homozygous   |
| NC_037646.1 | 6193992 | SNV | 1 | G | A | Heterozygous |
| NC_037646.1 | 6194101 | SNV | 1 | C | G | Homozygous   |
| NC_037646.1 | 6194110 | SNV | 1 | A | G | Homozygous   |
| NC_037646.1 | 6197152 | SNV | 1 | G | C | Homozygous   |
| NC_037646.1 | 6197191 | SNV | 1 | T | C | Homozygous   |
| NC_037646.1 | 6197228 | SNV | 1 | A | G | Homozygous   |
| NC_037646.1 | 6197544 | SNV | 1 | C | T | Homozygous   |
| NC_037646.1 | 6198782 | SNV | 1 | T | C | Heterozygous |
| NC_037646.1 | 6198828 | SNV | 1 | A | G | Homozygous   |
| NC_037646.1 | 6198866 | SNV | 1 | C | T | Heterozygous |
| NC_037646.1 | 6198873 | SNV | 1 | T | A | Heterozygous |
| NC_037646.1 | 6198991 | SNV | 1 | C | T | Heterozygous |
| NC_037646.1 | 6199012 | SNV | 1 | C | T | Heterozygous |
| NC_037646.1 | 6199293 | SNV | 1 | G | A | Homozygous   |
| NC_037646.1 | 6201325 | SNV | 1 | C | A | Homozygous   |
| NC_037646.1 | 6202062 | SNV | 1 | T | C | Homozygous   |
| NC_037646.1 | 6202163 | SNV | 1 | A | G | Heterozygous |
| NC_037646.1 | 6202187 | SNV | 1 | A | G | Heterozygous |
| NC_037646.1 | 6202538 | SNV | 1 | G | A | Homozygous   |
| NC_037646.1 | 6205085 | SNV | 1 | T | C | Heterozygous |
| NC_037646.1 | 6205122 | SNV | 1 | T | C | Heterozygous |
| NC_037646.1 | 6205141 | SNV | 1 | T | C | Heterozygous |
| NC_037646.1 | 6205148 | SNV | 1 | C | T | Heterozygous |
| NC_037646.1 | 6205152 | SNV | 1 | T | A | Homozygous   |
| NC_037646.1 | 6205155 | SNV | 1 | T | C | Homozygous   |
| NC_037646.1 | 6205166 | SNV | 1 | A | G | Heterozygous |
| NC_037646.1 | 6205173 | SNV | 1 | C | T | Heterozygous |
| NC_037646.1 | 6205178 | SNV | 1 | C | T | Heterozygous |
| NC_037646.1 | 6205206 | SNV | 1 | T | C | Homozygous   |
| NC_037646.1 | 6205241 | SNV | 1 | T | C | Homozygous   |
| NC_037646.1 | 6205273 | SNV | 1 | T | C | Heterozygous |
| NC_037646.1 | 6205276 | SNV | 1 | C | T | Heterozygous |
| NC_037646.1 | 6205305 | SNV | 1 | T | C | Homozygous   |
| NC_037646.1 | 6205314 | SNV | 1 | T | C | Homozygous   |
| NC_037646.1 | 6205317 | SNV | 1 | C | T | Heterozygous |
| NC_037646.1 | 6205331 | SNV | 1 | C | T | Heterozygous |
| NC_037646.1 | 6205336 | SNV | 1 | C | T | Heterozygous |
| NC_037646.1 | 6205363 | SNV | 1 | T | C | Homozygous   |
| NC_037646.1 | 6205367 | SNV | 1 | T | C | Homozygous   |

|             |         |     |   |   |   |              |
|-------------|---------|-----|---|---|---|--------------|
| NC_037646.1 | 6205369 | SNV | 1 | T | C | Homozygous   |
| NC_037646.1 | 6205378 | SNV | 1 | T | C | Homozygous   |
| NC_037646.1 | 6205409 | SNV | 1 | C | T | Heterozygous |
| NC_037646.1 | 6205416 | SNV | 1 | C | T | Heterozygous |
| NC_037646.1 | 6205420 | SNV | 1 | A | T | Homozygous   |
| NC_037646.1 | 6205456 | SNV | 1 | C | T | Homozygous   |
| NC_037646.1 | 6205565 | SNV | 1 | T | C | Heterozygous |
| NC_037646.1 | 6205574 | SNV | 1 | T | C | Homozygous   |
| NC_037646.1 | 6205623 | SNV | 1 | C | T | Heterozygous |
| NC_037646.1 | 6205663 | SNV | 1 | A | G | Homozygous   |
| NC_037646.1 | 6205730 | SNV | 1 | T | C | Homozygous   |
| NC_037646.1 | 6205854 | SNV | 1 | T | C | Homozygous   |
| NC_037646.1 | 6206363 | SNV | 1 | G | A | Heterozygous |
| NC_037646.1 | 6206373 | SNV | 1 | A | T | Heterozygous |
| NC_037646.1 | 6207995 | SNV | 1 | G | C | Homozygous   |
| NC_037646.1 | 6210897 | SNV | 1 | G | A | Homozygous   |
| NC_037646.1 | 6210957 | SNV | 1 | A | C | Homozygous   |
| NC_037646.1 | 6211158 | SNV | 1 | T | C | Homozygous   |
| NC_037646.1 | 6211215 | SNV | 1 | G | A | Heterozygous |
| NC_037646.1 | 6212867 | SNV | 1 | C | G | Homozygous   |
| NC_037646.1 | 6213242 | SNV | 1 | C | T | Homozygous   |
| NC_037646.1 | 6214603 | SNV | 1 | G | A | Homozygous   |
| NC_037646.1 | 6215381 | SNV | 1 | T | C | Heterozygous |
| NC_037646.1 | 6215402 | SNV | 1 | A | G | Homozygous   |
| NC_037646.1 | 6215520 | SNV | 1 | G | C | Homozygous   |
| NC_037646.1 | 6215540 | SNV | 1 | A | G | Homozygous   |
| NC_037646.1 | 6215543 | SNV | 1 | A | G | Heterozygous |
| NC_037646.1 | 6215624 | SNV | 1 | T | C | Homozygous   |
| NC_037646.1 | 6216654 | SNV | 1 | G | A | Heterozygous |
| NC_037646.1 | 6216836 | SNV | 1 | A | G | Homozygous   |
| NC_037646.1 | 6217074 | SNV | 1 | T | C | Heterozygous |
| NC_037646.1 | 6217550 | SNV | 1 | G | A | Heterozygous |
| NC_037646.1 | 6217567 | SNV | 1 | G | C | Heterozygous |
| NC_037646.1 | 6217594 | SNV | 1 | C | T | Homozygous   |
| NC_037646.1 | 6217681 | SNV | 1 | A | G | Homozygous   |
| NC_037646.1 | 6217690 | SNV | 1 | C | T | Homozygous   |
| NC_037646.1 | 6217928 | SNV | 1 | A | G | Homozygous   |
| NC_037646.1 | 6218046 | SNV | 1 | A | G | Heterozygous |
| NC_037646.1 | 6218244 | SNV | 1 | G | C | Homozygous   |
| NC_037646.1 | 6218396 | SNV | 1 | A | G | Homozygous   |
| NC_037646.1 | 6218436 | SNV | 1 | G | A | Heterozygous |
| NC_037646.1 | 6218505 | SNV | 1 | C | G | Heterozygous |
| NC_037646.1 | 6218523 | SNV | 1 | A | G | Heterozygous |
| NC_037646.1 | 6218573 | SNV | 1 | C | T | Heterozygous |
| NC_037646.1 | 6218733 | SNV | 1 | T | C | Homozygous   |
| NC_037646.1 | 6218752 | SNV | 1 | G | C | Heterozygous |
| NC_037646.1 | 6218786 | SNV | 1 | G | A | Heterozygous |
| NC_037646.1 | 6218821 | SNV | 1 | T | C | Heterozygous |
| NC_037646.1 | 6219004 | SNV | 1 | G | C | Homozygous   |
| NC_037646.1 | 6219053 | SNV | 1 | G | T | Homozygous   |
| NC_037646.1 | 6219479 | SNV | 1 | G | A | Heterozygous |

|             |         |     |   |   |   |              |
|-------------|---------|-----|---|---|---|--------------|
| NC_037646.1 | 6219547 | SNV | 1 | A | G | Homozygous   |
| NC_037646.1 | 6219725 | SNV | 1 | G | A | Heterozygous |
| NC_037646.1 | 6219842 | SNV | 1 | T | C | Heterozygous |
| NC_037646.1 | 6220214 | SNV | 1 | G | A | Homozygous   |
| NC_037646.1 | 6220371 | SNV | 1 | C | T | Heterozygous |
| NC_037646.1 | 6220533 | SNV | 1 | C | T | Heterozygous |
| NC_037646.1 | 6220572 | SNV | 1 | C | T | Heterozygous |
| NC_037646.1 | 6220701 | SNV | 1 | C | A | Homozygous   |
| NC_037646.1 | 6220712 | SNV | 1 | T | A | Homozygous   |
| NC_037646.1 | 6220756 | SNV | 1 | A | G | Heterozygous |
| NC_037646.1 | 6220823 | SNV | 1 | C | T | Heterozygous |
| NC_037646.1 | 6220974 | SNV | 1 | T | A | Homozygous   |
| NC_037646.1 | 6220983 | SNV | 1 | A | G | Heterozygous |
| NC_037646.1 | 6220985 | SNV | 1 | A | G | Heterozygous |
| NC_037646.1 | 6220999 | SNV | 1 | A | G | Homozygous   |
| NC_037646.1 | 6221070 | SNV | 1 | A | G | Homozygous   |
| NC_037646.1 | 6221126 | SNV | 1 | T | A | Heterozygous |
| NC_037646.1 | 6221145 | SNV | 1 | T | C | Heterozygous |
| NC_037646.1 | 6221156 | SNV | 1 | G | A | Homozygous   |
| NC_037646.1 | 6243195 | SNV | 1 | G | A | Homozygous   |
| NC_037646.1 | 6243202 | SNV | 1 | A | C | Homozygous   |
| NC_037646.1 | 6243206 | SNV | 1 | G | T | Homozygous   |
| NC_037646.1 | 6254685 | SNV | 1 | A | G | Homozygous   |
| NC_037646.1 | 6265469 | SNV | 1 | T | A | Homozygous   |
| NC_037646.1 | 6281237 | SNV | 1 | T | C | Homozygous   |
| NC_037646.1 | 6281266 | SNV | 1 | G | T | Heterozygous |
| NC_037646.1 | 6281362 | SNV | 1 | C | T | Homozygous   |
| NC_037646.1 | 6281374 | SNV | 1 | C | T | Homozygous   |
| NC_037646.1 | 6281379 | SNV | 1 | A | T | Homozygous   |
| NC_037646.1 | 6281400 | SNV | 1 | C | A | Homozygous   |
| NC_037646.1 | 6281403 | SNV | 1 | C | T | Homozygous   |
| NC_037646.1 | 6281406 | SNV | 1 | A | G | Homozygous   |
| NC_037646.1 | 6281989 | SNV | 1 | G | A | Heterozygous |
| NC_037646.1 | 6282829 | SNV | 1 | A | G | Homozygous   |
| NC_037646.1 | 6283065 | SNV | 1 | C | A | Homozygous   |
| NC_037646.1 | 6283796 | SNV | 1 | A | G | Heterozygous |
| NC_037646.1 | 6300552 | SNV | 1 | G | A | Homozygous   |
| NC_037646.1 | 6300565 | SNV | 1 | A | T | Homozygous   |
| NC_037646.1 | 6300572 | SNV | 1 | C | T | Homozygous   |
| NC_037646.1 | 6304035 | SNV | 1 | C | T | Heterozygous |
| NC_037646.1 | 6304064 | SNV | 1 | T | C | Heterozygous |
| NC_037646.1 | 6304070 | SNV | 1 | T | C | Heterozygous |
| NC_037646.1 | 6304074 | SNV | 1 | A | C | Heterozygous |
| NC_037646.1 | 6304078 | SNV | 1 | A | C | Heterozygous |
| NC_037646.1 | 6304080 | SNV | 1 | C | A | Heterozygous |
| NC_037646.1 | 6304139 | SNV | 1 | T | C | Homozygous   |
| NC_037646.1 | 6304236 | SNV | 1 | C | T | Heterozygous |
| NC_037646.1 | 6304295 | SNV | 1 | G | A | Heterozygous |
| NC_037646.1 | 6314144 | SNV | 1 | T | G | Homozygous   |
| NC_037646.1 | 6314147 | SNV | 1 | A | C | Heterozygous |
| NC_037646.1 | 6314158 | SNV | 1 | G | A | Homozygous   |

|             |         |     |   |   |   |              |
|-------------|---------|-----|---|---|---|--------------|
| NC_037646.1 | 6316403 | SNV | 1 | T | C | Homozygous   |
| NC_037646.1 | 6316409 | SNV | 1 | C | G | Homozygous   |
| NC_037646.1 | 6320388 | SNV | 1 | T | C | Homozygous   |
| NC_037646.1 | 6320392 | SNV | 1 | T | A | Homozygous   |
| NC_037646.1 | 6320402 | SNV | 1 | T | C | Homozygous   |
| NC_037646.1 | 6320415 | SNV | 1 | G | T | Homozygous   |
| NC_037646.1 | 6320436 | SNV | 1 | G | T | Homozygous   |
| NC_037646.1 | 6323514 | SNV | 1 | C | T | Homozygous   |
| NC_037646.1 | 6323552 | SNV | 1 | C | T | Homozygous   |
| NC_037646.1 | 6323581 | SNV | 1 | T | C | Homozygous   |
| NC_037646.1 | 6323585 | SNV | 1 | G | A | Homozygous   |
| NC_037646.1 | 6323601 | SNV | 1 | A | G | Homozygous   |
| NC_037646.1 | 6323685 | SNV | 1 | G | A | Homozygous   |
| NC_037646.1 | 6323712 | SNV | 1 | C | T | Homozygous   |
| NC_037646.1 | 6323724 | SNV | 1 | C | T | Homozygous   |
| NC_037646.1 | 6323727 | SNV | 1 | C | T | Homozygous   |
| NC_037646.1 | 6323737 | SNV | 1 | T | C | Homozygous   |
| NC_037646.1 | 6324085 | SNV | 1 | T | C | Homozygous   |
| NC_037646.1 | 6324087 | SNV | 1 | C | T | Homozygous   |
| NC_037646.1 | 6333050 | SNV | 1 | G | A | Heterozygous |
| NC_037646.1 | 6333067 | SNV | 1 | G | T | Heterozygous |
| NC_037646.1 | 6333093 | SNV | 1 | C | T | Heterozygous |
| NC_037646.1 | 6333348 | SNV | 1 | C | T | Heterozygous |
| NC_037646.1 | 6333458 | SNV | 1 | T | C | Homozygous   |
| NC_037646.1 | 6335568 | SNV | 1 | A | G | Homozygous   |
| NC_037646.1 | 6335734 | SNV | 1 | G | C | Homozygous   |
| NC_037646.1 | 6335880 | SNV | 1 | G | C | Heterozygous |
| NC_037646.1 | 6335935 | SNV | 1 | G | C | Homozygous   |
| NC_037646.1 | 6335972 | SNV | 1 | G | A | Heterozygous |
| NC_037646.1 | 6336001 | SNV | 1 | T | A | Heterozygous |
| NC_037646.1 | 6339812 | SNV | 1 | C | T | Homozygous   |
| NC_037646.1 | 6339835 | SNV | 1 | C | T | Homozygous   |
| NC_037646.1 | 6339895 | SNV | 1 | T | C | Homozygous   |
| NC_037646.1 | 6340614 | SNV | 1 | C | T | Heterozygous |
| NC_037646.1 | 6341392 | SNV | 1 | C | T | Homozygous   |
| NC_037646.1 | 6341502 | SNV | 1 | A | G | Homozygous   |
| NC_037646.1 | 6341526 | SNV | 1 | A | T | Homozygous   |
| NC_037646.1 | 6348466 | SNV | 1 | T | C | Heterozygous |
| NC_037646.1 | 6348473 | SNV | 1 | C | T | Homozygous   |
| NC_037646.1 | 6348476 | SNV | 1 | T | C | Homozygous   |
| NC_037646.1 | 6348488 | SNV | 1 | T | C | Homozygous   |
| NC_037646.1 | 6348492 | SNV | 1 | T | C | Heterozygous |
| NC_037646.1 | 6348523 | SNV | 1 | T | C | Homozygous   |
| NC_037646.1 | 6348590 | SNV | 1 | A | G | Homozygous   |
| NC_037646.1 | 6414670 | SNV | 1 | T | A | Homozygous   |
| NC_037646.1 | 6415005 | SNV | 1 | A | G | Homozygous   |
| NC_037646.1 | 6415740 | SNV | 1 | A | G | Heterozygous |
| NC_037646.1 | 6416214 | SNV | 1 | G | A | Homozygous   |
| NC_037646.1 | 6416789 | SNV | 1 | T | C | Homozygous   |
| NC_037646.1 | 6417351 | SNV | 1 | A | G | Homozygous   |
| NC_037646.1 | 6417393 | SNV | 1 | T | C | Homozygous   |

|             |         |     |   |   |   |              |
|-------------|---------|-----|---|---|---|--------------|
| NC_037646.1 | 6417603 | SNV | 1 | A | G | Heterozygous |
| NC_037646.1 | 6423460 | SNV | 1 | T | G | Homozygous   |
| NC_037646.1 | 6423462 | SNV | 1 | G | A | Heterozygous |
| NC_037646.1 | 6432793 | SNV | 1 | C | T | Homozygous   |
| NC_037646.1 | 6432918 | SNV | 1 | C | T | Heterozygous |
| NC_037646.1 | 6433857 | SNV | 1 | G | A | Heterozygous |
| NC_037646.1 | 6434463 | SNV | 1 | G | A | Heterozygous |
| NC_037646.1 | 6434520 | SNV | 1 | C | T | Heterozygous |
| NC_037646.1 | 6434653 | SNV | 1 | C | T | Heterozygous |
| NC_037646.1 | 6440887 | SNV | 1 | T | C | Homozygous   |
| NC_037646.1 | 6441510 | SNV | 1 | T | C | Homozygous   |
| NC_037646.1 | 6441848 | SNV | 1 | T | C | Heterozygous |
| NC_037646.1 | 6441854 | SNV | 1 | T | C | Heterozygous |
| NC_037646.1 | 6441860 | SNV | 1 | T | C | Heterozygous |
| NC_037646.1 | 6441862 | SNV | 1 | T | C | Heterozygous |
| NC_037646.1 | 6442206 | SNV | 1 | T | G | Homozygous   |
| NC_037646.1 | 6443251 | SNV | 1 | G | A | Heterozygous |
| NC_037646.1 | 6443677 | SNV | 1 | A | G | Heterozygous |
| NC_037646.1 | 6445168 | SNV | 1 | A | T | Heterozygous |
| NC_037646.1 | 6445556 | SNV | 1 | T | C | Heterozygous |
| NC_037646.1 | 6445666 | SNV | 1 | A | G | Homozygous   |
| NC_037646.1 | 6445791 | SNV | 1 | T | C | Homozygous   |
| NC_037646.1 | 6445820 | SNV | 1 | G | A | Heterozygous |
| NC_037646.1 | 6446413 | SNV | 1 | C | T | Heterozygous |
| NC_037646.1 | 6446526 | SNV | 1 | A | G | Homozygous   |
| NC_037646.1 | 6446866 | SNV | 1 | C | T | Heterozygous |
| NC_037646.1 | 6447759 | SNV | 1 | G | A | Homozygous   |
| NC_037646.1 | 6447891 | SNV | 1 | A | G | Homozygous   |
| NC_037646.1 | 6447921 | SNV | 1 | A | G | Homozygous   |
| NC_037646.1 | 6447933 | SNV | 1 | G | A | Homozygous   |
| NC_037646.1 | 6448606 | SNV | 1 | A | G | Homozygous   |
| NC_037646.1 | 6449621 | SNV | 1 | A | G | Heterozygous |
| NC_037646.1 | 6449846 | SNV | 1 | T | C | Homozygous   |
| NC_037646.1 | 6450428 | SNV | 1 | T | C | Homozygous   |
| NC_037646.1 | 6450437 | SNV | 1 | G | A | Heterozygous |
| NC_037646.1 | 6451030 | SNV | 1 | C | T | Heterozygous |
| NC_037646.1 | 6454173 | SNV | 1 | A | T | Homozygous   |
| NC_037646.1 | 6454178 | SNV | 1 | A | C | Homozygous   |
| NC_037646.1 | 6454181 | SNV | 1 | A | C | Homozygous   |
| NC_037646.1 | 6454191 | SNV | 1 | A | T | Homozygous   |
| NC_037646.1 | 6454684 | SNV | 1 | C | A | Homozygous   |
| NC_037646.1 | 6454699 | SNV | 1 | C | A | Homozygous   |
| NC_037646.1 | 6455890 | SNV | 1 | T | C | Homozygous   |
| NC_037646.1 | 6457378 | SNV | 1 | A | G | Homozygous   |
| NC_037646.1 | 6457591 | SNV | 1 | G | A | Homozygous   |
| NC_037646.1 | 6457611 | SNV | 1 | A | C | Heterozygous |
| NC_037646.1 | 6457904 | SNV | 1 | C | T | Heterozygous |
| NC_037646.1 | 6459021 | SNV | 1 | C | T | Heterozygous |
| NC_037646.1 | 6460109 | SNV | 1 | T | G | Homozygous   |
| NC_037646.1 | 6460112 | SNV | 1 | G | A | Homozygous   |
| NC_037646.1 | 6460148 | SNV | 1 | A | T | Homozygous   |

|             |         |     |   |   |   |              |
|-------------|---------|-----|---|---|---|--------------|
| NC_037646.1 | 6460951 | SNV | 1 | A | G | Homozygous   |
| NC_037646.1 | 6461384 | SNV | 1 | C | T | Heterozygous |
| NC_037646.1 | 6464485 | SNV | 1 | T | C | Heterozygous |
| NC_037646.1 | 6464488 | SNV | 1 | G | C | Heterozygous |
| NC_037646.1 | 6464936 | SNV | 1 | A | G | Homozygous   |
| NC_037646.1 | 6464939 | SNV | 1 | G | C | Homozygous   |
| NC_037646.1 | 6464966 | SNV | 1 | C | T | Homozygous   |
| NC_037646.1 | 6465255 | SNV | 1 | A | G | Homozygous   |
| NC_037646.1 | 6465495 | SNV | 1 | T | A | Homozygous   |
| NC_037646.1 | 6465505 | SNV | 1 | T | G | Homozygous   |
| NC_037646.1 | 6468421 | SNV | 1 | T | A | Homozygous   |
| NC_037646.1 | 6469085 | SNV | 1 | A | G | Heterozygous |
| NC_037646.1 | 6469570 | SNV | 1 | T | A | Heterozygous |
| NC_037646.1 | 6469589 | SNV | 1 | G | A | Homozygous   |
| NC_037646.1 | 6469596 | SNV | 1 | A | G | Homozygous   |
| NC_037646.1 | 6469632 | SNV | 1 | A | G | Homozygous   |
| NC_037646.1 | 6469683 | SNV | 1 | T | A | Heterozygous |
| NC_037646.1 | 6469804 | SNV | 1 | G | A | Homozygous   |
| NC_037646.1 | 6469826 | SNV | 1 | T | C | Homozygous   |
| NC_037646.1 | 6469864 | SNV | 1 | T | C | Heterozygous |
| NC_037646.1 | 6470085 | SNV | 1 | T | G | Heterozygous |
| NC_037646.1 | 6470524 | SNV | 1 | A | C | Homozygous   |
| NC_037646.1 | 6470536 | SNV | 1 | C | T | Homozygous   |
| NC_037646.1 | 6470546 | SNV | 1 | A | C | Heterozygous |
| NC_037646.1 | 6470559 | SNV | 1 | A | G | Heterozygous |
| NC_037646.1 | 6470572 | SNV | 1 | A | T | Heterozygous |
| NC_037646.1 | 6470578 | SNV | 1 | A | G | Heterozygous |
| NC_037646.1 | 6470582 | SNV | 1 | T | A | Heterozygous |
| NC_037646.1 | 6470592 | SNV | 1 | G | A | Heterozygous |
| NC_037646.1 | 6470600 | SNV | 1 | T | C | Heterozygous |
| NC_037646.1 | 6471941 | SNV | 1 | G | A | Heterozygous |
| NC_037646.1 | 6472048 | SNV | 1 | A | G | Homozygous   |
| NC_037646.1 | 6472106 | SNV | 1 | T | C | Heterozygous |
| NC_037646.1 | 6472109 | SNV | 1 | C | T | Heterozygous |
| NC_037646.1 | 6472131 | SNV | 1 | G | A | Homozygous   |
| NC_037646.1 | 6472140 | SNV | 1 | T | A | Heterozygous |
| NC_037646.1 | 6472150 | SNV | 1 | C | T | Homozygous   |
| NC_037646.1 | 6472340 | SNV | 1 | A | G | Homozygous   |
| NC_037646.1 | 6472593 | SNV | 1 | A | G | Heterozygous |
| NC_037646.1 | 6472599 | SNV | 1 | G | A | Heterozygous |
| NC_037646.1 | 6472605 | SNV | 1 | G | A | Heterozygous |
| NC_037646.1 | 6472623 | SNV | 1 | C | T | Heterozygous |
| NC_037646.1 | 6472626 | SNV | 1 | T | C | Homozygous   |
| NC_037646.1 | 6472671 | SNV | 1 | T | C | Homozygous   |
| NC_037646.1 | 6472674 | SNV | 1 | A | T | Homozygous   |
| NC_037646.1 | 6472686 | SNV | 1 | G | A | Homozygous   |
| NC_037646.1 | 6472829 | SNV | 1 | C | T | Homozygous   |
| NC_037646.1 | 6472850 | SNV | 1 | T | C | Homozygous   |
| NC_037646.1 | 6472883 | SNV | 1 | T | C | Heterozygous |
| NC_037646.1 | 6472969 | SNV | 1 | T | C | Heterozygous |
| NC_037646.1 | 6473003 | SNV | 1 | A | T | Heterozygous |

|             |         |     |   |   |   |              |
|-------------|---------|-----|---|---|---|--------------|
| NC_037646.1 | 6473075 | SNV | 1 | A | G | Homozygous   |
| NC_037646.1 | 6473126 | SNV | 1 | T | C | Homozygous   |
| NC_037646.1 | 6473718 | SNV | 1 | A | T | Heterozygous |
| NC_037646.1 | 6473747 | SNV | 1 | A | G | Homozygous   |
| NC_037646.1 | 6473869 | SNV | 1 | T | C | Heterozygous |
| NC_037646.1 | 6473959 | SNV | 1 | C | T | Heterozygous |
| NC_037646.1 | 6473965 | SNV | 1 | C | T | Heterozygous |
| NC_037646.1 | 6474023 | SNV | 1 | A | C | Heterozygous |
| NC_037646.1 | 6474066 | SNV | 1 | C | T | Homozygous   |
| NC_037646.1 | 6474098 | SNV | 1 | T | C | Heterozygous |
| NC_037646.1 | 6474176 | SNV | 1 | A | G | Homozygous   |
| NC_037646.1 | 6474281 | SNV | 1 | A | G | Homozygous   |
| NC_037646.1 | 6474316 | SNV | 1 | C | T | Homozygous   |
| NC_037646.1 | 6474513 | SNV | 1 | T | C | Homozygous   |
| NC_037646.1 | 6474539 | SNV | 1 | A | G | Homozygous   |
| NC_037646.1 | 6474546 | SNV | 1 | A | G | Homozygous   |
| NC_037646.1 | 6474563 | SNV | 1 | A | G | Heterozygous |
| NC_037646.1 | 6474836 | SNV | 1 | C | T | Homozygous   |
| NC_037646.1 | 6474840 | SNV | 1 | C | T | Homozygous   |
| NC_037646.1 | 6474845 | SNV | 1 | C | T | Heterozygous |
| NC_037646.1 | 6477092 | SNV | 1 | T | C | Homozygous   |
| NC_037646.1 | 6477573 | SNV | 1 | C | T | Heterozygous |
| NC_037646.1 | 6477617 | SNV | 1 | A | G | Heterozygous |
| NC_037646.1 | 6477626 | SNV | 1 | C | G | Heterozygous |
| NC_037646.1 | 6477685 | SNV | 1 | T | C | Homozygous   |
| NC_037646.1 | 6477710 | SNV | 1 | T | C | Homozygous   |
| NC_037646.1 | 6477739 | SNV | 1 | G | T | Heterozygous |
| NC_037646.1 | 6477760 | SNV | 1 | G | A | Heterozygous |
| NC_037646.1 | 6477816 | SNV | 1 | C | T | Heterozygous |
| NC_037646.1 | 6477918 | SNV | 1 | T | C | Homozygous   |
| NC_037646.1 | 6477920 | SNV | 1 | A | G | Homozygous   |
| NC_037646.1 | 6477945 | SNV | 1 | T | A | Homozygous   |
| NC_037646.1 | 6478216 | SNV | 1 | T | C | Heterozygous |
| NC_037646.1 | 6478433 | SNV | 1 | T | C | Homozygous   |
| NC_037646.1 | 6478540 | SNV | 1 | C | G | Heterozygous |
| NC_037646.1 | 6478604 | SNV | 1 | T | C | Heterozygous |
| NC_037646.1 | 6481803 | SNV | 1 | A | T | Homozygous   |
| NC_037646.1 | 6481949 | SNV | 1 | T | C | Homozygous   |
| NC_037646.1 | 6482068 | SNV | 1 | C | T | Homozygous   |
| NC_037646.1 | 6482305 | SNV | 1 | G | A | Heterozygous |
| NC_037646.1 | 6482334 | SNV | 1 | A | G | Homozygous   |
| NC_037646.1 | 6483533 | SNV | 1 | G | C | Homozygous   |
| NC_037646.1 | 6483543 | SNV | 1 | G | C | Homozygous   |
| NC_037646.1 | 6483570 | SNV | 1 | A | G | Homozygous   |
| NC_037646.1 | 6483828 | SNV | 1 | G | A | Heterozygous |
| NC_037646.1 | 6484177 | SNV | 1 | G | A | Heterozygous |
| NC_037646.1 | 6484818 | SNV | 1 | C | T | Homozygous   |
| NC_037646.1 | 6484825 | SNV | 1 | A | G | Homozygous   |
| NC_037646.1 | 6484900 | SNV | 1 | A | T | Heterozygous |
| NC_037646.1 | 6484907 | SNV | 1 | T | C | Heterozygous |
| NC_037646.1 | 6484909 | SNV | 1 | G | C | Heterozygous |



|             |         |     |   |   |   |              |
|-------------|---------|-----|---|---|---|--------------|
| NC_037646.1 | 6484945 | SNV | 1 | A | G | Homozygous   |
| NC_037646.1 | 6486914 | SNV | 1 | A | G | Homozygous   |
| NC_037646.1 | 6487128 | SNV | 1 | C | T | Homozygous   |
| NC_037646.1 | 6487322 | SNV | 1 | C | T | Homozygous   |
| NC_037646.1 | 6487508 | SNV | 1 | A | C | Homozygous   |
| NC_037646.1 | 6491169 | SNV | 1 | C | G | Homozygous   |
| NC_037646.1 | 6491172 | SNV | 1 | C | T | Homozygous   |
| NC_037646.1 | 6500302 | SNV | 1 | G | A | Homozygous   |
| NC_037646.1 | 6501091 | SNV | 1 | G | A | Heterozygous |
| NC_037646.1 | 6502644 | SNV | 1 | T | C | Homozygous   |
| NC_037646.1 | 6503014 | SNV | 1 | C | T | Homozygous   |
| NC_037646.1 | 6503016 | SNV | 1 | A | C | Homozygous   |
| NC_037646.1 | 6503070 | SNV | 1 | A | G | Heterozygous |
| NC_037646.1 | 6503337 | SNV | 1 | T | G | Homozygous   |
| NC_037646.1 | 6519127 | SNV | 1 | G | T | Homozygous   |
| NC_037646.1 | 6520346 | SNV | 1 | C | A | Homozygous   |
| NC_037646.1 | 6520350 | SNV | 1 | T | A | Heterozygous |
| NC_037646.1 | 6520375 | SNV | 1 | C | G | Homozygous   |
| NC_037646.1 | 6520378 | SNV | 1 | G | A | Homozygous   |
| NC_037646.1 | 6524126 | SNV | 1 | G | C | Homozygous   |
| NC_037646.1 | 6524358 | SNV | 1 | G | A | Homozygous   |
| NC_037646.1 | 6525076 | SNV | 1 | T | G | Heterozygous |
| NC_037646.1 | 6525243 | SNV | 1 | G | T | Homozygous   |
| NC_037646.1 | 6525330 | SNV | 1 | A | T | Homozygous   |
| NC_037646.1 | 6525417 | SNV | 1 | G | C | Homozygous   |
| NC_037646.1 | 6532567 | SNV | 1 | C | T | Heterozygous |
| NC_037646.1 | 6536186 | SNV | 1 | T | A | Homozygous   |
| NC_037646.1 | 6536196 | SNV | 1 | T | A | Homozygous   |
| NC_037646.1 | 6536229 | SNV | 1 | T | A | Homozygous   |
| NC_037646.1 | 6536680 | SNV | 1 | T | A | Homozygous   |
| NC_037646.1 | 6536683 | SNV | 1 | A | C | Homozygous   |
| NC_037646.1 | 6541027 | SNV | 1 | A | G | Homozygous   |
| NC_037646.1 | 6541415 | SNV | 1 | A | G | Homozygous   |
| NC_037646.1 | 6541902 | SNV | 1 | T | C | Homozygous   |
| NC_037646.1 | 6542824 | SNV | 1 | G | A | Homozygous   |
| NC_037646.1 | 6542891 | SNV | 1 | C | A | Heterozygous |
| NC_037646.1 | 6543478 | SNV | 1 | T | A | Homozygous   |
| NC_037646.1 | 6543772 | SNV | 1 | A | T | Homozygous   |
| NC_037646.1 | 6552497 | SNV | 1 | A | T | Homozygous   |
| NC_037646.1 | 6552503 | SNV | 1 | T | A | Homozygous   |
| NC_037646.1 | 6552532 | SNV | 1 | T | C | Homozygous   |
| NC_037646.1 | 6552536 | SNV | 1 | T | G | Homozygous   |
| NC_037646.1 | 6553621 | SNV | 1 | T | A | Homozygous   |
| NC_037646.1 | 6562168 | SNV | 1 | T | C | Homozygous   |
| NC_037646.1 | 6562610 | SNV | 1 | T | C | Homozygous   |
| NC_037646.1 | 6563428 | SNV | 1 | C | T | Heterozygous |
| NC_037646.1 | 6564383 | SNV | 1 | A | G | Homozygous   |
| NC_037646.1 | 6566693 | SNV | 1 | C | A | Homozygous   |
| NC_037646.1 | 6567083 | SNV | 1 | C | T | Homozygous   |
| NC_037646.1 | 6567443 | SNV | 1 | C | G | Heterozygous |
| NC_037646.1 | 6569058 | SNV | 1 | G | T | Homozygous   |

|             |         |     |   |   |   |              |
|-------------|---------|-----|---|---|---|--------------|
| NC_037646.1 | 6569178 | SNV | 1 | G | C | Homozygous   |
| NC_037646.1 | 6569397 | SNV | 1 | A | G | Homozygous   |
| NC_037646.1 | 6569400 | SNV | 1 | A | G | Homozygous   |
| NC_037646.1 | 6572327 | SNV | 1 | C | T | Homozygous   |
| NC_037646.1 | 6573805 | SNV | 1 | T | C | Homozygous   |
| NC_037646.1 | 6573814 | SNV | 1 | A | T | Homozygous   |
| NC_037646.1 | 6573832 | SNV | 1 | T | A | Homozygous   |
| NC_037646.1 | 6573834 | SNV | 1 | A | T | Homozygous   |
| NC_037646.1 | 6573837 | SNV | 1 | T | C | Homozygous   |
| NC_037646.1 | 6573844 | SNV | 1 | G | C | Homozygous   |
| NC_037646.1 | 6573847 | SNV | 1 | A | G | Homozygous   |
| NC_037646.1 | 6573852 | SNV | 1 | C | T | Homozygous   |
| NC_037646.1 | 6573862 | SNV | 1 | A | T | Homozygous   |
| NC_037646.1 | 6573865 | SNV | 1 | A | G | Homozygous   |
| NC_037646.1 | 6573868 | SNV | 1 | T | C | Homozygous   |
| NC_037646.1 | 6573877 | SNV | 1 | A | C | Homozygous   |
| NC_037646.1 | 6577753 | SNV | 1 | T | C | Homozygous   |
| NC_037646.1 | 6592301 | SNV | 1 | T | C | Homozygous   |
| NC_037646.1 | 6592564 | SNV | 1 | A | G | Homozygous   |
| NC_037646.1 | 6592567 | SNV | 1 | A | G | Homozygous   |
| NC_037646.1 | 6594625 | SNV | 1 | C | T | Homozygous   |
| NC_037646.1 | 6602011 | SNV | 1 | T | C | Heterozygous |
| NC_037646.1 | 6602021 | SNV | 1 | T | C | Heterozygous |
| NC_037646.1 | 6602034 | SNV | 1 | T | C | Heterozygous |
| NC_037646.1 | 6602036 | SNV | 1 | T | C | Heterozygous |
| NC_037646.1 | 6602038 | SNV | 1 | T | C | Homozygous   |
| NC_037646.1 | 6610477 | SNV | 1 | A | G | Heterozygous |
| NC_037646.1 | 6612041 | SNV | 1 | T | C | Homozygous   |
| NC_037646.1 | 6631154 | SNV | 1 | C | T | Heterozygous |
| NC_037646.1 | 6631157 | SNV | 1 | C | T | Heterozygous |
| NC_037646.1 | 6631487 | SNV | 1 | G | A | Heterozygous |
| NC_037646.1 | 6636461 | SNV | 1 | T | C | Heterozygous |
| NC_037646.1 | 6636491 | SNV | 1 | G | C | Heterozygous |
| NC_037646.1 | 6637061 | SNV | 1 | A | G | Homozygous   |
| NC_037646.1 | 6641815 | SNV | 1 | G | A | Homozygous   |
| NC_037646.1 | 6641836 | SNV | 1 | A | G | Heterozygous |
| NC_037646.1 | 6641843 | SNV | 1 | A | G | Heterozygous |
| NC_037646.1 | 6665521 | SNV | 1 | T | A | Heterozygous |
| NC_037646.1 | 6665566 | SNV | 1 | T | C | Homozygous   |
| NC_037646.1 | 6680447 | SNV | 1 | A | G | Homozygous   |
| NC_037646.1 | 6680549 | SNV | 1 | A | G | Homozygous   |
| NC_037646.1 | 6680757 | SNV | 1 | G | A | Heterozygous |
| NC_037646.1 | 6680799 | SNV | 1 | A | G | Homozygous   |
| NC_037646.1 | 6680811 | SNV | 1 | G | A | Heterozygous |
| NC_037646.1 | 6683734 | SNV | 1 | T | C | Homozygous   |
| NC_037646.1 | 6683755 | SNV | 1 | T | C | Homozygous   |
| NC_037646.1 | 6683882 | SNV | 1 | G | A | Heterozygous |
| NC_037646.1 | 6683912 | SNV | 1 | C | G | Heterozygous |
| NC_037646.1 | 6683928 | SNV | 1 | A | G | Homozygous   |
| NC_037646.1 | 6683958 | SNV | 1 | T | C | Heterozygous |
| NC_037646.1 | 6683994 | SNV | 1 | A | C | Heterozygous |

|             |         |     |   |   |   |              |
|-------------|---------|-----|---|---|---|--------------|
| NC_037646.1 | 6684022 | SNV | 1 | C | G | Homozygous   |
| NC_037646.1 | 6706147 | SNV | 1 | C | T | Homozygous   |
| NC_037646.1 | 6709696 | SNV | 1 | T | C | Heterozygous |
| NC_037646.1 | 6710108 | SNV | 1 | G | A | Homozygous   |
| NC_037646.1 | 6710311 | SNV | 1 | G | A | Heterozygous |
| NC_037646.1 | 6710313 | SNV | 1 | G | A | Heterozygous |
| NC_037646.1 | 6721701 | SNV | 1 | A | G | Heterozygous |
| NC_037646.1 | 6721763 | SNV | 1 | T | G | Heterozygous |
| NC_037646.1 | 6728478 | SNV | 1 | C | T | Heterozygous |
| NC_037646.1 | 6729112 | SNV | 1 | T | C | Heterozygous |
| NC_037646.1 | 6742186 | SNV | 1 | G | A | Homozygous   |
| NC_037646.1 | 6742188 | SNV | 1 | A | T | Homozygous   |
| NC_037646.1 | 6742195 | SNV | 1 | T | A | Homozygous   |
| NC_037646.1 | 6742778 | SNV | 1 | T | C | Homozygous   |
| NC_037646.1 | 6742780 | SNV | 1 | A | T | Homozygous   |
| NC_037646.1 | 6743294 | SNV | 1 | G | A | Homozygous   |
| NC_037646.1 | 6745603 | SNV | 1 | G | T | Homozygous   |
| NC_037646.1 | 6746410 | SNV | 1 | A | G | Heterozygous |
| NC_037646.1 | 6746420 | SNV | 1 | T | A | Heterozygous |
| NC_037646.1 | 6746423 | SNV | 1 | A | T | Heterozygous |
| NC_037646.1 | 6746425 | SNV | 1 | A | T | Heterozygous |
| NC_037646.1 | 6746711 | SNV | 1 | G | A | Heterozygous |
| NC_037646.1 | 6746734 | SNV | 1 | G | T | Homozygous   |
| NC_037646.1 | 6747437 | SNV | 1 | C | T | Homozygous   |
| NC_037646.1 | 6752466 | SNV | 1 | T | G | Homozygous   |
| NC_037646.1 | 6752474 | SNV | 1 | A | T | Homozygous   |
| NC_037646.1 | 6752480 | SNV | 1 | G | A | Homozygous   |
| NC_037646.1 | 6752483 | SNV | 1 | G | A | Homozygous   |
| NC_037646.1 | 6752485 | SNV | 1 | T | A | Homozygous   |
| NC_037646.1 | 6761241 | SNV | 1 | T | G | Homozygous   |
| NC_037646.1 | 6761247 | SNV | 1 | G | T | Homozygous   |
| NC_037646.1 | 6761252 | SNV | 1 | T | G | Homozygous   |
| NC_037646.1 | 6762227 | SNV | 1 | A | G | Homozygous   |
| NC_037646.1 | 6762244 | SNV | 1 | C | T | Heterozygous |
| NC_037646.1 | 6762272 | SNV | 1 | T | C | Homozygous   |
| NC_037646.1 | 6762323 | SNV | 1 | A | G | Homozygous   |
| NC_037646.1 | 6762344 | SNV | 1 | G | C | Homozygous   |
| NC_037646.1 | 6764620 | SNV | 1 | A | G | Heterozygous |
| NC_037646.1 | 6764630 | SNV | 1 | T | A | Homozygous   |
| NC_037646.1 | 6770944 | SNV | 1 | A | C | Heterozygous |
| NC_037646.1 | 6771406 | SNV | 1 | G | A | Heterozygous |
| NC_037646.1 | 6771418 | SNV | 1 | A | G | Heterozygous |
| NC_037646.1 | 6778917 | SNV | 1 | G | A | Homozygous   |
| NC_037646.1 | 6778923 | SNV | 1 | G | A | Homozygous   |
| NC_037646.1 | 6820954 | SNV | 1 | G | A | Heterozygous |
| NC_037646.1 | 6821122 | SNV | 1 | A | G | Homozygous   |
| NC_037646.1 | 6821777 | SNV | 1 | C | T | Heterozygous |
| NC_037646.1 | 6821820 | SNV | 1 | T | C | Heterozygous |
| NC_037646.1 | 6822106 | SNV | 1 | A | G | Homozygous   |
| NC_037646.1 | 6822130 | SNV | 1 | C | A | Homozygous   |
| NC_037646.1 | 6822144 | SNV | 1 | A | G | Homozygous   |

|             |         |     |   |   |   |              |
|-------------|---------|-----|---|---|---|--------------|
| NC_037646.1 | 6822465 | SNV | 1 | T | A | Homozygous   |
| NC_037646.1 | 6822826 | SNV | 1 | T | C | Homozygous   |
| NC_037646.1 | 6823277 | SNV | 1 | C | T | Heterozygous |
| NC_037646.1 | 6823514 | SNV | 1 | A | G | Heterozygous |
| NC_037646.1 | 6823603 | SNV | 1 | A | G | Homozygous   |
| NC_037646.1 | 6824625 | SNV | 1 | T | C | Homozygous   |
| NC_037646.1 | 6825888 | SNV | 1 | A | G | Homozygous   |
| NC_037646.1 | 6825923 | SNV | 1 | C | T | Heterozygous |
| NC_037646.1 | 6825948 | SNV | 1 | A | G | Heterozygous |
| NC_037646.1 | 6826041 | SNV | 1 | A | G | Homozygous   |
| NC_037646.1 | 6826123 | SNV | 1 | C | T | Heterozygous |
| NC_037646.1 | 6826241 | SNV | 1 | G | A | Heterozygous |
| NC_037646.1 | 6826915 | SNV | 1 | A | G | Heterozygous |
| NC_037646.1 | 6830063 | SNV | 1 | C | T | Heterozygous |
| NC_037646.1 | 6832948 | SNV | 1 | A | G | Heterozygous |
| NC_037646.1 | 6832986 | SNV | 1 | G | C | Homozygous   |
| NC_037646.1 | 6833631 | SNV | 1 | A | G | Homozygous   |
| NC_037646.1 | 6833693 | SNV | 1 | A | G | Homozygous   |
| NC_037646.1 | 6833860 | SNV | 1 | C | T | Heterozygous |
| NC_037646.1 | 6833865 | SNV | 1 | G | A | Heterozygous |
| NC_037646.1 | 6834157 | SNV | 1 | A | G | Heterozygous |
| NC_037646.1 | 6834207 | SNV | 1 | A | G | Homozygous   |
| NC_037646.1 | 6834244 | SNV | 1 | A | T | Homozygous   |
| NC_037646.1 | 6834619 | SNV | 1 | G | A | Homozygous   |
| NC_037646.1 | 6835075 | SNV | 1 | T | A | Homozygous   |
| NC_037646.1 | 6835088 | SNV | 1 | T | A | Homozygous   |
| NC_037646.1 | 6835109 | SNV | 1 | G | T | Homozygous   |
| NC_037646.1 | 6835112 | SNV | 1 | A | T | Homozygous   |
| NC_037646.1 | 6835550 | SNV | 1 | G | T | Heterozygous |
| NC_037646.1 | 6835556 | SNV | 1 | G | T | Heterozygous |
| NC_037646.1 | 6835665 | SNV | 1 | T | C | Homozygous   |
| NC_037646.1 | 6836227 | SNV | 1 | T | C | Homozygous   |
| NC_037646.1 | 6836394 | SNV | 1 | A | G | Homozygous   |
| NC_037646.1 | 6836516 | SNV | 1 | A | C | Homozygous   |
| NC_037646.1 | 6837893 | SNV | 1 | A | G | Homozygous   |
| NC_037646.1 | 6837942 | SNV | 1 | A | G | Homozygous   |
| NC_037646.1 | 6843933 | SNV | 1 | A | T | Homozygous   |
| NC_037646.1 | 6852829 | SNV | 1 | G | A | Homozygous   |
| NC_037646.1 | 6854642 | SNV | 1 | C | T | Homozygous   |
| NC_037646.1 | 6854788 | SNV | 1 | T | C | Homozygous   |
| NC_037646.1 | 6858272 | SNV | 1 | C | A | Heterozygous |
| NC_037646.1 | 6858275 | SNV | 1 | T | A | Homozygous   |
| NC_037646.1 | 6858278 | SNV | 1 | C | A | Heterozygous |
| NC_037646.1 | 6858281 | SNV | 1 | C | A | Heterozygous |
| NC_037646.1 | 6858284 | SNV | 1 | C | A | Heterozygous |
| NC_037646.1 | 6860819 | SNV | 1 | A | G | Homozygous   |
| NC_037646.1 | 6861359 | SNV | 1 | A | C | Homozygous   |
| NC_037646.1 | 6861364 | SNV | 1 | C | T | Homozygous   |
| NC_037646.1 | 6866836 | SNV | 1 | T | C | Homozygous   |
| NC_037646.1 | 6867112 | SNV | 1 | C | A | Homozygous   |
| NC_037646.1 | 6867195 | SNV | 1 | A | G | Homozygous   |

|             |         |     |   |   |   |              |
|-------------|---------|-----|---|---|---|--------------|
| NC_037646.1 | 6868578 | SNV | 1 | T | A | Homozygous   |
| NC_037646.1 | 6868679 | SNV | 1 | T | C | Homozygous   |
| NC_037646.1 | 6869379 | SNV | 1 | G | A | Heterozygous |
| NC_037646.1 | 6869413 | SNV | 1 | C | T | Heterozygous |
| NC_037646.1 | 6869455 | SNV | 1 | G | A | Homozygous   |
| NC_037646.1 | 6881662 | SNV | 1 | G | T | Homozygous   |
| NC_037646.1 | 6881683 | SNV | 1 | T | A | Homozygous   |
| NC_037646.1 | 6881688 | SNV | 1 | T | A | Homozygous   |
| NC_037646.1 | 6881691 | SNV | 1 | A | T | Homozygous   |
| NC_037646.1 | 6881698 | SNV | 1 | A | C | Homozygous   |
| NC_037646.1 | 6888997 | SNV | 1 | A | G | Homozygous   |
| NC_037646.1 | 6889027 | SNV | 1 | T | C | Homozygous   |
| NC_037646.1 | 6889078 | SNV | 1 | T | G | Homozygous   |
| NC_037646.1 | 6891465 | SNV | 1 | T | C | Homozygous   |
| NC_037646.1 | 6891765 | SNV | 1 | A | G | Heterozygous |
| NC_037646.1 | 6917990 | SNV | 1 | A | T | Heterozygous |
| NC_037646.1 | 6917997 | SNV | 1 | A | G | Heterozygous |
| NC_037646.1 | 6918129 | SNV | 1 | G | A | Heterozygous |
| NC_037646.1 | 6918470 | SNV | 1 | G | T | Heterozygous |
| NC_037646.1 | 6920092 | SNV | 1 | A | G | Homozygous   |
| NC_037646.1 | 6920143 | SNV | 1 | T | C | Homozygous   |
| NC_037646.1 | 6920275 | SNV | 1 | G | A | Heterozygous |
| NC_037646.1 | 6920397 | SNV | 1 | G | T | Heterozygous |
| NC_037646.1 | 6920402 | SNV | 1 | T | G | Heterozygous |
| NC_037646.1 | 6920810 | SNV | 1 | G | T | Heterozygous |
| NC_037646.1 | 6920933 | SNV | 1 | C | T | Heterozygous |
| NC_037646.1 | 6920945 | SNV | 1 | G | T | Homozygous   |
| NC_037646.1 | 6920954 | SNV | 1 | G | T | Heterozygous |
| NC_037646.1 | 6920979 | SNV | 1 | G | T | Heterozygous |
| NC_037646.1 | 6920999 | SNV | 1 | G | T | Heterozygous |
| NC_037646.1 | 6921551 | SNV | 1 | A | T | Heterozygous |
| NC_037646.1 | 6921574 | SNV | 1 | A | T | Heterozygous |
| NC_037646.1 | 6921583 | SNV | 1 | G | T | Heterozygous |
| NC_037646.1 | 6926169 | SNV | 1 | G | A | Homozygous   |
| NC_037646.1 | 6926177 | SNV | 1 | G | A | Homozygous   |
| NC_037646.1 | 6926209 | SNV | 1 | G | A | Homozygous   |
| NC_037646.1 | 6926244 | SNV | 1 | G | A | Heterozygous |
| NC_037646.1 | 6930408 | SNV | 1 | A | G | Homozygous   |
| NC_037646.1 | 6934704 | SNV | 1 | T | C | Heterozygous |
| NC_037646.1 | 6934716 | SNV | 1 | G | A | Heterozygous |
| NC_037646.1 | 6934718 | SNV | 1 | G | A | Heterozygous |
| NC_037646.1 | 6934726 | SNV | 1 | C | A | Heterozygous |
| NC_037646.1 | 6943616 | SNV | 1 | T | G | Homozygous   |
| NC_037646.1 | 6944261 | SNV | 1 | G | A | Homozygous   |
| NC_037646.1 | 6944352 | SNV | 1 | C | G | Heterozygous |
| NC_037646.1 | 6944782 | SNV | 1 | A | T | Heterozygous |
| NC_037646.1 | 6944844 | SNV | 1 | A | T | Homozygous   |
| NC_037646.1 | 6944855 | SNV | 1 | G | A | Heterozygous |
| NC_037646.1 | 6944903 | SNV | 1 | C | T | Homozygous   |
| NC_037646.1 | 6944922 | SNV | 1 | T | C | Homozygous   |
| NC_037646.1 | 6944925 | SNV | 1 | A | G | Homozygous   |

|             |         |     |   |   |   |              |
|-------------|---------|-----|---|---|---|--------------|
| NC_037646.1 | 6944957 | SNV | 1 | G | A | Homozygous   |
| NC_037646.1 | 6944980 | SNV | 1 | C | T | Homozygous   |
| NC_037646.1 | 6945009 | SNV | 1 | G | A | Heterozygous |
| NC_037646.1 | 6946510 | SNV | 1 | C | A | Heterozygous |
| NC_037646.1 | 6946516 | SNV | 1 | A | T | Homozygous   |
| NC_037646.1 | 6949579 | SNV | 1 | T | C | Homozygous   |
| NC_037646.1 | 6950527 | SNV | 1 | A | G | Heterozygous |
| NC_037646.1 | 6957610 | SNV | 1 | C | T | Homozygous   |
| NC_037646.1 | 6957842 | SNV | 1 | A | G | Homozygous   |
| NC_037646.1 | 6958166 | SNV | 1 | C | T | Heterozygous |
| NC_037646.1 | 6958377 | SNV | 1 | T | G | Heterozygous |
| NC_037646.1 | 6958601 | SNV | 1 | A | G | Homozygous   |
| NC_037646.1 | 6958610 | SNV | 1 | C | T | Heterozygous |
| NC_037646.1 | 6958617 | SNV | 1 | G | A | Heterozygous |
| NC_037646.1 | 6962815 | SNV | 1 | C | T | Heterozygous |
| NC_037646.1 | 6979798 | SNV | 1 | G | A | Heterozygous |
| NC_037646.1 | 6979800 | SNV | 1 | G | A | Heterozygous |
| NC_037646.1 | 6982642 | SNV | 1 | C | T | Heterozygous |
| NC_037646.1 | 6982735 | SNV | 1 | A | G | Heterozygous |
| NC_037646.1 | 6989485 | SNV | 1 | A | T | Homozygous   |
| NC_037646.1 | 6989522 | SNV | 1 | C | T | Homozygous   |
| NC_037646.1 | 7000266 | SNV | 1 | A | G | Homozygous   |
| NC_037646.1 | 7000540 | SNV | 1 | T | A | Heterozygous |
| NC_037646.1 | 7004800 | SNV | 1 | C | T | Homozygous   |
| NC_037646.1 | 7004810 | SNV | 1 | A | C | Homozygous   |
| NC_037646.1 | 7012715 | SNV | 1 | T | C | Homozygous   |
| NC_037646.1 | 7012720 | SNV | 1 | A | G | Homozygous   |
| NC_037646.1 | 7012770 | SNV | 1 | G | A | Homozygous   |
| NC_037646.1 | 7017219 | SNV | 1 | C | G | Homozygous   |
| NC_037646.1 | 7018888 | SNV | 1 | C | T | Heterozygous |
| NC_037646.1 | 7018945 | SNV | 1 | C | T | Heterozygous |
| NC_037646.1 | 7018972 | SNV | 1 | T | C | Homozygous   |
| NC_037646.1 | 7019207 | SNV | 1 | G | T | Heterozygous |
| NC_037646.1 | 7019574 | SNV | 1 | A | G | Heterozygous |
| NC_037646.1 | 7019584 | SNV | 1 | C | T | Homozygous   |
| NC_037646.1 | 7019617 | SNV | 1 | T | C | Heterozygous |
| NC_037646.1 | 7020280 | SNV | 1 | A | G | Heterozygous |
| NC_037646.1 | 7021127 | SNV | 1 | C | T | Homozygous   |
| NC_037646.1 | 7021132 | SNV | 1 | T | A | Heterozygous |
| NC_037646.1 | 7021139 | SNV | 1 | A | G | Homozygous   |
| NC_037646.1 | 7030320 | SNV | 1 | A | T | Homozygous   |
| NC_037646.1 | 7031891 | SNV | 1 | A | G | Homozygous   |
| NC_037646.1 | 7031894 | SNV | 1 | G | C | Homozygous   |
| NC_037646.1 | 7031905 | SNV | 1 | C | T | Homozygous   |
| NC_037646.1 | 7031983 | SNV | 1 | A | G | Homozygous   |
| NC_037646.1 | 7032278 | SNV | 1 | C | T | Homozygous   |
| NC_037646.1 | 7032339 | SNV | 1 | A | C | Homozygous   |
| NC_037646.1 | 7032398 | SNV | 1 | G | A | Heterozygous |
| NC_037646.1 | 7106748 | SNV | 1 | C | A | Homozygous   |
| NC_037646.1 | 7106765 | SNV | 1 | C | T | Homozygous   |
| NC_037646.1 | 7106771 | SNV | 1 | C | T | Homozygous   |

|             |         |     |   |   |   |              |
|-------------|---------|-----|---|---|---|--------------|
| NC_037646.1 | 7106773 | SNV | 1 | T | G | Homozygous   |
| NC_037646.1 | 7106775 | SNV | 1 | G | A | Homozygous   |
| NC_037646.1 | 7106802 | SNV | 1 | G | T | Homozygous   |
| NC_037646.1 | 7106816 | SNV | 1 | A | G | Heterozygous |
| NC_037646.1 | 7106822 | SNV | 1 | G | A | Homozygous   |
| NC_037646.1 | 7106830 | SNV | 1 | C | T | Homozygous   |
| NC_037646.1 | 7106832 | SNV | 1 | C | A | Homozygous   |
| NC_037646.1 | 7140133 | SNV | 1 | T | A | Heterozygous |
| NC_037646.1 | 7151298 | SNV | 1 | C | T | Heterozygous |
| NC_037646.1 | 7151414 | SNV | 1 | T | C | Heterozygous |
| NC_037646.1 | 7151491 | SNV | 1 | C | G | Homozygous   |
| NC_037646.1 | 7175509 | SNV | 1 | T | C | Homozygous   |
| NC_037646.1 | 7175522 | SNV | 1 | T | C | Heterozygous |
| NC_037646.1 | 7175666 | SNV | 1 | T | C | Homozygous   |
| NC_037646.1 | 7175671 | SNV | 1 | G | A | Heterozygous |
| NC_037646.1 | 7175748 | SNV | 1 | G | A | Heterozygous |
| NC_037646.1 | 7175800 | SNV | 1 | G | A | Heterozygous |
| NC_037646.1 | 7175803 | SNV | 1 | G | A | Heterozygous |
| NC_037646.1 | 7181423 | SNV | 1 | T | C | Homozygous   |
| NC_037646.1 | 7181449 | SNV | 1 | T | C | Heterozygous |
| NC_037646.1 | 7181463 | SNV | 1 | A | C | Homozygous   |
| NC_037646.1 | 7184745 | SNV | 1 | G | A | Homozygous   |
| NC_037646.1 | 7184749 | SNV | 1 | A | G | Homozygous   |
| NC_037646.1 | 7184774 | SNV | 1 | A | G | Heterozygous |
| NC_037646.1 | 7184858 | SNV | 1 | T | C | Homozygous   |
| NC_037646.1 | 7185010 | SNV | 1 | T | C | Homozygous   |
| NC_037646.1 | 7185095 | SNV | 1 | G | A | Heterozygous |
| NC_037646.1 | 7185098 | SNV | 1 | C | A | Homozygous   |
| NC_037646.1 | 7185328 | SNV | 1 | G | A | Homozygous   |
| NC_037646.1 | 7187504 | SNV | 1 | T | C | Homozygous   |
| NC_037646.1 | 7187623 | SNV | 1 | C | T | Homozygous   |
| NC_037646.1 | 7187628 | SNV | 1 | G | T | Homozygous   |
| NC_037646.1 | 7187633 | SNV | 1 | G | T | Homozygous   |
| NC_037646.1 | 7187643 | SNV | 1 | T | C | Homozygous   |
| NC_037646.1 | 7187645 | SNV | 1 | C | T | Heterozygous |
| NC_037646.1 | 7187650 | SNV | 1 | A | T | Homozygous   |
| NC_037646.1 | 7187655 | SNV | 1 | C | T | Homozygous   |
| NC_037646.1 | 7189812 | SNV | 1 | G | A | Heterozygous |
| NC_037646.1 | 7191321 | SNV | 1 | A | T | Homozygous   |
| NC_037646.1 | 7192565 | SNV | 1 | A | G | Homozygous   |
| NC_037646.1 | 7192574 | SNV | 1 | T | C | Heterozygous |
| NC_037646.1 | 7192603 | SNV | 1 | C | T | Heterozygous |
| NC_037646.1 | 7192647 | SNV | 1 | T | C | Homozygous   |
| NC_037646.1 | 7192825 | SNV | 1 | C | T | Heterozygous |
| NC_037646.1 | 7195331 | SNV | 1 | G | A | Homozygous   |
| NC_037646.1 | 7195494 | SNV | 1 | T | C | Homozygous   |
| NC_037646.1 | 7195497 | SNV | 1 | G | A | Heterozygous |
| NC_037646.1 | 7195504 | SNV | 1 | T | C | Homozygous   |
| NC_037646.1 | 7195525 | SNV | 1 | T | C | Homozygous   |
| NC_037646.1 | 7195583 | SNV | 1 | C | T | Homozygous   |
| NC_037646.1 | 7195799 | SNV | 1 | T | C | Homozygous   |

|             |         |     |   |   |   |              |
|-------------|---------|-----|---|---|---|--------------|
| NC_037646.1 | 7195805 | SNV | 1 | G | A | Homozygous   |
| NC_037646.1 | 7195809 | SNV | 1 | A | G | Homozygous   |
| NC_037646.1 | 7195814 | SNV | 1 | A | G | Homozygous   |
| NC_037646.1 | 7195818 | SNV | 1 | G | A | Heterozygous |
| NC_037646.1 | 7195829 | SNV | 1 | G | A | Homozygous   |
| NC_037646.1 | 7195839 | SNV | 1 | T | C | Homozygous   |
| NC_037646.1 | 7195845 | SNV | 1 | G | A | Homozygous   |
| NC_037646.1 | 7195847 | SNV | 1 | G | A | Homozygous   |
| NC_037646.1 | 7195851 | SNV | 1 | G | A | Homozygous   |
| NC_037646.1 | 7195880 | SNV | 1 | A | G | Homozygous   |
| NC_037646.1 | 7195890 | SNV | 1 | T | C | Homozygous   |
| NC_037646.1 | 7197567 | SNV | 1 | A | G | Homozygous   |
| NC_037646.1 | 7197684 | SNV | 1 | G | A | Heterozygous |
| NC_037646.1 | 7197831 | SNV | 1 | A | C | Homozygous   |
| NC_037646.1 | 7198032 | SNV | 1 | T | A | Heterozygous |
| NC_037646.1 | 7201464 | SNV | 1 | A | T | Homozygous   |
| NC_037646.1 | 7201473 | SNV | 1 | C | T | Heterozygous |
| NC_037646.1 | 7201476 | SNV | 1 | T | A | Heterozygous |
| NC_037646.1 | 7201501 | SNV | 1 | A | T | Heterozygous |
| NC_037646.1 | 7201511 | SNV | 1 | C | T | Heterozygous |
| NC_037646.1 | 7201515 | SNV | 1 | G | A | Heterozygous |
| NC_037646.1 | 7201518 | SNV | 1 | T | C | Heterozygous |
| NC_037646.1 | 7201528 | SNV | 1 | C | T | Heterozygous |
| NC_037646.1 | 7201532 | SNV | 1 | C | G | Heterozygous |
| NC_037646.1 | 7201563 | SNV | 1 | T | C | Heterozygous |
| NC_037646.1 | 7201582 | SNV | 1 | C | T | Heterozygous |
| NC_037646.1 | 7201588 | SNV | 1 | T | A | Homozygous   |
| NC_037646.1 | 7202580 | SNV | 1 | C | T | Heterozygous |
| NC_037646.1 | 7202586 | SNV | 1 | C | T | Heterozygous |
| NC_037646.1 | 7204313 | SNV | 1 | C | A | Homozygous   |
| NC_037646.1 | 7214508 | SNV | 1 | G | A | Heterozygous |
| NC_037646.1 | 7214533 | SNV | 1 | T | C | Homozygous   |
| NC_037646.1 | 7214551 | SNV | 1 | T | C | Heterozygous |
| NC_037646.1 | 7214581 | SNV | 1 | T | A | Heterozygous |
| NC_037646.1 | 7217905 | SNV | 1 | A | G | Homozygous   |
| NC_037646.1 | 7217907 | SNV | 1 | T | A | Homozygous   |
| NC_037646.1 | 7217909 | SNV | 1 | G | A | Homozygous   |
| NC_037646.1 | 7217915 | SNV | 1 | A | G | Homozygous   |
| NC_037646.1 | 7217919 | SNV | 1 | T | A | Heterozygous |
| NC_037646.1 | 7217964 | SNV | 1 | C | G | Homozygous   |
| NC_037646.1 | 7217969 | SNV | 1 | C | T | Homozygous   |
| NC_037646.1 | 7217973 | SNV | 1 | A | T | Homozygous   |
| NC_037646.1 | 7217985 | SNV | 1 | A | T | Homozygous   |
| NC_037646.1 | 7218232 | SNV | 1 | G | T | Heterozygous |
| NC_037646.1 | 7218261 | SNV | 1 | C | T | Heterozygous |
| NC_037646.1 | 7218269 | SNV | 1 | A | G | Homozygous   |
| NC_037646.1 | 7218271 | SNV | 1 | C | T | Homozygous   |
| NC_037646.1 | 7218282 | SNV | 1 | C | A | Homozygous   |
| NC_037646.1 | 7218296 | SNV | 1 | A | G | Heterozygous |
| NC_037646.1 | 7218559 | SNV | 1 | C | T | Homozygous   |
| NC_037646.1 | 7218569 | SNV | 1 | C | T | Homozygous   |



|             |         |     |   |   |   |              |
|-------------|---------|-----|---|---|---|--------------|
| NC_037646.1 | 7218576 | SNV | 1 | G | A | Homozygous   |
| NC_037646.1 | 7218582 | SNV | 1 | T | A | Homozygous   |
| NC_037646.1 | 7218617 | SNV | 1 | A | G | Homozygous   |
| NC_037646.1 | 7219377 | SNV | 1 | C | T | Heterozygous |
| NC_037646.1 | 7219418 | SNV | 1 | G | A | Heterozygous |
| NC_037646.1 | 7219449 | SNV | 1 | C | A | Heterozygous |
| NC_037646.1 | 7219453 | SNV | 1 | G | A | Heterozygous |
| NC_037646.1 | 7219463 | SNV | 1 | C | G | Heterozygous |
| NC_037646.1 | 7219540 | SNV | 1 | T | A | Homozygous   |
| NC_037646.1 | 7219545 | SNV | 1 | G | A | Homozygous   |
| NC_037646.1 | 7219554 | SNV | 1 | A | G | Heterozygous |
| NC_037646.1 | 7219561 | SNV | 1 | C | T | Heterozygous |
| NC_037646.1 | 7219564 | SNV | 1 | G | A | Homozygous   |
| NC_037646.1 | 7219567 | SNV | 1 | G | A | Homozygous   |
| NC_037646.1 | 7219577 | SNV | 1 | G | A | Heterozygous |
| NC_037646.1 | 7219963 | SNV | 1 | A | G | Heterozygous |
| NC_037646.1 | 7219966 | SNV | 1 | A | C | Heterozygous |
| NC_037646.1 | 7219967 | SNV | 1 | G | A | Heterozygous |
| NC_037646.1 | 7219992 | SNV | 1 | G | A | Homozygous   |
| NC_037646.1 | 7219995 | SNV | 1 | T | G | Homozygous   |
| NC_037646.1 | 7219998 | SNV | 1 | C | A | Homozygous   |
| NC_037646.1 | 7220039 | SNV | 1 | C | T | Homozygous   |
| NC_037646.1 | 7220045 | SNV | 1 | C | T | Homozygous   |
| NC_037646.1 | 7220282 | SNV | 1 | T | A | Heterozygous |
| NC_037646.1 | 7220282 | SNV | 1 | T | G | Heterozygous |
| NC_037646.1 | 7220343 | SNV | 1 | C | A | Heterozygous |
| NC_037646.1 | 7220349 | SNV | 1 | C | A | Heterozygous |
| NC_037646.1 | 7220354 | SNV | 1 | A | G | Heterozygous |
| NC_037646.1 | 7220359 | SNV | 1 | A | T | Heterozygous |
| NC_037646.1 | 7220363 | SNV | 1 | G | C | Homozygous   |
| NC_037646.1 | 7220367 | SNV | 1 | C | A | Homozygous   |
| NC_037646.1 | 7220601 | SNV | 1 | A | G | Homozygous   |
| NC_037646.1 | 7220605 | SNV | 1 | A | C | Homozygous   |
| NC_037646.1 | 7220608 | SNV | 1 | A | G | Homozygous   |
| NC_037646.1 | 7220618 | SNV | 1 | G | T | Homozygous   |
| NC_037646.1 | 7220621 | SNV | 1 | A | T | Homozygous   |
| NC_037646.1 | 7220639 | SNV | 1 | T | C | Homozygous   |
| NC_037646.1 | 7220648 | SNV | 1 | A | T | Homozygous   |
| NC_037646.1 | 7220662 | SNV | 1 | A | T | Homozygous   |
| NC_037646.1 | 7220674 | SNV | 1 | T | C | Homozygous   |
| NC_037646.1 | 7220676 | SNV | 1 | C | T | Homozygous   |
| NC_037646.1 | 7220717 | SNV | 1 | T | C | Homozygous   |
| NC_037646.1 | 7220723 | SNV | 1 | G | A | Homozygous   |
| NC_037646.1 | 7220763 | SNV | 1 | T | C | Heterozygous |
| NC_037646.1 | 7220773 | SNV | 1 | A | G | Heterozygous |
| NC_037646.1 | 7220779 | SNV | 1 | C | T | Heterozygous |
| NC_037646.1 | 7220800 | SNV | 1 | G | A | Homozygous   |
| NC_037646.1 | 7220802 | SNV | 1 | T | C | Homozygous   |
| NC_037646.1 | 7220826 | SNV | 1 | T | G | Heterozygous |
| NC_037646.1 | 7220828 | SNV | 1 | T | C | Homozygous   |
| NC_037646.1 | 7220858 | SNV | 1 | G | A | Heterozygous |

|             |         |     |   |   |   |              |
|-------------|---------|-----|---|---|---|--------------|
| NC_037646.1 | 7220859 | SNV | 1 | A | T | Heterozygous |
| NC_037646.1 | 7220863 | SNV | 1 | A | T | Heterozygous |
| NC_037646.1 | 7220865 | SNV | 1 | C | T | Homozygous   |
| NC_037646.1 | 7220873 | SNV | 1 | G | A | Heterozygous |
| NC_037646.1 | 7220876 | SNV | 1 | G | A | Heterozygous |
| NC_037646.1 | 7220883 | SNV | 1 | C | T | Heterozygous |
| NC_037646.1 | 7220893 | SNV | 1 | T | C | Heterozygous |
| NC_037646.1 | 7220911 | SNV | 1 | C | T | Homozygous   |
| NC_037646.1 | 7220921 | SNV | 1 | C | T | Heterozygous |
| NC_037646.1 | 7220933 | SNV | 1 | G | A | Heterozygous |
| NC_037646.1 | 7220940 | SNV | 1 | C | A | Homozygous   |
| NC_037646.1 | 7220951 | SNV | 1 | G | A | Homozygous   |
| NC_037646.1 | 7220968 | SNV | 1 | A | G | Heterozygous |
| NC_037646.1 | 7221065 | SNV | 1 | G | A | Homozygous   |
| NC_037646.1 | 7221068 | SNV | 1 | T | C | Homozygous   |
| NC_037646.1 | 7221072 | SNV | 1 | A | G | Homozygous   |
| NC_037646.1 | 7221078 | SNV | 1 | C | T | Homozygous   |
| NC_037646.1 | 7221080 | SNV | 1 | A | G | Homozygous   |
| NC_037646.1 | 7221088 | SNV | 1 | G | A | Homozygous   |
| NC_037646.1 | 7221094 | SNV | 1 | T | G | Homozygous   |
| NC_037646.1 | 7221096 | SNV | 1 | C | A | Homozygous   |
| NC_037646.1 | 7221103 | SNV | 1 | A | G | Homozygous   |
| NC_037646.1 | 7221107 | SNV | 1 | C | A | Homozygous   |
| NC_037646.1 | 7221114 | SNV | 1 | C | T | Homozygous   |
| NC_037646.1 | 7221122 | SNV | 1 | A | T | Homozygous   |
| NC_037646.1 | 7221138 | SNV | 1 | T | C | Homozygous   |
| NC_037646.1 | 7221141 | SNV | 1 | C | T | Homozygous   |
| NC_037646.1 | 7221155 | SNV | 1 | T | C | Homozygous   |
| NC_037646.1 | 7221162 | SNV | 1 | C | A | Heterozygous |
| NC_037646.1 | 7221164 | SNV | 1 | G | C | Heterozygous |
| NC_037646.1 | 7221166 | SNV | 1 | C | T | Homozygous   |
| NC_037646.1 | 7221177 | SNV | 1 | C | T | Heterozygous |
| NC_037646.1 | 7221179 | SNV | 1 | A | G | Homozygous   |
| NC_037646.1 | 7221184 | SNV | 1 | T | C | Heterozygous |
| NC_037646.1 | 7221190 | SNV | 1 | A | G | Homozygous   |
| NC_037646.1 | 7221194 | SNV | 1 | T | C | Homozygous   |
| NC_037646.1 | 7221197 | SNV | 1 | C | G | Homozygous   |
| NC_037646.1 | 7221203 | SNV | 1 | G | A | Homozygous   |
| NC_037646.1 | 7221258 | SNV | 1 | T | C | Homozygous   |
| NC_037646.1 | 7221264 | SNV | 1 | G | T | Homozygous   |
| NC_037646.1 | 7221275 | SNV | 1 | G | A | Homozygous   |
| NC_037646.1 | 7221284 | SNV | 1 | A | G | Homozygous   |
| NC_037646.1 | 7221317 | SNV | 1 | C | T | Homozygous   |
| NC_037646.1 | 7221322 | SNV | 1 | G | A | Homozygous   |
| NC_037646.1 | 7221392 | SNV | 1 | G | A | Homozygous   |
| NC_037646.1 | 7221397 | SNV | 1 | T | C | Homozygous   |
| NC_037646.1 | 7221411 | SNV | 1 | C | A | Homozygous   |
| NC_037646.1 | 7221440 | SNV | 1 | A | T | Heterozygous |
| NC_037646.1 | 7221448 | SNV | 1 | A | G | Homozygous   |
| NC_037646.1 | 7221505 | SNV | 1 | A | C | Heterozygous |
| NC_037646.1 | 7221525 | SNV | 1 | G | A | Heterozygous |

|             |         |     |   |   |   |              |
|-------------|---------|-----|---|---|---|--------------|
| NC_037646.1 | 7221537 | SNV | 1 | C | G | Heterozygous |
| NC_037646.1 | 7221542 | SNV | 1 | C | T | Homozygous   |
| NC_037646.1 | 7221548 | SNV | 1 | A | G | Heterozygous |
| NC_037646.1 | 7221563 | SNV | 1 | G | A | Heterozygous |
| NC_037646.1 | 7221569 | SNV | 1 | T | C | Homozygous   |
| NC_037646.1 | 7221593 | SNV | 1 | C | T | Homozygous   |
| NC_037646.1 | 7221633 | SNV | 1 | G | A | Heterozygous |
| NC_037646.1 | 7221663 | SNV | 1 | C | T | Homozygous   |
| NC_037646.1 | 7221667 | SNV | 1 | G | C | Homozygous   |
| NC_037646.1 | 7221670 | SNV | 1 | T | A | Homozygous   |
| NC_037646.1 | 7221720 | SNV | 1 | T | C | Homozygous   |
| NC_037646.1 | 7221735 | SNV | 1 | C | A | Homozygous   |
| NC_037646.1 | 7222172 | SNV | 1 | G | C | Homozygous   |
| NC_037646.1 | 7222185 | SNV | 1 | C | T | Heterozygous |
| NC_037646.1 | 7222190 | SNV | 1 | A | C | Homozygous   |
| NC_037646.1 | 7222192 | SNV | 1 | G | T | Heterozygous |
| NC_037646.1 | 7222209 | SNV | 1 | A | T | Heterozygous |
| NC_037646.1 | 7222211 | SNV | 1 | G | A | Homozygous   |
| NC_037646.1 | 7223943 | SNV | 1 | A | G | Homozygous   |
| NC_037646.1 | 7223953 | SNV | 1 | G | A | Homozygous   |
| NC_037646.1 | 7223957 | SNV | 1 | C | T | Homozygous   |
| NC_037646.1 | 7224006 | SNV | 1 | C | A | Homozygous   |
| NC_037646.1 | 7224024 | SNV | 1 | T | C | Homozygous   |
| NC_037646.1 | 7224040 | SNV | 1 | C | T | Homozygous   |
| NC_037646.1 | 7224044 | SNV | 1 | G | A | Heterozygous |
| NC_037646.1 | 7224286 | SNV | 1 | C | T | Homozygous   |
| NC_037646.1 | 7224293 | SNV | 1 | T | C | Homozygous   |
| NC_037646.1 | 7224303 | SNV | 1 | T | A | Homozygous   |
| NC_037646.1 | 7224342 | SNV | 1 | A | C | Heterozygous |
| NC_037646.1 | 7224346 | SNV | 1 | A | T | Heterozygous |
| NC_037646.1 | 7224360 | SNV | 1 | G | A | Heterozygous |
| NC_037646.1 | 7224424 | SNV | 1 | T | C | Heterozygous |
| NC_037646.1 | 7224496 | SNV | 1 | G | C | Heterozygous |
| NC_037646.1 | 7224527 | SNV | 1 | A | G | Homozygous   |
| NC_037646.1 | 7224564 | SNV | 1 | A | G | Homozygous   |
| NC_037646.1 | 7224826 | SNV | 1 | G | A | Homozygous   |
| NC_037646.1 | 7224828 | SNV | 1 | T | C | Heterozygous |
| NC_037646.1 | 7224848 | SNV | 1 | C | T | Heterozygous |
| NC_037646.1 | 7224850 | SNV | 1 | C | T | Homozygous   |
| NC_037646.1 | 7224852 | SNV | 1 | A | G | Heterozygous |
| NC_037646.1 | 7224868 | SNV | 1 | A | G | Heterozygous |
| NC_037646.1 | 7224870 | SNV | 1 | C | T | Homozygous   |
| NC_037646.1 | 7227077 | SNV | 1 | G | A | Heterozygous |
| NC_037646.1 | 7227309 | SNV | 1 | A | G | Homozygous   |
| NC_037646.1 | 7227343 | SNV | 1 | T | A | Homozygous   |
| NC_037646.1 | 7227457 | SNV | 1 | G | A | Homozygous   |
| NC_037646.1 | 7227595 | SNV | 1 | A | G | Heterozygous |
| NC_037646.1 | 7227599 | SNV | 1 | T | G | Heterozygous |
| NC_037646.1 | 7227607 | SNV | 1 | A | T | Heterozygous |
| NC_037646.1 | 7227609 | SNV | 1 | A | T | Homozygous   |
| NC_037646.1 | 7227679 | SNV | 1 | T | A | Homozygous   |

|             |         |     |   |   |   |              |
|-------------|---------|-----|---|---|---|--------------|
| NC_037646.1 | 7227681 | SNV | 1 | A | T | Heterozygous |
| NC_037646.1 | 7227691 | SNV | 1 | G | T | Heterozygous |
| NC_037646.1 | 7227716 | SNV | 1 | G | A | Heterozygous |
| NC_037646.1 | 7227733 | SNV | 1 | G | A | Heterozygous |
| NC_037646.1 | 7227827 | SNV | 1 | T | C | Heterozygous |
| NC_037646.1 | 7228138 | SNV | 1 | G | A | Homozygous   |
| NC_037646.1 | 7228232 | SNV | 1 | G | A | Homozygous   |
| NC_037646.1 | 7228323 | SNV | 1 | G | A | Heterozygous |
| NC_037646.1 | 7230868 | SNV | 1 | T | C | Homozygous   |
| NC_037646.1 | 7230923 | SNV | 1 | A | G | Heterozygous |
| NC_037646.1 | 7230955 | SNV | 1 | G | A | Heterozygous |
| NC_037646.1 | 7230965 | SNV | 1 | A | G | Homozygous   |
| NC_037646.1 | 7230998 | SNV | 1 | A | G | Heterozygous |
| NC_037646.1 | 7231002 | SNV | 1 | G | A | Homozygous   |
| NC_037646.1 | 7231038 | SNV | 1 | G | A | Heterozygous |
| NC_037646.1 | 7255624 | SNV | 1 | A | G | Homozygous   |
| NC_037646.1 | 7255637 | SNV | 1 | A | G | Homozygous   |
| NC_037646.1 | 7255660 | SNV | 1 | A | G | Homozygous   |
| NC_037646.1 | 7255831 | SNV | 1 | G | C | Heterozygous |
| NC_037646.1 | 7255920 | SNV | 1 | A | G | Heterozygous |
| NC_037646.1 | 7255934 | SNV | 1 | A | G | Homozygous   |
| NC_037646.1 | 7256740 | SNV | 1 | C | G | Homozygous   |
| NC_037646.1 | 7256928 | SNV | 1 | G | A | Homozygous   |
| NC_037646.1 | 7256955 | SNV | 1 | G | A | Heterozygous |
| NC_037646.1 | 7257000 | SNV | 1 | C | G | Homozygous   |
| NC_037646.1 | 7257537 | SNV | 1 | G | A | Heterozygous |
| NC_037646.1 | 7268357 | SNV | 1 | C | T | Heterozygous |
| NC_037646.1 | 7268374 | SNV | 1 | G | A | Heterozygous |
| NC_037646.1 | 7268451 | SNV | 1 | A | G | Homozygous   |
| NC_037646.1 | 7268469 | SNV | 1 | G | A | Heterozygous |
| NC_037646.1 | 7268622 | SNV | 1 | T | C | Heterozygous |
| NC_037646.1 | 7268632 | SNV | 1 | A | G | Heterozygous |
| NC_037646.1 | 7268684 | SNV | 1 | T | C | Heterozygous |
| NC_037646.1 | 7268704 | SNV | 1 | C | T | Homozygous   |
| NC_037646.1 | 7268709 | SNV | 1 | T | C | Homozygous   |
| NC_037646.1 | 7268786 | SNV | 1 | T | C | Homozygous   |
| NC_037646.1 | 7268814 | SNV | 1 | A | G | Homozygous   |
| NC_037646.1 | 7268821 | SNV | 1 | C | T | Homozygous   |
| NC_037646.1 | 7269188 | SNV | 1 | A | G | Heterozygous |
| NC_037646.1 | 7269520 | SNV | 1 | G | A | Heterozygous |
| NC_037646.1 | 7269525 | SNV | 1 | C | T | Heterozygous |
| NC_037646.1 | 7271593 | SNV | 1 | A | G | Heterozygous |
| NC_037646.1 | 7271621 | SNV | 1 | A | C | Heterozygous |
| NC_037646.1 | 7271705 | SNV | 1 | G | A | Heterozygous |
| NC_037646.1 | 7271708 | SNV | 1 | G | A | Heterozygous |
| NC_037646.1 | 7271711 | SNV | 1 | A | G | Homozygous   |
| NC_037646.1 | 7275215 | SNV | 1 | T | C | Homozygous   |
| NC_037646.1 | 7275265 | SNV | 1 | G | A | Heterozygous |
| NC_037646.1 | 7275302 | SNV | 1 | C | T | Homozygous   |
| NC_037646.1 | 7275312 | SNV | 1 | T | A | Homozygous   |
| NC_037646.1 | 7275322 | SNV | 1 | G | A | Heterozygous |

|             |         |     |   |   |   |              |
|-------------|---------|-----|---|---|---|--------------|
| NC_037646.1 | 7275340 | SNV | 1 | C | A | Heterozygous |
| NC_037646.1 | 7275360 | SNV | 1 | C | T | Heterozygous |
| NC_037646.1 | 7275500 | SNV | 1 | G | A | Heterozygous |
| NC_037646.1 | 7275503 | SNV | 1 | G | A | Homozygous   |
| NC_037646.1 | 7275548 | SNV | 1 | T | A | Heterozygous |
| NC_037646.1 | 7275551 | SNV | 1 | G | A | Heterozygous |
| NC_037646.1 | 7275594 | SNV | 1 | A | G | Heterozygous |
| NC_037646.1 | 7275618 | SNV | 1 | C | T | Heterozygous |
| NC_037646.1 | 7275622 | SNV | 1 | C | T | Heterozygous |
| NC_037646.1 | 7275627 | SNV | 1 | C | T | Heterozygous |
| NC_037646.1 | 7275631 | SNV | 1 | T | C | Homozygous   |
| NC_037646.1 | 7275634 | SNV | 1 | A | G | Homozygous   |
| NC_037646.1 | 7275643 | SNV | 1 | T | C | Homozygous   |
| NC_037646.1 | 7275703 | SNV | 1 | T | C | Homozygous   |
| NC_037646.1 | 7275712 | SNV | 1 | T | C | Heterozygous |
| NC_037646.1 | 7275725 | SNV | 1 | A | C | Heterozygous |
| NC_037646.1 | 7275743 | SNV | 1 | T | C | Heterozygous |
| NC_037646.1 | 7275747 | SNV | 1 | T | C | Homozygous   |
| NC_037646.1 | 7275854 | SNV | 1 | A | G | Homozygous   |
| NC_037646.1 | 7276804 | SNV | 1 | G | A | Heterozygous |
| NC_037646.1 | 7285494 | SNV | 1 | A | T | Heterozygous |
| NC_037646.1 | 7286842 | SNV | 1 | G | A | Heterozygous |
| NC_037646.1 | 7286862 | SNV | 1 | T | C | Heterozygous |
| NC_037646.1 | 7286988 | SNV | 1 | A | G | Homozygous   |
| NC_037646.1 | 7287217 | SNV | 1 | T | C | Homozygous   |
| NC_037646.1 | 7287436 | SNV | 1 | T | C | Homozygous   |
| NC_037646.1 | 7291265 | SNV | 1 | A | G | Homozygous   |
| NC_037646.1 | 7298780 | SNV | 1 | G | A | Heterozygous |
| NC_037646.1 | 7298783 | SNV | 1 | C | G | Heterozygous |
| NC_037646.1 | 7298789 | SNV | 1 | A | C | Homozygous   |
| NC_037646.1 | 7298793 | SNV | 1 | G | C | Heterozygous |
| NC_037646.1 | 7298850 | SNV | 1 | A | G | Heterozygous |
| NC_037646.1 | 7299080 | SNV | 1 | T | C | Heterozygous |
| NC_037646.1 | 7299845 | SNV | 1 | C | G | Heterozygous |
| NC_037646.1 | 7299952 | SNV | 1 | G | A | Homozygous   |
| NC_037646.1 | 7309927 | SNV | 1 | C | T | Homozygous   |
| NC_037646.1 | 7309941 | SNV | 1 | C | T | Homozygous   |
| NC_037646.1 | 7309970 | SNV | 1 | A | G | Homozygous   |
| NC_037646.1 | 7325489 | SNV | 1 | T | C | Heterozygous |
| NC_037646.1 | 7325539 | SNV | 1 | A | G | Homozygous   |
| NC_037646.1 | 7333189 | SNV | 1 | A | G | Homozygous   |
| NC_037646.1 | 7345320 | SNV | 1 | T | C | Heterozygous |
| NC_037646.1 | 7345341 | SNV | 1 | C | T | Heterozygous |
| NC_037646.1 | 7345358 | SNV | 1 | C | T | Heterozygous |
| NC_037646.1 | 7345361 | SNV | 1 | C | T | Heterozygous |
| NC_037646.1 | 7345388 | SNV | 1 | T | C | Heterozygous |
| NC_037646.1 | 7345423 | SNV | 1 | C | T | Heterozygous |
| NC_037646.1 | 7345430 | SNV | 1 | T | C | Heterozygous |
| NC_037646.1 | 7345432 | SNV | 1 | T | C | Heterozygous |
| NC_037646.1 | 7350900 | SNV | 1 | T | A | Homozygous   |
| NC_037646.1 | 7351179 | SNV | 1 | C | G | Heterozygous |

|             |         |     |   |   |   |              |
|-------------|---------|-----|---|---|---|--------------|
| NC_037646.1 | 7351310 | SNV | 1 | T | G | Heterozygous |
| NC_037646.1 | 7351643 | SNV | 1 | A | G | Homozygous   |
| NC_037646.1 | 7351723 | SNV | 1 | T | G | Homozygous   |
| NC_037646.1 | 7351730 | SNV | 1 | T | A | Homozygous   |
| NC_037646.1 | 7351940 | SNV | 1 | T | C | Heterozygous |
| NC_037646.1 | 7351942 | SNV | 1 | G | A | Heterozygous |
| NC_037646.1 | 7351946 | SNV | 1 | C | A | Heterozygous |
| NC_037646.1 | 7351949 | SNV | 1 | T | C | Heterozygous |
| NC_037646.1 | 7351952 | SNV | 1 | G | A | Heterozygous |
| NC_037646.1 | 7351964 | SNV | 1 | T | G | Heterozygous |
| NC_037646.1 | 7351970 | SNV | 1 | A | C | Heterozygous |
| NC_037646.1 | 7351978 | SNV | 1 | A | C | Heterozygous |
| NC_037646.1 | 7351981 | SNV | 1 | T | G | Heterozygous |
| NC_037646.1 | 7352129 | SNV | 1 | A | G | Homozygous   |
| NC_037646.1 | 7368448 | SNV | 1 | G | C | Heterozygous |
| NC_037646.1 | 7368557 | SNV | 1 | G | A | Homozygous   |
| NC_037646.1 | 7377897 | SNV | 1 | T | A | Homozygous   |
| NC_037646.1 | 7378204 | SNV | 1 | A | G | Homozygous   |
| NC_037646.1 | 7378359 | SNV | 1 | A | G | Homozygous   |
| NC_037646.1 | 7378449 | SNV | 1 | A | G | Homozygous   |
| NC_037646.1 | 7378478 | SNV | 1 | G | A | Heterozygous |
| NC_037646.1 | 7378534 | SNV | 1 | C | T | Homozygous   |
| NC_037646.1 | 7378542 | SNV | 1 | A | G | Homozygous   |
| NC_037646.1 | 7378547 | SNV | 1 | C | T | Homozygous   |
| NC_037646.1 | 7378567 | SNV | 1 | A | G | Homozygous   |
| NC_037646.1 | 7378588 | SNV | 1 | A | G | Homozygous   |
| NC_037646.1 | 7378600 | SNV | 1 | C | G | Homozygous   |
| NC_037646.1 | 7378606 | SNV | 1 | A | G | Homozygous   |
| NC_037646.1 | 7378899 | SNV | 1 | G | A | Homozygous   |
| NC_037646.1 | 7394078 | SNV | 1 | A | G | Homozygous   |
| NC_037646.1 | 7394909 | SNV | 1 | A | G | Homozygous   |
| NC_037646.1 | 7395856 | SNV | 1 | T | G | Heterozygous |
| NC_037646.1 | 7398630 | SNV | 1 | T | A | Homozygous   |
| NC_037646.1 | 7400017 | SNV | 1 | G | A | Heterozygous |
| NC_037646.1 | 7404477 | SNV | 1 | T | C | Homozygous   |
| NC_037646.1 | 7404483 | SNV | 1 | T | C | Homozygous   |
| NC_037646.1 | 7404490 | SNV | 1 | A | G | Homozygous   |
| NC_037646.1 | 7404492 | SNV | 1 | T | G | Homozygous   |
| NC_037646.1 | 7404495 | SNV | 1 | T | C | Heterozygous |
| NC_037646.1 | 7404502 | SNV | 1 | T | C | Homozygous   |
| NC_037646.1 | 7404510 | SNV | 1 | T | C | Homozygous   |
| NC_037646.1 | 7404516 | SNV | 1 | C | T | Homozygous   |
| NC_037646.1 | 7404521 | SNV | 1 | T | G | Homozygous   |
| NC_037646.1 | 7404523 | SNV | 1 | G | A | Homozygous   |
| NC_037646.1 | 7407156 | SNV | 1 | T | G | Homozygous   |
| NC_037646.1 | 7407160 | SNV | 1 | C | G | Homozygous   |
| NC_037646.1 | 7407166 | SNV | 1 | A | C | Homozygous   |
| NC_037646.1 | 7407183 | SNV | 1 | A | T | Homozygous   |
| NC_037646.1 | 7414060 | SNV | 1 | T | C | Homozygous   |
| NC_037646.1 | 7414623 | SNV | 1 | A | G | Homozygous   |
| NC_037646.1 | 7415034 | SNV | 1 | C | T | Heterozygous |

|             |         |     |   |   |   |              |
|-------------|---------|-----|---|---|---|--------------|
| NC_037646.1 | 7415187 | SNV | 1 | A | G | Heterozygous |
| NC_037646.1 | 7434216 | SNV | 1 | G | C | Heterozygous |
| NC_037646.1 | 7434236 | SNV | 1 | A | G | Heterozygous |
| NC_037646.1 | 7434240 | SNV | 1 | A | G | Homozygous   |
| NC_037646.1 | 7434248 | SNV | 1 | T | A | Homozygous   |
| NC_037646.1 | 7434311 | SNV | 1 | C | G | Homozygous   |
| NC_037646.1 | 7434522 | SNV | 1 | T | C | Heterozygous |
| NC_037646.1 | 7434867 | SNV | 1 | C | A | Heterozygous |
| NC_037646.1 | 7434904 | SNV | 1 | C | T | Homozygous   |
| NC_037646.1 | 7434993 | SNV | 1 | A | G | Homozygous   |
| NC_037646.1 | 7435023 | SNV | 1 | A | G | Heterozygous |
| NC_037646.1 | 7438332 | SNV | 1 | G | A | Heterozygous |
| NC_037646.1 | 7438337 | SNV | 1 | G | A | Heterozygous |
| NC_037646.1 | 7440237 | SNV | 1 | C | G | Heterozygous |
| NC_037646.1 | 7443795 | SNV | 1 | A | G | Homozygous   |
| NC_037646.1 | 7445124 | SNV | 1 | T | C | Homozygous   |
| NC_037646.1 | 7446268 | SNV | 1 | G | A | Homozygous   |
| NC_037646.1 | 7447160 | SNV | 1 | A | C | Homozygous   |
| NC_037646.1 | 7453409 | SNV | 1 | C | T | Heterozygous |
| NC_037646.1 | 7455695 | SNV | 1 | T | A | Heterozygous |
| NC_037646.1 | 7455711 | SNV | 1 | G | A | Heterozygous |
| NC_037646.1 | 7455741 | SNV | 1 | G | A | Heterozygous |
| NC_037646.1 | 7458918 | SNV | 1 | A | G | Homozygous   |
| NC_037646.1 | 7459550 | SNV | 1 | T | A | Homozygous   |
| NC_037646.1 | 7460225 | SNV | 1 | C | T | Homozygous   |
| NC_037646.1 | 7461080 | SNV | 1 | A | T | Homozygous   |
| NC_037646.1 | 7463299 | SNV | 1 | G | C | Homozygous   |
| NC_037646.1 | 7463649 | SNV | 1 | G | A | Heterozygous |
| NC_037646.1 | 7464769 | SNV | 1 | T | C | Homozygous   |
| NC_037646.1 | 7464773 | SNV | 1 | A | T | Homozygous   |
| NC_037646.1 | 7465365 | SNV | 1 | G | A | Homozygous   |
| NC_037646.1 | 7465602 | SNV | 1 | A | T | Homozygous   |
| NC_037646.1 | 7466583 | SNV | 1 | T | C | Homozygous   |
| NC_037646.1 | 7468466 | SNV | 1 | G | T | Homozygous   |
| NC_037646.1 | 7469438 | SNV | 1 | A | G | Homozygous   |
| NC_037646.1 | 7470892 | SNV | 1 | A | G | Homozygous   |
| NC_037646.1 | 7473793 | SNV | 1 | A | C | Homozygous   |
| NC_037646.1 | 7473885 | SNV | 1 | A | T | Homozygous   |
| NC_037646.1 | 7474664 | SNV | 1 | T | C | Homozygous   |
| NC_037646.1 | 7474672 | SNV | 1 | C | T | Homozygous   |
| NC_037646.1 | 7475443 | SNV | 1 | T | A | Homozygous   |
| NC_037646.1 | 7475447 | SNV | 1 | T | A | Homozygous   |
| NC_037646.1 | 7475461 | SNV | 1 | G | C | Homozygous   |
| NC_037646.1 | 7477717 | SNV | 1 | G | A | Heterozygous |
| NC_037646.1 | 7477786 | SNV | 1 | T | G | Heterozygous |
| NC_037646.1 | 7477791 | SNV | 1 | G | A | Heterozygous |
| NC_037646.1 | 7477804 | SNV | 1 | A | G | Heterozygous |
| NC_037646.1 | 7478613 | SNV | 1 | T | A | Homozygous   |
| NC_037646.1 | 7478615 | SNV | 1 | C | G | Homozygous   |
| NC_037646.1 | 7480061 | SNV | 1 | G | A | Homozygous   |
| NC_037646.1 | 7480939 | SNV | 1 | C | A | Heterozygous |

|             |         |     |   |   |   |              |
|-------------|---------|-----|---|---|---|--------------|
| NC_037646.1 | 7482976 | SNV | 1 | C | T | Heterozygous |
| NC_037646.1 | 7483805 | SNV | 1 | A | T | Homozygous   |
| NC_037646.1 | 7483955 | SNV | 1 | G | C | Homozygous   |
| NC_037646.1 | 7484241 | SNV | 1 | T | A | Heterozygous |
| NC_037646.1 | 7484248 | SNV | 1 | G | A | Heterozygous |
| NC_037646.1 | 7484259 | SNV | 1 | G | A | Heterozygous |
| NC_037646.1 | 7484714 | SNV | 1 | T | C | Homozygous   |
| NC_037646.1 | 7484773 | SNV | 1 | C | G | Heterozygous |
| NC_037646.1 | 7484778 | SNV | 1 | G | C | Heterozygous |
| NC_037646.1 | 7484802 | SNV | 1 | G | A | Heterozygous |
| NC_037646.1 | 7484824 | SNV | 1 | T | C | Homozygous   |
| NC_037646.1 | 7484828 | SNV | 1 | T | C | Heterozygous |
| NC_037646.1 | 7484855 | SNV | 1 | A | T | Homozygous   |
| NC_037646.1 | 7484977 | SNV | 1 | G | A | Heterozygous |
| NC_037646.1 | 7484988 | SNV | 1 | A | T | Homozygous   |
| NC_037646.1 | 7484990 | SNV | 1 | A | G | Homozygous   |
| NC_037646.1 | 7485389 | SNV | 1 | T | A | Homozygous   |
| NC_037646.1 | 7485713 | SNV | 1 | C | T | Homozygous   |
| NC_037646.1 | 7486285 | SNV | 1 | G | A | Heterozygous |
| NC_037646.1 | 7486315 | SNV | 1 | T | C | Homozygous   |
| NC_037646.1 | 7486344 | SNV | 1 | C | T | Homozygous   |
| NC_037646.1 | 7486354 | SNV | 1 | G | T | Homozygous   |
| NC_037646.1 | 7486375 | SNV | 1 | A | G | Homozygous   |
| NC_037646.1 | 7486506 | SNV | 1 | C | G | Heterozygous |
| NC_037646.1 | 7486750 | SNV | 1 | C | T | Homozygous   |
| NC_037646.1 | 7486853 | SNV | 1 | A | G | Homozygous   |
| NC_037646.1 | 7487000 | SNV | 1 | A | G | Homozygous   |
| NC_037646.1 | 7487062 | SNV | 1 | A | G | Homozygous   |
| NC_037646.1 | 7491510 | SNV | 1 | A | G | Homozygous   |
| NC_037646.1 | 7492326 | SNV | 1 | T | A | Heterozygous |
| NC_037646.1 | 7492663 | SNV | 1 | T | A | Homozygous   |
| NC_037646.1 | 7492739 | SNV | 1 | C | T | Homozygous   |
| NC_037646.1 | 7492742 | SNV | 1 | A | C | Homozygous   |
| NC_037646.1 | 7493050 | SNV | 1 | T | A | Homozygous   |
| NC_037646.1 | 7493181 | SNV | 1 | A | G | Homozygous   |
| NC_037646.1 | 7493292 | SNV | 1 | G | A | Homozygous   |
| NC_037646.1 | 7495144 | SNV | 1 | A | T | Homozygous   |
| NC_037646.1 | 7495167 | SNV | 1 | T | A | Homozygous   |
| NC_037646.1 | 7495176 | SNV | 1 | T | A | Homozygous   |
| NC_037646.1 | 7495186 | SNV | 1 | C | A | Heterozygous |
| NC_037646.1 | 7495191 | SNV | 1 | T | A | Heterozygous |
| NC_037646.1 | 7495767 | SNV | 1 | T | C | Homozygous   |
| NC_037646.1 | 7497091 | SNV | 1 | C | T | Heterozygous |
| NC_037646.1 | 7497963 | SNV | 1 | A | G | Homozygous   |
| NC_037646.1 | 7500777 | SNV | 1 | C | A | Heterozygous |
| NC_037646.1 | 7502495 | SNV | 1 | T | C | Homozygous   |
| NC_037646.1 | 7503479 | SNV | 1 | A | G | Homozygous   |
| NC_037646.1 | 7503499 | SNV | 1 | C | T | Homozygous   |
| NC_037646.1 | 7503502 | SNV | 1 | G | A | Homozygous   |
| NC_037646.1 | 7503508 | SNV | 1 | G | A | Homozygous   |
| NC_037646.1 | 7503510 | SNV | 1 | T | A | Homozygous   |



|             |         |     |   |   |   |              |
|-------------|---------|-----|---|---|---|--------------|
| NC_037646.1 | 7503516 | SNV | 1 | A | G | Homozygous   |
| NC_037646.1 | 7503522 | SNV | 1 | G | A | Homozygous   |
| NC_037646.1 | 7503525 | SNV | 1 | T | C | Homozygous   |
| NC_037646.1 | 7503537 | SNV | 1 | C | T | Heterozygous |
| NC_037646.1 | 7503566 | SNV | 1 | A | G | Homozygous   |
| NC_037646.1 | 7504681 | SNV | 1 | T | G | Homozygous   |
| NC_037646.1 | 7508486 | SNV | 1 | C | T | Homozygous   |
| NC_037646.1 | 7508719 | SNV | 1 | C | A | Homozygous   |
| NC_037646.1 | 7508723 | SNV | 1 | T | G | Homozygous   |
| NC_037646.1 | 7508729 | SNV | 1 | A | C | Homozygous   |
| NC_037646.1 | 7508732 | SNV | 1 | G | T | Homozygous   |
| NC_037646.1 | 7508735 | SNV | 1 | A | T | Homozygous   |
| NC_037646.1 | 7509251 | SNV | 1 | T | A | Homozygous   |
| NC_037646.1 | 7511926 | SNV | 1 | G | T | Homozygous   |
| NC_037646.1 | 7511929 | SNV | 1 | T | G | Homozygous   |
| NC_037646.1 | 7511931 | SNV | 1 | A | T | Homozygous   |
| NC_037646.1 | 7512446 | SNV | 1 | C | T | Homozygous   |
| NC_037646.1 | 7512639 | SNV | 1 | C | T | Homozygous   |
| NC_037646.1 | 7513239 | SNV | 1 | A | C | Homozygous   |
| NC_037646.1 | 7513258 | SNV | 1 | A | T | Homozygous   |
| NC_037646.1 | 7513675 | SNV | 1 | C | T | Homozygous   |
| NC_037646.1 | 7519447 | SNV | 1 | C | G | Homozygous   |
| NC_037646.1 | 7523102 | SNV | 1 | A | C | Homozygous   |
| NC_037646.1 | 7523656 | SNV | 1 | T | C | Homozygous   |
| NC_037646.1 | 7523712 | SNV | 1 | G | A | Homozygous   |
| NC_037646.1 | 7524354 | SNV | 1 | C | T | Heterozygous |
| NC_037646.1 | 7524771 | SNV | 1 | G | A | Homozygous   |
| NC_037646.1 | 7528706 | SNV | 1 | G | A | Homozygous   |
| NC_037646.1 | 7529111 | SNV | 1 | T | C | Homozygous   |
| NC_037646.1 | 7531039 | SNV | 1 | A | G | Homozygous   |
| NC_037646.1 | 7532458 | SNV | 1 | C | T | Homozygous   |
| NC_037646.1 | 7532584 | SNV | 1 | A | G | Homozygous   |
| NC_037646.1 | 7532668 | SNV | 1 | T | C | Homozygous   |
| NC_037646.1 | 7534266 | SNV | 1 | A | G | Homozygous   |
| NC_037646.1 | 7534402 | SNV | 1 | A | G | Heterozygous |
| NC_037646.1 | 7534414 | SNV | 1 | C | G | Heterozygous |
| NC_037646.1 | 7536594 | SNV | 1 | A | G | Homozygous   |
| NC_037646.1 | 7536609 | SNV | 1 | G | A | Heterozygous |
| NC_037646.1 | 7536909 | SNV | 1 | G | T | Homozygous   |
| NC_037646.1 | 7543931 | SNV | 1 | C | T | Homozygous   |
| NC_037646.1 | 7546090 | SNV | 1 | G | T | Homozygous   |
| NC_037646.1 | 7546111 | SNV | 1 | G | A | Heterozygous |
| NC_037646.1 | 7546157 | SNV | 1 | A | C | Homozygous   |
| NC_037646.1 | 7549625 | SNV | 1 | G | A | Heterozygous |
| NC_037646.1 | 7549659 | SNV | 1 | C | T | Homozygous   |
| NC_037646.1 | 7550121 | SNV | 1 | A | T | Heterozygous |
| NC_037646.1 | 7550589 | SNV | 1 | C | A | Heterozygous |
| NC_037646.1 | 7558948 | SNV | 1 | C | T | Homozygous   |
| NC_037646.1 | 7558993 | SNV | 1 | G | A | Homozygous   |
| NC_037646.1 | 7559030 | SNV | 1 | C | T | Homozygous   |
| NC_037646.1 | 7559054 | SNV | 1 | G | T | Homozygous   |

|             |         |     |   |   |   |              |
|-------------|---------|-----|---|---|---|--------------|
| NC_037646.1 | 7559236 | SNV | 1 | C | T | Heterozygous |
| NC_037646.1 | 7559525 | SNV | 1 | C | T | Homozygous   |
| NC_037646.1 | 7559632 | SNV | 1 | G | A | Heterozygous |
| NC_037646.1 | 7559758 | SNV | 1 | G | A | Heterozygous |
| NC_037646.1 | 7560103 | SNV | 1 | C | T | Heterozygous |
| NC_037646.1 | 7560123 | SNV | 1 | G | A | Heterozygous |
| NC_037646.1 | 7560133 | SNV | 1 | T | C | Homozygous   |
| NC_037646.1 | 7560900 | SNV | 1 | T | A | Homozygous   |
| NC_037646.1 | 7560902 | SNV | 1 | G | A | Heterozygous |
| NC_037646.1 | 7560905 | SNV | 1 | G | A | Heterozygous |
| NC_037646.1 | 7560910 | SNV | 1 | C | A | Homozygous   |
| NC_037646.1 | 7560921 | SNV | 1 | G | A | Heterozygous |
| NC_037646.1 | 7561164 | SNV | 1 | A | G | Homozygous   |
| NC_037646.1 | 7561169 | SNV | 1 | A | C | Homozygous   |
| NC_037646.1 | 7561174 | SNV | 1 | A | G | Homozygous   |
| NC_037646.1 | 7561196 | SNV | 1 | A | G | Homozygous   |
| NC_037646.1 | 7561202 | SNV | 1 | A | G | Homozygous   |
| NC_037646.1 | 7561436 | SNV | 1 | C | T | Heterozygous |
| NC_037646.1 | 7561582 | SNV | 1 | G | A | Homozygous   |
| NC_037646.1 | 7561877 | SNV | 1 | A | G | Homozygous   |
| NC_037646.1 | 7561992 | SNV | 1 | A | G | Homozygous   |
| NC_037646.1 | 7562422 | SNV | 1 | A | G | Homozygous   |
| NC_037646.1 | 7563472 | SNV | 1 | A | T | Heterozygous |
| NC_037646.1 | 7563477 | SNV | 1 | T | A | Heterozygous |
| NC_037646.1 | 7563487 | SNV | 1 | G | T | Homozygous   |
| NC_037646.1 | 7563491 | SNV | 1 | T | A | Heterozygous |
| NC_037646.1 | 7563493 | SNV | 1 | T | A | Heterozygous |
| NC_037646.1 | 7563493 | SNV | 1 | T | G | Heterozygous |
| NC_037646.1 | 7564356 | SNV | 1 | T | C | Homozygous   |
| NC_037646.1 | 7565822 | SNV | 1 | A | G | Heterozygous |
| NC_037646.1 | 7566276 | SNV | 1 | G | A | Homozygous   |
| NC_037646.1 | 7568882 | SNV | 1 | G | C | Homozygous   |
| NC_037646.1 | 7568900 | SNV | 1 | T | A | Homozygous   |
| NC_037646.1 | 7568902 | SNV | 1 | C | A | Homozygous   |
| NC_037646.1 | 7576120 | SNV | 1 | G | C | Homozygous   |
| NC_037646.1 | 7577421 | SNV | 1 | T | C | Homozygous   |
| NC_037646.1 | 7578258 | SNV | 1 | T | C | Homozygous   |
| NC_037646.1 | 7578778 | SNV | 1 | A | C | Homozygous   |
| NC_037646.1 | 7579123 | SNV | 1 | T | C | Homozygous   |
| NC_037646.1 | 7581744 | SNV | 1 | A | C | Homozygous   |
| NC_037646.1 | 7581747 | SNV | 1 | A | G | Homozygous   |
| NC_037646.1 | 7581754 | SNV | 1 | A | T | Heterozygous |
| NC_037646.1 | 7581757 | SNV | 1 | T | A | Heterozygous |
| NC_037646.1 | 7581764 | SNV | 1 | A | T | Heterozygous |
| NC_037646.1 | 7581767 | SNV | 1 | A | T | Heterozygous |
| NC_037646.1 | 7588053 | SNV | 1 | G | A | Homozygous   |
| NC_037646.1 | 7588307 | SNV | 1 | G | T | Heterozygous |
| NC_037646.1 | 7589505 | SNV | 1 | G | A | Heterozygous |
| NC_037646.1 | 7589508 | SNV | 1 | T | C | Heterozygous |
| NC_037646.1 | 7589626 | SNV | 1 | T | C | Homozygous   |
| NC_037646.1 | 7590196 | SNV | 1 | A | G | Homozygous   |

|             |         |     |   |   |   |              |
|-------------|---------|-----|---|---|---|--------------|
| NC_037646.1 | 7590199 | SNV | 1 | T | C | Homozygous   |
| NC_037646.1 | 7601161 | SNV | 1 | A | G | Heterozygous |
| NC_037646.1 | 7601197 | SNV | 1 | G | A | Homozygous   |
| NC_037646.1 | 7608870 | SNV | 1 | G | T | Homozygous   |
| NC_037646.1 | 7608874 | SNV | 1 | A | G | Homozygous   |
| NC_037646.1 | 7610013 | SNV | 1 | G | T | Heterozygous |
| NC_037646.1 | 7610166 | SNV | 1 | T | C | Homozygous   |
| NC_037646.1 | 7614560 | SNV | 1 | G | A | Heterozygous |
| NC_037646.1 | 7614566 | SNV | 1 | A | G | Homozygous   |
| NC_037646.1 | 7621745 | SNV | 1 | T | C | Homozygous   |
| NC_037646.1 | 7621753 | SNV | 1 | T | C | Homozygous   |
| NC_037646.1 | 7622129 | SNV | 1 | G | C | Heterozygous |
| NC_037646.1 | 7622150 | SNV | 1 | G | A | Heterozygous |
| NC_037646.1 | 7622205 | SNV | 1 | A | G | Homozygous   |
| NC_037646.1 | 7622242 | SNV | 1 | A | C | Homozygous   |
| NC_037646.1 | 7622259 | SNV | 1 | T | C | Heterozygous |
| NC_037646.1 | 7622269 | SNV | 1 | G | C | Heterozygous |
| NC_037646.1 | 7622303 | SNV | 1 | G | A | Heterozygous |
| NC_037646.1 | 7622337 | SNV | 1 | C | A | Heterozygous |
| NC_037646.1 | 7637615 | SNV | 1 | T | C | Heterozygous |
| NC_037646.1 | 7637632 | SNV | 1 | T | C | Heterozygous |
| NC_037646.1 | 7637678 | SNV | 1 | G | C | Heterozygous |
| NC_037646.1 | 7637774 | SNV | 1 | G | T | Homozygous   |
| NC_037646.1 | 7637811 | SNV | 1 | C | T | Heterozygous |
| NC_037646.1 | 7637817 | SNV | 1 | T | C | Homozygous   |
| NC_037646.1 | 7637864 | SNV | 1 | T | C | Homozygous   |
| NC_037646.1 | 7637866 | SNV | 1 | C | A | Homozygous   |
| NC_037646.1 | 7638063 | SNV | 1 | G | A | Heterozygous |
| NC_037646.1 | 7652503 | SNV | 1 | T | C | Heterozygous |
| NC_037646.1 | 7652548 | SNV | 1 | C | T | Heterozygous |
| NC_037646.1 | 7652551 | SNV | 1 | T | G | Heterozygous |
| NC_037646.1 | 7652622 | SNV | 1 | A | G | Homozygous   |
| NC_037646.1 | 7652649 | SNV | 1 | A | G | Heterozygous |
| NC_037646.1 | 7652790 | SNV | 1 | T | C | Homozygous   |
| NC_037646.1 | 7652952 | SNV | 1 | T | C | Heterozygous |
| NC_037646.1 | 7653000 | SNV | 1 | T | C | Heterozygous |
| NC_037646.1 | 7653118 | SNV | 1 | T | C | Homozygous   |
| NC_037646.1 | 7653250 | SNV | 1 | C | T | Heterozygous |
| NC_037646.1 | 7653277 | SNV | 1 | G | A | Heterozygous |
| NC_037646.1 | 7653292 | SNV | 1 | T | C | Heterozygous |
| NC_037646.1 | 7653327 | SNV | 1 | A | G | Heterozygous |
| NC_037646.1 | 7653446 | SNV | 1 | C | T | Heterozygous |
| NC_037646.1 | 7653453 | SNV | 1 | G | A | Heterozygous |
| NC_037646.1 | 7653484 | SNV | 1 | T | C | Homozygous   |
| NC_037646.1 | 7653526 | SNV | 1 | G | A | Heterozygous |
| NC_037646.1 | 7653537 | SNV | 1 | A | G | Homozygous   |
| NC_037646.1 | 7653547 | SNV | 1 | T | C | Homozygous   |
| NC_037646.1 | 7653655 | SNV | 1 | C | T | Heterozygous |
| NC_037646.1 | 7653664 | SNV | 1 | T | A | Heterozygous |
| NC_037646.1 | 7653667 | SNV | 1 | A | G | Heterozygous |
| NC_037646.1 | 7653693 | SNV | 1 | C | T | Heterozygous |

|             |         |     |   |   |   |              |
|-------------|---------|-----|---|---|---|--------------|
| NC_037646.1 | 7653817 | SNV | 1 | T | C | Heterozygous |
| NC_037646.1 | 7653822 | SNV | 1 | A | G | Homozygous   |
| NC_037646.1 | 7653893 | SNV | 1 | T | C | Heterozygous |
| NC_037646.1 | 7653905 | SNV | 1 | T | C | Homozygous   |
| NC_037646.1 | 7653918 | SNV | 1 | A | T | Heterozygous |
| NC_037646.1 | 7653947 | SNV | 1 | G | A | Heterozygous |
| NC_037646.1 | 7659308 | SNV | 1 | A | C | Homozygous   |
| NC_037646.1 | 7659332 | SNV | 1 | T | C | Homozygous   |
| NC_037646.1 | 7659345 | SNV | 1 | A | G | Homozygous   |
| NC_037646.1 | 7659349 | SNV | 1 | T | C | Homozygous   |
| NC_037646.1 | 7659668 | SNV | 1 | G | C | Homozygous   |
| NC_037646.1 | 7661144 | SNV | 1 | T | C | Homozygous   |
| NC_037646.1 | 7661258 | SNV | 1 | A | G | Heterozygous |
| NC_037646.1 | 7687360 | SNV | 1 | A | G | Homozygous   |
| NC_037646.1 | 7691924 | SNV | 1 | T | C | Homozygous   |
| NC_037646.1 | 7692571 | SNV | 1 | T | C | Homozygous   |
| NC_037646.1 | 7692974 | SNV | 1 | C | T | Heterozygous |
| NC_037646.1 | 7695996 | SNV | 1 | G | A | Heterozygous |
| NC_037646.1 | 7696829 | SNV | 1 | G | A | Heterozygous |
| NC_037646.1 | 7698035 | SNV | 1 | A | G | Homozygous   |
| NC_037646.1 | 7698414 | SNV | 1 | A | G | Homozygous   |
| NC_037646.1 | 7698724 | SNV | 1 | C | T | Heterozygous |
| NC_037646.1 | 7705305 | SNV | 1 | G | A | Heterozygous |
| NC_037646.1 | 7705323 | SNV | 1 | A | G | Homozygous   |
| NC_037646.1 | 7705722 | SNV | 1 | A | G | Homozygous   |
| NC_037646.1 | 7706082 | SNV | 1 | C | T | Heterozygous |
| NC_037646.1 | 7706128 | SNV | 1 | G | A | Homozygous   |
| NC_037646.1 | 7706318 | SNV | 1 | T | A | Homozygous   |
| NC_037646.1 | 7708326 | SNV | 1 | A | G | Homozygous   |
| NC_037646.1 | 7708363 | SNV | 1 | T | A | Homozygous   |
| NC_037646.1 | 7708861 | SNV | 1 | G | A | Heterozygous |
| NC_037646.1 | 7708984 | SNV | 1 | A | G | Heterozygous |
| NC_037646.1 | 7711926 | SNV | 1 | G | C | Heterozygous |
| NC_037646.1 | 7711939 | SNV | 1 | C | A | Heterozygous |
| NC_037646.1 | 7712187 | SNV | 1 | C | T | Homozygous   |
| NC_037646.1 | 7712470 | SNV | 1 | A | T | Heterozygous |
| NC_037646.1 | 7715000 | SNV | 1 | G | T | Homozygous   |
| NC_037646.1 | 7715002 | SNV | 1 | C | G | Homozygous   |
| NC_037646.1 | 7715024 | SNV | 1 | A | C | Homozygous   |
| NC_037646.1 | 7716693 | SNV | 1 | A | T | Homozygous   |
| NC_037646.1 | 7716697 | SNV | 1 | A | T | Homozygous   |
| NC_037646.1 | 7716699 | SNV | 1 | A | T | Homozygous   |
| NC_037646.1 | 7716701 | SNV | 1 | A | T | Homozygous   |
| NC_037646.1 | 7716710 | SNV | 1 | T | C | Homozygous   |
| NC_037646.1 | 7716713 | SNV | 1 | T | C | Homozygous   |
| NC_037646.1 | 7717198 | SNV | 1 | A | T | Homozygous   |
| NC_037646.1 | 7717204 | SNV | 1 | T | C | Homozygous   |
| NC_037646.1 | 7717231 | SNV | 1 | C | T | Homozygous   |
| NC_037646.1 | 7736039 | SNV | 1 | T | A | Homozygous   |
| NC_037646.1 | 7736042 | SNV | 1 | G | A | Homozygous   |
| NC_037646.1 | 7736044 | SNV | 1 | G | A | Homozygous   |

|             |         |     |   |   |   |              |
|-------------|---------|-----|---|---|---|--------------|
| NC_037646.1 | 7736052 | SNV | 1 | A | G | Heterozygous |
| NC_037646.1 | 7737470 | SNV | 1 | G | A | Homozygous   |
| NC_037646.1 | 7737686 | SNV | 1 | G | A | Homozygous   |
| NC_037646.1 | 7737946 | SNV | 1 | A | G | Homozygous   |
| NC_037646.1 | 7738215 | SNV | 1 | C | A | Homozygous   |
| NC_037646.1 | 7741539 | SNV | 1 | A | T | Homozygous   |
| NC_037646.1 | 7741570 | SNV | 1 | A | G | Homozygous   |
| NC_037646.1 | 7745543 | SNV | 1 | G | A | Homozygous   |
| NC_037646.1 | 7745570 | SNV | 1 | C | T | Heterozygous |
| NC_037646.1 | 7747107 | SNV | 1 | G | A | Heterozygous |
| NC_037646.1 | 7747699 | SNV | 1 | G | A | Homozygous   |
| NC_037646.1 | 7748272 | SNV | 1 | T | C | Homozygous   |
| NC_037646.1 | 7749129 | SNV | 1 | A | G | Homozygous   |
| NC_037646.1 | 7750941 | SNV | 1 | C | T | Homozygous   |
| NC_037646.1 | 7750943 | SNV | 1 | C | T | Homozygous   |
| NC_037646.1 | 7750961 | SNV | 1 | T | A | Homozygous   |
| NC_037646.1 | 7750967 | SNV | 1 | T | A | Homozygous   |
| NC_037646.1 | 7751452 | SNV | 1 | T | C | Homozygous   |
| NC_037646.1 | 7752114 | SNV | 1 | G | C | Homozygous   |
| NC_037646.1 | 7752471 | SNV | 1 | T | A | Heterozygous |
| NC_037646.1 | 7752693 | SNV | 1 | G | T | Homozygous   |
| NC_037646.1 | 7755494 | SNV | 1 | A | T | Heterozygous |
| NC_037646.1 | 7757217 | SNV | 1 | C | T | Homozygous   |
| NC_037646.1 | 7757477 | SNV | 1 | C | G | Homozygous   |
| NC_037646.1 | 7757544 | SNV | 1 | A | T | Heterozygous |
| NC_037646.1 | 7757575 | SNV | 1 | G | C | Homozygous   |
| NC_037646.1 | 7763609 | SNV | 1 | A | G | Homozygous   |
| NC_037646.1 | 7764233 | SNV | 1 | C | T | Homozygous   |
| NC_037646.1 | 7769528 | SNV | 1 | C | T | Heterozygous |
| NC_037646.1 | 7772999 | SNV | 1 | T | A | Homozygous   |
| NC_037646.1 | 7773003 | SNV | 1 | A | T | Homozygous   |
| NC_037646.1 | 7773190 | SNV | 1 | T | C | Homozygous   |
| NC_037646.1 | 7773235 | SNV | 1 | C | T | Homozygous   |
| NC_037646.1 | 7776831 | SNV | 1 | T | C | Homozygous   |
| NC_037646.1 | 7777505 | SNV | 1 | A | G | Homozygous   |
| NC_037646.1 | 7777544 | SNV | 1 | C | A | Heterozygous |
| NC_037646.1 | 7808171 | SNV | 1 | A | G | Heterozygous |
| NC_037646.1 | 7808173 | SNV | 1 | T | G | Homozygous   |
| NC_037646.1 | 7819631 | SNV | 1 | A | G | Heterozygous |
| NC_037646.1 | 7819895 | SNV | 1 | T | C | Homozygous   |
| NC_037646.1 | 7820598 | SNV | 1 | G | A | Homozygous   |
| NC_037646.1 | 7822117 | SNV | 1 | A | G | Homozygous   |
| NC_037646.1 | 7825016 | SNV | 1 | T | C | Heterozygous |
| NC_037646.1 | 7825021 | SNV | 1 | A | T | Heterozygous |
| NC_037646.1 | 7825023 | SNV | 1 | A | G | Heterozygous |
| NC_037646.1 | 7825060 | SNV | 1 | T | C | Homozygous   |
| NC_037646.1 | 7825070 | SNV | 1 | A | G | Homozygous   |
| NC_037646.1 | 7825306 | SNV | 1 | G | A | Heterozygous |
| NC_037646.1 | 7825997 | SNV | 1 | A | G | Homozygous   |
| NC_037646.1 | 7833035 | SNV | 1 | G | C | Heterozygous |
| NC_037646.1 | 7833037 | SNV | 1 | T | G | Heterozygous |

|             |         |     |   |   |   |              |
|-------------|---------|-----|---|---|---|--------------|
| NC_037646.1 | 7833040 | SNV | 1 | C | T | Heterozygous |
| NC_037646.1 | 7833335 | SNV | 1 | T | C | Homozygous   |
| NC_037646.1 | 7842294 | SNV | 1 | A | C | Heterozygous |
| NC_037646.1 | 7843257 | SNV | 1 | T | C | Homozygous   |
| NC_037646.1 | 7843260 | SNV | 1 | A | C | Homozygous   |
| NC_037646.1 | 7846294 | SNV | 1 | T | A | Homozygous   |
| NC_037646.1 | 7846296 | SNV | 1 | C | A | Homozygous   |
| NC_037646.1 | 7847528 | SNV | 1 | C | G | Homozygous   |
| NC_037646.1 | 7850253 | SNV | 1 | T | C | Homozygous   |
| NC_037646.1 | 7851992 | SNV | 1 | G | A | Heterozygous |
| NC_037646.1 | 7852035 | SNV | 1 | A | T | Homozygous   |
| NC_037646.1 | 7853299 | SNV | 1 | T | C | Heterozygous |
| NC_037646.1 | 7853375 | SNV | 1 | T | G | Homozygous   |
| NC_037646.1 | 7867191 | SNV | 1 | T | C | Homozygous   |
| NC_037646.1 | 7867199 | SNV | 1 | T | A | Homozygous   |
| NC_037646.1 | 7867202 | SNV | 1 | C | A | Homozygous   |
| NC_037646.1 | 7868007 | SNV | 1 | A | G | Homozygous   |
| NC_037646.1 | 7870848 | SNV | 1 | G | A | Homozygous   |
| NC_037646.1 | 7872549 | SNV | 1 | T | C | Homozygous   |
| NC_037646.1 | 7879249 | SNV | 1 | A | C | Homozygous   |
| NC_037646.1 | 7887766 | SNV | 1 | T | A | Heterozygous |
| NC_037646.1 | 7887782 | SNV | 1 | T | A | Heterozygous |
| NC_037646.1 | 7887786 | SNV | 1 | A | G | Heterozygous |
| NC_037646.1 | 7887857 | SNV | 1 | A | G | Homozygous   |
| NC_037646.1 | 7891655 | SNV | 1 | T | A | Homozygous   |
| NC_037646.1 | 7891691 | SNV | 1 | A | G | Homozygous   |
| NC_037646.1 | 7893805 | SNV | 1 | A | G | Homozygous   |
| NC_037646.1 | 7895105 | SNV | 1 | G | A | Homozygous   |
| NC_037646.1 | 7895202 | SNV | 1 | G | A | Heterozygous |
| NC_037646.1 | 7897001 | SNV | 1 | T | C | Homozygous   |
| NC_037646.1 | 7897056 | SNV | 1 | G | C | Homozygous   |
| NC_037646.1 | 7897060 | SNV | 1 | T | G | Homozygous   |
| NC_037646.1 | 7897062 | SNV | 1 | T | C | Homozygous   |
| NC_037646.1 | 7897961 | SNV | 1 | T | C | Homozygous   |
| NC_037646.1 | 7897963 | SNV | 1 | T | G | Homozygous   |
| NC_037646.1 | 7897973 | SNV | 1 | T | C | Homozygous   |
| NC_037646.1 | 7897975 | SNV | 1 | G | A | Homozygous   |
| NC_037646.1 | 7902035 | SNV | 1 | G | A | Homozygous   |
| NC_037646.1 | 7906056 | SNV | 1 | A | T | Homozygous   |
| NC_037646.1 | 7906201 | SNV | 1 | A | T | Homozygous   |
| NC_037646.1 | 7907213 | SNV | 1 | A | G | Homozygous   |
| NC_037646.1 | 7907489 | SNV | 1 | G | A | Homozygous   |
| NC_037646.1 | 7907780 | SNV | 1 | T | G | Homozygous   |
| NC_037646.1 | 7910417 | SNV | 1 | G | A | Heterozygous |
| NC_037646.1 | 7915702 | SNV | 1 | T | A | Homozygous   |
| NC_037646.1 | 7944906 | SNV | 1 | T | C | Heterozygous |
| NC_037646.1 | 7944912 | SNV | 1 | T | C | Heterozygous |
| NC_037646.1 | 7944915 | SNV | 1 | T | A | Heterozygous |
| NC_037646.1 | 7944918 | SNV | 1 | T | C | Homozygous   |
| NC_037646.1 | 7944922 | SNV | 1 | T | A | Heterozygous |
| NC_037646.1 | 7944924 | SNV | 1 | A | G | Heterozygous |

|             |         |     |   |   |   |              |
|-------------|---------|-----|---|---|---|--------------|
| NC_037646.1 | 7944935 | SNV | 1 | T | C | Heterozygous |
| NC_037646.1 | 7944938 | SNV | 1 | T | C | Homozygous   |
| NC_037646.1 | 7944944 | SNV | 1 | A | T | Homozygous   |
| NC_037646.1 | 7944947 | SNV | 1 | T | C | Homozygous   |
| NC_037646.1 | 7944950 | SNV | 1 | T | C | Homozygous   |
| NC_037646.1 | 7944953 | SNV | 1 | T | A | Homozygous   |
| NC_037646.1 | 7944959 | SNV | 1 | A | C | Homozygous   |
| NC_037646.1 | 7944962 | SNV | 1 | A | C | Homozygous   |
| NC_037646.1 | 7944980 | SNV | 1 | T | A | Homozygous   |
| NC_037646.1 | 7944983 | SNV | 1 | A | T | Homozygous   |
| NC_037646.1 | 7944986 | SNV | 1 | A | C | Homozygous   |
| NC_037646.1 | 7944995 | SNV | 1 | T | C | Homozygous   |
| NC_037646.1 | 7945001 | SNV | 1 | A | C | Homozygous   |
| NC_037646.1 | 7971639 | SNV | 1 | G | A | Homozygous   |
| NC_037646.1 | 7971642 | SNV | 1 | G | A | Homozygous   |
| NC_037646.1 | 7971647 | SNV | 1 | G | A | Heterozygous |
| NC_037646.1 | 7971672 | SNV | 1 | G | A | Homozygous   |
| NC_037646.1 | 7971674 | SNV | 1 | A | G | Homozygous   |
| NC_037646.1 | 7986359 | SNV | 1 | G | A | Heterozygous |
| NC_037646.1 | 7986361 | SNV | 1 | G | A | Heterozygous |
| NC_037646.1 | 7993980 | SNV | 1 | A | G | Homozygous   |
| NC_037646.1 | 7994171 | SNV | 1 | T | C | Homozygous   |
| NC_037646.1 | 7994240 | SNV | 1 | T | C | Homozygous   |
| NC_037646.1 | 7994602 | SNV | 1 | G | A | Homozygous   |
| NC_037646.1 | 7994632 | SNV | 1 | C | G | Homozygous   |
| NC_037646.1 | 7994658 | SNV | 1 | A | G | Homozygous   |
| NC_037646.1 | 7994796 | SNV | 1 | G | A | Heterozygous |
| NC_037646.1 | 7995434 | SNV | 1 | T | C | Homozygous   |
| NC_037646.1 | 8000346 | SNV | 1 | G | A | Homozygous   |
| NC_037646.1 | 8000521 | SNV | 1 | A | G | Heterozygous |
| NC_037646.1 | 8000722 | SNV | 1 | G | A | Homozygous   |
| NC_037646.1 | 8001848 | SNV | 1 | T | C | Homozygous   |
| NC_037646.1 | 8001938 | SNV | 1 | G | A | Heterozygous |
| NC_037646.1 | 8001948 | SNV | 1 | G | A | Heterozygous |
| NC_037646.1 | 8001953 | SNV | 1 | T | A | Homozygous   |
| NC_037646.1 | 8001956 | SNV | 1 | A | G | Heterozygous |
| NC_037646.1 | 8001958 | SNV | 1 | T | G | Heterozygous |
| NC_037646.1 | 8001962 | SNV | 1 | C | T | Homozygous   |
| NC_037646.1 | 8001968 | SNV | 1 | A | G | Homozygous   |
| NC_037646.1 | 8002242 | SNV | 1 | A | G | Heterozygous |
| NC_037646.1 | 8002328 | SNV | 1 | G | A | Heterozygous |
| NC_037646.1 | 8002409 | SNV | 1 | G | A | Heterozygous |
| NC_037646.1 | 8002504 | SNV | 1 | G | A | Homozygous   |
| NC_037646.1 | 8003379 | SNV | 1 | T | C | Homozygous   |
| NC_037646.1 | 8003455 | SNV | 1 | C | T | Heterozygous |
| NC_037646.1 | 8003814 | SNV | 1 | T | C | Homozygous   |
| NC_037646.1 | 8003983 | SNV | 1 | C | T | Heterozygous |
| NC_037646.1 | 8004088 | SNV | 1 | G | C | Homozygous   |
| NC_037646.1 | 8004147 | SNV | 1 | A | G | Heterozygous |
| NC_037646.1 | 8004291 | SNV | 1 | T | G | Homozygous   |
| NC_037646.1 | 8004408 | SNV | 1 | T | C | Heterozygous |

|             |         |     |   |   |   |              |
|-------------|---------|-----|---|---|---|--------------|
| NC_037646.1 | 8004609 | SNV | 1 | G | T | Heterozygous |
| NC_037646.1 | 8004684 | SNV | 1 | G | C | Heterozygous |
| NC_037646.1 | 8004744 | SNV | 1 | T | C | Homozygous   |
| NC_037646.1 | 8004747 | SNV | 1 | G | A | Heterozygous |
| NC_037646.1 | 8004792 | SNV | 1 | G | A | Heterozygous |
| NC_037646.1 | 8004852 | SNV | 1 | A | G | Heterozygous |
| NC_037646.1 | 8004855 | SNV | 1 | A | G | Homozygous   |
| NC_037646.1 | 8004879 | SNV | 1 | G | T | Heterozygous |
| NC_037646.1 | 8005757 | SNV | 1 | C | T | Homozygous   |
| NC_037646.1 | 8023488 | SNV | 1 | C | T | Homozygous   |
| NC_037646.1 | 8024348 | SNV | 1 | G | A | Heterozygous |
| NC_037646.1 | 8024361 | SNV | 1 | G | A | Heterozygous |
| NC_037646.1 | 8027549 | SNV | 1 | T | C | Homozygous   |
| NC_037646.1 | 8027556 | SNV | 1 | T | A | Homozygous   |
| NC_037646.1 | 8027568 | SNV | 1 | T | C | Homozygous   |
| NC_037646.1 | 8027573 | SNV | 1 | T | G | Homozygous   |
| NC_037646.1 | 8027577 | SNV | 1 | T | C | Homozygous   |
| NC_037646.1 | 8027923 | SNV | 1 | A | G | Heterozygous |
| NC_037646.1 | 8027949 | SNV | 1 | G | A | Heterozygous |
| NC_037646.1 | 8028027 | SNV | 1 | A | G | Homozygous   |
| NC_037646.1 | 8028087 | SNV | 1 | A | G | Homozygous   |
| NC_037646.1 | 8042590 | SNV | 1 | G | A | Heterozygous |
| NC_037646.1 | 8042613 | SNV | 1 | G | A | Heterozygous |
| NC_037646.1 | 8042626 | SNV | 1 | G | A | Heterozygous |
| NC_037646.1 | 8042751 | SNV | 1 | G | A | Heterozygous |
| NC_037646.1 | 8042900 | SNV | 1 | A | G | Homozygous   |
| NC_037646.1 | 8042911 | SNV | 1 | G | A | Heterozygous |
| NC_037646.1 | 8043055 | SNV | 1 | T | C | Heterozygous |
| NC_037646.1 | 8043297 | SNV | 1 | T | C | Heterozygous |
| NC_037646.1 | 8046258 | SNV | 1 | G | A | Heterozygous |
| NC_037646.1 | 8046281 | SNV | 1 | T | C | Homozygous   |
| NC_037646.1 | 8046292 | SNV | 1 | A | G | Homozygous   |
| NC_037646.1 | 8046923 | SNV | 1 | T | G | Homozygous   |
| NC_037646.1 | 8046941 | SNV | 1 | G | A | Heterozygous |
| NC_037646.1 | 8046943 | SNV | 1 | G | A | Heterozygous |
| NC_037646.1 | 8046947 | SNV | 1 | A | G | Heterozygous |
| NC_037646.1 | 8046957 | SNV | 1 | C | T | Homozygous   |
| NC_037646.1 | 8046959 | SNV | 1 | G | C | Homozygous   |
| NC_037646.1 | 8046985 | SNV | 1 | A | G | Homozygous   |
| NC_037646.1 | 8047050 | SNV | 1 | T | A | Heterozygous |
| NC_037646.1 | 8047055 | SNV | 1 | G | C | Heterozygous |
| NC_037646.1 | 8047095 | SNV | 1 | A | G | Homozygous   |
| NC_037646.1 | 8047102 | SNV | 1 | T | C | Homozygous   |
| NC_037646.1 | 8047129 | SNV | 1 | A | G | Homozygous   |
| NC_037646.1 | 8047193 | SNV | 1 | C | A | Homozygous   |
| NC_037646.1 | 8047200 | SNV | 1 | G | A | Heterozygous |
| NC_037646.1 | 8049463 | SNV | 1 | T | C | Homozygous   |
| NC_037646.1 | 8049615 | SNV | 1 | G | A | Heterozygous |
| NC_037646.1 | 8049624 | SNV | 1 | A | G | Homozygous   |
| NC_037646.1 | 8049685 | SNV | 1 | T | C | Homozygous   |
| NC_037646.1 | 8049702 | SNV | 1 | A | G | Heterozygous |



|             |         |     |   |   |   |              |
|-------------|---------|-----|---|---|---|--------------|
| NC_037646.1 | 8049705 | SNV | 1 | C | T | Heterozygous |
| NC_037646.1 | 8049720 | SNV | 1 | A | G | Heterozygous |
| NC_037646.1 | 8049725 | SNV | 1 | A | G | Homozygous   |
| NC_037646.1 | 8049727 | SNV | 1 | A | G | Homozygous   |
| NC_037646.1 | 8049731 | SNV | 1 | A | G | Heterozygous |
| NC_037646.1 | 8049750 | SNV | 1 | A | G | Homozygous   |
| NC_037646.1 | 8051438 | SNV | 1 | G | C | Homozygous   |
| NC_037646.1 | 8051506 | SNV | 1 | A | G | Homozygous   |
| NC_037646.1 | 8051523 | SNV | 1 | T | A | Heterozygous |
| NC_037646.1 | 8051882 | SNV | 1 | T | C | Homozygous   |
| NC_037646.1 | 8051929 | SNV | 1 | T | G | Homozygous   |
| NC_037646.1 | 8052177 | SNV | 1 | A | G | Homozygous   |
| NC_037646.1 | 8054843 | SNV | 1 | G | A | Homozygous   |
| NC_037646.1 | 8061405 | SNV | 1 | A | G | Homozygous   |
| NC_037646.1 | 8061536 | SNV | 1 | T | C | Homozygous   |
| NC_037646.1 | 8061826 | SNV | 1 | G | A | Homozygous   |
| NC_037646.1 | 8061847 | SNV | 1 | G | A | Homozygous   |
| NC_037646.1 | 8061936 | SNV | 1 | C | T | Heterozygous |
| NC_037646.1 | 8062056 | SNV | 1 | A | G | Homozygous   |
| NC_037646.1 | 8062059 | SNV | 1 | T | G | Homozygous   |
| NC_037646.1 | 8069448 | SNV | 1 | C | T | Homozygous   |
| NC_037646.1 | 8069613 | SNV | 1 | T | C | Homozygous   |
| NC_037646.1 | 8069660 | SNV | 1 | C | T | Heterozygous |
| NC_037646.1 | 8069701 | SNV | 1 | G | A | Heterozygous |
| NC_037646.1 | 8069729 | SNV | 1 | G | A | Heterozygous |
| NC_037646.1 | 8069760 | SNV | 1 | G | A | Homozygous   |
| NC_037646.1 | 8069766 | SNV | 1 | G | C | Heterozygous |
| NC_037646.1 | 8070059 | SNV | 1 | A | G | Homozygous   |
| NC_037646.1 | 8074575 | SNV | 1 | C | T | Homozygous   |
| NC_037646.1 | 8104643 | SNV | 1 | A | G | Heterozygous |
| NC_037646.1 | 8104647 | SNV | 1 | C | G | Homozygous   |
| NC_037646.1 | 8104728 | SNV | 1 | T | C | Homozygous   |
| NC_037646.1 | 8104869 | SNV | 1 | T | C | Homozygous   |
| NC_037646.1 | 8104901 | SNV | 1 | C | T | Homozygous   |
| NC_037646.1 | 8104956 | SNV | 1 | G | A | Homozygous   |
| NC_037646.1 | 8105005 | SNV | 1 | T | C | Homozygous   |
| NC_037646.1 | 8114208 | SNV | 1 | G | A | Heterozygous |
| NC_037646.1 | 8118146 | SNV | 1 | C | T | Heterozygous |
| NC_037646.1 | 8118517 | SNV | 1 | G | A | Heterozygous |
| NC_037646.1 | 8118682 | SNV | 1 | G | A | Homozygous   |
| NC_037646.1 | 8120881 | SNV | 1 | C | T | Homozygous   |
| NC_037646.1 | 8120912 | SNV | 1 | C | T | Homozygous   |
| NC_037646.1 | 8120916 | SNV | 1 | G | A | Homozygous   |
| NC_037646.1 | 8120919 | SNV | 1 | G | A | Homozygous   |
| NC_037646.1 | 8120930 | SNV | 1 | T | C | Homozygous   |
| NC_037646.1 | 8121883 | SNV | 1 | T | C | Homozygous   |
| NC_037646.1 | 8121952 | SNV | 1 | T | G | Homozygous   |
| NC_037646.1 | 8122327 | SNV | 1 | G | T | Homozygous   |
| NC_037646.1 | 8122416 | SNV | 1 | G | T | Homozygous   |
| NC_037646.1 | 8122426 | SNV | 1 | G | A | Homozygous   |
| NC_037646.1 | 8122631 | SNV | 1 | C | T | Heterozygous |

|             |         |     |   |   |   |              |
|-------------|---------|-----|---|---|---|--------------|
| NC_037646.1 | 8122706 | SNV | 1 | G | A | Heterozygous |
| NC_037646.1 | 8122708 | SNV | 1 | C | T | Heterozygous |
| NC_037646.1 | 8122782 | SNV | 1 | A | G | Heterozygous |
| NC_037646.1 | 8122785 | SNV | 1 | T | G | Heterozygous |
| NC_037646.1 | 8122787 | SNV | 1 | T | A | Heterozygous |
| NC_037646.1 | 8122789 | SNV | 1 | C | G | Heterozygous |
| NC_037646.1 | 8122797 | SNV | 1 | G | A | Heterozygous |
| NC_037646.1 | 8122835 | SNV | 1 | G | A | Heterozygous |
| NC_037646.1 | 8122843 | SNV | 1 | G | A | Heterozygous |
| NC_037646.1 | 8122846 | SNV | 1 | A | T | Homozygous   |
| NC_037646.1 | 8123232 | SNV | 1 | C | G | Homozygous   |
| NC_037646.1 | 8123509 | SNV | 1 | A | G | Homozygous   |
| NC_037646.1 | 8123530 | SNV | 1 | G | C | Homozygous   |
| NC_037646.1 | 8123573 | SNV | 1 | A | G | Heterozygous |
| NC_037646.1 | 8123702 | SNV | 1 | C | A | Heterozygous |
| NC_037646.1 | 8123797 | SNV | 1 | A | G | Homozygous   |
| NC_037646.1 | 8123980 | SNV | 1 | G | A | Heterozygous |
| NC_037646.1 | 8123983 | SNV | 1 | G | C | Heterozygous |
| NC_037646.1 | 8123985 | SNV | 1 | G | A | Heterozygous |
| NC_037646.1 | 8124003 | SNV | 1 | G | A | Homozygous   |
| NC_037646.1 | 8124015 | SNV | 1 | C | T | Heterozygous |
| NC_037646.1 | 8124051 | SNV | 1 | T | C | Homozygous   |
| NC_037646.1 | 8124055 | SNV | 1 | T | C | Homozygous   |
| NC_037646.1 | 8124178 | SNV | 1 | C | G | Homozygous   |
| NC_037646.1 | 8124208 | SNV | 1 | A | G | Heterozygous |
| NC_037646.1 | 8124490 | SNV | 1 | T | A | Homozygous   |
| NC_037646.1 | 8124493 | SNV | 1 | A | G | Heterozygous |
| NC_037646.1 | 8124889 | SNV | 1 | A | G | Heterozygous |
| NC_037646.1 | 8125247 | SNV | 1 | T | C | Homozygous   |
| NC_037646.1 | 8125360 | SNV | 1 | T | C | Homozygous   |
| NC_037646.1 | 8125393 | SNV | 1 | A | G | Heterozygous |
| NC_037646.1 | 8125507 | SNV | 1 | T | C | Heterozygous |
| NC_037646.1 | 8125510 | SNV | 1 | T | C | Heterozygous |
| NC_037646.1 | 8125911 | SNV | 1 | G | A | Heterozygous |
| NC_037646.1 | 8126056 | SNV | 1 | G | C | Homozygous   |
| NC_037646.1 | 8126127 | SNV | 1 | G | A | Homozygous   |
| NC_037646.1 | 8126158 | SNV | 1 | C | A | Heterozygous |
| NC_037646.1 | 8126448 | SNV | 1 | T | C | Homozygous   |
| NC_037646.1 | 8126500 | SNV | 1 | A | G | Heterozygous |
| NC_037646.1 | 8126548 | SNV | 1 | A | G | Heterozygous |
| NC_037646.1 | 8126595 | SNV | 1 | C | T | Homozygous   |
| NC_037646.1 | 8126779 | SNV | 1 | A | G | Heterozygous |
| NC_037646.1 | 8127550 | SNV | 1 | C | T | Heterozygous |
| NC_037646.1 | 8127706 | SNV | 1 | T | C | Homozygous   |
| NC_037646.1 | 8127972 | SNV | 1 | T | C | Homozygous   |
| NC_037646.1 | 8128020 | SNV | 1 | G | A | Heterozygous |
| NC_037646.1 | 8128690 | SNV | 1 | T | C | Heterozygous |
| NC_037646.1 | 8128702 | SNV | 1 | A | C | Heterozygous |
| NC_037646.1 | 8128821 | SNV | 1 | T | C | Heterozygous |
| NC_037646.1 | 8128840 | SNV | 1 | T | C | Homozygous   |
| NC_037646.1 | 8128846 | SNV | 1 | T | C | Heterozygous |

|             |         |     |   |   |   |              |
|-------------|---------|-----|---|---|---|--------------|
| NC_037646.1 | 8129116 | SNV | 1 | T | C | Heterozygous |
| NC_037646.1 | 8129132 | SNV | 1 | T | C | Homozygous   |
| NC_037646.1 | 8129134 | SNV | 1 | T | C | Heterozygous |
| NC_037646.1 | 8129152 | SNV | 1 | C | T | Heterozygous |
| NC_037646.1 | 8129976 | SNV | 1 | A | G | Homozygous   |
| NC_037646.1 | 8130330 | SNV | 1 | G | A | Homozygous   |
| NC_037646.1 | 8130361 | SNV | 1 | T | G | Homozygous   |
| NC_037646.1 | 8130446 | SNV | 1 | T | A | Homozygous   |
| NC_037646.1 | 8130828 | SNV | 1 | G | A | Heterozygous |
| NC_037646.1 | 8130843 | SNV | 1 | T | C | Homozygous   |
| NC_037646.1 | 8130906 | SNV | 1 | A | G | Homozygous   |
| NC_037646.1 | 8131118 | SNV | 1 | C | T | Heterozygous |
| NC_037646.1 | 8131127 | SNV | 1 | T | C | Homozygous   |
| NC_037646.1 | 8131344 | SNV | 1 | A | G | Homozygous   |
| NC_037646.1 | 8131428 | SNV | 1 | T | C | Homozygous   |
| NC_037646.1 | 8131464 | SNV | 1 | A | G | Heterozygous |
| NC_037646.1 | 8131473 | SNV | 1 | G | A | Heterozygous |
| NC_037646.1 | 8131534 | SNV | 1 | A | G | Homozygous   |
| NC_037646.1 | 8131753 | SNV | 1 | A | G | Heterozygous |
| NC_037646.1 | 8131998 | SNV | 1 | A | T | Homozygous   |
| NC_037646.1 | 8132064 | SNV | 1 | A | G | Homozygous   |
| NC_037646.1 | 8132145 | SNV | 1 | A | G | Homozygous   |
| NC_037646.1 | 8132152 | SNV | 1 | A | G | Homozygous   |
| NC_037646.1 | 8132467 | SNV | 1 | T | A | Homozygous   |
| NC_037646.1 | 8132786 | SNV | 1 | G | A | Homozygous   |
| NC_037646.1 | 8132795 | SNV | 1 | G | A | Heterozygous |
| NC_037646.1 | 8132798 | SNV | 1 | G | A | Heterozygous |
| NC_037646.1 | 8132865 | SNV | 1 | G | A | Heterozygous |
| NC_037646.1 | 8133322 | SNV | 1 | A | G | Heterozygous |
| NC_037646.1 | 8133404 | SNV | 1 | T | C | Homozygous   |
| NC_037646.1 | 8133526 | SNV | 1 | A | G | Heterozygous |
| NC_037646.1 | 8133561 | SNV | 1 | G | A | Heterozygous |
| NC_037646.1 | 8133628 | SNV | 1 | G | A | Homozygous   |
| NC_037646.1 | 8156579 | SNV | 1 | T | C | Heterozygous |
| NC_037646.1 | 8170641 | SNV | 1 | T | C | Homozygous   |
| NC_037646.1 | 8170739 | SNV | 1 | T | C | Homozygous   |
| NC_037646.1 | 8170771 | SNV | 1 | A | G | Heterozygous |
| NC_037646.1 | 8170919 | SNV | 1 | A | G | Homozygous   |
| NC_037646.1 | 8171118 | SNV | 1 | T | C | Homozygous   |
| NC_037646.1 | 8173708 | SNV | 1 | G | A | Heterozygous |
| NC_037646.1 | 8174775 | SNV | 1 | C | G | Homozygous   |
| NC_037646.1 | 8180943 | SNV | 1 | T | C | Homozygous   |
| NC_037646.1 | 8180969 | SNV | 1 | C | G | Heterozygous |
| NC_037646.1 | 8180990 | SNV | 1 | C | T | Heterozygous |
| NC_037646.1 | 8183274 | SNV | 1 | T | C | Homozygous   |
| NC_037646.1 | 8183342 | SNV | 1 | G | C | Homozygous   |
| NC_037646.1 | 8183356 | SNV | 1 | C | T | Heterozygous |
| NC_037646.1 | 8184026 | SNV | 1 | A | G | Homozygous   |
| NC_037646.1 | 8184030 | SNV | 1 | A | G | Heterozygous |
| NC_037646.1 | 8184039 | SNV | 1 | A | C | Heterozygous |
| NC_037646.1 | 8188141 | SNV | 1 | C | T | Heterozygous |

|             |         |     |   |   |   |              |
|-------------|---------|-----|---|---|---|--------------|
| NC_037646.1 | 8188250 | SNV | 1 | A | G | Heterozygous |
| NC_037646.1 | 8188371 | SNV | 1 | G | A | Heterozygous |
| NC_037646.1 | 8188882 | SNV | 1 | A | G | Homozygous   |
| NC_037646.1 | 8188916 | SNV | 1 | C | A | Homozygous   |
| NC_037646.1 | 8188940 | SNV | 1 | G | A | Homozygous   |
| NC_037646.1 | 8188944 | SNV | 1 | G | A | Homozygous   |
| NC_037646.1 | 8188946 | SNV | 1 | T | C | Homozygous   |
| NC_037646.1 | 8188952 | SNV | 1 | A | G | Heterozygous |
| NC_037646.1 | 8188957 | SNV | 1 | G | A | Heterozygous |
| NC_037646.1 | 8189091 | SNV | 1 | G | A | Heterozygous |
| NC_037646.1 | 8189099 | SNV | 1 | G | A | Homozygous   |
| NC_037646.1 | 8189132 | SNV | 1 | A | G | Homozygous   |
| NC_037646.1 | 8189244 | SNV | 1 | A | G | Homozygous   |
| NC_037646.1 | 8189280 | SNV | 1 | T | C | Homozygous   |
| NC_037646.1 | 8189626 | SNV | 1 | G | A | Homozygous   |
| NC_037646.1 | 8191934 | SNV | 1 | C | T | Homozygous   |
| NC_037646.1 | 8192112 | SNV | 1 | C | G | Homozygous   |
| NC_037646.1 | 8192319 | SNV | 1 | T | A | Heterozygous |
| NC_037646.1 | 8192413 | SNV | 1 | A | T | Homozygous   |
| NC_037646.1 | 8192480 | SNV | 1 | C | T | Heterozygous |
| NC_037646.1 | 8192490 | SNV | 1 | C | T | Homozygous   |
| NC_037646.1 | 8192500 | SNV | 1 | T | C | Heterozygous |
| NC_037646.1 | 8192631 | SNV | 1 | A | G | Heterozygous |
| NC_037646.1 | 8192634 | SNV | 1 | G | A | Heterozygous |
| NC_037646.1 | 8192959 | SNV | 1 | G | A | Heterozygous |
| NC_037646.1 | 8193255 | SNV | 1 | A | C | Homozygous   |
| NC_037646.1 | 8193797 | SNV | 1 | C | T | Homozygous   |
| NC_037646.1 | 8198488 | SNV | 1 | A | G | Homozygous   |
| NC_037646.1 | 8199964 | SNV | 1 | G | C | Heterozygous |
| NC_037646.1 | 8199970 | SNV | 1 | G | A | Heterozygous |
| NC_037646.1 | 8199984 | SNV | 1 | G | A | Heterozygous |
| NC_037646.1 | 8200085 | SNV | 1 | G | A | Heterozygous |
| NC_037646.1 | 8200268 | SNV | 1 | G | A | Heterozygous |
| NC_037646.1 | 8203675 | SNV | 1 | G | C | Homozygous   |
| NC_037646.1 | 8203816 | SNV | 1 | C | T | Heterozygous |
| NC_037646.1 | 8203854 | SNV | 1 | A | G | Homozygous   |
| NC_037646.1 | 8203856 | SNV | 1 | G | A | Heterozygous |
| NC_037646.1 | 8203944 | SNV | 1 | A | G | Heterozygous |
| NC_037646.1 | 8208329 | SNV | 1 | A | C | Homozygous   |
| NC_037646.1 | 8208334 | SNV | 1 | C | G | Homozygous   |
| NC_037646.1 | 8208343 | SNV | 1 | C | T | Heterozygous |
| NC_037646.1 | 8208345 | SNV | 1 | T | C | Homozygous   |
| NC_037646.1 | 8217145 | SNV | 1 | C | G | Homozygous   |
| NC_037646.1 | 8217829 | SNV | 1 | A | G | Heterozygous |
| NC_037646.1 | 8217959 | SNV | 1 | A | G | Homozygous   |
| NC_037646.1 | 8217966 | SNV | 1 | A | G | Homozygous   |
| NC_037646.1 | 8217969 | SNV | 1 | T | C | Homozygous   |
| NC_037646.1 | 8217998 | SNV | 1 | C | G | Homozygous   |
| NC_037646.1 | 8218006 | SNV | 1 | A | G | Homozygous   |
| NC_037646.1 | 8218637 | SNV | 1 | C | T | Heterozygous |
| NC_037646.1 | 8218667 | SNV | 1 | C | T | Heterozygous |

|             |         |     |   |   |   |              |
|-------------|---------|-----|---|---|---|--------------|
| NC_037646.1 | 8218677 | SNV | 1 | A | C | Heterozygous |
| NC_037646.1 | 8218686 | SNV | 1 | C | T | Heterozygous |
| NC_037646.1 | 8218690 | SNV | 1 | C | T | Heterozygous |
| NC_037646.1 | 8225426 | SNV | 1 | G | C | Homozygous   |
| NC_037646.1 | 8225468 | SNV | 1 | T | C | Heterozygous |
| NC_037646.1 | 8226874 | SNV | 1 | C | T | Heterozygous |
| NC_037646.1 | 8226963 | SNV | 1 | A | G | Homozygous   |
| NC_037646.1 | 8228134 | SNV | 1 | A | C | Heterozygous |
| NC_037646.1 | 8228345 | SNV | 1 | G | C | Heterozygous |
| NC_037646.1 | 8228350 | SNV | 1 | G | A | Heterozygous |
| NC_037646.1 | 8228355 | SNV | 1 | A | G | Heterozygous |
| NC_037646.1 | 8228358 | SNV | 1 | G | T | Heterozygous |
| NC_037646.1 | 8228363 | SNV | 1 | G | A | Heterozygous |
| NC_037646.1 | 8228368 | SNV | 1 | G | A | Heterozygous |
| NC_037646.1 | 8228370 | SNV | 1 | G | A | Heterozygous |
| NC_037646.1 | 8230860 | SNV | 1 | T | C | Homozygous   |
| NC_037646.1 | 8230964 | SNV | 1 | A | G | Heterozygous |
| NC_037646.1 | 8239847 | SNV | 1 | A | G | Homozygous   |
| NC_037646.1 | 8239851 | SNV | 1 | A | G | Homozygous   |
| NC_037646.1 | 8239872 | SNV | 1 | G | C | Homozygous   |
| NC_037646.1 | 8239874 | SNV | 1 | G | A | Homozygous   |
| NC_037646.1 | 8239878 | SNV | 1 | G | A | Homozygous   |
| NC_037646.1 | 8243860 | SNV | 1 | C | G | Homozygous   |
| NC_037646.1 | 8244733 | SNV | 1 | G | T | Heterozygous |
| NC_037646.1 | 8245004 | SNV | 1 | C | T | Homozygous   |
| NC_037646.1 | 8245339 | SNV | 1 | A | T | Heterozygous |
| NC_037646.1 | 8245347 | SNV | 1 | A | T | Heterozygous |
| NC_037646.1 | 8245409 | SNV | 1 | T | C | Homozygous   |
| NC_037646.1 | 8245460 | SNV | 1 | T | C | Homozygous   |
| NC_037646.1 | 8245471 | SNV | 1 | A | G | Homozygous   |
| NC_037646.1 | 8245595 | SNV | 1 | A | G | Homozygous   |
| NC_037646.1 | 8245687 | SNV | 1 | A | C | Heterozygous |
| NC_037646.1 | 8246805 | SNV | 1 | T | C | Homozygous   |
| NC_037646.1 | 8247280 | SNV | 1 | C | T | Homozygous   |
| NC_037646.1 | 8247664 | SNV | 1 | C | A | Heterozygous |
| NC_037646.1 | 8247859 | SNV | 1 | A | G | Homozygous   |
| NC_037646.1 | 8248009 | SNV | 1 | T | A | Heterozygous |
| NC_037646.1 | 8248899 | SNV | 1 | T | C | Homozygous   |
| NC_037646.1 | 8249855 | SNV | 1 | G | A | Heterozygous |
| NC_037646.1 | 8256900 | SNV | 1 | A | G | Heterozygous |
| NC_037646.1 | 8269927 | SNV | 1 | T | C | Homozygous   |
| NC_037646.1 | 8271647 | SNV | 1 | G | A | Homozygous   |
| NC_037646.1 | 8272058 | SNV | 1 | A | T | Homozygous   |
| NC_037646.1 | 8272124 | SNV | 1 | T | A | Homozygous   |
| NC_037646.1 | 8272659 | SNV | 1 | T | C | Homozygous   |
| NC_037646.1 | 8275889 | SNV | 1 | A | T | Heterozygous |
| NC_037646.1 | 8276111 | SNV | 1 | A | T | Heterozygous |
| NC_037646.1 | 8276120 | SNV | 1 | A | C | Heterozygous |
| NC_037646.1 | 8276123 | SNV | 1 | T | C | Heterozygous |
| NC_037646.1 | 8276156 | SNV | 1 | G | A | Heterozygous |
| NC_037646.1 | 8276163 | SNV | 1 | A | C | Heterozygous |

|             |         |     |   |   |   |              |
|-------------|---------|-----|---|---|---|--------------|
| NC_037646.1 | 8276223 | SNV | 1 | G | A | Heterozygous |
| NC_037646.1 | 8276937 | SNV | 1 | C | T | Heterozygous |
| NC_037646.1 | 8277024 | SNV | 1 | G | A | Homozygous   |
| NC_037646.1 | 8277261 | SNV | 1 | G | T | Heterozygous |
| NC_037646.1 | 8277608 | SNV | 1 | G | A | Homozygous   |
| NC_037646.1 | 8277622 | SNV | 1 | C | T | Homozygous   |
| NC_037646.1 | 8280512 | SNV | 1 | G | A | Homozygous   |
| NC_037646.1 | 8281232 | SNV | 1 | C | T | Heterozygous |
| NC_037646.1 | 8281777 | SNV | 1 | A | T | Homozygous   |
| NC_037646.1 | 8281860 | SNV | 1 | G | A | Heterozygous |
| NC_037646.1 | 8281872 | SNV | 1 | A | G | Homozygous   |
| NC_037646.1 | 8281938 | SNV | 1 | A | G | Homozygous   |
| NC_037646.1 | 8282355 | SNV | 1 | A | G | Homozygous   |
| NC_037646.1 | 8290109 | SNV | 1 | T | C | Homozygous   |
| NC_037646.1 | 8290443 | SNV | 1 | G | A | Heterozygous |
| NC_037646.1 | 8290476 | SNV | 1 | G | A | Homozygous   |
| NC_037646.1 | 8290649 | SNV | 1 | C | T | Homozygous   |
| NC_037646.1 | 8290659 | SNV | 1 | C | T | Heterozygous |
| NC_037646.1 | 8290826 | SNV | 1 | A | G | Heterozygous |
| NC_037646.1 | 8293130 | SNV | 1 | T | C | Homozygous   |
| NC_037646.1 | 8293359 | SNV | 1 | G | A | Homozygous   |
| NC_037646.1 | 8306054 | SNV | 1 | A | C | Homozygous   |
| NC_037646.1 | 8306056 | SNV | 1 | G | A | Homozygous   |
| NC_037646.1 | 8306084 | SNV | 1 | C | A | Homozygous   |
| NC_037646.1 | 8306088 | SNV | 1 | G | A | Homozygous   |
| NC_037646.1 | 8306672 | SNV | 1 | G | A | Homozygous   |
| NC_037646.1 | 8312697 | SNV | 1 | G | A | Heterozygous |
| NC_037646.1 | 8312883 | SNV | 1 | G | A | Heterozygous |
| NC_037646.1 | 8312889 | SNV | 1 | A | G | Heterozygous |
| NC_037646.1 | 8312976 | SNV | 1 | T | G | Homozygous   |
| NC_037646.1 | 8313014 | SNV | 1 | A | G | Homozygous   |
| NC_037646.1 | 8321983 | SNV | 1 | G | A | Heterozygous |
| NC_037646.1 | 8322010 | SNV | 1 | C | A | Heterozygous |
| NC_037646.1 | 8322021 | SNV | 1 | A | G | Heterozygous |
| NC_037646.1 | 8322032 | SNV | 1 | G | A | Heterozygous |
| NC_037646.1 | 8322204 | SNV | 1 | T | C | Homozygous   |
| NC_037646.1 | 8329550 | SNV | 1 | C | T | Heterozygous |
| NC_037646.1 | 8329582 | SNV | 1 | A | G | Homozygous   |
| NC_037646.1 | 8334273 | SNV | 1 | T | C | Heterozygous |
| NC_037646.1 | 8334317 | SNV | 1 | T | C | Homozygous   |
| NC_037646.1 | 8334510 | SNV | 1 | G | A | Homozygous   |
| NC_037646.1 | 8334512 | SNV | 1 | A | G | Homozygous   |
| NC_037646.1 | 8334519 | SNV | 1 | A | G | Homozygous   |
| NC_037646.1 | 8336560 | SNV | 1 | A | G | Homozygous   |
| NC_037646.1 | 8336697 | SNV | 1 | T | C | Homozygous   |
| NC_037646.1 | 8336796 | SNV | 1 | G | A | Heterozygous |
| NC_037646.1 | 8336907 | SNV | 1 | T | C | Heterozygous |
| NC_037646.1 | 8345295 | SNV | 1 | A | G | Homozygous   |
| NC_037646.1 | 8345307 | SNV | 1 | A | T | Homozygous   |
| NC_037646.1 | 8346123 | SNV | 1 | A | G | Homozygous   |
| NC_037646.1 | 8346344 | SNV | 1 | A | G | Homozygous   |

|             |         |     |   |   |   |              |
|-------------|---------|-----|---|---|---|--------------|
| NC_037646.1 | 8346493 | SNV | 1 | C | G | Heterozygous |
| NC_037646.1 | 8347665 | SNV | 1 | A | G | Homozygous   |
| NC_037646.1 | 8347758 | SNV | 1 | T | C | Homozygous   |
| NC_037646.1 | 8349210 | SNV | 1 | A | G | Heterozygous |
| NC_037646.1 | 8349321 | SNV | 1 | C | T | Homozygous   |
| NC_037646.1 | 8349506 | SNV | 1 | T | C | Homozygous   |
| NC_037646.1 | 8349527 | SNV | 1 | C | T | Homozygous   |
| NC_037646.1 | 8349845 | SNV | 1 | T | C | Heterozygous |
| NC_037646.1 | 8350691 | SNV | 1 | C | G | Heterozygous |
| NC_037646.1 | 8350748 | SNV | 1 | T | C | Homozygous   |
| NC_037646.1 | 8350783 | SNV | 1 | A | G | Homozygous   |
| NC_037646.1 | 8350791 | SNV | 1 | C | G | Heterozygous |
| NC_037646.1 | 8350990 | SNV | 1 | T | A | Homozygous   |
| NC_037646.1 | 8351510 | SNV | 1 | T | C | Heterozygous |
| NC_037646.1 | 8351573 | SNV | 1 | C | T | Heterozygous |
| NC_037646.1 | 8360521 | SNV | 1 | T | C | Homozygous   |
| NC_037646.1 | 8362525 | SNV | 1 | T | A | Homozygous   |
| NC_037646.1 | 8366104 | SNV | 1 | A | G | Heterozygous |
| NC_037646.1 | 8369226 | SNV | 1 | T | C | Homozygous   |
| NC_037646.1 | 8370362 | SNV | 1 | A | T | Homozygous   |
| NC_037646.1 | 8370465 | SNV | 1 | G | A | Homozygous   |
| NC_037646.1 | 8371247 | SNV | 1 | A | T | Heterozygous |
| NC_037646.1 | 8371468 | SNV | 1 | T | C | Heterozygous |
| NC_037646.1 | 8371510 | SNV | 1 | G | A | Heterozygous |
| NC_037646.1 | 8372402 | SNV | 1 | A | G | Homozygous   |
| NC_037646.1 | 8372450 | SNV | 1 | T | C | Homozygous   |
| NC_037646.1 | 8372788 | SNV | 1 | G | A | Homozygous   |
| NC_037646.1 | 8373359 | SNV | 1 | T | C | Homozygous   |
| NC_037646.1 | 8386498 | SNV | 1 | G | A | Heterozygous |
| NC_037646.1 | 8386629 | SNV | 1 | G | A | Heterozygous |
| NC_037646.1 | 8389563 | SNV | 1 | A | T | Homozygous   |
| NC_037646.1 | 8389585 | SNV | 1 | T | C | Heterozygous |
| NC_037646.1 | 8389920 | SNV | 1 | A | G | Homozygous   |
| NC_037646.1 | 8390008 | SNV | 1 | A | G | Heterozygous |
| NC_037646.1 | 8390011 | SNV | 1 | C | G | Heterozygous |
| NC_037646.1 | 8390017 | SNV | 1 | C | G | Heterozygous |
| NC_037646.1 | 8392669 | SNV | 1 | A | G | Homozygous   |
| NC_037646.1 | 8392673 | SNV | 1 | A | G | Homozygous   |
| NC_037646.1 | 8392701 | SNV | 1 | T | C | Homozygous   |
| NC_037646.1 | 8392707 | SNV | 1 | A | G | Homozygous   |
| NC_037646.1 | 8398325 | SNV | 1 | T | C | Homozygous   |
| NC_037646.1 | 8398352 | SNV | 1 | G | A | Heterozygous |
| NC_037646.1 | 8398510 | SNV | 1 | A | G | Homozygous   |
| NC_037646.1 | 8398668 | SNV | 1 | C | G | Homozygous   |
| NC_037646.1 | 8398687 | SNV | 1 | C | T | Homozygous   |
| NC_037646.1 | 8398699 | SNV | 1 | T | C | Homozygous   |
| NC_037646.1 | 8402387 | SNV | 1 | G | A | Heterozygous |
| NC_037646.1 | 8402391 | SNV | 1 | C | T | Heterozygous |
| NC_037646.1 | 8404466 | SNV | 1 | A | G | Heterozygous |
| NC_037646.1 | 8404798 | SNV | 1 | A | G | Heterozygous |
| NC_037646.1 | 8407046 | SNV | 1 | C | T | Heterozygous |

|             |         |     |   |   |   |              |
|-------------|---------|-----|---|---|---|--------------|
| NC_037646.1 | 8407121 | SNV | 1 | G | A | Heterozygous |
| NC_037646.1 | 8407124 | SNV | 1 | C | G | Homozygous   |
| NC_037646.1 | 8407126 | SNV | 1 | G | A | Homozygous   |
| NC_037646.1 | 8407133 | SNV | 1 | T | C | Homozygous   |
| NC_037646.1 | 8408603 | SNV | 1 | A | G | Homozygous   |
| NC_037646.1 | 8408683 | SNV | 1 | C | T | Homozygous   |
| NC_037646.1 | 8409401 | SNV | 1 | G | A | Homozygous   |
| NC_037646.1 | 8409408 | SNV | 1 | T | C | Homozygous   |
| NC_037646.1 | 8410105 | SNV | 1 | G | A | Heterozygous |
| NC_037646.1 | 8410189 | SNV | 1 | T | C | Heterozygous |
| NC_037646.1 | 8410243 | SNV | 1 | A | G | Heterozygous |
| NC_037646.1 | 8415942 | SNV | 1 | C | T | Homozygous   |
| NC_037646.1 | 8415993 | SNV | 1 | A | G | Heterozygous |
| NC_037646.1 | 8415997 | SNV | 1 | A | G | Heterozygous |
| NC_037646.1 | 8416044 | SNV | 1 | C | T | Homozygous   |
| NC_037646.1 | 8416224 | SNV | 1 | G | A | Homozygous   |
| NC_037646.1 | 8416288 | SNV | 1 | A | G | Homozygous   |
| NC_037646.1 | 8419715 | SNV | 1 | C | T | Homozygous   |
| NC_037646.1 | 8420055 | SNV | 1 | G | A | Homozygous   |
| NC_037646.1 | 8420311 | SNV | 1 | T | C | Homozygous   |
| NC_037646.1 | 8420323 | SNV | 1 | C | T | Heterozygous |
| NC_037646.1 | 8433566 | SNV | 1 | A | G | Heterozygous |
| NC_037646.1 | 8440080 | SNV | 1 | G | A | Heterozygous |
| NC_037646.1 | 8440225 | SNV | 1 | G | A | Heterozygous |
| NC_037646.1 | 8440249 | SNV | 1 | G | A | Heterozygous |
| NC_037646.1 | 8441220 | SNV | 1 | C | T | Homozygous   |
| NC_037646.1 | 8441254 | SNV | 1 | T | C | Heterozygous |
| NC_037646.1 | 8441295 | SNV | 1 | A | C | Homozygous   |
| NC_037646.1 | 8441315 | SNV | 1 | A | G | Heterozygous |
| NC_037646.1 | 8441374 | SNV | 1 | A | G | Heterozygous |
| NC_037646.1 | 8445808 | SNV | 1 | A | G | Homozygous   |
| NC_037646.1 | 8445989 | SNV | 1 | C | T | Homozygous   |
| NC_037646.1 | 8446008 | SNV | 1 | T | G | Homozygous   |
| NC_037646.1 | 8446020 | SNV | 1 | A | G | Heterozygous |
| NC_037646.1 | 8446024 | SNV | 1 | A | G | Heterozygous |
| NC_037646.1 | 8446157 | SNV | 1 | T | C | Homozygous   |
| NC_037646.1 | 8449590 | SNV | 1 | A | G | Homozygous   |
| NC_037646.1 | 8449672 | SNV | 1 | C | T | Homozygous   |
| NC_037646.1 | 8449674 | SNV | 1 | T | C | Homozygous   |
| NC_037646.1 | 8449683 | SNV | 1 | A | G | Homozygous   |
| NC_037646.1 | 8450227 | SNV | 1 | G | A | Heterozygous |
| NC_037646.1 | 8450230 | SNV | 1 | A | G | Heterozygous |
| NC_037646.1 | 8450283 | SNV | 1 | G | A | Homozygous   |
| NC_037646.1 | 8450445 | SNV | 1 | T | C | Homozygous   |
| NC_037646.1 | 8450592 | SNV | 1 | T | C | Heterozygous |
| NC_037646.1 | 8450597 | SNV | 1 | C | T | Heterozygous |
| NC_037646.1 | 8450628 | SNV | 1 | T | G | Heterozygous |
| NC_037646.1 | 8450726 | SNV | 1 | A | G | Homozygous   |
| NC_037646.1 | 8450787 | SNV | 1 | T | C | Heterozygous |
| NC_037646.1 | 8450823 | SNV | 1 | T | A | Heterozygous |
| NC_037646.1 | 8450864 | SNV | 1 | T | C | Heterozygous |



|             |         |     |   |   |   |              |
|-------------|---------|-----|---|---|---|--------------|
| NC_037646.1 | 8450931 | SNV | 1 | T | C | Homozygous   |
| NC_037646.1 | 8450947 | SNV | 1 | A | C | Homozygous   |
| NC_037646.1 | 8451289 | SNV | 1 | A | G | Homozygous   |
| NC_037646.1 | 8451317 | SNV | 1 | C | T | Homozygous   |
| NC_037646.1 | 8451331 | SNV | 1 | G | A | Homozygous   |
| NC_037646.1 | 8451333 | SNV | 1 | A | G | Homozygous   |
| NC_037646.1 | 8451371 | SNV | 1 | G | A | Heterozygous |
| NC_037646.1 | 8451434 | SNV | 1 | A | G | Heterozygous |
| NC_037646.1 | 8451515 | SNV | 1 | G | A | Heterozygous |
| NC_037646.1 | 8452939 | SNV | 1 | A | G | Homozygous   |
| NC_037646.1 | 8452969 | SNV | 1 | T | C | Heterozygous |
| NC_037646.1 | 8453397 | SNV | 1 | G | A | Heterozygous |
| NC_037646.1 | 8454012 | SNV | 1 | A | G | Homozygous   |
| NC_037646.1 | 8454237 | SNV | 1 | C | T | Heterozygous |
| NC_037646.1 | 8454283 | SNV | 1 | C | T | Heterozygous |
| NC_037646.1 | 8454423 | SNV | 1 | T | C | Heterozygous |
| NC_037646.1 | 8460217 | SNV | 1 | T | C | Homozygous   |
| NC_037646.1 | 8460229 | SNV | 1 | A | G | Homozygous   |
| NC_037646.1 | 8463328 | SNV | 1 | A | G | Heterozygous |
| NC_037646.1 | 8486293 | SNV | 1 | C | A | Homozygous   |
| NC_037646.1 | 8491658 | SNV | 1 | T | C | Homozygous   |
| NC_037646.1 | 8492877 | SNV | 1 | T | C | Homozygous   |
| NC_037646.1 | 8493381 | SNV | 1 | A | G | Homozygous   |
| NC_037646.1 | 8495361 | SNV | 1 | T | C | Heterozygous |
| NC_037646.1 | 8495380 | SNV | 1 | A | G | Homozygous   |
| NC_037646.1 | 8497720 | SNV | 1 | G | T | Homozygous   |
| NC_037646.1 | 8497738 | SNV | 1 | C | T | Homozygous   |
| NC_037646.1 | 8497765 | SNV | 1 | G | A | Homozygous   |
| NC_037646.1 | 8499013 | SNV | 1 | C | A | Heterozygous |
| NC_037646.1 | 8542380 | SNV | 1 | T | C | Homozygous   |
| NC_037646.1 | 8542656 | SNV | 1 | T | C | Homozygous   |
| NC_037646.1 | 8543071 | SNV | 1 | C | T | Heterozygous |
| NC_037646.1 | 8544724 | SNV | 1 | A | C | Heterozygous |
| NC_037646.1 | 8544743 | SNV | 1 | T | C | Homozygous   |
| NC_037646.1 | 8544773 | SNV | 1 | A | G | Homozygous   |
| NC_037646.1 | 8544843 | SNV | 1 | C | T | Heterozygous |
| NC_037646.1 | 8545039 | SNV | 1 | C | T | Homozygous   |
| NC_037646.1 | 8545314 | SNV | 1 | A | G | Homozygous   |
| NC_037646.1 | 8545347 | SNV | 1 | A | G | Homozygous   |
| NC_037646.1 | 8545362 | SNV | 1 | G | A | Heterozygous |
| NC_037646.1 | 8545379 | SNV | 1 | A | G | Homozygous   |
| NC_037646.1 | 8545392 | SNV | 1 | T | C | Homozygous   |
| NC_037646.1 | 8546050 | SNV | 1 | T | C | Homozygous   |
| NC_037646.1 | 8546325 | SNV | 1 | A | G | Homozygous   |
| NC_037646.1 | 8546367 | SNV | 1 | G | C | Homozygous   |
| NC_037646.1 | 8546704 | SNV | 1 | A | G | Homozygous   |
| NC_037646.1 | 8546707 | SNV | 1 | C | T | Heterozygous |
| NC_037646.1 | 8546716 | SNV | 1 | C | G | Homozygous   |
| NC_037646.1 | 8546725 | SNV | 1 | T | C | Homozygous   |
| NC_037646.1 | 8553077 | SNV | 1 | C | G | Heterozygous |
| NC_037646.1 | 8553208 | SNV | 1 | A | G | Heterozygous |

|             |         |     |   |   |   |              |
|-------------|---------|-----|---|---|---|--------------|
| NC_037646.1 | 8553948 | SNV | 1 | A | G | Heterozygous |
| NC_037646.1 | 8553954 | SNV | 1 | G | A | Heterozygous |
| NC_037646.1 | 8554047 | SNV | 1 | T | C | Homozygous   |
| NC_037646.1 | 8554049 | SNV | 1 | G | C | Heterozygous |
| NC_037646.1 | 8554477 | SNV | 1 | T | G | Heterozygous |
| NC_037646.1 | 8554788 | SNV | 1 | A | G | Homozygous   |
| NC_037646.1 | 8562929 | SNV | 1 | A | T | Heterozygous |
| NC_037646.1 | 8566191 | SNV | 1 | G | A | Heterozygous |
| NC_037646.1 | 8566266 | SNV | 1 | C | T | Heterozygous |
| NC_037646.1 | 8566742 | SNV | 1 | A | G | Homozygous   |
| NC_037646.1 | 8570570 | SNV | 1 | A | T | Heterozygous |
| NC_037646.1 | 8573925 | SNV | 1 | A | G | Homozygous   |
| NC_037646.1 | 8573929 | SNV | 1 | G | A | Homozygous   |
| NC_037646.1 | 8573981 | SNV | 1 | G | A | Homozygous   |
| NC_037646.1 | 8573984 | SNV | 1 | T | A | Homozygous   |
| NC_037646.1 | 8574371 | SNV | 1 | A | G | Homozygous   |
| NC_037646.1 | 8574835 | SNV | 1 | G | A | Heterozygous |
| NC_037646.1 | 8575631 | SNV | 1 | T | C | Heterozygous |
| NC_037646.1 | 8575636 | SNV | 1 | T | C | Heterozygous |
| NC_037646.1 | 8575643 | SNV | 1 | T | C | Homozygous   |
| NC_037646.1 | 8575645 | SNV | 1 | T | C | Homozygous   |
| NC_037646.1 | 8575708 | SNV | 1 | C | T | Homozygous   |
| NC_037646.1 | 8577152 | SNV | 1 | C | T | Heterozygous |
| NC_037646.1 | 8577184 | SNV | 1 | T | C | Homozygous   |
| NC_037646.1 | 8577273 | SNV | 1 | A | T | Heterozygous |
| NC_037646.1 | 8577376 | SNV | 1 | A | T | Heterozygous |
| NC_037646.1 | 8577487 | SNV | 1 | T | C | Heterozygous |
| NC_037646.1 | 8577523 | SNV | 1 | G | A | Heterozygous |
| NC_037646.1 | 8577602 | SNV | 1 | T | C | Homozygous   |
| NC_037646.1 | 8577645 | SNV | 1 | C | T | Heterozygous |
| NC_037646.1 | 8578181 | SNV | 1 | C | T | Heterozygous |
| NC_037646.1 | 8578303 | SNV | 1 | G | A | Homozygous   |
| NC_037646.1 | 8578370 | SNV | 1 | A | G | Homozygous   |
| NC_037646.1 | 8578516 | SNV | 1 | T | C | Homozygous   |
| NC_037646.1 | 8578672 | SNV | 1 | A | G | Homozygous   |
| NC_037646.1 | 8578691 | SNV | 1 | C | T | Homozygous   |
| NC_037646.1 | 8579285 | SNV | 1 | A | G | Heterozygous |
| NC_037646.1 | 8579699 | SNV | 1 | T | C | Homozygous   |
| NC_037646.1 | 8579900 | SNV | 1 | C | T | Heterozygous |
| NC_037646.1 | 8579946 | SNV | 1 | T | C | Homozygous   |
| NC_037646.1 | 8579998 | SNV | 1 | G | C | Heterozygous |
| NC_037646.1 | 8580049 | SNV | 1 | G | A | Heterozygous |
| NC_037646.1 | 8580069 | SNV | 1 | C | T | Homozygous   |
| NC_037646.1 | 8580138 | SNV | 1 | G | A | Heterozygous |
| NC_037646.1 | 8580256 | SNV | 1 | G | C | Heterozygous |
| NC_037646.1 | 8580279 | SNV | 1 | T | C | Homozygous   |
| NC_037646.1 | 8580502 | SNV | 1 | A | G | Homozygous   |
| NC_037646.1 | 8580518 | SNV | 1 | C | A | Homozygous   |
| NC_037646.1 | 8580577 | SNV | 1 | G | C | Homozygous   |
| NC_037646.1 | 8580586 | SNV | 1 | G | A | Heterozygous |
| NC_037646.1 | 8580881 | SNV | 1 | C | T | Homozygous   |

|             |         |     |   |   |   |              |
|-------------|---------|-----|---|---|---|--------------|
| NC_037646.1 | 8580975 | SNV | 1 | G | A | Homozygous   |
| NC_037646.1 | 8581030 | SNV | 1 | G | A | Homozygous   |
| NC_037646.1 | 8581479 | SNV | 1 | T | C | Homozygous   |
| NC_037646.1 | 8581485 | SNV | 1 | G | T | Homozygous   |
| NC_037646.1 | 8581527 | SNV | 1 | C | A | Heterozygous |
| NC_037646.1 | 8581724 | SNV | 1 | A | C | Homozygous   |
| NC_037646.1 | 8581842 | SNV | 1 | G | A | Heterozygous |
| NC_037646.1 | 8581877 | SNV | 1 | C | T | Heterozygous |
| NC_037646.1 | 8582005 | SNV | 1 | T | C | Heterozygous |
| NC_037646.1 | 8582013 | SNV | 1 | C | T | Homozygous   |
| NC_037646.1 | 8582019 | SNV | 1 | T | C | Heterozygous |
| NC_037646.1 | 8582487 | SNV | 1 | G | C | Heterozygous |
| NC_037646.1 | 8582499 | SNV | 1 | T | C | Heterozygous |
| NC_037646.1 | 8582604 | SNV | 1 | C | T | Heterozygous |
| NC_037646.1 | 8582615 | SNV | 1 | T | C | Homozygous   |
| NC_037646.1 | 8582675 | SNV | 1 | T | A | Heterozygous |
| NC_037646.1 | 8582936 | SNV | 1 | C | G | Heterozygous |
| NC_037646.1 | 8582984 | SNV | 1 | G | A | Homozygous   |
| NC_037646.1 | 8584542 | SNV | 1 | G | A | Homozygous   |
| NC_037646.1 | 8584551 | SNV | 1 | A | G | Heterozygous |
| NC_037646.1 | 8585243 | SNV | 1 | T | C | Homozygous   |
| NC_037646.1 | 8585258 | SNV | 1 | C | T | Heterozygous |
| NC_037646.1 | 8585311 | SNV | 1 | A | G | Heterozygous |
| NC_037646.1 | 8585406 | SNV | 1 | C | G | Heterozygous |
| NC_037646.1 | 8585913 | SNV | 1 | A | G | Homozygous   |
| NC_037646.1 | 8585915 | SNV | 1 | T | C | Homozygous   |
| NC_037646.1 | 8585976 | SNV | 1 | A | G | Heterozygous |
| NC_037646.1 | 8586118 | SNV | 1 | C | G | Heterozygous |
| NC_037646.1 | 8586123 | SNV | 1 | A | G | Heterozygous |
| NC_037646.1 | 8586126 | SNV | 1 | T | G | Heterozygous |
| NC_037646.1 | 8586130 | SNV | 1 | A | G | Heterozygous |
| NC_037646.1 | 8586136 | SNV | 1 | A | G | Heterozygous |
| NC_037646.1 | 8586141 | SNV | 1 | A | C | Heterozygous |
| NC_037646.1 | 8586144 | SNV | 1 | A | G | Heterozygous |
| NC_037646.1 | 8586308 | SNV | 1 | T | C | Homozygous   |
| NC_037646.1 | 8586402 | SNV | 1 | A | G | Heterozygous |
| NC_037646.1 | 8586442 | SNV | 1 | A | G | Heterozygous |
| NC_037646.1 | 8586448 | SNV | 1 | A | G | Heterozygous |
| NC_037646.1 | 8586450 | SNV | 1 | A | G | Heterozygous |
| NC_037646.1 | 8586454 | SNV | 1 | A | G | Heterozygous |
| NC_037646.1 | 8586467 | SNV | 1 | A | G | Homozygous   |
| NC_037646.1 | 8586471 | SNV | 1 | A | G | Heterozygous |
| NC_037646.1 | 8586490 | SNV | 1 | A | G | Heterozygous |
| NC_037646.1 | 8586928 | SNV | 1 | G | A | Heterozygous |
| NC_037646.1 | 8587137 | SNV | 1 | A | G | Homozygous   |
| NC_037646.1 | 8587146 | SNV | 1 | T | C | Homozygous   |
| NC_037646.1 | 8587149 | SNV | 1 | T | C | Homozygous   |
| NC_037646.1 | 8587162 | SNV | 1 | T | C | Homozygous   |
| NC_037646.1 | 8587178 | SNV | 1 | C | T | Homozygous   |
| NC_037646.1 | 8587405 | SNV | 1 | T | G | Homozygous   |
| NC_037646.1 | 8587520 | SNV | 1 | A | G | Heterozygous |

|             |         |     |   |   |   |              |
|-------------|---------|-----|---|---|---|--------------|
| NC_037646.1 | 8587753 | SNV | 1 | A | G | Homozygous   |
| NC_037646.1 | 8587914 | SNV | 1 | A | G | Homozygous   |
| NC_037646.1 | 8587921 | SNV | 1 | T | C | Homozygous   |
| NC_037646.1 | 8587941 | SNV | 1 | T | C | Homozygous   |
| NC_037646.1 | 8587964 | SNV | 1 | T | C | Homozygous   |
| NC_037646.1 | 8587987 | SNV | 1 | C | T | Homozygous   |
| NC_037646.1 | 8587995 | SNV | 1 | G | A | Homozygous   |
| NC_037646.1 | 8588338 | SNV | 1 | C | G | Homozygous   |
| NC_037646.1 | 8588402 | SNV | 1 | A | G | Homozygous   |
| NC_037646.1 | 8588482 | SNV | 1 | T | C | Homozygous   |
| NC_037646.1 | 8588640 | SNV | 1 | C | G | Heterozygous |
| NC_037646.1 | 8588758 | SNV | 1 | C | T | Homozygous   |
| NC_037646.1 | 8588857 | SNV | 1 | G | A | Heterozygous |
| NC_037646.1 | 8588901 | SNV | 1 | C | T | Heterozygous |
| NC_037646.1 | 8588961 | SNV | 1 | C | T | Heterozygous |
| NC_037646.1 | 8588977 | SNV | 1 | T | C | Homozygous   |
| NC_037646.1 | 8589229 | SNV | 1 | G | A | Heterozygous |
| NC_037646.1 | 8589289 | SNV | 1 | T | C | Heterozygous |
| NC_037646.1 | 8589539 | SNV | 1 | T | C | Homozygous   |
| NC_037646.1 | 8589857 | SNV | 1 | T | C | Homozygous   |
| NC_037646.1 | 8589937 | SNV | 1 | A | G | Homozygous   |
| NC_037646.1 | 8589941 | SNV | 1 | A | T | Heterozygous |
| NC_037646.1 | 8590506 | SNV | 1 | C | T | Heterozygous |
| NC_037646.1 | 8590884 | SNV | 1 | T | C | Heterozygous |
| NC_037646.1 | 8591515 | SNV | 1 | T | C | Homozygous   |
| NC_037646.1 | 8591538 | SNV | 1 | A | G | Homozygous   |
| NC_037646.1 | 8591566 | SNV | 1 | T | C | Homozygous   |
| NC_037646.1 | 8591611 | SNV | 1 | T | C | Homozygous   |
| NC_037646.1 | 8591618 | SNV | 1 | G | A | Homozygous   |
| NC_037646.1 | 8591664 | SNV | 1 | T | C | Homozygous   |
| NC_037646.1 | 8591871 | SNV | 1 | T | C | Homozygous   |
| NC_037646.1 | 8592243 | SNV | 1 | G | A | Homozygous   |
| NC_037646.1 | 8592247 | SNV | 1 | T | C | Heterozygous |
| NC_037646.1 | 8592259 | SNV | 1 | A | G | Heterozygous |
| NC_037646.1 | 8592553 | SNV | 1 | C | A | Heterozygous |
| NC_037646.1 | 8592567 | SNV | 1 | C | A | Heterozygous |
| NC_037646.1 | 8592573 | SNV | 1 | T | C | Homozygous   |
| NC_037646.1 | 8592587 | SNV | 1 | T | C | Homozygous   |
| NC_037646.1 | 8592908 | SNV | 1 | A | G | Homozygous   |
| NC_037646.1 | 8592913 | SNV | 1 | T | C | Homozygous   |
| NC_037646.1 | 8592921 | SNV | 1 | G | A | Homozygous   |
| NC_037646.1 | 8594899 | SNV | 1 | T | C | Homozygous   |
| NC_037646.1 | 8596322 | SNV | 1 | T | C | Homozygous   |
| NC_037646.1 | 8598549 | SNV | 1 | C | A | Homozygous   |
| NC_037646.1 | 8599686 | SNV | 1 | C | T | Homozygous   |
| NC_037646.1 | 8600003 | SNV | 1 | G | A | Heterozygous |
| NC_037646.1 | 8600327 | SNV | 1 | T | C | Homozygous   |
| NC_037646.1 | 8600488 | SNV | 1 | A | G | Homozygous   |
| NC_037646.1 | 8600575 | SNV | 1 | G | A | Heterozygous |
| NC_037646.1 | 8600782 | SNV | 1 | C | T | Heterozygous |
| NC_037646.1 | 8600886 | SNV | 1 | T | C | Homozygous   |

|             |         |     |   |   |   |              |
|-------------|---------|-----|---|---|---|--------------|
| NC_037646.1 | 8600943 | SNV | 1 | A | G | Homozygous   |
| NC_037646.1 | 8600952 | SNV | 1 | C | G | Homozygous   |
| NC_037646.1 | 8602473 | SNV | 1 | C | G | Heterozygous |
| NC_037646.1 | 8603643 | SNV | 1 | C | A | Homozygous   |
| NC_037646.1 | 8603657 | SNV | 1 | T | C | Heterozygous |
| NC_037646.1 | 8603664 | SNV | 1 | T | G | Heterozygous |
| NC_037646.1 | 8603726 | SNV | 1 | T | C | Homozygous   |
| NC_037646.1 | 8604848 | SNV | 1 | A | G | Homozygous   |
| NC_037646.1 | 8605037 | SNV | 1 | G | A | Homozygous   |
| NC_037646.1 | 8605438 | SNV | 1 | C | A | Homozygous   |
| NC_037646.1 | 8605971 | SNV | 1 | A | C | Homozygous   |
| NC_037646.1 | 8605974 | SNV | 1 | C | G | Homozygous   |
| NC_037646.1 | 8606156 | SNV | 1 | T | A | Homozygous   |
| NC_037646.1 | 8606228 | SNV | 1 | A | G | Homozygous   |
| NC_037646.1 | 8607253 | SNV | 1 | G | A | Heterozygous |
| NC_037646.1 | 8607264 | SNV | 1 | G | A | Homozygous   |
| NC_037646.1 | 8607298 | SNV | 1 | A | G | Homozygous   |
| NC_037646.1 | 8607313 | SNV | 1 | A | G | Homozygous   |
| NC_037646.1 | 8607862 | SNV | 1 | C | G | Heterozygous |
| NC_037646.1 | 8607901 | SNV | 1 | C | T | Homozygous   |
| NC_037646.1 | 8608125 | SNV | 1 | T | A | Homozygous   |
| NC_037646.1 | 8608128 | SNV | 1 | T | G | Homozygous   |
| NC_037646.1 | 8608411 | SNV | 1 | T | C | Homozygous   |
| NC_037646.1 | 8608582 | SNV | 1 | C | T | Heterozygous |
| NC_037646.1 | 8608676 | SNV | 1 | G | A | Homozygous   |
| NC_037646.1 | 8609339 | SNV | 1 | G | A | Homozygous   |
| NC_037646.1 | 8609956 | SNV | 1 | C | T | Heterozygous |
| NC_037646.1 | 8609977 | SNV | 1 | T | C | Heterozygous |
| NC_037646.1 | 8609980 | SNV | 1 | T | C | Homozygous   |
| NC_037646.1 | 8610031 | SNV | 1 | G | A | Heterozygous |
| NC_037646.1 | 8610081 | SNV | 1 | C | G | Heterozygous |
| NC_037646.1 | 8610083 | SNV | 1 | G | A | Heterozygous |
| NC_037646.1 | 8610085 | SNV | 1 | A | T | Heterozygous |
| NC_037646.1 | 8610150 | SNV | 1 | A | G | Heterozygous |
| NC_037646.1 | 8610250 | SNV | 1 | C | T | Homozygous   |
| NC_037646.1 | 8610327 | SNV | 1 | G | A | Homozygous   |
| NC_037646.1 | 8610342 | SNV | 1 | A | G | Heterozygous |
| NC_037646.1 | 8610373 | SNV | 1 | G | A | Homozygous   |
| NC_037646.1 | 8610504 | SNV | 1 | G | A | Heterozygous |
| NC_037646.1 | 8610506 | SNV | 1 | A | G | Homozygous   |
| NC_037646.1 | 8610510 | SNV | 1 | T | C | Heterozygous |
| NC_037646.1 | 8610728 | SNV | 1 | C | T | Heterozygous |
| NC_037646.1 | 8610751 | SNV | 1 | T | C | Homozygous   |
| NC_037646.1 | 8610768 | SNV | 1 | G | A | Homozygous   |
| NC_037646.1 | 8610923 | SNV | 1 | T | A | Homozygous   |
| NC_037646.1 | 8610927 | SNV | 1 | A | G | Homozygous   |
| NC_037646.1 | 8611282 | SNV | 1 | A | G | Homozygous   |
| NC_037646.1 | 8611312 | SNV | 1 | G | A | Heterozygous |
| NC_037646.1 | 8611328 | SNV | 1 | T | C | Homozygous   |
| NC_037646.1 | 8611866 | SNV | 1 | A | G | Homozygous   |
| NC_037646.1 | 8612137 | SNV | 1 | G | A | Homozygous   |

|             |         |     |   |   |   |              |
|-------------|---------|-----|---|---|---|--------------|
| NC_037646.1 | 8612497 | SNV | 1 | G | A | Homozygous   |
| NC_037646.1 | 8612867 | SNV | 1 | A | G | Homozygous   |
| NC_037646.1 | 8613090 | SNV | 1 | A | G | Homozygous   |
| NC_037646.1 | 8613103 | SNV | 1 | G | A | Heterozygous |
| NC_037646.1 | 8613224 | SNV | 1 | G | A | Homozygous   |
| NC_037646.1 | 8613245 | SNV | 1 | C | G | Homozygous   |
| NC_037646.1 | 8613262 | SNV | 1 | C | A | Homozygous   |
| NC_037646.1 | 8613402 | SNV | 1 | T | C | Heterozygous |
| NC_037646.1 | 8613435 | SNV | 1 | A | G | Homozygous   |
| NC_037646.1 | 8613439 | SNV | 1 | A | G | Homozygous   |
| NC_037646.1 | 8613553 | SNV | 1 | T | G | Heterozygous |
| NC_037646.1 | 8613562 | SNV | 1 | A | G | Heterozygous |
| NC_037646.1 | 8613674 | SNV | 1 | G | A | Heterozygous |
| NC_037646.1 | 8613746 | SNV | 1 | A | G | Homozygous   |
| NC_037646.1 | 8614148 | SNV | 1 | A | G | Homozygous   |
| NC_037646.1 | 8614195 | SNV | 1 | G | A | Heterozygous |
| NC_037646.1 | 8614203 | SNV | 1 | T | C | Homozygous   |
| NC_037646.1 | 8614330 | SNV | 1 | A | G | Homozygous   |
| NC_037646.1 | 8614344 | SNV | 1 | G | A | Heterozygous |
| NC_037646.1 | 8614358 | SNV | 1 | C | T | Heterozygous |
| NC_037646.1 | 8614380 | SNV | 1 | C | T | Homozygous   |
| NC_037646.1 | 8614457 | SNV | 1 | A | G | Homozygous   |
| NC_037646.1 | 8614497 | SNV | 1 | C | T | Homozygous   |
| NC_037646.1 | 8614936 | SNV | 1 | A | G | Heterozygous |
| NC_037646.1 | 8614995 | SNV | 1 | A | G | Homozygous   |
| NC_037646.1 | 8615160 | SNV | 1 | G | A | Homozygous   |
| NC_037646.1 | 8615495 | SNV | 1 | T | C | Homozygous   |
| NC_037646.1 | 8615504 | SNV | 1 | C | T | Homozygous   |
| NC_037646.1 | 8615623 | SNV | 1 | C | T | Heterozygous |
| NC_037646.1 | 8615783 | SNV | 1 | A | G | Homozygous   |
| NC_037646.1 | 8616725 | SNV | 1 | G | A | Homozygous   |
| NC_037646.1 | 8616753 | SNV | 1 | G | A | Heterozygous |
| NC_037646.1 | 8616810 | SNV | 1 | T | C | Homozygous   |
| NC_037646.1 | 8616843 | SNV | 1 | A | G | Heterozygous |
| NC_037646.1 | 8616929 | SNV | 1 | G | C | Heterozygous |
| NC_037646.1 | 8616965 | SNV | 1 | A | G | Homozygous   |
| NC_037646.1 | 8617220 | SNV | 1 | G | A | Heterozygous |
| NC_037646.1 | 8617302 | SNV | 1 | T | C | Heterozygous |
| NC_037646.1 | 8617385 | SNV | 1 | A | G | Heterozygous |
| NC_037646.1 | 8617424 | SNV | 1 | A | G | Heterozygous |
| NC_037646.1 | 8617463 | SNV | 1 | T | A | Heterozygous |
| NC_037646.1 | 8617469 | SNV | 1 | T | A | Heterozygous |
| NC_037646.1 | 8617877 | SNV | 1 | G | A | Heterozygous |
| NC_037646.1 | 8617908 | SNV | 1 | T | C | Homozygous   |
| NC_037646.1 | 8625611 | SNV | 1 | C | T | Homozygous   |
| NC_037646.1 | 8626582 | SNV | 1 | T | C | Homozygous   |
| NC_037646.1 | 8626601 | SNV | 1 | G | A | Homozygous   |
| NC_037646.1 | 8626651 | SNV | 1 | A | C | Heterozygous |
| NC_037646.1 | 8626998 | SNV | 1 | C | G | Homozygous   |
| NC_037646.1 | 8629880 | SNV | 1 | T | C | Heterozygous |
| NC_037646.1 | 8629922 | SNV | 1 | G | A | Heterozygous |

|             |         |     |   |   |   |              |
|-------------|---------|-----|---|---|---|--------------|
| NC_037646.1 | 8629951 | SNV | 1 | C | T | Heterozygous |
| NC_037646.1 | 8631254 | SNV | 1 | G | A | Homozygous   |
| NC_037646.1 | 8631266 | SNV | 1 | A | G | Homozygous   |
| NC_037646.1 | 8631270 | SNV | 1 | T | C | Homozygous   |
| NC_037646.1 | 8631908 | SNV | 1 | A | G | Homozygous   |
| NC_037646.1 | 8632965 | SNV | 1 | C | T | Heterozygous |
| NC_037646.1 | 8639165 | SNV | 1 | G | A | Homozygous   |
| NC_037646.1 | 8639826 | SNV | 1 | A | G | Homozygous   |
| NC_037646.1 | 8647716 | SNV | 1 | G | A | Homozygous   |
| NC_037646.1 | 8648676 | SNV | 1 | A | G | Homozygous   |
| NC_037646.1 | 8648994 | SNV | 1 | T | C | Homozygous   |
| NC_037646.1 | 8650069 | SNV | 1 | G | A | Homozygous   |
| NC_037646.1 | 8650165 | SNV | 1 | T | C | Homozygous   |
| NC_037646.1 | 8650389 | SNV | 1 | A | G | Homozygous   |
| NC_037646.1 | 8650419 | SNV | 1 | A | G | Homozygous   |
| NC_037646.1 | 8650722 | SNV | 1 | T | C | Homozygous   |
| NC_037646.1 | 8650771 | SNV | 1 | C | T | Homozygous   |
| NC_037646.1 | 8651090 | SNV | 1 | T | C | Homozygous   |
| NC_037646.1 | 8651312 | SNV | 1 | A | G | Homozygous   |
| NC_037646.1 | 8651415 | SNV | 1 | T | C | Heterozygous |
| NC_037646.1 | 8651490 | SNV | 1 | T | C | Heterozygous |
| NC_037646.1 | 8651502 | SNV | 1 | T | C | Heterozygous |
| NC_037646.1 | 8655969 | SNV | 1 | G | C | Homozygous   |
| NC_037646.1 | 8656359 | SNV | 1 | T | C | Homozygous   |
| NC_037646.1 | 8656440 | SNV | 1 | C | T | Homozygous   |
| NC_037646.1 | 8656548 | SNV | 1 | G | A | Homozygous   |
| NC_037646.1 | 8657008 | SNV | 1 | A | G | Heterozygous |
| NC_037646.1 | 8657011 | SNV | 1 | A | G | Homozygous   |
| NC_037646.1 | 8657352 | SNV | 1 | C | G | Homozygous   |
| NC_037646.1 | 8657580 | SNV | 1 | T | G | Homozygous   |
| NC_037646.1 | 8657587 | SNV | 1 | G | A | Homozygous   |
| NC_037646.1 | 8658537 | SNV | 1 | C | T | Homozygous   |
| NC_037646.1 | 8658756 | SNV | 1 | G | A | Homozygous   |
| NC_037646.1 | 8658926 | SNV | 1 | G | A | Heterozygous |
| NC_037646.1 | 8659387 | SNV | 1 | A | G | Heterozygous |
| NC_037646.1 | 8659392 | SNV | 1 | T | C | Heterozygous |
| NC_037646.1 | 8659394 | SNV | 1 | T | A | Heterozygous |
| NC_037646.1 | 8659400 | SNV | 1 | A | C | Heterozygous |
| NC_037646.1 | 8659414 | SNV | 1 | A | T | Heterozygous |
| NC_037646.1 | 8659419 | SNV | 1 | A | T | Heterozygous |
| NC_037646.1 | 8659955 | SNV | 1 | A | G | Homozygous   |
| NC_037646.1 | 8660034 | SNV | 1 | A | G | Homozygous   |
| NC_037646.1 | 8666437 | SNV | 1 | T | A | Homozygous   |
| NC_037646.1 | 8666439 | SNV | 1 | A | C | Homozygous   |
| NC_037646.1 | 8672701 | SNV | 1 | C | T | Homozygous   |
| NC_037646.1 | 8672725 | SNV | 1 | T | A | Homozygous   |
| NC_037646.1 | 8672745 | SNV | 1 | A | T | Homozygous   |
| NC_037646.1 | 8672747 | SNV | 1 | A | T | Homozygous   |
| NC_037646.1 | 8672843 | SNV | 1 | C | A | Homozygous   |
| NC_037646.1 | 8673371 | SNV | 1 | A | G | Homozygous   |
| NC_037646.1 | 8690263 | SNV | 1 | A | C | Heterozygous |

|             |         |     |   |   |   |              |
|-------------|---------|-----|---|---|---|--------------|
| NC_037646.1 | 8699379 | SNV | 1 | G | C | Heterozygous |
| NC_037646.1 | 8700878 | SNV | 1 | T | C | Homozygous   |
| NC_037646.1 | 8709419 | SNV | 1 | G | A | Homozygous   |
| NC_037646.1 | 8709422 | SNV | 1 | A | T | Homozygous   |
| NC_037646.1 | 8709464 | SNV | 1 | A | T | Homozygous   |
| NC_037646.1 | 8723281 | SNV | 1 | A | G | Homozygous   |
| NC_037646.1 | 8723284 | SNV | 1 | T | C | Homozygous   |
| NC_037646.1 | 8723315 | SNV | 1 | A | G | Homozygous   |
| NC_037646.1 | 8724435 | SNV | 1 | C | T | Homozygous   |
| NC_037646.1 | 8725392 | SNV | 1 | T | A | Heterozygous |
| NC_037646.1 | 8726344 | SNV | 1 | A | C | Heterozygous |
| NC_037646.1 | 8731908 | SNV | 1 | C | T | Homozygous   |
| NC_037646.1 | 8732038 | SNV | 1 | A | G | Heterozygous |
| NC_037646.1 | 8732077 | SNV | 1 | T | C | Heterozygous |
| NC_037646.1 | 8732149 | SNV | 1 | G | A | Heterozygous |
| NC_037646.1 | 8732196 | SNV | 1 | A | G | Homozygous   |
| NC_037646.1 | 8732267 | SNV | 1 | A | C | Heterozygous |
| NC_037646.1 | 8732293 | SNV | 1 | G | A | Heterozygous |
| NC_037646.1 | 8732296 | SNV | 1 | C | T | Heterozygous |
| NC_037646.1 | 8732307 | SNV | 1 | C | T | Homozygous   |
| NC_037646.1 | 8732309 | SNV | 1 | A | G | Homozygous   |
| NC_037646.1 | 8732418 | SNV | 1 | G | A | Homozygous   |
| NC_037646.1 | 8732425 | SNV | 1 | T | A | Homozygous   |
| NC_037646.1 | 8732477 | SNV | 1 | T | C | Heterozygous |
| NC_037646.1 | 8732581 | SNV | 1 | A | G | Heterozygous |
| NC_037646.1 | 8732616 | SNV | 1 | A | G | Heterozygous |
| NC_037646.1 | 8732692 | SNV | 1 | A | G | Heterozygous |
| NC_037646.1 | 8732736 | SNV | 1 | A | G | Heterozygous |
| NC_037646.1 | 8732746 | SNV | 1 | A | G | Homozygous   |
| NC_037646.1 | 8732807 | SNV | 1 | G | A | Heterozygous |
| NC_037646.1 | 8732819 | SNV | 1 | T | A | Heterozygous |
| NC_037646.1 | 8732886 | SNV | 1 | A | G | Heterozygous |
| NC_037646.1 | 8732889 | SNV | 1 | A | G | Homozygous   |
| NC_037646.1 | 8732896 | SNV | 1 | A | G | Homozygous   |
| NC_037646.1 | 8732959 | SNV | 1 | G | A | Heterozygous |
| NC_037646.1 | 8738416 | SNV | 1 | C | T | Homozygous   |
| NC_037646.1 | 8738833 | SNV | 1 | T | C | Homozygous   |
| NC_037646.1 | 8738968 | SNV | 1 | C | T | Homozygous   |
| NC_037646.1 | 8739005 | SNV | 1 | C | T | Homozygous   |
| NC_037646.1 | 8739007 | SNV | 1 | C | T | Homozygous   |
| NC_037646.1 | 8740263 | SNV | 1 | C | T | Heterozygous |
| NC_037646.1 | 8740270 | SNV | 1 | G | A | Heterozygous |
| NC_037646.1 | 8740949 | SNV | 1 | A | G | Heterozygous |
| NC_037646.1 | 8741025 | SNV | 1 | T | C | Heterozygous |
| NC_037646.1 | 8741209 | SNV | 1 | C | G | Homozygous   |
| NC_037646.1 | 8741245 | SNV | 1 | C | T | Homozygous   |
| NC_037646.1 | 8741930 | SNV | 1 | T | A | Homozygous   |
| NC_037646.1 | 8742735 | SNV | 1 | A | G | Homozygous   |
| NC_037646.1 | 8743101 | SNV | 1 | C | T | Heterozygous |
| NC_037646.1 | 8743109 | SNV | 1 | C | T | Heterozygous |
| NC_037646.1 | 8743153 | SNV | 1 | A | C | Homozygous   |



|             |         |     |   |   |   |              |
|-------------|---------|-----|---|---|---|--------------|
| NC_037646.1 | 8743218 | SNV | 1 | C | T | Heterozygous |
| NC_037646.1 | 8743255 | SNV | 1 | T | A | Heterozygous |
| NC_037646.1 | 8743266 | SNV | 1 | T | A | Heterozygous |
| NC_037646.1 | 8743277 | SNV | 1 | C | A | Homozygous   |
| NC_037646.1 | 8743335 | SNV | 1 | C | G | Homozygous   |
| NC_037646.1 | 8743372 | SNV | 1 | T | C | Heterozygous |
| NC_037646.1 | 8743989 | SNV | 1 | G | A | Heterozygous |
| NC_037646.1 | 8743993 | SNV | 1 | G | A | Homozygous   |
| NC_037646.1 | 8744003 | SNV | 1 | G | A | Heterozygous |
| NC_037646.1 | 8744021 | SNV | 1 | G | A | Heterozygous |
| NC_037646.1 | 8744064 | SNV | 1 | A | T | Heterozygous |
| NC_037646.1 | 8744066 | SNV | 1 | T | A | Heterozygous |
| NC_037646.1 | 8744600 | SNV | 1 | G | T | Homozygous   |
| NC_037646.1 | 8744621 | SNV | 1 | G | A | Homozygous   |
| NC_037646.1 | 8745637 | SNV | 1 | C | G | Heterozygous |
| NC_037646.1 | 8745652 | SNV | 1 | C | T | Heterozygous |
| NC_037646.1 | 8745654 | SNV | 1 | C | T | Heterozygous |
| NC_037646.1 | 8745871 | SNV | 1 | G | A | Heterozygous |
| NC_037646.1 | 8745929 | SNV | 1 | T | C | Homozygous   |
| NC_037646.1 | 8745941 | SNV | 1 | G | A | Heterozygous |
| NC_037646.1 | 8745943 | SNV | 1 | T | C | Homozygous   |
| NC_037646.1 | 8745981 | SNV | 1 | A | G | Homozygous   |
| NC_037646.1 | 8746027 | SNV | 1 | T | C | Homozygous   |
| NC_037646.1 | 8746151 | SNV | 1 | C | T | Heterozygous |
| NC_037646.1 | 8746502 | SNV | 1 | A | G | Homozygous   |
| NC_037646.1 | 8746854 | SNV | 1 | T | C | Homozygous   |
| NC_037646.1 | 8746856 | SNV | 1 | C | G | Homozygous   |
| NC_037646.1 | 8746864 | SNV | 1 | A | G | Heterozygous |
| NC_037646.1 | 8747041 | SNV | 1 | A | T | Homozygous   |
| NC_037646.1 | 8747151 | SNV | 1 | C | T | Homozygous   |
| NC_037646.1 | 8747156 | SNV | 1 | T | C | Homozygous   |
| NC_037646.1 | 8747160 | SNV | 1 | C | T | Homozygous   |
| NC_037646.1 | 8747172 | SNV | 1 | G | A | Homozygous   |
| NC_037646.1 | 8747248 | SNV | 1 | G | A | Homozygous   |
| NC_037646.1 | 8747378 | SNV | 1 | G | A | Heterozygous |
| NC_037646.1 | 8747441 | SNV | 1 | A | G | Heterozygous |
| NC_037646.1 | 8747815 | SNV | 1 | T | C | Heterozygous |
| NC_037646.1 | 8747839 | SNV | 1 | A | G | Homozygous   |
| NC_037646.1 | 8750430 | SNV | 1 | T | G | Homozygous   |
| NC_037646.1 | 8750787 | SNV | 1 | C | T | Heterozygous |
| NC_037646.1 | 8750793 | SNV | 1 | C | T | Heterozygous |
| NC_037646.1 | 8753963 | SNV | 1 | G | A | Heterozygous |
| NC_037646.1 | 8754495 | SNV | 1 | G | A | Heterozygous |
| NC_037646.1 | 8754621 | SNV | 1 | C | T | Heterozygous |
| NC_037646.1 | 8758286 | SNV | 1 | A | G | Heterozygous |
| NC_037646.1 | 8759181 | SNV | 1 | T | C | Homozygous   |
| NC_037646.1 | 8759549 | SNV | 1 | A | G | Homozygous   |
| NC_037646.1 | 8760101 | SNV | 1 | T | C | Heterozygous |
| NC_037646.1 | 8760910 | SNV | 1 | C | T | Heterozygous |
| NC_037646.1 | 8761008 | SNV | 1 | T | C | Homozygous   |
| NC_037646.1 | 8761060 | SNV | 1 | G | A | Homozygous   |

|             |         |     |   |   |   |              |
|-------------|---------|-----|---|---|---|--------------|
| NC_037646.1 | 8761085 | SNV | 1 | G | T | Homozygous   |
| NC_037646.1 | 8761117 | SNV | 1 | T | C | Heterozygous |
| NC_037646.1 | 8761445 | SNV | 1 | A | T | Heterozygous |
| NC_037646.1 | 8762246 | SNV | 1 | A | G | Homozygous   |
| NC_037646.1 | 8762490 | SNV | 1 | A | G | Homozygous   |
| NC_037646.1 | 8762825 | SNV | 1 | G | A | Homozygous   |
| NC_037646.1 | 8763066 | SNV | 1 | C | A | Heterozygous |
| NC_037646.1 | 8763931 | SNV | 1 | G | A | Heterozygous |
| NC_037646.1 | 8764158 | SNV | 1 | A | G | Heterozygous |
| NC_037646.1 | 8764721 | SNV | 1 | T | C | Heterozygous |
| NC_037646.1 | 8766832 | SNV | 1 | T | A | Homozygous   |
| NC_037646.1 | 8766836 | SNV | 1 | C | T | Heterozygous |
| NC_037646.1 | 8766851 | SNV | 1 | T | C | Homozygous   |
| NC_037646.1 | 8766937 | SNV | 1 | T | C | Homozygous   |
| NC_037646.1 | 8766939 | SNV | 1 | A | G | Homozygous   |
| NC_037646.1 | 8767003 | SNV | 1 | C | T | Heterozygous |
| NC_037646.1 | 8767090 | SNV | 1 | A | G | Homozygous   |
| NC_037646.1 | 8803242 | SNV | 1 | T | C | Heterozygous |
| NC_037646.1 | 8803261 | SNV | 1 | A | G | Heterozygous |
| NC_037646.1 | 8803390 | SNV | 1 | C | T | Homozygous   |
| NC_037646.1 | 8803494 | SNV | 1 | A | G | Heterozygous |
| NC_037646.1 | 8803519 | SNV | 1 | T | G | Heterozygous |
| NC_037646.1 | 8803573 | SNV | 1 | T | C | Homozygous   |
| NC_037646.1 | 8803926 | SNV | 1 | T | C | Heterozygous |
| NC_037646.1 | 8803933 | SNV | 1 | A | G | Heterozygous |
| NC_037646.1 | 8804001 | SNV | 1 | G | C | Homozygous   |
| NC_037646.1 | 8804113 | SNV | 1 | C | T | Heterozygous |
| NC_037646.1 | 8804718 | SNV | 1 | G | A | Homozygous   |
| NC_037646.1 | 8804978 | SNV | 1 | T | C | Homozygous   |
| NC_037646.1 | 8805117 | SNV | 1 | T | C | Homozygous   |
| NC_037646.1 | 8805323 | SNV | 1 | C | T | Heterozygous |
| NC_037646.1 | 8805336 | SNV | 1 | T | C | Heterozygous |
| NC_037646.1 | 8805346 | SNV | 1 | T | C | Heterozygous |
| NC_037646.1 | 8805502 | SNV | 1 | A | G | Heterozygous |
| NC_037646.1 | 8805939 | SNV | 1 | G | A | Heterozygous |
| NC_037646.1 | 8806222 | SNV | 1 | T | C | Homozygous   |
| NC_037646.1 | 8806238 | SNV | 1 | T | G | Homozygous   |
| NC_037646.1 | 8806533 | SNV | 1 | T | C | Heterozygous |
| NC_037646.1 | 8809609 | SNV | 1 | A | G | Homozygous   |
| NC_037646.1 | 8809641 | SNV | 1 | G | A | Homozygous   |
| NC_037646.1 | 8809645 | SNV | 1 | T | G | Homozygous   |
| NC_037646.1 | 8811421 | SNV | 1 | A | C | Heterozygous |
| NC_037646.1 | 8811424 | SNV | 1 | A | G | Heterozygous |
| NC_037646.1 | 8811429 | SNV | 1 | A | G | Heterozygous |
| NC_037646.1 | 8812656 | SNV | 1 | A | G | Heterozygous |
| NC_037646.1 | 8814494 | SNV | 1 | G | A | Heterozygous |
| NC_037646.1 | 8826389 | SNV | 1 | A | G | Heterozygous |
| NC_037646.1 | 8826450 | SNV | 1 | C | T | Heterozygous |
| NC_037646.1 | 8826489 | SNV | 1 | C | T | Heterozygous |
| NC_037646.1 | 8826693 | SNV | 1 | A | G | Homozygous   |
| NC_037646.1 | 8826741 | SNV | 1 | A | G | Homozygous   |

|             |         |     |   |   |   |              |
|-------------|---------|-----|---|---|---|--------------|
| NC_037646.1 | 8826799 | SNV | 1 | C | T | Homozygous   |
| NC_037646.1 | 8826827 | SNV | 1 | T | C | Homozygous   |
| NC_037646.1 | 8826842 | SNV | 1 | A | G | Heterozygous |
| NC_037646.1 | 8826862 | SNV | 1 | C | T | Heterozygous |
| NC_037646.1 | 8827269 | SNV | 1 | A | T | Heterozygous |
| NC_037646.1 | 8827378 | SNV | 1 | T | C | Homozygous   |
| NC_037646.1 | 8834282 | SNV | 1 | G | A | Homozygous   |
| NC_037646.1 | 8834460 | SNV | 1 | A | G | Heterozygous |
| NC_037646.1 | 8834484 | SNV | 1 | C | G | Heterozygous |
| NC_037646.1 | 8834486 | SNV | 1 | G | A | Heterozygous |
| NC_037646.1 | 8837177 | SNV | 1 | A | T | Heterozygous |
| NC_037646.1 | 8837181 | SNV | 1 | T | C | Heterozygous |
| NC_037646.1 | 8837183 | SNV | 1 | G | T | Heterozygous |
| NC_037646.1 | 8837185 | SNV | 1 | G | T | Heterozygous |
| NC_037646.1 | 8837189 | SNV | 1 | T | G | Heterozygous |
| NC_037646.1 | 8837201 | SNV | 1 | A | C | Heterozygous |
| NC_037646.1 | 8837204 | SNV | 1 | A | T | Heterozygous |
| NC_037646.1 | 8837207 | SNV | 1 | G | A | Heterozygous |
| NC_037646.1 | 8837210 | SNV | 1 | A | G | Heterozygous |
| NC_037646.1 | 8837216 | SNV | 1 | T | A | Heterozygous |
| NC_037646.1 | 8837230 | SNV | 1 | A | C | Heterozygous |
| NC_037646.1 | 8837237 | SNV | 1 | A | C | Heterozygous |
| NC_037646.1 | 8837243 | SNV | 1 | A | C | Heterozygous |
| NC_037646.1 | 8837267 | SNV | 1 | A | G | Heterozygous |
| NC_037646.1 | 8837386 | SNV | 1 | G | A | Homozygous   |
| NC_037646.1 | 8838917 | SNV | 1 | C | A | Heterozygous |
| NC_037646.1 | 8838927 | SNV | 1 | T | A | Heterozygous |
| NC_037646.1 | 8838935 | SNV | 1 | C | A | Homozygous   |
| NC_037646.1 | 8840440 | SNV | 1 | A | G | Homozygous   |
| NC_037646.1 | 8840691 | SNV | 1 | A | C | Heterozygous |
| NC_037646.1 | 8841175 | SNV | 1 | A | G | Homozygous   |
| NC_037646.1 | 8841180 | SNV | 1 | G | A | Homozygous   |
| NC_037646.1 | 8841264 | SNV | 1 | A | G | Homozygous   |
| NC_037646.1 | 8841301 | SNV | 1 | G | A | Homozygous   |
| NC_037646.1 | 8842008 | SNV | 1 | A | G | Heterozygous |
| NC_037646.1 | 8842016 | SNV | 1 | G | A | Heterozygous |
| NC_037646.1 | 8842087 | SNV | 1 | G | A | Heterozygous |
| NC_037646.1 | 8842366 | SNV | 1 | A | T | Heterozygous |
| NC_037646.1 | 8842425 | SNV | 1 | G | A | Heterozygous |
| NC_037646.1 | 8842443 | SNV | 1 | C | T | Heterozygous |
| NC_037646.1 | 8842445 | SNV | 1 | G | C | Heterozygous |
| NC_037646.1 | 8842495 | SNV | 1 | T | C | Homozygous   |
| NC_037646.1 | 8842497 | SNV | 1 | G | A | Homozygous   |
| NC_037646.1 | 8842500 | SNV | 1 | A | G | Homozygous   |
| NC_037646.1 | 8842559 | SNV | 1 | A | G | Homozygous   |
| NC_037646.1 | 8842686 | SNV | 1 | G | C | Heterozygous |
| NC_037646.1 | 8843197 | SNV | 1 | C | T | Heterozygous |
| NC_037646.1 | 8843215 | SNV | 1 | T | C | Homozygous   |
| NC_037646.1 | 8843586 | SNV | 1 | G | A | Heterozygous |
| NC_037646.1 | 8843659 | SNV | 1 | C | T | Heterozygous |
| NC_037646.1 | 8843770 | SNV | 1 | T | C | Homozygous   |

|             |         |     |   |   |   |              |
|-------------|---------|-----|---|---|---|--------------|
| NC_037646.1 | 8843794 | SNV | 1 | G | A | Heterozygous |
| NC_037646.1 | 8843823 | SNV | 1 | C | G | Heterozygous |
| NC_037646.1 | 8847084 | SNV | 1 | T | C | Homozygous   |
| NC_037646.1 | 8847376 | SNV | 1 | C | T | Heterozygous |
| NC_037646.1 | 8847408 | SNV | 1 | A | G | Homozygous   |
| NC_037646.1 | 8847587 | SNV | 1 | A | G | Homozygous   |
| NC_037646.1 | 8847699 | SNV | 1 | T | A | Heterozygous |
| NC_037646.1 | 8847950 | SNV | 1 | T | C | Homozygous   |
| NC_037646.1 | 8854403 | SNV | 1 | C | T | Homozygous   |
| NC_037646.1 | 8854408 | SNV | 1 | A | G | Homozygous   |
| NC_037646.1 | 8854411 | SNV | 1 | T | G | Homozygous   |
| NC_037646.1 | 8854417 | SNV | 1 | G | C | Homozygous   |
| NC_037646.1 | 8854428 | SNV | 1 | T | A | Homozygous   |
| NC_037646.1 | 8856276 | SNV | 1 | A | G | Homozygous   |
| NC_037646.1 | 8856489 | SNV | 1 | T | C | Homozygous   |
| NC_037646.1 | 8856593 | SNV | 1 | C | T | Heterozygous |
| NC_037646.1 | 8856667 | SNV | 1 | G | A | Heterozygous |
| NC_037646.1 | 8856696 | SNV | 1 | G | A | Heterozygous |
| NC_037646.1 | 8856794 | SNV | 1 | C | T | Homozygous   |
| NC_037646.1 | 8856881 | SNV | 1 | T | C | Homozygous   |
| NC_037646.1 | 8856890 | SNV | 1 | G | A | Heterozygous |
| NC_037646.1 | 8856940 | SNV | 1 | T | C | Homozygous   |
| NC_037646.1 | 8856990 | SNV | 1 | T | C | Heterozygous |
| NC_037646.1 | 8857066 | SNV | 1 | T | C | Homozygous   |
| NC_037646.1 | 8857077 | SNV | 1 | T | C | Heterozygous |
| NC_037646.1 | 8857778 | SNV | 1 | G | A | Homozygous   |
| NC_037646.1 | 8857802 | SNV | 1 | A | C | Homozygous   |
| NC_037646.1 | 8857966 | SNV | 1 | G | A | Heterozygous |
| NC_037646.1 | 8858171 | SNV | 1 | A | T | Heterozygous |
| NC_037646.1 | 8858191 | SNV | 1 | C | T | Heterozygous |
| NC_037646.1 | 8858193 | SNV | 1 | T | C | Homozygous   |
| NC_037646.1 | 8858207 | SNV | 1 | C | T | Homozygous   |
| NC_037646.1 | 8861776 | SNV | 1 | T | C | Homozygous   |
| NC_037646.1 | 8861942 | SNV | 1 | C | A | Heterozygous |
| NC_037646.1 | 8861946 | SNV | 1 | C | G | Heterozygous |
| NC_037646.1 | 8861948 | SNV | 1 | C | G | Heterozygous |
| NC_037646.1 | 8862035 | SNV | 1 | T | C | Heterozygous |
| NC_037646.1 | 8862068 | SNV | 1 | A | G | Homozygous   |
| NC_037646.1 | 8864799 | SNV | 1 | T | C | Heterozygous |
| NC_037646.1 | 8864914 | SNV | 1 | G | A | Homozygous   |
| NC_037646.1 | 8864983 | SNV | 1 | A | G | Heterozygous |
| NC_037646.1 | 8865044 | SNV | 1 | G | A | Homozygous   |
| NC_037646.1 | 8865046 | SNV | 1 | C | T | Heterozygous |
| NC_037646.1 | 8867286 | SNV | 1 | A | C | Heterozygous |
| NC_037646.1 | 8867481 | SNV | 1 | T | C | Homozygous   |
| NC_037646.1 | 8867641 | SNV | 1 | G | C | Heterozygous |
| NC_037646.1 | 8867738 | SNV | 1 | A | G | Homozygous   |
| NC_037646.1 | 8867863 | SNV | 1 | T | C | Heterozygous |
| NC_037646.1 | 8868024 | SNV | 1 | C | T | Heterozygous |
| NC_037646.1 | 8868043 | SNV | 1 | A | G | Homozygous   |
| NC_037646.1 | 8870302 | SNV | 1 | T | C | Homozygous   |

|             |         |     |   |   |   |              |
|-------------|---------|-----|---|---|---|--------------|
| NC_037646.1 | 8870304 | SNV | 1 | T | C | Homozygous   |
| NC_037646.1 | 8872378 | SNV | 1 | A | C | Homozygous   |
| NC_037646.1 | 8872381 | SNV | 1 | G | A | Homozygous   |
| NC_037646.1 | 8872387 | SNV | 1 | G | A | Homozygous   |
| NC_037646.1 | 8872391 | SNV | 1 | G | A | Homozygous   |
| NC_037646.1 | 8872396 | SNV | 1 | A | T | Homozygous   |
| NC_037646.1 | 8872398 | SNV | 1 | A | C | Homozygous   |
| NC_037646.1 | 8883996 | SNV | 1 | T | C | Homozygous   |
| NC_037646.1 | 8884180 | SNV | 1 | T | C | Homozygous   |
| NC_037646.1 | 8884702 | SNV | 1 | T | C | Homozygous   |
| NC_037646.1 | 8884884 | SNV | 1 | G | C | Heterozygous |
| NC_037646.1 | 8885113 | SNV | 1 | T | A | Homozygous   |
| NC_037646.1 | 8888220 | SNV | 1 | T | A | Homozygous   |
| NC_037646.1 | 8888280 | SNV | 1 | A | G | Homozygous   |
| NC_037646.1 | 8889018 | SNV | 1 | A | G | Homozygous   |
| NC_037646.1 | 8889063 | SNV | 1 | C | A | Heterozygous |
| NC_037646.1 | 8889075 | SNV | 1 | G | A | Heterozygous |
| NC_037646.1 | 8889178 | SNV | 1 | G | A | Heterozygous |
| NC_037646.1 | 8889198 | SNV | 1 | G | A | Homozygous   |
| NC_037646.1 | 8889222 | SNV | 1 | G | A | Homozygous   |
| NC_037646.1 | 8889227 | SNV | 1 | A | T | Homozygous   |
| NC_037646.1 | 8889957 | SNV | 1 | C | T | Heterozygous |
| NC_037646.1 | 8890118 | SNV | 1 | T | C | Homozygous   |
| NC_037646.1 | 8890158 | SNV | 1 | A | G | Homozygous   |
| NC_037646.1 | 8890173 | SNV | 1 | G | A | Homozygous   |
| NC_037646.1 | 8890202 | SNV | 1 | A | G | Homozygous   |
| NC_037646.1 | 8890206 | SNV | 1 | A | G | Homozygous   |
| NC_037646.1 | 8890208 | SNV | 1 | T | A | Homozygous   |
| NC_037646.1 | 8890356 | SNV | 1 | C | T | Heterozygous |
| NC_037646.1 | 8908258 | SNV | 1 | A | G | Homozygous   |
| NC_037646.1 | 8908315 | SNV | 1 | A | G | Homozygous   |
| NC_037646.1 | 8908480 | SNV | 1 | T | C | Heterozygous |
| NC_037646.1 | 8908531 | SNV | 1 | C | T | Homozygous   |
| NC_037646.1 | 8908542 | SNV | 1 | T | C | Heterozygous |
| NC_037646.1 | 8908544 | SNV | 1 | T | C | Heterozygous |
| NC_037646.1 | 8908596 | SNV | 1 | T | C | Homozygous   |
| NC_037646.1 | 8908642 | SNV | 1 | A | G | Homozygous   |
| NC_037646.1 | 8908743 | SNV | 1 | A | G | Homozygous   |
| NC_037646.1 | 8908780 | SNV | 1 | G | A | Heterozygous |
| NC_037646.1 | 8908929 | SNV | 1 | T | C | Heterozygous |
| NC_037646.1 | 8908932 | SNV | 1 | T | G | Heterozygous |
| NC_037646.1 | 8928550 | SNV | 1 | T | C | Homozygous   |
| NC_037646.1 | 8928720 | SNV | 1 | A | C | Homozygous   |
| NC_037646.1 | 8928796 | SNV | 1 | C | T | Homozygous   |
| NC_037646.1 | 8928847 | SNV | 1 | C | T | Heterozygous |
| NC_037646.1 | 8928912 | SNV | 1 | T | C | Homozygous   |
| NC_037646.1 | 8928935 | SNV | 1 | C | T | Homozygous   |
| NC_037646.1 | 8929029 | SNV | 1 | C | T | Homozygous   |
| NC_037646.1 | 8929037 | SNV | 1 | A | G | Homozygous   |
| NC_037646.1 | 8929075 | SNV | 1 | G | A | Heterozygous |
| NC_037646.1 | 8929083 | SNV | 1 | T | C | Homozygous   |

|             |         |     |   |   |   |              |
|-------------|---------|-----|---|---|---|--------------|
| NC_037646.1 | 8929504 | SNV | 1 | A | T | Homozygous   |
| NC_037646.1 | 8929506 | SNV | 1 | C | A | Homozygous   |
| NC_037646.1 | 8929528 | SNV | 1 | G | A | Homozygous   |
| NC_037646.1 | 8929540 | SNV | 1 | A | G | Homozygous   |
| NC_037646.1 | 8929899 | SNV | 1 | C | T | Homozygous   |
| NC_037646.1 | 8931082 | SNV | 1 | C | T | Heterozygous |
| NC_037646.1 | 8931534 | SNV | 1 | T | C | Homozygous   |
| NC_037646.1 | 8931594 | SNV | 1 | T | C | Homozygous   |
| NC_037646.1 | 8931758 | SNV | 1 | C | A | Homozygous   |
| NC_037646.1 | 8932002 | SNV | 1 | C | T | Heterozygous |
| NC_037646.1 | 8932007 | SNV | 1 | A | G | Homozygous   |
| NC_037646.1 | 8936067 | SNV | 1 | G | A | Heterozygous |
| NC_037646.1 | 8936072 | SNV | 1 | A | G | Heterozygous |
| NC_037646.1 | 8936109 | SNV | 1 | A | G | Heterozygous |
| NC_037646.1 | 8938935 | SNV | 1 | A | T | Homozygous   |
| NC_037646.1 | 8944250 | SNV | 1 | T | C | Homozygous   |
| NC_037646.1 | 8944255 | SNV | 1 | T | A | Homozygous   |
| NC_037646.1 | 8944293 | SNV | 1 | T | A | Homozygous   |
| NC_037646.1 | 8944302 | SNV | 1 | T | C | Homozygous   |
| NC_037646.1 | 8944307 | SNV | 1 | T | A | Homozygous   |
| NC_037646.1 | 8944310 | SNV | 1 | T | A | Homozygous   |
| NC_037646.1 | 8956124 | SNV | 1 | C | T | Homozygous   |
| NC_037646.1 | 8958310 | SNV | 1 | T | G | Homozygous   |
| NC_037646.1 | 8958315 | SNV | 1 | C | G | Homozygous   |
| NC_037646.1 | 8958319 | SNV | 1 | C | A | Homozygous   |
| NC_037646.1 | 8958325 | SNV | 1 | G | A | Homozygous   |
| NC_037646.1 | 8970112 | SNV | 1 | A | G | Heterozygous |
| NC_037646.1 | 8970244 | SNV | 1 | T | C | Heterozygous |
| NC_037646.1 | 8970301 | SNV | 1 | C | T | Heterozygous |
| NC_037646.1 | 8970313 | SNV | 1 | T | C | Heterozygous |
| NC_037646.1 | 8970328 | SNV | 1 | G | A | Homozygous   |
| NC_037646.1 | 8970330 | SNV | 1 | T | G | Homozygous   |
| NC_037646.1 | 8970334 | SNV | 1 | T | C | Homozygous   |
| NC_037646.1 | 8970337 | SNV | 1 | C | T | Homozygous   |
| NC_037646.1 | 8970341 | SNV | 1 | T | C | Homozygous   |
| NC_037646.1 | 8970352 | SNV | 1 | C | T | Homozygous   |
| NC_037646.1 | 8970371 | SNV | 1 | T | C | Homozygous   |
| NC_037646.1 | 8970374 | SNV | 1 | T | C | Heterozygous |
| NC_037646.1 | 8970717 | SNV | 1 | G | T | Homozygous   |
| NC_037646.1 | 8970753 | SNV | 1 | T | G | Homozygous   |
| NC_037646.1 | 8970761 | SNV | 1 | T | A | Homozygous   |
| NC_037646.1 | 8970768 | SNV | 1 | G | A | Heterozygous |
| NC_037646.1 | 8970770 | SNV | 1 | G | T | Heterozygous |
| NC_037646.1 | 8970777 | SNV | 1 | A | G | Homozygous   |
| NC_037646.1 | 8974301 | SNV | 1 | C | G | Homozygous   |
| NC_037646.1 | 8974311 | SNV | 1 | T | C | Heterozygous |
| NC_037646.1 | 8974331 | SNV | 1 | A | G | Homozygous   |
| NC_037646.1 | 8974337 | SNV | 1 | C | T | Heterozygous |
| NC_037646.1 | 8974344 | SNV | 1 | T | C | Homozygous   |
| NC_037646.1 | 8974355 | SNV | 1 | C | T | Heterozygous |
| NC_037646.1 | 8979685 | SNV | 1 | T | C | Heterozygous |

|             |         |     |   |   |   |              |
|-------------|---------|-----|---|---|---|--------------|
| NC_037646.1 | 8980043 | SNV | 1 | A | G | Homozygous   |
| NC_037646.1 | 8980215 | SNV | 1 | C | T | Heterozygous |
| NC_037646.1 | 8980217 | SNV | 1 | T | C | Homozygous   |
| NC_037646.1 | 8980250 | SNV | 1 | T | C | Heterozygous |
| NC_037646.1 | 8980284 | SNV | 1 | A | T | Heterozygous |
| NC_037646.1 | 8980309 | SNV | 1 | C | T | Heterozygous |
| NC_037646.1 | 8980704 | SNV | 1 | A | G | Homozygous   |
| NC_037646.1 | 8980955 | SNV | 1 | A | G | Heterozygous |
| NC_037646.1 | 8980976 | SNV | 1 | A | G | Heterozygous |
| NC_037646.1 | 8980980 | SNV | 1 | G | T | Heterozygous |
| NC_037646.1 | 8981081 | SNV | 1 | A | G | Homozygous   |
| NC_037646.1 | 8981086 | SNV | 1 | A | G | Heterozygous |
| NC_037646.1 | 8981116 | SNV | 1 | T | G | Homozygous   |
| NC_037646.1 | 8981132 | SNV | 1 | T | C | Heterozygous |
| NC_037646.1 | 8981145 | SNV | 1 | T | C | Heterozygous |
| NC_037646.1 | 8981203 | SNV | 1 | T | C | Homozygous   |
| NC_037646.1 | 8981243 | SNV | 1 | C | T | Homozygous   |
| NC_037646.1 | 8981287 | SNV | 1 | A | G | Heterozygous |
| NC_037646.1 | 8981323 | SNV | 1 | G | A | Heterozygous |
| NC_037646.1 | 8981334 | SNV | 1 | T | C | Homozygous   |
| NC_037646.1 | 8981561 | SNV | 1 | A | C | Heterozygous |
| NC_037646.1 | 8981576 | SNV | 1 | T | C | Homozygous   |
| NC_037646.1 | 8981593 | SNV | 1 | G | A | Heterozygous |
| NC_037646.1 | 8981648 | SNV | 1 | C | T | Heterozygous |
| NC_037646.1 | 8981698 | SNV | 1 | T | A | Heterozygous |
| NC_037646.1 | 8981719 | SNV | 1 | G | A | Heterozygous |
| NC_037646.1 | 8981735 | SNV | 1 | G | A | Heterozygous |
| NC_037646.1 | 8981819 | SNV | 1 | A | T | Homozygous   |
| NC_037646.1 | 8981825 | SNV | 1 | C | A | Homozygous   |
| NC_037646.1 | 8981829 | SNV | 1 | T | C | Homozygous   |
| NC_037646.1 | 8981831 | SNV | 1 | G | C | Homozygous   |
| NC_037646.1 | 8981841 | SNV | 1 | A | T | Homozygous   |
| NC_037646.1 | 8981858 | SNV | 1 | A | T | Homozygous   |
| NC_037646.1 | 8987995 | SNV | 1 | G | A | Heterozygous |
| NC_037646.1 | 8987999 | SNV | 1 | G | A | Heterozygous |
| NC_037646.1 | 8988003 | SNV | 1 | G | A | Homozygous   |
| NC_037646.1 | 9001514 | SNV | 1 | T | C | Homozygous   |
| NC_037646.1 | 9001677 | SNV | 1 | T | C | Homozygous   |
| NC_037646.1 | 9001793 | SNV | 1 | T | C | Homozygous   |
| NC_037646.1 | 9001802 | SNV | 1 | T | C | Homozygous   |
| NC_037646.1 | 9002071 | SNV | 1 | G | A | Homozygous   |
| NC_037646.1 | 9002183 | SNV | 1 | C | T | Heterozygous |
| NC_037646.1 | 9002188 | SNV | 1 | C | T | Heterozygous |
| NC_037646.1 | 9002191 | SNV | 1 | T | C | Homozygous   |
| NC_037646.1 | 9008640 | SNV | 1 | A | G | Homozygous   |
| NC_037646.1 | 9010582 | SNV | 1 | T | A | Homozygous   |
| NC_037646.1 | 9010612 | SNV | 1 | A | G | Homozygous   |
| NC_037646.1 | 9010619 | SNV | 1 | C | G | Homozygous   |
| NC_037646.1 | 9011990 | SNV | 1 | T | A | Homozygous   |
| NC_037646.1 | 9012120 | SNV | 1 | A | G | Homozygous   |
| NC_037646.1 | 9012155 | SNV | 1 | C | T | Homozygous   |

|             |         |     |   |   |   |              |
|-------------|---------|-----|---|---|---|--------------|
| NC_037646.1 | 9012164 | SNV | 1 | T | C | Homozygous   |
| NC_037646.1 | 9012174 | SNV | 1 | C | T | Homozygous   |
| NC_037646.1 | 9012219 | SNV | 1 | T | C | Homozygous   |
| NC_037646.1 | 9012395 | SNV | 1 | T | C | Homozygous   |
| NC_037646.1 | 9017387 | SNV | 1 | A | G | Homozygous   |
| NC_037646.1 | 9019553 | SNV | 1 | C | G | Heterozygous |
| NC_037646.1 | 9019601 | SNV | 1 | C | T | Homozygous   |
| NC_037646.1 | 9019603 | SNV | 1 | C | T | Homozygous   |
| NC_037646.1 | 9020695 | SNV | 1 | G | A | Heterozygous |
| NC_037646.1 | 9020760 | SNV | 1 | C | T | Heterozygous |
| NC_037646.1 | 9020868 | SNV | 1 | A | T | Heterozygous |
| NC_037646.1 | 9021124 | SNV | 1 | C | T | Heterozygous |
| NC_037646.1 | 9028320 | SNV | 1 | G | A | Homozygous   |
| NC_037646.1 | 9028325 | SNV | 1 | A | C | Homozygous   |
| NC_037646.1 | 9028332 | SNV | 1 | G | A | Homozygous   |
| NC_037646.1 | 9028336 | SNV | 1 | G | A | Homozygous   |
| NC_037646.1 | 9028339 | SNV | 1 | A | G | Homozygous   |
| NC_037646.1 | 9032014 | SNV | 1 | C | T | Heterozygous |
| NC_037646.1 | 9032088 | SNV | 1 | A | G | Homozygous   |
| NC_037646.1 | 9032094 | SNV | 1 | A | G | Homozygous   |
| NC_037646.1 | 9032279 | SNV | 1 | C | T | Homozygous   |
| NC_037646.1 | 9032288 | SNV | 1 | T | C | Homozygous   |
| NC_037646.1 | 9035762 | SNV | 1 | C | T | Heterozygous |
| NC_037646.1 | 9035797 | SNV | 1 | T | C | Heterozygous |
| NC_037646.1 | 9035803 | SNV | 1 | T | C | Heterozygous |
| NC_037646.1 | 9037673 | SNV | 1 | A | T | Homozygous   |
| NC_037646.1 | 9043190 | SNV | 1 | G | A | Homozygous   |
| NC_037646.1 | 9043192 | SNV | 1 | A | T | Homozygous   |
| NC_037646.1 | 9052696 | SNV | 1 | T | C | Heterozygous |
| NC_037646.1 | 9052705 | SNV | 1 | G | A | Heterozygous |
| NC_037646.1 | 9052902 | SNV | 1 | C | G | Homozygous   |
| NC_037646.1 | 9053241 | SNV | 1 | A | G | Homozygous   |
| NC_037646.1 | 9053890 | SNV | 1 | C | T | Heterozygous |
| NC_037646.1 | 9053898 | SNV | 1 | T | A | Heterozygous |
| NC_037646.1 | 9053977 | SNV | 1 | C | T | Heterozygous |
| NC_037646.1 | 9053982 | SNV | 1 | C | G | Homozygous   |
| NC_037646.1 | 9054082 | SNV | 1 | G | A | Homozygous   |
| NC_037646.1 | 9054259 | SNV | 1 | T | C | Homozygous   |
| NC_037646.1 | 9057646 | SNV | 1 | G | C | Homozygous   |
| NC_037646.1 | 9057715 | SNV | 1 | C | G | Homozygous   |
| NC_037646.1 | 9057728 | SNV | 1 | T | C | Heterozygous |
| NC_037646.1 | 9057812 | SNV | 1 | T | C | Heterozygous |
| NC_037646.1 | 9057847 | SNV | 1 | A | G | Heterozygous |
| NC_037646.1 | 9057896 | SNV | 1 | T | C | Homozygous   |
| NC_037646.1 | 9057939 | SNV | 1 | T | C | Homozygous   |
| NC_037646.1 | 9057964 | SNV | 1 | T | C | Homozygous   |
| NC_037646.1 | 9057978 | SNV | 1 | A | G | Homozygous   |
| NC_037646.1 | 9058016 | SNV | 1 | T | C | Homozygous   |
| NC_037646.1 | 9058039 | SNV | 1 | C | T | Homozygous   |
| NC_037646.1 | 9058064 | SNV | 1 | T | C | Homozygous   |
| NC_037646.1 | 9073848 | SNV | 1 | G | A | Heterozygous |



|             |         |     |   |   |   |              |
|-------------|---------|-----|---|---|---|--------------|
| NC_037646.1 | 9160013 | SNV | 1 | A | T | Homozygous   |
| NC_037646.1 | 9214433 | SNV | 1 | G | A | Homozygous   |
| NC_037646.1 | 9227023 | SNV | 1 | A | G | Homozygous   |
| NC_037646.1 | 9227038 | SNV | 1 | C | G | Homozygous   |
| NC_037646.1 | 9227070 | SNV | 1 | A | T | Homozygous   |
| NC_037646.1 | 9227108 | SNV | 1 | A | G | Homozygous   |
| NC_037646.1 | 9227469 | SNV | 1 | A | G | Homozygous   |
| NC_037646.1 | 9227508 | SNV | 1 | A | G | Heterozygous |
| NC_037646.1 | 9227516 | SNV | 1 | A | G | Heterozygous |
| NC_037646.1 | 9227528 | SNV | 1 | G | A | Homozygous   |
| NC_037646.1 | 9227721 | SNV | 1 | A | G | Homozygous   |
| NC_037646.1 | 9251715 | SNV | 1 | G | A | Homozygous   |
| NC_037646.1 | 9251727 | SNV | 1 | T | C | Homozygous   |
| NC_037646.1 | 9256520 | SNV | 1 | T | A | Heterozygous |
| NC_037646.1 | 9265816 | SNV | 1 | C | A | Heterozygous |
| NC_037646.1 | 9278994 | SNV | 1 | T | C | Heterozygous |
| NC_037646.1 | 9279625 | SNV | 1 | A | G | Homozygous   |
| NC_037646.1 | 9293906 | SNV | 1 | C | T | Homozygous   |
| NC_037646.1 | 9293913 | SNV | 1 | A | G | Homozygous   |
| NC_037646.1 | 9297496 | SNV | 1 | T | A | Homozygous   |
| NC_037646.1 | 9297502 | SNV | 1 | T | A | Homozygous   |
| NC_037646.1 | 9299654 | SNV | 1 | G | T | Homozygous   |
| NC_037646.1 | 9300832 | SNV | 1 | T | C | Homozygous   |
| NC_037646.1 | 9300881 | SNV | 1 | A | G | Heterozygous |
| NC_037646.1 | 9301605 | SNV | 1 | T | A | Homozygous   |
| NC_037646.1 | 9301620 | SNV | 1 | T | A | Heterozygous |
| NC_037646.1 | 9301663 | SNV | 1 | G | T | Heterozygous |
| NC_037646.1 | 9302150 | SNV | 1 | T | C | Homozygous   |
| NC_037646.1 | 9306942 | SNV | 1 | A | G | Homozygous   |
| NC_037646.1 | 9317768 | SNV | 1 | C | T | Heterozygous |
| NC_037646.1 | 9318007 | SNV | 1 | C | A | Homozygous   |
| NC_037646.1 | 9318546 | SNV | 1 | A | G | Homozygous   |
| NC_037646.1 | 9318742 | SNV | 1 | C | T | Heterozygous |
| NC_037646.1 | 9318908 | SNV | 1 | A | G | Homozygous   |
| NC_037646.1 | 9324487 | SNV | 1 | A | G | Homozygous   |
| NC_037646.1 | 9324498 | SNV | 1 | T | C | Homozygous   |
| NC_037646.1 | 9324542 | SNV | 1 | C | T | Homozygous   |
| NC_037646.1 | 9324656 | SNV | 1 | A | G | Homozygous   |
| NC_037646.1 | 9339564 | SNV | 1 | C | T | Homozygous   |
| NC_037646.1 | 9339663 | SNV | 1 | A | T | Heterozygous |
| NC_037646.1 | 9347809 | SNV | 1 | T | G | Homozygous   |
| NC_037646.1 | 9347811 | SNV | 1 | C | T | Homozygous   |
| NC_037646.1 | 9352390 | SNV | 1 | T | A | Heterozygous |
| NC_037646.1 | 9352413 | SNV | 1 | G | T | Heterozygous |
| NC_037646.1 | 9352416 | SNV | 1 | A | G | Heterozygous |
| NC_037646.1 | 9352441 | SNV | 1 | G | A | Homozygous   |
| NC_037646.1 | 9364600 | SNV | 1 | G | A | Heterozygous |
| NC_037646.1 | 9364603 | SNV | 1 | G | A | Homozygous   |
| NC_037646.1 | 9364626 | SNV | 1 | G | A | Homozygous   |
| NC_037646.1 | 9370194 | SNV | 1 | T | C | Homozygous   |
| NC_037646.1 | 9370245 | SNV | 1 | C | G | Heterozygous |

|             |         |     |   |   |   |              |
|-------------|---------|-----|---|---|---|--------------|
| NC_037646.1 | 9370450 | SNV | 1 | C | T | Heterozygous |
| NC_037646.1 | 9370454 | SNV | 1 | C | G | Heterozygous |
| NC_037646.1 | 9386978 | SNV | 1 | A | G | Heterozygous |
| NC_037646.1 | 9387075 | SNV | 1 | A | G | Homozygous   |
| NC_037646.1 | 9387213 | SNV | 1 | G | A | Homozygous   |
| NC_037646.1 | 9387235 | SNV | 1 | A | T | Heterozygous |
| NC_037646.1 | 9397713 | SNV | 1 | G | C | Heterozygous |
| NC_037646.1 | 9397737 | SNV | 1 | C | T | Heterozygous |
| NC_037646.1 | 9397896 | SNV | 1 | C | T | Heterozygous |
| NC_037646.1 | 9397918 | SNV | 1 | A | G | Homozygous   |
| NC_037646.1 | 9397943 | SNV | 1 | C | T | Heterozygous |
| NC_037646.1 | 9397945 | SNV | 1 | T | C | Heterozygous |
| NC_037646.1 | 9397954 | SNV | 1 | T | C | Homozygous   |
| NC_037646.1 | 9398087 | SNV | 1 | G | A | Heterozygous |
| NC_037646.1 | 9398232 | SNV | 1 | A | G | Homozygous   |
| NC_037646.1 | 9398442 | SNV | 1 | C | T | Heterozygous |
| NC_037646.1 | 9410490 | SNV | 1 | T | C | Homozygous   |
| NC_037646.1 | 9410704 | SNV | 1 | A | G | Homozygous   |
| NC_037646.1 | 9410775 | SNV | 1 | G | A | Homozygous   |
| NC_037646.1 | 9422360 | SNV | 1 | A | G | Heterozygous |
| NC_037646.1 | 9439427 | SNV | 1 | T | C | Heterozygous |
| NC_037646.1 | 9439471 | SNV | 1 | G | A | Heterozygous |
| NC_037646.1 | 9439538 | SNV | 1 | C | T | Homozygous   |
| NC_037646.1 | 9439609 | SNV | 1 | A | G | Homozygous   |
| NC_037646.1 | 9439667 | SNV | 1 | G | A | Homozygous   |
| NC_037646.1 | 9443247 | SNV | 1 | G | A | Heterozygous |
| NC_037646.1 | 9456174 | SNV | 1 | A | G | Heterozygous |
| NC_037646.1 | 9456193 | SNV | 1 | G | A | Homozygous   |
| NC_037646.1 | 9456212 | SNV | 1 | T | C | Homozygous   |
| NC_037646.1 | 9456244 | SNV | 1 | G | A | Heterozygous |
| NC_037646.1 | 9460261 | SNV | 1 | C | T | Heterozygous |
| NC_037646.1 | 9463011 | SNV | 1 | G | A | Homozygous   |
| NC_037646.1 | 9469286 | SNV | 1 | T | C | Homozygous   |
| NC_037646.1 | 9471966 | SNV | 1 | A | T | Homozygous   |
| NC_037646.1 | 9472018 | SNV | 1 | A | G | Homozygous   |
| NC_037646.1 | 9472183 | SNV | 1 | C | G | Homozygous   |
| NC_037646.1 | 9472807 | SNV | 1 | A | G | Homozygous   |
| NC_037646.1 | 9483175 | SNV | 1 | C | T | Heterozygous |
| NC_037646.1 | 9488865 | SNV | 1 | G | A | Heterozygous |
| NC_037646.1 | 9488876 | SNV | 1 | A | G | Homozygous   |
| NC_037646.1 | 9489536 | SNV | 1 | A | T | Homozygous   |
| NC_037646.1 | 9490131 | SNV | 1 | C | T | Heterozygous |
| NC_037646.1 | 9491718 | SNV | 1 | T | C | Homozygous   |
| NC_037646.1 | 9491885 | SNV | 1 | A | G | Homozygous   |
| NC_037646.1 | 9494151 | SNV | 1 | G | A | Heterozygous |
| NC_037646.1 | 9511773 | SNV | 1 | G | T | Heterozygous |
| NC_037646.1 | 9528184 | SNV | 1 | T | C | Homozygous   |
| NC_037646.1 | 9532144 | SNV | 1 | C | A | Homozygous   |
| NC_037646.1 | 9532160 | SNV | 1 | T | C | Homozygous   |
| NC_037646.1 | 9532180 | SNV | 1 | A | G | Heterozygous |
| NC_037646.1 | 9532193 | SNV | 1 | T | A | Heterozygous |

|             |         |     |   |   |   |              |
|-------------|---------|-----|---|---|---|--------------|
| NC_037646.1 | 9532201 | SNV | 1 | G | A | Heterozygous |
| NC_037646.1 | 9532261 | SNV | 1 | T | C | Heterozygous |
| NC_037646.1 | 9532307 | SNV | 1 | C | T | Heterozygous |
| NC_037646.1 | 9532642 | SNV | 1 | T | C | Heterozygous |
| NC_037646.1 | 9532716 | SNV | 1 | G | T | Heterozygous |
| NC_037646.1 | 9533055 | SNV | 1 | C | T | Heterozygous |
| NC_037646.1 | 9533058 | SNV | 1 | T | C | Homozygous   |
| NC_037646.1 | 9575022 | SNV | 1 | C | T | Homozygous   |
| NC_037646.1 | 9575051 | SNV | 1 | G | A | Homozygous   |
| NC_037646.1 | 9575059 | SNV | 1 | A | G | Heterozygous |
| NC_037646.1 | 9575112 | SNV | 1 | T | C | Heterozygous |
| NC_037646.1 | 9575133 | SNV | 1 | C | T | Heterozygous |
| NC_037646.1 | 9575175 | SNV | 1 | C | G | Homozygous   |
| NC_037646.1 | 9575178 | SNV | 1 | T | C | Homozygous   |
| NC_037646.1 | 9575182 | SNV | 1 | T | C | Homozygous   |
| NC_037646.1 | 9575184 | SNV | 1 | A | G | Homozygous   |
| NC_037646.1 | 9575216 | SNV | 1 | T | C | Homozygous   |
| NC_037646.1 | 9575430 | SNV | 1 | C | T | Heterozygous |
| NC_037646.1 | 9575469 | SNV | 1 | T | C | Homozygous   |
| NC_037646.1 | 9578912 | SNV | 1 | A | G | Heterozygous |
| NC_037646.1 | 9578999 | SNV | 1 | A | G | Homozygous   |
| NC_037646.1 | 9579010 | SNV | 1 | T | C | Heterozygous |
| NC_037646.1 | 9579020 | SNV | 1 | C | T | Heterozygous |
| NC_037646.1 | 9579143 | SNV | 1 | T | C | Heterozygous |
| NC_037646.1 | 9582083 | SNV | 1 | C | T | Homozygous   |
| NC_037646.1 | 9583335 | SNV | 1 | A | G | Homozygous   |
| NC_037646.1 | 9590058 | SNV | 1 | T | A | Homozygous   |
| NC_037646.1 | 9590062 | SNV | 1 | T | A | Homozygous   |
| NC_037646.1 | 9591487 | SNV | 1 | C | T | Heterozygous |
| NC_037646.1 | 9592406 | SNV | 1 | C | T | Heterozygous |
| NC_037646.1 | 9592452 | SNV | 1 | A | G | Homozygous   |
| NC_037646.1 | 9595321 | SNV | 1 | T | A | Heterozygous |
| NC_037646.1 | 9595334 | SNV | 1 | T | C | Homozygous   |
| NC_037646.1 | 9595337 | SNV | 1 | C | T | Heterozygous |
| NC_037646.1 | 9595441 | SNV | 1 | T | C | Homozygous   |
| NC_037646.1 | 9595444 | SNV | 1 | T | G | Homozygous   |
| NC_037646.1 | 9595459 | SNV | 1 | A | G | Homozygous   |
| NC_037646.1 | 9595482 | SNV | 1 | C | T | Heterozygous |
| NC_037646.1 | 9595714 | SNV | 1 | C | T | Heterozygous |
| NC_037646.1 | 9595851 | SNV | 1 | C | G | Homozygous   |
| NC_037646.1 | 9596385 | SNV | 1 | T | C | Homozygous   |
| NC_037646.1 | 9596415 | SNV | 1 | A | G | Homozygous   |
| NC_037646.1 | 9599533 | SNV | 1 | C | G | Homozygous   |
| NC_037646.1 | 9599537 | SNV | 1 | G | C | Homozygous   |
| NC_037646.1 | 9599542 | SNV | 1 | C | A | Homozygous   |
| NC_037646.1 | 9599545 | SNV | 1 | C | A | Homozygous   |
| NC_037646.1 | 9599551 | SNV | 1 | C | T | Homozygous   |
| NC_037646.1 | 9599562 | SNV | 1 | C | G | Homozygous   |
| NC_037646.1 | 9603634 | SNV | 1 | C | T | Homozygous   |
| NC_037646.1 | 9603643 | SNV | 1 | T | C | Heterozygous |
| NC_037646.1 | 9603649 | SNV | 1 | G | C | Homozygous   |

|             |         |     |   |   |   |              |
|-------------|---------|-----|---|---|---|--------------|
| NC_037646.1 | 9603659 | SNV | 1 | T | C | Homozygous   |
| NC_037646.1 | 9603663 | SNV | 1 | T | A | Homozygous   |
| NC_037646.1 | 9603668 | SNV | 1 | T | C | Homozygous   |
| NC_037646.1 | 9603674 | SNV | 1 | T | C | Homozygous   |
| NC_037646.1 | 9603676 | SNV | 1 | C | A | Homozygous   |
| NC_037646.1 | 9604886 | SNV | 1 | A | G | Homozygous   |
| NC_037646.1 | 9604917 | SNV | 1 | A | G | Homozygous   |
| NC_037646.1 | 9605169 | SNV | 1 | C | T | Heterozygous |
| NC_037646.1 | 9606034 | SNV | 1 | G | A | Homozygous   |
| NC_037646.1 | 9606043 | SNV | 1 | C | T | Homozygous   |
| NC_037646.1 | 9606174 | SNV | 1 | T | A | Heterozygous |
| NC_037646.1 | 9606280 | SNV | 1 | A | G | Homozygous   |
| NC_037646.1 | 9606326 | SNV | 1 | T | C | Heterozygous |
| NC_037646.1 | 9614024 | SNV | 1 | A | C | Heterozygous |
| NC_037646.1 | 9614036 | SNV | 1 | T | C | Homozygous   |
| NC_037646.1 | 9615523 | SNV | 1 | C | T | Heterozygous |
| NC_037646.1 | 9615528 | SNV | 1 | C | A | Heterozygous |
| NC_037646.1 | 9615533 | SNV | 1 | A | T | Heterozygous |
| NC_037646.1 | 9615544 | SNV | 1 | T | C | Homozygous   |
| NC_037646.1 | 9615564 | SNV | 1 | G | A | Homozygous   |
| NC_037646.1 | 9615942 | SNV | 1 | C | T | Heterozygous |
| NC_037646.1 | 9616140 | SNV | 1 | A | G | Homozygous   |
| NC_037646.1 | 9616247 | SNV | 1 | A | G | Homozygous   |
| NC_037646.1 | 9619359 | SNV | 1 | T | C | Heterozygous |
| NC_037646.1 | 9620453 | SNV | 1 | A | G | Homozygous   |
| NC_037646.1 | 9620816 | SNV | 1 | C | G | Homozygous   |
| NC_037646.1 | 9620957 | SNV | 1 | C | T | Homozygous   |
| NC_037646.1 | 9623634 | SNV | 1 | C | T | Heterozygous |
| NC_037646.1 | 9625207 | SNV | 1 | G | A | Homozygous   |
| NC_037646.1 | 9625560 | SNV | 1 | A | G | Homozygous   |
| NC_037646.1 | 9625563 | SNV | 1 | T | C | Homozygous   |
| NC_037646.1 | 9625764 | SNV | 1 | C | G | Heterozygous |
| NC_037646.1 | 9626171 | SNV | 1 | T | C | Homozygous   |
| NC_037646.1 | 9626183 | SNV | 1 | G | A | Heterozygous |
| NC_037646.1 | 9626336 | SNV | 1 | A | G | Homozygous   |
| NC_037646.1 | 9626554 | SNV | 1 | T | C | Homozygous   |
| NC_037646.1 | 9626590 | SNV | 1 | T | C | Heterozygous |
| NC_037646.1 | 9626608 | SNV | 1 | C | T | Heterozygous |
| NC_037646.1 | 9626968 | SNV | 1 | A | C | Homozygous   |
| NC_037646.1 | 9627022 | SNV | 1 | A | G | Homozygous   |
| NC_037646.1 | 9627073 | SNV | 1 | T | G | Homozygous   |
| NC_037646.1 | 9627459 | SNV | 1 | T | C | Homozygous   |
| NC_037646.1 | 9627713 | SNV | 1 | T | C | Homozygous   |
| NC_037646.1 | 9627807 | SNV | 1 | G | A | Heterozygous |
| NC_037646.1 | 9627809 | SNV | 1 | G | A | Heterozygous |
| NC_037646.1 | 9628210 | SNV | 1 | C | G | Homozygous   |
| NC_037646.1 | 9628487 | SNV | 1 | A | G | Homozygous   |
| NC_037646.1 | 9628549 | SNV | 1 | C | T | Heterozygous |
| NC_037646.1 | 9628595 | SNV | 1 | T | A | Heterozygous |
| NC_037646.1 | 9628750 | SNV | 1 | T | C | Homozygous   |
| NC_037646.1 | 9630669 | SNV | 1 | G | C | Homozygous   |

|             |         |     |   |   |   |              |
|-------------|---------|-----|---|---|---|--------------|
| NC_037646.1 | 9630671 | SNV | 1 | C | T | Heterozygous |
| NC_037646.1 | 9630726 | SNV | 1 | G | T | Homozygous   |
| NC_037646.1 | 9631168 | SNV | 1 | A | G | Homozygous   |
| NC_037646.1 | 9631202 | SNV | 1 | G | A | Homozygous   |
| NC_037646.1 | 9631479 | SNV | 1 | T | G | Homozygous   |
| NC_037646.1 | 9631983 | SNV | 1 | G | A | Heterozygous |
| NC_037646.1 | 9632305 | SNV | 1 | T | A | Homozygous   |
| NC_037646.1 | 9632316 | SNV | 1 | T | C | Homozygous   |
| NC_037646.1 | 9632337 | SNV | 1 | T | A | Homozygous   |
| NC_037646.1 | 9632344 | SNV | 1 | T | C | Homozygous   |
| NC_037646.1 | 9643695 | SNV | 1 | G | A | Heterozygous |
| NC_037646.1 | 9643700 | SNV | 1 | A | G | Homozygous   |
| NC_037646.1 | 9643722 | SNV | 1 | T | C | Homozygous   |
| NC_037646.1 | 9643827 | SNV | 1 | G | C | Homozygous   |
| NC_037646.1 | 9647143 | SNV | 1 | T | C | Homozygous   |
| NC_037646.1 | 9652106 | SNV | 1 | A | G | Homozygous   |
| NC_037646.1 | 9652109 | SNV | 1 | A | G | Homozygous   |
| NC_037646.1 | 9652111 | SNV | 1 | A | G | Homozygous   |
| NC_037646.1 | 9652696 | SNV | 1 | G | T | Heterozygous |
| NC_037646.1 | 9654810 | SNV | 1 | T | A | Heterozygous |
| NC_037646.1 | 9654837 | SNV | 1 | A | T | Heterozygous |
| NC_037646.1 | 9666618 | SNV | 1 | T | A | Heterozygous |
| NC_037646.1 | 9666927 | SNV | 1 | A | T | Heterozygous |
| NC_037646.1 | 9666930 | SNV | 1 | C | T | Heterozygous |
| NC_037646.1 | 9666959 | SNV | 1 | G | A | Heterozygous |
| NC_037646.1 | 9667078 | SNV | 1 | A | G | Homozygous   |
| NC_037646.1 | 9667175 | SNV | 1 | C | T | Heterozygous |
| NC_037646.1 | 9667187 | SNV | 1 | C | T | Heterozygous |
| NC_037646.1 | 9667203 | SNV | 1 | C | T | Heterozygous |
| NC_037646.1 | 9667358 | SNV | 1 | C | T | Heterozygous |
| NC_037646.1 | 9674814 | SNV | 1 | C | A | Homozygous   |
| NC_037646.1 | 9674840 | SNV | 1 | T | G | Homozygous   |
| NC_037646.1 | 9674848 | SNV | 1 | T | A | Homozygous   |
| NC_037646.1 | 9674855 | SNV | 1 | A | G | Homozygous   |
| NC_037646.1 | 9674858 | SNV | 1 | T | A | Homozygous   |
| NC_037646.1 | 9684390 | SNV | 1 | T | C | Homozygous   |
| NC_037646.1 | 9684393 | SNV | 1 | T | A | Heterozygous |
| NC_037646.1 | 9684395 | SNV | 1 | C | T | Heterozygous |
| NC_037646.1 | 9684428 | SNV | 1 | C | T | Heterozygous |
| NC_037646.1 | 9684430 | SNV | 1 | C | T | Heterozygous |
| NC_037646.1 | 9684453 | SNV | 1 | T | C | Heterozygous |
| NC_037646.1 | 9684456 | SNV | 1 | C | T | Heterozygous |
| NC_037646.1 | 9725154 | SNV | 1 | T | C | Homozygous   |
| NC_037646.1 | 9725196 | SNV | 1 | A | G | Heterozygous |
| NC_037646.1 | 9725222 | SNV | 1 | C | T | Homozygous   |
| NC_037646.1 | 9725619 | SNV | 1 | C | T | Heterozygous |
| NC_037646.1 | 9729938 | SNV | 1 | A | G | Heterozygous |
| NC_037646.1 | 9730188 | SNV | 1 | A | C | Heterozygous |
| NC_037646.1 | 9731660 | SNV | 1 | G | A | Homozygous   |
| NC_037646.1 | 9731741 | SNV | 1 | G | C | Heterozygous |
| NC_037646.1 | 9731760 | SNV | 1 | T | A | Heterozygous |

|             |         |     |   |   |   |              |
|-------------|---------|-----|---|---|---|--------------|
| NC_037646.1 | 9731778 | SNV | 1 | G | A | Homozygous   |
| NC_037646.1 | 9731835 | SNV | 1 | A | G | Homozygous   |
| NC_037646.1 | 9735135 | SNV | 1 | A | G | Homozygous   |
| NC_037646.1 | 9738011 | SNV | 1 | A | G | Homozygous   |
| NC_037646.1 | 9738649 | SNV | 1 | C | T | Heterozygous |
| NC_037646.1 | 9739812 | SNV | 1 | G | A | Heterozygous |
| NC_037646.1 | 9740184 | SNV | 1 | T | C | Homozygous   |
| NC_037646.1 | 9740380 | SNV | 1 | A | G | Heterozygous |
| NC_037646.1 | 9740574 | SNV | 1 | G | A | Homozygous   |
| NC_037646.1 | 9743509 | SNV | 1 | A | G | Homozygous   |
| NC_037646.1 | 9746595 | SNV | 1 | T | C | Heterozygous |
| NC_037646.1 | 9790900 | SNV | 1 | G | A | Homozygous   |
| NC_037646.1 | 9791254 | SNV | 1 | A | G | Heterozygous |
| NC_037646.1 | 9791268 | SNV | 1 | G | C | Homozygous   |
| NC_037646.1 | 9791271 | SNV | 1 | A | G | Homozygous   |
| NC_037646.1 | 9791352 | SNV | 1 | G | C | Homozygous   |
| NC_037646.1 | 9791355 | SNV | 1 | C | T | Homozygous   |
| NC_037646.1 | 9791417 | SNV | 1 | A | G | Homozygous   |
| NC_037646.1 | 9793660 | SNV | 1 | G | C | Homozygous   |
| NC_037646.1 | 9793709 | SNV | 1 | T | C | Homozygous   |
| NC_037646.1 | 9793726 | SNV | 1 | C | G | Homozygous   |
| NC_037646.1 | 9794111 | SNV | 1 | G | C | Heterozygous |
| NC_037646.1 | 9794170 | SNV | 1 | T | C | Homozygous   |
| NC_037646.1 | 9794172 | SNV | 1 | G | A | Homozygous   |
| NC_037646.1 | 9794175 | SNV | 1 | G | A | Homozygous   |
| NC_037646.1 | 9794248 | SNV | 1 | G | A | Homozygous   |
| NC_037646.1 | 9794378 | SNV | 1 | A | G | Homozygous   |
| NC_037646.1 | 9794543 | SNV | 1 | G | T | Homozygous   |
| NC_037646.1 | 9794572 | SNV | 1 | A | T | Homozygous   |
| NC_037646.1 | 9795152 | SNV | 1 | T | A | Homozygous   |
| NC_037646.1 | 9795193 | SNV | 1 | C | T | Homozygous   |
| NC_037646.1 | 9795227 | SNV | 1 | C | T | Heterozygous |
| NC_037646.1 | 9795309 | SNV | 1 | A | G | Heterozygous |
| NC_037646.1 | 9797829 | SNV | 1 | A | G | Homozygous   |
| NC_037646.1 | 9800156 | SNV | 1 | C | G | Heterozygous |
| NC_037646.1 | 9812196 | SNV | 1 | G | A | Homozygous   |
| NC_037646.1 | 9812363 | SNV | 1 | C | T | Heterozygous |
| NC_037646.1 | 9812380 | SNV | 1 | T | C | Homozygous   |
| NC_037646.1 | 9812451 | SNV | 1 | T | C | Homozygous   |
| NC_037646.1 | 9812581 | SNV | 1 | A | G | Homozygous   |
| NC_037646.1 | 9812634 | SNV | 1 | A | G | Heterozygous |
| NC_037646.1 | 9812647 | SNV | 1 | A | G | Heterozygous |
| NC_037646.1 | 9823675 | SNV | 1 | C | T | Heterozygous |
| NC_037646.1 | 9824227 | SNV | 1 | T | C | Homozygous   |
| NC_037646.1 | 9824236 | SNV | 1 | C | T | Heterozygous |
| NC_037646.1 | 9824238 | SNV | 1 | T | C | Heterozygous |
| NC_037646.1 | 9824245 | SNV | 1 | T | C | Heterozygous |
| NC_037646.1 | 9827274 | SNV | 1 | T | C | Heterozygous |
| NC_037646.1 | 9827294 | SNV | 1 | T | G | Homozygous   |
| NC_037646.1 | 9827350 | SNV | 1 | T | C | Heterozygous |
| NC_037646.1 | 9827356 | SNV | 1 | C | T | Homozygous   |

|             |         |     |   |   |   |              |
|-------------|---------|-----|---|---|---|--------------|
| NC_037646.1 | 9827862 | SNV | 1 | C | T | Heterozygous |
| NC_037646.1 | 9827864 | SNV | 1 | C | T | Heterozygous |
| NC_037646.1 | 9827871 | SNV | 1 | C | T | Homozygous   |
| NC_037646.1 | 9830931 | SNV | 1 | A | G | Heterozygous |
| NC_037646.1 | 9831015 | SNV | 1 | A | G | Homozygous   |
| NC_037646.1 | 9831017 | SNV | 1 | A | T | Homozygous   |
| NC_037646.1 | 9831641 | SNV | 1 | C | T | Heterozygous |
| NC_037646.1 | 9831836 | SNV | 1 | C | T | Homozygous   |
| NC_037646.1 | 9831850 | SNV | 1 | A | T | Heterozygous |
| NC_037646.1 | 9832060 | SNV | 1 | G | A | Heterozygous |
| NC_037646.1 | 9832599 | SNV | 1 | T | C | Homozygous   |
| NC_037646.1 | 9832716 | SNV | 1 | G | A | Heterozygous |
| NC_037646.1 | 9832952 | SNV | 1 | T | C | Homozygous   |
| NC_037646.1 | 9833057 | SNV | 1 | C | T | Heterozygous |
| NC_037646.1 | 9833249 | SNV | 1 | T | C | Homozygous   |
| NC_037646.1 | 9833294 | SNV | 1 | T | C | Homozygous   |
| NC_037646.1 | 9833338 | SNV | 1 | T | C | Heterozygous |
| NC_037646.1 | 9834722 | SNV | 1 | A | G | Homozygous   |
| NC_037646.1 | 9836092 | SNV | 1 | A | G | Homozygous   |
| NC_037646.1 | 9836094 | SNV | 1 | A | G | Homozygous   |
| NC_037646.1 | 9836133 | SNV | 1 | A | G | Heterozygous |
| NC_037646.1 | 9836147 | SNV | 1 | A | G | Homozygous   |
| NC_037646.1 | 9836186 | SNV | 1 | A | G | Homozygous   |
| NC_037646.1 | 9836221 | SNV | 1 | G | C | Homozygous   |
| NC_037646.1 | 9836291 | SNV | 1 | T | C | Homozygous   |
| NC_037646.1 | 9836460 | SNV | 1 | C | T | Homozygous   |
| NC_037646.1 | 9836463 | SNV | 1 | C | T | Heterozygous |
| NC_037646.1 | 9836569 | SNV | 1 | G | C | Homozygous   |
| NC_037646.1 | 9845730 | SNV | 1 | C | T | Homozygous   |
| NC_037646.1 | 9845737 | SNV | 1 | T | C | Homozygous   |
| NC_037646.1 | 9845954 | SNV | 1 | C | A | Heterozygous |
| NC_037646.1 | 9845957 | SNV | 1 | G | C | Heterozygous |
| NC_037646.1 | 9846007 | SNV | 1 | T | C | Heterozygous |
| NC_037646.1 | 9850936 | SNV | 1 | A | G | Homozygous   |
| NC_037646.1 | 9850939 | SNV | 1 | G | A | Homozygous   |
| NC_037646.1 | 9850944 | SNV | 1 | C | G | Homozygous   |
| NC_037646.1 | 9854307 | SNV | 1 | G | A | Heterozygous |
| NC_037646.1 | 9865062 | SNV | 1 | T | C | Homozygous   |
| NC_037646.1 | 9865195 | SNV | 1 | C | T | Heterozygous |
| NC_037646.1 | 9865497 | SNV | 1 | A | G | Homozygous   |
| NC_037646.1 | 9866251 | SNV | 1 | A | G | Homozygous   |
| NC_037646.1 | 9867190 | SNV | 1 | T | C | Homozygous   |
| NC_037646.1 | 9867311 | SNV | 1 | T | C | Homozygous   |
| NC_037646.1 | 9867614 | SNV | 1 | G | T | Heterozygous |
| NC_037646.1 | 9867617 | SNV | 1 | C | T | Heterozygous |
| NC_037646.1 | 9867695 | SNV | 1 | G | A | Heterozygous |
| NC_037646.1 | 9867876 | SNV | 1 | G | C | Heterozygous |
| NC_037646.1 | 9868096 | SNV | 1 | G | A | Heterozygous |
| NC_037646.1 | 9868397 | SNV | 1 | A | T | Heterozygous |
| NC_037646.1 | 9868399 | SNV | 1 | A | G | Heterozygous |
| NC_037646.1 | 9868399 | SNV | 1 | A | T | Heterozygous |

|             |         |     |   |   |   |              |
|-------------|---------|-----|---|---|---|--------------|
| NC_037646.1 | 9868401 | SNV | 1 | A | G | Heterozygous |
| NC_037646.1 | 9868406 | SNV | 1 | G | A | Heterozygous |
| NC_037646.1 | 9868411 | SNV | 1 | A | G | Homozygous   |
| NC_037646.1 | 9868430 | SNV | 1 | A | T | Homozygous   |
| NC_037646.1 | 9868442 | SNV | 1 | G | A | Homozygous   |
| NC_037646.1 | 9869032 | SNV | 1 | C | T | Heterozygous |
| NC_037646.1 | 9869656 | SNV | 1 | T | G | Heterozygous |
| NC_037646.1 | 9869889 | SNV | 1 | T | G | Homozygous   |
| NC_037646.1 | 9870082 | SNV | 1 | C | T | Heterozygous |
| NC_037646.1 | 9870253 | SNV | 1 | C | T | Heterozygous |
| NC_037646.1 | 9870258 | SNV | 1 | A | C | Heterozygous |
| NC_037646.1 | 9870268 | SNV | 1 | A | G | Heterozygous |
| NC_037646.1 | 9870314 | SNV | 1 | A | G | Homozygous   |
| NC_037646.1 | 9870360 | SNV | 1 | A | G | Homozygous   |
| NC_037646.1 | 9870401 | SNV | 1 | T | C | Homozygous   |
| NC_037646.1 | 9870538 | SNV | 1 | T | C | Heterozygous |
| NC_037646.1 | 9870600 | SNV | 1 | C | T | Heterozygous |
| NC_037646.1 | 9870623 | SNV | 1 | G | A | Heterozygous |
| NC_037646.1 | 9870681 | SNV | 1 | C | T | Homozygous   |
| NC_037646.1 | 9870990 | SNV | 1 | C | G | Heterozygous |
| NC_037646.1 | 9871291 | SNV | 1 | C | T | Homozygous   |
| NC_037646.1 | 9871300 | SNV | 1 | T | C | Heterozygous |
| NC_037646.1 | 9871302 | SNV | 1 | T | C | Homozygous   |
| NC_037646.1 | 9871337 | SNV | 1 | G | A | Heterozygous |
| NC_037646.1 | 9871691 | SNV | 1 | C | T | Heterozygous |
| NC_037646.1 | 9871930 | SNV | 1 | G | C | Heterozygous |
| NC_037646.1 | 9872543 | SNV | 1 | T | C | Heterozygous |
| NC_037646.1 | 9872547 | SNV | 1 | T | C | Heterozygous |
| NC_037646.1 | 9872557 | SNV | 1 | G | C | Heterozygous |
| NC_037646.1 | 9872584 | SNV | 1 | T | A | Heterozygous |
| NC_037646.1 | 9872587 | SNV | 1 | T | C | Homozygous   |
| NC_037646.1 | 9872959 | SNV | 1 | C | T | Heterozygous |
| NC_037646.1 | 9872967 | SNV | 1 | T | C | Homozygous   |
| NC_037646.1 | 9873466 | SNV | 1 | C | T | Homozygous   |
| NC_037646.1 | 9873768 | SNV | 1 | G | C | Heterozygous |
| NC_037646.1 | 9873966 | SNV | 1 | C | A | Homozygous   |
| NC_037646.1 | 9874377 | SNV | 1 | G | A | Heterozygous |
| NC_037646.1 | 9874487 | SNV | 1 | G | C | Heterozygous |
| NC_037646.1 | 9874670 | SNV | 1 | G | A | Homozygous   |
| NC_037646.1 | 9874980 | SNV | 1 | T | C | Heterozygous |
| NC_037646.1 | 9874996 | SNV | 1 | C | T | Heterozygous |
| NC_037646.1 | 9875048 | SNV | 1 | G | A | Heterozygous |
| NC_037646.1 | 9875228 | SNV | 1 | A | G | Homozygous   |
| NC_037646.1 | 9875383 | SNV | 1 | C | G | Homozygous   |
| NC_037646.1 | 9875391 | SNV | 1 | C | G | Homozygous   |
| NC_037646.1 | 9875409 | SNV | 1 | C | T | Homozygous   |
| NC_037646.1 | 9875490 | SNV | 1 | A | G | Homozygous   |
| NC_037646.1 | 9876313 | SNV | 1 | C | T | Homozygous   |
| NC_037646.1 | 9876408 | SNV | 1 | G | A | Homozygous   |
| NC_037646.1 | 9877046 | SNV | 1 | A | G | Heterozygous |
| NC_037646.1 | 9877292 | SNV | 1 | G | A | Heterozygous |



|             |         |     |   |   |   |              |
|-------------|---------|-----|---|---|---|--------------|
| NC_037646.1 | 9879097 | SNV | 1 | G | A | Heterozygous |
| NC_037646.1 | 9879099 | SNV | 1 | G | A | Heterozygous |
| NC_037646.1 | 9879101 | SNV | 1 | G | A | Heterozygous |
| NC_037646.1 | 9879104 | SNV | 1 | C | A | Heterozygous |
| NC_037646.1 | 9879112 | SNV | 1 | T | A | Homozygous   |
| NC_037646.1 | 9879620 | SNV | 1 | G | A | Heterozygous |
| NC_037646.1 | 9879727 | SNV | 1 | C | G | Homozygous   |
| NC_037646.1 | 9879747 | SNV | 1 | A | G | Homozygous   |
| NC_037646.1 | 9879752 | SNV | 1 | T | C | Homozygous   |
| NC_037646.1 | 9879766 | SNV | 1 | T | C | Homozygous   |
| NC_037646.1 | 9879782 | SNV | 1 | A | G | Homozygous   |
| NC_037646.1 | 9879784 | SNV | 1 | C | T | Heterozygous |
| NC_037646.1 | 9879799 | SNV | 1 | T | G | Heterozygous |
| NC_037646.1 | 9879847 | SNV | 1 | G | A | Heterozygous |
| NC_037646.1 | 9879869 | SNV | 1 | T | C | Homozygous   |
| NC_037646.1 | 9879882 | SNV | 1 | T | C | Heterozygous |
| NC_037646.1 | 9879916 | SNV | 1 | A | C | Homozygous   |
| NC_037646.1 | 9879925 | SNV | 1 | T | C | Homozygous   |
| NC_037646.1 | 9879942 | SNV | 1 | G | T | Homozygous   |
| NC_037646.1 | 9880213 | SNV | 1 | A | G | Homozygous   |
| NC_037646.1 | 9880232 | SNV | 1 | G | A | Heterozygous |
| NC_037646.1 | 9880254 | SNV | 1 | T | C | Homozygous   |
| NC_037646.1 | 9880256 | SNV | 1 | G | C | Heterozygous |
| NC_037646.1 | 9880260 | SNV | 1 | C | T | Heterozygous |
| NC_037646.1 | 9880266 | SNV | 1 | G | A | Heterozygous |
| NC_037646.1 | 9880269 | SNV | 1 | A | G | Homozygous   |
| NC_037646.1 | 9880313 | SNV | 1 | G | A | Homozygous   |
| NC_037646.1 | 9880366 | SNV | 1 | A | G | Homozygous   |
| NC_037646.1 | 9880385 | SNV | 1 | A | G | Homozygous   |
| NC_037646.1 | 9880400 | SNV | 1 | G | A | Homozygous   |
| NC_037646.1 | 9880535 | SNV | 1 | T | C | Homozygous   |
| NC_037646.1 | 9880560 | SNV | 1 | A | G | Heterozygous |
| NC_037646.1 | 9880574 | SNV | 1 | A | G | Heterozygous |
| NC_037646.1 | 9880660 | SNV | 1 | A | G | Heterozygous |
| NC_037646.1 | 9880681 | SNV | 1 | C | T | Heterozygous |
| NC_037646.1 | 9882605 | SNV | 1 | T | C | Homozygous   |
| NC_037646.1 | 9882612 | SNV | 1 | A | G | Homozygous   |
| NC_037646.1 | 9882630 | SNV | 1 | T | C | Heterozygous |
| NC_037646.1 | 9882663 | SNV | 1 | C | T | Heterozygous |
| NC_037646.1 | 9882682 | SNV | 1 | A | T | Heterozygous |
| NC_037646.1 | 9882715 | SNV | 1 | G | A | Heterozygous |
| NC_037646.1 | 9882737 | SNV | 1 | G | C | Homozygous   |
| NC_037646.1 | 9882764 | SNV | 1 | T | C | Homozygous   |
| NC_037646.1 | 9882811 | SNV | 1 | A | G | Heterozygous |
| NC_037646.1 | 9882820 | SNV | 1 | A | G | Homozygous   |
| NC_037646.1 | 9882825 | SNV | 1 | C | T | Homozygous   |
| NC_037646.1 | 9886833 | SNV | 1 | A | G | Heterozygous |
| NC_037646.1 | 9886906 | SNV | 1 | C | T | Heterozygous |
| NC_037646.1 | 9886974 | SNV | 1 | A | G | Heterozygous |
| NC_037646.1 | 9886989 | SNV | 1 | G | C | Homozygous   |
| NC_037646.1 | 9887063 | SNV | 1 | C | T | Heterozygous |

|             |          |     |   |   |   |              |
|-------------|----------|-----|---|---|---|--------------|
| NC_037646.1 | 9887078  | SNV | 1 | A | G | Homozygous   |
| NC_037646.1 | 9887194  | SNV | 1 | A | G | Homozygous   |
| NC_037646.1 | 9887333  | SNV | 1 | A | G | Homozygous   |
| NC_037646.1 | 9887339  | SNV | 1 | T | C | Homozygous   |
| NC_037646.1 | 9887520  | SNV | 1 | C | T | Heterozygous |
| NC_037646.1 | 9887529  | SNV | 1 | C | A | Homozygous   |
| NC_037646.1 | 9888254  | SNV | 1 | C | T | Homozygous   |
| NC_037646.1 | 9888262  | SNV | 1 | C | T | Homozygous   |
| NC_037646.1 | 9892475  | SNV | 1 | A | G | Homozygous   |
| NC_037646.1 | 9892546  | SNV | 1 | C | T | Homozygous   |
| NC_037646.1 | 9892655  | SNV | 1 | A | T | Homozygous   |
| NC_037646.1 | 9892698  | SNV | 1 | T | C | Homozygous   |
| NC_037646.1 | 9893691  | SNV | 1 | A | T | Homozygous   |
| NC_037646.1 | 9893698  | SNV | 1 | A | G | Homozygous   |
| NC_037646.1 | 9893700  | SNV | 1 | C | G | Homozygous   |
| NC_037646.1 | 9894453  | SNV | 1 | C | T | Homozygous   |
| NC_037646.1 | 9894579  | SNV | 1 | G | C | Heterozygous |
| NC_037646.1 | 9902502  | SNV | 1 | C | T | Heterozygous |
| NC_037646.1 | 9902522  | SNV | 1 | G | A | Heterozygous |
| NC_037646.1 | 9902636  | SNV | 1 | T | C | Homozygous   |
| NC_037646.1 | 9903348  | SNV | 1 | C | T | Heterozygous |
| NC_037646.1 | 9918814  | SNV | 1 | G | A | Homozygous   |
| NC_037646.1 | 9919051  | SNV | 1 | A | G | Homozygous   |
| NC_037646.1 | 9919184  | SNV | 1 | A | G | Heterozygous |
| NC_037646.1 | 10049825 | SNV | 1 | A | G | Homozygous   |
| NC_037646.1 | 10049855 | SNV | 1 | A | G | Homozygous   |
| NC_037646.1 | 10049894 | SNV | 1 | T | C | Heterozygous |
| NC_037646.1 | 10049897 | SNV | 1 | G | A | Homozygous   |
| NC_037646.1 | 10050237 | SNV | 1 | G | A | Homozygous   |
| NC_037646.1 | 10050252 | SNV | 1 | C | G | Homozygous   |
| NC_037646.1 | 10050569 | SNV | 1 | G | A | Homozygous   |
| NC_037646.1 | 10050572 | SNV | 1 | T | A | Heterozygous |
| NC_037646.1 | 10053037 | SNV | 1 | C | T | Heterozygous |
| NC_037646.1 | 10053136 | SNV | 1 | C | T | Heterozygous |
| NC_037646.1 | 10053314 | SNV | 1 | T | C | Homozygous   |
| NC_037646.1 | 10053642 | SNV | 1 | T | C | Homozygous   |
| NC_037646.1 | 10053922 | SNV | 1 | A | G | Homozygous   |
| NC_037646.1 | 10055903 | SNV | 1 | A | G | Homozygous   |
| NC_037646.1 | 10056044 | SNV | 1 | G | A | Homozygous   |
| NC_037646.1 | 10056494 | SNV | 1 | T | G | Homozygous   |
| NC_037646.1 | 10057657 | SNV | 1 | T | C | Homozygous   |
| NC_037646.1 | 10059342 | SNV | 1 | T | C | Heterozygous |
| NC_037646.1 | 10059373 | SNV | 1 | T | C | Homozygous   |
| NC_037646.1 | 10063667 | SNV | 1 | G | A | Heterozygous |
| NC_037646.1 | 10066640 | SNV | 1 | A | C | Heterozygous |
| NC_037646.1 | 10066692 | SNV | 1 | T | G | Homozygous   |
| NC_037646.1 | 10067010 | SNV | 1 | C | T | Heterozygous |
| NC_037646.1 | 10067013 | SNV | 1 | T | C | Homozygous   |
| NC_037646.1 | 10067121 | SNV | 1 | A | G | Heterozygous |
| NC_037646.1 | 10067265 | SNV | 1 | T | G | Homozygous   |
| NC_037646.1 | 10067289 | SNV | 1 | C | T | Heterozygous |

|             |          |     |   |   |   |              |
|-------------|----------|-----|---|---|---|--------------|
| NC_037646.1 | 10067292 | SNV | 1 | T | C | Heterozygous |
| NC_037646.1 | 10067328 | SNV | 1 | A | G | Homozygous   |
| NC_037646.1 | 10067340 | SNV | 1 | A | G | Homozygous   |
| NC_037646.1 | 10067352 | SNV | 1 | G | A | Heterozygous |
| NC_037646.1 | 10067486 | SNV | 1 | A | G | Heterozygous |
| NC_037646.1 | 10067529 | SNV | 1 | T | C | Heterozygous |
| NC_037646.1 | 10067555 | SNV | 1 | T | C | Homozygous   |
| NC_037646.1 | 10067576 | SNV | 1 | A | G | Heterozygous |
| NC_037646.1 | 10067592 | SNV | 1 | T | A | Homozygous   |
| NC_037646.1 | 10072244 | SNV | 1 | A | G | Homozygous   |
| NC_037646.1 | 10094938 | SNV | 1 | C | T | Heterozygous |
| NC_037646.1 | 10094941 | SNV | 1 | T | C | Heterozygous |
| NC_037646.1 | 10094951 | SNV | 1 | T | C | Heterozygous |
| NC_037646.1 | 10111943 | SNV | 1 | C | A | Heterozygous |
| NC_037646.1 | 10111952 | SNV | 1 | A | T | Homozygous   |
| NC_037646.1 | 10111967 | SNV | 1 | A | T | Homozygous   |
| NC_037646.1 | 10125269 | SNV | 1 | T | G | Heterozygous |
| NC_037646.1 | 10139182 | SNV | 1 | A | C | Homozygous   |
| NC_037646.1 | 10139322 | SNV | 1 | A | G | Heterozygous |
| NC_037646.1 | 10139341 | SNV | 1 | A | C | Heterozygous |
| NC_037646.1 | 10139343 | SNV | 1 | G | T | Homozygous   |
| NC_037646.1 | 10139382 | SNV | 1 | G | A | Heterozygous |
| NC_037646.1 | 10139729 | SNV | 1 | C | T | Homozygous   |
| NC_037646.1 | 10139735 | SNV | 1 | C | T | Heterozygous |
| NC_037646.1 | 10139954 | SNV | 1 | G | A | Heterozygous |
| NC_037646.1 | 10139987 | SNV | 1 | C | T | Homozygous   |
| NC_037646.1 | 10140243 | SNV | 1 | C | T | Heterozygous |
| NC_037646.1 | 10140249 | SNV | 1 | G | A | Heterozygous |
| NC_037646.1 | 10140291 | SNV | 1 | C | T | Heterozygous |
| NC_037646.1 | 10140853 | SNV | 1 | C | T | Heterozygous |
| NC_037646.1 | 10141337 | SNV | 1 | T | C | Heterozygous |
| NC_037646.1 | 10142377 | SNV | 1 | T | C | Homozygous   |
| NC_037646.1 | 10143425 | SNV | 1 | G | A | Heterozygous |
| NC_037646.1 | 10144956 | SNV | 1 | T | C | Homozygous   |
| NC_037646.1 | 10145643 | SNV | 1 | C | G | Homozygous   |
| NC_037646.1 | 10145897 | SNV | 1 | G | A | Homozygous   |
| NC_037646.1 | 10146550 | SNV | 1 | T | G | Homozygous   |
| NC_037646.1 | 10146774 | SNV | 1 | G | A | Heterozygous |
| NC_037646.1 | 10147023 | SNV | 1 | T | G | Homozygous   |
| NC_037646.1 | 10147427 | SNV | 1 | G | A | Heterozygous |
| NC_037646.1 | 10149009 | SNV | 1 | A | G | Homozygous   |
| NC_037646.1 | 10149029 | SNV | 1 | T | C | Homozygous   |
| NC_037646.1 | 10149058 | SNV | 1 | T | C | Heterozygous |
| NC_037646.1 | 10149061 | SNV | 1 | C | T | Heterozygous |
| NC_037646.1 | 10149074 | SNV | 1 | C | T | Heterozygous |
| NC_037646.1 | 10149327 | SNV | 1 | G | A | Heterozygous |
| NC_037646.1 | 10151574 | SNV | 1 | A | G | Heterozygous |
| NC_037646.1 | 10151742 | SNV | 1 | G | A | Heterozygous |
| NC_037646.1 | 10186334 | SNV | 1 | C | T | Heterozygous |
| NC_037646.1 | 10186517 | SNV | 1 | C | G | Heterozygous |
| NC_037646.1 | 10186697 | SNV | 1 | G | A | Homozygous   |

|             |          |     |   |   |   |              |
|-------------|----------|-----|---|---|---|--------------|
| NC_037646.1 | 10190088 | SNV | 1 | A | G | Heterozygous |
| NC_037646.1 | 10190089 | SNV | 1 | T | A | Heterozygous |
| NC_037646.1 | 10190093 | SNV | 1 | G | T | Heterozygous |
| NC_037646.1 | 10190120 | SNV | 1 | A | G | Heterozygous |
| NC_037646.1 | 10190125 | SNV | 1 | T | G | Heterozygous |
| NC_037646.1 | 10192161 | SNV | 1 | C | G | Heterozygous |
| NC_037646.1 | 10192180 | SNV | 1 | A | G | Heterozygous |
| NC_037646.1 | 10192203 | SNV | 1 | C | T | Heterozygous |
| NC_037646.1 | 10192230 | SNV | 1 | T | C | Heterozygous |
| NC_037646.1 | 10192293 | SNV | 1 | A | G | Homozygous   |
| NC_037646.1 | 10192338 | SNV | 1 | T | C | Homozygous   |
| NC_037646.1 | 10192352 | SNV | 1 | T | A | Homozygous   |
| NC_037646.1 | 10192413 | SNV | 1 | G | A | Homozygous   |
| NC_037646.1 | 10192464 | SNV | 1 | A | T | Homozygous   |
| NC_037646.1 | 10192580 | SNV | 1 | T | A | Homozygous   |
| NC_037646.1 | 10195311 | SNV | 1 | A | G | Homozygous   |
| NC_037646.1 | 10195600 | SNV | 1 | T | A | Heterozygous |
| NC_037646.1 | 10197369 | SNV | 1 | C | T | Homozygous   |
| NC_037646.1 | 10197389 | SNV | 1 | C | T | Homozygous   |
| NC_037646.1 | 10217998 | SNV | 1 | C | A | Heterozygous |
| NC_037646.1 | 10218022 | SNV | 1 | C | T | Heterozygous |
| NC_037646.1 | 10218055 | SNV | 1 | G | A | Heterozygous |
| NC_037646.1 | 10221670 | SNV | 1 | G | A | Heterozygous |
| NC_037646.1 | 10221679 | SNV | 1 | C | T | Heterozygous |
| NC_037646.1 | 10221733 | SNV | 1 | A | G | Heterozygous |
| NC_037646.1 | 10227265 | SNV | 1 | T | C | Heterozygous |
| NC_037646.1 | 10238554 | SNV | 1 | A | C | Homozygous   |
| NC_037646.1 | 10238582 | SNV | 1 | G | T | Heterozygous |
| NC_037646.1 | 10239699 | SNV | 1 | T | C | Homozygous   |
| NC_037646.1 | 10239737 | SNV | 1 | C | T | Homozygous   |
| NC_037646.1 | 10239761 | SNV | 1 | T | C | Homozygous   |
| NC_037646.1 | 10240851 | SNV | 1 | A | T | Heterozygous |
| NC_037646.1 | 10242955 | SNV | 1 | C | T | Homozygous   |
| NC_037646.1 | 10242972 | SNV | 1 | A | G | Heterozygous |
| NC_037646.1 | 10243485 | SNV | 1 | G | C | Heterozygous |
| NC_037646.1 | 10243489 | SNV | 1 | C | T | Heterozygous |
| NC_037646.1 | 10247542 | SNV | 1 | A | G | Heterozygous |
| NC_037646.1 | 10249381 | SNV | 1 | T | C | Homozygous   |
| NC_037646.1 | 10249384 | SNV | 1 | A | T | Homozygous   |
| NC_037646.1 | 10252908 | SNV | 1 | T | C | Homozygous   |
| NC_037646.1 | 10252910 | SNV | 1 | T | C | Heterozygous |
| NC_037646.1 | 10252932 | SNV | 1 | C | T | Homozygous   |
| NC_037646.1 | 10252936 | SNV | 1 | C | T | Heterozygous |
| NC_037646.1 | 10253396 | SNV | 1 | C | T | Homozygous   |
| NC_037646.1 | 10253478 | SNV | 1 | C | A | Homozygous   |
| NC_037646.1 | 10253579 | SNV | 1 | A | C | Homozygous   |
| NC_037646.1 | 10254763 | SNV | 1 | C | T | Heterozygous |
| NC_037646.1 | 10255086 | SNV | 1 | T | C | Homozygous   |
| NC_037646.1 | 10255091 | SNV | 1 | A | T | Heterozygous |
| NC_037646.1 | 10255100 | SNV | 1 | C | T | Homozygous   |
| NC_037646.1 | 10255115 | SNV | 1 | C | T | Heterozygous |

|             |          |     |   |   |   |              |
|-------------|----------|-----|---|---|---|--------------|
| NC_037646.1 | 10255128 | SNV | 1 | C | T | Heterozygous |
| NC_037646.1 | 10255134 | SNV | 1 | T | C | Homozygous   |
| NC_037646.1 | 10255136 | SNV | 1 | C | T | Heterozygous |
| NC_037646.1 | 10255276 | SNV | 1 | G | A | Heterozygous |
| NC_037646.1 | 10255572 | SNV | 1 | T | C | Heterozygous |
| NC_037646.1 | 10255721 | SNV | 1 | T | C | Homozygous   |
| NC_037646.1 | 10258937 | SNV | 1 | C | G | Heterozygous |
| NC_037646.1 | 10258990 | SNV | 1 | T | C | Homozygous   |
| NC_037646.1 | 10271536 | SNV | 1 | G | A | Homozygous   |
| NC_037646.1 | 10273464 | SNV | 1 | A | G | Homozygous   |
| NC_037646.1 | 10273501 | SNV | 1 | G | T | Homozygous   |
| NC_037646.1 | 10273544 | SNV | 1 | G | A | Homozygous   |
| NC_037646.1 | 10282212 | SNV | 1 | G | A | Heterozygous |
| NC_037646.1 | 10284831 | SNV | 1 | G | C | Homozygous   |
| NC_037646.1 | 10284860 | SNV | 1 | T | C | Homozygous   |
| NC_037646.1 | 10284877 | SNV | 1 | T | C | Heterozygous |
| NC_037646.1 | 10284913 | SNV | 1 | A | G | Homozygous   |
| NC_037646.1 | 10285121 | SNV | 1 | T | G | Homozygous   |
| NC_037646.1 | 10285126 | SNV | 1 | T | C | Heterozygous |
| NC_037646.1 | 10285129 | SNV | 1 | T | C | Heterozygous |
| NC_037646.1 | 10285550 | SNV | 1 | G | T | Homozygous   |
| NC_037646.1 | 10285650 | SNV | 1 | C | A | Homozygous   |
| NC_037646.1 | 10285652 | SNV | 1 | A | C | Homozygous   |
| NC_037646.1 | 10285777 | SNV | 1 | T | C | Homozygous   |
| NC_037646.1 | 10285781 | SNV | 1 | G | A | Homozygous   |
| NC_037646.1 | 10285813 | SNV | 1 | C | T | Homozygous   |
| NC_037646.1 | 10285945 | SNV | 1 | G | A | Homozygous   |
| NC_037646.1 | 10285962 | SNV | 1 | C | T | Homozygous   |
| NC_037646.1 | 10285993 | SNV | 1 | A | G | Heterozygous |
| NC_037646.1 | 10286150 | SNV | 1 | C | T | Heterozygous |
| NC_037646.1 | 10286318 | SNV | 1 | T | G | Homozygous   |
| NC_037646.1 | 10286345 | SNV | 1 | G | T | Heterozygous |
| NC_037646.1 | 10286372 | SNV | 1 | G | A | Heterozygous |
| NC_037646.1 | 10286426 | SNV | 1 | C | T | Heterozygous |
| NC_037646.1 | 10286481 | SNV | 1 | T | C | Homozygous   |
| NC_037646.1 | 10286519 | SNV | 1 | G | C | Heterozygous |
| NC_037646.1 | 10286532 | SNV | 1 | A | G | Homozygous   |
| NC_037646.1 | 10286562 | SNV | 1 | C | T | Heterozygous |
| NC_037646.1 | 10286575 | SNV | 1 | A | G | Heterozygous |
| NC_037646.1 | 10287002 | SNV | 1 | A | G | Homozygous   |
| NC_037646.1 | 10287282 | SNV | 1 | T | C | Heterozygous |
| NC_037646.1 | 10287846 | SNV | 1 | G | A | Homozygous   |
| NC_037646.1 | 10287902 | SNV | 1 | A | G | Homozygous   |
| NC_037646.1 | 10288834 | SNV | 1 | C | T | Heterozygous |
| NC_037646.1 | 10289109 | SNV | 1 | A | G | Heterozygous |
| NC_037646.1 | 10289117 | SNV | 1 | G | A | Heterozygous |
| NC_037646.1 | 10289122 | SNV | 1 | G | A | Homozygous   |
| NC_037646.1 | 10294701 | SNV | 1 | C | T | Heterozygous |
| NC_037646.1 | 10294719 | SNV | 1 | G | A | Homozygous   |
| NC_037646.1 | 10294799 | SNV | 1 | G | A | Heterozygous |
| NC_037646.1 | 10297205 | SNV | 1 | A | G | Homozygous   |

|             |          |     |   |   |   |              |
|-------------|----------|-----|---|---|---|--------------|
| NC_037646.1 | 10297225 | SNV | 1 | T | C | Heterozygous |
| NC_037646.1 | 10297351 | SNV | 1 | T | C | Homozygous   |
| NC_037646.1 | 10297421 | SNV | 1 | A | G | Homozygous   |
| NC_037646.1 | 10297476 | SNV | 1 | T | G | Homozygous   |
| NC_037646.1 | 10297503 | SNV | 1 | T | C | Homozygous   |
| NC_037646.1 | 10297507 | SNV | 1 | T | C | Homozygous   |
| NC_037646.1 | 10297550 | SNV | 1 | T | G | Heterozygous |
| NC_037646.1 | 10297589 | SNV | 1 | G | A | Homozygous   |
| NC_037646.1 | 10300619 | SNV | 1 | T | G | Heterozygous |
| NC_037646.1 | 10300644 | SNV | 1 | G | A | Homozygous   |
| NC_037646.1 | 10300647 | SNV | 1 | A | G | Homozygous   |
| NC_037646.1 | 10300860 | SNV | 1 | A | G | Homozygous   |
| NC_037646.1 | 10304713 | SNV | 1 | C | T | Heterozygous |
| NC_037646.1 | 10316679 | SNV | 1 | G | A | Heterozygous |
| NC_037646.1 | 10317589 | SNV | 1 | T | C | Homozygous   |
| NC_037646.1 | 10318682 | SNV | 1 | A | C | Homozygous   |
| NC_037646.1 | 10318697 | SNV | 1 | C | T | Homozygous   |
| NC_037646.1 | 10318722 | SNV | 1 | T | C | Heterozygous |
| NC_037646.1 | 10318728 | SNV | 1 | T | C | Homozygous   |
| NC_037646.1 | 10318732 | SNV | 1 | A | T | Homozygous   |
| NC_037646.1 | 10318737 | SNV | 1 | C | T | Homozygous   |
| NC_037646.1 | 10320255 | SNV | 1 | G | C | Heterozygous |
| NC_037646.1 | 10320298 | SNV | 1 | G | A | Homozygous   |
| NC_037646.1 | 10320335 | SNV | 1 | A | G | Homozygous   |
| NC_037646.1 | 10326386 | SNV | 1 | A | G | Homozygous   |
| NC_037646.1 | 10330138 | SNV | 1 | A | T | Homozygous   |
| NC_037646.1 | 10336543 | SNV | 1 | A | T | Heterozygous |
| NC_037646.1 | 10336560 | SNV | 1 | A | T | Homozygous   |
| NC_037646.1 | 10336572 | SNV | 1 | G | A | Homozygous   |
| NC_037646.1 | 10336579 | SNV | 1 | C | T | Homozygous   |
| NC_037646.1 | 10343853 | SNV | 1 | T | C | Homozygous   |
| NC_037646.1 | 10344062 | SNV | 1 | C | T | Heterozygous |
| NC_037646.1 | 10344079 | SNV | 1 | T | C | Homozygous   |
| NC_037646.1 | 10345046 | SNV | 1 | C | T | Heterozygous |
| NC_037646.1 | 10345092 | SNV | 1 | T | C | Heterozygous |
| NC_037646.1 | 10345193 | SNV | 1 | T | A | Homozygous   |
| NC_037646.1 | 10350518 | SNV | 1 | T | C | Homozygous   |
| NC_037646.1 | 10350801 | SNV | 1 | A | G | Homozygous   |
| NC_037646.1 | 10350957 | SNV | 1 | A | C | Homozygous   |
| NC_037646.1 | 10350967 | SNV | 1 | G | A | Homozygous   |
| NC_037646.1 | 10350972 | SNV | 1 | T | A | Homozygous   |
| NC_037646.1 | 10350996 | SNV | 1 | A | G | Homozygous   |
| NC_037646.1 | 10351301 | SNV | 1 | G | A | Homozygous   |
| NC_037646.1 | 10351436 | SNV | 1 | A | G | Homozygous   |
| NC_037646.1 | 10354132 | SNV | 1 | C | T | Heterozygous |
| NC_037646.1 | 10362317 | SNV | 1 | G | A | Heterozygous |
| NC_037646.1 | 10362332 | SNV | 1 | C | T | Heterozygous |
| NC_037646.1 | 10362338 | SNV | 1 | A | G | Heterozygous |
| NC_037646.1 | 10362365 | SNV | 1 | C | T | Homozygous   |
| NC_037646.1 | 10362384 | SNV | 1 | A | G | Homozygous   |
| NC_037646.1 | 10362387 | SNV | 1 | A | G | Heterozygous |

|             |          |     |   |   |   |              |
|-------------|----------|-----|---|---|---|--------------|
| NC_037646.1 | 10362449 | SNV | 1 | G | A | Homozygous   |
| NC_037646.1 | 10362466 | SNV | 1 | T | C | Heterozygous |
| NC_037646.1 | 10362474 | SNV | 1 | G | A | Homozygous   |
| NC_037646.1 | 10362511 | SNV | 1 | A | G | Heterozygous |
| NC_037646.1 | 10363712 | SNV | 1 | C | T | Heterozygous |
| NC_037646.1 | 10363944 | SNV | 1 | G | C | Heterozygous |
| NC_037646.1 | 10364127 | SNV | 1 | T | C | Homozygous   |
| NC_037646.1 | 10365142 | SNV | 1 | C | T | Heterozygous |
| NC_037646.1 | 10365292 | SNV | 1 | T | C | Homozygous   |
| NC_037646.1 | 10365362 | SNV | 1 | C | T | Homozygous   |
| NC_037646.1 | 10365534 | SNV | 1 | C | T | Heterozygous |
| NC_037646.1 | 10365759 | SNV | 1 | A | G | Homozygous   |
| NC_037646.1 | 10365774 | SNV | 1 | T | C | Homozygous   |
| NC_037646.1 | 10373972 | SNV | 1 | G | A | Homozygous   |
| NC_037646.1 | 10374006 | SNV | 1 | C | T | Homozygous   |
| NC_037646.1 | 10374025 | SNV | 1 | T | G | Homozygous   |
| NC_037646.1 | 10374031 | SNV | 1 | T | G | Homozygous   |
| NC_037646.1 | 10374033 | SNV | 1 | T | A | Homozygous   |
| NC_037646.1 | 10374043 | SNV | 1 | T | C | Homozygous   |
| NC_037646.1 | 10374049 | SNV | 1 | T | A | Homozygous   |
| NC_037646.1 | 10374090 | SNV | 1 | A | C | Heterozygous |
| NC_037646.1 | 10374092 | SNV | 1 | T | C | Heterozygous |
| NC_037646.1 | 10374158 | SNV | 1 | C | T | Heterozygous |
| NC_037646.1 | 10374192 | SNV | 1 | C | T | Heterozygous |
| NC_037646.1 | 10374194 | SNV | 1 | A | T | Homozygous   |
| NC_037646.1 | 10374198 | SNV | 1 | A | T | Heterozygous |
| NC_037646.1 | 10374206 | SNV | 1 | C | T | Heterozygous |
| NC_037646.1 | 10374295 | SNV | 1 | A | G | Homozygous   |
| NC_037646.1 | 10377486 | SNV | 1 | T | C | Homozygous   |
| NC_037646.1 | 10383545 | SNV | 1 | A | G | Heterozygous |
| NC_037646.1 | 10383619 | SNV | 1 | A | G | Homozygous   |
| NC_037646.1 | 10397086 | SNV | 1 | A | G | Homozygous   |
| NC_037646.1 | 10397188 | SNV | 1 | A | G | Homozygous   |
| NC_037646.1 | 10397482 | SNV | 1 | G | A | Heterozygous |
| NC_037646.1 | 10407673 | SNV | 1 | C | G | Homozygous   |
| NC_037646.1 | 10407904 | SNV | 1 | C | T | Heterozygous |
| NC_037646.1 | 10407936 | SNV | 1 | A | G | Homozygous   |
| NC_037646.1 | 10408096 | SNV | 1 | A | G | Heterozygous |
| NC_037646.1 | 10408102 | SNV | 1 | C | G | Homozygous   |
| NC_037646.1 | 10408144 | SNV | 1 | T | C | Homozygous   |
| NC_037646.1 | 10408206 | SNV | 1 | A | G | Heterozygous |
| NC_037646.1 | 10408227 | SNV | 1 | G | A | Heterozygous |
| NC_037646.1 | 10408227 | SNV | 1 | G | C | Heterozygous |
| NC_037646.1 | 10408239 | SNV | 1 | T | C | Homozygous   |
| NC_037646.1 | 10408245 | SNV | 1 | C | T | Homozygous   |
| NC_037646.1 | 10411848 | SNV | 1 | T | C | Heterozygous |
| NC_037646.1 | 10412072 | SNV | 1 | A | G | Heterozygous |
| NC_037646.1 | 10412364 | SNV | 1 | G | A | Heterozygous |
| NC_037646.1 | 10412808 | SNV | 1 | G | T | Heterozygous |
| NC_037646.1 | 10413159 | SNV | 1 | T | C | Homozygous   |
| NC_037646.1 | 10413188 | SNV | 1 | T | C | Homozygous   |

|             |          |     |   |   |   |              |
|-------------|----------|-----|---|---|---|--------------|
| NC_037646.1 | 10413254 | SNV | 1 | C | G | Homozygous   |
| NC_037646.1 | 10413279 | SNV | 1 | T | C | Heterozygous |
| NC_037646.1 | 10413362 | SNV | 1 | C | T | Heterozygous |
| NC_037646.1 | 10413381 | SNV | 1 | T | C | Homozygous   |
| NC_037646.1 | 10413409 | SNV | 1 | T | C | Homozygous   |
| NC_037646.1 | 10413426 | SNV | 1 | T | C | Heterozygous |
| NC_037646.1 | 10413600 | SNV | 1 | G | A | Homozygous   |
| NC_037646.1 | 10413748 | SNV | 1 | G | A | Heterozygous |
| NC_037646.1 | 10413765 | SNV | 1 | G | A | Heterozygous |
| NC_037646.1 | 10414660 | SNV | 1 | G | A | Heterozygous |
| NC_037646.1 | 10414734 | SNV | 1 | T | A | Heterozygous |
| NC_037646.1 | 10414754 | SNV | 1 | A | G | Homozygous   |
| NC_037646.1 | 10422803 | SNV | 1 | A | G | Homozygous   |
| NC_037646.1 | 10422812 | SNV | 1 | C | A | Homozygous   |
| NC_037646.1 | 10423326 | SNV | 1 | A | T | Homozygous   |
| NC_037646.1 | 10423360 | SNV | 1 | G | A | Homozygous   |
| NC_037646.1 | 10454797 | SNV | 1 | G | A | Heterozygous |
| NC_037646.1 | 10454932 | SNV | 1 | G | C | Heterozygous |
| NC_037646.1 | 10454963 | SNV | 1 | G | A | Heterozygous |
| NC_037646.1 | 10454999 | SNV | 1 | T | C | Heterozygous |
| NC_037646.1 | 10579554 | SNV | 1 | G | A | Homozygous   |
| NC_037646.1 | 10581107 | SNV | 1 | C | T | Homozygous   |
| NC_037646.1 | 10588642 | SNV | 1 | A | G | Homozygous   |
| NC_037646.1 | 10588644 | SNV | 1 | G | A | Homozygous   |
| NC_037646.1 | 10588653 | SNV | 1 | G | A | Homozygous   |
| NC_037646.1 | 10588711 | SNV | 1 | C | G | Heterozygous |
| NC_037646.1 | 10588725 | SNV | 1 | G | A | Homozygous   |
| NC_037646.1 | 10588774 | SNV | 1 | G | A | Heterozygous |
| NC_037646.1 | 10607194 | SNV | 1 | C | A | Homozygous   |
| NC_037646.1 | 10607217 | SNV | 1 | A | G | Homozygous   |
| NC_037646.1 | 10608592 | SNV | 1 | C | T | Heterozygous |
| NC_037646.1 | 10608712 | SNV | 1 | A | G | Heterozygous |
| NC_037646.1 | 10608718 | SNV | 1 | G | A | Heterozygous |
| NC_037646.1 | 10613099 | SNV | 1 | G | C | Homozygous   |
| NC_037646.1 | 10613167 | SNV | 1 | T | C | Homozygous   |
| NC_037646.1 | 10614331 | SNV | 1 | C | T | Homozygous   |
| NC_037646.1 | 10623168 | SNV | 1 | G | T | Heterozygous |
| NC_037646.1 | 10623171 | SNV | 1 | G | A | Heterozygous |
| NC_037646.1 | 10629504 | SNV | 1 | C | G | Heterozygous |
| NC_037646.1 | 10629628 | SNV | 1 | G | A | Heterozygous |
| NC_037646.1 | 10629633 | SNV | 1 | G | A | Heterozygous |
| NC_037646.1 | 10629636 | SNV | 1 | G | A | Heterozygous |
| NC_037646.1 | 10629730 | SNV | 1 | A | G | Homozygous   |
| NC_037646.1 | 10629837 | SNV | 1 | G | A | Homozygous   |
| NC_037646.1 | 10630732 | SNV | 1 | T | C | Heterozygous |
| NC_037646.1 | 10630758 | SNV | 1 | T | A | Homozygous   |
| NC_037646.1 | 10630896 | SNV | 1 | T | G | Heterozygous |
| NC_037646.1 | 10630903 | SNV | 1 | G | C | Homozygous   |
| NC_037646.1 | 10630960 | SNV | 1 | G | A | Homozygous   |
| NC_037646.1 | 10630966 | SNV | 1 | T | C | Homozygous   |
| NC_037646.1 | 10630972 | SNV | 1 | C | T | Homozygous   |



|             |          |     |   |   |   |              |
|-------------|----------|-----|---|---|---|--------------|
| NC_037646.1 | 10630989 | SNV | 1 | T | C | Homozygous   |
| NC_037646.1 | 10630991 | SNV | 1 | T | A | Homozygous   |
| NC_037646.1 | 10631105 | SNV | 1 | G | A | Homozygous   |
| NC_037646.1 | 10631113 | SNV | 1 | G | A | Homozygous   |
| NC_037646.1 | 10631117 | SNV | 1 | A | G | Homozygous   |
| NC_037646.1 | 10631188 | SNV | 1 | A | G | Homozygous   |
| NC_037646.1 | 10631211 | SNV | 1 | T | C | Homozygous   |
| NC_037646.1 | 10631301 | SNV | 1 | G | A | Heterozygous |
| NC_037646.1 | 10631313 | SNV | 1 | T | A | Homozygous   |
| NC_037646.1 | 10631337 | SNV | 1 | C | T | Homozygous   |
| NC_037646.1 | 10631414 | SNV | 1 | G | A | Homozygous   |
| NC_037646.1 | 10631427 | SNV | 1 | A | G | Homozygous   |
| NC_037646.1 | 10631596 | SNV | 1 | T | C | Homozygous   |
| NC_037646.1 | 10631611 | SNV | 1 | A | T | Homozygous   |
| NC_037646.1 | 10631653 | SNV | 1 | C | A | Heterozygous |
| NC_037646.1 | 10631722 | SNV | 1 | A | G | Heterozygous |
| NC_037646.1 | 10631823 | SNV | 1 | C | T | Heterozygous |
| NC_037646.1 | 10631846 | SNV | 1 | A | G | Heterozygous |
| NC_037646.1 | 10631880 | SNV | 1 | A | G | Heterozygous |
| NC_037646.1 | 10631920 | SNV | 1 | A | G | Homozygous   |
| NC_037646.1 | 10631939 | SNV | 1 | T | A | Heterozygous |
| NC_037646.1 | 10631943 | SNV | 1 | A | T | Heterozygous |
| NC_037646.1 | 10631956 | SNV | 1 | A | G | Heterozygous |
| NC_037646.1 | 10632017 | SNV | 1 | T | C | Homozygous   |
| NC_037646.1 | 10632045 | SNV | 1 | T | C | Homozygous   |
| NC_037646.1 | 10632048 | SNV | 1 | A | G | Heterozygous |
| NC_037646.1 | 10632090 | SNV | 1 | G | A | Heterozygous |
| NC_037646.1 | 10632092 | SNV | 1 | G | A | Heterozygous |
| NC_037646.1 | 10632163 | SNV | 1 | C | T | Homozygous   |
| NC_037646.1 | 10632290 | SNV | 1 | G | A | Heterozygous |
| NC_037646.1 | 10632344 | SNV | 1 | A | G | Homozygous   |
| NC_037646.1 | 10632427 | SNV | 1 | G | A | Heterozygous |
| NC_037646.1 | 10632480 | SNV | 1 | G | C | Homozygous   |
| NC_037646.1 | 10659982 | SNV | 1 | T | G | Heterozygous |
| NC_037646.1 | 10660086 | SNV | 1 | C | T | Heterozygous |
| NC_037646.1 | 10660446 | SNV | 1 | A | G | Homozygous   |
| NC_037646.1 | 10660767 | SNV | 1 | T | C | Homozygous   |
| NC_037646.1 | 10661076 | SNV | 1 | G | A | Homozygous   |
| NC_037646.1 | 10661122 | SNV | 1 | G | A | Homozygous   |
| NC_037646.1 | 10661125 | SNV | 1 | A | G | Homozygous   |
| NC_037646.1 | 10661719 | SNV | 1 | T | G | Heterozygous |
| NC_037646.1 | 10661849 | SNV | 1 | T | C | Heterozygous |
| NC_037646.1 | 10661953 | SNV | 1 | A | G | Heterozygous |
| NC_037646.1 | 10662221 | SNV | 1 | T | C | Heterozygous |
| NC_037646.1 | 10662225 | SNV | 1 | T | C | Heterozygous |
| NC_037646.1 | 10662228 | SNV | 1 | A | G | Heterozygous |
| NC_037646.1 | 10662233 | SNV | 1 | T | C | Heterozygous |
| NC_037646.1 | 10662265 | SNV | 1 | C | T | Heterozygous |
| NC_037646.1 | 10662327 | SNV | 1 | G | A | Heterozygous |
| NC_037646.1 | 10662417 | SNV | 1 | T | C | Homozygous   |
| NC_037646.1 | 10662534 | SNV | 1 | G | A | Heterozygous |

|             |          |     |   |   |   |              |
|-------------|----------|-----|---|---|---|--------------|
| NC_037646.1 | 10662782 | SNV | 1 | C | T | Homozygous   |
| NC_037646.1 | 10662810 | SNV | 1 | G | A | Heterozygous |
| NC_037646.1 | 10662812 | SNV | 1 | C | T | Heterozygous |
| NC_037646.1 | 10662932 | SNV | 1 | A | G | Homozygous   |
| NC_037646.1 | 10663130 | SNV | 1 | C | T | Heterozygous |
| NC_037646.1 | 10663239 | SNV | 1 | C | G | Homozygous   |
| NC_037646.1 | 10663281 | SNV | 1 | T | C | Homozygous   |
| NC_037646.1 | 10663288 | SNV | 1 | A | G | Homozygous   |
| NC_037646.1 | 10663370 | SNV | 1 | A | C | Heterozygous |
| NC_037646.1 | 10663491 | SNV | 1 | T | C | Homozygous   |
| NC_037646.1 | 10664337 | SNV | 1 | G | A | Heterozygous |
| NC_037646.1 | 10664486 | SNV | 1 | G | A | Heterozygous |
| NC_037646.1 | 10664491 | SNV | 1 | C | T | Homozygous   |
| NC_037646.1 | 10666074 | SNV | 1 | G | A | Heterozygous |
| NC_037646.1 | 10666100 | SNV | 1 | G | T | Homozygous   |
| NC_037646.1 | 10666104 | SNV | 1 | C | T | Homozygous   |
| NC_037646.1 | 10666146 | SNV | 1 | A | G | Heterozygous |
| NC_037646.1 | 10666305 | SNV | 1 | T | C | Homozygous   |
| NC_037646.1 | 10666399 | SNV | 1 | C | T | Heterozygous |
| NC_037646.1 | 10666748 | SNV | 1 | C | A | Homozygous   |
| NC_037646.1 | 10672554 | SNV | 1 | T | A | Heterozygous |
| NC_037646.1 | 10672557 | SNV | 1 | T | G | Heterozygous |
| NC_037646.1 | 10673054 | SNV | 1 | A | G | Heterozygous |
| NC_037646.1 | 10673598 | SNV | 1 | T | C | Homozygous   |
| NC_037646.1 | 10674228 | SNV | 1 | G | A | Heterozygous |
| NC_037646.1 | 10674230 | SNV | 1 | G | C | Heterozygous |
| NC_037646.1 | 10674261 | SNV | 1 | T | C | Heterozygous |
| NC_037646.1 | 10674282 | SNV | 1 | C | T | Heterozygous |
| NC_037646.1 | 10674284 | SNV | 1 | T | A | Heterozygous |
| NC_037646.1 | 10674374 | SNV | 1 | A | T | Heterozygous |
| NC_037646.1 | 10674383 | SNV | 1 | G | A | Heterozygous |
| NC_037646.1 | 10674525 | SNV | 1 | C | T | Homozygous   |
| NC_037646.1 | 10674585 | SNV | 1 | A | G | Homozygous   |
| NC_037646.1 | 10674930 | SNV | 1 | C | T | Heterozygous |
| NC_037646.1 | 10674945 | SNV | 1 | G | T | Heterozygous |
| NC_037646.1 | 10675002 | SNV | 1 | A | T | Homozygous   |
| NC_037646.1 | 10675892 | SNV | 1 | T | C | Homozygous   |
| NC_037646.1 | 10676119 | SNV | 1 | A | G | Homozygous   |
| NC_037646.1 | 10676154 | SNV | 1 | C | T | Heterozygous |
| NC_037646.1 | 10676311 | SNV | 1 | C | T | Homozygous   |
| NC_037646.1 | 10676313 | SNV | 1 | A | G | Heterozygous |
| NC_037646.1 | 10676338 | SNV | 1 | G | A | Homozygous   |
| NC_037646.1 | 10676405 | SNV | 1 | T | C | Heterozygous |
| NC_037646.1 | 10676408 | SNV | 1 | G | A | Homozygous   |
| NC_037646.1 | 10676416 | SNV | 1 | G | T | Heterozygous |
| NC_037646.1 | 10676628 | SNV | 1 | C | T | Homozygous   |
| NC_037646.1 | 10676702 | SNV | 1 | C | T | Heterozygous |
| NC_037646.1 | 10676774 | SNV | 1 | C | G | Heterozygous |
| NC_037646.1 | 10676811 | SNV | 1 | C | T | Homozygous   |
| NC_037646.1 | 10676896 | SNV | 1 | G | A | Heterozygous |
| NC_037646.1 | 10676926 | SNV | 1 | C | G | Homozygous   |

|             |          |     |   |   |   |              |
|-------------|----------|-----|---|---|---|--------------|
| NC_037646.1 | 10676929 | SNV | 1 | G | A | Heterozygous |
| NC_037646.1 | 10676939 | SNV | 1 | A | C | Heterozygous |
| NC_037646.1 | 10676984 | SNV | 1 | G | A | Heterozygous |
| NC_037646.1 | 10677202 | SNV | 1 | G | C | Homozygous   |
| NC_037646.1 | 10678024 | SNV | 1 | A | G | Homozygous   |
| NC_037646.1 | 10678088 | SNV | 1 | A | G | Homozygous   |
| NC_037646.1 | 10678208 | SNV | 1 | A | G | Heterozygous |
| NC_037646.1 | 10678350 | SNV | 1 | A | C | Homozygous   |
| NC_037646.1 | 10678398 | SNV | 1 | C | T | Homozygous   |
| NC_037646.1 | 10678579 | SNV | 1 | A | G | Homozygous   |
| NC_037646.1 | 10678905 | SNV | 1 | G | C | Heterozygous |
| NC_037646.1 | 10678995 | SNV | 1 | T | C | Heterozygous |
| NC_037646.1 | 10678997 | SNV | 1 | T | A | Heterozygous |
| NC_037646.1 | 10679163 | SNV | 1 | C | T | Heterozygous |
| NC_037646.1 | 10679192 | SNV | 1 | T | C | Heterozygous |
| NC_037646.1 | 10679194 | SNV | 1 | T | C | Homozygous   |
| NC_037646.1 | 10679196 | SNV | 1 | T | C | Homozygous   |
| NC_037646.1 | 10679204 | SNV | 1 | C | T | Heterozygous |
| NC_037646.1 | 10679206 | SNV | 1 | C | T | Heterozygous |
| NC_037646.1 | 10679257 | SNV | 1 | T | C | Homozygous   |
| NC_037646.1 | 10679320 | SNV | 1 | G | A | Heterozygous |
| NC_037646.1 | 10679420 | SNV | 1 | T | C | Homozygous   |
| NC_037646.1 | 10680070 | SNV | 1 | A | G | Homozygous   |
| NC_037646.1 | 10680091 | SNV | 1 | G | A | Homozygous   |
| NC_037646.1 | 10680195 | SNV | 1 | G | A | Heterozygous |
| NC_037646.1 | 10680242 | SNV | 1 | C | T | Homozygous   |
| NC_037646.1 | 10680377 | SNV | 1 | G | A | Heterozygous |
| NC_037646.1 | 10680379 | SNV | 1 | T | G | Heterozygous |
| NC_037646.1 | 10680384 | SNV | 1 | C | T | Heterozygous |
| NC_037646.1 | 10680482 | SNV | 1 | C | T | Heterozygous |
| NC_037646.1 | 10680571 | SNV | 1 | A | T | Homozygous   |
| NC_037646.1 | 10680604 | SNV | 1 | A | G | Homozygous   |
| NC_037646.1 | 10680666 | SNV | 1 | C | A | Homozygous   |
| NC_037646.1 | 10681249 | SNV | 1 | A | G | Heterozygous |
| NC_037646.1 | 10681891 | SNV | 1 | A | G | Homozygous   |
| NC_037646.1 | 10682268 | SNV | 1 | G | C | Heterozygous |
| NC_037646.1 | 10683212 | SNV | 1 | G | A | Heterozygous |
| NC_037646.1 | 10683282 | SNV | 1 | T | C | Homozygous   |
| NC_037646.1 | 10683883 | SNV | 1 | T | A | Homozygous   |
| NC_037646.1 | 10684036 | SNV | 1 | C | T | Heterozygous |
| NC_037646.1 | 10684058 | SNV | 1 | C | T | Homozygous   |
| NC_037646.1 | 10684194 | SNV | 1 | T | G | Homozygous   |
| NC_037646.1 | 10684287 | SNV | 1 | T | C | Homozygous   |
| NC_037646.1 | 10684611 | SNV | 1 | C | T | Homozygous   |
| NC_037646.1 | 10684690 | SNV | 1 | G | T | Homozygous   |
| NC_037646.1 | 10685009 | SNV | 1 | A | G | Heterozygous |
| NC_037646.1 | 10685250 | SNV | 1 | T | C | Heterozygous |
| NC_037646.1 | 10685649 | SNV | 1 | C | T | Heterozygous |
| NC_037646.1 | 10685699 | SNV | 1 | G | A | Homozygous   |
| NC_037646.1 | 10685977 | SNV | 1 | C | T | Heterozygous |
| NC_037646.1 | 10686025 | SNV | 1 | G | A | Homozygous   |

|             |          |     |   |   |   |              |
|-------------|----------|-----|---|---|---|--------------|
| NC_037646.1 | 10686107 | SNV | 1 | A | G | Homozygous   |
| NC_037646.1 | 10686121 | SNV | 1 | A | G | Heterozygous |
| NC_037646.1 | 10686208 | SNV | 1 | A | G | Homozygous   |
| NC_037646.1 | 10686338 | SNV | 1 | T | C | Homozygous   |
| NC_037646.1 | 10686342 | SNV | 1 | C | T | Heterozygous |
| NC_037646.1 | 10686423 | SNV | 1 | T | C | Homozygous   |
| NC_037646.1 | 10686524 | SNV | 1 | A | G | Heterozygous |
| NC_037646.1 | 10686526 | SNV | 1 | G | A | Heterozygous |
| NC_037646.1 | 10687108 | SNV | 1 | G | A | Heterozygous |
| NC_037646.1 | 10687797 | SNV | 1 | T | C | Heterozygous |
| NC_037646.1 | 10687870 | SNV | 1 | G | C | Heterozygous |
| NC_037646.1 | 10688156 | SNV | 1 | C | A | Heterozygous |
| NC_037646.1 | 10688166 | SNV | 1 | T | C | Homozygous   |
| NC_037646.1 | 10688197 | SNV | 1 | T | C | Heterozygous |
| NC_037646.1 | 10688215 | SNV | 1 | A | G | Heterozygous |
| NC_037646.1 | 10690062 | SNV | 1 | T | C | Homozygous   |
| NC_037646.1 | 10690483 | SNV | 1 | G | A | Homozygous   |
| NC_037646.1 | 10690542 | SNV | 1 | T | C | Heterozygous |
| NC_037646.1 | 10690599 | SNV | 1 | C | T | Heterozygous |
| NC_037646.1 | 10690784 | SNV | 1 | A | G | Homozygous   |
| NC_037646.1 | 10691088 | SNV | 1 | A | G | Heterozygous |
| NC_037646.1 | 10691134 | SNV | 1 | T | C | Heterozygous |
| NC_037646.1 | 10691145 | SNV | 1 | C | T | Heterozygous |
| NC_037646.1 | 10691685 | SNV | 1 | G | T | Homozygous   |
| NC_037646.1 | 10691691 | SNV | 1 | T | A | Heterozygous |
| NC_037646.1 | 10691709 | SNV | 1 | T | A | Heterozygous |
| NC_037646.1 | 10692097 | SNV | 1 | C | T | Homozygous   |
| NC_037646.1 | 10692164 | SNV | 1 | T | G | Homozygous   |
| NC_037646.1 | 10692231 | SNV | 1 | C | T | Heterozygous |
| NC_037646.1 | 10692640 | SNV | 1 | T | A | Homozygous   |
| NC_037646.1 | 10692747 | SNV | 1 | G | C | Heterozygous |
| NC_037646.1 | 10693005 | SNV | 1 | A | T | Heterozygous |
| NC_037646.1 | 10693010 | SNV | 1 | A | C | Heterozygous |
| NC_037646.1 | 10693741 | SNV | 1 | C | T | Heterozygous |
| NC_037646.1 | 10693790 | SNV | 1 | C | T | Heterozygous |
| NC_037646.1 | 10694218 | SNV | 1 | A | G | Homozygous   |
| NC_037646.1 | 10694263 | SNV | 1 | A | G | Homozygous   |
| NC_037646.1 | 10694305 | SNV | 1 | C | T | Heterozygous |
| NC_037646.1 | 10694866 | SNV | 1 | G | A | Homozygous   |
| NC_037646.1 | 10695106 | SNV | 1 | T | C | Heterozygous |
| NC_037646.1 | 10695183 | SNV | 1 | A | G | Homozygous   |
| NC_037646.1 | 10695267 | SNV | 1 | A | G | Homozygous   |
| NC_037646.1 | 10695412 | SNV | 1 | T | C | Homozygous   |
| NC_037646.1 | 10695708 | SNV | 1 | T | C | Heterozygous |
| NC_037646.1 | 10695788 | SNV | 1 | A | G | Homozygous   |
| NC_037646.1 | 10696470 | SNV | 1 | T | A | Homozygous   |
| NC_037646.1 | 10696513 | SNV | 1 | G | A | Heterozygous |
| NC_037646.1 | 10696521 | SNV | 1 | T | A | Homozygous   |
| NC_037646.1 | 10696534 | SNV | 1 | T | A | Heterozygous |
| NC_037646.1 | 10696699 | SNV | 1 | G | A | Heterozygous |
| NC_037646.1 | 10696727 | SNV | 1 | A | G | Heterozygous |

|             |          |     |   |   |   |              |
|-------------|----------|-----|---|---|---|--------------|
| NC_037646.1 | 10697451 | SNV | 1 | C | T | Heterozygous |
| NC_037646.1 | 10697491 | SNV | 1 | A | T | Homozygous   |
| NC_037646.1 | 10697501 | SNV | 1 | G | T | Homozygous   |
| NC_037646.1 | 10697504 | SNV | 1 | T | G | Homozygous   |
| NC_037646.1 | 10697507 | SNV | 1 | C | T | Heterozygous |
| NC_037646.1 | 10697511 | SNV | 1 | T | C | Heterozygous |
| NC_037646.1 | 10697518 | SNV | 1 | T | A | Heterozygous |
| NC_037646.1 | 10698444 | SNV | 1 | G | C | Heterozygous |
| NC_037646.1 | 10698457 | SNV | 1 | T | C | Homozygous   |
| NC_037646.1 | 10698579 | SNV | 1 | C | T | Heterozygous |
| NC_037646.1 | 10698877 | SNV | 1 | G | T | Heterozygous |
| NC_037646.1 | 10699119 | SNV | 1 | A | G | Homozygous   |
| NC_037646.1 | 10700262 | SNV | 1 | T | C | Heterozygous |
| NC_037646.1 | 10701019 | SNV | 1 | T | C | Heterozygous |
| NC_037646.1 | 10701114 | SNV | 1 | A | G | Homozygous   |
| NC_037646.1 | 10701268 | SNV | 1 | T | C | Homozygous   |
| NC_037646.1 | 10701366 | SNV | 1 | A | G | Homozygous   |
| NC_037646.1 | 10701501 | SNV | 1 | A | G | Homozygous   |
| NC_037646.1 | 10701627 | SNV | 1 | T | C | Homozygous   |
| NC_037646.1 | 10701687 | SNV | 1 | G | A | Homozygous   |
| NC_037646.1 | 10701784 | SNV | 1 | C | T | Heterozygous |
| NC_037646.1 | 10702118 | SNV | 1 | G | T | Homozygous   |
| NC_037646.1 | 10702336 | SNV | 1 | G | A | Heterozygous |
| NC_037646.1 | 10702337 | SNV | 1 | T | C | Heterozygous |
| NC_037646.1 | 10702456 | SNV | 1 | T | C | Homozygous   |
| NC_037646.1 | 10705432 | SNV | 1 | C | T | Homozygous   |
| NC_037646.1 | 10706123 | SNV | 1 | G | A | Heterozygous |
| NC_037646.1 | 10706198 | SNV | 1 | A | T | Homozygous   |
| NC_037646.1 | 10706270 | SNV | 1 | T | C | Homozygous   |
| NC_037646.1 | 10706510 | SNV | 1 | A | G | Homozygous   |
| NC_037646.1 | 10706809 | SNV | 1 | G | T | Heterozygous |
| NC_037646.1 | 10707752 | SNV | 1 | A | G | Homozygous   |
| NC_037646.1 | 10707786 | SNV | 1 | G | A | Homozygous   |
| NC_037646.1 | 10707789 | SNV | 1 | C | T | Homozygous   |
| NC_037646.1 | 10708040 | SNV | 1 | T | A | Heterozygous |
| NC_037646.1 | 10708536 | SNV | 1 | G | A | Heterozygous |
| NC_037646.1 | 10708572 | SNV | 1 | A | G | Heterozygous |
| NC_037646.1 | 10708575 | SNV | 1 | T | C | Homozygous   |
| NC_037646.1 | 10708582 | SNV | 1 | T | A | Heterozygous |
| NC_037646.1 | 10708755 | SNV | 1 | A | G | Homozygous   |
| NC_037646.1 | 10708771 | SNV | 1 | G | A | Homozygous   |
| NC_037646.1 | 10708785 | SNV | 1 | C | T | Homozygous   |
| NC_037646.1 | 10708886 | SNV | 1 | G | C | Heterozygous |
| NC_037646.1 | 10708936 | SNV | 1 | C | T | Heterozygous |
| NC_037646.1 | 10708965 | SNV | 1 | T | C | Heterozygous |
| NC_037646.1 | 10709365 | SNV | 1 | T | A | Heterozygous |
| NC_037646.1 | 10709409 | SNV | 1 | C | T | Heterozygous |
| NC_037646.1 | 10710208 | SNV | 1 | G | A | Homozygous   |
| NC_037646.1 | 10710521 | SNV | 1 | A | C | Heterozygous |
| NC_037646.1 | 10710575 | SNV | 1 | G | A | Heterozygous |
| NC_037646.1 | 10710587 | SNV | 1 | C | T | Heterozygous |

|             |          |     |   |   |   |              |
|-------------|----------|-----|---|---|---|--------------|
| NC_037646.1 | 10710778 | SNV | 1 | A | G | Heterozygous |
| NC_037646.1 | 10711364 | SNV | 1 | T | A | Homozygous   |
| NC_037646.1 | 10711378 | SNV | 1 | C | T | Heterozygous |
| NC_037646.1 | 10711388 | SNV | 1 | C | T | Heterozygous |
| NC_037646.1 | 10711391 | SNV | 1 | T | C | Heterozygous |
| NC_037646.1 | 10711639 | SNV | 1 | T | C | Heterozygous |
| NC_037646.1 | 10711656 | SNV | 1 | T | G | Homozygous   |
| NC_037646.1 | 10711658 | SNV | 1 | T | C | Homozygous   |
| NC_037646.1 | 10711847 | SNV | 1 | C | T | Homozygous   |
| NC_037646.1 | 10711868 | SNV | 1 | A | C | Homozygous   |
| NC_037646.1 | 10712042 | SNV | 1 | A | G | Homozygous   |
| NC_037646.1 | 10712547 | SNV | 1 | C | T | Heterozygous |
| NC_037646.1 | 10712549 | SNV | 1 | T | C | Heterozygous |
| NC_037646.1 | 10712594 | SNV | 1 | C | T | Heterozygous |
| NC_037646.1 | 10712751 | SNV | 1 | T | G | Heterozygous |
| NC_037646.1 | 10713115 | SNV | 1 | T | G | Heterozygous |
| NC_037646.1 | 10713294 | SNV | 1 | C | T | Heterozygous |
| NC_037646.1 | 10713385 | SNV | 1 | T | C | Heterozygous |
| NC_037646.1 | 10713454 | SNV | 1 | T | C | Heterozygous |
| NC_037646.1 | 10713492 | SNV | 1 | T | C | Heterozygous |
| NC_037646.1 | 10713513 | SNV | 1 | T | C | Homozygous   |
| NC_037646.1 | 10713647 | SNV | 1 | G | C | Heterozygous |
| NC_037646.1 | 10713915 | SNV | 1 | C | T | Heterozygous |
| NC_037646.1 | 10714022 | SNV | 1 | T | C | Heterozygous |
| NC_037646.1 | 10714116 | SNV | 1 | T | C | Heterozygous |
| NC_037646.1 | 10714270 | SNV | 1 | T | C | Heterozygous |
| NC_037646.1 | 10714285 | SNV | 1 | G | T | Heterozygous |
| NC_037646.1 | 10715091 | SNV | 1 | G | A | Heterozygous |
| NC_037646.1 | 10715103 | SNV | 1 | A | G | Heterozygous |
| NC_037646.1 | 10715108 | SNV | 1 | T | C | Homozygous   |
| NC_037646.1 | 10715112 | SNV | 1 | T | C | Heterozygous |
| NC_037646.1 | 10715968 | SNV | 1 | C | T | Heterozygous |
| NC_037646.1 | 10716197 | SNV | 1 | C | T | Heterozygous |
| NC_037646.1 | 10716306 | SNV | 1 | G | A | Heterozygous |
| NC_037646.1 | 10716308 | SNV | 1 | C | T | Heterozygous |
| NC_037646.1 | 10716414 | SNV | 1 | A | G | Homozygous   |
| NC_037646.1 | 10716438 | SNV | 1 | T | C | Homozygous   |
| NC_037646.1 | 10716503 | SNV | 1 | G | C | Heterozygous |
| NC_037646.1 | 10716519 | SNV | 1 | A | G | Heterozygous |
| NC_037646.1 | 10716532 | SNV | 1 | C | T | Heterozygous |
| NC_037646.1 | 10716539 | SNV | 1 | C | T | Heterozygous |
| NC_037646.1 | 10716709 | SNV | 1 | G | C | Homozygous   |
| NC_037646.1 | 10716766 | SNV | 1 | A | G | Homozygous   |
| NC_037646.1 | 10716856 | SNV | 1 | C | T | Heterozygous |
| NC_037646.1 | 10716963 | SNV | 1 | C | T | Heterozygous |
| NC_037646.1 | 10717661 | SNV | 1 | G | A | Heterozygous |
| NC_037646.1 | 10718177 | SNV | 1 | C | T | Heterozygous |
| NC_037646.1 | 10718618 | SNV | 1 | A | G | Heterozygous |
| NC_037646.1 | 10720006 | SNV | 1 | A | G | Homozygous   |
| NC_037646.1 | 10720939 | SNV | 1 | T | C | Heterozygous |
| NC_037646.1 | 10721341 | SNV | 1 | A | G | Homozygous   |

|             |          |     |   |   |   |              |
|-------------|----------|-----|---|---|---|--------------|
| NC_037646.1 | 10721547 | SNV | 1 | T | C | Heterozygous |
| NC_037646.1 | 10721571 | SNV | 1 | G | A | Heterozygous |
| NC_037646.1 | 10721604 | SNV | 1 | T | C | Heterozygous |
| NC_037646.1 | 10721766 | SNV | 1 | A | G | Heterozygous |
| NC_037646.1 | 10722258 | SNV | 1 | T | C | Heterozygous |
| NC_037646.1 | 10722283 | SNV | 1 | C | T | Homozygous   |
| NC_037646.1 | 10723151 | SNV | 1 | T | C | Homozygous   |
| NC_037646.1 | 10723166 | SNV | 1 | T | G | Homozygous   |
| NC_037646.1 | 10723205 | SNV | 1 | C | T | Heterozygous |
| NC_037646.1 | 10723207 | SNV | 1 | A | G | Heterozygous |
| NC_037646.1 | 10723250 | SNV | 1 | T | C | Heterozygous |
| NC_037646.1 | 10723314 | SNV | 1 | T | C | Homozygous   |
| NC_037646.1 | 10723373 | SNV | 1 | A | T | Homozygous   |
| NC_037646.1 | 10723382 | SNV | 1 | T | C | Homozygous   |
| NC_037646.1 | 10723438 | SNV | 1 | T | C | Heterozygous |
| NC_037646.1 | 10723535 | SNV | 1 | G | A | Heterozygous |
| NC_037646.1 | 10723760 | SNV | 1 | T | C | Heterozygous |
| NC_037646.1 | 10723762 | SNV | 1 | T | C | Homozygous   |
| NC_037646.1 | 10723770 | SNV | 1 | T | C | Heterozygous |
| NC_037646.1 | 10723772 | SNV | 1 | T | C | Heterozygous |
| NC_037646.1 | 10723774 | SNV | 1 | T | C | Heterozygous |
| NC_037646.1 | 10723784 | SNV | 1 | T | C | Heterozygous |
| NC_037646.1 | 10723796 | SNV | 1 | T | C | Heterozygous |
| NC_037646.1 | 10723798 | SNV | 1 | C | T | Heterozygous |
| NC_037646.1 | 10723806 | SNV | 1 | T | C | Heterozygous |
| NC_037646.1 | 10723809 | SNV | 1 | G | A | Homozygous   |
| NC_037646.1 | 10724150 | SNV | 1 | A | G | Homozygous   |
| NC_037646.1 | 10724216 | SNV | 1 | G | A | Homozygous   |
| NC_037646.1 | 10724247 | SNV | 1 | G | A | Heterozygous |
| NC_037646.1 | 10724302 | SNV | 1 | A | G | Homozygous   |
| NC_037646.1 | 10724304 | SNV | 1 | T | C | Homozygous   |
| NC_037646.1 | 10724337 | SNV | 1 | T | C | Homozygous   |
| NC_037646.1 | 10724483 | SNV | 1 | A | G | Heterozygous |
| NC_037646.1 | 10724488 | SNV | 1 | A | T | Heterozygous |
| NC_037646.1 | 10724511 | SNV | 1 | A | T | Heterozygous |
| NC_037646.1 | 10724888 | SNV | 1 | G | A | Heterozygous |
| NC_037646.1 | 10724903 | SNV | 1 | C | T | Heterozygous |
| NC_037646.1 | 10725138 | SNV | 1 | G | A | Homozygous   |
| NC_037646.1 | 10725362 | SNV | 1 | G | A | Heterozygous |
| NC_037646.1 | 10725366 | SNV | 1 | A | G | Homozygous   |
| NC_037646.1 | 10725447 | SNV | 1 | T | C | Homozygous   |
| NC_037646.1 | 10725469 | SNV | 1 | C | T | Heterozygous |
| NC_037646.1 | 10725524 | SNV | 1 | C | T | Heterozygous |
| NC_037646.1 | 10725677 | SNV | 1 | T | A | Heterozygous |
| NC_037646.1 | 10725724 | SNV | 1 | G | A | Homozygous   |
| NC_037646.1 | 10725904 | SNV | 1 | A | G | Heterozygous |
| NC_037646.1 | 10726284 | SNV | 1 | A | C | Heterozygous |
| NC_037646.1 | 10726309 | SNV | 1 | C | T | Heterozygous |
| NC_037646.1 | 10726313 | SNV | 1 | G | A | Heterozygous |
| NC_037646.1 | 10726636 | SNV | 1 | C | A | Heterozygous |
| NC_037646.1 | 10727163 | SNV | 1 | G | A | Heterozygous |

|             |          |     |   |   |   |              |
|-------------|----------|-----|---|---|---|--------------|
| NC_037646.1 | 10727845 | SNV | 1 | G | A | Heterozygous |
| NC_037646.1 | 10727870 | SNV | 1 | T | A | Homozygous   |
| NC_037646.1 | 10727900 | SNV | 1 | C | G | Heterozygous |
| NC_037646.1 | 10728207 | SNV | 1 | A | G | Homozygous   |
| NC_037646.1 | 10728231 | SNV | 1 | C | T | Heterozygous |
| NC_037646.1 | 10728245 | SNV | 1 | G | A | Homozygous   |
| NC_037646.1 | 10728262 | SNV | 1 | T | C | Homozygous   |
| NC_037646.1 | 10728417 | SNV | 1 | T | C | Heterozygous |
| NC_037646.1 | 10728555 | SNV | 1 | A | T | Homozygous   |
| NC_037646.1 | 10728558 | SNV | 1 | C | T | Homozygous   |
| NC_037646.1 | 10728603 | SNV | 1 | A | G | Homozygous   |
| NC_037646.1 | 10728632 | SNV | 1 | C | T | Homozygous   |
| NC_037646.1 | 10728902 | SNV | 1 | A | G | Heterozygous |
| NC_037646.1 | 10728911 | SNV | 1 | T | C | Heterozygous |
| NC_037646.1 | 10729507 | SNV | 1 | G | A | Homozygous   |
| NC_037646.1 | 10729597 | SNV | 1 | G | C | Homozygous   |
| NC_037646.1 | 10730004 | SNV | 1 | C | G | Heterozygous |
| NC_037646.1 | 10730519 | SNV | 1 | T | A | Homozygous   |
| NC_037646.1 | 10730583 | SNV | 1 | T | G | Homozygous   |
| NC_037646.1 | 10730587 | SNV | 1 | A | T | Homozygous   |
| NC_037646.1 | 10730841 | SNV | 1 | T | C | Homozygous   |
| NC_037646.1 | 10730874 | SNV | 1 | A | G | Homozygous   |
| NC_037646.1 | 10730950 | SNV | 1 | C | T | Heterozygous |
| NC_037646.1 | 10731044 | SNV | 1 | T | C | Homozygous   |
| NC_037646.1 | 10731055 | SNV | 1 | T | C | Heterozygous |
| NC_037646.1 | 10731087 | SNV | 1 | G | A | Homozygous   |
| NC_037646.1 | 10731435 | SNV | 1 | T | C | Homozygous   |
| NC_037646.1 | 10731797 | SNV | 1 | A | G | Heterozygous |
| NC_037646.1 | 10731835 | SNV | 1 | G | T | Heterozygous |
| NC_037646.1 | 10732070 | SNV | 1 | T | C | Homozygous   |
| NC_037646.1 | 10732262 | SNV | 1 | C | T | Homozygous   |
| NC_037646.1 | 10732311 | SNV | 1 | C | T | Heterozygous |
| NC_037646.1 | 10732523 | SNV | 1 | C | A | Heterozygous |
| NC_037646.1 | 10732759 | SNV | 1 | A | C | Homozygous   |
| NC_037646.1 | 10732957 | SNV | 1 | C | T | Heterozygous |
| NC_037646.1 | 10732965 | SNV | 1 | C | T | Heterozygous |
| NC_037646.1 | 10734497 | SNV | 1 | T | C | Homozygous   |
| NC_037646.1 | 10734882 | SNV | 1 | C | T | Heterozygous |
| NC_037646.1 | 10735503 | SNV | 1 | C | T | Heterozygous |
| NC_037646.1 | 10735765 | SNV | 1 | A | G | Heterozygous |
| NC_037646.1 | 10735772 | SNV | 1 | A | G | Homozygous   |
| NC_037646.1 | 10735822 | SNV | 1 | T | C | Heterozygous |
| NC_037646.1 | 10736141 | SNV | 1 | A | G | Homozygous   |
| NC_037646.1 | 10736161 | SNV | 1 | A | G | Heterozygous |
| NC_037646.1 | 10736267 | SNV | 1 | T | C | Homozygous   |
| NC_037646.1 | 10736355 | SNV | 1 | A | G | Homozygous   |
| NC_037646.1 | 10736360 | SNV | 1 | A | G | Heterozygous |
| NC_037646.1 | 10736367 | SNV | 1 | A | G | Homozygous   |
| NC_037646.1 | 10736412 | SNV | 1 | A | G | Heterozygous |
| NC_037646.1 | 10736412 | SNV | 1 | A | T | Heterozygous |
| NC_037646.1 | 10736493 | SNV | 1 | A | T | Heterozygous |



|             |          |     |   |   |   |              |
|-------------|----------|-----|---|---|---|--------------|
| NC_037646.1 | 10736519 | SNV | 1 | T | C | Heterozygous |
| NC_037646.1 | 10736520 | SNV | 1 | A | C | Heterozygous |
| NC_037646.1 | 10736523 | SNV | 1 | C | T | Heterozygous |
| NC_037646.1 | 10736531 | SNV | 1 | C | G | Heterozygous |
| NC_037646.1 | 10736531 | SNV | 1 | C | T | Heterozygous |
| NC_037646.1 | 10736537 | SNV | 1 | G | A | Heterozygous |
| NC_037646.1 | 10736927 | SNV | 1 | G | T | Homozygous   |
| NC_037646.1 | 10737109 | SNV | 1 | A | G | Heterozygous |
| NC_037646.1 | 10737177 | SNV | 1 | G | A | Heterozygous |
| NC_037646.1 | 10737260 | SNV | 1 | G | A | Heterozygous |
| NC_037646.1 | 10738099 | SNV | 1 | A | T | Heterozygous |
| NC_037646.1 | 10738432 | SNV | 1 | A | T | Heterozygous |
| NC_037646.1 | 10738553 | SNV | 1 | T | C | Homozygous   |
| NC_037646.1 | 10738562 | SNV | 1 | A | G | Homozygous   |
| NC_037646.1 | 10738577 | SNV | 1 | T | A | Heterozygous |
| NC_037646.1 | 10738651 | SNV | 1 | A | C | Heterozygous |
| NC_037646.1 | 10738672 | SNV | 1 | G | A | Heterozygous |
| NC_037646.1 | 10738680 | SNV | 1 | G | T | Heterozygous |
| NC_037646.1 | 10739047 | SNV | 1 | T | C | Homozygous   |
| NC_037646.1 | 10739151 | SNV | 1 | T | A | Homozygous   |
| NC_037646.1 | 10739624 | SNV | 1 | C | T | Heterozygous |
| NC_037646.1 | 10739647 | SNV | 1 | G | A | Homozygous   |
| NC_037646.1 | 10739693 | SNV | 1 | C | G | Homozygous   |
| NC_037646.1 | 10739728 | SNV | 1 | G | A | Heterozygous |
| NC_037646.1 | 10740019 | SNV | 1 | C | T | Heterozygous |
| NC_037646.1 | 10740027 | SNV | 1 | T | C | Homozygous   |
| NC_037646.1 | 10740038 | SNV | 1 | T | C | Homozygous   |
| NC_037646.1 | 10740045 | SNV | 1 | T | C | Homozygous   |
| NC_037646.1 | 10740114 | SNV | 1 | A | G | Homozygous   |
| NC_037646.1 | 10740220 | SNV | 1 | T | C | Homozygous   |
| NC_037646.1 | 10740234 | SNV | 1 | T | C | Homozygous   |
| NC_037646.1 | 10740254 | SNV | 1 | G | C | Heterozygous |
| NC_037646.1 | 10740265 | SNV | 1 | A | G | Homozygous   |
| NC_037646.1 | 10740308 | SNV | 1 | A | T | Heterozygous |
| NC_037646.1 | 10740347 | SNV | 1 | A | G | Homozygous   |
| NC_037646.1 | 10740527 | SNV | 1 | A | G | Heterozygous |
| NC_037646.1 | 10740558 | SNV | 1 | A | G | Homozygous   |
| NC_037646.1 | 10740663 | SNV | 1 | G | C | Homozygous   |
| NC_037646.1 | 10740887 | SNV | 1 | A | G | Heterozygous |
| NC_037646.1 | 10740900 | SNV | 1 | G | A | Homozygous   |
| NC_037646.1 | 10741240 | SNV | 1 | G | A | Homozygous   |
| NC_037646.1 | 10741462 | SNV | 1 | T | C | Heterozygous |
| NC_037646.1 | 10741844 | SNV | 1 | G | T | Heterozygous |
| NC_037646.1 | 10741937 | SNV | 1 | G | C | Homozygous   |
| NC_037646.1 | 10743067 | SNV | 1 | C | T | Heterozygous |
| NC_037646.1 | 10743205 | SNV | 1 | C | A | Heterozygous |
| NC_037646.1 | 10743555 | SNV | 1 | C | T | Heterozygous |
| NC_037646.1 | 10743560 | SNV | 1 | A | G | Heterozygous |
| NC_037646.1 | 10743641 | SNV | 1 | T | C | Homozygous   |
| NC_037646.1 | 10743744 | SNV | 1 | A | G | Heterozygous |
| NC_037646.1 | 10744090 | SNV | 1 | T | C | Heterozygous |

|             |          |     |   |   |   |              |
|-------------|----------|-----|---|---|---|--------------|
| NC_037646.1 | 10744347 | SNV | 1 | G | A | Heterozygous |
| NC_037646.1 | 10744353 | SNV | 1 | T | C | Heterozygous |
| NC_037646.1 | 10744392 | SNV | 1 | T | C | Heterozygous |
| NC_037646.1 | 10744547 | SNV | 1 | C | T | Heterozygous |
| NC_037646.1 | 10744561 | SNV | 1 | T | C | Homozygous   |
| NC_037646.1 | 10744645 | SNV | 1 | A | G | Heterozygous |
| NC_037646.1 | 10744656 | SNV | 1 | G | C | Homozygous   |
| NC_037646.1 | 10744694 | SNV | 1 | A | G | Homozygous   |
| NC_037646.1 | 10744780 | SNV | 1 | C | T | Homozygous   |
| NC_037646.1 | 10744831 | SNV | 1 | T | C | Homozygous   |
| NC_037646.1 | 10744958 | SNV | 1 | A | T | Homozygous   |
| NC_037646.1 | 10745087 | SNV | 1 | C | G | Homozygous   |
| NC_037646.1 | 10745305 | SNV | 1 | A | G | Homozygous   |
| NC_037646.1 | 10745725 | SNV | 1 | G | C | Heterozygous |
| NC_037646.1 | 10745776 | SNV | 1 | A | C | Homozygous   |
| NC_037646.1 | 10745779 | SNV | 1 | A | G | Homozygous   |
| NC_037646.1 | 10745835 | SNV | 1 | T | C | Heterozygous |
| NC_037646.1 | 10747429 | SNV | 1 | C | T | Homozygous   |
| NC_037646.1 | 10747711 | SNV | 1 | T | A | Homozygous   |
| NC_037646.1 | 10747778 | SNV | 1 | C | A | Heterozygous |
| NC_037646.1 | 10747780 | SNV | 1 | C | G | Heterozygous |
| NC_037646.1 | 10747796 | SNV | 1 | G | C | Heterozygous |
| NC_037646.1 | 10747903 | SNV | 1 | C | T | Heterozygous |
| NC_037646.1 | 10748054 | SNV | 1 | A | G | Homozygous   |
| NC_037646.1 | 10748077 | SNV | 1 | T | A | Homozygous   |
| NC_037646.1 | 10748095 | SNV | 1 | C | G | Homozygous   |
| NC_037646.1 | 10748228 | SNV | 1 | G | A | Heterozygous |
| NC_037646.1 | 10748291 | SNV | 1 | C | G | Heterozygous |
| NC_037646.1 | 10748589 | SNV | 1 | A | G | Homozygous   |
| NC_037646.1 | 10748946 | SNV | 1 | T | C | Homozygous   |
| NC_037646.1 | 10748951 | SNV | 1 | G | T | Heterozygous |
| NC_037646.1 | 10749254 | SNV | 1 | C | T | Heterozygous |
| NC_037646.1 | 10749315 | SNV | 1 | C | T | Heterozygous |
| NC_037646.1 | 10749620 | SNV | 1 | T | C | Homozygous   |
| NC_037646.1 | 10749869 | SNV | 1 | G | A | Heterozygous |
| NC_037646.1 | 10750662 | SNV | 1 | A | C | Heterozygous |
| NC_037646.1 | 10750664 | SNV | 1 | A | G | Heterozygous |
| NC_037646.1 | 10750684 | SNV | 1 | G | A | Homozygous   |
| NC_037646.1 | 10751164 | SNV | 1 | T | C | Heterozygous |
| NC_037646.1 | 10751701 | SNV | 1 | A | G | Heterozygous |
| NC_037646.1 | 10751773 | SNV | 1 | A | G | Heterozygous |
| NC_037646.1 | 10751991 | SNV | 1 | C | T | Homozygous   |
| NC_037646.1 | 10753025 | SNV | 1 | A | T | Heterozygous |
| NC_037646.1 | 10753126 | SNV | 1 | G | A | Homozygous   |
| NC_037646.1 | 10753219 | SNV | 1 | A | G | Heterozygous |
| NC_037646.1 | 10753310 | SNV | 1 | G | A | Homozygous   |
| NC_037646.1 | 10753447 | SNV | 1 | T | C | Homozygous   |
| NC_037646.1 | 10753484 | SNV | 1 | A | G | Homozygous   |
| NC_037646.1 | 10754015 | SNV | 1 | A | G | Heterozygous |
| NC_037646.1 | 10754032 | SNV | 1 | G | A | Heterozygous |
| NC_037646.1 | 10754099 | SNV | 1 | C | T | Homozygous   |

|             |          |     |   |   |   |              |
|-------------|----------|-----|---|---|---|--------------|
| NC_037646.1 | 10754245 | SNV | 1 | A | G | Heterozygous |
| NC_037646.1 | 10754265 | SNV | 1 | G | A | Homozygous   |
| NC_037646.1 | 10754298 | SNV | 1 | T | C | Homozygous   |
| NC_037646.1 | 10754651 | SNV | 1 | G | T | Homozygous   |
| NC_037646.1 | 10754658 | SNV | 1 | T | A | Homozygous   |
| NC_037646.1 | 10755173 | SNV | 1 | C | T | Heterozygous |
| NC_037646.1 | 10755177 | SNV | 1 | T | C | Heterozygous |
| NC_037646.1 | 10755198 | SNV | 1 | T | C | Heterozygous |
| NC_037646.1 | 10755200 | SNV | 1 | C | T | Heterozygous |
| NC_037646.1 | 10755210 | SNV | 1 | T | G | Homozygous   |
| NC_037646.1 | 10755214 | SNV | 1 | T | C | Homozygous   |
| NC_037646.1 | 10755230 | SNV | 1 | C | A | Homozygous   |
| NC_037646.1 | 10755269 | SNV | 1 | A | T | Heterozygous |
| NC_037646.1 | 10755766 | SNV | 1 | G | C | Homozygous   |
| NC_037646.1 | 10756099 | SNV | 1 | C | T | Heterozygous |
| NC_037646.1 | 10756163 | SNV | 1 | G | A | Heterozygous |
| NC_037646.1 | 10756535 | SNV | 1 | A | G | Homozygous   |
| NC_037646.1 | 10756660 | SNV | 1 | T | G | Heterozygous |
| NC_037646.1 | 10756872 | SNV | 1 | C | T | Heterozygous |
| NC_037646.1 | 10757001 | SNV | 1 | C | T | Heterozygous |
| NC_037646.1 | 10757202 | SNV | 1 | T | C | Homozygous   |
| NC_037646.1 | 10757230 | SNV | 1 | T | C | Homozygous   |
| NC_037646.1 | 10757235 | SNV | 1 | T | C | Homozygous   |
| NC_037646.1 | 10757456 | SNV | 1 | G | T | Heterozygous |
| NC_037646.1 | 10757627 | SNV | 1 | A | T | Heterozygous |
| NC_037646.1 | 10757925 | SNV | 1 | T | C | Homozygous   |
| NC_037646.1 | 10757946 | SNV | 1 | T | C | Homozygous   |
| NC_037646.1 | 10758031 | SNV | 1 | A | G | Heterozygous |
| NC_037646.1 | 10758251 | SNV | 1 | T | C | Homozygous   |
| NC_037646.1 | 10758557 | SNV | 1 | A | T | Homozygous   |
| NC_037646.1 | 10758860 | SNV | 1 | A | G | Homozygous   |
| NC_037646.1 | 10759624 | SNV | 1 | C | T | Homozygous   |
| NC_037646.1 | 10760021 | SNV | 1 | A | G | Homozygous   |
| NC_037646.1 | 10760198 | SNV | 1 | A | G | Homozygous   |
| NC_037646.1 | 10760343 | SNV | 1 | C | A | Heterozygous |
| NC_037646.1 | 10760347 | SNV | 1 | C | A | Homozygous   |
| NC_037646.1 | 10760356 | SNV | 1 | G | T | Heterozygous |
| NC_037646.1 | 10761107 | SNV | 1 | T | A | Heterozygous |
| NC_037646.1 | 10761384 | SNV | 1 | C | T | Homozygous   |
| NC_037646.1 | 10761610 | SNV | 1 | G | A | Heterozygous |
| NC_037646.1 | 10762077 | SNV | 1 | T | A | Homozygous   |
| NC_037646.1 | 10762406 | SNV | 1 | A | G | Homozygous   |
| NC_037646.1 | 10762810 | SNV | 1 | G | A | Homozygous   |
| NC_037646.1 | 10762929 | SNV | 1 | T | C | Heterozygous |
| NC_037646.1 | 10763125 | SNV | 1 | C | T | Heterozygous |
| NC_037646.1 | 10763190 | SNV | 1 | A | G | Heterozygous |
| NC_037646.1 | 10763256 | SNV | 1 | C | T | Heterozygous |
| NC_037646.1 | 10763277 | SNV | 1 | A | G | Heterozygous |
| NC_037646.1 | 10763302 | SNV | 1 | T | C | Heterozygous |
| NC_037646.1 | 10763429 | SNV | 1 | G | A | Homozygous   |
| NC_037646.1 | 10763564 | SNV | 1 | T | C | Homozygous   |

|             |          |     |   |   |   |              |
|-------------|----------|-----|---|---|---|--------------|
| NC_037646.1 | 10763682 | SNV | 1 | A | G | Heterozygous |
| NC_037646.1 | 10763839 | SNV | 1 | A | G | Homozygous   |
| NC_037646.1 | 10763877 | SNV | 1 | A | C | Heterozygous |
| NC_037646.1 | 10763883 | SNV | 1 | A | T | Heterozygous |
| NC_037646.1 | 10763888 | SNV | 1 | T | G | Homozygous   |
| NC_037646.1 | 10763890 | SNV | 1 | A | G | Heterozygous |
| NC_037646.1 | 10763897 | SNV | 1 | T | G | Homozygous   |
| NC_037646.1 | 10764077 | SNV | 1 | G | A | Heterozygous |
| NC_037646.1 | 10764569 | SNV | 1 | T | A | Heterozygous |
| NC_037646.1 | 10764615 | SNV | 1 | G | A | Heterozygous |
| NC_037646.1 | 10764651 | SNV | 1 | T | C | Homozygous   |
| NC_037646.1 | 10764754 | SNV | 1 | C | T | Homozygous   |
| NC_037646.1 | 10764947 | SNV | 1 | G | A | Heterozygous |
| NC_037646.1 | 10764989 | SNV | 1 | G | A | Heterozygous |
| NC_037646.1 | 10764992 | SNV | 1 | A | G | Heterozygous |
| NC_037646.1 | 10765167 | SNV | 1 | G | A | Heterozygous |
| NC_037646.1 | 10765232 | SNV | 1 | A | G | Homozygous   |
| NC_037646.1 | 10765377 | SNV | 1 | T | A | Homozygous   |
| NC_037646.1 | 10765571 | SNV | 1 | A | G | Heterozygous |
| NC_037646.1 | 10765573 | SNV | 1 | T | C | Heterozygous |
| NC_037646.1 | 10765604 | SNV | 1 | T | C | Homozygous   |
| NC_037646.1 | 10765616 | SNV | 1 | C | T | Homozygous   |
| NC_037646.1 | 10765924 | SNV | 1 | A | G | Homozygous   |
| NC_037646.1 | 10765929 | SNV | 1 | C | G | Heterozygous |
| NC_037646.1 | 10765931 | SNV | 1 | A | G | Heterozygous |
| NC_037646.1 | 10765933 | SNV | 1 | T | A | Heterozygous |
| NC_037646.1 | 10765937 | SNV | 1 | C | T | Heterozygous |
| NC_037646.1 | 10767471 | SNV | 1 | C | T | Heterozygous |
| NC_037646.1 | 10768144 | SNV | 1 | G | A | Homozygous   |
| NC_037646.1 | 10768148 | SNV | 1 | G | A | Homozygous   |
| NC_037646.1 | 10768156 | SNV | 1 | G | A | Homozygous   |
| NC_037646.1 | 10768160 | SNV | 1 | C | A | Homozygous   |
| NC_037646.1 | 10768363 | SNV | 1 | G | C | Homozygous   |
| NC_037646.1 | 10768496 | SNV | 1 | T | A | Heterozygous |
| NC_037646.1 | 10768508 | SNV | 1 | C | T | Homozygous   |
| NC_037646.1 | 10768524 | SNV | 1 | G | A | Heterozygous |
| NC_037646.1 | 10768564 | SNV | 1 | G | T | Homozygous   |
| NC_037646.1 | 10768804 | SNV | 1 | A | G | Heterozygous |
| NC_037646.1 | 10768950 | SNV | 1 | A | G | Homozygous   |
| NC_037646.1 | 10769038 | SNV | 1 | C | T | Homozygous   |
| NC_037646.1 | 10769040 | SNV | 1 | C | T | Homozygous   |
| NC_037646.1 | 10769321 | SNV | 1 | A | G | Heterozygous |
| NC_037646.1 | 10769376 | SNV | 1 | T | C | Heterozygous |
| NC_037646.1 | 10769436 | SNV | 1 | T | C | Heterozygous |
| NC_037646.1 | 10769533 | SNV | 1 | T | C | Homozygous   |
| NC_037646.1 | 10769804 | SNV | 1 | A | G | Heterozygous |
| NC_037646.1 | 10770051 | SNV | 1 | G | A | Heterozygous |
| NC_037646.1 | 10770500 | SNV | 1 | A | G | Heterozygous |
| NC_037646.1 | 10770685 | SNV | 1 | T | C | Heterozygous |
| NC_037646.1 | 10771331 | SNV | 1 | T | C | Heterozygous |
| NC_037646.1 | 10771443 | SNV | 1 | G | T | Heterozygous |

|             |          |     |   |   |   |              |
|-------------|----------|-----|---|---|---|--------------|
| NC_037646.1 | 10771445 | SNV | 1 | A | T | Heterozygous |
| NC_037646.1 | 10771607 | SNV | 1 | C | T | Heterozygous |
| NC_037646.1 | 10771636 | SNV | 1 | G | A | Heterozygous |
| NC_037646.1 | 10771901 | SNV | 1 | A | G | Homozygous   |
| NC_037646.1 | 10772033 | SNV | 1 | G | A | Homozygous   |
| NC_037646.1 | 10772042 | SNV | 1 | C | T | Homozygous   |
| NC_037646.1 | 10772061 | SNV | 1 | G | T | Heterozygous |
| NC_037646.1 | 10772603 | SNV | 1 | C | G | Heterozygous |
| NC_037646.1 | 10772739 | SNV | 1 | A | C | Homozygous   |
| NC_037646.1 | 10772749 | SNV | 1 | A | C | Homozygous   |
| NC_037646.1 | 10773293 | SNV | 1 | G | A | Heterozygous |
| NC_037646.1 | 10773308 | SNV | 1 | C | T | Heterozygous |
| NC_037646.1 | 10773312 | SNV | 1 | G | A | Heterozygous |
| NC_037646.1 | 10773410 | SNV | 1 | T | A | Homozygous   |
| NC_037646.1 | 10773524 | SNV | 1 | C | T | Heterozygous |
| NC_037646.1 | 10773532 | SNV | 1 | T | C | Heterozygous |
| NC_037646.1 | 10773967 | SNV | 1 | A | G | Homozygous   |
| NC_037646.1 | 10773979 | SNV | 1 | A | G | Homozygous   |
| NC_037646.1 | 10774034 | SNV | 1 | G | A | Homozygous   |
| NC_037646.1 | 10774038 | SNV | 1 | C | T | Heterozygous |
| NC_037646.1 | 10774067 | SNV | 1 | A | G | Homozygous   |
| NC_037646.1 | 10774077 | SNV | 1 | A | G | Homozygous   |
| NC_037646.1 | 10776363 | SNV | 1 | C | T | Homozygous   |
| NC_037646.1 | 10776545 | SNV | 1 | C | A | Heterozygous |
| NC_037646.1 | 10776795 | SNV | 1 | T | C | Heterozygous |
| NC_037646.1 | 10776973 | SNV | 1 | C | T | Heterozygous |
| NC_037646.1 | 10777632 | SNV | 1 | T | C | Heterozygous |
| NC_037646.1 | 10777768 | SNV | 1 | T | A | Heterozygous |
| NC_037646.1 | 10778104 | SNV | 1 | A | G | Heterozygous |
| NC_037646.1 | 10779069 | SNV | 1 | A | G | Homozygous   |
| NC_037646.1 | 10779149 | SNV | 1 | A | G | Heterozygous |
| NC_037646.1 | 10780174 | SNV | 1 | T | C | Homozygous   |
| NC_037646.1 | 10780273 | SNV | 1 | T | C | Heterozygous |
| NC_037646.1 | 10780292 | SNV | 1 | G | A | Heterozygous |
| NC_037646.1 | 10780322 | SNV | 1 | C | T | Homozygous   |
| NC_037646.1 | 10780547 | SNV | 1 | T | A | Homozygous   |
| NC_037646.1 | 10780755 | SNV | 1 | A | G | Homozygous   |
| NC_037646.1 | 10781241 | SNV | 1 | C | T | Homozygous   |
| NC_037646.1 | 10781499 | SNV | 1 | A | G | Homozygous   |
| NC_037646.1 | 10781519 | SNV | 1 | G | A | Homozygous   |
| NC_037646.1 | 10781526 | SNV | 1 | A | G | Homozygous   |
| NC_037646.1 | 10781788 | SNV | 1 | A | T | Homozygous   |
| NC_037646.1 | 10782297 | SNV | 1 | A | T | Homozygous   |
| NC_037646.1 | 10782328 | SNV | 1 | A | T | Heterozygous |
| NC_037646.1 | 10782333 | SNV | 1 | T | C | Heterozygous |
| NC_037646.1 | 10782713 | SNV | 1 | T | G | Heterozygous |
| NC_037646.1 | 10782758 | SNV | 1 | C | A | Heterozygous |
| NC_037646.1 | 10782889 | SNV | 1 | C | A | Homozygous   |
| NC_037646.1 | 10783079 | SNV | 1 | G | T | Heterozygous |
| NC_037646.1 | 10783087 | SNV | 1 | G | T | Heterozygous |
| NC_037646.1 | 10783564 | SNV | 1 | A | G | Heterozygous |

|             |          |     |   |   |   |              |
|-------------|----------|-----|---|---|---|--------------|
| NC_037646.1 | 10783568 | SNV | 1 | A | G | Heterozygous |
| NC_037646.1 | 10783572 | SNV | 1 | A | G | Heterozygous |
| NC_037646.1 | 10783574 | SNV | 1 | A | G | Heterozygous |
| NC_037646.1 | 10783576 | SNV | 1 | A | G | Heterozygous |
| NC_037646.1 | 10783590 | SNV | 1 | G | A | Homozygous   |
| NC_037646.1 | 10783594 | SNV | 1 | G | A | Homozygous   |
| NC_037646.1 | 10783596 | SNV | 1 | T | A | Heterozygous |
| NC_037646.1 | 10783598 | SNV | 1 | G | A | Heterozygous |
| NC_037646.1 | 10783606 | SNV | 1 | A | G | Heterozygous |
| NC_037646.1 | 10783610 | SNV | 1 | A | G | Heterozygous |
| NC_037646.1 | 10784043 | SNV | 1 | T | C | Homozygous   |
| NC_037646.1 | 10784223 | SNV | 1 | T | C | Homozygous   |
| NC_037646.1 | 10784268 | SNV | 1 | G | A | Homozygous   |
| NC_037646.1 | 10784700 | SNV | 1 | G | T | Homozygous   |
| NC_037646.1 | 10784753 | SNV | 1 | A | G | Homozygous   |
| NC_037646.1 | 10784819 | SNV | 1 | G | C | Homozygous   |
| NC_037646.1 | 10784880 | SNV | 1 | T | C | Homozygous   |
| NC_037646.1 | 10784935 | SNV | 1 | A | G | Homozygous   |
| NC_037646.1 | 10784976 | SNV | 1 | T | A | Homozygous   |
| NC_037646.1 | 10784990 | SNV | 1 | G | A | Homozygous   |
| NC_037646.1 | 10784994 | SNV | 1 | A | G | Homozygous   |
| NC_037646.1 | 10785004 | SNV | 1 | G | T | Heterozygous |
| NC_037646.1 | 10785045 | SNV | 1 | G | C | Homozygous   |
| NC_037646.1 | 10785095 | SNV | 1 | G | T | Heterozygous |
| NC_037646.1 | 10785107 | SNV | 1 | C | T | Heterozygous |
| NC_037646.1 | 10785110 | SNV | 1 | G | T | Heterozygous |
| NC_037646.1 | 10785116 | SNV | 1 | G | A | Heterozygous |
| NC_037646.1 | 10785201 | SNV | 1 | T | C | Heterozygous |
| NC_037646.1 | 10785208 | SNV | 1 | T | A | Heterozygous |
| NC_037646.1 | 10785212 | SNV | 1 | C | T | Heterozygous |
| NC_037646.1 | 10785273 | SNV | 1 | A | G | Heterozygous |
| NC_037646.1 | 10785291 | SNV | 1 | T | C | Heterozygous |
| NC_037646.1 | 10785532 | SNV | 1 | C | T | Heterozygous |
| NC_037646.1 | 10785907 | SNV | 1 | T | C | Homozygous   |
| NC_037646.1 | 10786147 | SNV | 1 | T | C | Homozygous   |
| NC_037646.1 | 10786276 | SNV | 1 | C | T | Homozygous   |
| NC_037646.1 | 10786319 | SNV | 1 | T | C | Heterozygous |
| NC_037646.1 | 10786393 | SNV | 1 | G | A | Heterozygous |
| NC_037646.1 | 10786508 | SNV | 1 | T | C | Homozygous   |
| NC_037646.1 | 10786800 | SNV | 1 | T | C | Heterozygous |
| NC_037646.1 | 10786902 | SNV | 1 | G | A | Homozygous   |
| NC_037646.1 | 10786931 | SNV | 1 | C | T | Heterozygous |
| NC_037646.1 | 10786952 | SNV | 1 | T | G | Homozygous   |
| NC_037646.1 | 10786973 | SNV | 1 | T | C | Homozygous   |
| NC_037646.1 | 10786981 | SNV | 1 | T | C | Homozygous   |
| NC_037646.1 | 10787042 | SNV | 1 | A | C | Heterozygous |
| NC_037646.1 | 10787392 | SNV | 1 | A | G | Homozygous   |
| NC_037646.1 | 10787462 | SNV | 1 | T | C | Heterozygous |
| NC_037646.1 | 10787464 | SNV | 1 | T | C | Heterozygous |
| NC_037646.1 | 10787486 | SNV | 1 | G | T | Heterozygous |
| NC_037646.1 | 10787967 | SNV | 1 | T | C | Heterozygous |

|             |          |     |   |   |   |              |
|-------------|----------|-----|---|---|---|--------------|
| NC_037646.1 | 10787973 | SNV | 1 | A | T | Homozygous   |
| NC_037646.1 | 10788628 | SNV | 1 | C | T | Heterozygous |
| NC_037646.1 | 10788670 | SNV | 1 | G | A | Homozygous   |
| NC_037646.1 | 10788988 | SNV | 1 | T | A | Homozygous   |
| NC_037646.1 | 10789373 | SNV | 1 | G | A | Heterozygous |
| NC_037646.1 | 10789432 | SNV | 1 | G | A | Heterozygous |
| NC_037646.1 | 10789739 | SNV | 1 | A | T | Homozygous   |
| NC_037646.1 | 10789803 | SNV | 1 | C | T | Heterozygous |
| NC_037646.1 | 10789893 | SNV | 1 | C | T | Heterozygous |
| NC_037646.1 | 10789983 | SNV | 1 | C | G | Heterozygous |
| NC_037646.1 | 10790204 | SNV | 1 | C | T | Heterozygous |
| NC_037646.1 | 10790221 | SNV | 1 | C | T | Heterozygous |
| NC_037646.1 | 10790233 | SNV | 1 | A | G | Homozygous   |
| NC_037646.1 | 10790238 | SNV | 1 | C | T | Homozygous   |
| NC_037646.1 | 10790265 | SNV | 1 | A | G | Heterozygous |
| NC_037646.1 | 10790404 | SNV | 1 | A | G | Heterozygous |
| NC_037646.1 | 10790967 | SNV | 1 | A | T | Heterozygous |
| NC_037646.1 | 10792078 | SNV | 1 | G | A | Homozygous   |
| NC_037646.1 | 10792087 | SNV | 1 | G | A | Heterozygous |
| NC_037646.1 | 10792131 | SNV | 1 | C | T | Heterozygous |
| NC_037646.1 | 10792517 | SNV | 1 | G | A | Heterozygous |
| NC_037646.1 | 10793132 | SNV | 1 | C | T | Homozygous   |
| NC_037646.1 | 10793516 | SNV | 1 | G | A | Heterozygous |
| NC_037646.1 | 10793528 | SNV | 1 | G | C | Heterozygous |
| NC_037646.1 | 10793577 | SNV | 1 | A | G | Heterozygous |
| NC_037646.1 | 10793657 | SNV | 1 | A | T | Heterozygous |
| NC_037646.1 | 10793670 | SNV | 1 | C | T | Homozygous   |
| NC_037646.1 | 10793830 | SNV | 1 | T | C | Homozygous   |
| NC_037646.1 | 10794327 | SNV | 1 | T | C | Heterozygous |
| NC_037646.1 | 10794331 | SNV | 1 | G | A | Heterozygous |
| NC_037646.1 | 10794370 | SNV | 1 | T | C | Heterozygous |
| NC_037646.1 | 10794385 | SNV | 1 | G | A | Heterozygous |
| NC_037646.1 | 10795220 | SNV | 1 | G | A | Heterozygous |
| NC_037646.1 | 10795659 | SNV | 1 | C | A | Homozygous   |
| NC_037646.1 | 10795873 | SNV | 1 | T | C | Heterozygous |
| NC_037646.1 | 10795974 | SNV | 1 | A | G | Heterozygous |
| NC_037646.1 | 10795993 | SNV | 1 | A | G | Homozygous   |
| NC_037646.1 | 10795996 | SNV | 1 | A | G | Homozygous   |
| NC_037646.1 | 10796017 | SNV | 1 | A | T | Homozygous   |
| NC_037646.1 | 10796147 | SNV | 1 | A | G | Heterozygous |
| NC_037646.1 | 10796169 | SNV | 1 | A | G | Homozygous   |
| NC_037646.1 | 10796872 | SNV | 1 | T | C | Homozygous   |
| NC_037646.1 | 10797070 | SNV | 1 | C | T | Heterozygous |
| NC_037646.1 | 10797076 | SNV | 1 | C | T | Heterozygous |
| NC_037646.1 | 10797141 | SNV | 1 | T | C | Homozygous   |
| NC_037646.1 | 10797469 | SNV | 1 | T | C | Heterozygous |
| NC_037646.1 | 10797821 | SNV | 1 | A | G | Heterozygous |
| NC_037646.1 | 10797857 | SNV | 1 | C | G | Heterozygous |
| NC_037646.1 | 10798311 | SNV | 1 | C | A | Heterozygous |
| NC_037646.1 | 10798375 | SNV | 1 | C | T | Heterozygous |
| NC_037646.1 | 10798502 | SNV | 1 | C | T | Heterozygous |

|             |          |     |   |   |   |              |
|-------------|----------|-----|---|---|---|--------------|
| NC_037646.1 | 10798830 | SNV | 1 | C | G | Homozygous   |
| NC_037646.1 | 10799532 | SNV | 1 | A | G | Heterozygous |
| NC_037646.1 | 10800117 | SNV | 1 | A | G | Homozygous   |
| NC_037646.1 | 10800567 | SNV | 1 | T | C | Heterozygous |
| NC_037646.1 | 10800586 | SNV | 1 | T | C | Heterozygous |
| NC_037646.1 | 10800597 | SNV | 1 | G | A | Heterozygous |
| NC_037646.1 | 10800625 | SNV | 1 | A | G | Heterozygous |
| NC_037646.1 | 10801380 | SNV | 1 | G | A | Heterozygous |
| NC_037646.1 | 10801428 | SNV | 1 | C | T | Homozygous   |
| NC_037646.1 | 10801470 | SNV | 1 | C | T | Homozygous   |
| NC_037646.1 | 10801622 | SNV | 1 | C | T | Homozygous   |
| NC_037646.1 | 10801740 | SNV | 1 | C | G | Homozygous   |
| NC_037646.1 | 10802078 | SNV | 1 | C | G | Homozygous   |
| NC_037646.1 | 10802355 | SNV | 1 | T | C | Homozygous   |
| NC_037646.1 | 10802405 | SNV | 1 | T | G | Heterozygous |
| NC_037646.1 | 10802410 | SNV | 1 | T | G | Homozygous   |
| NC_037646.1 | 10802418 | SNV | 1 | A | G | Heterozygous |
| NC_037646.1 | 10802613 | SNV | 1 | A | G | Homozygous   |
| NC_037646.1 | 10802797 | SNV | 1 | C | A | Homozygous   |
| NC_037646.1 | 10802903 | SNV | 1 | A | G | Homozygous   |
| NC_037646.1 | 10802906 | SNV | 1 | G | A | Heterozygous |
| NC_037646.1 | 10802909 | SNV | 1 | A | G | Homozygous   |
| NC_037646.1 | 10803007 | SNV | 1 | A | G | Heterozygous |
| NC_037646.1 | 10803083 | SNV | 1 | G | A | Heterozygous |
| NC_037646.1 | 10803227 | SNV | 1 | C | T | Heterozygous |
| NC_037646.1 | 10803305 | SNV | 1 | A | G | Homozygous   |
| NC_037646.1 | 10803315 | SNV | 1 | A | G | Homozygous   |
| NC_037646.1 | 10803327 | SNV | 1 | A | G | Heterozygous |
| NC_037646.1 | 10803339 | SNV | 1 | T | C | Heterozygous |
| NC_037646.1 | 10803695 | SNV | 1 | A | G | Heterozygous |
| NC_037646.1 | 10803713 | SNV | 1 | G | A | Heterozygous |
| NC_037646.1 | 10803715 | SNV | 1 | A | G | Heterozygous |
| NC_037646.1 | 10803984 | SNV | 1 | A | G | Heterozygous |
| NC_037646.1 | 10804554 | SNV | 1 | A | G | Heterozygous |
| NC_037646.1 | 10804666 | SNV | 1 | G | C | Homozygous   |
| NC_037646.1 | 10804735 | SNV | 1 | C | T | Heterozygous |
| NC_037646.1 | 10804885 | SNV | 1 | T | C | Homozygous   |
| NC_037646.1 | 10805101 | SNV | 1 | A | G | Homozygous   |
| NC_037646.1 | 10805208 | SNV | 1 | A | G | Homozygous   |
| NC_037646.1 | 10805363 | SNV | 1 | A | G | Heterozygous |
| NC_037646.1 | 10805857 | SNV | 1 | A | G | Heterozygous |
| NC_037646.1 | 10805885 | SNV | 1 | T | A | Heterozygous |
| NC_037646.1 | 10806239 | SNV | 1 | C | T | Heterozygous |
| NC_037646.1 | 10806289 | SNV | 1 | T | C | Heterozygous |
| NC_037646.1 | 10806332 | SNV | 1 | T | C | Homozygous   |
| NC_037646.1 | 10806786 | SNV | 1 | A | G | Homozygous   |
| NC_037646.1 | 10806862 | SNV | 1 | T | C | Heterozygous |
| NC_037646.1 | 10807240 | SNV | 1 | C | T | Heterozygous |
| NC_037646.1 | 10808022 | SNV | 1 | A | G | Homozygous   |
| NC_037646.1 | 10809802 | SNV | 1 | C | G | Homozygous   |
| NC_037646.1 | 10809810 | SNV | 1 | G | A | Heterozygous |



|             |          |     |   |   |   |              |
|-------------|----------|-----|---|---|---|--------------|
| NC_037646.1 | 10810836 | SNV | 1 | T | C | Homozygous   |
| NC_037646.1 | 10810866 | SNV | 1 | G | A | Homozygous   |
| NC_037646.1 | 10810992 | SNV | 1 | G | A | Heterozygous |
| NC_037646.1 | 10811441 | SNV | 1 | T | G | Heterozygous |
| NC_037646.1 | 10811636 | SNV | 1 | A | G | Homozygous   |
| NC_037646.1 | 10811851 | SNV | 1 | A | T | Heterozygous |
| NC_037646.1 | 10811855 | SNV | 1 | C | T | Heterozygous |
| NC_037646.1 | 10811894 | SNV | 1 | G | C | Homozygous   |
| NC_037646.1 | 10811978 | SNV | 1 | C | G | Heterozygous |
| NC_037646.1 | 10812239 | SNV | 1 | A | G | Heterozygous |
| NC_037646.1 | 10813851 | SNV | 1 | A | G | Heterozygous |
| NC_037646.1 | 10813891 | SNV | 1 | T | C | Homozygous   |
| NC_037646.1 | 10813923 | SNV | 1 | G | C | Homozygous   |
| NC_037646.1 | 10814306 | SNV | 1 | C | G | Heterozygous |
| NC_037646.1 | 10814885 | SNV | 1 | T | C | Heterozygous |
| NC_037646.1 | 10814909 | SNV | 1 | A | G | Homozygous   |
| NC_037646.1 | 10816538 | SNV | 1 | A | G | Homozygous   |
| NC_037646.1 | 10816845 | SNV | 1 | A | G | Homozygous   |
| NC_037646.1 | 10817703 | SNV | 1 | C | G | Homozygous   |
| NC_037646.1 | 10817997 | SNV | 1 | A | G | Homozygous   |
| NC_037646.1 | 10818146 | SNV | 1 | T | C | Homozygous   |
| NC_037646.1 | 10818264 | SNV | 1 | A | G | Homozygous   |
| NC_037646.1 | 10818266 | SNV | 1 | T | C | Homozygous   |
| NC_037646.1 | 10818360 | SNV | 1 | G | A | Homozygous   |
| NC_037646.1 | 10818365 | SNV | 1 | A | G | Heterozygous |
| NC_037646.1 | 10818800 | SNV | 1 | C | T | Heterozygous |
| NC_037646.1 | 10820109 | SNV | 1 | G | A | Homozygous   |
| NC_037646.1 | 10820127 | SNV | 1 | C | T | Heterozygous |
| NC_037646.1 | 10820716 | SNV | 1 | A | G | Homozygous   |
| NC_037646.1 | 10820763 | SNV | 1 | G | A | Heterozygous |
| NC_037646.1 | 10820786 | SNV | 1 | G | A | Heterozygous |
| NC_037646.1 | 10820912 | SNV | 1 | T | C | Homozygous   |
| NC_037646.1 | 10820936 | SNV | 1 | A | G | Heterozygous |
| NC_037646.1 | 10820947 | SNV | 1 | T | C | Heterozygous |
| NC_037646.1 | 10821032 | SNV | 1 | T | C | Homozygous   |
| NC_037646.1 | 10822585 | SNV | 1 | T | G | Homozygous   |
| NC_037646.1 | 10823132 | SNV | 1 | T | C | Heterozygous |
| NC_037646.1 | 10823234 | SNV | 1 | C | T | Heterozygous |
| NC_037646.1 | 10823300 | SNV | 1 | C | G | Heterozygous |
| NC_037646.1 | 10823312 | SNV | 1 | A | G | Heterozygous |
| NC_037646.1 | 10823369 | SNV | 1 | C | T | Homozygous   |
| NC_037646.1 | 10823661 | SNV | 1 | T | C | Homozygous   |
| NC_037646.1 | 10823878 | SNV | 1 | A | G | Homozygous   |
| NC_037646.1 | 10823911 | SNV | 1 | A | G | Homozygous   |
| NC_037646.1 | 10823977 | SNV | 1 | T | C | Homozygous   |
| NC_037646.1 | 10824065 | SNV | 1 | G | A | Heterozygous |
| NC_037646.1 | 10824082 | SNV | 1 | T | G | Homozygous   |
| NC_037646.1 | 10824380 | SNV | 1 | A | G | Homozygous   |
| NC_037646.1 | 10824738 | SNV | 1 | T | A | Homozygous   |
| NC_037646.1 | 10824740 | SNV | 1 | T | A | Homozygous   |
| NC_037646.1 | 10824745 | SNV | 1 | A | C | Homozygous   |

|             |          |     |   |   |   |              |
|-------------|----------|-----|---|---|---|--------------|
| NC_037646.1 | 10824750 | SNV | 1 | T | A | Homozygous   |
| NC_037646.1 | 10824759 | SNV | 1 | A | T | Homozygous   |
| NC_037646.1 | 10824881 | SNV | 1 | G | A | Heterozygous |
| NC_037646.1 | 10825664 | SNV | 1 | C | T | Homozygous   |
| NC_037646.1 | 10826495 | SNV | 1 | A | C | Heterozygous |
| NC_037646.1 | 10826507 | SNV | 1 | T | C | Homozygous   |
| NC_037646.1 | 10826575 | SNV | 1 | T | C | Heterozygous |
| NC_037646.1 | 10826643 | SNV | 1 | G | A | Heterozygous |
| NC_037646.1 | 10826655 | SNV | 1 | A | G | Homozygous   |
| NC_037646.1 | 10826659 | SNV | 1 | A | T | Homozygous   |
| NC_037646.1 | 10826750 | SNV | 1 | G | A | Heterozygous |
| NC_037646.1 | 10826777 | SNV | 1 | G | A | Heterozygous |
| NC_037646.1 | 10826786 | SNV | 1 | G | A | Heterozygous |
| NC_037646.1 | 10826800 | SNV | 1 | C | T | Heterozygous |
| NC_037646.1 | 10826878 | SNV | 1 | G | A | Heterozygous |
| NC_037646.1 | 10826958 | SNV | 1 | T | C | Heterozygous |
| NC_037646.1 | 10826961 | SNV | 1 | A | G | Homozygous   |
| NC_037646.1 | 10826977 | SNV | 1 | T | C | Homozygous   |
| NC_037646.1 | 10829921 | SNV | 1 | C | T | Heterozygous |
| NC_037646.1 | 10830102 | SNV | 1 | A | G | Homozygous   |
| NC_037646.1 | 10830144 | SNV | 1 | T | C | Heterozygous |
| NC_037646.1 | 10830223 | SNV | 1 | C | T | Heterozygous |
| NC_037646.1 | 10830256 | SNV | 1 | T | C | Heterozygous |
| NC_037646.1 | 10830262 | SNV | 1 | C | T | Homozygous   |
| NC_037646.1 | 10830458 | SNV | 1 | G | A | Homozygous   |
| NC_037646.1 | 10831530 | SNV | 1 | A | G | Homozygous   |
| NC_037646.1 | 10832644 | SNV | 1 | C | A | Homozygous   |
| NC_037646.1 | 10832796 | SNV | 1 | C | T | Homozygous   |
| NC_037646.1 | 10832877 | SNV | 1 | G | A | Homozygous   |
| NC_037646.1 | 10832907 | SNV | 1 | A | T | Homozygous   |
| NC_037646.1 | 10833223 | SNV | 1 | C | T | Homozygous   |
| NC_037646.1 | 10834512 | SNV | 1 | T | C | Homozygous   |
| NC_037646.1 | 10834527 | SNV | 1 | C | G | Homozygous   |
| NC_037646.1 | 10834557 | SNV | 1 | T | C | Homozygous   |
| NC_037646.1 | 10837043 | SNV | 1 | A | G | Heterozygous |
| NC_037646.1 | 10837189 | SNV | 1 | T | C | Heterozygous |
| NC_037646.1 | 10837203 | SNV | 1 | C | T | Homozygous   |
| NC_037646.1 | 10837206 | SNV | 1 | A | G | Homozygous   |
| NC_037646.1 | 10837215 | SNV | 1 | A | G | Heterozygous |
| NC_037646.1 | 10837221 | SNV | 1 | T | C | Heterozygous |
| NC_037646.1 | 10837309 | SNV | 1 | T | C | Homozygous   |
| NC_037646.1 | 10837352 | SNV | 1 | G | A | Heterozygous |
| NC_037646.1 | 10839007 | SNV | 1 | C | T | Homozygous   |
| NC_037646.1 | 10839080 | SNV | 1 | T | C | Homozygous   |
| NC_037646.1 | 10839222 | SNV | 1 | C | T | Heterozygous |
| NC_037646.1 | 10840942 | SNV | 1 | A | G | Homozygous   |
| NC_037646.1 | 10841600 | SNV | 1 | G | T | Homozygous   |
| NC_037646.1 | 10841608 | SNV | 1 | A | G | Homozygous   |
| NC_037646.1 | 10841670 | SNV | 1 | T | C | Homozygous   |
| NC_037646.1 | 10843000 | SNV | 1 | A | G | Homozygous   |
| NC_037646.1 | 10843167 | SNV | 1 | G | A | Heterozygous |

|             |          |     |   |   |   |              |
|-------------|----------|-----|---|---|---|--------------|
| NC_037646.1 | 10843273 | SNV | 1 | C | T | Homozygous   |
| NC_037646.1 | 10843291 | SNV | 1 | T | C | Homozygous   |
| NC_037646.1 | 10843401 | SNV | 1 | A | G | Homozygous   |
| NC_037646.1 | 10843423 | SNV | 1 | T | C | Homozygous   |
| NC_037646.1 | 10843785 | SNV | 1 | C | T | Homozygous   |
| NC_037646.1 | 10843899 | SNV | 1 | G | A | Heterozygous |
| NC_037646.1 | 10843911 | SNV | 1 | A | C | Heterozygous |
| NC_037646.1 | 10843944 | SNV | 1 | A | G | Homozygous   |
| NC_037646.1 | 10844057 | SNV | 1 | T | C | Homozygous   |
| NC_037646.1 | 10844078 | SNV | 1 | C | T | Heterozygous |
| NC_037646.1 | 10844204 | SNV | 1 | A | C | Heterozygous |
| NC_037646.1 | 10844207 | SNV | 1 | T | C | Heterozygous |
| NC_037646.1 | 10844210 | SNV | 1 | A | G | Homozygous   |
| NC_037646.1 | 10844371 | SNV | 1 | T | C | Homozygous   |
| NC_037646.1 | 10844523 | SNV | 1 | G | A | Homozygous   |
| NC_037646.1 | 10844528 | SNV | 1 | T | C | Heterozygous |
| NC_037646.1 | 10844594 | SNV | 1 | A | G | Heterozygous |
| NC_037646.1 | 10844603 | SNV | 1 | G | T | Homozygous   |
| NC_037646.1 | 10844650 | SNV | 1 | T | C | Homozygous   |
| NC_037646.1 | 10844741 | SNV | 1 | A | G | Heterozygous |
| NC_037646.1 | 10844780 | SNV | 1 | G | A | Homozygous   |
| NC_037646.1 | 10844883 | SNV | 1 | T | C | Homozygous   |
| NC_037646.1 | 10844931 | SNV | 1 | C | T | Heterozygous |
| NC_037646.1 | 10844963 | SNV | 1 | A | G | Heterozygous |
| NC_037646.1 | 10845128 | SNV | 1 | T | C | Heterozygous |
| NC_037646.1 | 10845135 | SNV | 1 | C | G | Heterozygous |
| NC_037646.1 | 10845165 | SNV | 1 | T | A | Homozygous   |
| NC_037646.1 | 10845248 | SNV | 1 | G | A | Homozygous   |
| NC_037646.1 | 10845435 | SNV | 1 | G | A | Heterozygous |
| NC_037646.1 | 10846028 | SNV | 1 | C | T | Heterozygous |
| NC_037646.1 | 10846041 | SNV | 1 | G | A | Heterozygous |
| NC_037646.1 | 10846683 | SNV | 1 | T | C | Homozygous   |
| NC_037646.1 | 10848212 | SNV | 1 | C | T | Homozygous   |
| NC_037646.1 | 10850515 | SNV | 1 | T | C | Homozygous   |
| NC_037646.1 | 10850787 | SNV | 1 | C | T | Homozygous   |
| NC_037646.1 | 10851205 | SNV | 1 | T | C | Homozygous   |
| NC_037646.1 | 10851212 | SNV | 1 | A | G | Homozygous   |
| NC_037646.1 | 10852370 | SNV | 1 | C | T | Homozygous   |
| NC_037646.1 | 10852529 | SNV | 1 | T | C | Homozygous   |
| NC_037646.1 | 10852558 | SNV | 1 | C | T | Homozygous   |
| NC_037646.1 | 10853898 | SNV | 1 | G | A | Heterozygous |
| NC_037646.1 | 10853900 | SNV | 1 | T | C | Homozygous   |
| NC_037646.1 | 10853929 | SNV | 1 | A | G | Homozygous   |
| NC_037646.1 | 10854156 | SNV | 1 | A | T | Heterozygous |
| NC_037646.1 | 10856036 | SNV | 1 | T | A | Heterozygous |
| NC_037646.1 | 10856099 | SNV | 1 | G | C | Homozygous   |
| NC_037646.1 | 10856103 | SNV | 1 | C | T | Heterozygous |
| NC_037646.1 | 10856537 | SNV | 1 | C | T | Heterozygous |
| NC_037646.1 | 10856945 | SNV | 1 | G | A | Heterozygous |
| NC_037646.1 | 10858653 | SNV | 1 | A | G | Homozygous   |
| NC_037646.1 | 10859120 | SNV | 1 | C | A | Homozygous   |

|             |          |     |   |   |   |              |
|-------------|----------|-----|---|---|---|--------------|
| NC_037646.1 | 10859370 | SNV | 1 | A | G | Homozygous   |
| NC_037646.1 | 10859439 | SNV | 1 | A | C | Homozygous   |
| NC_037646.1 | 10868448 | SNV | 1 | G | T | Heterozygous |
| NC_037646.1 | 10869642 | SNV | 1 | G | A | Heterozygous |
| NC_037646.1 | 10875406 | SNV | 1 | C | G | Heterozygous |
| NC_037646.1 | 10875424 | SNV | 1 | C | G | Heterozygous |
| NC_037646.1 | 10875428 | SNV | 1 | C | T | Heterozygous |
| NC_037646.1 | 10875432 | SNV | 1 | C | T | Heterozygous |
| NC_037646.1 | 10875435 | SNV | 1 | T | C | Heterozygous |
| NC_037646.1 | 10880574 | SNV | 1 | A | G | Homozygous   |
| NC_037646.1 | 10881127 | SNV | 1 | A | G | Homozygous   |
| NC_037646.1 | 10881708 | SNV | 1 | T | C | Heterozygous |
| NC_037646.1 | 10882747 | SNV | 1 | C | T | Heterozygous |
| NC_037646.1 | 10882821 | SNV | 1 | T | C | Heterozygous |
| NC_037646.1 | 10882850 | SNV | 1 | C | T | Heterozygous |
| NC_037646.1 | 10882892 | SNV | 1 | C | T | Homozygous   |
| NC_037646.1 | 10882898 | SNV | 1 | T | C | Heterozygous |
| NC_037646.1 | 10883028 | SNV | 1 | T | C | Homozygous   |
| NC_037646.1 | 10883274 | SNV | 1 | T | A | Heterozygous |
| NC_037646.1 | 10883402 | SNV | 1 | A | G | Heterozygous |
| NC_037646.1 | 10883405 | SNV | 1 | A | C | Heterozygous |
| NC_037646.1 | 10883411 | SNV | 1 | A | G | Homozygous   |
| NC_037646.1 | 10883413 | SNV | 1 | A | C | Heterozygous |
| NC_037646.1 | 10883423 | SNV | 1 | C | A | Heterozygous |
| NC_037646.1 | 10883427 | SNV | 1 | C | A | Heterozygous |
| NC_037646.1 | 10883434 | SNV | 1 | G | A | Heterozygous |
| NC_037646.1 | 10883443 | SNV | 1 | C | G | Heterozygous |
| NC_037646.1 | 10883461 | SNV | 1 | A | C | Heterozygous |
| NC_037646.1 | 10883466 | SNV | 1 | G | A | Heterozygous |
| NC_037646.1 | 10883470 | SNV | 1 | G | A | Heterozygous |
| NC_037646.1 | 10883909 | SNV | 1 | T | C | Homozygous   |
| NC_037646.1 | 10883992 | SNV | 1 | A | G | Homozygous   |
| NC_037646.1 | 10884012 | SNV | 1 | T | C | Homozygous   |
| NC_037646.1 | 10884571 | SNV | 1 | G | A | Heterozygous |
| NC_037646.1 | 10884598 | SNV | 1 | T | A | Homozygous   |
| NC_037646.1 | 10884608 | SNV | 1 | T | A | Homozygous   |
| NC_037646.1 | 10884614 | SNV | 1 | G | A | Homozygous   |
| NC_037646.1 | 10884695 | SNV | 1 | G | A | Homozygous   |
| NC_037646.1 | 10885013 | SNV | 1 | C | T | Homozygous   |
| NC_037646.1 | 10885029 | SNV | 1 | C | T | Homozygous   |
| NC_037646.1 | 10885032 | SNV | 1 | C | T | Homozygous   |
| NC_037646.1 | 10888256 | SNV | 1 | T | C | Heterozygous |
| NC_037646.1 | 10888665 | SNV | 1 | A | G | Heterozygous |
| NC_037646.1 | 10889320 | SNV | 1 | T | C | Homozygous   |
| NC_037646.1 | 10889488 | SNV | 1 | A | G | Heterozygous |
| NC_037646.1 | 10889491 | SNV | 1 | T | C | Homozygous   |
| NC_037646.1 | 10890108 | SNV | 1 | A | G | Heterozygous |
| NC_037646.1 | 10890165 | SNV | 1 | C | T | Heterozygous |
| NC_037646.1 | 10890403 | SNV | 1 | C | T | Heterozygous |
| NC_037646.1 | 10893689 | SNV | 1 | T | C | Homozygous   |
| NC_037646.1 | 10894027 | SNV | 1 | G | A | Homozygous   |

|             |          |     |   |   |   |              |
|-------------|----------|-----|---|---|---|--------------|
| NC_037646.1 | 10894118 | SNV | 1 | T | C | Heterozygous |
| NC_037646.1 | 10894130 | SNV | 1 | G | A | Homozygous   |
| NC_037646.1 | 10894259 | SNV | 1 | T | G | Homozygous   |
| NC_037646.1 | 10894424 | SNV | 1 | T | C | Homozygous   |
| NC_037646.1 | 10894460 | SNV | 1 | T | C | Homozygous   |
| NC_037646.1 | 10894571 | SNV | 1 | T | A | Homozygous   |
| NC_037646.1 | 10894587 | SNV | 1 | C | T | Heterozygous |
| NC_037646.1 | 10894655 | SNV | 1 | C | T | Heterozygous |
| NC_037646.1 | 10895084 | SNV | 1 | C | T | Heterozygous |
| NC_037646.1 | 10903052 | SNV | 1 | G | A | Homozygous   |
| NC_037646.1 | 10903058 | SNV | 1 | G | A | Homozygous   |
| NC_037646.1 | 10903068 | SNV | 1 | A | G | Homozygous   |
| NC_037646.1 | 10903708 | SNV | 1 | A | G | Homozygous   |
| NC_037646.1 | 10904118 | SNV | 1 | T | A | Homozygous   |
| NC_037646.1 | 10904120 | SNV | 1 | T | G | Homozygous   |
| NC_037646.1 | 10904132 | SNV | 1 | T | G | Homozygous   |
| NC_037646.1 | 10904148 | SNV | 1 | G | C | Homozygous   |
| NC_037646.1 | 10904591 | SNV | 1 | A | T | Homozygous   |
| NC_037646.1 | 10904600 | SNV | 1 | A | G | Homozygous   |
| NC_037646.1 | 10904604 | SNV | 1 | T | A | Homozygous   |
| NC_037646.1 | 10904606 | SNV | 1 | T | G | Homozygous   |
| NC_037646.1 | 10904609 | SNV | 1 | A | C | Homozygous   |
| NC_037646.1 | 10904613 | SNV | 1 | T | A | Homozygous   |
| NC_037646.1 | 10904615 | SNV | 1 | T | C | Homozygous   |
| NC_037646.1 | 10904621 | SNV | 1 | A | G | Homozygous   |
| NC_037646.1 | 10904627 | SNV | 1 | A | C | Homozygous   |
| NC_037646.1 | 10904648 | SNV | 1 | A | G | Homozygous   |
| NC_037646.1 | 10904651 | SNV | 1 | A | G | Homozygous   |
| NC_037646.1 | 10904657 | SNV | 1 | A | G | Homozygous   |
| NC_037646.1 | 10904660 | SNV | 1 | T | C | Homozygous   |
| NC_037646.1 | 10904663 | SNV | 1 | T | C | Homozygous   |
| NC_037646.1 | 10904666 | SNV | 1 | T | A | Homozygous   |
| NC_037646.1 | 10904675 | SNV | 1 | C | A | Homozygous   |
| NC_037646.1 | 10904974 | SNV | 1 | T | A | Heterozygous |
| NC_037646.1 | 10904976 | SNV | 1 | A | G | Homozygous   |
| NC_037646.1 | 10904978 | SNV | 1 | T | G | Heterozygous |
| NC_037646.1 | 10905572 | SNV | 1 | G | A | Homozygous   |
| NC_037646.1 | 10905586 | SNV | 1 | T | C | Heterozygous |
| NC_037646.1 | 10905588 | SNV | 1 | T | C | Heterozygous |
| NC_037646.1 | 10905590 | SNV | 1 | T | C | Heterozygous |
| NC_037646.1 | 10905592 | SNV | 1 | T | C | Homozygous   |
| NC_037646.1 | 10905594 | SNV | 1 | C | T | Heterozygous |
| NC_037646.1 | 10909682 | SNV | 1 | G | A | Homozygous   |
| NC_037646.1 | 10910397 | SNV | 1 | C | T | Heterozygous |
| NC_037646.1 | 10911229 | SNV | 1 | T | C | Homozygous   |
| NC_037646.1 | 10911425 | SNV | 1 | G | A | Homozygous   |
| NC_037646.1 | 10915054 | SNV | 1 | A | G | Homozygous   |
| NC_037646.1 | 10915073 | SNV | 1 | T | C | Homozygous   |
| NC_037646.1 | 10915304 | SNV | 1 | A | G | Homozygous   |
| NC_037646.1 | 10915422 | SNV | 1 | T | A | Homozygous   |
| NC_037646.1 | 10915425 | SNV | 1 | C | G | Homozygous   |

|             |          |     |   |   |   |              |
|-------------|----------|-----|---|---|---|--------------|
| NC_037646.1 | 10915439 | SNV | 1 | T | C | Homozygous   |
| NC_037646.1 | 10915625 | SNV | 1 | G | A | Homozygous   |
| NC_037646.1 | 10915736 | SNV | 1 | G | A | Heterozygous |
| NC_037646.1 | 10916072 | SNV | 1 | C | T | Heterozygous |
| NC_037646.1 | 10916311 | SNV | 1 | C | T | Heterozygous |
| NC_037646.1 | 10916389 | SNV | 1 | G | A | Homozygous   |
| NC_037646.1 | 10916400 | SNV | 1 | T | C | Heterozygous |
| NC_037646.1 | 10916404 | SNV | 1 | T | C | Heterozygous |
| NC_037646.1 | 10916432 | SNV | 1 | G | A | Heterozygous |
| NC_037646.1 | 10916435 | SNV | 1 | T | C | Heterozygous |
| NC_037646.1 | 10916623 | SNV | 1 | A | G | Homozygous   |
| NC_037646.1 | 10916676 | SNV | 1 | G | A | Homozygous   |
| NC_037646.1 | 10917356 | SNV | 1 | T | C | Homozygous   |
| NC_037646.1 | 10918735 | SNV | 1 | C | T | Homozygous   |
| NC_037646.1 | 10918922 | SNV | 1 | G | A | Homozygous   |
| NC_037646.1 | 10919187 | SNV | 1 | G | C | Heterozygous |
| NC_037646.1 | 10919194 | SNV | 1 | T | A | Heterozygous |
| NC_037646.1 | 10919198 | SNV | 1 | A | T | Heterozygous |
| NC_037646.1 | 10919245 | SNV | 1 | G | A | Heterozygous |
| NC_037646.1 | 10919255 | SNV | 1 | C | T | Heterozygous |
| NC_037646.1 | 10919780 | SNV | 1 | C | T | Heterozygous |
| NC_037646.1 | 10919834 | SNV | 1 | A | G | Heterozygous |
| NC_037646.1 | 10919998 | SNV | 1 | A | G | Homozygous   |
| NC_037646.1 | 10920856 | SNV | 1 | G | A | Heterozygous |
| NC_037646.1 | 10920921 | SNV | 1 | A | G | Homozygous   |
| NC_037646.1 | 10920952 | SNV | 1 | C | T | Heterozygous |
| NC_037646.1 | 10920954 | SNV | 1 | G | T | Heterozygous |
| NC_037646.1 | 10922861 | SNV | 1 | T | A | Homozygous   |
| NC_037646.1 | 10922864 | SNV | 1 | T | A | Homozygous   |
| NC_037646.1 | 10922866 | SNV | 1 | T | A | Homozygous   |
| NC_037646.1 | 10923113 | SNV | 1 | C | G | Homozygous   |
| NC_037646.1 | 10925432 | SNV | 1 | T | A | Homozygous   |
| NC_037646.1 | 10926616 | SNV | 1 | A | G | Homozygous   |
| NC_037646.1 | 10926817 | SNV | 1 | T | C | Homozygous   |
| NC_037646.1 | 10926899 | SNV | 1 | A | G | Heterozygous |
| NC_037646.1 | 10926937 | SNV | 1 | C | T | Homozygous   |
| NC_037646.1 | 10926971 | SNV | 1 | C | T | Heterozygous |
| NC_037646.1 | 10927013 | SNV | 1 | A | G | Heterozygous |
| NC_037646.1 | 10927964 | SNV | 1 | A | T | Homozygous   |
| NC_037646.1 | 10927982 | SNV | 1 | T | C | Homozygous   |
| NC_037646.1 | 10928004 | SNV | 1 | A | G | Homozygous   |
| NC_037646.1 | 10928024 | SNV | 1 | G | A | Heterozygous |
| NC_037646.1 | 10928147 | SNV | 1 | T | C | Heterozygous |
| NC_037646.1 | 10928335 | SNV | 1 | T | C | Homozygous   |
| NC_037646.1 | 10928410 | SNV | 1 | C | T | Heterozygous |
| NC_037646.1 | 10928458 | SNV | 1 | G | T | Homozygous   |
| NC_037646.1 | 10928645 | SNV | 1 | C | T | Heterozygous |
| NC_037646.1 | 10928855 | SNV | 1 | G | A | Heterozygous |
| NC_037646.1 | 10928918 | SNV | 1 | G | A | Homozygous   |
| NC_037646.1 | 10928971 | SNV | 1 | T | C | Heterozygous |
| NC_037646.1 | 10929226 | SNV | 1 | T | C | Homozygous   |

|             |          |     |   |   |   |              |
|-------------|----------|-----|---|---|---|--------------|
| NC_037646.1 | 10929342 | SNV | 1 | A | C | Heterozygous |
| NC_037646.1 | 10929518 | SNV | 1 | A | G | Homozygous   |
| NC_037646.1 | 10931550 | SNV | 1 | G | A | Homozygous   |
| NC_037646.1 | 10934900 | SNV | 1 | T | C | Heterozygous |
| NC_037646.1 | 10934958 | SNV | 1 | C | A | Heterozygous |
| NC_037646.1 | 10935064 | SNV | 1 | A | G | Homozygous   |
| NC_037646.1 | 10936486 | SNV | 1 | G | A | Heterozygous |
| NC_037646.1 | 10936498 | SNV | 1 | G | A | Heterozygous |
| NC_037646.1 | 10937084 | SNV | 1 | T | G | Homozygous   |
| NC_037646.1 | 10937552 | SNV | 1 | G | A | Heterozygous |
| NC_037646.1 | 10938163 | SNV | 1 | A | T | Heterozygous |
| NC_037646.1 | 10938380 | SNV | 1 | C | T | Heterozygous |
| NC_037646.1 | 10938385 | SNV | 1 | C | T | Heterozygous |
| NC_037646.1 | 10938411 | SNV | 1 | T | C | Homozygous   |
| NC_037646.1 | 10938552 | SNV | 1 | T | G | Homozygous   |
| NC_037646.1 | 10938732 | SNV | 1 | T | C | Homozygous   |
| NC_037646.1 | 10944872 | SNV | 1 | T | C | Homozygous   |
| NC_037646.1 | 10944876 | SNV | 1 | T | C | Homozygous   |
| NC_037646.1 | 10944878 | SNV | 1 | A | C | Homozygous   |
| NC_037646.1 | 10944881 | SNV | 1 | T | A | Homozygous   |
| NC_037646.1 | 10944883 | SNV | 1 | C | T | Homozygous   |
| NC_037646.1 | 10944888 | SNV | 1 | T | C | Homozygous   |
| NC_037646.1 | 10944919 | SNV | 1 | G | A | Homozygous   |
| NC_037646.1 | 10944934 | SNV | 1 | C | T | Homozygous   |
| NC_037646.1 | 10946485 | SNV | 1 | C | G | Homozygous   |
| NC_037646.1 | 10947126 | SNV | 1 | C | A | Homozygous   |
| NC_037646.1 | 10947601 | SNV | 1 | T | A | Homozygous   |
| NC_037646.1 | 10948584 | SNV | 1 | G | A | Heterozygous |
| NC_037646.1 | 10948712 | SNV | 1 | T | A | Homozygous   |
| NC_037646.1 | 10948733 | SNV | 1 | A | G | Homozygous   |
| NC_037646.1 | 10948741 | SNV | 1 | A | G | Homozygous   |
| NC_037646.1 | 10948759 | SNV | 1 | G | C | Heterozygous |
| NC_037646.1 | 10949119 | SNV | 1 | T | C | Homozygous   |
| NC_037646.1 | 10949554 | SNV | 1 | A | G | Homozygous   |
| NC_037646.1 | 10950556 | SNV | 1 | T | C | Homozygous   |
| NC_037646.1 | 10951445 | SNV | 1 | T | C | Homozygous   |
| NC_037646.1 | 10951514 | SNV | 1 | A | G | Homozygous   |
| NC_037646.1 | 10951924 | SNV | 1 | T | C | Homozygous   |
| NC_037646.1 | 10952451 | SNV | 1 | G | C | Heterozygous |
| NC_037646.1 | 10952690 | SNV | 1 | A | G | Heterozygous |
| NC_037646.1 | 10952698 | SNV | 1 | C | G | Homozygous   |
| NC_037646.1 | 10952720 | SNV | 1 | T | C | Homozygous   |
| NC_037646.1 | 10952756 | SNV | 1 | A | G | Heterozygous |
| NC_037646.1 | 10952760 | SNV | 1 | A | G | Heterozygous |
| NC_037646.1 | 10952980 | SNV | 1 | T | C | Heterozygous |
| NC_037646.1 | 10952986 | SNV | 1 | C | T | Heterozygous |
| NC_037646.1 | 10952993 | SNV | 1 | G | A | Heterozygous |
| NC_037646.1 | 10953002 | SNV | 1 | G | T | Heterozygous |
| NC_037646.1 | 10953728 | SNV | 1 | C | T | Heterozygous |
| NC_037646.1 | 10953751 | SNV | 1 | C | T | Heterozygous |
| NC_037646.1 | 10953803 | SNV | 1 | T | C | Heterozygous |

|             |          |     |   |   |   |              |
|-------------|----------|-----|---|---|---|--------------|
| NC_037646.1 | 10953806 | SNV | 1 | G | A | Homozygous   |
| NC_037646.1 | 10954347 | SNV | 1 | A | T | Homozygous   |
| NC_037646.1 | 10955780 | SNV | 1 | A | T | Homozygous   |
| NC_037646.1 | 10958421 | SNV | 1 | G | T | Homozygous   |
| NC_037646.1 | 10958424 | SNV | 1 | A | T | Homozygous   |
| NC_037646.1 | 10958428 | SNV | 1 | T | G | Homozygous   |
| NC_037646.1 | 10958430 | SNV | 1 | C | A | Homozygous   |
| NC_037646.1 | 10958458 | SNV | 1 | C | G | Heterozygous |
| NC_037646.1 | 10958821 | SNV | 1 | A | T | Homozygous   |
| NC_037646.1 | 10962682 | SNV | 1 | C | T | Heterozygous |
| NC_037646.1 | 10963016 | SNV | 1 | G | A | Homozygous   |
| NC_037646.1 | 10963502 | SNV | 1 | G | A | Homozygous   |
| NC_037646.1 | 10963800 | SNV | 1 | A | G | Homozygous   |
| NC_037646.1 | 10964377 | SNV | 1 | A | C | Homozygous   |
| NC_037646.1 | 10964403 | SNV | 1 | G | A | Homozygous   |
| NC_037646.1 | 10964445 | SNV | 1 | C | A | Homozygous   |
| NC_037646.1 | 10964559 | SNV | 1 | C | A | Heterozygous |
| NC_037646.1 | 10964562 | SNV | 1 | A | C | Heterozygous |
| NC_037646.1 | 10964873 | SNV | 1 | T | A | Homozygous   |
| NC_037646.1 | 10965356 | SNV | 1 | A | G | Heterozygous |
| NC_037646.1 | 10966934 | SNV | 1 | T | C | Heterozygous |
| NC_037646.1 | 10967125 | SNV | 1 | G | T | Heterozygous |
| NC_037646.1 | 10967149 | SNV | 1 | T | C | Homozygous   |
| NC_037646.1 | 10967155 | SNV | 1 | C | T | Heterozygous |
| NC_037646.1 | 10967644 | SNV | 1 | T | C | Homozygous   |
| NC_037646.1 | 10967892 | SNV | 1 | T | C | Homozygous   |
| NC_037646.1 | 10968186 | SNV | 1 | A | G | Homozygous   |
| NC_037646.1 | 10968766 | SNV | 1 | G | A | Heterozygous |
| NC_037646.1 | 10969262 | SNV | 1 | G | A | Heterozygous |
| NC_037646.1 | 10969294 | SNV | 1 | A | G | Homozygous   |
| NC_037646.1 | 10969313 | SNV | 1 | G | C | Homozygous   |
| NC_037646.1 | 10969329 | SNV | 1 | T | C | Homozygous   |
| NC_037646.1 | 10969538 | SNV | 1 | T | C | Heterozygous |
| NC_037646.1 | 10969640 | SNV | 1 | A | G | Heterozygous |
| NC_037646.1 | 10969653 | SNV | 1 | A | T | Homozygous   |
| NC_037646.1 | 10969663 | SNV | 1 | A | G | Homozygous   |
| NC_037646.1 | 10969680 | SNV | 1 | T | C | Homozygous   |
| NC_037646.1 | 10969955 | SNV | 1 | A | G | Homozygous   |
| NC_037646.1 | 10970530 | SNV | 1 | C | T | Heterozygous |
| NC_037646.1 | 10970660 | SNV | 1 | A | G | Homozygous   |
| NC_037646.1 | 10970667 | SNV | 1 | A | G | Heterozygous |
| NC_037646.1 | 10970732 | SNV | 1 | C | G | Homozygous   |
| NC_037646.1 | 10970747 | SNV | 1 | A | T | Heterozygous |
| NC_037646.1 | 10970827 | SNV | 1 | T | C | Heterozygous |
| NC_037646.1 | 10970837 | SNV | 1 | C | T | Homozygous   |
| NC_037646.1 | 10970871 | SNV | 1 | T | A | Homozygous   |
| NC_037646.1 | 10970874 | SNV | 1 | C | A | Homozygous   |
| NC_037646.1 | 10970939 | SNV | 1 | A | G | Heterozygous |
| NC_037646.1 | 10970942 | SNV | 1 | G | A | Heterozygous |
| NC_037646.1 | 10971027 | SNV | 1 | A | G | Heterozygous |
| NC_037646.1 | 10972124 | SNV | 1 | A | G | Homozygous   |



|             |          |     |   |   |   |              |
|-------------|----------|-----|---|---|---|--------------|
| NC_037646.1 | 10972881 | SNV | 1 | T | C | Homozygous   |
| NC_037646.1 | 10972969 | SNV | 1 | T | C | Homozygous   |
| NC_037646.1 | 10972978 | SNV | 1 | T | C | Homozygous   |
| NC_037646.1 | 10972987 | SNV | 1 | C | T | Homozygous   |
| NC_037646.1 | 10972999 | SNV | 1 | C | T | Heterozygous |
| NC_037646.1 | 10973157 | SNV | 1 | C | T | Heterozygous |
| NC_037646.1 | 10973408 | SNV | 1 | G | C | Homozygous   |
| NC_037646.1 | 10973452 | SNV | 1 | G | C | Heterozygous |
| NC_037646.1 | 10973452 | SNV | 1 | G | T | Heterozygous |
| NC_037646.1 | 10973497 | SNV | 1 | G | A | Homozygous   |
| NC_037646.1 | 10973889 | SNV | 1 | G | A | Homozygous   |
| NC_037646.1 | 10974987 | SNV | 1 | G | A | Homozygous   |
| NC_037646.1 | 10974991 | SNV | 1 | A | G | Homozygous   |
| NC_037646.1 | 10975056 | SNV | 1 | A | G | Homozygous   |
| NC_037646.1 | 10975068 | SNV | 1 | A | G | Homozygous   |
| NC_037646.1 | 10975125 | SNV | 1 | T | C | Homozygous   |
| NC_037646.1 | 10975175 | SNV | 1 | C | G | Heterozygous |
| NC_037646.1 | 10975204 | SNV | 1 | T | C | Heterozygous |
| NC_037646.1 | 10975220 | SNV | 1 | C | T | Heterozygous |
| NC_037646.1 | 10975224 | SNV | 1 | T | C | Homozygous   |
| NC_037646.1 | 10975657 | SNV | 1 | A | G | Homozygous   |
| NC_037646.1 | 10977106 | SNV | 1 | G | A | Homozygous   |
| NC_037646.1 | 10977292 | SNV | 1 | C | T | Heterozygous |
| NC_037646.1 | 10977373 | SNV | 1 | A | G | Heterozygous |
| NC_037646.1 | 10977539 | SNV | 1 | G | A | Homozygous   |
| NC_037646.1 | 10977568 | SNV | 1 | C | G | Homozygous   |
| NC_037646.1 | 10977570 | SNV | 1 | T | A | Homozygous   |
| NC_037646.1 | 10977577 | SNV | 1 | A | G | Homozygous   |
| NC_037646.1 | 10978254 | SNV | 1 | G | T | Homozygous   |
| NC_037646.1 | 10978657 | SNV | 1 | G | A | Heterozygous |
| NC_037646.1 | 10979314 | SNV | 1 | G | C | Homozygous   |
| NC_037646.1 | 10979368 | SNV | 1 | A | G | Heterozygous |
| NC_037646.1 | 10979379 | SNV | 1 | G | T | Heterozygous |
| NC_037646.1 | 10979453 | SNV | 1 | G | A | Heterozygous |
| NC_037646.1 | 10979542 | SNV | 1 | G | A | Heterozygous |
| NC_037646.1 | 10980232 | SNV | 1 | A | G | Heterozygous |
| NC_037646.1 | 10980234 | SNV | 1 | G | A | Homozygous   |
| NC_037646.1 | 10980345 | SNV | 1 | G | A | Heterozygous |
| NC_037646.1 | 10980376 | SNV | 1 | A | G | Homozygous   |
| NC_037646.1 | 10980388 | SNV | 1 | C | T | Heterozygous |
| NC_037646.1 | 10980409 | SNV | 1 | G | A | Homozygous   |
| NC_037646.1 | 10980526 | SNV | 1 | T | C | Homozygous   |
| NC_037646.1 | 10980544 | SNV | 1 | A | C | Heterozygous |
| NC_037646.1 | 10980555 | SNV | 1 | A | G | Homozygous   |
| NC_037646.1 | 10980557 | SNV | 1 | A | G | Heterozygous |
| NC_037646.1 | 10980635 | SNV | 1 | T | A | Homozygous   |
| NC_037646.1 | 10980664 | SNV | 1 | C | T | Homozygous   |
| NC_037646.1 | 10980686 | SNV | 1 | G | A | Heterozygous |
| NC_037646.1 | 10980968 | SNV | 1 | T | C | Heterozygous |
| NC_037646.1 | 10981258 | SNV | 1 | G | T | Homozygous   |
| NC_037646.1 | 10981291 | SNV | 1 | A | G | Homozygous   |

|             |          |     |   |   |   |              |
|-------------|----------|-----|---|---|---|--------------|
| NC_037646.1 | 10981597 | SNV | 1 | A | G | Homozygous   |
| NC_037646.1 | 10981813 | SNV | 1 | T | C | Homozygous   |
| NC_037646.1 | 10982131 | SNV | 1 | A | T | Homozygous   |
| NC_037646.1 | 10982452 | SNV | 1 | C | T | Heterozygous |
| NC_037646.1 | 10982525 | SNV | 1 | A | G | Homozygous   |
| NC_037646.1 | 10982586 | SNV | 1 | T | A | Homozygous   |
| NC_037646.1 | 10982665 | SNV | 1 | A | G | Homozygous   |
| NC_037646.1 | 10982688 | SNV | 1 | A | G | Homozygous   |
| NC_037646.1 | 10982788 | SNV | 1 | T | C | Heterozygous |
| NC_037646.1 | 10983338 | SNV | 1 | A | T | Homozygous   |
| NC_037646.1 | 10986862 | SNV | 1 | T | C | Heterozygous |
| NC_037646.1 | 10986954 | SNV | 1 | C | T | Heterozygous |
| NC_037646.1 | 10987033 | SNV | 1 | G | T | Homozygous   |
| NC_037646.1 | 10988262 | SNV | 1 | G | A | Homozygous   |
| NC_037646.1 | 10988265 | SNV | 1 | A | G | Homozygous   |
| NC_037646.1 | 10988269 | SNV | 1 | A | T | Homozygous   |
| NC_037646.1 | 10988272 | SNV | 1 | C | T | Homozygous   |
| NC_037646.1 | 10988276 | SNV | 1 | A | G | Homozygous   |
| NC_037646.1 | 10988394 | SNV | 1 | A | T | Homozygous   |
| NC_037646.1 | 10988408 | SNV | 1 | A | G | Homozygous   |
| NC_037646.1 | 10988411 | SNV | 1 | G | A | Homozygous   |
| NC_037646.1 | 10988414 | SNV | 1 | T | G | Homozygous   |
| NC_037646.1 | 10988421 | SNV | 1 | A | G | Homozygous   |
| NC_037646.1 | 10988433 | SNV | 1 | C | A | Homozygous   |
| NC_037646.1 | 10988435 | SNV | 1 | T | A | Homozygous   |
| NC_037646.1 | 10990757 | SNV | 1 | T | C | Homozygous   |
| NC_037646.1 | 10990846 | SNV | 1 | G | A | Homozygous   |
| NC_037646.1 | 10990848 | SNV | 1 | G | A | Homozygous   |
| NC_037646.1 | 10990876 | SNV | 1 | G | A | Homozygous   |
| NC_037646.1 | 10990930 | SNV | 1 | T | C | Heterozygous |
| NC_037646.1 | 10991390 | SNV | 1 | G | A | Homozygous   |
| NC_037646.1 | 10991458 | SNV | 1 | A | G | Homozygous   |
| NC_037646.1 | 10991680 | SNV | 1 | A | G | Homozygous   |
| NC_037646.1 | 10993271 | SNV | 1 | A | G | Homozygous   |
| NC_037646.1 | 10993481 | SNV | 1 | G | A | Homozygous   |
| NC_037646.1 | 10993741 | SNV | 1 | C | T | Heterozygous |
| NC_037646.1 | 10993790 | SNV | 1 | A | G | Heterozygous |
| NC_037646.1 | 10994056 | SNV | 1 | A | G | Homozygous   |
| NC_037646.1 | 10994245 | SNV | 1 | C | A | Heterozygous |
| NC_037646.1 | 10994472 | SNV | 1 | A | T | Homozygous   |
| NC_037646.1 | 10995258 | SNV | 1 | G | A | Homozygous   |
| NC_037646.1 | 10995288 | SNV | 1 | C | T | Homozygous   |
| NC_037646.1 | 10995920 | SNV | 1 | G | A | Heterozygous |
| NC_037646.1 | 10995945 | SNV | 1 | G | A | Homozygous   |
| NC_037646.1 | 10997361 | SNV | 1 | A | G | Homozygous   |
| NC_037646.1 | 10997415 | SNV | 1 | T | C | Homozygous   |
| NC_037646.1 | 10997710 | SNV | 1 | A | G | Homozygous   |
| NC_037646.1 | 10998310 | SNV | 1 | G | A | Heterozygous |
| NC_037646.1 | 10998395 | SNV | 1 | T | C | Homozygous   |
| NC_037646.1 | 10999221 | SNV | 1 | A | G | Homozygous   |
| NC_037646.1 | 10999526 | SNV | 1 | T | C | Heterozygous |

|             |          |     |   |   |   |              |
|-------------|----------|-----|---|---|---|--------------|
| NC_037646.1 | 10999535 | SNV | 1 | C | T | Heterozygous |
| NC_037646.1 | 10999556 | SNV | 1 | C | T | Heterozygous |
| NC_037646.1 | 10999971 | SNV | 1 | T | C | Homozygous   |
| NC_037646.1 | 11000171 | SNV | 1 | G | A | Heterozygous |
| NC_037646.1 | 11000612 | SNV | 1 | T | C | Homozygous   |
| NC_037646.1 | 11000736 | SNV | 1 | A | G | Heterozygous |
| NC_037646.1 | 11000898 | SNV | 1 | A | G | Homozygous   |
| NC_037646.1 | 11000953 | SNV | 1 | T | C | Homozygous   |
| NC_037646.1 | 11001293 | SNV | 1 | A | G | Homozygous   |
| NC_037646.1 | 11001313 | SNV | 1 | A | C | Heterozygous |
| NC_037646.1 | 11001362 | SNV | 1 | A | G | Homozygous   |
| NC_037646.1 | 11001399 | SNV | 1 | T | G | Heterozygous |
| NC_037646.1 | 11001619 | SNV | 1 | A | G | Homozygous   |
| NC_037646.1 | 11002140 | SNV | 1 | T | C | Homozygous   |
| NC_037646.1 | 11002149 | SNV | 1 | T | C | Homozygous   |
| NC_037646.1 | 11002515 | SNV | 1 | T | C | Homozygous   |
| NC_037646.1 | 11002534 | SNV | 1 | G | A | Homozygous   |
| NC_037646.1 | 11004034 | SNV | 1 | A | G | Homozygous   |
| NC_037646.1 | 11004437 | SNV | 1 | C | T | Heterozygous |
| NC_037646.1 | 11004638 | SNV | 1 | T | G | Heterozygous |
| NC_037646.1 | 11004672 | SNV | 1 | A | G | Homozygous   |
| NC_037646.1 | 11008564 | SNV | 1 | G | A | Homozygous   |
| NC_037646.1 | 11009456 | SNV | 1 | G | A | Heterozygous |
| NC_037646.1 | 11013602 | SNV | 1 | C | T | Homozygous   |
| NC_037646.1 | 11015605 | SNV | 1 | T | C | Heterozygous |
| NC_037646.1 | 11015735 | SNV | 1 | C | T | Homozygous   |
| NC_037646.1 | 11015916 | SNV | 1 | A | G | Heterozygous |
| NC_037646.1 | 11016059 | SNV | 1 | T | C | Heterozygous |
| NC_037646.1 | 11016347 | SNV | 1 | A | G | Homozygous   |
| NC_037646.1 | 11016363 | SNV | 1 | G | A | Heterozygous |
| NC_037646.1 | 11016564 | SNV | 1 | C | T | Heterozygous |
| NC_037646.1 | 11016821 | SNV | 1 | G | T | Homozygous   |
| NC_037646.1 | 11016831 | SNV | 1 | C | T | Heterozygous |
| NC_037646.1 | 11016843 | SNV | 1 | C | T | Heterozygous |
| NC_037646.1 | 11025631 | SNV | 1 | A | C | Homozygous   |
| NC_037646.1 | 11030058 | SNV | 1 | A | G | Homozygous   |
| NC_037646.1 | 11030069 | SNV | 1 | T | C | Homozygous   |
| NC_037646.1 | 11030105 | SNV | 1 | G | A | Heterozygous |
| NC_037646.1 | 11030177 | SNV | 1 | A | G | Homozygous   |
| NC_037646.1 | 11032497 | SNV | 1 | A | C | Heterozygous |
| NC_037646.1 | 11032862 | SNV | 1 | T | C | Homozygous   |
| NC_037646.1 | 11033818 | SNV | 1 | G | A | Heterozygous |
| NC_037646.1 | 11033898 | SNV | 1 | C | T | Homozygous   |
| NC_037646.1 | 11033936 | SNV | 1 | T | C | Homozygous   |
| NC_037646.1 | 11034676 | SNV | 1 | T | A | Heterozygous |
| NC_037646.1 | 11034680 | SNV | 1 | T | A | Homozygous   |
| NC_037646.1 | 11034707 | SNV | 1 | T | G | Homozygous   |
| NC_037646.1 | 11034712 | SNV | 1 | C | T | Homozygous   |
| NC_037646.1 | 11034714 | SNV | 1 | T | A | Homozygous   |
| NC_037646.1 | 11034881 | SNV | 1 | A | T | Homozygous   |
| NC_037646.1 | 11034976 | SNV | 1 | C | T | Heterozygous |

|             |          |     |   |   |   |              |
|-------------|----------|-----|---|---|---|--------------|
| NC_037646.1 | 11035039 | SNV | 1 | G | C | Heterozygous |
| NC_037646.1 | 11035106 | SNV | 1 | T | C | Homozygous   |
| NC_037646.1 | 11035146 | SNV | 1 | T | C | Homozygous   |
| NC_037646.1 | 11035377 | SNV | 1 | C | T | Heterozygous |
| NC_037646.1 | 11035447 | SNV | 1 | A | T | Heterozygous |
| NC_037646.1 | 11035450 | SNV | 1 | A | G | Heterozygous |
| NC_037646.1 | 11035452 | SNV | 1 | A | G | Heterozygous |
| NC_037646.1 | 11035456 | SNV | 1 | A | G | Homozygous   |
| NC_037646.1 | 11035468 | SNV | 1 | A | G | Heterozygous |
| NC_037646.1 | 11039762 | SNV | 1 | G | A | Heterozygous |
| NC_037646.1 | 11039937 | SNV | 1 | C | T | Heterozygous |
| NC_037646.1 | 11040188 | SNV | 1 | A | T | Heterozygous |
| NC_037646.1 | 11040637 | SNV | 1 | A | G | Heterozygous |
| NC_037646.1 | 11040724 | SNV | 1 | G | A | Heterozygous |
| NC_037646.1 | 11040791 | SNV | 1 | G | A | Homozygous   |
| NC_037646.1 | 11040826 | SNV | 1 | T | C | Heterozygous |
| NC_037646.1 | 11041024 | SNV | 1 | A | G | Homozygous   |
| NC_037646.1 | 11044569 | SNV | 1 | T | C | Heterozygous |
| NC_037646.1 | 11045019 | SNV | 1 | A | G | Homozygous   |
| NC_037646.1 | 11045127 | SNV | 1 | G | A | Heterozygous |
| NC_037646.1 | 11045462 | SNV | 1 | C | T | Heterozygous |
| NC_037646.1 | 11049297 | SNV | 1 | A | G | Heterozygous |
| NC_037646.1 | 11049320 | SNV | 1 | C | G | Heterozygous |
| NC_037646.1 | 11049361 | SNV | 1 | C | G | Homozygous   |
| NC_037646.1 | 11049723 | SNV | 1 | G | A | Heterozygous |
| NC_037646.1 | 11050405 | SNV | 1 | A | T | Homozygous   |
| NC_037646.1 | 11051341 | SNV | 1 | T | C | Heterozygous |
| NC_037646.1 | 11051346 | SNV | 1 | A | G | Homozygous   |
| NC_037646.1 | 11051948 | SNV | 1 | G | A | Heterozygous |
| NC_037646.1 | 11052038 | SNV | 1 | C | T | Homozygous   |
| NC_037646.1 | 11052187 | SNV | 1 | G | C | Homozygous   |
| NC_037646.1 | 11052610 | SNV | 1 | T | C | Heterozygous |
| NC_037646.1 | 11052878 | SNV | 1 | C | T | Homozygous   |
| NC_037646.1 | 11052937 | SNV | 1 | C | A | Heterozygous |
| NC_037646.1 | 11053069 | SNV | 1 | C | G | Heterozygous |
| NC_037646.1 | 11062310 | SNV | 1 | T | A | Homozygous   |
| NC_037646.1 | 11062331 | SNV | 1 | A | C | Homozygous   |
| NC_037646.1 | 11062342 | SNV | 1 | G | A | Homozygous   |
| NC_037646.1 | 11062345 | SNV | 1 | T | A | Homozygous   |
| NC_037646.1 | 11062349 | SNV | 1 | A | T | Homozygous   |
| NC_037646.1 | 11062352 | SNV | 1 | G | T | Homozygous   |
| NC_037646.1 | 11063627 | SNV | 1 | C | T | Heterozygous |
| NC_037646.1 | 11063840 | SNV | 1 | G | A | Homozygous   |
| NC_037646.1 | 11063946 | SNV | 1 | G | A | Heterozygous |
| NC_037646.1 | 11064036 | SNV | 1 | A | G | Homozygous   |
| NC_037646.1 | 11064064 | SNV | 1 | T | A | Homozygous   |
| NC_037646.1 | 11064067 | SNV | 1 | A | G | Homozygous   |
| NC_037646.1 | 11064857 | SNV | 1 | T | C | Homozygous   |
| NC_037646.1 | 11064985 | SNV | 1 | A | G | Homozygous   |
| NC_037646.1 | 11065304 | SNV | 1 | G | T | Heterozygous |
| NC_037646.1 | 11066351 | SNV | 1 | A | T | Homozygous   |

|             |          |     |   |   |   |              |
|-------------|----------|-----|---|---|---|--------------|
| NC_037646.1 | 11066353 | SNV | 1 | A | T | Homozygous   |
| NC_037646.1 | 11066355 | SNV | 1 | A | T | Homozygous   |
| NC_037646.1 | 11066369 | SNV | 1 | A | T | Homozygous   |
| NC_037646.1 | 11066761 | SNV | 1 | A | T | Heterozygous |
| NC_037646.1 | 11067556 | SNV | 1 | G | A | Homozygous   |
| NC_037646.1 | 11067561 | SNV | 1 | A | G | Homozygous   |
| NC_037646.1 | 11067563 | SNV | 1 | A | G | Homozygous   |
| NC_037646.1 | 11067723 | SNV | 1 | G | A | Heterozygous |
| NC_037646.1 | 11068302 | SNV | 1 | G | A | Homozygous   |
| NC_037646.1 | 11068480 | SNV | 1 | T | A | Homozygous   |
| NC_037646.1 | 11068536 | SNV | 1 | T | C | Heterozygous |
| NC_037646.1 | 11068788 | SNV | 1 | A | G | Homozygous   |
| NC_037646.1 | 11068888 | SNV | 1 | C | G | Homozygous   |
| NC_037646.1 | 11069286 | SNV | 1 | C | T | Homozygous   |
| NC_037646.1 | 11069698 | SNV | 1 | G | A | Heterozygous |
| NC_037646.1 | 11069785 | SNV | 1 | T | C | Heterozygous |
| NC_037646.1 | 11070523 | SNV | 1 | C | T | Homozygous   |
| NC_037646.1 | 11072019 | SNV | 1 | T | C | Heterozygous |
| NC_037646.1 | 11081522 | SNV | 1 | C | A | Homozygous   |
| NC_037646.1 | 11083334 | SNV | 1 | C | T | Homozygous   |
| NC_037646.1 | 11084414 | SNV | 1 | G | A | Heterozygous |
| NC_037646.1 | 11084422 | SNV | 1 | C | A | Heterozygous |
| NC_037646.1 | 11089510 | SNV | 1 | A | G | Homozygous   |
| NC_037646.1 | 11096306 | SNV | 1 | G | A | Homozygous   |
| NC_037646.1 | 11096454 | SNV | 1 | T | A | Heterozygous |
| NC_037646.1 | 11097041 | SNV | 1 | T | C | Heterozygous |
| NC_037646.1 | 11097083 | SNV | 1 | A | G | Homozygous   |
| NC_037646.1 | 11097095 | SNV | 1 | T | C | Homozygous   |
| NC_037646.1 | 11103278 | SNV | 1 | G | A | Heterozygous |
| NC_037646.1 | 11103347 | SNV | 1 | G | T | Heterozygous |
| NC_037646.1 | 11104632 | SNV | 1 | T | C | Homozygous   |
| NC_037646.1 | 11104651 | SNV | 1 | T | A | Homozygous   |
| NC_037646.1 | 11105370 | SNV | 1 | A | G | Homozygous   |
| NC_037646.1 | 11105412 | SNV | 1 | G | T | Homozygous   |
| NC_037646.1 | 11105429 | SNV | 1 | C | G | Homozygous   |
| NC_037646.1 | 11105432 | SNV | 1 | A | T | Heterozygous |
| NC_037646.1 | 11108051 | SNV | 1 | G | T | Homozygous   |
| NC_037646.1 | 11108074 | SNV | 1 | T | G | Heterozygous |
| NC_037646.1 | 11108150 | SNV | 1 | C | T | Heterozygous |
| NC_037646.1 | 11108153 | SNV | 1 | C | T | Heterozygous |
| NC_037646.1 | 11108156 | SNV | 1 | T | C | Heterozygous |
| NC_037646.1 | 11108176 | SNV | 1 | T | C | Heterozygous |
| NC_037646.1 | 11108199 | SNV | 1 | C | G | Homozygous   |
| NC_037646.1 | 11113292 | SNV | 1 | T | C | Heterozygous |
| NC_037646.1 | 11113309 | SNV | 1 | G | A | Heterozygous |
| NC_037646.1 | 11113311 | SNV | 1 | A | G | Homozygous   |
| NC_037646.1 | 11113346 | SNV | 1 | T | C | Heterozygous |
| NC_037646.1 | 11114677 | SNV | 1 | A | G | Heterozygous |
| NC_037646.1 | 11114687 | SNV | 1 | A | G | Heterozygous |
| NC_037646.1 | 11115054 | SNV | 1 | T | G | Homozygous   |
| NC_037646.1 | 11117373 | SNV | 1 | A | G | Homozygous   |

|             |          |     |   |   |   |              |
|-------------|----------|-----|---|---|---|--------------|
| NC_037646.1 | 11117384 | SNV | 1 | T | C | Homozygous   |
| NC_037646.1 | 11121997 | SNV | 1 | A | G | Homozygous   |
| NC_037646.1 | 11122024 | SNV | 1 | T | A | Homozygous   |
| NC_037646.1 | 11122033 | SNV | 1 | C | T | Homozygous   |
| NC_037646.1 | 11123070 | SNV | 1 | T | C | Heterozygous |
| NC_037646.1 | 11123103 | SNV | 1 | T | C | Heterozygous |
| NC_037646.1 | 11123134 | SNV | 1 | G | C | Homozygous   |
| NC_037646.1 | 11123185 | SNV | 1 | C | T | Homozygous   |
| NC_037646.1 | 11123197 | SNV | 1 | G | T | Heterozygous |
| NC_037646.1 | 11124434 | SNV | 1 | A | T | Heterozygous |
| NC_037646.1 | 11124726 | SNV | 1 | T | C | Homozygous   |
| NC_037646.1 | 11124756 | SNV | 1 | C | T | Homozygous   |
| NC_037646.1 | 11124759 | SNV | 1 | T | C | Homozygous   |
| NC_037646.1 | 11124762 | SNV | 1 | C | T | Homozygous   |
| NC_037646.1 | 11132352 | SNV | 1 | G | C | Homozygous   |
| NC_037646.1 | 11132359 | SNV | 1 | C | T | Homozygous   |
| NC_037646.1 | 11132384 | SNV | 1 | G | A | Homozygous   |
| NC_037646.1 | 11132396 | SNV | 1 | T | C | Homozygous   |
| NC_037646.1 | 11149195 | SNV | 1 | G | T | Heterozygous |
| NC_037646.1 | 11149201 | SNV | 1 | T | G | Homozygous   |
| NC_037646.1 | 11149204 | SNV | 1 | C | T | Homozygous   |
| NC_037646.1 | 11153084 | SNV | 1 | G | C | Homozygous   |
| NC_037646.1 | 11153088 | SNV | 1 | A | C | Homozygous   |
| NC_037646.1 | 11153094 | SNV | 1 | G | A | Homozygous   |
| NC_037646.1 | 11153098 | SNV | 1 | A | G | Homozygous   |
| NC_037646.1 | 11153100 | SNV | 1 | G | C | Homozygous   |
| NC_037646.1 | 11153104 | SNV | 1 | C | T | Homozygous   |
| NC_037646.1 | 11153110 | SNV | 1 | C | A | Homozygous   |
| NC_037646.1 | 11153122 | SNV | 1 | G | C | Homozygous   |
| NC_037646.1 | 11153142 | SNV | 1 | G | C | Heterozygous |
| NC_037646.1 | 11153146 | SNV | 1 | G | A | Heterozygous |
| NC_037646.1 | 11153162 | SNV | 1 | G | A | Heterozygous |
| NC_037646.1 | 11153164 | SNV | 1 | G | C | Heterozygous |
| NC_037646.1 | 11153168 | SNV | 1 | G | C | Heterozygous |
| NC_037646.1 | 11153171 | SNV | 1 | A | G | Heterozygous |
| NC_037646.1 | 11153175 | SNV | 1 | A | G | Heterozygous |
| NC_037646.1 | 11153179 | SNV | 1 | A | T | Heterozygous |
| NC_037646.1 | 11153190 | SNV | 1 | G | C | Heterozygous |
| NC_037646.1 | 11153197 | SNV | 1 | A | G | Homozygous   |
| NC_037646.1 | 11182613 | SNV | 1 | G | A | Heterozygous |
| NC_037646.1 | 11186357 | SNV | 1 | C | G | Heterozygous |
| NC_037646.1 | 11186435 | SNV | 1 | C | G | Heterozygous |
| NC_037646.1 | 11186445 | SNV | 1 | G | C | Heterozygous |
| NC_037646.1 | 11186465 | SNV | 1 | G | A | Heterozygous |
| NC_037646.1 | 11205683 | SNV | 1 | A | G | Homozygous   |
| NC_037646.1 | 11205790 | SNV | 1 | A | G | Homozygous   |
| NC_037646.1 | 11205816 | SNV | 1 | C | T | Homozygous   |
| NC_037646.1 | 11205882 | SNV | 1 | C | T | Homozygous   |
| NC_037646.1 | 11205886 | SNV | 1 | C | T | Homozygous   |
| NC_037646.1 | 11205907 | SNV | 1 | C | T | Heterozygous |
| NC_037646.1 | 11205928 | SNV | 1 | T | C | Homozygous   |

|             |          |     |   |   |   |              |
|-------------|----------|-----|---|---|---|--------------|
| NC_037646.1 | 11213298 | SNV | 1 | A | G | Homozygous   |
| NC_037646.1 | 11213354 | SNV | 1 | T | C | Homozygous   |
| NC_037646.1 | 11213381 | SNV | 1 | G | C | Heterozygous |
| NC_037646.1 | 11214065 | SNV | 1 | A | G | Homozygous   |
| NC_037646.1 | 11214089 | SNV | 1 | G | C | Heterozygous |
| NC_037646.1 | 11214176 | SNV | 1 | A | G | Homozygous   |
| NC_037646.1 | 11214181 | SNV | 1 | A | G | Homozygous   |
| NC_037646.1 | 11214295 | SNV | 1 | C | T | Heterozygous |
| NC_037646.1 | 11214329 | SNV | 1 | G | A | Heterozygous |
| NC_037646.1 | 11214336 | SNV | 1 | G | A | Heterozygous |
| NC_037646.1 | 11214705 | SNV | 1 | G | A | Homozygous   |
| NC_037646.1 | 11214723 | SNV | 1 | C | T | Homozygous   |
| NC_037646.1 | 11214893 | SNV | 1 | C | T | Heterozygous |
| NC_037646.1 | 11214922 | SNV | 1 | G | C | Heterozygous |
| NC_037646.1 | 11214947 | SNV | 1 | A | G | Homozygous   |
| NC_037646.1 | 11225672 | SNV | 1 | C | T | Homozygous   |
| NC_037646.1 | 11225838 | SNV | 1 | C | T | Heterozygous |
| NC_037646.1 | 11227129 | SNV | 1 | A | G | Homozygous   |
| NC_037646.1 | 11227145 | SNV | 1 | C | T | Homozygous   |
| NC_037646.1 | 11227168 | SNV | 1 | C | T | Homozygous   |
| NC_037646.1 | 11232253 | SNV | 1 | G | A | Homozygous   |
| NC_037646.1 | 11232449 | SNV | 1 | A | C | Homozygous   |
| NC_037646.1 | 11232452 | SNV | 1 | T | G | Homozygous   |
| NC_037646.1 | 11232609 | SNV | 1 | T | C | Homozygous   |
| NC_037646.1 | 11232615 | SNV | 1 | C | T | Homozygous   |
| NC_037646.1 | 11232638 | SNV | 1 | C | T | Homozygous   |
| NC_037646.1 | 11232687 | SNV | 1 | A | C | Homozygous   |
| NC_037646.1 | 11232697 | SNV | 1 | C | T | Homozygous   |
| NC_037646.1 | 11232785 | SNV | 1 | C | T | Homozygous   |
| NC_037646.1 | 11232789 | SNV | 1 | C | T | Homozygous   |
| NC_037646.1 | 11232800 | SNV | 1 | A | C | Homozygous   |
| NC_037646.1 | 11232843 | SNV | 1 | C | T | Homozygous   |
| NC_037646.1 | 11232847 | SNV | 1 | C | G | Heterozygous |
| NC_037646.1 | 11232904 | SNV | 1 | T | G | Homozygous   |
| NC_037646.1 | 11232911 | SNV | 1 | C | T | Heterozygous |
| NC_037646.1 | 11232915 | SNV | 1 | C | T | Homozygous   |
| NC_037646.1 | 11232919 | SNV | 1 | C | T | Homozygous   |
| NC_037646.1 | 11232939 | SNV | 1 | T | G | Homozygous   |
| NC_037646.1 | 11232979 | SNV | 1 | A | T | Homozygous   |
| NC_037646.1 | 11232982 | SNV | 1 | A | T | Heterozygous |
| NC_037646.1 | 11232995 | SNV | 1 | A | T | Homozygous   |
| NC_037646.1 | 11233060 | SNV | 1 | T | C | Heterozygous |
| NC_037646.1 | 11233066 | SNV | 1 | T | C | Heterozygous |
| NC_037646.1 | 11233068 | SNV | 1 | T | C | Heterozygous |
| NC_037646.1 | 11233070 | SNV | 1 | T | C | Heterozygous |
| NC_037646.1 | 11233073 | SNV | 1 | C | T | Homozygous   |
| NC_037646.1 | 11233081 | SNV | 1 | A | T | Homozygous   |
| NC_037646.1 | 11233083 | SNV | 1 | T | C | Heterozygous |
| NC_037646.1 | 11233085 | SNV | 1 | C | T | Heterozygous |
| NC_037646.1 | 11233089 | SNV | 1 | C | T | Heterozygous |
| NC_037646.1 | 11233094 | SNV | 1 | T | C | Heterozygous |

|             |          |     |   |   |   |              |
|-------------|----------|-----|---|---|---|--------------|
| NC_037646.1 | 11233098 | SNV | 1 | T | C | Heterozygous |
| NC_037646.1 | 11233102 | SNV | 1 | T | C | Heterozygous |
| NC_037646.1 | 11233106 | SNV | 1 | T | C | Heterozygous |
| NC_037646.1 | 11233108 | SNV | 1 | T | C | Heterozygous |
| NC_037646.1 | 11233121 | SNV | 1 | A | C | Homozygous   |
| NC_037646.1 | 11233154 | SNV | 1 | C | G | Homozygous   |
| NC_037646.1 | 11233161 | SNV | 1 | T | C | Heterozygous |
| NC_037646.1 | 11233179 | SNV | 1 | A | T | Homozygous   |
| NC_037646.1 | 11233190 | SNV | 1 | C | G | Homozygous   |
| NC_037646.1 | 11233198 | SNV | 1 | C | T | Homozygous   |
| NC_037646.1 | 11233219 | SNV | 1 | C | T | Homozygous   |
| NC_037646.1 | 11233222 | SNV | 1 | T | C | Homozygous   |
| NC_037646.1 | 11233224 | SNV | 1 | C | T | Homozygous   |
| NC_037646.1 | 11233240 | SNV | 1 | C | T | Heterozygous |
| NC_037646.1 | 11233284 | SNV | 1 | C | T | Heterozygous |
| NC_037646.1 | 11233300 | SNV | 1 | T | C | Heterozygous |
| NC_037646.1 | 11233383 | SNV | 1 | G | T | Homozygous   |
| NC_037646.1 | 11233386 | SNV | 1 | C | T | Heterozygous |
| NC_037646.1 | 11233414 | SNV | 1 | C | T | Heterozygous |
| NC_037646.1 | 11233422 | SNV | 1 | C | T | Heterozygous |
| NC_037646.1 | 11233494 | SNV | 1 | C | T | Heterozygous |
| NC_037646.1 | 11233496 | SNV | 1 | C | T | Heterozygous |
| NC_037646.1 | 11233499 | SNV | 1 | G | T | Homozygous   |
| NC_037646.1 | 11233509 | SNV | 1 | T | C | Heterozygous |
| NC_037646.1 | 11233544 | SNV | 1 | T | A | Heterozygous |
| NC_037646.1 | 11233560 | SNV | 1 | C | T | Heterozygous |
| NC_037646.1 | 11233803 | SNV | 1 | G | A | Homozygous   |
| NC_037646.1 | 11233832 | SNV | 1 | C | G | Homozygous   |
| NC_037646.1 | 11241085 | SNV | 1 | C | A | Heterozygous |
| NC_037646.1 | 11245284 | SNV | 1 | G | A | Homozygous   |
| NC_037646.1 | 11245524 | SNV | 1 | A | G | Homozygous   |
| NC_037646.1 | 11245554 | SNV | 1 | T | C | Heterozygous |
| NC_037646.1 | 11248474 | SNV | 1 | G | C | Homozygous   |
| NC_037646.1 | 11248484 | SNV | 1 | C | T | Homozygous   |
| NC_037646.1 | 11248510 | SNV | 1 | G | T | Homozygous   |
| NC_037646.1 | 11256274 | SNV | 1 | A | G | Homozygous   |
| NC_037646.1 | 11256407 | SNV | 1 | T | C | Homozygous   |
| NC_037646.1 | 11256606 | SNV | 1 | T | C | Homozygous   |
| NC_037646.1 | 11256939 | SNV | 1 | A | G | Heterozygous |
| NC_037646.1 | 11257682 | SNV | 1 | C | T | Heterozygous |
| NC_037646.1 | 11257769 | SNV | 1 | A | G | Homozygous   |
| NC_037646.1 | 11260524 | SNV | 1 | C | T | Homozygous   |
| NC_037646.1 | 11261511 | SNV | 1 | T | C | Homozygous   |
| NC_037646.1 | 11261766 | SNV | 1 | G | T | Heterozygous |
| NC_037646.1 | 11261850 | SNV | 1 | A | G | Heterozygous |
| NC_037646.1 | 11262375 | SNV | 1 | G | A | Heterozygous |
| NC_037646.1 | 11263451 | SNV | 1 | G | C | Heterozygous |
| NC_037646.1 | 11263910 | SNV | 1 | C | T | Heterozygous |
| NC_037646.1 | 11264087 | SNV | 1 | G | A | Heterozygous |
| NC_037646.1 | 11279810 | SNV | 1 | C | G | Homozygous   |
| NC_037646.1 | 11281063 | SNV | 1 | T | C | Heterozygous |



|             |          |     |   |   |   |              |
|-------------|----------|-----|---|---|---|--------------|
| NC_037646.1 | 11281097 | SNV | 1 | T | C | Homozygous   |
| NC_037646.1 | 11282250 | SNV | 1 | A | G | Homozygous   |
| NC_037646.1 | 11282442 | SNV | 1 | T | C | Homozygous   |
| NC_037646.1 | 11282634 | SNV | 1 | C | T | Homozygous   |
| NC_037646.1 | 11282711 | SNV | 1 | G | A | Heterozygous |
| NC_037646.1 | 11282834 | SNV | 1 | A | G | Homozygous   |
| NC_037646.1 | 11284324 | SNV | 1 | C | T | Heterozygous |
| NC_037646.1 | 11284708 | SNV | 1 | A | G | Homozygous   |
| NC_037646.1 | 11284888 | SNV | 1 | T | A | Heterozygous |
| NC_037646.1 | 11285032 | SNV | 1 | A | G | Heterozygous |
| NC_037646.1 | 11289302 | SNV | 1 | C | T | Heterozygous |
| NC_037646.1 | 11289369 | SNV | 1 | T | C | Homozygous   |
| NC_037646.1 | 11291384 | SNV | 1 | G | A | Homozygous   |
| NC_037646.1 | 11291490 | SNV | 1 | A | G | Heterozygous |
| NC_037646.1 | 11293086 | SNV | 1 | A | G | Heterozygous |
| NC_037646.1 | 11293351 | SNV | 1 | C | T | Heterozygous |
| NC_037646.1 | 11293567 | SNV | 1 | G | C | Homozygous   |
| NC_037646.1 | 11293603 | SNV | 1 | C | T | Homozygous   |
| NC_037646.1 | 11293641 | SNV | 1 | A | G | Homozygous   |
| NC_037646.1 | 11293829 | SNV | 1 | T | C | Heterozygous |
| NC_037646.1 | 11293940 | SNV | 1 | C | T | Heterozygous |
| NC_037646.1 | 11293955 | SNV | 1 | C | T | Heterozygous |
| NC_037646.1 | 11294046 | SNV | 1 | T | C | Homozygous   |
| NC_037646.1 | 11294081 | SNV | 1 | G | A | Heterozygous |
| NC_037646.1 | 11294115 | SNV | 1 | T | C | Homozygous   |
| NC_037646.1 | 11294274 | SNV | 1 | T | C | Homozygous   |
| NC_037646.1 | 11294642 | SNV | 1 | A | G | Homozygous   |
| NC_037646.1 | 11294907 | SNV | 1 | T | C | Homozygous   |
| NC_037646.1 | 11294930 | SNV | 1 | G | C | Homozygous   |
| NC_037646.1 | 11295065 | SNV | 1 | G | A | Heterozygous |
| NC_037646.1 | 11297192 | SNV | 1 | A | G | Homozygous   |
| NC_037646.1 | 11297261 | SNV | 1 | G | A | Heterozygous |
| NC_037646.1 | 11297273 | SNV | 1 | G | A | Homozygous   |
| NC_037646.1 | 11297369 | SNV | 1 | A | G | Homozygous   |
| NC_037646.1 | 11297401 | SNV | 1 | G | A | Heterozygous |
| NC_037646.1 | 11297433 | SNV | 1 | C | T | Heterozygous |
| NC_037646.1 | 11297455 | SNV | 1 | C | T | Heterozygous |
| NC_037646.1 | 11297466 | SNV | 1 | A | G | Homozygous   |
| NC_037646.1 | 11297483 | SNV | 1 | T | C | Homozygous   |
| NC_037646.1 | 11298352 | SNV | 1 | T | C | Homozygous   |
| NC_037646.1 | 11298827 | SNV | 1 | T | C | Homozygous   |
| NC_037646.1 | 11298829 | SNV | 1 | C | T | Homozygous   |
| NC_037646.1 | 11298831 | SNV | 1 | C | T | Homozygous   |
| NC_037646.1 | 11298860 | SNV | 1 | T | C | Homozygous   |
| NC_037646.1 | 11298862 | SNV | 1 | C | T | Homozygous   |
| NC_037646.1 | 11305010 | SNV | 1 | T | C | Heterozygous |
| NC_037646.1 | 11315620 | SNV | 1 | A | G | Homozygous   |
| NC_037646.1 | 11318603 | SNV | 1 | C | T | Heterozygous |
| NC_037646.1 | 11318830 | SNV | 1 | G | C | Homozygous   |
| NC_037646.1 | 11319370 | SNV | 1 | A | G | Homozygous   |
| NC_037646.1 | 11319768 | SNV | 1 | A | G | Homozygous   |

|             |          |     |   |   |   |              |
|-------------|----------|-----|---|---|---|--------------|
| NC_037646.1 | 11319977 | SNV | 1 | C | A | Homozygous   |
| NC_037646.1 | 11320265 | SNV | 1 | A | G | Homozygous   |
| NC_037646.1 | 11320317 | SNV | 1 | C | T | Homozygous   |
| NC_037646.1 | 11320326 | SNV | 1 | C | T | Heterozygous |
| NC_037646.1 | 11320328 | SNV | 1 | C | T | Heterozygous |
| NC_037646.1 | 11320330 | SNV | 1 | C | T | Heterozygous |
| NC_037646.1 | 11320465 | SNV | 1 | C | G | Homozygous   |
| NC_037646.1 | 11320794 | SNV | 1 | A | G | Homozygous   |
| NC_037646.1 | 11320801 | SNV | 1 | A | T | Homozygous   |
| NC_037646.1 | 11320833 | SNV | 1 | T | C | Homozygous   |
| NC_037646.1 | 11320861 | SNV | 1 | A | G | Heterozygous |
| NC_037646.1 | 11324516 | SNV | 1 | T | A | Homozygous   |
| NC_037646.1 | 11324526 | SNV | 1 | T | A | Homozygous   |
| NC_037646.1 | 11324528 | SNV | 1 | T | A | Homozygous   |
| NC_037646.1 | 11324538 | SNV | 1 | T | A | Homozygous   |
| NC_037646.1 | 11325636 | SNV | 1 | A | G | Heterozygous |
| NC_037646.1 | 11325651 | SNV | 1 | C | T | Heterozygous |
| NC_037646.1 | 11343288 | SNV | 1 | C | G | Homozygous   |
| NC_037646.1 | 11343409 | SNV | 1 | T | C | Homozygous   |
| NC_037646.1 | 11343460 | SNV | 1 | T | C | Homozygous   |
| NC_037646.1 | 11349406 | SNV | 1 | C | T | Homozygous   |
| NC_037646.1 | 11349463 | SNV | 1 | T | C | Heterozygous |
| NC_037646.1 | 11350291 | SNV | 1 | G | A | Homozygous   |
| NC_037646.1 | 11350315 | SNV | 1 | C | A | Heterozygous |
| NC_037646.1 | 11350352 | SNV | 1 | T | G | Homozygous   |
| NC_037646.1 | 11350582 | SNV | 1 | A | G | Heterozygous |
| NC_037646.1 | 11350603 | SNV | 1 | C | T | Heterozygous |
| NC_037646.1 | 11350615 | SNV | 1 | C | G | Homozygous   |
| NC_037646.1 | 11350666 | SNV | 1 | C | T | Heterozygous |
| NC_037646.1 | 11350696 | SNV | 1 | C | T | Heterozygous |
| NC_037646.1 | 11350877 | SNV | 1 | C | G | Heterozygous |
| NC_037646.1 | 11350923 | SNV | 1 | T | C | Homozygous   |
| NC_037646.1 | 11362324 | SNV | 1 | A | C | Homozygous   |
| NC_037646.1 | 11362328 | SNV | 1 | A | C | Homozygous   |
| NC_037646.1 | 11364431 | SNV | 1 | A | G | Homozygous   |
| NC_037646.1 | 11365609 | SNV | 1 | G | A | Heterozygous |
| NC_037646.1 | 11365611 | SNV | 1 | C | T | Heterozygous |
| NC_037646.1 | 11365669 | SNV | 1 | C | T | Heterozygous |
| NC_037646.1 | 11365721 | SNV | 1 | A | T | Heterozygous |
| NC_037646.1 | 11366022 | SNV | 1 | A | G | Homozygous   |
| NC_037646.1 | 11366130 | SNV | 1 | T | C | Homozygous   |
| NC_037646.1 | 11370225 | SNV | 1 | A | G | Heterozygous |
| NC_037646.1 | 11370322 | SNV | 1 | T | G | Heterozygous |
| NC_037646.1 | 11373694 | SNV | 1 | C | T | Homozygous   |
| NC_037646.1 | 11374320 | SNV | 1 | C | T | Heterozygous |
| NC_037646.1 | 11375498 | SNV | 1 | G | C | Homozygous   |
| NC_037646.1 | 11376746 | SNV | 1 | T | C | Homozygous   |
| NC_037646.1 | 11377118 | SNV | 1 | A | T | Homozygous   |
| NC_037646.1 | 11377572 | SNV | 1 | C | T | Heterozygous |
| NC_037646.1 | 11377578 | SNV | 1 | T | A | Heterozygous |
| NC_037646.1 | 11377581 | SNV | 1 | A | C | Heterozygous |

|             |          |     |   |   |   |              |
|-------------|----------|-----|---|---|---|--------------|
| NC_037646.1 | 11377590 | SNV | 1 | A | G | Heterozygous |
| NC_037646.1 | 11377594 | SNV | 1 | T | C | Heterozygous |
| NC_037646.1 | 11377596 | SNV | 1 | A | T | Heterozygous |
| NC_037646.1 | 11377599 | SNV | 1 | A | T | Heterozygous |
| NC_037646.1 | 11377602 | SNV | 1 | A | G | Heterozygous |
| NC_037646.1 | 11377608 | SNV | 1 | A | C | Heterozygous |
| NC_037646.1 | 11377707 | SNV | 1 | T | C | Heterozygous |
| NC_037646.1 | 11377910 | SNV | 1 | T | A | Homozygous   |
| NC_037646.1 | 11377913 | SNV | 1 | T | C | Homozygous   |
| NC_037646.1 | 11377920 | SNV | 1 | T | G | Heterozygous |
| NC_037646.1 | 11377922 | SNV | 1 | A | T | Heterozygous |
| NC_037646.1 | 11377925 | SNV | 1 | A | G | Homozygous   |
| NC_037646.1 | 11377928 | SNV | 1 | C | T | Homozygous   |
| NC_037646.1 | 11377964 | SNV | 1 | C | A | Heterozygous |
| NC_037646.1 | 11377970 | SNV | 1 | A | T | Heterozygous |
| NC_037646.1 | 11377977 | SNV | 1 | C | A | Heterozygous |
| NC_037646.1 | 11377979 | SNV | 1 | T | A | Heterozygous |
| NC_037646.1 | 11377992 | SNV | 1 | C | T | Heterozygous |
| NC_037646.1 | 11377994 | SNV | 1 | T | G | Heterozygous |
| NC_037646.1 | 11378567 | SNV | 1 | A | G | Homozygous   |
| NC_037646.1 | 11378627 | SNV | 1 | G | T | Homozygous   |
| NC_037646.1 | 11385333 | SNV | 1 | T | A | Homozygous   |
| NC_037646.1 | 11388548 | SNV | 1 | G | C | Homozygous   |
| NC_037646.1 | 11388628 | SNV | 1 | G | T | Heterozygous |
| NC_037646.1 | 11389976 | SNV | 1 | A | G | Homozygous   |
| NC_037646.1 | 11390181 | SNV | 1 | C | A | Homozygous   |
| NC_037646.1 | 11390184 | SNV | 1 | T | G | Homozygous   |
| NC_037646.1 | 11390262 | SNV | 1 | A | T | Homozygous   |
| NC_037646.1 | 11391939 | SNV | 1 | T | C | Homozygous   |
| NC_037646.1 | 11393880 | SNV | 1 | T | C | Homozygous   |
| NC_037646.1 | 11394136 | SNV | 1 | A | G | Homozygous   |
| NC_037646.1 | 11395232 | SNV | 1 | A | G | Homozygous   |
| NC_037646.1 | 11395602 | SNV | 1 | T | A | Heterozygous |
| NC_037646.1 | 11396148 | SNV | 1 | A | G | Heterozygous |
| NC_037646.1 | 11396220 | SNV | 1 | T | C | Heterozygous |
| NC_037646.1 | 11397011 | SNV | 1 | C | G | Heterozygous |
| NC_037646.1 | 11402909 | SNV | 1 | G | A | Heterozygous |
| NC_037646.1 | 11402924 | SNV | 1 | A | G | Homozygous   |
| NC_037646.1 | 11405570 | SNV | 1 | A | T | Heterozygous |
| NC_037646.1 | 11405580 | SNV | 1 | A | G | Heterozygous |
| NC_037646.1 | 11405601 | SNV | 1 | T | C | Heterozygous |
| NC_037646.1 | 11405607 | SNV | 1 | T | C | Heterozygous |
| NC_037646.1 | 11406846 | SNV | 1 | C | T | Homozygous   |
| NC_037646.1 | 11407883 | SNV | 1 | C | T | Homozygous   |
| NC_037646.1 | 11407928 | SNV | 1 | T | C | Homozygous   |
| NC_037646.1 | 11410619 | SNV | 1 | T | A | Homozygous   |
| NC_037646.1 | 11410713 | SNV | 1 | A | G | Homozygous   |
| NC_037646.1 | 11411132 | SNV | 1 | C | T | Heterozygous |
| NC_037646.1 | 11411134 | SNV | 1 | G | A | Heterozygous |
| NC_037646.1 | 11411552 | SNV | 1 | T | A | Homozygous   |
| NC_037646.1 | 11413307 | SNV | 1 | G | A | Homozygous   |

|             |          |     |   |   |   |              |
|-------------|----------|-----|---|---|---|--------------|
| NC_037646.1 | 11413396 | SNV | 1 | A | G | Homozygous   |
| NC_037646.1 | 11414481 | SNV | 1 | C | T | Homozygous   |
| NC_037646.1 | 11418768 | SNV | 1 | G | A | Homozygous   |
| NC_037646.1 | 11418892 | SNV | 1 | T | C | Heterozygous |
| NC_037646.1 | 11419246 | SNV | 1 | C | T | Homozygous   |
| NC_037646.1 | 11421618 | SNV | 1 | T | A | Homozygous   |
| NC_037646.1 | 11421623 | SNV | 1 | A | T | Homozygous   |
| NC_037646.1 | 11421633 | SNV | 1 | A | C | Homozygous   |
| NC_037646.1 | 11421640 | SNV | 1 | A | T | Homozygous   |
| NC_037646.1 | 11423314 | SNV | 1 | C | T | Homozygous   |
| NC_037646.1 | 11423316 | SNV | 1 | G | A | Homozygous   |
| NC_037646.1 | 11423320 | SNV | 1 | T | A | Homozygous   |
| NC_037646.1 | 11423325 | SNV | 1 | A | G | Homozygous   |
| NC_037646.1 | 11423329 | SNV | 1 | A | T | Homozygous   |
| NC_037646.1 | 11423339 | SNV | 1 | A | T | Homozygous   |
| NC_037646.1 | 11428636 | SNV | 1 | T | A | Homozygous   |
| NC_037646.1 | 11428921 | SNV | 1 | A | T | Heterozygous |
| NC_037646.1 | 11433801 | SNV | 1 | T | C | Homozygous   |
| NC_037646.1 | 11434210 | SNV | 1 | G | A | Homozygous   |
| NC_037646.1 | 11434389 | SNV | 1 | G | A | Heterozygous |
| NC_037646.1 | 11436249 | SNV | 1 | C | T | Homozygous   |
| NC_037646.1 | 11437368 | SNV | 1 | T | C | Heterozygous |
| NC_037646.1 | 11437469 | SNV | 1 | C | A | Homozygous   |
| NC_037646.1 | 11441930 | SNV | 1 | A | T | Heterozygous |
| NC_037646.1 | 11442727 | SNV | 1 | G | A | Heterozygous |
| NC_037646.1 | 11442851 | SNV | 1 | G | C | Heterozygous |
| NC_037646.1 | 11442854 | SNV | 1 | G | A | Homozygous   |
| NC_037646.1 | 11454468 | SNV | 1 | G | T | Heterozygous |
| NC_037646.1 | 11458278 | SNV | 1 | C | T | Heterozygous |
| NC_037646.1 | 11458331 | SNV | 1 | G | C | Homozygous   |
| NC_037646.1 | 11458436 | SNV | 1 | A | C | Homozygous   |
| NC_037646.1 | 11458454 | SNV | 1 | A | C | Heterozygous |
| NC_037646.1 | 11459000 | SNV | 1 | C | G | Homozygous   |
| NC_037646.1 | 11459210 | SNV | 1 | G | A | Homozygous   |
| NC_037646.1 | 11459489 | SNV | 1 | A | C | Homozygous   |
| NC_037646.1 | 11459684 | SNV | 1 | A | C | Homozygous   |
| NC_037646.1 | 11459747 | SNV | 1 | G | T | Homozygous   |
| NC_037646.1 | 11460056 | SNV | 1 | C | A | Homozygous   |
| NC_037646.1 | 11460251 | SNV | 1 | A | C | Heterozygous |
| NC_037646.1 | 11460402 | SNV | 1 | T | C | Homozygous   |
| NC_037646.1 | 11461133 | SNV | 1 | G | A | Homozygous   |
| NC_037646.1 | 11461136 | SNV | 1 | C | T | Heterozygous |
| NC_037646.1 | 11461199 | SNV | 1 | A | G | Homozygous   |
| NC_037646.1 | 11461545 | SNV | 1 | C | T | Heterozygous |
| NC_037646.1 | 11461640 | SNV | 1 | A | G | Homozygous   |
| NC_037646.1 | 11461643 | SNV | 1 | G | A | Homozygous   |
| NC_037646.1 | 11461655 | SNV | 1 | C | T | Heterozygous |
| NC_037646.1 | 11461683 | SNV | 1 | C | T | Heterozygous |
| NC_037646.1 | 11461808 | SNV | 1 | G | A | Heterozygous |
| NC_037646.1 | 11461811 | SNV | 1 | G | A | Heterozygous |
| NC_037646.1 | 11462495 | SNV | 1 | A | C | Homozygous   |

|             |          |     |   |   |   |              |
|-------------|----------|-----|---|---|---|--------------|
| NC_037646.1 | 11462564 | SNV | 1 | A | C | Homozygous   |
| NC_037646.1 | 11462907 | SNV | 1 | C | T | Heterozygous |
| NC_037646.1 | 11463138 | SNV | 1 | T | G | Heterozygous |
| NC_037646.1 | 11463338 | SNV | 1 | C | A | Heterozygous |
| NC_037646.1 | 11464146 | SNV | 1 | A | T | Homozygous   |
| NC_037646.1 | 11465151 | SNV | 1 | G | A | Homozygous   |
| NC_037646.1 | 11467497 | SNV | 1 | T | C | Homozygous   |
| NC_037646.1 | 11467505 | SNV | 1 | T | C | Homozygous   |
| NC_037646.1 | 11467517 | SNV | 1 | T | G | Homozygous   |
| NC_037646.1 | 11468274 | SNV | 1 | A | G | Homozygous   |
| NC_037646.1 | 11468632 | SNV | 1 | C | T | Heterozygous |
| NC_037646.1 | 11468683 | SNV | 1 | C | T | Heterozygous |
| NC_037646.1 | 11468717 | SNV | 1 | G | A | Homozygous   |
| NC_037646.1 | 11469010 | SNV | 1 | C | T | Homozygous   |
| NC_037646.1 | 11469394 | SNV | 1 | A | G | Homozygous   |
| NC_037646.1 | 11469546 | SNV | 1 | T | C | Homozygous   |
| NC_037646.1 | 11470338 | SNV | 1 | T | A | Heterozygous |
| NC_037646.1 | 11470373 | SNV | 1 | T | A | Heterozygous |
| NC_037646.1 | 11471950 | SNV | 1 | T | C | Homozygous   |
| NC_037646.1 | 11471965 | SNV | 1 | T | C | Heterozygous |
| NC_037646.1 | 11471967 | SNV | 1 | C | A | Heterozygous |
| NC_037646.1 | 11472075 | SNV | 1 | T | C | Homozygous   |
| NC_037646.1 | 11473076 | SNV | 1 | A | G | Homozygous   |
| NC_037646.1 | 11473134 | SNV | 1 | T | C | Homozygous   |
| NC_037646.1 | 11473188 | SNV | 1 | T | C | Homozygous   |
| NC_037646.1 | 11473267 | SNV | 1 | C | T | Heterozygous |
| NC_037646.1 | 11473375 | SNV | 1 | C | T | Homozygous   |
| NC_037646.1 | 11473386 | SNV | 1 | T | G | Homozygous   |
| NC_037646.1 | 11473389 | SNV | 1 | A | G | Homozygous   |
| NC_037646.1 | 11473392 | SNV | 1 | G | T | Homozygous   |
| NC_037646.1 | 11473403 | SNV | 1 | G | C | Heterozygous |
| NC_037646.1 | 11473430 | SNV | 1 | T | C | Homozygous   |
| NC_037646.1 | 11473488 | SNV | 1 | A | T | Heterozygous |
| NC_037646.1 | 11473601 | SNV | 1 | T | C | Homozygous   |
| NC_037646.1 | 11473608 | SNV | 1 | A | G | Heterozygous |
| NC_037646.1 | 11473888 | SNV | 1 | A | G | Heterozygous |
| NC_037646.1 | 11479375 | SNV | 1 | A | C | Homozygous   |
| NC_037646.1 | 11479379 | SNV | 1 | A | T | Homozygous   |
| NC_037646.1 | 11479381 | SNV | 1 | A | T | Homozygous   |
| NC_037646.1 | 11479383 | SNV | 1 | A | T | Homozygous   |
| NC_037646.1 | 11479386 | SNV | 1 | T | A | Homozygous   |
| NC_037646.1 | 11479390 | SNV | 1 | T | C | Homozygous   |
| NC_037646.1 | 11479410 | SNV | 1 | T | C | Homozygous   |
| NC_037646.1 | 11479971 | SNV | 1 | A | G | Homozygous   |
| NC_037646.1 | 11480662 | SNV | 1 | T | C | Homozygous   |
| NC_037646.1 | 11481052 | SNV | 1 | C | T | Heterozygous |
| NC_037646.1 | 11481310 | SNV | 1 | A | G | Homozygous   |
| NC_037646.1 | 11482264 | SNV | 1 | T | C | Homozygous   |
| NC_037646.1 | 11482681 | SNV | 1 | T | C | Homozygous   |
| NC_037646.1 | 11482684 | SNV | 1 | T | C | Heterozygous |
| NC_037646.1 | 11483380 | SNV | 1 | T | C | Homozygous   |

|             |          |     |   |   |   |              |
|-------------|----------|-----|---|---|---|--------------|
| NC_037646.1 | 11483689 | SNV | 1 | A | G | Homozygous   |
| NC_037646.1 | 11483773 | SNV | 1 | C | T | Heterozygous |
| NC_037646.1 | 11484958 | SNV | 1 | T | C | Heterozygous |
| NC_037646.1 | 11485039 | SNV | 1 | G | C | Homozygous   |
| NC_037646.1 | 11485225 | SNV | 1 | C | T | Heterozygous |
| NC_037646.1 | 11485601 | SNV | 1 | T | C | Homozygous   |
| NC_037646.1 | 11485793 | SNV | 1 | T | A | Homozygous   |
| NC_037646.1 | 11486045 | SNV | 1 | C | T | Heterozygous |
| NC_037646.1 | 11486338 | SNV | 1 | C | T | Heterozygous |
| NC_037646.1 | 11486396 | SNV | 1 | A | G | Heterozygous |
| NC_037646.1 | 11510393 | SNV | 1 | G | A | Homozygous   |
| NC_037646.1 | 11510395 | SNV | 1 | A | G | Homozygous   |
| NC_037646.1 | 11510399 | SNV | 1 | G | A | Homozygous   |
| NC_037646.1 | 11510407 | SNV | 1 | G | A | Homozygous   |
| NC_037646.1 | 11511276 | SNV | 1 | C | T | Heterozygous |
| NC_037646.1 | 11511356 | SNV | 1 | T | C | Homozygous   |
| NC_037646.1 | 11511376 | SNV | 1 | C | G | Homozygous   |
| NC_037646.1 | 11511404 | SNV | 1 | A | G | Homozygous   |
| NC_037646.1 | 11511455 | SNV | 1 | A | G | Homozygous   |
| NC_037646.1 | 11511507 | SNV | 1 | A | G | Heterozygous |
| NC_037646.1 | 11511811 | SNV | 1 | T | C | Homozygous   |
| NC_037646.1 | 11511815 | SNV | 1 | T | C | Homozygous   |
| NC_037646.1 | 11511912 | SNV | 1 | T | C | Homozygous   |
| NC_037646.1 | 11511927 | SNV | 1 | G | A | Homozygous   |
| NC_037646.1 | 11512271 | SNV | 1 | G | A | Homozygous   |
| NC_037646.1 | 11512382 | SNV | 1 | A | G | Homozygous   |
| NC_037646.1 | 11512460 | SNV | 1 | T | C | Heterozygous |
| NC_037646.1 | 11512476 | SNV | 1 | T | C | Homozygous   |
| NC_037646.1 | 11512478 | SNV | 1 | T | C | Homozygous   |
| NC_037646.1 | 11512497 | SNV | 1 | T | C | Homozygous   |
| NC_037646.1 | 11512510 | SNV | 1 | G | A | Heterozygous |
| NC_037646.1 | 11512536 | SNV | 1 | C | T | Heterozygous |
| NC_037646.1 | 11512572 | SNV | 1 | G | T | Homozygous   |
| NC_037646.1 | 11512592 | SNV | 1 | C | T | Heterozygous |
| NC_037646.1 | 11512640 | SNV | 1 | G | A | Heterozygous |
| NC_037646.1 | 11512653 | SNV | 1 | G | A | Heterozygous |
| NC_037646.1 | 11512657 | SNV | 1 | C | T | Heterozygous |
| NC_037646.1 | 11512721 | SNV | 1 | T | C | Homozygous   |
| NC_037646.1 | 11512726 | SNV | 1 | C | T | Heterozygous |
| NC_037646.1 | 11512729 | SNV | 1 | G | C | Homozygous   |
| NC_037646.1 | 11512876 | SNV | 1 | A | C | Homozygous   |
| NC_037646.1 | 11512937 | SNV | 1 | A | G | Homozygous   |
| NC_037646.1 | 11513013 | SNV | 1 | C | A | Heterozygous |
| NC_037646.1 | 11513050 | SNV | 1 | T | C | Homozygous   |
| NC_037646.1 | 11513157 | SNV | 1 | A | T | Heterozygous |
| NC_037646.1 | 11513163 | SNV | 1 | T | A | Heterozygous |
| NC_037646.1 | 11515004 | SNV | 1 | A | C | Homozygous   |
| NC_037646.1 | 11515041 | SNV | 1 | A | C | Homozygous   |
| NC_037646.1 | 11515043 | SNV | 1 | A | T | Homozygous   |
| NC_037646.1 | 11516094 | SNV | 1 | G | A | Heterozygous |
| NC_037646.1 | 11516103 | SNV | 1 | G | A | Heterozygous |

|             |          |     |   |   |   |              |
|-------------|----------|-----|---|---|---|--------------|
| NC_037646.1 | 11516139 | SNV | 1 | G | A | Heterozygous |
| NC_037646.1 | 11516150 | SNV | 1 | A | G | Heterozygous |
| NC_037646.1 | 11516154 | SNV | 1 | G | T | Homozygous   |
| NC_037646.1 | 11516158 | SNV | 1 | G | A | Heterozygous |
| NC_037646.1 | 11516170 | SNV | 1 | G | A | Homozygous   |
| NC_037646.1 | 11516178 | SNV | 1 | G | A | Homozygous   |
| NC_037646.1 | 11516190 | SNV | 1 | A | C | Homozygous   |
| NC_037646.1 | 11516193 | SNV | 1 | A | T | Homozygous   |
| NC_037646.1 | 11516200 | SNV | 1 | A | G | Homozygous   |
| NC_037646.1 | 11516231 | SNV | 1 | G | T | Homozygous   |
| NC_037646.1 | 11516613 | SNV | 1 | A | G | Heterozygous |
| NC_037646.1 | 11516620 | SNV | 1 | C | A | Heterozygous |
| NC_037646.1 | 11516624 | SNV | 1 | T | A | Homozygous   |
| NC_037646.1 | 11522283 | SNV | 1 | T | C | Homozygous   |
| NC_037646.1 | 11522287 | SNV | 1 | C | T | Homozygous   |
| NC_037646.1 | 11522291 | SNV | 1 | T | G | Homozygous   |
| NC_037646.1 | 11522314 | SNV | 1 | T | A | Homozygous   |
| NC_037646.1 | 11528127 | SNV | 1 | T | A | Homozygous   |
| NC_037646.1 | 11528156 | SNV | 1 | G | A | Homozygous   |
| NC_037646.1 | 11537625 | SNV | 1 | T | A | Heterozygous |
| NC_037646.1 | 11545734 | SNV | 1 | C | T | Homozygous   |
| NC_037646.1 | 11559881 | SNV | 1 | T | C | Heterozygous |
| NC_037646.1 | 11560073 | SNV | 1 | C | T | Homozygous   |
| NC_037646.1 | 11560464 | SNV | 1 | G | A | Homozygous   |
| NC_037646.1 | 11560597 | SNV | 1 | C | T | Homozygous   |
| NC_037646.1 | 11560614 | SNV | 1 | T | C | Homozygous   |
| NC_037646.1 | 11564557 | SNV | 1 | A | G | Homozygous   |
| NC_037646.1 | 11564582 | SNV | 1 | A | G | Homozygous   |
| NC_037646.1 | 11564945 | SNV | 1 | A | G | Homozygous   |
| NC_037646.1 | 11565707 | SNV | 1 | A | T | Heterozygous |
| NC_037646.1 | 11566543 | SNV | 1 | C | T | Homozygous   |
| NC_037646.1 | 11566573 | SNV | 1 | A | G | Homozygous   |
| NC_037646.1 | 11566832 | SNV | 1 | T | C | Heterozygous |
| NC_037646.1 | 11566880 | SNV | 1 | A | G | Heterozygous |
| NC_037646.1 | 11566998 | SNV | 1 | G | A | Homozygous   |
| NC_037646.1 | 11567081 | SNV | 1 | A | G | Heterozygous |
| NC_037646.1 | 11567150 | SNV | 1 | T | C | Homozygous   |
| NC_037646.1 | 11569311 | SNV | 1 | T | A | Homozygous   |
| NC_037646.1 | 11569337 | SNV | 1 | T | C | Homozygous   |
| NC_037646.1 | 11569339 | SNV | 1 | G | C | Homozygous   |
| NC_037646.1 | 11569361 | SNV | 1 | C | T | Heterozygous |
| NC_037646.1 | 11569660 | SNV | 1 | T | C | Homozygous   |
| NC_037646.1 | 11570442 | SNV | 1 | T | A | Homozygous   |
| NC_037646.1 | 11570444 | SNV | 1 | G | C | Homozygous   |
| NC_037646.1 | 11570462 | SNV | 1 | C | A | Heterozygous |
| NC_037646.1 | 11570879 | SNV | 1 | C | T | Heterozygous |
| NC_037646.1 | 11579300 | SNV | 1 | T | C | Heterozygous |
| NC_037646.1 | 11579304 | SNV | 1 | A | C | Heterozygous |
| NC_037646.1 | 11579856 | SNV | 1 | A | G | Homozygous   |
| NC_037646.1 | 11580625 | SNV | 1 | A | G | Heterozygous |
| NC_037646.1 | 11580763 | SNV | 1 | G | A | Heterozygous |

|             |          |     |   |   |   |              |
|-------------|----------|-----|---|---|---|--------------|
| NC_037646.1 | 11581154 | SNV | 1 | A | G | Heterozygous |
| NC_037646.1 | 11581212 | SNV | 1 | A | C | Heterozygous |
| NC_037646.1 | 11581217 | SNV | 1 | C | T | Heterozygous |
| NC_037646.1 | 11581230 | SNV | 1 | C | T | Heterozygous |
| NC_037646.1 | 11581623 | SNV | 1 | T | C | Homozygous   |
| NC_037646.1 | 11581678 | SNV | 1 | T | C | Homozygous   |
| NC_037646.1 | 11581721 | SNV | 1 | G | A | Heterozygous |
| NC_037646.1 | 11581912 | SNV | 1 | A | G | Homozygous   |
| NC_037646.1 | 11583179 | SNV | 1 | A | G | Homozygous   |
| NC_037646.1 | 11583585 | SNV | 1 | A | T | Homozygous   |
| NC_037646.1 | 11583718 | SNV | 1 | C | T | Heterozygous |
| NC_037646.1 | 11586632 | SNV | 1 | G | T | Homozygous   |
| NC_037646.1 | 11589162 | SNV | 1 | G | A | Homozygous   |
| NC_037646.1 | 11589571 | SNV | 1 | C | T | Heterozygous |
| NC_037646.1 | 11589614 | SNV | 1 | T | C | Heterozygous |
| NC_037646.1 | 11589621 | SNV | 1 | G | A | Heterozygous |
| NC_037646.1 | 11589819 | SNV | 1 | G | A | Heterozygous |
| NC_037646.1 | 11589906 | SNV | 1 | T | C | Homozygous   |
| NC_037646.1 | 11590184 | SNV | 1 | A | G | Homozygous   |
| NC_037646.1 | 11597326 | SNV | 1 | A | G | Heterozygous |
| NC_037646.1 | 11597343 | SNV | 1 | T | C | Homozygous   |
| NC_037646.1 | 11599750 | SNV | 1 | C | A | Heterozygous |
| NC_037646.1 | 11629632 | SNV | 1 | C | A | Homozygous   |
| NC_037646.1 | 11631486 | SNV | 1 | C | T | Heterozygous |
| NC_037646.1 | 11631494 | SNV | 1 | T | C | Homozygous   |
| NC_037646.1 | 11631502 | SNV | 1 | T | C | Homozygous   |
| NC_037646.1 | 11631613 | SNV | 1 | C | T | Heterozygous |
| NC_037646.1 | 11631659 | SNV | 1 | C | A | Heterozygous |
| NC_037646.1 | 11631662 | SNV | 1 | G | T | Heterozygous |
| NC_037646.1 | 11631814 | SNV | 1 | C | T | Heterozygous |
| NC_037646.1 | 11631823 | SNV | 1 | C | T | Heterozygous |
| NC_037646.1 | 11631955 | SNV | 1 | G | T | Homozygous   |
| NC_037646.1 | 11631975 | SNV | 1 | A | G | Homozygous   |
| NC_037646.1 | 11631993 | SNV | 1 | C | T | Homozygous   |
| NC_037646.1 | 11632107 | SNV | 1 | C | T | Homozygous   |
| NC_037646.1 | 11632147 | SNV | 1 | C | T | Homozygous   |
| NC_037646.1 | 11632167 | SNV | 1 | C | T | Homozygous   |
| NC_037646.1 | 11632435 | SNV | 1 | C | T | Homozygous   |
| NC_037646.1 | 11633273 | SNV | 1 | C | T | Heterozygous |
| NC_037646.1 | 11713089 | SNV | 1 | C | T | Homozygous   |
| NC_037646.1 | 11713173 | SNV | 1 | T | C | Homozygous   |
| NC_037646.1 | 11713243 | SNV | 1 | C | T | Heterozygous |
| NC_037646.1 | 11721942 | SNV | 1 | T | C | Homozygous   |
| NC_037646.1 | 11721947 | SNV | 1 | C | G | Heterozygous |
| NC_037646.1 | 11721990 | SNV | 1 | T | C | Heterozygous |
| NC_037646.1 | 11722122 | SNV | 1 | T | A | Heterozygous |
| NC_037646.1 | 11722125 | SNV | 1 | T | C | Homozygous   |
| NC_037646.1 | 11722218 | SNV | 1 | C | G | Heterozygous |
| NC_037646.1 | 11722236 | SNV | 1 | T | C | Homozygous   |
| NC_037646.1 | 11722300 | SNV | 1 | C | T | Heterozygous |
| NC_037646.1 | 11724225 | SNV | 1 | T | C | Homozygous   |



|             |          |     |   |   |   |              |
|-------------|----------|-----|---|---|---|--------------|
| NC_037646.1 | 11724232 | SNV | 1 | T | C | Homozygous   |
| NC_037646.1 | 11724257 | SNV | 1 | G | C | Homozygous   |
| NC_037646.1 | 11724279 | SNV | 1 | G | A | Homozygous   |
| NC_037646.1 | 11724378 | SNV | 1 | C | T | Heterozygous |
| NC_037646.1 | 11724381 | SNV | 1 | G | A | Heterozygous |
| NC_037646.1 | 11744961 | SNV | 1 | G | A | Heterozygous |
| NC_037646.1 | 11744976 | SNV | 1 | T | C | Heterozygous |
| NC_037646.1 | 11745890 | SNV | 1 | T | C | Homozygous   |
| NC_037646.1 | 11745896 | SNV | 1 | T | C | Homozygous   |
| NC_037646.1 | 11745901 | SNV | 1 | C | G | Homozygous   |
| NC_037646.1 | 11746026 | SNV | 1 | G | A | Heterozygous |
| NC_037646.1 | 11748887 | SNV | 1 | A | G | Heterozygous |
| NC_037646.1 | 11753996 | SNV | 1 | G | T | Heterozygous |
| NC_037646.1 | 11753999 | SNV | 1 | G | A | Heterozygous |
| NC_037646.1 | 11754045 | SNV | 1 | G | A | Heterozygous |
| NC_037646.1 | 11754066 | SNV | 1 | G | A | Heterozygous |
| NC_037646.1 | 11754192 | SNV | 1 | G | A | Homozygous   |
| NC_037646.1 | 11754339 | SNV | 1 | C | T | Homozygous   |
| NC_037646.1 | 11754375 | SNV | 1 | T | C | Heterozygous |
| NC_037646.1 | 11754501 | SNV | 1 | A | T | Heterozygous |
| NC_037646.1 | 11754757 | SNV | 1 | A | G | Homozygous   |
| NC_037646.1 | 11755018 | SNV | 1 | C | G | Homozygous   |
| NC_037646.1 | 11755033 | SNV | 1 | A | G | Homozygous   |
| NC_037646.1 | 11755302 | SNV | 1 | T | C | Heterozygous |
| NC_037646.1 | 11755374 | SNV | 1 | G | A | Heterozygous |
| NC_037646.1 | 11755398 | SNV | 1 | G | C | Homozygous   |
| NC_037646.1 | 11755618 | SNV | 1 | A | G | Homozygous   |
| NC_037646.1 | 11761137 | SNV | 1 | T | C | Heterozygous |
| NC_037646.1 | 11761201 | SNV | 1 | G | A | Heterozygous |
| NC_037646.1 | 11764044 | SNV | 1 | A | G | Heterozygous |
| NC_037646.1 | 11769735 | SNV | 1 | G | C | Homozygous   |
| NC_037646.1 | 11769908 | SNV | 1 | G | A | Heterozygous |
| NC_037646.1 | 11769918 | SNV | 1 | A | G | Heterozygous |
| NC_037646.1 | 11770406 | SNV | 1 | C | A | Homozygous   |
| NC_037646.1 | 11770410 | SNV | 1 | T | A | Homozygous   |
| NC_037646.1 | 11770450 | SNV | 1 | T | C | Homozygous   |
| NC_037646.1 | 11770570 | SNV | 1 | A | G | Homozygous   |
| NC_037646.1 | 11770636 | SNV | 1 | A | G | Heterozygous |
| NC_037646.1 | 11770822 | SNV | 1 | G | A | Heterozygous |
| NC_037646.1 | 11770891 | SNV | 1 | G | A | Heterozygous |
| NC_037646.1 | 11770915 | SNV | 1 | T | C | Heterozygous |
| NC_037646.1 | 11770933 | SNV | 1 | A | G | Homozygous   |
| NC_037646.1 | 11771146 | SNV | 1 | C | T | Heterozygous |
| NC_037646.1 | 11772008 | SNV | 1 | T | C | Homozygous   |
| NC_037646.1 | 11772393 | SNV | 1 | T | A | Homozygous   |
| NC_037646.1 | 11772478 | SNV | 1 | T | C | Homozygous   |
| NC_037646.1 | 11772505 | SNV | 1 | G | A | Heterozygous |
| NC_037646.1 | 11772525 | SNV | 1 | T | C | Homozygous   |
| NC_037646.1 | 11773787 | SNV | 1 | T | C | Homozygous   |
| NC_037646.1 | 11774043 | SNV | 1 | T | C | Homozygous   |
| NC_037646.1 | 11774099 | SNV | 1 | A | T | Homozygous   |

|             |          |     |   |   |   |              |
|-------------|----------|-----|---|---|---|--------------|
| NC_037646.1 | 11774242 | SNV | 1 | A | G | Homozygous   |
| NC_037646.1 | 11774938 | SNV | 1 | C | A | Homozygous   |
| NC_037646.1 | 11776157 | SNV | 1 | G | T | Heterozygous |
| NC_037646.1 | 11776219 | SNV | 1 | T | C | Heterozygous |
| NC_037646.1 | 11776592 | SNV | 1 | A | G | Heterozygous |
| NC_037646.1 | 11776603 | SNV | 1 | C | T | Heterozygous |
| NC_037646.1 | 11777397 | SNV | 1 | C | T | Homozygous   |
| NC_037646.1 | 11777953 | SNV | 1 | C | A | Homozygous   |
| NC_037646.1 | 11778838 | SNV | 1 | T | C | Homozygous   |
| NC_037646.1 | 11779647 | SNV | 1 | C | T | Heterozygous |
| NC_037646.1 | 11779863 | SNV | 1 | T | C | Heterozygous |
| NC_037646.1 | 11780133 | SNV | 1 | C | A | Heterozygous |
| NC_037646.1 | 11780275 | SNV | 1 | A | C | Homozygous   |
| NC_037646.1 | 11780288 | SNV | 1 | A | G | Homozygous   |
| NC_037646.1 | 11780314 | SNV | 1 | T | A | Homozygous   |
| NC_037646.1 | 11780332 | SNV | 1 | A | G | Homozygous   |
| NC_037646.1 | 11790203 | SNV | 1 | G | A | Homozygous   |
| NC_037646.1 | 11801131 | SNV | 1 | G | T | Homozygous   |
| NC_037646.1 | 11801138 | SNV | 1 | T | A | Homozygous   |
| NC_037646.1 | 11801162 | SNV | 1 | A | T | Homozygous   |
| NC_037646.1 | 11801168 | SNV | 1 | A | T | Homozygous   |
| NC_037646.1 | 11801212 | SNV | 1 | G | T | Homozygous   |
| NC_037646.1 | 11801215 | SNV | 1 | G | A | Homozygous   |
| NC_037646.1 | 11801288 | SNV | 1 | T | C | Homozygous   |
| NC_037646.1 | 11801324 | SNV | 1 | G | A | Homozygous   |
| NC_037646.1 | 11801462 | SNV | 1 | C | T | Homozygous   |
| NC_037646.1 | 11801757 | SNV | 1 | G | A | Homozygous   |
| NC_037646.1 | 11802900 | SNV | 1 | T | C | Homozygous   |
| NC_037646.1 | 11803508 | SNV | 1 | T | G | Homozygous   |
| NC_037646.1 | 11803921 | SNV | 1 | A | G | Heterozygous |
| NC_037646.1 | 11805320 | SNV | 1 | A | G | Homozygous   |
| NC_037646.1 | 11805357 | SNV | 1 | G | A | Heterozygous |
| NC_037646.1 | 11806396 | SNV | 1 | C | T | Heterozygous |
| NC_037646.1 | 11806403 | SNV | 1 | G | A | Homozygous   |
| NC_037646.1 | 11806521 | SNV | 1 | C | T | Homozygous   |
| NC_037646.1 | 11807074 | SNV | 1 | A | G | Homozygous   |
| NC_037646.1 | 11807819 | SNV | 1 | T | C | Heterozygous |
| NC_037646.1 | 11808515 | SNV | 1 | T | C | Heterozygous |
| NC_037646.1 | 11808822 | SNV | 1 | T | A | Heterozygous |
| NC_037646.1 | 11812373 | SNV | 1 | C | A | Homozygous   |
| NC_037646.1 | 11812375 | SNV | 1 | T | C | Homozygous   |
| NC_037646.1 | 11812377 | SNV | 1 | A | C | Homozygous   |
| NC_037646.1 | 11812771 | SNV | 1 | C | T | Heterozygous |
| NC_037646.1 | 11812905 | SNV | 1 | A | G | Homozygous   |
| NC_037646.1 | 11813117 | SNV | 1 | T | C | Heterozygous |
| NC_037646.1 | 11813164 | SNV | 1 | C | T | Homozygous   |
| NC_037646.1 | 11813187 | SNV | 1 | A | G | Homozygous   |
| NC_037646.1 | 11813239 | SNV | 1 | C | G | Heterozygous |
| NC_037646.1 | 11823571 | SNV | 1 | A | G | Heterozygous |
| NC_037646.1 | 11823592 | SNV | 1 | T | C | Heterozygous |
| NC_037646.1 | 11824517 | SNV | 1 | C | T | Heterozygous |

|             |          |     |   |   |   |              |
|-------------|----------|-----|---|---|---|--------------|
| NC_037646.1 | 11830468 | SNV | 1 | A | G | Homozygous   |
| NC_037646.1 | 11830669 | SNV | 1 | T | C | Homozygous   |
| NC_037646.1 | 11830705 | SNV | 1 | T | C | Homozygous   |
| NC_037646.1 | 11831814 | SNV | 1 | G | A | Heterozygous |
| NC_037646.1 | 11831862 | SNV | 1 | C | T | Heterozygous |
| NC_037646.1 | 11832046 | SNV | 1 | G | C | Homozygous   |
| NC_037646.1 | 11834583 | SNV | 1 | T | C | Homozygous   |
| NC_037646.1 | 11835781 | SNV | 1 | G | A | Homozygous   |
| NC_037646.1 | 11836741 | SNV | 1 | C | A | Homozygous   |
| NC_037646.1 | 11837390 | SNV | 1 | G | A | Heterozygous |
| NC_037646.1 | 11837973 | SNV | 1 | A | T | Homozygous   |
| NC_037646.1 | 11838257 | SNV | 1 | T | A | Heterozygous |
| NC_037646.1 | 11838401 | SNV | 1 | C | A | Heterozygous |
| NC_037646.1 | 11841631 | SNV | 1 | G | C | Homozygous   |
| NC_037646.1 | 11841948 | SNV | 1 | A | C | Heterozygous |
| NC_037646.1 | 11842222 | SNV | 1 | T | C | Homozygous   |
| NC_037646.1 | 11843096 | SNV | 1 | A | T | Heterozygous |
| NC_037646.1 | 11843106 | SNV | 1 | C | T | Heterozygous |
| NC_037646.1 | 11843114 | SNV | 1 | T | C | Homozygous   |
| NC_037646.1 | 11843120 | SNV | 1 | C | T | Heterozygous |
| NC_037646.1 | 11843293 | SNV | 1 | A | T | Heterozygous |
| NC_037646.1 | 11843460 | SNV | 1 | T | C | Homozygous   |
| NC_037646.1 | 11843677 | SNV | 1 | A | G | Heterozygous |
| NC_037646.1 | 11843933 | SNV | 1 | T | C | Heterozygous |
| NC_037646.1 | 11844071 | SNV | 1 | T | C | Homozygous   |
| NC_037646.1 | 11844142 | SNV | 1 | C | T | Heterozygous |
| NC_037646.1 | 11844159 | SNV | 1 | C | A | Heterozygous |
| NC_037646.1 | 11844386 | SNV | 1 | C | T | Heterozygous |
| NC_037646.1 | 11844401 | SNV | 1 | A | G | Homozygous   |
| NC_037646.1 | 11844431 | SNV | 1 | C | T | Heterozygous |
| NC_037646.1 | 11844876 | SNV | 1 | T | C | Homozygous   |
| NC_037646.1 | 11844915 | SNV | 1 | A | G | Homozygous   |
| NC_037646.1 | 11845139 | SNV | 1 | T | C | Heterozygous |
| NC_037646.1 | 11845577 | SNV | 1 | C | T | Homozygous   |
| NC_037646.1 | 11845586 | SNV | 1 | G | A | Heterozygous |
| NC_037646.1 | 11845592 | SNV | 1 | T | C | Homozygous   |
| NC_037646.1 | 11845635 | SNV | 1 | T | C | Heterozygous |
| NC_037646.1 | 11845898 | SNV | 1 | C | G | Heterozygous |
| NC_037646.1 | 11845927 | SNV | 1 | G | A | Heterozygous |
| NC_037646.1 | 11845947 | SNV | 1 | A | G | Heterozygous |
| NC_037646.1 | 11845962 | SNV | 1 | G | A | Heterozygous |
| NC_037646.1 | 11845977 | SNV | 1 | C | T | Heterozygous |
| NC_037646.1 | 11845990 | SNV | 1 | G | A | Heterozygous |
| NC_037646.1 | 11850667 | SNV | 1 | C | T | Heterozygous |
| NC_037646.1 | 11857746 | SNV | 1 | C | T | Homozygous   |
| NC_037646.1 | 11857750 | SNV | 1 | A | G | Homozygous   |
| NC_037646.1 | 11857774 | SNV | 1 | G | A | Homozygous   |
| NC_037646.1 | 11857777 | SNV | 1 | A | G | Homozygous   |
| NC_037646.1 | 11857779 | SNV | 1 | G | C | Homozygous   |
| NC_037646.1 | 11857782 | SNV | 1 | A | G | Homozygous   |
| NC_037646.1 | 11874118 | SNV | 1 | A | T | Homozygous   |

|             |          |     |   |   |   |              |
|-------------|----------|-----|---|---|---|--------------|
| NC_037646.1 | 11874785 | SNV | 1 | T | C | Heterozygous |
| NC_037646.1 | 11874794 | SNV | 1 | T | C | Homozygous   |
| NC_037646.1 | 11874804 | SNV | 1 | T | C | Homozygous   |
| NC_037646.1 | 11874823 | SNV | 1 | T | A | Homozygous   |
| NC_037646.1 | 11887574 | SNV | 1 | A | T | Heterozygous |
| NC_037646.1 | 11887580 | SNV | 1 | A | T | Heterozygous |
| NC_037646.1 | 11887582 | SNV | 1 | C | T | Heterozygous |
| NC_037646.1 | 11887584 | SNV | 1 | C | A | Heterozygous |
| NC_037646.1 | 11923294 | SNV | 1 | G | C | Heterozygous |
| NC_037646.1 | 11923300 | SNV | 1 | C | T | Heterozygous |
| NC_037646.1 | 11923312 | SNV | 1 | C | T | Heterozygous |
| NC_037646.1 | 11923315 | SNV | 1 | C | T | Heterozygous |
| NC_037646.1 | 11923324 | SNV | 1 | T | C | Heterozygous |
| NC_037646.1 | 11923327 | SNV | 1 | T | C | Heterozygous |
| NC_037646.1 | 11923355 | SNV | 1 | C | T | Homozygous   |
| NC_037646.1 | 11923377 | SNV | 1 | T | C | Homozygous   |
| NC_037646.1 | 11923386 | SNV | 1 | C | T | Homozygous   |
| NC_037646.1 | 11923417 | SNV | 1 | A | G | Homozygous   |
| NC_037646.1 | 11923427 | SNV | 1 | G | A | Homozygous   |
| NC_037646.1 | 11923467 | SNV | 1 | C | T | Homozygous   |
| NC_037646.1 | 11923503 | SNV | 1 | T | C | Homozygous   |
| NC_037646.1 | 11943738 | SNV | 1 | C | T | Heterozygous |
| NC_037646.1 | 11955364 | SNV | 1 | C | T | Heterozygous |
| NC_037646.1 | 11955393 | SNV | 1 | C | T | Homozygous   |
| NC_037646.1 | 11955424 | SNV | 1 | G | A | Homozygous   |
| NC_037646.1 | 11955427 | SNV | 1 | A | C | Homozygous   |
| NC_037646.1 | 11955609 | SNV | 1 | T | C | Homozygous   |
| NC_037646.1 | 11955652 | SNV | 1 | C | T | Heterozygous |
| NC_037646.1 | 11955673 | SNV | 1 | G | A | Heterozygous |
| NC_037646.1 | 11955691 | SNV | 1 | G | A | Heterozygous |
| NC_037646.1 | 11955702 | SNV | 1 | C | T | Heterozygous |
| NC_037646.1 | 11955795 | SNV | 1 | G | T | Heterozygous |
| NC_037646.1 | 11955798 | SNV | 1 | G | A | Heterozygous |
| NC_037646.1 | 11955802 | SNV | 1 | T | C | Heterozygous |
| NC_037646.1 | 11955805 | SNV | 1 | G | A | Heterozygous |
| NC_037646.1 | 11955837 | SNV | 1 | T | C | Heterozygous |
| NC_037646.1 | 11961525 | SNV | 1 | A | G | Homozygous   |
| NC_037646.1 | 11961540 | SNV | 1 | T | C | Homozygous   |
| NC_037646.1 | 11961547 | SNV | 1 | C | T | Heterozygous |
| NC_037646.1 | 11961549 | SNV | 1 | T | C | Heterozygous |
| NC_037646.1 | 11961572 | SNV | 1 | T | C | Homozygous   |
| NC_037646.1 | 11961578 | SNV | 1 | C | T | Heterozygous |
| NC_037646.1 | 11961646 | SNV | 1 | C | G | Heterozygous |
| NC_037646.1 | 11961652 | SNV | 1 | G | A | Homozygous   |
| NC_037646.1 | 11980457 | SNV | 1 | T | C | Homozygous   |
| NC_037646.1 | 11980465 | SNV | 1 | G | A | Homozygous   |
| NC_037646.1 | 11980851 | SNV | 1 | A | T | Homozygous   |
| NC_037646.1 | 11980968 | SNV | 1 | G | C | Homozygous   |
| NC_037646.1 | 11980972 | SNV | 1 | C | G | Homozygous   |
| NC_037646.1 | 11981259 | SNV | 1 | T | C | Homozygous   |
| NC_037646.1 | 11982006 | SNV | 1 | A | G | Heterozygous |

|             |          |     |   |   |   |              |
|-------------|----------|-----|---|---|---|--------------|
| NC_037646.1 | 11982208 | SNV | 1 | C | A | Heterozygous |
| NC_037646.1 | 11982552 | SNV | 1 | G | A | Homozygous   |
| NC_037646.1 | 11982582 | SNV | 1 | A | G | Heterozygous |
| NC_037646.1 | 11982751 | SNV | 1 | T | C | Homozygous   |
| NC_037646.1 | 11982779 | SNV | 1 | A | G | Homozygous   |
| NC_037646.1 | 11982824 | SNV | 1 | T | C | Homozygous   |
| NC_037646.1 | 11992655 | SNV | 1 | T | A | Homozygous   |
| NC_037646.1 | 11993061 | SNV | 1 | C | T | Heterozygous |
| NC_037646.1 | 11993163 | SNV | 1 | T | C | Homozygous   |
| NC_037646.1 | 11993668 | SNV | 1 | C | T | Heterozygous |
| NC_037646.1 | 11996776 | SNV | 1 | C | T | Heterozygous |
| NC_037646.1 | 11997090 | SNV | 1 | A | G | Heterozygous |
| NC_037646.1 | 11997448 | SNV | 1 | A | G | Homozygous   |
| NC_037646.1 | 11997613 | SNV | 1 | T | C | Homozygous   |
| NC_037646.1 | 11998280 | SNV | 1 | C | A | Homozygous   |
| NC_037646.1 | 11998639 | SNV | 1 | G | T | Heterozygous |
| NC_037646.1 | 11998678 | SNV | 1 | A | T | Homozygous   |
| NC_037646.1 | 11998681 | SNV | 1 | A | G | Homozygous   |
| NC_037646.1 | 12004921 | SNV | 1 | G | T | Heterozygous |
| NC_037646.1 | 12005397 | SNV | 1 | C | T | Homozygous   |
| NC_037646.1 | 12006203 | SNV | 1 | C | T | Homozygous   |
| NC_037646.1 | 12006336 | SNV | 1 | A | G | Homozygous   |
| NC_037646.1 | 12006403 | SNV | 1 | A | G | Homozygous   |
| NC_037646.1 | 12006942 | SNV | 1 | A | T | Homozygous   |
| NC_037646.1 | 12006944 | SNV | 1 | T | A | Homozygous   |
| NC_037646.1 | 12007227 | SNV | 1 | C | T | Homozygous   |
| NC_037646.1 | 12007774 | SNV | 1 | T | C | Heterozygous |
| NC_037646.1 | 12007918 | SNV | 1 | T | A | Homozygous   |
| NC_037646.1 | 12008490 | SNV | 1 | C | T | Homozygous   |
| NC_037646.1 | 12008709 | SNV | 1 | T | C | Heterozygous |
| NC_037646.1 | 12008714 | SNV | 1 | T | C | Heterozygous |
| NC_037646.1 | 12011222 | SNV | 1 | G | T | Homozygous   |
| NC_037646.1 | 12018081 | SNV | 1 | C | T | Heterozygous |
| NC_037646.1 | 12018248 | SNV | 1 | T | C | Homozygous   |
| NC_037646.1 | 12018262 | SNV | 1 | T | C | Heterozygous |
| NC_037646.1 | 12018265 | SNV | 1 | C | T | Homozygous   |
| NC_037646.1 | 12018293 | SNV | 1 | T | C | Heterozygous |
| NC_037646.1 | 12020224 | SNV | 1 | G | A | Homozygous   |
| NC_037646.1 | 12020250 | SNV | 1 | C | G | Homozygous   |
| NC_037646.1 | 12024306 | SNV | 1 | C | T | Heterozygous |
| NC_037646.1 | 12024360 | SNV | 1 | G | C | Homozygous   |
| NC_037646.1 | 12024444 | SNV | 1 | C | T | Heterozygous |
| NC_037646.1 | 12024476 | SNV | 1 | A | G | Heterozygous |
| NC_037646.1 | 12024510 | SNV | 1 | A | G | Homozygous   |
| NC_037646.1 | 12024515 | SNV | 1 | A | G | Homozygous   |
| NC_037646.1 | 12037082 | SNV | 1 | A | T | Heterozygous |
| NC_037646.1 | 12037262 | SNV | 1 | G | T | Heterozygous |
| NC_037646.1 | 12037879 | SNV | 1 | A | T | Homozygous   |
| NC_037646.1 | 12051404 | SNV | 1 | T | C | Homozygous   |
| NC_037646.1 | 12051525 | SNV | 1 | G | A | Heterozygous |
| NC_037646.1 | 12051553 | SNV | 1 | G | A | Homozygous   |

|             |          |     |   |   |   |              |
|-------------|----------|-----|---|---|---|--------------|
| NC_037646.1 | 12051594 | SNV | 1 | G | T | Homozygous   |
| NC_037646.1 | 12051603 | SNV | 1 | T | C | Heterozygous |
| NC_037646.1 | 12052006 | SNV | 1 | A | G | Homozygous   |
| NC_037646.1 | 12052842 | SNV | 1 | A | T | Homozygous   |
| NC_037646.1 | 12053022 | SNV | 1 | A | G | Homozygous   |
| NC_037646.1 | 12053050 | SNV | 1 | A | T | Homozygous   |
| NC_037646.1 | 12053052 | SNV | 1 | T | A | Heterozygous |
| NC_037646.1 | 12054626 | SNV | 1 | A | G | Heterozygous |
| NC_037646.1 | 12057547 | SNV | 1 | A | G | Heterozygous |
| NC_037646.1 | 12057557 | SNV | 1 | G | A | Heterozygous |
| NC_037646.1 | 12057560 | SNV | 1 | C | T | Heterozygous |
| NC_037646.1 | 12057564 | SNV | 1 | A | T | Heterozygous |
| NC_037646.1 | 12057568 | SNV | 1 | G | A | Homozygous   |
| NC_037646.1 | 12057576 | SNV | 1 | G | A | Heterozygous |
| NC_037646.1 | 12057692 | SNV | 1 | A | G | Homozygous   |
| NC_037646.1 | 12057694 | SNV | 1 | C | T | Heterozygous |
| NC_037646.1 | 12057770 | SNV | 1 | G | A | Homozygous   |
| NC_037646.1 | 12057862 | SNV | 1 | G | A | Heterozygous |
| NC_037646.1 | 12057875 | SNV | 1 | A | G | Heterozygous |
| NC_037646.1 | 12057878 | SNV | 1 | T | C | Heterozygous |
| NC_037646.1 | 12057885 | SNV | 1 | A | G | Homozygous   |
| NC_037646.1 | 12058124 | SNV | 1 | T | G | Homozygous   |
| NC_037646.1 | 12058130 | SNV | 1 | G | A | Homozygous   |
| NC_037646.1 | 12058286 | SNV | 1 | T | C | Homozygous   |
| NC_037646.1 | 12060419 | SNV | 1 | G | C | Homozygous   |
| NC_037646.1 | 12060459 | SNV | 1 | C | T | Heterozygous |
| NC_037646.1 | 12060467 | SNV | 1 | T | A | Heterozygous |
| NC_037646.1 | 12060746 | SNV | 1 | C | G | Homozygous   |
| NC_037646.1 | 12060782 | SNV | 1 | G | A | Homozygous   |
| NC_037646.1 | 12103417 | SNV | 1 | A | G | Homozygous   |
| NC_037646.1 | 12104917 | SNV | 1 | T | C | Homozygous   |
| NC_037646.1 | 12104935 | SNV | 1 | A | G | Homozygous   |
| NC_037646.1 | 12104948 | SNV | 1 | T | C | Heterozygous |
| NC_037646.1 | 12115870 | SNV | 1 | C | T | Homozygous   |
| NC_037646.1 | 12116011 | SNV | 1 | A | C | Homozygous   |
| NC_037646.1 | 12116077 | SNV | 1 | A | G | Heterozygous |
| NC_037646.1 | 12116139 | SNV | 1 | A | G | Heterozygous |
| NC_037646.1 | 12116156 | SNV | 1 | G | A | Homozygous   |
| NC_037646.1 | 12116227 | SNV | 1 | G | A | Homozygous   |
| NC_037646.1 | 12119036 | SNV | 1 | T | G | Homozygous   |
| NC_037646.1 | 12127331 | SNV | 1 | C | T | Heterozygous |
| NC_037646.1 | 12127417 | SNV | 1 | A | G | Homozygous   |
| NC_037646.1 | 12127602 | SNV | 1 | G | T | Heterozygous |
| NC_037646.1 | 12127605 | SNV | 1 | A | G | Heterozygous |
| NC_037646.1 | 12127607 | SNV | 1 | A | G | Heterozygous |
| NC_037646.1 | 12131663 | SNV | 1 | G | A | Heterozygous |
| NC_037646.1 | 12131688 | SNV | 1 | C | T | Heterozygous |
| NC_037646.1 | 12131690 | SNV | 1 | T | C | Heterozygous |
| NC_037646.1 | 12131790 | SNV | 1 | T | A | Homozygous   |
| NC_037646.1 | 12132087 | SNV | 1 | T | C | Homozygous   |
| NC_037646.1 | 12141568 | SNV | 1 | T | C | Heterozygous |

|             |          |     |   |   |   |              |
|-------------|----------|-----|---|---|---|--------------|
| NC_037646.1 | 12147128 | SNV | 1 | T | C | Homozygous   |
| NC_037646.1 | 12147191 | SNV | 1 | T | C | Homozygous   |
| NC_037646.1 | 12147202 | SNV | 1 | G | A | Homozygous   |
| NC_037646.1 | 12147212 | SNV | 1 | G | T | Homozygous   |
| NC_037646.1 | 12147224 | SNV | 1 | T | C | Homozygous   |
| NC_037646.1 | 12158455 | SNV | 1 | A | G | Homozygous   |
| NC_037646.1 | 12158457 | SNV | 1 | G | A | Homozygous   |
| NC_037646.1 | 12158459 | SNV | 1 | G | A | Homozygous   |
| NC_037646.1 | 12158465 | SNV | 1 | T | A | Homozygous   |
| NC_037646.1 | 12158467 | SNV | 1 | C | A | Homozygous   |
| NC_037646.1 | 12170967 | SNV | 1 | T | C | Homozygous   |
| NC_037646.1 | 12170982 | SNV | 1 | T | C | Homozygous   |
| NC_037646.1 | 12172691 | SNV | 1 | C | T | Heterozygous |
| NC_037646.1 | 12183031 | SNV | 1 | A | G | Homozygous   |
| NC_037646.1 | 12183061 | SNV | 1 | A | T | Homozygous   |
| NC_037646.1 | 12183075 | SNV | 1 | C | T | Heterozygous |
| NC_037646.1 | 12183158 | SNV | 1 | G | A | Heterozygous |
| NC_037646.1 | 12183637 | SNV | 1 | T | C | Homozygous   |
| NC_037646.1 | 12187231 | SNV | 1 | T | C | Heterozygous |
| NC_037646.1 | 12187237 | SNV | 1 | C | T | Homozygous   |
| NC_037646.1 | 12187240 | SNV | 1 | A | C | Heterozygous |
| NC_037646.1 | 12190228 | SNV | 1 | C | A | Heterozygous |
| NC_037646.1 | 12192794 | SNV | 1 | A | G | Homozygous   |
| NC_037646.1 | 12192811 | SNV | 1 | A | G | Homozygous   |
| NC_037646.1 | 12192913 | SNV | 1 | T | G | Homozygous   |
| NC_037646.1 | 12192916 | SNV | 1 | A | G | Homozygous   |
| NC_037646.1 | 12194206 | SNV | 1 | G | A | Heterozygous |
| NC_037646.1 | 12194320 | SNV | 1 | T | C | Homozygous   |
| NC_037646.1 | 12194349 | SNV | 1 | C | T | Homozygous   |
| NC_037646.1 | 12194434 | SNV | 1 | A | C | Heterozygous |
| NC_037646.1 | 12194461 | SNV | 1 | C | T | Homozygous   |
| NC_037646.1 | 12194509 | SNV | 1 | G | A | Heterozygous |
| NC_037646.1 | 12204785 | SNV | 1 | G | C | Heterozygous |
| NC_037646.1 | 12209144 | SNV | 1 | G | A | Homozygous   |
| NC_037646.1 | 12214112 | SNV | 1 | G | A | Heterozygous |
| NC_037646.1 | 12214259 | SNV | 1 | G | T | Heterozygous |
| NC_037646.1 | 12225042 | SNV | 1 | C | T | Homozygous   |
| NC_037646.1 | 12225044 | SNV | 1 | C | T | Homozygous   |
| NC_037646.1 | 12225056 | SNV | 1 | T | G | Heterozygous |
| NC_037646.1 | 12236975 | SNV | 1 | G | A | Heterozygous |
| NC_037646.1 | 12237046 | SNV | 1 | G | A | Homozygous   |
| NC_037646.1 | 12237050 | SNV | 1 | G | A | Heterozygous |
| NC_037646.1 | 12237967 | SNV | 1 | T | C | Homozygous   |
| NC_037646.1 | 12237972 | SNV | 1 | A | T | Homozygous   |
| NC_037646.1 | 12237977 | SNV | 1 | C | T | Homozygous   |
| NC_037646.1 | 12238042 | SNV | 1 | T | C | Homozygous   |
| NC_037646.1 | 12238078 | SNV | 1 | T | C | Homozygous   |
| NC_037646.1 | 12238339 | SNV | 1 | A | G | Heterozygous |
| NC_037646.1 | 12238363 | SNV | 1 | G | T | Heterozygous |
| NC_037646.1 | 12238368 | SNV | 1 | A | G | Homozygous   |
| NC_037646.1 | 12238374 | SNV | 1 | G | T | Homozygous   |

|             |          |     |   |   |   |              |
|-------------|----------|-----|---|---|---|--------------|
| NC_037646.1 | 12238380 | SNV | 1 | T | A | Homozygous   |
| NC_037646.1 | 12238382 | SNV | 1 | G | T | Homozygous   |
| NC_037646.1 | 12238910 | SNV | 1 | G | A | Heterozygous |
| NC_037646.1 | 12238928 | SNV | 1 | G | A | Heterozygous |
| NC_037646.1 | 12239408 | SNV | 1 | C | T | Homozygous   |
| NC_037646.1 | 12239669 | SNV | 1 | A | G | Heterozygous |
| NC_037646.1 | 12239953 | SNV | 1 | G | A | Heterozygous |
| NC_037646.1 | 12239960 | SNV | 1 | C | T | Heterozygous |
| NC_037646.1 | 12241030 | SNV | 1 | G | A | Heterozygous |
| NC_037646.1 | 12241074 | SNV | 1 | T | C | Heterozygous |
| NC_037646.1 | 12244724 | SNV | 1 | C | T | Homozygous   |
| NC_037646.1 | 12245991 | SNV | 1 | G | A | Heterozygous |
| NC_037646.1 | 12247537 | SNV | 1 | A | G | Homozygous   |
| NC_037646.1 | 12247562 | SNV | 1 | A | G | Homozygous   |
| NC_037646.1 | 12247586 | SNV | 1 | C | T | Heterozygous |
| NC_037646.1 | 12248056 | SNV | 1 | T | G | Heterozygous |
| NC_037646.1 | 12248067 | SNV | 1 | G | A | Homozygous   |
| NC_037646.1 | 12248071 | SNV | 1 | A | G | Homozygous   |
| NC_037646.1 | 12248090 | SNV | 1 | G | C | Homozygous   |
| NC_037646.1 | 12248144 | SNV | 1 | A | G | Homozygous   |
| NC_037646.1 | 12248152 | SNV | 1 | G | A | Homozygous   |
| NC_037646.1 | 12248733 | SNV | 1 | C | T | Homozygous   |
| NC_037646.1 | 12248763 | SNV | 1 | C | T | Heterozygous |
| NC_037646.1 | 12248982 | SNV | 1 | C | T | Homozygous   |
| NC_037646.1 | 12249060 | SNV | 1 | C | G | Homozygous   |
| NC_037646.1 | 12251158 | SNV | 1 | C | T | Homozygous   |
| NC_037646.1 | 12254407 | SNV | 1 | C | T | Heterozygous |
| NC_037646.1 | 12254413 | SNV | 1 | T | C | Homozygous   |
| NC_037646.1 | 12254418 | SNV | 1 | T | C | Homozygous   |
| NC_037646.1 | 12254422 | SNV | 1 | T | C | Homozygous   |
| NC_037646.1 | 12254491 | SNV | 1 | G | T | Homozygous   |
| NC_037646.1 | 12254503 | SNV | 1 | T | C | Homozygous   |
| NC_037646.1 | 12254624 | SNV | 1 | C | T | Homozygous   |
| NC_037646.1 | 12256225 | SNV | 1 | A | G | Homozygous   |
| NC_037646.1 | 12256243 | SNV | 1 | G | A | Homozygous   |
| NC_037646.1 | 12257903 | SNV | 1 | A | G | Heterozygous |
| NC_037646.1 | 12258206 | SNV | 1 | T | C | Homozygous   |
| NC_037646.1 | 12258269 | SNV | 1 | A | G | Homozygous   |
| NC_037646.1 | 12260577 | SNV | 1 | G | C | Homozygous   |
| NC_037646.1 | 12262850 | SNV | 1 | T | C | Heterozygous |
| NC_037646.1 | 12262931 | SNV | 1 | C | T | Heterozygous |
| NC_037646.1 | 12262946 | SNV | 1 | C | T | Heterozygous |
| NC_037646.1 | 12263246 | SNV | 1 | A | G | Heterozygous |
| NC_037646.1 | 12263355 | SNV | 1 | G | A | Heterozygous |
| NC_037646.1 | 12263814 | SNV | 1 | T | C | Heterozygous |
| NC_037646.1 | 12264890 | SNV | 1 | G | A | Heterozygous |
| NC_037646.1 | 12264908 | SNV | 1 | A | G | Homozygous   |
| NC_037646.1 | 12265064 | SNV | 1 | G | A | Homozygous   |
| NC_037646.1 | 12265132 | SNV | 1 | A | G | Homozygous   |
| NC_037646.1 | 12265154 | SNV | 1 | A | G | Homozygous   |
| NC_037646.1 | 12265325 | SNV | 1 | A | G | Heterozygous |



|             |          |     |   |   |   |              |
|-------------|----------|-----|---|---|---|--------------|
| NC_037646.1 | 12265370 | SNV | 1 | A | G | Homozygous   |
| NC_037646.1 | 12266345 | SNV | 1 | A | T | Heterozygous |
| NC_037646.1 | 12266347 | SNV | 1 | T | A | Heterozygous |
| NC_037646.1 | 12266358 | SNV | 1 | A | G | Heterozygous |
| NC_037646.1 | 12266364 | SNV | 1 | A | G | Heterozygous |
| NC_037646.1 | 12266369 | SNV | 1 | T | A | Heterozygous |
| NC_037646.1 | 12266502 | SNV | 1 | G | C | Heterozygous |
| NC_037646.1 | 12268373 | SNV | 1 | G | C | Heterozygous |
| NC_037646.1 | 12268392 | SNV | 1 | G | A | Homozygous   |
| NC_037646.1 | 12268395 | SNV | 1 | G | A | Heterozygous |
| NC_037646.1 | 12268398 | SNV | 1 | G | A | Heterozygous |
| NC_037646.1 | 12268401 | SNV | 1 | G | A | Heterozygous |
| NC_037646.1 | 12268404 | SNV | 1 | G | A | Heterozygous |
| NC_037646.1 | 12268418 | SNV | 1 | A | C | Homozygous   |
| NC_037646.1 | 12268424 | SNV | 1 | A | C | Heterozygous |
| NC_037646.1 | 12268494 | SNV | 1 | T | C | Homozygous   |
| NC_037646.1 | 12269312 | SNV | 1 | A | G | Heterozygous |
| NC_037646.1 | 12269314 | SNV | 1 | A | G | Heterozygous |
| NC_037646.1 | 12269325 | SNV | 1 | A | G | Heterozygous |
| NC_037646.1 | 12270003 | SNV | 1 | T | C | Homozygous   |
| NC_037646.1 | 12270200 | SNV | 1 | C | T | Homozygous   |
| NC_037646.1 | 12271069 | SNV | 1 | G | A | Homozygous   |
| NC_037646.1 | 12271199 | SNV | 1 | A | T | Homozygous   |
| NC_037646.1 | 12273567 | SNV | 1 | A | G | Heterozygous |
| NC_037646.1 | 12273695 | SNV | 1 | A | T | Homozygous   |
| NC_037646.1 | 12274469 | SNV | 1 | A | G | Homozygous   |
| NC_037646.1 | 12275766 | SNV | 1 | T | C | Homozygous   |
| NC_037646.1 | 12278139 | SNV | 1 | A | C | Homozygous   |
| NC_037646.1 | 12282604 | SNV | 1 | C | T | Heterozygous |
| NC_037646.1 | 12283222 | SNV | 1 | G | T | Heterozygous |
| NC_037646.1 | 12283665 | SNV | 1 | C | T | Homozygous   |
| NC_037646.1 | 12284375 | SNV | 1 | T | C | Homozygous   |
| NC_037646.1 | 12284592 | SNV | 1 | T | C | Heterozygous |
| NC_037646.1 | 12284639 | SNV | 1 | G | T | Heterozygous |
| NC_037646.1 | 12284647 | SNV | 1 | G | T | Heterozygous |
| NC_037646.1 | 12285875 | SNV | 1 | A | G | Heterozygous |
| NC_037646.1 | 12286251 | SNV | 1 | G | A | Heterozygous |
| NC_037646.1 | 12286939 | SNV | 1 | T | G | Homozygous   |
| NC_037646.1 | 12286943 | SNV | 1 | A | G | Homozygous   |
| NC_037646.1 | 12286945 | SNV | 1 | G | A | Homozygous   |
| NC_037646.1 | 12286962 | SNV | 1 | A | T | Homozygous   |
| NC_037646.1 | 12286964 | SNV | 1 | A | T | Homozygous   |
| NC_037646.1 | 12286983 | SNV | 1 | G | T | Homozygous   |
| NC_037646.1 | 12288395 | SNV | 1 | G | A | Homozygous   |
| NC_037646.1 | 12289189 | SNV | 1 | C | T | Homozygous   |
| NC_037646.1 | 12289895 | SNV | 1 | T | C | Homozygous   |
| NC_037646.1 | 12289951 | SNV | 1 | T | A | Homozygous   |
| NC_037646.1 | 12290162 | SNV | 1 | A | G | Homozygous   |
| NC_037646.1 | 12290263 | SNV | 1 | C | T | Heterozygous |
| NC_037646.1 | 12290348 | SNV | 1 | G | A | Heterozygous |
| NC_037646.1 | 12290490 | SNV | 1 | C | T | Homozygous   |

|             |          |     |   |   |   |              |
|-------------|----------|-----|---|---|---|--------------|
| NC_037646.1 | 12290621 | SNV | 1 | A | G | Heterozygous |
| NC_037646.1 | 12290642 | SNV | 1 | G | A | Heterozygous |
| NC_037646.1 | 12290880 | SNV | 1 | T | C | Homozygous   |
| NC_037646.1 | 12291694 | SNV | 1 | C | T | Homozygous   |
| NC_037646.1 | 12291880 | SNV | 1 | C | T | Heterozygous |
| NC_037646.1 | 12291891 | SNV | 1 | T | C | Homozygous   |
| NC_037646.1 | 12292112 | SNV | 1 | C | T | Heterozygous |
| NC_037646.1 | 12294289 | SNV | 1 | A | G | Heterozygous |
| NC_037646.1 | 12294314 | SNV | 1 | A | G | Heterozygous |
| NC_037646.1 | 12294318 | SNV | 1 | A | G | Heterozygous |
| NC_037646.1 | 12294322 | SNV | 1 | A | G | Heterozygous |
| NC_037646.1 | 12297271 | SNV | 1 | A | G | Homozygous   |
| NC_037646.1 | 12297982 | SNV | 1 | A | G | Homozygous   |
| NC_037646.1 | 12298463 | SNV | 1 | G | A | Heterozygous |
| NC_037646.1 | 12298487 | SNV | 1 | C | T | Heterozygous |
| NC_037646.1 | 12299258 | SNV | 1 | T | C | Homozygous   |
| NC_037646.1 | 12299261 | SNV | 1 | C | T | Homozygous   |
| NC_037646.1 | 12301901 | SNV | 1 | T | C | Homozygous   |
| NC_037646.1 | 12301906 | SNV | 1 | G | T | Homozygous   |
| NC_037646.1 | 12302471 | SNV | 1 | C | G | Heterozygous |
| NC_037646.1 | 12302473 | SNV | 1 | G | A | Heterozygous |
| NC_037646.1 | 12302491 | SNV | 1 | A | G | Heterozygous |
| NC_037646.1 | 12321112 | SNV | 1 | C | T | Heterozygous |
| NC_037646.1 | 12325807 | SNV | 1 | A | G | Homozygous   |
| NC_037646.1 | 12325869 | SNV | 1 | T | C | Homozygous   |
| NC_037646.1 | 12325994 | SNV | 1 | G | A | Homozygous   |
| NC_037646.1 | 12326592 | SNV | 1 | T | G | Homozygous   |
| NC_037646.1 | 12326792 | SNV | 1 | G | A | Heterozygous |
| NC_037646.1 | 12326861 | SNV | 1 | C | T | Homozygous   |
| NC_037646.1 | 12327632 | SNV | 1 | T | C | Homozygous   |
| NC_037646.1 | 12327658 | SNV | 1 | A | T | Homozygous   |
| NC_037646.1 | 12327892 | SNV | 1 | A | G | Homozygous   |
| NC_037646.1 | 12328821 | SNV | 1 | C | G | Homozygous   |
| NC_037646.1 | 12329422 | SNV | 1 | C | T | Homozygous   |
| NC_037646.1 | 12331127 | SNV | 1 | T | C | Homozygous   |
| NC_037646.1 | 12331196 | SNV | 1 | T | C | Homozygous   |
| NC_037646.1 | 12333919 | SNV | 1 | C | A | Heterozygous |
| NC_037646.1 | 12334432 | SNV | 1 | A | T | Heterozygous |
| NC_037646.1 | 12334446 | SNV | 1 | G | C | Heterozygous |
| NC_037646.1 | 12334450 | SNV | 1 | A | T | Heterozygous |
| NC_037646.1 | 12334827 | SNV | 1 | A | T | Homozygous   |
| NC_037646.1 | 12337631 | SNV | 1 | A | G | Heterozygous |
| NC_037646.1 | 12337947 | SNV | 1 | A | C | Heterozygous |
| NC_037646.1 | 12337952 | SNV | 1 | G | T | Heterozygous |
| NC_037646.1 | 12337967 | SNV | 1 | A | T | Heterozygous |
| NC_037646.1 | 12338656 | SNV | 1 | T | C | Homozygous   |
| NC_037646.1 | 12343330 | SNV | 1 | C | G | Homozygous   |
| NC_037646.1 | 12343968 | SNV | 1 | G | A | Heterozygous |
| NC_037646.1 | 12344116 | SNV | 1 | T | C | Homozygous   |
| NC_037646.1 | 12344697 | SNV | 1 | C | T | Homozygous   |
| NC_037646.1 | 12344711 | SNV | 1 | G | A | Heterozygous |

|                |          |     |   |   |   |              |
|----------------|----------|-----|---|---|---|--------------|
| NC_037646.1    | 12344765 | SNV | 1 | C | T | Homozygous   |
| NC_037646.1    | 12344818 | SNV | 1 | A | G | Homozygous   |
| NC_037646.1    | 12346401 | SNV | 1 | T | C | Homozygous   |
| NC_037646.1    | 12347256 | SNV | 1 | A | G | Heterozygous |
| NW_020555797.1 | 20243    | SNV | 1 | A | G | Homozygous   |
| NW_020555797.1 | 20320    | SNV | 1 | A | T | Homozygous   |
| NW_020555801.1 | 12532    | SNV | 1 | A | G | Heterozygous |
| NW_020555801.1 | 12558    | SNV | 1 | C | G | Heterozygous |
| NW_020555801.1 | 12646    | SNV | 1 | T | C | Heterozygous |
| NW_020555801.1 | 12648    | SNV | 1 | T | C | Heterozygous |
| NW_020555801.1 | 12781    | SNV | 1 | G | A | Heterozygous |
| NW_020555801.1 | 12815    | SNV | 1 | C | A | Heterozygous |
| NW_020555801.1 | 12818    | SNV | 1 | T | A | Heterozygous |
| NW_020555801.1 | 12886    | SNV | 1 | T | C | Homozygous   |
| NW_020555801.1 | 12929    | SNV | 1 | T | C | Heterozygous |
| NW_020555801.1 | 12976    | SNV | 1 | T | C | Heterozygous |
| NW_020555801.1 | 12988    | SNV | 1 | C | G | Heterozygous |
| NW_020555801.1 | 12997    | SNV | 1 | T | C | Homozygous   |
| NW_020555801.1 | 13009    | SNV | 1 | G | A | Heterozygous |
| NW_020555801.1 | 13011    | SNV | 1 | C | T | Heterozygous |
| NW_020555801.1 | 13021    | SNV | 1 | A | G | Heterozygous |
| NW_020555801.1 | 13923    | SNV | 1 | C | T | Homozygous   |
| NW_020555801.1 | 13933    | SNV | 1 | A | G | Heterozygous |
| NW_020555801.1 | 13948    | SNV | 1 | T | A | Heterozygous |
| NW_020555801.1 | 14110    | SNV | 1 | T | A | Homozygous   |
| NW_020555801.1 | 14170    | SNV | 1 | G | C | Heterozygous |
| NW_020555801.1 | 14481    | SNV | 1 | C | T | Homozygous   |
| NW_020555801.1 | 14510    | SNV | 1 | T | A | Heterozygous |
| NW_020555801.1 | 14516    | SNV | 1 | G | T | Heterozygous |
| NW_020555801.1 | 14520    | SNV | 1 | A | G | Heterozygous |
| NW_020555801.1 | 14538    | SNV | 1 | A | G | Heterozygous |
| NW_020555801.1 | 14555    | SNV | 1 | T | A | Heterozygous |
| NW_020555801.1 | 14558    | SNV | 1 | A | G | Heterozygous |
| NW_020555801.1 | 14561    | SNV | 1 | A | G | Heterozygous |
| NW_020555801.1 | 14571    | SNV | 1 | A | G | Heterozygous |
| NW_020555801.1 | 14580    | SNV | 1 | T | A | Heterozygous |
| NW_020555801.1 | 14607    | SNV | 1 | T | A | Heterozygous |
| NW_020555801.1 | 14678    | SNV | 1 | C | T | Homozygous   |
| NW_020555801.1 | 14886    | SNV | 1 | C | G | Heterozygous |
| NW_020555801.1 | 14980    | SNV | 1 | A | T | Homozygous   |
| NW_020555801.1 | 15242    | SNV | 1 | A | G | Homozygous   |
| NW_020555801.1 | 15631    | SNV | 1 | A | C | Heterozygous |
| NW_020555801.1 | 15655    | SNV | 1 | A | G | Homozygous   |
| NW_020555801.1 | 15854    | SNV | 1 | C | T | Homozygous   |
| NW_020555801.1 | 15894    | SNV | 1 | T | C | Homozygous   |
| NW_020555801.1 | 15910    | SNV | 1 | C | T | Homozygous   |
| NW_020555801.1 | 15941    | SNV | 1 | G | T | Homozygous   |
| NW_020555801.1 | 15990    | SNV | 1 | T | C | Homozygous   |
| NW_020555801.1 | 16002    | SNV | 1 | G | A | Heterozygous |
| NW_020555801.1 | 16017    | SNV | 1 | C | T | Heterozygous |
| NW_020555801.1 | 16063    | SNV | 1 | C | T | Heterozygous |

|                |       |     |   |   |   |              |
|----------------|-------|-----|---|---|---|--------------|
| NW_020555804.1 | 560   | SNV | 1 | T | A | Heterozygous |
| NW_020555804.1 | 575   | SNV | 1 | T | A | Homozygous   |
| NW_020555804.1 | 614   | SNV | 1 | T | A | Heterozygous |
| NW_020555804.1 | 623   | SNV | 1 | T | A | Homozygous   |
| NW_020555804.1 | 633   | SNV | 1 | T | C | Homozygous   |
| NW_020555804.1 | 638   | SNV | 1 | A | T | Homozygous   |
| NW_020555804.1 | 642   | SNV | 1 | A | T | Heterozygous |
| NW_020555807.1 | 1092  | SNV | 1 | T | G | Homozygous   |
| NW_020555807.1 | 1156  | SNV | 1 | G | A | Homozygous   |
| NW_020555807.1 | 1183  | SNV | 1 | A | G | Heterozygous |
| NW_020555807.1 | 1212  | SNV | 1 | A | T | Heterozygous |
| NW_020555807.1 | 1216  | SNV | 1 | C | G | Heterozygous |
| NW_020555807.1 | 1229  | SNV | 1 | G | A | Homozygous   |
| NW_020555807.1 | 1232  | SNV | 1 | C | A | Homozygous   |
| NW_020555807.1 | 1238  | SNV | 1 | G | A | Homozygous   |
| NW_020555807.1 | 1257  | SNV | 1 | A | G | Heterozygous |
| NW_020555807.1 | 1769  | SNV | 1 | A | G | Homozygous   |
| NW_020555807.1 | 1807  | SNV | 1 | C | T | Heterozygous |
| NW_020555807.1 | 1811  | SNV | 1 | G | T | Heterozygous |
| NW_020555807.1 | 1819  | SNV | 1 | A | G | Heterozygous |
| NW_020555807.1 | 1827  | SNV | 1 | G | A | Heterozygous |
| NW_020555807.1 | 1853  | SNV | 1 | A | G | Heterozygous |
| NW_020555807.1 | 1859  | SNV | 1 | C | A | Homozygous   |
| NW_020555807.1 | 2220  | SNV | 1 | A | G | Heterozygous |
| NW_020555807.1 | 2315  | SNV | 1 | A | T | Heterozygous |
| NW_020555807.1 | 2323  | SNV | 1 | G | A | Heterozygous |
| NW_020555807.1 | 2335  | SNV | 1 | C | A | Heterozygous |
| NW_020555807.1 | 2343  | SNV | 1 | C | T | Homozygous   |
| NW_020555807.1 | 3143  | SNV | 1 | G | A | Homozygous   |
| NW_020555807.1 | 3156  | SNV | 1 | A | G | Homozygous   |
| NW_020555807.1 | 3170  | SNV | 1 | C | T | Homozygous   |
| NW_020555807.1 | 3175  | SNV | 1 | A | G | Homozygous   |
| NW_020555807.1 | 3187  | SNV | 1 | T | A | Homozygous   |
| NW_020555807.1 | 3646  | SNV | 1 | A | G | Homozygous   |
| NW_020555807.1 | 3761  | SNV | 1 | A | T | Homozygous   |
| NW_020555807.1 | 3775  | SNV | 1 | A | T | Heterozygous |
| NW_020555807.1 | 3785  | SNV | 1 | G | C | Homozygous   |
| NW_020555807.1 | 4365  | SNV | 1 | C | T | Heterozygous |
| NW_020555807.1 | 4367  | SNV | 1 | G | A | Heterozygous |
| NW_020555807.1 | 4385  | SNV | 1 | A | G | Homozygous   |
| NW_020555807.1 | 4392  | SNV | 1 | G | T | Homozygous   |
| NW_020555807.1 | 4394  | SNV | 1 | A | G | Heterozygous |
| NW_020555807.1 | 4570  | SNV | 1 | G | A | Heterozygous |
| NW_020555807.1 | 4739  | SNV | 1 | A | G | Homozygous   |
| NW_020555807.1 | 4756  | SNV | 1 | G | C | Heterozygous |
| NW_020555807.1 | 4809  | SNV | 1 | G | A | Heterozygous |
| NC_037647.1    | 53476 | SNV | 1 | C | A | Heterozygous |
| NC_037647.1    | 53648 | SNV | 1 | A | G | Homozygous   |
| NC_037647.1    | 61405 | SNV | 1 | C | T | Heterozygous |
| NC_037647.1    | 61528 | SNV | 1 | A | T | Homozygous   |
| NC_037647.1    | 61531 | SNV | 1 | A | T | Homozygous   |

|             |        |     |   |   |   |              |
|-------------|--------|-----|---|---|---|--------------|
| NC_037647.1 | 62232  | SNV | 1 | C | T | Heterozygous |
| NC_037647.1 | 68402  | SNV | 1 | A | T | Homozygous   |
| NC_037647.1 | 68412  | SNV | 1 | T | A | Homozygous   |
| NC_037647.1 | 68419  | SNV | 1 | A | T | Homozygous   |
| NC_037647.1 | 68426  | SNV | 1 | G | A | Homozygous   |
| NC_037647.1 | 77094  | SNV | 1 | A | T | Heterozygous |
| NC_037647.1 | 77119  | SNV | 1 | G | T | Heterozygous |
| NC_037647.1 | 77386  | SNV | 1 | C | T | Homozygous   |
| NC_037647.1 | 78817  | SNV | 1 | A | G | Homozygous   |
| NC_037647.1 | 78821  | SNV | 1 | G | A | Homozygous   |
| NC_037647.1 | 78838  | SNV | 1 | G | A | Homozygous   |
| NC_037647.1 | 78934  | SNV | 1 | A | G | Homozygous   |
| NC_037647.1 | 84617  | SNV | 1 | A | G | Homozygous   |
| NC_037647.1 | 85253  | SNV | 1 | A | C | Homozygous   |
| NC_037647.1 | 94630  | SNV | 1 | A | T | Homozygous   |
| NC_037647.1 | 94657  | SNV | 1 | A | T | Homozygous   |
| NC_037647.1 | 94661  | SNV | 1 | G | A | Homozygous   |
| NC_037647.1 | 94666  | SNV | 1 | G | A | Homozygous   |
| NC_037647.1 | 94668  | SNV | 1 | A | T | Homozygous   |
| NC_037647.1 | 94674  | SNV | 1 | T | C | Homozygous   |
| NC_037647.1 | 94678  | SNV | 1 | C | T | Homozygous   |
| NC_037647.1 | 98662  | SNV | 1 | G | T | Homozygous   |
| NC_037647.1 | 98676  | SNV | 1 | A | T | Homozygous   |
| NC_037647.1 | 98678  | SNV | 1 | T | A | Homozygous   |
| NC_037647.1 | 98683  | SNV | 1 | T | A | Homozygous   |
| NC_037647.1 | 98685  | SNV | 1 | T | A | Homozygous   |
| NC_037647.1 | 99718  | SNV | 1 | C | A | Heterozygous |
| NC_037647.1 | 120930 | SNV | 1 | G | A | Homozygous   |
| NC_037647.1 | 121119 | SNV | 1 | A | G | Homozygous   |
| NC_037647.1 | 122375 | SNV | 1 | G | T | Homozygous   |
| NC_037647.1 | 122751 | SNV | 1 | C | T | Homozygous   |
| NC_037647.1 | 126538 | SNV | 1 | A | T | Homozygous   |
| NC_037647.1 | 188434 | SNV | 1 | A | T | Heterozygous |
| NC_037647.1 | 189138 | SNV | 1 | C | A | Heterozygous |
| NC_037647.1 | 189205 | SNV | 1 | G | A | Homozygous   |
| NC_037647.1 | 189610 | SNV | 1 | C | T | Heterozygous |
| NC_037647.1 | 190464 | SNV | 1 | T | C | Heterozygous |
| NC_037647.1 | 190477 | SNV | 1 | T | C | Heterozygous |
| NC_037647.1 | 191676 | SNV | 1 | G | C | Homozygous   |
| NC_037647.1 | 191681 | SNV | 1 | T | G | Homozygous   |
| NC_037647.1 | 191996 | SNV | 1 | T | G | Homozygous   |
| NC_037647.1 | 193879 | SNV | 1 | A | T | Heterozygous |
| NC_037647.1 | 194396 | SNV | 1 | A | C | Homozygous   |
| NC_037647.1 | 194399 | SNV | 1 | A | C | Homozygous   |
| NC_037647.1 | 194402 | SNV | 1 | A | C | Homozygous   |
| NC_037647.1 | 194763 | SNV | 1 | A | G | Homozygous   |
| NC_037647.1 | 195171 | SNV | 1 | C | G | Homozygous   |
| NC_037647.1 | 199196 | SNV | 1 | C | A | Heterozygous |
| NC_037647.1 | 200110 | SNV | 1 | G | A | Heterozygous |
| NC_037647.1 | 201311 | SNV | 1 | G | A | Homozygous   |
| NC_037647.1 | 205936 | SNV | 1 | G | A | Heterozygous |

|             |        |     |   |   |   |              |
|-------------|--------|-----|---|---|---|--------------|
| NC_037647.1 | 206090 | SNV | 1 | C | G | Homozygous   |
| NC_037647.1 | 216556 | SNV | 1 | T | C | Homozygous   |
| NC_037647.1 | 216559 | SNV | 1 | T | C | Homozygous   |
| NC_037647.1 | 216574 | SNV | 1 | T | C | Homozygous   |
| NC_037647.1 | 216625 | SNV | 1 | T | A | Heterozygous |
| NC_037647.1 | 216631 | SNV | 1 | T | C | Heterozygous |
| NC_037647.1 | 216641 | SNV | 1 | T | C | Heterozygous |
| NC_037647.1 | 216959 | SNV | 1 | T | A | Heterozygous |
| NC_037647.1 | 225383 | SNV | 1 | C | A | Homozygous   |
| NC_037647.1 | 235794 | SNV | 1 | C | T | Homozygous   |
| NC_037647.1 | 237805 | SNV | 1 | T | A | Homozygous   |
| NC_037647.1 | 237820 | SNV | 1 | A | T | Heterozygous |
| NC_037647.1 | 238325 | SNV | 1 | T | C | Homozygous   |
| NC_037647.1 | 246937 | SNV | 1 | C | T | Homozygous   |
| NC_037647.1 | 247099 | SNV | 1 | C | T | Homozygous   |
| NC_037647.1 | 247160 | SNV | 1 | A | T | Homozygous   |
| NC_037647.1 | 247438 | SNV | 1 | A | G | Homozygous   |
| NC_037647.1 | 247537 | SNV | 1 | C | T | Homozygous   |
| NC_037647.1 | 249978 | SNV | 1 | G | A | Heterozygous |
| NC_037647.1 | 251688 | SNV | 1 | T | C | Homozygous   |
| NC_037647.1 | 253239 | SNV | 1 | T | C | Homozygous   |
| NC_037647.1 | 253458 | SNV | 1 | T | A | Homozygous   |
| NC_037647.1 | 254360 | SNV | 1 | T | C | Heterozygous |
| NC_037647.1 | 255233 | SNV | 1 | C | A | Homozygous   |
| NC_037647.1 | 262167 | SNV | 1 | T | G | Heterozygous |
| NC_037647.1 | 262171 | SNV | 1 | T | A | Heterozygous |
| NC_037647.1 | 264450 | SNV | 1 | T | C | Heterozygous |
| NC_037647.1 | 264480 | SNV | 1 | C | T | Homozygous   |
| NC_037647.1 | 264484 | SNV | 1 | T | C | Homozygous   |
| NC_037647.1 | 264489 | SNV | 1 | A | C | Homozygous   |
| NC_037647.1 | 264496 | SNV | 1 | T | C | Homozygous   |
| NC_037647.1 | 264508 | SNV | 1 | G | A | Homozygous   |
| NC_037647.1 | 264510 | SNV | 1 | G | A | Homozygous   |
| NC_037647.1 | 264512 | SNV | 1 | G | A | Homozygous   |
| NC_037647.1 | 264528 | SNV | 1 | G | C | Homozygous   |
| NC_037647.1 | 264732 | SNV | 1 | G | A | Homozygous   |
| NC_037647.1 | 266529 | SNV | 1 | A | T | Heterozygous |
| NC_037647.1 | 267428 | SNV | 1 | C | G | Homozygous   |
| NC_037647.1 | 276973 | SNV | 1 | T | A | Homozygous   |
| NC_037647.1 | 276977 | SNV | 1 | T | C | Homozygous   |
| NC_037647.1 | 276983 | SNV | 1 | A | G | Homozygous   |
| NC_037647.1 | 276994 | SNV | 1 | A | G | Homozygous   |
| NC_037647.1 | 276997 | SNV | 1 | A | T | Homozygous   |
| NC_037647.1 | 276999 | SNV | 1 | A | G | Homozygous   |
| NC_037647.1 | 277278 | SNV | 1 | T | G | Heterozygous |
| NC_037647.1 | 277284 | SNV | 1 | T | A | Homozygous   |
| NC_037647.1 | 282455 | SNV | 1 | A | G | Homozygous   |
| NC_037647.1 | 282882 | SNV | 1 | A | G | Homozygous   |
| NC_037647.1 | 282950 | SNV | 1 | A | G | Heterozygous |
| NC_037647.1 | 282980 | SNV | 1 | A | G | Heterozygous |
| NC_037647.1 | 282991 | SNV | 1 | A | G | Homozygous   |

|             |        |     |   |   |   |              |
|-------------|--------|-----|---|---|---|--------------|
| NC_037647.1 | 283004 | SNV | 1 | A | G | Homozygous   |
| NC_037647.1 | 283036 | SNV | 1 | A | G | Heterozygous |
| NC_037647.1 | 283048 | SNV | 1 | A | G | Homozygous   |
| NC_037647.1 | 283228 | SNV | 1 | C | T | Heterozygous |
| NC_037647.1 | 284206 | SNV | 1 | A | G | Homozygous   |
| NC_037647.1 | 284209 | SNV | 1 | T | G | Homozygous   |
| NC_037647.1 | 284216 | SNV | 1 | T | A | Homozygous   |
| NC_037647.1 | 284222 | SNV | 1 | C | T | Homozygous   |
| NC_037647.1 | 284226 | SNV | 1 | T | C | Homozygous   |
| NC_037647.1 | 286651 | SNV | 1 | T | C | Homozygous   |
| NC_037647.1 | 286665 | SNV | 1 | A | G | Heterozygous |
| NC_037647.1 | 287580 | SNV | 1 | T | C | Heterozygous |
| NC_037647.1 | 287592 | SNV | 1 | T | C | Heterozygous |
| NC_037647.1 | 287715 | SNV | 1 | C | T | Homozygous   |
| NC_037647.1 | 292095 | SNV | 1 | A | G | Homozygous   |
| NC_037647.1 | 293631 | SNV | 1 | A | G | Homozygous   |
| NC_037647.1 | 293940 | SNV | 1 | A | G | Homozygous   |
| NC_037647.1 | 298408 | SNV | 1 | G | A | Heterozygous |
| NC_037647.1 | 300150 | SNV | 1 | T | C | Homozygous   |
| NC_037647.1 | 304569 | SNV | 1 | C | T | Homozygous   |
| NC_037647.1 | 304805 | SNV | 1 | T | A | Heterozygous |
| NC_037647.1 | 308044 | SNV | 1 | C | T | Homozygous   |
| NC_037647.1 | 308948 | SNV | 1 | A | G | Homozygous   |
| NC_037647.1 | 310065 | SNV | 1 | A | G | Heterozygous |
| NC_037647.1 | 310322 | SNV | 1 | T | C | Homozygous   |
| NC_037647.1 | 311863 | SNV | 1 | G | A | Heterozygous |
| NC_037647.1 | 312732 | SNV | 1 | T | C | Homozygous   |
| NC_037647.1 | 314540 | SNV | 1 | C | T | Heterozygous |
| NC_037647.1 | 320830 | SNV | 1 | A | T | Homozygous   |
| NC_037647.1 | 325367 | SNV | 1 | A | G | Homozygous   |
| NC_037647.1 | 325373 | SNV | 1 | T | C | Homozygous   |
| NC_037647.1 | 325380 | SNV | 1 | A | G | Homozygous   |
| NC_037647.1 | 325382 | SNV | 1 | T | C | Homozygous   |
| NC_037647.1 | 325387 | SNV | 1 | C | G | Homozygous   |
| NC_037647.1 | 325391 | SNV | 1 | T | C | Heterozygous |
| NC_037647.1 | 325615 | SNV | 1 | T | C | Heterozygous |
| NC_037647.1 | 325627 | SNV | 1 | A | T | Heterozygous |
| NC_037647.1 | 325629 | SNV | 1 | A | T | Heterozygous |
| NC_037647.1 | 325633 | SNV | 1 | T | A | Heterozygous |
| NC_037647.1 | 325634 | SNV | 1 | A | G | Heterozygous |
| NC_037647.1 | 325638 | SNV | 1 | A | C | Heterozygous |
| NC_037647.1 | 325638 | SNV | 1 | A | T | Heterozygous |
| NC_037647.1 | 325677 | SNV | 1 | G | A | Heterozygous |
| NC_037647.1 | 325695 | SNV | 1 | T | G | Homozygous   |
| NC_037647.1 | 327682 | SNV | 1 | T | C | Homozygous   |
| NC_037647.1 | 331066 | SNV | 1 | A | G | Homozygous   |
| NC_037647.1 | 332808 | SNV | 1 | T | C | Homozygous   |
| NC_037647.1 | 333404 | SNV | 1 | G | T | Homozygous   |
| NC_037647.1 | 333406 | SNV | 1 | T | A | Homozygous   |
| NC_037647.1 | 333454 | SNV | 1 | T | A | Homozygous   |
| NC_037647.1 | 333458 | SNV | 1 | A | T | Homozygous   |

|             |        |     |   |   |   |              |
|-------------|--------|-----|---|---|---|--------------|
| NC_037647.1 | 337301 | SNV | 1 | C | T | Heterozygous |
| NC_037647.1 | 337764 | SNV | 1 | A | C | Heterozygous |
| NC_037647.1 | 337771 | SNV | 1 | T | C | Heterozygous |
| NC_037647.1 | 337775 | SNV | 1 | T | A | Heterozygous |
| NC_037647.1 | 343097 | SNV | 1 | T | C | Homozygous   |
| NC_037647.1 | 350875 | SNV | 1 | G | A | Homozygous   |
| NC_037647.1 | 352351 | SNV | 1 | G | A | Homozygous   |
| NC_037647.1 | 361447 | SNV | 1 | A | T | Homozygous   |
| NC_037647.1 | 365993 | SNV | 1 | T | A | Homozygous   |
| NC_037647.1 | 371252 | SNV | 1 | A | G | Homozygous   |
| NC_037647.1 | 377753 | SNV | 1 | C | T | Heterozygous |
| NC_037647.1 | 378086 | SNV | 1 | C | T | Homozygous   |
| NC_037647.1 | 384814 | SNV | 1 | G | A | Homozygous   |
| NC_037647.1 | 385587 | SNV | 1 | G | C | Homozygous   |
| NC_037647.1 | 385606 | SNV | 1 | T | A | Homozygous   |
| NC_037647.1 | 385614 | SNV | 1 | A | C | Homozygous   |
| NC_037647.1 | 389638 | SNV | 1 | T | C | Heterozygous |
| NC_037647.1 | 389944 | SNV | 1 | T | A | Heterozygous |
| NC_037647.1 | 389947 | SNV | 1 | A | G | Heterozygous |
| NC_037647.1 | 390506 | SNV | 1 | G | A | Homozygous   |
| NC_037647.1 | 390509 | SNV | 1 | A | T | Homozygous   |
| NC_037647.1 | 390789 | SNV | 1 | T | C | Homozygous   |
| NC_037647.1 | 394189 | SNV | 1 | A | G | Homozygous   |
| NC_037647.1 | 394191 | SNV | 1 | G | C | Homozygous   |
| NC_037647.1 | 394345 | SNV | 1 | T | C | Homozygous   |
| NC_037647.1 | 394564 | SNV | 1 | T | C | Homozygous   |
| NC_037647.1 | 395814 | SNV | 1 | T | C | Homozygous   |
| NC_037647.1 | 395850 | SNV | 1 | T | C | Homozygous   |
| NC_037647.1 | 397407 | SNV | 1 | C | G | Homozygous   |
| NC_037647.1 | 397409 | SNV | 1 | T | G | Homozygous   |
| NC_037647.1 | 397411 | SNV | 1 | C | A | Homozygous   |
| NC_037647.1 | 398148 | SNV | 1 | G | T | Heterozygous |
| NC_037647.1 | 399945 | SNV | 1 | C | A | Homozygous   |
| NC_037647.1 | 402857 | SNV | 1 | T | A | Homozygous   |
| NC_037647.1 | 402862 | SNV | 1 | A | T | Homozygous   |
| NC_037647.1 | 402892 | SNV | 1 | A | T | Homozygous   |
| NC_037647.1 | 402899 | SNV | 1 | T | A | Homozygous   |
| NC_037647.1 | 402901 | SNV | 1 | T | G | Homozygous   |
| NC_037647.1 | 402904 | SNV | 1 | T | G | Homozygous   |
| NC_037647.1 | 402907 | SNV | 1 | T | A | Homozygous   |
| NC_037647.1 | 402918 | SNV | 1 | T | C | Homozygous   |
| NC_037647.1 | 402934 | SNV | 1 | A | C | Homozygous   |
| NC_037647.1 | 402955 | SNV | 1 | A | G | Homozygous   |
| NC_037647.1 | 402965 | SNV | 1 | A | C | Heterozygous |
| NC_037647.1 | 402965 | SNV | 1 | A | T | Heterozygous |
| NC_037647.1 | 407415 | SNV | 1 | T | A | Homozygous   |
| NC_037647.1 | 407637 | SNV | 1 | G | C | Homozygous   |
| NC_037647.1 | 410217 | SNV | 1 | T | G | Homozygous   |
| NC_037647.1 | 411073 | SNV | 1 | A | T | Homozygous   |
| NC_037647.1 | 416218 | SNV | 1 | A | G | Homozygous   |
| NC_037647.1 | 416222 | SNV | 1 | T | A | Homozygous   |



|             |        |     |   |   |   |              |
|-------------|--------|-----|---|---|---|--------------|
| NC_037647.1 | 416225 | SNV | 1 | A | T | Homozygous   |
| NC_037647.1 | 420054 | SNV | 1 | T | C | Homozygous   |
| NC_037647.1 | 420846 | SNV | 1 | T | C | Homozygous   |
| NC_037647.1 | 433317 | SNV | 1 | C | T | Homozygous   |
| NC_037647.1 | 433327 | SNV | 1 | C | T | Homozygous   |
| NC_037647.1 | 433332 | SNV | 1 | A | G | Heterozygous |
| NC_037647.1 | 433344 | SNV | 1 | G | A | Heterozygous |
| NC_037647.1 | 446749 | SNV | 1 | T | C | Homozygous   |
| NC_037647.1 | 446770 | SNV | 1 | A | G | Homozygous   |
| NC_037647.1 | 446826 | SNV | 1 | T | C | Homozygous   |
| NC_037647.1 | 452927 | SNV | 1 | C | T | Heterozygous |
| NC_037647.1 | 453495 | SNV | 1 | T | C | Heterozygous |
| NC_037647.1 | 453515 | SNV | 1 | G | A | Heterozygous |
| NC_037647.1 | 453812 | SNV | 1 | G | A | Homozygous   |
| NC_037647.1 | 459313 | SNV | 1 | T | C | Heterozygous |
| NC_037647.1 | 459361 | SNV | 1 | T | C | Homozygous   |
| NC_037647.1 | 459541 | SNV | 1 | T | A | Heterozygous |
| NC_037647.1 | 460863 | SNV | 1 | G | C | Heterozygous |
| NC_037647.1 | 468403 | SNV | 1 | C | T | Heterozygous |
| NC_037647.1 | 477425 | SNV | 1 | G | C | Heterozygous |
| NC_037647.1 | 477471 | SNV | 1 | A | G | Homozygous   |
| NC_037647.1 | 477704 | SNV | 1 | A | G | Homozygous   |
| NC_037647.1 | 477722 | SNV | 1 | T | C | Heterozygous |
| NC_037647.1 | 478818 | SNV | 1 | T | C | Homozygous   |
| NC_037647.1 | 479366 | SNV | 1 | T | C | Homozygous   |
| NC_037647.1 | 479559 | SNV | 1 | A | G | Homozygous   |
| NC_037647.1 | 479573 | SNV | 1 | A | G | Homozygous   |
| NC_037647.1 | 479739 | SNV | 1 | C | T | Homozygous   |
| NC_037647.1 | 495745 | SNV | 1 | A | T | Homozygous   |
| NC_037647.1 | 495787 | SNV | 1 | A | T | Homozygous   |
| NC_037647.1 | 506020 | SNV | 1 | A | C | Homozygous   |
| NC_037647.1 | 506029 | SNV | 1 | A | G | Homozygous   |
| NC_037647.1 | 506037 | SNV | 1 | T | A | Homozygous   |
| NC_037647.1 | 506042 | SNV | 1 | T | C | Homozygous   |
| NC_037647.1 | 506073 | SNV | 1 | T | A | Homozygous   |
| NC_037647.1 | 526764 | SNV | 1 | G | A | Homozygous   |
| NC_037647.1 | 527452 | SNV | 1 | T | A | Heterozygous |
| NC_037647.1 | 528072 | SNV | 1 | A | G | Homozygous   |
| NC_037647.1 | 533717 | SNV | 1 | G | A | Homozygous   |
| NC_037647.1 | 533720 | SNV | 1 | A | T | Homozygous   |
| NC_037647.1 | 533737 | SNV | 1 | G | A | Homozygous   |
| NC_037647.1 | 533743 | SNV | 1 | C | G | Homozygous   |
| NC_037647.1 | 541685 | SNV | 1 | T | C | Homozygous   |
| NC_037647.1 | 541736 | SNV | 1 | A | G | Heterozygous |
| NC_037647.1 | 549182 | SNV | 1 | A | G | Homozygous   |
| NC_037647.1 | 549267 | SNV | 1 | G | T | Homozygous   |
| NC_037647.1 | 558810 | SNV | 1 | T | C | Homozygous   |
| NC_037647.1 | 559777 | SNV | 1 | C | T | Homozygous   |
| NC_037647.1 | 559779 | SNV | 1 | T | C | Homozygous   |
| NC_037647.1 | 559785 | SNV | 1 | G | T | Homozygous   |
| NC_037647.1 | 559788 | SNV | 1 | T | A | Homozygous   |

|             |        |     |   |   |   |              |
|-------------|--------|-----|---|---|---|--------------|
| NC_037647.1 | 561829 | SNV | 1 | A | G | Homozygous   |
| NC_037647.1 | 563967 | SNV | 1 | A | T | Homozygous   |
| NC_037647.1 | 563971 | SNV | 1 | T | A | Homozygous   |
| NC_037647.1 | 563994 | SNV | 1 | T | G | Homozygous   |
| NC_037647.1 | 564002 | SNV | 1 | A | C | Homozygous   |
| NC_037647.1 | 564004 | SNV | 1 | T | C | Homozygous   |
| NC_037647.1 | 564007 | SNV | 1 | T | A | Homozygous   |
| NC_037647.1 | 564009 | SNV | 1 | T | G | Homozygous   |
| NC_037647.1 | 564028 | SNV | 1 | G | A | Homozygous   |
| NC_037647.1 | 568364 | SNV | 1 | A | G | Homozygous   |
| NC_037647.1 | 568495 | SNV | 1 | A | G | Homozygous   |
| NC_037647.1 | 568565 | SNV | 1 | C | T | Heterozygous |
| NC_037647.1 | 570532 | SNV | 1 | G | A | Heterozygous |
| NC_037647.1 | 570578 | SNV | 1 | A | G | Heterozygous |
| NC_037647.1 | 595351 | SNV | 1 | G | T | Homozygous   |
| NC_037647.1 | 595368 | SNV | 1 | T | C | Homozygous   |
| NC_037647.1 | 595370 | SNV | 1 | G | T | Homozygous   |
| NC_037647.1 | 595372 | SNV | 1 | C | T | Homozygous   |
| NC_037647.1 | 595380 | SNV | 1 | A | G | Homozygous   |
| NC_037647.1 | 604379 | SNV | 1 | T | C | Homozygous   |
| NC_037647.1 | 606619 | SNV | 1 | A | G | Homozygous   |
| NC_037647.1 | 606765 | SNV | 1 | C | T | Heterozygous |
| NC_037647.1 | 606798 | SNV | 1 | C | T | Heterozygous |
| NC_037647.1 | 626406 | SNV | 1 | T | A | Homozygous   |
| NC_037647.1 | 626408 | SNV | 1 | T | A | Homozygous   |
| NC_037647.1 | 626430 | SNV | 1 | A | G | Heterozygous |
| NC_037647.1 | 626447 | SNV | 1 | T | A | Homozygous   |
| NC_037647.1 | 626456 | SNV | 1 | T | A | Heterozygous |
| NC_037647.1 | 626477 | SNV | 1 | G | A | Homozygous   |
| NC_037647.1 | 626555 | SNV | 1 | A | G | Homozygous   |
| NC_037647.1 | 626718 | SNV | 1 | G | A | Homozygous   |
| NC_037647.1 | 626730 | SNV | 1 | A | G | Homozygous   |
| NC_037647.1 | 626734 | SNV | 1 | T | C | Homozygous   |
| NC_037647.1 | 626736 | SNV | 1 | T | A | Homozygous   |
| NC_037647.1 | 626742 | SNV | 1 | A | G | Homozygous   |
| NC_037647.1 | 626747 | SNV | 1 | A | G | Heterozygous |
| NC_037647.1 | 626800 | SNV | 1 | A | G | Heterozygous |
| NC_037647.1 | 646902 | SNV | 1 | A | T | Homozygous   |
| NC_037647.1 | 646905 | SNV | 1 | T | A | Homozygous   |
| NC_037647.1 | 646908 | SNV | 1 | C | T | Homozygous   |
| NC_037647.1 | 646928 | SNV | 1 | C | G | Homozygous   |
| NC_037647.1 | 646930 | SNV | 1 | A | G | Homozygous   |
| NC_037647.1 | 657781 | SNV | 1 | C | T | Heterozygous |
| NC_037647.1 | 657791 | SNV | 1 | C | G | Homozygous   |
| NC_037647.1 | 664008 | SNV | 1 | G | A | Homozygous   |
| NC_037647.1 | 664016 | SNV | 1 | G | A | Homozygous   |
| NC_037647.1 | 664018 | SNV | 1 | A | T | Homozygous   |
| NC_037647.1 | 664022 | SNV | 1 | G | A | Homozygous   |
| NC_037647.1 | 670759 | SNV | 1 | G | A | Homozygous   |
| NC_037647.1 | 670879 | SNV | 1 | T | A | Heterozygous |
| NC_037647.1 | 670891 | SNV | 1 | A | T | Homozygous   |

|             |        |     |   |   |   |              |
|-------------|--------|-----|---|---|---|--------------|
| NC_037647.1 | 670894 | SNV | 1 | A | G | Homozygous   |
| NC_037647.1 | 670910 | SNV | 1 | T | A | Heterozygous |
| NC_037647.1 | 670918 | SNV | 1 | T | A | Heterozygous |
| NC_037647.1 | 670942 | SNV | 1 | G | A | Homozygous   |
| NC_037647.1 | 670948 | SNV | 1 | G | A | Homozygous   |
| NC_037647.1 | 682479 | SNV | 1 | T | C | Homozygous   |
| NC_037647.1 | 682516 | SNV | 1 | T | G | Heterozygous |
| NC_037647.1 | 682627 | SNV | 1 | T | G | Heterozygous |
| NC_037647.1 | 682657 | SNV | 1 | C | T | Heterozygous |
| NC_037647.1 | 682718 | SNV | 1 | A | G | Heterozygous |
| NC_037647.1 | 684051 | SNV | 1 | A | G | Homozygous   |
| NC_037647.1 | 684093 | SNV | 1 | A | G | Homozygous   |
| NC_037647.1 | 684375 | SNV | 1 | A | G | Homozygous   |
| NC_037647.1 | 684536 | SNV | 1 | T | C | Homozygous   |
| NC_037647.1 | 684674 | SNV | 1 | T | C | Homozygous   |
| NC_037647.1 | 684687 | SNV | 1 | G | A | Homozygous   |
| NC_037647.1 | 684764 | SNV | 1 | C | T | Homozygous   |
| NC_037647.1 | 684870 | SNV | 1 | T | C | Homozygous   |
| NC_037647.1 | 685880 | SNV | 1 | C | T | Homozygous   |
| NC_037647.1 | 685890 | SNV | 1 | C | T | Homozygous   |
| NC_037647.1 | 685892 | SNV | 1 | T | G | Homozygous   |
| NC_037647.1 | 685909 | SNV | 1 | G | A | Homozygous   |
| NC_037647.1 | 685911 | SNV | 1 | T | C | Homozygous   |
| NC_037647.1 | 685928 | SNV | 1 | C | T | Homozygous   |
| NC_037647.1 | 685940 | SNV | 1 | T | A | Homozygous   |
| NC_037647.1 | 685943 | SNV | 1 | C | T | Homozygous   |
| NC_037647.1 | 685949 | SNV | 1 | A | T | Homozygous   |
| NC_037647.1 | 685960 | SNV | 1 | T | G | Homozygous   |
| NC_037647.1 | 685962 | SNV | 1 | G | A | Homozygous   |
| NC_037647.1 | 685973 | SNV | 1 | C | T | Homozygous   |
| NC_037647.1 | 690116 | SNV | 1 | C | T | Homozygous   |
| NC_037647.1 | 690253 | SNV | 1 | C | T | Homozygous   |
| NC_037647.1 | 716535 | SNV | 1 | C | T | Homozygous   |
| NC_037647.1 | 716543 | SNV | 1 | A | T | Heterozygous |
| NC_037647.1 | 716647 | SNV | 1 | A | G | Heterozygous |
| NC_037647.1 | 716770 | SNV | 1 | T | C | Heterozygous |
| NC_037647.1 | 717055 | SNV | 1 | A | C | Homozygous   |
| NC_037647.1 | 718744 | SNV | 1 | G | A | Heterozygous |
| NC_037647.1 | 718761 | SNV | 1 | G | A | Heterozygous |
| NC_037647.1 | 718851 | SNV | 1 | T | G | Homozygous   |
| NC_037647.1 | 718857 | SNV | 1 | A | G | Homozygous   |
| NC_037647.1 | 718870 | SNV | 1 | T | C | Heterozygous |
| NC_037647.1 | 718889 | SNV | 1 | G | A | Heterozygous |
| NC_037647.1 | 718899 | SNV | 1 | G | A | Heterozygous |
| NC_037647.1 | 737761 | SNV | 1 | T | C | Homozygous   |
| NC_037647.1 | 737932 | SNV | 1 | A | G | Homozygous   |
| NC_037647.1 | 737955 | SNV | 1 | C | T | Heterozygous |
| NC_037647.1 | 738007 | SNV | 1 | G | A | Heterozygous |
| NC_037647.1 | 738010 | SNV | 1 | C | A | Heterozygous |
| NC_037647.1 | 738208 | SNV | 1 | C | T | Heterozygous |
| NC_037647.1 | 738212 | SNV | 1 | G | A | Heterozygous |

|             |        |     |   |   |   |              |
|-------------|--------|-----|---|---|---|--------------|
| NC_037647.1 | 738257 | SNV | 1 | T | C | Homozygous   |
| NC_037647.1 | 745689 | SNV | 1 | A | T | Heterozygous |
| NC_037647.1 | 745708 | SNV | 1 | T | C | Heterozygous |
| NC_037647.1 | 745710 | SNV | 1 | T | C | Heterozygous |
| NC_037647.1 | 745713 | SNV | 1 | A | T | Heterozygous |
| NC_037647.1 | 745722 | SNV | 1 | T | C | Heterozygous |
| NC_037647.1 | 745729 | SNV | 1 | T | C | Heterozygous |
| NC_037647.1 | 745738 | SNV | 1 | T | C | Heterozygous |
| NC_037647.1 | 745742 | SNV | 1 | T | C | Heterozygous |
| NC_037647.1 | 746701 | SNV | 1 | T | C | Homozygous   |
| NC_037647.1 | 746884 | SNV | 1 | C | T | Homozygous   |
| NC_037647.1 | 746970 | SNV | 1 | T | C | Heterozygous |
| NC_037647.1 | 746974 | SNV | 1 | T | C | Heterozygous |
| NC_037647.1 | 746978 | SNV | 1 | A | T | Heterozygous |
| NC_037647.1 | 746986 | SNV | 1 | C | T | Heterozygous |
| NC_037647.1 | 761265 | SNV | 1 | G | C | Heterozygous |
| NC_037647.1 | 762389 | SNV | 1 | T | C | Homozygous   |
| NC_037647.1 | 762577 | SNV | 1 | T | G | Homozygous   |
| NC_037647.1 | 762761 | SNV | 1 | A | T | Heterozygous |
| NC_037647.1 | 762766 | SNV | 1 | C | T | Heterozygous |
| NC_037647.1 | 762817 | SNV | 1 | T | C | Heterozygous |
| NC_037647.1 | 762822 | SNV | 1 | T | C | Heterozygous |
| NC_037647.1 | 783065 | SNV | 1 | C | T | Homozygous   |
| NC_037647.1 | 783067 | SNV | 1 | C | T | Homozygous   |
| NC_037647.1 | 783490 | SNV | 1 | A | G | Homozygous   |
| NC_037647.1 | 943313 | SNV | 1 | G | A | Homozygous   |
| NC_037647.1 | 943423 | SNV | 1 | A | C | Homozygous   |
| NC_037647.1 | 943432 | SNV | 1 | A | G | Homozygous   |
| NC_037647.1 | 943468 | SNV | 1 | T | C | Homozygous   |
| NC_037647.1 | 944009 | SNV | 1 | A | G | Homozygous   |
| NC_037647.1 | 944582 | SNV | 1 | T | G | Homozygous   |
| NC_037647.1 | 944866 | SNV | 1 | G | A | Homozygous   |
| NC_037647.1 | 945332 | SNV | 1 | C | T | Homozygous   |
| NC_037647.1 | 945456 | SNV | 1 | T | C | Heterozygous |
| NC_037647.1 | 945591 | SNV | 1 | T | C | Homozygous   |
| NC_037647.1 | 946038 | SNV | 1 | G | A | Heterozygous |
| NC_037647.1 | 946456 | SNV | 1 | T | C | Heterozygous |
| NC_037647.1 | 960464 | SNV | 1 | A | G | Homozygous   |
| NC_037647.1 | 965040 | SNV | 1 | T | C | Heterozygous |
| NC_037647.1 | 965062 | SNV | 1 | C | T | Homozygous   |
| NC_037647.1 | 965081 | SNV | 1 | T | C | Homozygous   |
| NC_037647.1 | 965094 | SNV | 1 | C | T | Homozygous   |
| NC_037647.1 | 965140 | SNV | 1 | A | G | Homozygous   |
| NC_037647.1 | 965164 | SNV | 1 | C | T | Heterozygous |
| NC_037647.1 | 965247 | SNV | 1 | C | T | Heterozygous |
| NC_037647.1 | 965360 | SNV | 1 | G | A | Heterozygous |
| NC_037647.1 | 965934 | SNV | 1 | G | A | Heterozygous |
| NC_037647.1 | 966978 | SNV | 1 | G | A | Homozygous   |
| NC_037647.1 | 970031 | SNV | 1 | A | C | Homozygous   |
| NC_037647.1 | 970044 | SNV | 1 | G | A | Heterozygous |
| NC_037647.1 | 973408 | SNV | 1 | C | T | Heterozygous |

|             |         |     |   |   |   |              |
|-------------|---------|-----|---|---|---|--------------|
| NC_037647.1 | 973421  | SNV | 1 | A | G | Heterozygous |
| NC_037647.1 | 973670  | SNV | 1 | T | C | Homozygous   |
| NC_037647.1 | 992351  | SNV | 1 | C | A | Homozygous   |
| NC_037647.1 | 992692  | SNV | 1 | A | G | Heterozygous |
| NC_037647.1 | 992737  | SNV | 1 | T | C | Heterozygous |
| NC_037647.1 | 999443  | SNV | 1 | A | G | Heterozygous |
| NC_037647.1 | 1005459 | SNV | 1 | G | A | Heterozygous |
| NC_037647.1 | 1005689 | SNV | 1 | A | G | Homozygous   |
| NC_037647.1 | 1014039 | SNV | 1 | C | T | Heterozygous |
| NC_037647.1 | 1014053 | SNV | 1 | C | A | Heterozygous |
| NC_037647.1 | 1014118 | SNV | 1 | G | A | Heterozygous |
| NC_037647.1 | 1014139 | SNV | 1 | G | A | Heterozygous |
| NC_037647.1 | 1014183 | SNV | 1 | C | T | Heterozygous |
| NC_037647.1 | 1014298 | SNV | 1 | C | T | Heterozygous |
| NC_037647.1 | 1028006 | SNV | 1 | G | A | Heterozygous |
| NC_037647.1 | 1028006 | SNV | 1 | G | C | Heterozygous |
| NC_037647.1 | 1028217 | SNV | 1 | C | T | Heterozygous |
| NC_037647.1 | 1028218 | SNV | 1 | T | C | Heterozygous |
| NC_037647.1 | 1028336 | SNV | 1 | C | G | Homozygous   |
| NC_037647.1 | 1028762 | SNV | 1 | A | G | Homozygous   |
| NC_037647.1 | 1028767 | SNV | 1 | C | T | Homozygous   |
| NC_037647.1 | 1033639 | SNV | 1 | T | C | Homozygous   |
| NC_037647.1 | 1049604 | SNV | 1 | T | C | Homozygous   |
| NC_037647.1 | 1049615 | SNV | 1 | A | G | Homozygous   |
| NC_037647.1 | 1049617 | SNV | 1 | A | G | Homozygous   |
| NC_037647.1 | 1049620 | SNV | 1 | G | C | Homozygous   |
| NC_037647.1 | 1049656 | SNV | 1 | C | G | Homozygous   |
| NC_037647.1 | 1049663 | SNV | 1 | C | T | Homozygous   |
| NC_037647.1 | 1049670 | SNV | 1 | T | C | Homozygous   |
| NC_037647.1 | 1049677 | SNV | 1 | G | A | Homozygous   |
| NC_037647.1 | 1049680 | SNV | 1 | A | T | Homozygous   |
| NC_037647.1 | 1053772 | SNV | 1 | G | A | Homozygous   |
| NC_037647.1 | 1054268 | SNV | 1 | A | G | Homozygous   |
| NC_037647.1 | 1054426 | SNV | 1 | A | G | Homozygous   |
| NC_037647.1 | 1057404 | SNV | 1 | G | A | Heterozygous |
| NC_037647.1 | 1058136 | SNV | 1 | C | A | Homozygous   |
| NC_037647.1 | 1058161 | SNV | 1 | G | A | Homozygous   |
| NC_037647.1 | 1058216 | SNV | 1 | T | G | Homozygous   |
| NC_037647.1 | 1058222 | SNV | 1 | T | C | Homozygous   |
| NC_037647.1 | 1058430 | SNV | 1 | C | T | Heterozygous |
| NC_037647.1 | 1058497 | SNV | 1 | G | A | Heterozygous |
| NC_037647.1 | 1058520 | SNV | 1 | T | C | Heterozygous |
| NC_037647.1 | 1067508 | SNV | 1 | T | G | Homozygous   |
| NC_037647.1 | 1068076 | SNV | 1 | A | G | Homozygous   |
| NC_037647.1 | 1068136 | SNV | 1 | A | G | Homozygous   |
| NC_037647.1 | 1068358 | SNV | 1 | T | C | Heterozygous |
| NC_037647.1 | 1068465 | SNV | 1 | C | T | Heterozygous |
| NC_037647.1 | 1068480 | SNV | 1 | C | T | Heterozygous |
| NC_037647.1 | 1068495 | SNV | 1 | A | G | Heterozygous |
| NC_037647.1 | 1068535 | SNV | 1 | C | T | Heterozygous |
| NC_037647.1 | 1068655 | SNV | 1 | G | A | Heterozygous |

|             |         |     |   |   |   |              |
|-------------|---------|-----|---|---|---|--------------|
| NC_037647.1 | 1069716 | SNV | 1 | T | C | Homozygous   |
| NC_037647.1 | 1069944 | SNV | 1 | A | G | Heterozygous |
| NC_037647.1 | 1069980 | SNV | 1 | T | C | Heterozygous |
| NC_037647.1 | 1070010 | SNV | 1 | T | C | Heterozygous |
| NC_037647.1 | 1070016 | SNV | 1 | T | C | Heterozygous |
| NC_037647.1 | 1078765 | SNV | 1 | A | C | Heterozygous |
| NC_037647.1 | 1124284 | SNV | 1 | C | T | Homozygous   |
| NC_037647.1 | 1124561 | SNV | 1 | A | G | Homozygous   |
| NC_037647.1 | 1124617 | SNV | 1 | G | A | Heterozygous |
| NC_037647.1 | 1124653 | SNV | 1 | C | T | Heterozygous |
| NC_037647.1 | 1124656 | SNV | 1 | T | A | Heterozygous |
| NC_037647.1 | 1124726 | SNV | 1 | A | T | Homozygous   |
| NC_037647.1 | 1124732 | SNV | 1 | A | G | Heterozygous |
| NC_037647.1 | 1124812 | SNV | 1 | T | C | Homozygous   |
| NC_037647.1 | 1124818 | SNV | 1 | A | G | Homozygous   |
| NC_037647.1 | 1124873 | SNV | 1 | A | G | Heterozygous |
| NC_037647.1 | 1124873 | SNV | 1 | A | T | Heterozygous |
| NC_037647.1 | 1124969 | SNV | 1 | C | T | Heterozygous |
| NC_037647.1 | 1124990 | SNV | 1 | A | G | Homozygous   |
| NC_037647.1 | 1125013 | SNV | 1 | C | T | Heterozygous |
| NC_037647.1 | 1125222 | SNV | 1 | T | C | Homozygous   |
| NC_037647.1 | 1125250 | SNV | 1 | T | C | Homozygous   |
| NC_037647.1 | 1125528 | SNV | 1 | A | G | Heterozygous |
| NC_037647.1 | 1125534 | SNV | 1 | A | G | Heterozygous |
| NC_037647.1 | 1125564 | SNV | 1 | T | C | Heterozygous |
| NC_037647.1 | 1125599 | SNV | 1 | A | G | Homozygous   |
| NC_037647.1 | 1125621 | SNV | 1 | C | T | Heterozygous |
| NC_037647.1 | 1125660 | SNV | 1 | G | C | Homozygous   |
| NC_037647.1 | 1125815 | SNV | 1 | G | A | Heterozygous |
| NC_037647.1 | 1125984 | SNV | 1 | G | A | Heterozygous |
| NC_037647.1 | 1126463 | SNV | 1 | T | C | Homozygous   |
| NC_037647.1 | 1126502 | SNV | 1 | A | G | Homozygous   |
| NC_037647.1 | 1127365 | SNV | 1 | G | A | Heterozygous |
| NC_037647.1 | 1127736 | SNV | 1 | T | C | Homozygous   |
| NC_037647.1 | 1127827 | SNV | 1 | G | A | Heterozygous |
| NC_037647.1 | 1128819 | SNV | 1 | C | G | Heterozygous |
| NC_037647.1 | 1128828 | SNV | 1 | C | T | Heterozygous |
| NC_037647.1 | 1128861 | SNV | 1 | T | C | Homozygous   |
| NC_037647.1 | 1128888 | SNV | 1 | G | A | Homozygous   |
| NC_037647.1 | 1131042 | SNV | 1 | T | C | Homozygous   |
| NC_037647.1 | 1131077 | SNV | 1 | T | C | Homozygous   |
| NC_037647.1 | 1131572 | SNV | 1 | T | C | Homozygous   |
| NC_037647.1 | 1131869 | SNV | 1 | C | G | Homozygous   |
| NC_037647.1 | 1132051 | SNV | 1 | A | T | Homozygous   |
| NC_037647.1 | 1132090 | SNV | 1 | A | G | Homozygous   |
| NC_037647.1 | 1132102 | SNV | 1 | C | T | Heterozygous |
| NC_037647.1 | 1132110 | SNV | 1 | A | G | Homozygous   |
| NC_037647.1 | 1132128 | SNV | 1 | T | C | Homozygous   |
| NC_037647.1 | 1132130 | SNV | 1 | C | T | Heterozygous |
| NC_037647.1 | 1132132 | SNV | 1 | G | C | Heterozygous |
| NC_037647.1 | 1132152 | SNV | 1 | T | C | Heterozygous |

|             |         |     |   |   |   |              |
|-------------|---------|-----|---|---|---|--------------|
| NC_037647.1 | 1132158 | SNV | 1 | A | T | Homozygous   |
| NC_037647.1 | 1132441 | SNV | 1 | T | G | Heterozygous |
| NC_037647.1 | 1132517 | SNV | 1 | A | T | Heterozygous |
| NC_037647.1 | 1132550 | SNV | 1 | C | T | Heterozygous |
| NC_037647.1 | 1132570 | SNV | 1 | G | C | Homozygous   |
| NC_037647.1 | 1132574 | SNV | 1 | A | G | Homozygous   |
| NC_037647.1 | 1132586 | SNV | 1 | T | C | Homozygous   |
| NC_037647.1 | 1132620 | SNV | 1 | A | G | Homozygous   |
| NC_037647.1 | 1133053 | SNV | 1 | C | T | Heterozygous |
| NC_037647.1 | 1137453 | SNV | 1 | A | G | Homozygous   |
| NC_037647.1 | 1137471 | SNV | 1 | G | A | Heterozygous |
| NC_037647.1 | 1179561 | SNV | 1 | T | C | Homozygous   |
| NC_037647.1 | 1179940 | SNV | 1 | T | C | Homozygous   |
| NC_037647.1 | 1180053 | SNV | 1 | A | T | Heterozygous |
| NC_037647.1 | 1180061 | SNV | 1 | A | T | Heterozygous |
| NC_037647.1 | 1180235 | SNV | 1 | A | G | Heterozygous |
| NC_037647.1 | 1180418 | SNV | 1 | T | C | Homozygous   |
| NC_037647.1 | 1181591 | SNV | 1 | A | G | Heterozygous |
| NC_037647.1 | 1220091 | SNV | 1 | G | A | Homozygous   |
| NC_037647.1 | 1220330 | SNV | 1 | C | T | Heterozygous |
| NC_037647.1 | 1233312 | SNV | 1 | C | T | Homozygous   |
| NC_037647.1 | 1233362 | SNV | 1 | T | C | Heterozygous |
| NC_037647.1 | 1233365 | SNV | 1 | G | A | Heterozygous |
| NC_037647.1 | 1233428 | SNV | 1 | A | G | Heterozygous |
| NC_037647.1 | 1233860 | SNV | 1 | A | G | Homozygous   |
| NC_037647.1 | 1235992 | SNV | 1 | C | T | Homozygous   |
| NC_037647.1 | 1244641 | SNV | 1 | G | A | Heterozygous |
| NC_037647.1 | 1266034 | SNV | 1 | T | C | Homozygous   |
| NC_037647.1 | 1266209 | SNV | 1 | C | T | Heterozygous |
| NC_037647.1 | 1743058 | SNV | 1 | A | G | Homozygous   |
| NC_037647.1 | 1743061 | SNV | 1 | A | G | Homozygous   |
| NC_037647.1 | 1743064 | SNV | 1 | A | G | Homozygous   |
| NC_037647.1 | 1743066 | SNV | 1 | G | A | Homozygous   |
| NC_037647.1 | 1743068 | SNV | 1 | A | G | Homozygous   |
| NC_037647.1 | 1743074 | SNV | 1 | A | G | Homozygous   |
| NC_037647.1 | 1849477 | SNV | 1 | G | A | Heterozygous |
| NC_037647.1 | 1856452 | SNV | 1 | T | A | Homozygous   |
| NC_037647.1 | 1856456 | SNV | 1 | C | A | Homozygous   |
| NC_037647.1 | 1891779 | SNV | 1 | G | C | Homozygous   |
| NC_037647.1 | 1891805 | SNV | 1 | T | A | Homozygous   |
| NC_037647.1 | 1891813 | SNV | 1 | T | A | Homozygous   |
| NC_037647.1 | 1891815 | SNV | 1 | T | G | Homozygous   |
| NC_037647.1 | 1911725 | SNV | 1 | G | T | Homozygous   |
| NC_037647.1 | 1911738 | SNV | 1 | A | G | Homozygous   |
| NC_037647.1 | 1911799 | SNV | 1 | G | A | Homozygous   |
| NC_037647.1 | 1911805 | SNV | 1 | C | T | Homozygous   |
| NC_037647.1 | 1918565 | SNV | 1 | A | C | Heterozygous |
| NC_037647.1 | 1918597 | SNV | 1 | A | T | Homozygous   |
| NC_037647.1 | 1927514 | SNV | 1 | C | G | Homozygous   |
| NC_037647.1 | 1927521 | SNV | 1 | C | T | Homozygous   |
| NC_037647.1 | 1935152 | SNV | 1 | T | C | Heterozygous |

|             |         |     |   |   |   |              |
|-------------|---------|-----|---|---|---|--------------|
| NC_037647.1 | 1937807 | SNV | 1 | G | T | Heterozygous |
| NC_037647.1 | 1937808 | SNV | 1 | A | T | Heterozygous |
| NC_037647.1 | 1937812 | SNV | 1 | C | G | Homozygous   |
| NC_037647.1 | 1942196 | SNV | 1 | G | A | Homozygous   |
| NC_037647.1 | 1956721 | SNV | 1 | C | T | Heterozygous |
| NC_037647.1 | 1956752 | SNV | 1 | A | C | Heterozygous |
| NC_037647.1 | 1956755 | SNV | 1 | T | C | Heterozygous |
| NC_037647.1 | 1956761 | SNV | 1 | C | T | Heterozygous |
| NC_037647.1 | 1956790 | SNV | 1 | C | A | Heterozygous |
| NC_037647.1 | 1956793 | SNV | 1 | C | A | Heterozygous |
| NC_037647.1 | 1957446 | SNV | 1 | T | A | Heterozygous |
| NC_037647.1 | 1957544 | SNV | 1 | A | G | Homozygous   |
| NC_037647.1 | 1957581 | SNV | 1 | C | G | Heterozygous |
| NC_037647.1 | 1957971 | SNV | 1 | C | G | Heterozygous |
| NC_037647.1 | 1958048 | SNV | 1 | G | A | Homozygous   |
| NC_037647.1 | 1958100 | SNV | 1 | A | G | Homozygous   |
| NC_037647.1 | 1958149 | SNV | 1 | T | C | Homozygous   |
| NC_037647.1 | 1958450 | SNV | 1 | C | A | Homozygous   |
| NC_037647.1 | 1961006 | SNV | 1 | A | T | Homozygous   |
| NC_037647.1 | 1961010 | SNV | 1 | A | C | Heterozygous |
| NC_037647.1 | 1961016 | SNV | 1 | C | G | Homozygous   |
| NC_037647.1 | 1961201 | SNV | 1 | G | A | Homozygous   |
| NC_037647.1 | 1976914 | SNV | 1 | T | C | Homozygous   |
| NC_037647.1 | 1976920 | SNV | 1 | C | T | Heterozygous |
| NC_037647.1 | 1983990 | SNV | 1 | G | A | Homozygous   |
| NC_037647.1 | 1984045 | SNV | 1 | T | C | Homozygous   |
| NC_037647.1 | 2003064 | SNV | 1 | G | C | Homozygous   |
| NC_037647.1 | 2003118 | SNV | 1 | G | A | Heterozygous |
| NC_037647.1 | 2003273 | SNV | 1 | T | C | Homozygous   |
| NC_037647.1 | 2005403 | SNV | 1 | T | C | Homozygous   |
| NC_037647.1 | 2005475 | SNV | 1 | T | C | Heterozygous |
| NC_037647.1 | 2006006 | SNV | 1 | G | C | Heterozygous |
| NC_037647.1 | 2006115 | SNV | 1 | C | A | Heterozygous |
| NC_037647.1 | 2006563 | SNV | 1 | A | G | Heterozygous |
| NC_037647.1 | 2006565 | SNV | 1 | G | A | Homozygous   |
| NC_037647.1 | 2006786 | SNV | 1 | T | C | Homozygous   |
| NC_037647.1 | 2007049 | SNV | 1 | A | G | Heterozygous |
| NC_037647.1 | 2025658 | SNV | 1 | A | G | Homozygous   |
| NC_037647.1 | 2025675 | SNV | 1 | A | G | Homozygous   |
| NC_037647.1 | 2025677 | SNV | 1 | A | T | Homozygous   |
| NC_037647.1 | 2025681 | SNV | 1 | A | G | Homozygous   |
| NC_037647.1 | 2025688 | SNV | 1 | A | T | Homozygous   |
| NC_037647.1 | 2033828 | SNV | 1 | T | C | Homozygous   |
| NC_037647.1 | 2033854 | SNV | 1 | A | T | Homozygous   |
| NC_037647.1 | 2033864 | SNV | 1 | A | T | Homozygous   |
| NC_037647.1 | 2125463 | SNV | 1 | T | C | Heterozygous |
| NC_037647.1 | 2125503 | SNV | 1 | G | C | Heterozygous |
| NC_037647.1 | 2125527 | SNV | 1 | C | T | Homozygous   |
| NC_037647.1 | 2128579 | SNV | 1 | T | C | Homozygous   |
| NC_037647.1 | 2129036 | SNV | 1 | C | T | Homozygous   |
| NC_037647.1 | 2129040 | SNV | 1 | C | T | Homozygous   |



|             |         |     |   |   |   |              |
|-------------|---------|-----|---|---|---|--------------|
| NC_037647.1 | 2129578 | SNV | 1 | G | A | Homozygous   |
| NC_037647.1 | 2157058 | SNV | 1 | C | G | Homozygous   |
| NC_037647.1 | 2243221 | SNV | 1 | G | T | Homozygous   |
| NC_037647.1 | 2243247 | SNV | 1 | T | C | Homozygous   |
| NC_037647.1 | 2243258 | SNV | 1 | C | T | Homozygous   |
| NC_037647.1 | 2243262 | SNV | 1 | T | C | Homozygous   |
| NC_037647.1 | 2243265 | SNV | 1 | T | A | Homozygous   |
| NC_037647.1 | 2243268 | SNV | 1 | T | G | Homozygous   |
| NC_037647.1 | 2243274 | SNV | 1 | T | A | Homozygous   |
| NC_037647.1 | 2257988 | SNV | 1 | A | C | Homozygous   |
| NC_037647.1 | 2258047 | SNV | 1 | A | C | Homozygous   |
| NC_037647.1 | 2266112 | SNV | 1 | T | C | Homozygous   |
| NC_037647.1 | 2266117 | SNV | 1 | A | T | Homozygous   |
| NC_037647.1 | 2266160 | SNV | 1 | T | C | Homozygous   |
| NC_037647.1 | 2266165 | SNV | 1 | C | T | Homozygous   |
| NC_037647.1 | 2266171 | SNV | 1 | A | T | Homozygous   |
| NC_037647.1 | 2266180 | SNV | 1 | A | C | Homozygous   |
| NC_037647.1 | 2270448 | SNV | 1 | T | A | Homozygous   |
| NC_037647.1 | 2270453 | SNV | 1 | G | A | Homozygous   |
| NC_037647.1 | 2290743 | SNV | 1 | G | T | Homozygous   |
| NC_037647.1 | 2290773 | SNV | 1 | C | T | Homozygous   |
| NC_037647.1 | 2290779 | SNV | 1 | C | T | Homozygous   |
| NC_037647.1 | 2290781 | SNV | 1 | A | C | Homozygous   |
| NC_037647.1 | 2290822 | SNV | 1 | A | C | Homozygous   |
| NC_037647.1 | 2290828 | SNV | 1 | T | A | Homozygous   |
| NC_037647.1 | 2290830 | SNV | 1 | G | A | Homozygous   |
| NC_037647.1 | 2290832 | SNV | 1 | A | T | Homozygous   |
| NC_037647.1 | 2290842 | SNV | 1 | A | T | Homozygous   |
| NC_037647.1 | 2290846 | SNV | 1 | G | T | Homozygous   |
| NC_037647.1 | 2290856 | SNV | 1 | G | A | Homozygous   |
| NC_037647.1 | 2290877 | SNV | 1 | T | C | Homozygous   |
| NC_037647.1 | 2290884 | SNV | 1 | C | T | Homozygous   |
| NC_037647.1 | 2290890 | SNV | 1 | T | C | Homozygous   |
| NC_037647.1 | 2290893 | SNV | 1 | A | T | Homozygous   |
| NC_037647.1 | 2290901 | SNV | 1 | G | T | Homozygous   |
| NC_037647.1 | 2290905 | SNV | 1 | G | A | Heterozygous |
| NC_037647.1 | 2290918 | SNV | 1 | T | C | Homozygous   |
| NC_037647.1 | 2290935 | SNV | 1 | A | G | Heterozygous |
| NC_037647.1 | 2290937 | SNV | 1 | C | T | Heterozygous |
| NC_037647.1 | 2290969 | SNV | 1 | A | G | Homozygous   |
| NC_037647.1 | 2290983 | SNV | 1 | G | A | Homozygous   |
| NC_037647.1 | 2290991 | SNV | 1 | C | A | Homozygous   |
| NC_037647.1 | 2291002 | SNV | 1 | C | T | Heterozygous |
| NC_037647.1 | 2291037 | SNV | 1 | T | C | Heterozygous |
| NC_037647.1 | 2291043 | SNV | 1 | A | T | Heterozygous |
| NC_037647.1 | 2291052 | SNV | 1 | A | C | Heterozygous |
| NC_037647.1 | 2291053 | SNV | 1 | A | T | Heterozygous |
| NC_037647.1 | 2291055 | SNV | 1 | G | A | Heterozygous |
| NC_037647.1 | 2291057 | SNV | 1 | T | C | Heterozygous |
| NC_037647.1 | 2291078 | SNV | 1 | G | A | Heterozygous |
| NC_037647.1 | 2373515 | SNV | 1 | C | G | Homozygous   |

|             |         |     |   |   |   |              |
|-------------|---------|-----|---|---|---|--------------|
| NC_037647.1 | 2373518 | SNV | 1 | G | C | Homozygous   |
| NC_037647.1 | 2373543 | SNV | 1 | C | T | Heterozygous |
| NC_037647.1 | 2373669 | SNV | 1 | C | T | Heterozygous |
| NC_037647.1 | 2373929 | SNV | 1 | G | T | Homozygous   |
| NC_037647.1 | 2373931 | SNV | 1 | A | T | Heterozygous |
| NC_037647.1 | 2373959 | SNV | 1 | A | G | Heterozygous |
| NC_037647.1 | 2373963 | SNV | 1 | A | C | Heterozygous |
| NC_037647.1 | 2373966 | SNV | 1 | A | G | Heterozygous |
| NC_037647.1 | 2374252 | SNV | 1 | T | C | Homozygous   |
| NC_037647.1 | 2375544 | SNV | 1 | C | T | Heterozygous |
| NC_037647.1 | 2385954 | SNV | 1 | G | A | Homozygous   |
| NC_037647.1 | 2385985 | SNV | 1 | C | T | Heterozygous |
| NC_037647.1 | 2391718 | SNV | 1 | A | G | Heterozygous |
| NC_037647.1 | 2393330 | SNV | 1 | G | A | Heterozygous |
| NC_037647.1 | 2401514 | SNV | 1 | T | G | Homozygous   |
| NC_037647.1 | 2401530 | SNV | 1 | T | C | Homozygous   |
| NC_037647.1 | 2401675 | SNV | 1 | C | T | Homozygous   |
| NC_037647.1 | 2401680 | SNV | 1 | C | T | Homozygous   |
| NC_037647.1 | 2402021 | SNV | 1 | G | A | Heterozygous |
| NC_037647.1 | 2402054 | SNV | 1 | T | A | Homozygous   |
| NC_037647.1 | 2402061 | SNV | 1 | G | A | Homozygous   |
| NC_037647.1 | 2418901 | SNV | 1 | T | C | Homozygous   |
| NC_037647.1 | 2418922 | SNV | 1 | C | T | Homozygous   |
| NC_037647.1 | 2449260 | SNV | 1 | A | G | Homozygous   |
| NC_037647.1 | 2449262 | SNV | 1 | A | G | Homozygous   |
| NC_037647.1 | 2452840 | SNV | 1 | G | C | Homozygous   |
| NC_037647.1 | 2452848 | SNV | 1 | G | T | Homozygous   |
| NC_037647.1 | 2452852 | SNV | 1 | G | T | Homozygous   |
| NC_037647.1 | 2452854 | SNV | 1 | T | C | Homozygous   |
| NC_037647.1 | 2454339 | SNV | 1 | A | G | Homozygous   |
| NC_037647.1 | 2454350 | SNV | 1 | T | G | Homozygous   |
| NC_037647.1 | 2454352 | SNV | 1 | A | T | Homozygous   |
| NC_037647.1 | 2454356 | SNV | 1 | A | G | Homozygous   |
| NC_037647.1 | 2466625 | SNV | 1 | T | A | Heterozygous |
| NC_037647.1 | 2466631 | SNV | 1 | T | A | Homozygous   |
| NC_037647.1 | 2479736 | SNV | 1 | T | A | Homozygous   |
| NC_037647.1 | 2479739 | SNV | 1 | G | A | Homozygous   |
| NC_037647.1 | 2479885 | SNV | 1 | T | C | Homozygous   |
| NC_037647.1 | 2493316 | SNV | 1 | C | T | Homozygous   |
| NC_037647.1 | 2493428 | SNV | 1 | A | C | Heterozygous |
| NC_037647.1 | 2493536 | SNV | 1 | A | G | Homozygous   |
| NC_037647.1 | 2493837 | SNV | 1 | A | G | Homozygous   |
| NC_037647.1 | 2547156 | SNV | 1 | G | A | Homozygous   |
| NC_037647.1 | 2558501 | SNV | 1 | C | T | Heterozygous |
| NC_037647.1 | 2558543 | SNV | 1 | A | G | Homozygous   |
| NC_037647.1 | 2559167 | SNV | 1 | T | C | Homozygous   |
| NC_037647.1 | 2559170 | SNV | 1 | C | G | Heterozygous |
| NC_037647.1 | 2560624 | SNV | 1 | T | C | Heterozygous |
| NC_037647.1 | 2560827 | SNV | 1 | C | T | Heterozygous |
| NC_037647.1 | 2564249 | SNV | 1 | G | A | Heterozygous |
| NC_037647.1 | 2564308 | SNV | 1 | G | A | Heterozygous |

|             |         |     |   |   |   |              |
|-------------|---------|-----|---|---|---|--------------|
| NC_037647.1 | 2565193 | SNV | 1 | C | G | Heterozygous |
| NC_037647.1 | 2565463 | SNV | 1 | A | G | Homozygous   |
| NC_037647.1 | 2566476 | SNV | 1 | C | T | Heterozygous |
| NC_037647.1 | 2566570 | SNV | 1 | G | A | Homozygous   |
| NC_037647.1 | 2566742 | SNV | 1 | A | G | Homozygous   |
| NC_037647.1 | 2566758 | SNV | 1 | T | C | Homozygous   |
| NC_037647.1 | 2567246 | SNV | 1 | T | C | Homozygous   |
| NC_037647.1 | 2567621 | SNV | 1 | A | T | Heterozygous |
| NC_037647.1 | 2567628 | SNV | 1 | A | C | Heterozygous |
| NC_037647.1 | 2567631 | SNV | 1 | A | C | Heterozygous |
| NC_037647.1 | 2567642 | SNV | 1 | T | A | Heterozygous |
| NC_037647.1 | 2567648 | SNV | 1 | T | G | Heterozygous |
| NC_037647.1 | 2567655 | SNV | 1 | A | C | Heterozygous |
| NC_037647.1 | 2567662 | SNV | 1 | T | A | Heterozygous |
| NC_037647.1 | 2567695 | SNV | 1 | T | C | Heterozygous |
| NC_037647.1 | 2567704 | SNV | 1 | T | C | Heterozygous |
| NC_037647.1 | 2567711 | SNV | 1 | T | C | Homozygous   |
| NC_037647.1 | 2567725 | SNV | 1 | T | C | Heterozygous |
| NC_037647.1 | 2567731 | SNV | 1 | T | C | Heterozygous |
| NC_037647.1 | 2568697 | SNV | 1 | T | A | Homozygous   |
| NC_037647.1 | 2568705 | SNV | 1 | T | G | Homozygous   |
| NC_037647.1 | 2568721 | SNV | 1 | T | G | Homozygous   |
| NC_037647.1 | 2570175 | SNV | 1 | T | G | Heterozygous |
| NC_037647.1 | 2570921 | SNV | 1 | G | A | Heterozygous |
| NC_037647.1 | 2571085 | SNV | 1 | A | G | Homozygous   |
| NC_037647.1 | 2571309 | SNV | 1 | A | G | Homozygous   |
| NC_037647.1 | 2571536 | SNV | 1 | T | C | Homozygous   |
| NC_037647.1 | 2571649 | SNV | 1 | G | A | Heterozygous |
| NC_037647.1 | 2571676 | SNV | 1 | T | A | Homozygous   |
| NC_037647.1 | 2572066 | SNV | 1 | T | A | Homozygous   |
| NC_037647.1 | 2574616 | SNV | 1 | G | A | Homozygous   |
| NC_037647.1 | 2574675 | SNV | 1 | G | T | Heterozygous |
| NC_037647.1 | 2575242 | SNV | 1 | C | T | Heterozygous |
| NC_037647.1 | 2575266 | SNV | 1 | T | C | Homozygous   |
| NC_037647.1 | 2575358 | SNV | 1 | A | G | Homozygous   |
| NC_037647.1 | 2575456 | SNV | 1 | G | A | Homozygous   |
| NC_037647.1 | 2575498 | SNV | 1 | G | A | Heterozygous |
| NC_037647.1 | 2576170 | SNV | 1 | A | G | Homozygous   |
| NC_037647.1 | 2576192 | SNV | 1 | A | G | Heterozygous |
| NC_037647.1 | 2587416 | SNV | 1 | T | C | Homozygous   |
| NC_037647.1 | 2587774 | SNV | 1 | C | T | Homozygous   |
| NC_037647.1 | 2588146 | SNV | 1 | G | C | Homozygous   |
| NC_037647.1 | 2588312 | SNV | 1 | G | A | Heterozygous |
| NC_037647.1 | 2588318 | SNV | 1 | T | C | Heterozygous |
| NC_037647.1 | 2588321 | SNV | 1 | T | C | Heterozygous |
| NC_037647.1 | 2588558 | SNV | 1 | T | G | Homozygous   |
| NC_037647.1 | 2589023 | SNV | 1 | T | A | Homozygous   |
| NC_037647.1 | 2589065 | SNV | 1 | G | A | Homozygous   |
| NC_037647.1 | 2589081 | SNV | 1 | C | T | Homozygous   |
| NC_037647.1 | 2589087 | SNV | 1 | T | A | Homozygous   |
| NC_037647.1 | 2589092 | SNV | 1 | A | G | Homozygous   |

|             |         |     |   |   |   |              |
|-------------|---------|-----|---|---|---|--------------|
| NC_037647.1 | 2589413 | SNV | 1 | G | A | Homozygous   |
| NC_037647.1 | 2589419 | SNV | 1 | A | G | Homozygous   |
| NC_037647.1 | 2589443 | SNV | 1 | T | A | Heterozygous |
| NC_037647.1 | 2589459 | SNV | 1 | C | T | Heterozygous |
| NC_037647.1 | 2589464 | SNV | 1 | T | G | Homozygous   |
| NC_037647.1 | 2589502 | SNV | 1 | T | G | Homozygous   |
| NC_037647.1 | 2589536 | SNV | 1 | A | G | Heterozygous |
| NC_037647.1 | 2589538 | SNV | 1 | A | T | Heterozygous |
| NC_037647.1 | 2589554 | SNV | 1 | G | A | Heterozygous |
| NC_037647.1 | 2589563 | SNV | 1 | A | G | Homozygous   |
| NC_037647.1 | 2589566 | SNV | 1 | C | G | Homozygous   |
| NC_037647.1 | 2589579 | SNV | 1 | G | A | Homozygous   |
| NC_037647.1 | 2589592 | SNV | 1 | G | A | Homozygous   |
| NC_037647.1 | 2589602 | SNV | 1 | G | A | Homozygous   |
| NC_037647.1 | 2589617 | SNV | 1 | G | A | Homozygous   |
| NC_037647.1 | 2589637 | SNV | 1 | T | A | Homozygous   |
| NC_037647.1 | 2589652 | SNV | 1 | T | A | Homozygous   |
| NC_037647.1 | 2589700 | SNV | 1 | T | G | Homozygous   |
| NC_037647.1 | 2589708 | SNV | 1 | A | T | Heterozygous |
| NC_037647.1 | 2589715 | SNV | 1 | A | G | Heterozygous |
| NC_037647.1 | 2589721 | SNV | 1 | G | C | Heterozygous |
| NC_037647.1 | 2589729 | SNV | 1 | G | A | Heterozygous |
| NC_037647.1 | 2589744 | SNV | 1 | A | G | Heterozygous |
| NC_037647.1 | 2589750 | SNV | 1 | C | T | Homozygous   |
| NC_037647.1 | 2589753 | SNV | 1 | G | A | Heterozygous |
| NC_037647.1 | 2589759 | SNV | 1 | A | T | Homozygous   |
| NC_037647.1 | 2589769 | SNV | 1 | G | A | Homozygous   |
| NC_037647.1 | 2589845 | SNV | 1 | A | T | Homozygous   |
| NC_037647.1 | 2589854 | SNV | 1 | C | G | Homozygous   |
| NC_037647.1 | 2589894 | SNV | 1 | T | A | Homozygous   |
| NC_037647.1 | 2589896 | SNV | 1 | C | T | Homozygous   |
| NC_037647.1 | 2589900 | SNV | 1 | T | A | Homozygous   |
| NC_037647.1 | 2589902 | SNV | 1 | T | A | Homozygous   |
| NC_037647.1 | 2595587 | SNV | 1 | A | G | Homozygous   |
| NC_037647.1 | 2595589 | SNV | 1 | G | T | Homozygous   |
| NC_037647.1 | 2595594 | SNV | 1 | A | C | Homozygous   |
| NC_037647.1 | 2595596 | SNV | 1 | T | C | Homozygous   |
| NC_037647.1 | 2595605 | SNV | 1 | T | C | Homozygous   |
| NC_037647.1 | 2595608 | SNV | 1 | A | T | Homozygous   |
| NC_037647.1 | 2595614 | SNV | 1 | G | A | Homozygous   |
| NC_037647.1 | 2595638 | SNV | 1 | C | T | Homozygous   |
| NC_037647.1 | 2595642 | SNV | 1 | C | T | Homozygous   |
| NC_037647.1 | 2595644 | SNV | 1 | A | T | Homozygous   |
| NC_037647.1 | 2601061 | SNV | 1 | C | T | Homozygous   |
| NC_037647.1 | 2602621 | SNV | 1 | G | C | Homozygous   |
| NC_037647.1 | 2605921 | SNV | 1 | G | T | Heterozygous |
| NC_037647.1 | 2605925 | SNV | 1 | G | A | Heterozygous |
| NC_037647.1 | 2605928 | SNV | 1 | G | A | Heterozygous |
| NC_037647.1 | 2609463 | SNV | 1 | T | C | Homozygous   |
| NC_037647.1 | 2619537 | SNV | 1 | A | T | Homozygous   |
| NC_037647.1 | 2619540 | SNV | 1 | A | T | Homozygous   |

|             |         |     |   |   |   |              |
|-------------|---------|-----|---|---|---|--------------|
| NC_037647.1 | 2619546 | SNV | 1 | A | G | Homozygous   |
| NC_037647.1 | 2619549 | SNV | 1 | G | A | Homozygous   |
| NC_037647.1 | 2623292 | SNV | 1 | A | T | Heterozygous |
| NC_037647.1 | 2624263 | SNV | 1 | T | C | Homozygous   |
| NC_037647.1 | 2624277 | SNV | 1 | T | G | Homozygous   |
| NC_037647.1 | 2637560 | SNV | 1 | A | C | Homozygous   |
| NC_037647.1 | 2642980 | SNV | 1 | A | G | Homozygous   |
| NC_037647.1 | 2643067 | SNV | 1 | A | G | Homozygous   |
| NC_037647.1 | 2643591 | SNV | 1 | A | G | Homozygous   |
| NC_037647.1 | 2643614 | SNV | 1 | A | T | Homozygous   |
| NC_037647.1 | 2644956 | SNV | 1 | T | G | Homozygous   |
| NC_037647.1 | 2644969 | SNV | 1 | G | A | Homozygous   |
| NC_037647.1 | 2649343 | SNV | 1 | A | G | Homozygous   |
| NC_037647.1 | 2649348 | SNV | 1 | A | G | Homozygous   |
| NC_037647.1 | 2649501 | SNV | 1 | G | C | Homozygous   |
| NC_037647.1 | 2649544 | SNV | 1 | T | C | Homozygous   |
| NC_037647.1 | 2651762 | SNV | 1 | C | T | Heterozygous |
| NC_037647.1 | 2652150 | SNV | 1 | G | A | Heterozygous |
| NC_037647.1 | 2652974 | SNV | 1 | T | C | Homozygous   |
| NC_037647.1 | 2653836 | SNV | 1 | T | C | Homozygous   |
| NC_037647.1 | 2654644 | SNV | 1 | C | A | Heterozygous |
| NC_037647.1 | 2654886 | SNV | 1 | A | C | Homozygous   |
| NC_037647.1 | 2654909 | SNV | 1 | A | G | Heterozygous |
| NC_037647.1 | 2654946 | SNV | 1 | G | T | Heterozygous |
| NC_037647.1 | 2655221 | SNV | 1 | T | C | Homozygous   |
| NC_037647.1 | 2655384 | SNV | 1 | T | C | Homozygous   |
| NC_037647.1 | 2656765 | SNV | 1 | T | C | Homozygous   |
| NC_037647.1 | 2657107 | SNV | 1 | T | C | Homozygous   |
| NC_037647.1 | 2657307 | SNV | 1 | T | C | Heterozygous |
| NC_037647.1 | 2661437 | SNV | 1 | C | T | Homozygous   |
| NC_037647.1 | 2673279 | SNV | 1 | G | T | Homozygous   |
| NC_037647.1 | 2679902 | SNV | 1 | A | G | Homozygous   |
| NC_037647.1 | 2684859 | SNV | 1 | C | T | Homozygous   |
| NC_037647.1 | 2684882 | SNV | 1 | T | C | Homozygous   |
| NC_037647.1 | 2684900 | SNV | 1 | A | G | Homozygous   |
| NC_037647.1 | 2684963 | SNV | 1 | A | G | Homozygous   |
| NC_037647.1 | 2687233 | SNV | 1 | T | C | Homozygous   |
| NC_037647.1 | 2693914 | SNV | 1 | G | A | Heterozygous |
| NC_037647.1 | 2694788 | SNV | 1 | A | G | Homozygous   |
| NC_037647.1 | 2694795 | SNV | 1 | G | C | Homozygous   |
| NC_037647.1 | 2694797 | SNV | 1 | A | C | Homozygous   |
| NC_037647.1 | 2697887 | SNV | 1 | T | A | Homozygous   |
| NC_037647.1 | 2703545 | SNV | 1 | C | T | Heterozygous |
| NC_037647.1 | 2703723 | SNV | 1 | C | T | Heterozygous |
| NC_037647.1 | 2703952 | SNV | 1 | G | C | Heterozygous |
| NC_037647.1 | 2703957 | SNV | 1 | T | C | Homozygous   |
| NC_037647.1 | 2703965 | SNV | 1 | C | T | Heterozygous |
| NC_037647.1 | 2704366 | SNV | 1 | C | G | Homozygous   |
| NC_037647.1 | 2704747 | SNV | 1 | A | G | Heterozygous |
| NC_037647.1 | 2705002 | SNV | 1 | T | C | Homozygous   |
| NC_037647.1 | 2705244 | SNV | 1 | C | G | Homozygous   |

|             |         |     |   |   |   |              |
|-------------|---------|-----|---|---|---|--------------|
| NC_037647.1 | 2741084 | SNV | 1 | A | G | Homozygous   |
| NC_037647.1 | 2741147 | SNV | 1 | T | C | Homozygous   |
| NC_037647.1 | 2742340 | SNV | 1 | G | A | Homozygous   |
| NC_037647.1 | 2747722 | SNV | 1 | A | T | Homozygous   |
| NC_037647.1 | 2747731 | SNV | 1 | T | G | Heterozygous |
| NC_037647.1 | 2747733 | SNV | 1 | T | G | Heterozygous |
| NC_037647.1 | 2747734 | SNV | 1 | A | G | Heterozygous |
| NC_037647.1 | 2747737 | SNV | 1 | T | A | Homozygous   |
| NC_037647.1 | 2747743 | SNV | 1 | C | A | Homozygous   |
| NC_037647.1 | 2750521 | SNV | 1 | C | T | Heterozygous |
| NC_037647.1 | 2750548 | SNV | 1 | T | C | Homozygous   |
| NC_037647.1 | 2750563 | SNV | 1 | G | A | Heterozygous |
| NC_037647.1 | 2763041 | SNV | 1 | A | G | Homozygous   |
| NC_037647.1 | 2763245 | SNV | 1 | T | C | Homozygous   |
| NC_037647.1 | 2763304 | SNV | 1 | G | A | Heterozygous |
| NC_037647.1 | 2763478 | SNV | 1 | G | A | Heterozygous |
| NC_037647.1 | 2765771 | SNV | 1 | A | G | Homozygous   |
| NC_037647.1 | 2766852 | SNV | 1 | T | A | Homozygous   |
| NC_037647.1 | 2767042 | SNV | 1 | G | A | Homozygous   |
| NC_037647.1 | 2767395 | SNV | 1 | T | C | Homozygous   |
| NC_037647.1 | 2768221 | SNV | 1 | C | T | Heterozygous |
| NC_037647.1 | 2768227 | SNV | 1 | C | T | Heterozygous |
| NC_037647.1 | 2768242 | SNV | 1 | G | A | Heterozygous |
| NC_037647.1 | 2769451 | SNV | 1 | A | T | Homozygous   |
| NC_037647.1 | 2769454 | SNV | 1 | G | C | Homozygous   |
| NC_037647.1 | 2769460 | SNV | 1 | A | G | Homozygous   |
| NC_037647.1 | 2769465 | SNV | 1 | T | G | Homozygous   |
| NC_037647.1 | 2769468 | SNV | 1 | A | T | Homozygous   |
| NC_037647.1 | 2769470 | SNV | 1 | A | G | Homozygous   |
| NC_037647.1 | 2769479 | SNV | 1 | C | T | Homozygous   |
| NC_037647.1 | 2769501 | SNV | 1 | A | T | Homozygous   |
| NC_037647.1 | 2770273 | SNV | 1 | G | A | Homozygous   |
| NC_037647.1 | 2770277 | SNV | 1 | G | C | Homozygous   |
| NC_037647.1 | 2770279 | SNV | 1 | T | A | Homozygous   |
| NC_037647.1 | 2771233 | SNV | 1 | G | A | Homozygous   |
| NC_037647.1 | 2771253 | SNV | 1 | G | A | Homozygous   |
| NC_037647.1 | 2771282 | SNV | 1 | C | T | Homozygous   |
| NC_037647.1 | 2771969 | SNV | 1 | C | T | Homozygous   |
| NC_037647.1 | 2771997 | SNV | 1 | G | T | Heterozygous |
| NC_037647.1 | 2847264 | SNV | 1 | C | T | Homozygous   |
| NC_037647.1 | 2849106 | SNV | 1 | T | G | Heterozygous |
| NC_037647.1 | 2849324 | SNV | 1 | A | G | Homozygous   |
| NC_037647.1 | 2849456 | SNV | 1 | T | G | Homozygous   |
| NC_037647.1 | 2850358 | SNV | 1 | A | C | Homozygous   |
| NC_037647.1 | 2850361 | SNV | 1 | C | G | Homozygous   |
| NC_037647.1 | 2850363 | SNV | 1 | A | T | Homozygous   |
| NC_037647.1 | 2850390 | SNV | 1 | T | C | Homozygous   |
| NC_037647.1 | 2851911 | SNV | 1 | T | C | Homozygous   |
| NC_037647.1 | 2852252 | SNV | 1 | C | A | Heterozygous |
| NC_037647.1 | 2855725 | SNV | 1 | A | G | Homozygous   |
| NC_037647.1 | 2855902 | SNV | 1 | C | T | Heterozygous |

|             |         |     |   |   |   |              |
|-------------|---------|-----|---|---|---|--------------|
| NC_037647.1 | 2856369 | SNV | 1 | A | G | Homozygous   |
| NC_037647.1 | 2856447 | SNV | 1 | T | C | Homozygous   |
| NC_037647.1 | 2860222 | SNV | 1 | C | T | Heterozygous |
| NC_037647.1 | 2860225 | SNV | 1 | C | T | Heterozygous |
| NC_037647.1 | 2876223 | SNV | 1 | A | C | Homozygous   |
| NC_037647.1 | 2876230 | SNV | 1 | T | A | Homozygous   |
| NC_037647.1 | 2876232 | SNV | 1 | T | A | Homozygous   |
| NC_037647.1 | 2876243 | SNV | 1 | C | T | Homozygous   |
| NC_037647.1 | 2876250 | SNV | 1 | C | T | Homozygous   |
| NC_037647.1 | 2876273 | SNV | 1 | C | T | Homozygous   |
| NC_037647.1 | 2885214 | SNV | 1 | G | A | Homozygous   |
| NC_037647.1 | 2889206 | SNV | 1 | A | G | Homozygous   |
| NC_037647.1 | 2889208 | SNV | 1 | G | A | Homozygous   |
| NC_037647.1 | 2889219 | SNV | 1 | A | C | Homozygous   |
| NC_037647.1 | 2906473 | SNV | 1 | G | T | Heterozygous |
| NC_037647.1 | 2940890 | SNV | 1 | A | G | Heterozygous |
| NC_037647.1 | 2940892 | SNV | 1 | G | A | Heterozygous |
| NC_037647.1 | 2940917 | SNV | 1 | G | A | Heterozygous |
| NC_037647.1 | 2940988 | SNV | 1 | T | C | Homozygous   |
| NC_037647.1 | 2941844 | SNV | 1 | G | T | Heterozygous |
| NC_037647.1 | 2943831 | SNV | 1 | C | G | Heterozygous |
| NC_037647.1 | 2943834 | SNV | 1 | C | T | Heterozygous |
| NC_037647.1 | 3001901 | SNV | 1 | T | C | Heterozygous |
| NC_037647.1 | 3002153 | SNV | 1 | T | C | Homozygous   |
| NC_037647.1 | 3002167 | SNV | 1 | C | T | Heterozygous |
| NC_037647.1 | 3002193 | SNV | 1 | C | T | Heterozygous |
| NC_037647.1 | 3002224 | SNV | 1 | C | T | Heterozygous |
| NC_037647.1 | 3002232 | SNV | 1 | G | A | Heterozygous |
| NC_037647.1 | 3002253 | SNV | 1 | A | G | Heterozygous |
| NC_037647.1 | 3002339 | SNV | 1 | T | C | Heterozygous |
| NC_037647.1 | 3002424 | SNV | 1 | A | G | Heterozygous |
| NC_037647.1 | 3002529 | SNV | 1 | A | G | Homozygous   |
| NC_037647.1 | 3002823 | SNV | 1 | A | G | Homozygous   |
| NC_037647.1 | 3003874 | SNV | 1 | T | C | Homozygous   |
| NC_037647.1 | 3004390 | SNV | 1 | C | T | Homozygous   |
| NC_037647.1 | 3004399 | SNV | 1 | G | A | Homozygous   |
| NC_037647.1 | 3004464 | SNV | 1 | A | G | Homozygous   |
| NC_037647.1 | 3004485 | SNV | 1 | T | C | Homozygous   |
| NC_037647.1 | 3004580 | SNV | 1 | A | G | Heterozygous |
| NC_037647.1 | 3004631 | SNV | 1 | T | C | Heterozygous |
| NC_037647.1 | 3004742 | SNV | 1 | T | C | Heterozygous |
| NC_037647.1 | 3004744 | SNV | 1 | C | T | Heterozygous |
| NC_037647.1 | 3005246 | SNV | 1 | T | C | Homozygous   |
| NC_037647.1 | 3005292 | SNV | 1 | A | G | Homozygous   |
| NC_037647.1 | 3005929 | SNV | 1 | T | A | Heterozygous |
| NC_037647.1 | 3006782 | SNV | 1 | C | G | Heterozygous |
| NC_037647.1 | 3006848 | SNV | 1 | C | G | Homozygous   |
| NC_037647.1 | 3006851 | SNV | 1 | T | A | Homozygous   |
| NC_037647.1 | 3006857 | SNV | 1 | C | A | Homozygous   |
| NC_037647.1 | 3006860 | SNV | 1 | C | G | Homozygous   |
| NC_037647.1 | 3006863 | SNV | 1 | C | A | Heterozygous |

|             |         |     |   |   |   |              |
|-------------|---------|-----|---|---|---|--------------|
| NC_037647.1 | 3006866 | SNV | 1 | C | A | Heterozygous |
| NC_037647.1 | 3006913 | SNV | 1 | C | T | Homozygous   |
| NC_037647.1 | 3022080 | SNV | 1 | C | T | Heterozygous |
| NC_037647.1 | 3022144 | SNV | 1 | G | A | Heterozygous |
| NC_037647.1 | 3027083 | SNV | 1 | A | G | Homozygous   |
| NC_037647.1 | 3027097 | SNV | 1 | C | T | Homozygous   |
| NC_037647.1 | 3027099 | SNV | 1 | T | C | Homozygous   |
| NC_037647.1 | 3036246 | SNV | 1 | G | A | Homozygous   |
| NC_037647.1 | 3036403 | SNV | 1 | A | G | Homozygous   |
| NC_037647.1 | 3036481 | SNV | 1 | A | G | Heterozygous |
| NC_037647.1 | 3036565 | SNV | 1 | T | C | Homozygous   |
| NC_037647.1 | 3048744 | SNV | 1 | C | T | Homozygous   |
| NC_037647.1 | 3048746 | SNV | 1 | T | G | Homozygous   |
| NC_037647.1 | 3120774 | SNV | 1 | T | A | Homozygous   |
| NC_037647.1 | 3120792 | SNV | 1 | T | G | Heterozygous |
| NC_037647.1 | 3120800 | SNV | 1 | A | T | Homozygous   |
| NC_037647.1 | 3121793 | SNV | 1 | C | A | Heterozygous |
| NC_037647.1 | 3123701 | SNV | 1 | C | T | Homozygous   |
| NC_037647.1 | 3123988 | SNV | 1 | A | G | Homozygous   |
| NC_037647.1 | 3124006 | SNV | 1 | T | C | Homozygous   |
| NC_037647.1 | 3124799 | SNV | 1 | G | A | Heterozygous |
| NC_037647.1 | 3125687 | SNV | 1 | A | T | Heterozygous |
| NC_037647.1 | 3125838 | SNV | 1 | T | C | Homozygous   |
| NC_037647.1 | 3126296 | SNV | 1 | T | C | Heterozygous |
| NC_037647.1 | 3127140 | SNV | 1 | A | T | Heterozygous |
| NC_037647.1 | 3127437 | SNV | 1 | C | T | Heterozygous |
| NC_037647.1 | 3127662 | SNV | 1 | C | T | Heterozygous |
| NC_037647.1 | 3131167 | SNV | 1 | G | A | Homozygous   |
| NC_037647.1 | 3131173 | SNV | 1 | G | A | Homozygous   |
| NC_037647.1 | 3131185 | SNV | 1 | C | A | Homozygous   |
| NC_037647.1 | 3131191 | SNV | 1 | T | C | Homozygous   |
| NC_037647.1 | 3131195 | SNV | 1 | C | A | Homozygous   |
| NC_037647.1 | 3131214 | SNV | 1 | A | C | Homozygous   |
| NC_037647.1 | 3153161 | SNV | 1 | T | C | Heterozygous |
| NC_037647.1 | 3153220 | SNV | 1 | G | A | Heterozygous |
| NC_037647.1 | 3153334 | SNV | 1 | T | C | Homozygous   |
| NC_037647.1 | 3166980 | SNV | 1 | T | C | Homozygous   |
| NC_037647.1 | 3167232 | SNV | 1 | T | C | Homozygous   |
| NC_037647.1 | 3167609 | SNV | 1 | G | A | Heterozygous |
| NC_037647.1 | 3167665 | SNV | 1 | G | A | Homozygous   |
| NC_037647.1 | 3167691 | SNV | 1 | G | A | Homozygous   |
| NC_037647.1 | 3167693 | SNV | 1 | A | G | Heterozygous |
| NC_037647.1 | 3167896 | SNV | 1 | T | G | Homozygous   |
| NC_037647.1 | 3184937 | SNV | 1 | C | T | Homozygous   |
| NC_037647.1 | 3185013 | SNV | 1 | T | G | Heterozygous |
| NC_037647.1 | 3185036 | SNV | 1 | G | A | Heterozygous |
| NC_037647.1 | 3185135 | SNV | 1 | A | G | Homozygous   |
| NC_037647.1 | 3188056 | SNV | 1 | C | T | Homozygous   |
| NC_037647.1 | 3190226 | SNV | 1 | T | C | Homozygous   |
| NC_037647.1 | 3190241 | SNV | 1 | G | A | Homozygous   |
| NC_037647.1 | 3198315 | SNV | 1 | C | G | Homozygous   |



|             |         |     |   |   |   |              |
|-------------|---------|-----|---|---|---|--------------|
| NC_037647.1 | 3198451 | SNV | 1 | C | T | Homozygous   |
| NC_037647.1 | 3198529 | SNV | 1 | T | A | Homozygous   |
| NC_037647.1 | 3198531 | SNV | 1 | C | T | Homozygous   |
| NC_037647.1 | 3201175 | SNV | 1 | A | T | Heterozygous |
| NC_037647.1 | 3202539 | SNV | 1 | A | G | Heterozygous |
| NC_037647.1 | 3202544 | SNV | 1 | T | C | Heterozygous |
| NC_037647.1 | 3202574 | SNV | 1 | A | C | Homozygous   |
| NC_037647.1 | 3202593 | SNV | 1 | A | C | Heterozygous |
| NC_037647.1 | 3202708 | SNV | 1 | T | A | Homozygous   |
| NC_037647.1 | 3202722 | SNV | 1 | T | A | Homozygous   |
| NC_037647.1 | 3202727 | SNV | 1 | T | A | Homozygous   |
| NC_037647.1 | 3204312 | SNV | 1 | G | A | Homozygous   |
| NC_037647.1 | 3204502 | SNV | 1 | A | G | Homozygous   |
| NC_037647.1 | 3204742 | SNV | 1 | A | G | Homozygous   |
| NC_037647.1 | 3204995 | SNV | 1 | T | A | Homozygous   |
| NC_037647.1 | 3205016 | SNV | 1 | A | G | Heterozygous |
| NC_037647.1 | 3205253 | SNV | 1 | T | C | Heterozygous |
| NC_037647.1 | 3206171 | SNV | 1 | G | A | Heterozygous |
| NC_037647.1 | 3207312 | SNV | 1 | T | A | Heterozygous |
| NC_037647.1 | 3207357 | SNV | 1 | A | C | Heterozygous |
| NC_037647.1 | 3207361 | SNV | 1 | A | T | Heterozygous |
| NC_037647.1 | 3207392 | SNV | 1 | T | A | Homozygous   |
| NC_037647.1 | 3208292 | SNV | 1 | C | T | Homozygous   |
| NC_037647.1 | 3208503 | SNV | 1 | A | G | Heterozygous |
| NC_037647.1 | 3208562 | SNV | 1 | T | C | Heterozygous |
| NC_037647.1 | 3208701 | SNV | 1 | G | A | Heterozygous |
| NC_037647.1 | 3208731 | SNV | 1 | G | A | Heterozygous |
| NC_037647.1 | 3209262 | SNV | 1 | C | T | Heterozygous |
| NC_037647.1 | 3209543 | SNV | 1 | A | G | Heterozygous |
| NC_037647.1 | 3210148 | SNV | 1 | T | C | Homozygous   |
| NC_037647.1 | 3215322 | SNV | 1 | A | T | Heterozygous |
| NC_037647.1 | 3218592 | SNV | 1 | A | G | Homozygous   |
| NC_037647.1 | 3218657 | SNV | 1 | C | T | Heterozygous |
| NC_037647.1 | 3218843 | SNV | 1 | T | C | Homozygous   |
| NC_037647.1 | 3220133 | SNV | 1 | G | A | Heterozygous |
| NC_037647.1 | 3222086 | SNV | 1 | A | T | Homozygous   |
| NC_037647.1 | 3222091 | SNV | 1 | C | T | Homozygous   |
| NC_037647.1 | 3222100 | SNV | 1 | T | A | Homozygous   |
| NC_037647.1 | 3222699 | SNV | 1 | T | G | Homozygous   |
| NC_037647.1 | 3222701 | SNV | 1 | A | T | Homozygous   |
| NC_037647.1 | 3222707 | SNV | 1 | A | T | Homozygous   |
| NC_037647.1 | 3224439 | SNV | 1 | T | C | Homozygous   |
| NC_037647.1 | 3225066 | SNV | 1 | C | G | Homozygous   |
| NC_037647.1 | 3225070 | SNV | 1 | C | T | Homozygous   |
| NC_037647.1 | 3227392 | SNV | 1 | C | T | Heterozygous |
| NC_037647.1 | 3229839 | SNV | 1 | A | G | Homozygous   |
| NC_037647.1 | 3230005 | SNV | 1 | T | C | Homozygous   |
| NC_037647.1 | 3230420 | SNV | 1 | T | C | Homozygous   |
| NC_037647.1 | 3230946 | SNV | 1 | A | G | Homozygous   |
| NC_037647.1 | 3231066 | SNV | 1 | A | G | Heterozygous |
| NC_037647.1 | 3231072 | SNV | 1 | A | G | Homozygous   |

|             |         |     |   |   |   |              |
|-------------|---------|-----|---|---|---|--------------|
| NC_037647.1 | 3231096 | SNV | 1 | A | C | Heterozygous |
| NC_037647.1 | 3232794 | SNV | 1 | C | G | Heterozygous |
| NC_037647.1 | 3232874 | SNV | 1 | C | T | Heterozygous |
| NC_037647.1 | 3233189 | SNV | 1 | T | G | Heterozygous |
| NC_037647.1 | 3233215 | SNV | 1 | A | T | Heterozygous |
| NC_037647.1 | 3233713 | SNV | 1 | T | C | Homozygous   |
| NC_037647.1 | 3233722 | SNV | 1 | A | G | Heterozygous |
| NC_037647.1 | 3233936 | SNV | 1 | G | A | Heterozygous |
| NC_037647.1 | 3233985 | SNV | 1 | A | G | Homozygous   |
| NC_037647.1 | 3235626 | SNV | 1 | G | A | Homozygous   |
| NC_037647.1 | 3235635 | SNV | 1 | A | G | Homozygous   |
| NC_037647.1 | 3235643 | SNV | 1 | C | T | Homozygous   |
| NC_037647.1 | 3235657 | SNV | 1 | T | C | Homozygous   |
| NC_037647.1 | 3236362 | SNV | 1 | T | C | Homozygous   |
| NC_037647.1 | 3236459 | SNV | 1 | G | C | Homozygous   |
| NC_037647.1 | 3236610 | SNV | 1 | A | G | Homozygous   |
| NC_037647.1 | 3236726 | SNV | 1 | G | A | Homozygous   |
| NC_037647.1 | 3237762 | SNV | 1 | G | A | Heterozygous |
| NC_037647.1 | 3240135 | SNV | 1 | A | G | Homozygous   |
| NC_037647.1 | 3240180 | SNV | 1 | C | T | Heterozygous |
| NC_037647.1 | 3242922 | SNV | 1 | G | A | Homozygous   |
| NC_037647.1 | 3242947 | SNV | 1 | G | A | Homozygous   |
| NC_037647.1 | 3244907 | SNV | 1 | T | A | Homozygous   |
| NC_037647.1 | 3253905 | SNV | 1 | C | T | Heterozygous |
| NC_037647.1 | 3253967 | SNV | 1 | G | A | Heterozygous |
| NC_037647.1 | 3260339 | SNV | 1 | A | G | Homozygous   |
| NC_037647.1 | 3260552 | SNV | 1 | T | C | Homozygous   |
| NC_037647.1 | 3260558 | SNV | 1 | A | G | Heterozygous |
| NC_037647.1 | 3260621 | SNV | 1 | C | T | Homozygous   |
| NC_037647.1 | 3260656 | SNV | 1 | G | C | Homozygous   |
| NC_037647.1 | 3260660 | SNV | 1 | C | G | Heterozygous |
| NC_037647.1 | 3260662 | SNV | 1 | C | G | Homozygous   |
| NC_037647.1 | 3260691 | SNV | 1 | C | T | Heterozygous |
| NC_037647.1 | 3260718 | SNV | 1 | A | G | Homozygous   |
| NC_037647.1 | 3260792 | SNV | 1 | A | G | Heterozygous |
| NC_037647.1 | 3260827 | SNV | 1 | T | C | Homozygous   |
| NC_037647.1 | 3260939 | SNV | 1 | T | C | Homozygous   |
| NC_037647.1 | 3261077 | SNV | 1 | G | A | Heterozygous |
| NC_037647.1 | 3261138 | SNV | 1 | A | G | Homozygous   |
| NC_037647.1 | 3261321 | SNV | 1 | T | C | Homozygous   |
| NC_037647.1 | 3261422 | SNV | 1 | C | T | Heterozygous |
| NC_037647.1 | 3261920 | SNV | 1 | T | C | Heterozygous |
| NC_037647.1 | 3261930 | SNV | 1 | C | T | Heterozygous |
| NC_037647.1 | 3261936 | SNV | 1 | T | C | Heterozygous |
| NC_037647.1 | 3261939 | SNV | 1 | A | T | Homozygous   |
| NC_037647.1 | 3261993 | SNV | 1 | A | G | Heterozygous |
| NC_037647.1 | 3262002 | SNV | 1 | C | T | Heterozygous |
| NC_037647.1 | 3262012 | SNV | 1 | C | T | Heterozygous |
| NC_037647.1 | 3262226 | SNV | 1 | C | T | Heterozygous |
| NC_037647.1 | 3262234 | SNV | 1 | A | G | Homozygous   |
| NC_037647.1 | 3262313 | SNV | 1 | A | G | Homozygous   |

|             |         |     |   |   |   |              |
|-------------|---------|-----|---|---|---|--------------|
| NC_037647.1 | 3262353 | SNV | 1 | A | G | Heterozygous |
| NC_037647.1 | 3262379 | SNV | 1 | C | T | Heterozygous |
| NC_037647.1 | 3264001 | SNV | 1 | T | C | Homozygous   |
| NC_037647.1 | 3264279 | SNV | 1 | C | T | Heterozygous |
| NC_037647.1 | 3265333 | SNV | 1 | T | C | Homozygous   |
| NC_037647.1 | 3265345 | SNV | 1 | T | C | Homozygous   |
| NC_037647.1 | 3265378 | SNV | 1 | T | C | Homozygous   |
| NC_037647.1 | 3265393 | SNV | 1 | G | A | Heterozygous |
| NC_037647.1 | 3265430 | SNV | 1 | C | T | Heterozygous |
| NC_037647.1 | 3265585 | SNV | 1 | C | A | Heterozygous |
| NC_037647.1 | 3266497 | SNV | 1 | C | T | Heterozygous |
| NC_037647.1 | 3266506 | SNV | 1 | C | T | Heterozygous |
| NC_037647.1 | 3266686 | SNV | 1 | C | T | Heterozygous |
| NC_037647.1 | 3268472 | SNV | 1 | C | T | Homozygous   |
| NC_037647.1 | 3282912 | SNV | 1 | G | C | Homozygous   |
| NC_037647.1 | 3282925 | SNV | 1 | T | A | Homozygous   |
| NC_037647.1 | 3282930 | SNV | 1 | A | T | Homozygous   |
| NC_037647.1 | 3287201 | SNV | 1 | T | C | Heterozygous |
| NC_037647.1 | 3287233 | SNV | 1 | T | C | Heterozygous |
| NC_037647.1 | 3287258 | SNV | 1 | T | C | Heterozygous |
| NC_037647.1 | 3287313 | SNV | 1 | T | C | Heterozygous |
| NC_037647.1 | 3287530 | SNV | 1 | C | T | Heterozygous |
| NC_037647.1 | 3287552 | SNV | 1 | T | C | Heterozygous |
| NC_037647.1 | 3287664 | SNV | 1 | T | C | Heterozygous |
| NC_037647.1 | 3290404 | SNV | 1 | T | C | Heterozygous |
| NC_037647.1 | 3290629 | SNV | 1 | A | T | Heterozygous |
| NC_037647.1 | 3297837 | SNV | 1 | C | T | Heterozygous |
| NC_037647.1 | 3297888 | SNV | 1 | C | A | Heterozygous |
| NC_037647.1 | 3298451 | SNV | 1 | C | T | Heterozygous |
| NC_037647.1 | 3298459 | SNV | 1 | C | T | Homozygous   |
| NC_037647.1 | 3298510 | SNV | 1 | T | C | Homozygous   |
| NC_037647.1 | 3298562 | SNV | 1 | G | A | Heterozygous |
| NC_037647.1 | 3303337 | SNV | 1 | T | C | Homozygous   |
| NC_037647.1 | 3303850 | SNV | 1 | A | T | Homozygous   |
| NC_037647.1 | 3303852 | SNV | 1 | G | T | Homozygous   |
| NC_037647.1 | 3304235 | SNV | 1 | A | G | Homozygous   |
| NC_037647.1 | 3304812 | SNV | 1 | G | A | Heterozygous |
| NC_037647.1 | 3304816 | SNV | 1 | G | A | Heterozygous |
| NC_037647.1 | 3305015 | SNV | 1 | T | C | Homozygous   |
| NC_037647.1 | 3306400 | SNV | 1 | T | C | Homozygous   |
| NC_037647.1 | 3306466 | SNV | 1 | T | C | Homozygous   |
| NC_037647.1 | 3307236 | SNV | 1 | C | A | Heterozygous |
| NC_037647.1 | 3307238 | SNV | 1 | T | A | Heterozygous |
| NC_037647.1 | 3308943 | SNV | 1 | G | A | Homozygous   |
| NC_037647.1 | 3309114 | SNV | 1 | G | A | Heterozygous |
| NC_037647.1 | 3312333 | SNV | 1 | T | C | Homozygous   |
| NC_037647.1 | 3312510 | SNV | 1 | G | A | Homozygous   |
| NC_037647.1 | 3312693 | SNV | 1 | T | C | Homozygous   |
| NC_037647.1 | 3312789 | SNV | 1 | A | G | Homozygous   |
| NC_037647.1 | 3313404 | SNV | 1 | A | T | Heterozygous |
| NC_037647.1 | 3313736 | SNV | 1 | A | T | Heterozygous |

|             |         |     |   |   |   |              |
|-------------|---------|-----|---|---|---|--------------|
| NC_037647.1 | 3313739 | SNV | 1 | T | A | Heterozygous |
| NC_037647.1 | 3313783 | SNV | 1 | A | G | Homozygous   |
| NC_037647.1 | 3313906 | SNV | 1 | C | T | Heterozygous |
| NC_037647.1 | 3315165 | SNV | 1 | T | C | Heterozygous |
| NC_037647.1 | 3315174 | SNV | 1 | G | T | Heterozygous |
| NC_037647.1 | 3315176 | SNV | 1 | T | A | Heterozygous |
| NC_037647.1 | 3315196 | SNV | 1 | A | T | Homozygous   |
| NC_037647.1 | 3315450 | SNV | 1 | C | T | Heterozygous |
| NC_037647.1 | 3316073 | SNV | 1 | A | T | Heterozygous |
| NC_037647.1 | 3316080 | SNV | 1 | T | G | Heterozygous |
| NC_037647.1 | 3317451 | SNV | 1 | G | A | Homozygous   |
| NC_037647.1 | 3317693 | SNV | 1 | G | A | Homozygous   |
| NC_037647.1 | 3317731 | SNV | 1 | T | C | Homozygous   |
| NC_037647.1 | 3317762 | SNV | 1 | C | T | Homozygous   |
| NC_037647.1 | 3320829 | SNV | 1 | G | C | Heterozygous |
| NC_037647.1 | 3320831 | SNV | 1 | T | C | Heterozygous |
| NC_037647.1 | 3320841 | SNV | 1 | T | C | Homozygous   |
| NC_037647.1 | 3320843 | SNV | 1 | T | C | Homozygous   |
| NC_037647.1 | 3320881 | SNV | 1 | G | A | Heterozygous |
| NC_037647.1 | 3320897 | SNV | 1 | T | G | Homozygous   |
| NC_037647.1 | 3320924 | SNV | 1 | T | G | Homozygous   |
| NC_037647.1 | 3320940 | SNV | 1 | G | A | Heterozygous |
| NC_037647.1 | 3321136 | SNV | 1 | A | G | Homozygous   |
| NC_037647.1 | 3321332 | SNV | 1 | A | G | Heterozygous |
| NC_037647.1 | 3321599 | SNV | 1 | A | G | Heterozygous |
| NC_037647.1 | 3321602 | SNV | 1 | G | A | Homozygous   |
| NC_037647.1 | 3321604 | SNV | 1 | C | A | Heterozygous |
| NC_037647.1 | 3321694 | SNV | 1 | A | G | Homozygous   |
| NC_037647.1 | 3322122 | SNV | 1 | C | T | Homozygous   |
| NC_037647.1 | 3322556 | SNV | 1 | C | T | Heterozygous |
| NC_037647.1 | 3322909 | SNV | 1 | G | A | Homozygous   |
| NC_037647.1 | 3322913 | SNV | 1 | A | G | Heterozygous |
| NC_037647.1 | 3323459 | SNV | 1 | G | A | Heterozygous |
| NC_037647.1 | 3323608 | SNV | 1 | A | G | Heterozygous |
| NC_037647.1 | 3323616 | SNV | 1 | T | G | Heterozygous |
| NC_037647.1 | 3323624 | SNV | 1 | T | G | Heterozygous |
| NC_037647.1 | 3323672 | SNV | 1 | T | G | Heterozygous |
| NC_037647.1 | 3323678 | SNV | 1 | T | G | Homozygous   |
| NC_037647.1 | 3323699 | SNV | 1 | T | A | Heterozygous |
| NC_037647.1 | 3323707 | SNV | 1 | A | T | Heterozygous |
| NC_037647.1 | 3323709 | SNV | 1 | T | A | Heterozygous |
| NC_037647.1 | 3323713 | SNV | 1 | A | C | Heterozygous |
| NC_037647.1 | 3323908 | SNV | 1 | C | A | Homozygous   |
| NC_037647.1 | 3325954 | SNV | 1 | G | C | Heterozygous |
| NC_037647.1 | 3325954 | SNV | 1 | G | T | Heterozygous |
| NC_037647.1 | 3326268 | SNV | 1 | A | G | Homozygous   |
| NC_037647.1 | 3326442 | SNV | 1 | A | T | Heterozygous |
| NC_037647.1 | 3326518 | SNV | 1 | C | T | Homozygous   |
| NC_037647.1 | 3326535 | SNV | 1 | T | C | Heterozygous |
| NC_037647.1 | 3326652 | SNV | 1 | T | C | Homozygous   |
| NC_037647.1 | 3327245 | SNV | 1 | G | A | Heterozygous |

|             |         |     |   |   |   |              |
|-------------|---------|-----|---|---|---|--------------|
| NC_037647.1 | 3327367 | SNV | 1 | T | A | Heterozygous |
| NC_037647.1 | 3327811 | SNV | 1 | T | C | Homozygous   |
| NC_037647.1 | 3328138 | SNV | 1 | G | A | Heterozygous |
| NC_037647.1 | 3328550 | SNV | 1 | C | T | Heterozygous |
| NC_037647.1 | 3334874 | SNV | 1 | A | G | Homozygous   |
| NC_037647.1 | 3334876 | SNV | 1 | A | G | Homozygous   |
| NC_037647.1 | 3334880 | SNV | 1 | A | G | Homozygous   |
| NC_037647.1 | 3334884 | SNV | 1 | C | A | Homozygous   |
| NC_037647.1 | 3350221 | SNV | 1 | A | G | Homozygous   |
| NC_037647.1 | 3350346 | SNV | 1 | A | G | Homozygous   |
| NC_037647.1 | 3350506 | SNV | 1 | A | T | Homozygous   |
| NC_037647.1 | 3350588 | SNV | 1 | C | G | Homozygous   |
| NC_037647.1 | 3350792 | SNV | 1 | A | T | Homozygous   |
| NC_037647.1 | 3350844 | SNV | 1 | G | A | Heterozygous |
| NC_037647.1 | 3350873 | SNV | 1 | A | G | Homozygous   |
| NC_037647.1 | 3350882 | SNV | 1 | G | A | Homozygous   |
| NC_037647.1 | 3364123 | SNV | 1 | T | C | Homozygous   |
| NC_037647.1 | 3364208 | SNV | 1 | T | C | Heterozygous |
| NC_037647.1 | 3364212 | SNV | 1 | C | T | Heterozygous |
| NC_037647.1 | 3364218 | SNV | 1 | C | T | Homozygous   |
| NC_037647.1 | 3364289 | SNV | 1 | T | C | Homozygous   |
| NC_037647.1 | 3364302 | SNV | 1 | G | A | Heterozygous |
| NC_037647.1 | 3367879 | SNV | 1 | A | C | Heterozygous |
| NC_037647.1 | 3367886 | SNV | 1 | G | A | Heterozygous |
| NC_037647.1 | 3367902 | SNV | 1 | T | A | Homozygous   |
| NC_037647.1 | 3367906 | SNV | 1 | T | C | Homozygous   |
| NC_037647.1 | 3368324 | SNV | 1 | A | G | Homozygous   |
| NC_037647.1 | 3368370 | SNV | 1 | A | G | Homozygous   |
| NC_037647.1 | 3368395 | SNV | 1 | T | A | Homozygous   |
| NC_037647.1 | 3368400 | SNV | 1 | C | T | Homozygous   |
| NC_037647.1 | 3368434 | SNV | 1 | T | A | Homozygous   |
| NC_037647.1 | 3368438 | SNV | 1 | T | C | Homozygous   |
| NC_037647.1 | 3368457 | SNV | 1 | A | G | Homozygous   |
| NC_037647.1 | 3368587 | SNV | 1 | C | T | Homozygous   |
| NC_037647.1 | 3368591 | SNV | 1 | A | G | Homozygous   |
| NC_037647.1 | 3368598 | SNV | 1 | T | C | Heterozygous |
| NC_037647.1 | 3368614 | SNV | 1 | T | G | Homozygous   |
| NC_037647.1 | 3388928 | SNV | 1 | A | G | Heterozygous |
| NC_037647.1 | 3414501 | SNV | 1 | T | C | Homozygous   |
| NC_037647.1 | 3414561 | SNV | 1 | A | G | Homozygous   |
| NC_037647.1 | 3414693 | SNV | 1 | T | C | Homozygous   |
| NC_037647.1 | 3414872 | SNV | 1 | G | A | Heterozygous |
| NC_037647.1 | 3414916 | SNV | 1 | G | A | Homozygous   |
| NC_037647.1 | 3414943 | SNV | 1 | T | C | Heterozygous |
| NC_037647.1 | 3425699 | SNV | 1 | C | A | Homozygous   |
| NC_037647.1 | 3426098 | SNV | 1 | T | C | Heterozygous |
| NC_037647.1 | 3426116 | SNV | 1 | T | G | Heterozygous |
| NC_037647.1 | 3426181 | SNV | 1 | C | G | Homozygous   |
| NC_037647.1 | 3426275 | SNV | 1 | A | G | Homozygous   |
| NC_037647.1 | 3426329 | SNV | 1 | A | G | Homozygous   |
| NC_037647.1 | 3449581 | SNV | 1 | T | A | Homozygous   |

|             |         |     |   |   |   |              |
|-------------|---------|-----|---|---|---|--------------|
| NC_037647.1 | 3449585 | SNV | 1 | T | G | Homozygous   |
| NC_037647.1 | 3458220 | SNV | 1 | C | T | Homozygous   |
| NC_037647.1 | 3464085 | SNV | 1 | C | A | Homozygous   |
| NC_037647.1 | 3464114 | SNV | 1 | C | A | Homozygous   |
| NC_037647.1 | 3478188 | SNV | 1 | G | A | Homozygous   |
| NC_037647.1 | 3478190 | SNV | 1 | G | A | Homozygous   |
| NC_037647.1 | 3478194 | SNV | 1 | G | A | Homozygous   |
| NC_037647.1 | 3478198 | SNV | 1 | C | A | Homozygous   |
| NC_037647.1 | 3558791 | SNV | 1 | C | A | Homozygous   |
| NC_037647.1 | 3558856 | SNV | 1 | C | T | Homozygous   |
| NC_037647.1 | 3559471 | SNV | 1 | A | T | Heterozygous |
| NC_037647.1 | 3567668 | SNV | 1 | G | A | Homozygous   |
| NC_037647.1 | 3568262 | SNV | 1 | T | C | Homozygous   |
| NC_037647.1 | 3568484 | SNV | 1 | T | G | Homozygous   |
| NC_037647.1 | 3579057 | SNV | 1 | A | G | Homozygous   |
| NC_037647.1 | 3654967 | SNV | 1 | G | A | Heterozygous |
| NC_037647.1 | 3655105 | SNV | 1 | A | G | Heterozygous |
| NC_037647.1 | 3655548 | SNV | 1 | G | A | Homozygous   |
| NC_037647.1 | 3655602 | SNV | 1 | T | C | Homozygous   |
| NC_037647.1 | 3656300 | SNV | 1 | T | C | Heterozygous |
| NC_037647.1 | 3656307 | SNV | 1 | A | T | Homozygous   |
| NC_037647.1 | 3656377 | SNV | 1 | C | T | Heterozygous |
| NC_037647.1 | 3657062 | SNV | 1 | G | A | Heterozygous |
| NC_037647.1 | 3657064 | SNV | 1 | C | T | Heterozygous |
| NC_037647.1 | 3657078 | SNV | 1 | A | T | Heterozygous |
| NC_037647.1 | 3657086 | SNV | 1 | C | A | Heterozygous |
| NC_037647.1 | 3657335 | SNV | 1 | G | A | Heterozygous |
| NC_037647.1 | 3657412 | SNV | 1 | T | C | Homozygous   |
| NC_037647.1 | 3657558 | SNV | 1 | A | G | Homozygous   |
| NC_037647.1 | 3657762 | SNV | 1 | G | A | Heterozygous |
| NC_037647.1 | 3657830 | SNV | 1 | C | A | Heterozygous |
| NC_037647.1 | 3657950 | SNV | 1 | T | A | Homozygous   |
| NC_037647.1 | 3657956 | SNV | 1 | T | A | Homozygous   |
| NC_037647.1 | 3657958 | SNV | 1 | A | T | Homozygous   |
| NC_037647.1 | 3657988 | SNV | 1 | A | T | Homozygous   |
| NC_037647.1 | 3657992 | SNV | 1 | T | G | Homozygous   |
| NC_037647.1 | 3658007 | SNV | 1 | C | T | Homozygous   |
| NC_037647.1 | 3658015 | SNV | 1 | A | C | Homozygous   |
| NC_037647.1 | 3658018 | SNV | 1 | T | A | Homozygous   |
| NC_037647.1 | 3658082 | SNV | 1 | A | T | Homozygous   |
| NC_037647.1 | 3658173 | SNV | 1 | A | T | Homozygous   |
| NC_037647.1 | 3658331 | SNV | 1 | G | A | Heterozygous |
| NC_037647.1 | 3658395 | SNV | 1 | T | C | Heterozygous |
| NC_037647.1 | 3665928 | SNV | 1 | C | T | Heterozygous |
| NC_037647.1 | 3665962 | SNV | 1 | T | G | Homozygous   |
| NC_037647.1 | 3666035 | SNV | 1 | C | T | Heterozygous |
| NC_037647.1 | 3666282 | SNV | 1 | C | T | Heterozygous |
| NC_037647.1 | 3666292 | SNV | 1 | G | T | Heterozygous |
| NC_037647.1 | 3666329 | SNV | 1 | C | T | Homozygous   |
| NC_037647.1 | 3681700 | SNV | 1 | G | A | Homozygous   |
| NC_037647.1 | 3681710 | SNV | 1 | G | T | Homozygous   |

|             |         |     |   |   |   |              |
|-------------|---------|-----|---|---|---|--------------|
| NC_037647.1 | 3691740 | SNV | 1 | G | A | Heterozygous |
| NC_037647.1 | 3692191 | SNV | 1 | T | C | Homozygous   |
| NC_037647.1 | 3692211 | SNV | 1 | T | C | Heterozygous |
| NC_037647.1 | 3694096 | SNV | 1 | A | G | Homozygous   |
| NC_037647.1 | 3694140 | SNV | 1 | A | G | Homozygous   |
| NC_037647.1 | 3695275 | SNV | 1 | T | C | Homozygous   |
| NC_037647.1 | 3696809 | SNV | 1 | C | T | Homozygous   |
| NC_037647.1 | 3697676 | SNV | 1 | A | G | Homozygous   |
| NC_037647.1 | 3697679 | SNV | 1 | A | T | Homozygous   |
| NC_037647.1 | 3697708 | SNV | 1 | T | A | Homozygous   |
| NC_037647.1 | 3741687 | SNV | 1 | G | C | Homozygous   |
| NC_037647.1 | 3764256 | SNV | 1 | A | G | Homozygous   |
| NC_037647.1 | 3764264 | SNV | 1 | G | C | Homozygous   |
| NC_037647.1 | 3764343 | SNV | 1 | G | A | Heterozygous |
| NC_037647.1 | 3790598 | SNV | 1 | A | G | Homozygous   |
| NC_037647.1 | 3803219 | SNV | 1 | T | C | Heterozygous |
| NC_037647.1 | 3810065 | SNV | 1 | A | G | Homozygous   |
| NC_037647.1 | 3810172 | SNV | 1 | T | G | Heterozygous |
| NC_037647.1 | 3810251 | SNV | 1 | A | G | Homozygous   |
| NC_037647.1 | 3810269 | SNV | 1 | G | A | Heterozygous |
| NC_037647.1 | 3810279 | SNV | 1 | G | A | Heterozygous |
| NC_037647.1 | 3810308 | SNV | 1 | G | T | Homozygous   |
| NC_037647.1 | 3810412 | SNV | 1 | C | T | Homozygous   |
| NC_037647.1 | 3810585 | SNV | 1 | A | G | Heterozygous |
| NC_037647.1 | 3810594 | SNV | 1 | T | C | Heterozygous |
| NC_037647.1 | 3810966 | SNV | 1 | G | A | Homozygous   |
| NC_037647.1 | 3810976 | SNV | 1 | A | G | Homozygous   |
| NC_037647.1 | 3810984 | SNV | 1 | G | A | Homozygous   |
| NC_037647.1 | 3818720 | SNV | 1 | G | A | Heterozygous |
| NC_037647.1 | 3818721 | SNV | 1 | A | T | Heterozygous |
| NC_037647.1 | 3823593 | SNV | 1 | C | T | Heterozygous |
| NC_037647.1 | 3823700 | SNV | 1 | C | T | Heterozygous |
| NC_037647.1 | 3823722 | SNV | 1 | T | A | Heterozygous |
| NC_037647.1 | 3823731 | SNV | 1 | A | G | Heterozygous |
| NC_037647.1 | 3823784 | SNV | 1 | G | A | Heterozygous |
| NC_037647.1 | 3823794 | SNV | 1 | G | A | Homozygous   |
| NC_037647.1 | 3830251 | SNV | 1 | T | A | Heterozygous |
| NC_037647.1 | 3831142 | SNV | 1 | C | T | Heterozygous |
| NC_037647.1 | 3831144 | SNV | 1 | T | C | Homozygous   |
| NC_037647.1 | 3831512 | SNV | 1 | C | T | Heterozygous |
| NC_037647.1 | 3837753 | SNV | 1 | A | T | Homozygous   |
| NC_037647.1 | 3837858 | SNV | 1 | T | C | Homozygous   |
| NC_037647.1 | 3837948 | SNV | 1 | C | T | Homozygous   |
| NC_037647.1 | 3838146 | SNV | 1 | C | T | Heterozygous |
| NC_037647.1 | 3838201 | SNV | 1 | T | C | Heterozygous |
| NC_037647.1 | 3838206 | SNV | 1 | G | A | Heterozygous |
| NC_037647.1 | 3838800 | SNV | 1 | G | A | Homozygous   |
| NC_037647.1 | 3839049 | SNV | 1 | C | T | Heterozygous |
| NC_037647.1 | 3839181 | SNV | 1 | G | A | Heterozygous |
| NC_037647.1 | 3839184 | SNV | 1 | G | A | Homozygous   |
| NC_037647.1 | 3839282 | SNV | 1 | G | C | Heterozygous |

|             |         |     |   |   |   |              |
|-------------|---------|-----|---|---|---|--------------|
| NC_037647.1 | 3840116 | SNV | 1 | A | T | Homozygous   |
| NC_037647.1 | 3851594 | SNV | 1 | C | T | Homozygous   |
| NC_037647.1 | 3851596 | SNV | 1 | A | G | Homozygous   |
| NC_037647.1 | 3851695 | SNV | 1 | C | T | Heterozygous |
| NC_037647.1 | 3851841 | SNV | 1 | A | T | Heterozygous |
| NC_037647.1 | 3853829 | SNV | 1 | A | T | Heterozygous |
| NC_037647.1 | 3854489 | SNV | 1 | T | C | Homozygous   |
| NC_037647.1 | 3854864 | SNV | 1 | T | C | Heterozygous |
| NC_037647.1 | 3854993 | SNV | 1 | C | T | Heterozygous |
| NC_037647.1 | 3855124 | SNV | 1 | C | T | Homozygous   |
| NC_037647.1 | 3855202 | SNV | 1 | T | C | Heterozygous |
| NC_037647.1 | 3855220 | SNV | 1 | A | G | Heterozygous |
| NC_037647.1 | 3855265 | SNV | 1 | G | A | Heterozygous |
| NC_037647.1 | 3855304 | SNV | 1 | C | T | Heterozygous |
| NC_037647.1 | 3855582 | SNV | 1 | G | C | Heterozygous |
| NC_037647.1 | 3855609 | SNV | 1 | T | C | Homozygous   |
| NC_037647.1 | 3855648 | SNV | 1 | C | G | Homozygous   |
| NC_037647.1 | 3855768 | SNV | 1 | T | C | Homozygous   |
| NC_037647.1 | 3855819 | SNV | 1 | C | T | Homozygous   |
| NC_037647.1 | 3855846 | SNV | 1 | T | C | Homozygous   |
| NC_037647.1 | 3856749 | SNV | 1 | C | T | Homozygous   |
| NC_037647.1 | 3856770 | SNV | 1 | T | C | Heterozygous |
| NC_037647.1 | 3856770 | SNV | 1 | T | G | Heterozygous |
| NC_037647.1 | 3857025 | SNV | 1 | G | A | Heterozygous |
| NC_037647.1 | 3857079 | SNV | 1 | G | A | Heterozygous |
| NC_037647.1 | 3863885 | SNV | 1 | A | G | Homozygous   |
| NC_037647.1 | 3864283 | SNV | 1 | A | T | Heterozygous |
| NC_037647.1 | 3864286 | SNV | 1 | G | T | Heterozygous |
| NC_037647.1 | 3864308 | SNV | 1 | G | C | Heterozygous |
| NC_037647.1 | 3864314 | SNV | 1 | A | T | Heterozygous |
| NC_037647.1 | 3864317 | SNV | 1 | T | G | Heterozygous |
| NC_037647.1 | 3865845 | SNV | 1 | A | T | Homozygous   |
| NC_037647.1 | 3865849 | SNV | 1 | C | T | Heterozygous |
| NC_037647.1 | 3865851 | SNV | 1 | A | T | Heterozygous |
| NC_037647.1 | 3869727 | SNV | 1 | T | C | Homozygous   |
| NC_037647.1 | 3869898 | SNV | 1 | T | C | Homozygous   |
| NC_037647.1 | 3870185 | SNV | 1 | G | T | Heterozygous |
| NC_037647.1 | 3870196 | SNV | 1 | G | T | Heterozygous |
| NC_037647.1 | 3870213 | SNV | 1 | G | T | Heterozygous |
| NC_037647.1 | 3870230 | SNV | 1 | G | T | Heterozygous |
| NC_037647.1 | 3874061 | SNV | 1 | A | T | Heterozygous |
| NC_037647.1 | 3874090 | SNV | 1 | T | C | Homozygous   |
| NC_037647.1 | 3874612 | SNV | 1 | T | C | Homozygous   |
| NC_037647.1 | 3874653 | SNV | 1 | G | A | Heterozygous |
| NC_037647.1 | 3874706 | SNV | 1 | C | G | Heterozygous |
| NC_037647.1 | 3875090 | SNV | 1 | C | A | Heterozygous |
| NC_037647.1 | 3881244 | SNV | 1 | T | C | Homozygous   |
| NC_037647.1 | 3888511 | SNV | 1 | T | G | Heterozygous |
| NC_037647.1 | 3889911 | SNV | 1 | G | A | Heterozygous |
| NC_037647.1 | 3895504 | SNV | 1 | A | T | Homozygous   |
| NC_037647.1 | 3895506 | SNV | 1 | A | G | Homozygous   |



|             |         |     |   |   |   |              |
|-------------|---------|-----|---|---|---|--------------|
| NC_037647.1 | 3895511 | SNV | 1 | A | G | Homozygous   |
| NC_037647.1 | 3895514 | SNV | 1 | G | A | Homozygous   |
| NC_037647.1 | 3907270 | SNV | 1 | A | G | Homozygous   |
| NC_037647.1 | 3907711 | SNV | 1 | T | C | Heterozygous |
| NC_037647.1 | 3907724 | SNV | 1 | A | G | Homozygous   |
| NC_037647.1 | 3907728 | SNV | 1 | A | G | Homozygous   |
| NC_037647.1 | 3907773 | SNV | 1 | C | T | Homozygous   |
| NC_037647.1 | 3909932 | SNV | 1 | A | G | Heterozygous |
| NC_037647.1 | 3913444 | SNV | 1 | T | C | Homozygous   |
| NC_037647.1 | 3913752 | SNV | 1 | T | C | Homozygous   |
| NC_037647.1 | 3924658 | SNV | 1 | G | A | Heterozygous |
| NC_037647.1 | 3924700 | SNV | 1 | A | G | Homozygous   |
| NC_037647.1 | 3924830 | SNV | 1 | C | G | Homozygous   |
| NC_037647.1 | 3924891 | SNV | 1 | A | G | Heterozygous |
| NC_037647.1 | 3927244 | SNV | 1 | A | G | Homozygous   |
| NC_037647.1 | 3927256 | SNV | 1 | A | T | Homozygous   |
| NC_037647.1 | 3927330 | SNV | 1 | A | G | Homozygous   |
| NC_037647.1 | 3927387 | SNV | 1 | A | G | Homozygous   |
| NC_037647.1 | 3927425 | SNV | 1 | T | C | Homozygous   |
| NC_037647.1 | 3927442 | SNV | 1 | G | T | Homozygous   |
| NC_037647.1 | 3927445 | SNV | 1 | C | T | Heterozygous |
| NC_037647.1 | 3927615 | SNV | 1 | T | C | Homozygous   |
| NC_037647.1 | 3927695 | SNV | 1 | A | G | Heterozygous |
| NC_037647.1 | 3964332 | SNV | 1 | A | T | Homozygous   |
| NC_037647.1 | 3964334 | SNV | 1 | A | T | Homozygous   |
| NC_037647.1 | 3964350 | SNV | 1 | G | T | Homozygous   |
| NC_037647.1 | 3964354 | SNV | 1 | G | T | Heterozygous |
| NC_037647.1 | 3964356 | SNV | 1 | A | T | Heterozygous |
| NC_037647.1 | 3964363 | SNV | 1 | A | T | Heterozygous |
| NC_037647.1 | 3964365 | SNV | 1 | A | T | Heterozygous |
| NC_037647.1 | 3964370 | SNV | 1 | A | T | Heterozygous |
| NC_037647.1 | 3964373 | SNV | 1 | G | T | Heterozygous |
| NC_037647.1 | 4014016 | SNV | 1 | A | G | Heterozygous |
| NC_037647.1 | 4014018 | SNV | 1 | G | A | Heterozygous |
| NC_037647.1 | 4014021 | SNV | 1 | A | T | Heterozygous |
| NC_037647.1 | 4014025 | SNV | 1 | T | G | Heterozygous |
| NC_037647.1 | 4014048 | SNV | 1 | T | C | Heterozygous |
| NC_037647.1 | 4014055 | SNV | 1 | C | T | Heterozygous |
| NC_037647.1 | 4038840 | SNV | 1 | T | A | Heterozygous |
| NC_037647.1 | 4038854 | SNV | 1 | T | C | Homozygous   |
| NC_037647.1 | 4038883 | SNV | 1 | T | C | Heterozygous |
| NC_037647.1 | 4038885 | SNV | 1 | C | A | Homozygous   |
| NC_037647.1 | 4038896 | SNV | 1 | T | C | Heterozygous |
| NC_037647.1 | 4038910 | SNV | 1 | A | G | Heterozygous |
| NC_037647.1 | 4038933 | SNV | 1 | T | A | Heterozygous |
| NC_037647.1 | 4039010 | SNV | 1 | G | A | Heterozygous |
| NC_037647.1 | 4039017 | SNV | 1 | G | A | Homozygous   |
| NC_037647.1 | 4039020 | SNV | 1 | A | G | Heterozygous |
| NC_037647.1 | 4039033 | SNV | 1 | A | C | Heterozygous |
| NC_037647.1 | 4039893 | SNV | 1 | A | G | Heterozygous |
| NC_037647.1 | 4039901 | SNV | 1 | C | T | Heterozygous |

|             |         |     |   |   |   |              |
|-------------|---------|-----|---|---|---|--------------|
| NC_037647.1 | 4039937 | SNV | 1 | A | T | Heterozygous |
| NC_037647.1 | 4039981 | SNV | 1 | A | G | Heterozygous |
| NC_037647.1 | 4040014 | SNV | 1 | A | G | Heterozygous |
| NC_037647.1 | 4040027 | SNV | 1 | G | A | Heterozygous |
| NC_037647.1 | 4040040 | SNV | 1 | G | A | Heterozygous |
| NC_037647.1 | 4040059 | SNV | 1 | A | T | Heterozygous |
| NC_037647.1 | 4040264 | SNV | 1 | T | A | Heterozygous |
| NC_037647.1 | 4040435 | SNV | 1 | A | G | Heterozygous |
| NC_037647.1 | 4040460 | SNV | 1 | G | A | Homozygous   |
| NC_037647.1 | 4040466 | SNV | 1 | A | T | Heterozygous |
| NC_037647.1 | 4040828 | SNV | 1 | T | A | Homozygous   |
| NC_037647.1 | 4040859 | SNV | 1 | G | A | Homozygous   |
| NC_037647.1 | 4040991 | SNV | 1 | C | T | Heterozygous |
| NC_037647.1 | 4041005 | SNV | 1 | C | T | Heterozygous |
| NC_037647.1 | 4211489 | SNV | 1 | C | T | Heterozygous |
| NC_037647.1 | 4211496 | SNV | 1 | G | A | Heterozygous |
| NC_037647.1 | 4211589 | SNV | 1 | G | A | Heterozygous |
| NC_037647.1 | 4211620 | SNV | 1 | A | T | Heterozygous |
| NC_037647.1 | 4211637 | SNV | 1 | G | C | Heterozygous |
| NC_037647.1 | 4211650 | SNV | 1 | T | C | Heterozygous |
| NC_037647.1 | 4211841 | SNV | 1 | C | T | Homozygous   |
| NC_037647.1 | 4212307 | SNV | 1 | G | A | Homozygous   |
| NC_037647.1 | 4212313 | SNV | 1 | C | T | Homozygous   |
| NC_037647.1 | 4212977 | SNV | 1 | T | C | Homozygous   |
| NC_037647.1 | 4221481 | SNV | 1 | A | G | Homozygous   |
| NC_037647.1 | 4227373 | SNV | 1 | C | T | Homozygous   |
| NC_037647.1 | 4227433 | SNV | 1 | T | C | Homozygous   |
| NC_037647.1 | 4227577 | SNV | 1 | C | T | Heterozygous |
| NC_037647.1 | 4231125 | SNV | 1 | G | A | Heterozygous |
| NC_037647.1 | 4231156 | SNV | 1 | T | G | Homozygous   |
| NC_037647.1 | 4234507 | SNV | 1 | C | T | Heterozygous |
| NC_037647.1 | 4234527 | SNV | 1 | T | C | Homozygous   |
| NC_037647.1 | 4235798 | SNV | 1 | C | G | Homozygous   |
| NC_037647.1 | 4235830 | SNV | 1 | T | A | Homozygous   |
| NC_037647.1 | 4235833 | SNV | 1 | C | A | Homozygous   |
| NC_037647.1 | 4235835 | SNV | 1 | C | G | Homozygous   |
| NC_037647.1 | 4237672 | SNV | 1 | A | G | Heterozygous |
| NC_037647.1 | 4237987 | SNV | 1 | C | T | Homozygous   |
| NC_037647.1 | 4238187 | SNV | 1 | C | A | Homozygous   |
| NC_037647.1 | 4254067 | SNV | 1 | A | C | Homozygous   |
| NC_037647.1 | 4257921 | SNV | 1 | G | T | Heterozygous |
| NC_037647.1 | 4257939 | SNV | 1 | A | T | Heterozygous |
| NC_037647.1 | 4257948 | SNV | 1 | C | T | Heterozygous |
| NC_037647.1 | 4257963 | SNV | 1 | G | T | Heterozygous |
| NC_037647.1 | 4268352 | SNV | 1 | G | A | Homozygous   |
| NC_037647.1 | 4268420 | SNV | 1 | G | A | Homozygous   |
| NC_037647.1 | 4268519 | SNV | 1 | A | G | Homozygous   |
| NC_037647.1 | 4268572 | SNV | 1 | C | T | Homozygous   |
| NC_037647.1 | 4268658 | SNV | 1 | A | T | Homozygous   |
| NC_037647.1 | 4271147 | SNV | 1 | T | C | Homozygous   |
| NC_037647.1 | 4271176 | SNV | 1 | C | G | Homozygous   |

|             |         |     |   |   |   |              |
|-------------|---------|-----|---|---|---|--------------|
| NC_037647.1 | 4276183 | SNV | 1 | C | T | Heterozygous |
| NC_037647.1 | 4276223 | SNV | 1 | C | T | Heterozygous |
| NC_037647.1 | 4276273 | SNV | 1 | A | C | Homozygous   |
| NC_037647.1 | 4287886 | SNV | 1 | A | G | Homozygous   |
| NC_037647.1 | 4287898 | SNV | 1 | G | A | Homozygous   |
| NC_037647.1 | 4301427 | SNV | 1 | A | T | Heterozygous |
| NC_037647.1 | 4301435 | SNV | 1 | A | T | Heterozygous |
| NC_037647.1 | 4301443 | SNV | 1 | A | T | Heterozygous |
| NC_037647.1 | 4301498 | SNV | 1 | A | G | Heterozygous |
| NC_037647.1 | 4301504 | SNV | 1 | T | C | Heterozygous |
| NC_037647.1 | 4303838 | SNV | 1 | T | C | Homozygous   |
| NC_037647.1 | 4304596 | SNV | 1 | A | G | Homozygous   |
| NC_037647.1 | 4304663 | SNV | 1 | C | A | Homozygous   |
| NC_037647.1 | 4304940 | SNV | 1 | G | A | Homozygous   |
| NC_037647.1 | 4304953 | SNV | 1 | C | T | Homozygous   |
| NC_037647.1 | 4305003 | SNV | 1 | G | A | Heterozygous |
| NC_037647.1 | 4307120 | SNV | 1 | G | T | Homozygous   |
| NC_037647.1 | 4307207 | SNV | 1 | A | T | Homozygous   |
| NC_037647.1 | 4307216 | SNV | 1 | G | A | Homozygous   |
| NC_037647.1 | 4307446 | SNV | 1 | G | A | Heterozygous |
| NC_037647.1 | 4309572 | SNV | 1 | G | C | Homozygous   |
| NC_037647.1 | 4309892 | SNV | 1 | C | T | Heterozygous |
| NC_037647.1 | 4310103 | SNV | 1 | T | C | Homozygous   |
| NC_037647.1 | 4310141 | SNV | 1 | C | A | Homozygous   |
| NC_037647.1 | 4310456 | SNV | 1 | T | C | Heterozygous |
| NC_037647.1 | 4310478 | SNV | 1 | G | A | Homozygous   |
| NC_037647.1 | 4310505 | SNV | 1 | C | G | Homozygous   |
| NC_037647.1 | 4311789 | SNV | 1 | T | C | Heterozygous |
| NC_037647.1 | 4312320 | SNV | 1 | C | T | Homozygous   |
| NC_037647.1 | 4312883 | SNV | 1 | A | T | Homozygous   |
| NC_037647.1 | 4319645 | SNV | 1 | C | A | Homozygous   |
| NC_037647.1 | 4325313 | SNV | 1 | A | G | Homozygous   |
| NC_037647.1 | 4325329 | SNV | 1 | G | T | Homozygous   |
| NC_037647.1 | 4325353 | SNV | 1 | T | G | Homozygous   |
| NC_037647.1 | 4332907 | SNV | 1 | C | A | Heterozygous |
| NC_037647.1 | 4337111 | SNV | 1 | C | T | Heterozygous |
| NC_037647.1 | 4337161 | SNV | 1 | C | G | Homozygous   |
| NC_037647.1 | 4337209 | SNV | 1 | T | C | Homozygous   |
| NC_037647.1 | 4337295 | SNV | 1 | A | G | Homozygous   |
| NC_037647.1 | 4337353 | SNV | 1 | T | C | Heterozygous |
| NC_037647.1 | 4338067 | SNV | 1 | T | C | Heterozygous |
| NC_037647.1 | 4338152 | SNV | 1 | T | C | Homozygous   |
| NC_037647.1 | 4358203 | SNV | 1 | G | A | Heterozygous |
| NC_037647.1 | 4358261 | SNV | 1 | G | A | Heterozygous |
| NC_037647.1 | 4358275 | SNV | 1 | T | A | Heterozygous |
| NC_037647.1 | 4358284 | SNV | 1 | C | T | Heterozygous |
| NC_037647.1 | 4358400 | SNV | 1 | C | G | Homozygous   |
| NC_037647.1 | 4358407 | SNV | 1 | G | A | Heterozygous |
| NC_037647.1 | 4373490 | SNV | 1 | T | G | Homozygous   |
| NC_037647.1 | 4375972 | SNV | 1 | C | A | Homozygous   |
| NC_037647.1 | 4375984 | SNV | 1 | T | G | Homozygous   |

|             |         |     |   |   |   |              |
|-------------|---------|-----|---|---|---|--------------|
| NC_037647.1 | 4375986 | SNV | 1 | T | C | Homozygous   |
| NC_037647.1 | 4375989 | SNV | 1 | C | T | Homozygous   |
| NC_037647.1 | 4378583 | SNV | 1 | A | G | Homozygous   |
| NC_037647.1 | 4378873 | SNV | 1 | G | T | Heterozygous |
| NC_037647.1 | 4382319 | SNV | 1 | G | A | Heterozygous |
| NC_037647.1 | 4382349 | SNV | 1 | G | A | Heterozygous |
| NC_037647.1 | 4382660 | SNV | 1 | G | A | Heterozygous |
| NC_037647.1 | 4385590 | SNV | 1 | C | T | Homozygous   |
| NC_037647.1 | 4385645 | SNV | 1 | A | G | Homozygous   |
| NC_037647.1 | 4395705 | SNV | 1 | A | G | Heterozygous |
| NC_037647.1 | 4395717 | SNV | 1 | A | G | Heterozygous |
| NC_037647.1 | 4395726 | SNV | 1 | G | A | Homozygous   |
| NC_037647.1 | 4395731 | SNV | 1 | A | G | Heterozygous |
| NC_037647.1 | 4395734 | SNV | 1 | A | G | Homozygous   |
| NC_037647.1 | 4395745 | SNV | 1 | A | G | Homozygous   |
| NC_037647.1 | 4395752 | SNV | 1 | A | G | Heterozygous |
| NC_037647.1 | 4395762 | SNV | 1 | G | C | Homozygous   |
| NC_037647.1 | 4395884 | SNV | 1 | A | G | Homozygous   |
| NC_037647.1 | 4395937 | SNV | 1 | A | T | Heterozygous |
| NC_037647.1 | 4395943 | SNV | 1 | A | T | Homozygous   |
| NC_037647.1 | 4398096 | SNV | 1 | T | C | Heterozygous |
| NC_037647.1 | 4431998 | SNV | 1 | A | G | Homozygous   |
| NC_037647.1 | 4432036 | SNV | 1 | G | A | Homozygous   |
| NC_037647.1 | 4432581 | SNV | 1 | C | T | Heterozygous |
| NC_037647.1 | 4432967 | SNV | 1 | T | C | Homozygous   |
| NC_037647.1 | 4433132 | SNV | 1 | C | T | Heterozygous |
| NC_037647.1 | 4434525 | SNV | 1 | T | C | Heterozygous |
| NC_037647.1 | 4434562 | SNV | 1 | G | A | Heterozygous |
| NC_037647.1 | 4434671 | SNV | 1 | A | G | Heterozygous |
| NC_037647.1 | 4434762 | SNV | 1 | C | G | Heterozygous |
| NC_037647.1 | 4434765 | SNV | 1 | T | C | Heterozygous |
| NC_037647.1 | 4434782 | SNV | 1 | T | C | Heterozygous |
| NC_037647.1 | 4434862 | SNV | 1 | T | C | Heterozygous |
| NC_037647.1 | 4434940 | SNV | 1 | G | A | Heterozygous |
| NC_037647.1 | 4434974 | SNV | 1 | T | C | Heterozygous |
| NC_037647.1 | 4434981 | SNV | 1 | T | C | Heterozygous |
| NC_037647.1 | 4435302 | SNV | 1 | A | G | Homozygous   |
| NC_037647.1 | 4435571 | SNV | 1 | T | G | Heterozygous |
| NC_037647.1 | 4435844 | SNV | 1 | G | T | Homozygous   |
| NC_037647.1 | 4435885 | SNV | 1 | A | G | Homozygous   |
| NC_037647.1 | 4435980 | SNV | 1 | C | T | Heterozygous |
| NC_037647.1 | 4437088 | SNV | 1 | C | T | Homozygous   |
| NC_037647.1 | 4438612 | SNV | 1 | T | C | Heterozygous |
| NC_037647.1 | 4438714 | SNV | 1 | C | T | Heterozygous |
| NC_037647.1 | 4438766 | SNV | 1 | T | G | Homozygous   |
| NC_037647.1 | 4438769 | SNV | 1 | A | G | Homozygous   |
| NC_037647.1 | 4438794 | SNV | 1 | T | C | Homozygous   |
| NC_037647.1 | 4438809 | SNV | 1 | A | G | Homozygous   |
| NC_037647.1 | 4438825 | SNV | 1 | G | A | Homozygous   |
| NC_037647.1 | 4443798 | SNV | 1 | A | G | Homozygous   |
| NC_037647.1 | 4443824 | SNV | 1 | G | A | Heterozygous |

|             |         |     |   |   |   |              |
|-------------|---------|-----|---|---|---|--------------|
| NC_037647.1 | 4452130 | SNV | 1 | C | T | Homozygous   |
| NC_037647.1 | 4452574 | SNV | 1 | A | G | Homozygous   |
| NC_037647.1 | 4452920 | SNV | 1 | G | A | Homozygous   |
| NC_037647.1 | 4452947 | SNV | 1 | A | G | Homozygous   |
| NC_037647.1 | 4456460 | SNV | 1 | T | C | Homozygous   |
| NC_037647.1 | 4462231 | SNV | 1 | A | T | Homozygous   |
| NC_037647.1 | 4462240 | SNV | 1 | G | T | Homozygous   |
| NC_037647.1 | 4467331 | SNV | 1 | G | A | Homozygous   |
| NC_037647.1 | 4467531 | SNV | 1 | C | T | Homozygous   |
| NC_037647.1 | 4479664 | SNV | 1 | T | C | Homozygous   |
| NC_037647.1 | 4479806 | SNV | 1 | C | T | Heterozygous |
| NC_037647.1 | 4479823 | SNV | 1 | T | C | Homozygous   |
| NC_037647.1 | 4479840 | SNV | 1 | C | T | Heterozygous |
| NC_037647.1 | 4480104 | SNV | 1 | T | C | Homozygous   |
| NC_037647.1 | 4480144 | SNV | 1 | A | T | Homozygous   |
| NC_037647.1 | 4482011 | SNV | 1 | G | A | Homozygous   |
| NC_037647.1 | 4482068 | SNV | 1 | C | T | Heterozygous |
| NC_037647.1 | 4482107 | SNV | 1 | C | T | Heterozygous |
| NC_037647.1 | 4482511 | SNV | 1 | C | T | Homozygous   |
| NC_037647.1 | 4482553 | SNV | 1 | A | G | Homozygous   |
| NC_037647.1 | 4482926 | SNV | 1 | G | A | Homozygous   |
| NC_037647.1 | 4483245 | SNV | 1 | G | A | Heterozygous |
| NC_037647.1 | 4483251 | SNV | 1 | C | T | Homozygous   |
| NC_037647.1 | 4483375 | SNV | 1 | T | C | Homozygous   |
| NC_037647.1 | 4483582 | SNV | 1 | T | C | Homozygous   |
| NC_037647.1 | 4483806 | SNV | 1 | A | G | Homozygous   |
| NC_037647.1 | 4487176 | SNV | 1 | C | T | Homozygous   |
| NC_037647.1 | 4487199 | SNV | 1 | T | C | Heterozygous |
| NC_037647.1 | 4487203 | SNV | 1 | T | C | Homozygous   |
| NC_037647.1 | 4487205 | SNV | 1 | A | G | Homozygous   |
| NC_037647.1 | 4487208 | SNV | 1 | T | C | Homozygous   |
| NC_037647.1 | 4487210 | SNV | 1 | C | A | Heterozygous |
| NC_037647.1 | 4487213 | SNV | 1 | A | T | Homozygous   |
| NC_037647.1 | 4487216 | SNV | 1 | A | G | Heterozygous |
| NC_037647.1 | 4487225 | SNV | 1 | A | T | Heterozygous |
| NC_037647.1 | 4487228 | SNV | 1 | T | G | Heterozygous |
| NC_037647.1 | 4487230 | SNV | 1 | A | G | Heterozygous |
| NC_037647.1 | 4487255 | SNV | 1 | T | C | Homozygous   |
| NC_037647.1 | 4487260 | SNV | 1 | C | T | Homozygous   |
| NC_037647.1 | 4487263 | SNV | 1 | T | G | Homozygous   |
| NC_037647.1 | 4487276 | SNV | 1 | T | C | Homozygous   |
| NC_037647.1 | 4487282 | SNV | 1 | A | G | Homozygous   |
| NC_037647.1 | 4487287 | SNV | 1 | A | G | Homozygous   |
| NC_037647.1 | 4487295 | SNV | 1 | A | T | Homozygous   |
| NC_037647.1 | 4487312 | SNV | 1 | T | G | Heterozygous |
| NC_037647.1 | 4487313 | SNV | 1 | T | G | Heterozygous |
| NC_037647.1 | 4487336 | SNV | 1 | A | G | Homozygous   |
| NC_037647.1 | 4487338 | SNV | 1 | T | G | Homozygous   |
| NC_037647.1 | 4487344 | SNV | 1 | A | G | Homozygous   |
| NC_037647.1 | 4487351 | SNV | 1 | A | T | Homozygous   |
| NC_037647.1 | 4487359 | SNV | 1 | A | G | Homozygous   |

|             |         |     |   |   |   |              |
|-------------|---------|-----|---|---|---|--------------|
| NC_037647.1 | 4487365 | SNV | 1 | G | C | Homozygous   |
| NC_037647.1 | 4487391 | SNV | 1 | G | T | Homozygous   |
| NC_037647.1 | 4487407 | SNV | 1 | T | C | Heterozygous |
| NC_037647.1 | 4522411 | SNV | 1 | G | A | Heterozygous |
| NC_037647.1 | 4523477 | SNV | 1 | T | C | Homozygous   |
| NC_037647.1 | 4523534 | SNV | 1 | T | G | Homozygous   |
| NC_037647.1 | 4523548 | SNV | 1 | T | C | Heterozygous |
| NC_037647.1 | 4529450 | SNV | 1 | G | A | Homozygous   |
| NC_037647.1 | 4529476 | SNV | 1 | A | G | Homozygous   |
| NC_037647.1 | 4529506 | SNV | 1 | T | C | Homozygous   |
| NC_037647.1 | 4529524 | SNV | 1 | A | G | Homozygous   |
| NC_037647.1 | 4529553 | SNV | 1 | T | C | Homozygous   |
| NC_037647.1 | 4538908 | SNV | 1 | G | A | Homozygous   |
| NC_037647.1 | 4538934 | SNV | 1 | C | T | Heterozygous |
| NC_037647.1 | 4538952 | SNV | 1 | G | A | Homozygous   |
| NC_037647.1 | 4538997 | SNV | 1 | G | T | Homozygous   |
| NC_037647.1 | 4538999 | SNV | 1 | G | A | Homozygous   |
| NC_037647.1 | 4539002 | SNV | 1 | G | A | Homozygous   |
| NC_037647.1 | 4547983 | SNV | 1 | G | A | Heterozygous |
| NC_037647.1 | 4548232 | SNV | 1 | A | G | Heterozygous |
| NC_037647.1 | 4548390 | SNV | 1 | A | G | Heterozygous |
| NC_037647.1 | 4549121 | SNV | 1 | C | T | Homozygous   |
| NC_037647.1 | 4576694 | SNV | 1 | G | A | Homozygous   |
| NC_037647.1 | 4591955 | SNV | 1 | A | G | Heterozygous |
| NC_037647.1 | 4599092 | SNV | 1 | C | T | Heterozygous |
| NC_037647.1 | 4599158 | SNV | 1 | T | C | Heterozygous |
| NC_037647.1 | 4599188 | SNV | 1 | G | C | Homozygous   |
| NC_037647.1 | 4599246 | SNV | 1 | C | T | Heterozygous |
| NC_037647.1 | 4599260 | SNV | 1 | T | C | Heterozygous |
| NC_037647.1 | 4599280 | SNV | 1 | A | G | Homozygous   |
| NC_037647.1 | 4599287 | SNV | 1 | A | T | Heterozygous |
| NC_037647.1 | 4599356 | SNV | 1 | A | C | Heterozygous |
| NC_037647.1 | 4600189 | SNV | 1 | C | G | Heterozygous |
| NC_037647.1 | 4600303 | SNV | 1 | T | C | Homozygous   |
| NC_037647.1 | 4600579 | SNV | 1 | A | G | Heterozygous |
| NC_037647.1 | 4600762 | SNV | 1 | A | G | Heterozygous |
| NC_037647.1 | 4604209 | SNV | 1 | A | G | Heterozygous |
| NC_037647.1 | 4605095 | SNV | 1 | G | T | Homozygous   |
| NC_037647.1 | 4605097 | SNV | 1 | T | C | Homozygous   |
| NC_037647.1 | 4605101 | SNV | 1 | G | C | Homozygous   |
| NC_037647.1 | 4605110 | SNV | 1 | T | C | Homozygous   |
| NC_037647.1 | 4605210 | SNV | 1 | C | T | Heterozygous |
| NC_037647.1 | 4605243 | SNV | 1 | A | G | Heterozygous |
| NC_037647.1 | 4605292 | SNV | 1 | A | G | Heterozygous |
| NC_037647.1 | 4605637 | SNV | 1 | G | A | Homozygous   |
| NC_037647.1 | 4606010 | SNV | 1 | T | C | Heterozygous |
| NC_037647.1 | 4607747 | SNV | 1 | G | A | Heterozygous |
| NC_037647.1 | 4607751 | SNV | 1 | G | A | Heterozygous |
| NC_037647.1 | 4607755 | SNV | 1 | T | A | Heterozygous |
| NC_037647.1 | 4607759 | SNV | 1 | G | T | Homozygous   |
| NC_037647.1 | 4607762 | SNV | 1 | A | T | Heterozygous |

|             |         |     |   |   |   |              |
|-------------|---------|-----|---|---|---|--------------|
| NC_037647.1 | 4613363 | SNV | 1 | G | T | Heterozygous |
| NC_037647.1 | 4613823 | SNV | 1 | C | G | Homozygous   |
| NC_037647.1 | 4624130 | SNV | 1 | A | G | Heterozygous |
| NC_037647.1 | 4624524 | SNV | 1 | G | A | Heterozygous |
| NC_037647.1 | 4624526 | SNV | 1 | T | G | Heterozygous |
| NC_037647.1 | 4624712 | SNV | 1 | C | T | Heterozygous |
| NC_037647.1 | 4624716 | SNV | 1 | C | T | Heterozygous |
| NC_037647.1 | 4624725 | SNV | 1 | C | A | Heterozygous |
| NC_037647.1 | 4624736 | SNV | 1 | A | T | Heterozygous |
| NC_037647.1 | 4624745 | SNV | 1 | T | C | Heterozygous |
| NC_037647.1 | 4624757 | SNV | 1 | C | A | Heterozygous |
| NC_037647.1 | 4624759 | SNV | 1 | C | T | Heterozygous |
| NC_037647.1 | 4624780 | SNV | 1 | C | T | Heterozygous |
| NC_037647.1 | 4624783 | SNV | 1 | A | T | Heterozygous |
| NC_037647.1 | 4624803 | SNV | 1 | G | A | Heterozygous |
| NC_037647.1 | 4624806 | SNV | 1 | C | T | Heterozygous |
| NC_037647.1 | 4626071 | SNV | 1 | C | T | Homozygous   |
| NC_037647.1 | 4626073 | SNV | 1 | T | A | Homozygous   |
| NC_037647.1 | 4626079 | SNV | 1 | T | C | Heterozygous |
| NC_037647.1 | 4626111 | SNV | 1 | G | T | Homozygous   |
| NC_037647.1 | 4649497 | SNV | 1 | T | A | Homozygous   |
| NC_037647.1 | 4649642 | SNV | 1 | A | G | Homozygous   |
| NC_037647.1 | 4649756 | SNV | 1 | A | T | Heterozygous |
| NC_037647.1 | 4649797 | SNV | 1 | T | C | Homozygous   |
| NC_037647.1 | 4649973 | SNV | 1 | A | G | Homozygous   |
| NC_037647.1 | 4650368 | SNV | 1 | T | C | Homozygous   |
| NC_037647.1 | 4657796 | SNV | 1 | C | T | Heterozygous |
| NC_037647.1 | 4658537 | SNV | 1 | C | T | Homozygous   |
| NC_037647.1 | 4659792 | SNV | 1 | C | T | Heterozygous |
| NC_037647.1 | 4661575 | SNV | 1 | T | A | Homozygous   |
| NC_037647.1 | 4662092 | SNV | 1 | C | T | Heterozygous |
| NC_037647.1 | 4662123 | SNV | 1 | C | T | Heterozygous |
| NC_037647.1 | 4668295 | SNV | 1 | A | G | Homozygous   |
| NC_037647.1 | 4677180 | SNV | 1 | G | A | Homozygous   |
| NC_037647.1 | 4677249 | SNV | 1 | G | A | Homozygous   |
| NC_037647.1 | 4677491 | SNV | 1 | A | G | Homozygous   |
| NC_037647.1 | 4677499 | SNV | 1 | A | G | Heterozygous |
| NC_037647.1 | 4677533 | SNV | 1 | A | G | Heterozygous |
| NC_037647.1 | 4679184 | SNV | 1 | T | A | Heterozygous |
| NC_037647.1 | 4686858 | SNV | 1 | G | C | Homozygous   |
| NC_037647.1 | 4687956 | SNV | 1 | A | G | Homozygous   |
| NC_037647.1 | 4687969 | SNV | 1 | A | T | Homozygous   |
| NC_037647.1 | 4687971 | SNV | 1 | G | A | Homozygous   |
| NC_037647.1 | 4688008 | SNV | 1 | T | C | Homozygous   |
| NC_037647.1 | 4689729 | SNV | 1 | T | C | Homozygous   |
| NC_037647.1 | 4690305 | SNV | 1 | A | T | Homozygous   |
| NC_037647.1 | 4690307 | SNV | 1 | A | T | Homozygous   |
| NC_037647.1 | 4690309 | SNV | 1 | A | G | Homozygous   |
| NC_037647.1 | 4690318 | SNV | 1 | T | A | Homozygous   |
| NC_037647.1 | 4690326 | SNV | 1 | A | T | Homozygous   |
| NC_037647.1 | 4690330 | SNV | 1 | T | A | Heterozygous |

|             |         |     |   |   |   |              |
|-------------|---------|-----|---|---|---|--------------|
| NC_037647.1 | 4690341 | SNV | 1 | T | A | Heterozygous |
| NC_037647.1 | 4690349 | SNV | 1 | T | C | Heterozygous |
| NC_037647.1 | 4690353 | SNV | 1 | A | T | Heterozygous |
| NC_037647.1 | 4692862 | SNV | 1 | A | G | Heterozygous |
| NC_037647.1 | 4692927 | SNV | 1 | A | C | Heterozygous |
| NC_037647.1 | 4692965 | SNV | 1 | A | G | Heterozygous |
| NC_037647.1 | 4695675 | SNV | 1 | C | T | Homozygous   |
| NC_037647.1 | 4695895 | SNV | 1 | T | A | Homozygous   |
| NC_037647.1 | 4698483 | SNV | 1 | T | C | Homozygous   |
| NC_037647.1 | 4699449 | SNV | 1 | T | A | Heterozygous |
| NC_037647.1 | 4700609 | SNV | 1 | T | C | Heterozygous |
| NC_037647.1 | 4700799 | SNV | 1 | T | C | Homozygous   |
| NC_037647.1 | 4711696 | SNV | 1 | A | G | Homozygous   |
| NC_037647.1 | 4711703 | SNV | 1 | T | C | Homozygous   |
| NC_037647.1 | 4711706 | SNV | 1 | C | A | Homozygous   |
| NC_037647.1 | 4711738 | SNV | 1 | A | T | Homozygous   |
| NC_037647.1 | 4711740 | SNV | 1 | A | T | Homozygous   |
| NC_037647.1 | 4711749 | SNV | 1 | T | A | Homozygous   |
| NC_037647.1 | 4713569 | SNV | 1 | A | T | Homozygous   |
| NC_037647.1 | 4713572 | SNV | 1 | C | T | Homozygous   |
| NC_037647.1 | 4714888 | SNV | 1 | G | T | Homozygous   |
| NC_037647.1 | 4714892 | SNV | 1 | T | C | Homozygous   |
| NC_037647.1 | 4714894 | SNV | 1 | T | A | Homozygous   |
| NC_037647.1 | 4714897 | SNV | 1 | T | C | Homozygous   |
| NC_037647.1 | 4714899 | SNV | 1 | A | G | Homozygous   |
| NC_037647.1 | 4714928 | SNV | 1 | A | T | Homozygous   |
| NC_037647.1 | 4714933 | SNV | 1 | G | C | Homozygous   |
| NC_037647.1 | 4714935 | SNV | 1 | T | G | Heterozygous |
| NC_037647.1 | 4714959 | SNV | 1 | T | G | Homozygous   |
| NC_037647.1 | 4720719 | SNV | 1 | T | C | Homozygous   |
| NC_037647.1 | 4720731 | SNV | 1 | T | A | Heterozygous |
| NC_037647.1 | 4720762 | SNV | 1 | A | T | Homozygous   |
| NC_037647.1 | 4753477 | SNV | 1 | C | T | Homozygous   |
| NC_037647.1 | 4754204 | SNV | 1 | G | A | Heterozygous |
| NC_037647.1 | 4754243 | SNV | 1 | G | A | Heterozygous |
| NC_037647.1 | 4754249 | SNV | 1 | G | T | Heterozygous |
| NC_037647.1 | 4754514 | SNV | 1 | A | G | Homozygous   |
| NC_037647.1 | 4768057 | SNV | 1 | A | G | Homozygous   |
| NC_037647.1 | 4768066 | SNV | 1 | T | C | Homozygous   |
| NC_037647.1 | 4768072 | SNV | 1 | T | C | Homozygous   |
| NC_037647.1 | 4773123 | SNV | 1 | C | G | Heterozygous |
| NC_037647.1 | 4773125 | SNV | 1 | G | A | Heterozygous |
| NC_037647.1 | 4773159 | SNV | 1 | C | T | Heterozygous |
| NC_037647.1 | 4773219 | SNV | 1 | G | A | Heterozygous |
| NC_037647.1 | 4773503 | SNV | 1 | C | T | Homozygous   |
| NC_037647.1 | 4776102 | SNV | 1 | T | A | Homozygous   |
| NC_037647.1 | 4776107 | SNV | 1 | T | C | Homozygous   |
| NC_037647.1 | 4776112 | SNV | 1 | T | A | Homozygous   |
| NC_037647.1 | 4787476 | SNV | 1 | T | C | Homozygous   |
| NC_037647.1 | 4787872 | SNV | 1 | G | A | Heterozygous |
| NC_037647.1 | 4788874 | SNV | 1 | T | A | Homozygous   |



|             |         |     |   |   |   |              |
|-------------|---------|-----|---|---|---|--------------|
| NC_037647.1 | 4789153 | SNV | 1 | T | C | Homozygous   |
| NC_037647.1 | 4791951 | SNV | 1 | A | T | Homozygous   |
| NC_037647.1 | 4791954 | SNV | 1 | T | A | Homozygous   |
| NC_037647.1 | 4791976 | SNV | 1 | A | T | Homozygous   |
| NC_037647.1 | 4791990 | SNV | 1 | A | G | Homozygous   |
| NC_037647.1 | 4804144 | SNV | 1 | A | G | Homozygous   |
| NC_037647.1 | 4804847 | SNV | 1 | A | T | Homozygous   |
| NC_037647.1 | 4806994 | SNV | 1 | C | A | Heterozygous |
| NC_037647.1 | 4812643 | SNV | 1 | A | T | Heterozygous |
| NC_037647.1 | 4812662 | SNV | 1 | A | G | Heterozygous |
| NC_037647.1 | 4812665 | SNV | 1 | A | T | Heterozygous |
| NC_037647.1 | 4818746 | SNV | 1 | A | T | Heterozygous |
| NC_037647.1 | 4818747 | SNV | 1 | A | T | Heterozygous |
| NC_037647.1 | 4818765 | SNV | 1 | G | T | Heterozygous |
| NC_037647.1 | 4819313 | SNV | 1 | A | G | Homozygous   |
| NC_037647.1 | 4821799 | SNV | 1 | C | T | Homozygous   |
| NC_037647.1 | 4835017 | SNV | 1 | T | A | Homozygous   |
| NC_037647.1 | 4839050 | SNV | 1 | T | G | Homozygous   |
| NC_037647.1 | 4844588 | SNV | 1 | G | A | Heterozygous |
| NC_037647.1 | 4844992 | SNV | 1 | C | T | Heterozygous |
| NC_037647.1 | 4844996 | SNV | 1 | T | C | Heterozygous |
| NC_037647.1 | 4844998 | SNV | 1 | G | C | Heterozygous |
| NC_037647.1 | 4845002 | SNV | 1 | C | A | Heterozygous |
| NC_037647.1 | 4845014 | SNV | 1 | G | T | Heterozygous |
| NC_037647.1 | 4845024 | SNV | 1 | C | G | Heterozygous |
| NC_037647.1 | 4845302 | SNV | 1 | T | C | Heterozygous |
| NC_037647.1 | 4845311 | SNV | 1 | T | C | Heterozygous |
| NC_037647.1 | 4845342 | SNV | 1 | T | C | Heterozygous |
| NC_037647.1 | 4845345 | SNV | 1 | T | C | Heterozygous |
| NC_037647.1 | 4857985 | SNV | 1 | C | G | Heterozygous |
| NC_037647.1 | 4857987 | SNV | 1 | C | A | Heterozygous |
| NC_037647.1 | 4858361 | SNV | 1 | A | T | Homozygous   |
| NC_037647.1 | 4858370 | SNV | 1 | A | T | Homozygous   |
| NC_037647.1 | 4858833 | SNV | 1 | A | G | Homozygous   |
| NC_037647.1 | 4861549 | SNV | 1 | C | T | Heterozygous |
| NC_037647.1 | 4864484 | SNV | 1 | T | A | Heterozygous |
| NC_037647.1 | 4864490 | SNV | 1 | T | C | Heterozygous |
| NC_037647.1 | 4864495 | SNV | 1 | A | G | Heterozygous |
| NC_037647.1 | 4864497 | SNV | 1 | T | C | Heterozygous |
| NC_037647.1 | 4864499 | SNV | 1 | A | T | Heterozygous |
| NC_037647.1 | 4864507 | SNV | 1 | T | C | Heterozygous |
| NC_037647.1 | 4871476 | SNV | 1 | G | T | Homozygous   |
| NC_037647.1 | 4873450 | SNV | 1 | T | G | Homozygous   |
| NC_037647.1 | 4875704 | SNV | 1 | A | T | Homozygous   |
| NC_037647.1 | 4875708 | SNV | 1 | T | C | Homozygous   |
| NC_037647.1 | 4875716 | SNV | 1 | A | T | Homozygous   |
| NC_037647.1 | 4875718 | SNV | 1 | T | A | Homozygous   |
| NC_037647.1 | 4875729 | SNV | 1 | C | A | Homozygous   |
| NC_037647.1 | 4875735 | SNV | 1 | A | T | Homozygous   |
| NC_037647.1 | 4875738 | SNV | 1 | A | G | Homozygous   |
| NC_037647.1 | 4875740 | SNV | 1 | A | T | Homozygous   |

|             |         |     |   |   |   |              |
|-------------|---------|-----|---|---|---|--------------|
| NC_037647.1 | 4875907 | SNV | 1 | A | G | Heterozygous |
| NC_037647.1 | 4875910 | SNV | 1 | T | C | Heterozygous |
| NC_037647.1 | 4875914 | SNV | 1 | T | C | Heterozygous |
| NC_037647.1 | 4875917 | SNV | 1 | G | A | Heterozygous |
| NC_037647.1 | 4876702 | SNV | 1 | A | G | Heterozygous |
| NC_037647.1 | 4880679 | SNV | 1 | A | G | Heterozygous |
| NC_037647.1 | 4880683 | SNV | 1 | A | G | Heterozygous |
| NC_037647.1 | 4880687 | SNV | 1 | A | G | Heterozygous |
| NC_037647.1 | 4880692 | SNV | 1 | A | G | Heterozygous |
| NC_037647.1 | 4882559 | SNV | 1 | T | A | Homozygous   |
| NC_037647.1 | 4882639 | SNV | 1 | T | C | Homozygous   |
| NC_037647.1 | 4893680 | SNV | 1 | G | A | Heterozygous |
| NC_037647.1 | 4893687 | SNV | 1 | T | A | Homozygous   |
| NC_037647.1 | 4893732 | SNV | 1 | T | A | Homozygous   |
| NC_037647.1 | 4896111 | SNV | 1 | T | C | Heterozygous |
| NC_037647.1 | 4901210 | SNV | 1 | T | G | Homozygous   |
| NC_037647.1 | 4901213 | SNV | 1 | A | T | Homozygous   |
| NC_037647.1 | 4901628 | SNV | 1 | A | G | Homozygous   |
| NC_037647.1 | 4903087 | SNV | 1 | A | T | Homozygous   |
| NC_037647.1 | 4905821 | SNV | 1 | T | A | Homozygous   |
| NC_037647.1 | 4906011 | SNV | 1 | C | T | Homozygous   |
| NC_037647.1 | 4906091 | SNV | 1 | A | G | Homozygous   |
| NC_037647.1 | 4906097 | SNV | 1 | A | T | Homozygous   |
| NC_037647.1 | 4906100 | SNV | 1 | T | A | Homozygous   |
| NC_037647.1 | 4906102 | SNV | 1 | C | T | Homozygous   |
| NC_037647.1 | 4906452 | SNV | 1 | G | A | Homozygous   |
| NC_037647.1 | 4906555 | SNV | 1 | C | T | Homozygous   |
| NC_037647.1 | 4911503 | SNV | 1 | A | G | Heterozygous |
| NC_037647.1 | 4911578 | SNV | 1 | A | G | Heterozygous |
| NC_037647.1 | 4911655 | SNV | 1 | A | G | Heterozygous |
| NC_037647.1 | 4911775 | SNV | 1 | A | G | Heterozygous |
| NC_037647.1 | 4911787 | SNV | 1 | A | G | Heterozygous |
| NC_037647.1 | 4912078 | SNV | 1 | T | C | Homozygous   |
| NC_037647.1 | 4912165 | SNV | 1 | A | G | Heterozygous |
| NC_037647.1 | 4912169 | SNV | 1 | A | G | Heterozygous |
| NC_037647.1 | 4913777 | SNV | 1 | A | G | Heterozygous |
| NC_037647.1 | 4913812 | SNV | 1 | A | G | Heterozygous |
| NC_037647.1 | 4913832 | SNV | 1 | A | G | Heterozygous |
| NC_037647.1 | 4913923 | SNV | 1 | A | G | Heterozygous |
| NC_037647.1 | 4913925 | SNV | 1 | A | G | Heterozygous |
| NC_037647.1 | 4913942 | SNV | 1 | A | G | Heterozygous |
| NC_037647.1 | 4913950 | SNV | 1 | A | G | Heterozygous |
| NC_037647.1 | 4914139 | SNV | 1 | A | G | Heterozygous |
| NC_037647.1 | 4914145 | SNV | 1 | A | G | Heterozygous |
| NC_037647.1 | 4914365 | SNV | 1 | T | C | Heterozygous |
| NC_037647.1 | 4914492 | SNV | 1 | A | T | Homozygous   |
| NC_037647.1 | 4914519 | SNV | 1 | T | A | Homozygous   |
| NC_037647.1 | 4914527 | SNV | 1 | A | G | Homozygous   |
| NC_037647.1 | 4914532 | SNV | 1 | T | A | Homozygous   |
| NC_037647.1 | 4919751 | SNV | 1 | A | T | Homozygous   |
| NC_037647.1 | 4919761 | SNV | 1 | A | T | Homozygous   |

|             |         |     |   |   |   |              |
|-------------|---------|-----|---|---|---|--------------|
| NC_037647.1 | 4920368 | SNV | 1 | T | C | Homozygous   |
| NC_037647.1 | 4920376 | SNV | 1 | T | C | Homozygous   |
| NC_037647.1 | 4922032 | SNV | 1 | G | T | Homozygous   |
| NC_037647.1 | 4923828 | SNV | 1 | G | A | Homozygous   |
| NC_037647.1 | 4947240 | SNV | 1 | A | G | Heterozygous |
| NC_037647.1 | 4948057 | SNV | 1 | G | A | Homozygous   |
| NC_037647.1 | 4948249 | SNV | 1 | A | T | Heterozygous |
| NC_037647.1 | 4948269 | SNV | 1 | C | T | Heterozygous |
| NC_037647.1 | 4948338 | SNV | 1 | A | C | Homozygous   |
| NC_037647.1 | 4948425 | SNV | 1 | G | T | Homozygous   |
| NC_037647.1 | 4948526 | SNV | 1 | T | C | Homozygous   |
| NC_037647.1 | 4948679 | SNV | 1 | C | A | Heterozygous |
| NC_037647.1 | 4948712 | SNV | 1 | C | G | Heterozygous |
| NC_037647.1 | 4948814 | SNV | 1 | T | C | Heterozygous |
| NC_037647.1 | 4948862 | SNV | 1 | G | A | Homozygous   |
| NC_037647.1 | 4949527 | SNV | 1 | C | A | Homozygous   |
| NC_037647.1 | 4958543 | SNV | 1 | A | G | Homozygous   |
| NC_037647.1 | 4958548 | SNV | 1 | A | T | Homozygous   |
| NC_037647.1 | 4958572 | SNV | 1 | G | A | Homozygous   |
| NC_037647.1 | 4969940 | SNV | 1 | T | C | Homozygous   |
| NC_037647.1 | 4969945 | SNV | 1 | T | C | Homozygous   |
| NC_037647.1 | 4995093 | SNV | 1 | G | A | Heterozygous |
| NC_037647.1 | 4995114 | SNV | 1 | A | C | Heterozygous |
| NC_037647.1 | 5003508 | SNV | 1 | A | G | Heterozygous |
| NC_037647.1 | 5003905 | SNV | 1 | T | C | Homozygous   |
| NC_037647.1 | 5003954 | SNV | 1 | G | C | Homozygous   |
| NC_037647.1 | 5057659 | SNV | 1 | C | T | Homozygous   |
| NC_037647.1 | 5057699 | SNV | 1 | G | A | Heterozygous |
| NC_037647.1 | 5057716 | SNV | 1 | G | A | Heterozygous |
| NC_037647.1 | 5064605 | SNV | 1 | T | G | Homozygous   |
| NC_037647.1 | 5064609 | SNV | 1 | T | C | Homozygous   |
| NC_037647.1 | 5064618 | SNV | 1 | C | A | Homozygous   |
| NC_037647.1 | 5065950 | SNV | 1 | A | G | Homozygous   |
| NC_037647.1 | 5065960 | SNV | 1 | G | A | Homozygous   |
| NC_037647.1 | 5067596 | SNV | 1 | T | C | Homozygous   |
| NC_037647.1 | 5071338 | SNV | 1 | C | G | Homozygous   |
| NC_037647.1 | 5071358 | SNV | 1 | C | G | Homozygous   |
| NC_037647.1 | 5071361 | SNV | 1 | T | A | Homozygous   |
| NC_037647.1 | 5071365 | SNV | 1 | C | G | Homozygous   |
| NC_037647.1 | 5071368 | SNV | 1 | C | T | Homozygous   |
| NC_037647.1 | 5071825 | SNV | 1 | A | G | Heterozygous |
| NC_037647.1 | 5071831 | SNV | 1 | C | T | Heterozygous |
| NC_037647.1 | 5074373 | SNV | 1 | A | G | Homozygous   |
| NC_037647.1 | 5076929 | SNV | 1 | G | A | Homozygous   |
| NC_037647.1 | 5080310 | SNV | 1 | G | A | Heterozygous |
| NC_037647.1 | 5080346 | SNV | 1 | G | A | Heterozygous |
| NC_037647.1 | 5087021 | SNV | 1 | A | G | Heterozygous |
| NC_037647.1 | 5087031 | SNV | 1 | A | G | Heterozygous |
| NC_037647.1 | 5089801 | SNV | 1 | T | A | Homozygous   |
| NC_037647.1 | 5089807 | SNV | 1 | A | T | Homozygous   |
| NC_037647.1 | 5089843 | SNV | 1 | A | C | Homozygous   |

|             |         |     |   |   |   |              |
|-------------|---------|-----|---|---|---|--------------|
| NC_037647.1 | 5096483 | SNV | 1 | A | G | Heterozygous |
| NC_037647.1 | 5109621 | SNV | 1 | T | A | Homozygous   |
| NC_037647.1 | 5109653 | SNV | 1 | T | A | Homozygous   |
| NC_037647.1 | 5109655 | SNV | 1 | A | T | Homozygous   |
| NC_037647.1 | 5109660 | SNV | 1 | T | A | Homozygous   |
| NC_037647.1 | 5109665 | SNV | 1 | A | C | Homozygous   |
| NC_037647.1 | 5111121 | SNV | 1 | T | C | Homozygous   |
| NC_037647.1 | 5111260 | SNV | 1 | C | T | Heterozygous |
| NC_037647.1 | 5111279 | SNV | 1 | C | T | Homozygous   |
| NC_037647.1 | 5124376 | SNV | 1 | G | T | Homozygous   |
| NC_037647.1 | 5124415 | SNV | 1 | T | A | Homozygous   |
| NC_037647.1 | 5133484 | SNV | 1 | A | G | Heterozygous |
| NC_037647.1 | 5136393 | SNV | 1 | T | A | Homozygous   |
| NC_037647.1 | 5136427 | SNV | 1 | T | C | Heterozygous |
| NC_037647.1 | 5136436 | SNV | 1 | A | G | Heterozygous |
| NC_037647.1 | 5158484 | SNV | 1 | T | A | Heterozygous |
| NC_037647.1 | 5160355 | SNV | 1 | C | G | Homozygous   |
| NC_037647.1 | 5160365 | SNV | 1 | C | T | Heterozygous |
| NC_037647.1 | 5160370 | SNV | 1 | G | T | Homozygous   |
| NC_037647.1 | 5160373 | SNV | 1 | A | T | Homozygous   |
| NC_037647.1 | 5169929 | SNV | 1 | T | C | Homozygous   |
| NC_037647.1 | 5176373 | SNV | 1 | A | C | Homozygous   |
| NC_037647.1 | 5176375 | SNV | 1 | A | T | Homozygous   |
| NC_037647.1 | 5176379 | SNV | 1 | A | T | Homozygous   |
| NC_037647.1 | 5176393 | SNV | 1 | C | A | Homozygous   |
| NC_037647.1 | 5176889 | SNV | 1 | T | C | Homozygous   |
| NC_037647.1 | 5177082 | SNV | 1 | T | C | Heterozygous |
| NC_037647.1 | 5177334 | SNV | 1 | G | A | Heterozygous |
| NC_037647.1 | 5179202 | SNV | 1 | A | T | Homozygous   |
| NC_037647.1 | 5179248 | SNV | 1 | C | G | Homozygous   |
| NC_037647.1 | 5184625 | SNV | 1 | C | A | Heterozygous |
| NC_037647.1 | 5184628 | SNV | 1 | G | A | Heterozygous |
| NC_037647.1 | 5187701 | SNV | 1 | G | A | Homozygous   |
| NC_037647.1 | 5187703 | SNV | 1 | T | A | Homozygous   |
| NC_037647.1 | 5187708 | SNV | 1 | G | A | Homozygous   |
| NC_037647.1 | 5187711 | SNV | 1 | A | T | Heterozygous |
| NC_037647.1 | 5187714 | SNV | 1 | A | G | Homozygous   |
| NC_037647.1 | 5213478 | SNV | 1 | G | A | Heterozygous |
| NC_037647.1 | 5213939 | SNV | 1 | T | A | Heterozygous |
| NC_037647.1 | 5213953 | SNV | 1 | C | A | Heterozygous |
| NC_037647.1 | 5216328 | SNV | 1 | G | A | Heterozygous |
| NC_037647.1 | 5216334 | SNV | 1 | C | T | Homozygous   |
| NC_037647.1 | 5216411 | SNV | 1 | A | G | Homozygous   |
| NC_037647.1 | 5216416 | SNV | 1 | T | C | Homozygous   |
| NC_037647.1 | 5216441 | SNV | 1 | T | G | Heterozygous |
| NC_037647.1 | 5218915 | SNV | 1 | C | A | Homozygous   |
| NC_037647.1 | 5219700 | SNV | 1 | C | T | Heterozygous |
| NC_037647.1 | 5219857 | SNV | 1 | C | T | Homozygous   |
| NC_037647.1 | 5219867 | SNV | 1 | A | G | Homozygous   |
| NC_037647.1 | 5219880 | SNV | 1 | C | T | Homozygous   |
| NC_037647.1 | 5221403 | SNV | 1 | T | G | Heterozygous |

|             |         |     |   |   |   |              |
|-------------|---------|-----|---|---|---|--------------|
| NC_037647.1 | 5223088 | SNV | 1 | A | G | Homozygous   |
| NC_037647.1 | 5226572 | SNV | 1 | T | G | Homozygous   |
| NC_037647.1 | 5226574 | SNV | 1 | A | G | Homozygous   |
| NC_037647.1 | 5226585 | SNV | 1 | G | C | Homozygous   |
| NC_037647.1 | 5229645 | SNV | 1 | G | A | Heterozygous |
| NC_037647.1 | 5234065 | SNV | 1 | A | T | Homozygous   |
| NC_037647.1 | 5236768 | SNV | 1 | C | T | Homozygous   |
| NC_037647.1 | 5236807 | SNV | 1 | T | A | Heterozygous |
| NC_037647.1 | 5236879 | SNV | 1 | T | C | Heterozygous |
| NC_037647.1 | 5236885 | SNV | 1 | T | G | Homozygous   |
| NC_037647.1 | 5239415 | SNV | 1 | A | G | Heterozygous |
| NC_037647.1 | 5239603 | SNV | 1 | T | C | Homozygous   |
| NC_037647.1 | 5239807 | SNV | 1 | T | C | Homozygous   |
| NC_037647.1 | 5240304 | SNV | 1 | A | G | Homozygous   |
| NC_037647.1 | 5240413 | SNV | 1 | T | C | Homozygous   |
| NC_037647.1 | 5240476 | SNV | 1 | A | G | Homozygous   |
| NC_037647.1 | 5240537 | SNV | 1 | G | A | Heterozygous |
| NC_037647.1 | 5241337 | SNV | 1 | C | T | Heterozygous |
| NC_037647.1 | 5241343 | SNV | 1 | T | C | Heterozygous |
| NC_037647.1 | 5241468 | SNV | 1 | A | G | Heterozygous |
| NC_037647.1 | 5241471 | SNV | 1 | A | G | Heterozygous |
| NC_037647.1 | 5241494 | SNV | 1 | T | A | Heterozygous |
| NC_037647.1 | 5241631 | SNV | 1 | T | G | Heterozygous |
| NC_037647.1 | 5241661 | SNV | 1 | A | G | Heterozygous |
| NC_037647.1 | 5241670 | SNV | 1 | A | G | Heterozygous |
| NC_037647.1 | 5241694 | SNV | 1 | C | T | Heterozygous |
| NC_037647.1 | 5241760 | SNV | 1 | G | A | Heterozygous |
| NC_037647.1 | 5242172 | SNV | 1 | T | C | Heterozygous |
| NC_037647.1 | 5242288 | SNV | 1 | C | T | Heterozygous |
| NC_037647.1 | 5242549 | SNV | 1 | T | C | Homozygous   |
| NC_037647.1 | 5243155 | SNV | 1 | C | T | Heterozygous |
| NC_037647.1 | 5243272 | SNV | 1 | G | A | Heterozygous |
| NC_037647.1 | 5243356 | SNV | 1 | T | G | Heterozygous |
| NC_037647.1 | 5247309 | SNV | 1 | A | G | Homozygous   |
| NC_037647.1 | 5248728 | SNV | 1 | G | T | Homozygous   |
| NC_037647.1 | 5251321 | SNV | 1 | A | G | Homozygous   |
| NC_037647.1 | 5251378 | SNV | 1 | C | T | Heterozygous |
| NC_037647.1 | 5251501 | SNV | 1 | T | C | Heterozygous |
| NC_037647.1 | 5251944 | SNV | 1 | A | G | Homozygous   |
| NC_037647.1 | 5252012 | SNV | 1 | A | G | Homozygous   |
| NC_037647.1 | 5252032 | SNV | 1 | A | G | Homozygous   |
| NC_037647.1 | 5252271 | SNV | 1 | C | T | Homozygous   |
| NC_037647.1 | 5252630 | SNV | 1 | T | C | Homozygous   |
| NC_037647.1 | 5304890 | SNV | 1 | T | C | Heterozygous |
| NC_037647.1 | 5304983 | SNV | 1 | A | G | Homozygous   |
| NC_037647.1 | 5305028 | SNV | 1 | A | G | Homozygous   |
| NC_037647.1 | 5305529 | SNV | 1 | C | T | Heterozygous |
| NC_037647.1 | 5305544 | SNV | 1 | A | T | Heterozygous |
| NC_037647.1 | 5305547 | SNV | 1 | C | T | Heterozygous |
| NC_037647.1 | 5311803 | SNV | 1 | C | T | Homozygous   |
| NC_037647.1 | 5314487 | SNV | 1 | C | T | Heterozygous |

|             |         |     |   |   |   |              |
|-------------|---------|-----|---|---|---|--------------|
| NC_037647.1 | 5325481 | SNV | 1 | A | G | Heterozygous |
| NC_037647.1 | 5325490 | SNV | 1 | A | G | Homozygous   |
| NC_037647.1 | 5325975 | SNV | 1 | C | T | Heterozygous |
| NC_037647.1 | 5335269 | SNV | 1 | A | G | Heterozygous |
| NC_037647.1 | 5335296 | SNV | 1 | G | A | Heterozygous |
| NC_037647.1 | 5340381 | SNV | 1 | A | G | Homozygous   |
| NC_037647.1 | 5340420 | SNV | 1 | G | A | Homozygous   |
| NC_037647.1 | 5340885 | SNV | 1 | T | A | Homozygous   |
| NC_037647.1 | 5341556 | SNV | 1 | G | A | Heterozygous |
| NC_037647.1 | 5341582 | SNV | 1 | G | C | Homozygous   |
| NC_037647.1 | 5341669 | SNV | 1 | A | G | Homozygous   |
| NC_037647.1 | 5342282 | SNV | 1 | T | C | Heterozygous |
| NC_037647.1 | 5342374 | SNV | 1 | T | C | Heterozygous |
| NC_037647.1 | 5342569 | SNV | 1 | A | G | Homozygous   |
| NC_037647.1 | 5404483 | SNV | 1 | C | T | Homozygous   |
| NC_037647.1 | 5404486 | SNV | 1 | C | A | Homozygous   |
| NC_037647.1 | 5404492 | SNV | 1 | C | A | Homozygous   |
| NC_037647.1 | 5404495 | SNV | 1 | C | A | Homozygous   |
| NC_037647.1 | 5621752 | SNV | 1 | A | T | Homozygous   |
| NC_037647.1 | 5621755 | SNV | 1 | A | C | Homozygous   |
| NC_037647.1 | 5621777 | SNV | 1 | A | C | Homozygous   |
| NC_037647.1 | 5621780 | SNV | 1 | T | A | Homozygous   |
| NC_037647.1 | 5621788 | SNV | 1 | A | T | Homozygous   |
| NC_037647.1 | 5621805 | SNV | 1 | T | C | Homozygous   |
| NC_037647.1 | 5627535 | SNV | 1 | G | A | Homozygous   |
| NC_037647.1 | 5629511 | SNV | 1 | C | T | Heterozygous |
| NC_037647.1 | 5629674 | SNV | 1 | A | G | Homozygous   |
| NC_037647.1 | 5631290 | SNV | 1 | A | T | Homozygous   |
| NC_037647.1 | 5631292 | SNV | 1 | C | T | Homozygous   |
| NC_037647.1 | 5631321 | SNV | 1 | T | A | Homozygous   |
| NC_037647.1 | 5655328 | SNV | 1 | G | A | Homozygous   |
| NC_037647.1 | 5655331 | SNV | 1 | A | T | Homozygous   |
| NC_037647.1 | 5655336 | SNV | 1 | A | T | Heterozygous |
| NC_037647.1 | 5655345 | SNV | 1 | A | T | Homozygous   |
| NC_037647.1 | 5655348 | SNV | 1 | A | T | Homozygous   |
| NC_037647.1 | 5674987 | SNV | 1 | C | A | Heterozygous |
| NC_037647.1 | 5678919 | SNV | 1 | G | A | Heterozygous |
| NC_037647.1 | 5679827 | SNV | 1 | A | G | Homozygous   |
| NC_037647.1 | 5685401 | SNV | 1 | T | A | Heterozygous |
| NC_037647.1 | 5685919 | SNV | 1 | T | C | Heterozygous |
| NC_037647.1 | 5686251 | SNV | 1 | A | G | Heterozygous |
| NC_037647.1 | 5686854 | SNV | 1 | G | A | Heterozygous |
| NC_037647.1 | 5687217 | SNV | 1 | T | C | Heterozygous |
| NC_037647.1 | 5691231 | SNV | 1 | A | T | Homozygous   |
| NC_037647.1 | 5691234 | SNV | 1 | T | G | Homozygous   |
| NC_037647.1 | 5691800 | SNV | 1 | T | C | Heterozygous |
| NC_037647.1 | 5691937 | SNV | 1 | T | C | Heterozygous |
| NC_037647.1 | 5692412 | SNV | 1 | T | C | Heterozygous |
| NC_037647.1 | 5692532 | SNV | 1 | T | C | Homozygous   |
| NC_037647.1 | 5697707 | SNV | 1 | A | G | Heterozygous |
| NC_037647.1 | 5698020 | SNV | 1 | A | G | Heterozygous |

|             |         |     |   |   |   |              |
|-------------|---------|-----|---|---|---|--------------|
| NC_037647.1 | 5698561 | SNV | 1 | C | G | Homozygous   |
| NC_037647.1 | 5698605 | SNV | 1 | G | A | Heterozygous |
| NC_037647.1 | 5698613 | SNV | 1 | C | T | Heterozygous |
| NC_037647.1 | 5698628 | SNV | 1 | T | G | Heterozygous |
| NC_037647.1 | 5698637 | SNV | 1 | G | A | Heterozygous |
| NC_037647.1 | 5698811 | SNV | 1 | G | A | Homozygous   |
| NC_037647.1 | 5699624 | SNV | 1 | T | C | Heterozygous |
| NC_037647.1 | 5699728 | SNV | 1 | T | A | Heterozygous |
| NC_037647.1 | 5699732 | SNV | 1 | T | G | Heterozygous |
| NC_037647.1 | 5701865 | SNV | 1 | T | C | Homozygous   |
| NC_037647.1 | 5702060 | SNV | 1 | T | C | Heterozygous |
| NC_037647.1 | 5702225 | SNV | 1 | A | G | Heterozygous |
| NC_037647.1 | 5703314 | SNV | 1 | T | A | Homozygous   |
| NC_037647.1 | 5703328 | SNV | 1 | C | A | Homozygous   |
| NC_037647.1 | 5703351 | SNV | 1 | C | A | Homozygous   |
| NC_037647.1 | 5703356 | SNV | 1 | G | A | Homozygous   |
| NC_037647.1 | 5704128 | SNV | 1 | T | C | Heterozygous |
| NC_037647.1 | 5705120 | SNV | 1 | A | G | Heterozygous |
| NC_037647.1 | 5711711 | SNV | 1 | C | T | Heterozygous |
| NC_037647.1 | 5712543 | SNV | 1 | T | A | Heterozygous |
| NC_037647.1 | 5712548 | SNV | 1 | A | G | Homozygous   |
| NC_037647.1 | 5713034 | SNV | 1 | A | G | Homozygous   |
| NC_037647.1 | 5719168 | SNV | 1 | C | T | Homozygous   |
| NC_037647.1 | 5736090 | SNV | 1 | C | T | Homozygous   |
| NC_037647.1 | 5738772 | SNV | 1 | T | C | Homozygous   |
| NC_037647.1 | 5738778 | SNV | 1 | C | T | Homozygous   |
| NC_037647.1 | 5738844 | SNV | 1 | G | A | Heterozygous |
| NC_037647.1 | 5743187 | SNV | 1 | T | C | Homozygous   |
| NC_037647.1 | 5743336 | SNV | 1 | G | A | Homozygous   |
| NC_037647.1 | 5743344 | SNV | 1 | C | T | Homozygous   |
| NC_037647.1 | 5743397 | SNV | 1 | A | G | Heterozygous |
| NC_037647.1 | 5743501 | SNV | 1 | T | C | Heterozygous |
| NC_037647.1 | 5743505 | SNV | 1 | T | C | Heterozygous |
| NC_037647.1 | 5743541 | SNV | 1 | T | C | Homozygous   |
| NC_037647.1 | 5744058 | SNV | 1 | C | T | Homozygous   |
| NC_037647.1 | 5744078 | SNV | 1 | T | C | Homozygous   |
| NC_037647.1 | 5745610 | SNV | 1 | A | T | Heterozygous |
| NC_037647.1 | 5745615 | SNV | 1 | A | T | Heterozygous |
| NC_037647.1 | 5745643 | SNV | 1 | T | C | Heterozygous |
| NC_037647.1 | 5746871 | SNV | 1 | A | G | Homozygous   |
| NC_037647.1 | 5746997 | SNV | 1 | T | G | Heterozygous |
| NC_037647.1 | 5747069 | SNV | 1 | A | T | Homozygous   |
| NC_037647.1 | 5747184 | SNV | 1 | A | G | Homozygous   |
| NC_037647.1 | 5747240 | SNV | 1 | G | C | Homozygous   |
| NC_037647.1 | 5747242 | SNV | 1 | A | G | Heterozygous |
| NC_037647.1 | 5747273 | SNV | 1 | T | A | Heterozygous |
| NC_037647.1 | 5747306 | SNV | 1 | C | T | Heterozygous |
| NC_037647.1 | 5751961 | SNV | 1 | A | G | Heterozygous |
| NC_037647.1 | 5751972 | SNV | 1 | A | G | Heterozygous |
| NC_037647.1 | 5753029 | SNV | 1 | G | C | Homozygous   |
| NC_037647.1 | 5755153 | SNV | 1 | T | G | Homozygous   |

|             |         |     |   |   |   |              |
|-------------|---------|-----|---|---|---|--------------|
| NC_037647.1 | 5755167 | SNV | 1 | A | G | Homozygous   |
| NC_037647.1 | 5755175 | SNV | 1 | A | C | Homozygous   |
| NC_037647.1 | 5777755 | SNV | 1 | T | C | Homozygous   |
| NC_037647.1 | 5778898 | SNV | 1 | T | C | Homozygous   |
| NC_037647.1 | 5779080 | SNV | 1 | C | T | Homozygous   |
| NC_037647.1 | 5782282 | SNV | 1 | T | G | Homozygous   |
| NC_037647.1 | 5782285 | SNV | 1 | A | C | Homozygous   |
| NC_037647.1 | 5782300 | SNV | 1 | T | A | Homozygous   |
| NC_037647.1 | 5783590 | SNV | 1 | T | C | Homozygous   |
| NC_037647.1 | 5783843 | SNV | 1 | A | G | Homozygous   |
| NC_037647.1 | 5783846 | SNV | 1 | A | G | Homozygous   |
| NC_037647.1 | 5783912 | SNV | 1 | T | C | Homozygous   |
| NC_037647.1 | 5784002 | SNV | 1 | A | G | Homozygous   |
| NC_037647.1 | 5786041 | SNV | 1 | T | C | Heterozygous |
| NC_037647.1 | 5786401 | SNV | 1 | C | G | Heterozygous |
| NC_037647.1 | 5786435 | SNV | 1 | C | T | Homozygous   |
| NC_037647.1 | 5790929 | SNV | 1 | T | C | Heterozygous |
| NC_037647.1 | 5790936 | SNV | 1 | T | A | Heterozygous |
| NC_037647.1 | 5790939 | SNV | 1 | A | C | Heterozygous |
| NC_037647.1 | 5791154 | SNV | 1 | T | C | Homozygous   |
| NC_037647.1 | 5791195 | SNV | 1 | G | A | Homozygous   |
| NC_037647.1 | 5791200 | SNV | 1 | C | T | Heterozygous |
| NC_037647.1 | 5791336 | SNV | 1 | C | T | Heterozygous |
| NC_037647.1 | 5791350 | SNV | 1 | C | T | Homozygous   |
| NC_037647.1 | 5791361 | SNV | 1 | G | A | Homozygous   |
| NC_037647.1 | 5791363 | SNV | 1 | G | T | Homozygous   |
| NC_037647.1 | 5791365 | SNV | 1 | C | T | Homozygous   |
| NC_037647.1 | 5791405 | SNV | 1 | A | G | Heterozygous |
| NC_037647.1 | 5792131 | SNV | 1 | G | A | Heterozygous |
| NC_037647.1 | 5792331 | SNV | 1 | T | C | Heterozygous |
| NC_037647.1 | 5793042 | SNV | 1 | C | T | Heterozygous |
| NC_037647.1 | 5793099 | SNV | 1 | G | T | Heterozygous |
| NC_037647.1 | 5793105 | SNV | 1 | G | T | Homozygous   |
| NC_037647.1 | 5793289 | SNV | 1 | T | C | Homozygous   |
| NC_037647.1 | 5793450 | SNV | 1 | T | G | Heterozygous |
| NC_037647.1 | 5793453 | SNV | 1 | T | C | Heterozygous |
| NC_037647.1 | 5793803 | SNV | 1 | T | C | Homozygous   |
| NC_037647.1 | 5794185 | SNV | 1 | T | C | Heterozygous |
| NC_037647.1 | 5794249 | SNV | 1 | T | C | Heterozygous |
| NC_037647.1 | 5795613 | SNV | 1 | T | C | Homozygous   |
| NC_037647.1 | 5795891 | SNV | 1 | C | T | Heterozygous |
| NC_037647.1 | 5795982 | SNV | 1 | C | T | Homozygous   |
| NC_037647.1 | 5796404 | SNV | 1 | G | T | Heterozygous |
| NC_037647.1 | 5796437 | SNV | 1 | G | A | Heterozygous |
| NC_037647.1 | 5796561 | SNV | 1 | T | C | Homozygous   |
| NC_037647.1 | 5796630 | SNV | 1 | A | G | Homozygous   |
| NC_037647.1 | 5797148 | SNV | 1 | A | T | Heterozygous |
| NC_037647.1 | 5797175 | SNV | 1 | T | C | Homozygous   |
| NC_037647.1 | 5797196 | SNV | 1 | T | C | Homozygous   |
| NC_037647.1 | 5797232 | SNV | 1 | T | C | Homozygous   |
| NC_037647.1 | 5808063 | SNV | 1 | T | C | Homozygous   |



|             |         |     |   |   |   |              |
|-------------|---------|-----|---|---|---|--------------|
| NC_037647.1 | 5808367 | SNV | 1 | T | A | Homozygous   |
| NC_037647.1 | 5808392 | SNV | 1 | G | A | Homozygous   |
| NC_037647.1 | 5808397 | SNV | 1 | T | A | Homozygous   |
| NC_037647.1 | 5808400 | SNV | 1 | A | G | Homozygous   |
| NC_037647.1 | 5808412 | SNV | 1 | A | C | Homozygous   |
| NC_037647.1 | 5809471 | SNV | 1 | C | T | Homozygous   |
| NC_037647.1 | 5809492 | SNV | 1 | A | G | Homozygous   |
| NC_037647.1 | 5809495 | SNV | 1 | G | C | Homozygous   |
| NC_037647.1 | 5812496 | SNV | 1 | G | A | Homozygous   |
| NC_037647.1 | 5812538 | SNV | 1 | A | G | Homozygous   |
| NC_037647.1 | 5812848 | SNV | 1 | G | A | Homozygous   |
| NC_037647.1 | 5814182 | SNV | 1 | G | A | Homozygous   |
| NC_037647.1 | 5814305 | SNV | 1 | C | T | Heterozygous |
| NC_037647.1 | 5816150 | SNV | 1 | C | T | Homozygous   |
| NC_037647.1 | 5817308 | SNV | 1 | A | G | Homozygous   |
| NC_037647.1 | 5817745 | SNV | 1 | A | G | Heterozygous |
| NC_037647.1 | 5817841 | SNV | 1 | G | A | Homozygous   |
| NC_037647.1 | 5818003 | SNV | 1 | A | G | Homozygous   |
| NC_037647.1 | 5826030 | SNV | 1 | T | A | Homozygous   |
| NC_037647.1 | 5826129 | SNV | 1 | A | T | Homozygous   |
| NC_037647.1 | 5826133 | SNV | 1 | C | T | Homozygous   |
| NC_037647.1 | 5826428 | SNV | 1 | A | G | Homozygous   |
| NC_037647.1 | 5833090 | SNV | 1 | T | C | Heterozygous |
| NC_037647.1 | 5833093 | SNV | 1 | T | C | Heterozygous |
| NC_037647.1 | 5833100 | SNV | 1 | A | T | Homozygous   |
| NC_037647.1 | 5833120 | SNV | 1 | T | C | Homozygous   |
| NC_037647.1 | 5833131 | SNV | 1 | A | C | Homozygous   |
| NC_037647.1 | 5836192 | SNV | 1 | A | G | Homozygous   |
| NC_037647.1 | 5836514 | SNV | 1 | C | T | Homozygous   |
| NC_037647.1 | 5836578 | SNV | 1 | G | C | Homozygous   |
| NC_037647.1 | 5836922 | SNV | 1 | A | G | Homozygous   |
| NC_037647.1 | 5837576 | SNV | 1 | T | G | Homozygous   |
| NC_037647.1 | 5837578 | SNV | 1 | T | C | Homozygous   |
| NC_037647.1 | 5837885 | SNV | 1 | C | T | Homozygous   |
| NC_037647.1 | 5838325 | SNV | 1 | G | T | Homozygous   |
| NC_037647.1 | 5838349 | SNV | 1 | C | T | Homozygous   |
| NC_037647.1 | 5839022 | SNV | 1 | A | T | Heterozygous |
| NC_037647.1 | 5839265 | SNV | 1 | T | C | Homozygous   |
| NC_037647.1 | 5839479 | SNV | 1 | A | C | Homozygous   |
| NC_037647.1 | 5839858 | SNV | 1 | A | G | Homozygous   |
| NC_037647.1 | 5840049 | SNV | 1 | A | G | Heterozygous |
| NC_037647.1 | 5840673 | SNV | 1 | C | T | Heterozygous |
| NC_037647.1 | 5840748 | SNV | 1 | T | C | Heterozygous |
| NC_037647.1 | 5840750 | SNV | 1 | C | T | Heterozygous |
| NC_037647.1 | 5849381 | SNV | 1 | G | A | Heterozygous |
| NC_037647.1 | 5849576 | SNV | 1 | A | G | Homozygous   |
| NC_037647.1 | 5858105 | SNV | 1 | C | T | Homozygous   |
| NC_037647.1 | 5858115 | SNV | 1 | C | T | Homozygous   |
| NC_037647.1 | 5858120 | SNV | 1 | C | T | Homozygous   |
| NC_037647.1 | 5858125 | SNV | 1 | C | T | Homozygous   |
| NC_037647.1 | 5858150 | SNV | 1 | C | T | Heterozygous |

|             |         |     |   |   |   |              |
|-------------|---------|-----|---|---|---|--------------|
| NC_037647.1 | 5858152 | SNV | 1 | A | G | Heterozygous |
| NC_037647.1 | 5858155 | SNV | 1 | C | T | Homozygous   |
| NC_037647.1 | 5858165 | SNV | 1 | C | T | Homozygous   |
| NC_037647.1 | 5858170 | SNV | 1 | C | T | Homozygous   |
| NC_037647.1 | 5858175 | SNV | 1 | C | T | Homozygous   |
| NC_037647.1 | 5858180 | SNV | 1 | C | T | Homozygous   |
| NC_037647.1 | 5858185 | SNV | 1 | C | T | Homozygous   |
| NC_037647.1 | 5858188 | SNV | 1 | G | A | Homozygous   |
| NC_037647.1 | 5858200 | SNV | 1 | C | T | Heterozygous |
| NC_037647.1 | 5858220 | SNV | 1 | C | T | Homozygous   |
| NC_037647.1 | 5858222 | SNV | 1 | A | G | Homozygous   |
| NC_037647.1 | 5858230 | SNV | 1 | C | T | Heterozygous |
| NC_037647.1 | 5858232 | SNV | 1 | A | G | Homozygous   |
| NC_037647.1 | 5858237 | SNV | 1 | A | G | Heterozygous |
| NC_037647.1 | 5859036 | SNV | 1 | A | T | Homozygous   |
| NC_037647.1 | 5859046 | SNV | 1 | C | T | Heterozygous |
| NC_037647.1 | 5867570 | SNV | 1 | G | A | Heterozygous |
| NC_037647.1 | 5867674 | SNV | 1 | A | T | Heterozygous |
| NC_037647.1 | 5874867 | SNV | 1 | C | T | Homozygous   |
| NC_037647.1 | 5881277 | SNV | 1 | A | G | Homozygous   |
| NC_037647.1 | 5885912 | SNV | 1 | T | C | Homozygous   |
| NC_037647.1 | 5894245 | SNV | 1 | T | C | Homozygous   |
| NC_037647.1 | 5898527 | SNV | 1 | A | G | Heterozygous |
| NC_037647.1 | 5908694 | SNV | 1 | C | G | Homozygous   |
| NC_037647.1 | 5908833 | SNV | 1 | T | C | Heterozygous |
| NC_037647.1 | 5908845 | SNV | 1 | A | G | Heterozygous |
| NC_037647.1 | 5908885 | SNV | 1 | A | C | Homozygous   |
| NC_037647.1 | 5908960 | SNV | 1 | G | A | Heterozygous |
| NC_037647.1 | 5909051 | SNV | 1 | A | G | Homozygous   |
| NC_037647.1 | 5909056 | SNV | 1 | C | G | Homozygous   |
| NC_037647.1 | 5909529 | SNV | 1 | A | T | Homozygous   |
| NC_037647.1 | 5909951 | SNV | 1 | G | A | Heterozygous |
| NC_037647.1 | 5910262 | SNV | 1 | G | A | Homozygous   |
| NC_037647.1 | 5910662 | SNV | 1 | A | G | Heterozygous |
| NC_037647.1 | 5916358 | SNV | 1 | C | T | Heterozygous |
| NC_037647.1 | 5918199 | SNV | 1 | T | C | Heterozygous |
| NC_037647.1 | 5920098 | SNV | 1 | C | T | Heterozygous |
| NC_037647.1 | 5925642 | SNV | 1 | G | A | Heterozygous |
| NC_037647.1 | 5925672 | SNV | 1 | G | A | Heterozygous |
| NC_037647.1 | 5925678 | SNV | 1 | T | A | Heterozygous |
| NC_037647.1 | 5925747 | SNV | 1 | T | C | Homozygous   |
| NC_037647.1 | 5925753 | SNV | 1 | A | G | Heterozygous |
| NC_037647.1 | 5925852 | SNV | 1 | T | C | Homozygous   |
| NC_037647.1 | 5925858 | SNV | 1 | C | T | Heterozygous |
| NC_037647.1 | 5926075 | SNV | 1 | G | A | Heterozygous |
| NC_037647.1 | 5935753 | SNV | 1 | A | G | Homozygous   |
| NC_037647.1 | 5935771 | SNV | 1 | T | C | Homozygous   |
| NC_037647.1 | 5935776 | SNV | 1 | A | G | Heterozygous |
| NC_037647.1 | 5935783 | SNV | 1 | C | T | Heterozygous |
| NC_037647.1 | 5935787 | SNV | 1 | A | T | Heterozygous |
| NC_037647.1 | 5935789 | SNV | 1 | T | C | Heterozygous |

|             |         |     |   |   |   |              |
|-------------|---------|-----|---|---|---|--------------|
| NC_037647.1 | 5935791 | SNV | 1 | A | G | Heterozygous |
| NC_037647.1 | 5935795 | SNV | 1 | A | G | Heterozygous |
| NC_037647.1 | 5935798 | SNV | 1 | T | C | Heterozygous |
| NC_037647.1 | 5935807 | SNV | 1 | C | G | Homozygous   |
| NC_037647.1 | 5935819 | SNV | 1 | C | T | Homozygous   |
| NC_037647.1 | 5935832 | SNV | 1 | G | A | Homozygous   |
| NC_037647.1 | 5936444 | SNV | 1 | A | T | Homozygous   |
| NC_037647.1 | 5936477 | SNV | 1 | A | T | Homozygous   |
| NC_037647.1 | 5936480 | SNV | 1 | T | A | Homozygous   |
| NC_037647.1 | 5937021 | SNV | 1 | A | G | Homozygous   |
| NC_037647.1 | 5937034 | SNV | 1 | A | T | Homozygous   |
| NC_037647.1 | 5937041 | SNV | 1 | G | A | Heterozygous |
| NC_037647.1 | 5937056 | SNV | 1 | C | T | Homozygous   |
| NC_037647.1 | 5938327 | SNV | 1 | A | T | Homozygous   |
| NC_037647.1 | 5938336 | SNV | 1 | A | T | Homozygous   |
| NC_037647.1 | 5938340 | SNV | 1 | T | A | Homozygous   |
| NC_037647.1 | 5938343 | SNV | 1 | A | T | Homozygous   |
| NC_037647.1 | 5938347 | SNV | 1 | A | T | Homozygous   |
| NC_037647.1 | 5938356 | SNV | 1 | A | G | Homozygous   |
| NC_037647.1 | 5938388 | SNV | 1 | A | T | Heterozygous |
| NC_037647.1 | 5939349 | SNV | 1 | A | T | Homozygous   |
| NC_037647.1 | 5939351 | SNV | 1 | T | A | Homozygous   |
| NC_037647.1 | 5939360 | SNV | 1 | T | A | Homozygous   |
| NC_037647.1 | 5939365 | SNV | 1 | A | T | Homozygous   |
| NC_037647.1 | 5958595 | SNV | 1 | G | T | Heterozygous |
| NC_037647.1 | 5958596 | SNV | 1 | T | C | Heterozygous |
| NC_037647.1 | 5958598 | SNV | 1 | G | A | Heterozygous |
| NC_037647.1 | 5958972 | SNV | 1 | T | C | Heterozygous |
| NC_037647.1 | 5959176 | SNV | 1 | A | G | Homozygous   |
| NC_037647.1 | 5959182 | SNV | 1 | A | C | Heterozygous |
| NC_037647.1 | 5959184 | SNV | 1 | T | G | Heterozygous |
| NC_037647.1 | 5959868 | SNV | 1 | G | A | Homozygous   |
| NC_037647.1 | 5959886 | SNV | 1 | C | T | Heterozygous |
| NC_037647.1 | 5964389 | SNV | 1 | G | A | Heterozygous |
| NC_037647.1 | 5964393 | SNV | 1 | G | A | Heterozygous |
| NC_037647.1 | 5964395 | SNV | 1 | A | T | Heterozygous |
| NC_037647.1 | 5964401 | SNV | 1 | A | T | Heterozygous |
| NC_037647.1 | 5964405 | SNV | 1 | A | G | Homozygous   |
| NC_037647.1 | 5964425 | SNV | 1 | G | C | Heterozygous |
| NC_037647.1 | 5964430 | SNV | 1 | C | T | Heterozygous |
| NC_037647.1 | 5964438 | SNV | 1 | G | A | Heterozygous |
| NC_037647.1 | 5964622 | SNV | 1 | G | T | Homozygous   |
| NC_037647.1 | 5964630 | SNV | 1 | G | T | Homozygous   |
| NC_037647.1 | 5964656 | SNV | 1 | T | C | Heterozygous |
| NC_037647.1 | 5964661 | SNV | 1 | T | C | Homozygous   |
| NC_037647.1 | 5964665 | SNV | 1 | C | T | Heterozygous |
| NC_037647.1 | 5964670 | SNV | 1 | T | C | Heterozygous |
| NC_037647.1 | 5964675 | SNV | 1 | T | G | Heterozygous |
| NC_037647.1 | 5964705 | SNV | 1 | G | A | Heterozygous |
| NC_037647.1 | 5964762 | SNV | 1 | T | C | Heterozygous |
| NC_037647.1 | 5964766 | SNV | 1 | T | A | Heterozygous |

|             |         |     |   |   |   |              |
|-------------|---------|-----|---|---|---|--------------|
| NC_037647.1 | 5964769 | SNV | 1 | C | T | Heterozygous |
| NC_037647.1 | 5965332 | SNV | 1 | T | G | Homozygous   |
| NC_037647.1 | 5965393 | SNV | 1 | T | G | Homozygous   |
| NC_037647.1 | 5965481 | SNV | 1 | T | C | Heterozygous |
| NC_037647.1 | 5965671 | SNV | 1 | C | T | Homozygous   |
| NC_037647.1 | 5967246 | SNV | 1 | A | G | Homozygous   |
| NC_037647.1 | 5967254 | SNV | 1 | C | T | Heterozygous |
| NC_037647.1 | 5967611 | SNV | 1 | C | A | Homozygous   |
| NC_037647.1 | 5967816 | SNV | 1 | C | T | Homozygous   |
| NC_037647.1 | 5967818 | SNV | 1 | A | T | Homozygous   |
| NC_037647.1 | 5967823 | SNV | 1 | T | G | Homozygous   |
| NC_037647.1 | 5967829 | SNV | 1 | A | G | Homozygous   |
| NC_037647.1 | 5967832 | SNV | 1 | T | C | Homozygous   |
| NC_037647.1 | 5967837 | SNV | 1 | T | C | Homozygous   |
| NC_037647.1 | 5969515 | SNV | 1 | A | C | Heterozygous |
| NC_037647.1 | 5969551 | SNV | 1 | T | C | Heterozygous |
| NC_037647.1 | 5970803 | SNV | 1 | T | A | Heterozygous |
| NC_037647.1 | 5972223 | SNV | 1 | T | C | Homozygous   |
| NC_037647.1 | 5972232 | SNV | 1 | A | C | Homozygous   |
| NC_037647.1 | 5972253 | SNV | 1 | T | C | Homozygous   |
| NC_037647.1 | 5972271 | SNV | 1 | A | G | Homozygous   |
| NC_037647.1 | 5985219 | SNV | 1 | C | T | Heterozygous |
| NC_037647.1 | 5985468 | SNV | 1 | A | T | Homozygous   |
| NC_037647.1 | 5985470 | SNV | 1 | A | T | Homozygous   |
| NC_037647.1 | 5985473 | SNV | 1 | C | T | Homozygous   |
| NC_037647.1 | 5988667 | SNV | 1 | G | A | Homozygous   |
| NC_037647.1 | 5991730 | SNV | 1 | A | G | Homozygous   |
| NC_037647.1 | 5991946 | SNV | 1 | T | C | Homozygous   |
| NC_037647.1 | 5991952 | SNV | 1 | T | C | Homozygous   |
| NC_037647.1 | 5991956 | SNV | 1 | C | A | Homozygous   |
| NC_037647.1 | 5991961 | SNV | 1 | A | T | Homozygous   |
| NC_037647.1 | 5991964 | SNV | 1 | A | T | Homozygous   |
| NC_037647.1 | 5997227 | SNV | 1 | G | A | Heterozygous |
| NC_037647.1 | 5997231 | SNV | 1 | G | A | Heterozygous |
| NC_037647.1 | 5997235 | SNV | 1 | A | C | Heterozygous |
| NC_037647.1 | 5997259 | SNV | 1 | A | G | Heterozygous |
| NC_037647.1 | 5999588 | SNV | 1 | A | G | Homozygous   |
| NC_037647.1 | 6002027 | SNV | 1 | T | A | Homozygous   |
| NC_037647.1 | 6002204 | SNV | 1 | A | G | Homozygous   |
| NC_037647.1 | 6002600 | SNV | 1 | A | G | Homozygous   |
| NC_037647.1 | 6005619 | SNV | 1 | A | G | Homozygous   |
| NC_037647.1 | 6005621 | SNV | 1 | T | C | Heterozygous |
| NC_037647.1 | 6005624 | SNV | 1 | T | C | Heterozygous |
| NC_037647.1 | 6007256 | SNV | 1 | A | G | Heterozygous |
| NC_037647.1 | 6007266 | SNV | 1 | A | G | Homozygous   |
| NC_037647.1 | 6007268 | SNV | 1 | A | G | Homozygous   |
| NC_037647.1 | 6007291 | SNV | 1 | C | A | Homozygous   |
| NC_037647.1 | 6007299 | SNV | 1 | G | A | Homozygous   |
| NC_037647.1 | 6007302 | SNV | 1 | A | G | Homozygous   |
| NC_037647.1 | 6008335 | SNV | 1 | C | T | Heterozygous |
| NC_037647.1 | 6009969 | SNV | 1 | T | C | Heterozygous |

|             |         |     |   |   |   |              |
|-------------|---------|-----|---|---|---|--------------|
| NC_037647.1 | 6010802 | SNV | 1 | T | A | Homozygous   |
| NC_037647.1 | 6010805 | SNV | 1 | A | T | Homozygous   |
| NC_037647.1 | 6010811 | SNV | 1 | A | C | Homozygous   |
| NC_037647.1 | 6010821 | SNV | 1 | A | T | Homozygous   |
| NC_037647.1 | 6010829 | SNV | 1 | A | T | Homozygous   |
| NC_037647.1 | 6011247 | SNV | 1 | A | G | Homozygous   |
| NC_037647.1 | 6011286 | SNV | 1 | A | T | Heterozygous |
| NC_037647.1 | 6013054 | SNV | 1 | A | G | Heterozygous |
| NC_037647.1 | 6013847 | SNV | 1 | A | G | Homozygous   |
| NC_037647.1 | 6014662 | SNV | 1 | T | C | Heterozygous |
| NC_037647.1 | 6017597 | SNV | 1 | T | C | Homozygous   |
| NC_037647.1 | 6027427 | SNV | 1 | G | A | Homozygous   |
| NC_037647.1 | 6034844 | SNV | 1 | A | G | Heterozygous |
| NC_037647.1 | 6036904 | SNV | 1 | G | C | Homozygous   |
| NC_037647.1 | 6036997 | SNV | 1 | A | G | Homozygous   |
| NC_037647.1 | 6037024 | SNV | 1 | G | A | Heterozygous |
| NC_037647.1 | 6037221 | SNV | 1 | C | T | Homozygous   |
| NC_037647.1 | 6037235 | SNV | 1 | T | C | Homozygous   |
| NC_037647.1 | 6037277 | SNV | 1 | T | C | Homozygous   |
| NC_037647.1 | 6040086 | SNV | 1 | G | A | Heterozygous |
| NC_037647.1 | 6040090 | SNV | 1 | G | A | Heterozygous |
| NC_037647.1 | 6040100 | SNV | 1 | G | C | Heterozygous |
| NC_037647.1 | 6040103 | SNV | 1 | A | T | Heterozygous |
| NC_037647.1 | 6040110 | SNV | 1 | G | A | Heterozygous |
| NC_037647.1 | 6041849 | SNV | 1 | T | C | Homozygous   |
| NC_037647.1 | 6054391 | SNV | 1 | G | A | Homozygous   |
| NC_037647.1 | 6054662 | SNV | 1 | G | C | Heterozygous |
| NC_037647.1 | 6054699 | SNV | 1 | C | T | Heterozygous |
| NC_037647.1 | 6054709 | SNV | 1 | A | T | Homozygous   |
| NC_037647.1 | 6055563 | SNV | 1 | A | G | Heterozygous |
| NC_037647.1 | 6056028 | SNV | 1 | T | A | Heterozygous |
| NC_037647.1 | 6056662 | SNV | 1 | A | G | Homozygous   |
| NC_037647.1 | 6056778 | SNV | 1 | G | A | Homozygous   |
| NC_037647.1 | 6056782 | SNV | 1 | T | C | Homozygous   |
| NC_037647.1 | 6056822 | SNV | 1 | G | A | Heterozygous |
| NC_037647.1 | 6056889 | SNV | 1 | T | C | Homozygous   |
| NC_037647.1 | 6083454 | SNV | 1 | C | A | Homozygous   |
| NC_037647.1 | 6083457 | SNV | 1 | C | T | Heterozygous |
| NC_037647.1 | 6083495 | SNV | 1 | C | T | Heterozygous |
| NC_037647.1 | 6085069 | SNV | 1 | T | C | Heterozygous |
| NC_037647.1 | 6093436 | SNV | 1 | A | G | Heterozygous |
| NC_037647.1 | 6103679 | SNV | 1 | T | C | Heterozygous |
| NC_037647.1 | 6118027 | SNV | 1 | A | G | Heterozygous |
| NC_037647.1 | 6118082 | SNV | 1 | G | T | Homozygous   |
| NC_037647.1 | 6118111 | SNV | 1 | G | A | Homozygous   |
| NC_037647.1 | 6118155 | SNV | 1 | C | T | Heterozygous |
| NC_037647.1 | 6118169 | SNV | 1 | C | T | Heterozygous |
| NC_037647.1 | 6118231 | SNV | 1 | G | C | Homozygous   |
| NC_037647.1 | 6121362 | SNV | 1 | G | A | Homozygous   |
| NC_037647.1 | 6121365 | SNV | 1 | C | T | Homozygous   |
| NC_037647.1 | 6202540 | SNV | 1 | A | G | Homozygous   |

|             |         |     |   |   |   |              |
|-------------|---------|-----|---|---|---|--------------|
| NC_037647.1 | 6202691 | SNV | 1 | T | A | Homozygous   |
| NC_037647.1 | 6211738 | SNV | 1 | T | C | Homozygous   |
| NC_037647.1 | 6211867 | SNV | 1 | C | T | Heterozygous |
| NC_037647.1 | 6212087 | SNV | 1 | G | A | Homozygous   |
| NC_037647.1 | 6215416 | SNV | 1 | G | A | Homozygous   |
| NC_037647.1 | 6215493 | SNV | 1 | G | C | Heterozygous |
| NC_037647.1 | 6215509 | SNV | 1 | G | A | Homozygous   |
| NC_037647.1 | 6215606 | SNV | 1 | T | C | Heterozygous |
| NC_037647.1 | 6215696 | SNV | 1 | T | C | Heterozygous |
| NC_037647.1 | 6215802 | SNV | 1 | C | T | Heterozygous |
| NC_037647.1 | 6217121 | SNV | 1 | G | A | Heterozygous |
| NC_037647.1 | 6220064 | SNV | 1 | T | C | Heterozygous |
| NC_037647.1 | 6220837 | SNV | 1 | T | G | Homozygous   |
| NC_037647.1 | 6220979 | SNV | 1 | G | A | Homozygous   |
| NC_037647.1 | 6221012 | SNV | 1 | T | C | Heterozygous |
| NC_037647.1 | 6221099 | SNV | 1 | G | C | Heterozygous |
| NC_037647.1 | 6221104 | SNV | 1 | A | G | Heterozygous |
| NC_037647.1 | 6221499 | SNV | 1 | C | T | Heterozygous |
| NC_037647.1 | 6221506 | SNV | 1 | G | C | Heterozygous |
| NC_037647.1 | 6221762 | SNV | 1 | G | A | Homozygous   |
| NC_037647.1 | 6231091 | SNV | 1 | T | C | Homozygous   |
| NC_037647.1 | 6231099 | SNV | 1 | T | G | Homozygous   |
| NC_037647.1 | 6231128 | SNV | 1 | T | A | Homozygous   |
| NC_037647.1 | 6237415 | SNV | 1 | C | G | Heterozygous |
| NC_037647.1 | 6237501 | SNV | 1 | C | T | Heterozygous |
| NC_037647.1 | 6237645 | SNV | 1 | C | T | Heterozygous |
| NC_037647.1 | 6237670 | SNV | 1 | T | C | Heterozygous |
| NC_037647.1 | 6237730 | SNV | 1 | T | C | Homozygous   |
| NC_037647.1 | 6237766 | SNV | 1 | C | T | Homozygous   |
| NC_037647.1 | 6237830 | SNV | 1 | A | T | Homozygous   |
| NC_037647.1 | 6251564 | SNV | 1 | C | A | Heterozygous |
| NC_037647.1 | 6251698 | SNV | 1 | C | T | Heterozygous |
| NC_037647.1 | 6251841 | SNV | 1 | G | A | Homozygous   |
| NC_037647.1 | 6252143 | SNV | 1 | C | T | Heterozygous |
| NC_037647.1 | 6257261 | SNV | 1 | G | A | Homozygous   |
| NC_037647.1 | 6257279 | SNV | 1 | T | C | Heterozygous |
| NC_037647.1 | 6257282 | SNV | 1 | C | T | Heterozygous |
| NC_037647.1 | 6257284 | SNV | 1 | C | T | Heterozygous |
| NC_037647.1 | 6257314 | SNV | 1 | A | G | Heterozygous |
| NC_037647.1 | 6266997 | SNV | 1 | A | G | Homozygous   |
| NC_037647.1 | 6267027 | SNV | 1 | T | C | Homozygous   |
| NC_037647.1 | 6267339 | SNV | 1 | A | G | Homozygous   |
| NC_037647.1 | 6267411 | SNV | 1 | G | T | Homozygous   |
| NC_037647.1 | 6274442 | SNV | 1 | T | C | Heterozygous |
| NC_037647.1 | 6274480 | SNV | 1 | C | T | Heterozygous |
| NC_037647.1 | 6282844 | SNV | 1 | C | A | Homozygous   |
| NC_037647.1 | 6282868 | SNV | 1 | C | A | Heterozygous |
| NC_037647.1 | 6282872 | SNV | 1 | C | A | Heterozygous |
| NC_037647.1 | 6291058 | SNV | 1 | C | T | Heterozygous |
| NC_037647.1 | 6296801 | SNV | 1 | G | C | Heterozygous |
| NC_037647.1 | 6297119 | SNV | 1 | T | A | Heterozygous |

|             |         |     |   |   |   |              |
|-------------|---------|-----|---|---|---|--------------|
| NC_037647.1 | 6297704 | SNV | 1 | C | T | Heterozygous |
| NC_037647.1 | 6309871 | SNV | 1 | A | G | Heterozygous |
| NC_037647.1 | 6310563 | SNV | 1 | C | T | Heterozygous |
| NC_037647.1 | 6310578 | SNV | 1 | A | G | Homozygous   |
| NC_037647.1 | 6315075 | SNV | 1 | T | A | Homozygous   |
| NC_037647.1 | 6317043 | SNV | 1 | C | T | Homozygous   |
| NC_037647.1 | 6317088 | SNV | 1 | A | G | Homozygous   |
| NC_037647.1 | 6317459 | SNV | 1 | C | G | Homozygous   |
| NC_037647.1 | 6320197 | SNV | 1 | A | G | Heterozygous |
| NC_037647.1 | 6320262 | SNV | 1 | G | A | Heterozygous |
| NC_037647.1 | 6321271 | SNV | 1 | G | C | Heterozygous |
| NC_037647.1 | 6323150 | SNV | 1 | T | C | Heterozygous |
| NC_037647.1 | 6360251 | SNV | 1 | C | T | Homozygous   |
| NC_037647.1 | 6360253 | SNV | 1 | A | C | Homozygous   |
| NC_037647.1 | 6360280 | SNV | 1 | T | A | Homozygous   |
| NC_037647.1 | 6360508 | SNV | 1 | A | G | Homozygous   |
| NC_037647.1 | 6361086 | SNV | 1 | C | T | Heterozygous |
| NC_037647.1 | 6361221 | SNV | 1 | A | C | Homozygous   |
| NC_037647.1 | 6362345 | SNV | 1 | C | T | Homozygous   |
| NC_037647.1 | 6368984 | SNV | 1 | C | T | Heterozygous |
| NC_037647.1 | 6369189 | SNV | 1 | T | C | Homozygous   |
| NC_037647.1 | 6375503 | SNV | 1 | A | G | Homozygous   |
| NC_037647.1 | 6375505 | SNV | 1 | A | T | Homozygous   |
| NC_037647.1 | 6375514 | SNV | 1 | T | C | Homozygous   |
| NC_037647.1 | 6376242 | SNV | 1 | T | C | Homozygous   |
| NC_037647.1 | 6378822 | SNV | 1 | T | A | Homozygous   |
| NC_037647.1 | 6378852 | SNV | 1 | T | C | Homozygous   |
| NC_037647.1 | 6381439 | SNV | 1 | A | T | Homozygous   |
| NC_037647.1 | 6381442 | SNV | 1 | A | T | Homozygous   |
| NC_037647.1 | 6381473 | SNV | 1 | C | A | Homozygous   |
| NC_037647.1 | 6381475 | SNV | 1 | T | A | Homozygous   |
| NC_037647.1 | 6387544 | SNV | 1 | T | C | Heterozygous |
| NC_037647.1 | 6390408 | SNV | 1 | C | T | Homozygous   |
| NC_037647.1 | 6390730 | SNV | 1 | T | A | Homozygous   |
| NC_037647.1 | 6390734 | SNV | 1 | A | C | Homozygous   |
| NC_037647.1 | 6391274 | SNV | 1 | C | T | Homozygous   |
| NC_037647.1 | 6393313 | SNV | 1 | T | G | Heterozygous |
| NC_037647.1 | 6393318 | SNV | 1 | A | G | Heterozygous |
| NC_037647.1 | 6393318 | SNV | 1 | A | T | Heterozygous |
| NC_037647.1 | 6393320 | SNV | 1 | T | A | Heterozygous |
| NC_037647.1 | 6393321 | SNV | 1 | T | A | Heterozygous |
| NC_037647.1 | 6393323 | SNV | 1 | T | A | Heterozygous |
| NC_037647.1 | 6393325 | SNV | 1 | A | G | Heterozygous |
| NC_037647.1 | 6402061 | SNV | 1 | A | T | Heterozygous |
| NC_037647.1 | 6402064 | SNV | 1 | T | A | Heterozygous |
| NC_037647.1 | 6402068 | SNV | 1 | T | C | Heterozygous |
| NC_037647.1 | 6402076 | SNV | 1 | A | C | Heterozygous |
| NC_037647.1 | 6402284 | SNV | 1 | G | A | Heterozygous |
| NC_037647.1 | 6404871 | SNV | 1 | G | T | Heterozygous |
| NC_037647.1 | 6405500 | SNV | 1 | A | G | Heterozygous |
| NC_037647.1 | 6407731 | SNV | 1 | A | G | Homozygous   |

|             |         |     |   |   |   |              |
|-------------|---------|-----|---|---|---|--------------|
| NC_037647.1 | 6410849 | SNV | 1 | T | A | Homozygous   |
| NC_037647.1 | 6410854 | SNV | 1 | C | T | Homozygous   |
| NC_037647.1 | 6414000 | SNV | 1 | A | T | Homozygous   |
| NC_037647.1 | 6417580 | SNV | 1 | T | C | Homozygous   |
| NC_037647.1 | 6422873 | SNV | 1 | G | A | Heterozygous |
| NC_037647.1 | 6422889 | SNV | 1 | C | T | Heterozygous |
| NC_037647.1 | 6422895 | SNV | 1 | T | C | Heterozygous |
| NC_037647.1 | 6428519 | SNV | 1 | T | C | Homozygous   |
| NC_037647.1 | 6428527 | SNV | 1 | T | C | Homozygous   |
| NC_037647.1 | 6428532 | SNV | 1 | A | G | Homozygous   |
| NC_037647.1 | 6428535 | SNV | 1 | T | A | Homozygous   |
| NC_037647.1 | 6428539 | SNV | 1 | T | A | Homozygous   |
| NC_037647.1 | 6428543 | SNV | 1 | T | A | Homozygous   |
| NC_037647.1 | 6428547 | SNV | 1 | T | G | Homozygous   |
| NC_037647.1 | 6428549 | SNV | 1 | T | A | Homozygous   |
| NC_037647.1 | 6428551 | SNV | 1 | T | A | Homozygous   |
| NC_037647.1 | 6428628 | SNV | 1 | T | C | Homozygous   |
| NC_037647.1 | 6429693 | SNV | 1 | A | T | Homozygous   |
| NC_037647.1 | 6435384 | SNV | 1 | A | T | Homozygous   |
| NC_037647.1 | 6441030 | SNV | 1 | G | A | Heterozygous |
| NC_037647.1 | 6442718 | SNV | 1 | A | T | Homozygous   |
| NC_037647.1 | 6455240 | SNV | 1 | A | T | Homozygous   |
| NC_037647.1 | 6455243 | SNV | 1 | A | G | Homozygous   |
| NC_037647.1 | 6463983 | SNV | 1 | C | A | Homozygous   |
| NC_037647.1 | 6464151 | SNV | 1 | A | C | Homozygous   |
| NC_037647.1 | 6464175 | SNV | 1 | T | A | Homozygous   |
| NC_037647.1 | 6464181 | SNV | 1 | G | T | Homozygous   |
| NC_037647.1 | 6464187 | SNV | 1 | T | A | Homozygous   |
| NC_037647.1 | 6467952 | SNV | 1 | T | C | Homozygous   |
| NC_037647.1 | 6467956 | SNV | 1 | T | G | Homozygous   |
| NC_037647.1 | 6467958 | SNV | 1 | T | C | Homozygous   |
| NC_037647.1 | 6475613 | SNV | 1 | A | G | Homozygous   |
| NC_037647.1 | 6479464 | SNV | 1 | A | T | Heterozygous |
| NC_037647.1 | 6479473 | SNV | 1 | T | C | Heterozygous |
| NC_037647.1 | 6490122 | SNV | 1 | G | T | Homozygous   |
| NC_037647.1 | 6490125 | SNV | 1 | A | G | Homozygous   |
| NC_037647.1 | 6491041 | SNV | 1 | A | T | Homozygous   |
| NC_037647.1 | 6493547 | SNV | 1 | A | G | Homozygous   |
| NC_037647.1 | 6493991 | SNV | 1 | C | A | Homozygous   |
| NC_037647.1 | 6494413 | SNV | 1 | C | T | Heterozygous |
| NC_037647.1 | 6494715 | SNV | 1 | C | T | Homozygous   |
| NC_037647.1 | 6504277 | SNV | 1 | A | G | Heterozygous |
| NC_037647.1 | 6508933 | SNV | 1 | A | C | Homozygous   |
| NC_037647.1 | 6508941 | SNV | 1 | C | A | Homozygous   |
| NC_037647.1 | 6508945 | SNV | 1 | C | G | Homozygous   |
| NC_037647.1 | 6508973 | SNV | 1 | A | G | Homozygous   |
| NC_037647.1 | 6508984 | SNV | 1 | A | G | Homozygous   |
| NC_037647.1 | 6510345 | SNV | 1 | A | G | Heterozygous |
| NC_037647.1 | 6510384 | SNV | 1 | C | T | Heterozygous |
| NC_037647.1 | 6529783 | SNV | 1 | A | T | Heterozygous |
| NC_037647.1 | 6530269 | SNV | 1 | T | C | Homozygous   |



|             |         |     |   |   |   |              |
|-------------|---------|-----|---|---|---|--------------|
| NC_037647.1 | 6530275 | SNV | 1 | G | A | Homozygous   |
| NC_037647.1 | 6530289 | SNV | 1 | T | C | Homozygous   |
| NC_037647.1 | 6530336 | SNV | 1 | C | T | Homozygous   |
| NC_037647.1 | 6531603 | SNV | 1 | A | G | Heterozygous |
| NC_037647.1 | 6533045 | SNV | 1 | T | C | Heterozygous |
| NC_037647.1 | 6533052 | SNV | 1 | G | A | Heterozygous |
| NC_037647.1 | 6533071 | SNV | 1 | G | A | Heterozygous |
| NC_037647.1 | 6533104 | SNV | 1 | T | G | Homozygous   |
| NC_037647.1 | 6533334 | SNV | 1 | A | G | Homozygous   |
| NC_037647.1 | 6533482 | SNV | 1 | T | C | Homozygous   |
| NC_037647.1 | 6534117 | SNV | 1 | C | T | Heterozygous |
| NC_037647.1 | 6538434 | SNV | 1 | T | C | Homozygous   |
| NC_037647.1 | 6538653 | SNV | 1 | G | A | Heterozygous |
| NC_037647.1 | 6538935 | SNV | 1 | G | A | Heterozygous |
| NC_037647.1 | 6548197 | SNV | 1 | G | A | Homozygous   |
| NC_037647.1 | 6549023 | SNV | 1 | T | C | Homozygous   |
| NC_037647.1 | 6549042 | SNV | 1 | A | C | Homozygous   |
| NC_037647.1 | 6549080 | SNV | 1 | A | G | Heterozygous |
| NC_037647.1 | 6549185 | SNV | 1 | T | C | Homozygous   |
| NC_037647.1 | 6549206 | SNV | 1 | G | A | Homozygous   |
| NC_037647.1 | 6550033 | SNV | 1 | C | T | Homozygous   |
| NC_037647.1 | 6550055 | SNV | 1 | C | T | Homozygous   |
| NC_037647.1 | 6550313 | SNV | 1 | G | A | Heterozygous |
| NC_037647.1 | 6550337 | SNV | 1 | G | A | Homozygous   |
| NC_037647.1 | 6550353 | SNV | 1 | A | G | Homozygous   |
| NC_037647.1 | 6550408 | SNV | 1 | G | C | Homozygous   |
| NC_037647.1 | 6550615 | SNV | 1 | A | G | Heterozygous |
| NC_037647.1 | 6550684 | SNV | 1 | C | T | Heterozygous |
| NC_037647.1 | 6550707 | SNV | 1 | G | A | Homozygous   |
| NC_037647.1 | 6554545 | SNV | 1 | T | C | Heterozygous |
| NC_037647.1 | 6554580 | SNV | 1 | A | T | Heterozygous |
| NC_037647.1 | 6554588 | SNV | 1 | C | T | Heterozygous |
| NC_037647.1 | 6559840 | SNV | 1 | T | C | Heterozygous |
| NC_037647.1 | 6565783 | SNV | 1 | C | A | Heterozygous |
| NC_037647.1 | 6565820 | SNV | 1 | C | G | Homozygous   |
| NC_037647.1 | 6565834 | SNV | 1 | T | C | Homozygous   |
| NC_037647.1 | 6565843 | SNV | 1 | C | T | Homozygous   |
| NC_037647.1 | 6565941 | SNV | 1 | C | T | Heterozygous |
| NC_037647.1 | 6569693 | SNV | 1 | C | T | Homozygous   |
| NC_037647.1 | 6574834 | SNV | 1 | T | C | Homozygous   |
| NC_037647.1 | 6578925 | SNV | 1 | A | G | Heterozygous |
| NC_037647.1 | 6598296 | SNV | 1 | A | G | Homozygous   |
| NC_037647.1 | 6598350 | SNV | 1 | C | T | Homozygous   |
| NC_037647.1 | 6598354 | SNV | 1 | A | G | Homozygous   |
| NC_037647.1 | 6598510 | SNV | 1 | T | G | Heterozygous |
| NC_037647.1 | 6598552 | SNV | 1 | G | A | Homozygous   |
| NC_037647.1 | 6598786 | SNV | 1 | C | T | Heterozygous |
| NC_037647.1 | 6598848 | SNV | 1 | A | C | Heterozygous |
| NC_037647.1 | 6598857 | SNV | 1 | G | A | Homozygous   |
| NC_037647.1 | 6598876 | SNV | 1 | G | T | Homozygous   |
| NC_037647.1 | 6598879 | SNV | 1 | C | T | Homozygous   |

|             |         |     |   |   |   |              |
|-------------|---------|-----|---|---|---|--------------|
| NC_037647.1 | 6598917 | SNV | 1 | G | A | Heterozygous |
| NC_037647.1 | 6598922 | SNV | 1 | C | G | Homozygous   |
| NC_037647.1 | 6598929 | SNV | 1 | T | C | Homozygous   |
| NC_037647.1 | 6598932 | SNV | 1 | A | G | Heterozygous |
| NC_037647.1 | 6599056 | SNV | 1 | C | T | Homozygous   |
| NC_037647.1 | 6599058 | SNV | 1 | T | C | Homozygous   |
| NC_037647.1 | 6599071 | SNV | 1 | C | T | Heterozygous |
| NC_037647.1 | 6599074 | SNV | 1 | T | C | Homozygous   |
| NC_037647.1 | 6599164 | SNV | 1 | A | G | Heterozygous |
| NC_037647.1 | 6599178 | SNV | 1 | C | T | Homozygous   |
| NC_037647.1 | 6599186 | SNV | 1 | C | T | Homozygous   |
| NC_037647.1 | 6602145 | SNV | 1 | A | G | Heterozygous |
| NC_037647.1 | 6613888 | SNV | 1 | A | G | Homozygous   |
| NC_037647.1 | 6636418 | SNV | 1 | A | G | Homozygous   |
| NC_037647.1 | 6636445 | SNV | 1 | C | A | Homozygous   |
| NC_037647.1 | 6641284 | SNV | 1 | C | T | Homozygous   |
| NC_037647.1 | 6641542 | SNV | 1 | C | T | Homozygous   |
| NC_037647.1 | 6641653 | SNV | 1 | G | A | Heterozygous |
| NC_037647.1 | 6662550 | SNV | 1 | T | C | Homozygous   |
| NC_037647.1 | 6662641 | SNV | 1 | T | A | Heterozygous |
| NC_037647.1 | 6662682 | SNV | 1 | T | C | Homozygous   |
| NC_037647.1 | 6662766 | SNV | 1 | T | C | Homozygous   |
| NC_037647.1 | 6663070 | SNV | 1 | T | C | Homozygous   |
| NC_037647.1 | 6683044 | SNV | 1 | T | C | Homozygous   |
| NC_037647.1 | 6683241 | SNV | 1 | G | A | Heterozygous |
| NC_037647.1 | 6683282 | SNV | 1 | A | G | Homozygous   |
| NC_037647.1 | 6683287 | SNV | 1 | T | C | Heterozygous |
| NC_037647.1 | 6683298 | SNV | 1 | C | T | Homozygous   |
| NC_037647.1 | 6683330 | SNV | 1 | C | T | Heterozygous |
| NC_037647.1 | 6683470 | SNV | 1 | T | C | Heterozygous |
| NC_037647.1 | 6709934 | SNV | 1 | C | T | Heterozygous |
| NC_037647.1 | 6709988 | SNV | 1 | T | C | Homozygous   |
| NC_037647.1 | 6710043 | SNV | 1 | G | A | Homozygous   |
| NC_037647.1 | 6710055 | SNV | 1 | G | A | Heterozygous |
| NC_037647.1 | 6725075 | SNV | 1 | C | T | Heterozygous |
| NC_037647.1 | 6725148 | SNV | 1 | C | T | Heterozygous |
| NC_037647.1 | 6739438 | SNV | 1 | A | G | Homozygous   |
| NC_037647.1 | 6742957 | SNV | 1 | T | C | Heterozygous |
| NC_037647.1 | 6742981 | SNV | 1 | C | T | Heterozygous |
| NC_037647.1 | 6742994 | SNV | 1 | C | T | Heterozygous |
| NC_037647.1 | 6743009 | SNV | 1 | G | A | Heterozygous |
| NC_037647.1 | 6743011 | SNV | 1 | T | C | Homozygous   |
| NC_037647.1 | 6743013 | SNV | 1 | C | T | Homozygous   |
| NC_037647.1 | 6743019 | SNV | 1 | A | G | Homozygous   |
| NC_037647.1 | 6777804 | SNV | 1 | A | G | Heterozygous |
| NC_037647.1 | 6815841 | SNV | 1 | A | G | Homozygous   |
| NC_037647.1 | 6815843 | SNV | 1 | T | C | Homozygous   |
| NC_037647.1 | 6816260 | SNV | 1 | C | T | Homozygous   |
| NC_037647.1 | 6816661 | SNV | 1 | G | A | Heterozygous |
| NC_037647.1 | 6816696 | SNV | 1 | G | A | Heterozygous |
| NC_037647.1 | 6864078 | SNV | 1 | T | C | Heterozygous |

|             |         |     |   |   |   |              |
|-------------|---------|-----|---|---|---|--------------|
| NC_037647.1 | 6865711 | SNV | 1 | C | T | Homozygous   |
| NC_037647.1 | 6865761 | SNV | 1 | C | A | Heterozygous |
| NC_037647.1 | 6865853 | SNV | 1 | A | G | Homozygous   |
| NC_037647.1 | 6866285 | SNV | 1 | G | A | Heterozygous |
| NC_037647.1 | 6866337 | SNV | 1 | T | A | Heterozygous |
| NC_037647.1 | 6866469 | SNV | 1 | C | T | Homozygous   |
| NC_037647.1 | 6866524 | SNV | 1 | G | A | Heterozygous |
| NC_037647.1 | 6867436 | SNV | 1 | C | T | Homozygous   |
| NC_037647.1 | 6868795 | SNV | 1 | T | C | Homozygous   |
| NC_037647.1 | 6868843 | SNV | 1 | G | C | Homozygous   |
| NC_037647.1 | 6879931 | SNV | 1 | T | C | Homozygous   |
| NC_037647.1 | 6880455 | SNV | 1 | G | A | Heterozygous |
| NC_037647.1 | 6885973 | SNV | 1 | A | G | Homozygous   |
| NC_037647.1 | 6890950 | SNV | 1 | G | A | Heterozygous |
| NC_037647.1 | 6890971 | SNV | 1 | A | G | Homozygous   |
| NC_037647.1 | 6894496 | SNV | 1 | G | A | Heterozygous |
| NC_037647.1 | 6894788 | SNV | 1 | C | T | Heterozygous |
| NC_037647.1 | 6894934 | SNV | 1 | T | C | Heterozygous |
| NC_037647.1 | 6894976 | SNV | 1 | T | C | Heterozygous |
| NC_037647.1 | 6896406 | SNV | 1 | T | C | Homozygous   |
| NC_037647.1 | 6915236 | SNV | 1 | G | A | Homozygous   |
| NC_037647.1 | 6915239 | SNV | 1 | A | G | Homozygous   |
| NC_037647.1 | 6915249 | SNV | 1 | C | A | Homozygous   |
| NC_037647.1 | 6915251 | SNV | 1 | A | C | Homozygous   |
| NC_037647.1 | 6915253 | SNV | 1 | C | T | Homozygous   |
| NC_037647.1 | 6915579 | SNV | 1 | A | T | Homozygous   |
| NC_037647.1 | 6915583 | SNV | 1 | G | A | Homozygous   |
| NC_037647.1 | 6915585 | SNV | 1 | G | A | Homozygous   |
| NC_037647.1 | 6915597 | SNV | 1 | G | A | Homozygous   |
| NC_037647.1 | 6915619 | SNV | 1 | C | G | Homozygous   |
| NC_037647.1 | 6917265 | SNV | 1 | G | C | Homozygous   |
| NC_037647.1 | 6917277 | SNV | 1 | G | T | Homozygous   |
| NC_037647.1 | 6917281 | SNV | 1 | T | C | Homozygous   |
| NC_037647.1 | 6917288 | SNV | 1 | G | C | Homozygous   |
| NC_037647.1 | 6921757 | SNV | 1 | T | C | Heterozygous |
| NC_037647.1 | 6921848 | SNV | 1 | G | A | Homozygous   |
| NC_037647.1 | 6921882 | SNV | 1 | G | A | Heterozygous |
| NC_037647.1 | 6921884 | SNV | 1 | G | A | Heterozygous |
| NC_037647.1 | 6921887 | SNV | 1 | G | A | Heterozygous |
| NC_037647.1 | 6922027 | SNV | 1 | G | T | Heterozygous |
| NC_037647.1 | 6935878 | SNV | 1 | G | A | Homozygous   |
| NC_037647.1 | 6935880 | SNV | 1 | G | T | Homozygous   |
| NC_037647.1 | 6946241 | SNV | 1 | G | C | Heterozygous |
| NC_037647.1 | 6946247 | SNV | 1 | G | T | Heterozygous |
| NC_037647.1 | 6946251 | SNV | 1 | G | A | Heterozygous |
| NC_037647.1 | 6946263 | SNV | 1 | A | C | Heterozygous |
| NC_037647.1 | 6946922 | SNV | 1 | G | T | Heterozygous |
| NC_037647.1 | 6946940 | SNV | 1 | C | A | Heterozygous |
| NC_037647.1 | 6946943 | SNV | 1 | T | C | Heterozygous |
| NC_037647.1 | 6946979 | SNV | 1 | T | C | Heterozygous |
| NC_037647.1 | 6949186 | SNV | 1 | T | G | Homozygous   |

|             |         |     |   |   |   |              |
|-------------|---------|-----|---|---|---|--------------|
| NC_037647.1 | 6949202 | SNV | 1 | G | T | Homozygous   |
| NC_037647.1 | 6949204 | SNV | 1 | G | T | Homozygous   |
| NC_037647.1 | 6949208 | SNV | 1 | G | A | Homozygous   |
| NC_037647.1 | 6949219 | SNV | 1 | G | A | Homozygous   |
| NC_037647.1 | 6949224 | SNV | 1 | A | G | Homozygous   |
| NC_037647.1 | 6949319 | SNV | 1 | G | C | Heterozygous |
| NC_037647.1 | 6949325 | SNV | 1 | G | A | Homozygous   |
| NC_037647.1 | 6949330 | SNV | 1 | G | A | Heterozygous |
| NC_037647.1 | 6949376 | SNV | 1 | G | A | Homozygous   |
| NC_037647.1 | 6950225 | SNV | 1 | G | A | Homozygous   |
| NC_037647.1 | 6950230 | SNV | 1 | A | G | Homozygous   |
| NC_037647.1 | 6962630 | SNV | 1 | T | C | Heterozygous |
| NC_037647.1 | 6962632 | SNV | 1 | C | A | Heterozygous |
| NC_037647.1 | 6962645 | SNV | 1 | G | A | Heterozygous |
| NC_037647.1 | 6963832 | SNV | 1 | A | T | Homozygous   |
| NC_037647.1 | 6966452 | SNV | 1 | A | G | Heterozygous |
| NC_037647.1 | 6966507 | SNV | 1 | A | T | Heterozygous |
| NC_037647.1 | 6967493 | SNV | 1 | C | T | Heterozygous |
| NC_037647.1 | 6967511 | SNV | 1 | A | G | Homozygous   |
| NC_037647.1 | 6972922 | SNV | 1 | T | C | Heterozygous |
| NC_037647.1 | 6972963 | SNV | 1 | G | A | Homozygous   |
| NC_037647.1 | 6992267 | SNV | 1 | C | T | Homozygous   |
| NC_037647.1 | 6992285 | SNV | 1 | G | A | Homozygous   |
| NC_037647.1 | 6996494 | SNV | 1 | C | T | Heterozygous |
| NC_037647.1 | 7024667 | SNV | 1 | T | C | Homozygous   |
| NC_037647.1 | 7024820 | SNV | 1 | T | C | Homozygous   |
| NC_037647.1 | 7030848 | SNV | 1 | A | G | Heterozygous |
| NC_037647.1 | 7030862 | SNV | 1 | A | G | Heterozygous |
| NC_037647.1 | 7030866 | SNV | 1 | A | G | Heterozygous |
| NC_037647.1 | 7030891 | SNV | 1 | T | C | Heterozygous |
| NC_037647.1 | 7030912 | SNV | 1 | A | G | Heterozygous |
| NC_037647.1 | 7035225 | SNV | 1 | A | T | Heterozygous |
| NC_037647.1 | 7041790 | SNV | 1 | G | C | Heterozygous |
| NC_037647.1 | 7041852 | SNV | 1 | A | G | Heterozygous |
| NC_037647.1 | 7042770 | SNV | 1 | A | G | Homozygous   |
| NC_037647.1 | 7043258 | SNV | 1 | T | C | Heterozygous |
| NC_037647.1 | 7043423 | SNV | 1 | G | A | Heterozygous |
| NC_037647.1 | 7052771 | SNV | 1 | T | A | Homozygous   |
| NC_037647.1 | 7053207 | SNV | 1 | C | G | Homozygous   |
| NC_037647.1 | 7053817 | SNV | 1 | T | C | Heterozygous |
| NC_037647.1 | 7054173 | SNV | 1 | C | G | Homozygous   |
| NC_037647.1 | 7059549 | SNV | 1 | A | T | Homozygous   |
| NC_037647.1 | 7059555 | SNV | 1 | G | T | Homozygous   |
| NC_037647.1 | 7062073 | SNV | 1 | T | C | Heterozygous |
| NC_037647.1 | 7062894 | SNV | 1 | A | T | Heterozygous |
| NC_037647.1 | 7063408 | SNV | 1 | T | A | Homozygous   |
| NC_037647.1 | 7063765 | SNV | 1 | T | C | Heterozygous |
| NC_037647.1 | 7064578 | SNV | 1 | T | A | Homozygous   |
| NC_037647.1 | 7064580 | SNV | 1 | A | T | Homozygous   |
| NC_037647.1 | 7067299 | SNV | 1 | G | A | Homozygous   |
| NC_037647.1 | 7067700 | SNV | 1 | G | C | Homozygous   |

|             |         |     |   |   |   |              |
|-------------|---------|-----|---|---|---|--------------|
| NC_037647.1 | 7067918 | SNV | 1 | T | C | Heterozygous |
| NC_037647.1 | 7114176 | SNV | 1 | A | T | Heterozygous |
| NC_037647.1 | 7114192 | SNV | 1 | T | A | Heterozygous |
| NC_037647.1 | 7114193 | SNV | 1 | A | T | Heterozygous |
| NC_037647.1 | 7114197 | SNV | 1 | A | G | Homozygous   |
| NC_037647.1 | 7114317 | SNV | 1 | C | T | Homozygous   |
| NC_037647.1 | 7114365 | SNV | 1 | A | G | Homozygous   |
| NC_037647.1 | 7114423 | SNV | 1 | A | G | Homozygous   |
| NC_037647.1 | 7116242 | SNV | 1 | C | T | Heterozygous |
| NC_037647.1 | 7116296 | SNV | 1 | A | G | Homozygous   |
| NC_037647.1 | 7116318 | SNV | 1 | A | G | Heterozygous |
| NC_037647.1 | 7116323 | SNV | 1 | G | A | Homozygous   |
| NC_037647.1 | 7125721 | SNV | 1 | G | A | Heterozygous |
| NC_037647.1 | 7125729 | SNV | 1 | G | A | Heterozygous |
| NC_037647.1 | 7125734 | SNV | 1 | C | G | Homozygous   |
| NC_037647.1 | 7125743 | SNV | 1 | A | G | Heterozygous |
| NC_037647.1 | 7125775 | SNV | 1 | G | A | Heterozygous |
| NC_037647.1 | 7125777 | SNV | 1 | G | A | Heterozygous |
| NC_037647.1 | 7126358 | SNV | 1 | G | C | Homozygous   |
| NC_037647.1 | 7126459 | SNV | 1 | G | A | Homozygous   |
| NC_037647.1 | 7126466 | SNV | 1 | G | A | Heterozygous |
| NC_037647.1 | 7126473 | SNV | 1 | A | C | Heterozygous |
| NC_037647.1 | 7126477 | SNV | 1 | A | G | Homozygous   |
| NC_037647.1 | 7126530 | SNV | 1 | G | A | Homozygous   |
| NC_037647.1 | 7129684 | SNV | 1 | C | T | Heterozygous |
| NC_037647.1 | 7129740 | SNV | 1 | G | T | Homozygous   |
| NC_037647.1 | 7152028 | SNV | 1 | T | A | Homozygous   |
| NC_037647.1 | 7152057 | SNV | 1 | A | T | Homozygous   |
| NC_037647.1 | 7162597 | SNV | 1 | C | T | Heterozygous |
| NC_037647.1 | 7163153 | SNV | 1 | C | T | Heterozygous |
| NC_037647.1 | 7163400 | SNV | 1 | A | G | Homozygous   |
| NC_037647.1 | 7163429 | SNV | 1 | A | T | Heterozygous |
| NC_037647.1 | 7165763 | SNV | 1 | A | G | Homozygous   |
| NC_037647.1 | 7167728 | SNV | 1 | A | G | Homozygous   |
| NC_037647.1 | 7167730 | SNV | 1 | A | G | Homozygous   |
| NC_037647.1 | 7182811 | SNV | 1 | A | T | Heterozygous |
| NC_037647.1 | 7182818 | SNV | 1 | G | T | Heterozygous |
| NC_037647.1 | 7183256 | SNV | 1 | A | T | Heterozygous |
| NC_037647.1 | 7191293 | SNV | 1 | T | C | Homozygous   |
| NC_037647.1 | 7191362 | SNV | 1 | C | T | Homozygous   |
| NC_037647.1 | 7218015 | SNV | 1 | G | A | Heterozygous |
| NC_037647.1 | 7218854 | SNV | 1 | T | A | Homozygous   |
| NC_037647.1 | 7219257 | SNV | 1 | T | C | Homozygous   |
| NC_037647.1 | 7219299 | SNV | 1 | T | C | Heterozygous |
| NC_037647.1 | 7222245 | SNV | 1 | A | G | Homozygous   |
| NC_037647.1 | 7225055 | SNV | 1 | T | G | Homozygous   |
| NC_037647.1 | 7274359 | SNV | 1 | T | C | Homozygous   |
| NC_037647.1 | 7274409 | SNV | 1 | C | T | Homozygous   |
| NC_037647.1 | 7279364 | SNV | 1 | T | C | Homozygous   |
| NC_037647.1 | 7279427 | SNV | 1 | A | G | Heterozygous |
| NC_037647.1 | 7280448 | SNV | 1 | T | C | Heterozygous |

|             |         |     |   |   |   |              |
|-------------|---------|-----|---|---|---|--------------|
| NC_037647.1 | 7285810 | SNV | 1 | T | C | Homozygous   |
| NC_037647.1 | 7287453 | SNV | 1 | C | T | Heterozygous |
| NC_037647.1 | 7287978 | SNV | 1 | C | A | Homozygous   |
| NC_037647.1 | 7288627 | SNV | 1 | A | G | Homozygous   |
| NC_037647.1 | 7288691 | SNV | 1 | C | T | Heterozygous |
| NC_037647.1 | 7288724 | SNV | 1 | C | T | Heterozygous |
| NC_037647.1 | 7288784 | SNV | 1 | G | C | Homozygous   |
| NC_037647.1 | 7288793 | SNV | 1 | C | T | Homozygous   |
| NC_037647.1 | 7288797 | SNV | 1 | T | C | Homozygous   |
| NC_037647.1 | 7288820 | SNV | 1 | A | G | Homozygous   |
| NC_037647.1 | 7289175 | SNV | 1 | T | C | Heterozygous |
| NC_037647.1 | 7289922 | SNV | 1 | C | T | Heterozygous |
| NC_037647.1 | 7289977 | SNV | 1 | G | A | Homozygous   |
| NC_037647.1 | 7289982 | SNV | 1 | T | C | Homozygous   |
| NC_037647.1 | 7290007 | SNV | 1 | T | C | Homozygous   |
| NC_037647.1 | 7290040 | SNV | 1 | G | A | Homozygous   |
| NC_037647.1 | 7290072 | SNV | 1 | C | T | Homozygous   |
| NC_037647.1 | 7290115 | SNV | 1 | G | A | Heterozygous |
| NC_037647.1 | 7290117 | SNV | 1 | G | A | Heterozygous |
| NC_037647.1 | 7290137 | SNV | 1 | G | A | Heterozygous |
| NC_037647.1 | 7290622 | SNV | 1 | A | G | Homozygous   |
| NC_037647.1 | 7291451 | SNV | 1 | C | T | Homozygous   |
| NC_037647.1 | 7291464 | SNV | 1 | A | G | Homozygous   |
| NC_037647.1 | 7291489 | SNV | 1 | A | G | Homozygous   |
| NC_037647.1 | 7306413 | SNV | 1 | C | A | Heterozygous |
| NC_037647.1 | 7306450 | SNV | 1 | G | A | Heterozygous |
| NC_037647.1 | 7306456 | SNV | 1 | T | A | Heterozygous |
| NC_037647.1 | 7306462 | SNV | 1 | G | A | Heterozygous |
| NC_037647.1 | 7314614 | SNV | 1 | C | G | Heterozygous |
| NC_037647.1 | 7315097 | SNV | 1 | T | C | Homozygous   |
| NC_037647.1 | 7315124 | SNV | 1 | G | A | Heterozygous |
| NC_037647.1 | 7315218 | SNV | 1 | C | T | Heterozygous |
| NC_037647.1 | 7315303 | SNV | 1 | C | T | Heterozygous |
| NC_037647.1 | 7317130 | SNV | 1 | T | C | Homozygous   |
| NC_037647.1 | 7317462 | SNV | 1 | A | G | Homozygous   |
| NC_037647.1 | 7317843 | SNV | 1 | G | A | Heterozygous |
| NC_037647.1 | 7317864 | SNV | 1 | G | A | Heterozygous |
| NC_037647.1 | 7325417 | SNV | 1 | A | G | Homozygous   |
| NC_037647.1 | 7325467 | SNV | 1 | C | G | Heterozygous |
| NC_037647.1 | 7325491 | SNV | 1 | G | A | Heterozygous |
| NC_037647.1 | 7325494 | SNV | 1 | T | C | Heterozygous |
| NC_037647.1 | 7325519 | SNV | 1 | C | T | Heterozygous |
| NC_037647.1 | 7325576 | SNV | 1 | A | G | Homozygous   |
| NC_037647.1 | 7325589 | SNV | 1 | T | C | Homozygous   |
| NC_037647.1 | 7325681 | SNV | 1 | A | G | Homozygous   |
| NC_037647.1 | 7325716 | SNV | 1 | C | T | Homozygous   |
| NC_037647.1 | 7325724 | SNV | 1 | T | C | Homozygous   |
| NC_037647.1 | 7325727 | SNV | 1 | A | G | Homozygous   |
| NC_037647.1 | 7325755 | SNV | 1 | A | G | Homozygous   |
| NC_037647.1 | 7325763 | SNV | 1 | C | T | Homozygous   |
| NC_037647.1 | 7325788 | SNV | 1 | G | A | Heterozygous |

|             |         |     |   |   |   |              |
|-------------|---------|-----|---|---|---|--------------|
| NC_037647.1 | 7325798 | SNV | 1 | G | A | Heterozygous |
| NC_037647.1 | 7325833 | SNV | 1 | C | G | Heterozygous |
| NC_037647.1 | 7325923 | SNV | 1 | A | G | Heterozygous |
| NC_037647.1 | 7326015 | SNV | 1 | A | G | Homozygous   |
| NC_037647.1 | 7326296 | SNV | 1 | T | C | Heterozygous |
| NC_037647.1 | 7326309 | SNV | 1 | A | G | Homozygous   |
| NC_037647.1 | 7326319 | SNV | 1 | T | C | Heterozygous |
| NC_037647.1 | 7326366 | SNV | 1 | C | T | Heterozygous |
| NC_037647.1 | 7326373 | SNV | 1 | A | G | Heterozygous |
| NC_037647.1 | 7326457 | SNV | 1 | T | C | Homozygous   |
| NC_037647.1 | 7326537 | SNV | 1 | C | T | Homozygous   |
| NC_037647.1 | 7330524 | SNV | 1 | T | C | Homozygous   |
| NC_037647.1 | 7330555 | SNV | 1 | C | T | Homozygous   |
| NC_037647.1 | 7331084 | SNV | 1 | C | T | Heterozygous |
| NC_037647.1 | 7331241 | SNV | 1 | T | C | Heterozygous |
| NC_037647.1 | 7342158 | SNV | 1 | T | C | Homozygous   |
| NC_037647.1 | 7342164 | SNV | 1 | C | T | Homozygous   |
| NC_037647.1 | 7342174 | SNV | 1 | A | G | Homozygous   |
| NC_037647.1 | 7389802 | SNV | 1 | A | T | Homozygous   |
| NC_037647.1 | 7389846 | SNV | 1 | C | T | Homozygous   |
| NC_037647.1 | 7389895 | SNV | 1 | C | G | Homozygous   |
| NC_037647.1 | 7389932 | SNV | 1 | A | G | Homozygous   |
| NC_037647.1 | 7389952 | SNV | 1 | T | A | Heterozygous |
| NC_037647.1 | 7390006 | SNV | 1 | G | A | Heterozygous |
| NC_037647.1 | 7391462 | SNV | 1 | C | A | Heterozygous |
| NC_037647.1 | 7391462 | SNV | 1 | C | G | Heterozygous |
| NC_037647.1 | 7391488 | SNV | 1 | T | C | Heterozygous |
| NC_037647.1 | 7405826 | SNV | 1 | T | C | Homozygous   |
| NC_037647.1 | 7405979 | SNV | 1 | C | T | Homozygous   |
| NC_037647.1 | 7406076 | SNV | 1 | T | C | Heterozygous |
| NC_037647.1 | 7406078 | SNV | 1 | T | C | Heterozygous |
| NC_037647.1 | 7406224 | SNV | 1 | A | G | Homozygous   |
| NC_037647.1 | 7423319 | SNV | 1 | G | C | Homozygous   |
| NC_037647.1 | 7433641 | SNV | 1 | T | C | Homozygous   |
| NC_037647.1 | 7433646 | SNV | 1 | T | C | Homozygous   |
| NC_037647.1 | 7453930 | SNV | 1 | C | T | Heterozygous |
| NC_037647.1 | 7489331 | SNV | 1 | A | C | Heterozygous |
| NC_037647.1 | 7489333 | SNV | 1 | A | C | Heterozygous |
| NC_037647.1 | 7489335 | SNV | 1 | A | T | Heterozygous |
| NC_037647.1 | 7489337 | SNV | 1 | A | T | Heterozygous |
| NC_037647.1 | 7489342 | SNV | 1 | T | A | Heterozygous |
| NC_037647.1 | 7489344 | SNV | 1 | T | A | Heterozygous |
| NC_037647.1 | 7492891 | SNV | 1 | C | T | Homozygous   |
| NC_037647.1 | 7492910 | SNV | 1 | C | T | Homozygous   |
| NC_037647.1 | 7492912 | SNV | 1 | C | T | Homozygous   |
| NC_037647.1 | 7492914 | SNV | 1 | C | T | Homozygous   |
| NC_037647.1 | 7500060 | SNV | 1 | A | G | Homozygous   |
| NC_037647.1 | 7500078 | SNV | 1 | A | G | Homozygous   |
| NC_037647.1 | 7500482 | SNV | 1 | T | C | Homozygous   |
| NC_037647.1 | 7500888 | SNV | 1 | T | C | Homozygous   |
| NC_037647.1 | 7500982 | SNV | 1 | C | A | Heterozygous |

|             |         |     |   |   |   |              |
|-------------|---------|-----|---|---|---|--------------|
| NC_037647.1 | 7501161 | SNV | 1 | C | T | Homozygous   |
| NC_037647.1 | 7501266 | SNV | 1 | T | C | Homozygous   |
| NC_037647.1 | 7501450 | SNV | 1 | C | T | Homozygous   |
| NC_037647.1 | 7501452 | SNV | 1 | A | C | Homozygous   |
| NC_037647.1 | 7502002 | SNV | 1 | A | G | Homozygous   |
| NC_037647.1 | 7502019 | SNV | 1 | A | G | Homozygous   |
| NC_037647.1 | 7502155 | SNV | 1 | G | A | Heterozygous |
| NC_037647.1 | 7502249 | SNV | 1 | T | C | Heterozygous |
| NC_037647.1 | 7502335 | SNV | 1 | A | G | Heterozygous |
| NC_037647.1 | 7502514 | SNV | 1 | G | T | Heterozygous |
| NC_037647.1 | 7502742 | SNV | 1 | C | T | Heterozygous |
| NC_037647.1 | 7502750 | SNV | 1 | T | C | Homozygous   |
| NC_037647.1 | 7503014 | SNV | 1 | T | C | Homozygous   |
| NC_037647.1 | 7503368 | SNV | 1 | A | G | Homozygous   |
| NC_037647.1 | 7503377 | SNV | 1 | C | G | Heterozygous |
| NC_037647.1 | 7505129 | SNV | 1 | C | G | Homozygous   |
| NC_037647.1 | 7506399 | SNV | 1 | A | G | Homozygous   |
| NC_037647.1 | 7506500 | SNV | 1 | A | G | Homozygous   |
| NC_037647.1 | 7506518 | SNV | 1 | G | A | Homozygous   |
| NC_037647.1 | 7506569 | SNV | 1 | T | G | Homozygous   |
| NC_037647.1 | 7506615 | SNV | 1 | C | T | Heterozygous |
| NC_037647.1 | 7509481 | SNV | 1 | C | T | Homozygous   |
| NC_037647.1 | 7509612 | SNV | 1 | T | G | Homozygous   |
| NC_037647.1 | 7509640 | SNV | 1 | T | C | Homozygous   |
| NC_037647.1 | 7515969 | SNV | 1 | G | A | Homozygous   |
| NC_037647.1 | 7516453 | SNV | 1 | A | T | Homozygous   |
| NC_037647.1 | 7517471 | SNV | 1 | A | G | Homozygous   |
| NC_037647.1 | 7518138 | SNV | 1 | A | G | Homozygous   |
| NC_037647.1 | 7518145 | SNV | 1 | T | A | Homozygous   |
| NC_037647.1 | 7518151 | SNV | 1 | T | G | Homozygous   |
| NC_037647.1 | 7518174 | SNV | 1 | C | A | Homozygous   |
| NC_037647.1 | 7518187 | SNV | 1 | T | A | Homozygous   |
| NC_037647.1 | 7518190 | SNV | 1 | T | G | Homozygous   |
| NC_037647.1 | 7520349 | SNV | 1 | C | T | Heterozygous |
| NC_037647.1 | 7524325 | SNV | 1 | G | A | Homozygous   |
| NC_037647.1 | 7525115 | SNV | 1 | T | C | Homozygous   |
| NC_037647.1 | 7541295 | SNV | 1 | A | G | Homozygous   |
| NC_037647.1 | 7541434 | SNV | 1 | A | T | Homozygous   |
| NC_037647.1 | 7542052 | SNV | 1 | C | T | Homozygous   |
| NC_037647.1 | 7545672 | SNV | 1 | G | A | Heterozygous |
| NC_037647.1 | 7546175 | SNV | 1 | G | A | Homozygous   |
| NC_037647.1 | 7546270 | SNV | 1 | A | G | Homozygous   |
| NC_037647.1 | 7551564 | SNV | 1 | G | A | Homozygous   |
| NC_037647.1 | 7551613 | SNV | 1 | T | C | Homozygous   |
| NC_037647.1 | 7552275 | SNV | 1 | A | G | Homozygous   |
| NC_037647.1 | 7552323 | SNV | 1 | T | G | Homozygous   |
| NC_037647.1 | 7553348 | SNV | 1 | C | T | Homozygous   |
| NC_037647.1 | 7556578 | SNV | 1 | A | G | Homozygous   |
| NC_037647.1 | 7561489 | SNV | 1 | G | A | Homozygous   |
| NC_037647.1 | 7562393 | SNV | 1 | G | A | Homozygous   |
| NC_037647.1 | 7562533 | SNV | 1 | A | G | Homozygous   |



|             |         |     |   |   |   |              |
|-------------|---------|-----|---|---|---|--------------|
| NC_037647.1 | 7563806 | SNV | 1 | C | A | Homozygous   |
| NC_037647.1 | 7569734 | SNV | 1 | A | T | Homozygous   |
| NC_037647.1 | 7569739 | SNV | 1 | G | T | Homozygous   |
| NC_037647.1 | 7569741 | SNV | 1 | T | A | Homozygous   |
| NC_037647.1 | 7570813 | SNV | 1 | G | A | Heterozygous |
| NC_037647.1 | 7577508 | SNV | 1 | T | C | Homozygous   |
| NC_037647.1 | 7578282 | SNV | 1 | G | A | Heterozygous |
| NC_037647.1 | 7583957 | SNV | 1 | A | G | Homozygous   |
| NC_037647.1 | 7584170 | SNV | 1 | C | T | Homozygous   |
| NC_037647.1 | 7584509 | SNV | 1 | T | C | Homozygous   |
| NC_037647.1 | 7584837 | SNV | 1 | A | G | Homozygous   |
| NC_037647.1 | 7585510 | SNV | 1 | T | C | Homozygous   |
| NC_037647.1 | 7585861 | SNV | 1 | A | G | Homozygous   |
| NC_037647.1 | 7586290 | SNV | 1 | T | A | Heterozygous |
| NC_037647.1 | 7592730 | SNV | 1 | G | T | Homozygous   |
| NC_037647.1 | 7593977 | SNV | 1 | C | T | Homozygous   |
| NC_037647.1 | 7657264 | SNV | 1 | A | G | Heterozygous |
| NC_037647.1 | 7657752 | SNV | 1 | C | T | Heterozygous |
| NC_037647.1 | 7657796 | SNV | 1 | A | T | Heterozygous |
| NC_037647.1 | 7658097 | SNV | 1 | C | A | Homozygous   |
| NC_037647.1 | 7658103 | SNV | 1 | C | T | Homozygous   |
| NC_037647.1 | 7658109 | SNV | 1 | C | A | Homozygous   |
| NC_037647.1 | 7658112 | SNV | 1 | T | A | Heterozygous |
| NC_037647.1 | 7658112 | SNV | 1 | T | G | Heterozygous |
| NC_037647.1 | 7658115 | SNV | 1 | C | A | Homozygous   |
| NC_037647.1 | 7658121 | SNV | 1 | C | G | Homozygous   |
| NC_037647.1 | 7660579 | SNV | 1 | G | A | Homozygous   |
| NC_037647.1 | 7661803 | SNV | 1 | A | G | Heterozygous |
| NC_037647.1 | 7662092 | SNV | 1 | A | C | Homozygous   |
| NC_037647.1 | 7662160 | SNV | 1 | T | A | Homozygous   |
| NC_037647.1 | 7663822 | SNV | 1 | T | G | Heterozygous |
| NC_037647.1 | 7663829 | SNV | 1 | G | A | Heterozygous |
| NC_037647.1 | 7663835 | SNV | 1 | A | G | Homozygous   |
| NC_037647.1 | 7663840 | SNV | 1 | G | A | Homozygous   |
| NC_037647.1 | 7663859 | SNV | 1 | G | A | Homozygous   |
| NC_037647.1 | 7663867 | SNV | 1 | A | T | Homozygous   |
| NC_037647.1 | 7663869 | SNV | 1 | G | C | Homozygous   |
| NC_037647.1 | 7663883 | SNV | 1 | G | A | Heterozygous |
| NC_037647.1 | 7667915 | SNV | 1 | G | A | Heterozygous |
| NC_037647.1 | 7668043 | SNV | 1 | T | C | Homozygous   |
| NC_037647.1 | 7668321 | SNV | 1 | A | G | Heterozygous |
| NC_037647.1 | 7668507 | SNV | 1 | G | A | Heterozygous |
| NC_037647.1 | 7668527 | SNV | 1 | A | G | Heterozygous |
| NC_037647.1 | 7668840 | SNV | 1 | G | C | Heterozygous |
| NC_037647.1 | 7670788 | SNV | 1 | A | G | Heterozygous |
| NC_037647.1 | 7670827 | SNV | 1 | A | G | Homozygous   |
| NC_037647.1 | 7670893 | SNV | 1 | T | A | Homozygous   |
| NC_037647.1 | 7670921 | SNV | 1 | T | C | Homozygous   |
| NC_037647.1 | 7673363 | SNV | 1 | C | T | Heterozygous |
| NC_037647.1 | 7673381 | SNV | 1 | C | T | Heterozygous |
| NC_037647.1 | 7673432 | SNV | 1 | T | C | Heterozygous |

|             |         |     |   |   |   |              |
|-------------|---------|-----|---|---|---|--------------|
| NC_037647.1 | 7673856 | SNV | 1 | A | G | Homozygous   |
| NC_037647.1 | 7673898 | SNV | 1 | G | C | Heterozygous |
| NC_037647.1 | 7673903 | SNV | 1 | A | T | Heterozygous |
| NC_037647.1 | 7673918 | SNV | 1 | A | G | Heterozygous |
| NC_037647.1 | 7675731 | SNV | 1 | T | C | Homozygous   |
| NC_037647.1 | 7675761 | SNV | 1 | A | T | Homozygous   |
| NC_037647.1 | 7682754 | SNV | 1 | G | A | Heterozygous |
| NC_037647.1 | 7682885 | SNV | 1 | G | A | Heterozygous |
| NC_037647.1 | 7682891 | SNV | 1 | G | A | Heterozygous |
| NC_037647.1 | 7682949 | SNV | 1 | G | A | Homozygous   |
| NC_037647.1 | 7682975 | SNV | 1 | T | C | Homozygous   |
| NC_037647.1 | 7683148 | SNV | 1 | A | G | Homozygous   |
| NC_037647.1 | 7683311 | SNV | 1 | C | T | Heterozygous |
| NC_037647.1 | 7683517 | SNV | 1 | G | A | Heterozygous |
| NC_037647.1 | 7684310 | SNV | 1 | A | G | Homozygous   |
| NC_037647.1 | 7684883 | SNV | 1 | T | A | Homozygous   |
| NC_037647.1 | 7684915 | SNV | 1 | A | G | Heterozygous |
| NC_037647.1 | 7685059 | SNV | 1 | T | C | Homozygous   |
| NC_037647.1 | 7685166 | SNV | 1 | A | G | Heterozygous |
| NC_037647.1 | 7685324 | SNV | 1 | T | C | Heterozygous |
| NC_037647.1 | 7685379 | SNV | 1 | A | G | Heterozygous |
| NC_037647.1 | 7685508 | SNV | 1 | A | G | Homozygous   |
| NC_037647.1 | 7685520 | SNV | 1 | A | G | Homozygous   |
| NC_037647.1 | 7685905 | SNV | 1 | T | C | Homozygous   |
| NC_037647.1 | 7686098 | SNV | 1 | G | A | Homozygous   |
| NC_037647.1 | 7688021 | SNV | 1 | A | G | Homozygous   |
| NC_037647.1 | 7688072 | SNV | 1 | A | G | Heterozygous |
| NC_037647.1 | 7714001 | SNV | 1 | C | A | Homozygous   |
| NC_037647.1 | 7714411 | SNV | 1 | A | G | Homozygous   |
| NC_037647.1 | 7720145 | SNV | 1 | T | C | Homozygous   |
| NC_037647.1 | 7722126 | SNV | 1 | G | A | Homozygous   |
| NC_037647.1 | 7724864 | SNV | 1 | T | G | Homozygous   |
| NC_037647.1 | 7725055 | SNV | 1 | T | C | Heterozygous |
| NC_037647.1 | 7725908 | SNV | 1 | A | T | Heterozygous |
| NC_037647.1 | 7725913 | SNV | 1 | G | T | Heterozygous |
| NC_037647.1 | 7725974 | SNV | 1 | A | G | Homozygous   |
| NC_037647.1 | 7726119 | SNV | 1 | A | G | Homozygous   |
| NC_037647.1 | 7726343 | SNV | 1 | C | T | Homozygous   |
| NC_037647.1 | 7726431 | SNV | 1 | A | G | Homozygous   |
| NC_037647.1 | 7726982 | SNV | 1 | A | G | Homozygous   |
| NC_037647.1 | 7726993 | SNV | 1 | G | A | Heterozygous |
| NC_037647.1 | 7727307 | SNV | 1 | G | A | Heterozygous |
| NC_037647.1 | 7727335 | SNV | 1 | T | C | Homozygous   |
| NC_037647.1 | 7727528 | SNV | 1 | T | G | Heterozygous |
| NC_037647.1 | 7727981 | SNV | 1 | C | T | Homozygous   |
| NC_037647.1 | 7728469 | SNV | 1 | C | T | Heterozygous |
| NC_037647.1 | 7728936 | SNV | 1 | G | A | Homozygous   |
| NC_037647.1 | 7729374 | SNV | 1 | T | C | Homozygous   |
| NC_037647.1 | 7729869 | SNV | 1 | C | G | Homozygous   |
| NC_037647.1 | 7730062 | SNV | 1 | A | G | Homozygous   |
| NC_037647.1 | 7733545 | SNV | 1 | A | G | Heterozygous |

|             |         |     |   |   |   |              |
|-------------|---------|-----|---|---|---|--------------|
| NC_037647.1 | 7733588 | SNV | 1 | C | T | Homozygous   |
| NC_037647.1 | 7733591 | SNV | 1 | G | A | Homozygous   |
| NC_037647.1 | 7733594 | SNV | 1 | T | C | Homozygous   |
| NC_037647.1 | 7733596 | SNV | 1 | T | A | Homozygous   |
| NC_037647.1 | 7733602 | SNV | 1 | A | G | Homozygous   |
| NC_037647.1 | 7740029 | SNV | 1 | G | A | Heterozygous |
| NC_037647.1 | 7740541 | SNV | 1 | T | A | Homozygous   |
| NC_037647.1 | 7742272 | SNV | 1 | A | G | Heterozygous |
| NC_037647.1 | 7742571 | SNV | 1 | T | C | Homozygous   |
| NC_037647.1 | 7742696 | SNV | 1 | A | G | Homozygous   |
| NC_037647.1 | 7761831 | SNV | 1 | A | G | Homozygous   |
| NC_037647.1 | 7761887 | SNV | 1 | T | C | Homozygous   |
| NC_037647.1 | 7761927 | SNV | 1 | A | G | Homozygous   |
| NC_037647.1 | 7761936 | SNV | 1 | T | C | Homozygous   |
| NC_037647.1 | 7761940 | SNV | 1 | T | C | Heterozygous |
| NC_037647.1 | 7762048 | SNV | 1 | T | C | Homozygous   |
| NC_037647.1 | 7770946 | SNV | 1 | A | G | Heterozygous |
| NC_037647.1 | 7770992 | SNV | 1 | A | G | Heterozygous |
| NC_037647.1 | 7771006 | SNV | 1 | G | A | Heterozygous |
| NC_037647.1 | 7772554 | SNV | 1 | G | A | Homozygous   |
| NC_037647.1 | 7772606 | SNV | 1 | T | G | Heterozygous |
| NC_037647.1 | 7772721 | SNV | 1 | T | G | Homozygous   |
| NC_037647.1 | 7772830 | SNV | 1 | C | T | Homozygous   |
| NC_037647.1 | 7773960 | SNV | 1 | T | C | Homozygous   |
| NC_037647.1 | 7774041 | SNV | 1 | G | A | Heterozygous |
| NC_037647.1 | 7774078 | SNV | 1 | C | T | Heterozygous |
| NC_037647.1 | 7774501 | SNV | 1 | T | C | Homozygous   |
| NC_037647.1 | 7774507 | SNV | 1 | G | C | Homozygous   |
| NC_037647.1 | 7774515 | SNV | 1 | A | G | Homozygous   |
| NC_037647.1 | 7774566 | SNV | 1 | C | G | Homozygous   |
| NC_037647.1 | 7774601 | SNV | 1 | C | T | Homozygous   |
| NC_037647.1 | 7774618 | SNV | 1 | G | A | Heterozygous |
| NC_037647.1 | 7777579 | SNV | 1 | C | G | Heterozygous |
| NC_037647.1 | 7779120 | SNV | 1 | T | C | Homozygous   |
| NC_037647.1 | 7780643 | SNV | 1 | C | T | Heterozygous |
| NC_037647.1 | 7784707 | SNV | 1 | T | C | Homozygous   |
| NC_037647.1 | 7784746 | SNV | 1 | A | G | Homozygous   |
| NC_037647.1 | 7787117 | SNV | 1 | C | A | Homozygous   |
| NC_037647.1 | 7787127 | SNV | 1 | G | C | Homozygous   |
| NC_037647.1 | 7787132 | SNV | 1 | C | G | Homozygous   |
| NC_037647.1 | 7787149 | SNV | 1 | C | T | Homozygous   |
| NC_037647.1 | 7787153 | SNV | 1 | C | T | Homozygous   |
| NC_037647.1 | 7787478 | SNV | 1 | C | T | Homozygous   |
| NC_037647.1 | 7787492 | SNV | 1 | G | A | Homozygous   |
| NC_037647.1 | 7793532 | SNV | 1 | A | G | Homozygous   |
| NC_037647.1 | 7793744 | SNV | 1 | A | G | Homozygous   |
| NC_037647.1 | 7793747 | SNV | 1 | C | T | Homozygous   |
| NC_037647.1 | 7802367 | SNV | 1 | G | A | Homozygous   |
| NC_037647.1 | 7803268 | SNV | 1 | C | T | Homozygous   |
| NC_037647.1 | 7803438 | SNV | 1 | A | G | Heterozygous |
| NC_037647.1 | 7803602 | SNV | 1 | A | G | Heterozygous |

|             |         |     |   |   |   |              |
|-------------|---------|-----|---|---|---|--------------|
| NC_037647.1 | 7813763 | SNV | 1 | A | T | Heterozygous |
| NC_037647.1 | 7813765 | SNV | 1 | C | A | Heterozygous |
| NC_037647.1 | 7813767 | SNV | 1 | G | T | Heterozygous |
| NC_037647.1 | 7813781 | SNV | 1 | A | G | Homozygous   |
| NC_037647.1 | 7813851 | SNV | 1 | T | C | Homozygous   |
| NC_037647.1 | 7814189 | SNV | 1 | T | A | Homozygous   |
| NC_037647.1 | 7814259 | SNV | 1 | T | A | Heterozygous |
| NC_037647.1 | 7814261 | SNV | 1 | A | T | Heterozygous |
| NC_037647.1 | 7814268 | SNV | 1 | G | A | Heterozygous |
| NC_037647.1 | 7814359 | SNV | 1 | T | C | Homozygous   |
| NC_037647.1 | 7814371 | SNV | 1 | T | C | Heterozygous |
| NC_037647.1 | 7814378 | SNV | 1 | T | C | Heterozygous |
| NC_037647.1 | 7814391 | SNV | 1 | C | T | Homozygous   |
| NC_037647.1 | 7814412 | SNV | 1 | T | C | Homozygous   |
| NC_037647.1 | 7814432 | SNV | 1 | T | C | Heterozygous |
| NC_037647.1 | 7814436 | SNV | 1 | T | C | Heterozygous |
| NC_037647.1 | 7814526 | SNV | 1 | G | A | Heterozygous |
| NC_037647.1 | 7814541 | SNV | 1 | C | T | Heterozygous |
| NC_037647.1 | 7814678 | SNV | 1 | A | T | Heterozygous |
| NC_037647.1 | 7814769 | SNV | 1 | A | G | Heterozygous |
| NC_037647.1 | 7814780 | SNV | 1 | T | C | Heterozygous |
| NC_037647.1 | 7814821 | SNV | 1 | C | T | Heterozygous |
| NC_037647.1 | 7814825 | SNV | 1 | C | G | Homozygous   |
| NC_037647.1 | 7814829 | SNV | 1 | T | G | Homozygous   |
| NC_037647.1 | 7814860 | SNV | 1 | A | T | Homozygous   |
| NC_037647.1 | 7814865 | SNV | 1 | C | A | Homozygous   |
| NC_037647.1 | 7814872 | SNV | 1 | T | A | Homozygous   |
| NC_037647.1 | 7815899 | SNV | 1 | C | T | Heterozygous |
| NC_037647.1 | 7816153 | SNV | 1 | T | G | Heterozygous |
| NC_037647.1 | 7816218 | SNV | 1 | C | T | Heterozygous |
| NC_037647.1 | 7816321 | SNV | 1 | G | A | Heterozygous |
| NC_037647.1 | 7816337 | SNV | 1 | A | G | Heterozygous |
| NC_037647.1 | 7816392 | SNV | 1 | A | G | Heterozygous |
| NC_037647.1 | 7816400 | SNV | 1 | A | G | Homozygous   |
| NC_037647.1 | 7816627 | SNV | 1 | C | T | Homozygous   |
| NC_037647.1 | 7816639 | SNV | 1 | C | G | Homozygous   |
| NC_037647.1 | 7816651 | SNV | 1 | A | G | Homozygous   |
| NC_037647.1 | 7816716 | SNV | 1 | G | A | Heterozygous |
| NC_037647.1 | 7816735 | SNV | 1 | C | T | Homozygous   |
| NC_037647.1 | 7816858 | SNV | 1 | C | T | Heterozygous |
| NC_037647.1 | 7816874 | SNV | 1 | C | T | Heterozygous |
| NC_037647.1 | 7816893 | SNV | 1 | A | G | Homozygous   |
| NC_037647.1 | 7816905 | SNV | 1 | G | A | Heterozygous |
| NC_037647.1 | 7817106 | SNV | 1 | T | C | Heterozygous |
| NC_037647.1 | 7817219 | SNV | 1 | G | A | Homozygous   |
| NC_037647.1 | 7817410 | SNV | 1 | T | C | Homozygous   |
| NC_037647.1 | 7817412 | SNV | 1 | C | T | Homozygous   |
| NC_037647.1 | 7817414 | SNV | 1 | C | A | Homozygous   |
| NC_037647.1 | 7817428 | SNV | 1 | G | A | Homozygous   |
| NC_037647.1 | 7817432 | SNV | 1 | T | C | Homozygous   |
| NC_037647.1 | 7817435 | SNV | 1 | G | A | Homozygous   |

|             |         |     |   |   |   |              |
|-------------|---------|-----|---|---|---|--------------|
| NC_037647.1 | 7817437 | SNV | 1 | A | T | Homozygous   |
| NC_037647.1 | 7817441 | SNV | 1 | T | A | Homozygous   |
| NC_037647.1 | 7817449 | SNV | 1 | C | T | Heterozygous |
| NC_037647.1 | 7817466 | SNV | 1 | T | C | Heterozygous |
| NC_037647.1 | 7817579 | SNV | 1 | A | G | Homozygous   |
| NC_037647.1 | 7817609 | SNV | 1 | A | G | Heterozygous |
| NC_037647.1 | 7817766 | SNV | 1 | T | C | Heterozygous |
| NC_037647.1 | 7818042 | SNV | 1 | G | C | Heterozygous |
| NC_037647.1 | 7839916 | SNV | 1 | T | C | Heterozygous |
| NC_037647.1 | 7839918 | SNV | 1 | C | T | Homozygous   |
| NC_037647.1 | 7839964 | SNV | 1 | A | T | Heterozygous |
| NC_037647.1 | 7839967 | SNV | 1 | C | T | Heterozygous |
| NC_037647.1 | 7840075 | SNV | 1 | A | C | Homozygous   |
| NC_037647.1 | 7840115 | SNV | 1 | A | G | Heterozygous |
| NC_037647.1 | 7845574 | SNV | 1 | A | C | Homozygous   |
| NC_037647.1 | 7860813 | SNV | 1 | T | C | Heterozygous |
| NC_037647.1 | 7861333 | SNV | 1 | T | C | Homozygous   |
| NC_037647.1 | 7867001 | SNV | 1 | C | T | Homozygous   |
| NC_037647.1 | 7867306 | SNV | 1 | G | A | Heterozygous |
| NC_037647.1 | 7867550 | SNV | 1 | G | C | Heterozygous |
| NC_037647.1 | 7868372 | SNV | 1 | T | C | Homozygous   |
| NC_037647.1 | 7870246 | SNV | 1 | C | T | Heterozygous |
| NC_037647.1 | 7870293 | SNV | 1 | T | C | Homozygous   |
| NC_037647.1 | 7870484 | SNV | 1 | C | T | Heterozygous |
| NC_037647.1 | 7870583 | SNV | 1 | A | C | Homozygous   |
| NC_037647.1 | 7871337 | SNV | 1 | A | G | Heterozygous |
| NC_037647.1 | 7871387 | SNV | 1 | T | C | Heterozygous |
| NC_037647.1 | 7879862 | SNV | 1 | C | T | Homozygous   |
| NC_037647.1 | 7883274 | SNV | 1 | T | C | Heterozygous |
| NC_037647.1 | 7883329 | SNV | 1 | T | C | Homozygous   |
| NC_037647.1 | 7883512 | SNV | 1 | C | T | Homozygous   |
| NC_037647.1 | 7896348 | SNV | 1 | T | C | Homozygous   |
| NC_037647.1 | 7896359 | SNV | 1 | C | T | Heterozygous |
| NC_037647.1 | 7896370 | SNV | 1 | C | T | Heterozygous |
| NC_037647.1 | 7896372 | SNV | 1 | C | T | Heterozygous |
| NC_037647.1 | 7896390 | SNV | 1 | T | C | Homozygous   |
| NC_037647.1 | 7896484 | SNV | 1 | A | C | Homozygous   |
| NC_037647.1 | 7896738 | SNV | 1 | C | G | Heterozygous |
| NC_037647.1 | 7896744 | SNV | 1 | A | T | Homozygous   |
| NC_037647.1 | 7896768 | SNV | 1 | A | T | Homozygous   |
| NC_037647.1 | 7896770 | SNV | 1 | A | T | Homozygous   |
| NC_037647.1 | 7897950 | SNV | 1 | G | A | Heterozygous |
| NC_037647.1 | 7897956 | SNV | 1 | G | A | Heterozygous |
| NC_037647.1 | 7897960 | SNV | 1 | C | T | Heterozygous |
| NC_037647.1 | 7898121 | SNV | 1 | A | G | Heterozygous |
| NC_037647.1 | 7898142 | SNV | 1 | T | C | Heterozygous |
| NC_037647.1 | 7898150 | SNV | 1 | A | G | Heterozygous |
| NC_037647.1 | 7898168 | SNV | 1 | G | A | Heterozygous |
| NC_037647.1 | 7898177 | SNV | 1 | G | A | Heterozygous |
| NC_037647.1 | 7898192 | SNV | 1 | A | G | Heterozygous |
| NC_037647.1 | 7898218 | SNV | 1 | G | A | Heterozygous |

|             |         |     |   |   |   |              |
|-------------|---------|-----|---|---|---|--------------|
| NC_037647.1 | 7898225 | SNV | 1 | G | A | Heterozygous |
| NC_037647.1 | 7898308 | SNV | 1 | A | G | Homozygous   |
| NC_037647.1 | 7898383 | SNV | 1 | A | G | Heterozygous |
| NC_037647.1 | 7898456 | SNV | 1 | G | A | Heterozygous |
| NC_037647.1 | 7898519 | SNV | 1 | A | T | Heterozygous |
| NC_037647.1 | 7898879 | SNV | 1 | A | T | Homozygous   |
| NC_037647.1 | 7898970 | SNV | 1 | A | G | Homozygous   |
| NC_037647.1 | 7898994 | SNV | 1 | C | G | Heterozygous |
| NC_037647.1 | 7899001 | SNV | 1 | A | G | Heterozygous |
| NC_037647.1 | 7899025 | SNV | 1 | A | G | Homozygous   |
| NC_037647.1 | 7899310 | SNV | 1 | T | G | Heterozygous |
| NC_037647.1 | 7899468 | SNV | 1 | G | A | Heterozygous |
| NC_037647.1 | 7899784 | SNV | 1 | A | T | Homozygous   |
| NC_037647.1 | 7899886 | SNV | 1 | A | T | Homozygous   |
| NC_037647.1 | 7899945 | SNV | 1 | T | C | Homozygous   |
| NC_037647.1 | 7900003 | SNV | 1 | C | A | Heterozygous |
| NC_037647.1 | 7900007 | SNV | 1 | C | A | Heterozygous |
| NC_037647.1 | 7900024 | SNV | 1 | A | G | Heterozygous |
| NC_037647.1 | 7901781 | SNV | 1 | T | G | Heterozygous |
| NC_037647.1 | 7901815 | SNV | 1 | A | G | Homozygous   |
| NC_037647.1 | 7901819 | SNV | 1 | G | A | Homozygous   |
| NC_037647.1 | 7907480 | SNV | 1 | A | G | Homozygous   |
| NC_037647.1 | 7907514 | SNV | 1 | G | C | Homozygous   |
| NC_037647.1 | 7912619 | SNV | 1 | A | G | Heterozygous |
| NC_037647.1 | 7912633 | SNV | 1 | A | G | Heterozygous |
| NC_037647.1 | 7912635 | SNV | 1 | G | A | Heterozygous |
| NC_037647.1 | 7912643 | SNV | 1 | G | A | Heterozygous |
| NC_037647.1 | 7912644 | SNV | 1 | G | A | Heterozygous |
| NC_037647.1 | 7912645 | SNV | 1 | A | G | Heterozygous |
| NC_037647.1 | 7923326 | SNV | 1 | G | A | Homozygous   |
| NC_037647.1 | 7923371 | SNV | 1 | C | T | Homozygous   |
| NC_037647.1 | 7941180 | SNV | 1 | T | A | Homozygous   |
| NC_037647.1 | 7941203 | SNV | 1 | A | G | Homozygous   |
| NC_037647.1 | 7941460 | SNV | 1 | A | T | Heterozygous |
| NC_037647.1 | 7941889 | SNV | 1 | T | C | Homozygous   |
| NC_037647.1 | 7942296 | SNV | 1 | T | C | Homozygous   |
| NC_037647.1 | 7942383 | SNV | 1 | G | A | Homozygous   |
| NC_037647.1 | 7942619 | SNV | 1 | T | A | Homozygous   |
| NC_037647.1 | 7943282 | SNV | 1 | G | A | Homozygous   |
| NC_037647.1 | 7943497 | SNV | 1 | G | A | Heterozygous |
| NC_037647.1 | 7943508 | SNV | 1 | T | A | Heterozygous |
| NC_037647.1 | 7944736 | SNV | 1 | T | C | Heterozygous |
| NC_037647.1 | 7944761 | SNV | 1 | C | T | Heterozygous |
| NC_037647.1 | 7944869 | SNV | 1 | C | G | Heterozygous |
| NC_037647.1 | 7944928 | SNV | 1 | A | T | Heterozygous |
| NC_037647.1 | 7945143 | SNV | 1 | C | T | Homozygous   |
| NC_037647.1 | 7945154 | SNV | 1 | C | T | Heterozygous |
| NC_037647.1 | 7945668 | SNV | 1 | T | C | Homozygous   |
| NC_037647.1 | 7946047 | SNV | 1 | C | G | Homozygous   |
| NC_037647.1 | 7946369 | SNV | 1 | G | A | Heterozygous |
| NC_037647.1 | 7946373 | SNV | 1 | T | C | Homozygous   |

|             |         |     |   |   |   |              |
|-------------|---------|-----|---|---|---|--------------|
| NC_037647.1 | 7948574 | SNV | 1 | T | C | Heterozygous |
| NC_037647.1 | 7948827 | SNV | 1 | A | T | Heterozygous |
| NC_037647.1 | 7948848 | SNV | 1 | C | T | Heterozygous |
| NC_037647.1 | 7948882 | SNV | 1 | G | T | Heterozygous |
| NC_037647.1 | 7948886 | SNV | 1 | T | G | Heterozygous |
| NC_037647.1 | 7948973 | SNV | 1 | G | A | Heterozygous |
| NC_037647.1 | 7949059 | SNV | 1 | C | T | Homozygous   |
| NC_037647.1 | 7949388 | SNV | 1 | C | T | Heterozygous |
| NC_037647.1 | 7950501 | SNV | 1 | A | G | Homozygous   |
| NC_037647.1 | 7951592 | SNV | 1 | T | C | Homozygous   |
| NC_037647.1 | 7952821 | SNV | 1 | T | C | Homozygous   |
| NC_037647.1 | 7953219 | SNV | 1 | A | G | Homozygous   |
| NC_037647.1 | 7953525 | SNV | 1 | A | G | Homozygous   |
| NC_037647.1 | 7954595 | SNV | 1 | T | C | Homozygous   |
| NC_037647.1 | 7954879 | SNV | 1 | C | T | Homozygous   |
| NC_037647.1 | 7955009 | SNV | 1 | C | T | Homozygous   |
| NC_037647.1 | 7955093 | SNV | 1 | C | G | Homozygous   |
| NC_037647.1 | 7955394 | SNV | 1 | G | C | Heterozygous |
| NC_037647.1 | 7955456 | SNV | 1 | C | G | Homozygous   |
| NC_037647.1 | 7955459 | SNV | 1 | A | G | Homozygous   |
| NC_037647.1 | 7955597 | SNV | 1 | C | T | Homozygous   |
| NC_037647.1 | 7956992 | SNV | 1 | C | T | Heterozygous |
| NC_037647.1 | 7957043 | SNV | 1 | G | A | Homozygous   |
| NC_037647.1 | 7957053 | SNV | 1 | G | A | Homozygous   |
| NC_037647.1 | 7957208 | SNV | 1 | T | G | Homozygous   |
| NC_037647.1 | 7957345 | SNV | 1 | G | A | Homozygous   |
| NC_037647.1 | 7957826 | SNV | 1 | A | T | Homozygous   |
| NC_037647.1 | 7959192 | SNV | 1 | A | G | Homozygous   |
| NC_037647.1 | 7959196 | SNV | 1 | A | G | Homozygous   |
| NC_037647.1 | 7959444 | SNV | 1 | C | T | Homozygous   |
| NC_037647.1 | 7959455 | SNV | 1 | C | T | Heterozygous |
| NC_037647.1 | 7960023 | SNV | 1 | T | C | Homozygous   |
| NC_037647.1 | 7960029 | SNV | 1 | C | T | Homozygous   |
| NC_037647.1 | 7960053 | SNV | 1 | C | T | Homozygous   |
| NC_037647.1 | 7960215 | SNV | 1 | C | G | Homozygous   |
| NC_037647.1 | 7960366 | SNV | 1 | G | A | Homozygous   |
| NC_037647.1 | 7961465 | SNV | 1 | A | G | Homozygous   |
| NC_037647.1 | 7961484 | SNV | 1 | G | A | Homozygous   |
| NC_037647.1 | 7961580 | SNV | 1 | C | G | Heterozygous |
| NC_037647.1 | 7961593 | SNV | 1 | A | C | Homozygous   |
| NC_037647.1 | 7961617 | SNV | 1 | A | G | Homozygous   |
| NC_037647.1 | 7961673 | SNV | 1 | C | T | Homozygous   |
| NC_037647.1 | 7961692 | SNV | 1 | T | C | Homozygous   |
| NC_037647.1 | 7961724 | SNV | 1 | G | C | Heterozygous |
| NC_037647.1 | 7961727 | SNV | 1 | G | A | Heterozygous |
| NC_037647.1 | 7961768 | SNV | 1 | G | A | Homozygous   |
| NC_037647.1 | 7961772 | SNV | 1 | G | A | Heterozygous |
| NC_037647.1 | 7961774 | SNV | 1 | G | A | Heterozygous |
| NC_037647.1 | 7963375 | SNV | 1 | T | C | Homozygous   |
| NC_037647.1 | 7963478 | SNV | 1 | C | T | Homozygous   |
| NC_037647.1 | 7963512 | SNV | 1 | C | T | Heterozygous |

|             |         |     |   |   |   |              |
|-------------|---------|-----|---|---|---|--------------|
| NC_037647.1 | 7963524 | SNV | 1 | C | T | Heterozygous |
| NC_037647.1 | 7963545 | SNV | 1 | C | T | Homozygous   |
| NC_037647.1 | 7963590 | SNV | 1 | G | A | Heterozygous |
| NC_037647.1 | 7963828 | SNV | 1 | C | T | Homozygous   |
| NC_037647.1 | 7963846 | SNV | 1 | C | T | Homozygous   |
| NC_037647.1 | 7963880 | SNV | 1 | C | T | Homozygous   |
| NC_037647.1 | 7963884 | SNV | 1 | T | A | Homozygous   |
| NC_037647.1 | 7965180 | SNV | 1 | C | T | Heterozygous |
| NC_037647.1 | 7965708 | SNV | 1 | C | G | Heterozygous |
| NC_037647.1 | 7965725 | SNV | 1 | A | T | Heterozygous |
| NC_037647.1 | 7965732 | SNV | 1 | A | C | Heterozygous |
| NC_037647.1 | 7965747 | SNV | 1 | C | T | Heterozygous |
| NC_037647.1 | 7965750 | SNV | 1 | T | C | Homozygous   |
| NC_037647.1 | 7966987 | SNV | 1 | G | A | Heterozygous |
| NC_037647.1 | 7969643 | SNV | 1 | T | C | Homozygous   |
| NC_037647.1 | 7969888 | SNV | 1 | G | C | Homozygous   |
| NC_037647.1 | 7970712 | SNV | 1 | T | C | Heterozygous |
| NC_037647.1 | 7970942 | SNV | 1 | T | G | Homozygous   |
| NC_037647.1 | 7972201 | SNV | 1 | T | C | Homozygous   |
| NC_037647.1 | 7972287 | SNV | 1 | A | G | Homozygous   |
| NC_037647.1 | 7972428 | SNV | 1 | A | G | Homozygous   |
| NC_037647.1 | 7972469 | SNV | 1 | A | G | Homozygous   |
| NC_037647.1 | 7973222 | SNV | 1 | T | G | Heterozygous |
| NC_037647.1 | 7974057 | SNV | 1 | G | T | Heterozygous |
| NC_037647.1 | 7974202 | SNV | 1 | T | C | Heterozygous |
| NC_037647.1 | 7974204 | SNV | 1 | C | T | Heterozygous |
| NC_037647.1 | 7974213 | SNV | 1 | C | T | Homozygous   |
| NC_037647.1 | 7974286 | SNV | 1 | T | C | Homozygous   |
| NC_037647.1 | 7974298 | SNV | 1 | C | T | Heterozygous |
| NC_037647.1 | 7974368 | SNV | 1 | G | A | Homozygous   |
| NC_037647.1 | 7976917 | SNV | 1 | T | G | Heterozygous |
| NC_037647.1 | 7976986 | SNV | 1 | G | A | Homozygous   |
| NC_037647.1 | 7977415 | SNV | 1 | A | G | Homozygous   |
| NC_037647.1 | 7977737 | SNV | 1 | G | T | Heterozygous |
| NC_037647.1 | 7978481 | SNV | 1 | T | C | Heterozygous |
| NC_037647.1 | 7978645 | SNV | 1 | C | T | Heterozygous |
| NC_037647.1 | 7978656 | SNV | 1 | A | G | Homozygous   |
| NC_037647.1 | 7978697 | SNV | 1 | G | A | Heterozygous |
| NC_037647.1 | 7979031 | SNV | 1 | A | G | Heterozygous |
| NC_037647.1 | 7979055 | SNV | 1 | T | C | Homozygous   |
| NC_037647.1 | 7979067 | SNV | 1 | G | A | Heterozygous |
| NC_037647.1 | 7979252 | SNV | 1 | A | G | Homozygous   |
| NC_037647.1 | 7980824 | SNV | 1 | T | A | Heterozygous |
| NC_037647.1 | 7981009 | SNV | 1 | A | G | Heterozygous |
| NC_037647.1 | 7981016 | SNV | 1 | C | T | Homozygous   |
| NC_037647.1 | 7981355 | SNV | 1 | G | C | Heterozygous |
| NC_037647.1 | 7981953 | SNV | 1 | C | T | Homozygous   |
| NC_037647.1 | 7982196 | SNV | 1 | T | C | Heterozygous |
| NC_037647.1 | 7982219 | SNV | 1 | A | G | Homozygous   |
| NC_037647.1 | 7982230 | SNV | 1 | C | T | Homozygous   |
| NC_037647.1 | 7982261 | SNV | 1 | A | T | Heterozygous |



|             |         |     |   |   |   |              |
|-------------|---------|-----|---|---|---|--------------|
| NC_037647.1 | 7982438 | SNV | 1 | C | T | Homozygous   |
| NC_037647.1 | 7982999 | SNV | 1 | C | G | Homozygous   |
| NC_037647.1 | 7983240 | SNV | 1 | A | G | Heterozygous |
| NC_037647.1 | 7983416 | SNV | 1 | C | G | Heterozygous |
| NC_037647.1 | 7983629 | SNV | 1 | C | T | Homozygous   |
| NC_037647.1 | 7985532 | SNV | 1 | C | A | Heterozygous |
| NC_037647.1 | 7985830 | SNV | 1 | A | G | Homozygous   |
| NC_037647.1 | 7985983 | SNV | 1 | C | T | Heterozygous |
| NC_037647.1 | 7986266 | SNV | 1 | T | C | Homozygous   |
| NC_037647.1 | 7986388 | SNV | 1 | C | T | Homozygous   |
| NC_037647.1 | 7986432 | SNV | 1 | A | G | Homozygous   |
| NC_037647.1 | 7986440 | SNV | 1 | C | T | Heterozygous |
| NC_037647.1 | 7986844 | SNV | 1 | T | C | Homozygous   |
| NC_037647.1 | 7987425 | SNV | 1 | T | C | Homozygous   |
| NC_037647.1 | 7992889 | SNV | 1 | A | T | Heterozygous |
| NC_037647.1 | 7992899 | SNV | 1 | A | G | Heterozygous |
| NC_037647.1 | 8002268 | SNV | 1 | A | G | Heterozygous |
| NC_037647.1 | 8002279 | SNV | 1 | A | G | Heterozygous |
| NC_037647.1 | 8002283 | SNV | 1 | A | G | Heterozygous |
| NC_037647.1 | 8002287 | SNV | 1 | A | G | Heterozygous |
| NC_037647.1 | 8002293 | SNV | 1 | A | G | Heterozygous |
| NC_037647.1 | 8002565 | SNV | 1 | T | C | Heterozygous |
| NC_037647.1 | 8002572 | SNV | 1 | C | T | Homozygous   |
| NC_037647.1 | 8010104 | SNV | 1 | A | G | Homozygous   |
| NC_037647.1 | 8010338 | SNV | 1 | C | T | Homozygous   |
| NC_037647.1 | 8010340 | SNV | 1 | A | T | Homozygous   |
| NC_037647.1 | 8015466 | SNV | 1 | T | C | Homozygous   |
| NC_037647.1 | 8019178 | SNV | 1 | C | T | Heterozygous |
| NC_037647.1 | 8019905 | SNV | 1 | A | C | Heterozygous |
| NC_037647.1 | 8019919 | SNV | 1 | T | C | Heterozygous |
| NC_037647.1 | 8019926 | SNV | 1 | T | C | Heterozygous |
| NC_037647.1 | 8022086 | SNV | 1 | G | A | Heterozygous |
| NC_037647.1 | 8022119 | SNV | 1 | A | G | Homozygous   |
| NC_037647.1 | 8024324 | SNV | 1 | G | A | Heterozygous |
| NC_037647.1 | 8025029 | SNV | 1 | T | A | Homozygous   |
| NC_037647.1 | 8025190 | SNV | 1 | C | T | Heterozygous |
| NC_037647.1 | 8025648 | SNV | 1 | T | A | Heterozygous |
| NC_037647.1 | 8028127 | SNV | 1 | C | T | Heterozygous |
| NC_037647.1 | 8035322 | SNV | 1 | G | A | Heterozygous |
| NC_037647.1 | 8035529 | SNV | 1 | G | T | Heterozygous |
| NC_037647.1 | 8047692 | SNV | 1 | C | T | Homozygous   |
| NC_037647.1 | 8055258 | SNV | 1 | G | A | Heterozygous |
| NC_037647.1 | 8055937 | SNV | 1 | T | C | Heterozygous |
| NC_037647.1 | 8055943 | SNV | 1 | T | C | Heterozygous |
| NC_037647.1 | 8055945 | SNV | 1 | T | C | Heterozygous |
| NC_037647.1 | 8055950 | SNV | 1 | T | C | Heterozygous |
| NC_037647.1 | 8057613 | SNV | 1 | A | T | Homozygous   |
| NC_037647.1 | 8057668 | SNV | 1 | A | G | Homozygous   |
| NC_037647.1 | 8057783 | SNV | 1 | A | T | Homozygous   |
| NC_037647.1 | 8058757 | SNV | 1 | T | C | Heterozygous |
| NC_037647.1 | 8065298 | SNV | 1 | A | G | Homozygous   |

|             |         |     |   |   |   |              |
|-------------|---------|-----|---|---|---|--------------|
| NC_037647.1 | 8072517 | SNV | 1 | C | T | Heterozygous |
| NC_037647.1 | 8073292 | SNV | 1 | T | C | Homozygous   |
| NC_037647.1 | 8073304 | SNV | 1 | T | G | Homozygous   |
| NC_037647.1 | 8073314 | SNV | 1 | A | G | Homozygous   |
| NC_037647.1 | 8074651 | SNV | 1 | A | C | Heterozygous |
| NC_037647.1 | 8074660 | SNV | 1 | A | G | Homozygous   |
| NC_037647.1 | 8076887 | SNV | 1 | T | C | Homozygous   |
| NC_037647.1 | 8077358 | SNV | 1 | A | G | Homozygous   |
| NC_037647.1 | 8077813 | SNV | 1 | G | A | Homozygous   |
| NC_037647.1 | 8077925 | SNV | 1 | T | C | Heterozygous |
| NC_037647.1 | 8077949 | SNV | 1 | T | C | Heterozygous |
| NC_037647.1 | 8078030 | SNV | 1 | G | C | Heterozygous |
| NC_037647.1 | 8078318 | SNV | 1 | T | C | Heterozygous |
| NC_037647.1 | 8078319 | SNV | 1 | A | G | Heterozygous |
| NC_037647.1 | 8078320 | SNV | 1 | T | C | Heterozygous |
| NC_037647.1 | 8078321 | SNV | 1 | A | G | Heterozygous |
| NC_037647.1 | 8078330 | SNV | 1 | T | C | Heterozygous |
| NC_037647.1 | 8079519 | SNV | 1 | T | A | Heterozygous |
| NC_037647.1 | 8081580 | SNV | 1 | T | C | Homozygous   |
| NC_037647.1 | 8081617 | SNV | 1 | T | C | Homozygous   |
| NC_037647.1 | 8082081 | SNV | 1 | A | G | Homozygous   |
| NC_037647.1 | 8082111 | SNV | 1 | T | C | Homozygous   |
| NC_037647.1 | 8083159 | SNV | 1 | T | C | Homozygous   |
| NC_037647.1 | 8088127 | SNV | 1 | G | A | Heterozygous |
| NC_037647.1 | 8088134 | SNV | 1 | T | C | Heterozygous |
| NC_037647.1 | 8088170 | SNV | 1 | C | T | Heterozygous |
| NC_037647.1 | 8088437 | SNV | 1 | C | T | Heterozygous |
| NC_037647.1 | 8088440 | SNV | 1 | C | T | Heterozygous |
| NC_037647.1 | 8088449 | SNV | 1 | T | C | Homozygous   |
| NC_037647.1 | 8090355 | SNV | 1 | C | T | Heterozygous |
| NC_037647.1 | 8090680 | SNV | 1 | T | C | Heterozygous |
| NC_037647.1 | 8090683 | SNV | 1 | C | G | Heterozygous |
| NC_037647.1 | 8090725 | SNV | 1 | G | A | Heterozygous |
| NC_037647.1 | 8090738 | SNV | 1 | G | A | Heterozygous |
| NC_037647.1 | 8092789 | SNV | 1 | A | G | Homozygous   |
| NC_037647.1 | 8093473 | SNV | 1 | C | T | Homozygous   |
| NC_037647.1 | 8093485 | SNV | 1 | T | G | Homozygous   |
| NC_037647.1 | 8093517 | SNV | 1 | A | G | Homozygous   |
| NC_037647.1 | 8094153 | SNV | 1 | T | C | Homozygous   |
| NC_037647.1 | 8094487 | SNV | 1 | G | A | Heterozygous |
| NC_037647.1 | 8094529 | SNV | 1 | A | G | Homozygous   |
| NC_037647.1 | 8094753 | SNV | 1 | C | G | Heterozygous |
| NC_037647.1 | 8096447 | SNV | 1 | G | A | Homozygous   |
| NC_037647.1 | 8096450 | SNV | 1 | A | G | Heterozygous |
| NC_037647.1 | 8096504 | SNV | 1 | A | G | Heterozygous |
| NC_037647.1 | 8096671 | SNV | 1 | A | C | Heterozygous |
| NC_037647.1 | 8097416 | SNV | 1 | T | C | Homozygous   |
| NC_037647.1 | 8097437 | SNV | 1 | C | T | Homozygous   |
| NC_037647.1 | 8097452 | SNV | 1 | C | T | Heterozygous |
| NC_037647.1 | 8097512 | SNV | 1 | C | T | Heterozygous |
| NC_037647.1 | 8097552 | SNV | 1 | C | T | Heterozygous |

|             |         |     |   |   |   |              |
|-------------|---------|-----|---|---|---|--------------|
| NC_037647.1 | 8097937 | SNV | 1 | A | G | Homozygous   |
| NC_037647.1 | 8099432 | SNV | 1 | C | T | Heterozygous |
| NC_037647.1 | 8099844 | SNV | 1 | A | G | Homozygous   |
| NC_037647.1 | 8099868 | SNV | 1 | G | A | Heterozygous |
| NC_037647.1 | 8100029 | SNV | 1 | A | G | Homozygous   |
| NC_037647.1 | 8100247 | SNV | 1 | C | T | Heterozygous |
| NC_037647.1 | 8100442 | SNV | 1 | C | T | Homozygous   |
| NC_037647.1 | 8100448 | SNV | 1 | C | T | Heterozygous |
| NC_037647.1 | 8100646 | SNV | 1 | A | C | Homozygous   |
| NC_037647.1 | 8100733 | SNV | 1 | A | G | Homozygous   |
| NC_037647.1 | 8100830 | SNV | 1 | A | G | Homozygous   |
| NC_037647.1 | 8100901 | SNV | 1 | G | A | Heterozygous |
| NC_037647.1 | 8101532 | SNV | 1 | C | G | Homozygous   |
| NC_037647.1 | 8101617 | SNV | 1 | A | G | Homozygous   |
| NC_037647.1 | 8101790 | SNV | 1 | A | G | Homozygous   |
| NC_037647.1 | 8104155 | SNV | 1 | T | C | Homozygous   |
| NC_037647.1 | 8106563 | SNV | 1 | G | A | Homozygous   |
| NC_037647.1 | 8106570 | SNV | 1 | A | T | Homozygous   |
| NC_037647.1 | 8106573 | SNV | 1 | A | T | Homozygous   |
| NC_037647.1 | 8106580 | SNV | 1 | A | T | Homozygous   |
| NC_037647.1 | 8111106 | SNV | 1 | A | C | Homozygous   |
| NC_037647.1 | 8111110 | SNV | 1 | T | A | Homozygous   |
| NC_037647.1 | 8111136 | SNV | 1 | G | C | Homozygous   |
| NC_037647.1 | 8111142 | SNV | 1 | T | G | Homozygous   |
| NC_037647.1 | 8111152 | SNV | 1 | G | T | Homozygous   |
| NC_037647.1 | 8111884 | SNV | 1 | A | T | Homozygous   |
| NC_037647.1 | 8111886 | SNV | 1 | A | G | Heterozygous |
| NC_037647.1 | 8111905 | SNV | 1 | G | A | Homozygous   |
| NC_037647.1 | 8111912 | SNV | 1 | T | C | Homozygous   |
| NC_037647.1 | 8112124 | SNV | 1 | T | C | Homozygous   |
| NC_037647.1 | 8112155 | SNV | 1 | T | A | Homozygous   |
| NC_037647.1 | 8113718 | SNV | 1 | A | G | Homozygous   |
| NC_037647.1 | 8113720 | SNV | 1 | A | G | Homozygous   |
| NC_037647.1 | 8113739 | SNV | 1 | A | G | Homozygous   |
| NC_037647.1 | 8126884 | SNV | 1 | C | T | Heterozygous |
| NC_037647.1 | 8126901 | SNV | 1 | C | T | Heterozygous |
| NC_037647.1 | 8127088 | SNV | 1 | G | T | Homozygous   |
| NC_037647.1 | 8127121 | SNV | 1 | C | T | Heterozygous |
| NC_037647.1 | 8129762 | SNV | 1 | A | G | Heterozygous |
| NC_037647.1 | 8132860 | SNV | 1 | A | T | Homozygous   |
| NC_037647.1 | 8132909 | SNV | 1 | C | T | Heterozygous |
| NC_037647.1 | 8133113 | SNV | 1 | T | C | Homozygous   |
| NC_037647.1 | 8133198 | SNV | 1 | C | T | Homozygous   |
| NC_037647.1 | 8133456 | SNV | 1 | G | A | Heterozygous |
| NC_037647.1 | 8142941 | SNV | 1 | A | G | Heterozygous |
| NC_037647.1 | 8143211 | SNV | 1 | A | G | Heterozygous |
| NC_037647.1 | 8143965 | SNV | 1 | G | A | Homozygous   |
| NC_037647.1 | 8146649 | SNV | 1 | G | A | Heterozygous |
| NC_037647.1 | 8146679 | SNV | 1 | T | C | Homozygous   |
| NC_037647.1 | 8149144 | SNV | 1 | C | T | Homozygous   |
| NC_037647.1 | 8149211 | SNV | 1 | A | G | Heterozygous |

|             |         |     |   |   |   |              |
|-------------|---------|-----|---|---|---|--------------|
| NC_037647.1 | 8149255 | SNV | 1 | G | A | Homozygous   |
| NC_037647.1 | 8149390 | SNV | 1 | G | A | Homozygous   |
| NC_037647.1 | 8149878 | SNV | 1 | C | A | Heterozygous |
| NC_037647.1 | 8149881 | SNV | 1 | T | A | Heterozygous |
| NC_037647.1 | 8153298 | SNV | 1 | A | C | Homozygous   |
| NC_037647.1 | 8153423 | SNV | 1 | G | A | Homozygous   |
| NC_037647.1 | 8155374 | SNV | 1 | A | G | Heterozygous |
| NC_037647.1 | 8156816 | SNV | 1 | G | A | Heterozygous |
| NC_037647.1 | 8158437 | SNV | 1 | A | G | Homozygous   |
| NC_037647.1 | 8158440 | SNV | 1 | A | G | Homozygous   |
| NC_037647.1 | 8158550 | SNV | 1 | A | T | Homozygous   |
| NC_037647.1 | 8160049 | SNV | 1 | T | C | Homozygous   |
| NC_037647.1 | 8160438 | SNV | 1 | C | A | Homozygous   |
| NC_037647.1 | 8163361 | SNV | 1 | T | A | Heterozygous |
| NC_037647.1 | 8163377 | SNV | 1 | A | G | Heterozygous |
| NC_037647.1 | 8163381 | SNV | 1 | A | G | Heterozygous |
| NC_037647.1 | 8163391 | SNV | 1 | A | T | Heterozygous |
| NC_037647.1 | 8163399 | SNV | 1 | T | A | Heterozygous |
| NC_037647.1 | 8163403 | SNV | 1 | T | A | Heterozygous |
| NC_037647.1 | 8164968 | SNV | 1 | A | G | Homozygous   |
| NC_037647.1 | 8165725 | SNV | 1 | C | T | Heterozygous |
| NC_037647.1 | 8165913 | SNV | 1 | A | C | Heterozygous |
| NC_037647.1 | 8166193 | SNV | 1 | G | A | Heterozygous |
| NC_037647.1 | 8166884 | SNV | 1 | T | C | Homozygous   |
| NC_037647.1 | 8167071 | SNV | 1 | A | G | Heterozygous |
| NC_037647.1 | 8167082 | SNV | 1 | T | C | Heterozygous |
| NC_037647.1 | 8167113 | SNV | 1 | C | T | Heterozygous |
| NC_037647.1 | 8167661 | SNV | 1 | T | C | Homozygous   |
| NC_037647.1 | 8167680 | SNV | 1 | G | A | Homozygous   |
| NC_037647.1 | 8168437 | SNV | 1 | C | T | Heterozygous |
| NC_037647.1 | 8168875 | SNV | 1 | A | G | Heterozygous |
| NC_037647.1 | 8168879 | SNV | 1 | A | G | Heterozygous |
| NC_037647.1 | 8168921 | SNV | 1 | A | G | Heterozygous |
| NC_037647.1 | 8168925 | SNV | 1 | A | G | Heterozygous |
| NC_037647.1 | 8168944 | SNV | 1 | A | G | Heterozygous |
| NC_037647.1 | 8169685 | SNV | 1 | T | C | Homozygous   |
| NC_037647.1 | 8170184 | SNV | 1 | A | G | Homozygous   |
| NC_037647.1 | 8171434 | SNV | 1 | A | C | Homozygous   |
| NC_037647.1 | 8171437 | SNV | 1 | T | A | Homozygous   |
| NC_037647.1 | 8174990 | SNV | 1 | A | G | Homozygous   |
| NC_037647.1 | 8180528 | SNV | 1 | C | T | Homozygous   |
| NC_037647.1 | 8180914 | SNV | 1 | C | A | Heterozygous |
| NC_037647.1 | 8180929 | SNV | 1 | G | C | Heterozygous |
| NC_037647.1 | 8181313 | SNV | 1 | C | T | Heterozygous |
| NC_037647.1 | 8181318 | SNV | 1 | G | T | Heterozygous |
| NC_037647.1 | 8181851 | SNV | 1 | C | A | Homozygous   |
| NC_037647.1 | 8183250 | SNV | 1 | T | C | Homozygous   |
| NC_037647.1 | 8184344 | SNV | 1 | T | G | Heterozygous |
| NC_037647.1 | 8189956 | SNV | 1 | C | G | Homozygous   |
| NC_037647.1 | 8190301 | SNV | 1 | T | C | Heterozygous |
| NC_037647.1 | 8190392 | SNV | 1 | C | T | Homozygous   |

|             |         |     |   |   |   |              |
|-------------|---------|-----|---|---|---|--------------|
| NC_037647.1 | 8190570 | SNV | 1 | T | C | Homozygous   |
| NC_037647.1 | 8191047 | SNV | 1 | A | T | Homozygous   |
| NC_037647.1 | 8191293 | SNV | 1 | T | C | Homozygous   |
| NC_037647.1 | 8193809 | SNV | 1 | A | G | Heterozygous |
| NC_037647.1 | 8193811 | SNV | 1 | A | G | Heterozygous |
| NC_037647.1 | 8193817 | SNV | 1 | A | G | Heterozygous |
| NC_037647.1 | 8193826 | SNV | 1 | A | G | Heterozygous |
| NC_037647.1 | 8193869 | SNV | 1 | A | G | Heterozygous |
| NC_037647.1 | 8193965 | SNV | 1 | T | C | Heterozygous |
| NC_037647.1 | 8194210 | SNV | 1 | C | A | Homozygous   |
| NC_037647.1 | 8194626 | SNV | 1 | A | G | Homozygous   |
| NC_037647.1 | 8194804 | SNV | 1 | C | A | Homozygous   |
| NC_037647.1 | 8195452 | SNV | 1 | G | A | Heterozygous |
| NC_037647.1 | 8198617 | SNV | 1 | G | A | Heterozygous |
| NC_037647.1 | 8198808 | SNV | 1 | A | G | Homozygous   |
| NC_037647.1 | 8201881 | SNV | 1 | C | T | Homozygous   |
| NC_037647.1 | 8201891 | SNV | 1 | A | G | Homozygous   |
| NC_037647.1 | 8202277 | SNV | 1 | T | C | Homozygous   |
| NC_037647.1 | 8202736 | SNV | 1 | C | T | Homozygous   |
| NC_037647.1 | 8202955 | SNV | 1 | G | A | Heterozygous |
| NC_037647.1 | 8202973 | SNV | 1 | A | G | Homozygous   |
| NC_037647.1 | 8211256 | SNV | 1 | T | C | Homozygous   |
| NC_037647.1 | 8211264 | SNV | 1 | C | T | Heterozygous |
| NC_037647.1 | 8211285 | SNV | 1 | A | C | Heterozygous |
| NC_037647.1 | 8211306 | SNV | 1 | T | C | Homozygous   |
| NC_037647.1 | 8211341 | SNV | 1 | C | T | Homozygous   |
| NC_037647.1 | 8211530 | SNV | 1 | G | C | Homozygous   |
| NC_037647.1 | 8211922 | SNV | 1 | C | A | Homozygous   |
| NC_037647.1 | 8231460 | SNV | 1 | G | A | Homozygous   |
| NC_037647.1 | 8231475 | SNV | 1 | G | A | Homozygous   |
| NC_037647.1 | 8238432 | SNV | 1 | G | A | Heterozygous |
| NC_037647.1 | 8249280 | SNV | 1 | C | T | Heterozygous |
| NC_037647.1 | 8254815 | SNV | 1 | A | G | Homozygous   |
| NC_037647.1 | 8254900 | SNV | 1 | G | A | Homozygous   |
| NC_037647.1 | 8288820 | SNV | 1 | C | T | Heterozygous |
| NC_037647.1 | 8288842 | SNV | 1 | C | G | Heterozygous |
| NC_037647.1 | 8288848 | SNV | 1 | G | A | Homozygous   |
| NC_037647.1 | 8288878 | SNV | 1 | T | C | Homozygous   |
| NC_037647.1 | 8288881 | SNV | 1 | G | C | Homozygous   |
| NC_037647.1 | 8288941 | SNV | 1 | C | T | Heterozygous |
| NC_037647.1 | 8288957 | SNV | 1 | C | T | Heterozygous |
| NC_037647.1 | 8288969 | SNV | 1 | T | C | Homozygous   |
| NC_037647.1 | 8289102 | SNV | 1 | A | T | Homozygous   |
| NC_037647.1 | 8289104 | SNV | 1 | T | C | Homozygous   |
| NC_037647.1 | 8289109 | SNV | 1 | C | T | Heterozygous |
| NC_037647.1 | 8289111 | SNV | 1 | C | T | Homozygous   |
| NC_037647.1 | 8289117 | SNV | 1 | C | T | Homozygous   |
| NC_037647.1 | 8289140 | SNV | 1 | C | G | Heterozygous |
| NC_037647.1 | 8289146 | SNV | 1 | A | G | Heterozygous |
| NC_037647.1 | 8289167 | SNV | 1 | A | G | Heterozygous |
| NC_037647.1 | 8289230 | SNV | 1 | T | C | Homozygous   |

|             |         |     |   |   |   |              |
|-------------|---------|-----|---|---|---|--------------|
| NC_037647.1 | 8289255 | SNV | 1 | A | T | Homozygous   |
| NC_037647.1 | 8289264 | SNV | 1 | C | T | Homozygous   |
| NC_037647.1 | 8289726 | SNV | 1 | G | A | Homozygous   |
| NC_037647.1 | 8289728 | SNV | 1 | G | A | Homozygous   |
| NC_037647.1 | 8289733 | SNV | 1 | C | T | Heterozygous |
| NC_037647.1 | 8289754 | SNV | 1 | A | G | Homozygous   |
| NC_037647.1 | 8289788 | SNV | 1 | G | C | Heterozygous |
| NC_037647.1 | 8289886 | SNV | 1 | G | C | Homozygous   |
| NC_037647.1 | 8289894 | SNV | 1 | T | C | Homozygous   |
| NC_037647.1 | 8289968 | SNV | 1 | C | T | Homozygous   |
| NC_037647.1 | 8294401 | SNV | 1 | T | C | Heterozygous |
| NC_037647.1 | 8294406 | SNV | 1 | C | T | Homozygous   |
| NC_037647.1 | 8294513 | SNV | 1 | C | G | Homozygous   |
| NC_037647.1 | 8300472 | SNV | 1 | C | G | Homozygous   |
| NC_037647.1 | 8300485 | SNV | 1 | A | C | Homozygous   |
| NC_037647.1 | 8300528 | SNV | 1 | G | T | Heterozygous |
| NC_037647.1 | 8300530 | SNV | 1 | G | A | Heterozygous |
| NC_037647.1 | 8304897 | SNV | 1 | G | A | Heterozygous |
| NC_037647.1 | 8304923 | SNV | 1 | G | C | Heterozygous |
| NC_037647.1 | 8304928 | SNV | 1 | A | G | Heterozygous |
| NC_037647.1 | 8307750 | SNV | 1 | T | C | Homozygous   |
| NC_037647.1 | 8319124 | SNV | 1 | C | T | Heterozygous |
| NC_037647.1 | 8319231 | SNV | 1 | T | C | Homozygous   |
| NC_037647.1 | 8325786 | SNV | 1 | T | A | Homozygous   |
| NC_037647.1 | 8325857 | SNV | 1 | T | C | Heterozygous |
| NC_037647.1 | 8325861 | SNV | 1 | T | G | Heterozygous |
| NC_037647.1 | 8325863 | SNV | 1 | T | A | Heterozygous |
| NC_037647.1 | 8325878 | SNV | 1 | T | C | Heterozygous |
| NC_037647.1 | 8325882 | SNV | 1 | A | T | Heterozygous |
| NC_037647.1 | 8325884 | SNV | 1 | T | C | Heterozygous |
| NC_037647.1 | 8325889 | SNV | 1 | T | C | Heterozygous |
| NC_037647.1 | 8325960 | SNV | 1 | C | T | Heterozygous |
| NC_037647.1 | 8326303 | SNV | 1 | A | G | Heterozygous |
| NC_037647.1 | 8326360 | SNV | 1 | A | G | Homozygous   |
| NC_037647.1 | 8326454 | SNV | 1 | T | A | Homozygous   |
| NC_037647.1 | 8326458 | SNV | 1 | T | A | Homozygous   |
| NC_037647.1 | 8326667 | SNV | 1 | A | C | Heterozygous |
| NC_037647.1 | 8326681 | SNV | 1 | A | C | Heterozygous |
| NC_037647.1 | 8327966 | SNV | 1 | T | A | Heterozygous |
| NC_037647.1 | 8327985 | SNV | 1 | T | G | Heterozygous |
| NC_037647.1 | 8336549 | SNV | 1 | G | A | Homozygous   |
| NC_037647.1 | 8337893 | SNV | 1 | T | C | Homozygous   |
| NC_037647.1 | 8337948 | SNV | 1 | A | G | Homozygous   |
| NC_037647.1 | 8338553 | SNV | 1 | A | G | Homozygous   |
| NC_037647.1 | 8338862 | SNV | 1 | T | C | Homozygous   |
| NC_037647.1 | 8338980 | SNV | 1 | T | C | Homozygous   |
| NC_037647.1 | 8357820 | SNV | 1 | T | A | Homozygous   |
| NC_037647.1 | 8357843 | SNV | 1 | A | G | Heterozygous |
| NC_037647.1 | 8357900 | SNV | 1 | T | C | Heterozygous |
| NC_037647.1 | 8357964 | SNV | 1 | C | T | Heterozygous |
| NC_037647.1 | 8358177 | SNV | 1 | C | T | Heterozygous |

|             |         |     |   |   |   |              |
|-------------|---------|-----|---|---|---|--------------|
| NC_037647.1 | 8358449 | SNV | 1 | A | C | Heterozygous |
| NC_037647.1 | 8358507 | SNV | 1 | A | T | Heterozygous |
| NC_037647.1 | 8358515 | SNV | 1 | C | T | Heterozygous |
| NC_037647.1 | 8358526 | SNV | 1 | G | A | Heterozygous |
| NC_037647.1 | 8358531 | SNV | 1 | T | C | Heterozygous |
| NC_037647.1 | 8358572 | SNV | 1 | A | T | Heterozygous |
| NC_037647.1 | 8358617 | SNV | 1 | T | C | Heterozygous |
| NC_037647.1 | 8359011 | SNV | 1 | A | G | Heterozygous |
| NC_037647.1 | 8359299 | SNV | 1 | C | A | Heterozygous |
| NC_037647.1 | 8359669 | SNV | 1 | A | T | Homozygous   |
| NC_037647.1 | 8359673 | SNV | 1 | A | C | Homozygous   |
| NC_037647.1 | 8363815 | SNV | 1 | C | T | Heterozygous |
| NC_037647.1 | 8365648 | SNV | 1 | A | G | Homozygous   |
| NC_037647.1 | 8365775 | SNV | 1 | G | T | Homozygous   |
| NC_037647.1 | 8365783 | SNV | 1 | T | C | Heterozygous |
| NC_037647.1 | 8372958 | SNV | 1 | A | G | Heterozygous |
| NC_037647.1 | 8373079 | SNV | 1 | T | C | Homozygous   |
| NC_037647.1 | 8373300 | SNV | 1 | A | G | Heterozygous |
| NC_037647.1 | 8374601 | SNV | 1 | A | G | Homozygous   |
| NC_037647.1 | 8374997 | SNV | 1 | T | C | Homozygous   |
| NC_037647.1 | 8375253 | SNV | 1 | A | G | Homozygous   |
| NC_037647.1 | 8375990 | SNV | 1 | C | A | Heterozygous |
| NC_037647.1 | 8376503 | SNV | 1 | C | T | Heterozygous |
| NC_037647.1 | 8376656 | SNV | 1 | G | T | Heterozygous |
| NC_037647.1 | 8377040 | SNV | 1 | C | T | Homozygous   |
| NC_037647.1 | 8377215 | SNV | 1 | A | G | Homozygous   |
| NC_037647.1 | 8377425 | SNV | 1 | A | G | Homozygous   |
| NC_037647.1 | 8377447 | SNV | 1 | G | A | Homozygous   |
| NC_037647.1 | 8378817 | SNV | 1 | A | G | Homozygous   |
| NC_037647.1 | 8380306 | SNV | 1 | C | T | Homozygous   |
| NC_037647.1 | 8385774 | SNV | 1 | T | C | Homozygous   |
| NC_037647.1 | 8385803 | SNV | 1 | A | G | Homozygous   |
| NC_037647.1 | 8386215 | SNV | 1 | G | A | Heterozygous |
| NC_037647.1 | 8386223 | SNV | 1 | C | G | Heterozygous |
| NC_037647.1 | 8386327 | SNV | 1 | A | G | Homozygous   |
| NC_037647.1 | 8386378 | SNV | 1 | T | C | Heterozygous |
| NC_037647.1 | 8386655 | SNV | 1 | T | C | Homozygous   |
| NC_037647.1 | 8386791 | SNV | 1 | C | T | Heterozygous |
| NC_037647.1 | 8400081 | SNV | 1 | A | T | Homozygous   |
| NC_037647.1 | 8405307 | SNV | 1 | C | T | Homozygous   |
| NC_037647.1 | 8408158 | SNV | 1 | T | A | Homozygous   |
| NC_037647.1 | 8409526 | SNV | 1 | C | T | Homozygous   |
| NC_037647.1 | 8409578 | SNV | 1 | G | A | Heterozygous |
| NC_037647.1 | 8410603 | SNV | 1 | C | T | Homozygous   |
| NC_037647.1 | 8411005 | SNV | 1 | A | G | Homozygous   |
| NC_037647.1 | 8417197 | SNV | 1 | T | G | Homozygous   |
| NC_037647.1 | 8417202 | SNV | 1 | T | C | Homozygous   |
| NC_037647.1 | 8417208 | SNV | 1 | T | C | Homozygous   |
| NC_037647.1 | 8417211 | SNV | 1 | T | G | Homozygous   |
| NC_037647.1 | 8420983 | SNV | 1 | T | A | Homozygous   |
| NC_037647.1 | 8421008 | SNV | 1 | A | T | Homozygous   |

|             |         |     |   |   |   |              |
|-------------|---------|-----|---|---|---|--------------|
| NC_037647.1 | 8422269 | SNV | 1 | T | C | Homozygous   |
| NC_037647.1 | 8426355 | SNV | 1 | C | T | Heterozygous |
| NC_037647.1 | 8426909 | SNV | 1 | C | G | Heterozygous |
| NC_037647.1 | 8427825 | SNV | 1 | A | G | Heterozygous |
| NC_037647.1 | 8429539 | SNV | 1 | G | A | Homozygous   |
| NC_037647.1 | 8429589 | SNV | 1 | T | C | Homozygous   |
| NC_037647.1 | 8429997 | SNV | 1 | G | A | Homozygous   |
| NC_037647.1 | 8431195 | SNV | 1 | T | A | Heterozygous |
| NC_037647.1 | 8431210 | SNV | 1 | G | A | Heterozygous |
| NC_037647.1 | 8441036 | SNV | 1 | C | T | Heterozygous |
| NC_037647.1 | 8442768 | SNV | 1 | A | G | Homozygous   |
| NC_037647.1 | 8445278 | SNV | 1 | C | T | Heterozygous |
| NC_037647.1 | 8445710 | SNV | 1 | A | T | Heterozygous |
| NC_037647.1 | 8445716 | SNV | 1 | C | T | Heterozygous |
| NC_037647.1 | 8447123 | SNV | 1 | G | C | Homozygous   |
| NC_037647.1 | 8451471 | SNV | 1 | G | C | Heterozygous |
| NC_037647.1 | 8451478 | SNV | 1 | C | A | Heterozygous |
| NC_037647.1 | 8451500 | SNV | 1 | T | A | Homozygous   |
| NC_037647.1 | 8452255 | SNV | 1 | A | T | Homozygous   |
| NC_037647.1 | 8458926 | SNV | 1 | G | C | Heterozygous |
| NC_037647.1 | 8459214 | SNV | 1 | A | G | Homozygous   |
| NC_037647.1 | 8460986 | SNV | 1 | T | C | Heterozygous |
| NC_037647.1 | 8462107 | SNV | 1 | G | C | Homozygous   |
| NC_037647.1 | 8462111 | SNV | 1 | G | A | Homozygous   |
| NC_037647.1 | 8462113 | SNV | 1 | G | A | Homozygous   |
| NC_037647.1 | 8462115 | SNV | 1 | A | G | Homozygous   |
| NC_037647.1 | 8462139 | SNV | 1 | A | T | Heterozygous |
| NC_037647.1 | 8462143 | SNV | 1 | G | A | Heterozygous |
| NC_037647.1 | 8462178 | SNV | 1 | A | G | Heterozygous |
| NC_037647.1 | 8462196 | SNV | 1 | G | A | Heterozygous |
| NC_037647.1 | 8463410 | SNV | 1 | A | G | Heterozygous |
| NC_037647.1 | 8463412 | SNV | 1 | G | A | Heterozygous |
| NC_037647.1 | 8463422 | SNV | 1 | C | T | Heterozygous |
| NC_037647.1 | 8481917 | SNV | 1 | T | C | Homozygous   |
| NC_037647.1 | 8481941 | SNV | 1 | A | G | Heterozygous |
| NC_037647.1 | 8492886 | SNV | 1 | T | G | Heterozygous |
| NC_037647.1 | 8492890 | SNV | 1 | A | G | Heterozygous |
| NC_037647.1 | 8511111 | SNV | 1 | A | G | Homozygous   |
| NC_037647.1 | 8512000 | SNV | 1 | C | A | Heterozygous |
| NC_037647.1 | 8512153 | SNV | 1 | A | G | Homozygous   |
| NC_037647.1 | 8512243 | SNV | 1 | C | T | Heterozygous |
| NC_037647.1 | 8512247 | SNV | 1 | C | T | Heterozygous |
| NC_037647.1 | 8531385 | SNV | 1 | C | T | Heterozygous |
| NC_037647.1 | 8546207 | SNV | 1 | G | A | Homozygous   |
| NC_037647.1 | 8546214 | SNV | 1 | T | A | Homozygous   |
| NC_037647.1 | 8546223 | SNV | 1 | C | A | Homozygous   |
| NC_037647.1 | 8596742 | SNV | 1 | C | T | Heterozygous |
| NC_037647.1 | 8622356 | SNV | 1 | A | G | Heterozygous |
| NC_037647.1 | 8622358 | SNV | 1 | G | A | Heterozygous |
| NC_037647.1 | 8622360 | SNV | 1 | A | G | Heterozygous |
| NC_037647.1 | 8622534 | SNV | 1 | C | T | Heterozygous |



|             |         |     |   |   |   |              |
|-------------|---------|-----|---|---|---|--------------|
| NC_037647.1 | 8622597 | SNV | 1 | T | C | Homozygous   |
| NC_037647.1 | 8622611 | SNV | 1 | A | G | Homozygous   |
| NC_037647.1 | 8622637 | SNV | 1 | C | G | Homozygous   |
| NC_037647.1 | 8637112 | SNV | 1 | A | G | Homozygous   |
| NC_037647.1 | 8637119 | SNV | 1 | G | A | Heterozygous |
| NC_037647.1 | 8637160 | SNV | 1 | A | G | Homozygous   |
| NC_037647.1 | 8637165 | SNV | 1 | A | G | Homozygous   |
| NC_037647.1 | 8637189 | SNV | 1 | A | G | Homozygous   |
| NC_037647.1 | 8637226 | SNV | 1 | G | A | Homozygous   |
| NC_037647.1 | 8637310 | SNV | 1 | T | C | Homozygous   |
| NC_037647.1 | 8637313 | SNV | 1 | T | C | Homozygous   |
| NC_037647.1 | 8637319 | SNV | 1 | A | G | Heterozygous |
| NC_037647.1 | 8637336 | SNV | 1 | G | A | Heterozygous |
| NC_037647.1 | 8660845 | SNV | 1 | A | G | Homozygous   |
| NC_037647.1 | 8660899 | SNV | 1 | G | A | Heterozygous |
| NC_037647.1 | 8664821 | SNV | 1 | T | C | Homozygous   |
| NC_037647.1 | 8681446 | SNV | 1 | C | T | Homozygous   |
| NC_037647.1 | 8681482 | SNV | 1 | A | G | Homozygous   |
| NC_037647.1 | 8681794 | SNV | 1 | T | C | Homozygous   |
| NC_037647.1 | 8681830 | SNV | 1 | G | A | Heterozygous |
| NC_037647.1 | 8681914 | SNV | 1 | T | C | Homozygous   |
| NC_037647.1 | 8681917 | SNV | 1 | T | C | Homozygous   |
| NC_037647.1 | 8681992 | SNV | 1 | T | C | Homozygous   |
| NC_037647.1 | 8684146 | SNV | 1 | T | C | Heterozygous |
| NC_037647.1 | 8684586 | SNV | 1 | G | A | Homozygous   |
| NC_037647.1 | 8685418 | SNV | 1 | A | G | Homozygous   |
| NC_037647.1 | 8687903 | SNV | 1 | C | T | Homozygous   |
| NC_037647.1 | 8688194 | SNV | 1 | A | G | Homozygous   |
| NC_037647.1 | 8688356 | SNV | 1 | A | C | Homozygous   |
| NC_037647.1 | 8688361 | SNV | 1 | C | T | Homozygous   |
| NC_037647.1 | 8688563 | SNV | 1 | A | T | Homozygous   |
| NC_037647.1 | 8688769 | SNV | 1 | C | G | Homozygous   |
| NC_037647.1 | 8688798 | SNV | 1 | C | A | Homozygous   |
| NC_037647.1 | 8688976 | SNV | 1 | T | C | Homozygous   |
| NC_037647.1 | 8693480 | SNV | 1 | T | A | Homozygous   |
| NC_037647.1 | 8694029 | SNV | 1 | G | A | Homozygous   |
| NC_037647.1 | 8697671 | SNV | 1 | T | A | Homozygous   |
| NC_037647.1 | 8697843 | SNV | 1 | T | G | Homozygous   |
| NC_037647.1 | 8697847 | SNV | 1 | T | G | Homozygous   |
| NC_037647.1 | 8698482 | SNV | 1 | G | A | Homozygous   |
| NC_037647.1 | 8699035 | SNV | 1 | T | A | Homozygous   |
| NC_037647.1 | 8699037 | SNV | 1 | A | G | Homozygous   |
| NC_037647.1 | 8700848 | SNV | 1 | A | T | Heterozygous |
| NC_037647.1 | 8701055 | SNV | 1 | G | A | Homozygous   |
| NC_037647.1 | 8701097 | SNV | 1 | A | G | Homozygous   |
| NC_037647.1 | 8701103 | SNV | 1 | A | G | Homozygous   |
| NC_037647.1 | 8701159 | SNV | 1 | G | A | Homozygous   |
| NC_037647.1 | 8702652 | SNV | 1 | A | G | Homozygous   |
| NC_037647.1 | 8703951 | SNV | 1 | C | T | Homozygous   |
| NC_037647.1 | 8704022 | SNV | 1 | A | G | Homozygous   |
| NC_037647.1 | 8709020 | SNV | 1 | A | G | Heterozygous |

|             |         |     |   |   |   |              |
|-------------|---------|-----|---|---|---|--------------|
| NC_037647.1 | 8709092 | SNV | 1 | T | C | Homozygous   |
| NC_037647.1 | 8709537 | SNV | 1 | C | T | Heterozygous |
| NC_037647.1 | 8715617 | SNV | 1 | C | T | Heterozygous |
| NC_037647.1 | 8717316 | SNV | 1 | C | T | Heterozygous |
| NC_037647.1 | 8717420 | SNV | 1 | A | G | Homozygous   |
| NC_037647.1 | 8717427 | SNV | 1 | A | G | Heterozygous |
| NC_037647.1 | 8717448 | SNV | 1 | A | G | Homozygous   |
| NC_037647.1 | 8717469 | SNV | 1 | T | C | Homozygous   |
| NC_037647.1 | 8718068 | SNV | 1 | T | C | Heterozygous |
| NC_037647.1 | 8718655 | SNV | 1 | A | G | Heterozygous |
| NC_037647.1 | 8718962 | SNV | 1 | G | A | Homozygous   |
| NC_037647.1 | 8719075 | SNV | 1 | T | C | Heterozygous |
| NC_037647.1 | 8720591 | SNV | 1 | C | G | Homozygous   |
| NC_037647.1 | 8721372 | SNV | 1 | T | A | Homozygous   |
| NC_037647.1 | 8721374 | SNV | 1 | T | C | Homozygous   |
| NC_037647.1 | 8721545 | SNV | 1 | C | G | Heterozygous |
| NC_037647.1 | 8721646 | SNV | 1 | T | A | Homozygous   |
| NC_037647.1 | 8723808 | SNV | 1 | T | C | Homozygous   |
| NC_037647.1 | 8724119 | SNV | 1 | A | G | Homozygous   |
| NC_037647.1 | 8727126 | SNV | 1 | A | G | Homozygous   |
| NC_037647.1 | 8733065 | SNV | 1 | T | G | Heterozygous |
| NC_037647.1 | 8733086 | SNV | 1 | G | T | Homozygous   |
| NC_037647.1 | 8733096 | SNV | 1 | T | A | Heterozygous |
| NC_037647.1 | 8733137 | SNV | 1 | T | C | Homozygous   |
| NC_037647.1 | 8733139 | SNV | 1 | T | C | Heterozygous |
| NC_037647.1 | 8733142 | SNV | 1 | T | A | Homozygous   |
| NC_037647.1 | 8734345 | SNV | 1 | T | A | Homozygous   |
| NC_037647.1 | 8734347 | SNV | 1 | A | T | Homozygous   |
| NC_037647.1 | 8746817 | SNV | 1 | C | T | Heterozygous |
| NC_037647.1 | 8746819 | SNV | 1 | C | T | Heterozygous |
| NC_037647.1 | 8746831 | SNV | 1 | C | T | Heterozygous |
| NC_037647.1 | 8751243 | SNV | 1 | G | T | Heterozygous |
| NC_037647.1 | 8751245 | SNV | 1 | C | T | Homozygous   |
| NC_037647.1 | 8751248 | SNV | 1 | C | A | Heterozygous |
| NC_037647.1 | 8753675 | SNV | 1 | A | G | Heterozygous |
| NC_037647.1 | 8757866 | SNV | 1 | G | T | Homozygous   |
| NC_037647.1 | 8757909 | SNV | 1 | T | A | Heterozygous |
| NC_037647.1 | 8759056 | SNV | 1 | G | A | Heterozygous |
| NC_037647.1 | 8764111 | SNV | 1 | A | G | Homozygous   |
| NC_037647.1 | 8764122 | SNV | 1 | A | G | Heterozygous |
| NC_037647.1 | 8764347 | SNV | 1 | G | A | Homozygous   |
| NC_037647.1 | 8764429 | SNV | 1 | G | A | Heterozygous |
| NC_037647.1 | 8764456 | SNV | 1 | A | G | Heterozygous |
| NC_037647.1 | 8766927 | SNV | 1 | G | T | Homozygous   |
| NC_037647.1 | 8782782 | SNV | 1 | A | G | Homozygous   |
| NC_037647.1 | 8782790 | SNV | 1 | A | G | Homozygous   |
| NC_037647.1 | 8782848 | SNV | 1 | A | G | Heterozygous |
| NC_037647.1 | 8782953 | SNV | 1 | G | A | Heterozygous |
| NC_037647.1 | 8782956 | SNV | 1 | A | G | Heterozygous |
| NC_037647.1 | 8789118 | SNV | 1 | C | T | Heterozygous |
| NC_037647.1 | 8789767 | SNV | 1 | T | C | Heterozygous |

|             |         |     |   |   |   |              |
|-------------|---------|-----|---|---|---|--------------|
| NC_037647.1 | 8790467 | SNV | 1 | G | A | Homozygous   |
| NC_037647.1 | 8791167 | SNV | 1 | T | A | Homozygous   |
| NC_037647.1 | 8792283 | SNV | 1 | C | T | Heterozygous |
| NC_037647.1 | 8803377 | SNV | 1 | A | G | Homozygous   |
| NC_037647.1 | 8803801 | SNV | 1 | T | G | Homozygous   |
| NC_037647.1 | 8804229 | SNV | 1 | G | A | Homozygous   |
| NC_037647.1 | 8804586 | SNV | 1 | A | G | Heterozygous |
| NC_037647.1 | 8804655 | SNV | 1 | A | G | Homozygous   |
| NC_037647.1 | 8806459 | SNV | 1 | G | A | Heterozygous |
| NC_037647.1 | 8807483 | SNV | 1 | T | A | Homozygous   |
| NC_037647.1 | 8807897 | SNV | 1 | G | A | Homozygous   |
| NC_037647.1 | 8807932 | SNV | 1 | T | C | Homozygous   |
| NC_037647.1 | 8808133 | SNV | 1 | A | T | Heterozygous |
| NC_037647.1 | 8808422 | SNV | 1 | C | T | Heterozygous |
| NC_037647.1 | 8808867 | SNV | 1 | T | C | Homozygous   |
| NC_037647.1 | 8809002 | SNV | 1 | G | A | Heterozygous |
| NC_037647.1 | 8809026 | SNV | 1 | T | C | Heterozygous |
| NC_037647.1 | 8809062 | SNV | 1 | C | T | Heterozygous |
| NC_037647.1 | 8809107 | SNV | 1 | C | T | Homozygous   |
| NC_037647.1 | 8809207 | SNV | 1 | C | T | Homozygous   |
| NC_037647.1 | 8809337 | SNV | 1 | T | A | Homozygous   |
| NC_037647.1 | 8809339 | SNV | 1 | A | C | Homozygous   |
| NC_037647.1 | 8809737 | SNV | 1 | T | A | Homozygous   |
| NC_037647.1 | 8810127 | SNV | 1 | C | T | Homozygous   |
| NC_037647.1 | 8810454 | SNV | 1 | G | A | Heterozygous |
| NC_037647.1 | 8810517 | SNV | 1 | T | C | Homozygous   |
| NC_037647.1 | 8810544 | SNV | 1 | C | T | Heterozygous |
| NC_037647.1 | 8811174 | SNV | 1 | A | G | Heterozygous |
| NC_037647.1 | 8813746 | SNV | 1 | T | C | Heterozygous |
| NC_037647.1 | 8814847 | SNV | 1 | T | C | Homozygous   |
| NC_037647.1 | 8814983 | SNV | 1 | A | G | Homozygous   |
| NC_037647.1 | 8815517 | SNV | 1 | A | C | Homozygous   |
| NC_037647.1 | 8815713 | SNV | 1 | T | C | Heterozygous |
| NC_037647.1 | 8840519 | SNV | 1 | G | A | Homozygous   |
| NC_037647.1 | 8840586 | SNV | 1 | A | G | Heterozygous |
| NC_037647.1 | 8840599 | SNV | 1 | A | G | Heterozygous |
| NC_037647.1 | 8840600 | SNV | 1 | A | G | Heterozygous |
| NC_037647.1 | 8840624 | SNV | 1 | A | C | Heterozygous |
| NC_037647.1 | 8840634 | SNV | 1 | G | A | Heterozygous |
| NC_037647.1 | 8840730 | SNV | 1 | G | A | Heterozygous |
| NC_037647.1 | 8954547 | SNV | 1 | G | C | Homozygous   |
| NC_037647.1 | 8954556 | SNV | 1 | G | A | Homozygous   |
| NC_037647.1 | 8954558 | SNV | 1 | C | T | Homozygous   |
| NC_037647.1 | 8954568 | SNV | 1 | G | T | Heterozygous |
| NC_037647.1 | 8954608 | SNV | 1 | A | T | Homozygous   |
| NC_037647.1 | 8954636 | SNV | 1 | G | T | Homozygous   |
| NC_037647.1 | 8954645 | SNV | 1 | G | C | Homozygous   |
| NC_037647.1 | 8954648 | SNV | 1 | T | C | Homozygous   |
| NC_037647.1 | 8954663 | SNV | 1 | C | T | Homozygous   |
| NC_037647.1 | 8956164 | SNV | 1 | G | C | Homozygous   |
| NC_037647.1 | 8956212 | SNV | 1 | A | G | Homozygous   |

|             |         |     |   |   |   |              |
|-------------|---------|-----|---|---|---|--------------|
| NC_037647.1 | 8956305 | SNV | 1 | C | T | Heterozygous |
| NC_037647.1 | 8956343 | SNV | 1 | A | C | Heterozygous |
| NC_037647.1 | 8956360 | SNV | 1 | T | C | Homozygous   |
| NC_037647.1 | 8956612 | SNV | 1 | A | G | Heterozygous |
| NC_037647.1 | 8956749 | SNV | 1 | G | C | Homozygous   |
| NC_037647.1 | 8956791 | SNV | 1 | A | G | Heterozygous |
| NC_037647.1 | 8956968 | SNV | 1 | A | G | Homozygous   |
| NC_037647.1 | 8956995 | SNV | 1 | A | G | Homozygous   |
| NC_037647.1 | 8957100 | SNV | 1 | A | G | Heterozygous |
| NC_037647.1 | 8957489 | SNV | 1 | T | C | Homozygous   |
| NC_037647.1 | 9136058 | SNV | 1 | T | C | Homozygous   |
| NC_037647.1 | 9136255 | SNV | 1 | G | T | Heterozygous |
| NC_037647.1 | 9136386 | SNV | 1 | G | A | Heterozygous |
| NC_037647.1 | 9136451 | SNV | 1 | A | T | Heterozygous |
| NC_037647.1 | 9138154 | SNV | 1 | G | A | Heterozygous |
| NC_037647.1 | 9139109 | SNV | 1 | T | G | Homozygous   |
| NC_037647.1 | 9139131 | SNV | 1 | C | G | Homozygous   |
| NC_037647.1 | 9140360 | SNV | 1 | T | C | Homozygous   |
| NC_037647.1 | 9141150 | SNV | 1 | G | A | Heterozygous |
| NC_037647.1 | 9141162 | SNV | 1 | T | C | Homozygous   |
| NC_037647.1 | 9141220 | SNV | 1 | G | C | Heterozygous |
| NC_037647.1 | 9141411 | SNV | 1 | T | A | Homozygous   |
| NC_037647.1 | 9141448 | SNV | 1 | A | C | Heterozygous |
| NC_037647.1 | 9141452 | SNV | 1 | G | T | Heterozygous |
| NC_037647.1 | 9141461 | SNV | 1 | T | C | Heterozygous |
| NC_037647.1 | 9141467 | SNV | 1 | T | C | Heterozygous |
| NC_037647.1 | 9141506 | SNV | 1 | A | G | Homozygous   |
| NC_037647.1 | 9141532 | SNV | 1 | T | C | Homozygous   |
| NC_037647.1 | 9141537 | SNV | 1 | A | G | Homozygous   |
| NC_037647.1 | 9141557 | SNV | 1 | A | C | Homozygous   |
| NC_037647.1 | 9141563 | SNV | 1 | T | C | Heterozygous |
| NC_037647.1 | 9142030 | SNV | 1 | A | G | Homozygous   |
| NC_037647.1 | 9143129 | SNV | 1 | A | G | Heterozygous |
| NC_037647.1 | 9143559 | SNV | 1 | G | A | Heterozygous |
| NC_037647.1 | 9143562 | SNV | 1 | T | C | Heterozygous |
| NC_037647.1 | 9143887 | SNV | 1 | C | G | Heterozygous |
| NC_037647.1 | 9143901 | SNV | 1 | G | A | Homozygous   |
| NC_037647.1 | 9144200 | SNV | 1 | A | G | Homozygous   |
| NC_037647.1 | 9144650 | SNV | 1 | A | G | Heterozygous |
| NC_037647.1 | 9144933 | SNV | 1 | C | T | Heterozygous |
| NC_037647.1 | 9145337 | SNV | 1 | T | C | Heterozygous |
| NC_037647.1 | 9147386 | SNV | 1 | G | A | Heterozygous |
| NC_037647.1 | 9148971 | SNV | 1 | C | T | Heterozygous |
| NC_037647.1 | 9156848 | SNV | 1 | C | A | Homozygous   |
| NC_037647.1 | 9161934 | SNV | 1 | A | G | Heterozygous |
| NC_037647.1 | 9162222 | SNV | 1 | C | T | Heterozygous |
| NC_037647.1 | 9163544 | SNV | 1 | A | G | Homozygous   |
| NC_037647.1 | 9164380 | SNV | 1 | T | C | Heterozygous |
| NC_037647.1 | 9164628 | SNV | 1 | G | A | Heterozygous |
| NC_037647.1 | 9164715 | SNV | 1 | T | C | Heterozygous |
| NC_037647.1 | 9164721 | SNV | 1 | A | G | Heterozygous |

|             |         |     |   |   |   |              |
|-------------|---------|-----|---|---|---|--------------|
| NC_037647.1 | 9165332 | SNV | 1 | T | A | Homozygous   |
| NC_037647.1 | 9166606 | SNV | 1 | C | T | Homozygous   |
| NC_037647.1 | 9167057 | SNV | 1 | A | G | Homozygous   |
| NC_037647.1 | 9173484 | SNV | 1 | C | T | Homozygous   |
| NC_037647.1 | 9180769 | SNV | 1 | G | A | Heterozygous |
| NC_037647.1 | 9189803 | SNV | 1 | C | T | Homozygous   |
| NC_037647.1 | 9189833 | SNV | 1 | T | C | Heterozygous |
| NC_037647.1 | 9198106 | SNV | 1 | C | T | Heterozygous |
| NC_037647.1 | 9198172 | SNV | 1 | C | T | Heterozygous |
| NC_037647.1 | 9198178 | SNV | 1 | C | T | Heterozygous |
| NC_037647.1 | 9198187 | SNV | 1 | T | C | Heterozygous |
| NC_037647.1 | 9198189 | SNV | 1 | T | C | Heterozygous |
| NC_037647.1 | 9198201 | SNV | 1 | C | T | Heterozygous |
| NC_037647.1 | 9206733 | SNV | 1 | C | A | Homozygous   |
| NC_037647.1 | 9206741 | SNV | 1 | A | C | Homozygous   |
| NC_037647.1 | 9212538 | SNV | 1 | C | T | Homozygous   |
| NC_037647.1 | 9213711 | SNV | 1 | T | C | Homozygous   |
| NC_037647.1 | 9213947 | SNV | 1 | T | C | Homozygous   |
| NC_037647.1 | 9214830 | SNV | 1 | G | A | Heterozygous |
| NC_037647.1 | 9214851 | SNV | 1 | G | A | Homozygous   |
| NC_037647.1 | 9214925 | SNV | 1 | A | G | Homozygous   |
| NC_037647.1 | 9214929 | SNV | 1 | A | G | Homozygous   |
| NC_037647.1 | 9214932 | SNV | 1 | A | G | Homozygous   |
| NC_037647.1 | 9214943 | SNV | 1 | G | A | Homozygous   |
| NC_037647.1 | 9214945 | SNV | 1 | T | A | Homozygous   |
| NC_037647.1 | 9214947 | SNV | 1 | G | A | Homozygous   |
| NC_037647.1 | 9214958 | SNV | 1 | A | G | Homozygous   |
| NC_037647.1 | 9214960 | SNV | 1 | T | A | Homozygous   |
| NC_037647.1 | 9214962 | SNV | 1 | G | A | Homozygous   |
| NC_037647.1 | 9214965 | SNV | 1 | C | T | Homozygous   |
| NC_037647.1 | 9214976 | SNV | 1 | A | G | Homozygous   |
| NC_037647.1 | 9214985 | SNV | 1 | G | A | Homozygous   |
| NC_037647.1 | 9214995 | SNV | 1 | G | A | Homozygous   |
| NC_037647.1 | 9215872 | SNV | 1 | T | C | Homozygous   |
| NC_037647.1 | 9215878 | SNV | 1 | T | C | Homozygous   |
| NC_037647.1 | 9215881 | SNV | 1 | C | T | Homozygous   |
| NC_037647.1 | 9215884 | SNV | 1 | A | T | Homozygous   |
| NC_037647.1 | 9215891 | SNV | 1 | T | G | Homozygous   |
| NC_037647.1 | 9215900 | SNV | 1 | C | T | Homozygous   |
| NC_037647.1 | 9215921 | SNV | 1 | G | A | Homozygous   |
| NC_037647.1 | 9215972 | SNV | 1 | C | G | Homozygous   |
| NC_037647.1 | 9215978 | SNV | 1 | C | T | Homozygous   |
| NC_037647.1 | 9220300 | SNV | 1 | C | T | Homozygous   |
| NC_037647.1 | 9220319 | SNV | 1 | A | G | Homozygous   |
| NC_037647.1 | 9220924 | SNV | 1 | G | A | Heterozygous |
| NC_037647.1 | 9225496 | SNV | 1 | C | T | Homozygous   |
| NC_037647.1 | 9225908 | SNV | 1 | T | C | Heterozygous |
| NC_037647.1 | 9227243 | SNV | 1 | A | G | Heterozygous |
| NC_037647.1 | 9228753 | SNV | 1 | G | C | Homozygous   |
| NC_037647.1 | 9232184 | SNV | 1 | G | A | Heterozygous |
| NC_037647.1 | 9232351 | SNV | 1 | G | C | Homozygous   |

|             |         |     |   |   |   |              |
|-------------|---------|-----|---|---|---|--------------|
| NC_037647.1 | 9232402 | SNV | 1 | C | T | Heterozygous |
| NC_037647.1 | 9232425 | SNV | 1 | T | C | Homozygous   |
| NC_037647.1 | 9234393 | SNV | 1 | A | C | Homozygous   |
| NC_037647.1 | 9235517 | SNV | 1 | T | C | Homozygous   |
| NC_037647.1 | 9235580 | SNV | 1 | A | G | Homozygous   |
| NC_037647.1 | 9235814 | SNV | 1 | A | G | Homozygous   |
| NC_037647.1 | 9235868 | SNV | 1 | C | G | Homozygous   |
| NC_037647.1 | 9235870 | SNV | 1 | G | T | Homozygous   |
| NC_037647.1 | 9236167 | SNV | 1 | G | A | Homozygous   |
| NC_037647.1 | 9236222 | SNV | 1 | T | C | Heterozygous |
| NC_037647.1 | 9236237 | SNV | 1 | T | A | Heterozygous |
| NC_037647.1 | 9236338 | SNV | 1 | C | T | Heterozygous |
| NC_037647.1 | 9236881 | SNV | 1 | T | C | Heterozygous |
| NC_037647.1 | 9236927 | SNV | 1 | T | C | Homozygous   |
| NC_037647.1 | 9238443 | SNV | 1 | T | C | Homozygous   |
| NC_037647.1 | 9238448 | SNV | 1 | A | G | Homozygous   |
| NC_037647.1 | 9238636 | SNV | 1 | C | T | Homozygous   |
| NC_037647.1 | 9244433 | SNV | 1 | G | C | Homozygous   |
| NC_037647.1 | 9249890 | SNV | 1 | T | C | Homozygous   |
| NC_037647.1 | 9249894 | SNV | 1 | C | T | Heterozygous |
| NC_037647.1 | 9250588 | SNV | 1 | A | T | Heterozygous |
| NC_037647.1 | 9250594 | SNV | 1 | T | C | Heterozygous |
| NC_037647.1 | 9250598 | SNV | 1 | C | A | Heterozygous |
| NC_037647.1 | 9250601 | SNV | 1 | G | A | Heterozygous |
| NC_037647.1 | 9250621 | SNV | 1 | G | A | Heterozygous |
| NC_037647.1 | 9251084 | SNV | 1 | A | T | Homozygous   |
| NC_037647.1 | 9251092 | SNV | 1 | G | A | Homozygous   |
| NC_037647.1 | 9251095 | SNV | 1 | G | C | Homozygous   |
| NC_037647.1 | 9251098 | SNV | 1 | G | A | Homozygous   |
| NC_037647.1 | 9251106 | SNV | 1 | G | A | Heterozygous |
| NC_037647.1 | 9251108 | SNV | 1 | A | G | Homozygous   |
| NC_037647.1 | 9251110 | SNV | 1 | A | T | Homozygous   |
| NC_037647.1 | 9252282 | SNV | 1 | C | G | Homozygous   |
| NC_037647.1 | 9252288 | SNV | 1 | C | A | Heterozygous |
| NC_037647.1 | 9252292 | SNV | 1 | A | T | Heterozygous |
| NC_037647.1 | 9252296 | SNV | 1 | C | A | Heterozygous |
| NC_037647.1 | 9252305 | SNV | 1 | A | G | Homozygous   |
| NC_037647.1 | 9252345 | SNV | 1 | G | A | Homozygous   |
| NC_037647.1 | 9252350 | SNV | 1 | A | C | Homozygous   |
| NC_037647.1 | 9252354 | SNV | 1 | C | A | Homozygous   |
| NC_037647.1 | 9256028 | SNV | 1 | T | G | Homozygous   |
| NC_037647.1 | 9256031 | SNV | 1 | A | G | Homozygous   |
| NC_037647.1 | 9256042 | SNV | 1 | A | G | Homozygous   |
| NC_037647.1 | 9256044 | SNV | 1 | A | C | Homozygous   |
| NC_037647.1 | 9256059 | SNV | 1 | A | G | Homozygous   |
| NC_037647.1 | 9263643 | SNV | 1 | C | G | Homozygous   |
| NC_037647.1 | 9263676 | SNV | 1 | C | T | Homozygous   |
| NC_037647.1 | 9263680 | SNV | 1 | C | T | Homozygous   |
| NC_037647.1 | 9266805 | SNV | 1 | T | C | Homozygous   |
| NC_037647.1 | 9266823 | SNV | 1 | T | G | Heterozygous |
| NC_037647.1 | 9266837 | SNV | 1 | A | G | Heterozygous |

|             |         |     |   |   |   |              |
|-------------|---------|-----|---|---|---|--------------|
| NC_037647.1 | 9266861 | SNV | 1 | A | T | Homozygous   |
| NC_037647.1 | 9268682 | SNV | 1 | A | G | Homozygous   |
| NC_037647.1 | 9268688 | SNV | 1 | T | G | Homozygous   |
| NC_037647.1 | 9268690 | SNV | 1 | A | G | Homozygous   |
| NC_037647.1 | 9268692 | SNV | 1 | G | T | Homozygous   |
| NC_037647.1 | 9270674 | SNV | 1 | G | A | Heterozygous |
| NC_037647.1 | 9274270 | SNV | 1 | G | A | Heterozygous |
| NC_037647.1 | 9274342 | SNV | 1 | T | A | Homozygous   |
| NC_037647.1 | 9274993 | SNV | 1 | G | A | Heterozygous |
| NC_037647.1 | 9275006 | SNV | 1 | T | C | Heterozygous |
| NC_037647.1 | 9275045 | SNV | 1 | C | T | Heterozygous |
| NC_037647.1 | 9275964 | SNV | 1 | T | C | Homozygous   |
| NC_037647.1 | 9276506 | SNV | 1 | C | T | Heterozygous |
| NC_037647.1 | 9276651 | SNV | 1 | T | C | Heterozygous |
| NC_037647.1 | 9276950 | SNV | 1 | G | A | Heterozygous |
| NC_037647.1 | 9276952 | SNV | 1 | G | A | Heterozygous |
| NC_037647.1 | 9276954 | SNV | 1 | G | A | Heterozygous |
| NC_037647.1 | 9276956 | SNV | 1 | G | A | Heterozygous |
| NC_037647.1 | 9276958 | SNV | 1 | G | A | Heterozygous |
| NC_037647.1 | 9277066 | SNV | 1 | A | G | Heterozygous |
| NC_037647.1 | 9277221 | SNV | 1 | G | A | Homozygous   |
| NC_037647.1 | 9277425 | SNV | 1 | G | A | Heterozygous |
| NC_037647.1 | 9277433 | SNV | 1 | A | G | Heterozygous |
| NC_037647.1 | 9277558 | SNV | 1 | A | G | Homozygous   |
| NC_037647.1 | 9277598 | SNV | 1 | C | T | Homozygous   |
| NC_037647.1 | 9277820 | SNV | 1 | T | A | Heterozygous |
| NC_037647.1 | 9277826 | SNV | 1 | T | A | Heterozygous |
| NC_037647.1 | 9277833 | SNV | 1 | A | T | Heterozygous |
| NC_037647.1 | 9277839 | SNV | 1 | T | A | Homozygous   |
| NC_037647.1 | 9277842 | SNV | 1 | A | T | Heterozygous |
| NC_037647.1 | 9277871 | SNV | 1 | C | A | Heterozygous |
| NC_037647.1 | 9277876 | SNV | 1 | T | A | Heterozygous |
| NC_037647.1 | 9277877 | SNV | 1 | G | A | Heterozygous |
| NC_037647.1 | 9277884 | SNV | 1 | T | A | Heterozygous |
| NC_037647.1 | 9277886 | SNV | 1 | C | A | Heterozygous |
| NC_037647.1 | 9277940 | SNV | 1 | A | T | Heterozygous |
| NC_037647.1 | 9278068 | SNV | 1 | C | T | Homozygous   |
| NC_037647.1 | 9278352 | SNV | 1 | G | C | Homozygous   |
| NC_037647.1 | 9278873 | SNV | 1 | A | G | Heterozygous |
| NC_037647.1 | 9279819 | SNV | 1 | C | T | Heterozygous |
| NC_037647.1 | 9279880 | SNV | 1 | A | G | Homozygous   |
| NC_037647.1 | 9281650 | SNV | 1 | C | T | Homozygous   |
| NC_037647.1 | 9282120 | SNV | 1 | A | G | Homozygous   |
| NC_037647.1 | 9282524 | SNV | 1 | C | T | Homozygous   |
| NC_037647.1 | 9283507 | SNV | 1 | T | C | Heterozygous |
| NC_037647.1 | 9283565 | SNV | 1 | A | G | Homozygous   |
| NC_037647.1 | 9283574 | SNV | 1 | T | C | Homozygous   |
| NC_037647.1 | 9290716 | SNV | 1 | T | C | Homozygous   |
| NC_037647.1 | 9290958 | SNV | 1 | C | T | Heterozygous |
| NC_037647.1 | 9291534 | SNV | 1 | T | C | Homozygous   |
| NC_037647.1 | 9291634 | SNV | 1 | A | G | Homozygous   |

|             |         |     |   |   |   |              |
|-------------|---------|-----|---|---|---|--------------|
| NC_037647.1 | 9291677 | SNV | 1 | A | G | Homozygous   |
| NC_037647.1 | 9292154 | SNV | 1 | C | T | Homozygous   |
| NC_037647.1 | 9292275 | SNV | 1 | G | T | Homozygous   |
| NC_037647.1 | 9298230 | SNV | 1 | T | C | Heterozygous |
| NC_037647.1 | 9300733 | SNV | 1 | G | A | Homozygous   |
| NC_037647.1 | 9300749 | SNV | 1 | G | A | Homozygous   |
| NC_037647.1 | 9300759 | SNV | 1 | T | A | Heterozygous |
| NC_037647.1 | 9309664 | SNV | 1 | C | T | Homozygous   |
| NC_037647.1 | 9309667 | SNV | 1 | C | G | Homozygous   |
| NC_037647.1 | 9314553 | SNV | 1 | C | T | Homozygous   |
| NC_037647.1 | 9314583 | SNV | 1 | T | C | Heterozygous |
| NC_037647.1 | 9314588 | SNV | 1 | T | C | Heterozygous |
| NC_037647.1 | 9321435 | SNV | 1 | G | A | Homozygous   |
| NC_037647.1 | 9327704 | SNV | 1 | G | C | Homozygous   |
| NC_037647.1 | 9327750 | SNV | 1 | C | G | Homozygous   |
| NC_037647.1 | 9328572 | SNV | 1 | C | G | Homozygous   |
| NC_037647.1 | 9328575 | SNV | 1 | T | C | Homozygous   |
| NC_037647.1 | 9328610 | SNV | 1 | A | C | Homozygous   |
| NC_037647.1 | 9328615 | SNV | 1 | T | C | Homozygous   |
| NC_037647.1 | 9328637 | SNV | 1 | T | C | Homozygous   |
| NC_037647.1 | 9332126 | SNV | 1 | T | C | Homozygous   |
| NC_037647.1 | 9332398 | SNV | 1 | G | C | Homozygous   |
| NC_037647.1 | 9332794 | SNV | 1 | T | A | Homozygous   |
| NC_037647.1 | 9332824 | SNV | 1 | C | T | Homozygous   |
| NC_037647.1 | 9332854 | SNV | 1 | C | T | Heterozygous |
| NC_037647.1 | 9333366 | SNV | 1 | A | G | Heterozygous |
| NC_037647.1 | 9333377 | SNV | 1 | G | C | Heterozygous |
| NC_037647.1 | 9333381 | SNV | 1 | C | G | Heterozygous |
| NC_037647.1 | 9333478 | SNV | 1 | T | C | Homozygous   |
| NC_037647.1 | 9333527 | SNV | 1 | A | G | Homozygous   |
| NC_037647.1 | 9333769 | SNV | 1 | C | T | Heterozygous |
| NC_037647.1 | 9334093 | SNV | 1 | T | C | Homozygous   |
| NC_037647.1 | 9334183 | SNV | 1 | A | G | Homozygous   |
| NC_037647.1 | 9334608 | SNV | 1 | C | T | Heterozygous |
| NC_037647.1 | 9334631 | SNV | 1 | G | A | Heterozygous |
| NC_037647.1 | 9334650 | SNV | 1 | T | C | Homozygous   |
| NC_037647.1 | 9334910 | SNV | 1 | T | C | Homozygous   |
| NC_037647.1 | 9334976 | SNV | 1 | A | G | Homozygous   |
| NC_037647.1 | 9335006 | SNV | 1 | C | T | Heterozygous |
| NC_037647.1 | 9335033 | SNV | 1 | C | G | Heterozygous |
| NC_037647.1 | 9335277 | SNV | 1 | A | G | Homozygous   |
| NC_037647.1 | 9335304 | SNV | 1 | A | G | Homozygous   |
| NC_037647.1 | 9335434 | SNV | 1 | T | C | Homozygous   |
| NC_037647.1 | 9335436 | SNV | 1 | A | G | Heterozygous |
| NC_037647.1 | 9335791 | SNV | 1 | A | G | Homozygous   |
| NC_037647.1 | 9339137 | SNV | 1 | G | A | Heterozygous |
| NC_037647.1 | 9339746 | SNV | 1 | T | A | Homozygous   |
| NC_037647.1 | 9348538 | SNV | 1 | C | T | Homozygous   |
| NC_037647.1 | 9348544 | SNV | 1 | C | T | Homozygous   |
| NC_037647.1 | 9348547 | SNV | 1 | C | A | Homozygous   |
| NC_037647.1 | 9348574 | SNV | 1 | C | A | Homozygous   |



|             |         |     |   |   |   |              |
|-------------|---------|-----|---|---|---|--------------|
| NC_037647.1 | 9349297 | SNV | 1 | G | A | Homozygous   |
| NC_037647.1 | 9349309 | SNV | 1 | G | A | Homozygous   |
| NC_037647.1 | 9372386 | SNV | 1 | C | G | Homozygous   |
| NC_037647.1 | 9372611 | SNV | 1 | C | T | Homozygous   |
| NC_037647.1 | 9376604 | SNV | 1 | C | T | Heterozygous |
| NC_037647.1 | 9381839 | SNV | 1 | G | A | Heterozygous |
| NC_037647.1 | 9383888 | SNV | 1 | G | A | Homozygous   |
| NC_037647.1 | 9383892 | SNV | 1 | A | T | Heterozygous |
| NC_037647.1 | 9383897 | SNV | 1 | T | A | Homozygous   |
| NC_037647.1 | 9384789 | SNV | 1 | C | A | Heterozygous |
| NC_037647.1 | 9384813 | SNV | 1 | T | G | Heterozygous |
| NC_037647.1 | 9385916 | SNV | 1 | A | T | Heterozygous |
| NC_037647.1 | 9385955 | SNV | 1 | G | A | Homozygous   |
| NC_037647.1 | 9389007 | SNV | 1 | A | G | Homozygous   |
| NC_037647.1 | 9389866 | SNV | 1 | C | T | Heterozygous |
| NC_037647.1 | 9392919 | SNV | 1 | A | G | Heterozygous |
| NC_037647.1 | 9394002 | SNV | 1 | A | G | Homozygous   |
| NC_037647.1 | 9399337 | SNV | 1 | A | T | Homozygous   |
| NC_037647.1 | 9399339 | SNV | 1 | A | G | Homozygous   |
| NC_037647.1 | 9399350 | SNV | 1 | G | T | Homozygous   |
| NC_037647.1 | 9405991 | SNV | 1 | A | C | Homozygous   |
| NC_037647.1 | 9405997 | SNV | 1 | T | C | Homozygous   |
| NC_037647.1 | 9407410 | SNV | 1 | G | A | Heterozygous |
| NC_037647.1 | 9408872 | SNV | 1 | T | A | Homozygous   |
| NC_037647.1 | 9409131 | SNV | 1 | G | C | Homozygous   |
| NC_037647.1 | 9409911 | SNV | 1 | C | A | Homozygous   |
| NC_037647.1 | 9411024 | SNV | 1 | G | C | Homozygous   |
| NC_037647.1 | 9412180 | SNV | 1 | A | G | Homozygous   |
| NC_037647.1 | 9412336 | SNV | 1 | C | A | Homozygous   |
| NC_037647.1 | 9414064 | SNV | 1 | A | T | Homozygous   |
| NC_037647.1 | 9416273 | SNV | 1 | C | T | Homozygous   |
| NC_037647.1 | 9416289 | SNV | 1 | C | G | Heterozygous |
| NC_037647.1 | 9416293 | SNV | 1 | T | G | Heterozygous |
| NC_037647.1 | 9416308 | SNV | 1 | A | T | Heterozygous |
| NC_037647.1 | 9416312 | SNV | 1 | T | C | Heterozygous |
| NC_037647.1 | 9416314 | SNV | 1 | A | G | Heterozygous |
| NC_037647.1 | 9416320 | SNV | 1 | T | C | Heterozygous |
| NC_037647.1 | 9416323 | SNV | 1 | T | G | Homozygous   |
| NC_037647.1 | 9416848 | SNV | 1 | A | G | Homozygous   |
| NC_037647.1 | 9416851 | SNV | 1 | A | G | Homozygous   |
| NC_037647.1 | 9416873 | SNV | 1 | T | C | Heterozygous |
| NC_037647.1 | 9416876 | SNV | 1 | A | T | Homozygous   |
| NC_037647.1 | 9417515 | SNV | 1 | T | G | Homozygous   |
| NC_037647.1 | 9419382 | SNV | 1 | T | C | Homozygous   |
| NC_037647.1 | 9420260 | SNV | 1 | T | C | Homozygous   |
| NC_037647.1 | 9422328 | SNV | 1 | T | C | Homozygous   |
| NC_037647.1 | 9422404 | SNV | 1 | A | T | Homozygous   |
| NC_037647.1 | 9422520 | SNV | 1 | A | T | Homozygous   |
| NC_037647.1 | 9422524 | SNV | 1 | A | C | Homozygous   |
| NC_037647.1 | 9422532 | SNV | 1 | T | G | Homozygous   |
| NC_037647.1 | 9422536 | SNV | 1 | T | A | Homozygous   |

|             |         |     |   |   |   |              |
|-------------|---------|-----|---|---|---|--------------|
| NC_037647.1 | 9422542 | SNV | 1 | T | A | Homozygous   |
| NC_037647.1 | 9422665 | SNV | 1 | C | T | Heterozygous |
| NC_037647.1 | 9423750 | SNV | 1 | A | G | Homozygous   |
| NC_037647.1 | 9424455 | SNV | 1 | C | G | Homozygous   |
| NC_037647.1 | 9427555 | SNV | 1 | T | C | Heterozygous |
| NC_037647.1 | 9429862 | SNV | 1 | T | C | Heterozygous |
| NC_037647.1 | 9430048 | SNV | 1 | T | C | Homozygous   |
| NC_037647.1 | 9430146 | SNV | 1 | T | C | Homozygous   |
| NC_037647.1 | 9430658 | SNV | 1 | C | T | Homozygous   |
| NC_037647.1 | 9436794 | SNV | 1 | T | G | Homozygous   |
| NC_037647.1 | 9436823 | SNV | 1 | C | T | Heterozygous |
| NC_037647.1 | 9438235 | SNV | 1 | C | T | Homozygous   |
| NC_037647.1 | 9438251 | SNV | 1 | C | T | Heterozygous |
| NC_037647.1 | 9438253 | SNV | 1 | C | T | Heterozygous |
| NC_037647.1 | 9438611 | SNV | 1 | T | C | Homozygous   |
| NC_037647.1 | 9440620 | SNV | 1 | C | T | Heterozygous |
| NC_037647.1 | 9441152 | SNV | 1 | A | G | Homozygous   |
| NC_037647.1 | 9443152 | SNV | 1 | G | A | Heterozygous |
| NC_037647.1 | 9443164 | SNV | 1 | G | A | Homozygous   |
| NC_037647.1 | 9444134 | SNV | 1 | T | C | Heterozygous |
| NC_037647.1 | 9444137 | SNV | 1 | G | C | Homozygous   |
| NC_037647.1 | 9444314 | SNV | 1 | C | G | Homozygous   |
| NC_037647.1 | 9447206 | SNV | 1 | A | C | Heterozygous |
| NC_037647.1 | 9447206 | SNV | 1 | A | T | Heterozygous |
| NC_037647.1 | 9447208 | SNV | 1 | T | C | Heterozygous |
| NC_037647.1 | 9454114 | SNV | 1 | A | T | Heterozygous |
| NC_037647.1 | 9454123 | SNV | 1 | A | T | Heterozygous |
| NC_037647.1 | 9454129 | SNV | 1 | C | T | Heterozygous |
| NC_037647.1 | 9457949 | SNV | 1 | T | C | Homozygous   |
| NC_037647.1 | 9457959 | SNV | 1 | T | C | Homozygous   |
| NC_037647.1 | 9459334 | SNV | 1 | T | A | Homozygous   |
| NC_037647.1 | 9459339 | SNV | 1 | A | G | Homozygous   |
| NC_037647.1 | 9460065 | SNV | 1 | G | A | Heterozygous |
| NC_037647.1 | 9460521 | SNV | 1 | G | A | Heterozygous |
| NC_037647.1 | 9460624 | SNV | 1 | T | C | Homozygous   |
| NC_037647.1 | 9460677 | SNV | 1 | A | G | Heterozygous |
| NC_037647.1 | 9460680 | SNV | 1 | A | G | Heterozygous |
| NC_037647.1 | 9460686 | SNV | 1 | A | C | Heterozygous |
| NC_037647.1 | 9460698 | SNV | 1 | A | G | Homozygous   |
| NC_037647.1 | 9460850 | SNV | 1 | A | G | Homozygous   |
| NC_037647.1 | 9460985 | SNV | 1 | T | C | Homozygous   |
| NC_037647.1 | 9461046 | SNV | 1 | T | C | Homozygous   |
| NC_037647.1 | 9461317 | SNV | 1 | T | A | Heterozygous |
| NC_037647.1 | 9461322 | SNV | 1 | T | C | Homozygous   |
| NC_037647.1 | 9461359 | SNV | 1 | C | T | Homozygous   |
| NC_037647.1 | 9462081 | SNV | 1 | A | G | Homozygous   |
| NC_037647.1 | 9462083 | SNV | 1 | T | G | Homozygous   |
| NC_037647.1 | 9462086 | SNV | 1 | A | G | Homozygous   |
| NC_037647.1 | 9462098 | SNV | 1 | C | T | Heterozygous |
| NC_037647.1 | 9462118 | SNV | 1 | T | C | Homozygous   |
| NC_037647.1 | 9463214 | SNV | 1 | G | T | Homozygous   |

|             |         |     |   |   |   |              |
|-------------|---------|-----|---|---|---|--------------|
| NC_037647.1 | 9463278 | SNV | 1 | T | C | Heterozygous |
| NC_037647.1 | 9463328 | SNV | 1 | G | A | Homozygous   |
| NC_037647.1 | 9463346 | SNV | 1 | G | A | Homozygous   |
| NC_037647.1 | 9463424 | SNV | 1 | C | T | Heterozygous |
| NC_037647.1 | 9463439 | SNV | 1 | G | A | Heterozygous |
| NC_037647.1 | 9463505 | SNV | 1 | T | C | Homozygous   |
| NC_037647.1 | 9464225 | SNV | 1 | C | T | Heterozygous |
| NC_037647.1 | 9464732 | SNV | 1 | T | G | Heterozygous |
| NC_037647.1 | 9465968 | SNV | 1 | A | C | Homozygous   |
| NC_037647.1 | 9466005 | SNV | 1 | T | G | Homozygous   |
| NC_037647.1 | 9466015 | SNV | 1 | T | A | Homozygous   |
| NC_037647.1 | 9473489 | SNV | 1 | T | A | Heterozygous |
| NC_037647.1 | 9473517 | SNV | 1 | G | A | Heterozygous |
| NC_037647.1 | 9477146 | SNV | 1 | A | C | Heterozygous |
| NC_037647.1 | 9483075 | SNV | 1 | A | G | Homozygous   |
| NC_037647.1 | 9483351 | SNV | 1 | T | C | Homozygous   |
| NC_037647.1 | 9483461 | SNV | 1 | C | G | Homozygous   |
| NC_037647.1 | 9483629 | SNV | 1 | C | G | Homozygous   |
| NC_037647.1 | 9483951 | SNV | 1 | T | G | Homozygous   |
| NC_037647.1 | 9484062 | SNV | 1 | C | T | Homozygous   |
| NC_037647.1 | 9484668 | SNV | 1 | A | T | Heterozygous |
| NC_037647.1 | 9484671 | SNV | 1 | T | C | Heterozygous |
| NC_037647.1 | 9487869 | SNV | 1 | T | A | Homozygous   |
| NC_037647.1 | 9488148 | SNV | 1 | A | T | Heterozygous |
| NC_037647.1 | 9489100 | SNV | 1 | T | C | Homozygous   |
| NC_037647.1 | 9496090 | SNV | 1 | G | A | Homozygous   |
| NC_037647.1 | 9499051 | SNV | 1 | A | G | Homozygous   |
| NC_037647.1 | 9499053 | SNV | 1 | T | A | Homozygous   |
| NC_037647.1 | 9499062 | SNV | 1 | G | A | Homozygous   |
| NC_037647.1 | 9499067 | SNV | 1 | T | A | Homozygous   |
| NC_037647.1 | 9499397 | SNV | 1 | T | G | Heterozygous |
| NC_037647.1 | 9499405 | SNV | 1 | T | A | Heterozygous |
| NC_037647.1 | 9499504 | SNV | 1 | T | A | Homozygous   |
| NC_037647.1 | 9499531 | SNV | 1 | A | C | Homozygous   |
| NC_037647.1 | 9499843 | SNV | 1 | A | T | Homozygous   |
| NC_037647.1 | 9499997 | SNV | 1 | A | T | Homozygous   |
| NC_037647.1 | 9500006 | SNV | 1 | T | G | Homozygous   |
| NC_037647.1 | 9500009 | SNV | 1 | T | G | Homozygous   |
| NC_037647.1 | 9500487 | SNV | 1 | C | T | Heterozygous |
| NC_037647.1 | 9502475 | SNV | 1 | T | C | Homozygous   |
| NC_037647.1 | 9503364 | SNV | 1 | A | G | Homozygous   |
| NC_037647.1 | 9503919 | SNV | 1 | A | G | Heterozygous |
| NC_037647.1 | 9503929 | SNV | 1 | A | T | Heterozygous |
| NC_037647.1 | 9503932 | SNV | 1 | T | A | Heterozygous |
| NC_037647.1 | 9503934 | SNV | 1 | T | G | Heterozygous |
| NC_037647.1 | 9505916 | SNV | 1 | A | G | Heterozygous |
| NC_037647.1 | 9506040 | SNV | 1 | G | T | Homozygous   |
| NC_037647.1 | 9506042 | SNV | 1 | A | G | Homozygous   |
| NC_037647.1 | 9506045 | SNV | 1 | T | C | Homozygous   |
| NC_037647.1 | 9506290 | SNV | 1 | T | C | Heterozygous |
| NC_037647.1 | 9506731 | SNV | 1 | G | A | Heterozygous |

|             |         |     |   |   |   |              |
|-------------|---------|-----|---|---|---|--------------|
| NC_037647.1 | 9506889 | SNV | 1 | T | A | Homozygous   |
| NC_037647.1 | 9506893 | SNV | 1 | T | A | Homozygous   |
| NC_037647.1 | 9506895 | SNV | 1 | G | A | Homozygous   |
| NC_037647.1 | 9509273 | SNV | 1 | T | C | Homozygous   |
| NC_037647.1 | 9509436 | SNV | 1 | T | C | Homozygous   |
| NC_037647.1 | 9509515 | SNV | 1 | C | T | Homozygous   |
| NC_037647.1 | 9509590 | SNV | 1 | T | C | Homozygous   |
| NC_037647.1 | 9511547 | SNV | 1 | T | A | Homozygous   |
| NC_037647.1 | 9511878 | SNV | 1 | T | A | Homozygous   |
| NC_037647.1 | 9511881 | SNV | 1 | A | T | Homozygous   |
| NC_037647.1 | 9511890 | SNV | 1 | A | T | Homozygous   |
| NC_037647.1 | 9511892 | SNV | 1 | G | A | Homozygous   |
| NC_037647.1 | 9511902 | SNV | 1 | T | C | Homozygous   |
| NC_037647.1 | 9511908 | SNV | 1 | A | T | Homozygous   |
| NC_037647.1 | 9511935 | SNV | 1 | T | A | Homozygous   |
| NC_037647.1 | 9512146 | SNV | 1 | A | G | Homozygous   |
| NC_037647.1 | 9512148 | SNV | 1 | A | T | Homozygous   |
| NC_037647.1 | 9512152 | SNV | 1 | T | G | Homozygous   |
| NC_037647.1 | 9512204 | SNV | 1 | A | T | Homozygous   |
| NC_037647.1 | 9512214 | SNV | 1 | C | A | Homozygous   |
| NC_037647.1 | 9512320 | SNV | 1 | G | A | Homozygous   |
| NC_037647.1 | 9512322 | SNV | 1 | A | G | Homozygous   |
| NC_037647.1 | 9512324 | SNV | 1 | T | G | Homozygous   |
| NC_037647.1 | 9513035 | SNV | 1 | A | G | Homozygous   |
| NC_037647.1 | 9513336 | SNV | 1 | T | C | Homozygous   |
| NC_037647.1 | 9514377 | SNV | 1 | T | A | Homozygous   |
| NC_037647.1 | 9514387 | SNV | 1 | T | A | Heterozygous |
| NC_037647.1 | 9514391 | SNV | 1 | A | T | Heterozygous |
| NC_037647.1 | 9514643 | SNV | 1 | T | C | Homozygous   |
| NC_037647.1 | 9514645 | SNV | 1 | C | T | Homozygous   |
| NC_037647.1 | 9515276 | SNV | 1 | C | A | Homozygous   |
| NC_037647.1 | 9515538 | SNV | 1 | T | C | Homozygous   |
| NC_037647.1 | 9516600 | SNV | 1 | C | T | Homozygous   |
| NC_037647.1 | 9516777 | SNV | 1 | T | C | Homozygous   |
| NC_037647.1 | 9518453 | SNV | 1 | T | C | Homozygous   |
| NC_037647.1 | 9518468 | SNV | 1 | T | A | Homozygous   |
| NC_037647.1 | 9518968 | SNV | 1 | T | C | Homozygous   |
| NC_037647.1 | 9518972 | SNV | 1 | T | C | Heterozygous |
| NC_037647.1 | 9518976 | SNV | 1 | T | C | Heterozygous |
| NC_037647.1 | 9518990 | SNV | 1 | T | C | Homozygous   |
| NC_037647.1 | 9518992 | SNV | 1 | T | C | Heterozygous |
| NC_037647.1 | 9519119 | SNV | 1 | G | T | Heterozygous |
| NC_037647.1 | 9520667 | SNV | 1 | T | A | Homozygous   |
| NC_037647.1 | 9522585 | SNV | 1 | T | C | Homozygous   |
| NC_037647.1 | 9523855 | SNV | 1 | C | G | Heterozygous |
| NC_037647.1 | 9524182 | SNV | 1 | A | G | Heterozygous |
| NC_037647.1 | 9524189 | SNV | 1 | T | A | Heterozygous |
| NC_037647.1 | 9524202 | SNV | 1 | A | G | Heterozygous |
| NC_037647.1 | 9545081 | SNV | 1 | G | T | Homozygous   |
| NC_037647.1 | 9545083 | SNV | 1 | T | A | Homozygous   |
| NC_037647.1 | 9545085 | SNV | 1 | T | A | Homozygous   |

|             |         |     |   |   |   |              |
|-------------|---------|-----|---|---|---|--------------|
| NC_037647.1 | 9545772 | SNV | 1 | A | G | Heterozygous |
| NC_037647.1 | 9545897 | SNV | 1 | T | C | Homozygous   |
| NC_037647.1 | 9545917 | SNV | 1 | A | G | Homozygous   |
| NC_037647.1 | 9545922 | SNV | 1 | T | C | Homozygous   |
| NC_037647.1 | 9546770 | SNV | 1 | T | A | Heterozygous |
| NC_037647.1 | 9574216 | SNV | 1 | T | C | Homozygous   |
| NC_037647.1 | 9574248 | SNV | 1 | C | G | Homozygous   |
| NC_037647.1 | 9576102 | SNV | 1 | C | A | Heterozygous |
| NC_037647.1 | 9576105 | SNV | 1 | G | A | Heterozygous |
| NC_037647.1 | 9576117 | SNV | 1 | G | A | Heterozygous |
| NC_037647.1 | 9576120 | SNV | 1 | G | A | Heterozygous |
| NC_037647.1 | 9576152 | SNV | 1 | A | C | Homozygous   |
| NC_037647.1 | 9576154 | SNV | 1 | G | A | Homozygous   |
| NC_037647.1 | 9576157 | SNV | 1 | G | A | Homozygous   |
| NC_037647.1 | 9589913 | SNV | 1 | G | A | Heterozygous |
| NC_037647.1 | 9589924 | SNV | 1 | A | T | Heterozygous |
| NC_037647.1 | 9589929 | SNV | 1 | G | A | Heterozygous |
| NC_037647.1 | 9589972 | SNV | 1 | A | T | Heterozygous |
| NC_037647.1 | 9745518 | SNV | 1 | T | C | Homozygous   |
| NC_037647.1 | 9745869 | SNV | 1 | T | C | Heterozygous |
| NC_037647.1 | 9745907 | SNV | 1 | G | A | Homozygous   |
| NC_037647.1 | 9745931 | SNV | 1 | C | G | Heterozygous |
| NC_037647.1 | 9761738 | SNV | 1 | C | G | Heterozygous |
| NC_037647.1 | 9761749 | SNV | 1 | C | T | Homozygous   |
| NC_037647.1 | 9761751 | SNV | 1 | T | C | Homozygous   |
| NC_037647.1 | 9761753 | SNV | 1 | T | C | Homozygous   |
| NC_037647.1 | 9761785 | SNV | 1 | A | G | Homozygous   |
| NC_037647.1 | 9762056 | SNV | 1 | A | G | Heterozygous |
| NC_037647.1 | 9762063 | SNV | 1 | A | G | Homozygous   |
| NC_037647.1 | 9762423 | SNV | 1 | C | T | Heterozygous |
| NC_037647.1 | 9762488 | SNV | 1 | T | A | Homozygous   |
| NC_037647.1 | 9762746 | SNV | 1 | G | A | Heterozygous |
| NC_037647.1 | 9762783 | SNV | 1 | T | A | Heterozygous |
| NC_037647.1 | 9762793 | SNV | 1 | T | C | Homozygous   |
| NC_037647.1 | 9763162 | SNV | 1 | A | G | Homozygous   |
| NC_037647.1 | 9763463 | SNV | 1 | G | A | Homozygous   |
| NC_037647.1 | 9763471 | SNV | 1 | A | G | Homozygous   |
| NC_037647.1 | 9763542 | SNV | 1 | A | G | Heterozygous |
| NC_037647.1 | 9763549 | SNV | 1 | G | T | Heterozygous |
| NC_037647.1 | 9763553 | SNV | 1 | G | C | Heterozygous |
| NC_037647.1 | 9763615 | SNV | 1 | A | G | Homozygous   |
| NC_037647.1 | 9764036 | SNV | 1 | A | G | Homozygous   |
| NC_037647.1 | 9764430 | SNV | 1 | T | C | Homozygous   |
| NC_037647.1 | 9764455 | SNV | 1 | C | T | Homozygous   |
| NC_037647.1 | 9764677 | SNV | 1 | T | G | Heterozygous |
| NC_037647.1 | 9765199 | SNV | 1 | C | T | Homozygous   |
| NC_037647.1 | 9765424 | SNV | 1 | G | T | Homozygous   |
| NC_037647.1 | 9765512 | SNV | 1 | G | C | Homozygous   |
| NC_037647.1 | 9765515 | SNV | 1 | G | A | Homozygous   |
| NC_037647.1 | 9765525 | SNV | 1 | G | A | Homozygous   |
| NC_037647.1 | 9765617 | SNV | 1 | T | C | Heterozygous |

|             |         |     |   |   |   |              |
|-------------|---------|-----|---|---|---|--------------|
| NC_037647.1 | 9765644 | SNV | 1 | C | T | Heterozygous |
| NC_037647.1 | 9765677 | SNV | 1 | T | C | Homozygous   |
| NC_037647.1 | 9767556 | SNV | 1 | A | G | Heterozygous |
| NC_037647.1 | 9767637 | SNV | 1 | C | T | Heterozygous |
| NC_037647.1 | 9767691 | SNV | 1 | C | T | Homozygous   |
| NC_037647.1 | 9767789 | SNV | 1 | C | G | Homozygous   |
| NC_037647.1 | 9768458 | SNV | 1 | G | A | Heterozygous |
| NC_037647.1 | 9768460 | SNV | 1 | G | C | Homozygous   |
| NC_037647.1 | 9768463 | SNV | 1 | C | T | Homozygous   |
| NC_037647.1 | 9795003 | SNV | 1 | G | C | Homozygous   |
| NC_037647.1 | 9795125 | SNV | 1 | T | A | Homozygous   |
| NC_037647.1 | 9795165 | SNV | 1 | T | C | Heterozygous |
| NC_037647.1 | 9795174 | SNV | 1 | T | C | Heterozygous |
| NC_037647.1 | 9795324 | SNV | 1 | T | C | Homozygous   |
| NC_037647.1 | 9796336 | SNV | 1 | A | G | Homozygous   |
| NC_037647.1 | 9796369 | SNV | 1 | T | G | Heterozygous |
| NC_037647.1 | 9796494 | SNV | 1 | A | T | Homozygous   |
| NC_037647.1 | 9796496 | SNV | 1 | G | A | Homozygous   |
| NC_037647.1 | 9796498 | SNV | 1 | T | C | Homozygous   |
| NC_037647.1 | 9796511 | SNV | 1 | A | G | Heterozygous |
| NC_037647.1 | 9796594 | SNV | 1 | T | C | Homozygous   |
| NC_037647.1 | 9796765 | SNV | 1 | T | C | Homozygous   |
| NC_037647.1 | 9805631 | SNV | 1 | T | G | Homozygous   |
| NC_037647.1 | 9805634 | SNV | 1 | C | A | Homozygous   |
| NC_037647.1 | 9805638 | SNV | 1 | A | G | Homozygous   |
| NC_037647.1 | 9805640 | SNV | 1 | A | T | Homozygous   |
| NC_037647.1 | 9808701 | SNV | 1 | A | C | Homozygous   |
| NC_037647.1 | 9808706 | SNV | 1 | T | G | Homozygous   |
| NC_037647.1 | 9808709 | SNV | 1 | A | T | Homozygous   |
| NC_037647.1 | 9808711 | SNV | 1 | T | C | Homozygous   |
| NC_037647.1 | 9813296 | SNV | 1 | T | C | Homozygous   |
| NC_037647.1 | 9813320 | SNV | 1 | A | T | Heterozygous |
| NC_037647.1 | 9813344 | SNV | 1 | A | T | Heterozygous |
| NC_037647.1 | 9816283 | SNV | 1 | T | C | Homozygous   |
| NC_037647.1 | 9816288 | SNV | 1 | T | G | Homozygous   |
| NC_037647.1 | 9816710 | SNV | 1 | C | T | Homozygous   |
| NC_037647.1 | 9816712 | SNV | 1 | A | T | Homozygous   |
| NC_037647.1 | 9817061 | SNV | 1 | G | A | Homozygous   |
| NC_037647.1 | 9817066 | SNV | 1 | G | A | Homozygous   |
| NC_037647.1 | 9817069 | SNV | 1 | A | T | Homozygous   |
| NC_037647.1 | 9817074 | SNV | 1 | T | A | Homozygous   |
| NC_037647.1 | 9818354 | SNV | 1 | A | G | Homozygous   |
| NC_037647.1 | 9819668 | SNV | 1 | A | G | Homozygous   |
| NC_037647.1 | 9819741 | SNV | 1 | A | G | Homozygous   |
| NC_037647.1 | 9820041 | SNV | 1 | G | A | Homozygous   |
| NC_037647.1 | 9823664 | SNV | 1 | G | A | Heterozygous |
| NC_037647.1 | 9824011 | SNV | 1 | G | A | Heterozygous |
| NC_037647.1 | 9824152 | SNV | 1 | T | C | Heterozygous |
| NC_037647.1 | 9824313 | SNV | 1 | G | T | Homozygous   |
| NC_037647.1 | 9824317 | SNV | 1 | T | A | Homozygous   |
| NC_037647.1 | 9824319 | SNV | 1 | T | A | Homozygous   |

|             |         |     |   |   |   |              |
|-------------|---------|-----|---|---|---|--------------|
| NC_037647.1 | 9824613 | SNV | 1 | G | A | Heterozygous |
| NC_037647.1 | 9824928 | SNV | 1 | T | C | Homozygous   |
| NC_037647.1 | 9828349 | SNV | 1 | T | C | Homozygous   |
| NC_037647.1 | 9830740 | SNV | 1 | C | T | Homozygous   |
| NC_037647.1 | 9834362 | SNV | 1 | T | C | Homozygous   |
| NC_037647.1 | 9835571 | SNV | 1 | T | C | Homozygous   |
| NC_037647.1 | 9835603 | SNV | 1 | T | C | Heterozygous |
| NC_037647.1 | 9835620 | SNV | 1 | T | C | Homozygous   |
| NC_037647.1 | 9835645 | SNV | 1 | T | C | Homozygous   |
| NC_037647.1 | 9835833 | SNV | 1 | G | A | Homozygous   |
| NC_037647.1 | 9835995 | SNV | 1 | G | A | Homozygous   |
| NC_037647.1 | 9836130 | SNV | 1 | G | A | Homozygous   |
| NC_037647.1 | 9836521 | SNV | 1 | A | G | Heterozygous |
| NC_037647.1 | 9836531 | SNV | 1 | G | A | Heterozygous |
| NC_037647.1 | 9836574 | SNV | 1 | C | T | Heterozygous |
| NC_037647.1 | 9836622 | SNV | 1 | G | C | Homozygous   |
| NC_037647.1 | 9838780 | SNV | 1 | G | A | Homozygous   |
| NC_037647.1 | 9839018 | SNV | 1 | A | T | Homozygous   |
| NC_037647.1 | 9839618 | SNV | 1 | T | A | Homozygous   |
| NC_037647.1 | 9839621 | SNV | 1 | C | T | Homozygous   |
| NC_037647.1 | 9841222 | SNV | 1 | G | A | Heterozygous |
| NC_037647.1 | 9841326 | SNV | 1 | G | C | Homozygous   |
| NC_037647.1 | 9841460 | SNV | 1 | A | G | Homozygous   |
| NC_037647.1 | 9842463 | SNV | 1 | T | C | Homozygous   |
| NC_037647.1 | 9853640 | SNV | 1 | A | T | Homozygous   |
| NC_037647.1 | 9853831 | SNV | 1 | C | G | Homozygous   |
| NC_037647.1 | 9853834 | SNV | 1 | T | C | Homozygous   |
| NC_037647.1 | 9853836 | SNV | 1 | G | C | Homozygous   |
| NC_037647.1 | 9854086 | SNV | 1 | A | G | Homozygous   |
| NC_037647.1 | 9855016 | SNV | 1 | C | T | Homozygous   |
| NC_037647.1 | 9866471 | SNV | 1 | A | T | Homozygous   |
| NC_037647.1 | 9866540 | SNV | 1 | G | A | Homozygous   |
| NC_037647.1 | 9866842 | SNV | 1 | T | A | Heterozygous |
| NC_037647.1 | 9867037 | SNV | 1 | T | C | Homozygous   |
| NC_037647.1 | 9870750 | SNV | 1 | A | C | Homozygous   |
| NC_037647.1 | 9870752 | SNV | 1 | A | T | Homozygous   |
| NC_037647.1 | 9870764 | SNV | 1 | T | A | Homozygous   |
| NC_037647.1 | 9872731 | SNV | 1 | A | G | Homozygous   |
| NC_037647.1 | 9872897 | SNV | 1 | G | A | Heterozygous |
| NC_037647.1 | 9873211 | SNV | 1 | T | G | Homozygous   |
| NC_037647.1 | 9873435 | SNV | 1 | G | A | Heterozygous |
| NC_037647.1 | 9874207 | SNV | 1 | C | T | Heterozygous |
| NC_037647.1 | 9877037 | SNV | 1 | A | G | Heterozygous |
| NC_037647.1 | 9877046 | SNV | 1 | G | A | Heterozygous |
| NC_037647.1 | 9877339 | SNV | 1 | G | A | Homozygous   |
| NC_037647.1 | 9877352 | SNV | 1 | T | C | Homozygous   |
| NC_037647.1 | 9877366 | SNV | 1 | A | G | Homozygous   |
| NC_037647.1 | 9877478 | SNV | 1 | A | T | Homozygous   |
| NC_037647.1 | 9887643 | SNV | 1 | C | T | Heterozygous |
| NC_037647.1 | 9887652 | SNV | 1 | T | C | Homozygous   |
| NC_037647.1 | 9887657 | SNV | 1 | A | G | Homozygous   |

|             |         |     |   |   |   |              |
|-------------|---------|-----|---|---|---|--------------|
| NC_037647.1 | 9887660 | SNV | 1 | A | G | Homozygous   |
| NC_037647.1 | 9889329 | SNV | 1 | C | T | Homozygous   |
| NC_037647.1 | 9889643 | SNV | 1 | C | T | Heterozygous |
| NC_037647.1 | 9889718 | SNV | 1 | T | C | Heterozygous |
| NC_037647.1 | 9891824 | SNV | 1 | G | A | Homozygous   |
| NC_037647.1 | 9891859 | SNV | 1 | C | T | Heterozygous |
| NC_037647.1 | 9892004 | SNV | 1 | C | T | Heterozygous |
| NC_037647.1 | 9892239 | SNV | 1 | A | T | Heterozygous |
| NC_037647.1 | 9892254 | SNV | 1 | T | C | Homozygous   |
| NC_037647.1 | 9892269 | SNV | 1 | G | A | Heterozygous |
| NC_037647.1 | 9892332 | SNV | 1 | T | C | Homozygous   |
| NC_037647.1 | 9892578 | SNV | 1 | T | C | Homozygous   |
| NC_037647.1 | 9892727 | SNV | 1 | G | A | Heterozygous |
| NC_037647.1 | 9892913 | SNV | 1 | A | G | Homozygous   |
| NC_037647.1 | 9894917 | SNV | 1 | C | T | Homozygous   |
| NC_037647.1 | 9894963 | SNV | 1 | T | C | Heterozygous |
| NC_037647.1 | 9895631 | SNV | 1 | T | C | Homozygous   |
| NC_037647.1 | 9896424 | SNV | 1 | A | T | Homozygous   |
| NC_037647.1 | 9896957 | SNV | 1 | T | C | Heterozygous |
| NC_037647.1 | 9897201 | SNV | 1 | T | C | Heterozygous |
| NC_037647.1 | 9897204 | SNV | 1 | T | C | Heterozygous |
| NC_037647.1 | 9897264 | SNV | 1 | G | C | Homozygous   |
| NC_037647.1 | 9897314 | SNV | 1 | T | C | Heterozygous |
| NC_037647.1 | 9897619 | SNV | 1 | T | C | Heterozygous |
| NC_037647.1 | 9897694 | SNV | 1 | A | G | Homozygous   |
| NC_037647.1 | 9897699 | SNV | 1 | A | G | Homozygous   |
| NC_037647.1 | 9897733 | SNV | 1 | A | G | Homozygous   |
| NC_037647.1 | 9897861 | SNV | 1 | A | G | Homozygous   |
| NC_037647.1 | 9897890 | SNV | 1 | A | G | Homozygous   |
| NC_037647.1 | 9897896 | SNV | 1 | A | G | Heterozygous |
| NC_037647.1 | 9897901 | SNV | 1 | G | T | Homozygous   |
| NC_037647.1 | 9898035 | SNV | 1 | T | C | Heterozygous |
| NC_037647.1 | 9898057 | SNV | 1 | T | C | Heterozygous |
| NC_037647.1 | 9898064 | SNV | 1 | T | C | Homozygous   |
| NC_037647.1 | 9898105 | SNV | 1 | A | G | Homozygous   |
| NC_037647.1 | 9898127 | SNV | 1 | C | T | Homozygous   |
| NC_037647.1 | 9898439 | SNV | 1 | A | G | Homozygous   |
| NC_037647.1 | 9898611 | SNV | 1 | C | T | Heterozygous |
| NC_037647.1 | 9898764 | SNV | 1 | T | C | Homozygous   |
| NC_037647.1 | 9898785 | SNV | 1 | A | G | Heterozygous |
| NC_037647.1 | 9899306 | SNV | 1 | T | C | Homozygous   |
| NC_037647.1 | 9899310 | SNV | 1 | T | C | Homozygous   |
| NC_037647.1 | 9899419 | SNV | 1 | A | C | Homozygous   |
| NC_037647.1 | 9899458 | SNV | 1 | G | A | Heterozygous |
| NC_037647.1 | 9899623 | SNV | 1 | A | G | Homozygous   |
| NC_037647.1 | 9899806 | SNV | 1 | C | T | Homozygous   |
| NC_037647.1 | 9899851 | SNV | 1 | T | G | Heterozygous |
| NC_037647.1 | 9899881 | SNV | 1 | C | T | Heterozygous |
| NC_037647.1 | 9900101 | SNV | 1 | A | G | Homozygous   |
| NC_037647.1 | 9900198 | SNV | 1 | A | C | Homozygous   |
| NC_037647.1 | 9900485 | SNV | 1 | T | C | Homozygous   |



|             |         |     |   |   |   |              |
|-------------|---------|-----|---|---|---|--------------|
| NC_037647.1 | 9900829 | SNV | 1 | G | C | Homozygous   |
| NC_037647.1 | 9900928 | SNV | 1 | T | C | Homozygous   |
| NC_037647.1 | 9901054 | SNV | 1 | A | T | Heterozygous |
| NC_037647.1 | 9901241 | SNV | 1 | C | T | Homozygous   |
| NC_037647.1 | 9901252 | SNV | 1 | G | A | Heterozygous |
| NC_037647.1 | 9901302 | SNV | 1 | C | G | Heterozygous |
| NC_037647.1 | 9901307 | SNV | 1 | T | C | Homozygous   |
| NC_037647.1 | 9901311 | SNV | 1 | T | C | Homozygous   |
| NC_037647.1 | 9901455 | SNV | 1 | T | C | Heterozygous |
| NC_037647.1 | 9901663 | SNV | 1 | C | T | Homozygous   |
| NC_037647.1 | 9902316 | SNV | 1 | C | T | Homozygous   |
| NC_037647.1 | 9902676 | SNV | 1 | G | A | Homozygous   |
| NC_037647.1 | 9902888 | SNV | 1 | T | C | Homozygous   |
| NC_037647.1 | 9902913 | SNV | 1 | C | T | Heterozygous |
| NC_037647.1 | 9902925 | SNV | 1 | T | C | Homozygous   |
| NC_037647.1 | 9902985 | SNV | 1 | C | T | Homozygous   |
| NC_037647.1 | 9903347 | SNV | 1 | G | A | Heterozygous |
| NC_037647.1 | 9903387 | SNV | 1 | A | G | Homozygous   |
| NC_037647.1 | 9903432 | SNV | 1 | T | C | Homozygous   |
| NC_037647.1 | 9903447 | SNV | 1 | T | C | Homozygous   |
| NC_037647.1 | 9903758 | SNV | 1 | C | T | Heterozygous |
| NC_037647.1 | 9903994 | SNV | 1 | T | C | Heterozygous |
| NC_037647.1 | 9906347 | SNV | 1 | C | T | Homozygous   |
| NC_037647.1 | 9906365 | SNV | 1 | C | T | Homozygous   |
| NC_037647.1 | 9906372 | SNV | 1 | A | G | Homozygous   |
| NC_037647.1 | 9906604 | SNV | 1 | A | G | Homozygous   |
| NC_037647.1 | 9906619 | SNV | 1 | A | G | Heterozygous |
| NC_037647.1 | 9907674 | SNV | 1 | T | C | Heterozygous |
| NC_037647.1 | 9907789 | SNV | 1 | A | G | Homozygous   |
| NC_037647.1 | 9908051 | SNV | 1 | C | T | Heterozygous |
| NC_037647.1 | 9908053 | SNV | 1 | C | T | Heterozygous |
| NC_037647.1 | 9908098 | SNV | 1 | C | T | Heterozygous |
| NC_037647.1 | 9908189 | SNV | 1 | A | G | Homozygous   |
| NC_037647.1 | 9908354 | SNV | 1 | C | T | Heterozygous |
| NC_037647.1 | 9909086 | SNV | 1 | G | T | Heterozygous |
| NC_037647.1 | 9909119 | SNV | 1 | A | G | Heterozygous |
| NC_037647.1 | 9909127 | SNV | 1 | A | G | Heterozygous |
| NC_037647.1 | 9909202 | SNV | 1 | A | G | Homozygous   |
| NC_037647.1 | 9909328 | SNV | 1 | C | A | Heterozygous |
| NC_037647.1 | 9909384 | SNV | 1 | T | C | Homozygous   |
| NC_037647.1 | 9909408 | SNV | 1 | G | A | Homozygous   |
| NC_037647.1 | 9909412 | SNV | 1 | A | G | Homozygous   |
| NC_037647.1 | 9909737 | SNV | 1 | A | G | Heterozygous |
| NC_037647.1 | 9912344 | SNV | 1 | A | G | Homozygous   |
| NC_037647.1 | 9912523 | SNV | 1 | A | G | Homozygous   |
| NC_037647.1 | 9912528 | SNV | 1 | T | C | Heterozygous |
| NC_037647.1 | 9912580 | SNV | 1 | A | G | Heterozygous |
| NC_037647.1 | 9912581 | SNV | 1 | A | T | Heterozygous |
| NC_037647.1 | 9913210 | SNV | 1 | A | G | Homozygous   |
| NC_037647.1 | 9913378 | SNV | 1 | G | A | Heterozygous |
| NC_037647.1 | 9913899 | SNV | 1 | T | C | Homozygous   |

|             |         |     |   |   |   |              |
|-------------|---------|-----|---|---|---|--------------|
| NC_037647.1 | 9913921 | SNV | 1 | T | C | Homozygous   |
| NC_037647.1 | 9914004 | SNV | 1 | A | G | Homozygous   |
| NC_037647.1 | 9914142 | SNV | 1 | T | C | Homozygous   |
| NC_037647.1 | 9914180 | SNV | 1 | C | T | Homozygous   |
| NC_037647.1 | 9914683 | SNV | 1 | A | T | Heterozygous |
| NC_037647.1 | 9915395 | SNV | 1 | A | G | Homozygous   |
| NC_037647.1 | 9915613 | SNV | 1 | T | C | Heterozygous |
| NC_037647.1 | 9915618 | SNV | 1 | G | A | Heterozygous |
| NC_037647.1 | 9915643 | SNV | 1 | T | C | Homozygous   |
| NC_037647.1 | 9915782 | SNV | 1 | G | A | Heterozygous |
| NC_037647.1 | 9915819 | SNV | 1 | A | G | Homozygous   |
| NC_037647.1 | 9915900 | SNV | 1 | A | G | Homozygous   |
| NC_037647.1 | 9916434 | SNV | 1 | G | C | Heterozygous |
| NC_037647.1 | 9917285 | SNV | 1 | T | C | Homozygous   |
| NC_037647.1 | 9917356 | SNV | 1 | A | T | Heterozygous |
| NC_037647.1 | 9918794 | SNV | 1 | T | C | Homozygous   |
| NC_037647.1 | 9919025 | SNV | 1 | G | C | Homozygous   |
| NC_037647.1 | 9919089 | SNV | 1 | C | T | Homozygous   |
| NC_037647.1 | 9923816 | SNV | 1 | A | G | Heterozygous |
| NC_037647.1 | 9923874 | SNV | 1 | T | G | Heterozygous |
| NC_037647.1 | 9923901 | SNV | 1 | C | G | Homozygous   |
| NC_037647.1 | 9923904 | SNV | 1 | G | T | Homozygous   |
| NC_037647.1 | 9924339 | SNV | 1 | A | G | Homozygous   |
| NC_037647.1 | 9925133 | SNV | 1 | C | T | Heterozygous |
| NC_037647.1 | 9931359 | SNV | 1 | C | T | Heterozygous |
| NC_037647.1 | 9932132 | SNV | 1 | C | T | Homozygous   |
| NC_037647.1 | 9932422 | SNV | 1 | A | G | Heterozygous |
| NC_037647.1 | 9932441 | SNV | 1 | G | A | Heterozygous |
| NC_037647.1 | 9932496 | SNV | 1 | G | A | Heterozygous |
| NC_037647.1 | 9932586 | SNV | 1 | G | A | Homozygous   |
| NC_037647.1 | 9932612 | SNV | 1 | C | G | Homozygous   |
| NC_037647.1 | 9932665 | SNV | 1 | C | T | Heterozygous |
| NC_037647.1 | 9932923 | SNV | 1 | G | A | Homozygous   |
| NC_037647.1 | 9935112 | SNV | 1 | C | T | Homozygous   |
| NC_037647.1 | 9935280 | SNV | 1 | G | A | Heterozygous |
| NC_037647.1 | 9935292 | SNV | 1 | C | T | Heterozygous |
| NC_037647.1 | 9935366 | SNV | 1 | T | C | Homozygous   |
| NC_037647.1 | 9935830 | SNV | 1 | C | T | Heterozygous |
| NC_037647.1 | 9935972 | SNV | 1 | T | C | Homozygous   |
| NC_037647.1 | 9936243 | SNV | 1 | G | A | Homozygous   |
| NC_037647.1 | 9938708 | SNV | 1 | T | C | Heterozygous |
| NC_037647.1 | 9940079 | SNV | 1 | T | C | Homozygous   |
| NC_037647.1 | 9940969 | SNV | 1 | T | A | Heterozygous |
| NC_037647.1 | 9941011 | SNV | 1 | G | A | Heterozygous |
| NC_037647.1 | 9941039 | SNV | 1 | T | C | Heterozygous |
| NC_037647.1 | 9942399 | SNV | 1 | A | G | Homozygous   |
| NC_037647.1 | 9947977 | SNV | 1 | G | T | Homozygous   |
| NC_037647.1 | 9949091 | SNV | 1 | C | T | Homozygous   |
| NC_037647.1 | 9949281 | SNV | 1 | T | C | Homozygous   |
| NC_037647.1 | 9949548 | SNV | 1 | T | C | Heterozygous |
| NC_037647.1 | 9949607 | SNV | 1 | T | G | Homozygous   |

|             |         |     |   |   |   |              |
|-------------|---------|-----|---|---|---|--------------|
| NC_037647.1 | 9949614 | SNV | 1 | C | A | Homozygous   |
| NC_037647.1 | 9952096 | SNV | 1 | T | C | Homozygous   |
| NC_037647.1 | 9952148 | SNV | 1 | A | G | Homozygous   |
| NC_037647.1 | 9952797 | SNV | 1 | G | A | Homozygous   |
| NC_037647.1 | 9952908 | SNV | 1 | A | T | Heterozygous |
| NC_037647.1 | 9952929 | SNV | 1 | A | G | Homozygous   |
| NC_037647.1 | 9953114 | SNV | 1 | A | G | Homozygous   |
| NC_037647.1 | 9953118 | SNV | 1 | C | A | Homozygous   |
| NC_037647.1 | 9953451 | SNV | 1 | C | T | Heterozygous |
| NC_037647.1 | 9953546 | SNV | 1 | C | T | Heterozygous |
| NC_037647.1 | 9965470 | SNV | 1 | G | T | Homozygous   |
| NC_037647.1 | 9965472 | SNV | 1 | T | A | Homozygous   |
| NC_037647.1 | 9965503 | SNV | 1 | A | G | Homozygous   |
| NC_037647.1 | 9965509 | SNV | 1 | A | T | Homozygous   |
| NC_037647.1 | 9969128 | SNV | 1 | T | A | Homozygous   |
| NC_037647.1 | 9969133 | SNV | 1 | G | A | Homozygous   |
| NC_037647.1 | 9969162 | SNV | 1 | T | G | Homozygous   |
| NC_037647.1 | 9969165 | SNV | 1 | A | G | Homozygous   |
| NC_037647.1 | 9970424 | SNV | 1 | A | G | Heterozygous |
| NC_037647.1 | 9973347 | SNV | 1 | C | T | Heterozygous |
| NC_037647.1 | 9973396 | SNV | 1 | G | A | Heterozygous |
| NC_037647.1 | 9974563 | SNV | 1 | T | C | Homozygous   |
| NC_037647.1 | 9975058 | SNV | 1 | T | G | Homozygous   |
| NC_037647.1 | 9975062 | SNV | 1 | T | C | Homozygous   |
| NC_037647.1 | 9975069 | SNV | 1 | C | T | Heterozygous |
| NC_037647.1 | 9975147 | SNV | 1 | C | T | Heterozygous |
| NC_037647.1 | 9975168 | SNV | 1 | A | G | Homozygous   |
| NC_037647.1 | 9975282 | SNV | 1 | T | C | Homozygous   |
| NC_037647.1 | 9976449 | SNV | 1 | G | T | Homozygous   |
| NC_037647.1 | 9976539 | SNV | 1 | T | C | Heterozygous |
| NC_037647.1 | 9976672 | SNV | 1 | G | A | Heterozygous |
| NC_037647.1 | 9976687 | SNV | 1 | T | C | Homozygous   |
| NC_037647.1 | 9976765 | SNV | 1 | A | G | Homozygous   |
| NC_037647.1 | 9976896 | SNV | 1 | C | T | Heterozygous |
| NC_037647.1 | 9977688 | SNV | 1 | A | T | Homozygous   |
| NC_037647.1 | 9977696 | SNV | 1 | C | T | Heterozygous |
| NC_037647.1 | 9977717 | SNV | 1 | T | C | Heterozygous |
| NC_037647.1 | 9977777 | SNV | 1 | G | A | Heterozygous |
| NC_037647.1 | 9978056 | SNV | 1 | T | C | Heterozygous |
| NC_037647.1 | 9978629 | SNV | 1 | A | G | Heterozygous |
| NC_037647.1 | 9978638 | SNV | 1 | G | A | Heterozygous |
| NC_037647.1 | 9978963 | SNV | 1 | C | T | Heterozygous |
| NC_037647.1 | 9979249 | SNV | 1 | G | A | Homozygous   |
| NC_037647.1 | 9979455 | SNV | 1 | T | C | Homozygous   |
| NC_037647.1 | 9979653 | SNV | 1 | G | A | Heterozygous |
| NC_037647.1 | 9979683 | SNV | 1 | C | T | Homozygous   |
| NC_037647.1 | 9979722 | SNV | 1 | T | C | Homozygous   |
| NC_037647.1 | 9979926 | SNV | 1 | A | G | Homozygous   |
| NC_037647.1 | 9980227 | SNV | 1 | T | C | Homozygous   |
| NC_037647.1 | 9980664 | SNV | 1 | A | G | Homozygous   |
| NC_037647.1 | 9980675 | SNV | 1 | C | T | Homozygous   |

|             |          |     |   |   |   |              |
|-------------|----------|-----|---|---|---|--------------|
| NC_037647.1 | 9980865  | SNV | 1 | T | C | Heterozygous |
| NC_037647.1 | 9991779  | SNV | 1 | T | C | Heterozygous |
| NC_037647.1 | 9991815  | SNV | 1 | T | C | Homozygous   |
| NC_037647.1 | 9991839  | SNV | 1 | C | T | Heterozygous |
| NC_037647.1 | 9991887  | SNV | 1 | A | G | Homozygous   |
| NC_037647.1 | 9991896  | SNV | 1 | T | C | Homozygous   |
| NC_037647.1 | 9991959  | SNV | 1 | T | C | Heterozygous |
| NC_037647.1 | 9991982  | SNV | 1 | T | C | Homozygous   |
| NC_037647.1 | 9992069  | SNV | 1 | A | T | Homozygous   |
| NC_037647.1 | 9996234  | SNV | 1 | A | G | Homozygous   |
| NC_037647.1 | 9996239  | SNV | 1 | G | A | Heterozygous |
| NC_037647.1 | 9996292  | SNV | 1 | A | G | Homozygous   |
| NC_037647.1 | 9996304  | SNV | 1 | C | T | Homozygous   |
| NC_037647.1 | 9996361  | SNV | 1 | A | G | Homozygous   |
| NC_037647.1 | 9996529  | SNV | 1 | A | G | Homozygous   |
| NC_037647.1 | 9996589  | SNV | 1 | A | C | Homozygous   |
| NC_037647.1 | 9996591  | SNV | 1 | G | A | Homozygous   |
| NC_037647.1 | 9996607  | SNV | 1 | T | C | Heterozygous |
| NC_037647.1 | 9996720  | SNV | 1 | C | G | Heterozygous |
| NC_037647.1 | 9996834  | SNV | 1 | T | C | Homozygous   |
| NC_037647.1 | 9996865  | SNV | 1 | T | C | Homozygous   |
| NC_037647.1 | 9996913  | SNV | 1 | T | C | Homozygous   |
| NC_037647.1 | 9997006  | SNV | 1 | A | G | Heterozygous |
| NC_037647.1 | 9997069  | SNV | 1 | C | T | Homozygous   |
| NC_037647.1 | 9997252  | SNV | 1 | T | C | Homozygous   |
| NC_037647.1 | 9997423  | SNV | 1 | C | A | Heterozygous |
| NC_037647.1 | 9997425  | SNV | 1 | C | T | Homozygous   |
| NC_037647.1 | 9997444  | SNV | 1 | T | C | Homozygous   |
| NC_037647.1 | 9997504  | SNV | 1 | A | C | Homozygous   |
| NC_037647.1 | 9997542  | SNV | 1 | T | C | Homozygous   |
| NC_037647.1 | 9997551  | SNV | 1 | C | T | Homozygous   |
| NC_037647.1 | 9997981  | SNV | 1 | T | C | Heterozygous |
| NC_037647.1 | 9997991  | SNV | 1 | A | G | Heterozygous |
| NC_037647.1 | 9998959  | SNV | 1 | G | A | Homozygous   |
| NC_037647.1 | 9999021  | SNV | 1 | C | A | Homozygous   |
| NC_037647.1 | 10001266 | SNV | 1 | T | A | Homozygous   |
| NC_037647.1 | 10001279 | SNV | 1 | A | T | Homozygous   |
| NC_037647.1 | 10001786 | SNV | 1 | C | T | Homozygous   |
| NC_037647.1 | 10002159 | SNV | 1 | G | T | Homozygous   |
| NC_037647.1 | 10002167 | SNV | 1 | T | A | Homozygous   |
| NC_037647.1 | 10004612 | SNV | 1 | T | C | Homozygous   |
| NC_037647.1 | 10006292 | SNV | 1 | A | C | Homozygous   |
| NC_037647.1 | 10007711 | SNV | 1 | C | T | Homozygous   |
| NC_037647.1 | 10009100 | SNV | 1 | A | T | Homozygous   |
| NC_037647.1 | 10009104 | SNV | 1 | T | A | Homozygous   |
| NC_037647.1 | 10009715 | SNV | 1 | T | C | Homozygous   |
| NC_037647.1 | 10009717 | SNV | 1 | T | C | Homozygous   |
| NC_037647.1 | 10010812 | SNV | 1 | C | A | Homozygous   |
| NC_037647.1 | 10017696 | SNV | 1 | A | T | Homozygous   |
| NC_037647.1 | 10018458 | SNV | 1 | G | A | Homozygous   |
| NC_037647.1 | 10018488 | SNV | 1 | C | G | Homozygous   |

|             |          |     |   |   |   |              |
|-------------|----------|-----|---|---|---|--------------|
| NC_037647.1 | 10019810 | SNV | 1 | A | G | Homozygous   |
| NC_037647.1 | 10019908 | SNV | 1 | G | A | Homozygous   |
| NC_037647.1 | 10020004 | SNV | 1 | C | T | Homozygous   |
| NC_037647.1 | 10021239 | SNV | 1 | C | T | Homozygous   |
| NC_037647.1 | 10021279 | SNV | 1 | G | A | Homozygous   |
| NC_037647.1 | 10021305 | SNV | 1 | G | T | Heterozygous |
| NC_037647.1 | 10021309 | SNV | 1 | G | A | Heterozygous |
| NC_037647.1 | 10021312 | SNV | 1 | T | C | Heterozygous |
| NC_037647.1 | 10021314 | SNV | 1 | T | G | Heterozygous |
| NC_037647.1 | 10021316 | SNV | 1 | G | T | Heterozygous |
| NC_037647.1 | 10021318 | SNV | 1 | G | A | Heterozygous |
| NC_037647.1 | 10021318 | SNV | 1 | G | T | Heterozygous |
| NC_037647.1 | 10021321 | SNV | 1 | A | C | Heterozygous |
| NC_037647.1 | 10021321 | SNV | 1 | A | G | Heterozygous |
| NC_037647.1 | 10021327 | SNV | 1 | A | C | Heterozygous |
| NC_037647.1 | 10021333 | SNV | 1 | T | C | Heterozygous |
| NC_037647.1 | 10021342 | SNV | 1 | A | G | Homozygous   |
| NC_037647.1 | 10021345 | SNV | 1 | A | G | Heterozygous |
| NC_037647.1 | 10021348 | SNV | 1 | G | A | Homozygous   |
| NC_037647.1 | 10021369 | SNV | 1 | G | C | Homozygous   |
| NC_037647.1 | 10021381 | SNV | 1 | A | G | Heterozygous |
| NC_037647.1 | 10021384 | SNV | 1 | G | A | Homozygous   |
| NC_037647.1 | 10021860 | SNV | 1 | T | G | Homozygous   |
| NC_037647.1 | 10021864 | SNV | 1 | C | T | Homozygous   |
| NC_037647.1 | 10021867 | SNV | 1 | G | A | Homozygous   |
| NC_037647.1 | 10021870 | SNV | 1 | A | G | Homozygous   |
| NC_037647.1 | 10021873 | SNV | 1 | A | G | Homozygous   |
| NC_037647.1 | 10021876 | SNV | 1 | A | G | Homozygous   |
| NC_037647.1 | 10021894 | SNV | 1 | A | G | Heterozygous |
| NC_037647.1 | 10021900 | SNV | 1 | G | C | Homozygous   |
| NC_037647.1 | 10021915 | SNV | 1 | T | A | Homozygous   |
| NC_037647.1 | 10023384 | SNV | 1 | T | G | Heterozygous |
| NC_037647.1 | 10023390 | SNV | 1 | A | G | Heterozygous |
| NC_037647.1 | 10023398 | SNV | 1 | A | G | Heterozygous |
| NC_037647.1 | 10023405 | SNV | 1 | G | T | Heterozygous |
| NC_037647.1 | 10023408 | SNV | 1 | T | C | Heterozygous |
| NC_037647.1 | 10023426 | SNV | 1 | T | G | Heterozygous |
| NC_037647.1 | 10023429 | SNV | 1 | T | C | Heterozygous |
| NC_037647.1 | 10025556 | SNV | 1 | T | C | Homozygous   |
| NC_037647.1 | 10026540 | SNV | 1 | T | A | Homozygous   |
| NC_037647.1 | 10028427 | SNV | 1 | T | C | Homozygous   |
| NC_037647.1 | 10029858 | SNV | 1 | G | A | Homozygous   |
| NC_037647.1 | 10029978 | SNV | 1 | G | A | Heterozygous |
| NC_037647.1 | 10037424 | SNV | 1 | A | G | Homozygous   |
| NC_037647.1 | 10042809 | SNV | 1 | C | A | Heterozygous |
| NC_037647.1 | 10042809 | SNV | 1 | C | T | Heterozygous |
| NC_037647.1 | 10042902 | SNV | 1 | T | C | Homozygous   |
| NC_037647.1 | 10043209 | SNV | 1 | T | C | Homozygous   |
| NC_037647.1 | 10043353 | SNV | 1 | A | G | Heterozygous |
| NC_037647.1 | 10043374 | SNV | 1 | A | C | Heterozygous |
| NC_037647.1 | 10043917 | SNV | 1 | T | C | Homozygous   |

|             |          |     |   |   |   |              |
|-------------|----------|-----|---|---|---|--------------|
| NC_037647.1 | 10044007 | SNV | 1 | C | T | Heterozygous |
| NC_037647.1 | 10044559 | SNV | 1 | A | G | Homozygous   |
| NC_037647.1 | 10044698 | SNV | 1 | A | T | Homozygous   |
| NC_037647.1 | 10044700 | SNV | 1 | T | C | Homozygous   |
| NC_037647.1 | 10044702 | SNV | 1 | C | T | Homozygous   |
| NC_037647.1 | 10045200 | SNV | 1 | C | T | Heterozygous |
| NC_037647.1 | 10045567 | SNV | 1 | G | A | Heterozygous |
| NC_037647.1 | 10045965 | SNV | 1 | A | G | Homozygous   |
| NC_037647.1 | 10055119 | SNV | 1 | G | A | Heterozygous |
| NC_037647.1 | 10055252 | SNV | 1 | G | A | Heterozygous |
| NC_037647.1 | 10056575 | SNV | 1 | A | G | Heterozygous |
| NC_037647.1 | 10057069 | SNV | 1 | T | C | Heterozygous |
| NC_037647.1 | 10058417 | SNV | 1 | T | C | Homozygous   |
| NC_037647.1 | 10058891 | SNV | 1 | T | C | Homozygous   |
| NC_037647.1 | 10060130 | SNV | 1 | A | G | Heterozygous |
| NC_037647.1 | 10062190 | SNV | 1 | T | C | Heterozygous |
| NC_037647.1 | 10062246 | SNV | 1 | G | C | Homozygous   |
| NC_037647.1 | 10062353 | SNV | 1 | G | C | Homozygous   |
| NC_037647.1 | 10062619 | SNV | 1 | A | G | Homozygous   |
| NC_037647.1 | 10062775 | SNV | 1 | A | G | Homozygous   |
| NC_037647.1 | 10062922 | SNV | 1 | G | A | Heterozygous |
| NC_037647.1 | 10063218 | SNV | 1 | G | A | Heterozygous |
| NC_037647.1 | 10063360 | SNV | 1 | C | T | Homozygous   |
| NC_037647.1 | 10063671 | SNV | 1 | G | A | Homozygous   |
| NC_037647.1 | 10064009 | SNV | 1 | C | T | Heterozygous |
| NC_037647.1 | 10068639 | SNV | 1 | A | G | Homozygous   |
| NC_037647.1 | 10081471 | SNV | 1 | A | T | Heterozygous |
| NC_037647.1 | 10081477 | SNV | 1 | C | A | Heterozygous |
| NC_037647.1 | 10081483 | SNV | 1 | C | A | Heterozygous |
| NC_037647.1 | 10081865 | SNV | 1 | G | A | Heterozygous |
| NC_037647.1 | 10081877 | SNV | 1 | G | A | Homozygous   |
| NC_037647.1 | 10082437 | SNV | 1 | T | C | Homozygous   |
| NC_037647.1 | 10082683 | SNV | 1 | A | T | Heterozygous |
| NC_037647.1 | 10082855 | SNV | 1 | A | G | Homozygous   |
| NC_037647.1 | 10082858 | SNV | 1 | C | A | Heterozygous |
| NC_037647.1 | 10083049 | SNV | 1 | G | T | Heterozygous |
| NC_037647.1 | 10083052 | SNV | 1 | C | T | Homozygous   |
| NC_037647.1 | 10084971 | SNV | 1 | A | G | Homozygous   |
| NC_037647.1 | 10087517 | SNV | 1 | A | G | Homozygous   |
| NC_037647.1 | 10091255 | SNV | 1 | C | T | Heterozygous |
| NC_037647.1 | 10091510 | SNV | 1 | G | A | Heterozygous |
| NC_037647.1 | 10091560 | SNV | 1 | C | T | Heterozygous |
| NC_037647.1 | 10091738 | SNV | 1 | T | C | Heterozygous |
| NC_037647.1 | 10091848 | SNV | 1 | G | A | Heterozygous |
| NC_037647.1 | 10091875 | SNV | 1 | C | T | Heterozygous |
| NC_037647.1 | 10092100 | SNV | 1 | G | A | Heterozygous |
| NC_037647.1 | 10092275 | SNV | 1 | A | G | Heterozygous |
| NC_037647.1 | 10092296 | SNV | 1 | C | T | Heterozygous |
| NC_037647.1 | 10092318 | SNV | 1 | A | G | Homozygous   |
| NC_037647.1 | 10092502 | SNV | 1 | A | G | Homozygous   |
| NC_037647.1 | 10092514 | SNV | 1 | T | C | Homozygous   |

|             |          |     |   |   |   |              |
|-------------|----------|-----|---|---|---|--------------|
| NC_037647.1 | 10092757 | SNV | 1 | A | G | Homozygous   |
| NC_037647.1 | 10092796 | SNV | 1 | T | C | Homozygous   |
| NC_037647.1 | 10092799 | SNV | 1 | C | T | Homozygous   |
| NC_037647.1 | 10093044 | SNV | 1 | C | G | Heterozygous |
| NC_037647.1 | 10094204 | SNV | 1 | G | A | Homozygous   |
| NC_037647.1 | 10094396 | SNV | 1 | A | G | Heterozygous |
| NC_037647.1 | 10094398 | SNV | 1 | A | G | Heterozygous |
| NC_037647.1 | 10094408 | SNV | 1 | G | A | Homozygous   |
| NC_037647.1 | 10094532 | SNV | 1 | T | C | Homozygous   |
| NC_037647.1 | 10094571 | SNV | 1 | C | T | Homozygous   |
| NC_037647.1 | 10094708 | SNV | 1 | G | A | Heterozygous |
| NC_037647.1 | 10094725 | SNV | 1 | G | A | Heterozygous |
| NC_037647.1 | 10094739 | SNV | 1 | A | G | Heterozygous |
| NC_037647.1 | 10095755 | SNV | 1 | T | C | Homozygous   |
| NC_037647.1 | 10095889 | SNV | 1 | G | A | Homozygous   |
| NC_037647.1 | 10095976 | SNV | 1 | G | A | Homozygous   |
| NC_037647.1 | 10096032 | SNV | 1 | G | C | Heterozygous |
| NC_037647.1 | 10096125 | SNV | 1 | T | C | Homozygous   |
| NC_037647.1 | 10096232 | SNV | 1 | G | A | Homozygous   |
| NC_037647.1 | 10096494 | SNV | 1 | A | G | Homozygous   |
| NC_037647.1 | 10096555 | SNV | 1 | T | G | Homozygous   |
| NC_037647.1 | 10096938 | SNV | 1 | C | T | Heterozygous |
| NC_037647.1 | 10097043 | SNV | 1 | T | C | Homozygous   |
| NC_037647.1 | 10097667 | SNV | 1 | C | T | Heterozygous |
| NC_037647.1 | 10100697 | SNV | 1 | C | T | Heterozygous |
| NC_037647.1 | 10100746 | SNV | 1 | A | G | Homozygous   |
| NC_037647.1 | 10101386 | SNV | 1 | A | G | Homozygous   |
| NC_037647.1 | 10101485 | SNV | 1 | C | T | Homozygous   |
| NC_037647.1 | 10103627 | SNV | 1 | C | A | Homozygous   |
| NC_037647.1 | 10104028 | SNV | 1 | A | T | Homozygous   |
| NC_037647.1 | 10104388 | SNV | 1 | A | G | Homozygous   |
| NC_037647.1 | 10104547 | SNV | 1 | C | T | Homozygous   |
| NC_037647.1 | 10104769 | SNV | 1 | A | G | Heterozygous |
| NC_037647.1 | 10111388 | SNV | 1 | G | A | Heterozygous |
| NC_037647.1 | 10111645 | SNV | 1 | T | C | Homozygous   |
| NC_037647.1 | 10111774 | SNV | 1 | A | G | Homozygous   |
| NC_037647.1 | 10112001 | SNV | 1 | C | T | Heterozygous |
| NC_037647.1 | 10112270 | SNV | 1 | G | A | Homozygous   |
| NC_037647.1 | 10112355 | SNV | 1 | A | G | Homozygous   |
| NC_037647.1 | 10112587 | SNV | 1 | A | G | Homozygous   |
| NC_037647.1 | 10112790 | SNV | 1 | T | A | Heterozygous |
| NC_037647.1 | 10120023 | SNV | 1 | C | T | Homozygous   |
| NC_037647.1 | 10121037 | SNV | 1 | G | A | Homozygous   |
| NC_037647.1 | 10124880 | SNV | 1 | A | T | Homozygous   |
| NC_037647.1 | 10124937 | SNV | 1 | A | G | Homozygous   |
| NC_037647.1 | 10125225 | SNV | 1 | A | G | Homozygous   |
| NC_037647.1 | 10125312 | SNV | 1 | A | G | Heterozygous |
| NC_037647.1 | 10125354 | SNV | 1 | A | G | Homozygous   |
| NC_037647.1 | 10125564 | SNV | 1 | T | C | Homozygous   |
| NC_037647.1 | 10125602 | SNV | 1 | T | C | Heterozygous |
| NC_037647.1 | 10125629 | SNV | 1 | C | T | Heterozygous |

|             |          |     |   |   |   |              |
|-------------|----------|-----|---|---|---|--------------|
| NC_037647.1 | 10125889 | SNV | 1 | T | C | Homozygous   |
| NC_037647.1 | 10126150 | SNV | 1 | T | C | Heterozygous |
| NC_037647.1 | 10126561 | SNV | 1 | T | C | Homozygous   |
| NC_037647.1 | 10126575 | SNV | 1 | G | A | Heterozygous |
| NC_037647.1 | 10126577 | SNV | 1 | G | A | Heterozygous |
| NC_037647.1 | 10126591 | SNV | 1 | T | A | Homozygous   |
| NC_037647.1 | 10126867 | SNV | 1 | A | T | Homozygous   |
| NC_037647.1 | 10126877 | SNV | 1 | A | G | Heterozygous |
| NC_037647.1 | 10127956 | SNV | 1 | T | G | Heterozygous |
| NC_037647.1 | 10127963 | SNV | 1 | C | T | Homozygous   |
| NC_037647.1 | 10127967 | SNV | 1 | T | A | Heterozygous |
| NC_037647.1 | 10128176 | SNV | 1 | A | G | Heterozygous |
| NC_037647.1 | 10130273 | SNV | 1 | G | A | Homozygous   |
| NC_037647.1 | 10130278 | SNV | 1 | G | A | Homozygous   |
| NC_037647.1 | 10178024 | SNV | 1 | C | T | Heterozygous |
| NC_037647.1 | 10178423 | SNV | 1 | C | G | Homozygous   |
| NC_037647.1 | 10178552 | SNV | 1 | G | A | Homozygous   |
| NC_037647.1 | 10178817 | SNV | 1 | T | C | Heterozygous |
| NC_037647.1 | 10178823 | SNV | 1 | T | C | Homozygous   |
| NC_037647.1 | 10178841 | SNV | 1 | C | T | Homozygous   |
| NC_037647.1 | 10179410 | SNV | 1 | G | C | Homozygous   |
| NC_037647.1 | 10179413 | SNV | 1 | C | G | Homozygous   |
| NC_037647.1 | 10180204 | SNV | 1 | C | T | Homozygous   |
| NC_037647.1 | 10180600 | SNV | 1 | A | G | Homozygous   |
| NC_037647.1 | 10180602 | SNV | 1 | T | A | Homozygous   |
| NC_037647.1 | 10180605 | SNV | 1 | T | A | Homozygous   |
| NC_037647.1 | 10180653 | SNV | 1 | A | C | Heterozygous |
| NC_037647.1 | 10185084 | SNV | 1 | A | G | Heterozygous |
| NC_037647.1 | 10185112 | SNV | 1 | A | G | Heterozygous |
| NC_037647.1 | 10185120 | SNV | 1 | A | G | Heterozygous |
| NC_037647.1 | 10185127 | SNV | 1 | C | G | Homozygous   |
| NC_037647.1 | 10190294 | SNV | 1 | G | A | Heterozygous |
| NC_037647.1 | 10190296 | SNV | 1 | A | G | Heterozygous |
| NC_037647.1 | 10190308 | SNV | 1 | A | G | Heterozygous |
| NC_037647.1 | 10193877 | SNV | 1 | A | G | Homozygous   |
| NC_037647.1 | 10193880 | SNV | 1 | G | A | Heterozygous |
| NC_037647.1 | 10193886 | SNV | 1 | T | G | Homozygous   |
| NC_037647.1 | 10193901 | SNV | 1 | A | G | Heterozygous |
| NC_037647.1 | 10193906 | SNV | 1 | T | C | Heterozygous |
| NC_037647.1 | 10193918 | SNV | 1 | G | A | Heterozygous |
| NC_037647.1 | 10193972 | SNV | 1 | T | G | Heterozygous |
| NC_037647.1 | 10194192 | SNV | 1 | C | G | Homozygous   |
| NC_037647.1 | 10194195 | SNV | 1 | A | T | Homozygous   |
| NC_037647.1 | 10194201 | SNV | 1 | G | T | Homozygous   |
| NC_037647.1 | 10194206 | SNV | 1 | A | G | Heterozygous |
| NC_037647.1 | 10194213 | SNV | 1 | C | T | Homozygous   |
| NC_037647.1 | 10194219 | SNV | 1 | C | G | Homozygous   |
| NC_037647.1 | 10194222 | SNV | 1 | A | G | Homozygous   |
| NC_037647.1 | 10194225 | SNV | 1 | C | A | Homozygous   |
| NC_037647.1 | 10194231 | SNV | 1 | G | C | Homozygous   |
| NC_037647.1 | 10194234 | SNV | 1 | G | C | Heterozygous |



|             |          |     |   |   |   |              |
|-------------|----------|-----|---|---|---|--------------|
| NC_037647.1 | 10194237 | SNV | 1 | A | G | Heterozygous |
| NC_037647.1 | 10194241 | SNV | 1 | T | A | Heterozygous |
| NC_037647.1 | 10194243 | SNV | 1 | G | T | Heterozygous |
| NC_037647.1 | 10194244 | SNV | 1 | T | A | Heterozygous |
| NC_037647.1 | 10194246 | SNV | 1 | C | T | Heterozygous |
| NC_037647.1 | 10194264 | SNV | 1 | G | T | Homozygous   |
| NC_037647.1 | 10194267 | SNV | 1 | A | C | Homozygous   |
| NC_037647.1 | 10194271 | SNV | 1 | T | C | Heterozygous |
| NC_037647.1 | 10194288 | SNV | 1 | C | G | Homozygous   |
| NC_037647.1 | 10194294 | SNV | 1 | C | G | Homozygous   |
| NC_037647.1 | 10194300 | SNV | 1 | T | A | Homozygous   |
| NC_037647.1 | 10194302 | SNV | 1 | G | C | Homozygous   |
| NC_037647.1 | 10194309 | SNV | 1 | A | G | Homozygous   |
| NC_037647.1 | 10194312 | SNV | 1 | A | G | Homozygous   |
| NC_037647.1 | 10194318 | SNV | 1 | G | A | Homozygous   |
| NC_037647.1 | 10194844 | SNV | 1 | C | T | Heterozygous |
| NC_037647.1 | 10194899 | SNV | 1 | T | G | Heterozygous |
| NC_037647.1 | 10195302 | SNV | 1 | A | G | Homozygous   |
| NC_037647.1 | 10195503 | SNV | 1 | C | T | Heterozygous |
| NC_037647.1 | 10207715 | SNV | 1 | C | G | Homozygous   |
| NC_037647.1 | 10207730 | SNV | 1 | T | C | Homozygous   |
| NC_037647.1 | 10207741 | SNV | 1 | T | A | Homozygous   |
| NC_037647.1 | 10207745 | SNV | 1 | T | A | Homozygous   |
| NC_037647.1 | 10207749 | SNV | 1 | T | A | Homozygous   |
| NC_037647.1 | 10207753 | SNV | 1 | T | G | Homozygous   |
| NC_037647.1 | 10207757 | SNV | 1 | T | C | Homozygous   |
| NC_037647.1 | 10207782 | SNV | 1 | C | T | Homozygous   |
| NC_037647.1 | 10212067 | SNV | 1 | A | C | Homozygous   |
| NC_037647.1 | 10212145 | SNV | 1 | A | T | Homozygous   |
| NC_037647.1 | 10214183 | SNV | 1 | A | G | Heterozygous |
| NC_037647.1 | 10215607 | SNV | 1 | C | T | Heterozygous |
| NC_037647.1 | 10215667 | SNV | 1 | G | C | Homozygous   |
| NC_037647.1 | 10216182 | SNV | 1 | A | G | Homozygous   |
| NC_037647.1 | 10219391 | SNV | 1 | C | T | Heterozygous |
| NC_037647.1 | 10227945 | SNV | 1 | A | T | Heterozygous |
| NC_037647.1 | 10227950 | SNV | 1 | C | A | Heterozygous |
| NC_037647.1 | 10227983 | SNV | 1 | A | T | Heterozygous |
| NC_037647.1 | 10234482 | SNV | 1 | T | A | Homozygous   |
| NC_037647.1 | 10234484 | SNV | 1 | T | A | Homozygous   |
| NC_037647.1 | 10234487 | SNV | 1 | A | G | Homozygous   |
| NC_037647.1 | 10234490 | SNV | 1 | T | A | Homozygous   |
| NC_037647.1 | 10237686 | SNV | 1 | G | C | Homozygous   |
| NC_037647.1 | 10237689 | SNV | 1 | A | C | Homozygous   |
| NC_037647.1 | 10238193 | SNV | 1 | T | C | Heterozygous |
| NC_037647.1 | 10238195 | SNV | 1 | T | C | Heterozygous |
| NC_037647.1 | 10238696 | SNV | 1 | T | A | Homozygous   |
| NC_037647.1 | 10239395 | SNV | 1 | A | G | Homozygous   |
| NC_037647.1 | 10239553 | SNV | 1 | G | A | Homozygous   |
| NC_037647.1 | 10241075 | SNV | 1 | C | A | Homozygous   |
| NC_037647.1 | 10242009 | SNV | 1 | C | T | Homozygous   |
| NC_037647.1 | 10246098 | SNV | 1 | A | G | Heterozygous |

|             |          |     |   |   |   |              |
|-------------|----------|-----|---|---|---|--------------|
| NC_037647.1 | 10246102 | SNV | 1 | A | G | Heterozygous |
| NC_037647.1 | 10246109 | SNV | 1 | A | G | Heterozygous |
| NC_037647.1 | 10246118 | SNV | 1 | A | G | Heterozygous |
| NC_037647.1 | 10246451 | SNV | 1 | A | G | Heterozygous |
| NC_037647.1 | 10246466 | SNV | 1 | A | G | Heterozygous |
| NC_037647.1 | 10246480 | SNV | 1 | A | G | Heterozygous |
| NC_037647.1 | 10246485 | SNV | 1 | A | G | Heterozygous |
| NC_037647.1 | 10246487 | SNV | 1 | A | G | Heterozygous |
| NC_037647.1 | 10246491 | SNV | 1 | A | G | Heterozygous |
| NC_037647.1 | 10247509 | SNV | 1 | T | C | Homozygous   |
| NC_037647.1 | 10249799 | SNV | 1 | T | C | Homozygous   |
| NC_037647.1 | 10249802 | SNV | 1 | A | T | Homozygous   |
| NC_037647.1 | 10249815 | SNV | 1 | C | A | Homozygous   |
| NC_037647.1 | 10249817 | SNV | 1 | C | T | Homozygous   |
| NC_037647.1 | 10249822 | SNV | 1 | T | A | Homozygous   |
| NC_037647.1 | 10255941 | SNV | 1 | A | T | Homozygous   |
| NC_037647.1 | 10255946 | SNV | 1 | T | A | Homozygous   |
| NC_037647.1 | 10255951 | SNV | 1 | T | G | Homozygous   |
| NC_037647.1 | 10257443 | SNV | 1 | C | T | Heterozygous |
| NC_037647.1 | 10257742 | SNV | 1 | C | T | Heterozygous |
| NC_037647.1 | 10258605 | SNV | 1 | C | G | Homozygous   |
| NC_037647.1 | 10258609 | SNV | 1 | A | T | Homozygous   |
| NC_037647.1 | 10268272 | SNV | 1 | G | A | Homozygous   |
| NC_037647.1 | 10268275 | SNV | 1 | T | C | Homozygous   |
| NC_037647.1 | 10268279 | SNV | 1 | T | A | Homozygous   |
| NC_037647.1 | 10268443 | SNV | 1 | C | G | Heterozygous |
| NC_037647.1 | 10268556 | SNV | 1 | C | T | Homozygous   |
| NC_037647.1 | 10268564 | SNV | 1 | C | T | Heterozygous |
| NC_037647.1 | 10269033 | SNV | 1 | T | A | Homozygous   |
| NC_037647.1 | 10269035 | SNV | 1 | T | A | Homozygous   |
| NC_037647.1 | 10269037 | SNV | 1 | T | G | Homozygous   |
| NC_037647.1 | 10269040 | SNV | 1 | T | A | Homozygous   |
| NC_037647.1 | 10269042 | SNV | 1 | T | A | Homozygous   |
| NC_037647.1 | 10269046 | SNV | 1 | T | A | Homozygous   |
| NC_037647.1 | 10269049 | SNV | 1 | A | G | Homozygous   |
| NC_037647.1 | 10269223 | SNV | 1 | G | A | Homozygous   |
| NC_037647.1 | 10270505 | SNV | 1 | G | A | Heterozygous |
| NC_037647.1 | 10270613 | SNV | 1 | T | C | Heterozygous |
| NC_037647.1 | 10270620 | SNV | 1 | T | C | Homozygous   |
| NC_037647.1 | 10271583 | SNV | 1 | T | C | Heterozygous |
| NC_037647.1 | 10271588 | SNV | 1 | T | C | Heterozygous |
| NC_037647.1 | 10271610 | SNV | 1 | T | C | Heterozygous |
| NC_037647.1 | 10271619 | SNV | 1 | T | C | Homozygous   |
| NC_037647.1 | 10271625 | SNV | 1 | T | C | Homozygous   |
| NC_037647.1 | 10271635 | SNV | 1 | T | C | Homozygous   |
| NC_037647.1 | 10271642 | SNV | 1 | T | C | Homozygous   |
| NC_037647.1 | 10271644 | SNV | 1 | T | C | Homozygous   |
| NC_037647.1 | 10271668 | SNV | 1 | T | C | Homozygous   |
| NC_037647.1 | 10271670 | SNV | 1 | T | C | Homozygous   |
| NC_037647.1 | 10271934 | SNV | 1 | C | A | Homozygous   |
| NC_037647.1 | 10271937 | SNV | 1 | T | A | Homozygous   |

|             |          |     |   |   |   |              |
|-------------|----------|-----|---|---|---|--------------|
| NC_037647.1 | 10271940 | SNV | 1 | A | T | Homozygous   |
| NC_037647.1 | 10271946 | SNV | 1 | A | C | Homozygous   |
| NC_037647.1 | 10271972 | SNV | 1 | A | C | Homozygous   |
| NC_037647.1 | 10271980 | SNV | 1 | T | A | Homozygous   |
| NC_037647.1 | 10271984 | SNV | 1 | T | C | Homozygous   |
| NC_037647.1 | 10272654 | SNV | 1 | A | T | Homozygous   |
| NC_037647.1 | 10272689 | SNV | 1 | T | G | Homozygous   |
| NC_037647.1 | 10272698 | SNV | 1 | T | C | Homozygous   |
| NC_037647.1 | 10273564 | SNV | 1 | T | C | Heterozygous |
| NC_037647.1 | 10273567 | SNV | 1 | G | A | Homozygous   |
| NC_037647.1 | 10273745 | SNV | 1 | C | T | Homozygous   |
| NC_037647.1 | 10274163 | SNV | 1 | T | C | Homozygous   |
| NC_037647.1 | 10274167 | SNV | 1 | T | A | Homozygous   |
| NC_037647.1 | 10274171 | SNV | 1 | C | G | Homozygous   |
| NC_037647.1 | 10278290 | SNV | 1 | T | C | Heterozygous |
| NC_037647.1 | 10281392 | SNV | 1 | T | G | Homozygous   |
| NC_037647.1 | 10281406 | SNV | 1 | T | A | Homozygous   |
| NC_037647.1 | 10281411 | SNV | 1 | A | C | Homozygous   |
| NC_037647.1 | 10281439 | SNV | 1 | C | A | Homozygous   |
| NC_037647.1 | 10281441 | SNV | 1 | A | G | Homozygous   |
| NC_037647.1 | 10281444 | SNV | 1 | T | C | Homozygous   |
| NC_037647.1 | 10288055 | SNV | 1 | G | A | Heterozygous |
| NC_037647.1 | 10288266 | SNV | 1 | A | G | Homozygous   |
| NC_037647.1 | 10292434 | SNV | 1 | A | G | Homozygous   |
| NC_037647.1 | 10292461 | SNV | 1 | T | A | Homozygous   |
| NC_037647.1 | 10292469 | SNV | 1 | A | T | Homozygous   |
| NC_037647.1 | 10292473 | SNV | 1 | G | C | Homozygous   |
| NC_037647.1 | 10292481 | SNV | 1 | A | C | Homozygous   |
| NC_037647.1 | 10292964 | SNV | 1 | A | G | Homozygous   |
| NC_037647.1 | 10294002 | SNV | 1 | C | T | Homozygous   |
| NC_037647.1 | 10294053 | SNV | 1 | C | T | Heterozygous |
| NC_037647.1 | 10294517 | SNV | 1 | A | G | Homozygous   |
| NC_037647.1 | 10294587 | SNV | 1 | T | C | Homozygous   |
| NC_037647.1 | 10297927 | SNV | 1 | T | C | Homozygous   |
| NC_037647.1 | 10298040 | SNV | 1 | G | A | Heterozygous |
| NC_037647.1 | 10298793 | SNV | 1 | C | T | Heterozygous |
| NC_037647.1 | 10304805 | SNV | 1 | C | T | Homozygous   |
| NC_037647.1 | 10306423 | SNV | 1 | A | G | Heterozygous |
| NC_037647.1 | 10306775 | SNV | 1 | G | A | Heterozygous |
| NC_037647.1 | 10310301 | SNV | 1 | G | A | Homozygous   |
| NC_037647.1 | 10310303 | SNV | 1 | T | G | Homozygous   |
| NC_037647.1 | 10310464 | SNV | 1 | T | G | Homozygous   |
| NC_037647.1 | 10310466 | SNV | 1 | T | G | Homozygous   |
| NC_037647.1 | 10310474 | SNV | 1 | G | A | Homozygous   |
| NC_037647.1 | 10310503 | SNV | 1 | A | G | Homozygous   |
| NC_037647.1 | 10311074 | SNV | 1 | T | C | Heterozygous |
| NC_037647.1 | 10312222 | SNV | 1 | A | G | Homozygous   |
| NC_037647.1 | 10312517 | SNV | 1 | G | A | Homozygous   |
| NC_037647.1 | 10312550 | SNV | 1 | T | C | Heterozygous |
| NC_037647.1 | 10313821 | SNV | 1 | A | T | Homozygous   |
| NC_037647.1 | 10318488 | SNV | 1 | T | C | Homozygous   |

|             |          |     |   |   |   |              |
|-------------|----------|-----|---|---|---|--------------|
| NC_037647.1 | 10319952 | SNV | 1 | G | C | Heterozygous |
| NC_037647.1 | 10319984 | SNV | 1 | A | G | Homozygous   |
| NC_037647.1 | 10321777 | SNV | 1 | A | G | Heterozygous |
| NC_037647.1 | 10321785 | SNV | 1 | A | G | Heterozygous |
| NC_037647.1 | 10321787 | SNV | 1 | A | G | Heterozygous |
| NC_037647.1 | 10321789 | SNV | 1 | A | G | Heterozygous |
| NC_037647.1 | 10321798 | SNV | 1 | T | C | Heterozygous |
| NC_037647.1 | 10323057 | SNV | 1 | A | G | Homozygous   |
| NC_037647.1 | 10323059 | SNV | 1 | A | T | Homozygous   |
| NC_037647.1 | 10323407 | SNV | 1 | C | T | Homozygous   |
| NC_037647.1 | 10323575 | SNV | 1 | C | T | Heterozygous |
| NC_037647.1 | 10324735 | SNV | 1 | T | C | Heterozygous |
| NC_037647.1 | 10325492 | SNV | 1 | A | G | Homozygous   |
| NC_037647.1 | 10329628 | SNV | 1 | T | A | Heterozygous |
| NC_037647.1 | 10329630 | SNV | 1 | T | G | Heterozygous |
| NC_037647.1 | 10329636 | SNV | 1 | T | C | Heterozygous |
| NC_037647.1 | 10329643 | SNV | 1 | C | T | Heterozygous |
| NC_037647.1 | 10329650 | SNV | 1 | T | G | Heterozygous |
| NC_037647.1 | 10329657 | SNV | 1 | C | A | Heterozygous |
| NC_037647.1 | 10332838 | SNV | 1 | A | C | Homozygous   |
| NC_037647.1 | 10332840 | SNV | 1 | G | A | Homozygous   |
| NC_037647.1 | 10333044 | SNV | 1 | G | A | Homozygous   |
| NC_037647.1 | 10333267 | SNV | 1 | A | T | Heterozygous |
| NC_037647.1 | 10333350 | SNV | 1 | T | A | Homozygous   |
| NC_037647.1 | 10334344 | SNV | 1 | A | T | Heterozygous |
| NC_037647.1 | 10334346 | SNV | 1 | T | C | Heterozygous |
| NC_037647.1 | 10334603 | SNV | 1 | G | C | Homozygous   |
| NC_037647.1 | 10337117 | SNV | 1 | T | G | Homozygous   |
| NC_037647.1 | 10337122 | SNV | 1 | T | C | Homozygous   |
| NC_037647.1 | 10337134 | SNV | 1 | A | T | Homozygous   |
| NC_037647.1 | 10337141 | SNV | 1 | A | T | Homozygous   |
| NC_037647.1 | 10337143 | SNV | 1 | A | C | Homozygous   |
| NC_037647.1 | 10337150 | SNV | 1 | A | C | Homozygous   |
| NC_037647.1 | 10337154 | SNV | 1 | T | A | Homozygous   |
| NC_037647.1 | 10337159 | SNV | 1 | A | T | Homozygous   |
| NC_037647.1 | 10338917 | SNV | 1 | C | A | Heterozygous |
| NC_037647.1 | 10338934 | SNV | 1 | T | C | Heterozygous |
| NC_037647.1 | 10338977 | SNV | 1 | A | G | Heterozygous |
| NC_037647.1 | 10338988 | SNV | 1 | G | A | Heterozygous |
| NC_037647.1 | 10338990 | SNV | 1 | C | A | Heterozygous |
| NC_037647.1 | 10345709 | SNV | 1 | G | T | Homozygous   |
| NC_037647.1 | 10346952 | SNV | 1 | T | C | Homozygous   |
| NC_037647.1 | 10356051 | SNV | 1 | C | A | Heterozygous |
| NC_037647.1 | 10356055 | SNV | 1 | G | T | Homozygous   |
| NC_037647.1 | 10357104 | SNV | 1 | C | G | Homozygous   |
| NC_037647.1 | 10357116 | SNV | 1 | A | C | Homozygous   |
| NC_037647.1 | 10357141 | SNV | 1 | T | G | Homozygous   |
| NC_037647.1 | 10357838 | SNV | 1 | G | A | Heterozygous |
| NC_037647.1 | 10357840 | SNV | 1 | A | T | Heterozygous |
| NC_037647.1 | 10357841 | SNV | 1 | C | T | Heterozygous |
| NC_037647.1 | 10357844 | SNV | 1 | T | C | Heterozygous |

|             |          |     |   |   |   |              |
|-------------|----------|-----|---|---|---|--------------|
| NC_037647.1 | 10357852 | SNV | 1 | G | A | Heterozygous |
| NC_037647.1 | 10357877 | SNV | 1 | T | C | Heterozygous |
| NC_037647.1 | 10357884 | SNV | 1 | A | G | Heterozygous |
| NC_037647.1 | 10357888 | SNV | 1 | T | G | Heterozygous |
| NC_037647.1 | 10358981 | SNV | 1 | G | A | Heterozygous |
| NC_037647.1 | 10359789 | SNV | 1 | G | T | Homozygous   |
| NC_037647.1 | 10359795 | SNV | 1 | A | C | Homozygous   |
| NC_037647.1 | 10363011 | SNV | 1 | T | C | Homozygous   |
| NC_037647.1 | 10363840 | SNV | 1 | C | A | Heterozygous |
| NC_037647.1 | 10363860 | SNV | 1 | T | A | Heterozygous |
| NC_037647.1 | 10363869 | SNV | 1 | T | A | Heterozygous |
| NC_037647.1 | 10364799 | SNV | 1 | A | G | Homozygous   |
| NC_037647.1 | 10364876 | SNV | 1 | G | A | Heterozygous |
| NC_037647.1 | 10364923 | SNV | 1 | T | C | Homozygous   |
| NC_037647.1 | 10365557 | SNV | 1 | C | T | Homozygous   |
| NC_037647.1 | 10365813 | SNV | 1 | G | A | Homozygous   |
| NC_037647.1 | 10365896 | SNV | 1 | T | A | Heterozygous |
| NC_037647.1 | 10366034 | SNV | 1 | T | C | Homozygous   |
| NC_037647.1 | 10433572 | SNV | 1 | T | C | Homozygous   |
| NC_037647.1 | 10433600 | SNV | 1 | A | G | Homozygous   |
| NC_037647.1 | 10433677 | SNV | 1 | C | A | Heterozygous |
| NC_037647.1 | 10438850 | SNV | 1 | A | C | Homozygous   |
| NC_037647.1 | 10439513 | SNV | 1 | A | T | Homozygous   |
| NC_037647.1 | 10439519 | SNV | 1 | T | A | Homozygous   |
| NC_037647.1 | 10439555 | SNV | 1 | C | A | Homozygous   |
| NC_037647.1 | 10439565 | SNV | 1 | A | C | Homozygous   |
| NC_037647.1 | 10439579 | SNV | 1 | C | A | Homozygous   |
| NC_037647.1 | 10439609 | SNV | 1 | C | G | Homozygous   |
| NC_037647.1 | 10439621 | SNV | 1 | T | G | Homozygous   |
| NC_037647.1 | 10439631 | SNV | 1 | G | A | Heterozygous |
| NC_037647.1 | 10439635 | SNV | 1 | A | G | Heterozygous |
| NC_037647.1 | 10446575 | SNV | 1 | T | A | Heterozygous |
| NC_037647.1 | 10446622 | SNV | 1 | A | G | Heterozygous |
| NC_037647.1 | 10451674 | SNV | 1 | G | A | Heterozygous |
| NC_037647.1 | 10451683 | SNV | 1 | G | A | Homozygous   |
| NC_037647.1 | 10452748 | SNV | 1 | A | G | Homozygous   |
| NC_037647.1 | 10452862 | SNV | 1 | T | C | Homozygous   |
| NC_037647.1 | 10452995 | SNV | 1 | G | A | Heterozygous |
| NC_037647.1 | 10453041 | SNV | 1 | T | C | Homozygous   |
| NC_037647.1 | 10453043 | SNV | 1 | A | G | Homozygous   |
| NC_037647.1 | 10453071 | SNV | 1 | C | T | Heterozygous |
| NC_037647.1 | 10453105 | SNV | 1 | A | G | Homozygous   |
| NC_037647.1 | 10454665 | SNV | 1 | T | G | Heterozygous |
| NC_037647.1 | 10464497 | SNV | 1 | T | C | Homozygous   |
| NC_037647.1 | 10466260 | SNV | 1 | C | G | Homozygous   |
| NC_037647.1 | 10466270 | SNV | 1 | C | T | Heterozygous |
| NC_037647.1 | 10466305 | SNV | 1 | A | G | Homozygous   |
| NC_037647.1 | 10466348 | SNV | 1 | G | C | Heterozygous |
| NC_037647.1 | 10468200 | SNV | 1 | A | G | Heterozygous |
| NC_037647.1 | 10468203 | SNV | 1 | A | G | Heterozygous |
| NC_037647.1 | 10468214 | SNV | 1 | A | C | Heterozygous |

|             |          |     |   |   |   |              |
|-------------|----------|-----|---|---|---|--------------|
| NC_037647.1 | 10468224 | SNV | 1 | G | A | Homozygous   |
| NC_037647.1 | 10468294 | SNV | 1 | G | A | Homozygous   |
| NC_037647.1 | 10474929 | SNV | 1 | C | T | Heterozygous |
| NC_037647.1 | 10474960 | SNV | 1 | G | T | Heterozygous |
| NC_037647.1 | 10474973 | SNV | 1 | T | C | Homozygous   |
| NC_037647.1 | 10476821 | SNV | 1 | T | A | Homozygous   |
| NC_037647.1 | 10480051 | SNV | 1 | G | A | Homozygous   |
| NC_037647.1 | 10480364 | SNV | 1 | C | T | Heterozygous |
| NC_037647.1 | 10480414 | SNV | 1 | T | C | Homozygous   |
| NC_037647.1 | 10480578 | SNV | 1 | A | T | Heterozygous |
| NC_037647.1 | 10480763 | SNV | 1 | T | C | Homozygous   |
| NC_037647.1 | 10480801 | SNV | 1 | G | A | Homozygous   |
| NC_037647.1 | 10485000 | SNV | 1 | A | T | Heterozygous |
| NC_037647.1 | 10485004 | SNV | 1 | A | T | Homozygous   |
| NC_037647.1 | 10485814 | SNV | 1 | A | G | Heterozygous |
| NC_037647.1 | 10485815 | SNV | 1 | A | G | Heterozygous |
| NC_037647.1 | 10486462 | SNV | 1 | C | A | Homozygous   |
| NC_037647.1 | 10486474 | SNV | 1 | T | C | Heterozygous |
| NC_037647.1 | 10488058 | SNV | 1 | A | C | Homozygous   |
| NC_037647.1 | 10490589 | SNV | 1 | T | C | Homozygous   |
| NC_037647.1 | 10490617 | SNV | 1 | T | C | Heterozygous |
| NC_037647.1 | 10490753 | SNV | 1 | A | G | Homozygous   |
| NC_037647.1 | 10490766 | SNV | 1 | G | A | Heterozygous |
| NC_037647.1 | 10490791 | SNV | 1 | T | C | Homozygous   |
| NC_037647.1 | 10490797 | SNV | 1 | A | T | Homozygous   |
| NC_037647.1 | 10490980 | SNV | 1 | A | G | Homozygous   |
| NC_037647.1 | 10491552 | SNV | 1 | T | C | Homozygous   |
| NC_037647.1 | 10491652 | SNV | 1 | T | G | Homozygous   |
| NC_037647.1 | 10491825 | SNV | 1 | C | T | Heterozygous |
| NC_037647.1 | 10491962 | SNV | 1 | A | G | Heterozygous |
| NC_037647.1 | 10492750 | SNV | 1 | G | A | Homozygous   |
| NC_037647.1 | 10493312 | SNV | 1 | A | G | Homozygous   |
| NC_037647.1 | 10493413 | SNV | 1 | A | G | Homozygous   |
| NC_037647.1 | 10493415 | SNV | 1 | A | G | Homozygous   |
| NC_037647.1 | 10493632 | SNV | 1 | T | C | Homozygous   |
| NC_037647.1 | 10493655 | SNV | 1 | T | C | Homozygous   |
| NC_037647.1 | 10494189 | SNV | 1 | T | C | Heterozygous |
| NC_037647.1 | 10495659 | SNV | 1 | C | A | Homozygous   |
| NC_037647.1 | 10496502 | SNV | 1 | T | C | Homozygous   |
| NC_037647.1 | 10500168 | SNV | 1 | C | T | Homozygous   |
| NC_037647.1 | 10500208 | SNV | 1 | T | C | Heterozygous |
| NC_037647.1 | 10500277 | SNV | 1 | A | G | Homozygous   |
| NC_037647.1 | 10501745 | SNV | 1 | A | T | Heterozygous |
| NC_037647.1 | 10502181 | SNV | 1 | G | C | Homozygous   |
| NC_037647.1 | 10502292 | SNV | 1 | G | A | Heterozygous |
| NC_037647.1 | 10504808 | SNV | 1 | A | G | Heterozygous |
| NC_037647.1 | 10505021 | SNV | 1 | A | G | Homozygous   |
| NC_037647.1 | 10505028 | SNV | 1 | T | C | Homozygous   |
| NC_037647.1 | 10509291 | SNV | 1 | A | G | Homozygous   |
| NC_037647.1 | 10509560 | SNV | 1 | A | G | Heterozygous |
| NC_037647.1 | 10509590 | SNV | 1 | G | A | Heterozygous |

|             |          |     |   |   |   |              |
|-------------|----------|-----|---|---|---|--------------|
| NC_037647.1 | 10510596 | SNV | 1 | A | G | Homozygous   |
| NC_037647.1 | 10510612 | SNV | 1 | T | C | Heterozygous |
| NC_037647.1 | 10511026 | SNV | 1 | A | G | Homozygous   |
| NC_037647.1 | 10513447 | SNV | 1 | G | A | Heterozygous |
| NC_037647.1 | 10513854 | SNV | 1 | T | C | Heterozygous |
| NC_037647.1 | 10514267 | SNV | 1 | A | G | Homozygous   |
| NC_037647.1 | 10520321 | SNV | 1 | G | A | Homozygous   |
| NC_037647.1 | 10520328 | SNV | 1 | G | C | Homozygous   |
| NC_037647.1 | 10520335 | SNV | 1 | A | G | Homozygous   |
| NC_037647.1 | 10520352 | SNV | 1 | T | C | Homozygous   |
| NC_037647.1 | 10520360 | SNV | 1 | A | G | Homozygous   |
| NC_037647.1 | 10520364 | SNV | 1 | G | A | Heterozygous |
| NC_037647.1 | 10520366 | SNV | 1 | A | G | Heterozygous |
| NC_037647.1 | 10532369 | SNV | 1 | T | A | Heterozygous |
| NC_037647.1 | 10532375 | SNV | 1 | T | A | Homozygous   |
| NC_037647.1 | 10532383 | SNV | 1 | T | C | Heterozygous |
| NC_037647.1 | 10532579 | SNV | 1 | C | T | Homozygous   |
| NC_037647.1 | 10533885 | SNV | 1 | G | A | Heterozygous |
| NC_037647.1 | 10534736 | SNV | 1 | G | A | Homozygous   |
| NC_037647.1 | 10534858 | SNV | 1 | G | A | Homozygous   |
| NC_037647.1 | 10534982 | SNV | 1 | A | G | Heterozygous |
| NC_037647.1 | 10535139 | SNV | 1 | G | T | Heterozygous |
| NC_037647.1 | 10535192 | SNV | 1 | G | T | Heterozygous |
| NC_037647.1 | 10535310 | SNV | 1 | T | C | Homozygous   |
| NC_037647.1 | 10535314 | SNV | 1 | A | T | Heterozygous |
| NC_037647.1 | 10535456 | SNV | 1 | A | G | Homozygous   |
| NC_037647.1 | 10535459 | SNV | 1 | C | T | Heterozygous |
| NC_037647.1 | 10535578 | SNV | 1 | C | G | Heterozygous |
| NC_037647.1 | 10535870 | SNV | 1 | T | C | Homozygous   |
| NC_037647.1 | 10535976 | SNV | 1 | A | G | Homozygous   |
| NC_037647.1 | 10536364 | SNV | 1 | T | C | Homozygous   |
| NC_037647.1 | 10536425 | SNV | 1 | G | A | Heterozygous |
| NC_037647.1 | 10536459 | SNV | 1 | T | A | Homozygous   |
| NC_037647.1 | 10536997 | SNV | 1 | C | T | Heterozygous |
| NC_037647.1 | 10537410 | SNV | 1 | G | A | Heterozygous |
| NC_037647.1 | 10537424 | SNV | 1 | C | G | Homozygous   |
| NC_037647.1 | 10537508 | SNV | 1 | T | C | Homozygous   |
| NC_037647.1 | 10537821 | SNV | 1 | G | A | Heterozygous |
| NC_037647.1 | 10537893 | SNV | 1 | G | A | Homozygous   |
| NC_037647.1 | 10537917 | SNV | 1 | A | G | Heterozygous |
| NC_037647.1 | 10538577 | SNV | 1 | A | G | Homozygous   |
| NC_037647.1 | 10538612 | SNV | 1 | A | G | Homozygous   |
| NC_037647.1 | 10538615 | SNV | 1 | G | A | Heterozygous |
| NC_037647.1 | 10538630 | SNV | 1 | A | G | Heterozygous |
| NC_037647.1 | 10538665 | SNV | 1 | A | G | Homozygous   |
| NC_037647.1 | 10539268 | SNV | 1 | G | A | Heterozygous |
| NC_037647.1 | 10539273 | SNV | 1 | G | A | Heterozygous |
| NC_037647.1 | 10539285 | SNV | 1 | T | C | Homozygous   |
| NC_037647.1 | 10539287 | SNV | 1 | C | T | Homozygous   |
| NC_037647.1 | 10539354 | SNV | 1 | A | G | Heterozygous |
| NC_037647.1 | 10539517 | SNV | 1 | T | C | Homozygous   |

|             |          |     |   |   |   |              |
|-------------|----------|-----|---|---|---|--------------|
| NC_037647.1 | 10540052 | SNV | 1 | A | G | Homozygous   |
| NC_037647.1 | 10540071 | SNV | 1 | T | C | Homozygous   |
| NC_037647.1 | 10540073 | SNV | 1 | G | T | Homozygous   |
| NC_037647.1 | 10540270 | SNV | 1 | T | C | Homozygous   |
| NC_037647.1 | 10540465 | SNV | 1 | C | A | Heterozygous |
| NC_037647.1 | 10541123 | SNV | 1 | G | T | Heterozygous |
| NC_037647.1 | 10541129 | SNV | 1 | A | T | Heterozygous |
| NC_037647.1 | 10543773 | SNV | 1 | T | A | Homozygous   |
| NC_037647.1 | 10543779 | SNV | 1 | C | T | Homozygous   |
| NC_037647.1 | 10543785 | SNV | 1 | G | C | Homozygous   |
| NC_037647.1 | 10544763 | SNV | 1 | C | T | Homozygous   |
| NC_037647.1 | 10544788 | SNV | 1 | C | T | Homozygous   |
| NC_037647.1 | 10544835 | SNV | 1 | C | T | Homozygous   |
| NC_037647.1 | 10544843 | SNV | 1 | G | A | Homozygous   |
| NC_037647.1 | 10544855 | SNV | 1 | A | C | Heterozygous |
| NC_037647.1 | 10545133 | SNV | 1 | A | G | Homozygous   |
| NC_037647.1 | 10545159 | SNV | 1 | T | C | Homozygous   |
| NC_037647.1 | 10560792 | SNV | 1 | T | C | Homozygous   |
| NC_037647.1 | 10561015 | SNV | 1 | G | A | Heterozygous |
| NC_037647.1 | 10561018 | SNV | 1 | T | C | Homozygous   |
| NC_037647.1 | 10561215 | SNV | 1 | T | C | Heterozygous |
| NC_037647.1 | 10562054 | SNV | 1 | C | T | Heterozygous |
| NC_037647.1 | 10562106 | SNV | 1 | G | T | Homozygous   |
| NC_037647.1 | 10562128 | SNV | 1 | T | C | Homozygous   |
| NC_037647.1 | 10566645 | SNV | 1 | C | T | Heterozygous |
| NC_037647.1 | 10567122 | SNV | 1 | G | A | Homozygous   |
| NC_037647.1 | 10567142 | SNV | 1 | A | G | Homozygous   |
| NC_037647.1 | 10567170 | SNV | 1 | G | A | Homozygous   |
| NC_037647.1 | 10567173 | SNV | 1 | T | G | Homozygous   |
| NC_037647.1 | 10567176 | SNV | 1 | A | G | Homozygous   |
| NC_037647.1 | 10567179 | SNV | 1 | C | G | Homozygous   |
| NC_037647.1 | 10567187 | SNV | 1 | G | A | Homozygous   |
| NC_037647.1 | 10575262 | SNV | 1 | T | A | Homozygous   |
| NC_037647.1 | 10575267 | SNV | 1 | T | A | Homozygous   |
| NC_037647.1 | 10575273 | SNV | 1 | T | A | Homozygous   |
| NC_037647.1 | 10575316 | SNV | 1 | T | A | Homozygous   |
| NC_037647.1 | 10575328 | SNV | 1 | A | C | Homozygous   |
| NC_037647.1 | 10575330 | SNV | 1 | T | G | Homozygous   |
| NC_037647.1 | 10575332 | SNV | 1 | T | A | Homozygous   |
| NC_037647.1 | 10575343 | SNV | 1 | A | C | Homozygous   |
| NC_037647.1 | 10575347 | SNV | 1 | T | A | Homozygous   |
| NC_037647.1 | 10575356 | SNV | 1 | T | A | Homozygous   |
| NC_037647.1 | 10580823 | SNV | 1 | T | G | Heterozygous |
| NC_037647.1 | 10580831 | SNV | 1 | T | C | Heterozygous |
| NC_037647.1 | 10596331 | SNV | 1 | C | T | Homozygous   |
| NC_037647.1 | 10600011 | SNV | 1 | T | A | Heterozygous |
| NC_037647.1 | 10600017 | SNV | 1 | T | G | Homozygous   |
| NC_037647.1 | 10600021 | SNV | 1 | T | A | Heterozygous |
| NC_037647.1 | 10600025 | SNV | 1 | T | A | Heterozygous |
| NC_037647.1 | 10605789 | SNV | 1 | A | G | Heterozygous |
| NC_037647.1 | 10605792 | SNV | 1 | T | A | Homozygous   |



|             |          |     |   |   |   |              |
|-------------|----------|-----|---|---|---|--------------|
| NC_037647.1 | 10615954 | SNV | 1 | A | G | Homozygous   |
| NC_037647.1 | 10615976 | SNV | 1 | A | G | Homozygous   |
| NC_037647.1 | 10615981 | SNV | 1 | A | T | Homozygous   |
| NC_037647.1 | 10630700 | SNV | 1 | A | G | Heterozygous |
| NC_037647.1 | 10631047 | SNV | 1 | C | T | Homozygous   |
| NC_037647.1 | 10634558 | SNV | 1 | T | C | Heterozygous |
| NC_037647.1 | 10639923 | SNV | 1 | A | T | Homozygous   |
| NC_037647.1 | 10640800 | SNV | 1 | A | G | Homozygous   |
| NC_037647.1 | 10640816 | SNV | 1 | G | A | Heterozygous |
| NC_037647.1 | 10641061 | SNV | 1 | A | G | Heterozygous |
| NC_037647.1 | 10641077 | SNV | 1 | G | A | Homozygous   |
| NC_037647.1 | 10642421 | SNV | 1 | A | T | Heterozygous |
| NC_037647.1 | 10651897 | SNV | 1 | G | A | Heterozygous |
| NC_037647.1 | 10651919 | SNV | 1 | T | A | Heterozygous |
| NC_037647.1 | 10651923 | SNV | 1 | T | C | Homozygous   |
| NC_037647.1 | 10652093 | SNV | 1 | T | C | Homozygous   |
| NC_037647.1 | 10652106 | SNV | 1 | G | A | Heterozygous |
| NC_037647.1 | 10652132 | SNV | 1 | G | C | Heterozygous |
| NC_037647.1 | 10653566 | SNV | 1 | C | T | Heterozygous |
| NC_037647.1 | 10653604 | SNV | 1 | A | G | Homozygous   |
| NC_037647.1 | 10653666 | SNV | 1 | A | G | Homozygous   |
| NC_037647.1 | 10653785 | SNV | 1 | T | C | Heterozygous |
| NC_037647.1 | 10653789 | SNV | 1 | T | C | Homozygous   |
| NC_037647.1 | 10653850 | SNV | 1 | A | G | Homozygous   |
| NC_037647.1 | 10653898 | SNV | 1 | G | A | Heterozygous |
| NC_037647.1 | 10653921 | SNV | 1 | C | T | Homozygous   |
| NC_037647.1 | 10653928 | SNV | 1 | T | C | Homozygous   |
| NC_037647.1 | 10653968 | SNV | 1 | C | T | Homozygous   |
| NC_037647.1 | 10653981 | SNV | 1 | T | C | Homozygous   |
| NC_037647.1 | 10654022 | SNV | 1 | T | G | Homozygous   |
| NC_037647.1 | 10654040 | SNV | 1 | C | A | Homozygous   |
| NC_037647.1 | 10654076 | SNV | 1 | A | G | Homozygous   |
| NC_037647.1 | 10654078 | SNV | 1 | C | T | Heterozygous |
| NC_037647.1 | 10654096 | SNV | 1 | A | T | Homozygous   |
| NC_037647.1 | 10654181 | SNV | 1 | G | A | Heterozygous |
| NC_037647.1 | 10654206 | SNV | 1 | C | T | Heterozygous |
| NC_037647.1 | 10654275 | SNV | 1 | A | G | Homozygous   |
| NC_037647.1 | 10654532 | SNV | 1 | A | G | Homozygous   |
| NC_037647.1 | 10658147 | SNV | 1 | C | G | Heterozygous |
| NC_037647.1 | 10658205 | SNV | 1 | T | C | Homozygous   |
| NC_037647.1 | 10664349 | SNV | 1 | T | C | Homozygous   |
| NC_037647.1 | 10664497 | SNV | 1 | A | T | Heterozygous |
| NC_037647.1 | 10664519 | SNV | 1 | C | T | Heterozygous |
| NC_037647.1 | 10664620 | SNV | 1 | A | G | Heterozygous |
| NC_037647.1 | 10666770 | SNV | 1 | A | T | Heterozygous |
| NC_037647.1 | 10678967 | SNV | 1 | T | C | Homozygous   |
| NC_037647.1 | 10679612 | SNV | 1 | A | G | Homozygous   |
| NC_037647.1 | 10680735 | SNV | 1 | G | A | Homozygous   |
| NC_037647.1 | 10680906 | SNV | 1 | C | G | Homozygous   |
| NC_037647.1 | 10680918 | SNV | 1 | T | C | Homozygous   |
| NC_037647.1 | 10681283 | SNV | 1 | G | A | Heterozygous |

|             |          |     |   |   |   |              |
|-------------|----------|-----|---|---|---|--------------|
| NC_037647.1 | 10681285 | SNV | 1 | T | C | Homozygous   |
| NC_037647.1 | 10681605 | SNV | 1 | A | G | Homozygous   |
| NC_037647.1 | 10682089 | SNV | 1 | C | G | Homozygous   |
| NC_037647.1 | 10682585 | SNV | 1 | A | G | Homozygous   |
| NC_037647.1 | 10682602 | SNV | 1 | A | G | Homozygous   |
| NC_037647.1 | 10682649 | SNV | 1 | C | T | Heterozygous |
| NC_037647.1 | 10682659 | SNV | 1 | A | G | Heterozygous |
| NC_037647.1 | 10682683 | SNV | 1 | G | A | Homozygous   |
| NC_037647.1 | 10682847 | SNV | 1 | T | C | Homozygous   |
| NC_037647.1 | 10682858 | SNV | 1 | T | C | Homozygous   |
| NC_037647.1 | 10683448 | SNV | 1 | G | A | Homozygous   |
| NC_037647.1 | 10683462 | SNV | 1 | G | A | Homozygous   |
| NC_037647.1 | 10683494 | SNV | 1 | G | A | Heterozygous |
| NC_037647.1 | 10683510 | SNV | 1 | A | G | Homozygous   |
| NC_037647.1 | 10684359 | SNV | 1 | T | C | Heterozygous |
| NC_037647.1 | 10684389 | SNV | 1 | T | A | Homozygous   |
| NC_037647.1 | 10684576 | SNV | 1 | G | A | Heterozygous |
| NC_037647.1 | 10685483 | SNV | 1 | G | T | Homozygous   |
| NC_037647.1 | 10685500 | SNV | 1 | A | T | Homozygous   |
| NC_037647.1 | 10687035 | SNV | 1 | C | G | Homozygous   |
| NC_037647.1 | 10687038 | SNV | 1 | A | C | Homozygous   |
| NC_037647.1 | 10687073 | SNV | 1 | G | A | Homozygous   |
| NC_037647.1 | 10687910 | SNV | 1 | A | C | Homozygous   |
| NC_037647.1 | 10687949 | SNV | 1 | G | A | Heterozygous |
| NC_037647.1 | 10688253 | SNV | 1 | A | G | Homozygous   |
| NC_037647.1 | 10688555 | SNV | 1 | A | G | Homozygous   |
| NC_037647.1 | 10689278 | SNV | 1 | G | A | Heterozygous |
| NC_037647.1 | 10690120 | SNV | 1 | A | G | Homozygous   |
| NC_037647.1 | 10691176 | SNV | 1 | A | G | Homozygous   |
| NC_037647.1 | 10693512 | SNV | 1 | G | A | Heterozygous |
| NC_037647.1 | 10697656 | SNV | 1 | T | A | Heterozygous |
| NC_037647.1 | 10697665 | SNV | 1 | G | T | Heterozygous |
| NC_037647.1 | 10697695 | SNV | 1 | T | A | Heterozygous |
| NC_037647.1 | 10697716 | SNV | 1 | T | C | Heterozygous |
| NC_037647.1 | 10697719 | SNV | 1 | A | G | Heterozygous |
| NC_037647.1 | 10697722 | SNV | 1 | T | A | Heterozygous |
| NC_037647.1 | 10697734 | SNV | 1 | A | T | Heterozygous |
| NC_037647.1 | 10697743 | SNV | 1 | A | G | Heterozygous |
| NC_037647.1 | 10697746 | SNV | 1 | A | G | Heterozygous |
| NC_037647.1 | 10697869 | SNV | 1 | C | A | Homozygous   |
| NC_037647.1 | 10698182 | SNV | 1 | A | T | Homozygous   |
| NC_037647.1 | 10698319 | SNV | 1 | A | T | Homozygous   |
| NC_037647.1 | 10698933 | SNV | 1 | T | A | Homozygous   |
| NC_037647.1 | 10698941 | SNV | 1 | T | C | Homozygous   |
| NC_037647.1 | 10698943 | SNV | 1 | T | A | Homozygous   |
| NC_037647.1 | 10698969 | SNV | 1 | C | T | Homozygous   |
| NC_037647.1 | 10698973 | SNV | 1 | G | A | Homozygous   |
| NC_037647.1 | 10705745 | SNV | 1 | C | T | Heterozygous |
| NC_037647.1 | 10712483 | SNV | 1 | C | T | Homozygous   |
| NC_037647.1 | 10712846 | SNV | 1 | G | A | Homozygous   |
| NC_037647.1 | 10714093 | SNV | 1 | A | G | Homozygous   |

|             |          |     |   |   |   |              |
|-------------|----------|-----|---|---|---|--------------|
| NC_037647.1 | 10714095 | SNV | 1 | T | A | Homozygous   |
| NC_037647.1 | 10714112 | SNV | 1 | T | C | Heterozygous |
| NC_037647.1 | 10716622 | SNV | 1 | G | A | Heterozygous |
| NC_037647.1 | 10716636 | SNV | 1 | T | C | Heterozygous |
| NC_037647.1 | 10716660 | SNV | 1 | G | A | Heterozygous |
| NC_037647.1 | 10716887 | SNV | 1 | A | T | Homozygous   |
| NC_037647.1 | 10716891 | SNV | 1 | C | T | Homozygous   |
| NC_037647.1 | 10716978 | SNV | 1 | T | G | Homozygous   |
| NC_037647.1 | 10717226 | SNV | 1 | T | A | Homozygous   |
| NC_037647.1 | 10717229 | SNV | 1 | T | G | Homozygous   |
| NC_037647.1 | 10717233 | SNV | 1 | C | T | Homozygous   |
| NC_037647.1 | 10717728 | SNV | 1 | C | T | Heterozygous |
| NC_037647.1 | 10719098 | SNV | 1 | C | T | Heterozygous |
| NC_037647.1 | 10731124 | SNV | 1 | C | T | Homozygous   |
| NC_037647.1 | 10749111 | SNV | 1 | T | C | Homozygous   |
| NC_037647.1 | 10749498 | SNV | 1 | G | A | Heterozygous |
| NC_037647.1 | 10752362 | SNV | 1 | T | G | Homozygous   |
| NC_037647.1 | 10752364 | SNV | 1 | A | C | Homozygous   |
| NC_037647.1 | 10752373 | SNV | 1 | T | G | Homozygous   |
| NC_037647.1 | 10754573 | SNV | 1 | C | T | Homozygous   |
| NC_037647.1 | 10754642 | SNV | 1 | T | C | Homozygous   |
| NC_037647.1 | 10754971 | SNV | 1 | T | C | Homozygous   |
| NC_037647.1 | 10755002 | SNV | 1 | A | G | Homozygous   |
| NC_037647.1 | 10759425 | SNV | 1 | G | A | Homozygous   |
| NC_037647.1 | 10759434 | SNV | 1 | T | C | Homozygous   |
| NC_037647.1 | 10759458 | SNV | 1 | G | A | Heterozygous |
| NC_037647.1 | 10759590 | SNV | 1 | C | T | Homozygous   |
| NC_037647.1 | 10759692 | SNV | 1 | G | A | Heterozygous |
| NC_037647.1 | 10759695 | SNV | 1 | T | C | Heterozygous |
| NC_037647.1 | 10760032 | SNV | 1 | A | G | Homozygous   |
| NC_037647.1 | 10760046 | SNV | 1 | A | T | Homozygous   |
| NC_037647.1 | 10760633 | SNV | 1 | T | C | Heterozygous |
| NC_037647.1 | 10760872 | SNV | 1 | C | G | Homozygous   |
| NC_037647.1 | 10760998 | SNV | 1 | G | A | Heterozygous |
| NC_037647.1 | 10761108 | SNV | 1 | C | T | Homozygous   |
| NC_037647.1 | 10762081 | SNV | 1 | C | T | Homozygous   |
| NC_037647.1 | 10762276 | SNV | 1 | A | G | Homozygous   |
| NC_037647.1 | 10762278 | SNV | 1 | A | G | Homozygous   |
| NC_037647.1 | 10762585 | SNV | 1 | T | C | Homozygous   |
| NC_037647.1 | 10795351 | SNV | 1 | A | G | Heterozygous |
| NC_037647.1 | 10797546 | SNV | 1 | C | T | Homozygous   |
| NC_037647.1 | 10797579 | SNV | 1 | A | G | Homozygous   |
| NC_037647.1 | 10813884 | SNV | 1 | G | C | Homozygous   |
| NC_037647.1 | 10826488 | SNV | 1 | T | C | Heterozygous |
| NC_037647.1 | 10828451 | SNV | 1 | G | A | Homozygous   |
| NC_037647.1 | 10828461 | SNV | 1 | T | A | Homozygous   |
| NC_037647.1 | 10828481 | SNV | 1 | A | G | Homozygous   |
| NC_037647.1 | 10831595 | SNV | 1 | A | G | Homozygous   |
| NC_037647.1 | 10831610 | SNV | 1 | A | G | Homozygous   |
| NC_037647.1 | 10831854 | SNV | 1 | A | G | Homozygous   |
| NC_037647.1 | 10831861 | SNV | 1 | A | T | Heterozygous |

|             |          |     |   |   |   |              |
|-------------|----------|-----|---|---|---|--------------|
| NC_037647.1 | 10832370 | SNV | 1 | C | T | Homozygous   |
| NC_037647.1 | 10832378 | SNV | 1 | T | C | Homozygous   |
| NC_037647.1 | 10832384 | SNV | 1 | T | C | Heterozygous |
| NC_037647.1 | 10832394 | SNV | 1 | T | C | Heterozygous |
| NC_037647.1 | 10832423 | SNV | 1 | A | G | Heterozygous |
| NC_037647.1 | 10832425 | SNV | 1 | A | G | Heterozygous |
| NC_037647.1 | 10832427 | SNV | 1 | A | G | Heterozygous |
| NC_037647.1 | 10832434 | SNV | 1 | T | C | Heterozygous |
| NC_037647.1 | 10832438 | SNV | 1 | C | T | Heterozygous |
| NC_037647.1 | 10832440 | SNV | 1 | T | A | Heterozygous |
| NC_037647.1 | 10832444 | SNV | 1 | T | C | Heterozygous |
| NC_037647.1 | 10832452 | SNV | 1 | T | C | Heterozygous |
| NC_037647.1 | 10835242 | SNV | 1 | C | G | Heterozygous |
| NC_037647.1 | 10835424 | SNV | 1 | G | A | Homozygous   |
| NC_037647.1 | 10835434 | SNV | 1 | A | G | Heterozygous |
| NC_037647.1 | 10835602 | SNV | 1 | G | A | Heterozygous |
| NC_037647.1 | 10835728 | SNV | 1 | A | G | Heterozygous |
| NC_037647.1 | 10835729 | SNV | 1 | A | G | Heterozygous |
| NC_037647.1 | 10835735 | SNV | 1 | A | G | Heterozygous |
| NC_037647.1 | 10835821 | SNV | 1 | G | A | Heterozygous |
| NC_037647.1 | 10835848 | SNV | 1 | G | T | Heterozygous |
| NC_037647.1 | 10841237 | SNV | 1 | G | A | Homozygous   |
| NC_037647.1 | 10841266 | SNV | 1 | G | T | Homozygous   |
| NC_037647.1 | 10841272 | SNV | 1 | G | A | Homozygous   |
| NC_037647.1 | 10841701 | SNV | 1 | A | T | Homozygous   |
| NC_037647.1 | 10841727 | SNV | 1 | T | G | Homozygous   |
| NC_037647.1 | 10841734 | SNV | 1 | A | T | Homozygous   |
| NC_037647.1 | 10843430 | SNV | 1 | G | A | Homozygous   |
| NC_037647.1 | 10845330 | SNV | 1 | C | T | Homozygous   |
| NC_037647.1 | 10845337 | SNV | 1 | T | C | Homozygous   |
| NC_037647.1 | 10881243 | SNV | 1 | C | T | Heterozygous |
| NC_037647.1 | 10882795 | SNV | 1 | T | C | Homozygous   |
| NC_037647.1 | 10882801 | SNV | 1 | C | T | Homozygous   |
| NC_037647.1 | 10882803 | SNV | 1 | C | T | Homozygous   |
| NC_037647.1 | 10882811 | SNV | 1 | C | G | Homozygous   |
| NC_037647.1 | 10883407 | SNV | 1 | G | C | Homozygous   |
| NC_037647.1 | 10883415 | SNV | 1 | T | G | Heterozygous |
| NC_037647.1 | 10883417 | SNV | 1 | A | T | Heterozygous |
| NC_037647.1 | 10883420 | SNV | 1 | T | G | Heterozygous |
| NC_037647.1 | 10883432 | SNV | 1 | T | A | Heterozygous |
| NC_037647.1 | 10890265 | SNV | 1 | C | T | Homozygous   |
| NC_037647.1 | 10890396 | SNV | 1 | T | C | Heterozygous |
| NC_037647.1 | 10890492 | SNV | 1 | G | A | Homozygous   |
| NC_037647.1 | 10895317 | SNV | 1 | T | C | Heterozygous |
| NC_037647.1 | 10895328 | SNV | 1 | A | T | Homozygous   |
| NC_037647.1 | 10895842 | SNV | 1 | A | G | Homozygous   |
| NC_037647.1 | 10895846 | SNV | 1 | T | A | Homozygous   |
| NC_037647.1 | 10895851 | SNV | 1 | A | G | Homozygous   |
| NC_037647.1 | 10901762 | SNV | 1 | T | A | Homozygous   |
| NC_037647.1 | 10901772 | SNV | 1 | A | G | Homozygous   |
| NC_037647.1 | 10901792 | SNV | 1 | T | C | Homozygous   |

|             |          |     |   |   |   |              |
|-------------|----------|-----|---|---|---|--------------|
| NC_037647.1 | 10902126 | SNV | 1 | A | G | Heterozygous |
| NC_037647.1 | 10903181 | SNV | 1 | A | C | Heterozygous |
| NC_037647.1 | 10903183 | SNV | 1 | A | T | Homozygous   |
| NC_037647.1 | 10903185 | SNV | 1 | G | A | Homozygous   |
| NC_037647.1 | 10904072 | SNV | 1 | A | G | Heterozygous |
| NC_037647.1 | 10904098 | SNV | 1 | A | C | Homozygous   |
| NC_037647.1 | 10904204 | SNV | 1 | G | A | Heterozygous |
| NC_037647.1 | 10905207 | SNV | 1 | A | G | Homozygous   |
| NC_037647.1 | 10905408 | SNV | 1 | G | A | Heterozygous |
| NC_037647.1 | 10905582 | SNV | 1 | A | G | Homozygous   |
| NC_037647.1 | 10905639 | SNV | 1 | T | C | Homozygous   |
| NC_037647.1 | 10909972 | SNV | 1 | C | A | Homozygous   |
| NC_037647.1 | 10910031 | SNV | 1 | T | A | Homozygous   |
| NC_037647.1 | 10912108 | SNV | 1 | C | T | Heterozygous |
| NC_037647.1 | 10912135 | SNV | 1 | T | C | Homozygous   |
| NC_037647.1 | 10914708 | SNV | 1 | T | A | Homozygous   |
| NC_037647.1 | 10916526 | SNV | 1 | A | T | Homozygous   |
| NC_037647.1 | 10918779 | SNV | 1 | C | T | Heterozygous |
| NC_037647.1 | 10918891 | SNV | 1 | A | G | Homozygous   |
| NC_037647.1 | 10924202 | SNV | 1 | G | T | Homozygous   |
| NC_037647.1 | 10924207 | SNV | 1 | T | A | Homozygous   |
| NC_037647.1 | 10924216 | SNV | 1 | C | A | Homozygous   |
| NC_037647.1 | 10924237 | SNV | 1 | A | C | Homozygous   |
| NC_037647.1 | 10928140 | SNV | 1 | T | C | Homozygous   |
| NC_037647.1 | 10929246 | SNV | 1 | T | C | Heterozygous |
| NC_037647.1 | 10930489 | SNV | 1 | A | C | Homozygous   |
| NC_037647.1 | 10930505 | SNV | 1 | T | G | Homozygous   |
| NC_037647.1 | 10931457 | SNV | 1 | C | T | Heterozygous |
| NC_037647.1 | 10934805 | SNV | 1 | T | C | Homozygous   |
| NC_037647.1 | 10934808 | SNV | 1 | C | T | Homozygous   |
| NC_037647.1 | 10934814 | SNV | 1 | T | G | Homozygous   |
| NC_037647.1 | 10934826 | SNV | 1 | C | G | Homozygous   |
| NC_037647.1 | 10934829 | SNV | 1 | T | A | Homozygous   |
| NC_037647.1 | 10934850 | SNV | 1 | T | C | Heterozygous |
| NC_037647.1 | 10934858 | SNV | 1 | T | G | Heterozygous |
| NC_037647.1 | 10934868 | SNV | 1 | A | T | Heterozygous |
| NC_037647.1 | 10934875 | SNV | 1 | T | C | Heterozygous |
| NC_037647.1 | 10934879 | SNV | 1 | T | C | Heterozygous |
| NC_037647.1 | 10934887 | SNV | 1 | G | C | Homozygous   |
| NC_037647.1 | 10944596 | SNV | 1 | G | A | Heterozygous |
| NC_037647.1 | 10947878 | SNV | 1 | T | C | Heterozygous |
| NC_037647.1 | 10948034 | SNV | 1 | C | T | Heterozygous |
| NC_037647.1 | 10948535 | SNV | 1 | T | C | Homozygous   |
| NC_037647.1 | 10948553 | SNV | 1 | C | T | Heterozygous |
| NC_037647.1 | 10948578 | SNV | 1 | G | C | Heterozygous |
| NC_037647.1 | 10948747 | SNV | 1 | G | C | Homozygous   |
| NC_037647.1 | 10949119 | SNV | 1 | C | T | Heterozygous |
| NC_037647.1 | 10949169 | SNV | 1 | G | A | Heterozygous |
| NC_037647.1 | 10949286 | SNV | 1 | G | A | Heterozygous |
| NC_037647.1 | 10949300 | SNV | 1 | T | G | Heterozygous |
| NC_037647.1 | 10949428 | SNV | 1 | G | C | Homozygous   |

|             |          |     |   |   |   |              |
|-------------|----------|-----|---|---|---|--------------|
| NC_037647.1 | 10949486 | SNV | 1 | T | C | Homozygous   |
| NC_037647.1 | 10949507 | SNV | 1 | C | T | Homozygous   |
| NC_037647.1 | 10953108 | SNV | 1 | A | G | Homozygous   |
| NC_037647.1 | 10953271 | SNV | 1 | A | G | Heterozygous |
| NC_037647.1 | 10954215 | SNV | 1 | G | A | Homozygous   |
| NC_037647.1 | 10954747 | SNV | 1 | A | G | Homozygous   |
| NC_037647.1 | 10956279 | SNV | 1 | C | G | Homozygous   |
| NC_037647.1 | 10957010 | SNV | 1 | T | A | Heterozygous |
| NC_037647.1 | 10957017 | SNV | 1 | A | C | Heterozygous |
| NC_037647.1 | 10957028 | SNV | 1 | A | G | Heterozygous |
| NC_037647.1 | 10957032 | SNV | 1 | G | T | Heterozygous |
| NC_037647.1 | 10957222 | SNV | 1 | T | C | Homozygous   |
| NC_037647.1 | 10957236 | SNV | 1 | T | C | Heterozygous |
| NC_037647.1 | 10957240 | SNV | 1 | G | A | Heterozygous |
| NC_037647.1 | 10957278 | SNV | 1 | T | C | Homozygous   |
| NC_037647.1 | 10957297 | SNV | 1 | T | C | Homozygous   |
| NC_037647.1 | 10957320 | SNV | 1 | A | G | Homozygous   |
| NC_037647.1 | 10957338 | SNV | 1 | A | T | Homozygous   |
| NC_037647.1 | 10957340 | SNV | 1 | A | G | Homozygous   |
| NC_037647.1 | 10957357 | SNV | 1 | T | C | Heterozygous |
| NC_037647.1 | 10957435 | SNV | 1 | G | A | Heterozygous |
| NC_037647.1 | 10957465 | SNV | 1 | T | C | Homozygous   |
| NC_037647.1 | 10957758 | SNV | 1 | A | G | Heterozygous |
| NC_037647.1 | 10957931 | SNV | 1 | G | T | Homozygous   |
| NC_037647.1 | 10958386 | SNV | 1 | T | C | Homozygous   |
| NC_037647.1 | 10958420 | SNV | 1 | T | C | Homozygous   |
| NC_037647.1 | 10958834 | SNV | 1 | T | G | Homozygous   |
| NC_037647.1 | 10958838 | SNV | 1 | T | G | Homozygous   |
| NC_037647.1 | 10958992 | SNV | 1 | A | G | Homozygous   |
| NC_037647.1 | 10964103 | SNV | 1 | T | A | Homozygous   |
| NC_037647.1 | 10964116 | SNV | 1 | T | A | Homozygous   |
| NC_037647.1 | 10965316 | SNV | 1 | G | A | Homozygous   |
| NC_037647.1 | 10965463 | SNV | 1 | A | G | Heterozygous |
| NC_037647.1 | 10965899 | SNV | 1 | T | C | Homozygous   |
| NC_037647.1 | 10967529 | SNV | 1 | A | G | Homozygous   |
| NC_037647.1 | 10967715 | SNV | 1 | C | T | Homozygous   |
| NC_037647.1 | 10967722 | SNV | 1 | G | C | Homozygous   |
| NC_037647.1 | 10971230 | SNV | 1 | A | G | Heterozygous |
| NC_037647.1 | 10971453 | SNV | 1 | T | C | Homozygous   |
| NC_037647.1 | 10971456 | SNV | 1 | T | C | Heterozygous |
| NC_037647.1 | 10971468 | SNV | 1 | A | G | Homozygous   |
| NC_037647.1 | 10971525 | SNV | 1 | C | G | Homozygous   |
| NC_037647.1 | 10971708 | SNV | 1 | C | T | Heterozygous |
| NC_037647.1 | 10971742 | SNV | 1 | A | T | Heterozygous |
| NC_037647.1 | 10971761 | SNV | 1 | A | G | Homozygous   |
| NC_037647.1 | 10971839 | SNV | 1 | A | G | Homozygous   |
| NC_037647.1 | 10971952 | SNV | 1 | T | C | Homozygous   |
| NC_037647.1 | 10971980 | SNV | 1 | T | C | Homozygous   |
| NC_037647.1 | 10971987 | SNV | 1 | A | G | Homozygous   |
| NC_037647.1 | 10973804 | SNV | 1 | G | A | Homozygous   |
| NC_037647.1 | 10973810 | SNV | 1 | G | A | Homozygous   |

|             |          |     |   |   |   |              |
|-------------|----------|-----|---|---|---|--------------|
| NC_037647.1 | 10973874 | SNV | 1 | G | A | Heterozygous |
| NC_037647.1 | 10973884 | SNV | 1 | C | G | Heterozygous |
| NC_037647.1 | 10973887 | SNV | 1 | G | A | Heterozygous |
| NC_037647.1 | 10973889 | SNV | 1 | A | G | Heterozygous |
| NC_037647.1 | 10973902 | SNV | 1 | G | A | Heterozygous |
| NC_037647.1 | 10974745 | SNV | 1 | G | A | Homozygous   |
| NC_037647.1 | 10974792 | SNV | 1 | G | A | Heterozygous |
| NC_037647.1 | 10975425 | SNV | 1 | A | G | Homozygous   |
| NC_037647.1 | 10975483 | SNV | 1 | C | T | Heterozygous |
| NC_037647.1 | 10975490 | SNV | 1 | C | T | Homozygous   |
| NC_037647.1 | 10975532 | SNV | 1 | T | A | Homozygous   |
| NC_037647.1 | 10975537 | SNV | 1 | T | C | Homozygous   |
| NC_037647.1 | 10975635 | SNV | 1 | T | C | Homozygous   |
| NC_037647.1 | 10975639 | SNV | 1 | G | A | Homozygous   |
| NC_037647.1 | 10975650 | SNV | 1 | C | T | Heterozygous |
| NC_037647.1 | 10975662 | SNV | 1 | T | C | Homozygous   |
| NC_037647.1 | 10975697 | SNV | 1 | T | C | Homozygous   |
| NC_037647.1 | 10975748 | SNV | 1 | A | G | Homozygous   |
| NC_037647.1 | 10975751 | SNV | 1 | T | G | Homozygous   |
| NC_037647.1 | 10978116 | SNV | 1 | C | T | Heterozygous |
| NC_037647.1 | 10978132 | SNV | 1 | C | T | Homozygous   |
| NC_037647.1 | 10978260 | SNV | 1 | G | A | Homozygous   |
| NC_037647.1 | 10978899 | SNV | 1 | T | C | Homozygous   |
| NC_037647.1 | 10978902 | SNV | 1 | C | T | Heterozygous |
| NC_037647.1 | 10979166 | SNV | 1 | T | A | Heterozygous |
| NC_037647.1 | 10979295 | SNV | 1 | A | G | Homozygous   |
| NC_037647.1 | 10979401 | SNV | 1 | G | A | Homozygous   |
| NC_037647.1 | 10979419 | SNV | 1 | A | G | Heterozygous |
| NC_037647.1 | 10979872 | SNV | 1 | T | C | Heterozygous |
| NC_037647.1 | 10979874 | SNV | 1 | C | T | Homozygous   |
| NC_037647.1 | 10980212 | SNV | 1 | A | G | Homozygous   |
| NC_037647.1 | 10980351 | SNV | 1 | G | A | Heterozygous |
| NC_037647.1 | 10980374 | SNV | 1 | G | C | Homozygous   |
| NC_037647.1 | 10980382 | SNV | 1 | T | C | Homozygous   |
| NC_037647.1 | 10980396 | SNV | 1 | T | C | Heterozygous |
| NC_037647.1 | 10980516 | SNV | 1 | T | C | Homozygous   |
| NC_037647.1 | 10980809 | SNV | 1 | A | T | Homozygous   |
| NC_037647.1 | 10980814 | SNV | 1 | A | G | Heterozygous |
| NC_037647.1 | 10981195 | SNV | 1 | T | C | Homozygous   |
| NC_037647.1 | 10981361 | SNV | 1 | A | T | Heterozygous |
| NC_037647.1 | 10981414 | SNV | 1 | A | G | Homozygous   |
| NC_037647.1 | 10981470 | SNV | 1 | T | C | Homozygous   |
| NC_037647.1 | 10981486 | SNV | 1 | C | T | Homozygous   |
| NC_037647.1 | 10981570 | SNV | 1 | C | G | Heterozygous |
| NC_037647.1 | 10981882 | SNV | 1 | C | G | Heterozygous |
| NC_037647.1 | 10982386 | SNV | 1 | T | C | Heterozygous |
| NC_037647.1 | 10982533 | SNV | 1 | C | G | Homozygous   |
| NC_037647.1 | 10982568 | SNV | 1 | T | C | Homozygous   |
| NC_037647.1 | 10982607 | SNV | 1 | G | C | Heterozygous |
| NC_037647.1 | 10982815 | SNV | 1 | G | T | Heterozygous |
| NC_037647.1 | 10982881 | SNV | 1 | G | A | Heterozygous |

|             |          |     |   |   |   |              |
|-------------|----------|-----|---|---|---|--------------|
| NC_037647.1 | 10982989 | SNV | 1 | A | T | Homozygous   |
| NC_037647.1 | 10983924 | SNV | 1 | A | G | Homozygous   |
| NC_037647.1 | 10983985 | SNV | 1 | T | C | Homozygous   |
| NC_037647.1 | 10984017 | SNV | 1 | A | G | Homozygous   |
| NC_037647.1 | 10984086 | SNV | 1 | A | G | Heterozygous |
| NC_037647.1 | 10984189 | SNV | 1 | C | T | Heterozygous |
| NC_037647.1 | 10984205 | SNV | 1 | T | C | Heterozygous |
| NC_037647.1 | 10984377 | SNV | 1 | G | A | Heterozygous |
| NC_037647.1 | 10984406 | SNV | 1 | T | C | Heterozygous |
| NC_037647.1 | 10984415 | SNV | 1 | A | G | Homozygous   |
| NC_037647.1 | 10984436 | SNV | 1 | T | C | Heterozygous |
| NC_037647.1 | 10984485 | SNV | 1 | G | A | Heterozygous |
| NC_037647.1 | 10984530 | SNV | 1 | C | T | Heterozygous |
| NC_037647.1 | 10984533 | SNV | 1 | T | C | Homozygous   |
| NC_037647.1 | 10984566 | SNV | 1 | C | T | Homozygous   |
| NC_037647.1 | 10984582 | SNV | 1 | A | G | Heterozygous |
| NC_037647.1 | 10984614 | SNV | 1 | T | C | Heterozygous |
| NC_037647.1 | 10984679 | SNV | 1 | G | A | Heterozygous |
| NC_037647.1 | 10984721 | SNV | 1 | T | C | Homozygous   |
| NC_037647.1 | 10984997 | SNV | 1 | A | G | Heterozygous |
| NC_037647.1 | 10985156 | SNV | 1 | A | G | Heterozygous |
| NC_037647.1 | 10985167 | SNV | 1 | T | C | Heterozygous |
| NC_037647.1 | 10985271 | SNV | 1 | A | G | Heterozygous |
| NC_037647.1 | 10988250 | SNV | 1 | A | G | Homozygous   |
| NC_037647.1 | 10992414 | SNV | 1 | A | G | Homozygous   |
| NC_037647.1 | 10992430 | SNV | 1 | A | G | Heterozygous |
| NC_037647.1 | 10992442 | SNV | 1 | T | C | Heterozygous |
| NC_037647.1 | 10992450 | SNV | 1 | C | T | Heterozygous |
| NC_037647.1 | 11005408 | SNV | 1 | A | T | Heterozygous |
| NC_037647.1 | 11005415 | SNV | 1 | G | A | Heterozygous |
| NC_037647.1 | 11005455 | SNV | 1 | C | T | Heterozygous |
| NC_037647.1 | 11006845 | SNV | 1 | G | A | Homozygous   |
| NC_037647.1 | 11006857 | SNV | 1 | G | A | Homozygous   |
| NC_037647.1 | 11006859 | SNV | 1 | A | T | Heterozygous |
| NC_037647.1 | 11006890 | SNV | 1 | A | G | Heterozygous |
| NC_037647.1 | 11023035 | SNV | 1 | G | C | Heterozygous |
| NC_037647.1 | 11023059 | SNV | 1 | A | G | Heterozygous |
| NC_037647.1 | 11023061 | SNV | 1 | G | A | Heterozygous |
| NC_037647.1 | 11023065 | SNV | 1 | A | G | Homozygous   |
| NC_037647.1 | 11023068 | SNV | 1 | T | G | Heterozygous |
| NC_037647.1 | 11023072 | SNV | 1 | G | T | Heterozygous |
| NC_037647.1 | 11023074 | SNV | 1 | G | C | Heterozygous |
| NC_037647.1 | 11023130 | SNV | 1 | T | C | Homozygous   |
| NC_037647.1 | 11023137 | SNV | 1 | A | G | Homozygous   |
| NC_037647.1 | 11023143 | SNV | 1 | T | C | Homozygous   |
| NC_037647.1 | 11023155 | SNV | 1 | A | G | Homozygous   |
| NC_037647.1 | 11023192 | SNV | 1 | G | T | Heterozygous |
| NC_037647.1 | 11023198 | SNV | 1 | G | T | Heterozygous |
| NC_037647.1 | 11025050 | SNV | 1 | T | C | Homozygous   |
| NC_037647.1 | 11025434 | SNV | 1 | A | G | Homozygous   |
| NC_037647.1 | 11030368 | SNV | 1 | G | T | Heterozygous |



|             |          |     |   |   |   |              |
|-------------|----------|-----|---|---|---|--------------|
| NC_037647.1 | 11030668 | SNV | 1 | C | T | Heterozygous |
| NC_037647.1 | 11031165 | SNV | 1 | C | T | Heterozygous |
| NC_037647.1 | 11031169 | SNV | 1 | T | C | Heterozygous |
| NC_037647.1 | 11032813 | SNV | 1 | T | C | Homozygous   |
| NC_037647.1 | 11032818 | SNV | 1 | C | T | Homozygous   |
| NC_037647.1 | 11032822 | SNV | 1 | T | A | Homozygous   |
| NC_037647.1 | 11032836 | SNV | 1 | T | C | Homozygous   |
| NC_037647.1 | 11032839 | SNV | 1 | C | T | Homozygous   |
| NC_037647.1 | 11038362 | SNV | 1 | A | G | Homozygous   |
| NC_037647.1 | 11039955 | SNV | 1 | T | C | Homozygous   |
| NC_037647.1 | 11039961 | SNV | 1 | A | G | Homozygous   |
| NC_037647.1 | 11040055 | SNV | 1 | T | C | Homozygous   |
| NC_037647.1 | 11040074 | SNV | 1 | G | C | Homozygous   |
| NC_037647.1 | 11043018 | SNV | 1 | C | A | Homozygous   |
| NC_037647.1 | 11043069 | SNV | 1 | C | T | Homozygous   |
| NC_037647.1 | 11043078 | SNV | 1 | C | A | Homozygous   |
| NC_037647.1 | 11043082 | SNV | 1 | C | T | Homozygous   |
| NC_037647.1 | 11043084 | SNV | 1 | G | C | Homozygous   |
| NC_037647.1 | 11043088 | SNV | 1 | C | T | Homozygous   |
| NC_037647.1 | 11044184 | SNV | 1 | C | T | Heterozygous |
| NC_037647.1 | 11044215 | SNV | 1 | T | C | Homozygous   |
| NC_037647.1 | 11044232 | SNV | 1 | A | G | Homozygous   |
| NC_037647.1 | 11044248 | SNV | 1 | C | T | Heterozygous |
| NC_037647.1 | 11045104 | SNV | 1 | C | T | Homozygous   |
| NC_037647.1 | 11047530 | SNV | 1 | A | G | Heterozygous |
| NC_037647.1 | 11049464 | SNV | 1 | T | C | Heterozygous |
| NC_037647.1 | 11049467 | SNV | 1 | T | C | Heterozygous |
| NC_037647.1 | 11049877 | SNV | 1 | G | A | Homozygous   |
| NC_037647.1 | 11049887 | SNV | 1 | T | A | Homozygous   |
| NC_037647.1 | 11051342 | SNV | 1 | G | A | Homozygous   |
| NC_037647.1 | 11053654 | SNV | 1 | G | A | Heterozygous |
| NC_037647.1 | 11053753 | SNV | 1 | G | C | Heterozygous |
| NC_037647.1 | 11053862 | SNV | 1 | T | G | Heterozygous |
| NC_037647.1 | 11055225 | SNV | 1 | C | T | Homozygous   |
| NC_037647.1 | 11055258 | SNV | 1 | C | T | Heterozygous |
| NC_037647.1 | 11055270 | SNV | 1 | C | T | Heterozygous |
| NC_037647.1 | 11055294 | SNV | 1 | T | C | Heterozygous |
| NC_037647.1 | 11055309 | SNV | 1 | C | T | Heterozygous |
| NC_037647.1 | 11056331 | SNV | 1 | G | A | Heterozygous |
| NC_037647.1 | 11091724 | SNV | 1 | C | T | Heterozygous |
| NC_037647.1 | 11092964 | SNV | 1 | T | A | Homozygous   |
| NC_037647.1 | 11092975 | SNV | 1 | C | A | Homozygous   |
| NC_037647.1 | 11092979 | SNV | 1 | G | A | Homozygous   |
| NC_037647.1 | 11092985 | SNV | 1 | T | A | Homozygous   |
| NC_037647.1 | 11094389 | SNV | 1 | T | A | Homozygous   |
| NC_037647.1 | 11094391 | SNV | 1 | T | G | Homozygous   |
| NC_037647.1 | 11094404 | SNV | 1 | A | T | Homozygous   |
| NC_037647.1 | 11096177 | SNV | 1 | G | A | Homozygous   |
| NC_037647.1 | 11096183 | SNV | 1 | A | G | Heterozygous |
| NC_037647.1 | 11096210 | SNV | 1 | T | C | Heterozygous |
| NC_037647.1 | 11096212 | SNV | 1 | C | T | Heterozygous |

|             |          |     |   |   |   |              |
|-------------|----------|-----|---|---|---|--------------|
| NC_037647.1 | 11096217 | SNV | 1 | A | G | Heterozygous |
| NC_037647.1 | 11106454 | SNV | 1 | G | A | Homozygous   |
| NC_037647.1 | 11106502 | SNV | 1 | A | T | Homozygous   |
| NC_037647.1 | 11106505 | SNV | 1 | G | T | Homozygous   |
| NC_037647.1 | 11106511 | SNV | 1 | G | T | Homozygous   |
| NC_037647.1 | 11106568 | SNV | 1 | G | T | Heterozygous |
| NC_037647.1 | 11106574 | SNV | 1 | A | T | Homozygous   |
| NC_037647.1 | 11106585 | SNV | 1 | C | A | Heterozygous |
| NC_037647.1 | 11106596 | SNV | 1 | T | A | Heterozygous |
| NC_037647.1 | 11106682 | SNV | 1 | G | T | Heterozygous |
| NC_037647.1 | 11106688 | SNV | 1 | G | T | Heterozygous |
| NC_037647.1 | 11106754 | SNV | 1 | A | G | Heterozygous |
| NC_037647.1 | 11106799 | SNV | 1 | A | G | Homozygous   |
| NC_037647.1 | 11106960 | SNV | 1 | A | G | Heterozygous |
| NC_037647.1 | 11107087 | SNV | 1 | A | G | Homozygous   |
| NC_037647.1 | 11107098 | SNV | 1 | A | G | Homozygous   |
| NC_037647.1 | 11107131 | SNV | 1 | G | A | Heterozygous |
| NC_037647.1 | 11107132 | SNV | 1 | A | T | Heterozygous |
| NC_037647.1 | 11107134 | SNV | 1 | A | T | Heterozygous |
| NC_037647.1 | 11107143 | SNV | 1 | G | A | Heterozygous |
| NC_037647.1 | 11107169 | SNV | 1 | C | T | Heterozygous |
| NC_037647.1 | 11107368 | SNV | 1 | G | A | Heterozygous |
| NC_037647.1 | 11107373 | SNV | 1 | A | G | Heterozygous |
| NC_037647.1 | 11107379 | SNV | 1 | G | A | Heterozygous |
| NC_037647.1 | 11109044 | SNV | 1 | G | T | Heterozygous |
| NC_037647.1 | 11109052 | SNV | 1 | T | C | Heterozygous |
| NC_037647.1 | 11109055 | SNV | 1 | T | C | Heterozygous |
| NC_037647.1 | 11109057 | SNV | 1 | C | T | Heterozygous |
| NC_037647.1 | 11109082 | SNV | 1 | C | T | Heterozygous |
| NC_037647.1 | 11109134 | SNV | 1 | G | A | Homozygous   |
| NC_037647.1 | 11109196 | SNV | 1 | A | T | Heterozygous |
| NC_037647.1 | 11109337 | SNV | 1 | C | T | Homozygous   |
| NC_037647.1 | 11109450 | SNV | 1 | C | T | Heterozygous |
| NC_037647.1 | 11109464 | SNV | 1 | A | G | Heterozygous |
| NC_037647.1 | 11109500 | SNV | 1 | G | C | Heterozygous |
| NC_037647.1 | 11109699 | SNV | 1 | A | G | Homozygous   |
| NC_037647.1 | 11109827 | SNV | 1 | A | G | Heterozygous |
| NC_037647.1 | 11111116 | SNV | 1 | A | T | Homozygous   |
| NC_037647.1 | 11111169 | SNV | 1 | C | T | Heterozygous |
| NC_037647.1 | 11111240 | SNV | 1 | C | T | Homozygous   |
| NC_037647.1 | 11111296 | SNV | 1 | C | A | Homozygous   |
| NC_037647.1 | 11111367 | SNV | 1 | A | T | Homozygous   |
| NC_037647.1 | 11111424 | SNV | 1 | T | C | Homozygous   |
| NC_037647.1 | 11111650 | SNV | 1 | A | G | Homozygous   |
| NC_037647.1 | 11111662 | SNV | 1 | C | G | Homozygous   |
| NC_037647.1 | 11111669 | SNV | 1 | C | T | Homozygous   |
| NC_037647.1 | 11114175 | SNV | 1 | T | C | Homozygous   |
| NC_037647.1 | 11114410 | SNV | 1 | T | C | Homozygous   |
| NC_037647.1 | 11114469 | SNV | 1 | T | C | Homozygous   |
| NC_037647.1 | 11114697 | SNV | 1 | T | C | Heterozygous |
| NC_037647.1 | 11114757 | SNV | 1 | T | C | Homozygous   |

|             |          |     |   |   |   |              |
|-------------|----------|-----|---|---|---|--------------|
| NC_037647.1 | 11116152 | SNV | 1 | T | A | Homozygous   |
| NC_037647.1 | 11116180 | SNV | 1 | A | T | Homozygous   |
| NC_037647.1 | 11116189 | SNV | 1 | A | G | Homozygous   |
| NC_037647.1 | 11116198 | SNV | 1 | A | T | Homozygous   |
| NC_037647.1 | 11117992 | SNV | 1 | G | A | Homozygous   |
| NC_037647.1 | 11118010 | SNV | 1 | A | G | Homozygous   |
| NC_037647.1 | 11118051 | SNV | 1 | C | T | Heterozygous |
| NC_037647.1 | 11118100 | SNV | 1 | G | A | Homozygous   |
| NC_037647.1 | 11118149 | SNV | 1 | G | T | Heterozygous |
| NC_037647.1 | 11133970 | SNV | 1 | T | C | Homozygous   |
| NC_037647.1 | 11134313 | SNV | 1 | T | C | Homozygous   |
| NC_037647.1 | 11134348 | SNV | 1 | T | C | Heterozygous |
| NC_037647.1 | 11134367 | SNV | 1 | C | T | Heterozygous |
| NC_037647.1 | 11134376 | SNV | 1 | C | T | Heterozygous |
| NC_037647.1 | 11134393 | SNV | 1 | A | G | Homozygous   |
| NC_037647.1 | 11134427 | SNV | 1 | A | G | Homozygous   |
| NC_037647.1 | 11134563 | SNV | 1 | C | T | Heterozygous |
| NC_037647.1 | 11136990 | SNV | 1 | C | T | Heterozygous |
| NC_037647.1 | 11137025 | SNV | 1 | A | G | Homozygous   |
| NC_037647.1 | 11138467 | SNV | 1 | T | A | Homozygous   |
| NC_037647.1 | 11138469 | SNV | 1 | A | T | Homozygous   |
| NC_037647.1 | 11138474 | SNV | 1 | A | G | Homozygous   |
| NC_037647.1 | 11138477 | SNV | 1 | A | T | Homozygous   |
| NC_037647.1 | 11138501 | SNV | 1 | T | C | Homozygous   |
| NC_037647.1 | 11138705 | SNV | 1 | G | A | Homozygous   |
| NC_037647.1 | 11148114 | SNV | 1 | G | A | Homozygous   |
| NC_037647.1 | 11148488 | SNV | 1 | T | C | Homozygous   |
| NC_037647.1 | 11148612 | SNV | 1 | G | A | Heterozygous |
| NC_037647.1 | 11148874 | SNV | 1 | C | T | Heterozygous |
| NC_037647.1 | 11148906 | SNV | 1 | G | A | Homozygous   |
| NC_037647.1 | 11148918 | SNV | 1 | T | C | Heterozygous |
| NC_037647.1 | 11148956 | SNV | 1 | G | A | Heterozygous |
| NC_037647.1 | 11148957 | SNV | 1 | G | A | Heterozygous |
| NC_037647.1 | 11153733 | SNV | 1 | C | T | Homozygous   |
| NC_037647.1 | 11153764 | SNV | 1 | A | T | Homozygous   |
| NC_037647.1 | 11153766 | SNV | 1 | C | T | Homozygous   |
| NC_037647.1 | 11162422 | SNV | 1 | T | C | Homozygous   |
| NC_037647.1 | 11162424 | SNV | 1 | G | C | Homozygous   |
| NC_037647.1 | 11162429 | SNV | 1 | T | C | Homozygous   |
| NC_037647.1 | 11162431 | SNV | 1 | G | C | Homozygous   |
| NC_037647.1 | 11162571 | SNV | 1 | C | T | Heterozygous |
| NC_037647.1 | 11162579 | SNV | 1 | T | A | Homozygous   |
| NC_037647.1 | 11162581 | SNV | 1 | T | A | Heterozygous |
| NC_037647.1 | 11162834 | SNV | 1 | T | G | Homozygous   |
| NC_037647.1 | 11162839 | SNV | 1 | A | G | Homozygous   |
| NC_037647.1 | 11165250 | SNV | 1 | T | C | Homozygous   |
| NC_037647.1 | 11166790 | SNV | 1 | G | A | Heterozygous |
| NC_037647.1 | 11166803 | SNV | 1 | C | T | Heterozygous |
| NC_037647.1 | 11166897 | SNV | 1 | G | A | Homozygous   |
| NC_037647.1 | 11169108 | SNV | 1 | G | A | Homozygous   |
| NC_037647.1 | 11169110 | SNV | 1 | T | A | Homozygous   |

|             |          |     |   |   |   |              |
|-------------|----------|-----|---|---|---|--------------|
| NC_037647.1 | 11169138 | SNV | 1 | T | C | Homozygous   |
| NC_037647.1 | 11169142 | SNV | 1 | G | T | Homozygous   |
| NC_037647.1 | 11196632 | SNV | 1 | C | A | Homozygous   |
| NC_037647.1 | 11198231 | SNV | 1 | A | G | Homozygous   |
| NC_037647.1 | 11198240 | SNV | 1 | T | C | Homozygous   |
| NC_037647.1 | 11198247 | SNV | 1 | A | G | Homozygous   |
| NC_037647.1 | 11198255 | SNV | 1 | G | A | Homozygous   |
| NC_037647.1 | 11198257 | SNV | 1 | A | T | Homozygous   |
| NC_037647.1 | 11209930 | SNV | 1 | T | C | Homozygous   |
| NC_037647.1 | 11209955 | SNV | 1 | C | T | Homozygous   |
| NC_037647.1 | 11237472 | SNV | 1 | C | T | Homozygous   |
| NC_037647.1 | 11237499 | SNV | 1 | G | T | Heterozygous |
| NC_037647.1 | 11237504 | SNV | 1 | A | G | Heterozygous |
| NC_037647.1 | 11237507 | SNV | 1 | G | C | Heterozygous |
| NC_037647.1 | 11239393 | SNV | 1 | C | A | Homozygous   |
| NC_037647.1 | 11239396 | SNV | 1 | T | A | Homozygous   |
| NC_037647.1 | 11239427 | SNV | 1 | A | C | Heterozygous |
| NC_037647.1 | 11239438 | SNV | 1 | A | T | Homozygous   |
| NC_037647.1 | 11239442 | SNV | 1 | C | T | Homozygous   |
| NC_037647.1 | 11239470 | SNV | 1 | T | C | Heterozygous |
| NC_037647.1 | 11239883 | SNV | 1 | A | G | Homozygous   |
| NC_037647.1 | 11239901 | SNV | 1 | G | A | Heterozygous |
| NC_037647.1 | 11239914 | SNV | 1 | A | G | Homozygous   |
| NC_037647.1 | 11240294 | SNV | 1 | A | C | Heterozygous |
| NC_037647.1 | 11240360 | SNV | 1 | G | A | Heterozygous |
| NC_037647.1 | 11240816 | SNV | 1 | A | G | Homozygous   |
| NC_037647.1 | 11240946 | SNV | 1 | A | G | Heterozygous |
| NC_037647.1 | 11241012 | SNV | 1 | C | T | Heterozygous |
| NC_037647.1 | 11241065 | SNV | 1 | T | C | Heterozygous |
| NC_037647.1 | 11241745 | SNV | 1 | T | C | Heterozygous |
| NC_037647.1 | 11241803 | SNV | 1 | A | G | Heterozygous |
| NC_037647.1 | 11241812 | SNV | 1 | A | G | Heterozygous |
| NC_037647.1 | 11241815 | SNV | 1 | G | A | Heterozygous |
| NC_037647.1 | 11241971 | SNV | 1 | T | C | Homozygous   |
| NC_037647.1 | 11242015 | SNV | 1 | G | A | Homozygous   |
| NC_037647.1 | 11242487 | SNV | 1 | C | T | Homozygous   |
| NC_037647.1 | 11243148 | SNV | 1 | G | A | Heterozygous |
| NC_037647.1 | 11258549 | SNV | 1 | T | C | Homozygous   |
| NC_037647.1 | 11258551 | SNV | 1 | A | C | Homozygous   |
| NC_037647.1 | 11258558 | SNV | 1 | G | A | Heterozygous |
| NC_037647.1 | 11258639 | SNV | 1 | T | C | Homozygous   |
| NC_037647.1 | 11258644 | SNV | 1 | G | A | Heterozygous |
| NC_037647.1 | 11258695 | SNV | 1 | A | G | Homozygous   |
| NC_037647.1 | 11258697 | SNV | 1 | T | C | Homozygous   |
| NC_037647.1 | 11259311 | SNV | 1 | G | A | Homozygous   |
| NC_037647.1 | 11259546 | SNV | 1 | C | T | Homozygous   |
| NC_037647.1 | 11259898 | SNV | 1 | A | G | Homozygous   |
| NC_037647.1 | 11259900 | SNV | 1 | A | G | Heterozygous |
| NC_037647.1 | 11259909 | SNV | 1 | G | A | Homozygous   |
| NC_037647.1 | 11260222 | SNV | 1 | C | T | Heterozygous |
| NC_037647.1 | 11260255 | SNV | 1 | A | G | Heterozygous |

|             |          |     |   |   |   |              |
|-------------|----------|-----|---|---|---|--------------|
| NC_037647.1 | 11260281 | SNV | 1 | G | A | Heterozygous |
| NC_037647.1 | 11260288 | SNV | 1 | A | G | Homozygous   |
| NC_037647.1 | 11276175 | SNV | 1 | A | G | Homozygous   |
| NC_037647.1 | 11276203 | SNV | 1 | A | G | Homozygous   |
| NC_037647.1 | 11278133 | SNV | 1 | G | A | Heterozygous |
| NC_037647.1 | 11278137 | SNV | 1 | C | T | Homozygous   |
| NC_037647.1 | 11279905 | SNV | 1 | T | C | Heterozygous |
| NC_037647.1 | 11279953 | SNV | 1 | T | C | Homozygous   |
| NC_037647.1 | 11280317 | SNV | 1 | T | C | Heterozygous |
| NC_037647.1 | 11280320 | SNV | 1 | G | C | Heterozygous |
| NC_037647.1 | 11281394 | SNV | 1 | C | T | Heterozygous |
| NC_037647.1 | 11281654 | SNV | 1 | T | C | Heterozygous |
| NC_037647.1 | 11283248 | SNV | 1 | A | G | Homozygous   |
| NC_037647.1 | 11283874 | SNV | 1 | C | T | Heterozygous |
| NC_037647.1 | 11286796 | SNV | 1 | C | T | Homozygous   |
| NC_037647.1 | 11287006 | SNV | 1 | T | A | Heterozygous |
| NC_037647.1 | 11287812 | SNV | 1 | A | G | Homozygous   |
| NC_037647.1 | 11287930 | SNV | 1 | G | A | Heterozygous |
| NC_037647.1 | 11290063 | SNV | 1 | C | T | Heterozygous |
| NC_037647.1 | 11298941 | SNV | 1 | A | G | Homozygous   |
| NC_037647.1 | 11298978 | SNV | 1 | T | C | Homozygous   |
| NC_037647.1 | 11299109 | SNV | 1 | A | G | Heterozygous |
| NC_037647.1 | 11299299 | SNV | 1 | A | G | Heterozygous |
| NC_037647.1 | 11300206 | SNV | 1 | A | C | Homozygous   |
| NC_037647.1 | 11300209 | SNV | 1 | G | T | Homozygous   |
| NC_037647.1 | 11300632 | SNV | 1 | G | A | Homozygous   |
| NC_037647.1 | 11300649 | SNV | 1 | A | T | Homozygous   |
| NC_037647.1 | 11302294 | SNV | 1 | C | T | Heterozygous |
| NC_037647.1 | 11303327 | SNV | 1 | T | C | Homozygous   |
| NC_037647.1 | 11304411 | SNV | 1 | C | A | Homozygous   |
| NC_037647.1 | 11305395 | SNV | 1 | A | G | Heterozygous |
| NC_037647.1 | 11306086 | SNV | 1 | C | G | Homozygous   |
| NC_037647.1 | 11306639 | SNV | 1 | C | G | Homozygous   |
| NC_037647.1 | 11306659 | SNV | 1 | G | A | Heterozygous |
| NC_037647.1 | 11307198 | SNV | 1 | G | A | Heterozygous |
| NC_037647.1 | 11307393 | SNV | 1 | T | C | Heterozygous |
| NC_037647.1 | 11307418 | SNV | 1 | A | G | Heterozygous |
| NC_037647.1 | 11307517 | SNV | 1 | C | A | Heterozygous |
| NC_037647.1 | 11307866 | SNV | 1 | A | G | Homozygous   |
| NC_037647.1 | 11307922 | SNV | 1 | T | C | Homozygous   |
| NC_037647.1 | 11308052 | SNV | 1 | C | T | Heterozygous |
| NC_037647.1 | 11308055 | SNV | 1 | G | A | Heterozygous |
| NC_037647.1 | 11308476 | SNV | 1 | A | T | Heterozygous |
| NC_037647.1 | 11308482 | SNV | 1 | T | A | Homozygous   |
| NC_037647.1 | 11308491 | SNV | 1 | A | G | Homozygous   |
| NC_037647.1 | 11308651 | SNV | 1 | C | T | Heterozygous |
| NC_037647.1 | 11308857 | SNV | 1 | C | A | Homozygous   |
| NC_037647.1 | 11308950 | SNV | 1 | A | T | Homozygous   |
| NC_037647.1 | 11309148 | SNV | 1 | T | C | Heterozygous |
| NC_037647.1 | 11309305 | SNV | 1 | T | C | Heterozygous |
| NC_037647.1 | 11309452 | SNV | 1 | T | G | Homozygous   |

|             |          |     |   |   |   |              |
|-------------|----------|-----|---|---|---|--------------|
| NC_037647.1 | 11309462 | SNV | 1 | A | G | Heterozygous |
| NC_037647.1 | 11309510 | SNV | 1 | T | C | Heterozygous |
| NC_037647.1 | 11309522 | SNV | 1 | A | G | Homozygous   |
| NC_037647.1 | 11309600 | SNV | 1 | G | A | Heterozygous |
| NC_037647.1 | 11309620 | SNV | 1 | G | C | Homozygous   |
| NC_037647.1 | 11309637 | SNV | 1 | A | G | Heterozygous |
| NC_037647.1 | 11309708 | SNV | 1 | A | G | Heterozygous |
| NC_037647.1 | 11309732 | SNV | 1 | G | A | Homozygous   |
| NC_037647.1 | 11309811 | SNV | 1 | T | C | Homozygous   |
| NC_037647.1 | 11309953 | SNV | 1 | G | C | Heterozygous |
| NC_037647.1 | 11309966 | SNV | 1 | G | A | Heterozygous |
| NC_037647.1 | 11310046 | SNV | 1 | G | A | Homozygous   |
| NC_037647.1 | 11310190 | SNV | 1 | T | C | Homozygous   |
| NC_037647.1 | 11310208 | SNV | 1 | T | C | Homozygous   |
| NC_037647.1 | 11310233 | SNV | 1 | A | C | Heterozygous |
| NC_037647.1 | 11310254 | SNV | 1 | G | A | Heterozygous |
| NC_037647.1 | 11310257 | SNV | 1 | C | T | Homozygous   |
| NC_037647.1 | 11310259 | SNV | 1 | A | G | Homozygous   |
| NC_037647.1 | 11310268 | SNV | 1 | A | G | Homozygous   |
| NC_037647.1 | 11310323 | SNV | 1 | T | C | Homozygous   |
| NC_037647.1 | 11310326 | SNV | 1 | G | A | Homozygous   |
| NC_037647.1 | 11310381 | SNV | 1 | T | C | Homozygous   |
| NC_037647.1 | 11310408 | SNV | 1 | T | C | Homozygous   |
| NC_037647.1 | 11310417 | SNV | 1 | C | T | Homozygous   |
| NC_037647.1 | 11310436 | SNV | 1 | A | G | Heterozygous |
| NC_037647.1 | 11310474 | SNV | 1 | T | C | Heterozygous |
| NC_037647.1 | 11310553 | SNV | 1 | T | A | Homozygous   |
| NC_037647.1 | 11310651 | SNV | 1 | G | C | Heterozygous |
| NC_037647.1 | 11310693 | SNV | 1 | C | T | Heterozygous |
| NC_037647.1 | 11310708 | SNV | 1 | C | T | Heterozygous |
| NC_037647.1 | 11310905 | SNV | 1 | C | T | Heterozygous |
| NC_037647.1 | 11322212 | SNV | 1 | G | C | Heterozygous |
| NC_037647.1 | 11322217 | SNV | 1 | C | G | Heterozygous |
| NC_037647.1 | 11334952 | SNV | 1 | A | C | Heterozygous |
| NC_037647.1 | 11334961 | SNV | 1 | A | T | Homozygous   |
| NC_037647.1 | 11334968 | SNV | 1 | A | T | Homozygous   |
| NC_037647.1 | 11348363 | SNV | 1 | G | T | Homozygous   |
| NC_037647.1 | 11348366 | SNV | 1 | T | A | Homozygous   |
| NC_037647.1 | 11348401 | SNV | 1 | T | A | Homozygous   |
| NC_037647.1 | 11349168 | SNV | 1 | C | T | Homozygous   |
| NC_037647.1 | 11349210 | SNV | 1 | C | T | Homozygous   |
| NC_037647.1 | 11349212 | SNV | 1 | C | G | Homozygous   |
| NC_037647.1 | 11349214 | SNV | 1 | G | A | Homozygous   |
| NC_037647.1 | 11356993 | SNV | 1 | G | A | Homozygous   |
| NC_037647.1 | 11357143 | SNV | 1 | A | G | Heterozygous |
| NC_037647.1 | 11357145 | SNV | 1 | G | A | Homozygous   |
| NC_037647.1 | 11357186 | SNV | 1 | A | G | Homozygous   |
| NC_037647.1 | 11357220 | SNV | 1 | T | G | Homozygous   |
| NC_037647.1 | 11357495 | SNV | 1 | C | T | Heterozygous |
| NC_037647.1 | 11359567 | SNV | 1 | A | G | Heterozygous |
| NC_037647.1 | 11359570 | SNV | 1 | T | G | Heterozygous |

|             |          |     |   |   |   |              |
|-------------|----------|-----|---|---|---|--------------|
| NC_037647.1 | 11359572 | SNV | 1 | A | G | Heterozygous |
| NC_037647.1 | 11359592 | SNV | 1 | G | A | Heterozygous |
| NC_037647.1 | 11359769 | SNV | 1 | A | G | Heterozygous |
| NC_037647.1 | 11360109 | SNV | 1 | T | C | Homozygous   |
| NC_037647.1 | 11386672 | SNV | 1 | C | A | Homozygous   |
| NC_037647.1 | 11395160 | SNV | 1 | G | A | Heterozygous |
| NC_037647.1 | 11395174 | SNV | 1 | G | A | Heterozygous |
| NC_037647.1 | 11397098 | SNV | 1 | G | C | Heterozygous |
| NC_037647.1 | 11399222 | SNV | 1 | A | G | Homozygous   |
| NC_037647.1 | 11399581 | SNV | 1 | A | C | Homozygous   |
| NC_037647.1 | 11399624 | SNV | 1 | A | G | Heterozygous |
| NC_037647.1 | 11399686 | SNV | 1 | A | C | Heterozygous |
| NC_037647.1 | 11399752 | SNV | 1 | A | G | Heterozygous |
| NC_037647.1 | 11400413 | SNV | 1 | G | A | Heterozygous |
| NC_037647.1 | 11400608 | SNV | 1 | C | T | Heterozygous |
| NC_037647.1 | 11400612 | SNV | 1 | C | T | Homozygous   |
| NC_037647.1 | 11400657 | SNV | 1 | A | G | Heterozygous |
| NC_037647.1 | 11400678 | SNV | 1 | A | T | Heterozygous |
| NC_037647.1 | 11400687 | SNV | 1 | G | A | Heterozygous |
| NC_037647.1 | 11400734 | SNV | 1 | G | A | Heterozygous |
| NC_037647.1 | 11400934 | SNV | 1 | G | A | Homozygous   |
| NC_037647.1 | 11401495 | SNV | 1 | G | A | Heterozygous |
| NC_037647.1 | 11401509 | SNV | 1 | G | T | Heterozygous |
| NC_037647.1 | 11401514 | SNV | 1 | C | T | Heterozygous |
| NC_037647.1 | 11401532 | SNV | 1 | A | G | Homozygous   |
| NC_037647.1 | 11401548 | SNV | 1 | C | T | Heterozygous |
| NC_037647.1 | 11401661 | SNV | 1 | T | C | Homozygous   |
| NC_037647.1 | 11402317 | SNV | 1 | T | C | Heterozygous |
| NC_037647.1 | 11402343 | SNV | 1 | T | C | Homozygous   |
| NC_037647.1 | 11402400 | SNV | 1 | G | A | Heterozygous |
| NC_037647.1 | 11402420 | SNV | 1 | T | A | Heterozygous |
| NC_037647.1 | 11402446 | SNV | 1 | G | T | Heterozygous |
| NC_037647.1 | 11402623 | SNV | 1 | C | T | Heterozygous |
| NC_037647.1 | 11403010 | SNV | 1 | T | C | Heterozygous |
| NC_037647.1 | 11408759 | SNV | 1 | C | T | Homozygous   |
| NC_037647.1 | 11409984 | SNV | 1 | G | A | Heterozygous |
| NC_037647.1 | 11411197 | SNV | 1 | T | C | Heterozygous |
| NC_037647.1 | 11412280 | SNV | 1 | T | C | Homozygous   |
| NC_037647.1 | 11412417 | SNV | 1 | C | T | Homozygous   |
| NC_037647.1 | 11412447 | SNV | 1 | T | C | Homozygous   |
| NC_037647.1 | 11412468 | SNV | 1 | C | T | Homozygous   |
| NC_037647.1 | 11412774 | SNV | 1 | G | A | Homozygous   |
| NC_037647.1 | 11412993 | SNV | 1 | A | G | Heterozygous |
| NC_037647.1 | 11416040 | SNV | 1 | T | C | Homozygous   |
| NC_037647.1 | 11421513 | SNV | 1 | T | A | Homozygous   |
| NC_037647.1 | 11421519 | SNV | 1 | A | T | Homozygous   |
| NC_037647.1 | 11421551 | SNV | 1 | T | C | Heterozygous |
| NC_037647.1 | 11421568 | SNV | 1 | G | A | Heterozygous |
| NC_037647.1 | 11423316 | SNV | 1 | G | A | Heterozygous |
| NC_037647.1 | 11427631 | SNV | 1 | C | T | Homozygous   |
| NC_037647.1 | 11432772 | SNV | 1 | A | G | Homozygous   |

|             |          |     |   |   |   |              |
|-------------|----------|-----|---|---|---|--------------|
| NC_037647.1 | 11432847 | SNV | 1 | C | T | Heterozygous |
| NC_037647.1 | 11433495 | SNV | 1 | G | A | Homozygous   |
| NC_037647.1 | 11436088 | SNV | 1 | T | C | Heterozygous |
| NC_037647.1 | 11436139 | SNV | 1 | G | A | Homozygous   |
| NC_037647.1 | 11444856 | SNV | 1 | A | T | Homozygous   |
| NC_037647.1 | 11444896 | SNV | 1 | A | G | Homozygous   |
| NC_037647.1 | 11466521 | SNV | 1 | G | A | Heterozygous |
| NC_037647.1 | 11466586 | SNV | 1 | C | T | Homozygous   |
| NC_037647.1 | 11466825 | SNV | 1 | C | T | Homozygous   |
| NC_037647.1 | 11466862 | SNV | 1 | T | A | Heterozygous |
| NC_037647.1 | 11469739 | SNV | 1 | C | T | Heterozygous |
| NC_037647.1 | 11469873 | SNV | 1 | G | A | Heterozygous |
| NC_037647.1 | 11470043 | SNV | 1 | A | G | Homozygous   |
| NC_037647.1 | 11470648 | SNV | 1 | G | A | Heterozygous |
| NC_037647.1 | 11470767 | SNV | 1 | A | G | Homozygous   |
| NC_037647.1 | 11488095 | SNV | 1 | A | G | Homozygous   |
| NC_037647.1 | 11488125 | SNV | 1 | T | C | Homozygous   |
| NC_037647.1 | 11488346 | SNV | 1 | G | A | Heterozygous |
| NC_037647.1 | 11488905 | SNV | 1 | T | A | Heterozygous |
| NC_037647.1 | 11490803 | SNV | 1 | T | A | Homozygous   |
| NC_037647.1 | 11492061 | SNV | 1 | A | T | Homozygous   |
| NC_037647.1 | 11492447 | SNV | 1 | T | A | Heterozygous |
| NC_037647.1 | 11492519 | SNV | 1 | A | T | Homozygous   |
| NC_037647.1 | 11492522 | SNV | 1 | T | C | Heterozygous |
| NC_037647.1 | 11492585 | SNV | 1 | G | A | Heterozygous |
| NC_037647.1 | 11493051 | SNV | 1 | A | T | Homozygous   |
| NC_037647.1 | 11493682 | SNV | 1 | C | T | Heterozygous |
| NC_037647.1 | 11493753 | SNV | 1 | T | G | Heterozygous |
| NC_037647.1 | 11493831 | SNV | 1 | G | A | Heterozygous |
| NC_037647.1 | 11494782 | SNV | 1 | G | A | Homozygous   |
| NC_037647.1 | 11494995 | SNV | 1 | G | A | Homozygous   |
| NC_037647.1 | 11500001 | SNV | 1 | G | A | Homozygous   |
| NC_037647.1 | 11500066 | SNV | 1 | T | C | Homozygous   |
| NC_037647.1 | 11503230 | SNV | 1 | G | T | Heterozygous |
| NC_037647.1 | 11503261 | SNV | 1 | C | T | Heterozygous |
| NC_037647.1 | 11503468 | SNV | 1 | G | C | Homozygous   |
| NC_037647.1 | 11503498 | SNV | 1 | C | T | Heterozygous |
| NC_037647.1 | 11503512 | SNV | 1 | A | C | Heterozygous |
| NC_037647.1 | 11503783 | SNV | 1 | T | C | Heterozygous |
| NC_037647.1 | 11503789 | SNV | 1 | C | T | Heterozygous |
| NC_037647.1 | 11503798 | SNV | 1 | G | A | Heterozygous |
| NC_037647.1 | 11503805 | SNV | 1 | C | G | Heterozygous |
| NC_037647.1 | 11503811 | SNV | 1 | C | T | Heterozygous |
| NC_037647.1 | 11503864 | SNV | 1 | C | A | Homozygous   |
| NC_037647.1 | 11503887 | SNV | 1 | C | T | Heterozygous |
| NC_037647.1 | 11503916 | SNV | 1 | G | A | Heterozygous |
| NC_037647.1 | 11503930 | SNV | 1 | T | C | Heterozygous |
| NC_037647.1 | 11504338 | SNV | 1 | T | C | Heterozygous |
| NC_037647.1 | 11504357 | SNV | 1 | A | G | Heterozygous |
| NC_037647.1 | 11504388 | SNV | 1 | C | T | Heterozygous |
| NC_037647.1 | 11506337 | SNV | 1 | A | T | Homozygous   |



|             |          |     |   |   |   |              |
|-------------|----------|-----|---|---|---|--------------|
| NC_037647.1 | 11506346 | SNV | 1 | G | A | Heterozygous |
| NC_037647.1 | 11506372 | SNV | 1 | A | G | Homozygous   |
| NC_037647.1 | 11506394 | SNV | 1 | G | A | Homozygous   |
| NC_037647.1 | 11506475 | SNV | 1 | G | A | Heterozygous |
| NC_037647.1 | 11506527 | SNV | 1 | C | T | Homozygous   |
| NC_037647.1 | 11506543 | SNV | 1 | A | G | Homozygous   |
| NC_037647.1 | 11506657 | SNV | 1 | G | C | Homozygous   |
| NC_037647.1 | 11506696 | SNV | 1 | C | T | Heterozygous |
| NC_037647.1 | 11506742 | SNV | 1 | G | A | Heterozygous |
| NC_037647.1 | 11506744 | SNV | 1 | G | A | Homozygous   |
| NC_037647.1 | 11506757 | SNV | 1 | C | T | Heterozygous |
| NC_037647.1 | 11506764 | SNV | 1 | T | A | Heterozygous |
| NC_037647.1 | 11506787 | SNV | 1 | A | C | Heterozygous |
| NC_037647.1 | 11506787 | SNV | 1 | A | T | Heterozygous |
| NC_037647.1 | 11506805 | SNV | 1 | C | T | Heterozygous |
| NC_037647.1 | 11506824 | SNV | 1 | G | A | Heterozygous |
| NC_037647.1 | 11506890 | SNV | 1 | A | G | Homozygous   |
| NC_037647.1 | 11506956 | SNV | 1 | T | C | Homozygous   |
| NC_037647.1 | 11506971 | SNV | 1 | G | A | Heterozygous |
| NC_037647.1 | 11506995 | SNV | 1 | G | A | Homozygous   |
| NC_037647.1 | 11507170 | SNV | 1 | A | T | Homozygous   |
| NC_037647.1 | 11508445 | SNV | 1 | G | C | Heterozygous |
| NC_037647.1 | 11508493 | SNV | 1 | G | C | Homozygous   |
| NC_037647.1 | 11509917 | SNV | 1 | A | C | Homozygous   |
| NC_037647.1 | 11509919 | SNV | 1 | A | T | Homozygous   |
| NC_037647.1 | 11511320 | SNV | 1 | T | G | Homozygous   |
| NC_037647.1 | 11512024 | SNV | 1 | G | C | Homozygous   |
| NC_037647.1 | 11516238 | SNV | 1 | T | G | Heterozygous |
| NC_037647.1 | 11516330 | SNV | 1 | G | A | Heterozygous |
| NC_037647.1 | 11516346 | SNV | 1 | A | G | Heterozygous |
| NC_037647.1 | 11516351 | SNV | 1 | G | T | Homozygous   |
| NC_037647.1 | 11516500 | SNV | 1 | G | A | Heterozygous |
| NC_037647.1 | 11517281 | SNV | 1 | T | G | Homozygous   |
| NC_037647.1 | 11517643 | SNV | 1 | G | A | Homozygous   |
| NC_037647.1 | 11517663 | SNV | 1 | T | C | Homozygous   |
| NC_037647.1 | 11517667 | SNV | 1 | C | A | Heterozygous |
| NC_037647.1 | 11517696 | SNV | 1 | A | G | Heterozygous |
| NC_037647.1 | 11517843 | SNV | 1 | C | T | Heterozygous |
| NC_037647.1 | 11517846 | SNV | 1 | G | C | Heterozygous |
| NC_037647.1 | 11517848 | SNV | 1 | A | C | Heterozygous |
| NC_037647.1 | 11517917 | SNV | 1 | G | T | Heterozygous |
| NC_037647.1 | 11517952 | SNV | 1 | A | G | Heterozygous |
| NC_037647.1 | 11517955 | SNV | 1 | C | T | Heterozygous |
| NC_037647.1 | 11518050 | SNV | 1 | C | T | Homozygous   |
| NC_037647.1 | 11518107 | SNV | 1 | T | A | Homozygous   |
| NC_037647.1 | 11518466 | SNV | 1 | A | C | Heterozygous |
| NC_037647.1 | 11518468 | SNV | 1 | A | G | Heterozygous |
| NC_037647.1 | 11518631 | SNV | 1 | A | G | Heterozygous |
| NC_037647.1 | 11518647 | SNV | 1 | C | T | Homozygous   |
| NC_037647.1 | 11518650 | SNV | 1 | C | T | Heterozygous |
| NC_037647.1 | 11518792 | SNV | 1 | G | A | Homozygous   |

|             |          |     |   |   |   |              |
|-------------|----------|-----|---|---|---|--------------|
| NC_037647.1 | 11518825 | SNV | 1 | C | T | Homozygous   |
| NC_037647.1 | 11518830 | SNV | 1 | C | T | Homozygous   |
| NC_037647.1 | 11518840 | SNV | 1 | T | C | Homozygous   |
| NC_037647.1 | 11518843 | SNV | 1 | A | G | Homozygous   |
| NC_037647.1 | 11519117 | SNV | 1 | T | A | Heterozygous |
| NC_037647.1 | 11519242 | SNV | 1 | G | A | Heterozygous |
| NC_037647.1 | 11519281 | SNV | 1 | C | T | Homozygous   |
| NC_037647.1 | 11519325 | SNV | 1 | T | C | Homozygous   |
| NC_037647.1 | 11519422 | SNV | 1 | A | C | Homozygous   |
| NC_037647.1 | 11519472 | SNV | 1 | C | T | Homozygous   |
| NC_037647.1 | 11519569 | SNV | 1 | A | C | Homozygous   |
| NC_037647.1 | 11519661 | SNV | 1 | G | A | Heterozygous |
| NC_037647.1 | 11519702 | SNV | 1 | A | G | Homozygous   |
| NC_037647.1 | 11519710 | SNV | 1 | A | G | Homozygous   |
| NC_037647.1 | 11520912 | SNV | 1 | A | G | Homozygous   |
| NC_037647.1 | 11520933 | SNV | 1 | T | C | Heterozygous |
| NC_037647.1 | 11520944 | SNV | 1 | A | G | Homozygous   |
| NC_037647.1 | 11521062 | SNV | 1 | T | G | Homozygous   |
| NC_037647.1 | 11521070 | SNV | 1 | C | G | Heterozygous |
| NC_037647.1 | 11521112 | SNV | 1 | T | C | Heterozygous |
| NC_037647.1 | 11521156 | SNV | 1 | C | A | Heterozygous |
| NC_037647.1 | 11521170 | SNV | 1 | G | A | Heterozygous |
| NC_037647.1 | 11521256 | SNV | 1 | G | A | Homozygous   |
| NC_037647.1 | 11521392 | SNV | 1 | T | C | Heterozygous |
| NC_037647.1 | 11521604 | SNV | 1 | A | G | Homozygous   |
| NC_037647.1 | 11521664 | SNV | 1 | A | G | Heterozygous |
| NC_037647.1 | 11521676 | SNV | 1 | A | G | Heterozygous |
| NC_037647.1 | 11521728 | SNV | 1 | T | C | Homozygous   |
| NC_037647.1 | 11521738 | SNV | 1 | T | C | Heterozygous |
| NC_037647.1 | 11522281 | SNV | 1 | A | G | Heterozygous |
| NC_037647.1 | 11522484 | SNV | 1 | A | G | Homozygous   |
| NC_037647.1 | 11522831 | SNV | 1 | C | T | Heterozygous |
| NC_037647.1 | 11522912 | SNV | 1 | C | A | Homozygous   |
| NC_037647.1 | 11522922 | SNV | 1 | A | G | Homozygous   |
| NC_037647.1 | 11523001 | SNV | 1 | G | C | Heterozygous |
| NC_037647.1 | 11523010 | SNV | 1 | G | A | Heterozygous |
| NC_037647.1 | 11523067 | SNV | 1 | G | A | Heterozygous |
| NC_037647.1 | 11523629 | SNV | 1 | C | T | Heterozygous |
| NC_037647.1 | 11523648 | SNV | 1 | G | C | Heterozygous |
| NC_037647.1 | 11523657 | SNV | 1 | G | C | Homozygous   |
| NC_037647.1 | 11523661 | SNV | 1 | G | A | Homozygous   |
| NC_037647.1 | 11523870 | SNV | 1 | A | G | Homozygous   |
| NC_037647.1 | 11523936 | SNV | 1 | T | G | Homozygous   |
| NC_037647.1 | 11524098 | SNV | 1 | C | T | Heterozygous |
| NC_037647.1 | 11524109 | SNV | 1 | T | C | Homozygous   |
| NC_037647.1 | 11524113 | SNV | 1 | C | T | Heterozygous |
| NC_037647.1 | 11524120 | SNV | 1 | T | C | Homozygous   |
| NC_037647.1 | 11524148 | SNV | 1 | T | G | Heterozygous |
| NC_037647.1 | 11524176 | SNV | 1 | G | A | Homozygous   |
| NC_037647.1 | 11524178 | SNV | 1 | G | A | Homozygous   |
| NC_037647.1 | 11524186 | SNV | 1 | T | A | Heterozygous |

|             |          |     |   |   |   |              |
|-------------|----------|-----|---|---|---|--------------|
| NC_037647.1 | 11524272 | SNV | 1 | G | A | Heterozygous |
| NC_037647.1 | 11524277 | SNV | 1 | A | G | Homozygous   |
| NC_037647.1 | 11524284 | SNV | 1 | T | G | Heterozygous |
| NC_037647.1 | 11524311 | SNV | 1 | G | C | Heterozygous |
| NC_037647.1 | 11524332 | SNV | 1 | G | A | Heterozygous |
| NC_037647.1 | 11524335 | SNV | 1 | G | T | Heterozygous |
| NC_037647.1 | 11524350 | SNV | 1 | G | A | Heterozygous |
| NC_037647.1 | 11524361 | SNV | 1 | T | C | Heterozygous |
| NC_037647.1 | 11524405 | SNV | 1 | C | T | Heterozygous |
| NC_037647.1 | 11524563 | SNV | 1 | A | G | Homozygous   |
| NC_037647.1 | 11524566 | SNV | 1 | T | C | Homozygous   |
| NC_037647.1 | 11524593 | SNV | 1 | A | G | Homozygous   |
| NC_037647.1 | 11524609 | SNV | 1 | A | G | Heterozygous |
| NC_037647.1 | 11524620 | SNV | 1 | A | G | Heterozygous |
| NC_037647.1 | 11524628 | SNV | 1 | T | C | Heterozygous |
| NC_037647.1 | 11524631 | SNV | 1 | G | A | Heterozygous |
| NC_037647.1 | 11524679 | SNV | 1 | G | A | Homozygous   |
| NC_037647.1 | 11524709 | SNV | 1 | T | C | Homozygous   |
| NC_037647.1 | 11524712 | SNV | 1 | A | G | Homozygous   |
| NC_037647.1 | 11524715 | SNV | 1 | A | G | Heterozygous |
| NC_037647.1 | 11524775 | SNV | 1 | C | T | Heterozygous |
| NC_037647.1 | 11524844 | SNV | 1 | G | A | Homozygous   |
| NC_037647.1 | 11524876 | SNV | 1 | G | A | Heterozygous |
| NC_037647.1 | 11525155 | SNV | 1 | T | C | Homozygous   |
| NC_037647.1 | 11525159 | SNV | 1 | T | C | Homozygous   |
| NC_037647.1 | 11526967 | SNV | 1 | G | A | Heterozygous |
| NC_037647.1 | 11527020 | SNV | 1 | T | C | Homozygous   |
| NC_037647.1 | 11527023 | SNV | 1 | C | T | Homozygous   |
| NC_037647.1 | 11527046 | SNV | 1 | A | G | Heterozygous |
| NC_037647.1 | 11527063 | SNV | 1 | T | C | Homozygous   |
| NC_037647.1 | 11527104 | SNV | 1 | A | G | Homozygous   |
| NC_037647.1 | 11527204 | SNV | 1 | G | A | Heterozygous |
| NC_037647.1 | 11527593 | SNV | 1 | A | G | Heterozygous |
| NC_037647.1 | 11527598 | SNV | 1 | A | G | Heterozygous |
| NC_037647.1 | 11527606 | SNV | 1 | A | G | Heterozygous |
| NC_037647.1 | 11527631 | SNV | 1 | G | A | Heterozygous |
| NC_037647.1 | 11527640 | SNV | 1 | A | G | Homozygous   |
| NC_037647.1 | 11527662 | SNV | 1 | G | T | Heterozygous |
| NC_037647.1 | 11527664 | SNV | 1 | G | A | Heterozygous |
| NC_037647.1 | 11527677 | SNV | 1 | G | A | Heterozygous |
| NC_037647.1 | 11527680 | SNV | 1 | A | G | Heterozygous |
| NC_037647.1 | 11527702 | SNV | 1 | A | G | Heterozygous |
| NC_037647.1 | 11527725 | SNV | 1 | G | A | Heterozygous |
| NC_037647.1 | 11527736 | SNV | 1 | G | A | Heterozygous |
| NC_037647.1 | 11527764 | SNV | 1 | G | A | Heterozygous |
| NC_037647.1 | 11527770 | SNV | 1 | G | A | Heterozygous |
| NC_037647.1 | 11527773 | SNV | 1 | A | T | Heterozygous |
| NC_037647.1 | 11527775 | SNV | 1 | G | A | Heterozygous |
| NC_037647.1 | 11527777 | SNV | 1 | G | A | Heterozygous |
| NC_037647.1 | 11527779 | SNV | 1 | A | G | Heterozygous |
| NC_037647.1 | 11527784 | SNV | 1 | A | G | Homozygous   |

|             |          |     |   |   |   |              |
|-------------|----------|-----|---|---|---|--------------|
| NC_037647.1 | 11527800 | SNV | 1 | A | G | Homozygous   |
| NC_037647.1 | 11527802 | SNV | 1 | A | G | Homozygous   |
| NC_037647.1 | 11527805 | SNV | 1 | G | T | Heterozygous |
| NC_037647.1 | 11527807 | SNV | 1 | G | A | Homozygous   |
| NC_037647.1 | 11527837 | SNV | 1 | A | G | Heterozygous |
| NC_037647.1 | 11527842 | SNV | 1 | A | G | Heterozygous |
| NC_037647.1 | 11527863 | SNV | 1 | A | G | Heterozygous |
| NC_037647.1 | 11527865 | SNV | 1 | G | A | Heterozygous |
| NC_037647.1 | 11527875 | SNV | 1 | A | G | Heterozygous |
| NC_037647.1 | 11527878 | SNV | 1 | A | G | Heterozygous |
| NC_037647.1 | 11527888 | SNV | 1 | A | G | Heterozygous |
| NC_037647.1 | 11528015 | SNV | 1 | A | G | Homozygous   |
| NC_037647.1 | 11528017 | SNV | 1 | A | G | Homozygous   |
| NC_037647.1 | 11528022 | SNV | 1 | T | G | Heterozygous |
| NC_037647.1 | 11528026 | SNV | 1 | T | A | Heterozygous |
| NC_037647.1 | 11528060 | SNV | 1 | G | A | Heterozygous |
| NC_037647.1 | 11528062 | SNV | 1 | G | C | Homozygous   |
| NC_037647.1 | 11528087 | SNV | 1 | A | G | Homozygous   |
| NC_037647.1 | 11528092 | SNV | 1 | G | A | Homozygous   |
| NC_037647.1 | 11528107 | SNV | 1 | T | G | Heterozygous |
| NC_037647.1 | 11528135 | SNV | 1 | A | G | Heterozygous |
| NC_037647.1 | 11528149 | SNV | 1 | A | G | Homozygous   |
| NC_037647.1 | 11528184 | SNV | 1 | C | A | Homozygous   |
| NC_037647.1 | 11528203 | SNV | 1 | C | T | Heterozygous |
| NC_037647.1 | 11528267 | SNV | 1 | C | T | Heterozygous |
| NC_037647.1 | 11528496 | SNV | 1 | T | A | Homozygous   |
| NC_037647.1 | 11528501 | SNV | 1 | T | C | Homozygous   |
| NC_037647.1 | 11528538 | SNV | 1 | A | T | Homozygous   |
| NC_037647.1 | 11528553 | SNV | 1 | T | A | Homozygous   |
| NC_037647.1 | 11528823 | SNV | 1 | G | A | Homozygous   |
| NC_037647.1 | 11528832 | SNV | 1 | G | A | Heterozygous |
| NC_037647.1 | 11528949 | SNV | 1 | G | A | Heterozygous |
| NC_037647.1 | 11529099 | SNV | 1 | A | G | Homozygous   |
| NC_037647.1 | 11529119 | SNV | 1 | G | A | Heterozygous |
| NC_037647.1 | 11529177 | SNV | 1 | T | C | Homozygous   |
| NC_037647.1 | 11529198 | SNV | 1 | C | G | Heterozygous |
| NC_037647.1 | 11529234 | SNV | 1 | A | G | Homozygous   |
| NC_037647.1 | 11529252 | SNV | 1 | T | C | Homozygous   |
| NC_037647.1 | 11529257 | SNV | 1 | G | A | Homozygous   |
| NC_037647.1 | 11529268 | SNV | 1 | A | G | Heterozygous |
| NC_037647.1 | 11529280 | SNV | 1 | T | C | Homozygous   |
| NC_037647.1 | 11529293 | SNV | 1 | T | C | Homozygous   |
| NC_037647.1 | 11529366 | SNV | 1 | G | A | Heterozygous |
| NC_037647.1 | 11529430 | SNV | 1 | G | A | Heterozygous |
| NC_037647.1 | 11529443 | SNV | 1 | A | G | Heterozygous |
| NC_037647.1 | 11529468 | SNV | 1 | G | A | Heterozygous |
| NC_037647.1 | 11529493 | SNV | 1 | G | A | Heterozygous |
| NC_037647.1 | 11529498 | SNV | 1 | C | A | Homozygous   |
| NC_037647.1 | 11529503 | SNV | 1 | G | A | Heterozygous |
| NC_037647.1 | 11529527 | SNV | 1 | G | A | Homozygous   |
| NC_037647.1 | 11529542 | SNV | 1 | T | G | Heterozygous |

|             |          |     |   |   |   |              |
|-------------|----------|-----|---|---|---|--------------|
| NC_037647.1 | 11529552 | SNV | 1 | A | G | Homozygous   |
| NC_037647.1 | 11529555 | SNV | 1 | A | G | Homozygous   |
| NC_037647.1 | 11529635 | SNV | 1 | A | G | Homozygous   |
| NC_037647.1 | 11529671 | SNV | 1 | A | G | Homozygous   |
| NC_037647.1 | 11529706 | SNV | 1 | A | G | Homozygous   |
| NC_037647.1 | 11529723 | SNV | 1 | A | G | Homozygous   |
| NC_037647.1 | 11529733 | SNV | 1 | A | G | Heterozygous |
| NC_037647.1 | 11529786 | SNV | 1 | A | G | Heterozygous |
| NC_037647.1 | 11529939 | SNV | 1 | A | C | Heterozygous |
| NC_037647.1 | 11529955 | SNV | 1 | A | G | Homozygous   |
| NC_037647.1 | 11530083 | SNV | 1 | C | G | Heterozygous |
| NC_037647.1 | 11530086 | SNV | 1 | A | G | Heterozygous |
| NC_037647.1 | 11530132 | SNV | 1 | A | G | Heterozygous |
| NC_037647.1 | 11530153 | SNV | 1 | G | A | Heterozygous |
| NC_037647.1 | 11530166 | SNV | 1 | T | A | Heterozygous |
| NC_037647.1 | 11530184 | SNV | 1 | G | A | Heterozygous |
| NC_037647.1 | 11530186 | SNV | 1 | T | C | Heterozygous |
| NC_037647.1 | 11530197 | SNV | 1 | A | T | Homozygous   |
| NC_037647.1 | 11530212 | SNV | 1 | C | T | Heterozygous |
| NC_037647.1 | 11530215 | SNV | 1 | C | T | Heterozygous |
| NC_037647.1 | 11530275 | SNV | 1 | G | A | Heterozygous |
| NC_037647.1 | 11530310 | SNV | 1 | A | G | Heterozygous |
| NC_037647.1 | 11530317 | SNV | 1 | T | C | Heterozygous |
| NC_037647.1 | 11530333 | SNV | 1 | G | A | Heterozygous |
| NC_037647.1 | 11530580 | SNV | 1 | G | A | Homozygous   |
| NC_037647.1 | 11530605 | SNV | 1 | A | G | Homozygous   |
| NC_037647.1 | 11530620 | SNV | 1 | G | A | Homozygous   |
| NC_037647.1 | 11530672 | SNV | 1 | G | A | Homozygous   |
| NC_037647.1 | 11530720 | SNV | 1 | A | G | Homozygous   |
| NC_037647.1 | 11530742 | SNV | 1 | T | C | Heterozygous |
| NC_037647.1 | 11530831 | SNV | 1 | A | G | Homozygous   |
| NC_037647.1 | 11530847 | SNV | 1 | A | G | Heterozygous |
| NC_037647.1 | 11530858 | SNV | 1 | A | G | Homozygous   |
| NC_037647.1 | 11530982 | SNV | 1 | A | G | Homozygous   |
| NC_037647.1 | 11530988 | SNV | 1 | T | C | Heterozygous |
| NC_037647.1 | 11531568 | SNV | 1 | A | G | Homozygous   |
| NC_037647.1 | 11531933 | SNV | 1 | T | C | Homozygous   |
| NC_037647.1 | 11531963 | SNV | 1 | A | G | Heterozygous |
| NC_037647.1 | 11532744 | SNV | 1 | G | A | Heterozygous |
| NC_037647.1 | 11533253 | SNV | 1 | G | A | Heterozygous |
| NC_037647.1 | 11533255 | SNV | 1 | A | G | Heterozygous |
| NC_037647.1 | 11533263 | SNV | 1 | G | A | Heterozygous |
| NC_037647.1 | 11533459 | SNV | 1 | C | T | Heterozygous |
| NC_037647.1 | 11533463 | SNV | 1 | C | A | Heterozygous |
| NC_037647.1 | 11533477 | SNV | 1 | G | C | Homozygous   |
| NC_037647.1 | 11533480 | SNV | 1 | T | C | Heterozygous |
| NC_037647.1 | 11533485 | SNV | 1 | G | C | Heterozygous |
| NC_037647.1 | 11533487 | SNV | 1 | C | T | Heterozygous |
| NC_037647.1 | 11533491 | SNV | 1 | C | G | Heterozygous |
| NC_037647.1 | 11533493 | SNV | 1 | G | T | Heterozygous |
| NC_037647.1 | 11533501 | SNV | 1 | G | C | Homozygous   |

|             |          |     |   |   |   |              |
|-------------|----------|-----|---|---|---|--------------|
| NC_037647.1 | 11533513 | SNV | 1 | C | G | Homozygous   |
| NC_037647.1 | 11533519 | SNV | 1 | C | T | Homozygous   |
| NC_037647.1 | 11533525 | SNV | 1 | G | C | Homozygous   |
| NC_037647.1 | 11533527 | SNV | 1 | C | T | Homozygous   |
| NC_037647.1 | 11533533 | SNV | 1 | G | C | Homozygous   |
| NC_037647.1 | 11533545 | SNV | 1 | G | C | Homozygous   |
| NC_037647.1 | 11533547 | SNV | 1 | C | T | Homozygous   |
| NC_037647.1 | 11533749 | SNV | 1 | G | C | Homozygous   |
| NC_037647.1 | 11533776 | SNV | 1 | T | G | Homozygous   |
| NC_037647.1 | 11533806 | SNV | 1 | T | G | Heterozygous |
| NC_037647.1 | 11534365 | SNV | 1 | G | C | Homozygous   |
| NC_037647.1 | 11534386 | SNV | 1 | T | A | Heterozygous |
| NC_037647.1 | 11534395 | SNV | 1 | G | A | Heterozygous |
| NC_037647.1 | 11534397 | SNV | 1 | C | A | Heterozygous |
| NC_037647.1 | 11534399 | SNV | 1 | G | C | Homozygous   |
| NC_037647.1 | 11534403 | SNV | 1 | C | G | Homozygous   |
| NC_037647.1 | 11534409 | SNV | 1 | C | G | Heterozygous |
| NC_037647.1 | 11534478 | SNV | 1 | G | A | Heterozygous |
| NC_037647.1 | 11534505 | SNV | 1 | T | A | Heterozygous |
| NC_037647.1 | 11534509 | SNV | 1 | T | C | Heterozygous |
| NC_037647.1 | 11534516 | SNV | 1 | G | C | Heterozygous |
| NC_037647.1 | 11534596 | SNV | 1 | G | T | Heterozygous |
| NC_037647.1 | 11534645 | SNV | 1 | G | T | Heterozygous |
| NC_037647.1 | 11534751 | SNV | 1 | T | A | Homozygous   |
| NC_037647.1 | 11534790 | SNV | 1 | C | T | Homozygous   |
| NC_037647.1 | 11535015 | SNV | 1 | T | C | Homozygous   |
| NC_037647.1 | 11535068 | SNV | 1 | C | T | Heterozygous |
| NC_037647.1 | 11535070 | SNV | 1 | T | C | Homozygous   |
| NC_037647.1 | 11535077 | SNV | 1 | G | A | Homozygous   |
| NC_037647.1 | 11535082 | SNV | 1 | T | C | Homozygous   |
| NC_037647.1 | 11535944 | SNV | 1 | T | C | Homozygous   |
| NC_037647.1 | 11535989 | SNV | 1 | A | G | Homozygous   |
| NC_037647.1 | 11535995 | SNV | 1 | C | T | Heterozygous |
| NC_037647.1 | 11536097 | SNV | 1 | T | C | Homozygous   |
| NC_037647.1 | 11536429 | SNV | 1 | T | C | Homozygous   |
| NC_037647.1 | 11536530 | SNV | 1 | G | A | Heterozygous |
| NC_037647.1 | 11536671 | SNV | 1 | A | G | Heterozygous |
| NC_037647.1 | 11536685 | SNV | 1 | C | T | Heterozygous |
| NC_037647.1 | 11536695 | SNV | 1 | A | G | Homozygous   |
| NC_037647.1 | 11536741 | SNV | 1 | A | G | Homozygous   |
| NC_037647.1 | 11538162 | SNV | 1 | T | C | Homozygous   |
| NC_037647.1 | 11538196 | SNV | 1 | T | C | Homozygous   |
| NC_037647.1 | 11538208 | SNV | 1 | C | T | Heterozygous |
| NC_037647.1 | 11538319 | SNV | 1 | C | A | Heterozygous |
| NC_037647.1 | 11538331 | SNV | 1 | C | T | Heterozygous |
| NC_037647.1 | 11538340 | SNV | 1 | C | T | Heterozygous |
| NC_037647.1 | 11538358 | SNV | 1 | T | C | Homozygous   |
| NC_037647.1 | 11538529 | SNV | 1 | G | A | Heterozygous |
| NC_037647.1 | 11538602 | SNV | 1 | A | G | Homozygous   |
| NC_037647.1 | 11538720 | SNV | 1 | C | T | Homozygous   |
| NC_037647.1 | 11538722 | SNV | 1 | T | C | Homozygous   |

|             |          |     |   |   |   |              |
|-------------|----------|-----|---|---|---|--------------|
| NC_037647.1 | 11538729 | SNV | 1 | T | C | Homozygous   |
| NC_037647.1 | 11538939 | SNV | 1 | A | C | Homozygous   |
| NC_037647.1 | 11538968 | SNV | 1 | A | T | Heterozygous |
| NC_037647.1 | 11538976 | SNV | 1 | C | T | Heterozygous |
| NC_037647.1 | 11539015 | SNV | 1 | A | T | Heterozygous |
| NC_037647.1 | 11539020 | SNV | 1 | A | T | Heterozygous |
| NC_037647.1 | 11539058 | SNV | 1 | A | G | Heterozygous |
| NC_037647.1 | 11539104 | SNV | 1 | A | G | Homozygous   |
| NC_037647.1 | 11539176 | SNV | 1 | C | T | Heterozygous |
| NC_037647.1 | 11539324 | SNV | 1 | G | A | Heterozygous |
| NC_037647.1 | 11543430 | SNV | 1 | G | A | Homozygous   |
| NC_037647.1 | 11543594 | SNV | 1 | T | C | Homozygous   |
| NC_037647.1 | 11543626 | SNV | 1 | C | T | Homozygous   |
| NC_037647.1 | 11543676 | SNV | 1 | G | A | Heterozygous |
| NC_037647.1 | 11543690 | SNV | 1 | G | A | Homozygous   |
| NC_037647.1 | 11543698 | SNV | 1 | G | A | Heterozygous |
| NC_037647.1 | 11543709 | SNV | 1 | G | C | Heterozygous |
| NC_037647.1 | 11543757 | SNV | 1 | C | A | Heterozygous |
| NC_037647.1 | 11543762 | SNV | 1 | G | A | Heterozygous |
| NC_037647.1 | 11543851 | SNV | 1 | T | C | Homozygous   |
| NC_037647.1 | 11543875 | SNV | 1 | A | G | Homozygous   |
| NC_037647.1 | 11543885 | SNV | 1 | G | A | Homozygous   |
| NC_037647.1 | 11543924 | SNV | 1 | T | C | Homozygous   |
| NC_037647.1 | 11543926 | SNV | 1 | A | G | Homozygous   |
| NC_037647.1 | 11543939 | SNV | 1 | G | C | Homozygous   |
| NC_037647.1 | 11543954 | SNV | 1 | G | A | Homozygous   |
| NC_037647.1 | 11543989 | SNV | 1 | T | C | Homozygous   |
| NC_037647.1 | 11543995 | SNV | 1 | A | C | Homozygous   |
| NC_037647.1 | 11544042 | SNV | 1 | C | T | Homozygous   |
| NC_037647.1 | 11544093 | SNV | 1 | A | G | Homozygous   |
| NC_037647.1 | 11544096 | SNV | 1 | A | G | Homozygous   |
| NC_037647.1 | 11544105 | SNV | 1 | A | G | Homozygous   |
| NC_037647.1 | 11544107 | SNV | 1 | A | G | Homozygous   |
| NC_037647.1 | 11544124 | SNV | 1 | G | A | Homozygous   |
| NC_037647.1 | 11544228 | SNV | 1 | G | A | Heterozygous |
| NC_037647.1 | 11544243 | SNV | 1 | A | G | Heterozygous |
| NC_037647.1 | 11544276 | SNV | 1 | A | G | Homozygous   |
| NC_037647.1 | 11544281 | SNV | 1 | G | A | Homozygous   |
| NC_037647.1 | 11544289 | SNV | 1 | G | A | Heterozygous |
| NC_037647.1 | 11544293 | SNV | 1 | G | A | Heterozygous |
| NC_037647.1 | 11544305 | SNV | 1 | A | G | Homozygous   |
| NC_037647.1 | 11544334 | SNV | 1 | G | A | Homozygous   |
| NC_037647.1 | 11544404 | SNV | 1 | C | T | Heterozygous |
| NC_037647.1 | 11544413 | SNV | 1 | A | T | Homozygous   |
| NC_037647.1 | 11544422 | SNV | 1 | A | G | Homozygous   |
| NC_037647.1 | 11544437 | SNV | 1 | T | C | Homozygous   |
| NC_037647.1 | 11544554 | SNV | 1 | T | C | Homozygous   |
| NC_037647.1 | 11544709 | SNV | 1 | G | C | Homozygous   |
| NC_037647.1 | 11544714 | SNV | 1 | T | A | Homozygous   |
| NC_037647.1 | 11544768 | SNV | 1 | C | T | Heterozygous |
| NC_037647.1 | 11544771 | SNV | 1 | G | A | Heterozygous |

|             |          |     |   |   |   |              |
|-------------|----------|-----|---|---|---|--------------|
| NC_037647.1 | 11544833 | SNV | 1 | A | G | Homozygous   |
| NC_037647.1 | 11544838 | SNV | 1 | T | G | Heterozygous |
| NC_037647.1 | 11545335 | SNV | 1 | T | C | Homozygous   |
| NC_037647.1 | 11545337 | SNV | 1 | T | C | Heterozygous |
| NC_037647.1 | 11545394 | SNV | 1 | C | A | Heterozygous |
| NC_037647.1 | 11545428 | SNV | 1 | A | G | Heterozygous |
| NC_037647.1 | 11545442 | SNV | 1 | T | C | Heterozygous |
| NC_037647.1 | 11545446 | SNV | 1 | A | G | Heterozygous |
| NC_037647.1 | 11545450 | SNV | 1 | G | C | Heterozygous |
| NC_037647.1 | 11545461 | SNV | 1 | T | C | Heterozygous |
| NC_037647.1 | 11545465 | SNV | 1 | G | A | Homozygous   |
| NC_037647.1 | 11545513 | SNV | 1 | A | G | Homozygous   |
| NC_037647.1 | 11545519 | SNV | 1 | C | T | Homozygous   |
| NC_037647.1 | 11545532 | SNV | 1 | T | G | Homozygous   |
| NC_037647.1 | 11545538 | SNV | 1 | G | A | Homozygous   |
| NC_037647.1 | 11545692 | SNV | 1 | A | G | Heterozygous |
| NC_037647.1 | 11545740 | SNV | 1 | G | A | Homozygous   |
| NC_037647.1 | 11545751 | SNV | 1 | G | A | Heterozygous |
| NC_037647.1 | 11545753 | SNV | 1 | G | A | Homozygous   |
| NC_037647.1 | 11545828 | SNV | 1 | T | C | Homozygous   |
| NC_037647.1 | 11556967 | SNV | 1 | G | A | Homozygous   |
| NC_037647.1 | 11557129 | SNV | 1 | C | T | Heterozygous |
| NC_037647.1 | 11559315 | SNV | 1 | T | G | Homozygous   |
| NC_037647.1 | 11559591 | SNV | 1 | A | T | Homozygous   |
| NC_037647.1 | 11559659 | SNV | 1 | T | C | Homozygous   |
| NC_037647.1 | 11559715 | SNV | 1 | T | A | Homozygous   |
| NC_037647.1 | 11559925 | SNV | 1 | G | A | Heterozygous |
| NC_037647.1 | 11560423 | SNV | 1 | C | T | Homozygous   |
| NC_037647.1 | 11560456 | SNV | 1 | A | G | Homozygous   |
| NC_037647.1 | 11560483 | SNV | 1 | A | T | Homozygous   |
| NC_037647.1 | 11560682 | SNV | 1 | T | A | Heterozygous |
| NC_037647.1 | 11560686 | SNV | 1 | T | A | Homozygous   |
| NC_037647.1 | 11560809 | SNV | 1 | G | T | Homozygous   |
| NC_037647.1 | 11560828 | SNV | 1 | T | A | Homozygous   |
| NC_037647.1 | 11560877 | SNV | 1 | C | T | Heterozygous |
| NC_037647.1 | 11560882 | SNV | 1 | C | T | Heterozygous |
| NC_037647.1 | 11560947 | SNV | 1 | A | G | Heterozygous |
| NC_037647.1 | 11560994 | SNV | 1 | C | A | Homozygous   |
| NC_037647.1 | 11561001 | SNV | 1 | G | A | Heterozygous |
| NC_037647.1 | 11561177 | SNV | 1 | T | C | Homozygous   |
| NC_037647.1 | 11561199 | SNV | 1 | A | G | Homozygous   |
| NC_037647.1 | 11561329 | SNV | 1 | T | C | Homozygous   |
| NC_037647.1 | 11569484 | SNV | 1 | T | C | Homozygous   |
| NC_037647.1 | 11569488 | SNV | 1 | A | G | Heterozygous |
| NC_037647.1 | 11569810 | SNV | 1 | C | T | Heterozygous |
| NC_037647.1 | 11569814 | SNV | 1 | A | G | Heterozygous |
| NC_037647.1 | 11569830 | SNV | 1 | G | A | Heterozygous |
| NC_037647.1 | 11570314 | SNV | 1 | C | T | Homozygous   |
| NC_037647.1 | 11575890 | SNV | 1 | G | A | Heterozygous |
| NC_037647.1 | 11575915 | SNV | 1 | G | C | Heterozygous |
| NC_037647.1 | 11575996 | SNV | 1 | C | A | Homozygous   |



|             |          |     |   |   |   |              |
|-------------|----------|-----|---|---|---|--------------|
| NC_037647.1 | 11578677 | SNV | 1 | A | T | Homozygous   |
| NC_037647.1 | 11578914 | SNV | 1 | G | C | Heterozygous |
| NC_037647.1 | 11578994 | SNV | 1 | T | C | Homozygous   |
| NC_037647.1 | 11579327 | SNV | 1 | G | C | Homozygous   |
| NC_037647.1 | 11579336 | SNV | 1 | A | G | Heterozygous |
| NC_037647.1 | 11579342 | SNV | 1 | A | G | Homozygous   |
| NC_037647.1 | 11579353 | SNV | 1 | C | T | Heterozygous |
| NC_037647.1 | 11580486 | SNV | 1 | A | G | Homozygous   |
| NC_037647.1 | 11580534 | SNV | 1 | A | G | Heterozygous |
| NC_037647.1 | 11580738 | SNV | 1 | G | A | Heterozygous |
| NC_037647.1 | 11580829 | SNV | 1 | C | T | Homozygous   |
| NC_037647.1 | 11581644 | SNV | 1 | G | C | Homozygous   |
| NC_037647.1 | 11581683 | SNV | 1 | T | C | Heterozygous |
| NC_037647.1 | 11581799 | SNV | 1 | T | C | Heterozygous |
| NC_037647.1 | 11581819 | SNV | 1 | T | C | Heterozygous |
| NC_037647.1 | 11583437 | SNV | 1 | G | T | Homozygous   |
| NC_037647.1 | 11583492 | SNV | 1 | C | T | Heterozygous |
| NC_037647.1 | 11583718 | SNV | 1 | C | G | Homozygous   |
| NC_037647.1 | 11583732 | SNV | 1 | A | G | Homozygous   |
| NC_037647.1 | 11583893 | SNV | 1 | T | C | Homozygous   |
| NC_037647.1 | 11584232 | SNV | 1 | T | C | Homozygous   |
| NC_037647.1 | 11584364 | SNV | 1 | A | G | Homozygous   |
| NC_037647.1 | 11584401 | SNV | 1 | T | C | Homozygous   |
| NC_037647.1 | 11590881 | SNV | 1 | T | C | Heterozygous |
| NC_037647.1 | 11591449 | SNV | 1 | G | A | Heterozygous |
| NC_037647.1 | 11591863 | SNV | 1 | G | C | Heterozygous |
| NC_037647.1 | 11591918 | SNV | 1 | A | G | Heterozygous |
| NC_037647.1 | 11591921 | SNV | 1 | T | G | Heterozygous |
| NC_037647.1 | 11591944 | SNV | 1 | G | A | Heterozygous |
| NC_037647.1 | 11591961 | SNV | 1 | A | G | Homozygous   |
| NC_037647.1 | 11593208 | SNV | 1 | G | A | Heterozygous |
| NC_037647.1 | 11593276 | SNV | 1 | A | G | Heterozygous |
| NC_037647.1 | 11594425 | SNV | 1 | G | A | Heterozygous |
| NC_037647.1 | 11594907 | SNV | 1 | A | G | Homozygous   |
| NC_037647.1 | 11594920 | SNV | 1 | C | T | Heterozygous |
| NC_037647.1 | 11594948 | SNV | 1 | T | C | Heterozygous |
| NC_037647.1 | 11595675 | SNV | 1 | A | G | Homozygous   |
| NC_037647.1 | 11595762 | SNV | 1 | T | C | Heterozygous |
| NC_037647.1 | 11595794 | SNV | 1 | T | C | Homozygous   |
| NC_037647.1 | 11595813 | SNV | 1 | A | G | Homozygous   |
| NC_037647.1 | 11595865 | SNV | 1 | T | C | Homozygous   |
| NC_037647.1 | 11595896 | SNV | 1 | A | G | Homozygous   |
| NC_037647.1 | 11596093 | SNV | 1 | C | T | Homozygous   |
| NC_037647.1 | 11596183 | SNV | 1 | C | T | Homozygous   |
| NC_037647.1 | 11596281 | SNV | 1 | T | C | Heterozygous |
| NC_037647.1 | 11596558 | SNV | 1 | G | A | Homozygous   |
| NC_037647.1 | 11596804 | SNV | 1 | G | A | Heterozygous |
| NC_037647.1 | 11598973 | SNV | 1 | C | G | Homozygous   |
| NC_037647.1 | 11599621 | SNV | 1 | T | C | Homozygous   |
| NC_037647.1 | 11599712 | SNV | 1 | C | T | Heterozygous |
| NC_037647.1 | 11599743 | SNV | 1 | G | A | Heterozygous |

|             |          |     |   |   |   |              |
|-------------|----------|-----|---|---|---|--------------|
| NC_037647.1 | 11599772 | SNV | 1 | T | C | Heterozygous |
| NC_037647.1 | 11599838 | SNV | 1 | A | G | Homozygous   |
| NC_037647.1 | 11599915 | SNV | 1 | A | G | Heterozygous |
| NC_037647.1 | 11599922 | SNV | 1 | A | T | Heterozygous |
| NC_037647.1 | 11599941 | SNV | 1 | A | G | Heterozygous |
| NC_037647.1 | 11599948 | SNV | 1 | G | A | Heterozygous |
| NC_037647.1 | 11599951 | SNV | 1 | G | A | Heterozygous |
| NC_037647.1 | 11599959 | SNV | 1 | G | A | Heterozygous |
| NC_037647.1 | 11600788 | SNV | 1 | A | G | Heterozygous |
| NC_037647.1 | 11600877 | SNV | 1 | T | C | Heterozygous |
| NC_037647.1 | 11601071 | SNV | 1 | C | T | Heterozygous |
| NC_037647.1 | 11601090 | SNV | 1 | C | T | Heterozygous |
| NC_037647.1 | 11601095 | SNV | 1 | T | C | Heterozygous |
| NC_037647.1 | 11601097 | SNV | 1 | T | C | Heterozygous |
| NC_037647.1 | 11601127 | SNV | 1 | T | C | Homozygous   |
| NC_037647.1 | 11601135 | SNV | 1 | T | C | Homozygous   |
| NC_037647.1 | 11607342 | SNV | 1 | G | A | Heterozygous |
| NC_037647.1 | 11607364 | SNV | 1 | G | A | Homozygous   |
| NC_037647.1 | 11608471 | SNV | 1 | G | T | Homozygous   |
| NC_037647.1 | 11608479 | SNV | 1 | A | G | Heterozygous |
| NC_037647.1 | 11609383 | SNV | 1 | A | G | Homozygous   |
| NC_037647.1 | 11609503 | SNV | 1 | C | T | Homozygous   |
| NC_037647.1 | 11609947 | SNV | 1 | G | A | Heterozygous |
| NC_037647.1 | 11610201 | SNV | 1 | C | G | Homozygous   |
| NC_037647.1 | 11610206 | SNV | 1 | A | G | Homozygous   |
| NC_037647.1 | 11610208 | SNV | 1 | A | T | Homozygous   |
| NC_037647.1 | 11610210 | SNV | 1 | T | C | Heterozygous |
| NC_037647.1 | 11610238 | SNV | 1 | G | C | Homozygous   |
| NC_037647.1 | 11614680 | SNV | 1 | G | T | Homozygous   |
| NC_037647.1 | 11614754 | SNV | 1 | G | A | Heterozygous |
| NC_037647.1 | 11614792 | SNV | 1 | A | G | Homozygous   |
| NC_037647.1 | 11615827 | SNV | 1 | T | A | Heterozygous |
| NC_037647.1 | 11615832 | SNV | 1 | C | T | Heterozygous |
| NC_037647.1 | 11615835 | SNV | 1 | G | A | Heterozygous |
| NC_037647.1 | 11615856 | SNV | 1 | A | T | Heterozygous |
| NC_037647.1 | 11615865 | SNV | 1 | A | G | Heterozygous |
| NC_037647.1 | 11617595 | SNV | 1 | T | C | Homozygous   |
| NC_037647.1 | 11618564 | SNV | 1 | C | T | Heterozygous |
| NC_037647.1 | 11619780 | SNV | 1 | A | T | Heterozygous |
| NC_037647.1 | 11619930 | SNV | 1 | G | A | Heterozygous |
| NC_037647.1 | 11621898 | SNV | 1 | A | T | Homozygous   |
| NC_037647.1 | 11621943 | SNV | 1 | A | T | Heterozygous |
| NC_037647.1 | 11621987 | SNV | 1 | C | T | Homozygous   |
| NC_037647.1 | 11622635 | SNV | 1 | T | C | Heterozygous |
| NC_037647.1 | 11622660 | SNV | 1 | G | A | Homozygous   |
| NC_037647.1 | 11623525 | SNV | 1 | T | G | Heterozygous |
| NC_037647.1 | 11623549 | SNV | 1 | T | G | Heterozygous |
| NC_037647.1 | 11623624 | SNV | 1 | A | T | Homozygous   |
| NC_037647.1 | 11623825 | SNV | 1 | T | C | Homozygous   |
| NC_037647.1 | 11623833 | SNV | 1 | T | C | Homozygous   |
| NC_037647.1 | 11623849 | SNV | 1 | T | C | Heterozygous |

|             |          |     |   |   |   |              |
|-------------|----------|-----|---|---|---|--------------|
| NC_037647.1 | 11623923 | SNV | 1 | C | T | Heterozygous |
| NC_037647.1 | 11624030 | SNV | 1 | C | T | Heterozygous |
| NC_037647.1 | 11626213 | SNV | 1 | C | T | Homozygous   |
| NC_037647.1 | 11626228 | SNV | 1 | T | C | Heterozygous |
| NC_037647.1 | 11626242 | SNV | 1 | C | T | Homozygous   |
| NC_037647.1 | 11626356 | SNV | 1 | C | G | Homozygous   |
| NC_037647.1 | 11627723 | SNV | 1 | T | C | Homozygous   |
| NC_037647.1 | 11627994 | SNV | 1 | G | T | Heterozygous |
| NC_037647.1 | 11628121 | SNV | 1 | A | T | Heterozygous |
| NC_037647.1 | 11628426 | SNV | 1 | C | T | Heterozygous |
| NC_037647.1 | 11631087 | SNV | 1 | T | A | Homozygous   |
| NC_037647.1 | 11631092 | SNV | 1 | A | T | Homozygous   |
| NC_037647.1 | 11631096 | SNV | 1 | T | A | Homozygous   |
| NC_037647.1 | 11632315 | SNV | 1 | G | A | Homozygous   |
| NC_037647.1 | 11632603 | SNV | 1 | A | G | Heterozygous |
| NC_037647.1 | 11633145 | SNV | 1 | A | G | Homozygous   |
| NC_037647.1 | 11633149 | SNV | 1 | A | G | Heterozygous |
| NC_037647.1 | 11646689 | SNV | 1 | A | G | Homozygous   |
| NC_037647.1 | 11650607 | SNV | 1 | C | T | Heterozygous |
| NC_037647.1 | 11650628 | SNV | 1 | T | A | Homozygous   |
| NC_037647.1 | 11650632 | SNV | 1 | T | A | Heterozygous |
| NC_037647.1 | 11652026 | SNV | 1 | A | G | Homozygous   |
| NC_037647.1 | 11652035 | SNV | 1 | T | A | Heterozygous |
| NC_037647.1 | 11652035 | SNV | 1 | T | G | Heterozygous |
| NC_037647.1 | 11652529 | SNV | 1 | A | G | Heterozygous |
| NC_037647.1 | 11652749 | SNV | 1 | G | A | Heterozygous |
| NC_037647.1 | 11653321 | SNV | 1 | C | T | Heterozygous |
| NC_037647.1 | 11653488 | SNV | 1 | C | G | Homozygous   |
| NC_037647.1 | 11653502 | SNV | 1 | G | A | Homozygous   |
| NC_037647.1 | 11653639 | SNV | 1 | C | T | Heterozygous |
| NC_037647.1 | 11655647 | SNV | 1 | C | G | Heterozygous |
| NC_037647.1 | 11655902 | SNV | 1 | C | T | Heterozygous |
| NC_037647.1 | 11655943 | SNV | 1 | G | A | Heterozygous |
| NC_037647.1 | 11655968 | SNV | 1 | G | A | Heterozygous |
| NC_037647.1 | 11656121 | SNV | 1 | T | C | Homozygous   |
| NC_037647.1 | 11656678 | SNV | 1 | C | T | Homozygous   |
| NC_037647.1 | 11656986 | SNV | 1 | G | C | Heterozygous |
| NC_037647.1 | 11657123 | SNV | 1 | T | C | Homozygous   |
| NC_037647.1 | 11657141 | SNV | 1 | G | A | Heterozygous |
| NC_037647.1 | 11657190 | SNV | 1 | T | C | Homozygous   |
| NC_037647.1 | 11657577 | SNV | 1 | T | A | Homozygous   |
| NC_037647.1 | 11658025 | SNV | 1 | G | A | Heterozygous |
| NC_037647.1 | 11658027 | SNV | 1 | A | T | Heterozygous |
| NC_037647.1 | 11658038 | SNV | 1 | A | G | Heterozygous |
| NC_037647.1 | 11658042 | SNV | 1 | A | G | Heterozygous |
| NC_037647.1 | 11658066 | SNV | 1 | T | G | Heterozygous |
| NC_037647.1 | 11658187 | SNV | 1 | A | G | Heterozygous |
| NC_037647.1 | 11658346 | SNV | 1 | A | C | Homozygous   |
| NC_037647.1 | 11658439 | SNV | 1 | A | C | Heterozygous |
| NC_037647.1 | 11658442 | SNV | 1 | C | T | Homozygous   |
| NC_037647.1 | 11658445 | SNV | 1 | T | C | Homozygous   |

|             |          |     |   |   |   |              |
|-------------|----------|-----|---|---|---|--------------|
| NC_037647.1 | 11658534 | SNV | 1 | A | G | Heterozygous |
| NC_037647.1 | 11658753 | SNV | 1 | T | A | Homozygous   |
| NC_037647.1 | 11658921 | SNV | 1 | C | T | Heterozygous |
| NC_037647.1 | 11659261 | SNV | 1 | T | C | Homozygous   |
| NC_037647.1 | 11659358 | SNV | 1 | G | A | Homozygous   |
| NC_037647.1 | 11659542 | SNV | 1 | T | C | Homozygous   |
| NC_037647.1 | 11673153 | SNV | 1 | C | T | Heterozygous |
| NC_037647.1 | 11673956 | SNV | 1 | A | G | Homozygous   |
| NC_037647.1 | 11673989 | SNV | 1 | A | G | Heterozygous |
| NC_037647.1 | 11674527 | SNV | 1 | G | A | Heterozygous |
| NC_037647.1 | 11674613 | SNV | 1 | T | C | Homozygous   |
| NC_037647.1 | 11674937 | SNV | 1 | A | G | Heterozygous |
| NC_037647.1 | 11674949 | SNV | 1 | G | A | Heterozygous |
| NC_037647.1 | 11675021 | SNV | 1 | G | A | Homozygous   |
| NC_037647.1 | 11706372 | SNV | 1 | G | C | Homozygous   |
| NC_037647.1 | 11707407 | SNV | 1 | C | T | Heterozygous |
| NC_037647.1 | 11707446 | SNV | 1 | T | C | Homozygous   |
| NC_037647.1 | 11707476 | SNV | 1 | T | C | Homozygous   |
| NC_037647.1 | 11707554 | SNV | 1 | T | C | Homozygous   |
| NC_037647.1 | 11707569 | SNV | 1 | T | C | Homozygous   |
| NC_037647.1 | 11707612 | SNV | 1 | A | G | Homozygous   |
| NC_037647.1 | 11707624 | SNV | 1 | T | C | Homozygous   |
| NC_037647.1 | 11707657 | SNV | 1 | C | T | Homozygous   |
| NC_037647.1 | 11707686 | SNV | 1 | C | T | Heterozygous |
| NC_037647.1 | 11708608 | SNV | 1 | A | T | Homozygous   |
| NC_037647.1 | 11708637 | SNV | 1 | T | A | Homozygous   |
| NC_037647.1 | 11708640 | SNV | 1 | C | G | Homozygous   |
| NC_037647.1 | 11715022 | SNV | 1 | T | G | Homozygous   |
| NC_037647.1 | 11715027 | SNV | 1 | C | A | Homozygous   |
| NC_037647.1 | 11715029 | SNV | 1 | C | T | Homozygous   |
| NC_037647.1 | 11715036 | SNV | 1 | T | A | Homozygous   |
| NC_037647.1 | 11715041 | SNV | 1 | C | T | Homozygous   |
| NC_037647.1 | 11715046 | SNV | 1 | T | A | Homozygous   |
| NC_037647.1 | 11715977 | SNV | 1 | C | T | Homozygous   |
| NC_037647.1 | 11715987 | SNV | 1 | C | A | Heterozygous |
| NC_037647.1 | 11715989 | SNV | 1 | C | T | Heterozygous |
| NC_037647.1 | 11716007 | SNV | 1 | C | T | Heterozygous |
| NC_037647.1 | 11726419 | SNV | 1 | C | G | Homozygous   |
| NC_037647.1 | 11726429 | SNV | 1 | C | T | Homozygous   |
| NC_037647.1 | 11726634 | SNV | 1 | C | G | Heterozygous |
| NC_037647.1 | 11726636 | SNV | 1 | C | T | Heterozygous |
| NC_037647.1 | 11726794 | SNV | 1 | C | T | Homozygous   |
| NC_037647.1 | 11726899 | SNV | 1 | G | C | Heterozygous |
| NC_037647.1 | 11726915 | SNV | 1 | G | A | Heterozygous |
| NC_037647.1 | 11726917 | SNV | 1 | G | A | Homozygous   |
| NC_037647.1 | 11726926 | SNV | 1 | G | A | Heterozygous |
| NC_037647.1 | 11744022 | SNV | 1 | A | G | Heterozygous |
| NC_037647.1 | 11744029 | SNV | 1 | G | C | Homozygous   |
| NC_037647.1 | 11744322 | SNV | 1 | A | G | Homozygous   |
| NC_037647.1 | 11744493 | SNV | 1 | C | T | Heterozygous |
| NC_037647.1 | 11744657 | SNV | 1 | T | C | Heterozygous |

|             |          |     |   |   |   |              |
|-------------|----------|-----|---|---|---|--------------|
| NC_037647.1 | 11744683 | SNV | 1 | C | T | Heterozygous |
| NC_037647.1 | 11744740 | SNV | 1 | A | G | Homozygous   |
| NC_037647.1 | 11744748 | SNV | 1 | A | T | Heterozygous |
| NC_037647.1 | 11744842 | SNV | 1 | T | G | Heterozygous |
| NC_037647.1 | 11744846 | SNV | 1 | T | C | Heterozygous |
| NC_037647.1 | 11744876 | SNV | 1 | T | C | Heterozygous |
| NC_037647.1 | 11744932 | SNV | 1 | A | G | Heterozygous |
| NC_037647.1 | 11745008 | SNV | 1 | C | T | Homozygous   |
| NC_037647.1 | 11745087 | SNV | 1 | C | T | Homozygous   |
| NC_037647.1 | 11745179 | SNV | 1 | A | G | Homozygous   |
| NC_037647.1 | 11745438 | SNV | 1 | G | C | Homozygous   |
| NC_037647.1 | 11745727 | SNV | 1 | A | G | Homozygous   |
| NC_037647.1 | 11746060 | SNV | 1 | G | A | Homozygous   |
| NC_037647.1 | 11749227 | SNV | 1 | A | G | Homozygous   |
| NC_037647.1 | 11749327 | SNV | 1 | A | T | Homozygous   |
| NC_037647.1 | 11749989 | SNV | 1 | T | A | Homozygous   |
| NC_037647.1 | 11749992 | SNV | 1 | G | A | Homozygous   |
| NC_037647.1 | 11749995 | SNV | 1 | A | G | Homozygous   |
| NC_037647.1 | 11750010 | SNV | 1 | A | G | Homozygous   |
| NC_037647.1 | 11761016 | SNV | 1 | G | A | Homozygous   |
| NC_037647.1 | 11761247 | SNV | 1 | C | T | Heterozygous |
| NC_037647.1 | 11761572 | SNV | 1 | A | T | Homozygous   |
| NC_037647.1 | 11761574 | SNV | 1 | A | C | Homozygous   |
| NC_037647.1 | 11761580 | SNV | 1 | A | C | Homozygous   |
| NC_037647.1 | 11761632 | SNV | 1 | G | A | Homozygous   |
| NC_037647.1 | 11761634 | SNV | 1 | A | G | Homozygous   |
| NC_037647.1 | 11761644 | SNV | 1 | T | C | Homozygous   |
| NC_037647.1 | 11761647 | SNV | 1 | G | C | Homozygous   |
| NC_037647.1 | 11761654 | SNV | 1 | T | C | Homozygous   |
| NC_037647.1 | 11761672 | SNV | 1 | G | C | Homozygous   |
| NC_037647.1 | 11761674 | SNV | 1 | A | G | Homozygous   |
| NC_037647.1 | 11761677 | SNV | 1 | A | G | Homozygous   |
| NC_037647.1 | 11761686 | SNV | 1 | T | C | Homozygous   |
| NC_037647.1 | 11769337 | SNV | 1 | T | G | Heterozygous |
| NC_037647.1 | 11769340 | SNV | 1 | C | A | Heterozygous |
| NC_037647.1 | 11769344 | SNV | 1 | T | G | Heterozygous |
| NC_037647.1 | 11769346 | SNV | 1 | T | G | Heterozygous |
| NC_037647.1 | 11769356 | SNV | 1 | T | G | Heterozygous |
| NC_037647.1 | 11769363 | SNV | 1 | C | T | Heterozygous |
| NC_037647.1 | 11780315 | SNV | 1 | A | T | Homozygous   |
| NC_037647.1 | 11780318 | SNV | 1 | G | A | Heterozygous |
| NC_037647.1 | 11780436 | SNV | 1 | A | G | Homozygous   |
| NC_037647.1 | 11780475 | SNV | 1 | C | T | Homozygous   |
| NC_037647.1 | 11780523 | SNV | 1 | T | C | Homozygous   |
| NC_037647.1 | 11780635 | SNV | 1 | T | C | Heterozygous |
| NC_037647.1 | 11780684 | SNV | 1 | T | G | Heterozygous |
| NC_037647.1 | 11780764 | SNV | 1 | A | T | Heterozygous |
| NC_037647.1 | 11780802 | SNV | 1 | A | T | Homozygous   |
| NC_037647.1 | 11780953 | SNV | 1 | A | C | Homozygous   |
| NC_037647.1 | 11785092 | SNV | 1 | A | T | Homozygous   |
| NC_037647.1 | 11787406 | SNV | 1 | A | G | Homozygous   |

|             |          |     |   |   |   |              |
|-------------|----------|-----|---|---|---|--------------|
| NC_037647.1 | 11787577 | SNV | 1 | C | T | Heterozygous |
| NC_037647.1 | 11787766 | SNV | 1 | C | T | Heterozygous |
| NC_037647.1 | 11787879 | SNV | 1 | A | G | Heterozygous |
| NC_037647.1 | 11787888 | SNV | 1 | G | A | Heterozygous |
| NC_037647.1 | 11787900 | SNV | 1 | A | G | Heterozygous |
| NC_037647.1 | 11787951 | SNV | 1 | A | G | Homozygous   |
| NC_037647.1 | 11787954 | SNV | 1 | T | A | Heterozygous |
| NC_037647.1 | 11792196 | SNV | 1 | A | T | Homozygous   |
| NC_037647.1 | 11792229 | SNV | 1 | T | C | Homozygous   |
| NC_037647.1 | 11792231 | SNV | 1 | T | C | Homozygous   |
| NC_037647.1 | 11792236 | SNV | 1 | A | C | Homozygous   |
| NC_037647.1 | 11792490 | SNV | 1 | A | G | Heterozygous |
| NC_037647.1 | 11792491 | SNV | 1 | T | C | Heterozygous |
| NC_037647.1 | 11792497 | SNV | 1 | C | T | Homozygous   |
| NC_037647.1 | 11792499 | SNV | 1 | C | T | Homozygous   |
| NC_037647.1 | 11792504 | SNV | 1 | T | C | Homozygous   |
| NC_037647.1 | 11792515 | SNV | 1 | C | T | Heterozygous |
| NC_037647.1 | 11792541 | SNV | 1 | G | C | Heterozygous |
| NC_037647.1 | 11792541 | SNV | 1 | G | T | Heterozygous |
| NC_037647.1 | 11792548 | SNV | 1 | G | T | Heterozygous |
| NC_037647.1 | 11792617 | SNV | 1 | T | C | Homozygous   |
| NC_037647.1 | 11795802 | SNV | 1 | T | C | Heterozygous |
| NC_037647.1 | 11795898 | SNV | 1 | C | T | Heterozygous |
| NC_037647.1 | 11797162 | SNV | 1 | G | A | Heterozygous |
| NC_037647.1 | 11797168 | SNV | 1 | G | A | Heterozygous |
| NC_037647.1 | 11797170 | SNV | 1 | G | A | Heterozygous |
| NC_037647.1 | 11797173 | SNV | 1 | A | T | Heterozygous |
| NC_037647.1 | 11797242 | SNV | 1 | C | A | Heterozygous |
| NC_037647.1 | 11797250 | SNV | 1 | C | A | Heterozygous |
| NC_037647.1 | 11797301 | SNV | 1 | C | A | Homozygous   |
| NC_037647.1 | 11797319 | SNV | 1 | C | A | Homozygous   |
| NC_037647.1 | 11797325 | SNV | 1 | C | A | Heterozygous |
| NC_037647.1 | 11797329 | SNV | 1 | C | A | Heterozygous |
| NC_037647.1 | 11797333 | SNV | 1 | C | A | Heterozygous |
| NC_037647.1 | 11797339 | SNV | 1 | C | A | Heterozygous |
| NC_037647.1 | 11797385 | SNV | 1 | A | G | Heterozygous |
| NC_037647.1 | 11804841 | SNV | 1 | G | A | Homozygous   |
| NC_037647.1 | 11804843 | SNV | 1 | G | T | Heterozygous |
| NC_037647.1 | 11817270 | SNV | 1 | T | C | Heterozygous |
| NC_037647.1 | 11817423 | SNV | 1 | T | C | Homozygous   |
| NC_037647.1 | 11817567 | SNV | 1 | A | T | Homozygous   |
| NC_037647.1 | 11817573 | SNV | 1 | C | T | Heterozygous |
| NC_037647.1 | 11817605 | SNV | 1 | C | T | Heterozygous |
| NC_037647.1 | 11817724 | SNV | 1 | A | G | Homozygous   |
| NC_037647.1 | 11817917 | SNV | 1 | C | A | Homozygous   |
| NC_037647.1 | 11818174 | SNV | 1 | G | A | Heterozygous |
| NC_037647.1 | 11818226 | SNV | 1 | C | T | Heterozygous |
| NC_037647.1 | 11818236 | SNV | 1 | G | T | Heterozygous |
| NC_037647.1 | 11818245 | SNV | 1 | C | T | Heterozygous |
| NC_037647.1 | 11818247 | SNV | 1 | C | T | Homozygous   |
| NC_037647.1 | 11818336 | SNV | 1 | C | T | Heterozygous |

|             |          |     |   |   |   |              |
|-------------|----------|-----|---|---|---|--------------|
| NC_037647.1 | 11818376 | SNV | 1 | T | A | Heterozygous |
| NC_037647.1 | 11818483 | SNV | 1 | T | C | Heterozygous |
| NC_037647.1 | 11818516 | SNV | 1 | A | G | Homozygous   |
| NC_037647.1 | 11818738 | SNV | 1 | G | C | Homozygous   |
| NC_037647.1 | 11818748 | SNV | 1 | C | T | Homozygous   |
| NC_037647.1 | 11819371 | SNV | 1 | G | A | Heterozygous |
| NC_037647.1 | 11819375 | SNV | 1 | G | A | Heterozygous |
| NC_037647.1 | 11819454 | SNV | 1 | G | A | Heterozygous |
| NC_037647.1 | 11819661 | SNV | 1 | A | G | Homozygous   |
| NC_037647.1 | 11819725 | SNV | 1 | A | G | Heterozygous |
| NC_037647.1 | 11820033 | SNV | 1 | T | C | Homozygous   |
| NC_037647.1 | 11820248 | SNV | 1 | A | G | Homozygous   |
| NC_037647.1 | 11820405 | SNV | 1 | G | A | Heterozygous |
| NC_037647.1 | 11820752 | SNV | 1 | T | C | Heterozygous |
| NC_037647.1 | 11820981 | SNV | 1 | A | G | Homozygous   |
| NC_037647.1 | 11821105 | SNV | 1 | T | C | Homozygous   |
| NC_037647.1 | 11821110 | SNV | 1 | C | T | Homozygous   |
| NC_037647.1 | 11821148 | SNV | 1 | A | G | Homozygous   |
| NC_037647.1 | 11822117 | SNV | 1 | G | A | Heterozygous |
| NC_037647.1 | 11822131 | SNV | 1 | C | T | Homozygous   |
| NC_037647.1 | 11825147 | SNV | 1 | T | C | Homozygous   |
| NC_037647.1 | 11827918 | SNV | 1 | G | A | Heterozygous |
| NC_037647.1 | 11828039 | SNV | 1 | C | T | Heterozygous |
| NC_037647.1 | 11828278 | SNV | 1 | A | C | Heterozygous |
| NC_037647.1 | 11828368 | SNV | 1 | A | T | Heterozygous |
| NC_037647.1 | 11828992 | SNV | 1 | C | T | Heterozygous |
| NC_037647.1 | 11829552 | SNV | 1 | A | G | Heterozygous |
| NC_037647.1 | 11832789 | SNV | 1 | G | A | Heterozygous |
| NC_037647.1 | 11833219 | SNV | 1 | A | G | Homozygous   |
| NC_037647.1 | 11833258 | SNV | 1 | T | C | Homozygous   |
| NC_037647.1 | 11833745 | SNV | 1 | C | T | Heterozygous |
| NC_037647.1 | 11833765 | SNV | 1 | T | C | Heterozygous |
| NC_037647.1 | 11833771 | SNV | 1 | C | T | Heterozygous |
| NC_037647.1 | 11834655 | SNV | 1 | T | C | Heterozygous |
| NC_037647.1 | 11834658 | SNV | 1 | T | C | Heterozygous |
| NC_037647.1 | 11834966 | SNV | 1 | T | C | Homozygous   |
| NC_037647.1 | 11834984 | SNV | 1 | T | C | Homozygous   |
| NC_037647.1 | 11837328 | SNV | 1 | A | C | Heterozygous |
| NC_037647.1 | 11845637 | SNV | 1 | A | T | Homozygous   |
| NC_037647.1 | 11845645 | SNV | 1 | A | C | Homozygous   |
| NC_037647.1 | 11846526 | SNV | 1 | T | C | Homozygous   |
| NC_037647.1 | 11846551 | SNV | 1 | A | C | Homozygous   |
| NC_037647.1 | 11846569 | SNV | 1 | A | T | Homozygous   |
| NC_037647.1 | 11850660 | SNV | 1 | G | A | Heterozygous |
| NC_037647.1 | 11850695 | SNV | 1 | T | C | Homozygous   |
| NC_037647.1 | 11850724 | SNV | 1 | T | C | Heterozygous |
| NC_037647.1 | 11857190 | SNV | 1 | G | A | Homozygous   |
| NC_037647.1 | 11862027 | SNV | 1 | A | G | Homozygous   |
| NC_037647.1 | 11862030 | SNV | 1 | T | G | Homozygous   |
| NC_037647.1 | 11866730 | SNV | 1 | A | C | Homozygous   |
| NC_037647.1 | 11866735 | SNV | 1 | A | T | Homozygous   |

|             |          |     |   |   |   |              |
|-------------|----------|-----|---|---|---|--------------|
| NC_037647.1 | 11866739 | SNV | 1 | C | T | Homozygous   |
| NC_037647.1 | 11866745 | SNV | 1 | C | A | Homozygous   |
| NC_037647.1 | 11866775 | SNV | 1 | T | G | Homozygous   |
| NC_037647.1 | 11870297 | SNV | 1 | T | C | Homozygous   |
| NC_037647.1 | 11870300 | SNV | 1 | T | G | Homozygous   |
| NC_037647.1 | 11870316 | SNV | 1 | A | T | Homozygous   |
| NC_037647.1 | 11870334 | SNV | 1 | A | T | Homozygous   |
| NC_037647.1 | 11870346 | SNV | 1 | T | A | Homozygous   |
| NC_037647.1 | 11873586 | SNV | 1 | C | A | Homozygous   |
| NC_037647.1 | 11873599 | SNV | 1 | A | T | Homozygous   |
| NC_037647.1 | 11873602 | SNV | 1 | T | A | Homozygous   |
| NC_037647.1 | 11874110 | SNV | 1 | T | C | Homozygous   |
| NC_037647.1 | 11874115 | SNV | 1 | G | T | Homozygous   |
| NC_037647.1 | 11874134 | SNV | 1 | G | T | Homozygous   |
| NC_037647.1 | 11874141 | SNV | 1 | T | G | Homozygous   |
| NC_037647.1 | 11874144 | SNV | 1 | A | T | Homozygous   |
| NC_037647.1 | 11874479 | SNV | 1 | T | G | Homozygous   |
| NC_037647.1 | 11875439 | SNV | 1 | T | C | Heterozygous |
| NC_037647.1 | 11875486 | SNV | 1 | T | G | Heterozygous |
| NC_037647.1 | 11879160 | SNV | 1 | A | G | Homozygous   |
| NC_037647.1 | 11879919 | SNV | 1 | C | G | Homozygous   |
| NC_037647.1 | 11880533 | SNV | 1 | C | A | Homozygous   |
| NC_037647.1 | 11885232 | SNV | 1 | C | G | Homozygous   |
| NC_037647.1 | 11885270 | SNV | 1 | T | A | Homozygous   |
| NC_037647.1 | 11885273 | SNV | 1 | A | T | Homozygous   |
| NC_037647.1 | 11885279 | SNV | 1 | T | C | Homozygous   |
| NC_037647.1 | 11885282 | SNV | 1 | A | G | Homozygous   |
| NC_037647.1 | 11885292 | SNV | 1 | A | T | Homozygous   |
| NC_037647.1 | 11885308 | SNV | 1 | A | T | Heterozygous |
| NC_037647.1 | 11885310 | SNV | 1 | A | T | Heterozygous |
| NC_037647.1 | 11885312 | SNV | 1 | A | T | Heterozygous |
| NC_037647.1 | 11885315 | SNV | 1 | A | T | Heterozygous |
| NC_037647.1 | 11885351 | SNV | 1 | A | T | Heterozygous |
| NC_037647.1 | 11885353 | SNV | 1 | A | G | Heterozygous |
| NC_037647.1 | 11885365 | SNV | 1 | A | T | Heterozygous |
| NC_037647.1 | 11898070 | SNV | 1 | G | A | Homozygous   |
| NC_037647.1 | 11908518 | SNV | 1 | C | T | Homozygous   |
| NC_037647.1 | 11908520 | SNV | 1 | G | A | Homozygous   |
| NC_037647.1 | 11908525 | SNV | 1 | A | C | Homozygous   |
| NC_037647.1 | 11908870 | SNV | 1 | T | C | Homozygous   |
| NC_037647.1 | 11909112 | SNV | 1 | A | T | Heterozygous |
| NC_037647.1 | 11909259 | SNV | 1 | C | T | Homozygous   |
| NC_037647.1 | 11909428 | SNV | 1 | C | A | Homozygous   |
| NC_037647.1 | 11909569 | SNV | 1 | T | C | Homozygous   |
| NC_037647.1 | 11909625 | SNV | 1 | C | T | Homozygous   |
| NC_037647.1 | 11910657 | SNV | 1 | T | A | Heterozygous |
| NC_037647.1 | 11914576 | SNV | 1 | T | A | Homozygous   |
| NC_037647.1 | 11914583 | SNV | 1 | A | G | Homozygous   |
| NC_037647.1 | 11914590 | SNV | 1 | T | C | Homozygous   |
| NC_037647.1 | 11914595 | SNV | 1 | A | G | Homozygous   |
| NC_037647.1 | 11915362 | SNV | 1 | T | C | Homozygous   |



|             |          |     |   |   |   |              |
|-------------|----------|-----|---|---|---|--------------|
| NC_037647.1 | 11915403 | SNV | 1 | A | G | Homozygous   |
| NC_037647.1 | 11918255 | SNV | 1 | T | A | Heterozygous |
| NC_037647.1 | 11918264 | SNV | 1 | C | T | Heterozygous |
| NC_037647.1 | 11918269 | SNV | 1 | T | A | Heterozygous |
| NC_037647.1 | 11918438 | SNV | 1 | A | G | Homozygous   |
| NC_037647.1 | 11918738 | SNV | 1 | A | G | Heterozygous |
| NC_037647.1 | 11921581 | SNV | 1 | G | A | Homozygous   |
| NC_037647.1 | 11922385 | SNV | 1 | G | A | Heterozygous |
| NC_037647.1 | 11924457 | SNV | 1 | T | C | Heterozygous |
| NC_037647.1 | 11924464 | SNV | 1 | G | T | Homozygous   |
| NC_037647.1 | 11924469 | SNV | 1 | T | G | Heterozygous |
| NC_037647.1 | 11924480 | SNV | 1 | A | T | Heterozygous |
| NC_037647.1 | 11924501 | SNV | 1 | T | A | Heterozygous |
| NC_037647.1 | 11924509 | SNV | 1 | T | A | Heterozygous |
| NC_037647.1 | 11930368 | SNV | 1 | A | G | Homozygous   |
| NC_037647.1 | 11930948 | SNV | 1 | A | G | Homozygous   |
| NC_037647.1 | 11934415 | SNV | 1 | T | C | Heterozygous |
| NC_037647.1 | 11934420 | SNV | 1 | A | T | Heterozygous |
| NC_037647.1 | 11934427 | SNV | 1 | A | T | Heterozygous |
| NC_037647.1 | 11934820 | SNV | 1 | T | A | Heterozygous |
| NC_037647.1 | 11934824 | SNV | 1 | A | G | Heterozygous |
| NC_037647.1 | 11934832 | SNV | 1 | A | C | Homozygous   |
| NC_037647.1 | 11934863 | SNV | 1 | A | G | Homozygous   |
| NC_037647.1 | 11934935 | SNV | 1 | T | C | Homozygous   |
| NC_037647.1 | 11935980 | SNV | 1 | A | G | Heterozygous |
| NC_037647.1 | 11935999 | SNV | 1 | C | T | Heterozygous |
| NC_037647.1 | 11937810 | SNV | 1 | T | C | Heterozygous |
| NC_037647.1 | 11937834 | SNV | 1 | G | A | Heterozygous |
| NC_037647.1 | 11938191 | SNV | 1 | A | G | Homozygous   |
| NC_037647.1 | 11938303 | SNV | 1 | T | C | Homozygous   |
| NC_037647.1 | 11941134 | SNV | 1 | C | T | Homozygous   |
| NC_037647.1 | 11941652 | SNV | 1 | G | A | Homozygous   |
| NC_037647.1 | 11941759 | SNV | 1 | G | A | Heterozygous |
| NC_037647.1 | 11942169 | SNV | 1 | G | T | Homozygous   |
| NC_037647.1 | 11943113 | SNV | 1 | A | G | Heterozygous |
| NC_037647.1 | 11943198 | SNV | 1 | C | T | Heterozygous |
| NC_037647.1 | 11943213 | SNV | 1 | T | C | Heterozygous |
| NC_037647.1 | 11943239 | SNV | 1 | A | G | Heterozygous |
| NC_037647.1 | 11943331 | SNV | 1 | T | C | Homozygous   |
| NC_037647.1 | 11943421 | SNV | 1 | G | A | Homozygous   |
| NC_037647.1 | 11943480 | SNV | 1 | A | G | Heterozygous |
| NC_037647.1 | 11943498 | SNV | 1 | A | G | Homozygous   |
| NC_037647.1 | 11944230 | SNV | 1 | C | A | Homozygous   |
| NC_037647.1 | 11944470 | SNV | 1 | A | G | Homozygous   |
| NC_037647.1 | 11946739 | SNV | 1 | T | C | Homozygous   |
| NC_037647.1 | 11946797 | SNV | 1 | T | C | Homozygous   |
| NC_037647.1 | 11947060 | SNV | 1 | T | C | Homozygous   |
| NC_037647.1 | 11947625 | SNV | 1 | A | T | Homozygous   |
| NC_037647.1 | 11947864 | SNV | 1 | A | G | Homozygous   |
| NC_037647.1 | 11948312 | SNV | 1 | C | T | Heterozygous |
| NC_037647.1 | 11948345 | SNV | 1 | T | C | Homozygous   |

|             |          |     |   |   |   |              |
|-------------|----------|-----|---|---|---|--------------|
| NC_037647.1 | 11948421 | SNV | 1 | T | C | Homozygous   |
| NC_037647.1 | 11948423 | SNV | 1 | C | T | Homozygous   |
| NC_037647.1 | 11948428 | SNV | 1 | A | T | Heterozygous |
| NC_037647.1 | 11948441 | SNV | 1 | A | T | Heterozygous |
| NC_037647.1 | 11948469 | SNV | 1 | C | T | Heterozygous |
| NC_037647.1 | 11948546 | SNV | 1 | G | A | Heterozygous |
| NC_037647.1 | 11948573 | SNV | 1 | A | G | Homozygous   |
| NC_037647.1 | 11948585 | SNV | 1 | C | T | Homozygous   |
| NC_037647.1 | 11948873 | SNV | 1 | C | T | Homozygous   |
| NC_037647.1 | 11949616 | SNV | 1 | A | G | Homozygous   |
| NC_037647.1 | 11949727 | SNV | 1 | T | C | Heterozygous |
| NC_037647.1 | 11949816 | SNV | 1 | T | C | Homozygous   |
| NC_037647.1 | 11949867 | SNV | 1 | A | G | Heterozygous |
| NC_037647.1 | 11949869 | SNV | 1 | T | C | Homozygous   |
| NC_037647.1 | 11949878 | SNV | 1 | G | A | Heterozygous |
| NC_037647.1 | 11949885 | SNV | 1 | T | A | Homozygous   |
| NC_037647.1 | 11949928 | SNV | 1 | A | G | Homozygous   |
| NC_037647.1 | 11950005 | SNV | 1 | G | T | Heterozygous |
| NC_037647.1 | 11957185 | SNV | 1 | T | G | Heterozygous |
| NC_037647.1 | 11957188 | SNV | 1 | T | A | Heterozygous |
| NC_037647.1 | 11957198 | SNV | 1 | G | A | Homozygous   |
| NC_037647.1 | 11957567 | SNV | 1 | T | G | Homozygous   |
| NC_037647.1 | 11957931 | SNV | 1 | T | C | Heterozygous |
| NC_037647.1 | 11957940 | SNV | 1 | T | C | Heterozygous |
| NC_037647.1 | 11958769 | SNV | 1 | T | C | Homozygous   |
| NC_037647.1 | 11958800 | SNV | 1 | T | C | Homozygous   |
| NC_037647.1 | 11959383 | SNV | 1 | C | T | Heterozygous |
| NC_037647.1 | 11960990 | SNV | 1 | C | T | Homozygous   |
| NC_037647.1 | 11961751 | SNV | 1 | C | T | Homozygous   |
| NC_037647.1 | 11961756 | SNV | 1 | A | T | Homozygous   |
| NC_037647.1 | 11962940 | SNV | 1 | G | A | Heterozygous |
| NC_037647.1 | 11962949 | SNV | 1 | T | A | Heterozygous |
| NC_037647.1 | 11962958 | SNV | 1 | A | G | Homozygous   |
| NC_037647.1 | 11963080 | SNV | 1 | A | G | Homozygous   |
| NC_037647.1 | 11963388 | SNV | 1 | A | C | Homozygous   |
| NC_037647.1 | 11964089 | SNV | 1 | T | C | Heterozygous |
| NC_037647.1 | 11971603 | SNV | 1 | G | A | Homozygous   |
| NC_037647.1 | 11971625 | SNV | 1 | T | C | Homozygous   |
| NC_037647.1 | 11971672 | SNV | 1 | C | T | Heterozygous |
| NC_037647.1 | 11972507 | SNV | 1 | G | A | Homozygous   |
| NC_037647.1 | 11972770 | SNV | 1 | A | G | Homozygous   |
| NC_037647.1 | 11973497 | SNV | 1 | A | G | Homozygous   |
| NC_037647.1 | 11974668 | SNV | 1 | C | A | Homozygous   |
| NC_037647.1 | 11975161 | SNV | 1 | T | C | Homozygous   |
| NC_037647.1 | 11978770 | SNV | 1 | G | T | Homozygous   |
| NC_037647.1 | 11978776 | SNV | 1 | T | C | Homozygous   |
| NC_037647.1 | 11978788 | SNV | 1 | T | C | Homozygous   |
| NC_037647.1 | 11978797 | SNV | 1 | A | G | Homozygous   |
| NC_037647.1 | 11978800 | SNV | 1 | T | A | Homozygous   |
| NC_037647.1 | 11978806 | SNV | 1 | G | A | Homozygous   |
| NC_037647.1 | 11978812 | SNV | 1 | A | C | Homozygous   |

|             |          |     |   |   |   |              |
|-------------|----------|-----|---|---|---|--------------|
| NC_037647.1 | 11978815 | SNV | 1 | A | G | Homozygous   |
| NC_037647.1 | 11978833 | SNV | 1 | A | T | Heterozygous |
| NC_037647.1 | 11978836 | SNV | 1 | T | G | Heterozygous |
| NC_037647.1 | 11978839 | SNV | 1 | A | G | Heterozygous |
| NC_037647.1 | 11978842 | SNV | 1 | A | G | Homozygous   |
| NC_037647.1 | 11978845 | SNV | 1 | A | G | Homozygous   |
| NC_037647.1 | 11978848 | SNV | 1 | T | G | Homozygous   |
| NC_037647.1 | 11978860 | SNV | 1 | A | T | Heterozygous |
| NC_037647.1 | 11978878 | SNV | 1 | G | A | Heterozygous |
| NC_037647.1 | 11978882 | SNV | 1 | A | G | Heterozygous |
| NC_037647.1 | 11995767 | SNV | 1 | T | C | Heterozygous |
| NC_037647.1 | 11996347 | SNV | 1 | A | G | Homozygous   |
| NC_037647.1 | 11996523 | SNV | 1 | A | G | Homozygous   |
| NC_037647.1 | 11996807 | SNV | 1 | G | A | Homozygous   |
| NC_037647.1 | 11997409 | SNV | 1 | G | C | Homozygous   |
| NC_037647.1 | 11997431 | SNV | 1 | T | C | Heterozygous |
| NC_037647.1 | 11997448 | SNV | 1 | G | T | Heterozygous |
| NC_037647.1 | 11998267 | SNV | 1 | G | A | Heterozygous |
| NC_037647.1 | 11998287 | SNV | 1 | G | T | Heterozygous |
| NC_037647.1 | 11998315 | SNV | 1 | G | A | Homozygous   |
| NC_037647.1 | 11998324 | SNV | 1 | C | T | Homozygous   |
| NC_037647.1 | 11998416 | SNV | 1 | C | A | Heterozygous |
| NC_037647.1 | 11998733 | SNV | 1 | G | A | Homozygous   |
| NC_037647.1 | 11998849 | SNV | 1 | A | T | Heterozygous |
| NC_037647.1 | 11999253 | SNV | 1 | C | G | Homozygous   |
| NC_037647.1 | 12014852 | SNV | 1 | C | T | Homozygous   |
| NC_037647.1 | 12018879 | SNV | 1 | A | C | Heterozygous |
| NC_037647.1 | 12035541 | SNV | 1 | C | T | Homozygous   |
| NC_037647.1 | 12038106 | SNV | 1 | C | T | Heterozygous |
| NC_037647.1 | 12038133 | SNV | 1 | C | T | Heterozygous |
| NC_037647.1 | 12038191 | SNV | 1 | C | T | Homozygous   |
| NC_037647.1 | 12038946 | SNV | 1 | T | C | Homozygous   |
| NC_037647.1 | 12039780 | SNV | 1 | G | A | Heterozygous |
| NC_037647.1 | 12043868 | SNV | 1 | A | G | Homozygous   |
| NC_037647.1 | 12043872 | SNV | 1 | T | A | Homozygous   |
| NC_037647.1 | 12043875 | SNV | 1 | A | T | Homozygous   |
| NC_037647.1 | 12043881 | SNV | 1 | T | A | Homozygous   |
| NC_037647.1 | 12044769 | SNV | 1 | T | C | Heterozygous |
| NC_037647.1 | 12046699 | SNV | 1 | T | C | Homozygous   |
| NC_037647.1 | 12047310 | SNV | 1 | A | G | Homozygous   |
| NC_037647.1 | 12047371 | SNV | 1 | T | C | Heterozygous |
| NC_037647.1 | 12047605 | SNV | 1 | A | G | Homozygous   |
| NC_037647.1 | 12048302 | SNV | 1 | A | G | Heterozygous |
| NC_037647.1 | 12048689 | SNV | 1 | G | A | Heterozygous |
| NC_037647.1 | 12048737 | SNV | 1 | T | A | Heterozygous |
| NC_037647.1 | 12048854 | SNV | 1 | T | A | Heterozygous |
| NC_037647.1 | 12048993 | SNV | 1 | T | A | Heterozygous |
| NC_037647.1 | 12050395 | SNV | 1 | C | T | Heterozygous |
| NC_037647.1 | 12050405 | SNV | 1 | C | T | Homozygous   |
| NC_037647.1 | 12050724 | SNV | 1 | C | T | Heterozygous |
| NC_037647.1 | 12050732 | SNV | 1 | T | A | Heterozygous |

|             |          |     |   |   |   |              |
|-------------|----------|-----|---|---|---|--------------|
| NC_037647.1 | 12050734 | SNV | 1 | A | T | Homozygous   |
| NC_037647.1 | 12050823 | SNV | 1 | G | A | Homozygous   |
| NC_037647.1 | 12051093 | SNV | 1 | A | G | Homozygous   |
| NC_037647.1 | 12051297 | SNV | 1 | T | C | Homozygous   |
| NC_037647.1 | 12051503 | SNV | 1 | T | C | Homozygous   |
| NC_037647.1 | 12051513 | SNV | 1 | A | G | Homozygous   |
| NC_037647.1 | 12051537 | SNV | 1 | T | A | Homozygous   |
| NC_037647.1 | 12054059 | SNV | 1 | C | G | Homozygous   |
| NC_037647.1 | 12054659 | SNV | 1 | A | T | Homozygous   |
| NC_037647.1 | 12063777 | SNV | 1 | A | G | Homozygous   |
| NC_037647.1 | 12063803 | SNV | 1 | G | A | Heterozygous |
| NC_037647.1 | 12064550 | SNV | 1 | T | A | Homozygous   |
| NC_037647.1 | 12064559 | SNV | 1 | A | T | Homozygous   |
| NC_037647.1 | 12064567 | SNV | 1 | T | A | Homozygous   |
| NC_037647.1 | 12065057 | SNV | 1 | A | G | Homozygous   |
| NC_037647.1 | 12065117 | SNV | 1 | C | T | Homozygous   |
| NC_037647.1 | 12065472 | SNV | 1 | A | T | Homozygous   |
| NC_037647.1 | 12065611 | SNV | 1 | A | G | Heterozygous |
| NC_037647.1 | 12065700 | SNV | 1 | T | C | Homozygous   |
| NC_037647.1 | 12065707 | SNV | 1 | C | A | Homozygous   |
| NC_037647.1 | 12066412 | SNV | 1 | A | G | Homozygous   |
| NC_037647.1 | 12066591 | SNV | 1 | A | G | Homozygous   |
| NC_037647.1 | 12076143 | SNV | 1 | C | T | Heterozygous |
| NC_037647.1 | 12076164 | SNV | 1 | A | T | Homozygous   |
| NC_037647.1 | 12077158 | SNV | 1 | C | G | Homozygous   |
| NC_037647.1 | 12082562 | SNV | 1 | T | C | Homozygous   |
| NC_037647.1 | 12082604 | SNV | 1 | A | G | Homozygous   |
| NC_037647.1 | 12082658 | SNV | 1 | A | G | Homozygous   |
| NC_037647.1 | 12084302 | SNV | 1 | C | T | Heterozygous |
| NC_037647.1 | 12084396 | SNV | 1 | C | T | Heterozygous |
| NC_037647.1 | 12084399 | SNV | 1 | C | T | Heterozygous |
| NC_037647.1 | 12084409 | SNV | 1 | A | T | Heterozygous |
| NC_037647.1 | 12089030 | SNV | 1 | T | C | Homozygous   |
| NC_037647.1 | 12089610 | SNV | 1 | T | A | Homozygous   |
| NC_037647.1 | 12090244 | SNV | 1 | A | G | Homozygous   |
| NC_037647.1 | 12090484 | SNV | 1 | A | G | Heterozygous |
| NC_037647.1 | 12090527 | SNV | 1 | A | G | Heterozygous |
| NC_037647.1 | 12090536 | SNV | 1 | C | T | Heterozygous |
| NC_037647.1 | 12090555 | SNV | 1 | A | G | Heterozygous |
| NC_037647.1 | 12090557 | SNV | 1 | A | G | Heterozygous |
| NC_037647.1 | 12090559 | SNV | 1 | A | G | Heterozygous |
| NC_037647.1 | 12090563 | SNV | 1 | A | G | Heterozygous |
| NC_037647.1 | 12090567 | SNV | 1 | A | G | Heterozygous |
| NC_037647.1 | 12090575 | SNV | 1 | A | G | Homozygous   |
| NC_037647.1 | 12090577 | SNV | 1 | A | G | Heterozygous |
| NC_037647.1 | 12090604 | SNV | 1 | C | A | Heterozygous |
| NC_037647.1 | 12090673 | SNV | 1 | C | T | Heterozygous |
| NC_037647.1 | 12090723 | SNV | 1 | T | C | Homozygous   |
| NC_037647.1 | 12090854 | SNV | 1 | T | C | Homozygous   |
| NC_037647.1 | 12092539 | SNV | 1 | T | A | Heterozygous |
| NC_037647.1 | 12092548 | SNV | 1 | T | C | Heterozygous |

|             |          |     |   |   |   |              |
|-------------|----------|-----|---|---|---|--------------|
| NC_037647.1 | 12092679 | SNV | 1 | C | A | Homozygous   |
| NC_037647.1 | 12092965 | SNV | 1 | A | T | Homozygous   |
| NC_037647.1 | 12093015 | SNV | 1 | A | G | Homozygous   |
| NC_037647.1 | 12093241 | SNV | 1 | G | A | Homozygous   |
| NC_037647.1 | 12094117 | SNV | 1 | T | C | Heterozygous |
| NC_037647.1 | 12094124 | SNV | 1 | A | T | Homozygous   |
| NC_037647.1 | 12094129 | SNV | 1 | C | A | Homozygous   |
| NC_037647.1 | 12094135 | SNV | 1 | T | G | Homozygous   |
| NC_037647.1 | 12096636 | SNV | 1 | T | C | Homozygous   |
| NC_037647.1 | 12096658 | SNV | 1 | T | C | Homozygous   |
| NC_037647.1 | 12096691 | SNV | 1 | G | C | Homozygous   |
| NC_037647.1 | 12096762 | SNV | 1 | A | G | Heterozygous |
| NC_037647.1 | 12096779 | SNV | 1 | T | C | Heterozygous |
| NC_037647.1 | 12097587 | SNV | 1 | T | C | Homozygous   |
| NC_037647.1 | 12097875 | SNV | 1 | G | A | Homozygous   |
| NC_037647.1 | 12099065 | SNV | 1 | T | A | Homozygous   |
| NC_037647.1 | 12099067 | SNV | 1 | T | A | Homozygous   |
| NC_037647.1 | 12099074 | SNV | 1 | T | A | Homozygous   |
| NC_037647.1 | 12099077 | SNV | 1 | T | G | Homozygous   |
| NC_037647.1 | 12099081 | SNV | 1 | A | C | Homozygous   |
| NC_037647.1 | 12099083 | SNV | 1 | A | G | Homozygous   |
| NC_037647.1 | 12099090 | SNV | 1 | T | A | Homozygous   |
| NC_037647.1 | 12099093 | SNV | 1 | A | T | Homozygous   |
| NC_037647.1 | 12099099 | SNV | 1 | T | A | Homozygous   |
| NC_037647.1 | 12099298 | SNV | 1 | A | T | Heterozygous |
| NC_037647.1 | 12099337 | SNV | 1 | C | T | Heterozygous |
| NC_037647.1 | 12099376 | SNV | 1 | A | G | Homozygous   |
| NC_037647.1 | 12099632 | SNV | 1 | A | G | Homozygous   |
| NC_037647.1 | 12099659 | SNV | 1 | T | C | Homozygous   |
| NC_037647.1 | 12099665 | SNV | 1 | G | A | Heterozygous |
| NC_037647.1 | 12102747 | SNV | 1 | C | T | Homozygous   |
| NC_037647.1 | 12104300 | SNV | 1 | T | C | Homozygous   |
| NC_037647.1 | 12104332 | SNV | 1 | T | C | Homozygous   |
| NC_037647.1 | 12104429 | SNV | 1 | C | T | Heterozygous |
| NC_037647.1 | 12104489 | SNV | 1 | C | T | Homozygous   |
| NC_037647.1 | 12104543 | SNV | 1 | G | A | Heterozygous |
| NC_037647.1 | 12104607 | SNV | 1 | T | C | Homozygous   |
| NC_037647.1 | 12104631 | SNV | 1 | A | G | Homozygous   |
| NC_037647.1 | 12104748 | SNV | 1 | G | A | Heterozygous |
| NC_037647.1 | 12104917 | SNV | 1 | T | C | Homozygous   |
| NC_037647.1 | 12105017 | SNV | 1 | A | T | Homozygous   |
| NC_037647.1 | 12105334 | SNV | 1 | G | A | Homozygous   |
| NC_037647.1 | 12105362 | SNV | 1 | T | A | Homozygous   |
| NC_037647.1 | 12105724 | SNV | 1 | G | C | Heterozygous |
| NC_037647.1 | 12105933 | SNV | 1 | A | G | Homozygous   |
| NC_037647.1 | 12106415 | SNV | 1 | G | A | Homozygous   |
| NC_037647.1 | 12106473 | SNV | 1 | T | C | Homozygous   |
| NC_037647.1 | 12117183 | SNV | 1 | C | T | Heterozygous |
| NC_037647.1 | 12117531 | SNV | 1 | C | T | Heterozygous |
| NC_037647.1 | 12117739 | SNV | 1 | T | C | Homozygous   |
| NC_037647.1 | 12117881 | SNV | 1 | C | T | Homozygous   |

|                |          |     |   |   |   |              |
|----------------|----------|-----|---|---|---|--------------|
| NC_037647.1    | 12118666 | SNV | 1 | A | T | Homozygous   |
| NC_037647.1    | 12119491 | SNV | 1 | C | G | Homozygous   |
| NC_037647.1    | 12171805 | SNV | 1 | C | T | Heterozygous |
| NC_037647.1    | 12172438 | SNV | 1 | G | C | Heterozygous |
| NC_037647.1    | 12172480 | SNV | 1 | T | C | Heterozygous |
| NC_037647.1    | 12173400 | SNV | 1 | T | A | Homozygous   |
| NC_037647.1    | 12173721 | SNV | 1 | T | C | Heterozygous |
| NC_037647.1    | 12173725 | SNV | 1 | T | C | Heterozygous |
| NC_037647.1    | 12173729 | SNV | 1 | T | C | Heterozygous |
| NC_037647.1    | 12173733 | SNV | 1 | T | C | Heterozygous |
| NC_037647.1    | 12174612 | SNV | 1 | G | A | Homozygous   |
| NC_037647.1    | 12174844 | SNV | 1 | C | T | Homozygous   |
| NC_037647.1    | 12175041 | SNV | 1 | C | T | Homozygous   |
| NC_037647.1    | 12233083 | SNV | 1 | A | T | Homozygous   |
| NC_037647.1    | 12233086 | SNV | 1 | A | T | Heterozygous |
| NC_037647.1    | 12233307 | SNV | 1 | G | A | Homozygous   |
| NC_037647.1    | 12241568 | SNV | 1 | C | A | Heterozygous |
| NC_037647.1    | 12242439 | SNV | 1 | C | T | Heterozygous |
| NC_037647.1    | 12242450 | SNV | 1 | C | T | Heterozygous |
| NC_037647.1    | 12267191 | SNV | 1 | G | A | Heterozygous |
| NC_037647.1    | 12267484 | SNV | 1 | A | G | Heterozygous |
| NC_037647.1    | 12267487 | SNV | 1 | C | T | Heterozygous |
| NC_037647.1    | 12267916 | SNV | 1 | A | C | Heterozygous |
| NC_037647.1    | 12267929 | SNV | 1 | G | C | Homozygous   |
| NC_037647.1    | 12267951 | SNV | 1 | G | A | Heterozygous |
| NC_037647.1    | 12282779 | SNV | 1 | C | T | Heterozygous |
| NC_037647.1    | 12306285 | SNV | 1 | T | C | Homozygous   |
| NC_037647.1    | 12306289 | SNV | 1 | T | C | Homozygous   |
| NC_037647.1    | 12306293 | SNV | 1 | T | C | Homozygous   |
| NC_037647.1    | 12321467 | SNV | 1 | A | G | Heterozygous |
| NC_037647.1    | 12321514 | SNV | 1 | G | A | Heterozygous |
| NC_037647.1    | 12321719 | SNV | 1 | T | C | Homozygous   |
| NC_037647.1    | 12321770 | SNV | 1 | T | A | Homozygous   |
| NC_037647.1    | 12332284 | SNV | 1 | G | C | Homozygous   |
| NC_037647.1    | 12332667 | SNV | 1 | C | T | Homozygous   |
| NC_037647.1    | 12332982 | SNV | 1 | A | G | Homozygous   |
| NC_037647.1    | 12335334 | SNV | 1 | T | A | Homozygous   |
| NC_037647.1    | 12335354 | SNV | 1 | T | G | Homozygous   |
| NC_037647.1    | 12335358 | SNV | 1 | A | G | Homozygous   |
| NC_037647.1    | 12335362 | SNV | 1 | A | T | Homozygous   |
| NW_020555814.1 | 680      | SNV | 1 | C | T | Homozygous   |
| NW_020555814.1 | 779      | SNV | 1 | T | C | Homozygous   |
| NW_020555814.1 | 4413     | SNV | 1 | G | A | Homozygous   |
| NW_020555814.1 | 4444     | SNV | 1 | A | G | Heterozygous |
| NW_020555815.1 | 15878    | SNV | 1 | G | A | Homozygous   |
| NW_020555815.1 | 17249    | SNV | 1 | A | G | Heterozygous |
| NW_020555815.1 | 17258    | SNV | 1 | C | T | Heterozygous |
| NW_020555815.1 | 17261    | SNV | 1 | A | G | Heterozygous |
| NW_020555815.1 | 17270    | SNV | 1 | G | A | Heterozygous |
| NW_020555815.1 | 17279    | SNV | 1 | T | C | Heterozygous |
| NW_020555815.1 | 17297    | SNV | 1 | T | C | Heterozygous |

|                |       |     |   |   |   |              |
|----------------|-------|-----|---|---|---|--------------|
| NW_020555815.1 | 17300 | SNV | 1 | T | G | Heterozygous |
| NW_020555815.1 | 17303 | SNV | 1 | T | C | Heterozygous |
| NW_020555815.1 | 18143 | SNV | 1 | T | C | Homozygous   |
| NW_020555815.1 | 18655 | SNV | 1 | T | C | Heterozygous |
| NW_020555815.1 | 18662 | SNV | 1 | A | T | Heterozygous |
| NW_020555815.1 | 18920 | SNV | 1 | A | T | Heterozygous |
| NW_020555815.1 | 23939 | SNV | 1 | G | A | Heterozygous |
| NW_020555815.1 | 24027 | SNV | 1 | A | G | Homozygous   |
| NW_020555815.1 | 28052 | SNV | 1 | T | C | Homozygous   |
| NW_020555815.1 | 28465 | SNV | 1 | C | T | Homozygous   |
| NW_020555815.1 | 30543 | SNV | 1 | T | A | Homozygous   |
| NW_020555815.1 | 31191 | SNV | 1 | G | A | Homozygous   |
| NW_020555816.1 | 28623 | SNV | 1 | G | A | Heterozygous |
| NW_020555816.1 | 28630 | SNV | 1 | A | T | Homozygous   |
| NW_020555816.1 | 28684 | SNV | 1 | G | A | Heterozygous |
| NW_020555816.1 | 28703 | SNV | 1 | G | A | Heterozygous |
| NW_020555816.1 | 28733 | SNV | 1 | A | G | Homozygous   |
| NW_020555816.1 | 28738 | SNV | 1 | T | G | Heterozygous |
| NW_020555816.1 | 28754 | SNV | 1 | G | A | Homozygous   |
| NW_020555816.1 | 28765 | SNV | 1 | G | A | Heterozygous |
| NW_020555816.1 | 28774 | SNV | 1 | A | T | Homozygous   |
| NW_020555816.1 | 28786 | SNV | 1 | A | T | Homozygous   |
| NW_020555816.1 | 28793 | SNV | 1 | A | T | Heterozygous |
| NW_020555816.1 | 28797 | SNV | 1 | G | A | Homozygous   |
| NW_020555816.1 | 28800 | SNV | 1 | C | T | Homozygous   |
| NW_020555816.1 | 28815 | SNV | 1 | C | T | Heterozygous |
| NW_020555816.1 | 28821 | SNV | 1 | A | G | Heterozygous |
| NW_020555816.1 | 28825 | SNV | 1 | G | T | Heterozygous |
| NW_020555816.1 | 28852 | SNV | 1 | T | A | Heterozygous |
| NW_020555816.1 | 28854 | SNV | 1 | A | C | Heterozygous |
| NW_020555816.1 | 28935 | SNV | 1 | T | C | Heterozygous |
| NW_020555816.1 | 28954 | SNV | 1 | T | C | Homozygous   |
| NW_020555816.1 | 28984 | SNV | 1 | A | G | Homozygous   |
| NW_020555816.1 | 29006 | SNV | 1 | G | A | Heterozygous |
| NW_020555816.1 | 29034 | SNV | 1 | T | A | Homozygous   |
| NW_020555816.1 | 29063 | SNV | 1 | G | T | Homozygous   |
| NW_020555816.1 | 29077 | SNV | 1 | G | A | Heterozygous |
| NW_020555816.1 | 29081 | SNV | 1 | A | T | Homozygous   |
| NW_020555816.1 | 29091 | SNV | 1 | A | T | Heterozygous |
| NW_020555816.1 | 29101 | SNV | 1 | A | T | Heterozygous |
| NW_020555816.1 | 29111 | SNV | 1 | A | T | Heterozygous |
| NW_020555816.1 | 29147 | SNV | 1 | C | G | Heterozygous |
| NW_020555816.1 | 29157 | SNV | 1 | C | G | Homozygous   |
| NW_020555816.1 | 29167 | SNV | 1 | C | G | Homozygous   |
| NW_020555816.1 | 29541 | SNV | 1 | C | G | Heterozygous |
| NW_020555816.1 | 29546 | SNV | 1 | G | T | Homozygous   |
| NW_020555816.1 | 29558 | SNV | 1 | G | C | Heterozygous |
| NW_020555816.1 | 29560 | SNV | 1 | T | A | Heterozygous |
| NW_020555816.1 | 29562 | SNV | 1 | T | C | Heterozygous |
| NW_020555816.1 | 29567 | SNV | 1 | A | T | Homozygous   |
| NW_020555816.1 | 29569 | SNV | 1 | C | T | Heterozygous |

|                |        |     |   |   |   |              |
|----------------|--------|-----|---|---|---|--------------|
| NW_020555816.1 | 29592  | SNV | 1 | T | A | Homozygous   |
| NW_020555816.1 | 29598  | SNV | 1 | C | G | Homozygous   |
| NW_020555816.1 | 29601  | SNV | 1 | T | A | Heterozygous |
| NW_020555816.1 | 29634  | SNV | 1 | C | T | Homozygous   |
| NW_020555816.1 | 29638  | SNV | 1 | C | T | Heterozygous |
| NC_037648.1    | 172079 | SNV | 1 | G | C | Heterozygous |
| NC_037648.1    | 172096 | SNV | 1 | C | G | Heterozygous |
| NC_037648.1    | 172157 | SNV | 1 | T | C | Heterozygous |
| NC_037648.1    | 172164 | SNV | 1 | G | A | Heterozygous |
| NC_037648.1    | 172193 | SNV | 1 | T | C | Heterozygous |
| NC_037648.1    | 172622 | SNV | 1 | C | A | Heterozygous |
| NC_037648.1    | 172658 | SNV | 1 | C | A | Heterozygous |
| NC_037648.1    | 173031 | SNV | 1 | C | T | Homozygous   |
| NC_037648.1    | 173535 | SNV | 1 | C | T | Homozygous   |
| NC_037648.1    | 173627 | SNV | 1 | G | A | Homozygous   |
| NC_037648.1    | 174148 | SNV | 1 | C | T | Heterozygous |
| NC_037648.1    | 174287 | SNV | 1 | T | C | Homozygous   |
| NC_037648.1    | 174333 | SNV | 1 | A | G | Homozygous   |
| NC_037648.1    | 174799 | SNV | 1 | T | C | Heterozygous |
| NC_037648.1    | 174842 | SNV | 1 | C | T | Homozygous   |
| NC_037648.1    | 175342 | SNV | 1 | C | T | Homozygous   |
| NC_037648.1    | 176125 | SNV | 1 | T | C | Heterozygous |
| NC_037648.1    | 178965 | SNV | 1 | T | C | Homozygous   |
| NC_037648.1    | 184434 | SNV | 1 | A | G | Homozygous   |
| NC_037648.1    | 184510 | SNV | 1 | C | T | Heterozygous |
| NC_037648.1    | 184587 | SNV | 1 | T | C | Homozygous   |
| NC_037648.1    | 188077 | SNV | 1 | A | G | Heterozygous |
| NC_037648.1    | 210202 | SNV | 1 | A | T | Homozygous   |
| NC_037648.1    | 210233 | SNV | 1 | T | C | Homozygous   |
| NC_037648.1    | 213849 | SNV | 1 | G | A | Homozygous   |
| NC_037648.1    | 214061 | SNV | 1 | T | C | Homozygous   |
| NC_037648.1    | 214469 | SNV | 1 | A | G | Homozygous   |
| NC_037648.1    | 215207 | SNV | 1 | T | C | Homozygous   |
| NC_037648.1    | 221216 | SNV | 1 | A | G | Homozygous   |
| NC_037648.1    | 223097 | SNV | 1 | A | T | Homozygous   |
| NC_037648.1    | 223099 | SNV | 1 | A | T | Homozygous   |
| NC_037648.1    | 223106 | SNV | 1 | T | A | Homozygous   |
| NC_037648.1    | 223190 | SNV | 1 | G | T | Heterozygous |
| NC_037648.1    | 225295 | SNV | 1 | C | A | Homozygous   |
| NC_037648.1    | 225826 | SNV | 1 | G | A | Homozygous   |
| NC_037648.1    | 227334 | SNV | 1 | A | G | Heterozygous |
| NC_037648.1    | 227555 | SNV | 1 | T | A | Homozygous   |
| NC_037648.1    | 227580 | SNV | 1 | C | T | Homozygous   |
| NC_037648.1    | 235497 | SNV | 1 | T | C | Heterozygous |
| NC_037648.1    | 235521 | SNV | 1 | T | C | Heterozygous |
| NC_037648.1    | 235541 | SNV | 1 | T | C | Heterozygous |
| NC_037648.1    | 235543 | SNV | 1 | T | C | Heterozygous |
| NC_037648.1    | 235555 | SNV | 1 | A | T | Homozygous   |
| NC_037648.1    | 235706 | SNV | 1 | C | T | Heterozygous |
| NC_037648.1    | 235720 | SNV | 1 | T | C | Homozygous   |
| NC_037648.1    | 254603 | SNV | 1 | G | T | Heterozygous |



|             |        |     |   |   |   |              |
|-------------|--------|-----|---|---|---|--------------|
| NC_037648.1 | 267779 | SNV | 1 | G | A | Heterozygous |
| NC_037648.1 | 267803 | SNV | 1 | G | A | Heterozygous |
| NC_037648.1 | 267811 | SNV | 1 | G | A | Heterozygous |
| NC_037648.1 | 267829 | SNV | 1 | G | A | Heterozygous |
| NC_037648.1 | 267836 | SNV | 1 | G | C | Heterozygous |
| NC_037648.1 | 294697 | SNV | 1 | A | T | Homozygous   |
| NC_037648.1 | 294709 | SNV | 1 | A | G | Homozygous   |
| NC_037648.1 | 361606 | SNV | 1 | A | G | Homozygous   |
| NC_037648.1 | 370852 | SNV | 1 | G | A | Homozygous   |
| NC_037648.1 | 377584 | SNV | 1 | A | G | Homozygous   |
| NC_037648.1 | 379889 | SNV | 1 | C | T | Heterozygous |
| NC_037648.1 | 379891 | SNV | 1 | G | T | Heterozygous |
| NC_037648.1 | 379918 | SNV | 1 | A | G | Homozygous   |
| NC_037648.1 | 380269 | SNV | 1 | A | T | Homozygous   |
| NC_037648.1 | 380360 | SNV | 1 | C | A | Homozygous   |
| NC_037648.1 | 380613 | SNV | 1 | G | A | Homozygous   |
| NC_037648.1 | 380939 | SNV | 1 | C | T | Homozygous   |
| NC_037648.1 | 385003 | SNV | 1 | T | A | Homozygous   |
| NC_037648.1 | 385064 | SNV | 1 | T | C | Homozygous   |
| NC_037648.1 | 385339 | SNV | 1 | T | A | Heterozygous |
| NC_037648.1 | 385817 | SNV | 1 | A | G | Homozygous   |
| NC_037648.1 | 386814 | SNV | 1 | C | T | Homozygous   |
| NC_037648.1 | 387121 | SNV | 1 | C | T | Homozygous   |
| NC_037648.1 | 387276 | SNV | 1 | G | A | Heterozygous |
| NC_037648.1 | 387310 | SNV | 1 | C | T | Homozygous   |
| NC_037648.1 | 387317 | SNV | 1 | C | A | Homozygous   |
| NC_037648.1 | 387450 | SNV | 1 | T | C | Homozygous   |
| NC_037648.1 | 390940 | SNV | 1 | A | T | Homozygous   |
| NC_037648.1 | 390943 | SNV | 1 | A | G | Homozygous   |
| NC_037648.1 | 390953 | SNV | 1 | A | T | Homozygous   |
| NC_037648.1 | 393366 | SNV | 1 | T | A | Homozygous   |
| NC_037648.1 | 393374 | SNV | 1 | A | G | Heterozygous |
| NC_037648.1 | 393396 | SNV | 1 | A | G | Homozygous   |
| NC_037648.1 | 393542 | SNV | 1 | A | C | Heterozygous |
| NC_037648.1 | 393555 | SNV | 1 | A | G | Homozygous   |
| NC_037648.1 | 393558 | SNV | 1 | G | A | Homozygous   |
| NC_037648.1 | 393572 | SNV | 1 | G | A | Heterozygous |
| NC_037648.1 | 393585 | SNV | 1 | T | A | Homozygous   |
| NC_037648.1 | 393597 | SNV | 1 | C | T | Homozygous   |
| NC_037648.1 | 393771 | SNV | 1 | T | A | Homozygous   |
| NC_037648.1 | 399790 | SNV | 1 | C | A | Heterozygous |
| NC_037648.1 | 401620 | SNV | 1 | A | G | Homozygous   |
| NC_037648.1 | 401638 | SNV | 1 | T | A | Heterozygous |
| NC_037648.1 | 401852 | SNV | 1 | A | G | Homozygous   |
| NC_037648.1 | 401858 | SNV | 1 | G | A | Homozygous   |
| NC_037648.1 | 402006 | SNV | 1 | A | G | Homozygous   |
| NC_037648.1 | 402101 | SNV | 1 | T | C | Homozygous   |
| NC_037648.1 | 402104 | SNV | 1 | G | A | Homozygous   |
| NC_037648.1 | 402107 | SNV | 1 | A | C | Homozygous   |
| NC_037648.1 | 402293 | SNV | 1 | C | T | Homozygous   |
| NC_037648.1 | 402562 | SNV | 1 | C | A | Homozygous   |

|             |        |     |   |   |   |              |
|-------------|--------|-----|---|---|---|--------------|
| NC_037648.1 | 402697 | SNV | 1 | G | A | Heterozygous |
| NC_037648.1 | 402712 | SNV | 1 | T | C | Homozygous   |
| NC_037648.1 | 402736 | SNV | 1 | A | T | Heterozygous |
| NC_037648.1 | 404816 | SNV | 1 | G | A | Homozygous   |
| NC_037648.1 | 405276 | SNV | 1 | A | G | Heterozygous |
| NC_037648.1 | 405804 | SNV | 1 | G | A | Heterozygous |
| NC_037648.1 | 405847 | SNV | 1 | C | A | Homozygous   |
| NC_037648.1 | 406303 | SNV | 1 | T | C | Homozygous   |
| NC_037648.1 | 406442 | SNV | 1 | C | T | Heterozygous |
| NC_037648.1 | 406685 | SNV | 1 | A | T | Homozygous   |
| NC_037648.1 | 407222 | SNV | 1 | A | G | Homozygous   |
| NC_037648.1 | 407229 | SNV | 1 | A | T | Homozygous   |
| NC_037648.1 | 407301 | SNV | 1 | G | A | Homozygous   |
| NC_037648.1 | 407464 | SNV | 1 | A | G | Homozygous   |
| NC_037648.1 | 412879 | SNV | 1 | A | G | Homozygous   |
| NC_037648.1 | 412912 | SNV | 1 | G | A | Homozygous   |
| NC_037648.1 | 413336 | SNV | 1 | G | A | Heterozygous |
| NC_037648.1 | 413954 | SNV | 1 | G | A | Homozygous   |
| NC_037648.1 | 416954 | SNV | 1 | A | G | Homozygous   |
| NC_037648.1 | 417583 | SNV | 1 | A | T | Heterozygous |
| NC_037648.1 | 418777 | SNV | 1 | A | T | Homozygous   |
| NC_037648.1 | 423945 | SNV | 1 | C | T | Homozygous   |
| NC_037648.1 | 424013 | SNV | 1 | C | T | Heterozygous |
| NC_037648.1 | 424800 | SNV | 1 | G | A | Heterozygous |
| NC_037648.1 | 425124 | SNV | 1 | A | G | Heterozygous |
| NC_037648.1 | 425804 | SNV | 1 | A | T | Homozygous   |
| NC_037648.1 | 426153 | SNV | 1 | A | T | Homozygous   |
| NC_037648.1 | 426161 | SNV | 1 | C | A | Homozygous   |
| NC_037648.1 | 426381 | SNV | 1 | A | G | Heterozygous |
| NC_037648.1 | 426416 | SNV | 1 | G | A | Heterozygous |
| NC_037648.1 | 426466 | SNV | 1 | A | G | Homozygous   |
| NC_037648.1 | 426533 | SNV | 1 | A | G | Homozygous   |
| NC_037648.1 | 426862 | SNV | 1 | T | C | Heterozygous |
| NC_037648.1 | 426981 | SNV | 1 | T | C | Homozygous   |
| NC_037648.1 | 427145 | SNV | 1 | G | A | Heterozygous |
| NC_037648.1 | 427597 | SNV | 1 | G | A | Heterozygous |
| NC_037648.1 | 427688 | SNV | 1 | A | G | Heterozygous |
| NC_037648.1 | 427827 | SNV | 1 | C | T | Homozygous   |
| NC_037648.1 | 428048 | SNV | 1 | G | A | Homozygous   |
| NC_037648.1 | 428156 | SNV | 1 | G | T | Homozygous   |
| NC_037648.1 | 428185 | SNV | 1 | G | C | Heterozygous |
| NC_037648.1 | 428424 | SNV | 1 | A | G | Homozygous   |
| NC_037648.1 | 428491 | SNV | 1 | A | G | Homozygous   |
| NC_037648.1 | 428664 | SNV | 1 | C | T | Homozygous   |
| NC_037648.1 | 429031 | SNV | 1 | G | A | Homozygous   |
| NC_037648.1 | 429040 | SNV | 1 | A | G | Homozygous   |
| NC_037648.1 | 429109 | SNV | 1 | A | G | Homozygous   |
| NC_037648.1 | 429157 | SNV | 1 | A | G | Homozygous   |
| NC_037648.1 | 429205 | SNV | 1 | T | C | Homozygous   |
| NC_037648.1 | 431282 | SNV | 1 | A | G | Homozygous   |
| NC_037648.1 | 431295 | SNV | 1 | T | C | Homozygous   |

|             |        |     |   |   |   |              |
|-------------|--------|-----|---|---|---|--------------|
| NC_037648.1 | 431305 | SNV | 1 | T | G | Homozygous   |
| NC_037648.1 | 431308 | SNV | 1 | A | G | Homozygous   |
| NC_037648.1 | 433639 | SNV | 1 | A | T | Heterozygous |
| NC_037648.1 | 437663 | SNV | 1 | C | T | Homozygous   |
| NC_037648.1 | 445762 | SNV | 1 | A | T | Heterozygous |
| NC_037648.1 | 447395 | SNV | 1 | A | C | Homozygous   |
| NC_037648.1 | 447432 | SNV | 1 | A | G | Heterozygous |
| NC_037648.1 | 447527 | SNV | 1 | C | T | Heterozygous |
| NC_037648.1 | 454238 | SNV | 1 | A | G | Heterozygous |
| NC_037648.1 | 454668 | SNV | 1 | A | T | Heterozygous |
| NC_037648.1 | 455225 | SNV | 1 | G | A | Heterozygous |
| NC_037648.1 | 455233 | SNV | 1 | A | G | Homozygous   |
| NC_037648.1 | 456535 | SNV | 1 | C | T | Heterozygous |
| NC_037648.1 | 457831 | SNV | 1 | G | C | Heterozygous |
| NC_037648.1 | 458755 | SNV | 1 | G | A | Heterozygous |
| NC_037648.1 | 459004 | SNV | 1 | T | A | Homozygous   |
| NC_037648.1 | 459009 | SNV | 1 | G | A | Homozygous   |
| NC_037648.1 | 459011 | SNV | 1 | T | G | Homozygous   |
| NC_037648.1 | 459036 | SNV | 1 | A | T | Homozygous   |
| NC_037648.1 | 459043 | SNV | 1 | T | A | Homozygous   |
| NC_037648.1 | 459248 | SNV | 1 | C | T | Homozygous   |
| NC_037648.1 | 463466 | SNV | 1 | G | A | Homozygous   |
| NC_037648.1 | 464996 | SNV | 1 | C | T | Homozygous   |
| NC_037648.1 | 467013 | SNV | 1 | A | T | Heterozygous |
| NC_037648.1 | 467017 | SNV | 1 | G | A | Heterozygous |
| NC_037648.1 | 467020 | SNV | 1 | C | A | Heterozygous |
| NC_037648.1 | 467483 | SNV | 1 | G | A | Heterozygous |
| NC_037648.1 | 467660 | SNV | 1 | T | C | Heterozygous |
| NC_037648.1 | 467663 | SNV | 1 | C | T | Heterozygous |
| NC_037648.1 | 467771 | SNV | 1 | A | G | Homozygous   |
| NC_037648.1 | 467810 | SNV | 1 | T | C | Homozygous   |
| NC_037648.1 | 468266 | SNV | 1 | G | T | Homozygous   |
| NC_037648.1 | 468278 | SNV | 1 | G | T | Homozygous   |
| NC_037648.1 | 468350 | SNV | 1 | A | C | Homozygous   |
| NC_037648.1 | 468433 | SNV | 1 | T | C | Homozygous   |
| NC_037648.1 | 468656 | SNV | 1 | C | G | Homozygous   |
| NC_037648.1 | 468666 | SNV | 1 | T | C | Homozygous   |
| NC_037648.1 | 468896 | SNV | 1 | A | T | Heterozygous |
| NC_037648.1 | 469403 | SNV | 1 | C | T | Heterozygous |
| NC_037648.1 | 469409 | SNV | 1 | T | C | Homozygous   |
| NC_037648.1 | 469625 | SNV | 1 | C | T | Heterozygous |
| NC_037648.1 | 469673 | SNV | 1 | A | T | Heterozygous |
| NC_037648.1 | 469682 | SNV | 1 | G | C | Homozygous   |
| NC_037648.1 | 470327 | SNV | 1 | A | G | Heterozygous |
| NC_037648.1 | 471564 | SNV | 1 | G | A | Homozygous   |
| NC_037648.1 | 471789 | SNV | 1 | T | C | Homozygous   |
| NC_037648.1 | 472225 | SNV | 1 | C | T | Homozygous   |
| NC_037648.1 | 474436 | SNV | 1 | C | A | Homozygous   |
| NC_037648.1 | 476020 | SNV | 1 | T | C | Homozygous   |
| NC_037648.1 | 476581 | SNV | 1 | G | T | Heterozygous |
| NC_037648.1 | 476904 | SNV | 1 | A | G | Heterozygous |

|             |        |     |   |   |   |              |
|-------------|--------|-----|---|---|---|--------------|
| NC_037648.1 | 476907 | SNV | 1 | A | G | Heterozygous |
| NC_037648.1 | 476911 | SNV | 1 | A | G | Heterozygous |
| NC_037648.1 | 476917 | SNV | 1 | A | G | Heterozygous |
| NC_037648.1 | 477324 | SNV | 1 | C | T | Heterozygous |
| NC_037648.1 | 477353 | SNV | 1 | A | T | Heterozygous |
| NC_037648.1 | 477369 | SNV | 1 | G | T | Heterozygous |
| NC_037648.1 | 479829 | SNV | 1 | T | C | Homozygous   |
| NC_037648.1 | 480092 | SNV | 1 | A | T | Homozygous   |
| NC_037648.1 | 480118 | SNV | 1 | A | G | Homozygous   |
| NC_037648.1 | 480191 | SNV | 1 | T | A | Heterozygous |
| NC_037648.1 | 492191 | SNV | 1 | A | T | Heterozygous |
| NC_037648.1 | 492196 | SNV | 1 | C | T | Heterozygous |
| NC_037648.1 | 492198 | SNV | 1 | C | T | Heterozygous |
| NC_037648.1 | 492202 | SNV | 1 | T | C | Heterozygous |
| NC_037648.1 | 492211 | SNV | 1 | G | A | Homozygous   |
| NC_037648.1 | 492262 | SNV | 1 | C | G | Homozygous   |
| NC_037648.1 | 492270 | SNV | 1 | G | A | Homozygous   |
| NC_037648.1 | 500030 | SNV | 1 | A | C | Heterozygous |
| NC_037648.1 | 500038 | SNV | 1 | A | C | Heterozygous |
| NC_037648.1 | 513978 | SNV | 1 | C | G | Homozygous   |
| NC_037648.1 | 514128 | SNV | 1 | T | C | Homozygous   |
| NC_037648.1 | 514528 | SNV | 1 | G | T | Homozygous   |
| NC_037648.1 | 515325 | SNV | 1 | A | G | Homozygous   |
| NC_037648.1 | 515985 | SNV | 1 | T | A | Homozygous   |
| NC_037648.1 | 516010 | SNV | 1 | A | G | Homozygous   |
| NC_037648.1 | 516015 | SNV | 1 | G | A | Homozygous   |
| NC_037648.1 | 516017 | SNV | 1 | T | A | Homozygous   |
| NC_037648.1 | 518308 | SNV | 1 | A | C | Homozygous   |
| NC_037648.1 | 518314 | SNV | 1 | A | T | Homozygous   |
| NC_037648.1 | 518316 | SNV | 1 | T | A | Homozygous   |
| NC_037648.1 | 518359 | SNV | 1 | A | G | Homozygous   |
| NC_037648.1 | 518813 | SNV | 1 | T | C | Homozygous   |
| NC_037648.1 | 518971 | SNV | 1 | G | A | Heterozygous |
| NC_037648.1 | 519067 | SNV | 1 | T | C | Homozygous   |
| NC_037648.1 | 519142 | SNV | 1 | G | C | Heterozygous |
| NC_037648.1 | 519474 | SNV | 1 | T | C | Homozygous   |
| NC_037648.1 | 519920 | SNV | 1 | C | T | Homozygous   |
| NC_037648.1 | 519923 | SNV | 1 | G | A | Homozygous   |
| NC_037648.1 | 520837 | SNV | 1 | A | G | Homozygous   |
| NC_037648.1 | 525638 | SNV | 1 | C | T | Heterozygous |
| NC_037648.1 | 525872 | SNV | 1 | T | C | Homozygous   |
| NC_037648.1 | 533328 | SNV | 1 | T | G | Homozygous   |
| NC_037648.1 | 533590 | SNV | 1 | G | A | Heterozygous |
| NC_037648.1 | 533858 | SNV | 1 | T | C | Homozygous   |
| NC_037648.1 | 534218 | SNV | 1 | T | C | Homozygous   |
| NC_037648.1 | 534372 | SNV | 1 | T | G | Heterozygous |
| NC_037648.1 | 534601 | SNV | 1 | C | T | Heterozygous |
| NC_037648.1 | 534631 | SNV | 1 | T | C | Homozygous   |
| NC_037648.1 | 534641 | SNV | 1 | A | C | Heterozygous |
| NC_037648.1 | 534937 | SNV | 1 | G | A | Homozygous   |
| NC_037648.1 | 535060 | SNV | 1 | C | T | Heterozygous |

|             |        |     |   |   |   |              |
|-------------|--------|-----|---|---|---|--------------|
| NC_037648.1 | 535329 | SNV | 1 | T | A | Heterozygous |
| NC_037648.1 | 535333 | SNV | 1 | C | T | Homozygous   |
| NC_037648.1 | 535603 | SNV | 1 | T | C | Heterozygous |
| NC_037648.1 | 535656 | SNV | 1 | A | G | Heterozygous |
| NC_037648.1 | 535670 | SNV | 1 | A | G | Heterozygous |
| NC_037648.1 | 536126 | SNV | 1 | T | A | Homozygous   |
| NC_037648.1 | 536128 | SNV | 1 | T | C | Homozygous   |
| NC_037648.1 | 536163 | SNV | 1 | G | A | Heterozygous |
| NC_037648.1 | 536189 | SNV | 1 | T | C | Heterozygous |
| NC_037648.1 | 536224 | SNV | 1 | T | C | Heterozygous |
| NC_037648.1 | 536271 | SNV | 1 | T | C | Heterozygous |
| NC_037648.1 | 536293 | SNV | 1 | T | C | Homozygous   |
| NC_037648.1 | 536313 | SNV | 1 | G | A | Homozygous   |
| NC_037648.1 | 536344 | SNV | 1 | C | A | Homozygous   |
| NC_037648.1 | 536379 | SNV | 1 | G | A | Heterozygous |
| NC_037648.1 | 536422 | SNV | 1 | C | G | Heterozygous |
| NC_037648.1 | 536424 | SNV | 1 | C | T | Heterozygous |
| NC_037648.1 | 541266 | SNV | 1 | T | G | Homozygous   |
| NC_037648.1 | 541907 | SNV | 1 | C | T | Heterozygous |
| NC_037648.1 | 542031 | SNV | 1 | A | T | Homozygous   |
| NC_037648.1 | 543406 | SNV | 1 | T | A | Heterozygous |
| NC_037648.1 | 547502 | SNV | 1 | G | T | Homozygous   |
| NC_037648.1 | 548194 | SNV | 1 | A | G | Homozygous   |
| NC_037648.1 | 554273 | SNV | 1 | G | A | Heterozygous |
| NC_037648.1 | 554693 | SNV | 1 | G | T | Homozygous   |
| NC_037648.1 | 560482 | SNV | 1 | T | C | Homozygous   |
| NC_037648.1 | 564906 | SNV | 1 | T | G | Homozygous   |
| NC_037648.1 | 564919 | SNV | 1 | A | C | Homozygous   |
| NC_037648.1 | 564938 | SNV | 1 | T | A | Homozygous   |
| NC_037648.1 | 564998 | SNV | 1 | A | T | Homozygous   |
| NC_037648.1 | 565000 | SNV | 1 | A | C | Homozygous   |
| NC_037648.1 | 569627 | SNV | 1 | T | C | Homozygous   |
| NC_037648.1 | 570072 | SNV | 1 | T | A | Heterozygous |
| NC_037648.1 | 570109 | SNV | 1 | T | C | Homozygous   |
| NC_037648.1 | 574186 | SNV | 1 | A | T | Homozygous   |
| NC_037648.1 | 579046 | SNV | 1 | T | C | Homozygous   |
| NC_037648.1 | 581620 | SNV | 1 | T | C | Heterozygous |
| NC_037648.1 | 582675 | SNV | 1 | A | G | Homozygous   |
| NC_037648.1 | 583274 | SNV | 1 | T | C | Heterozygous |
| NC_037648.1 | 583711 | SNV | 1 | C | A | Heterozygous |
| NC_037648.1 | 584031 | SNV | 1 | T | C | Homozygous   |
| NC_037648.1 | 584246 | SNV | 1 | T | C | Heterozygous |
| NC_037648.1 | 584732 | SNV | 1 | C | T | Heterozygous |
| NC_037648.1 | 585359 | SNV | 1 | C | T | Heterozygous |
| NC_037648.1 | 586825 | SNV | 1 | A | G | Homozygous   |
| NC_037648.1 | 590615 | SNV | 1 | T | C | Homozygous   |
| NC_037648.1 | 590766 | SNV | 1 | A | G | Homozygous   |
| NC_037648.1 | 590769 | SNV | 1 | G | A | Homozygous   |
| NC_037648.1 | 591523 | SNV | 1 | A | G | Homozygous   |
| NC_037648.1 | 594593 | SNV | 1 | A | G | Homozygous   |
| NC_037648.1 | 594830 | SNV | 1 | T | C | Homozygous   |

|             |        |     |   |   |   |              |
|-------------|--------|-----|---|---|---|--------------|
| NC_037648.1 | 595133 | SNV | 1 | C | T | Homozygous   |
| NC_037648.1 | 595264 | SNV | 1 | G | A | Homozygous   |
| NC_037648.1 | 595423 | SNV | 1 | T | C | Homozygous   |
| NC_037648.1 | 595593 | SNV | 1 | T | G | Homozygous   |
| NC_037648.1 | 596820 | SNV | 1 | A | C | Homozygous   |
| NC_037648.1 | 599009 | SNV | 1 | A | G | Homozygous   |
| NC_037648.1 | 599129 | SNV | 1 | T | C | Homozygous   |
| NC_037648.1 | 603337 | SNV | 1 | A | G | Homozygous   |
| NC_037648.1 | 634402 | SNV | 1 | C | T | Heterozygous |
| NC_037648.1 | 635525 | SNV | 1 | G | T | Heterozygous |
| NC_037648.1 | 635674 | SNV | 1 | A | G | Heterozygous |
| NC_037648.1 | 635723 | SNV | 1 | A | G | Homozygous   |
| NC_037648.1 | 660749 | SNV | 1 | C | T | Heterozygous |
| NC_037648.1 | 660758 | SNV | 1 | G | A | Heterozygous |
| NC_037648.1 | 661097 | SNV | 1 | T | C | Homozygous   |
| NC_037648.1 | 661256 | SNV | 1 | A | G | Heterozygous |
| NC_037648.1 | 661259 | SNV | 1 | G | A | Heterozygous |
| NC_037648.1 | 661281 | SNV | 1 | G | A | Homozygous   |
| NC_037648.1 | 661706 | SNV | 1 | T | C | Heterozygous |
| NC_037648.1 | 661725 | SNV | 1 | T | C | Heterozygous |
| NC_037648.1 | 661727 | SNV | 1 | C | T | Homozygous   |
| NC_037648.1 | 661746 | SNV | 1 | T | C | Heterozygous |
| NC_037648.1 | 662316 | SNV | 1 | G | A | Homozygous   |
| NC_037648.1 | 662520 | SNV | 1 | C | T | Heterozygous |
| NC_037648.1 | 662563 | SNV | 1 | C | T | Heterozygous |
| NC_037648.1 | 662598 | SNV | 1 | T | C | Heterozygous |
| NC_037648.1 | 662607 | SNV | 1 | G | A | Heterozygous |
| NC_037648.1 | 663094 | SNV | 1 | A | G | Homozygous   |
| NC_037648.1 | 663157 | SNV | 1 | T | C | Heterozygous |
| NC_037648.1 | 663759 | SNV | 1 | C | G | Homozygous   |
| NC_037648.1 | 663876 | SNV | 1 | G | A | Heterozygous |
| NC_037648.1 | 665401 | SNV | 1 | T | C | Heterozygous |
| NC_037648.1 | 741147 | SNV | 1 | C | T | Heterozygous |
| NC_037648.1 | 742186 | SNV | 1 | C | A | Heterozygous |
| NC_037648.1 | 742465 | SNV | 1 | A | G | Homozygous   |
| NC_037648.1 | 742893 | SNV | 1 | T | C | Homozygous   |
| NC_037648.1 | 743000 | SNV | 1 | G | A | Heterozygous |
| NC_037648.1 | 744261 | SNV | 1 | T | C | Heterozygous |
| NC_037648.1 | 744423 | SNV | 1 | C | T | Homozygous   |
| NC_037648.1 | 744589 | SNV | 1 | A | G | Homozygous   |
| NC_037648.1 | 744720 | SNV | 1 | C | T | Heterozygous |
| NC_037648.1 | 744727 | SNV | 1 | T | A | Heterozygous |
| NC_037648.1 | 744730 | SNV | 1 | T | A | Heterozygous |
| NC_037648.1 | 744736 | SNV | 1 | A | G | Heterozygous |
| NC_037648.1 | 744739 | SNV | 1 | T | C | Heterozygous |
| NC_037648.1 | 744751 | SNV | 1 | C | T | Heterozygous |
| NC_037648.1 | 744769 | SNV | 1 | A | C | Heterozygous |
| NC_037648.1 | 744775 | SNV | 1 | T | A | Heterozygous |
| NC_037648.1 | 744777 | SNV | 1 | G | T | Heterozygous |
| NC_037648.1 | 744783 | SNV | 1 | A | G | Heterozygous |
| NC_037648.1 | 750929 | SNV | 1 | G | A | Homozygous   |

|             |        |     |   |   |   |              |
|-------------|--------|-----|---|---|---|--------------|
| NC_037648.1 | 750950 | SNV | 1 | T | G | Homozygous   |
| NC_037648.1 | 750954 | SNV | 1 | A | G | Heterozygous |
| NC_037648.1 | 750956 | SNV | 1 | T | A | Homozygous   |
| NC_037648.1 | 750973 | SNV | 1 | A | T | Heterozygous |
| NC_037648.1 | 750977 | SNV | 1 | G | A | Homozygous   |
| NC_037648.1 | 750979 | SNV | 1 | A | C | Heterozygous |
| NC_037648.1 | 756375 | SNV | 1 | C | T | Heterozygous |
| NC_037648.1 | 756533 | SNV | 1 | T | C | Homozygous   |
| NC_037648.1 | 756664 | SNV | 1 | G | A | Heterozygous |
| NC_037648.1 | 756688 | SNV | 1 | G | A | Heterozygous |
| NC_037648.1 | 756774 | SNV | 1 | C | A | Heterozygous |
| NC_037648.1 | 756782 | SNV | 1 | G | A | Heterozygous |
| NC_037648.1 | 756837 | SNV | 1 | T | C | Heterozygous |
| NC_037648.1 | 756841 | SNV | 1 | T | C | Homozygous   |
| NC_037648.1 | 756848 | SNV | 1 | T | C | Homozygous   |
| NC_037648.1 | 756855 | SNV | 1 | C | T | Heterozygous |
| NC_037648.1 | 756903 | SNV | 1 | T | C | Homozygous   |
| NC_037648.1 | 757164 | SNV | 1 | C | T | Heterozygous |
| NC_037648.1 | 757273 | SNV | 1 | G | C | Heterozygous |
| NC_037648.1 | 757348 | SNV | 1 | G | A | Homozygous   |
| NC_037648.1 | 757424 | SNV | 1 | A | G | Heterozygous |
| NC_037648.1 | 757557 | SNV | 1 | A | G | Heterozygous |
| NC_037648.1 | 769811 | SNV | 1 | G | C | Homozygous   |
| NC_037648.1 | 769822 | SNV | 1 | C | T | Homozygous   |
| NC_037648.1 | 769842 | SNV | 1 | A | G | Homozygous   |
| NC_037648.1 | 769973 | SNV | 1 | T | A | Heterozygous |
| NC_037648.1 | 770319 | SNV | 1 | A | G | Homozygous   |
| NC_037648.1 | 770343 | SNV | 1 | A | G | Homozygous   |
| NC_037648.1 | 770357 | SNV | 1 | A | G | Heterozygous |
| NC_037648.1 | 770371 | SNV | 1 | A | T | Heterozygous |
| NC_037648.1 | 770437 | SNV | 1 | T | C | Heterozygous |
| NC_037648.1 | 770480 | SNV | 1 | G | A | Heterozygous |
| NC_037648.1 | 770524 | SNV | 1 | T | C | Homozygous   |
| NC_037648.1 | 773986 | SNV | 1 | C | A | Homozygous   |
| NC_037648.1 | 782794 | SNV | 1 | C | T | Homozygous   |
| NC_037648.1 | 782810 | SNV | 1 | G | A | Homozygous   |
| NC_037648.1 | 782976 | SNV | 1 | A | G | Heterozygous |
| NC_037648.1 | 782980 | SNV | 1 | A | G | Heterozygous |
| NC_037648.1 | 782982 | SNV | 1 | G | A | Homozygous   |
| NC_037648.1 | 783055 | SNV | 1 | G | A | Heterozygous |
| NC_037648.1 | 783057 | SNV | 1 | G | C | Heterozygous |
| NC_037648.1 | 783062 | SNV | 1 | A | C | Heterozygous |
| NC_037648.1 | 783082 | SNV | 1 | A | C | Heterozygous |
| NC_037648.1 | 783117 | SNV | 1 | T | G | Homozygous   |
| NC_037648.1 | 783137 | SNV | 1 | T | A | Homozygous   |
| NC_037648.1 | 783185 | SNV | 1 | T | A | Homozygous   |
| NC_037648.1 | 783192 | SNV | 1 | A | T | Homozygous   |
| NC_037648.1 | 783199 | SNV | 1 | T | C | Homozygous   |
| NC_037648.1 | 783421 | SNV | 1 | C | T | Heterozygous |
| NC_037648.1 | 783932 | SNV | 1 | G | A | Homozygous   |
| NC_037648.1 | 783963 | SNV | 1 | A | G | Homozygous   |

|             |        |     |   |   |   |              |
|-------------|--------|-----|---|---|---|--------------|
| NC_037648.1 | 785457 | SNV | 1 | T | C | Heterozygous |
| NC_037648.1 | 785728 | SNV | 1 | G | A | Heterozygous |
| NC_037648.1 | 785839 | SNV | 1 | G | A | Homozygous   |
| NC_037648.1 | 785954 | SNV | 1 | T | A | Homozygous   |
| NC_037648.1 | 793296 | SNV | 1 | T | C | Homozygous   |
| NC_037648.1 | 793320 | SNV | 1 | C | A | Homozygous   |
| NC_037648.1 | 793496 | SNV | 1 | G | A | Homozygous   |
| NC_037648.1 | 793588 | SNV | 1 | T | G | Heterozygous |
| NC_037648.1 | 793673 | SNV | 1 | T | C | Homozygous   |
| NC_037648.1 | 793677 | SNV | 1 | G | A | Heterozygous |
| NC_037648.1 | 793683 | SNV | 1 | T | C | Homozygous   |
| NC_037648.1 | 793779 | SNV | 1 | G | A | Homozygous   |
| NC_037648.1 | 793791 | SNV | 1 | C | A | Homozygous   |
| NC_037648.1 | 793814 | SNV | 1 | T | G | Heterozygous |
| NC_037648.1 | 793825 | SNV | 1 | G | A | Heterozygous |
| NC_037648.1 | 793853 | SNV | 1 | C | G | Homozygous   |
| NC_037648.1 | 793865 | SNV | 1 | C | A | Homozygous   |
| NC_037648.1 | 794002 | SNV | 1 | A | G | Homozygous   |
| NC_037648.1 | 794033 | SNV | 1 | T | A | Homozygous   |
| NC_037648.1 | 794037 | SNV | 1 | C | T | Heterozygous |
| NC_037648.1 | 794077 | SNV | 1 | C | T | Homozygous   |
| NC_037648.1 | 794206 | SNV | 1 | T | G | Heterozygous |
| NC_037648.1 | 794208 | SNV | 1 | T | A | Heterozygous |
| NC_037648.1 | 794287 | SNV | 1 | C | T | Homozygous   |
| NC_037648.1 | 794311 | SNV | 1 | C | A | Homozygous   |
| NC_037648.1 | 794337 | SNV | 1 | A | G | Homozygous   |
| NC_037648.1 | 794371 | SNV | 1 | T | C | Homozygous   |
| NC_037648.1 | 798697 | SNV | 1 | C | A | Homozygous   |
| NC_037648.1 | 798712 | SNV | 1 | C | T | Homozygous   |
| NC_037648.1 | 798721 | SNV | 1 | G | A | Homozygous   |
| NC_037648.1 | 798727 | SNV | 1 | G | A | Homozygous   |
| NC_037648.1 | 798729 | SNV | 1 | G | A | Homozygous   |
| NC_037648.1 | 798735 | SNV | 1 | G | A | Homozygous   |
| NC_037648.1 | 798751 | SNV | 1 | G | A | Homozygous   |
| NC_037648.1 | 798763 | SNV | 1 | G | A | Homozygous   |
| NC_037648.1 | 810632 | SNV | 1 | A | T | Heterozygous |
| NC_037648.1 | 810635 | SNV | 1 | G | T | Heterozygous |
| NC_037648.1 | 810668 | SNV | 1 | G | A | Heterozygous |
| NC_037648.1 | 810679 | SNV | 1 | G | A | Heterozygous |
| NC_037648.1 | 824615 | SNV | 1 | A | G | Homozygous   |
| NC_037648.1 | 824677 | SNV | 1 | A | G | Homozygous   |
| NC_037648.1 | 824765 | SNV | 1 | T | C | Homozygous   |
| NC_037648.1 | 824774 | SNV | 1 | G | A | Homozygous   |
| NC_037648.1 | 824789 | SNV | 1 | A | G | Homozygous   |
| NC_037648.1 | 824826 | SNV | 1 | G | A | Heterozygous |
| NC_037648.1 | 824861 | SNV | 1 | A | G | Homozygous   |
| NC_037648.1 | 824871 | SNV | 1 | A | G | Homozygous   |
| NC_037648.1 | 824962 | SNV | 1 | T | A | Heterozygous |
| NC_037648.1 | 824968 | SNV | 1 | C | G | Heterozygous |
| NC_037648.1 | 824970 | SNV | 1 | T | C | Heterozygous |
| NC_037648.1 | 824972 | SNV | 1 | T | G | Heterozygous |



|             |        |     |   |   |   |              |
|-------------|--------|-----|---|---|---|--------------|
| NC_037648.1 | 824980 | SNV | 1 | G | A | Heterozygous |
| NC_037648.1 | 827692 | SNV | 1 | G | C | Heterozygous |
| NC_037648.1 | 827709 | SNV | 1 | A | G | Heterozygous |
| NC_037648.1 | 827768 | SNV | 1 | C | G | Homozygous   |
| NC_037648.1 | 828282 | SNV | 1 | G | A | Homozygous   |
| NC_037648.1 | 828387 | SNV | 1 | G | C | Homozygous   |
| NC_037648.1 | 828452 | SNV | 1 | C | T | Heterozygous |
| NC_037648.1 | 828454 | SNV | 1 | T | C | Heterozygous |
| NC_037648.1 | 828501 | SNV | 1 | T | C | Homozygous   |
| NC_037648.1 | 828606 | SNV | 1 | C | T | Homozygous   |
| NC_037648.1 | 828664 | SNV | 1 | C | T | Heterozygous |
| NC_037648.1 | 828682 | SNV | 1 | T | C | Homozygous   |
| NC_037648.1 | 828793 | SNV | 1 | A | G | Homozygous   |
| NC_037648.1 | 828905 | SNV | 1 | C | T | Heterozygous |
| NC_037648.1 | 828922 | SNV | 1 | C | G | Heterozygous |
| NC_037648.1 | 829042 | SNV | 1 | A | G | Homozygous   |
| NC_037648.1 | 829066 | SNV | 1 | A | G | Homozygous   |
| NC_037648.1 | 829068 | SNV | 1 | A | G | Homozygous   |
| NC_037648.1 | 829170 | SNV | 1 | C | T | Heterozygous |
| NC_037648.1 | 829194 | SNV | 1 | A | G | Homozygous   |
| NC_037648.1 | 829205 | SNV | 1 | T | C | Homozygous   |
| NC_037648.1 | 829209 | SNV | 1 | C | T | Heterozygous |
| NC_037648.1 | 829267 | SNV | 1 | A | G | Homozygous   |
| NC_037648.1 | 829341 | SNV | 1 | A | G | Homozygous   |
| NC_037648.1 | 829376 | SNV | 1 | A | G | Homozygous   |
| NC_037648.1 | 829437 | SNV | 1 | G | A | Homozygous   |
| NC_037648.1 | 829442 | SNV | 1 | G | A | Homozygous   |
| NC_037648.1 | 830177 | SNV | 1 | T | C | Homozygous   |
| NC_037648.1 | 830290 | SNV | 1 | G | A | Heterozygous |
| NC_037648.1 | 830310 | SNV | 1 | T | C | Homozygous   |
| NC_037648.1 | 830856 | SNV | 1 | C | A | Homozygous   |
| NC_037648.1 | 830881 | SNV | 1 | A | G | Homozygous   |
| NC_037648.1 | 830897 | SNV | 1 | C | T | Heterozygous |
| NC_037648.1 | 831122 | SNV | 1 | T | C | Homozygous   |
| NC_037648.1 | 831315 | SNV | 1 | A | G | Heterozygous |
| NC_037648.1 | 831546 | SNV | 1 | A | G | Heterozygous |
| NC_037648.1 | 831942 | SNV | 1 | A | G | Homozygous   |
| NC_037648.1 | 832089 | SNV | 1 | T | G | Homozygous   |
| NC_037648.1 | 832102 | SNV | 1 | G | A | Homozygous   |
| NC_037648.1 | 832253 | SNV | 1 | C | T | Homozygous   |
| NC_037648.1 | 832850 | SNV | 1 | T | C | Homozygous   |
| NC_037648.1 | 832863 | SNV | 1 | T | A | Homozygous   |
| NC_037648.1 | 832923 | SNV | 1 | C | A | Homozygous   |
| NC_037648.1 | 832925 | SNV | 1 | T | C | Homozygous   |
| NC_037648.1 | 834995 | SNV | 1 | A | G | Homozygous   |
| NC_037648.1 | 835015 | SNV | 1 | A | G | Homozygous   |
| NC_037648.1 | 835027 | SNV | 1 | T | A | Homozygous   |
| NC_037648.1 | 835030 | SNV | 1 | T | A | Homozygous   |
| NC_037648.1 | 835033 | SNV | 1 | T | A | Homozygous   |
| NC_037648.1 | 836625 | SNV | 1 | G | A | Homozygous   |
| NC_037648.1 | 836628 | SNV | 1 | T | C | Homozygous   |

|             |        |     |   |   |   |              |
|-------------|--------|-----|---|---|---|--------------|
| NC_037648.1 | 836633 | SNV | 1 | A | G | Homozygous   |
| NC_037648.1 | 836762 | SNV | 1 | C | T | Heterozygous |
| NC_037648.1 | 836909 | SNV | 1 | A | G | Heterozygous |
| NC_037648.1 | 837326 | SNV | 1 | T | C | Homozygous   |
| NC_037648.1 | 837389 | SNV | 1 | A | G | Homozygous   |
| NC_037648.1 | 839437 | SNV | 1 | C | T | Heterozygous |
| NC_037648.1 | 839491 | SNV | 1 | A | G | Homozygous   |
| NC_037648.1 | 840018 | SNV | 1 | A | G | Heterozygous |
| NC_037648.1 | 840039 | SNV | 1 | A | G | Homozygous   |
| NC_037648.1 | 840106 | SNV | 1 | A | G | Heterozygous |
| NC_037648.1 | 840122 | SNV | 1 | G | A | Heterozygous |
| NC_037648.1 | 840136 | SNV | 1 | C | T | Heterozygous |
| NC_037648.1 | 840170 | SNV | 1 | C | T | Homozygous   |
| NC_037648.1 | 840198 | SNV | 1 | A | G | Homozygous   |
| NC_037648.1 | 840250 | SNV | 1 | G | A | Heterozygous |
| NC_037648.1 | 841400 | SNV | 1 | T | G | Homozygous   |
| NC_037648.1 | 841411 | SNV | 1 | T | C | Homozygous   |
| NC_037648.1 | 841439 | SNV | 1 | A | C | Homozygous   |
| NC_037648.1 | 841688 | SNV | 1 | G | A | Heterozygous |
| NC_037648.1 | 841833 | SNV | 1 | A | C | Heterozygous |
| NC_037648.1 | 842068 | SNV | 1 | A | G | Heterozygous |
| NC_037648.1 | 847007 | SNV | 1 | A | G | Heterozygous |
| NC_037648.1 | 847412 | SNV | 1 | A | G | Homozygous   |
| NC_037648.1 | 847674 | SNV | 1 | C | G | Homozygous   |
| NC_037648.1 | 847719 | SNV | 1 | A | T | Heterozygous |
| NC_037648.1 | 848352 | SNV | 1 | A | T | Homozygous   |
| NC_037648.1 | 849420 | SNV | 1 | G | T | Homozygous   |
| NC_037648.1 | 849668 | SNV | 1 | G | T | Homozygous   |
| NC_037648.1 | 849671 | SNV | 1 | T | C | Homozygous   |
| NC_037648.1 | 849680 | SNV | 1 | G | A | Homozygous   |
| NC_037648.1 | 849732 | SNV | 1 | G | A | Heterozygous |
| NC_037648.1 | 849958 | SNV | 1 | T | C | Homozygous   |
| NC_037648.1 | 849981 | SNV | 1 | T | C | Homozygous   |
| NC_037648.1 | 850184 | SNV | 1 | A | G | Heterozygous |
| NC_037648.1 | 850879 | SNV | 1 | C | T | Homozygous   |
| NC_037648.1 | 850912 | SNV | 1 | G | A | Homozygous   |
| NC_037648.1 | 851146 | SNV | 1 | T | C | Homozygous   |
| NC_037648.1 | 851199 | SNV | 1 | C | G | Homozygous   |
| NC_037648.1 | 851559 | SNV | 1 | C | G | Homozygous   |
| NC_037648.1 | 851728 | SNV | 1 | A | G | Heterozygous |
| NC_037648.1 | 851794 | SNV | 1 | T | C | Heterozygous |
| NC_037648.1 | 851801 | SNV | 1 | G | C | Homozygous   |
| NC_037648.1 | 851872 | SNV | 1 | C | T | Heterozygous |
| NC_037648.1 | 853829 | SNV | 1 | G | A | Heterozygous |
| NC_037648.1 | 858391 | SNV | 1 | G | A | Heterozygous |
| NC_037648.1 | 858425 | SNV | 1 | C | T | Heterozygous |
| NC_037648.1 | 858437 | SNV | 1 | G | A | Heterozygous |
| NC_037648.1 | 858488 | SNV | 1 | G | A | Heterozygous |
| NC_037648.1 | 858590 | SNV | 1 | G | A | Heterozygous |
| NC_037648.1 | 858595 | SNV | 1 | G | A | Heterozygous |
| NC_037648.1 | 859343 | SNV | 1 | C | G | Heterozygous |

|             |        |     |   |   |   |              |
|-------------|--------|-----|---|---|---|--------------|
| NC_037648.1 | 859375 | SNV | 1 | C | T | Heterozygous |
| NC_037648.1 | 859481 | SNV | 1 | A | T | Homozygous   |
| NC_037648.1 | 859483 | SNV | 1 | T | C | Homozygous   |
| NC_037648.1 | 860366 | SNV | 1 | A | T | Homozygous   |
| NC_037648.1 | 861795 | SNV | 1 | C | G | Homozygous   |
| NC_037648.1 | 861801 | SNV | 1 | C | A | Heterozygous |
| NC_037648.1 | 861807 | SNV | 1 | C | A | Heterozygous |
| NC_037648.1 | 861815 | SNV | 1 | A | T | Homozygous   |
| NC_037648.1 | 861817 | SNV | 1 | T | A | Homozygous   |
| NC_037648.1 | 861823 | SNV | 1 | A | T | Homozygous   |
| NC_037648.1 | 862665 | SNV | 1 | C | T | Heterozygous |
| NC_037648.1 | 866898 | SNV | 1 | G | A | Homozygous   |
| NC_037648.1 | 867719 | SNV | 1 | A | G | Heterozygous |
| NC_037648.1 | 867972 | SNV | 1 | A | G | Homozygous   |
| NC_037648.1 | 868384 | SNV | 1 | T | G | Heterozygous |
| NC_037648.1 | 868387 | SNV | 1 | A | G | Heterozygous |
| NC_037648.1 | 868403 | SNV | 1 | G | A | Heterozygous |
| NC_037648.1 | 868411 | SNV | 1 | T | A | Heterozygous |
| NC_037648.1 | 868885 | SNV | 1 | C | T | Homozygous   |
| NC_037648.1 | 870634 | SNV | 1 | A | T | Homozygous   |
| NC_037648.1 | 871377 | SNV | 1 | T | C | Homozygous   |
| NC_037648.1 | 873137 | SNV | 1 | T | C | Homozygous   |
| NC_037648.1 | 873177 | SNV | 1 | A | G | Homozygous   |
| NC_037648.1 | 874498 | SNV | 1 | T | C | Homozygous   |
| NC_037648.1 | 874698 | SNV | 1 | G | A | Homozygous   |
| NC_037648.1 | 874722 | SNV | 1 | C | T | Heterozygous |
| NC_037648.1 | 874737 | SNV | 1 | T | C | Homozygous   |
| NC_037648.1 | 875313 | SNV | 1 | C | T | Heterozygous |
| NC_037648.1 | 876417 | SNV | 1 | C | T | Heterozygous |
| NC_037648.1 | 880544 | SNV | 1 | G | A | Homozygous   |
| NC_037648.1 | 881869 | SNV | 1 | G | A | Heterozygous |
| NC_037648.1 | 885998 | SNV | 1 | A | G | Homozygous   |
| NC_037648.1 | 886001 | SNV | 1 | A | T | Homozygous   |
| NC_037648.1 | 886034 | SNV | 1 | T | A | Homozygous   |
| NC_037648.1 | 893453 | SNV | 1 | C | T | Heterozygous |
| NC_037648.1 | 895695 | SNV | 1 | G | A | Homozygous   |
| NC_037648.1 | 896175 | SNV | 1 | A | T | Homozygous   |
| NC_037648.1 | 896439 | SNV | 1 | G | A | Homozygous   |
| NC_037648.1 | 896467 | SNV | 1 | A | G | Heterozygous |
| NC_037648.1 | 896474 | SNV | 1 | T | C | Heterozygous |
| NC_037648.1 | 896490 | SNV | 1 | A | T | Heterozygous |
| NC_037648.1 | 897997 | SNV | 1 | A | G | Homozygous   |
| NC_037648.1 | 898371 | SNV | 1 | G | A | Heterozygous |
| NC_037648.1 | 901376 | SNV | 1 | T | G | Homozygous   |
| NC_037648.1 | 901379 | SNV | 1 | A | G | Homozygous   |
| NC_037648.1 | 904073 | SNV | 1 | T | C | Heterozygous |
| NC_037648.1 | 907481 | SNV | 1 | A | G | Homozygous   |
| NC_037648.1 | 907627 | SNV | 1 | C | T | Heterozygous |
| NC_037648.1 | 908033 | SNV | 1 | T | C | Homozygous   |
| NC_037648.1 | 908101 | SNV | 1 | G | A | Heterozygous |
| NC_037648.1 | 908106 | SNV | 1 | G | A | Heterozygous |

|             |        |     |   |   |   |              |
|-------------|--------|-----|---|---|---|--------------|
| NC_037648.1 | 908115 | SNV | 1 | G | A | Heterozygous |
| NC_037648.1 | 908169 | SNV | 1 | G | A | Heterozygous |
| NC_037648.1 | 908292 | SNV | 1 | G | A | Heterozygous |
| NC_037648.1 | 908410 | SNV | 1 | T | C | Homozygous   |
| NC_037648.1 | 908415 | SNV | 1 | G | A | Homozygous   |
| NC_037648.1 | 908659 | SNV | 1 | C | G | Heterozygous |
| NC_037648.1 | 908671 | SNV | 1 | A | G | Heterozygous |
| NC_037648.1 | 910508 | SNV | 1 | T | C | Homozygous   |
| NC_037648.1 | 910527 | SNV | 1 | C | T | Homozygous   |
| NC_037648.1 | 910532 | SNV | 1 | A | G | Homozygous   |
| NC_037648.1 | 910759 | SNV | 1 | T | C | Homozygous   |
| NC_037648.1 | 910799 | SNV | 1 | C | T | Heterozygous |
| NC_037648.1 | 910802 | SNV | 1 | A | T | Heterozygous |
| NC_037648.1 | 911824 | SNV | 1 | T | C | Homozygous   |
| NC_037648.1 | 922654 | SNV | 1 | G | A | Homozygous   |
| NC_037648.1 | 927453 | SNV | 1 | C | T | Heterozygous |
| NC_037648.1 | 930067 | SNV | 1 | A | T | Homozygous   |
| NC_037648.1 | 930069 | SNV | 1 | A | T | Homozygous   |
| NC_037648.1 | 931180 | SNV | 1 | A | T | Homozygous   |
| NC_037648.1 | 932038 | SNV | 1 | A | T | Homozygous   |
| NC_037648.1 | 932040 | SNV | 1 | A | C | Homozygous   |
| NC_037648.1 | 932044 | SNV | 1 | T | G | Homozygous   |
| NC_037648.1 | 932051 | SNV | 1 | T | A | Homozygous   |
| NC_037648.1 | 936714 | SNV | 1 | T | G | Homozygous   |
| NC_037648.1 | 937764 | SNV | 1 | T | C | Homozygous   |
| NC_037648.1 | 937795 | SNV | 1 | A | G | Homozygous   |
| NC_037648.1 | 937952 | SNV | 1 | A | G | Homozygous   |
| NC_037648.1 | 939680 | SNV | 1 | T | C | Homozygous   |
| NC_037648.1 | 940093 | SNV | 1 | A | T | Homozygous   |
| NC_037648.1 | 949088 | SNV | 1 | T | A | Homozygous   |
| NC_037648.1 | 949249 | SNV | 1 | G | C | Homozygous   |
| NC_037648.1 | 950376 | SNV | 1 | T | C | Homozygous   |
| NC_037648.1 | 950907 | SNV | 1 | G | A | Homozygous   |
| NC_037648.1 | 953607 | SNV | 1 | A | G | Heterozygous |
| NC_037648.1 | 953611 | SNV | 1 | A | G | Heterozygous |
| NC_037648.1 | 953629 | SNV | 1 | A | G | Heterozygous |
| NC_037648.1 | 953632 | SNV | 1 | C | T | Heterozygous |
| NC_037648.1 | 953634 | SNV | 1 | T | A | Heterozygous |
| NC_037648.1 | 953640 | SNV | 1 | T | A | Heterozygous |
| NC_037648.1 | 953643 | SNV | 1 | A | T | Heterozygous |
| NC_037648.1 | 953647 | SNV | 1 | A | G | Heterozygous |
| NC_037648.1 | 953656 | SNV | 1 | T | A | Heterozygous |
| NC_037648.1 | 953665 | SNV | 1 | A | T | Heterozygous |
| NC_037648.1 | 953670 | SNV | 1 | T | C | Heterozygous |
| NC_037648.1 | 953674 | SNV | 1 | T | A | Heterozygous |
| NC_037648.1 | 953680 | SNV | 1 | T | A | Heterozygous |
| NC_037648.1 | 954722 | SNV | 1 | C | A | Heterozygous |
| NC_037648.1 | 955267 | SNV | 1 | T | G | Heterozygous |
| NC_037648.1 | 955291 | SNV | 1 | T | C | Homozygous   |
| NC_037648.1 | 961786 | SNV | 1 | A | T | Homozygous   |
| NC_037648.1 | 967949 | SNV | 1 | A | T | Homozygous   |

|             |         |     |   |   |   |              |
|-------------|---------|-----|---|---|---|--------------|
| NC_037648.1 | 967958  | SNV | 1 | A | T | Homozygous   |
| NC_037648.1 | 967962  | SNV | 1 | T | G | Homozygous   |
| NC_037648.1 | 967971  | SNV | 1 | A | T | Homozygous   |
| NC_037648.1 | 967977  | SNV | 1 | C | T | Homozygous   |
| NC_037648.1 | 967981  | SNV | 1 | T | A | Homozygous   |
| NC_037648.1 | 971541  | SNV | 1 | A | G | Heterozygous |
| NC_037648.1 | 971738  | SNV | 1 | T | C | Homozygous   |
| NC_037648.1 | 971775  | SNV | 1 | G | C | Heterozygous |
| NC_037648.1 | 971930  | SNV | 1 | C | T | Heterozygous |
| NC_037648.1 | 971959  | SNV | 1 | A | G | Homozygous   |
| NC_037648.1 | 971982  | SNV | 1 | T | C | Homozygous   |
| NC_037648.1 | 971986  | SNV | 1 | A | T | Homozygous   |
| NC_037648.1 | 972019  | SNV | 1 | T | C | Heterozygous |
| NC_037648.1 | 972022  | SNV | 1 | G | A | Heterozygous |
| NC_037648.1 | 972036  | SNV | 1 | G | A | Heterozygous |
| NC_037648.1 | 972039  | SNV | 1 | T | C | Heterozygous |
| NC_037648.1 | 972050  | SNV | 1 | C | T | Heterozygous |
| NC_037648.1 | 972084  | SNV | 1 | C | T | Homozygous   |
| NC_037648.1 | 972121  | SNV | 1 | G | A | Heterozygous |
| NC_037648.1 | 972322  | SNV | 1 | A | G | Homozygous   |
| NC_037648.1 | 972491  | SNV | 1 | A | G | Homozygous   |
| NC_037648.1 | 981784  | SNV | 1 | T | C | Homozygous   |
| NC_037648.1 | 981796  | SNV | 1 | A | G | Homozygous   |
| NC_037648.1 | 982946  | SNV | 1 | T | G | Homozygous   |
| NC_037648.1 | 986589  | SNV | 1 | T | C | Heterozygous |
| NC_037648.1 | 986677  | SNV | 1 | C | T | Heterozygous |
| NC_037648.1 | 999917  | SNV | 1 | A | G | Homozygous   |
| NC_037648.1 | 1000100 | SNV | 1 | T | C | Homozygous   |
| NC_037648.1 | 1001326 | SNV | 1 | A | G | Heterozygous |
| NC_037648.1 | 1001328 | SNV | 1 | A | T | Heterozygous |
| NC_037648.1 | 1001716 | SNV | 1 | C | A | Heterozygous |
| NC_037648.1 | 1002643 | SNV | 1 | T | C | Homozygous   |
| NC_037648.1 | 1002836 | SNV | 1 | T | C | Homozygous   |
| NC_037648.1 | 1002838 | SNV | 1 | T | C | Homozygous   |
| NC_037648.1 | 1003547 | SNV | 1 | G | C | Heterozygous |
| NC_037648.1 | 1004006 | SNV | 1 | T | C | Heterozygous |
| NC_037648.1 | 1009224 | SNV | 1 | G | A | Heterozygous |
| NC_037648.1 | 1009391 | SNV | 1 | G | A | Heterozygous |
| NC_037648.1 | 1009395 | SNV | 1 | A | G | Homozygous   |
| NC_037648.1 | 1009399 | SNV | 1 | G | A | Heterozygous |
| NC_037648.1 | 1009411 | SNV | 1 | T | G | Homozygous   |
| NC_037648.1 | 1009415 | SNV | 1 | T | A | Heterozygous |
| NC_037648.1 | 1009415 | SNV | 1 | T | G | Heterozygous |
| NC_037648.1 | 1009419 | SNV | 1 | T | A | Heterozygous |
| NC_037648.1 | 1009419 | SNV | 1 | T | G | Heterozygous |
| NC_037648.1 | 1015325 | SNV | 1 | T | C | Heterozygous |
| NC_037648.1 | 1015327 | SNV | 1 | C | T | Homozygous   |
| NC_037648.1 | 1018191 | SNV | 1 | T | C | Homozygous   |
| NC_037648.1 | 1021402 | SNV | 1 | G | A | Heterozygous |
| NC_037648.1 | 1021448 | SNV | 1 | G | A | Heterozygous |
| NC_037648.1 | 1021675 | SNV | 1 | G | A | Heterozygous |

|             |         |     |   |   |   |              |
|-------------|---------|-----|---|---|---|--------------|
| NC_037648.1 | 1021681 | SNV | 1 | G | A | Heterozygous |
| NC_037648.1 | 1022538 | SNV | 1 | G | A | Heterozygous |
| NC_037648.1 | 1022755 | SNV | 1 | G | A | Homozygous   |
| NC_037648.1 | 1027929 | SNV | 1 | T | A | Heterozygous |
| NC_037648.1 | 1027949 | SNV | 1 | G | A | Heterozygous |
| NC_037648.1 | 1028451 | SNV | 1 | C | T | Heterozygous |
| NC_037648.1 | 1029967 | SNV | 1 | G | A | Heterozygous |
| NC_037648.1 | 1030005 | SNV | 1 | G | A | Heterozygous |
| NC_037648.1 | 1030075 | SNV | 1 | T | C | Heterozygous |
| NC_037648.1 | 1030118 | SNV | 1 | G | C | Homozygous   |
| NC_037648.1 | 1030120 | SNV | 1 | T | C | Homozygous   |
| NC_037648.1 | 1030141 | SNV | 1 | C | T | Heterozygous |
| NC_037648.1 | 1030698 | SNV | 1 | T | A | Heterozygous |
| NC_037648.1 | 1030931 | SNV | 1 | G | A | Heterozygous |
| NC_037648.1 | 1031117 | SNV | 1 | C | A | Heterozygous |
| NC_037648.1 | 1031178 | SNV | 1 | T | C | Heterozygous |
| NC_037648.1 | 1031289 | SNV | 1 | A | G | Homozygous   |
| NC_037648.1 | 1031965 | SNV | 1 | C | T | Heterozygous |
| NC_037648.1 | 1032008 | SNV | 1 | T | C | Heterozygous |
| NC_037648.1 | 1032105 | SNV | 1 | G | A | Heterozygous |
| NC_037648.1 | 1032144 | SNV | 1 | G | A | Heterozygous |
| NC_037648.1 | 1032376 | SNV | 1 | G | A | Heterozygous |
| NC_037648.1 | 1032455 | SNV | 1 | A | G | Heterozygous |
| NC_037648.1 | 1032460 | SNV | 1 | A | G | Heterozygous |
| NC_037648.1 | 1032497 | SNV | 1 | C | T | Heterozygous |
| NC_037648.1 | 1032512 | SNV | 1 | G | A | Heterozygous |
| NC_037648.1 | 1032534 | SNV | 1 | G | A | Heterozygous |
| NC_037648.1 | 1032586 | SNV | 1 | A | G | Heterozygous |
| NC_037648.1 | 1032614 | SNV | 1 | G | A | Heterozygous |
| NC_037648.1 | 1032995 | SNV | 1 | C | G | Heterozygous |
| NC_037648.1 | 1033000 | SNV | 1 | G | C | Heterozygous |
| NC_037648.1 | 1033459 | SNV | 1 | A | G | Heterozygous |
| NC_037648.1 | 1033794 | SNV | 1 | T | A | Homozygous   |
| NC_037648.1 | 1034139 | SNV | 1 | A | G | Heterozygous |
| NC_037648.1 | 1034239 | SNV | 1 | A | G | Heterozygous |
| NC_037648.1 | 1034555 | SNV | 1 | T | C | Heterozygous |
| NC_037648.1 | 1034556 | SNV | 1 | G | A | Heterozygous |
| NC_037648.1 | 1034574 | SNV | 1 | C | T | Homozygous   |
| NC_037648.1 | 1034602 | SNV | 1 | G | C | Homozygous   |
| NC_037648.1 | 1034648 | SNV | 1 | A | G | Homozygous   |
| NC_037648.1 | 1035994 | SNV | 1 | A | G | Homozygous   |
| NC_037648.1 | 1036052 | SNV | 1 | A | C | Homozygous   |
| NC_037648.1 | 1036342 | SNV | 1 | T | C | Heterozygous |
| NC_037648.1 | 1038292 | SNV | 1 | G | A | Heterozygous |
| NC_037648.1 | 1038374 | SNV | 1 | A | G | Homozygous   |
| NC_037648.1 | 1039940 | SNV | 1 | T | C | Homozygous   |
| NC_037648.1 | 1047295 | SNV | 1 | G | A | Heterozygous |
| NC_037648.1 | 1047349 | SNV | 1 | T | C | Homozygous   |
| NC_037648.1 | 1047354 | SNV | 1 | T | C | Heterozygous |
| NC_037648.1 | 1047362 | SNV | 1 | G | A | Heterozygous |
| NC_037648.1 | 1047374 | SNV | 1 | C | T | Heterozygous |

|             |         |     |   |   |   |              |
|-------------|---------|-----|---|---|---|--------------|
| NC_037648.1 | 1060799 | SNV | 1 | G | A | Heterozygous |
| NC_037648.1 | 1060810 | SNV | 1 | A | T | Heterozygous |
| NC_037648.1 | 1060861 | SNV | 1 | A | G | Homozygous   |
| NC_037648.1 | 1061254 | SNV | 1 | T | C | Homozygous   |
| NC_037648.1 | 1061268 | SNV | 1 | A | G | Heterozygous |
| NC_037648.1 | 1061510 | SNV | 1 | C | T | Heterozygous |
| NC_037648.1 | 1061827 | SNV | 1 | A | G | Homozygous   |
| NC_037648.1 | 1061858 | SNV | 1 | T | C | Homozygous   |
| NC_037648.1 | 1063371 | SNV | 1 | A | G | Homozygous   |
| NC_037648.1 | 1063441 | SNV | 1 | G | C | Homozygous   |
| NC_037648.1 | 1063694 | SNV | 1 | G | A | Homozygous   |
| NC_037648.1 | 1063977 | SNV | 1 | C | T | Heterozygous |
| NC_037648.1 | 1064045 | SNV | 1 | G | A | Heterozygous |
| NC_037648.1 | 1065510 | SNV | 1 | A | T | Heterozygous |
| NC_037648.1 | 1065538 | SNV | 1 | G | A | Homozygous   |
| NC_037648.1 | 1065622 | SNV | 1 | A | G | Homozygous   |
| NC_037648.1 | 1065649 | SNV | 1 | A | G | Homozygous   |
| NC_037648.1 | 1065704 | SNV | 1 | C | T | Homozygous   |
| NC_037648.1 | 1065720 | SNV | 1 | G | A | Heterozygous |
| NC_037648.1 | 1065739 | SNV | 1 | C | T | Heterozygous |
| NC_037648.1 | 1065896 | SNV | 1 | T | C | Homozygous   |
| NC_037648.1 | 1066092 | SNV | 1 | T | C | Homozygous   |
| NC_037648.1 | 1066099 | SNV | 1 | C | T | Heterozygous |
| NC_037648.1 | 1066357 | SNV | 1 | G | C | Homozygous   |
| NC_037648.1 | 1066397 | SNV | 1 | C | T | Heterozygous |
| NC_037648.1 | 1066399 | SNV | 1 | T | C | Heterozygous |
| NC_037648.1 | 1066409 | SNV | 1 | C | T | Heterozygous |
| NC_037648.1 | 1066453 | SNV | 1 | T | C | Homozygous   |
| NC_037648.1 | 1066483 | SNV | 1 | A | G | Homozygous   |
| NC_037648.1 | 1066617 | SNV | 1 | T | C | Homozygous   |
| NC_037648.1 | 1066619 | SNV | 1 | C | T | Heterozygous |
| NC_037648.1 | 1066620 | SNV | 1 | G | A | Heterozygous |
| NC_037648.1 | 1066636 | SNV | 1 | A | G | Heterozygous |
| NC_037648.1 | 1066645 | SNV | 1 | T | C | Homozygous   |
| NC_037648.1 | 1074126 | SNV | 1 | T | G | Homozygous   |
| NC_037648.1 | 1074163 | SNV | 1 | A | T | Homozygous   |
| NC_037648.1 | 1074335 | SNV | 1 | G | A | Heterozygous |
| NC_037648.1 | 1074344 | SNV | 1 | C | T | Heterozygous |
| NC_037648.1 | 1074390 | SNV | 1 | T | A | Homozygous   |
| NC_037648.1 | 1074461 | SNV | 1 | A | T | Homozygous   |
| NC_037648.1 | 1074470 | SNV | 1 | A | G | Homozygous   |
| NC_037648.1 | 1074936 | SNV | 1 | C | T | Homozygous   |
| NC_037648.1 | 1075343 | SNV | 1 | C | T | Homozygous   |
| NC_037648.1 | 1075392 | SNV | 1 | A | G | Homozygous   |
| NC_037648.1 | 1075415 | SNV | 1 | T | C | Homozygous   |
| NC_037648.1 | 1075951 | SNV | 1 | C | T | Heterozygous |
| NC_037648.1 | 1076323 | SNV | 1 | G | A | Homozygous   |
| NC_037648.1 | 1076523 | SNV | 1 | T | A | Heterozygous |
| NC_037648.1 | 1076525 | SNV | 1 | T | A | Heterozygous |
| NC_037648.1 | 1077450 | SNV | 1 | C | A | Homozygous   |
| NC_037648.1 | 1078204 | SNV | 1 | G | A | Heterozygous |

|             |         |     |   |   |   |              |
|-------------|---------|-----|---|---|---|--------------|
| NC_037648.1 | 1078277 | SNV | 1 | A | T | Homozygous   |
| NC_037648.1 | 1078302 | SNV | 1 | T | A | Homozygous   |
| NC_037648.1 | 1078317 | SNV | 1 | C | T | Homozygous   |
| NC_037648.1 | 1078372 | SNV | 1 | A | T | Homozygous   |
| NC_037648.1 | 1082896 | SNV | 1 | T | C | Heterozygous |
| NC_037648.1 | 1082972 | SNV | 1 | T | C | Heterozygous |
| NC_037648.1 | 1083615 | SNV | 1 | T | C | Homozygous   |
| NC_037648.1 | 1083710 | SNV | 1 | C | T | Heterozygous |
| NC_037648.1 | 1084489 | SNV | 1 | C | T | Homozygous   |
| NC_037648.1 | 1084511 | SNV | 1 | A | G | Heterozygous |
| NC_037648.1 | 1085238 | SNV | 1 | C | A | Homozygous   |
| NC_037648.1 | 1085625 | SNV | 1 | G | A | Heterozygous |
| NC_037648.1 | 1085653 | SNV | 1 | G | A | Heterozygous |
| NC_037648.1 | 1085658 | SNV | 1 | C | T | Heterozygous |
| NC_037648.1 | 1087010 | SNV | 1 | T | C | Heterozygous |
| NC_037648.1 | 1091558 | SNV | 1 | G | C | Homozygous   |
| NC_037648.1 | 1091603 | SNV | 1 | C | T | Heterozygous |
| NC_037648.1 | 1091810 | SNV | 1 | T | G | Homozygous   |
| NC_037648.1 | 1091921 | SNV | 1 | C | T | Homozygous   |
| NC_037648.1 | 1097745 | SNV | 1 | A | G | Homozygous   |
| NC_037648.1 | 1097873 | SNV | 1 | A | G | Heterozygous |
| NC_037648.1 | 1100473 | SNV | 1 | T | A | Homozygous   |
| NC_037648.1 | 1100490 | SNV | 1 | G | A | Homozygous   |
| NC_037648.1 | 1100492 | SNV | 1 | G | T | Homozygous   |
| NC_037648.1 | 1100497 | SNV | 1 | G | A | Homozygous   |
| NC_037648.1 | 1100501 | SNV | 1 | G | A | Homozygous   |
| NC_037648.1 | 1101120 | SNV | 1 | A | G | Homozygous   |
| NC_037648.1 | 1101128 | SNV | 1 | C | T | Homozygous   |
| NC_037648.1 | 1101158 | SNV | 1 | T | A | Homozygous   |
| NC_037648.1 | 1101282 | SNV | 1 | T | C | Heterozygous |
| NC_037648.1 | 1101292 | SNV | 1 | A | T | Heterozygous |
| NC_037648.1 | 1101294 | SNV | 1 | T | C | Homozygous   |
| NC_037648.1 | 1101296 | SNV | 1 | A | G | Homozygous   |
| NC_037648.1 | 1106456 | SNV | 1 | G | A | Heterozygous |
| NC_037648.1 | 1106458 | SNV | 1 | G | C | Heterozygous |
| NC_037648.1 | 1106486 | SNV | 1 | A | T | Heterozygous |
| NC_037648.1 | 1106496 | SNV | 1 | C | T | Heterozygous |
| NC_037648.1 | 1106499 | SNV | 1 | C | T | Heterozygous |
| NC_037648.1 | 1106503 | SNV | 1 | A | C | Homozygous   |
| NC_037648.1 | 1106509 | SNV | 1 | C | T | Heterozygous |
| NC_037648.1 | 1106523 | SNV | 1 | T | C | Heterozygous |
| NC_037648.1 | 1122254 | SNV | 1 | G | A | Homozygous   |
| NC_037648.1 | 1122256 | SNV | 1 | A | G | Homozygous   |
| NC_037648.1 | 1122268 | SNV | 1 | A | T | Heterozygous |
| NC_037648.1 | 1122273 | SNV | 1 | G | A | Heterozygous |
| NC_037648.1 | 1122282 | SNV | 1 | C | G | Heterozygous |
| NC_037648.1 | 1122285 | SNV | 1 | G | A | Homozygous   |
| NC_037648.1 | 1122292 | SNV | 1 | C | A | Homozygous   |
| NC_037648.1 | 1122300 | SNV | 1 | A | G | Homozygous   |
| NC_037648.1 | 1122302 | SNV | 1 | G | A | Homozygous   |
| NC_037648.1 | 1122478 | SNV | 1 | T | A | Homozygous   |



|             |         |     |   |   |   |              |
|-------------|---------|-----|---|---|---|--------------|
| NC_037648.1 | 1122506 | SNV | 1 | T | C | Homozygous   |
| NC_037648.1 | 1123098 | SNV | 1 | G | A | Homozygous   |
| NC_037648.1 | 1123102 | SNV | 1 | C | T | Homozygous   |
| NC_037648.1 | 1123105 | SNV | 1 | G | A | Homozygous   |
| NC_037648.1 | 1123109 | SNV | 1 | C | T | Homozygous   |
| NC_037648.1 | 1123111 | SNV | 1 | G | A | Homozygous   |
| NC_037648.1 | 1123118 | SNV | 1 | A | T | Homozygous   |
| NC_037648.1 | 1123123 | SNV | 1 | A | C | Homozygous   |
| NC_037648.1 | 1125512 | SNV | 1 | C | A | Homozygous   |
| NC_037648.1 | 1125531 | SNV | 1 | A | C | Homozygous   |
| NC_037648.1 | 1125558 | SNV | 1 | A | G | Homozygous   |
| NC_037648.1 | 1125834 | SNV | 1 | C | T | Homozygous   |
| NC_037648.1 | 1126007 | SNV | 1 | C | T | Heterozygous |
| NC_037648.1 | 1130271 | SNV | 1 | A | G | Heterozygous |
| NC_037648.1 | 1130847 | SNV | 1 | C | T | Homozygous   |
| NC_037648.1 | 1130855 | SNV | 1 | G | A | Homozygous   |
| NC_037648.1 | 1131274 | SNV | 1 | T | A | Homozygous   |
| NC_037648.1 | 1131359 | SNV | 1 | C | G | Homozygous   |
| NC_037648.1 | 1131361 | SNV | 1 | T | A | Homozygous   |
| NC_037648.1 | 1131367 | SNV | 1 | T | A | Homozygous   |
| NC_037648.1 | 1131379 | SNV | 1 | C | T | Homozygous   |
| NC_037648.1 | 1131392 | SNV | 1 | T | C | Homozygous   |
| NC_037648.1 | 1131394 | SNV | 1 | A | T | Homozygous   |
| NC_037648.1 | 1131396 | SNV | 1 | T | C | Homozygous   |
| NC_037648.1 | 1131452 | SNV | 1 | T | A | Homozygous   |
| NC_037648.1 | 1131458 | SNV | 1 | T | A | Homozygous   |
| NC_037648.1 | 1131482 | SNV | 1 | T | C | Heterozygous |
| NC_037648.1 | 1131487 | SNV | 1 | G | C | Homozygous   |
| NC_037648.1 | 1131494 | SNV | 1 | A | T | Homozygous   |
| NC_037648.1 | 1131531 | SNV | 1 | G | A | Heterozygous |
| NC_037648.1 | 1131545 | SNV | 1 | T | C | Homozygous   |
| NC_037648.1 | 1131557 | SNV | 1 | T | A | Homozygous   |
| NC_037648.1 | 1131561 | SNV | 1 | C | A | Homozygous   |
| NC_037648.1 | 1131575 | SNV | 1 | C | T | Homozygous   |
| NC_037648.1 | 1131611 | SNV | 1 | A | T | Homozygous   |
| NC_037648.1 | 1133110 | SNV | 1 | T | C | Homozygous   |
| NC_037648.1 | 1133906 | SNV | 1 | A | C | Heterozygous |
| NC_037648.1 | 1134483 | SNV | 1 | C | T | Heterozygous |
| NC_037648.1 | 1135271 | SNV | 1 | A | G | Homozygous   |
| NC_037648.1 | 1136793 | SNV | 1 | C | T | Heterozygous |
| NC_037648.1 | 1137434 | SNV | 1 | C | T | Heterozygous |
| NC_037648.1 | 1137445 | SNV | 1 | G | A | Heterozygous |
| NC_037648.1 | 1137468 | SNV | 1 | T | C | Heterozygous |
| NC_037648.1 | 1137789 | SNV | 1 | C | T | Heterozygous |
| NC_037648.1 | 1137797 | SNV | 1 | C | T | Heterozygous |
| NC_037648.1 | 1141963 | SNV | 1 | C | T | Heterozygous |
| NC_037648.1 | 1142241 | SNV | 1 | C | T | Heterozygous |
| NC_037648.1 | 1142344 | SNV | 1 | G | A | Heterozygous |
| NC_037648.1 | 1142360 | SNV | 1 | T | A | Homozygous   |
| NC_037648.1 | 1142597 | SNV | 1 | G | A | Heterozygous |
| NC_037648.1 | 1142610 | SNV | 1 | G | A | Heterozygous |

|             |         |     |   |   |   |              |
|-------------|---------|-----|---|---|---|--------------|
| NC_037648.1 | 1142618 | SNV | 1 | G | A | Heterozygous |
| NC_037648.1 | 1142809 | SNV | 1 | T | A | Homozygous   |
| NC_037648.1 | 1142830 | SNV | 1 | A | G | Homozygous   |
| NC_037648.1 | 1142849 | SNV | 1 | T | A | Homozygous   |
| NC_037648.1 | 1143172 | SNV | 1 | A | G | Heterozygous |
| NC_037648.1 | 1143567 | SNV | 1 | C | T | Heterozygous |
| NC_037648.1 | 1143622 | SNV | 1 | C | T | Heterozygous |
| NC_037648.1 | 1146811 | SNV | 1 | G | A | Heterozygous |
| NC_037648.1 | 1154366 | SNV | 1 | A | T | Homozygous   |
| NC_037648.1 | 1154396 | SNV | 1 | C | A | Homozygous   |
| NC_037648.1 | 1156639 | SNV | 1 | A | G | Heterozygous |
| NC_037648.1 | 1156691 | SNV | 1 | T | C | Homozygous   |
| NC_037648.1 | 1156824 | SNV | 1 | G | A | Homozygous   |
| NC_037648.1 | 1157010 | SNV | 1 | G | A | Heterozygous |
| NC_037648.1 | 1157487 | SNV | 1 | A | G | Heterozygous |
| NC_037648.1 | 1157619 | SNV | 1 | G | A | Heterozygous |
| NC_037648.1 | 1157633 | SNV | 1 | G | A | Heterozygous |
| NC_037648.1 | 1157665 | SNV | 1 | G | A | Heterozygous |
| NC_037648.1 | 1157690 | SNV | 1 | A | G | Homozygous   |
| NC_037648.1 | 1157695 | SNV | 1 | G | T | Homozygous   |
| NC_037648.1 | 1157716 | SNV | 1 | G | A | Homozygous   |
| NC_037648.1 | 1157728 | SNV | 1 | A | G | Homozygous   |
| NC_037648.1 | 1157731 | SNV | 1 | G | A | Homozygous   |
| NC_037648.1 | 1157844 | SNV | 1 | T | C | Homozygous   |
| NC_037648.1 | 1157868 | SNV | 1 | G | A | Homozygous   |
| NC_037648.1 | 1157919 | SNV | 1 | A | G | Homozygous   |
| NC_037648.1 | 1157933 | SNV | 1 | G | A | Homozygous   |
| NC_037648.1 | 1157949 | SNV | 1 | A | T | Heterozygous |
| NC_037648.1 | 1157964 | SNV | 1 | G | A | Heterozygous |
| NC_037648.1 | 1158143 | SNV | 1 | T | A | Homozygous   |
| NC_037648.1 | 1158164 | SNV | 1 | C | G | Heterozygous |
| NC_037648.1 | 1158229 | SNV | 1 | A | G | Homozygous   |
| NC_037648.1 | 1158285 | SNV | 1 | G | A | Heterozygous |
| NC_037648.1 | 1158292 | SNV | 1 | A | G | Homozygous   |
| NC_037648.1 | 1158341 | SNV | 1 | A | G | Homozygous   |
| NC_037648.1 | 1158346 | SNV | 1 | A | G | Homozygous   |
| NC_037648.1 | 1158373 | SNV | 1 | A | G | Homozygous   |
| NC_037648.1 | 1158407 | SNV | 1 | G | A | Homozygous   |
| NC_037648.1 | 1158436 | SNV | 1 | T | C | Homozygous   |
| NC_037648.1 | 1158489 | SNV | 1 | A | G | Homozygous   |
| NC_037648.1 | 1158504 | SNV | 1 | G | A | Heterozygous |
| NC_037648.1 | 1158536 | SNV | 1 | T | C | Homozygous   |
| NC_037648.1 | 1158555 | SNV | 1 | G | A | Homozygous   |
| NC_037648.1 | 1158563 | SNV | 1 | G | A | Homozygous   |
| NC_037648.1 | 1158579 | SNV | 1 | A | G | Heterozygous |
| NC_037648.1 | 1158597 | SNV | 1 | G | A | Heterozygous |
| NC_037648.1 | 1158622 | SNV | 1 | G | A | Heterozygous |
| NC_037648.1 | 1158628 | SNV | 1 | G | A | Homozygous   |
| NC_037648.1 | 1158631 | SNV | 1 | G | A | Heterozygous |
| NC_037648.1 | 1158637 | SNV | 1 | G | C | Homozygous   |
| NC_037648.1 | 1158642 | SNV | 1 | A | G | Homozygous   |

|             |         |     |   |   |   |              |
|-------------|---------|-----|---|---|---|--------------|
| NC_037648.1 | 1158652 | SNV | 1 | A | G | Homozygous   |
| NC_037648.1 | 1158737 | SNV | 1 | T | C | Homozygous   |
| NC_037648.1 | 1158746 | SNV | 1 | T | C | Heterozygous |
| NC_037648.1 | 1158769 | SNV | 1 | T | C | Heterozygous |
| NC_037648.1 | 1158776 | SNV | 1 | T | C | Heterozygous |
| NC_037648.1 | 1158806 | SNV | 1 | G | A | Heterozygous |
| NC_037648.1 | 1158810 | SNV | 1 | G | A | Heterozygous |
| NC_037648.1 | 1158819 | SNV | 1 | A | G | Heterozygous |
| NC_037648.1 | 1158839 | SNV | 1 | A | G | Heterozygous |
| NC_037648.1 | 1158857 | SNV | 1 | T | C | Heterozygous |
| NC_037648.1 | 1158880 | SNV | 1 | G | A | Heterozygous |
| NC_037648.1 | 1158886 | SNV | 1 | G | A | Heterozygous |
| NC_037648.1 | 1158894 | SNV | 1 | T | G | Heterozygous |
| NC_037648.1 | 1158895 | SNV | 1 | G | A | Heterozygous |
| NC_037648.1 | 1158916 | SNV | 1 | T | G | Heterozygous |
| NC_037648.1 | 1158925 | SNV | 1 | A | G | Heterozygous |
| NC_037648.1 | 1158962 | SNV | 1 | A | G | Heterozygous |
| NC_037648.1 | 1159014 | SNV | 1 | A | G | Heterozygous |
| NC_037648.1 | 1159032 | SNV | 1 | A | G | Heterozygous |
| NC_037648.1 | 1159083 | SNV | 1 | T | A | Homozygous   |
| NC_037648.1 | 1159110 | SNV | 1 | A | G | Heterozygous |
| NC_037648.1 | 1159202 | SNV | 1 | A | G | Heterozygous |
| NC_037648.1 | 1159214 | SNV | 1 | A | G | Heterozygous |
| NC_037648.1 | 1159230 | SNV | 1 | A | G | Heterozygous |
| NC_037648.1 | 1159250 | SNV | 1 | G | A | Heterozygous |
| NC_037648.1 | 1159279 | SNV | 1 | A | G | Heterozygous |
| NC_037648.1 | 1159339 | SNV | 1 | C | T | Homozygous   |
| NC_037648.1 | 1159410 | SNV | 1 | A | G | Heterozygous |
| NC_037648.1 | 1159436 | SNV | 1 | A | G | Heterozygous |
| NC_037648.1 | 1159574 | SNV | 1 | C | T | Heterozygous |
| NC_037648.1 | 1159595 | SNV | 1 | T | C | Homozygous   |
| NC_037648.1 | 1159630 | SNV | 1 | G | A | Heterozygous |
| NC_037648.1 | 1159669 | SNV | 1 | G | T | Heterozygous |
| NC_037648.1 | 1159688 | SNV | 1 | A | C | Heterozygous |
| NC_037648.1 | 1159695 | SNV | 1 | A | G | Heterozygous |
| NC_037648.1 | 1159697 | SNV | 1 | G | A | Heterozygous |
| NC_037648.1 | 1159711 | SNV | 1 | T | A | Heterozygous |
| NC_037648.1 | 1159716 | SNV | 1 | T | C | Heterozygous |
| NC_037648.1 | 1159854 | SNV | 1 | C | T | Heterozygous |
| NC_037648.1 | 1160126 | SNV | 1 | T | C | Homozygous   |
| NC_037648.1 | 1160130 | SNV | 1 | C | T | Homozygous   |
| NC_037648.1 | 1160143 | SNV | 1 | G | A | Heterozygous |
| NC_037648.1 | 1167700 | SNV | 1 | T | C | Homozygous   |
| NC_037648.1 | 1167716 | SNV | 1 | G | A | Homozygous   |
| NC_037648.1 | 1167839 | SNV | 1 | A | T | Homozygous   |
| NC_037648.1 | 1167844 | SNV | 1 | A | G | Homozygous   |
| NC_037648.1 | 1167949 | SNV | 1 | G | T | Homozygous   |
| NC_037648.1 | 1167963 | SNV | 1 | C | T | Homozygous   |
| NC_037648.1 | 1168061 | SNV | 1 | C | T | Homozygous   |
| NC_037648.1 | 1168082 | SNV | 1 | G | A | Homozygous   |
| NC_037648.1 | 1168182 | SNV | 1 | T | C | Homozygous   |

|             |         |     |   |   |   |              |
|-------------|---------|-----|---|---|---|--------------|
| NC_037648.1 | 1168226 | SNV | 1 | A | G | Homozygous   |
| NC_037648.1 | 1173047 | SNV | 1 | A | G | Homozygous   |
| NC_037648.1 | 1173196 | SNV | 1 | A | G | Homozygous   |
| NC_037648.1 | 1173234 | SNV | 1 | A | G | Homozygous   |
| NC_037648.1 | 1173304 | SNV | 1 | A | G | Homozygous   |
| NC_037648.1 | 1181355 | SNV | 1 | T | A | Heterozygous |
| NC_037648.1 | 1181358 | SNV | 1 | T | A | Heterozygous |
| NC_037648.1 | 1181376 | SNV | 1 | A | T | Heterozygous |
| NC_037648.1 | 1181379 | SNV | 1 | T | A | Heterozygous |
| NC_037648.1 | 1181381 | SNV | 1 | T | A | Homozygous   |
| NC_037648.1 | 1181385 | SNV | 1 | T | A | Heterozygous |
| NC_037648.1 | 1187940 | SNV | 1 | C | A | Homozygous   |
| NC_037648.1 | 1187973 | SNV | 1 | T | C | Homozygous   |
| NC_037648.1 | 1188025 | SNV | 1 | A | G | Heterozygous |
| NC_037648.1 | 1188189 | SNV | 1 | A | G | Homozygous   |
| NC_037648.1 | 1188366 | SNV | 1 | C | T | Heterozygous |
| NC_037648.1 | 1188375 | SNV | 1 | A | T | Heterozygous |
| NC_037648.1 | 1190149 | SNV | 1 | A | G | Homozygous   |
| NC_037648.1 | 1190273 | SNV | 1 | C | T | Homozygous   |
| NC_037648.1 | 1190294 | SNV | 1 | A | G | Homozygous   |
| NC_037648.1 | 1192456 | SNV | 1 | C | T | Heterozygous |
| NC_037648.1 | 1192493 | SNV | 1 | A | G | Heterozygous |
| NC_037648.1 | 1196252 | SNV | 1 | A | G | Homozygous   |
| NC_037648.1 | 1196255 | SNV | 1 | G | A | Homozygous   |
| NC_037648.1 | 1196257 | SNV | 1 | A | C | Homozygous   |
| NC_037648.1 | 1196263 | SNV | 1 | A | C | Homozygous   |
| NC_037648.1 | 1196265 | SNV | 1 | T | G | Homozygous   |
| NC_037648.1 | 1196268 | SNV | 1 | G | A | Homozygous   |
| NC_037648.1 | 1196298 | SNV | 1 | G | A | Homozygous   |
| NC_037648.1 | 1198407 | SNV | 1 | C | T | Homozygous   |
| NC_037648.1 | 1198417 | SNV | 1 | G | A | Homozygous   |
| NC_037648.1 | 1198439 | SNV | 1 | T | A | Heterozygous |
| NC_037648.1 | 1198608 | SNV | 1 | C | T | Heterozygous |
| NC_037648.1 | 1198619 | SNV | 1 | T | C | Homozygous   |
| NC_037648.1 | 1198953 | SNV | 1 | A | G | Heterozygous |
| NC_037648.1 | 1198961 | SNV | 1 | T | C | Heterozygous |
| NC_037648.1 | 1199727 | SNV | 1 | G | A | Heterozygous |
| NC_037648.1 | 1199807 | SNV | 1 | T | C | Homozygous   |
| NC_037648.1 | 1212810 | SNV | 1 | A | G | Heterozygous |
| NC_037648.1 | 1215244 | SNV | 1 | G | A | Heterozygous |
| NC_037648.1 | 1215252 | SNV | 1 | G | A | Heterozygous |
| NC_037648.1 | 1215256 | SNV | 1 | G | A | Heterozygous |
| NC_037648.1 | 1215295 | SNV | 1 | G | T | Heterozygous |
| NC_037648.1 | 1215446 | SNV | 1 | T | G | Heterozygous |
| NC_037648.1 | 1215448 | SNV | 1 | T | G | Heterozygous |
| NC_037648.1 | 1215459 | SNV | 1 | G | A | Heterozygous |
| NC_037648.1 | 1215461 | SNV | 1 | G | T | Heterozygous |
| NC_037648.1 | 1223299 | SNV | 1 | G | A | Homozygous   |
| NC_037648.1 | 1223304 | SNV | 1 | G | A | Homozygous   |
| NC_037648.1 | 1223317 | SNV | 1 | T | C | Homozygous   |
| NC_037648.1 | 1223322 | SNV | 1 | A | G | Homozygous   |

|             |         |     |   |   |   |              |
|-------------|---------|-----|---|---|---|--------------|
| NC_037648.1 | 1223326 | SNV | 1 | T | C | Homozygous   |
| NC_037648.1 | 1223342 | SNV | 1 | A | G | Homozygous   |
| NC_037648.1 | 1225469 | SNV | 1 | T | C | Homozygous   |
| NC_037648.1 | 1227290 | SNV | 1 | T | G | Homozygous   |
| NC_037648.1 | 1228631 | SNV | 1 | C | T | Homozygous   |
| NC_037648.1 | 1228661 | SNV | 1 | C | G | Homozygous   |
| NC_037648.1 | 1229011 | SNV | 1 | A | G | Homozygous   |
| NC_037648.1 | 1231119 | SNV | 1 | C | A | Homozygous   |
| NC_037648.1 | 1231541 | SNV | 1 | G | A | Heterozygous |
| NC_037648.1 | 1231567 | SNV | 1 | A | T | Homozygous   |
| NC_037648.1 | 1234867 | SNV | 1 | T | C | Homozygous   |
| NC_037648.1 | 1234899 | SNV | 1 | C | T | Heterozygous |
| NC_037648.1 | 1234972 | SNV | 1 | G | A | Heterozygous |
| NC_037648.1 | 1234976 | SNV | 1 | C | T | Heterozygous |
| NC_037648.1 | 1235883 | SNV | 1 | C | T | Homozygous   |
| NC_037648.1 | 1256118 | SNV | 1 | A | G | Heterozygous |
| NC_037648.1 | 1256214 | SNV | 1 | A | G | Homozygous   |
| NC_037648.1 | 1256235 | SNV | 1 | A | G | Homozygous   |
| NC_037648.1 | 1256282 | SNV | 1 | A | G | Heterozygous |
| NC_037648.1 | 1256285 | SNV | 1 | G | C | Homozygous   |
| NC_037648.1 | 1256291 | SNV | 1 | G | A | Heterozygous |
| NC_037648.1 | 1256303 | SNV | 1 | G | A | Heterozygous |
| NC_037648.1 | 1256311 | SNV | 1 | C | T | Heterozygous |
| NC_037648.1 | 1256348 | SNV | 1 | T | C | Homozygous   |
| NC_037648.1 | 1256361 | SNV | 1 | T | C | Heterozygous |
| NC_037648.1 | 1256593 | SNV | 1 | A | G | Homozygous   |
| NC_037648.1 | 1256698 | SNV | 1 | G | A | Heterozygous |
| NC_037648.1 | 1256738 | SNV | 1 | C | T | Heterozygous |
| NC_037648.1 | 1257138 | SNV | 1 | C | T | Heterozygous |
| NC_037648.1 | 1257403 | SNV | 1 | G | C | Homozygous   |
| NC_037648.1 | 1262100 | SNV | 1 | T | C | Heterozygous |
| NC_037648.1 | 1265485 | SNV | 1 | A | T | Homozygous   |
| NC_037648.1 | 1265524 | SNV | 1 | A | T | Homozygous   |
| NC_037648.1 | 1265948 | SNV | 1 | G | A | Homozygous   |
| NC_037648.1 | 1266876 | SNV | 1 | A | G | Homozygous   |
| NC_037648.1 | 1267110 | SNV | 1 | G | A | Heterozygous |
| NC_037648.1 | 1268613 | SNV | 1 | G | T | Homozygous   |
| NC_037648.1 | 1268625 | SNV | 1 | T | C | Homozygous   |
| NC_037648.1 | 1268641 | SNV | 1 | C | T | Heterozygous |
| NC_037648.1 | 1268656 | SNV | 1 | C | T | Heterozygous |
| NC_037648.1 | 1268661 | SNV | 1 | G | A | Heterozygous |
| NC_037648.1 | 1268688 | SNV | 1 | A | G | Homozygous   |
| NC_037648.1 | 1268739 | SNV | 1 | G | A | Homozygous   |
| NC_037648.1 | 1269021 | SNV | 1 | T | C | Homozygous   |
| NC_037648.1 | 1269163 | SNV | 1 | A | T | Homozygous   |
| NC_037648.1 | 1269167 | SNV | 1 | T | G | Homozygous   |
| NC_037648.1 | 1269764 | SNV | 1 | T | C | Heterozygous |
| NC_037648.1 | 1269868 | SNV | 1 | T | C | Homozygous   |
| NC_037648.1 | 1270917 | SNV | 1 | G | A | Homozygous   |
| NC_037648.1 | 1270957 | SNV | 1 | C | T | Heterozygous |
| NC_037648.1 | 1271256 | SNV | 1 | A | G | Heterozygous |

|             |         |     |   |   |   |              |
|-------------|---------|-----|---|---|---|--------------|
| NC_037648.1 | 1271281 | SNV | 1 | A | G | Heterozygous |
| NC_037648.1 | 1271334 | SNV | 1 | A | G | Homozygous   |
| NC_037648.1 | 1271762 | SNV | 1 | C | A | Heterozygous |
| NC_037648.1 | 1272169 | SNV | 1 | C | T | Heterozygous |
| NC_037648.1 | 1272266 | SNV | 1 | G | A | Heterozygous |
| NC_037648.1 | 1273105 | SNV | 1 | A | G | Homozygous   |
| NC_037648.1 | 1273294 | SNV | 1 | C | A | Heterozygous |
| NC_037648.1 | 1273523 | SNV | 1 | T | A | Homozygous   |
| NC_037648.1 | 1273533 | SNV | 1 | A | G | Homozygous   |
| NC_037648.1 | 1276714 | SNV | 1 | T | C | Homozygous   |
| NC_037648.1 | 1279718 | SNV | 1 | G | A | Homozygous   |
| NC_037648.1 | 1279733 | SNV | 1 | A | G | Homozygous   |
| NC_037648.1 | 1282326 | SNV | 1 | A | G | Heterozygous |
| NC_037648.1 | 1282344 | SNV | 1 | A | G | Heterozygous |
| NC_037648.1 | 1282557 | SNV | 1 | T | C | Heterozygous |
| NC_037648.1 | 1288962 | SNV | 1 | A | G | Homozygous   |
| NC_037648.1 | 1289138 | SNV | 1 | A | G | Homozygous   |
| NC_037648.1 | 1289484 | SNV | 1 | A | G | Homozygous   |
| NC_037648.1 | 1289550 | SNV | 1 | G | A | Heterozygous |
| NC_037648.1 | 1290653 | SNV | 1 | G | A | Heterozygous |
| NC_037648.1 | 1290854 | SNV | 1 | T | C | Homozygous   |
| NC_037648.1 | 1292438 | SNV | 1 | C | G | Homozygous   |
| NC_037648.1 | 1293128 | SNV | 1 | G | A | Heterozygous |
| NC_037648.1 | 1293134 | SNV | 1 | C | G | Heterozygous |
| NC_037648.1 | 1293632 | SNV | 1 | C | T | Heterozygous |
| NC_037648.1 | 1293644 | SNV | 1 | A | C | Homozygous   |
| NC_037648.1 | 1293647 | SNV | 1 | C | T | Homozygous   |
| NC_037648.1 | 1294424 | SNV | 1 | G | A | Heterozygous |
| NC_037648.1 | 1294529 | SNV | 1 | C | G | Heterozygous |
| NC_037648.1 | 1294661 | SNV | 1 | C | T | Heterozygous |
| NC_037648.1 | 1294739 | SNV | 1 | A | G | Homozygous   |
| NC_037648.1 | 1294814 | SNV | 1 | T | C | Heterozygous |
| NC_037648.1 | 1294818 | SNV | 1 | G | C | Homozygous   |
| NC_037648.1 | 1294907 | SNV | 1 | A | G | Heterozygous |
| NC_037648.1 | 1295141 | SNV | 1 | A | G | Homozygous   |
| NC_037648.1 | 1295162 | SNV | 1 | T | C | Homozygous   |
| NC_037648.1 | 1295206 | SNV | 1 | G | A | Heterozygous |
| NC_037648.1 | 1295257 | SNV | 1 | T | C | Homozygous   |
| NC_037648.1 | 1295279 | SNV | 1 | A | G | Homozygous   |
| NC_037648.1 | 1295447 | SNV | 1 | G | A | Heterozygous |
| NC_037648.1 | 1295548 | SNV | 1 | A | G | Heterozygous |
| NC_037648.1 | 1295594 | SNV | 1 | A | G | Homozygous   |
| NC_037648.1 | 1295627 | SNV | 1 | T | C | Homozygous   |
| NC_037648.1 | 1295854 | SNV | 1 | C | T | Homozygous   |
| NC_037648.1 | 1295862 | SNV | 1 | T | C | Heterozygous |
| NC_037648.1 | 1295869 | SNV | 1 | G | A | Homozygous   |
| NC_037648.1 | 1295919 | SNV | 1 | C | G | Homozygous   |
| NC_037648.1 | 1295924 | SNV | 1 | A | C | Homozygous   |
| NC_037648.1 | 1295945 | SNV | 1 | C | T | Heterozygous |
| NC_037648.1 | 1296023 | SNV | 1 | G | A | Heterozygous |
| NC_037648.1 | 1296088 | SNV | 1 | T | C | Heterozygous |

|             |         |     |   |   |   |              |
|-------------|---------|-----|---|---|---|--------------|
| NC_037648.1 | 1296135 | SNV | 1 | T | C | Homozygous   |
| NC_037648.1 | 1296203 | SNV | 1 | A | T | Homozygous   |
| NC_037648.1 | 1296253 | SNV | 1 | T | G | Homozygous   |
| NC_037648.1 | 1296265 | SNV | 1 | T | C | Heterozygous |
| NC_037648.1 | 1296268 | SNV | 1 | T | C | Heterozygous |
| NC_037648.1 | 1296271 | SNV | 1 | C | T | Heterozygous |
| NC_037648.1 | 1296300 | SNV | 1 | G | A | Homozygous   |
| NC_037648.1 | 1296303 | SNV | 1 | G | A | Heterozygous |
| NC_037648.1 | 1296655 | SNV | 1 | A | G | Homozygous   |
| NC_037648.1 | 1296667 | SNV | 1 | G | A | Homozygous   |
| NC_037648.1 | 1296674 | SNV | 1 | C | T | Homozygous   |
| NC_037648.1 | 1296889 | SNV | 1 | A | C | Homozygous   |
| NC_037648.1 | 1296958 | SNV | 1 | A | T | Homozygous   |
| NC_037648.1 | 1299255 | SNV | 1 | C | T | Heterozygous |
| NC_037648.1 | 1300255 | SNV | 1 | T | C | Heterozygous |
| NC_037648.1 | 1300334 | SNV | 1 | A | G | Heterozygous |
| NC_037648.1 | 1300351 | SNV | 1 | A | G | Heterozygous |
| NC_037648.1 | 1300406 | SNV | 1 | A | T | Homozygous   |
| NC_037648.1 | 1300508 | SNV | 1 | T | C | Homozygous   |
| NC_037648.1 | 1300603 | SNV | 1 | A | G | Homozygous   |
| NC_037648.1 | 1300612 | SNV | 1 | T | C | Homozygous   |
| NC_037648.1 | 1300634 | SNV | 1 | T | C | Heterozygous |
| NC_037648.1 | 1300768 | SNV | 1 | G | A | Heterozygous |
| NC_037648.1 | 1307152 | SNV | 1 | G | A | Homozygous   |
| NC_037648.1 | 1307771 | SNV | 1 | G | A | Homozygous   |
| NC_037648.1 | 1307835 | SNV | 1 | A | G | Homozygous   |
| NC_037648.1 | 1307968 | SNV | 1 | T | C | Heterozygous |
| NC_037648.1 | 1307975 | SNV | 1 | C | T | Heterozygous |
| NC_037648.1 | 1307987 | SNV | 1 | T | G | Heterozygous |
| NC_037648.1 | 1307989 | SNV | 1 | G | A | Heterozygous |
| NC_037648.1 | 1309630 | SNV | 1 | G | A | Heterozygous |
| NC_037648.1 | 1314290 | SNV | 1 | C | G | Heterozygous |
| NC_037648.1 | 1314297 | SNV | 1 | T | A | Homozygous   |
| NC_037648.1 | 1314299 | SNV | 1 | T | A | Homozygous   |
| NC_037648.1 | 1322171 | SNV | 1 | C | T | Heterozygous |
| NC_037648.1 | 1322286 | SNV | 1 | T | C | Heterozygous |
| NC_037648.1 | 1322299 | SNV | 1 | G | C | Heterozygous |
| NC_037648.1 | 1331994 | SNV | 1 | A | G | Homozygous   |
| NC_037648.1 | 1340516 | SNV | 1 | G | T | Heterozygous |
| NC_037648.1 | 1340616 | SNV | 1 | A | G | Homozygous   |
| NC_037648.1 | 1340627 | SNV | 1 | A | G | Homozygous   |
| NC_037648.1 | 1340681 | SNV | 1 | T | C | Homozygous   |
| NC_037648.1 | 1340715 | SNV | 1 | C | T | Heterozygous |
| NC_037648.1 | 1340742 | SNV | 1 | T | C | Heterozygous |
| NC_037648.1 | 1343275 | SNV | 1 | C | T | Homozygous   |
| NC_037648.1 | 1343301 | SNV | 1 | A | G | Homozygous   |
| NC_037648.1 | 1350994 | SNV | 1 | A | G | Homozygous   |
| NC_037648.1 | 1350997 | SNV | 1 | T | C | Homozygous   |
| NC_037648.1 | 1351007 | SNV | 1 | T | A | Homozygous   |
| NC_037648.1 | 1361349 | SNV | 1 | T | C | Heterozygous |
| NC_037648.1 | 1365304 | SNV | 1 | C | G | Homozygous   |

|             |         |     |   |   |   |              |
|-------------|---------|-----|---|---|---|--------------|
| NC_037648.1 | 1365508 | SNV | 1 | A | G | Homozygous   |
| NC_037648.1 | 1365988 | SNV | 1 | C | T | Homozygous   |
| NC_037648.1 | 1366256 | SNV | 1 | T | C | Heterozygous |
| NC_037648.1 | 1366334 | SNV | 1 | T | C | Heterozygous |
| NC_037648.1 | 1366357 | SNV | 1 | T | C | Homozygous   |
| NC_037648.1 | 1366382 | SNV | 1 | A | C | Homozygous   |
| NC_037648.1 | 1367109 | SNV | 1 | T | C | Homozygous   |
| NC_037648.1 | 1367112 | SNV | 1 | T | C | Homozygous   |
| NC_037648.1 | 1367130 | SNV | 1 | G | A | Heterozygous |
| NC_037648.1 | 1376048 | SNV | 1 | C | T | Homozygous   |
| NC_037648.1 | 1394126 | SNV | 1 | A | T | Heterozygous |
| NC_037648.1 | 1395974 | SNV | 1 | T | C | Heterozygous |
| NC_037648.1 | 1395974 | SNV | 1 | T | G | Heterozygous |
| NC_037648.1 | 1402045 | SNV | 1 | G | A | Heterozygous |
| NC_037648.1 | 1402451 | SNV | 1 | T | C | Homozygous   |
| NC_037648.1 | 1405536 | SNV | 1 | G | A | Heterozygous |
| NC_037648.1 | 1410368 | SNV | 1 | T | C | Heterozygous |
| NC_037648.1 | 1414607 | SNV | 1 | T | A | Heterozygous |
| NC_037648.1 | 1414621 | SNV | 1 | G | A | Heterozygous |
| NC_037648.1 | 1414734 | SNV | 1 | A | G | Heterozygous |
| NC_037648.1 | 1414736 | SNV | 1 | G | A | Heterozygous |
| NC_037648.1 | 1415585 | SNV | 1 | A | G | Homozygous   |
| NC_037648.1 | 1415642 | SNV | 1 | A | G | Homozygous   |
| NC_037648.1 | 1415692 | SNV | 1 | A | G | Homozygous   |
| NC_037648.1 | 1415762 | SNV | 1 | A | G | Homozygous   |
| NC_037648.1 | 1415785 | SNV | 1 | A | G | Homozygous   |
| NC_037648.1 | 1415886 | SNV | 1 | T | C | Homozygous   |
| NC_037648.1 | 1415971 | SNV | 1 | T | C | Homozygous   |
| NC_037648.1 | 1416011 | SNV | 1 | T | C | Homozygous   |
| NC_037648.1 | 1416040 | SNV | 1 | A | G | Homozygous   |
| NC_037648.1 | 1416050 | SNV | 1 | C | T | Heterozygous |
| NC_037648.1 | 1416206 | SNV | 1 | G | A | Homozygous   |
| NC_037648.1 | 1417926 | SNV | 1 | C | T | Heterozygous |
| NC_037648.1 | 1418168 | SNV | 1 | C | T | Heterozygous |
| NC_037648.1 | 1418171 | SNV | 1 | T | C | Heterozygous |
| NC_037648.1 | 1418232 | SNV | 1 | T | C | Homozygous   |
| NC_037648.1 | 1418457 | SNV | 1 | A | G | Homozygous   |
| NC_037648.1 | 1419426 | SNV | 1 | G | C | Homozygous   |
| NC_037648.1 | 1419489 | SNV | 1 | A | G | Heterozygous |
| NC_037648.1 | 1419492 | SNV | 1 | A | G | Heterozygous |
| NC_037648.1 | 1419885 | SNV | 1 | G | A | Homozygous   |
| NC_037648.1 | 1420342 | SNV | 1 | A | G | Heterozygous |
| NC_037648.1 | 1420518 | SNV | 1 | T | C | Homozygous   |
| NC_037648.1 | 1420521 | SNV | 1 | C | T | Heterozygous |
| NC_037648.1 | 1420588 | SNV | 1 | G | A | Heterozygous |
| NC_037648.1 | 1421118 | SNV | 1 | T | G | Homozygous   |
| NC_037648.1 | 1421144 | SNV | 1 | G | A | Heterozygous |
| NC_037648.1 | 1421268 | SNV | 1 | C | T | Heterozygous |
| NC_037648.1 | 1421274 | SNV | 1 | T | C | Heterozygous |
| NC_037648.1 | 1421348 | SNV | 1 | C | T | Heterozygous |
| NC_037648.1 | 1421390 | SNV | 1 | T | C | Homozygous   |



|             |         |     |   |   |   |              |
|-------------|---------|-----|---|---|---|--------------|
| NC_037648.1 | 1421416 | SNV | 1 | T | C | Heterozygous |
| NC_037648.1 | 1421426 | SNV | 1 | C | T | Heterozygous |
| NC_037648.1 | 1421436 | SNV | 1 | C | A | Heterozygous |
| NC_037648.1 | 1421456 | SNV | 1 | C | T | Heterozygous |
| NC_037648.1 | 1421463 | SNV | 1 | T | C | Heterozygous |
| NC_037648.1 | 1421480 | SNV | 1 | T | C | Heterozygous |
| NC_037648.1 | 1421522 | SNV | 1 | C | T | Heterozygous |
| NC_037648.1 | 1421542 | SNV | 1 | T | C | Homozygous   |
| NC_037648.1 | 1421604 | SNV | 1 | T | C | Heterozygous |
| NC_037648.1 | 1421654 | SNV | 1 | C | G | Heterozygous |
| NC_037648.1 | 1421713 | SNV | 1 | G | A | Heterozygous |
| NC_037648.1 | 1421727 | SNV | 1 | C | T | Heterozygous |
| NC_037648.1 | 1421755 | SNV | 1 | T | C | Heterozygous |
| NC_037648.1 | 1421847 | SNV | 1 | G | A | Heterozygous |
| NC_037648.1 | 1421854 | SNV | 1 | T | C | Heterozygous |
| NC_037648.1 | 1421861 | SNV | 1 | T | C | Heterozygous |
| NC_037648.1 | 1421903 | SNV | 1 | C | T | Heterozygous |
| NC_037648.1 | 1421906 | SNV | 1 | A | G | Heterozygous |
| NC_037648.1 | 1421941 | SNV | 1 | C | T | Homozygous   |
| NC_037648.1 | 1421974 | SNV | 1 | A | G | Heterozygous |
| NC_037648.1 | 1421977 | SNV | 1 | T | C | Heterozygous |
| NC_037648.1 | 1422026 | SNV | 1 | T | C | Homozygous   |
| NC_037648.1 | 1422082 | SNV | 1 | C | T | Homozygous   |
| NC_037648.1 | 1422119 | SNV | 1 | C | T | Heterozygous |
| NC_037648.1 | 1422124 | SNV | 1 | A | G | Heterozygous |
| NC_037648.1 | 1422199 | SNV | 1 | C | T | Heterozygous |
| NC_037648.1 | 1422236 | SNV | 1 | T | C | Heterozygous |
| NC_037648.1 | 1422263 | SNV | 1 | C | T | Heterozygous |
| NC_037648.1 | 1422274 | SNV | 1 | T | C | Heterozygous |
| NC_037648.1 | 1422328 | SNV | 1 | T | C | Heterozygous |
| NC_037648.1 | 1422406 | SNV | 1 | G | A | Heterozygous |
| NC_037648.1 | 1422411 | SNV | 1 | C | T | Heterozygous |
| NC_037648.1 | 1422415 | SNV | 1 | T | C | Homozygous   |
| NC_037648.1 | 1422445 | SNV | 1 | T | C | Homozygous   |
| NC_037648.1 | 1422478 | SNV | 1 | A | G | Heterozygous |
| NC_037648.1 | 1422498 | SNV | 1 | T | C | Homozygous   |
| NC_037648.1 | 1422516 | SNV | 1 | T | C | Heterozygous |
| NC_037648.1 | 1422526 | SNV | 1 | T | C | Homozygous   |
| NC_037648.1 | 1422637 | SNV | 1 | G | C | Heterozygous |
| NC_037648.1 | 1422723 | SNV | 1 | T | C | Heterozygous |
| NC_037648.1 | 1422803 | SNV | 1 | A | G | Heterozygous |
| NC_037648.1 | 1422831 | SNV | 1 | C | G | Heterozygous |
| NC_037648.1 | 1422845 | SNV | 1 | C | T | Heterozygous |
| NC_037648.1 | 1422861 | SNV | 1 | C | T | Heterozygous |
| NC_037648.1 | 1422869 | SNV | 1 | T | C | Heterozygous |
| NC_037648.1 | 1422911 | SNV | 1 | G | A | Homozygous   |
| NC_037648.1 | 1422983 | SNV | 1 | G | A | Heterozygous |
| NC_037648.1 | 1423021 | SNV | 1 | T | C | Heterozygous |
| NC_037648.1 | 1423038 | SNV | 1 | T | C | Homozygous   |
| NC_037648.1 | 1423044 | SNV | 1 | T | C | Homozygous   |
| NC_037648.1 | 1423079 | SNV | 1 | T | C | Homozygous   |

|             |         |     |   |   |   |              |
|-------------|---------|-----|---|---|---|--------------|
| NC_037648.1 | 1423099 | SNV | 1 | A | G | Homozygous   |
| NC_037648.1 | 1423115 | SNV | 1 | C | T | Heterozygous |
| NC_037648.1 | 1423121 | SNV | 1 | A | C | Heterozygous |
| NC_037648.1 | 1423125 | SNV | 1 | T | C | Heterozygous |
| NC_037648.1 | 1423141 | SNV | 1 | T | C | Heterozygous |
| NC_037648.1 | 1423164 | SNV | 1 | C | T | Heterozygous |
| NC_037648.1 | 1423230 | SNV | 1 | C | T | Heterozygous |
| NC_037648.1 | 1423241 | SNV | 1 | C | T | Heterozygous |
| NC_037648.1 | 1423267 | SNV | 1 | G | C | Heterozygous |
| NC_037648.1 | 1423315 | SNV | 1 | T | C | Heterozygous |
| NC_037648.1 | 1423341 | SNV | 1 | C | T | Heterozygous |
| NC_037648.1 | 1423362 | SNV | 1 | T | C | Heterozygous |
| NC_037648.1 | 1423394 | SNV | 1 | A | G | Heterozygous |
| NC_037648.1 | 1423401 | SNV | 1 | C | T | Heterozygous |
| NC_037648.1 | 1423432 | SNV | 1 | A | G | Homozygous   |
| NC_037648.1 | 1423513 | SNV | 1 | C | T | Heterozygous |
| NC_037648.1 | 1423546 | SNV | 1 | C | T | Heterozygous |
| NC_037648.1 | 1423581 | SNV | 1 | A | G | Homozygous   |
| NC_037648.1 | 1423589 | SNV | 1 | T | C | Homozygous   |
| NC_037648.1 | 1423628 | SNV | 1 | T | C | Heterozygous |
| NC_037648.1 | 1423644 | SNV | 1 | T | C | Heterozygous |
| NC_037648.1 | 1423648 | SNV | 1 | T | C | Heterozygous |
| NC_037648.1 | 1423755 | SNV | 1 | T | C | Heterozygous |
| NC_037648.1 | 1423805 | SNV | 1 | C | G | Homozygous   |
| NC_037648.1 | 1423974 | SNV | 1 | T | G | Homozygous   |
| NC_037648.1 | 1424009 | SNV | 1 | T | C | Homozygous   |
| NC_037648.1 | 1424116 | SNV | 1 | A | T | Homozygous   |
| NC_037648.1 | 1424459 | SNV | 1 | C | A | Homozygous   |
| NC_037648.1 | 1424540 | SNV | 1 | A | G | Heterozygous |
| NC_037648.1 | 1424887 | SNV | 1 | C | G | Homozygous   |
| NC_037648.1 | 1424920 | SNV | 1 | G | A | Heterozygous |
| NC_037648.1 | 1424923 | SNV | 1 | G | A | Heterozygous |
| NC_037648.1 | 1424929 | SNV | 1 | G | A | Heterozygous |
| NC_037648.1 | 1424932 | SNV | 1 | G | A | Heterozygous |
| NC_037648.1 | 1425016 | SNV | 1 | G | A | Heterozygous |
| NC_037648.1 | 1425019 | SNV | 1 | G | A | Heterozygous |
| NC_037648.1 | 1425022 | SNV | 1 | G | A | Heterozygous |
| NC_037648.1 | 1425219 | SNV | 1 | C | T | Heterozygous |
| NC_037648.1 | 1425646 | SNV | 1 | C | G | Heterozygous |
| NC_037648.1 | 1425799 | SNV | 1 | C | T | Heterozygous |
| NC_037648.1 | 1425997 | SNV | 1 | G | C | Heterozygous |
| NC_037648.1 | 1426104 | SNV | 1 | T | G | Heterozygous |
| NC_037648.1 | 1427462 | SNV | 1 | A | G | Homozygous   |
| NC_037648.1 | 1427633 | SNV | 1 | A | C | Homozygous   |
| NC_037648.1 | 1428945 | SNV | 1 | C | T | Homozygous   |
| NC_037648.1 | 1428959 | SNV | 1 | A | G | Homozygous   |
| NC_037648.1 | 1428977 | SNV | 1 | T | C | Homozygous   |
| NC_037648.1 | 1429363 | SNV | 1 | G | C | Homozygous   |
| NC_037648.1 | 1429365 | SNV | 1 | A | T | Homozygous   |
| NC_037648.1 | 1429408 | SNV | 1 | T | C | Homozygous   |
| NC_037648.1 | 1429573 | SNV | 1 | A | T | Heterozygous |

|             |         |     |   |   |   |              |
|-------------|---------|-----|---|---|---|--------------|
| NC_037648.1 | 1429825 | SNV | 1 | A | G | Homozygous   |
| NC_037648.1 | 1429874 | SNV | 1 | T | C | Heterozygous |
| NC_037648.1 | 1429912 | SNV | 1 | T | C | Heterozygous |
| NC_037648.1 | 1430292 | SNV | 1 | A | G | Heterozygous |
| NC_037648.1 | 1430489 | SNV | 1 | C | T | Heterozygous |
| NC_037648.1 | 1430492 | SNV | 1 | C | T | Homozygous   |
| NC_037648.1 | 1430605 | SNV | 1 | G | A | Heterozygous |
| NC_037648.1 | 1431391 | SNV | 1 | A | G | Heterozygous |
| NC_037648.1 | 1431550 | SNV | 1 | G | A | Heterozygous |
| NC_037648.1 | 1431673 | SNV | 1 | A | C | Heterozygous |
| NC_037648.1 | 1431677 | SNV | 1 | A | G | Heterozygous |
| NC_037648.1 | 1431861 | SNV | 1 | C | G | Homozygous   |
| NC_037648.1 | 1432882 | SNV | 1 | G | A | Heterozygous |
| NC_037648.1 | 1433041 | SNV | 1 | T | C | Homozygous   |
| NC_037648.1 | 1433061 | SNV | 1 | A | G | Homozygous   |
| NC_037648.1 | 1433088 | SNV | 1 | C | T | Heterozygous |
| NC_037648.1 | 1433092 | SNV | 1 | C | T | Heterozygous |
| NC_037648.1 | 1433174 | SNV | 1 | G | A | Heterozygous |
| NC_037648.1 | 1433183 | SNV | 1 | G | A | Homozygous   |
| NC_037648.1 | 1466344 | SNV | 1 | C | A | Homozygous   |
| NC_037648.1 | 1466351 | SNV | 1 | T | G | Homozygous   |
| NC_037648.1 | 1466383 | SNV | 1 | C | A | Homozygous   |
| NC_037648.1 | 1466559 | SNV | 1 | A | T | Heterozygous |
| NC_037648.1 | 1470083 | SNV | 1 | G | A | Homozygous   |
| NC_037648.1 | 1471103 | SNV | 1 | A | G | Homozygous   |
| NC_037648.1 | 1471142 | SNV | 1 | T | C | Homozygous   |
| NC_037648.1 | 1471453 | SNV | 1 | A | G | Homozygous   |
| NC_037648.1 | 1473833 | SNV | 1 | C | T | Homozygous   |
| NC_037648.1 | 1473920 | SNV | 1 | G | T | Homozygous   |
| NC_037648.1 | 1474025 | SNV | 1 | G | A | Heterozygous |
| NC_037648.1 | 1474037 | SNV | 1 | G | A | Heterozygous |
| NC_037648.1 | 1475098 | SNV | 1 | T | A | Homozygous   |
| NC_037648.1 | 1475101 | SNV | 1 | G | A | Homozygous   |
| NC_037648.1 | 1475267 | SNV | 1 | T | C | Heterozygous |
| NC_037648.1 | 1475337 | SNV | 1 | T | C | Heterozygous |
| NC_037648.1 | 1475590 | SNV | 1 | G | A | Heterozygous |
| NC_037648.1 | 1492105 | SNV | 1 | T | A | Heterozygous |
| NC_037648.1 | 1492125 | SNV | 1 | C | A | Heterozygous |
| NC_037648.1 | 1492127 | SNV | 1 | G | A | Heterozygous |
| NC_037648.1 | 1492140 | SNV | 1 | T | A | Heterozygous |
| NC_037648.1 | 1492520 | SNV | 1 | T | A | Heterozygous |
| NC_037648.1 | 1494173 | SNV | 1 | T | A | Homozygous   |
| NC_037648.1 | 1494420 | SNV | 1 | T | C | Homozygous   |
| NC_037648.1 | 1498218 | SNV | 1 | C | A | Heterozygous |
| NC_037648.1 | 1498221 | SNV | 1 | C | G | Heterozygous |
| NC_037648.1 | 1498702 | SNV | 1 | G | A | Homozygous   |
| NC_037648.1 | 1501822 | SNV | 1 | G | A | Heterozygous |
| NC_037648.1 | 1501952 | SNV | 1 | A | G | Homozygous   |
| NC_037648.1 | 1501963 | SNV | 1 | A | G | Homozygous   |
| NC_037648.1 | 1502103 | SNV | 1 | T | C | Homozygous   |
| NC_037648.1 | 1502209 | SNV | 1 | T | A | Heterozygous |

|             |         |     |   |   |   |              |
|-------------|---------|-----|---|---|---|--------------|
| NC_037648.1 | 1502317 | SNV | 1 | C | T | Heterozygous |
| NC_037648.1 | 1503617 | SNV | 1 | C | T | Heterozygous |
| NC_037648.1 | 1506787 | SNV | 1 | G | A | Heterozygous |
| NC_037648.1 | 1506796 | SNV | 1 | T | C | Heterozygous |
| NC_037648.1 | 1508087 | SNV | 1 | T | C | Heterozygous |
| NC_037648.1 | 1508144 | SNV | 1 | T | C | Heterozygous |
| NC_037648.1 | 1508167 | SNV | 1 | T | C | Heterozygous |
| NC_037648.1 | 1508173 | SNV | 1 | T | C | Heterozygous |
| NC_037648.1 | 1508178 | SNV | 1 | T | C | Heterozygous |
| NC_037648.1 | 1508198 | SNV | 1 | T | C | Homozygous   |
| NC_037648.1 | 1521547 | SNV | 1 | T | C | Homozygous   |
| NC_037648.1 | 1521550 | SNV | 1 | G | A | Heterozygous |
| NC_037648.1 | 1524179 | SNV | 1 | C | T | Homozygous   |
| NC_037648.1 | 1524589 | SNV | 1 | A | G | Heterozygous |
| NC_037648.1 | 1546017 | SNV | 1 | T | C | Heterozygous |
| NC_037648.1 | 1546035 | SNV | 1 | C | T | Homozygous   |
| NC_037648.1 | 1546084 | SNV | 1 | A | C | Homozygous   |
| NC_037648.1 | 1546208 | SNV | 1 | T | C | Heterozygous |
| NC_037648.1 | 1546210 | SNV | 1 | C | T | Heterozygous |
| NC_037648.1 | 1546220 | SNV | 1 | C | G | Heterozygous |
| NC_037648.1 | 1546254 | SNV | 1 | A | C | Heterozygous |
| NC_037648.1 | 1546315 | SNV | 1 | C | T | Heterozygous |
| NC_037648.1 | 1546324 | SNV | 1 | A | T | Homozygous   |
| NC_037648.1 | 1546326 | SNV | 1 | G | A | Heterozygous |
| NC_037648.1 | 1546350 | SNV | 1 | A | G | Homozygous   |
| NC_037648.1 | 1546368 | SNV | 1 | T | C | Heterozygous |
| NC_037648.1 | 1546402 | SNV | 1 | C | G | Heterozygous |
| NC_037648.1 | 1546409 | SNV | 1 | A | C | Homozygous   |
| NC_037648.1 | 1546559 | SNV | 1 | G | A | Heterozygous |
| NC_037648.1 | 1546595 | SNV | 1 | A | T | Heterozygous |
| NC_037648.1 | 1546672 | SNV | 1 | T | C | Homozygous   |
| NC_037648.1 | 1546709 | SNV | 1 | G | A | Heterozygous |
| NC_037648.1 | 1546716 | SNV | 1 | T | C | Heterozygous |
| NC_037648.1 | 1546728 | SNV | 1 | T | C | Heterozygous |
| NC_037648.1 | 1546750 | SNV | 1 | G | A | Heterozygous |
| NC_037648.1 | 1546757 | SNV | 1 | C | T | Heterozygous |
| NC_037648.1 | 1546808 | SNV | 1 | A | T | Homozygous   |
| NC_037648.1 | 1546819 | SNV | 1 | G | A | Heterozygous |
| NC_037648.1 | 1546838 | SNV | 1 | T | G | Heterozygous |
| NC_037648.1 | 1546858 | SNV | 1 | A | T | Heterozygous |
| NC_037648.1 | 1546919 | SNV | 1 | C | T | Homozygous   |
| NC_037648.1 | 1546947 | SNV | 1 | T | C | Heterozygous |
| NC_037648.1 | 1546973 | SNV | 1 | G | A | Heterozygous |
| NC_037648.1 | 1546997 | SNV | 1 | T | A | Homozygous   |
| NC_037648.1 | 1547041 | SNV | 1 | T | C | Heterozygous |
| NC_037648.1 | 1547087 | SNV | 1 | G | A | Heterozygous |
| NC_037648.1 | 1547092 | SNV | 1 | G | A | Heterozygous |
| NC_037648.1 | 1547107 | SNV | 1 | C | G | Homozygous   |
| NC_037648.1 | 1547114 | SNV | 1 | T | C | Homozygous   |
| NC_037648.1 | 1550111 | SNV | 1 | C | T | Homozygous   |
| NC_037648.1 | 1550200 | SNV | 1 | T | A | Homozygous   |

|             |         |     |   |   |   |              |
|-------------|---------|-----|---|---|---|--------------|
| NC_037648.1 | 1550225 | SNV | 1 | T | C | Homozygous   |
| NC_037648.1 | 1550288 | SNV | 1 | T | A | Homozygous   |
| NC_037648.1 | 1550370 | SNV | 1 | A | G | Heterozygous |
| NC_037648.1 | 1550386 | SNV | 1 | T | C | Homozygous   |
| NC_037648.1 | 1550528 | SNV | 1 | A | G | Heterozygous |
| NC_037648.1 | 1550535 | SNV | 1 | G | A | Heterozygous |
| NC_037648.1 | 1550537 | SNV | 1 | A | G | Heterozygous |
| NC_037648.1 | 1550544 | SNV | 1 | C | T | Heterozygous |
| NC_037648.1 | 1550553 | SNV | 1 | T | C | Heterozygous |
| NC_037648.1 | 1550595 | SNV | 1 | T | C | Heterozygous |
| NC_037648.1 | 1552366 | SNV | 1 | A | G | Homozygous   |
| NC_037648.1 | 1552441 | SNV | 1 | A | T | Heterozygous |
| NC_037648.1 | 1552462 | SNV | 1 | T | C | Homozygous   |
| NC_037648.1 | 1555045 | SNV | 1 | A | G | Homozygous   |
| NC_037648.1 | 1570598 | SNV | 1 | A | T | Homozygous   |
| NC_037648.1 | 1570633 | SNV | 1 | G | A | Homozygous   |
| NC_037648.1 | 1570684 | SNV | 1 | G | A | Homozygous   |
| NC_037648.1 | 1570687 | SNV | 1 | A | G | Homozygous   |
| NC_037648.1 | 1570695 | SNV | 1 | A | G | Heterozygous |
| NC_037648.1 | 1580448 | SNV | 1 | G | A | Heterozygous |
| NC_037648.1 | 1581651 | SNV | 1 | A | C | Heterozygous |
| NC_037648.1 | 1583480 | SNV | 1 | G | C | Homozygous   |
| NC_037648.1 | 1583482 | SNV | 1 | G | T | Homozygous   |
| NC_037648.1 | 1583484 | SNV | 1 | G | C | Homozygous   |
| NC_037648.1 | 1583526 | SNV | 1 | T | C | Homozygous   |
| NC_037648.1 | 1583563 | SNV | 1 | A | T | Homozygous   |
| NC_037648.1 | 1583616 | SNV | 1 | T | C | Heterozygous |
| NC_037648.1 | 1583656 | SNV | 1 | C | T | Homozygous   |
| NC_037648.1 | 1583685 | SNV | 1 | T | G | Homozygous   |
| NC_037648.1 | 1583698 | SNV | 1 | A | G | Homozygous   |
| NC_037648.1 | 1583703 | SNV | 1 | G | A | Homozygous   |
| NC_037648.1 | 1583705 | SNV | 1 | A | G | Heterozygous |
| NC_037648.1 | 1583714 | SNV | 1 | A | G | Heterozygous |
| NC_037648.1 | 1583722 | SNV | 1 | A | G | Homozygous   |
| NC_037648.1 | 1583729 | SNV | 1 | G | A | Heterozygous |
| NC_037648.1 | 1583740 | SNV | 1 | G | A | Heterozygous |
| NC_037648.1 | 1592399 | SNV | 1 | C | T | Heterozygous |
| NC_037648.1 | 1592410 | SNV | 1 | T | A | Heterozygous |
| NC_037648.1 | 1593609 | SNV | 1 | G | A | Homozygous   |
| NC_037648.1 | 1593617 | SNV | 1 | T | A | Homozygous   |
| NC_037648.1 | 1599166 | SNV | 1 | T | G | Homozygous   |
| NC_037648.1 | 1599196 | SNV | 1 | C | A | Homozygous   |
| NC_037648.1 | 1599200 | SNV | 1 | G | T | Homozygous   |
| NC_037648.1 | 1599202 | SNV | 1 | C | T | Homozygous   |
| NC_037648.1 | 1599208 | SNV | 1 | C | G | Homozygous   |
| NC_037648.1 | 1604346 | SNV | 1 | T | C | Homozygous   |
| NC_037648.1 | 1604349 | SNV | 1 | A | C | Homozygous   |
| NC_037648.1 | 1604419 | SNV | 1 | A | G | Homozygous   |
| NC_037648.1 | 1604431 | SNV | 1 | T | G | Homozygous   |
| NC_037648.1 | 1604462 | SNV | 1 | T | C | Homozygous   |
| NC_037648.1 | 1604481 | SNV | 1 | C | T | Homozygous   |

|             |         |     |   |   |   |              |
|-------------|---------|-----|---|---|---|--------------|
| NC_037648.1 | 1604518 | SNV | 1 | G | T | Homozygous   |
| NC_037648.1 | 1604521 | SNV | 1 | A | T | Heterozygous |
| NC_037648.1 | 1606864 | SNV | 1 | T | C | Homozygous   |
| NC_037648.1 | 1607036 | SNV | 1 | C | T | Heterozygous |
| NC_037648.1 | 1607665 | SNV | 1 | A | T | Homozygous   |
| NC_037648.1 | 1607674 | SNV | 1 | C | T | Homozygous   |
| NC_037648.1 | 1607677 | SNV | 1 | C | T | Homozygous   |
| NC_037648.1 | 1607684 | SNV | 1 | C | T | Homozygous   |
| NC_037648.1 | 1607689 | SNV | 1 | C | T | Homozygous   |
| NC_037648.1 | 1607715 | SNV | 1 | T | G | Homozygous   |
| NC_037648.1 | 1635313 | SNV | 1 | A | G | Homozygous   |
| NC_037648.1 | 1635316 | SNV | 1 | A | G | Homozygous   |
| NC_037648.1 | 1635325 | SNV | 1 | T | A | Homozygous   |
| NC_037648.1 | 1648685 | SNV | 1 | C | T | Heterozygous |
| NC_037648.1 | 1648699 | SNV | 1 | G | T | Heterozygous |
| NC_037648.1 | 1648732 | SNV | 1 | A | C | Heterozygous |
| NC_037648.1 | 1648846 | SNV | 1 | C | T | Heterozygous |
| NC_037648.1 | 1648861 | SNV | 1 | G | T | Heterozygous |
| NC_037648.1 | 1648866 | SNV | 1 | T | C | Heterozygous |
| NC_037648.1 | 1648872 | SNV | 1 | A | C | Heterozygous |
| NC_037648.1 | 1648884 | SNV | 1 | T | C | Heterozygous |
| NC_037648.1 | 1648891 | SNV | 1 | G | T | Heterozygous |
| NC_037648.1 | 1648895 | SNV | 1 | G | T | Homozygous   |
| NC_037648.1 | 1648903 | SNV | 1 | T | G | Homozygous   |
| NC_037648.1 | 1648960 | SNV | 1 | C | T | Homozygous   |
| NC_037648.1 | 1648963 | SNV | 1 | G | T | Homozygous   |
| NC_037648.1 | 1655428 | SNV | 1 | C | A | Heterozygous |
| NC_037648.1 | 1655431 | SNV | 1 | C | T | Heterozygous |
| NC_037648.1 | 1655504 | SNV | 1 | C | G | Heterozygous |
| NC_037648.1 | 1655910 | SNV | 1 | C | A | Heterozygous |
| NC_037648.1 | 1655912 | SNV | 1 | A | C | Heterozygous |
| NC_037648.1 | 1655936 | SNV | 1 | C | A | Heterozygous |
| NC_037648.1 | 1655952 | SNV | 1 | G | C | Heterozygous |
| NC_037648.1 | 1655978 | SNV | 1 | A | C | Heterozygous |
| NC_037648.1 | 1655993 | SNV | 1 | T | A | Heterozygous |
| NC_037648.1 | 1655997 | SNV | 1 | T | A | Heterozygous |
| NC_037648.1 | 1656029 | SNV | 1 | T | C | Homozygous   |
| NC_037648.1 | 1656038 | SNV | 1 | C | T | Heterozygous |
| NC_037648.1 | 1656040 | SNV | 1 | C | T | Heterozygous |
| NC_037648.1 | 1656060 | SNV | 1 | C | A | Homozygous   |
| NC_037648.1 | 1656090 | SNV | 1 | C | A | Homozygous   |
| NC_037648.1 | 1656100 | SNV | 1 | G | C | Heterozygous |
| NC_037648.1 | 1674842 | SNV | 1 | A | T | Homozygous   |
| NC_037648.1 | 1674845 | SNV | 1 | T | A | Homozygous   |
| NC_037648.1 | 1674891 | SNV | 1 | A | G | Homozygous   |
| NC_037648.1 | 1674895 | SNV | 1 | G | A | Homozygous   |
| NC_037648.1 | 1674952 | SNV | 1 | A | G | Homozygous   |
| NC_037648.1 | 1674955 | SNV | 1 | A | C | Homozygous   |
| NC_037648.1 | 1674962 | SNV | 1 | G | A | Homozygous   |
| NC_037648.1 | 1674968 | SNV | 1 | G | A | Homozygous   |
| NC_037648.1 | 1684469 | SNV | 1 | T | G | Homozygous   |

|             |         |     |   |   |   |              |
|-------------|---------|-----|---|---|---|--------------|
| NC_037648.1 | 1684473 | SNV | 1 | C | A | Homozygous   |
| NC_037648.1 | 1703416 | SNV | 1 | A | G | Homozygous   |
| NC_037648.1 | 1703448 | SNV | 1 | A | G | Homozygous   |
| NC_037648.1 | 1704265 | SNV | 1 | A | T | Heterozygous |
| NC_037648.1 | 1704329 | SNV | 1 | G | C | Heterozygous |
| NC_037648.1 | 1704336 | SNV | 1 | C | A | Heterozygous |
| NC_037648.1 | 1704342 | SNV | 1 | C | G | Heterozygous |
| NC_037648.1 | 1704421 | SNV | 1 | C | T | Heterozygous |
| NC_037648.1 | 1704444 | SNV | 1 | C | A | Heterozygous |
| NC_037648.1 | 1704446 | SNV | 1 | C | G | Heterozygous |
| NC_037648.1 | 1704452 | SNV | 1 | C | T | Heterozygous |
| NC_037648.1 | 1704468 | SNV | 1 | C | G | Heterozygous |
| NC_037648.1 | 1713649 | SNV | 1 | A | G | Homozygous   |
| NC_037648.1 | 1713653 | SNV | 1 | A | C | Homozygous   |
| NC_037648.1 | 1713661 | SNV | 1 | A | T | Homozygous   |
| NC_037648.1 | 1718284 | SNV | 1 | T | G | Homozygous   |
| NC_037648.1 | 1718310 | SNV | 1 | T | C | Homozygous   |
| NC_037648.1 | 1718313 | SNV | 1 | G | C | Homozygous   |
| NC_037648.1 | 1718319 | SNV | 1 | C | T | Homozygous   |
| NC_037648.1 | 1750787 | SNV | 1 | T | C | Homozygous   |
| NC_037648.1 | 1750823 | SNV | 1 | C | T | Homozygous   |
| NC_037648.1 | 1750900 | SNV | 1 | G | A | Homozygous   |
| NC_037648.1 | 1750919 | SNV | 1 | T | C | Homozygous   |
| NC_037648.1 | 1751229 | SNV | 1 | T | C | Heterozygous |
| NC_037648.1 | 1751254 | SNV | 1 | T | C | Homozygous   |
| NC_037648.1 | 1751271 | SNV | 1 | C | A | Homozygous   |
| NC_037648.1 | 1751274 | SNV | 1 | T | C | Homozygous   |
| NC_037648.1 | 1751289 | SNV | 1 | C | T | Homozygous   |
| NC_037648.1 | 1751309 | SNV | 1 | G | A | Heterozygous |
| NC_037648.1 | 1751340 | SNV | 1 | C | T | Homozygous   |
| NC_037648.1 | 1751352 | SNV | 1 | T | C | Homozygous   |
| NC_037648.1 | 1751399 | SNV | 1 | T | C | Heterozygous |
| NC_037648.1 | 1756053 | SNV | 1 | G | A | Heterozygous |
| NC_037648.1 | 1756073 | SNV | 1 | G | A | Heterozygous |
| NC_037648.1 | 1756079 | SNV | 1 | T | C | Heterozygous |
| NC_037648.1 | 1756081 | SNV | 1 | C | T | Heterozygous |
| NC_037648.1 | 1756358 | SNV | 1 | A | C | Heterozygous |
| NC_037648.1 | 1756441 | SNV | 1 | T | G | Heterozygous |
| NC_037648.1 | 1756625 | SNV | 1 | G | A | Heterozygous |
| NC_037648.1 | 1756717 | SNV | 1 | G | A | Heterozygous |
| NC_037648.1 | 1756824 | SNV | 1 | G | A | Heterozygous |
| NC_037648.1 | 1756849 | SNV | 1 | G | A | Homozygous   |
| NC_037648.1 | 1756971 | SNV | 1 | A | G | Heterozygous |
| NC_037648.1 | 1757898 | SNV | 1 | C | A | Heterozygous |
| NC_037648.1 | 1784824 | SNV | 1 | A | T | Homozygous   |
| NC_037648.1 | 1784832 | SNV | 1 | A | C | Homozygous   |
| NC_037648.1 | 1796770 | SNV | 1 | G | A | Homozygous   |
| NC_037648.1 | 1796801 | SNV | 1 | T | C | Homozygous   |
| NC_037648.1 | 1796876 | SNV | 1 | C | G | Homozygous   |
| NC_037648.1 | 1796879 | SNV | 1 | G | A | Homozygous   |
| NC_037648.1 | 1797679 | SNV | 1 | T | C | Homozygous   |

|             |         |     |   |   |   |              |
|-------------|---------|-----|---|---|---|--------------|
| NC_037648.1 | 1797681 | SNV | 1 | A | G | Heterozygous |
| NC_037648.1 | 1797825 | SNV | 1 | C | T | Heterozygous |
| NC_037648.1 | 1797831 | SNV | 1 | T | C | Heterozygous |
| NC_037648.1 | 1797913 | SNV | 1 | G | A | Homozygous   |
| NC_037648.1 | 1797917 | SNV | 1 | T | C | Homozygous   |
| NC_037648.1 | 1798484 | SNV | 1 | T | C | Homozygous   |
| NC_037648.1 | 1833170 | SNV | 1 | A | G | Homozygous   |
| NC_037648.1 | 1833230 | SNV | 1 | G | A | Heterozygous |
| NC_037648.1 | 1857851 | SNV | 1 | G | T | Homozygous   |
| NC_037648.1 | 1857856 | SNV | 1 | A | C | Homozygous   |
| NC_037648.1 | 1857859 | SNV | 1 | A | T | Homozygous   |
| NC_037648.1 | 1857892 | SNV | 1 | T | A | Homozygous   |
| NC_037648.1 | 1864654 | SNV | 1 | T | C | Homozygous   |
| NC_037648.1 | 1864695 | SNV | 1 | G | T | Homozygous   |
| NC_037648.1 | 1884742 | SNV | 1 | A | G | Heterozygous |
| NC_037648.1 | 1884802 | SNV | 1 | C | A | Heterozygous |
| NC_037648.1 | 1884804 | SNV | 1 | C | A | Heterozygous |
| NC_037648.1 | 1884806 | SNV | 1 | A | C | Heterozygous |
| NC_037648.1 | 1884808 | SNV | 1 | C | T | Heterozygous |
| NC_037648.1 | 1884908 | SNV | 1 | A | G | Heterozygous |
| NC_037648.1 | 1884923 | SNV | 1 | G | A | Heterozygous |
| NC_037648.1 | 2078638 | SNV | 1 | G | C | Heterozygous |
| NC_037648.1 | 2265160 | SNV | 1 | T | C | Heterozygous |
| NC_037648.1 | 2265172 | SNV | 1 | G | C | Heterozygous |
| NC_037648.1 | 2265223 | SNV | 1 | T | C | Heterozygous |
| NC_037648.1 | 2265232 | SNV | 1 | G | A | Heterozygous |
| NC_037648.1 | 2265289 | SNV | 1 | A | G | Homozygous   |
| NC_037648.1 | 2268625 | SNV | 1 | G | A | Homozygous   |
| NC_037648.1 | 2268784 | SNV | 1 | G | A | Homozygous   |
| NC_037648.1 | 2269010 | SNV | 1 | C | T | Homozygous   |
| NC_037648.1 | 2269348 | SNV | 1 | T | C | Homozygous   |
| NC_037648.1 | 2269369 | SNV | 1 | A | T | Heterozygous |
| NC_037648.1 | 2269986 | SNV | 1 | A | C | Homozygous   |
| NC_037648.1 | 2271342 | SNV | 1 | C | T | Heterozygous |
| NC_037648.1 | 2271455 | SNV | 1 | G | A | Heterozygous |
| NC_037648.1 | 2271482 | SNV | 1 | T | C | Homozygous   |
| NC_037648.1 | 2271507 | SNV | 1 | G | A | Heterozygous |
| NC_037648.1 | 2271557 | SNV | 1 | G | A | Homozygous   |
| NC_037648.1 | 2271676 | SNV | 1 | A | G | Homozygous   |
| NC_037648.1 | 2271880 | SNV | 1 | T | C | Heterozygous |
| NC_037648.1 | 2274812 | SNV | 1 | C | T | Heterozygous |
| NC_037648.1 | 2275018 | SNV | 1 | G | A | Homozygous   |
| NC_037648.1 | 2275025 | SNV | 1 | A | T | Heterozygous |
| NC_037648.1 | 2275031 | SNV | 1 | T | C | Heterozygous |
| NC_037648.1 | 2275129 | SNV | 1 | A | T | Homozygous   |
| NC_037648.1 | 2276019 | SNV | 1 | C | T | Homozygous   |
| NC_037648.1 | 2276023 | SNV | 1 | C | A | Homozygous   |
| NC_037648.1 | 2276241 | SNV | 1 | A | T | Homozygous   |
| NC_037648.1 | 2276251 | SNV | 1 | T | C | Homozygous   |
| NC_037648.1 | 2276305 | SNV | 1 | T | C | Homozygous   |
| NC_037648.1 | 2277108 | SNV | 1 | T | A | Heterozygous |



|             |         |     |   |   |   |              |
|-------------|---------|-----|---|---|---|--------------|
| NC_037648.1 | 2277132 | SNV | 1 | G | T | Heterozygous |
| NC_037648.1 | 2277156 | SNV | 1 | A | G | Homozygous   |
| NC_037648.1 | 2280779 | SNV | 1 | C | G | Homozygous   |
| NC_037648.1 | 2280823 | SNV | 1 | G | A | Homozygous   |
| NC_037648.1 | 2280835 | SNV | 1 | A | G | Homozygous   |
| NC_037648.1 | 2281038 | SNV | 1 | A | T | Homozygous   |
| NC_037648.1 | 2281041 | SNV | 1 | A | G | Heterozygous |
| NC_037648.1 | 2281109 | SNV | 1 | G | T | Heterozygous |
| NC_037648.1 | 2281129 | SNV | 1 | T | C | Homozygous   |
| NC_037648.1 | 2281339 | SNV | 1 | T | C | Homozygous   |
| NC_037648.1 | 2281428 | SNV | 1 | C | T | Heterozygous |
| NC_037648.1 | 2282181 | SNV | 1 | T | C | Homozygous   |
| NC_037648.1 | 2282340 | SNV | 1 | C | T | Homozygous   |
| NC_037648.1 | 2282349 | SNV | 1 | G | C | Homozygous   |
| NC_037648.1 | 2282384 | SNV | 1 | C | T | Heterozygous |
| NC_037648.1 | 2282391 | SNV | 1 | G | A | Homozygous   |
| NC_037648.1 | 2282890 | SNV | 1 | C | T | Homozygous   |
| NC_037648.1 | 2282902 | SNV | 1 | C | T | Homozygous   |
| NC_037648.1 | 2283595 | SNV | 1 | A | G | Homozygous   |
| NC_037648.1 | 2283892 | SNV | 1 | C | G | Homozygous   |
| NC_037648.1 | 2283910 | SNV | 1 | C | G | Homozygous   |
| NC_037648.1 | 2283916 | SNV | 1 | T | C | Homozygous   |
| NC_037648.1 | 2283979 | SNV | 1 | T | C | Homozygous   |
| NC_037648.1 | 2286785 | SNV | 1 | C | T | Homozygous   |
| NC_037648.1 | 2286816 | SNV | 1 | A | G | Homozygous   |
| NC_037648.1 | 2286922 | SNV | 1 | A | G | Homozygous   |
| NC_037648.1 | 2286942 | SNV | 1 | G | A | Heterozygous |
| NC_037648.1 | 2287009 | SNV | 1 | G | A | Homozygous   |
| NC_037648.1 | 2287013 | SNV | 1 | A | G | Homozygous   |
| NC_037648.1 | 2287015 | SNV | 1 | T | C | Homozygous   |
| NC_037648.1 | 2287224 | SNV | 1 | G | A | Heterozygous |
| NC_037648.1 | 2287403 | SNV | 1 | T | C | Homozygous   |
| NC_037648.1 | 2287434 | SNV | 1 | G | A | Homozygous   |
| NC_037648.1 | 2287457 | SNV | 1 | T | C | Heterozygous |
| NC_037648.1 | 2287496 | SNV | 1 | G | A | Heterozygous |
| NC_037648.1 | 2287505 | SNV | 1 | A | G | Heterozygous |
| NC_037648.1 | 2287509 | SNV | 1 | A | G | Heterozygous |
| NC_037648.1 | 2287520 | SNV | 1 | G | A | Homozygous   |
| NC_037648.1 | 2287539 | SNV | 1 | T | G | Homozygous   |
| NC_037648.1 | 2288218 | SNV | 1 | A | T | Homozygous   |
| NC_037648.1 | 2288417 | SNV | 1 | C | T | Heterozygous |
| NC_037648.1 | 2288456 | SNV | 1 | A | G | Homozygous   |
| NC_037648.1 | 2288496 | SNV | 1 | G | C | Heterozygous |
| NC_037648.1 | 2288835 | SNV | 1 | C | T | Homozygous   |
| NC_037648.1 | 2288888 | SNV | 1 | A | G | Homozygous   |
| NC_037648.1 | 2289012 | SNV | 1 | T | A | Homozygous   |
| NC_037648.1 | 2289358 | SNV | 1 | G | A | Homozygous   |
| NC_037648.1 | 2289380 | SNV | 1 | C | T | Heterozygous |
| NC_037648.1 | 2289481 | SNV | 1 | A | G | Homozygous   |
| NC_037648.1 | 2289508 | SNV | 1 | G | A | Heterozygous |
| NC_037648.1 | 2289595 | SNV | 1 | G | A | Heterozygous |

|             |         |     |   |   |   |              |
|-------------|---------|-----|---|---|---|--------------|
| NC_037648.1 | 2289626 | SNV | 1 | T | C | Homozygous   |
| NC_037648.1 | 2289654 | SNV | 1 | T | G | Heterozygous |
| NC_037648.1 | 2292040 | SNV | 1 | T | C | Homozygous   |
| NC_037648.1 | 2292392 | SNV | 1 | T | C | Heterozygous |
| NC_037648.1 | 2292708 | SNV | 1 | G | T | Homozygous   |
| NC_037648.1 | 2292726 | SNV | 1 | A | G | Homozygous   |
| NC_037648.1 | 2292735 | SNV | 1 | T | C | Heterozygous |
| NC_037648.1 | 2292742 | SNV | 1 | A | G | Homozygous   |
| NC_037648.1 | 2292756 | SNV | 1 | T | C | Homozygous   |
| NC_037648.1 | 2292784 | SNV | 1 | G | A | Heterozygous |
| NC_037648.1 | 2293469 | SNV | 1 | G | A | Heterozygous |
| NC_037648.1 | 2293539 | SNV | 1 | A | C | Heterozygous |
| NC_037648.1 | 2293568 | SNV | 1 | C | T | Homozygous   |
| NC_037648.1 | 2293610 | SNV | 1 | C | T | Heterozygous |
| NC_037648.1 | 2294219 | SNV | 1 | T | A | Homozygous   |
| NC_037648.1 | 2294761 | SNV | 1 | A | T | Homozygous   |
| NC_037648.1 | 2294773 | SNV | 1 | G | A | Homozygous   |
| NC_037648.1 | 2294806 | SNV | 1 | A | G | Homozygous   |
| NC_037648.1 | 2294848 | SNV | 1 | G | A | Heterozygous |
| NC_037648.1 | 2294902 | SNV | 1 | G | A | Heterozygous |
| NC_037648.1 | 2294965 | SNV | 1 | A | G | Homozygous   |
| NC_037648.1 | 2294992 | SNV | 1 | A | G | Heterozygous |
| NC_037648.1 | 2295080 | SNV | 1 | G | A | Heterozygous |
| NC_037648.1 | 2295142 | SNV | 1 | A | G | Heterozygous |
| NC_037648.1 | 2295152 | SNV | 1 | G | A | Heterozygous |
| NC_037648.1 | 2295262 | SNV | 1 | A | G | Homozygous   |
| NC_037648.1 | 2295271 | SNV | 1 | A | G | Heterozygous |
| NC_037648.1 | 2295358 | SNV | 1 | G | A | Homozygous   |
| NC_037648.1 | 2295475 | SNV | 1 | C | T | Heterozygous |
| NC_037648.1 | 2295556 | SNV | 1 | G | A | Heterozygous |
| NC_037648.1 | 2298591 | SNV | 1 | A | G | Homozygous   |
| NC_037648.1 | 2298599 | SNV | 1 | G | A | Homozygous   |
| NC_037648.1 | 2301565 | SNV | 1 | C | T | Heterozygous |
| NC_037648.1 | 2301594 | SNV | 1 | G | A | Heterozygous |
| NC_037648.1 | 2301697 | SNV | 1 | G | A | Homozygous   |
| NC_037648.1 | 2301925 | SNV | 1 | G | A | Homozygous   |
| NC_037648.1 | 2301929 | SNV | 1 | A | G | Homozygous   |
| NC_037648.1 | 2301931 | SNV | 1 | T | C | Homozygous   |
| NC_037648.1 | 2302098 | SNV | 1 | G | T | Heterozygous |
| NC_037648.1 | 2302124 | SNV | 1 | A | G | Homozygous   |
| NC_037648.1 | 2302150 | SNV | 1 | C | T | Heterozygous |
| NC_037648.1 | 2302458 | SNV | 1 | G | A | Homozygous   |
| NC_037648.1 | 2302467 | SNV | 1 | C | T | Heterozygous |
| NC_037648.1 | 2303122 | SNV | 1 | T | C | Homozygous   |
| NC_037648.1 | 2303619 | SNV | 1 | C | T | Heterozygous |
| NC_037648.1 | 2304515 | SNV | 1 | T | C | Homozygous   |
| NC_037648.1 | 2304533 | SNV | 1 | T | C | Homozygous   |
| NC_037648.1 | 2304646 | SNV | 1 | A | T | Heterozygous |
| NC_037648.1 | 2304650 | SNV | 1 | G | A | Heterozygous |
| NC_037648.1 | 2304653 | SNV | 1 | G | T | Heterozygous |
| NC_037648.1 | 2304655 | SNV | 1 | A | C | Heterozygous |

|             |         |     |   |   |   |              |
|-------------|---------|-----|---|---|---|--------------|
| NC_037648.1 | 2304662 | SNV | 1 | G | A | Heterozygous |
| NC_037648.1 | 2304670 | SNV | 1 | C | A | Heterozygous |
| NC_037648.1 | 2304680 | SNV | 1 | A | G | Heterozygous |
| NC_037648.1 | 2304695 | SNV | 1 | G | A | Homozygous   |
| NC_037648.1 | 2304758 | SNV | 1 | T | C | Heterozygous |
| NC_037648.1 | 2307898 | SNV | 1 | C | T | Homozygous   |
| NC_037648.1 | 2307910 | SNV | 1 | G | C | Homozygous   |
| NC_037648.1 | 2307952 | SNV | 1 | G | A | Homozygous   |
| NC_037648.1 | 2307978 | SNV | 1 | A | G | Homozygous   |
| NC_037648.1 | 2308028 | SNV | 1 | T | G | Homozygous   |
| NC_037648.1 | 2308041 | SNV | 1 | A | G | Homozygous   |
| NC_037648.1 | 2308096 | SNV | 1 | A | G | Homozygous   |
| NC_037648.1 | 2308180 | SNV | 1 | G | A | Homozygous   |
| NC_037648.1 | 2308184 | SNV | 1 | A | G | Homozygous   |
| NC_037648.1 | 2308186 | SNV | 1 | T | C | Homozygous   |
| NC_037648.1 | 2308333 | SNV | 1 | A | G | Homozygous   |
| NC_037648.1 | 2308660 | SNV | 1 | G | A | Heterozygous |
| NC_037648.1 | 2308781 | SNV | 1 | T | A | Heterozygous |
| NC_037648.1 | 2309804 | SNV | 1 | A | T | Homozygous   |
| NC_037648.1 | 2309843 | SNV | 1 | T | C | Homozygous   |
| NC_037648.1 | 2310036 | SNV | 1 | T | A | Homozygous   |
| NC_037648.1 | 2310060 | SNV | 1 | A | G | Homozygous   |
| NC_037648.1 | 2313405 | SNV | 1 | T | C | Homozygous   |
| NC_037648.1 | 2313456 | SNV | 1 | C | T | Heterozygous |
| NC_037648.1 | 2313530 | SNV | 1 | A | G | Homozygous   |
| NC_037648.1 | 2314970 | SNV | 1 | T | C | Homozygous   |
| NC_037648.1 | 2314982 | SNV | 1 | T | C | Homozygous   |
| NC_037648.1 | 2314991 | SNV | 1 | G | A | Heterozygous |
| NC_037648.1 | 2315001 | SNV | 1 | G | A | Homozygous   |
| NC_037648.1 | 2315013 | SNV | 1 | T | A | Heterozygous |
| NC_037648.1 | 2315019 | SNV | 1 | G | A | Heterozygous |
| NC_037648.1 | 2315284 | SNV | 1 | T | A | Heterozygous |
| NC_037648.1 | 2315794 | SNV | 1 | C | T | Heterozygous |
| NC_037648.1 | 2315803 | SNV | 1 | G | A | Heterozygous |
| NC_037648.1 | 2315818 | SNV | 1 | G | A | Homozygous   |
| NC_037648.1 | 2315832 | SNV | 1 | T | C | Homozygous   |
| NC_037648.1 | 2315835 | SNV | 1 | C | T | Heterozygous |
| NC_037648.1 | 2318954 | SNV | 1 | T | C | Homozygous   |
| NC_037648.1 | 2323495 | SNV | 1 | A | G | Homozygous   |
| NC_037648.1 | 2324202 | SNV | 1 | T | C | Heterozygous |
| NC_037648.1 | 2324514 | SNV | 1 | G | A | Heterozygous |
| NC_037648.1 | 2325170 | SNV | 1 | C | G | Homozygous   |
| NC_037648.1 | 2331641 | SNV | 1 | C | T | Homozygous   |
| NC_037648.1 | 2331658 | SNV | 1 | C | T | Homozygous   |
| NC_037648.1 | 2331664 | SNV | 1 | T | C | Homozygous   |
| NC_037648.1 | 2334565 | SNV | 1 | G | T | Heterozygous |
| NC_037648.1 | 2334608 | SNV | 1 | A | T | Heterozygous |
| NC_037648.1 | 2340046 | SNV | 1 | A | T | Homozygous   |
| NC_037648.1 | 2340048 | SNV | 1 | A | T | Homozygous   |
| NC_037648.1 | 2340054 | SNV | 1 | T | A | Homozygous   |
| NC_037648.1 | 2340059 | SNV | 1 | A | T | Homozygous   |

|             |         |     |   |   |   |              |
|-------------|---------|-----|---|---|---|--------------|
| NC_037648.1 | 2340064 | SNV | 1 | A | T | Homozygous   |
| NC_037648.1 | 2341075 | SNV | 1 | C | T | Homozygous   |
| NC_037648.1 | 2345681 | SNV | 1 | A | T | Heterozygous |
| NC_037648.1 | 2345688 | SNV | 1 | G | A | Heterozygous |
| NC_037648.1 | 2345690 | SNV | 1 | A | G | Heterozygous |
| NC_037648.1 | 2345691 | SNV | 1 | A | C | Heterozygous |
| NC_037648.1 | 2345700 | SNV | 1 | A | T | Heterozygous |
| NC_037648.1 | 2345705 | SNV | 1 | A | T | Heterozygous |
| NC_037648.1 | 2345708 | SNV | 1 | T | G | Heterozygous |
| NC_037648.1 | 2345710 | SNV | 1 | A | T | Heterozygous |
| NC_037648.1 | 2345712 | SNV | 1 | A | C | Heterozygous |
| NC_037648.1 | 2345722 | SNV | 1 | T | A | Heterozygous |
| NC_037648.1 | 2348687 | SNV | 1 | A | T | Heterozygous |
| NC_037648.1 | 2348738 | SNV | 1 | C | T | Homozygous   |
| NC_037648.1 | 2349513 | SNV | 1 | A | G | Homozygous   |
| NC_037648.1 | 2349523 | SNV | 1 | T | C | Homozygous   |
| NC_037648.1 | 2349530 | SNV | 1 | T | C | Homozygous   |
| NC_037648.1 | 2349550 | SNV | 1 | T | G | Homozygous   |
| NC_037648.1 | 2370315 | SNV | 1 | G | A | Heterozygous |
| NC_037648.1 | 2371178 | SNV | 1 | T | C | Homozygous   |
| NC_037648.1 | 2371280 | SNV | 1 | C | T | Homozygous   |
| NC_037648.1 | 2371401 | SNV | 1 | A | G | Heterozygous |
| NC_037648.1 | 2371407 | SNV | 1 | T | A | Homozygous   |
| NC_037648.1 | 2371738 | SNV | 1 | A | G | Homozygous   |
| NC_037648.1 | 2372027 | SNV | 1 | G | C | Homozygous   |
| NC_037648.1 | 2372367 | SNV | 1 | G | A | Heterozygous |
| NC_037648.1 | 2372690 | SNV | 1 | G | C | Heterozygous |
| NC_037648.1 | 2372700 | SNV | 1 | T | C | Homozygous   |
| NC_037648.1 | 2372733 | SNV | 1 | C | T | Heterozygous |
| NC_037648.1 | 2372757 | SNV | 1 | A | G | Heterozygous |
| NC_037648.1 | 2375396 | SNV | 1 | C | T | Heterozygous |
| NC_037648.1 | 2380345 | SNV | 1 | A | G | Homozygous   |
| NC_037648.1 | 2380811 | SNV | 1 | T | G | Heterozygous |
| NC_037648.1 | 2380873 | SNV | 1 | A | G | Homozygous   |
| NC_037648.1 | 2381079 | SNV | 1 | T | C | Homozygous   |
| NC_037648.1 | 2381163 | SNV | 1 | C | T | Homozygous   |
| NC_037648.1 | 2381317 | SNV | 1 | T | C | Heterozygous |
| NC_037648.1 | 2381455 | SNV | 1 | C | T | Heterozygous |
| NC_037648.1 | 2381658 | SNV | 1 | T | C | Homozygous   |
| NC_037648.1 | 2381705 | SNV | 1 | A | G | Homozygous   |
| NC_037648.1 | 2381787 | SNV | 1 | G | C | Homozygous   |
| NC_037648.1 | 2382061 | SNV | 1 | A | G | Heterozygous |
| NC_037648.1 | 2382440 | SNV | 1 | T | C | Homozygous   |
| NC_037648.1 | 2382576 | SNV | 1 | A | G | Homozygous   |
| NC_037648.1 | 2382585 | SNV | 1 | T | C | Homozygous   |
| NC_037648.1 | 2382914 | SNV | 1 | G | A | Heterozygous |
| NC_037648.1 | 2382947 | SNV | 1 | T | C | Heterozygous |
| NC_037648.1 | 2382981 | SNV | 1 | C | G | Heterozygous |
| NC_037648.1 | 2383745 | SNV | 1 | A | G | Homozygous   |
| NC_037648.1 | 2383860 | SNV | 1 | T | C | Heterozygous |
| NC_037648.1 | 2383878 | SNV | 1 | T | C | Homozygous   |

|             |         |     |   |   |   |              |
|-------------|---------|-----|---|---|---|--------------|
| NC_037648.1 | 2383897 | SNV | 1 | T | C | Heterozygous |
| NC_037648.1 | 2383945 | SNV | 1 | A | C | Homozygous   |
| NC_037648.1 | 2383951 | SNV | 1 | T | C | Homozygous   |
| NC_037648.1 | 2383955 | SNV | 1 | T | C | Homozygous   |
| NC_037648.1 | 2383959 | SNV | 1 | T | C | Homozygous   |
| NC_037648.1 | 2383983 | SNV | 1 | A | G | Heterozygous |
| NC_037648.1 | 2384002 | SNV | 1 | G | A | Homozygous   |
| NC_037648.1 | 2384112 | SNV | 1 | T | C | Homozygous   |
| NC_037648.1 | 2384167 | SNV | 1 | G | A | Heterozygous |
| NC_037648.1 | 2384425 | SNV | 1 | T | C | Heterozygous |
| NC_037648.1 | 2384524 | SNV | 1 | T | C | Heterozygous |
| NC_037648.1 | 2384528 | SNV | 1 | T | A | Heterozygous |
| NC_037648.1 | 2384539 | SNV | 1 | A | G | Homozygous   |
| NC_037648.1 | 2384659 | SNV | 1 | A | T | Heterozygous |
| NC_037648.1 | 2384742 | SNV | 1 | T | C | Homozygous   |
| NC_037648.1 | 2385006 | SNV | 1 | T | A | Homozygous   |
| NC_037648.1 | 2385543 | SNV | 1 | C | T | Homozygous   |
| NC_037648.1 | 2387429 | SNV | 1 | A | T | Homozygous   |
| NC_037648.1 | 2387521 | SNV | 1 | G | T | Heterozygous |
| NC_037648.1 | 2387569 | SNV | 1 | C | T | Homozygous   |
| NC_037648.1 | 2387622 | SNV | 1 | T | G | Homozygous   |
| NC_037648.1 | 2387790 | SNV | 1 | A | G | Heterozygous |
| NC_037648.1 | 2387802 | SNV | 1 | G | A | Homozygous   |
| NC_037648.1 | 2388115 | SNV | 1 | A | G | Homozygous   |
| NC_037648.1 | 2389239 | SNV | 1 | G | A | Heterozygous |
| NC_037648.1 | 2390069 | SNV | 1 | T | C | Homozygous   |
| NC_037648.1 | 2390153 | SNV | 1 | C | A | Heterozygous |
| NC_037648.1 | 2390354 | SNV | 1 | A | G | Homozygous   |
| NC_037648.1 | 2390422 | SNV | 1 | G | A | Heterozygous |
| NC_037648.1 | 2390459 | SNV | 1 | A | G | Homozygous   |
| NC_037648.1 | 2391629 | SNV | 1 | C | T | Heterozygous |
| NC_037648.1 | 2392351 | SNV | 1 | C | T | Homozygous   |
| NC_037648.1 | 2392740 | SNV | 1 | A | G | Homozygous   |
| NC_037648.1 | 2393278 | SNV | 1 | T | A | Homozygous   |
| NC_037648.1 | 2393377 | SNV | 1 | A | G | Homozygous   |
| NC_037648.1 | 2393380 | SNV | 1 | A | G | Homozygous   |
| NC_037648.1 | 2393587 | SNV | 1 | C | T | Heterozygous |
| NC_037648.1 | 2393919 | SNV | 1 | C | T | Homozygous   |
| NC_037648.1 | 2394144 | SNV | 1 | A | G | Heterozygous |
| NC_037648.1 | 2394962 | SNV | 1 | A | T | Homozygous   |
| NC_037648.1 | 2394964 | SNV | 1 | C | T | Homozygous   |
| NC_037648.1 | 2395007 | SNV | 1 | G | A | Homozygous   |
| NC_037648.1 | 2401648 | SNV | 1 | A | T | Heterozygous |
| NC_037648.1 | 2401655 | SNV | 1 | T | C | Heterozygous |
| NC_037648.1 | 2401664 | SNV | 1 | A | T | Heterozygous |
| NC_037648.1 | 2403723 | SNV | 1 | T | A | Homozygous   |
| NC_037648.1 | 2407245 | SNV | 1 | A | G | Homozygous   |
| NC_037648.1 | 2407786 | SNV | 1 | G | C | Heterozygous |
| NC_037648.1 | 2407789 | SNV | 1 | C | T | Heterozygous |
| NC_037648.1 | 2407791 | SNV | 1 | A | G | Heterozygous |
| NC_037648.1 | 2407801 | SNV | 1 | T | A | Heterozygous |

|             |         |     |   |   |   |              |
|-------------|---------|-----|---|---|---|--------------|
| NC_037648.1 | 2407810 | SNV | 1 | T | A | Homozygous   |
| NC_037648.1 | 2407840 | SNV | 1 | C | A | Homozygous   |
| NC_037648.1 | 2407846 | SNV | 1 | A | G | Homozygous   |
| NC_037648.1 | 2407866 | SNV | 1 | G | T | Heterozygous |
| NC_037648.1 | 2407870 | SNV | 1 | G | C | Heterozygous |
| NC_037648.1 | 2416025 | SNV | 1 | G | A | Heterozygous |
| NC_037648.1 | 2416521 | SNV | 1 | A | G | Homozygous   |
| NC_037648.1 | 2417491 | SNV | 1 | C | T | Heterozygous |
| NC_037648.1 | 2417796 | SNV | 1 | A | G | Heterozygous |
| NC_037648.1 | 2417979 | SNV | 1 | A | G | Homozygous   |
| NC_037648.1 | 2418459 | SNV | 1 | T | C | Homozygous   |
| NC_037648.1 | 2418502 | SNV | 1 | C | G | Homozygous   |
| NC_037648.1 | 2418598 | SNV | 1 | C | T | Homozygous   |
| NC_037648.1 | 2419445 | SNV | 1 | T | C | Homozygous   |
| NC_037648.1 | 2419562 | SNV | 1 | G | T | Heterozygous |
| NC_037648.1 | 2431372 | SNV | 1 | G | A | Heterozygous |
| NC_037648.1 | 2439727 | SNV | 1 | G | A | Homozygous   |
| NC_037648.1 | 2439735 | SNV | 1 | T | C | Homozygous   |
| NC_037648.1 | 2439763 | SNV | 1 | A | G | Homozygous   |
| NC_037648.1 | 2442410 | SNV | 1 | C | T | Homozygous   |
| NC_037648.1 | 2442939 | SNV | 1 | T | C | Heterozygous |
| NC_037648.1 | 2443197 | SNV | 1 | C | A | Homozygous   |
| NC_037648.1 | 2445219 | SNV | 1 | G | A | Homozygous   |
| NC_037648.1 | 2445255 | SNV | 1 | G | A | Homozygous   |
| NC_037648.1 | 2445312 | SNV | 1 | A | G | Homozygous   |
| NC_037648.1 | 2445367 | SNV | 1 | T | C | Homozygous   |
| NC_037648.1 | 2445465 | SNV | 1 | A | T | Homozygous   |
| NC_037648.1 | 2447060 | SNV | 1 | T | A | Homozygous   |
| NC_037648.1 | 2447082 | SNV | 1 | A | G | Homozygous   |
| NC_037648.1 | 2452090 | SNV | 1 | G | A | Heterozygous |
| NC_037648.1 | 2452158 | SNV | 1 | C | A | Homozygous   |
| NC_037648.1 | 2452854 | SNV | 1 | A | G | Homozygous   |
| NC_037648.1 | 2452896 | SNV | 1 | A | G | Homozygous   |
| NC_037648.1 | 2459555 | SNV | 1 | T | C | Homozygous   |
| NC_037648.1 | 2461982 | SNV | 1 | T | C | Homozygous   |
| NC_037648.1 | 2461986 | SNV | 1 | G | T | Homozygous   |
| NC_037648.1 | 2461988 | SNV | 1 | A | T | Homozygous   |
| NC_037648.1 | 2461992 | SNV | 1 | G | T | Homozygous   |
| NC_037648.1 | 2461994 | SNV | 1 | A | C | Homozygous   |
| NC_037648.1 | 2461998 | SNV | 1 | T | G | Homozygous   |
| NC_037648.1 | 2462120 | SNV | 1 | C | T | Homozygous   |
| NC_037648.1 | 2462199 | SNV | 1 | G | A | Homozygous   |
| NC_037648.1 | 2462716 | SNV | 1 | A | T | Homozygous   |
| NC_037648.1 | 2462721 | SNV | 1 | A | C | Homozygous   |
| NC_037648.1 | 2462723 | SNV | 1 | A | T | Homozygous   |
| NC_037648.1 | 2462735 | SNV | 1 | T | A | Homozygous   |
| NC_037648.1 | 2462744 | SNV | 1 | A | G | Heterozygous |
| NC_037648.1 | 2467726 | SNV | 1 | G | A | Homozygous   |
| NC_037648.1 | 2467743 | SNV | 1 | C | T | Heterozygous |
| NC_037648.1 | 2470564 | SNV | 1 | T | C | Heterozygous |
| NC_037648.1 | 2470571 | SNV | 1 | G | A | Heterozygous |

|             |         |     |   |   |   |              |
|-------------|---------|-----|---|---|---|--------------|
| NC_037648.1 | 2472531 | SNV | 1 | A | G | Homozygous   |
| NC_037648.1 | 2472832 | SNV | 1 | T | C | Homozygous   |
| NC_037648.1 | 2472849 | SNV | 1 | T | C | Homozygous   |
| NC_037648.1 | 2473867 | SNV | 1 | G | T | Homozygous   |
| NC_037648.1 | 2473871 | SNV | 1 | A | G | Homozygous   |
| NC_037648.1 | 2474012 | SNV | 1 | C | T | Heterozygous |
| NC_037648.1 | 2475023 | SNV | 1 | G | A | Homozygous   |
| NC_037648.1 | 2475046 | SNV | 1 | C | T | Homozygous   |
| NC_037648.1 | 2477506 | SNV | 1 | T | G | Homozygous   |
| NC_037648.1 | 2478921 | SNV | 1 | T | C | Homozygous   |
| NC_037648.1 | 2479065 | SNV | 1 | T | C | Homozygous   |
| NC_037648.1 | 2479157 | SNV | 1 | T | C | Homozygous   |
| NC_037648.1 | 2480559 | SNV | 1 | G | C | Homozygous   |
| NC_037648.1 | 2480561 | SNV | 1 | A | G | Homozygous   |
| NC_037648.1 | 2480565 | SNV | 1 | A | T | Homozygous   |
| NC_037648.1 | 2480964 | SNV | 1 | A | G | Homozygous   |
| NC_037648.1 | 2483490 | SNV | 1 | T | A | Heterozygous |
| NC_037648.1 | 2483968 | SNV | 1 | A | G | Heterozygous |
| NC_037648.1 | 2483980 | SNV | 1 | A | T | Heterozygous |
| NC_037648.1 | 2485345 | SNV | 1 | C | T | Homozygous   |
| NC_037648.1 | 2485905 | SNV | 1 | C | T | Homozygous   |
| NC_037648.1 | 2485907 | SNV | 1 | G | A | Homozygous   |
| NC_037648.1 | 2486302 | SNV | 1 | T | C | Heterozygous |
| NC_037648.1 | 2486304 | SNV | 1 | C | G | Heterozygous |
| NC_037648.1 | 2497539 | SNV | 1 | A | G | Homozygous   |
| NC_037648.1 | 2497580 | SNV | 1 | T | G | Homozygous   |
| NC_037648.1 | 2497584 | SNV | 1 | T | C | Homozygous   |
| NC_037648.1 | 2497589 | SNV | 1 | T | C | Homozygous   |
| NC_037648.1 | 2499994 | SNV | 1 | A | C | Homozygous   |
| NC_037648.1 | 2500496 | SNV | 1 | C | T | Homozygous   |
| NC_037648.1 | 2500587 | SNV | 1 | A | T | Heterozygous |
| NC_037648.1 | 2501871 | SNV | 1 | A | G | Homozygous   |
| NC_037648.1 | 2501937 | SNV | 1 | T | C | Homozygous   |
| NC_037648.1 | 2515223 | SNV | 1 | A | T | Homozygous   |
| NC_037648.1 | 2515226 | SNV | 1 | A | G | Homozygous   |
| NC_037648.1 | 2515284 | SNV | 1 | A | G | Homozygous   |
| NC_037648.1 | 2515286 | SNV | 1 | T | A | Homozygous   |
| NC_037648.1 | 2518880 | SNV | 1 | A | T | Heterozygous |
| NC_037648.1 | 2519488 | SNV | 1 | T | C | Homozygous   |
| NC_037648.1 | 2519699 | SNV | 1 | A | G | Homozygous   |
| NC_037648.1 | 2519730 | SNV | 1 | A | T | Heterozygous |
| NC_037648.1 | 2521127 | SNV | 1 | C | A | Homozygous   |
| NC_037648.1 | 2521283 | SNV | 1 | A | G | Heterozygous |
| NC_037648.1 | 2542346 | SNV | 1 | T | C | Heterozygous |
| NC_037648.1 | 2545888 | SNV | 1 | G | A | Homozygous   |
| NC_037648.1 | 2546074 | SNV | 1 | C | T | Heterozygous |
| NC_037648.1 | 2546164 | SNV | 1 | A | G | Heterozygous |
| NC_037648.1 | 2546278 | SNV | 1 | G | A | Homozygous   |
| NC_037648.1 | 2546293 | SNV | 1 | G | A | Homozygous   |
| NC_037648.1 | 2552433 | SNV | 1 | C | T | Heterozygous |
| NC_037648.1 | 2552956 | SNV | 1 | A | G | Homozygous   |

|             |         |     |   |   |   |              |
|-------------|---------|-----|---|---|---|--------------|
| NC_037648.1 | 2553378 | SNV | 1 | T | C | Homozygous   |
| NC_037648.1 | 2553414 | SNV | 1 | G | A | Heterozygous |
| NC_037648.1 | 2553420 | SNV | 1 | C | T | Homozygous   |
| NC_037648.1 | 2553478 | SNV | 1 | T | A | Heterozygous |
| NC_037648.1 | 2553480 | SNV | 1 | T | C | Heterozygous |
| NC_037648.1 | 2553494 | SNV | 1 | G | A | Homozygous   |
| NC_037648.1 | 2553539 | SNV | 1 | T | C | Homozygous   |
| NC_037648.1 | 2553590 | SNV | 1 | C | T | Heterozygous |
| NC_037648.1 | 2553683 | SNV | 1 | A | C | Heterozygous |
| NC_037648.1 | 2569393 | SNV | 1 | G | A | Homozygous   |
| NC_037648.1 | 2571861 | SNV | 1 | C | T | Heterozygous |
| NC_037648.1 | 2571964 | SNV | 1 | G | A | Homozygous   |
| NC_037648.1 | 2571969 | SNV | 1 | A | G | Homozygous   |
| NC_037648.1 | 2572119 | SNV | 1 | G | T | Heterozygous |
| NC_037648.1 | 2583966 | SNV | 1 | C | T | Heterozygous |
| NC_037648.1 | 2585242 | SNV | 1 | G | A | Heterozygous |
| NC_037648.1 | 2585371 | SNV | 1 | C | T | Homozygous   |
| NC_037648.1 | 2587261 | SNV | 1 | G | T | Homozygous   |
| NC_037648.1 | 2587362 | SNV | 1 | T | C | Homozygous   |
| NC_037648.1 | 2593721 | SNV | 1 | C | T | Homozygous   |
| NC_037648.1 | 2593733 | SNV | 1 | A | G | Homozygous   |
| NC_037648.1 | 2593995 | SNV | 1 | A | G | Homozygous   |
| NC_037648.1 | 2594061 | SNV | 1 | G | A | Homozygous   |
| NC_037648.1 | 2594133 | SNV | 1 | G | A | Homozygous   |
| NC_037648.1 | 2594174 | SNV | 1 | T | G | Homozygous   |
| NC_037648.1 | 2598255 | SNV | 1 | T | C | Heterozygous |
| NC_037648.1 | 2598261 | SNV | 1 | T | C | Homozygous   |
| NC_037648.1 | 2598264 | SNV | 1 | A | T | Heterozygous |
| NC_037648.1 | 2598268 | SNV | 1 | T | A | Homozygous   |
| NC_037648.1 | 2598273 | SNV | 1 | C | T | Heterozygous |
| NC_037648.1 | 2598314 | SNV | 1 | A | G | Homozygous   |
| NC_037648.1 | 2598415 | SNV | 1 | G | A | Heterozygous |
| NC_037648.1 | 2598760 | SNV | 1 | C | T | Homozygous   |
| NC_037648.1 | 2598774 | SNV | 1 | T | C | Homozygous   |
| NC_037648.1 | 2598798 | SNV | 1 | T | C | Homozygous   |
| NC_037648.1 | 2598827 | SNV | 1 | G | A | Homozygous   |
| NC_037648.1 | 2598839 | SNV | 1 | C | T | Heterozygous |
| NC_037648.1 | 2598920 | SNV | 1 | A | G | Homozygous   |
| NC_037648.1 | 2599203 | SNV | 1 | T | C | Heterozygous |
| NC_037648.1 | 2602957 | SNV | 1 | T | C | Homozygous   |
| NC_037648.1 | 2603038 | SNV | 1 | T | C | Heterozygous |
| NC_037648.1 | 2603515 | SNV | 1 | T | C | Homozygous   |
| NC_037648.1 | 2603575 | SNV | 1 | A | G | Homozygous   |
| NC_037648.1 | 2603584 | SNV | 1 | G | A | Homozygous   |
| NC_037648.1 | 2603588 | SNV | 1 | T | C | Heterozygous |
| NC_037648.1 | 2603904 | SNV | 1 | C | T | Homozygous   |
| NC_037648.1 | 2604220 | SNV | 1 | G | C | Heterozygous |
| NC_037648.1 | 2604292 | SNV | 1 | A | G | Heterozygous |
| NC_037648.1 | 2604696 | SNV | 1 | T | C | Homozygous   |
| NC_037648.1 | 2604861 | SNV | 1 | G | A | Homozygous   |
| NC_037648.1 | 2604948 | SNV | 1 | A | T | Heterozygous |



|             |         |     |   |   |   |              |
|-------------|---------|-----|---|---|---|--------------|
| NC_037648.1 | 2605102 | SNV | 1 | A | C | Heterozygous |
| NC_037648.1 | 2605186 | SNV | 1 | T | C | Heterozygous |
| NC_037648.1 | 2606970 | SNV | 1 | T | A | Homozygous   |
| NC_037648.1 | 2606972 | SNV | 1 | A | T | Homozygous   |
| NC_037648.1 | 2607233 | SNV | 1 | T | C | Homozygous   |
| NC_037648.1 | 2607347 | SNV | 1 | A | T | Homozygous   |
| NC_037648.1 | 2607349 | SNV | 1 | A | T | Homozygous   |
| NC_037648.1 | 2607356 | SNV | 1 | T | A | Homozygous   |
| NC_037648.1 | 2607383 | SNV | 1 | A | C | Homozygous   |
| NC_037648.1 | 2607386 | SNV | 1 | A | C | Homozygous   |
| NC_037648.1 | 2607683 | SNV | 1 | G | T | Homozygous   |
| NC_037648.1 | 2607971 | SNV | 1 | T | C | Homozygous   |
| NC_037648.1 | 2616675 | SNV | 1 | A | T | Homozygous   |
| NC_037648.1 | 2616743 | SNV | 1 | C | T | Homozygous   |
| NC_037648.1 | 2617279 | SNV | 1 | C | A | Homozygous   |
| NC_037648.1 | 2617650 | SNV | 1 | A | G | Heterozygous |
| NC_037648.1 | 2624609 | SNV | 1 | T | A | Heterozygous |
| NC_037648.1 | 2625275 | SNV | 1 | T | A | Heterozygous |
| NC_037648.1 | 2625279 | SNV | 1 | T | A | Heterozygous |
| NC_037648.1 | 2625281 | SNV | 1 | T | A | Heterozygous |
| NC_037648.1 | 2625297 | SNV | 1 | C | A | Heterozygous |
| NC_037648.1 | 2625310 | SNV | 1 | A | C | Heterozygous |
| NC_037648.1 | 2625909 | SNV | 1 | T | A | Homozygous   |
| NC_037648.1 | 2625914 | SNV | 1 | A | T | Homozygous   |
| NC_037648.1 | 2625945 | SNV | 1 | A | T | Homozygous   |
| NC_037648.1 | 2625951 | SNV | 1 | A | G | Homozygous   |
| NC_037648.1 | 2626004 | SNV | 1 | C | T | Heterozygous |
| NC_037648.1 | 2631646 | SNV | 1 | G | A | Homozygous   |
| NC_037648.1 | 2632795 | SNV | 1 | C | T | Homozygous   |
| NC_037648.1 | 2633941 | SNV | 1 | T | C | Homozygous   |
| NC_037648.1 | 2634236 | SNV | 1 | A | G | Heterozygous |
| NC_037648.1 | 2634241 | SNV | 1 | A | G | Heterozygous |
| NC_037648.1 | 2634270 | SNV | 1 | C | T | Homozygous   |
| NC_037648.1 | 2634966 | SNV | 1 | T | C | Homozygous   |
| NC_037648.1 | 2635082 | SNV | 1 | C | T | Homozygous   |
| NC_037648.1 | 2636047 | SNV | 1 | G | T | Homozygous   |
| NC_037648.1 | 2636882 | SNV | 1 | C | T | Homozygous   |
| NC_037648.1 | 2637136 | SNV | 1 | C | T | Homozygous   |
| NC_037648.1 | 2637573 | SNV | 1 | C | T | Homozygous   |
| NC_037648.1 | 2643729 | SNV | 1 | T | C | Homozygous   |
| NC_037648.1 | 2644378 | SNV | 1 | A | G | Homozygous   |
| NC_037648.1 | 2648529 | SNV | 1 | C | T | Homozygous   |
| NC_037648.1 | 2649190 | SNV | 1 | G | A | Homozygous   |
| NC_037648.1 | 2649192 | SNV | 1 | A | T | Homozygous   |
| NC_037648.1 | 2649477 | SNV | 1 | C | A | Heterozygous |
| NC_037648.1 | 2650175 | SNV | 1 | T | C | Homozygous   |
| NC_037648.1 | 2650381 | SNV | 1 | A | G | Homozygous   |
| NC_037648.1 | 2650404 | SNV | 1 | G | T | Heterozygous |
| NC_037648.1 | 2650698 | SNV | 1 | C | T | Homozygous   |
| NC_037648.1 | 2650808 | SNV | 1 | C | T | Heterozygous |
| NC_037648.1 | 2650810 | SNV | 1 | A | T | Heterozygous |

|             |         |     |   |   |   |              |
|-------------|---------|-----|---|---|---|--------------|
| NC_037648.1 | 2651130 | SNV | 1 | G | A | Homozygous   |
| NC_037648.1 | 2677280 | SNV | 1 | C | T | Homozygous   |
| NC_037648.1 | 2677397 | SNV | 1 | G | C | Homozygous   |
| NC_037648.1 | 2677522 | SNV | 1 | G | A | Heterozygous |
| NC_037648.1 | 2678011 | SNV | 1 | T | C | Homozygous   |
| NC_037648.1 | 2678046 | SNV | 1 | C | T | Heterozygous |
| NC_037648.1 | 2678130 | SNV | 1 | A | T | Heterozygous |
| NC_037648.1 | 2679202 | SNV | 1 | A | T | Homozygous   |
| NC_037648.1 | 2679574 | SNV | 1 | A | G | Homozygous   |
| NC_037648.1 | 2679607 | SNV | 1 | A | G | Heterozygous |
| NC_037648.1 | 2679637 | SNV | 1 | A | G | Heterozygous |
| NC_037648.1 | 2680431 | SNV | 1 | G | C | Heterozygous |
| NC_037648.1 | 2680720 | SNV | 1 | A | G | Homozygous   |
| NC_037648.1 | 2692315 | SNV | 1 | T | A | Heterozygous |
| NC_037648.1 | 2692335 | SNV | 1 | A | T | Heterozygous |
| NC_037648.1 | 2692360 | SNV | 1 | T | A | Heterozygous |
| NC_037648.1 | 2692790 | SNV | 1 | T | A | Homozygous   |
| NC_037648.1 | 2696961 | SNV | 1 | A | C | Homozygous   |
| NC_037648.1 | 2696985 | SNV | 1 | G | A | Homozygous   |
| NC_037648.1 | 2696994 | SNV | 1 | C | A | Homozygous   |
| NC_037648.1 | 2696999 | SNV | 1 | A | T | Homozygous   |
| NC_037648.1 | 2706860 | SNV | 1 | A | G | Homozygous   |
| NC_037648.1 | 2715210 | SNV | 1 | T | C | Heterozygous |
| NC_037648.1 | 2715212 | SNV | 1 | C | T | Homozygous   |
| NC_037648.1 | 2720231 | SNV | 1 | G | A | Heterozygous |
| NC_037648.1 | 2723007 | SNV | 1 | A | T | Homozygous   |
| NC_037648.1 | 2723014 | SNV | 1 | A | T | Homozygous   |
| NC_037648.1 | 2723018 | SNV | 1 | C | T | Homozygous   |
| NC_037648.1 | 2723042 | SNV | 1 | T | A | Homozygous   |
| NC_037648.1 | 2723046 | SNV | 1 | T | A | Homozygous   |
| NC_037648.1 | 2723059 | SNV | 1 | A | T | Homozygous   |
| NC_037648.1 | 2724237 | SNV | 1 | G | A | Homozygous   |
| NC_037648.1 | 2724527 | SNV | 1 | A | G | Homozygous   |
| NC_037648.1 | 2726071 | SNV | 1 | C | T | Heterozygous |
| NC_037648.1 | 2734427 | SNV | 1 | A | G | Homozygous   |
| NC_037648.1 | 2735088 | SNV | 1 | G | A | Homozygous   |
| NC_037648.1 | 2738778 | SNV | 1 | T | C | Homozygous   |
| NC_037648.1 | 2738794 | SNV | 1 | A | G | Homozygous   |
| NC_037648.1 | 2738989 | SNV | 1 | A | G | Heterozygous |
| NC_037648.1 | 2739673 | SNV | 1 | G | A | Heterozygous |
| NC_037648.1 | 2742302 | SNV | 1 | G | A | Homozygous   |
| NC_037648.1 | 2755998 | SNV | 1 | C | T | Homozygous   |
| NC_037648.1 | 2756002 | SNV | 1 | C | T | Homozygous   |
| NC_037648.1 | 2757184 | SNV | 1 | G | C | Homozygous   |
| NC_037648.1 | 2770019 | SNV | 1 | A | T | Homozygous   |
| NC_037648.1 | 2771915 | SNV | 1 | C | T | Homozygous   |
| NC_037648.1 | 2771951 | SNV | 1 | A | T | Heterozygous |
| NC_037648.1 | 2772096 | SNV | 1 | G | A | Heterozygous |
| NC_037648.1 | 2772366 | SNV | 1 | G | A | Homozygous   |
| NC_037648.1 | 2772374 | SNV | 1 | A | G | Homozygous   |
| NC_037648.1 | 2772379 | SNV | 1 | C | T | Homozygous   |

|             |         |     |   |   |   |              |
|-------------|---------|-----|---|---|---|--------------|
| NC_037648.1 | 2774362 | SNV | 1 | G | A | Heterozygous |
| NC_037648.1 | 2774442 | SNV | 1 | T | C | Homozygous   |
| NC_037648.1 | 2774513 | SNV | 1 | C | G | Heterozygous |
| NC_037648.1 | 2783261 | SNV | 1 | C | T | Homozygous   |
| NC_037648.1 | 2783267 | SNV | 1 | C | T | Heterozygous |
| NC_037648.1 | 2790837 | SNV | 1 | C | T | Heterozygous |
| NC_037648.1 | 2790920 | SNV | 1 | A | G | Homozygous   |
| NC_037648.1 | 2791877 | SNV | 1 | C | G | Homozygous   |
| NC_037648.1 | 2792563 | SNV | 1 | A | G | Heterozygous |
| NC_037648.1 | 2792964 | SNV | 1 | C | T | Homozygous   |
| NC_037648.1 | 2793464 | SNV | 1 | C | T | Heterozygous |
| NC_037648.1 | 2793675 | SNV | 1 | A | G | Heterozygous |
| NC_037648.1 | 2794597 | SNV | 1 | A | T | Heterozygous |
| NC_037648.1 | 2795344 | SNV | 1 | C | A | Heterozygous |
| NC_037648.1 | 2795346 | SNV | 1 | G | T | Heterozygous |
| NC_037648.1 | 2796864 | SNV | 1 | G | A | Homozygous   |
| NC_037648.1 | 2797113 | SNV | 1 | T | C | Heterozygous |
| NC_037648.1 | 2797179 | SNV | 1 | C | G | Homozygous   |
| NC_037648.1 | 2797725 | SNV | 1 | T | C | Heterozygous |
| NC_037648.1 | 2802419 | SNV | 1 | T | C | Heterozygous |
| NC_037648.1 | 2802748 | SNV | 1 | G | T | Heterozygous |
| NC_037648.1 | 2803183 | SNV | 1 | T | C | Heterozygous |
| NC_037648.1 | 2803373 | SNV | 1 | C | G | Homozygous   |
| NC_037648.1 | 2814804 | SNV | 1 | T | C | Homozygous   |
| NC_037648.1 | 2825048 | SNV | 1 | T | G | Homozygous   |
| NC_037648.1 | 2825050 | SNV | 1 | T | C | Homozygous   |
| NC_037648.1 | 2825052 | SNV | 1 | T | C | Homozygous   |
| NC_037648.1 | 2825058 | SNV | 1 | T | A | Homozygous   |
| NC_037648.1 | 2825060 | SNV | 1 | T | A | Homozygous   |
| NC_037648.1 | 2825076 | SNV | 1 | A | T | Homozygous   |
| NC_037648.1 | 2825082 | SNV | 1 | G | C | Homozygous   |
| NC_037648.1 | 2825084 | SNV | 1 | T | C | Homozygous   |
| NC_037648.1 | 2825086 | SNV | 1 | T | C | Homozygous   |
| NC_037648.1 | 2833085 | SNV | 1 | A | G | Homozygous   |
| NC_037648.1 | 2839550 | SNV | 1 | A | G | Homozygous   |
| NC_037648.1 | 2839661 | SNV | 1 | T | C | Homozygous   |
| NC_037648.1 | 2839991 | SNV | 1 | A | G | Homozygous   |
| NC_037648.1 | 2841676 | SNV | 1 | A | G | Heterozygous |
| NC_037648.1 | 2841838 | SNV | 1 | C | A | Heterozygous |
| NC_037648.1 | 2841847 | SNV | 1 | A | G | Homozygous   |
| NC_037648.1 | 2847175 | SNV | 1 | A | G | Heterozygous |
| NC_037648.1 | 2847255 | SNV | 1 | T | C | Heterozygous |
| NC_037648.1 | 2847817 | SNV | 1 | T | C | Homozygous   |
| NC_037648.1 | 2847844 | SNV | 1 | G | A | Homozygous   |
| NC_037648.1 | 2848876 | SNV | 1 | G | A | Heterozygous |
| NC_037648.1 | 2849398 | SNV | 1 | A | G | Heterozygous |
| NC_037648.1 | 2849419 | SNV | 1 | A | G | Heterozygous |
| NC_037648.1 | 2849776 | SNV | 1 | A | G | Heterozygous |
| NC_037648.1 | 2860712 | SNV | 1 | T | C | Homozygous   |
| NC_037648.1 | 2907563 | SNV | 1 | G | A | Homozygous   |
| NC_037648.1 | 2908221 | SNV | 1 | C | T | Homozygous   |

|             |         |     |   |   |   |              |
|-------------|---------|-----|---|---|---|--------------|
| NC_037648.1 | 2908476 | SNV | 1 | A | T | Heterozygous |
| NC_037648.1 | 2908479 | SNV | 1 | A | C | Heterozygous |
| NC_037648.1 | 2908500 | SNV | 1 | C | T | Heterozygous |
| NC_037648.1 | 2908603 | SNV | 1 | A | G | Heterozygous |
| NC_037648.1 | 2909239 | SNV | 1 | G | A | Homozygous   |
| NC_037648.1 | 2909755 | SNV | 1 | C | T | Heterozygous |
| NC_037648.1 | 2909761 | SNV | 1 | T | C | Homozygous   |
| NC_037648.1 | 2909767 | SNV | 1 | C | T | Heterozygous |
| NC_037648.1 | 2910410 | SNV | 1 | G | A | Heterozygous |
| NC_037648.1 | 2910829 | SNV | 1 | G | A | Homozygous   |
| NC_037648.1 | 2911329 | SNV | 1 | T | C | Homozygous   |
| NC_037648.1 | 2911341 | SNV | 1 | T | C | Heterozygous |
| NC_037648.1 | 2936844 | SNV | 1 | C | T | Heterozygous |
| NC_037648.1 | 2936859 | SNV | 1 | C | G | Homozygous   |
| NC_037648.1 | 2936890 | SNV | 1 | G | C | Homozygous   |
| NC_037648.1 | 2936916 | SNV | 1 | T | C | Homozygous   |
| NC_037648.1 | 2936929 | SNV | 1 | T | C | Homozygous   |
| NC_037648.1 | 2936975 | SNV | 1 | C | A | Homozygous   |
| NC_037648.1 | 2937250 | SNV | 1 | A | G | Heterozygous |
| NC_037648.1 | 2937349 | SNV | 1 | T | C | Homozygous   |
| NC_037648.1 | 2938206 | SNV | 1 | G | A | Heterozygous |
| NC_037648.1 | 2938242 | SNV | 1 | T | C | Heterozygous |
| NC_037648.1 | 2938358 | SNV | 1 | G | A | Heterozygous |
| NC_037648.1 | 2938422 | SNV | 1 | C | T | Heterozygous |
| NC_037648.1 | 2938437 | SNV | 1 | C | T | Homozygous   |
| NC_037648.1 | 2941483 | SNV | 1 | G | A | Heterozygous |
| NC_037648.1 | 2941518 | SNV | 1 | C | T | Heterozygous |
| NC_037648.1 | 2941524 | SNV | 1 | G | A | Heterozygous |
| NC_037648.1 | 2943811 | SNV | 1 | C | T | Homozygous   |
| NC_037648.1 | 2943822 | SNV | 1 | C | T | Homozygous   |
| NC_037648.1 | 2949840 | SNV | 1 | T | G | Heterozygous |
| NC_037648.1 | 2949887 | SNV | 1 | G | A | Homozygous   |
| NC_037648.1 | 2949894 | SNV | 1 | A | G | Heterozygous |
| NC_037648.1 | 2949898 | SNV | 1 | A | G | Homozygous   |
| NC_037648.1 | 2960611 | SNV | 1 | C | A | Homozygous   |
| NC_037648.1 | 2960640 | SNV | 1 | T | C | Heterozygous |
| NC_037648.1 | 2960693 | SNV | 1 | G | A | Heterozygous |
| NC_037648.1 | 2960728 | SNV | 1 | G | A | Heterozygous |
| NC_037648.1 | 2965527 | SNV | 1 | T | C | Homozygous   |
| NC_037648.1 | 2965538 | SNV | 1 | G | A | Homozygous   |
| NC_037648.1 | 2965541 | SNV | 1 | A | G | Homozygous   |
| NC_037648.1 | 2965550 | SNV | 1 | G | A | Homozygous   |
| NC_037648.1 | 2965562 | SNV | 1 | T | A | Homozygous   |
| NC_037648.1 | 2967976 | SNV | 1 | T | C | Homozygous   |
| NC_037648.1 | 2968193 | SNV | 1 | T | C | Homozygous   |
| NC_037648.1 | 2968195 | SNV | 1 | C | A | Homozygous   |
| NC_037648.1 | 2968248 | SNV | 1 | C | T | Homozygous   |
| NC_037648.1 | 2985765 | SNV | 1 | C | A | Homozygous   |
| NC_037648.1 | 2985769 | SNV | 1 | A | G | Homozygous   |
| NC_037648.1 | 2985775 | SNV | 1 | T | C | Homozygous   |
| NC_037648.1 | 2985778 | SNV | 1 | A | G | Homozygous   |

|             |         |     |   |   |   |              |
|-------------|---------|-----|---|---|---|--------------|
| NC_037648.1 | 2985794 | SNV | 1 | T | G | Homozygous   |
| NC_037648.1 | 2988210 | SNV | 1 | T | A | Homozygous   |
| NC_037648.1 | 2988214 | SNV | 1 | C | T | Homozygous   |
| NC_037648.1 | 2988256 | SNV | 1 | G | A | Homozygous   |
| NC_037648.1 | 2988420 | SNV | 1 | G | A | Heterozygous |
| NC_037648.1 | 2988475 | SNV | 1 | A | C | Heterozygous |
| NC_037648.1 | 2988552 | SNV | 1 | G | A | Heterozygous |
| NC_037648.1 | 2988778 | SNV | 1 | G | A | Heterozygous |
| NC_037648.1 | 2988992 | SNV | 1 | T | C | Heterozygous |
| NC_037648.1 | 2989026 | SNV | 1 | C | G | Homozygous   |
| NC_037648.1 | 3001131 | SNV | 1 | T | A | Homozygous   |
| NC_037648.1 | 3001136 | SNV | 1 | T | C | Homozygous   |
| NC_037648.1 | 3003815 | SNV | 1 | A | C | Homozygous   |
| NC_037648.1 | 3011806 | SNV | 1 | T | C | Homozygous   |
| NC_037648.1 | 3011928 | SNV | 1 | C | A | Heterozygous |
| NC_037648.1 | 3011951 | SNV | 1 | T | C | Homozygous   |
| NC_037648.1 | 3011968 | SNV | 1 | C | A | Homozygous   |
| NC_037648.1 | 3012030 | SNV | 1 | A | G | Heterozygous |
| NC_037648.1 | 3012047 | SNV | 1 | C | T | Heterozygous |
| NC_037648.1 | 3012111 | SNV | 1 | T | G | Homozygous   |
| NC_037648.1 | 3012121 | SNV | 1 | G | A | Heterozygous |
| NC_037648.1 | 3012123 | SNV | 1 | A | G | Homozygous   |
| NC_037648.1 | 3012141 | SNV | 1 | A | G | Homozygous   |
| NC_037648.1 | 3012175 | SNV | 1 | G | A | Heterozygous |
| NC_037648.1 | 3012228 | SNV | 1 | G | A | Homozygous   |
| NC_037648.1 | 3014844 | SNV | 1 | A | T | Homozygous   |
| NC_037648.1 | 3026534 | SNV | 1 | G | A | Homozygous   |
| NC_037648.1 | 3026611 | SNV | 1 | C | T | Homozygous   |
| NC_037648.1 | 3030837 | SNV | 1 | C | T | Homozygous   |
| NC_037648.1 | 3031864 | SNV | 1 | A | G | Homozygous   |
| NC_037648.1 | 3031940 | SNV | 1 | C | T | Homozygous   |
| NC_037648.1 | 3031986 | SNV | 1 | G | T | Homozygous   |
| NC_037648.1 | 3032345 | SNV | 1 | A | G | Heterozygous |
| NC_037648.1 | 3032451 | SNV | 1 | A | G | Homozygous   |
| NC_037648.1 | 3032568 | SNV | 1 | G | A | Heterozygous |
| NC_037648.1 | 3033990 | SNV | 1 | C | T | Homozygous   |
| NC_037648.1 | 3033999 | SNV | 1 | T | C | Homozygous   |
| NC_037648.1 | 3034048 | SNV | 1 | A | G | Heterozygous |
| NC_037648.1 | 3034958 | SNV | 1 | T | C | Homozygous   |
| NC_037648.1 | 3038806 | SNV | 1 | G | A | Homozygous   |
| NC_037648.1 | 3038874 | SNV | 1 | T | C | Homozygous   |
| NC_037648.1 | 3039082 | SNV | 1 | T | C | Homozygous   |
| NC_037648.1 | 3039104 | SNV | 1 | C | T | Heterozygous |
| NC_037648.1 | 3039172 | SNV | 1 | C | T | Homozygous   |
| NC_037648.1 | 3039193 | SNV | 1 | T | C | Homozygous   |
| NC_037648.1 | 3039306 | SNV | 1 | C | T | Homozygous   |
| NC_037648.1 | 3039384 | SNV | 1 | G | A | Homozygous   |
| NC_037648.1 | 3040180 | SNV | 1 | C | G | Heterozygous |
| NC_037648.1 | 3040187 | SNV | 1 | T | C | Homozygous   |
| NC_037648.1 | 3040342 | SNV | 1 | T | C | Heterozygous |
| NC_037648.1 | 3040349 | SNV | 1 | A | T | Heterozygous |

|             |         |     |   |   |   |              |
|-------------|---------|-----|---|---|---|--------------|
| NC_037648.1 | 3040358 | SNV | 1 | G | A | Homozygous   |
| NC_037648.1 | 3040398 | SNV | 1 | T | C | Homozygous   |
| NC_037648.1 | 3040426 | SNV | 1 | C | G | Homozygous   |
| NC_037648.1 | 3040945 | SNV | 1 | G | A | Heterozygous |
| NC_037648.1 | 3040994 | SNV | 1 | T | C | Homozygous   |
| NC_037648.1 | 3041062 | SNV | 1 | G | T | Heterozygous |
| NC_037648.1 | 3041072 | SNV | 1 | A | G | Homozygous   |
| NC_037648.1 | 3041135 | SNV | 1 | T | G | Homozygous   |
| NC_037648.1 | 3041140 | SNV | 1 | T | C | Homozygous   |
| NC_037648.1 | 3041153 | SNV | 1 | T | C | Heterozygous |
| NC_037648.1 | 3041195 | SNV | 1 | T | C | Homozygous   |
| NC_037648.1 | 3041955 | SNV | 1 | C | G | Homozygous   |
| NC_037648.1 | 3042232 | SNV | 1 | A | G | Homozygous   |
| NC_037648.1 | 3042375 | SNV | 1 | G | A | Homozygous   |
| NC_037648.1 | 3042386 | SNV | 1 | G | A | Homozygous   |
| NC_037648.1 | 3046131 | SNV | 1 | T | C | Homozygous   |
| NC_037648.1 | 3046444 | SNV | 1 | G | A | Heterozygous |
| NC_037648.1 | 3046463 | SNV | 1 | G | A | Heterozygous |
| NC_037648.1 | 3046577 | SNV | 1 | A | T | Homozygous   |
| NC_037648.1 | 3046591 | SNV | 1 | G | A | Heterozygous |
| NC_037648.1 | 3049487 | SNV | 1 | A | G | Homozygous   |
| NC_037648.1 | 3059226 | SNV | 1 | A | G | Heterozygous |
| NC_037648.1 | 3059726 | SNV | 1 | A | G | Heterozygous |
| NC_037648.1 | 3060184 | SNV | 1 | G | A | Heterozygous |
| NC_037648.1 | 3060291 | SNV | 1 | T | C | Homozygous   |
| NC_037648.1 | 3060736 | SNV | 1 | A | G | Heterozygous |
| NC_037648.1 | 3063988 | SNV | 1 | T | C | Homozygous   |
| NC_037648.1 | 3064036 | SNV | 1 | T | C | Homozygous   |
| NC_037648.1 | 3064056 | SNV | 1 | T | G | Heterozygous |
| NC_037648.1 | 3064064 | SNV | 1 | G | C | Homozygous   |
| NC_037648.1 | 3064253 | SNV | 1 | T | C | Homozygous   |
| NC_037648.1 | 3064354 | SNV | 1 | G | C | Homozygous   |
| NC_037648.1 | 3064503 | SNV | 1 | T | C | Heterozygous |
| NC_037648.1 | 3064621 | SNV | 1 | T | C | Heterozygous |
| NC_037648.1 | 3064634 | SNV | 1 | G | A | Heterozygous |
| NC_037648.1 | 3064674 | SNV | 1 | C | T | Heterozygous |
| NC_037648.1 | 3064690 | SNV | 1 | T | C | Heterozygous |
| NC_037648.1 | 3064711 | SNV | 1 | T | C | Heterozygous |
| NC_037648.1 | 3064714 | SNV | 1 | A | G | Heterozygous |
| NC_037648.1 | 3064731 | SNV | 1 | C | G | Heterozygous |
| NC_037648.1 | 3064768 | SNV | 1 | T | G | Homozygous   |
| NC_037648.1 | 3064775 | SNV | 1 | T | A | Homozygous   |
| NC_037648.1 | 3064779 | SNV | 1 | A | C | Homozygous   |
| NC_037648.1 | 3065448 | SNV | 1 | T | G | Homozygous   |
| NC_037648.1 | 3065451 | SNV | 1 | G | A | Homozygous   |
| NC_037648.1 | 3065455 | SNV | 1 | A | G | Heterozygous |
| NC_037648.1 | 3065463 | SNV | 1 | G | A | Heterozygous |
| NC_037648.1 | 3070737 | SNV | 1 | T | C | Homozygous   |
| NC_037648.1 | 3070785 | SNV | 1 | T | C | Homozygous   |
| NC_037648.1 | 3070787 | SNV | 1 | C | T | Heterozygous |
| NC_037648.1 | 3071754 | SNV | 1 | A | G | Heterozygous |

|             |         |     |   |   |   |              |
|-------------|---------|-----|---|---|---|--------------|
| NC_037648.1 | 3071771 | SNV | 1 | G | A | Homozygous   |
| NC_037648.1 | 3071777 | SNV | 1 | T | A | Homozygous   |
| NC_037648.1 | 3071799 | SNV | 1 | T | A | Homozygous   |
| NC_037648.1 | 3071938 | SNV | 1 | C | T | Homozygous   |
| NC_037648.1 | 3072018 | SNV | 1 | C | T | Heterozygous |
| NC_037648.1 | 3072083 | SNV | 1 | G | A | Homozygous   |
| NC_037648.1 | 3072366 | SNV | 1 | T | G | Homozygous   |
| NC_037648.1 | 3072392 | SNV | 1 | T | A | Homozygous   |
| NC_037648.1 | 3072396 | SNV | 1 | A | T | Homozygous   |
| NC_037648.1 | 3072400 | SNV | 1 | T | G | Homozygous   |
| NC_037648.1 | 3072851 | SNV | 1 | C | T | Heterozygous |
| NC_037648.1 | 3072874 | SNV | 1 | G | T | Homozygous   |
| NC_037648.1 | 3072878 | SNV | 1 | A | G | Homozygous   |
| NC_037648.1 | 3072994 | SNV | 1 | C | A | Heterozygous |
| NC_037648.1 | 3072994 | SNV | 1 | C | G | Heterozygous |
| NC_037648.1 | 3073032 | SNV | 1 | C | T | Homozygous   |
| NC_037648.1 | 3073039 | SNV | 1 | A | G | Heterozygous |
| NC_037648.1 | 3073051 | SNV | 1 | A | G | Heterozygous |
| NC_037648.1 | 3073054 | SNV | 1 | A | G | Heterozygous |
| NC_037648.1 | 3077722 | SNV | 1 | A | T | Heterozygous |
| NC_037648.1 | 3077745 | SNV | 1 | C | T | Heterozygous |
| NC_037648.1 | 3077826 | SNV | 1 | T | C | Homozygous   |
| NC_037648.1 | 3077892 | SNV | 1 | T | C | Heterozygous |
| NC_037648.1 | 3077902 | SNV | 1 | G | A | Heterozygous |
| NC_037648.1 | 3077910 | SNV | 1 | T | C | Homozygous   |
| NC_037648.1 | 3078194 | SNV | 1 | C | T | Homozygous   |
| NC_037648.1 | 3079402 | SNV | 1 | G | A | Homozygous   |
| NC_037648.1 | 3085590 | SNV | 1 | T | C | Heterozygous |
| NC_037648.1 | 3085686 | SNV | 1 | T | C | Heterozygous |
| NC_037648.1 | 3085915 | SNV | 1 | C | G | Homozygous   |
| NC_037648.1 | 3104191 | SNV | 1 | G | A | Homozygous   |
| NC_037648.1 | 3104220 | SNV | 1 | A | T | Homozygous   |
| NC_037648.1 | 3104280 | SNV | 1 | A | G | Homozygous   |
| NC_037648.1 | 3104316 | SNV | 1 | A | G | Homozygous   |
| NC_037648.1 | 3104374 | SNV | 1 | G | A | Homozygous   |
| NC_037648.1 | 3104376 | SNV | 1 | T | C | Homozygous   |
| NC_037648.1 | 3104381 | SNV | 1 | T | C | Homozygous   |
| NC_037648.1 | 3104389 | SNV | 1 | T | C | Heterozygous |
| NC_037648.1 | 3104412 | SNV | 1 | C | T | Heterozygous |
| NC_037648.1 | 3104418 | SNV | 1 | T | C | Heterozygous |
| NC_037648.1 | 3104436 | SNV | 1 | C | T | Heterozygous |
| NC_037648.1 | 3104477 | SNV | 1 | A | G | Heterozygous |
| NC_037648.1 | 3104479 | SNV | 1 | T | C | Homozygous   |
| NC_037648.1 | 3104501 | SNV | 1 | T | A | Heterozygous |
| NC_037648.1 | 3104553 | SNV | 1 | T | C | Homozygous   |
| NC_037648.1 | 3119513 | SNV | 1 | T | A | Homozygous   |
| NC_037648.1 | 3119547 | SNV | 1 | T | C | Homozygous   |
| NC_037648.1 | 3122054 | SNV | 1 | G | A | Homozygous   |
| NC_037648.1 | 3122079 | SNV | 1 | A | C | Homozygous   |
| NC_037648.1 | 3122090 | SNV | 1 | A | G | Homozygous   |
| NC_037648.1 | 3122098 | SNV | 1 | T | C | Homozygous   |

|             |         |     |   |   |   |              |
|-------------|---------|-----|---|---|---|--------------|
| NC_037648.1 | 3122111 | SNV | 1 | A | C | Heterozygous |
| NC_037648.1 | 3122119 | SNV | 1 | C | T | Heterozygous |
| NC_037648.1 | 3122124 | SNV | 1 | G | A | Heterozygous |
| NC_037648.1 | 3122136 | SNV | 1 | A | G | Heterozygous |
| NC_037648.1 | 3122155 | SNV | 1 | C | T | Homozygous   |
| NC_037648.1 | 3122277 | SNV | 1 | C | G | Homozygous   |
| NC_037648.1 | 3122292 | SNV | 1 | A | G | Homozygous   |
| NC_037648.1 | 3126864 | SNV | 1 | C | T | Homozygous   |
| NC_037648.1 | 3126867 | SNV | 1 | T | C | Heterozygous |
| NC_037648.1 | 3126869 | SNV | 1 | T | C | Heterozygous |
| NC_037648.1 | 3126873 | SNV | 1 | T | C | Heterozygous |
| NC_037648.1 | 3126876 | SNV | 1 | C | T | Heterozygous |
| NC_037648.1 | 3126885 | SNV | 1 | T | C | Heterozygous |
| NC_037648.1 | 3128380 | SNV | 1 | C | T | Homozygous   |
| NC_037648.1 | 3128409 | SNV | 1 | G | A | Heterozygous |
| NC_037648.1 | 3128642 | SNV | 1 | C | T | Heterozygous |
| NC_037648.1 | 3128644 | SNV | 1 | C | T | Heterozygous |
| NC_037648.1 | 3128715 | SNV | 1 | C | T | Heterozygous |
| NC_037648.1 | 3128720 | SNV | 1 | G | A | Heterozygous |
| NC_037648.1 | 3128745 | SNV | 1 | C | A | Homozygous   |
| NC_037648.1 | 3133763 | SNV | 1 | T | C | Homozygous   |
| NC_037648.1 | 3133914 | SNV | 1 | C | T | Heterozygous |
| NC_037648.1 | 3133916 | SNV | 1 | T | C | Homozygous   |
| NC_037648.1 | 3133975 | SNV | 1 | G | A | Heterozygous |
| NC_037648.1 | 3133984 | SNV | 1 | C | T | Homozygous   |
| NC_037648.1 | 3134039 | SNV | 1 | G | A | Heterozygous |
| NC_037648.1 | 3134328 | SNV | 1 | T | C | Heterozygous |
| NC_037648.1 | 3134359 | SNV | 1 | T | C | Homozygous   |
| NC_037648.1 | 3142802 | SNV | 1 | A | G | Homozygous   |
| NC_037648.1 | 3142804 | SNV | 1 | A | G | Homozygous   |
| NC_037648.1 | 3142814 | SNV | 1 | G | A | Homozygous   |
| NC_037648.1 | 3142824 | SNV | 1 | C | T | Homozygous   |
| NC_037648.1 | 3142840 | SNV | 1 | A | G | Homozygous   |
| NC_037648.1 | 3142848 | SNV | 1 | A | C | Homozygous   |
| NC_037648.1 | 3142854 | SNV | 1 | C | T | Heterozygous |
| NC_037648.1 | 3142887 | SNV | 1 | C | T | Heterozygous |
| NC_037648.1 | 3142898 | SNV | 1 | G | A | Heterozygous |
| NC_037648.1 | 3143314 | SNV | 1 | C | T | Homozygous   |
| NC_037648.1 | 3143352 | SNV | 1 | T | C | Homozygous   |
| NC_037648.1 | 3143394 | SNV | 1 | T | C | Homozygous   |
| NC_037648.1 | 3143397 | SNV | 1 | T | C | Homozygous   |
| NC_037648.1 | 3143401 | SNV | 1 | A | G | Homozygous   |
| NC_037648.1 | 3143831 | SNV | 1 | G | A | Homozygous   |
| NC_037648.1 | 3143852 | SNV | 1 | T | C | Homozygous   |
| NC_037648.1 | 3143888 | SNV | 1 | T | C | Homozygous   |
| NC_037648.1 | 3143896 | SNV | 1 | T | C | Heterozygous |
| NC_037648.1 | 3143918 | SNV | 1 | G | A | Homozygous   |
| NC_037648.1 | 3143952 | SNV | 1 | C | T | Heterozygous |
| NC_037648.1 | 3144030 | SNV | 1 | T | C | Homozygous   |
| NC_037648.1 | 3144149 | SNV | 1 | G | C | Homozygous   |
| NC_037648.1 | 3144181 | SNV | 1 | T | A | Homozygous   |



|             |         |     |   |   |   |              |
|-------------|---------|-----|---|---|---|--------------|
| NC_037648.1 | 3144414 | SNV | 1 | G | A | Heterozygous |
| NC_037648.1 | 3144513 | SNV | 1 | T | C | Homozygous   |
| NC_037648.1 | 3158511 | SNV | 1 | A | G | Homozygous   |
| NC_037648.1 | 3158568 | SNV | 1 | T | C | Homozygous   |
| NC_037648.1 | 3158595 | SNV | 1 | C | A | Homozygous   |
| NC_037648.1 | 3158626 | SNV | 1 | A | G | Heterozygous |
| NC_037648.1 | 3158635 | SNV | 1 | A | G | Homozygous   |
| NC_037648.1 | 3158756 | SNV | 1 | A | G | Homozygous   |
| NC_037648.1 | 3163426 | SNV | 1 | A | C | Homozygous   |
| NC_037648.1 | 3163436 | SNV | 1 | A | G | Homozygous   |
| NC_037648.1 | 3169542 | SNV | 1 | T | C | Homozygous   |
| NC_037648.1 | 3171523 | SNV | 1 | T | A | Heterozygous |
| NC_037648.1 | 3171532 | SNV | 1 | C | T | Homozygous   |
| NC_037648.1 | 3171555 | SNV | 1 | G | A | Heterozygous |
| NC_037648.1 | 3171563 | SNV | 1 | C | T | Heterozygous |
| NC_037648.1 | 3171573 | SNV | 1 | A | T | Heterozygous |
| NC_037648.1 | 3171600 | SNV | 1 | T | C | Homozygous   |
| NC_037648.1 | 3171604 | SNV | 1 | C | T | Heterozygous |
| NC_037648.1 | 3171619 | SNV | 1 | A | G | Heterozygous |
| NC_037648.1 | 3173140 | SNV | 1 | G | A | Heterozygous |
| NC_037648.1 | 3173330 | SNV | 1 | A | G | Heterozygous |
| NC_037648.1 | 3173355 | SNV | 1 | T | C | Homozygous   |
| NC_037648.1 | 3173389 | SNV | 1 | A | G | Homozygous   |
| NC_037648.1 | 3173422 | SNV | 1 | C | A | Heterozygous |
| NC_037648.1 | 3173424 | SNV | 1 | T | C | Heterozygous |
| NC_037648.1 | 3173483 | SNV | 1 | A | G | Heterozygous |
| NC_037648.1 | 3173496 | SNV | 1 | A | C | Heterozygous |
| NC_037648.1 | 3173522 | SNV | 1 | C | T | Homozygous   |
| NC_037648.1 | 3173780 | SNV | 1 | A | C | Homozygous   |
| NC_037648.1 | 3173783 | SNV | 1 | G | A | Homozygous   |
| NC_037648.1 | 3173788 | SNV | 1 | A | C | Heterozygous |
| NC_037648.1 | 3173860 | SNV | 1 | T | A | Heterozygous |
| NC_037648.1 | 3174374 | SNV | 1 | T | C | Homozygous   |
| NC_037648.1 | 3174709 | SNV | 1 | T | C | Heterozygous |
| NC_037648.1 | 3175397 | SNV | 1 | C | A | Heterozygous |
| NC_037648.1 | 3175755 | SNV | 1 | T | A | Homozygous   |
| NC_037648.1 | 3175777 | SNV | 1 | A | T | Homozygous   |
| NC_037648.1 | 3184881 | SNV | 1 | T | G | Homozygous   |
| NC_037648.1 | 3185013 | SNV | 1 | G | A | Homozygous   |
| NC_037648.1 | 3185370 | SNV | 1 | G | C | Heterozygous |
| NC_037648.1 | 3185397 | SNV | 1 | T | C | Homozygous   |
| NC_037648.1 | 3185425 | SNV | 1 | C | A | Homozygous   |
| NC_037648.1 | 3199107 | SNV | 1 | T | C | Homozygous   |
| NC_037648.1 | 3199110 | SNV | 1 | A | T | Homozygous   |
| NC_037648.1 | 3219196 | SNV | 1 | T | C | Homozygous   |
| NC_037648.1 | 3219202 | SNV | 1 | A | T | Homozygous   |
| NC_037648.1 | 3219215 | SNV | 1 | T | G | Homozygous   |
| NC_037648.1 | 3224670 | SNV | 1 | C | G | Homozygous   |
| NC_037648.1 | 3224704 | SNV | 1 | C | T | Homozygous   |
| NC_037648.1 | 3224714 | SNV | 1 | T | C | Homozygous   |
| NC_037648.1 | 3225164 | SNV | 1 | A | G | Homozygous   |

|             |         |     |   |   |   |              |
|-------------|---------|-----|---|---|---|--------------|
| NC_037648.1 | 3225166 | SNV | 1 | C | T | Heterozygous |
| NC_037648.1 | 3225202 | SNV | 1 | A | G | Heterozygous |
| NC_037648.1 | 3225287 | SNV | 1 | C | T | Heterozygous |
| NC_037648.1 | 3225674 | SNV | 1 | T | C | Heterozygous |
| NC_037648.1 | 3225692 | SNV | 1 | T | C | Heterozygous |
| NC_037648.1 | 3226316 | SNV | 1 | A | G | Homozygous   |
| NC_037648.1 | 3226592 | SNV | 1 | C | T | Heterozygous |
| NC_037648.1 | 3226599 | SNV | 1 | A | T | Heterozygous |
| NC_037648.1 | 3226627 | SNV | 1 | C | T | Heterozygous |
| NC_037648.1 | 3226657 | SNV | 1 | T | C | Heterozygous |
| NC_037648.1 | 3226739 | SNV | 1 | T | A | Heterozygous |
| NC_037648.1 | 3226791 | SNV | 1 | A | T | Heterozygous |
| NC_037648.1 | 3226828 | SNV | 1 | T | C | Heterozygous |
| NC_037648.1 | 3226985 | SNV | 1 | T | C | Heterozygous |
| NC_037648.1 | 3227033 | SNV | 1 | T | C | Heterozygous |
| NC_037648.1 | 3227087 | SNV | 1 | T | C | Heterozygous |
| NC_037648.1 | 3227174 | SNV | 1 | T | C | Heterozygous |
| NC_037648.1 | 3227185 | SNV | 1 | C | T | Heterozygous |
| NC_037648.1 | 3227187 | SNV | 1 | A | T | Heterozygous |
| NC_037648.1 | 3227194 | SNV | 1 | G | A | Heterozygous |
| NC_037648.1 | 3227216 | SNV | 1 | T | C | Heterozygous |
| NC_037648.1 | 3227277 | SNV | 1 | T | C | Homozygous   |
| NC_037648.1 | 3227350 | SNV | 1 | T | C | Heterozygous |
| NC_037648.1 | 3227377 | SNV | 1 | T | C | Heterozygous |
| NC_037648.1 | 3227417 | SNV | 1 | T | C | Heterozygous |
| NC_037648.1 | 3227457 | SNV | 1 | T | C | Heterozygous |
| NC_037648.1 | 3227461 | SNV | 1 | C | T | Heterozygous |
| NC_037648.1 | 3227466 | SNV | 1 | C | T | Heterozygous |
| NC_037648.1 | 3227601 | SNV | 1 | G | A | Heterozygous |
| NC_037648.1 | 3227607 | SNV | 1 | C | T | Homozygous   |
| NC_037648.1 | 3227660 | SNV | 1 | G | A | Heterozygous |
| NC_037648.1 | 3227670 | SNV | 1 | G | A | Heterozygous |
| NC_037648.1 | 3227677 | SNV | 1 | T | C | Homozygous   |
| NC_037648.1 | 3227679 | SNV | 1 | T | C | Heterozygous |
| NC_037648.1 | 3227713 | SNV | 1 | T | C | Heterozygous |
| NC_037648.1 | 3227788 | SNV | 1 | T | C | Heterozygous |
| NC_037648.1 | 3227890 | SNV | 1 | A | G | Homozygous   |
| NC_037648.1 | 3227920 | SNV | 1 | T | C | Homozygous   |
| NC_037648.1 | 3230901 | SNV | 1 | T | C | Homozygous   |
| NC_037648.1 | 3230952 | SNV | 1 | C | T | Heterozygous |
| NC_037648.1 | 3230975 | SNV | 1 | T | G | Heterozygous |
| NC_037648.1 | 3230995 | SNV | 1 | A | G | Homozygous   |
| NC_037648.1 | 3231004 | SNV | 1 | T | C | Homozygous   |
| NC_037648.1 | 3231105 | SNV | 1 | G | A | Heterozygous |
| NC_037648.1 | 3231245 | SNV | 1 | A | C | Homozygous   |
| NC_037648.1 | 3231292 | SNV | 1 | G | A | Heterozygous |
| NC_037648.1 | 3233608 | SNV | 1 | A | G | Homozygous   |
| NC_037648.1 | 3233630 | SNV | 1 | T | A | Homozygous   |
| NC_037648.1 | 3233642 | SNV | 1 | A | C | Homozygous   |
| NC_037648.1 | 3238529 | SNV | 1 | A | G | Homozygous   |
| NC_037648.1 | 3243782 | SNV | 1 | A | G | Homozygous   |

|             |         |     |   |   |   |              |
|-------------|---------|-----|---|---|---|--------------|
| NC_037648.1 | 3243816 | SNV | 1 | G | A | Heterozygous |
| NC_037648.1 | 3243818 | SNV | 1 | T | C | Heterozygous |
| NC_037648.1 | 3243978 | SNV | 1 | T | C | Heterozygous |
| NC_037648.1 | 3247000 | SNV | 1 | G | A | Heterozygous |
| NC_037648.1 | 3247697 | SNV | 1 | A | G | Heterozygous |
| NC_037648.1 | 3249300 | SNV | 1 | T | C | Homozygous   |
| NC_037648.1 | 3249346 | SNV | 1 | T | C | Homozygous   |
| NC_037648.1 | 3249545 | SNV | 1 | T | C | Homozygous   |
| NC_037648.1 | 3249559 | SNV | 1 | G | T | Homozygous   |
| NC_037648.1 | 3249577 | SNV | 1 | G | A | Heterozygous |
| NC_037648.1 | 3249580 | SNV | 1 | C | T | Homozygous   |
| NC_037648.1 | 3279404 | SNV | 1 | G | A | Homozygous   |
| NC_037648.1 | 3279411 | SNV | 1 | T | A | Homozygous   |
| NC_037648.1 | 3288859 | SNV | 1 | T | C | Homozygous   |
| NC_037648.1 | 3413083 | SNV | 1 | G | A | Homozygous   |
| NC_037648.1 | 3413095 | SNV | 1 | G | T | Homozygous   |
| NC_037648.1 | 3413116 | SNV | 1 | G | A | Homozygous   |
| NC_037648.1 | 3413130 | SNV | 1 | T | G | Homozygous   |
| NC_037648.1 | 3413137 | SNV | 1 | C | G | Homozygous   |
| NC_037648.1 | 3413321 | SNV | 1 | C | T | Homozygous   |
| NC_037648.1 | 3413327 | SNV | 1 | C | A | Homozygous   |
| NC_037648.1 | 3413333 | SNV | 1 | C | A | Homozygous   |
| NC_037648.1 | 3413335 | SNV | 1 | G | A | Heterozygous |
| NC_037648.1 | 3413336 | SNV | 1 | A | G | Heterozygous |
| NC_037648.1 | 3413339 | SNV | 1 | C | A | Homozygous   |
| NC_037648.1 | 3413341 | SNV | 1 | G | A | Heterozygous |
| NC_037648.1 | 3413345 | SNV | 1 | C | G | Homozygous   |
| NC_037648.1 | 3413348 | SNV | 1 | A | G | Heterozygous |
| NC_037648.1 | 3413352 | SNV | 1 | T | A | Homozygous   |
| NC_037648.1 | 3413357 | SNV | 1 | C | G | Heterozygous |
| NC_037648.1 | 3413359 | SNV | 1 | G | C | Heterozygous |
| NC_037648.1 | 3413381 | SNV | 1 | T | A | Heterozygous |
| NC_037648.1 | 3413383 | SNV | 1 | G | C | Heterozygous |
| NC_037648.1 | 3413393 | SNV | 1 | C | G | Homozygous   |
| NC_037648.1 | 3413408 | SNV | 1 | T | A | Homozygous   |
| NC_037648.1 | 3413411 | SNV | 1 | C | G | Heterozygous |
| NC_037648.1 | 3413441 | SNV | 1 | C | A | Heterozygous |
| NC_037648.1 | 3413458 | SNV | 1 | G | A | Homozygous   |
| NC_037648.1 | 3413471 | SNV | 1 | C | T | Homozygous   |
| NC_037648.1 | 3413501 | SNV | 1 | C | G | Homozygous   |
| NC_037648.1 | 3413511 | SNV | 1 | T | A | Homozygous   |
| NC_037648.1 | 3413521 | SNV | 1 | T | A | Homozygous   |
| NC_037648.1 | 3413524 | SNV | 1 | C | A | Homozygous   |
| NC_037648.1 | 3413530 | SNV | 1 | C | G | Homozygous   |
| NC_037648.1 | 3413536 | SNV | 1 | C | G | Homozygous   |
| NC_037648.1 | 3417568 | SNV | 1 | T | A | Homozygous   |
| NC_037648.1 | 3417574 | SNV | 1 | G | A | Homozygous   |
| NC_037648.1 | 3417600 | SNV | 1 | A | G | Homozygous   |
| NC_037648.1 | 3596772 | SNV | 1 | G | T | Homozygous   |
| NC_037648.1 | 3596776 | SNV | 1 | T | A | Heterozygous |
| NC_037648.1 | 3596799 | SNV | 1 | A | T | Heterozygous |

|             |         |     |   |   |   |              |
|-------------|---------|-----|---|---|---|--------------|
| NC_037648.1 | 3617428 | SNV | 1 | A | G | Homozygous   |
| NC_037648.1 | 3617437 | SNV | 1 | A | G | Homozygous   |
| NC_037648.1 | 3620621 | SNV | 1 | A | G | Homozygous   |
| NC_037648.1 | 3620624 | SNV | 1 | A | T | Homozygous   |
| NC_037648.1 | 3620628 | SNV | 1 | A | T | Homozygous   |
| NC_037648.1 | 3620630 | SNV | 1 | T | G | Homozygous   |
| NC_037648.1 | 3620640 | SNV | 1 | C | G | Homozygous   |
| NC_037648.1 | 3620661 | SNV | 1 | C | G | Homozygous   |
| NC_037648.1 | 3622151 | SNV | 1 | T | A | Homozygous   |
| NC_037648.1 | 3622201 | SNV | 1 | A | T | Homozygous   |
| NC_037648.1 | 3623737 | SNV | 1 | T | C | Homozygous   |
| NC_037648.1 | 3623741 | SNV | 1 | C | A | Homozygous   |
| NC_037648.1 | 3654508 | SNV | 1 | G | A | Heterozygous |
| NC_037648.1 | 3656436 | SNV | 1 | C | T | Homozygous   |
| NC_037648.1 | 3660556 | SNV | 1 | A | C | Heterozygous |
| NC_037648.1 | 3660558 | SNV | 1 | A | T | Heterozygous |
| NC_037648.1 | 3660566 | SNV | 1 | A | T | Heterozygous |
| NC_037648.1 | 3660887 | SNV | 1 | C | T | Heterozygous |
| NC_037648.1 | 3665492 | SNV | 1 | T | C | Homozygous   |
| NC_037648.1 | 3665735 | SNV | 1 | G | A | Homozygous   |
| NC_037648.1 | 3670840 | SNV | 1 | G | A | Homozygous   |
| NC_037648.1 | 3672762 | SNV | 1 | A | G | Homozygous   |
| NC_037648.1 | 3673004 | SNV | 1 | A | G | Homozygous   |
| NC_037648.1 | 3673160 | SNV | 1 | G | A | Homozygous   |
| NC_037648.1 | 3674948 | SNV | 1 | C | T | Heterozygous |
| NC_037648.1 | 3674978 | SNV | 1 | C | T | Heterozygous |
| NC_037648.1 | 3674996 | SNV | 1 | C | T | Heterozygous |
| NC_037648.1 | 3679284 | SNV | 1 | C | T | Homozygous   |
| NC_037648.1 | 3681438 | SNV | 1 | G | A | Heterozygous |
| NC_037648.1 | 3681444 | SNV | 1 | A | G | Heterozygous |
| NC_037648.1 | 3681450 | SNV | 1 | G | A | Heterozygous |
| NC_037648.1 | 3681462 | SNV | 1 | G | A | Homozygous   |
| NC_037648.1 | 3683764 | SNV | 1 | T | A | Homozygous   |
| NC_037648.1 | 3683846 | SNV | 1 | T | C | Homozygous   |
| NC_037648.1 | 3695016 | SNV | 1 | T | C | Homozygous   |
| NC_037648.1 | 3695589 | SNV | 1 | A | G | Homozygous   |
| NC_037648.1 | 3695608 | SNV | 1 | G | A | Heterozygous |
| NC_037648.1 | 3695640 | SNV | 1 | T | C | Homozygous   |
| NC_037648.1 | 3705445 | SNV | 1 | G | A | Homozygous   |
| NC_037648.1 | 3705465 | SNV | 1 | T | C | Homozygous   |
| NC_037648.1 | 3706167 | SNV | 1 | T | C | Homozygous   |
| NC_037648.1 | 3706185 | SNV | 1 | G | A | Homozygous   |
| NC_037648.1 | 3710033 | SNV | 1 | A | G | Homozygous   |
| NC_037648.1 | 3710041 | SNV | 1 | A | G | Homozygous   |
| NC_037648.1 | 3710049 | SNV | 1 | A | G | Heterozygous |
| NC_037648.1 | 3710625 | SNV | 1 | C | T | Homozygous   |
| NC_037648.1 | 3710629 | SNV | 1 | A | C | Homozygous   |
| NC_037648.1 | 3710643 | SNV | 1 | A | T | Homozygous   |
| NC_037648.1 | 3710664 | SNV | 1 | A | C | Homozygous   |
| NC_037648.1 | 3721338 | SNV | 1 | A | T | Homozygous   |
| NC_037648.1 | 3721386 | SNV | 1 | T | C | Heterozygous |

|             |         |     |   |   |   |              |
|-------------|---------|-----|---|---|---|--------------|
| NC_037648.1 | 3746849 | SNV | 1 | G | T | Heterozygous |
| NC_037648.1 | 3746947 | SNV | 1 | A | T | Homozygous   |
| NC_037648.1 | 3753656 | SNV | 1 | A | T | Homozygous   |
| NC_037648.1 | 3753676 | SNV | 1 | A | T | Homozygous   |
| NC_037648.1 | 3753678 | SNV | 1 | A | T | Homozygous   |
| NC_037648.1 | 3753686 | SNV | 1 | A | T | Homozygous   |
| NC_037648.1 | 3753689 | SNV | 1 | A | T | Homozygous   |
| NC_037648.1 | 3753692 | SNV | 1 | A | T | Homozygous   |
| NC_037648.1 | 3754479 | SNV | 1 | T | C | Homozygous   |
| NC_037648.1 | 3754501 | SNV | 1 | C | T | Homozygous   |
| NC_037648.1 | 3754543 | SNV | 1 | T | C | Homozygous   |
| NC_037648.1 | 3768555 | SNV | 1 | T | C | Heterozygous |
| NC_037648.1 | 3776275 | SNV | 1 | T | A | Homozygous   |
| NC_037648.1 | 3776280 | SNV | 1 | T | A | Homozygous   |
| NC_037648.1 | 3780068 | SNV | 1 | G | A | Heterozygous |
| NC_037648.1 | 3780253 | SNV | 1 | T | C | Homozygous   |
| NC_037648.1 | 3799145 | SNV | 1 | A | T | Homozygous   |
| NC_037648.1 | 3799150 | SNV | 1 | A | C | Homozygous   |
| NC_037648.1 | 3807217 | SNV | 1 | G | A | Heterozygous |
| NC_037648.1 | 3807263 | SNV | 1 | A | G | Heterozygous |
| NC_037648.1 | 3807273 | SNV | 1 | T | C | Heterozygous |
| NC_037648.1 | 3807343 | SNV | 1 | A | T | Heterozygous |
| NC_037648.1 | 3807345 | SNV | 1 | G | T | Heterozygous |
| NC_037648.1 | 3807355 | SNV | 1 | C | T | Heterozygous |
| NC_037648.1 | 3811873 | SNV | 1 | G | A | Homozygous   |
| NC_037648.1 | 3812647 | SNV | 1 | A | T | Heterozygous |
| NC_037648.1 | 3812671 | SNV | 1 | T | C | Heterozygous |
| NC_037648.1 | 3824350 | SNV | 1 | T | A | Homozygous   |
| NC_037648.1 | 3824360 | SNV | 1 | A | T | Homozygous   |
| NC_037648.1 | 3824374 | SNV | 1 | A | C | Homozygous   |
| NC_037648.1 | 3837106 | SNV | 1 | T | C | Homozygous   |
| NC_037648.1 | 3837128 | SNV | 1 | A | G | Homozygous   |
| NC_037648.1 | 3837130 | SNV | 1 | A | T | Homozygous   |
| NC_037648.1 | 3840835 | SNV | 1 | A | G | Homozygous   |
| NC_037648.1 | 3840873 | SNV | 1 | T | C | Homozygous   |
| NC_037648.1 | 3843318 | SNV | 1 | A | C | Homozygous   |
| NC_037648.1 | 3845291 | SNV | 1 | A | G | Homozygous   |
| NC_037648.1 | 3845313 | SNV | 1 | T | A | Homozygous   |
| NC_037648.1 | 3847190 | SNV | 1 | A | G | Homozygous   |
| NC_037648.1 | 3847464 | SNV | 1 | A | C | Homozygous   |
| NC_037648.1 | 3847466 | SNV | 1 | A | G | Heterozygous |
| NC_037648.1 | 3847471 | SNV | 1 | A | T | Heterozygous |
| NC_037648.1 | 3850602 | SNV | 1 | A | G | Homozygous   |
| NC_037648.1 | 3853830 | SNV | 1 | T | A | Homozygous   |
| NC_037648.1 | 3853834 | SNV | 1 | T | A | Homozygous   |
| NC_037648.1 | 3854432 | SNV | 1 | T | C | Homozygous   |
| NC_037648.1 | 3854495 | SNV | 1 | A | G | Heterozygous |
| NC_037648.1 | 3854678 | SNV | 1 | A | G | Heterozygous |
| NC_037648.1 | 3858048 | SNV | 1 | G | A | Heterozygous |
| NC_037648.1 | 3862186 | SNV | 1 | C | T | Heterozygous |
| NC_037648.1 | 3863883 | SNV | 1 | C | T | Homozygous   |

|             |         |     |   |   |   |              |
|-------------|---------|-----|---|---|---|--------------|
| NC_037648.1 | 3863902 | SNV | 1 | T | C | Heterozygous |
| NC_037648.1 | 3863979 | SNV | 1 | T | C | Heterozygous |
| NC_037648.1 | 3871377 | SNV | 1 | C | T | Heterozygous |
| NC_037648.1 | 3871449 | SNV | 1 | G | C | Heterozygous |
| NC_037648.1 | 3871835 | SNV | 1 | C | T | Homozygous   |
| NC_037648.1 | 3871839 | SNV | 1 | G | A | Homozygous   |
| NC_037648.1 | 3871849 | SNV | 1 | A | G | Homozygous   |
| NC_037648.1 | 3871879 | SNV | 1 | T | A | Homozygous   |
| NC_037648.1 | 3875592 | SNV | 1 | A | G | Homozygous   |
| NC_037648.1 | 3875594 | SNV | 1 | T | G | Homozygous   |
| NC_037648.1 | 3875610 | SNV | 1 | T | G | Homozygous   |
| NC_037648.1 | 3875615 | SNV | 1 | A | G | Homozygous   |
| NC_037648.1 | 3878671 | SNV | 1 | A | G | Heterozygous |
| NC_037648.1 | 3896603 | SNV | 1 | A | T | Homozygous   |
| NC_037648.1 | 3896625 | SNV | 1 | T | C | Homozygous   |
| NC_037648.1 | 3896630 | SNV | 1 | A | T | Homozygous   |
| NC_037648.1 | 3896638 | SNV | 1 | A | G | Homozygous   |
| NC_037648.1 | 3925153 | SNV | 1 | G | A | Homozygous   |
| NC_037648.1 | 3925244 | SNV | 1 | A | T | Heterozygous |
| NC_037648.1 | 3925247 | SNV | 1 | A | T | Heterozygous |
| NC_037648.1 | 3925249 | SNV | 1 | A | T | Heterozygous |
| NC_037648.1 | 3925262 | SNV | 1 | A | T | Heterozygous |
| NC_037648.1 | 3929479 | SNV | 1 | A | T | Heterozygous |
| NC_037648.1 | 3929495 | SNV | 1 | G | A | Homozygous   |
| NC_037648.1 | 3929498 | SNV | 1 | T | A | Homozygous   |
| NC_037648.1 | 3929501 | SNV | 1 | A | G | Homozygous   |
| NC_037648.1 | 3929518 | SNV | 1 | G | T | Homozygous   |
| NC_037648.1 | 3949891 | SNV | 1 | C | A | Homozygous   |
| NC_037648.1 | 3949908 | SNV | 1 | A | G | Heterozygous |
| NC_037648.1 | 3967103 | SNV | 1 | A | G | Homozygous   |
| NC_037648.1 | 3967698 | SNV | 1 | T | C | Homozygous   |
| NC_037648.1 | 3968075 | SNV | 1 | C | T | Homozygous   |
| NC_037648.1 | 3968316 | SNV | 1 | C | T | Homozygous   |
| NC_037648.1 | 3968723 | SNV | 1 | T | C | Homozygous   |
| NC_037648.1 | 3968818 | SNV | 1 | A | G | Homozygous   |
| NC_037648.1 | 3968851 | SNV | 1 | T | C | Heterozygous |
| NC_037648.1 | 3968905 | SNV | 1 | C | T | Heterozygous |
| NC_037648.1 | 4021196 | SNV | 1 | T | A | Homozygous   |
| NC_037648.1 | 4021198 | SNV | 1 | T | C | Homozygous   |
| NC_037648.1 | 4021200 | SNV | 1 | T | G | Homozygous   |
| NC_037648.1 | 4021211 | SNV | 1 | C | T | Homozygous   |
| NC_037648.1 | 4021214 | SNV | 1 | T | A | Homozygous   |
| NC_037648.1 | 4028958 | SNV | 1 | A | C | Homozygous   |
| NC_037648.1 | 4028964 | SNV | 1 | A | T | Homozygous   |
| NC_037648.1 | 4032704 | SNV | 1 | T | A | Homozygous   |
| NC_037648.1 | 4032711 | SNV | 1 | A | T | Homozygous   |
| NC_037648.1 | 4032737 | SNV | 1 | A | C | Homozygous   |
| NC_037648.1 | 4032745 | SNV | 1 | T | A | Homozygous   |
| NC_037648.1 | 4032755 | SNV | 1 | T | G | Homozygous   |
| NC_037648.1 | 4037016 | SNV | 1 | C | T | Heterozygous |
| NC_037648.1 | 4037018 | SNV | 1 | C | T | Heterozygous |

|             |         |     |   |   |   |              |
|-------------|---------|-----|---|---|---|--------------|
| NC_037648.1 | 4037021 | SNV | 1 | A | G | Heterozygous |
| NC_037648.1 | 4037087 | SNV | 1 | A | G | Heterozygous |
| NC_037648.1 | 4037089 | SNV | 1 | A | G | Heterozygous |
| NC_037648.1 | 4037091 | SNV | 1 | A | G | Heterozygous |
| NC_037648.1 | 4059034 | SNV | 1 | C | T | Homozygous   |
| NC_037648.1 | 4059047 | SNV | 1 | T | C | Homozygous   |
| NC_037648.1 | 4059068 | SNV | 1 | A | G | Homozygous   |
| NC_037648.1 | 4059083 | SNV | 1 | G | A | Homozygous   |
| NC_037648.1 | 4064046 | SNV | 1 | G | A | Homozygous   |
| NC_037648.1 | 4064087 | SNV | 1 | T | A | Homozygous   |
| NC_037648.1 | 4069156 | SNV | 1 | T | A | Homozygous   |
| NC_037648.1 | 4081020 | SNV | 1 | G | A | Homozygous   |
| NC_037648.1 | 4081029 | SNV | 1 | C | T | Homozygous   |
| NC_037648.1 | 4081059 | SNV | 1 | T | C | Homozygous   |
| NC_037648.1 | 4262762 | SNV | 1 | C | G | Homozygous   |
| NC_037648.1 | 4262988 | SNV | 1 | T | A | Homozygous   |
| NC_037648.1 | 4262991 | SNV | 1 | T | A | Homozygous   |
| NC_037648.1 | 4262993 | SNV | 1 | G | C | Homozygous   |
| NC_037648.1 | 4263677 | SNV | 1 | T | C | Homozygous   |
| NC_037648.1 | 4263759 | SNV | 1 | T | C | Homozygous   |
| NC_037648.1 | 4268682 | SNV | 1 | A | C | Heterozygous |
| NC_037648.1 | 4268771 | SNV | 1 | G | A | Heterozygous |
| NC_037648.1 | 4270535 | SNV | 1 | T | G | Homozygous   |
| NC_037648.1 | 4270538 | SNV | 1 | T | A | Homozygous   |
| NC_037648.1 | 4270566 | SNV | 1 | G | T | Homozygous   |
| NC_037648.1 | 4270576 | SNV | 1 | T | C | Homozygous   |
| NC_037648.1 | 4270745 | SNV | 1 | A | G | Homozygous   |
| NC_037648.1 | 4271354 | SNV | 1 | A | T | Homozygous   |
| NC_037648.1 | 4271357 | SNV | 1 | G | T | Homozygous   |
| NC_037648.1 | 4271377 | SNV | 1 | T | A | Heterozygous |
| NC_037648.1 | 4271813 | SNV | 1 | C | T | Homozygous   |
| NC_037648.1 | 4303591 | SNV | 1 | T | A | Homozygous   |
| NC_037648.1 | 4303598 | SNV | 1 | A | T | Homozygous   |
| NC_037648.1 | 4303605 | SNV | 1 | T | A | Homozygous   |
| NC_037648.1 | 4303611 | SNV | 1 | C | A | Homozygous   |
| NC_037648.1 | 4303640 | SNV | 1 | A | T | Homozygous   |
| NC_037648.1 | 4307249 | SNV | 1 | C | A | Heterozygous |
| NC_037648.1 | 4320497 | SNV | 1 | T | G | Homozygous   |
| NC_037648.1 | 4329452 | SNV | 1 | T | C | Homozygous   |
| NC_037648.1 | 4329469 | SNV | 1 | A | G | Heterozygous |
| NC_037648.1 | 4329474 | SNV | 1 | T | C | Homozygous   |
| NC_037648.1 | 4329478 | SNV | 1 | A | G | Homozygous   |
| NC_037648.1 | 4329660 | SNV | 1 | T | A | Homozygous   |
| NC_037648.1 | 4329664 | SNV | 1 | T | A | Homozygous   |
| NC_037648.1 | 4329668 | SNV | 1 | A | T | Homozygous   |
| NC_037648.1 | 4332178 | SNV | 1 | A | C | Homozygous   |
| NC_037648.1 | 4332185 | SNV | 1 | G | A | Homozygous   |
| NC_037648.1 | 4332195 | SNV | 1 | C | T | Homozygous   |
| NC_037648.1 | 4332214 | SNV | 1 | C | T | Homozygous   |
| NC_037648.1 | 4334091 | SNV | 1 | A | T | Homozygous   |
| NC_037648.1 | 4334095 | SNV | 1 | A | T | Homozygous   |

|             |         |     |   |   |   |              |
|-------------|---------|-----|---|---|---|--------------|
| NC_037648.1 | 4334103 | SNV | 1 | T | G | Homozygous   |
| NC_037648.1 | 4334107 | SNV | 1 | A | G | Homozygous   |
| NC_037648.1 | 4334114 | SNV | 1 | T | A | Homozygous   |
| NC_037648.1 | 4334138 | SNV | 1 | T | C | Homozygous   |
| NC_037648.1 | 4341451 | SNV | 1 | T | A | Heterozygous |
| NC_037648.1 | 4341885 | SNV | 1 | A | G | Homozygous   |
| NC_037648.1 | 4341993 | SNV | 1 | A | G | Homozygous   |
| NC_037648.1 | 4345448 | SNV | 1 | T | A | Homozygous   |
| NC_037648.1 | 4345457 | SNV | 1 | T | C | Homozygous   |
| NC_037648.1 | 4345471 | SNV | 1 | T | A | Homozygous   |
| NC_037648.1 | 4345477 | SNV | 1 | T | C | Homozygous   |
| NC_037648.1 | 4345485 | SNV | 1 | A | T | Homozygous   |
| NC_037648.1 | 4345487 | SNV | 1 | T | A | Homozygous   |
| NC_037648.1 | 4354552 | SNV | 1 | T | C | Homozygous   |
| NC_037648.1 | 4354564 | SNV | 1 | T | A | Homozygous   |
| NC_037648.1 | 4354584 | SNV | 1 | T | G | Homozygous   |
| NC_037648.1 | 4356736 | SNV | 1 | C | G | Heterozygous |
| NC_037648.1 | 4356818 | SNV | 1 | C | G | Heterozygous |
| NC_037648.1 | 4356906 | SNV | 1 | T | C | Homozygous   |
| NC_037648.1 | 4356936 | SNV | 1 | G | C | Heterozygous |
| NC_037648.1 | 4356965 | SNV | 1 | T | C | Heterozygous |
| NC_037648.1 | 4357239 | SNV | 1 | C | T | Homozygous   |
| NC_037648.1 | 4357343 | SNV | 1 | T | C | Heterozygous |
| NC_037648.1 | 4367664 | SNV | 1 | A | G | Homozygous   |
| NC_037648.1 | 4367900 | SNV | 1 | T | C | Homozygous   |
| NC_037648.1 | 4368760 | SNV | 1 | G | A | Homozygous   |
| NC_037648.1 | 4368907 | SNV | 1 | G | C | Heterozygous |
| NC_037648.1 | 4373347 | SNV | 1 | C | T | Heterozygous |
| NC_037648.1 | 4380146 | SNV | 1 | A | G | Homozygous   |
| NC_037648.1 | 4383804 | SNV | 1 | A | C | Heterozygous |
| NC_037648.1 | 4383804 | SNV | 1 | A | T | Heterozygous |
| NC_037648.1 | 4383807 | SNV | 1 | A | T | Homozygous   |
| NC_037648.1 | 4383817 | SNV | 1 | T | G | Homozygous   |
| NC_037648.1 | 4383822 | SNV | 1 | T | A | Homozygous   |
| NC_037648.1 | 4383824 | SNV | 1 | T | A | Heterozygous |
| NC_037648.1 | 4383826 | SNV | 1 | T | G | Heterozygous |
| NC_037648.1 | 4383830 | SNV | 1 | T | A | Heterozygous |
| NC_037648.1 | 4385568 | SNV | 1 | A | G | Homozygous   |
| NC_037648.1 | 4385571 | SNV | 1 | T | G | Homozygous   |
| NC_037648.1 | 4385580 | SNV | 1 | A | C | Homozygous   |
| NC_037648.1 | 4385582 | SNV | 1 | T | C | Homozygous   |
| NC_037648.1 | 4385592 | SNV | 1 | T | C | Homozygous   |
| NC_037648.1 | 4389547 | SNV | 1 | G | A | Heterozygous |
| NC_037648.1 | 4389550 | SNV | 1 | C | T | Heterozygous |
| NC_037648.1 | 4389566 | SNV | 1 | C | T | Heterozygous |
| NC_037648.1 | 4395901 | SNV | 1 | T | C | Homozygous   |
| NC_037648.1 | 4397750 | SNV | 1 | A | T | Homozygous   |
| NC_037648.1 | 4397779 | SNV | 1 | C | A | Homozygous   |
| NC_037648.1 | 4397786 | SNV | 1 | A | C | Homozygous   |
| NC_037648.1 | 4397788 | SNV | 1 | T | C | Homozygous   |
| NC_037648.1 | 4398028 | SNV | 1 | A | G | Homozygous   |



|             |         |     |   |   |   |              |
|-------------|---------|-----|---|---|---|--------------|
| NC_037648.1 | 4398033 | SNV | 1 | A | T | Homozygous   |
| NC_037648.1 | 4398041 | SNV | 1 | T | C | Homozygous   |
| NC_037648.1 | 4398046 | SNV | 1 | A | C | Homozygous   |
| NC_037648.1 | 4398051 | SNV | 1 | A | T | Homozygous   |
| NC_037648.1 | 4398053 | SNV | 1 | T | C | Homozygous   |
| NC_037648.1 | 4398063 | SNV | 1 | T | C | Homozygous   |
| NC_037648.1 | 4398074 | SNV | 1 | C | A | Homozygous   |
| NC_037648.1 | 4398302 | SNV | 1 | A | G | Homozygous   |
| NC_037648.1 | 4399305 | SNV | 1 | A | C | Heterozygous |
| NC_037648.1 | 4401793 | SNV | 1 | A | G | Homozygous   |
| NC_037648.1 | 4405615 | SNV | 1 | T | C | Homozygous   |
| NC_037648.1 | 4405853 | SNV | 1 | A | G | Heterozygous |
| NC_037648.1 | 4408125 | SNV | 1 | G | A | Homozygous   |
| NC_037648.1 | 4408127 | SNV | 1 | A | T | Homozygous   |
| NC_037648.1 | 4411821 | SNV | 1 | A | G | Heterozygous |
| NC_037648.1 | 4413294 | SNV | 1 | A | G | Homozygous   |
| NC_037648.1 | 4424532 | SNV | 1 | C | A | Homozygous   |
| NC_037648.1 | 4424543 | SNV | 1 | A | T | Homozygous   |
| NC_037648.1 | 4424563 | SNV | 1 | T | A | Homozygous   |
| NC_037648.1 | 4424570 | SNV | 1 | A | G | Homozygous   |
| NC_037648.1 | 4424577 | SNV | 1 | T | G | Homozygous   |
| NC_037648.1 | 4424579 | SNV | 1 | A | C | Homozygous   |
| NC_037648.1 | 4428127 | SNV | 1 | A | T | Heterozygous |
| NC_037648.1 | 4428137 | SNV | 1 | A | T | Homozygous   |
| NC_037648.1 | 4428140 | SNV | 1 | A | C | Homozygous   |
| NC_037648.1 | 4428186 | SNV | 1 | A | C | Homozygous   |
| NC_037648.1 | 4432904 | SNV | 1 | G | T | Homozygous   |
| NC_037648.1 | 4432917 | SNV | 1 | A | T | Homozygous   |
| NC_037648.1 | 4444340 | SNV | 1 | T | A | Homozygous   |
| NC_037648.1 | 4444380 | SNV | 1 | A | G | Homozygous   |
| NC_037648.1 | 4456901 | SNV | 1 | A | T | Heterozygous |
| NC_037648.1 | 4456907 | SNV | 1 | G | T | Heterozygous |
| NC_037648.1 | 4456910 | SNV | 1 | C | T | Heterozygous |
| NC_037648.1 | 4456920 | SNV | 1 | G | T | Homozygous   |
| NC_037648.1 | 4456933 | SNV | 1 | G | T | Homozygous   |
| NC_037648.1 | 4456950 | SNV | 1 | A | T | Heterozygous |
| NC_037648.1 | 4459858 | SNV | 1 | T | A | Homozygous   |
| NC_037648.1 | 4459961 | SNV | 1 | C | T | Homozygous   |
| NC_037648.1 | 4459964 | SNV | 1 | T | C | Homozygous   |
| NC_037648.1 | 4459967 | SNV | 1 | C | T | Homozygous   |
| NC_037648.1 | 4463927 | SNV | 1 | A | G | Homozygous   |
| NC_037648.1 | 4463930 | SNV | 1 | T | A | Homozygous   |
| NC_037648.1 | 4463939 | SNV | 1 | A | T | Homozygous   |
| NC_037648.1 | 4463943 | SNV | 1 | C | A | Homozygous   |
| NC_037648.1 | 4463984 | SNV | 1 | T | C | Homozygous   |
| NC_037648.1 | 4463992 | SNV | 1 | T | C | Homozygous   |
| NC_037648.1 | 4463996 | SNV | 1 | A | G | Heterozygous |
| NC_037648.1 | 4463998 | SNV | 1 | T | A | Homozygous   |
| NC_037648.1 | 4464000 | SNV | 1 | C | A | Homozygous   |
| NC_037648.1 | 4464013 | SNV | 1 | T | C | Homozygous   |
| NC_037648.1 | 4467959 | SNV | 1 | T | A | Homozygous   |

|             |         |     |   |   |   |              |
|-------------|---------|-----|---|---|---|--------------|
| NC_037648.1 | 4467966 | SNV | 1 | A | G | Homozygous   |
| NC_037648.1 | 4472761 | SNV | 1 | A | G | Homozygous   |
| NC_037648.1 | 4479292 | SNV | 1 | C | G | Homozygous   |
| NC_037648.1 | 4479401 | SNV | 1 | C | T | Heterozygous |
| NC_037648.1 | 4483693 | SNV | 1 | T | G | Homozygous   |
| NC_037648.1 | 4483717 | SNV | 1 | T | A | Heterozygous |
| NC_037648.1 | 4483720 | SNV | 1 | T | A | Heterozygous |
| NC_037648.1 | 4483722 | SNV | 1 | T | A | Heterozygous |
| NC_037648.1 | 4483723 | SNV | 1 | A | T | Heterozygous |
| NC_037648.1 | 4483740 | SNV | 1 | A | T | Homozygous   |
| NC_037648.1 | 4483743 | SNV | 1 | T | G | Homozygous   |
| NC_037648.1 | 4483747 | SNV | 1 | T | A | Homozygous   |
| NC_037648.1 | 4493342 | SNV | 1 | T | C | Homozygous   |
| NC_037648.1 | 4506285 | SNV | 1 | T | G | Heterozygous |
| NC_037648.1 | 4506305 | SNV | 1 | A | G | Heterozygous |
| NC_037648.1 | 4506323 | SNV | 1 | A | G | Heterozygous |
| NC_037648.1 | 4506336 | SNV | 1 | T | A | Heterozygous |
| NC_037648.1 | 4506400 | SNV | 1 | A | T | Heterozygous |
| NC_037648.1 | 4506572 | SNV | 1 | T | A | Homozygous   |
| NC_037648.1 | 4506587 | SNV | 1 | T | A | Homozygous   |
| NC_037648.1 | 4506632 | SNV | 1 | A | T | Homozygous   |
| NC_037648.1 | 4506634 | SNV | 1 | T | A | Homozygous   |
| NC_037648.1 | 4506857 | SNV | 1 | T | G | Homozygous   |
| NC_037648.1 | 4506877 | SNV | 1 | A | G | Heterozygous |
| NC_037648.1 | 4506879 | SNV | 1 | T | C | Heterozygous |
| NC_037648.1 | 4506938 | SNV | 1 | T | A | Heterozygous |
| NC_037648.1 | 4506947 | SNV | 1 | T | A | Heterozygous |
| NC_037648.1 | 4506947 | SNV | 1 | T | C | Heterozygous |
| NC_037648.1 | 4506956 | SNV | 1 | T | C | Homozygous   |
| NC_037648.1 | 4507102 | SNV | 1 | T | A | Heterozygous |
| NC_037648.1 | 4507156 | SNV | 1 | A | G | Heterozygous |
| NC_037648.1 | 4507203 | SNV | 1 | T | A | Heterozygous |
| NC_037648.1 | 4507217 | SNV | 1 | T | A | Homozygous   |
| NC_037648.1 | 4507239 | SNV | 1 | A | T | Homozygous   |
| NC_037648.1 | 4507254 | SNV | 1 | A | T | Homozygous   |
| NC_037648.1 | 4507264 | SNV | 1 | T | A | Heterozygous |
| NC_037648.1 | 4507317 | SNV | 1 | A | T | Heterozygous |
| NC_037648.1 | 4508339 | SNV | 1 | A | G | Homozygous   |
| NC_037648.1 | 4508341 | SNV | 1 | C | T | Homozygous   |
| NC_037648.1 | 4508353 | SNV | 1 | C | T | Homozygous   |
| NC_037648.1 | 4508368 | SNV | 1 | T | C | Homozygous   |
| NC_037648.1 | 4508664 | SNV | 1 | T | A | Heterozygous |
| NC_037648.1 | 4508665 | SNV | 1 | C | T | Heterozygous |
| NC_037648.1 | 4508668 | SNV | 1 | C | T | Heterozygous |
| NC_037648.1 | 4508674 | SNV | 1 | T | C | Heterozygous |
| NC_037648.1 | 4508680 | SNV | 1 | C | G | Heterozygous |
| NC_037648.1 | 4508684 | SNV | 1 | A | G | Heterozygous |
| NC_037648.1 | 4508687 | SNV | 1 | A | G | Heterozygous |
| NC_037648.1 | 4508695 | SNV | 1 | T | C | Heterozygous |
| NC_037648.1 | 4508703 | SNV | 1 | T | C | Heterozygous |
| NC_037648.1 | 4508713 | SNV | 1 | T | C | Heterozygous |

|             |         |     |   |   |   |              |
|-------------|---------|-----|---|---|---|--------------|
| NC_037648.1 | 4508737 | SNV | 1 | T | C | Heterozygous |
| NC_037648.1 | 4508740 | SNV | 1 | C | G | Heterozygous |
| NC_037648.1 | 4509893 | SNV | 1 | C | T | Heterozygous |
| NC_037648.1 | 4509902 | SNV | 1 | C | T | Heterozygous |
| NC_037648.1 | 4509930 | SNV | 1 | G | A | Homozygous   |
| NC_037648.1 | 4509978 | SNV | 1 | A | G | Homozygous   |
| NC_037648.1 | 4509981 | SNV | 1 | A | G | Heterozygous |
| NC_037648.1 | 4509984 | SNV | 1 | A | G | Heterozygous |
| NC_037648.1 | 4509987 | SNV | 1 | A | G | Heterozygous |
| NC_037648.1 | 4513354 | SNV | 1 | A | T | Homozygous   |
| NC_037648.1 | 4519079 | SNV | 1 | T | C | Heterozygous |
| NC_037648.1 | 4523930 | SNV | 1 | T | C | Heterozygous |
| NC_037648.1 | 4523933 | SNV | 1 | G | T | Homozygous   |
| NC_037648.1 | 4523937 | SNV | 1 | C | T | Heterozygous |
| NC_037648.1 | 4523945 | SNV | 1 | A | T | Homozygous   |
| NC_037648.1 | 4523949 | SNV | 1 | G | A | Homozygous   |
| NC_037648.1 | 4523955 | SNV | 1 | A | C | Homozygous   |
| NC_037648.1 | 4526565 | SNV | 1 | T | C | Homozygous   |
| NC_037648.1 | 4526570 | SNV | 1 | T | A | Homozygous   |
| NC_037648.1 | 4526579 | SNV | 1 | A | T | Homozygous   |
| NC_037648.1 | 4526585 | SNV | 1 | T | A | Homozygous   |
| NC_037648.1 | 4526592 | SNV | 1 | T | G | Homozygous   |
| NC_037648.1 | 4536721 | SNV | 1 | A | T | Homozygous   |
| NC_037648.1 | 4536741 | SNV | 1 | A | T | Homozygous   |
| NC_037648.1 | 4551639 | SNV | 1 | A | T | Heterozygous |
| NC_037648.1 | 4551883 | SNV | 1 | A | G | Homozygous   |
| NC_037648.1 | 4552509 | SNV | 1 | C | T | Homozygous   |
| NC_037648.1 | 4557114 | SNV | 1 | C | A | Heterozygous |
| NC_037648.1 | 4557227 | SNV | 1 | G | T | Homozygous   |
| NC_037648.1 | 4560899 | SNV | 1 | C | A | Heterozygous |
| NC_037648.1 | 4560912 | SNV | 1 | T | C | Homozygous   |
| NC_037648.1 | 4560937 | SNV | 1 | C | A | Homozygous   |
| NC_037648.1 | 4560941 | SNV | 1 | T | A | Heterozygous |
| NC_037648.1 | 4561875 | SNV | 1 | A | T | Homozygous   |
| NC_037648.1 | 4561882 | SNV | 1 | G | T | Homozygous   |
| NC_037648.1 | 4561884 | SNV | 1 | G | A | Homozygous   |
| NC_037648.1 | 4561893 | SNV | 1 | A | T | Homozygous   |
| NC_037648.1 | 4561898 | SNV | 1 | C | G | Homozygous   |
| NC_037648.1 | 4561904 | SNV | 1 | T | A | Homozygous   |
| NC_037648.1 | 4561925 | SNV | 1 | T | A | Homozygous   |
| NC_037648.1 | 4562223 | SNV | 1 | T | G | Homozygous   |
| NC_037648.1 | 4579514 | SNV | 1 | T | C | Homozygous   |
| NC_037648.1 | 4579552 | SNV | 1 | T | C | Homozygous   |
| NC_037648.1 | 4580761 | SNV | 1 | C | T | Homozygous   |
| NC_037648.1 | 4580903 | SNV | 1 | T | A | Homozygous   |
| NC_037648.1 | 4580966 | SNV | 1 | A | G | Homozygous   |
| NC_037648.1 | 4581029 | SNV | 1 | G | A | Heterozygous |
| NC_037648.1 | 4581149 | SNV | 1 | A | T | Homozygous   |
| NC_037648.1 | 4581268 | SNV | 1 | C | T | Homozygous   |
| NC_037648.1 | 4581270 | SNV | 1 | T | C | Homozygous   |
| NC_037648.1 | 4582883 | SNV | 1 | G | C | Heterozygous |

|             |         |     |   |   |   |              |
|-------------|---------|-----|---|---|---|--------------|
| NC_037648.1 | 4591271 | SNV | 1 | C | A | Homozygous   |
| NC_037648.1 | 4591387 | SNV | 1 | A | G | Homozygous   |
| NC_037648.1 | 4594264 | SNV | 1 | T | A | Homozygous   |
| NC_037648.1 | 4594269 | SNV | 1 | G | T | Homozygous   |
| NC_037648.1 | 4594275 | SNV | 1 | T | A | Homozygous   |
| NC_037648.1 | 4600294 | SNV | 1 | T | G | Homozygous   |
| NC_037648.1 | 4600305 | SNV | 1 | T | A | Homozygous   |
| NC_037648.1 | 4600307 | SNV | 1 | C | T | Homozygous   |
| NC_037648.1 | 4604386 | SNV | 1 | T | A | Heterozygous |
| NC_037648.1 | 4604388 | SNV | 1 | A | T | Heterozygous |
| NC_037648.1 | 4604396 | SNV | 1 | C | A | Heterozygous |
| NC_037648.1 | 4604396 | SNV | 1 | C | G | Heterozygous |
| NC_037648.1 | 4604408 | SNV | 1 | T | A | Heterozygous |
| NC_037648.1 | 4604412 | SNV | 1 | A | T | Heterozygous |
| NC_037648.1 | 4604418 | SNV | 1 | A | C | Heterozygous |
| NC_037648.1 | 4604422 | SNV | 1 | T | G | Heterozygous |
| NC_037648.1 | 4604426 | SNV | 1 | A | T | Heterozygous |
| NC_037648.1 | 4604810 | SNV | 1 | A | C | Homozygous   |
| NC_037648.1 | 4604823 | SNV | 1 | T | C | Homozygous   |
| NC_037648.1 | 4604844 | SNV | 1 | A | T | Homozygous   |
| NC_037648.1 | 4604851 | SNV | 1 | A | T | Homozygous   |
| NC_037648.1 | 4609904 | SNV | 1 | T | A | Homozygous   |
| NC_037648.1 | 4609906 | SNV | 1 | T | G | Homozygous   |
| NC_037648.1 | 4609927 | SNV | 1 | T | G | Homozygous   |
| NC_037648.1 | 4609934 | SNV | 1 | A | T | Homozygous   |
| NC_037648.1 | 4627334 | SNV | 1 | T | A | Homozygous   |
| NC_037648.1 | 4627357 | SNV | 1 | T | G | Homozygous   |
| NC_037648.1 | 4627360 | SNV | 1 | A | C | Homozygous   |
| NC_037648.1 | 4627366 | SNV | 1 | C | A | Homozygous   |
| NC_037648.1 | 4627371 | SNV | 1 | T | A | Homozygous   |
| NC_037648.1 | 4632784 | SNV | 1 | A | T | Homozygous   |
| NC_037648.1 | 4632802 | SNV | 1 | A | G | Homozygous   |
| NC_037648.1 | 4632848 | SNV | 1 | C | T | Homozygous   |
| NC_037648.1 | 4632874 | SNV | 1 | T | G | Homozygous   |
| NC_037648.1 | 4632879 | SNV | 1 | C | T | Homozygous   |
| NC_037648.1 | 4632909 | SNV | 1 | C | T | Homozygous   |
| NC_037648.1 | 4632918 | SNV | 1 | T | C | Homozygous   |
| NC_037648.1 | 4632933 | SNV | 1 | G | T | Homozygous   |
| NC_037648.1 | 4632947 | SNV | 1 | G | A | Homozygous   |
| NC_037648.1 | 4632962 | SNV | 1 | T | C | Homozygous   |
| NC_037648.1 | 4632974 | SNV | 1 | T | C | Homozygous   |
| NC_037648.1 | 4632982 | SNV | 1 | G | C | Homozygous   |
| NC_037648.1 | 4632987 | SNV | 1 | G | A | Homozygous   |
| NC_037648.1 | 4632999 | SNV | 1 | G | A | Homozygous   |
| NC_037648.1 | 4633006 | SNV | 1 | C | T | Homozygous   |
| NC_037648.1 | 4633021 | SNV | 1 | C | T | Homozygous   |
| NC_037648.1 | 4634849 | SNV | 1 | T | G | Homozygous   |
| NC_037648.1 | 4636881 | SNV | 1 | T | C | Homozygous   |
| NC_037648.1 | 4636883 | SNV | 1 | T | A | Homozygous   |
| NC_037648.1 | 4636957 | SNV | 1 | T | C | Heterozygous |
| NC_037648.1 | 4655119 | SNV | 1 | G | A | Homozygous   |

|             |         |     |   |   |   |              |
|-------------|---------|-----|---|---|---|--------------|
| NC_037648.1 | 4655697 | SNV | 1 | A | G | Heterozygous |
| NC_037648.1 | 4655701 | SNV | 1 | A | G | Heterozygous |
| NC_037648.1 | 4655703 | SNV | 1 | A | T | Heterozygous |
| NC_037648.1 | 4655706 | SNV | 1 | T | A | Heterozygous |
| NC_037648.1 | 4655709 | SNV | 1 | T | C | Heterozygous |
| NC_037648.1 | 4655733 | SNV | 1 | T | C | Heterozygous |
| NC_037648.1 | 4655736 | SNV | 1 | A | G | Homozygous   |
| NC_037648.1 | 4656066 | SNV | 1 | A | G | Homozygous   |
| NC_037648.1 | 4656281 | SNV | 1 | T | C | Homozygous   |
| NC_037648.1 | 4656650 | SNV | 1 | G | A | Homozygous   |
| NC_037648.1 | 4656950 | SNV | 1 | A | T | Homozygous   |
| NC_037648.1 | 4656952 | SNV | 1 | A | T | Homozygous   |
| NC_037648.1 | 4656954 | SNV | 1 | A | T | Homozygous   |
| NC_037648.1 | 4656992 | SNV | 1 | A | G | Homozygous   |
| NC_037648.1 | 4656994 | SNV | 1 | T | A | Homozygous   |
| NC_037648.1 | 4656999 | SNV | 1 | C | A | Homozygous   |
| NC_037648.1 | 4657379 | SNV | 1 | G | A | Homozygous   |
| NC_037648.1 | 4657415 | SNV | 1 | A | G | Homozygous   |
| NC_037648.1 | 4671172 | SNV | 1 | A | G | Homozygous   |
| NC_037648.1 | 4671177 | SNV | 1 | T | A | Homozygous   |
| NC_037648.1 | 4671182 | SNV | 1 | A | T | Homozygous   |
| NC_037648.1 | 4866582 | SNV | 1 | C | T | Homozygous   |
| NC_037648.1 | 4866608 | SNV | 1 | A | G | Homozygous   |
| NC_037648.1 | 4866632 | SNV | 1 | A | G | Homozygous   |
| NC_037648.1 | 4866648 | SNV | 1 | T | A | Homozygous   |
| NC_037648.1 | 4866660 | SNV | 1 | T | C | Homozygous   |
| NC_037648.1 | 4866668 | SNV | 1 | T | G | Homozygous   |
| NC_037648.1 | 4866670 | SNV | 1 | A | G | Homozygous   |
| NC_037648.1 | 4866707 | SNV | 1 | A | G | Homozygous   |
| NC_037648.1 | 4866714 | SNV | 1 | T | C | Homozygous   |
| NC_037648.1 | 4866730 | SNV | 1 | A | G | Homozygous   |
| NC_037648.1 | 4866734 | SNV | 1 | A | G | Homozygous   |
| NC_037648.1 | 4866738 | SNV | 1 | A | G | Homozygous   |
| NC_037648.1 | 4866764 | SNV | 1 | G | T | Homozygous   |
| NC_037648.1 | 4866778 | SNV | 1 | C | T | Homozygous   |
| NC_037648.1 | 4866813 | SNV | 1 | A | T | Homozygous   |
| NC_037648.1 | 4866856 | SNV | 1 | T | C | Homozygous   |
| NC_037648.1 | 4866858 | SNV | 1 | A | G | Homozygous   |
| NC_037648.1 | 4866866 | SNV | 1 | T | C | Homozygous   |
| NC_037648.1 | 4866882 | SNV | 1 | G | A | Homozygous   |
| NC_037648.1 | 4866885 | SNV | 1 | C | A | Homozygous   |
| NC_037648.1 | 4866896 | SNV | 1 | A | G | Homozygous   |
| NC_037648.1 | 4866913 | SNV | 1 | T | C | Homozygous   |
| NC_037648.1 | 4866943 | SNV | 1 | C | T | Homozygous   |
| NC_037648.1 | 4866946 | SNV | 1 | G | C | Heterozygous |
| NC_037648.1 | 4866962 | SNV | 1 | T | G | Heterozygous |
| NC_037648.1 | 4866977 | SNV | 1 | T | C | Heterozygous |
| NC_037648.1 | 4867088 | SNV | 1 | A | G | Homozygous   |
| NC_037648.1 | 4867107 | SNV | 1 | G | A | Homozygous   |
| NC_037648.1 | 4867159 | SNV | 1 | A | G | Heterozygous |
| NC_037648.1 | 4867334 | SNV | 1 | C | T | Heterozygous |

|             |         |     |   |   |   |              |
|-------------|---------|-----|---|---|---|--------------|
| NC_037648.1 | 4867358 | SNV | 1 | T | A | Heterozygous |
| NC_037648.1 | 4867600 | SNV | 1 | G | A | Heterozygous |
| NC_037648.1 | 4867612 | SNV | 1 | T | C | Heterozygous |
| NC_037648.1 | 4867619 | SNV | 1 | A | G | Heterozygous |
| NC_037648.1 | 4867630 | SNV | 1 | T | C | Heterozygous |
| NC_037648.1 | 4867634 | SNV | 1 | A | G | Heterozygous |
| NC_037648.1 | 4867668 | SNV | 1 | A | G | Heterozygous |
| NC_037648.1 | 4867674 | SNV | 1 | T | C | Heterozygous |
| NC_037648.1 | 4867678 | SNV | 1 | T | A | Heterozygous |
| NC_037648.1 | 4867680 | SNV | 1 | C | G | Heterozygous |
| NC_037648.1 | 4867709 | SNV | 1 | A | G | Heterozygous |
| NC_037648.1 | 4867712 | SNV | 1 | G | A | Heterozygous |
| NC_037648.1 | 4867715 | SNV | 1 | C | T | Heterozygous |
| NC_037648.1 | 4867717 | SNV | 1 | G | C | Heterozygous |
| NC_037648.1 | 4867729 | SNV | 1 | T | C | Heterozygous |
| NC_037648.1 | 4867731 | SNV | 1 | C | T | Heterozygous |
| NC_037648.1 | 4867735 | SNV | 1 | T | C | Heterozygous |
| NC_037648.1 | 4867749 | SNV | 1 | T | C | Heterozygous |
| NC_037648.1 | 4867762 | SNV | 1 | T | A | Heterozygous |
| NC_037648.1 | 4867764 | SNV | 1 | A | G | Homozygous   |
| NC_037648.1 | 4867807 | SNV | 1 | T | C | Heterozygous |
| NC_037648.1 | 4867816 | SNV | 1 | A | G | Heterozygous |
| NC_037648.1 | 4867833 | SNV | 1 | G | A | Heterozygous |
| NC_037648.1 | 4867908 | SNV | 1 | G | T | Heterozygous |
| NC_037648.1 | 4867943 | SNV | 1 | C | T | Heterozygous |
| NC_037648.1 | 4867977 | SNV | 1 | A | G | Heterozygous |
| NC_037648.1 | 4868021 | SNV | 1 | C | T | Heterozygous |
| NC_037648.1 | 4868024 | SNV | 1 | A | C | Heterozygous |
| NC_037648.1 | 4868027 | SNV | 1 | A | G | Heterozygous |
| NC_037648.1 | 4868029 | SNV | 1 | A | T | Heterozygous |
| NC_037648.1 | 4868041 | SNV | 1 | G | C | Homozygous   |
| NC_037648.1 | 4868044 | SNV | 1 | A | C | Heterozygous |
| NC_037648.1 | 4868047 | SNV | 1 | A | T | Homozygous   |
| NC_037648.1 | 4868050 | SNV | 1 | A | C | Homozygous   |
| NC_037648.1 | 4868079 | SNV | 1 | C | A | Homozygous   |
| NC_037648.1 | 4868082 | SNV | 1 | A | C | Homozygous   |
| NC_037648.1 | 4868094 | SNV | 1 | T | C | Homozygous   |
| NC_037648.1 | 4868149 | SNV | 1 | A | G | Homozygous   |
| NC_037648.1 | 4868162 | SNV | 1 | T | A | Homozygous   |
| NC_037648.1 | 4868168 | SNV | 1 | T | C | Heterozygous |
| NC_037648.1 | 4868185 | SNV | 1 | T | C | Homozygous   |
| NC_037648.1 | 4868229 | SNV | 1 | G | A | Homozygous   |
| NC_037648.1 | 4868344 | SNV | 1 | C | T | Heterozygous |
| NC_037648.1 | 4868397 | SNV | 1 | T | C | Homozygous   |
| NC_037648.1 | 4868399 | SNV | 1 | C | A | Homozygous   |
| NC_037648.1 | 4868415 | SNV | 1 | A | T | Homozygous   |
| NC_037648.1 | 4868444 | SNV | 1 | G | A | Homozygous   |
| NC_037648.1 | 4868446 | SNV | 1 | T | C | Homozygous   |
| NC_037648.1 | 4868449 | SNV | 1 | A | G | Homozygous   |
| NC_037648.1 | 4868467 | SNV | 1 | A | G | Homozygous   |
| NC_037648.1 | 4868494 | SNV | 1 | C | T | Homozygous   |

|             |         |     |   |   |   |              |
|-------------|---------|-----|---|---|---|--------------|
| NC_037648.1 | 4868513 | SNV | 1 | C | T | Heterozygous |
| NC_037648.1 | 4868553 | SNV | 1 | C | T | Homozygous   |
| NC_037648.1 | 4868579 | SNV | 1 | G | A | Homozygous   |
| NC_037648.1 | 4868618 | SNV | 1 | C | T | Homozygous   |
| NC_037648.1 | 4976099 | SNV | 1 | A | G | Homozygous   |
| NC_037648.1 | 4976424 | SNV | 1 | C | T | Heterozygous |
| NC_037648.1 | 4976429 | SNV | 1 | C | T | Heterozygous |
| NC_037648.1 | 4976460 | SNV | 1 | G | A | Homozygous   |
| NC_037648.1 | 4976499 | SNV | 1 | C | T | Homozygous   |
| NC_037648.1 | 4976531 | SNV | 1 | G | A | Homozygous   |
| NC_037648.1 | 4976541 | SNV | 1 | T | C | Homozygous   |
| NC_037648.1 | 4983985 | SNV | 1 | T | A | Heterozygous |
| NC_037648.1 | 4988513 | SNV | 1 | A | G | Homozygous   |
| NC_037648.1 | 4988517 | SNV | 1 | C | T | Homozygous   |
| NC_037648.1 | 4988528 | SNV | 1 | A | C | Homozygous   |
| NC_037648.1 | 4988554 | SNV | 1 | T | A | Homozygous   |
| NC_037648.1 | 4988673 | SNV | 1 | T | A | Heterozygous |
| NC_037648.1 | 4988732 | SNV | 1 | C | A | Homozygous   |
| NC_037648.1 | 4988741 | SNV | 1 | C | A | Heterozygous |
| NC_037648.1 | 4989764 | SNV | 1 | C | T | Homozygous   |
| NC_037648.1 | 4989768 | SNV | 1 | G | A | Homozygous   |
| NC_037648.1 | 4989777 | SNV | 1 | G | A | Homozygous   |
| NC_037648.1 | 4989786 | SNV | 1 | G | A | Homozygous   |
| NC_037648.1 | 4999805 | SNV | 1 | A | G | Homozygous   |
| NC_037648.1 | 4999812 | SNV | 1 | T | C | Homozygous   |
| NC_037648.1 | 4999814 | SNV | 1 | A | G | Homozygous   |
| NC_037648.1 | 4999817 | SNV | 1 | A | T | Homozygous   |
| NC_037648.1 | 4999836 | SNV | 1 | T | A | Homozygous   |
| NC_037648.1 | 5005190 | SNV | 1 | T | A | Homozygous   |
| NC_037648.1 | 5005219 | SNV | 1 | A | G | Homozygous   |
| NC_037648.1 | 5008173 | SNV | 1 | T | A | Homozygous   |
| NC_037648.1 | 5008193 | SNV | 1 | A | T | Homozygous   |
| NC_037648.1 | 5008200 | SNV | 1 | T | A | Homozygous   |
| NC_037648.1 | 5008208 | SNV | 1 | G | A | Homozygous   |
| NC_037648.1 | 5014667 | SNV | 1 | C | T | Homozygous   |
| NC_037648.1 | 5015246 | SNV | 1 | T | C | Homozygous   |
| NC_037648.1 | 5015607 | SNV | 1 | C | T | Heterozygous |
| NC_037648.1 | 5022423 | SNV | 1 | T | C | Homozygous   |
| NC_037648.1 | 5023617 | SNV | 1 | G | A | Homozygous   |
| NC_037648.1 | 5027167 | SNV | 1 | G | A | Heterozygous |
| NC_037648.1 | 5028082 | SNV | 1 | T | G | Heterozygous |
| NC_037648.1 | 5030523 | SNV | 1 | T | A | Homozygous   |
| NC_037648.1 | 5031496 | SNV | 1 | A | T | Homozygous   |
| NC_037648.1 | 5039978 | SNV | 1 | T | A | Homozygous   |
| NC_037648.1 | 5039984 | SNV | 1 | G | A | Homozygous   |
| NC_037648.1 | 5039986 | SNV | 1 | A | T | Homozygous   |
| NC_037648.1 | 5040011 | SNV | 1 | A | T | Homozygous   |
| NC_037648.1 | 5047202 | SNV | 1 | C | T | Homozygous   |
| NC_037648.1 | 5047210 | SNV | 1 | A | C | Homozygous   |
| NC_037648.1 | 5047214 | SNV | 1 | G | A | Homozygous   |
| NC_037648.1 | 5047220 | SNV | 1 | T | G | Heterozygous |

|             |         |     |   |   |   |              |
|-------------|---------|-----|---|---|---|--------------|
| NC_037648.1 | 5047239 | SNV | 1 | C | A | Homozygous   |
| NC_037648.1 | 5047244 | SNV | 1 | A | G | Heterozygous |
| NC_037648.1 | 5055990 | SNV | 1 | A | G | Homozygous   |
| NC_037648.1 | 5055992 | SNV | 1 | A | G | Homozygous   |
| NC_037648.1 | 5055998 | SNV | 1 | A | G | Homozygous   |
| NC_037648.1 | 5056040 | SNV | 1 | A | T | Homozygous   |
| NC_037648.1 | 5056881 | SNV | 1 | A | T | Homozygous   |
| NC_037648.1 | 5056883 | SNV | 1 | T | A | Homozygous   |
| NC_037648.1 | 5056889 | SNV | 1 | A | G | Homozygous   |
| NC_037648.1 | 5056892 | SNV | 1 | A | T | Homozygous   |
| NC_037648.1 | 5056898 | SNV | 1 | A | G | Homozygous   |
| NC_037648.1 | 5058232 | SNV | 1 | T | A | Homozygous   |
| NC_037648.1 | 5058236 | SNV | 1 | A | C | Homozygous   |
| NC_037648.1 | 5058271 | SNV | 1 | A | T | Homozygous   |
| NC_037648.1 | 5058278 | SNV | 1 | T | A | Homozygous   |
| NC_037648.1 | 5058281 | SNV | 1 | T | C | Homozygous   |
| NC_037648.1 | 5070186 | SNV | 1 | T | A | Heterozygous |
| NC_037648.1 | 5070695 | SNV | 1 | T | C | Heterozygous |
| NC_037648.1 | 5070725 | SNV | 1 | G | A | Homozygous   |
| NC_037648.1 | 5070727 | SNV | 1 | A | G | Homozygous   |
| NC_037648.1 | 5071067 | SNV | 1 | C | A | Heterozygous |
| NC_037648.1 | 5071096 | SNV | 1 | C | T | Homozygous   |
| NC_037648.1 | 5074319 | SNV | 1 | G | C | Heterozygous |
| NC_037648.1 | 5076758 | SNV | 1 | T | A | Homozygous   |
| NC_037648.1 | 5076763 | SNV | 1 | A | C | Homozygous   |
| NC_037648.1 | 5076768 | SNV | 1 | T | A | Homozygous   |
| NC_037648.1 | 5082323 | SNV | 1 | T | C | Homozygous   |
| NC_037648.1 | 5082344 | SNV | 1 | T | A | Homozygous   |
| NC_037648.1 | 5082361 | SNV | 1 | T | A | Homozygous   |
| NC_037648.1 | 5082363 | SNV | 1 | T | A | Homozygous   |
| NC_037648.1 | 5085935 | SNV | 1 | A | G | Homozygous   |
| NC_037648.1 | 5085953 | SNV | 1 | A | G | Heterozygous |
| NC_037648.1 | 5085955 | SNV | 1 | A | G | Heterozygous |
| NC_037648.1 | 5085957 | SNV | 1 | A | G | Heterozygous |
| NC_037648.1 | 5085965 | SNV | 1 | A | G | Heterozygous |
| NC_037648.1 | 5085965 | SNV | 1 | A | T | Heterozygous |
| NC_037648.1 | 5085969 | SNV | 1 | A | G | Heterozygous |
| NC_037648.1 | 5085971 | SNV | 1 | A | G | Heterozygous |
| NC_037648.1 | 5085973 | SNV | 1 | A | G | Heterozygous |
| NC_037648.1 | 5085974 | SNV | 1 | T | A | Heterozygous |
| NC_037648.1 | 5085975 | SNV | 1 | A | G | Heterozygous |
| NC_037648.1 | 5106230 | SNV | 1 | A | G | Homozygous   |
| NC_037648.1 | 5106232 | SNV | 1 | A | T | Homozygous   |
| NC_037648.1 | 5106239 | SNV | 1 | A | C | Homozygous   |
| NC_037648.1 | 5106254 | SNV | 1 | C | A | Homozygous   |
| NC_037648.1 | 5106261 | SNV | 1 | G | T | Homozygous   |
| NC_037648.1 | 5106284 | SNV | 1 | A | T | Homozygous   |
| NC_037648.1 | 5116363 | SNV | 1 | A | C | Homozygous   |
| NC_037648.1 | 5116370 | SNV | 1 | A | C | Homozygous   |
| NC_037648.1 | 5116374 | SNV | 1 | A | C | Homozygous   |
| NC_037648.1 | 5116405 | SNV | 1 | A | T | Homozygous   |



|             |         |     |   |   |   |              |
|-------------|---------|-----|---|---|---|--------------|
| NC_037648.1 | 5116410 | SNV | 1 | A | T | Homozygous   |
| NC_037648.1 | 5116427 | SNV | 1 | T | C | Heterozygous |
| NC_037648.1 | 5121462 | SNV | 1 | G | A | Homozygous   |
| NC_037648.1 | 5128098 | SNV | 1 | T | A | Homozygous   |
| NC_037648.1 | 5128105 | SNV | 1 | A | T | Homozygous   |
| NC_037648.1 | 5128111 | SNV | 1 | A | G | Homozygous   |
| NC_037648.1 | 5128114 | SNV | 1 | T | A | Homozygous   |
| NC_037648.1 | 5128171 | SNV | 1 | A | T | Homozygous   |
| NC_037648.1 | 5128180 | SNV | 1 | T | A | Homozygous   |
| NC_037648.1 | 5133656 | SNV | 1 | C | A | Homozygous   |
| NC_037648.1 | 5133793 | SNV | 1 | T | C | Homozygous   |
| NC_037648.1 | 5133804 | SNV | 1 | A | G | Homozygous   |
| NC_037648.1 | 5144370 | SNV | 1 | G | A | Homozygous   |
| NC_037648.1 | 5144375 | SNV | 1 | G | T | Homozygous   |
| NC_037648.1 | 5147199 | SNV | 1 | T | C | Homozygous   |
| NC_037648.1 | 5147864 | SNV | 1 | A | T | Homozygous   |
| NC_037648.1 | 5147893 | SNV | 1 | A | G | Homozygous   |
| NC_037648.1 | 5147896 | SNV | 1 | A | G | Homozygous   |
| NC_037648.1 | 5147900 | SNV | 1 | A | T | Homozygous   |
| NC_037648.1 | 5147902 | SNV | 1 | G | A | Homozygous   |
| NC_037648.1 | 5149742 | SNV | 1 | T | A | Homozygous   |
| NC_037648.1 | 5149745 | SNV | 1 | A | T | Homozygous   |
| NC_037648.1 | 5149754 | SNV | 1 | C | A | Homozygous   |
| NC_037648.1 | 5149757 | SNV | 1 | G | A | Homozygous   |
| NC_037648.1 | 5152783 | SNV | 1 | T | C | Heterozygous |
| NC_037648.1 | 5152840 | SNV | 1 | G | C | Heterozygous |
| NC_037648.1 | 5153163 | SNV | 1 | A | G | Heterozygous |
| NC_037648.1 | 5155300 | SNV | 1 | C | T | Homozygous   |
| NC_037648.1 | 5155303 | SNV | 1 | A | T | Homozygous   |
| NC_037648.1 | 5155329 | SNV | 1 | T | C | Homozygous   |
| NC_037648.1 | 5155332 | SNV | 1 | A | G | Homozygous   |
| NC_037648.1 | 5155338 | SNV | 1 | T | C | Homozygous   |
| NC_037648.1 | 5155345 | SNV | 1 | G | A | Homozygous   |
| NC_037648.1 | 5155348 | SNV | 1 | T | C | Homozygous   |
| NC_037648.1 | 5155351 | SNV | 1 | G | A | Homozygous   |
| NC_037648.1 | 5170519 | SNV | 1 | A | T | Homozygous   |
| NC_037648.1 | 5175034 | SNV | 1 | C | T | Homozygous   |
| NC_037648.1 | 5185453 | SNV | 1 | A | T | Homozygous   |
| NC_037648.1 | 5185492 | SNV | 1 | T | G | Homozygous   |
| NC_037648.1 | 5189740 | SNV | 1 | C | A | Homozygous   |
| NC_037648.1 | 5189752 | SNV | 1 | T | A | Homozygous   |
| NC_037648.1 | 5189760 | SNV | 1 | A | T | Homozygous   |
| NC_037648.1 | 5189762 | SNV | 1 | A | T | Homozygous   |
| NC_037648.1 | 5190145 | SNV | 1 | T | C | Homozygous   |
| NC_037648.1 | 5190160 | SNV | 1 | A | T | Homozygous   |
| NC_037648.1 | 5190164 | SNV | 1 | T | G | Homozygous   |
| NC_037648.1 | 5190167 | SNV | 1 | G | A | Homozygous   |
| NC_037648.1 | 5190173 | SNV | 1 | A | T | Homozygous   |
| NC_037648.1 | 5190192 | SNV | 1 | A | T | Homozygous   |
| NC_037648.1 | 5200596 | SNV | 1 | A | T | Homozygous   |
| NC_037648.1 | 5200598 | SNV | 1 | A | T | Homozygous   |

|             |         |     |   |   |   |              |
|-------------|---------|-----|---|---|---|--------------|
| NC_037648.1 | 5210217 | SNV | 1 | T | C | Homozygous   |
| NC_037648.1 | 5210691 | SNV | 1 | G | A | Heterozygous |
| NC_037648.1 | 5210696 | SNV | 1 | G | A | Heterozygous |
| NC_037648.1 | 5210709 | SNV | 1 | G | A | Heterozygous |
| NC_037648.1 | 5211163 | SNV | 1 | C | A | Heterozygous |
| NC_037648.1 | 5212135 | SNV | 1 | C | A | Heterozygous |
| NC_037648.1 | 5212576 | SNV | 1 | T | C | Homozygous   |
| NC_037648.1 | 5212637 | SNV | 1 | G | A | Heterozygous |
| NC_037648.1 | 5219956 | SNV | 1 | A | T | Homozygous   |
| NC_037648.1 | 5219959 | SNV | 1 | A | G | Homozygous   |
| NC_037648.1 | 5219965 | SNV | 1 | A | T | Homozygous   |
| NC_037648.1 | 5220002 | SNV | 1 | T | C | Homozygous   |
| NC_037648.1 | 5220015 | SNV | 1 | T | A | Heterozygous |
| NC_037648.1 | 5220034 | SNV | 1 | T | G | Homozygous   |
| NC_037648.1 | 5220037 | SNV | 1 | T | G | Homozygous   |
| NC_037648.1 | 5220041 | SNV | 1 | T | A | Homozygous   |
| NC_037648.1 | 5223023 | SNV | 1 | T | A | Homozygous   |
| NC_037648.1 | 5223029 | SNV | 1 | T | C | Homozygous   |
| NC_037648.1 | 5223041 | SNV | 1 | T | C | Homozygous   |
| NC_037648.1 | 5223043 | SNV | 1 | A | G | Homozygous   |
| NC_037648.1 | 5229440 | SNV | 1 | T | A | Homozygous   |
| NC_037648.1 | 5229475 | SNV | 1 | T | C | Heterozygous |
| NC_037648.1 | 5229495 | SNV | 1 | T | A | Homozygous   |
| NC_037648.1 | 5229497 | SNV | 1 | T | A | Homozygous   |
| NC_037648.1 | 5233439 | SNV | 1 | A | T | Heterozygous |
| NC_037648.1 | 5233442 | SNV | 1 | A | T | Heterozygous |
| NC_037648.1 | 5233447 | SNV | 1 | T | A | Homozygous   |
| NC_037648.1 | 5233453 | SNV | 1 | A | T | Homozygous   |
| NC_037648.1 | 5233459 | SNV | 1 | T | A | Heterozygous |
| NC_037648.1 | 5233467 | SNV | 1 | A | G | Heterozygous |
| NC_037648.1 | 5238757 | SNV | 1 | C | T | Homozygous   |
| NC_037648.1 | 5238759 | SNV | 1 | T | C | Heterozygous |
| NC_037648.1 | 5240090 | SNV | 1 | A | T | Homozygous   |
| NC_037648.1 | 5300536 | SNV | 1 | C | T | Homozygous   |
| NC_037648.1 | 5308757 | SNV | 1 | C | G | Homozygous   |
| NC_037648.1 | 5308798 | SNV | 1 | G | T | Homozygous   |
| NC_037648.1 | 5315135 | SNV | 1 | T | C | Homozygous   |
| NC_037648.1 | 5315154 | SNV | 1 | T | A | Homozygous   |
| NC_037648.1 | 5318056 | SNV | 1 | G | A | Homozygous   |
| NC_037648.1 | 5318075 | SNV | 1 | A | T | Homozygous   |
| NC_037648.1 | 5318079 | SNV | 1 | A | T | Homozygous   |
| NC_037648.1 | 5318100 | SNV | 1 | T | A | Homozygous   |
| NC_037648.1 | 5318103 | SNV | 1 | A | T | Homozygous   |
| NC_037648.1 | 5322792 | SNV | 1 | T | A | Homozygous   |
| NC_037648.1 | 5322797 | SNV | 1 | G | A | Homozygous   |
| NC_037648.1 | 5322845 | SNV | 1 | A | C | Homozygous   |
| NC_037648.1 | 5322847 | SNV | 1 | T | C | Homozygous   |
| NC_037648.1 | 5322851 | SNV | 1 | T | C | Homozygous   |
| NC_037648.1 | 5322862 | SNV | 1 | T | C | Homozygous   |
| NC_037648.1 | 5324577 | SNV | 1 | T | C | Heterozygous |
| NC_037648.1 | 5324582 | SNV | 1 | A | G | Heterozygous |

|             |         |     |   |   |   |              |
|-------------|---------|-----|---|---|---|--------------|
| NC_037648.1 | 5324584 | SNV | 1 | C | T | Heterozygous |
| NC_037648.1 | 5324611 | SNV | 1 | T | A | Homozygous   |
| NC_037648.1 | 5324625 | SNV | 1 | C | T | Homozygous   |
| NC_037648.1 | 5329838 | SNV | 1 | A | G | Heterozygous |
| NC_037648.1 | 5329871 | SNV | 1 | A | G | Heterozygous |
| NC_037648.1 | 5334729 | SNV | 1 | T | A | Homozygous   |
| NC_037648.1 | 5334738 | SNV | 1 | T | C | Homozygous   |
| NC_037648.1 | 5334769 | SNV | 1 | T | C | Homozygous   |
| NC_037648.1 | 5334771 | SNV | 1 | T | C | Homozygous   |
| NC_037648.1 | 5334792 | SNV | 1 | C | T | Homozygous   |
| NC_037648.1 | 5344185 | SNV | 1 | C | T | Heterozygous |
| NC_037648.1 | 5359480 | SNV | 1 | A | T | Homozygous   |
| NC_037648.1 | 5359488 | SNV | 1 | C | T | Homozygous   |
| NC_037648.1 | 5359490 | SNV | 1 | T | A | Homozygous   |
| NC_037648.1 | 5368482 | SNV | 1 | T | A | Homozygous   |
| NC_037648.1 | 5368486 | SNV | 1 | T | A | Homozygous   |
| NC_037648.1 | 5368514 | SNV | 1 | A | G | Heterozygous |
| NC_037648.1 | 5368520 | SNV | 1 | T | A | Homozygous   |
| NC_037648.1 | 5368527 | SNV | 1 | T | A | Homozygous   |
| NC_037648.1 | 5387881 | SNV | 1 | T | A | Homozygous   |
| NC_037648.1 | 5387888 | SNV | 1 | G | A | Homozygous   |
| NC_037648.1 | 5387900 | SNV | 1 | A | G | Homozygous   |
| NC_037648.1 | 5387903 | SNV | 1 | T | C | Homozygous   |
| NC_037648.1 | 5387911 | SNV | 1 | A | T | Homozygous   |
| NC_037648.1 | 5387913 | SNV | 1 | A | G | Homozygous   |
| NC_037648.1 | 5387916 | SNV | 1 | T | G | Homozygous   |
| NC_037648.1 | 5398443 | SNV | 1 | T | C | Homozygous   |
| NC_037648.1 | 5398445 | SNV | 1 | A | T | Homozygous   |
| NC_037648.1 | 5399678 | SNV | 1 | T | A | Homozygous   |
| NC_037648.1 | 5399686 | SNV | 1 | T | C | Homozygous   |
| NC_037648.1 | 5399688 | SNV | 1 | A | T | Homozygous   |
| NC_037648.1 | 5399698 | SNV | 1 | A | T | Homozygous   |
| NC_037648.1 | 5399700 | SNV | 1 | A | C | Homozygous   |
| NC_037648.1 | 5399702 | SNV | 1 | G | T | Homozygous   |
| NC_037648.1 | 5405255 | SNV | 1 | T | A | Homozygous   |
| NC_037648.1 | 5405319 | SNV | 1 | G | A | Homozygous   |
| NC_037648.1 | 5407333 | SNV | 1 | T | G | Heterozygous |
| NC_037648.1 | 5407335 | SNV | 1 | T | A | Heterozygous |
| NC_037648.1 | 5407342 | SNV | 1 | T | A | Heterozygous |
| NC_037648.1 | 5418956 | SNV | 1 | A | T | Homozygous   |
| NC_037648.1 | 5418982 | SNV | 1 | T | A | Homozygous   |
| NC_037648.1 | 5418988 | SNV | 1 | A | T | Homozygous   |
| NC_037648.1 | 5418998 | SNV | 1 | A | C | Homozygous   |
| NC_037648.1 | 5419000 | SNV | 1 | T | A | Homozygous   |
| NC_037648.1 | 5419002 | SNV | 1 | A | G | Homozygous   |
| NC_037648.1 | 5419007 | SNV | 1 | A | G | Homozygous   |
| NC_037648.1 | 5419015 | SNV | 1 | T | A | Homozygous   |
| NC_037648.1 | 5429703 | SNV | 1 | G | T | Homozygous   |
| NC_037648.1 | 5429705 | SNV | 1 | A | T | Homozygous   |
| NC_037648.1 | 5429709 | SNV | 1 | G | T | Homozygous   |
| NC_037648.1 | 5429716 | SNV | 1 | A | G | Homozygous   |

|             |         |     |   |   |   |              |
|-------------|---------|-----|---|---|---|--------------|
| NC_037648.1 | 5429721 | SNV | 1 | C | A | Homozygous   |
| NC_037648.1 | 5429723 | SNV | 1 | A | G | Homozygous   |
| NC_037648.1 | 5429745 | SNV | 1 | A | T | Homozygous   |
| NC_037648.1 | 5429750 | SNV | 1 | G | C | Homozygous   |
| NC_037648.1 | 5433506 | SNV | 1 | C | A | Homozygous   |
| NC_037648.1 | 5433527 | SNV | 1 | T | A | Homozygous   |
| NC_037648.1 | 5433529 | SNV | 1 | T | A | Homozygous   |
| NC_037648.1 | 5458990 | SNV | 1 | C | T | Homozygous   |
| NC_037648.1 | 5458993 | SNV | 1 | C | T | Homozygous   |
| NC_037648.1 | 5462605 | SNV | 1 | A | T | Homozygous   |
| NC_037648.1 | 5462618 | SNV | 1 | G | A | Homozygous   |
| NC_037648.1 | 5463863 | SNV | 1 | A | G | Homozygous   |
| NC_037648.1 | 5473899 | SNV | 1 | A | T | Homozygous   |
| NC_037648.1 | 5473903 | SNV | 1 | T | A | Homozygous   |
| NC_037648.1 | 5473907 | SNV | 1 | A | T | Homozygous   |
| NC_037648.1 | 5473911 | SNV | 1 | T | A | Homozygous   |
| NC_037648.1 | 5473916 | SNV | 1 | T | A | Homozygous   |
| NC_037648.1 | 5473927 | SNV | 1 | T | A | Homozygous   |
| NC_037648.1 | 5473931 | SNV | 1 | A | T | Homozygous   |
| NC_037648.1 | 5473940 | SNV | 1 | A | T | Homozygous   |
| NC_037648.1 | 5473942 | SNV | 1 | T | G | Homozygous   |
| NC_037648.1 | 5477594 | SNV | 1 | A | G | Heterozygous |
| NC_037648.1 | 5482449 | SNV | 1 | T | C | Homozygous   |
| NC_037648.1 | 5482452 | SNV | 1 | A | C | Homozygous   |
| NC_037648.1 | 5482457 | SNV | 1 | A | G | Homozygous   |
| NC_037648.1 | 5482460 | SNV | 1 | T | C | Homozygous   |
| NC_037648.1 | 5482469 | SNV | 1 | A | T | Homozygous   |
| NC_037648.1 | 5483292 | SNV | 1 | T | A | Homozygous   |
| NC_037648.1 | 5483296 | SNV | 1 | T | A | Homozygous   |
| NC_037648.1 | 5483303 | SNV | 1 | C | A | Homozygous   |
| NC_037648.1 | 5483310 | SNV | 1 | A | C | Homozygous   |
| NC_037648.1 | 5483312 | SNV | 1 | A | T | Homozygous   |
| NC_037648.1 | 5488485 | SNV | 1 | T | C | Homozygous   |
| NC_037648.1 | 5488493 | SNV | 1 | T | A | Homozygous   |
| NC_037648.1 | 5497009 | SNV | 1 | T | C | Homozygous   |
| NC_037648.1 | 5497018 | SNV | 1 | A | T | Homozygous   |
| NC_037648.1 | 5497030 | SNV | 1 | T | C | Homozygous   |
| NC_037648.1 | 5497062 | SNV | 1 | T | A | Homozygous   |
| NC_037648.1 | 5497065 | SNV | 1 | T | A | Homozygous   |
| NC_037648.1 | 5507170 | SNV | 1 | A | T | Homozygous   |
| NC_037648.1 | 5507178 | SNV | 1 | T | A | Homozygous   |
| NC_037648.1 | 5518971 | SNV | 1 | T | G | Heterozygous |
| NC_037648.1 | 5531113 | SNV | 1 | A | G | Homozygous   |
| NC_037648.1 | 5531205 | SNV | 1 | A | G | Homozygous   |
| NC_037648.1 | 5535433 | SNV | 1 | T | A | Homozygous   |
| NC_037648.1 | 5535442 | SNV | 1 | C | G | Homozygous   |
| NC_037648.1 | 5535446 | SNV | 1 | T | G | Homozygous   |
| NC_037648.1 | 5535454 | SNV | 1 | T | A | Homozygous   |
| NC_037648.1 | 5545223 | SNV | 1 | A | T | Homozygous   |
| NC_037648.1 | 5545246 | SNV | 1 | T | G | Homozygous   |
| NC_037648.1 | 5545248 | SNV | 1 | T | A | Homozygous   |

|             |         |     |   |   |   |              |
|-------------|---------|-----|---|---|---|--------------|
| NC_037648.1 | 5545251 | SNV | 1 | T | G | Homozygous   |
| NC_037648.1 | 5545259 | SNV | 1 | T | A | Homozygous   |
| NC_037648.1 | 5545261 | SNV | 1 | T | A | Homozygous   |
| NC_037648.1 | 5554705 | SNV | 1 | C | T | Homozygous   |
| NC_037648.1 | 5554708 | SNV | 1 | T | A | Homozygous   |
| NC_037648.1 | 5554742 | SNV | 1 | A | T | Heterozygous |
| NC_037648.1 | 5554750 | SNV | 1 | T | C | Heterozygous |
| NC_037648.1 | 5558750 | SNV | 1 | T | C | Homozygous   |
| NC_037648.1 | 5558767 | SNV | 1 | T | C | Homozygous   |
| NC_037648.1 | 5558772 | SNV | 1 | G | A | Homozygous   |
| NC_037648.1 | 5558777 | SNV | 1 | C | T | Homozygous   |
| NC_037648.1 | 5558779 | SNV | 1 | C | T | Homozygous   |
| NC_037648.1 | 5558804 | SNV | 1 | G | A | Heterozygous |
| NC_037648.1 | 5563352 | SNV | 1 | A | C | Homozygous   |
| NC_037648.1 | 5563356 | SNV | 1 | C | A | Homozygous   |
| NC_037648.1 | 5583276 | SNV | 1 | A | G | Homozygous   |
| NC_037648.1 | 5583285 | SNV | 1 | G | A | Homozygous   |
| NC_037648.1 | 5583289 | SNV | 1 | T | A | Homozygous   |
| NC_037648.1 | 5583292 | SNV | 1 | A | G | Homozygous   |
| NC_037648.1 | 5583294 | SNV | 1 | A | C | Homozygous   |
| NC_037648.1 | 5583305 | SNV | 1 | A | C | Homozygous   |
| NC_037648.1 | 5595169 | SNV | 1 | A | T | Homozygous   |
| NC_037648.1 | 5595177 | SNV | 1 | A | T | Homozygous   |
| NC_037648.1 | 5595181 | SNV | 1 | T | G | Homozygous   |
| NC_037648.1 | 5595198 | SNV | 1 | T | G | Homozygous   |
| NC_037648.1 | 5595206 | SNV | 1 | G | T | Homozygous   |
| NC_037648.1 | 5601304 | SNV | 1 | T | G | Homozygous   |
| NC_037648.1 | 5601310 | SNV | 1 | G | A | Homozygous   |
| NC_037648.1 | 5601313 | SNV | 1 | A | G | Homozygous   |
| NC_037648.1 | 5601315 | SNV | 1 | A | T | Homozygous   |
| NC_037648.1 | 5601324 | SNV | 1 | T | A | Homozygous   |
| NC_037648.1 | 5601333 | SNV | 1 | C | T | Homozygous   |
| NC_037648.1 | 5601335 | SNV | 1 | T | G | Homozygous   |
| NC_037648.1 | 5601346 | SNV | 1 | A | T | Homozygous   |
| NC_037648.1 | 5601350 | SNV | 1 | A | T | Homozygous   |
| NC_037648.1 | 5601352 | SNV | 1 | A | T | Homozygous   |
| NC_037648.1 | 5606402 | SNV | 1 | T | C | Homozygous   |
| NC_037648.1 | 5606432 | SNV | 1 | A | T | Homozygous   |
| NC_037648.1 | 5606437 | SNV | 1 | T | C | Homozygous   |
| NC_037648.1 | 5606448 | SNV | 1 | T | A | Homozygous   |
| NC_037648.1 | 5606452 | SNV | 1 | A | C | Homozygous   |
| NC_037648.1 | 5606457 | SNV | 1 | T | A | Homozygous   |
| NC_037648.1 | 5619618 | SNV | 1 | A | T | Homozygous   |
| NC_037648.1 | 5619627 | SNV | 1 | T | A | Homozygous   |
| NC_037648.1 | 5619633 | SNV | 1 | T | C | Homozygous   |
| NC_037648.1 | 5619637 | SNV | 1 | A | T | Homozygous   |
| NC_037648.1 | 5619639 | SNV | 1 | T | A | Homozygous   |
| NC_037648.1 | 5619641 | SNV | 1 | C | T | Homozygous   |
| NC_037648.1 | 5619649 | SNV | 1 | A | T | Homozygous   |
| NC_037648.1 | 5621337 | SNV | 1 | A | T | Heterozygous |
| NC_037648.1 | 5653846 | SNV | 1 | A | G | Homozygous   |

|             |         |     |   |   |   |              |
|-------------|---------|-----|---|---|---|--------------|
| NC_037648.1 | 5653873 | SNV | 1 | A | C | Homozygous   |
| NC_037648.1 | 5653875 | SNV | 1 | T | A | Homozygous   |
| NC_037648.1 | 5653883 | SNV | 1 | A | T | Homozygous   |
| NC_037648.1 | 5653894 | SNV | 1 | T | C | Homozygous   |
| NC_037648.1 | 5655937 | SNV | 1 | C | G | Heterozygous |
| NC_037648.1 | 5655940 | SNV | 1 | A | T | Heterozygous |
| NC_037648.1 | 5655941 | SNV | 1 | A | C | Heterozygous |
| NC_037648.1 | 5655949 | SNV | 1 | G | A | Homozygous   |
| NC_037648.1 | 5655953 | SNV | 1 | C | T | Homozygous   |
| NC_037648.1 | 5656020 | SNV | 1 | A | C | Heterozygous |
| NC_037648.1 | 5656027 | SNV | 1 | C | T | Homozygous   |
| NC_037648.1 | 5662249 | SNV | 1 | G | T | Homozygous   |
| NC_037648.1 | 5662251 | SNV | 1 | C | T | Homozygous   |
| NC_037648.1 | 5662280 | SNV | 1 | T | A | Homozygous   |
| NC_037648.1 | 5662283 | SNV | 1 | A | T | Homozygous   |
| NC_037648.1 | 5666134 | SNV | 1 | A | G | Homozygous   |
| NC_037648.1 | 5666146 | SNV | 1 | A | T | Homozygous   |
| NC_037648.1 | 5666148 | SNV | 1 | A | T | Homozygous   |
| NC_037648.1 | 5666163 | SNV | 1 | T | C | Homozygous   |
| NC_037648.1 | 5666165 | SNV | 1 | T | A | Homozygous   |
| NC_037648.1 | 5666174 | SNV | 1 | A | G | Homozygous   |
| NC_037648.1 | 5666177 | SNV | 1 | T | A | Homozygous   |
| NC_037648.1 | 5666184 | SNV | 1 | A | T | Homozygous   |
| NC_037648.1 | 5666187 | SNV | 1 | T | C | Homozygous   |
| NC_037648.1 | 5668464 | SNV | 1 | A | C | Heterozygous |
| NC_037648.1 | 5668474 | SNV | 1 | A | G | Homozygous   |
| NC_037648.1 | 5668481 | SNV | 1 | T | C | Homozygous   |
| NC_037648.1 | 5668483 | SNV | 1 | T | A | Heterozygous |
| NC_037648.1 | 5668491 | SNV | 1 | T | G | Homozygous   |
| NC_037648.1 | 5668505 | SNV | 1 | G | T | Homozygous   |
| NC_037648.1 | 5671022 | SNV | 1 | T | A | Heterozygous |
| NC_037648.1 | 5671024 | SNV | 1 | T | A | Heterozygous |
| NC_037648.1 | 5680388 | SNV | 1 | A | G | Homozygous   |
| NC_037648.1 | 5680408 | SNV | 1 | A | T | Homozygous   |
| NC_037648.1 | 5680427 | SNV | 1 | A | T | Homozygous   |
| NC_037648.1 | 5687038 | SNV | 1 | T | A | Homozygous   |
| NC_037648.1 | 5687045 | SNV | 1 | A | G | Homozygous   |
| NC_037648.1 | 5687051 | SNV | 1 | A | T | Homozygous   |
| NC_037648.1 | 5687061 | SNV | 1 | A | T | Homozygous   |
| NC_037648.1 | 5687150 | SNV | 1 | A | T | Homozygous   |
| NC_037648.1 | 5697100 | SNV | 1 | T | G | Heterozygous |
| NC_037648.1 | 5697108 | SNV | 1 | T | G | Heterozygous |
| NC_037648.1 | 5697114 | SNV | 1 | T | G | Heterozygous |
| NC_037648.1 | 5702067 | SNV | 1 | G | A | Heterozygous |
| NC_037648.1 | 5702091 | SNV | 1 | G | A | Heterozygous |
| NC_037648.1 | 5702172 | SNV | 1 | A | G | Homozygous   |
| NC_037648.1 | 5702187 | SNV | 1 | C | T | Heterozygous |
| NC_037648.1 | 5705451 | SNV | 1 | T | C | Homozygous   |
| NC_037648.1 | 5705461 | SNV | 1 | A | T | Heterozygous |
| NC_037648.1 | 5705463 | SNV | 1 | T | A | Heterozygous |
| NC_037648.1 | 5705470 | SNV | 1 | A | T | Heterozygous |

|             |         |     |   |   |   |              |
|-------------|---------|-----|---|---|---|--------------|
| NC_037648.1 | 5705481 | SNV | 1 | A | T | Heterozygous |
| NC_037648.1 | 5705487 | SNV | 1 | A | T | Heterozygous |
| NC_037648.1 | 5705489 | SNV | 1 | G | T | Heterozygous |
| NC_037648.1 | 5705509 | SNV | 1 | A | C | Heterozygous |
| NC_037648.1 | 5705509 | SNV | 1 | A | T | Heterozygous |
| NC_037648.1 | 5709574 | SNV | 1 | T | C | Homozygous   |
| NC_037648.1 | 5709579 | SNV | 1 | G | A | Homozygous   |
| NC_037648.1 | 5709590 | SNV | 1 | A | T | Homozygous   |
| NC_037648.1 | 5711011 | SNV | 1 | A | T | Heterozygous |
| NC_037648.1 | 5711026 | SNV | 1 | T | A | Heterozygous |
| NC_037648.1 | 5711035 | SNV | 1 | A | G | Heterozygous |
| NC_037648.1 | 5728262 | SNV | 1 | G | T | Homozygous   |
| NC_037648.1 | 5728266 | SNV | 1 | A | G | Homozygous   |
| NC_037648.1 | 5728282 | SNV | 1 | A | G | Homozygous   |
| NC_037648.1 | 5731637 | SNV | 1 | T | A | Homozygous   |
| NC_037648.1 | 5731644 | SNV | 1 | A | T | Homozygous   |
| NC_037648.1 | 5731654 | SNV | 1 | G | A | Homozygous   |
| NC_037648.1 | 5731657 | SNV | 1 | A | T | Homozygous   |
| NC_037648.1 | 5732346 | SNV | 1 | A | T | Homozygous   |
| NC_037648.1 | 5732348 | SNV | 1 | A | T | Homozygous   |
| NC_037648.1 | 5732352 | SNV | 1 | A | G | Homozygous   |
| NC_037648.1 | 5732392 | SNV | 1 | T | C | Heterozygous |
| NC_037648.1 | 5732402 | SNV | 1 | T | C | Heterozygous |
| NC_037648.1 | 5741265 | SNV | 1 | T | G | Homozygous   |
| NC_037648.1 | 5741363 | SNV | 1 | G | A | Homozygous   |
| NC_037648.1 | 5741385 | SNV | 1 | T | A | Heterozygous |
| NC_037648.1 | 5741385 | SNV | 1 | T | G | Heterozygous |
| NC_037648.1 | 5741387 | SNV | 1 | T | A | Heterozygous |
| NC_037648.1 | 5747221 | SNV | 1 | T | A | Homozygous   |
| NC_037648.1 | 5747250 | SNV | 1 | T | C | Homozygous   |
| NC_037648.1 | 5747257 | SNV | 1 | T | A | Homozygous   |
| NC_037648.1 | 5747992 | SNV | 1 | T | A | Homozygous   |
| NC_037648.1 | 5747994 | SNV | 1 | A | G | Homozygous   |
| NC_037648.1 | 5748012 | SNV | 1 | A | T | Homozygous   |
| NC_037648.1 | 5753104 | SNV | 1 | T | A | Homozygous   |
| NC_037648.1 | 5753114 | SNV | 1 | G | A | Homozygous   |
| NC_037648.1 | 5753120 | SNV | 1 | G | T | Homozygous   |
| NC_037648.1 | 5753125 | SNV | 1 | T | G | Homozygous   |
| NC_037648.1 | 5753973 | SNV | 1 | C | A | Homozygous   |
| NC_037648.1 | 5753980 | SNV | 1 | A | T | Homozygous   |
| NC_037648.1 | 5753983 | SNV | 1 | A | T | Homozygous   |
| NC_037648.1 | 5753991 | SNV | 1 | A | G | Homozygous   |
| NC_037648.1 | 5754369 | SNV | 1 | A | T | Heterozygous |
| NC_037648.1 | 5754375 | SNV | 1 | A | T | Heterozygous |
| NC_037648.1 | 5754385 | SNV | 1 | A | G | Heterozygous |
| NC_037648.1 | 5754866 | SNV | 1 | A | T | Heterozygous |
| NC_037648.1 | 5754909 | SNV | 1 | T | A | Heterozygous |
| NC_037648.1 | 5764796 | SNV | 1 | T | C | Homozygous   |
| NC_037648.1 | 5764806 | SNV | 1 | T | A | Homozygous   |
| NC_037648.1 | 5788143 | SNV | 1 | A | T | Homozygous   |
| NC_037648.1 | 5788148 | SNV | 1 | T | A | Homozygous   |

|             |         |     |   |   |   |              |
|-------------|---------|-----|---|---|---|--------------|
| NC_037648.1 | 5788152 | SNV | 1 | T | A | Homozygous   |
| NC_037648.1 | 5788156 | SNV | 1 | A | C | Homozygous   |
| NC_037648.1 | 5811552 | SNV | 1 | C | T | Homozygous   |
| NC_037648.1 | 5811562 | SNV | 1 | A | C | Homozygous   |
| NC_037648.1 | 5811565 | SNV | 1 | T | C | Homozygous   |
| NC_037648.1 | 5811571 | SNV | 1 | T | A | Homozygous   |
| NC_037648.1 | 5811573 | SNV | 1 | A | C | Homozygous   |
| NC_037648.1 | 5814984 | SNV | 1 | T | C | Homozygous   |
| NC_037648.1 | 5814988 | SNV | 1 | A | T | Homozygous   |
| NC_037648.1 | 5814991 | SNV | 1 | T | C | Homozygous   |
| NC_037648.1 | 5815006 | SNV | 1 | A | G | Homozygous   |
| NC_037648.1 | 5815009 | SNV | 1 | A | G | Homozygous   |
| NC_037648.1 | 5816363 | SNV | 1 | G | A | Homozygous   |
| NC_037648.1 | 5816412 | SNV | 1 | A | C | Homozygous   |
| NC_037648.1 | 5818486 | SNV | 1 | T | A | Homozygous   |
| NC_037648.1 | 5822941 | SNV | 1 | T | A | Homozygous   |
| NC_037648.1 | 5822961 | SNV | 1 | A | C | Homozygous   |
| NC_037648.1 | 5822981 | SNV | 1 | A | T | Homozygous   |
| NC_037648.1 | 5822989 | SNV | 1 | A | G | Homozygous   |
| NC_037648.1 | 5830227 | SNV | 1 | T | A | Homozygous   |
| NC_037648.1 | 5830231 | SNV | 1 | A | T | Homozygous   |
| NC_037648.1 | 5830235 | SNV | 1 | A | T | Homozygous   |
| NC_037648.1 | 5830240 | SNV | 1 | C | G | Homozygous   |
| NC_037648.1 | 5830258 | SNV | 1 | T | A | Homozygous   |
| NC_037648.1 | 5830260 | SNV | 1 | T | C | Homozygous   |
| NC_037648.1 | 5837575 | SNV | 1 | A | T | Heterozygous |
| NC_037648.1 | 5837577 | SNV | 1 | A | T | Heterozygous |
| NC_037648.1 | 5837579 | SNV | 1 | T | A | Heterozygous |
| NC_037648.1 | 5837581 | SNV | 1 | A | T | Heterozygous |
| NC_037648.1 | 5837583 | SNV | 1 | A | C | Heterozygous |
| NC_037648.1 | 5837583 | SNV | 1 | A | G | Heterozygous |
| NC_037648.1 | 5837586 | SNV | 1 | T | A | Heterozygous |
| NC_037648.1 | 5837602 | SNV | 1 | A | G | Homozygous   |
| NC_037648.1 | 5837618 | SNV | 1 | T | G | Heterozygous |
| NC_037648.1 | 5849620 | SNV | 1 | A | G | Homozygous   |
| NC_037648.1 | 5849627 | SNV | 1 | T | C | Homozygous   |
| NC_037648.1 | 5849630 | SNV | 1 | A | C | Homozygous   |
| NC_037648.1 | 5849657 | SNV | 1 | T | A | Homozygous   |
| NC_037648.1 | 5860477 | SNV | 1 | T | A | Heterozygous |
| NC_037648.1 | 5863657 | SNV | 1 | A | T | Homozygous   |
| NC_037648.1 | 5867119 | SNV | 1 | T | A | Homozygous   |
| NC_037648.1 | 5867129 | SNV | 1 | A | G | Homozygous   |
| NC_037648.1 | 5867161 | SNV | 1 | C | T | Homozygous   |
| NC_037648.1 | 5867164 | SNV | 1 | G | A | Homozygous   |
| NC_037648.1 | 5869895 | SNV | 1 | T | C | Homozygous   |
| NC_037648.1 | 5869904 | SNV | 1 | A | G | Homozygous   |
| NC_037648.1 | 5874519 | SNV | 1 | C | G | Homozygous   |
| NC_037648.1 | 5874559 | SNV | 1 | T | G | Homozygous   |
| NC_037648.1 | 5878882 | SNV | 1 | T | A | Heterozygous |
| NC_037648.1 | 5878898 | SNV | 1 | T | A | Heterozygous |
| NC_037648.1 | 5878900 | SNV | 1 | T | C | Heterozygous |



|             |         |     |   |   |   |              |
|-------------|---------|-----|---|---|---|--------------|
| NC_037648.1 | 5878907 | SNV | 1 | A | T | Heterozygous |
| NC_037648.1 | 5881492 | SNV | 1 | T | A | Homozygous   |
| NC_037648.1 | 5881501 | SNV | 1 | A | G | Homozygous   |
| NC_037648.1 | 5881524 | SNV | 1 | A | C | Homozygous   |
| NC_037648.1 | 5881534 | SNV | 1 | A | T | Homozygous   |
| NC_037648.1 | 5883747 | SNV | 1 | A | C | Homozygous   |
| NC_037648.1 | 5886551 | SNV | 1 | G | A | Homozygous   |
| NC_037648.1 | 5886553 | SNV | 1 | A | T | Homozygous   |
| NC_037648.1 | 5886555 | SNV | 1 | A | T | Homozygous   |
| NC_037648.1 | 5886566 | SNV | 1 | A | G | Homozygous   |
| NC_037648.1 | 5887520 | SNV | 1 | A | T | Homozygous   |
| NC_037648.1 | 5902990 | SNV | 1 | T | C | Heterozygous |
| NC_037648.1 | 5909354 | SNV | 1 | T | C | Homozygous   |
| NC_037648.1 | 5909357 | SNV | 1 | T | G | Homozygous   |
| NC_037648.1 | 5918762 | SNV | 1 | T | A | Homozygous   |
| NC_037648.1 | 5918795 | SNV | 1 | T | A | Homozygous   |
| NC_037648.1 | 5918807 | SNV | 1 | A | T | Homozygous   |
| NC_037648.1 | 5918812 | SNV | 1 | A | T | Homozygous   |
| NC_037648.1 | 5932527 | SNV | 1 | T | C | Homozygous   |
| NC_037648.1 | 5932558 | SNV | 1 | T | C | Heterozygous |
| NC_037648.1 | 5932585 | SNV | 1 | A | G | Homozygous   |
| NC_037648.1 | 5932587 | SNV | 1 | C | G | Homozygous   |
| NC_037648.1 | 5932613 | SNV | 1 | T | C | Heterozygous |
| NC_037648.1 | 5932618 | SNV | 1 | T | C | Heterozygous |
| NC_037648.1 | 5949818 | SNV | 1 | T | A | Heterozygous |
| NC_037648.1 | 5949908 | SNV | 1 | A | T | Heterozygous |
| NC_037648.1 | 5951636 | SNV | 1 | T | A | Homozygous   |
| NC_037648.1 | 5951640 | SNV | 1 | T | A | Homozygous   |
| NC_037648.1 | 5951650 | SNV | 1 | T | A | Homozygous   |
| NC_037648.1 | 5951658 | SNV | 1 | T | A | Homozygous   |
| NC_037648.1 | 5951664 | SNV | 1 | T | A | Homozygous   |
| NC_037648.1 | 5956398 | SNV | 1 | A | T | Homozygous   |
| NC_037648.1 | 5956427 | SNV | 1 | T | A | Homozygous   |
| NC_037648.1 | 5956430 | SNV | 1 | A | T | Homozygous   |
| NC_037648.1 | 5970159 | SNV | 1 | A | T | Homozygous   |
| NC_037648.1 | 5970166 | SNV | 1 | A | T | Homozygous   |
| NC_037648.1 | 5970171 | SNV | 1 | G | A | Homozygous   |
| NC_037648.1 | 5970176 | SNV | 1 | A | T | Homozygous   |
| NC_037648.1 | 5970179 | SNV | 1 | G | A | Homozygous   |
| NC_037648.1 | 5970201 | SNV | 1 | A | T | Homozygous   |
| NC_037648.1 | 5975335 | SNV | 1 | A | T | Heterozygous |
| NC_037648.1 | 5975378 | SNV | 1 | T | C | Heterozygous |
| NC_037648.1 | 5975384 | SNV | 1 | T | G | Heterozygous |
| NC_037648.1 | 5975417 | SNV | 1 | T | A | Homozygous   |
| NC_037648.1 | 5975420 | SNV | 1 | T | A | Homozygous   |
| NC_037648.1 | 5975589 | SNV | 1 | G | A | Homozygous   |
| NC_037648.1 | 5975595 | SNV | 1 | G | A | Homozygous   |
| NC_037648.1 | 5975607 | SNV | 1 | G | A | Homozygous   |
| NC_037648.1 | 5975610 | SNV | 1 | A | T | Homozygous   |
| NC_037648.1 | 5975757 | SNV | 1 | G | A | Heterozygous |
| NC_037648.1 | 5976019 | SNV | 1 | A | T | Heterozygous |

|             |         |     |   |   |   |              |
|-------------|---------|-----|---|---|---|--------------|
| NC_037648.1 | 5976043 | SNV | 1 | A | T | Heterozygous |
| NC_037648.1 | 5976083 | SNV | 1 | A | G | Homozygous   |
| NC_037648.1 | 5976091 | SNV | 1 | A | G | Homozygous   |
| NC_037648.1 | 5976097 | SNV | 1 | A | G | Homozygous   |
| NC_037648.1 | 5976128 | SNV | 1 | A | T | Heterozygous |
| NC_037648.1 | 5976184 | SNV | 1 | G | A | Homozygous   |
| NC_037648.1 | 5976192 | SNV | 1 | T | C | Homozygous   |
| NC_037648.1 | 5976198 | SNV | 1 | T | C | Homozygous   |
| NC_037648.1 | 5976202 | SNV | 1 | G | C | Homozygous   |
| NC_037648.1 | 5976206 | SNV | 1 | A | C | Homozygous   |
| NC_037648.1 | 5976208 | SNV | 1 | G | A | Homozygous   |
| NC_037648.1 | 5976215 | SNV | 1 | A | G | Homozygous   |
| NC_037648.1 | 5976217 | SNV | 1 | G | A | Homozygous   |
| NC_037648.1 | 5976226 | SNV | 1 | G | A | Homozygous   |
| NC_037648.1 | 5976255 | SNV | 1 | T | C | Homozygous   |
| NC_037648.1 | 5981661 | SNV | 1 | T | A | Homozygous   |
| NC_037648.1 | 5981663 | SNV | 1 | A | T | Homozygous   |
| NC_037648.1 | 5990393 | SNV | 1 | A | G | Homozygous   |
| NC_037648.1 | 5990399 | SNV | 1 | A | G | Homozygous   |
| NC_037648.1 | 5990424 | SNV | 1 | T | C | Homozygous   |
| NC_037648.1 | 5990449 | SNV | 1 | T | C | Homozygous   |
| NC_037648.1 | 5993103 | SNV | 1 | T | A | Heterozygous |
| NC_037648.1 | 5993164 | SNV | 1 | T | C | Heterozygous |
| NC_037648.1 | 5993167 | SNV | 1 | A | T | Heterozygous |
| NC_037648.1 | 5993197 | SNV | 1 | T | A | Homozygous   |
| NC_037648.1 | 5993202 | SNV | 1 | T | C | Homozygous   |
| NC_037648.1 | 5993270 | SNV | 1 | T | A | Heterozygous |
| NC_037648.1 | 5993285 | SNV | 1 | A | G | Homozygous   |
| NC_037648.1 | 5993291 | SNV | 1 | G | A | Homozygous   |
| NC_037648.1 | 5994772 | SNV | 1 | T | C | Homozygous   |
| NC_037648.1 | 5994881 | SNV | 1 | C | T | Heterozygous |
| NC_037648.1 | 5994926 | SNV | 1 | A | G | Heterozygous |
| NC_037648.1 | 5994979 | SNV | 1 | G | C | Heterozygous |
| NC_037648.1 | 5995119 | SNV | 1 | C | G | Homozygous   |
| NC_037648.1 | 6008563 | SNV | 1 | T | G | Homozygous   |
| NC_037648.1 | 6008573 | SNV | 1 | A | T | Homozygous   |
| NC_037648.1 | 6008575 | SNV | 1 | C | A | Homozygous   |
| NC_037648.1 | 6008591 | SNV | 1 | A | T | Homozygous   |
| NC_037648.1 | 6008594 | SNV | 1 | T | A | Homozygous   |
| NC_037648.1 | 6008602 | SNV | 1 | T | G | Homozygous   |
| NC_037648.1 | 6008606 | SNV | 1 | G | A | Homozygous   |
| NC_037648.1 | 6008623 | SNV | 1 | A | G | Homozygous   |
| NC_037648.1 | 6018901 | SNV | 1 | T | A | Homozygous   |
| NC_037648.1 | 6026242 | SNV | 1 | C | T | Homozygous   |
| NC_037648.1 | 6026247 | SNV | 1 | C | T | Heterozygous |
| NC_037648.1 | 6026250 | SNV | 1 | A | T | Heterozygous |
| NC_037648.1 | 6026252 | SNV | 1 | C | T | Heterozygous |
| NC_037648.1 | 6026256 | SNV | 1 | G | T | Homozygous   |
| NC_037648.1 | 6040345 | SNV | 1 | T | G | Homozygous   |
| NC_037648.1 | 6041813 | SNV | 1 | A | G | Homozygous   |
| NC_037648.1 | 6041825 | SNV | 1 | T | A | Homozygous   |

|             |         |     |   |   |   |              |
|-------------|---------|-----|---|---|---|--------------|
| NC_037648.1 | 6041847 | SNV | 1 | T | G | Homozygous   |
| NC_037648.1 | 6041850 | SNV | 1 | C | G | Homozygous   |
| NC_037648.1 | 6041853 | SNV | 1 | T | A | Homozygous   |
| NC_037648.1 | 6044632 | SNV | 1 | T | A | Homozygous   |
| NC_037648.1 | 6051206 | SNV | 1 | T | A | Homozygous   |
| NC_037648.1 | 6052098 | SNV | 1 | T | A | Homozygous   |
| NC_037648.1 | 6075413 | SNV | 1 | C | A | Homozygous   |
| NC_037648.1 | 6075420 | SNV | 1 | A | T | Heterozygous |
| NC_037648.1 | 6075453 | SNV | 1 | A | G | Heterozygous |
| NC_037648.1 | 6075459 | SNV | 1 | A | T | Heterozygous |
| NC_037648.1 | 6075486 | SNV | 1 | T | A | Heterozygous |
| NC_037648.1 | 6085115 | SNV | 1 | G | T | Homozygous   |
| NC_037648.1 | 6085123 | SNV | 1 | T | A | Homozygous   |
| NC_037648.1 | 6085686 | SNV | 1 | A | T | Homozygous   |
| NC_037648.1 | 6085691 | SNV | 1 | G | C | Homozygous   |
| NC_037648.1 | 6085700 | SNV | 1 | A | G | Homozygous   |
| NC_037648.1 | 6090072 | SNV | 1 | A | G | Homozygous   |
| NC_037648.1 | 6090075 | SNV | 1 | T | A | Homozygous   |
| NC_037648.1 | 6090077 | SNV | 1 | A | C | Homozygous   |
| NC_037648.1 | 6090081 | SNV | 1 | T | A | Homozygous   |
| NC_037648.1 | 6090092 | SNV | 1 | T | G | Homozygous   |
| NC_037648.1 | 6090914 | SNV | 1 | T | A | Heterozygous |
| NC_037648.1 | 6090949 | SNV | 1 | A | T | Homozygous   |
| NC_037648.1 | 6090952 | SNV | 1 | T | G | Homozygous   |
| NC_037648.1 | 6090956 | SNV | 1 | T | A | Heterozygous |
| NC_037648.1 | 6092750 | SNV | 1 | T | G | Heterozygous |
| NC_037648.1 | 6092756 | SNV | 1 | A | T | Heterozygous |
| NC_037648.1 | 6092817 | SNV | 1 | A | T | Heterozygous |
| NC_037648.1 | 6092828 | SNV | 1 | G | A | Homozygous   |
| NC_037648.1 | 6092845 | SNV | 1 | T | C | Heterozygous |
| NC_037648.1 | 6094767 | SNV | 1 | C | T | Homozygous   |
| NC_037648.1 | 6094775 | SNV | 1 | A | T | Homozygous   |
| NC_037648.1 | 6108287 | SNV | 1 | T | G | Homozygous   |
| NC_037648.1 | 6108291 | SNV | 1 | A | C | Homozygous   |
| NC_037648.1 | 6108294 | SNV | 1 | A | T | Homozygous   |
| NC_037648.1 | 6108307 | SNV | 1 | T | A | Homozygous   |
| NC_037648.1 | 6108312 | SNV | 1 | T | C | Homozygous   |
| NC_037648.1 | 6108314 | SNV | 1 | A | G | Homozygous   |
| NC_037648.1 | 6108337 | SNV | 1 | A | G | Homozygous   |
| NC_037648.1 | 6108352 | SNV | 1 | T | C | Homozygous   |
| NC_037648.1 | 6111258 | SNV | 1 | C | A | Homozygous   |
| NC_037648.1 | 6111267 | SNV | 1 | A | T | Homozygous   |
| NC_037648.1 | 6111305 | SNV | 1 | A | C | Homozygous   |
| NC_037648.1 | 6112108 | SNV | 1 | T | A | Homozygous   |
| NC_037648.1 | 6112113 | SNV | 1 | A | G | Homozygous   |
| NC_037648.1 | 6112142 | SNV | 1 | A | T | Homozygous   |
| NC_037648.1 | 6112149 | SNV | 1 | A | T | Homozygous   |
| NC_037648.1 | 6112571 | SNV | 1 | A | T | Homozygous   |
| NC_037648.1 | 6112574 | SNV | 1 | A | G | Homozygous   |
| NC_037648.1 | 6113405 | SNV | 1 | C | T | Homozygous   |
| NC_037648.1 | 6113407 | SNV | 1 | T | G | Homozygous   |

|             |         |     |   |   |   |              |
|-------------|---------|-----|---|---|---|--------------|
| NC_037648.1 | 6114166 | SNV | 1 | C | T | Heterozygous |
| NC_037648.1 | 6114171 | SNV | 1 | T | C | Homozygous   |
| NC_037648.1 | 6115579 | SNV | 1 | T | C | Homozygous   |
| NC_037648.1 | 6115596 | SNV | 1 | C | T | Homozygous   |
| NC_037648.1 | 6115614 | SNV | 1 | T | A | Homozygous   |
| NC_037648.1 | 6141222 | SNV | 1 | T | A | Homozygous   |
| NC_037648.1 | 6141243 | SNV | 1 | A | G | Homozygous   |
| NC_037648.1 | 6141245 | SNV | 1 | A | T | Homozygous   |
| NC_037648.1 | 6141257 | SNV | 1 | A | T | Homozygous   |
| NC_037648.1 | 6141263 | SNV | 1 | T | C | Homozygous   |
| NC_037648.1 | 6141271 | SNV | 1 | C | T | Homozygous   |
| NC_037648.1 | 6141288 | SNV | 1 | T | A | Homozygous   |
| NC_037648.1 | 6150395 | SNV | 1 | T | G | Homozygous   |
| NC_037648.1 | 6150402 | SNV | 1 | A | T | Homozygous   |
| NC_037648.1 | 6150412 | SNV | 1 | A | G | Homozygous   |
| NC_037648.1 | 6150415 | SNV | 1 | A | T | Homozygous   |
| NC_037648.1 | 6150428 | SNV | 1 | A | T | Homozygous   |
| NC_037648.1 | 6150431 | SNV | 1 | T | A | Homozygous   |
| NC_037648.1 | 6150482 | SNV | 1 | G | A | Homozygous   |
| NC_037648.1 | 6150492 | SNV | 1 | A | T | Homozygous   |
| NC_037648.1 | 6150501 | SNV | 1 | A | T | Homozygous   |
| NC_037648.1 | 6150505 | SNV | 1 | A | T | Homozygous   |
| NC_037648.1 | 6150514 | SNV | 1 | T | C | Homozygous   |
| NC_037648.1 | 6156136 | SNV | 1 | A | C | Homozygous   |
| NC_037648.1 | 6156141 | SNV | 1 | T | C | Homozygous   |
| NC_037648.1 | 6156144 | SNV | 1 | A | G | Homozygous   |
| NC_037648.1 | 6156157 | SNV | 1 | T | A | Homozygous   |
| NC_037648.1 | 6156161 | SNV | 1 | C | A | Homozygous   |
| NC_037648.1 | 6163668 | SNV | 1 | A | G | Homozygous   |
| NC_037648.1 | 6165967 | SNV | 1 | C | T | Heterozygous |
| NC_037648.1 | 6165981 | SNV | 1 | C | T | Heterozygous |
| NC_037648.1 | 6166571 | SNV | 1 | G | C | Homozygous   |
| NC_037648.1 | 6166587 | SNV | 1 | T | G | Homozygous   |
| NC_037648.1 | 6166592 | SNV | 1 | A | T | Homozygous   |
| NC_037648.1 | 6166596 | SNV | 1 | A | C | Homozygous   |
| NC_037648.1 | 6166599 | SNV | 1 | T | A | Homozygous   |
| NC_037648.1 | 6166605 | SNV | 1 | A | T | Homozygous   |
| NC_037648.1 | 6167946 | SNV | 1 | A | T | Homozygous   |
| NC_037648.1 | 6167954 | SNV | 1 | A | C | Homozygous   |
| NC_037648.1 | 6169864 | SNV | 1 | A | T | Homozygous   |
| NC_037648.1 | 6169866 | SNV | 1 | T | G | Homozygous   |
| NC_037648.1 | 6169872 | SNV | 1 | G | C | Heterozygous |
| NC_037648.1 | 6169872 | SNV | 1 | G | T | Heterozygous |
| NC_037648.1 | 6169878 | SNV | 1 | T | C | Homozygous   |
| NC_037648.1 | 6169884 | SNV | 1 | T | G | Homozygous   |
| NC_037648.1 | 6169886 | SNV | 1 | G | A | Homozygous   |
| NC_037648.1 | 6169901 | SNV | 1 | G | A | Homozygous   |
| NC_037648.1 | 6169910 | SNV | 1 | A | G | Homozygous   |
| NC_037648.1 | 6169916 | SNV | 1 | T | C | Homozygous   |
| NC_037648.1 | 6172039 | SNV | 1 | A | T | Heterozygous |
| NC_037648.1 | 6172075 | SNV | 1 | T | C | Homozygous   |

|             |         |     |   |   |   |              |
|-------------|---------|-----|---|---|---|--------------|
| NC_037648.1 | 6175388 | SNV | 1 | A | T | Heterozygous |
| NC_037648.1 | 6175391 | SNV | 1 | T | C | Heterozygous |
| NC_037648.1 | 6175414 | SNV | 1 | T | A | Heterozygous |
| NC_037648.1 | 6179630 | SNV | 1 | A | G | Homozygous   |
| NC_037648.1 | 6179693 | SNV | 1 | T | C | Homozygous   |
| NC_037648.1 | 6180729 | SNV | 1 | G | A | Homozygous   |
| NC_037648.1 | 6184941 | SNV | 1 | A | G | Homozygous   |
| NC_037648.1 | 6185915 | SNV | 1 | A | G | Heterozygous |
| NC_037648.1 | 6186225 | SNV | 1 | A | T | Homozygous   |
| NC_037648.1 | 6186269 | SNV | 1 | C | A | Homozygous   |
| NC_037648.1 | 6186277 | SNV | 1 | C | A | Homozygous   |
| NC_037648.1 | 6186302 | SNV | 1 | A | G | Homozygous   |
| NC_037648.1 | 6186309 | SNV | 1 | C | A | Homozygous   |
| NC_037648.1 | 6188562 | SNV | 1 | C | T | Homozygous   |
| NC_037648.1 | 6188737 | SNV | 1 | A | G | Homozygous   |
| NC_037648.1 | 6189134 | SNV | 1 | C | T | Heterozygous |
| NC_037648.1 | 6189140 | SNV | 1 | T | C | Heterozygous |
| NC_037648.1 | 6189163 | SNV | 1 | G | A | Heterozygous |
| NC_037648.1 | 6189173 | SNV | 1 | G | A | Heterozygous |
| NC_037648.1 | 6190105 | SNV | 1 | G | A | Heterozygous |
| NC_037648.1 | 6191202 | SNV | 1 | T | C | Homozygous   |
| NC_037648.1 | 6191491 | SNV | 1 | A | G | Homozygous   |
| NC_037648.1 | 6192013 | SNV | 1 | T | C | Homozygous   |
| NC_037648.1 | 6192640 | SNV | 1 | A | G | Homozygous   |
| NC_037648.1 | 6195016 | SNV | 1 | A | G | Homozygous   |
| NC_037648.1 | 6196014 | SNV | 1 | T | A | Homozygous   |
| NC_037648.1 | 6196021 | SNV | 1 | T | G | Homozygous   |
| NC_037648.1 | 6196023 | SNV | 1 | A | G | Homozygous   |
| NC_037648.1 | 6197182 | SNV | 1 | A | G | Heterozygous |
| NC_037648.1 | 6198178 | SNV | 1 | C | T | Heterozygous |
| NC_037648.1 | 6199350 | SNV | 1 | A | G | Homozygous   |
| NC_037648.1 | 6202984 | SNV | 1 | A | T | Homozygous   |
| NC_037648.1 | 6202986 | SNV | 1 | A | T | Homozygous   |
| NC_037648.1 | 6203004 | SNV | 1 | T | A | Homozygous   |
| NC_037648.1 | 6203009 | SNV | 1 | T | A | Homozygous   |
| NC_037648.1 | 6203011 | SNV | 1 | T | A | Homozygous   |
| NC_037648.1 | 6204468 | SNV | 1 | G | C | Homozygous   |
| NC_037648.1 | 6214172 | SNV | 1 | C | T | Homozygous   |
| NC_037648.1 | 6215192 | SNV | 1 | A | C | Homozygous   |
| NC_037648.1 | 6215199 | SNV | 1 | T | C | Homozygous   |
| NC_037648.1 | 6215240 | SNV | 1 | A | C | Homozygous   |
| NC_037648.1 | 6215242 | SNV | 1 | A | G | Homozygous   |
| NC_037648.1 | 6215249 | SNV | 1 | T | A | Homozygous   |
| NC_037648.1 | 6226813 | SNV | 1 | T | C | Homozygous   |
| NC_037648.1 | 6226818 | SNV | 1 | G | T | Homozygous   |
| NC_037648.1 | 6226833 | SNV | 1 | T | C | Homozygous   |
| NC_037648.1 | 6230045 | SNV | 1 | G | T | Heterozygous |
| NC_037648.1 | 6230059 | SNV | 1 | G | T | Homozygous   |
| NC_037648.1 | 6238654 | SNV | 1 | A | G | Heterozygous |
| NC_037648.1 | 6238661 | SNV | 1 | G | A | Heterozygous |
| NC_037648.1 | 6250022 | SNV | 1 | G | T | Heterozygous |

|             |         |     |   |   |   |              |
|-------------|---------|-----|---|---|---|--------------|
| NC_037648.1 | 6250027 | SNV | 1 | T | C | Heterozygous |
| NC_037648.1 | 6250030 | SNV | 1 | G | A | Heterozygous |
| NC_037648.1 | 6250057 | SNV | 1 | C | T | Heterozygous |
| NC_037648.1 | 6250065 | SNV | 1 | C | T | Heterozygous |
| NC_037648.1 | 6250069 | SNV | 1 | C | A | Heterozygous |
| NC_037648.1 | 6252962 | SNV | 1 | G | T | Homozygous   |
| NC_037648.1 | 6252980 | SNV | 1 | T | A | Heterozygous |
| NC_037648.1 | 6252986 | SNV | 1 | T | A | Heterozygous |
| NC_037648.1 | 6255630 | SNV | 1 | A | G | Homozygous   |
| NC_037648.1 | 6255633 | SNV | 1 | A | C | Homozygous   |
| NC_037648.1 | 6255663 | SNV | 1 | C | A | Homozygous   |
| NC_037648.1 | 6255665 | SNV | 1 | T | G | Homozygous   |
| NC_037648.1 | 6255670 | SNV | 1 | G | A | Homozygous   |
| NC_037648.1 | 6255673 | SNV | 1 | G | A | Homozygous   |
| NC_037648.1 | 6255679 | SNV | 1 | A | T | Homozygous   |
| NC_037648.1 | 6255681 | SNV | 1 | A | C | Homozygous   |
| NC_037648.1 | 6258154 | SNV | 1 | A | T | Homozygous   |
| NC_037648.1 | 6258182 | SNV | 1 | A | C | Homozygous   |
| NC_037648.1 | 6258185 | SNV | 1 | T | A | Homozygous   |
| NC_037648.1 | 6269709 | SNV | 1 | T | C | Heterozygous |
| NC_037648.1 | 6269711 | SNV | 1 | C | G | Heterozygous |
| NC_037648.1 | 6269714 | SNV | 1 | T | C | Heterozygous |
| NC_037648.1 | 6269717 | SNV | 1 | C | T | Heterozygous |
| NC_037648.1 | 6269724 | SNV | 1 | C | G | Heterozygous |
| NC_037648.1 | 6269732 | SNV | 1 | C | T | Homozygous   |
| NC_037648.1 | 6270663 | SNV | 1 | T | A | Homozygous   |
| NC_037648.1 | 6270686 | SNV | 1 | T | A | Homozygous   |
| NC_037648.1 | 6270707 | SNV | 1 | T | G | Homozygous   |
| NC_037648.1 | 6270712 | SNV | 1 | T | A | Homozygous   |
| NC_037648.1 | 6275242 | SNV | 1 | A | G | Heterozygous |
| NC_037648.1 | 6275310 | SNV | 1 | G | T | Homozygous   |
| NC_037648.1 | 6275314 | SNV | 1 | A | G | Homozygous   |
| NC_037648.1 | 6275323 | SNV | 1 | A | G | Homozygous   |
| NC_037648.1 | 6279367 | SNV | 1 | T | C | Homozygous   |
| NC_037648.1 | 6283507 | SNV | 1 | C | A | Homozygous   |
| NC_037648.1 | 6283514 | SNV | 1 | T | A | Homozygous   |
| NC_037648.1 | 6284523 | SNV | 1 | G | C | Heterozygous |
| NC_037648.1 | 6284540 | SNV | 1 | A | G | Heterozygous |
| NC_037648.1 | 6284545 | SNV | 1 | T | C | Heterozygous |
| NC_037648.1 | 6284565 | SNV | 1 | A | T | Heterozygous |
| NC_037648.1 | 6284571 | SNV | 1 | A | G | Heterozygous |
| NC_037648.1 | 6285732 | SNV | 1 | T | C | Homozygous   |
| NC_037648.1 | 6285738 | SNV | 1 | A | C | Homozygous   |
| NC_037648.1 | 6285743 | SNV | 1 | A | G | Homozygous   |
| NC_037648.1 | 6299750 | SNV | 1 | A | G | Homozygous   |
| NC_037648.1 | 6299753 | SNV | 1 | G | A | Homozygous   |
| NC_037648.1 | 6316510 | SNV | 1 | A | G | Heterozygous |
| NC_037648.1 | 6317318 | SNV | 1 | G | A | Homozygous   |
| NC_037648.1 | 6317320 | SNV | 1 | G | C | Homozygous   |
| NC_037648.1 | 6317330 | SNV | 1 | G | C | Homozygous   |
| NC_037648.1 | 6317334 | SNV | 1 | G | C | Homozygous   |

|             |         |     |   |   |   |              |
|-------------|---------|-----|---|---|---|--------------|
| NC_037648.1 | 6317341 | SNV | 1 | G | A | Homozygous   |
| NC_037648.1 | 6323272 | SNV | 1 | G | T | Homozygous   |
| NC_037648.1 | 6323274 | SNV | 1 | T | A | Homozygous   |
| NC_037648.1 | 6323283 | SNV | 1 | A | T | Homozygous   |
| NC_037648.1 | 6323295 | SNV | 1 | A | T | Heterozygous |
| NC_037648.1 | 6326890 | SNV | 1 | A | G | Homozygous   |
| NC_037648.1 | 6335390 | SNV | 1 | A | G | Homozygous   |
| NC_037648.1 | 6335399 | SNV | 1 | A | T | Homozygous   |
| NC_037648.1 | 6335418 | SNV | 1 | A | T | Heterozygous |
| NC_037648.1 | 6335423 | SNV | 1 | T | G | Heterozygous |
| NC_037648.1 | 6335428 | SNV | 1 | T | A | Heterozygous |
| NC_037648.1 | 6342925 | SNV | 1 | A | C | Homozygous   |
| NC_037648.1 | 6342930 | SNV | 1 | T | A | Homozygous   |
| NC_037648.1 | 6342937 | SNV | 1 | A | T | Homozygous   |
| NC_037648.1 | 6346146 | SNV | 1 | T | C | Homozygous   |
| NC_037648.1 | 6346148 | SNV | 1 | T | C | Heterozygous |
| NC_037648.1 | 6346168 | SNV | 1 | T | C | Homozygous   |
| NC_037648.1 | 6351512 | SNV | 1 | C | T | Homozygous   |
| NC_037648.1 | 6351523 | SNV | 1 | A | T | Homozygous   |
| NC_037648.1 | 6351538 | SNV | 1 | T | A | Homozygous   |
| NC_037648.1 | 6351548 | SNV | 1 | A | T | Homozygous   |
| NC_037648.1 | 6351551 | SNV | 1 | A | T | Homozygous   |
| NC_037648.1 | 6351553 | SNV | 1 | T | G | Homozygous   |
| NC_037648.1 | 6362338 | SNV | 1 | A | G | Homozygous   |
| NC_037648.1 | 6369192 | SNV | 1 | T | G | Homozygous   |
| NC_037648.1 | 6372532 | SNV | 1 | A | G | Homozygous   |
| NC_037648.1 | 6372538 | SNV | 1 | T | A | Homozygous   |
| NC_037648.1 | 6372560 | SNV | 1 | T | A | Homozygous   |
| NC_037648.1 | 6372568 | SNV | 1 | T | C | Homozygous   |
| NC_037648.1 | 6378493 | SNV | 1 | C | T | Homozygous   |
| NC_037648.1 | 6380527 | SNV | 1 | G | T | Heterozygous |
| NC_037648.1 | 6385574 | SNV | 1 | A | T | Homozygous   |
| NC_037648.1 | 6385595 | SNV | 1 | C | A | Heterozygous |
| NC_037648.1 | 6385598 | SNV | 1 | A | G | Heterozygous |
| NC_037648.1 | 6385601 | SNV | 1 | C | A | Heterozygous |
| NC_037648.1 | 6389544 | SNV | 1 | A | G | Homozygous   |
| NC_037648.1 | 6390924 | SNV | 1 | A | G | Homozygous   |
| NC_037648.1 | 6390933 | SNV | 1 | A | G | Homozygous   |
| NC_037648.1 | 6390976 | SNV | 1 | T | C | Homozygous   |
| NC_037648.1 | 6391670 | SNV | 1 | T | C | Heterozygous |
| NC_037648.1 | 6392712 | SNV | 1 | A | C | Homozygous   |
| NC_037648.1 | 6392714 | SNV | 1 | A | T | Homozygous   |
| NC_037648.1 | 6392716 | SNV | 1 | T | G | Homozygous   |
| NC_037648.1 | 6392737 | SNV | 1 | T | A | Homozygous   |
| NC_037648.1 | 6396438 | SNV | 1 | T | A | Heterozygous |
| NC_037648.1 | 6396445 | SNV | 1 | T | C | Heterozygous |
| NC_037648.1 | 6397751 | SNV | 1 | G | A | Homozygous   |
| NC_037648.1 | 6397758 | SNV | 1 | T | A | Homozygous   |
| NC_037648.1 | 6397886 | SNV | 1 | A | T | Heterozygous |
| NC_037648.1 | 6397916 | SNV | 1 | A | C | Heterozygous |
| NC_037648.1 | 6397918 | SNV | 1 | T | G | Heterozygous |

|             |         |     |   |   |   |              |
|-------------|---------|-----|---|---|---|--------------|
| NC_037648.1 | 6397925 | SNV | 1 | A | T | Homozygous   |
| NC_037648.1 | 6397931 | SNV | 1 | T | A | Heterozygous |
| NC_037648.1 | 6397955 | SNV | 1 | G | C | Heterozygous |
| NC_037648.1 | 6398011 | SNV | 1 | C | A | Homozygous   |
| NC_037648.1 | 6398163 | SNV | 1 | C | T | Homozygous   |
| NC_037648.1 | 6399495 | SNV | 1 | T | C | Heterozygous |
| NC_037648.1 | 6399497 | SNV | 1 | T | C | Heterozygous |
| NC_037648.1 | 6399499 | SNV | 1 | T | C | Heterozygous |
| NC_037648.1 | 6399505 | SNV | 1 | T | C | Heterozygous |
| NC_037648.1 | 6399508 | SNV | 1 | G | A | Homozygous   |
| NC_037648.1 | 6399531 | SNV | 1 | A | G | Heterozygous |
| NC_037648.1 | 6399536 | SNV | 1 | T | C | Homozygous   |
| NC_037648.1 | 6399539 | SNV | 1 | A | T | Homozygous   |
| NC_037648.1 | 6399830 | SNV | 1 | A | G | Homozygous   |
| NC_037648.1 | 6399840 | SNV | 1 | A | G | Homozygous   |
| NC_037648.1 | 6401057 | SNV | 1 | A | T | Homozygous   |
| NC_037648.1 | 6402630 | SNV | 1 | A | C | Homozygous   |
| NC_037648.1 | 6402636 | SNV | 1 | A | T | Homozygous   |
| NC_037648.1 | 6402652 | SNV | 1 | G | A | Homozygous   |
| NC_037648.1 | 6403286 | SNV | 1 | T | A | Heterozygous |
| NC_037648.1 | 6403312 | SNV | 1 | A | C | Heterozygous |
| NC_037648.1 | 6403318 | SNV | 1 | T | G | Heterozygous |
| NC_037648.1 | 6403332 | SNV | 1 | A | C | Heterozygous |
| NC_037648.1 | 6404055 | SNV | 1 | A | G | Heterozygous |
| NC_037648.1 | 6404120 | SNV | 1 | T | A | Heterozygous |
| NC_037648.1 | 6405298 | SNV | 1 | T | C | Heterozygous |
| NC_037648.1 | 6407685 | SNV | 1 | A | G | Heterozygous |
| NC_037648.1 | 6407700 | SNV | 1 | A | G | Heterozygous |
| NC_037648.1 | 6408172 | SNV | 1 | A | G | Heterozygous |
| NC_037648.1 | 6408491 | SNV | 1 | G | C | Homozygous   |
| NC_037648.1 | 6415871 | SNV | 1 | C | T | Homozygous   |
| NC_037648.1 | 6415873 | SNV | 1 | A | T | Homozygous   |
| NC_037648.1 | 6416044 | SNV | 1 | C | T | Heterozygous |
| NC_037648.1 | 6416113 | SNV | 1 | T | C | Heterozygous |
| NC_037648.1 | 6421143 | SNV | 1 | A | C | Homozygous   |
| NC_037648.1 | 6421150 | SNV | 1 | A | T | Homozygous   |
| NC_037648.1 | 6421160 | SNV | 1 | A | T | Homozygous   |
| NC_037648.1 | 6422233 | SNV | 1 | C | G | Homozygous   |
| NC_037648.1 | 6422265 | SNV | 1 | T | A | Homozygous   |
| NC_037648.1 | 6422277 | SNV | 1 | A | T | Homozygous   |
| NC_037648.1 | 6422280 | SNV | 1 | T | A | Homozygous   |
| NC_037648.1 | 6423469 | SNV | 1 | C | T | Homozygous   |
| NC_037648.1 | 6423471 | SNV | 1 | A | T | Heterozygous |
| NC_037648.1 | 6423473 | SNV | 1 | T | C | Heterozygous |
| NC_037648.1 | 6423482 | SNV | 1 | A | G | Heterozygous |
| NC_037648.1 | 6429226 | SNV | 1 | G | T | Homozygous   |
| NC_037648.1 | 6429231 | SNV | 1 | T | C | Homozygous   |
| NC_037648.1 | 6429237 | SNV | 1 | T | C | Homozygous   |
| NC_037648.1 | 6429240 | SNV | 1 | A | G | Homozygous   |
| NC_037648.1 | 6429243 | SNV | 1 | T | C | Homozygous   |
| NC_037648.1 | 6429245 | SNV | 1 | T | C | Homozygous   |



|             |         |     |   |   |   |              |
|-------------|---------|-----|---|---|---|--------------|
| NC_037648.1 | 6429254 | SNV | 1 | A | G | Homozygous   |
| NC_037648.1 | 6429258 | SNV | 1 | A | G | Homozygous   |
| NC_037648.1 | 6432268 | SNV | 1 | T | C | Homozygous   |
| NC_037648.1 | 6432278 | SNV | 1 | T | A | Homozygous   |
| NC_037648.1 | 6433927 | SNV | 1 | G | A | Homozygous   |
| NC_037648.1 | 6434220 | SNV | 1 | T | C | Heterozygous |
| NC_037648.1 | 6434223 | SNV | 1 | A | T | Heterozygous |
| NC_037648.1 | 6434228 | SNV | 1 | T | C | Heterozygous |
| NC_037648.1 | 6434232 | SNV | 1 | T | G | Heterozygous |
| NC_037648.1 | 6434248 | SNV | 1 | T | C | Heterozygous |
| NC_037648.1 | 6434254 | SNV | 1 | A | T | Homozygous   |
| NC_037648.1 | 6434259 | SNV | 1 | G | A | Homozygous   |
| NC_037648.1 | 6437617 | SNV | 1 | A | G | Heterozygous |
| NC_037648.1 | 6438843 | SNV | 1 | C | T | Heterozygous |
| NC_037648.1 | 6439033 | SNV | 1 | C | A | Homozygous   |
| NC_037648.1 | 6439046 | SNV | 1 | G | A | Homozygous   |
| NC_037648.1 | 6439118 | SNV | 1 | C | T | Heterozygous |
| NC_037648.1 | 6439297 | SNV | 1 | A | G | Heterozygous |
| NC_037648.1 | 6439407 | SNV | 1 | T | C | Homozygous   |
| NC_037648.1 | 6439922 | SNV | 1 | T | A | Homozygous   |
| NC_037648.1 | 6439924 | SNV | 1 | C | T | Homozygous   |
| NC_037648.1 | 6440267 | SNV | 1 | G | A | Heterozygous |
| NC_037648.1 | 6440720 | SNV | 1 | T | C | Heterozygous |
| NC_037648.1 | 6446032 | SNV | 1 | A | T | Heterozygous |
| NC_037648.1 | 6446036 | SNV | 1 | A | T | Heterozygous |
| NC_037648.1 | 6446040 | SNV | 1 | G | T | Homozygous   |
| NC_037648.1 | 6447969 | SNV | 1 | T | G | Heterozygous |
| NC_037648.1 | 6448462 | SNV | 1 | C | T | Heterozygous |
| NC_037648.1 | 6453463 | SNV | 1 | C | T | Homozygous   |
| NC_037648.1 | 6454289 | SNV | 1 | T | G | Homozygous   |
| NC_037648.1 | 6455208 | SNV | 1 | A | G | Homozygous   |
| NC_037648.1 | 6458843 | SNV | 1 | C | T | Homozygous   |
| NC_037648.1 | 6459230 | SNV | 1 | C | A | Heterozygous |
| NC_037648.1 | 6459232 | SNV | 1 | A | C | Heterozygous |
| NC_037648.1 | 6459771 | SNV | 1 | T | C | Homozygous   |
| NC_037648.1 | 6461316 | SNV | 1 | C | T | Homozygous   |
| NC_037648.1 | 6462614 | SNV | 1 | A | T | Homozygous   |
| NC_037648.1 | 6462637 | SNV | 1 | G | C | Homozygous   |
| NC_037648.1 | 6462640 | SNV | 1 | A | T | Homozygous   |
| NC_037648.1 | 6462645 | SNV | 1 | T | A | Homozygous   |
| NC_037648.1 | 6462651 | SNV | 1 | T | G | Homozygous   |
| NC_037648.1 | 6462662 | SNV | 1 | T | A | Homozygous   |
| NC_037648.1 | 6463114 | SNV | 1 | T | A | Heterozygous |
| NC_037648.1 | 6464808 | SNV | 1 | T | C | Homozygous   |
| NC_037648.1 | 6464856 | SNV | 1 | A | G | Homozygous   |
| NC_037648.1 | 6469589 | SNV | 1 | A | G | Homozygous   |
| NC_037648.1 | 6469625 | SNV | 1 | A | G | Homozygous   |
| NC_037648.1 | 6469629 | SNV | 1 | T | A | Homozygous   |
| NC_037648.1 | 6470665 | SNV | 1 | T | A | Heterozygous |
| NC_037648.1 | 6471967 | SNV | 1 | A | G | Heterozygous |
| NC_037648.1 | 6472959 | SNV | 1 | T | C | Homozygous   |

|             |         |     |   |   |   |              |
|-------------|---------|-----|---|---|---|--------------|
| NC_037648.1 | 6472992 | SNV | 1 | T | C | Homozygous   |
| NC_037648.1 | 6472994 | SNV | 1 | A | G | Homozygous   |
| NC_037648.1 | 6473004 | SNV | 1 | A | T | Homozygous   |
| NC_037648.1 | 6473006 | SNV | 1 | G | A | Homozygous   |
| NC_037648.1 | 6473010 | SNV | 1 | T | G | Homozygous   |
| NC_037648.1 | 6477639 | SNV | 1 | C | T | Homozygous   |
| NC_037648.1 | 6478330 | SNV | 1 | C | T | Heterozygous |
| NC_037648.1 | 6478692 | SNV | 1 | C | G | Homozygous   |
| NC_037648.1 | 6480184 | SNV | 1 | A | T | Homozygous   |
| NC_037648.1 | 6480767 | SNV | 1 | A | T | Heterozygous |
| NC_037648.1 | 6480884 | SNV | 1 | A | G | Heterozygous |
| NC_037648.1 | 6481100 | SNV | 1 | G | A | Heterozygous |
| NC_037648.1 | 6484166 | SNV | 1 | T | C | Homozygous   |
| NC_037648.1 | 6485606 | SNV | 1 | T | C | Heterozygous |
| NC_037648.1 | 6485697 | SNV | 1 | A | G | Homozygous   |
| NC_037648.1 | 6490391 | SNV | 1 | C | T | Heterozygous |
| NC_037648.1 | 6490522 | SNV | 1 | G | A | Heterozygous |
| NC_037648.1 | 6496089 | SNV | 1 | T | G | Homozygous   |
| NC_037648.1 | 6496094 | SNV | 1 | A | C | Homozygous   |
| NC_037648.1 | 6496107 | SNV | 1 | T | C | Homozygous   |
| NC_037648.1 | 6496110 | SNV | 1 | A | G | Homozygous   |
| NC_037648.1 | 6496114 | SNV | 1 | C | G | Homozygous   |
| NC_037648.1 | 6497559 | SNV | 1 | A | T | Homozygous   |
| NC_037648.1 | 6497576 | SNV | 1 | T | C | Homozygous   |
| NC_037648.1 | 6497579 | SNV | 1 | T | A | Homozygous   |
| NC_037648.1 | 6497583 | SNV | 1 | T | A | Homozygous   |
| NC_037648.1 | 6497585 | SNV | 1 | A | C | Homozygous   |
| NC_037648.1 | 6497587 | SNV | 1 | T | A | Homozygous   |
| NC_037648.1 | 6501528 | SNV | 1 | G | A | Homozygous   |
| NC_037648.1 | 6501582 | SNV | 1 | T | A | Homozygous   |
| NC_037648.1 | 6501584 | SNV | 1 | T | A | Homozygous   |
| NC_037648.1 | 6501593 | SNV | 1 | C | T | Homozygous   |
| NC_037648.1 | 6501600 | SNV | 1 | T | G | Homozygous   |
| NC_037648.1 | 6501885 | SNV | 1 | A | C | Homozygous   |
| NC_037648.1 | 6501897 | SNV | 1 | T | A | Homozygous   |
| NC_037648.1 | 6501909 | SNV | 1 | T | A | Homozygous   |
| NC_037648.1 | 6501912 | SNV | 1 | A | C | Homozygous   |
| NC_037648.1 | 6502279 | SNV | 1 | T | C | Homozygous   |
| NC_037648.1 | 6502424 | SNV | 1 | G | A | Homozygous   |
| NC_037648.1 | 6502430 | SNV | 1 | A | T | Homozygous   |
| NC_037648.1 | 6502795 | SNV | 1 | G | A | Heterozygous |
| NC_037648.1 | 6503532 | SNV | 1 | G | A | Heterozygous |
| NC_037648.1 | 6503542 | SNV | 1 | T | A | Homozygous   |
| NC_037648.1 | 6524017 | SNV | 1 | T | C | Heterozygous |
| NC_037648.1 | 6524557 | SNV | 1 | A | G | Homozygous   |
| NC_037648.1 | 6525002 | SNV | 1 | G | T | Homozygous   |
| NC_037648.1 | 6525018 | SNV | 1 | A | G | Homozygous   |
| NC_037648.1 | 6525194 | SNV | 1 | A | G | Homozygous   |
| NC_037648.1 | 6525204 | SNV | 1 | G | T | Homozygous   |
| NC_037648.1 | 6525224 | SNV | 1 | C | T | Homozygous   |
| NC_037648.1 | 6532235 | SNV | 1 | T | C | Heterozygous |

|             |         |     |   |   |   |              |
|-------------|---------|-----|---|---|---|--------------|
| NC_037648.1 | 6532375 | SNV | 1 | A | C | Heterozygous |
| NC_037648.1 | 6532788 | SNV | 1 | A | T | Heterozygous |
| NC_037648.1 | 6533188 | SNV | 1 | T | G | Homozygous   |
| NC_037648.1 | 6533193 | SNV | 1 | T | A | Homozygous   |
| NC_037648.1 | 6533205 | SNV | 1 | T | C | Homozygous   |
| NC_037648.1 | 6533210 | SNV | 1 | A | G | Homozygous   |
| NC_037648.1 | 6533221 | SNV | 1 | T | A | Homozygous   |
| NC_037648.1 | 6533240 | SNV | 1 | C | T | Homozygous   |
| NC_037648.1 | 6533242 | SNV | 1 | T | C | Homozygous   |
| NC_037648.1 | 6533245 | SNV | 1 | A | T | Homozygous   |
| NC_037648.1 | 6533296 | SNV | 1 | A | G | Homozygous   |
| NC_037648.1 | 6533307 | SNV | 1 | A | C | Homozygous   |
| NC_037648.1 | 6533317 | SNV | 1 | T | A | Homozygous   |
| NC_037648.1 | 6540347 | SNV | 1 | A | C | Heterozygous |
| NC_037648.1 | 6540353 | SNV | 1 | T | A | Heterozygous |
| NC_037648.1 | 6540435 | SNV | 1 | G | A | Heterozygous |
| NC_037648.1 | 6540649 | SNV | 1 | A | T | Homozygous   |
| NC_037648.1 | 6540663 | SNV | 1 | A | G | Heterozygous |
| NC_037648.1 | 6540670 | SNV | 1 | G | A | Heterozygous |
| NC_037648.1 | 6540688 | SNV | 1 | A | G | Heterozygous |
| NC_037648.1 | 6540770 | SNV | 1 | T | C | Heterozygous |
| NC_037648.1 | 6546486 | SNV | 1 | A | T | Heterozygous |
| NC_037648.1 | 6546490 | SNV | 1 | T | A | Heterozygous |
| NC_037648.1 | 6559762 | SNV | 1 | T | C | Homozygous   |
| NC_037648.1 | 6560132 | SNV | 1 | T | A | Homozygous   |
| NC_037648.1 | 6560141 | SNV | 1 | T | A | Homozygous   |
| NC_037648.1 | 6560143 | SNV | 1 | T | C | Homozygous   |
| NC_037648.1 | 6561248 | SNV | 1 | A | G | Homozygous   |
| NC_037648.1 | 6562214 | SNV | 1 | T | C | Heterozygous |
| NC_037648.1 | 6562242 | SNV | 1 | T | C | Heterozygous |
| NC_037648.1 | 6562257 | SNV | 1 | A | T | Heterozygous |
| NC_037648.1 | 6562268 | SNV | 1 | T | C | Homozygous   |
| NC_037648.1 | 6562270 | SNV | 1 | T | C | Heterozygous |
| NC_037648.1 | 6562272 | SNV | 1 | T | C | Heterozygous |
| NC_037648.1 | 6562278 | SNV | 1 | T | C | Heterozygous |
| NC_037648.1 | 6562539 | SNV | 1 | C | T | Homozygous   |
| NC_037648.1 | 6562931 | SNV | 1 | T | C | Homozygous   |
| NC_037648.1 | 6565746 | SNV | 1 | C | T | Homozygous   |
| NC_037648.1 | 6566536 | SNV | 1 | C | A | Homozygous   |
| NC_037648.1 | 6567268 | SNV | 1 | G | A | Homozygous   |
| NC_037648.1 | 6567969 | SNV | 1 | T | C | Homozygous   |
| NC_037648.1 | 6569368 | SNV | 1 | G | T | Homozygous   |
| NC_037648.1 | 6569371 | SNV | 1 | T | A | Homozygous   |
| NC_037648.1 | 6569392 | SNV | 1 | G | A | Heterozygous |
| NC_037648.1 | 6569396 | SNV | 1 | A | T | Heterozygous |
| NC_037648.1 | 6569685 | SNV | 1 | G | T | Homozygous   |
| NC_037648.1 | 6569694 | SNV | 1 | A | C | Homozygous   |
| NC_037648.1 | 6569699 | SNV | 1 | A | G | Homozygous   |
| NC_037648.1 | 6569705 | SNV | 1 | T | G | Homozygous   |
| NC_037648.1 | 6572259 | SNV | 1 | A | G | Heterozygous |
| NC_037648.1 | 6572319 | SNV | 1 | A | T | Heterozygous |

|             |         |     |   |   |   |              |
|-------------|---------|-----|---|---|---|--------------|
| NC_037648.1 | 6572322 | SNV | 1 | T | A | Heterozygous |
| NC_037648.1 | 6572325 | SNV | 1 | T | A | Heterozygous |
| NC_037648.1 | 6572427 | SNV | 1 | G | A | Homozygous   |
| NC_037648.1 | 6572493 | SNV | 1 | T | C | Heterozygous |
| NC_037648.1 | 6572688 | SNV | 1 | T | C | Heterozygous |
| NC_037648.1 | 6572694 | SNV | 1 | T | C | Heterozygous |
| NC_037648.1 | 6572698 | SNV | 1 | T | C | Heterozygous |
| NC_037648.1 | 6572703 | SNV | 1 | T | C | Heterozygous |
| NC_037648.1 | 6572710 | SNV | 1 | T | C | Heterozygous |
| NC_037648.1 | 6573311 | SNV | 1 | G | A | Homozygous   |
| NC_037648.1 | 6573314 | SNV | 1 | A | G | Homozygous   |
| NC_037648.1 | 6573344 | SNV | 1 | C | T | Homozygous   |
| NC_037648.1 | 6573349 | SNV | 1 | T | C | Homozygous   |
| NC_037648.1 | 6573353 | SNV | 1 | G | T | Homozygous   |
| NC_037648.1 | 6573355 | SNV | 1 | G | A | Homozygous   |
| NC_037648.1 | 6573362 | SNV | 1 | A | G | Homozygous   |
| NC_037648.1 | 6573630 | SNV | 1 | T | A | Homozygous   |
| NC_037648.1 | 6573636 | SNV | 1 | C | A | Homozygous   |
| NC_037648.1 | 6578250 | SNV | 1 | C | A | Heterozygous |
| NC_037648.1 | 6578259 | SNV | 1 | A | T | Heterozygous |
| NC_037648.1 | 6578262 | SNV | 1 | A | T | Heterozygous |
| NC_037648.1 | 6591484 | SNV | 1 | T | A | Homozygous   |
| NC_037648.1 | 6591496 | SNV | 1 | C | T | Heterozygous |
| NC_037648.1 | 6598638 | SNV | 1 | T | C | Homozygous   |
| NC_037648.1 | 6599310 | SNV | 1 | A | G | Homozygous   |
| NC_037648.1 | 6599419 | SNV | 1 | T | G | Homozygous   |
| NC_037648.1 | 6600191 | SNV | 1 | T | C | Homozygous   |
| NC_037648.1 | 6600343 | SNV | 1 | G | A | Homozygous   |
| NC_037648.1 | 6600346 | SNV | 1 | A | T | Homozygous   |
| NC_037648.1 | 6600517 | SNV | 1 | A | G | Homozygous   |
| NC_037648.1 | 6602713 | SNV | 1 | A | T | Heterozygous |
| NC_037648.1 | 6602715 | SNV | 1 | A | T | Heterozygous |
| NC_037648.1 | 6602724 | SNV | 1 | A | T | Heterozygous |
| NC_037648.1 | 6604440 | SNV | 1 | T | G | Heterozygous |
| NC_037648.1 | 6604492 | SNV | 1 | C | T | Heterozygous |
| NC_037648.1 | 6604522 | SNV | 1 | C | T | Heterozygous |
| NC_037648.1 | 6604529 | SNV | 1 | A | G | Heterozygous |
| NC_037648.1 | 6604540 | SNV | 1 | C | T | Heterozygous |
| NC_037648.1 | 6604546 | SNV | 1 | C | T | Heterozygous |
| NC_037648.1 | 6604776 | SNV | 1 | T | C | Heterozygous |
| NC_037648.1 | 6609026 | SNV | 1 | C | T | Homozygous   |
| NC_037648.1 | 6609032 | SNV | 1 | T | A | Homozygous   |
| NC_037648.1 | 6609056 | SNV | 1 | T | A | Homozygous   |
| NC_037648.1 | 6609058 | SNV | 1 | G | A | Homozygous   |
| NC_037648.1 | 6609063 | SNV | 1 | T | A | Homozygous   |
| NC_037648.1 | 6609071 | SNV | 1 | C | T | Homozygous   |
| NC_037648.1 | 6609446 | SNV | 1 | T | G | Homozygous   |
| NC_037648.1 | 6609483 | SNV | 1 | A | T | Heterozygous |
| NC_037648.1 | 6615890 | SNV | 1 | T | C | Homozygous   |
| NC_037648.1 | 6616219 | SNV | 1 | C | T | Heterozygous |
| NC_037648.1 | 6616725 | SNV | 1 | C | T | Homozygous   |

|             |         |     |   |   |   |              |
|-------------|---------|-----|---|---|---|--------------|
| NC_037648.1 | 6616862 | SNV | 1 | C | T | Homozygous   |
| NC_037648.1 | 6616865 | SNV | 1 | A | T | Homozygous   |
| NC_037648.1 | 6617189 | SNV | 1 | C | T | Homozygous   |
| NC_037648.1 | 6617907 | SNV | 1 | C | T | Homozygous   |
| NC_037648.1 | 6618450 | SNV | 1 | T | G | Homozygous   |
| NC_037648.1 | 6618479 | SNV | 1 | C | A | Homozygous   |
| NC_037648.1 | 6618501 | SNV | 1 | T | A | Homozygous   |
| NC_037648.1 | 6621283 | SNV | 1 | T | C | Heterozygous |
| NC_037648.1 | 6621309 | SNV | 1 | T | C | Homozygous   |
| NC_037648.1 | 6621930 | SNV | 1 | A | G | Homozygous   |
| NC_037648.1 | 6622462 | SNV | 1 | T | C | Homozygous   |
| NC_037648.1 | 6623057 | SNV | 1 | T | A | Homozygous   |
| NC_037648.1 | 6624500 | SNV | 1 | T | A | Homozygous   |
| NC_037648.1 | 6624508 | SNV | 1 | A | T | Homozygous   |
| NC_037648.1 | 6624514 | SNV | 1 | T | C | Heterozygous |
| NC_037648.1 | 6624841 | SNV | 1 | G | A | Heterozygous |
| NC_037648.1 | 6628806 | SNV | 1 | A | G | Heterozygous |
| NC_037648.1 | 6630239 | SNV | 1 | A | C | Homozygous   |
| NC_037648.1 | 6630689 | SNV | 1 | T | C | Homozygous   |
| NC_037648.1 | 6630809 | SNV | 1 | G | A | Homozygous   |
| NC_037648.1 | 6631837 | SNV | 1 | T | A | Heterozygous |
| NC_037648.1 | 6660887 | SNV | 1 | A | G | Homozygous   |
| NC_037648.1 | 6660912 | SNV | 1 | A | G | Homozygous   |
| NC_037648.1 | 6660917 | SNV | 1 | T | A | Homozygous   |
| NC_037648.1 | 6660919 | SNV | 1 | T | C | Homozygous   |
| NC_037648.1 | 6661009 | SNV | 1 | G | T | Heterozygous |
| NC_037648.1 | 6661013 | SNV | 1 | A | G | Heterozygous |
| NC_037648.1 | 6661020 | SNV | 1 | T | A | Heterozygous |
| NC_037648.1 | 6661030 | SNV | 1 | T | A | Heterozygous |
| NC_037648.1 | 6661720 | SNV | 1 | T | A | Homozygous   |
| NC_037648.1 | 6665493 | SNV | 1 | G | T | Homozygous   |
| NC_037648.1 | 6665502 | SNV | 1 | A | C | Homozygous   |
| NC_037648.1 | 6665505 | SNV | 1 | G | A | Homozygous   |
| NC_037648.1 | 6665507 | SNV | 1 | T | A | Homozygous   |
| NC_037648.1 | 6665532 | SNV | 1 | T | C | Homozygous   |
| NC_037648.1 | 6666956 | SNV | 1 | T | C | Homozygous   |
| NC_037648.1 | 6666979 | SNV | 1 | T | C | Heterozygous |
| NC_037648.1 | 6666981 | SNV | 1 | C | G | Heterozygous |
| NC_037648.1 | 6666983 | SNV | 1 | T | A | Heterozygous |
| NC_037648.1 | 6666990 | SNV | 1 | T | A | Heterozygous |
| NC_037648.1 | 6666992 | SNV | 1 | T | G | Homozygous   |
| NC_037648.1 | 6666997 | SNV | 1 | A | G | Heterozygous |
| NC_037648.1 | 6666999 | SNV | 1 | A | T | Homozygous   |
| NC_037648.1 | 6667002 | SNV | 1 | T | C | Heterozygous |
| NC_037648.1 | 6667005 | SNV | 1 | A | T | Heterozygous |
| NC_037648.1 | 6667012 | SNV | 1 | T | A | Heterozygous |
| NC_037648.1 | 6669032 | SNV | 1 | C | G | Homozygous   |
| NC_037648.1 | 6669040 | SNV | 1 | T | G | Homozygous   |
| NC_037648.1 | 6669045 | SNV | 1 | T | A | Homozygous   |
| NC_037648.1 | 6683686 | SNV | 1 | A | T | Homozygous   |
| NC_037648.1 | 6683688 | SNV | 1 | T | C | Homozygous   |

|             |         |     |   |   |   |              |
|-------------|---------|-----|---|---|---|--------------|
| NC_037648.1 | 6683694 | SNV | 1 | A | T | Homozygous   |
| NC_037648.1 | 6683719 | SNV | 1 | C | T | Homozygous   |
| NC_037648.1 | 6693394 | SNV | 1 | G | C | Homozygous   |
| NC_037648.1 | 6693396 | SNV | 1 | G | A | Homozygous   |
| NC_037648.1 | 6693407 | SNV | 1 | C | T | Homozygous   |
| NC_037648.1 | 6693409 | SNV | 1 | C | G | Homozygous   |
| NC_037648.1 | 6695740 | SNV | 1 | A | G | Homozygous   |
| NC_037648.1 | 6695742 | SNV | 1 | T | A | Homozygous   |
| NC_037648.1 | 6695744 | SNV | 1 | T | C | Homozygous   |
| NC_037648.1 | 6695772 | SNV | 1 | A | T | Homozygous   |
| NC_037648.1 | 6710493 | SNV | 1 | A | T | Homozygous   |
| NC_037648.1 | 6710515 | SNV | 1 | T | G | Homozygous   |
| NC_037648.1 | 6710530 | SNV | 1 | A | T | Homozygous   |
| NC_037648.1 | 6710539 | SNV | 1 | T | A | Homozygous   |
| NC_037648.1 | 6710542 | SNV | 1 | A | G | Homozygous   |
| NC_037648.1 | 6713878 | SNV | 1 | T | C | Homozygous   |
| NC_037648.1 | 6713880 | SNV | 1 | A | G | Heterozygous |
| NC_037648.1 | 6713890 | SNV | 1 | T | C | Heterozygous |
| NC_037648.1 | 6726252 | SNV | 1 | G | A | Heterozygous |
| NC_037648.1 | 6727807 | SNV | 1 | T | C | Homozygous   |
| NC_037648.1 | 6734349 | SNV | 1 | C | T | Homozygous   |
| NC_037648.1 | 6734368 | SNV | 1 | A | T | Homozygous   |
| NC_037648.1 | 6735644 | SNV | 1 | A | C | Homozygous   |
| NC_037648.1 | 6735650 | SNV | 1 | A | T | Homozygous   |
| NC_037648.1 | 6735652 | SNV | 1 | A | C | Homozygous   |
| NC_037648.1 | 6735659 | SNV | 1 | G | T | Homozygous   |
| NC_037648.1 | 6735667 | SNV | 1 | T | A | Homozygous   |
| NC_037648.1 | 6735674 | SNV | 1 | A | G | Homozygous   |
| NC_037648.1 | 6745214 | SNV | 1 | G | A | Homozygous   |
| NC_037648.1 | 6745446 | SNV | 1 | G | T | Homozygous   |
| NC_037648.1 | 6745982 | SNV | 1 | C | T | Heterozygous |
| NC_037648.1 | 6745988 | SNV | 1 | C | T | Heterozygous |
| NC_037648.1 | 6746211 | SNV | 1 | A | G | Homozygous   |
| NC_037648.1 | 6747269 | SNV | 1 | A | G | Homozygous   |
| NC_037648.1 | 6747400 | SNV | 1 | G | A | Homozygous   |
| NC_037648.1 | 6747412 | SNV | 1 | T | C | Homozygous   |
| NC_037648.1 | 6747905 | SNV | 1 | T | C | Homozygous   |
| NC_037648.1 | 6752631 | SNV | 1 | C | T | Homozygous   |
| NC_037648.1 | 6758003 | SNV | 1 | T | G | Homozygous   |
| NC_037648.1 | 6758012 | SNV | 1 | A | T | Homozygous   |
| NC_037648.1 | 6758017 | SNV | 1 | T | A | Homozygous   |
| NC_037648.1 | 6758022 | SNV | 1 | A | C | Homozygous   |
| NC_037648.1 | 6758027 | SNV | 1 | T | A | Homozygous   |
| NC_037648.1 | 6758029 | SNV | 1 | T | G | Homozygous   |
| NC_037648.1 | 6758694 | SNV | 1 | T | A | Heterozygous |
| NC_037648.1 | 6758717 | SNV | 1 | T | A | Heterozygous |
| NC_037648.1 | 6758725 | SNV | 1 | T | C | Heterozygous |
| NC_037648.1 | 6760277 | SNV | 1 | A | G | Homozygous   |
| NC_037648.1 | 6768289 | SNV | 1 | T | C | Homozygous   |
| NC_037648.1 | 6769777 | SNV | 1 | C | T | Homozygous   |
| NC_037648.1 | 6771113 | SNV | 1 | C | G | Homozygous   |

|             |         |     |   |   |   |              |
|-------------|---------|-----|---|---|---|--------------|
| NC_037648.1 | 6772269 | SNV | 1 | T | A | Homozygous   |
| NC_037648.1 | 6772285 | SNV | 1 | G | C | Homozygous   |
| NC_037648.1 | 6772287 | SNV | 1 | A | T | Homozygous   |
| NC_037648.1 | 6773834 | SNV | 1 | G | A | Homozygous   |
| NC_037648.1 | 6773842 | SNV | 1 | T | G | Homozygous   |
| NC_037648.1 | 6773845 | SNV | 1 | A | G | Homozygous   |
| NC_037648.1 | 6773854 | SNV | 1 | C | G | Homozygous   |
| NC_037648.1 | 6773859 | SNV | 1 | G | T | Homozygous   |
| NC_037648.1 | 6782769 | SNV | 1 | T | A | Homozygous   |
| NC_037648.1 | 6791194 | SNV | 1 | T | C | Homozygous   |
| NC_037648.1 | 6804752 | SNV | 1 | A | T | Homozygous   |
| NC_037648.1 | 6804755 | SNV | 1 | A | T | Homozygous   |
| NC_037648.1 | 6804757 | SNV | 1 | C | T | Homozygous   |
| NC_037648.1 | 6804760 | SNV | 1 | A | G | Homozygous   |
| NC_037648.1 | 6804767 | SNV | 1 | A | C | Homozygous   |
| NC_037648.1 | 6804769 | SNV | 1 | A | C | Homozygous   |
| NC_037648.1 | 6805234 | SNV | 1 | T | G | Homozygous   |
| NC_037648.1 | 6805238 | SNV | 1 | C | T | Homozygous   |
| NC_037648.1 | 6805251 | SNV | 1 | T | C | Homozygous   |
| NC_037648.1 | 6805253 | SNV | 1 | A | C | Homozygous   |
| NC_037648.1 | 6807394 | SNV | 1 | C | T | Heterozygous |
| NC_037648.1 | 6815053 | SNV | 1 | T | C | Homozygous   |
| NC_037648.1 | 6815056 | SNV | 1 | A | G | Homozygous   |
| NC_037648.1 | 6815074 | SNV | 1 | A | G | Homozygous   |
| NC_037648.1 | 6815083 | SNV | 1 | A | C | Homozygous   |
| NC_037648.1 | 6815085 | SNV | 1 | T | A | Homozygous   |
| NC_037648.1 | 6816748 | SNV | 1 | T | A | Heterozygous |
| NC_037648.1 | 6816753 | SNV | 1 | G | A | Homozygous   |
| NC_037648.1 | 6816813 | SNV | 1 | T | G | Homozygous   |
| NC_037648.1 | 6819531 | SNV | 1 | G | A | Homozygous   |
| NC_037648.1 | 6819547 | SNV | 1 | A | G | Homozygous   |
| NC_037648.1 | 6819553 | SNV | 1 | A | C | Homozygous   |
| NC_037648.1 | 6819563 | SNV | 1 | A | T | Homozygous   |
| NC_037648.1 | 6823065 | SNV | 1 | G | T | Homozygous   |
| NC_037648.1 | 6823745 | SNV | 1 | A | T | Homozygous   |
| NC_037648.1 | 6823896 | SNV | 1 | G | A | Homozygous   |
| NC_037648.1 | 6823898 | SNV | 1 | A | T | Homozygous   |
| NC_037648.1 | 6823900 | SNV | 1 | A | G | Homozygous   |
| NC_037648.1 | 6824026 | SNV | 1 | A | T | Homozygous   |
| NC_037648.1 | 6824196 | SNV | 1 | G | T | Homozygous   |
| NC_037648.1 | 6857628 | SNV | 1 | A | G | Homozygous   |
| NC_037648.1 | 6857640 | SNV | 1 | T | C | Homozygous   |
| NC_037648.1 | 6857643 | SNV | 1 | T | A | Homozygous   |
| NC_037648.1 | 6857668 | SNV | 1 | A | T | Homozygous   |
| NC_037648.1 | 6859528 | SNV | 1 | A | T | Heterozygous |
| NC_037648.1 | 6859534 | SNV | 1 | A | G | Heterozygous |
| NC_037648.1 | 6859537 | SNV | 1 | T | C | Heterozygous |
| NC_037648.1 | 6880007 | SNV | 1 | C | T | Heterozygous |
| NC_037648.1 | 6881658 | SNV | 1 | G | A | Heterozygous |
| NC_037648.1 | 6881755 | SNV | 1 | C | T | Homozygous   |
| NC_037648.1 | 6881809 | SNV | 1 | G | A | Homozygous   |

|             |         |     |   |   |   |              |
|-------------|---------|-----|---|---|---|--------------|
| NC_037648.1 | 6882118 | SNV | 1 | G | A | Homozygous   |
| NC_037648.1 | 6882900 | SNV | 1 | G | A | Heterozygous |
| NC_037648.1 | 6883464 | SNV | 1 | A | G | Homozygous   |
| NC_037648.1 | 6883846 | SNV | 1 | T | C | Homozygous   |
| NC_037648.1 | 6915097 | SNV | 1 | G | A | Homozygous   |
| NC_037648.1 | 6932399 | SNV | 1 | T | G | Homozygous   |
| NC_037648.1 | 6932404 | SNV | 1 | T | A | Homozygous   |
| NC_037648.1 | 6935819 | SNV | 1 | A | G | Homozygous   |
| NC_037648.1 | 6938098 | SNV | 1 | T | A | Homozygous   |
| NC_037648.1 | 6938109 | SNV | 1 | T | C | Homozygous   |
| NC_037648.1 | 6938131 | SNV | 1 | T | G | Homozygous   |
| NC_037648.1 | 6939513 | SNV | 1 | T | G | Heterozygous |
| NC_037648.1 | 6939516 | SNV | 1 | A | C | Heterozygous |
| NC_037648.1 | 6939519 | SNV | 1 | A | T | Heterozygous |
| NC_037648.1 | 6939573 | SNV | 1 | A | G | Heterozygous |
| NC_037648.1 | 6939584 | SNV | 1 | T | A | Heterozygous |
| NC_037648.1 | 6942116 | SNV | 1 | G | A | Homozygous   |
| NC_037648.1 | 6942125 | SNV | 1 | C | T | Homozygous   |
| NC_037648.1 | 6942392 | SNV | 1 | A | G | Heterozygous |
| NC_037648.1 | 6943641 | SNV | 1 | T | C | Heterozygous |
| NC_037648.1 | 6949451 | SNV | 1 | T | C | Homozygous   |
| NC_037648.1 | 6949454 | SNV | 1 | A | T | Homozygous   |
| NC_037648.1 | 6949471 | SNV | 1 | A | T | Homozygous   |
| NC_037648.1 | 6967829 | SNV | 1 | T | G | Heterozygous |
| NC_037648.1 | 6967838 | SNV | 1 | A | C | Heterozygous |
| NC_037648.1 | 6967879 | SNV | 1 | C | T | Homozygous   |
| NC_037648.1 | 6967907 | SNV | 1 | A | C | Heterozygous |
| NC_037648.1 | 6967945 | SNV | 1 | A | T | Heterozygous |
| NC_037648.1 | 6967949 | SNV | 1 | A | T | Heterozygous |
| NC_037648.1 | 6967961 | SNV | 1 | A | G | Heterozygous |
| NC_037648.1 | 6967971 | SNV | 1 | A | G | Heterozygous |
| NC_037648.1 | 6967981 | SNV | 1 | A | T | Heterozygous |
| NC_037648.1 | 6967989 | SNV | 1 | A | G | Homozygous   |
| NC_037648.1 | 6968851 | SNV | 1 | A | T | Homozygous   |
| NC_037648.1 | 6968863 | SNV | 1 | T | A | Homozygous   |
| NC_037648.1 | 6968870 | SNV | 1 | T | G | Homozygous   |
| NC_037648.1 | 6968874 | SNV | 1 | T | C | Homozygous   |
| NC_037648.1 | 6978058 | SNV | 1 | C | A | Homozygous   |
| NC_037648.1 | 6978072 | SNV | 1 | G | A | Homozygous   |
| NC_037648.1 | 6982458 | SNV | 1 | T | A | Homozygous   |
| NC_037648.1 | 6982463 | SNV | 1 | T | G | Homozygous   |
| NC_037648.1 | 6982466 | SNV | 1 | C | T | Homozygous   |
| NC_037648.1 | 6982472 | SNV | 1 | A | G | Homozygous   |
| NC_037648.1 | 7000507 | SNV | 1 | G | A | Homozygous   |
| NC_037648.1 | 7000558 | SNV | 1 | G | A | Heterozygous |
| NC_037648.1 | 7000737 | SNV | 1 | A | G | Homozygous   |
| NC_037648.1 | 7000955 | SNV | 1 | T | A | Homozygous   |
| NC_037648.1 | 7003827 | SNV | 1 | T | C | Homozygous   |
| NC_037648.1 | 7003879 | SNV | 1 | G | C | Homozygous   |
| NC_037648.1 | 7004166 | SNV | 1 | A | C | Heterozygous |
| NC_037648.1 | 7010975 | SNV | 1 | A | G | Heterozygous |



|             |         |     |   |   |   |              |
|-------------|---------|-----|---|---|---|--------------|
| NC_037648.1 | 7011505 | SNV | 1 | G | T | Heterozygous |
| NC_037648.1 | 7012512 | SNV | 1 | A | G | Homozygous   |
| NC_037648.1 | 7012537 | SNV | 1 | T | A | Homozygous   |
| NC_037648.1 | 7012915 | SNV | 1 | C | T | Heterozygous |
| NC_037648.1 | 7012963 | SNV | 1 | G | A | Heterozygous |
| NC_037648.1 | 7013015 | SNV | 1 | T | G | Homozygous   |
| NC_037648.1 | 7013608 | SNV | 1 | G | A | Homozygous   |
| NC_037648.1 | 7017510 | SNV | 1 | A | G | Homozygous   |
| NC_037648.1 | 7017761 | SNV | 1 | T | C | Heterozygous |
| NC_037648.1 | 7020456 | SNV | 1 | C | T | Heterozygous |
| NC_037648.1 | 7026465 | SNV | 1 | A | G | Heterozygous |
| NC_037648.1 | 7031834 | SNV | 1 | T | C | Homozygous   |
| NC_037648.1 | 7031853 | SNV | 1 | A | T | Homozygous   |
| NC_037648.1 | 7031859 | SNV | 1 | T | C | Homozygous   |
| NC_037648.1 | 7031864 | SNV | 1 | G | T | Homozygous   |
| NC_037648.1 | 7046364 | SNV | 1 | A | T | Homozygous   |
| NC_037648.1 | 7046709 | SNV | 1 | T | C | Heterozygous |
| NC_037648.1 | 7048996 | SNV | 1 | A | T | Homozygous   |
| NC_037648.1 | 7049968 | SNV | 1 | A | C | Homozygous   |
| NC_037648.1 | 7053709 | SNV | 1 | T | C | Homozygous   |
| NC_037648.1 | 7053713 | SNV | 1 | T | G | Heterozygous |
| NC_037648.1 | 7053766 | SNV | 1 | A | C | Homozygous   |
| NC_037648.1 | 7053768 | SNV | 1 | A | T | Homozygous   |
| NC_037648.1 | 7053776 | SNV | 1 | A | T | Homozygous   |
| NC_037648.1 | 7053778 | SNV | 1 | A | C | Homozygous   |
| NC_037648.1 | 7053786 | SNV | 1 | A | T | Homozygous   |
| NC_037648.1 | 7054052 | SNV | 1 | C | G | Homozygous   |
| NC_037648.1 | 7062836 | SNV | 1 | A | C | Homozygous   |
| NC_037648.1 | 7067370 | SNV | 1 | G | A | Homozygous   |
| NC_037648.1 | 7067372 | SNV | 1 | A | T | Homozygous   |
| NC_037648.1 | 7067374 | SNV | 1 | G | T | Homozygous   |
| NC_037648.1 | 7075243 | SNV | 1 | C | G | Heterozygous |
| NC_037648.1 | 7076069 | SNV | 1 | A | T | Homozygous   |
| NC_037648.1 | 7076071 | SNV | 1 | C | T | Homozygous   |
| NC_037648.1 | 7076092 | SNV | 1 | G | A | Homozygous   |
| NC_037648.1 | 7076097 | SNV | 1 | A | G | Homozygous   |
| NC_037648.1 | 7079918 | SNV | 1 | A | T | Homozygous   |
| NC_037648.1 | 7079921 | SNV | 1 | A | G | Homozygous   |
| NC_037648.1 | 7081349 | SNV | 1 | A | G | Heterozygous |
| NC_037648.1 | 7088934 | SNV | 1 | T | A | Homozygous   |
| NC_037648.1 | 7088936 | SNV | 1 | T | A | Homozygous   |
| NC_037648.1 | 7088941 | SNV | 1 | T | G | Homozygous   |
| NC_037648.1 | 7088949 | SNV | 1 | A | T | Homozygous   |
| NC_037648.1 | 7089470 | SNV | 1 | T | A | Heterozygous |
| NC_037648.1 | 7090903 | SNV | 1 | A | C | Homozygous   |
| NC_037648.1 | 7090906 | SNV | 1 | T | G | Homozygous   |
| NC_037648.1 | 7091174 | SNV | 1 | A | C | Heterozygous |
| NC_037648.1 | 7093032 | SNV | 1 | A | T | Heterozygous |
| NC_037648.1 | 7095773 | SNV | 1 | C | T | Heterozygous |
| NC_037648.1 | 7107629 | SNV | 1 | G | C | Homozygous   |
| NC_037648.1 | 7108129 | SNV | 1 | A | G | Homozygous   |

|             |         |     |   |   |   |              |
|-------------|---------|-----|---|---|---|--------------|
| NC_037648.1 | 7108175 | SNV | 1 | A | T | Heterozygous |
| NC_037648.1 | 7108179 | SNV | 1 | C | T | Heterozygous |
| NC_037648.1 | 7108190 | SNV | 1 | A | C | Heterozygous |
| NC_037648.1 | 7108201 | SNV | 1 | C | T | Heterozygous |
| NC_037648.1 | 7108204 | SNV | 1 | C | T | Heterozygous |
| NC_037648.1 | 7108209 | SNV | 1 | G | A | Homozygous   |
| NC_037648.1 | 7108211 | SNV | 1 | C | T | Homozygous   |
| NC_037648.1 | 7108235 | SNV | 1 | G | A | Homozygous   |
| NC_037648.1 | 7108243 | SNV | 1 | T | C | Homozygous   |
| NC_037648.1 | 7108253 | SNV | 1 | G | A | Homozygous   |
| NC_037648.1 | 7108257 | SNV | 1 | G | A | Homozygous   |
| NC_037648.1 | 7108259 | SNV | 1 | C | T | Homozygous   |
| NC_037648.1 | 7108262 | SNV | 1 | G | A | Homozygous   |
| NC_037648.1 | 7108266 | SNV | 1 | A | G | Homozygous   |
| NC_037648.1 | 7108272 | SNV | 1 | T | A | Homozygous   |
| NC_037648.1 | 7108284 | SNV | 1 | G | A | Homozygous   |
| NC_037648.1 | 7108287 | SNV | 1 | A | G | Homozygous   |
| NC_037648.1 | 7108292 | SNV | 1 | G | A | Homozygous   |
| NC_037648.1 | 7110839 | SNV | 1 | T | C | Heterozygous |
| NC_037648.1 | 7110862 | SNV | 1 | C | T | Heterozygous |
| NC_037648.1 | 7110868 | SNV | 1 | G | A | Heterozygous |
| NC_037648.1 | 7114705 | SNV | 1 | G | C | Homozygous   |
| NC_037648.1 | 7116793 | SNV | 1 | C | T | Homozygous   |
| NC_037648.1 | 7124726 | SNV | 1 | C | T | Heterozygous |
| NC_037648.1 | 7126919 | SNV | 1 | A | G | Homozygous   |
| NC_037648.1 | 7127782 | SNV | 1 | T | A | Heterozygous |
| NC_037648.1 | 7128102 | SNV | 1 | C | T | Homozygous   |
| NC_037648.1 | 7130544 | SNV | 1 | T | C | Heterozygous |
| NC_037648.1 | 7131886 | SNV | 1 | G | A | Heterozygous |
| NC_037648.1 | 7131933 | SNV | 1 | C | A | Heterozygous |
| NC_037648.1 | 7132163 | SNV | 1 | T | C | Homozygous   |
| NC_037648.1 | 7135841 | SNV | 1 | G | A | Heterozygous |
| NC_037648.1 | 7136742 | SNV | 1 | G | A | Heterozygous |
| NC_037648.1 | 7136840 | SNV | 1 | T | C | Heterozygous |
| NC_037648.1 | 7137644 | SNV | 1 | T | A | Homozygous   |
| NC_037648.1 | 7143921 | SNV | 1 | C | T | Heterozygous |
| NC_037648.1 | 7143927 | SNV | 1 | C | T | Heterozygous |
| NC_037648.1 | 7144352 | SNV | 1 | C | A | Heterozygous |
| NC_037648.1 | 7144360 | SNV | 1 | C | A | Heterozygous |
| NC_037648.1 | 7144364 | SNV | 1 | C | A | Heterozygous |
| NC_037648.1 | 7145764 | SNV | 1 | G | A | Heterozygous |
| NC_037648.1 | 7145775 | SNV | 1 | T | C | Heterozygous |
| NC_037648.1 | 7145778 | SNV | 1 | A | T | Heterozygous |
| NC_037648.1 | 7145783 | SNV | 1 | T | C | Homozygous   |
| NC_037648.1 | 7149139 | SNV | 1 | C | T | Homozygous   |
| NC_037648.1 | 7170473 | SNV | 1 | A | C | Homozygous   |
| NC_037648.1 | 7170486 | SNV | 1 | T | G | Homozygous   |
| NC_037648.1 | 7170488 | SNV | 1 | T | G | Homozygous   |
| NC_037648.1 | 7177410 | SNV | 1 | A | T | Homozygous   |
| NC_037648.1 | 7177420 | SNV | 1 | T | C | Homozygous   |
| NC_037648.1 | 7177431 | SNV | 1 | T | A | Homozygous   |

|             |         |     |   |   |   |              |
|-------------|---------|-----|---|---|---|--------------|
| NC_037648.1 | 7177454 | SNV | 1 | A | C | Homozygous   |
| NC_037648.1 | 7196533 | SNV | 1 | A | G | Heterozygous |
| NC_037648.1 | 7203819 | SNV | 1 | T | C | Homozygous   |
| NC_037648.1 | 7204690 | SNV | 1 | T | G | Homozygous   |
| NC_037648.1 | 7204694 | SNV | 1 | G | C | Homozygous   |
| NC_037648.1 | 7211553 | SNV | 1 | A | G | Heterozygous |
| NC_037648.1 | 7211555 | SNV | 1 | A | G | Heterozygous |
| NC_037648.1 | 7211561 | SNV | 1 | A | G | Heterozygous |
| NC_037648.1 | 7214011 | SNV | 1 | G | T | Heterozygous |
| NC_037648.1 | 7220539 | SNV | 1 | G | T | Homozygous   |
| NC_037648.1 | 7223142 | SNV | 1 | G | A | Heterozygous |
| NC_037648.1 | 7230577 | SNV | 1 | A | T | Homozygous   |
| NC_037648.1 | 7231088 | SNV | 1 | T | C | Homozygous   |
| NC_037648.1 | 7231092 | SNV | 1 | T | A | Homozygous   |
| NC_037648.1 | 7231324 | SNV | 1 | T | C | Heterozygous |
| NC_037648.1 | 7239105 | SNV | 1 | A | G | Homozygous   |
| NC_037648.1 | 7240006 | SNV | 1 | T | A | Heterozygous |
| NC_037648.1 | 7241246 | SNV | 1 | G | A | Heterozygous |
| NC_037648.1 | 7243051 | SNV | 1 | A | T | Heterozygous |
| NC_037648.1 | 7243056 | SNV | 1 | A | G | Heterozygous |
| NC_037648.1 | 7243738 | SNV | 1 | A | T | Homozygous   |
| NC_037648.1 | 7248167 | SNV | 1 | G | A | Homozygous   |
| NC_037648.1 | 7248176 | SNV | 1 | A | C | Homozygous   |
| NC_037648.1 | 7248178 | SNV | 1 | A | C | Homozygous   |
| NC_037648.1 | 7248184 | SNV | 1 | A | C | Homozygous   |
| NC_037648.1 | 7256002 | SNV | 1 | T | C | Homozygous   |
| NC_037648.1 | 7266695 | SNV | 1 | A | T | Heterozygous |
| NC_037648.1 | 7266697 | SNV | 1 | G | A | Homozygous   |
| NC_037648.1 | 7276174 | SNV | 1 | T | A | Homozygous   |
| NC_037648.1 | 7276183 | SNV | 1 | G | T | Homozygous   |
| NC_037648.1 | 7276224 | SNV | 1 | G | T | Homozygous   |
| NC_037648.1 | 7276227 | SNV | 1 | C | T | Homozygous   |
| NC_037648.1 | 7276254 | SNV | 1 | C | T | Heterozygous |
| NC_037648.1 | 7276305 | SNV | 1 | A | G | Homozygous   |
| NC_037648.1 | 7276329 | SNV | 1 | A | T | Homozygous   |
| NC_037648.1 | 7276335 | SNV | 1 | A | T | Homozygous   |
| NC_037648.1 | 7276344 | SNV | 1 | G | T | Homozygous   |
| NC_037648.1 | 7276392 | SNV | 1 | T | A | Heterozygous |
| NC_037648.1 | 7277173 | SNV | 1 | A | T | Homozygous   |
| NC_037648.1 | 7278357 | SNV | 1 | A | T | Homozygous   |
| NC_037648.1 | 7278449 | SNV | 1 | T | A | Homozygous   |
| NC_037648.1 | 7278458 | SNV | 1 | A | G | Homozygous   |
| NC_037648.1 | 7278461 | SNV | 1 | A | G | Homozygous   |
| NC_037648.1 | 7278464 | SNV | 1 | G | A | Homozygous   |
| NC_037648.1 | 7278477 | SNV | 1 | G | T | Homozygous   |
| NC_037648.1 | 7278494 | SNV | 1 | T | C | Heterozygous |
| NC_037648.1 | 7278782 | SNV | 1 | C | T | Homozygous   |
| NC_037648.1 | 7278975 | SNV | 1 | G | A | Heterozygous |
| NC_037648.1 | 7279035 | SNV | 1 | G | A | Homozygous   |
| NC_037648.1 | 7279044 | SNV | 1 | A | G | Homozygous   |
| NC_037648.1 | 7279349 | SNV | 1 | A | G | Homozygous   |

|             |         |     |   |   |   |              |
|-------------|---------|-----|---|---|---|--------------|
| NC_037648.1 | 7279430 | SNV | 1 | G | T | Homozygous   |
| NC_037648.1 | 7279439 | SNV | 1 | G | A | Homozygous   |
| NC_037648.1 | 7279508 | SNV | 1 | A | G | Heterozygous |
| NC_037648.1 | 7279551 | SNV | 1 | C | T | Homozygous   |
| NC_037648.1 | 7358686 | SNV | 1 | T | A | Homozygous   |
| NC_037648.1 | 7373527 | SNV | 1 | C | T | Heterozygous |
| NC_037648.1 | 7386730 | SNV | 1 | T | C | Homozygous   |
| NC_037648.1 | 7386865 | SNV | 1 | T | A | Heterozygous |
| NC_037648.1 | 7386873 | SNV | 1 | T | A | Heterozygous |
| NC_037648.1 | 7386876 | SNV | 1 | T | C | Heterozygous |
| NC_037648.1 | 7386879 | SNV | 1 | T | C | Heterozygous |
| NC_037648.1 | 7386888 | SNV | 1 | T | C | Heterozygous |
| NC_037648.1 | 7386898 | SNV | 1 | C | T | Homozygous   |
| NC_037648.1 | 7386903 | SNV | 1 | T | G | Homozygous   |
| NC_037648.1 | 7389301 | SNV | 1 | A | G | Homozygous   |
| NC_037648.1 | 7389309 | SNV | 1 | G | T | Heterozygous |
| NC_037648.1 | 7389313 | SNV | 1 | A | G | Homozygous   |
| NC_037648.1 | 7394242 | SNV | 1 | G | C | Homozygous   |
| NC_037648.1 | 7394277 | SNV | 1 | C | T | Homozygous   |
| NC_037648.1 | 7394284 | SNV | 1 | G | A | Heterozygous |
| NC_037648.1 | 7396170 | SNV | 1 | A | G | Homozygous   |
| NC_037648.1 | 7396177 | SNV | 1 | G | A | Homozygous   |
| NC_037648.1 | 7396179 | SNV | 1 | A | G | Homozygous   |
| NC_037648.1 | 7396181 | SNV | 1 | G | T | Homozygous   |
| NC_037648.1 | 7396186 | SNV | 1 | A | G | Homozygous   |
| NC_037648.1 | 7396190 | SNV | 1 | G | A | Homozygous   |
| NC_037648.1 | 7396212 | SNV | 1 | A | G | Homozygous   |
| NC_037648.1 | 7396224 | SNV | 1 | A | G | Homozygous   |
| NC_037648.1 | 7398884 | SNV | 1 | G | A | Heterozygous |
| NC_037648.1 | 7399076 | SNV | 1 | A | C | Homozygous   |
| NC_037648.1 | 7399080 | SNV | 1 | G | A | Homozygous   |
| NC_037648.1 | 7405091 | SNV | 1 | A | G | Heterozygous |
| NC_037648.1 | 7434624 | SNV | 1 | C | T | Homozygous   |
| NC_037648.1 | 7434664 | SNV | 1 | G | A | Heterozygous |
| NC_037648.1 | 7434682 | SNV | 1 | A | T | Heterozygous |
| NC_037648.1 | 7440153 | SNV | 1 | T | C | Heterozygous |
| NC_037648.1 | 7441123 | SNV | 1 | A | G | Homozygous   |
| NC_037648.1 | 7441127 | SNV | 1 | A | G | Homozygous   |
| NC_037648.1 | 7441130 | SNV | 1 | A | G | Homozygous   |
| NC_037648.1 | 7470721 | SNV | 1 | A | G | Homozygous   |
| NC_037648.1 | 7470755 | SNV | 1 | G | A | Homozygous   |
| NC_037648.1 | 7470761 | SNV | 1 | G | A | Heterozygous |
| NC_037648.1 | 7470765 | SNV | 1 | G | A | Heterozygous |
| NC_037648.1 | 7470777 | SNV | 1 | C | A | Heterozygous |
| NC_037648.1 | 7470777 | SNV | 1 | C | T | Heterozygous |
| NC_037648.1 | 7472147 | SNV | 1 | G | A | Homozygous   |
| NC_037648.1 | 7472155 | SNV | 1 | G | A | Homozygous   |
| NC_037648.1 | 7482837 | SNV | 1 | C | T | Homozygous   |
| NC_037648.1 | 7482924 | SNV | 1 | A | G | Heterozygous |
| NC_037648.1 | 7483058 | SNV | 1 | A | G | Homozygous   |
| NC_037648.1 | 7490091 | SNV | 1 | C | T | Homozygous   |

|             |         |     |   |   |   |              |
|-------------|---------|-----|---|---|---|--------------|
| NC_037648.1 | 7490095 | SNV | 1 | A | G | Homozygous   |
| NC_037648.1 | 7490097 | SNV | 1 | C | T | Homozygous   |
| NC_037648.1 | 7490122 | SNV | 1 | G | A | Homozygous   |
| NC_037648.1 | 7490135 | SNV | 1 | G | A | Homozygous   |
| NC_037648.1 | 7490138 | SNV | 1 | G | A | Homozygous   |
| NC_037648.1 | 7490141 | SNV | 1 | G | A | Homozygous   |
| NC_037648.1 | 7490148 | SNV | 1 | C | T | Homozygous   |
| NC_037648.1 | 7490678 | SNV | 1 | A | G | Homozygous   |
| NC_037648.1 | 7491184 | SNV | 1 | G | A | Heterozygous |
| NC_037648.1 | 7506368 | SNV | 1 | C | T | Heterozygous |
| NC_037648.1 | 7533336 | SNV | 1 | A | G | Homozygous   |
| NC_037648.1 | 7533430 | SNV | 1 | A | G | Heterozygous |
| NC_037648.1 | 7533440 | SNV | 1 | G | A | Heterozygous |
| NC_037648.1 | 7554385 | SNV | 1 | T | G | Homozygous   |
| NC_037648.1 | 7554394 | SNV | 1 | G | A | Heterozygous |
| NC_037648.1 | 7554455 | SNV | 1 | G | A | Homozygous   |
| NC_037648.1 | 7554478 | SNV | 1 | A | G | Heterozygous |
| NC_037648.1 | 7554541 | SNV | 1 | C | T | Homozygous   |
| NC_037648.1 | 7556573 | SNV | 1 | G | A | Homozygous   |
| NC_037648.1 | 7556582 | SNV | 1 | A | G | Heterozygous |
| NC_037648.1 | 7556590 | SNV | 1 | G | A | Heterozygous |
| NC_037648.1 | 7561425 | SNV | 1 | T | C | Homozygous   |
| NC_037648.1 | 7561596 | SNV | 1 | G | C | Homozygous   |
| NC_037648.1 | 7563040 | SNV | 1 | C | A | Homozygous   |
| NC_037648.1 | 7564278 | SNV | 1 | C | A | Homozygous   |
| NC_037648.1 | 7582610 | SNV | 1 | T | C | Homozygous   |
| NC_037648.1 | 7582712 | SNV | 1 | C | T | Heterozygous |
| NC_037648.1 | 7582768 | SNV | 1 | C | T | Heterozygous |
| NC_037648.1 | 7582802 | SNV | 1 | G | C | Heterozygous |
| NC_037648.1 | 7582832 | SNV | 1 | C | T | Heterozygous |
| NC_037648.1 | 7583932 | SNV | 1 | T | C | Homozygous   |
| NC_037648.1 | 7584550 | SNV | 1 | A | G | Homozygous   |
| NC_037648.1 | 7600282 | SNV | 1 | G | T | Heterozygous |
| NC_037648.1 | 7600300 | SNV | 1 | C | T | Heterozygous |
| NC_037648.1 | 7600456 | SNV | 1 | A | G | Homozygous   |
| NC_037648.1 | 7600465 | SNV | 1 | T | C | Homozygous   |
| NC_037648.1 | 7600493 | SNV | 1 | T | C | Heterozygous |
| NC_037648.1 | 7600533 | SNV | 1 | T | G | Heterozygous |
| NC_037648.1 | 7600547 | SNV | 1 | A | G | Homozygous   |
| NC_037648.1 | 7600605 | SNV | 1 | T | G | Heterozygous |
| NC_037648.1 | 7600615 | SNV | 1 | T | A | Homozygous   |
| NC_037648.1 | 7600728 | SNV | 1 | T | C | Homozygous   |
| NC_037648.1 | 7600798 | SNV | 1 | G | C | Homozygous   |
| NC_037648.1 | 7600808 | SNV | 1 | A | G | Homozygous   |
| NC_037648.1 | 7621450 | SNV | 1 | G | A | Homozygous   |
| NC_037648.1 | 7621568 | SNV | 1 | T | G | Homozygous   |
| NC_037648.1 | 7621624 | SNV | 1 | C | T | Heterozygous |
| NC_037648.1 | 7621692 | SNV | 1 | C | T | Homozygous   |
| NC_037648.1 | 7621741 | SNV | 1 | T | C | Heterozygous |
| NC_037648.1 | 7621766 | SNV | 1 | T | C | Homozygous   |
| NC_037648.1 | 7621769 | SNV | 1 | A | G | Homozygous   |

|             |         |     |   |   |   |              |
|-------------|---------|-----|---|---|---|--------------|
| NC_037648.1 | 7621840 | SNV | 1 | A | G | Homozygous   |
| NC_037648.1 | 7621894 | SNV | 1 | A | G | Homozygous   |
| NC_037648.1 | 7622850 | SNV | 1 | T | A | Homozygous   |
| NC_037648.1 | 7622857 | SNV | 1 | C | A | Homozygous   |
| NC_037648.1 | 7622864 | SNV | 1 | T | C | Homozygous   |
| NC_037648.1 | 7638224 | SNV | 1 | G | A | Heterozygous |
| NC_037648.1 | 7638284 | SNV | 1 | C | T | Heterozygous |
| NC_037648.1 | 7650994 | SNV | 1 | C | G | Homozygous   |
| NC_037648.1 | 7651062 | SNV | 1 | A | G | Homozygous   |
| NC_037648.1 | 7651065 | SNV | 1 | G | A | Heterozygous |
| NC_037648.1 | 7674328 | SNV | 1 | C | T | Homozygous   |
| NC_037648.1 | 7674350 | SNV | 1 | C | T | Homozygous   |
| NC_037648.1 | 7674352 | SNV | 1 | C | T | Homozygous   |
| NC_037648.1 | 7674489 | SNV | 1 | T | C | Homozygous   |
| NC_037648.1 | 7674495 | SNV | 1 | C | T | Homozygous   |
| NC_037648.1 | 7674529 | SNV | 1 | T | A | Homozygous   |
| NC_037648.1 | 7674532 | SNV | 1 | T | A | Homozygous   |
| NC_037648.1 | 7674535 | SNV | 1 | T | A | Homozygous   |
| NC_037648.1 | 7675840 | SNV | 1 | G | A | Homozygous   |
| NC_037648.1 | 7675848 | SNV | 1 | A | G | Homozygous   |
| NC_037648.1 | 7682496 | SNV | 1 | C | T | Homozygous   |
| NC_037648.1 | 7682531 | SNV | 1 | G | C | Heterozygous |
| NC_037648.1 | 7682533 | SNV | 1 | G | C | Heterozygous |
| NC_037648.1 | 7684917 | SNV | 1 | A | T | Homozygous   |
| NC_037648.1 | 7684923 | SNV | 1 | T | A | Homozygous   |
| NC_037648.1 | 7684948 | SNV | 1 | C | A | Homozygous   |
| NC_037648.1 | 7700307 | SNV | 1 | G | A | Heterozygous |
| NC_037648.1 | 7700473 | SNV | 1 | A | G | Heterozygous |
| NC_037648.1 | 7706431 | SNV | 1 | A | G | Homozygous   |
| NC_037648.1 | 7706443 | SNV | 1 | C | T | Homozygous   |
| NC_037648.1 | 7706647 | SNV | 1 | C | A | Homozygous   |
| NC_037648.1 | 7706657 | SNV | 1 | C | T | Homozygous   |
| NC_037648.1 | 7706713 | SNV | 1 | C | T | Homozygous   |
| NC_037648.1 | 7713147 | SNV | 1 | T | C | Heterozygous |
| NC_037648.1 | 7713230 | SNV | 1 | A | G | Homozygous   |
| NC_037648.1 | 7713317 | SNV | 1 | G | A | Heterozygous |
| NC_037648.1 | 7713344 | SNV | 1 | G | T | Homozygous   |
| NC_037648.1 | 7714333 | SNV | 1 | T | C | Homozygous   |
| NC_037648.1 | 7714382 | SNV | 1 | G | T | Heterozygous |
| NC_037648.1 | 7724802 | SNV | 1 | G | A | Heterozygous |
| NC_037648.1 | 7724809 | SNV | 1 | G | A | Heterozygous |
| NC_037648.1 | 7724812 | SNV | 1 | A | G | Heterozygous |
| NC_037648.1 | 7724814 | SNV | 1 | A | G | Homozygous   |
| NC_037648.1 | 7728447 | SNV | 1 | C | G | Heterozygous |
| NC_037648.1 | 7728493 | SNV | 1 | C | T | Heterozygous |
| NC_037648.1 | 7728540 | SNV | 1 | T | C | Homozygous   |
| NC_037648.1 | 7728542 | SNV | 1 | C | T | Heterozygous |
| NC_037648.1 | 7728578 | SNV | 1 | T | A | Heterozygous |
| NC_037648.1 | 7728631 | SNV | 1 | C | T | Homozygous   |
| NC_037648.1 | 7728640 | SNV | 1 | C | A | Heterozygous |
| NC_037648.1 | 7728749 | SNV | 1 | G | T | Heterozygous |

|             |         |     |   |   |   |              |
|-------------|---------|-----|---|---|---|--------------|
| NC_037648.1 | 7757124 | SNV | 1 | C | A | Homozygous   |
| NC_037648.1 | 7768561 | SNV | 1 | C | T | Homozygous   |
| NC_037648.1 | 7768572 | SNV | 1 | G | A | Homozygous   |
| NC_037648.1 | 7768601 | SNV | 1 | A | G | Heterozygous |
| NC_037648.1 | 7768608 | SNV | 1 | T | G | Heterozygous |
| NC_037648.1 | 7768619 | SNV | 1 | T | G | Homozygous   |
| NC_037648.1 | 7986050 | SNV | 1 | T | G | Homozygous   |
| NC_037648.1 | 7986383 | SNV | 1 | G | A | Heterozygous |
| NC_037648.1 | 7986388 | SNV | 1 | A | G | Heterozygous |
| NC_037648.1 | 7986727 | SNV | 1 | T | C | Homozygous   |
| NC_037648.1 | 7996068 | SNV | 1 | C | T | Homozygous   |
| NC_037648.1 | 7996132 | SNV | 1 | T | C | Homozygous   |
| NC_037648.1 | 7996137 | SNV | 1 | G | A | Heterozygous |
| NC_037648.1 | 7996156 | SNV | 1 | T | A | Homozygous   |
| NC_037648.1 | 7996164 | SNV | 1 | A | G | Homozygous   |
| NC_037648.1 | 7996241 | SNV | 1 | T | C | Homozygous   |
| NC_037648.1 | 7999313 | SNV | 1 | A | G | Homozygous   |
| NC_037648.1 | 7999376 | SNV | 1 | C | G | Heterozygous |
| NC_037648.1 | 7999398 | SNV | 1 | G | A | Heterozygous |
| NC_037648.1 | 7999417 | SNV | 1 | A | G | Homozygous   |
| NC_037648.1 | 8000191 | SNV | 1 | A | G | Homozygous   |
| NC_037648.1 | 8000253 | SNV | 1 | T | C | Homozygous   |
| NC_037648.1 | 8000264 | SNV | 1 | A | G | Homozygous   |
| NC_037648.1 | 8000383 | SNV | 1 | G | A | Homozygous   |
| NC_037648.1 | 8003350 | SNV | 1 | A | G | Homozygous   |
| NC_037648.1 | 8003479 | SNV | 1 | G | A | Heterozygous |
| NC_037648.1 | 8003484 | SNV | 1 | G | A | Heterozygous |
| NC_037648.1 | 8003698 | SNV | 1 | T | G | Homozygous   |
| NC_037648.1 | 8005599 | SNV | 1 | A | G | Homozygous   |
| NC_037648.1 | 8005730 | SNV | 1 | T | A | Heterozygous |
| NC_037648.1 | 8005802 | SNV | 1 | T | C | Heterozygous |
| NC_037648.1 | 8006387 | SNV | 1 | A | G | Homozygous   |
| NC_037648.1 | 8013051 | SNV | 1 | C | T | Homozygous   |
| NC_037648.1 | 8014979 | SNV | 1 | T | C | Homozygous   |
| NC_037648.1 | 8015087 | SNV | 1 | G | A | Homozygous   |
| NC_037648.1 | 8038825 | SNV | 1 | G | A | Homozygous   |
| NC_037648.1 | 8038827 | SNV | 1 | T | C | Homozygous   |
| NC_037648.1 | 8038856 | SNV | 1 | G | A | Heterozygous |
| NC_037648.1 | 8038966 | SNV | 1 | C | T | Heterozygous |
| NC_037648.1 | 8039102 | SNV | 1 | A | T | Heterozygous |
| NC_037648.1 | 8039427 | SNV | 1 | G | A | Heterozygous |
| NC_037648.1 | 8039653 | SNV | 1 | A | T | Heterozygous |
| NC_037648.1 | 8040325 | SNV | 1 | A | G | Heterozygous |
| NC_037648.1 | 8040424 | SNV | 1 | T | C | Homozygous   |
| NC_037648.1 | 8040427 | SNV | 1 | G | A | Homozygous   |
| NC_037648.1 | 8040461 | SNV | 1 | C | T | Homozygous   |
| NC_037648.1 | 8040780 | SNV | 1 | A | G | Heterozygous |
| NC_037648.1 | 8040848 | SNV | 1 | T | C | Heterozygous |
| NC_037648.1 | 8040849 | SNV | 1 | T | C | Heterozygous |
| NC_037648.1 | 8040870 | SNV | 1 | C | T | Homozygous   |
| NC_037648.1 | 8040897 | SNV | 1 | T | C | Homozygous   |

|             |         |     |   |   |   |              |
|-------------|---------|-----|---|---|---|--------------|
| NC_037648.1 | 8040951 | SNV | 1 | T | C | Homozygous   |
| NC_037648.1 | 8041035 | SNV | 1 | T | C | Homozygous   |
| NC_037648.1 | 8041131 | SNV | 1 | A | G | Homozygous   |
| NC_037648.1 | 8041160 | SNV | 1 | C | T | Heterozygous |
| NC_037648.1 | 8041222 | SNV | 1 | A | G | Homozygous   |
| NC_037648.1 | 8041226 | SNV | 1 | G | A | Homozygous   |
| NC_037648.1 | 8041671 | SNV | 1 | G | A | Heterozygous |
| NC_037648.1 | 8042844 | SNV | 1 | A | G | Homozygous   |
| NC_037648.1 | 8042893 | SNV | 1 | C | T | Homozygous   |
| NC_037648.1 | 8042902 | SNV | 1 | G | A | Homozygous   |
| NC_037648.1 | 8045713 | SNV | 1 | C | T | Heterozygous |
| NC_037648.1 | 8045973 | SNV | 1 | C | A | Heterozygous |
| NC_037648.1 | 8046322 | SNV | 1 | T | C | Heterozygous |
| NC_037648.1 | 8047196 | SNV | 1 | A | G | Homozygous   |
| NC_037648.1 | 8048193 | SNV | 1 | T | C | Heterozygous |
| NC_037648.1 | 8048763 | SNV | 1 | G | A | Heterozygous |
| NC_037648.1 | 8049161 | SNV | 1 | C | T | Heterozygous |
| NC_037648.1 | 8049217 | SNV | 1 | C | T | Heterozygous |
| NC_037648.1 | 8051069 | SNV | 1 | A | G | Homozygous   |
| NC_037648.1 | 8051075 | SNV | 1 | C | A | Homozygous   |
| NC_037648.1 | 8051937 | SNV | 1 | G | C | Homozygous   |
| NC_037648.1 | 8052435 | SNV | 1 | C | G | Heterozygous |
| NC_037648.1 | 8052891 | SNV | 1 | T | C | Homozygous   |
| NC_037648.1 | 8052941 | SNV | 1 | T | C | Homozygous   |
| NC_037648.1 | 8062336 | SNV | 1 | T | G | Homozygous   |
| NC_037648.1 | 8062338 | SNV | 1 | T | A | Homozygous   |
| NC_037648.1 | 8062361 | SNV | 1 | C | G | Homozygous   |
| NC_037648.1 | 8062363 | SNV | 1 | A | G | Homozygous   |
| NC_037648.1 | 8065471 | SNV | 1 | T | C | Heterozygous |
| NC_037648.1 | 8068546 | SNV | 1 | T | C | Heterozygous |
| NC_037648.1 | 8073541 | SNV | 1 | A | T | Homozygous   |
| NC_037648.1 | 8073546 | SNV | 1 | A | T | Homozygous   |
| NC_037648.1 | 8075081 | SNV | 1 | G | A | Homozygous   |
| NC_037648.1 | 8075568 | SNV | 1 | A | T | Homozygous   |
| NC_037648.1 | 8084605 | SNV | 1 | G | A | Homozygous   |
| NC_037648.1 | 8085208 | SNV | 1 | C | T | Heterozygous |
| NC_037648.1 | 8109459 | SNV | 1 | G | A | Heterozygous |
| NC_037648.1 | 8109492 | SNV | 1 | A | G | Heterozygous |
| NC_037648.1 | 8110536 | SNV | 1 | A | G | Heterozygous |
| NC_037648.1 | 8110798 | SNV | 1 | G | A | Homozygous   |
| NC_037648.1 | 8110834 | SNV | 1 | G | A | Homozygous   |
| NC_037648.1 | 8110846 | SNV | 1 | A | T | Homozygous   |
| NC_037648.1 | 8110885 | SNV | 1 | T | C | Homozygous   |
| NC_037648.1 | 8110925 | SNV | 1 | G | A | Homozygous   |
| NC_037648.1 | 8111071 | SNV | 1 | G | A | Homozygous   |
| NC_037648.1 | 8111093 | SNV | 1 | G | A | Heterozygous |
| NC_037648.1 | 8111105 | SNV | 1 | G | A | Heterozygous |
| NC_037648.1 | 8111350 | SNV | 1 | G | A | Homozygous   |
| NC_037648.1 | 8111371 | SNV | 1 | G | T | Homozygous   |
| NC_037648.1 | 8111663 | SNV | 1 | G | A | Homozygous   |
| NC_037648.1 | 8111838 | SNV | 1 | G | A | Heterozygous |



|             |         |     |   |   |   |              |
|-------------|---------|-----|---|---|---|--------------|
| NC_037648.1 | 8111924 | SNV | 1 | G | A | Heterozygous |
| NC_037648.1 | 8112130 | SNV | 1 | A | G | Heterozygous |
| NC_037648.1 | 8112148 | SNV | 1 | G | C | Heterozygous |
| NC_037648.1 | 8112313 | SNV | 1 | A | G | Homozygous   |
| NC_037648.1 | 8114927 | SNV | 1 | G | A | Homozygous   |
| NC_037648.1 | 8115001 | SNV | 1 | G | A | Heterozygous |
| NC_037648.1 | 8115027 | SNV | 1 | T | C | Heterozygous |
| NC_037648.1 | 8115054 | SNV | 1 | G | T | Heterozygous |
| NC_037648.1 | 8115140 | SNV | 1 | A | G | Homozygous   |
| NC_037648.1 | 8115528 | SNV | 1 | G | A | Heterozygous |
| NC_037648.1 | 8115562 | SNV | 1 | G | A | Heterozygous |
| NC_037648.1 | 8115643 | SNV | 1 | A | G | Homozygous   |
| NC_037648.1 | 8115664 | SNV | 1 | A | G | Homozygous   |
| NC_037648.1 | 8117820 | SNV | 1 | C | T | Heterozygous |
| NC_037648.1 | 8119528 | SNV | 1 | A | G | Homozygous   |
| NC_037648.1 | 8119537 | SNV | 1 | T | C | Homozygous   |
| NC_037648.1 | 8121465 | SNV | 1 | T | C | Homozygous   |
| NC_037648.1 | 8171406 | SNV | 1 | C | A | Homozygous   |
| NC_037648.1 | 8171412 | SNV | 1 | A | G | Homozygous   |
| NC_037648.1 | 8171445 | SNV | 1 | T | A | Homozygous   |
| NC_037648.1 | 8171450 | SNV | 1 | A | T | Homozygous   |
| NC_037648.1 | 8173348 | SNV | 1 | T | C | Homozygous   |
| NC_037648.1 | 8220434 | SNV | 1 | A | G | Homozygous   |
| NC_037648.1 | 8220443 | SNV | 1 | T | C | Homozygous   |
| NC_037648.1 | 8220452 | SNV | 1 | C | G | Homozygous   |
| NC_037648.1 | 8220454 | SNV | 1 | T | A | Homozygous   |
| NC_037648.1 | 8220461 | SNV | 1 | T | G | Homozygous   |
| NC_037648.1 | 8220466 | SNV | 1 | C | T | Homozygous   |
| NC_037648.1 | 8247076 | SNV | 1 | A | G | Homozygous   |
| NC_037648.1 | 8247102 | SNV | 1 | A | T | Homozygous   |
| NC_037648.1 | 8247105 | SNV | 1 | A | T | Homozygous   |
| NC_037648.1 | 8247107 | SNV | 1 | T | A | Homozygous   |
| NC_037648.1 | 8249102 | SNV | 1 | G | T | Homozygous   |
| NC_037648.1 | 8249881 | SNV | 1 | A | G | Homozygous   |
| NC_037648.1 | 8250557 | SNV | 1 | A | G | Heterozygous |
| NC_037648.1 | 8250596 | SNV | 1 | C | T | Heterozygous |
| NC_037648.1 | 8250636 | SNV | 1 | C | G | Heterozygous |
| NC_037648.1 | 8255063 | SNV | 1 | G | A | Homozygous   |
| NC_037648.1 | 8261937 | SNV | 1 | T | C | Heterozygous |
| NC_037648.1 | 8266362 | SNV | 1 | A | C | Homozygous   |
| NC_037648.1 | 8266892 | SNV | 1 | C | T | Homozygous   |
| NC_037648.1 | 8280156 | SNV | 1 | C | T | Heterozygous |
| NC_037648.1 | 8281896 | SNV | 1 | G | A | Homozygous   |
| NC_037648.1 | 8281961 | SNV | 1 | G | A | Homozygous   |
| NC_037648.1 | 8281971 | SNV | 1 | T | C | Homozygous   |
| NC_037648.1 | 8282316 | SNV | 1 | A | G | Homozygous   |
| NC_037648.1 | 8289018 | SNV | 1 | C | T | Homozygous   |
| NC_037648.1 | 8289203 | SNV | 1 | A | G | Heterozygous |
| NC_037648.1 | 8289501 | SNV | 1 | T | C | Homozygous   |
| NC_037648.1 | 8301762 | SNV | 1 | T | A | Homozygous   |
| NC_037648.1 | 8301770 | SNV | 1 | A | T | Homozygous   |

|             |         |     |   |   |   |              |
|-------------|---------|-----|---|---|---|--------------|
| NC_037648.1 | 8301874 | SNV | 1 | C | A | Homozygous   |
| NC_037648.1 | 8303139 | SNV | 1 | A | G | Homozygous   |
| NC_037648.1 | 8303457 | SNV | 1 | A | G | Homozygous   |
| NC_037648.1 | 8303662 | SNV | 1 | C | T | Heterozygous |
| NC_037648.1 | 8303839 | SNV | 1 | T | G | Heterozygous |
| NC_037648.1 | 8303935 | SNV | 1 | T | C | Heterozygous |
| NC_037648.1 | 8304754 | SNV | 1 | T | C | Homozygous   |
| NC_037648.1 | 8305736 | SNV | 1 | A | G | Homozygous   |
| NC_037648.1 | 8305962 | SNV | 1 | A | T | Heterozygous |
| NC_037648.1 | 8310362 | SNV | 1 | G | A | Heterozygous |
| NC_037648.1 | 8314465 | SNV | 1 | A | T | Heterozygous |
| NC_037648.1 | 8315558 | SNV | 1 | A | T | Homozygous   |
| NC_037648.1 | 8315561 | SNV | 1 | A | T | Homozygous   |
| NC_037648.1 | 8315565 | SNV | 1 | G | A | Homozygous   |
| NC_037648.1 | 8315568 | SNV | 1 | T | A | Homozygous   |
| NC_037648.1 | 8315669 | SNV | 1 | C | T | Homozygous   |
| NC_037648.1 | 8316292 | SNV | 1 | A | G | Homozygous   |
| NC_037648.1 | 8316729 | SNV | 1 | A | G | Heterozygous |
| NC_037648.1 | 8317255 | SNV | 1 | T | A | Homozygous   |
| NC_037648.1 | 8317486 | SNV | 1 | C | T | Homozygous   |
| NC_037648.1 | 8317552 | SNV | 1 | T | G | Heterozygous |
| NC_037648.1 | 8317612 | SNV | 1 | G | A | Heterozygous |
| NC_037648.1 | 8317837 | SNV | 1 | T | C | Heterozygous |
| NC_037648.1 | 8329765 | SNV | 1 | C | T | Heterozygous |
| NC_037648.1 | 8340799 | SNV | 1 | T | C | Homozygous   |
| NC_037648.1 | 8377822 | SNV | 1 | A | G | Heterozygous |
| NC_037648.1 | 8377841 | SNV | 1 | C | T | Heterozygous |
| NC_037648.1 | 8377878 | SNV | 1 | C | T | Homozygous   |
| NC_037648.1 | 8400606 | SNV | 1 | A | G | Homozygous   |
| NC_037648.1 | 8400662 | SNV | 1 | C | T | Homozygous   |
| NC_037648.1 | 8400668 | SNV | 1 | C | A | Homozygous   |
| NC_037648.1 | 8400890 | SNV | 1 | G | A | Heterozygous |
| NC_037648.1 | 8402307 | SNV | 1 | T | C | Homozygous   |
| NC_037648.1 | 8405543 | SNV | 1 | C | G | Homozygous   |
| NC_037648.1 | 8415724 | SNV | 1 | G | A | Homozygous   |
| NC_037648.1 | 8418679 | SNV | 1 | G | A | Homozygous   |
| NC_037648.1 | 8424445 | SNV | 1 | C | T | Homozygous   |
| NC_037648.1 | 8424621 | SNV | 1 | T | C | Heterozygous |
| NC_037648.1 | 8424632 | SNV | 1 | C | T | Homozygous   |
| NC_037648.1 | 8424642 | SNV | 1 | C | T | Homozygous   |
| NC_037648.1 | 8424654 | SNV | 1 | A | T | Heterozygous |
| NC_037648.1 | 8424725 | SNV | 1 | C | T | Heterozygous |
| NC_037648.1 | 8441142 | SNV | 1 | C | T | Heterozygous |
| NC_037648.1 | 8441278 | SNV | 1 | T | C | Homozygous   |
| NC_037648.1 | 8452260 | SNV | 1 | C | T | Homozygous   |
| NC_037648.1 | 8455702 | SNV | 1 | C | T | Heterozygous |
| NC_037648.1 | 8455704 | SNV | 1 | C | T | Heterozygous |
| NC_037648.1 | 8455756 | SNV | 1 | G | A | Heterozygous |
| NC_037648.1 | 8455920 | SNV | 1 | C | G | Homozygous   |
| NC_037648.1 | 8459980 | SNV | 1 | C | T | Homozygous   |
| NC_037648.1 | 8459986 | SNV | 1 | C | T | Homozygous   |

|             |         |     |   |   |   |              |
|-------------|---------|-----|---|---|---|--------------|
| NC_037648.1 | 8465489 | SNV | 1 | G | A | Homozygous   |
| NC_037648.1 | 8478567 | SNV | 1 | T | C | Homozygous   |
| NC_037648.1 | 8478573 | SNV | 1 | C | T | Homozygous   |
| NC_037648.1 | 8478583 | SNV | 1 | T | C | Homozygous   |
| NC_037648.1 | 8478684 | SNV | 1 | C | T | Homozygous   |
| NC_037648.1 | 8479605 | SNV | 1 | T | C | Homozygous   |
| NC_037648.1 | 8479647 | SNV | 1 | T | C | Homozygous   |
| NC_037648.1 | 8479652 | SNV | 1 | C | T | Homozygous   |
| NC_037648.1 | 8479780 | SNV | 1 | G | A | Heterozygous |
| NC_037648.1 | 8484176 | SNV | 1 | G | A | Heterozygous |
| NC_037648.1 | 8484182 | SNV | 1 | C | T | Heterozygous |
| NC_037648.1 | 8484189 | SNV | 1 | C | T | Homozygous   |
| NC_037648.1 | 8484471 | SNV | 1 | C | T | Heterozygous |
| NC_037648.1 | 8484566 | SNV | 1 | T | C | Homozygous   |
| NC_037648.1 | 8484594 | SNV | 1 | C | T | Heterozygous |
| NC_037648.1 | 8484782 | SNV | 1 | T | C | Homozygous   |
| NC_037648.1 | 8485074 | SNV | 1 | T | C | Heterozygous |
| NC_037648.1 | 8485551 | SNV | 1 | T | C | Heterozygous |
| NC_037648.1 | 8485553 | SNV | 1 | T | C | Heterozygous |
| NC_037648.1 | 8485585 | SNV | 1 | G | T | Heterozygous |
| NC_037648.1 | 8485590 | SNV | 1 | T | A | Heterozygous |
| NC_037648.1 | 8485676 | SNV | 1 | A | G | Homozygous   |
| NC_037648.1 | 8485742 | SNV | 1 | A | G | Homozygous   |
| NC_037648.1 | 8485746 | SNV | 1 | A | G | Heterozygous |
| NC_037648.1 | 8485809 | SNV | 1 | A | G | Homozygous   |
| NC_037648.1 | 8486099 | SNV | 1 | C | T | Heterozygous |
| NC_037648.1 | 8489721 | SNV | 1 | C | T | Homozygous   |
| NC_037648.1 | 8630888 | SNV | 1 | T | C | Heterozygous |
| NC_037648.1 | 8632404 | SNV | 1 | C | T | Heterozygous |
| NC_037648.1 | 8632415 | SNV | 1 | T | A | Heterozygous |
| NC_037648.1 | 8657205 | SNV | 1 | C | T | Heterozygous |
| NC_037648.1 | 8663295 | SNV | 1 | C | A | Homozygous   |
| NC_037648.1 | 8663411 | SNV | 1 | C | T | Heterozygous |
| NC_037648.1 | 8666559 | SNV | 1 | A | G | Homozygous   |
| NC_037648.1 | 8666579 | SNV | 1 | A | G | Homozygous   |
| NC_037648.1 | 8666594 | SNV | 1 | A | G | Homozygous   |
| NC_037648.1 | 8676919 | SNV | 1 | C | T | Homozygous   |
| NC_037648.1 | 8677134 | SNV | 1 | A | G | Homozygous   |
| NC_037648.1 | 8677186 | SNV | 1 | T | C | Heterozygous |
| NC_037648.1 | 8677188 | SNV | 1 | C | T | Heterozygous |
| NC_037648.1 | 8677192 | SNV | 1 | T | C | Heterozygous |
| NC_037648.1 | 8684016 | SNV | 1 | G | A | Homozygous   |
| NC_037648.1 | 8685323 | SNV | 1 | G | A | Heterozygous |
| NC_037648.1 | 8693111 | SNV | 1 | C | T | Heterozygous |
| NC_037648.1 | 8695099 | SNV | 1 | T | C | Homozygous   |
| NC_037648.1 | 8695135 | SNV | 1 | A | G | Homozygous   |
| NC_037648.1 | 8695205 | SNV | 1 | G | T | Homozygous   |
| NC_037648.1 | 8695391 | SNV | 1 | T | C | Homozygous   |
| NC_037648.1 | 8695552 | SNV | 1 | G | C | Homozygous   |
| NC_037648.1 | 8695569 | SNV | 1 | T | C | Homozygous   |
| NC_037648.1 | 8695727 | SNV | 1 | T | C | Homozygous   |

|             |         |     |   |   |   |              |
|-------------|---------|-----|---|---|---|--------------|
| NC_037648.1 | 8695888 | SNV | 1 | A | G | Homozygous   |
| NC_037648.1 | 8695902 | SNV | 1 | G | A | Heterozygous |
| NC_037648.1 | 8695983 | SNV | 1 | T | G | Homozygous   |
| NC_037648.1 | 8696009 | SNV | 1 | T | C | Homozygous   |
| NC_037648.1 | 8696065 | SNV | 1 | A | G | Heterozygous |
| NC_037648.1 | 8696574 | SNV | 1 | T | C | Heterozygous |
| NC_037648.1 | 8696592 | SNV | 1 | C | T | Heterozygous |
| NC_037648.1 | 8696626 | SNV | 1 | T | C | Heterozygous |
| NC_037648.1 | 8741404 | SNV | 1 | C | T | Heterozygous |
| NC_037648.1 | 8741520 | SNV | 1 | T | C | Homozygous   |
| NC_037648.1 | 8741540 | SNV | 1 | T | C | Heterozygous |
| NC_037648.1 | 8741550 | SNV | 1 | T | C | Homozygous   |
| NC_037648.1 | 8741720 | SNV | 1 | T | C | Homozygous   |
| NC_037648.1 | 8741804 | SNV | 1 | T | C | Heterozygous |
| NC_037648.1 | 8741911 | SNV | 1 | T | C | Heterozygous |
| NC_037648.1 | 8741942 | SNV | 1 | C | T | Heterozygous |
| NC_037648.1 | 8741992 | SNV | 1 | G | A | Heterozygous |
| NC_037648.1 | 8742081 | SNV | 1 | G | T | Homozygous   |
| NC_037648.1 | 8742088 | SNV | 1 | G | T | Heterozygous |
| NC_037648.1 | 8742191 | SNV | 1 | A | G | Homozygous   |
| NC_037648.1 | 8750732 | SNV | 1 | A | G | Heterozygous |
| NC_037648.1 | 8751702 | SNV | 1 | C | T | Homozygous   |
| NC_037648.1 | 8751924 | SNV | 1 | A | G | Homozygous   |
| NC_037648.1 | 8752161 | SNV | 1 | T | C | Homozygous   |
| NC_037648.1 | 8754818 | SNV | 1 | G | C | Homozygous   |
| NC_037648.1 | 8754827 | SNV | 1 | A | G | Homozygous   |
| NC_037648.1 | 8754835 | SNV | 1 | A | G | Homozygous   |
| NC_037648.1 | 8754921 | SNV | 1 | T | C | Heterozygous |
| NC_037648.1 | 8754978 | SNV | 1 | A | T | Heterozygous |
| NC_037648.1 | 8755235 | SNV | 1 | C | G | Heterozygous |
| NC_037648.1 | 8755432 | SNV | 1 | G | A | Homozygous   |
| NC_037648.1 | 8755449 | SNV | 1 | A | G | Homozygous   |
| NC_037648.1 | 8761200 | SNV | 1 | C | T | Homozygous   |
| NC_037648.1 | 8761216 | SNV | 1 | C | G | Homozygous   |
| NC_037648.1 | 8782583 | SNV | 1 | C | T | Heterozygous |
| NC_037648.1 | 8782614 | SNV | 1 | G | C | Heterozygous |
| NC_037648.1 | 8785188 | SNV | 1 | T | A | Homozygous   |
| NC_037648.1 | 8785191 | SNV | 1 | A | T | Homozygous   |
| NC_037648.1 | 8785194 | SNV | 1 | G | A | Homozygous   |
| NC_037648.1 | 8785196 | SNV | 1 | C | A | Homozygous   |
| NC_037648.1 | 8785198 | SNV | 1 | G | T | Homozygous   |
| NC_037648.1 | 8785211 | SNV | 1 | A | G | Homozygous   |
| NC_037648.1 | 8787328 | SNV | 1 | A | G | Homozygous   |
| NC_037648.1 | 8789947 | SNV | 1 | A | G | Homozygous   |
| NC_037648.1 | 8791195 | SNV | 1 | G | A | Heterozygous |
| NC_037648.1 | 8791251 | SNV | 1 | C | T | Heterozygous |
| NC_037648.1 | 8791337 | SNV | 1 | T | A | Homozygous   |
| NC_037648.1 | 8795882 | SNV | 1 | A | G | Homozygous   |
| NC_037648.1 | 8795993 | SNV | 1 | A | G | Homozygous   |
| NC_037648.1 | 8796443 | SNV | 1 | A | G | Homozygous   |
| NC_037648.1 | 8796448 | SNV | 1 | C | A | Homozygous   |

|             |         |     |   |   |   |              |
|-------------|---------|-----|---|---|---|--------------|
| NC_037648.1 | 8796494 | SNV | 1 | A | G | Homozygous   |
| NC_037648.1 | 8796759 | SNV | 1 | A | G | Homozygous   |
| NC_037648.1 | 8796829 | SNV | 1 | T | C | Heterozygous |
| NC_037648.1 | 8796885 | SNV | 1 | T | G | Homozygous   |
| NC_037648.1 | 8796895 | SNV | 1 | A | G | Homozygous   |
| NC_037648.1 | 8796919 | SNV | 1 | A | G | Homozygous   |
| NC_037648.1 | 8797529 | SNV | 1 | A | G | Homozygous   |
| NC_037648.1 | 8797865 | SNV | 1 | T | C | Homozygous   |
| NC_037648.1 | 8800398 | SNV | 1 | A | G | Heterozygous |
| NC_037648.1 | 8800426 | SNV | 1 | A | G | Homozygous   |
| NC_037648.1 | 8800505 | SNV | 1 | A | G | Homozygous   |
| NC_037648.1 | 8800670 | SNV | 1 | C | T | Heterozygous |
| NC_037648.1 | 8800732 | SNV | 1 | G | A | Homozygous   |
| NC_037648.1 | 8801405 | SNV | 1 | C | G | Homozygous   |
| NC_037648.1 | 8813850 | SNV | 1 | A | G | Heterozygous |
| NC_037648.1 | 8813943 | SNV | 1 | C | T | Heterozygous |
| NC_037648.1 | 8814451 | SNV | 1 | A | G | Homozygous   |
| NC_037648.1 | 8814689 | SNV | 1 | G | A | Heterozygous |
| NC_037648.1 | 8814756 | SNV | 1 | C | G | Homozygous   |
| NC_037648.1 | 8814774 | SNV | 1 | G | A | Heterozygous |
| NC_037648.1 | 8814780 | SNV | 1 | T | C | Heterozygous |
| NC_037648.1 | 8815411 | SNV | 1 | T | G | Homozygous   |
| NC_037648.1 | 8815413 | SNV | 1 | C | T | Homozygous   |
| NC_037648.1 | 8825707 | SNV | 1 | C | G | Homozygous   |
| NC_037648.1 | 8825732 | SNV | 1 | T | C | Heterozygous |
| NC_037648.1 | 8825736 | SNV | 1 | C | T | Heterozygous |
| NC_037648.1 | 8829932 | SNV | 1 | C | T | Heterozygous |
| NC_037648.1 | 8829945 | SNV | 1 | C | T | Homozygous   |
| NC_037648.1 | 8839619 | SNV | 1 | C | T | Heterozygous |
| NC_037648.1 | 8839636 | SNV | 1 | G | T | Heterozygous |
| NC_037648.1 | 8841525 | SNV | 1 | A | G | Homozygous   |
| NC_037648.1 | 8841536 | SNV | 1 | A | T | Homozygous   |
| NC_037648.1 | 8841561 | SNV | 1 | A | T | Homozygous   |
| NC_037648.1 | 8841564 | SNV | 1 | A | T | Homozygous   |
| NC_037648.1 | 8845535 | SNV | 1 | T | A | Homozygous   |
| NC_037648.1 | 8845537 | SNV | 1 | A | C | Homozygous   |
| NC_037648.1 | 8845559 | SNV | 1 | T | G | Homozygous   |
| NC_037648.1 | 8845561 | SNV | 1 | T | G | Homozygous   |
| NC_037648.1 | 8845565 | SNV | 1 | A | T | Homozygous   |
| NC_037648.1 | 8845569 | SNV | 1 | A | C | Homozygous   |
| NC_037648.1 | 8845571 | SNV | 1 | T | A | Homozygous   |
| NC_037648.1 | 8845883 | SNV | 1 | C | T | Homozygous   |
| NC_037648.1 | 8845896 | SNV | 1 | A | G | Heterozygous |
| NC_037648.1 | 8847506 | SNV | 1 | T | C | Homozygous   |
| NC_037648.1 | 8848597 | SNV | 1 | G | C | Homozygous   |
| NC_037648.1 | 8848605 | SNV | 1 | G | C | Homozygous   |
| NC_037648.1 | 8848609 | SNV | 1 | G | C | Homozygous   |
| NC_037648.1 | 8848613 | SNV | 1 | A | C | Homozygous   |
| NC_037648.1 | 8852642 | SNV | 1 | G | A | Heterozygous |
| NC_037648.1 | 8852658 | SNV | 1 | T | C | Homozygous   |
| NC_037648.1 | 8852689 | SNV | 1 | T | C | Heterozygous |

|             |         |     |   |   |   |              |
|-------------|---------|-----|---|---|---|--------------|
| NC_037648.1 | 8852694 | SNV | 1 | A | G | Heterozygous |
| NC_037648.1 | 8852707 | SNV | 1 | C | T | Homozygous   |
| NC_037648.1 | 8870040 | SNV | 1 | G | T | Homozygous   |
| NC_037648.1 | 8870082 | SNV | 1 | A | T | Heterozygous |
| NC_037648.1 | 8881983 | SNV | 1 | A | G | Homozygous   |
| NC_037648.1 | 8882179 | SNV | 1 | C | T | Heterozygous |
| NC_037648.1 | 8882228 | SNV | 1 | A | G | Homozygous   |
| NC_037648.1 | 8882296 | SNV | 1 | G | A | Heterozygous |
| NC_037648.1 | 8882318 | SNV | 1 | G | A | Heterozygous |
| NC_037648.1 | 8882330 | SNV | 1 | G | C | Heterozygous |
| NC_037648.1 | 8882751 | SNV | 1 | A | G | Homozygous   |
| NC_037648.1 | 8891018 | SNV | 1 | A | G | Homozygous   |
| NC_037648.1 | 8891410 | SNV | 1 | A | G | Homozygous   |
| NC_037648.1 | 8923330 | SNV | 1 | A | G | Homozygous   |
| NC_037648.1 | 8924517 | SNV | 1 | G | T | Heterozygous |
| NC_037648.1 | 8924764 | SNV | 1 | T | C | Homozygous   |
| NC_037648.1 | 8927324 | SNV | 1 | C | A | Homozygous   |
| NC_037648.1 | 8928060 | SNV | 1 | T | C | Homozygous   |
| NC_037648.1 | 8928069 | SNV | 1 | A | T | Homozygous   |
| NC_037648.1 | 8928074 | SNV | 1 | A | C | Homozygous   |
| NC_037648.1 | 8928076 | SNV | 1 | T | G | Homozygous   |
| NC_037648.1 | 8928376 | SNV | 1 | G | A | Heterozygous |
| NC_037648.1 | 8928433 | SNV | 1 | A | G | Heterozygous |
| NC_037648.1 | 8928904 | SNV | 1 | C | T | Heterozygous |
| NC_037648.1 | 8928998 | SNV | 1 | T | C | Homozygous   |
| NC_037648.1 | 8929009 | SNV | 1 | C | T | Homozygous   |
| NC_037648.1 | 8929741 | SNV | 1 | T | C | Heterozygous |
| NC_037648.1 | 8929752 | SNV | 1 | C | T | Homozygous   |
| NC_037648.1 | 8930098 | SNV | 1 | T | C | Homozygous   |
| NC_037648.1 | 8930806 | SNV | 1 | C | T | Homozygous   |
| NC_037648.1 | 8931425 | SNV | 1 | C | T | Homozygous   |
| NC_037648.1 | 8931463 | SNV | 1 | T | C | Homozygous   |
| NC_037648.1 | 8931481 | SNV | 1 | T | C | Heterozygous |
| NC_037648.1 | 8931654 | SNV | 1 | G | A | Homozygous   |
| NC_037648.1 | 8932599 | SNV | 1 | T | A | Heterozygous |
| NC_037648.1 | 8934962 | SNV | 1 | T | C | Homozygous   |
| NC_037648.1 | 8935032 | SNV | 1 | C | T | Heterozygous |
| NC_037648.1 | 8935081 | SNV | 1 | T | C | Homozygous   |
| NC_037648.1 | 8935158 | SNV | 1 | G | A | Homozygous   |
| NC_037648.1 | 8935325 | SNV | 1 | A | G | Homozygous   |
| NC_037648.1 | 8935327 | SNV | 1 | G | C | Homozygous   |
| NC_037648.1 | 8950266 | SNV | 1 | A | G | Homozygous   |
| NC_037648.1 | 8950344 | SNV | 1 | T | C | Homozygous   |
| NC_037648.1 | 8953279 | SNV | 1 | C | T | Homozygous   |
| NC_037648.1 | 8953293 | SNV | 1 | G | A | Homozygous   |
| NC_037648.1 | 8960286 | SNV | 1 | C | A | Homozygous   |
| NC_037648.1 | 8960290 | SNV | 1 | G | A | Homozygous   |
| NC_037648.1 | 8960344 | SNV | 1 | A | G | Heterozygous |
| NC_037648.1 | 9040866 | SNV | 1 | C | A | Homozygous   |
| NC_037648.1 | 9040890 | SNV | 1 | T | C | Homozygous   |
| NC_037648.1 | 9041035 | SNV | 1 | A | G | Homozygous   |

|             |         |     |   |   |   |              |
|-------------|---------|-----|---|---|---|--------------|
| NC_037648.1 | 9042226 | SNV | 1 | T | C | Heterozygous |
| NC_037648.1 | 9042236 | SNV | 1 | C | T | Heterozygous |
| NC_037648.1 | 9042411 | SNV | 1 | T | C | Homozygous   |
| NC_037648.1 | 9042460 | SNV | 1 | G | A | Homozygous   |
| NC_037648.1 | 9042468 | SNV | 1 | T | A | Homozygous   |
| NC_037648.1 | 9042506 | SNV | 1 | T | C | Homozygous   |
| NC_037648.1 | 9042516 | SNV | 1 | T | C | Heterozygous |
| NC_037648.1 | 9042527 | SNV | 1 | T | C | Homozygous   |
| NC_037648.1 | 9042537 | SNV | 1 | T | C | Homozygous   |
| NC_037648.1 | 9042580 | SNV | 1 | G | A | Homozygous   |
| NC_037648.1 | 9042582 | SNV | 1 | T | A | Homozygous   |
| NC_037648.1 | 9042584 | SNV | 1 | G | A | Homozygous   |
| NC_037648.1 | 9042597 | SNV | 1 | A | C | Heterozygous |
| NC_037648.1 | 9042597 | SNV | 1 | A | T | Heterozygous |
| NC_037648.1 | 9042752 | SNV | 1 | A | C | Homozygous   |
| NC_037648.1 | 9042761 | SNV | 1 | G | A | Heterozygous |
| NC_037648.1 | 9042806 | SNV | 1 | A | G | Homozygous   |
| NC_037648.1 | 9042959 | SNV | 1 | C | T | Homozygous   |
| NC_037648.1 | 9042983 | SNV | 1 | A | G | Homozygous   |
| NC_037648.1 | 9043025 | SNV | 1 | A | G | Homozygous   |
| NC_037648.1 | 9044682 | SNV | 1 | T | A | Heterozygous |
| NC_037648.1 | 9044709 | SNV | 1 | A | G | Homozygous   |
| NC_037648.1 | 9044742 | SNV | 1 | C | T | Homozygous   |
| NC_037648.1 | 9044857 | SNV | 1 | T | A | Homozygous   |
| NC_037648.1 | 9044996 | SNV | 1 | T | C | Homozygous   |
| NC_037648.1 | 9044998 | SNV | 1 | G | A | Homozygous   |
| NC_037648.1 | 9045060 | SNV | 1 | T | C | Heterozygous |
| NC_037648.1 | 9045088 | SNV | 1 | C | T | Homozygous   |
| NC_037648.1 | 9045132 | SNV | 1 | T | C | Heterozygous |
| NC_037648.1 | 9045197 | SNV | 1 | A | G | Homozygous   |
| NC_037648.1 | 9045366 | SNV | 1 | T | C | Homozygous   |
| NC_037648.1 | 9047572 | SNV | 1 | A | G | Heterozygous |
| NC_037648.1 | 9047579 | SNV | 1 | C | T | Heterozygous |
| NC_037648.1 | 9047610 | SNV | 1 | C | A | Heterozygous |
| NC_037648.1 | 9047616 | SNV | 1 | C | A | Heterozygous |
| NC_037648.1 | 9047623 | SNV | 1 | C | A | Heterozygous |
| NC_037648.1 | 9047726 | SNV | 1 | T | C | Homozygous   |
| NC_037648.1 | 9047853 | SNV | 1 | C | T | Heterozygous |
| NC_037648.1 | 9049042 | SNV | 1 | T | C | Heterozygous |
| NC_037648.1 | 9049046 | SNV | 1 | T | C | Heterozygous |
| NC_037648.1 | 9049461 | SNV | 1 | G | A | Heterozygous |
| NC_037648.1 | 9049481 | SNV | 1 | A | G | Homozygous   |
| NC_037648.1 | 9049487 | SNV | 1 | C | T | Heterozygous |
| NC_037648.1 | 9049541 | SNV | 1 | T | C | Homozygous   |
| NC_037648.1 | 9049563 | SNV | 1 | G | A | Homozygous   |
| NC_037648.1 | 9049840 | SNV | 1 | T | A | Heterozygous |
| NC_037648.1 | 9049869 | SNV | 1 | C | T | Heterozygous |
| NC_037648.1 | 9054149 | SNV | 1 | G | C | Heterozygous |
| NC_037648.1 | 9054152 | SNV | 1 | A | C | Heterozygous |
| NC_037648.1 | 9054154 | SNV | 1 | C | T | Heterozygous |
| NC_037648.1 | 9054209 | SNV | 1 | C | T | Heterozygous |

|             |         |     |   |   |   |              |
|-------------|---------|-----|---|---|---|--------------|
| NC_037648.1 | 9063103 | SNV | 1 | C | T | Heterozygous |
| NC_037648.1 | 9063110 | SNV | 1 | T | C | Homozygous   |
| NC_037648.1 | 9063138 | SNV | 1 | C | T | Homozygous   |
| NC_037648.1 | 9063143 | SNV | 1 | C | T | Heterozygous |
| NC_037648.1 | 9063226 | SNV | 1 | G | A | Heterozygous |
| NC_037648.1 | 9063327 | SNV | 1 | G | A | Heterozygous |
| NC_037648.1 | 9063495 | SNV | 1 | T | C | Homozygous   |
| NC_037648.1 | 9066127 | SNV | 1 | A | T | Heterozygous |
| NC_037648.1 | 9066416 | SNV | 1 | C | A | Homozygous   |
| NC_037648.1 | 9066981 | SNV | 1 | A | C | Homozygous   |
| NC_037648.1 | 9067091 | SNV | 1 | T | A | Heterozygous |
| NC_037648.1 | 9067248 | SNV | 1 | T | C | Homozygous   |
| NC_037648.1 | 9067986 | SNV | 1 | T | C | Homozygous   |
| NC_037648.1 | 9068024 | SNV | 1 | A | G | Homozygous   |
| NC_037648.1 | 9068052 | SNV | 1 | A | G | Homozygous   |
| NC_037648.1 | 9198576 | SNV | 1 | T | C | Homozygous   |
| NC_037648.1 | 9205809 | SNV | 1 | T | A | Homozygous   |
| NC_037648.1 | 9205815 | SNV | 1 | G | A | Homozygous   |
| NC_037648.1 | 9205819 | SNV | 1 | A | C | Homozygous   |
| NC_037648.1 | 9205831 | SNV | 1 | A | T | Homozygous   |
| NC_037648.1 | 9206539 | SNV | 1 | G | T | Homozygous   |
| NC_037648.1 | 9206542 | SNV | 1 | C | G | Heterozygous |
| NC_037648.1 | 9224946 | SNV | 1 | G | A | Homozygous   |
| NC_037648.1 | 9224970 | SNV | 1 | T | A | Homozygous   |
| NC_037648.1 | 9224986 | SNV | 1 | A | C | Homozygous   |
| NC_037648.1 | 9233267 | SNV | 1 | G | A | Homozygous   |
| NC_037648.1 | 9233303 | SNV | 1 | A | G | Homozygous   |
| NC_037648.1 | 9233307 | SNV | 1 | T | C | Homozygous   |
| NC_037648.1 | 9233350 | SNV | 1 | C | G | Homozygous   |
| NC_037648.1 | 9233446 | SNV | 1 | A | T | Homozygous   |
| NC_037648.1 | 9233512 | SNV | 1 | C | T | Homozygous   |
| NC_037648.1 | 9242432 | SNV | 1 | T | C | Homozygous   |
| NC_037648.1 | 9242452 | SNV | 1 | C | T | Homozygous   |
| NC_037648.1 | 9242465 | SNV | 1 | A | C | Homozygous   |
| NC_037648.1 | 9242476 | SNV | 1 | A | C | Homozygous   |
| NC_037648.1 | 9242486 | SNV | 1 | T | A | Homozygous   |
| NC_037648.1 | 9242492 | SNV | 1 | C | T | Homozygous   |
| NC_037648.1 | 9257078 | SNV | 1 | C | T | Heterozygous |
| NC_037648.1 | 9258617 | SNV | 1 | T | C | Heterozygous |
| NC_037648.1 | 9258623 | SNV | 1 | C | T | Heterozygous |
| NC_037648.1 | 9258634 | SNV | 1 | G | A | Homozygous   |
| NC_037648.1 | 9258649 | SNV | 1 | C | T | Heterozygous |
| NC_037648.1 | 9258661 | SNV | 1 | A | G | Heterozygous |
| NC_037648.1 | 9258806 | SNV | 1 | G | A | Heterozygous |
| NC_037648.1 | 9258811 | SNV | 1 | G | A | Heterozygous |
| NC_037648.1 | 9258838 | SNV | 1 | T | C | Homozygous   |
| NC_037648.1 | 9258922 | SNV | 1 | C | G | Homozygous   |
| NC_037648.1 | 9258934 | SNV | 1 | T | C | Homozygous   |
| NC_037648.1 | 9258943 | SNV | 1 | G | A | Heterozygous |
| NC_037648.1 | 9275792 | SNV | 1 | T | A | Homozygous   |
| NC_037648.1 | 9285814 | SNV | 1 | C | T | Homozygous   |



|             |         |     |   |   |   |              |
|-------------|---------|-----|---|---|---|--------------|
| NC_037648.1 | 9286049 | SNV | 1 | T | C | Homozygous   |
| NC_037648.1 | 9286166 | SNV | 1 | T | C | Homozygous   |
| NC_037648.1 | 9287130 | SNV | 1 | A | G | Homozygous   |
| NC_037648.1 | 9300275 | SNV | 1 | T | C | Heterozygous |
| NC_037648.1 | 9300311 | SNV | 1 | T | A | Heterozygous |
| NC_037648.1 | 9300326 | SNV | 1 | T | A | Heterozygous |
| NC_037648.1 | 9300353 | SNV | 1 | T | A | Heterozygous |
| NC_037648.1 | 9300355 | SNV | 1 | G | A | Heterozygous |
| NC_037648.1 | 9300367 | SNV | 1 | A | T | Heterozygous |
| NC_037648.1 | 9311864 | SNV | 1 | T | C | Homozygous   |
| NC_037648.1 | 9311878 | SNV | 1 | G | A | Homozygous   |
| NC_037648.1 | 9311884 | SNV | 1 | G | A | Homozygous   |
| NC_037648.1 | 9333283 | SNV | 1 | G | T | Heterozygous |
| NC_037648.1 | 9333293 | SNV | 1 | G | A | Heterozygous |
| NC_037648.1 | 9348870 | SNV | 1 | G | A | Heterozygous |
| NC_037648.1 | 9348873 | SNV | 1 | G | A | Heterozygous |
| NC_037648.1 | 9348960 | SNV | 1 | A | T | Heterozygous |
| NC_037648.1 | 9348979 | SNV | 1 | G | A | Homozygous   |
| NC_037648.1 | 9348983 | SNV | 1 | T | C | Homozygous   |
| NC_037648.1 | 9349026 | SNV | 1 | T | C | Homozygous   |
| NC_037648.1 | 9349036 | SNV | 1 | A | G | Heterozygous |
| NC_037648.1 | 9349061 | SNV | 1 | C | G | Heterozygous |
| NC_037648.1 | 9349084 | SNV | 1 | G | C | Heterozygous |
| NC_037648.1 | 9349145 | SNV | 1 | A | G | Heterozygous |
| NC_037648.1 | 9349557 | SNV | 1 | T | C | Homozygous   |
| NC_037648.1 | 9356227 | SNV | 1 | C | T | Heterozygous |
| NC_037648.1 | 9356237 | SNV | 1 | G | A | Heterozygous |
| NC_037648.1 | 9356247 | SNV | 1 | C | T | Homozygous   |
| NC_037648.1 | 9356321 | SNV | 1 | T | C | Heterozygous |
| NC_037648.1 | 9356383 | SNV | 1 | T | G | Homozygous   |
| NC_037648.1 | 9358304 | SNV | 1 | C | T | Heterozygous |
| NC_037648.1 | 9358311 | SNV | 1 | C | T | Homozygous   |
| NC_037648.1 | 9358313 | SNV | 1 | A | T | Homozygous   |
| NC_037648.1 | 9358318 | SNV | 1 | C | T | Heterozygous |
| NC_037648.1 | 9358327 | SNV | 1 | T | C | Homozygous   |
| NC_037648.1 | 9367525 | SNV | 1 | A | G | Homozygous   |
| NC_037648.1 | 9367574 | SNV | 1 | A | G | Homozygous   |
| NC_037648.1 | 9370561 | SNV | 1 | T | C | Homozygous   |
| NC_037648.1 | 9370998 | SNV | 1 | C | T | Heterozygous |
| NC_037648.1 | 9371224 | SNV | 1 | T | C | Homozygous   |
| NC_037648.1 | 9371227 | SNV | 1 | G | C | Homozygous   |
| NC_037648.1 | 9376750 | SNV | 1 | G | A | Homozygous   |
| NC_037648.1 | 9376882 | SNV | 1 | T | G | Homozygous   |
| NC_037648.1 | 9377075 | SNV | 1 | T | C | Homozygous   |
| NC_037648.1 | 9377242 | SNV | 1 | T | C | Homozygous   |
| NC_037648.1 | 9377339 | SNV | 1 | A | T | Homozygous   |
| NC_037648.1 | 9377407 | SNV | 1 | C | T | Heterozygous |
| NC_037648.1 | 9377608 | SNV | 1 | G | A | Heterozygous |
| NC_037648.1 | 9384084 | SNV | 1 | A | T | Heterozygous |
| NC_037648.1 | 9384129 | SNV | 1 | T | C | Heterozygous |
| NC_037648.1 | 9384611 | SNV | 1 | G | A | Heterozygous |

|             |         |     |   |   |   |              |
|-------------|---------|-----|---|---|---|--------------|
| NC_037648.1 | 9384614 | SNV | 1 | C | A | Heterozygous |
| NC_037648.1 | 9384630 | SNV | 1 | G | C | Heterozygous |
| NC_037648.1 | 9384635 | SNV | 1 | T | C | Homozygous   |
| NC_037648.1 | 9384669 | SNV | 1 | A | G | Heterozygous |
| NC_037648.1 | 9384694 | SNV | 1 | G | A | Heterozygous |
| NC_037648.1 | 9385779 | SNV | 1 | T | C | Heterozygous |
| NC_037648.1 | 9385783 | SNV | 1 | C | T | Heterozygous |
| NC_037648.1 | 9385787 | SNV | 1 | T | C | Heterozygous |
| NC_037648.1 | 9413085 | SNV | 1 | A | T | Homozygous   |
| NC_037648.1 | 9414342 | SNV | 1 | C | T | Heterozygous |
| NC_037648.1 | 9414462 | SNV | 1 | A | G | Homozygous   |
| NC_037648.1 | 9414537 | SNV | 1 | A | T | Heterozygous |
| NC_037648.1 | 9414691 | SNV | 1 | G | A | Heterozygous |
| NC_037648.1 | 9414772 | SNV | 1 | A | G | Heterozygous |
| NC_037648.1 | 9414968 | SNV | 1 | A | G | Heterozygous |
| NC_037648.1 | 9419893 | SNV | 1 | T | A | Homozygous   |
| NC_037648.1 | 9419898 | SNV | 1 | A | T | Homozygous   |
| NC_037648.1 | 9419903 | SNV | 1 | A | T | Homozygous   |
| NC_037648.1 | 9424792 | SNV | 1 | A | G | Homozygous   |
| NC_037648.1 | 9424849 | SNV | 1 | A | G | Homozygous   |
| NC_037648.1 | 9433461 | SNV | 1 | A | T | Homozygous   |
| NC_037648.1 | 9433470 | SNV | 1 | T | G | Homozygous   |
| NC_037648.1 | 9433473 | SNV | 1 | C | T | Homozygous   |
| NC_037648.1 | 9433495 | SNV | 1 | T | C | Homozygous   |
| NC_037648.1 | 9433505 | SNV | 1 | C | T | Heterozygous |
| NC_037648.1 | 9433638 | SNV | 1 | T | C | Heterozygous |
| NC_037648.1 | 9433643 | SNV | 1 | C | T | Heterozygous |
| NC_037648.1 | 9433645 | SNV | 1 | A | T | Heterozygous |
| NC_037648.1 | 9433647 | SNV | 1 | C | T | Heterozygous |
| NC_037648.1 | 9433655 | SNV | 1 | C | G | Heterozygous |
| NC_037648.1 | 9433659 | SNV | 1 | G | C | Heterozygous |
| NC_037648.1 | 9434030 | SNV | 1 | G | A | Homozygous   |
| NC_037648.1 | 9436187 | SNV | 1 | A | G | Homozygous   |
| NC_037648.1 | 9436365 | SNV | 1 | C | T | Homozygous   |
| NC_037648.1 | 9436433 | SNV | 1 | G | A | Heterozygous |
| NC_037648.1 | 9436444 | SNV | 1 | T | C | Homozygous   |
| NC_037648.1 | 9436447 | SNV | 1 | A | T | Homozygous   |
| NC_037648.1 | 9452881 | SNV | 1 | T | G | Homozygous   |
| NC_037648.1 | 9452894 | SNV | 1 | T | A | Homozygous   |
| NC_037648.1 | 9452917 | SNV | 1 | A | T | Homozygous   |
| NC_037648.1 | 9452920 | SNV | 1 | A | T | Homozygous   |
| NC_037648.1 | 9459262 | SNV | 1 | T | C | Homozygous   |
| NC_037648.1 | 9459274 | SNV | 1 | C | T | Heterozygous |
| NC_037648.1 | 9459416 | SNV | 1 | G | A | Heterozygous |
| NC_037648.1 | 9459418 | SNV | 1 | A | T | Heterozygous |
| NC_037648.1 | 9464041 | SNV | 1 | A | G | Homozygous   |
| NC_037648.1 | 9465948 | SNV | 1 | T | C | Homozygous   |
| NC_037648.1 | 9466366 | SNV | 1 | T | G | Homozygous   |
| NC_037648.1 | 9466378 | SNV | 1 | A | G | Homozygous   |
| NC_037648.1 | 9466387 | SNV | 1 | A | C | Heterozygous |
| NC_037648.1 | 9466391 | SNV | 1 | T | A | Homozygous   |

|             |         |     |   |   |   |              |
|-------------|---------|-----|---|---|---|--------------|
| NC_037648.1 | 9466399 | SNV | 1 | A | T | Heterozygous |
| NC_037648.1 | 9466423 | SNV | 1 | T | C | Heterozygous |
| NC_037648.1 | 9466429 | SNV | 1 | A | C | Homozygous   |
| NC_037648.1 | 9466435 | SNV | 1 | T | A | Homozygous   |
| NC_037648.1 | 9466437 | SNV | 1 | T | G | Homozygous   |
| NC_037648.1 | 9466441 | SNV | 1 | T | C | Homozygous   |
| NC_037648.1 | 9466444 | SNV | 1 | A | G | Homozygous   |
| NC_037648.1 | 9466447 | SNV | 1 | T | C | Homozygous   |
| NC_037648.1 | 9466453 | SNV | 1 | A | T | Heterozygous |
| NC_037648.1 | 9466465 | SNV | 1 | T | C | Heterozygous |
| NC_037648.1 | 9466465 | SNV | 1 | T | G | Heterozygous |
| NC_037648.1 | 9466468 | SNV | 1 | C | A | Homozygous   |
| NC_037648.1 | 9466471 | SNV | 1 | A | G | Homozygous   |
| NC_037648.1 | 9466474 | SNV | 1 | A | G | Homozygous   |
| NC_037648.1 | 9466480 | SNV | 1 | A | G | Homozygous   |
| NC_037648.1 | 9466484 | SNV | 1 | C | T | Homozygous   |
| NC_037648.1 | 9466486 | SNV | 1 | A | G | Homozygous   |
| NC_037648.1 | 9466489 | SNV | 1 | T | C | Heterozygous |
| NC_037648.1 | 9466492 | SNV | 1 | A | C | Homozygous   |
| NC_037648.1 | 9466498 | SNV | 1 | T | C | Heterozygous |
| NC_037648.1 | 9466507 | SNV | 1 | G | A | Homozygous   |
| NC_037648.1 | 9466510 | SNV | 1 | A | T | Heterozygous |
| NC_037648.1 | 9466513 | SNV | 1 | A | G | Homozygous   |
| NC_037648.1 | 9466519 | SNV | 1 | A | G | Heterozygous |
| NC_037648.1 | 9466522 | SNV | 1 | T | G | Heterozygous |
| NC_037648.1 | 9466528 | SNV | 1 | T | G | Heterozygous |
| NC_037648.1 | 9466534 | SNV | 1 | A | G | Heterozygous |
| NC_037648.1 | 9466540 | SNV | 1 | A | T | Heterozygous |
| NC_037648.1 | 9469869 | SNV | 1 | T | C | Homozygous   |
| NC_037648.1 | 9469909 | SNV | 1 | T | C | Homozygous   |
| NC_037648.1 | 9470004 | SNV | 1 | T | C | Heterozygous |
| NC_037648.1 | 9470121 | SNV | 1 | A | G | Homozygous   |
| NC_037648.1 | 9470228 | SNV | 1 | G | T | Homozygous   |
| NC_037648.1 | 9471122 | SNV | 1 | T | C | Homozygous   |
| NC_037648.1 | 9471151 | SNV | 1 | G | A | Homozygous   |
| NC_037648.1 | 9471220 | SNV | 1 | A | G | Heterozygous |
| NC_037648.1 | 9471325 | SNV | 1 | A | G | Homozygous   |
| NC_037648.1 | 9471505 | SNV | 1 | A | G | Homozygous   |
| NC_037648.1 | 9475473 | SNV | 1 | G | A | Homozygous   |
| NC_037648.1 | 9476577 | SNV | 1 | C | A | Heterozygous |
| NC_037648.1 | 9476964 | SNV | 1 | G | A | Heterozygous |
| NC_037648.1 | 9477117 | SNV | 1 | A | G | Heterozygous |
| NC_037648.1 | 9477472 | SNV | 1 | G | A | Homozygous   |
| NC_037648.1 | 9477529 | SNV | 1 | T | C | Homozygous   |
| NC_037648.1 | 9477817 | SNV | 1 | C | T | Homozygous   |
| NC_037648.1 | 9477827 | SNV | 1 | A | G | Heterozygous |
| NC_037648.1 | 9477925 | SNV | 1 | C | T | Homozygous   |
| NC_037648.1 | 9478322 | SNV | 1 | A | C | Homozygous   |
| NC_037648.1 | 9478325 | SNV | 1 | T | C | Homozygous   |
| NC_037648.1 | 9478337 | SNV | 1 | T | C | Homozygous   |
| NC_037648.1 | 9478343 | SNV | 1 | G | T | Homozygous   |

|             |         |     |   |   |   |              |
|-------------|---------|-----|---|---|---|--------------|
| NC_037648.1 | 9478853 | SNV | 1 | T | C | Homozygous   |
| NC_037648.1 | 9479378 | SNV | 1 | C | T | Homozygous   |
| NC_037648.1 | 9479786 | SNV | 1 | G | A | Homozygous   |
| NC_037648.1 | 9492376 | SNV | 1 | T | C | Homozygous   |
| NC_037648.1 | 9492553 | SNV | 1 | T | C | Homozygous   |
| NC_037648.1 | 9492570 | SNV | 1 | T | C | Homozygous   |
| NC_037648.1 | 9492636 | SNV | 1 | T | C | Homozygous   |
| NC_037648.1 | 9492658 | SNV | 1 | T | C | Heterozygous |
| NC_037648.1 | 9492662 | SNV | 1 | A | G | Homozygous   |
| NC_037648.1 | 9506263 | SNV | 1 | T | G | Heterozygous |
| NC_037648.1 | 9506266 | SNV | 1 | A | G | Heterozygous |
| NC_037648.1 | 9521966 | SNV | 1 | A | G | Homozygous   |
| NC_037648.1 | 9524553 | SNV | 1 | G | A | Homozygous   |
| NC_037648.1 | 9524565 | SNV | 1 | C | T | Heterozygous |
| NC_037648.1 | 9525063 | SNV | 1 | G | A | Homozygous   |
| NC_037648.1 | 9525933 | SNV | 1 | A | T | Homozygous   |
| NC_037648.1 | 9525936 | SNV | 1 | T | C | Homozygous   |
| NC_037648.1 | 9525941 | SNV | 1 | C | T | Homozygous   |
| NC_037648.1 | 9526985 | SNV | 1 | A | T | Heterozygous |
| NC_037648.1 | 9526987 | SNV | 1 | G | A | Homozygous   |
| NC_037648.1 | 9526998 | SNV | 1 | A | C | Heterozygous |
| NC_037648.1 | 9530197 | SNV | 1 | T | C | Homozygous   |
| NC_037648.1 | 9530199 | SNV | 1 | T | G | Homozygous   |
| NC_037648.1 | 9533399 | SNV | 1 | A | T | Heterozygous |
| NC_037648.1 | 9533469 | SNV | 1 | T | C | Homozygous   |
| NC_037648.1 | 9533686 | SNV | 1 | T | C | Homozygous   |
| NC_037648.1 | 9533688 | SNV | 1 | C | T | Heterozygous |
| NC_037648.1 | 9537637 | SNV | 1 | A | G | Heterozygous |
| NC_037648.1 | 9537649 | SNV | 1 | A | G | Homozygous   |
| NC_037648.1 | 9537658 | SNV | 1 | G | A | Homozygous   |
| NC_037648.1 | 9537694 | SNV | 1 | A | G | Homozygous   |
| NC_037648.1 | 9538399 | SNV | 1 | C | T | Homozygous   |
| NC_037648.1 | 9539474 | SNV | 1 | T | C | Homozygous   |
| NC_037648.1 | 9539557 | SNV | 1 | A | G | Heterozygous |
| NC_037648.1 | 9539668 | SNV | 1 | T | C | Homozygous   |
| NC_037648.1 | 9539874 | SNV | 1 | T | C | Homozygous   |
| NC_037648.1 | 9539941 | SNV | 1 | T | C | Homozygous   |
| NC_037648.1 | 9547117 | SNV | 1 | G | A | Heterozygous |
| NC_037648.1 | 9547130 | SNV | 1 | A | G | Homozygous   |
| NC_037648.1 | 9580846 | SNV | 1 | T | C | Homozygous   |
| NC_037648.1 | 9580879 | SNV | 1 | A | G | Homozygous   |
| NC_037648.1 | 9580993 | SNV | 1 | C | T | Homozygous   |
| NC_037648.1 | 9590587 | SNV | 1 | T | C | Homozygous   |
| NC_037648.1 | 9590724 | SNV | 1 | T | C | Homozygous   |
| NC_037648.1 | 9590828 | SNV | 1 | T | C | Homozygous   |
| NC_037648.1 | 9590916 | SNV | 1 | G | A | Heterozygous |
| NC_037648.1 | 9590975 | SNV | 1 | A | G | Homozygous   |
| NC_037648.1 | 9590978 | SNV | 1 | A | G | Homozygous   |
| NC_037648.1 | 9591050 | SNV | 1 | C | T | Homozygous   |
| NC_037648.1 | 9591240 | SNV | 1 | C | T | Heterozygous |
| NC_037648.1 | 9591349 | SNV | 1 | A | T | Heterozygous |

|             |         |     |   |   |   |              |
|-------------|---------|-----|---|---|---|--------------|
| NC_037648.1 | 9591354 | SNV | 1 | C | T | Heterozygous |
| NC_037648.1 | 9591452 | SNV | 1 | G | A | Homozygous   |
| NC_037648.1 | 9591454 | SNV | 1 | A | G | Homozygous   |
| NC_037648.1 | 9591458 | SNV | 1 | G | A | Homozygous   |
| NC_037648.1 | 9608394 | SNV | 1 | G | A | Homozygous   |
| NC_037648.1 | 9626961 | SNV | 1 | G | A | Heterozygous |
| NC_037648.1 | 9637878 | SNV | 1 | G | A | Heterozygous |
| NC_037648.1 | 9638040 | SNV | 1 | T | C | Heterozygous |
| NC_037648.1 | 9638070 | SNV | 1 | A | G | Homozygous   |
| NC_037648.1 | 9638155 | SNV | 1 | G | A | Homozygous   |
| NC_037648.1 | 9638175 | SNV | 1 | G | A | Homozygous   |
| NC_037648.1 | 9638248 | SNV | 1 | A | C | Homozygous   |
| NC_037648.1 | 9638254 | SNV | 1 | A | G | Homozygous   |
| NC_037648.1 | 9638295 | SNV | 1 | T | C | Heterozygous |
| NC_037648.1 | 9638356 | SNV | 1 | T | A | Homozygous   |
| NC_037648.1 | 9638427 | SNV | 1 | T | C | Homozygous   |
| NC_037648.1 | 9638949 | SNV | 1 | A | G | Homozygous   |
| NC_037648.1 | 9639034 | SNV | 1 | C | T | Homozygous   |
| NC_037648.1 | 9639037 | SNV | 1 | C | T | Heterozygous |
| NC_037648.1 | 9639101 | SNV | 1 | G | A | Heterozygous |
| NC_037648.1 | 9640967 | SNV | 1 | A | G | Homozygous   |
| NC_037648.1 | 9649082 | SNV | 1 | A | G | Homozygous   |
| NC_037648.1 | 9649266 | SNV | 1 | C | T | Heterozygous |
| NC_037648.1 | 9649433 | SNV | 1 | C | T | Heterozygous |
| NC_037648.1 | 9649436 | SNV | 1 | C | A | Heterozygous |
| NC_037648.1 | 9649471 | SNV | 1 | A | T | Homozygous   |
| NC_037648.1 | 9649475 | SNV | 1 | G | T | Homozygous   |
| NC_037648.1 | 9649484 | SNV | 1 | C | A | Homozygous   |
| NC_037648.1 | 9650208 | SNV | 1 | A | T | Homozygous   |
| NC_037648.1 | 9650400 | SNV | 1 | A | C | Heterozygous |
| NC_037648.1 | 9650410 | SNV | 1 | G | A | Homozygous   |
| NC_037648.1 | 9656029 | SNV | 1 | C | A | Heterozygous |
| NC_037648.1 | 9656033 | SNV | 1 | A | G | Heterozygous |
| NC_037648.1 | 9656036 | SNV | 1 | G | C | Homozygous   |
| NC_037648.1 | 9656039 | SNV | 1 | T | G | Homozygous   |
| NC_037648.1 | 9656041 | SNV | 1 | G | T | Homozygous   |
| NC_037648.1 | 9656211 | SNV | 1 | G | A | Homozygous   |
| NC_037648.1 | 9656214 | SNV | 1 | A | G | Heterozygous |
| NC_037648.1 | 9656217 | SNV | 1 | G | A | Heterozygous |
| NC_037648.1 | 9656352 | SNV | 1 | G | A | Heterozygous |
| NC_037648.1 | 9658203 | SNV | 1 | C | T | Heterozygous |
| NC_037648.1 | 9659716 | SNV | 1 | C | A | Homozygous   |
| NC_037648.1 | 9659738 | SNV | 1 | G | A | Heterozygous |
| NC_037648.1 | 9659962 | SNV | 1 | G | T | Heterozygous |
| NC_037648.1 | 9659969 | SNV | 1 | T | C | Heterozygous |
| NC_037648.1 | 9660138 | SNV | 1 | G | T | Heterozygous |
| NC_037648.1 | 9662935 | SNV | 1 | A | G | Homozygous   |
| NC_037648.1 | 9662991 | SNV | 1 | A | G | Homozygous   |
| NC_037648.1 | 9663018 | SNV | 1 | C | T | Homozygous   |
| NC_037648.1 | 9663071 | SNV | 1 | T | C | Heterozygous |
| NC_037648.1 | 9663076 | SNV | 1 | A | T | Homozygous   |

|             |         |     |   |   |   |              |
|-------------|---------|-----|---|---|---|--------------|
| NC_037648.1 | 9663085 | SNV | 1 | G | T | Homozygous   |
| NC_037648.1 | 9663096 | SNV | 1 | C | T | Homozygous   |
| NC_037648.1 | 9663433 | SNV | 1 | C | G | Homozygous   |
| NC_037648.1 | 9663445 | SNV | 1 | C | T | Homozygous   |
| NC_037648.1 | 9672112 | SNV | 1 | A | G | Heterozygous |
| NC_037648.1 | 9675974 | SNV | 1 | C | T | Heterozygous |
| NC_037648.1 | 9676004 | SNV | 1 | T | C | Homozygous   |
| NC_037648.1 | 9676007 | SNV | 1 | C | T | Homozygous   |
| NC_037648.1 | 9681672 | SNV | 1 | C | G | Heterozygous |
| NC_037648.1 | 9681680 | SNV | 1 | T | C | Heterozygous |
| NC_037648.1 | 9681737 | SNV | 1 | A | G | Heterozygous |
| NC_037648.1 | 9681748 | SNV | 1 | C | G | Homozygous   |
| NC_037648.1 | 9682061 | SNV | 1 | C | T | Homozygous   |
| NC_037648.1 | 9682090 | SNV | 1 | C | T | Heterozygous |
| NC_037648.1 | 9682169 | SNV | 1 | C | T | Heterozygous |
| NC_037648.1 | 9682301 | SNV | 1 | T | C | Heterozygous |
| NC_037648.1 | 9682304 | SNV | 1 | T | C | Heterozygous |
| NC_037648.1 | 9682575 | SNV | 1 | T | C | Heterozygous |
| NC_037648.1 | 9682610 | SNV | 1 | T | C | Homozygous   |
| NC_037648.1 | 9682618 | SNV | 1 | A | T | Heterozygous |
| NC_037648.1 | 9682620 | SNV | 1 | A | T | Heterozygous |
| NC_037648.1 | 9682627 | SNV | 1 | T | C | Heterozygous |
| NC_037648.1 | 9682649 | SNV | 1 | T | C | Homozygous   |
| NC_037648.1 | 9682655 | SNV | 1 | A | G | Heterozygous |
| NC_037648.1 | 9682670 | SNV | 1 | A | G | Heterozygous |
| NC_037648.1 | 9682729 | SNV | 1 | G | C | Homozygous   |
| NC_037648.1 | 9690186 | SNV | 1 | C | G | Homozygous   |
| NC_037648.1 | 9690221 | SNV | 1 | C | T | Heterozygous |
| NC_037648.1 | 9690224 | SNV | 1 | C | T | Homozygous   |
| NC_037648.1 | 9690365 | SNV | 1 | C | T | Homozygous   |
| NC_037648.1 | 9717343 | SNV | 1 | G | A | Heterozygous |
| NC_037648.1 | 9717414 | SNV | 1 | A | G | Homozygous   |
| NC_037648.1 | 9717764 | SNV | 1 | C | T | Homozygous   |
| NC_037648.1 | 9717804 | SNV | 1 | A | G | Homozygous   |
| NC_037648.1 | 9723482 | SNV | 1 | G | T | Homozygous   |
| NC_037648.1 | 9723487 | SNV | 1 | G | C | Homozygous   |
| NC_037648.1 | 9723490 | SNV | 1 | G | C | Homozygous   |
| NC_037648.1 | 9723495 | SNV | 1 | C | A | Homozygous   |
| NC_037648.1 | 9723500 | SNV | 1 | T | G | Homozygous   |
| NC_037648.1 | 9728966 | SNV | 1 | G | A | Heterozygous |
| NC_037648.1 | 9729025 | SNV | 1 | C | T | Homozygous   |
| NC_037648.1 | 9735895 | SNV | 1 | A | T | Heterozygous |
| NC_037648.1 | 9735903 | SNV | 1 | A | T | Heterozygous |
| NC_037648.1 | 9755182 | SNV | 1 | A | T | Homozygous   |
| NC_037648.1 | 9764475 | SNV | 1 | A | G | Homozygous   |
| NC_037648.1 | 9764634 | SNV | 1 | G | A | Heterozygous |
| NC_037648.1 | 9764671 | SNV | 1 | G | A | Heterozygous |
| NC_037648.1 | 9764724 | SNV | 1 | C | T | Heterozygous |
| NC_037648.1 | 9764819 | SNV | 1 | C | T | Heterozygous |
| NC_037648.1 | 9764873 | SNV | 1 | G | T | Homozygous   |
| NC_037648.1 | 9764888 | SNV | 1 | C | T | Homozygous   |

|             |         |     |   |   |   |              |
|-------------|---------|-----|---|---|---|--------------|
| NC_037648.1 | 9764941 | SNV | 1 | A | G | Homozygous   |
| NC_037648.1 | 9784446 | SNV | 1 | C | T | Heterozygous |
| NC_037648.1 | 9791438 | SNV | 1 | C | T | Heterozygous |
| NC_037648.1 | 9791441 | SNV | 1 | C | T | Homozygous   |
| NC_037648.1 | 9791449 | SNV | 1 | C | T | Homozygous   |
| NC_037648.1 | 9795585 | SNV | 1 | T | C | Homozygous   |
| NC_037648.1 | 9795703 | SNV | 1 | C | T | Homozygous   |
| NC_037648.1 | 9795715 | SNV | 1 | C | T | Homozygous   |
| NC_037648.1 | 9798223 | SNV | 1 | G | A | Heterozygous |
| NC_037648.1 | 9798417 | SNV | 1 | C | T | Heterozygous |
| NC_037648.1 | 9804547 | SNV | 1 | A | T | Homozygous   |
| NC_037648.1 | 9804614 | SNV | 1 | C | T | Heterozygous |
| NC_037648.1 | 9804667 | SNV | 1 | A | T | Homozygous   |
| NC_037648.1 | 9804669 | SNV | 1 | T | C | Heterozygous |
| NC_037648.1 | 9804675 | SNV | 1 | G | A | Heterozygous |
| NC_037648.1 | 9804726 | SNV | 1 | C | T | Homozygous   |
| NC_037648.1 | 9811453 | SNV | 1 | A | G | Homozygous   |
| NC_037648.1 | 9811508 | SNV | 1 | A | C | Homozygous   |
| NC_037648.1 | 9811512 | SNV | 1 | G | A | Homozygous   |
| NC_037648.1 | 9818418 | SNV | 1 | G | A | Heterozygous |
| NC_037648.1 | 9818435 | SNV | 1 | C | T | Heterozygous |
| NC_037648.1 | 9818437 | SNV | 1 | C | T | Heterozygous |
| NC_037648.1 | 9818450 | SNV | 1 | C | T | Homozygous   |
| NC_037648.1 | 9818697 | SNV | 1 | A | G | Homozygous   |
| NC_037648.1 | 9818734 | SNV | 1 | A | G | Heterozygous |
| NC_037648.1 | 9821598 | SNV | 1 | A | T | Heterozygous |
| NC_037648.1 | 9821607 | SNV | 1 | A | T | Heterozygous |
| NC_037648.1 | 9821919 | SNV | 1 | C | T | Heterozygous |
| NC_037648.1 | 9821921 | SNV | 1 | T | C | Heterozygous |
| NC_037648.1 | 9824749 | SNV | 1 | T | C | Homozygous   |
| NC_037648.1 | 9824762 | SNV | 1 | A | G | Homozygous   |
| NC_037648.1 | 9824778 | SNV | 1 | T | C | Heterozygous |
| NC_037648.1 | 9824784 | SNV | 1 | C | T | Heterozygous |
| NC_037648.1 | 9825203 | SNV | 1 | C | T | Heterozygous |
| NC_037648.1 | 9825206 | SNV | 1 | A | T | Heterozygous |
| NC_037648.1 | 9825240 | SNV | 1 | G | T | Heterozygous |
| NC_037648.1 | 9825347 | SNV | 1 | G | A | Homozygous   |
| NC_037648.1 | 9827365 | SNV | 1 | G | A | Homozygous   |
| NC_037648.1 | 9836382 | SNV | 1 | A | G | Homozygous   |
| NC_037648.1 | 9836495 | SNV | 1 | G | T | Heterozygous |
| NC_037648.1 | 9845590 | SNV | 1 | G | A | Homozygous   |
| NC_037648.1 | 9845592 | SNV | 1 | G | A | Homozygous   |
| NC_037648.1 | 9845595 | SNV | 1 | G | T | Homozygous   |
| NC_037648.1 | 9845638 | SNV | 1 | A | G | Homozygous   |
| NC_037648.1 | 9852640 | SNV | 1 | A | G | Homozygous   |
| NC_037648.1 | 9853172 | SNV | 1 | A | G | Heterozygous |
| NC_037648.1 | 9853230 | SNV | 1 | C | G | Heterozygous |
| NC_037648.1 | 9853440 | SNV | 1 | T | C | Homozygous   |
| NC_037648.1 | 9853629 | SNV | 1 | A | G | Heterozygous |
| NC_037648.1 | 9853743 | SNV | 1 | T | C | Heterozygous |
| NC_037648.1 | 9854516 | SNV | 1 | A | G | Homozygous   |

|             |         |     |   |   |   |              |
|-------------|---------|-----|---|---|---|--------------|
| NC_037648.1 | 9854521 | SNV | 1 | A | C | Heterozygous |
| NC_037648.1 | 9859826 | SNV | 1 | G | A | Heterozygous |
| NC_037648.1 | 9864776 | SNV | 1 | T | A | Homozygous   |
| NC_037648.1 | 9865114 | SNV | 1 | C | T | Heterozygous |
| NC_037648.1 | 9865271 | SNV | 1 | A | G | Homozygous   |
| NC_037648.1 | 9865274 | SNV | 1 | G | A | Homozygous   |
| NC_037648.1 | 9867026 | SNV | 1 | G | A | Heterozygous |
| NC_037648.1 | 9867543 | SNV | 1 | C | T | Homozygous   |
| NC_037648.1 | 9873007 | SNV | 1 | A | G | Homozygous   |
| NC_037648.1 | 9873027 | SNV | 1 | A | G | Heterozygous |
| NC_037648.1 | 9873055 | SNV | 1 | T | C | Heterozygous |
| NC_037648.1 | 9873210 | SNV | 1 | A | G | Homozygous   |
| NC_037648.1 | 9878012 | SNV | 1 | T | C | Homozygous   |
| NC_037648.1 | 9880410 | SNV | 1 | C | T | Heterozygous |
| NC_037648.1 | 9880417 | SNV | 1 | C | T | Heterozygous |
| NC_037648.1 | 9880439 | SNV | 1 | A | T | Heterozygous |
| NC_037648.1 | 9880441 | SNV | 1 | A | T | Heterozygous |
| NC_037648.1 | 9880448 | SNV | 1 | T | C | Homozygous   |
| NC_037648.1 | 9880493 | SNV | 1 | G | A | Heterozygous |
| NC_037648.1 | 9880497 | SNV | 1 | A | G | Homozygous   |
| NC_037648.1 | 9880499 | SNV | 1 | G | A | Heterozygous |
| NC_037648.1 | 9880623 | SNV | 1 | T | C | Homozygous   |
| NC_037648.1 | 9880653 | SNV | 1 | G | C | Heterozygous |
| NC_037648.1 | 9881182 | SNV | 1 | T | C | Homozygous   |
| NC_037648.1 | 9881249 | SNV | 1 | A | G | Homozygous   |
| NC_037648.1 | 9881348 | SNV | 1 | T | C | Heterozygous |
| NC_037648.1 | 9882113 | SNV | 1 | T | C | Homozygous   |
| NC_037648.1 | 9882519 | SNV | 1 | C | A | Heterozygous |
| NC_037648.1 | 9883792 | SNV | 1 | A | G | Homozygous   |
| NC_037648.1 | 9884638 | SNV | 1 | T | G | Heterozygous |
| NC_037648.1 | 9884746 | SNV | 1 | A | T | Heterozygous |
| NC_037648.1 | 9884748 | SNV | 1 | G | A | Heterozygous |
| NC_037648.1 | 9888391 | SNV | 1 | C | T | Homozygous   |
| NC_037648.1 | 9888398 | SNV | 1 | C | T | Homozygous   |
| NC_037648.1 | 9888402 | SNV | 1 | C | T | Homozygous   |
| NC_037648.1 | 9890227 | SNV | 1 | T | C | Heterozygous |
| NC_037648.1 | 9893397 | SNV | 1 | T | C | Homozygous   |
| NC_037648.1 | 9894436 | SNV | 1 | T | C | Homozygous   |
| NC_037648.1 | 9894441 | SNV | 1 | C | T | Heterozygous |
| NC_037648.1 | 9896894 | SNV | 1 | G | A | Heterozygous |
| NC_037648.1 | 9899022 | SNV | 1 | C | T | Homozygous   |
| NC_037648.1 | 9908306 | SNV | 1 | G | A | Homozygous   |
| NC_037648.1 | 9908875 | SNV | 1 | T | C | Homozygous   |
| NC_037648.1 | 9912693 | SNV | 1 | C | T | Homozygous   |
| NC_037648.1 | 9913533 | SNV | 1 | A | G | Homozygous   |
| NC_037648.1 | 9914131 | SNV | 1 | G | T | Homozygous   |
| NC_037648.1 | 9916497 | SNV | 1 | A | G | Heterozygous |
| NC_037648.1 | 9917917 | SNV | 1 | T | C | Homozygous   |
| NC_037648.1 | 9918355 | SNV | 1 | G | A | Homozygous   |
| NC_037648.1 | 9918682 | SNV | 1 | C | T | Homozygous   |
| NC_037648.1 | 9919175 | SNV | 1 | G | A | Heterozygous |



|             |         |     |   |   |   |              |
|-------------|---------|-----|---|---|---|--------------|
| NC_037648.1 | 9919261 | SNV | 1 | G | A | Homozygous   |
| NC_037648.1 | 9925321 | SNV | 1 | A | G | Heterozygous |
| NC_037648.1 | 9925878 | SNV | 1 | C | T | Homozygous   |
| NC_037648.1 | 9925926 | SNV | 1 | A | G | Heterozygous |
| NC_037648.1 | 9926095 | SNV | 1 | A | G | Heterozygous |
| NC_037648.1 | 9927292 | SNV | 1 | C | A | Homozygous   |
| NC_037648.1 | 9934460 | SNV | 1 | G | C | Homozygous   |
| NC_037648.1 | 9934462 | SNV | 1 | G | C | Homozygous   |
| NC_037648.1 | 9934464 | SNV | 1 | T | C | Homozygous   |
| NC_037648.1 | 9934468 | SNV | 1 | T | A | Homozygous   |
| NC_037648.1 | 9934470 | SNV | 1 | C | A | Homozygous   |
| NC_037648.1 | 9934504 | SNV | 1 | T | C | Homozygous   |
| NC_037648.1 | 9934910 | SNV | 1 | T | C | Heterozygous |
| NC_037648.1 | 9944339 | SNV | 1 | C | T | Homozygous   |
| NC_037648.1 | 9944342 | SNV | 1 | A | T | Homozygous   |
| NC_037648.1 | 9944345 | SNV | 1 | A | C | Homozygous   |
| NC_037648.1 | 9944350 | SNV | 1 | T | G | Homozygous   |
| NC_037648.1 | 9947526 | SNV | 1 | C | G | Homozygous   |
| NC_037648.1 | 9948927 | SNV | 1 | A | C | Heterozygous |
| NC_037648.1 | 9948929 | SNV | 1 | G | C | Homozygous   |
| NC_037648.1 | 9948935 | SNV | 1 | A | T | Heterozygous |
| NC_037648.1 | 9948937 | SNV | 1 | G | A | Homozygous   |
| NC_037648.1 | 9948945 | SNV | 1 | T | A | Heterozygous |
| NC_037648.1 | 9948952 | SNV | 1 | T | A | Homozygous   |
| NC_037648.1 | 9948989 | SNV | 1 | C | A | Homozygous   |
| NC_037648.1 | 9948996 | SNV | 1 | T | G | Homozygous   |
| NC_037648.1 | 9949003 | SNV | 1 | T | G | Homozygous   |
| NC_037648.1 | 9949009 | SNV | 1 | A | T | Homozygous   |
| NC_037648.1 | 9951182 | SNV | 1 | G | A | Homozygous   |
| NC_037648.1 | 9957884 | SNV | 1 | G | C | Homozygous   |
| NC_037648.1 | 9957912 | SNV | 1 | T | A | Homozygous   |
| NC_037648.1 | 9957918 | SNV | 1 | T | C | Homozygous   |
| NC_037648.1 | 9957925 | SNV | 1 | T | A | Homozygous   |
| NC_037648.1 | 9957930 | SNV | 1 | A | C | Homozygous   |
| NC_037648.1 | 9957941 | SNV | 1 | C | T | Heterozygous |
| NC_037648.1 | 9958087 | SNV | 1 | A | G | Homozygous   |
| NC_037648.1 | 9958101 | SNV | 1 | C | T | Heterozygous |
| NC_037648.1 | 9978932 | SNV | 1 | G | A | Heterozygous |
| NC_037648.1 | 9979057 | SNV | 1 | C | T | Homozygous   |
| NC_037648.1 | 9979106 | SNV | 1 | T | G | Heterozygous |
| NC_037648.1 | 9979242 | SNV | 1 | G | A | Homozygous   |
| NC_037648.1 | 9979245 | SNV | 1 | A | C | Homozygous   |
| NC_037648.1 | 9979274 | SNV | 1 | G | A | Homozygous   |
| NC_037648.1 | 9979279 | SNV | 1 | A | T | Homozygous   |
| NC_037648.1 | 9979417 | SNV | 1 | A | G | Homozygous   |
| NC_037648.1 | 9983997 | SNV | 1 | T | C | Heterozygous |
| NC_037648.1 | 9985231 | SNV | 1 | T | G | Homozygous   |
| NC_037648.1 | 9985235 | SNV | 1 | C | T | Heterozygous |
| NC_037648.1 | 9986333 | SNV | 1 | T | C | Homozygous   |
| NC_037648.1 | 9995036 | SNV | 1 | G | A | Heterozygous |
| NC_037648.1 | 9995236 | SNV | 1 | G | A | Heterozygous |

|             |          |     |   |   |   |              |
|-------------|----------|-----|---|---|---|--------------|
| NC_037648.1 | 10002096 | SNV | 1 | A | G | Homozygous   |
| NC_037648.1 | 10002099 | SNV | 1 | G | A | Homozygous   |
| NC_037648.1 | 10002117 | SNV | 1 | C | T | Heterozygous |
| NC_037648.1 | 10002153 | SNV | 1 | A | G | Homozygous   |
| NC_037648.1 | 10002156 | SNV | 1 | C | T | Homozygous   |
| NC_037648.1 | 10002159 | SNV | 1 | T | A | Heterozygous |
| NC_037648.1 | 10004217 | SNV | 1 | T | C | Homozygous   |
| NC_037648.1 | 10011121 | SNV | 1 | A | C | Heterozygous |
| NC_037648.1 | 10011126 | SNV | 1 | A | T | Homozygous   |
| NC_037648.1 | 10011129 | SNV | 1 | T | A | Homozygous   |
| NC_037648.1 | 10011131 | SNV | 1 | T | C | Heterozygous |
| NC_037648.1 | 10011133 | SNV | 1 | A | T | Heterozygous |
| NC_037648.1 | 10012603 | SNV | 1 | T | C | Homozygous   |
| NC_037648.1 | 10013021 | SNV | 1 | G | A | Homozygous   |
| NC_037648.1 | 10013264 | SNV | 1 | T | A | Homozygous   |
| NC_037648.1 | 10013792 | SNV | 1 | G | A | Heterozygous |
| NC_037648.1 | 10013811 | SNV | 1 | T | C | Homozygous   |
| NC_037648.1 | 10013873 | SNV | 1 | G | A | Heterozygous |
| NC_037648.1 | 10013968 | SNV | 1 | T | C | Homozygous   |
| NC_037648.1 | 10013982 | SNV | 1 | A | G | Homozygous   |
| NC_037648.1 | 10027234 | SNV | 1 | T | A | Homozygous   |
| NC_037648.1 | 10027237 | SNV | 1 | A | T | Heterozygous |
| NC_037648.1 | 10027745 | SNV | 1 | A | G | Heterozygous |
| NC_037648.1 | 10027763 | SNV | 1 | C | T | Heterozygous |
| NC_037648.1 | 10029020 | SNV | 1 | T | C | Homozygous   |
| NC_037648.1 | 10032292 | SNV | 1 | A | G | Homozygous   |
| NC_037648.1 | 10032498 | SNV | 1 | C | A | Heterozygous |
| NC_037648.1 | 10032500 | SNV | 1 | T | G | Heterozygous |
| NC_037648.1 | 10032551 | SNV | 1 | G | T | Homozygous   |
| NC_037648.1 | 10032715 | SNV | 1 | G | T | Homozygous   |
| NC_037648.1 | 10034050 | SNV | 1 | A | T | Homozygous   |
| NC_037648.1 | 10035656 | SNV | 1 | T | G | Homozygous   |
| NC_037648.1 | 10035676 | SNV | 1 | A | C | Homozygous   |
| NC_037648.1 | 10035680 | SNV | 1 | A | G | Homozygous   |
| NC_037648.1 | 10035695 | SNV | 1 | T | A | Homozygous   |
| NC_037648.1 | 10035700 | SNV | 1 | T | A | Homozygous   |
| NC_037648.1 | 10035702 | SNV | 1 | T | G | Homozygous   |
| NC_037648.1 | 10035705 | SNV | 1 | A | G | Homozygous   |
| NC_037648.1 | 10035722 | SNV | 1 | T | A | Homozygous   |
| NC_037648.1 | 10036136 | SNV | 1 | A | G | Homozygous   |
| NC_037648.1 | 10048444 | SNV | 1 | G | T | Homozygous   |
| NC_037648.1 | 10048446 | SNV | 1 | A | T | Homozygous   |
| NC_037648.1 | 10048448 | SNV | 1 | T | A | Homozygous   |
| NC_037648.1 | 10052230 | SNV | 1 | G | A | Homozygous   |
| NC_037648.1 | 10052806 | SNV | 1 | G | A | Homozygous   |
| NC_037648.1 | 10057787 | SNV | 1 | T | A | Heterozygous |
| NC_037648.1 | 10057791 | SNV | 1 | T | G | Homozygous   |
| NC_037648.1 | 10057794 | SNV | 1 | T | C | Homozygous   |
| NC_037648.1 | 10057800 | SNV | 1 | T | A | Homozygous   |
| NC_037648.1 | 10063269 | SNV | 1 | G | A | Heterozygous |
| NC_037648.1 | 10063764 | SNV | 1 | G | A | Homozygous   |

|             |          |     |   |   |   |              |
|-------------|----------|-----|---|---|---|--------------|
| NC_037648.1 | 10063883 | SNV | 1 | A | T | Heterozygous |
| NC_037648.1 | 10063886 | SNV | 1 | A | G | Heterozygous |
| NC_037648.1 | 10063892 | SNV | 1 | T | G | Heterozygous |
| NC_037648.1 | 10063907 | SNV | 1 | A | C | Heterozygous |
| NC_037648.1 | 10063916 | SNV | 1 | T | C | Heterozygous |
| NC_037648.1 | 10063925 | SNV | 1 | A | G | Heterozygous |
| NC_037648.1 | 10063928 | SNV | 1 | G | T | Heterozygous |
| NC_037648.1 | 10063940 | SNV | 1 | G | A | Heterozygous |
| NC_037648.1 | 10063946 | SNV | 1 | A | G | Heterozygous |
| NC_037648.1 | 10063951 | SNV | 1 | T | A | Heterozygous |
| NC_037648.1 | 10071979 | SNV | 1 | G | A | Heterozygous |
| NC_037648.1 | 10083261 | SNV | 1 | A | T | Homozygous   |
| NC_037648.1 | 10083266 | SNV | 1 | G | A | Homozygous   |
| NC_037648.1 | 10091145 | SNV | 1 | T | C | Heterozygous |
| NC_037648.1 | 10093634 | SNV | 1 | A | G | Homozygous   |
| NC_037648.1 | 10093645 | SNV | 1 | T | C | Homozygous   |
| NC_037648.1 | 10120266 | SNV | 1 | C | A | Homozygous   |
| NC_037648.1 | 10120271 | SNV | 1 | C | T | Homozygous   |
| NC_037648.1 | 10120299 | SNV | 1 | T | C | Homozygous   |
| NC_037648.1 | 10156274 | SNV | 1 | A | G | Heterozygous |
| NC_037648.1 | 10205882 | SNV | 1 | G | A | Heterozygous |
| NC_037648.1 | 10207481 | SNV | 1 | A | G | Heterozygous |
| NC_037648.1 | 10210847 | SNV | 1 | A | T | Homozygous   |
| NC_037648.1 | 10211127 | SNV | 1 | T | C | Homozygous   |
| NC_037648.1 | 10211209 | SNV | 1 | T | G | Homozygous   |
| NC_037648.1 | 10211489 | SNV | 1 | T | C | Heterozygous |
| NC_037648.1 | 10211613 | SNV | 1 | A | G | Homozygous   |
| NC_037648.1 | 10211725 | SNV | 1 | G | A | Heterozygous |
| NC_037648.1 | 10212166 | SNV | 1 | A | G | Heterozygous |
| NC_037648.1 | 10212259 | SNV | 1 | T | C | Heterozygous |
| NC_037648.1 | 10212778 | SNV | 1 | T | G | Heterozygous |
| NC_037648.1 | 10212943 | SNV | 1 | T | C | Homozygous   |
| NC_037648.1 | 10213228 | SNV | 1 | T | C | Homozygous   |
| NC_037648.1 | 10214112 | SNV | 1 | T | C | Heterozygous |
| NC_037648.1 | 10214676 | SNV | 1 | T | C | Homozygous   |
| NC_037648.1 | 10214807 | SNV | 1 | C | T | Heterozygous |
| NC_037648.1 | 10214809 | SNV | 1 | T | A | Heterozygous |
| NC_037648.1 | 10214842 | SNV | 1 | C | T | Homozygous   |
| NC_037648.1 | 10214950 | SNV | 1 | T | C | Homozygous   |
| NC_037648.1 | 10215071 | SNV | 1 | C | T | Heterozygous |
| NC_037648.1 | 10215074 | SNV | 1 | T | C | Heterozygous |
| NC_037648.1 | 10215533 | SNV | 1 | T | C | Heterozygous |
| NC_037648.1 | 10215536 | SNV | 1 | C | T | Heterozygous |
| NC_037648.1 | 10215545 | SNV | 1 | T | C | Homozygous   |
| NC_037648.1 | 10215746 | SNV | 1 | G | C | Homozygous   |
| NC_037648.1 | 10216073 | SNV | 1 | C | G | Homozygous   |
| NC_037648.1 | 10216175 | SNV | 1 | T | C | Homozygous   |
| NC_037648.1 | 10216574 | SNV | 1 | T | C | Heterozygous |
| NC_037648.1 | 10216586 | SNV | 1 | T | C | Heterozygous |
| NC_037648.1 | 10216613 | SNV | 1 | C | T | Heterozygous |
| NC_037648.1 | 10216682 | SNV | 1 | C | T | Heterozygous |

|             |          |     |   |   |   |              |
|-------------|----------|-----|---|---|---|--------------|
| NC_037648.1 | 10216790 | SNV | 1 | C | G | Homozygous   |
| NC_037648.1 | 10216811 | SNV | 1 | G | A | Homozygous   |
| NC_037648.1 | 10218321 | SNV | 1 | A | G | Homozygous   |
| NC_037648.1 | 10218352 | SNV | 1 | G | A | Homozygous   |
| NC_037648.1 | 10218368 | SNV | 1 | G | A | Homozygous   |
| NC_037648.1 | 10228459 | SNV | 1 | C | T | Heterozygous |
| NC_037648.1 | 10243947 | SNV | 1 | T | C | Heterozygous |
| NC_037648.1 | 10243979 | SNV | 1 | T | C | Homozygous   |
| NC_037648.1 | 10246616 | SNV | 1 | A | G | Heterozygous |
| NC_037648.1 | 10258229 | SNV | 1 | A | G | Homozygous   |
| NC_037648.1 | 10298077 | SNV | 1 | T | A | Homozygous   |
| NC_037648.1 | 10298079 | SNV | 1 | G | A | Homozygous   |
| NC_037648.1 | 10298110 | SNV | 1 | C | G | Homozygous   |
| NC_037648.1 | 10298114 | SNV | 1 | T | A | Homozygous   |
| NC_037648.1 | 10306136 | SNV | 1 | C | A | Homozygous   |
| NC_037648.1 | 10306139 | SNV | 1 | A | C | Homozygous   |
| NC_037648.1 | 10306165 | SNV | 1 | C | T | Homozygous   |
| NC_037648.1 | 10328775 | SNV | 1 | A | T | Homozygous   |
| NC_037648.1 | 10328779 | SNV | 1 | A | T | Homozygous   |
| NC_037648.1 | 10328781 | SNV | 1 | A | C | Homozygous   |
| NC_037648.1 | 10413003 | SNV | 1 | A | T | Heterozygous |
| NC_037648.1 | 10413816 | SNV | 1 | A | G | Homozygous   |
| NC_037648.1 | 10416101 | SNV | 1 | G | T | Homozygous   |
| NC_037648.1 | 10417075 | SNV | 1 | A | T | Heterozygous |
| NC_037648.1 | 10417434 | SNV | 1 | C | T | Homozygous   |
| NC_037648.1 | 10417475 | SNV | 1 | G | A | Heterozygous |
| NC_037648.1 | 10419978 | SNV | 1 | A | G | Heterozygous |
| NC_037648.1 | 10420037 | SNV | 1 | A | T | Heterozygous |
| NC_037648.1 | 10422754 | SNV | 1 | T | A | Heterozygous |
| NC_037648.1 | 10422760 | SNV | 1 | A | G | Homozygous   |
| NC_037648.1 | 10422765 | SNV | 1 | T | C | Homozygous   |
| NC_037648.1 | 10425561 | SNV | 1 | T | C | Heterozygous |
| NC_037648.1 | 10425637 | SNV | 1 | T | C | Homozygous   |
| NC_037648.1 | 10425641 | SNV | 1 | C | T | Heterozygous |
| NC_037648.1 | 10425645 | SNV | 1 | T | C | Homozygous   |
| NC_037648.1 | 10425985 | SNV | 1 | G | A | Heterozygous |
| NC_037648.1 | 10426495 | SNV | 1 | C | T | Homozygous   |
| NC_037648.1 | 10437441 | SNV | 1 | T | G | Homozygous   |
| NC_037648.1 | 10437443 | SNV | 1 | C | T | Homozygous   |
| NC_037648.1 | 10441355 | SNV | 1 | T | C | Heterozygous |
| NC_037648.1 | 10444400 | SNV | 1 | T | C | Heterozygous |
| NC_037648.1 | 10444469 | SNV | 1 | A | G | Homozygous   |
| NC_037648.1 | 10444532 | SNV | 1 | T | C | Homozygous   |
| NC_037648.1 | 10447169 | SNV | 1 | A | G | Homozygous   |
| NC_037648.1 | 10447256 | SNV | 1 | T | C | Homozygous   |
| NC_037648.1 | 10447333 | SNV | 1 | T | C | Homozygous   |
| NC_037648.1 | 10448789 | SNV | 1 | C | T | Homozygous   |
| NC_037648.1 | 10448850 | SNV | 1 | T | C | Homozygous   |
| NC_037648.1 | 10449515 | SNV | 1 | G | A | Homozygous   |
| NC_037648.1 | 10449539 | SNV | 1 | C | T | Heterozygous |
| NC_037648.1 | 10454354 | SNV | 1 | G | C | Homozygous   |

|             |          |     |   |   |   |              |
|-------------|----------|-----|---|---|---|--------------|
| NC_037648.1 | 10454441 | SNV | 1 | T | C | Homozygous   |
| NC_037648.1 | 10454687 | SNV | 1 | G | T | Heterozygous |
| NC_037648.1 | 10454750 | SNV | 1 | C | G | Heterozygous |
| NC_037648.1 | 10455195 | SNV | 1 | C | A | Heterozygous |
| NC_037648.1 | 10455290 | SNV | 1 | A | C | Heterozygous |
| NC_037648.1 | 10455673 | SNV | 1 | T | C | Heterozygous |
| NC_037648.1 | 10456384 | SNV | 1 | C | G | Heterozygous |
| NC_037648.1 | 10456392 | SNV | 1 | C | G | Homozygous   |
| NC_037648.1 | 10456695 | SNV | 1 | C | A | Heterozygous |
| NC_037648.1 | 10458519 | SNV | 1 | T | C | Homozygous   |
| NC_037648.1 | 10461521 | SNV | 1 | A | G | Heterozygous |
| NC_037648.1 | 10462453 | SNV | 1 | C | T | Homozygous   |
| NC_037648.1 | 10465800 | SNV | 1 | T | A | Homozygous   |
| NC_037648.1 | 10465802 | SNV | 1 | T | A | Homozygous   |
| NC_037648.1 | 10465815 | SNV | 1 | A | G | Homozygous   |
| NC_037648.1 | 10465820 | SNV | 1 | T | C | Homozygous   |
| NC_037648.1 | 10465822 | SNV | 1 | T | A | Homozygous   |
| NC_037648.1 | 10467168 | SNV | 1 | T | C | Heterozygous |
| NC_037648.1 | 10467203 | SNV | 1 | A | G | Homozygous   |
| NC_037648.1 | 10467205 | SNV | 1 | A | G | Heterozygous |
| NC_037648.1 | 10467207 | SNV | 1 | T | G | Heterozygous |
| NC_037648.1 | 10467210 | SNV | 1 | T | G | Heterozygous |
| NC_037648.1 | 10468792 | SNV | 1 | T | C | Homozygous   |
| NC_037648.1 | 10470374 | SNV | 1 | C | T | Heterozygous |
| NC_037648.1 | 10471255 | SNV | 1 | T | C | Homozygous   |
| NC_037648.1 | 10471264 | SNV | 1 | A | G | Homozygous   |
| NC_037648.1 | 10478694 | SNV | 1 | C | A | Homozygous   |
| NC_037648.1 | 10478714 | SNV | 1 | C | T | Heterozygous |
| NC_037648.1 | 10478762 | SNV | 1 | G | A | Heterozygous |
| NC_037648.1 | 10478849 | SNV | 1 | C | T | Heterozygous |
| NC_037648.1 | 10479702 | SNV | 1 | C | G | Heterozygous |
| NC_037648.1 | 10480056 | SNV | 1 | T | C | Homozygous   |
| NC_037648.1 | 10480077 | SNV | 1 | A | T | Homozygous   |
| NC_037648.1 | 10480788 | SNV | 1 | G | A | Homozygous   |
| NC_037648.1 | 10480810 | SNV | 1 | A | G | Homozygous   |
| NC_037648.1 | 10480907 | SNV | 1 | G | A | Homozygous   |
| NC_037648.1 | 10480912 | SNV | 1 | T | C | Homozygous   |
| NC_037648.1 | 10481116 | SNV | 1 | T | C | Homozygous   |
| NC_037648.1 | 10481180 | SNV | 1 | G | C | Heterozygous |
| NC_037648.1 | 10503726 | SNV | 1 | A | T | Homozygous   |
| NC_037648.1 | 10503781 | SNV | 1 | G | T | Heterozygous |
| NC_037648.1 | 10527954 | SNV | 1 | T | C | Heterozygous |
| NC_037648.1 | 10527971 | SNV | 1 | C | T | Heterozygous |
| NC_037648.1 | 10528462 | SNV | 1 | A | G | Homozygous   |
| NC_037648.1 | 10528506 | SNV | 1 | C | T | Heterozygous |
| NC_037648.1 | 10529092 | SNV | 1 | G | A | Heterozygous |
| NC_037648.1 | 10529385 | SNV | 1 | C | T | Homozygous   |
| NC_037648.1 | 10530979 | SNV | 1 | G | C | Homozygous   |
| NC_037648.1 | 10530982 | SNV | 1 | A | T | Homozygous   |
| NC_037648.1 | 10531138 | SNV | 1 | C | T | Homozygous   |
| NC_037648.1 | 10531559 | SNV | 1 | T | G | Homozygous   |

|             |          |     |   |   |   |              |
|-------------|----------|-----|---|---|---|--------------|
| NC_037648.1 | 10531854 | SNV | 1 | T | G | Homozygous   |
| NC_037648.1 | 10536068 | SNV | 1 | T | G | Homozygous   |
| NC_037648.1 | 10546560 | SNV | 1 | A | C | Heterozygous |
| NC_037648.1 | 10546563 | SNV | 1 | T | G | Heterozygous |
| NC_037648.1 | 10546912 | SNV | 1 | A | T | Heterozygous |
| NC_037648.1 | 10546914 | SNV | 1 | A | T | Heterozygous |
| NC_037648.1 | 10546974 | SNV | 1 | A | T | Heterozygous |
| NC_037648.1 | 10554349 | SNV | 1 | T | C | Homozygous   |
| NC_037648.1 | 10560410 | SNV | 1 | G | A | Heterozygous |
| NC_037648.1 | 10562018 | SNV | 1 | G | A | Homozygous   |
| NC_037648.1 | 10562026 | SNV | 1 | A | C | Homozygous   |
| NC_037648.1 | 10562029 | SNV | 1 | T | C | Homozygous   |
| NC_037648.1 | 10562033 | SNV | 1 | T | G | Homozygous   |
| NC_037648.1 | 10562059 | SNV | 1 | A | G | Homozygous   |
| NC_037648.1 | 10562067 | SNV | 1 | A | G | Homozygous   |
| NC_037648.1 | 10562073 | SNV | 1 | A | G | Homozygous   |
| NC_037648.1 | 10567094 | SNV | 1 | A | G | Homozygous   |
| NC_037648.1 | 10567637 | SNV | 1 | A | G | Heterozygous |
| NC_037648.1 | 10567771 | SNV | 1 | T | C | Homozygous   |
| NC_037648.1 | 10569206 | SNV | 1 | C | T | Heterozygous |
| NC_037648.1 | 10569852 | SNV | 1 | A | G | Heterozygous |
| NC_037648.1 | 10569861 | SNV | 1 | A | G | Heterozygous |
| NC_037648.1 | 10569869 | SNV | 1 | A | G | Heterozygous |
| NC_037648.1 | 10570036 | SNV | 1 | T | C | Heterozygous |
| NC_037648.1 | 10571779 | SNV | 1 | A | G | Homozygous   |
| NC_037648.1 | 10572731 | SNV | 1 | G | C | Homozygous   |
| NC_037648.1 | 10572734 | SNV | 1 | A | T | Homozygous   |
| NC_037648.1 | 10575885 | SNV | 1 | G | A | Heterozygous |
| NC_037648.1 | 10576642 | SNV | 1 | T | C | Homozygous   |
| NC_037648.1 | 10577143 | SNV | 1 | T | C | Heterozygous |
| NC_037648.1 | 10577157 | SNV | 1 | T | C | Heterozygous |
| NC_037648.1 | 10577163 | SNV | 1 | T | C | Homozygous   |
| NC_037648.1 | 10577193 | SNV | 1 | T | C | Homozygous   |
| NC_037648.1 | 10577219 | SNV | 1 | T | C | Homozygous   |
| NC_037648.1 | 10577575 | SNV | 1 | T | C | Heterozygous |
| NC_037648.1 | 10577956 | SNV | 1 | T | C | Homozygous   |
| NC_037648.1 | 10578306 | SNV | 1 | T | A | Homozygous   |
| NC_037648.1 | 10578311 | SNV | 1 | A | T | Homozygous   |
| NC_037648.1 | 10578322 | SNV | 1 | T | G | Homozygous   |
| NC_037648.1 | 10578325 | SNV | 1 | C | A | Homozygous   |
| NC_037648.1 | 10578327 | SNV | 1 | C | A | Homozygous   |
| NC_037648.1 | 10578335 | SNV | 1 | T | G | Homozygous   |
| NC_037648.1 | 10578342 | SNV | 1 | A | G | Homozygous   |
| NC_037648.1 | 10578344 | SNV | 1 | A | T | Homozygous   |
| NC_037648.1 | 10585087 | SNV | 1 | G | A | Heterozygous |
| NC_037648.1 | 10585320 | SNV | 1 | A | G | Heterozygous |
| NC_037648.1 | 10585322 | SNV | 1 | G | C | Homozygous   |
| NC_037648.1 | 10585332 | SNV | 1 | A | T | Homozygous   |
| NC_037648.1 | 10585334 | SNV | 1 | T | A | Homozygous   |
| NC_037648.1 | 10585700 | SNV | 1 | A | T | Homozygous   |
| NC_037648.1 | 10586007 | SNV | 1 | G | A | Homozygous   |

|             |          |     |   |   |   |              |
|-------------|----------|-----|---|---|---|--------------|
| NC_037648.1 | 10589315 | SNV | 1 | T | A | Homozygous   |
| NC_037648.1 | 10591749 | SNV | 1 | T | G | Homozygous   |
| NC_037648.1 | 10591752 | SNV | 1 | T | C | Homozygous   |
| NC_037648.1 | 10591759 | SNV | 1 | G | A | Homozygous   |
| NC_037648.1 | 10595728 | SNV | 1 | A | T | Homozygous   |
| NC_037648.1 | 10595747 | SNV | 1 | T | C | Homozygous   |
| NC_037648.1 | 10595749 | SNV | 1 | A | C | Homozygous   |
| NC_037648.1 | 10595758 | SNV | 1 | A | T | Homozygous   |
| NC_037648.1 | 10597833 | SNV | 1 | C | T | Heterozygous |
| NC_037648.1 | 10597837 | SNV | 1 | C | T | Heterozygous |
| NC_037648.1 | 10597846 | SNV | 1 | A | G | Heterozygous |
| NC_037648.1 | 10599560 | SNV | 1 | A | G | Homozygous   |
| NC_037648.1 | 10603314 | SNV | 1 | G | A | Homozygous   |
| NC_037648.1 | 10604111 | SNV | 1 | A | T | Homozygous   |
| NC_037648.1 | 10612628 | SNV | 1 | G | A | Homozygous   |
| NC_037648.1 | 10612676 | SNV | 1 | T | C | Homozygous   |
| NC_037648.1 | 10613204 | SNV | 1 | A | C | Homozygous   |
| NC_037648.1 | 10614101 | SNV | 1 | C | T | Homozygous   |
| NC_037648.1 | 10614489 | SNV | 1 | T | G | Heterozygous |
| NC_037648.1 | 10614494 | SNV | 1 | T | C | Heterozygous |
| NC_037648.1 | 10616311 | SNV | 1 | T | G | Homozygous   |
| NC_037648.1 | 10616313 | SNV | 1 | T | A | Homozygous   |
| NC_037648.1 | 10616333 | SNV | 1 | A | C | Homozygous   |
| NC_037648.1 | 10616335 | SNV | 1 | A | C | Homozygous   |
| NC_037648.1 | 10616338 | SNV | 1 | T | A | Homozygous   |
| NC_037648.1 | 10616345 | SNV | 1 | T | C | Homozygous   |
| NC_037648.1 | 10616348 | SNV | 1 | A | T | Homozygous   |
| NC_037648.1 | 10618595 | SNV | 1 | T | C | Homozygous   |
| NC_037648.1 | 10620764 | SNV | 1 | T | C | Homozygous   |
| NC_037648.1 | 10622423 | SNV | 1 | A | G | Homozygous   |
| NC_037648.1 | 10622426 | SNV | 1 | T | C | Homozygous   |
| NC_037648.1 | 10622436 | SNV | 1 | G | A | Homozygous   |
| NC_037648.1 | 10622453 | SNV | 1 | A | G | Heterozygous |
| NC_037648.1 | 10622462 | SNV | 1 | A | C | Homozygous   |
| NC_037648.1 | 10624198 | SNV | 1 | A | G | Heterozygous |
| NC_037648.1 | 10624309 | SNV | 1 | G | T | Heterozygous |
| NC_037648.1 | 10624419 | SNV | 1 | A | G | Heterozygous |
| NC_037648.1 | 10630425 | SNV | 1 | T | C | Heterozygous |
| NC_037648.1 | 10631277 | SNV | 1 | T | A | Heterozygous |
| NC_037648.1 | 10631288 | SNV | 1 | A | T | Heterozygous |
| NC_037648.1 | 10631409 | SNV | 1 | T | C | Homozygous   |
| NC_037648.1 | 10631423 | SNV | 1 | T | C | Homozygous   |
| NC_037648.1 | 10631613 | SNV | 1 | G | C | Homozygous   |
| NC_037648.1 | 10632004 | SNV | 1 | T | A | Homozygous   |
| NC_037648.1 | 10632020 | SNV | 1 | G | C | Homozygous   |
| NC_037648.1 | 10632052 | SNV | 1 | A | T | Homozygous   |
| NC_037648.1 | 10632633 | SNV | 1 | C | T | Homozygous   |
| NC_037648.1 | 10717314 | SNV | 1 | T | G | Homozygous   |
| NC_037648.1 | 10717319 | SNV | 1 | C | T | Homozygous   |
| NC_037648.1 | 10717324 | SNV | 1 | C | A | Homozygous   |
| NC_037648.1 | 10717328 | SNV | 1 | C | A | Homozygous   |

|             |          |     |   |   |   |              |
|-------------|----------|-----|---|---|---|--------------|
| NC_037648.1 | 10717332 | SNV | 1 | G | A | Homozygous   |
| NC_037648.1 | 10718342 | SNV | 1 | G | C | Homozygous   |
| NC_037648.1 | 10718400 | SNV | 1 | C | G | Homozygous   |
| NC_037648.1 | 10718404 | SNV | 1 | G | C | Heterozygous |
| NC_037648.1 | 10718408 | SNV | 1 | G | A | Heterozygous |
| NC_037648.1 | 10718412 | SNV | 1 | A | G | Homozygous   |
| NC_037648.1 | 10718457 | SNV | 1 | G | A | Heterozygous |
| NC_037648.1 | 10769580 | SNV | 1 | T | C | Homozygous   |
| NC_037648.1 | 10769750 | SNV | 1 | G | A | Heterozygous |
| NC_037648.1 | 10769987 | SNV | 1 | A | T | Homozygous   |
| NC_037648.1 | 10772020 | SNV | 1 | T | C | Homozygous   |
| NC_037648.1 | 10772118 | SNV | 1 | G | C | Heterozygous |
| NC_037648.1 | 10776432 | SNV | 1 | C | G | Homozygous   |
| NC_037648.1 | 10776508 | SNV | 1 | C | T | Homozygous   |
| NC_037648.1 | 10776513 | SNV | 1 | T | A | Homozygous   |
| NC_037648.1 | 10777224 | SNV | 1 | T | C | Homozygous   |
| NC_037648.1 | 10777230 | SNV | 1 | C | T | Homozygous   |
| NC_037648.1 | 10777357 | SNV | 1 | T | C | Homozygous   |
| NC_037648.1 | 10777378 | SNV | 1 | C | T | Heterozygous |
| NC_037648.1 | 10777405 | SNV | 1 | C | G | Heterozygous |
| NC_037648.1 | 10777607 | SNV | 1 | A | G | Heterozygous |
| NC_037648.1 | 10777671 | SNV | 1 | T | C | Homozygous   |
| NC_037648.1 | 10777708 | SNV | 1 | A | G | Heterozygous |
| NC_037648.1 | 10777777 | SNV | 1 | G | A | Homozygous   |
| NC_037648.1 | 10777968 | SNV | 1 | A | G | Heterozygous |
| NC_037648.1 | 10777971 | SNV | 1 | A | G | Homozygous   |
| NC_037648.1 | 10778009 | SNV | 1 | A | G | Heterozygous |
| NC_037648.1 | 10794617 | SNV | 1 | C | T | Heterozygous |
| NC_037648.1 | 10794850 | SNV | 1 | G | A | Heterozygous |
| NC_037648.1 | 10794911 | SNV | 1 | A | G | Heterozygous |
| NC_037648.1 | 10812921 | SNV | 1 | C | T | Heterozygous |
| NC_037648.1 | 10812929 | SNV | 1 | C | T | Heterozygous |
| NC_037648.1 | 10812931 | SNV | 1 | C | T | Heterozygous |
| NC_037648.1 | 10814916 | SNV | 1 | G | A | Heterozygous |
| NC_037648.1 | 10814963 | SNV | 1 | G | A | Heterozygous |
| NC_037648.1 | 10816233 | SNV | 1 | G | T | Heterozygous |
| NC_037648.1 | 10816805 | SNV | 1 | T | C | Homozygous   |
| NC_037648.1 | 10816863 | SNV | 1 | A | G | Homozygous   |
| NC_037648.1 | 10823613 | SNV | 1 | G | T | Homozygous   |
| NC_037648.1 | 10823705 | SNV | 1 | G | A | Heterozygous |
| NC_037648.1 | 10827656 | SNV | 1 | C | G | Homozygous   |
| NC_037648.1 | 10850258 | SNV | 1 | G | A | Homozygous   |
| NC_037648.1 | 10853348 | SNV | 1 | C | T | Homozygous   |
| NC_037648.1 | 10853359 | SNV | 1 | C | T | Heterozygous |
| NC_037648.1 | 10853380 | SNV | 1 | G | C | Homozygous   |
| NC_037648.1 | 10853384 | SNV | 1 | C | T | Homozygous   |
| NC_037648.1 | 10897205 | SNV | 1 | G | A | Heterozygous |
| NC_037648.1 | 10897244 | SNV | 1 | G | A | Heterozygous |
| NC_037648.1 | 10897247 | SNV | 1 | G | A | Heterozygous |
| NC_037648.1 | 10897258 | SNV | 1 | G | A | Heterozygous |
| NC_037648.1 | 10900530 | SNV | 1 | G | T | Homozygous   |



|             |          |     |   |   |   |              |
|-------------|----------|-----|---|---|---|--------------|
| NC_037648.1 | 10900534 | SNV | 1 | G | C | Homozygous   |
| NC_037648.1 | 10900536 | SNV | 1 | C | A | Homozygous   |
| NC_037648.1 | 10900543 | SNV | 1 | G | A | Homozygous   |
| NC_037648.1 | 10900547 | SNV | 1 | C | A | Homozygous   |
| NC_037648.1 | 10900573 | SNV | 1 | G | T | Homozygous   |
| NC_037648.1 | 10900577 | SNV | 1 | G | T | Homozygous   |
| NC_037648.1 | 10905582 | SNV | 1 | A | G | Heterozygous |
| NC_037648.1 | 10919781 | SNV | 1 | G | A | Homozygous   |
| NC_037648.1 | 10925630 | SNV | 1 | A | T | Homozygous   |
| NC_037648.1 | 10927970 | SNV | 1 | T | C | Homozygous   |
| NC_037648.1 | 10928570 | SNV | 1 | T | C | Homozygous   |
| NC_037648.1 | 10928591 | SNV | 1 | A | G | Homozygous   |
| NC_037648.1 | 10928703 | SNV | 1 | A | G | Homozygous   |
| NC_037648.1 | 10928730 | SNV | 1 | A | G | Homozygous   |
| NC_037648.1 | 10928771 | SNV | 1 | C | T | Heterozygous |
| NC_037648.1 | 10928907 | SNV | 1 | G | A | Heterozygous |
| NC_037648.1 | 10928912 | SNV | 1 | G | A | Heterozygous |
| NC_037648.1 | 10929879 | SNV | 1 | A | G | Homozygous   |
| NC_037648.1 | 10940530 | SNV | 1 | G | C | Homozygous   |
| NC_037648.1 | 10940567 | SNV | 1 | T | C | Homozygous   |
| NC_037648.1 | 10940590 | SNV | 1 | A | G | Homozygous   |
| NC_037648.1 | 10940666 | SNV | 1 | G | A | Homozygous   |
| NC_037648.1 | 10940963 | SNV | 1 | C | A | Heterozygous |
| NC_037648.1 | 10940970 | SNV | 1 | T | G | Heterozygous |
| NC_037648.1 | 10946318 | SNV | 1 | G | A | Heterozygous |
| NC_037648.1 | 10946595 | SNV | 1 | A | T | Homozygous   |
| NC_037648.1 | 10946912 | SNV | 1 | G | A | Heterozygous |
| NC_037648.1 | 10946923 | SNV | 1 | A | G | Homozygous   |
| NC_037648.1 | 10947031 | SNV | 1 | T | C | Heterozygous |
| NC_037648.1 | 10947208 | SNV | 1 | A | G | Homozygous   |
| NC_037648.1 | 10947348 | SNV | 1 | G | A | Heterozygous |
| NC_037648.1 | 10947374 | SNV | 1 | G | C | Homozygous   |
| NC_037648.1 | 11041060 | SNV | 1 | A | G | Homozygous   |
| NC_037648.1 | 11042128 | SNV | 1 | A | G | Homozygous   |
| NC_037648.1 | 11042472 | SNV | 1 | C | T | Heterozygous |
| NC_037648.1 | 11042578 | SNV | 1 | C | T | Homozygous   |
| NC_037648.1 | 11043251 | SNV | 1 | G | A | Heterozygous |
| NC_037648.1 | 11056548 | SNV | 1 | A | C | Homozygous   |
| NC_037648.1 | 11056558 | SNV | 1 | A | C | Homozygous   |
| NC_037648.1 | 11056562 | SNV | 1 | C | T | Homozygous   |
| NC_037648.1 | 11056835 | SNV | 1 | A | G | Homozygous   |
| NC_037648.1 | 11060981 | SNV | 1 | C | T | Heterozygous |
| NC_037648.1 | 11061776 | SNV | 1 | G | A | Homozygous   |
| NC_037648.1 | 11083189 | SNV | 1 | C | T | Heterozygous |
| NC_037648.1 | 11083195 | SNV | 1 | C | A | Heterozygous |
| NC_037648.1 | 11083198 | SNV | 1 | T | C | Heterozygous |
| NC_037648.1 | 11083201 | SNV | 1 | A | C | Heterozygous |
| NC_037648.1 | 11083204 | SNV | 1 | C | T | Heterozygous |
| NC_037648.1 | 11083435 | SNV | 1 | C | T | Heterozygous |
| NC_037648.1 | 11083459 | SNV | 1 | G | A | Homozygous   |
| NC_037648.1 | 11083486 | SNV | 1 | T | C | Homozygous   |

|             |          |     |   |   |   |              |
|-------------|----------|-----|---|---|---|--------------|
| NC_037648.1 | 11083768 | SNV | 1 | A | G | Heterozygous |
| NC_037648.1 | 11084592 | SNV | 1 | G | A | Homozygous   |
| NC_037648.1 | 11084851 | SNV | 1 | A | T | Homozygous   |
| NC_037648.1 | 11085435 | SNV | 1 | A | G | Homozygous   |
| NC_037648.1 | 11087415 | SNV | 1 | T | C | Homozygous   |
| NC_037648.1 | 11087897 | SNV | 1 | A | G | Homozygous   |
| NC_037648.1 | 11087900 | SNV | 1 | T | A | Heterozygous |
| NC_037648.1 | 11090089 | SNV | 1 | G | A | Heterozygous |
| NC_037648.1 | 11090179 | SNV | 1 | A | G | Heterozygous |
| NC_037648.1 | 11091948 | SNV | 1 | C | T | Heterozygous |
| NC_037648.1 | 11092854 | SNV | 1 | A | G | Heterozygous |
| NC_037648.1 | 11093045 | SNV | 1 | G | A | Homozygous   |
| NC_037648.1 | 11093520 | SNV | 1 | A | G | Homozygous   |
| NC_037648.1 | 11093583 | SNV | 1 | C | T | Heterozygous |
| NC_037648.1 | 11093724 | SNV | 1 | A | G | Homozygous   |
| NC_037648.1 | 11094083 | SNV | 1 | G | A | Heterozygous |
| NC_037648.1 | 11096982 | SNV | 1 | C | T | Heterozygous |
| NC_037648.1 | 11100480 | SNV | 1 | C | A | Homozygous   |
| NC_037648.1 | 11100482 | SNV | 1 | G | T | Homozygous   |
| NC_037648.1 | 11100561 | SNV | 1 | C | A | Homozygous   |
| NC_037648.1 | 11100797 | SNV | 1 | A | G | Homozygous   |
| NC_037648.1 | 11100869 | SNV | 1 | C | G | Heterozygous |
| NC_037648.1 | 11101324 | SNV | 1 | A | G | Homozygous   |
| NC_037648.1 | 11101391 | SNV | 1 | T | A | Homozygous   |
| NC_037648.1 | 11101396 | SNV | 1 | T | A | Homozygous   |
| NC_037648.1 | 11101660 | SNV | 1 | A | G | Homozygous   |
| NC_037648.1 | 11102327 | SNV | 1 | A | G | Homozygous   |
| NC_037648.1 | 11102342 | SNV | 1 | A | G | Homozygous   |
| NC_037648.1 | 11102344 | SNV | 1 | T | C | Homozygous   |
| NC_037648.1 | 11102348 | SNV | 1 | T | A | Homozygous   |
| NC_037648.1 | 11104202 | SNV | 1 | C | T | Heterozygous |
| NC_037648.1 | 11105755 | SNV | 1 | C | T | Heterozygous |
| NC_037648.1 | 11106192 | SNV | 1 | A | G | Homozygous   |
| NC_037648.1 | 11106200 | SNV | 1 | A | G | Homozygous   |
| NC_037648.1 | 11109562 | SNV | 1 | A | G | Homozygous   |
| NC_037648.1 | 11114301 | SNV | 1 | C | T | Homozygous   |
| NC_037648.1 | 11114621 | SNV | 1 | C | A | Heterozygous |
| NC_037648.1 | 11115472 | SNV | 1 | G | A | Heterozygous |
| NC_037648.1 | 11118345 | SNV | 1 | C | T | Homozygous   |
| NC_037648.1 | 11125879 | SNV | 1 | T | C | Heterozygous |
| NC_037648.1 | 11126506 | SNV | 1 | T | C | Heterozygous |
| NC_037648.1 | 11126530 | SNV | 1 | C | T | Homozygous   |
| NC_037648.1 | 11126533 | SNV | 1 | C | T | Heterozygous |
| NC_037648.1 | 11126539 | SNV | 1 | T | C | Homozygous   |
| NC_037648.1 | 11126542 | SNV | 1 | A | G | Homozygous   |
| NC_037648.1 | 11126545 | SNV | 1 | T | C | Homozygous   |
| NC_037648.1 | 11126620 | SNV | 1 | A | C | Heterozygous |
| NC_037648.1 | 11126668 | SNV | 1 | C | T | Heterozygous |
| NC_037648.1 | 11126671 | SNV | 1 | A | G | Heterozygous |
| NC_037648.1 | 11126679 | SNV | 1 | T | G | Heterozygous |
| NC_037648.1 | 11126691 | SNV | 1 | A | G | Heterozygous |

|             |          |     |   |   |   |              |
|-------------|----------|-----|---|---|---|--------------|
| NC_037648.1 | 11126694 | SNV | 1 | A | G | Heterozygous |
| NC_037648.1 | 11126711 | SNV | 1 | A | G | Heterozygous |
| NC_037648.1 | 11126716 | SNV | 1 | C | T | Heterozygous |
| NC_037648.1 | 11126718 | SNV | 1 | G | A | Heterozygous |
| NC_037648.1 | 11126730 | SNV | 1 | G | A | Homozygous   |
| NC_037648.1 | 11126741 | SNV | 1 | A | G | Heterozygous |
| NC_037648.1 | 11130522 | SNV | 1 | C | G | Heterozygous |
| NC_037648.1 | 11130552 | SNV | 1 | C | G | Heterozygous |
| NC_037648.1 | 11130563 | SNV | 1 | T | C | Homozygous   |
| NC_037648.1 | 11130573 | SNV | 1 | G | A | Heterozygous |
| NC_037648.1 | 11130576 | SNV | 1 | G | A | Heterozygous |
| NC_037648.1 | 11130583 | SNV | 1 | G | A | Heterozygous |
| NC_037648.1 | 11130593 | SNV | 1 | T | C | Heterozygous |
| NC_037648.1 | 11130612 | SNV | 1 | T | A | Heterozygous |
| NC_037648.1 | 11130621 | SNV | 1 | C | T | Heterozygous |
| NC_037648.1 | 11138920 | SNV | 1 | G | C | Heterozygous |
| NC_037648.1 | 11138926 | SNV | 1 | A | T | Homozygous   |
| NC_037648.1 | 11138928 | SNV | 1 | T | C | Homozygous   |
| NC_037648.1 | 11138944 | SNV | 1 | A | G | Homozygous   |
| NC_037648.1 | 11138953 | SNV | 1 | T | C | Homozygous   |
| NC_037648.1 | 11138965 | SNV | 1 | A | T | Homozygous   |
| NC_037648.1 | 11138980 | SNV | 1 | T | C | Homozygous   |
| NC_037648.1 | 11138992 | SNV | 1 | G | A | Homozygous   |
| NC_037648.1 | 11138998 | SNV | 1 | C | T | Homozygous   |
| NC_037648.1 | 11146200 | SNV | 1 | T | C | Heterozygous |
| NC_037648.1 | 11148282 | SNV | 1 | T | C | Heterozygous |
| NC_037648.1 | 11151783 | SNV | 1 | G | T | Homozygous   |
| NC_037648.1 | 11153423 | SNV | 1 | G | A | Heterozygous |
| NC_037648.1 | 11154089 | SNV | 1 | C | A | Heterozygous |
| NC_037648.1 | 11154092 | SNV | 1 | C | A | Homozygous   |
| NC_037648.1 | 11154199 | SNV | 1 | G | A | Heterozygous |
| NC_037648.1 | 11154204 | SNV | 1 | A | T | Heterozygous |
| NC_037648.1 | 11154211 | SNV | 1 | T | A | Heterozygous |
| NC_037648.1 | 11156250 | SNV | 1 | A | G | Homozygous   |
| NC_037648.1 | 11156267 | SNV | 1 | C | T | Homozygous   |
| NC_037648.1 | 11161765 | SNV | 1 | T | A | Homozygous   |
| NC_037648.1 | 11161960 | SNV | 1 | A | T | Heterozygous |
| NC_037648.1 | 11162921 | SNV | 1 | C | T | Heterozygous |
| NC_037648.1 | 11163086 | SNV | 1 | A | G | Homozygous   |
| NC_037648.1 | 11163601 | SNV | 1 | A | G | Homozygous   |
| NC_037648.1 | 11163639 | SNV | 1 | G | A | Homozygous   |
| NC_037648.1 | 11163666 | SNV | 1 | A | G | Heterozygous |
| NC_037648.1 | 11163696 | SNV | 1 | C | T | Heterozygous |
| NC_037648.1 | 11164337 | SNV | 1 | C | T | Heterozygous |
| NC_037648.1 | 11164340 | SNV | 1 | C | T | Heterozygous |
| NC_037648.1 | 11165033 | SNV | 1 | G | T | Homozygous   |
| NC_037648.1 | 11165117 | SNV | 1 | G | C | Homozygous   |
| NC_037648.1 | 11178388 | SNV | 1 | T | C | Homozygous   |
| NC_037648.1 | 11178426 | SNV | 1 | C | T | Homozygous   |
| NC_037648.1 | 11178509 | SNV | 1 | A | T | Homozygous   |
| NC_037648.1 | 11178511 | SNV | 1 | T | A | Homozygous   |

|             |          |     |   |   |   |              |
|-------------|----------|-----|---|---|---|--------------|
| NC_037648.1 | 11178519 | SNV | 1 | T | A | Homozygous   |
| NC_037648.1 | 11265616 | SNV | 1 | A | G | Homozygous   |
| NC_037648.1 | 11265646 | SNV | 1 | G | A | Homozygous   |
| NC_037648.1 | 11265915 | SNV | 1 | T | A | Heterozygous |
| NC_037648.1 | 11266104 | SNV | 1 | G | A | Heterozygous |
| NC_037648.1 | 11266108 | SNV | 1 | C | G | Heterozygous |
| NC_037648.1 | 11266136 | SNV | 1 | A | T | Heterozygous |
| NC_037648.1 | 11266348 | SNV | 1 | G | A | Heterozygous |
| NC_037648.1 | 11279069 | SNV | 1 | C | T | Homozygous   |
| NC_037648.1 | 11286730 | SNV | 1 | T | C | Homozygous   |
| NC_037648.1 | 11286752 | SNV | 1 | C | T | Heterozygous |
| NC_037648.1 | 11286816 | SNV | 1 | T | A | Heterozygous |
| NC_037648.1 | 11286926 | SNV | 1 | A | G | Homozygous   |
| NC_037648.1 | 11287060 | SNV | 1 | T | C | Heterozygous |
| NC_037648.1 | 11287076 | SNV | 1 | T | C | Homozygous   |
| NC_037648.1 | 11287227 | SNV | 1 | T | C | Homozygous   |
| NC_037648.1 | 11290759 | SNV | 1 | G | A | Heterozygous |
| NC_037648.1 | 11290762 | SNV | 1 | A | G | Heterozygous |
| NC_037648.1 | 11290896 | SNV | 1 | G | A | Homozygous   |
| NC_037648.1 | 11291011 | SNV | 1 | G | A | Heterozygous |
| NC_037648.1 | 11291059 | SNV | 1 | A | G | Homozygous   |
| NC_037648.1 | 11291084 | SNV | 1 | C | T | Homozygous   |
| NC_037648.1 | 11291146 | SNV | 1 | T | C | Homozygous   |
| NC_037648.1 | 11291206 | SNV | 1 | C | T | Heterozygous |
| NC_037648.1 | 11323033 | SNV | 1 | G | A | Heterozygous |
| NC_037648.1 | 11357708 | SNV | 1 | C | T | Heterozygous |
| NC_037648.1 | 11357714 | SNV | 1 | T | C | Heterozygous |
| NC_037648.1 | 11363988 | SNV | 1 | T | C | Heterozygous |
| NC_037648.1 | 11366403 | SNV | 1 | C | G | Homozygous   |
| NC_037648.1 | 11366405 | SNV | 1 | C | G | Homozygous   |
| NC_037648.1 | 11366425 | SNV | 1 | C | G | Homozygous   |
| NC_037648.1 | 11366428 | SNV | 1 | C | T | Homozygous   |
| NC_037648.1 | 11366434 | SNV | 1 | C | A | Homozygous   |
| NC_037648.1 | 11367409 | SNV | 1 | A | G | Homozygous   |
| NC_037648.1 | 11367449 | SNV | 1 | A | G | Homozygous   |
| NC_037648.1 | 11371678 | SNV | 1 | C | T | Heterozygous |
| NC_037648.1 | 11371686 | SNV | 1 | C | T | Homozygous   |
| NC_037648.1 | 11371690 | SNV | 1 | C | T | Homozygous   |
| NC_037648.1 | 11372024 | SNV | 1 | C | T | Homozygous   |
| NC_037648.1 | 11383114 | SNV | 1 | T | C | Heterozygous |
| NC_037648.1 | 11383117 | SNV | 1 | G | T | Heterozygous |
| NC_037648.1 | 11383152 | SNV | 1 | C | T | Homozygous   |
| NC_037648.1 | 11383304 | SNV | 1 | A | G | Heterozygous |
| NC_037648.1 | 11383314 | SNV | 1 | G | A | Heterozygous |
| NC_037648.1 | 11383320 | SNV | 1 | A | G | Homozygous   |
| NC_037648.1 | 11384074 | SNV | 1 | T | C | Homozygous   |
| NC_037648.1 | 11384246 | SNV | 1 | C | T | Heterozygous |
| NC_037648.1 | 11384425 | SNV | 1 | A | G | Homozygous   |
| NC_037648.1 | 11384516 | SNV | 1 | A | G | Homozygous   |
| NC_037648.1 | 11384528 | SNV | 1 | C | T | Heterozygous |
| NC_037648.1 | 11387037 | SNV | 1 | C | A | Homozygous   |

|             |          |     |   |   |   |              |
|-------------|----------|-----|---|---|---|--------------|
| NC_037648.1 | 11387039 | SNV | 1 | A | G | Homozygous   |
| NC_037648.1 | 11387053 | SNV | 1 | A | C | Heterozygous |
| NC_037648.1 | 11387060 | SNV | 1 | G | A | Homozygous   |
| NC_037648.1 | 11387087 | SNV | 1 | A | G | Heterozygous |
| NC_037648.1 | 11387090 | SNV | 1 | A | G | Heterozygous |
| NC_037648.1 | 11397802 | SNV | 1 | G | A | Heterozygous |
| NC_037648.1 | 11397884 | SNV | 1 | A | G | Homozygous   |
| NC_037648.1 | 11397968 | SNV | 1 | A | T | Heterozygous |
| NC_037648.1 | 11398311 | SNV | 1 | C | A | Homozygous   |
| NC_037648.1 | 11398317 | SNV | 1 | A | C | Heterozygous |
| NC_037648.1 | 11398772 | SNV | 1 | C | T | Heterozygous |
| NC_037648.1 | 11399599 | SNV | 1 | A | G | Homozygous   |
| NC_037648.1 | 11408554 | SNV | 1 | C | T | Homozygous   |
| NC_037648.1 | 11410454 | SNV | 1 | G | A | Heterozygous |
| NC_037648.1 | 11412726 | SNV | 1 | G | A | Heterozygous |
| NC_037648.1 | 11412731 | SNV | 1 | A | C | Heterozygous |
| NC_037648.1 | 11414362 | SNV | 1 | G | A | Homozygous   |
| NC_037648.1 | 11414395 | SNV | 1 | A | T | Homozygous   |
| NC_037648.1 | 11418273 | SNV | 1 | G | A | Homozygous   |
| NC_037648.1 | 11418277 | SNV | 1 | G | A | Homozygous   |
| NC_037648.1 | 11418280 | SNV | 1 | T | A | Homozygous   |
| NC_037648.1 | 11418290 | SNV | 1 | A | G | Homozygous   |
| NC_037648.1 | 11418298 | SNV | 1 | G | T | Homozygous   |
| NC_037648.1 | 11418304 | SNV | 1 | G | A | Homozygous   |
| NC_037648.1 | 11419114 | SNV | 1 | T | C | Heterozygous |
| NC_037648.1 | 11423194 | SNV | 1 | G | A | Homozygous   |
| NC_037648.1 | 11423261 | SNV | 1 | A | G | Homozygous   |
| NC_037648.1 | 11435243 | SNV | 1 | T | C | Heterozygous |
| NC_037648.1 | 11435429 | SNV | 1 | A | G | Heterozygous |
| NC_037648.1 | 11435468 | SNV | 1 | T | G | Heterozygous |
| NC_037648.1 | 11437233 | SNV | 1 | A | G | Heterozygous |
| NC_037648.1 | 11443091 | SNV | 1 | C | T | Heterozygous |
| NC_037648.1 | 11443241 | SNV | 1 | G | A | Heterozygous |
| NC_037648.1 | 11443301 | SNV | 1 | T | C | Heterozygous |
| NC_037648.1 | 11443314 | SNV | 1 | G | A | Homozygous   |
| NC_037648.1 | 11443392 | SNV | 1 | T | A | Homozygous   |
| NC_037648.1 | 11443491 | SNV | 1 | T | C | Heterozygous |
| NC_037648.1 | 11443836 | SNV | 1 | G | A | Heterozygous |
| NC_037648.1 | 11443888 | SNV | 1 | T | C | Heterozygous |
| NC_037648.1 | 11444181 | SNV | 1 | A | G | Heterozygous |
| NC_037648.1 | 11450947 | SNV | 1 | A | G | Heterozygous |
| NC_037648.1 | 11451249 | SNV | 1 | A | G | Homozygous   |
| NC_037648.1 | 11451481 | SNV | 1 | T | C | Heterozygous |
| NC_037648.1 | 11451492 | SNV | 1 | A | T | Heterozygous |
| NC_037648.1 | 11451531 | SNV | 1 | A | G | Heterozygous |
| NC_037648.1 | 11451673 | SNV | 1 | A | G | Heterozygous |
| NC_037648.1 | 11452507 | SNV | 1 | A | G | Homozygous   |
| NC_037648.1 | 11452665 | SNV | 1 | A | G | Heterozygous |
| NC_037648.1 | 11452753 | SNV | 1 | C | T | Heterozygous |
| NC_037648.1 | 11452910 | SNV | 1 | A | G | Heterozygous |
| NC_037648.1 | 11452978 | SNV | 1 | G | A | Heterozygous |

|             |          |     |   |   |   |              |
|-------------|----------|-----|---|---|---|--------------|
| NC_037648.1 | 11453022 | SNV | 1 | C | T | Heterozygous |
| NC_037648.1 | 11453033 | SNV | 1 | G | A | Heterozygous |
| NC_037648.1 | 11453211 | SNV | 1 | C | T | Heterozygous |
| NC_037648.1 | 11453747 | SNV | 1 | C | T | Heterozygous |
| NC_037648.1 | 11453831 | SNV | 1 | T | C | Heterozygous |
| NC_037648.1 | 11454013 | SNV | 1 | C | T | Heterozygous |
| NC_037648.1 | 11454892 | SNV | 1 | T | C | Heterozygous |
| NC_037648.1 | 11455503 | SNV | 1 | A | G | Homozygous   |
| NC_037648.1 | 11456705 | SNV | 1 | A | G | Heterozygous |
| NC_037648.1 | 11458431 | SNV | 1 | G | A | Heterozygous |
| NC_037648.1 | 11469802 | SNV | 1 | A | G | Heterozygous |
| NC_037648.1 | 11470040 | SNV | 1 | T | C | Heterozygous |
| NC_037648.1 | 11470329 | SNV | 1 | G | A | Heterozygous |
| NC_037648.1 | 11471027 | SNV | 1 | G | A | Heterozygous |
| NC_037648.1 | 11488892 | SNV | 1 | G | T | Heterozygous |
| NC_037648.1 | 11494242 | SNV | 1 | T | C | Homozygous   |
| NC_037648.1 | 11494358 | SNV | 1 | T | C | Homozygous   |
| NC_037648.1 | 11494538 | SNV | 1 | A | G | Heterozygous |
| NC_037648.1 | 11494734 | SNV | 1 | T | C | Heterozygous |
| NC_037648.1 | 11494750 | SNV | 1 | T | C | Heterozygous |
| NC_037648.1 | 11494762 | SNV | 1 | T | A | Heterozygous |
| NC_037648.1 | 11495245 | SNV | 1 | T | A | Heterozygous |
| NC_037648.1 | 11495280 | SNV | 1 | A | T | Homozygous   |
| NC_037648.1 | 11495291 | SNV | 1 | A | G | Homozygous   |
| NC_037648.1 | 11510980 | SNV | 1 | G | C | Heterozygous |
| NC_037648.1 | 11511093 | SNV | 1 | T | C | Heterozygous |
| NC_037648.1 | 11511130 | SNV | 1 | C | T | Heterozygous |
| NC_037648.1 | 11511233 | SNV | 1 | T | C | Heterozygous |
| NC_037648.1 | 11511760 | SNV | 1 | A | G | Heterozygous |
| NC_037648.1 | 11512692 | SNV | 1 | C | T | Homozygous   |
| NC_037648.1 | 11512737 | SNV | 1 | A | G | Homozygous   |
| NC_037648.1 | 11512789 | SNV | 1 | G | C | Homozygous   |
| NC_037648.1 | 11512906 | SNV | 1 | C | T | Homozygous   |
| NC_037648.1 | 11512938 | SNV | 1 | T | G | Homozygous   |
| NC_037648.1 | 11512991 | SNV | 1 | C | T | Heterozygous |
| NC_037648.1 | 11512995 | SNV | 1 | C | T | Heterozygous |
| NC_037648.1 | 11513095 | SNV | 1 | C | G | Heterozygous |
| NC_037648.1 | 11513148 | SNV | 1 | C | T | Homozygous   |
| NC_037648.1 | 11525307 | SNV | 1 | T | C | Homozygous   |
| NC_037648.1 | 11554267 | SNV | 1 | T | C | Homozygous   |
| NC_037648.1 | 11554368 | SNV | 1 | G | A | Homozygous   |
| NC_037648.1 | 11554372 | SNV | 1 | A | G | Homozygous   |
| NC_037648.1 | 11554500 | SNV | 1 | C | G | Heterozygous |
| NC_037648.1 | 11554583 | SNV | 1 | A | G | Homozygous   |
| NC_037648.1 | 11554724 | SNV | 1 | A | C | Homozygous   |
| NC_037648.1 | 11554797 | SNV | 1 | A | G | Homozygous   |
| NC_037648.1 | 11554799 | SNV | 1 | T | C | Homozygous   |
| NC_037648.1 | 11554939 | SNV | 1 | A | G | Homozygous   |
| NC_037648.1 | 11554966 | SNV | 1 | A | G | Homozygous   |
| NC_037648.1 | 11555010 | SNV | 1 | A | G | Homozygous   |
| NC_037648.1 | 11555068 | SNV | 1 | T | C | Heterozygous |

|             |          |     |   |   |   |              |
|-------------|----------|-----|---|---|---|--------------|
| NC_037648.1 | 11555071 | SNV | 1 | A | C | Heterozygous |
| NC_037648.1 | 11555078 | SNV | 1 | G | C | Heterozygous |
| NC_037648.1 | 11555085 | SNV | 1 | C | T | Heterozygous |
| NC_037648.1 | 11555183 | SNV | 1 | A | G | Homozygous   |
| NC_037648.1 | 11555196 | SNV | 1 | G | A | Homozygous   |
| NC_037648.1 | 11555199 | SNV | 1 | A | G | Homozygous   |
| NC_037648.1 | 11555323 | SNV | 1 | A | G | Heterozygous |
| NC_037648.1 | 11555446 | SNV | 1 | A | G | Heterozygous |
| NC_037648.1 | 11555557 | SNV | 1 | T | C | Homozygous   |
| NC_037648.1 | 11555606 | SNV | 1 | C | T | Heterozygous |
| NC_037648.1 | 11555634 | SNV | 1 | T | C | Heterozygous |
| NC_037648.1 | 11555657 | SNV | 1 | C | T | Heterozygous |
| NC_037648.1 | 11557719 | SNV | 1 | C | T | Homozygous   |
| NC_037648.1 | 11557736 | SNV | 1 | C | T | Homozygous   |
| NC_037648.1 | 11557747 | SNV | 1 | C | T | Homozygous   |
| NC_037648.1 | 11557760 | SNV | 1 | A | C | Homozygous   |
| NC_037648.1 | 11559739 | SNV | 1 | C | G | Homozygous   |
| NC_037648.1 | 11577808 | SNV | 1 | G | A | Heterozygous |
| NC_037648.1 | 11577839 | SNV | 1 | A | G | Homozygous   |
| NC_037648.1 | 11577841 | SNV | 1 | G | C | Homozygous   |
| NC_037648.1 | 11577846 | SNV | 1 | T | C | Homozygous   |
| NC_037648.1 | 11577912 | SNV | 1 | T | C | Heterozygous |
| NC_037648.1 | 11577915 | SNV | 1 | C | T | Homozygous   |
| NC_037648.1 | 11578061 | SNV | 1 | T | C | Homozygous   |
| NC_037648.1 | 11578105 | SNV | 1 | C | T | Heterozygous |
| NC_037648.1 | 11578107 | SNV | 1 | G | A | Homozygous   |
| NC_037648.1 | 11578111 | SNV | 1 | C | A | Heterozygous |
| NC_037648.1 | 11578118 | SNV | 1 | G | A | Homozygous   |
| NC_037648.1 | 11578130 | SNV | 1 | T | C | Heterozygous |
| NC_037648.1 | 11578215 | SNV | 1 | T | C | Homozygous   |
| NC_037648.1 | 11590626 | SNV | 1 | T | C | Homozygous   |
| NC_037648.1 | 11590724 | SNV | 1 | C | A | Homozygous   |
| NC_037648.1 | 11590737 | SNV | 1 | C | T | Heterozygous |
| NC_037648.1 | 11590778 | SNV | 1 | C | T | Heterozygous |
| NC_037648.1 | 11592227 | SNV | 1 | G | A | Heterozygous |
| NC_037648.1 | 11599395 | SNV | 1 | C | T | Heterozygous |
| NC_037648.1 | 11599400 | SNV | 1 | G | A | Heterozygous |
| NC_037648.1 | 11599601 | SNV | 1 | T | C | Heterozygous |
| NC_037648.1 | 11601375 | SNV | 1 | G | A | Homozygous   |
| NC_037648.1 | 11601387 | SNV | 1 | C | T | Heterozygous |
| NC_037648.1 | 11601402 | SNV | 1 | C | T | Homozygous   |
| NC_037648.1 | 11601422 | SNV | 1 | T | C | Heterozygous |
| NC_037648.1 | 11602450 | SNV | 1 | G | C | Homozygous   |
| NC_037648.1 | 11602477 | SNV | 1 | C | G | Homozygous   |
| NC_037648.1 | 11602493 | SNV | 1 | G | A | Heterozygous |
| NC_037648.1 | 11602648 | SNV | 1 | T | C | Homozygous   |
| NC_037648.1 | 11602666 | SNV | 1 | T | C | Homozygous   |
| NC_037648.1 | 11602679 | SNV | 1 | G | C | Homozygous   |
| NC_037648.1 | 11602682 | SNV | 1 | A | G | Heterozygous |
| NC_037648.1 | 11602684 | SNV | 1 | G | C | Heterozygous |
| NC_037648.1 | 11602810 | SNV | 1 | T | C | Homozygous   |

|             |          |     |   |   |   |              |
|-------------|----------|-----|---|---|---|--------------|
| NC_037648.1 | 11602835 | SNV | 1 | T | C | Homozygous   |
| NC_037648.1 | 11602906 | SNV | 1 | A | G | Homozygous   |
| NC_037648.1 | 11602979 | SNV | 1 | C | T | Heterozygous |
| NC_037648.1 | 11602989 | SNV | 1 | G | A | Homozygous   |
| NC_037648.1 | 11603155 | SNV | 1 | T | C | Homozygous   |
| NC_037648.1 | 11603172 | SNV | 1 | A | G | Heterozygous |
| NC_037648.1 | 11603176 | SNV | 1 | G | A | Heterozygous |
| NC_037648.1 | 11603187 | SNV | 1 | T | G | Heterozygous |
| NC_037648.1 | 11603201 | SNV | 1 | C | T | Heterozygous |
| NC_037648.1 | 11603228 | SNV | 1 | A | C | Homozygous   |
| NC_037648.1 | 11603253 | SNV | 1 | T | G | Heterozygous |
| NC_037648.1 | 11603263 | SNV | 1 | T | C | Homozygous   |
| NC_037648.1 | 11603287 | SNV | 1 | C | T | Heterozygous |
| NC_037648.1 | 11603298 | SNV | 1 | C | T | Heterozygous |
| NC_037648.1 | 11603304 | SNV | 1 | T | C | Heterozygous |
| NC_037648.1 | 11603327 | SNV | 1 | A | G | Heterozygous |
| NC_037648.1 | 11603334 | SNV | 1 | C | G | Heterozygous |
| NC_037648.1 | 11603386 | SNV | 1 | C | T | Heterozygous |
| NC_037648.1 | 11603423 | SNV | 1 | A | G | Homozygous   |
| NC_037648.1 | 11603428 | SNV | 1 | T | C | Homozygous   |
| NC_037648.1 | 11603472 | SNV | 1 | T | C | Heterozygous |
| NC_037648.1 | 11605727 | SNV | 1 | G | T | Homozygous   |
| NC_037648.1 | 11638098 | SNV | 1 | C | T | Heterozygous |
| NC_037648.1 | 11638232 | SNV | 1 | T | C | Homozygous   |
| NC_037648.1 | 11648549 | SNV | 1 | A | T | Heterozygous |
| NC_037648.1 | 11651186 | SNV | 1 | A | C | Heterozygous |
| NC_037648.1 | 11651195 | SNV | 1 | A | G | Heterozygous |
| NC_037648.1 | 11660388 | SNV | 1 | C | T | Homozygous   |
| NC_037648.1 | 11660414 | SNV | 1 | C | T | Homozygous   |
| NC_037648.1 | 11660437 | SNV | 1 | C | T | Homozygous   |
| NC_037648.1 | 11703323 | SNV | 1 | G | A | Heterozygous |
| NC_037648.1 | 11703363 | SNV | 1 | C | T | Heterozygous |
| NC_037648.1 | 11706472 | SNV | 1 | G | A | Heterozygous |
| NC_037648.1 | 11706497 | SNV | 1 | A | G | Homozygous   |
| NC_037648.1 | 11706574 | SNV | 1 | T | C | Heterozygous |
| NC_037648.1 | 11706577 | SNV | 1 | T | G | Heterozygous |
| NC_037648.1 | 11706580 | SNV | 1 | T | C | Heterozygous |
| NC_037648.1 | 11706596 | SNV | 1 | C | G | Homozygous   |
| NC_037648.1 | 11706599 | SNV | 1 | T | C | Heterozygous |
| NC_037648.1 | 11706601 | SNV | 1 | T | C | Heterozygous |
| NC_037648.1 | 11706603 | SNV | 1 | C | A | Homozygous   |
| NC_037648.1 | 11706611 | SNV | 1 | T | A | Heterozygous |
| NC_037648.1 | 11706763 | SNV | 1 | A | G | Heterozygous |
| NC_037648.1 | 11707142 | SNV | 1 | T | C | Heterozygous |
| NC_037648.1 | 11707167 | SNV | 1 | G | A | Heterozygous |
| NC_037648.1 | 11707176 | SNV | 1 | A | G | Heterozygous |
| NC_037648.1 | 11707221 | SNV | 1 | G | A | Homozygous   |
| NC_037648.1 | 11707225 | SNV | 1 | T | C | Homozygous   |
| NC_037648.1 | 11712583 | SNV | 1 | G | A | Homozygous   |
| NC_037648.1 | 11712592 | SNV | 1 | A | G | Homozygous   |
| NC_037648.1 | 11713886 | SNV | 1 | T | C | Heterozygous |



|             |          |     |   |   |   |              |
|-------------|----------|-----|---|---|---|--------------|
| NC_037648.1 | 11713895 | SNV | 1 | C | T | Homozygous   |
| NC_037648.1 | 11713920 | SNV | 1 | C | T | Heterozygous |
| NC_037648.1 | 11713930 | SNV | 1 | C | T | Heterozygous |
| NC_037648.1 | 11713939 | SNV | 1 | T | C | Heterozygous |
| NC_037648.1 | 11713948 | SNV | 1 | T | C | Homozygous   |
| NC_037648.1 | 11723432 | SNV | 1 | G | A | Heterozygous |
| NC_037648.1 | 11723451 | SNV | 1 | C | T | Heterozygous |
| NC_037648.1 | 11724864 | SNV | 1 | A | G | Homozygous   |
| NC_037648.1 | 11724867 | SNV | 1 | A | G | Homozygous   |
| NC_037648.1 | 11724873 | SNV | 1 | A | G | Homozygous   |
| NC_037648.1 | 11725242 | SNV | 1 | C | T | Homozygous   |
| NC_037648.1 | 11725271 | SNV | 1 | T | G | Homozygous   |
| NC_037648.1 | 11726574 | SNV | 1 | A | G | Heterozygous |
| NC_037648.1 | 11726708 | SNV | 1 | C | T | Heterozygous |
| NC_037648.1 | 11726754 | SNV | 1 | T | G | Heterozygous |
| NC_037648.1 | 11726758 | SNV | 1 | G | A | Homozygous   |
| NC_037648.1 | 11726768 | SNV | 1 | G | A | Heterozygous |
| NC_037648.1 | 11726790 | SNV | 1 | C | T | Heterozygous |
| NC_037648.1 | 11726793 | SNV | 1 | G | A | Heterozygous |
| NC_037648.1 | 11727021 | SNV | 1 | C | T | Heterozygous |
| NC_037648.1 | 11727115 | SNV | 1 | G | A | Heterozygous |
| NC_037648.1 | 11727490 | SNV | 1 | A | G | Homozygous   |
| NC_037648.1 | 11727531 | SNV | 1 | A | G | Homozygous   |
| NC_037648.1 | 11727941 | SNV | 1 | G | A | Heterozygous |
| NC_037648.1 | 11727953 | SNV | 1 | T | C | Homozygous   |
| NC_037648.1 | 11728032 | SNV | 1 | A | G | Heterozygous |
| NC_037648.1 | 11728057 | SNV | 1 | G | A | Heterozygous |
| NC_037648.1 | 11728060 | SNV | 1 | C | T | Heterozygous |
| NC_037648.1 | 11728447 | SNV | 1 | T | C | Homozygous   |
| NC_037648.1 | 11728496 | SNV | 1 | T | A | Heterozygous |
| NC_037648.1 | 11728500 | SNV | 1 | T | C | Heterozygous |
| NC_037648.1 | 11728505 | SNV | 1 | A | G | Heterozygous |
| NC_037648.1 | 11728554 | SNV | 1 | T | C | Heterozygous |
| NC_037648.1 | 11728929 | SNV | 1 | A | G | Homozygous   |
| NC_037648.1 | 11734992 | SNV | 1 | T | C | Homozygous   |
| NC_037648.1 | 11735854 | SNV | 1 | C | T | Heterozygous |
| NC_037648.1 | 11735859 | SNV | 1 | A | T | Homozygous   |
| NC_037648.1 | 11735868 | SNV | 1 | C | A | Homozygous   |
| NC_037648.1 | 11735896 | SNV | 1 | T | G | Heterozygous |
| NC_037648.1 | 11735898 | SNV | 1 | C | T | Heterozygous |
| NC_037648.1 | 11736879 | SNV | 1 | T | G | Heterozygous |
| NC_037648.1 | 11736906 | SNV | 1 | C | T | Homozygous   |
| NC_037648.1 | 11736939 | SNV | 1 | A | G | Heterozygous |
| NC_037648.1 | 11736955 | SNV | 1 | C | G | Homozygous   |
| NC_037648.1 | 11737139 | SNV | 1 | C | G | Homozygous   |
| NC_037648.1 | 11737188 | SNV | 1 | T | C | Homozygous   |
| NC_037648.1 | 11737192 | SNV | 1 | G | A | Homozygous   |
| NC_037648.1 | 11737196 | SNV | 1 | T | C | Heterozygous |
| NC_037648.1 | 11737236 | SNV | 1 | T | A | Heterozygous |
| NC_037648.1 | 11737239 | SNV | 1 | A | G | Homozygous   |
| NC_037648.1 | 11737260 | SNV | 1 | T | C | Homozygous   |

|             |          |     |   |   |   |              |
|-------------|----------|-----|---|---|---|--------------|
| NC_037648.1 | 11737275 | SNV | 1 | T | C | Homozygous   |
| NC_037648.1 | 11737279 | SNV | 1 | T | A | Heterozygous |
| NC_037648.1 | 11737279 | SNV | 1 | T | C | Heterozygous |
| NC_037648.1 | 11737296 | SNV | 1 | T | C | Heterozygous |
| NC_037648.1 | 11737305 | SNV | 1 | T | C | Homozygous   |
| NC_037648.1 | 11737316 | SNV | 1 | C | T | Heterozygous |
| NC_037648.1 | 11744062 | SNV | 1 | C | T | Heterozygous |
| NC_037648.1 | 11744070 | SNV | 1 | C | G | Heterozygous |
| NC_037648.1 | 11744073 | SNV | 1 | C | T | Heterozygous |
| NC_037648.1 | 11744074 | SNV | 1 | C | T | Heterozygous |
| NC_037648.1 | 11744077 | SNV | 1 | T | C | Heterozygous |
| NC_037648.1 | 11744082 | SNV | 1 | C | G | Heterozygous |
| NC_037648.1 | 11744086 | SNV | 1 | C | T | Heterozygous |
| NC_037648.1 | 11744089 | SNV | 1 | C | A | Heterozygous |
| NC_037648.1 | 11744094 | SNV | 1 | C | G | Heterozygous |
| NC_037648.1 | 11744097 | SNV | 1 | C | G | Heterozygous |
| NC_037648.1 | 11818423 | SNV | 1 | T | C | Homozygous   |
| NC_037648.1 | 11818466 | SNV | 1 | T | A | Heterozygous |
| NC_037648.1 | 11840863 | SNV | 1 | A | G | Homozygous   |
| NC_037648.1 | 11841238 | SNV | 1 | A | G | Heterozygous |
| NC_037648.1 | 11842021 | SNV | 1 | T | C | Heterozygous |
| NC_037648.1 | 11842137 | SNV | 1 | C | T | Heterozygous |
| NC_037648.1 | 11842750 | SNV | 1 | C | T | Homozygous   |
| NC_037648.1 | 11842928 | SNV | 1 | T | C | Homozygous   |
| NC_037648.1 | 11843461 | SNV | 1 | C | T | Heterozygous |
| NC_037648.1 | 11891844 | SNV | 1 | C | T | Heterozygous |
| NC_037648.1 | 11891851 | SNV | 1 | G | A | Heterozygous |
| NC_037648.1 | 11892270 | SNV | 1 | C | A | Heterozygous |
| NC_037648.1 | 11895709 | SNV | 1 | A | G | Homozygous   |
| NC_037648.1 | 11895745 | SNV | 1 | A | G | Homozygous   |
| NC_037648.1 | 11895751 | SNV | 1 | G | T | Heterozygous |
| NC_037648.1 | 11896834 | SNV | 1 | A | G | Heterozygous |
| NC_037648.1 | 11897514 | SNV | 1 | T | C | Heterozygous |
| NC_037648.1 | 11901128 | SNV | 1 | C | A | Homozygous   |
| NC_037648.1 | 11901160 | SNV | 1 | T | G | Homozygous   |
| NC_037648.1 | 11901165 | SNV | 1 | A | G | Homozygous   |
| NC_037648.1 | 11901234 | SNV | 1 | A | T | Homozygous   |
| NC_037648.1 | 11901813 | SNV | 1 | A | G | Heterozygous |
| NC_037648.1 | 11901818 | SNV | 1 | G | A | Heterozygous |
| NC_037648.1 | 11902297 | SNV | 1 | C | T | Heterozygous |
| NC_037648.1 | 11902303 | SNV | 1 | C | T | Heterozygous |
| NC_037648.1 | 11902309 | SNV | 1 | G | T | Homozygous   |
| NC_037648.1 | 11902331 | SNV | 1 | T | C | Heterozygous |
| NC_037648.1 | 11902340 | SNV | 1 | C | T | Heterozygous |
| NC_037648.1 | 11902366 | SNV | 1 | T | C | Homozygous   |
| NC_037648.1 | 11911285 | SNV | 1 | G | A | Heterozygous |
| NC_037648.1 | 11911857 | SNV | 1 | T | C | Homozygous   |
| NC_037648.1 | 11911894 | SNV | 1 | G | A | Heterozygous |
| NC_037648.1 | 11912636 | SNV | 1 | A | G | Heterozygous |
| NC_037648.1 | 11913346 | SNV | 1 | C | T | Homozygous   |
| NC_037648.1 | 11918444 | SNV | 1 | G | A | Homozygous   |

|             |          |     |   |   |   |              |
|-------------|----------|-----|---|---|---|--------------|
| NC_037648.1 | 11918669 | SNV | 1 | T | C | Heterozygous |
| NC_037648.1 | 11918822 | SNV | 1 | T | C | Heterozygous |
| NC_037648.1 | 11918867 | SNV | 1 | A | G | Homozygous   |
| NC_037648.1 | 11919014 | SNV | 1 | A | C | Homozygous   |
| NC_037648.1 | 11919048 | SNV | 1 | G | A | Homozygous   |
| NC_037648.1 | 11919067 | SNV | 1 | G | A | Heterozygous |
| NC_037648.1 | 11919069 | SNV | 1 | T | C | Heterozygous |
| NC_037648.1 | 11919255 | SNV | 1 | C | T | Homozygous   |
| NC_037648.1 | 11919270 | SNV | 1 | A | G | Homozygous   |
| NC_037648.1 | 11919551 | SNV | 1 | A | G | Homozygous   |
| NC_037648.1 | 11919602 | SNV | 1 | A | G | Homozygous   |
| NC_037648.1 | 11919893 | SNV | 1 | C | T | Homozygous   |
| NC_037648.1 | 11919984 | SNV | 1 | G | A | Homozygous   |
| NC_037648.1 | 11920108 | SNV | 1 | G | A | Heterozygous |
| NC_037648.1 | 11920288 | SNV | 1 | A | G | Homozygous   |
| NC_037648.1 | 11920315 | SNV | 1 | T | C | Homozygous   |
| NC_037648.1 | 11920447 | SNV | 1 | A | C | Homozygous   |
| NC_037648.1 | 11920465 | SNV | 1 | A | G | Homozygous   |
| NC_037648.1 | 11920495 | SNV | 1 | A | G | Homozygous   |
| NC_037648.1 | 11920560 | SNV | 1 | A | T | Heterozygous |
| NC_037648.1 | 11920679 | SNV | 1 | T | C | Homozygous   |
| NC_037648.1 | 11921898 | SNV | 1 | A | G | Heterozygous |
| NC_037648.1 | 11921917 | SNV | 1 | T | C | Heterozygous |
| NC_037648.1 | 11924944 | SNV | 1 | T | C | Heterozygous |
| NC_037648.1 | 11925131 | SNV | 1 | T | C | Heterozygous |
| NC_037648.1 | 11932740 | SNV | 1 | C | A | Heterozygous |
| NC_037648.1 | 11933335 | SNV | 1 | G | T | Heterozygous |
| NC_037648.1 | 11933342 | SNV | 1 | A | G | Homozygous   |
| NC_037648.1 | 11933649 | SNV | 1 | T | C | Heterozygous |
| NC_037648.1 | 11933804 | SNV | 1 | C | T | Heterozygous |
| NC_037648.1 | 11933840 | SNV | 1 | G | A | Homozygous   |
| NC_037648.1 | 11933851 | SNV | 1 | T | A | Homozygous   |
| NC_037648.1 | 11933896 | SNV | 1 | C | T | Homozygous   |
| NC_037648.1 | 11933926 | SNV | 1 | A | C | Homozygous   |
| NC_037648.1 | 11933932 | SNV | 1 | C | G | Homozygous   |
| NC_037648.1 | 11933946 | SNV | 1 | C | T | Homozygous   |
| NC_037648.1 | 11933982 | SNV | 1 | C | T | Heterozygous |
| NC_037648.1 | 11934258 | SNV | 1 | C | T | Heterozygous |
| NC_037648.1 | 11934446 | SNV | 1 | G | A | Heterozygous |
| NC_037648.1 | 11935397 | SNV | 1 | T | C | Homozygous   |
| NC_037648.1 | 11936207 | SNV | 1 | C | T | Heterozygous |
| NC_037648.1 | 11936791 | SNV | 1 | T | C | Homozygous   |
| NC_037648.1 | 11937021 | SNV | 1 | G | A | Homozygous   |
| NC_037648.1 | 11942360 | SNV | 1 | A | G | Homozygous   |
| NC_037648.1 | 11943117 | SNV | 1 | T | C | Heterozygous |
| NC_037648.1 | 11956518 | SNV | 1 | A | G | Homozygous   |
| NC_037648.1 | 11957205 | SNV | 1 | G | C | Homozygous   |
| NC_037648.1 | 11957261 | SNV | 1 | A | T | Homozygous   |
| NC_037648.1 | 11957688 | SNV | 1 | A | G | Heterozygous |
| NC_037648.1 | 11957744 | SNV | 1 | A | G | Homozygous   |
| NC_037648.1 | 11958007 | SNV | 1 | C | T | Homozygous   |

|             |          |     |   |   |   |              |
|-------------|----------|-----|---|---|---|--------------|
| NC_037648.1 | 11958151 | SNV | 1 | C | T | Heterozygous |
| NC_037648.1 | 11958230 | SNV | 1 | C | T | Heterozygous |
| NC_037648.1 | 11958240 | SNV | 1 | C | T | Homozygous   |
| NC_037648.1 | 11958331 | SNV | 1 | C | T | Homozygous   |
| NC_037648.1 | 11958594 | SNV | 1 | C | T | Homozygous   |
| NC_037648.1 | 11958599 | SNV | 1 | T | G | Heterozygous |
| NC_037648.1 | 11958609 | SNV | 1 | G | T | Heterozygous |
| NC_037648.1 | 11958623 | SNV | 1 | G | T | Heterozygous |
| NC_037648.1 | 11958633 | SNV | 1 | T | G | Heterozygous |
| NC_037648.1 | 11958644 | SNV | 1 | T | C | Heterozygous |
| NC_037648.1 | 11958754 | SNV | 1 | T | C | Homozygous   |
| NC_037648.1 | 11959097 | SNV | 1 | T | G | Homozygous   |
| NC_037648.1 | 11959099 | SNV | 1 | T | A | Homozygous   |
| NC_037648.1 | 11959106 | SNV | 1 | G | A | Homozygous   |
| NC_037648.1 | 11959334 | SNV | 1 | T | C | Homozygous   |
| NC_037648.1 | 11959378 | SNV | 1 | G | A | Heterozygous |
| NC_037648.1 | 11959540 | SNV | 1 | A | G | Homozygous   |
| NC_037648.1 | 11960097 | SNV | 1 | A | G | Homozygous   |
| NC_037648.1 | 11960161 | SNV | 1 | T | C | Homozygous   |
| NC_037648.1 | 11960189 | SNV | 1 | T | C | Homozygous   |
| NC_037648.1 | 11960867 | SNV | 1 | T | A | Homozygous   |
| NC_037648.1 | 11960994 | SNV | 1 | A | G | Homozygous   |
| NC_037648.1 | 11961170 | SNV | 1 | G | A | Homozygous   |
| NC_037648.1 | 11961172 | SNV | 1 | T | A | Homozygous   |
| NC_037648.1 | 11961254 | SNV | 1 | T | A | Heterozygous |
| NC_037648.1 | 11961290 | SNV | 1 | T | C | Heterozygous |
| NC_037648.1 | 11961416 | SNV | 1 | T | C | Heterozygous |
| NC_037648.1 | 11961441 | SNV | 1 | A | G | Heterozygous |
| NC_037648.1 | 11961490 | SNV | 1 | C | T | Heterozygous |
| NC_037648.1 | 11962166 | SNV | 1 | C | T | Heterozygous |
| NC_037648.1 | 11962178 | SNV | 1 | A | T | Homozygous   |
| NC_037648.1 | 11962329 | SNV | 1 | T | C | Homozygous   |
| NC_037648.1 | 11962432 | SNV | 1 | A | C | Homozygous   |
| NC_037648.1 | 11962571 | SNV | 1 | G | A | Heterozygous |
| NC_037648.1 | 11962668 | SNV | 1 | T | C | Homozygous   |
| NC_037648.1 | 11962671 | SNV | 1 | T | C | Homozygous   |
| NC_037648.1 | 11962823 | SNV | 1 | T | C | Homozygous   |
| NC_037648.1 | 11962827 | SNV | 1 | G | A | Heterozygous |
| NC_037648.1 | 11962866 | SNV | 1 | A | G | Homozygous   |
| NC_037648.1 | 11963336 | SNV | 1 | A | C | Homozygous   |
| NC_037648.1 | 11963389 | SNV | 1 | T | C | Homozygous   |
| NC_037648.1 | 11963540 | SNV | 1 | A | G | Homozygous   |
| NC_037648.1 | 11963688 | SNV | 1 | T | C | Homozygous   |
| NC_037648.1 | 11963697 | SNV | 1 | G | A | Heterozygous |
| NC_037648.1 | 11963698 | SNV | 1 | T | C | Heterozygous |
| NC_037648.1 | 11963699 | SNV | 1 | C | T | Heterozygous |
| NC_037648.1 | 11963788 | SNV | 1 | G | A | Heterozygous |
| NC_037648.1 | 11963930 | SNV | 1 | G | A | Heterozygous |
| NC_037648.1 | 11963987 | SNV | 1 | C | T | Heterozygous |
| NC_037648.1 | 11964020 | SNV | 1 | C | T | Homozygous   |
| NC_037648.1 | 11964163 | SNV | 1 | T | C | Homozygous   |

|             |          |     |   |   |   |              |
|-------------|----------|-----|---|---|---|--------------|
| NC_037648.1 | 11964213 | SNV | 1 | C | T | Heterozygous |
| NC_037648.1 | 11964217 | SNV | 1 | C | T | Heterozygous |
| NC_037648.1 | 11964253 | SNV | 1 | A | G | Homozygous   |
| NC_037648.1 | 11964785 | SNV | 1 | T | C | Homozygous   |
| NC_037648.1 | 11964809 | SNV | 1 | C | G | Homozygous   |
| NC_037648.1 | 11965205 | SNV | 1 | T | C | Homozygous   |
| NC_037648.1 | 11966787 | SNV | 1 | A | G | Heterozygous |
| NC_037648.1 | 11977089 | SNV | 1 | G | C | Heterozygous |
| NC_037648.1 | 11977105 | SNV | 1 | A | C | Homozygous   |
| NC_037648.1 | 11980696 | SNV | 1 | A | C | Heterozygous |
| NC_037648.1 | 11980702 | SNV | 1 | T | A | Homozygous   |
| NC_037648.1 | 11980705 | SNV | 1 | A | G | Homozygous   |
| NC_037648.1 | 11983778 | SNV | 1 | C | A | Heterozygous |
| NC_037648.1 | 11984314 | SNV | 1 | G | A | Homozygous   |
| NC_037648.1 | 11984335 | SNV | 1 | G | A | Heterozygous |
| NC_037648.1 | 11984405 | SNV | 1 | A | G | Homozygous   |
| NC_037648.1 | 11984670 | SNV | 1 | T | C | Heterozygous |
| NC_037648.1 | 11985746 | SNV | 1 | C | T | Homozygous   |
| NC_037648.1 | 11985917 | SNV | 1 | A | G | Heterozygous |
| NC_037648.1 | 11987615 | SNV | 1 | G | A | Homozygous   |
| NC_037648.1 | 11987653 | SNV | 1 | A | G | Heterozygous |
| NC_037648.1 | 11987703 | SNV | 1 | G | A | Homozygous   |
| NC_037648.1 | 11987724 | SNV | 1 | A | T | Heterozygous |
| NC_037648.1 | 11988072 | SNV | 1 | A | C | Homozygous   |
| NC_037648.1 | 11988241 | SNV | 1 | T | C | Homozygous   |
| NC_037648.1 | 11988324 | SNV | 1 | T | C | Heterozygous |
| NC_037648.1 | 11988338 | SNV | 1 | T | G | Homozygous   |
| NC_037648.1 | 11991297 | SNV | 1 | A | C | Homozygous   |
| NC_037648.1 | 11991312 | SNV | 1 | A | G | Homozygous   |
| NC_037648.1 | 11991383 | SNV | 1 | G | C | Heterozygous |
| NC_037648.1 | 11992499 | SNV | 1 | C | T | Homozygous   |
| NC_037648.1 | 11992562 | SNV | 1 | C | T | Heterozygous |
| NC_037648.1 | 11992586 | SNV | 1 | C | T | Homozygous   |
| NC_037648.1 | 11992590 | SNV | 1 | T | C | Heterozygous |
| NC_037648.1 | 11994170 | SNV | 1 | T | C | Homozygous   |
| NC_037648.1 | 11994552 | SNV | 1 | A | G | Homozygous   |
| NC_037648.1 | 11994645 | SNV | 1 | G | T | Heterozygous |
| NC_037648.1 | 11994940 | SNV | 1 | T | A | Homozygous   |
| NC_037648.1 | 11995101 | SNV | 1 | A | T | Homozygous   |
| NC_037648.1 | 11995106 | SNV | 1 | A | T | Homozygous   |
| NC_037648.1 | 11995122 | SNV | 1 | G | A | Homozygous   |
| NC_037648.1 | 11996107 | SNV | 1 | A | G | Homozygous   |
| NC_037648.1 | 11996132 | SNV | 1 | T | C | Heterozygous |
| NC_037648.1 | 11996136 | SNV | 1 | C | T | Homozygous   |
| NC_037648.1 | 11996163 | SNV | 1 | G | A | Homozygous   |
| NC_037648.1 | 11996208 | SNV | 1 | C | T | Homozygous   |
| NC_037648.1 | 12020533 | SNV | 1 | T | C | Homozygous   |
| NC_037648.1 | 12020757 | SNV | 1 | T | C | Homozygous   |
| NC_037648.1 | 12020781 | SNV | 1 | G | A | Homozygous   |
| NC_037648.1 | 12020820 | SNV | 1 | G | A | Homozygous   |
| NC_037648.1 | 12020890 | SNV | 1 | C | T | Heterozygous |

|             |          |     |   |   |   |              |
|-------------|----------|-----|---|---|---|--------------|
| NC_037648.1 | 12020965 | SNV | 1 | T | C | Homozygous   |
| NC_037648.1 | 12020989 | SNV | 1 | C | T | Heterozygous |
| NC_037648.1 | 12021016 | SNV | 1 | A | G | Homozygous   |
| NC_037648.1 | 12021215 | SNV | 1 | A | G | Homozygous   |
| NC_037648.1 | 12021965 | SNV | 1 | T | C | Homozygous   |
| NC_037648.1 | 12022047 | SNV | 1 | A | G | Homozygous   |
| NC_037648.1 | 12022090 | SNV | 1 | C | T | Heterozygous |
| NC_037648.1 | 12024733 | SNV | 1 | T | C | Homozygous   |
| NC_037648.1 | 12024831 | SNV | 1 | A | G | Heterozygous |
| NC_037648.1 | 12024961 | SNV | 1 | C | T | Heterozygous |
| NC_037648.1 | 12025054 | SNV | 1 | G | A | Heterozygous |
| NC_037648.1 | 12025065 | SNV | 1 | A | G | Homozygous   |
| NC_037648.1 | 12025071 | SNV | 1 | T | C | Homozygous   |
| NC_037648.1 | 12025113 | SNV | 1 | T | C | Heterozygous |
| NC_037648.1 | 12025177 | SNV | 1 | A | G | Homozygous   |
| NC_037648.1 | 12025191 | SNV | 1 | C | T | Heterozygous |
| NC_037648.1 | 12025580 | SNV | 1 | A | G | Heterozygous |
| NC_037648.1 | 12032913 | SNV | 1 | G | A | Heterozygous |
| NC_037648.1 | 12033256 | SNV | 1 | T | C | Heterozygous |
| NC_037648.1 | 12033336 | SNV | 1 | C | T | Heterozygous |
| NC_037648.1 | 12033432 | SNV | 1 | C | T | Homozygous   |
| NC_037648.1 | 12033506 | SNV | 1 | T | C | Heterozygous |
| NC_037648.1 | 12033546 | SNV | 1 | C | T | Heterozygous |
| NC_037648.1 | 12033580 | SNV | 1 | T | C | Heterozygous |
| NC_037648.1 | 12033787 | SNV | 1 | A | G | Heterozygous |
| NC_037648.1 | 12033810 | SNV | 1 | C | A | Heterozygous |
| NC_037648.1 | 12033875 | SNV | 1 | G | A | Homozygous   |
| NC_037648.1 | 12034057 | SNV | 1 | A | G | Homozygous   |
| NC_037648.1 | 12037951 | SNV | 1 | G | A | Heterozygous |
| NC_037648.1 | 12037984 | SNV | 1 | T | C | Homozygous   |
| NC_037648.1 | 12039997 | SNV | 1 | C | G | Heterozygous |
| NC_037648.1 | 12040086 | SNV | 1 | A | G | Homozygous   |
| NC_037648.1 | 12040099 | SNV | 1 | T | C | Homozygous   |
| NC_037648.1 | 12040229 | SNV | 1 | T | C | Heterozygous |
| NC_037648.1 | 12040320 | SNV | 1 | G | A | Heterozygous |
| NC_037648.1 | 12040333 | SNV | 1 | T | C | Heterozygous |
| NC_037648.1 | 12040350 | SNV | 1 | T | G | Homozygous   |
| NC_037648.1 | 12040354 | SNV | 1 | C | A | Heterozygous |
| NC_037648.1 | 12040382 | SNV | 1 | A | G | Homozygous   |
| NC_037648.1 | 12043840 | SNV | 1 | C | T | Heterozygous |
| NC_037648.1 | 12043847 | SNV | 1 | C | T | Heterozygous |
| NC_037648.1 | 12043857 | SNV | 1 | G | C | Heterozygous |
| NC_037648.1 | 12043901 | SNV | 1 | C | T | Homozygous   |
| NC_037648.1 | 12043942 | SNV | 1 | C | T | Homozygous   |
| NC_037648.1 | 12043964 | SNV | 1 | C | T | Homozygous   |
| NC_037648.1 | 12043968 | SNV | 1 | A | C | Heterozygous |
| NC_037648.1 | 12043974 | SNV | 1 | C | T | Heterozygous |
| NC_037648.1 | 12043997 | SNV | 1 | C | T | Heterozygous |
| NC_037648.1 | 12044014 | SNV | 1 | T | C | Homozygous   |
| NC_037648.1 | 12044072 | SNV | 1 | A | G | Homozygous   |
| NC_037648.1 | 12048925 | SNV | 1 | G | A | Heterozygous |

|             |          |     |   |   |   |              |
|-------------|----------|-----|---|---|---|--------------|
| NC_037648.1 | 12049103 | SNV | 1 | T | C | Homozygous   |
| NC_037648.1 | 12049107 | SNV | 1 | C | T | Heterozygous |
| NC_037648.1 | 12049160 | SNV | 1 | A | C | Homozygous   |
| NC_037648.1 | 12049510 | SNV | 1 | T | C | Heterozygous |
| NC_037648.1 | 12050153 | SNV | 1 | T | A | Homozygous   |
| NC_037648.1 | 12050165 | SNV | 1 | T | C | Homozygous   |
| NC_037648.1 | 12050167 | SNV | 1 | G | A | Heterozygous |
| NC_037648.1 | 12050175 | SNV | 1 | A | G | Heterozygous |
| NC_037648.1 | 12050177 | SNV | 1 | G | T | Heterozygous |
| NC_037648.1 | 12050184 | SNV | 1 | G | C | Heterozygous |
| NC_037648.1 | 12051846 | SNV | 1 | A | T | Heterozygous |
| NC_037648.1 | 12051850 | SNV | 1 | T | G | Heterozygous |
| NC_037648.1 | 12052484 | SNV | 1 | A | T | Heterozygous |
| NC_037648.1 | 12052509 | SNV | 1 | A | T | Heterozygous |
| NC_037648.1 | 12052637 | SNV | 1 | A | G | Heterozygous |
| NC_037648.1 | 12052677 | SNV | 1 | A | G | Homozygous   |
| NC_037648.1 | 12052947 | SNV | 1 | T | C | Homozygous   |
| NC_037648.1 | 12052953 | SNV | 1 | T | C | Homozygous   |
| NC_037648.1 | 12053784 | SNV | 1 | G | A | Homozygous   |
| NC_037648.1 | 12053787 | SNV | 1 | C | A | Homozygous   |
| NC_037648.1 | 12054129 | SNV | 1 | T | C | Heterozygous |
| NC_037648.1 | 12054337 | SNV | 1 | C | A | Homozygous   |
| NC_037648.1 | 12054811 | SNV | 1 | C | G | Homozygous   |
| NC_037648.1 | 12055012 | SNV | 1 | G | C | Homozygous   |
| NC_037648.1 | 12055264 | SNV | 1 | C | T | Heterozygous |
| NC_037648.1 | 12055344 | SNV | 1 | T | C | Homozygous   |
| NC_037648.1 | 12055895 | SNV | 1 | A | G | Homozygous   |
| NC_037648.1 | 12055917 | SNV | 1 | A | G | Homozygous   |
| NC_037648.1 | 12056016 | SNV | 1 | T | G | Homozygous   |
| NC_037648.1 | 12057308 | SNV | 1 | T | C | Heterozygous |
| NC_037648.1 | 12069643 | SNV | 1 | C | G | Heterozygous |
| NC_037648.1 | 12069661 | SNV | 1 | A | G | Homozygous   |
| NC_037648.1 | 12069690 | SNV | 1 | G | A | Heterozygous |
| NC_037648.1 | 12069851 | SNV | 1 | A | G | Homozygous   |
| NC_037648.1 | 12069879 | SNV | 1 | G | A | Homozygous   |
| NC_037648.1 | 12069944 | SNV | 1 | G | A | Heterozygous |
| NC_037648.1 | 12069980 | SNV | 1 | A | G | Homozygous   |
| NC_037648.1 | 12077229 | SNV | 1 | G | T | Heterozygous |
| NC_037648.1 | 12077233 | SNV | 1 | G | T | Heterozygous |
| NC_037648.1 | 12077237 | SNV | 1 | G | T | Heterozygous |
| NC_037648.1 | 12077242 | SNV | 1 | C | T | Heterozygous |
| NC_037648.1 | 12077264 | SNV | 1 | G | A | Heterozygous |
| NC_037648.1 | 12077268 | SNV | 1 | A | G | Heterozygous |
| NC_037648.1 | 12077270 | SNV | 1 | A | G | Heterozygous |
| NC_037648.1 | 12077398 | SNV | 1 | G | A | Heterozygous |
| NC_037648.1 | 12090599 | SNV | 1 | G | A | Homozygous   |
| NC_037648.1 | 12090647 | SNV | 1 | C | T | Homozygous   |
| NC_037648.1 | 12090746 | SNV | 1 | A | G | Heterozygous |
| NC_037648.1 | 12091504 | SNV | 1 | A | T | Heterozygous |
| NC_037648.1 | 12092069 | SNV | 1 | T | C | Homozygous   |
| NC_037648.1 | 12092264 | SNV | 1 | C | T | Heterozygous |

|             |          |     |   |   |   |              |
|-------------|----------|-----|---|---|---|--------------|
| NC_037648.1 | 12092624 | SNV | 1 | A | C | Heterozygous |
| NC_037648.1 | 12093124 | SNV | 1 | G | T | Heterozygous |
| NC_037648.1 | 12093127 | SNV | 1 | T | A | Heterozygous |
| NC_037648.1 | 12093455 | SNV | 1 | T | C | Homozygous   |
| NC_037648.1 | 12094066 | SNV | 1 | T | C | Heterozygous |
| NC_037648.1 | 12094246 | SNV | 1 | T | A | Heterozygous |
| NC_037648.1 | 12094507 | SNV | 1 | T | C | Heterozygous |
| NC_037648.1 | 12094627 | SNV | 1 | C | T | Heterozygous |
| NC_037648.1 | 12096066 | SNV | 1 | T | C | Heterozygous |
| NC_037648.1 | 12097157 | SNV | 1 | T | C | Heterozygous |
| NC_037648.1 | 12097495 | SNV | 1 | G | A | Heterozygous |
| NC_037648.1 | 12097563 | SNV | 1 | G | A | Heterozygous |
| NC_037648.1 | 12098817 | SNV | 1 | A | C | Homozygous   |
| NC_037648.1 | 12100252 | SNV | 1 | C | T | Homozygous   |
| NC_037648.1 | 12103694 | SNV | 1 | C | T | Heterozygous |
| NC_037648.1 | 12103737 | SNV | 1 | T | C | Homozygous   |
| NC_037648.1 | 12104455 | SNV | 1 | C | A | Homozygous   |
| NC_037648.1 | 12107934 | SNV | 1 | T | C | Homozygous   |
| NC_037648.1 | 12108100 | SNV | 1 | C | T | Homozygous   |
| NC_037648.1 | 12108104 | SNV | 1 | T | C | Heterozygous |
| NC_037648.1 | 12122210 | SNV | 1 | C | G | Heterozygous |
| NC_037648.1 | 12122250 | SNV | 1 | C | G | Homozygous   |
| NC_037648.1 | 12123057 | SNV | 1 | A | G | Homozygous   |
| NC_037648.1 | 12123063 | SNV | 1 | A | G | Heterozygous |
| NC_037648.1 | 12124118 | SNV | 1 | A | G | Homozygous   |
| NC_037648.1 | 12124371 | SNV | 1 | C | T | Homozygous   |
| NC_037648.1 | 12124616 | SNV | 1 | C | T | Heterozygous |
| NC_037648.1 | 12124622 | SNV | 1 | C | T | Heterozygous |
| NC_037648.1 | 12124827 | SNV | 1 | A | G | Homozygous   |
| NC_037648.1 | 12125665 | SNV | 1 | G | A | Homozygous   |
| NC_037648.1 | 12154163 | SNV | 1 | G | A | Homozygous   |
| NC_037648.1 | 12154259 | SNV | 1 | T | C | Heterozygous |
| NC_037648.1 | 12154478 | SNV | 1 | T | A | Heterozygous |
| NC_037648.1 | 12154773 | SNV | 1 | G | A | Homozygous   |
| NC_037648.1 | 12154935 | SNV | 1 | T | C | Heterozygous |
| NC_037648.1 | 12154953 | SNV | 1 | C | T | Homozygous   |
| NC_037648.1 | 12155367 | SNV | 1 | A | T | Homozygous   |
| NC_037648.1 | 12156372 | SNV | 1 | G | A | Heterozygous |
| NC_037648.1 | 12171344 | SNV | 1 | A | G | Heterozygous |
| NC_037648.1 | 12178101 | SNV | 1 | C | T | Heterozygous |
| NC_037648.1 | 12178413 | SNV | 1 | C | A | Homozygous   |
| NC_037648.1 | 12180108 | SNV | 1 | C | A | Homozygous   |
| NC_037648.1 | 12181152 | SNV | 1 | T | C | Homozygous   |
| NC_037648.1 | 12183647 | SNV | 1 | G | A | Homozygous   |
| NC_037648.1 | 12183968 | SNV | 1 | G | T | Homozygous   |
| NC_037648.1 | 12184004 | SNV | 1 | T | C | Homozygous   |
| NC_037648.1 | 12184034 | SNV | 1 | A | G | Homozygous   |
| NC_037648.1 | 12184043 | SNV | 1 | G | A | Homozygous   |
| NC_037648.1 | 12184059 | SNV | 1 | C | T | Homozygous   |
| NC_037648.1 | 12184124 | SNV | 1 | T | C | Homozygous   |
| NC_037648.1 | 12184780 | SNV | 1 | G | C | Homozygous   |



|             |          |     |   |   |   |              |
|-------------|----------|-----|---|---|---|--------------|
| NC_037648.1 | 12185045 | SNV | 1 | T | A | Homozygous   |
| NC_037648.1 | 12185048 | SNV | 1 | T | A | Homozygous   |
| NC_037648.1 | 12185051 | SNV | 1 | T | A | Homozygous   |
| NC_037648.1 | 12185505 | SNV | 1 | T | C | Heterozygous |
| NC_037648.1 | 12185525 | SNV | 1 | T | C | Heterozygous |
| NC_037648.1 | 12185536 | SNV | 1 | T | C | Heterozygous |
| NC_037648.1 | 12185554 | SNV | 1 | T | C | Heterozygous |
| NC_037648.1 | 12185557 | SNV | 1 | T | C | Heterozygous |
| NC_037648.1 | 12186708 | SNV | 1 | C | A | Homozygous   |
| NC_037648.1 | 12187380 | SNV | 1 | A | G | Homozygous   |
| NC_037648.1 | 12190705 | SNV | 1 | T | C | Homozygous   |
| NC_037648.1 | 12191565 | SNV | 1 | C | T | Homozygous   |
| NC_037648.1 | 12191567 | SNV | 1 | G | A | Homozygous   |
| NC_037648.1 | 12191599 | SNV | 1 | A | T | Homozygous   |
| NC_037648.1 | 12192631 | SNV | 1 | C | T | Homozygous   |
| NC_037648.1 | 12192633 | SNV | 1 | G | T | Homozygous   |
| NC_037648.1 | 12196361 | SNV | 1 | T | C | Homozygous   |
| NC_037648.1 | 12196978 | SNV | 1 | T | A | Homozygous   |
| NC_037648.1 | 12196981 | SNV | 1 | A | C | Homozygous   |
| NC_037648.1 | 12196983 | SNV | 1 | A | G | Homozygous   |
| NC_037648.1 | 12197080 | SNV | 1 | C | T | Homozygous   |
| NC_037648.1 | 12197347 | SNV | 1 | A | T | Homozygous   |
| NC_037648.1 | 12197583 | SNV | 1 | G | A | Homozygous   |
| NC_037648.1 | 12205652 | SNV | 1 | A | T | Heterozygous |
| NC_037648.1 | 12206558 | SNV | 1 | C | A | Homozygous   |
| NC_037648.1 | 12208326 | SNV | 1 | A | T | Homozygous   |
| NC_037648.1 | 12208586 | SNV | 1 | T | A | Homozygous   |
| NC_037648.1 | 12208896 | SNV | 1 | T | A | Homozygous   |
| NC_037648.1 | 12208931 | SNV | 1 | T | A | Homozygous   |
| NC_037648.1 | 12208944 | SNV | 1 | A | T | Homozygous   |
| NC_037648.1 | 12208947 | SNV | 1 | A | T | Homozygous   |
| NC_037648.1 | 12208950 | SNV | 1 | T | A | Homozygous   |
| NC_037648.1 | 12208954 | SNV | 1 | T | A | Homozygous   |
| NC_037648.1 | 12208958 | SNV | 1 | G | A | Homozygous   |
| NC_037648.1 | 12208960 | SNV | 1 | T | A | Homozygous   |
| NC_037648.1 | 12208969 | SNV | 1 | A | T | Homozygous   |
| NC_037648.1 | 12208975 | SNV | 1 | T | A | Homozygous   |
| NC_037648.1 | 12208981 | SNV | 1 | T | A | Homozygous   |
| NC_037648.1 | 12208983 | SNV | 1 | T | A | Homozygous   |
| NC_037648.1 | 12208991 | SNV | 1 | C | A | Homozygous   |
| NC_037648.1 | 12208993 | SNV | 1 | T | A | Homozygous   |
| NC_037648.1 | 12209655 | SNV | 1 | A | G | Heterozygous |
| NC_037648.1 | 12214047 | SNV | 1 | C | T | Heterozygous |
| NC_037648.1 | 12217608 | SNV | 1 | A | T | Homozygous   |
| NC_037648.1 | 12220703 | SNV | 1 | A | G | Heterozygous |
| NC_037648.1 | 12220716 | SNV | 1 | C | T | Homozygous   |
| NC_037648.1 | 12220740 | SNV | 1 | A | T | Homozygous   |
| NC_037648.1 | 12220744 | SNV | 1 | T | A | Homozygous   |
| NC_037648.1 | 12220757 | SNV | 1 | C | A | Homozygous   |
| NC_037648.1 | 12225782 | SNV | 1 | T | A | Homozygous   |
| NC_037648.1 | 12226342 | SNV | 1 | A | G | Homozygous   |

|             |          |     |   |   |   |              |
|-------------|----------|-----|---|---|---|--------------|
| NC_037648.1 | 12226377 | SNV | 1 | T | C | Homozygous   |
| NC_037648.1 | 12227194 | SNV | 1 | T | C | Homozygous   |
| NC_037648.1 | 12232867 | SNV | 1 | T | G | Homozygous   |
| NC_037648.1 | 12262690 | SNV | 1 | A | G | Homozygous   |
| NC_037648.1 | 12262741 | SNV | 1 | A | G | Heterozygous |
| NC_037648.1 | 12262747 | SNV | 1 | T | G | Homozygous   |
| NC_037648.1 | 12262757 | SNV | 1 | G | A | Homozygous   |
| NC_037648.1 | 12262893 | SNV | 1 | G | A | Heterozygous |
| NC_037648.1 | 12272362 | SNV | 1 | C | T | Homozygous   |
| NC_037648.1 | 12272414 | SNV | 1 | T | C | Heterozygous |
| NC_037648.1 | 12272453 | SNV | 1 | A | G | Homozygous   |
| NC_037648.1 | 12272505 | SNV | 1 | G | A | Heterozygous |
| NC_037648.1 | 12281004 | SNV | 1 | G | A | Homozygous   |
| NC_037648.1 | 12281168 | SNV | 1 | C | T | Heterozygous |
| NC_037648.1 | 12281188 | SNV | 1 | C | T | Heterozygous |
| NC_037648.1 | 12281849 | SNV | 1 | A | G | Heterozygous |
| NC_037648.1 | 12282190 | SNV | 1 | G | A | Heterozygous |
| NC_037648.1 | 12282192 | SNV | 1 | G | A | Homozygous   |
| NC_037648.1 | 12290935 | SNV | 1 | G | A | Homozygous   |
| NC_037648.1 | 12291049 | SNV | 1 | A | G | Heterozygous |
| NC_037648.1 | 12291288 | SNV | 1 | G | T | Homozygous   |
| NC_037648.1 | 12291292 | SNV | 1 | G | T | Homozygous   |
| NC_037648.1 | 12291301 | SNV | 1 | G | T | Heterozygous |
| NC_037648.1 | 12291397 | SNV | 1 | C | A | Heterozygous |
| NC_037648.1 | 12296167 | SNV | 1 | C | T | Homozygous   |
| NC_037648.1 | 12296177 | SNV | 1 | T | G | Homozygous   |
| NC_037648.1 | 12296183 | SNV | 1 | G | T | Homozygous   |
| NC_037648.1 | 12296185 | SNV | 1 | G | T | Homozygous   |
| NC_037648.1 | 12303741 | SNV | 1 | G | T | Homozygous   |
| NC_037648.1 | 12317264 | SNV | 1 | A | C | Homozygous   |
| NC_037648.1 | 12317315 | SNV | 1 | G | A | Heterozygous |
| NC_037648.1 | 12328732 | SNV | 1 | A | G | Heterozygous |
| NC_037648.1 | 12328742 | SNV | 1 | A | G | Homozygous   |
| NC_037648.1 | 12328754 | SNV | 1 | G | A | Heterozygous |
| NC_037648.1 | 12328899 | SNV | 1 | C | T | Heterozygous |
| NC_037648.1 | 12333023 | SNV | 1 | C | G | Homozygous   |
| NC_037648.1 | 12335358 | SNV | 1 | C | T | Homozygous   |
| NC_037648.1 | 12335403 | SNV | 1 | C | T | Heterozygous |
| NC_037648.1 | 12335416 | SNV | 1 | C | T | Heterozygous |
| NC_037648.1 | 12335421 | SNV | 1 | T | C | Heterozygous |
| NC_037648.1 | 12335426 | SNV | 1 | T | C | Heterozygous |
| NC_037648.1 | 12335440 | SNV | 1 | T | A | Heterozygous |
| NC_037648.1 | 12335442 | SNV | 1 | T | G | Heterozygous |
| NC_037648.1 | 12335450 | SNV | 1 | T | G | Heterozygous |
| NC_037648.1 | 12335452 | SNV | 1 | T | G | Heterozygous |
| NC_037648.1 | 12335461 | SNV | 1 | C | T | Heterozygous |
| NC_037648.1 | 12335498 | SNV | 1 | T | C | Homozygous   |
| NC_037648.1 | 12335528 | SNV | 1 | T | A | Heterozygous |
| NC_037648.1 | 12335531 | SNV | 1 | C | T | Homozygous   |
| NC_037648.1 | 12335534 | SNV | 1 | T | G | Homozygous   |
| NC_037648.1 | 12335536 | SNV | 1 | T | A | Homozygous   |

|             |          |     |   |   |   |              |
|-------------|----------|-----|---|---|---|--------------|
| NC_037648.1 | 12335547 | SNV | 1 | C | T | Homozygous   |
| NC_037648.1 | 12335552 | SNV | 1 | C | A | Homozygous   |
| NC_037648.1 | 12335556 | SNV | 1 | T | A | Homozygous   |
| NC_037648.1 | 12335565 | SNV | 1 | T | C | Homozygous   |
| NC_037648.1 | 12335569 | SNV | 1 | T | C | Homozygous   |
| NC_037648.1 | 12335576 | SNV | 1 | C | T | Heterozygous |
| NC_037648.1 | 12335727 | SNV | 1 | T | G | Heterozygous |
| NC_037648.1 | 12335732 | SNV | 1 | C | T | Heterozygous |
| NC_037648.1 | 12335738 | SNV | 1 | C | T | Heterozygous |
| NC_037648.1 | 12335745 | SNV | 1 | A | C | Heterozygous |
| NC_037648.1 | 12335762 | SNV | 1 | G | T | Heterozygous |
| NC_037648.1 | 12335764 | SNV | 1 | C | G | Heterozygous |
| NC_037648.1 | 12341707 | SNV | 1 | G | A | Heterozygous |
| NC_037648.1 | 12346762 | SNV | 1 | T | C | Homozygous   |
| NC_037648.1 | 12347518 | SNV | 1 | A | G | Homozygous   |
| NC_037648.1 | 12347555 | SNV | 1 | A | G | Homozygous   |
| NC_037648.1 | 12347563 | SNV | 1 | T | C | Homozygous   |
| NC_037648.1 | 12347603 | SNV | 1 | A | G | Heterozygous |
| NC_037648.1 | 12347612 | SNV | 1 | G | A | Homozygous   |
| NC_037648.1 | 12380450 | SNV | 1 | T | C | Heterozygous |
| NC_037648.1 | 12380464 | SNV | 1 | A | G | Homozygous   |
| NC_037648.1 | 12380682 | SNV | 1 | G | A | Heterozygous |
| NC_037648.1 | 12393573 | SNV | 1 | G | A | Heterozygous |
| NC_037648.1 | 12394198 | SNV | 1 | G | A | Heterozygous |
| NC_037648.1 | 12397303 | SNV | 1 | G | A | Heterozygous |
| NC_037648.1 | 12410838 | SNV | 1 | T | C | Homozygous   |
| NC_037648.1 | 12410894 | SNV | 1 | G | C | Homozygous   |
| NC_037648.1 | 12413972 | SNV | 1 | G | C | Heterozygous |
| NC_037648.1 | 12414025 | SNV | 1 | G | A | Homozygous   |
| NC_037648.1 | 12415020 | SNV | 1 | A | G | Homozygous   |
| NC_037648.1 | 12415362 | SNV | 1 | C | T | Heterozygous |
| NC_037648.1 | 12415698 | SNV | 1 | G | A | Homozygous   |
| NC_037648.1 | 12417324 | SNV | 1 | C | T | Heterozygous |
| NC_037648.1 | 12417749 | SNV | 1 | T | C | Heterozygous |
| NC_037648.1 | 12417758 | SNV | 1 | C | T | Heterozygous |
| NC_037648.1 | 12418566 | SNV | 1 | C | T | Heterozygous |
| NC_037648.1 | 12418754 | SNV | 1 | T | C | Homozygous   |
| NC_037648.1 | 12418970 | SNV | 1 | G | A | Homozygous   |
| NC_037648.1 | 12418972 | SNV | 1 | A | C | Homozygous   |
| NC_037648.1 | 12418974 | SNV | 1 | T | C | Homozygous   |
| NC_037648.1 | 12418979 | SNV | 1 | T | G | Homozygous   |
| NC_037648.1 | 12421550 | SNV | 1 | A | G | Homozygous   |
| NC_037648.1 | 12421744 | SNV | 1 | T | C | Homozygous   |
| NC_037648.1 | 12422396 | SNV | 1 | A | G | Heterozygous |
| NC_037648.1 | 12422425 | SNV | 1 | A | G | Heterozygous |
| NC_037648.1 | 12423460 | SNV | 1 | C | T | Homozygous   |
| NC_037648.1 | 12423511 | SNV | 1 | A | G | Homozygous   |
| NC_037648.1 | 12423664 | SNV | 1 | T | C | Homozygous   |
| NC_037648.1 | 12423692 | SNV | 1 | T | C | Heterozygous |
| NC_037648.1 | 12423906 | SNV | 1 | C | T | Heterozygous |
| NC_037648.1 | 12425276 | SNV | 1 | G | C | Heterozygous |

|             |          |     |   |   |   |              |
|-------------|----------|-----|---|---|---|--------------|
| NC_037648.1 | 12444772 | SNV | 1 | G | T | Heterozygous |
| NC_037648.1 | 12445083 | SNV | 1 | T | G | Homozygous   |
| NC_037648.1 | 12451398 | SNV | 1 | A | C | Homozygous   |
| NC_037648.1 | 12451716 | SNV | 1 | C | T | Homozygous   |
| NC_037648.1 | 12451724 | SNV | 1 | T | G | Homozygous   |
| NC_037648.1 | 12451760 | SNV | 1 | G | T | Heterozygous |
| NC_037648.1 | 12452828 | SNV | 1 | T | C | Homozygous   |
| NC_037648.1 | 12452954 | SNV | 1 | G | A | Heterozygous |
| NC_037648.1 | 12453065 | SNV | 1 | T | C | Homozygous   |
| NC_037648.1 | 12453096 | SNV | 1 | G | A | Heterozygous |
| NC_037648.1 | 12453136 | SNV | 1 | T | C | Homozygous   |
| NC_037648.1 | 12453264 | SNV | 1 | A | G | Heterozygous |
| NC_037648.1 | 12453272 | SNV | 1 | A | G | Homozygous   |
| NC_037648.1 | 12455924 | SNV | 1 | T | A | Heterozygous |
| NC_037648.1 | 12455926 | SNV | 1 | T | G | Heterozygous |
| NC_037648.1 | 12461453 | SNV | 1 | G | A | Heterozygous |
| NC_037648.1 | 12461585 | SNV | 1 | T | C | Homozygous   |
| NC_037648.1 | 12461606 | SNV | 1 | A | G | Heterozygous |
| NC_037648.1 | 12461613 | SNV | 1 | A | G | Heterozygous |
| NC_037648.1 | 12466856 | SNV | 1 | A | T | Homozygous   |
| NC_037648.1 | 12466859 | SNV | 1 | C | T | Homozygous   |
| NC_037648.1 | 12466875 | SNV | 1 | A | T | Homozygous   |
| NC_037648.1 | 12474830 | SNV | 1 | C | T | Homozygous   |
| NC_037648.1 | 12474840 | SNV | 1 | T | C | Heterozygous |
| NC_037648.1 | 12474867 | SNV | 1 | T | A | Homozygous   |
| NC_037648.1 | 12478708 | SNV | 1 | G | C | Homozygous   |
| NC_037648.1 | 12478732 | SNV | 1 | G | A | Heterozygous |
| NC_037648.1 | 12478844 | SNV | 1 | G | A | Heterozygous |
| NC_037648.1 | 12479181 | SNV | 1 | G | A | Heterozygous |
| NC_037648.1 | 12480912 | SNV | 1 | A | G | Homozygous   |
| NC_037648.1 | 12483512 | SNV | 1 | G | A | Homozygous   |
| NC_037648.1 | 12483552 | SNV | 1 | C | T | Homozygous   |
| NC_037648.1 | 12483810 | SNV | 1 | A | G | Homozygous   |
| NC_037648.1 | 12483820 | SNV | 1 | G | A | Heterozygous |
| NC_037648.1 | 12483886 | SNV | 1 | C | G | Heterozygous |
| NC_037648.1 | 12483889 | SNV | 1 | T | A | Heterozygous |
| NC_037648.1 | 12483966 | SNV | 1 | C | T | Homozygous   |
| NC_037648.1 | 12495524 | SNV | 1 | G | T | Heterozygous |
| NC_037648.1 | 12495564 | SNV | 1 | G | T | Heterozygous |
| NC_037648.1 | 12495582 | SNV | 1 | A | T | Heterozygous |
| NC_037648.1 | 12501199 | SNV | 1 | A | G | Homozygous   |
| NC_037648.1 | 12501561 | SNV | 1 | C | T | Heterozygous |
| NC_037648.1 | 12501563 | SNV | 1 | A | C | Heterozygous |
| NC_037648.1 | 12501566 | SNV | 1 | A | T | Heterozygous |
| NC_037648.1 | 12501572 | SNV | 1 | C | G | Homozygous   |
| NC_037648.1 | 12501589 | SNV | 1 | T | C | Homozygous   |
| NC_037648.1 | 12501613 | SNV | 1 | T | G | Homozygous   |
| NC_037648.1 | 12501744 | SNV | 1 | T | G | Homozygous   |
| NC_037648.1 | 12501800 | SNV | 1 | A | T | Heterozygous |
| NC_037648.1 | 12502330 | SNV | 1 | C | T | Heterozygous |
| NC_037648.1 | 12502504 | SNV | 1 | G | C | Homozygous   |

|             |          |     |   |   |   |              |
|-------------|----------|-----|---|---|---|--------------|
| NC_037648.1 | 12502524 | SNV | 1 | A | G | Heterozygous |
| NC_037648.1 | 12502917 | SNV | 1 | A | G | Homozygous   |
| NC_037648.1 | 12502930 | SNV | 1 | T | G | Homozygous   |
| NC_037648.1 | 12503008 | SNV | 1 | A | G | Homozygous   |
| NC_037648.1 | 12503023 | SNV | 1 | T | C | Homozygous   |
| NC_037648.1 | 12503098 | SNV | 1 | T | C | Homozygous   |
| NC_037648.1 | 12503134 | SNV | 1 | C | T | Heterozygous |
| NC_037648.1 | 12503227 | SNV | 1 | A | G | Heterozygous |
| NC_037648.1 | 12503332 | SNV | 1 | G | A | Heterozygous |
| NC_037648.1 | 12503350 | SNV | 1 | C | A | Homozygous   |
| NC_037648.1 | 12503488 | SNV | 1 | T | C | Heterozygous |
| NC_037648.1 | 12503569 | SNV | 1 | T | G | Homozygous   |
| NC_037648.1 | 12503614 | SNV | 1 | G | C | Heterozygous |
| NC_037648.1 | 12503695 | SNV | 1 | A | G | Heterozygous |
| NC_037648.1 | 12504027 | SNV | 1 | A | G | Homozygous   |
| NC_037648.1 | 12504031 | SNV | 1 | T | C | Homozygous   |
| NC_037648.1 | 12510127 | SNV | 1 | G | C | Homozygous   |
| NC_037648.1 | 12510233 | SNV | 1 | A | T | Homozygous   |
| NC_037648.1 | 12510268 | SNV | 1 | T | A | Homozygous   |
| NC_037648.1 | 12510295 | SNV | 1 | T | C | Homozygous   |
| NC_037648.1 | 12521209 | SNV | 1 | C | T | Homozygous   |
| NC_037648.1 | 12521250 | SNV | 1 | G | C | Homozygous   |
| NC_037648.1 | 12521515 | SNV | 1 | T | C | Heterozygous |
| NC_037648.1 | 12521609 | SNV | 1 | G | A | Homozygous   |
| NC_037648.1 | 12521632 | SNV | 1 | G | C | Homozygous   |
| NC_037648.1 | 12521824 | SNV | 1 | T | C | Homozygous   |
| NC_037648.1 | 12522250 | SNV | 1 | G | A | Homozygous   |
| NC_037648.1 | 12522345 | SNV | 1 | G | C | Homozygous   |
| NC_037648.1 | 12522377 | SNV | 1 | G | A | Homozygous   |
| NC_037648.1 | 12522456 | SNV | 1 | T | C | Heterozygous |
| NC_037648.1 | 12522480 | SNV | 1 | T | C | Homozygous   |
| NC_037648.1 | 12522603 | SNV | 1 | A | G | Heterozygous |
| NC_037648.1 | 12523683 | SNV | 1 | T | G | Heterozygous |
| NC_037648.1 | 12523686 | SNV | 1 | A | G | Heterozygous |
| NC_037648.1 | 12523858 | SNV | 1 | T | C | Heterozygous |
| NC_037648.1 | 12523975 | SNV | 1 | A | G | Homozygous   |
| NC_037648.1 | 12524204 | SNV | 1 | A | G | Homozygous   |
| NC_037648.1 | 12524353 | SNV | 1 | C | T | Homozygous   |
| NC_037648.1 | 12524557 | SNV | 1 | T | C | Homozygous   |
| NC_037648.1 | 12527091 | SNV | 1 | A | C | Homozygous   |
| NC_037648.1 | 12527262 | SNV | 1 | C | T | Homozygous   |
| NC_037648.1 | 12527327 | SNV | 1 | C | A | Homozygous   |
| NC_037648.1 | 12527349 | SNV | 1 | T | C | Heterozygous |
| NC_037648.1 | 12527351 | SNV | 1 | G | A | Heterozygous |
| NC_037648.1 | 12527365 | SNV | 1 | C | T | Heterozygous |
| NC_037648.1 | 12527373 | SNV | 1 | G | A | Heterozygous |
| NC_037648.1 | 12527492 | SNV | 1 | G | A | Heterozygous |
| NC_037648.1 | 12527497 | SNV | 1 | C | T | Heterozygous |
| NC_037648.1 | 12527597 | SNV | 1 | T | C | Heterozygous |
| NC_037648.1 | 12527701 | SNV | 1 | A | G | Heterozygous |
| NC_037648.1 | 12527705 | SNV | 1 | G | A | Heterozygous |

|             |          |     |   |   |   |              |
|-------------|----------|-----|---|---|---|--------------|
| NC_037648.1 | 12527798 | SNV | 1 | G | A | Heterozygous |
| NC_037648.1 | 12527804 | SNV | 1 | G | A | Heterozygous |
| NC_037648.1 | 12528101 | SNV | 1 | C | T | Heterozygous |
| NC_037648.1 | 12529682 | SNV | 1 | G | A | Heterozygous |
| NC_037648.1 | 12529697 | SNV | 1 | C | A | Homozygous   |
| NC_037648.1 | 12533854 | SNV | 1 | G | C | Heterozygous |
| NC_037648.1 | 12534260 | SNV | 1 | G | C | Heterozygous |
| NC_037648.1 | 12534326 | SNV | 1 | T | C | Homozygous   |
| NC_037648.1 | 12534370 | SNV | 1 | G | A | Homozygous   |
| NC_037648.1 | 12534471 | SNV | 1 | A | T | Homozygous   |
| NC_037648.1 | 12534490 | SNV | 1 | T | C | Homozygous   |
| NC_037648.1 | 12534601 | SNV | 1 | T | G | Heterozygous |
| NC_037648.1 | 12534639 | SNV | 1 | A | G | Homozygous   |
| NC_037648.1 | 12534754 | SNV | 1 | G | A | Homozygous   |
| NC_037648.1 | 12538035 | SNV | 1 | A | G | Homozygous   |
| NC_037648.1 | 12548140 | SNV | 1 | C | T | Homozygous   |
| NC_037648.1 | 12548373 | SNV | 1 | A | G | Homozygous   |
| NC_037648.1 | 12548430 | SNV | 1 | A | G | Heterozygous |
| NC_037648.1 | 12548438 | SNV | 1 | G | A | Heterozygous |
| NC_037648.1 | 12548447 | SNV | 1 | G | A | Heterozygous |
| NC_037648.1 | 12548518 | SNV | 1 | G | A | Heterozygous |
| NC_037648.1 | 12548603 | SNV | 1 | G | A | Homozygous   |
| NC_037648.1 | 12548624 | SNV | 1 | A | G | Homozygous   |
| NC_037648.1 | 12548659 | SNV | 1 | A | G | Homozygous   |
| NC_037648.1 | 12548677 | SNV | 1 | G | A | Heterozygous |
| NC_037648.1 | 12550811 | SNV | 1 | G | A | Heterozygous |
| NC_037648.1 | 12551584 | SNV | 1 | C | G | Homozygous   |
| NC_037648.1 | 12551680 | SNV | 1 | A | G | Homozygous   |
| NC_037648.1 | 12551907 | SNV | 1 | T | C | Homozygous   |
| NC_037648.1 | 12552125 | SNV | 1 | C | T | Heterozygous |
| NC_037648.1 | 12562081 | SNV | 1 | C | G | Homozygous   |
| NC_037648.1 | 12562204 | SNV | 1 | G | A | Heterozygous |
| NC_037648.1 | 12568338 | SNV | 1 | A | C | Homozygous   |
| NC_037648.1 | 12568537 | SNV | 1 | T | C | Homozygous   |
| NC_037648.1 | 12568578 | SNV | 1 | G | A | Homozygous   |
| NC_037648.1 | 12568650 | SNV | 1 | T | C | Homozygous   |
| NC_037648.1 | 12568673 | SNV | 1 | C | T | Homozygous   |
| NC_037648.1 | 12568701 | SNV | 1 | C | T | Homozygous   |
| NC_037648.1 | 12568716 | SNV | 1 | T | C | Homozygous   |
| NC_037648.1 | 12568869 | SNV | 1 | G | A | Homozygous   |
| NC_037648.1 | 12568922 | SNV | 1 | C | G | Homozygous   |
| NC_037648.1 | 12568963 | SNV | 1 | T | C | Homozygous   |
| NC_037648.1 | 12569021 | SNV | 1 | G | A | Heterozygous |
| NC_037648.1 | 12574641 | SNV | 1 | A | C | Heterozygous |
| NC_037648.1 | 12577209 | SNV | 1 | G | A | Homozygous   |
| NC_037648.1 | 12577223 | SNV | 1 | T | C | Homozygous   |
| NC_037648.1 | 12577312 | SNV | 1 | A | T | Heterozygous |
| NC_037648.1 | 12577322 | SNV | 1 | C | T | Heterozygous |
| NC_037648.1 | 12577351 | SNV | 1 | A | G | Heterozygous |
| NC_037648.1 | 12577375 | SNV | 1 | T | C | Homozygous   |
| NC_037648.1 | 12585612 | SNV | 1 | C | T | Homozygous   |

|             |          |     |   |   |   |              |
|-------------|----------|-----|---|---|---|--------------|
| NC_037648.1 | 12589708 | SNV | 1 | G | A | Homozygous   |
| NC_037648.1 | 12592222 | SNV | 1 | C | G | Homozygous   |
| NC_037648.1 | 12592224 | SNV | 1 | G | C | Homozygous   |
| NC_037648.1 | 12596509 | SNV | 1 | G | A | Heterozygous |
| NC_037648.1 | 12596527 | SNV | 1 | G | A | Heterozygous |
| NC_037648.1 | 12598085 | SNV | 1 | A | G | Heterozygous |
| NC_037648.1 | 12598167 | SNV | 1 | G | A | Heterozygous |
| NC_037648.1 | 12599143 | SNV | 1 | T | C | Homozygous   |
| NC_037648.1 | 12599148 | SNV | 1 | A | C | Homozygous   |
| NC_037648.1 | 12599212 | SNV | 1 | T | A | Heterozygous |
| NC_037648.1 | 12599356 | SNV | 1 | A | G | Homozygous   |
| NC_037648.1 | 12599379 | SNV | 1 | T | C | Homozygous   |
| NC_037648.1 | 12599392 | SNV | 1 | C | T | Heterozygous |
| NC_037648.1 | 12599425 | SNV | 1 | A | G | Homozygous   |
| NC_037648.1 | 12599440 | SNV | 1 | C | T | Heterozygous |
| NC_037648.1 | 12599451 | SNV | 1 | A | G | Homozygous   |
| NC_037648.1 | 12599464 | SNV | 1 | C | T | Heterozygous |
| NC_037648.1 | 12599539 | SNV | 1 | G | A | Homozygous   |
| NC_037648.1 | 12599552 | SNV | 1 | C | T | Heterozygous |
| NC_037648.1 | 12599568 | SNV | 1 | G | A | Heterozygous |
| NC_037648.1 | 12599628 | SNV | 1 | A | T | Heterozygous |
| NC_037648.1 | 12599657 | SNV | 1 | C | T | Homozygous   |
| NC_037648.1 | 12599670 | SNV | 1 | T | C | Homozygous   |
| NC_037648.1 | 12599699 | SNV | 1 | A | G | Heterozygous |
| NC_037648.1 | 12599707 | SNV | 1 | G | C | Heterozygous |
| NC_037648.1 | 12599776 | SNV | 1 | T | C | Homozygous   |
| NC_037648.1 | 12599825 | SNV | 1 | C | G | Homozygous   |
| NC_037648.1 | 12599902 | SNV | 1 | G | A | Heterozygous |
| NC_037648.1 | 12600074 | SNV | 1 | A | G | Homozygous   |
| NC_037648.1 | 12600159 | SNV | 1 | G | A | Heterozygous |
| NC_037648.1 | 12600434 | SNV | 1 | T | C | Heterozygous |
| NC_037648.1 | 12600469 | SNV | 1 | G | A | Homozygous   |
| NC_037648.1 | 12600515 | SNV | 1 | T | C | Heterozygous |
| NC_037648.1 | 12600800 | SNV | 1 | G | A | Heterozygous |
| NC_037648.1 | 12602398 | SNV | 1 | T | C | Heterozygous |
| NC_037648.1 | 12602418 | SNV | 1 | C | T | Homozygous   |
| NC_037648.1 | 12602430 | SNV | 1 | G | C | Homozygous   |
| NC_037648.1 | 12602470 | SNV | 1 | T | C | Homozygous   |
| NC_037648.1 | 12602483 | SNV | 1 | T | C | Homozygous   |
| NC_037648.1 | 12602589 | SNV | 1 | G | A | Heterozygous |
| NC_037648.1 | 12603018 | SNV | 1 | T | G | Homozygous   |
| NC_037648.1 | 12604065 | SNV | 1 | T | C | Homozygous   |
| NC_037648.1 | 12604075 | SNV | 1 | T | A | Homozygous   |
| NC_037648.1 | 12608122 | SNV | 1 | C | T | Homozygous   |
| NC_037648.1 | 12608138 | SNV | 1 | G | C | Homozygous   |
| NC_037648.1 | 12609322 | SNV | 1 | T | C | Homozygous   |
| NC_037648.1 | 12609543 | SNV | 1 | C | T | Homozygous   |
| NC_037648.1 | 12610199 | SNV | 1 | G | A | Homozygous   |
| NC_037648.1 | 12611073 | SNV | 1 | A | C | Homozygous   |
| NC_037648.1 | 12611296 | SNV | 1 | G | C | Heterozygous |
| NC_037648.1 | 12614087 | SNV | 1 | A | G | Homozygous   |

|             |          |     |   |   |   |              |
|-------------|----------|-----|---|---|---|--------------|
| NC_037648.1 | 12614717 | SNV | 1 | T | A | Heterozygous |
| NC_037648.1 | 12614717 | SNV | 1 | T | G | Heterozygous |
| NC_037648.1 | 12614744 | SNV | 1 | G | A | Heterozygous |
| NC_037648.1 | 12614771 | SNV | 1 | C | T | Homozygous   |
| NC_037648.1 | 12614776 | SNV | 1 | G | A | Homozygous   |
| NC_037648.1 | 12632052 | SNV | 1 | T | C | Homozygous   |
| NC_037648.1 | 12642616 | SNV | 1 | A | G | Homozygous   |
| NC_037648.1 | 12644088 | SNV | 1 | T | C | Heterozygous |
| NC_037648.1 | 12644170 | SNV | 1 | A | G | Heterozygous |
| NC_037648.1 | 12645023 | SNV | 1 | G | A | Heterozygous |
| NC_037648.1 | 12645027 | SNV | 1 | T | G | Homozygous   |
| NC_037648.1 | 12645044 | SNV | 1 | A | G | Homozygous   |
| NC_037648.1 | 12645049 | SNV | 1 | T | C | Homozygous   |
| NC_037648.1 | 12647571 | SNV | 1 | T | C | Heterozygous |
| NC_037648.1 | 12647573 | SNV | 1 | T | C | Heterozygous |
| NC_037648.1 | 12647578 | SNV | 1 | T | C | Heterozygous |
| NC_037648.1 | 12647605 | SNV | 1 | T | C | Heterozygous |
| NC_037648.1 | 12647788 | SNV | 1 | A | G | Homozygous   |
| NC_037648.1 | 12648500 | SNV | 1 | C | T | Heterozygous |
| NC_037648.1 | 12648530 | SNV | 1 | T | C | Homozygous   |
| NC_037648.1 | 12648637 | SNV | 1 | G | A | Homozygous   |
| NC_037648.1 | 12648659 | SNV | 1 | T | C | Homozygous   |
| NC_037648.1 | 12648750 | SNV | 1 | T | C | Homozygous   |
| NC_037648.1 | 12648756 | SNV | 1 | C | T | Heterozygous |
| NC_037648.1 | 12649026 | SNV | 1 | A | G | Homozygous   |
| NC_037648.1 | 12649050 | SNV | 1 | C | T | Homozygous   |
| NC_037648.1 | 12649062 | SNV | 1 | C | T | Homozygous   |
| NC_037648.1 | 12649142 | SNV | 1 | A | G | Heterozygous |
| NC_037648.1 | 12649146 | SNV | 1 | A | G | Heterozygous |
| NC_037648.1 | 12649189 | SNV | 1 | A | G | Homozygous   |
| NC_037648.1 | 12649302 | SNV | 1 | G | A | Homozygous   |
| NC_037648.1 | 12649315 | SNV | 1 | G | A | Heterozygous |
| NC_037648.1 | 12649322 | SNV | 1 | G | A | Homozygous   |
| NC_037648.1 | 12649605 | SNV | 1 | T | C | Heterozygous |
| NC_037648.1 | 12649673 | SNV | 1 | T | C | Homozygous   |
| NC_037648.1 | 12649689 | SNV | 1 | G | A | Heterozygous |
| NC_037648.1 | 12650011 | SNV | 1 | A | G | Homozygous   |
| NC_037648.1 | 12653244 | SNV | 1 | C | G | Heterozygous |
| NC_037648.1 | 12653290 | SNV | 1 | G | A | Homozygous   |
| NC_037648.1 | 12653300 | SNV | 1 | G | A | Heterozygous |
| NC_037648.1 | 12653722 | SNV | 1 | A | G | Heterozygous |
| NC_037648.1 | 12653724 | SNV | 1 | G | A | Heterozygous |
| NC_037648.1 | 12653869 | SNV | 1 | A | G | Homozygous   |
| NC_037648.1 | 12657143 | SNV | 1 | A | G | Homozygous   |
| NC_037648.1 | 12657163 | SNV | 1 | T | C | Homozygous   |
| NC_037648.1 | 12657213 | SNV | 1 | A | G | Heterozygous |
| NC_037648.1 | 12657795 | SNV | 1 | G | A | Heterozygous |
| NC_037648.1 | 12658440 | SNV | 1 | A | G | Homozygous   |
| NC_037648.1 | 12658493 | SNV | 1 | A | G | Homozygous   |
| NC_037648.1 | 12658620 | SNV | 1 | A | T | Heterozygous |
| NC_037648.1 | 12658622 | SNV | 1 | T | A | Heterozygous |



|             |          |     |   |   |   |              |
|-------------|----------|-----|---|---|---|--------------|
| NC_037648.1 | 12658672 | SNV | 1 | G | A | Heterozygous |
| NC_037648.1 | 12659096 | SNV | 1 | A | T | Heterozygous |
| NC_037648.1 | 12659102 | SNV | 1 | A | T | Heterozygous |
| NC_037648.1 | 12659489 | SNV | 1 | G | A | Heterozygous |
| NC_037648.1 | 12659799 | SNV | 1 | A | G | Homozygous   |
| NC_037648.1 | 12660389 | SNV | 1 | C | G | Heterozygous |
| NC_037648.1 | 12660534 | SNV | 1 | G | A | Heterozygous |
| NC_037648.1 | 12661036 | SNV | 1 | C | T | Heterozygous |
| NC_037648.1 | 12661130 | SNV | 1 | C | T | Heterozygous |
| NC_037648.1 | 12661170 | SNV | 1 | T | C | Homozygous   |
| NC_037648.1 | 12661414 | SNV | 1 | C | T | Homozygous   |
| NC_037648.1 | 12662648 | SNV | 1 | A | G | Homozygous   |
| NC_037648.1 | 12664587 | SNV | 1 | G | C | Heterozygous |
| NC_037648.1 | 12664783 | SNV | 1 | C | T | Homozygous   |
| NC_037648.1 | 12664920 | SNV | 1 | G | A | Heterozygous |
| NC_037648.1 | 12665475 | SNV | 1 | C | T | Homozygous   |
| NC_037648.1 | 12666235 | SNV | 1 | C | T | Homozygous   |
| NC_037648.1 | 12666255 | SNV | 1 | C | T | Heterozygous |
| NC_037648.1 | 12684534 | SNV | 1 | G | A | Homozygous   |
| NC_037648.1 | 12684545 | SNV | 1 | A | G | Homozygous   |
| NC_037648.1 | 12684549 | SNV | 1 | G | A | Homozygous   |
| NC_037648.1 | 12685041 | SNV | 1 | G | T | Heterozygous |
| NC_037648.1 | 12695196 | SNV | 1 | G | A | Heterozygous |
| NC_037648.1 | 12695469 | SNV | 1 | T | G | Homozygous   |
| NC_037648.1 | 12695478 | SNV | 1 | C | A | Homozygous   |
| NC_037648.1 | 12705092 | SNV | 1 | G | A | Homozygous   |
| NC_037648.1 | 12705137 | SNV | 1 | A | T | Homozygous   |
| NC_037648.1 | 12705139 | SNV | 1 | A | C | Homozygous   |
| NC_037648.1 | 12705145 | SNV | 1 | C | T | Homozygous   |
| NC_037648.1 | 12705147 | SNV | 1 | A | T | Homozygous   |
| NC_037648.1 | 12705153 | SNV | 1 | A | C | Homozygous   |
| NC_037648.1 | 12705758 | SNV | 1 | T | A | Heterozygous |
| NC_037648.1 | 12706057 | SNV | 1 | T | C | Homozygous   |
| NC_037648.1 | 12706063 | SNV | 1 | T | C | Homozygous   |
| NC_037648.1 | 12706140 | SNV | 1 | A | G | Homozygous   |
| NC_037648.1 | 12706161 | SNV | 1 | G | A | Homozygous   |
| NC_037648.1 | 12706423 | SNV | 1 | C | T | Heterozygous |
| NC_037648.1 | 12758425 | SNV | 1 | T | A | Homozygous   |
| NC_037648.1 | 12758586 | SNV | 1 | A | C | Heterozygous |
| NC_037648.1 | 12758592 | SNV | 1 | T | C | Heterozygous |
| NC_037648.1 | 12758634 | SNV | 1 | T | A | Homozygous   |
| NC_037648.1 | 12758654 | SNV | 1 | C | T | Heterozygous |
| NC_037648.1 | 12758754 | SNV | 1 | T | C | Homozygous   |
| NC_037648.1 | 12759378 | SNV | 1 | T | C | Homozygous   |
| NC_037648.1 | 12759390 | SNV | 1 | T | G | Homozygous   |
| NC_037648.1 | 12759402 | SNV | 1 | T | G | Homozygous   |
| NC_037648.1 | 12759418 | SNV | 1 | T | G | Homozygous   |
| NC_037648.1 | 12762293 | SNV | 1 | T | C | Homozygous   |
| NC_037648.1 | 12762586 | SNV | 1 | A | G | Homozygous   |
| NC_037648.1 | 12762659 | SNV | 1 | G | T | Heterozygous |
| NC_037648.1 | 12762817 | SNV | 1 | T | C | Homozygous   |

|             |          |     |   |   |   |              |
|-------------|----------|-----|---|---|---|--------------|
| NC_037648.1 | 12763481 | SNV | 1 | G | A | Heterozygous |
| NC_037648.1 | 12763501 | SNV | 1 | T | C | Heterozygous |
| NC_037648.1 | 12763538 | SNV | 1 | T | C | Homozygous   |
| NC_037648.1 | 12763658 | SNV | 1 | A | G | Homozygous   |
| NC_037648.1 | 12763823 | SNV | 1 | T | C | Homozygous   |
| NC_037648.1 | 12763869 | SNV | 1 | G | A | Homozygous   |
| NC_037648.1 | 12763871 | SNV | 1 | G | A | Heterozygous |
| NC_037648.1 | 12764117 | SNV | 1 | T | C | Homozygous   |
| NC_037648.1 | 12764671 | SNV | 1 | A | G | Homozygous   |
| NC_037648.1 | 12764699 | SNV | 1 | C | G | Heterozygous |
| NC_037648.1 | 12764701 | SNV | 1 | C | T | Heterozygous |
| NC_037648.1 | 12764788 | SNV | 1 | A | T | Heterozygous |
| NC_037648.1 | 12764864 | SNV | 1 | A | G | Homozygous   |
| NC_037648.1 | 12765003 | SNV | 1 | A | C | Homozygous   |
| NC_037648.1 | 12765108 | SNV | 1 | C | T | Heterozygous |
| NC_037648.1 | 12765690 | SNV | 1 | G | A | Heterozygous |
| NC_037648.1 | 12768830 | SNV | 1 | C | T | Heterozygous |
| NC_037648.1 | 12768848 | SNV | 1 | T | G | Homozygous   |
| NC_037648.1 | 12768866 | SNV | 1 | C | T | Homozygous   |
| NC_037648.1 | 12769010 | SNV | 1 | G | C | Heterozygous |
| NC_037648.1 | 12769023 | SNV | 1 | G | A | Heterozygous |
| NC_037648.1 | 12769151 | SNV | 1 | C | T | Homozygous   |
| NC_037648.1 | 12769255 | SNV | 1 | A | G | Homozygous   |
| NC_037648.1 | 12769348 | SNV | 1 | A | T | Homozygous   |
| NC_037648.1 | 12769472 | SNV | 1 | C | T | Heterozygous |
| NC_037648.1 | 12769488 | SNV | 1 | T | C | Heterozygous |
| NC_037648.1 | 12769549 | SNV | 1 | G | A | Heterozygous |
| NC_037648.1 | 12769589 | SNV | 1 | T | C | Homozygous   |
| NC_037648.1 | 12769688 | SNV | 1 | T | C | Heterozygous |
| NC_037648.1 | 12769692 | SNV | 1 | T | C | Homozygous   |
| NC_037648.1 | 12769846 | SNV | 1 | C | T | Homozygous   |
| NC_037648.1 | 12769854 | SNV | 1 | C | T | Heterozygous |
| NC_037648.1 | 12770049 | SNV | 1 | T | C | Heterozygous |
| NC_037648.1 | 12770051 | SNV | 1 | A | T | Homozygous   |
| NC_037648.1 | 12770067 | SNV | 1 | C | T | Homozygous   |
| NC_037648.1 | 12770120 | SNV | 1 | T | C | Homozygous   |
| NC_037648.1 | 12801488 | SNV | 1 | C | T | Homozygous   |
| NC_037648.1 | 12801492 | SNV | 1 | C | T | Homozygous   |
| NC_037648.1 | 12801545 | SNV | 1 | A | G | Homozygous   |
| NC_037648.1 | 12801547 | SNV | 1 | T | C | Heterozygous |
| NC_037648.1 | 12801653 | SNV | 1 | C | T | Homozygous   |
| NC_037648.1 | 12803387 | SNV | 1 | G | C | Heterozygous |
| NC_037648.1 | 12803447 | SNV | 1 | T | C | Heterozygous |
| NC_037648.1 | 12803450 | SNV | 1 | A | T | Heterozygous |
| NC_037648.1 | 12803463 | SNV | 1 | T | C | Homozygous   |
| NC_037648.1 | 12803468 | SNV | 1 | C | T | Heterozygous |
| NC_037648.1 | 12832609 | SNV | 1 | T | G | Homozygous   |
| NC_037648.1 | 12832814 | SNV | 1 | T | C | Homozygous   |
| NC_037648.1 | 12832834 | SNV | 1 | C | T | Heterozygous |
| NC_037648.1 | 12832986 | SNV | 1 | T | C | Homozygous   |
| NC_037648.1 | 12833003 | SNV | 1 | T | C | Heterozygous |

|             |          |     |   |   |   |              |
|-------------|----------|-----|---|---|---|--------------|
| NC_037648.1 | 12833006 | SNV | 1 | A | T | Homozygous   |
| NC_037648.1 | 12833015 | SNV | 1 | G | T | Homozygous   |
| NC_037648.1 | 12833115 | SNV | 1 | T | C | Heterozygous |
| NC_037648.1 | 12847238 | SNV | 1 | T | C | Homozygous   |
| NC_037648.1 | 12852323 | SNV | 1 | G | A | Homozygous   |
| NC_037648.1 | 12852334 | SNV | 1 | A | C | Homozygous   |
| NC_037648.1 | 12853174 | SNV | 1 | A | G | Homozygous   |
| NC_037648.1 | 12853211 | SNV | 1 | G | A | Homozygous   |
| NC_037648.1 | 12859302 | SNV | 1 | T | G | Homozygous   |
| NC_037648.1 | 12874040 | SNV | 1 | C | T | Homozygous   |
| NC_037648.1 | 12874065 | SNV | 1 | G | A | Heterozygous |
| NC_037648.1 | 12874084 | SNV | 1 | T | C | Heterozygous |
| NC_037648.1 | 12874272 | SNV | 1 | C | T | Heterozygous |
| NC_037648.1 | 12874342 | SNV | 1 | G | A | Heterozygous |
| NC_037648.1 | 12874381 | SNV | 1 | T | C | Homozygous   |
| NC_037648.1 | 12874401 | SNV | 1 | A | G | Homozygous   |
| NC_037648.1 | 12874881 | SNV | 1 | G | A | Heterozygous |
| NC_037648.1 | 12875585 | SNV | 1 | C | A | Homozygous   |
| NC_037648.1 | 12875675 | SNV | 1 | A | C | Homozygous   |
| NC_037648.1 | 12875825 | SNV | 1 | A | C | Homozygous   |
| NC_037648.1 | 12876125 | SNV | 1 | T | C | Heterozygous |
| NC_037648.1 | 12876199 | SNV | 1 | G | A | Heterozygous |
| NC_037648.1 | 12878139 | SNV | 1 | A | T | Heterozygous |
| NC_037648.1 | 12878543 | SNV | 1 | G | A | Heterozygous |
| NC_037648.1 | 12879857 | SNV | 1 | T | C | Homozygous   |
| NC_037648.1 | 12879921 | SNV | 1 | T | G | Homozygous   |
| NC_037648.1 | 12885989 | SNV | 1 | T | C | Heterozygous |
| NC_037648.1 | 12886009 | SNV | 1 | G | T | Heterozygous |
| NC_037648.1 | 12888433 | SNV | 1 | C | T | Heterozygous |
| NC_037648.1 | 12888789 | SNV | 1 | G | A | Homozygous   |
| NC_037648.1 | 12888792 | SNV | 1 | G | A | Homozygous   |
| NC_037648.1 | 12889322 | SNV | 1 | T | C | Homozygous   |
| NC_037648.1 | 12890321 | SNV | 1 | A | G | Homozygous   |
| NC_037648.1 | 12890364 | SNV | 1 | T | C | Homozygous   |
| NC_037648.1 | 12890857 | SNV | 1 | T | C | Homozygous   |
| NC_037648.1 | 12891160 | SNV | 1 | A | G | Homozygous   |
| NC_037648.1 | 12891592 | SNV | 1 | A | G | Homozygous   |
| NC_037648.1 | 12891595 | SNV | 1 | T | C | Homozygous   |
| NC_037648.1 | 12892642 | SNV | 1 | A | G | Homozygous   |
| NC_037648.1 | 12892987 | SNV | 1 | A | G | Heterozygous |
| NC_037648.1 | 12892998 | SNV | 1 | A | G | Homozygous   |
| NC_037648.1 | 12893099 | SNV | 1 | A | G | Homozygous   |
| NC_037648.1 | 12893322 | SNV | 1 | T | C | Homozygous   |
| NC_037648.1 | 12893505 | SNV | 1 | C | T | Heterozygous |
| NC_037648.1 | 12893982 | SNV | 1 | A | G | Homozygous   |
| NC_037648.1 | 12893990 | SNV | 1 | C | T | Heterozygous |
| NC_037648.1 | 12894068 | SNV | 1 | A | G | Heterozygous |
| NC_037648.1 | 12894094 | SNV | 1 | G | C | Homozygous   |
| NC_037648.1 | 12894213 | SNV | 1 | A | G | Homozygous   |
| NC_037648.1 | 12894241 | SNV | 1 | T | G | Heterozygous |
| NC_037648.1 | 12895264 | SNV | 1 | C | T | Homozygous   |

|             |          |     |   |   |   |              |
|-------------|----------|-----|---|---|---|--------------|
| NC_037648.1 | 12895400 | SNV | 1 | T | C | Homozygous   |
| NC_037648.1 | 12895408 | SNV | 1 | T | C | Homozygous   |
| NC_037648.1 | 12895440 | SNV | 1 | C | T | Homozygous   |
| NC_037648.1 | 12895477 | SNV | 1 | C | A | Heterozygous |
| NC_037648.1 | 12895508 | SNV | 1 | T | C | Homozygous   |
| NC_037648.1 | 12895521 | SNV | 1 | G | A | Homozygous   |
| NC_037648.1 | 12895529 | SNV | 1 | T | C | Homozygous   |
| NC_037648.1 | 12895536 | SNV | 1 | T | A | Heterozygous |
| NC_037648.1 | 12895590 | SNV | 1 | T | C | Homozygous   |
| NC_037648.1 | 12895761 | SNV | 1 | T | C | Homozygous   |
| NC_037648.1 | 12895969 | SNV | 1 | C | T | Homozygous   |
| NC_037648.1 | 12896148 | SNV | 1 | A | T | Homozygous   |
| NC_037648.1 | 12896156 | SNV | 1 | G | A | Homozygous   |
| NC_037648.1 | 12896190 | SNV | 1 | C | T | Homozygous   |
| NC_037648.1 | 12896821 | SNV | 1 | G | A | Homozygous   |
| NC_037648.1 | 12897574 | SNV | 1 | A | C | Heterozygous |
| NC_037648.1 | 12897916 | SNV | 1 | A | G | Homozygous   |
| NC_037648.1 | 12897944 | SNV | 1 | G | A | Homozygous   |
| NC_037648.1 | 12897956 | SNV | 1 | A | G | Heterozygous |
| NC_037648.1 | 12897958 | SNV | 1 | G | T | Heterozygous |
| NC_037648.1 | 12898310 | SNV | 1 | G | A | Homozygous   |
| NC_037648.1 | 12898549 | SNV | 1 | T | A | Homozygous   |
| NC_037648.1 | 12898570 | SNV | 1 | T | C | Heterozygous |
| NC_037648.1 | 12898586 | SNV | 1 | C | T | Heterozygous |
| NC_037648.1 | 12898609 | SNV | 1 | T | C | Homozygous   |
| NC_037648.1 | 12898925 | SNV | 1 | C | T | Homozygous   |
| NC_037648.1 | 12899422 | SNV | 1 | T | C | Homozygous   |
| NC_037648.1 | 12899458 | SNV | 1 | C | T | Heterozygous |
| NC_037648.1 | 12899560 | SNV | 1 | G | T | Heterozygous |
| NC_037648.1 | 12900046 | SNV | 1 | A | G | Homozygous   |
| NC_037648.1 | 12900396 | SNV | 1 | C | T | Homozygous   |
| NC_037648.1 | 12901425 | SNV | 1 | G | A | Homozygous   |
| NC_037648.1 | 12902293 | SNV | 1 | G | A | Heterozygous |
| NC_037648.1 | 12902350 | SNV | 1 | A | G | Homozygous   |
| NC_037648.1 | 12902479 | SNV | 1 | G | A | Heterozygous |
| NC_037648.1 | 12902482 | SNV | 1 | G | A | Heterozygous |
| NC_037648.1 | 12902733 | SNV | 1 | G | A | Homozygous   |
| NC_037648.1 | 12902736 | SNV | 1 | A | C | Homozygous   |
| NC_037648.1 | 12902857 | SNV | 1 | G | A | Heterozygous |
| NC_037648.1 | 12902881 | SNV | 1 | G | A | Heterozygous |
| NC_037648.1 | 12902886 | SNV | 1 | C | G | Homozygous   |
| NC_037648.1 | 12902937 | SNV | 1 | T | C | Homozygous   |
| NC_037648.1 | 12902982 | SNV | 1 | G | A | Heterozygous |
| NC_037648.1 | 12903281 | SNV | 1 | A | G | Homozygous   |
| NC_037648.1 | 12903827 | SNV | 1 | A | G | Homozygous   |
| NC_037648.1 | 12903967 | SNV | 1 | C | T | Homozygous   |
| NC_037648.1 | 12904101 | SNV | 1 | C | T | Heterozygous |
| NC_037648.1 | 12904509 | SNV | 1 | G | A | Heterozygous |
| NC_037648.1 | 12904644 | SNV | 1 | A | G | Homozygous   |
| NC_037648.1 | 12904647 | SNV | 1 | T | C | Homozygous   |
| NC_037648.1 | 12905109 | SNV | 1 | G | A | Homozygous   |

|             |          |     |   |   |   |              |
|-------------|----------|-----|---|---|---|--------------|
| NC_037648.1 | 12906644 | SNV | 1 | A | G | Homozygous   |
| NC_037648.1 | 12907290 | SNV | 1 | C | T | Heterozygous |
| NC_037648.1 | 12907333 | SNV | 1 | A | G | Heterozygous |
| NC_037648.1 | 12907995 | SNV | 1 | G | A | Homozygous   |
| NC_037648.1 | 12909321 | SNV | 1 | A | G | Homozygous   |
| NC_037648.1 | 12909578 | SNV | 1 | C | T | Homozygous   |
| NC_037648.1 | 12921875 | SNV | 1 | A | G | Heterozygous |
| NC_037648.1 | 12921903 | SNV | 1 | G | A | Homozygous   |
| NC_037648.1 | 12921963 | SNV | 1 | C | T | Homozygous   |
| NC_037648.1 | 12922010 | SNV | 1 | A | G | Homozygous   |
| NC_037648.1 | 12922020 | SNV | 1 | A | G | Homozygous   |
| NC_037648.1 | 12922233 | SNV | 1 | G | T | Homozygous   |
| NC_037648.1 | 12922530 | SNV | 1 | T | C | Heterozygous |
| NC_037648.1 | 12922626 | SNV | 1 | T | G | Heterozygous |
| NC_037648.1 | 12923970 | SNV | 1 | A | G | Homozygous   |
| NC_037648.1 | 12923991 | SNV | 1 | A | G | Heterozygous |
| NC_037648.1 | 12924044 | SNV | 1 | A | G | Homozygous   |
| NC_037648.1 | 12924048 | SNV | 1 | A | C | Homozygous   |
| NC_037648.1 | 12924120 | SNV | 1 | G | C | Homozygous   |
| NC_037648.1 | 12924184 | SNV | 1 | A | T | Homozygous   |
| NC_037648.1 | 12924200 | SNV | 1 | A | G | Homozygous   |
| NC_037648.1 | 12924260 | SNV | 1 | A | G | Homozygous   |
| NC_037648.1 | 12924280 | SNV | 1 | G | A | Homozygous   |
| NC_037648.1 | 12924390 | SNV | 1 | A | G | Homozygous   |
| NC_037648.1 | 12924400 | SNV | 1 | A | G | Homozygous   |
| NC_037648.1 | 12930124 | SNV | 1 | T | C | Homozygous   |
| NC_037648.1 | 12930167 | SNV | 1 | A | G | Homozygous   |
| NC_037648.1 | 12930207 | SNV | 1 | T | A | Heterozygous |
| NC_037648.1 | 12930278 | SNV | 1 | A | G | Homozygous   |
| NC_037648.1 | 12930423 | SNV | 1 | T | A | Heterozygous |
| NC_037648.1 | 12930542 | SNV | 1 | C | A | Heterozygous |
| NC_037648.1 | 12930649 | SNV | 1 | G | A | Homozygous   |
| NC_037648.1 | 12930813 | SNV | 1 | A | T | Heterozygous |
| NC_037648.1 | 12930833 | SNV | 1 | G | T | Heterozygous |
| NC_037648.1 | 12930846 | SNV | 1 | T | C | Heterozygous |
| NC_037648.1 | 12930858 | SNV | 1 | C | T | Heterozygous |
| NC_037648.1 | 12930927 | SNV | 1 | C | T | Heterozygous |
| NC_037648.1 | 12931037 | SNV | 1 | T | G | Homozygous   |
| NC_037648.1 | 12931135 | SNV | 1 | G | A | Heterozygous |
| NC_037648.1 | 12931188 | SNV | 1 | G | C | Heterozygous |
| NC_037648.1 | 12931356 | SNV | 1 | T | C | Homozygous   |
| NC_037648.1 | 12931510 | SNV | 1 | A | G | Homozygous   |
| NC_037648.1 | 12931528 | SNV | 1 | A | G | Homozygous   |
| NC_037648.1 | 12931805 | SNV | 1 | G | A | Heterozygous |
| NC_037648.1 | 12932048 | SNV | 1 | A | G | Homozygous   |
| NC_037648.1 | 12932320 | SNV | 1 | C | T | Heterozygous |
| NC_037648.1 | 12932331 | SNV | 1 | C | G | Heterozygous |
| NC_037648.1 | 12932533 | SNV | 1 | C | T | Heterozygous |
| NC_037648.1 | 12932545 | SNV | 1 | G | A | Heterozygous |
| NC_037648.1 | 12932563 | SNV | 1 | G | A | Homozygous   |
| NC_037648.1 | 12932790 | SNV | 1 | C | T | Homozygous   |

|             |          |     |   |   |   |              |
|-------------|----------|-----|---|---|---|--------------|
| NC_037648.1 | 12932919 | SNV | 1 | A | G | Homozygous   |
| NC_037648.1 | 12933023 | SNV | 1 | A | G | Homozygous   |
| NC_037648.1 | 12933154 | SNV | 1 | G | A | Heterozygous |
| NC_037648.1 | 12933173 | SNV | 1 | T | C | Homozygous   |
| NC_037648.1 | 12933532 | SNV | 1 | C | T | Heterozygous |
| NC_037648.1 | 12934185 | SNV | 1 | C | T | Homozygous   |
| NC_037648.1 | 12934189 | SNV | 1 | C | T | Heterozygous |
| NC_037648.1 | 12940676 | SNV | 1 | T | C | Homozygous   |
| NC_037648.1 | 12940721 | SNV | 1 | T | C | Homozygous   |
| NC_037648.1 | 12942327 | SNV | 1 | C | A | Homozygous   |
| NC_037648.1 | 12942360 | SNV | 1 | A | G | Homozygous   |
| NC_037648.1 | 12950308 | SNV | 1 | C | G | Heterozygous |
| NC_037648.1 | 12950331 | SNV | 1 | G | A | Heterozygous |
| NC_037648.1 | 12951069 | SNV | 1 | A | G | Homozygous   |
| NC_037648.1 | 12951105 | SNV | 1 | C | T | Heterozygous |
| NC_037648.1 | 12951175 | SNV | 1 | C | T | Homozygous   |
| NC_037648.1 | 12951181 | SNV | 1 | A | G | Homozygous   |
| NC_037648.1 | 12951193 | SNV | 1 | G | A | Homozygous   |
| NC_037648.1 | 12951204 | SNV | 1 | T | C | Homozygous   |
| NC_037648.1 | 12951514 | SNV | 1 | A | T | Homozygous   |
| NC_037648.1 | 12951539 | SNV | 1 | A | T | Homozygous   |
| NC_037648.1 | 12951559 | SNV | 1 | G | C | Homozygous   |
| NC_037648.1 | 12952049 | SNV | 1 | G | C | Homozygous   |
| NC_037648.1 | 12952103 | SNV | 1 | T | C | Homozygous   |
| NC_037648.1 | 12952997 | SNV | 1 | G | C | Heterozygous |
| NC_037648.1 | 12953042 | SNV | 1 | C | T | Heterozygous |
| NC_037648.1 | 12953060 | SNV | 1 | T | C | Heterozygous |
| NC_037648.1 | 12953099 | SNV | 1 | A | C | Heterozygous |
| NC_037648.1 | 12956367 | SNV | 1 | T | C | Homozygous   |
| NC_037648.1 | 12966601 | SNV | 1 | A | G | Homozygous   |
| NC_037648.1 | 12966607 | SNV | 1 | A | T | Homozygous   |
| NC_037648.1 | 12969752 | SNV | 1 | G | A | Heterozygous |
| NC_037648.1 | 12970401 | SNV | 1 | G | A | Heterozygous |
| NC_037648.1 | 12970466 | SNV | 1 | A | G | Homozygous   |
| NC_037648.1 | 12970726 | SNV | 1 | C | T | Homozygous   |
| NC_037648.1 | 12970820 | SNV | 1 | T | C | Heterozygous |
| NC_037648.1 | 12970953 | SNV | 1 | C | G | Heterozygous |
| NC_037648.1 | 12971010 | SNV | 1 | T | A | Homozygous   |
| NC_037648.1 | 12971191 | SNV | 1 | G | A | Heterozygous |
| NC_037648.1 | 12971367 | SNV | 1 | T | C | Homozygous   |
| NC_037648.1 | 12971372 | SNV | 1 | A | G | Heterozygous |
| NC_037648.1 | 12971426 | SNV | 1 | C | G | Homozygous   |
| NC_037648.1 | 12971499 | SNV | 1 | G | A | Heterozygous |
| NC_037648.1 | 12971701 | SNV | 1 | G | A | Homozygous   |
| NC_037648.1 | 12971738 | SNV | 1 | C | T | Heterozygous |
| NC_037648.1 | 12972392 | SNV | 1 | A | G | Heterozygous |
| NC_037648.1 | 12972398 | SNV | 1 | C | G | Heterozygous |
| NC_037648.1 | 12972408 | SNV | 1 | A | G | Heterozygous |
| NC_037648.1 | 12972938 | SNV | 1 | A | G | Heterozygous |
| NC_037648.1 | 12973067 | SNV | 1 | G | A | Heterozygous |
| NC_037648.1 | 12973115 | SNV | 1 | G | C | Homozygous   |

|             |          |     |   |   |   |              |
|-------------|----------|-----|---|---|---|--------------|
| NC_037648.1 | 12973177 | SNV | 1 | T | C | Homozygous   |
| NC_037648.1 | 12973290 | SNV | 1 | A | G | Homozygous   |
| NC_037648.1 | 12973319 | SNV | 1 | A | G | Homozygous   |
| NC_037648.1 | 12973478 | SNV | 1 | G | A | Heterozygous |
| NC_037648.1 | 12973491 | SNV | 1 | C | T | Homozygous   |
| NC_037648.1 | 12975362 | SNV | 1 | A | G | Heterozygous |
| NC_037648.1 | 12975447 | SNV | 1 | T | A | Homozygous   |
| NC_037648.1 | 12975631 | SNV | 1 | T | C | Homozygous   |
| NC_037648.1 | 12975703 | SNV | 1 | C | T | Heterozygous |
| NC_037648.1 | 12975715 | SNV | 1 | G | T | Homozygous   |
| NC_037648.1 | 12975748 | SNV | 1 | C | G | Homozygous   |
| NC_037648.1 | 12975766 | SNV | 1 | G | A | Heterozygous |
| NC_037648.1 | 12975766 | SNV | 1 | G | C | Heterozygous |
| NC_037648.1 | 12983413 | SNV | 1 | G | A | Homozygous   |
| NC_037648.1 | 12983423 | SNV | 1 | T | C | Homozygous   |
| NC_037648.1 | 12983433 | SNV | 1 | C | T | Heterozygous |
| NC_037648.1 | 12983439 | SNV | 1 | C | T | Heterozygous |
| NC_037648.1 | 12983448 | SNV | 1 | A | G | Homozygous   |
| NC_037648.1 | 12983543 | SNV | 1 | A | G | Homozygous   |
| NC_037648.1 | 12983548 | SNV | 1 | C | G | Homozygous   |
| NC_037648.1 | 12983665 | SNV | 1 | C | T | Homozygous   |
| NC_037648.1 | 12984266 | SNV | 1 | A | G | Homozygous   |
| NC_037648.1 | 12984270 | SNV | 1 | C | T | Heterozygous |
| NC_037648.1 | 12984331 | SNV | 1 | G | A | Heterozygous |
| NC_037648.1 | 12984406 | SNV | 1 | G | A | Heterozygous |
| NC_037648.1 | 12984745 | SNV | 1 | C | T | Heterozygous |
| NC_037648.1 | 12985402 | SNV | 1 | T | C | Homozygous   |
| NC_037648.1 | 12985404 | SNV | 1 | T | A | Homozygous   |
| NC_037648.1 | 12985407 | SNV | 1 | T | A | Homozygous   |
| NC_037648.1 | 12985416 | SNV | 1 | A | G | Homozygous   |
| NC_037648.1 | 12985429 | SNV | 1 | T | C | Homozygous   |
| NC_037648.1 | 12985431 | SNV | 1 | T | A | Homozygous   |
| NC_037648.1 | 12985446 | SNV | 1 | T | C | Homozygous   |
| NC_037648.1 | 12985491 | SNV | 1 | A | T | Homozygous   |
| NC_037648.1 | 12985497 | SNV | 1 | A | C | Homozygous   |
| NC_037648.1 | 12985500 | SNV | 1 | C | T | Homozygous   |
| NC_037648.1 | 12985523 | SNV | 1 | C | T | Homozygous   |
| NC_037648.1 | 12985545 | SNV | 1 | A | G | Homozygous   |
| NC_037648.1 | 12985894 | SNV | 1 | C | T | Homozygous   |
| NC_037648.1 | 12985897 | SNV | 1 | T | C | Homozygous   |
| NC_037648.1 | 12985903 | SNV | 1 | A | T | Homozygous   |
| NC_037648.1 | 12985908 | SNV | 1 | A | G | Homozygous   |
| NC_037648.1 | 12985915 | SNV | 1 | T | A | Homozygous   |
| NC_037648.1 | 12985918 | SNV | 1 | C | T | Homozygous   |
| NC_037648.1 | 12985923 | SNV | 1 | T | A | Heterozygous |
| NC_037648.1 | 13001481 | SNV | 1 | G | A | Homozygous   |
| NC_037648.1 | 13001483 | SNV | 1 | G | A | Homozygous   |
| NC_037648.1 | 13001490 | SNV | 1 | T | G | Homozygous   |
| NC_037648.1 | 13006226 | SNV | 1 | C | T | Heterozygous |
| NC_037648.1 | 13006307 | SNV | 1 | G | A | Homozygous   |
| NC_037648.1 | 13006311 | SNV | 1 | A | G | Homozygous   |

|             |          |     |   |   |   |              |
|-------------|----------|-----|---|---|---|--------------|
| NC_037648.1 | 13006329 | SNV | 1 | G | A | Homozygous   |
| NC_037648.1 | 13006453 | SNV | 1 | T | C | Homozygous   |
| NC_037648.1 | 13006510 | SNV | 1 | T | A | Heterozygous |
| NC_037648.1 | 13006592 | SNV | 1 | G | A | Homozygous   |
| NC_037648.1 | 13006697 | SNV | 1 | A | G | Homozygous   |
| NC_037648.1 | 13006736 | SNV | 1 | A | G | Homozygous   |
| NC_037648.1 | 13029694 | SNV | 1 | A | G | Homozygous   |
| NC_037648.1 | 13029754 | SNV | 1 | C | T | Heterozygous |
| NC_037648.1 | 13029978 | SNV | 1 | A | G | Homozygous   |
| NC_037648.1 | 13030063 | SNV | 1 | T | C | Homozygous   |
| NC_037648.1 | 13030737 | SNV | 1 | T | C | Heterozygous |
| NC_037648.1 | 13030794 | SNV | 1 | C | T | Heterozygous |
| NC_037648.1 | 13031248 | SNV | 1 | T | C | Homozygous   |
| NC_037648.1 | 13031266 | SNV | 1 | C | T | Heterozygous |
| NC_037648.1 | 13031604 | SNV | 1 | T | C | Homozygous   |
| NC_037648.1 | 13032869 | SNV | 1 | T | C | Homozygous   |
| NC_037648.1 | 13032871 | SNV | 1 | C | A | Homozygous   |
| NC_037648.1 | 13032903 | SNV | 1 | C | G | Homozygous   |
| NC_037648.1 | 13035372 | SNV | 1 | C | A | Heterozygous |
| NC_037648.1 | 13035372 | SNV | 1 | C | G | Heterozygous |
| NC_037648.1 | 13035378 | SNV | 1 | G | T | Homozygous   |
| NC_037648.1 | 13035391 | SNV | 1 | T | A | Homozygous   |
| NC_037648.1 | 13035395 | SNV | 1 | G | A | Homozygous   |
| NC_037648.1 | 13035435 | SNV | 1 | A | G | Heterozygous |
| NC_037648.1 | 13035468 | SNV | 1 | C | G | Homozygous   |
| NC_037648.1 | 13035519 | SNV | 1 | T | G | Homozygous   |
| NC_037648.1 | 13035747 | SNV | 1 | A | C | Homozygous   |
| NC_037648.1 | 13037733 | SNV | 1 | G | C | Homozygous   |
| NC_037648.1 | 13037805 | SNV | 1 | G | C | Homozygous   |
| NC_037648.1 | 13037808 | SNV | 1 | G | A | Heterozygous |
| NC_037648.1 | 13037811 | SNV | 1 | C | T | Heterozygous |
| NC_037648.1 | 13037978 | SNV | 1 | A | G | Homozygous   |
| NC_037648.1 | 13038091 | SNV | 1 | T | C | Heterozygous |
| NC_037648.1 | 13038111 | SNV | 1 | G | A | Heterozygous |
| NC_037648.1 | 13038218 | SNV | 1 | C | T | Homozygous   |
| NC_037648.1 | 13038222 | SNV | 1 | A | G | Homozygous   |
| NC_037648.1 | 13038260 | SNV | 1 | T | C | Homozygous   |
| NC_037648.1 | 13038262 | SNV | 1 | C | T | Heterozygous |
| NC_037648.1 | 13038270 | SNV | 1 | C | G | Heterozygous |
| NC_037648.1 | 13038276 | SNV | 1 | C | T | Heterozygous |
| NC_037648.1 | 13038326 | SNV | 1 | C | T | Heterozygous |
| NC_037648.1 | 13041796 | SNV | 1 | C | T | Homozygous   |
| NC_037648.1 | 13041801 | SNV | 1 | C | G | Heterozygous |
| NC_037648.1 | 13041803 | SNV | 1 | G | C | Homozygous   |
| NC_037648.1 | 13041883 | SNV | 1 | C | T | Homozygous   |
| NC_037648.1 | 13041990 | SNV | 1 | A | G | Homozygous   |
| NC_037648.1 | 13042089 | SNV | 1 | C | T | Homozygous   |
| NC_037648.1 | 13042116 | SNV | 1 | A | G | Homozygous   |
| NC_037648.1 | 13042128 | SNV | 1 | T | C | Homozygous   |
| NC_037648.1 | 13042466 | SNV | 1 | A | G | Homozygous   |
| NC_037648.1 | 13042871 | SNV | 1 | C | T | Heterozygous |



|             |          |     |   |   |   |              |
|-------------|----------|-----|---|---|---|--------------|
| NC_037648.1 | 13042881 | SNV | 1 | C | G | Heterozygous |
| NC_037648.1 | 13042931 | SNV | 1 | G | A | Heterozygous |
| NC_037648.1 | 13043873 | SNV | 1 | T | C | Homozygous   |
| NC_037648.1 | 13044022 | SNV | 1 | G | A | Heterozygous |
| NC_037648.1 | 13044079 | SNV | 1 | A | G | Homozygous   |
| NC_037648.1 | 13044091 | SNV | 1 | T | C | Homozygous   |
| NC_037648.1 | 13044109 | SNV | 1 | C | T | Heterozygous |
| NC_037648.1 | 13044151 | SNV | 1 | C | T | Heterozygous |
| NC_037648.1 | 13044175 | SNV | 1 | A | C | Homozygous   |
| NC_037648.1 | 13044235 | SNV | 1 | C | T | Heterozygous |
| NC_037648.1 | 13044301 | SNV | 1 | T | C | Homozygous   |
| NC_037648.1 | 13044565 | SNV | 1 | G | A | Heterozygous |
| NC_037648.1 | 13044852 | SNV | 1 | C | T | Heterozygous |
| NC_037648.1 | 13044948 | SNV | 1 | T | C | Homozygous   |
| NC_037648.1 | 13045079 | SNV | 1 | A | G | Homozygous   |
| NC_037648.1 | 13045285 | SNV | 1 | G | A | Homozygous   |
| NC_037648.1 | 13045417 | SNV | 1 | C | T | Homozygous   |
| NC_037648.1 | 13045555 | SNV | 1 | T | C | Homozygous   |
| NC_037648.1 | 13045644 | SNV | 1 | A | G | Homozygous   |
| NC_037648.1 | 13046109 | SNV | 1 | C | T | Homozygous   |
| NC_037648.1 | 13046116 | SNV | 1 | G | A | Homozygous   |
| NC_037648.1 | 13046157 | SNV | 1 | G | A | Heterozygous |
| NC_037648.1 | 13046198 | SNV | 1 | G | A | Heterozygous |
| NC_037648.1 | 13046222 | SNV | 1 | A | G | Homozygous   |
| NC_037648.1 | 13046251 | SNV | 1 | T | C | Heterozygous |
| NC_037648.1 | 13046307 | SNV | 1 | A | G | Heterozygous |
| NC_037648.1 | 13046465 | SNV | 1 | T | C | Homozygous   |
| NC_037648.1 | 13047264 | SNV | 1 | T | C | Heterozygous |
| NC_037648.1 | 13047371 | SNV | 1 | A | G | Homozygous   |
| NC_037648.1 | 13047553 | SNV | 1 | A | G | Homozygous   |
| NC_037648.1 | 13047578 | SNV | 1 | G | A | Homozygous   |
| NC_037648.1 | 13047607 | SNV | 1 | G | A | Homozygous   |
| NC_037648.1 | 13047637 | SNV | 1 | G | A | Homozygous   |
| NC_037648.1 | 13047765 | SNV | 1 | T | C | Homozygous   |
| NC_037648.1 | 13048290 | SNV | 1 | G | T | Heterozygous |
| NC_037648.1 | 13048326 | SNV | 1 | A | G | Homozygous   |
| NC_037648.1 | 13048740 | SNV | 1 | C | G | Heterozygous |
| NC_037648.1 | 13049146 | SNV | 1 | C | T | Homozygous   |
| NC_037648.1 | 13049149 | SNV | 1 | T | C | Homozygous   |
| NC_037648.1 | 13080345 | SNV | 1 | C | T | Heterozygous |
| NC_037648.1 | 13080364 | SNV | 1 | A | G | Heterozygous |
| NC_037648.1 | 13080378 | SNV | 1 | G | A | Heterozygous |
| NC_037648.1 | 13080405 | SNV | 1 | G | A | Heterozygous |
| NC_037648.1 | 13080431 | SNV | 1 | C | G | Homozygous   |
| NC_037648.1 | 13080438 | SNV | 1 | T | C | Heterozygous |
| NC_037648.1 | 13080441 | SNV | 1 | C | T | Heterozygous |
| NC_037648.1 | 13080456 | SNV | 1 | T | C | Heterozygous |
| NC_037648.1 | 13080488 | SNV | 1 | C | T | Heterozygous |
| NC_037648.1 | 13080498 | SNV | 1 | C | T | Heterozygous |
| NC_037648.1 | 13080570 | SNV | 1 | A | G | Heterozygous |
| NC_037648.1 | 13080603 | SNV | 1 | T | C | Heterozygous |

|             |          |     |   |   |   |              |
|-------------|----------|-----|---|---|---|--------------|
| NC_037648.1 | 13080606 | SNV | 1 | A | T | Heterozygous |
| NC_037648.1 | 13080612 | SNV | 1 | T | C | Homozygous   |
| NC_037648.1 | 13080615 | SNV | 1 | C | T | Heterozygous |
| NC_037648.1 | 13080617 | SNV | 1 | C | T | Heterozygous |
| NC_037648.1 | 13080621 | SNV | 1 | G | T | Homozygous   |
| NC_037648.1 | 13080628 | SNV | 1 | C | T | Homozygous   |
| NC_037648.1 | 13080667 | SNV | 1 | A | G | Homozygous   |
| NC_037648.1 | 13081060 | SNV | 1 | A | T | Heterozygous |
| NC_037648.1 | 13081069 | SNV | 1 | C | T | Heterozygous |
| NC_037648.1 | 13081071 | SNV | 1 | C | T | Heterozygous |
| NC_037648.1 | 13081075 | SNV | 1 | G | T | Homozygous   |
| NC_037648.1 | 13081082 | SNV | 1 | C | T | Homozygous   |
| NC_037648.1 | 13081130 | SNV | 1 | T | C | Homozygous   |
| NC_037648.1 | 13081146 | SNV | 1 | G | C | Homozygous   |
| NC_037648.1 | 13081155 | SNV | 1 | C | T | Heterozygous |
| NC_037648.1 | 13081165 | SNV | 1 | C | T | Heterozygous |
| NC_037648.1 | 13081177 | SNV | 1 | G | A | Homozygous   |
| NC_037648.1 | 13081204 | SNV | 1 | G | A | Heterozygous |
| NC_037648.1 | 13081230 | SNV | 1 | C | G | Homozygous   |
| NC_037648.1 | 13081246 | SNV | 1 | T | C | Homozygous   |
| NC_037648.1 | 13081252 | SNV | 1 | G | A | Heterozygous |
| NC_037648.1 | 13081273 | SNV | 1 | C | A | Heterozygous |
| NC_037648.1 | 13082770 | SNV | 1 | C | T | Homozygous   |
| NC_037648.1 | 13082805 | SNV | 1 | C | T | Heterozygous |
| NC_037648.1 | 13082811 | SNV | 1 | C | T | Heterozygous |
| NC_037648.1 | 13082927 | SNV | 1 | A | C | Heterozygous |
| NC_037648.1 | 13086254 | SNV | 1 | G | A | Homozygous   |
| NC_037648.1 | 13086261 | SNV | 1 | A | T | Homozygous   |
| NC_037648.1 | 13087095 | SNV | 1 | C | T | Heterozygous |
| NC_037648.1 | 13087106 | SNV | 1 | C | T | Homozygous   |
| NC_037648.1 | 13087110 | SNV | 1 | C | T | Heterozygous |
| NC_037648.1 | 13087157 | SNV | 1 | A | G | Heterozygous |
| NC_037648.1 | 13087160 | SNV | 1 | A | G | Heterozygous |
| NC_037648.1 | 13087225 | SNV | 1 | T | C | Homozygous   |
| NC_037648.1 | 13094441 | SNV | 1 | G | A | Homozygous   |
| NC_037648.1 | 13094443 | SNV | 1 | C | T | Homozygous   |
| NC_037648.1 | 13094459 | SNV | 1 | G | A | Homozygous   |
| NC_037648.1 | 13094472 | SNV | 1 | C | T | Homozygous   |
| NC_037648.1 | 13094502 | SNV | 1 | T | C | Homozygous   |
| NC_037648.1 | 13094521 | SNV | 1 | C | T | Homozygous   |
| NC_037648.1 | 13108963 | SNV | 1 | C | T | Heterozygous |
| NC_037648.1 | 13109046 | SNV | 1 | C | G | Homozygous   |
| NC_037648.1 | 13124360 | SNV | 1 | A | G | Heterozygous |
| NC_037648.1 | 13124362 | SNV | 1 | T | G | Heterozygous |
| NC_037648.1 | 13124400 | SNV | 1 | G | A | Homozygous   |
| NC_037648.1 | 13124434 | SNV | 1 | C | A | Heterozygous |
| NC_037648.1 | 13124444 | SNV | 1 | A | G | Heterozygous |
| NC_037648.1 | 13124452 | SNV | 1 | A | C | Heterozygous |
| NC_037648.1 | 13124456 | SNV | 1 | G | C | Heterozygous |
| NC_037648.1 | 13124466 | SNV | 1 | G | C | Heterozygous |
| NC_037648.1 | 13124837 | SNV | 1 | T | G | Homozygous   |

|             |          |     |   |   |   |              |
|-------------|----------|-----|---|---|---|--------------|
| NC_037648.1 | 13124861 | SNV | 1 | T | G | Heterozygous |
| NC_037648.1 | 13124910 | SNV | 1 | G | A | Heterozygous |
| NC_037648.1 | 13124916 | SNV | 1 | A | G | Heterozygous |
| NC_037648.1 | 13124918 | SNV | 1 | G | A | Heterozygous |
| NC_037648.1 | 13124923 | SNV | 1 | T | A | Heterozygous |
| NC_037648.1 | 13124944 | SNV | 1 | A | G | Homozygous   |
| NC_037648.1 | 13124949 | SNV | 1 | A | G | Homozygous   |
| NC_037648.1 | 13124953 | SNV | 1 | A | G | Heterozygous |
| NC_037648.1 | 13124964 | SNV | 1 | A | G | Homozygous   |
| NC_037648.1 | 13125000 | SNV | 1 | G | A | Heterozygous |
| NC_037648.1 | 13125080 | SNV | 1 | G | A | Heterozygous |
| NC_037648.1 | 13125122 | SNV | 1 | G | A | Heterozygous |
| NC_037648.1 | 13125129 | SNV | 1 | A | G | Heterozygous |
| NC_037648.1 | 13125136 | SNV | 1 | A | G | Heterozygous |
| NC_037648.1 | 13125219 | SNV | 1 | T | G | Heterozygous |
| NC_037648.1 | 13125221 | SNV | 1 | G | A | Heterozygous |
| NC_037648.1 | 13125223 | SNV | 1 | G | A | Heterozygous |
| NC_037648.1 | 13125225 | SNV | 1 | G | A | Heterozygous |
| NC_037648.1 | 13125230 | SNV | 1 | A | C | Homozygous   |
| NC_037648.1 | 13125240 | SNV | 1 | A | G | Homozygous   |
| NC_037648.1 | 13125246 | SNV | 1 | G | A | Homozygous   |
| NC_037648.1 | 13125280 | SNV | 1 | A | G | Homozygous   |
| NC_037648.1 | 13125282 | SNV | 1 | A | G | Homozygous   |
| NC_037648.1 | 13125284 | SNV | 1 | A | G | Heterozygous |
| NC_037648.1 | 13125293 | SNV | 1 | G | T | Homozygous   |
| NC_037648.1 | 13125327 | SNV | 1 | G | C | Homozygous   |
| NC_037648.1 | 13125331 | SNV | 1 | A | G | Heterozygous |
| NC_037648.1 | 13125337 | SNV | 1 | C | G | Homozygous   |
| NC_037648.1 | 13125341 | SNV | 1 | G | C | Heterozygous |
| NC_037648.1 | 13125343 | SNV | 1 | G | A | Heterozygous |
| NC_037648.1 | 13125349 | SNV | 1 | A | G | Heterozygous |
| NC_037648.1 | 13125386 | SNV | 1 | C | G | Homozygous   |
| NC_037648.1 | 13141965 | SNV | 1 | G | T | Heterozygous |
| NC_037648.1 | 13141969 | SNV | 1 | A | G | Heterozygous |
| NC_037648.1 | 13141974 | SNV | 1 | A | G | Heterozygous |
| NC_037648.1 | 13141992 | SNV | 1 | G | A | Heterozygous |
| NC_037648.1 | 13142004 | SNV | 1 | G | A | Homozygous   |
| NC_037648.1 | 13142006 | SNV | 1 | G | A | Heterozygous |
| NC_037648.1 | 13142179 | SNV | 1 | A | T | Heterozygous |
| NC_037648.1 | 13142255 | SNV | 1 | T | G | Heterozygous |
| NC_037648.1 | 13145396 | SNV | 1 | T | C | Heterozygous |
| NC_037648.1 | 13157436 | SNV | 1 | C | T | Homozygous   |
| NC_037648.1 | 13190324 | SNV | 1 | T | A | Homozygous   |
| NC_037648.1 | 13190330 | SNV | 1 | C | G | Homozygous   |
| NC_037648.1 | 13191568 | SNV | 1 | T | A | Homozygous   |
| NC_037648.1 | 13191573 | SNV | 1 | T | A | Homozygous   |
| NC_037648.1 | 13191577 | SNV | 1 | T | A | Homozygous   |
| NC_037648.1 | 13193043 | SNV | 1 | A | G | Heterozygous |
| NC_037648.1 | 13193057 | SNV | 1 | C | T | Heterozygous |
| NC_037648.1 | 13193066 | SNV | 1 | G | A | Heterozygous |
| NC_037648.1 | 13193104 | SNV | 1 | A | G | Homozygous   |

|             |          |     |   |   |   |              |
|-------------|----------|-----|---|---|---|--------------|
| NC_037648.1 | 13193111 | SNV | 1 | C | T | Homozygous   |
| NC_037648.1 | 13193114 | SNV | 1 | G | A | Homozygous   |
| NC_037648.1 | 13193142 | SNV | 1 | G | A | Heterozygous |
| NC_037648.1 | 13201908 | SNV | 1 | G | A | Heterozygous |
| NC_037648.1 | 13202021 | SNV | 1 | C | A | Heterozygous |
| NC_037648.1 | 13211590 | SNV | 1 | C | T | Heterozygous |
| NC_037648.1 | 13211848 | SNV | 1 | A | G | Homozygous   |
| NC_037648.1 | 13212384 | SNV | 1 | C | T | Homozygous   |
| NC_037648.1 | 13214893 | SNV | 1 | G | A | Homozygous   |
| NC_037648.1 | 13214991 | SNV | 1 | G | A | Heterozygous |
| NC_037648.1 | 13215313 | SNV | 1 | C | A | Homozygous   |
| NC_037648.1 | 13215761 | SNV | 1 | T | C | Homozygous   |
| NC_037648.1 | 13220847 | SNV | 1 | T | C | Heterozygous |
| NC_037648.1 | 13220855 | SNV | 1 | T | C | Heterozygous |
| NC_037648.1 | 13220861 | SNV | 1 | T | C | Heterozygous |
| NC_037648.1 | 13221095 | SNV | 1 | T | C | Heterozygous |
| NC_037648.1 | 13223597 | SNV | 1 | T | C | Homozygous   |
| NC_037648.1 | 13224243 | SNV | 1 | T | C | Heterozygous |
| NC_037648.1 | 13224432 | SNV | 1 | A | T | Heterozygous |
| NC_037648.1 | 13224438 | SNV | 1 | T | A | Heterozygous |
| NC_037648.1 | 13224442 | SNV | 1 | T | C | Heterozygous |
| NC_037648.1 | 13224543 | SNV | 1 | C | A | Heterozygous |
| NC_037648.1 | 13224829 | SNV | 1 | T | A | Heterozygous |
| NC_037648.1 | 13224933 | SNV | 1 | T | C | Heterozygous |
| NC_037648.1 | 13224945 | SNV | 1 | T | C | Heterozygous |
| NC_037648.1 | 13224974 | SNV | 1 | T | C | Heterozygous |
| NC_037648.1 | 13225967 | SNV | 1 | T | C | Heterozygous |
| NC_037648.1 | 13225980 | SNV | 1 | T | C | Heterozygous |
| NC_037648.1 | 13227476 | SNV | 1 | A | G | Homozygous   |
| NC_037648.1 | 13227480 | SNV | 1 | G | A | Homozygous   |
| NC_037648.1 | 13228087 | SNV | 1 | G | T | Heterozygous |
| NC_037648.1 | 13228090 | SNV | 1 | C | T | Heterozygous |
| NC_037648.1 | 13228571 | SNV | 1 | T | G | Heterozygous |
| NC_037648.1 | 13229474 | SNV | 1 | T | C | Homozygous   |
| NC_037648.1 | 13229742 | SNV | 1 | T | C | Homozygous   |
| NC_037648.1 | 13231655 | SNV | 1 | A | G | Heterozygous |
| NC_037648.1 | 13231714 | SNV | 1 | G | A | Homozygous   |
| NC_037648.1 | 13231721 | SNV | 1 | T | C | Homozygous   |
| NC_037648.1 | 13232568 | SNV | 1 | C | T | Homozygous   |
| NC_037648.1 | 13232616 | SNV | 1 | A | G | Homozygous   |
| NC_037648.1 | 13232649 | SNV | 1 | T | C | Homozygous   |
| NC_037648.1 | 13233539 | SNV | 1 | T | C | Heterozygous |
| NC_037648.1 | 13233853 | SNV | 1 | A | G | Homozygous   |
| NC_037648.1 | 13241727 | SNV | 1 | A | G | Homozygous   |
| NC_037648.1 | 13241853 | SNV | 1 | A | G | Heterozygous |
| NC_037648.1 | 13241901 | SNV | 1 | A | G | Homozygous   |
| NC_037648.1 | 13242382 | SNV | 1 | C | T | Heterozygous |
| NC_037648.1 | 13242744 | SNV | 1 | G | A | Heterozygous |
| NC_037648.1 | 13243498 | SNV | 1 | A | G | Homozygous   |
| NC_037648.1 | 13243678 | SNV | 1 | T | C | Homozygous   |
| NC_037648.1 | 13243709 | SNV | 1 | G | T | Homozygous   |

|             |          |     |   |   |   |              |
|-------------|----------|-----|---|---|---|--------------|
| NC_037648.1 | 13243749 | SNV | 1 | G | A | Heterozygous |
| NC_037648.1 | 13243755 | SNV | 1 | A | G | Heterozygous |
| NC_037648.1 | 13243832 | SNV | 1 | T | A | Heterozygous |
| NC_037648.1 | 13243842 | SNV | 1 | G | A | Homozygous   |
| NC_037648.1 | 13243868 | SNV | 1 | A | C | Heterozygous |
| NC_037648.1 | 13243935 | SNV | 1 | A | G | Homozygous   |
| NC_037648.1 | 13243969 | SNV | 1 | A | T | Heterozygous |
| NC_037648.1 | 13243972 | SNV | 1 | C | T | Heterozygous |
| NC_037648.1 | 13244050 | SNV | 1 | A | G | Homozygous   |
| NC_037648.1 | 13244121 | SNV | 1 | A | G | Homozygous   |
| NC_037648.1 | 13244147 | SNV | 1 | A | G | Homozygous   |
| NC_037648.1 | 13244182 | SNV | 1 | G | A | Homozygous   |
| NC_037648.1 | 13244207 | SNV | 1 | A | C | Heterozygous |
| NC_037648.1 | 13244213 | SNV | 1 | C | T | Heterozygous |
| NC_037648.1 | 13244280 | SNV | 1 | G | A | Homozygous   |
| NC_037648.1 | 13244308 | SNV | 1 | C | A | Homozygous   |
| NC_037648.1 | 13244321 | SNV | 1 | T | A | Homozygous   |
| NC_037648.1 | 13244352 | SNV | 1 | G | C | Heterozygous |
| NC_037648.1 | 13244440 | SNV | 1 | C | T | Heterozygous |
| NC_037648.1 | 13244454 | SNV | 1 | A | T | Homozygous   |
| NC_037648.1 | 13244463 | SNV | 1 | C | T | Heterozygous |
| NC_037648.1 | 13244465 | SNV | 1 | A | T | Heterozygous |
| NC_037648.1 | 13244468 | SNV | 1 | A | T | Homozygous   |
| NC_037648.1 | 13244495 | SNV | 1 | G | A | Heterozygous |
| NC_037648.1 | 13244503 | SNV | 1 | G | A | Heterozygous |
| NC_037648.1 | 13244545 | SNV | 1 | G | A | Homozygous   |
| NC_037648.1 | 13244602 | SNV | 1 | T | C | Homozygous   |
| NC_037648.1 | 13244793 | SNV | 1 | G | A | Heterozygous |
| NC_037648.1 | 13245004 | SNV | 1 | A | G | Heterozygous |
| NC_037648.1 | 13245015 | SNV | 1 | C | T | Heterozygous |
| NC_037648.1 | 13245042 | SNV | 1 | C | A | Heterozygous |
| NC_037648.1 | 13245056 | SNV | 1 | G | A | Heterozygous |
| NC_037648.1 | 13245109 | SNV | 1 | T | C | Heterozygous |
| NC_037648.1 | 13245342 | SNV | 1 | G | T | Heterozygous |
| NC_037648.1 | 13245569 | SNV | 1 | T | C | Homozygous   |
| NC_037648.1 | 13245594 | SNV | 1 | G | A | Heterozygous |
| NC_037648.1 | 13245610 | SNV | 1 | A | G | Homozygous   |
| NC_037648.1 | 13245636 | SNV | 1 | G | A | Homozygous   |
| NC_037648.1 | 13245656 | SNV | 1 | T | C | Homozygous   |
| NC_037648.1 | 13245662 | SNV | 1 | T | C | Homozygous   |
| NC_037648.1 | 13245665 | SNV | 1 | A | G | Homozygous   |
| NC_037648.1 | 13248523 | SNV | 1 | C | T | Homozygous   |
| NC_037648.1 | 13248528 | SNV | 1 | G | C | Homozygous   |
| NC_037648.1 | 13248553 | SNV | 1 | T | C | Homozygous   |
| NC_037648.1 | 13248557 | SNV | 1 | A | G | Homozygous   |
| NC_037648.1 | 13248570 | SNV | 1 | G | A | Homozygous   |
| NC_037648.1 | 13248685 | SNV | 1 | A | G | Homozygous   |
| NC_037648.1 | 13248691 | SNV | 1 | G | C | Homozygous   |
| NC_037648.1 | 13248693 | SNV | 1 | T | C | Homozygous   |
| NC_037648.1 | 13248699 | SNV | 1 | T | C | Homozygous   |
| NC_037648.1 | 13248704 | SNV | 1 | G | C | Homozygous   |

|             |          |     |   |   |   |              |
|-------------|----------|-----|---|---|---|--------------|
| NC_037648.1 | 13248732 | SNV | 1 | G | A | Heterozygous |
| NC_037648.1 | 13248734 | SNV | 1 | A | G | Heterozygous |
| NC_037648.1 | 13248744 | SNV | 1 | G | C | Homozygous   |
| NC_037648.1 | 13248783 | SNV | 1 | G | A | Homozygous   |
| NC_037648.1 | 13248791 | SNV | 1 | C | T | Homozygous   |
| NC_037648.1 | 13248797 | SNV | 1 | C | T | Homozygous   |
| NC_037648.1 | 13248801 | SNV | 1 | A | G | Homozygous   |
| NC_037648.1 | 13248955 | SNV | 1 | G | A | Heterozygous |
| NC_037648.1 | 13249299 | SNV | 1 | T | C | Homozygous   |
| NC_037648.1 | 13249307 | SNV | 1 | A | G | Homozygous   |
| NC_037648.1 | 13249470 | SNV | 1 | C | T | Heterozygous |
| NC_037648.1 | 13249766 | SNV | 1 | T | C | Homozygous   |
| NC_037648.1 | 13249773 | SNV | 1 | A | G | Homozygous   |
| NC_037648.1 | 13249791 | SNV | 1 | C | T | Heterozygous |
| NC_037648.1 | 13250291 | SNV | 1 | G | A | Heterozygous |
| NC_037648.1 | 13250321 | SNV | 1 | A | G | Heterozygous |
| NC_037648.1 | 13250398 | SNV | 1 | T | C | Homozygous   |
| NC_037648.1 | 13250794 | SNV | 1 | A | T | Heterozygous |
| NC_037648.1 | 13250899 | SNV | 1 | A | G | Homozygous   |
| NC_037648.1 | 13250983 | SNV | 1 | T | C | Homozygous   |
| NC_037648.1 | 13251171 | SNV | 1 | A | G | Homozygous   |
| NC_037648.1 | 13251230 | SNV | 1 | C | T | Homozygous   |
| NC_037648.1 | 13251252 | SNV | 1 | A | G | Homozygous   |
| NC_037648.1 | 13267310 | SNV | 1 | G | A | Homozygous   |
| NC_037648.1 | 13273400 | SNV | 1 | G | A | Homozygous   |
| NC_037648.1 | 13273406 | SNV | 1 | A | G | Homozygous   |
| NC_037648.1 | 13273417 | SNV | 1 | A | G | Homozygous   |
| NC_037648.1 | 13273432 | SNV | 1 | A | G | Homozygous   |
| NC_037648.1 | 13273454 | SNV | 1 | G | A | Homozygous   |
| NC_037648.1 | 13273459 | SNV | 1 | G | T | Homozygous   |
| NC_037648.1 | 13273462 | SNV | 1 | G | A | Homozygous   |
| NC_037648.1 | 13273485 | SNV | 1 | A | G | Heterozygous |
| NC_037648.1 | 13273732 | SNV | 1 | T | C | Homozygous   |
| NC_037648.1 | 13273930 | SNV | 1 | T | C | Homozygous   |
| NC_037648.1 | 13274020 | SNV | 1 | A | T | Heterozygous |
| NC_037648.1 | 13274104 | SNV | 1 | G | A | Heterozygous |
| NC_037648.1 | 13274110 | SNV | 1 | G | A | Homozygous   |
| NC_037648.1 | 13274118 | SNV | 1 | C | T | Homozygous   |
| NC_037648.1 | 13274120 | SNV | 1 | C | T | Homozygous   |
| NC_037648.1 | 13283755 | SNV | 1 | A | G | Homozygous   |
| NC_037648.1 | 13283801 | SNV | 1 | C | T | Homozygous   |
| NC_037648.1 | 13283824 | SNV | 1 | C | G | Homozygous   |
| NC_037648.1 | 13283837 | SNV | 1 | G | A | Heterozygous |
| NC_037648.1 | 13287401 | SNV | 1 | C | T | Homozygous   |
| NC_037648.1 | 13290972 | SNV | 1 | A | G | Heterozygous |
| NC_037648.1 | 13291252 | SNV | 1 | A | G | Homozygous   |
| NC_037648.1 | 13291393 | SNV | 1 | A | G | Homozygous   |
| NC_037648.1 | 13291626 | SNV | 1 | T | G | Homozygous   |
| NC_037648.1 | 13291658 | SNV | 1 | C | T | Heterozygous |
| NC_037648.1 | 13291660 | SNV | 1 | T | C | Heterozygous |
| NC_037648.1 | 13291699 | SNV | 1 | T | C | Homozygous   |

|             |          |     |   |   |   |              |
|-------------|----------|-----|---|---|---|--------------|
| NC_037648.1 | 13291897 | SNV | 1 | G | C | Heterozygous |
| NC_037648.1 | 13292008 | SNV | 1 | A | G | Homozygous   |
| NC_037648.1 | 13293922 | SNV | 1 | T | C | Homozygous   |
| NC_037648.1 | 13293924 | SNV | 1 | T | C | Homozygous   |
| NC_037648.1 | 13293929 | SNV | 1 | A | T | Homozygous   |
| NC_037648.1 | 13293933 | SNV | 1 | A | T | Homozygous   |
| NC_037648.1 | 13293943 | SNV | 1 | A | G | Homozygous   |
| NC_037648.1 | 13299290 | SNV | 1 | G | T | Homozygous   |
| NC_037648.1 | 13299309 | SNV | 1 | A | T | Homozygous   |
| NC_037648.1 | 13300339 | SNV | 1 | G | T | Homozygous   |
| NC_037648.1 | 13300782 | SNV | 1 | C | T | Homozygous   |
| NC_037648.1 | 13301869 | SNV | 1 | C | T | Homozygous   |
| NC_037648.1 | 13301951 | SNV | 1 | A | G | Homozygous   |
| NC_037648.1 | 13302428 | SNV | 1 | A | G | Homozygous   |
| NC_037648.1 | 13302474 | SNV | 1 | C | T | Homozygous   |
| NC_037648.1 | 13304696 | SNV | 1 | A | G | Homozygous   |
| NC_037648.1 | 13304756 | SNV | 1 | C | T | Heterozygous |
| NC_037648.1 | 13306496 | SNV | 1 | G | A | Homozygous   |
| NC_037648.1 | 13307219 | SNV | 1 | T | A | Heterozygous |
| NC_037648.1 | 13310211 | SNV | 1 | A | C | Homozygous   |
| NC_037648.1 | 13310702 | SNV | 1 | T | C | Homozygous   |
| NC_037648.1 | 13314994 | SNV | 1 | C | T | Homozygous   |
| NC_037648.1 | 13325720 | SNV | 1 | G | A | Heterozygous |
| NC_037648.1 | 13330345 | SNV | 1 | G | T | Homozygous   |
| NC_037648.1 | 13330367 | SNV | 1 | C | T | Heterozygous |
| NC_037648.1 | 13330372 | SNV | 1 | G | C | Heterozygous |
| NC_037648.1 | 13330372 | SNV | 1 | G | T | Heterozygous |
| NC_037648.1 | 13330382 | SNV | 1 | T | C | Homozygous   |
| NC_037648.1 | 13330387 | SNV | 1 | T | C | Homozygous   |
| NC_037648.1 | 13330390 | SNV | 1 | G | C | Homozygous   |
| NC_037648.1 | 13330771 | SNV | 1 | T | C | Heterozygous |
| NC_037648.1 | 13332857 | SNV | 1 | G | T | Heterozygous |
| NC_037648.1 | 13333465 | SNV | 1 | T | G | Homozygous   |
| NC_037648.1 | 13335221 | SNV | 1 | T | C | Heterozygous |
| NC_037648.1 | 13335230 | SNV | 1 | C | T | Homozygous   |
| NC_037648.1 | 13335233 | SNV | 1 | C | G | Homozygous   |
| NC_037648.1 | 13335236 | SNV | 1 | C | T | Homozygous   |
| NC_037648.1 | 13335242 | SNV | 1 | A | T | Homozygous   |
| NC_037648.1 | 13335260 | SNV | 1 | G | C | Homozygous   |
| NC_037648.1 | 13335272 | SNV | 1 | G | A | Homozygous   |
| NC_037648.1 | 13339468 | SNV | 1 | C | T | Homozygous   |
| NC_037648.1 | 13365150 | SNV | 1 | A | T | Homozygous   |
| NC_037648.1 | 13366074 | SNV | 1 | T | C | Heterozygous |
| NC_037648.1 | 13366174 | SNV | 1 | G | A | Heterozygous |
| NC_037648.1 | 13366639 | SNV | 1 | A | C | Heterozygous |
| NC_037648.1 | 13366648 | SNV | 1 | C | G | Heterozygous |
| NC_037648.1 | 13383553 | SNV | 1 | G | T | Heterozygous |
| NC_037648.1 | 13383625 | SNV | 1 | A | C | Homozygous   |
| NC_037648.1 | 13383675 | SNV | 1 | A | G | Homozygous   |
| NC_037648.1 | 13383707 | SNV | 1 | A | G | Homozygous   |
| NC_037648.1 | 13384321 | SNV | 1 | C | T | Heterozygous |

|             |          |     |   |   |   |              |
|-------------|----------|-----|---|---|---|--------------|
| NC_037648.1 | 13423731 | SNV | 1 | A | G | Homozygous   |
| NC_037648.1 | 13424123 | SNV | 1 | A | T | Heterozygous |
| NC_037648.1 | 13424294 | SNV | 1 | A | T | Heterozygous |
| NC_037648.1 | 13424345 | SNV | 1 | T | C | Homozygous   |
| NC_037648.1 | 13427141 | SNV | 1 | C | T | Homozygous   |
| NC_037648.1 | 13427179 | SNV | 1 | T | A | Homozygous   |
| NC_037648.1 | 13427181 | SNV | 1 | C | A | Homozygous   |
| NC_037648.1 | 13427185 | SNV | 1 | T | G | Homozygous   |
| NC_037648.1 | 13427213 | SNV | 1 | C | T | Heterozygous |
| NC_037648.1 | 13427215 | SNV | 1 | A | T | Heterozygous |
| NC_037648.1 | 13432172 | SNV | 1 | C | T | Heterozygous |
| NC_037648.1 | 13432174 | SNV | 1 | G | C | Heterozygous |
| NC_037648.1 | 13432179 | SNV | 1 | G | T | Heterozygous |
| NC_037648.1 | 13432187 | SNV | 1 | T | A | Heterozygous |
| NC_037648.1 | 13432215 | SNV | 1 | T | A | Heterozygous |
| NC_037648.1 | 13432217 | SNV | 1 | A | G | Heterozygous |
| NC_037648.1 | 13432220 | SNV | 1 | T | A | Heterozygous |
| NC_037648.1 | 13432229 | SNV | 1 | A | G | Heterozygous |
| NC_037648.1 | 13433831 | SNV | 1 | T | C | Homozygous   |
| NC_037648.1 | 13433835 | SNV | 1 | C | T | Homozygous   |
| NC_037648.1 | 13438326 | SNV | 1 | G | A | Homozygous   |
| NC_037648.1 | 13442321 | SNV | 1 | A | C | Homozygous   |
| NC_037648.1 | 13442789 | SNV | 1 | T | C | Homozygous   |
| NC_037648.1 | 13442894 | SNV | 1 | C | T | Heterozygous |
| NC_037648.1 | 13442916 | SNV | 1 | C | T | Heterozygous |
| NC_037648.1 | 13443398 | SNV | 1 | C | T | Homozygous   |
| NC_037648.1 | 13443467 | SNV | 1 | A | T | Homozygous   |
| NC_037648.1 | 13445365 | SNV | 1 | G | A | Homozygous   |
| NC_037648.1 | 13446175 | SNV | 1 | G | A | Homozygous   |
| NC_037648.1 | 13448957 | SNV | 1 | C | A | Heterozygous |
| NC_037648.1 | 13448960 | SNV | 1 | G | A | Heterozygous |
| NC_037648.1 | 13448964 | SNV | 1 | T | A | Heterozygous |
| NC_037648.1 | 13449089 | SNV | 1 | T | A | Heterozygous |
| NC_037648.1 | 13449391 | SNV | 1 | G | C | Homozygous   |
| NC_037648.1 | 13449624 | SNV | 1 | C | T | Heterozygous |
| NC_037648.1 | 13449907 | SNV | 1 | A | G | Homozygous   |
| NC_037648.1 | 13451248 | SNV | 1 | T | C | Heterozygous |
| NC_037648.1 | 13451370 | SNV | 1 | T | A | Heterozygous |
| NC_037648.1 | 13451375 | SNV | 1 | G | A | Homozygous   |
| NC_037648.1 | 13451443 | SNV | 1 | G | A | Homozygous   |
| NC_037648.1 | 13451632 | SNV | 1 | T | C | Homozygous   |
| NC_037648.1 | 13451637 | SNV | 1 | C | A | Homozygous   |
| NC_037648.1 | 13451639 | SNV | 1 | G | A | Homozygous   |
| NC_037648.1 | 13453361 | SNV | 1 | T | G | Heterozygous |
| NC_037648.1 | 13453471 | SNV | 1 | A | G | Homozygous   |
| NC_037648.1 | 13454069 | SNV | 1 | C | T | Homozygous   |
| NC_037648.1 | 13454088 | SNV | 1 | T | C | Homozygous   |
| NC_037648.1 | 13454138 | SNV | 1 | G | A | Heterozygous |
| NC_037648.1 | 13455272 | SNV | 1 | T | C | Homozygous   |
| NC_037648.1 | 13461047 | SNV | 1 | C | T | Homozygous   |
| NC_037648.1 | 13462554 | SNV | 1 | C | A | Heterozygous |



|             |          |     |   |   |   |              |
|-------------|----------|-----|---|---|---|--------------|
| NC_037648.1 | 13462560 | SNV | 1 | C | A | Heterozygous |
| NC_037648.1 | 13463241 | SNV | 1 | G | A | Heterozygous |
| NC_037648.1 | 13463753 | SNV | 1 | C | T | Heterozygous |
| NC_037648.1 | 13464081 | SNV | 1 | A | G | Homozygous   |
| NC_037648.1 | 13464173 | SNV | 1 | T | A | Heterozygous |
| NC_037648.1 | 13464620 | SNV | 1 | G | A | Heterozygous |
| NC_037648.1 | 13464744 | SNV | 1 | T | C | Homozygous   |
| NC_037648.1 | 13464758 | SNV | 1 | G | A | Heterozygous |
| NC_037648.1 | 13464770 | SNV | 1 | G | A | Homozygous   |
| NC_037648.1 | 13464862 | SNV | 1 | G | C | Homozygous   |
| NC_037648.1 | 13465471 | SNV | 1 | A | T | Heterozygous |
| NC_037648.1 | 13466086 | SNV | 1 | A | G | Heterozygous |
| NC_037648.1 | 13466839 | SNV | 1 | G | A | Heterozygous |
| NC_037648.1 | 13466842 | SNV | 1 | C | G | Heterozygous |
| NC_037648.1 | 13467145 | SNV | 1 | G | A | Homozygous   |
| NC_037648.1 | 13470994 | SNV | 1 | T | C | Homozygous   |
| NC_037648.1 | 13471812 | SNV | 1 | G | T | Homozygous   |
| NC_037648.1 | 13471831 | SNV | 1 | T | A | Homozygous   |
| NC_037648.1 | 13477361 | SNV | 1 | G | A | Heterozygous |
| NC_037648.1 | 13477366 | SNV | 1 | G | A | Heterozygous |
| NC_037648.1 | 13477523 | SNV | 1 | C | T | Heterozygous |
| NC_037648.1 | 13477531 | SNV | 1 | T | C | Homozygous   |
| NC_037648.1 | 13487572 | SNV | 1 | T | C | Heterozygous |
| NC_037648.1 | 13487576 | SNV | 1 | C | T | Homozygous   |
| NC_037648.1 | 13487589 | SNV | 1 | T | G | Homozygous   |
| NC_037648.1 | 13487609 | SNV | 1 | C | T | Heterozygous |
| NC_037648.1 | 13487643 | SNV | 1 | C | T | Heterozygous |
| NC_037648.1 | 13487651 | SNV | 1 | A | C | Heterozygous |
| NC_037648.1 | 13487661 | SNV | 1 | C | T | Heterozygous |
| NC_037648.1 | 13488026 | SNV | 1 | C | A | Heterozygous |
| NC_037648.1 | 13488029 | SNV | 1 | G | A | Heterozygous |
| NC_037648.1 | 13488040 | SNV | 1 | C | A | Heterozygous |
| NC_037648.1 | 13488594 | SNV | 1 | T | C | Heterozygous |
| NC_037648.1 | 13488633 | SNV | 1 | T | G | Heterozygous |
| NC_037648.1 | 13493798 | SNV | 1 | C | T | Homozygous   |
| NC_037648.1 | 13499069 | SNV | 1 | A | G | Homozygous   |
| NC_037648.1 | 13499546 | SNV | 1 | G | A | Heterozygous |
| NC_037648.1 | 13499851 | SNV | 1 | A | C | Homozygous   |
| NC_037648.1 | 13500055 | SNV | 1 | C | T | Heterozygous |
| NC_037648.1 | 13500145 | SNV | 1 | G | A | Heterozygous |
| NC_037648.1 | 13500214 | SNV | 1 | G | A | Homozygous   |
| NC_037648.1 | 13500685 | SNV | 1 | T | C | Homozygous   |
| NC_037648.1 | 13501175 | SNV | 1 | A | G | Homozygous   |
| NC_037648.1 | 13501265 | SNV | 1 | G | A | Homozygous   |
| NC_037648.1 | 13501314 | SNV | 1 | A | G | Heterozygous |
| NC_037648.1 | 13502762 | SNV | 1 | T | C | Homozygous   |
| NC_037648.1 | 13503461 | SNV | 1 | G | A | Heterozygous |
| NC_037648.1 | 13517858 | SNV | 1 | A | G | Heterozygous |
| NC_037648.1 | 13517956 | SNV | 1 | A | G | Homozygous   |
| NC_037648.1 | 13517975 | SNV | 1 | T | C | Homozygous   |
| NC_037648.1 | 13517978 | SNV | 1 | G | C | Homozygous   |

|             |          |     |   |   |   |              |
|-------------|----------|-----|---|---|---|--------------|
| NC_037648.1 | 13518080 | SNV | 1 | G | A | Heterozygous |
| NC_037648.1 | 13518089 | SNV | 1 | G | A | Homozygous   |
| NC_037648.1 | 13518092 | SNV | 1 | T | C | Heterozygous |
| NC_037648.1 | 13518710 | SNV | 1 | T | C | Homozygous   |
| NC_037648.1 | 13518728 | SNV | 1 | C | G | Heterozygous |
| NC_037648.1 | 13518749 | SNV | 1 | C | T | Heterozygous |
| NC_037648.1 | 13518812 | SNV | 1 | A | G | Homozygous   |
| NC_037648.1 | 13519070 | SNV | 1 | C | A | Homozygous   |
| NC_037648.1 | 13519875 | SNV | 1 | T | C | Homozygous   |
| NC_037648.1 | 13519902 | SNV | 1 | G | A | Heterozygous |
| NC_037648.1 | 13519917 | SNV | 1 | C | A | Heterozygous |
| NC_037648.1 | 13520447 | SNV | 1 | G | A | Heterozygous |
| NC_037648.1 | 13520458 | SNV | 1 | A | G | Homozygous   |
| NC_037648.1 | 13520492 | SNV | 1 | G | A | Heterozygous |
| NC_037648.1 | 13520537 | SNV | 1 | G | A | Heterozygous |
| NC_037648.1 | 13525404 | SNV | 1 | T | G | Homozygous   |
| NC_037648.1 | 13525455 | SNV | 1 | T | A | Homozygous   |
| NC_037648.1 | 13527192 | SNV | 1 | T | A | Heterozygous |
| NC_037648.1 | 13527503 | SNV | 1 | T | C | Heterozygous |
| NC_037648.1 | 13527975 | SNV | 1 | A | T | Homozygous   |
| NC_037648.1 | 13528047 | SNV | 1 | C | T | Homozygous   |
| NC_037648.1 | 13528351 | SNV | 1 | G | A | Heterozygous |
| NC_037648.1 | 13528382 | SNV | 1 | C | T | Homozygous   |
| NC_037648.1 | 13540997 | SNV | 1 | G | A | Heterozygous |
| NC_037648.1 | 13541160 | SNV | 1 | G | A | Heterozygous |
| NC_037648.1 | 13541197 | SNV | 1 | T | A | Heterozygous |
| NC_037648.1 | 13541288 | SNV | 1 | G | A | Heterozygous |
| NC_037648.1 | 13541402 | SNV | 1 | A | C | Heterozygous |
| NC_037648.1 | 13541523 | SNV | 1 | T | C | Heterozygous |
| NC_037648.1 | 13543482 | SNV | 1 | T | A | Homozygous   |
| NC_037648.1 | 13543494 | SNV | 1 | T | A | Homozygous   |
| NC_037648.1 | 13543501 | SNV | 1 | A | T | Homozygous   |
| NC_037648.1 | 13543507 | SNV | 1 | T | G | Homozygous   |
| NC_037648.1 | 13543634 | SNV | 1 | A | T | Homozygous   |
| NC_037648.1 | 13543637 | SNV | 1 | A | T | Homozygous   |
| NC_037648.1 | 13543669 | SNV | 1 | C | A | Homozygous   |
| NC_037648.1 | 13554979 | SNV | 1 | A | G | Homozygous   |
| NC_037648.1 | 13566422 | SNV | 1 | C | T | Homozygous   |
| NC_037648.1 | 13571855 | SNV | 1 | T | C | Homozygous   |
| NC_037648.1 | 13572370 | SNV | 1 | G | A | Heterozygous |
| NC_037648.1 | 13572939 | SNV | 1 | T | A | Homozygous   |
| NC_037648.1 | 13573250 | SNV | 1 | C | T | Homozygous   |
| NC_037648.1 | 13575186 | SNV | 1 | A | T | Homozygous   |
| NC_037648.1 | 13577134 | SNV | 1 | C | T | Homozygous   |
| NC_037648.1 | 13578011 | SNV | 1 | C | A | Heterozygous |
| NC_037648.1 | 13578014 | SNV | 1 | C | A | Heterozygous |
| NC_037648.1 | 13579478 | SNV | 1 | G | A | Heterozygous |
| NC_037648.1 | 13582747 | SNV | 1 | T | G | Homozygous   |
| NC_037648.1 | 13583598 | SNV | 1 | A | T | Homozygous   |
| NC_037648.1 | 13583606 | SNV | 1 | G | A | Homozygous   |
| NC_037648.1 | 13583610 | SNV | 1 | G | A | Homozygous   |

|             |          |     |   |   |   |              |
|-------------|----------|-----|---|---|---|--------------|
| NC_037648.1 | 13583613 | SNV | 1 | A | C | Homozygous   |
| NC_037648.1 | 13583618 | SNV | 1 | G | T | Homozygous   |
| NC_037648.1 | 13584884 | SNV | 1 | C | T | Heterozygous |
| NC_037648.1 | 13586674 | SNV | 1 | T | C | Heterozygous |
| NC_037648.1 | 13586858 | SNV | 1 | A | G | Homozygous   |
| NC_037648.1 | 13587693 | SNV | 1 | A | G | Heterozygous |
| NC_037648.1 | 13587722 | SNV | 1 | A | G | Homozygous   |
| NC_037648.1 | 13588594 | SNV | 1 | G | A | Homozygous   |
| NC_037648.1 | 13589800 | SNV | 1 | G | A | Homozygous   |
| NC_037648.1 | 13591881 | SNV | 1 | G | A | Homozygous   |
| NC_037648.1 | 13592432 | SNV | 1 | A | G | Homozygous   |
| NC_037648.1 | 13594363 | SNV | 1 | A | T | Homozygous   |
| NC_037648.1 | 13599263 | SNV | 1 | A | G | Homozygous   |
| NC_037648.1 | 13599374 | SNV | 1 | A | G | Homozygous   |
| NC_037648.1 | 13599380 | SNV | 1 | G | A | Heterozygous |
| NC_037648.1 | 13599386 | SNV | 1 | G | A | Heterozygous |
| NC_037648.1 | 13599467 | SNV | 1 | G | A | Heterozygous |
| NC_037648.1 | 13599482 | SNV | 1 | T | C | Homozygous   |
| NC_037648.1 | 13599620 | SNV | 1 | T | C | Heterozygous |
| NC_037648.1 | 13599701 | SNV | 1 | T | C | Heterozygous |
| NC_037648.1 | 13599758 | SNV | 1 | T | C | Homozygous   |
| NC_037648.1 | 13599773 | SNV | 1 | T | A | Homozygous   |
| NC_037648.1 | 13600638 | SNV | 1 | A | G | Homozygous   |
| NC_037648.1 | 13602758 | SNV | 1 | T | C | Heterozygous |
| NC_037648.1 | 13602968 | SNV | 1 | C | A | Homozygous   |
| NC_037648.1 | 13603002 | SNV | 1 | A | G | Homozygous   |
| NC_037648.1 | 13603004 | SNV | 1 | C | T | Homozygous   |
| NC_037648.1 | 13603067 | SNV | 1 | C | T | Heterozygous |
| NC_037648.1 | 13603133 | SNV | 1 | T | C | Homozygous   |
| NC_037648.1 | 13603278 | SNV | 1 | T | C | Homozygous   |
| NC_037648.1 | 13603337 | SNV | 1 | C | G | Homozygous   |
| NC_037648.1 | 13603520 | SNV | 1 | G | T | Heterozygous |
| NC_037648.1 | 13603536 | SNV | 1 | C | A | Homozygous   |
| NC_037648.1 | 13603626 | SNV | 1 | G | A | Heterozygous |
| NC_037648.1 | 13603929 | SNV | 1 | G | A | Homozygous   |
| NC_037648.1 | 13603997 | SNV | 1 | A | G | Homozygous   |
| NC_037648.1 | 13604131 | SNV | 1 | A | G | Homozygous   |
| NC_037648.1 | 13604273 | SNV | 1 | T | A | Heterozygous |
| NC_037648.1 | 13604321 | SNV | 1 | A | G | Homozygous   |
| NC_037648.1 | 13604906 | SNV | 1 | C | T | Homozygous   |
| NC_037648.1 | 13610945 | SNV | 1 | C | T | Homozygous   |
| NC_037648.1 | 13612143 | SNV | 1 | T | C | Heterozygous |
| NC_037648.1 | 13612526 | SNV | 1 | G | T | Homozygous   |
| NC_037648.1 | 13612792 | SNV | 1 | G | A | Homozygous   |
| NC_037648.1 | 13612795 | SNV | 1 | A | C | Homozygous   |
| NC_037648.1 | 13612870 | SNV | 1 | T | A | Homozygous   |
| NC_037648.1 | 13615049 | SNV | 1 | G | A | Heterozygous |
| NC_037648.1 | 13615675 | SNV | 1 | T | A | Heterozygous |
| NC_037648.1 | 13615677 | SNV | 1 | C | A | Heterozygous |
| NC_037648.1 | 13615679 | SNV | 1 | G | A | Homozygous   |
| NC_037648.1 | 13616979 | SNV | 1 | A | G | Heterozygous |

|             |          |     |   |   |   |              |
|-------------|----------|-----|---|---|---|--------------|
| NC_037648.1 | 13617005 | SNV | 1 | T | C | Homozygous   |
| NC_037648.1 | 13617417 | SNV | 1 | G | A | Heterozygous |
| NC_037648.1 | 13617631 | SNV | 1 | A | G | Homozygous   |
| NC_037648.1 | 13618116 | SNV | 1 | T | C | Homozygous   |
| NC_037648.1 | 13618290 | SNV | 1 | T | A | Homozygous   |
| NC_037648.1 | 13618463 | SNV | 1 | A | G | Homozygous   |
| NC_037648.1 | 13618592 | SNV | 1 | C | T | Homozygous   |
| NC_037648.1 | 13618661 | SNV | 1 | A | G | Homozygous   |
| NC_037648.1 | 13618999 | SNV | 1 | T | C | Homozygous   |
| NC_037648.1 | 13619023 | SNV | 1 | C | G | Homozygous   |
| NC_037648.1 | 13619036 | SNV | 1 | C | T | Homozygous   |
| NC_037648.1 | 13619065 | SNV | 1 | G | A | Heterozygous |
| NC_037648.1 | 13619086 | SNV | 1 | A | G | Homozygous   |
| NC_037648.1 | 13619107 | SNV | 1 | G | T | Homozygous   |
| NC_037648.1 | 13619444 | SNV | 1 | G | T | Heterozygous |
| NC_037648.1 | 13619575 | SNV | 1 | T | A | Heterozygous |
| NC_037648.1 | 13619579 | SNV | 1 | T | A | Heterozygous |
| NC_037648.1 | 13619774 | SNV | 1 | G | T | Heterozygous |
| NC_037648.1 | 13620846 | SNV | 1 | G | A | Homozygous   |
| NC_037648.1 | 13621111 | SNV | 1 | A | C | Homozygous   |
| NC_037648.1 | 13621141 | SNV | 1 | A | T | Homozygous   |
| NC_037648.1 | 13621179 | SNV | 1 | G | A | Homozygous   |
| NC_037648.1 | 13621496 | SNV | 1 | A | C | Heterozygous |
| NC_037648.1 | 13621560 | SNV | 1 | C | T | Heterozygous |
| NC_037648.1 | 13621592 | SNV | 1 | T | C | Heterozygous |
| NC_037648.1 | 13622221 | SNV | 1 | T | C | Heterozygous |
| NC_037648.1 | 13623285 | SNV | 1 | G | C | Homozygous   |
| NC_037648.1 | 13623405 | SNV | 1 | A | G | Homozygous   |
| NC_037648.1 | 13625603 | SNV | 1 | G | A | Homozygous   |
| NC_037648.1 | 13626206 | SNV | 1 | G | A | Heterozygous |
| NC_037648.1 | 13627603 | SNV | 1 | T | G | Homozygous   |
| NC_037648.1 | 13628156 | SNV | 1 | A | C | Homozygous   |
| NC_037648.1 | 13628842 | SNV | 1 | C | T | Homozygous   |
| NC_037648.1 | 13631401 | SNV | 1 | T | C | Homozygous   |
| NC_037648.1 | 13636195 | SNV | 1 | T | C | Homozygous   |
| NC_037648.1 | 13636592 | SNV | 1 | G | T | Homozygous   |
| NC_037648.1 | 13636595 | SNV | 1 | A | G | Homozygous   |
| NC_037648.1 | 13636657 | SNV | 1 | C | A | Homozygous   |
| NC_037648.1 | 13637027 | SNV | 1 | A | T | Homozygous   |
| NC_037648.1 | 13638496 | SNV | 1 | A | G | Homozygous   |
| NC_037648.1 | 13639023 | SNV | 1 | C | A | Homozygous   |
| NC_037648.1 | 13640472 | SNV | 1 | C | T | Heterozygous |
| NC_037648.1 | 13642227 | SNV | 1 | T | G | Homozygous   |
| NC_037648.1 | 13642229 | SNV | 1 | A | T | Homozygous   |
| NC_037648.1 | 13642255 | SNV | 1 | A | T | Homozygous   |
| NC_037648.1 | 13642261 | SNV | 1 | A | T | Homozygous   |
| NC_037648.1 | 13659984 | SNV | 1 | A | G | Homozygous   |
| NC_037648.1 | 13659991 | SNV | 1 | G | A | Homozygous   |
| NC_037648.1 | 13660764 | SNV | 1 | A | G | Homozygous   |
| NC_037648.1 | 13661464 | SNV | 1 | T | C | Heterozygous |
| NC_037648.1 | 13661492 | SNV | 1 | C | A | Heterozygous |

|             |          |     |   |   |   |              |
|-------------|----------|-----|---|---|---|--------------|
| NC_037648.1 | 13662182 | SNV | 1 | T | C | Homozygous   |
| NC_037648.1 | 13677972 | SNV | 1 | C | T | Homozygous   |
| NC_037648.1 | 13677996 | SNV | 1 | C | T | Homozygous   |
| NC_037648.1 | 13678553 | SNV | 1 | C | T | Heterozygous |
| NC_037648.1 | 13678586 | SNV | 1 | A | C | Homozygous   |
| NC_037648.1 | 13678636 | SNV | 1 | G | T | Homozygous   |
| NC_037648.1 | 13678675 | SNV | 1 | G | A | Homozygous   |
| NC_037648.1 | 13678745 | SNV | 1 | T | C | Heterozygous |
| NC_037648.1 | 13678757 | SNV | 1 | G | A | Homozygous   |
| NC_037648.1 | 13678791 | SNV | 1 | A | G | Homozygous   |
| NC_037648.1 | 13678836 | SNV | 1 | G | A | Heterozygous |
| NC_037648.1 | 13678841 | SNV | 1 | G | A | Heterozygous |
| NC_037648.1 | 13678921 | SNV | 1 | A | G | Homozygous   |
| NC_037648.1 | 13678966 | SNV | 1 | A | C | Heterozygous |
| NC_037648.1 | 13679202 | SNV | 1 | C | T | Homozygous   |
| NC_037648.1 | 13680647 | SNV | 1 | G | A | Heterozygous |
| NC_037648.1 | 13682723 | SNV | 1 | G | A | Heterozygous |
| NC_037648.1 | 13683107 | SNV | 1 | G | T | Homozygous   |
| NC_037648.1 | 13683109 | SNV | 1 | T | G | Homozygous   |
| NC_037648.1 | 13683257 | SNV | 1 | A | G | Homozygous   |
| NC_037648.1 | 13685547 | SNV | 1 | A | G | Homozygous   |
| NC_037648.1 | 13685807 | SNV | 1 | A | G | Homozygous   |
| NC_037648.1 | 13685862 | SNV | 1 | C | T | Homozygous   |
| NC_037648.1 | 13685877 | SNV | 1 | T | C | Homozygous   |
| NC_037648.1 | 13686062 | SNV | 1 | T | C | Heterozygous |
| NC_037648.1 | 13687339 | SNV | 1 | C | T | Heterozygous |
| NC_037648.1 | 13687729 | SNV | 1 | T | C | Homozygous   |
| NC_037648.1 | 13688086 | SNV | 1 | G | A | Homozygous   |
| NC_037648.1 | 13688191 | SNV | 1 | A | G | Homozygous   |
| NC_037648.1 | 13688503 | SNV | 1 | T | A | Homozygous   |
| NC_037648.1 | 13688660 | SNV | 1 | G | A | Heterozygous |
| NC_037648.1 | 13688844 | SNV | 1 | T | C | Homozygous   |
| NC_037648.1 | 13689078 | SNV | 1 | G | A | Heterozygous |
| NC_037648.1 | 13689419 | SNV | 1 | T | C | Homozygous   |
| NC_037648.1 | 13689432 | SNV | 1 | A | G | Homozygous   |
| NC_037648.1 | 13689614 | SNV | 1 | T | C | Homozygous   |
| NC_037648.1 | 13689632 | SNV | 1 | A | G | Homozygous   |
| NC_037648.1 | 13689999 | SNV | 1 | T | C | Homozygous   |
| NC_037648.1 | 13690272 | SNV | 1 | C | T | Heterozygous |
| NC_037648.1 | 13690291 | SNV | 1 | G | A | Heterozygous |
| NC_037648.1 | 13690881 | SNV | 1 | T | G | Homozygous   |
| NC_037648.1 | 13692055 | SNV | 1 | G | C | Heterozygous |
| NC_037648.1 | 13692676 | SNV | 1 | C | T | Homozygous   |
| NC_037648.1 | 13699376 | SNV | 1 | G | A | Heterozygous |
| NC_037648.1 | 13699687 | SNV | 1 | A | G | Heterozygous |
| NC_037648.1 | 13699696 | SNV | 1 | T | C | Homozygous   |
| NC_037648.1 | 13699751 | SNV | 1 | G | A | Homozygous   |
| NC_037648.1 | 13701298 | SNV | 1 | A | C | Homozygous   |
| NC_037648.1 | 13701307 | SNV | 1 | A | G | Homozygous   |
| NC_037648.1 | 13701761 | SNV | 1 | T | C | Heterozygous |
| NC_037648.1 | 13701767 | SNV | 1 | C | T | Homozygous   |

|             |          |     |   |   |   |              |
|-------------|----------|-----|---|---|---|--------------|
| NC_037648.1 | 13701853 | SNV | 1 | T | C | Homozygous   |
| NC_037648.1 | 13701923 | SNV | 1 | C | G | Heterozygous |
| NC_037648.1 | 13702081 | SNV | 1 | C | T | Heterozygous |
| NC_037648.1 | 13702116 | SNV | 1 | T | C | Heterozygous |
| NC_037648.1 | 13702342 | SNV | 1 | A | G | Heterozygous |
| NC_037648.1 | 13702748 | SNV | 1 | C | A | Heterozygous |
| NC_037648.1 | 13703448 | SNV | 1 | A | T | Homozygous   |
| NC_037648.1 | 13703552 | SNV | 1 | C | T | Homozygous   |
| NC_037648.1 | 13703555 | SNV | 1 | C | T | Homozygous   |
| NC_037648.1 | 13703642 | SNV | 1 | A | C | Heterozygous |
| NC_037648.1 | 13703742 | SNV | 1 | A | C | Heterozygous |
| NC_037648.1 | 13703829 | SNV | 1 | T | C | Homozygous   |
| NC_037648.1 | 13703887 | SNV | 1 | G | A | Homozygous   |
| NC_037648.1 | 13703972 | SNV | 1 | C | T | Heterozygous |
| NC_037648.1 | 13703977 | SNV | 1 | A | G | Homozygous   |
| NC_037648.1 | 13704111 | SNV | 1 | T | C | Heterozygous |
| NC_037648.1 | 13704505 | SNV | 1 | C | T | Heterozygous |
| NC_037648.1 | 13704602 | SNV | 1 | G | A | Heterozygous |
| NC_037648.1 | 13704604 | SNV | 1 | A | G | Heterozygous |
| NC_037648.1 | 13704746 | SNV | 1 | A | C | Heterozygous |
| NC_037648.1 | 13704896 | SNV | 1 | A | C | Heterozygous |
| NC_037648.1 | 13704943 | SNV | 1 | C | G | Heterozygous |
| NC_037648.1 | 13705103 | SNV | 1 | T | C | Homozygous   |
| NC_037648.1 | 13705143 | SNV | 1 | T | C | Heterozygous |
| NC_037648.1 | 13707474 | SNV | 1 | G | A | Heterozygous |
| NC_037648.1 | 13714024 | SNV | 1 | A | G | Heterozygous |
| NC_037648.1 | 13714059 | SNV | 1 | C | A | Homozygous   |
| NC_037648.1 | 13714063 | SNV | 1 | G | A | Heterozygous |
| NC_037648.1 | 13728894 | SNV | 1 | G | A | Homozygous   |
| NC_037648.1 | 13734987 | SNV | 1 | T | C | Homozygous   |
| NC_037648.1 | 13735017 | SNV | 1 | G | C | Homozygous   |
| NC_037648.1 | 13744663 | SNV | 1 | G | A | Heterozygous |
| NC_037648.1 | 13750790 | SNV | 1 | T | C | Heterozygous |
| NC_037648.1 | 13751040 | SNV | 1 | T | C | Homozygous   |
| NC_037648.1 | 13751079 | SNV | 1 | C | G | Homozygous   |
| NC_037648.1 | 13751111 | SNV | 1 | C | T | Heterozygous |
| NC_037648.1 | 13751166 | SNV | 1 | G | A | Heterozygous |
| NC_037648.1 | 13751169 | SNV | 1 | C | T | Heterozygous |
| NC_037648.1 | 13751296 | SNV | 1 | G | A | Heterozygous |
| NC_037648.1 | 13751386 | SNV | 1 | T | A | Homozygous   |
| NC_037648.1 | 13751465 | SNV | 1 | A | G | Homozygous   |
| NC_037648.1 | 13751470 | SNV | 1 | A | G | Homozygous   |
| NC_037648.1 | 13759374 | SNV | 1 | T | A | Homozygous   |
| NC_037648.1 | 13759400 | SNV | 1 | C | T | Homozygous   |
| NC_037648.1 | 13759806 | SNV | 1 | G | C | Heterozygous |
| NC_037648.1 | 13759808 | SNV | 1 | G | C | Heterozygous |
| NC_037648.1 | 13759840 | SNV | 1 | G | C | Heterozygous |
| NC_037648.1 | 13759842 | SNV | 1 | G | C | Heterozygous |
| NC_037648.1 | 13759855 | SNV | 1 | T | G | Heterozygous |
| NC_037648.1 | 13760076 | SNV | 1 | G | A | Heterozygous |
| NC_037648.1 | 13760078 | SNV | 1 | G | A | Homozygous   |

|             |          |     |   |   |   |              |
|-------------|----------|-----|---|---|---|--------------|
| NC_037648.1 | 13760096 | SNV | 1 | G | A | Heterozygous |
| NC_037648.1 | 13761429 | SNV | 1 | A | T | Heterozygous |
| NC_037648.1 | 13777195 | SNV | 1 | G | A | Homozygous   |
| NC_037648.1 | 13781718 | SNV | 1 | A | C | Heterozygous |
| NC_037648.1 | 13782080 | SNV | 1 | C | T | Homozygous   |
| NC_037648.1 | 13782083 | SNV | 1 | T | A | Heterozygous |
| NC_037648.1 | 13782101 | SNV | 1 | A | G | Heterozygous |
| NC_037648.1 | 13782458 | SNV | 1 | C | T | Heterozygous |
| NC_037648.1 | 13782477 | SNV | 1 | A | C | Homozygous   |
| NC_037648.1 | 13782612 | SNV | 1 | C | T | Homozygous   |
| NC_037648.1 | 13782626 | SNV | 1 | T | C | Homozygous   |
| NC_037648.1 | 13786449 | SNV | 1 | C | G | Homozygous   |
| NC_037648.1 | 13801318 | SNV | 1 | C | A | Heterozygous |
| NC_037648.1 | 13801322 | SNV | 1 | A | C | Heterozygous |
| NC_037648.1 | 13801324 | SNV | 1 | A | G | Heterozygous |
| NC_037648.1 | 13801331 | SNV | 1 | G | A | Heterozygous |
| NC_037648.1 | 13801338 | SNV | 1 | A | G | Heterozygous |
| NC_037648.1 | 13801359 | SNV | 1 | G | A | Heterozygous |
| NC_037648.1 | 13806459 | SNV | 1 | C | T | Heterozygous |
| NC_037648.1 | 13806464 | SNV | 1 | T | C | Homozygous   |
| NC_037648.1 | 13806466 | SNV | 1 | G | A | Heterozygous |
| NC_037648.1 | 13812415 | SNV | 1 | G | A | Heterozygous |
| NC_037648.1 | 13845127 | SNV | 1 | T | C | Heterozygous |
| NC_037648.1 | 13845145 | SNV | 1 | G | A | Heterozygous |
| NC_037648.1 | 13845303 | SNV | 1 | C | T | Homozygous   |
| NC_037648.1 | 13845366 | SNV | 1 | A | G | Homozygous   |
| NC_037648.1 | 13845501 | SNV | 1 | A | G | Homozygous   |
| NC_037648.1 | 13845755 | SNV | 1 | T | C | Homozygous   |
| NC_037648.1 | 13845759 | SNV | 1 | A | C | Homozygous   |
| NC_037648.1 | 13845941 | SNV | 1 | A | C | Homozygous   |
| NC_037648.1 | 13846003 | SNV | 1 | G | A | Homozygous   |
| NC_037648.1 | 13846079 | SNV | 1 | T | C | Heterozygous |
| NC_037648.1 | 13846091 | SNV | 1 | G | C | Homozygous   |
| NC_037648.1 | 13846098 | SNV | 1 | C | T | Heterozygous |
| NC_037648.1 | 13846218 | SNV | 1 | G | C | Homozygous   |
| NC_037648.1 | 13846224 | SNV | 1 | T | C | Homozygous   |
| NC_037648.1 | 13846230 | SNV | 1 | T | A | Homozygous   |
| NC_037648.1 | 13846232 | SNV | 1 | C | T | Homozygous   |
| NC_037648.1 | 13846234 | SNV | 1 | G | A | Homozygous   |
| NC_037648.1 | 13847229 | SNV | 1 | A | G | Homozygous   |
| NC_037648.1 | 13847259 | SNV | 1 | C | T | Homozygous   |
| NC_037648.1 | 13847269 | SNV | 1 | C | G | Heterozygous |
| NC_037648.1 | 13847313 | SNV | 1 | G | A | Heterozygous |
| NC_037648.1 | 13847471 | SNV | 1 | T | C | Heterozygous |
| NC_037648.1 | 13847827 | SNV | 1 | T | C | Homozygous   |
| NC_037648.1 | 13847895 | SNV | 1 | C | T | Heterozygous |
| NC_037648.1 | 13847904 | SNV | 1 | C | T | Homozygous   |
| NC_037648.1 | 13848000 | SNV | 1 | C | G | Heterozygous |
| NC_037648.1 | 13848560 | SNV | 1 | A | G | Homozygous   |
| NC_037648.1 | 13848980 | SNV | 1 | G | A | Homozygous   |
| NC_037648.1 | 13849202 | SNV | 1 | C | T | Heterozygous |

|             |          |     |   |   |   |              |
|-------------|----------|-----|---|---|---|--------------|
| NC_037648.1 | 13849311 | SNV | 1 | A | G | Heterozygous |
| NC_037648.1 | 13849455 | SNV | 1 | G | A | Homozygous   |
| NC_037648.1 | 13849524 | SNV | 1 | C | T | Heterozygous |
| NC_037648.1 | 13849659 | SNV | 1 | T | C | Homozygous   |
| NC_037648.1 | 13849665 | SNV | 1 | G | A | Heterozygous |
| NC_037648.1 | 13849698 | SNV | 1 | T | A | Heterozygous |
| NC_037648.1 | 13849707 | SNV | 1 | C | T | Heterozygous |
| NC_037648.1 | 13849731 | SNV | 1 | T | C | Homozygous   |
| NC_037648.1 | 13849734 | SNV | 1 | A | G | Homozygous   |
| NC_037648.1 | 13849828 | SNV | 1 | T | C | Homozygous   |
| NC_037648.1 | 13849834 | SNV | 1 | T | C | Homozygous   |
| NC_037648.1 | 13849887 | SNV | 1 | G | A | Heterozygous |
| NC_037648.1 | 13850140 | SNV | 1 | C | A | Heterozygous |
| NC_037648.1 | 13850225 | SNV | 1 | C | T | Homozygous   |
| NC_037648.1 | 13850370 | SNV | 1 | T | C | Homozygous   |
| NC_037648.1 | 13850618 | SNV | 1 | T | C | Homozygous   |
| NC_037648.1 | 13850622 | SNV | 1 | C | T | Heterozygous |
| NC_037648.1 | 13850627 | SNV | 1 | G | A | Heterozygous |
| NC_037648.1 | 13850906 | SNV | 1 | G | C | Heterozygous |
| NC_037648.1 | 13860744 | SNV | 1 | A | G | Heterozygous |
| NC_037648.1 | 13860746 | SNV | 1 | A | G | Heterozygous |
| NC_037648.1 | 13860750 | SNV | 1 | A | G | Heterozygous |
| NC_037648.1 | 13860752 | SNV | 1 | A | G | Heterozygous |
| NC_037648.1 | 13860753 | SNV | 1 | T | C | Heterozygous |
| NC_037648.1 | 13860909 | SNV | 1 | C | G | Heterozygous |
| NC_037648.1 | 13860948 | SNV | 1 | T | A | Homozygous   |
| NC_037648.1 | 13860954 | SNV | 1 | T | C | Homozygous   |
| NC_037648.1 | 13866489 | SNV | 1 | T | G | Homozygous   |
| NC_037648.1 | 13867846 | SNV | 1 | C | A | Homozygous   |
| NC_037648.1 | 13867857 | SNV | 1 | A | G | Heterozygous |
| NC_037648.1 | 13868295 | SNV | 1 | C | T | Heterozygous |
| NC_037648.1 | 13868350 | SNV | 1 | T | C | Heterozygous |
| NC_037648.1 | 13868463 | SNV | 1 | T | C | Heterozygous |
| NC_037648.1 | 13869072 | SNV | 1 | C | T | Heterozygous |
| NC_037648.1 | 13869157 | SNV | 1 | T | C | Homozygous   |
| NC_037648.1 | 13869189 | SNV | 1 | G | A | Homozygous   |
| NC_037648.1 | 13869208 | SNV | 1 | T | C | Heterozygous |
| NC_037648.1 | 13869218 | SNV | 1 | C | T | Homozygous   |
| NC_037648.1 | 13871389 | SNV | 1 | A | C | Heterozygous |
| NC_037648.1 | 13871392 | SNV | 1 | T | G | Heterozygous |
| NC_037648.1 | 13871394 | SNV | 1 | T | G | Heterozygous |
| NC_037648.1 | 13871412 | SNV | 1 | G | T | Heterozygous |
| NC_037648.1 | 13871416 | SNV | 1 | A | G | Heterozygous |
| NC_037648.1 | 13871419 | SNV | 1 | T | C | Heterozygous |
| NC_037648.1 | 13871867 | SNV | 1 | C | T | Heterozygous |
| NC_037648.1 | 13871943 | SNV | 1 | C | T | Heterozygous |
| NC_037648.1 | 13872531 | SNV | 1 | C | T | Heterozygous |
| NC_037648.1 | 13872920 | SNV | 1 | T | C | Homozygous   |
| NC_037648.1 | 13872944 | SNV | 1 | G | A | Heterozygous |
| NC_037648.1 | 13873389 | SNV | 1 | T | C | Homozygous   |
| NC_037648.1 | 13873394 | SNV | 1 | T | C | Heterozygous |



|             |          |     |   |   |   |              |
|-------------|----------|-----|---|---|---|--------------|
| NC_037648.1 | 13873516 | SNV | 1 | A | G | Homozygous   |
| NC_037648.1 | 13873592 | SNV | 1 | T | C | Homozygous   |
| NC_037648.1 | 13873772 | SNV | 1 | G | A | Heterozygous |
| NC_037648.1 | 13873780 | SNV | 1 | G | C | Heterozygous |
| NC_037648.1 | 13873868 | SNV | 1 | T | C | Homozygous   |
| NC_037648.1 | 13873931 | SNV | 1 | G | A | Homozygous   |
| NC_037648.1 | 13874025 | SNV | 1 | T | C | Homozygous   |
| NC_037648.1 | 13874089 | SNV | 1 | G | A | Heterozygous |
| NC_037648.1 | 13874588 | SNV | 1 | G | A | Homozygous   |
| NC_037648.1 | 13874683 | SNV | 1 | T | C | Homozygous   |
| NC_037648.1 | 13874784 | SNV | 1 | A | G | Heterozygous |
| NC_037648.1 | 13874790 | SNV | 1 | T | C | Homozygous   |
| NC_037648.1 | 13874792 | SNV | 1 | T | C | Homozygous   |
| NC_037648.1 | 13875130 | SNV | 1 | T | C | Homozygous   |
| NC_037648.1 | 13875470 | SNV | 1 | T | G | Homozygous   |
| NC_037648.1 | 13875477 | SNV | 1 | A | G | Homozygous   |
| NC_037648.1 | 13875480 | SNV | 1 | A | G | Homozygous   |
| NC_037648.1 | 13875485 | SNV | 1 | G | A | Heterozygous |
| NC_037648.1 | 13875553 | SNV | 1 | A | G | Homozygous   |
| NC_037648.1 | 13875572 | SNV | 1 | A | G | Homozygous   |
| NC_037648.1 | 13875766 | SNV | 1 | C | T | Heterozygous |
| NC_037648.1 | 13875778 | SNV | 1 | G | T | Heterozygous |
| NC_037648.1 | 13877389 | SNV | 1 | C | A | Homozygous   |
| NC_037648.1 | 13879627 | SNV | 1 | C | G | Heterozygous |
| NC_037648.1 | 13879678 | SNV | 1 | G | A | Heterozygous |
| NC_037648.1 | 13879739 | SNV | 1 | T | A | Heterozygous |
| NC_037648.1 | 13879743 | SNV | 1 | G | A | Heterozygous |
| NC_037648.1 | 13879834 | SNV | 1 | T | A | Heterozygous |
| NC_037648.1 | 13880024 | SNV | 1 | T | C | Heterozygous |
| NC_037648.1 | 13880405 | SNV | 1 | C | T | Homozygous   |
| NC_037648.1 | 13880870 | SNV | 1 | C | A | Homozygous   |
| NC_037648.1 | 13881233 | SNV | 1 | C | T | Homozygous   |
| NC_037648.1 | 13882779 | SNV | 1 | C | T | Homozygous   |
| NC_037648.1 | 13882871 | SNV | 1 | C | T | Heterozygous |
| NC_037648.1 | 13883046 | SNV | 1 | T | C | Homozygous   |
| NC_037648.1 | 13883056 | SNV | 1 | T | C | Homozygous   |
| NC_037648.1 | 13883074 | SNV | 1 | A | T | Heterozygous |
| NC_037648.1 | 13883180 | SNV | 1 | A | C | Homozygous   |
| NC_037648.1 | 13883372 | SNV | 1 | C | T | Heterozygous |
| NC_037648.1 | 13883418 | SNV | 1 | G | A | Homozygous   |
| NC_037648.1 | 13883693 | SNV | 1 | G | T | Homozygous   |
| NC_037648.1 | 13883797 | SNV | 1 | C | T | Heterozygous |
| NC_037648.1 | 13883904 | SNV | 1 | C | T | Homozygous   |
| NC_037648.1 | 13885327 | SNV | 1 | A | C | Homozygous   |
| NC_037648.1 | 13886321 | SNV | 1 | A | G | Homozygous   |
| NC_037648.1 | 13886325 | SNV | 1 | A | G | Homozygous   |
| NC_037648.1 | 13886328 | SNV | 1 | T | C | Heterozygous |
| NC_037648.1 | 13886393 | SNV | 1 | C | T | Heterozygous |
| NC_037648.1 | 13886520 | SNV | 1 | A | G | Homozygous   |
| NC_037648.1 | 13886530 | SNV | 1 | G | A | Heterozygous |
| NC_037648.1 | 13886532 | SNV | 1 | G | C | Heterozygous |

|             |          |     |   |   |   |              |
|-------------|----------|-----|---|---|---|--------------|
| NC_037648.1 | 13886580 | SNV | 1 | A | G | Homozygous   |
| NC_037648.1 | 13886772 | SNV | 1 | T | A | Heterozygous |
| NC_037648.1 | 13886810 | SNV | 1 | T | C | Homozygous   |
| NC_037648.1 | 13886965 | SNV | 1 | A | G | Heterozygous |
| NC_037648.1 | 13896094 | SNV | 1 | G | A | Homozygous   |
| NC_037648.1 | 13896106 | SNV | 1 | G | T | Heterozygous |
| NC_037648.1 | 13896443 | SNV | 1 | G | C | Heterozygous |
| NC_037648.1 | 13896445 | SNV | 1 | T | C | Heterozygous |
| NC_037648.1 | 13896479 | SNV | 1 | C | T | Heterozygous |
| NC_037648.1 | 13896489 | SNV | 1 | A | C | Homozygous   |
| NC_037648.1 | 13896757 | SNV | 1 | A | G | Homozygous   |
| NC_037648.1 | 13896772 | SNV | 1 | C | T | Homozygous   |
| NC_037648.1 | 13903443 | SNV | 1 | T | C | Homozygous   |
| NC_037648.1 | 13904338 | SNV | 1 | T | C | Homozygous   |
| NC_037648.1 | 13904424 | SNV | 1 | T | C | Heterozygous |
| NC_037648.1 | 13908222 | SNV | 1 | G | C | Homozygous   |
| NC_037648.1 | 13908265 | SNV | 1 | A | G | Heterozygous |
| NC_037648.1 | 13908273 | SNV | 1 | A | G | Heterozygous |
| NC_037648.1 | 13908363 | SNV | 1 | T | C | Homozygous   |
| NC_037648.1 | 13908420 | SNV | 1 | G | A | Homozygous   |
| NC_037648.1 | 13908592 | SNV | 1 | T | C | Heterozygous |
| NC_037648.1 | 13908602 | SNV | 1 | A | G | Homozygous   |
| NC_037648.1 | 13908623 | SNV | 1 | G | A | Heterozygous |
| NC_037648.1 | 13908626 | SNV | 1 | A | G | Heterozygous |
| NC_037648.1 | 13908737 | SNV | 1 | T | C | Homozygous   |
| NC_037648.1 | 13908859 | SNV | 1 | T | C | Heterozygous |
| NC_037648.1 | 13908869 | SNV | 1 | T | C | Homozygous   |
| NC_037648.1 | 13908876 | SNV | 1 | T | C | Homozygous   |
| NC_037648.1 | 13908909 | SNV | 1 | T | C | Homozygous   |
| NC_037648.1 | 13908912 | SNV | 1 | A | G | Homozygous   |
| NC_037648.1 | 13908919 | SNV | 1 | G | A | Homozygous   |
| NC_037648.1 | 13908932 | SNV | 1 | T | C | Homozygous   |
| NC_037648.1 | 13908981 | SNV | 1 | A | C | Heterozygous |
| NC_037648.1 | 13908981 | SNV | 1 | A | T | Heterozygous |
| NC_037648.1 | 13909011 | SNV | 1 | C | T | Heterozygous |
| NC_037648.1 | 13909022 | SNV | 1 | C | T | Heterozygous |
| NC_037648.1 | 13909033 | SNV | 1 | T | C | Homozygous   |
| NC_037648.1 | 13909041 | SNV | 1 | C | T | Homozygous   |
| NC_037648.1 | 13909078 | SNV | 1 | T | C | Homozygous   |
| NC_037648.1 | 13909080 | SNV | 1 | T | C | Homozygous   |
| NC_037648.1 | 13909083 | SNV | 1 | T | C | Homozygous   |
| NC_037648.1 | 13909124 | SNV | 1 | T | C | Homozygous   |
| NC_037648.1 | 13909148 | SNV | 1 | G | A | Homozygous   |
| NC_037648.1 | 13909245 | SNV | 1 | G | C | Homozygous   |
| NC_037648.1 | 13909273 | SNV | 1 | A | G | Heterozygous |
| NC_037648.1 | 13909277 | SNV | 1 | T | C | Heterozygous |
| NC_037648.1 | 13909336 | SNV | 1 | C | T | Heterozygous |
| NC_037648.1 | 13909355 | SNV | 1 | G | A | Heterozygous |
| NC_037648.1 | 13909360 | SNV | 1 | A | G | Heterozygous |
| NC_037648.1 | 13909368 | SNV | 1 | A | G | Homozygous   |
| NC_037648.1 | 13909488 | SNV | 1 | T | C | Homozygous   |

|             |          |     |   |   |   |              |
|-------------|----------|-----|---|---|---|--------------|
| NC_037648.1 | 13909560 | SNV | 1 | T | C | Heterozygous |
| NC_037648.1 | 13909567 | SNV | 1 | A | C | Homozygous   |
| NC_037648.1 | 13909569 | SNV | 1 | A | G | Heterozygous |
| NC_037648.1 | 13909572 | SNV | 1 | C | T | Heterozygous |
| NC_037648.1 | 13909574 | SNV | 1 | G | A | Heterozygous |
| NC_037648.1 | 13909581 | SNV | 1 | T | C | Heterozygous |
| NC_037648.1 | 13909614 | SNV | 1 | A | T | Heterozygous |
| NC_037648.1 | 13909636 | SNV | 1 | A | G | Heterozygous |
| NC_037648.1 | 13910052 | SNV | 1 | C | T | Homozygous   |
| NC_037648.1 | 13910055 | SNV | 1 | A | C | Homozygous   |
| NC_037648.1 | 13910080 | SNV | 1 | T | A | Heterozygous |
| NC_037648.1 | 13910083 | SNV | 1 | C | T | Homozygous   |
| NC_037648.1 | 13910085 | SNV | 1 | C | A | Homozygous   |
| NC_037648.1 | 13910087 | SNV | 1 | C | T | Heterozygous |
| NC_037648.1 | 13910090 | SNV | 1 | T | A | Homozygous   |
| NC_037648.1 | 13910098 | SNV | 1 | T | G | Heterozygous |
| NC_037648.1 | 13910102 | SNV | 1 | T | A | Homozygous   |
| NC_037648.1 | 13910105 | SNV | 1 | C | T | Homozygous   |
| NC_037648.1 | 13910372 | SNV | 1 | G | A | Homozygous   |
| NC_037648.1 | 13911259 | SNV | 1 | T | C | Homozygous   |
| NC_037648.1 | 13911862 | SNV | 1 | A | G | Heterozygous |
| NC_037648.1 | 13911877 | SNV | 1 | G | A | Heterozygous |
| NC_037648.1 | 13912264 | SNV | 1 | G | C | Heterozygous |
| NC_037648.1 | 13912341 | SNV | 1 | A | G | Homozygous   |
| NC_037648.1 | 13912411 | SNV | 1 | T | G | Homozygous   |
| NC_037648.1 | 13912414 | SNV | 1 | A | G | Homozygous   |
| NC_037648.1 | 13912424 | SNV | 1 | A | G | Heterozygous |
| NC_037648.1 | 13912435 | SNV | 1 | T | C | Heterozygous |
| NC_037648.1 | 13912448 | SNV | 1 | A | G | Homozygous   |
| NC_037648.1 | 13912473 | SNV | 1 | A | G | Heterozygous |
| NC_037648.1 | 13916736 | SNV | 1 | A | T | Homozygous   |
| NC_037648.1 | 13920529 | SNV | 1 | A | T | Homozygous   |
| NC_037648.1 | 13920531 | SNV | 1 | G | A | Homozygous   |
| NC_037648.1 | 13920534 | SNV | 1 | C | T | Homozygous   |
| NC_037648.1 | 13920537 | SNV | 1 | A | G | Homozygous   |
| NC_037648.1 | 13920575 | SNV | 1 | G | A | Homozygous   |
| NC_037648.1 | 13920577 | SNV | 1 | A | G | Homozygous   |
| NC_037648.1 | 13921412 | SNV | 1 | A | G | Homozygous   |
| NC_037648.1 | 13921517 | SNV | 1 | G | C | Heterozygous |
| NC_037648.1 | 13922687 | SNV | 1 | G | T | Heterozygous |
| NC_037648.1 | 13922717 | SNV | 1 | A | T | Heterozygous |
| NC_037648.1 | 13922739 | SNV | 1 | C | A | Heterozygous |
| NC_037648.1 | 13923314 | SNV | 1 | C | A | Homozygous   |
| NC_037648.1 | 13923326 | SNV | 1 | T | C | Heterozygous |
| NC_037648.1 | 13923329 | SNV | 1 | T | C | Heterozygous |
| NC_037648.1 | 13923365 | SNV | 1 | G | T | Homozygous   |
| NC_037648.1 | 13923377 | SNV | 1 | T | G | Heterozygous |
| NC_037648.1 | 13923410 | SNV | 1 | T | G | Homozygous   |
| NC_037648.1 | 13935928 | SNV | 1 | A | G | Homozygous   |
| NC_037648.1 | 13936145 | SNV | 1 | C | G | Homozygous   |
| NC_037648.1 | 13936361 | SNV | 1 | T | A | Homozygous   |

|             |          |     |   |   |   |              |
|-------------|----------|-----|---|---|---|--------------|
| NC_037648.1 | 13936912 | SNV | 1 | G | A | Heterozygous |
| NC_037648.1 | 13937403 | SNV | 1 | G | C | Heterozygous |
| NC_037648.1 | 13937425 | SNV | 1 | C | T | Heterozygous |
| NC_037648.1 | 13937829 | SNV | 1 | A | T | Homozygous   |
| NC_037648.1 | 13937838 | SNV | 1 | C | T | Homozygous   |
| NC_037648.1 | 13937852 | SNV | 1 | C | T | Homozygous   |
| NC_037648.1 | 13937872 | SNV | 1 | A | G | Heterozygous |
| NC_037648.1 | 13938056 | SNV | 1 | T | C | Homozygous   |
| NC_037648.1 | 13938074 | SNV | 1 | A | C | Heterozygous |
| NC_037648.1 | 13938077 | SNV | 1 | T | A | Heterozygous |
| NC_037648.1 | 13938327 | SNV | 1 | T | C | Heterozygous |
| NC_037648.1 | 13938409 | SNV | 1 | T | C | Heterozygous |
| NC_037648.1 | 13938412 | SNV | 1 | C | T | Heterozygous |
| NC_037648.1 | 13938840 | SNV | 1 | T | A | Heterozygous |
| NC_037648.1 | 13938872 | SNV | 1 | T | C | Homozygous   |
| NC_037648.1 | 13938877 | SNV | 1 | T | C | Homozygous   |
| NC_037648.1 | 13938899 | SNV | 1 | G | A | Heterozygous |
| NC_037648.1 | 13938901 | SNV | 1 | A | C | Heterozygous |
| NC_037648.1 | 13938913 | SNV | 1 | C | G | Heterozygous |
| NC_037648.1 | 13938960 | SNV | 1 | A | G | Heterozygous |
| NC_037648.1 | 13938962 | SNV | 1 | A | G | Heterozygous |
| NC_037648.1 | 13939090 | SNV | 1 | T | C | Homozygous   |
| NC_037648.1 | 13940950 | SNV | 1 | T | C | Homozygous   |
| NC_037648.1 | 13941060 | SNV | 1 | T | C | Homozygous   |
| NC_037648.1 | 13941289 | SNV | 1 | C | T | Homozygous   |
| NC_037648.1 | 13941304 | SNV | 1 | G | A | Heterozygous |
| NC_037648.1 | 13941311 | SNV | 1 | C | T | Homozygous   |
| NC_037648.1 | 13941600 | SNV | 1 | C | T | Heterozygous |
| NC_037648.1 | 13941765 | SNV | 1 | T | C | Heterozygous |
| NC_037648.1 | 13941794 | SNV | 1 | T | C | Heterozygous |
| NC_037648.1 | 13941809 | SNV | 1 | C | T | Heterozygous |
| NC_037648.1 | 13941847 | SNV | 1 | C | T | Heterozygous |
| NC_037648.1 | 13941908 | SNV | 1 | C | T | Homozygous   |
| NC_037648.1 | 13942192 | SNV | 1 | T | C | Homozygous   |
| NC_037648.1 | 13942271 | SNV | 1 | T | C | Homozygous   |
| NC_037648.1 | 13942304 | SNV | 1 | T | C | Heterozygous |
| NC_037648.1 | 13942597 | SNV | 1 | C | T | Homozygous   |
| NC_037648.1 | 13942823 | SNV | 1 | A | T | Heterozygous |
| NC_037648.1 | 13942840 | SNV | 1 | C | T | Heterozygous |
| NC_037648.1 | 13942854 | SNV | 1 | T | C | Heterozygous |
| NC_037648.1 | 13942959 | SNV | 1 | G | A | Heterozygous |
| NC_037648.1 | 13942968 | SNV | 1 | T | C | Heterozygous |
| NC_037648.1 | 13942972 | SNV | 1 | A | G | Heterozygous |
| NC_037648.1 | 13943015 | SNV | 1 | C | T | Homozygous   |
| NC_037648.1 | 13943241 | SNV | 1 | G | A | Heterozygous |
| NC_037648.1 | 13943384 | SNV | 1 | C | T | Heterozygous |
| NC_037648.1 | 13943548 | SNV | 1 | C | T | Homozygous   |
| NC_037648.1 | 13943564 | SNV | 1 | T | C | Heterozygous |
| NC_037648.1 | 13943590 | SNV | 1 | A | G | Homozygous   |
| NC_037648.1 | 13943601 | SNV | 1 | T | C | Heterozygous |
| NC_037648.1 | 13943642 | SNV | 1 | T | C | Homozygous   |

|             |          |     |   |   |   |              |
|-------------|----------|-----|---|---|---|--------------|
| NC_037648.1 | 13943708 | SNV | 1 | A | G | Heterozygous |
| NC_037648.1 | 13943761 | SNV | 1 | C | T | Homozygous   |
| NC_037648.1 | 13944011 | SNV | 1 | T | C | Homozygous   |
| NC_037648.1 | 13944254 | SNV | 1 | A | G | Heterozygous |
| NC_037648.1 | 13944269 | SNV | 1 | T | C | Homozygous   |
| NC_037648.1 | 13944273 | SNV | 1 | C | T | Heterozygous |
| NC_037648.1 | 13944280 | SNV | 1 | A | G | Heterozygous |
| NC_037648.1 | 13944283 | SNV | 1 | C | T | Heterozygous |
| NC_037648.1 | 13944293 | SNV | 1 | A | G | Heterozygous |
| NC_037648.1 | 13944301 | SNV | 1 | T | G | Heterozygous |
| NC_037648.1 | 13944303 | SNV | 1 | A | C | Heterozygous |
| NC_037648.1 | 13944303 | SNV | 1 | A | G | Heterozygous |
| NC_037648.1 | 13944311 | SNV | 1 | G | T | Heterozygous |
| NC_037648.1 | 13944314 | SNV | 1 | A | G | Heterozygous |
| NC_037648.1 | 13944755 | SNV | 1 | C | T | Homozygous   |
| NC_037648.1 | 13945011 | SNV | 1 | A | G | Heterozygous |
| NC_037648.1 | 13945091 | SNV | 1 | A | C | Homozygous   |
| NC_037648.1 | 13945098 | SNV | 1 | T | A | Heterozygous |
| NC_037648.1 | 13945100 | SNV | 1 | T | A | Heterozygous |
| NC_037648.1 | 13945102 | SNV | 1 | G | A | Homozygous   |
| NC_037648.1 | 13945105 | SNV | 1 | T | C | Heterozygous |
| NC_037648.1 | 13945109 | SNV | 1 | T | C | Homozygous   |
| NC_037648.1 | 13945168 | SNV | 1 | T | C | Homozygous   |
| NC_037648.1 | 13945427 | SNV | 1 | T | A | Heterozygous |
| NC_037648.1 | 13945481 | SNV | 1 | G | A | Homozygous   |
| NC_037648.1 | 13945786 | SNV | 1 | A | G | Heterozygous |
| NC_037648.1 | 13945790 | SNV | 1 | G | C | Homozygous   |
| NC_037648.1 | 13945800 | SNV | 1 | A | G | Heterozygous |
| NC_037648.1 | 13946148 | SNV | 1 | T | C | Homozygous   |
| NC_037648.1 | 13946191 | SNV | 1 | T | C | Heterozygous |
| NC_037648.1 | 13946208 | SNV | 1 | C | T | Heterozygous |
| NC_037648.1 | 13946285 | SNV | 1 | A | G | Heterozygous |
| NC_037648.1 | 13946453 | SNV | 1 | A | G | Homozygous   |
| NC_037648.1 | 13946884 | SNV | 1 | G | A | Heterozygous |
| NC_037648.1 | 13946986 | SNV | 1 | A | T | Heterozygous |
| NC_037648.1 | 13947038 | SNV | 1 | T | C | Homozygous   |
| NC_037648.1 | 13947046 | SNV | 1 | T | A | Heterozygous |
| NC_037648.1 | 13947048 | SNV | 1 | T | G | Heterozygous |
| NC_037648.1 | 13947063 | SNV | 1 | G | T | Heterozygous |
| NC_037648.1 | 13947236 | SNV | 1 | G | C | Heterozygous |
| NC_037648.1 | 13947238 | SNV | 1 | A | G | Homozygous   |
| NC_037648.1 | 13947492 | SNV | 1 | T | C | Heterozygous |
| NC_037648.1 | 13947964 | SNV | 1 | T | C | Homozygous   |
| NC_037648.1 | 13948040 | SNV | 1 | C | T | Homozygous   |
| NC_037648.1 | 13948060 | SNV | 1 | C | T | Heterozygous |
| NC_037648.1 | 13948111 | SNV | 1 | T | C | Heterozygous |
| NC_037648.1 | 13948156 | SNV | 1 | A | G | Homozygous   |
| NC_037648.1 | 13948166 | SNV | 1 | T | C | Homozygous   |
| NC_037648.1 | 13948373 | SNV | 1 | G | C | Homozygous   |
| NC_037648.1 | 13948465 | SNV | 1 | C | T | Heterozygous |
| NC_037648.1 | 13948668 | SNV | 1 | C | T | Heterozygous |

|             |          |     |   |   |   |              |
|-------------|----------|-----|---|---|---|--------------|
| NC_037648.1 | 13948731 | SNV | 1 | C | T | Heterozygous |
| NC_037648.1 | 13948900 | SNV | 1 | T | A | Heterozygous |
| NC_037648.1 | 13948985 | SNV | 1 | A | C | Heterozygous |
| NC_037648.1 | 13949019 | SNV | 1 | C | G | Homozygous   |
| NC_037648.1 | 13949207 | SNV | 1 | A | G | Homozygous   |
| NC_037648.1 | 13949698 | SNV | 1 | C | G | Homozygous   |
| NC_037648.1 | 13949844 | SNV | 1 | G | T | Homozygous   |
| NC_037648.1 | 13949849 | SNV | 1 | T | G | Homozygous   |
| NC_037648.1 | 13950098 | SNV | 1 | C | T | Heterozygous |
| NC_037648.1 | 13950116 | SNV | 1 | C | T | Heterozygous |
| NC_037648.1 | 13950179 | SNV | 1 | T | C | Heterozygous |
| NC_037648.1 | 13951173 | SNV | 1 | C | A | Heterozygous |
| NC_037648.1 | 13951188 | SNV | 1 | G | A | Heterozygous |
| NC_037648.1 | 13951191 | SNV | 1 | T | C | Heterozygous |
| NC_037648.1 | 13951203 | SNV | 1 | A | G | Heterozygous |
| NC_037648.1 | 13951340 | SNV | 1 | T | C | Homozygous   |
| NC_037648.1 | 13951407 | SNV | 1 | G | A | Homozygous   |
| NC_037648.1 | 13952215 | SNV | 1 | T | C | Homozygous   |
| NC_037648.1 | 13954933 | SNV | 1 | C | T | Heterozygous |
| NC_037648.1 | 13955066 | SNV | 1 | A | G | Heterozygous |
| NC_037648.1 | 13955303 | SNV | 1 | C | G | Homozygous   |
| NC_037648.1 | 13955860 | SNV | 1 | C | T | Homozygous   |
| NC_037648.1 | 13956132 | SNV | 1 | T | C | Homozygous   |
| NC_037648.1 | 13956189 | SNV | 1 | C | T | Homozygous   |
| NC_037648.1 | 13956203 | SNV | 1 | A | G | Homozygous   |
| NC_037648.1 | 13956210 | SNV | 1 | A | G | Homozygous   |
| NC_037648.1 | 13956297 | SNV | 1 | A | G | Homozygous   |
| NC_037648.1 | 13956494 | SNV | 1 | A | G | Heterozygous |
| NC_037648.1 | 13956604 | SNV | 1 | C | G | Homozygous   |
| NC_037648.1 | 13956610 | SNV | 1 | T | C | Heterozygous |
| NC_037648.1 | 13957256 | SNV | 1 | T | A | Heterozygous |
| NC_037648.1 | 13957259 | SNV | 1 | G | A | Heterozygous |
| NC_037648.1 | 13957340 | SNV | 1 | C | T | Heterozygous |
| NC_037648.1 | 13957344 | SNV | 1 | T | A | Heterozygous |
| NC_037648.1 | 13957471 | SNV | 1 | A | G | Heterozygous |
| NC_037648.1 | 13958515 | SNV | 1 | T | A | Heterozygous |
| NC_037648.1 | 13958772 | SNV | 1 | G | A | Heterozygous |
| NC_037648.1 | 13958968 | SNV | 1 | T | C | Homozygous   |
| NC_037648.1 | 13959002 | SNV | 1 | A | G | Heterozygous |
| NC_037648.1 | 13959064 | SNV | 1 | G | A | Heterozygous |
| NC_037648.1 | 13959721 | SNV | 1 | A | C | Heterozygous |
| NC_037648.1 | 13960660 | SNV | 1 | C | T | Homozygous   |
| NC_037648.1 | 13960876 | SNV | 1 | T | C | Homozygous   |
| NC_037648.1 | 13960940 | SNV | 1 | A | G | Homozygous   |
| NC_037648.1 | 13960949 | SNV | 1 | T | C | Homozygous   |
| NC_037648.1 | 13960958 | SNV | 1 | G | A | Heterozygous |
| NC_037648.1 | 13960972 | SNV | 1 | A | G | Heterozygous |
| NC_037648.1 | 13962525 | SNV | 1 | T | C | Homozygous   |
| NC_037648.1 | 13962885 | SNV | 1 | C | T | Heterozygous |
| NC_037648.1 | 13962888 | SNV | 1 | C | T | Heterozygous |
| NC_037648.1 | 13962892 | SNV | 1 | T | C | Homozygous   |

|             |          |     |   |   |   |              |
|-------------|----------|-----|---|---|---|--------------|
| NC_037648.1 | 13963241 | SNV | 1 | C | A | Homozygous   |
| NC_037648.1 | 13963844 | SNV | 1 | A | C | Homozygous   |
| NC_037648.1 | 13963858 | SNV | 1 | C | A | Homozygous   |
| NC_037648.1 | 13963862 | SNV | 1 | A | C | Homozygous   |
| NC_037648.1 | 13963864 | SNV | 1 | C | T | Homozygous   |
| NC_037648.1 | 13963895 | SNV | 1 | A | G | Heterozygous |
| NC_037648.1 | 13963902 | SNV | 1 | C | A | Heterozygous |
| NC_037648.1 | 13963906 | SNV | 1 | A | C | Heterozygous |
| NC_037648.1 | 13963917 | SNV | 1 | G | A | Heterozygous |
| NC_037648.1 | 13963921 | SNV | 1 | G | A | Heterozygous |
| NC_037648.1 | 13963926 | SNV | 1 | A | T | Heterozygous |
| NC_037648.1 | 13963930 | SNV | 1 | A | T | Heterozygous |
| NC_037648.1 | 13963934 | SNV | 1 | A | T | Heterozygous |
| NC_037648.1 | 13966702 | SNV | 1 | G | A | Homozygous   |
| NC_037648.1 | 13966929 | SNV | 1 | T | C | Homozygous   |
| NC_037648.1 | 13966934 | SNV | 1 | C | T | Heterozygous |
| NC_037648.1 | 13967023 | SNV | 1 | C | G | Heterozygous |
| NC_037648.1 | 13967032 | SNV | 1 | G | C | Heterozygous |
| NC_037648.1 | 13970977 | SNV | 1 | C | G | Heterozygous |
| NC_037648.1 | 13970986 | SNV | 1 | A | G | Heterozygous |
| NC_037648.1 | 13971000 | SNV | 1 | G | A | Heterozygous |
| NC_037648.1 | 13974554 | SNV | 1 | T | A | Homozygous   |
| NC_037648.1 | 13974556 | SNV | 1 | G | A | Homozygous   |
| NC_037648.1 | 13974566 | SNV | 1 | A | C | Homozygous   |
| NC_037648.1 | 13988708 | SNV | 1 | G | A | Heterozygous |
| NC_037648.1 | 13988711 | SNV | 1 | A | T | Heterozygous |
| NC_037648.1 | 13988729 | SNV | 1 | A | G | Heterozygous |
| NC_037648.1 | 13988738 | SNV | 1 | A | G | Heterozygous |
| NC_037648.1 | 13988820 | SNV | 1 | G | A | Heterozygous |
| NC_037648.1 | 13989929 | SNV | 1 | C | T | Heterozygous |
| NC_037648.1 | 13990217 | SNV | 1 | G | A | Heterozygous |
| NC_037648.1 | 13996067 | SNV | 1 | C | T | Homozygous   |
| NC_037648.1 | 13996375 | SNV | 1 | G | A | Heterozygous |
| NC_037648.1 | 13996497 | SNV | 1 | C | T | Heterozygous |
| NC_037648.1 | 13996758 | SNV | 1 | T | A | Heterozygous |
| NC_037648.1 | 13996762 | SNV | 1 | C | T | Heterozygous |
| NC_037648.1 | 13996764 | SNV | 1 | C | A | Heterozygous |
| NC_037648.1 | 13996766 | SNV | 1 | C | T | Heterozygous |
| NC_037648.1 | 13996776 | SNV | 1 | T | A | Heterozygous |
| NC_037648.1 | 13996782 | SNV | 1 | T | A | Heterozygous |
| NC_037648.1 | 13997680 | SNV | 1 | A | G | Homozygous   |
| NC_037648.1 | 14005725 | SNV | 1 | T | G | Homozygous   |
| NC_037648.1 | 14009233 | SNV | 1 | A | G | Heterozygous |
| NC_037648.1 | 14009288 | SNV | 1 | G | A | Homozygous   |
| NC_037648.1 | 14009614 | SNV | 1 | A | G | Heterozygous |
| NC_037648.1 | 14009735 | SNV | 1 | C | T | Heterozygous |
| NC_037648.1 | 14009740 | SNV | 1 | C | T | Heterozygous |
| NC_037648.1 | 14009771 | SNV | 1 | C | T | Heterozygous |
| NC_037648.1 | 14009774 | SNV | 1 | T | A | Heterozygous |
| NC_037648.1 | 14009789 | SNV | 1 | C | T | Homozygous   |
| NC_037648.1 | 14011080 | SNV | 1 | A | G | Homozygous   |

|             |          |     |   |   |   |              |
|-------------|----------|-----|---|---|---|--------------|
| NC_037648.1 | 14013580 | SNV | 1 | T | C | Homozygous   |
| NC_037648.1 | 14014397 | SNV | 1 | T | C | Homozygous   |
| NC_037648.1 | 14015142 | SNV | 1 | A | C | Homozygous   |
| NC_037648.1 | 14015456 | SNV | 1 | C | T | Heterozygous |
| NC_037648.1 | 14015477 | SNV | 1 | G | T | Heterozygous |
| NC_037648.1 | 14015492 | SNV | 1 | C | T | Homozygous   |
| NC_037648.1 | 14015996 | SNV | 1 | G | A | Heterozygous |
| NC_037648.1 | 14016110 | SNV | 1 | G | C | Heterozygous |
| NC_037648.1 | 14016287 | SNV | 1 | T | C | Homozygous   |
| NC_037648.1 | 14018761 | SNV | 1 | G | A | Homozygous   |
| NC_037648.1 | 14018778 | SNV | 1 | C | T | Homozygous   |
| NC_037648.1 | 14018780 | SNV | 1 | T | C | Homozygous   |
| NC_037648.1 | 14018787 | SNV | 1 | C | A | Homozygous   |
| NC_037648.1 | 14022501 | SNV | 1 | A | G | Homozygous   |
| NC_037648.1 | 14022591 | SNV | 1 | A | G | Heterozygous |
| NC_037648.1 | 14022624 | SNV | 1 | C | T | Heterozygous |
| NC_037648.1 | 14022705 | SNV | 1 | A | G | Homozygous   |
| NC_037648.1 | 14022882 | SNV | 1 | T | A | Heterozygous |
| NC_037648.1 | 14022923 | SNV | 1 | T | C | Homozygous   |
| NC_037648.1 | 14022980 | SNV | 1 | A | G | Heterozygous |
| NC_037648.1 | 14023006 | SNV | 1 | T | C | Heterozygous |
| NC_037648.1 | 14027086 | SNV | 1 | G | A | Heterozygous |
| NC_037648.1 | 14027169 | SNV | 1 | A | G | Homozygous   |
| NC_037648.1 | 14027573 | SNV | 1 | C | T | Homozygous   |
| NC_037648.1 | 14027579 | SNV | 1 | T | C | Homozygous   |
| NC_037648.1 | 14027585 | SNV | 1 | T | C | Homozygous   |
| NC_037648.1 | 14027614 | SNV | 1 | G | C | Homozygous   |
| NC_037648.1 | 14027798 | SNV | 1 | T | A | Heterozygous |
| NC_037648.1 | 14027882 | SNV | 1 | G | A | Heterozygous |
| NC_037648.1 | 14027933 | SNV | 1 | G | A | Homozygous   |
| NC_037648.1 | 14028770 | SNV | 1 | C | T | Heterozygous |
| NC_037648.1 | 14028823 | SNV | 1 | C | T | Heterozygous |
| NC_037648.1 | 14028843 | SNV | 1 | A | G | Homozygous   |
| NC_037648.1 | 14028853 | SNV | 1 | G | A | Heterozygous |
| NC_037648.1 | 14028877 | SNV | 1 | C | T | Heterozygous |
| NC_037648.1 | 14028898 | SNV | 1 | G | A | Heterozygous |
| NC_037648.1 | 14029625 | SNV | 1 | G | A | Homozygous   |
| NC_037648.1 | 14029629 | SNV | 1 | C | G | Heterozygous |
| NC_037648.1 | 14029635 | SNV | 1 | G | A | Heterozygous |
| NC_037648.1 | 14029639 | SNV | 1 | C | G | Heterozygous |
| NC_037648.1 | 14029644 | SNV | 1 | T | C | Heterozygous |
| NC_037648.1 | 14029671 | SNV | 1 | T | A | Heterozygous |
| NC_037648.1 | 14029671 | SNV | 1 | T | C | Heterozygous |
| NC_037648.1 | 14033070 | SNV | 1 | A | G | Homozygous   |
| NC_037648.1 | 14033075 | SNV | 1 | C | G | Homozygous   |
| NC_037648.1 | 14042585 | SNV | 1 | C | T | Heterozygous |
| NC_037648.1 | 14042667 | SNV | 1 | T | C | Homozygous   |
| NC_037648.1 | 14042715 | SNV | 1 | T | C | Homozygous   |
| NC_037648.1 | 14043076 | SNV | 1 | G | C | Heterozygous |
| NC_037648.1 | 14043105 | SNV | 1 | G | A | Heterozygous |
| NC_037648.1 | 14043149 | SNV | 1 | A | G | Homozygous   |



|             |          |     |   |   |   |              |
|-------------|----------|-----|---|---|---|--------------|
| NC_037648.1 | 14043151 | SNV | 1 | A | G | Heterozygous |
| NC_037648.1 | 14043201 | SNV | 1 | T | C | Heterozygous |
| NC_037648.1 | 14043223 | SNV | 1 | C | T | Heterozygous |
| NC_037648.1 | 14043278 | SNV | 1 | C | T | Heterozygous |
| NC_037648.1 | 14043298 | SNV | 1 | A | G | Heterozygous |
| NC_037648.1 | 14043348 | SNV | 1 | T | G | Homozygous   |
| NC_037648.1 | 14043355 | SNV | 1 | A | G | Homozygous   |
| NC_037648.1 | 14043360 | SNV | 1 | G | A | Heterozygous |
| NC_037648.1 | 14043375 | SNV | 1 | T | A | Homozygous   |
| NC_037648.1 | 14043380 | SNV | 1 | A | T | Homozygous   |
| NC_037648.1 | 14053359 | SNV | 1 | G | C | Heterozygous |
| NC_037648.1 | 14053620 | SNV | 1 | A | T | Homozygous   |
| NC_037648.1 | 14053689 | SNV | 1 | A | G | Heterozygous |
| NC_037648.1 | 14053757 | SNV | 1 | T | G | Heterozygous |
| NC_037648.1 | 14054183 | SNV | 1 | T | G | Heterozygous |
| NC_037648.1 | 14055109 | SNV | 1 | C | T | Homozygous   |
| NC_037648.1 | 14055181 | SNV | 1 | T | G | Heterozygous |
| NC_037648.1 | 14056282 | SNV | 1 | G | T | Heterozygous |
| NC_037648.1 | 14058047 | SNV | 1 | C | T | Heterozygous |
| NC_037648.1 | 14060337 | SNV | 1 | A | G | Heterozygous |
| NC_037648.1 | 14060438 | SNV | 1 | A | G | Homozygous   |
| NC_037648.1 | 14060676 | SNV | 1 | C | T | Heterozygous |
| NC_037648.1 | 14061117 | SNV | 1 | T | C | Homozygous   |
| NC_037648.1 | 14061188 | SNV | 1 | G | A | Heterozygous |
| NC_037648.1 | 14061298 | SNV | 1 | T | C | Heterozygous |
| NC_037648.1 | 14061340 | SNV | 1 | G | T | Homozygous   |
| NC_037648.1 | 14061769 | SNV | 1 | C | G | Homozygous   |
| NC_037648.1 | 14061798 | SNV | 1 | G | A | Heterozygous |
| NC_037648.1 | 14069355 | SNV | 1 | A | G | Homozygous   |
| NC_037648.1 | 14069565 | SNV | 1 | A | T | Homozygous   |
| NC_037648.1 | 14069879 | SNV | 1 | T | C | Homozygous   |
| NC_037648.1 | 14069925 | SNV | 1 | T | C | Heterozygous |
| NC_037648.1 | 14069977 | SNV | 1 | A | T | Homozygous   |
| NC_037648.1 | 14069990 | SNV | 1 | T | C | Homozygous   |
| NC_037648.1 | 14070002 | SNV | 1 | A | G | Homozygous   |
| NC_037648.1 | 14070043 | SNV | 1 | T | C | Homozygous   |
| NC_037648.1 | 14070057 | SNV | 1 | T | C | Homozygous   |
| NC_037648.1 | 14070520 | SNV | 1 | A | G | Homozygous   |
| NC_037648.1 | 14070627 | SNV | 1 | T | A | Heterozygous |
| NC_037648.1 | 14071067 | SNV | 1 | G | C | Homozygous   |
| NC_037648.1 | 14071113 | SNV | 1 | A | G | Homozygous   |
| NC_037648.1 | 14071145 | SNV | 1 | A | T | Heterozygous |
| NC_037648.1 | 14071839 | SNV | 1 | A | G | Homozygous   |
| NC_037648.1 | 14072069 | SNV | 1 | C | T | Heterozygous |
| NC_037648.1 | 14072225 | SNV | 1 | T | C | Heterozygous |
| NC_037648.1 | 14072478 | SNV | 1 | C | T | Homozygous   |
| NC_037648.1 | 14072487 | SNV | 1 | G | C | Homozygous   |
| NC_037648.1 | 14072765 | SNV | 1 | G | A | Homozygous   |
| NC_037648.1 | 14072822 | SNV | 1 | A | G | Heterozygous |
| NC_037648.1 | 14073069 | SNV | 1 | G | C | Homozygous   |
| NC_037648.1 | 14073249 | SNV | 1 | G | C | Homozygous   |

|             |          |     |   |   |   |              |
|-------------|----------|-----|---|---|---|--------------|
| NC_037648.1 | 14073314 | SNV | 1 | A | G | Homozygous   |
| NC_037648.1 | 14073497 | SNV | 1 | T | C | Homozygous   |
| NC_037648.1 | 14073617 | SNV | 1 | G | A | Heterozygous |
| NC_037648.1 | 14073622 | SNV | 1 | A | G | Heterozygous |
| NC_037648.1 | 14073673 | SNV | 1 | A | C | Homozygous   |
| NC_037648.1 | 14073681 | SNV | 1 | A | G | Homozygous   |
| NC_037648.1 | 14073705 | SNV | 1 | A | G | Homozygous   |
| NC_037648.1 | 14076606 | SNV | 1 | G | T | Homozygous   |
| NC_037648.1 | 14076615 | SNV | 1 | A | G | Homozygous   |
| NC_037648.1 | 14077407 | SNV | 1 | G | A | Heterozygous |
| NC_037648.1 | 14077416 | SNV | 1 | G | A | Heterozygous |
| NC_037648.1 | 14077422 | SNV | 1 | A | G | Heterozygous |
| NC_037648.1 | 14077437 | SNV | 1 | C | T | Heterozygous |
| NC_037648.1 | 14077780 | SNV | 1 | G | C | Homozygous   |
| NC_037648.1 | 14077783 | SNV | 1 | G | C | Homozygous   |
| NC_037648.1 | 14078014 | SNV | 1 | C | T | Homozygous   |
| NC_037648.1 | 14078290 | SNV | 1 | A | G | Heterozygous |
| NC_037648.1 | 14078333 | SNV | 1 | G | A | Heterozygous |
| NC_037648.1 | 14078379 | SNV | 1 | A | G | Heterozygous |
| NC_037648.1 | 14078428 | SNV | 1 | A | G | Homozygous   |
| NC_037648.1 | 14078666 | SNV | 1 | A | G | Homozygous   |
| NC_037648.1 | 14078870 | SNV | 1 | C | T | Heterozygous |
| NC_037648.1 | 14078917 | SNV | 1 | T | C | Homozygous   |
| NC_037648.1 | 14079169 | SNV | 1 | T | C | Homozygous   |
| NC_037648.1 | 14079215 | SNV | 1 | G | A | Heterozygous |
| NC_037648.1 | 14079230 | SNV | 1 | T | A | Homozygous   |
| NC_037648.1 | 14079281 | SNV | 1 | A | G | Homozygous   |
| NC_037648.1 | 14079304 | SNV | 1 | A | G | Homozygous   |
| NC_037648.1 | 14079329 | SNV | 1 | A | G | Homozygous   |
| NC_037648.1 | 14079718 | SNV | 1 | A | G | Heterozygous |
| NC_037648.1 | 14081644 | SNV | 1 | T | C | Homozygous   |
| NC_037648.1 | 14081689 | SNV | 1 | A | T | Homozygous   |
| NC_037648.1 | 14081705 | SNV | 1 | T | A | Homozygous   |
| NC_037648.1 | 14082128 | SNV | 1 | T | C | Homozygous   |
| NC_037648.1 | 14082281 | SNV | 1 | G | A | Homozygous   |
| NC_037648.1 | 14082428 | SNV | 1 | A | G | Heterozygous |
| NC_037648.1 | 14082754 | SNV | 1 | G | A | Homozygous   |
| NC_037648.1 | 14082761 | SNV | 1 | A | G | Homozygous   |
| NC_037648.1 | 14083097 | SNV | 1 | G | A | Heterozygous |
| NC_037648.1 | 14083114 | SNV | 1 | A | G | Homozygous   |
| NC_037648.1 | 14083198 | SNV | 1 | G | A | Heterozygous |
| NC_037648.1 | 14083359 | SNV | 1 | A | T | Homozygous   |
| NC_037648.1 | 14083382 | SNV | 1 | T | C | Homozygous   |
| NC_037648.1 | 14083397 | SNV | 1 | T | A | Heterozygous |
| NC_037648.1 | 14083459 | SNV | 1 | T | G | Homozygous   |
| NC_037648.1 | 14083791 | SNV | 1 | T | C | Heterozygous |
| NC_037648.1 | 14083795 | SNV | 1 | T | C | Heterozygous |
| NC_037648.1 | 14083807 | SNV | 1 | T | A | Heterozygous |
| NC_037648.1 | 14089289 | SNV | 1 | T | C | Heterozygous |
| NC_037648.1 | 14089655 | SNV | 1 | C | T | Heterozygous |
| NC_037648.1 | 14089819 | SNV | 1 | T | C | Homozygous   |

|             |          |     |   |   |   |              |
|-------------|----------|-----|---|---|---|--------------|
| NC_037648.1 | 14089979 | SNV | 1 | T | C | Homozygous   |
| NC_037648.1 | 14090000 | SNV | 1 | A | G | Heterozygous |
| NC_037648.1 | 14090101 | SNV | 1 | C | T | Homozygous   |
| NC_037648.1 | 14090298 | SNV | 1 | T | C | Homozygous   |
| NC_037648.1 | 14090436 | SNV | 1 | C | G | Homozygous   |
| NC_037648.1 | 14090469 | SNV | 1 | T | C | Homozygous   |
| NC_037648.1 | 14090484 | SNV | 1 | T | C | Homozygous   |
| NC_037648.1 | 14090555 | SNV | 1 | T | C | Homozygous   |
| NC_037648.1 | 14090831 | SNV | 1 | G | A | Homozygous   |
| NC_037648.1 | 14090872 | SNV | 1 | C | T | Heterozygous |
| NC_037648.1 | 14090875 | SNV | 1 | G | C | Heterozygous |
| NC_037648.1 | 14090926 | SNV | 1 | G | A | Heterozygous |
| NC_037648.1 | 14091033 | SNV | 1 | C | T | Heterozygous |
| NC_037648.1 | 14091070 | SNV | 1 | G | A | Heterozygous |
| NC_037648.1 | 14091117 | SNV | 1 | G | A | Homozygous   |
| NC_037648.1 | 14091504 | SNV | 1 | A | C | Homozygous   |
| NC_037648.1 | 14091602 | SNV | 1 | G | A | Heterozygous |
| NC_037648.1 | 14091605 | SNV | 1 | C | T | Heterozygous |
| NC_037648.1 | 14091756 | SNV | 1 | T | C | Homozygous   |
| NC_037648.1 | 14091836 | SNV | 1 | G | A | Heterozygous |
| NC_037648.1 | 14091889 | SNV | 1 | G | A | Heterozygous |
| NC_037648.1 | 14091976 | SNV | 1 | A | G | Homozygous   |
| NC_037648.1 | 14092035 | SNV | 1 | G | C | Heterozygous |
| NC_037648.1 | 14092062 | SNV | 1 | A | C | Heterozygous |
| NC_037648.1 | 14092075 | SNV | 1 | T | C | Heterozygous |
| NC_037648.1 | 14092245 | SNV | 1 | T | C | Homozygous   |
| NC_037648.1 | 14092253 | SNV | 1 | G | A | Heterozygous |
| NC_037648.1 | 14092418 | SNV | 1 | A | G | Homozygous   |
| NC_037648.1 | 14092468 | SNV | 1 | T | C | Homozygous   |
| NC_037648.1 | 14092824 | SNV | 1 | C | T | Heterozygous |
| NC_037648.1 | 14093322 | SNV | 1 | T | C | Homozygous   |
| NC_037648.1 | 14093358 | SNV | 1 | T | C | Homozygous   |
| NC_037648.1 | 14093506 | SNV | 1 | T | C | Heterozygous |
| NC_037648.1 | 14093881 | SNV | 1 | T | C | Heterozygous |
| NC_037648.1 | 14093893 | SNV | 1 | A | C | Heterozygous |
| NC_037648.1 | 14094241 | SNV | 1 | G | A | Heterozygous |
| NC_037648.1 | 14094308 | SNV | 1 | C | T | Heterozygous |
| NC_037648.1 | 14094414 | SNV | 1 | A | T | Homozygous   |
| NC_037648.1 | 14095047 | SNV | 1 | T | C | Homozygous   |
| NC_037648.1 | 14095150 | SNV | 1 | G | A | Heterozygous |
| NC_037648.1 | 14095182 | SNV | 1 | T | C | Homozygous   |
| NC_037648.1 | 14095188 | SNV | 1 | T | C | Homozygous   |
| NC_037648.1 | 14095212 | SNV | 1 | T | C | Homozygous   |
| NC_037648.1 | 14095278 | SNV | 1 | G | A | Heterozygous |
| NC_037648.1 | 14095285 | SNV | 1 | A | T | Homozygous   |
| NC_037648.1 | 14095291 | SNV | 1 | A | T | Heterozygous |
| NC_037648.1 | 14095315 | SNV | 1 | A | T | Heterozygous |
| NC_037648.1 | 14095324 | SNV | 1 | A | T | Heterozygous |
| NC_037648.1 | 14095361 | SNV | 1 | G | A | Homozygous   |
| NC_037648.1 | 14095476 | SNV | 1 | T | G | Heterozygous |
| NC_037648.1 | 14095480 | SNV | 1 | T | G | Heterozygous |

|             |          |     |   |   |   |              |
|-------------|----------|-----|---|---|---|--------------|
| NC_037648.1 | 14095486 | SNV | 1 | C | G | Homozygous   |
| NC_037648.1 | 14095488 | SNV | 1 | G | T | Heterozygous |
| NC_037648.1 | 14095508 | SNV | 1 | T | G | Heterozygous |
| NC_037648.1 | 14095510 | SNV | 1 | G | A | Heterozygous |
| NC_037648.1 | 14095657 | SNV | 1 | G | A | Homozygous   |
| NC_037648.1 | 14095659 | SNV | 1 | A | T | Homozygous   |
| NC_037648.1 | 14095665 | SNV | 1 | C | T | Homozygous   |
| NC_037648.1 | 14095677 | SNV | 1 | C | T | Homozygous   |
| NC_037648.1 | 14096300 | SNV | 1 | C | T | Heterozygous |
| NC_037648.1 | 14096338 | SNV | 1 | C | G | Homozygous   |
| NC_037648.1 | 14096393 | SNV | 1 | A | G | Heterozygous |
| NC_037648.1 | 14099569 | SNV | 1 | A | T | Homozygous   |
| NC_037648.1 | 14100516 | SNV | 1 | A | T | Heterozygous |
| NC_037648.1 | 14100521 | SNV | 1 | C | T | Heterozygous |
| NC_037648.1 | 14100525 | SNV | 1 | C | T | Heterozygous |
| NC_037648.1 | 14100529 | SNV | 1 | C | T | Heterozygous |
| NC_037648.1 | 14100573 | SNV | 1 | C | T | Heterozygous |
| NC_037648.1 | 14100913 | SNV | 1 | T | C | Homozygous   |
| NC_037648.1 | 14100917 | SNV | 1 | T | C | Heterozygous |
| NC_037648.1 | 14100919 | SNV | 1 | A | G | Homozygous   |
| NC_037648.1 | 14100965 | SNV | 1 | T | C | Homozygous   |
| NC_037648.1 | 14101973 | SNV | 1 | C | A | Heterozygous |
| NC_037648.1 | 14101981 | SNV | 1 | T | A | Heterozygous |
| NC_037648.1 | 14102017 | SNV | 1 | G | A | Heterozygous |
| NC_037648.1 | 14102019 | SNV | 1 | G | A | Homozygous   |
| NC_037648.1 | 14102021 | SNV | 1 | G | A | Homozygous   |
| NC_037648.1 | 14102260 | SNV | 1 | G | A | Heterozygous |
| NC_037648.1 | 14102592 | SNV | 1 | C | T | Homozygous   |
| NC_037648.1 | 14102774 | SNV | 1 | A | T | Heterozygous |
| NC_037648.1 | 14102802 | SNV | 1 | A | G | Homozygous   |
| NC_037648.1 | 14102820 | SNV | 1 | A | T | Homozygous   |
| NC_037648.1 | 14102823 | SNV | 1 | A | T | Homozygous   |
| NC_037648.1 | 14102920 | SNV | 1 | A | G | Heterozygous |
| NC_037648.1 | 14102929 | SNV | 1 | A | G | Homozygous   |
| NC_037648.1 | 14102941 | SNV | 1 | C | T | Heterozygous |
| NC_037648.1 | 14103018 | SNV | 1 | C | T | Homozygous   |
| NC_037648.1 | 14107343 | SNV | 1 | G | A | Heterozygous |
| NC_037648.1 | 14107399 | SNV | 1 | A | G | Homozygous   |
| NC_037648.1 | 14107407 | SNV | 1 | A | G | Homozygous   |
| NC_037648.1 | 14107592 | SNV | 1 | T | C | Heterozygous |
| NC_037648.1 | 14107739 | SNV | 1 | T | C | Heterozygous |
| NC_037648.1 | 14107833 | SNV | 1 | C | T | Homozygous   |
| NC_037648.1 | 14107872 | SNV | 1 | G | C | Heterozygous |
| NC_037648.1 | 14107914 | SNV | 1 | G | C | Homozygous   |
| NC_037648.1 | 14107929 | SNV | 1 | T | C | Homozygous   |
| NC_037648.1 | 14107939 | SNV | 1 | A | G | Heterozygous |
| NC_037648.1 | 14107953 | SNV | 1 | A | G | Homozygous   |
| NC_037648.1 | 14107956 | SNV | 1 | A | G | Homozygous   |
| NC_037648.1 | 14108017 | SNV | 1 | A | C | Heterozygous |
| NC_037648.1 | 14108019 | SNV | 1 | G | A | Homozygous   |
| NC_037648.1 | 14108027 | SNV | 1 | G | A | Heterozygous |

|             |          |     |   |   |   |              |
|-------------|----------|-----|---|---|---|--------------|
| NC_037648.1 | 14108621 | SNV | 1 | C | T | Heterozygous |
| NC_037648.1 | 14108630 | SNV | 1 | C | T | Heterozygous |
| NC_037648.1 | 14108651 | SNV | 1 | T | C | Heterozygous |
| NC_037648.1 | 14108697 | SNV | 1 | A | G | Heterozygous |
| NC_037648.1 | 14108704 | SNV | 1 | T | G | Heterozygous |
| NC_037648.1 | 14108791 | SNV | 1 | A | G | Heterozygous |
| NC_037648.1 | 14108826 | SNV | 1 | T | C | Heterozygous |
| NC_037648.1 | 14108891 | SNV | 1 | C | T | Heterozygous |
| NC_037648.1 | 14108991 | SNV | 1 | T | C | Homozygous   |
| NC_037648.1 | 14109006 | SNV | 1 | C | G | Homozygous   |
| NC_037648.1 | 14109032 | SNV | 1 | C | T | Heterozygous |
| NC_037648.1 | 14109081 | SNV | 1 | G | A | Heterozygous |
| NC_037648.1 | 14109116 | SNV | 1 | A | G | Homozygous   |
| NC_037648.1 | 14109129 | SNV | 1 | G | A | Heterozygous |
| NC_037648.1 | 14109169 | SNV | 1 | G | A | Heterozygous |
| NC_037648.1 | 14109176 | SNV | 1 | A | C | Heterozygous |
| NC_037648.1 | 14114438 | SNV | 1 | A | C | Homozygous   |
| NC_037648.1 | 14114794 | SNV | 1 | T | C | Heterozygous |
| NC_037648.1 | 14114796 | SNV | 1 | T | C | Heterozygous |
| NC_037648.1 | 14119870 | SNV | 1 | G | A | Heterozygous |
| NC_037648.1 | 14119873 | SNV | 1 | A | G | Heterozygous |
| NC_037648.1 | 14119881 | SNV | 1 | A | C | Heterozygous |
| NC_037648.1 | 14119886 | SNV | 1 | T | G | Heterozygous |
| NC_037648.1 | 14119898 | SNV | 1 | G | T | Heterozygous |
| NC_037648.1 | 14119934 | SNV | 1 | G | C | Homozygous   |
| NC_037648.1 | 14119942 | SNV | 1 | G | C | Homozygous   |
| NC_037648.1 | 14119947 | SNV | 1 | A | T | Heterozygous |
| NC_037648.1 | 14119956 | SNV | 1 | G | C | Heterozygous |
| NC_037648.1 | 14119970 | SNV | 1 | G | C | Homozygous   |
| NC_037648.1 | 14119984 | SNV | 1 | T | A | Homozygous   |
| NC_037648.1 | 14120006 | SNV | 1 | G | A | Heterozygous |
| NC_037648.1 | 14132216 | SNV | 1 | T | G | Heterozygous |
| NC_037648.1 | 14132218 | SNV | 1 | T | G | Heterozygous |
| NC_037648.1 | 14132220 | SNV | 1 | T | G | Heterozygous |
| NC_037648.1 | 14133856 | SNV | 1 | T | C | Heterozygous |
| NC_037648.1 | 14133971 | SNV | 1 | A | G | Heterozygous |
| NC_037648.1 | 14134047 | SNV | 1 | T | C | Homozygous   |
| NC_037648.1 | 14134050 | SNV | 1 | C | T | Homozygous   |
| NC_037648.1 | 14134055 | SNV | 1 | C | T | Heterozygous |
| NC_037648.1 | 14134071 | SNV | 1 | C | T | Heterozygous |
| NC_037648.1 | 14134083 | SNV | 1 | C | T | Heterozygous |
| NC_037648.1 | 14134087 | SNV | 1 | T | C | Homozygous   |
| NC_037648.1 | 14134091 | SNV | 1 | C | T | Homozygous   |
| NC_037648.1 | 14134175 | SNV | 1 | C | T | Heterozygous |
| NC_037648.1 | 14134258 | SNV | 1 | C | T | Heterozygous |
| NC_037648.1 | 14134264 | SNV | 1 | C | T | Homozygous   |
| NC_037648.1 | 14134271 | SNV | 1 | T | C | Heterozygous |
| NC_037648.1 | 14134400 | SNV | 1 | A | G | Homozygous   |
| NC_037648.1 | 14134491 | SNV | 1 | T | G | Homozygous   |
| NC_037648.1 | 14134522 | SNV | 1 | A | G | Heterozygous |
| NC_037648.1 | 14134596 | SNV | 1 | C | T | Homozygous   |

|             |          |     |   |   |   |              |
|-------------|----------|-----|---|---|---|--------------|
| NC_037648.1 | 14139288 | SNV | 1 | A | G | Homozygous   |
| NC_037648.1 | 14139302 | SNV | 1 | C | T | Heterozygous |
| NC_037648.1 | 14139323 | SNV | 1 | C | G | Homozygous   |
| NC_037648.1 | 14139325 | SNV | 1 | G | A | Homozygous   |
| NC_037648.1 | 14145095 | SNV | 1 | A | T | Heterozygous |
| NC_037648.1 | 14145097 | SNV | 1 | A | G | Heterozygous |
| NC_037648.1 | 14145645 | SNV | 1 | G | A | Homozygous   |
| NC_037648.1 | 14145648 | SNV | 1 | T | G | Heterozygous |
| NC_037648.1 | 14145653 | SNV | 1 | T | C | Heterozygous |
| NC_037648.1 | 14145681 | SNV | 1 | G | A | Heterozygous |
| NC_037648.1 | 14145707 | SNV | 1 | G | A | Homozygous   |
| NC_037648.1 | 14145718 | SNV | 1 | A | G | Homozygous   |
| NC_037648.1 | 14147967 | SNV | 1 | T | C | Homozygous   |
| NC_037648.1 | 14148151 | SNV | 1 | C | T | Heterozygous |
| NC_037648.1 | 14148189 | SNV | 1 | T | C | Heterozygous |
| NC_037648.1 | 14148286 | SNV | 1 | C | T | Homozygous   |
| NC_037648.1 | 14148432 | SNV | 1 | A | T | Homozygous   |
| NC_037648.1 | 14148485 | SNV | 1 | G | T | Heterozygous |
| NC_037648.1 | 14148530 | SNV | 1 | A | G | Homozygous   |
| NC_037648.1 | 14148597 | SNV | 1 | A | G | Homozygous   |
| NC_037648.1 | 14148745 | SNV | 1 | A | G | Heterozygous |
| NC_037648.1 | 14148792 | SNV | 1 | G | A | Heterozygous |
| NC_037648.1 | 14150767 | SNV | 1 | T | C | Homozygous   |
| NC_037648.1 | 14150794 | SNV | 1 | C | A | Homozygous   |
| NC_037648.1 | 14153686 | SNV | 1 | T | C | Homozygous   |
| NC_037648.1 | 14159204 | SNV | 1 | T | A | Heterozygous |
| NC_037648.1 | 14159221 | SNV | 1 | G | A | Heterozygous |
| NC_037648.1 | 14159227 | SNV | 1 | A | G | Homozygous   |
| NC_037648.1 | 14161654 | SNV | 1 | C | T | Heterozygous |
| NC_037648.1 | 14161672 | SNV | 1 | C | T | Homozygous   |
| NC_037648.1 | 14161686 | SNV | 1 | T | C | Homozygous   |
| NC_037648.1 | 14161768 | SNV | 1 | C | T | Heterozygous |
| NC_037648.1 | 14161820 | SNV | 1 | A | G | Homozygous   |
| NC_037648.1 | 14161844 | SNV | 1 | G | A | Heterozygous |
| NC_037648.1 | 14161894 | SNV | 1 | G | C | Homozygous   |
| NC_037648.1 | 14161911 | SNV | 1 | T | C | Homozygous   |
| NC_037648.1 | 14162106 | SNV | 1 | A | G | Homozygous   |
| NC_037648.1 | 14164114 | SNV | 1 | G | A | Homozygous   |
| NC_037648.1 | 14164130 | SNV | 1 | T | C | Homozygous   |
| NC_037648.1 | 14164134 | SNV | 1 | T | C | Heterozygous |
| NC_037648.1 | 14164232 | SNV | 1 | A | G | Homozygous   |
| NC_037648.1 | 14164268 | SNV | 1 | G | A | Heterozygous |
| NC_037648.1 | 14165181 | SNV | 1 | A | G | Homozygous   |
| NC_037648.1 | 14165199 | SNV | 1 | C | G | Heterozygous |
| NC_037648.1 | 14165269 | SNV | 1 | T | C | Homozygous   |
| NC_037648.1 | 14165421 | SNV | 1 | A | G | Homozygous   |
| NC_037648.1 | 14165459 | SNV | 1 | T | C | Homozygous   |
| NC_037648.1 | 14165463 | SNV | 1 | A | G | Homozygous   |
| NC_037648.1 | 14165650 | SNV | 1 | A | G | Heterozygous |
| NC_037648.1 | 14165653 | SNV | 1 | G | A | Heterozygous |
| NC_037648.1 | 14165656 | SNV | 1 | A | G | Homozygous   |

|             |          |     |   |   |   |              |
|-------------|----------|-----|---|---|---|--------------|
| NC_037648.1 | 14165661 | SNV | 1 | A | G | Heterozygous |
| NC_037648.1 | 14165675 | SNV | 1 | A | G | Homozygous   |
| NC_037648.1 | 14165752 | SNV | 1 | G | T | Heterozygous |
| NC_037648.1 | 14172037 | SNV | 1 | C | A | Homozygous   |
| NC_037648.1 | 14172272 | SNV | 1 | C | A | Homozygous   |
| NC_037648.1 | 14172387 | SNV | 1 | G | A | Heterozygous |
| NC_037648.1 | 14174209 | SNV | 1 | G | A | Homozygous   |
| NC_037648.1 | 14174338 | SNV | 1 | C | T | Heterozygous |
| NC_037648.1 | 14174459 | SNV | 1 | G | A | Heterozygous |
| NC_037648.1 | 14174499 | SNV | 1 | C | T | Homozygous   |
| NC_037648.1 | 14174616 | SNV | 1 | G | A | Heterozygous |
| NC_037648.1 | 14174687 | SNV | 1 | G | T | Homozygous   |
| NC_037648.1 | 14175978 | SNV | 1 | G | A | Homozygous   |
| NC_037648.1 | 14176180 | SNV | 1 | G | A | Heterozygous |
| NC_037648.1 | 14176743 | SNV | 1 | G | A | Heterozygous |
| NC_037648.1 | 14176750 | SNV | 1 | A | G | Homozygous   |
| NC_037648.1 | 14176807 | SNV | 1 | T | C | Homozygous   |
| NC_037648.1 | 14176822 | SNV | 1 | G | A | Heterozygous |
| NC_037648.1 | 14176916 | SNV | 1 | T | C | Homozygous   |
| NC_037648.1 | 14177084 | SNV | 1 | G | A | Heterozygous |
| NC_037648.1 | 14177385 | SNV | 1 | T | C | Homozygous   |
| NC_037648.1 | 14177757 | SNV | 1 | C | T | Heterozygous |
| NC_037648.1 | 14177910 | SNV | 1 | C | T | Heterozygous |
| NC_037648.1 | 14177985 | SNV | 1 | G | A | Heterozygous |
| NC_037648.1 | 14178156 | SNV | 1 | G | A | Homozygous   |
| NC_037648.1 | 14178159 | SNV | 1 | G | A | Heterozygous |
| NC_037648.1 | 14178605 | SNV | 1 | C | T | Heterozygous |
| NC_037648.1 | 14178657 | SNV | 1 | G | A | Heterozygous |
| NC_037648.1 | 14178942 | SNV | 1 | G | A | Heterozygous |
| NC_037648.1 | 14178987 | SNV | 1 | C | T | Homozygous   |
| NC_037648.1 | 14179653 | SNV | 1 | A | G | Homozygous   |
| NC_037648.1 | 14181138 | SNV | 1 | T | A | Heterozygous |
| NC_037648.1 | 14182746 | SNV | 1 | T | C | Homozygous   |
| NC_037648.1 | 14182758 | SNV | 1 | A | G | Homozygous   |
| NC_037648.1 | 14182831 | SNV | 1 | A | G | Heterozygous |
| NC_037648.1 | 14182891 | SNV | 1 | A | G | Heterozygous |
| NC_037648.1 | 14182923 | SNV | 1 | A | G | Heterozygous |
| NC_037648.1 | 14182935 | SNV | 1 | A | G | Heterozygous |
| NC_037648.1 | 14182941 | SNV | 1 | A | G | Heterozygous |
| NC_037648.1 | 14182946 | SNV | 1 | A | G | Heterozygous |
| NC_037648.1 | 14182951 | SNV | 1 | A | G | Heterozygous |
| NC_037648.1 | 14182956 | SNV | 1 | A | G | Homozygous   |
| NC_037648.1 | 14182971 | SNV | 1 | A | G | Heterozygous |
| NC_037648.1 | 14197881 | SNV | 1 | T | C | Heterozygous |
| NC_037648.1 | 14200350 | SNV | 1 | G | A | Homozygous   |
| NC_037648.1 | 14201313 | SNV | 1 | T | C | Heterozygous |
| NC_037648.1 | 14202415 | SNV | 1 | T | G | Heterozygous |
| NC_037648.1 | 14202539 | SNV | 1 | G | A | Heterozygous |
| NC_037648.1 | 14217072 | SNV | 1 | C | T | Heterozygous |
| NC_037648.1 | 14217074 | SNV | 1 | T | C | Heterozygous |
| NC_037648.1 | 14217162 | SNV | 1 | T | A | Homozygous   |

|             |          |     |   |   |   |              |
|-------------|----------|-----|---|---|---|--------------|
| NC_037648.1 | 14217234 | SNV | 1 | T | C | Homozygous   |
| NC_037648.1 | 14217238 | SNV | 1 | T | C | Homozygous   |
| NC_037648.1 | 14225188 | SNV | 1 | T | A | Heterozygous |
| NC_037648.1 | 14225191 | SNV | 1 | T | A | Homozygous   |
| NC_037648.1 | 14225219 | SNV | 1 | T | A | Heterozygous |
| NC_037648.1 | 14225221 | SNV | 1 | A | T | Heterozygous |
| NC_037648.1 | 14227850 | SNV | 1 | C | T | Heterozygous |
| NC_037648.1 | 14227861 | SNV | 1 | A | T | Heterozygous |
| NC_037648.1 | 14227910 | SNV | 1 | A | G | Homozygous   |
| NC_037648.1 | 14229235 | SNV | 1 | C | T | Heterozygous |
| NC_037648.1 | 14229647 | SNV | 1 | C | T | Homozygous   |
| NC_037648.1 | 14229900 | SNV | 1 | T | C | Homozygous   |
| NC_037648.1 | 14241047 | SNV | 1 | C | T | Homozygous   |
| NC_037648.1 | 14241065 | SNV | 1 | A | T | Homozygous   |
| NC_037648.1 | 14244306 | SNV | 1 | C | G | Homozygous   |
| NC_037648.1 | 14244346 | SNV | 1 | C | T | Homozygous   |
| NC_037648.1 | 14244387 | SNV | 1 | T | C | Homozygous   |
| NC_037648.1 | 14244549 | SNV | 1 | T | C | Heterozygous |
| NC_037648.1 | 14244573 | SNV | 1 | G | C | Homozygous   |
| NC_037648.1 | 14244765 | SNV | 1 | G | A | Heterozygous |
| NC_037648.1 | 14244773 | SNV | 1 | T | C | Homozygous   |
| NC_037648.1 | 14244869 | SNV | 1 | G | A | Homozygous   |
| NC_037648.1 | 14248925 | SNV | 1 | G | A | Homozygous   |
| NC_037648.1 | 14249312 | SNV | 1 | A | G | Heterozygous |
| NC_037648.1 | 14250457 | SNV | 1 | G | A | Heterozygous |
| NC_037648.1 | 14250535 | SNV | 1 | C | T | Heterozygous |
| NC_037648.1 | 14250568 | SNV | 1 | T | C | Homozygous   |
| NC_037648.1 | 14250631 | SNV | 1 | T | A | Heterozygous |
| NC_037648.1 | 14250634 | SNV | 1 | A | G | Heterozygous |
| NC_037648.1 | 14250648 | SNV | 1 | G | A | Heterozygous |
| NC_037648.1 | 14250888 | SNV | 1 | A | G | Heterozygous |
| NC_037648.1 | 14251205 | SNV | 1 | C | T | Homozygous   |
| NC_037648.1 | 14251559 | SNV | 1 | T | C | Heterozygous |
| NC_037648.1 | 14252321 | SNV | 1 | G | A | Homozygous   |
| NC_037648.1 | 14252328 | SNV | 1 | A | T | Homozygous   |
| NC_037648.1 | 14252345 | SNV | 1 | A | G | Homozygous   |
| NC_037648.1 | 14252360 | SNV | 1 | A | G | Homozygous   |
| NC_037648.1 | 14252502 | SNV | 1 | G | C | Homozygous   |
| NC_037648.1 | 14252868 | SNV | 1 | C | T | Heterozygous |
| NC_037648.1 | 14252871 | SNV | 1 | C | T | Homozygous   |
| NC_037648.1 | 14252880 | SNV | 1 | T | G | Heterozygous |
| NC_037648.1 | 14252888 | SNV | 1 | A | G | Homozygous   |
| NC_037648.1 | 14252928 | SNV | 1 | C | G | Homozygous   |
| NC_037648.1 | 14252984 | SNV | 1 | G | A | Heterozygous |
| NC_037648.1 | 14253007 | SNV | 1 | A | G | Heterozygous |
| NC_037648.1 | 14253022 | SNV | 1 | A | G | Homozygous   |
| NC_037648.1 | 14253170 | SNV | 1 | A | G | Homozygous   |
| NC_037648.1 | 14253828 | SNV | 1 | T | C | Homozygous   |
| NC_037648.1 | 14253861 | SNV | 1 | A | G | Homozygous   |
| NC_037648.1 | 14253980 | SNV | 1 | G | A | Homozygous   |
| NC_037648.1 | 14254011 | SNV | 1 | G | T | Homozygous   |



|             |          |     |   |   |   |              |
|-------------|----------|-----|---|---|---|--------------|
| NC_037648.1 | 14254189 | SNV | 1 | C | T | Homozygous   |
| NC_037648.1 | 14254211 | SNV | 1 | C | T | Heterozygous |
| NC_037648.1 | 14254254 | SNV | 1 | G | A | Heterozygous |
| NC_037648.1 | 14254418 | SNV | 1 | T | C | Homozygous   |
| NC_037648.1 | 14254434 | SNV | 1 | C | A | Homozygous   |
| NC_037648.1 | 14254437 | SNV | 1 | A | G | Homozygous   |
| NC_037648.1 | 14254448 | SNV | 1 | G | T | Homozygous   |
| NC_037648.1 | 14254474 | SNV | 1 | A | T | Homozygous   |
| NC_037648.1 | 14254938 | SNV | 1 | C | T | Heterozygous |
| NC_037648.1 | 14255000 | SNV | 1 | G | A | Heterozygous |
| NC_037648.1 | 14255117 | SNV | 1 | A | G | Homozygous   |
| NC_037648.1 | 14255145 | SNV | 1 | T | C | Homozygous   |
| NC_037648.1 | 14255350 | SNV | 1 | A | G | Homozygous   |
| NC_037648.1 | 14255713 | SNV | 1 | T | C | Heterozygous |
| NC_037648.1 | 14255960 | SNV | 1 | T | G | Heterozygous |
| NC_037648.1 | 14256081 | SNV | 1 | G | A | Homozygous   |
| NC_037648.1 | 14256133 | SNV | 1 | G | A | Homozygous   |
| NC_037648.1 | 14256183 | SNV | 1 | A | G | Homozygous   |
| NC_037648.1 | 14256252 | SNV | 1 | G | A | Heterozygous |
| NC_037648.1 | 14256280 | SNV | 1 | C | T | Homozygous   |
| NC_037648.1 | 14256370 | SNV | 1 | A | G | Heterozygous |
| NC_037648.1 | 14256440 | SNV | 1 | A | G | Homozygous   |
| NC_037648.1 | 14256618 | SNV | 1 | A | G | Homozygous   |
| NC_037648.1 | 14256642 | SNV | 1 | G | A | Heterozygous |
| NC_037648.1 | 14257415 | SNV | 1 | T | C | Heterozygous |
| NC_037648.1 | 14257430 | SNV | 1 | T | C | Homozygous   |
| NC_037648.1 | 14257654 | SNV | 1 | T | G | Heterozygous |
| NC_037648.1 | 14257665 | SNV | 1 | T | G | Homozygous   |
| NC_037648.1 | 14257685 | SNV | 1 | A | G | Heterozygous |
| NC_037648.1 | 14257696 | SNV | 1 | A | T | Homozygous   |
| NC_037648.1 | 14257700 | SNV | 1 | T | G | Homozygous   |
| NC_037648.1 | 14257745 | SNV | 1 | A | G | Homozygous   |
| NC_037648.1 | 14257756 | SNV | 1 | G | A | Heterozygous |
| NC_037648.1 | 14257759 | SNV | 1 | T | C | Heterozygous |
| NC_037648.1 | 14257767 | SNV | 1 | T | A | Heterozygous |
| NC_037648.1 | 14257772 | SNV | 1 | G | A | Homozygous   |
| NC_037648.1 | 14257776 | SNV | 1 | G | A | Heterozygous |
| NC_037648.1 | 14257830 | SNV | 1 | G | C | Heterozygous |
| NC_037648.1 | 14257855 | SNV | 1 | A | G | Homozygous   |
| NC_037648.1 | 14257879 | SNV | 1 | G | A | Heterozygous |
| NC_037648.1 | 14257885 | SNV | 1 | G | T | Homozygous   |
| NC_037648.1 | 14257891 | SNV | 1 | G | A | Heterozygous |
| NC_037648.1 | 14257893 | SNV | 1 | G | A | Homozygous   |
| NC_037648.1 | 14257941 | SNV | 1 | A | G | Homozygous   |
| NC_037648.1 | 14257961 | SNV | 1 | C | G | Homozygous   |
| NC_037648.1 | 14257977 | SNV | 1 | T | C | Homozygous   |
| NC_037648.1 | 14258149 | SNV | 1 | T | C | Homozygous   |
| NC_037648.1 | 14258156 | SNV | 1 | T | A | Homozygous   |
| NC_037648.1 | 14258161 | SNV | 1 | T | G | Homozygous   |
| NC_037648.1 | 14258509 | SNV | 1 | T | C | Homozygous   |
| NC_037648.1 | 14258549 | SNV | 1 | A | G | Homozygous   |

|             |          |     |   |   |   |              |
|-------------|----------|-----|---|---|---|--------------|
| NC_037648.1 | 14258621 | SNV | 1 | C | T | Heterozygous |
| NC_037648.1 | 14258691 | SNV | 1 | C | T | Homozygous   |
| NC_037648.1 | 14258694 | SNV | 1 | A | G | Homozygous   |
| NC_037648.1 | 14258709 | SNV | 1 | G | T | Heterozygous |
| NC_037648.1 | 14258720 | SNV | 1 | A | G | Homozygous   |
| NC_037648.1 | 14258723 | SNV | 1 | T | G | Heterozygous |
| NC_037648.1 | 14258726 | SNV | 1 | G | A | Homozygous   |
| NC_037648.1 | 14258732 | SNV | 1 | G | C | Homozygous   |
| NC_037648.1 | 14258743 | SNV | 1 | G | A | Heterozygous |
| NC_037648.1 | 14258890 | SNV | 1 | A | C | Heterozygous |
| NC_037648.1 | 14258893 | SNV | 1 | A | G | Heterozygous |
| NC_037648.1 | 14258900 | SNV | 1 | G | A | Homozygous   |
| NC_037648.1 | 14258902 | SNV | 1 | A | G | Heterozygous |
| NC_037648.1 | 14258906 | SNV | 1 | A | G | Heterozygous |
| NC_037648.1 | 14258908 | SNV | 1 | A | G | Homozygous   |
| NC_037648.1 | 14258912 | SNV | 1 | G | A | Heterozygous |
| NC_037648.1 | 14258936 | SNV | 1 | G | A | Heterozygous |
| NC_037648.1 | 14258948 | SNV | 1 | G | A | Homozygous   |
| NC_037648.1 | 14259047 | SNV | 1 | G | C | Heterozygous |
| NC_037648.1 | 14259054 | SNV | 1 | A | G | Homozygous   |
| NC_037648.1 | 14259071 | SNV | 1 | T | G | Heterozygous |
| NC_037648.1 | 14259080 | SNV | 1 | G | C | Heterozygous |
| NC_037648.1 | 14259211 | SNV | 1 | A | G | Heterozygous |
| NC_037648.1 | 14259217 | SNV | 1 | A | G | Heterozygous |
| NC_037648.1 | 14259271 | SNV | 1 | G | A | Heterozygous |
| NC_037648.1 | 14259276 | SNV | 1 | G | A | Heterozygous |
| NC_037648.1 | 14259288 | SNV | 1 | A | G | Heterozygous |
| NC_037648.1 | 14259332 | SNV | 1 | A | G | Heterozygous |
| NC_037648.1 | 14259340 | SNV | 1 | A | G | Heterozygous |
| NC_037648.1 | 14259342 | SNV | 1 | G | A | Homozygous   |
| NC_037648.1 | 14259352 | SNV | 1 | A | T | Heterozygous |
| NC_037648.1 | 14259357 | SNV | 1 | C | A | Homozygous   |
| NC_037648.1 | 14259360 | SNV | 1 | G | A | Heterozygous |
| NC_037648.1 | 14259364 | SNV | 1 | G | A | Heterozygous |
| NC_037648.1 | 14259366 | SNV | 1 | G | A | Heterozygous |
| NC_037648.1 | 14259369 | SNV | 1 | T | G | Homozygous   |
| NC_037648.1 | 14259378 | SNV | 1 | A | G | Heterozygous |
| NC_037648.1 | 14259392 | SNV | 1 | A | G | Homozygous   |
| NC_037648.1 | 14259399 | SNV | 1 | T | G | Homozygous   |
| NC_037648.1 | 14259402 | SNV | 1 | A | T | Homozygous   |
| NC_037648.1 | 14259405 | SNV | 1 | T | G | Homozygous   |
| NC_037648.1 | 14259413 | SNV | 1 | A | G | Homozygous   |
| NC_037648.1 | 14259417 | SNV | 1 | T | A | Homozygous   |
| NC_037648.1 | 14259420 | SNV | 1 | G | A | Homozygous   |
| NC_037648.1 | 14259423 | SNV | 1 | G | A | Homozygous   |
| NC_037648.1 | 14259425 | SNV | 1 | A | G | Heterozygous |
| NC_037648.1 | 14259449 | SNV | 1 | A | T | Homozygous   |
| NC_037648.1 | 14259458 | SNV | 1 | A | G | Homozygous   |
| NC_037648.1 | 14259465 | SNV | 1 | A | G | Homozygous   |
| NC_037648.1 | 14259468 | SNV | 1 | C | G | Homozygous   |
| NC_037648.1 | 14259471 | SNV | 1 | A | C | Homozygous   |

|             |          |     |   |   |   |              |
|-------------|----------|-----|---|---|---|--------------|
| NC_037648.1 | 14259480 | SNV | 1 | C | G | Heterozygous |
| NC_037648.1 | 14259491 | SNV | 1 | G | A | Heterozygous |
| NC_037648.1 | 14259521 | SNV | 1 | A | G | Heterozygous |
| NC_037648.1 | 14259813 | SNV | 1 | G | A | Homozygous   |
| NC_037648.1 | 14259822 | SNV | 1 | T | A | Homozygous   |
| NC_037648.1 | 14259851 | SNV | 1 | A | C | Heterozygous |
| NC_037648.1 | 14259970 | SNV | 1 | A | G | Homozygous   |
| NC_037648.1 | 14260073 | SNV | 1 | T | G | Homozygous   |
| NC_037648.1 | 14260286 | SNV | 1 | G | C | Heterozygous |
| NC_037648.1 | 14260583 | SNV | 1 | A | G | Heterozygous |
| NC_037648.1 | 14260689 | SNV | 1 | G | T | Heterozygous |
| NC_037648.1 | 14260779 | SNV | 1 | G | C | Homozygous   |
| NC_037648.1 | 14261069 | SNV | 1 | G | C | Homozygous   |
| NC_037648.1 | 14261485 | SNV | 1 | A | C | Homozygous   |
| NC_037648.1 | 14261488 | SNV | 1 | G | C | Homozygous   |
| NC_037648.1 | 14261548 | SNV | 1 | G | A | Homozygous   |
| NC_037648.1 | 14262388 | SNV | 1 | A | G | Homozygous   |
| NC_037648.1 | 14279701 | SNV | 1 | T | C | Homozygous   |
| NC_037648.1 | 14280322 | SNV | 1 | C | T | Heterozygous |
| NC_037648.1 | 14280860 | SNV | 1 | G | A | Homozygous   |
| NC_037648.1 | 14280865 | SNV | 1 | A | T | Homozygous   |
| NC_037648.1 | 14281282 | SNV | 1 | T | C | Heterozygous |
| NC_037648.1 | 14285379 | SNV | 1 | C | T | Homozygous   |
| NC_037648.1 | 14286347 | SNV | 1 | A | G | Homozygous   |
| NC_037648.1 | 14286349 | SNV | 1 | A | T | Homozygous   |
| NC_037648.1 | 14286910 | SNV | 1 | T | C | Homozygous   |
| NC_037648.1 | 14286995 | SNV | 1 | G | A | Heterozygous |
| NC_037648.1 | 14290365 | SNV | 1 | C | A | Homozygous   |
| NC_037648.1 | 14290368 | SNV | 1 | G | T | Homozygous   |
| NC_037648.1 | 14292348 | SNV | 1 | C | A | Homozygous   |
| NC_037648.1 | 14292356 | SNV | 1 | A | C | Homozygous   |
| NC_037648.1 | 14292359 | SNV | 1 | G | C | Heterozygous |
| NC_037648.1 | 14292364 | SNV | 1 | T | A | Heterozygous |
| NC_037648.1 | 14292366 | SNV | 1 | T | G | Heterozygous |
| NC_037648.1 | 14297234 | SNV | 1 | C | G | Heterozygous |
| NC_037648.1 | 14297250 | SNV | 1 | A | G | Homozygous   |
| NC_037648.1 | 14297259 | SNV | 1 | A | T | Heterozygous |
| NC_037648.1 | 14297271 | SNV | 1 | T | A | Heterozygous |
| NC_037648.1 | 14297283 | SNV | 1 | A | T | Heterozygous |
| NC_037648.1 | 14297295 | SNV | 1 | T | A | Heterozygous |
| NC_037648.1 | 14300288 | SNV | 1 | T | C | Heterozygous |
| NC_037648.1 | 14305198 | SNV | 1 | T | C | Homozygous   |
| NC_037648.1 | 14309460 | SNV | 1 | C | T | Heterozygous |
| NC_037648.1 | 14309961 | SNV | 1 | C | T | Homozygous   |
| NC_037648.1 | 14310238 | SNV | 1 | A | G | Homozygous   |
| NC_037648.1 | 14310261 | SNV | 1 | T | C | Homozygous   |
| NC_037648.1 | 14311082 | SNV | 1 | C | T | Heterozygous |
| NC_037648.1 | 14311115 | SNV | 1 | G | A | Homozygous   |
| NC_037648.1 | 14311903 | SNV | 1 | A | C | Homozygous   |
| NC_037648.1 | 14312269 | SNV | 1 | T | A | Heterozygous |
| NC_037648.1 | 14312444 | SNV | 1 | G | A | Heterozygous |

|             |          |     |   |   |   |              |
|-------------|----------|-----|---|---|---|--------------|
| NC_037648.1 | 14312514 | SNV | 1 | A | G | Homozygous   |
| NC_037648.1 | 14313048 | SNV | 1 | G | A | Heterozygous |
| NC_037648.1 | 14320720 | SNV | 1 | G | A | Homozygous   |
| NC_037648.1 | 14321475 | SNV | 1 | T | C | Homozygous   |
| NC_037648.1 | 14322166 | SNV | 1 | G | C | Homozygous   |
| NC_037648.1 | 14322196 | SNV | 1 | C | T | Homozygous   |
| NC_037648.1 | 14322476 | SNV | 1 | C | T | Homozygous   |
| NC_037648.1 | 14322580 | SNV | 1 | G | A | Heterozygous |
| NC_037648.1 | 14322676 | SNV | 1 | G | A | Heterozygous |
| NC_037648.1 | 14322794 | SNV | 1 | A | G | Homozygous   |
| NC_037648.1 | 14323043 | SNV | 1 | G | A | Homozygous   |
| NC_037648.1 | 14323144 | SNV | 1 | G | A | Heterozygous |
| NC_037648.1 | 14323407 | SNV | 1 | A | G | Homozygous   |
| NC_037648.1 | 14323412 | SNV | 1 | C | T | Homozygous   |
| NC_037648.1 | 14323810 | SNV | 1 | A | G | Homozygous   |
| NC_037648.1 | 14324050 | SNV | 1 | A | G | Homozygous   |
| NC_037648.1 | 14324183 | SNV | 1 | C | T | Homozygous   |
| NC_037648.1 | 14324433 | SNV | 1 | A | G | Homozygous   |
| NC_037648.1 | 14335577 | SNV | 1 | A | T | Heterozygous |
| NC_037648.1 | 14336359 | SNV | 1 | A | G | Homozygous   |
| NC_037648.1 | 14336362 | SNV | 1 | A | C | Homozygous   |
| NC_037648.1 | 14336544 | SNV | 1 | T | A | Heterozygous |
| NC_037648.1 | 14339189 | SNV | 1 | C | T | Homozygous   |
| NC_037648.1 | 14339329 | SNV | 1 | A | G | Heterozygous |
| NC_037648.1 | 14339602 | SNV | 1 | T | C | Heterozygous |
| NC_037648.1 | 14339873 | SNV | 1 | T | C | Homozygous   |
| NC_037648.1 | 14340029 | SNV | 1 | T | G | Homozygous   |
| NC_037648.1 | 14340198 | SNV | 1 | A | T | Homozygous   |
| NC_037648.1 | 14341261 | SNV | 1 | A | G | Homozygous   |
| NC_037648.1 | 14341374 | SNV | 1 | A | C | Homozygous   |
| NC_037648.1 | 14341376 | SNV | 1 | A | T | Homozygous   |
| NC_037648.1 | 14341378 | SNV | 1 | A | T | Homozygous   |
| NC_037648.1 | 14341381 | SNV | 1 | A | T | Homozygous   |
| NC_037648.1 | 14341425 | SNV | 1 | T | A | Homozygous   |
| NC_037648.1 | 14341429 | SNV | 1 | C | T | Homozygous   |
| NC_037648.1 | 14341433 | SNV | 1 | T | A | Homozygous   |
| NC_037648.1 | 14341439 | SNV | 1 | A | G | Homozygous   |
| NC_037648.1 | 14341442 | SNV | 1 | T | C | Homozygous   |
| NC_037648.1 | 14341450 | SNV | 1 | A | G | Homozygous   |
| NC_037648.1 | 14344016 | SNV | 1 | A | T | Heterozygous |
| NC_037648.1 | 14344018 | SNV | 1 | A | T | Heterozygous |
| NC_037648.1 | 14344024 | SNV | 1 | T | A | Heterozygous |
| NC_037648.1 | 14344288 | SNV | 1 | C | T | Homozygous   |
| NC_037648.1 | 14345142 | SNV | 1 | A | G | Heterozygous |
| NC_037648.1 | 14345567 | SNV | 1 | A | G | Homozygous   |
| NC_037648.1 | 14355309 | SNV | 1 | G | A | Homozygous   |
| NC_037648.1 | 14355740 | SNV | 1 | T | A | Homozygous   |
| NC_037648.1 | 14355743 | SNV | 1 | T | A | Homozygous   |
| NC_037648.1 | 14355748 | SNV | 1 | G | T | Homozygous   |
| NC_037648.1 | 14360658 | SNV | 1 | G | A | Homozygous   |
| NC_037648.1 | 14363140 | SNV | 1 | G | A | Heterozygous |

|             |          |     |   |   |   |              |
|-------------|----------|-----|---|---|---|--------------|
| NC_037648.1 | 14363290 | SNV | 1 | T | C | Homozygous   |
| NC_037648.1 | 14363304 | SNV | 1 | G | A | Homozygous   |
| NC_037648.1 | 14363542 | SNV | 1 | T | C | Homozygous   |
| NC_037648.1 | 14363649 | SNV | 1 | A | G | Homozygous   |
| NC_037648.1 | 14363655 | SNV | 1 | T | C | Homozygous   |
| NC_037648.1 | 14363932 | SNV | 1 | C | T | Homozygous   |
| NC_037648.1 | 14364314 | SNV | 1 | G | A | Heterozygous |
| NC_037648.1 | 14364407 | SNV | 1 | A | G | Homozygous   |
| NC_037648.1 | 14364796 | SNV | 1 | A | G | Homozygous   |
| NC_037648.1 | 14364832 | SNV | 1 | T | C | Homozygous   |
| NC_037648.1 | 14364893 | SNV | 1 | C | T | Homozygous   |
| NC_037648.1 | 14364908 | SNV | 1 | T | C | Homozygous   |
| NC_037648.1 | 14364973 | SNV | 1 | T | G | Homozygous   |
| NC_037648.1 | 14365200 | SNV | 1 | T | A | Homozygous   |
| NC_037648.1 | 14365258 | SNV | 1 | C | T | Heterozygous |
| NC_037648.1 | 14365375 | SNV | 1 | G | A | Homozygous   |
| NC_037648.1 | 14365377 | SNV | 1 | T | C | Homozygous   |
| NC_037648.1 | 14366145 | SNV | 1 | T | C | Heterozygous |
| NC_037648.1 | 14366195 | SNV | 1 | G | A | Heterozygous |
| NC_037648.1 | 14366347 | SNV | 1 | C | T | Heterozygous |
| NC_037648.1 | 14366511 | SNV | 1 | C | T | Heterozygous |
| NC_037648.1 | 14366549 | SNV | 1 | G | A | Homozygous   |
| NC_037648.1 | 14366578 | SNV | 1 | G | A | Heterozygous |
| NC_037648.1 | 14366793 | SNV | 1 | G | A | Homozygous   |
| NC_037648.1 | 14366803 | SNV | 1 | G | A | Homozygous   |
| NC_037648.1 | 14366836 | SNV | 1 | A | G | Homozygous   |
| NC_037648.1 | 14366844 | SNV | 1 | C | T | Homozygous   |
| NC_037648.1 | 14366947 | SNV | 1 | T | C | Heterozygous |
| NC_037648.1 | 14366970 | SNV | 1 | T | C | Heterozygous |
| NC_037648.1 | 14367983 | SNV | 1 | C | T | Homozygous   |
| NC_037648.1 | 14367985 | SNV | 1 | G | A | Heterozygous |
| NC_037648.1 | 14368045 | SNV | 1 | T | C | Homozygous   |
| NC_037648.1 | 14368065 | SNV | 1 | T | A | Heterozygous |
| NC_037648.1 | 14368069 | SNV | 1 | T | C | Heterozygous |
| NC_037648.1 | 14368149 | SNV | 1 | T | C | Heterozygous |
| NC_037648.1 | 14368154 | SNV | 1 | A | G | Homozygous   |
| NC_037648.1 | 14368186 | SNV | 1 | C | T | Homozygous   |
| NC_037648.1 | 14368212 | SNV | 1 | C | T | Heterozygous |
| NC_037648.1 | 14368221 | SNV | 1 | A | G | Homozygous   |
| NC_037648.1 | 14370051 | SNV | 1 | G | T | Heterozygous |
| NC_037648.1 | 14370103 | SNV | 1 | G | A | Heterozygous |
| NC_037648.1 | 14371067 | SNV | 1 | T | A | Homozygous   |
| NC_037648.1 | 14371070 | SNV | 1 | A | T | Homozygous   |
| NC_037648.1 | 14371073 | SNV | 1 | C | T | Homozygous   |
| NC_037648.1 | 14371099 | SNV | 1 | A | T | Homozygous   |
| NC_037648.1 | 14371103 | SNV | 1 | G | A | Homozygous   |
| NC_037648.1 | 14374450 | SNV | 1 | A | G | Homozygous   |
| NC_037648.1 | 14374594 | SNV | 1 | G | A | Homozygous   |
| NC_037648.1 | 14374641 | SNV | 1 | C | T | Homozygous   |
| NC_037648.1 | 14374656 | SNV | 1 | G | A | Heterozygous |
| NC_037648.1 | 14374688 | SNV | 1 | A | T | Homozygous   |

|             |          |     |   |   |   |              |
|-------------|----------|-----|---|---|---|--------------|
| NC_037648.1 | 14375332 | SNV | 1 | A | T | Homozygous   |
| NC_037648.1 | 14377803 | SNV | 1 | T | C | Homozygous   |
| NC_037648.1 | 14377836 | SNV | 1 | A | G | Homozygous   |
| NC_037648.1 | 14377891 | SNV | 1 | A | T | Heterozygous |
| NC_037648.1 | 14377899 | SNV | 1 | C | T | Heterozygous |
| NC_037648.1 | 14377980 | SNV | 1 | A | G | Homozygous   |
| NC_037648.1 | 14378084 | SNV | 1 | A | G | Homozygous   |
| NC_037648.1 | 14378090 | SNV | 1 | T | C | Homozygous   |
| NC_037648.1 | 14379550 | SNV | 1 | G | A | Homozygous   |
| NC_037648.1 | 14381946 | SNV | 1 | A | C | Homozygous   |
| NC_037648.1 | 14381951 | SNV | 1 | T | C | Homozygous   |
| NC_037648.1 | 14381953 | SNV | 1 | A | C | Homozygous   |
| NC_037648.1 | 14381958 | SNV | 1 | T | G | Homozygous   |
| NC_037648.1 | 14382113 | SNV | 1 | C | T | Heterozygous |
| NC_037648.1 | 14386045 | SNV | 1 | T | C | Homozygous   |
| NC_037648.1 | 14386518 | SNV | 1 | C | T | Heterozygous |
| NC_037648.1 | 14388804 | SNV | 1 | A | T | Heterozygous |
| NC_037648.1 | 14388806 | SNV | 1 | T | C | Heterozygous |
| NC_037648.1 | 14388807 | SNV | 1 | A | T | Heterozygous |
| NC_037648.1 | 14388810 | SNV | 1 | A | T | Heterozygous |
| NC_037648.1 | 14388814 | SNV | 1 | T | G | Heterozygous |
| NC_037648.1 | 14388958 | SNV | 1 | G | A | Homozygous   |
| NC_037648.1 | 14389010 | SNV | 1 | C | A | Heterozygous |
| NC_037648.1 | 14390842 | SNV | 1 | G | T | Homozygous   |
| NC_037648.1 | 14391876 | SNV | 1 | A | T | Heterozygous |
| NC_037648.1 | 14391878 | SNV | 1 | G | T | Heterozygous |
| NC_037648.1 | 14391887 | SNV | 1 | A | T | Homozygous   |
| NC_037648.1 | 14392578 | SNV | 1 | G | A | Heterozygous |
| NC_037648.1 | 14392820 | SNV | 1 | G | T | Heterozygous |
| NC_037648.1 | 14392824 | SNV | 1 | A | C | Heterozygous |
| NC_037648.1 | 14394737 | SNV | 1 | G | A | Homozygous   |
| NC_037648.1 | 14394846 | SNV | 1 | T | A | Heterozygous |
| NC_037648.1 | 14394848 | SNV | 1 | T | A | Heterozygous |
| NC_037648.1 | 14395131 | SNV | 1 | A | C | Heterozygous |
| NC_037648.1 | 14395847 | SNV | 1 | A | G | Homozygous   |
| NC_037648.1 | 14396024 | SNV | 1 | T | C | Homozygous   |
| NC_037648.1 | 14396526 | SNV | 1 | G | A | Heterozygous |
| NC_037648.1 | 14396736 | SNV | 1 | A | G | Homozygous   |
| NC_037648.1 | 14397246 | SNV | 1 | G | A | Heterozygous |
| NC_037648.1 | 14397450 | SNV | 1 | A | T | Heterozygous |
| NC_037648.1 | 14400253 | SNV | 1 | T | A | Homozygous   |
| NC_037648.1 | 14400265 | SNV | 1 | T | C | Homozygous   |
| NC_037648.1 | 14400267 | SNV | 1 | T | C | Homozygous   |
| NC_037648.1 | 14403681 | SNV | 1 | T | C | Homozygous   |
| NC_037648.1 | 14403851 | SNV | 1 | C | T | Homozygous   |
| NC_037648.1 | 14404221 | SNV | 1 | G | A | Homozygous   |
| NC_037648.1 | 14405241 | SNV | 1 | A | G | Homozygous   |
| NC_037648.1 | 14407402 | SNV | 1 | T | C | Heterozygous |
| NC_037648.1 | 14407404 | SNV | 1 | T | C | Heterozygous |
| NC_037648.1 | 14407409 | SNV | 1 | C | T | Heterozygous |
| NC_037648.1 | 14407413 | SNV | 1 | C | A | Heterozygous |

|             |          |     |   |   |   |              |
|-------------|----------|-----|---|---|---|--------------|
| NC_037648.1 | 14408763 | SNV | 1 | T | C | Homozygous   |
| NC_037648.1 | 14408774 | SNV | 1 | G | A | Homozygous   |
| NC_037648.1 | 14410437 | SNV | 1 | G | A | Homozygous   |
| NC_037648.1 | 14410440 | SNV | 1 | G | A | Homozygous   |
| NC_037648.1 | 14410462 | SNV | 1 | C | T | Homozygous   |
| NC_037648.1 | 14411717 | SNV | 1 | T | C | Heterozygous |
| NC_037648.1 | 14412009 | SNV | 1 | C | T | Heterozygous |
| NC_037648.1 | 14412573 | SNV | 1 | T | C | Homozygous   |
| NC_037648.1 | 14412902 | SNV | 1 | T | A | Homozygous   |
| NC_037648.1 | 14412938 | SNV | 1 | A | G | Homozygous   |
| NC_037648.1 | 14413546 | SNV | 1 | A | G | Homozygous   |
| NC_037648.1 | 14413579 | SNV | 1 | T | C | Homozygous   |
| NC_037648.1 | 14413771 | SNV | 1 | C | T | Homozygous   |
| NC_037648.1 | 14413963 | SNV | 1 | C | T | Heterozygous |
| NC_037648.1 | 14414159 | SNV | 1 | T | C | Homozygous   |
| NC_037648.1 | 14414289 | SNV | 1 | T | A | Heterozygous |
| NC_037648.1 | 14414413 | SNV | 1 | C | T | Homozygous   |
| NC_037648.1 | 14414450 | SNV | 1 | C | A | Homozygous   |
| NC_037648.1 | 14414455 | SNV | 1 | C | A | Heterozygous |
| NC_037648.1 | 14418445 | SNV | 1 | T | C | Heterozygous |
| NC_037648.1 | 14418773 | SNV | 1 | G | A | Heterozygous |
| NC_037648.1 | 14418947 | SNV | 1 | G | A | Homozygous   |
| NC_037648.1 | 14419799 | SNV | 1 | A | T | Homozygous   |
| NC_037648.1 | 14420956 | SNV | 1 | T | C | Homozygous   |
| NC_037648.1 | 14420962 | SNV | 1 | C | T | Homozygous   |
| NC_037648.1 | 14421088 | SNV | 1 | A | G | Homozygous   |
| NC_037648.1 | 14421327 | SNV | 1 | A | G | Homozygous   |
| NC_037648.1 | 14422362 | SNV | 1 | G | A | Homozygous   |
| NC_037648.1 | 14429758 | SNV | 1 | A | T | Heterozygous |
| NC_037648.1 | 14429760 | SNV | 1 | T | C | Heterozygous |
| NC_037648.1 | 14429763 | SNV | 1 | C | A | Heterozygous |
| NC_037648.1 | 14429767 | SNV | 1 | A | C | Heterozygous |
| NC_037648.1 | 14429767 | SNV | 1 | A | T | Heterozygous |
| NC_037648.1 | 14429769 | SNV | 1 | T | C | Heterozygous |
| NC_037648.1 | 14429782 | SNV | 1 | T | A | Heterozygous |
| NC_037648.1 | 14429788 | SNV | 1 | T | A | Heterozygous |
| NC_037648.1 | 14429788 | SNV | 1 | T | C | Heterozygous |
| NC_037648.1 | 14429791 | SNV | 1 | T | A | Heterozygous |
| NC_037648.1 | 14429791 | SNV | 1 | T | C | Heterozygous |
| NC_037648.1 | 14429793 | SNV | 1 | T | G | Heterozygous |
| NC_037648.1 | 14429795 | SNV | 1 | T | C | Heterozygous |
| NC_037648.1 | 14429797 | SNV | 1 | T | C | Heterozygous |
| NC_037648.1 | 14429803 | SNV | 1 | A | C | Heterozygous |
| NC_037648.1 | 14429810 | SNV | 1 | A | G | Homozygous   |
| NC_037648.1 | 14429812 | SNV | 1 | T | A | Homozygous   |
| NC_037648.1 | 14429818 | SNV | 1 | G | T | Homozygous   |
| NC_037648.1 | 14429824 | SNV | 1 | T | C | Homozygous   |
| NC_037648.1 | 14429827 | SNV | 1 | T | A | Homozygous   |
| NC_037648.1 | 14429830 | SNV | 1 | T | A | Homozygous   |
| NC_037648.1 | 14429839 | SNV | 1 | T | A | Homozygous   |
| NC_037648.1 | 14429845 | SNV | 1 | T | C | Homozygous   |

|             |          |     |   |   |   |              |
|-------------|----------|-----|---|---|---|--------------|
| NC_037648.1 | 14435075 | SNV | 1 | G | A | Homozygous   |
| NC_037648.1 | 14435996 | SNV | 1 | C | T | Homozygous   |
| NC_037648.1 | 14436188 | SNV | 1 | C | T | Homozygous   |
| NC_037648.1 | 14436205 | SNV | 1 | G | C | Homozygous   |
| NC_037648.1 | 14436245 | SNV | 1 | G | A | Homozygous   |
| NC_037648.1 | 14436530 | SNV | 1 | A | G | Heterozygous |
| NC_037648.1 | 14436537 | SNV | 1 | A | T | Homozygous   |
| NC_037648.1 | 14436540 | SNV | 1 | A | G | Heterozygous |
| NC_037648.1 | 14436549 | SNV | 1 | T | C | Heterozygous |
| NC_037648.1 | 14436561 | SNV | 1 | A | T | Heterozygous |
| NC_037648.1 | 14436565 | SNV | 1 | A | T | Heterozygous |
| NC_037648.1 | 14436612 | SNV | 1 | G | C | Homozygous   |
| NC_037648.1 | 14436614 | SNV | 1 | G | A | Homozygous   |
| NC_037648.1 | 14436616 | SNV | 1 | T | C | Homozygous   |
| NC_037648.1 | 14436618 | SNV | 1 | A | G | Heterozygous |
| NC_037648.1 | 14437138 | SNV | 1 | G | A | Homozygous   |
| NC_037648.1 | 14437180 | SNV | 1 | G | A | Homozygous   |
| NC_037648.1 | 14437578 | SNV | 1 | G | A | Homozygous   |
| NC_037648.1 | 14438024 | SNV | 1 | T | C | Homozygous   |
| NC_037648.1 | 14438417 | SNV | 1 | A | G | Homozygous   |
| NC_037648.1 | 14438422 | SNV | 1 | A | G | Heterozygous |
| NC_037648.1 | 14438428 | SNV | 1 | A | G | Heterozygous |
| NC_037648.1 | 14439103 | SNV | 1 | A | G | Homozygous   |
| NC_037648.1 | 14440138 | SNV | 1 | G | A | Homozygous   |
| NC_037648.1 | 14440885 | SNV | 1 | T | G | Heterozygous |
| NC_037648.1 | 14440943 | SNV | 1 | A | T | Homozygous   |
| NC_037648.1 | 14446419 | SNV | 1 | C | T | Heterozygous |
| NC_037648.1 | 14446604 | SNV | 1 | C | T | Heterozygous |
| NC_037648.1 | 14446718 | SNV | 1 | A | T | Homozygous   |
| NC_037648.1 | 14449219 | SNV | 1 | C | T | Heterozygous |
| NC_037648.1 | 14449244 | SNV | 1 | T | C | Heterozygous |
| NC_037648.1 | 14449478 | SNV | 1 | C | T | Homozygous   |
| NC_037648.1 | 14449988 | SNV | 1 | G | A | Homozygous   |
| NC_037648.1 | 14450537 | SNV | 1 | C | G | Heterozygous |
| NC_037648.1 | 14450994 | SNV | 1 | A | G | Heterozygous |
| NC_037648.1 | 14451549 | SNV | 1 | A | G | Homozygous   |
| NC_037648.1 | 14451621 | SNV | 1 | C | T | Heterozygous |
| NC_037648.1 | 14452635 | SNV | 1 | T | C | Heterozygous |
| NC_037648.1 | 14453998 | SNV | 1 | C | T | Heterozygous |
| NC_037648.1 | 14454437 | SNV | 1 | A | G | Homozygous   |
| NC_037648.1 | 14455866 | SNV | 1 | A | T | Homozygous   |
| NC_037648.1 | 14456206 | SNV | 1 | G | A | Homozygous   |
| NC_037648.1 | 14464140 | SNV | 1 | G | A | Homozygous   |
| NC_037648.1 | 14464143 | SNV | 1 | T | A | Homozygous   |
| NC_037648.1 | 14466236 | SNV | 1 | C | A | Homozygous   |
| NC_037648.1 | 14466238 | SNV | 1 | A | T | Homozygous   |
| NC_037648.1 | 14466241 | SNV | 1 | T | C | Homozygous   |
| NC_037648.1 | 14466376 | SNV | 1 | T | C | Heterozygous |
| NC_037648.1 | 14467500 | SNV | 1 | G | A | Homozygous   |
| NC_037648.1 | 14467504 | SNV | 1 | T | A | Homozygous   |
| NC_037648.1 | 14469175 | SNV | 1 | C | T | Homozygous   |



|             |          |     |   |   |   |              |
|-------------|----------|-----|---|---|---|--------------|
| NC_037648.1 | 14470012 | SNV | 1 | G | A | Homozygous   |
| NC_037648.1 | 14470017 | SNV | 1 | A | C | Homozygous   |
| NC_037648.1 | 14470019 | SNV | 1 | T | C | Homozygous   |
| NC_037648.1 | 14470021 | SNV | 1 | A | T | Homozygous   |
| NC_037648.1 | 14470029 | SNV | 1 | C | A | Homozygous   |
| NC_037648.1 | 14470048 | SNV | 1 | T | G | Homozygous   |
| NC_037648.1 | 14470050 | SNV | 1 | A | G | Homozygous   |
| NC_037648.1 | 14470054 | SNV | 1 | T | A | Homozygous   |
| NC_037648.1 | 14471341 | SNV | 1 | G | C | Homozygous   |
| NC_037648.1 | 14471346 | SNV | 1 | T | A | Heterozygous |
| NC_037648.1 | 14471349 | SNV | 1 | T | C | Heterozygous |
| NC_037648.1 | 14471362 | SNV | 1 | A | G | Heterozygous |
| NC_037648.1 | 14471382 | SNV | 1 | T | C | Heterozygous |
| NC_037648.1 | 14471386 | SNV | 1 | C | T | Heterozygous |
| NC_037648.1 | 14471682 | SNV | 1 | A | C | Homozygous   |
| NC_037648.1 | 14471716 | SNV | 1 | A | C | Homozygous   |
| NC_037648.1 | 14472535 | SNV | 1 | G | A | Heterozygous |
| NC_037648.1 | 14474735 | SNV | 1 | T | C | Heterozygous |
| NC_037648.1 | 14474798 | SNV | 1 | T | A | Heterozygous |
| NC_037648.1 | 14475047 | SNV | 1 | T | C | Homozygous   |
| NC_037648.1 | 14475214 | SNV | 1 | A | G | Homozygous   |
| NC_037648.1 | 14475266 | SNV | 1 | C | T | Homozygous   |
| NC_037648.1 | 14475290 | SNV | 1 | T | A | Homozygous   |
| NC_037648.1 | 14475834 | SNV | 1 | G | C | Homozygous   |
| NC_037648.1 | 14475850 | SNV | 1 | A | G | Homozygous   |
| NC_037648.1 | 14475942 | SNV | 1 | T | C | Homozygous   |
| NC_037648.1 | 14476027 | SNV | 1 | A | G | Homozygous   |
| NC_037648.1 | 14476256 | SNV | 1 | A | G | Homozygous   |
| NC_037648.1 | 14476783 | SNV | 1 | G | A | Homozygous   |
| NC_037648.1 | 14476849 | SNV | 1 | T | C | Heterozygous |
| NC_037648.1 | 14480144 | SNV | 1 | G | A | Homozygous   |
| NC_037648.1 | 14480381 | SNV | 1 | G | A | Homozygous   |
| NC_037648.1 | 14480387 | SNV | 1 | A | T | Homozygous   |
| NC_037648.1 | 14493133 | SNV | 1 | C | A | Heterozygous |
| NC_037648.1 | 14494979 | SNV | 1 | T | A | Homozygous   |
| NC_037648.1 | 14494993 | SNV | 1 | G | A | Heterozygous |
| NC_037648.1 | 14494997 | SNV | 1 | C | A | Homozygous   |
| NC_037648.1 | 14495000 | SNV | 1 | T | A | Homozygous   |
| NC_037648.1 | 14502721 | SNV | 1 | A | G | Homozygous   |
| NC_037648.1 | 14503254 | SNV | 1 | G | A | Heterozygous |
| NC_037648.1 | 14503487 | SNV | 1 | A | C | Homozygous   |
| NC_037648.1 | 14503849 | SNV | 1 | A | T | Homozygous   |
| NC_037648.1 | 14504506 | SNV | 1 | T | A | Homozygous   |
| NC_037648.1 | 14505246 | SNV | 1 | C | T | Homozygous   |
| NC_037648.1 | 14506204 | SNV | 1 | A | T | Homozygous   |
| NC_037648.1 | 14506327 | SNV | 1 | A | G | Homozygous   |
| NC_037648.1 | 14507823 | SNV | 1 | A | T | Heterozygous |
| NC_037648.1 | 14507825 | SNV | 1 | A | T | Heterozygous |
| NC_037648.1 | 14507828 | SNV | 1 | T | A | Heterozygous |
| NC_037648.1 | 14507833 | SNV | 1 | A | T | Heterozygous |
| NC_037648.1 | 14507836 | SNV | 1 | A | C | Homozygous   |

|             |          |     |   |   |   |              |
|-------------|----------|-----|---|---|---|--------------|
| NC_037648.1 | 14507885 | SNV | 1 | A | G | Homozygous   |
| NC_037648.1 | 14508264 | SNV | 1 | A | T | Heterozygous |
| NC_037648.1 | 14513552 | SNV | 1 | T | C | Homozygous   |
| NC_037648.1 | 14514025 | SNV | 1 | T | A | Heterozygous |
| NC_037648.1 | 14514031 | SNV | 1 | A | C | Heterozygous |
| NC_037648.1 | 14514210 | SNV | 1 | G | A | Homozygous   |
| NC_037648.1 | 14514306 | SNV | 1 | A | G | Homozygous   |
| NC_037648.1 | 14514552 | SNV | 1 | A | G | Homozygous   |
| NC_037648.1 | 14515034 | SNV | 1 | A | G | Homozygous   |
| NC_037648.1 | 14515326 | SNV | 1 | C | T | Heterozygous |
| NC_037648.1 | 14515721 | SNV | 1 | C | T | Heterozygous |
| NC_037648.1 | 14515972 | SNV | 1 | T | C | Homozygous   |
| NC_037648.1 | 14516033 | SNV | 1 | G | A | Homozygous   |
| NC_037648.1 | 14516413 | SNV | 1 | T | C | Heterozygous |
| NC_037648.1 | 14518211 | SNV | 1 | T | C | Homozygous   |
| NC_037648.1 | 14519202 | SNV | 1 | A | G | Homozygous   |
| NC_037648.1 | 14519215 | SNV | 1 | G | T | Heterozygous |
| NC_037648.1 | 14519251 | SNV | 1 | T | C | Homozygous   |
| NC_037648.1 | 14519431 | SNV | 1 | C | T | Homozygous   |
| NC_037648.1 | 14519502 | SNV | 1 | C | T | Homozygous   |
| NC_037648.1 | 14519581 | SNV | 1 | A | G | Homozygous   |
| NC_037648.1 | 14521471 | SNV | 1 | A | G | Homozygous   |
| NC_037648.1 | 14521582 | SNV | 1 | G | A | Homozygous   |
| NC_037648.1 | 14521659 | SNV | 1 | T | C | Homozygous   |
| NC_037648.1 | 14521702 | SNV | 1 | T | C | Heterozygous |
| NC_037648.1 | 14521715 | SNV | 1 | G | A | Heterozygous |
| NC_037648.1 | 14522072 | SNV | 1 | T | C | Homozygous   |
| NC_037648.1 | 14522111 | SNV | 1 | T | C | Homozygous   |
| NC_037648.1 | 14522330 | SNV | 1 | T | A | Heterozygous |
| NC_037648.1 | 14522439 | SNV | 1 | A | G | Homozygous   |
| NC_037648.1 | 14522939 | SNV | 1 | C | G | Homozygous   |
| NC_037648.1 | 14523021 | SNV | 1 | G | A | Heterozygous |
| NC_037648.1 | 14523039 | SNV | 1 | G | T | Homozygous   |
| NC_037648.1 | 14523777 | SNV | 1 | G | A | Heterozygous |
| NC_037648.1 | 14524261 | SNV | 1 | A | T | Homozygous   |
| NC_037648.1 | 14524768 | SNV | 1 | T | C | Homozygous   |
| NC_037648.1 | 14526378 | SNV | 1 | C | T | Heterozygous |
| NC_037648.1 | 14527009 | SNV | 1 | C | T | Homozygous   |
| NC_037648.1 | 14527110 | SNV | 1 | G | C | Heterozygous |
| NC_037648.1 | 14527201 | SNV | 1 | T | C | Homozygous   |
| NC_037648.1 | 14527585 | SNV | 1 | G | A | Heterozygous |
| NC_037648.1 | 14527821 | SNV | 1 | A | T | Homozygous   |
| NC_037648.1 | 14528128 | SNV | 1 | C | T | Heterozygous |
| NC_037648.1 | 14528292 | SNV | 1 | G | A | Heterozygous |
| NC_037648.1 | 14528389 | SNV | 1 | G | A | Homozygous   |
| NC_037648.1 | 14528407 | SNV | 1 | C | T | Homozygous   |
| NC_037648.1 | 14528499 | SNV | 1 | C | T | Homozygous   |
| NC_037648.1 | 14528553 | SNV | 1 | A | C | Heterozygous |
| NC_037648.1 | 14528571 | SNV | 1 | A | G | Homozygous   |
| NC_037648.1 | 14529596 | SNV | 1 | A | T | Homozygous   |
| NC_037648.1 | 14529604 | SNV | 1 | T | A | Homozygous   |

|             |          |     |   |   |   |              |
|-------------|----------|-----|---|---|---|--------------|
| NC_037648.1 | 14529608 | SNV | 1 | C | G | Homozygous   |
| NC_037648.1 | 14531369 | SNV | 1 | G | T | Heterozygous |
| NC_037648.1 | 14535789 | SNV | 1 | C | T | Heterozygous |
| NC_037648.1 | 14535848 | SNV | 1 | A | G | Homozygous   |
| NC_037648.1 | 14535850 | SNV | 1 | A | G | Homozygous   |
| NC_037648.1 | 14535852 | SNV | 1 | T | C | Heterozygous |
| NC_037648.1 | 14536040 | SNV | 1 | T | C | Heterozygous |
| NC_037648.1 | 14536557 | SNV | 1 | A | C | Homozygous   |
| NC_037648.1 | 14536688 | SNV | 1 | A | G | Homozygous   |
| NC_037648.1 | 14536717 | SNV | 1 | A | T | Homozygous   |
| NC_037648.1 | 14536731 | SNV | 1 | T | C | Homozygous   |
| NC_037648.1 | 14536755 | SNV | 1 | A | G | Homozygous   |
| NC_037648.1 | 14536764 | SNV | 1 | A | G | Homozygous   |
| NC_037648.1 | 14536771 | SNV | 1 | A | G | Homozygous   |
| NC_037648.1 | 14536774 | SNV | 1 | G | A | Heterozygous |
| NC_037648.1 | 14536983 | SNV | 1 | T | C | Homozygous   |
| NC_037648.1 | 14537091 | SNV | 1 | G | A | Heterozygous |
| NC_037648.1 | 14537099 | SNV | 1 | G | A | Heterozygous |
| NC_037648.1 | 14537167 | SNV | 1 | A | G | Heterozygous |
| NC_037648.1 | 14537183 | SNV | 1 | A | G | Heterozygous |
| NC_037648.1 | 14537194 | SNV | 1 | G | A | Homozygous   |
| NC_037648.1 | 14537537 | SNV | 1 | C | T | Homozygous   |
| NC_037648.1 | 14537576 | SNV | 1 | A | G | Heterozygous |
| NC_037648.1 | 14537584 | SNV | 1 | G | A | Heterozygous |
| NC_037648.1 | 14540999 | SNV | 1 | A | T | Heterozygous |
| NC_037648.1 | 14541012 | SNV | 1 | C | T | Heterozygous |
| NC_037648.1 | 14546634 | SNV | 1 | T | C | Homozygous   |
| NC_037648.1 | 14546637 | SNV | 1 | A | T | Homozygous   |
| NC_037648.1 | 14546640 | SNV | 1 | C | T | Homozygous   |
| NC_037648.1 | 14546659 | SNV | 1 | A | T | Homozygous   |
| NC_037648.1 | 14548331 | SNV | 1 | T | A | Heterozygous |
| NC_037648.1 | 14548712 | SNV | 1 | A | G | Homozygous   |
| NC_037648.1 | 14548795 | SNV | 1 | C | G | Homozygous   |
| NC_037648.1 | 14548929 | SNV | 1 | G | A | Homozygous   |
| NC_037648.1 | 14552783 | SNV | 1 | T | C | Homozygous   |
| NC_037648.1 | 14552822 | SNV | 1 | G | T | Homozygous   |
| NC_037648.1 | 14553385 | SNV | 1 | G | A | Heterozygous |
| NC_037648.1 | 14553389 | SNV | 1 | G | A | Heterozygous |
| NC_037648.1 | 14553581 | SNV | 1 | C | T | Heterozygous |
| NC_037648.1 | 14553593 | SNV | 1 | T | C | Heterozygous |
| NC_037648.1 | 14553630 | SNV | 1 | C | T | Heterozygous |
| NC_037648.1 | 14553662 | SNV | 1 | G | C | Homozygous   |
| NC_037648.1 | 14553704 | SNV | 1 | A | G | Homozygous   |
| NC_037648.1 | 14553771 | SNV | 1 | G | A | Heterozygous |
| NC_037648.1 | 14553883 | SNV | 1 | A | C | Heterozygous |
| NC_037648.1 | 14553933 | SNV | 1 | T | C | Homozygous   |
| NC_037648.1 | 14553936 | SNV | 1 | A | G | Homozygous   |
| NC_037648.1 | 14554040 | SNV | 1 | T | G | Homozygous   |
| NC_037648.1 | 14554063 | SNV | 1 | C | T | Homozygous   |
| NC_037648.1 | 14554216 | SNV | 1 | T | C | Homozygous   |
| NC_037648.1 | 14554269 | SNV | 1 | T | C | Heterozygous |

|             |          |     |   |   |   |              |
|-------------|----------|-----|---|---|---|--------------|
| NC_037648.1 | 14554271 | SNV | 1 | C | T | Heterozygous |
| NC_037648.1 | 14554274 | SNV | 1 | C | T | Heterozygous |
| NC_037648.1 | 14557581 | SNV | 1 | A | G | Homozygous   |
| NC_037648.1 | 14557638 | SNV | 1 | A | G | Homozygous   |
| NC_037648.1 | 14557676 | SNV | 1 | T | C | Homozygous   |
| NC_037648.1 | 14558227 | SNV | 1 | G | A | Heterozygous |
| NC_037648.1 | 14558247 | SNV | 1 | G | A | Homozygous   |
| NC_037648.1 | 14558252 | SNV | 1 | G | A | Homozygous   |
| NC_037648.1 | 14558433 | SNV | 1 | T | G | Homozygous   |
| NC_037648.1 | 14558859 | SNV | 1 | T | C | Homozygous   |
| NC_037648.1 | 14558880 | SNV | 1 | C | T | Homozygous   |
| NC_037648.1 | 14559105 | SNV | 1 | C | A | Heterozygous |
| NC_037648.1 | 14559327 | SNV | 1 | C | T | Heterozygous |
| NC_037648.1 | 14559376 | SNV | 1 | G | A | Heterozygous |
| NC_037648.1 | 14559378 | SNV | 1 | A | T | Heterozygous |
| NC_037648.1 | 14559462 | SNV | 1 | C | T | Heterozygous |
| NC_037648.1 | 14560162 | SNV | 1 | T | C | Homozygous   |
| NC_037648.1 | 14560291 | SNV | 1 | C | T | Heterozygous |
| NC_037648.1 | 14560294 | SNV | 1 | T | C | Homozygous   |
| NC_037648.1 | 14560399 | SNV | 1 | A | G | Heterozygous |
| NC_037648.1 | 14561246 | SNV | 1 | A | G | Homozygous   |
| NC_037648.1 | 14561250 | SNV | 1 | A | G | Homozygous   |
| NC_037648.1 | 14561258 | SNV | 1 | G | T | Heterozygous |
| NC_037648.1 | 14561295 | SNV | 1 | C | T | Homozygous   |
| NC_037648.1 | 14561322 | SNV | 1 | G | A | Heterozygous |
| NC_037648.1 | 14561590 | SNV | 1 | A | G | Homozygous   |
| NC_037648.1 | 14561625 | SNV | 1 | T | A | Homozygous   |
| NC_037648.1 | 14561674 | SNV | 1 | C | T | Heterozygous |
| NC_037648.1 | 14563925 | SNV | 1 | A | C | Homozygous   |
| NC_037648.1 | 14563931 | SNV | 1 | T | G | Homozygous   |
| NC_037648.1 | 14564455 | SNV | 1 | T | C | Homozygous   |
| NC_037648.1 | 14578572 | SNV | 1 | A | G | Homozygous   |
| NC_037648.1 | 14578957 | SNV | 1 | A | G | Heterozygous |
| NC_037648.1 | 14579127 | SNV | 1 | A | T | Heterozygous |
| NC_037648.1 | 14579290 | SNV | 1 | G | A | Heterozygous |
| NC_037648.1 | 14579336 | SNV | 1 | G | C | Homozygous   |
| NC_037648.1 | 14579361 | SNV | 1 | G | C | Homozygous   |
| NC_037648.1 | 14607170 | SNV | 1 | A | G | Homozygous   |
| NC_037648.1 | 14607242 | SNV | 1 | C | T | Heterozygous |
| NC_037648.1 | 14611867 | SNV | 1 | C | T | Heterozygous |
| NC_037648.1 | 14612334 | SNV | 1 | C | T | Homozygous   |
| NC_037648.1 | 14703396 | SNV | 1 | A | G | Homozygous   |
| NC_037648.1 | 14703453 | SNV | 1 | C | T | Heterozygous |
| NC_037648.1 | 14703489 | SNV | 1 | C | T | Heterozygous |
| NC_037648.1 | 14704472 | SNV | 1 | A | G | Homozygous   |
| NC_037648.1 | 14704490 | SNV | 1 | C | T | Heterozygous |
| NC_037648.1 | 14704520 | SNV | 1 | T | C | Homozygous   |
| NC_037648.1 | 14705007 | SNV | 1 | C | T | Heterozygous |
| NC_037648.1 | 14705900 | SNV | 1 | T | C | Heterozygous |
| NC_037648.1 | 14705961 | SNV | 1 | T | C | Heterozygous |
| NC_037648.1 | 14706244 | SNV | 1 | A | G | Heterozygous |

|             |          |     |   |   |   |              |
|-------------|----------|-----|---|---|---|--------------|
| NC_037648.1 | 14706352 | SNV | 1 | A | G | Heterozygous |
| NC_037648.1 | 14706357 | SNV | 1 | A | G | Heterozygous |
| NC_037648.1 | 14706385 | SNV | 1 | A | G | Heterozygous |
| NC_037648.1 | 14706410 | SNV | 1 | G | A | Homozygous   |
| NC_037648.1 | 14726254 | SNV | 1 | T | A | Homozygous   |
| NC_037648.1 | 14726342 | SNV | 1 | C | T | Heterozygous |
| NC_037648.1 | 14726638 | SNV | 1 | A | G | Heterozygous |
| NC_037648.1 | 14726648 | SNV | 1 | G | A | Heterozygous |
| NC_037648.1 | 14726695 | SNV | 1 | C | T | Homozygous   |
| NC_037648.1 | 14726734 | SNV | 1 | A | T | Homozygous   |
| NC_037648.1 | 14726736 | SNV | 1 | T | C | Homozygous   |
| NC_037648.1 | 14726742 | SNV | 1 | C | T | Homozygous   |
| NC_037648.1 | 14726837 | SNV | 1 | T | C | Homozygous   |
| NC_037648.1 | 14728402 | SNV | 1 | C | T | Homozygous   |
| NC_037648.1 | 14728548 | SNV | 1 | G | A | Homozygous   |
| NC_037648.1 | 14732960 | SNV | 1 | G | C | Homozygous   |
| NC_037648.1 | 14733031 | SNV | 1 | C | T | Heterozygous |
| NC_037648.1 | 14733053 | SNV | 1 | C | T | Heterozygous |
| NC_037648.1 | 14733063 | SNV | 1 | C | T | Homozygous   |
| NC_037648.1 | 14733356 | SNV | 1 | G | A | Heterozygous |
| NC_037648.1 | 14733370 | SNV | 1 | A | G | Heterozygous |
| NC_037648.1 | 14733498 | SNV | 1 | A | G | Heterozygous |
| NC_037648.1 | 14733702 | SNV | 1 | A | T | Heterozygous |
| NC_037648.1 | 14733856 | SNV | 1 | A | G | Heterozygous |
| NC_037648.1 | 14733859 | SNV | 1 | T | A | Heterozygous |
| NC_037648.1 | 14733871 | SNV | 1 | A | G | Homozygous   |
| NC_037648.1 | 14733922 | SNV | 1 | A | G | Homozygous   |
| NC_037648.1 | 14733955 | SNV | 1 | A | G | Heterozygous |
| NC_037648.1 | 14734575 | SNV | 1 | G | A | Heterozygous |
| NC_037648.1 | 14734594 | SNV | 1 | G | A | Heterozygous |
| NC_037648.1 | 14735080 | SNV | 1 | C | T | Heterozygous |
| NC_037648.1 | 14735492 | SNV | 1 | A | G | Heterozygous |
| NC_037648.1 | 14735520 | SNV | 1 | C | T | Heterozygous |
| NC_037648.1 | 14735594 | SNV | 1 | A | G | Homozygous   |
| NC_037648.1 | 14735605 | SNV | 1 | G | A | Heterozygous |
| NC_037648.1 | 14735608 | SNV | 1 | G | A | Heterozygous |
| NC_037648.1 | 14735611 | SNV | 1 | G | A | Heterozygous |
| NC_037648.1 | 14740716 | SNV | 1 | T | C | Homozygous   |
| NC_037648.1 | 14742182 | SNV | 1 | C | T | Heterozygous |
| NC_037648.1 | 14742185 | SNV | 1 | T | A | Homozygous   |
| NC_037648.1 | 14742287 | SNV | 1 | A | C | Homozygous   |
| NC_037648.1 | 14742435 | SNV | 1 | A | G | Homozygous   |
| NC_037648.1 | 14742578 | SNV | 1 | G | A | Homozygous   |
| NC_037648.1 | 14742847 | SNV | 1 | T | C | Heterozygous |
| NC_037648.1 | 14742850 | SNV | 1 | G | A | Homozygous   |
| NC_037648.1 | 14742918 | SNV | 1 | C | G | Homozygous   |
| NC_037648.1 | 14742989 | SNV | 1 | T | C | Homozygous   |
| NC_037648.1 | 14743058 | SNV | 1 | T | C | Homozygous   |
| NC_037648.1 | 14743069 | SNV | 1 | A | G | Heterozygous |
| NC_037648.1 | 14743114 | SNV | 1 | T | C | Homozygous   |
| NC_037648.1 | 14743126 | SNV | 1 | A | G | Homozygous   |

|             |          |     |   |   |   |              |
|-------------|----------|-----|---|---|---|--------------|
| NC_037648.1 | 14743164 | SNV | 1 | A | G | Homozygous   |
| NC_037648.1 | 14743170 | SNV | 1 | C | T | Heterozygous |
| NC_037648.1 | 14743648 | SNV | 1 | A | T | Homozygous   |
| NC_037648.1 | 14743652 | SNV | 1 | G | T | Homozygous   |
| NC_037648.1 | 14743696 | SNV | 1 | A | G | Homozygous   |
| NC_037648.1 | 14757467 | SNV | 1 | C | T | Homozygous   |
| NC_037648.1 | 14757472 | SNV | 1 | A | G | Homozygous   |
| NC_037648.1 | 14757605 | SNV | 1 | A | G | Homozygous   |
| NC_037648.1 | 14757776 | SNV | 1 | T | C | Homozygous   |
| NC_037648.1 | 14757832 | SNV | 1 | G | A | Homozygous   |
| NC_037648.1 | 14757853 | SNV | 1 | C | T | Heterozygous |
| NC_037648.1 | 14757882 | SNV | 1 | G | A | Heterozygous |
| NC_037648.1 | 14758073 | SNV | 1 | G | A | Heterozygous |
| NC_037648.1 | 14758490 | SNV | 1 | C | T | Homozygous   |
| NC_037648.1 | 14767789 | SNV | 1 | C | T | Heterozygous |
| NC_037648.1 | 14767934 | SNV | 1 | G | C | Homozygous   |
| NC_037648.1 | 14767939 | SNV | 1 | C | T | Homozygous   |
| NC_037648.1 | 14767975 | SNV | 1 | T | C | Homozygous   |
| NC_037648.1 | 14768073 | SNV | 1 | C | T | Homozygous   |
| NC_037648.1 | 14772804 | SNV | 1 | A | G | Heterozygous |
| NC_037648.1 | 14772807 | SNV | 1 | G | A | Homozygous   |
| NC_037648.1 | 14772810 | SNV | 1 | G | A | Homozygous   |
| NC_037648.1 | 14772821 | SNV | 1 | G | A | Homozygous   |
| NC_037648.1 | 14772824 | SNV | 1 | A | T | Homozygous   |
| NC_037648.1 | 14778990 | SNV | 1 | G | A | Heterozygous |
| NC_037648.1 | 14779235 | SNV | 1 | G | A | Heterozygous |
| NC_037648.1 | 14779270 | SNV | 1 | G | A | Heterozygous |
| NC_037648.1 | 14779361 | SNV | 1 | G | A | Heterozygous |
| NC_037648.1 | 14794548 | SNV | 1 | A | G | Homozygous   |
| NC_037648.1 | 14794551 | SNV | 1 | C | A | Homozygous   |
| NC_037648.1 | 14795079 | SNV | 1 | T | C | Homozygous   |
| NC_037648.1 | 14795575 | SNV | 1 | C | T | Homozygous   |
| NC_037648.1 | 14797330 | SNV | 1 | T | A | Homozygous   |
| NC_037648.1 | 14797333 | SNV | 1 | T | G | Homozygous   |
| NC_037648.1 | 14797342 | SNV | 1 | T | A | Homozygous   |
| NC_037648.1 | 14806135 | SNV | 1 | G | C | Homozygous   |
| NC_037648.1 | 14806225 | SNV | 1 | T | C | Homozygous   |
| NC_037648.1 | 14806371 | SNV | 1 | G | A | Homozygous   |
| NC_037648.1 | 14806419 | SNV | 1 | G | A | Homozygous   |
| NC_037648.1 | 14806560 | SNV | 1 | C | G | Homozygous   |
| NC_037648.1 | 14806871 | SNV | 1 | T | C | Homozygous   |
| NC_037648.1 | 14807341 | SNV | 1 | C | T | Homozygous   |
| NC_037648.1 | 14807606 | SNV | 1 | C | T | Heterozygous |
| NC_037648.1 | 14807628 | SNV | 1 | C | T | Homozygous   |
| NC_037648.1 | 14808556 | SNV | 1 | C | T | Homozygous   |
| NC_037648.1 | 14809402 | SNV | 1 | C | T | Homozygous   |
| NC_037648.1 | 14811892 | SNV | 1 | C | T | Heterozygous |
| NC_037648.1 | 14812901 | SNV | 1 | T | C | Heterozygous |
| NC_037648.1 | 14813102 | SNV | 1 | G | A | Homozygous   |
| NC_037648.1 | 14813322 | SNV | 1 | T | C | Homozygous   |
| NC_037648.1 | 14813340 | SNV | 1 | A | G | Homozygous   |

|             |          |     |   |   |   |              |
|-------------|----------|-----|---|---|---|--------------|
| NC_037648.1 | 14813353 | SNV | 1 | A | G | Homozygous   |
| NC_037648.1 | 14813360 | SNV | 1 | A | T | Homozygous   |
| NC_037648.1 | 14814620 | SNV | 1 | T | C | Homozygous   |
| NC_037648.1 | 14815053 | SNV | 1 | A | G | Homozygous   |
| NC_037648.1 | 14815104 | SNV | 1 | T | C | Homozygous   |
| NC_037648.1 | 14815360 | SNV | 1 | G | A | Homozygous   |
| NC_037648.1 | 14815432 | SNV | 1 | T | C | Homozygous   |
| NC_037648.1 | 14815749 | SNV | 1 | T | C | Heterozygous |
| NC_037648.1 | 14815777 | SNV | 1 | T | C | Homozygous   |
| NC_037648.1 | 14816356 | SNV | 1 | T | C | Heterozygous |
| NC_037648.1 | 14816387 | SNV | 1 | C | T | Homozygous   |
| NC_037648.1 | 14816537 | SNV | 1 | C | T | Homozygous   |
| NC_037648.1 | 14816563 | SNV | 1 | T | C | Homozygous   |
| NC_037648.1 | 14816567 | SNV | 1 | C | T | Homozygous   |
| NC_037648.1 | 14816573 | SNV | 1 | C | T | Homozygous   |
| NC_037648.1 | 14817555 | SNV | 1 | C | A | Heterozygous |
| NC_037648.1 | 14817759 | SNV | 1 | T | A | Homozygous   |
| NC_037648.1 | 14818133 | SNV | 1 | G | A | Homozygous   |
| NC_037648.1 | 14818234 | SNV | 1 | T | C | Homozygous   |
| NC_037648.1 | 14818237 | SNV | 1 | G | T | Homozygous   |
| NC_037648.1 | 14818271 | SNV | 1 | T | A | Heterozygous |
| NC_037648.1 | 14818271 | SNV | 1 | T | G | Heterozygous |
| NC_037648.1 | 14818313 | SNV | 1 | T | C | Homozygous   |
| NC_037648.1 | 14818851 | SNV | 1 | C | A | Homozygous   |
| NC_037648.1 | 14819003 | SNV | 1 | C | T | Heterozygous |
| NC_037648.1 | 14819382 | SNV | 1 | C | T | Heterozygous |
| NC_037648.1 | 14819578 | SNV | 1 | C | T | Heterozygous |
| NC_037648.1 | 14819617 | SNV | 1 | A | G | Homozygous   |
| NC_037648.1 | 14819878 | SNV | 1 | C | T | Homozygous   |
| NC_037648.1 | 14819995 | SNV | 1 | A | G | Homozygous   |
| NC_037648.1 | 14820030 | SNV | 1 | C | T | Homozygous   |
| NC_037648.1 | 14820071 | SNV | 1 | T | C | Heterozygous |
| NC_037648.1 | 14820087 | SNV | 1 | A | G | Homozygous   |
| NC_037648.1 | 14820090 | SNV | 1 | T | C | Homozygous   |
| NC_037648.1 | 14820214 | SNV | 1 | A | G | Homozygous   |
| NC_037648.1 | 14820235 | SNV | 1 | A | C | Homozygous   |
| NC_037648.1 | 14820415 | SNV | 1 | C | T | Heterozygous |
| NC_037648.1 | 14820654 | SNV | 1 | A | G | Homozygous   |
| NC_037648.1 | 14820729 | SNV | 1 | G | A | Heterozygous |
| NC_037648.1 | 14822481 | SNV | 1 | A | G | Homozygous   |
| NC_037648.1 | 14822536 | SNV | 1 | C | T | Heterozygous |
| NC_037648.1 | 14822925 | SNV | 1 | T | C | Homozygous   |
| NC_037648.1 | 14822938 | SNV | 1 | G | A | Heterozygous |
| NC_037648.1 | 14823366 | SNV | 1 | C | T | Heterozygous |
| NC_037648.1 | 14825025 | SNV | 1 | C | T | Homozygous   |
| NC_037648.1 | 14825635 | SNV | 1 | C | G | Homozygous   |
| NC_037648.1 | 14828405 | SNV | 1 | T | C | Homozygous   |
| NC_037648.1 | 14828540 | SNV | 1 | C | T | Homozygous   |
| NC_037648.1 | 14831338 | SNV | 1 | T | C | Homozygous   |
| NC_037648.1 | 14833989 | SNV | 1 | A | G | Homozygous   |
| NC_037648.1 | 14834592 | SNV | 1 | T | C | Homozygous   |

|             |          |     |   |   |   |              |
|-------------|----------|-----|---|---|---|--------------|
| NC_037648.1 | 14834599 | SNV | 1 | T | A | Homozygous   |
| NC_037648.1 | 14834605 | SNV | 1 | A | T | Homozygous   |
| NC_037648.1 | 14834607 | SNV | 1 | A | G | Homozygous   |
| NC_037648.1 | 14834610 | SNV | 1 | A | T | Homozygous   |
| NC_037648.1 | 14834624 | SNV | 1 | A | T | Homozygous   |
| NC_037648.1 | 14840938 | SNV | 1 | G | A | Homozygous   |
| NC_037648.1 | 14841788 | SNV | 1 | G | A | Homozygous   |
| NC_037648.1 | 14843914 | SNV | 1 | T | A | Heterozygous |
| NC_037648.1 | 14846887 | SNV | 1 | T | C | Homozygous   |
| NC_037648.1 | 14852537 | SNV | 1 | T | C | Homozygous   |
| NC_037648.1 | 14853223 | SNV | 1 | G | A | Heterozygous |
| NC_037648.1 | 14854693 | SNV | 1 | A | G | Homozygous   |
| NC_037648.1 | 14856096 | SNV | 1 | T | C | Homozygous   |
| NC_037648.1 | 14856525 | SNV | 1 | C | T | Homozygous   |
| NC_037648.1 | 14861459 | SNV | 1 | T | C | Homozygous   |
| NC_037648.1 | 14861780 | SNV | 1 | T | C | Heterozygous |
| NC_037648.1 | 14861817 | SNV | 1 | C | G | Homozygous   |
| NC_037648.1 | 14862839 | SNV | 1 | T | C | Homozygous   |
| NC_037648.1 | 14863305 | SNV | 1 | A | G | Homozygous   |
| NC_037648.1 | 14863675 | SNV | 1 | C | T | Homozygous   |
| NC_037648.1 | 14863677 | SNV | 1 | A | G | Homozygous   |
| NC_037648.1 | 14863685 | SNV | 1 | A | G | Homozygous   |
| NC_037648.1 | 14864463 | SNV | 1 | T | C | Heterozygous |
| NC_037648.1 | 14864465 | SNV | 1 | A | G | Heterozygous |
| NC_037648.1 | 14864467 | SNV | 1 | C | G | Heterozygous |
| NC_037648.1 | 14864478 | SNV | 1 | T | C | Homozygous   |
| NC_037648.1 | 14864480 | SNV | 1 | A | T | Homozygous   |
| NC_037648.1 | 14864496 | SNV | 1 | T | A | Homozygous   |
| NC_037648.1 | 14864505 | SNV | 1 | A | G | Homozygous   |
| NC_037648.1 | 14864508 | SNV | 1 | T | C | Homozygous   |
| NC_037648.1 | 14864510 | SNV | 1 | A | G | Homozygous   |
| NC_037648.1 | 14876123 | SNV | 1 | T | C | Heterozygous |
| NC_037648.1 | 14880706 | SNV | 1 | A | C | Homozygous   |
| NC_037648.1 | 14880708 | SNV | 1 | A | C | Homozygous   |
| NC_037648.1 | 14881253 | SNV | 1 | C | A | Homozygous   |
| NC_037648.1 | 14883465 | SNV | 1 | T | G | Heterozygous |
| NC_037648.1 | 14883470 | SNV | 1 | T | C | Heterozygous |
| NC_037648.1 | 14883472 | SNV | 1 | C | A | Heterozygous |
| NC_037648.1 | 14883474 | SNV | 1 | G | A | Heterozygous |
| NC_037648.1 | 14883571 | SNV | 1 | T | C | Homozygous   |
| NC_037648.1 | 14884435 | SNV | 1 | T | G | Homozygous   |
| NC_037648.1 | 14884453 | SNV | 1 | C | G | Homozygous   |
| NC_037648.1 | 14884679 | SNV | 1 | C | A | Heterozygous |
| NC_037648.1 | 14884823 | SNV | 1 | T | C | Homozygous   |
| NC_037648.1 | 14884861 | SNV | 1 | G | A | Homozygous   |
| NC_037648.1 | 14885445 | SNV | 1 | C | A | Homozygous   |
| NC_037648.1 | 14886938 | SNV | 1 | G | T | Homozygous   |
| NC_037648.1 | 14889290 | SNV | 1 | C | A | Homozygous   |
| NC_037648.1 | 14889640 | SNV | 1 | C | T | Heterozygous |
| NC_037648.1 | 14890143 | SNV | 1 | C | T | Homozygous   |
| NC_037648.1 | 14896944 | SNV | 1 | C | T | Heterozygous |



|             |          |     |   |   |   |              |
|-------------|----------|-----|---|---|---|--------------|
| NC_037648.1 | 14897921 | SNV | 1 | T | C | Homozygous   |
| NC_037648.1 | 14898503 | SNV | 1 | A | T | Homozygous   |
| NC_037648.1 | 14900505 | SNV | 1 | T | A | Homozygous   |
| NC_037648.1 | 14900512 | SNV | 1 | A | T | Homozygous   |
| NC_037648.1 | 14903819 | SNV | 1 | C | T | Homozygous   |
| NC_037648.1 | 14904167 | SNV | 1 | A | G | Homozygous   |
| NC_037648.1 | 14904172 | SNV | 1 | T | A | Heterozygous |
| NC_037648.1 | 14904175 | SNV | 1 | A | C | Heterozygous |
| NC_037648.1 | 14904177 | SNV | 1 | A | T | Homozygous   |
| NC_037648.1 | 14904183 | SNV | 1 | A | G | Heterozygous |
| NC_037648.1 | 14904191 | SNV | 1 | A | G | Heterozygous |
| NC_037648.1 | 14904197 | SNV | 1 | A | C | Homozygous   |
| NC_037648.1 | 14904199 | SNV | 1 | A | T | Homozygous   |
| NC_037648.1 | 14904206 | SNV | 1 | A | G | Heterozygous |
| NC_037648.1 | 14904210 | SNV | 1 | G | A | Homozygous   |
| NC_037648.1 | 14904215 | SNV | 1 | C | T | Homozygous   |
| NC_037648.1 | 14904747 | SNV | 1 | A | G | Heterozygous |
| NC_037648.1 | 14913165 | SNV | 1 | G | A | Heterozygous |
| NC_037648.1 | 14913723 | SNV | 1 | G | A | Homozygous   |
| NC_037648.1 | 14915327 | SNV | 1 | G | A | Heterozygous |
| NC_037648.1 | 14915819 | SNV | 1 | C | T | Heterozygous |
| NC_037648.1 | 14915981 | SNV | 1 | T | C | Homozygous   |
| NC_037648.1 | 14916194 | SNV | 1 | A | G | Homozygous   |
| NC_037648.1 | 14916228 | SNV | 1 | T | C | Homozygous   |
| NC_037648.1 | 14916764 | SNV | 1 | G | A | Homozygous   |
| NC_037648.1 | 14922472 | SNV | 1 | A | T | Homozygous   |
| NC_037648.1 | 14922479 | SNV | 1 | T | A | Homozygous   |
| NC_037648.1 | 14925000 | SNV | 1 | A | G | Homozygous   |
| NC_037648.1 | 14928209 | SNV | 1 | T | A | Homozygous   |
| NC_037648.1 | 14928399 | SNV | 1 | C | G | Homozygous   |
| NC_037648.1 | 14928832 | SNV | 1 | T | A | Homozygous   |
| NC_037648.1 | 14928848 | SNV | 1 | T | G | Heterozygous |
| NC_037648.1 | 14928852 | SNV | 1 | A | T | Heterozygous |
| NC_037648.1 | 14928854 | SNV | 1 | A | C | Heterozygous |
| NC_037648.1 | 14928867 | SNV | 1 | A | T | Heterozygous |
| NC_037648.1 | 14928875 | SNV | 1 | T | G | Heterozygous |
| NC_037648.1 | 14928877 | SNV | 1 | T | A | Homozygous   |
| NC_037648.1 | 14928900 | SNV | 1 | G | A | Heterozygous |
| NC_037648.1 | 14930377 | SNV | 1 | A | G | Homozygous   |
| NC_037648.1 | 14930649 | SNV | 1 | T | A | Homozygous   |
| NC_037648.1 | 14930652 | SNV | 1 | A | C | Homozygous   |
| NC_037648.1 | 14931089 | SNV | 1 | A | C | Homozygous   |
| NC_037648.1 | 14931104 | SNV | 1 | T | A | Homozygous   |
| NC_037648.1 | 14931261 | SNV | 1 | C | A | Homozygous   |
| NC_037648.1 | 14931871 | SNV | 1 | T | C | Homozygous   |
| NC_037648.1 | 14932116 | SNV | 1 | C | A | Homozygous   |
| NC_037648.1 | 14932119 | SNV | 1 | C | T | Homozygous   |
| NC_037648.1 | 14932127 | SNV | 1 | T | C | Homozygous   |
| NC_037648.1 | 14932129 | SNV | 1 | T | A | Homozygous   |
| NC_037648.1 | 14932167 | SNV | 1 | T | C | Homozygous   |
| NC_037648.1 | 14932251 | SNV | 1 | G | A | Homozygous   |

|             |          |     |   |   |   |              |
|-------------|----------|-----|---|---|---|--------------|
| NC_037648.1 | 14932862 | SNV | 1 | T | A | Homozygous   |
| NC_037648.1 | 14937715 | SNV | 1 | C | T | Homozygous   |
| NC_037648.1 | 14944718 | SNV | 1 | T | A | Homozygous   |
| NC_037648.1 | 14945810 | SNV | 1 | A | G | Heterozygous |
| NC_037648.1 | 14946322 | SNV | 1 | A | G | Heterozygous |
| NC_037648.1 | 14946334 | SNV | 1 | A | G | Heterozygous |
| NC_037648.1 | 14946338 | SNV | 1 | A | G | Heterozygous |
| NC_037648.1 | 14946344 | SNV | 1 | A | G | Heterozygous |
| NC_037648.1 | 14952523 | SNV | 1 | A | T | Homozygous   |
| NC_037648.1 | 14952568 | SNV | 1 | A | C | Homozygous   |
| NC_037648.1 | 14952574 | SNV | 1 | T | A | Homozygous   |
| NC_037648.1 | 14952673 | SNV | 1 | T | C | Homozygous   |
| NC_037648.1 | 14952964 | SNV | 1 | C | T | Heterozygous |
| NC_037648.1 | 14953006 | SNV | 1 | T | C | Homozygous   |
| NC_037648.1 | 14953258 | SNV | 1 | A | G | Homozygous   |
| NC_037648.1 | 14954627 | SNV | 1 | C | T | Homozygous   |
| NC_037648.1 | 14954631 | SNV | 1 | A | C | Homozygous   |
| NC_037648.1 | 14954634 | SNV | 1 | A | T | Homozygous   |
| NC_037648.1 | 14955264 | SNV | 1 | T | C | Heterozygous |
| NC_037648.1 | 14956315 | SNV | 1 | C | T | Homozygous   |
| NC_037648.1 | 14958518 | SNV | 1 | A | G | Homozygous   |
| NC_037648.1 | 14961002 | SNV | 1 | A | C | Homozygous   |
| NC_037648.1 | 14962558 | SNV | 1 | T | A | Heterozygous |
| NC_037648.1 | 14964249 | SNV | 1 | C | T | Heterozygous |
| NC_037648.1 | 14964345 | SNV | 1 | G | A | Heterozygous |
| NC_037648.1 | 14965909 | SNV | 1 | A | T | Heterozygous |
| NC_037648.1 | 14967006 | SNV | 1 | G | A | Heterozygous |
| NC_037648.1 | 14973586 | SNV | 1 | A | G | Homozygous   |
| NC_037648.1 | 14979035 | SNV | 1 | G | T | Heterozygous |
| NC_037648.1 | 14979299 | SNV | 1 | C | T | Heterozygous |
| NC_037648.1 | 14979561 | SNV | 1 | A | G | Homozygous   |
| NC_037648.1 | 14979827 | SNV | 1 | C | T | Homozygous   |
| NC_037648.1 | 14980083 | SNV | 1 | C | T | Heterozygous |
| NC_037648.1 | 14983343 | SNV | 1 | A | C | Homozygous   |
| NC_037648.1 | 14983350 | SNV | 1 | T | A | Homozygous   |
| NC_037648.1 | 14983352 | SNV | 1 | A | G | Homozygous   |
| NC_037648.1 | 14983594 | SNV | 1 | C | T | Homozygous   |
| NC_037648.1 | 14983601 | SNV | 1 | T | A | Homozygous   |
| NC_037648.1 | 14983609 | SNV | 1 | A | G | Homozygous   |
| NC_037648.1 | 14983611 | SNV | 1 | C | A | Homozygous   |
| NC_037648.1 | 14983618 | SNV | 1 | A | T | Homozygous   |
| NC_037648.1 | 14983701 | SNV | 1 | C | A | Homozygous   |
| NC_037648.1 | 14984061 | SNV | 1 | C | T | Heterozygous |
| NC_037648.1 | 14985937 | SNV | 1 | G | A | Heterozygous |
| NC_037648.1 | 14986264 | SNV | 1 | A | G | Homozygous   |
| NC_037648.1 | 14986584 | SNV | 1 | A | G | Homozygous   |
| NC_037648.1 | 14987113 | SNV | 1 | C | T | Heterozygous |
| NC_037648.1 | 14987133 | SNV | 1 | C | G | Homozygous   |
| NC_037648.1 | 14987307 | SNV | 1 | A | C | Homozygous   |
| NC_037648.1 | 14987450 | SNV | 1 | G | A | Homozygous   |
| NC_037648.1 | 14992146 | SNV | 1 | A | G | Homozygous   |

|             |          |     |   |   |   |              |
|-------------|----------|-----|---|---|---|--------------|
| NC_037648.1 | 14992681 | SNV | 1 | T | G | Homozygous   |
| NC_037648.1 | 14993190 | SNV | 1 | T | C | Heterozygous |
| NC_037648.1 | 14993446 | SNV | 1 | T | C | Heterozygous |
| NC_037648.1 | 14993467 | SNV | 1 | T | G | Heterozygous |
| NC_037648.1 | 14993491 | SNV | 1 | T | G | Heterozygous |
| NC_037648.1 | 14993503 | SNV | 1 | T | G | Homozygous   |
| NC_037648.1 | 14993506 | SNV | 1 | T | C | Homozygous   |
| NC_037648.1 | 14993545 | SNV | 1 | A | G | Homozygous   |
| NC_037648.1 | 14994068 | SNV | 1 | C | T | Heterozygous |
| NC_037648.1 | 14994244 | SNV | 1 | C | T | Heterozygous |
| NC_037648.1 | 14994645 | SNV | 1 | C | T | Heterozygous |
| NC_037648.1 | 14994698 | SNV | 1 | A | G | Homozygous   |
| NC_037648.1 | 14995055 | SNV | 1 | A | G | Homozygous   |
| NC_037648.1 | 14995185 | SNV | 1 | T | A | Homozygous   |
| NC_037648.1 | 14995351 | SNV | 1 | T | C | Heterozygous |
| NC_037648.1 | 14995428 | SNV | 1 | T | C | Heterozygous |
| NC_037648.1 | 14995458 | SNV | 1 | T | C | Homozygous   |
| NC_037648.1 | 14996236 | SNV | 1 | G | A | Heterozygous |
| NC_037648.1 | 15000371 | SNV | 1 | G | A | Heterozygous |
| NC_037648.1 | 15006702 | SNV | 1 | T | C | Heterozygous |
| NC_037648.1 | 15006704 | SNV | 1 | G | A | Heterozygous |
| NC_037648.1 | 15007115 | SNV | 1 | T | C | Homozygous   |
| NC_037648.1 | 15007495 | SNV | 1 | A | G | Homozygous   |
| NC_037648.1 | 15010137 | SNV | 1 | T | C | Heterozygous |
| NC_037648.1 | 15010363 | SNV | 1 | G | A | Homozygous   |
| NC_037648.1 | 15011632 | SNV | 1 | C | A | Homozygous   |
| NC_037648.1 | 15015084 | SNV | 1 | A | T | Homozygous   |
| NC_037648.1 | 15015609 | SNV | 1 | T | C | Homozygous   |
| NC_037648.1 | 15016347 | SNV | 1 | T | C | Homozygous   |
| NC_037648.1 | 15016407 | SNV | 1 | G | T | Heterozygous |
| NC_037648.1 | 15016410 | SNV | 1 | T | C | Heterozygous |
| NC_037648.1 | 15016416 | SNV | 1 | T | A | Heterozygous |
| NC_037648.1 | 15016419 | SNV | 1 | G | A | Heterozygous |
| NC_037648.1 | 15016422 | SNV | 1 | T | G | Heterozygous |
| NC_037648.1 | 15016424 | SNV | 1 | A | G | Heterozygous |
| NC_037648.1 | 15016428 | SNV | 1 | T | C | Heterozygous |
| NC_037648.1 | 15016434 | SNV | 1 | G | A | Heterozygous |
| NC_037648.1 | 15016452 | SNV | 1 | A | G | Heterozygous |
| NC_037648.1 | 15016455 | SNV | 1 | T | C | Heterozygous |
| NC_037648.1 | 15016484 | SNV | 1 | T | G | Heterozygous |
| NC_037648.1 | 15016488 | SNV | 1 | T | G | Heterozygous |
| NC_037648.1 | 15016500 | SNV | 1 | T | C | Heterozygous |
| NC_037648.1 | 15016503 | SNV | 1 | T | C | Heterozygous |
| NC_037648.1 | 15016506 | SNV | 1 | A | T | Heterozygous |
| NC_037648.1 | 15016950 | SNV | 1 | A | T | Heterozygous |
| NC_037648.1 | 15016980 | SNV | 1 | T | C | Heterozygous |
| NC_037648.1 | 15016998 | SNV | 1 | T | A | Homozygous   |
| NC_037648.1 | 15017001 | SNV | 1 | T | A | Homozygous   |
| NC_037648.1 | 15017022 | SNV | 1 | G | A | Homozygous   |
| NC_037648.1 | 15017034 | SNV | 1 | T | C | Homozygous   |
| NC_037648.1 | 15017049 | SNV | 1 | A | C | Homozygous   |

|             |          |     |   |   |   |              |
|-------------|----------|-----|---|---|---|--------------|
| NC_037648.1 | 15017055 | SNV | 1 | C | T | Homozygous   |
| NC_037648.1 | 15017064 | SNV | 1 | T | C | Homozygous   |
| NC_037648.1 | 15017067 | SNV | 1 | A | G | Heterozygous |
| NC_037648.1 | 15017271 | SNV | 1 | T | C | Heterozygous |
| NC_037648.1 | 15017427 | SNV | 1 | A | G | Homozygous   |
| NC_037648.1 | 15017544 | SNV | 1 | T | C | Heterozygous |
| NC_037648.1 | 15022011 | SNV | 1 | A | T | Heterozygous |
| NC_037648.1 | 15022014 | SNV | 1 | G | C | Heterozygous |
| NC_037648.1 | 15022023 | SNV | 1 | G | A | Heterozygous |
| NC_037648.1 | 15022029 | SNV | 1 | A | G | Homozygous   |
| NC_037648.1 | 15022239 | SNV | 1 | T | C | Heterozygous |
| NC_037648.1 | 15028312 | SNV | 1 | A | G | Homozygous   |
| NC_037648.1 | 15028344 | SNV | 1 | C | T | Heterozygous |
| NC_037648.1 | 15028729 | SNV | 1 | T | G | Homozygous   |
| NC_037648.1 | 15029809 | SNV | 1 | C | T | Heterozygous |
| NC_037648.1 | 15030446 | SNV | 1 | C | T | Heterozygous |
| NC_037648.1 | 15030824 | SNV | 1 | A | G | Homozygous   |
| NC_037648.1 | 15031168 | SNV | 1 | C | T | Homozygous   |
| NC_037648.1 | 15031185 | SNV | 1 | C | T | Homozygous   |
| NC_037648.1 | 15031247 | SNV | 1 | T | C | Homozygous   |
| NC_037648.1 | 15031268 | SNV | 1 | T | C | Heterozygous |
| NC_037648.1 | 15031278 | SNV | 1 | C | T | Heterozygous |
| NC_037648.1 | 15031535 | SNV | 1 | C | T | Homozygous   |
| NC_037648.1 | 15038509 | SNV | 1 | G | A | Heterozygous |
| NC_037648.1 | 15038515 | SNV | 1 | T | C | Homozygous   |
| NC_037648.1 | 15039177 | SNV | 1 | C | T | Homozygous   |
| NC_037648.1 | 15040948 | SNV | 1 | T | C | Homozygous   |
| NC_037648.1 | 15041008 | SNV | 1 | T | C | Homozygous   |
| NC_037648.1 | 15041032 | SNV | 1 | T | C | Homozygous   |
| NC_037648.1 | 15044278 | SNV | 1 | C | T | Heterozygous |
| NC_037648.1 | 15044714 | SNV | 1 | T | C | Heterozygous |
| NC_037648.1 | 15044721 | SNV | 1 | A | G | Homozygous   |
| NC_037648.1 | 15045658 | SNV | 1 | G | A | Homozygous   |
| NC_037648.1 | 15045897 | SNV | 1 | C | T | Homozygous   |
| NC_037648.1 | 15046368 | SNV | 1 | C | A | Homozygous   |
| NC_037648.1 | 15048404 | SNV | 1 | C | T | Homozygous   |
| NC_037648.1 | 15055512 | SNV | 1 | G | A | Homozygous   |
| NC_037648.1 | 15055567 | SNV | 1 | A | T | Homozygous   |
| NC_037648.1 | 15056510 | SNV | 1 | C | T | Homozygous   |
| NC_037648.1 | 15056794 | SNV | 1 | G | A | Homozygous   |
| NC_037648.1 | 15057467 | SNV | 1 | T | A | Heterozygous |
| NC_037648.1 | 15059438 | SNV | 1 | A | G | Homozygous   |
| NC_037648.1 | 15059441 | SNV | 1 | A | G | Homozygous   |
| NC_037648.1 | 15059443 | SNV | 1 | A | C | Homozygous   |
| NC_037648.1 | 15059466 | SNV | 1 | T | C | Homozygous   |
| NC_037648.1 | 15059470 | SNV | 1 | C | G | Homozygous   |
| NC_037648.1 | 15059552 | SNV | 1 | C | T | Homozygous   |
| NC_037648.1 | 15059854 | SNV | 1 | C | T | Homozygous   |
| NC_037648.1 | 15061471 | SNV | 1 | C | T | Homozygous   |
| NC_037648.1 | 15066390 | SNV | 1 | T | C | Heterozygous |
| NC_037648.1 | 15070413 | SNV | 1 | G | A | Homozygous   |

|             |          |     |   |   |   |              |
|-------------|----------|-----|---|---|---|--------------|
| NC_037648.1 | 15073763 | SNV | 1 | C | T | Heterozygous |
| NC_037648.1 | 15075863 | SNV | 1 | C | T | Heterozygous |
| NC_037648.1 | 15075944 | SNV | 1 | A | G | Heterozygous |
| NC_037648.1 | 15075950 | SNV | 1 | C | T | Heterozygous |
| NC_037648.1 | 15076013 | SNV | 1 | A | G | Heterozygous |
| NC_037648.1 | 15076176 | SNV | 1 | G | A | Homozygous   |
| NC_037648.1 | 15076597 | SNV | 1 | T | C | Homozygous   |
| NC_037648.1 | 15083048 | SNV | 1 | A | G | Heterozygous |
| NC_037648.1 | 15083082 | SNV | 1 | A | G | Homozygous   |
| NC_037648.1 | 15083848 | SNV | 1 | A | G | Heterozygous |
| NC_037648.1 | 15083928 | SNV | 1 | G | A | Homozygous   |
| NC_037648.1 | 15084091 | SNV | 1 | G | A | Homozygous   |
| NC_037648.1 | 15084112 | SNV | 1 | A | G | Homozygous   |
| NC_037648.1 | 15084695 | SNV | 1 | C | T | Homozygous   |
| NC_037648.1 | 15084914 | SNV | 1 | T | C | Homozygous   |
| NC_037648.1 | 15084977 | SNV | 1 | A | G | Homozygous   |
| NC_037648.1 | 15084983 | SNV | 1 | T | C | Homozygous   |
| NC_037648.1 | 15085000 | SNV | 1 | T | A | Homozygous   |
| NC_037648.1 | 15085228 | SNV | 1 | T | C | Homozygous   |
| NC_037648.1 | 15085270 | SNV | 1 | T | C | Homozygous   |
| NC_037648.1 | 15085361 | SNV | 1 | C | A | Homozygous   |
| NC_037648.1 | 15085368 | SNV | 1 | A | C | Homozygous   |
| NC_037648.1 | 15085418 | SNV | 1 | G | C | Homozygous   |
| NC_037648.1 | 15089110 | SNV | 1 | A | G | Homozygous   |
| NC_037648.1 | 15094347 | SNV | 1 | T | C | Homozygous   |
| NC_037648.1 | 15094485 | SNV | 1 | T | C | Homozygous   |
| NC_037648.1 | 15094501 | SNV | 1 | A | G | Homozygous   |
| NC_037648.1 | 15094577 | SNV | 1 | G | A | Homozygous   |
| NC_037648.1 | 15095331 | SNV | 1 | C | T | Homozygous   |
| NC_037648.1 | 15095890 | SNV | 1 | G | A | Homozygous   |
| NC_037648.1 | 15096170 | SNV | 1 | T | G | Homozygous   |
| NC_037648.1 | 15096173 | SNV | 1 | C | T | Homozygous   |
| NC_037648.1 | 15096553 | SNV | 1 | C | T | Homozygous   |
| NC_037648.1 | 15101651 | SNV | 1 | A | G | Heterozygous |
| NC_037648.1 | 15104634 | SNV | 1 | C | T | Heterozygous |
| NC_037648.1 | 15104684 | SNV | 1 | T | C | Homozygous   |
| NC_037648.1 | 15107210 | SNV | 1 | G | A | Homozygous   |
| NC_037648.1 | 15108147 | SNV | 1 | G | A | Homozygous   |
| NC_037648.1 | 15108216 | SNV | 1 | C | T | Homozygous   |
| NC_037648.1 | 15115531 | SNV | 1 | A | T | Homozygous   |
| NC_037648.1 | 15115551 | SNV | 1 | A | C | Heterozygous |
| NC_037648.1 | 15115585 | SNV | 1 | A | C | Heterozygous |
| NC_037648.1 | 15120483 | SNV | 1 | T | A | Homozygous   |
| NC_037648.1 | 15121095 | SNV | 1 | A | G | Homozygous   |
| NC_037648.1 | 15121523 | SNV | 1 | C | A | Homozygous   |
| NC_037648.1 | 15121526 | SNV | 1 | G | A | Homozygous   |
| NC_037648.1 | 15122002 | SNV | 1 | G | A | Heterozygous |
| NC_037648.1 | 15122694 | SNV | 1 | A | T | Heterozygous |
| NC_037648.1 | 15122718 | SNV | 1 | T | A | Homozygous   |
| NC_037648.1 | 15122720 | SNV | 1 | A | C | Homozygous   |
| NC_037648.1 | 15123043 | SNV | 1 | T | C | Homozygous   |

|             |          |     |   |   |   |              |
|-------------|----------|-----|---|---|---|--------------|
| NC_037648.1 | 15123391 | SNV | 1 | T | C | Homozygous   |
| NC_037648.1 | 15127339 | SNV | 1 | G | C | Homozygous   |
| NC_037648.1 | 15129977 | SNV | 1 | G | A | Homozygous   |
| NC_037648.1 | 15130058 | SNV | 1 | G | T | Heterozygous |
| NC_037648.1 | 15130618 | SNV | 1 | A | C | Homozygous   |
| NC_037648.1 | 15130622 | SNV | 1 | T | G | Homozygous   |
| NC_037648.1 | 15132098 | SNV | 1 | A | G | Homozygous   |
| NC_037648.1 | 15132187 | SNV | 1 | T | G | Homozygous   |
| NC_037648.1 | 15132190 | SNV | 1 | C | T | Homozygous   |
| NC_037648.1 | 15132481 | SNV | 1 | C | A | Homozygous   |
| NC_037648.1 | 15139411 | SNV | 1 | T | C | Homozygous   |
| NC_037648.1 | 15139725 | SNV | 1 | C | T | Homozygous   |
| NC_037648.1 | 15139789 | SNV | 1 | C | A | Homozygous   |
| NC_037648.1 | 15142854 | SNV | 1 | T | C | Homozygous   |
| NC_037648.1 | 15145270 | SNV | 1 | T | G | Homozygous   |
| NC_037648.1 | 15146738 | SNV | 1 | A | G | Heterozygous |
| NC_037648.1 | 15146748 | SNV | 1 | T | C | Homozygous   |
| NC_037648.1 | 15148332 | SNV | 1 | G | A | Homozygous   |
| NC_037648.1 | 15148791 | SNV | 1 | G | T | Homozygous   |
| NC_037648.1 | 15148920 | SNV | 1 | C | T | Heterozygous |
| NC_037648.1 | 15149111 | SNV | 1 | T | A | Homozygous   |
| NC_037648.1 | 15149772 | SNV | 1 | G | A | Homozygous   |
| NC_037648.1 | 15150062 | SNV | 1 | T | C | Homozygous   |
| NC_037648.1 | 15150065 | SNV | 1 | C | T | Heterozygous |
| NC_037648.1 | 15150691 | SNV | 1 | C | T | Homozygous   |
| NC_037648.1 | 15151393 | SNV | 1 | G | A | Heterozygous |
| NC_037648.1 | 15151395 | SNV | 1 | G | A | Homozygous   |
| NC_037648.1 | 15151502 | SNV | 1 | T | C | Heterozygous |
| NC_037648.1 | 15151505 | SNV | 1 | A | G | Heterozygous |
| NC_037648.1 | 15152064 | SNV | 1 | A | G | Homozygous   |
| NC_037648.1 | 15153411 | SNV | 1 | A | G | Homozygous   |
| NC_037648.1 | 15153421 | SNV | 1 | G | A | Homozygous   |
| NC_037648.1 | 15153441 | SNV | 1 | A | G | Homozygous   |
| NC_037648.1 | 15157340 | SNV | 1 | A | T | Heterozygous |
| NC_037648.1 | 15157915 | SNV | 1 | G | A | Heterozygous |
| NC_037648.1 | 15158396 | SNV | 1 | A | G | Homozygous   |
| NC_037648.1 | 15160234 | SNV | 1 | T | A | Homozygous   |
| NC_037648.1 | 15160596 | SNV | 1 | C | T | Homozygous   |
| NC_037648.1 | 15160980 | SNV | 1 | T | C | Homozygous   |
| NC_037648.1 | 15162635 | SNV | 1 | T | A | Homozygous   |
| NC_037648.1 | 15163802 | SNV | 1 | T | A | Homozygous   |
| NC_037648.1 | 15164020 | SNV | 1 | T | A | Heterozygous |
| NC_037648.1 | 15164634 | SNV | 1 | A | G | Heterozygous |
| NC_037648.1 | 15168213 | SNV | 1 | A | G | Homozygous   |
| NC_037648.1 | 15173800 | SNV | 1 | A | G | Homozygous   |
| NC_037648.1 | 15174112 | SNV | 1 | G | A | Heterozygous |
| NC_037648.1 | 15174343 | SNV | 1 | A | C | Homozygous   |
| NC_037648.1 | 15174400 | SNV | 1 | C | G | Homozygous   |
| NC_037648.1 | 15175193 | SNV | 1 | G | A | Heterozygous |
| NC_037648.1 | 15175381 | SNV | 1 | A | G | Homozygous   |
| NC_037648.1 | 15175555 | SNV | 1 | A | G | Homozygous   |

|             |          |     |   |   |   |              |
|-------------|----------|-----|---|---|---|--------------|
| NC_037648.1 | 15175716 | SNV | 1 | C | A | Heterozygous |
| NC_037648.1 | 15183357 | SNV | 1 | T | C | Homozygous   |
| NC_037648.1 | 15183364 | SNV | 1 | G | A | Heterozygous |
| NC_037648.1 | 15183374 | SNV | 1 | C | T | Heterozygous |
| NC_037648.1 | 15183393 | SNV | 1 | C | T | Heterozygous |
| NC_037648.1 | 15183592 | SNV | 1 | T | C | Heterozygous |
| NC_037648.1 | 15183945 | SNV | 1 | A | T | Heterozygous |
| NC_037648.1 | 15183976 | SNV | 1 | A | T | Heterozygous |
| NC_037648.1 | 15185668 | SNV | 1 | A | G | Homozygous   |
| NC_037648.1 | 15185698 | SNV | 1 | G | T | Heterozygous |
| NC_037648.1 | 15185764 | SNV | 1 | A | G | Homozygous   |
| NC_037648.1 | 15185818 | SNV | 1 | G | A | Homozygous   |
| NC_037648.1 | 15185945 | SNV | 1 | T | A | Heterozygous |
| NC_037648.1 | 15186057 | SNV | 1 | C | T | Heterozygous |
| NC_037648.1 | 15186120 | SNV | 1 | T | C | Heterozygous |
| NC_037648.1 | 15186144 | SNV | 1 | G | A | Heterozygous |
| NC_037648.1 | 15190701 | SNV | 1 | A | C | Homozygous   |
| NC_037648.1 | 15194496 | SNV | 1 | G | A | Homozygous   |
| NC_037648.1 | 15195658 | SNV | 1 | G | C | Heterozygous |
| NC_037648.1 | 15202267 | SNV | 1 | A | C | Homozygous   |
| NC_037648.1 | 15202272 | SNV | 1 | C | T | Homozygous   |
| NC_037648.1 | 15202300 | SNV | 1 | A | C | Homozygous   |
| NC_037648.1 | 15202303 | SNV | 1 | T | C | Heterozygous |
| NC_037648.1 | 15202307 | SNV | 1 | C | A | Homozygous   |
| NC_037648.1 | 15202310 | SNV | 1 | G | A | Homozygous   |
| NC_037648.1 | 15202313 | SNV | 1 | T | A | Homozygous   |
| NC_037648.1 | 15202320 | SNV | 1 | A | C | Homozygous   |
| NC_037648.1 | 15205400 | SNV | 1 | G | A | Heterozygous |
| NC_037648.1 | 15212849 | SNV | 1 | C | G | Homozygous   |
| NC_037648.1 | 15217267 | SNV | 1 | C | T | Homozygous   |
| NC_037648.1 | 15221706 | SNV | 1 | G | A | Heterozygous |
| NC_037648.1 | 15221709 | SNV | 1 | T | C | Homozygous   |
| NC_037648.1 | 15233603 | SNV | 1 | G | T | Heterozygous |
| NC_037648.1 | 15233613 | SNV | 1 | G | T | Heterozygous |
| NC_037648.1 | 15233625 | SNV | 1 | G | T | Heterozygous |
| NC_037648.1 | 15233631 | SNV | 1 | G | T | Heterozygous |
| NC_037648.1 | 15233640 | SNV | 1 | G | A | Homozygous   |
| NC_037648.1 | 15237913 | SNV | 1 | G | A | Heterozygous |
| NC_037648.1 | 15246376 | SNV | 1 | A | G | Homozygous   |
| NC_037648.1 | 15247104 | SNV | 1 | G | A | Homozygous   |
| NC_037648.1 | 15247224 | SNV | 1 | G | T | Homozygous   |
| NC_037648.1 | 15247260 | SNV | 1 | A | C | Homozygous   |
| NC_037648.1 | 15247276 | SNV | 1 | T | A | Homozygous   |
| NC_037648.1 | 15247805 | SNV | 1 | C | T | Homozygous   |
| NC_037648.1 | 15248020 | SNV | 1 | C | G | Homozygous   |
| NC_037648.1 | 15270526 | SNV | 1 | G | A | Heterozygous |
| NC_037648.1 | 15270542 | SNV | 1 | T | C | Homozygous   |
| NC_037648.1 | 15270566 | SNV | 1 | A | G | Homozygous   |
| NC_037648.1 | 15270574 | SNV | 1 | C | T | Heterozygous |
| NC_037648.1 | 15270580 | SNV | 1 | T | C | Homozygous   |
| NC_037648.1 | 15270613 | SNV | 1 | G | A | Homozygous   |

|             |          |     |   |   |   |              |
|-------------|----------|-----|---|---|---|--------------|
| NC_037648.1 | 15270847 | SNV | 1 | A | G | Homozygous   |
| NC_037648.1 | 15270930 | SNV | 1 | G | A | Homozygous   |
| NC_037648.1 | 15271132 | SNV | 1 | C | G | Heterozygous |
| NC_037648.1 | 15271138 | SNV | 1 | G | A | Homozygous   |
| NC_037648.1 | 15271217 | SNV | 1 | G | A | Homozygous   |
| NC_037648.1 | 15271228 | SNV | 1 | G | A | Heterozygous |
| NC_037648.1 | 15271382 | SNV | 1 | G | A | Heterozygous |
| NC_037648.1 | 15271399 | SNV | 1 | G | A | Heterozygous |
| NC_037648.1 | 15271435 | SNV | 1 | A | G | Homozygous   |
| NC_037648.1 | 15271491 | SNV | 1 | T | C | Homozygous   |
| NC_037648.1 | 15273043 | SNV | 1 | G | A | Heterozygous |
| NC_037648.1 | 15273228 | SNV | 1 | G | A | Heterozygous |
| NC_037648.1 | 15273234 | SNV | 1 | C | T | Heterozygous |
| NC_037648.1 | 15273270 | SNV | 1 | A | G | Homozygous   |
| NC_037648.1 | 15273322 | SNV | 1 | A | G | Heterozygous |
| NC_037648.1 | 15277688 | SNV | 1 | T | C | Homozygous   |
| NC_037648.1 | 15277709 | SNV | 1 | T | C | Homozygous   |
| NC_037648.1 | 15277958 | SNV | 1 | A | G | Heterozygous |
| NC_037648.1 | 15278064 | SNV | 1 | A | G | Homozygous   |
| NC_037648.1 | 15278165 | SNV | 1 | T | C | Heterozygous |
| NC_037648.1 | 15282880 | SNV | 1 | G | A | Homozygous   |
| NC_037648.1 | 15283831 | SNV | 1 | A | G | Homozygous   |
| NC_037648.1 | 15284039 | SNV | 1 | A | G | Homozygous   |
| NC_037648.1 | 15284067 | SNV | 1 | T | C | Heterozygous |
| NC_037648.1 | 15284067 | SNV | 1 | T | G | Heterozygous |
| NC_037648.1 | 15293077 | SNV | 1 | T | C | Homozygous   |
| NC_037648.1 | 15293092 | SNV | 1 | C | T | Homozygous   |
| NC_037648.1 | 15293101 | SNV | 1 | G | A | Homozygous   |
| NC_037648.1 | 15293138 | SNV | 1 | G | A | Heterozygous |
| NC_037648.1 | 15293167 | SNV | 1 | T | C | Homozygous   |
| NC_037648.1 | 15293251 | SNV | 1 | G | A | Heterozygous |
| NC_037648.1 | 15295268 | SNV | 1 | A | G | Homozygous   |
| NC_037648.1 | 15295316 | SNV | 1 | T | A | Heterozygous |
| NC_037648.1 | 15296484 | SNV | 1 | C | T | Heterozygous |
| NC_037648.1 | 15303456 | SNV | 1 | A | T | Homozygous   |
| NC_037648.1 | 15303521 | SNV | 1 | A | G | Homozygous   |
| NC_037648.1 | 15303527 | SNV | 1 | G | A | Heterozygous |
| NC_037648.1 | 15303533 | SNV | 1 | G | A | Heterozygous |
| NC_037648.1 | 15303544 | SNV | 1 | T | A | Homozygous   |
| NC_037648.1 | 15303595 | SNV | 1 | G | A | Homozygous   |
| NC_037648.1 | 15303668 | SNV | 1 | G | A | Heterozygous |
| NC_037648.1 | 15306123 | SNV | 1 | A | G | Homozygous   |
| NC_037648.1 | 15306162 | SNV | 1 | A | G | Heterozygous |
| NC_037648.1 | 15306169 | SNV | 1 | A | G | Heterozygous |
| NC_037648.1 | 15306221 | SNV | 1 | C | T | Homozygous   |
| NC_037648.1 | 15308208 | SNV | 1 | G | C | Heterozygous |
| NC_037648.1 | 15309020 | SNV | 1 | A | G | Homozygous   |
| NC_037648.1 | 15309308 | SNV | 1 | A | G | Homozygous   |
| NC_037648.1 | 15309362 | SNV | 1 | C | T | Heterozygous |
| NC_037648.1 | 15309922 | SNV | 1 | T | C | Heterozygous |
| NC_037648.1 | 15310058 | SNV | 1 | C | T | Heterozygous |



|             |          |     |   |   |   |              |
|-------------|----------|-----|---|---|---|--------------|
| NC_037648.1 | 15310115 | SNV | 1 | A | G | Homozygous   |
| NC_037648.1 | 15310154 | SNV | 1 | G | A | Heterozygous |
| NC_037648.1 | 15310400 | SNV | 1 | A | G | Homozygous   |
| NC_037648.1 | 15311602 | SNV | 1 | T | G | Homozygous   |
| NC_037648.1 | 15311663 | SNV | 1 | T | C | Homozygous   |
| NC_037648.1 | 15311746 | SNV | 1 | T | C | Heterozygous |
| NC_037648.1 | 15311751 | SNV | 1 | A | G | Homozygous   |
| NC_037648.1 | 15311928 | SNV | 1 | T | A | Heterozygous |
| NC_037648.1 | 15311954 | SNV | 1 | T | C | Heterozygous |
| NC_037648.1 | 15312004 | SNV | 1 | C | T | Heterozygous |
| NC_037648.1 | 15312161 | SNV | 1 | A | T | Homozygous   |
| NC_037648.1 | 15315290 | SNV | 1 | T | C | Homozygous   |
| NC_037648.1 | 15315853 | SNV | 1 | T | C | Heterozygous |
| NC_037648.1 | 15316112 | SNV | 1 | A | T | Homozygous   |
| NC_037648.1 | 15316311 | SNV | 1 | A | G | Homozygous   |
| NC_037648.1 | 15316355 | SNV | 1 | T | C | Homozygous   |
| NC_037648.1 | 15316390 | SNV | 1 | T | A | Heterozygous |
| NC_037648.1 | 15316569 | SNV | 1 | A | G | Homozygous   |
| NC_037648.1 | 15317007 | SNV | 1 | A | G | Homozygous   |
| NC_037648.1 | 15317064 | SNV | 1 | C | T | Homozygous   |
| NC_037648.1 | 15317177 | SNV | 1 | T | C | Homozygous   |
| NC_037648.1 | 15317309 | SNV | 1 | A | G | Homozygous   |
| NC_037648.1 | 15317312 | SNV | 1 | G | A | Homozygous   |
| NC_037648.1 | 15317586 | SNV | 1 | T | C | Homozygous   |
| NC_037648.1 | 15317931 | SNV | 1 | G | A | Heterozygous |
| NC_037648.1 | 15318115 | SNV | 1 | G | A | Heterozygous |
| NC_037648.1 | 15318173 | SNV | 1 | A | G | Homozygous   |
| NC_037648.1 | 15318262 | SNV | 1 | G | A | Heterozygous |
| NC_037648.1 | 15318435 | SNV | 1 | C | T | Heterozygous |
| NC_037648.1 | 15318451 | SNV | 1 | G | A | Homozygous   |
| NC_037648.1 | 15318465 | SNV | 1 | A | G | Homozygous   |
| NC_037648.1 | 15318474 | SNV | 1 | A | G | Heterozygous |
| NC_037648.1 | 15318514 | SNV | 1 | G | A | Heterozygous |
| NC_037648.1 | 15318837 | SNV | 1 | A | G | Homozygous   |
| NC_037648.1 | 15318839 | SNV | 1 | G | T | Homozygous   |
| NC_037648.1 | 15318997 | SNV | 1 | G | A | Homozygous   |
| NC_037648.1 | 15319002 | SNV | 1 | A | G | Homozygous   |
| NC_037648.1 | 15319041 | SNV | 1 | A | G | Homozygous   |
| NC_037648.1 | 15319071 | SNV | 1 | A | T | Homozygous   |
| NC_037648.1 | 15319167 | SNV | 1 | A | C | Heterozygous |
| NC_037648.1 | 15319176 | SNV | 1 | T | C | Heterozygous |
| NC_037648.1 | 15319264 | SNV | 1 | A | T | Homozygous   |
| NC_037648.1 | 15319485 | SNV | 1 | A | G | Heterozygous |
| NC_037648.1 | 15319593 | SNV | 1 | A | G | Homozygous   |
| NC_037648.1 | 15319635 | SNV | 1 | A | T | Heterozygous |
| NC_037648.1 | 15319805 | SNV | 1 | A | T | Heterozygous |
| NC_037648.1 | 15319830 | SNV | 1 | T | C | Homozygous   |
| NC_037648.1 | 15320059 | SNV | 1 | G | A | Heterozygous |
| NC_037648.1 | 15320138 | SNV | 1 | T | C | Heterozygous |
| NC_037648.1 | 15320195 | SNV | 1 | G | A | Heterozygous |
| NC_037648.1 | 15320237 | SNV | 1 | A | G | Homozygous   |

|             |          |     |   |   |   |              |
|-------------|----------|-----|---|---|---|--------------|
| NC_037648.1 | 15320285 | SNV | 1 | T | C | Homozygous   |
| NC_037648.1 | 15320508 | SNV | 1 | C | T | Heterozygous |
| NC_037648.1 | 15320626 | SNV | 1 | T | C | Heterozygous |
| NC_037648.1 | 15325784 | SNV | 1 | G | A | Homozygous   |
| NC_037648.1 | 15325886 | SNV | 1 | C | T | Heterozygous |
| NC_037648.1 | 15326371 | SNV | 1 | C | T | Heterozygous |
| NC_037648.1 | 15330615 | SNV | 1 | C | T | Heterozygous |
| NC_037648.1 | 15331007 | SNV | 1 | T | C | Homozygous   |
| NC_037648.1 | 15331879 | SNV | 1 | T | C | Heterozygous |
| NC_037648.1 | 15331885 | SNV | 1 | C | T | Homozygous   |
| NC_037648.1 | 15334953 | SNV | 1 | C | T | Homozygous   |
| NC_037648.1 | 15335520 | SNV | 1 | C | T | Homozygous   |
| NC_037648.1 | 15336786 | SNV | 1 | T | C | Homozygous   |
| NC_037648.1 | 15340685 | SNV | 1 | T | A | Homozygous   |
| NC_037648.1 | 15341285 | SNV | 1 | T | A | Homozygous   |
| NC_037648.1 | 15341288 | SNV | 1 | T | G | Homozygous   |
| NC_037648.1 | 15341383 | SNV | 1 | G | A | Homozygous   |
| NC_037648.1 | 15341601 | SNV | 1 | G | A | Heterozygous |
| NC_037648.1 | 15342095 | SNV | 1 | A | G | Homozygous   |
| NC_037648.1 | 15342099 | SNV | 1 | T | C | Heterozygous |
| NC_037648.1 | 15342225 | SNV | 1 | T | C | Homozygous   |
| NC_037648.1 | 15342259 | SNV | 1 | A | C | Homozygous   |
| NC_037648.1 | 15342361 | SNV | 1 | T | A | Heterozygous |
| NC_037648.1 | 15342406 | SNV | 1 | A | T | Heterozygous |
| NC_037648.1 | 15342460 | SNV | 1 | G | A | Homozygous   |
| NC_037648.1 | 15342601 | SNV | 1 | C | T | Homozygous   |
| NC_037648.1 | 15342663 | SNV | 1 | A | C | Homozygous   |
| NC_037648.1 | 15342690 | SNV | 1 | A | G | Homozygous   |
| NC_037648.1 | 15342709 | SNV | 1 | A | G | Heterozygous |
| NC_037648.1 | 15343235 | SNV | 1 | C | T | Homozygous   |
| NC_037648.1 | 15343251 | SNV | 1 | G | A | Homozygous   |
| NC_037648.1 | 15343316 | SNV | 1 | T | A | Homozygous   |
| NC_037648.1 | 15343441 | SNV | 1 | C | T | Heterozygous |
| NC_037648.1 | 15343461 | SNV | 1 | T | G | Heterozygous |
| NC_037648.1 | 15344717 | SNV | 1 | G | A | Heterozygous |
| NC_037648.1 | 15344767 | SNV | 1 | G | C | Homozygous   |
| NC_037648.1 | 15345290 | SNV | 1 | G | A | Heterozygous |
| NC_037648.1 | 15345352 | SNV | 1 | G | A | Homozygous   |
| NC_037648.1 | 15345478 | SNV | 1 | G | C | Homozygous   |
| NC_037648.1 | 15346300 | SNV | 1 | C | T | Heterozygous |
| NC_037648.1 | 15346321 | SNV | 1 | A | G | Homozygous   |
| NC_037648.1 | 15346365 | SNV | 1 | A | T | Homozygous   |
| NC_037648.1 | 15346378 | SNV | 1 | G | A | Heterozygous |
| NC_037648.1 | 15346682 | SNV | 1 | T | C | Homozygous   |
| NC_037648.1 | 15346897 | SNV | 1 | A | G | Homozygous   |
| NC_037648.1 | 15349628 | SNV | 1 | T | G | Homozygous   |
| NC_037648.1 | 15349635 | SNV | 1 | G | A | Homozygous   |
| NC_037648.1 | 15349694 | SNV | 1 | G | T | Heterozygous |
| NC_037648.1 | 15351168 | SNV | 1 | T | G | Homozygous   |
| NC_037648.1 | 15351170 | SNV | 1 | T | A | Homozygous   |
| NC_037648.1 | 15351250 | SNV | 1 | G | A | Heterozygous |

|             |          |     |   |   |   |              |
|-------------|----------|-----|---|---|---|--------------|
| NC_037648.1 | 15351341 | SNV | 1 | A | T | Heterozygous |
| NC_037648.1 | 15353209 | SNV | 1 | A | G | Homozygous   |
| NC_037648.1 | 15354411 | SNV | 1 | C | A | Heterozygous |
| NC_037648.1 | 15354432 | SNV | 1 | C | T | Heterozygous |
| NC_037648.1 | 15354624 | SNV | 1 | A | G | Heterozygous |
| NC_037648.1 | 15355473 | SNV | 1 | T | C | Homozygous   |
| NC_037648.1 | 15355694 | SNV | 1 | A | G | Homozygous   |
| NC_037648.1 | 15364453 | SNV | 1 | G | C | Heterozygous |
| NC_037648.1 | 15369406 | SNV | 1 | C | T | Heterozygous |
| NC_037648.1 | 15369769 | SNV | 1 | T | C | Homozygous   |
| NC_037648.1 | 15369943 | SNV | 1 | A | G | Homozygous   |
| NC_037648.1 | 15370113 | SNV | 1 | T | C | Homozygous   |
| NC_037648.1 | 15370278 | SNV | 1 | T | C | Heterozygous |
| NC_037648.1 | 15370288 | SNV | 1 | G | A | Homozygous   |
| NC_037648.1 | 15370528 | SNV | 1 | G | A | Homozygous   |
| NC_037648.1 | 15370714 | SNV | 1 | C | T | Heterozygous |
| NC_037648.1 | 15370922 | SNV | 1 | A | T | Heterozygous |
| NC_037648.1 | 15370930 | SNV | 1 | T | A | Heterozygous |
| NC_037648.1 | 15371150 | SNV | 1 | G | C | Homozygous   |
| NC_037648.1 | 15371419 | SNV | 1 | A | G | Heterozygous |
| NC_037648.1 | 15373234 | SNV | 1 | G | A | Homozygous   |
| NC_037648.1 | 15373236 | SNV | 1 | T | C | Homozygous   |
| NC_037648.1 | 15373725 | SNV | 1 | G | A | Heterozygous |
| NC_037648.1 | 15373827 | SNV | 1 | A | G | Heterozygous |
| NC_037648.1 | 15374265 | SNV | 1 | T | G | Homozygous   |
| NC_037648.1 | 15374397 | SNV | 1 | C | T | Homozygous   |
| NC_037648.1 | 15374557 | SNV | 1 | G | A | Homozygous   |
| NC_037648.1 | 15374614 | SNV | 1 | T | C | Homozygous   |
| NC_037648.1 | 15374647 | SNV | 1 | G | A | Heterozygous |
| NC_037648.1 | 15374961 | SNV | 1 | G | A | Homozygous   |
| NC_037648.1 | 15375032 | SNV | 1 | T | C | Homozygous   |
| NC_037648.1 | 15375773 | SNV | 1 | C | T | Heterozygous |
| NC_037648.1 | 15375972 | SNV | 1 | C | T | Homozygous   |
| NC_037648.1 | 15376320 | SNV | 1 | C | T | Heterozygous |
| NC_037648.1 | 15376349 | SNV | 1 | C | T | Heterozygous |
| NC_037648.1 | 15376351 | SNV | 1 | A | T | Heterozygous |
| NC_037648.1 | 15376353 | SNV | 1 | A | T | Heterozygous |
| NC_037648.1 | 15376359 | SNV | 1 | A | T | Heterozygous |
| NC_037648.1 | 15376373 | SNV | 1 | A | G | Heterozygous |
| NC_037648.1 | 15376385 | SNV | 1 | A | G | Heterozygous |
| NC_037648.1 | 15377043 | SNV | 1 | C | T | Heterozygous |
| NC_037648.1 | 15377132 | SNV | 1 | C | T | Homozygous   |
| NC_037648.1 | 15377406 | SNV | 1 | A | T | Heterozygous |
| NC_037648.1 | 15378392 | SNV | 1 | T | C | Homozygous   |
| NC_037648.1 | 15378438 | SNV | 1 | C | T | Homozygous   |
| NC_037648.1 | 15378470 | SNV | 1 | G | A | Heterozygous |
| NC_037648.1 | 15378699 | SNV | 1 | G | A | Heterozygous |
| NC_037648.1 | 15378780 | SNV | 1 | T | C | Homozygous   |
| NC_037648.1 | 15379155 | SNV | 1 | G | A | Homozygous   |
| NC_037648.1 | 15379492 | SNV | 1 | A | G | Homozygous   |
| NC_037648.1 | 15380695 | SNV | 1 | C | T | Homozygous   |

|             |          |     |   |   |   |              |
|-------------|----------|-----|---|---|---|--------------|
| NC_037648.1 | 15380723 | SNV | 1 | T | C | Heterozygous |
| NC_037648.1 | 15380917 | SNV | 1 | T | C | Heterozygous |
| NC_037648.1 | 15380961 | SNV | 1 | A | G | Homozygous   |
| NC_037648.1 | 15381467 | SNV | 1 | A | G | Homozygous   |
| NC_037648.1 | 15381715 | SNV | 1 | G | A | Heterozygous |
| NC_037648.1 | 15381940 | SNV | 1 | T | A | Homozygous   |
| NC_037648.1 | 15382011 | SNV | 1 | T | C | Heterozygous |
| NC_037648.1 | 15382183 | SNV | 1 | G | A | Homozygous   |
| NC_037648.1 | 15383167 | SNV | 1 | C | T | Homozygous   |
| NC_037648.1 | 15383296 | SNV | 1 | C | G | Heterozygous |
| NC_037648.1 | 15384182 | SNV | 1 | C | T | Heterozygous |
| NC_037648.1 | 15384266 | SNV | 1 | C | T | Heterozygous |
| NC_037648.1 | 15384658 | SNV | 1 | T | C | Homozygous   |
| NC_037648.1 | 15388002 | SNV | 1 | T | C | Heterozygous |
| NC_037648.1 | 15394498 | SNV | 1 | C | T | Homozygous   |
| NC_037648.1 | 15396779 | SNV | 1 | T | C | Homozygous   |
| NC_037648.1 | 15397223 | SNV | 1 | G | A | Heterozygous |
| NC_037648.1 | 15398190 | SNV | 1 | G | T | Homozygous   |
| NC_037648.1 | 15398380 | SNV | 1 | G | A | Homozygous   |
| NC_037648.1 | 15398390 | SNV | 1 | C | T | Heterozygous |
| NC_037648.1 | 15398476 | SNV | 1 | A | G | Homozygous   |
| NC_037648.1 | 15398741 | SNV | 1 | C | T | Homozygous   |
| NC_037648.1 | 15398756 | SNV | 1 | G | A | Homozygous   |
| NC_037648.1 | 15398762 | SNV | 1 | G | A | Homozygous   |
| NC_037648.1 | 15398846 | SNV | 1 | A | T | Heterozygous |
| NC_037648.1 | 15399114 | SNV | 1 | C | T | Homozygous   |
| NC_037648.1 | 15399194 | SNV | 1 | C | T | Heterozygous |
| NC_037648.1 | 15399210 | SNV | 1 | C | T | Heterozygous |
| NC_037648.1 | 15399478 | SNV | 1 | A | G | Homozygous   |
| NC_037648.1 | 15399647 | SNV | 1 | C | T | Heterozygous |
| NC_037648.1 | 15399997 | SNV | 1 | T | C | Homozygous   |
| NC_037648.1 | 15400813 | SNV | 1 | A | G | Heterozygous |
| NC_037648.1 | 15401339 | SNV | 1 | T | C | Heterozygous |
| NC_037648.1 | 15401378 | SNV | 1 | C | A | Heterozygous |
| NC_037648.1 | 15401406 | SNV | 1 | C | G | Heterozygous |
| NC_037648.1 | 15402317 | SNV | 1 | T | C | Homozygous   |
| NC_037648.1 | 15402516 | SNV | 1 | C | T | Heterozygous |
| NC_037648.1 | 15402520 | SNV | 1 | T | C | Homozygous   |
| NC_037648.1 | 15402599 | SNV | 1 | A | G | Homozygous   |
| NC_037648.1 | 15403283 | SNV | 1 | C | T | Heterozygous |
| NC_037648.1 | 15404645 | SNV | 1 | T | C | Homozygous   |
| NC_037648.1 | 15407319 | SNV | 1 | C | T | Homozygous   |
| NC_037648.1 | 15407423 | SNV | 1 | G | A | Heterozygous |
| NC_037648.1 | 15407434 | SNV | 1 | G | A | Heterozygous |
| NC_037648.1 | 15411541 | SNV | 1 | A | G | Homozygous   |
| NC_037648.1 | 15411626 | SNV | 1 | T | C | Heterozygous |
| NC_037648.1 | 15411714 | SNV | 1 | T | G | Homozygous   |
| NC_037648.1 | 15411989 | SNV | 1 | T | C | Heterozygous |
| NC_037648.1 | 15411998 | SNV | 1 | T | G | Homozygous   |
| NC_037648.1 | 15412022 | SNV | 1 | T | C | Heterozygous |
| NC_037648.1 | 15412024 | SNV | 1 | T | C | Heterozygous |

|             |          |     |   |   |   |              |
|-------------|----------|-----|---|---|---|--------------|
| NC_037648.1 | 15412029 | SNV | 1 | G | A | Heterozygous |
| NC_037648.1 | 15412035 | SNV | 1 | T | C | Heterozygous |
| NC_037648.1 | 15412436 | SNV | 1 | G | T | Heterozygous |
| NC_037648.1 | 15413343 | SNV | 1 | C | T | Heterozygous |
| NC_037648.1 | 15415452 | SNV | 1 | T | A | Homozygous   |
| NC_037648.1 | 15415458 | SNV | 1 | T | A | Homozygous   |
| NC_037648.1 | 15415464 | SNV | 1 | T | C | Homozygous   |
| NC_037648.1 | 15415467 | SNV | 1 | T | C | Homozygous   |
| NC_037648.1 | 15416499 | SNV | 1 | A | G | Homozygous   |
| NC_037648.1 | 15416689 | SNV | 1 | T | C | Homozygous   |
| NC_037648.1 | 15421495 | SNV | 1 | T | C | Homozygous   |
| NC_037648.1 | 15421497 | SNV | 1 | T | C | Heterozygous |
| NC_037648.1 | 15421500 | SNV | 1 | T | C | Homozygous   |
| NC_037648.1 | 15421509 | SNV | 1 | T | C | Homozygous   |
| NC_037648.1 | 15421668 | SNV | 1 | A | G | Homozygous   |
| NC_037648.1 | 15421707 | SNV | 1 | A | G | Homozygous   |
| NC_037648.1 | 15422140 | SNV | 1 | C | T | Homozygous   |
| NC_037648.1 | 15422647 | SNV | 1 | C | T | Homozygous   |
| NC_037648.1 | 15422770 | SNV | 1 | G | A | Homozygous   |
| NC_037648.1 | 15422960 | SNV | 1 | C | T | Homozygous   |
| NC_037648.1 | 15423104 | SNV | 1 | C | T | Homozygous   |
| NC_037648.1 | 15423603 | SNV | 1 | G | A | Heterozygous |
| NC_037648.1 | 15424493 | SNV | 1 | A | G | Heterozygous |
| NC_037648.1 | 15424501 | SNV | 1 | A | G | Heterozygous |
| NC_037648.1 | 15424508 | SNV | 1 | A | G | Heterozygous |
| NC_037648.1 | 15424547 | SNV | 1 | A | G | Heterozygous |
| NC_037648.1 | 15426785 | SNV | 1 | A | G | Homozygous   |
| NC_037648.1 | 15427255 | SNV | 1 | G | A | Homozygous   |
| NC_037648.1 | 15427639 | SNV | 1 | C | T | Homozygous   |
| NC_037648.1 | 15427720 | SNV | 1 | A | G | Homozygous   |
| NC_037648.1 | 15427850 | SNV | 1 | G | A | Heterozygous |
| NC_037648.1 | 15428177 | SNV | 1 | A | G | Homozygous   |
| NC_037648.1 | 15430531 | SNV | 1 | C | T | Homozygous   |
| NC_037648.1 | 15431092 | SNV | 1 | T | C | Homozygous   |
| NC_037648.1 | 15432051 | SNV | 1 | C | T | Homozygous   |
| NC_037648.1 | 15432388 | SNV | 1 | C | T | Heterozygous |
| NC_037648.1 | 15440999 | SNV | 1 | G | A | Homozygous   |
| NC_037648.1 | 15441112 | SNV | 1 | A | G | Heterozygous |
| NC_037648.1 | 15441265 | SNV | 1 | T | A | Homozygous   |
| NC_037648.1 | 15442637 | SNV | 1 | C | T | Homozygous   |
| NC_037648.1 | 15442945 | SNV | 1 | G | A | Homozygous   |
| NC_037648.1 | 15443015 | SNV | 1 | A | G | Homozygous   |
| NC_037648.1 | 15443063 | SNV | 1 | T | C | Homozygous   |
| NC_037648.1 | 15443872 | SNV | 1 | C | T | Homozygous   |
| NC_037648.1 | 15443896 | SNV | 1 | C | T | Homozygous   |
| NC_037648.1 | 15444200 | SNV | 1 | G | A | Homozygous   |
| NC_037648.1 | 15444226 | SNV | 1 | T | C | Homozygous   |
| NC_037648.1 | 15444422 | SNV | 1 | G | A | Homozygous   |
| NC_037648.1 | 15444731 | SNV | 1 | G | A | Homozygous   |
| NC_037648.1 | 15450721 | SNV | 1 | C | T | Homozygous   |
| NC_037648.1 | 15450784 | SNV | 1 | G | A | Homozygous   |

|             |          |     |   |   |   |              |
|-------------|----------|-----|---|---|---|--------------|
| NC_037648.1 | 15452261 | SNV | 1 | C | T | Heterozygous |
| NC_037648.1 | 15452264 | SNV | 1 | T | G | Heterozygous |
| NC_037648.1 | 15452269 | SNV | 1 | T | G | Heterozygous |
| NC_037648.1 | 15452274 | SNV | 1 | C | A | Heterozygous |
| NC_037648.1 | 15452282 | SNV | 1 | A | G | Heterozygous |
| NC_037648.1 | 15452289 | SNV | 1 | C | A | Heterozygous |
| NC_037648.1 | 15452291 | SNV | 1 | A | G | Heterozygous |
| NC_037648.1 | 15452310 | SNV | 1 | A | T | Heterozygous |
| NC_037648.1 | 15452312 | SNV | 1 | T | G | Heterozygous |
| NC_037648.1 | 15452321 | SNV | 1 | T | C | Heterozygous |
| NC_037648.1 | 15452324 | SNV | 1 | A | G | Heterozygous |
| NC_037648.1 | 15453073 | SNV | 1 | T | C | Homozygous   |
| NC_037648.1 | 15453440 | SNV | 1 | T | C | Homozygous   |
| NC_037648.1 | 15453620 | SNV | 1 | C | T | Homozygous   |
| NC_037648.1 | 15454057 | SNV | 1 | A | G | Homozygous   |
| NC_037648.1 | 15454107 | SNV | 1 | A | G | Homozygous   |
| NC_037648.1 | 15454139 | SNV | 1 | A | G | Heterozygous |
| NC_037648.1 | 15454341 | SNV | 1 | A | T | Homozygous   |
| NC_037648.1 | 15470055 | SNV | 1 | C | T | Heterozygous |
| NC_037648.1 | 15471326 | SNV | 1 | A | G | Homozygous   |
| NC_037648.1 | 15471495 | SNV | 1 | C | T | Homozygous   |
| NC_037648.1 | 15479009 | SNV | 1 | T | A | Homozygous   |
| NC_037648.1 | 15480593 | SNV | 1 | C | T | Heterozygous |
| NC_037648.1 | 15480603 | SNV | 1 | A | G | Homozygous   |
| NC_037648.1 | 15482045 | SNV | 1 | T | C | Homozygous   |
| NC_037648.1 | 15483510 | SNV | 1 | C | G | Homozygous   |
| NC_037648.1 | 15484172 | SNV | 1 | G | A | Homozygous   |
| NC_037648.1 | 15484659 | SNV | 1 | T | C | Homozygous   |
| NC_037648.1 | 15485034 | SNV | 1 | T | C | Homozygous   |
| NC_037648.1 | 15486805 | SNV | 1 | T | C | Homozygous   |
| NC_037648.1 | 15486807 | SNV | 1 | C | T | Homozygous   |
| NC_037648.1 | 15487323 | SNV | 1 | A | C | Homozygous   |
| NC_037648.1 | 15489361 | SNV | 1 | A | G | Homozygous   |
| NC_037648.1 | 15492308 | SNV | 1 | A | T | Homozygous   |
| NC_037648.1 | 15498697 | SNV | 1 | C | T | Heterozygous |
| NC_037648.1 | 15499038 | SNV | 1 | A | C | Homozygous   |
| NC_037648.1 | 15499041 | SNV | 1 | T | C | Homozygous   |
| NC_037648.1 | 15499250 | SNV | 1 | G | T | Homozygous   |
| NC_037648.1 | 15499254 | SNV | 1 | T | A | Homozygous   |
| NC_037648.1 | 15499256 | SNV | 1 | T | A | Homozygous   |
| NC_037648.1 | 15499602 | SNV | 1 | T | A | Heterozygous |
| NC_037648.1 | 15499655 | SNV | 1 | C | T | Heterozygous |
| NC_037648.1 | 15500147 | SNV | 1 | T | C | Homozygous   |
| NC_037648.1 | 15500201 | SNV | 1 | G | A | Heterozygous |
| NC_037648.1 | 15500914 | SNV | 1 | A | G | Homozygous   |
| NC_037648.1 | 15506166 | SNV | 1 | T | C | Homozygous   |
| NC_037648.1 | 15507023 | SNV | 1 | A | G | Heterozygous |
| NC_037648.1 | 15508358 | SNV | 1 | A | G | Homozygous   |
| NC_037648.1 | 15508538 | SNV | 1 | C | T | Heterozygous |
| NC_037648.1 | 15510330 | SNV | 1 | T | C | Heterozygous |
| NC_037648.1 | 15510340 | SNV | 1 | T | C | Heterozygous |

|             |          |     |   |   |   |              |
|-------------|----------|-----|---|---|---|--------------|
| NC_037648.1 | 15510343 | SNV | 1 | T | C | Heterozygous |
| NC_037648.1 | 15510347 | SNV | 1 | T | C | Heterozygous |
| NC_037648.1 | 15513958 | SNV | 1 | T | A | Heterozygous |
| NC_037648.1 | 15517476 | SNV | 1 | T | A | Heterozygous |
| NC_037648.1 | 15517478 | SNV | 1 | C | A | Heterozygous |
| NC_037648.1 | 15517566 | SNV | 1 | A | T | Heterozygous |
| NC_037648.1 | 15518063 | SNV | 1 | A | G | Homozygous   |
| NC_037648.1 | 15518162 | SNV | 1 | C | T | Heterozygous |
| NC_037648.1 | 15518399 | SNV | 1 | G | T | Homozygous   |
| NC_037648.1 | 15518510 | SNV | 1 | A | G | Homozygous   |
| NC_037648.1 | 15518638 | SNV | 1 | T | A | Heterozygous |
| NC_037648.1 | 15518640 | SNV | 1 | G | A | Homozygous   |
| NC_037648.1 | 15520379 | SNV | 1 | T | C | Homozygous   |
| NC_037648.1 | 15520381 | SNV | 1 | C | T | Homozygous   |
| NC_037648.1 | 15523412 | SNV | 1 | C | A | Heterozygous |
| NC_037648.1 | 15523435 | SNV | 1 | A | G | Homozygous   |
| NC_037648.1 | 15523585 | SNV | 1 | G | A | Heterozygous |
| NC_037648.1 | 15523708 | SNV | 1 | G | A | Homozygous   |
| NC_037648.1 | 15523723 | SNV | 1 | G | A | Homozygous   |
| NC_037648.1 | 15523752 | SNV | 1 | G | A | Homozygous   |
| NC_037648.1 | 15523782 | SNV | 1 | T | C | Heterozygous |
| NC_037648.1 | 15523814 | SNV | 1 | A | G | Homozygous   |
| NC_037648.1 | 15523839 | SNV | 1 | G | A | Homozygous   |
| NC_037648.1 | 15523844 | SNV | 1 | A | G | Homozygous   |
| NC_037648.1 | 15523963 | SNV | 1 | A | G | Homozygous   |
| NC_037648.1 | 15524042 | SNV | 1 | T | C | Homozygous   |
| NC_037648.1 | 15524051 | SNV | 1 | C | T | Heterozygous |
| NC_037648.1 | 15524066 | SNV | 1 | T | C | Homozygous   |
| NC_037648.1 | 15524070 | SNV | 1 | C | T | Homozygous   |
| NC_037648.1 | 15524085 | SNV | 1 | A | G | Homozygous   |
| NC_037648.1 | 15524154 | SNV | 1 | G | A | Heterozygous |
| NC_037648.1 | 15524343 | SNV | 1 | T | C | Homozygous   |
| NC_037648.1 | 15524468 | SNV | 1 | T | C | Homozygous   |
| NC_037648.1 | 15524577 | SNV | 1 | A | T | Heterozygous |
| NC_037648.1 | 15524602 | SNV | 1 | G | A | Heterozygous |
| NC_037648.1 | 15524681 | SNV | 1 | C | T | Homozygous   |
| NC_037648.1 | 15526318 | SNV | 1 | A | G | Homozygous   |
| NC_037648.1 | 15526346 | SNV | 1 | C | T | Homozygous   |
| NC_037648.1 | 15526501 | SNV | 1 | A | G | Homozygous   |
| NC_037648.1 | 15526756 | SNV | 1 | T | A | Homozygous   |
| NC_037648.1 | 15526764 | SNV | 1 | A | T | Homozygous   |
| NC_037648.1 | 15526768 | SNV | 1 | C | G | Homozygous   |
| NC_037648.1 | 15526771 | SNV | 1 | A | G | Homozygous   |
| NC_037648.1 | 15526775 | SNV | 1 | A | C | Homozygous   |
| NC_037648.1 | 15526781 | SNV | 1 | A | G | Homozygous   |
| NC_037648.1 | 15526784 | SNV | 1 | T | C | Homozygous   |
| NC_037648.1 | 15528704 | SNV | 1 | C | T | Homozygous   |
| NC_037648.1 | 15528818 | SNV | 1 | T | A | Homozygous   |
| NC_037648.1 | 15528833 | SNV | 1 | G | A | Homozygous   |
| NC_037648.1 | 15531810 | SNV | 1 | A | G | Heterozygous |
| NC_037648.1 | 15531831 | SNV | 1 | T | C | Heterozygous |

|             |          |     |   |   |   |              |
|-------------|----------|-----|---|---|---|--------------|
| NC_037648.1 | 15531849 | SNV | 1 | A | G | Heterozygous |
| NC_037648.1 | 15531918 | SNV | 1 | A | G | Homozygous   |
| NC_037648.1 | 15533481 | SNV | 1 | A | C | Homozygous   |
| NC_037648.1 | 15533602 | SNV | 1 | C | T | Homozygous   |
| NC_037648.1 | 15533639 | SNV | 1 | T | C | Homozygous   |
| NC_037648.1 | 15533729 | SNV | 1 | C | T | Heterozygous |
| NC_037648.1 | 15533924 | SNV | 1 | G | A | Heterozygous |
| NC_037648.1 | 15533927 | SNV | 1 | T | A | Heterozygous |
| NC_037648.1 | 15533935 | SNV | 1 | C | A | Heterozygous |
| NC_037648.1 | 15534004 | SNV | 1 | G | T | Heterozygous |
| NC_037648.1 | 15534009 | SNV | 1 | T | C | Homozygous   |
| NC_037648.1 | 15534190 | SNV | 1 | C | T | Homozygous   |
| NC_037648.1 | 15534364 | SNV | 1 | G | A | Homozygous   |
| NC_037648.1 | 15534369 | SNV | 1 | A | G | Homozygous   |
| NC_037648.1 | 15534563 | SNV | 1 | G | A | Homozygous   |
| NC_037648.1 | 15534677 | SNV | 1 | T | C | Homozygous   |
| NC_037648.1 | 15534853 | SNV | 1 | T | C | Homozygous   |
| NC_037648.1 | 15534931 | SNV | 1 | C | T | Heterozygous |
| NC_037648.1 | 15535238 | SNV | 1 | T | C | Heterozygous |
| NC_037648.1 | 15535342 | SNV | 1 | C | T | Homozygous   |
| NC_037648.1 | 15535418 | SNV | 1 | G | A | Homozygous   |
| NC_037648.1 | 15535524 | SNV | 1 | G | A | Heterozygous |
| NC_037648.1 | 15535708 | SNV | 1 | G | C | Homozygous   |
| NC_037648.1 | 15535748 | SNV | 1 | C | G | Homozygous   |
| NC_037648.1 | 15535863 | SNV | 1 | T | C | Homozygous   |
| NC_037648.1 | 15535949 | SNV | 1 | A | G | Homozygous   |
| NC_037648.1 | 15535964 | SNV | 1 | T | C | Homozygous   |
| NC_037648.1 | 15535979 | SNV | 1 | C | T | Homozygous   |
| NC_037648.1 | 15536207 | SNV | 1 | A | T | Homozygous   |
| NC_037648.1 | 15536679 | SNV | 1 | T | C | Homozygous   |
| NC_037648.1 | 15536715 | SNV | 1 | T | C | Homozygous   |
| NC_037648.1 | 15537057 | SNV | 1 | C | G | Heterozygous |
| NC_037648.1 | 15537425 | SNV | 1 | T | C | Homozygous   |
| NC_037648.1 | 15537484 | SNV | 1 | T | C | Homozygous   |
| NC_037648.1 | 15537626 | SNV | 1 | C | G | Heterozygous |
| NC_037648.1 | 15537880 | SNV | 1 | G | A | Homozygous   |
| NC_037648.1 | 15537932 | SNV | 1 | T | G | Homozygous   |
| NC_037648.1 | 15538043 | SNV | 1 | C | G | Heterozygous |
| NC_037648.1 | 15538100 | SNV | 1 | G | A | Heterozygous |
| NC_037648.1 | 15538103 | SNV | 1 | C | T | Heterozygous |
| NC_037648.1 | 15538253 | SNV | 1 | C | G | Homozygous   |
| NC_037648.1 | 15538328 | SNV | 1 | A | G | Homozygous   |
| NC_037648.1 | 15538624 | SNV | 1 | G | A | Homozygous   |
| NC_037648.1 | 15538633 | SNV | 1 | T | G | Homozygous   |
| NC_037648.1 | 15538846 | SNV | 1 | A | C | Heterozygous |
| NC_037648.1 | 15539203 | SNV | 1 | G | A | Heterozygous |
| NC_037648.1 | 15539722 | SNV | 1 | G | A | Heterozygous |
| NC_037648.1 | 15539749 | SNV | 1 | G | A | Heterozygous |
| NC_037648.1 | 15539884 | SNV | 1 | T | C | Homozygous   |
| NC_037648.1 | 15543706 | SNV | 1 | A | G | Heterozygous |
| NC_037648.1 | 15543746 | SNV | 1 | G | A | Heterozygous |



|             |          |     |   |   |   |              |
|-------------|----------|-----|---|---|---|--------------|
| NC_037648.1 | 15554448 | SNV | 1 | G | A | Heterozygous |
| NC_037648.1 | 15554644 | SNV | 1 | G | A | Homozygous   |
| NC_037648.1 | 15554664 | SNV | 1 | C | T | Homozygous   |
| NC_037648.1 | 15554729 | SNV | 1 | A | G | Homozygous   |
| NC_037648.1 | 15554880 | SNV | 1 | C | T | Heterozygous |
| NC_037648.1 | 15555738 | SNV | 1 | A | G | Homozygous   |
| NC_037648.1 | 15556664 | SNV | 1 | G | A | Heterozygous |
| NC_037648.1 | 15556806 | SNV | 1 | T | C | Heterozygous |
| NC_037648.1 | 15556851 | SNV | 1 | A | G | Heterozygous |
| NC_037648.1 | 15557039 | SNV | 1 | T | C | Homozygous   |
| NC_037648.1 | 15557062 | SNV | 1 | C | T | Heterozygous |
| NC_037648.1 | 15557266 | SNV | 1 | G | A | Homozygous   |
| NC_037648.1 | 15557323 | SNV | 1 | G | A | Homozygous   |
| NC_037648.1 | 15557400 | SNV | 1 | T | C | Homozygous   |
| NC_037648.1 | 15557414 | SNV | 1 | T | C | Homozygous   |
| NC_037648.1 | 15558318 | SNV | 1 | G | A | Heterozygous |
| NC_037648.1 | 15558322 | SNV | 1 | G | A | Homozygous   |
| NC_037648.1 | 15560328 | SNV | 1 | T | A | Heterozygous |
| NC_037648.1 | 15561112 | SNV | 1 | A | G | Heterozygous |
| NC_037648.1 | 15561126 | SNV | 1 | G | A | Heterozygous |
| NC_037648.1 | 15561212 | SNV | 1 | G | A | Heterozygous |
| NC_037648.1 | 15561432 | SNV | 1 | G | A | Heterozygous |
| NC_037648.1 | 15562042 | SNV | 1 | C | T | Homozygous   |
| NC_037648.1 | 15562091 | SNV | 1 | A | G | Heterozygous |
| NC_037648.1 | 15572374 | SNV | 1 | A | G | Heterozygous |
| NC_037648.1 | 15572446 | SNV | 1 | A | G | Homozygous   |
| NC_037648.1 | 15574477 | SNV | 1 | T | C | Heterozygous |
| NC_037648.1 | 15575858 | SNV | 1 | A | C | Homozygous   |
| NC_037648.1 | 15575867 | SNV | 1 | G | A | Homozygous   |
| NC_037648.1 | 15575909 | SNV | 1 | T | C | Homozygous   |
| NC_037648.1 | 15577171 | SNV | 1 | T | C | Heterozygous |
| NC_037648.1 | 15577694 | SNV | 1 | T | C | Heterozygous |
| NC_037648.1 | 15578591 | SNV | 1 | T | C | Heterozygous |
| NC_037648.1 | 15578598 | SNV | 1 | C | T | Heterozygous |
| NC_037648.1 | 15578603 | SNV | 1 | A | G | Heterozygous |
| NC_037648.1 | 15578612 | SNV | 1 | A | G | Heterozygous |
| NC_037648.1 | 15578642 | SNV | 1 | T | C | Heterozygous |
| NC_037648.1 | 15579299 | SNV | 1 | C | T | Heterozygous |
| NC_037648.1 | 15579470 | SNV | 1 | A | T | Heterozygous |
| NC_037648.1 | 15579560 | SNV | 1 | A | G | Homozygous   |
| NC_037648.1 | 15580059 | SNV | 1 | T | C | Homozygous   |
| NC_037648.1 | 15580299 | SNV | 1 | T | C | Heterozygous |
| NC_037648.1 | 15580583 | SNV | 1 | C | G | Heterozygous |
| NC_037648.1 | 15581251 | SNV | 1 | A | G | Heterozygous |
| NC_037648.1 | 15581307 | SNV | 1 | A | T | Heterozygous |
| NC_037648.1 | 15586752 | SNV | 1 | C | T | Homozygous   |
| NC_037648.1 | 15586837 | SNV | 1 | C | A | Homozygous   |
| NC_037648.1 | 15586947 | SNV | 1 | C | A | Heterozygous |
| NC_037648.1 | 15587014 | SNV | 1 | C | T | Homozygous   |
| NC_037648.1 | 15587054 | SNV | 1 | T | G | Homozygous   |
| NC_037648.1 | 15587074 | SNV | 1 | G | A | Heterozygous |

|             |          |     |   |   |   |              |
|-------------|----------|-----|---|---|---|--------------|
| NC_037648.1 | 15588766 | SNV | 1 | G | A | Homozygous   |
| NC_037648.1 | 15589574 | SNV | 1 | A | G | Homozygous   |
| NC_037648.1 | 15589671 | SNV | 1 | C | T | Homozygous   |
| NC_037648.1 | 15589828 | SNV | 1 | C | T | Heterozygous |
| NC_037648.1 | 15590040 | SNV | 1 | G | A | Homozygous   |
| NC_037648.1 | 15590118 | SNV | 1 | T | C | Homozygous   |
| NC_037648.1 | 15590737 | SNV | 1 | T | C | Homozygous   |
| NC_037648.1 | 15590747 | SNV | 1 | G | C | Homozygous   |
| NC_037648.1 | 15590757 | SNV | 1 | A | G | Homozygous   |
| NC_037648.1 | 15590775 | SNV | 1 | T | C | Homozygous   |
| NC_037648.1 | 15590787 | SNV | 1 | G | A | Homozygous   |
| NC_037648.1 | 15591248 | SNV | 1 | G | A | Homozygous   |
| NC_037648.1 | 15592113 | SNV | 1 | T | C | Homozygous   |
| NC_037648.1 | 15594499 | SNV | 1 | C | T | Homozygous   |
| NC_037648.1 | 15596587 | SNV | 1 | G | C | Homozygous   |
| NC_037648.1 | 15596864 | SNV | 1 | A | G | Homozygous   |
| NC_037648.1 | 15596866 | SNV | 1 | G | A | Heterozygous |
| NC_037648.1 | 15596957 | SNV | 1 | G | C | Homozygous   |
| NC_037648.1 | 15596964 | SNV | 1 | T | C | Heterozygous |
| NC_037648.1 | 15597287 | SNV | 1 | T | C | Heterozygous |
| NC_037648.1 | 15597293 | SNV | 1 | C | G | Heterozygous |
| NC_037648.1 | 15597461 | SNV | 1 | G | A | Heterozygous |
| NC_037648.1 | 15597587 | SNV | 1 | C | T | Heterozygous |
| NC_037648.1 | 15597599 | SNV | 1 | C | T | Heterozygous |
| NC_037648.1 | 15598601 | SNV | 1 | G | A | Heterozygous |
| NC_037648.1 | 15598751 | SNV | 1 | T | C | Heterozygous |
| NC_037648.1 | 15602254 | SNV | 1 | G | A | Heterozygous |
| NC_037648.1 | 15602269 | SNV | 1 | T | C | Heterozygous |
| NC_037648.1 | 15603233 | SNV | 1 | T | G | Homozygous   |
| NC_037648.1 | 15603488 | SNV | 1 | G | A | Homozygous   |
| NC_037648.1 | 15603657 | SNV | 1 | A | T | Heterozygous |
| NC_037648.1 | 15603663 | SNV | 1 | T | C | Heterozygous |
| NC_037648.1 | 15603665 | SNV | 1 | G | C | Heterozygous |
| NC_037648.1 | 15603876 | SNV | 1 | C | T | Homozygous   |
| NC_037648.1 | 15603911 | SNV | 1 | C | T | Heterozygous |
| NC_037648.1 | 15603943 | SNV | 1 | A | G | Heterozygous |
| NC_037648.1 | 15603947 | SNV | 1 | T | A | Heterozygous |
| NC_037648.1 | 15604034 | SNV | 1 | T | C | Heterozygous |
| NC_037648.1 | 15604892 | SNV | 1 | C | T | Heterozygous |
| NC_037648.1 | 15604899 | SNV | 1 | C | T | Homozygous   |
| NC_037648.1 | 15605393 | SNV | 1 | T | C | Homozygous   |
| NC_037648.1 | 15606752 | SNV | 1 | A | G | Heterozygous |
| NC_037648.1 | 15606754 | SNV | 1 | A | G | Heterozygous |
| NC_037648.1 | 15606762 | SNV | 1 | A | G | Heterozygous |
| NC_037648.1 | 15609730 | SNV | 1 | A | G | Heterozygous |
| NC_037648.1 | 15611191 | SNV | 1 | G | A | Heterozygous |
| NC_037648.1 | 15611211 | SNV | 1 | G | A | Heterozygous |
| NC_037648.1 | 15611239 | SNV | 1 | G | A | Heterozygous |
| NC_037648.1 | 15615919 | SNV | 1 | C | T | Homozygous   |
| NC_037648.1 | 15615922 | SNV | 1 | C | T | Homozygous   |
| NC_037648.1 | 15615925 | SNV | 1 | C | T | Homozygous   |

|             |          |     |   |   |   |              |
|-------------|----------|-----|---|---|---|--------------|
| NC_037648.1 | 15615979 | SNV | 1 | G | C | Heterozygous |
| NC_037648.1 | 15624634 | SNV | 1 | T | G | Homozygous   |
| NC_037648.1 | 15624637 | SNV | 1 | A | G | Heterozygous |
| NC_037648.1 | 15624642 | SNV | 1 | G | A | Homozygous   |
| NC_037648.1 | 15624645 | SNV | 1 | C | T | Homozygous   |
| NC_037648.1 | 15624648 | SNV | 1 | A | G | Heterozygous |
| NC_037648.1 | 15624946 | SNV | 1 | C | T | Heterozygous |
| NC_037648.1 | 15625093 | SNV | 1 | C | G | Homozygous   |
| NC_037648.1 | 15627624 | SNV | 1 | G | A | Homozygous   |
| NC_037648.1 | 15628161 | SNV | 1 | G | A | Homozygous   |
| NC_037648.1 | 15628169 | SNV | 1 | A | G | Homozygous   |
| NC_037648.1 | 15628378 | SNV | 1 | T | C | Homozygous   |
| NC_037648.1 | 15628704 | SNV | 1 | G | A | Heterozygous |
| NC_037648.1 | 15628746 | SNV | 1 | C | T | Homozygous   |
| NC_037648.1 | 15628878 | SNV | 1 | C | T | Heterozygous |
| NC_037648.1 | 15628895 | SNV | 1 | T | A | Homozygous   |
| NC_037648.1 | 15628931 | SNV | 1 | A | G | Homozygous   |
| NC_037648.1 | 15629055 | SNV | 1 | A | G | Heterozygous |
| NC_037648.1 | 15629157 | SNV | 1 | T | C | Heterozygous |
| NC_037648.1 | 15629425 | SNV | 1 | C | T | Heterozygous |
| NC_037648.1 | 15629559 | SNV | 1 | G | A | Homozygous   |
| NC_037648.1 | 15632047 | SNV | 1 | T | C | Homozygous   |
| NC_037648.1 | 15635525 | SNV | 1 | A | G | Homozygous   |
| NC_037648.1 | 15636384 | SNV | 1 | G | A | Homozygous   |
| NC_037648.1 | 15636462 | SNV | 1 | C | T | Homozygous   |
| NC_037648.1 | 15637427 | SNV | 1 | C | T | Heterozygous |
| NC_037648.1 | 15637912 | SNV | 1 | A | G | Heterozygous |
| NC_037648.1 | 15639382 | SNV | 1 | C | T | Heterozygous |
| NC_037648.1 | 15639394 | SNV | 1 | G | A | Heterozygous |
| NC_037648.1 | 15641821 | SNV | 1 | G | T | Heterozygous |
| NC_037648.1 | 15641907 | SNV | 1 | T | C | Homozygous   |
| NC_037648.1 | 15641940 | SNV | 1 | G | A | Homozygous   |
| NC_037648.1 | 15642433 | SNV | 1 | T | C | Heterozygous |
| NC_037648.1 | 15642450 | SNV | 1 | C | T | Heterozygous |
| NC_037648.1 | 15642903 | SNV | 1 | T | G | Homozygous   |
| NC_037648.1 | 15643526 | SNV | 1 | A | G | Homozygous   |
| NC_037648.1 | 15643559 | SNV | 1 | T | C | Homozygous   |
| NC_037648.1 | 15643978 | SNV | 1 | C | T | Heterozygous |
| NC_037648.1 | 15647483 | SNV | 1 | G | C | Heterozygous |
| NC_037648.1 | 15652982 | SNV | 1 | T | C | Homozygous   |
| NC_037648.1 | 15655342 | SNV | 1 | C | T | Homozygous   |
| NC_037648.1 | 15655611 | SNV | 1 | T | C | Homozygous   |
| NC_037648.1 | 15657979 | SNV | 1 | A | G | Heterozygous |
| NC_037648.1 | 15658023 | SNV | 1 | T | C | Heterozygous |
| NC_037648.1 | 15658187 | SNV | 1 | A | T | Homozygous   |
| NC_037648.1 | 15658194 | SNV | 1 | A | T | Homozygous   |
| NC_037648.1 | 15658218 | SNV | 1 | T | A | Heterozygous |
| NC_037648.1 | 15658229 | SNV | 1 | T | G | Homozygous   |
| NC_037648.1 | 15658826 | SNV | 1 | A | G | Homozygous   |
| NC_037648.1 | 15661707 | SNV | 1 | G | C | Heterozygous |
| NC_037648.1 | 15662701 | SNV | 1 | A | G | Heterozygous |

|             |          |     |   |   |   |              |
|-------------|----------|-----|---|---|---|--------------|
| NC_037648.1 | 15663768 | SNV | 1 | T | A | Heterozygous |
| NC_037648.1 | 15663987 | SNV | 1 | C | T | Heterozygous |
| NC_037648.1 | 15664308 | SNV | 1 | T | C | Homozygous   |
| NC_037648.1 | 15664310 | SNV | 1 | A | G | Homozygous   |
| NC_037648.1 | 15664369 | SNV | 1 | C | A | Homozygous   |
| NC_037648.1 | 15664660 | SNV | 1 | A | G | Homozygous   |
| NC_037648.1 | 15665494 | SNV | 1 | C | T | Homozygous   |
| NC_037648.1 | 15665510 | SNV | 1 | A | C | Homozygous   |
| NC_037648.1 | 15671775 | SNV | 1 | C | T | Heterozygous |
| NC_037648.1 | 15672102 | SNV | 1 | A | G | Homozygous   |
| NC_037648.1 | 15672105 | SNV | 1 | C | T | Homozygous   |
| NC_037648.1 | 15678375 | SNV | 1 | A | G | Homozygous   |
| NC_037648.1 | 15678448 | SNV | 1 | G | A | Heterozygous |
| NC_037648.1 | 15678504 | SNV | 1 | A | G | Homozygous   |
| NC_037648.1 | 15678507 | SNV | 1 | C | G | Homozygous   |
| NC_037648.1 | 15678565 | SNV | 1 | G | A | Heterozygous |
| NC_037648.1 | 15679216 | SNV | 1 | C | T | Heterozygous |
| NC_037648.1 | 15679340 | SNV | 1 | C | G | Heterozygous |
| NC_037648.1 | 15679341 | SNV | 1 | A | C | Heterozygous |
| NC_037648.1 | 15679343 | SNV | 1 | A | T | Heterozygous |
| NC_037648.1 | 15679347 | SNV | 1 | A | C | Heterozygous |
| NC_037648.1 | 15679350 | SNV | 1 | C | T | Homozygous   |
| NC_037648.1 | 15679370 | SNV | 1 | C | G | Heterozygous |
| NC_037648.1 | 15679373 | SNV | 1 | A | G | Heterozygous |
| NC_037648.1 | 15679376 | SNV | 1 | C | T | Heterozygous |
| NC_037648.1 | 15679384 | SNV | 1 | C | T | Heterozygous |
| NC_037648.1 | 15679398 | SNV | 1 | C | T | Heterozygous |
| NC_037648.1 | 15679576 | SNV | 1 | C | T | Heterozygous |
| NC_037648.1 | 15679585 | SNV | 1 | A | T | Homozygous   |
| NC_037648.1 | 15679597 | SNV | 1 | A | T | Heterozygous |
| NC_037648.1 | 15679600 | SNV | 1 | C | T | Heterozygous |
| NC_037648.1 | 15679617 | SNV | 1 | A | T | Heterozygous |
| NC_037648.1 | 15691166 | SNV | 1 | T | C | Homozygous   |
| NC_037648.1 | 15695904 | SNV | 1 | T | C | Heterozygous |
| NC_037648.1 | 15697338 | SNV | 1 | C | T | Heterozygous |
| NC_037648.1 | 15697664 | SNV | 1 | G | A | Heterozygous |
| NC_037648.1 | 15697901 | SNV | 1 | G | C | Heterozygous |
| NC_037648.1 | 15697955 | SNV | 1 | T | C | Homozygous   |
| NC_037648.1 | 15699316 | SNV | 1 | T | C | Heterozygous |
| NC_037648.1 | 15699352 | SNV | 1 | T | C | Heterozygous |
| NC_037648.1 | 15699355 | SNV | 1 | C | T | Homozygous   |
| NC_037648.1 | 15699397 | SNV | 1 | A | G | Heterozygous |
| NC_037648.1 | 15699707 | SNV | 1 | C | T | Heterozygous |
| NC_037648.1 | 15699802 | SNV | 1 | A | G | Heterozygous |
| NC_037648.1 | 15700530 | SNV | 1 | A | G | Heterozygous |
| NC_037648.1 | 15700716 | SNV | 1 | A | G | Heterozygous |
| NC_037648.1 | 15700785 | SNV | 1 | G | A | Homozygous   |
| NC_037648.1 | 15701156 | SNV | 1 | T | C | Homozygous   |
| NC_037648.1 | 15701194 | SNV | 1 | A | G | Heterozygous |
| NC_037648.1 | 15701292 | SNV | 1 | T | C | Homozygous   |
| NC_037648.1 | 15701392 | SNV | 1 | A | G | Homozygous   |

|             |          |     |   |   |   |              |
|-------------|----------|-----|---|---|---|--------------|
| NC_037648.1 | 15701510 | SNV | 1 | T | C | Homozygous   |
| NC_037648.1 | 15703030 | SNV | 1 | A | T | Homozygous   |
| NC_037648.1 | 15703034 | SNV | 1 | C | T | Homozygous   |
| NC_037648.1 | 15703036 | SNV | 1 | C | T | Homozygous   |
| NC_037648.1 | 15705134 | SNV | 1 | T | A | Homozygous   |
| NC_037648.1 | 15705142 | SNV | 1 | T | C | Homozygous   |
| NC_037648.1 | 15705144 | SNV | 1 | T | C | Homozygous   |
| NC_037648.1 | 15705153 | SNV | 1 | T | A | Homozygous   |
| NC_037648.1 | 15705160 | SNV | 1 | T | G | Homozygous   |
| NC_037648.1 | 15705201 | SNV | 1 | A | G | Heterozygous |
| NC_037648.1 | 15705209 | SNV | 1 | A | G | Heterozygous |
| NC_037648.1 | 15705214 | SNV | 1 | C | T | Heterozygous |
| NC_037648.1 | 15705219 | SNV | 1 | A | C | Heterozygous |
| NC_037648.1 | 15705378 | SNV | 1 | C | T | Heterozygous |
| NC_037648.1 | 15705390 | SNV | 1 | C | T | Heterozygous |
| NC_037648.1 | 15712954 | SNV | 1 | G | A | Heterozygous |
| NC_037648.1 | 15712960 | SNV | 1 | G | A | Heterozygous |
| NC_037648.1 | 15713682 | SNV | 1 | G | A | Heterozygous |
| NC_037648.1 | 15713686 | SNV | 1 | G | A | Heterozygous |
| NC_037648.1 | 15713694 | SNV | 1 | G | A | Heterozygous |
| NC_037648.1 | 15713697 | SNV | 1 | T | C | Heterozygous |
| NC_037648.1 | 15720782 | SNV | 1 | T | C | Heterozygous |
| NC_037648.1 | 15720784 | SNV | 1 | T | A | Heterozygous |
| NC_037648.1 | 15720792 | SNV | 1 | G | T | Homozygous   |
| NC_037648.1 | 15720797 | SNV | 1 | G | T | Heterozygous |
| NC_037648.1 | 15725419 | SNV | 1 | G | C | Homozygous   |
| NC_037648.1 | 15725424 | SNV | 1 | G | C | Heterozygous |
| NC_037648.1 | 15726113 | SNV | 1 | A | C | Homozygous   |
| NC_037648.1 | 15726119 | SNV | 1 | A | G | Homozygous   |
| NC_037648.1 | 15726125 | SNV | 1 | A | G | Homozygous   |
| NC_037648.1 | 15726148 | SNV | 1 | A | G | Homozygous   |
| NC_037648.1 | 15726150 | SNV | 1 | A | G | Homozygous   |
| NC_037648.1 | 15726153 | SNV | 1 | G | A | Homozygous   |
| NC_037648.1 | 15726156 | SNV | 1 | G | T | Homozygous   |
| NC_037648.1 | 15732843 | SNV | 1 | G | A | Homozygous   |
| NC_037648.1 | 15732850 | SNV | 1 | A | T | Heterozygous |
| NC_037648.1 | 15732853 | SNV | 1 | G | A | Heterozygous |
| NC_037648.1 | 15732865 | SNV | 1 | G | T | Heterozygous |
| NC_037648.1 | 15732867 | SNV | 1 | G | C | Heterozygous |
| NC_037648.1 | 15732871 | SNV | 1 | G | A | Heterozygous |
| NC_037648.1 | 15732871 | SNV | 1 | G | C | Heterozygous |
| NC_037648.1 | 15732881 | SNV | 1 | G | A | Homozygous   |
| NC_037648.1 | 15732887 | SNV | 1 | G | A | Homozygous   |
| NC_037648.1 | 15732895 | SNV | 1 | G | A | Homozygous   |
| NC_037648.1 | 15732907 | SNV | 1 | G | A | Homozygous   |
| NC_037648.1 | 15732909 | SNV | 1 | G | T | Homozygous   |
| NC_037648.1 | 15732934 | SNV | 1 | G | A | Homozygous   |
| NC_037648.1 | 15732939 | SNV | 1 | A | T | Homozygous   |
| NC_037648.1 | 15733048 | SNV | 1 | G | A | Heterozygous |
| NC_037648.1 | 15733140 | SNV | 1 | A | G | Homozygous   |
| NC_037648.1 | 15733144 | SNV | 1 | G | A | Homozygous   |

|             |          |     |   |   |   |              |
|-------------|----------|-----|---|---|---|--------------|
| NC_037648.1 | 15737515 | SNV | 1 | T | C | Heterozygous |
| NC_037648.1 | 15737522 | SNV | 1 | A | G | Heterozygous |
| NC_037648.1 | 15737528 | SNV | 1 | A | G | Heterozygous |
| NC_037648.1 | 15751287 | SNV | 1 | G | A | Heterozygous |
| NC_037648.1 | 15753184 | SNV | 1 | A | C | Homozygous   |
| NC_037648.1 | 15753188 | SNV | 1 | G | T | Homozygous   |
| NC_037648.1 | 15753202 | SNV | 1 | G | A | Homozygous   |
| NC_037648.1 | 15753210 | SNV | 1 | G | T | Homozygous   |
| NC_037648.1 | 15753253 | SNV | 1 | G | A | Heterozygous |
| NC_037648.1 | 15753260 | SNV | 1 | G | A | Heterozygous |
| NC_037648.1 | 15753265 | SNV | 1 | G | A | Heterozygous |
| NC_037648.1 | 15753270 | SNV | 1 | C | G | Heterozygous |
| NC_037648.1 | 15761796 | SNV | 1 | A | T | Homozygous   |
| NC_037648.1 | 15761812 | SNV | 1 | T | C | Homozygous   |
| NC_037648.1 | 15761820 | SNV | 1 | A | T | Homozygous   |
| NC_037648.1 | 15761822 | SNV | 1 | T | G | Homozygous   |
| NC_037648.1 | 15761824 | SNV | 1 | C | T | Homozygous   |
| NC_037648.1 | 15763414 | SNV | 1 | C | A | Homozygous   |
| NC_037648.1 | 15763416 | SNV | 1 | G | C | Homozygous   |
| NC_037648.1 | 15763601 | SNV | 1 | T | G | Homozygous   |
| NC_037648.1 | 15764183 | SNV | 1 | T | C | Heterozygous |
| NC_037648.1 | 15764574 | SNV | 1 | A | T | Homozygous   |
| NC_037648.1 | 15764844 | SNV | 1 | A | C | Heterozygous |
| NC_037648.1 | 15765060 | SNV | 1 | T | C | Homozygous   |
| NC_037648.1 | 15765070 | SNV | 1 | C | T | Homozygous   |
| NC_037648.1 | 15765659 | SNV | 1 | A | G | Homozygous   |
| NC_037648.1 | 15766190 | SNV | 1 | C | T | Heterozygous |
| NC_037648.1 | 15766283 | SNV | 1 | C | A | Homozygous   |
| NC_037648.1 | 15766600 | SNV | 1 | C | T | Homozygous   |
| NC_037648.1 | 15766620 | SNV | 1 | G | A | Heterozygous |
| NC_037648.1 | 15766635 | SNV | 1 | A | G | Heterozygous |
| NC_037648.1 | 15766672 | SNV | 1 | T | C | Homozygous   |
| NC_037648.1 | 15772750 | SNV | 1 | G | A | Heterozygous |
| NC_037648.1 | 15774660 | SNV | 1 | G | C | Heterozygous |
| NC_037648.1 | 15774664 | SNV | 1 | A | G | Homozygous   |
| NC_037648.1 | 15778458 | SNV | 1 | C | T | Homozygous   |
| NC_037648.1 | 15778463 | SNV | 1 | C | T | Homozygous   |
| NC_037648.1 | 15778473 | SNV | 1 | C | A | Homozygous   |
| NC_037648.1 | 15778477 | SNV | 1 | C | A | Homozygous   |
| NC_037648.1 | 15778501 | SNV | 1 | C | T | Homozygous   |
| NC_037648.1 | 15778752 | SNV | 1 | G | A | Heterozygous |
| NC_037648.1 | 15778757 | SNV | 1 | A | C | Heterozygous |
| NC_037648.1 | 15778759 | SNV | 1 | T | C | Heterozygous |
| NC_037648.1 | 15778778 | SNV | 1 | A | G | Heterozygous |
| NC_037648.1 | 15778783 | SNV | 1 | T | C | Heterozygous |
| NC_037648.1 | 15778972 | SNV | 1 | T | A | Homozygous   |
| NC_037648.1 | 15778981 | SNV | 1 | T | A | Heterozygous |
| NC_037648.1 | 15778984 | SNV | 1 | A | G | Heterozygous |
| NC_037648.1 | 15778984 | SNV | 1 | A | T | Heterozygous |
| NC_037648.1 | 15779853 | SNV | 1 | C | T | Heterozygous |
| NC_037648.1 | 15779943 | SNV | 1 | G | A | Heterozygous |

|             |          |     |   |   |   |              |
|-------------|----------|-----|---|---|---|--------------|
| NC_037648.1 | 15780045 | SNV | 1 | T | G | Heterozygous |
| NC_037648.1 | 15780538 | SNV | 1 | G | A | Heterozygous |
| NC_037648.1 | 15780548 | SNV | 1 | A | G | Homozygous   |
| NC_037648.1 | 15780733 | SNV | 1 | G | C | Heterozygous |
| NC_037648.1 | 15780946 | SNV | 1 | G | C | Homozygous   |
| NC_037648.1 | 15780955 | SNV | 1 | A | G | Homozygous   |
| NC_037648.1 | 15786177 | SNV | 1 | G | A | Heterozygous |
| NC_037648.1 | 15786203 | SNV | 1 | A | G | Heterozygous |
| NC_037648.1 | 15786218 | SNV | 1 | G | A | Heterozygous |
| NC_037648.1 | 15786228 | SNV | 1 | A | G | Heterozygous |
| NC_037648.1 | 15786232 | SNV | 1 | G | A | Homozygous   |
| NC_037648.1 | 15786512 | SNV | 1 | A | G | Heterozygous |
| NC_037648.1 | 15786534 | SNV | 1 | C | T | Homozygous   |
| NC_037648.1 | 15786970 | SNV | 1 | A | T | Homozygous   |
| NC_037648.1 | 15787167 | SNV | 1 | A | G | Homozygous   |
| NC_037648.1 | 15787344 | SNV | 1 | C | T | Homozygous   |
| NC_037648.1 | 15787351 | SNV | 1 | A | C | Heterozygous |
| NC_037648.1 | 15787363 | SNV | 1 | G | A | Heterozygous |
| NC_037648.1 | 15787610 | SNV | 1 | G | T | Heterozygous |
| NC_037648.1 | 15787628 | SNV | 1 | C | T | Heterozygous |
| NC_037648.1 | 15787645 | SNV | 1 | G | A | Homozygous   |
| NC_037648.1 | 15787671 | SNV | 1 | C | G | Heterozygous |
| NC_037648.1 | 15787920 | SNV | 1 | T | G | Homozygous   |
| NC_037648.1 | 15788306 | SNV | 1 | C | T | Heterozygous |
| NC_037648.1 | 15788701 | SNV | 1 | T | C | Homozygous   |
| NC_037648.1 | 15788764 | SNV | 1 | C | A | Heterozygous |
| NC_037648.1 | 15788791 | SNV | 1 | A | G | Homozygous   |
| NC_037648.1 | 15788885 | SNV | 1 | A | T | Heterozygous |
| NC_037648.1 | 15788928 | SNV | 1 | T | C | Homozygous   |
| NC_037648.1 | 15788942 | SNV | 1 | A | G | Heterozygous |
| NC_037648.1 | 15789292 | SNV | 1 | T | C | Heterozygous |
| NC_037648.1 | 15789344 | SNV | 1 | A | G | Homozygous   |
| NC_037648.1 | 15789370 | SNV | 1 | T | C | Homozygous   |
| NC_037648.1 | 15789436 | SNV | 1 | C | G | Homozygous   |
| NC_037648.1 | 15789441 | SNV | 1 | G | A | Homozygous   |
| NC_037648.1 | 15789452 | SNV | 1 | A | G | Homozygous   |
| NC_037648.1 | 15789466 | SNV | 1 | C | T | Heterozygous |
| NC_037648.1 | 15790154 | SNV | 1 | C | G | Homozygous   |
| NC_037648.1 | 15790475 | SNV | 1 | A | G | Homozygous   |
| NC_037648.1 | 15792141 | SNV | 1 | A | G | Heterozygous |
| NC_037648.1 | 15793735 | SNV | 1 | C | T | Homozygous   |
| NC_037648.1 | 15794518 | SNV | 1 | T | C | Homozygous   |
| NC_037648.1 | 15797639 | SNV | 1 | T | C | Homozygous   |
| NC_037648.1 | 15797642 | SNV | 1 | T | C | Homozygous   |
| NC_037648.1 | 15797645 | SNV | 1 | C | G | Homozygous   |
| NC_037648.1 | 15797983 | SNV | 1 | T | C | Heterozygous |
| NC_037648.1 | 15798364 | SNV | 1 | C | T | Homozygous   |
| NC_037648.1 | 15801390 | SNV | 1 | T | G | Homozygous   |
| NC_037648.1 | 15801489 | SNV | 1 | G | T | Homozygous   |
| NC_037648.1 | 15801963 | SNV | 1 | A | G | Heterozygous |
| NC_037648.1 | 15802214 | SNV | 1 | C | T | Homozygous   |

|             |          |     |   |   |   |              |
|-------------|----------|-----|---|---|---|--------------|
| NC_037648.1 | 15802269 | SNV | 1 | A | G | Homozygous   |
| NC_037648.1 | 15803967 | SNV | 1 | A | G | Homozygous   |
| NC_037648.1 | 15803969 | SNV | 1 | A | G | Heterozygous |
| NC_037648.1 | 15807300 | SNV | 1 | A | G | Homozygous   |
| NC_037648.1 | 15809075 | SNV | 1 | T | A | Heterozygous |
| NC_037648.1 | 15812708 | SNV | 1 | T | C | Heterozygous |
| NC_037648.1 | 15814526 | SNV | 1 | A | T | Homozygous   |
| NC_037648.1 | 15814718 | SNV | 1 | T | C | Homozygous   |
| NC_037648.1 | 15814720 | SNV | 1 | A | G | Homozygous   |
| NC_037648.1 | 15815693 | SNV | 1 | C | T | Homozygous   |
| NC_037648.1 | 15822214 | SNV | 1 | T | C | Homozygous   |
| NC_037648.1 | 15825988 | SNV | 1 | G | A | Heterozygous |
| NC_037648.1 | 15832201 | SNV | 1 | G | A | Heterozygous |
| NC_037648.1 | 15832580 | SNV | 1 | A | G | Homozygous   |
| NC_037648.1 | 15832839 | SNV | 1 | G | T | Homozygous   |
| NC_037648.1 | 15832936 | SNV | 1 | G | A | Homozygous   |
| NC_037648.1 | 15833039 | SNV | 1 | T | C | Heterozygous |
| NC_037648.1 | 15833310 | SNV | 1 | A | T | Homozygous   |
| NC_037648.1 | 15833760 | SNV | 1 | A | G | Heterozygous |
| NC_037648.1 | 15834122 | SNV | 1 | T | C | Homozygous   |
| NC_037648.1 | 15834316 | SNV | 1 | A | T | Heterozygous |
| NC_037648.1 | 15835130 | SNV | 1 | A | G | Homozygous   |
| NC_037648.1 | 15837718 | SNV | 1 | T | C | Homozygous   |
| NC_037648.1 | 15837941 | SNV | 1 | A | G | Heterozygous |
| NC_037648.1 | 15838142 | SNV | 1 | T | A | Homozygous   |
| NC_037648.1 | 15838146 | SNV | 1 | T | C | Homozygous   |
| NC_037648.1 | 15838804 | SNV | 1 | A | G | Homozygous   |
| NC_037648.1 | 15841811 | SNV | 1 | G | A | Heterozygous |
| NC_037648.1 | 15841993 | SNV | 1 | C | G | Homozygous   |
| NC_037648.1 | 15843576 | SNV | 1 | C | T | Homozygous   |
| NC_037648.1 | 15843587 | SNV | 1 | C | T | Homozygous   |
| NC_037648.1 | 15843605 | SNV | 1 | C | T | Homozygous   |
| NC_037648.1 | 15846019 | SNV | 1 | T | C | Heterozygous |
| NC_037648.1 | 15846051 | SNV | 1 | G | A | Heterozygous |
| NC_037648.1 | 15855386 | SNV | 1 | G | A | Homozygous   |
| NC_037648.1 | 15855414 | SNV | 1 | T | C | Heterozygous |
| NC_037648.1 | 15855557 | SNV | 1 | A | T | Heterozygous |
| NC_037648.1 | 15855699 | SNV | 1 | C | G | Homozygous   |
| NC_037648.1 | 15855776 | SNV | 1 | G | A | Heterozygous |
| NC_037648.1 | 15856126 | SNV | 1 | A | G | Homozygous   |
| NC_037648.1 | 15856372 | SNV | 1 | T | C | Heterozygous |
| NC_037648.1 | 15856383 | SNV | 1 | T | A | Heterozygous |
| NC_037648.1 | 15856778 | SNV | 1 | T | C | Heterozygous |
| NC_037648.1 | 15857003 | SNV | 1 | C | T | Heterozygous |
| NC_037648.1 | 15857186 | SNV | 1 | T | C | Homozygous   |
| NC_037648.1 | 15857349 | SNV | 1 | A | T | Homozygous   |
| NC_037648.1 | 15857373 | SNV | 1 | A | G | Heterozygous |
| NC_037648.1 | 15857404 | SNV | 1 | A | G | Heterozygous |
| NC_037648.1 | 15857406 | SNV | 1 | C | T | Homozygous   |
| NC_037648.1 | 15857434 | SNV | 1 | T | C | Heterozygous |
| NC_037648.1 | 15857446 | SNV | 1 | T | C | Heterozygous |



|             |          |     |   |   |   |              |
|-------------|----------|-----|---|---|---|--------------|
| NC_037648.1 | 15857537 | SNV | 1 | C | T | Homozygous   |
| NC_037648.1 | 15857947 | SNV | 1 | T | C | Homozygous   |
| NC_037648.1 | 15858630 | SNV | 1 | G | T | Heterozygous |
| NC_037648.1 | 15860044 | SNV | 1 | C | G | Homozygous   |
| NC_037648.1 | 15860046 | SNV | 1 | C | A | Homozygous   |
| NC_037648.1 | 15860058 | SNV | 1 | C | T | Homozygous   |
| NC_037648.1 | 15860134 | SNV | 1 | G | A | Homozygous   |
| NC_037648.1 | 15861698 | SNV | 1 | A | G | Homozygous   |
| NC_037648.1 | 15861702 | SNV | 1 | G | T | Homozygous   |
| NC_037648.1 | 15863113 | SNV | 1 | C | T | Homozygous   |
| NC_037648.1 | 15863208 | SNV | 1 | A | G | Homozygous   |
| NC_037648.1 | 15863243 | SNV | 1 | G | A | Heterozygous |
| NC_037648.1 | 15863644 | SNV | 1 | G | T | Heterozygous |
| NC_037648.1 | 15864386 | SNV | 1 | G | A | Heterozygous |
| NC_037648.1 | 15864458 | SNV | 1 | A | G | Heterozygous |
| NC_037648.1 | 15864488 | SNV | 1 | C | T | Heterozygous |
| NC_037648.1 | 15864825 | SNV | 1 | G | A | Heterozygous |
| NC_037648.1 | 15865088 | SNV | 1 | T | C | Heterozygous |
| NC_037648.1 | 15865130 | SNV | 1 | T | C | Heterozygous |
| NC_037648.1 | 15865142 | SNV | 1 | T | C | Heterozygous |
| NC_037648.1 | 15865149 | SNV | 1 | T | C | Heterozygous |
| NC_037648.1 | 15865644 | SNV | 1 | T | C | Homozygous   |
| NC_037648.1 | 15865746 | SNV | 1 | T | C | Heterozygous |
| NC_037648.1 | 15866303 | SNV | 1 | C | T | Heterozygous |
| NC_037648.1 | 15866329 | SNV | 1 | A | G | Homozygous   |
| NC_037648.1 | 15866567 | SNV | 1 | C | A | Heterozygous |
| NC_037648.1 | 15867049 | SNV | 1 | A | T | Heterozygous |
| NC_037648.1 | 15867245 | SNV | 1 | G | T | Homozygous   |
| NC_037648.1 | 15867322 | SNV | 1 | C | T | Homozygous   |
| NC_037648.1 | 15873819 | SNV | 1 | A | G | Heterozygous |
| NC_037648.1 | 15873855 | SNV | 1 | A | G | Heterozygous |
| NC_037648.1 | 15879312 | SNV | 1 | G | A | Homozygous   |
| NC_037648.1 | 15880482 | SNV | 1 | T | C | Homozygous   |
| NC_037648.1 | 15886234 | SNV | 1 | A | G | Homozygous   |
| NC_037648.1 | 15886294 | SNV | 1 | T | C | Homozygous   |
| NC_037648.1 | 15886424 | SNV | 1 | A | T | Homozygous   |
| NC_037648.1 | 15886435 | SNV | 1 | C | G | Heterozygous |
| NC_037648.1 | 15886846 | SNV | 1 | C | A | Heterozygous |
| NC_037648.1 | 15886954 | SNV | 1 | T | A | Heterozygous |
| NC_037648.1 | 15887024 | SNV | 1 | C | G | Homozygous   |
| NC_037648.1 | 15887028 | SNV | 1 | G | A | Homozygous   |
| NC_037648.1 | 15887031 | SNV | 1 | A | G | Homozygous   |
| NC_037648.1 | 15887417 | SNV | 1 | C | A | Heterozygous |
| NC_037648.1 | 15887591 | SNV | 1 | A | G | Heterozygous |
| NC_037648.1 | 15887769 | SNV | 1 | A | G | Homozygous   |
| NC_037648.1 | 15888040 | SNV | 1 | G | A | Heterozygous |
| NC_037648.1 | 15888156 | SNV | 1 | T | C | Homozygous   |
| NC_037648.1 | 15888158 | SNV | 1 | T | C | Homozygous   |
| NC_037648.1 | 15888407 | SNV | 1 | T | C | Heterozygous |
| NC_037648.1 | 15888573 | SNV | 1 | C | T | Heterozygous |
| NC_037648.1 | 15888872 | SNV | 1 | C | T | Heterozygous |

|             |          |     |   |   |   |              |
|-------------|----------|-----|---|---|---|--------------|
| NC_037648.1 | 15889016 | SNV | 1 | A | G | Homozygous   |
| NC_037648.1 | 15889186 | SNV | 1 | A | G | Homozygous   |
| NC_037648.1 | 15889366 | SNV | 1 | G | A | Homozygous   |
| NC_037648.1 | 15889432 | SNV | 1 | G | A | Heterozygous |
| NC_037648.1 | 15889577 | SNV | 1 | A | G | Heterozygous |
| NC_037648.1 | 15889739 | SNV | 1 | C | T | Homozygous   |
| NC_037648.1 | 15889750 | SNV | 1 | A | G | Homozygous   |
| NC_037648.1 | 15889778 | SNV | 1 | G | A | Homozygous   |
| NC_037648.1 | 15889790 | SNV | 1 | C | T | Homozygous   |
| NC_037648.1 | 15889899 | SNV | 1 | T | C | Homozygous   |
| NC_037648.1 | 15889959 | SNV | 1 | C | A | Homozygous   |
| NC_037648.1 | 15890123 | SNV | 1 | C | T | Homozygous   |
| NC_037648.1 | 15890126 | SNV | 1 | C | T | Homozygous   |
| NC_037648.1 | 15890355 | SNV | 1 | G | A | Heterozygous |
| NC_037648.1 | 15890557 | SNV | 1 | T | C | Homozygous   |
| NC_037648.1 | 15891231 | SNV | 1 | T | C | Homozygous   |
| NC_037648.1 | 15891498 | SNV | 1 | G | A | Homozygous   |
| NC_037648.1 | 15891676 | SNV | 1 | C | T | Homozygous   |
| NC_037648.1 | 15895192 | SNV | 1 | A | G | Homozygous   |
| NC_037648.1 | 15895200 | SNV | 1 | A | T | Homozygous   |
| NC_037648.1 | 15895208 | SNV | 1 | A | T | Homozygous   |
| NC_037648.1 | 15895220 | SNV | 1 | A | G | Homozygous   |
| NC_037648.1 | 15895222 | SNV | 1 | A | G | Homozygous   |
| NC_037648.1 | 15895253 | SNV | 1 | C | G | Homozygous   |
| NC_037648.1 | 15895766 | SNV | 1 | T | A | Homozygous   |
| NC_037648.1 | 15895826 | SNV | 1 | A | T | Heterozygous |
| NC_037648.1 | 15895842 | SNV | 1 | T | C | Homozygous   |
| NC_037648.1 | 15895845 | SNV | 1 | T | A | Homozygous   |
| NC_037648.1 | 15895872 | SNV | 1 | T | A | Homozygous   |
| NC_037648.1 | 15895893 | SNV | 1 | T | C | Homozygous   |
| NC_037648.1 | 15895896 | SNV | 1 | T | A | Homozygous   |
| NC_037648.1 | 15895953 | SNV | 1 | C | A | Heterozygous |
| NC_037648.1 | 15898741 | SNV | 1 | T | C | Heterozygous |
| NC_037648.1 | 15898744 | SNV | 1 | T | C | Heterozygous |
| NC_037648.1 | 15898891 | SNV | 1 | T | C | Homozygous   |
| NC_037648.1 | 15899405 | SNV | 1 | C | T | Heterozygous |
| NC_037648.1 | 15899476 | SNV | 1 | C | T | Homozygous   |
| NC_037648.1 | 15900191 | SNV | 1 | T | C | Homozygous   |
| NC_037648.1 | 15900194 | SNV | 1 | C | G | Homozygous   |
| NC_037648.1 | 15901578 | SNV | 1 | C | G | Homozygous   |
| NC_037648.1 | 15901590 | SNV | 1 | C | T | Homozygous   |
| NC_037648.1 | 15901608 | SNV | 1 | C | G | Homozygous   |
| NC_037648.1 | 15901615 | SNV | 1 | C | G | Homozygous   |
| NC_037648.1 | 15901619 | SNV | 1 | C | G | Homozygous   |
| NC_037648.1 | 15901628 | SNV | 1 | T | C | Homozygous   |
| NC_037648.1 | 15901635 | SNV | 1 | C | G | Homozygous   |
| NC_037648.1 | 15901754 | SNV | 1 | T | C | Homozygous   |
| NC_037648.1 | 15901757 | SNV | 1 | G | A | Heterozygous |
| NC_037648.1 | 15901760 | SNV | 1 | C | T | Heterozygous |
| NC_037648.1 | 15901786 | SNV | 1 | T | C | Heterozygous |
| NC_037648.1 | 15901790 | SNV | 1 | T | C | Heterozygous |

|             |          |     |   |   |   |              |
|-------------|----------|-----|---|---|---|--------------|
| NC_037648.1 | 15901807 | SNV | 1 | G | C | Heterozygous |
| NC_037648.1 | 15901810 | SNV | 1 | T | C | Heterozygous |
| NC_037648.1 | 15901815 | SNV | 1 | G | A | Heterozygous |
| NC_037648.1 | 15902034 | SNV | 1 | G | T | Homozygous   |
| NC_037648.1 | 15902073 | SNV | 1 | C | G | Homozygous   |
| NC_037648.1 | 15902182 | SNV | 1 | T | C | Heterozygous |
| NC_037648.1 | 15904810 | SNV | 1 | G | A | Homozygous   |
| NC_037648.1 | 15904948 | SNV | 1 | A | G | Homozygous   |
| NC_037648.1 | 15905480 | SNV | 1 | C | T | Homozygous   |
| NC_037648.1 | 15905585 | SNV | 1 | T | C | Homozygous   |
| NC_037648.1 | 15905726 | SNV | 1 | C | G | Heterozygous |
| NC_037648.1 | 15905826 | SNV | 1 | T | C | Homozygous   |
| NC_037648.1 | 15905828 | SNV | 1 | T | C | Homozygous   |
| NC_037648.1 | 15906041 | SNV | 1 | A | G | Homozygous   |
| NC_037648.1 | 15906190 | SNV | 1 | T | C | Homozygous   |
| NC_037648.1 | 15906776 | SNV | 1 | G | A | Homozygous   |
| NC_037648.1 | 15906783 | SNV | 1 | G | A | Heterozygous |
| NC_037648.1 | 15907210 | SNV | 1 | T | C | Homozygous   |
| NC_037648.1 | 15907245 | SNV | 1 | T | C | Homozygous   |
| NC_037648.1 | 15907544 | SNV | 1 | T | C | Homozygous   |
| NC_037648.1 | 15911301 | SNV | 1 | T | C | Heterozygous |
| NC_037648.1 | 15911454 | SNV | 1 | T | C | Homozygous   |
| NC_037648.1 | 15911997 | SNV | 1 | A | C | Homozygous   |
| NC_037648.1 | 15914380 | SNV | 1 | A | G | Homozygous   |
| NC_037648.1 | 15921128 | SNV | 1 | A | C | Homozygous   |
| NC_037648.1 | 15921130 | SNV | 1 | A | T | Homozygous   |
| NC_037648.1 | 15921181 | SNV | 1 | G | T | Heterozygous |
| NC_037648.1 | 15921789 | SNV | 1 | G | A | Homozygous   |
| NC_037648.1 | 15922449 | SNV | 1 | G | A | Heterozygous |
| NC_037648.1 | 15923045 | SNV | 1 | T | C | Heterozygous |
| NC_037648.1 | 15923249 | SNV | 1 | A | T | Homozygous   |
| NC_037648.1 | 15923565 | SNV | 1 | C | A | Homozygous   |
| NC_037648.1 | 15927817 | SNV | 1 | A | G | Homozygous   |
| NC_037648.1 | 15927893 | SNV | 1 | T | C | Heterozygous |
| NC_037648.1 | 15927924 | SNV | 1 | C | T | Heterozygous |
| NC_037648.1 | 15927990 | SNV | 1 | G | A | Heterozygous |
| NC_037648.1 | 15927996 | SNV | 1 | T | C | Homozygous   |
| NC_037648.1 | 15928135 | SNV | 1 | T | C | Heterozygous |
| NC_037648.1 | 15928423 | SNV | 1 | A | G | Homozygous   |
| NC_037648.1 | 15928451 | SNV | 1 | A | G | Heterozygous |
| NC_037648.1 | 15928665 | SNV | 1 | T | C | Homozygous   |
| NC_037648.1 | 15928779 | SNV | 1 | A | G | Homozygous   |
| NC_037648.1 | 15929009 | SNV | 1 | T | C | Homozygous   |
| NC_037648.1 | 15929019 | SNV | 1 | C | T | Homozygous   |
| NC_037648.1 | 15930149 | SNV | 1 | G | C | Homozygous   |
| NC_037648.1 | 15930445 | SNV | 1 | A | G | Homozygous   |
| NC_037648.1 | 15931209 | SNV | 1 | T | C | Homozygous   |
| NC_037648.1 | 15931346 | SNV | 1 | A | G | Homozygous   |
| NC_037648.1 | 15931419 | SNV | 1 | T | C | Homozygous   |
| NC_037648.1 | 15931447 | SNV | 1 | C | T | Homozygous   |
| NC_037648.1 | 15931931 | SNV | 1 | C | G | Homozygous   |

|             |          |     |   |   |   |              |
|-------------|----------|-----|---|---|---|--------------|
| NC_037648.1 | 15931954 | SNV | 1 | T | C | Homozygous   |
| NC_037648.1 | 15932063 | SNV | 1 | A | G | Homozygous   |
| NC_037648.1 | 15933761 | SNV | 1 | A | G | Homozygous   |
| NC_037648.1 | 15934390 | SNV | 1 | G | T | Heterozygous |
| NC_037648.1 | 15934392 | SNV | 1 | A | T | Heterozygous |
| NC_037648.1 | 15935083 | SNV | 1 | A | G | Homozygous   |
| NC_037648.1 | 15935717 | SNV | 1 | A | G | Heterozygous |
| NC_037648.1 | 15935724 | SNV | 1 | T | C | Homozygous   |
| NC_037648.1 | 15936661 | SNV | 1 | A | G | Heterozygous |
| NC_037648.1 | 15936872 | SNV | 1 | A | G | Heterozygous |
| NC_037648.1 | 15936915 | SNV | 1 | T | C | Heterozygous |
| NC_037648.1 | 15936936 | SNV | 1 | G | A | Heterozygous |
| NC_037648.1 | 15937822 | SNV | 1 | T | C | Homozygous   |
| NC_037648.1 | 15938037 | SNV | 1 | A | G | Heterozygous |
| NC_037648.1 | 15938199 | SNV | 1 | C | A | Homozygous   |
| NC_037648.1 | 15938323 | SNV | 1 | T | C | Homozygous   |
| NC_037648.1 | 15938539 | SNV | 1 | G | A | Heterozygous |
| NC_037648.1 | 15939621 | SNV | 1 | A | G | Homozygous   |
| NC_037648.1 | 15946841 | SNV | 1 | T | C | Homozygous   |
| NC_037648.1 | 15946877 | SNV | 1 | G | A | Homozygous   |
| NC_037648.1 | 15948017 | SNV | 1 | T | A | Homozygous   |
| NC_037648.1 | 15950739 | SNV | 1 | A | G | Heterozygous |
| NC_037648.1 | 15950740 | SNV | 1 | G | A | Heterozygous |
| NC_037648.1 | 15950747 | SNV | 1 | A | T | Homozygous   |
| NC_037648.1 | 15950749 | SNV | 1 | G | A | Heterozygous |
| NC_037648.1 | 15950769 | SNV | 1 | C | A | Heterozygous |
| NC_037648.1 | 15950769 | SNV | 1 | C | G | Heterozygous |
| NC_037648.1 | 15950776 | SNV | 1 | A | G | Heterozygous |
| NC_037648.1 | 15950783 | SNV | 1 | C | T | Homozygous   |
| NC_037648.1 | 15950785 | SNV | 1 | G | A | Homozygous   |
| NC_037648.1 | 15950789 | SNV | 1 | C | T | Homozygous   |
| NC_037648.1 | 15950849 | SNV | 1 | C | T | Homozygous   |
| NC_037648.1 | 15950854 | SNV | 1 | T | C | Homozygous   |
| NC_037648.1 | 15950856 | SNV | 1 | A | T | Homozygous   |
| NC_037648.1 | 15950867 | SNV | 1 | T | G | Homozygous   |
| NC_037648.1 | 15950872 | SNV | 1 | T | G | Homozygous   |
| NC_037648.1 | 15950878 | SNV | 1 | T | A | Heterozygous |
| NC_037648.1 | 15950899 | SNV | 1 | A | C | Homozygous   |
| NC_037648.1 | 15950912 | SNV | 1 | T | C | Homozygous   |
| NC_037648.1 | 15950914 | SNV | 1 | T | C | Homozygous   |
| NC_037648.1 | 15950917 | SNV | 1 | T | C | Homozygous   |
| NC_037648.1 | 15950921 | SNV | 1 | C | T | Heterozygous |
| NC_037648.1 | 15951762 | SNV | 1 | A | G | Homozygous   |
| NC_037648.1 | 15951768 | SNV | 1 | A | G | Homozygous   |
| NC_037648.1 | 15951782 | SNV | 1 | T | C | Homozygous   |
| NC_037648.1 | 15951798 | SNV | 1 | C | T | Homozygous   |
| NC_037648.1 | 15951837 | SNV | 1 | C | T | Heterozygous |
| NC_037648.1 | 15951876 | SNV | 1 | G | A | Heterozygous |
| NC_037648.1 | 15953305 | SNV | 1 | A | G | Heterozygous |
| NC_037648.1 | 15953312 | SNV | 1 | G | A | Heterozygous |
| NC_037648.1 | 15953627 | SNV | 1 | A | G | Homozygous   |

|             |          |     |   |   |   |              |
|-------------|----------|-----|---|---|---|--------------|
| NC_037648.1 | 15954076 | SNV | 1 | G | T | Heterozygous |
| NC_037648.1 | 15954223 | SNV | 1 | T | G | Heterozygous |
| NC_037648.1 | 15954237 | SNV | 1 | C | G | Heterozygous |
| NC_037648.1 | 15955114 | SNV | 1 | T | C | Homozygous   |
| NC_037648.1 | 15955171 | SNV | 1 | A | G | Homozygous   |
| NC_037648.1 | 15955359 | SNV | 1 | T | C | Homozygous   |
| NC_037648.1 | 15955467 | SNV | 1 | T | C | Homozygous   |
| NC_037648.1 | 15956195 | SNV | 1 | C | A | Homozygous   |
| NC_037648.1 | 15956499 | SNV | 1 | T | C | Homozygous   |
| NC_037648.1 | 15956736 | SNV | 1 | C | T | Homozygous   |
| NC_037648.1 | 15956871 | SNV | 1 | A | G | Homozygous   |
| NC_037648.1 | 15956936 | SNV | 1 | C | T | Homozygous   |
| NC_037648.1 | 15956962 | SNV | 1 | T | C | Heterozygous |
| NC_037648.1 | 15957085 | SNV | 1 | A | G | Homozygous   |
| NC_037648.1 | 15957426 | SNV | 1 | A | T | Homozygous   |
| NC_037648.1 | 15959254 | SNV | 1 | T | A | Homozygous   |
| NC_037648.1 | 15960945 | SNV | 1 | A | G | Heterozygous |
| NC_037648.1 | 15961541 | SNV | 1 | T | C | Homozygous   |
| NC_037648.1 | 15961596 | SNV | 1 | G | A | Heterozygous |
| NC_037648.1 | 15961680 | SNV | 1 | A | G | Homozygous   |
| NC_037648.1 | 15961683 | SNV | 1 | A | T | Homozygous   |
| NC_037648.1 | 15961687 | SNV | 1 | A | G | Homozygous   |
| NC_037648.1 | 15961914 | SNV | 1 | C | T | Homozygous   |
| NC_037648.1 | 15961920 | SNV | 1 | A | G | Homozygous   |
| NC_037648.1 | 15962013 | SNV | 1 | T | C | Homozygous   |
| NC_037648.1 | 15962023 | SNV | 1 | C | T | Homozygous   |
| NC_037648.1 | 15962545 | SNV | 1 | A | G | Homozygous   |
| NC_037648.1 | 15963713 | SNV | 1 | T | A | Heterozygous |
| NC_037648.1 | 15963716 | SNV | 1 | G | A | Heterozygous |
| NC_037648.1 | 15963887 | SNV | 1 | T | G | Homozygous   |
| NC_037648.1 | 15964162 | SNV | 1 | A | G | Homozygous   |
| NC_037648.1 | 15964473 | SNV | 1 | A | G | Homozygous   |
| NC_037648.1 | 15964522 | SNV | 1 | A | G | Homozygous   |
| NC_037648.1 | 15964654 | SNV | 1 | A | G | Heterozygous |
| NC_037648.1 | 15964787 | SNV | 1 | T | C | Heterozygous |
| NC_037648.1 | 15965817 | SNV | 1 | A | G | Homozygous   |
| NC_037648.1 | 15965841 | SNV | 1 | A | G | Homozygous   |
| NC_037648.1 | 15966899 | SNV | 1 | G | A | Heterozygous |
| NC_037648.1 | 15966909 | SNV | 1 | T | C | Homozygous   |
| NC_037648.1 | 15966931 | SNV | 1 | C | T | Heterozygous |
| NC_037648.1 | 15967180 | SNV | 1 | G | A | Homozygous   |
| NC_037648.1 | 15967240 | SNV | 1 | A | G | Heterozygous |
| NC_037648.1 | 15967453 | SNV | 1 | T | G | Heterozygous |
| NC_037648.1 | 15967489 | SNV | 1 | G | A | Heterozygous |
| NC_037648.1 | 15967493 | SNV | 1 | G | C | Homozygous   |
| NC_037648.1 | 15967549 | SNV | 1 | G | A | Heterozygous |
| NC_037648.1 | 15967558 | SNV | 1 | A | G | Heterozygous |
| NC_037648.1 | 15967561 | SNV | 1 | G | T | Heterozygous |
| NC_037648.1 | 15967740 | SNV | 1 | G | A | Homozygous   |
| NC_037648.1 | 15967867 | SNV | 1 | A | G | Homozygous   |
| NC_037648.1 | 15967910 | SNV | 1 | C | G | Heterozygous |

|             |          |     |   |   |   |              |
|-------------|----------|-----|---|---|---|--------------|
| NC_037648.1 | 15968039 | SNV | 1 | A | G | Homozygous   |
| NC_037648.1 | 15968118 | SNV | 1 | T | C | Homozygous   |
| NC_037648.1 | 15968161 | SNV | 1 | A | T | Heterozygous |
| NC_037648.1 | 15968164 | SNV | 1 | T | A | Heterozygous |
| NC_037648.1 | 15968341 | SNV | 1 | A | G | Heterozygous |
| NC_037648.1 | 15968462 | SNV | 1 | G | C | Heterozygous |
| NC_037648.1 | 15968465 | SNV | 1 | C | G | Homozygous   |
| NC_037648.1 | 15968490 | SNV | 1 | C | T | Heterozygous |
| NC_037648.1 | 15968503 | SNV | 1 | A | G | Heterozygous |
| NC_037648.1 | 15968554 | SNV | 1 | G | A | Heterozygous |
| NC_037648.1 | 15968560 | SNV | 1 | A | G | Heterozygous |
| NC_037648.1 | 15968563 | SNV | 1 | A | G | Heterozygous |
| NC_037648.1 | 15968569 | SNV | 1 | T | G | Heterozygous |
| NC_037648.1 | 15968572 | SNV | 1 | A | G | Heterozygous |
| NC_037648.1 | 15968581 | SNV | 1 | T | A | Heterozygous |
| NC_037648.1 | 15968650 | SNV | 1 | G | A | Homozygous   |
| NC_037648.1 | 15968661 | SNV | 1 | T | C | Homozygous   |
| NC_037648.1 | 15968701 | SNV | 1 | A | G | Heterozygous |
| NC_037648.1 | 15968707 | SNV | 1 | A | G | Heterozygous |
| NC_037648.1 | 15968728 | SNV | 1 | A | T | Heterozygous |
| NC_037648.1 | 15968833 | SNV | 1 | A | T | Homozygous   |
| NC_037648.1 | 15968871 | SNV | 1 | A | G | Homozygous   |
| NC_037648.1 | 15968983 | SNV | 1 | T | C | Homozygous   |
| NC_037648.1 | 15971467 | SNV | 1 | C | T | Homozygous   |
| NC_037648.1 | 15971677 | SNV | 1 | G | A | Heterozygous |
| NC_037648.1 | 15971694 | SNV | 1 | G | A | Heterozygous |
| NC_037648.1 | 15971694 | SNV | 1 | G | C | Heterozygous |
| NC_037648.1 | 15971699 | SNV | 1 | T | C | Heterozygous |
| NC_037648.1 | 15971731 | SNV | 1 | T | C | Heterozygous |
| NC_037648.1 | 15971733 | SNV | 1 | A | G | Homozygous   |
| NC_037648.1 | 15971818 | SNV | 1 | T | C | Heterozygous |
| NC_037648.1 | 15971957 | SNV | 1 | G | C | Homozygous   |
| NC_037648.1 | 15972060 | SNV | 1 | T | C | Heterozygous |
| NC_037648.1 | 15972086 | SNV | 1 | T | C | Heterozygous |
| NC_037648.1 | 15972094 | SNV | 1 | C | T | Heterozygous |
| NC_037648.1 | 15972098 | SNV | 1 | G | A | Homozygous   |
| NC_037648.1 | 15972112 | SNV | 1 | A | G | Homozygous   |
| NC_037648.1 | 15972592 | SNV | 1 | A | G | Homozygous   |
| NC_037648.1 | 15972805 | SNV | 1 | T | C | Homozygous   |
| NC_037648.1 | 15973505 | SNV | 1 | T | A | Homozygous   |
| NC_037648.1 | 15974090 | SNV | 1 | A | T | Homozygous   |
| NC_037648.1 | 15974093 | SNV | 1 | A | T | Homozygous   |
| NC_037648.1 | 15974533 | SNV | 1 | T | C | Homozygous   |
| NC_037648.1 | 15974587 | SNV | 1 | G | A | Heterozygous |
| NC_037648.1 | 15974770 | SNV | 1 | T | C | Heterozygous |
| NC_037648.1 | 15975153 | SNV | 1 | T | C | Homozygous   |
| NC_037648.1 | 15975515 | SNV | 1 | G | A | Homozygous   |
| NC_037648.1 | 15975518 | SNV | 1 | A | T | Heterozygous |
| NC_037648.1 | 15975520 | SNV | 1 | A | G | Heterozygous |
| NC_037648.1 | 15975525 | SNV | 1 | G | A | Heterozygous |
| NC_037648.1 | 15975555 | SNV | 1 | T | G | Homozygous   |

|             |          |     |   |   |   |              |
|-------------|----------|-----|---|---|---|--------------|
| NC_037648.1 | 15975557 | SNV | 1 | T | G | Homozygous   |
| NC_037648.1 | 15976568 | SNV | 1 | A | G | Heterozygous |
| NC_037648.1 | 15976575 | SNV | 1 | A | C | Heterozygous |
| NC_037648.1 | 15976580 | SNV | 1 | G | A | Heterozygous |
| NC_037648.1 | 15977427 | SNV | 1 | G | C | Heterozygous |
| NC_037648.1 | 15977448 | SNV | 1 | C | T | Heterozygous |
| NC_037648.1 | 15977501 | SNV | 1 | C | T | Homozygous   |
| NC_037648.1 | 15977775 | SNV | 1 | A | G | Homozygous   |
| NC_037648.1 | 15977811 | SNV | 1 | A | G | Heterozygous |
| NC_037648.1 | 15977970 | SNV | 1 | T | C | Homozygous   |
| NC_037648.1 | 15978328 | SNV | 1 | A | G | Homozygous   |
| NC_037648.1 | 15978460 | SNV | 1 | A | T | Heterozygous |
| NC_037648.1 | 15978656 | SNV | 1 | C | T | Homozygous   |
| NC_037648.1 | 15979125 | SNV | 1 | T | C | Homozygous   |
| NC_037648.1 | 15979325 | SNV | 1 | C | T | Heterozygous |
| NC_037648.1 | 15979731 | SNV | 1 | C | T | Homozygous   |
| NC_037648.1 | 15980605 | SNV | 1 | G | A | Homozygous   |
| NC_037648.1 | 15981196 | SNV | 1 | T | C | Homozygous   |
| NC_037648.1 | 15981219 | SNV | 1 | A | G | Homozygous   |
| NC_037648.1 | 15981221 | SNV | 1 | G | A | Homozygous   |
| NC_037648.1 | 15981395 | SNV | 1 | G | T | Heterozygous |
| NC_037648.1 | 15981397 | SNV | 1 | T | C | Homozygous   |
| NC_037648.1 | 15981652 | SNV | 1 | C | T | Heterozygous |
| NC_037648.1 | 15982172 | SNV | 1 | T | C | Heterozygous |
| NC_037648.1 | 15982958 | SNV | 1 | C | A | Heterozygous |
| NC_037648.1 | 15983006 | SNV | 1 | C | T | Heterozygous |
| NC_037648.1 | 15984119 | SNV | 1 | G | A | Homozygous   |
| NC_037648.1 | 15984125 | SNV | 1 | G | A | Homozygous   |
| NC_037648.1 | 15984128 | SNV | 1 | G | A | Homozygous   |
| NC_037648.1 | 15984132 | SNV | 1 | C | T | Homozygous   |
| NC_037648.1 | 15984134 | SNV | 1 | G | A | Homozygous   |
| NC_037648.1 | 15984140 | SNV | 1 | C | A | Homozygous   |
| NC_037648.1 | 15984166 | SNV | 1 | C | T | Homozygous   |
| NC_037648.1 | 15984171 | SNV | 1 | A | T | Homozygous   |
| NC_037648.1 | 15984182 | SNV | 1 | C | A | Homozygous   |
| NC_037648.1 | 15984197 | SNV | 1 | C | A | Homozygous   |
| NC_037648.1 | 15984203 | SNV | 1 | C | A | Homozygous   |
| NC_037648.1 | 15984206 | SNV | 1 | G | T | Homozygous   |
| NC_037648.1 | 15984213 | SNV | 1 | A | T | Homozygous   |
| NC_037648.1 | 15986671 | SNV | 1 | T | C | Homozygous   |
| NC_037648.1 | 15986691 | SNV | 1 | A | T | Homozygous   |
| NC_037648.1 | 15986694 | SNV | 1 | G | T | Homozygous   |
| NC_037648.1 | 15986702 | SNV | 1 | T | C | Homozygous   |
| NC_037648.1 | 15989459 | SNV | 1 | G | C | Heterozygous |
| NC_037648.1 | 15989471 | SNV | 1 | G | A | Heterozygous |
| NC_037648.1 | 15989543 | SNV | 1 | A | G | Homozygous   |
| NC_037648.1 | 15995376 | SNV | 1 | G | A | Homozygous   |
| NC_037648.1 | 15995503 | SNV | 1 | A | G | Homozygous   |
| NC_037648.1 | 15995532 | SNV | 1 | A | G | Homozygous   |
| NC_037648.1 | 16000181 | SNV | 1 | T | C | Heterozygous |
| NC_037648.1 | 16000193 | SNV | 1 | T | A | Heterozygous |

|             |          |     |   |   |   |              |
|-------------|----------|-----|---|---|---|--------------|
| NC_037648.1 | 16000634 | SNV | 1 | C | T | Heterozygous |
| NC_037648.1 | 16000754 | SNV | 1 | G | T | Homozygous   |
| NC_037648.1 | 16001443 | SNV | 1 | C | A | Homozygous   |
| NC_037648.1 | 16001446 | SNV | 1 | T | C | Homozygous   |
| NC_037648.1 | 16001532 | SNV | 1 | A | G | Heterozygous |
| NC_037648.1 | 16001925 | SNV | 1 | C | G | Homozygous   |
| NC_037648.1 | 16002766 | SNV | 1 | A | G | Homozygous   |
| NC_037648.1 | 16003098 | SNV | 1 | T | C | Heterozygous |
| NC_037648.1 | 16004484 | SNV | 1 | G | A | Heterozygous |
| NC_037648.1 | 16004496 | SNV | 1 | A | G | Heterozygous |
| NC_037648.1 | 16004562 | SNV | 1 | C | T | Heterozygous |
| NC_037648.1 | 16004748 | SNV | 1 | A | G | Heterozygous |
| NC_037648.1 | 16004784 | SNV | 1 | A | C | Homozygous   |
| NC_037648.1 | 16004871 | SNV | 1 | A | G | Homozygous   |
| NC_037648.1 | 16005000 | SNV | 1 | C | A | Heterozygous |
| NC_037648.1 | 16005018 | SNV | 1 | A | G | Homozygous   |
| NC_037648.1 | 16005024 | SNV | 1 | C | T | Heterozygous |
| NC_037648.1 | 16005123 | SNV | 1 | T | G | Homozygous   |
| NC_037648.1 | 16005132 | SNV | 1 | G | A | Heterozygous |
| NC_037648.1 | 16005139 | SNV | 1 | A | G | Homozygous   |
| NC_037648.1 | 16005158 | SNV | 1 | C | T | Homozygous   |
| NC_037648.1 | 16005857 | SNV | 1 | T | C | Heterozygous |
| NC_037648.1 | 16006040 | SNV | 1 | T | C | Homozygous   |
| NC_037648.1 | 16006205 | SNV | 1 | A | T | Heterozygous |
| NC_037648.1 | 16006279 | SNV | 1 | A | G | Heterozygous |
| NC_037648.1 | 16006432 | SNV | 1 | G | A | Homozygous   |
| NC_037648.1 | 16006545 | SNV | 1 | A | G | Heterozygous |
| NC_037648.1 | 16006836 | SNV | 1 | G | C | Homozygous   |
| NC_037648.1 | 16007389 | SNV | 1 | T | A | Heterozygous |
| NC_037648.1 | 16007603 | SNV | 1 | T | C | Heterozygous |
| NC_037648.1 | 16007795 | SNV | 1 | A | G | Homozygous   |
| NC_037648.1 | 16007806 | SNV | 1 | A | T | Homozygous   |
| NC_037648.1 | 16007872 | SNV | 1 | T | C | Heterozygous |
| NC_037648.1 | 16010060 | SNV | 1 | G | A | Heterozygous |
| NC_037648.1 | 16010119 | SNV | 1 | G | A | Heterozygous |
| NC_037648.1 | 16010516 | SNV | 1 | G | A | Heterozygous |
| NC_037648.1 | 16011263 | SNV | 1 | G | C | Heterozygous |
| NC_037648.1 | 16013091 | SNV | 1 | G | T | Heterozygous |
| NC_037648.1 | 16013132 | SNV | 1 | T | A | Homozygous   |
| NC_037648.1 | 16013188 | SNV | 1 | T | A | Homozygous   |
| NC_037648.1 | 16013591 | SNV | 1 | A | G | Homozygous   |
| NC_037648.1 | 16017041 | SNV | 1 | C | T | Homozygous   |
| NC_037648.1 | 16019375 | SNV | 1 | C | T | Heterozygous |
| NC_037648.1 | 16020006 | SNV | 1 | C | T | Heterozygous |
| NC_037648.1 | 16022649 | SNV | 1 | A | G | Homozygous   |
| NC_037648.1 | 16023293 | SNV | 1 | A | G | Homozygous   |
| NC_037648.1 | 16023796 | SNV | 1 | A | G | Homozygous   |
| NC_037648.1 | 16034230 | SNV | 1 | T | C | Homozygous   |
| NC_037648.1 | 16034846 | SNV | 1 | T | A | Homozygous   |
| NC_037648.1 | 16034917 | SNV | 1 | T | C | Homozygous   |
| NC_037648.1 | 16034950 | SNV | 1 | T | C | Homozygous   |



|             |          |     |   |   |   |              |
|-------------|----------|-----|---|---|---|--------------|
| NC_037648.1 | 16035028 | SNV | 1 | C | T | Homozygous   |
| NC_037648.1 | 16035112 | SNV | 1 | T | C | Homozygous   |
| NC_037648.1 | 16036678 | SNV | 1 | T | C | Homozygous   |
| NC_037648.1 | 16037459 | SNV | 1 | A | G | Homozygous   |
| NC_037648.1 | 16037931 | SNV | 1 | T | C | Homozygous   |
| NC_037648.1 | 16038048 | SNV | 1 | C | T | Heterozygous |
| NC_037648.1 | 16038209 | SNV | 1 | G | A | Homozygous   |
| NC_037648.1 | 16038245 | SNV | 1 | T | A | Homozygous   |
| NC_037648.1 | 16038667 | SNV | 1 | A | G | Homozygous   |
| NC_037648.1 | 16038871 | SNV | 1 | C | T | Homozygous   |
| NC_037648.1 | 16039053 | SNV | 1 | C | G | Heterozygous |
| NC_037648.1 | 16039291 | SNV | 1 | C | T | Heterozygous |
| NC_037648.1 | 16041150 | SNV | 1 | G | A | Homozygous   |
| NC_037648.1 | 16041332 | SNV | 1 | A | G | Heterozygous |
| NC_037648.1 | 16041334 | SNV | 1 | G | A | Homozygous   |
| NC_037648.1 | 16041346 | SNV | 1 | A | G | Homozygous   |
| NC_037648.1 | 16041401 | SNV | 1 | C | T | Heterozygous |
| NC_037648.1 | 16041618 | SNV | 1 | T | A | Heterozygous |
| NC_037648.1 | 16041797 | SNV | 1 | G | A | Heterozygous |
| NC_037648.1 | 16041847 | SNV | 1 | T | C | Homozygous   |
| NC_037648.1 | 16043424 | SNV | 1 | A | G | Homozygous   |
| NC_037648.1 | 16044385 | SNV | 1 | T | C | Heterozygous |
| NC_037648.1 | 16044628 | SNV | 1 | G | A | Homozygous   |
| NC_037648.1 | 16045051 | SNV | 1 | G | A | Heterozygous |
| NC_037648.1 | 16045055 | SNV | 1 | A | G | Heterozygous |
| NC_037648.1 | 16045058 | SNV | 1 | T | G | Heterozygous |
| NC_037648.1 | 16045082 | SNV | 1 | A | G | Heterozygous |
| NC_037648.1 | 16045085 | SNV | 1 | A | G | Heterozygous |
| NC_037648.1 | 16045706 | SNV | 1 | G | A | Heterozygous |
| NC_037648.1 | 16045747 | SNV | 1 | T | A | Heterozygous |
| NC_037648.1 | 16046800 | SNV | 1 | T | A | Heterozygous |
| NC_037648.1 | 16048805 | SNV | 1 | C | T | Heterozygous |
| NC_037648.1 | 16048943 | SNV | 1 | A | G | Heterozygous |
| NC_037648.1 | 16049478 | SNV | 1 | A | G | Homozygous   |
| NC_037648.1 | 16049555 | SNV | 1 | A | T | Homozygous   |
| NC_037648.1 | 16049741 | SNV | 1 | T | C | Homozygous   |
| NC_037648.1 | 16049825 | SNV | 1 | A | C | Homozygous   |
| NC_037648.1 | 16049976 | SNV | 1 | G | A | Heterozygous |
| NC_037648.1 | 16050359 | SNV | 1 | T | C | Homozygous   |
| NC_037648.1 | 16051584 | SNV | 1 | C | A | Homozygous   |
| NC_037648.1 | 16051718 | SNV | 1 | A | G | Homozygous   |
| NC_037648.1 | 16059336 | SNV | 1 | T | C | Heterozygous |
| NC_037648.1 | 16059346 | SNV | 1 | T | C | Heterozygous |
| NC_037648.1 | 16059350 | SNV | 1 | T | C | Heterozygous |
| NC_037648.1 | 16059351 | SNV | 1 | A | G | Heterozygous |
| NC_037648.1 | 16059376 | SNV | 1 | C | T | Heterozygous |
| NC_037648.1 | 16059489 | SNV | 1 | T | C | Homozygous   |
| NC_037648.1 | 16059541 | SNV | 1 | G | A | Homozygous   |
| NC_037648.1 | 16060016 | SNV | 1 | G | A | Heterozygous |
| NC_037648.1 | 16060269 | SNV | 1 | G | A | Heterozygous |
| NC_037648.1 | 16060270 | SNV | 1 | C | T | Heterozygous |

|             |          |     |   |   |   |              |
|-------------|----------|-----|---|---|---|--------------|
| NC_037648.1 | 16060842 | SNV | 1 | C | T | Homozygous   |
| NC_037648.1 | 16061017 | SNV | 1 | G | A | Homozygous   |
| NC_037648.1 | 16061266 | SNV | 1 | C | T | Homozygous   |
| NC_037648.1 | 16061313 | SNV | 1 | T | C | Homozygous   |
| NC_037648.1 | 16062234 | SNV | 1 | A | G | Heterozygous |
| NC_037648.1 | 16062387 | SNV | 1 | T | C | Homozygous   |
| NC_037648.1 | 16063854 | SNV | 1 | C | T | Homozygous   |
| NC_037648.1 | 16068330 | SNV | 1 | T | C | Homozygous   |
| NC_037648.1 | 16070688 | SNV | 1 | T | C | Heterozygous |
| NC_037648.1 | 16070694 | SNV | 1 | T | C | Heterozygous |
| NC_037648.1 | 16070700 | SNV | 1 | T | C | Heterozygous |
| NC_037648.1 | 16070703 | SNV | 1 | T | C | Heterozygous |
| NC_037648.1 | 16070715 | SNV | 1 | T | C | Heterozygous |
| NC_037648.1 | 16070726 | SNV | 1 | T | C | Heterozygous |
| NC_037648.1 | 16070731 | SNV | 1 | T | C | Heterozygous |
| NC_037648.1 | 16070736 | SNV | 1 | T | C | Heterozygous |
| NC_037648.1 | 16070750 | SNV | 1 | T | C | Heterozygous |
| NC_037648.1 | 16070766 | SNV | 1 | T | C | Heterozygous |
| NC_037648.1 | 16070772 | SNV | 1 | T | C | Heterozygous |
| NC_037648.1 | 16070838 | SNV | 1 | T | C | Homozygous   |
| NC_037648.1 | 16071222 | SNV | 1 | G | A | Heterozygous |
| NC_037648.1 | 16071961 | SNV | 1 | T | C | Heterozygous |
| NC_037648.1 | 16071963 | SNV | 1 | T | C | Heterozygous |
| NC_037648.1 | 16071966 | SNV | 1 | T | C | Heterozygous |
| NC_037648.1 | 16071969 | SNV | 1 | T | C | Heterozygous |
| NC_037648.1 | 16072992 | SNV | 1 | A | G | Heterozygous |
| NC_037648.1 | 16073931 | SNV | 1 | T | C | Homozygous   |
| NC_037648.1 | 16075538 | SNV | 1 | G | C | Homozygous   |
| NC_037648.1 | 16076168 | SNV | 1 | G | A | Homozygous   |
| NC_037648.1 | 16076621 | SNV | 1 | C | T | Heterozygous |
| NC_037648.1 | 16076641 | SNV | 1 | C | T | Homozygous   |
| NC_037648.1 | 16076844 | SNV | 1 | T | C | Homozygous   |
| NC_037648.1 | 16076884 | SNV | 1 | T | A | Homozygous   |
| NC_037648.1 | 16076940 | SNV | 1 | A | C | Homozygous   |
| NC_037648.1 | 16077710 | SNV | 1 | G | A | Homozygous   |
| NC_037648.1 | 16077988 | SNV | 1 | G | A | Heterozygous |
| NC_037648.1 | 16078921 | SNV | 1 | C | T | Heterozygous |
| NC_037648.1 | 16080035 | SNV | 1 | T | G | Homozygous   |
| NC_037648.1 | 16080321 | SNV | 1 | G | A | Homozygous   |
| NC_037648.1 | 16080324 | SNV | 1 | G | T | Homozygous   |
| NC_037648.1 | 16080558 | SNV | 1 | T | A | Homozygous   |
| NC_037648.1 | 16080821 | SNV | 1 | A | G | Heterozygous |
| NC_037648.1 | 16081111 | SNV | 1 | T | C | Heterozygous |
| NC_037648.1 | 16081141 | SNV | 1 | A | G | Homozygous   |
| NC_037648.1 | 16081279 | SNV | 1 | A | G | Heterozygous |
| NC_037648.1 | 16081688 | SNV | 1 | G | A | Heterozygous |
| NC_037648.1 | 16083891 | SNV | 1 | G | T | Homozygous   |
| NC_037648.1 | 16083897 | SNV | 1 | A | T | Homozygous   |
| NC_037648.1 | 16083903 | SNV | 1 | T | C | Homozygous   |
| NC_037648.1 | 16083908 | SNV | 1 | T | G | Homozygous   |
| NC_037648.1 | 16083924 | SNV | 1 | G | T | Homozygous   |

|             |          |     |   |   |   |              |
|-------------|----------|-----|---|---|---|--------------|
| NC_037648.1 | 16083941 | SNV | 1 | A | T | Homozygous   |
| NC_037648.1 | 16085882 | SNV | 1 | A | G | Homozygous   |
| NC_037648.1 | 16086108 | SNV | 1 | A | G | Homozygous   |
| NC_037648.1 | 16086408 | SNV | 1 | G | C | Heterozygous |
| NC_037648.1 | 16086882 | SNV | 1 | C | G | Homozygous   |
| NC_037648.1 | 16087104 | SNV | 1 | C | G | Heterozygous |
| NC_037648.1 | 16087106 | SNV | 1 | T | A | Heterozygous |
| NC_037648.1 | 16087110 | SNV | 1 | T | G | Heterozygous |
| NC_037648.1 | 16087649 | SNV | 1 | C | T | Heterozygous |
| NC_037648.1 | 16087694 | SNV | 1 | C | A | Heterozygous |
| NC_037648.1 | 16088459 | SNV | 1 | A | G | Homozygous   |
| NC_037648.1 | 16089145 | SNV | 1 | A | T | Heterozygous |
| NC_037648.1 | 16089149 | SNV | 1 | A | T | Heterozygous |
| NC_037648.1 | 16089257 | SNV | 1 | G | A | Heterozygous |
| NC_037648.1 | 16089500 | SNV | 1 | T | C | Heterozygous |
| NC_037648.1 | 16089727 | SNV | 1 | T | C | Heterozygous |
| NC_037648.1 | 16089731 | SNV | 1 | T | C | Heterozygous |
| NC_037648.1 | 16089735 | SNV | 1 | T | C | Heterozygous |
| NC_037648.1 | 16089740 | SNV | 1 | T | C | Heterozygous |
| NC_037648.1 | 16089748 | SNV | 1 | T | C | Heterozygous |
| NC_037648.1 | 16089760 | SNV | 1 | T | C | Heterozygous |
| NC_037648.1 | 16089764 | SNV | 1 | T | C | Heterozygous |
| NC_037648.1 | 16089771 | SNV | 1 | T | C | Heterozygous |
| NC_037648.1 | 16089908 | SNV | 1 | T | C | Homozygous   |
| NC_037648.1 | 16089926 | SNV | 1 | T | C | Homozygous   |
| NC_037648.1 | 16090122 | SNV | 1 | A | C | Homozygous   |
| NC_037648.1 | 16090701 | SNV | 1 | G | A | Heterozygous |
| NC_037648.1 | 16091061 | SNV | 1 | A | G | Homozygous   |
| NC_037648.1 | 16091325 | SNV | 1 | A | G | Homozygous   |
| NC_037648.1 | 16093452 | SNV | 1 | A | G | Homozygous   |
| NC_037648.1 | 16093455 | SNV | 1 | A | G | Heterozygous |
| NC_037648.1 | 16093457 | SNV | 1 | A | G | Heterozygous |
| NC_037648.1 | 16093488 | SNV | 1 | A | G | Heterozygous |
| NC_037648.1 | 16093493 | SNV | 1 | T | C | Heterozygous |
| NC_037648.1 | 16093497 | SNV | 1 | A | G | Heterozygous |
| NC_037648.1 | 16093503 | SNV | 1 | G | A | Heterozygous |
| NC_037648.1 | 16093771 | SNV | 1 | A | T | Homozygous   |
| NC_037648.1 | 16094132 | SNV | 1 | G | A | Homozygous   |
| NC_037648.1 | 16097727 | SNV | 1 | A | G | Heterozygous |
| NC_037648.1 | 16097784 | SNV | 1 | G | A | Heterozygous |
| NC_037648.1 | 16098018 | SNV | 1 | G | A | Heterozygous |
| NC_037648.1 | 16098299 | SNV | 1 | A | G | Heterozygous |
| NC_037648.1 | 16098341 | SNV | 1 | A | G | Heterozygous |
| NC_037648.1 | 16098511 | SNV | 1 | G | A | Homozygous   |
| NC_037648.1 | 16098946 | SNV | 1 | T | C | Heterozygous |
| NC_037648.1 | 16099009 | SNV | 1 | T | A | Homozygous   |
| NC_037648.1 | 16099024 | SNV | 1 | T | A | Heterozygous |
| NC_037648.1 | 16099038 | SNV | 1 | G | C | Heterozygous |
| NC_037648.1 | 16099040 | SNV | 1 | T | G | Heterozygous |
| NC_037648.1 | 16099200 | SNV | 1 | T | G | Homozygous   |
| NC_037648.1 | 16099230 | SNV | 1 | C | T | Heterozygous |

|             |          |     |   |   |   |              |
|-------------|----------|-----|---|---|---|--------------|
| NC_037648.1 | 16099361 | SNV | 1 | T | C | Homozygous   |
| NC_037648.1 | 16099424 | SNV | 1 | C | T | Homozygous   |
| NC_037648.1 | 16099518 | SNV | 1 | C | A | Homozygous   |
| NC_037648.1 | 16099637 | SNV | 1 | C | T | Heterozygous |
| NC_037648.1 | 16099669 | SNV | 1 | T | G | Homozygous   |
| NC_037648.1 | 16099750 | SNV | 1 | C | T | Homozygous   |
| NC_037648.1 | 16099875 | SNV | 1 | G | A | Heterozygous |
| NC_037648.1 | 16100007 | SNV | 1 | G | A | Homozygous   |
| NC_037648.1 | 16100019 | SNV | 1 | G | A | Heterozygous |
| NC_037648.1 | 16100500 | SNV | 1 | A | C | Heterozygous |
| NC_037648.1 | 16100736 | SNV | 1 | C | G | Homozygous   |
| NC_037648.1 | 16100745 | SNV | 1 | G | A | Heterozygous |
| NC_037648.1 | 16100772 | SNV | 1 | T | C | Heterozygous |
| NC_037648.1 | 16101156 | SNV | 1 | T | C | Heterozygous |
| NC_037648.1 | 16101212 | SNV | 1 | T | A | Homozygous   |
| NC_037648.1 | 16101341 | SNV | 1 | T | C | Homozygous   |
| NC_037648.1 | 16101401 | SNV | 1 | A | G | Heterozygous |
| NC_037648.1 | 16101937 | SNV | 1 | T | C | Homozygous   |
| NC_037648.1 | 16102127 | SNV | 1 | T | C | Heterozygous |
| NC_037648.1 | 16102149 | SNV | 1 | T | C | Homozygous   |
| NC_037648.1 | 16102210 | SNV | 1 | T | C | Homozygous   |
| NC_037648.1 | 16102219 | SNV | 1 | A | G | Homozygous   |
| NC_037648.1 | 16102230 | SNV | 1 | T | C | Homozygous   |
| NC_037648.1 | 16102246 | SNV | 1 | C | T | Homozygous   |
| NC_037648.1 | 16102305 | SNV | 1 | A | G | Homozygous   |
| NC_037648.1 | 16102361 | SNV | 1 | A | G | Homozygous   |
| NC_037648.1 | 16102670 | SNV | 1 | T | C | Homozygous   |
| NC_037648.1 | 16103234 | SNV | 1 | G | A | Heterozygous |
| NC_037648.1 | 16103267 | SNV | 1 | A | C | Homozygous   |
| NC_037648.1 | 16103645 | SNV | 1 | A | G | Heterozygous |
| NC_037648.1 | 16105723 | SNV | 1 | A | G | Homozygous   |
| NC_037648.1 | 16105767 | SNV | 1 | A | G | Homozygous   |
| NC_037648.1 | 16105844 | SNV | 1 | G | A | Heterozygous |
| NC_037648.1 | 16105846 | SNV | 1 | G | C | Homozygous   |
| NC_037648.1 | 16105914 | SNV | 1 | T | C | Heterozygous |
| NC_037648.1 | 16105933 | SNV | 1 | C | A | Heterozygous |
| NC_037648.1 | 16111054 | SNV | 1 | T | G | Homozygous   |
| NC_037648.1 | 16111057 | SNV | 1 | C | A | Homozygous   |
| NC_037648.1 | 16111271 | SNV | 1 | T | G | Homozygous   |
| NC_037648.1 | 16111431 | SNV | 1 | C | T | Homozygous   |
| NC_037648.1 | 16111607 | SNV | 1 | G | A | Heterozygous |
| NC_037648.1 | 16111656 | SNV | 1 | T | G | Homozygous   |
| NC_037648.1 | 16111665 | SNV | 1 | A | G | Homozygous   |
| NC_037648.1 | 16112102 | SNV | 1 | C | T | Heterozygous |
| NC_037648.1 | 16112110 | SNV | 1 | G | A | Heterozygous |
| NC_037648.1 | 16112270 | SNV | 1 | T | C | Homozygous   |
| NC_037648.1 | 16112336 | SNV | 1 | C | T | Heterozygous |
| NC_037648.1 | 16112525 | SNV | 1 | T | A | Heterozygous |
| NC_037648.1 | 16112545 | SNV | 1 | A | G | Homozygous   |
| NC_037648.1 | 16112749 | SNV | 1 | T | A | Homozygous   |
| NC_037648.1 | 16112763 | SNV | 1 | T | A | Homozygous   |

|             |          |     |   |   |   |              |
|-------------|----------|-----|---|---|---|--------------|
| NC_037648.1 | 16113146 | SNV | 1 | T | C | Heterozygous |
| NC_037648.1 | 16113436 | SNV | 1 | T | C | Homozygous   |
| NC_037648.1 | 16114174 | SNV | 1 | G | A | Homozygous   |
| NC_037648.1 | 16114354 | SNV | 1 | C | T | Homozygous   |
| NC_037648.1 | 16114652 | SNV | 1 | G | C | Heterozygous |
| NC_037648.1 | 16114658 | SNV | 1 | C | T | Heterozygous |
| NC_037648.1 | 16114713 | SNV | 1 | T | C | Homozygous   |
| NC_037648.1 | 16114755 | SNV | 1 | T | C | Homozygous   |
| NC_037648.1 | 16115551 | SNV | 1 | A | G | Heterozygous |
| NC_037648.1 | 16115561 | SNV | 1 | A | G | Heterozygous |
| NC_037648.1 | 16115566 | SNV | 1 | C | T | Heterozygous |
| NC_037648.1 | 16115728 | SNV | 1 | C | T | Homozygous   |
| NC_037648.1 | 16115930 | SNV | 1 | C | T | Heterozygous |
| NC_037648.1 | 16116012 | SNV | 1 | T | C | Heterozygous |
| NC_037648.1 | 16116202 | SNV | 1 | T | C | Heterozygous |
| NC_037648.1 | 16116205 | SNV | 1 | G | A | Homozygous   |
| NC_037648.1 | 16116515 | SNV | 1 | A | G | Homozygous   |
| NC_037648.1 | 16116535 | SNV | 1 | C | T | Heterozygous |
| NC_037648.1 | 16117152 | SNV | 1 | T | C | Homozygous   |
| NC_037648.1 | 16117339 | SNV | 1 | C | T | Heterozygous |
| NC_037648.1 | 16117360 | SNV | 1 | T | C | Homozygous   |
| NC_037648.1 | 16117406 | SNV | 1 | A | T | Homozygous   |
| NC_037648.1 | 16117437 | SNV | 1 | G | A | Heterozygous |
| NC_037648.1 | 16117532 | SNV | 1 | C | T | Heterozygous |
| NC_037648.1 | 16117854 | SNV | 1 | A | G | Homozygous   |
| NC_037648.1 | 16118367 | SNV | 1 | T | C | Heterozygous |
| NC_037648.1 | 16118487 | SNV | 1 | T | C | Heterozygous |
| NC_037648.1 | 16118528 | SNV | 1 | A | G | Homozygous   |
| NC_037648.1 | 16119040 | SNV | 1 | G | A | Homozygous   |
| NC_037648.1 | 16119102 | SNV | 1 | T | A | Homozygous   |
| NC_037648.1 | 16119109 | SNV | 1 | A | T | Heterozygous |
| NC_037648.1 | 16119113 | SNV | 1 | A | T | Homozygous   |
| NC_037648.1 | 16119247 | SNV | 1 | T | C | Homozygous   |
| NC_037648.1 | 16119250 | SNV | 1 | T | C | Homozygous   |
| NC_037648.1 | 16119511 | SNV | 1 | T | C | Homozygous   |
| NC_037648.1 | 16122948 | SNV | 1 | A | G | Homozygous   |
| NC_037648.1 | 16123047 | SNV | 1 | T | A | Heterozygous |
| NC_037648.1 | 16123104 | SNV | 1 | G | A | Homozygous   |
| NC_037648.1 | 16123122 | SNV | 1 | A | G | Homozygous   |
| NC_037648.1 | 16123156 | SNV | 1 | C | T | Heterozygous |
| NC_037648.1 | 16124193 | SNV | 1 | G | A | Heterozygous |
| NC_037648.1 | 16124277 | SNV | 1 | T | C | Homozygous   |
| NC_037648.1 | 16124294 | SNV | 1 | A | G | Homozygous   |
| NC_037648.1 | 16124298 | SNV | 1 | G | A | Heterozygous |
| NC_037648.1 | 16124400 | SNV | 1 | A | G | Homozygous   |
| NC_037648.1 | 16124430 | SNV | 1 | G | A | Heterozygous |
| NC_037648.1 | 16124521 | SNV | 1 | G | A | Homozygous   |
| NC_037648.1 | 16124779 | SNV | 1 | A | C | Homozygous   |
| NC_037648.1 | 16124888 | SNV | 1 | G | A | Heterozygous |
| NC_037648.1 | 16125154 | SNV | 1 | T | A | Homozygous   |
| NC_037648.1 | 16125243 | SNV | 1 | G | A | Heterozygous |

|             |          |     |   |   |   |              |
|-------------|----------|-----|---|---|---|--------------|
| NC_037648.1 | 16125296 | SNV | 1 | T | A | Heterozygous |
| NC_037648.1 | 16125302 | SNV | 1 | T | C | Heterozygous |
| NC_037648.1 | 16125564 | SNV | 1 | A | G | Heterozygous |
| NC_037648.1 | 16125939 | SNV | 1 | G | T | Heterozygous |
| NC_037648.1 | 16126242 | SNV | 1 | T | A | Heterozygous |
| NC_037648.1 | 16126505 | SNV | 1 | A | G | Homozygous   |
| NC_037648.1 | 16126846 | SNV | 1 | T | C | Homozygous   |
| NC_037648.1 | 16126876 | SNV | 1 | T | C | Homozygous   |
| NC_037648.1 | 16127163 | SNV | 1 | T | C | Heterozygous |
| NC_037648.1 | 16129566 | SNV | 1 | A | G | Heterozygous |
| NC_037648.1 | 16129575 | SNV | 1 | G | A | Homozygous   |
| NC_037648.1 | 16129642 | SNV | 1 | G | T | Heterozygous |
| NC_037648.1 | 16130101 | SNV | 1 | A | G | Heterozygous |
| NC_037648.1 | 16130221 | SNV | 1 | C | A | Heterozygous |
| NC_037648.1 | 16130534 | SNV | 1 | T | G | Homozygous   |
| NC_037648.1 | 16130536 | SNV | 1 | C | T | Homozygous   |
| NC_037648.1 | 16130924 | SNV | 1 | G | A | Homozygous   |
| NC_037648.1 | 16131196 | SNV | 1 | T | C | Homozygous   |
| NC_037648.1 | 16131329 | SNV | 1 | A | G | Heterozygous |
| NC_037648.1 | 16131988 | SNV | 1 | G | C | Heterozygous |
| NC_037648.1 | 16132114 | SNV | 1 | T | A | Homozygous   |
| NC_037648.1 | 16133115 | SNV | 1 | T | A | Heterozygous |
| NC_037648.1 | 16133120 | SNV | 1 | G | A | Heterozygous |
| NC_037648.1 | 16133124 | SNV | 1 | G | A | Homozygous   |
| NC_037648.1 | 16136629 | SNV | 1 | T | C | Heterozygous |
| NC_037648.1 | 16136632 | SNV | 1 | C | T | Heterozygous |
| NC_037648.1 | 16136669 | SNV | 1 | T | C | Heterozygous |
| NC_037648.1 | 16136671 | SNV | 1 | C | T | Heterozygous |
| NC_037648.1 | 16136673 | SNV | 1 | T | C | Heterozygous |
| NC_037648.1 | 16136675 | SNV | 1 | C | T | Heterozygous |
| NC_037648.1 | 16136677 | SNV | 1 | T | C | Heterozygous |
| NC_037648.1 | 16136685 | SNV | 1 | T | C | Homozygous   |
| NC_037648.1 | 16136689 | SNV | 1 | T | C | Heterozygous |
| NC_037648.1 | 16136693 | SNV | 1 | T | C | Heterozygous |
| NC_037648.1 | 16136711 | SNV | 1 | A | C | Homozygous   |
| NC_037648.1 | 16136715 | SNV | 1 | A | C | Homozygous   |
| NC_037648.1 | 16136719 | SNV | 1 | A | C | Homozygous   |
| NC_037648.1 | 16137389 | SNV | 1 | T | C | Homozygous   |
| NC_037648.1 | 16137401 | SNV | 1 | T | C | Homozygous   |
| NC_037648.1 | 16137407 | SNV | 1 | C | T | Homozygous   |
| NC_037648.1 | 16137491 | SNV | 1 | T | C | Homozygous   |
| NC_037648.1 | 16139018 | SNV | 1 | G | C | Heterozygous |
| NC_037648.1 | 16139062 | SNV | 1 | G | T | Homozygous   |
| NC_037648.1 | 16139484 | SNV | 1 | G | C | Homozygous   |
| NC_037648.1 | 16139819 | SNV | 1 | T | C | Homozygous   |
| NC_037648.1 | 16139853 | SNV | 1 | T | C | Homozygous   |
| NC_037648.1 | 16139881 | SNV | 1 | A | G | Heterozygous |
| NC_037648.1 | 16139990 | SNV | 1 | G | A | Heterozygous |
| NC_037648.1 | 16140066 | SNV | 1 | A | G | Homozygous   |
| NC_037648.1 | 16140151 | SNV | 1 | A | T | Homozygous   |
| NC_037648.1 | 16140205 | SNV | 1 | T | C | Heterozygous |

|             |          |     |   |   |   |              |
|-------------|----------|-----|---|---|---|--------------|
| NC_037648.1 | 16140214 | SNV | 1 | C | T | Heterozygous |
| NC_037648.1 | 16140284 | SNV | 1 | T | C | Homozygous   |
| NC_037648.1 | 16140539 | SNV | 1 | T | A | Homozygous   |
| NC_037648.1 | 16140630 | SNV | 1 | G | C | Heterozygous |
| NC_037648.1 | 16140825 | SNV | 1 | A | G | Homozygous   |
| NC_037648.1 | 16141055 | SNV | 1 | G | T | Heterozygous |
| NC_037648.1 | 16142085 | SNV | 1 | A | G | Homozygous   |
| NC_037648.1 | 16142124 | SNV | 1 | T | A | Heterozygous |
| NC_037648.1 | 16142177 | SNV | 1 | C | T | Heterozygous |
| NC_037648.1 | 16144610 | SNV | 1 | A | G | Heterozygous |
| NC_037648.1 | 16145725 | SNV | 1 | T | C | Homozygous   |
| NC_037648.1 | 16145936 | SNV | 1 | C | T | Homozygous   |
| NC_037648.1 | 16145948 | SNV | 1 | T | C | Heterozygous |
| NC_037648.1 | 16145955 | SNV | 1 | T | C | Heterozygous |
| NC_037648.1 | 16145971 | SNV | 1 | T | C | Homozygous   |
| NC_037648.1 | 16145986 | SNV | 1 | C | T | Heterozygous |
| NC_037648.1 | 16146185 | SNV | 1 | G | A | Heterozygous |
| NC_037648.1 | 16146227 | SNV | 1 | A | G | Homozygous   |
| NC_037648.1 | 16146340 | SNV | 1 | T | C | Homozygous   |
| NC_037648.1 | 16146501 | SNV | 1 | C | T | Homozygous   |
| NC_037648.1 | 16146510 | SNV | 1 | C | A | Homozygous   |
| NC_037648.1 | 16146606 | SNV | 1 | G | C | Heterozygous |
| NC_037648.1 | 16146943 | SNV | 1 | A | G | Homozygous   |
| NC_037648.1 | 16146988 | SNV | 1 | C | T | Heterozygous |
| NC_037648.1 | 16147030 | SNV | 1 | C | T | Heterozygous |
| NC_037648.1 | 16147168 | SNV | 1 | C | T | Homozygous   |
| NC_037648.1 | 16147933 | SNV | 1 | C | T | Heterozygous |
| NC_037648.1 | 16147949 | SNV | 1 | C | T | Heterozygous |
| NC_037648.1 | 16148331 | SNV | 1 | A | G | Homozygous   |
| NC_037648.1 | 16148376 | SNV | 1 | T | C | Homozygous   |
| NC_037648.1 | 16150302 | SNV | 1 | T | C | Heterozygous |
| NC_037648.1 | 16150307 | SNV | 1 | G | A | Heterozygous |
| NC_037648.1 | 16153345 | SNV | 1 | C | T | Homozygous   |
| NC_037648.1 | 16158733 | SNV | 1 | T | A | Homozygous   |
| NC_037648.1 | 16158935 | SNV | 1 | T | C | Homozygous   |
| NC_037648.1 | 16159001 | SNV | 1 | A | T | Heterozygous |
| NC_037648.1 | 16159039 | SNV | 1 | T | A | Homozygous   |
| NC_037648.1 | 16159354 | SNV | 1 | G | C | Homozygous   |
| NC_037648.1 | 16159458 | SNV | 1 | C | T | Heterozygous |
| NC_037648.1 | 16159744 | SNV | 1 | T | A | Homozygous   |
| NC_037648.1 | 16159950 | SNV | 1 | T | C | Heterozygous |
| NC_037648.1 | 16160421 | SNV | 1 | C | T | Homozygous   |
| NC_037648.1 | 16160423 | SNV | 1 | T | C | Heterozygous |
| NC_037648.1 | 16162961 | SNV | 1 | A | G | Heterozygous |
| NC_037648.1 | 16162964 | SNV | 1 | C | G | Heterozygous |
| NC_037648.1 | 16162966 | SNV | 1 | T | C | Heterozygous |
| NC_037648.1 | 16162968 | SNV | 1 | A | G | Heterozygous |
| NC_037648.1 | 16162982 | SNV | 1 | G | A | Heterozygous |
| NC_037648.1 | 16162984 | SNV | 1 | T | A | Heterozygous |
| NC_037648.1 | 16162996 | SNV | 1 | T | C | Heterozygous |
| NC_037648.1 | 16163001 | SNV | 1 | T | C | Heterozygous |

|             |          |     |   |   |   |              |
|-------------|----------|-----|---|---|---|--------------|
| NC_037648.1 | 16163522 | SNV | 1 | T | A | Homozygous   |
| NC_037648.1 | 16163529 | SNV | 1 | T | A | Homozygous   |
| NC_037648.1 | 16163545 | SNV | 1 | A | G | Homozygous   |
| NC_037648.1 | 16163551 | SNV | 1 | T | C | Homozygous   |
| NC_037648.1 | 16163553 | SNV | 1 | G | A | Homozygous   |
| NC_037648.1 | 16163555 | SNV | 1 | A | G | Homozygous   |
| NC_037648.1 | 16164335 | SNV | 1 | G | A | Homozygous   |
| NC_037648.1 | 16165860 | SNV | 1 | G | A | Heterozygous |
| NC_037648.1 | 16165956 | SNV | 1 | T | G | Homozygous   |
| NC_037648.1 | 16165995 | SNV | 1 | C | T | Heterozygous |
| NC_037648.1 | 16166067 | SNV | 1 | T | C | Homozygous   |
| NC_037648.1 | 16166085 | SNV | 1 | A | G | Homozygous   |
| NC_037648.1 | 16166094 | SNV | 1 | T | C | Homozygous   |
| NC_037648.1 | 16166097 | SNV | 1 | G | A | Homozygous   |
| NC_037648.1 | 16166100 | SNV | 1 | A | G | Heterozygous |
| NC_037648.1 | 16166542 | SNV | 1 | C | A | Homozygous   |
| NC_037648.1 | 16166787 | SNV | 1 | G | A | Heterozygous |
| NC_037648.1 | 16167234 | SNV | 1 | G | A | Heterozygous |
| NC_037648.1 | 16167252 | SNV | 1 | A | C | Homozygous   |
| NC_037648.1 | 16167265 | SNV | 1 | T | C | Homozygous   |
| NC_037648.1 | 16167859 | SNV | 1 | G | C | Homozygous   |
| NC_037648.1 | 16167994 | SNV | 1 | A | G | Homozygous   |
| NC_037648.1 | 16168079 | SNV | 1 | A | T | Heterozygous |
| NC_037648.1 | 16168086 | SNV | 1 | G | A | Heterozygous |
| NC_037648.1 | 16168103 | SNV | 1 | C | T | Heterozygous |
| NC_037648.1 | 16168322 | SNV | 1 | T | C | Heterozygous |
| NC_037648.1 | 16168423 | SNV | 1 | T | C | Homozygous   |
| NC_037648.1 | 16168734 | SNV | 1 | G | A | Homozygous   |
| NC_037648.1 | 16168760 | SNV | 1 | A | G | Homozygous   |
| NC_037648.1 | 16169728 | SNV | 1 | G | C | Heterozygous |
| NC_037648.1 | 16169733 | SNV | 1 | C | T | Heterozygous |
| NC_037648.1 | 16169867 | SNV | 1 | A | C | Heterozygous |
| NC_037648.1 | 16169891 | SNV | 1 | C | T | Homozygous   |
| NC_037648.1 | 16169937 | SNV | 1 | A | G | Homozygous   |
| NC_037648.1 | 16169980 | SNV | 1 | A | G | Heterozygous |
| NC_037648.1 | 16170024 | SNV | 1 | G | A | Heterozygous |
| NC_037648.1 | 16170030 | SNV | 1 | G | A | Heterozygous |
| NC_037648.1 | 16170191 | SNV | 1 | T | G | Homozygous   |
| NC_037648.1 | 16170208 | SNV | 1 | A | G | Homozygous   |
| NC_037648.1 | 16170220 | SNV | 1 | G | T | Homozygous   |
| NC_037648.1 | 16170246 | SNV | 1 | A | G | Heterozygous |
| NC_037648.1 | 16170816 | SNV | 1 | T | A | Homozygous   |
| NC_037648.1 | 16170832 | SNV | 1 | A | G | Heterozygous |
| NC_037648.1 | 16171007 | SNV | 1 | T | C | Homozygous   |
| NC_037648.1 | 16171127 | SNV | 1 | A | C | Homozygous   |
| NC_037648.1 | 16171219 | SNV | 1 | A | G | Homozygous   |
| NC_037648.1 | 16171495 | SNV | 1 | G | T | Homozygous   |
| NC_037648.1 | 16171893 | SNV | 1 | C | T | Heterozygous |
| NC_037648.1 | 16171898 | SNV | 1 | C | T | Homozygous   |
| NC_037648.1 | 16171902 | SNV | 1 | T | C | Heterozygous |
| NC_037648.1 | 16172654 | SNV | 1 | A | G | Homozygous   |



|             |          |     |   |   |   |              |
|-------------|----------|-----|---|---|---|--------------|
| NC_037648.1 | 16172720 | SNV | 1 | G | A | Homozygous   |
| NC_037648.1 | 16172907 | SNV | 1 | T | C | Heterozygous |
| NC_037648.1 | 16175254 | SNV | 1 | G | C | Heterozygous |
| NC_037648.1 | 16175273 | SNV | 1 | G | A | Heterozygous |
| NC_037648.1 | 16175279 | SNV | 1 | G | A | Homozygous   |
| NC_037648.1 | 16175299 | SNV | 1 | G | A | Heterozygous |
| NC_037648.1 | 16175741 | SNV | 1 | G | A | Heterozygous |
| NC_037648.1 | 16175886 | SNV | 1 | G | A | Heterozygous |
| NC_037648.1 | 16175972 | SNV | 1 | T | C | Heterozygous |
| NC_037648.1 | 16175974 | SNV | 1 | C | T | Homozygous   |
| NC_037648.1 | 16175999 | SNV | 1 | T | C | Heterozygous |
| NC_037648.1 | 16176151 | SNV | 1 | T | C | Homozygous   |
| NC_037648.1 | 16176171 | SNV | 1 | T | C | Homozygous   |
| NC_037648.1 | 16176227 | SNV | 1 | G | T | Homozygous   |
| NC_037648.1 | 16176552 | SNV | 1 | T | C | Homozygous   |
| NC_037648.1 | 16176557 | SNV | 1 | T | C | Homozygous   |
| NC_037648.1 | 16177363 | SNV | 1 | C | T | Heterozygous |
| NC_037648.1 | 16177483 | SNV | 1 | C | T | Heterozygous |
| NC_037648.1 | 16177528 | SNV | 1 | T | C | Heterozygous |
| NC_037648.1 | 16177670 | SNV | 1 | T | C | Heterozygous |
| NC_037648.1 | 16177677 | SNV | 1 | A | G | Homozygous   |
| NC_037648.1 | 16178384 | SNV | 1 | T | G | Heterozygous |
| NC_037648.1 | 16178388 | SNV | 1 | T | C | Heterozygous |
| NC_037648.1 | 16178388 | SNV | 1 | T | G | Heterozygous |
| NC_037648.1 | 16178767 | SNV | 1 | T | C | Heterozygous |
| NC_037648.1 | 16178771 | SNV | 1 | T | A | Heterozygous |
| NC_037648.1 | 16178773 | SNV | 1 | C | T | Heterozygous |
| NC_037648.1 | 16178775 | SNV | 1 | T | C | Heterozygous |
| NC_037648.1 | 16179285 | SNV | 1 | G | A | Heterozygous |
| NC_037648.1 | 16179367 | SNV | 1 | G | A | Heterozygous |
| NC_037648.1 | 16179488 | SNV | 1 | G | A | Homozygous   |
| NC_037648.1 | 16179512 | SNV | 1 | T | C | Homozygous   |
| NC_037648.1 | 16179629 | SNV | 1 | G | A | Heterozygous |
| NC_037648.1 | 16179976 | SNV | 1 | G | A | Heterozygous |
| NC_037648.1 | 16180010 | SNV | 1 | T | G | Homozygous   |
| NC_037648.1 | 16180021 | SNV | 1 | C | G | Homozygous   |
| NC_037648.1 | 16180078 | SNV | 1 | A | C | Homozygous   |
| NC_037648.1 | 16180221 | SNV | 1 | T | C | Homozygous   |
| NC_037648.1 | 16180282 | SNV | 1 | G | A | Heterozygous |
| NC_037648.1 | 16180289 | SNV | 1 | T | C | Heterozygous |
| NC_037648.1 | 16180847 | SNV | 1 | C | T | Heterozygous |
| NC_037648.1 | 16181484 | SNV | 1 | C | G | Heterozygous |
| NC_037648.1 | 16181594 | SNV | 1 | A | G | Homozygous   |
| NC_037648.1 | 16181610 | SNV | 1 | A | T | Homozygous   |
| NC_037648.1 | 16181878 | SNV | 1 | A | G | Homozygous   |
| NC_037648.1 | 16182368 | SNV | 1 | A | G | Homozygous   |
| NC_037648.1 | 16182480 | SNV | 1 | T | C | Homozygous   |
| NC_037648.1 | 16182497 | SNV | 1 | C | T | Homozygous   |
| NC_037648.1 | 16182629 | SNV | 1 | T | C | Homozygous   |
| NC_037648.1 | 16182700 | SNV | 1 | A | G | Homozygous   |
| NC_037648.1 | 16182716 | SNV | 1 | T | C | Homozygous   |

|             |          |     |   |   |   |              |
|-------------|----------|-----|---|---|---|--------------|
| NC_037648.1 | 16182740 | SNV | 1 | A | G | Heterozygous |
| NC_037648.1 | 16182751 | SNV | 1 | G | A | Heterozygous |
| NC_037648.1 | 16182820 | SNV | 1 | T | C | Homozygous   |
| NC_037648.1 | 16183444 | SNV | 1 | C | A | Heterozygous |
| NC_037648.1 | 16184391 | SNV | 1 | G | A | Heterozygous |
| NC_037648.1 | 16184409 | SNV | 1 | C | T | Heterozygous |
| NC_037648.1 | 16184443 | SNV | 1 | A | T | Homozygous   |
| NC_037648.1 | 16184884 | SNV | 1 | C | T | Homozygous   |
| NC_037648.1 | 16184890 | SNV | 1 | T | C | Homozygous   |
| NC_037648.1 | 16184910 | SNV | 1 | C | T | Homozygous   |
| NC_037648.1 | 16185010 | SNV | 1 | A | C | Heterozygous |
| NC_037648.1 | 16185073 | SNV | 1 | G | A | Heterozygous |
| NC_037648.1 | 16185080 | SNV | 1 | A | C | Heterozygous |
| NC_037648.1 | 16185564 | SNV | 1 | T | C | Homozygous   |
| NC_037648.1 | 16185567 | SNV | 1 | G | C | Homozygous   |
| NC_037648.1 | 16185617 | SNV | 1 | G | A | Heterozygous |
| NC_037648.1 | 16186026 | SNV | 1 | C | T | Homozygous   |
| NC_037648.1 | 16186230 | SNV | 1 | G | A | Heterozygous |
| NC_037648.1 | 16186701 | SNV | 1 | A | G | Homozygous   |
| NC_037648.1 | 16187127 | SNV | 1 | T | C | Homozygous   |
| NC_037648.1 | 16187461 | SNV | 1 | T | C | Heterozygous |
| NC_037648.1 | 16187625 | SNV | 1 | A | G | Heterozygous |
| NC_037648.1 | 16187628 | SNV | 1 | T | C | Heterozygous |
| NC_037648.1 | 16187804 | SNV | 1 | C | T | Heterozygous |
| NC_037648.1 | 16188117 | SNV | 1 | A | G | Heterozygous |
| NC_037648.1 | 16188233 | SNV | 1 | A | G | Homozygous   |
| NC_037648.1 | 16188245 | SNV | 1 | A | G | Homozygous   |
| NC_037648.1 | 16188272 | SNV | 1 | G | A | Homozygous   |
| NC_037648.1 | 16188301 | SNV | 1 | A | G | Heterozygous |
| NC_037648.1 | 16188340 | SNV | 1 | G | A | Homozygous   |
| NC_037648.1 | 16188346 | SNV | 1 | A | G | Heterozygous |
| NC_037648.1 | 16188357 | SNV | 1 | A | G | Homozygous   |
| NC_037648.1 | 16190968 | SNV | 1 | G | A | Heterozygous |
| NC_037648.1 | 16191769 | SNV | 1 | G | A | Heterozygous |
| NC_037648.1 | 16192914 | SNV | 1 | A | C | Homozygous   |
| NC_037648.1 | 16196628 | SNV | 1 | A | C | Homozygous   |
| NC_037648.1 | 16196866 | SNV | 1 | A | T | Homozygous   |
| NC_037648.1 | 16196869 | SNV | 1 | T | C | Heterozygous |
| NC_037648.1 | 16196872 | SNV | 1 | C | A | Homozygous   |
| NC_037648.1 | 16196893 | SNV | 1 | A | C | Homozygous   |
| NC_037648.1 | 16196896 | SNV | 1 | A | G | Heterozygous |
| NC_037648.1 | 16196899 | SNV | 1 | C | T | Homozygous   |
| NC_037648.1 | 16196911 | SNV | 1 | T | C | Heterozygous |
| NC_037648.1 | 16196914 | SNV | 1 | A | T | Homozygous   |
| NC_037648.1 | 16196917 | SNV | 1 | A | G | Heterozygous |
| NC_037648.1 | 16196920 | SNV | 1 | G | A | Homozygous   |
| NC_037648.1 | 16196923 | SNV | 1 | T | C | Heterozygous |
| NC_037648.1 | 16196927 | SNV | 1 | G | A | Homozygous   |
| NC_037648.1 | 16196929 | SNV | 1 | C | T | Heterozygous |
| NC_037648.1 | 16196932 | SNV | 1 | T | C | Heterozygous |
| NC_037648.1 | 16197280 | SNV | 1 | T | A | Homozygous   |

|             |          |     |   |   |   |              |
|-------------|----------|-----|---|---|---|--------------|
| NC_037648.1 | 16197283 | SNV | 1 | G | A | Homozygous   |
| NC_037648.1 | 16198294 | SNV | 1 | G | A | Heterozygous |
| NC_037648.1 | 16199050 | SNV | 1 | G | A | Heterozygous |
| NC_037648.1 | 16199276 | SNV | 1 | T | C | Heterozygous |
| NC_037648.1 | 16199525 | SNV | 1 | C | G | Homozygous   |
| NC_037648.1 | 16199528 | SNV | 1 | A | G | Homozygous   |
| NC_037648.1 | 16199567 | SNV | 1 | C | T | Heterozygous |
| NC_037648.1 | 16199569 | SNV | 1 | T | A | Heterozygous |
| NC_037648.1 | 16199960 | SNV | 1 | A | G | Homozygous   |
| NC_037648.1 | 16200008 | SNV | 1 | T | C | Homozygous   |
| NC_037648.1 | 16200822 | SNV | 1 | G | A | Heterozygous |
| NC_037648.1 | 16200893 | SNV | 1 | T | C | Homozygous   |
| NC_037648.1 | 16200941 | SNV | 1 | A | T | Homozygous   |
| NC_037648.1 | 16200944 | SNV | 1 | A | C | Homozygous   |
| NC_037648.1 | 16201062 | SNV | 1 | A | G | Homozygous   |
| NC_037648.1 | 16201074 | SNV | 1 | T | A | Homozygous   |
| NC_037648.1 | 16203523 | SNV | 1 | C | G | Homozygous   |
| NC_037648.1 | 16205298 | SNV | 1 | G | A | Homozygous   |
| NC_037648.1 | 16205304 | SNV | 1 | G | A | Homozygous   |
| NC_037648.1 | 16205535 | SNV | 1 | G | C | Homozygous   |
| NC_037648.1 | 16206126 | SNV | 1 | A | G | Heterozygous |
| NC_037648.1 | 16206499 | SNV | 1 | A | G | Heterozygous |
| NC_037648.1 | 16206602 | SNV | 1 | C | T | Heterozygous |
| NC_037648.1 | 16206608 | SNV | 1 | C | T | Heterozygous |
| NC_037648.1 | 16206610 | SNV | 1 | G | A | Heterozygous |
| NC_037648.1 | 16206989 | SNV | 1 | A | G | Heterozygous |
| NC_037648.1 | 16207106 | SNV | 1 | C | T | Homozygous   |
| NC_037648.1 | 16207194 | SNV | 1 | C | T | Heterozygous |
| NC_037648.1 | 16207919 | SNV | 1 | T | C | Homozygous   |
| NC_037648.1 | 16208231 | SNV | 1 | A | G | Heterozygous |
| NC_037648.1 | 16209088 | SNV | 1 | C | T | Homozygous   |
| NC_037648.1 | 16209357 | SNV | 1 | T | C | Heterozygous |
| NC_037648.1 | 16209916 | SNV | 1 | T | C | Homozygous   |
| NC_037648.1 | 16210465 | SNV | 1 | C | T | Heterozygous |
| NC_037648.1 | 16210489 | SNV | 1 | T | C | Heterozygous |
| NC_037648.1 | 16210536 | SNV | 1 | A | G | Homozygous   |
| NC_037648.1 | 16210871 | SNV | 1 | C | T | Heterozygous |
| NC_037648.1 | 16212227 | SNV | 1 | G | C | Heterozygous |
| NC_037648.1 | 16212278 | SNV | 1 | G | T | Heterozygous |
| NC_037648.1 | 16215886 | SNV | 1 | C | T | Heterozygous |
| NC_037648.1 | 16215896 | SNV | 1 | T | C | Homozygous   |
| NC_037648.1 | 16215901 | SNV | 1 | A | T | Homozygous   |
| NC_037648.1 | 16215932 | SNV | 1 | C | T | Homozygous   |
| NC_037648.1 | 16215945 | SNV | 1 | T | C | Homozygous   |
| NC_037648.1 | 16216082 | SNV | 1 | T | C | Homozygous   |
| NC_037648.1 | 16216145 | SNV | 1 | C | T | Heterozygous |
| NC_037648.1 | 16216160 | SNV | 1 | A | T | Heterozygous |
| NC_037648.1 | 16217353 | SNV | 1 | T | G | Heterozygous |
| NC_037648.1 | 16217851 | SNV | 1 | T | C | Homozygous   |
| NC_037648.1 | 16218070 | SNV | 1 | C | T | Heterozygous |
| NC_037648.1 | 16218192 | SNV | 1 | A | G | Heterozygous |

|             |          |     |   |   |   |              |
|-------------|----------|-----|---|---|---|--------------|
| NC_037648.1 | 16218333 | SNV | 1 | C | T | Homozygous   |
| NC_037648.1 | 16218579 | SNV | 1 | G | C | Heterozygous |
| NC_037648.1 | 16218896 | SNV | 1 | A | G | Heterozygous |
| NC_037648.1 | 16219010 | SNV | 1 | G | C | Heterozygous |
| NC_037648.1 | 16220423 | SNV | 1 | C | T | Homozygous   |
| NC_037648.1 | 16220429 | SNV | 1 | C | T | Homozygous   |
| NC_037648.1 | 16220431 | SNV | 1 | C | G | Homozygous   |
| NC_037648.1 | 16220446 | SNV | 1 | G | A | Homozygous   |
| NC_037648.1 | 16220478 | SNV | 1 | A | T | Homozygous   |
| NC_037648.1 | 16223220 | SNV | 1 | A | G | Heterozygous |
| NC_037648.1 | 16223306 | SNV | 1 | G | A | Heterozygous |
| NC_037648.1 | 16223328 | SNV | 1 | G | A | Heterozygous |
| NC_037648.1 | 16223332 | SNV | 1 | G | A | Heterozygous |
| NC_037648.1 | 16223334 | SNV | 1 | G | A | Heterozygous |
| NC_037648.1 | 16223339 | SNV | 1 | A | T | Heterozygous |
| NC_037648.1 | 16226611 | SNV | 1 | T | C | Homozygous   |
| NC_037648.1 | 16226673 | SNV | 1 | C | T | Heterozygous |
| NC_037648.1 | 16226697 | SNV | 1 | T | C | Homozygous   |
| NC_037648.1 | 16226710 | SNV | 1 | A | C | Heterozygous |
| NC_037648.1 | 16226865 | SNV | 1 | G | A | Homozygous   |
| NC_037648.1 | 16227573 | SNV | 1 | G | A | Homozygous   |
| NC_037648.1 | 16228980 | SNV | 1 | T | G | Heterozygous |
| NC_037648.1 | 16232765 | SNV | 1 | C | T | Heterozygous |
| NC_037648.1 | 16234018 | SNV | 1 | C | T | Homozygous   |
| NC_037648.1 | 16235081 | SNV | 1 | G | C | Homozygous   |
| NC_037648.1 | 16235180 | SNV | 1 | C | G | Homozygous   |
| NC_037648.1 | 16235403 | SNV | 1 | T | C | Heterozygous |
| NC_037648.1 | 16237576 | SNV | 1 | G | A | Homozygous   |
| NC_037648.1 | 16237679 | SNV | 1 | T | A | Homozygous   |
| NC_037648.1 | 16238426 | SNV | 1 | T | C | Heterozygous |
| NC_037648.1 | 16238440 | SNV | 1 | C | T | Homozygous   |
| NC_037648.1 | 16239322 | SNV | 1 | T | C | Heterozygous |
| NC_037648.1 | 16240080 | SNV | 1 | A | C | Heterozygous |
| NC_037648.1 | 16240089 | SNV | 1 | A | G | Heterozygous |
| NC_037648.1 | 16240132 | SNV | 1 | A | G | Heterozygous |
| NC_037648.1 | 16240149 | SNV | 1 | T | C | Heterozygous |
| NC_037648.1 | 16240152 | SNV | 1 | A | G | Heterozygous |
| NC_037648.1 | 16240731 | SNV | 1 | T | A | Heterozygous |
| NC_037648.1 | 16241059 | SNV | 1 | T | A | Heterozygous |
| NC_037648.1 | 16241299 | SNV | 1 | A | G | Homozygous   |
| NC_037648.1 | 16241373 | SNV | 1 | T | G | Homozygous   |
| NC_037648.1 | 16241375 | SNV | 1 | C | T | Heterozygous |
| NC_037648.1 | 16241427 | SNV | 1 | C | A | Homozygous   |
| NC_037648.1 | 16241429 | SNV | 1 | G | C | Homozygous   |
| NC_037648.1 | 16241566 | SNV | 1 | T | C | Homozygous   |
| NC_037648.1 | 16241753 | SNV | 1 | C | G | Homozygous   |
| NC_037648.1 | 16241762 | SNV | 1 | G | A | Heterozygous |
| NC_037648.1 | 16241766 | SNV | 1 | A | G | Heterozygous |
| NC_037648.1 | 16242276 | SNV | 1 | C | T | Homozygous   |
| NC_037648.1 | 16242943 | SNV | 1 | T | C | Heterozygous |
| NC_037648.1 | 16242995 | SNV | 1 | G | A | Homozygous   |

|             |          |     |   |   |   |              |
|-------------|----------|-----|---|---|---|--------------|
| NC_037648.1 | 16246398 | SNV | 1 | T | C | Homozygous   |
| NC_037648.1 | 16246542 | SNV | 1 | T | C | Heterozygous |
| NC_037648.1 | 16246852 | SNV | 1 | A | C | Heterozygous |
| NC_037648.1 | 16247672 | SNV | 1 | C | T | Homozygous   |
| NC_037648.1 | 16247697 | SNV | 1 | C | T | Heterozygous |
| NC_037648.1 | 16248359 | SNV | 1 | C | T | Heterozygous |
| NC_037648.1 | 16248407 | SNV | 1 | T | C | Heterozygous |
| NC_037648.1 | 16248914 | SNV | 1 | A | G | Homozygous   |
| NC_037648.1 | 16249154 | SNV | 1 | C | T | Heterozygous |
| NC_037648.1 | 16255014 | SNV | 1 | C | T | Homozygous   |
| NC_037648.1 | 16255043 | SNV | 1 | A | G | Homozygous   |
| NC_037648.1 | 16255060 | SNV | 1 | G | A | Homozygous   |
| NC_037648.1 | 16255707 | SNV | 1 | T | A | Homozygous   |
| NC_037648.1 | 16255820 | SNV | 1 | C | T | Heterozygous |
| NC_037648.1 | 16256055 | SNV | 1 | G | A | Homozygous   |
| NC_037648.1 | 16256595 | SNV | 1 | G | A | Heterozygous |
| NC_037648.1 | 16258895 | SNV | 1 | T | C | Homozygous   |
| NC_037648.1 | 16258898 | SNV | 1 | C | A | Homozygous   |
| NC_037648.1 | 16259927 | SNV | 1 | A | G | Heterozygous |
| NC_037648.1 | 16259932 | SNV | 1 | A | G | Heterozygous |
| NC_037648.1 | 16260158 | SNV | 1 | A | G | Homozygous   |
| NC_037648.1 | 16261965 | SNV | 1 | C | T | Homozygous   |
| NC_037648.1 | 16262785 | SNV | 1 | G | C | Heterozygous |
| NC_037648.1 | 16270191 | SNV | 1 | C | T | Heterozygous |
| NC_037648.1 | 16270257 | SNV | 1 | C | T | Homozygous   |
| NC_037648.1 | 16270335 | SNV | 1 | A | G | Homozygous   |
| NC_037648.1 | 16270391 | SNV | 1 | T | C | Heterozygous |
| NC_037648.1 | 16270411 | SNV | 1 | T | C | Heterozygous |
| NC_037648.1 | 16270517 | SNV | 1 | A | G | Homozygous   |
| NC_037648.1 | 16270667 | SNV | 1 | T | A | Homozygous   |
| NC_037648.1 | 16270670 | SNV | 1 | C | T | Homozygous   |
| NC_037648.1 | 16270681 | SNV | 1 | C | T | Homozygous   |
| NC_037648.1 | 16270783 | SNV | 1 | C | T | Homozygous   |
| NC_037648.1 | 16270831 | SNV | 1 | T | C | Homozygous   |
| NC_037648.1 | 16270838 | SNV | 1 | T | C | Homozygous   |
| NC_037648.1 | 16271560 | SNV | 1 | A | G | Homozygous   |
| NC_037648.1 | 16271870 | SNV | 1 | A | T | Homozygous   |
| NC_037648.1 | 16272087 | SNV | 1 | C | T | Homozygous   |
| NC_037648.1 | 16273418 | SNV | 1 | A | G | Homozygous   |
| NC_037648.1 | 16273635 | SNV | 1 | A | G | Homozygous   |
| NC_037648.1 | 16273837 | SNV | 1 | T | G | Heterozygous |
| NC_037648.1 | 16273857 | SNV | 1 | T | C | Heterozygous |
| NC_037648.1 | 16274139 | SNV | 1 | A | G | Heterozygous |
| NC_037648.1 | 16274412 | SNV | 1 | C | T | Heterozygous |
| NC_037648.1 | 16274420 | SNV | 1 | C | T | Heterozygous |
| NC_037648.1 | 16274604 | SNV | 1 | C | T | Heterozygous |
| NC_037648.1 | 16274792 | SNV | 1 | C | T | Heterozygous |
| NC_037648.1 | 16274951 | SNV | 1 | A | T | Homozygous   |
| NC_037648.1 | 16275208 | SNV | 1 | T | C | Heterozygous |
| NC_037648.1 | 16275214 | SNV | 1 | G | A | Heterozygous |
| NC_037648.1 | 16275232 | SNV | 1 | C | T | Heterozygous |

|             |          |     |   |   |   |              |
|-------------|----------|-----|---|---|---|--------------|
| NC_037648.1 | 16275379 | SNV | 1 | T | C | Homozygous   |
| NC_037648.1 | 16275505 | SNV | 1 | G | A | Heterozygous |
| NC_037648.1 | 16275532 | SNV | 1 | G | A | Heterozygous |
| NC_037648.1 | 16275615 | SNV | 1 | G | A | Homozygous   |
| NC_037648.1 | 16275667 | SNV | 1 | G | A | Heterozygous |
| NC_037648.1 | 16275697 | SNV | 1 | A | G | Homozygous   |
| NC_037648.1 | 16275708 | SNV | 1 | T | C | Homozygous   |
| NC_037648.1 | 16277045 | SNV | 1 | C | T | Heterozygous |
| NC_037648.1 | 16277156 | SNV | 1 | A | G | Homozygous   |
| NC_037648.1 | 16277879 | SNV | 1 | C | G | Homozygous   |
| NC_037648.1 | 16278008 | SNV | 1 | G | C | Homozygous   |
| NC_037648.1 | 16278022 | SNV | 1 | A | G | Heterozygous |
| NC_037648.1 | 16278248 | SNV | 1 | A | G | Homozygous   |
| NC_037648.1 | 16278538 | SNV | 1 | G | T | Homozygous   |
| NC_037648.1 | 16278588 | SNV | 1 | C | T | Homozygous   |
| NC_037648.1 | 16278623 | SNV | 1 | C | G | Homozygous   |
| NC_037648.1 | 16278817 | SNV | 1 | C | T | Homozygous   |
| NC_037648.1 | 16279365 | SNV | 1 | T | C | Heterozygous |
| NC_037648.1 | 16279466 | SNV | 1 | T | C | Heterozygous |
| NC_037648.1 | 16279469 | SNV | 1 | G | A | Heterozygous |
| NC_037648.1 | 16279723 | SNV | 1 | C | T | Heterozygous |
| NC_037648.1 | 16279909 | SNV | 1 | G | T | Homozygous   |
| NC_037648.1 | 16280543 | SNV | 1 | C | T | Heterozygous |
| NC_037648.1 | 16280654 | SNV | 1 | G | A | Heterozygous |
| NC_037648.1 | 16280672 | SNV | 1 | C | T | Heterozygous |
| NC_037648.1 | 16280705 | SNV | 1 | C | T | Heterozygous |
| NC_037648.1 | 16280744 | SNV | 1 | A | G | Heterozygous |
| NC_037648.1 | 16280849 | SNV | 1 | G | A | Heterozygous |
| NC_037648.1 | 16284951 | SNV | 1 | G | A | Homozygous   |
| NC_037648.1 | 16285292 | SNV | 1 | G | T | Homozygous   |
| NC_037648.1 | 16285310 | SNV | 1 | A | G | Heterozygous |
| NC_037648.1 | 16285323 | SNV | 1 | T | G | Heterozygous |
| NC_037648.1 | 16290582 | SNV | 1 | C | T | Homozygous   |
| NC_037648.1 | 16291549 | SNV | 1 | G | A | Heterozygous |
| NC_037648.1 | 16291570 | SNV | 1 | A | G | Heterozygous |
| NC_037648.1 | 16291573 | SNV | 1 | A | G | Heterozygous |
| NC_037648.1 | 16291666 | SNV | 1 | C | G | Heterozygous |
| NC_037648.1 | 16291687 | SNV | 1 | A | G | Heterozygous |
| NC_037648.1 | 16291858 | SNV | 1 | T | C | Homozygous   |
| NC_037648.1 | 16291906 | SNV | 1 | T | C | Homozygous   |
| NC_037648.1 | 16292161 | SNV | 1 | C | G | Heterozygous |
| NC_037648.1 | 16293599 | SNV | 1 | G | T | Heterozygous |
| NC_037648.1 | 16293693 | SNV | 1 | A | G | Homozygous   |
| NC_037648.1 | 16293726 | SNV | 1 | T | C | Homozygous   |
| NC_037648.1 | 16293970 | SNV | 1 | C | G | Homozygous   |
| NC_037648.1 | 16295780 | SNV | 1 | A | G | Homozygous   |
| NC_037648.1 | 16295964 | SNV | 1 | A | G | Homozygous   |
| NC_037648.1 | 16296336 | SNV | 1 | G | A | Heterozygous |
| NC_037648.1 | 16296339 | SNV | 1 | A | G | Heterozygous |
| NC_037648.1 | 16296384 | SNV | 1 | C | T | Homozygous   |
| NC_037648.1 | 16296396 | SNV | 1 | T | A | Heterozygous |

|             |          |     |   |   |   |              |
|-------------|----------|-----|---|---|---|--------------|
| NC_037648.1 | 16296621 | SNV | 1 | T | C | Homozygous   |
| NC_037648.1 | 16297757 | SNV | 1 | G | A | Homozygous   |
| NC_037648.1 | 16297820 | SNV | 1 | G | A | Homozygous   |
| NC_037648.1 | 16298315 | SNV | 1 | C | T | Homozygous   |
| NC_037648.1 | 16298685 | SNV | 1 | G | A | Heterozygous |
| NC_037648.1 | 16298688 | SNV | 1 | C | T | Heterozygous |
| NC_037648.1 | 16299037 | SNV | 1 | C | G | Homozygous   |
| NC_037648.1 | 16300390 | SNV | 1 | A | G | Homozygous   |
| NC_037648.1 | 16300867 | SNV | 1 | A | G | Heterozygous |
| NC_037648.1 | 16308656 | SNV | 1 | G | C | Homozygous   |
| NC_037648.1 | 16308735 | SNV | 1 | C | A | Homozygous   |
| NC_037648.1 | 16308966 | SNV | 1 | T | C | Heterozygous |
| NC_037648.1 | 16309047 | SNV | 1 | A | T | Heterozygous |
| NC_037648.1 | 16310504 | SNV | 1 | G | C | Homozygous   |
| NC_037648.1 | 16312696 | SNV | 1 | T | A | Heterozygous |
| NC_037648.1 | 16312757 | SNV | 1 | T | C | Heterozygous |
| NC_037648.1 | 16312759 | SNV | 1 | C | T | Homozygous   |
| NC_037648.1 | 16312887 | SNV | 1 | T | C | Homozygous   |
| NC_037648.1 | 16313078 | SNV | 1 | G | T | Homozygous   |
| NC_037648.1 | 16313084 | SNV | 1 | T | C | Heterozygous |
| NC_037648.1 | 16313129 | SNV | 1 | T | C | Heterozygous |
| NC_037648.1 | 16313132 | SNV | 1 | G | A | Heterozygous |
| NC_037648.1 | 16313191 | SNV | 1 | G | A | Heterozygous |
| NC_037648.1 | 16313353 | SNV | 1 | C | T | Heterozygous |
| NC_037648.1 | 16313368 | SNV | 1 | G | A | Heterozygous |
| NC_037648.1 | 16313675 | SNV | 1 | T | C | Homozygous   |
| NC_037648.1 | 16313682 | SNV | 1 | A | G | Heterozygous |
| NC_037648.1 | 16313772 | SNV | 1 | C | T | Heterozygous |
| NC_037648.1 | 16314687 | SNV | 1 | T | C | Homozygous   |
| NC_037648.1 | 16314853 | SNV | 1 | C | T | Heterozygous |
| NC_037648.1 | 16315354 | SNV | 1 | T | C | Homozygous   |
| NC_037648.1 | 16315380 | SNV | 1 | C | T | Heterozygous |
| NC_037648.1 | 16315404 | SNV | 1 | C | T | Homozygous   |
| NC_037648.1 | 16315410 | SNV | 1 | A | G | Homozygous   |
| NC_037648.1 | 16318380 | SNV | 1 | G | A | Heterozygous |
| NC_037648.1 | 16318808 | SNV | 1 | T | A | Homozygous   |
| NC_037648.1 | 16319069 | SNV | 1 | C | T | Heterozygous |
| NC_037648.1 | 16319420 | SNV | 1 | T | C | Heterozygous |
| NC_037648.1 | 16319429 | SNV | 1 | T | C | Homozygous   |
| NC_037648.1 | 16319441 | SNV | 1 | T | C | Homozygous   |
| NC_037648.1 | 16319840 | SNV | 1 | A | T | Homozygous   |
| NC_037648.1 | 16319863 | SNV | 1 | T | C | Homozygous   |
| NC_037648.1 | 16321309 | SNV | 1 | C | A | Heterozygous |
| NC_037648.1 | 16321571 | SNV | 1 | T | C | Heterozygous |
| NC_037648.1 | 16321590 | SNV | 1 | T | C | Homozygous   |
| NC_037648.1 | 16321596 | SNV | 1 | T | C | Heterozygous |
| NC_037648.1 | 16321603 | SNV | 1 | T | C | Heterozygous |
| NC_037648.1 | 16321605 | SNV | 1 | T | C | Heterozygous |
| NC_037648.1 | 16321612 | SNV | 1 | T | C | Heterozygous |
| NC_037648.1 | 16321620 | SNV | 1 | T | C | Heterozygous |
| NC_037648.1 | 16321633 | SNV | 1 | G | A | Homozygous   |

|             |          |     |   |   |   |              |
|-------------|----------|-----|---|---|---|--------------|
| NC_037648.1 | 16321639 | SNV | 1 | T | C | Heterozygous |
| NC_037648.1 | 16321653 | SNV | 1 | T | C | Heterozygous |
| NC_037648.1 | 16321654 | SNV | 1 | A | G | Heterozygous |
| NC_037648.1 | 16321660 | SNV | 1 | A | G | Homozygous   |
| NC_037648.1 | 16321672 | SNV | 1 | A | G | Homozygous   |
| NC_037648.1 | 16321681 | SNV | 1 | A | G | Heterozygous |
| NC_037648.1 | 16321953 | SNV | 1 | A | G | Homozygous   |
| NC_037648.1 | 16322424 | SNV | 1 | G | C | Heterozygous |
| NC_037648.1 | 16322920 | SNV | 1 | G | A | Homozygous   |
| NC_037648.1 | 16323008 | SNV | 1 | A | G | Homozygous   |
| NC_037648.1 | 16323132 | SNV | 1 | C | T | Heterozygous |
| NC_037648.1 | 16323591 | SNV | 1 | C | A | Homozygous   |
| NC_037648.1 | 16324562 | SNV | 1 | C | T | Homozygous   |
| NC_037648.1 | 16324777 | SNV | 1 | C | T | Heterozygous |
| NC_037648.1 | 16324787 | SNV | 1 | G | A | Heterozygous |
| NC_037648.1 | 16327398 | SNV | 1 | T | C | Homozygous   |
| NC_037648.1 | 16327549 | SNV | 1 | A | G | Heterozygous |
| NC_037648.1 | 16327553 | SNV | 1 | A | G | Homozygous   |
| NC_037648.1 | 16329330 | SNV | 1 | A | G | Homozygous   |
| NC_037648.1 | 16330106 | SNV | 1 | A | T | Homozygous   |
| NC_037648.1 | 16331199 | SNV | 1 | A | G | Heterozygous |
| NC_037648.1 | 16331708 | SNV | 1 | A | G | Homozygous   |
| NC_037648.1 | 16332260 | SNV | 1 | C | T | Heterozygous |
| NC_037648.1 | 16332536 | SNV | 1 | A | G | Heterozygous |
| NC_037648.1 | 16332668 | SNV | 1 | C | T | Heterozygous |
| NC_037648.1 | 16332671 | SNV | 1 | A | G | Homozygous   |
| NC_037648.1 | 16332999 | SNV | 1 | T | A | Homozygous   |
| NC_037648.1 | 16333124 | SNV | 1 | A | G | Homozygous   |
| NC_037648.1 | 16333301 | SNV | 1 | T | C | Homozygous   |
| NC_037648.1 | 16333307 | SNV | 1 | T | C | Homozygous   |
| NC_037648.1 | 16334367 | SNV | 1 | T | C | Homozygous   |
| NC_037648.1 | 16334807 | SNV | 1 | T | C | Homozygous   |
| NC_037648.1 | 16334810 | SNV | 1 | T | C | Homozygous   |
| NC_037648.1 | 16334859 | SNV | 1 | T | C | Homozygous   |
| NC_037648.1 | 16335572 | SNV | 1 | T | C | Homozygous   |
| NC_037648.1 | 16335684 | SNV | 1 | C | T | Homozygous   |
| NC_037648.1 | 16335788 | SNV | 1 | A | C | Homozygous   |
| NC_037648.1 | 16335794 | SNV | 1 | G | A | Heterozygous |
| NC_037648.1 | 16336300 | SNV | 1 | G | A | Heterozygous |
| NC_037648.1 | 16336314 | SNV | 1 | T | C | Homozygous   |
| NC_037648.1 | 16336323 | SNV | 1 | G | A | Heterozygous |
| NC_037648.1 | 16336474 | SNV | 1 | T | C | Homozygous   |
| NC_037648.1 | 16336566 | SNV | 1 | T | C | Homozygous   |
| NC_037648.1 | 16336590 | SNV | 1 | T | C | Homozygous   |
| NC_037648.1 | 16336603 | SNV | 1 | T | C | Heterozygous |
| NC_037648.1 | 16336637 | SNV | 1 | T | C | Homozygous   |
| NC_037648.1 | 16336858 | SNV | 1 | G | C | Homozygous   |
| NC_037648.1 | 16336883 | SNV | 1 | T | C | Heterozygous |
| NC_037648.1 | 16336913 | SNV | 1 | T | C | Heterozygous |
| NC_037648.1 | 16338366 | SNV | 1 | G | A | Heterozygous |
| NC_037648.1 | 16341554 | SNV | 1 | A | G | Homozygous   |



|                |          |     |   |   |   |              |
|----------------|----------|-----|---|---|---|--------------|
| NC_037648.1    | 16341569 | SNV | 1 | G | T | Homozygous   |
| NC_037648.1    | 16341797 | SNV | 1 | T | A | Homozygous   |
| NC_037648.1    | 16343104 | SNV | 1 | C | T | Homozygous   |
| NC_037648.1    | 16344608 | SNV | 1 | G | A | Homozygous   |
| NC_037648.1    | 16344626 | SNV | 1 | G | A | Homozygous   |
| NW_020555822.1 | 10642    | SNV | 1 | G | A | Heterozygous |
| NW_020555822.1 | 10648    | SNV | 1 | T | C | Heterozygous |
| NW_020555822.1 | 10650    | SNV | 1 | G | A | Heterozygous |
| NW_020555822.1 | 10669    | SNV | 1 | T | A | Heterozygous |
| NW_020555824.1 | 7252     | SNV | 1 | G | A | Homozygous   |
| NC_037649.1    | 53366    | SNV | 1 | A | G | Homozygous   |
| NC_037649.1    | 53369    | SNV | 1 | G | A | Homozygous   |
| NC_037649.1    | 53396    | SNV | 1 | G | A | Homozygous   |
| NC_037649.1    | 53399    | SNV | 1 | G | A | Homozygous   |
| NC_037649.1    | 57350    | SNV | 1 | A | G | Homozygous   |
| NC_037649.1    | 57971    | SNV | 1 | A | G | Homozygous   |
| NC_037649.1    | 60819    | SNV | 1 | G | C | Heterozygous |
| NC_037649.1    | 60820    | SNV | 1 | A | C | Heterozygous |
| NC_037649.1    | 60822    | SNV | 1 | A | T | Heterozygous |
| NC_037649.1    | 75442    | SNV | 1 | T | C | Heterozygous |
| NC_037649.1    | 119606   | SNV | 1 | T | C | Homozygous   |
| NC_037649.1    | 119608   | SNV | 1 | T | C | Homozygous   |
| NC_037649.1    | 138193   | SNV | 1 | T | C | Heterozygous |
| NC_037649.1    | 138208   | SNV | 1 | T | A | Heterozygous |
| NC_037649.1    | 139689   | SNV | 1 | G | C | Heterozygous |
| NC_037649.1    | 149913   | SNV | 1 | T | C | Homozygous   |
| NC_037649.1    | 149915   | SNV | 1 | C | T | Homozygous   |
| NC_037649.1    | 149985   | SNV | 1 | G | A | Homozygous   |
| NC_037649.1    | 149996   | SNV | 1 | G | A | Homozygous   |
| NC_037649.1    | 153231   | SNV | 1 | T | A | Homozygous   |
| NC_037649.1    | 154401   | SNV | 1 | G | C | Homozygous   |
| NC_037649.1    | 154868   | SNV | 1 | C | T | Homozygous   |
| NC_037649.1    | 154893   | SNV | 1 | C | T | Homozygous   |
| NC_037649.1    | 154925   | SNV | 1 | C | T | Heterozygous |
| NC_037649.1    | 155194   | SNV | 1 | A | G | Heterozygous |
| NC_037649.1    | 155196   | SNV | 1 | A | G | Heterozygous |
| NC_037649.1    | 155210   | SNV | 1 | G | A | Heterozygous |
| NC_037649.1    | 155219   | SNV | 1 | A | G | Heterozygous |
| NC_037649.1    | 155248   | SNV | 1 | A | G | Heterozygous |
| NC_037649.1    | 155600   | SNV | 1 | C | T | Homozygous   |
| NC_037649.1    | 155735   | SNV | 1 | T | C | Homozygous   |
| NC_037649.1    | 158786   | SNV | 1 | T | A | Heterozygous |
| NC_037649.1    | 158925   | SNV | 1 | A | G | Homozygous   |
| NC_037649.1    | 163792   | SNV | 1 | A | G | Heterozygous |
| NC_037649.1    | 167866   | SNV | 1 | C | T | Heterozygous |
| NC_037649.1    | 173014   | SNV | 1 | G | A | Heterozygous |
| NC_037649.1    | 173042   | SNV | 1 | C | T | Heterozygous |
| NC_037649.1    | 173133   | SNV | 1 | T | C | Homozygous   |
| NC_037649.1    | 176891   | SNV | 1 | C | T | Heterozygous |
| NC_037649.1    | 176900   | SNV | 1 | C | T | Heterozygous |
| NC_037649.1    | 176905   | SNV | 1 | T | G | Heterozygous |

|             |        |     |   |   |   |              |
|-------------|--------|-----|---|---|---|--------------|
| NC_037649.1 | 179175 | SNV | 1 | A | G | Heterozygous |
| NC_037649.1 | 179200 | SNV | 1 | T | C | Homozygous   |
| NC_037649.1 | 179204 | SNV | 1 | A | G | Homozygous   |
| NC_037649.1 | 179215 | SNV | 1 | A | G | Homozygous   |
| NC_037649.1 | 179237 | SNV | 1 | A | G | Homozygous   |
| NC_037649.1 | 179346 | SNV | 1 | T | C | Homozygous   |
| NC_037649.1 | 190179 | SNV | 1 | G | A | Heterozygous |
| NC_037649.1 | 190265 | SNV | 1 | G | A | Homozygous   |
| NC_037649.1 | 190528 | SNV | 1 | G | A | Heterozygous |
| NC_037649.1 | 190710 | SNV | 1 | A | G | Homozygous   |
| NC_037649.1 | 190918 | SNV | 1 | C | T | Homozygous   |
| NC_037649.1 | 190959 | SNV | 1 | G | A | Heterozygous |
| NC_037649.1 | 191003 | SNV | 1 | G | A | Heterozygous |
| NC_037649.1 | 191006 | SNV | 1 | C | A | Homozygous   |
| NC_037649.1 | 191024 | SNV | 1 | C | G | Homozygous   |
| NC_037649.1 | 194508 | SNV | 1 | A | C | Homozygous   |
| NC_037649.1 | 194544 | SNV | 1 | C | T | Homozygous   |
| NC_037649.1 | 196006 | SNV | 1 | G | T | Heterozygous |
| NC_037649.1 | 196326 | SNV | 1 | A | G | Heterozygous |
| NC_037649.1 | 213489 | SNV | 1 | T | A | Heterozygous |
| NC_037649.1 | 213895 | SNV | 1 | C | T | Heterozygous |
| NC_037649.1 | 214177 | SNV | 1 | G | A | Homozygous   |
| NC_037649.1 | 214184 | SNV | 1 | G | A | Heterozygous |
| NC_037649.1 | 214191 | SNV | 1 | A | G | Homozygous   |
| NC_037649.1 | 214198 | SNV | 1 | G | A | Homozygous   |
| NC_037649.1 | 216494 | SNV | 1 | T | C | Homozygous   |
| NC_037649.1 | 216516 | SNV | 1 | C | T | Homozygous   |
| NC_037649.1 | 216528 | SNV | 1 | A | T | Homozygous   |
| NC_037649.1 | 216535 | SNV | 1 | T | C | Homozygous   |
| NC_037649.1 | 216581 | SNV | 1 | T | A | Homozygous   |
| NC_037649.1 | 220805 | SNV | 1 | C | T | Homozygous   |
| NC_037649.1 | 220812 | SNV | 1 | C | T | Homozygous   |
| NC_037649.1 | 220819 | SNV | 1 | T | C | Homozygous   |
| NC_037649.1 | 221492 | SNV | 1 | T | C | Homozygous   |
| NC_037649.1 | 222026 | SNV | 1 | A | G | Heterozygous |
| NC_037649.1 | 222099 | SNV | 1 | T | C | Homozygous   |
| NC_037649.1 | 222349 | SNV | 1 | A | G | Homozygous   |
| NC_037649.1 | 222447 | SNV | 1 | A | G | Homozygous   |
| NC_037649.1 | 222545 | SNV | 1 | T | C | Homozygous   |
| NC_037649.1 | 230211 | SNV | 1 | G | A | Homozygous   |
| NC_037649.1 | 230305 | SNV | 1 | T | A | Homozygous   |
| NC_037649.1 | 230426 | SNV | 1 | G | A | Heterozygous |
| NC_037649.1 | 232392 | SNV | 1 | C | T | Homozygous   |
| NC_037649.1 | 234508 | SNV | 1 | A | G | Heterozygous |
| NC_037649.1 | 234521 | SNV | 1 | T | C | Homozygous   |
| NC_037649.1 | 234525 | SNV | 1 | T | C | Homozygous   |
| NC_037649.1 | 234562 | SNV | 1 | T | G | Homozygous   |
| NC_037649.1 | 234607 | SNV | 1 | C | T | Homozygous   |
| NC_037649.1 | 234640 | SNV | 1 | G | A | Heterozygous |
| NC_037649.1 | 234657 | SNV | 1 | G | A | Heterozygous |
| NC_037649.1 | 234660 | SNV | 1 | G | A | Heterozygous |

|             |        |     |   |   |   |              |
|-------------|--------|-----|---|---|---|--------------|
| NC_037649.1 | 234662 | SNV | 1 | G | A | Heterozygous |
| NC_037649.1 | 234824 | SNV | 1 | C | T | Homozygous   |
| NC_037649.1 | 235713 | SNV | 1 | C | T | Heterozygous |
| NC_037649.1 | 242807 | SNV | 1 | G | A | Heterozygous |
| NC_037649.1 | 243293 | SNV | 1 | T | G | Homozygous   |
| NC_037649.1 | 243298 | SNV | 1 | T | G | Homozygous   |
| NC_037649.1 | 243301 | SNV | 1 | T | C | Homozygous   |
| NC_037649.1 | 243303 | SNV | 1 | T | G | Homozygous   |
| NC_037649.1 | 243305 | SNV | 1 | C | T | Homozygous   |
| NC_037649.1 | 243312 | SNV | 1 | T | G | Homozygous   |
| NC_037649.1 | 245995 | SNV | 1 | C | T | Heterozygous |
| NC_037649.1 | 247753 | SNV | 1 | C | G | Heterozygous |
| NC_037649.1 | 247760 | SNV | 1 | G | A | Heterozygous |
| NC_037649.1 | 247762 | SNV | 1 | A | G | Homozygous   |
| NC_037649.1 | 247777 | SNV | 1 | T | C | Homozygous   |
| NC_037649.1 | 247801 | SNV | 1 | T | C | Homozygous   |
| NC_037649.1 | 247828 | SNV | 1 | A | G | Homozygous   |
| NC_037649.1 | 248250 | SNV | 1 | A | G | Homozygous   |
| NC_037649.1 | 251376 | SNV | 1 | A | G | Homozygous   |
| NC_037649.1 | 251466 | SNV | 1 | G | C | Homozygous   |
| NC_037649.1 | 251489 | SNV | 1 | G | A | Homozygous   |
| NC_037649.1 | 261156 | SNV | 1 | A | G | Homozygous   |
| NC_037649.1 | 261210 | SNV | 1 | C | T | Homozygous   |
| NC_037649.1 | 261256 | SNV | 1 | A | G | Homozygous   |
| NC_037649.1 | 261694 | SNV | 1 | T | C | Heterozygous |
| NC_037649.1 | 261734 | SNV | 1 | A | T | Heterozygous |
| NC_037649.1 | 261828 | SNV | 1 | A | C | Homozygous   |
| NC_037649.1 | 261841 | SNV | 1 | G | A | Homozygous   |
| NC_037649.1 | 261843 | SNV | 1 | G | A | Homozygous   |
| NC_037649.1 | 262217 | SNV | 1 | T | A | Homozygous   |
| NC_037649.1 | 262222 | SNV | 1 | G | T | Homozygous   |
| NC_037649.1 | 262252 | SNV | 1 | A | T | Homozygous   |
| NC_037649.1 | 262255 | SNV | 1 | G | A | Homozygous   |
| NC_037649.1 | 266350 | SNV | 1 | C | T | Heterozygous |
| NC_037649.1 | 266430 | SNV | 1 | G | A | Heterozygous |
| NC_037649.1 | 267124 | SNV | 1 | A | G | Homozygous   |
| NC_037649.1 | 267130 | SNV | 1 | G | A | Homozygous   |
| NC_037649.1 | 267132 | SNV | 1 | G | C | Homozygous   |
| NC_037649.1 | 273165 | SNV | 1 | C | T | Heterozygous |
| NC_037649.1 | 276166 | SNV | 1 | C | T | Heterozygous |
| NC_037649.1 | 276186 | SNV | 1 | T | A | Heterozygous |
| NC_037649.1 | 276189 | SNV | 1 | C | T | Heterozygous |
| NC_037649.1 | 280147 | SNV | 1 | A | G | Heterozygous |
| NC_037649.1 | 280148 | SNV | 1 | A | C | Heterozygous |
| NC_037649.1 | 280150 | SNV | 1 | A | C | Heterozygous |
| NC_037649.1 | 286107 | SNV | 1 | C | T | Homozygous   |
| NC_037649.1 | 286121 | SNV | 1 | C | G | Homozygous   |
| NC_037649.1 | 286128 | SNV | 1 | T | G | Heterozygous |
| NC_037649.1 | 286135 | SNV | 1 | C | T | Heterozygous |
| NC_037649.1 | 286141 | SNV | 1 | C | T | Heterozygous |
| NC_037649.1 | 286145 | SNV | 1 | C | T | Heterozygous |

|             |        |     |   |   |   |              |
|-------------|--------|-----|---|---|---|--------------|
| NC_037649.1 | 286150 | SNV | 1 | T | G | Heterozygous |
| NC_037649.1 | 286160 | SNV | 1 | C | T | Homozygous   |
| NC_037649.1 | 287018 | SNV | 1 | A | G | Heterozygous |
| NC_037649.1 | 287032 | SNV | 1 | A | G | Heterozygous |
| NC_037649.1 | 287035 | SNV | 1 | C | T | Heterozygous |
| NC_037649.1 | 288814 | SNV | 1 | C | T | Heterozygous |
| NC_037649.1 | 288831 | SNV | 1 | T | A | Homozygous   |
| NC_037649.1 | 288834 | SNV | 1 | T | C | Homozygous   |
| NC_037649.1 | 292780 | SNV | 1 | A | C | Homozygous   |
| NC_037649.1 | 292814 | SNV | 1 | T | A | Homozygous   |
| NC_037649.1 | 292817 | SNV | 1 | T | G | Homozygous   |
| NC_037649.1 | 292822 | SNV | 1 | G | A | Homozygous   |
| NC_037649.1 | 295670 | SNV | 1 | A | G | Homozygous   |
| NC_037649.1 | 295673 | SNV | 1 | G | C | Heterozygous |
| NC_037649.1 | 295676 | SNV | 1 | G | A | Heterozygous |
| NC_037649.1 | 295679 | SNV | 1 | T | C | Heterozygous |
| NC_037649.1 | 295685 | SNV | 1 | A | G | Heterozygous |
| NC_037649.1 | 295696 | SNV | 1 | G | A | Heterozygous |
| NC_037649.1 | 295757 | SNV | 1 | G | A | Homozygous   |
| NC_037649.1 | 295762 | SNV | 1 | A | G | Homozygous   |
| NC_037649.1 | 295774 | SNV | 1 | G | A | Homozygous   |
| NC_037649.1 | 295780 | SNV | 1 | G | A | Homozygous   |
| NC_037649.1 | 295797 | SNV | 1 | C | T | Heterozygous |
| NC_037649.1 | 295888 | SNV | 1 | G | A | Homozygous   |
| NC_037649.1 | 295891 | SNV | 1 | A | G | Homozygous   |
| NC_037649.1 | 295969 | SNV | 1 | T | C | Homozygous   |
| NC_037649.1 | 295978 | SNV | 1 | A | G | Homozygous   |
| NC_037649.1 | 295994 | SNV | 1 | A | T | Homozygous   |
| NC_037649.1 | 296025 | SNV | 1 | G | A | Homozygous   |
| NC_037649.1 | 296049 | SNV | 1 | G | A | Homozygous   |
| NC_037649.1 | 296072 | SNV | 1 | C | T | Homozygous   |
| NC_037649.1 | 296092 | SNV | 1 | T | C | Homozygous   |
| NC_037649.1 | 296166 | SNV | 1 | A | G | Homozygous   |
| NC_037649.1 | 296185 | SNV | 1 | G | A | Heterozygous |
| NC_037649.1 | 296202 | SNV | 1 | A | G | Homozygous   |
| NC_037649.1 | 308199 | SNV | 1 | G | A | Homozygous   |
| NC_037649.1 | 308205 | SNV | 1 | A | G | Homozygous   |
| NC_037649.1 | 308260 | SNV | 1 | A | G | Homozygous   |
| NC_037649.1 | 320482 | SNV | 1 | G | A | Heterozygous |
| NC_037649.1 | 320759 | SNV | 1 | A | G | Homozygous   |
| NC_037649.1 | 322428 | SNV | 1 | G | A | Homozygous   |
| NC_037649.1 | 322431 | SNV | 1 | C | T | Homozygous   |
| NC_037649.1 | 322436 | SNV | 1 | A | C | Homozygous   |
| NC_037649.1 | 322438 | SNV | 1 | A | C | Heterozygous |
| NC_037649.1 | 322463 | SNV | 1 | A | T | Homozygous   |
| NC_037649.1 | 325984 | SNV | 1 | A | G | Homozygous   |
| NC_037649.1 | 326066 | SNV | 1 | C | G | Heterozygous |
| NC_037649.1 | 326081 | SNV | 1 | T | C | Homozygous   |
| NC_037649.1 | 326166 | SNV | 1 | T | C | Homozygous   |
| NC_037649.1 | 326200 | SNV | 1 | T | C | Homozygous   |
| NC_037649.1 | 326207 | SNV | 1 | A | G | Homozygous   |

|             |        |     |   |   |   |              |
|-------------|--------|-----|---|---|---|--------------|
| NC_037649.1 | 326266 | SNV | 1 | G | A | Homozygous   |
| NC_037649.1 | 326281 | SNV | 1 | G | A | Homozygous   |
| NC_037649.1 | 328692 | SNV | 1 | T | C | Heterozygous |
| NC_037649.1 | 328703 | SNV | 1 | T | C | Heterozygous |
| NC_037649.1 | 328707 | SNV | 1 | T | C | Heterozygous |
| NC_037649.1 | 328713 | SNV | 1 | C | T | Heterozygous |
| NC_037649.1 | 328720 | SNV | 1 | C | T | Heterozygous |
| NC_037649.1 | 340697 | SNV | 1 | C | T | Homozygous   |
| NC_037649.1 | 340717 | SNV | 1 | T | C | Heterozygous |
| NC_037649.1 | 340720 | SNV | 1 | C | T | Heterozygous |
| NC_037649.1 | 340728 | SNV | 1 | C | T | Heterozygous |
| NC_037649.1 | 340736 | SNV | 1 | C | T | Heterozygous |
| NC_037649.1 | 340738 | SNV | 1 | C | T | Heterozygous |
| NC_037649.1 | 340740 | SNV | 1 | C | T | Heterozygous |
| NC_037649.1 | 340744 | SNV | 1 | C | T | Heterozygous |
| NC_037649.1 | 340747 | SNV | 1 | T | A | Heterozygous |
| NC_037649.1 | 340749 | SNV | 1 | T | A | Heterozygous |
| NC_037649.1 | 340752 | SNV | 1 | C | T | Heterozygous |
| NC_037649.1 | 345382 | SNV | 1 | T | C | Heterozygous |
| NC_037649.1 | 345384 | SNV | 1 | A | T | Homozygous   |
| NC_037649.1 | 345390 | SNV | 1 | T | C | Homozygous   |
| NC_037649.1 | 345402 | SNV | 1 | A | T | Homozygous   |
| NC_037649.1 | 355047 | SNV | 1 | T | C | Homozygous   |
| NC_037649.1 | 355057 | SNV | 1 | G | A | Homozygous   |
| NC_037649.1 | 355064 | SNV | 1 | A | T | Homozygous   |
| NC_037649.1 | 355069 | SNV | 1 | G | T | Homozygous   |
| NC_037649.1 | 355137 | SNV | 1 | T | A | Homozygous   |
| NC_037649.1 | 355140 | SNV | 1 | G | A | Homozygous   |
| NC_037649.1 | 355143 | SNV | 1 | A | T | Homozygous   |
| NC_037649.1 | 355149 | SNV | 1 | A | T | Homozygous   |
| NC_037649.1 | 355158 | SNV | 1 | T | A | Homozygous   |
| NC_037649.1 | 355167 | SNV | 1 | A | T | Homozygous   |
| NC_037649.1 | 360404 | SNV | 1 | G | A | Homozygous   |
| NC_037649.1 | 360447 | SNV | 1 | A | G | Homozygous   |
| NC_037649.1 | 360664 | SNV | 1 | G | T | Heterozygous |
| NC_037649.1 | 360810 | SNV | 1 | T | C | Homozygous   |
| NC_037649.1 | 361038 | SNV | 1 | A | G | Homozygous   |
| NC_037649.1 | 361041 | SNV | 1 | G | A | Homozygous   |
| NC_037649.1 | 361278 | SNV | 1 | A | T | Homozygous   |
| NC_037649.1 | 361357 | SNV | 1 | A | G | Homozygous   |
| NC_037649.1 | 361390 | SNV | 1 | A | G | Heterozygous |
| NC_037649.1 | 361456 | SNV | 1 | A | T | Heterozygous |
| NC_037649.1 | 361474 | SNV | 1 | G | C | Homozygous   |
| NC_037649.1 | 361697 | SNV | 1 | G | A | Heterozygous |
| NC_037649.1 | 361826 | SNV | 1 | T | A | Homozygous   |
| NC_037649.1 | 379498 | SNV | 1 | A | G | Homozygous   |
| NC_037649.1 | 379501 | SNV | 1 | C | G | Heterozygous |
| NC_037649.1 | 379776 | SNV | 1 | G | T | Heterozygous |
| NC_037649.1 | 379786 | SNV | 1 | G | A | Heterozygous |
| NC_037649.1 | 379790 | SNV | 1 | G | A | Heterozygous |
| NC_037649.1 | 379976 | SNV | 1 | G | C | Homozygous   |

|             |        |     |   |   |   |              |
|-------------|--------|-----|---|---|---|--------------|
| NC_037649.1 | 380096 | SNV | 1 | A | G | Homozygous   |
| NC_037649.1 | 380102 | SNV | 1 | A | G | Homozygous   |
| NC_037649.1 | 385014 | SNV | 1 | A | G | Heterozygous |
| NC_037649.1 | 385032 | SNV | 1 | C | T | Heterozygous |
| NC_037649.1 | 392705 | SNV | 1 | A | C | Homozygous   |
| NC_037649.1 | 392708 | SNV | 1 | C | T | Homozygous   |
| NC_037649.1 | 392913 | SNV | 1 | A | G | Homozygous   |
| NC_037649.1 | 392964 | SNV | 1 | T | C | Homozygous   |
| NC_037649.1 | 393026 | SNV | 1 | C | T | Heterozygous |
| NC_037649.1 | 393064 | SNV | 1 | A | C | Homozygous   |
| NC_037649.1 | 393286 | SNV | 1 | A | G | Heterozygous |
| NC_037649.1 | 393635 | SNV | 1 | T | C | Homozygous   |
| NC_037649.1 | 395469 | SNV | 1 | G | A | Homozygous   |
| NC_037649.1 | 424111 | SNV | 1 | T | A | Heterozygous |
| NC_037649.1 | 424145 | SNV | 1 | C | T | Homozygous   |
| NC_037649.1 | 424148 | SNV | 1 | C | T | Heterozygous |
| NC_037649.1 | 431943 | SNV | 1 | G | A | Homozygous   |
| NC_037649.1 | 434742 | SNV | 1 | A | G | Homozygous   |
| NC_037649.1 | 438282 | SNV | 1 | T | C | Heterozygous |
| NC_037649.1 | 438394 | SNV | 1 | G | A | Heterozygous |
| NC_037649.1 | 438466 | SNV | 1 | A | G | Heterozygous |
| NC_037649.1 | 438475 | SNV | 1 | A | G | Homozygous   |
| NC_037649.1 | 438780 | SNV | 1 | A | C | Heterozygous |
| NC_037649.1 | 438785 | SNV | 1 | T | C | Homozygous   |
| NC_037649.1 | 438792 | SNV | 1 | T | G | Homozygous   |
| NC_037649.1 | 440901 | SNV | 1 | T | G | Homozygous   |
| NC_037649.1 | 441118 | SNV | 1 | C | T | Heterozygous |
| NC_037649.1 | 441468 | SNV | 1 | C | A | Heterozygous |
| NC_037649.1 | 441470 | SNV | 1 | T | C | Homozygous   |
| NC_037649.1 | 441475 | SNV | 1 | A | C | Homozygous   |
| NC_037649.1 | 441657 | SNV | 1 | C | G | Heterozygous |
| NC_037649.1 | 442056 | SNV | 1 | T | C | Homozygous   |
| NC_037649.1 | 442113 | SNV | 1 | G | A | Heterozygous |
| NC_037649.1 | 455158 | SNV | 1 | A | C | Homozygous   |
| NC_037649.1 | 455189 | SNV | 1 | C | T | Homozygous   |
| NC_037649.1 | 463053 | SNV | 1 | T | A | Homozygous   |
| NC_037649.1 | 463055 | SNV | 1 | C | T | Homozygous   |
| NC_037649.1 | 463062 | SNV | 1 | T | C | Homozygous   |
| NC_037649.1 | 475325 | SNV | 1 | C | A | Homozygous   |
| NC_037649.1 | 502073 | SNV | 1 | T | C | Heterozygous |
| NC_037649.1 | 502080 | SNV | 1 | G | A | Heterozygous |
| NC_037649.1 | 502095 | SNV | 1 | T | C | Homozygous   |
| NC_037649.1 | 502130 | SNV | 1 | A | G | Heterozygous |
| NC_037649.1 | 502265 | SNV | 1 | T | A | Heterozygous |
| NC_037649.1 | 502452 | SNV | 1 | G | A | Homozygous   |
| NC_037649.1 | 502666 | SNV | 1 | G | A | Homozygous   |
| NC_037649.1 | 517039 | SNV | 1 | T | C | Heterozygous |
| NC_037649.1 | 517244 | SNV | 1 | A | G | Homozygous   |
| NC_037649.1 | 517464 | SNV | 1 | A | G | Heterozygous |
| NC_037649.1 | 517511 | SNV | 1 | T | C | Homozygous   |
| NC_037649.1 | 518221 | SNV | 1 | A | G | Homozygous   |

|             |        |     |   |   |   |              |
|-------------|--------|-----|---|---|---|--------------|
| NC_037649.1 | 518223 | SNV | 1 | A | G | Heterozygous |
| NC_037649.1 | 518245 | SNV | 1 | A | G | Heterozygous |
| NC_037649.1 | 519005 | SNV | 1 | T | C | Homozygous   |
| NC_037649.1 | 519049 | SNV | 1 | G | A | Homozygous   |
| NC_037649.1 | 519159 | SNV | 1 | G | A | Homozygous   |
| NC_037649.1 | 519161 | SNV | 1 | A | G | Homozygous   |
| NC_037649.1 | 520093 | SNV | 1 | A | T | Homozygous   |
| NC_037649.1 | 520128 | SNV | 1 | A | G | Heterozygous |
| NC_037649.1 | 520355 | SNV | 1 | C | G | Heterozygous |
| NC_037649.1 | 529994 | SNV | 1 | T | C | Homozygous   |
| NC_037649.1 | 530017 | SNV | 1 | G | T | Heterozygous |
| NC_037649.1 | 530040 | SNV | 1 | A | G | Homozygous   |
| NC_037649.1 | 530062 | SNV | 1 | G | A | Homozygous   |
| NC_037649.1 | 532861 | SNV | 1 | C | A | Homozygous   |
| NC_037649.1 | 532873 | SNV | 1 | T | C | Homozygous   |
| NC_037649.1 | 532875 | SNV | 1 | T | C | Homozygous   |
| NC_037649.1 | 551697 | SNV | 1 | G | A | Homozygous   |
| NC_037649.1 | 551735 | SNV | 1 | T | A | Homozygous   |
| NC_037649.1 | 556997 | SNV | 1 | C | T | Homozygous   |
| NC_037649.1 | 557078 | SNV | 1 | T | A | Homozygous   |
| NC_037649.1 | 557115 | SNV | 1 | G | A | Homozygous   |
| NC_037649.1 | 557199 | SNV | 1 | T | C | Homozygous   |
| NC_037649.1 | 560255 | SNV | 1 | A | G | Homozygous   |
| NC_037649.1 | 560271 | SNV | 1 | C | G | Homozygous   |
| NC_037649.1 | 560326 | SNV | 1 | G | A | Homozygous   |
| NC_037649.1 | 563226 | SNV | 1 | G | A | Homozygous   |
| NC_037649.1 | 565648 | SNV | 1 | A | T | Homozygous   |
| NC_037649.1 | 565656 | SNV | 1 | T | C | Homozygous   |
| NC_037649.1 | 565658 | SNV | 1 | T | C | Homozygous   |
| NC_037649.1 | 565660 | SNV | 1 | T | C | Homozygous   |
| NC_037649.1 | 565665 | SNV | 1 | C | A | Homozygous   |
| NC_037649.1 | 571128 | SNV | 1 | G | A | Heterozygous |
| NC_037649.1 | 571205 | SNV | 1 | A | G | Homozygous   |
| NC_037649.1 | 571230 | SNV | 1 | G | A | Heterozygous |
| NC_037649.1 | 571279 | SNV | 1 | T | C | Heterozygous |
| NC_037649.1 | 571631 | SNV | 1 | C | T | Homozygous   |
| NC_037649.1 | 571846 | SNV | 1 | C | A | Heterozygous |
| NC_037649.1 | 571903 | SNV | 1 | T | A | Heterozygous |
| NC_037649.1 | 571981 | SNV | 1 | G | A | Heterozygous |
| NC_037649.1 | 574073 | SNV | 1 | A | G | Heterozygous |
| NC_037649.1 | 574075 | SNV | 1 | G | C | Heterozygous |
| NC_037649.1 | 574097 | SNV | 1 | T | C | Heterozygous |
| NC_037649.1 | 574105 | SNV | 1 | C | T | Heterozygous |
| NC_037649.1 | 574365 | SNV | 1 | T | C | Homozygous   |
| NC_037649.1 | 574388 | SNV | 1 | A | G | Heterozygous |
| NC_037649.1 | 574426 | SNV | 1 | G | A | Homozygous   |
| NC_037649.1 | 574804 | SNV | 1 | G | A | Homozygous   |
| NC_037649.1 | 575396 | SNV | 1 | T | C | Homozygous   |
| NC_037649.1 | 575415 | SNV | 1 | G | A | Heterozygous |
| NC_037649.1 | 575421 | SNV | 1 | G | A | Heterozygous |
| NC_037649.1 | 575741 | SNV | 1 | G | A | Homozygous   |

|             |        |     |   |   |   |              |
|-------------|--------|-----|---|---|---|--------------|
| NC_037649.1 | 576060 | SNV | 1 | T | C | Homozygous   |
| NC_037649.1 | 576075 | SNV | 1 | C | T | Heterozygous |
| NC_037649.1 | 576521 | SNV | 1 | G | T | Homozygous   |
| NC_037649.1 | 653286 | SNV | 1 | A | C | Homozygous   |
| NC_037649.1 | 711061 | SNV | 1 | T | C | Homozygous   |
| NC_037649.1 | 711194 | SNV | 1 | G | A | Homozygous   |
| NC_037649.1 | 711201 | SNV | 1 | T | C | Homozygous   |
| NC_037649.1 | 732354 | SNV | 1 | C | G | Homozygous   |
| NC_037649.1 | 732371 | SNV | 1 | G | A | Homozygous   |
| NC_037649.1 | 732392 | SNV | 1 | T | C | Homozygous   |
| NC_037649.1 | 732491 | SNV | 1 | A | G | Homozygous   |
| NC_037649.1 | 734082 | SNV | 1 | C | T | Heterozygous |
| NC_037649.1 | 734088 | SNV | 1 | T | C | Heterozygous |
| NC_037649.1 | 734096 | SNV | 1 | C | T | Heterozygous |
| NC_037649.1 | 734098 | SNV | 1 | C | T | Heterozygous |
| NC_037649.1 | 734100 | SNV | 1 | C | T | Heterozygous |
| NC_037649.1 | 734102 | SNV | 1 | C | T | Heterozygous |
| NC_037649.1 | 734107 | SNV | 1 | T | G | Heterozygous |
| NC_037649.1 | 734114 | SNV | 1 | C | T | Heterozygous |
| NC_037649.1 | 734116 | SNV | 1 | C | T | Heterozygous |
| NC_037649.1 | 734120 | SNV | 1 | C | T | Homozygous   |
| NC_037649.1 | 734757 | SNV | 1 | G | A | Homozygous   |
| NC_037649.1 | 734761 | SNV | 1 | C | G | Homozygous   |
| NC_037649.1 | 734837 | SNV | 1 | G | A | Homozygous   |
| NC_037649.1 | 736808 | SNV | 1 | A | G | Homozygous   |
| NC_037649.1 | 736822 | SNV | 1 | C | G | Homozygous   |
| NC_037649.1 | 736825 | SNV | 1 | A | G | Homozygous   |
| NC_037649.1 | 736912 | SNV | 1 | C | A | Heterozygous |
| NC_037649.1 | 745704 | SNV | 1 | A | G | Homozygous   |
| NC_037649.1 | 745727 | SNV | 1 | G | A | Homozygous   |
| NC_037649.1 | 746009 | SNV | 1 | A | G | Heterozygous |
| NC_037649.1 | 746172 | SNV | 1 | A | G | Homozygous   |
| NC_037649.1 | 746192 | SNV | 1 | A | G | Homozygous   |
| NC_037649.1 | 746659 | SNV | 1 | C | T | Heterozygous |
| NC_037649.1 | 746738 | SNV | 1 | A | G | Homozygous   |
| NC_037649.1 | 746974 | SNV | 1 | G | A | Heterozygous |
| NC_037649.1 | 746980 | SNV | 1 | A | G | Heterozygous |
| NC_037649.1 | 746982 | SNV | 1 | G | T | Heterozygous |
| NC_037649.1 | 747079 | SNV | 1 | A | G | Homozygous   |
| NC_037649.1 | 747500 | SNV | 1 | C | T | Heterozygous |
| NC_037649.1 | 747594 | SNV | 1 | A | G | Heterozygous |
| NC_037649.1 | 761281 | SNV | 1 | C | T | Heterozygous |
| NC_037649.1 | 761706 | SNV | 1 | A | G | Homozygous   |
| NC_037649.1 | 761782 | SNV | 1 | C | T | Heterozygous |
| NC_037649.1 | 762002 | SNV | 1 | A | G | Heterozygous |
| NC_037649.1 | 762113 | SNV | 1 | A | G | Heterozygous |
| NC_037649.1 | 762130 | SNV | 1 | C | T | Heterozygous |
| NC_037649.1 | 764204 | SNV | 1 | G | A | Homozygous   |
| NC_037649.1 | 764369 | SNV | 1 | A | G | Homozygous   |
| NC_037649.1 | 764383 | SNV | 1 | T | C | Homozygous   |
| NC_037649.1 | 764424 | SNV | 1 | T | A | Homozygous   |



|             |        |     |   |   |   |              |
|-------------|--------|-----|---|---|---|--------------|
| NC_037649.1 | 770114 | SNV | 1 | G | A | Homozygous   |
| NC_037649.1 | 770213 | SNV | 1 | C | T | Heterozygous |
| NC_037649.1 | 770242 | SNV | 1 | C | A | Homozygous   |
| NC_037649.1 | 770428 | SNV | 1 | A | T | Homozygous   |
| NC_037649.1 | 770497 | SNV | 1 | G | C | Homozygous   |
| NC_037649.1 | 773094 | SNV | 1 | T | A | Heterozygous |
| NC_037649.1 | 773377 | SNV | 1 | T | C | Homozygous   |
| NC_037649.1 | 773550 | SNV | 1 | A | T | Heterozygous |
| NC_037649.1 | 773596 | SNV | 1 | G | C | Homozygous   |
| NC_037649.1 | 773636 | SNV | 1 | A | G | Homozygous   |
| NC_037649.1 | 773890 | SNV | 1 | C | T | Homozygous   |
| NC_037649.1 | 774090 | SNV | 1 | G | A | Heterozygous |
| NC_037649.1 | 774299 | SNV | 1 | C | T | Homozygous   |
| NC_037649.1 | 774325 | SNV | 1 | A | G | Homozygous   |
| NC_037649.1 | 774385 | SNV | 1 | A | T | Homozygous   |
| NC_037649.1 | 774689 | SNV | 1 | C | T | Homozygous   |
| NC_037649.1 | 774780 | SNV | 1 | C | T | Homozygous   |
| NC_037649.1 | 774783 | SNV | 1 | G | A | Homozygous   |
| NC_037649.1 | 774806 | SNV | 1 | T | C | Heterozygous |
| NC_037649.1 | 774842 | SNV | 1 | G | C | Heterozygous |
| NC_037649.1 | 774982 | SNV | 1 | A | G | Homozygous   |
| NC_037649.1 | 776484 | SNV | 1 | A | T | Homozygous   |
| NC_037649.1 | 776500 | SNV | 1 | C | T | Heterozygous |
| NC_037649.1 | 776522 | SNV | 1 | C | T | Homozygous   |
| NC_037649.1 | 776548 | SNV | 1 | T | C | Homozygous   |
| NC_037649.1 | 776587 | SNV | 1 | A | G | Homozygous   |
| NC_037649.1 | 776658 | SNV | 1 | T | C | Heterozygous |
| NC_037649.1 | 777007 | SNV | 1 | A | G | Homozygous   |
| NC_037649.1 | 777044 | SNV | 1 | G | A | Heterozygous |
| NC_037649.1 | 777046 | SNV | 1 | A | G | Homozygous   |
| NC_037649.1 | 777068 | SNV | 1 | C | T | Heterozygous |
| NC_037649.1 | 777080 | SNV | 1 | G | A | Heterozygous |
| NC_037649.1 | 777083 | SNV | 1 | T | G | Heterozygous |
| NC_037649.1 | 777089 | SNV | 1 | G | A | Heterozygous |
| NC_037649.1 | 777634 | SNV | 1 | A | G | Homozygous   |
| NC_037649.1 | 777674 | SNV | 1 | T | A | Heterozygous |
| NC_037649.1 | 777676 | SNV | 1 | T | A | Heterozygous |
| NC_037649.1 | 777724 | SNV | 1 | A | G | Homozygous   |
| NC_037649.1 | 777743 | SNV | 1 | A | G | Homozygous   |
| NC_037649.1 | 777872 | SNV | 1 | C | A | Homozygous   |
| NC_037649.1 | 778064 | SNV | 1 | C | A | Homozygous   |
| NC_037649.1 | 778256 | SNV | 1 | G | C | Heterozygous |
| NC_037649.1 | 778445 | SNV | 1 | C | T | Homozygous   |
| NC_037649.1 | 778477 | SNV | 1 | G | A | Heterozygous |
| NC_037649.1 | 778483 | SNV | 1 | G | A | Heterozygous |
| NC_037649.1 | 778544 | SNV | 1 | C | A | Heterozygous |
| NC_037649.1 | 778548 | SNV | 1 | C | T | Homozygous   |
| NC_037649.1 | 778567 | SNV | 1 | A | G | Homozygous   |
| NC_037649.1 | 778570 | SNV | 1 | A | G | Heterozygous |
| NC_037649.1 | 778613 | SNV | 1 | G | C | Heterozygous |
| NC_037649.1 | 779322 | SNV | 1 | T | C | Heterozygous |

|             |        |     |   |   |   |              |
|-------------|--------|-----|---|---|---|--------------|
| NC_037649.1 | 779401 | SNV | 1 | A | G | Homozygous   |
| NC_037649.1 | 779415 | SNV | 1 | T | C | Homozygous   |
| NC_037649.1 | 779426 | SNV | 1 | G | C | Homozygous   |
| NC_037649.1 | 779439 | SNV | 1 | A | G | Homozygous   |
| NC_037649.1 | 779516 | SNV | 1 | T | A | Homozygous   |
| NC_037649.1 | 779650 | SNV | 1 | A | G | Homozygous   |
| NC_037649.1 | 779741 | SNV | 1 | C | T | Heterozygous |
| NC_037649.1 | 779779 | SNV | 1 | A | T | Heterozygous |
| NC_037649.1 | 779788 | SNV | 1 | T | C | Homozygous   |
| NC_037649.1 | 779882 | SNV | 1 | A | G | Heterozygous |
| NC_037649.1 | 779916 | SNV | 1 | C | T | Homozygous   |
| NC_037649.1 | 779977 | SNV | 1 | A | C | Heterozygous |
| NC_037649.1 | 779982 | SNV | 1 | G | A | Heterozygous |
| NC_037649.1 | 780028 | SNV | 1 | C | T | Heterozygous |
| NC_037649.1 | 780050 | SNV | 1 | G | A | Heterozygous |
| NC_037649.1 | 780055 | SNV | 1 | T | C | Homozygous   |
| NC_037649.1 | 780073 | SNV | 1 | G | T | Heterozygous |
| NC_037649.1 | 780091 | SNV | 1 | T | C | Homozygous   |
| NC_037649.1 | 780113 | SNV | 1 | T | C | Homozygous   |
| NC_037649.1 | 780162 | SNV | 1 | T | G | Homozygous   |
| NC_037649.1 | 780333 | SNV | 1 | A | C | Homozygous   |
| NC_037649.1 | 780344 | SNV | 1 | C | G | Homozygous   |
| NC_037649.1 | 780352 | SNV | 1 | G | A | Homozygous   |
| NC_037649.1 | 780389 | SNV | 1 | C | T | Heterozygous |
| NC_037649.1 | 780692 | SNV | 1 | T | C | Homozygous   |
| NC_037649.1 | 780710 | SNV | 1 | C | T | Homozygous   |
| NC_037649.1 | 780723 | SNV | 1 | T | C | Homozygous   |
| NC_037649.1 | 780732 | SNV | 1 | G | A | Heterozygous |
| NC_037649.1 | 780778 | SNV | 1 | C | T | Heterozygous |
| NC_037649.1 | 780808 | SNV | 1 | T | C | Heterozygous |
| NC_037649.1 | 780874 | SNV | 1 | A | G | Homozygous   |
| NC_037649.1 | 780897 | SNV | 1 | C | T | Heterozygous |
| NC_037649.1 | 781002 | SNV | 1 | G | A | Heterozygous |
| NC_037649.1 | 781222 | SNV | 1 | G | T | Homozygous   |
| NC_037649.1 | 800362 | SNV | 1 | C | T | Homozygous   |
| NC_037649.1 | 825359 | SNV | 1 | C | G | Homozygous   |
| NC_037649.1 | 825366 | SNV | 1 | T | G | Homozygous   |
| NC_037649.1 | 826363 | SNV | 1 | G | A | Homozygous   |
| NC_037649.1 | 844917 | SNV | 1 | A | C | Homozygous   |
| NC_037649.1 | 845209 | SNV | 1 | C | T | Homozygous   |
| NC_037649.1 | 845292 | SNV | 1 | A | G | Heterozygous |
| NC_037649.1 | 849132 | SNV | 1 | A | C | Homozygous   |
| NC_037649.1 | 849170 | SNV | 1 | A | T | Homozygous   |
| NC_037649.1 | 849174 | SNV | 1 | C | A | Homozygous   |
| NC_037649.1 | 849178 | SNV | 1 | C | T | Heterozygous |
| NC_037649.1 | 866646 | SNV | 1 | G | C | Homozygous   |
| NC_037649.1 | 866669 | SNV | 1 | A | T | Homozygous   |
| NC_037649.1 | 866671 | SNV | 1 | A | C | Homozygous   |
| NC_037649.1 | 866675 | SNV | 1 | A | G | Homozygous   |
| NC_037649.1 | 883368 | SNV | 1 | G | A | Homozygous   |
| NC_037649.1 | 883379 | SNV | 1 | G | A | Homozygous   |

|             |        |     |   |   |   |              |
|-------------|--------|-----|---|---|---|--------------|
| NC_037649.1 | 883536 | SNV | 1 | A | G | Homozygous   |
| NC_037649.1 | 884342 | SNV | 1 | G | A | Heterozygous |
| NC_037649.1 | 885096 | SNV | 1 | G | A | Heterozygous |
| NC_037649.1 | 885108 | SNV | 1 | A | G | Homozygous   |
| NC_037649.1 | 897577 | SNV | 1 | A | G | Heterozygous |
| NC_037649.1 | 897708 | SNV | 1 | A | G | Homozygous   |
| NC_037649.1 | 897711 | SNV | 1 | A | T | Homozygous   |
| NC_037649.1 | 897714 | SNV | 1 | T | G | Homozygous   |
| NC_037649.1 | 897720 | SNV | 1 | A | T | Homozygous   |
| NC_037649.1 | 897735 | SNV | 1 | A | T | Homozygous   |
| NC_037649.1 | 897741 | SNV | 1 | T | C | Homozygous   |
| NC_037649.1 | 897744 | SNV | 1 | T | A | Homozygous   |
| NC_037649.1 | 897747 | SNV | 1 | T | A | Homozygous   |
| NC_037649.1 | 897753 | SNV | 1 | T | G | Homozygous   |
| NC_037649.1 | 899671 | SNV | 1 | G | T | Heterozygous |
| NC_037649.1 | 900275 | SNV | 1 | T | A | Heterozygous |
| NC_037649.1 | 900579 | SNV | 1 | T | C | Homozygous   |
| NC_037649.1 | 901696 | SNV | 1 | T | C | Heterozygous |
| NC_037649.1 | 901761 | SNV | 1 | A | T | Heterozygous |
| NC_037649.1 | 901958 | SNV | 1 | C | T | Heterozygous |
| NC_037649.1 | 901965 | SNV | 1 | A | T | Homozygous   |
| NC_037649.1 | 906998 | SNV | 1 | A | C | Heterozygous |
| NC_037649.1 | 907194 | SNV | 1 | A | T | Heterozygous |
| NC_037649.1 | 907229 | SNV | 1 | A | G | Homozygous   |
| NC_037649.1 | 907760 | SNV | 1 | T | C | Heterozygous |
| NC_037649.1 | 907777 | SNV | 1 | T | C | Heterozygous |
| NC_037649.1 | 907788 | SNV | 1 | T | C | Heterozygous |
| NC_037649.1 | 907790 | SNV | 1 | T | C | Heterozygous |
| NC_037649.1 | 909350 | SNV | 1 | C | A | Homozygous   |
| NC_037649.1 | 910895 | SNV | 1 | A | C | Heterozygous |
| NC_037649.1 | 910897 | SNV | 1 | G | T | Heterozygous |
| NC_037649.1 | 910901 | SNV | 1 | T | A | Heterozygous |
| NC_037649.1 | 910906 | SNV | 1 | T | G | Heterozygous |
| NC_037649.1 | 910913 | SNV | 1 | A | G | Heterozygous |
| NC_037649.1 | 910917 | SNV | 1 | A | T | Heterozygous |
| NC_037649.1 | 910922 | SNV | 1 | A | G | Heterozygous |
| NC_037649.1 | 910940 | SNV | 1 | T | C | Homozygous   |
| NC_037649.1 | 911579 | SNV | 1 | T | C | Homozygous   |
| NC_037649.1 | 913584 | SNV | 1 | T | C | Homozygous   |
| NC_037649.1 | 913637 | SNV | 1 | T | A | Homozygous   |
| NC_037649.1 | 914998 | SNV | 1 | T | A | Heterozygous |
| NC_037649.1 | 915184 | SNV | 1 | G | A | Heterozygous |
| NC_037649.1 | 915355 | SNV | 1 | A | C | Homozygous   |
| NC_037649.1 | 915930 | SNV | 1 | T | A | Homozygous   |
| NC_037649.1 | 915988 | SNV | 1 | T | A | Heterozygous |
| NC_037649.1 | 915993 | SNV | 1 | C | A | Heterozygous |
| NC_037649.1 | 917107 | SNV | 1 | A | T | Homozygous   |
| NC_037649.1 | 917109 | SNV | 1 | G | T | Homozygous   |
| NC_037649.1 | 917112 | SNV | 1 | A | G | Homozygous   |
| NC_037649.1 | 917114 | SNV | 1 | A | T | Homozygous   |
| NC_037649.1 | 917126 | SNV | 1 | G | T | Homozygous   |

|             |        |     |   |   |   |              |
|-------------|--------|-----|---|---|---|--------------|
| NC_037649.1 | 920666 | SNV | 1 | G | A | Heterozygous |
| NC_037649.1 | 921881 | SNV | 1 | C | A | Homozygous   |
| NC_037649.1 | 925062 | SNV | 1 | T | A | Homozygous   |
| NC_037649.1 | 925083 | SNV | 1 | A | T | Homozygous   |
| NC_037649.1 | 925086 | SNV | 1 | A | T | Homozygous   |
| NC_037649.1 | 925089 | SNV | 1 | T | C | Homozygous   |
| NC_037649.1 | 925096 | SNV | 1 | T | C | Homozygous   |
| NC_037649.1 | 925100 | SNV | 1 | A | T | Homozygous   |
| NC_037649.1 | 925104 | SNV | 1 | T | A | Homozygous   |
| NC_037649.1 | 928345 | SNV | 1 | C | T | Homozygous   |
| NC_037649.1 | 928444 | SNV | 1 | A | C | Homozygous   |
| NC_037649.1 | 928624 | SNV | 1 | G | A | Homozygous   |
| NC_037649.1 | 928627 | SNV | 1 | T | A | Homozygous   |
| NC_037649.1 | 928967 | SNV | 1 | G | A | Homozygous   |
| NC_037649.1 | 929168 | SNV | 1 | G | A | Homozygous   |
| NC_037649.1 | 931702 | SNV | 1 | G | C | Homozygous   |
| NC_037649.1 | 931714 | SNV | 1 | A | G | Homozygous   |
| NC_037649.1 | 931769 | SNV | 1 | A | G | Homozygous   |
| NC_037649.1 | 931862 | SNV | 1 | C | T | Homozygous   |
| NC_037649.1 | 931868 | SNV | 1 | T | C | Homozygous   |
| NC_037649.1 | 931883 | SNV | 1 | A | G | Heterozygous |
| NC_037649.1 | 931944 | SNV | 1 | C | T | Heterozygous |
| NC_037649.1 | 931986 | SNV | 1 | C | T | Heterozygous |
| NC_037649.1 | 932393 | SNV | 1 | G | A | Heterozygous |
| NC_037649.1 | 933355 | SNV | 1 | G | A | Homozygous   |
| NC_037649.1 | 933373 | SNV | 1 | C | T | Homozygous   |
| NC_037649.1 | 933625 | SNV | 1 | C | G | Homozygous   |
| NC_037649.1 | 933705 | SNV | 1 | G | A | Homozygous   |
| NC_037649.1 | 934498 | SNV | 1 | C | T | Heterozygous |
| NC_037649.1 | 934562 | SNV | 1 | T | A | Heterozygous |
| NC_037649.1 | 934638 | SNV | 1 | C | T | Homozygous   |
| NC_037649.1 | 934645 | SNV | 1 | G | A | Heterozygous |
| NC_037649.1 | 934729 | SNV | 1 | T | G | Homozygous   |
| NC_037649.1 | 956908 | SNV | 1 | G | T | Homozygous   |
| NC_037649.1 | 956919 | SNV | 1 | A | C | Homozygous   |
| NC_037649.1 | 956923 | SNV | 1 | A | T | Heterozygous |
| NC_037649.1 | 965575 | SNV | 1 | A | G | Heterozygous |
| NC_037649.1 | 965579 | SNV | 1 | A | G | Heterozygous |
| NC_037649.1 | 965581 | SNV | 1 | A | G | Heterozygous |
| NC_037649.1 | 965582 | SNV | 1 | G | A | Heterozygous |
| NC_037649.1 | 965585 | SNV | 1 | G | C | Heterozygous |
| NC_037649.1 | 965588 | SNV | 1 | G | A | Heterozygous |
| NC_037649.1 | 965590 | SNV | 1 | A | G | Heterozygous |
| NC_037649.1 | 965591 | SNV | 1 | A | C | Heterozygous |
| NC_037649.1 | 965594 | SNV | 1 | G | A | Heterozygous |
| NC_037649.1 | 965594 | SNV | 1 | G | C | Heterozygous |
| NC_037649.1 | 965597 | SNV | 1 | G | C | Heterozygous |
| NC_037649.1 | 965603 | SNV | 1 | G | A | Homozygous   |
| NC_037649.1 | 973576 | SNV | 1 | C | A | Homozygous   |
| NC_037649.1 | 988289 | SNV | 1 | T | C | Homozygous   |
| NC_037649.1 | 988569 | SNV | 1 | T | C | Heterozygous |

|             |         |     |   |   |   |              |
|-------------|---------|-----|---|---|---|--------------|
| NC_037649.1 | 988591  | SNV | 1 | A | T | Heterozygous |
| NC_037649.1 | 988593  | SNV | 1 | T | A | Heterozygous |
| NC_037649.1 | 988597  | SNV | 1 | T | A | Heterozygous |
| NC_037649.1 | 988612  | SNV | 1 | T | G | Heterozygous |
| NC_037649.1 | 988709  | SNV | 1 | C | T | Heterozygous |
| NC_037649.1 | 988820  | SNV | 1 | T | C | Homozygous   |
| NC_037649.1 | 988965  | SNV | 1 | T | C | Homozygous   |
| NC_037649.1 | 989005  | SNV | 1 | T | C | Homozygous   |
| NC_037649.1 | 989036  | SNV | 1 | G | A | Heterozygous |
| NC_037649.1 | 992291  | SNV | 1 | G | A | Homozygous   |
| NC_037649.1 | 992390  | SNV | 1 | A | G | Homozygous   |
| NC_037649.1 | 992524  | SNV | 1 | T | C | Homozygous   |
| NC_037649.1 | 992809  | SNV | 1 | A | G | Homozygous   |
| NC_037649.1 | 993178  | SNV | 1 | T | C | Heterozygous |
| NC_037649.1 | 993339  | SNV | 1 | T | C | Homozygous   |
| NC_037649.1 | 993482  | SNV | 1 | T | C | Homozygous   |
| NC_037649.1 | 993485  | SNV | 1 | G | A | Heterozygous |
| NC_037649.1 | 993493  | SNV | 1 | T | A | Heterozygous |
| NC_037649.1 | 993495  | SNV | 1 | C | A | Heterozygous |
| NC_037649.1 | 993602  | SNV | 1 | T | C | Homozygous   |
| NC_037649.1 | 995500  | SNV | 1 | A | G | Homozygous   |
| NC_037649.1 | 995504  | SNV | 1 | G | A | Homozygous   |
| NC_037649.1 | 995675  | SNV | 1 | A | G | Heterozygous |
| NC_037649.1 | 995730  | SNV | 1 | C | A | Homozygous   |
| NC_037649.1 | 995773  | SNV | 1 | A | G | Homozygous   |
| NC_037649.1 | 995844  | SNV | 1 | G | C | Homozygous   |
| NC_037649.1 | 996079  | SNV | 1 | A | G | Homozygous   |
| NC_037649.1 | 996393  | SNV | 1 | G | A | Heterozygous |
| NC_037649.1 | 996476  | SNV | 1 | A | G | Heterozygous |
| NC_037649.1 | 996802  | SNV | 1 | C | T | Homozygous   |
| NC_037649.1 | 997099  | SNV | 1 | A | G | Homozygous   |
| NC_037649.1 | 998511  | SNV | 1 | T | C | Heterozygous |
| NC_037649.1 | 998626  | SNV | 1 | C | T | Heterozygous |
| NC_037649.1 | 998631  | SNV | 1 | G | A | Homozygous   |
| NC_037649.1 | 998636  | SNV | 1 | A | G | Homozygous   |
| NC_037649.1 | 998682  | SNV | 1 | C | T | Heterozygous |
| NC_037649.1 | 998917  | SNV | 1 | C | T | Homozygous   |
| NC_037649.1 | 998936  | SNV | 1 | G | A | Heterozygous |
| NC_037649.1 | 999082  | SNV | 1 | G | A | Homozygous   |
| NC_037649.1 | 1000172 | SNV | 1 | T | G | Homozygous   |
| NC_037649.1 | 1000174 | SNV | 1 | A | C | Homozygous   |
| NC_037649.1 | 1001909 | SNV | 1 | G | T | Homozygous   |
| NC_037649.1 | 1002748 | SNV | 1 | T | C | Heterozygous |
| NC_037649.1 | 1003240 | SNV | 1 | C | G | Heterozygous |
| NC_037649.1 | 1003256 | SNV | 1 | A | G | Homozygous   |
| NC_037649.1 | 1003258 | SNV | 1 | C | G | Homozygous   |
| NC_037649.1 | 1003609 | SNV | 1 | T | C | Heterozygous |
| NC_037649.1 | 1003747 | SNV | 1 | T | C | Homozygous   |
| NC_037649.1 | 1003809 | SNV | 1 | T | C | Homozygous   |
| NC_037649.1 | 1004296 | SNV | 1 | G | A | Homozygous   |
| NC_037649.1 | 1004330 | SNV | 1 | T | C | Heterozygous |

|             |         |     |   |   |   |              |
|-------------|---------|-----|---|---|---|--------------|
| NC_037649.1 | 1004383 | SNV | 1 | C | T | Heterozygous |
| NC_037649.1 | 1005182 | SNV | 1 | A | C | Heterozygous |
| NC_037649.1 | 1005183 | SNV | 1 | A | C | Heterozygous |
| NC_037649.1 | 1005291 | SNV | 1 | C | T | Heterozygous |
| NC_037649.1 | 1005372 | SNV | 1 | A | G | Heterozygous |
| NC_037649.1 | 1006134 | SNV | 1 | C | T | Heterozygous |
| NC_037649.1 | 1006209 | SNV | 1 | C | T | Homozygous   |
| NC_037649.1 | 1006270 | SNV | 1 | T | C | Homozygous   |
| NC_037649.1 | 1006299 | SNV | 1 | G | A | Heterozygous |
| NC_037649.1 | 1006776 | SNV | 1 | A | C | Homozygous   |
| NC_037649.1 | 1010488 | SNV | 1 | T | G | Homozygous   |
| NC_037649.1 | 1012072 | SNV | 1 | A | C | Homozygous   |
| NC_037649.1 | 1013009 | SNV | 1 | C | A | Heterozygous |
| NC_037649.1 | 1013011 | SNV | 1 | A | G | Heterozygous |
| NC_037649.1 | 1013041 | SNV | 1 | T | C | Heterozygous |
| NC_037649.1 | 1013046 | SNV | 1 | T | G | Homozygous   |
| NC_037649.1 | 1013077 | SNV | 1 | C | T | Homozygous   |
| NC_037649.1 | 1013090 | SNV | 1 | C | T | Homozygous   |
| NC_037649.1 | 1013101 | SNV | 1 | T | C | Heterozygous |
| NC_037649.1 | 1013106 | SNV | 1 | C | T | Heterozygous |
| NC_037649.1 | 1013107 | SNV | 1 | A | G | Heterozygous |
| NC_037649.1 | 1013851 | SNV | 1 | C | T | Heterozygous |
| NC_037649.1 | 1013874 | SNV | 1 | T | A | Heterozygous |
| NC_037649.1 | 1013880 | SNV | 1 | T | G | Heterozygous |
| NC_037649.1 | 1013883 | SNV | 1 | T | C | Homozygous   |
| NC_037649.1 | 1013887 | SNV | 1 | T | C | Homozygous   |
| NC_037649.1 | 1020524 | SNV | 1 | T | G | Homozygous   |
| NC_037649.1 | 1026040 | SNV | 1 | G | T | Homozygous   |
| NC_037649.1 | 1026042 | SNV | 1 | A | T | Homozygous   |
| NC_037649.1 | 1026050 | SNV | 1 | T | G | Homozygous   |
| NC_037649.1 | 1026746 | SNV | 1 | T | A | Homozygous   |
| NC_037649.1 | 1026751 | SNV | 1 | T | C | Homozygous   |
| NC_037649.1 | 1026754 | SNV | 1 | T | C | Homozygous   |
| NC_037649.1 | 1026766 | SNV | 1 | C | T | Homozygous   |
| NC_037649.1 | 1031521 | SNV | 1 | T | C | Homozygous   |
| NC_037649.1 | 1031553 | SNV | 1 | G | T | Heterozygous |
| NC_037649.1 | 1039351 | SNV | 1 | A | T | Heterozygous |
| NC_037649.1 | 1044299 | SNV | 1 | A | G | Homozygous   |
| NC_037649.1 | 1044311 | SNV | 1 | G | A | Heterozygous |
| NC_037649.1 | 1044351 | SNV | 1 | C | T | Homozygous   |
| NC_037649.1 | 1050675 | SNV | 1 | G | A | Homozygous   |
| NC_037649.1 | 1050836 | SNV | 1 | C | T | Homozygous   |
| NC_037649.1 | 1050838 | SNV | 1 | C | T | Homozygous   |
| NC_037649.1 | 1050898 | SNV | 1 | T | C | Homozygous   |
| NC_037649.1 | 1051059 | SNV | 1 | A | G | Homozygous   |
| NC_037649.1 | 1053734 | SNV | 1 | C | A | Homozygous   |
| NC_037649.1 | 1053771 | SNV | 1 | A | C | Homozygous   |
| NC_037649.1 | 1054045 | SNV | 1 | C | T | Heterozygous |
| NC_037649.1 | 1054049 | SNV | 1 | C | T | Heterozygous |
| NC_037649.1 | 1054063 | SNV | 1 | G | A | Heterozygous |
| NC_037649.1 | 1065417 | SNV | 1 | C | T | Homozygous   |

|             |         |     |   |   |   |              |
|-------------|---------|-----|---|---|---|--------------|
| NC_037649.1 | 1065434 | SNV | 1 | G | T | Homozygous   |
| NC_037649.1 | 1101340 | SNV | 1 | G | A | Homozygous   |
| NC_037649.1 | 1101348 | SNV | 1 | A | G | Homozygous   |
| NC_037649.1 | 1101385 | SNV | 1 | T | A | Heterozygous |
| NC_037649.1 | 1101392 | SNV | 1 | T | G | Homozygous   |
| NC_037649.1 | 1101399 | SNV | 1 | T | A | Homozygous   |
| NC_037649.1 | 1101405 | SNV | 1 | T | C | Homozygous   |
| NC_037649.1 | 1111776 | SNV | 1 | T | C | Homozygous   |
| NC_037649.1 | 1113232 | SNV | 1 | T | A | Homozygous   |
| NC_037649.1 | 1113242 | SNV | 1 | C | G | Homozygous   |
| NC_037649.1 | 1113376 | SNV | 1 | T | C | Homozygous   |
| NC_037649.1 | 1113851 | SNV | 1 | T | A | Heterozygous |
| NC_037649.1 | 1113989 | SNV | 1 | A | G | Heterozygous |
| NC_037649.1 | 1113993 | SNV | 1 | C | T | Heterozygous |
| NC_037649.1 | 1114711 | SNV | 1 | T | C | Heterozygous |
| NC_037649.1 | 1125788 | SNV | 1 | G | A | Homozygous   |
| NC_037649.1 | 1125802 | SNV | 1 | T | C | Homozygous   |
| NC_037649.1 | 1131613 | SNV | 1 | A | G | Heterozygous |
| NC_037649.1 | 1131621 | SNV | 1 | A | G | Heterozygous |
| NC_037649.1 | 1135082 | SNV | 1 | T | A | Homozygous   |
| NC_037649.1 | 1135122 | SNV | 1 | G | A | Homozygous   |
| NC_037649.1 | 1135132 | SNV | 1 | G | A | Homozygous   |
| NC_037649.1 | 1138958 | SNV | 1 | A | G | Homozygous   |
| NC_037649.1 | 1138982 | SNV | 1 | C | T | Homozygous   |
| NC_037649.1 | 1142617 | SNV | 1 | G | A | Heterozygous |
| NC_037649.1 | 1142639 | SNV | 1 | A | G | Homozygous   |
| NC_037649.1 | 1142655 | SNV | 1 | T | C | Heterozygous |
| NC_037649.1 | 1142795 | SNV | 1 | A | G | Heterozygous |
| NC_037649.1 | 1144346 | SNV | 1 | A | G | Homozygous   |
| NC_037649.1 | 1144349 | SNV | 1 | T | G | Homozygous   |
| NC_037649.1 | 1147000 | SNV | 1 | A | G | Homozygous   |
| NC_037649.1 | 1147029 | SNV | 1 | G | A | Heterozygous |
| NC_037649.1 | 1147656 | SNV | 1 | A | T | Homozygous   |
| NC_037649.1 | 1147658 | SNV | 1 | G | A | Homozygous   |
| NC_037649.1 | 1147664 | SNV | 1 | C | T | Homozygous   |
| NC_037649.1 | 1147666 | SNV | 1 | T | C | Homozygous   |
| NC_037649.1 | 1147674 | SNV | 1 | T | C | Homozygous   |
| NC_037649.1 | 1148022 | SNV | 1 | T | G | Homozygous   |
| NC_037649.1 | 1148027 | SNV | 1 | T | A | Homozygous   |
| NC_037649.1 | 1148030 | SNV | 1 | T | G | Homozygous   |
| NC_037649.1 | 1148032 | SNV | 1 | G | A | Homozygous   |
| NC_037649.1 | 1148453 | SNV | 1 | C | T | Heterozygous |
| NC_037649.1 | 1148516 | SNV | 1 | T | C | Homozygous   |
| NC_037649.1 | 1148992 | SNV | 1 | T | C | Homozygous   |
| NC_037649.1 | 1150470 | SNV | 1 | C | T | Heterozygous |
| NC_037649.1 | 1152820 | SNV | 1 | G | A | Heterozygous |
| NC_037649.1 | 1152831 | SNV | 1 | T | C | Homozygous   |
| NC_037649.1 | 1152935 | SNV | 1 | T | G | Heterozygous |
| NC_037649.1 | 1152981 | SNV | 1 | T | C | Homozygous   |
| NC_037649.1 | 1152998 | SNV | 1 | C | T | Homozygous   |
| NC_037649.1 | 1153048 | SNV | 1 | C | A | Heterozygous |

|             |         |     |   |   |   |              |
|-------------|---------|-----|---|---|---|--------------|
| NC_037649.1 | 1153065 | SNV | 1 | A | G | Homozygous   |
| NC_037649.1 | 1153067 | SNV | 1 | A | G | Homozygous   |
| NC_037649.1 | 1153499 | SNV | 1 | T | C | Heterozygous |
| NC_037649.1 | 1153584 | SNV | 1 | A | G | Heterozygous |
| NC_037649.1 | 1153641 | SNV | 1 | C | T | Heterozygous |
| NC_037649.1 | 1153861 | SNV | 1 | C | G | Homozygous   |
| NC_037649.1 | 1155872 | SNV | 1 | G | A | Homozygous   |
| NC_037649.1 | 1161970 | SNV | 1 | T | A | Homozygous   |
| NC_037649.1 | 1161976 | SNV | 1 | A | T | Homozygous   |
| NC_037649.1 | 1161988 | SNV | 1 | A | T | Heterozygous |
| NC_037649.1 | 1161991 | SNV | 1 | T | A | Heterozygous |
| NC_037649.1 | 1162009 | SNV | 1 | T | A | Homozygous   |
| NC_037649.1 | 1162030 | SNV | 1 | G | A | Homozygous   |
| NC_037649.1 | 1162040 | SNV | 1 | G | A | Heterozygous |
| NC_037649.1 | 1162042 | SNV | 1 | T | A | Heterozygous |
| NC_037649.1 | 1162075 | SNV | 1 | T | G | Homozygous   |
| NC_037649.1 | 1162081 | SNV | 1 | G | A | Homozygous   |
| NC_037649.1 | 1162096 | SNV | 1 | G | A | Homozygous   |
| NC_037649.1 | 1162102 | SNV | 1 | G | A | Homozygous   |
| NC_037649.1 | 1207422 | SNV | 1 | T | C | Homozygous   |
| NC_037649.1 | 1207548 | SNV | 1 | A | G | Heterozygous |
| NC_037649.1 | 1207550 | SNV | 1 | G | A | Heterozygous |
| NC_037649.1 | 1207557 | SNV | 1 | A | T | Homozygous   |
| NC_037649.1 | 1207581 | SNV | 1 | A | G | Homozygous   |
| NC_037649.1 | 1207589 | SNV | 1 | A | G | Homozygous   |
| NC_037649.1 | 1207593 | SNV | 1 | G | A | Heterozygous |
| NC_037649.1 | 1207614 | SNV | 1 | A | G | Heterozygous |
| NC_037649.1 | 1207635 | SNV | 1 | G | A | Homozygous   |
| NC_037649.1 | 1207730 | SNV | 1 | C | T | Homozygous   |
| NC_037649.1 | 1207733 | SNV | 1 | C | T | Homozygous   |
| NC_037649.1 | 1207737 | SNV | 1 | G | A | Heterozygous |
| NC_037649.1 | 1207741 | SNV | 1 | C | T | Heterozygous |
| NC_037649.1 | 1207806 | SNV | 1 | A | G | Homozygous   |
| NC_037649.1 | 1207930 | SNV | 1 | C | T | Homozygous   |
| NC_037649.1 | 1207953 | SNV | 1 | G | A | Homozygous   |
| NC_037649.1 | 1207959 | SNV | 1 | G | A | Heterozygous |
| NC_037649.1 | 1207982 | SNV | 1 | G | A | Heterozygous |
| NC_037649.1 | 1207996 | SNV | 1 | T | A | Homozygous   |
| NC_037649.1 | 1208001 | SNV | 1 | A | G | Heterozygous |
| NC_037649.1 | 1209514 | SNV | 1 | G | A | Heterozygous |
| NC_037649.1 | 1210312 | SNV | 1 | A | G | Homozygous   |
| NC_037649.1 | 1214277 | SNV | 1 | G | A | Homozygous   |
| NC_037649.1 | 1214280 | SNV | 1 | G | A | Homozygous   |
| NC_037649.1 | 1214285 | SNV | 1 | A | C | Heterozygous |
| NC_037649.1 | 1214324 | SNV | 1 | A | G | Heterozygous |
| NC_037649.1 | 1214326 | SNV | 1 | G | A | Heterozygous |
| NC_037649.1 | 1214330 | SNV | 1 | A | G | Heterozygous |
| NC_037649.1 | 1214338 | SNV | 1 | C | A | Homozygous   |
| NC_037649.1 | 1224866 | SNV | 1 | A | G | Heterozygous |
| NC_037649.1 | 1224907 | SNV | 1 | T | C | Heterozygous |
| NC_037649.1 | 1224921 | SNV | 1 | T | C | Homozygous   |



|             |         |     |   |   |   |              |
|-------------|---------|-----|---|---|---|--------------|
| NC_037649.1 | 1224923 | SNV | 1 | C | T | Homozygous   |
| NC_037649.1 | 1224975 | SNV | 1 | T | G | Heterozygous |
| NC_037649.1 | 1225228 | SNV | 1 | T | C | Homozygous   |
| NC_037649.1 | 1225484 | SNV | 1 | C | T | Homozygous   |
| NC_037649.1 | 1225502 | SNV | 1 | G | A | Heterozygous |
| NC_037649.1 | 1225506 | SNV | 1 | T | C | Homozygous   |
| NC_037649.1 | 1225539 | SNV | 1 | C | G | Heterozygous |
| NC_037649.1 | 1225835 | SNV | 1 | C | T | Heterozygous |
| NC_037649.1 | 1225868 | SNV | 1 | G | A | Heterozygous |
| NC_037649.1 | 1225872 | SNV | 1 | G | A | Homozygous   |
| NC_037649.1 | 1225898 | SNV | 1 | G | A | Homozygous   |
| NC_037649.1 | 1227133 | SNV | 1 | T | C | Homozygous   |
| NC_037649.1 | 1227152 | SNV | 1 | C | T | Heterozygous |
| NC_037649.1 | 1227188 | SNV | 1 | G | A | Homozygous   |
| NC_037649.1 | 1227220 | SNV | 1 | A | G | Homozygous   |
| NC_037649.1 | 1227360 | SNV | 1 | A | G | Homozygous   |
| NC_037649.1 | 1227375 | SNV | 1 | G | C | Heterozygous |
| NC_037649.1 | 1227391 | SNV | 1 | T | C | Heterozygous |
| NC_037649.1 | 1227462 | SNV | 1 | C | T | Homozygous   |
| NC_037649.1 | 1227530 | SNV | 1 | T | C | Homozygous   |
| NC_037649.1 | 1227533 | SNV | 1 | C | T | Heterozygous |
| NC_037649.1 | 1227682 | SNV | 1 | C | G | Homozygous   |
| NC_037649.1 | 1227684 | SNV | 1 | C | T | Homozygous   |
| NC_037649.1 | 1227790 | SNV | 1 | C | T | Homozygous   |
| NC_037649.1 | 1227838 | SNV | 1 | C | T | Heterozygous |
| NC_037649.1 | 1227855 | SNV | 1 | C | T | Heterozygous |
| NC_037649.1 | 1227902 | SNV | 1 | A | G | Heterozygous |
| NC_037649.1 | 1229677 | SNV | 1 | C | T | Heterozygous |
| NC_037649.1 | 1229686 | SNV | 1 | G | A | Heterozygous |
| NC_037649.1 | 1229724 | SNV | 1 | C | T | Homozygous   |
| NC_037649.1 | 1229798 | SNV | 1 | A | G | Homozygous   |
| NC_037649.1 | 1229818 | SNV | 1 | C | G | Homozygous   |
| NC_037649.1 | 1229929 | SNV | 1 | A | G | Heterozygous |
| NC_037649.1 | 1230286 | SNV | 1 | A | G | Homozygous   |
| NC_037649.1 | 1230356 | SNV | 1 | A | G | Homozygous   |
| NC_037649.1 | 1244739 | SNV | 1 | G | A | Homozygous   |
| NC_037649.1 | 1244749 | SNV | 1 | G | A | Homozygous   |
| NC_037649.1 | 1245253 | SNV | 1 | T | C | Homozygous   |
| NC_037649.1 | 1245556 | SNV | 1 | T | C | Homozygous   |
| NC_037649.1 | 1245787 | SNV | 1 | T | C | Homozygous   |
| NC_037649.1 | 1290902 | SNV | 1 | C | T | Homozygous   |
| NC_037649.1 | 1294882 | SNV | 1 | G | A | Homozygous   |
| NC_037649.1 | 1294885 | SNV | 1 | T | C | Homozygous   |
| NC_037649.1 | 1294898 | SNV | 1 | C | G | Heterozygous |
| NC_037649.1 | 1294906 | SNV | 1 | T | A | Homozygous   |
| NC_037649.1 | 1294912 | SNV | 1 | T | C | Homozygous   |
| NC_037649.1 | 1295053 | SNV | 1 | A | G | Heterozygous |
| NC_037649.1 | 1295074 | SNV | 1 | T | A | Homozygous   |
| NC_037649.1 | 1295083 | SNV | 1 | T | C | Homozygous   |
| NC_037649.1 | 1295089 | SNV | 1 | T | C | Homozygous   |
| NC_037649.1 | 1295092 | SNV | 1 | T | C | Homozygous   |

|             |         |     |   |   |   |              |
|-------------|---------|-----|---|---|---|--------------|
| NC_037649.1 | 1295095 | SNV | 1 | C | T | Homozygous   |
| NC_037649.1 | 1295107 | SNV | 1 | T | C | Homozygous   |
| NC_037649.1 | 1295110 | SNV | 1 | A | G | Homozygous   |
| NC_037649.1 | 1295122 | SNV | 1 | G | A | Heterozygous |
| NC_037649.1 | 1295128 | SNV | 1 | A | G | Heterozygous |
| NC_037649.1 | 1295134 | SNV | 1 | T | A | Heterozygous |
| NC_037649.1 | 1295137 | SNV | 1 | A | T | Heterozygous |
| NC_037649.1 | 1295140 | SNV | 1 | C | T | Heterozygous |
| NC_037649.1 | 1295143 | SNV | 1 | A | G | Heterozygous |
| NC_037649.1 | 1295146 | SNV | 1 | T | A | Heterozygous |
| NC_037649.1 | 1295681 | SNV | 1 | A | G | Homozygous   |
| NC_037649.1 | 1296115 | SNV | 1 | C | T | Heterozygous |
| NC_037649.1 | 1296291 | SNV | 1 | C | T | Heterozygous |
| NC_037649.1 | 1296480 | SNV | 1 | A | G | Homozygous   |
| NC_037649.1 | 1306738 | SNV | 1 | A | G | Homozygous   |
| NC_037649.1 | 1306757 | SNV | 1 | T | A | Homozygous   |
| NC_037649.1 | 1306760 | SNV | 1 | A | T | Homozygous   |
| NC_037649.1 | 1309013 | SNV | 1 | G | A | Heterozygous |
| NC_037649.1 | 1318808 | SNV | 1 | G | C | Homozygous   |
| NC_037649.1 | 1318881 | SNV | 1 | G | A | Heterozygous |
| NC_037649.1 | 1318890 | SNV | 1 | G | A | Heterozygous |
| NC_037649.1 | 1318893 | SNV | 1 | A | G | Heterozygous |
| NC_037649.1 | 1318896 | SNV | 1 | A | G | Heterozygous |
| NC_037649.1 | 1319001 | SNV | 1 | G | C | Heterozygous |
| NC_037649.1 | 1319139 | SNV | 1 | G | A | Homozygous   |
| NC_037649.1 | 1319638 | SNV | 1 | A | G | Homozygous   |
| NC_037649.1 | 1319706 | SNV | 1 | A | G | Homozygous   |
| NC_037649.1 | 1323734 | SNV | 1 | A | G | Homozygous   |
| NC_037649.1 | 1323913 | SNV | 1 | C | T | Heterozygous |
| NC_037649.1 | 1327561 | SNV | 1 | T | A | Homozygous   |
| NC_037649.1 | 1339089 | SNV | 1 | C | T | Heterozygous |
| NC_037649.1 | 1339195 | SNV | 1 | A | C | Heterozygous |
| NC_037649.1 | 1339279 | SNV | 1 | G | A | Heterozygous |
| NC_037649.1 | 1339293 | SNV | 1 | A | G | Homozygous   |
| NC_037649.1 | 1339308 | SNV | 1 | A | G | Homozygous   |
| NC_037649.1 | 1339319 | SNV | 1 | C | T | Homozygous   |
| NC_037649.1 | 1339406 | SNV | 1 | G | T | Homozygous   |
| NC_037649.1 | 1339458 | SNV | 1 | G | T | Homozygous   |
| NC_037649.1 | 1339483 | SNV | 1 | A | G | Homozygous   |
| NC_037649.1 | 1339557 | SNV | 1 | A | G | Heterozygous |
| NC_037649.1 | 1339836 | SNV | 1 | C | T | Heterozygous |
| NC_037649.1 | 1339975 | SNV | 1 | T | C | Heterozygous |
| NC_037649.1 | 1340017 | SNV | 1 | T | C | Heterozygous |
| NC_037649.1 | 1340020 | SNV | 1 | C | T | Heterozygous |
| NC_037649.1 | 1340618 | SNV | 1 | A | T | Homozygous   |
| NC_037649.1 | 1340649 | SNV | 1 | A | T | Homozygous   |
| NC_037649.1 | 1340654 | SNV | 1 | A | T | Homozygous   |
| NC_037649.1 | 1340706 | SNV | 1 | A | G | Homozygous   |
| NC_037649.1 | 1340714 | SNV | 1 | A | G | Homozygous   |
| NC_037649.1 | 1340763 | SNV | 1 | G | A | Homozygous   |
| NC_037649.1 | 1340963 | SNV | 1 | T | A | Heterozygous |

|             |         |     |   |   |   |              |
|-------------|---------|-----|---|---|---|--------------|
| NC_037649.1 | 1340974 | SNV | 1 | A | G | Homozygous   |
| NC_037649.1 | 1341053 | SNV | 1 | G | A | Homozygous   |
| NC_037649.1 | 1341113 | SNV | 1 | A | G | Homozygous   |
| NC_037649.1 | 1341180 | SNV | 1 | G | T | Heterozygous |
| NC_037649.1 | 1341229 | SNV | 1 | G | A | Heterozygous |
| NC_037649.1 | 1341235 | SNV | 1 | G | A | Homozygous   |
| NC_037649.1 | 1341275 | SNV | 1 | T | G | Homozygous   |
| NC_037649.1 | 1341296 | SNV | 1 | T | C | Heterozygous |
| NC_037649.1 | 1341305 | SNV | 1 | A | G | Homozygous   |
| NC_037649.1 | 1341413 | SNV | 1 | A | G | Homozygous   |
| NC_037649.1 | 1341461 | SNV | 1 | A | T | Homozygous   |
| NC_037649.1 | 1341548 | SNV | 1 | A | G | Homozygous   |
| NC_037649.1 | 1341556 | SNV | 1 | G | A | Homozygous   |
| NC_037649.1 | 1341599 | SNV | 1 | G | A | Homozygous   |
| NC_037649.1 | 1341605 | SNV | 1 | T | A | Heterozygous |
| NC_037649.1 | 1341632 | SNV | 1 | G | A | Homozygous   |
| NC_037649.1 | 1341696 | SNV | 1 | C | A | Heterozygous |
| NC_037649.1 | 1344281 | SNV | 1 | T | C | Homozygous   |
| NC_037649.1 | 1344314 | SNV | 1 | A | T | Heterozygous |
| NC_037649.1 | 1344345 | SNV | 1 | A | G | Homozygous   |
| NC_037649.1 | 1344361 | SNV | 1 | A | G | Heterozygous |
| NC_037649.1 | 1348235 | SNV | 1 | T | G | Homozygous   |
| NC_037649.1 | 1348243 | SNV | 1 | T | C | Homozygous   |
| NC_037649.1 | 1354309 | SNV | 1 | C | A | Heterozygous |
| NC_037649.1 | 1354338 | SNV | 1 | G | A | Homozygous   |
| NC_037649.1 | 1354344 | SNV | 1 | C | A | Homozygous   |
| NC_037649.1 | 1354394 | SNV | 1 | G | C | Homozygous   |
| NC_037649.1 | 1354446 | SNV | 1 | A | G | Homozygous   |
| NC_037649.1 | 1354448 | SNV | 1 | G | T | Heterozygous |
| NC_037649.1 | 1354490 | SNV | 1 | T | C | Homozygous   |
| NC_037649.1 | 1360981 | SNV | 1 | T | C | Homozygous   |
| NC_037649.1 | 1361009 | SNV | 1 | T | C | Homozygous   |
| NC_037649.1 | 1361065 | SNV | 1 | T | C | Heterozygous |
| NC_037649.1 | 1361104 | SNV | 1 | C | T | Heterozygous |
| NC_037649.1 | 1361132 | SNV | 1 | T | C | Homozygous   |
| NC_037649.1 | 1361138 | SNV | 1 | T | C | Homozygous   |
| NC_037649.1 | 1361164 | SNV | 1 | C | A | Homozygous   |
| NC_037649.1 | 1361244 | SNV | 1 | A | G | Homozygous   |
| NC_037649.1 | 1361316 | SNV | 1 | G | A | Homozygous   |
| NC_037649.1 | 1361360 | SNV | 1 | G | A | Homozygous   |
| NC_037649.1 | 1361442 | SNV | 1 | A | G | Heterozygous |
| NC_037649.1 | 1361648 | SNV | 1 | A | G | Homozygous   |
| NC_037649.1 | 1362035 | SNV | 1 | A | G | Homozygous   |
| NC_037649.1 | 1362039 | SNV | 1 | C | T | Homozygous   |
| NC_037649.1 | 1362098 | SNV | 1 | C | G | Homozygous   |
| NC_037649.1 | 1362142 | SNV | 1 | C | T | Heterozygous |
| NC_037649.1 | 1363569 | SNV | 1 | G | A | Homozygous   |
| NC_037649.1 | 1363651 | SNV | 1 | G | A | Homozygous   |
| NC_037649.1 | 1363703 | SNV | 1 | G | A | Homozygous   |
| NC_037649.1 | 1364724 | SNV | 1 | A | G | Homozygous   |
| NC_037649.1 | 1364749 | SNV | 1 | G | A | Heterozygous |

|             |         |     |   |   |   |              |
|-------------|---------|-----|---|---|---|--------------|
| NC_037649.1 | 1364758 | SNV | 1 | A | G | Heterozygous |
| NC_037649.1 | 1364908 | SNV | 1 | T | C | Homozygous   |
| NC_037649.1 | 1365594 | SNV | 1 | C | T | Homozygous   |
| NC_037649.1 | 1365757 | SNV | 1 | C | T | Heterozygous |
| NC_037649.1 | 1375804 | SNV | 1 | A | G | Homozygous   |
| NC_037649.1 | 1375838 | SNV | 1 | A | T | Homozygous   |
| NC_037649.1 | 1375846 | SNV | 1 | G | C | Homozygous   |
| NC_037649.1 | 1379345 | SNV | 1 | A | G | Heterozygous |
| NC_037649.1 | 1381985 | SNV | 1 | T | A | Heterozygous |
| NC_037649.1 | 1387610 | SNV | 1 | C | T | Heterozygous |
| NC_037649.1 | 1388413 | SNV | 1 | T | C | Homozygous   |
| NC_037649.1 | 1388932 | SNV | 1 | T | C | Homozygous   |
| NC_037649.1 | 1390076 | SNV | 1 | G | A | Heterozygous |
| NC_037649.1 | 1390373 | SNV | 1 | C | T | Heterozygous |
| NC_037649.1 | 1390510 | SNV | 1 | A | G | Homozygous   |
| NC_037649.1 | 1391486 | SNV | 1 | A | G | Heterozygous |
| NC_037649.1 | 1391532 | SNV | 1 | T | C | Homozygous   |
| NC_037649.1 | 1391549 | SNV | 1 | A | G | Homozygous   |
| NC_037649.1 | 1391595 | SNV | 1 | A | G | Homozygous   |
| NC_037649.1 | 1391609 | SNV | 1 | T | A | Homozygous   |
| NC_037649.1 | 1391748 | SNV | 1 | G | A | Homozygous   |
| NC_037649.1 | 1391756 | SNV | 1 | G | A | Homozygous   |
| NC_037649.1 | 1391856 | SNV | 1 | C | T | Heterozygous |
| NC_037649.1 | 1392080 | SNV | 1 | G | A | Homozygous   |
| NC_037649.1 | 1392579 | SNV | 1 | T | C | Heterozygous |
| NC_037649.1 | 1392686 | SNV | 1 | A | T | Homozygous   |
| NC_037649.1 | 1392724 | SNV | 1 | A | T | Heterozygous |
| NC_037649.1 | 1392837 | SNV | 1 | G | A | Homozygous   |
| NC_037649.1 | 1393041 | SNV | 1 | C | T | Heterozygous |
| NC_037649.1 | 1393150 | SNV | 1 | T | C | Heterozygous |
| NC_037649.1 | 1393186 | SNV | 1 | T | C | Homozygous   |
| NC_037649.1 | 1393273 | SNV | 1 | A | T | Heterozygous |
| NC_037649.1 | 1393630 | SNV | 1 | T | G | Homozygous   |
| NC_037649.1 | 1394009 | SNV | 1 | A | T | Homozygous   |
| NC_037649.1 | 1394020 | SNV | 1 | C | T | Homozygous   |
| NC_037649.1 | 1394029 | SNV | 1 | G | A | Heterozygous |
| NC_037649.1 | 1394054 | SNV | 1 | C | T | Heterozygous |
| NC_037649.1 | 1394059 | SNV | 1 | A | G | Heterozygous |
| NC_037649.1 | 1394061 | SNV | 1 | C | T | Heterozygous |
| NC_037649.1 | 1394086 | SNV | 1 | G | A | Heterozygous |
| NC_037649.1 | 1394180 | SNV | 1 | C | G | Homozygous   |
| NC_037649.1 | 1394367 | SNV | 1 | T | C | Homozygous   |
| NC_037649.1 | 1394403 | SNV | 1 | T | C | Heterozygous |
| NC_037649.1 | 1394858 | SNV | 1 | G | A | Homozygous   |
| NC_037649.1 | 1394889 | SNV | 1 | T | C | Heterozygous |
| NC_037649.1 | 1394936 | SNV | 1 | T | C | Heterozygous |
| NC_037649.1 | 1395084 | SNV | 1 | C | T | Heterozygous |
| NC_037649.1 | 1395526 | SNV | 1 | A | G | Heterozygous |
| NC_037649.1 | 1395648 | SNV | 1 | C | G | Homozygous   |
| NC_037649.1 | 1395689 | SNV | 1 | A | G | Homozygous   |
| NC_037649.1 | 1396568 | SNV | 1 | T | C | Heterozygous |

|             |         |     |   |   |   |              |
|-------------|---------|-----|---|---|---|--------------|
| NC_037649.1 | 1396692 | SNV | 1 | T | C | Heterozygous |
| NC_037649.1 | 1397091 | SNV | 1 | A | G | Homozygous   |
| NC_037649.1 | 1399146 | SNV | 1 | T | C | Homozygous   |
| NC_037649.1 | 1400595 | SNV | 1 | T | C | Heterozygous |
| NC_037649.1 | 1400622 | SNV | 1 | C | T | Homozygous   |
| NC_037649.1 | 1400624 | SNV | 1 | G | T | Homozygous   |
| NC_037649.1 | 1403430 | SNV | 1 | C | T | Heterozygous |
| NC_037649.1 | 1406982 | SNV | 1 | G | A | Heterozygous |
| NC_037649.1 | 1407039 | SNV | 1 | T | C | Homozygous   |
| NC_037649.1 | 1407053 | SNV | 1 | C | T | Heterozygous |
| NC_037649.1 | 1407062 | SNV | 1 | A | G | Homozygous   |
| NC_037649.1 | 1407143 | SNV | 1 | T | C | Homozygous   |
| NC_037649.1 | 1407165 | SNV | 1 | C | T | Homozygous   |
| NC_037649.1 | 1407185 | SNV | 1 | T | C | Homozygous   |
| NC_037649.1 | 1407220 | SNV | 1 | T | C | Homozygous   |
| NC_037649.1 | 1407288 | SNV | 1 | T | C | Homozygous   |
| NC_037649.1 | 1407313 | SNV | 1 | G | A | Heterozygous |
| NC_037649.1 | 1407344 | SNV | 1 | T | A | Heterozygous |
| NC_037649.1 | 1407363 | SNV | 1 | T | C | Homozygous   |
| NC_037649.1 | 1407498 | SNV | 1 | A | G | Heterozygous |
| NC_037649.1 | 1407687 | SNV | 1 | A | G | Homozygous   |
| NC_037649.1 | 1407937 | SNV | 1 | T | C | Heterozygous |
| NC_037649.1 | 1408019 | SNV | 1 | T | C | Homozygous   |
| NC_037649.1 | 1408051 | SNV | 1 | T | C | Heterozygous |
| NC_037649.1 | 1408054 | SNV | 1 | G | A | Heterozygous |
| NC_037649.1 | 1408143 | SNV | 1 | T | C | Homozygous   |
| NC_037649.1 | 1408211 | SNV | 1 | A | G | Heterozygous |
| NC_037649.1 | 1408215 | SNV | 1 | T | G | Heterozygous |
| NC_037649.1 | 1408218 | SNV | 1 | A | G | Homozygous   |
| NC_037649.1 | 1408298 | SNV | 1 | C | T | Homozygous   |
| NC_037649.1 | 1408302 | SNV | 1 | G | A | Heterozygous |
| NC_037649.1 | 1408330 | SNV | 1 | A | G | Homozygous   |
| NC_037649.1 | 1408534 | SNV | 1 | T | C | Homozygous   |
| NC_037649.1 | 1408733 | SNV | 1 | A | G | Homozygous   |
| NC_037649.1 | 1408942 | SNV | 1 | G | A | Heterozygous |
| NC_037649.1 | 1416573 | SNV | 1 | T | C | Heterozygous |
| NC_037649.1 | 1416595 | SNV | 1 | T | C | Heterozygous |
| NC_037649.1 | 1416610 | SNV | 1 | C | T | Heterozygous |
| NC_037649.1 | 1416613 | SNV | 1 | G | C | Homozygous   |
| NC_037649.1 | 1416817 | SNV | 1 | A | T | Homozygous   |
| NC_037649.1 | 1417210 | SNV | 1 | T | C | Heterozygous |
| NC_037649.1 | 1417315 | SNV | 1 | G | A | Heterozygous |
| NC_037649.1 | 1417340 | SNV | 1 | C | T | Homozygous   |
| NC_037649.1 | 1417345 | SNV | 1 | A | T | Heterozygous |
| NC_037649.1 | 1417363 | SNV | 1 | C | G | Homozygous   |
| NC_037649.1 | 1438338 | SNV | 1 | A | G | Homozygous   |
| NC_037649.1 | 1438390 | SNV | 1 | T | C | Heterozygous |
| NC_037649.1 | 1440140 | SNV | 1 | C | T | Homozygous   |
| NC_037649.1 | 1448356 | SNV | 1 | T | A | Homozygous   |
| NC_037649.1 | 1448372 | SNV | 1 | T | C | Heterozygous |
| NC_037649.1 | 1448456 | SNV | 1 | T | A | Heterozygous |

|             |         |     |   |   |   |              |
|-------------|---------|-----|---|---|---|--------------|
| NC_037649.1 | 1448469 | SNV | 1 | A | T | Homozygous   |
| NC_037649.1 | 1448472 | SNV | 1 | G | T | Heterozygous |
| NC_037649.1 | 1448485 | SNV | 1 | T | A | Homozygous   |
| NC_037649.1 | 1448495 | SNV | 1 | T | A | Heterozygous |
| NC_037649.1 | 1448511 | SNV | 1 | G | C | Heterozygous |
| NC_037649.1 | 1448586 | SNV | 1 | T | A | Heterozygous |
| NC_037649.1 | 1448586 | SNV | 1 | T | C | Heterozygous |
| NC_037649.1 | 1448596 | SNV | 1 | T | C | Homozygous   |
| NC_037649.1 | 1448615 | SNV | 1 | T | A | Homozygous   |
| NC_037649.1 | 1450334 | SNV | 1 | C | T | Heterozygous |
| NC_037649.1 | 1450339 | SNV | 1 | T | C | Heterozygous |
| NC_037649.1 | 1450353 | SNV | 1 | G | C | Heterozygous |
| NC_037649.1 | 1457243 | SNV | 1 | T | C | Homozygous   |
| NC_037649.1 | 1457326 | SNV | 1 | G | A | Heterozygous |
| NC_037649.1 | 1457440 | SNV | 1 | T | C | Homozygous   |
| NC_037649.1 | 1457628 | SNV | 1 | G | T | Homozygous   |
| NC_037649.1 | 1457637 | SNV | 1 | A | T | Homozygous   |
| NC_037649.1 | 1458388 | SNV | 1 | G | A | Heterozygous |
| NC_037649.1 | 1458400 | SNV | 1 | A | C | Homozygous   |
| NC_037649.1 | 1462290 | SNV | 1 | A | G | Homozygous   |
| NC_037649.1 | 1462362 | SNV | 1 | T | C | Homozygous   |
| NC_037649.1 | 1462371 | SNV | 1 | T | A | Homozygous   |
| NC_037649.1 | 1462466 | SNV | 1 | A | T | Heterozygous |
| NC_037649.1 | 1462843 | SNV | 1 | G | A | Heterozygous |
| NC_037649.1 | 1464128 | SNV | 1 | G | A | Heterozygous |
| NC_037649.1 | 1464206 | SNV | 1 | C | T | Homozygous   |
| NC_037649.1 | 1464272 | SNV | 1 | C | T | Homozygous   |
| NC_037649.1 | 1464485 | SNV | 1 | C | G | Homozygous   |
| NC_037649.1 | 1464492 | SNV | 1 | A | T | Heterozygous |
| NC_037649.1 | 1464494 | SNV | 1 | A | C | Homozygous   |
| NC_037649.1 | 1466764 | SNV | 1 | T | C | Heterozygous |
| NC_037649.1 | 1466839 | SNV | 1 | A | G | Homozygous   |
| NC_037649.1 | 1468798 | SNV | 1 | T | C | Homozygous   |
| NC_037649.1 | 1469057 | SNV | 1 | T | C | Homozygous   |
| NC_037649.1 | 1469094 | SNV | 1 | C | T | Homozygous   |
| NC_037649.1 | 1470468 | SNV | 1 | A | G | Heterozygous |
| NC_037649.1 | 1470494 | SNV | 1 | G | T | Homozygous   |
| NC_037649.1 | 1470566 | SNV | 1 | A | G | Heterozygous |
| NC_037649.1 | 1476304 | SNV | 1 | C | T | Homozygous   |
| NC_037649.1 | 1476838 | SNV | 1 | C | T | Homozygous   |
| NC_037649.1 | 1476889 | SNV | 1 | A | C | Homozygous   |
| NC_037649.1 | 1476919 | SNV | 1 | C | T | Homozygous   |
| NC_037649.1 | 1476925 | SNV | 1 | C | T | Homozygous   |
| NC_037649.1 | 1476946 | SNV | 1 | C | T | Heterozygous |
| NC_037649.1 | 1476962 | SNV | 1 | A | G | Homozygous   |
| NC_037649.1 | 1477027 | SNV | 1 | A | G | Homozygous   |
| NC_037649.1 | 1477156 | SNV | 1 | G | T | Homozygous   |
| NC_037649.1 | 1477477 | SNV | 1 | C | T | Homozygous   |
| NC_037649.1 | 1477952 | SNV | 1 | C | A | Heterozygous |
| NC_037649.1 | 1480831 | SNV | 1 | C | T | Heterozygous |
| NC_037649.1 | 1480947 | SNV | 1 | T | C | Homozygous   |

|             |         |     |   |   |   |              |
|-------------|---------|-----|---|---|---|--------------|
| NC_037649.1 | 1481800 | SNV | 1 | C | T | Homozygous   |
| NC_037649.1 | 1481802 | SNV | 1 | T | G | Homozygous   |
| NC_037649.1 | 1481804 | SNV | 1 | G | A | Heterozygous |
| NC_037649.1 | 1482133 | SNV | 1 | G | A | Homozygous   |
| NC_037649.1 | 1486530 | SNV | 1 | A | C | Heterozygous |
| NC_037649.1 | 1486545 | SNV | 1 | G | C | Homozygous   |
| NC_037649.1 | 1486585 | SNV | 1 | G | C | Homozygous   |
| NC_037649.1 | 1487998 | SNV | 1 | C | T | Heterozygous |
| NC_037649.1 | 1488060 | SNV | 1 | T | A | Heterozygous |
| NC_037649.1 | 1488129 | SNV | 1 | A | G | Homozygous   |
| NC_037649.1 | 1488240 | SNV | 1 | C | T | Homozygous   |
| NC_037649.1 | 1489598 | SNV | 1 | G | A | Homozygous   |
| NC_037649.1 | 1489716 | SNV | 1 | G | A | Heterozygous |
| NC_037649.1 | 1489870 | SNV | 1 | T | C | Heterozygous |
| NC_037649.1 | 1491376 | SNV | 1 | G | A | Heterozygous |
| NC_037649.1 | 1491774 | SNV | 1 | T | C | Homozygous   |
| NC_037649.1 | 1491783 | SNV | 1 | T | A | Homozygous   |
| NC_037649.1 | 1491797 | SNV | 1 | T | A | Homozygous   |
| NC_037649.1 | 1491814 | SNV | 1 | T | G | Homozygous   |
| NC_037649.1 | 1492318 | SNV | 1 | G | A | Heterozygous |
| NC_037649.1 | 1492345 | SNV | 1 | T | C | Homozygous   |
| NC_037649.1 | 1494668 | SNV | 1 | T | C | Homozygous   |
| NC_037649.1 | 1496385 | SNV | 1 | G | A | Heterozygous |
| NC_037649.1 | 1496413 | SNV | 1 | G | A | Heterozygous |
| NC_037649.1 | 1496422 | SNV | 1 | T | A | Homozygous   |
| NC_037649.1 | 1496431 | SNV | 1 | T | A | Homozygous   |
| NC_037649.1 | 1496444 | SNV | 1 | T | C | Homozygous   |
| NC_037649.1 | 1496452 | SNV | 1 | G | A | Heterozygous |
| NC_037649.1 | 1496528 | SNV | 1 | G | A | Heterozygous |
| NC_037649.1 | 1500618 | SNV | 1 | T | C | Homozygous   |
| NC_037649.1 | 1500673 | SNV | 1 | A | T | Homozygous   |
| NC_037649.1 | 1500689 | SNV | 1 | G | A | Homozygous   |
| NC_037649.1 | 1500694 | SNV | 1 | C | T | Homozygous   |
| NC_037649.1 | 1501735 | SNV | 1 | C | A | Heterozygous |
| NC_037649.1 | 1501743 | SNV | 1 | A | G | Heterozygous |
| NC_037649.1 | 1501764 | SNV | 1 | G | C | Homozygous   |
| NC_037649.1 | 1502065 | SNV | 1 | T | C | Heterozygous |
| NC_037649.1 | 1502214 | SNV | 1 | T | C | Homozygous   |
| NC_037649.1 | 1502352 | SNV | 1 | T | C | Homozygous   |
| NC_037649.1 | 1502412 | SNV | 1 | C | T | Heterozygous |
| NC_037649.1 | 1503358 | SNV | 1 | T | C | Homozygous   |
| NC_037649.1 | 1504309 | SNV | 1 | A | G | Homozygous   |
| NC_037649.1 | 1504338 | SNV | 1 | G | A | Homozygous   |
| NC_037649.1 | 1504343 | SNV | 1 | C | G | Homozygous   |
| NC_037649.1 | 1504416 | SNV | 1 | T | C | Heterozygous |
| NC_037649.1 | 1504527 | SNV | 1 | T | G | Homozygous   |
| NC_037649.1 | 1504554 | SNV | 1 | A | G | Homozygous   |
| NC_037649.1 | 1504581 | SNV | 1 | C | T | Heterozygous |
| NC_037649.1 | 1507099 | SNV | 1 | G | A | Heterozygous |
| NC_037649.1 | 1507345 | SNV | 1 | G | A | Homozygous   |
| NC_037649.1 | 1507390 | SNV | 1 | C | T | Homozygous   |

|             |         |     |   |   |   |              |
|-------------|---------|-----|---|---|---|--------------|
| NC_037649.1 | 1507635 | SNV | 1 | T | C | Homozygous   |
| NC_037649.1 | 1507659 | SNV | 1 | A | G | Homozygous   |
| NC_037649.1 | 1507884 | SNV | 1 | A | G | Homozygous   |
| NC_037649.1 | 1508850 | SNV | 1 | G | A | Heterozygous |
| NC_037649.1 | 1508907 | SNV | 1 | T | C | Homozygous   |
| NC_037649.1 | 1510070 | SNV | 1 | T | C | Homozygous   |
| NC_037649.1 | 1510728 | SNV | 1 | A | G | Heterozygous |
| NC_037649.1 | 1513206 | SNV | 1 | G | A | Heterozygous |
| NC_037649.1 | 1513211 | SNV | 1 | A | G | Homozygous   |
| NC_037649.1 | 1513279 | SNV | 1 | C | T | Heterozygous |
| NC_037649.1 | 1513353 | SNV | 1 | T | C | Heterozygous |
| NC_037649.1 | 1513405 | SNV | 1 | C | T | Heterozygous |
| NC_037649.1 | 1513435 | SNV | 1 | T | C | Heterozygous |
| NC_037649.1 | 1513447 | SNV | 1 | G | A | Heterozygous |
| NC_037649.1 | 1513621 | SNV | 1 | G | A | Heterozygous |
| NC_037649.1 | 1513624 | SNV | 1 | T | G | Heterozygous |
| NC_037649.1 | 1513882 | SNV | 1 | C | T | Heterozygous |
| NC_037649.1 | 1513903 | SNV | 1 | A | G | Heterozygous |
| NC_037649.1 | 1514096 | SNV | 1 | T | A | Heterozygous |
| NC_037649.1 | 1514369 | SNV | 1 | C | G | Heterozygous |
| NC_037649.1 | 1514409 | SNV | 1 | G | A | Heterozygous |
| NC_037649.1 | 1514415 | SNV | 1 | C | T | Homozygous   |
| NC_037649.1 | 1514434 | SNV | 1 | A | G | Homozygous   |
| NC_037649.1 | 1514460 | SNV | 1 | G | A | Heterozygous |
| NC_037649.1 | 1514500 | SNV | 1 | G | C | Heterozygous |
| NC_037649.1 | 1514502 | SNV | 1 | A | G | Homozygous   |
| NC_037649.1 | 1514527 | SNV | 1 | T | C | Heterozygous |
| NC_037649.1 | 1514546 | SNV | 1 | A | G | Heterozygous |
| NC_037649.1 | 1514553 | SNV | 1 | A | C | Heterozygous |
| NC_037649.1 | 1514559 | SNV | 1 | T | C | Heterozygous |
| NC_037649.1 | 1514563 | SNV | 1 | A | G | Heterozygous |
| NC_037649.1 | 1514577 | SNV | 1 | C | T | Heterozygous |
| NC_037649.1 | 1514631 | SNV | 1 | G | A | Heterozygous |
| NC_037649.1 | 1514640 | SNV | 1 | G | A | Heterozygous |
| NC_037649.1 | 1514651 | SNV | 1 | A | G | Heterozygous |
| NC_037649.1 | 1514659 | SNV | 1 | G | A | Heterozygous |
| NC_037649.1 | 1514728 | SNV | 1 | A | C | Heterozygous |
| NC_037649.1 | 1514730 | SNV | 1 | A | G | Heterozygous |
| NC_037649.1 | 1514742 | SNV | 1 | C | T | Heterozygous |
| NC_037649.1 | 1514755 | SNV | 1 | G | A | Heterozygous |
| NC_037649.1 | 1514810 | SNV | 1 | G | A | Homozygous   |
| NC_037649.1 | 1514990 | SNV | 1 | A | T | Heterozygous |
| NC_037649.1 | 1514994 | SNV | 1 | A | G | Heterozygous |
| NC_037649.1 | 1514997 | SNV | 1 | G | A | Heterozygous |
| NC_037649.1 | 1515001 | SNV | 1 | G | A | Heterozygous |
| NC_037649.1 | 1515004 | SNV | 1 | C | T | Heterozygous |
| NC_037649.1 | 1515009 | SNV | 1 | G | A | Heterozygous |
| NC_037649.1 | 1515036 | SNV | 1 | T | C | Heterozygous |
| NC_037649.1 | 1515041 | SNV | 1 | T | C | Homozygous   |
| NC_037649.1 | 1515048 | SNV | 1 | C | T | Heterozygous |
| NC_037649.1 | 1515198 | SNV | 1 | A | G | Homozygous   |



|             |         |     |   |   |   |              |
|-------------|---------|-----|---|---|---|--------------|
| NC_037649.1 | 1515230 | SNV | 1 | A | T | Homozygous   |
| NC_037649.1 | 1515247 | SNV | 1 | A | T | Heterozygous |
| NC_037649.1 | 1515259 | SNV | 1 | G | A | Heterozygous |
| NC_037649.1 | 1516308 | SNV | 1 | C | T | Homozygous   |
| NC_037649.1 | 1516311 | SNV | 1 | G | A | Heterozygous |
| NC_037649.1 | 1516352 | SNV | 1 | A | C | Homozygous   |
| NC_037649.1 | 1516383 | SNV | 1 | G | C | Homozygous   |
| NC_037649.1 | 1516392 | SNV | 1 | C | T | Homozygous   |
| NC_037649.1 | 1516427 | SNV | 1 | G | A | Homozygous   |
| NC_037649.1 | 1516444 | SNV | 1 | T | C | Homozygous   |
| NC_037649.1 | 1516471 | SNV | 1 | G | A | Homozygous   |
| NC_037649.1 | 1516489 | SNV | 1 | A | G | Homozygous   |
| NC_037649.1 | 1516546 | SNV | 1 | A | G | Homozygous   |
| NC_037649.1 | 1516645 | SNV | 1 | C | T | Heterozygous |
| NC_037649.1 | 1516702 | SNV | 1 | A | G | Homozygous   |
| NC_037649.1 | 1516705 | SNV | 1 | T | C | Homozygous   |
| NC_037649.1 | 1517505 | SNV | 1 | G | A | Heterozygous |
| NC_037649.1 | 1517514 | SNV | 1 | T | C | Homozygous   |
| NC_037649.1 | 1518183 | SNV | 1 | G | C | Homozygous   |
| NC_037649.1 | 1518206 | SNV | 1 | C | G | Homozygous   |
| NC_037649.1 | 1518299 | SNV | 1 | G | A | Heterozygous |
| NC_037649.1 | 1518305 | SNV | 1 | A | T | Homozygous   |
| NC_037649.1 | 1518416 | SNV | 1 | G | A | Homozygous   |
| NC_037649.1 | 1519012 | SNV | 1 | G | A | Homozygous   |
| NC_037649.1 | 1519039 | SNV | 1 | T | C | Homozygous   |
| NC_037649.1 | 1519045 | SNV | 1 | C | T | Homozygous   |
| NC_037649.1 | 1519575 | SNV | 1 | A | G | Homozygous   |
| NC_037649.1 | 1519593 | SNV | 1 | A | G | Homozygous   |
| NC_037649.1 | 1520200 | SNV | 1 | G | A | Homozygous   |
| NC_037649.1 | 1520411 | SNV | 1 | G | A | Heterozygous |
| NC_037649.1 | 1520414 | SNV | 1 | G | A | Heterozygous |
| NC_037649.1 | 1520594 | SNV | 1 | A | G | Homozygous   |
| NC_037649.1 | 1521456 | SNV | 1 | G | C | Heterozygous |
| NC_037649.1 | 1521460 | SNV | 1 | G | A | Heterozygous |
| NC_037649.1 | 1521613 | SNV | 1 | T | C | Heterozygous |
| NC_037649.1 | 1522546 | SNV | 1 | G | A | Heterozygous |
| NC_037649.1 | 1523602 | SNV | 1 | C | T | Heterozygous |
| NC_037649.1 | 1525038 | SNV | 1 | C | T | Heterozygous |
| NC_037649.1 | 1525050 | SNV | 1 | A | G | Homozygous   |
| NC_037649.1 | 1530800 | SNV | 1 | T | A | Homozygous   |
| NC_037649.1 | 1534803 | SNV | 1 | T | C | Homozygous   |
| NC_037649.1 | 1534971 | SNV | 1 | A | G | Heterozygous |
| NC_037649.1 | 1535198 | SNV | 1 | A | G | Heterozygous |
| NC_037649.1 | 1537064 | SNV | 1 | T | C | Homozygous   |
| NC_037649.1 | 1537069 | SNV | 1 | G | A | Heterozygous |
| NC_037649.1 | 1537148 | SNV | 1 | G | A | Heterozygous |
| NC_037649.1 | 1537185 | SNV | 1 | T | C | Heterozygous |
| NC_037649.1 | 1537255 | SNV | 1 | T | C | Homozygous   |
| NC_037649.1 | 1537387 | SNV | 1 | C | A | Heterozygous |
| NC_037649.1 | 1537715 | SNV | 1 | T | C | Heterozygous |
| NC_037649.1 | 1539542 | SNV | 1 | A | G | Homozygous   |

|             |         |     |   |   |   |              |
|-------------|---------|-----|---|---|---|--------------|
| NC_037649.1 | 1539560 | SNV | 1 | C | A | Heterozygous |
| NC_037649.1 | 1539572 | SNV | 1 | A | G | Homozygous   |
| NC_037649.1 | 1539635 | SNV | 1 | T | C | Homozygous   |
| NC_037649.1 | 1540038 | SNV | 1 | A | C | Homozygous   |
| NC_037649.1 | 1540171 | SNV | 1 | C | G | Homozygous   |
| NC_037649.1 | 1540210 | SNV | 1 | G | C | Homozygous   |
| NC_037649.1 | 1540240 | SNV | 1 | A | G | Homozygous   |
| NC_037649.1 | 1540323 | SNV | 1 | T | C | Homozygous   |
| NC_037649.1 | 1540345 | SNV | 1 | T | C | Homozygous   |
| NC_037649.1 | 1543230 | SNV | 1 | C | T | Homozygous   |
| NC_037649.1 | 1543458 | SNV | 1 | A | G | Heterozygous |
| NC_037649.1 | 1544277 | SNV | 1 | C | T | Homozygous   |
| NC_037649.1 | 1544862 | SNV | 1 | A | G | Homozygous   |
| NC_037649.1 | 1545886 | SNV | 1 | C | T | Homozygous   |
| NC_037649.1 | 1546260 | SNV | 1 | C | T | Heterozygous |
| NC_037649.1 | 1566297 | SNV | 1 | G | A | Heterozygous |
| NC_037649.1 | 1566431 | SNV | 1 | C | T | Heterozygous |
| NC_037649.1 | 1566644 | SNV | 1 | G | C | Heterozygous |
| NC_037649.1 | 1566665 | SNV | 1 | T | C | Heterozygous |
| NC_037649.1 | 1566668 | SNV | 1 | T | C | Homozygous   |
| NC_037649.1 | 1566692 | SNV | 1 | T | C | Homozygous   |
| NC_037649.1 | 1566743 | SNV | 1 | C | G | Heterozygous |
| NC_037649.1 | 1566779 | SNV | 1 | T | C | Homozygous   |
| NC_037649.1 | 1566785 | SNV | 1 | G | T | Homozygous   |
| NC_037649.1 | 1567669 | SNV | 1 | A | T | Heterozygous |
| NC_037649.1 | 1567674 | SNV | 1 | T | A | Heterozygous |
| NC_037649.1 | 1567685 | SNV | 1 | T | G | Heterozygous |
| NC_037649.1 | 1571262 | SNV | 1 | A | G | Heterozygous |
| NC_037649.1 | 1581914 | SNV | 1 | A | G | Homozygous   |
| NC_037649.1 | 1581917 | SNV | 1 | T | C | Homozygous   |
| NC_037649.1 | 1585480 | SNV | 1 | T | A | Homozygous   |
| NC_037649.1 | 1585496 | SNV | 1 | T | A | Homozygous   |
| NC_037649.1 | 1585502 | SNV | 1 | A | T | Homozygous   |
| NC_037649.1 | 1588643 | SNV | 1 | A | C | Homozygous   |
| NC_037649.1 | 1588646 | SNV | 1 | T | C | Homozygous   |
| NC_037649.1 | 1588656 | SNV | 1 | A | G | Homozygous   |
| NC_037649.1 | 1588673 | SNV | 1 | T | G | Homozygous   |
| NC_037649.1 | 1588675 | SNV | 1 | A | T | Homozygous   |
| NC_037649.1 | 1588677 | SNV | 1 | T | A | Homozygous   |
| NC_037649.1 | 1588682 | SNV | 1 | T | A | Homozygous   |
| NC_037649.1 | 1589061 | SNV | 1 | T | A | Homozygous   |
| NC_037649.1 | 1589064 | SNV | 1 | A | C | Heterozygous |
| NC_037649.1 | 1589067 | SNV | 1 | T | A | Heterozygous |
| NC_037649.1 | 1589087 | SNV | 1 | A | T | Homozygous   |
| NC_037649.1 | 1589101 | SNV | 1 | A | T | Homozygous   |
| NC_037649.1 | 1589104 | SNV | 1 | G | A | Heterozygous |
| NC_037649.1 | 1591754 | SNV | 1 | C | T | Heterozygous |
| NC_037649.1 | 1591795 | SNV | 1 | T | A | Homozygous   |
| NC_037649.1 | 1591827 | SNV | 1 | T | C | Homozygous   |
| NC_037649.1 | 1720036 | SNV | 1 | T | C | Homozygous   |
| NC_037649.1 | 1720056 | SNV | 1 | G | A | Heterozygous |

|             |         |     |   |   |   |              |
|-------------|---------|-----|---|---|---|--------------|
| NC_037649.1 | 1720535 | SNV | 1 | A | G | Homozygous   |
| NC_037649.1 | 1720566 | SNV | 1 | T | G | Homozygous   |
| NC_037649.1 | 1720687 | SNV | 1 | A | G | Homozygous   |
| NC_037649.1 | 1720704 | SNV | 1 | T | A | Homozygous   |
| NC_037649.1 | 1720706 | SNV | 1 | A | G | Homozygous   |
| NC_037649.1 | 1720718 | SNV | 1 | C | T | Homozygous   |
| NC_037649.1 | 1720721 | SNV | 1 | G | T | Homozygous   |
| NC_037649.1 | 1720727 | SNV | 1 | T | C | Homozygous   |
| NC_037649.1 | 1724043 | SNV | 1 | G | T | Homozygous   |
| NC_037649.1 | 1724049 | SNV | 1 | A | G | Homozygous   |
| NC_037649.1 | 1724096 | SNV | 1 | T | A | Homozygous   |
| NC_037649.1 | 1724110 | SNV | 1 | C | T | Homozygous   |
| NC_037649.1 | 1724141 | SNV | 1 | A | T | Homozygous   |
| NC_037649.1 | 1724143 | SNV | 1 | T | A | Heterozygous |
| NC_037649.1 | 1746095 | SNV | 1 | T | C | Heterozygous |
| NC_037649.1 | 1746133 | SNV | 1 | C | T | Heterozygous |
| NC_037649.1 | 1746379 | SNV | 1 | G | T | Homozygous   |
| NC_037649.1 | 1746382 | SNV | 1 | C | G | Homozygous   |
| NC_037649.1 | 1748511 | SNV | 1 | A | G | Heterozygous |
| NC_037649.1 | 1760567 | SNV | 1 | T | A | Homozygous   |
| NC_037649.1 | 1760569 | SNV | 1 | G | A | Homozygous   |
| NC_037649.1 | 1760572 | SNV | 1 | T | A | Homozygous   |
| NC_037649.1 | 1760585 | SNV | 1 | A | C | Homozygous   |
| NC_037649.1 | 1760593 | SNV | 1 | T | A | Homozygous   |
| NC_037649.1 | 1760595 | SNV | 1 | G | T | Homozygous   |
| NC_037649.1 | 1767282 | SNV | 1 | C | T | Homozygous   |
| NC_037649.1 | 1771726 | SNV | 1 | A | G | Homozygous   |
| NC_037649.1 | 1771729 | SNV | 1 | C | G | Homozygous   |
| NC_037649.1 | 1771754 | SNV | 1 | C | A | Homozygous   |
| NC_037649.1 | 1786537 | SNV | 1 | A | G | Heterozygous |
| NC_037649.1 | 1786776 | SNV | 1 | C | T | Heterozygous |
| NC_037649.1 | 1786796 | SNV | 1 | C | T | Heterozygous |
| NC_037649.1 | 1786834 | SNV | 1 | C | A | Heterozygous |
| NC_037649.1 | 1786861 | SNV | 1 | T | C | Heterozygous |
| NC_037649.1 | 1786886 | SNV | 1 | T | C | Heterozygous |
| NC_037649.1 | 1786903 | SNV | 1 | T | C | Homozygous   |
| NC_037649.1 | 1786930 | SNV | 1 | T | A | Homozygous   |
| NC_037649.1 | 1787072 | SNV | 1 | G | A | Heterozygous |
| NC_037649.1 | 1787107 | SNV | 1 | T | C | Heterozygous |
| NC_037649.1 | 1787203 | SNV | 1 | T | C | Homozygous   |
| NC_037649.1 | 1787210 | SNV | 1 | C | G | Heterozygous |
| NC_037649.1 | 1787215 | SNV | 1 | T | C | Homozygous   |
| NC_037649.1 | 1787270 | SNV | 1 | T | C | Homozygous   |
| NC_037649.1 | 1787328 | SNV | 1 | G | A | Homozygous   |
| NC_037649.1 | 1787356 | SNV | 1 | A | G | Homozygous   |
| NC_037649.1 | 1787481 | SNV | 1 | A | G | Homozygous   |
| NC_037649.1 | 1788620 | SNV | 1 | A | T | Homozygous   |
| NC_037649.1 | 1788623 | SNV | 1 | T | C | Homozygous   |
| NC_037649.1 | 1788629 | SNV | 1 | A | T | Homozygous   |
| NC_037649.1 | 1788632 | SNV | 1 | A | G | Heterozygous |
| NC_037649.1 | 1789731 | SNV | 1 | C | T | Homozygous   |

|             |         |     |   |   |   |              |
|-------------|---------|-----|---|---|---|--------------|
| NC_037649.1 | 1789974 | SNV | 1 | A | G | Heterozygous |
| NC_037649.1 | 1790007 | SNV | 1 | C | T | Heterozygous |
| NC_037649.1 | 1790391 | SNV | 1 | T | C | Heterozygous |
| NC_037649.1 | 1790460 | SNV | 1 | T | C | Homozygous   |
| NC_037649.1 | 1790551 | SNV | 1 | C | T | Homozygous   |
| NC_037649.1 | 1790556 | SNV | 1 | A | G | Homozygous   |
| NC_037649.1 | 1790565 | SNV | 1 | T | C | Homozygous   |
| NC_037649.1 | 1790571 | SNV | 1 | G | A | Homozygous   |
| NC_037649.1 | 1791121 | SNV | 1 | A | T | Homozygous   |
| NC_037649.1 | 1793546 | SNV | 1 | G | A | Heterozygous |
| NC_037649.1 | 1795461 | SNV | 1 | T | G | Heterozygous |
| NC_037649.1 | 1795717 | SNV | 1 | T | C | Homozygous   |
| NC_037649.1 | 1795777 | SNV | 1 | G | A | Heterozygous |
| NC_037649.1 | 1795795 | SNV | 1 | A | G | Heterozygous |
| NC_037649.1 | 1795942 | SNV | 1 | C | T | Homozygous   |
| NC_037649.1 | 1795993 | SNV | 1 | C | G | Homozygous   |
| NC_037649.1 | 1797266 | SNV | 1 | A | G | Heterozygous |
| NC_037649.1 | 1798891 | SNV | 1 | C | T | Homozygous   |
| NC_037649.1 | 1798895 | SNV | 1 | T | C | Heterozygous |
| NC_037649.1 | 1798918 | SNV | 1 | A | T | Heterozygous |
| NC_037649.1 | 1798932 | SNV | 1 | C | T | Heterozygous |
| NC_037649.1 | 1798940 | SNV | 1 | T | C | Homozygous   |
| NC_037649.1 | 1798961 | SNV | 1 | A | G | Heterozygous |
| NC_037649.1 | 1798991 | SNV | 1 | C | A | Heterozygous |
| NC_037649.1 | 1799006 | SNV | 1 | C | T | Heterozygous |
| NC_037649.1 | 1799045 | SNV | 1 | T | C | Homozygous   |
| NC_037649.1 | 1799065 | SNV | 1 | C | T | Heterozygous |
| NC_037649.1 | 1799066 | SNV | 1 | C | T | Heterozygous |
| NC_037649.1 | 1799069 | SNV | 1 | A | G | Heterozygous |
| NC_037649.1 | 1799082 | SNV | 1 | C | T | Homozygous   |
| NC_037649.1 | 1799101 | SNV | 1 | T | G | Homozygous   |
| NC_037649.1 | 1799117 | SNV | 1 | T | A | Heterozygous |
| NC_037649.1 | 1799120 | SNV | 1 | A | G | Heterozygous |
| NC_037649.1 | 1799132 | SNV | 1 | T | C | Heterozygous |
| NC_037649.1 | 1799926 | SNV | 1 | A | G | Homozygous   |
| NC_037649.1 | 1799928 | SNV | 1 | A | G | Homozygous   |
| NC_037649.1 | 1800125 | SNV | 1 | A | T | Heterozygous |
| NC_037649.1 | 1800132 | SNV | 1 | C | T | Homozygous   |
| NC_037649.1 | 1800206 | SNV | 1 | T | C | Homozygous   |
| NC_037649.1 | 1800318 | SNV | 1 | C | T | Homozygous   |
| NC_037649.1 | 1800338 | SNV | 1 | G | A | Homozygous   |
| NC_037649.1 | 1800734 | SNV | 1 | C | T | Homozygous   |
| NC_037649.1 | 1800766 | SNV | 1 | T | C | Homozygous   |
| NC_037649.1 | 1800806 | SNV | 1 | A | G | Homozygous   |
| NC_037649.1 | 1801135 | SNV | 1 | T | C | Heterozygous |
| NC_037649.1 | 1801183 | SNV | 1 | T | C | Homozygous   |
| NC_037649.1 | 1801240 | SNV | 1 | A | T | Homozygous   |
| NC_037649.1 | 1801247 | SNV | 1 | C | T | Heterozygous |
| NC_037649.1 | 1803003 | SNV | 1 | C | T | Heterozygous |
| NC_037649.1 | 1803017 | SNV | 1 | T | C | Homozygous   |
| NC_037649.1 | 1803671 | SNV | 1 | C | T | Homozygous   |

|             |         |     |   |   |   |              |
|-------------|---------|-----|---|---|---|--------------|
| NC_037649.1 | 1809055 | SNV | 1 | G | A | Heterozygous |
| NC_037649.1 | 1809057 | SNV | 1 | A | G | Homozygous   |
| NC_037649.1 | 1809065 | SNV | 1 | A | T | Homozygous   |
| NC_037649.1 | 1809156 | SNV | 1 | T | C | Heterozygous |
| NC_037649.1 | 1809162 | SNV | 1 | C | T | Heterozygous |
| NC_037649.1 | 1809172 | SNV | 1 | C | T | Heterozygous |
| NC_037649.1 | 1809218 | SNV | 1 | C | T | Heterozygous |
| NC_037649.1 | 1809291 | SNV | 1 | T | C | Homozygous   |
| NC_037649.1 | 1809344 | SNV | 1 | C | G | Heterozygous |
| NC_037649.1 | 1809553 | SNV | 1 | C | T | Heterozygous |
| NC_037649.1 | 1809908 | SNV | 1 | G | A | Heterozygous |
| NC_037649.1 | 1809914 | SNV | 1 | A | G | Heterozygous |
| NC_037649.1 | 1809937 | SNV | 1 | A | G | Homozygous   |
| NC_037649.1 | 1809962 | SNV | 1 | C | G | Heterozygous |
| NC_037649.1 | 1810037 | SNV | 1 | T | C | Heterozygous |
| NC_037649.1 | 1810251 | SNV | 1 | G | A | Heterozygous |
| NC_037649.1 | 1810303 | SNV | 1 | G | C | Heterozygous |
| NC_037649.1 | 1810375 | SNV | 1 | A | G | Heterozygous |
| NC_037649.1 | 1810447 | SNV | 1 | A | G | Homozygous   |
| NC_037649.1 | 1810489 | SNV | 1 | A | G | Homozygous   |
| NC_037649.1 | 1810506 | SNV | 1 | G | A | Heterozygous |
| NC_037649.1 | 1810524 | SNV | 1 | C | T | Homozygous   |
| NC_037649.1 | 1810539 | SNV | 1 | G | A | Homozygous   |
| NC_037649.1 | 1810554 | SNV | 1 | C | T | Heterozygous |
| NC_037649.1 | 1810563 | SNV | 1 | A | T | Heterozygous |
| NC_037649.1 | 1810625 | SNV | 1 | G | A | Homozygous   |
| NC_037649.1 | 1810646 | SNV | 1 | G | T | Heterozygous |
| NC_037649.1 | 1810731 | SNV | 1 | T | C | Homozygous   |
| NC_037649.1 | 1810733 | SNV | 1 | G | A | Heterozygous |
| NC_037649.1 | 1810794 | SNV | 1 | A | G | Heterozygous |
| NC_037649.1 | 1810812 | SNV | 1 | A | G | Heterozygous |
| NC_037649.1 | 1810868 | SNV | 1 | G | A | Heterozygous |
| NC_037649.1 | 1810974 | SNV | 1 | A | G | Heterozygous |
| NC_037649.1 | 1811069 | SNV | 1 | G | A | Heterozygous |
| NC_037649.1 | 1811165 | SNV | 1 | G | A | Heterozygous |
| NC_037649.1 | 1811691 | SNV | 1 | A | G | Homozygous   |
| NC_037649.1 | 1811743 | SNV | 1 | T | C | Heterozygous |
| NC_037649.1 | 1811770 | SNV | 1 | T | C | Homozygous   |
| NC_037649.1 | 1811785 | SNV | 1 | A | G | Heterozygous |
| NC_037649.1 | 1811796 | SNV | 1 | C | T | Heterozygous |
| NC_037649.1 | 1811804 | SNV | 1 | C | T | Heterozygous |
| NC_037649.1 | 1811819 | SNV | 1 | C | T | Homozygous   |
| NC_037649.1 | 1812388 | SNV | 1 | C | T | Heterozygous |
| NC_037649.1 | 1812415 | SNV | 1 | T | C | Heterozygous |
| NC_037649.1 | 1812419 | SNV | 1 | A | G | Heterozygous |
| NC_037649.1 | 1812421 | SNV | 1 | A | T | Heterozygous |
| NC_037649.1 | 1814939 | SNV | 1 | A | G | Heterozygous |
| NC_037649.1 | 1814952 | SNV | 1 | C | T | Heterozygous |
| NC_037649.1 | 1814977 | SNV | 1 | G | A | Homozygous   |
| NC_037649.1 | 1817139 | SNV | 1 | G | A | Heterozygous |
| NC_037649.1 | 1825052 | SNV | 1 | C | T | Homozygous   |

|             |         |     |   |   |   |              |
|-------------|---------|-----|---|---|---|--------------|
| NC_037649.1 | 1831683 | SNV | 1 | G | A | Heterozygous |
| NC_037649.1 | 1831813 | SNV | 1 | A | G | Heterozygous |
| NC_037649.1 | 1831815 | SNV | 1 | T | C | Heterozygous |
| NC_037649.1 | 1831928 | SNV | 1 | C | T | Heterozygous |
| NC_037649.1 | 1831938 | SNV | 1 | T | C | Homozygous   |
| NC_037649.1 | 1831944 | SNV | 1 | T | C | Heterozygous |
| NC_037649.1 | 1831967 | SNV | 1 | G | T | Heterozygous |
| NC_037649.1 | 1831978 | SNV | 1 | A | G | Heterozygous |
| NC_037649.1 | 1831982 | SNV | 1 | T | A | Homozygous   |
| NC_037649.1 | 1831986 | SNV | 1 | A | G | Heterozygous |
| NC_037649.1 | 1831988 | SNV | 1 | G | A | Heterozygous |
| NC_037649.1 | 1832112 | SNV | 1 | C | T | Heterozygous |
| NC_037649.1 | 1832115 | SNV | 1 | T | C | Heterozygous |
| NC_037649.1 | 1838251 | SNV | 1 | G | A | Homozygous   |
| NC_037649.1 | 1838298 | SNV | 1 | C | T | Homozygous   |
| NC_037649.1 | 1838310 | SNV | 1 | T | C | Homozygous   |
| NC_037649.1 | 1845382 | SNV | 1 | C | T | Homozygous   |
| NC_037649.1 | 1846089 | SNV | 1 | A | G | Heterozygous |
| NC_037649.1 | 1851809 | SNV | 1 | T | A | Heterozygous |
| NC_037649.1 | 1861006 | SNV | 1 | A | T | Heterozygous |
| NC_037649.1 | 1861009 | SNV | 1 | T | C | Heterozygous |
| NC_037649.1 | 1861099 | SNV | 1 | C | T | Heterozygous |
| NC_037649.1 | 1861111 | SNV | 1 | C | T | Heterozygous |
| NC_037649.1 | 1861151 | SNV | 1 | C | T | Homozygous   |
| NC_037649.1 | 1861307 | SNV | 1 | T | C | Homozygous   |
| NC_037649.1 | 1861430 | SNV | 1 | C | T | Heterozygous |
| NC_037649.1 | 1861438 | SNV | 1 | T | C | Homozygous   |
| NC_037649.1 | 1861445 | SNV | 1 | A | G | Homozygous   |
| NC_037649.1 | 1861449 | SNV | 1 | C | A | Homozygous   |
| NC_037649.1 | 1861464 | SNV | 1 | G | A | Heterozygous |
| NC_037649.1 | 1861489 | SNV | 1 | T | C | Homozygous   |
| NC_037649.1 | 1861498 | SNV | 1 | C | T | Homozygous   |
| NC_037649.1 | 1861506 | SNV | 1 | A | G | Homozygous   |
| NC_037649.1 | 1861522 | SNV | 1 | C | T | Homozygous   |
| NC_037649.1 | 1861538 | SNV | 1 | A | G | Homozygous   |
| NC_037649.1 | 1861541 | SNV | 1 | G | A | Homozygous   |
| NC_037649.1 | 1861573 | SNV | 1 | A | G | Homozygous   |
| NC_037649.1 | 1861580 | SNV | 1 | G | A | Heterozygous |
| NC_037649.1 | 1861751 | SNV | 1 | A | G | Homozygous   |
| NC_037649.1 | 1861800 | SNV | 1 | A | G | Heterozygous |
| NC_037649.1 | 1861831 | SNV | 1 | T | C | Heterozygous |
| NC_037649.1 | 1862072 | SNV | 1 | G | A | Heterozygous |
| NC_037649.1 | 1862141 | SNV | 1 | T | C | Heterozygous |
| NC_037649.1 | 1862161 | SNV | 1 | C | T | Heterozygous |
| NC_037649.1 | 1862180 | SNV | 1 | G | A | Homozygous   |
| NC_037649.1 | 1862225 | SNV | 1 | G | A | Heterozygous |
| NC_037649.1 | 1862238 | SNV | 1 | A | G | Homozygous   |
| NC_037649.1 | 1862351 | SNV | 1 | A | T | Homozygous   |
| NC_037649.1 | 1862379 | SNV | 1 | T | C | Homozygous   |
| NC_037649.1 | 1862387 | SNV | 1 | G | A | Heterozygous |
| NC_037649.1 | 1862396 | SNV | 1 | G | C | Heterozygous |

|             |         |     |   |   |   |              |
|-------------|---------|-----|---|---|---|--------------|
| NC_037649.1 | 1862781 | SNV | 1 | C | T | Heterozygous |
| NC_037649.1 | 1862821 | SNV | 1 | A | T | Homozygous   |
| NC_037649.1 | 1863017 | SNV | 1 | C | T | Heterozygous |
| NC_037649.1 | 1863033 | SNV | 1 | G | A | Homozygous   |
| NC_037649.1 | 1863044 | SNV | 1 | A | C | Homozygous   |
| NC_037649.1 | 1863571 | SNV | 1 | T | C | Homozygous   |
| NC_037649.1 | 1863580 | SNV | 1 | G | A | Homozygous   |
| NC_037649.1 | 1880502 | SNV | 1 | A | C | Heterozygous |
| NC_037649.1 | 1880519 | SNV | 1 | T | G | Homozygous   |
| NC_037649.1 | 1880556 | SNV | 1 | T | C | Heterozygous |
| NC_037649.1 | 1880832 | SNV | 1 | A | G | Homozygous   |
| NC_037649.1 | 1882649 | SNV | 1 | C | T | Homozygous   |
| NC_037649.1 | 1882653 | SNV | 1 | G | A | Homozygous   |
| NC_037649.1 | 1882661 | SNV | 1 | C | T | Homozygous   |
| NC_037649.1 | 1882689 | SNV | 1 | G | C | Homozygous   |
| NC_037649.1 | 1882705 | SNV | 1 | G | A | Homozygous   |
| NC_037649.1 | 1882732 | SNV | 1 | G | A | Homozygous   |
| NC_037649.1 | 1882805 | SNV | 1 | A | T | Homozygous   |
| NC_037649.1 | 1902224 | SNV | 1 | A | G | Homozygous   |
| NC_037649.1 | 1907986 | SNV | 1 | T | C | Homozygous   |
| NC_037649.1 | 1908072 | SNV | 1 | G | A | Homozygous   |
| NC_037649.1 | 1908114 | SNV | 1 | T | C | Homozygous   |
| NC_037649.1 | 1908173 | SNV | 1 | A | G | Homozygous   |
| NC_037649.1 | 1920012 | SNV | 1 | A | T | Homozygous   |
| NC_037649.1 | 1920041 | SNV | 1 | T | C | Homozygous   |
| NC_037649.1 | 1920049 | SNV | 1 | T | A | Homozygous   |
| NC_037649.1 | 1925295 | SNV | 1 | G | T | Homozygous   |
| NC_037649.1 | 1925298 | SNV | 1 | G | A | Homozygous   |
| NC_037649.1 | 1925322 | SNV | 1 | C | A | Homozygous   |
| NC_037649.1 | 1925330 | SNV | 1 | A | T | Homozygous   |
| NC_037649.1 | 1925337 | SNV | 1 | T | G | Homozygous   |
| NC_037649.1 | 1928279 | SNV | 1 | A | G | Homozygous   |
| NC_037649.1 | 1929591 | SNV | 1 | T | G | Heterozygous |
| NC_037649.1 | 1929612 | SNV | 1 | G | C | Homozygous   |
| NC_037649.1 | 1929622 | SNV | 1 | T | C | Heterozygous |
| NC_037649.1 | 1929628 | SNV | 1 | T | C | Heterozygous |
| NC_037649.1 | 1929636 | SNV | 1 | C | T | Heterozygous |
| NC_037649.1 | 1929638 | SNV | 1 | C | T | Heterozygous |
| NC_037649.1 | 1936297 | SNV | 1 | A | G | Homozygous   |
| NC_037649.1 | 1942697 | SNV | 1 | A | C | Heterozygous |
| NC_037649.1 | 1943009 | SNV | 1 | G | C | Heterozygous |
| NC_037649.1 | 1943013 | SNV | 1 | G | A | Homozygous   |
| NC_037649.1 | 1943019 | SNV | 1 | G | A | Heterozygous |
| NC_037649.1 | 1943027 | SNV | 1 | G | A | Heterozygous |
| NC_037649.1 | 1943031 | SNV | 1 | G | A | Heterozygous |
| NC_037649.1 | 1943036 | SNV | 1 | A | G | Homozygous   |
| NC_037649.1 | 1950853 | SNV | 1 | C | T | Heterozygous |
| NC_037649.1 | 1951082 | SNV | 1 | C | T | Homozygous   |
| NC_037649.1 | 1951137 | SNV | 1 | C | T | Homozygous   |
| NC_037649.1 | 1951143 | SNV | 1 | G | A | Homozygous   |
| NC_037649.1 | 1951210 | SNV | 1 | G | C | Heterozygous |

|             |         |     |   |   |   |              |
|-------------|---------|-----|---|---|---|--------------|
| NC_037649.1 | 1951269 | SNV | 1 | C | T | Homozygous   |
| NC_037649.1 | 1951271 | SNV | 1 | A | G | Heterozygous |
| NC_037649.1 | 1951494 | SNV | 1 | G | A | Homozygous   |
| NC_037649.1 | 1964589 | SNV | 1 | A | G | Homozygous   |
| NC_037649.1 | 1964742 | SNV | 1 | G | A | Homozygous   |
| NC_037649.1 | 1964751 | SNV | 1 | C | A | Heterozygous |
| NC_037649.1 | 1964938 | SNV | 1 | C | T | Heterozygous |
| NC_037649.1 | 1964984 | SNV | 1 | A | G | Heterozygous |
| NC_037649.1 | 1965578 | SNV | 1 | A | C | Heterozygous |
| NC_037649.1 | 1965761 | SNV | 1 | C | T | Homozygous   |
| NC_037649.1 | 1965824 | SNV | 1 | A | C | Homozygous   |
| NC_037649.1 | 1965842 | SNV | 1 | C | T | Heterozygous |
| NC_037649.1 | 1965863 | SNV | 1 | G | A | Heterozygous |
| NC_037649.1 | 1965933 | SNV | 1 | T | A | Heterozygous |
| NC_037649.1 | 1965936 | SNV | 1 | G | A | Heterozygous |
| NC_037649.1 | 1965987 | SNV | 1 | A | T | Heterozygous |
| NC_037649.1 | 1966051 | SNV | 1 | C | T | Homozygous   |
| NC_037649.1 | 1966106 | SNV | 1 | T | C | Heterozygous |
| NC_037649.1 | 1974481 | SNV | 1 | T | A | Homozygous   |
| NC_037649.1 | 1974491 | SNV | 1 | T | A | Homozygous   |
| NC_037649.1 | 1984354 | SNV | 1 | T | G | Heterozygous |
| NC_037649.1 | 1996033 | SNV | 1 | C | T | Homozygous   |
| NC_037649.1 | 1996039 | SNV | 1 | C | A | Heterozygous |
| NC_037649.1 | 1998583 | SNV | 1 | A | G | Heterozygous |
| NC_037649.1 | 1998595 | SNV | 1 | A | G | Homozygous   |
| NC_037649.1 | 1998607 | SNV | 1 | A | T | Homozygous   |
| NC_037649.1 | 1998971 | SNV | 1 | T | C | Homozygous   |
| NC_037649.1 | 1999000 | SNV | 1 | A | G | Homozygous   |
| NC_037649.1 | 1999164 | SNV | 1 | G | A | Homozygous   |
| NC_037649.1 | 1999247 | SNV | 1 | A | G | Homozygous   |
| NC_037649.1 | 1999885 | SNV | 1 | G | A | Homozygous   |
| NC_037649.1 | 1999892 | SNV | 1 | T | A | Homozygous   |
| NC_037649.1 | 2000128 | SNV | 1 | C | T | Heterozygous |
| NC_037649.1 | 2000293 | SNV | 1 | A | G | Homozygous   |
| NC_037649.1 | 2000310 | SNV | 1 | T | C | Homozygous   |
| NC_037649.1 | 2000324 | SNV | 1 | T | C | Homozygous   |
| NC_037649.1 | 2000379 | SNV | 1 | A | G | Homozygous   |
| NC_037649.1 | 2001086 | SNV | 1 | C | T | Heterozygous |
| NC_037649.1 | 2001143 | SNV | 1 | G | T | Homozygous   |
| NC_037649.1 | 2001148 | SNV | 1 | G | T | Homozygous   |
| NC_037649.1 | 2001153 | SNV | 1 | C | T | Heterozygous |
| NC_037649.1 | 2001155 | SNV | 1 | A | T | Heterozygous |
| NC_037649.1 | 2001157 | SNV | 1 | A | T | Heterozygous |
| NC_037649.1 | 2002186 | SNV | 1 | C | T | Homozygous   |
| NC_037649.1 | 2004507 | SNV | 1 | T | C | Homozygous   |
| NC_037649.1 | 2005389 | SNV | 1 | A | T | Homozygous   |
| NC_037649.1 | 2005392 | SNV | 1 | A | T | Homozygous   |
| NC_037649.1 | 2005651 | SNV | 1 | A | T | Homozygous   |
| NC_037649.1 | 2005658 | SNV | 1 | C | T | Homozygous   |
| NC_037649.1 | 2005665 | SNV | 1 | C | A | Homozygous   |
| NC_037649.1 | 2005671 | SNV | 1 | C | T | Heterozygous |



|             |         |     |   |   |   |              |
|-------------|---------|-----|---|---|---|--------------|
| NC_037649.1 | 2005913 | SNV | 1 | C | T | Heterozygous |
| NC_037649.1 | 2012130 | SNV | 1 | G | A | Heterozygous |
| NC_037649.1 | 2012210 | SNV | 1 | A | C | Heterozygous |
| NC_037649.1 | 2012211 | SNV | 1 | T | C | Heterozygous |
| NC_037649.1 | 2012224 | SNV | 1 | A | G | Homozygous   |
| NC_037649.1 | 2012248 | SNV | 1 | C | T | Heterozygous |
| NC_037649.1 | 2012352 | SNV | 1 | A | G | Homozygous   |
| NC_037649.1 | 2012402 | SNV | 1 | G | A | Heterozygous |
| NC_037649.1 | 2013000 | SNV | 1 | G | A | Heterozygous |
| NC_037649.1 | 2015334 | SNV | 1 | A | T | Heterozygous |
| NC_037649.1 | 2015395 | SNV | 1 | T | C | Heterozygous |
| NC_037649.1 | 2015402 | SNV | 1 | A | G | Heterozygous |
| NC_037649.1 | 2015601 | SNV | 1 | C | G | Heterozygous |
| NC_037649.1 | 2016048 | SNV | 1 | T | A | Homozygous   |
| NC_037649.1 | 2016169 | SNV | 1 | T | C | Homozygous   |
| NC_037649.1 | 2016197 | SNV | 1 | G | A | Heterozygous |
| NC_037649.1 | 2017759 | SNV | 1 | G | A | Heterozygous |
| NC_037649.1 | 2018355 | SNV | 1 | A | G | Homozygous   |
| NC_037649.1 | 2018425 | SNV | 1 | T | C | Heterozygous |
| NC_037649.1 | 2018843 | SNV | 1 | G | A | Homozygous   |
| NC_037649.1 | 2018855 | SNV | 1 | C | T | Heterozygous |
| NC_037649.1 | 2019353 | SNV | 1 | A | T | Homozygous   |
| NC_037649.1 | 2020411 | SNV | 1 | T | C | Homozygous   |
| NC_037649.1 | 2020542 | SNV | 1 | C | T | Homozygous   |
| NC_037649.1 | 2020561 | SNV | 1 | A | T | Homozygous   |
| NC_037649.1 | 2020724 | SNV | 1 | C | T | Homozygous   |
| NC_037649.1 | 2020963 | SNV | 1 | A | T | Heterozygous |
| NC_037649.1 | 2020966 | SNV | 1 | T | A | Heterozygous |
| NC_037649.1 | 2021341 | SNV | 1 | C | T | Heterozygous |
| NC_037649.1 | 2021547 | SNV | 1 | G | A | Homozygous   |
| NC_037649.1 | 2021599 | SNV | 1 | A | G | Heterozygous |
| NC_037649.1 | 2021745 | SNV | 1 | G | A | Homozygous   |
| NC_037649.1 | 2021892 | SNV | 1 | A | G | Heterozygous |
| NC_037649.1 | 2021896 | SNV | 1 | G | A | Heterozygous |
| NC_037649.1 | 2022464 | SNV | 1 | A | G | Homozygous   |
| NC_037649.1 | 2023353 | SNV | 1 | A | G | Heterozygous |
| NC_037649.1 | 2023355 | SNV | 1 | A | G | Heterozygous |
| NC_037649.1 | 2023364 | SNV | 1 | C | A | Homozygous   |
| NC_037649.1 | 2023367 | SNV | 1 | A | T | Heterozygous |
| NC_037649.1 | 2023554 | SNV | 1 | C | A | Heterozygous |
| NC_037649.1 | 2023569 | SNV | 1 | A | G | Homozygous   |
| NC_037649.1 | 2023651 | SNV | 1 | G | A | Homozygous   |
| NC_037649.1 | 2023689 | SNV | 1 | C | T | Heterozygous |
| NC_037649.1 | 2023716 | SNV | 1 | C | A | Heterozygous |
| NC_037649.1 | 2023730 | SNV | 1 | G | A | Homozygous   |
| NC_037649.1 | 2023732 | SNV | 1 | A | G | Heterozygous |
| NC_037649.1 | 2024903 | SNV | 1 | T | C | Homozygous   |
| NC_037649.1 | 2025810 | SNV | 1 | G | C | Homozygous   |
| NC_037649.1 | 2025813 | SNV | 1 | C | T | Heterozygous |
| NC_037649.1 | 2026792 | SNV | 1 | T | G | Homozygous   |
| NC_037649.1 | 2026798 | SNV | 1 | T | A | Homozygous   |

|             |         |     |   |   |   |              |
|-------------|---------|-----|---|---|---|--------------|
| NC_037649.1 | 2026823 | SNV | 1 | C | A | Homozygous   |
| NC_037649.1 | 2027306 | SNV | 1 | T | C | Homozygous   |
| NC_037649.1 | 2027324 | SNV | 1 | T | C | Homozygous   |
| NC_037649.1 | 2027439 | SNV | 1 | A | G | Heterozygous |
| NC_037649.1 | 2027558 | SNV | 1 | G | A | Homozygous   |
| NC_037649.1 | 2028193 | SNV | 1 | C | T | Homozygous   |
| NC_037649.1 | 2028278 | SNV | 1 | T | A | Heterozygous |
| NC_037649.1 | 2028304 | SNV | 1 | G | A | Heterozygous |
| NC_037649.1 | 2028329 | SNV | 1 | T | C | Homozygous   |
| NC_037649.1 | 2028348 | SNV | 1 | T | C | Heterozygous |
| NC_037649.1 | 2028565 | SNV | 1 | T | C | Homozygous   |
| NC_037649.1 | 2028635 | SNV | 1 | C | G | Heterozygous |
| NC_037649.1 | 2052455 | SNV | 1 | A | G | Homozygous   |
| NC_037649.1 | 2052936 | SNV | 1 | G | A | Heterozygous |
| NC_037649.1 | 2052944 | SNV | 1 | C | T | Heterozygous |
| NC_037649.1 | 2053264 | SNV | 1 | A | G | Heterozygous |
| NC_037649.1 | 2053890 | SNV | 1 | C | A | Homozygous   |
| NC_037649.1 | 2053892 | SNV | 1 | A | T | Homozygous   |
| NC_037649.1 | 2053970 | SNV | 1 | C | T | Homozygous   |
| NC_037649.1 | 2053977 | SNV | 1 | G | A | Heterozygous |
| NC_037649.1 | 2054212 | SNV | 1 | C | T | Homozygous   |
| NC_037649.1 | 2054215 | SNV | 1 | T | C | Homozygous   |
| NC_037649.1 | 2054265 | SNV | 1 | A | G | Heterozygous |
| NC_037649.1 | 2054482 | SNV | 1 | A | T | Heterozygous |
| NC_037649.1 | 2054520 | SNV | 1 | G | A | Heterozygous |
| NC_037649.1 | 2054529 | SNV | 1 | T | C | Homozygous   |
| NC_037649.1 | 2054565 | SNV | 1 | A | C | Homozygous   |
| NC_037649.1 | 2055644 | SNV | 1 | C | T | Heterozygous |
| NC_037649.1 | 2055739 | SNV | 1 | T | C | Heterozygous |
| NC_037649.1 | 2056313 | SNV | 1 | A | G | Heterozygous |
| NC_037649.1 | 2060601 | SNV | 1 | T | C | Heterozygous |
| NC_037649.1 | 2060736 | SNV | 1 | G | A | Heterozygous |
| NC_037649.1 | 2060748 | SNV | 1 | T | C | Homozygous   |
| NC_037649.1 | 2060772 | SNV | 1 | G | A | Homozygous   |
| NC_037649.1 | 2061964 | SNV | 1 | T | C | Homozygous   |
| NC_037649.1 | 2062691 | SNV | 1 | T | A | Heterozygous |
| NC_037649.1 | 2062713 | SNV | 1 | A | C | Heterozygous |
| NC_037649.1 | 2066220 | SNV | 1 | G | A | Heterozygous |
| NC_037649.1 | 2066232 | SNV | 1 | G | A | Heterozygous |
| NC_037649.1 | 2066259 | SNV | 1 | A | G | Heterozygous |
| NC_037649.1 | 2068291 | SNV | 1 | T | C | Homozygous   |
| NC_037649.1 | 2080235 | SNV | 1 | G | T | Heterozygous |
| NC_037649.1 | 2080245 | SNV | 1 | T | G | Homozygous   |
| NC_037649.1 | 2084325 | SNV | 1 | A | T | Homozygous   |
| NC_037649.1 | 2084330 | SNV | 1 | G | C | Homozygous   |
| NC_037649.1 | 2084335 | SNV | 1 | A | T | Homozygous   |
| NC_037649.1 | 2084346 | SNV | 1 | T | G | Homozygous   |
| NC_037649.1 | 2091445 | SNV | 1 | T | C | Homozygous   |
| NC_037649.1 | 2091510 | SNV | 1 | A | G | Heterozygous |
| NC_037649.1 | 2091515 | SNV | 1 | T | G | Heterozygous |
| NC_037649.1 | 2091552 | SNV | 1 | A | G | Homozygous   |

|             |         |     |   |   |   |              |
|-------------|---------|-----|---|---|---|--------------|
| NC_037649.1 | 2091554 | SNV | 1 | T | C | Homozygous   |
| NC_037649.1 | 2098076 | SNV | 1 | T | C | Homozygous   |
| NC_037649.1 | 2098080 | SNV | 1 | A | T | Homozygous   |
| NC_037649.1 | 2107448 | SNV | 1 | A | T | Homozygous   |
| NC_037649.1 | 2107452 | SNV | 1 | A | T | Homozygous   |
| NC_037649.1 | 2107455 | SNV | 1 | T | C | Homozygous   |
| NC_037649.1 | 2107457 | SNV | 1 | A | C | Homozygous   |
| NC_037649.1 | 2107463 | SNV | 1 | T | A | Homozygous   |
| NC_037649.1 | 2107466 | SNV | 1 | T | A | Homozygous   |
| NC_037649.1 | 2107469 | SNV | 1 | C | A | Homozygous   |
| NC_037649.1 | 2108644 | SNV | 1 | G | A | Heterozygous |
| NC_037649.1 | 2109722 | SNV | 1 | C | T | Heterozygous |
| NC_037649.1 | 2109734 | SNV | 1 | A | G | Homozygous   |
| NC_037649.1 | 2109741 | SNV | 1 | A | G | Homozygous   |
| NC_037649.1 | 2109764 | SNV | 1 | C | T | Heterozygous |
| NC_037649.1 | 2109804 | SNV | 1 | T | A | Heterozygous |
| NC_037649.1 | 2110353 | SNV | 1 | T | C | Homozygous   |
| NC_037649.1 | 2110407 | SNV | 1 | T | C | Heterozygous |
| NC_037649.1 | 2110425 | SNV | 1 | C | T | Homozygous   |
| NC_037649.1 | 2110471 | SNV | 1 | A | G | Homozygous   |
| NC_037649.1 | 2110779 | SNV | 1 | T | C | Homozygous   |
| NC_037649.1 | 2110791 | SNV | 1 | A | G | Homozygous   |
| NC_037649.1 | 2110990 | SNV | 1 | A | G | Homozygous   |
| NC_037649.1 | 2111116 | SNV | 1 | A | G | Homozygous   |
| NC_037649.1 | 2111119 | SNV | 1 | A | G | Heterozygous |
| NC_037649.1 | 2111123 | SNV | 1 | T | C | Homozygous   |
| NC_037649.1 | 2114521 | SNV | 1 | G | A | Heterozygous |
| NC_037649.1 | 2114676 | SNV | 1 | T | C | Homozygous   |
| NC_037649.1 | 2114698 | SNV | 1 | G | A | Homozygous   |
| NC_037649.1 | 2114733 | SNV | 1 | T | C | Homozygous   |
| NC_037649.1 | 2123075 | SNV | 1 | A | T | Homozygous   |
| NC_037649.1 | 2123081 | SNV | 1 | A | C | Homozygous   |
| NC_037649.1 | 2123106 | SNV | 1 | T | A | Homozygous   |
| NC_037649.1 | 2125754 | SNV | 1 | T | C | Homozygous   |
| NC_037649.1 | 2126586 | SNV | 1 | A | T | Homozygous   |
| NC_037649.1 | 2142057 | SNV | 1 | G | A | Heterozygous |
| NC_037649.1 | 2142235 | SNV | 1 | T | C | Homozygous   |
| NC_037649.1 | 2142319 | SNV | 1 | C | G | Homozygous   |
| NC_037649.1 | 2150414 | SNV | 1 | A | T | Homozygous   |
| NC_037649.1 | 2158348 | SNV | 1 | G | A | Heterozygous |
| NC_037649.1 | 2158364 | SNV | 1 | C | A | Homozygous   |
| NC_037649.1 | 2158410 | SNV | 1 | G | A | Homozygous   |
| NC_037649.1 | 2166043 | SNV | 1 | A | C | Heterozygous |
| NC_037649.1 | 2166054 | SNV | 1 | T | C | Homozygous   |
| NC_037649.1 | 2166100 | SNV | 1 | G | A | Heterozygous |
| NC_037649.1 | 2166186 | SNV | 1 | T | A | Heterozygous |
| NC_037649.1 | 2166273 | SNV | 1 | A | G | Heterozygous |
| NC_037649.1 | 2170075 | SNV | 1 | C | T | Heterozygous |
| NC_037649.1 | 2170081 | SNV | 1 | C | T | Heterozygous |
| NC_037649.1 | 2170118 | SNV | 1 | C | T | Heterozygous |
| NC_037649.1 | 2172474 | SNV | 1 | G | T | Homozygous   |

|             |         |     |   |   |   |              |
|-------------|---------|-----|---|---|---|--------------|
| NC_037649.1 | 2172495 | SNV | 1 | A | T | Homozygous   |
| NC_037649.1 | 2172533 | SNV | 1 | C | T | Heterozygous |
| NC_037649.1 | 2172562 | SNV | 1 | C | T | Heterozygous |
| NC_037649.1 | 2172572 | SNV | 1 | A | G | Homozygous   |
| NC_037649.1 | 2172609 | SNV | 1 | T | C | Homozygous   |
| NC_037649.1 | 2172648 | SNV | 1 | T | C | Homozygous   |
| NC_037649.1 | 2172656 | SNV | 1 | T | G | Homozygous   |
| NC_037649.1 | 2172675 | SNV | 1 | G | A | Heterozygous |
| NC_037649.1 | 2172781 | SNV | 1 | T | G | Homozygous   |
| NC_037649.1 | 2172783 | SNV | 1 | G | A | Homozygous   |
| NC_037649.1 | 2172801 | SNV | 1 | T | C | Homozygous   |
| NC_037649.1 | 2172862 | SNV | 1 | C | T | Homozygous   |
| NC_037649.1 | 2172982 | SNV | 1 | T | C | Heterozygous |
| NC_037649.1 | 2173048 | SNV | 1 | C | T | Heterozygous |
| NC_037649.1 | 2173185 | SNV | 1 | G | A | Heterozygous |
| NC_037649.1 | 2173202 | SNV | 1 | G | A | Heterozygous |
| NC_037649.1 | 2173208 | SNV | 1 | A | G | Homozygous   |
| NC_037649.1 | 2173225 | SNV | 1 | A | T | Homozygous   |
| NC_037649.1 | 2173239 | SNV | 1 | T | C | Homozygous   |
| NC_037649.1 | 2173342 | SNV | 1 | T | C | Heterozygous |
| NC_037649.1 | 2173390 | SNV | 1 | T | G | Homozygous   |
| NC_037649.1 | 2173406 | SNV | 1 | C | T | Heterozygous |
| NC_037649.1 | 2173472 | SNV | 1 | G | A | Homozygous   |
| NC_037649.1 | 2173499 | SNV | 1 | G | A | Homozygous   |
| NC_037649.1 | 2173537 | SNV | 1 | C | T | Homozygous   |
| NC_037649.1 | 2173571 | SNV | 1 | T | C | Homozygous   |
| NC_037649.1 | 2173662 | SNV | 1 | T | G | Homozygous   |
| NC_037649.1 | 2173739 | SNV | 1 | C | T | Heterozygous |
| NC_037649.1 | 2173938 | SNV | 1 | A | G | Homozygous   |
| NC_037649.1 | 2173956 | SNV | 1 | C | T | Homozygous   |
| NC_037649.1 | 2174137 | SNV | 1 | G | A | Heterozygous |
| NC_037649.1 | 2177272 | SNV | 1 | C | T | Heterozygous |
| NC_037649.1 | 2177432 | SNV | 1 | T | G | Homozygous   |
| NC_037649.1 | 2177458 | SNV | 1 | T | C | Homozygous   |
| NC_037649.1 | 2177477 | SNV | 1 | T | C | Homozygous   |
| NC_037649.1 | 2177481 | SNV | 1 | T | C | Homozygous   |
| NC_037649.1 | 2177484 | SNV | 1 | C | T | Heterozygous |
| NC_037649.1 | 2177536 | SNV | 1 | C | G | Homozygous   |
| NC_037649.1 | 2177546 | SNV | 1 | A | G | Homozygous   |
| NC_037649.1 | 2177609 | SNV | 1 | C | T | Homozygous   |
| NC_037649.1 | 2183610 | SNV | 1 | T | A | Homozygous   |
| NC_037649.1 | 2183614 | SNV | 1 | T | A | Homozygous   |
| NC_037649.1 | 2183621 | SNV | 1 | C | T | Heterozygous |
| NC_037649.1 | 2183625 | SNV | 1 | C | T | Heterozygous |
| NC_037649.1 | 2183630 | SNV | 1 | T | C | Heterozygous |
| NC_037649.1 | 2183636 | SNV | 1 | T | G | Heterozygous |
| NC_037649.1 | 2183639 | SNV | 1 | C | T | Heterozygous |
| NC_037649.1 | 2183665 | SNV | 1 | C | T | Homozygous   |
| NC_037649.1 | 2188434 | SNV | 1 | C | T | Homozygous   |
| NC_037649.1 | 2188503 | SNV | 1 | C | T | Homozygous   |
| NC_037649.1 | 2188508 | SNV | 1 | C | A | Homozygous   |

|             |         |     |   |   |   |              |
|-------------|---------|-----|---|---|---|--------------|
| NC_037649.1 | 2188533 | SNV | 1 | G | A | Heterozygous |
| NC_037649.1 | 2188550 | SNV | 1 | G | A | Heterozygous |
| NC_037649.1 | 2188643 | SNV | 1 | T | G | Homozygous   |
| NC_037649.1 | 2188646 | SNV | 1 | T | G | Homozygous   |
| NC_037649.1 | 2191566 | SNV | 1 | T | G | Homozygous   |
| NC_037649.1 | 2196634 | SNV | 1 | C | T | Homozygous   |
| NC_037649.1 | 2196686 | SNV | 1 | T | C | Homozygous   |
| NC_037649.1 | 2196693 | SNV | 1 | T | A | Heterozygous |
| NC_037649.1 | 2196701 | SNV | 1 | T | A | Heterozygous |
| NC_037649.1 | 2196754 | SNV | 1 | G | A | Homozygous   |
| NC_037649.1 | 2196756 | SNV | 1 | G | A | Homozygous   |
| NC_037649.1 | 2196792 | SNV | 1 | C | T | Heterozygous |
| NC_037649.1 | 2204197 | SNV | 1 | G | A | Homozygous   |
| NC_037649.1 | 2204201 | SNV | 1 | T | A | Homozygous   |
| NC_037649.1 | 2204364 | SNV | 1 | T | C | Homozygous   |
| NC_037649.1 | 2204451 | SNV | 1 | T | A | Homozygous   |
| NC_037649.1 | 2204576 | SNV | 1 | G | T | Homozygous   |
| NC_037649.1 | 2204587 | SNV | 1 | G | A | Heterozygous |
| NC_037649.1 | 2204618 | SNV | 1 | T | C | Homozygous   |
| NC_037649.1 | 2204625 | SNV | 1 | G | A | Heterozygous |
| NC_037649.1 | 2249843 | SNV | 1 | A | C | Homozygous   |
| NC_037649.1 | 2249889 | SNV | 1 | G | T | Heterozygous |
| NC_037649.1 | 2251129 | SNV | 1 | G | A | Homozygous   |
| NC_037649.1 | 2251136 | SNV | 1 | A | G | Homozygous   |
| NC_037649.1 | 2251142 | SNV | 1 | A | G | Homozygous   |
| NC_037649.1 | 2251254 | SNV | 1 | G | A | Heterozygous |
| NC_037649.1 | 2251581 | SNV | 1 | T | A | Heterozygous |
| NC_037649.1 | 2251981 | SNV | 1 | C | T | Heterozygous |
| NC_037649.1 | 2252810 | SNV | 1 | G | C | Heterozygous |
| NC_037649.1 | 2252946 | SNV | 1 | T | G | Homozygous   |
| NC_037649.1 | 2253205 | SNV | 1 | G | A | Homozygous   |
| NC_037649.1 | 2253521 | SNV | 1 | T | G | Homozygous   |
| NC_037649.1 | 2253557 | SNV | 1 | T | C | Homozygous   |
| NC_037649.1 | 2254018 | SNV | 1 | G | C | Heterozygous |
| NC_037649.1 | 2254071 | SNV | 1 | T | C | Heterozygous |
| NC_037649.1 | 2254164 | SNV | 1 | C | T | Heterozygous |
| NC_037649.1 | 2255117 | SNV | 1 | G | A | Heterozygous |
| NC_037649.1 | 2255132 | SNV | 1 | T | G | Homozygous   |
| NC_037649.1 | 2255152 | SNV | 1 | G | A | Heterozygous |
| NC_037649.1 | 2255194 | SNV | 1 | C | A | Homozygous   |
| NC_037649.1 | 2255528 | SNV | 1 | T | G | Homozygous   |
| NC_037649.1 | 2255535 | SNV | 1 | T | A | Heterozygous |
| NC_037649.1 | 2255538 | SNV | 1 | C | T | Homozygous   |
| NC_037649.1 | 2255546 | SNV | 1 | T | A | Homozygous   |
| NC_037649.1 | 2255568 | SNV | 1 | A | T | Homozygous   |
| NC_037649.1 | 2255750 | SNV | 1 | T | C | Homozygous   |
| NC_037649.1 | 2255783 | SNV | 1 | T | C | Homozygous   |
| NC_037649.1 | 2258020 | SNV | 1 | A | G | Homozygous   |
| NC_037649.1 | 2258457 | SNV | 1 | A | G | Homozygous   |
| NC_037649.1 | 2258479 | SNV | 1 | C | T | Homozygous   |
| NC_037649.1 | 2258484 | SNV | 1 | A | T | Homozygous   |

|             |         |     |   |   |   |              |
|-------------|---------|-----|---|---|---|--------------|
| NC_037649.1 | 2262685 | SNV | 1 | T | C | Heterozygous |
| NC_037649.1 | 2262779 | SNV | 1 | C | T | Heterozygous |
| NC_037649.1 | 2263112 | SNV | 1 | T | C | Homozygous   |
| NC_037649.1 | 2263558 | SNV | 1 | T | C | Homozygous   |
| NC_037649.1 | 2269886 | SNV | 1 | T | C | Homozygous   |
| NC_037649.1 | 2269922 | SNV | 1 | C | T | Homozygous   |
| NC_037649.1 | 2270070 | SNV | 1 | A | T | Homozygous   |
| NC_037649.1 | 2270103 | SNV | 1 | A | G | Heterozygous |
| NC_037649.1 | 2270126 | SNV | 1 | C | T | Heterozygous |
| NC_037649.1 | 2270663 | SNV | 1 | C | T | Heterozygous |
| NC_037649.1 | 2270852 | SNV | 1 | C | T | Heterozygous |
| NC_037649.1 | 2285082 | SNV | 1 | T | C | Homozygous   |
| NC_037649.1 | 2285084 | SNV | 1 | T | A | Homozygous   |
| NC_037649.1 | 2285091 | SNV | 1 | A | C | Homozygous   |
| NC_037649.1 | 2285096 | SNV | 1 | T | C | Homozygous   |
| NC_037649.1 | 2285115 | SNV | 1 | A | T | Homozygous   |
| NC_037649.1 | 2285148 | SNV | 1 | T | A | Homozygous   |
| NC_037649.1 | 2285153 | SNV | 1 | A | T | Homozygous   |
| NC_037649.1 | 2289104 | SNV | 1 | A | C | Homozygous   |
| NC_037649.1 | 2292857 | SNV | 1 | A | C | Heterozygous |
| NC_037649.1 | 2292860 | SNV | 1 | T | C | Heterozygous |
| NC_037649.1 | 2292866 | SNV | 1 | T | C | Heterozygous |
| NC_037649.1 | 2292868 | SNV | 1 | T | C | Heterozygous |
| NC_037649.1 | 2292869 | SNV | 1 | A | C | Heterozygous |
| NC_037649.1 | 2292873 | SNV | 1 | A | C | Heterozygous |
| NC_037649.1 | 2292879 | SNV | 1 | A | T | Heterozygous |
| NC_037649.1 | 2292881 | SNV | 1 | A | T | Heterozygous |
| NC_037649.1 | 2292892 | SNV | 1 | T | A | Heterozygous |
| NC_037649.1 | 2292896 | SNV | 1 | T | C | Heterozygous |
| NC_037649.1 | 2293429 | SNV | 1 | G | A | Heterozygous |
| NC_037649.1 | 2293439 | SNV | 1 | T | A | Heterozygous |
| NC_037649.1 | 2298380 | SNV | 1 | G | A | Heterozygous |
| NC_037649.1 | 2298828 | SNV | 1 | C | T | Heterozygous |
| NC_037649.1 | 2299299 | SNV | 1 | C | T | Heterozygous |
| NC_037649.1 | 2299695 | SNV | 1 | C | T | Heterozygous |
| NC_037649.1 | 2300508 | SNV | 1 | G | A | Homozygous   |
| NC_037649.1 | 2300522 | SNV | 1 | A | C | Homozygous   |
| NC_037649.1 | 2301562 | SNV | 1 | T | C | Homozygous   |
| NC_037649.1 | 2302168 | SNV | 1 | T | C | Heterozygous |
| NC_037649.1 | 2302169 | SNV | 1 | T | C | Heterozygous |
| NC_037649.1 | 2302825 | SNV | 1 | A | T | Homozygous   |
| NC_037649.1 | 2304845 | SNV | 1 | C | G | Homozygous   |
| NC_037649.1 | 2309741 | SNV | 1 | A | G | Homozygous   |
| NC_037649.1 | 2320970 | SNV | 1 | C | G | Heterozygous |
| NC_037649.1 | 2321120 | SNV | 1 | T | C | Homozygous   |
| NC_037649.1 | 2321601 | SNV | 1 | T | C | Homozygous   |
| NC_037649.1 | 2321626 | SNV | 1 | T | C | Homozygous   |
| NC_037649.1 | 2321811 | SNV | 1 | C | T | Heterozygous |
| NC_037649.1 | 2321900 | SNV | 1 | T | A | Heterozygous |
| NC_037649.1 | 2321914 | SNV | 1 | T | C | Homozygous   |
| NC_037649.1 | 2321923 | SNV | 1 | T | C | Homozygous   |

|             |         |     |   |   |   |              |
|-------------|---------|-----|---|---|---|--------------|
| NC_037649.1 | 2321926 | SNV | 1 | T | C | Homozygous   |
| NC_037649.1 | 2321939 | SNV | 1 | C | A | Heterozygous |
| NC_037649.1 | 2321941 | SNV | 1 | T | C | Heterozygous |
| NC_037649.1 | 2321955 | SNV | 1 | C | T | Heterozygous |
| NC_037649.1 | 2321994 | SNV | 1 | G | T | Heterozygous |
| NC_037649.1 | 2322039 | SNV | 1 | C | T | Homozygous   |
| NC_037649.1 | 2322088 | SNV | 1 | T | C | Homozygous   |
| NC_037649.1 | 2322090 | SNV | 1 | T | C | Homozygous   |
| NC_037649.1 | 2322174 | SNV | 1 | A | G | Heterozygous |
| NC_037649.1 | 2334648 | SNV | 1 | C | T | Homozygous   |
| NC_037649.1 | 2334733 | SNV | 1 | C | T | Homozygous   |
| NC_037649.1 | 2338568 | SNV | 1 | T | A | Heterozygous |
| NC_037649.1 | 2338572 | SNV | 1 | C | T | Heterozygous |
| NC_037649.1 | 2338584 | SNV | 1 | A | G | Heterozygous |
| NC_037649.1 | 2338633 | SNV | 1 | T | C | Heterozygous |
| NC_037649.1 | 2338641 | SNV | 1 | T | G | Heterozygous |
| NC_037649.1 | 2338644 | SNV | 1 | A | G | Heterozygous |
| NC_037649.1 | 2345829 | SNV | 1 | C | T | Homozygous   |
| NC_037649.1 | 2345841 | SNV | 1 | C | A | Heterozygous |
| NC_037649.1 | 2345845 | SNV | 1 | C | T | Heterozygous |
| NC_037649.1 | 2345849 | SNV | 1 | C | T | Homozygous   |
| NC_037649.1 | 2356393 | SNV | 1 | T | G | Homozygous   |
| NC_037649.1 | 2356396 | SNV | 1 | T | A | Homozygous   |
| NC_037649.1 | 2356406 | SNV | 1 | T | C | Homozygous   |
| NC_037649.1 | 2365688 | SNV | 1 | T | C | Homozygous   |
| NC_037649.1 | 2365696 | SNV | 1 | A | T | Homozygous   |
| NC_037649.1 | 2365700 | SNV | 1 | A | T | Homozygous   |
| NC_037649.1 | 2365703 | SNV | 1 | T | C | Homozygous   |
| NC_037649.1 | 2365707 | SNV | 1 | C | T | Homozygous   |
| NC_037649.1 | 2366080 | SNV | 1 | G | A | Heterozygous |
| NC_037649.1 | 2366105 | SNV | 1 | G | A | Heterozygous |
| NC_037649.1 | 2366109 | SNV | 1 | A | C | Heterozygous |
| NC_037649.1 | 2366111 | SNV | 1 | T | C | Heterozygous |
| NC_037649.1 | 2366321 | SNV | 1 | G | A | Homozygous   |
| NC_037649.1 | 2366332 | SNV | 1 | A | T | Homozygous   |
| NC_037649.1 | 2366350 | SNV | 1 | C | T | Homozygous   |
| NC_037649.1 | 2366354 | SNV | 1 | C | T | Heterozygous |
| NC_037649.1 | 2366360 | SNV | 1 | C | T | Heterozygous |
| NC_037649.1 | 2366370 | SNV | 1 | G | A | Heterozygous |
| NC_037649.1 | 2371922 | SNV | 1 | A | T | Heterozygous |
| NC_037649.1 | 2371930 | SNV | 1 | G | T | Heterozygous |
| NC_037649.1 | 2387924 | SNV | 1 | C | T | Heterozygous |
| NC_037649.1 | 2391970 | SNV | 1 | C | T | Heterozygous |
| NC_037649.1 | 2393544 | SNV | 1 | A | C | Homozygous   |
| NC_037649.1 | 2393684 | SNV | 1 | T | C | Heterozygous |
| NC_037649.1 | 2393890 | SNV | 1 | C | T | Homozygous   |
| NC_037649.1 | 2394023 | SNV | 1 | T | A | Homozygous   |
| NC_037649.1 | 2394981 | SNV | 1 | G | A | Heterozygous |
| NC_037649.1 | 2395408 | SNV | 1 | A | G | Homozygous   |
| NC_037649.1 | 2395853 | SNV | 1 | C | T | Homozygous   |
| NC_037649.1 | 2395929 | SNV | 1 | T | C | Homozygous   |

|             |         |     |   |   |   |              |
|-------------|---------|-----|---|---|---|--------------|
| NC_037649.1 | 2398956 | SNV | 1 | T | A | Homozygous   |
| NC_037649.1 | 2398960 | SNV | 1 | T | C | Homozygous   |
| NC_037649.1 | 2404996 | SNV | 1 | C | G | Homozygous   |
| NC_037649.1 | 2405002 | SNV | 1 | T | A | Homozygous   |
| NC_037649.1 | 2405008 | SNV | 1 | T | A | Homozygous   |
| NC_037649.1 | 2405011 | SNV | 1 | A | T | Homozygous   |
| NC_037649.1 | 2405043 | SNV | 1 | A | T | Homozygous   |
| NC_037649.1 | 2405049 | SNV | 1 | A | T | Heterozygous |
| NC_037649.1 | 2414827 | SNV | 1 | A | T | Homozygous   |
| NC_037649.1 | 2414833 | SNV | 1 | C | T | Homozygous   |
| NC_037649.1 | 2414835 | SNV | 1 | T | A | Homozygous   |
| NC_037649.1 | 2414843 | SNV | 1 | A | G | Homozygous   |
| NC_037649.1 | 2414853 | SNV | 1 | A | T | Homozygous   |
| NC_037649.1 | 2421785 | SNV | 1 | A | C | Homozygous   |
| NC_037649.1 | 2421791 | SNV | 1 | A | T | Homozygous   |
| NC_037649.1 | 2421794 | SNV | 1 | T | C | Homozygous   |
| NC_037649.1 | 2421796 | SNV | 1 | T | G | Homozygous   |
| NC_037649.1 | 2421802 | SNV | 1 | T | C | Homozygous   |
| NC_037649.1 | 2421806 | SNV | 1 | T | A | Homozygous   |
| NC_037649.1 | 2427277 | SNV | 1 | A | T | Homozygous   |
| NC_037649.1 | 2427297 | SNV | 1 | A | C | Homozygous   |
| NC_037649.1 | 2427302 | SNV | 1 | C | A | Homozygous   |
| NC_037649.1 | 2427322 | SNV | 1 | C | G | Homozygous   |
| NC_037649.1 | 2451469 | SNV | 1 | A | G | Homozygous   |
| NC_037649.1 | 2457392 | SNV | 1 | A | G | Heterozygous |
| NC_037649.1 | 2457396 | SNV | 1 | T | C | Homozygous   |
| NC_037649.1 | 2457401 | SNV | 1 | T | C | Homozygous   |
| NC_037649.1 | 2457408 | SNV | 1 | G | A | Homozygous   |
| NC_037649.1 | 2457428 | SNV | 1 | A | C | Homozygous   |
| NC_037649.1 | 2457433 | SNV | 1 | C | T | Homozygous   |
| NC_037649.1 | 2457435 | SNV | 1 | T | C | Homozygous   |
| NC_037649.1 | 2457444 | SNV | 1 | T | G | Homozygous   |
| NC_037649.1 | 2468693 | SNV | 1 | T | G | Homozygous   |
| NC_037649.1 | 2468717 | SNV | 1 | T | A | Homozygous   |
| NC_037649.1 | 2468883 | SNV | 1 | A | G | Homozygous   |
| NC_037649.1 | 2468888 | SNV | 1 | T | C | Homozygous   |
| NC_037649.1 | 2473465 | SNV | 1 | T | A | Homozygous   |
| NC_037649.1 | 2473484 | SNV | 1 | A | C | Homozygous   |
| NC_037649.1 | 2473491 | SNV | 1 | A | C | Homozygous   |
| NC_037649.1 | 2484897 | SNV | 1 | T | A | Homozygous   |
| NC_037649.1 | 2484900 | SNV | 1 | A | T | Homozygous   |
| NC_037649.1 | 2484902 | SNV | 1 | A | T | Homozygous   |
| NC_037649.1 | 2484907 | SNV | 1 | T | A | Homozygous   |
| NC_037649.1 | 2484914 | SNV | 1 | A | T | Homozygous   |
| NC_037649.1 | 2484918 | SNV | 1 | T | A | Homozygous   |
| NC_037649.1 | 2484922 | SNV | 1 | C | A | Homozygous   |
| NC_037649.1 | 2493783 | SNV | 1 | G | A | Heterozygous |
| NC_037649.1 | 2493857 | SNV | 1 | T | A | Heterozygous |
| NC_037649.1 | 2495485 | SNV | 1 | T | C | Homozygous   |
| NC_037649.1 | 2497062 | SNV | 1 | T | C | Homozygous   |
| NC_037649.1 | 2498444 | SNV | 1 | G | T | Heterozygous |



|             |         |     |   |   |   |              |
|-------------|---------|-----|---|---|---|--------------|
| NC_037649.1 | 2498810 | SNV | 1 | T | C | Homozygous   |
| NC_037649.1 | 2499374 | SNV | 1 | G | A | Homozygous   |
| NC_037649.1 | 2504568 | SNV | 1 | A | C | Homozygous   |
| NC_037649.1 | 2504586 | SNV | 1 | T | A | Homozygous   |
| NC_037649.1 | 2504589 | SNV | 1 | A | C | Homozygous   |
| NC_037649.1 | 2504612 | SNV | 1 | T | A | Homozygous   |
| NC_037649.1 | 2509497 | SNV | 1 | A | T | Heterozygous |
| NC_037649.1 | 2509518 | SNV | 1 | A | G | Heterozygous |
| NC_037649.1 | 2509530 | SNV | 1 | T | A | Heterozygous |
| NC_037649.1 | 2509534 | SNV | 1 | T | C | Heterozygous |
| NC_037649.1 | 2509538 | SNV | 1 | A | G | Heterozygous |
| NC_037649.1 | 2509542 | SNV | 1 | A | G | Heterozygous |
| NC_037649.1 | 2510213 | SNV | 1 | G | A | Homozygous   |
| NC_037649.1 | 2520731 | SNV | 1 | C | T | Homozygous   |
| NC_037649.1 | 2520736 | SNV | 1 | A | T | Homozygous   |
| NC_037649.1 | 2520768 | SNV | 1 | T | A | Homozygous   |
| NC_037649.1 | 2520773 | SNV | 1 | T | A | Homozygous   |
| NC_037649.1 | 2520775 | SNV | 1 | A | G | Homozygous   |
| NC_037649.1 | 2520784 | SNV | 1 | T | A | Homozygous   |
| NC_037649.1 | 2529167 | SNV | 1 | G | A | Homozygous   |
| NC_037649.1 | 2529231 | SNV | 1 | A | G | Homozygous   |
| NC_037649.1 | 2564731 | SNV | 1 | A | C | Heterozygous |
| NC_037649.1 | 2564733 | SNV | 1 | A | C | Heterozygous |
| NC_037649.1 | 2564735 | SNV | 1 | A | C | Homozygous   |
| NC_037649.1 | 2564737 | SNV | 1 | A | C | Heterozygous |
| NC_037649.1 | 2564740 | SNV | 1 | T | G | Heterozygous |
| NC_037649.1 | 2564745 | SNV | 1 | A | G | Heterozygous |
| NC_037649.1 | 2564750 | SNV | 1 | T | G | Heterozygous |
| NC_037649.1 | 2564772 | SNV | 1 | T | G | Heterozygous |
| NC_037649.1 | 2566914 | SNV | 1 | T | A | Homozygous   |
| NC_037649.1 | 2566947 | SNV | 1 | T | A | Heterozygous |
| NC_037649.1 | 2566953 | SNV | 1 | T | G | Heterozygous |
| NC_037649.1 | 2566962 | SNV | 1 | T | A | Heterozygous |
| NC_037649.1 | 2572537 | SNV | 1 | A | T | Homozygous   |
| NC_037649.1 | 2575337 | SNV | 1 | G | C | Homozygous   |
| NC_037649.1 | 2575341 | SNV | 1 | T | G | Homozygous   |
| NC_037649.1 | 2575347 | SNV | 1 | C | T | Heterozygous |
| NC_037649.1 | 2575350 | SNV | 1 | C | T | Homozygous   |
| NC_037649.1 | 2575354 | SNV | 1 | T | A | Homozygous   |
| NC_037649.1 | 2575360 | SNV | 1 | T | A | Homozygous   |
| NC_037649.1 | 2575379 | SNV | 1 | A | G | Homozygous   |
| NC_037649.1 | 2580116 | SNV | 1 | C | T | Heterozygous |
| NC_037649.1 | 2580134 | SNV | 1 | G | C | Homozygous   |
| NC_037649.1 | 2586302 | SNV | 1 | A | G | Homozygous   |
| NC_037649.1 | 2586309 | SNV | 1 | A | T | Homozygous   |
| NC_037649.1 | 2610868 | SNV | 1 | C | T | Homozygous   |
| NC_037649.1 | 2610871 | SNV | 1 | A | G | Homozygous   |
| NC_037649.1 | 2610903 | SNV | 1 | A | T | Homozygous   |
| NC_037649.1 | 2610985 | SNV | 1 | A | T | Heterozygous |
| NC_037649.1 | 2626492 | SNV | 1 | T | A | Homozygous   |
| NC_037649.1 | 2626499 | SNV | 1 | T | A | Homozygous   |

|             |         |     |   |   |   |              |
|-------------|---------|-----|---|---|---|--------------|
| NC_037649.1 | 2626501 | SNV | 1 | G | A | Homozygous   |
| NC_037649.1 | 2626505 | SNV | 1 | A | C | Heterozygous |
| NC_037649.1 | 2626518 | SNV | 1 | A | G | Homozygous   |
| NC_037649.1 | 2626530 | SNV | 1 | A | G | Homozygous   |
| NC_037649.1 | 2631255 | SNV | 1 | A | T | Homozygous   |
| NC_037649.1 | 2631261 | SNV | 1 | T | A | Heterozygous |
| NC_037649.1 | 2631265 | SNV | 1 | T | A | Heterozygous |
| NC_037649.1 | 2631268 | SNV | 1 | A | T | Heterozygous |
| NC_037649.1 | 2631283 | SNV | 1 | A | T | Heterozygous |
| NC_037649.1 | 2635936 | SNV | 1 | T | A | Homozygous   |
| NC_037649.1 | 2635938 | SNV | 1 | C | A | Homozygous   |
| NC_037649.1 | 2635944 | SNV | 1 | T | A | Homozygous   |
| NC_037649.1 | 2635954 | SNV | 1 | C | T | Homozygous   |
| NC_037649.1 | 2636943 | SNV | 1 | A | C | Homozygous   |
| NC_037649.1 | 2636950 | SNV | 1 | A | G | Homozygous   |
| NC_037649.1 | 2637354 | SNV | 1 | A | G | Homozygous   |
| NC_037649.1 | 2637373 | SNV | 1 | A | G | Homozygous   |
| NC_037649.1 | 2637379 | SNV | 1 | T | A | Homozygous   |
| NC_037649.1 | 2637381 | SNV | 1 | A | T | Homozygous   |
| NC_037649.1 | 2639122 | SNV | 1 | A | G | Homozygous   |
| NC_037649.1 | 2639141 | SNV | 1 | T | C | Homozygous   |
| NC_037649.1 | 2639154 | SNV | 1 | A | C | Homozygous   |
| NC_037649.1 | 2639159 | SNV | 1 | T | C | Homozygous   |
| NC_037649.1 | 2643027 | SNV | 1 | T | A | Homozygous   |
| NC_037649.1 | 2643030 | SNV | 1 | G | A | Homozygous   |
| NC_037649.1 | 2649498 | SNV | 1 | A | T | Homozygous   |
| NC_037649.1 | 2649500 | SNV | 1 | A | C | Homozygous   |
| NC_037649.1 | 2654586 | SNV | 1 | A | C | Homozygous   |
| NC_037649.1 | 2654599 | SNV | 1 | A | G | Homozygous   |
| NC_037649.1 | 2654611 | SNV | 1 | T | A | Homozygous   |
| NC_037649.1 | 2654615 | SNV | 1 | A | G | Homozygous   |
| NC_037649.1 | 2657524 | SNV | 1 | A | G | Homozygous   |
| NC_037649.1 | 2657543 | SNV | 1 | G | A | Homozygous   |
| NC_037649.1 | 2657549 | SNV | 1 | G | T | Homozygous   |
| NC_037649.1 | 2657554 | SNV | 1 | T | C | Homozygous   |
| NC_037649.1 | 2657557 | SNV | 1 | T | A | Homozygous   |
| NC_037649.1 | 2657562 | SNV | 1 | T | G | Homozygous   |
| NC_037649.1 | 2657566 | SNV | 1 | T | C | Homozygous   |
| NC_037649.1 | 2680684 | SNV | 1 | T | A | Heterozygous |
| NC_037649.1 | 2680694 | SNV | 1 | T | A | Homozygous   |
| NC_037649.1 | 2680696 | SNV | 1 | T | A | Homozygous   |
| NC_037649.1 | 2680698 | SNV | 1 | T | A | Homozygous   |
| NC_037649.1 | 2680704 | SNV | 1 | T | A | Homozygous   |
| NC_037649.1 | 2680732 | SNV | 1 | T | A | Heterozygous |
| NC_037649.1 | 2695477 | SNV | 1 | T | A | Homozygous   |
| NC_037649.1 | 2695500 | SNV | 1 | G | A | Homozygous   |
| NC_037649.1 | 2695515 | SNV | 1 | C | A | Homozygous   |
| NC_037649.1 | 2729497 | SNV | 1 | T | A | Homozygous   |
| NC_037649.1 | 2729501 | SNV | 1 | T | A | Homozygous   |
| NC_037649.1 | 2734616 | SNV | 1 | T | C | Homozygous   |
| NC_037649.1 | 2744725 | SNV | 1 | G | A | Homozygous   |

|             |         |     |   |   |   |              |
|-------------|---------|-----|---|---|---|--------------|
| NC_037649.1 | 2744739 | SNV | 1 | A | T | Homozygous   |
| NC_037649.1 | 2744741 | SNV | 1 | A | T | Homozygous   |
| NC_037649.1 | 2812619 | SNV | 1 | T | A | Homozygous   |
| NC_037649.1 | 2812632 | SNV | 1 | C | A | Homozygous   |
| NC_037649.1 | 2812638 | SNV | 1 | T | G | Homozygous   |
| NC_037649.1 | 2812644 | SNV | 1 | T | A | Homozygous   |
| NC_037649.1 | 2812653 | SNV | 1 | C | A | Homozygous   |
| NC_037649.1 | 2812682 | SNV | 1 | T | A | Homozygous   |
| NC_037649.1 | 2813891 | SNV | 1 | G | A | Homozygous   |
| NC_037649.1 | 2814320 | SNV | 1 | A | G | Homozygous   |
| NC_037649.1 | 2814569 | SNV | 1 | G | A | Homozygous   |
| NC_037649.1 | 2819357 | SNV | 1 | G | T | Heterozygous |
| NC_037649.1 | 2819923 | SNV | 1 | A | G | Homozygous   |
| NC_037649.1 | 2822144 | SNV | 1 | T | C | Homozygous   |
| NC_037649.1 | 2822809 | SNV | 1 | A | G | Homozygous   |
| NC_037649.1 | 2825951 | SNV | 1 | A | T | Homozygous   |
| NC_037649.1 | 2825960 | SNV | 1 | G | A | Homozygous   |
| NC_037649.1 | 2825975 | SNV | 1 | T | A | Homozygous   |
| NC_037649.1 | 2828419 | SNV | 1 | T | G | Homozygous   |
| NC_037649.1 | 2828424 | SNV | 1 | A | C | Homozygous   |
| NC_037649.1 | 2828434 | SNV | 1 | A | T | Homozygous   |
| NC_037649.1 | 2828438 | SNV | 1 | G | A | Homozygous   |
| NC_037649.1 | 2831019 | SNV | 1 | T | A | Homozygous   |
| NC_037649.1 | 2831021 | SNV | 1 | T | A | Homozygous   |
| NC_037649.1 | 2831031 | SNV | 1 | T | C | Homozygous   |
| NC_037649.1 | 2838691 | SNV | 1 | T | A | Homozygous   |
| NC_037649.1 | 2838697 | SNV | 1 | T | G | Homozygous   |
| NC_037649.1 | 2838703 | SNV | 1 | G | T | Homozygous   |
| NC_037649.1 | 2838711 | SNV | 1 | A | T | Homozygous   |
| NC_037649.1 | 2838714 | SNV | 1 | A | T | Homozygous   |
| NC_037649.1 | 2851576 | SNV | 1 | T | C | Homozygous   |
| NC_037649.1 | 2851594 | SNV | 1 | C | G | Homozygous   |
| NC_037649.1 | 2851599 | SNV | 1 | A | C | Homozygous   |
| NC_037649.1 | 2851602 | SNV | 1 | T | A | Homozygous   |
| NC_037649.1 | 2858891 | SNV | 1 | T | A | Homozygous   |
| NC_037649.1 | 2858895 | SNV | 1 | T | C | Homozygous   |
| NC_037649.1 | 2858904 | SNV | 1 | C | A | Homozygous   |
| NC_037649.1 | 2861088 | SNV | 1 | A | G | Homozygous   |
| NC_037649.1 | 2862074 | SNV | 1 | G | A | Homozygous   |
| NC_037649.1 | 2868908 | SNV | 1 | T | C | Heterozygous |
| NC_037649.1 | 2872767 | SNV | 1 | A | T | Heterozygous |
| NC_037649.1 | 2872771 | SNV | 1 | A | T | Homozygous   |
| NC_037649.1 | 2872773 | SNV | 1 | A | T | Homozygous   |
| NC_037649.1 | 2872776 | SNV | 1 | A | T | Heterozygous |
| NC_037649.1 | 2872797 | SNV | 1 | A | C | Homozygous   |
| NC_037649.1 | 2872799 | SNV | 1 | C | T | Homozygous   |
| NC_037649.1 | 2872808 | SNV | 1 | C | T | Homozygous   |
| NC_037649.1 | 2872811 | SNV | 1 | C | T | Homozygous   |
| NC_037649.1 | 2872821 | SNV | 1 | A | C | Homozygous   |
| NC_037649.1 | 2872838 | SNV | 1 | C | T | Homozygous   |
| NC_037649.1 | 2872849 | SNV | 1 | T | A | Homozygous   |

|             |         |     |   |   |   |              |
|-------------|---------|-----|---|---|---|--------------|
| NC_037649.1 | 2872854 | SNV | 1 | A | C | Homozygous   |
| NC_037649.1 | 2872856 | SNV | 1 | C | T | Homozygous   |
| NC_037649.1 | 2872864 | SNV | 1 | T | C | Heterozygous |
| NC_037649.1 | 2872890 | SNV | 1 | A | G | Heterozygous |
| NC_037649.1 | 2872952 | SNV | 1 | T | C | Heterozygous |
| NC_037649.1 | 2872955 | SNV | 1 | T | C | Heterozygous |
| NC_037649.1 | 2872958 | SNV | 1 | T | C | Homozygous   |
| NC_037649.1 | 2872970 | SNV | 1 | T | C | Homozygous   |
| NC_037649.1 | 2872975 | SNV | 1 | T | C | Heterozygous |
| NC_037649.1 | 2872982 | SNV | 1 | T | C | Heterozygous |
| NC_037649.1 | 2872990 | SNV | 1 | T | C | Heterozygous |
| NC_037649.1 | 2873008 | SNV | 1 | T | C | Heterozygous |
| NC_037649.1 | 2873010 | SNV | 1 | A | C | Heterozygous |
| NC_037649.1 | 2873014 | SNV | 1 | T | A | Homozygous   |
| NC_037649.1 | 2873032 | SNV | 1 | T | C | Homozygous   |
| NC_037649.1 | 2873057 | SNV | 1 | T | C | Heterozygous |
| NC_037649.1 | 2873108 | SNV | 1 | C | A | Heterozygous |
| NC_037649.1 | 2873121 | SNV | 1 | A | G | Heterozygous |
| NC_037649.1 | 2873257 | SNV | 1 | T | C | Homozygous   |
| NC_037649.1 | 2873259 | SNV | 1 | A | C | Homozygous   |
| NC_037649.1 | 2873264 | SNV | 1 | T | A | Homozygous   |
| NC_037649.1 | 2873270 | SNV | 1 | T | G | Homozygous   |
| NC_037649.1 | 2873275 | SNV | 1 | C | T | Homozygous   |
| NC_037649.1 | 2873277 | SNV | 1 | A | C | Homozygous   |
| NC_037649.1 | 2873284 | SNV | 1 | T | A | Homozygous   |
| NC_037649.1 | 2873312 | SNV | 1 | T | G | Homozygous   |
| NC_037649.1 | 2874745 | SNV | 1 | G | C | Homozygous   |
| NC_037649.1 | 2874750 | SNV | 1 | C | A | Homozygous   |
| NC_037649.1 | 2874761 | SNV | 1 | G | A | Homozygous   |
| NC_037649.1 | 2874766 | SNV | 1 | G | A | Homozygous   |
| NC_037649.1 | 2874790 | SNV | 1 | A | G | Homozygous   |
| NC_037649.1 | 2874804 | SNV | 1 | G | A | Homozygous   |
| NC_037649.1 | 2883002 | SNV | 1 | C | A | Homozygous   |
| NC_037649.1 | 2891682 | SNV | 1 | T | A | Heterozygous |
| NC_037649.1 | 2891686 | SNV | 1 | T | C | Heterozygous |
| NC_037649.1 | 2891717 | SNV | 1 | T | A | Homozygous   |
| NC_037649.1 | 2891719 | SNV | 1 | T | G | Homozygous   |
| NC_037649.1 | 2891727 | SNV | 1 | T | G | Homozygous   |
| NC_037649.1 | 2891745 | SNV | 1 | T | A | Homozygous   |
| NC_037649.1 | 2891777 | SNV | 1 | T | A | Heterozygous |
| NC_037649.1 | 2891781 | SNV | 1 | T | C | Heterozygous |
| NC_037649.1 | 2891829 | SNV | 1 | A | T | Homozygous   |
| NC_037649.1 | 2894988 | SNV | 1 | T | C | Homozygous   |
| NC_037649.1 | 2895004 | SNV | 1 | C | T | Homozygous   |
| NC_037649.1 | 2895071 | SNV | 1 | C | T | Homozygous   |
| NC_037649.1 | 2895078 | SNV | 1 | C | T | Homozygous   |
| NC_037649.1 | 2895100 | SNV | 1 | T | C | Homozygous   |
| NC_037649.1 | 2895102 | SNV | 1 | A | G | Homozygous   |
| NC_037649.1 | 2895111 | SNV | 1 | G | A | Homozygous   |
| NC_037649.1 | 2896770 | SNV | 1 | G | T | Homozygous   |
| NC_037649.1 | 2896778 | SNV | 1 | A | C | Homozygous   |

|             |         |     |   |   |   |              |
|-------------|---------|-----|---|---|---|--------------|
| NC_037649.1 | 2896780 | SNV | 1 | A | T | Homozygous   |
| NC_037649.1 | 2896782 | SNV | 1 | A | T | Homozygous   |
| NC_037649.1 | 2896789 | SNV | 1 | G | A | Homozygous   |
| NC_037649.1 | 2896794 | SNV | 1 | T | G | Homozygous   |
| NC_037649.1 | 2897270 | SNV | 1 | T | A | Homozygous   |
| NC_037649.1 | 2897281 | SNV | 1 | T | A | Homozygous   |
| NC_037649.1 | 2897289 | SNV | 1 | T | G | Heterozygous |
| NC_037649.1 | 2897294 | SNV | 1 | A | C | Heterozygous |
| NC_037649.1 | 2897296 | SNV | 1 | T | A | Heterozygous |
| NC_037649.1 | 2897299 | SNV | 1 | A | T | Heterozygous |
| NC_037649.1 | 2897317 | SNV | 1 | T | C | Heterozygous |
| NC_037649.1 | 2897326 | SNV | 1 | G | C | Homozygous   |
| NC_037649.1 | 2897359 | SNV | 1 | A | T | Homozygous   |
| NC_037649.1 | 2897366 | SNV | 1 | A | C | Homozygous   |
| NC_037649.1 | 2897369 | SNV | 1 | A | T | Homozygous   |
| NC_037649.1 | 2897384 | SNV | 1 | T | C | Homozygous   |
| NC_037649.1 | 2903725 | SNV | 1 | C | T | Homozygous   |
| NC_037649.1 | 2922868 | SNV | 1 | A | T | Heterozygous |
| NC_037649.1 | 2922876 | SNV | 1 | A | T | Heterozygous |
| NC_037649.1 | 2922878 | SNV | 1 | A | T | Heterozygous |
| NC_037649.1 | 2922881 | SNV | 1 | T | A | Heterozygous |
| NC_037649.1 | 2922884 | SNV | 1 | A | C | Heterozygous |
| NC_037649.1 | 2925045 | SNV | 1 | A | T | Homozygous   |
| NC_037649.1 | 2925048 | SNV | 1 | A | T | Homozygous   |
| NC_037649.1 | 2925087 | SNV | 1 | T | G | Homozygous   |
| NC_037649.1 | 2925092 | SNV | 1 | T | A | Homozygous   |
| NC_037649.1 | 2925097 | SNV | 1 | G | A | Homozygous   |
| NC_037649.1 | 2925104 | SNV | 1 | G | A | Homozygous   |
| NC_037649.1 | 2934079 | SNV | 1 | T | A | Homozygous   |
| NC_037649.1 | 2934082 | SNV | 1 | T | A | Homozygous   |
| NC_037649.1 | 2934085 | SNV | 1 | T | A | Homozygous   |
| NC_037649.1 | 2934111 | SNV | 1 | T | G | Homozygous   |
| NC_037649.1 | 2934117 | SNV | 1 | T | A | Heterozygous |
| NC_037649.1 | 2939844 | SNV | 1 | T | A | Homozygous   |
| NC_037649.1 | 2939855 | SNV | 1 | T | A | Homozygous   |
| NC_037649.1 | 2939862 | SNV | 1 | T | A | Homozygous   |
| NC_037649.1 | 2940141 | SNV | 1 | G | T | Homozygous   |
| NC_037649.1 | 2940150 | SNV | 1 | A | T | Homozygous   |
| NC_037649.1 | 2940157 | SNV | 1 | C | T | Homozygous   |
| NC_037649.1 | 2970950 | SNV | 1 | A | T | Heterozygous |
| NC_037649.1 | 2970956 | SNV | 1 | T | A | Homozygous   |
| NC_037649.1 | 2981721 | SNV | 1 | T | A | Homozygous   |
| NC_037649.1 | 2981724 | SNV | 1 | A | G | Heterozygous |
| NC_037649.1 | 2981726 | SNV | 1 | A | G | Heterozygous |
| NC_037649.1 | 2981778 | SNV | 1 | T | A | Homozygous   |
| NC_037649.1 | 2986085 | SNV | 1 | C | T | Homozygous   |
| NC_037649.1 | 2986090 | SNV | 1 | A | T | Homozygous   |
| NC_037649.1 | 2986092 | SNV | 1 | T | A | Homozygous   |
| NC_037649.1 | 2986115 | SNV | 1 | T | A | Homozygous   |
| NC_037649.1 | 2986117 | SNV | 1 | T | C | Homozygous   |
| NC_037649.1 | 2986120 | SNV | 1 | A | G | Homozygous   |

|             |         |     |   |   |   |              |
|-------------|---------|-----|---|---|---|--------------|
| NC_037649.1 | 2986126 | SNV | 1 | T | A | Homozygous   |
| NC_037649.1 | 2988918 | SNV | 1 | T | A | Homozygous   |
| NC_037649.1 | 2990128 | SNV | 1 | G | A | Heterozygous |
| NC_037649.1 | 2990159 | SNV | 1 | C | T | Heterozygous |
| NC_037649.1 | 2990162 | SNV | 1 | T | C | Heterozygous |
| NC_037649.1 | 3059892 | SNV | 1 | A | T | Homozygous   |
| NC_037649.1 | 3063264 | SNV | 1 | A | G | Homozygous   |
| NC_037649.1 | 3065017 | SNV | 1 | A | T | Homozygous   |
| NC_037649.1 | 3065019 | SNV | 1 | A | C | Homozygous   |
| NC_037649.1 | 3065243 | SNV | 1 | A | G | Homozygous   |
| NC_037649.1 | 3065459 | SNV | 1 | A | T | Homozygous   |
| NC_037649.1 | 3065758 | SNV | 1 | A | T | Homozygous   |
| NC_037649.1 | 3065762 | SNV | 1 | T | A | Homozygous   |
| NC_037649.1 | 3066931 | SNV | 1 | T | A | Homozygous   |
| NC_037649.1 | 3069521 | SNV | 1 | G | A | Homozygous   |
| NC_037649.1 | 3070912 | SNV | 1 | A | C | Heterozygous |
| NC_037649.1 | 3070921 | SNV | 1 | A | G | Heterozygous |
| NC_037649.1 | 3070924 | SNV | 1 | T | C | Heterozygous |
| NC_037649.1 | 3070926 | SNV | 1 | T | G | Heterozygous |
| NC_037649.1 | 3070948 | SNV | 1 | A | T | Homozygous   |
| NC_037649.1 | 3070954 | SNV | 1 | T | C | Heterozygous |
| NC_037649.1 | 3070957 | SNV | 1 | A | T | Heterozygous |
| NC_037649.1 | 3070966 | SNV | 1 | A | C | Homozygous   |
| NC_037649.1 | 3070969 | SNV | 1 | A | C | Homozygous   |
| NC_037649.1 | 3070971 | SNV | 1 | G | A | Homozygous   |
| NC_037649.1 | 3070981 | SNV | 1 | A | G | Homozygous   |
| NC_037649.1 | 3070987 | SNV | 1 | T | G | Homozygous   |
| NC_037649.1 | 3070996 | SNV | 1 | A | G | Homozygous   |
| NC_037649.1 | 3073232 | SNV | 1 | A | C | Heterozygous |
| NC_037649.1 | 3073235 | SNV | 1 | A | T | Heterozygous |
| NC_037649.1 | 3073244 | SNV | 1 | A | C | Heterozygous |
| NC_037649.1 | 3073247 | SNV | 1 | T | C | Heterozygous |
| NC_037649.1 | 3081160 | SNV | 1 | T | C | Homozygous   |
| NC_037649.1 | 3081166 | SNV | 1 | T | C | Homozygous   |
| NC_037649.1 | 3081176 | SNV | 1 | C | A | Homozygous   |
| NC_037649.1 | 3081178 | SNV | 1 | T | G | Homozygous   |
| NC_037649.1 | 3081199 | SNV | 1 | T | A | Homozygous   |
| NC_037649.1 | 3081202 | SNV | 1 | A | G | Homozygous   |
| NC_037649.1 | 3081205 | SNV | 1 | A | G | Homozygous   |
| NC_037649.1 | 3081211 | SNV | 1 | A | T | Homozygous   |
| NC_037649.1 | 3082967 | SNV | 1 | T | C | Heterozygous |
| NC_037649.1 | 3082973 | SNV | 1 | C | T | Heterozygous |
| NC_037649.1 | 3082985 | SNV | 1 | T | A | Heterozygous |
| NC_037649.1 | 3082991 | SNV | 1 | A | T | Homozygous   |
| NC_037649.1 | 3082997 | SNV | 1 | A | T | Homozygous   |
| NC_037649.1 | 3083000 | SNV | 1 | A | T | Homozygous   |
| NC_037649.1 | 3087854 | SNV | 1 | T | C | Homozygous   |
| NC_037649.1 | 3091185 | SNV | 1 | G | A | Homozygous   |
| NC_037649.1 | 3098809 | SNV | 1 | T | A | Homozygous   |
| NC_037649.1 | 3100302 | SNV | 1 | C | T | Heterozygous |
| NC_037649.1 | 3118132 | SNV | 1 | T | A | Homozygous   |

|             |         |     |   |   |   |              |
|-------------|---------|-----|---|---|---|--------------|
| NC_037649.1 | 3119355 | SNV | 1 | A | C | Heterozygous |
| NC_037649.1 | 3119357 | SNV | 1 | A | T | Heterozygous |
| NC_037649.1 | 3119358 | SNV | 1 | A | T | Heterozygous |
| NC_037649.1 | 3119360 | SNV | 1 | G | T | Heterozygous |
| NC_037649.1 | 3119363 | SNV | 1 | A | G | Heterozygous |
| NC_037649.1 | 3119367 | SNV | 1 | T | C | Heterozygous |
| NC_037649.1 | 3119381 | SNV | 1 | T | C | Heterozygous |
| NC_037649.1 | 3119461 | SNV | 1 | T | A | Heterozygous |
| NC_037649.1 | 3119501 | SNV | 1 | A | T | Heterozygous |
| NC_037649.1 | 3119509 | SNV | 1 | T | A | Heterozygous |
| NC_037649.1 | 3119513 | SNV | 1 | A | T | Heterozygous |
| NC_037649.1 | 3119516 | SNV | 1 | A | G | Heterozygous |
| NC_037649.1 | 3124565 | SNV | 1 | C | T | Homozygous   |
| NC_037649.1 | 3124587 | SNV | 1 | G | A | Homozygous   |
| NC_037649.1 | 3124595 | SNV | 1 | T | C | Homozygous   |
| NC_037649.1 | 3124601 | SNV | 1 | C | T | Homozygous   |
| NC_037649.1 | 3135124 | SNV | 1 | C | T | Homozygous   |
| NC_037649.1 | 3135128 | SNV | 1 | T | C | Homozygous   |
| NC_037649.1 | 3156882 | SNV | 1 | T | C | Homozygous   |
| NC_037649.1 | 3156885 | SNV | 1 | T | A | Homozygous   |
| NC_037649.1 | 3156894 | SNV | 1 | T | G | Homozygous   |
| NC_037649.1 | 3156902 | SNV | 1 | A | G | Homozygous   |
| NC_037649.1 | 3162550 | SNV | 1 | T | G | Homozygous   |
| NC_037649.1 | 3162567 | SNV | 1 | T | G | Homozygous   |
| NC_037649.1 | 3162571 | SNV | 1 | T | A | Homozygous   |
| NC_037649.1 | 3162582 | SNV | 1 | G | A | Homozygous   |
| NC_037649.1 | 3162593 | SNV | 1 | T | A | Homozygous   |
| NC_037649.1 | 3162595 | SNV | 1 | G | A | Homozygous   |
| NC_037649.1 | 3162600 | SNV | 1 | G | A | Homozygous   |
| NC_037649.1 | 3164225 | SNV | 1 | T | C | Heterozygous |
| NC_037649.1 | 3164230 | SNV | 1 | A | T | Heterozygous |
| NC_037649.1 | 3164234 | SNV | 1 | C | T | Heterozygous |
| NC_037649.1 | 3164236 | SNV | 1 | A | T | Heterozygous |
| NC_037649.1 | 3164243 | SNV | 1 | A | T | Heterozygous |
| NC_037649.1 | 3164267 | SNV | 1 | T | A | Homozygous   |
| NC_037649.1 | 3164778 | SNV | 1 | A | T | Homozygous   |
| NC_037649.1 | 3164786 | SNV | 1 | A | T | Homozygous   |
| NC_037649.1 | 3164788 | SNV | 1 | T | C | Homozygous   |
| NC_037649.1 | 3164795 | SNV | 1 | T | A | Homozygous   |
| NC_037649.1 | 3164798 | SNV | 1 | T | A | Homozygous   |
| NC_037649.1 | 3164801 | SNV | 1 | A | G | Homozygous   |
| NC_037649.1 | 3174135 | SNV | 1 | T | C | Homozygous   |
| NC_037649.1 | 3174140 | SNV | 1 | C | T | Heterozygous |
| NC_037649.1 | 3174157 | SNV | 1 | A | G | Homozygous   |
| NC_037649.1 | 3174161 | SNV | 1 | T | C | Homozygous   |
| NC_037649.1 | 3174165 | SNV | 1 | T | C | Homozygous   |
| NC_037649.1 | 3174167 | SNV | 1 | C | T | Homozygous   |
| NC_037649.1 | 3174171 | SNV | 1 | G | A | Homozygous   |
| NC_037649.1 | 3174192 | SNV | 1 | A | G | Heterozygous |
| NC_037649.1 | 3174196 | SNV | 1 | G | A | Heterozygous |
| NC_037649.1 | 3174210 | SNV | 1 | C | T | Homozygous   |

|             |         |     |   |   |   |              |
|-------------|---------|-----|---|---|---|--------------|
| NC_037649.1 | 3178754 | SNV | 1 | G | A | Homozygous   |
| NC_037649.1 | 3178763 | SNV | 1 | G | A | Homozygous   |
| NC_037649.1 | 3178776 | SNV | 1 | G | T | Homozygous   |
| NC_037649.1 | 3178783 | SNV | 1 | A | G | Homozygous   |
| NC_037649.1 | 3178831 | SNV | 1 | T | C | Homozygous   |
| NC_037649.1 | 3178844 | SNV | 1 | T | C | Homozygous   |
| NC_037649.1 | 3178847 | SNV | 1 | G | A | Homozygous   |
| NC_037649.1 | 3178850 | SNV | 1 | G | A | Homozygous   |
| NC_037649.1 | 3178856 | SNV | 1 | G | A | Homozygous   |
| NC_037649.1 | 3178858 | SNV | 1 | G | A | Homozygous   |
| NC_037649.1 | 3188973 | SNV | 1 | T | A | Heterozygous |
| NC_037649.1 | 3188976 | SNV | 1 | A | T | Heterozygous |
| NC_037649.1 | 3188978 | SNV | 1 | T | G | Heterozygous |
| NC_037649.1 | 3188980 | SNV | 1 | A | G | Heterozygous |
| NC_037649.1 | 3188987 | SNV | 1 | A | T | Heterozygous |
| NC_037649.1 | 3189008 | SNV | 1 | A | T | Heterozygous |
| NC_037649.1 | 3189019 | SNV | 1 | A | G | Homozygous   |
| NC_037649.1 | 3189039 | SNV | 1 | T | A | Homozygous   |
| NC_037649.1 | 3189084 | SNV | 1 | T | G | Homozygous   |
| NC_037649.1 | 3189093 | SNV | 1 | A | T | Homozygous   |
| NC_037649.1 | 3189106 | SNV | 1 | T | C | Heterozygous |
| NC_037649.1 | 3189109 | SNV | 1 | A | T | Heterozygous |
| NC_037649.1 | 3189134 | SNV | 1 | T | A | Heterozygous |
| NC_037649.1 | 3189138 | SNV | 1 | T | C | Heterozygous |
| NC_037649.1 | 3189140 | SNV | 1 | T | C | Heterozygous |
| NC_037649.1 | 3199966 | SNV | 1 | A | T | Heterozygous |
| NC_037649.1 | 3199968 | SNV | 1 | A | T | Heterozygous |
| NC_037649.1 | 3199975 | SNV | 1 | T | C | Heterozygous |
| NC_037649.1 | 3199983 | SNV | 1 | T | C | Heterozygous |
| NC_037649.1 | 3200766 | SNV | 1 | A | T | Homozygous   |
| NC_037649.1 | 3200776 | SNV | 1 | G | A | Homozygous   |
| NC_037649.1 | 3200780 | SNV | 1 | T | A | Homozygous   |
| NC_037649.1 | 3200782 | SNV | 1 | T | A | Homozygous   |
| NC_037649.1 | 3200784 | SNV | 1 | T | G | Homozygous   |
| NC_037649.1 | 3200786 | SNV | 1 | T | G | Homozygous   |
| NC_037649.1 | 3201180 | SNV | 1 | A | G | Heterozygous |
| NC_037649.1 | 3205797 | SNV | 1 | G | T | Homozygous   |
| NC_037649.1 | 3205828 | SNV | 1 | A | G | Homozygous   |
| NC_037649.1 | 3213646 | SNV | 1 | C | T | Homozygous   |
| NC_037649.1 | 3214578 | SNV | 1 | G | A | Heterozygous |
| NC_037649.1 | 3216000 | SNV | 1 | G | A | Homozygous   |
| NC_037649.1 | 3216002 | SNV | 1 | T | C | Homozygous   |
| NC_037649.1 | 3216005 | SNV | 1 | A | G | Homozygous   |
| NC_037649.1 | 3216162 | SNV | 1 | C | T | Homozygous   |
| NC_037649.1 | 3216164 | SNV | 1 | G | A | Homozygous   |
| NC_037649.1 | 3216171 | SNV | 1 | A | G | Homozygous   |
| NC_037649.1 | 3216174 | SNV | 1 | G | A | Homozygous   |
| NC_037649.1 | 3216180 | SNV | 1 | C | T | Homozygous   |
| NC_037649.1 | 3216188 | SNV | 1 | A | G | Homozygous   |
| NC_037649.1 | 3216201 | SNV | 1 | G | A | Homozygous   |
| NC_037649.1 | 3216285 | SNV | 1 | C | G | Homozygous   |



|             |         |     |   |   |   |              |
|-------------|---------|-----|---|---|---|--------------|
| NC_037649.1 | 3216292 | SNV | 1 | A | T | Homozygous   |
| NC_037649.1 | 3216297 | SNV | 1 | T | C | Homozygous   |
| NC_037649.1 | 3216302 | SNV | 1 | A | T | Homozygous   |
| NC_037649.1 | 3216318 | SNV | 1 | A | G | Homozygous   |
| NC_037649.1 | 3216323 | SNV | 1 | C | T | Homozygous   |
| NC_037649.1 | 3216329 | SNV | 1 | A | C | Homozygous   |
| NC_037649.1 | 3216338 | SNV | 1 | G | T | Homozygous   |
| NC_037649.1 | 3216430 | SNV | 1 | T | C | Homozygous   |
| NC_037649.1 | 3216436 | SNV | 1 | A | C | Homozygous   |
| NC_037649.1 | 3216447 | SNV | 1 | G | C | Homozygous   |
| NC_037649.1 | 3216451 | SNV | 1 | C | T | Homozygous   |
| NC_037649.1 | 3216459 | SNV | 1 | T | C | Homozygous   |
| NC_037649.1 | 3216494 | SNV | 1 | G | C | Heterozygous |
| NC_037649.1 | 3216507 | SNV | 1 | A | G | Heterozygous |
| NC_037649.1 | 3216515 | SNV | 1 | A | T | Heterozygous |
| NC_037649.1 | 3216518 | SNV | 1 | T | C | Heterozygous |
| NC_037649.1 | 3216537 | SNV | 1 | C | T | Heterozygous |
| NC_037649.1 | 3216544 | SNV | 1 | G | A | Heterozygous |
| NC_037649.1 | 3216549 | SNV | 1 | T | C | Heterozygous |
| NC_037649.1 | 3217457 | SNV | 1 | T | G | Homozygous   |
| NC_037649.1 | 3217461 | SNV | 1 | T | G | Homozygous   |
| NC_037649.1 | 3217865 | SNV | 1 | G | A | Homozygous   |
| NC_037649.1 | 3231368 | SNV | 1 | A | T | Homozygous   |
| NC_037649.1 | 3231370 | SNV | 1 | T | C | Homozygous   |
| NC_037649.1 | 3231401 | SNV | 1 | A | T | Homozygous   |
| NC_037649.1 | 3231408 | SNV | 1 | T | A | Homozygous   |
| NC_037649.1 | 3231943 | SNV | 1 | T | C | Homozygous   |
| NC_037649.1 | 3231962 | SNV | 1 | T | C | Homozygous   |
| NC_037649.1 | 3231970 | SNV | 1 | A | G | Homozygous   |
| NC_037649.1 | 3231977 | SNV | 1 | T | C | Homozygous   |
| NC_037649.1 | 3231983 | SNV | 1 | A | G | Homozygous   |
| NC_037649.1 | 3231986 | SNV | 1 | T | A | Homozygous   |
| NC_037649.1 | 3235373 | SNV | 1 | T | C | Homozygous   |
| NC_037649.1 | 3235383 | SNV | 1 | T | A | Homozygous   |
| NC_037649.1 | 3235391 | SNV | 1 | G | A | Homozygous   |
| NC_037649.1 | 3235394 | SNV | 1 | C | T | Homozygous   |
| NC_037649.1 | 3235403 | SNV | 1 | A | G | Homozygous   |
| NC_037649.1 | 3235408 | SNV | 1 | C | G | Homozygous   |
| NC_037649.1 | 3235592 | SNV | 1 | G | A | Homozygous   |
| NC_037649.1 | 3235655 | SNV | 1 | G | A | Homozygous   |
| NC_037649.1 | 3235662 | SNV | 1 | A | G | Homozygous   |
| NC_037649.1 | 3235675 | SNV | 1 | G | A | Homozygous   |
| NC_037649.1 | 3235681 | SNV | 1 | T | C | Homozygous   |
| NC_037649.1 | 3235684 | SNV | 1 | G | T | Homozygous   |
| NC_037649.1 | 3235691 | SNV | 1 | T | C | Homozygous   |
| NC_037649.1 | 3235697 | SNV | 1 | G | A | Homozygous   |
| NC_037649.1 | 3250774 | SNV | 1 | G | C | Heterozygous |
| NC_037649.1 | 3251920 | SNV | 1 | G | T | Homozygous   |
| NC_037649.1 | 3251922 | SNV | 1 | C | T | Homozygous   |
| NC_037649.1 | 3251926 | SNV | 1 | C | T | Heterozygous |
| NC_037649.1 | 3251928 | SNV | 1 | C | T | Heterozygous |

|             |         |     |   |   |   |              |
|-------------|---------|-----|---|---|---|--------------|
| NC_037649.1 | 3253493 | SNV | 1 | A | G | Heterozygous |
| NC_037649.1 | 3253525 | SNV | 1 | A | T | Heterozygous |
| NC_037649.1 | 3253528 | SNV | 1 | A | C | Heterozygous |
| NC_037649.1 | 3253533 | SNV | 1 | A | T | Heterozygous |
| NC_037649.1 | 3253569 | SNV | 1 | A | G | Homozygous   |
| NC_037649.1 | 3253571 | SNV | 1 | A | C | Homozygous   |
| NC_037649.1 | 3253578 | SNV | 1 | G | T | Homozygous   |
| NC_037649.1 | 3253581 | SNV | 1 | A | G | Homozygous   |
| NC_037649.1 | 3253608 | SNV | 1 | A | C | Homozygous   |
| NC_037649.1 | 3253615 | SNV | 1 | T | C | Homozygous   |
| NC_037649.1 | 3253618 | SNV | 1 | T | C | Homozygous   |
| NC_037649.1 | 3253622 | SNV | 1 | T | C | Homozygous   |
| NC_037649.1 | 3253628 | SNV | 1 | T | A | Homozygous   |
| NC_037649.1 | 3253645 | SNV | 1 | T | A | Homozygous   |
| NC_037649.1 | 3253648 | SNV | 1 | T | C | Homozygous   |
| NC_037649.1 | 3253657 | SNV | 1 | T | C | Heterozygous |
| NC_037649.1 | 3253711 | SNV | 1 | A | T | Heterozygous |
| NC_037649.1 | 3253715 | SNV | 1 | T | C | Homozygous   |
| NC_037649.1 | 3253882 | SNV | 1 | C | T | Heterozygous |
| NC_037649.1 | 3253885 | SNV | 1 | T | C | Homozygous   |
| NC_037649.1 | 3253916 | SNV | 1 | T | C | Heterozygous |
| NC_037649.1 | 3253961 | SNV | 1 | T | A | Homozygous   |
| NC_037649.1 | 3253974 | SNV | 1 | A | T | Homozygous   |
| NC_037649.1 | 3253986 | SNV | 1 | A | C | Heterozygous |
| NC_037649.1 | 3253997 | SNV | 1 | C | T | Homozygous   |
| NC_037649.1 | 3253999 | SNV | 1 | C | T | Heterozygous |
| NC_037649.1 | 3254035 | SNV | 1 | T | C | Heterozygous |
| NC_037649.1 | 3254038 | SNV | 1 | C | T | Homozygous   |
| NC_037649.1 | 3254045 | SNV | 1 | T | C | Heterozygous |
| NC_037649.1 | 3254047 | SNV | 1 | T | C | Homozygous   |
| NC_037649.1 | 3254053 | SNV | 1 | C | T | Homozygous   |
| NC_037649.1 | 3254059 | SNV | 1 | C | T | Heterozygous |
| NC_037649.1 | 3254062 | SNV | 1 | C | T | Heterozygous |
| NC_037649.1 | 3254107 | SNV | 1 | T | C | Heterozygous |
| NC_037649.1 | 3254146 | SNV | 1 | T | C | Heterozygous |
| NC_037649.1 | 3254156 | SNV | 1 | G | C | Homozygous   |
| NC_037649.1 | 3254163 | SNV | 1 | A | G | Heterozygous |
| NC_037649.1 | 3254180 | SNV | 1 | T | C | Homozygous   |
| NC_037649.1 | 3254185 | SNV | 1 | A | T | Homozygous   |
| NC_037649.1 | 3254240 | SNV | 1 | A | C | Homozygous   |
| NC_037649.1 | 3254243 | SNV | 1 | A | T | Homozygous   |
| NC_037649.1 | 3254246 | SNV | 1 | G | C | Homozygous   |
| NC_037649.1 | 3254255 | SNV | 1 | G | T | Homozygous   |
| NC_037649.1 | 3254262 | SNV | 1 | C | T | Homozygous   |
| NC_037649.1 | 3254273 | SNV | 1 | G | A | Homozygous   |
| NC_037649.1 | 3254279 | SNV | 1 | G | A | Homozygous   |
| NC_037649.1 | 3254500 | SNV | 1 | A | G | Heterozygous |
| NC_037649.1 | 3254511 | SNV | 1 | C | T | Homozygous   |
| NC_037649.1 | 3254538 | SNV | 1 | T | C | Heterozygous |
| NC_037649.1 | 3254540 | SNV | 1 | C | T | Heterozygous |
| NC_037649.1 | 3254548 | SNV | 1 | A | G | Heterozygous |

|             |         |     |   |   |   |              |
|-------------|---------|-----|---|---|---|--------------|
| NC_037649.1 | 3254554 | SNV | 1 | A | G | Heterozygous |
| NC_037649.1 | 3254560 | SNV | 1 | A | G | Heterozygous |
| NC_037649.1 | 3254573 | SNV | 1 | C | T | Heterozygous |
| NC_037649.1 | 3254583 | SNV | 1 | T | G | Heterozygous |
| NC_037649.1 | 3254584 | SNV | 1 | A | T | Heterozygous |
| NC_037649.1 | 3254589 | SNV | 1 | T | G | Heterozygous |
| NC_037649.1 | 3254592 | SNV | 1 | T | C | Heterozygous |
| NC_037649.1 | 3254933 | SNV | 1 | C | T | Heterozygous |
| NC_037649.1 | 3254967 | SNV | 1 | A | G | Homozygous   |
| NC_037649.1 | 3254974 | SNV | 1 | C | T | Homozygous   |
| NC_037649.1 | 3254980 | SNV | 1 | C | T | Homozygous   |
| NC_037649.1 | 3256242 | SNV | 1 | T | G | Homozygous   |
| NC_037649.1 | 3256313 | SNV | 1 | G | T | Homozygous   |
| NC_037649.1 | 3256323 | SNV | 1 | A | T | Heterozygous |
| NC_037649.1 | 3257859 | SNV | 1 | C | T | Homozygous   |
| NC_037649.1 | 3257870 | SNV | 1 | T | A | Homozygous   |
| NC_037649.1 | 3261619 | SNV | 1 | T | C | Heterozygous |
| NC_037649.1 | 3261634 | SNV | 1 | T | A | Heterozygous |
| NC_037649.1 | 3261652 | SNV | 1 | T | A | Heterozygous |
| NC_037649.1 | 3262083 | SNV | 1 | A | C | Homozygous   |
| NC_037649.1 | 3262089 | SNV | 1 | A | C | Homozygous   |
| NC_037649.1 | 3262091 | SNV | 1 | T | G | Homozygous   |
| NC_037649.1 | 3262659 | SNV | 1 | G | A | Heterozygous |
| NC_037649.1 | 3263125 | SNV | 1 | C | T | Heterozygous |
| NC_037649.1 | 3264430 | SNV | 1 | A | T | Heterozygous |
| NC_037649.1 | 3264946 | SNV | 1 | T | A | Homozygous   |
| NC_037649.1 | 3265583 | SNV | 1 | A | G | Homozygous   |
| NC_037649.1 | 3268486 | SNV | 1 | T | C | Homozygous   |
| NC_037649.1 | 3268876 | SNV | 1 | T | A | Homozygous   |
| NC_037649.1 | 3269299 | SNV | 1 | G | A | Homozygous   |
| NC_037649.1 | 3269305 | SNV | 1 | A | T | Homozygous   |
| NC_037649.1 | 3269308 | SNV | 1 | T | G | Homozygous   |
| NC_037649.1 | 3269589 | SNV | 1 | G | T | Homozygous   |
| NC_037649.1 | 3270601 | SNV | 1 | T | C | Homozygous   |
| NC_037649.1 | 3272126 | SNV | 1 | G | C | Homozygous   |
| NC_037649.1 | 3272240 | SNV | 1 | C | T | Homozygous   |
| NC_037649.1 | 3273823 | SNV | 1 | T | C | Homozygous   |
| NC_037649.1 | 3274587 | SNV | 1 | A | T | Homozygous   |
| NC_037649.1 | 3274590 | SNV | 1 | A | T | Homozygous   |
| NC_037649.1 | 3274594 | SNV | 1 | T | A | Homozygous   |
| NC_037649.1 | 3274596 | SNV | 1 | T | A | Homozygous   |
| NC_037649.1 | 3274598 | SNV | 1 | G | A | Homozygous   |
| NC_037649.1 | 3274724 | SNV | 1 | A | C | Homozygous   |
| NC_037649.1 | 3274813 | SNV | 1 | T | A | Homozygous   |
| NC_037649.1 | 3274816 | SNV | 1 | G | A | Homozygous   |
| NC_037649.1 | 3275381 | SNV | 1 | T | C | Homozygous   |
| NC_037649.1 | 3275652 | SNV | 1 | T | C | Homozygous   |
| NC_037649.1 | 3276034 | SNV | 1 | A | T | Homozygous   |
| NC_037649.1 | 3276043 | SNV | 1 | T | A | Homozygous   |
| NC_037649.1 | 3276045 | SNV | 1 | A | T | Homozygous   |
| NC_037649.1 | 3276223 | SNV | 1 | G | A | Homozygous   |

|             |         |     |   |   |   |              |
|-------------|---------|-----|---|---|---|--------------|
| NC_037649.1 | 3276871 | SNV | 1 | C | T | Homozygous   |
| NC_037649.1 | 3277325 | SNV | 1 | A | G | Heterozygous |
| NC_037649.1 | 3277730 | SNV | 1 | C | T | Homozygous   |
| NC_037649.1 | 3278135 | SNV | 1 | G | C | Homozygous   |
| NC_037649.1 | 3278139 | SNV | 1 | C | T | Homozygous   |
| NC_037649.1 | 3278198 | SNV | 1 | T | C | Homozygous   |
| NC_037649.1 | 3278208 | SNV | 1 | A | T | Homozygous   |
| NC_037649.1 | 3278350 | SNV | 1 | C | A | Homozygous   |
| NC_037649.1 | 3278661 | SNV | 1 | T | C | Homozygous   |
| NC_037649.1 | 3278692 | SNV | 1 | G | A | Homozygous   |
| NC_037649.1 | 3279228 | SNV | 1 | G | A | Homozygous   |
| NC_037649.1 | 3283150 | SNV | 1 | G | A | Homozygous   |
| NC_037649.1 | 3283229 | SNV | 1 | A | G | Homozygous   |
| NC_037649.1 | 3283718 | SNV | 1 | T | C | Homozygous   |
| NC_037649.1 | 3289586 | SNV | 1 | C | T | Homozygous   |
| NC_037649.1 | 3290128 | SNV | 1 | A | T | Heterozygous |
| NC_037649.1 | 3290132 | SNV | 1 | T | G | Homozygous   |
| NC_037649.1 | 3290134 | SNV | 1 | A | G | Homozygous   |
| NC_037649.1 | 3299151 | SNV | 1 | T | C | Homozygous   |
| NC_037649.1 | 3299164 | SNV | 1 | A | C | Homozygous   |
| NC_037649.1 | 3299170 | SNV | 1 | T | A | Homozygous   |
| NC_037649.1 | 3299172 | SNV | 1 | A | G | Homozygous   |
| NC_037649.1 | 3299184 | SNV | 1 | A | C | Homozygous   |
| NC_037649.1 | 3303835 | SNV | 1 | T | A | Homozygous   |
| NC_037649.1 | 3303843 | SNV | 1 | G | A | Heterozygous |
| NC_037649.1 | 3303847 | SNV | 1 | C | G | Homozygous   |
| NC_037649.1 | 3303854 | SNV | 1 | C | T | Homozygous   |
| NC_037649.1 | 3303857 | SNV | 1 | G | A | Heterozygous |
| NC_037649.1 | 3308991 | SNV | 1 | A | T | Homozygous   |
| NC_037649.1 | 3308999 | SNV | 1 | T | G | Homozygous   |
| NC_037649.1 | 3309002 | SNV | 1 | T | G | Homozygous   |
| NC_037649.1 | 3309004 | SNV | 1 | A | G | Homozygous   |
| NC_037649.1 | 3309006 | SNV | 1 | A | G | Homozygous   |
| NC_037649.1 | 3309385 | SNV | 1 | T | A | Homozygous   |
| NC_037649.1 | 3323481 | SNV | 1 | C | A | Homozygous   |
| NC_037649.1 | 3323492 | SNV | 1 | A | G | Homozygous   |
| NC_037649.1 | 3323510 | SNV | 1 | T | C | Homozygous   |
| NC_037649.1 | 3323515 | SNV | 1 | A | G | Homozygous   |
| NC_037649.1 | 3323518 | SNV | 1 | T | A | Homozygous   |
| NC_037649.1 | 3323524 | SNV | 1 | T | C | Homozygous   |
| NC_037649.1 | 3323541 | SNV | 1 | A | T | Heterozygous |
| NC_037649.1 | 3323545 | SNV | 1 | A | G | Homozygous   |
| NC_037649.1 | 3323547 | SNV | 1 | A | G | Heterozygous |
| NC_037649.1 | 3323555 | SNV | 1 | A | T | Heterozygous |
| NC_037649.1 | 3323881 | SNV | 1 | A | G | Homozygous   |
| NC_037649.1 | 3324040 | SNV | 1 | A | T | Homozygous   |
| NC_037649.1 | 3325095 | SNV | 1 | T | C | Homozygous   |
| NC_037649.1 | 3326201 | SNV | 1 | A | T | Heterozygous |
| NC_037649.1 | 3326214 | SNV | 1 | A | T | Heterozygous |
| NC_037649.1 | 3326223 | SNV | 1 | T | A | Heterozygous |
| NC_037649.1 | 3326231 | SNV | 1 | G | C | Heterozygous |

|             |         |     |   |   |   |              |
|-------------|---------|-----|---|---|---|--------------|
| NC_037649.1 | 3326234 | SNV | 1 | T | A | Heterozygous |
| NC_037649.1 | 3326237 | SNV | 1 | A | T | Heterozygous |
| NC_037649.1 | 3328008 | SNV | 1 | A | G | Homozygous   |
| NC_037649.1 | 3330639 | SNV | 1 | T | A | Homozygous   |
| NC_037649.1 | 3330642 | SNV | 1 | G | A | Homozygous   |
| NC_037649.1 | 3334218 | SNV | 1 | T | C | Homozygous   |
| NC_037649.1 | 3337254 | SNV | 1 | A | T | Homozygous   |
| NC_037649.1 | 3344446 | SNV | 1 | G | T | Homozygous   |
| NC_037649.1 | 3344615 | SNV | 1 | C | T | Homozygous   |
| NC_037649.1 | 3344868 | SNV | 1 | T | C | Homozygous   |
| NC_037649.1 | 3348682 | SNV | 1 | A | G | Homozygous   |
| NC_037649.1 | 3349767 | SNV | 1 | G | A | Homozygous   |
| NC_037649.1 | 3350065 | SNV | 1 | A | G | Homozygous   |
| NC_037649.1 | 3350281 | SNV | 1 | T | C | Heterozygous |
| NC_037649.1 | 3530279 | SNV | 1 | T | C | Homozygous   |
| NC_037649.1 | 3535695 | SNV | 1 | C | T | Homozygous   |
| NC_037649.1 | 3542358 | SNV | 1 | A | T | Homozygous   |
| NC_037649.1 | 3542361 | SNV | 1 | A | T | Homozygous   |
| NC_037649.1 | 3542369 | SNV | 1 | T | A | Homozygous   |
| NC_037649.1 | 3559099 | SNV | 1 | C | A | Heterozygous |
| NC_037649.1 | 3559111 | SNV | 1 | A | G | Heterozygous |
| NC_037649.1 | 3559115 | SNV | 1 | G | A | Heterozygous |
| NC_037649.1 | 3559120 | SNV | 1 | C | A | Heterozygous |
| NC_037649.1 | 3559128 | SNV | 1 | C | A | Heterozygous |
| NC_037649.1 | 3559201 | SNV | 1 | T | G | Homozygous   |
| NC_037649.1 | 3559224 | SNV | 1 | T | G | Homozygous   |
| NC_037649.1 | 3559234 | SNV | 1 | T | A | Homozygous   |
| NC_037649.1 | 3561673 | SNV | 1 | T | A | Homozygous   |
| NC_037649.1 | 3561675 | SNV | 1 | A | G | Homozygous   |
| NC_037649.1 | 3586936 | SNV | 1 | T | C | Homozygous   |
| NC_037649.1 | 3586946 | SNV | 1 | T | C | Heterozygous |
| NC_037649.1 | 3586969 | SNV | 1 | A | G | Homozygous   |
| NC_037649.1 | 3587151 | SNV | 1 | G | A | Homozygous   |
| NC_037649.1 | 3587153 | SNV | 1 | A | T | Homozygous   |
| NC_037649.1 | 3587166 | SNV | 1 | C | T | Homozygous   |
| NC_037649.1 | 3587178 | SNV | 1 | C | T | Homozygous   |
| NC_037649.1 | 3587195 | SNV | 1 | T | C | Homozygous   |
| NC_037649.1 | 3606280 | SNV | 1 | A | C | Homozygous   |
| NC_037649.1 | 3606284 | SNV | 1 | T | A | Homozygous   |
| NC_037649.1 | 3606286 | SNV | 1 | G | C | Homozygous   |
| NC_037649.1 | 3607647 | SNV | 1 | T | C | Heterozygous |
| NC_037649.1 | 3611302 | SNV | 1 | A | G | Homozygous   |
| NC_037649.1 | 3611331 | SNV | 1 | A | T | Homozygous   |
| NC_037649.1 | 3611850 | SNV | 1 | G | A | Heterozygous |
| NC_037649.1 | 3611866 | SNV | 1 | C | T | Heterozygous |
| NC_037649.1 | 3611893 | SNV | 1 | G | A | Heterozygous |
| NC_037649.1 | 3613404 | SNV | 1 | T | C | Heterozygous |
| NC_037649.1 | 3613455 | SNV | 1 | A | G | Homozygous   |
| NC_037649.1 | 3613644 | SNV | 1 | G | A | Heterozygous |
| NC_037649.1 | 3613765 | SNV | 1 | G | A | Heterozygous |
| NC_037649.1 | 3613782 | SNV | 1 | A | G | Homozygous   |

|             |         |     |   |   |   |              |
|-------------|---------|-----|---|---|---|--------------|
| NC_037649.1 | 3613860 | SNV | 1 | G | C | Homozygous   |
| NC_037649.1 | 3618726 | SNV | 1 | T | C | Homozygous   |
| NC_037649.1 | 3618729 | SNV | 1 | T | G | Homozygous   |
| NC_037649.1 | 3618751 | SNV | 1 | A | T | Homozygous   |
| NC_037649.1 | 3618756 | SNV | 1 | A | T | Homozygous   |
| NC_037649.1 | 3630032 | SNV | 1 | T | C | Homozygous   |
| NC_037649.1 | 3630066 | SNV | 1 | C | T | Heterozygous |
| NC_037649.1 | 3630136 | SNV | 1 | G | A | Heterozygous |
| NC_037649.1 | 3645755 | SNV | 1 | T | A | Homozygous   |
| NC_037649.1 | 3645761 | SNV | 1 | T | G | Homozygous   |
| NC_037649.1 | 3645765 | SNV | 1 | A | C | Homozygous   |
| NC_037649.1 | 3645767 | SNV | 1 | A | T | Homozygous   |
| NC_037649.1 | 3645771 | SNV | 1 | A | C | Homozygous   |
| NC_037649.1 | 3645779 | SNV | 1 | T | C | Homozygous   |
| NC_037649.1 | 3645797 | SNV | 1 | A | G | Homozygous   |
| NC_037649.1 | 3653357 | SNV | 1 | T | C | Heterozygous |
| NC_037649.1 | 3653363 | SNV | 1 | T | C | Homozygous   |
| NC_037649.1 | 3653399 | SNV | 1 | T | C | Heterozygous |
| NC_037649.1 | 3653513 | SNV | 1 | A | T | Homozygous   |
| NC_037649.1 | 3653527 | SNV | 1 | A | G | Heterozygous |
| NC_037649.1 | 3653683 | SNV | 1 | C | T | Heterozygous |
| NC_037649.1 | 3653713 | SNV | 1 | T | C | Homozygous   |
| NC_037649.1 | 3653881 | SNV | 1 | T | C | Homozygous   |
| NC_037649.1 | 3698003 | SNV | 1 | T | C | Homozygous   |
| NC_037649.1 | 3698005 | SNV | 1 | C | T | Homozygous   |
| NC_037649.1 | 3698012 | SNV | 1 | T | C | Homozygous   |
| NC_037649.1 | 3703098 | SNV | 1 | G | A | Heterozygous |
| NC_037649.1 | 3708037 | SNV | 1 | C | T | Homozygous   |
| NC_037649.1 | 3708048 | SNV | 1 | T | C | Heterozygous |
| NC_037649.1 | 3708054 | SNV | 1 | C | T | Homozygous   |
| NC_037649.1 | 3708061 | SNV | 1 | C | A | Homozygous   |
| NC_037649.1 | 3708063 | SNV | 1 | C | T | Homozygous   |
| NC_037649.1 | 3708066 | SNV | 1 | C | T | Homozygous   |
| NC_037649.1 | 3709567 | SNV | 1 | C | A | Heterozygous |
| NC_037649.1 | 3709585 | SNV | 1 | G | A | Heterozygous |
| NC_037649.1 | 3709653 | SNV | 1 | C | T | Heterozygous |
| NC_037649.1 | 3711572 | SNV | 1 | A | T | Homozygous   |
| NC_037649.1 | 3711579 | SNV | 1 | A | T | Homozygous   |
| NC_037649.1 | 3711582 | SNV | 1 | A | T | Homozygous   |
| NC_037649.1 | 3711610 | SNV | 1 | G | T | Homozygous   |
| NC_037649.1 | 3716490 | SNV | 1 | T | C | Homozygous   |
| NC_037649.1 | 3716519 | SNV | 1 | T | C | Homozygous   |
| NC_037649.1 | 3717989 | SNV | 1 | T | C | Homozygous   |
| NC_037649.1 | 3718079 | SNV | 1 | T | C | Homozygous   |
| NC_037649.1 | 3741707 | SNV | 1 | T | G | Homozygous   |
| NC_037649.1 | 3741727 | SNV | 1 | C | G | Homozygous   |
| NC_037649.1 | 3741735 | SNV | 1 | T | G | Homozygous   |
| NC_037649.1 | 3741737 | SNV | 1 | A | G | Homozygous   |
| NC_037649.1 | 3745253 | SNV | 1 | C | T | Heterozygous |
| NC_037649.1 | 3745266 | SNV | 1 | T | A | Heterozygous |
| NC_037649.1 | 3745272 | SNV | 1 | A | T | Heterozygous |

|             |         |     |   |   |   |              |
|-------------|---------|-----|---|---|---|--------------|
| NC_037649.1 | 3745296 | SNV | 1 | G | A | Homozygous   |
| NC_037649.1 | 3745299 | SNV | 1 | G | A | Homozygous   |
| NC_037649.1 | 3745302 | SNV | 1 | A | G | Heterozygous |
| NC_037649.1 | 3745302 | SNV | 1 | A | T | Heterozygous |
| NC_037649.1 | 3745305 | SNV | 1 | G | A | Heterozygous |
| NC_037649.1 | 3745305 | SNV | 1 | G | T | Heterozygous |
| NC_037649.1 | 3745307 | SNV | 1 | T | G | Heterozygous |
| NC_037649.1 | 3745314 | SNV | 1 | T | A | Heterozygous |
| NC_037649.1 | 3745316 | SNV | 1 | T | A | Heterozygous |
| NC_037649.1 | 3746084 | SNV | 1 | C | A | Heterozygous |
| NC_037649.1 | 3748381 | SNV | 1 | T | G | Homozygous   |
| NC_037649.1 | 3748413 | SNV | 1 | T | G | Homozygous   |
| NC_037649.1 | 3751069 | SNV | 1 | C | G | Heterozygous |
| NC_037649.1 | 3756547 | SNV | 1 | T | C | Homozygous   |
| NC_037649.1 | 3756706 | SNV | 1 | G | A | Heterozygous |
| NC_037649.1 | 3756715 | SNV | 1 | A | G | Homozygous   |
| NC_037649.1 | 3756725 | SNV | 1 | A | G | Homozygous   |
| NC_037649.1 | 3756839 | SNV | 1 | C | T | Heterozygous |
| NC_037649.1 | 3756863 | SNV | 1 | T | C | Homozygous   |
| NC_037649.1 | 3756973 | SNV | 1 | G | A | Heterozygous |
| NC_037649.1 | 3757039 | SNV | 1 | T | C | Heterozygous |
| NC_037649.1 | 3766961 | SNV | 1 | G | A | Homozygous   |
| NC_037649.1 | 3766965 | SNV | 1 | G | A | Homozygous   |
| NC_037649.1 | 3766974 | SNV | 1 | A | C | Homozygous   |
| NC_037649.1 | 3766980 | SNV | 1 | A | G | Homozygous   |
| NC_037649.1 | 3769055 | SNV | 1 | T | C | Heterozygous |
| NC_037649.1 | 3769096 | SNV | 1 | G | A | Homozygous   |
| NC_037649.1 | 3769162 | SNV | 1 | G | A | Heterozygous |
| NC_037649.1 | 3769211 | SNV | 1 | T | C | Homozygous   |
| NC_037649.1 | 3769340 | SNV | 1 | G | A | Heterozygous |
| NC_037649.1 | 3769343 | SNV | 1 | C | G | Heterozygous |
| NC_037649.1 | 3769359 | SNV | 1 | T | C | Homozygous   |
| NC_037649.1 | 3769431 | SNV | 1 | T | C | Homozygous   |
| NC_037649.1 | 3769490 | SNV | 1 | G | A | Homozygous   |
| NC_037649.1 | 3769500 | SNV | 1 | A | C | Homozygous   |
| NC_037649.1 | 3769913 | SNV | 1 | G | A | Heterozygous |
| NC_037649.1 | 3769933 | SNV | 1 | C | A | Heterozygous |
| NC_037649.1 | 3769965 | SNV | 1 | C | T | Homozygous   |
| NC_037649.1 | 3769994 | SNV | 1 | A | G | Homozygous   |
| NC_037649.1 | 3770064 | SNV | 1 | A | G | Homozygous   |
| NC_037649.1 | 3770361 | SNV | 1 | T | C | Homozygous   |
| NC_037649.1 | 3770391 | SNV | 1 | T | C | Heterozygous |
| NC_037649.1 | 3770392 | SNV | 1 | G | A | Heterozygous |
| NC_037649.1 | 3770775 | SNV | 1 | C | G | Homozygous   |
| NC_037649.1 | 3770895 | SNV | 1 | T | A | Homozygous   |
| NC_037649.1 | 3771803 | SNV | 1 | A | G | Homozygous   |
| NC_037649.1 | 3771829 | SNV | 1 | T | G | Homozygous   |
| NC_037649.1 | 3771831 | SNV | 1 | T | A | Homozygous   |
| NC_037649.1 | 3772270 | SNV | 1 | G | A | Heterozygous |
| NC_037649.1 | 3772315 | SNV | 1 | G | A | Heterozygous |
| NC_037649.1 | 3775173 | SNV | 1 | A | G | Heterozygous |

|             |         |     |   |   |   |              |
|-------------|---------|-----|---|---|---|--------------|
| NC_037649.1 | 3775180 | SNV | 1 | T | A | Heterozygous |
| NC_037649.1 | 3775182 | SNV | 1 | A | G | Heterozygous |
| NC_037649.1 | 3775190 | SNV | 1 | A | C | Heterozygous |
| NC_037649.1 | 3775194 | SNV | 1 | A | G | Heterozygous |
| NC_037649.1 | 3775199 | SNV | 1 | A | T | Heterozygous |
| NC_037649.1 | 3775200 | SNV | 1 | T | C | Heterozygous |
| NC_037649.1 | 3775206 | SNV | 1 | T | A | Heterozygous |
| NC_037649.1 | 3776293 | SNV | 1 | A | G | Homozygous   |
| NC_037649.1 | 3776362 | SNV | 1 | A | G | Homozygous   |
| NC_037649.1 | 3786559 | SNV | 1 | G | A | Homozygous   |
| NC_037649.1 | 3802535 | SNV | 1 | A | T | Homozygous   |
| NC_037649.1 | 3802544 | SNV | 1 | C | A | Homozygous   |
| NC_037649.1 | 3802547 | SNV | 1 | T | C | Homozygous   |
| NC_037649.1 | 3803379 | SNV | 1 | A | T | Homozygous   |
| NC_037649.1 | 3803597 | SNV | 1 | A | G | Heterozygous |
| NC_037649.1 | 3803627 | SNV | 1 | G | A | Heterozygous |
| NC_037649.1 | 3803651 | SNV | 1 | A | T | Homozygous   |
| NC_037649.1 | 3804042 | SNV | 1 | A | T | Homozygous   |
| NC_037649.1 | 3804049 | SNV | 1 | C | A | Homozygous   |
| NC_037649.1 | 3804051 | SNV | 1 | T | A | Homozygous   |
| NC_037649.1 | 3804054 | SNV | 1 | T | A | Homozygous   |
| NC_037649.1 | 3814529 | SNV | 1 | A | G | Homozygous   |
| NC_037649.1 | 3814802 | SNV | 1 | A | G | Homozygous   |
| NC_037649.1 | 3820376 | SNV | 1 | G | A | Homozygous   |
| NC_037649.1 | 3820379 | SNV | 1 | G | T | Homozygous   |
| NC_037649.1 | 3820396 | SNV | 1 | A | T | Homozygous   |
| NC_037649.1 | 3820402 | SNV | 1 | T | A | Homozygous   |
| NC_037649.1 | 3820408 | SNV | 1 | T | C | Homozygous   |
| NC_037649.1 | 3820411 | SNV | 1 | C | T | Homozygous   |
| NC_037649.1 | 3820442 | SNV | 1 | T | G | Homozygous   |
| NC_037649.1 | 3820446 | SNV | 1 | A | G | Homozygous   |
| NC_037649.1 | 3831664 | SNV | 1 | T | C | Homozygous   |
| NC_037649.1 | 3832939 | SNV | 1 | A | G | Homozygous   |
| NC_037649.1 | 3832978 | SNV | 1 | T | C | Homozygous   |
| NC_037649.1 | 3832996 | SNV | 1 | T | C | Homozygous   |
| NC_037649.1 | 3833626 | SNV | 1 | T | C | Homozygous   |
| NC_037649.1 | 3835225 | SNV | 1 | G | A | Heterozygous |
| NC_037649.1 | 3837903 | SNV | 1 | A | G | Heterozygous |
| NC_037649.1 | 3839306 | SNV | 1 | A | G | Homozygous   |
| NC_037649.1 | 3839911 | SNV | 1 | G | A | Heterozygous |
| NC_037649.1 | 3840130 | SNV | 1 | G | A | Heterozygous |
| NC_037649.1 | 3840184 | SNV | 1 | C | T | Heterozygous |
| NC_037649.1 | 3841088 | SNV | 1 | T | C | Heterozygous |
| NC_037649.1 | 3841288 | SNV | 1 | C | G | Homozygous   |
| NC_037649.1 | 3841490 | SNV | 1 | C | T | Heterozygous |
| NC_037649.1 | 3842078 | SNV | 1 | A | G | Homozygous   |
| NC_037649.1 | 3843221 | SNV | 1 | T | C | Heterozygous |
| NC_037649.1 | 3843282 | SNV | 1 | T | C | Heterozygous |
| NC_037649.1 | 3843325 | SNV | 1 | A | C | Homozygous   |
| NC_037649.1 | 3844945 | SNV | 1 | T | C | Homozygous   |
| NC_037649.1 | 3845800 | SNV | 1 | T | A | Heterozygous |



|             |         |     |   |   |   |              |
|-------------|---------|-----|---|---|---|--------------|
| NC_037649.1 | 3845804 | SNV | 1 | A | T | Heterozygous |
| NC_037649.1 | 3847069 | SNV | 1 | A | G | Homozygous   |
| NC_037649.1 | 3852234 | SNV | 1 | G | A | Homozygous   |
| NC_037649.1 | 3853737 | SNV | 1 | T | A | Heterozygous |
| NC_037649.1 | 3853741 | SNV | 1 | A | T | Heterozygous |
| NC_037649.1 | 3855057 | SNV | 1 | C | A | Homozygous   |
| NC_037649.1 | 3855108 | SNV | 1 | C | T | Homozygous   |
| NC_037649.1 | 3861492 | SNV | 1 | T | C | Homozygous   |
| NC_037649.1 | 3861587 | SNV | 1 | A | G | Homozygous   |
| NC_037649.1 | 3861819 | SNV | 1 | T | A | Homozygous   |
| NC_037649.1 | 3865367 | SNV | 1 | A | T | Homozygous   |
| NC_037649.1 | 3865382 | SNV | 1 | G | A | Homozygous   |
| NC_037649.1 | 3865384 | SNV | 1 | A | G | Homozygous   |
| NC_037649.1 | 3865392 | SNV | 1 | G | A | Homozygous   |
| NC_037649.1 | 3865396 | SNV | 1 | G | A | Homozygous   |
| NC_037649.1 | 3865399 | SNV | 1 | A | G | Homozygous   |
| NC_037649.1 | 3869325 | SNV | 1 | T | C | Homozygous   |
| NC_037649.1 | 3872267 | SNV | 1 | G | A | Homozygous   |
| NC_037649.1 | 3873267 | SNV | 1 | T | C | Homozygous   |
| NC_037649.1 | 3882320 | SNV | 1 | G | C | Homozygous   |
| NC_037649.1 | 3887943 | SNV | 1 | A | G | Homozygous   |
| NC_037649.1 | 3887973 | SNV | 1 | C | T | Homozygous   |
| NC_037649.1 | 3888127 | SNV | 1 | T | A | Heterozygous |
| NC_037649.1 | 3888130 | SNV | 1 | G | A | Heterozygous |
| NC_037649.1 | 3888464 | SNV | 1 | T | C | Homozygous   |
| NC_037649.1 | 3891848 | SNV | 1 | T | C | Heterozygous |
| NC_037649.1 | 3891858 | SNV | 1 | A | G | Heterozygous |
| NC_037649.1 | 3891870 | SNV | 1 | T | C | Heterozygous |
| NC_037649.1 | 3894571 | SNV | 1 | G | A | Heterozygous |
| NC_037649.1 | 3894673 | SNV | 1 | G | A | Heterozygous |
| NC_037649.1 | 3894694 | SNV | 1 | A | T | Homozygous   |
| NC_037649.1 | 3894717 | SNV | 1 | G | A | Homozygous   |
| NC_037649.1 | 3895243 | SNV | 1 | G | A | Homozygous   |
| NC_037649.1 | 3895419 | SNV | 1 | G | A | Homozygous   |
| NC_037649.1 | 3895456 | SNV | 1 | A | G | Homozygous   |
| NC_037649.1 | 3895492 | SNV | 1 | A | G | Homozygous   |
| NC_037649.1 | 3895531 | SNV | 1 | A | T | Homozygous   |
| NC_037649.1 | 3908437 | SNV | 1 | G | A | Heterozygous |
| NC_037649.1 | 3909958 | SNV | 1 | C | T | Homozygous   |
| NC_037649.1 | 3909967 | SNV | 1 | T | A | Homozygous   |
| NC_037649.1 | 3909971 | SNV | 1 | T | A | Homozygous   |
| NC_037649.1 | 3915902 | SNV | 1 | C | T | Heterozygous |
| NC_037649.1 | 3921028 | SNV | 1 | A | T | Homozygous   |
| NC_037649.1 | 3921135 | SNV | 1 | T | A | Homozygous   |
| NC_037649.1 | 3921197 | SNV | 1 | A | T | Homozygous   |
| NC_037649.1 | 3921865 | SNV | 1 | C | T | Heterozygous |
| NC_037649.1 | 3923255 | SNV | 1 | T | C | Homozygous   |
| NC_037649.1 | 3930758 | SNV | 1 | C | A | Heterozygous |
| NC_037649.1 | 3930768 | SNV | 1 | T | A | Homozygous   |
| NC_037649.1 | 3930770 | SNV | 1 | A | T | Homozygous   |
| NC_037649.1 | 3930772 | SNV | 1 | A | T | Homozygous   |

|             |         |     |   |   |   |              |
|-------------|---------|-----|---|---|---|--------------|
| NC_037649.1 | 3930778 | SNV | 1 | T | A | Heterozygous |
| NC_037649.1 | 3930780 | SNV | 1 | A | T | Heterozygous |
| NC_037649.1 | 3936840 | SNV | 1 | T | A | Homozygous   |
| NC_037649.1 | 3958722 | SNV | 1 | C | T | Homozygous   |
| NC_037649.1 | 3959068 | SNV | 1 | A | G | Homozygous   |
| NC_037649.1 | 3959071 | SNV | 1 | T | C | Homozygous   |
| NC_037649.1 | 3961193 | SNV | 1 | T | C | Homozygous   |
| NC_037649.1 | 3961636 | SNV | 1 | G | A | Homozygous   |
| NC_037649.1 | 3974503 | SNV | 1 | G | A | Heterozygous |
| NC_037649.1 | 3974533 | SNV | 1 | G | A | Homozygous   |
| NC_037649.1 | 3975886 | SNV | 1 | A | G | Homozygous   |
| NC_037649.1 | 3975909 | SNV | 1 | T | C | Homozygous   |
| NC_037649.1 | 3975913 | SNV | 1 | A | G | Homozygous   |
| NC_037649.1 | 3976115 | SNV | 1 | A | G | Homozygous   |
| NC_037649.1 | 3977129 | SNV | 1 | G | A | Homozygous   |
| NC_037649.1 | 3984421 | SNV | 1 | G | C | Homozygous   |
| NC_037649.1 | 3988116 | SNV | 1 | G | T | Homozygous   |
| NC_037649.1 | 3988142 | SNV | 1 | T | A | Homozygous   |
| NC_037649.1 | 3989434 | SNV | 1 | T | G | Homozygous   |
| NC_037649.1 | 3989437 | SNV | 1 | T | C | Homozygous   |
| NC_037649.1 | 3989453 | SNV | 1 | T | A | Homozygous   |
| NC_037649.1 | 3989458 | SNV | 1 | T | C | Homozygous   |
| NC_037649.1 | 3989465 | SNV | 1 | T | A | Homozygous   |
| NC_037649.1 | 3989467 | SNV | 1 | A | T | Homozygous   |
| NC_037649.1 | 3989470 | SNV | 1 | A | C | Homozygous   |
| NC_037649.1 | 3989479 | SNV | 1 | A | T | Homozygous   |
| NC_037649.1 | 3992504 | SNV | 1 | T | A | Homozygous   |
| NC_037649.1 | 3992510 | SNV | 1 | G | T | Homozygous   |
| NC_037649.1 | 3992542 | SNV | 1 | T | A | Heterozygous |
| NC_037649.1 | 3992548 | SNV | 1 | T | A | Heterozygous |
| NC_037649.1 | 3992564 | SNV | 1 | T | C | Heterozygous |
| NC_037649.1 | 3992567 | SNV | 1 | A | G | Heterozygous |
| NC_037649.1 | 3992572 | SNV | 1 | T | C | Heterozygous |
| NC_037649.1 | 3993219 | SNV | 1 | A | G | Homozygous   |
| NC_037649.1 | 3993574 | SNV | 1 | A | T | Homozygous   |
| NC_037649.1 | 3997626 | SNV | 1 | A | G | Homozygous   |
| NC_037649.1 | 3997798 | SNV | 1 | C | T | Homozygous   |
| NC_037649.1 | 3998140 | SNV | 1 | A | G | Homozygous   |
| NC_037649.1 | 3998974 | SNV | 1 | T | C | Homozygous   |
| NC_037649.1 | 4000288 | SNV | 1 | T | C | Homozygous   |
| NC_037649.1 | 4000665 | SNV | 1 | T | C | Heterozygous |
| NC_037649.1 | 4004352 | SNV | 1 | C | G | Homozygous   |
| NC_037649.1 | 4004356 | SNV | 1 | C | A | Homozygous   |
| NC_037649.1 | 4005649 | SNV | 1 | A | G | Homozygous   |
| NC_037649.1 | 4005733 | SNV | 1 | T | A | Homozygous   |
| NC_037649.1 | 4005737 | SNV | 1 | T | C | Homozygous   |
| NC_037649.1 | 4006866 | SNV | 1 | A | T | Homozygous   |
| NC_037649.1 | 4008374 | SNV | 1 | A | G | Homozygous   |
| NC_037649.1 | 4010289 | SNV | 1 | T | A | Homozygous   |
| NC_037649.1 | 4010297 | SNV | 1 | T | A | Homozygous   |
| NC_037649.1 | 4025628 | SNV | 1 | T | C | Homozygous   |

|             |         |     |   |   |   |              |
|-------------|---------|-----|---|---|---|--------------|
| NC_037649.1 | 4025647 | SNV | 1 | A | G | Homozygous   |
| NC_037649.1 | 4025660 | SNV | 1 | T | C | Homozygous   |
| NC_037649.1 | 4025996 | SNV | 1 | A | G | Homozygous   |
| NC_037649.1 | 4026728 | SNV | 1 | A | T | Homozygous   |
| NC_037649.1 | 4026913 | SNV | 1 | C | T | Homozygous   |
| NC_037649.1 | 4027110 | SNV | 1 | C | T | Heterozygous |
| NC_037649.1 | 4027514 | SNV | 1 | T | C | Homozygous   |
| NC_037649.1 | 4028216 | SNV | 1 | C | G | Homozygous   |
| NC_037649.1 | 4032545 | SNV | 1 | G | A | Homozygous   |
| NC_037649.1 | 4032566 | SNV | 1 | G | A | Homozygous   |
| NC_037649.1 | 4032605 | SNV | 1 | A | G | Heterozygous |
| NC_037649.1 | 4032620 | SNV | 1 | T | G | Heterozygous |
| NC_037649.1 | 4032623 | SNV | 1 | C | A | Heterozygous |
| NC_037649.1 | 4035043 | SNV | 1 | G | A | Heterozygous |
| NC_037649.1 | 4035055 | SNV | 1 | G | A | Heterozygous |
| NC_037649.1 | 4035059 | SNV | 1 | C | T | Heterozygous |
| NC_037649.1 | 4035062 | SNV | 1 | C | T | Heterozygous |
| NC_037649.1 | 4035084 | SNV | 1 | T | G | Heterozygous |
| NC_037649.1 | 4035103 | SNV | 1 | G | A | Heterozygous |
| NC_037649.1 | 4035410 | SNV | 1 | G | A | Heterozygous |
| NC_037649.1 | 4039727 | SNV | 1 | C | T | Heterozygous |
| NC_037649.1 | 4039758 | SNV | 1 | C | T | Homozygous   |
| NC_037649.1 | 4039785 | SNV | 1 | C | T | Homozygous   |
| NC_037649.1 | 4039792 | SNV | 1 | G | C | Homozygous   |
| NC_037649.1 | 4039795 | SNV | 1 | T | C | Homozygous   |
| NC_037649.1 | 4040266 | SNV | 1 | G | C | Homozygous   |
| NC_037649.1 | 4040269 | SNV | 1 | C | T | Homozygous   |
| NC_037649.1 | 4044678 | SNV | 1 | A | G | Heterozygous |
| NC_037649.1 | 4044688 | SNV | 1 | A | G | Homozygous   |
| NC_037649.1 | 4044855 | SNV | 1 | C | T | Homozygous   |
| NC_037649.1 | 4044858 | SNV | 1 | T | C | Heterozygous |
| NC_037649.1 | 4044921 | SNV | 1 | T | C | Heterozygous |
| NC_037649.1 | 4044926 | SNV | 1 | T | C | Heterozygous |
| NC_037649.1 | 4044958 | SNV | 1 | A | G | Heterozygous |
| NC_037649.1 | 4044959 | SNV | 1 | A | T | Heterozygous |
| NC_037649.1 | 4048161 | SNV | 1 | A | G | Homozygous   |
| NC_037649.1 | 4048168 | SNV | 1 | G | A | Homozygous   |
| NC_037649.1 | 4048276 | SNV | 1 | A | T | Heterozygous |
| NC_037649.1 | 4048332 | SNV | 1 | G | A | Homozygous   |
| NC_037649.1 | 4048336 | SNV | 1 | A | G | Homozygous   |
| NC_037649.1 | 4048887 | SNV | 1 | A | T | Heterozygous |
| NC_037649.1 | 4048889 | SNV | 1 | C | T | Heterozygous |
| NC_037649.1 | 4048920 | SNV | 1 | G | T | Heterozygous |
| NC_037649.1 | 4054485 | SNV | 1 | A | G | Homozygous   |
| NC_037649.1 | 4054490 | SNV | 1 | G | A | Homozygous   |
| NC_037649.1 | 4056251 | SNV | 1 | C | T | Homozygous   |
| NC_037649.1 | 4056253 | SNV | 1 | C | T | Homozygous   |
| NC_037649.1 | 4056256 | SNV | 1 | T | C | Heterozygous |
| NC_037649.1 | 4056257 | SNV | 1 | T | C | Heterozygous |
| NC_037649.1 | 4056261 | SNV | 1 | T | C | Homozygous   |
| NC_037649.1 | 4056283 | SNV | 1 | C | A | Homozygous   |

|             |         |     |   |   |   |              |
|-------------|---------|-----|---|---|---|--------------|
| NC_037649.1 | 4056286 | SNV | 1 | C | A | Heterozygous |
| NC_037649.1 | 4056425 | SNV | 1 | C | A | Heterozygous |
| NC_037649.1 | 4072248 | SNV | 1 | C | T | Heterozygous |
| NC_037649.1 | 4072260 | SNV | 1 | C | T | Homozygous   |
| NC_037649.1 | 4072265 | SNV | 1 | G | A | Homozygous   |
| NC_037649.1 | 4072273 | SNV | 1 | G | A | Homozygous   |
| NC_037649.1 | 4072846 | SNV | 1 | T | G | Heterozygous |
| NC_037649.1 | 4072924 | SNV | 1 | T | C | Heterozygous |
| NC_037649.1 | 4072928 | SNV | 1 | T | C | Homozygous   |
| NC_037649.1 | 4072946 | SNV | 1 | A | C | Homozygous   |
| NC_037649.1 | 4072962 | SNV | 1 | T | C | Homozygous   |
| NC_037649.1 | 4072997 | SNV | 1 | T | C | Homozygous   |
| NC_037649.1 | 4073007 | SNV | 1 | G | A | Heterozygous |
| NC_037649.1 | 4073692 | SNV | 1 | A | G | Homozygous   |
| NC_037649.1 | 4074344 | SNV | 1 | T | A | Heterozygous |
| NC_037649.1 | 4074350 | SNV | 1 | G | A | Heterozygous |
| NC_037649.1 | 4074621 | SNV | 1 | C | T | Homozygous   |
| NC_037649.1 | 4074652 | SNV | 1 | C | T | Homozygous   |
| NC_037649.1 | 4075682 | SNV | 1 | T | C | Homozygous   |
| NC_037649.1 | 4075848 | SNV | 1 | A | G | Homozygous   |
| NC_037649.1 | 4075957 | SNV | 1 | A | G | Heterozygous |
| NC_037649.1 | 4075963 | SNV | 1 | G | A | Heterozygous |
| NC_037649.1 | 4076087 | SNV | 1 | C | A | Homozygous   |
| NC_037649.1 | 4076148 | SNV | 1 | C | T | Heterozygous |
| NC_037649.1 | 4076163 | SNV | 1 | T | G | Homozygous   |
| NC_037649.1 | 4076264 | SNV | 1 | A | G | Heterozygous |
| NC_037649.1 | 4080340 | SNV | 1 | A | T | Homozygous   |
| NC_037649.1 | 4080759 | SNV | 1 | G | T | Heterozygous |
| NC_037649.1 | 4080765 | SNV | 1 | G | A | Heterozygous |
| NC_037649.1 | 4080769 | SNV | 1 | G | A | Heterozygous |
| NC_037649.1 | 4080775 | SNV | 1 | G | A | Heterozygous |
| NC_037649.1 | 4089142 | SNV | 1 | A | G | Homozygous   |
| NC_037649.1 | 4089516 | SNV | 1 | A | T | Homozygous   |
| NC_037649.1 | 4097362 | SNV | 1 | A | G | Homozygous   |
| NC_037649.1 | 4097383 | SNV | 1 | A | G | Heterozygous |
| NC_037649.1 | 4100018 | SNV | 1 | C | T | Homozygous   |
| NC_037649.1 | 4100032 | SNV | 1 | C | T | Heterozygous |
| NC_037649.1 | 4105642 | SNV | 1 | G | A | Homozygous   |
| NC_037649.1 | 4105648 | SNV | 1 | A | G | Heterozygous |
| NC_037649.1 | 4109019 | SNV | 1 | A | G | Homozygous   |
| NC_037649.1 | 4109091 | SNV | 1 | G | A | Heterozygous |
| NC_037649.1 | 4125320 | SNV | 1 | C | T | Homozygous   |
| NC_037649.1 | 4142671 | SNV | 1 | T | C | Homozygous   |
| NC_037649.1 | 4148157 | SNV | 1 | C | T | Heterozygous |
| NC_037649.1 | 4151737 | SNV | 1 | T | C | Homozygous   |
| NC_037649.1 | 4151798 | SNV | 1 | T | C | Heterozygous |
| NC_037649.1 | 4161478 | SNV | 1 | T | C | Heterozygous |
| NC_037649.1 | 4161517 | SNV | 1 | A | G | Homozygous   |
| NC_037649.1 | 4161521 | SNV | 1 | T | C | Homozygous   |
| NC_037649.1 | 4164983 | SNV | 1 | A | G | Homozygous   |
| NC_037649.1 | 4165027 | SNV | 1 | G | T | Homozygous   |

|             |         |     |   |   |   |              |
|-------------|---------|-----|---|---|---|--------------|
| NC_037649.1 | 4183694 | SNV | 1 | G | A | Heterozygous |
| NC_037649.1 | 4183715 | SNV | 1 | T | C | Homozygous   |
| NC_037649.1 | 4183720 | SNV | 1 | C | T | Homozygous   |
| NC_037649.1 | 4183732 | SNV | 1 | T | C | Homozygous   |
| NC_037649.1 | 4184506 | SNV | 1 | T | G | Homozygous   |
| NC_037649.1 | 4184532 | SNV | 1 | A | G | Homozygous   |
| NC_037649.1 | 4184545 | SNV | 1 | T | C | Homozygous   |
| NC_037649.1 | 4188863 | SNV | 1 | C | T | Homozygous   |
| NC_037649.1 | 4189475 | SNV | 1 | A | G | Heterozygous |
| NC_037649.1 | 4189574 | SNV | 1 | C | A | Homozygous   |
| NC_037649.1 | 4190079 | SNV | 1 | C | G | Homozygous   |
| NC_037649.1 | 4190191 | SNV | 1 | C | T | Heterozygous |
| NC_037649.1 | 4190206 | SNV | 1 | T | C | Homozygous   |
| NC_037649.1 | 4190255 | SNV | 1 | C | T | Homozygous   |
| NC_037649.1 | 4190344 | SNV | 1 | C | T | Heterozygous |
| NC_037649.1 | 4190378 | SNV | 1 | G | A | Heterozygous |
| NC_037649.1 | 4190475 | SNV | 1 | C | T | Heterozygous |
| NC_037649.1 | 4190775 | SNV | 1 | C | T | Homozygous   |
| NC_037649.1 | 4190873 | SNV | 1 | C | T | Homozygous   |
| NC_037649.1 | 4191046 | SNV | 1 | G | A | Heterozygous |
| NC_037649.1 | 4191077 | SNV | 1 | C | T | Heterozygous |
| NC_037649.1 | 4191593 | SNV | 1 | C | A | Homozygous   |
| NC_037649.1 | 4191598 | SNV | 1 | T | C | Homozygous   |
| NC_037649.1 | 4191601 | SNV | 1 | C | T | Homozygous   |
| NC_037649.1 | 4191638 | SNV | 1 | T | G | Homozygous   |
| NC_037649.1 | 4191640 | SNV | 1 | T | A | Heterozygous |
| NC_037649.1 | 4191833 | SNV | 1 | T | C | Homozygous   |
| NC_037649.1 | 4203723 | SNV | 1 | C | T | Homozygous   |
| NC_037649.1 | 4203799 | SNV | 1 | C | T | Heterozygous |
| NC_037649.1 | 4203803 | SNV | 1 | C | T | Heterozygous |
| NC_037649.1 | 4203814 | SNV | 1 | A | G | Homozygous   |
| NC_037649.1 | 4206361 | SNV | 1 | T | A | Homozygous   |
| NC_037649.1 | 4206367 | SNV | 1 | T | A | Homozygous   |
| NC_037649.1 | 4206373 | SNV | 1 | T | C | Homozygous   |
| NC_037649.1 | 4206375 | SNV | 1 | G | T | Homozygous   |
| NC_037649.1 | 4206378 | SNV | 1 | C | G | Homozygous   |
| NC_037649.1 | 4206382 | SNV | 1 | T | A | Heterozygous |
| NC_037649.1 | 4206393 | SNV | 1 | G | A | Heterozygous |
| NC_037649.1 | 4206415 | SNV | 1 | C | T | Homozygous   |
| NC_037649.1 | 4207581 | SNV | 1 | A | G | Homozygous   |
| NC_037649.1 | 4238704 | SNV | 1 | C | T | Homozygous   |
| NC_037649.1 | 4238803 | SNV | 1 | G | A | Heterozygous |
| NC_037649.1 | 4246176 | SNV | 1 | A | G | Homozygous   |
| NC_037649.1 | 4246201 | SNV | 1 | T | C | Homozygous   |
| NC_037649.1 | 4256463 | SNV | 1 | T | C | Homozygous   |
| NC_037649.1 | 4256533 | SNV | 1 | T | C | Heterozygous |
| NC_037649.1 | 4258234 | SNV | 1 | T | A | Heterozygous |
| NC_037649.1 | 4258236 | SNV | 1 | A | G | Heterozygous |
| NC_037649.1 | 4258946 | SNV | 1 | C | T | Heterozygous |
| NC_037649.1 | 4266015 | SNV | 1 | T | C | Homozygous   |
| NC_037649.1 | 4266019 | SNV | 1 | G | A | Heterozygous |

|             |         |     |   |   |   |              |
|-------------|---------|-----|---|---|---|--------------|
| NC_037649.1 | 4267379 | SNV | 1 | A | C | Homozygous   |
| NC_037649.1 | 4267389 | SNV | 1 | A | G | Homozygous   |
| NC_037649.1 | 4269179 | SNV | 1 | T | G | Homozygous   |
| NC_037649.1 | 4269181 | SNV | 1 | G | A | Homozygous   |
| NC_037649.1 | 4269225 | SNV | 1 | T | C | Homozygous   |
| NC_037649.1 | 4269771 | SNV | 1 | A | G | Heterozygous |
| NC_037649.1 | 4269928 | SNV | 1 | G | A | Heterozygous |
| NC_037649.1 | 4269937 | SNV | 1 | C | T | Heterozygous |
| NC_037649.1 | 4269979 | SNV | 1 | G | C | Heterozygous |
| NC_037649.1 | 4269994 | SNV | 1 | T | C | Homozygous   |
| NC_037649.1 | 4270260 | SNV | 1 | C | T | Heterozygous |
| NC_037649.1 | 4270302 | SNV | 1 | G | A | Heterozygous |
| NC_037649.1 | 4270396 | SNV | 1 | A | G | Homozygous   |
| NC_037649.1 | 4270494 | SNV | 1 | C | A | Homozygous   |
| NC_037649.1 | 4270976 | SNV | 1 | C | T | Heterozygous |
| NC_037649.1 | 4367968 | SNV | 1 | T | C | Homozygous   |
| NC_037649.1 | 4397450 | SNV | 1 | C | G | Homozygous   |
| NC_037649.1 | 4405061 | SNV | 1 | A | G | Heterozygous |
| NC_037649.1 | 4405074 | SNV | 1 | A | G | Heterozygous |
| NC_037649.1 | 4405110 | SNV | 1 | A | G | Homozygous   |
| NC_037649.1 | 4405125 | SNV | 1 | A | G | Homozygous   |
| NC_037649.1 | 4407481 | SNV | 1 | A | G | Homozygous   |
| NC_037649.1 | 4407492 | SNV | 1 | G | A | Homozygous   |
| NC_037649.1 | 4407509 | SNV | 1 | G | C | Heterozygous |
| NC_037649.1 | 4419147 | SNV | 1 | G | C | Homozygous   |
| NC_037649.1 | 4419150 | SNV | 1 | G | C | Heterozygous |
| NC_037649.1 | 4420874 | SNV | 1 | C | T | Heterozygous |
| NC_037649.1 | 4422105 | SNV | 1 | C | A | Heterozygous |
| NC_037649.1 | 4426600 | SNV | 1 | T | C | Homozygous   |
| NC_037649.1 | 4426636 | SNV | 1 | A | T | Heterozygous |
| NC_037649.1 | 4426662 | SNV | 1 | G | A | Heterozygous |
| NC_037649.1 | 4426725 | SNV | 1 | A | G | Homozygous   |
| NC_037649.1 | 4426835 | SNV | 1 | G | A | Heterozygous |
| NC_037649.1 | 4426854 | SNV | 1 | A | G | Heterozygous |
| NC_037649.1 | 4427094 | SNV | 1 | A | G | Heterozygous |
| NC_037649.1 | 4428787 | SNV | 1 | A | C | Homozygous   |
| NC_037649.1 | 4428843 | SNV | 1 | G | A | Heterozygous |
| NC_037649.1 | 4428900 | SNV | 1 | A | G | Heterozygous |
| NC_037649.1 | 4440208 | SNV | 1 | G | A | Homozygous   |
| NC_037649.1 | 4440213 | SNV | 1 | C | T | Homozygous   |
| NC_037649.1 | 4440219 | SNV | 1 | C | T | Homozygous   |
| NC_037649.1 | 4440226 | SNV | 1 | C | T | Homozygous   |
| NC_037649.1 | 4440229 | SNV | 1 | A | T | Homozygous   |
| NC_037649.1 | 4440244 | SNV | 1 | T | C | Homozygous   |
| NC_037649.1 | 4447960 | SNV | 1 | C | T | Heterozygous |
| NC_037649.1 | 4448019 | SNV | 1 | T | C | Heterozygous |
| NC_037649.1 | 4448057 | SNV | 1 | T | C | Heterozygous |
| NC_037649.1 | 4448192 | SNV | 1 | G | T | Homozygous   |
| NC_037649.1 | 4448209 | SNV | 1 | T | C | Homozygous   |
| NC_037649.1 | 4448241 | SNV | 1 | G | C | Heterozygous |
| NC_037649.1 | 4448598 | SNV | 1 | G | A | Heterozygous |

|             |         |     |   |   |   |              |
|-------------|---------|-----|---|---|---|--------------|
| NC_037649.1 | 4448600 | SNV | 1 | A | C | Heterozygous |
| NC_037649.1 | 4448634 | SNV | 1 | G | A | Heterozygous |
| NC_037649.1 | 4448824 | SNV | 1 | C | T | Heterozygous |
| NC_037649.1 | 4448934 | SNV | 1 | A | G | Homozygous   |
| NC_037649.1 | 4455882 | SNV | 1 | G | T | Heterozygous |
| NC_037649.1 | 4459638 | SNV | 1 | C | T | Heterozygous |
| NC_037649.1 | 4459657 | SNV | 1 | C | G | Heterozygous |
| NC_037649.1 | 4459743 | SNV | 1 | G | A | Homozygous   |
| NC_037649.1 | 4459787 | SNV | 1 | T | C | Homozygous   |
| NC_037649.1 | 4459796 | SNV | 1 | G | A | Heterozygous |
| NC_037649.1 | 4459796 | SNV | 1 | G | C | Heterozygous |
| NC_037649.1 | 4459805 | SNV | 1 | T | C | Homozygous   |
| NC_037649.1 | 4459808 | SNV | 1 | G | A | Homozygous   |
| NC_037649.1 | 4459819 | SNV | 1 | C | A | Heterozygous |
| NC_037649.1 | 4459858 | SNV | 1 | T | C | Homozygous   |
| NC_037649.1 | 4459948 | SNV | 1 | T | C | Homozygous   |
| NC_037649.1 | 4459957 | SNV | 1 | A | G | Homozygous   |
| NC_037649.1 | 4459960 | SNV | 1 | A | G | Homozygous   |
| NC_037649.1 | 4459963 | SNV | 1 | A | T | Homozygous   |
| NC_037649.1 | 4463294 | SNV | 1 | A | G | Homozygous   |
| NC_037649.1 | 4463304 | SNV | 1 | A | G | Heterozygous |
| NC_037649.1 | 4463307 | SNV | 1 | C | T | Heterozygous |
| NC_037649.1 | 4463573 | SNV | 1 | T | C | Heterozygous |
| NC_037649.1 | 4463576 | SNV | 1 | G | A | Heterozygous |
| NC_037649.1 | 4463612 | SNV | 1 | T | C | Heterozygous |
| NC_037649.1 | 4463616 | SNV | 1 | A | G | Homozygous   |
| NC_037649.1 | 4463772 | SNV | 1 | T | C | Homozygous   |
| NC_037649.1 | 4463841 | SNV | 1 | A | G | Homozygous   |
| NC_037649.1 | 4464172 | SNV | 1 | G | A | Heterozygous |
| NC_037649.1 | 4472105 | SNV | 1 | A | G | Homozygous   |
| NC_037649.1 | 4477674 | SNV | 1 | T | A | Heterozygous |
| NC_037649.1 | 4477825 | SNV | 1 | G | A | Homozygous   |
| NC_037649.1 | 4482128 | SNV | 1 | A | T | Homozygous   |
| NC_037649.1 | 4482135 | SNV | 1 | T | C | Homozygous   |
| NC_037649.1 | 4482737 | SNV | 1 | A | C | Heterozygous |
| NC_037649.1 | 4520581 | SNV | 1 | T | C | Homozygous   |
| NC_037649.1 | 4520654 | SNV | 1 | G | A | Heterozygous |
| NC_037649.1 | 4520696 | SNV | 1 | G | A | Heterozygous |
| NC_037649.1 | 4527832 | SNV | 1 | C | T | Homozygous   |
| NC_037649.1 | 4527836 | SNV | 1 | T | C | Homozygous   |
| NC_037649.1 | 4527843 | SNV | 1 | T | G | Homozygous   |
| NC_037649.1 | 4527873 | SNV | 1 | T | A | Homozygous   |
| NC_037649.1 | 4530267 | SNV | 1 | A | G | Heterozygous |
| NC_037649.1 | 4530277 | SNV | 1 | A | G | Heterozygous |
| NC_037649.1 | 4530284 | SNV | 1 | T | A | Heterozygous |
| NC_037649.1 | 4530290 | SNV | 1 | T | A | Heterozygous |
| NC_037649.1 | 4530299 | SNV | 1 | T | A | Heterozygous |
| NC_037649.1 | 4544315 | SNV | 1 | T | A | Homozygous   |
| NC_037649.1 | 4544318 | SNV | 1 | A | T | Homozygous   |
| NC_037649.1 | 4544328 | SNV | 1 | T | A | Homozygous   |
| NC_037649.1 | 4544330 | SNV | 1 | G | A | Homozygous   |

|             |         |     |   |   |   |              |
|-------------|---------|-----|---|---|---|--------------|
| NC_037649.1 | 4553210 | SNV | 1 | T | C | Homozygous   |
| NC_037649.1 | 4553322 | SNV | 1 | T | C | Heterozygous |
| NC_037649.1 | 4553599 | SNV | 1 | A | G | Heterozygous |
| NC_037649.1 | 4553655 | SNV | 1 | T | C | Heterozygous |
| NC_037649.1 | 4553756 | SNV | 1 | G | A | Homozygous   |
| NC_037649.1 | 4568697 | SNV | 1 | C | T | Homozygous   |
| NC_037649.1 | 4568699 | SNV | 1 | T | C | Homozygous   |
| NC_037649.1 | 4568701 | SNV | 1 | G | A | Homozygous   |
| NC_037649.1 | 4568708 | SNV | 1 | T | A | Homozygous   |
| NC_037649.1 | 4568713 | SNV | 1 | G | A | Heterozygous |
| NC_037649.1 | 4568730 | SNV | 1 | A | G | Homozygous   |
| NC_037649.1 | 4568737 | SNV | 1 | C | T | Homozygous   |
| NC_037649.1 | 4569574 | SNV | 1 | T | C | Homozygous   |
| NC_037649.1 | 4577673 | SNV | 1 | T | A | Homozygous   |
| NC_037649.1 | 4577676 | SNV | 1 | A | T | Homozygous   |
| NC_037649.1 | 4577678 | SNV | 1 | A | T | Homozygous   |
| NC_037649.1 | 4594873 | SNV | 1 | A | G | Homozygous   |
| NC_037649.1 | 4601255 | SNV | 1 | C | T | Homozygous   |
| NC_037649.1 | 4601280 | SNV | 1 | T | G | Heterozygous |
| NC_037649.1 | 4601283 | SNV | 1 | C | T | Homozygous   |
| NC_037649.1 | 4601304 | SNV | 1 | T | C | Heterozygous |
| NC_037649.1 | 4602013 | SNV | 1 | G | T | Heterozygous |
| NC_037649.1 | 4617151 | SNV | 1 | G | A | Homozygous   |
| NC_037649.1 | 4632216 | SNV | 1 | A | G | Homozygous   |
| NC_037649.1 | 4632220 | SNV | 1 | G | A | Homozygous   |
| NC_037649.1 | 4632300 | SNV | 1 | C | T | Heterozygous |
| NC_037649.1 | 4632343 | SNV | 1 | A | G | Homozygous   |
| NC_037649.1 | 4632385 | SNV | 1 | T | A | Homozygous   |
| NC_037649.1 | 4633912 | SNV | 1 | T | G | Homozygous   |
| NC_037649.1 | 4633915 | SNV | 1 | A | G | Homozygous   |
| NC_037649.1 | 4633923 | SNV | 1 | G | C | Homozygous   |
| NC_037649.1 | 4633927 | SNV | 1 | T | G | Homozygous   |
| NC_037649.1 | 4633930 | SNV | 1 | A | G | Homozygous   |
| NC_037649.1 | 4633950 | SNV | 1 | A | G | Homozygous   |
| NC_037649.1 | 4649047 | SNV | 1 | C | T | Heterozygous |
| NC_037649.1 | 4706421 | SNV | 1 | C | T | Heterozygous |
| NC_037649.1 | 4706726 | SNV | 1 | G | A | Heterozygous |
| NC_037649.1 | 4706762 | SNV | 1 | A | G | Heterozygous |
| NC_037649.1 | 4709863 | SNV | 1 | A | G | Homozygous   |
| NC_037649.1 | 4709888 | SNV | 1 | G | A | Homozygous   |
| NC_037649.1 | 4711709 | SNV | 1 | G | A | Heterozygous |
| NC_037649.1 | 4711763 | SNV | 1 | T | C | Homozygous   |
| NC_037649.1 | 4730333 | SNV | 1 | G | A | Homozygous   |
| NC_037649.1 | 4730358 | SNV | 1 | A | G | Heterozygous |
| NC_037649.1 | 4730378 | SNV | 1 | C | G | Homozygous   |
| NC_037649.1 | 4730391 | SNV | 1 | G | A | Homozygous   |
| NC_037649.1 | 4730409 | SNV | 1 | A | G | Homozygous   |
| NC_037649.1 | 4748420 | SNV | 1 | A | T | Homozygous   |
| NC_037649.1 | 4758269 | SNV | 1 | T | C | Homozygous   |
| NC_037649.1 | 4759331 | SNV | 1 | C | G | Heterozygous |
| NC_037649.1 | 4759333 | SNV | 1 | C | T | Heterozygous |



|             |         |     |   |   |   |              |
|-------------|---------|-----|---|---|---|--------------|
| NC_037649.1 | 4759343 | SNV | 1 | C | T | Homozygous   |
| NC_037649.1 | 4764669 | SNV | 1 | T | C | Homozygous   |
| NC_037649.1 | 4764743 | SNV | 1 | A | G | Homozygous   |
| NC_037649.1 | 4764779 | SNV | 1 | C | T | Heterozygous |
| NC_037649.1 | 4764785 | SNV | 1 | T | C | Homozygous   |
| NC_037649.1 | 4764830 | SNV | 1 | A | T | Heterozygous |
| NC_037649.1 | 4765834 | SNV | 1 | C | T | Homozygous   |
| NC_037649.1 | 4765846 | SNV | 1 | T | C | Homozygous   |
| NC_037649.1 | 4765859 | SNV | 1 | C | T | Homozygous   |
| NC_037649.1 | 4771341 | SNV | 1 | T | C | Homozygous   |
| NC_037649.1 | 4775686 | SNV | 1 | T | C | Homozygous   |
| NC_037649.1 | 4775698 | SNV | 1 | T | G | Homozygous   |
| NC_037649.1 | 4775700 | SNV | 1 | C | T | Homozygous   |
| NC_037649.1 | 4775703 | SNV | 1 | C | T | Homozygous   |
| NC_037649.1 | 4775708 | SNV | 1 | C | T | Homozygous   |
| NC_037649.1 | 4775730 | SNV | 1 | C | T | Homozygous   |
| NC_037649.1 | 4775732 | SNV | 1 | C | T | Homozygous   |
| NC_037649.1 | 4775734 | SNV | 1 | C | T | Homozygous   |
| NC_037649.1 | 4775738 | SNV | 1 | C | T | Homozygous   |
| NC_037649.1 | 4775742 | SNV | 1 | C | T | Homozygous   |
| NC_037649.1 | 4779265 | SNV | 1 | T | C | Heterozygous |
| NC_037649.1 | 4779268 | SNV | 1 | C | T | Homozygous   |
| NC_037649.1 | 4779271 | SNV | 1 | T | C | Homozygous   |
| NC_037649.1 | 4779294 | SNV | 1 | C | T | Heterozygous |
| NC_037649.1 | 4779305 | SNV | 1 | C | T | Homozygous   |
| NC_037649.1 | 4779319 | SNV | 1 | C | T | Heterozygous |
| NC_037649.1 | 4779516 | SNV | 1 | G | A | Heterozygous |
| NC_037649.1 | 4785078 | SNV | 1 | T | C | Heterozygous |
| NC_037649.1 | 4785234 | SNV | 1 | C | T | Heterozygous |
| NC_037649.1 | 4785294 | SNV | 1 | C | T | Homozygous   |
| NC_037649.1 | 4800802 | SNV | 1 | T | G | Heterozygous |
| NC_037649.1 | 4801043 | SNV | 1 | C | A | Homozygous   |
| NC_037649.1 | 4804912 | SNV | 1 | T | A | Homozygous   |
| NC_037649.1 | 4806828 | SNV | 1 | T | C | Homozygous   |
| NC_037649.1 | 4806836 | SNV | 1 | C | A | Homozygous   |
| NC_037649.1 | 4808396 | SNV | 1 | G | A | Heterozygous |
| NC_037649.1 | 4808399 | SNV | 1 | T | C | Homozygous   |
| NC_037649.1 | 4808460 | SNV | 1 | G | A | Heterozygous |
| NC_037649.1 | 4808465 | SNV | 1 | G | A | Heterozygous |
| NC_037649.1 | 4808467 | SNV | 1 | A | G | Heterozygous |
| NC_037649.1 | 4808631 | SNV | 1 | G | A | Heterozygous |
| NC_037649.1 | 4808665 | SNV | 1 | T | A | Homozygous   |
| NC_037649.1 | 4818654 | SNV | 1 | G | A | Homozygous   |
| NC_037649.1 | 4820107 | SNV | 1 | T | C | Heterozygous |
| NC_037649.1 | 4823626 | SNV | 1 | A | G | Heterozygous |
| NC_037649.1 | 4823641 | SNV | 1 | T | G | Heterozygous |
| NC_037649.1 | 4823651 | SNV | 1 | T | C | Heterozygous |
| NC_037649.1 | 4833141 | SNV | 1 | T | A | Heterozygous |
| NC_037649.1 | 4833147 | SNV | 1 | A | G | Heterozygous |
| NC_037649.1 | 4833765 | SNV | 1 | G | A | Homozygous   |
| NC_037649.1 | 4833771 | SNV | 1 | G | A | Homozygous   |

|             |         |     |   |   |   |              |
|-------------|---------|-----|---|---|---|--------------|
| NC_037649.1 | 4836750 | SNV | 1 | A | C | Homozygous   |
| NC_037649.1 | 4836759 | SNV | 1 | C | A | Homozygous   |
| NC_037649.1 | 4836781 | SNV | 1 | C | A | Heterozygous |
| NC_037649.1 | 4836784 | SNV | 1 | T | G | Heterozygous |
| NC_037649.1 | 4838664 | SNV | 1 | G | A | Heterozygous |
| NC_037649.1 | 4838769 | SNV | 1 | T | C | Homozygous   |
| NC_037649.1 | 4838783 | SNV | 1 | C | G | Homozygous   |
| NC_037649.1 | 4838856 | SNV | 1 | G | A | Homozygous   |
| NC_037649.1 | 4842611 | SNV | 1 | T | C | Homozygous   |
| NC_037649.1 | 4842614 | SNV | 1 | T | C | Homozygous   |
| NC_037649.1 | 4842621 | SNV | 1 | C | T | Heterozygous |
| NC_037649.1 | 4842625 | SNV | 1 | C | T | Homozygous   |
| NC_037649.1 | 4842642 | SNV | 1 | G | C | Homozygous   |
| NC_037649.1 | 4842644 | SNV | 1 | A | T | Homozygous   |
| NC_037649.1 | 4842648 | SNV | 1 | A | T | Homozygous   |
| NC_037649.1 | 4842650 | SNV | 1 | T | A | Homozygous   |
| NC_037649.1 | 4850488 | SNV | 1 | T | C | Homozygous   |
| NC_037649.1 | 4857438 | SNV | 1 | C | T | Homozygous   |
| NC_037649.1 | 4857445 | SNV | 1 | A | C | Homozygous   |
| NC_037649.1 | 4857449 | SNV | 1 | A | T | Homozygous   |
| NC_037649.1 | 4882709 | SNV | 1 | T | C | Heterozygous |
| NC_037649.1 | 4884274 | SNV | 1 | T | A | Homozygous   |
| NC_037649.1 | 4884316 | SNV | 1 | A | G | Homozygous   |
| NC_037649.1 | 4884320 | SNV | 1 | G | C | Heterozygous |
| NC_037649.1 | 4884325 | SNV | 1 | G | C | Homozygous   |
| NC_037649.1 | 4893881 | SNV | 1 | G | C | Homozygous   |
| NC_037649.1 | 4893884 | SNV | 1 | C | T | Homozygous   |
| NC_037649.1 | 4893912 | SNV | 1 | C | T | Homozygous   |
| NC_037649.1 | 4893920 | SNV | 1 | T | C | Homozygous   |
| NC_037649.1 | 4916412 | SNV | 1 | G | A | Homozygous   |
| NC_037649.1 | 4916611 | SNV | 1 | T | C | Homozygous   |
| NC_037649.1 | 4921233 | SNV | 1 | T | C | Homozygous   |
| NC_037649.1 | 4921235 | SNV | 1 | A | G | Homozygous   |
| NC_037649.1 | 4941064 | SNV | 1 | A | G | Homozygous   |
| NC_037649.1 | 4941074 | SNV | 1 | G | T | Homozygous   |
| NC_037649.1 | 5021978 | SNV | 1 | A | G | Homozygous   |
| NC_037649.1 | 5026123 | SNV | 1 | A | G | Homozygous   |
| NC_037649.1 | 5026145 | SNV | 1 | C | T | Heterozygous |
| NC_037649.1 | 5026175 | SNV | 1 | A | C | Heterozygous |
| NC_037649.1 | 5026445 | SNV | 1 | T | C | Homozygous   |
| NC_037649.1 | 5026627 | SNV | 1 | G | A | Heterozygous |
| NC_037649.1 | 5026895 | SNV | 1 | G | T | Homozygous   |
| NC_037649.1 | 5029325 | SNV | 1 | G | A | Heterozygous |
| NC_037649.1 | 5029346 | SNV | 1 | C | T | Heterozygous |
| NC_037649.1 | 5039722 | SNV | 1 | C | T | Heterozygous |
| NC_037649.1 | 5039768 | SNV | 1 | A | T | Heterozygous |
| NC_037649.1 | 5048589 | SNV | 1 | A | G | Heterozygous |
| NC_037649.1 | 5049112 | SNV | 1 | A | T | Heterozygous |
| NC_037649.1 | 5049114 | SNV | 1 | G | A | Heterozygous |
| NC_037649.1 | 5049137 | SNV | 1 | G | A | Heterozygous |
| NC_037649.1 | 5049158 | SNV | 1 | C | T | Homozygous   |

|             |         |     |   |   |   |              |
|-------------|---------|-----|---|---|---|--------------|
| NC_037649.1 | 5049166 | SNV | 1 | A | G | Homozygous   |
| NC_037649.1 | 5049174 | SNV | 1 | G | T | Homozygous   |
| NC_037649.1 | 5049182 | SNV | 1 | C | G | Homozygous   |
| NC_037649.1 | 5067638 | SNV | 1 | A | G | Homozygous   |
| NC_037649.1 | 5067662 | SNV | 1 | T | A | Homozygous   |
| NC_037649.1 | 5067668 | SNV | 1 | A | G | Heterozygous |
| NC_037649.1 | 5067671 | SNV | 1 | A | T | Homozygous   |
| NC_037649.1 | 5067679 | SNV | 1 | A | G | Heterozygous |
| NC_037649.1 | 5067681 | SNV | 1 | T | C | Homozygous   |
| NC_037649.1 | 5067723 | SNV | 1 | A | G | Homozygous   |
| NC_037649.1 | 5067725 | SNV | 1 | C | T | Homozygous   |
| NC_037649.1 | 5067730 | SNV | 1 | A | G | Heterozygous |
| NC_037649.1 | 5067739 | SNV | 1 | A | G | Heterozygous |
| NC_037649.1 | 5069528 | SNV | 1 | T | C | Homozygous   |
| NC_037649.1 | 5069546 | SNV | 1 | A | C | Homozygous   |
| NC_037649.1 | 5069549 | SNV | 1 | T | C | Homozygous   |
| NC_037649.1 | 5090971 | SNV | 1 | C | G | Heterozygous |
| NC_037649.1 | 5090985 | SNV | 1 | G | C | Homozygous   |
| NC_037649.1 | 5091022 | SNV | 1 | C | T | Heterozygous |
| NC_037649.1 | 5091036 | SNV | 1 | G | C | Heterozygous |
| NC_037649.1 | 5091099 | SNV | 1 | G | A | Heterozygous |
| NC_037649.1 | 5091107 | SNV | 1 | G | A | Heterozygous |
| NC_037649.1 | 5131064 | SNV | 1 | G | A | Homozygous   |
| NC_037649.1 | 5132671 | SNV | 1 | C | A | Homozygous   |
| NC_037649.1 | 5132761 | SNV | 1 | A | G | Heterozygous |
| NC_037649.1 | 5132830 | SNV | 1 | C | G | Homozygous   |
| NC_037649.1 | 5133601 | SNV | 1 | A | G | Homozygous   |
| NC_037649.1 | 5133604 | SNV | 1 | A | G | Homozygous   |
| NC_037649.1 | 5133619 | SNV | 1 | A | G | Homozygous   |
| NC_037649.1 | 5134147 | SNV | 1 | T | C | Homozygous   |
| NC_037649.1 | 5134221 | SNV | 1 | A | G | Homozygous   |
| NC_037649.1 | 5134336 | SNV | 1 | T | G | Homozygous   |
| NC_037649.1 | 5134407 | SNV | 1 | A | G | Heterozygous |
| NC_037649.1 | 5134532 | SNV | 1 | A | T | Heterozygous |
| NC_037649.1 | 5134550 | SNV | 1 | C | T | Heterozygous |
| NC_037649.1 | 5134895 | SNV | 1 | G | A | Heterozygous |
| NC_037649.1 | 5134897 | SNV | 1 | A | C | Heterozygous |
| NC_037649.1 | 5144624 | SNV | 1 | G | A | Homozygous   |
| NC_037649.1 | 5144632 | SNV | 1 | G | T | Homozygous   |
| NC_037649.1 | 5144662 | SNV | 1 | G | A | Homozygous   |
| NC_037649.1 | 5144667 | SNV | 1 | T | C | Homozygous   |
| NC_037649.1 | 5144669 | SNV | 1 | T | C | Homozygous   |
| NC_037649.1 | 5144671 | SNV | 1 | A | T | Homozygous   |
| NC_037649.1 | 5144674 | SNV | 1 | T | A | Homozygous   |
| NC_037649.1 | 5144684 | SNV | 1 | A | G | Homozygous   |
| NC_037649.1 | 5144686 | SNV | 1 | T | C | Homozygous   |
| NC_037649.1 | 5147003 | SNV | 1 | A | G | Homozygous   |
| NC_037649.1 | 5147023 | SNV | 1 | C | T | Homozygous   |
| NC_037649.1 | 5147059 | SNV | 1 | G | A | Heterozygous |
| NC_037649.1 | 5147114 | SNV | 1 | C | G | Homozygous   |
| NC_037649.1 | 5148015 | SNV | 1 | G | A | Homozygous   |

|             |         |     |   |   |   |              |
|-------------|---------|-----|---|---|---|--------------|
| NC_037649.1 | 5180403 | SNV | 1 | C | T | Heterozygous |
| NC_037649.1 | 5180508 | SNV | 1 | T | C | Homozygous   |
| NC_037649.1 | 5180589 | SNV | 1 | A | G | Heterozygous |
| NC_037649.1 | 5180591 | SNV | 1 | A | G | Heterozygous |
| NC_037649.1 | 5180675 | SNV | 1 | A | G | Homozygous   |
| NC_037649.1 | 5182565 | SNV | 1 | A | G | Heterozygous |
| NC_037649.1 | 5196520 | SNV | 1 | A | G | Homozygous   |
| NC_037649.1 | 5197315 | SNV | 1 | T | A | Heterozygous |
| NC_037649.1 | 5197538 | SNV | 1 | T | C | Heterozygous |
| NC_037649.1 | 5197860 | SNV | 1 | A | G | Heterozygous |
| NC_037649.1 | 5197995 | SNV | 1 | C | T | Homozygous   |
| NC_037649.1 | 5202974 | SNV | 1 | C | T | Homozygous   |
| NC_037649.1 | 5202979 | SNV | 1 | T | A | Homozygous   |
| NC_037649.1 | 5202982 | SNV | 1 | C | T | Homozygous   |
| NC_037649.1 | 5202984 | SNV | 1 | G | A | Homozygous   |
| NC_037649.1 | 5202988 | SNV | 1 | C | T | Homozygous   |
| NC_037649.1 | 5209227 | SNV | 1 | T | C | Homozygous   |
| NC_037649.1 | 5209746 | SNV | 1 | T | C | Homozygous   |
| NC_037649.1 | 5211876 | SNV | 1 | T | A | Homozygous   |
| NC_037649.1 | 5214824 | SNV | 1 | A | T | Heterozygous |
| NC_037649.1 | 5214826 | SNV | 1 | A | T | Heterozygous |
| NC_037649.1 | 5214835 | SNV | 1 | T | A | Heterozygous |
| NC_037649.1 | 5214848 | SNV | 1 | A | T | Heterozygous |
| NC_037649.1 | 5217987 | SNV | 1 | C | G | Homozygous   |
| NC_037649.1 | 5218407 | SNV | 1 | A | G | Homozygous   |
| NC_037649.1 | 5219471 | SNV | 1 | C | T | Homozygous   |
| NC_037649.1 | 5220338 | SNV | 1 | A | G | Homozygous   |
| NC_037649.1 | 5220393 | SNV | 1 | G | C | Homozygous   |
| NC_037649.1 | 5220396 | SNV | 1 | C | G | Homozygous   |
| NC_037649.1 | 5220867 | SNV | 1 | A | G | Homozygous   |
| NC_037649.1 | 5221172 | SNV | 1 | G | A | Homozygous   |
| NC_037649.1 | 5223917 | SNV | 1 | C | T | Homozygous   |
| NC_037649.1 | 5224047 | SNV | 1 | G | T | Homozygous   |
| NC_037649.1 | 5224069 | SNV | 1 | A | T | Homozygous   |
| NC_037649.1 | 5224445 | SNV | 1 | C | A | Homozygous   |
| NC_037649.1 | 5227132 | SNV | 1 | T | A | Homozygous   |
| NC_037649.1 | 5227435 | SNV | 1 | G | A | Homozygous   |
| NC_037649.1 | 5228040 | SNV | 1 | G | A | Homozygous   |
| NC_037649.1 | 5228341 | SNV | 1 | T | A | Homozygous   |
| NC_037649.1 | 5228346 | SNV | 1 | A | G | Homozygous   |
| NC_037649.1 | 5229120 | SNV | 1 | A | T | Homozygous   |
| NC_037649.1 | 5229298 | SNV | 1 | C | T | Homozygous   |
| NC_037649.1 | 5230955 | SNV | 1 | G | A | Heterozygous |
| NC_037649.1 | 5231973 | SNV | 1 | A | C | Homozygous   |
| NC_037649.1 | 5233019 | SNV | 1 | C | T | Heterozygous |
| NC_037649.1 | 5234213 | SNV | 1 | T | A | Homozygous   |
| NC_037649.1 | 5244616 | SNV | 1 | T | G | Heterozygous |
| NC_037649.1 | 5244624 | SNV | 1 | T | G | Heterozygous |
| NC_037649.1 | 5244628 | SNV | 1 | T | G | Heterozygous |
| NC_037649.1 | 5244632 | SNV | 1 | T | G | Heterozygous |
| NC_037649.1 | 5244636 | SNV | 1 | T | G | Heterozygous |

|             |         |     |   |   |   |              |
|-------------|---------|-----|---|---|---|--------------|
| NC_037649.1 | 5247646 | SNV | 1 | T | C | Heterozygous |
| NC_037649.1 | 5253210 | SNV | 1 | T | C | Homozygous   |
| NC_037649.1 | 5296608 | SNV | 1 | T | C | Heterozygous |
| NC_037649.1 | 5304802 | SNV | 1 | G | A | Heterozygous |
| NC_037649.1 | 5304807 | SNV | 1 | A | T | Homozygous   |
| NC_037649.1 | 5304815 | SNV | 1 | A | T | Homozygous   |
| NC_037649.1 | 5304869 | SNV | 1 | T | C | Homozygous   |
| NC_037649.1 | 5304899 | SNV | 1 | T | C | Homozygous   |
| NC_037649.1 | 5305295 | SNV | 1 | G | A | Heterozygous |
| NC_037649.1 | 5305677 | SNV | 1 | A | G | Homozygous   |
| NC_037649.1 | 5305694 | SNV | 1 | A | T | Heterozygous |
| NC_037649.1 | 5305741 | SNV | 1 | T | C | Homozygous   |
| NC_037649.1 | 5310598 | SNV | 1 | G | T | Heterozygous |
| NC_037649.1 | 5347993 | SNV | 1 | A | G | Homozygous   |
| NC_037649.1 | 5402924 | SNV | 1 | C | T | Heterozygous |
| NC_037649.1 | 5443325 | SNV | 1 | A | C | Homozygous   |
| NC_037649.1 | 5443329 | SNV | 1 | A | T | Heterozygous |
| NC_037649.1 | 5443346 | SNV | 1 | C | G | Heterozygous |
| NC_037649.1 | 5458745 | SNV | 1 | G | A | Heterozygous |
| NC_037649.1 | 5460771 | SNV | 1 | A | G | Homozygous   |
| NC_037649.1 | 5464832 | SNV | 1 | T | C | Homozygous   |
| NC_037649.1 | 5464842 | SNV | 1 | T | C | Homozygous   |
| NC_037649.1 | 5464844 | SNV | 1 | C | T | Homozygous   |
| NC_037649.1 | 5464876 | SNV | 1 | C | T | Homozygous   |
| NC_037649.1 | 5481013 | SNV | 1 | G | A | Heterozygous |
| NC_037649.1 | 5481019 | SNV | 1 | G | A | Heterozygous |
| NC_037649.1 | 5481047 | SNV | 1 | A | T | Homozygous   |
| NC_037649.1 | 5481410 | SNV | 1 | T | G | Homozygous   |
| NC_037649.1 | 5481519 | SNV | 1 | T | C | Heterozygous |
| NC_037649.1 | 5481549 | SNV | 1 | G | A | Homozygous   |
| NC_037649.1 | 5481597 | SNV | 1 | A | C | Heterozygous |
| NC_037649.1 | 5483723 | SNV | 1 | A | C | Homozygous   |
| NC_037649.1 | 5483739 | SNV | 1 | A | G | Heterozygous |
| NC_037649.1 | 5491468 | SNV | 1 | T | C | Homozygous   |
| NC_037649.1 | 5491725 | SNV | 1 | T | C | Heterozygous |
| NC_037649.1 | 5520272 | SNV | 1 | G | A | Heterozygous |
| NC_037649.1 | 5520278 | SNV | 1 | G | A | Heterozygous |
| NC_037649.1 | 5520285 | SNV | 1 | G | A | Homozygous   |
| NC_037649.1 | 5520293 | SNV | 1 | A | G | Homozygous   |
| NC_037649.1 | 5547027 | SNV | 1 | A | T | Heterozygous |
| NC_037649.1 | 5547551 | SNV | 1 | G | T | Homozygous   |
| NC_037649.1 | 5548919 | SNV | 1 | A | C | Heterozygous |
| NC_037649.1 | 5551122 | SNV | 1 | G | C | Homozygous   |
| NC_037649.1 | 5551616 | SNV | 1 | C | T | Homozygous   |
| NC_037649.1 | 5551624 | SNV | 1 | G | A | Homozygous   |
| NC_037649.1 | 5551777 | SNV | 1 | C | T | Heterozygous |
| NC_037649.1 | 5551801 | SNV | 1 | C | T | Homozygous   |
| NC_037649.1 | 5552087 | SNV | 1 | T | C | Heterozygous |
| NC_037649.1 | 5552311 | SNV | 1 | C | T | Homozygous   |
| NC_037649.1 | 5552810 | SNV | 1 | A | G | Homozygous   |
| NC_037649.1 | 5552812 | SNV | 1 | A | G | Homozygous   |

|             |         |     |   |   |   |              |
|-------------|---------|-----|---|---|---|--------------|
| NC_037649.1 | 5552854 | SNV | 1 | T | C | Heterozygous |
| NC_037649.1 | 5552902 | SNV | 1 | G | A | Homozygous   |
| NC_037649.1 | 5553410 | SNV | 1 | C | T | Heterozygous |
| NC_037649.1 | 5553419 | SNV | 1 | G | A | Heterozygous |
| NC_037649.1 | 5553801 | SNV | 1 | T | A | Homozygous   |
| NC_037649.1 | 5554297 | SNV | 1 | A | G | Heterozygous |
| NC_037649.1 | 5554440 | SNV | 1 | C | T | Homozygous   |
| NC_037649.1 | 5554443 | SNV | 1 | A | C | Homozygous   |
| NC_037649.1 | 5554546 | SNV | 1 | G | A | Heterozygous |
| NC_037649.1 | 5554555 | SNV | 1 | C | T | Homozygous   |
| NC_037649.1 | 5554643 | SNV | 1 | A | C | Homozygous   |
| NC_037649.1 | 5554849 | SNV | 1 | C | T | Heterozygous |
| NC_037649.1 | 5554943 | SNV | 1 | A | C | Homozygous   |
| NC_037649.1 | 5554948 | SNV | 1 | A | G | Heterozygous |
| NC_037649.1 | 5555613 | SNV | 1 | A | G | Homozygous   |
| NC_037649.1 | 5556701 | SNV | 1 | G | T | Homozygous   |
| NC_037649.1 | 5556706 | SNV | 1 | C | T | Homozygous   |
| NC_037649.1 | 5556993 | SNV | 1 | T | C | Heterozygous |
| NC_037649.1 | 5557262 | SNV | 1 | G | A | Heterozygous |
| NC_037649.1 | 5564171 | SNV | 1 | C | T | Homozygous   |
| NC_037649.1 | 5564243 | SNV | 1 | G | C | Homozygous   |
| NC_037649.1 | 5564378 | SNV | 1 | C | T | Homozygous   |
| NC_037649.1 | 5564543 | SNV | 1 | G | A | Heterozygous |
| NC_037649.1 | 5567622 | SNV | 1 | C | G | Homozygous   |
| NC_037649.1 | 5571091 | SNV | 1 | A | T | Heterozygous |
| NC_037649.1 | 5576858 | SNV | 1 | C | T | Homozygous   |
| NC_037649.1 | 5576869 | SNV | 1 | C | T | Homozygous   |
| NC_037649.1 | 5576885 | SNV | 1 | C | T | Homozygous   |
| NC_037649.1 | 5588079 | SNV | 1 | G | A | Homozygous   |
| NC_037649.1 | 5588121 | SNV | 1 | C | T | Homozygous   |
| NC_037649.1 | 5588246 | SNV | 1 | T | C | Homozygous   |
| NC_037649.1 | 5589425 | SNV | 1 | C | T | Heterozygous |
| NC_037649.1 | 5589465 | SNV | 1 | G | A | Homozygous   |
| NC_037649.1 | 5589472 | SNV | 1 | G | A | Homozygous   |
| NC_037649.1 | 5589479 | SNV | 1 | A | G | Heterozygous |
| NC_037649.1 | 5596958 | SNV | 1 | T | C | Homozygous   |
| NC_037649.1 | 5604499 | SNV | 1 | C | T | Homozygous   |
| NC_037649.1 | 5604501 | SNV | 1 | G | T | Homozygous   |
| NC_037649.1 | 5604520 | SNV | 1 | G | A | Homozygous   |
| NC_037649.1 | 5622857 | SNV | 1 | A | G | Heterozygous |
| NC_037649.1 | 5622881 | SNV | 1 | G | A | Homozygous   |
| NC_037649.1 | 5623299 | SNV | 1 | C | G | Homozygous   |
| NC_037649.1 | 5630727 | SNV | 1 | A | G | Homozygous   |
| NC_037649.1 | 5630836 | SNV | 1 | A | G | Homozygous   |
| NC_037649.1 | 5630859 | SNV | 1 | A | G | Homozygous   |
| NC_037649.1 | 5630976 | SNV | 1 | C | A | Homozygous   |
| NC_037649.1 | 5638573 | SNV | 1 | A | G | Heterozygous |
| NC_037649.1 | 5638581 | SNV | 1 | A | G | Homozygous   |
| NC_037649.1 | 5638660 | SNV | 1 | C | G | Homozygous   |
| NC_037649.1 | 5644924 | SNV | 1 | G | C | Homozygous   |
| NC_037649.1 | 5644929 | SNV | 1 | T | A | Homozygous   |

|             |         |     |   |   |   |              |
|-------------|---------|-----|---|---|---|--------------|
| NC_037649.1 | 5644931 | SNV | 1 | G | A | Homozygous   |
| NC_037649.1 | 5644936 | SNV | 1 | A | G | Homozygous   |
| NC_037649.1 | 5644939 | SNV | 1 | C | A | Homozygous   |
| NC_037649.1 | 5644942 | SNV | 1 | G | T | Homozygous   |
| NC_037649.1 | 5653818 | SNV | 1 | C | T | Homozygous   |
| NC_037649.1 | 5653824 | SNV | 1 | C | T | Homozygous   |
| NC_037649.1 | 5663256 | SNV | 1 | G | A | Homozygous   |
| NC_037649.1 | 5663267 | SNV | 1 | C | T | Homozygous   |
| NC_037649.1 | 5663407 | SNV | 1 | G | T | Homozygous   |
| NC_037649.1 | 5663418 | SNV | 1 | G | C | Heterozygous |
| NC_037649.1 | 5678554 | SNV | 1 | C | T | Heterozygous |
| NC_037649.1 | 5678557 | SNV | 1 | G | A | Heterozygous |
| NC_037649.1 | 5678564 | SNV | 1 | C | T | Heterozygous |
| NC_037649.1 | 5678571 | SNV | 1 | G | A | Heterozygous |
| NC_037649.1 | 5678582 | SNV | 1 | C | T | Heterozygous |
| NC_037649.1 | 5678588 | SNV | 1 | C | T | Heterozygous |
| NC_037649.1 | 5678590 | SNV | 1 | C | T | Heterozygous |
| NC_037649.1 | 5678596 | SNV | 1 | C | T | Homozygous   |
| NC_037649.1 | 5679087 | SNV | 1 | G | A | Heterozygous |
| NC_037649.1 | 5679107 | SNV | 1 | C | T | Heterozygous |
| NC_037649.1 | 5679110 | SNV | 1 | A | G | Homozygous   |
| NC_037649.1 | 5679114 | SNV | 1 | T | C | Heterozygous |
| NC_037649.1 | 5679124 | SNV | 1 | T | A | Heterozygous |
| NC_037649.1 | 5679140 | SNV | 1 | T | G | Homozygous   |
| NC_037649.1 | 5679214 | SNV | 1 | T | C | Homozygous   |
| NC_037649.1 | 5679398 | SNV | 1 | T | C | Heterozygous |
| NC_037649.1 | 5679410 | SNV | 1 | G | C | Heterozygous |
| NC_037649.1 | 5679440 | SNV | 1 | A | G | Homozygous   |
| NC_037649.1 | 5679451 | SNV | 1 | T | C | Homozygous   |
| NC_037649.1 | 5679481 | SNV | 1 | C | T | Homozygous   |
| NC_037649.1 | 5679498 | SNV | 1 | C | T | Heterozygous |
| NC_037649.1 | 5679577 | SNV | 1 | G | A | Homozygous   |
| NC_037649.1 | 5679620 | SNV | 1 | C | T | Heterozygous |
| NC_037649.1 | 5679725 | SNV | 1 | T | C | Homozygous   |
| NC_037649.1 | 5679735 | SNV | 1 | A | G | Homozygous   |
| NC_037649.1 | 5680150 | SNV | 1 | A | G | Heterozygous |
| NC_037649.1 | 5680159 | SNV | 1 | A | G | Heterozygous |
| NC_037649.1 | 5680162 | SNV | 1 | A | C | Heterozygous |
| NC_037649.1 | 5680205 | SNV | 1 | G | A | Heterozygous |
| NC_037649.1 | 5680216 | SNV | 1 | C | T | Heterozygous |
| NC_037649.1 | 5680220 | SNV | 1 | G | A | Heterozygous |
| NC_037649.1 | 5680232 | SNV | 1 | G | A | Homozygous   |
| NC_037649.1 | 5680239 | SNV | 1 | C | T | Heterozygous |
| NC_037649.1 | 5680260 | SNV | 1 | G | T | Homozygous   |
| NC_037649.1 | 5680357 | SNV | 1 | A | G | Homozygous   |
| NC_037649.1 | 5680383 | SNV | 1 | A | T | Homozygous   |
| NC_037649.1 | 5680389 | SNV | 1 | A | T | Heterozygous |
| NC_037649.1 | 5680411 | SNV | 1 | G | T | Heterozygous |
| NC_037649.1 | 5680597 | SNV | 1 | T | C | Homozygous   |
| NC_037649.1 | 5680602 | SNV | 1 | G | A | Heterozygous |
| NC_037649.1 | 5680659 | SNV | 1 | A | G | Homozygous   |

|             |         |     |   |   |   |              |
|-------------|---------|-----|---|---|---|--------------|
| NC_037649.1 | 5689407 | SNV | 1 | T | C | Homozygous   |
| NC_037649.1 | 5689419 | SNV | 1 | A | G | Homozygous   |
| NC_037649.1 | 5689492 | SNV | 1 | T | C | Homozygous   |
| NC_037649.1 | 5689558 | SNV | 1 | A | G | Homozygous   |
| NC_037649.1 | 5689680 | SNV | 1 | A | G | Homozygous   |
| NC_037649.1 | 5689720 | SNV | 1 | T | C | Homozygous   |
| NC_037649.1 | 5689755 | SNV | 1 | G | A | Homozygous   |
| NC_037649.1 | 5697590 | SNV | 1 | C | T | Heterozygous |
| NC_037649.1 | 5697759 | SNV | 1 | C | T | Heterozygous |
| NC_037649.1 | 5697808 | SNV | 1 | T | C | Homozygous   |
| NC_037649.1 | 5697887 | SNV | 1 | C | T | Homozygous   |
| NC_037649.1 | 5697897 | SNV | 1 | A | G | Homozygous   |
| NC_037649.1 | 5697927 | SNV | 1 | A | G | Homozygous   |
| NC_037649.1 | 5698050 | SNV | 1 | T | C | Homozygous   |
| NC_037649.1 | 5698135 | SNV | 1 | G | A | Heterozygous |
| NC_037649.1 | 5698141 | SNV | 1 | T | C | Homozygous   |
| NC_037649.1 | 5698194 | SNV | 1 | G | A | Homozygous   |
| NC_037649.1 | 5698574 | SNV | 1 | T | C | Homozygous   |
| NC_037649.1 | 5698589 | SNV | 1 | A | G | Heterozygous |
| NC_037649.1 | 5698659 | SNV | 1 | A | G | Heterozygous |
| NC_037649.1 | 5701874 | SNV | 1 | A | G | Heterozygous |
| NC_037649.1 | 5701900 | SNV | 1 | A | G | Homozygous   |
| NC_037649.1 | 5701908 | SNV | 1 | T | C | Homozygous   |
| NC_037649.1 | 5701971 | SNV | 1 | T | C | Heterozygous |
| NC_037649.1 | 5701972 | SNV | 1 | C | T | Heterozygous |
| NC_037649.1 | 5702064 | SNV | 1 | A | T | Heterozygous |
| NC_037649.1 | 5702203 | SNV | 1 | G | A | Homozygous   |
| NC_037649.1 | 5702238 | SNV | 1 | G | A | Heterozygous |
| NC_037649.1 | 5702283 | SNV | 1 | T | C | Homozygous   |
| NC_037649.1 | 5702384 | SNV | 1 | G | C | Heterozygous |
| NC_037649.1 | 5702531 | SNV | 1 | G | C | Homozygous   |
| NC_037649.1 | 5702576 | SNV | 1 | G | A | Heterozygous |
| NC_037649.1 | 5710419 | SNV | 1 | G | A | Heterozygous |
| NC_037649.1 | 5710425 | SNV | 1 | A | G | Heterozygous |
| NC_037649.1 | 5710720 | SNV | 1 | G | A | Heterozygous |
| NC_037649.1 | 5710982 | SNV | 1 | T | A | Homozygous   |
| NC_037649.1 | 5711829 | SNV | 1 | G | A | Heterozygous |
| NC_037649.1 | 5711833 | SNV | 1 | G | A | Heterozygous |
| NC_037649.1 | 5715243 | SNV | 1 | C | T | Heterozygous |
| NC_037649.1 | 5715512 | SNV | 1 | T | C | Heterozygous |
| NC_037649.1 | 5727486 | SNV | 1 | A | G | Heterozygous |
| NC_037649.1 | 5727619 | SNV | 1 | A | G | Homozygous   |
| NC_037649.1 | 5727764 | SNV | 1 | A | T | Homozygous   |
| NC_037649.1 | 5731574 | SNV | 1 | G | C | Heterozygous |
| NC_037649.1 | 5732672 | SNV | 1 | T | C | Homozygous   |
| NC_037649.1 | 5732685 | SNV | 1 | T | C | Homozygous   |
| NC_037649.1 | 5733012 | SNV | 1 | C | T | Heterozygous |
| NC_037649.1 | 5733016 | SNV | 1 | T | C | Heterozygous |
| NC_037649.1 | 5733029 | SNV | 1 | A | G | Homozygous   |
| NC_037649.1 | 5733040 | SNV | 1 | A | G | Homozygous   |
| NC_037649.1 | 5741095 | SNV | 1 | A | G | Homozygous   |



|             |         |     |   |   |   |              |
|-------------|---------|-----|---|---|---|--------------|
| NC_037649.1 | 5751173 | SNV | 1 | C | T | Heterozygous |
| NC_037649.1 | 5751263 | SNV | 1 | C | A | Homozygous   |
| NC_037649.1 | 5752585 | SNV | 1 | T | C | Homozygous   |
| NC_037649.1 | 5752727 | SNV | 1 | G | A | Homozygous   |
| NC_037649.1 | 5752920 | SNV | 1 | G | C | Homozygous   |
| NC_037649.1 | 5756815 | SNV | 1 | A | G | Homozygous   |
| NC_037649.1 | 5756866 | SNV | 1 | G | A | Heterozygous |
| NC_037649.1 | 5765441 | SNV | 1 | A | G | Homozygous   |
| NC_037649.1 | 5765464 | SNV | 1 | A | G | Homozygous   |
| NC_037649.1 | 5765468 | SNV | 1 | C | G | Heterozygous |
| NC_037649.1 | 5765470 | SNV | 1 | G | A | Heterozygous |
| NC_037649.1 | 5765489 | SNV | 1 | G | A | Heterozygous |
| NC_037649.1 | 5765671 | SNV | 1 | T | C | Homozygous   |
| NC_037649.1 | 5765879 | SNV | 1 | T | C | Heterozygous |
| NC_037649.1 | 5765959 | SNV | 1 | A | G | Homozygous   |
| NC_037649.1 | 5766546 | SNV | 1 | A | G | Homozygous   |
| NC_037649.1 | 5766773 | SNV | 1 | G | A | Heterozygous |
| NC_037649.1 | 5787244 | SNV | 1 | A | G | Homozygous   |
| NC_037649.1 | 5787278 | SNV | 1 | A | G | Homozygous   |
| NC_037649.1 | 5787283 | SNV | 1 | T | A | Homozygous   |
| NC_037649.1 | 5788571 | SNV | 1 | G | A | Homozygous   |
| NC_037649.1 | 5788621 | SNV | 1 | A | G | Heterozygous |
| NC_037649.1 | 5788635 | SNV | 1 | G | A | Heterozygous |
| NC_037649.1 | 5788653 | SNV | 1 | T | G | Heterozygous |
| NC_037649.1 | 5788657 | SNV | 1 | G | A | Heterozygous |
| NC_037649.1 | 5788678 | SNV | 1 | C | T | Heterozygous |
| NC_037649.1 | 5788684 | SNV | 1 | C | T | Heterozygous |
| NC_037649.1 | 5788782 | SNV | 1 | G | A | Heterozygous |
| NC_037649.1 | 5788850 | SNV | 1 | A | G | Homozygous   |
| NC_037649.1 | 5788904 | SNV | 1 | A | G | Homozygous   |
| NC_037649.1 | 5789100 | SNV | 1 | A | G | Homozygous   |
| NC_037649.1 | 5789185 | SNV | 1 | A | G | Homozygous   |
| NC_037649.1 | 5790850 | SNV | 1 | A | T | Homozygous   |
| NC_037649.1 | 5790858 | SNV | 1 | T | C | Homozygous   |
| NC_037649.1 | 5790860 | SNV | 1 | T | C | Homozygous   |
| NC_037649.1 | 5790864 | SNV | 1 | C | A | Homozygous   |
| NC_037649.1 | 5790886 | SNV | 1 | T | C | Homozygous   |
| NC_037649.1 | 5790890 | SNV | 1 | A | T | Homozygous   |
| NC_037649.1 | 5802893 | SNV | 1 | C | T | Heterozygous |
| NC_037649.1 | 5802967 | SNV | 1 | G | A | Heterozygous |
| NC_037649.1 | 5803136 | SNV | 1 | A | G | Homozygous   |
| NC_037649.1 | 5814395 | SNV | 1 | T | C | Homozygous   |
| NC_037649.1 | 5814404 | SNV | 1 | C | T | Homozygous   |
| NC_037649.1 | 5815349 | SNV | 1 | C | T | Homozygous   |
| NC_037649.1 | 5815381 | SNV | 1 | C | G | Heterozygous |
| NC_037649.1 | 5815421 | SNV | 1 | C | T | Homozygous   |
| NC_037649.1 | 5817877 | SNV | 1 | C | T | Heterozygous |
| NC_037649.1 | 5819055 | SNV | 1 | C | T | Heterozygous |
| NC_037649.1 | 5819064 | SNV | 1 | T | C | Heterozygous |
| NC_037649.1 | 5819372 | SNV | 1 | C | T | Heterozygous |
| NC_037649.1 | 5819417 | SNV | 1 | G | C | Heterozygous |

|             |         |     |   |   |   |              |
|-------------|---------|-----|---|---|---|--------------|
| NC_037649.1 | 5819552 | SNV | 1 | A | G | Heterozygous |
| NC_037649.1 | 5820092 | SNV | 1 | C | T | Heterozygous |
| NC_037649.1 | 5820103 | SNV | 1 | T | C | Heterozygous |
| NC_037649.1 | 5820526 | SNV | 1 | C | G | Heterozygous |
| NC_037649.1 | 5821220 | SNV | 1 | G | C | Heterozygous |
| NC_037649.1 | 5822843 | SNV | 1 | A | C | Homozygous   |
| NC_037649.1 | 5826579 | SNV | 1 | G | A | Heterozygous |
| NC_037649.1 | 5828242 | SNV | 1 | C | T | Heterozygous |
| NC_037649.1 | 5828298 | SNV | 1 | C | T | Heterozygous |
| NC_037649.1 | 5833033 | SNV | 1 | C | A | Heterozygous |
| NC_037649.1 | 5836451 | SNV | 1 | T | C | Heterozygous |
| NC_037649.1 | 5836866 | SNV | 1 | A | C | Homozygous   |
| NC_037649.1 | 5836895 | SNV | 1 | C | G | Heterozygous |
| NC_037649.1 | 5836904 | SNV | 1 | C | T | Heterozygous |
| NC_037649.1 | 5836949 | SNV | 1 | C | T | Heterozygous |
| NC_037649.1 | 5836961 | SNV | 1 | C | A | Heterozygous |
| NC_037649.1 | 5836984 | SNV | 1 | C | T | Heterozygous |
| NC_037649.1 | 5836996 | SNV | 1 | T | C | Heterozygous |
| NC_037649.1 | 5837003 | SNV | 1 | C | G | Heterozygous |
| NC_037649.1 | 5837005 | SNV | 1 | C | T | Heterozygous |
| NC_037649.1 | 5840051 | SNV | 1 | A | G | Heterozygous |
| NC_037649.1 | 5840223 | SNV | 1 | T | C | Homozygous   |
| NC_037649.1 | 5840497 | SNV | 1 | C | G | Heterozygous |
| NC_037649.1 | 5840558 | SNV | 1 | A | G | Homozygous   |
| NC_037649.1 | 5840605 | SNV | 1 | A | G | Homozygous   |
| NC_037649.1 | 5840679 | SNV | 1 | C | A | Homozygous   |
| NC_037649.1 | 5849159 | SNV | 1 | C | T | Homozygous   |
| NC_037649.1 | 5849167 | SNV | 1 | C | T | Homozygous   |
| NC_037649.1 | 5849197 | SNV | 1 | T | C | Homozygous   |
| NC_037649.1 | 5849409 | SNV | 1 | T | A | Homozygous   |
| NC_037649.1 | 5849417 | SNV | 1 | T | A | Heterozygous |
| NC_037649.1 | 5849431 | SNV | 1 | A | T | Heterozygous |
| NC_037649.1 | 5849434 | SNV | 1 | T | C | Homozygous   |
| NC_037649.1 | 5849447 | SNV | 1 | C | T | Homozygous   |
| NC_037649.1 | 5850386 | SNV | 1 | G | C | Heterozygous |
| NC_037649.1 | 5850392 | SNV | 1 | G | A | Heterozygous |
| NC_037649.1 | 5850430 | SNV | 1 | C | A | Heterozygous |
| NC_037649.1 | 5850535 | SNV | 1 | A | G | Homozygous   |
| NC_037649.1 | 5850680 | SNV | 1 | A | G | Heterozygous |
| NC_037649.1 | 5850765 | SNV | 1 | A | C | Homozygous   |
| NC_037649.1 | 5850886 | SNV | 1 | A | G | Homozygous   |
| NC_037649.1 | 5850917 | SNV | 1 | C | T | Heterozygous |
| NC_037649.1 | 5850924 | SNV | 1 | G | A | Heterozygous |
| NC_037649.1 | 5850927 | SNV | 1 | G | A | Heterozygous |
| NC_037649.1 | 5850983 | SNV | 1 | T | C | Heterozygous |
| NC_037649.1 | 5851818 | SNV | 1 | T | C | Homozygous   |
| NC_037649.1 | 5852042 | SNV | 1 | A | G | Homozygous   |
| NC_037649.1 | 5852049 | SNV | 1 | T | C | Homozygous   |
| NC_037649.1 | 5852125 | SNV | 1 | G | A | Homozygous   |
| NC_037649.1 | 5853029 | SNV | 1 | A | G | Homozygous   |
| NC_037649.1 | 5853485 | SNV | 1 | T | C | Homozygous   |

|             |         |     |   |   |   |              |
|-------------|---------|-----|---|---|---|--------------|
| NC_037649.1 | 5853593 | SNV | 1 | A | G | Homozygous   |
| NC_037649.1 | 5853714 | SNV | 1 | C | T | Homozygous   |
| NC_037649.1 | 5853725 | SNV | 1 | C | G | Homozygous   |
| NC_037649.1 | 5870349 | SNV | 1 | A | G | Heterozygous |
| NC_037649.1 | 5876200 | SNV | 1 | G | A | Heterozygous |
| NC_037649.1 | 5879340 | SNV | 1 | G | T | Heterozygous |
| NC_037649.1 | 5879387 | SNV | 1 | C | T | Heterozygous |
| NC_037649.1 | 5879587 | SNV | 1 | C | T | Heterozygous |
| NC_037649.1 | 5879614 | SNV | 1 | T | C | Heterozygous |
| NC_037649.1 | 5882444 | SNV | 1 | G | A | Homozygous   |
| NC_037649.1 | 5887303 | SNV | 1 | G | A | Homozygous   |
| NC_037649.1 | 5887368 | SNV | 1 | A | G | Homozygous   |
| NC_037649.1 | 5887685 | SNV | 1 | C | T | Heterozygous |
| NC_037649.1 | 5887741 | SNV | 1 | T | C | Homozygous   |
| NC_037649.1 | 5890341 | SNV | 1 | C | T | Heterozygous |
| NC_037649.1 | 5892250 | SNV | 1 | G | A | Homozygous   |
| NC_037649.1 | 5892318 | SNV | 1 | T | C | Homozygous   |
| NC_037649.1 | 5892403 | SNV | 1 | C | T | Homozygous   |
| NC_037649.1 | 5893736 | SNV | 1 | G | T | Heterozygous |
| NC_037649.1 | 5893771 | SNV | 1 | A | C | Heterozygous |
| NC_037649.1 | 5893799 | SNV | 1 | T | A | Heterozygous |
| NC_037649.1 | 5908677 | SNV | 1 | C | T | Heterozygous |
| NC_037649.1 | 5908719 | SNV | 1 | G | C | Heterozygous |
| NC_037649.1 | 5908722 | SNV | 1 | C | T | Heterozygous |
| NC_037649.1 | 5908802 | SNV | 1 | T | C | Homozygous   |
| NC_037649.1 | 5908882 | SNV | 1 | C | T | Heterozygous |
| NC_037649.1 | 5908918 | SNV | 1 | A | G | Homozygous   |
| NC_037649.1 | 5908920 | SNV | 1 | T | A | Homozygous   |
| NC_037649.1 | 5908924 | SNV | 1 | C | T | Homozygous   |
| NC_037649.1 | 5908931 | SNV | 1 | C | A | Heterozygous |
| NC_037649.1 | 5918582 | SNV | 1 | A | G | Homozygous   |
| NC_037649.1 | 5920135 | SNV | 1 | A | G | Heterozygous |
| NC_037649.1 | 5920581 | SNV | 1 | A | G | Heterozygous |
| NC_037649.1 | 5920793 | SNV | 1 | C | T | Heterozygous |
| NC_037649.1 | 5920799 | SNV | 1 | T | C | Heterozygous |
| NC_037649.1 | 5920808 | SNV | 1 | T | C | Heterozygous |
| NC_037649.1 | 5920813 | SNV | 1 | G | C | Heterozygous |
| NC_037649.1 | 5927206 | SNV | 1 | T | C | Homozygous   |
| NC_037649.1 | 5927230 | SNV | 1 | C | T | Heterozygous |
| NC_037649.1 | 5927235 | SNV | 1 | C | T | Heterozygous |
| NC_037649.1 | 5954485 | SNV | 1 | G | T | Homozygous   |
| NC_037649.1 | 5954489 | SNV | 1 | A | G | Homozygous   |
| NC_037649.1 | 5954498 | SNV | 1 | G | C | Homozygous   |
| NC_037649.1 | 5954503 | SNV | 1 | C | T | Homozygous   |
| NC_037649.1 | 5957378 | SNV | 1 | C | A | Homozygous   |
| NC_037649.1 | 5957384 | SNV | 1 | T | A | Homozygous   |
| NC_037649.1 | 5957392 | SNV | 1 | T | A | Homozygous   |
| NC_037649.1 | 5957878 | SNV | 1 | G | A | Heterozygous |
| NC_037649.1 | 5964728 | SNV | 1 | G | C | Heterozygous |
| NC_037649.1 | 5964791 | SNV | 1 | T | C | Heterozygous |
| NC_037649.1 | 5964808 | SNV | 1 | T | C | Homozygous   |

|             |         |     |   |   |   |              |
|-------------|---------|-----|---|---|---|--------------|
| NC_037649.1 | 5964817 | SNV | 1 | T | C | Heterozygous |
| NC_037649.1 | 5964853 | SNV | 1 | T | C | Homozygous   |
| NC_037649.1 | 5966194 | SNV | 1 | C | T | Heterozygous |
| NC_037649.1 | 5966226 | SNV | 1 | G | A | Heterozygous |
| NC_037649.1 | 5973142 | SNV | 1 | C | T | Homozygous   |
| NC_037649.1 | 5981931 | SNV | 1 | A | G | Homozygous   |
| NC_037649.1 | 5981934 | SNV | 1 | A | G | Homozygous   |
| NC_037649.1 | 5981950 | SNV | 1 | G | A | Homozygous   |
| NC_037649.1 | 5981953 | SNV | 1 | G | A | Homozygous   |
| NC_037649.1 | 5981957 | SNV | 1 | A | T | Heterozygous |
| NC_037649.1 | 6004161 | SNV | 1 | A | G | Heterozygous |
| NC_037649.1 | 6004192 | SNV | 1 | A | G | Heterozygous |
| NC_037649.1 | 6004195 | SNV | 1 | G | A | Homozygous   |
| NC_037649.1 | 6075401 | SNV | 1 | A | G | Homozygous   |
| NC_037649.1 | 6075751 | SNV | 1 | G | T | Homozygous   |
| NC_037649.1 | 6076322 | SNV | 1 | C | T | Homozygous   |
| NC_037649.1 | 6076447 | SNV | 1 | C | T | Heterozygous |
| NC_037649.1 | 6078952 | SNV | 1 | A | G | Homozygous   |
| NC_037649.1 | 6079740 | SNV | 1 | G | A | Homozygous   |
| NC_037649.1 | 6081274 | SNV | 1 | T | C | Heterozygous |
| NC_037649.1 | 6082759 | SNV | 1 | A | G | Heterozygous |
| NC_037649.1 | 6090352 | SNV | 1 | T | C | Homozygous   |
| NC_037649.1 | 6105088 | SNV | 1 | A | G | Heterozygous |
| NC_037649.1 | 6105343 | SNV | 1 | T | C | Homozygous   |
| NC_037649.1 | 6105444 | SNV | 1 | T | C | Homozygous   |
| NC_037649.1 | 6105453 | SNV | 1 | A | G | Homozygous   |
| NC_037649.1 | 6105519 | SNV | 1 | T | C | Heterozygous |
| NC_037649.1 | 6105560 | SNV | 1 | A | G | Homozygous   |
| NC_037649.1 | 6105754 | SNV | 1 | G | A | Heterozygous |
| NC_037649.1 | 6105834 | SNV | 1 | A | G | Homozygous   |
| NC_037649.1 | 6105839 | SNV | 1 | C | T | Heterozygous |
| NC_037649.1 | 6105841 | SNV | 1 | G | T | Heterozygous |
| NC_037649.1 | 6105849 | SNV | 1 | A | G | Heterozygous |
| NC_037649.1 | 6105859 | SNV | 1 | A | G | Homozygous   |
| NC_037649.1 | 6105866 | SNV | 1 | C | G | Homozygous   |
| NC_037649.1 | 6105868 | SNV | 1 | T | G | Homozygous   |
| NC_037649.1 | 6108979 | SNV | 1 | T | C | Heterozygous |
| NC_037649.1 | 6108982 | SNV | 1 | A | T | Heterozygous |
| NC_037649.1 | 6108984 | SNV | 1 | C | A | Heterozygous |
| NC_037649.1 | 6109023 | SNV | 1 | A | G | Heterozygous |
| NC_037649.1 | 6109030 | SNV | 1 | A | G | Heterozygous |
| NC_037649.1 | 6109132 | SNV | 1 | A | G | Heterozygous |
| NC_037649.1 | 6109139 | SNV | 1 | A | G | Homozygous   |
| NC_037649.1 | 6111410 | SNV | 1 | A | G | Homozygous   |
| NC_037649.1 | 6111467 | SNV | 1 | C | T | Heterozygous |
| NC_037649.1 | 6111563 | SNV | 1 | T | A | Heterozygous |
| NC_037649.1 | 6111623 | SNV | 1 | C | G | Heterozygous |
| NC_037649.1 | 6128333 | SNV | 1 | G | A | Homozygous   |
| NC_037649.1 | 6149806 | SNV | 1 | A | G | Homozygous   |
| NC_037649.1 | 6149914 | SNV | 1 | G | A | Heterozygous |
| NC_037649.1 | 6149982 | SNV | 1 | A | G | Heterozygous |

|             |         |     |   |   |   |              |
|-------------|---------|-----|---|---|---|--------------|
| NC_037649.1 | 6149996 | SNV | 1 | G | C | Heterozygous |
| NC_037649.1 | 6154053 | SNV | 1 | A | G | Homozygous   |
| NC_037649.1 | 6154103 | SNV | 1 | C | A | Heterozygous |
| NC_037649.1 | 6154230 | SNV | 1 | T | C | Homozygous   |
| NC_037649.1 | 6154241 | SNV | 1 | G | A | Homozygous   |
| NC_037649.1 | 6154321 | SNV | 1 | T | C | Homozygous   |
| NC_037649.1 | 6154338 | SNV | 1 | T | C | Heterozygous |
| NC_037649.1 | 6154374 | SNV | 1 | A | G | Heterozygous |
| NC_037649.1 | 6154376 | SNV | 1 | C | T | Heterozygous |
| NC_037649.1 | 6154489 | SNV | 1 | A | G | Homozygous   |
| NC_037649.1 | 6157228 | SNV | 1 | A | G | Heterozygous |
| NC_037649.1 | 6157271 | SNV | 1 | A | G | Heterozygous |
| NC_037649.1 | 6157335 | SNV | 1 | G | A | Homozygous   |
| NC_037649.1 | 6180420 | SNV | 1 | A | G | Homozygous   |
| NC_037649.1 | 6180896 | SNV | 1 | A | C | Homozygous   |
| NC_037649.1 | 6184160 | SNV | 1 | A | G | Homozygous   |
| NC_037649.1 | 6184346 | SNV | 1 | A | T | Heterozygous |
| NC_037649.1 | 6196129 | SNV | 1 | G | A | Homozygous   |
| NC_037649.1 | 6204658 | SNV | 1 | T | C | Heterozygous |
| NC_037649.1 | 6206069 | SNV | 1 | A | G | Homozygous   |
| NC_037649.1 | 6206173 | SNV | 1 | G | A | Heterozygous |
| NC_037649.1 | 6208656 | SNV | 1 | G | C | Homozygous   |
| NC_037649.1 | 6208679 | SNV | 1 | A | C | Homozygous   |
| NC_037649.1 | 6208821 | SNV | 1 | T | C | Homozygous   |
| NC_037649.1 | 6209078 | SNV | 1 | C | A | Heterozygous |
| NC_037649.1 | 6209082 | SNV | 1 | C | T | Heterozygous |
| NC_037649.1 | 6209088 | SNV | 1 | C | T | Heterozygous |
| NC_037649.1 | 6209089 | SNV | 1 | T | G | Heterozygous |
| NC_037649.1 | 6209093 | SNV | 1 | T | G | Heterozygous |
| NC_037649.1 | 6209097 | SNV | 1 | T | G | Heterozygous |
| NC_037649.1 | 6210962 | SNV | 1 | A | G | Homozygous   |
| NC_037649.1 | 6210982 | SNV | 1 | T | A | Homozygous   |
| NC_037649.1 | 6212400 | SNV | 1 | T | A | Homozygous   |
| NC_037649.1 | 6213045 | SNV | 1 | G | A | Homozygous   |
| NC_037649.1 | 6213080 | SNV | 1 | A | G | Homozygous   |
| NC_037649.1 | 6213182 | SNV | 1 | T | C | Homozygous   |
| NC_037649.1 | 6217108 | SNV | 1 | T | A | Homozygous   |
| NC_037649.1 | 6217124 | SNV | 1 | T | C | Homozygous   |
| NC_037649.1 | 6218516 | SNV | 1 | A | T | Homozygous   |
| NC_037649.1 | 6218519 | SNV | 1 | A | C | Homozygous   |
| NC_037649.1 | 6220149 | SNV | 1 | T | A | Homozygous   |
| NC_037649.1 | 6220212 | SNV | 1 | A | C | Homozygous   |
| NC_037649.1 | 6220662 | SNV | 1 | T | C | Homozygous   |
| NC_037649.1 | 6220699 | SNV | 1 | C | A | Homozygous   |
| NC_037649.1 | 6224166 | SNV | 1 | T | C | Homozygous   |
| NC_037649.1 | 6224169 | SNV | 1 | A | C | Homozygous   |
| NC_037649.1 | 6224171 | SNV | 1 | A | C | Homozygous   |
| NC_037649.1 | 6228265 | SNV | 1 | G | A | Heterozygous |
| NC_037649.1 | 6228657 | SNV | 1 | T | A | Homozygous   |
| NC_037649.1 | 6228662 | SNV | 1 | G | A | Homozygous   |
| NC_037649.1 | 6228769 | SNV | 1 | G | A | Homozygous   |

|             |         |     |   |   |   |              |
|-------------|---------|-----|---|---|---|--------------|
| NC_037649.1 | 6228987 | SNV | 1 | C | A | Homozygous   |
| NC_037649.1 | 6229138 | SNV | 1 | T | C | Homozygous   |
| NC_037649.1 | 6229202 | SNV | 1 | C | T | Homozygous   |
| NC_037649.1 | 6229465 | SNV | 1 | T | A | Homozygous   |
| NC_037649.1 | 6312829 | SNV | 1 | T | C | Heterozygous |
| NC_037649.1 | 6312836 | SNV | 1 | C | T | Homozygous   |
| NC_037649.1 | 6312865 | SNV | 1 | T | C | Homozygous   |
| NC_037649.1 | 6312953 | SNV | 1 | G | A | Heterozygous |
| NC_037649.1 | 6313048 | SNV | 1 | C | G | Heterozygous |
| NC_037649.1 | 6313067 | SNV | 1 | C | T | Heterozygous |
| NC_037649.1 | 6313158 | SNV | 1 | A | G | Homozygous   |
| NC_037649.1 | 6313165 | SNV | 1 | T | C | Heterozygous |
| NC_037649.1 | 6313177 | SNV | 1 | C | T | Heterozygous |
| NC_037649.1 | 6319475 | SNV | 1 | C | T | Heterozygous |
| NC_037649.1 | 6319543 | SNV | 1 | G | T | Heterozygous |
| NC_037649.1 | 6404137 | SNV | 1 | A | G | Homozygous   |
| NC_037649.1 | 6404287 | SNV | 1 | G | A | Heterozygous |
| NC_037649.1 | 6404534 | SNV | 1 | T | A | Homozygous   |
| NC_037649.1 | 6407260 | SNV | 1 | T | C | Homozygous   |
| NC_037649.1 | 6407769 | SNV | 1 | T | A | Heterozygous |
| NC_037649.1 | 6407783 | SNV | 1 | T | C | Heterozygous |
| NC_037649.1 | 6413292 | SNV | 1 | A | G | Homozygous   |
| NC_037649.1 | 6413461 | SNV | 1 | A | G | Heterozygous |
| NC_037649.1 | 6413530 | SNV | 1 | T | C | Homozygous   |
| NC_037649.1 | 6413609 | SNV | 1 | A | G | Homozygous   |
| NC_037649.1 | 6449194 | SNV | 1 | G | A | Heterozygous |
| NC_037649.1 | 6449241 | SNV | 1 | C | A | Heterozygous |
| NC_037649.1 | 6449243 | SNV | 1 | C | G | Heterozygous |
| NC_037649.1 | 6480855 | SNV | 1 | C | T | Heterozygous |
| NC_037649.1 | 6482601 | SNV | 1 | G | A | Heterozygous |
| NC_037649.1 | 6482613 | SNV | 1 | T | C | Homozygous   |
| NC_037649.1 | 6482658 | SNV | 1 | C | T | Heterozygous |
| NC_037649.1 | 6482678 | SNV | 1 | C | T | Heterozygous |
| NC_037649.1 | 6482682 | SNV | 1 | T | C | Heterozygous |
| NC_037649.1 | 6482690 | SNV | 1 | A | G | Homozygous   |
| NC_037649.1 | 6487999 | SNV | 1 | A | G | Heterozygous |
| NC_037649.1 | 6488001 | SNV | 1 | T | G | Heterozygous |
| NC_037649.1 | 6488078 | SNV | 1 | T | C | Homozygous   |
| NC_037649.1 | 6506180 | SNV | 1 | A | G | Heterozygous |
| NC_037649.1 | 6517878 | SNV | 1 | G | A | Homozygous   |
| NC_037649.1 | 6517883 | SNV | 1 | G | A | Homozygous   |
| NC_037649.1 | 6517898 | SNV | 1 | G | A | Homozygous   |
| NC_037649.1 | 6517911 | SNV | 1 | A | G | Homozygous   |
| NC_037649.1 | 6517916 | SNV | 1 | G | C | Homozygous   |
| NC_037649.1 | 6517918 | SNV | 1 | A | T | Homozygous   |
| NC_037649.1 | 6538993 | SNV | 1 | A | G | Homozygous   |
| NC_037649.1 | 6540880 | SNV | 1 | A | G | Homozygous   |
| NC_037649.1 | 6540904 | SNV | 1 | G | C | Homozygous   |
| NC_037649.1 | 6541181 | SNV | 1 | A | G | Homozygous   |
| NC_037649.1 | 6541209 | SNV | 1 | G | A | Homozygous   |
| NC_037649.1 | 6541218 | SNV | 1 | G | A | Heterozygous |

|             |         |     |   |   |   |              |
|-------------|---------|-----|---|---|---|--------------|
| NC_037649.1 | 6543173 | SNV | 1 | T | C | Homozygous   |
| NC_037649.1 | 6543211 | SNV | 1 | T | C | Homozygous   |
| NC_037649.1 | 6544043 | SNV | 1 | G | A | Heterozygous |
| NC_037649.1 | 6544125 | SNV | 1 | C | G | Homozygous   |
| NC_037649.1 | 6544138 | SNV | 1 | A | G | Homozygous   |
| NC_037649.1 | 6544175 | SNV | 1 | C | T | Homozygous   |
| NC_037649.1 | 6558265 | SNV | 1 | A | G | Homozygous   |
| NC_037649.1 | 6571078 | SNV | 1 | A | C | Homozygous   |
| NC_037649.1 | 6575892 | SNV | 1 | G | A | Homozygous   |
| NC_037649.1 | 6584493 | SNV | 1 | G | A | Heterozygous |
| NC_037649.1 | 6590508 | SNV | 1 | G | A | Heterozygous |
| NC_037649.1 | 6590526 | SNV | 1 | C | T | Homozygous   |
| NC_037649.1 | 6590533 | SNV | 1 | T | C | Heterozygous |
| NC_037649.1 | 6590610 | SNV | 1 | A | G | Homozygous   |
| NC_037649.1 | 6590920 | SNV | 1 | C | T | Heterozygous |
| NC_037649.1 | 6592049 | SNV | 1 | G | C | Homozygous   |
| NC_037649.1 | 6592054 | SNV | 1 | T | C | Homozygous   |
| NC_037649.1 | 6592162 | SNV | 1 | A | G | Homozygous   |
| NC_037649.1 | 6592666 | SNV | 1 | A | G | Homozygous   |
| NC_037649.1 | 6592685 | SNV | 1 | A | G | Homozygous   |
| NC_037649.1 | 6592739 | SNV | 1 | T | C | Homozygous   |
| NC_037649.1 | 6593006 | SNV | 1 | A | G | Heterozygous |
| NC_037649.1 | 6593023 | SNV | 1 | C | G | Homozygous   |
| NC_037649.1 | 6593033 | SNV | 1 | G | C | Heterozygous |
| NC_037649.1 | 6744989 | SNV | 1 | G | C | Homozygous   |
| NC_037649.1 | 6745035 | SNV | 1 | T | C | Homozygous   |
| NC_037649.1 | 6745118 | SNV | 1 | C | T | Heterozygous |
| NC_037649.1 | 6745241 | SNV | 1 | T | C | Homozygous   |
| NC_037649.1 | 6745274 | SNV | 1 | T | C | Homozygous   |
| NC_037649.1 | 6745316 | SNV | 1 | C | A | Homozygous   |
| NC_037649.1 | 6745329 | SNV | 1 | T | C | Heterozygous |
| NC_037649.1 | 6745336 | SNV | 1 | A | C | Homozygous   |
| NC_037649.1 | 6745338 | SNV | 1 | A | C | Homozygous   |
| NC_037649.1 | 6745340 | SNV | 1 | A | C | Homozygous   |
| NC_037649.1 | 6745342 | SNV | 1 | A | C | Heterozygous |
| NC_037649.1 | 6745478 | SNV | 1 | A | G | Homozygous   |
| NC_037649.1 | 6745643 | SNV | 1 | C | T | Heterozygous |
| NC_037649.1 | 6745743 | SNV | 1 | T | C | Heterozygous |
| NC_037649.1 | 6745749 | SNV | 1 | T | C | Homozygous   |
| NC_037649.1 | 6745920 | SNV | 1 | C | T | Homozygous   |
| NC_037649.1 | 6746259 | SNV | 1 | A | G | Homozygous   |
| NC_037649.1 | 6746330 | SNV | 1 | A | T | Homozygous   |
| NC_037649.1 | 6746341 | SNV | 1 | A | G | Homozygous   |
| NC_037649.1 | 6746404 | SNV | 1 | A | G | Homozygous   |
| NC_037649.1 | 6746493 | SNV | 1 | A | G | Heterozygous |
| NC_037649.1 | 6746502 | SNV | 1 | C | T | Heterozygous |
| NC_037649.1 | 6746506 | SNV | 1 | T | C | Homozygous   |
| NC_037649.1 | 6746576 | SNV | 1 | C | T | Heterozygous |
| NC_037649.1 | 6746788 | SNV | 1 | C | T | Heterozygous |
| NC_037649.1 | 6747075 | SNV | 1 | A | T | Homozygous   |
| NC_037649.1 | 6747364 | SNV | 1 | C | T | Heterozygous |

|             |         |     |   |   |   |              |
|-------------|---------|-----|---|---|---|--------------|
| NC_037649.1 | 6747370 | SNV | 1 | C | T | Homozygous   |
| NC_037649.1 | 6747622 | SNV | 1 | T | A | Homozygous   |
| NC_037649.1 | 6747748 | SNV | 1 | T | C | Homozygous   |
| NC_037649.1 | 6747934 | SNV | 1 | A | G | Homozygous   |
| NC_037649.1 | 6748170 | SNV | 1 | T | C | Heterozygous |
| NC_037649.1 | 6748173 | SNV | 1 | C | T | Homozygous   |
| NC_037649.1 | 6748366 | SNV | 1 | T | C | Heterozygous |
| NC_037649.1 | 6748407 | SNV | 1 | A | G | Homozygous   |
| NC_037649.1 | 6748505 | SNV | 1 | A | G | Homozygous   |
| NC_037649.1 | 6748569 | SNV | 1 | C | T | Heterozygous |
| NC_037649.1 | 6748655 | SNV | 1 | G | A | Heterozygous |
| NC_037649.1 | 6748659 | SNV | 1 | A | G | Homozygous   |
| NC_037649.1 | 6748671 | SNV | 1 | A | G | Heterozygous |
| NC_037649.1 | 6748673 | SNV | 1 | A | G | Heterozygous |
| NC_037649.1 | 6748708 | SNV | 1 | G | A | Homozygous   |
| NC_037649.1 | 6748910 | SNV | 1 | C | T | Homozygous   |
| NC_037649.1 | 6748926 | SNV | 1 | C | T | Homozygous   |
| NC_037649.1 | 6749113 | SNV | 1 | C | T | Heterozygous |
| NC_037649.1 | 6749122 | SNV | 1 | G | C | Heterozygous |
| NC_037649.1 | 6749218 | SNV | 1 | A | G | Homozygous   |
| NC_037649.1 | 6749307 | SNV | 1 | C | G | Homozygous   |
| NC_037649.1 | 6749502 | SNV | 1 | T | C | Homozygous   |
| NC_037649.1 | 6749530 | SNV | 1 | T | A | Heterozygous |
| NC_037649.1 | 6750760 | SNV | 1 | G | T | Heterozygous |
| NC_037649.1 | 6750763 | SNV | 1 | C | T | Heterozygous |
| NC_037649.1 | 6750805 | SNV | 1 | A | G | Homozygous   |
| NC_037649.1 | 6750808 | SNV | 1 | T | C | Homozygous   |
| NC_037649.1 | 6752629 | SNV | 1 | A | G | Heterozygous |
| NC_037649.1 | 6752647 | SNV | 1 | A | G | Homozygous   |
| NC_037649.1 | 6752683 | SNV | 1 | G | A | Heterozygous |
| NC_037649.1 | 6767209 | SNV | 1 | T | C | Homozygous   |
| NC_037649.1 | 6775331 | SNV | 1 | C | T | Homozygous   |
| NC_037649.1 | 6775927 | SNV | 1 | A | G | Heterozygous |
| NC_037649.1 | 6776015 | SNV | 1 | G | A | Heterozygous |
| NC_037649.1 | 6776054 | SNV | 1 | T | C | Heterozygous |
| NC_037649.1 | 6776200 | SNV | 1 | G | A | Heterozygous |
| NC_037649.1 | 6776210 | SNV | 1 | A | G | Homozygous   |
| NC_037649.1 | 6776901 | SNV | 1 | T | C | Heterozygous |
| NC_037649.1 | 6776905 | SNV | 1 | C | T | Heterozygous |
| NC_037649.1 | 6776922 | SNV | 1 | T | C | Homozygous   |
| NC_037649.1 | 6777086 | SNV | 1 | T | C | Heterozygous |
| NC_037649.1 | 6777094 | SNV | 1 | A | G | Homozygous   |
| NC_037649.1 | 6777402 | SNV | 1 | T | C | Homozygous   |
| NC_037649.1 | 6777407 | SNV | 1 | C | T | Heterozygous |
| NC_037649.1 | 6777503 | SNV | 1 | A | G | Heterozygous |
| NC_037649.1 | 6777507 | SNV | 1 | T | G | Heterozygous |
| NC_037649.1 | 6777583 | SNV | 1 | T | C | Heterozygous |
| NC_037649.1 | 6777596 | SNV | 1 | T | C | Heterozygous |
| NC_037649.1 | 6777685 | SNV | 1 | T | C | Homozygous   |
| NC_037649.1 | 6777819 | SNV | 1 | T | C | Homozygous   |
| NC_037649.1 | 6777901 | SNV | 1 | C | T | Homozygous   |



|             |         |     |   |   |   |              |
|-------------|---------|-----|---|---|---|--------------|
| NC_037649.1 | 6777914 | SNV | 1 | C | T | Heterozygous |
| NC_037649.1 | 6778347 | SNV | 1 | A | T | Homozygous   |
| NC_037649.1 | 6778369 | SNV | 1 | G | A | Heterozygous |
| NC_037649.1 | 6778412 | SNV | 1 | A | G | Homozygous   |
| NC_037649.1 | 6778425 | SNV | 1 | G | A | Homozygous   |
| NC_037649.1 | 6778529 | SNV | 1 | T | C | Homozygous   |
| NC_037649.1 | 6778704 | SNV | 1 | C | T | Homozygous   |
| NC_037649.1 | 6778713 | SNV | 1 | A | G | Heterozygous |
| NC_037649.1 | 6778939 | SNV | 1 | C | T | Heterozygous |
| NC_037649.1 | 6779076 | SNV | 1 | T | C | Homozygous   |
| NC_037649.1 | 6779137 | SNV | 1 | A | C | Homozygous   |
| NC_037649.1 | 6779238 | SNV | 1 | G | A | Heterozygous |
| NC_037649.1 | 6779317 | SNV | 1 | G | A | Heterozygous |
| NC_037649.1 | 6779721 | SNV | 1 | A | G | Homozygous   |
| NC_037649.1 | 6779817 | SNV | 1 | C | G | Homozygous   |
| NC_037649.1 | 6779973 | SNV | 1 | C | T | Homozygous   |
| NC_037649.1 | 6780290 | SNV | 1 | A | T | Heterozygous |
| NC_037649.1 | 6780316 | SNV | 1 | G | A | Heterozygous |
| NC_037649.1 | 6780629 | SNV | 1 | T | C | Homozygous   |
| NC_037649.1 | 6781482 | SNV | 1 | G | A | Heterozygous |
| NC_037649.1 | 6781810 | SNV | 1 | T | C | Homozygous   |
| NC_037649.1 | 6781923 | SNV | 1 | G | A | Homozygous   |
| NC_037649.1 | 6782390 | SNV | 1 | T | C | Homozygous   |
| NC_037649.1 | 6783298 | SNV | 1 | T | C | Homozygous   |
| NC_037649.1 | 6783337 | SNV | 1 | C | T | Homozygous   |
| NC_037649.1 | 6783340 | SNV | 1 | T | C | Heterozygous |
| NC_037649.1 | 6783635 | SNV | 1 | T | A | Heterozygous |
| NC_037649.1 | 6783639 | SNV | 1 | A | T | Heterozygous |
| NC_037649.1 | 6784106 | SNV | 1 | C | T | Homozygous   |
| NC_037649.1 | 6784328 | SNV | 1 | T | C | Homozygous   |
| NC_037649.1 | 6784453 | SNV | 1 | C | T | Heterozygous |
| NC_037649.1 | 6784488 | SNV | 1 | T | A | Heterozygous |
| NC_037649.1 | 6784504 | SNV | 1 | C | T | Homozygous   |
| NC_037649.1 | 6784749 | SNV | 1 | A | G | Homozygous   |
| NC_037649.1 | 6784791 | SNV | 1 | A | G | Homozygous   |
| NC_037649.1 | 6785102 | SNV | 1 | A | C | Homozygous   |
| NC_037649.1 | 6785526 | SNV | 1 | C | A | Homozygous   |
| NC_037649.1 | 6785905 | SNV | 1 | A | G | Homozygous   |
| NC_037649.1 | 6786141 | SNV | 1 | G | A | Heterozygous |
| NC_037649.1 | 6786164 | SNV | 1 | T | A | Heterozygous |
| NC_037649.1 | 6786237 | SNV | 1 | A | G | Homozygous   |
| NC_037649.1 | 6786263 | SNV | 1 | T | C | Homozygous   |
| NC_037649.1 | 6786268 | SNV | 1 | A | G | Homozygous   |
| NC_037649.1 | 6788885 | SNV | 1 | A | G | Homozygous   |
| NC_037649.1 | 6788888 | SNV | 1 | A | T | Heterozygous |
| NC_037649.1 | 6788891 | SNV | 1 | G | A | Heterozygous |
| NC_037649.1 | 6788908 | SNV | 1 | A | G | Heterozygous |
| NC_037649.1 | 6789301 | SNV | 1 | A | G | Heterozygous |
| NC_037649.1 | 6789438 | SNV | 1 | T | A | Homozygous   |
| NC_037649.1 | 6789475 | SNV | 1 | A | C | Heterozygous |
| NC_037649.1 | 6790219 | SNV | 1 | T | C | Homozygous   |

|             |         |     |   |   |   |              |
|-------------|---------|-----|---|---|---|--------------|
| NC_037649.1 | 6793553 | SNV | 1 | C | T | Heterozygous |
| NC_037649.1 | 6793564 | SNV | 1 | T | C | Heterozygous |
| NC_037649.1 | 6793567 | SNV | 1 | A | G | Heterozygous |
| NC_037649.1 | 6794684 | SNV | 1 | G | C | Homozygous   |
| NC_037649.1 | 6794728 | SNV | 1 | T | G | Homozygous   |
| NC_037649.1 | 6794848 | SNV | 1 | T | C | Heterozygous |
| NC_037649.1 | 6794888 | SNV | 1 | G | A | Homozygous   |
| NC_037649.1 | 6794891 | SNV | 1 | A | G | Homozygous   |
| NC_037649.1 | 6794901 | SNV | 1 | T | C | Homozygous   |
| NC_037649.1 | 6794905 | SNV | 1 | T | C | Homozygous   |
| NC_037649.1 | 6794916 | SNV | 1 | G | A | Homozygous   |
| NC_037649.1 | 6795311 | SNV | 1 | C | T | Heterozygous |
| NC_037649.1 | 6795317 | SNV | 1 | C | T | Homozygous   |
| NC_037649.1 | 6795320 | SNV | 1 | C | T | Homozygous   |
| NC_037649.1 | 6795328 | SNV | 1 | G | T | Homozygous   |
| NC_037649.1 | 6795373 | SNV | 1 | T | C | Heterozygous |
| NC_037649.1 | 6795581 | SNV | 1 | C | G | Homozygous   |
| NC_037649.1 | 6795651 | SNV | 1 | T | C | Homozygous   |
| NC_037649.1 | 6795843 | SNV | 1 | T | C | Homozygous   |
| NC_037649.1 | 6797395 | SNV | 1 | A | G | Homozygous   |
| NC_037649.1 | 6798519 | SNV | 1 | C | T | Heterozygous |
| NC_037649.1 | 6798637 | SNV | 1 | C | T | Heterozygous |
| NC_037649.1 | 6798656 | SNV | 1 | G | A | Heterozygous |
| NC_037649.1 | 6798665 | SNV | 1 | T | C | Homozygous   |
| NC_037649.1 | 6798715 | SNV | 1 | A | T | Homozygous   |
| NC_037649.1 | 6798724 | SNV | 1 | T | C | Homozygous   |
| NC_037649.1 | 6798758 | SNV | 1 | C | T | Heterozygous |
| NC_037649.1 | 6800828 | SNV | 1 | G | A | Homozygous   |
| NC_037649.1 | 6800843 | SNV | 1 | T | C | Heterozygous |
| NC_037649.1 | 6800895 | SNV | 1 | T | C | Homozygous   |
| NC_037649.1 | 6800897 | SNV | 1 | T | A | Homozygous   |
| NC_037649.1 | 6800901 | SNV | 1 | C | T | Homozygous   |
| NC_037649.1 | 6800935 | SNV | 1 | T | G | Heterozygous |
| NC_037649.1 | 6801261 | SNV | 1 | G | A | Heterozygous |
| NC_037649.1 | 6801795 | SNV | 1 | C | T | Heterozygous |
| NC_037649.1 | 6801797 | SNV | 1 | C | G | Heterozygous |
| NC_037649.1 | 6801811 | SNV | 1 | G | A | Heterozygous |
| NC_037649.1 | 6801987 | SNV | 1 | T | C | Heterozygous |
| NC_037649.1 | 6802714 | SNV | 1 | T | C | Homozygous   |
| NC_037649.1 | 6803357 | SNV | 1 | G | A | Homozygous   |
| NC_037649.1 | 6803396 | SNV | 1 | C | G | Heterozygous |
| NC_037649.1 | 6803687 | SNV | 1 | G | C | Homozygous   |
| NC_037649.1 | 6803715 | SNV | 1 | A | G | Homozygous   |
| NC_037649.1 | 6803801 | SNV | 1 | C | G | Homozygous   |
| NC_037649.1 | 6803921 | SNV | 1 | C | G | Homozygous   |
| NC_037649.1 | 6804259 | SNV | 1 | T | C | Homozygous   |
| NC_037649.1 | 6804468 | SNV | 1 | A | G | Heterozygous |
| NC_037649.1 | 6804588 | SNV | 1 | C | G | Heterozygous |
| NC_037649.1 | 6805030 | SNV | 1 | A | G | Heterozygous |
| NC_037649.1 | 6805040 | SNV | 1 | A | G | Homozygous   |
| NC_037649.1 | 6805992 | SNV | 1 | T | C | Homozygous   |

|             |         |     |   |   |   |              |
|-------------|---------|-----|---|---|---|--------------|
| NC_037649.1 | 6806075 | SNV | 1 | C | T | Heterozygous |
| NC_037649.1 | 6806577 | SNV | 1 | T | C | Heterozygous |
| NC_037649.1 | 6810186 | SNV | 1 | A | C | Homozygous   |
| NC_037649.1 | 6810278 | SNV | 1 | C | T | Heterozygous |
| NC_037649.1 | 6814710 | SNV | 1 | A | G | Homozygous   |
| NC_037649.1 | 6814730 | SNV | 1 | C | G | Heterozygous |
| NC_037649.1 | 6814732 | SNV | 1 | T | A | Heterozygous |
| NC_037649.1 | 6814742 | SNV | 1 | A | G | Heterozygous |
| NC_037649.1 | 6814744 | SNV | 1 | G | A | Heterozygous |
| NC_037649.1 | 6814778 | SNV | 1 | A | G | Homozygous   |
| NC_037649.1 | 6814887 | SNV | 1 | G | A | Heterozygous |
| NC_037649.1 | 6814998 | SNV | 1 | T | C | Homozygous   |
| NC_037649.1 | 6815098 | SNV | 1 | T | C | Homozygous   |
| NC_037649.1 | 6815214 | SNV | 1 | C | T | Heterozygous |
| NC_037649.1 | 6815699 | SNV | 1 | T | G | Homozygous   |
| NC_037649.1 | 6815875 | SNV | 1 | C | T | Heterozygous |
| NC_037649.1 | 6816046 | SNV | 1 | G | A | Heterozygous |
| NC_037649.1 | 6816121 | SNV | 1 | A | G | Homozygous   |
| NC_037649.1 | 6816129 | SNV | 1 | G | A | Heterozygous |
| NC_037649.1 | 6816448 | SNV | 1 | C | A | Heterozygous |
| NC_037649.1 | 6816457 | SNV | 1 | A | T | Heterozygous |
| NC_037649.1 | 6816468 | SNV | 1 | A | G | Heterozygous |
| NC_037649.1 | 6817177 | SNV | 1 | T | C | Homozygous   |
| NC_037649.1 | 6817324 | SNV | 1 | T | G | Homozygous   |
| NC_037649.1 | 6819779 | SNV | 1 | T | A | Homozygous   |
| NC_037649.1 | 6820609 | SNV | 1 | T | C | Homozygous   |
| NC_037649.1 | 6820655 | SNV | 1 | A | G | Homozygous   |
| NC_037649.1 | 6821820 | SNV | 1 | A | G | Homozygous   |
| NC_037649.1 | 6821836 | SNV | 1 | T | A | Heterozygous |
| NC_037649.1 | 6821893 | SNV | 1 | C | T | Homozygous   |
| NC_037649.1 | 6821897 | SNV | 1 | G | A | Homozygous   |
| NC_037649.1 | 6821995 | SNV | 1 | C | T | Homozygous   |
| NC_037649.1 | 6822237 | SNV | 1 | T | C | Homozygous   |
| NC_037649.1 | 6822402 | SNV | 1 | C | T | Homozygous   |
| NC_037649.1 | 6823750 | SNV | 1 | A | G | Homozygous   |
| NC_037649.1 | 6823887 | SNV | 1 | G | A | Heterozygous |
| NC_037649.1 | 6823897 | SNV | 1 | A | G | Heterozygous |
| NC_037649.1 | 6823946 | SNV | 1 | C | A | Homozygous   |
| NC_037649.1 | 6823985 | SNV | 1 | A | G | Heterozygous |
| NC_037649.1 | 6824036 | SNV | 1 | C | T | Heterozygous |
| NC_037649.1 | 6827134 | SNV | 1 | A | T | Heterozygous |
| NC_037649.1 | 6827741 | SNV | 1 | T | C | Homozygous   |
| NC_037649.1 | 6829798 | SNV | 1 | T | C | Heterozygous |
| NC_037649.1 | 6829802 | SNV | 1 | T | C | Heterozygous |
| NC_037649.1 | 6829804 | SNV | 1 | T | C | Heterozygous |
| NC_037649.1 | 6829812 | SNV | 1 | T | C | Heterozygous |
| NC_037649.1 | 6829819 | SNV | 1 | A | G | Heterozygous |
| NC_037649.1 | 6831632 | SNV | 1 | C | A | Homozygous   |
| NC_037649.1 | 6831652 | SNV | 1 | T | C | Homozygous   |
| NC_037649.1 | 6831657 | SNV | 1 | C | T | Homozygous   |
| NC_037649.1 | 6842014 | SNV | 1 | C | G | Homozygous   |

|             |         |     |   |   |   |              |
|-------------|---------|-----|---|---|---|--------------|
| NC_037649.1 | 6842077 | SNV | 1 | G | T | Heterozygous |
| NC_037649.1 | 6853065 | SNV | 1 | A | G | Homozygous   |
| NC_037649.1 | 6854002 | SNV | 1 | T | G | Heterozygous |
| NC_037649.1 | 6854006 | SNV | 1 | T | C | Heterozygous |
| NC_037649.1 | 6854009 | SNV | 1 | T | C | Heterozygous |
| NC_037649.1 | 6854161 | SNV | 1 | C | G | Homozygous   |
| NC_037649.1 | 6854569 | SNV | 1 | C | T | Homozygous   |
| NC_037649.1 | 6854577 | SNV | 1 | T | C | Homozygous   |
| NC_037649.1 | 6854758 | SNV | 1 | A | G | Homozygous   |
| NC_037649.1 | 6854780 | SNV | 1 | T | C | Homozygous   |
| NC_037649.1 | 6854812 | SNV | 1 | G | T | Homozygous   |
| NC_037649.1 | 6856934 | SNV | 1 | A | G | Homozygous   |
| NC_037649.1 | 6857851 | SNV | 1 | A | G | Homozygous   |
| NC_037649.1 | 6858241 | SNV | 1 | T | A | Homozygous   |
| NC_037649.1 | 6858255 | SNV | 1 | G | A | Heterozygous |
| NC_037649.1 | 6858525 | SNV | 1 | A | C | Heterozygous |
| NC_037649.1 | 6859604 | SNV | 1 | C | T | Heterozygous |
| NC_037649.1 | 6892508 | SNV | 1 | C | A | Heterozygous |
| NC_037649.1 | 6892510 | SNV | 1 | T | A | Heterozygous |
| NC_037649.1 | 6900019 | SNV | 1 | A | C | Homozygous   |
| NC_037649.1 | 6904764 | SNV | 1 | C | T | Heterozygous |
| NC_037649.1 | 6904817 | SNV | 1 | G | A | Heterozygous |
| NC_037649.1 | 6904837 | SNV | 1 | G | A | Heterozygous |
| NC_037649.1 | 6931409 | SNV | 1 | G | A | Heterozygous |
| NC_037649.1 | 6931752 | SNV | 1 | T | C | Homozygous   |
| NC_037649.1 | 6932045 | SNV | 1 | G | A | Heterozygous |
| NC_037649.1 | 6987994 | SNV | 1 | T | C | Homozygous   |
| NC_037649.1 | 6988114 | SNV | 1 | C | T | Homozygous   |
| NC_037649.1 | 6988157 | SNV | 1 | G | A | Heterozygous |
| NC_037649.1 | 6989190 | SNV | 1 | G | A | Heterozygous |
| NC_037649.1 | 6992189 | SNV | 1 | A | G | Homozygous   |
| NC_037649.1 | 6992324 | SNV | 1 | A | G | Homozygous   |
| NC_037649.1 | 6992678 | SNV | 1 | G | A | Homozygous   |
| NC_037649.1 | 6992733 | SNV | 1 | A | G | Heterozygous |
| NC_037649.1 | 6992774 | SNV | 1 | T | C | Homozygous   |
| NC_037649.1 | 6992797 | SNV | 1 | A | G | Homozygous   |
| NC_037649.1 | 6992809 | SNV | 1 | A | G | Homozygous   |
| NC_037649.1 | 6993710 | SNV | 1 | G | A | Heterozygous |
| NC_037649.1 | 6993758 | SNV | 1 | G | A | Heterozygous |
| NC_037649.1 | 6994543 | SNV | 1 | T | C | Homozygous   |
| NC_037649.1 | 6994637 | SNV | 1 | C | G | Homozygous   |
| NC_037649.1 | 6994712 | SNV | 1 | A | G | Homozygous   |
| NC_037649.1 | 6995114 | SNV | 1 | C | G | Homozygous   |
| NC_037649.1 | 6995402 | SNV | 1 | G | A | Heterozygous |
| NC_037649.1 | 6995768 | SNV | 1 | C | G | Homozygous   |
| NC_037649.1 | 6997320 | SNV | 1 | C | A | Heterozygous |
| NC_037649.1 | 6997461 | SNV | 1 | A | G | Homozygous   |
| NC_037649.1 | 6997486 | SNV | 1 | T | C | Homozygous   |
| NC_037649.1 | 6997574 | SNV | 1 | G | A | Homozygous   |
| NC_037649.1 | 6997635 | SNV | 1 | A | G | Homozygous   |
| NC_037649.1 | 6997648 | SNV | 1 | T | C | Homozygous   |

|             |         |     |   |   |   |              |
|-------------|---------|-----|---|---|---|--------------|
| NC_037649.1 | 6997651 | SNV | 1 | A | G | Homozygous   |
| NC_037649.1 | 6997659 | SNV | 1 | G | A | Heterozygous |
| NC_037649.1 | 6997676 | SNV | 1 | C | T | Heterozygous |
| NC_037649.1 | 6998144 | SNV | 1 | C | T | Homozygous   |
| NC_037649.1 | 6998390 | SNV | 1 | A | G | Homozygous   |
| NC_037649.1 | 6998393 | SNV | 1 | A | G | Heterozygous |
| NC_037649.1 | 6999226 | SNV | 1 | A | G | Homozygous   |
| NC_037649.1 | 6999228 | SNV | 1 | G | A | Heterozygous |
| NC_037649.1 | 6999272 | SNV | 1 | C | G | Heterozygous |
| NC_037649.1 | 6999280 | SNV | 1 | G | C | Homozygous   |
| NC_037649.1 | 6999284 | SNV | 1 | C | G | Homozygous   |
| NC_037649.1 | 6999335 | SNV | 1 | G | A | Homozygous   |
| NC_037649.1 | 6999338 | SNV | 1 | G | A | Homozygous   |
| NC_037649.1 | 6999360 | SNV | 1 | C | T | Homozygous   |
| NC_037649.1 | 6999371 | SNV | 1 | T | G | Homozygous   |
| NC_037649.1 | 6999399 | SNV | 1 | T | C | Homozygous   |
| NC_037649.1 | 6999447 | SNV | 1 | G | A | Heterozygous |
| NC_037649.1 | 6999461 | SNV | 1 | G | A | Homozygous   |
| NC_037649.1 | 6999530 | SNV | 1 | C | T | Homozygous   |
| NC_037649.1 | 6999682 | SNV | 1 | C | T | Homozygous   |
| NC_037649.1 | 6999709 | SNV | 1 | T | C | Homozygous   |
| NC_037649.1 | 6999754 | SNV | 1 | G | A | Heterozygous |
| NC_037649.1 | 6999812 | SNV | 1 | A | G | Homozygous   |
| NC_037649.1 | 7001168 | SNV | 1 | A | C | Homozygous   |
| NC_037649.1 | 7001504 | SNV | 1 | C | T | Heterozygous |
| NC_037649.1 | 7001938 | SNV | 1 | A | G | Homozygous   |
| NC_037649.1 | 7001991 | SNV | 1 | C | G | Homozygous   |
| NC_037649.1 | 7002956 | SNV | 1 | T | C | Homozygous   |
| NC_037649.1 | 7002992 | SNV | 1 | T | C | Homozygous   |
| NC_037649.1 | 7003002 | SNV | 1 | A | G | Heterozygous |
| NC_037649.1 | 7003127 | SNV | 1 | T | C | Heterozygous |
| NC_037649.1 | 7003263 | SNV | 1 | C | T | Heterozygous |
| NC_037649.1 | 7003414 | SNV | 1 | A | G | Homozygous   |
| NC_037649.1 | 7003452 | SNV | 1 | T | C | Heterozygous |
| NC_037649.1 | 7003466 | SNV | 1 | T | G | Heterozygous |
| NC_037649.1 | 7003654 | SNV | 1 | T | C | Heterozygous |
| NC_037649.1 | 7003681 | SNV | 1 | G | A | Heterozygous |
| NC_037649.1 | 7003965 | SNV | 1 | A | G | Heterozygous |
| NC_037649.1 | 7003969 | SNV | 1 | T | C | Homozygous   |
| NC_037649.1 | 7004121 | SNV | 1 | A | C | Homozygous   |
| NC_037649.1 | 7004140 | SNV | 1 | A | G | Homozygous   |
| NC_037649.1 | 7004150 | SNV | 1 | A | C | Homozygous   |
| NC_037649.1 | 7004366 | SNV | 1 | C | A | Heterozygous |
| NC_037649.1 | 7005534 | SNV | 1 | A | C | Homozygous   |
| NC_037649.1 | 7005549 | SNV | 1 | C | T | Homozygous   |
| NC_037649.1 | 7005910 | SNV | 1 | T | C | Heterozygous |
| NC_037649.1 | 7005933 | SNV | 1 | G | A | Heterozygous |
| NC_037649.1 | 7005977 | SNV | 1 | T | C | Homozygous   |
| NC_037649.1 | 7006111 | SNV | 1 | T | C | Homozygous   |
| NC_037649.1 | 7006334 | SNV | 1 | C | T | Heterozygous |
| NC_037649.1 | 7006346 | SNV | 1 | G | A | Homozygous   |

|             |         |     |   |   |   |              |
|-------------|---------|-----|---|---|---|--------------|
| NC_037649.1 | 7006442 | SNV | 1 | G | A | Heterozygous |
| NC_037649.1 | 7006534 | SNV | 1 | G | A | Homozygous   |
| NC_037649.1 | 7006872 | SNV | 1 | C | T | Homozygous   |
| NC_037649.1 | 7006887 | SNV | 1 | C | T | Homozygous   |
| NC_037649.1 | 7006896 | SNV | 1 | T | A | Homozygous   |
| NC_037649.1 | 7006977 | SNV | 1 | T | C | Heterozygous |
| NC_037649.1 | 7007106 | SNV | 1 | G | A | Homozygous   |
| NC_037649.1 | 7007511 | SNV | 1 | C | T | Heterozygous |
| NC_037649.1 | 7007964 | SNV | 1 | G | A | Heterozygous |
| NC_037649.1 | 7009497 | SNV | 1 | A | C | Heterozygous |
| NC_037649.1 | 7009539 | SNV | 1 | T | C | Heterozygous |
| NC_037649.1 | 7009542 | SNV | 1 | G | A | Homozygous   |
| NC_037649.1 | 7010661 | SNV | 1 | C | T | Heterozygous |
| NC_037649.1 | 7010753 | SNV | 1 | G | T | Heterozygous |
| NC_037649.1 | 7010850 | SNV | 1 | A | G | Homozygous   |
| NC_037649.1 | 7010916 | SNV | 1 | G | A | Homozygous   |
| NC_037649.1 | 7011004 | SNV | 1 | C | T | Heterozygous |
| NC_037649.1 | 7061480 | SNV | 1 | G | A | Heterozygous |
| NC_037649.1 | 7061541 | SNV | 1 | C | A | Homozygous   |
| NC_037649.1 | 7062030 | SNV | 1 | A | G | Homozygous   |
| NC_037649.1 | 7062039 | SNV | 1 | A | C | Homozygous   |
| NC_037649.1 | 7062144 | SNV | 1 | A | G | Homozygous   |
| NC_037649.1 | 7062250 | SNV | 1 | C | T | Homozygous   |
| NC_037649.1 | 7062437 | SNV | 1 | A | G | Homozygous   |
| NC_037649.1 | 7062660 | SNV | 1 | T | A | Heterozygous |
| NC_037649.1 | 7075014 | SNV | 1 | T | A | Heterozygous |
| NC_037649.1 | 7075016 | SNV | 1 | T | A | Heterozygous |
| NC_037649.1 | 7092371 | SNV | 1 | A | G | Heterozygous |
| NC_037649.1 | 7092937 | SNV | 1 | G | A | Homozygous   |
| NC_037649.1 | 7093030 | SNV | 1 | T | C | Heterozygous |
| NC_037649.1 | 7097124 | SNV | 1 | T | C | Homozygous   |
| NC_037649.1 | 7097127 | SNV | 1 | C | T | Homozygous   |
| NC_037649.1 | 7101403 | SNV | 1 | A | G | Homozygous   |
| NC_037649.1 | 7101405 | SNV | 1 | A | G | Homozygous   |
| NC_037649.1 | 7101407 | SNV | 1 | A | G | Homozygous   |
| NC_037649.1 | 7101409 | SNV | 1 | A | G | Homozygous   |
| NC_037649.1 | 7101423 | SNV | 1 | A | C | Homozygous   |
| NC_037649.1 | 7123386 | SNV | 1 | C | T | Homozygous   |
| NC_037649.1 | 7139567 | SNV | 1 | A | G | Homozygous   |
| NC_037649.1 | 7139913 | SNV | 1 | A | T | Homozygous   |
| NC_037649.1 | 7139919 | SNV | 1 | A | T | Homozygous   |
| NC_037649.1 | 7139924 | SNV | 1 | T | C | Homozygous   |
| NC_037649.1 | 7139931 | SNV | 1 | A | T | Homozygous   |
| NC_037649.1 | 7140206 | SNV | 1 | T | C | Homozygous   |
| NC_037649.1 | 7140365 | SNV | 1 | A | T | Homozygous   |
| NC_037649.1 | 7140571 | SNV | 1 | G | A | Homozygous   |
| NC_037649.1 | 7140633 | SNV | 1 | A | G | Homozygous   |
| NC_037649.1 | 7140760 | SNV | 1 | G | A | Homozygous   |
| NC_037649.1 | 7141043 | SNV | 1 | T | C | Homozygous   |
| NC_037649.1 | 7141057 | SNV | 1 | G | A | Homozygous   |
| NC_037649.1 | 7157571 | SNV | 1 | T | C | Homozygous   |

|             |         |     |   |   |   |              |
|-------------|---------|-----|---|---|---|--------------|
| NC_037649.1 | 7157597 | SNV | 1 | G | C | Homozygous   |
| NC_037649.1 | 7157607 | SNV | 1 | T | C | Homozygous   |
| NC_037649.1 | 7180065 | SNV | 1 | T | A | Homozygous   |
| NC_037649.1 | 7193505 | SNV | 1 | C | T | Heterozygous |
| NC_037649.1 | 7237376 | SNV | 1 | T | C | Homozygous   |
| NC_037649.1 | 7262271 | SNV | 1 | C | T | Heterozygous |
| NC_037649.1 | 7262314 | SNV | 1 | C | T | Homozygous   |
| NC_037649.1 | 7291976 | SNV | 1 | C | T | Homozygous   |
| NC_037649.1 | 7318086 | SNV | 1 | C | T | Homozygous   |
| NC_037649.1 | 7318193 | SNV | 1 | T | A | Homozygous   |
| NC_037649.1 | 7318198 | SNV | 1 | T | A | Homozygous   |
| NC_037649.1 | 7318275 | SNV | 1 | A | C | Homozygous   |
| NC_037649.1 | 7318366 | SNV | 1 | T | C | Homozygous   |
| NC_037649.1 | 7319884 | SNV | 1 | T | A | Homozygous   |
| NC_037649.1 | 7320027 | SNV | 1 | G | A | Homozygous   |
| NC_037649.1 | 7320483 | SNV | 1 | A | C | Homozygous   |
| NC_037649.1 | 7320485 | SNV | 1 | T | A | Homozygous   |
| NC_037649.1 | 7321058 | SNV | 1 | G | A | Homozygous   |
| NC_037649.1 | 7321536 | SNV | 1 | A | C | Homozygous   |
| NC_037649.1 | 7321603 | SNV | 1 | C | T | Homozygous   |
| NC_037649.1 | 7321605 | SNV | 1 | A | G | Homozygous   |
| NC_037649.1 | 7322313 | SNV | 1 | T | G | Homozygous   |
| NC_037649.1 | 7322651 | SNV | 1 | T | C | Heterozygous |
| NC_037649.1 | 7322725 | SNV | 1 | A | G | Homozygous   |
| NC_037649.1 | 7327596 | SNV | 1 | G | A | Heterozygous |
| NC_037649.1 | 7327685 | SNV | 1 | G | A | Homozygous   |
| NC_037649.1 | 7332163 | SNV | 1 | C | A | Homozygous   |
| NC_037649.1 | 7346835 | SNV | 1 | T | C | Homozygous   |
| NC_037649.1 | 7346997 | SNV | 1 | G | A | Homozygous   |
| NC_037649.1 | 7349140 | SNV | 1 | G | A | Heterozygous |
| NC_037649.1 | 7354103 | SNV | 1 | A | G | Homozygous   |
| NC_037649.1 | 7354135 | SNV | 1 | A | T | Heterozygous |
| NC_037649.1 | 7365516 | SNV | 1 | G | T | Homozygous   |
| NC_037649.1 | 7365828 | SNV | 1 | G | T | Homozygous   |
| NC_037649.1 | 7365916 | SNV | 1 | A | G | Homozygous   |
| NC_037649.1 | 7366540 | SNV | 1 | C | T | Homozygous   |
| NC_037649.1 | 7366781 | SNV | 1 | T | C | Homozygous   |
| NC_037649.1 | 7370588 | SNV | 1 | A | T | Homozygous   |
| NC_037649.1 | 7370593 | SNV | 1 | T | A | Homozygous   |
| NC_037649.1 | 7370595 | SNV | 1 | C | A | Homozygous   |
| NC_037649.1 | 7370598 | SNV | 1 | A | T | Homozygous   |
| NC_037649.1 | 7370610 | SNV | 1 | T | A | Homozygous   |
| NC_037649.1 | 7370620 | SNV | 1 | T | C | Heterozygous |
| NC_037649.1 | 7370628 | SNV | 1 | C | T | Homozygous   |
| NC_037649.1 | 7370632 | SNV | 1 | A | T | Heterozygous |
| NC_037649.1 | 7370642 | SNV | 1 | A | T | Homozygous   |
| NC_037649.1 | 7370661 | SNV | 1 | A | G | Homozygous   |
| NC_037649.1 | 7372558 | SNV | 1 | G | T | Heterozygous |
| NC_037649.1 | 7387339 | SNV | 1 | T | C | Homozygous   |
| NC_037649.1 | 7412221 | SNV | 1 | T | A | Homozygous   |
| NC_037649.1 | 7412309 | SNV | 1 | A | C | Homozygous   |

|             |         |     |   |   |   |              |
|-------------|---------|-----|---|---|---|--------------|
| NC_037649.1 | 7426378 | SNV | 1 | G | A | Heterozygous |
| NC_037649.1 | 7426704 | SNV | 1 | A | G | Homozygous   |
| NC_037649.1 | 7426801 | SNV | 1 | C | T | Heterozygous |
| NC_037649.1 | 7426826 | SNV | 1 | T | C | Homozygous   |
| NC_037649.1 | 7426893 | SNV | 1 | G | A | Homozygous   |
| NC_037649.1 | 7426896 | SNV | 1 | G | C | Heterozygous |
| NC_037649.1 | 7426966 | SNV | 1 | T | C | Homozygous   |
| NC_037649.1 | 7447168 | SNV | 1 | A | T | Homozygous   |
| NC_037649.1 | 7447325 | SNV | 1 | C | T | Homozygous   |
| NC_037649.1 | 7447331 | SNV | 1 | A | G | Heterozygous |
| NC_037649.1 | 7468261 | SNV | 1 | C | T | Heterozygous |
| NC_037649.1 | 7468298 | SNV | 1 | G | A | Homozygous   |
| NC_037649.1 | 7487536 | SNV | 1 | C | G | Heterozygous |
| NC_037649.1 | 7487584 | SNV | 1 | T | G | Homozygous   |
| NC_037649.1 | 7487602 | SNV | 1 | C | T | Heterozygous |
| NC_037649.1 | 7492357 | SNV | 1 | C | A | Heterozygous |
| NC_037649.1 | 7492451 | SNV | 1 | G | T | Heterozygous |
| NC_037649.1 | 7518121 | SNV | 1 | G | A | Homozygous   |
| NC_037649.1 | 7518124 | SNV | 1 | G | A | Homozygous   |
| NC_037649.1 | 7518126 | SNV | 1 | A | G | Heterozygous |
| NC_037649.1 | 7518273 | SNV | 1 | T | G | Heterozygous |
| NC_037649.1 | 7518294 | SNV | 1 | G | A | Heterozygous |
| NC_037649.1 | 7518344 | SNV | 1 | G | A | Heterozygous |
| NC_037649.1 | 7537824 | SNV | 1 | G | A | Heterozygous |
| NC_037649.1 | 7549626 | SNV | 1 | C | T | Heterozygous |
| NC_037649.1 | 7549632 | SNV | 1 | T | G | Homozygous   |
| NC_037649.1 | 7549655 | SNV | 1 | T | C | Homozygous   |
| NC_037649.1 | 7549684 | SNV | 1 | T | C | Homozygous   |
| NC_037649.1 | 7549829 | SNV | 1 | A | G | Homozygous   |
| NC_037649.1 | 7556686 | SNV | 1 | G | T | Homozygous   |
| NC_037649.1 | 7556696 | SNV | 1 | G | C | Homozygous   |
| NC_037649.1 | 7556705 | SNV | 1 | G | A | Homozygous   |
| NC_037649.1 | 7556707 | SNV | 1 | G | A | Homozygous   |
| NC_037649.1 | 7556713 | SNV | 1 | A | G | Homozygous   |
| NC_037649.1 | 7556739 | SNV | 1 | C | G | Homozygous   |
| NC_037649.1 | 7562649 | SNV | 1 | G | C | Homozygous   |
| NC_037649.1 | 7562658 | SNV | 1 | G | A | Homozygous   |
| NC_037649.1 | 7562663 | SNV | 1 | C | A | Homozygous   |
| NC_037649.1 | 7606325 | SNV | 1 | G | A | Homozygous   |
| NC_037649.1 | 7606438 | SNV | 1 | C | A | Heterozygous |
| NC_037649.1 | 7606503 | SNV | 1 | A | G | Homozygous   |
| NC_037649.1 | 7612286 | SNV | 1 | A | G | Heterozygous |
| NC_037649.1 | 7612309 | SNV | 1 | G | A | Heterozygous |
| NC_037649.1 | 7612361 | SNV | 1 | G | A | Heterozygous |
| NC_037649.1 | 7612805 | SNV | 1 | G | A | Heterozygous |
| NC_037649.1 | 7612884 | SNV | 1 | T | C | Heterozygous |
| NC_037649.1 | 7612911 | SNV | 1 | T | C | Heterozygous |
| NC_037649.1 | 7619446 | SNV | 1 | A | G | Heterozygous |
| NC_037649.1 | 7619642 | SNV | 1 | T | C | Homozygous   |
| NC_037649.1 | 7624856 | SNV | 1 | T | C | Heterozygous |
| NC_037649.1 | 7624944 | SNV | 1 | A | G | Homozygous   |



|             |         |     |   |   |   |              |
|-------------|---------|-----|---|---|---|--------------|
| NC_037649.1 | 7625184 | SNV | 1 | C | T | Heterozygous |
| NC_037649.1 | 7625215 | SNV | 1 | C | T | Heterozygous |
| NC_037649.1 | 7625224 | SNV | 1 | C | T | Heterozygous |
| NC_037649.1 | 7625380 | SNV | 1 | G | A | Heterozygous |
| NC_037649.1 | 7625403 | SNV | 1 | T | C | Heterozygous |
| NC_037649.1 | 7625449 | SNV | 1 | G | A | Heterozygous |
| NC_037649.1 | 7632594 | SNV | 1 | T | C | Heterozygous |
| NC_037649.1 | 7632599 | SNV | 1 | T | C | Heterozygous |
| NC_037649.1 | 7632601 | SNV | 1 | C | T | Heterozygous |
| NC_037649.1 | 7632651 | SNV | 1 | G | C | Homozygous   |
| NC_037649.1 | 7632668 | SNV | 1 | T | C | Heterozygous |
| NC_037649.1 | 7632723 | SNV | 1 | T | C | Heterozygous |
| NC_037649.1 | 7632731 | SNV | 1 | A | G | Heterozygous |
| NC_037649.1 | 7659035 | SNV | 1 | C | T | Homozygous   |
| NC_037649.1 | 7660096 | SNV | 1 | C | T | Homozygous   |
| NC_037649.1 | 7666426 | SNV | 1 | T | C | Homozygous   |
| NC_037649.1 | 7666435 | SNV | 1 | T | A | Homozygous   |
| NC_037649.1 | 7666439 | SNV | 1 | A | G | Homozygous   |
| NC_037649.1 | 7666456 | SNV | 1 | G | A | Homozygous   |
| NC_037649.1 | 7667406 | SNV | 1 | T | A | Heterozygous |
| NC_037649.1 | 7667411 | SNV | 1 | T | A | Heterozygous |
| NC_037649.1 | 7667414 | SNV | 1 | G | A | Heterozygous |
| NC_037649.1 | 7667440 | SNV | 1 | T | A | Homozygous   |
| NC_037649.1 | 7667445 | SNV | 1 | T | A | Heterozygous |
| NC_037649.1 | 7667731 | SNV | 1 | A | G | Homozygous   |
| NC_037649.1 | 7668845 | SNV | 1 | C | A | Heterozygous |
| NC_037649.1 | 7669410 | SNV | 1 | C | T | Heterozygous |
| NC_037649.1 | 7675120 | SNV | 1 | G | T | Heterozygous |
| NC_037649.1 | 7682460 | SNV | 1 | C | T | Heterozygous |
| NC_037649.1 | 7683027 | SNV | 1 | A | G | Homozygous   |
| NC_037649.1 | 7686434 | SNV | 1 | A | G | Heterozygous |
| NC_037649.1 | 7687482 | SNV | 1 | C | A | Homozygous   |
| NC_037649.1 | 7691396 | SNV | 1 | A | G | Homozygous   |
| NC_037649.1 | 7691575 | SNV | 1 | G | C | Heterozygous |
| NC_037649.1 | 7691633 | SNV | 1 | G | A | Heterozygous |
| NC_037649.1 | 7694285 | SNV | 1 | A | T | Homozygous   |
| NC_037649.1 | 7694289 | SNV | 1 | T | A | Homozygous   |
| NC_037649.1 | 7697848 | SNV | 1 | G | A | Homozygous   |
| NC_037649.1 | 7699190 | SNV | 1 | G | A | Heterozygous |
| NC_037649.1 | 7752980 | SNV | 1 | T | A | Heterozygous |
| NC_037649.1 | 7752998 | SNV | 1 | G | A | Homozygous   |
| NC_037649.1 | 7753004 | SNV | 1 | T | A | Heterozygous |
| NC_037649.1 | 7755797 | SNV | 1 | G | A | Heterozygous |
| NC_037649.1 | 7755965 | SNV | 1 | A | C | Heterozygous |
| NC_037649.1 | 7756459 | SNV | 1 | A | T | Homozygous   |
| NC_037649.1 | 7757948 | SNV | 1 | A | G | Homozygous   |
| NC_037649.1 | 7758151 | SNV | 1 | T | A | Homozygous   |
| NC_037649.1 | 7758155 | SNV | 1 | G | C | Homozygous   |
| NC_037649.1 | 7758158 | SNV | 1 | A | G | Homozygous   |
| NC_037649.1 | 7758165 | SNV | 1 | A | G | Homozygous   |
| NC_037649.1 | 7758172 | SNV | 1 | T | G | Homozygous   |

|             |         |     |   |   |   |              |
|-------------|---------|-----|---|---|---|--------------|
| NC_037649.1 | 7758177 | SNV | 1 | A | G | Heterozygous |
| NC_037649.1 | 7758185 | SNV | 1 | C | T | Homozygous   |
| NC_037649.1 | 7758187 | SNV | 1 | A | G | Homozygous   |
| NC_037649.1 | 7758206 | SNV | 1 | T | C | Heterozygous |
| NC_037649.1 | 7758578 | SNV | 1 | A | T | Homozygous   |
| NC_037649.1 | 7758585 | SNV | 1 | A | T | Homozygous   |
| NC_037649.1 | 7758610 | SNV | 1 | T | A | Homozygous   |
| NC_037649.1 | 7762035 | SNV | 1 | G | A | Homozygous   |
| NC_037649.1 | 7762038 | SNV | 1 | A | T | Homozygous   |
| NC_037649.1 | 7762706 | SNV | 1 | T | C | Heterozygous |
| NC_037649.1 | 7762734 | SNV | 1 | A | T | Homozygous   |
| NC_037649.1 | 7767653 | SNV | 1 | C | A | Homozygous   |
| NC_037649.1 | 7790696 | SNV | 1 | C | T | Homozygous   |
| NC_037649.1 | 7792976 | SNV | 1 | G | A | Homozygous   |
| NC_037649.1 | 7793055 | SNV | 1 | G | A | Homozygous   |
| NC_037649.1 | 7793107 | SNV | 1 | A | G | Heterozygous |
| NC_037649.1 | 7793876 | SNV | 1 | T | A | Homozygous   |
| NC_037649.1 | 7796509 | SNV | 1 | C | T | Homozygous   |
| NC_037649.1 | 7797322 | SNV | 1 | T | C | Heterozygous |
| NC_037649.1 | 7797896 | SNV | 1 | T | A | Homozygous   |
| NC_037649.1 | 7797905 | SNV | 1 | G | T | Homozygous   |
| NC_037649.1 | 7799432 | SNV | 1 | A | G | Heterozygous |
| NC_037649.1 | 7799717 | SNV | 1 | T | A | Homozygous   |
| NC_037649.1 | 7800462 | SNV | 1 | A | T | Heterozygous |
| NC_037649.1 | 7800667 | SNV | 1 | A | T | Homozygous   |
| NC_037649.1 | 7801191 | SNV | 1 | C | A | Homozygous   |
| NC_037649.1 | 7801419 | SNV | 1 | C | G | Homozygous   |
| NC_037649.1 | 7802304 | SNV | 1 | G | A | Homozygous   |
| NC_037649.1 | 7802733 | SNV | 1 | A | G | Homozygous   |
| NC_037649.1 | 7803033 | SNV | 1 | T | A | Heterozygous |
| NC_037649.1 | 7806379 | SNV | 1 | T | G | Homozygous   |
| NC_037649.1 | 7821903 | SNV | 1 | T | A | Homozygous   |
| NC_037649.1 | 7821906 | SNV | 1 | A | T | Homozygous   |
| NC_037649.1 | 7821924 | SNV | 1 | T | C | Homozygous   |
| NC_037649.1 | 7821930 | SNV | 1 | G | T | Homozygous   |
| NC_037649.1 | 7821937 | SNV | 1 | G | C | Homozygous   |
| NC_037649.1 | 7824219 | SNV | 1 | A | G | Heterozygous |
| NC_037649.1 | 7825333 | SNV | 1 | T | C | Homozygous   |
| NC_037649.1 | 7828194 | SNV | 1 | A | G | Homozygous   |
| NC_037649.1 | 7836292 | SNV | 1 | G | A | Heterozygous |
| NC_037649.1 | 7838288 | SNV | 1 | T | G | Heterozygous |
| NC_037649.1 | 7838298 | SNV | 1 | A | C | Heterozygous |
| NC_037649.1 | 7838325 | SNV | 1 | A | T | Heterozygous |
| NC_037649.1 | 7838327 | SNV | 1 | T | A | Heterozygous |
| NC_037649.1 | 7839140 | SNV | 1 | T | A | Heterozygous |
| NC_037649.1 | 7839152 | SNV | 1 | A | C | Heterozygous |
| NC_037649.1 | 7839154 | SNV | 1 | T | A | Heterozygous |
| NC_037649.1 | 7839156 | SNV | 1 | A | T | Heterozygous |
| NC_037649.1 | 7839180 | SNV | 1 | A | T | Heterozygous |
| NC_037649.1 | 7839183 | SNV | 1 | A | T | Heterozygous |
| NC_037649.1 | 7839189 | SNV | 1 | A | T | Heterozygous |

|             |         |     |   |   |   |              |
|-------------|---------|-----|---|---|---|--------------|
| NC_037649.1 | 7839191 | SNV | 1 | T | G | Homozygous   |
| NC_037649.1 | 7843205 | SNV | 1 | A | T | Homozygous   |
| NC_037649.1 | 7843676 | SNV | 1 | C | T | Homozygous   |
| NC_037649.1 | 7850721 | SNV | 1 | C | T | Heterozygous |
| NC_037649.1 | 7852186 | SNV | 1 | A | G | Heterozygous |
| NC_037649.1 | 7861028 | SNV | 1 | C | T | Heterozygous |
| NC_037649.1 | 7864373 | SNV | 1 | T | C | Homozygous   |
| NC_037649.1 | 7864982 | SNV | 1 | C | T | Heterozygous |
| NC_037649.1 | 7866134 | SNV | 1 | A | G | Homozygous   |
| NC_037649.1 | 7866159 | SNV | 1 | T | C | Homozygous   |
| NC_037649.1 | 7866194 | SNV | 1 | G | A | Heterozygous |
| NC_037649.1 | 7867812 | SNV | 1 | G | A | Homozygous   |
| NC_037649.1 | 7867820 | SNV | 1 | C | A | Homozygous   |
| NC_037649.1 | 7867825 | SNV | 1 | C | A | Homozygous   |
| NC_037649.1 | 7867851 | SNV | 1 | A | C | Homozygous   |
| NC_037649.1 | 7868347 | SNV | 1 | A | T | Heterozygous |
| NC_037649.1 | 7868351 | SNV | 1 | G | T | Homozygous   |
| NC_037649.1 | 7869480 | SNV | 1 | A | G | Homozygous   |
| NC_037649.1 | 7869486 | SNV | 1 | A | G | Homozygous   |
| NC_037649.1 | 7886274 | SNV | 1 | A | G | Homozygous   |
| NC_037649.1 | 7896025 | SNV | 1 | G | A | Heterozygous |
| NC_037649.1 | 7897564 | SNV | 1 | T | C | Heterozygous |
| NC_037649.1 | 7897672 | SNV | 1 | A | G | Heterozygous |
| NC_037649.1 | 7897786 | SNV | 1 | A | G | Heterozygous |
| NC_037649.1 | 7897978 | SNV | 1 | C | T | Homozygous   |
| NC_037649.1 | 7898011 | SNV | 1 | G | A | Heterozygous |
| NC_037649.1 | 7902445 | SNV | 1 | A | G | Homozygous   |
| NC_037649.1 | 7903723 | SNV | 1 | T | C | Homozygous   |
| NC_037649.1 | 7903835 | SNV | 1 | A | G | Heterozygous |
| NC_037649.1 | 7903970 | SNV | 1 | T | C | Homozygous   |
| NC_037649.1 | 7903993 | SNV | 1 | A | G | Heterozygous |
| NC_037649.1 | 7904041 | SNV | 1 | T | C | Homozygous   |
| NC_037649.1 | 7904045 | SNV | 1 | T | C | Heterozygous |
| NC_037649.1 | 7904552 | SNV | 1 | T | C | Homozygous   |
| NC_037649.1 | 7905084 | SNV | 1 | C | T | Heterozygous |
| NC_037649.1 | 7905328 | SNV | 1 | G | C | Homozygous   |
| NC_037649.1 | 7905338 | SNV | 1 | A | G | Heterozygous |
| NC_037649.1 | 7905372 | SNV | 1 | T | G | Homozygous   |
| NC_037649.1 | 7905718 | SNV | 1 | G | A | Homozygous   |
| NC_037649.1 | 7905811 | SNV | 1 | C | T | Homozygous   |
| NC_037649.1 | 7906062 | SNV | 1 | A | T | Heterozygous |
| NC_037649.1 | 7906172 | SNV | 1 | A | G | Heterozygous |
| NC_037649.1 | 7906390 | SNV | 1 | A | G | Homozygous   |
| NC_037649.1 | 7906640 | SNV | 1 | G | C | Heterozygous |
| NC_037649.1 | 7906649 | SNV | 1 | G | A | Homozygous   |
| NC_037649.1 | 7915792 | SNV | 1 | A | G | Homozygous   |
| NC_037649.1 | 7915964 | SNV | 1 | T | C | Heterozygous |
| NC_037649.1 | 7916232 | SNV | 1 | C | G | Heterozygous |
| NC_037649.1 | 7916327 | SNV | 1 | A | G | Homozygous   |
| NC_037649.1 | 7921071 | SNV | 1 | G | A | Heterozygous |
| NC_037649.1 | 7921074 | SNV | 1 | A | G | Heterozygous |

|             |         |     |   |   |   |              |
|-------------|---------|-----|---|---|---|--------------|
| NC_037649.1 | 7921084 | SNV | 1 | G | A | Heterozygous |
| NC_037649.1 | 7940740 | SNV | 1 | T | C | Homozygous   |
| NC_037649.1 | 7940810 | SNV | 1 | C | T | Heterozygous |
| NC_037649.1 | 7940968 | SNV | 1 | G | A | Homozygous   |
| NC_037649.1 | 7940971 | SNV | 1 | A | G | Homozygous   |
| NC_037649.1 | 7942132 | SNV | 1 | A | C | Homozygous   |
| NC_037649.1 | 7942418 | SNV | 1 | G | A | Heterozygous |
| NC_037649.1 | 7942439 | SNV | 1 | C | A | Heterozygous |
| NC_037649.1 | 7942532 | SNV | 1 | T | C | Homozygous   |
| NC_037649.1 | 7943140 | SNV | 1 | T | A | Heterozygous |
| NC_037649.1 | 7943869 | SNV | 1 | A | G | Heterozygous |
| NC_037649.1 | 7944362 | SNV | 1 | A | G | Heterozygous |
| NC_037649.1 | 7944364 | SNV | 1 | G | A | Heterozygous |
| NC_037649.1 | 7944422 | SNV | 1 | G | A | Heterozygous |
| NC_037649.1 | 7944690 | SNV | 1 | G | A | Heterozygous |
| NC_037649.1 | 7948157 | SNV | 1 | G | A | Heterozygous |
| NC_037649.1 | 7950401 | SNV | 1 | C | G | Heterozygous |
| NC_037649.1 | 7955535 | SNV | 1 | C | T | Heterozygous |
| NC_037649.1 | 7955616 | SNV | 1 | A | G | Heterozygous |
| NC_037649.1 | 7955864 | SNV | 1 | T | C | Heterozygous |
| NC_037649.1 | 7955891 | SNV | 1 | G | A | Heterozygous |
| NC_037649.1 | 7956046 | SNV | 1 | G | A | Homozygous   |
| NC_037649.1 | 7956471 | SNV | 1 | C | G | Heterozygous |
| NC_037649.1 | 7956685 | SNV | 1 | G | C | Homozygous   |
| NC_037649.1 | 7957498 | SNV | 1 | G | A | Heterozygous |
| NC_037649.1 | 7959843 | SNV | 1 | G | A | Heterozygous |
| NC_037649.1 | 7963407 | SNV | 1 | G | A | Homozygous   |
| NC_037649.1 | 7965491 | SNV | 1 | A | G | Heterozygous |
| NC_037649.1 | 7965754 | SNV | 1 | C | T | Heterozygous |
| NC_037649.1 | 7967870 | SNV | 1 | A | T | Homozygous   |
| NC_037649.1 | 7967878 | SNV | 1 | T | A | Homozygous   |
| NC_037649.1 | 7967886 | SNV | 1 | A | C | Homozygous   |
| NC_037649.1 | 7967896 | SNV | 1 | A | C | Heterozygous |
| NC_037649.1 | 7971110 | SNV | 1 | A | T | Homozygous   |
| NC_037649.1 | 7971117 | SNV | 1 | A | C | Homozygous   |
| NC_037649.1 | 7971140 | SNV | 1 | C | G | Homozygous   |
| NC_037649.1 | 7971143 | SNV | 1 | A | G | Homozygous   |
| NC_037649.1 | 7971146 | SNV | 1 | A | G | Homozygous   |
| NC_037649.1 | 7980510 | SNV | 1 | G | A | Heterozygous |
| NC_037649.1 | 7980566 | SNV | 1 | G | A | Heterozygous |
| NC_037649.1 | 7980570 | SNV | 1 | T | C | Heterozygous |
| NC_037649.1 | 7980706 | SNV | 1 | C | A | Heterozygous |
| NC_037649.1 | 7980863 | SNV | 1 | A | G | Heterozygous |
| NC_037649.1 | 7982132 | SNV | 1 | C | A | Homozygous   |
| NC_037649.1 | 7982892 | SNV | 1 | C | A | Homozygous   |
| NC_037649.1 | 7982896 | SNV | 1 | T | A | Homozygous   |
| NC_037649.1 | 7982903 | SNV | 1 | A | G | Homozygous   |
| NC_037649.1 | 7982917 | SNV | 1 | A | G | Homozygous   |
| NC_037649.1 | 7989818 | SNV | 1 | A | G | Heterozygous |
| NC_037649.1 | 7989846 | SNV | 1 | T | A | Homozygous   |
| NC_037649.1 | 7989856 | SNV | 1 | T | A | Homozygous   |

|             |         |     |   |   |   |              |
|-------------|---------|-----|---|---|---|--------------|
| NC_037649.1 | 7990030 | SNV | 1 | T | C | Heterozygous |
| NC_037649.1 | 7990032 | SNV | 1 | C | T | Homozygous   |
| NC_037649.1 | 7990034 | SNV | 1 | C | T | Heterozygous |
| NC_037649.1 | 7990044 | SNV | 1 | C | T | Heterozygous |
| NC_037649.1 | 7990797 | SNV | 1 | G | A | Heterozygous |
| NC_037649.1 | 7991175 | SNV | 1 | C | T | Heterozygous |
| NC_037649.1 | 7991214 | SNV | 1 | A | C | Heterozygous |
| NC_037649.1 | 8002519 | SNV | 1 | A | G | Homozygous   |
| NC_037649.1 | 8002692 | SNV | 1 | T | C | Homozygous   |
| NC_037649.1 | 8002697 | SNV | 1 | G | A | Heterozygous |
| NC_037649.1 | 8002960 | SNV | 1 | C | T | Homozygous   |
| NC_037649.1 | 8003057 | SNV | 1 | T | C | Heterozygous |
| NC_037649.1 | 8003060 | SNV | 1 | C | T | Heterozygous |
| NC_037649.1 | 8003128 | SNV | 1 | A | G | Homozygous   |
| NC_037649.1 | 8006591 | SNV | 1 | A | G | Homozygous   |
| NC_037649.1 | 8006816 | SNV | 1 | A | G | Homozygous   |
| NC_037649.1 | 8006912 | SNV | 1 | G | A | Homozygous   |
| NC_037649.1 | 8006950 | SNV | 1 | A | T | Homozygous   |
| NC_037649.1 | 8009518 | SNV | 1 | C | T | Heterozygous |
| NC_037649.1 | 8009773 | SNV | 1 | A | G | Heterozygous |
| NC_037649.1 | 8010468 | SNV | 1 | G | A | Heterozygous |
| NC_037649.1 | 8010782 | SNV | 1 | G | A | Heterozygous |
| NC_037649.1 | 8010913 | SNV | 1 | G | A | Heterozygous |
| NC_037649.1 | 8010934 | SNV | 1 | A | G | Homozygous   |
| NC_037649.1 | 8010947 | SNV | 1 | T | G | Homozygous   |
| NC_037649.1 | 8010979 | SNV | 1 | T | C | Homozygous   |
| NC_037649.1 | 8011046 | SNV | 1 | G | A | Homozygous   |
| NC_037649.1 | 8011495 | SNV | 1 | G | A | Homozygous   |
| NC_037649.1 | 8011498 | SNV | 1 | G | A | Homozygous   |
| NC_037649.1 | 8011501 | SNV | 1 | G | C | Heterozygous |
| NC_037649.1 | 8017255 | SNV | 1 | T | A | Homozygous   |
| NC_037649.1 | 8017258 | SNV | 1 | G | C | Homozygous   |
| NC_037649.1 | 8017291 | SNV | 1 | T | C | Homozygous   |
| NC_037649.1 | 8017307 | SNV | 1 | T | A | Heterozygous |
| NC_037649.1 | 8018963 | SNV | 1 | G | A | Heterozygous |
| NC_037649.1 | 8019424 | SNV | 1 | C | T | Homozygous   |
| NC_037649.1 | 8020239 | SNV | 1 | A | G | Homozygous   |
| NC_037649.1 | 8020463 | SNV | 1 | G | A | Homozygous   |
| NC_037649.1 | 8024599 | SNV | 1 | T | C | Homozygous   |
| NC_037649.1 | 8025057 | SNV | 1 | A | G | Homozygous   |
| NC_037649.1 | 8030175 | SNV | 1 | T | C | Heterozygous |
| NC_037649.1 | 8035638 | SNV | 1 | G | A | Heterozygous |
| NC_037649.1 | 8035821 | SNV | 1 | C | T | Heterozygous |
| NC_037649.1 | 8036025 | SNV | 1 | T | C | Heterozygous |
| NC_037649.1 | 8036043 | SNV | 1 | T | G | Heterozygous |
| NC_037649.1 | 8036046 | SNV | 1 | G | A | Heterozygous |
| NC_037649.1 | 8036049 | SNV | 1 | A | G | Heterozygous |
| NC_037649.1 | 8036058 | SNV | 1 | A | T | Heterozygous |
| NC_037649.1 | 8036064 | SNV | 1 | A | T | Heterozygous |
| NC_037649.1 | 8036070 | SNV | 1 | C | A | Heterozygous |
| NC_037649.1 | 8036073 | SNV | 1 | C | T | Heterozygous |

|             |         |     |   |   |   |              |
|-------------|---------|-----|---|---|---|--------------|
| NC_037649.1 | 8036079 | SNV | 1 | T | A | Heterozygous |
| NC_037649.1 | 8036880 | SNV | 1 | T | A | Homozygous   |
| NC_037649.1 | 8036886 | SNV | 1 | A | T | Homozygous   |
| NC_037649.1 | 8036892 | SNV | 1 | T | A | Homozygous   |
| NC_037649.1 | 8036894 | SNV | 1 | A | G | Homozygous   |
| NC_037649.1 | 8036919 | SNV | 1 | T | G | Heterozygous |
| NC_037649.1 | 8036922 | SNV | 1 | C | T | Heterozygous |
| NC_037649.1 | 8037255 | SNV | 1 | T | C | Heterozygous |
| NC_037649.1 | 8037258 | SNV | 1 | T | A | Heterozygous |
| NC_037649.1 | 8037267 | SNV | 1 | T | G | Heterozygous |
| NC_037649.1 | 8037270 | SNV | 1 | T | A | Heterozygous |
| NC_037649.1 | 8037327 | SNV | 1 | T | A | Homozygous   |
| NC_037649.1 | 8037330 | SNV | 1 | T | C | Homozygous   |
| NC_037649.1 | 8037336 | SNV | 1 | T | C | Homozygous   |
| NC_037649.1 | 8037339 | SNV | 1 | T | G | Homozygous   |
| NC_037649.1 | 8037344 | SNV | 1 | T | G | Homozygous   |
| NC_037649.1 | 8037360 | SNV | 1 | T | A | Homozygous   |
| NC_037649.1 | 8037366 | SNV | 1 | A | G | Homozygous   |
| NC_037649.1 | 8037369 | SNV | 1 | A | G | Homozygous   |
| NC_037649.1 | 8037536 | SNV | 1 | A | T | Heterozygous |
| NC_037649.1 | 8037567 | SNV | 1 | A | T | Homozygous   |
| NC_037649.1 | 8037571 | SNV | 1 | A | G | Homozygous   |
| NC_037649.1 | 8037579 | SNV | 1 | T | C | Homozygous   |
| NC_037649.1 | 8037585 | SNV | 1 | T | A | Homozygous   |
| NC_037649.1 | 8037630 | SNV | 1 | A | T | Homozygous   |
| NC_037649.1 | 8037639 | SNV | 1 | G | C | Homozygous   |
| NC_037649.1 | 8037645 | SNV | 1 | C | T | Heterozygous |
| NC_037649.1 | 8037654 | SNV | 1 | A | C | Homozygous   |
| NC_037649.1 | 8037671 | SNV | 1 | A | G | Homozygous   |
| NC_037649.1 | 8037681 | SNV | 1 | G | T | Homozygous   |
| NC_037649.1 | 8037684 | SNV | 1 | A | T | Homozygous   |
| NC_037649.1 | 8039967 | SNV | 1 | A | G | Homozygous   |
| NC_037649.1 | 8039974 | SNV | 1 | T | G | Homozygous   |
| NC_037649.1 | 8040468 | SNV | 1 | T | C | Heterozygous |
| NC_037649.1 | 8042322 | SNV | 1 | G | A | Homozygous   |
| NC_037649.1 | 8057035 | SNV | 1 | G | A | Homozygous   |
| NC_037649.1 | 8057038 | SNV | 1 | C | G | Homozygous   |
| NC_037649.1 | 8057074 | SNV | 1 | A | G | Homozygous   |
| NC_037649.1 | 8070157 | SNV | 1 | A | G | Homozygous   |
| NC_037649.1 | 8070512 | SNV | 1 | T | C | Heterozygous |
| NC_037649.1 | 8070523 | SNV | 1 | A | G | Homozygous   |
| NC_037649.1 | 8077883 | SNV | 1 | A | T | Heterozygous |
| NC_037649.1 | 8078068 | SNV | 1 | T | A | Heterozygous |
| NC_037649.1 | 8078114 | SNV | 1 | T | A | Heterozygous |
| NC_037649.1 | 8078118 | SNV | 1 | T | G | Heterozygous |
| NC_037649.1 | 8078122 | SNV | 1 | T | G | Heterozygous |
| NC_037649.1 | 8078127 | SNV | 1 | G | A | Homozygous   |
| NC_037649.1 | 8078135 | SNV | 1 | A | G | Heterozygous |
| NC_037649.1 | 8085233 | SNV | 1 | A | G | Homozygous   |
| NC_037649.1 | 8085448 | SNV | 1 | T | G | Homozygous   |
| NC_037649.1 | 8085622 | SNV | 1 | C | T | Heterozygous |

|             |         |     |   |   |   |              |
|-------------|---------|-----|---|---|---|--------------|
| NC_037649.1 | 8090717 | SNV | 1 | A | G | Homozygous   |
| NC_037649.1 | 8090908 | SNV | 1 | C | T | Heterozygous |
| NC_037649.1 | 8092240 | SNV | 1 | G | A | Heterozygous |
| NC_037649.1 | 8092402 | SNV | 1 | A | G | Heterozygous |
| NC_037649.1 | 8093259 | SNV | 1 | A | G | Homozygous   |
| NC_037649.1 | 8093356 | SNV | 1 | A | G | Homozygous   |
| NC_037649.1 | 8093580 | SNV | 1 | T | C | Homozygous   |
| NC_037649.1 | 8096723 | SNV | 1 | T | A | Homozygous   |
| NC_037649.1 | 8096761 | SNV | 1 | T | A | Homozygous   |
| NC_037649.1 | 8099645 | SNV | 1 | A | T | Heterozygous |
| NC_037649.1 | 8099654 | SNV | 1 | A | C | Homozygous   |
| NC_037649.1 | 8100154 | SNV | 1 | G | A | Homozygous   |
| NC_037649.1 | 8100164 | SNV | 1 | A | T | Homozygous   |
| NC_037649.1 | 8100166 | SNV | 1 | G | A | Homozygous   |
| NC_037649.1 | 8100169 | SNV | 1 | G | C | Homozygous   |
| NC_037649.1 | 8107862 | SNV | 1 | A | G | Homozygous   |
| NC_037649.1 | 8107969 | SNV | 1 | T | A | Homozygous   |
| NC_037649.1 | 8108141 | SNV | 1 | A | G | Homozygous   |
| NC_037649.1 | 8133677 | SNV | 1 | G | A | Heterozygous |
| NC_037649.1 | 8133698 | SNV | 1 | T | C | Heterozygous |
| NC_037649.1 | 8141133 | SNV | 1 | G | A | Heterozygous |
| NC_037649.1 | 8141178 | SNV | 1 | T | C | Homozygous   |
| NC_037649.1 | 8142173 | SNV | 1 | G | A | Homozygous   |
| NC_037649.1 | 8142587 | SNV | 1 | T | A | Heterozygous |
| NC_037649.1 | 8142785 | SNV | 1 | A | G | Heterozygous |
| NC_037649.1 | 8155785 | SNV | 1 | G | C | Heterozygous |
| NC_037649.1 | 8156656 | SNV | 1 | G | A | Homozygous   |
| NC_037649.1 | 8167302 | SNV | 1 | A | G | Homozygous   |
| NC_037649.1 | 8167305 | SNV | 1 | T | A | Homozygous   |
| NC_037649.1 | 8167311 | SNV | 1 | A | G | Homozygous   |
| NC_037649.1 | 8167324 | SNV | 1 | C | T | Heterozygous |
| NC_037649.1 | 8167326 | SNV | 1 | T | C | Homozygous   |
| NC_037649.1 | 8167334 | SNV | 1 | T | C | Homozygous   |
| NC_037649.1 | 8167337 | SNV | 1 | T | C | Heterozygous |
| NC_037649.1 | 8167348 | SNV | 1 | G | A | Heterozygous |
| NC_037649.1 | 8167369 | SNV | 1 | C | G | Homozygous   |
| NC_037649.1 | 8167385 | SNV | 1 | C | T | Homozygous   |
| NC_037649.1 | 8171322 | SNV | 1 | T | C | Homozygous   |
| NC_037649.1 | 8171330 | SNV | 1 | T | C | Homozygous   |
| NC_037649.1 | 8171332 | SNV | 1 | T | A | Homozygous   |
| NC_037649.1 | 8171334 | SNV | 1 | C | T | Homozygous   |
| NC_037649.1 | 8172992 | SNV | 1 | T | G | Homozygous   |
| NC_037649.1 | 8181374 | SNV | 1 | A | T | Heterozygous |
| NC_037649.1 | 8192242 | SNV | 1 | G | A | Homozygous   |
| NC_037649.1 | 8217675 | SNV | 1 | C | T | Heterozygous |
| NC_037649.1 | 8217973 | SNV | 1 | T | C | Homozygous   |
| NC_037649.1 | 8218004 | SNV | 1 | C | T | Heterozygous |
| NC_037649.1 | 8218021 | SNV | 1 | A | G | Heterozygous |
| NC_037649.1 | 8218180 | SNV | 1 | G | A | Homozygous   |
| NC_037649.1 | 8218183 | SNV | 1 | A | T | Homozygous   |
| NC_037649.1 | 8222405 | SNV | 1 | T | C | Homozygous   |

|             |         |     |   |   |   |              |
|-------------|---------|-----|---|---|---|--------------|
| NC_037649.1 | 8222436 | SNV | 1 | C | G | Homozygous   |
| NC_037649.1 | 8222510 | SNV | 1 | T | C | Homozygous   |
| NC_037649.1 | 8222554 | SNV | 1 | C | T | Heterozygous |
| NC_037649.1 | 8222618 | SNV | 1 | C | T | Heterozygous |
| NC_037649.1 | 8222856 | SNV | 1 | C | T | Heterozygous |
| NC_037649.1 | 8222940 | SNV | 1 | C | G | Heterozygous |
| NC_037649.1 | 8223053 | SNV | 1 | C | T | Homozygous   |
| NC_037649.1 | 8223104 | SNV | 1 | C | T | Heterozygous |
| NC_037649.1 | 8223110 | SNV | 1 | G | C | Heterozygous |
| NC_037649.1 | 8223173 | SNV | 1 | C | T | Heterozygous |
| NC_037649.1 | 8223175 | SNV | 1 | T | C | Homozygous   |
| NC_037649.1 | 8223488 | SNV | 1 | G | T | Heterozygous |
| NC_037649.1 | 8223747 | SNV | 1 | G | C | Heterozygous |
| NC_037649.1 | 8223749 | SNV | 1 | G | C | Heterozygous |
| NC_037649.1 | 8223756 | SNV | 1 | C | A | Heterozygous |
| NC_037649.1 | 8223764 | SNV | 1 | A | G | Heterozygous |
| NC_037649.1 | 8224121 | SNV | 1 | C | T | Heterozygous |
| NC_037649.1 | 8224198 | SNV | 1 | T | C | Heterozygous |
| NC_037649.1 | 8225143 | SNV | 1 | A | C | Heterozygous |
| NC_037649.1 | 8225321 | SNV | 1 | A | G | Homozygous   |
| NC_037649.1 | 8225331 | SNV | 1 | C | T | Homozygous   |
| NC_037649.1 | 8225349 | SNV | 1 | G | C | Homozygous   |
| NC_037649.1 | 8225351 | SNV | 1 | G | A | Homozygous   |
| NC_037649.1 | 8225567 | SNV | 1 | A | G | Heterozygous |
| NC_037649.1 | 8226024 | SNV | 1 | T | C | Homozygous   |
| NC_037649.1 | 8226859 | SNV | 1 | A | G | Homozygous   |
| NC_037649.1 | 8226945 | SNV | 1 | T | C | Heterozygous |
| NC_037649.1 | 8226948 | SNV | 1 | C | T | Homozygous   |
| NC_037649.1 | 8226951 | SNV | 1 | T | C | Heterozygous |
| NC_037649.1 | 8226966 | SNV | 1 | C | T | Heterozygous |
| NC_037649.1 | 8227123 | SNV | 1 | T | A | Homozygous   |
| NC_037649.1 | 8227131 | SNV | 1 | C | T | Heterozygous |
| NC_037649.1 | 8227188 | SNV | 1 | G | A | Heterozygous |
| NC_037649.1 | 8227628 | SNV | 1 | G | A | Heterozygous |
| NC_037649.1 | 8228083 | SNV | 1 | C | T | Homozygous   |
| NC_037649.1 | 8228361 | SNV | 1 | A | G | Homozygous   |
| NC_037649.1 | 8229176 | SNV | 1 | C | T | Homozygous   |
| NC_037649.1 | 8229264 | SNV | 1 | T | C | Homozygous   |
| NC_037649.1 | 8229768 | SNV | 1 | A | G | Homozygous   |
| NC_037649.1 | 8229849 | SNV | 1 | T | A | Homozygous   |
| NC_037649.1 | 8230237 | SNV | 1 | T | C | Homozygous   |
| NC_037649.1 | 8230608 | SNV | 1 | A | G | Heterozygous |
| NC_037649.1 | 8231142 | SNV | 1 | G | T | Homozygous   |
| NC_037649.1 | 8231153 | SNV | 1 | C | T | Homozygous   |
| NC_037649.1 | 8231775 | SNV | 1 | G | A | Homozygous   |
| NC_037649.1 | 8232451 | SNV | 1 | G | A | Heterozygous |
| NC_037649.1 | 8232454 | SNV | 1 | A | G | Heterozygous |
| NC_037649.1 | 8232457 | SNV | 1 | G | T | Heterozygous |
| NC_037649.1 | 8232460 | SNV | 1 | C | A | Heterozygous |
| NC_037649.1 | 8232463 | SNV | 1 | A | C | Heterozygous |
| NC_037649.1 | 8232484 | SNV | 1 | G | A | Heterozygous |



|             |         |     |   |   |   |              |
|-------------|---------|-----|---|---|---|--------------|
| NC_037649.1 | 8232490 | SNV | 1 | G | T | Heterozygous |
| NC_037649.1 | 8232790 | SNV | 1 | G | C | Homozygous   |
| NC_037649.1 | 8233072 | SNV | 1 | T | C | Heterozygous |
| NC_037649.1 | 8233141 | SNV | 1 | C | G | Homozygous   |
| NC_037649.1 | 8233153 | SNV | 1 | G | T | Homozygous   |
| NC_037649.1 | 8233171 | SNV | 1 | G | A | Heterozygous |
| NC_037649.1 | 8233354 | SNV | 1 | C | G | Homozygous   |
| NC_037649.1 | 8233525 | SNV | 1 | C | T | Homozygous   |
| NC_037649.1 | 8233657 | SNV | 1 | C | G | Homozygous   |
| NC_037649.1 | 8233830 | SNV | 1 | G | C | Homozygous   |
| NC_037649.1 | 8248458 | SNV | 1 | C | G | Homozygous   |
| NC_037649.1 | 8248658 | SNV | 1 | C | T | Homozygous   |
| NC_037649.1 | 8248677 | SNV | 1 | C | T | Heterozygous |
| NC_037649.1 | 8248743 | SNV | 1 | C | T | Homozygous   |
| NC_037649.1 | 8248805 | SNV | 1 | G | A | Heterozygous |
| NC_037649.1 | 8248937 | SNV | 1 | C | T | Heterozygous |
| NC_037649.1 | 8248943 | SNV | 1 | T | C | Homozygous   |
| NC_037649.1 | 8248955 | SNV | 1 | A | G | Homozygous   |
| NC_037649.1 | 8249019 | SNV | 1 | T | C | Homozygous   |
| NC_037649.1 | 8249085 | SNV | 1 | T | A | Heterozygous |
| NC_037649.1 | 8249111 | SNV | 1 | A | G | Heterozygous |
| NC_037649.1 | 8249141 | SNV | 1 | C | A | Homozygous   |
| NC_037649.1 | 8249155 | SNV | 1 | T | C | Homozygous   |
| NC_037649.1 | 8249305 | SNV | 1 | C | T | Heterozygous |
| NC_037649.1 | 8249348 | SNV | 1 | T | C | Heterozygous |
| NC_037649.1 | 8277506 | SNV | 1 | G | C | Heterozygous |
| NC_037649.1 | 8278002 | SNV | 1 | C | T | Heterozygous |
| NC_037649.1 | 8278065 | SNV | 1 | T | C | Heterozygous |
| NC_037649.1 | 8278094 | SNV | 1 | T | C | Homozygous   |
| NC_037649.1 | 8278323 | SNV | 1 | A | G | Heterozygous |
| NC_037649.1 | 8278369 | SNV | 1 | T | C | Homozygous   |
| NC_037649.1 | 8279538 | SNV | 1 | C | T | Homozygous   |
| NC_037649.1 | 8279545 | SNV | 1 | T | C | Homozygous   |
| NC_037649.1 | 8279585 | SNV | 1 | C | T | Homozygous   |
| NC_037649.1 | 8279808 | SNV | 1 | G | C | Homozygous   |
| NC_037649.1 | 8280361 | SNV | 1 | C | T | Homozygous   |
| NC_037649.1 | 8280822 | SNV | 1 | A | G | Homozygous   |
| NC_037649.1 | 8280932 | SNV | 1 | T | C | Heterozygous |
| NC_037649.1 | 8281293 | SNV | 1 | C | A | Homozygous   |
| NC_037649.1 | 8281471 | SNV | 1 | A | G | Homozygous   |
| NC_037649.1 | 8281481 | SNV | 1 | A | G | Homozygous   |
| NC_037649.1 | 8281485 | SNV | 1 | T | C | Homozygous   |
| NC_037649.1 | 8281573 | SNV | 1 | T | C | Homozygous   |
| NC_037649.1 | 8282609 | SNV | 1 | G | A | Heterozygous |
| NC_037649.1 | 8296428 | SNV | 1 | A | G | Heterozygous |
| NC_037649.1 | 8301283 | SNV | 1 | C | T | Heterozygous |
| NC_037649.1 | 8301376 | SNV | 1 | A | G | Homozygous   |
| NC_037649.1 | 8301444 | SNV | 1 | T | C | Homozygous   |
| NC_037649.1 | 8301639 | SNV | 1 | A | C | Homozygous   |
| NC_037649.1 | 8301706 | SNV | 1 | G | A | Heterozygous |
| NC_037649.1 | 8301977 | SNV | 1 | T | C | Heterozygous |

|             |         |     |   |   |   |              |
|-------------|---------|-----|---|---|---|--------------|
| NC_037649.1 | 8305621 | SNV | 1 | C | T | Homozygous   |
| NC_037649.1 | 8305825 | SNV | 1 | T | C | Homozygous   |
| NC_037649.1 | 8305878 | SNV | 1 | T | G | Homozygous   |
| NC_037649.1 | 8313749 | SNV | 1 | A | G | Homozygous   |
| NC_037649.1 | 8313885 | SNV | 1 | C | T | Homozygous   |
| NC_037649.1 | 8313908 | SNV | 1 | C | T | Heterozygous |
| NC_037649.1 | 8313992 | SNV | 1 | G | A | Homozygous   |
| NC_037649.1 | 8314259 | SNV | 1 | A | G | Heterozygous |
| NC_037649.1 | 8314285 | SNV | 1 | A | G | Heterozygous |
| NC_037649.1 | 8314721 | SNV | 1 | T | C | Homozygous   |
| NC_037649.1 | 8314741 | SNV | 1 | G | T | Homozygous   |
| NC_037649.1 | 8314746 | SNV | 1 | A | G | Homozygous   |
| NC_037649.1 | 8314804 | SNV | 1 | G | A | Homozygous   |
| NC_037649.1 | 8314942 | SNV | 1 | C | T | Heterozygous |
| NC_037649.1 | 8314986 | SNV | 1 | C | T | Homozygous   |
| NC_037649.1 | 8314993 | SNV | 1 | G | A | Homozygous   |
| NC_037649.1 | 8315017 | SNV | 1 | G | A | Homozygous   |
| NC_037649.1 | 8315052 | SNV | 1 | T | C | Homozygous   |
| NC_037649.1 | 8315058 | SNV | 1 | T | C | Homozygous   |
| NC_037649.1 | 8315126 | SNV | 1 | A | G | Homozygous   |
| NC_037649.1 | 8315152 | SNV | 1 | A | C | Homozygous   |
| NC_037649.1 | 8315227 | SNV | 1 | A | G | Heterozygous |
| NC_037649.1 | 8315332 | SNV | 1 | A | G | Heterozygous |
| NC_037649.1 | 8315334 | SNV | 1 | A | G | Homozygous   |
| NC_037649.1 | 8315356 | SNV | 1 | A | G | Heterozygous |
| NC_037649.1 | 8315389 | SNV | 1 | A | G | Homozygous   |
| NC_037649.1 | 8315484 | SNV | 1 | T | G | Homozygous   |
| NC_037649.1 | 8315874 | SNV | 1 | G | A | Heterozygous |
| NC_037649.1 | 8316021 | SNV | 1 | T | C | Heterozygous |
| NC_037649.1 | 8316036 | SNV | 1 | T | C | Heterozygous |
| NC_037649.1 | 8316057 | SNV | 1 | T | G | Homozygous   |
| NC_037649.1 | 8316108 | SNV | 1 | A | G | Homozygous   |
| NC_037649.1 | 8316182 | SNV | 1 | T | C | Homozygous   |
| NC_037649.1 | 8316236 | SNV | 1 | G | A | Homozygous   |
| NC_037649.1 | 8316251 | SNV | 1 | G | A | Homozygous   |
| NC_037649.1 | 8316288 | SNV | 1 | C | T | Homozygous   |
| NC_037649.1 | 8316293 | SNV | 1 | G | A | Homozygous   |
| NC_037649.1 | 8316302 | SNV | 1 | C | T | Homozygous   |
| NC_037649.1 | 8316304 | SNV | 1 | A | T | Homozygous   |
| NC_037649.1 | 8316308 | SNV | 1 | G | A | Homozygous   |
| NC_037649.1 | 8316312 | SNV | 1 | A | C | Homozygous   |
| NC_037649.1 | 8316314 | SNV | 1 | C | T | Homozygous   |
| NC_037649.1 | 8316398 | SNV | 1 | A | G | Homozygous   |
| NC_037649.1 | 8316438 | SNV | 1 | A | G | Homozygous   |
| NC_037649.1 | 8316478 | SNV | 1 | A | G | Homozygous   |
| NC_037649.1 | 8316498 | SNV | 1 | G | A | Heterozygous |
| NC_037649.1 | 8316524 | SNV | 1 | A | G | Homozygous   |
| NC_037649.1 | 8316529 | SNV | 1 | A | G | Heterozygous |
| NC_037649.1 | 8316537 | SNV | 1 | A | G | Heterozygous |
| NC_037649.1 | 8316549 | SNV | 1 | T | C | Heterozygous |
| NC_037649.1 | 8316580 | SNV | 1 | C | T | Homozygous   |

|             |         |     |   |   |   |              |
|-------------|---------|-----|---|---|---|--------------|
| NC_037649.1 | 8316593 | SNV | 1 | A | G | Homozygous   |
| NC_037649.1 | 8316790 | SNV | 1 | T | C | Homozygous   |
| NC_037649.1 | 8316800 | SNV | 1 | A | G | Homozygous   |
| NC_037649.1 | 8316823 | SNV | 1 | A | G | Heterozygous |
| NC_037649.1 | 8316829 | SNV | 1 | A | G | Homozygous   |
| NC_037649.1 | 8316987 | SNV | 1 | T | C | Homozygous   |
| NC_037649.1 | 8316994 | SNV | 1 | C | G | Heterozygous |
| NC_037649.1 | 8317004 | SNV | 1 | A | G | Heterozygous |
| NC_037649.1 | 8317047 | SNV | 1 | T | C | Homozygous   |
| NC_037649.1 | 8317122 | SNV | 1 | G | A | Heterozygous |
| NC_037649.1 | 8347978 | SNV | 1 | A | G | Homozygous   |
| NC_037649.1 | 8350920 | SNV | 1 | G | A | Homozygous   |
| NC_037649.1 | 8351101 | SNV | 1 | T | C | Heterozygous |
| NC_037649.1 | 8351230 | SNV | 1 | G | A | Heterozygous |
| NC_037649.1 | 8353318 | SNV | 1 | A | G | Homozygous   |
| NC_037649.1 | 8353617 | SNV | 1 | G | A | Heterozygous |
| NC_037649.1 | 8353917 | SNV | 1 | C | G | Heterozygous |
| NC_037649.1 | 8353943 | SNV | 1 | C | A | Heterozygous |
| NC_037649.1 | 8353959 | SNV | 1 | C | T | Heterozygous |
| NC_037649.1 | 8354107 | SNV | 1 | A | G | Homozygous   |
| NC_037649.1 | 8354373 | SNV | 1 | G | A | Homozygous   |
| NC_037649.1 | 8354433 | SNV | 1 | T | C | Homozygous   |
| NC_037649.1 | 8354565 | SNV | 1 | G | A | Heterozygous |
| NC_037649.1 | 8354643 | SNV | 1 | C | T | Homozygous   |
| NC_037649.1 | 8354693 | SNV | 1 | A | G | Homozygous   |
| NC_037649.1 | 8354735 | SNV | 1 | T | G | Heterozygous |
| NC_037649.1 | 8354740 | SNV | 1 | A | T | Heterozygous |
| NC_037649.1 | 8354743 | SNV | 1 | G | T | Heterozygous |
| NC_037649.1 | 8354744 | SNV | 1 | G | A | Heterozygous |
| NC_037649.1 | 8354762 | SNV | 1 | A | G | Homozygous   |
| NC_037649.1 | 8354765 | SNV | 1 | A | T | Homozygous   |
| NC_037649.1 | 8354866 | SNV | 1 | A | T | Heterozygous |
| NC_037649.1 | 8354886 | SNV | 1 | T | G | Heterozygous |
| NC_037649.1 | 8382678 | SNV | 1 | G | C | Heterozygous |
| NC_037649.1 | 8382741 | SNV | 1 | C | T | Heterozygous |
| NC_037649.1 | 8382767 | SNV | 1 | G | T | Homozygous   |
| NC_037649.1 | 8412795 | SNV | 1 | A | T | Homozygous   |
| NC_037649.1 | 8412830 | SNV | 1 | G | A | Heterozygous |
| NC_037649.1 | 8412830 | SNV | 1 | G | C | Heterozygous |
| NC_037649.1 | 8412836 | SNV | 1 | C | T | Homozygous   |
| NC_037649.1 | 8412851 | SNV | 1 | C | T | Homozygous   |
| NC_037649.1 | 8412863 | SNV | 1 | A | G | Homozygous   |
| NC_037649.1 | 8412866 | SNV | 1 | A | G | Homozygous   |
| NC_037649.1 | 8412873 | SNV | 1 | A | G | Homozygous   |
| NC_037649.1 | 8412901 | SNV | 1 | A | G | Homozygous   |
| NC_037649.1 | 8412908 | SNV | 1 | C | T | Heterozygous |
| NC_037649.1 | 8413293 | SNV | 1 | T | A | Homozygous   |
| NC_037649.1 | 8413297 | SNV | 1 | A | G | Homozygous   |
| NC_037649.1 | 8413375 | SNV | 1 | A | T | Heterozygous |
| NC_037649.1 | 8413410 | SNV | 1 | C | T | Heterozygous |
| NC_037649.1 | 8413439 | SNV | 1 | G | T | Heterozygous |

|             |         |     |   |   |   |              |
|-------------|---------|-----|---|---|---|--------------|
| NC_037649.1 | 8413546 | SNV | 1 | T | C | Homozygous   |
| NC_037649.1 | 8413566 | SNV | 1 | C | T | Heterozygous |
| NC_037649.1 | 8413575 | SNV | 1 | T | A | Heterozygous |
| NC_037649.1 | 8413577 | SNV | 1 | G | T | Heterozygous |
| NC_037649.1 | 8413653 | SNV | 1 | G | A | Homozygous   |
| NC_037649.1 | 8433333 | SNV | 1 | G | A | Homozygous   |
| NC_037649.1 | 8438285 | SNV | 1 | T | C | Homozygous   |
| NC_037649.1 | 8438401 | SNV | 1 | T | C | Homozygous   |
| NC_037649.1 | 8439341 | SNV | 1 | G | A | Heterozygous |
| NC_037649.1 | 8439349 | SNV | 1 | G | A | Heterozygous |
| NC_037649.1 | 8439379 | SNV | 1 | A | G | Homozygous   |
| NC_037649.1 | 8439450 | SNV | 1 | A | T | Homozygous   |
| NC_037649.1 | 8439852 | SNV | 1 | G | C | Homozygous   |
| NC_037649.1 | 8446554 | SNV | 1 | T | C | Homozygous   |
| NC_037649.1 | 8446611 | SNV | 1 | C | T | Heterozygous |
| NC_037649.1 | 8446635 | SNV | 1 | G | A | Heterozygous |
| NC_037649.1 | 8446695 | SNV | 1 | T | C | Homozygous   |
| NC_037649.1 | 8446850 | SNV | 1 | A | G | Homozygous   |
| NC_037649.1 | 8446883 | SNV | 1 | G | A | Homozygous   |
| NC_037649.1 | 8449359 | SNV | 1 | T | C | Homozygous   |
| NC_037649.1 | 8449367 | SNV | 1 | C | A | Homozygous   |
| NC_037649.1 | 8449386 | SNV | 1 | G | A | Homozygous   |
| NC_037649.1 | 8449389 | SNV | 1 | A | C | Homozygous   |
| NC_037649.1 | 8449397 | SNV | 1 | G | C | Homozygous   |
| NC_037649.1 | 8458936 | SNV | 1 | G | C | Heterozygous |
| NC_037649.1 | 8458937 | SNV | 1 | G | A | Heterozygous |
| NC_037649.1 | 8459236 | SNV | 1 | A | G | Heterozygous |
| NC_037649.1 | 8461503 | SNV | 1 | G | A | Heterozygous |
| NC_037649.1 | 8461534 | SNV | 1 | G | A | Homozygous   |
| NC_037649.1 | 8461937 | SNV | 1 | G | A | Homozygous   |
| NC_037649.1 | 8461958 | SNV | 1 | A | G | Homozygous   |
| NC_037649.1 | 8462356 | SNV | 1 | C | G | Homozygous   |
| NC_037649.1 | 8462359 | SNV | 1 | T | C | Homozygous   |
| NC_037649.1 | 8462428 | SNV | 1 | C | G | Heterozygous |
| NC_037649.1 | 8462431 | SNV | 1 | C | T | Homozygous   |
| NC_037649.1 | 8463901 | SNV | 1 | A | G | Homozygous   |
| NC_037649.1 | 8463916 | SNV | 1 | A | G | Homozygous   |
| NC_037649.1 | 8465694 | SNV | 1 | T | C | Homozygous   |
| NC_037649.1 | 8466168 | SNV | 1 | A | G | Homozygous   |
| NC_037649.1 | 8466481 | SNV | 1 | A | G | Homozygous   |
| NC_037649.1 | 8466520 | SNV | 1 | T | C | Heterozygous |
| NC_037649.1 | 8466554 | SNV | 1 | A | G | Homozygous   |
| NC_037649.1 | 8466561 | SNV | 1 | C | T | Heterozygous |
| NC_037649.1 | 8466724 | SNV | 1 | T | A | Homozygous   |
| NC_037649.1 | 8466836 | SNV | 1 | A | G | Heterozygous |
| NC_037649.1 | 8467132 | SNV | 1 | C | T | Heterozygous |
| NC_037649.1 | 8467225 | SNV | 1 | A | G | Homozygous   |
| NC_037649.1 | 8467494 | SNV | 1 | C | G | Homozygous   |
| NC_037649.1 | 8467504 | SNV | 1 | T | C | Homozygous   |
| NC_037649.1 | 8467566 | SNV | 1 | A | G | Heterozygous |
| NC_037649.1 | 8467866 | SNV | 1 | A | G | Heterozygous |

|             |         |     |   |   |   |              |
|-------------|---------|-----|---|---|---|--------------|
| NC_037649.1 | 8468166 | SNV | 1 | A | G | Homozygous   |
| NC_037649.1 | 8472513 | SNV | 1 | T | A | Heterozygous |
| NC_037649.1 | 8472579 | SNV | 1 | C | T | Heterozygous |
| NC_037649.1 | 8472613 | SNV | 1 | T | A | Homozygous   |
| NC_037649.1 | 8472728 | SNV | 1 | T | C | Heterozygous |
| NC_037649.1 | 8472807 | SNV | 1 | A | G | Heterozygous |
| NC_037649.1 | 8473165 | SNV | 1 | A | G | Homozygous   |
| NC_037649.1 | 8483238 | SNV | 1 | C | A | Homozygous   |
| NC_037649.1 | 8483257 | SNV | 1 | A | T | Homozygous   |
| NC_037649.1 | 8484422 | SNV | 1 | A | T | Homozygous   |
| NC_037649.1 | 8484425 | SNV | 1 | T | A | Homozygous   |
| NC_037649.1 | 8484427 | SNV | 1 | T | A | Homozygous   |
| NC_037649.1 | 8484431 | SNV | 1 | C | T | Homozygous   |
| NC_037649.1 | 8484433 | SNV | 1 | A | G | Homozygous   |
| NC_037649.1 | 8484443 | SNV | 1 | A | T | Heterozygous |
| NC_037649.1 | 8485381 | SNV | 1 | T | C | Homozygous   |
| NC_037649.1 | 8486541 | SNV | 1 | A | T | Homozygous   |
| NC_037649.1 | 8486596 | SNV | 1 | T | C | Homozygous   |
| NC_037649.1 | 8487499 | SNV | 1 | T | G | Homozygous   |
| NC_037649.1 | 8491689 | SNV | 1 | T | A | Heterozygous |
| NC_037649.1 | 8491893 | SNV | 1 | A | G | Homozygous   |
| NC_037649.1 | 8492299 | SNV | 1 | A | G | Heterozygous |
| NC_037649.1 | 8492819 | SNV | 1 | A | G | Homozygous   |
| NC_037649.1 | 8492832 | SNV | 1 | A | G | Homozygous   |
| NC_037649.1 | 8493036 | SNV | 1 | T | C | Homozygous   |
| NC_037649.1 | 8497489 | SNV | 1 | T | C | Heterozygous |
| NC_037649.1 | 8497963 | SNV | 1 | T | G | Heterozygous |
| NC_037649.1 | 8498075 | SNV | 1 | G | T | Homozygous   |
| NC_037649.1 | 8498190 | SNV | 1 | A | G | Heterozygous |
| NC_037649.1 | 8498626 | SNV | 1 | A | G | Heterozygous |
| NC_037649.1 | 8498658 | SNV | 1 | C | T | Heterozygous |
| NC_037649.1 | 8499877 | SNV | 1 | G | T | Homozygous   |
| NC_037649.1 | 8499889 | SNV | 1 | C | T | Homozygous   |
| NC_037649.1 | 8501266 | SNV | 1 | T | C | Homozygous   |
| NC_037649.1 | 8501470 | SNV | 1 | G | C | Homozygous   |
| NC_037649.1 | 8502587 | SNV | 1 | A | T | Homozygous   |
| NC_037649.1 | 8502590 | SNV | 1 | A | T | Homozygous   |
| NC_037649.1 | 8506904 | SNV | 1 | A | G | Homozygous   |
| NC_037649.1 | 8507367 | SNV | 1 | T | C | Homozygous   |
| NC_037649.1 | 8507452 | SNV | 1 | G | A | Homozygous   |
| NC_037649.1 | 8507462 | SNV | 1 | T | C | Homozygous   |
| NC_037649.1 | 8508011 | SNV | 1 | T | C | Homozygous   |
| NC_037649.1 | 8508202 | SNV | 1 | G | A | Heterozygous |
| NC_037649.1 | 8508903 | SNV | 1 | A | G | Heterozygous |
| NC_037649.1 | 8509166 | SNV | 1 | A | G | Homozygous   |
| NC_037649.1 | 8509326 | SNV | 1 | A | G | Homozygous   |
| NC_037649.1 | 8509363 | SNV | 1 | C | T | Heterozygous |
| NC_037649.1 | 8511110 | SNV | 1 | G | A | Homozygous   |
| NC_037649.1 | 8511138 | SNV | 1 | G | A | Heterozygous |
| NC_037649.1 | 8514275 | SNV | 1 | C | A | Heterozygous |
| NC_037649.1 | 8514420 | SNV | 1 | T | A | Homozygous   |

|             |         |     |   |   |   |              |
|-------------|---------|-----|---|---|---|--------------|
| NC_037649.1 | 8514597 | SNV | 1 | G | A | Heterozygous |
| NC_037649.1 | 8514603 | SNV | 1 | G | A | Heterozygous |
| NC_037649.1 | 8514670 | SNV | 1 | T | A | Homozygous   |
| NC_037649.1 | 8515105 | SNV | 1 | C | T | Heterozygous |
| NC_037649.1 | 8519948 | SNV | 1 | A | T | Heterozygous |
| NC_037649.1 | 8520108 | SNV | 1 | A | G | Heterozygous |
| NC_037649.1 | 8520162 | SNV | 1 | T | C | Homozygous   |
| NC_037649.1 | 8523036 | SNV | 1 | G | A | Heterozygous |
| NC_037649.1 | 8523184 | SNV | 1 | T | C | Homozygous   |
| NC_037649.1 | 8523201 | SNV | 1 | G | A | Heterozygous |
| NC_037649.1 | 8523268 | SNV | 1 | C | T | Heterozygous |
| NC_037649.1 | 8523289 | SNV | 1 | A | G | Homozygous   |
| NC_037649.1 | 8523293 | SNV | 1 | G | T | Heterozygous |
| NC_037649.1 | 8523385 | SNV | 1 | G | A | Heterozygous |
| NC_037649.1 | 8523410 | SNV | 1 | G | A | Heterozygous |
| NC_037649.1 | 8523416 | SNV | 1 | C | T | Heterozygous |
| NC_037649.1 | 8523654 | SNV | 1 | G | A | Heterozygous |
| NC_037649.1 | 8523667 | SNV | 1 | C | T | Heterozygous |
| NC_037649.1 | 8523857 | SNV | 1 | G | A | Heterozygous |
| NC_037649.1 | 8524068 | SNV | 1 | C | T | Homozygous   |
| NC_037649.1 | 8524264 | SNV | 1 | T | C | Heterozygous |
| NC_037649.1 | 8524806 | SNV | 1 | T | A | Homozygous   |
| NC_037649.1 | 8527045 | SNV | 1 | T | C | Homozygous   |
| NC_037649.1 | 8527977 | SNV | 1 | C | T | Heterozygous |
| NC_037649.1 | 8528011 | SNV | 1 | G | A | Heterozygous |
| NC_037649.1 | 8528025 | SNV | 1 | C | T | Heterozygous |
| NC_037649.1 | 8529095 | SNV | 1 | C | T | Heterozygous |
| NC_037649.1 | 8529232 | SNV | 1 | A | C | Heterozygous |
| NC_037649.1 | 8529612 | SNV | 1 | G | A | Heterozygous |
| NC_037649.1 | 8530187 | SNV | 1 | G | A | Homozygous   |
| NC_037649.1 | 8530436 | SNV | 1 | G | A | Homozygous   |
| NC_037649.1 | 8530462 | SNV | 1 | T | C | Homozygous   |
| NC_037649.1 | 8530482 | SNV | 1 | T | G | Heterozygous |
| NC_037649.1 | 8530485 | SNV | 1 | T | C | Heterozygous |
| NC_037649.1 | 8530493 | SNV | 1 | G | A | Heterozygous |
| NC_037649.1 | 8530504 | SNV | 1 | C | T | Homozygous   |
| NC_037649.1 | 8530588 | SNV | 1 | A | G | Homozygous   |
| NC_037649.1 | 8530655 | SNV | 1 | A | G | Heterozygous |
| NC_037649.1 | 8530668 | SNV | 1 | T | C | Homozygous   |
| NC_037649.1 | 8530783 | SNV | 1 | C | T | Homozygous   |
| NC_037649.1 | 8531517 | SNV | 1 | G | A | Homozygous   |
| NC_037649.1 | 8531565 | SNV | 1 | A | G | Heterozygous |
| NC_037649.1 | 8531717 | SNV | 1 | G | A | Homozygous   |
| NC_037649.1 | 8531770 | SNV | 1 | A | G | Heterozygous |
| NC_037649.1 | 8533081 | SNV | 1 | G | C | Homozygous   |
| NC_037649.1 | 8533426 | SNV | 1 | C | T | Heterozygous |
| NC_037649.1 | 8533431 | SNV | 1 | C | T | Heterozygous |
| NC_037649.1 | 8533436 | SNV | 1 | T | C | Heterozygous |
| NC_037649.1 | 8533453 | SNV | 1 | T | C | Heterozygous |
| NC_037649.1 | 8533471 | SNV | 1 | T | C | Heterozygous |
| NC_037649.1 | 8536432 | SNV | 1 | C | T | Heterozygous |

|             |         |     |   |   |   |              |
|-------------|---------|-----|---|---|---|--------------|
| NC_037649.1 | 8548828 | SNV | 1 | G | A | Homozygous   |
| NC_037649.1 | 8549805 | SNV | 1 | G | A | Homozygous   |
| NC_037649.1 | 8550011 | SNV | 1 | G | T | Homozygous   |
| NC_037649.1 | 8552457 | SNV | 1 | T | A | Heterozygous |
| NC_037649.1 | 8552909 | SNV | 1 | A | G | Homozygous   |
| NC_037649.1 | 8554796 | SNV | 1 | A | G | Heterozygous |
| NC_037649.1 | 8563158 | SNV | 1 | G | T | Homozygous   |
| NC_037649.1 | 8563236 | SNV | 1 | A | G | Homozygous   |
| NC_037649.1 | 8563297 | SNV | 1 | A | G | Heterozygous |
| NC_037649.1 | 8563502 | SNV | 1 | A | G | Heterozygous |
| NC_037649.1 | 8563519 | SNV | 1 | A | T | Heterozygous |
| NC_037649.1 | 8563565 | SNV | 1 | A | T | Homozygous   |
| NC_037649.1 | 8567528 | SNV | 1 | T | G | Heterozygous |
| NC_037649.1 | 8568421 | SNV | 1 | G | A | Homozygous   |
| NC_037649.1 | 8569702 | SNV | 1 | T | G | Homozygous   |
| NC_037649.1 | 8569704 | SNV | 1 | A | T | Homozygous   |
| NC_037649.1 | 8569780 | SNV | 1 | A | T | Homozygous   |
| NC_037649.1 | 8569928 | SNV | 1 | A | C | Homozygous   |
| NC_037649.1 | 8569941 | SNV | 1 | T | A | Homozygous   |
| NC_037649.1 | 8569943 | SNV | 1 | T | G | Homozygous   |
| NC_037649.1 | 8569949 | SNV | 1 | A | G | Homozygous   |
| NC_037649.1 | 8578761 | SNV | 1 | A | T | Homozygous   |
| NC_037649.1 | 8578867 | SNV | 1 | T | G | Heterozygous |
| NC_037649.1 | 8578873 | SNV | 1 | A | G | Heterozygous |
| NC_037649.1 | 8578882 | SNV | 1 | T | G | Heterozygous |
| NC_037649.1 | 8578888 | SNV | 1 | T | C | Heterozygous |
| NC_037649.1 | 8578891 | SNV | 1 | C | A | Heterozygous |
| NC_037649.1 | 8578894 | SNV | 1 | A | T | Heterozygous |
| NC_037649.1 | 8578897 | SNV | 1 | A | G | Heterozygous |
| NC_037649.1 | 8578900 | SNV | 1 | T | A | Heterozygous |
| NC_037649.1 | 8578903 | SNV | 1 | G | A | Heterozygous |
| NC_037649.1 | 8578906 | SNV | 1 | T | G | Heterozygous |
| NC_037649.1 | 8578924 | SNV | 1 | A | G | Heterozygous |
| NC_037649.1 | 8578933 | SNV | 1 | A | T | Heterozygous |
| NC_037649.1 | 8585708 | SNV | 1 | C | A | Homozygous   |
| NC_037649.1 | 8585962 | SNV | 1 | A | G | Homozygous   |
| NC_037649.1 | 8585965 | SNV | 1 | A | G | Homozygous   |
| NC_037649.1 | 8585971 | SNV | 1 | A | T | Homozygous   |
| NC_037649.1 | 8586067 | SNV | 1 | C | G | Homozygous   |
| NC_037649.1 | 8586182 | SNV | 1 | T | C | Homozygous   |
| NC_037649.1 | 8586333 | SNV | 1 | T | A | Homozygous   |
| NC_037649.1 | 8586860 | SNV | 1 | T | A | Homozygous   |
| NC_037649.1 | 8586863 | SNV | 1 | A | T | Homozygous   |
| NC_037649.1 | 8588705 | SNV | 1 | C | T | Homozygous   |
| NC_037649.1 | 8592038 | SNV | 1 | C | A | Heterozygous |
| NC_037649.1 | 8592045 | SNV | 1 | A | T | Heterozygous |
| NC_037649.1 | 8592118 | SNV | 1 | A | G | Homozygous   |
| NC_037649.1 | 8594089 | SNV | 1 | T | C | Homozygous   |
| NC_037649.1 | 8594132 | SNV | 1 | A | C | Heterozygous |
| NC_037649.1 | 8594324 | SNV | 1 | A | G | Heterozygous |
| NC_037649.1 | 8594590 | SNV | 1 | A | G | Heterozygous |

|             |         |     |   |   |   |              |
|-------------|---------|-----|---|---|---|--------------|
| NC_037649.1 | 8595461 | SNV | 1 | C | A | Homozygous   |
| NC_037649.1 | 8595906 | SNV | 1 | C | T | Homozygous   |
| NC_037649.1 | 8595908 | SNV | 1 | A | C | Homozygous   |
| NC_037649.1 | 8595911 | SNV | 1 | A | G | Homozygous   |
| NC_037649.1 | 8596243 | SNV | 1 | C | T | Homozygous   |
| NC_037649.1 | 8596675 | SNV | 1 | G | C | Homozygous   |
| NC_037649.1 | 8596733 | SNV | 1 | A | C | Homozygous   |
| NC_037649.1 | 8602923 | SNV | 1 | C | T | Homozygous   |
| NC_037649.1 | 8603276 | SNV | 1 | T | C | Homozygous   |
| NC_037649.1 | 8605268 | SNV | 1 | A | G | Homozygous   |
| NC_037649.1 | 8605271 | SNV | 1 | A | T | Homozygous   |
| NC_037649.1 | 8605274 | SNV | 1 | T | G | Homozygous   |
| NC_037649.1 | 8606643 | SNV | 1 | T | G | Homozygous   |
| NC_037649.1 | 8606660 | SNV | 1 | A | T | Homozygous   |
| NC_037649.1 | 8606666 | SNV | 1 | A | T | Homozygous   |
| NC_037649.1 | 8606670 | SNV | 1 | T | A | Homozygous   |
| NC_037649.1 | 8606675 | SNV | 1 | T | C | Homozygous   |
| NC_037649.1 | 8606678 | SNV | 1 | T | A | Homozygous   |
| NC_037649.1 | 8606681 | SNV | 1 | A | T | Homozygous   |
| NC_037649.1 | 8606683 | SNV | 1 | T | A | Homozygous   |
| NC_037649.1 | 8606696 | SNV | 1 | T | A | Homozygous   |
| NC_037649.1 | 8608593 | SNV | 1 | G | T | Homozygous   |
| NC_037649.1 | 8612262 | SNV | 1 | T | A | Homozygous   |
| NC_037649.1 | 8612264 | SNV | 1 | G | A | Homozygous   |
| NC_037649.1 | 8612863 | SNV | 1 | T | C | Homozygous   |
| NC_037649.1 | 8613063 | SNV | 1 | T | G | Homozygous   |
| NC_037649.1 | 8613065 | SNV | 1 | A | T | Homozygous   |
| NC_037649.1 | 8613250 | SNV | 1 | T | C | Homozygous   |
| NC_037649.1 | 8621188 | SNV | 1 | T | A | Homozygous   |
| NC_037649.1 | 8621191 | SNV | 1 | A | C | Heterozygous |
| NC_037649.1 | 8621216 | SNV | 1 | A | T | Homozygous   |
| NC_037649.1 | 8621222 | SNV | 1 | T | A | Homozygous   |
| NC_037649.1 | 8621227 | SNV | 1 | T | G | Homozygous   |
| NC_037649.1 | 8621464 | SNV | 1 | C | T | Homozygous   |
| NC_037649.1 | 8621469 | SNV | 1 | G | T | Homozygous   |
| NC_037649.1 | 8621475 | SNV | 1 | A | T | Homozygous   |
| NC_037649.1 | 8621477 | SNV | 1 | G | A | Homozygous   |
| NC_037649.1 | 8621506 | SNV | 1 | T | A | Homozygous   |
| NC_037649.1 | 8622764 | SNV | 1 | T | C | Homozygous   |
| NC_037649.1 | 8622771 | SNV | 1 | T | A | Homozygous   |
| NC_037649.1 | 8625562 | SNV | 1 | A | C | Homozygous   |
| NC_037649.1 | 8625566 | SNV | 1 | A | C | Homozygous   |
| NC_037649.1 | 8625829 | SNV | 1 | T | C | Homozygous   |
| NC_037649.1 | 8625832 | SNV | 1 | C | T | Homozygous   |
| NC_037649.1 | 8629579 | SNV | 1 | T | C | Homozygous   |
| NC_037649.1 | 8632250 | SNV | 1 | G | A | Homozygous   |
| NC_037649.1 | 8632639 | SNV | 1 | G | A | Homozygous   |
| NC_037649.1 | 8632936 | SNV | 1 | A | T | Homozygous   |
| NC_037649.1 | 8633416 | SNV | 1 | A | G | Homozygous   |
| NC_037649.1 | 8633453 | SNV | 1 | A | G | Homozygous   |
| NC_037649.1 | 8635205 | SNV | 1 | G | A | Heterozygous |



|             |         |     |   |   |   |              |
|-------------|---------|-----|---|---|---|--------------|
| NC_037649.1 | 8635986 | SNV | 1 | T | A | Homozygous   |
| NC_037649.1 | 8639840 | SNV | 1 | T | A | Homozygous   |
| NC_037649.1 | 8639869 | SNV | 1 | C | T | Homozygous   |
| NC_037649.1 | 8639920 | SNV | 1 | A | G | Homozygous   |
| NC_037649.1 | 8649401 | SNV | 1 | A | G | Homozygous   |
| NC_037649.1 | 8649887 | SNV | 1 | G | A | Homozygous   |
| NC_037649.1 | 8650080 | SNV | 1 | C | T | Heterozygous |
| NC_037649.1 | 8651012 | SNV | 1 | T | C | Homozygous   |
| NC_037649.1 | 8651194 | SNV | 1 | C | T | Homozygous   |
| NC_037649.1 | 8651930 | SNV | 1 | G | A | Heterozygous |
| NC_037649.1 | 8652050 | SNV | 1 | G | C | Homozygous   |
| NC_037649.1 | 8657235 | SNV | 1 | T | C | Homozygous   |
| NC_037649.1 | 8657309 | SNV | 1 | G | A | Heterozygous |
| NC_037649.1 | 8660097 | SNV | 1 | C | T | Homozygous   |
| NC_037649.1 | 8664044 | SNV | 1 | A | G | Homozygous   |
| NC_037649.1 | 8664176 | SNV | 1 | C | A | Homozygous   |
| NC_037649.1 | 8672133 | SNV | 1 | A | G | Heterozygous |
| NC_037649.1 | 8677896 | SNV | 1 | T | G | Heterozygous |
| NC_037649.1 | 8677899 | SNV | 1 | A | G | Heterozygous |
| NC_037649.1 | 8677902 | SNV | 1 | T | A | Heterozygous |
| NC_037649.1 | 8677905 | SNV | 1 | T | C | Heterozygous |
| NC_037649.1 | 8677909 | SNV | 1 | A | G | Heterozygous |
| NC_037649.1 | 8677912 | SNV | 1 | G | A | Heterozygous |
| NC_037649.1 | 8677914 | SNV | 1 | A | T | Heterozygous |
| NC_037649.1 | 8677917 | SNV | 1 | A | T | Heterozygous |
| NC_037649.1 | 8677923 | SNV | 1 | C | A | Heterozygous |
| NC_037649.1 | 8681225 | SNV | 1 | T | A | Homozygous   |
| NC_037649.1 | 8681228 | SNV | 1 | A | T | Heterozygous |
| NC_037649.1 | 8681236 | SNV | 1 | A | G | Heterozygous |
| NC_037649.1 | 8681240 | SNV | 1 | A | T | Heterozygous |
| NC_037649.1 | 8681249 | SNV | 1 | T | G | Heterozygous |
| NC_037649.1 | 8681252 | SNV | 1 | G | A | Heterozygous |
| NC_037649.1 | 8681254 | SNV | 1 | A | T | Heterozygous |
| NC_037649.1 | 8681257 | SNV | 1 | T | C | Heterozygous |
| NC_037649.1 | 8684621 | SNV | 1 | T | C | Homozygous   |
| NC_037649.1 | 8685231 | SNV | 1 | A | G | Homozygous   |
| NC_037649.1 | 8685233 | SNV | 1 | A | G | Homozygous   |
| NC_037649.1 | 8685239 | SNV | 1 | A | G | Heterozygous |
| NC_037649.1 | 8685255 | SNV | 1 | A | G | Homozygous   |
| NC_037649.1 | 8685257 | SNV | 1 | A | G | Homozygous   |
| NC_037649.1 | 8685259 | SNV | 1 | A | G | Homozygous   |
| NC_037649.1 | 8685284 | SNV | 1 | A | G | Homozygous   |
| NC_037649.1 | 8685750 | SNV | 1 | G | C | Homozygous   |
| NC_037649.1 | 8685755 | SNV | 1 | A | C | Homozygous   |
| NC_037649.1 | 8687179 | SNV | 1 | C | A | Heterozygous |
| NC_037649.1 | 8690849 | SNV | 1 | A | T | Homozygous   |
| NC_037649.1 | 8693058 | SNV | 1 | A | G | Homozygous   |
| NC_037649.1 | 8693962 | SNV | 1 | T | C | Heterozygous |
| NC_037649.1 | 8695712 | SNV | 1 | A | T | Homozygous   |
| NC_037649.1 | 8695714 | SNV | 1 | A | T | Homozygous   |
| NC_037649.1 | 8695716 | SNV | 1 | A | T | Homozygous   |

|             |         |     |   |   |   |              |
|-------------|---------|-----|---|---|---|--------------|
| NC_037649.1 | 8695719 | SNV | 1 | A | G | Homozygous   |
| NC_037649.1 | 8695730 | SNV | 1 | A | G | Homozygous   |
| NC_037649.1 | 8695738 | SNV | 1 | A | T | Homozygous   |
| NC_037649.1 | 8695740 | SNV | 1 | G | C | Homozygous   |
| NC_037649.1 | 8695751 | SNV | 1 | A | T | Homozygous   |
| NC_037649.1 | 8706478 | SNV | 1 | C | G | Homozygous   |
| NC_037649.1 | 8708228 | SNV | 1 | A | G | Homozygous   |
| NC_037649.1 | 8714554 | SNV | 1 | A | G | Homozygous   |
| NC_037649.1 | 8714556 | SNV | 1 | A | G | Homozygous   |
| NC_037649.1 | 8714578 | SNV | 1 | C | T | Homozygous   |
| NC_037649.1 | 8714583 | SNV | 1 | G | A | Homozygous   |
| NC_037649.1 | 8714612 | SNV | 1 | A | G | Homozygous   |
| NC_037649.1 | 8714620 | SNV | 1 | C | T | Homozygous   |
| NC_037649.1 | 8714628 | SNV | 1 | C | T | Homozygous   |
| NC_037649.1 | 8741514 | SNV | 1 | A | G | Heterozygous |
| NC_037649.1 | 8741517 | SNV | 1 | T | C | Heterozygous |
| NC_037649.1 | 8741521 | SNV | 1 | T | C | Heterozygous |
| NC_037649.1 | 8748438 | SNV | 1 | C | G | Homozygous   |
| NC_037649.1 | 8748468 | SNV | 1 | G | A | Homozygous   |
| NC_037649.1 | 8748482 | SNV | 1 | A | G | Homozygous   |
| NC_037649.1 | 8748492 | SNV | 1 | T | A | Homozygous   |
| NC_037649.1 | 8776786 | SNV | 1 | G | A | Heterozygous |
| NC_037649.1 | 8776793 | SNV | 1 | C | A | Homozygous   |
| NC_037649.1 | 8776836 | SNV | 1 | A | G | Heterozygous |
| NC_037649.1 | 8776856 | SNV | 1 | A | T | Heterozygous |
| NC_037649.1 | 8776860 | SNV | 1 | A | T | Heterozygous |
| NC_037649.1 | 8777839 | SNV | 1 | G | A | Heterozygous |
| NC_037649.1 | 8816924 | SNV | 1 | C | G | Homozygous   |
| NC_037649.1 | 8816928 | SNV | 1 | T | G | Homozygous   |
| NC_037649.1 | 8816931 | SNV | 1 | G | A | Heterozygous |
| NC_037649.1 | 8816958 | SNV | 1 | G | A | Homozygous   |
| NC_037649.1 | 8816965 | SNV | 1 | T | G | Homozygous   |
| NC_037649.1 | 8816991 | SNV | 1 | G | A | Homozygous   |
| NC_037649.1 | 8816995 | SNV | 1 | G | A | Homozygous   |
| NC_037649.1 | 8817004 | SNV | 1 | G | A | Homozygous   |
| NC_037649.1 | 8830645 | SNV | 1 | C | T | Homozygous   |
| NC_037649.1 | 8830647 | SNV | 1 | T | C | Homozygous   |
| NC_037649.1 | 8830659 | SNV | 1 | T | C | Homozygous   |
| NC_037649.1 | 8832688 | SNV | 1 | A | G | Heterozygous |
| NC_037649.1 | 8833206 | SNV | 1 | T | C | Heterozygous |
| NC_037649.1 | 8833272 | SNV | 1 | G | A | Heterozygous |
| NC_037649.1 | 8833470 | SNV | 1 | A | G | Homozygous   |
| NC_037649.1 | 8833482 | SNV | 1 | T | C | Homozygous   |
| NC_037649.1 | 8833506 | SNV | 1 | C | T | Homozygous   |
| NC_037649.1 | 8833515 | SNV | 1 | C | T | Homozygous   |
| NC_037649.1 | 8833645 | SNV | 1 | C | T | Homozygous   |
| NC_037649.1 | 8833852 | SNV | 1 | G | A | Heterozygous |
| NC_037649.1 | 8834343 | SNV | 1 | C | T | Homozygous   |
| NC_037649.1 | 8834570 | SNV | 1 | A | G | Homozygous   |
| NC_037649.1 | 8842670 | SNV | 1 | T | C | Homozygous   |
| NC_037649.1 | 8842698 | SNV | 1 | G | T | Homozygous   |

|             |         |     |   |   |   |              |
|-------------|---------|-----|---|---|---|--------------|
| NC_037649.1 | 8842701 | SNV | 1 | A | C | Homozygous   |
| NC_037649.1 | 8842703 | SNV | 1 | A | G | Homozygous   |
| NC_037649.1 | 8842706 | SNV | 1 | A | G | Homozygous   |
| NC_037649.1 | 8845196 | SNV | 1 | T | C | Heterozygous |
| NC_037649.1 | 8845583 | SNV | 1 | A | G | Heterozygous |
| NC_037649.1 | 8845850 | SNV | 1 | A | G | Heterozygous |
| NC_037649.1 | 8846330 | SNV | 1 | T | A | Heterozygous |
| NC_037649.1 | 8846350 | SNV | 1 | C | A | Heterozygous |
| NC_037649.1 | 8846359 | SNV | 1 | G | C | Homozygous   |
| NC_037649.1 | 8846363 | SNV | 1 | C | A | Homozygous   |
| NC_037649.1 | 8847023 | SNV | 1 | T | G | Heterozygous |
| NC_037649.1 | 8847025 | SNV | 1 | C | T | Heterozygous |
| NC_037649.1 | 8847109 | SNV | 1 | T | G | Homozygous   |
| NC_037649.1 | 8850952 | SNV | 1 | G | C | Heterozygous |
| NC_037649.1 | 8850964 | SNV | 1 | T | C | Homozygous   |
| NC_037649.1 | 8851025 | SNV | 1 | T | C | Homozygous   |
| NC_037649.1 | 8851082 | SNV | 1 | T | C | Homozygous   |
| NC_037649.1 | 8851371 | SNV | 1 | A | C | Homozygous   |
| NC_037649.1 | 8851560 | SNV | 1 | A | G | Homozygous   |
| NC_037649.1 | 8851987 | SNV | 1 | T | C | Homozygous   |
| NC_037649.1 | 8852622 | SNV | 1 | T | C | Heterozygous |
| NC_037649.1 | 8852824 | SNV | 1 | T | G | Homozygous   |
| NC_037649.1 | 8852857 | SNV | 1 | T | A | Homozygous   |
| NC_037649.1 | 8853094 | SNV | 1 | C | T | Homozygous   |
| NC_037649.1 | 8853499 | SNV | 1 | G | A | Homozygous   |
| NC_037649.1 | 8853774 | SNV | 1 | G | A | Heterozygous |
| NC_037649.1 | 8853975 | SNV | 1 | G | C | Homozygous   |
| NC_037649.1 | 8854109 | SNV | 1 | G | A | Heterozygous |
| NC_037649.1 | 8854279 | SNV | 1 | T | C | Homozygous   |
| NC_037649.1 | 8854455 | SNV | 1 | T | A | Heterozygous |
| NC_037649.1 | 8854459 | SNV | 1 | T | C | Heterozygous |
| NC_037649.1 | 8854555 | SNV | 1 | T | C | Homozygous   |
| NC_037649.1 | 8857299 | SNV | 1 | G | C | Homozygous   |
| NC_037649.1 | 8858005 | SNV | 1 | T | C | Homozygous   |
| NC_037649.1 | 8858063 | SNV | 1 | T | G | Heterozygous |
| NC_037649.1 | 8858351 | SNV | 1 | A | G | Heterozygous |
| NC_037649.1 | 8858409 | SNV | 1 | G | A | Homozygous   |
| NC_037649.1 | 8858823 | SNV | 1 | T | C | Heterozygous |
| NC_037649.1 | 8859080 | SNV | 1 | T | C | Homozygous   |
| NC_037649.1 | 8859123 | SNV | 1 | C | T | Heterozygous |
| NC_037649.1 | 8859132 | SNV | 1 | C | T | Homozygous   |
| NC_037649.1 | 8873350 | SNV | 1 | C | A | Homozygous   |
| NC_037649.1 | 8875234 | SNV | 1 | T | C | Heterozygous |
| NC_037649.1 | 8875244 | SNV | 1 | C | T | Heterozygous |
| NC_037649.1 | 8875257 | SNV | 1 | C | T | Heterozygous |
| NC_037649.1 | 8876634 | SNV | 1 | G | A | Homozygous   |
| NC_037649.1 | 8876660 | SNV | 1 | A | G | Homozygous   |
| NC_037649.1 | 8876888 | SNV | 1 | T | C | Heterozygous |
| NC_037649.1 | 8887386 | SNV | 1 | T | C | Heterozygous |
| NC_037649.1 | 8887390 | SNV | 1 | T | C | Heterozygous |
| NC_037649.1 | 8887394 | SNV | 1 | T | C | Heterozygous |

|             |         |     |   |   |   |              |
|-------------|---------|-----|---|---|---|--------------|
| NC_037649.1 | 8894645 | SNV | 1 | A | T | Heterozygous |
| NC_037649.1 | 8913386 | SNV | 1 | A | T | Heterozygous |
| NC_037649.1 | 8913393 | SNV | 1 | A | T | Heterozygous |
| NC_037649.1 | 8930475 | SNV | 1 | T | C | Heterozygous |
| NC_037649.1 | 8950703 | SNV | 1 | A | G | Homozygous   |
| NC_037649.1 | 8963447 | SNV | 1 | T | C | Homozygous   |
| NC_037649.1 | 8973064 | SNV | 1 | G | A | Heterozygous |
| NC_037649.1 | 8973076 | SNV | 1 | A | G | Heterozygous |
| NC_037649.1 | 8973092 | SNV | 1 | A | T | Homozygous   |
| NC_037649.1 | 8973298 | SNV | 1 | T | C | Homozygous   |
| NC_037649.1 | 8973320 | SNV | 1 | A | G | Homozygous   |
| NC_037649.1 | 8973453 | SNV | 1 | T | C | Homozygous   |
| NC_037649.1 | 8973814 | SNV | 1 | T | C | Homozygous   |
| NC_037649.1 | 8973818 | SNV | 1 | C | T | Heterozygous |
| NC_037649.1 | 8973838 | SNV | 1 | C | T | Heterozygous |
| NC_037649.1 | 8974368 | SNV | 1 | C | T | Heterozygous |
| NC_037649.1 | 8974716 | SNV | 1 | G | A | Heterozygous |
| NC_037649.1 | 8974757 | SNV | 1 | A | T | Heterozygous |
| NC_037649.1 | 8975004 | SNV | 1 | C | T | Heterozygous |
| NC_037649.1 | 8975007 | SNV | 1 | T | G | Homozygous   |
| NC_037649.1 | 8975136 | SNV | 1 | T | C | Homozygous   |
| NC_037649.1 | 8975178 | SNV | 1 | T | C | Homozygous   |
| NC_037649.1 | 8975259 | SNV | 1 | A | G | Homozygous   |
| NC_037649.1 | 8975346 | SNV | 1 | T | C | Homozygous   |
| NC_037649.1 | 8975380 | SNV | 1 | C | A | Heterozygous |
| NC_037649.1 | 8975395 | SNV | 1 | C | T | Heterozygous |
| NC_037649.1 | 8975465 | SNV | 1 | A | G | Homozygous   |
| NC_037649.1 | 8975620 | SNV | 1 | G | T | Heterozygous |
| NC_037649.1 | 8975666 | SNV | 1 | A | G | Homozygous   |
| NC_037649.1 | 8975696 | SNV | 1 | C | T | Heterozygous |
| NC_037649.1 | 8975929 | SNV | 1 | T | C | Homozygous   |
| NC_037649.1 | 8976055 | SNV | 1 | C | T | Heterozygous |
| NC_037649.1 | 8976074 | SNV | 1 | T | G | Heterozygous |
| NC_037649.1 | 8976108 | SNV | 1 | T | A | Homozygous   |
| NC_037649.1 | 8976150 | SNV | 1 | A | G | Heterozygous |
| NC_037649.1 | 8976380 | SNV | 1 | G | C | Homozygous   |
| NC_037649.1 | 8976403 | SNV | 1 | T | C | Homozygous   |
| NC_037649.1 | 8976777 | SNV | 1 | C | T | Heterozygous |
| NC_037649.1 | 8976790 | SNV | 1 | T | G | Heterozygous |
| NC_037649.1 | 8977629 | SNV | 1 | A | G | Homozygous   |
| NC_037649.1 | 8977638 | SNV | 1 | T | C | Heterozygous |
| NC_037649.1 | 8977640 | SNV | 1 | T | C | Homozygous   |
| NC_037649.1 | 8977684 | SNV | 1 | T | C | Homozygous   |
| NC_037649.1 | 8977719 | SNV | 1 | T | A | Homozygous   |
| NC_037649.1 | 8978060 | SNV | 1 | A | G | Homozygous   |
| NC_037649.1 | 8978072 | SNV | 1 | A | G | Homozygous   |
| NC_037649.1 | 8978080 | SNV | 1 | C | T | Homozygous   |
| NC_037649.1 | 8978109 | SNV | 1 | A | T | Homozygous   |
| NC_037649.1 | 8979031 | SNV | 1 | A | C | Heterozygous |
| NC_037649.1 | 8979180 | SNV | 1 | T | C | Homozygous   |
| NC_037649.1 | 8979254 | SNV | 1 | A | G | Homozygous   |

|             |         |     |   |   |   |              |
|-------------|---------|-----|---|---|---|--------------|
| NC_037649.1 | 8980245 | SNV | 1 | G | A | Heterozygous |
| NC_037649.1 | 8980287 | SNV | 1 | C | T | Heterozygous |
| NC_037649.1 | 8981728 | SNV | 1 | G | T | Heterozygous |
| NC_037649.1 | 8983967 | SNV | 1 | C | T | Homozygous   |
| NC_037649.1 | 8984195 | SNV | 1 | G | A | Heterozygous |
| NC_037649.1 | 8991807 | SNV | 1 | C | T | Homozygous   |
| NC_037649.1 | 8991812 | SNV | 1 | T | C | Heterozygous |
| NC_037649.1 | 8991822 | SNV | 1 | C | T | Homozygous   |
| NC_037649.1 | 8991828 | SNV | 1 | C | T | Heterozygous |
| NC_037649.1 | 8991839 | SNV | 1 | A | G | Homozygous   |
| NC_037649.1 | 8991856 | SNV | 1 | G | A | Heterozygous |
| NC_037649.1 | 8991864 | SNV | 1 | T | C | Heterozygous |
| NC_037649.1 | 8991883 | SNV | 1 | G | A | Homozygous   |
| NC_037649.1 | 8991904 | SNV | 1 | C | T | Homozygous   |
| NC_037649.1 | 8991906 | SNV | 1 | T | C | Homozygous   |
| NC_037649.1 | 8997279 | SNV | 1 | C | T | Heterozygous |
| NC_037649.1 | 8997354 | SNV | 1 | T | C | Homozygous   |
| NC_037649.1 | 8997380 | SNV | 1 | T | A | Heterozygous |
| NC_037649.1 | 8997409 | SNV | 1 | T | A | Heterozygous |
| NC_037649.1 | 8997414 | SNV | 1 | G | C | Heterozygous |
| NC_037649.1 | 8997568 | SNV | 1 | A | C | Heterozygous |
| NC_037649.1 | 8997570 | SNV | 1 | A | T | Heterozygous |
| NC_037649.1 | 8997573 | SNV | 1 | T | A | Heterozygous |
| NC_037649.1 | 8997735 | SNV | 1 | T | C | Homozygous   |
| NC_037649.1 | 8997758 | SNV | 1 | T | C | Homozygous   |
| NC_037649.1 | 8997828 | SNV | 1 | T | C | Homozygous   |
| NC_037649.1 | 8997912 | SNV | 1 | A | G | Homozygous   |
| NC_037649.1 | 8997918 | SNV | 1 | T | C | Heterozygous |
| NC_037649.1 | 8997920 | SNV | 1 | T | A | Homozygous   |
| NC_037649.1 | 8998140 | SNV | 1 | G | T | Heterozygous |
| NC_037649.1 | 8998187 | SNV | 1 | A | G | Homozygous   |
| NC_037649.1 | 8998200 | SNV | 1 | G | A | Heterozygous |
| NC_037649.1 | 8998223 | SNV | 1 | T | C | Homozygous   |
| NC_037649.1 | 8998287 | SNV | 1 | T | C | Homozygous   |
| NC_037649.1 | 8998372 | SNV | 1 | G | A | Heterozygous |
| NC_037649.1 | 8998396 | SNV | 1 | G | A | Heterozygous |
| NC_037649.1 | 8998417 | SNV | 1 | A | T | Homozygous   |
| NC_037649.1 | 8998440 | SNV | 1 | G | A | Homozygous   |
| NC_037649.1 | 8998474 | SNV | 1 | A | G | Homozygous   |
| NC_037649.1 | 8998482 | SNV | 1 | G | A | Heterozygous |
| NC_037649.1 | 8998490 | SNV | 1 | C | T | Heterozygous |
| NC_037649.1 | 8998498 | SNV | 1 | C | T | Homozygous   |
| NC_037649.1 | 8998518 | SNV | 1 | G | A | Homozygous   |
| NC_037649.1 | 8998539 | SNV | 1 | G | A | Homozygous   |
| NC_037649.1 | 8998542 | SNV | 1 | C | T | Homozygous   |
| NC_037649.1 | 8998544 | SNV | 1 | G | A | Homozygous   |
| NC_037649.1 | 8998553 | SNV | 1 | G | C | Homozygous   |
| NC_037649.1 | 8998598 | SNV | 1 | C | T | Homozygous   |
| NC_037649.1 | 8998604 | SNV | 1 | G | A | Homozygous   |
| NC_037649.1 | 8998619 | SNV | 1 | C | T | Homozygous   |
| NC_037649.1 | 8998621 | SNV | 1 | G | C | Homozygous   |

|             |         |     |   |   |   |              |
|-------------|---------|-----|---|---|---|--------------|
| NC_037649.1 | 8998628 | SNV | 1 | T | C | Homozygous   |
| NC_037649.1 | 8998635 | SNV | 1 | T | C | Homozygous   |
| NC_037649.1 | 8998647 | SNV | 1 | C | G | Homozygous   |
| NC_037649.1 | 9001271 | SNV | 1 | C | T | Homozygous   |
| NC_037649.1 | 9001291 | SNV | 1 | A | G | Heterozygous |
| NC_037649.1 | 9001294 | SNV | 1 | T | G | Homozygous   |
| NC_037649.1 | 9026625 | SNV | 1 | G | C | Homozygous   |
| NC_037649.1 | 9026652 | SNV | 1 | A | T | Homozygous   |
| NC_037649.1 | 9026656 | SNV | 1 | G | A | Homozygous   |
| NC_037649.1 | 9026662 | SNV | 1 | G | T | Homozygous   |
| NC_037649.1 | 9027492 | SNV | 1 | C | T | Heterozygous |
| NC_037649.1 | 9027663 | SNV | 1 | G | A | Homozygous   |
| NC_037649.1 | 9027850 | SNV | 1 | C | T | Heterozygous |
| NC_037649.1 | 9027891 | SNV | 1 | G | A | Heterozygous |
| NC_037649.1 | 9027968 | SNV | 1 | T | C | Heterozygous |
| NC_037649.1 | 9027975 | SNV | 1 | T | C | Heterozygous |
| NC_037649.1 | 9027990 | SNV | 1 | T | C | Homozygous   |
| NC_037649.1 | 9028088 | SNV | 1 | T | C | Homozygous   |
| NC_037649.1 | 9035012 | SNV | 1 | G | A | Homozygous   |
| NC_037649.1 | 9060452 | SNV | 1 | T | G | Homozygous   |
| NC_037649.1 | 9061989 | SNV | 1 | G | A | Heterozygous |
| NC_037649.1 | 9062356 | SNV | 1 | T | C | Homozygous   |
| NC_037649.1 | 9073370 | SNV | 1 | C | G | Heterozygous |
| NC_037649.1 | 9073400 | SNV | 1 | C | T | Heterozygous |
| NC_037649.1 | 9073406 | SNV | 1 | C | T | Heterozygous |
| NC_037649.1 | 9073411 | SNV | 1 | T | C | Heterozygous |
| NC_037649.1 | 9073413 | SNV | 1 | T | C | Homozygous   |
| NC_037649.1 | 9073621 | SNV | 1 | C | T | Homozygous   |
| NC_037649.1 | 9073629 | SNV | 1 | T | C | Homozygous   |
| NC_037649.1 | 9073660 | SNV | 1 | C | T | Heterozygous |
| NC_037649.1 | 9073674 | SNV | 1 | G | A | Heterozygous |
| NC_037649.1 | 9073683 | SNV | 1 | T | A | Homozygous   |
| NC_037649.1 | 9073735 | SNV | 1 | C | T | Heterozygous |
| NC_037649.1 | 9073737 | SNV | 1 | A | C | Heterozygous |
| NC_037649.1 | 9073739 | SNV | 1 | C | T | Heterozygous |
| NC_037649.1 | 9073840 | SNV | 1 | T | C | Homozygous   |
| NC_037649.1 | 9073872 | SNV | 1 | G | A | Heterozygous |
| NC_037649.1 | 9073880 | SNV | 1 | A | T | Homozygous   |
| NC_037649.1 | 9074094 | SNV | 1 | G | A | Heterozygous |
| NC_037649.1 | 9074109 | SNV | 1 | C | T | Heterozygous |
| NC_037649.1 | 9074142 | SNV | 1 | T | C | Heterozygous |
| NC_037649.1 | 9074146 | SNV | 1 | C | T | Heterozygous |
| NC_037649.1 | 9074157 | SNV | 1 | T | A | Heterozygous |
| NC_037649.1 | 9075220 | SNV | 1 | T | A | Heterozygous |
| NC_037649.1 | 9075787 | SNV | 1 | G | A | Heterozygous |
| NC_037649.1 | 9075969 | SNV | 1 | A | T | Homozygous   |
| NC_037649.1 | 9076135 | SNV | 1 | C | T | Homozygous   |
| NC_037649.1 | 9076222 | SNV | 1 | C | A | Homozygous   |
| NC_037649.1 | 9082078 | SNV | 1 | A | G | Homozygous   |
| NC_037649.1 | 9082516 | SNV | 1 | A | G | Homozygous   |
| NC_037649.1 | 9083017 | SNV | 1 | G | A | Homozygous   |

|             |         |     |   |   |   |              |
|-------------|---------|-----|---|---|---|--------------|
| NC_037649.1 | 9085292 | SNV | 1 | C | A | Homozygous   |
| NC_037649.1 | 9085496 | SNV | 1 | A | T | Heterozygous |
| NC_037649.1 | 9085741 | SNV | 1 | T | C | Homozygous   |
| NC_037649.1 | 9086443 | SNV | 1 | G | T | Homozygous   |
| NC_037649.1 | 9086463 | SNV | 1 | G | A | Heterozygous |
| NC_037649.1 | 9087087 | SNV | 1 | T | C | Homozygous   |
| NC_037649.1 | 9087131 | SNV | 1 | C | T | Homozygous   |
| NC_037649.1 | 9087234 | SNV | 1 | G | A | Heterozygous |
| NC_037649.1 | 9087256 | SNV | 1 | T | C | Homozygous   |
| NC_037649.1 | 9087318 | SNV | 1 | T | C | Homozygous   |
| NC_037649.1 | 9087344 | SNV | 1 | C | G | Heterozygous |
| NC_037649.1 | 9087445 | SNV | 1 | G | A | Heterozygous |
| NC_037649.1 | 9087447 | SNV | 1 | C | T | Heterozygous |
| NC_037649.1 | 9087969 | SNV | 1 | A | G | Homozygous   |
| NC_037649.1 | 9088167 | SNV | 1 | C | T | Heterozygous |
| NC_037649.1 | 9088180 | SNV | 1 | T | C | Homozygous   |
| NC_037649.1 | 9088222 | SNV | 1 | T | C | Homozygous   |
| NC_037649.1 | 9095914 | SNV | 1 | T | C | Homozygous   |
| NC_037649.1 | 9095970 | SNV | 1 | A | G | Homozygous   |
| NC_037649.1 | 9096163 | SNV | 1 | C | G | Homozygous   |
| NC_037649.1 | 9096188 | SNV | 1 | T | C | Homozygous   |
| NC_037649.1 | 9107256 | SNV | 1 | G | A | Homozygous   |
| NC_037649.1 | 9114583 | SNV | 1 | T | C | Homozygous   |
| NC_037649.1 | 9114612 | SNV | 1 | A | G | Heterozygous |
| NC_037649.1 | 9114643 | SNV | 1 | A | G | Homozygous   |
| NC_037649.1 | 9114652 | SNV | 1 | G | T | Heterozygous |
| NC_037649.1 | 9114939 | SNV | 1 | T | C | Homozygous   |
| NC_037649.1 | 9114975 | SNV | 1 | C | T | Heterozygous |
| NC_037649.1 | 9115091 | SNV | 1 | A | C | Homozygous   |
| NC_037649.1 | 9115093 | SNV | 1 | A | G | Homozygous   |
| NC_037649.1 | 9115135 | SNV | 1 | T | C | Heterozygous |
| NC_037649.1 | 9115198 | SNV | 1 | C | T | Heterozygous |
| NC_037649.1 | 9120404 | SNV | 1 | A | G | Heterozygous |
| NC_037649.1 | 9126497 | SNV | 1 | A | G | Heterozygous |
| NC_037649.1 | 9128557 | SNV | 1 | G | A | Heterozygous |
| NC_037649.1 | 9128631 | SNV | 1 | C | T | Homozygous   |
| NC_037649.1 | 9128648 | SNV | 1 | A | T | Heterozygous |
| NC_037649.1 | 9128671 | SNV | 1 | G | T | Heterozygous |
| NC_037649.1 | 9135700 | SNV | 1 | A | G | Heterozygous |
| NC_037649.1 | 9135729 | SNV | 1 | A | G | Heterozygous |
| NC_037649.1 | 9135764 | SNV | 1 | T | C | Homozygous   |
| NC_037649.1 | 9139992 | SNV | 1 | T | C | Homozygous   |
| NC_037649.1 | 9140248 | SNV | 1 | A | G | Homozygous   |
| NC_037649.1 | 9140300 | SNV | 1 | T | C | Homozygous   |
| NC_037649.1 | 9140956 | SNV | 1 | T | C | Heterozygous |
| NC_037649.1 | 9141920 | SNV | 1 | T | C | Homozygous   |
| NC_037649.1 | 9145295 | SNV | 1 | G | T | Homozygous   |
| NC_037649.1 | 9145310 | SNV | 1 | C | T | Homozygous   |
| NC_037649.1 | 9146379 | SNV | 1 | A | C | Homozygous   |
| NC_037649.1 | 9146388 | SNV | 1 | T | C | Homozygous   |
| NC_037649.1 | 9146397 | SNV | 1 | A | T | Homozygous   |

|             |         |     |   |   |   |              |
|-------------|---------|-----|---|---|---|--------------|
| NC_037649.1 | 9146401 | SNV | 1 | T | G | Homozygous   |
| NC_037649.1 | 9148895 | SNV | 1 | C | T | Homozygous   |
| NC_037649.1 | 9150861 | SNV | 1 | G | A | Heterozygous |
| NC_037649.1 | 9154384 | SNV | 1 | T | C | Heterozygous |
| NC_037649.1 | 9154401 | SNV | 1 | T | C | Homozygous   |
| NC_037649.1 | 9154406 | SNV | 1 | T | A | Homozygous   |
| NC_037649.1 | 9154450 | SNV | 1 | T | C | Heterozygous |
| NC_037649.1 | 9154671 | SNV | 1 | G | A | Heterozygous |
| NC_037649.1 | 9154683 | SNV | 1 | T | C | Heterozygous |
| NC_037649.1 | 9154706 | SNV | 1 | G | A | Heterozygous |
| NC_037649.1 | 9154772 | SNV | 1 | G | A | Heterozygous |
| NC_037649.1 | 9155133 | SNV | 1 | A | G | Heterozygous |
| NC_037649.1 | 9155512 | SNV | 1 | A | T | Heterozygous |
| NC_037649.1 | 9155520 | SNV | 1 | T | C | Homozygous   |
| NC_037649.1 | 9155884 | SNV | 1 | C | T | Homozygous   |
| NC_037649.1 | 9158163 | SNV | 1 | A | G | Homozygous   |
| NC_037649.1 | 9158303 | SNV | 1 | T | C | Homozygous   |
| NC_037649.1 | 9158333 | SNV | 1 | A | G | Homozygous   |
| NC_037649.1 | 9162105 | SNV | 1 | C | T | Homozygous   |
| NC_037649.1 | 9164975 | SNV | 1 | G | T | Homozygous   |
| NC_037649.1 | 9177189 | SNV | 1 | T | A | Homozygous   |
| NC_037649.1 | 9177194 | SNV | 1 | T | A | Homozygous   |
| NC_037649.1 | 9177200 | SNV | 1 | G | C | Homozygous   |
| NC_037649.1 | 9177203 | SNV | 1 | T | C | Homozygous   |
| NC_037649.1 | 9179457 | SNV | 1 | C | T | Homozygous   |
| NC_037649.1 | 9183698 | SNV | 1 | T | G | Homozygous   |
| NC_037649.1 | 9183713 | SNV | 1 | G | A | Heterozygous |
| NC_037649.1 | 9183719 | SNV | 1 | G | A | Heterozygous |
| NC_037649.1 | 9183726 | SNV | 1 | A | G | Heterozygous |
| NC_037649.1 | 9183730 | SNV | 1 | A | G | Heterozygous |
| NC_037649.1 | 9183734 | SNV | 1 | A | T | Heterozygous |
| NC_037649.1 | 9211270 | SNV | 1 | G | A | Homozygous   |
| NC_037649.1 | 9211306 | SNV | 1 | A | G | Homozygous   |
| NC_037649.1 | 9225092 | SNV | 1 | C | T | Homozygous   |
| NC_037649.1 | 9225197 | SNV | 1 | C | T | Homozygous   |
| NC_037649.1 | 9225220 | SNV | 1 | T | C | Homozygous   |
| NC_037649.1 | 9225397 | SNV | 1 | G | A | Heterozygous |
| NC_037649.1 | 9229310 | SNV | 1 | C | T | Homozygous   |
| NC_037649.1 | 9231376 | SNV | 1 | C | T | Homozygous   |
| NC_037649.1 | 9231420 | SNV | 1 | A | G | Heterozygous |
| NC_037649.1 | 9231631 | SNV | 1 | T | C | Heterozygous |
| NC_037649.1 | 9231690 | SNV | 1 | T | C | Homozygous   |
| NC_037649.1 | 9231906 | SNV | 1 | A | G | Homozygous   |
| NC_037649.1 | 9231937 | SNV | 1 | A | G | Homozygous   |
| NC_037649.1 | 9231978 | SNV | 1 | A | G | Homozygous   |
| NC_037649.1 | 9232024 | SNV | 1 | G | A | Homozygous   |
| NC_037649.1 | 9232315 | SNV | 1 | T | C | Homozygous   |
| NC_037649.1 | 9232460 | SNV | 1 | G | A | Heterozygous |
| NC_037649.1 | 9232746 | SNV | 1 | C | T | Homozygous   |
| NC_037649.1 | 9233009 | SNV | 1 | G | A | Homozygous   |
| NC_037649.1 | 9233675 | SNV | 1 | C | T | Heterozygous |



|             |         |     |   |   |   |              |
|-------------|---------|-----|---|---|---|--------------|
| NC_037649.1 | 9233698 | SNV | 1 | G | C | Homozygous   |
| NC_037649.1 | 9233747 | SNV | 1 | C | T | Homozygous   |
| NC_037649.1 | 9234314 | SNV | 1 | T | C | Heterozygous |
| NC_037649.1 | 9234329 | SNV | 1 | A | G | Homozygous   |
| NC_037649.1 | 9234514 | SNV | 1 | T | A | Homozygous   |
| NC_037649.1 | 9234532 | SNV | 1 | A | G | Homozygous   |
| NC_037649.1 | 9235467 | SNV | 1 | C | T | Heterozygous |
| NC_037649.1 | 9235506 | SNV | 1 | C | T | Homozygous   |
| NC_037649.1 | 9235576 | SNV | 1 | T | A | Homozygous   |
| NC_037649.1 | 9235769 | SNV | 1 | T | C | Homozygous   |
| NC_037649.1 | 9235958 | SNV | 1 | C | G | Homozygous   |
| NC_037649.1 | 9236789 | SNV | 1 | C | T | Heterozygous |
| NC_037649.1 | 9237121 | SNV | 1 | C | T | Heterozygous |
| NC_037649.1 | 9239883 | SNV | 1 | C | A | Homozygous   |
| NC_037649.1 | 9239887 | SNV | 1 | C | A | Homozygous   |
| NC_037649.1 | 9241051 | SNV | 1 | T | C | Homozygous   |
| NC_037649.1 | 9241712 | SNV | 1 | A | G | Heterozygous |
| NC_037649.1 | 9241835 | SNV | 1 | G | A | Heterozygous |
| NC_037649.1 | 9242015 | SNV | 1 | T | C | Homozygous   |
| NC_037649.1 | 9242232 | SNV | 1 | C | T | Heterozygous |
| NC_037649.1 | 9242429 | SNV | 1 | A | G | Homozygous   |
| NC_037649.1 | 9242757 | SNV | 1 | G | A | Heterozygous |
| NC_037649.1 | 9242939 | SNV | 1 | G | A | Heterozygous |
| NC_037649.1 | 9245178 | SNV | 1 | G | A | Homozygous   |
| NC_037649.1 | 9245196 | SNV | 1 | G | A | Heterozygous |
| NC_037649.1 | 9245573 | SNV | 1 | G | T | Homozygous   |
| NC_037649.1 | 9246832 | SNV | 1 | T | C | Heterozygous |
| NC_037649.1 | 9246879 | SNV | 1 | A | G | Homozygous   |
| NC_037649.1 | 9246897 | SNV | 1 | G | A | Heterozygous |
| NC_037649.1 | 9251013 | SNV | 1 | A | G | Homozygous   |
| NC_037649.1 | 9251044 | SNV | 1 | C | T | Heterozygous |
| NC_037649.1 | 9254843 | SNV | 1 | T | A | Homozygous   |
| NC_037649.1 | 9254851 | SNV | 1 | T | C | Homozygous   |
| NC_037649.1 | 9254855 | SNV | 1 | C | T | Homozygous   |
| NC_037649.1 | 9254857 | SNV | 1 | T | C | Homozygous   |
| NC_037649.1 | 9254863 | SNV | 1 | T | C | Homozygous   |
| NC_037649.1 | 9254887 | SNV | 1 | C | T | Homozygous   |
| NC_037649.1 | 9268650 | SNV | 1 | A | G | Homozygous   |
| NC_037649.1 | 9269541 | SNV | 1 | A | G | Homozygous   |
| NC_037649.1 | 9269654 | SNV | 1 | T | A | Homozygous   |
| NC_037649.1 | 9269904 | SNV | 1 | C | T | Homozygous   |
| NC_037649.1 | 9271685 | SNV | 1 | T | A | Heterozygous |
| NC_037649.1 | 9271691 | SNV | 1 | A | G | Heterozygous |
| NC_037649.1 | 9271701 | SNV | 1 | T | A | Heterozygous |
| NC_037649.1 | 9271703 | SNV | 1 | G | A | Heterozygous |
| NC_037649.1 | 9273865 | SNV | 1 | A | T | Heterozygous |
| NC_037649.1 | 9274111 | SNV | 1 | G | A | Homozygous   |
| NC_037649.1 | 9274515 | SNV | 1 | C | T | Heterozygous |
| NC_037649.1 | 9274644 | SNV | 1 | G | A | Heterozygous |
| NC_037649.1 | 9274901 | SNV | 1 | G | A | Homozygous   |
| NC_037649.1 | 9274903 | SNV | 1 | A | G | Homozygous   |

|             |         |     |   |   |   |              |
|-------------|---------|-----|---|---|---|--------------|
| NC_037649.1 | 9278150 | SNV | 1 | T | C | Homozygous   |
| NC_037649.1 | 9286168 | SNV | 1 | G | A | Homozygous   |
| NC_037649.1 | 9286227 | SNV | 1 | A | G | Heterozygous |
| NC_037649.1 | 9290271 | SNV | 1 | G | A | Homozygous   |
| NC_037649.1 | 9290275 | SNV | 1 | G | T | Homozygous   |
| NC_037649.1 | 9290278 | SNV | 1 | C | T | Homozygous   |
| NC_037649.1 | 9290509 | SNV | 1 | C | T | Heterozygous |
| NC_037649.1 | 9290708 | SNV | 1 | A | G | Homozygous   |
| NC_037649.1 | 9292954 | SNV | 1 | A | G | Homozygous   |
| NC_037649.1 | 9292997 | SNV | 1 | A | C | Homozygous   |
| NC_037649.1 | 9293030 | SNV | 1 | T | G | Heterozygous |
| NC_037649.1 | 9293040 | SNV | 1 | C | A | Heterozygous |
| NC_037649.1 | 9293881 | SNV | 1 | A | G | Homozygous   |
| NC_037649.1 | 9299927 | SNV | 1 | G | C | Heterozygous |
| NC_037649.1 | 9313753 | SNV | 1 | G | A | Heterozygous |
| NC_037649.1 | 9313913 | SNV | 1 | T | G | Homozygous   |
| NC_037649.1 | 9313944 | SNV | 1 | T | A | Heterozygous |
| NC_037649.1 | 9313948 | SNV | 1 | T | C | Heterozygous |
| NC_037649.1 | 9314022 | SNV | 1 | C | A | Homozygous   |
| NC_037649.1 | 9314473 | SNV | 1 | A | T | Heterozygous |
| NC_037649.1 | 9318331 | SNV | 1 | T | C | Homozygous   |
| NC_037649.1 | 9318341 | SNV | 1 | C | A | Homozygous   |
| NC_037649.1 | 9318349 | SNV | 1 | T | C | Homozygous   |
| NC_037649.1 | 9318358 | SNV | 1 | A | C | Homozygous   |
| NC_037649.1 | 9320621 | SNV | 1 | C | A | Heterozygous |
| NC_037649.1 | 9320967 | SNV | 1 | C | T | Heterozygous |
| NC_037649.1 | 9321233 | SNV | 1 | A | G | Heterozygous |
| NC_037649.1 | 9321319 | SNV | 1 | T | C | Heterozygous |
| NC_037649.1 | 9321323 | SNV | 1 | T | C | Heterozygous |
| NC_037649.1 | 9321815 | SNV | 1 | C | T | Heterozygous |
| NC_037649.1 | 9321856 | SNV | 1 | A | G | Homozygous   |
| NC_037649.1 | 9321920 | SNV | 1 | A | G | Homozygous   |
| NC_037649.1 | 9321950 | SNV | 1 | G | A | Homozygous   |
| NC_037649.1 | 9322098 | SNV | 1 | C | T | Homozygous   |
| NC_037649.1 | 9322369 | SNV | 1 | A | T | Homozygous   |
| NC_037649.1 | 9322438 | SNV | 1 | T | C | Homozygous   |
| NC_037649.1 | 9322452 | SNV | 1 | C | T | Heterozygous |
| NC_037649.1 | 9322460 | SNV | 1 | C | T | Heterozygous |
| NC_037649.1 | 9322475 | SNV | 1 | A | G | Heterozygous |
| NC_037649.1 | 9322525 | SNV | 1 | C | T | Heterozygous |
| NC_037649.1 | 9322675 | SNV | 1 | T | C | Heterozygous |
| NC_037649.1 | 9322842 | SNV | 1 | T | C | Heterozygous |
| NC_037649.1 | 9322973 | SNV | 1 | G | T | Heterozygous |
| NC_037649.1 | 9323375 | SNV | 1 | T | C | Heterozygous |
| NC_037649.1 | 9323869 | SNV | 1 | T | C | Homozygous   |
| NC_037649.1 | 9323874 | SNV | 1 | C | T | Homozygous   |
| NC_037649.1 | 9324087 | SNV | 1 | T | A | Heterozygous |
| NC_037649.1 | 9324122 | SNV | 1 | A | G | Homozygous   |
| NC_037649.1 | 9324792 | SNV | 1 | T | C | Heterozygous |
| NC_037649.1 | 9324845 | SNV | 1 | T | C | Heterozygous |
| NC_037649.1 | 9325545 | SNV | 1 | C | T | Heterozygous |

|             |         |     |   |   |   |              |
|-------------|---------|-----|---|---|---|--------------|
| NC_037649.1 | 9325823 | SNV | 1 | A | T | Heterozygous |
| NC_037649.1 | 9325966 | SNV | 1 | G | A | Heterozygous |
| NC_037649.1 | 9326035 | SNV | 1 | C | T | Heterozygous |
| NC_037649.1 | 9326444 | SNV | 1 | T | C | Homozygous   |
| NC_037649.1 | 9326511 | SNV | 1 | C | T | Homozygous   |
| NC_037649.1 | 9326587 | SNV | 1 | A | G | Homozygous   |
| NC_037649.1 | 9326633 | SNV | 1 | T | G | Homozygous   |
| NC_037649.1 | 9326752 | SNV | 1 | C | T | Heterozygous |
| NC_037649.1 | 9327182 | SNV | 1 | T | A | Heterozygous |
| NC_037649.1 | 9327373 | SNV | 1 | T | C | Homozygous   |
| NC_037649.1 | 9327883 | SNV | 1 | T | C | Heterozygous |
| NC_037649.1 | 9328203 | SNV | 1 | T | C | Homozygous   |
| NC_037649.1 | 9328303 | SNV | 1 | C | T | Heterozygous |
| NC_037649.1 | 9355446 | SNV | 1 | T | C | Homozygous   |
| NC_037649.1 | 9357963 | SNV | 1 | T | C | Homozygous   |
| NC_037649.1 | 9357995 | SNV | 1 | G | A | Homozygous   |
| NC_037649.1 | 9365979 | SNV | 1 | C | T | Heterozygous |
| NC_037649.1 | 9366039 | SNV | 1 | G | A | Homozygous   |
| NC_037649.1 | 9366097 | SNV | 1 | T | A | Homozygous   |
| NC_037649.1 | 9373531 | SNV | 1 | C | T | Heterozygous |
| NC_037649.1 | 9373622 | SNV | 1 | T | C | Heterozygous |
| NC_037649.1 | 9373653 | SNV | 1 | A | G | Heterozygous |
| NC_037649.1 | 9373754 | SNV | 1 | T | A | Heterozygous |
| NC_037649.1 | 9374623 | SNV | 1 | T | C | Heterozygous |
| NC_037649.1 | 9374642 | SNV | 1 | A | G | Heterozygous |
| NC_037649.1 | 9377336 | SNV | 1 | G | T | Heterozygous |
| NC_037649.1 | 9382081 | SNV | 1 | C | T | Heterozygous |
| NC_037649.1 | 9382609 | SNV | 1 | A | G | Homozygous   |
| NC_037649.1 | 9382612 | SNV | 1 | T | G | Homozygous   |
| NC_037649.1 | 9383174 | SNV | 1 | T | C | Homozygous   |
| NC_037649.1 | 9383185 | SNV | 1 | T | C | Homozygous   |
| NC_037649.1 | 9383200 | SNV | 1 | T | C | Homozygous   |
| NC_037649.1 | 9383202 | SNV | 1 | T | C | Homozygous   |
| NC_037649.1 | 9383208 | SNV | 1 | A | G | Homozygous   |
| NC_037649.1 | 9383210 | SNV | 1 | T | C | Homozygous   |
| NC_037649.1 | 9383252 | SNV | 1 | T | C | Homozygous   |
| NC_037649.1 | 9383255 | SNV | 1 | T | C | Heterozygous |
| NC_037649.1 | 9383270 | SNV | 1 | A | G | Homozygous   |
| NC_037649.1 | 9383272 | SNV | 1 | G | A | Homozygous   |
| NC_037649.1 | 9385728 | SNV | 1 | T | A | Homozygous   |
| NC_037649.1 | 9385731 | SNV | 1 | A | G | Heterozygous |
| NC_037649.1 | 9385736 | SNV | 1 | G | C | Homozygous   |
| NC_037649.1 | 9385745 | SNV | 1 | T | C | Heterozygous |
| NC_037649.1 | 9386054 | SNV | 1 | C | T | Homozygous   |
| NC_037649.1 | 9386074 | SNV | 1 | A | G | Heterozygous |
| NC_037649.1 | 9386081 | SNV | 1 | T | G | Homozygous   |
| NC_037649.1 | 9386088 | SNV | 1 | G | T | Homozygous   |
| NC_037649.1 | 9386092 | SNV | 1 | T | A | Heterozygous |
| NC_037649.1 | 9386092 | SNV | 1 | T | G | Heterozygous |
| NC_037649.1 | 9386102 | SNV | 1 | A | G | Heterozygous |
| NC_037649.1 | 9386104 | SNV | 1 | A | G | Homozygous   |

|             |         |     |   |   |   |              |
|-------------|---------|-----|---|---|---|--------------|
| NC_037649.1 | 9386116 | SNV | 1 | A | G | Homozygous   |
| NC_037649.1 | 9386124 | SNV | 1 | A | G | Homozygous   |
| NC_037649.1 | 9386129 | SNV | 1 | A | G | Homozygous   |
| NC_037649.1 | 9390993 | SNV | 1 | G | A | Homozygous   |
| NC_037649.1 | 9391038 | SNV | 1 | C | G | Homozygous   |
| NC_037649.1 | 9396401 | SNV | 1 | T | C | Heterozygous |
| NC_037649.1 | 9396486 | SNV | 1 | A | G | Homozygous   |
| NC_037649.1 | 9396509 | SNV | 1 | A | C | Homozygous   |
| NC_037649.1 | 9397644 | SNV | 1 | T | C | Homozygous   |
| NC_037649.1 | 9397657 | SNV | 1 | C | A | Heterozygous |
| NC_037649.1 | 9397739 | SNV | 1 | T | C | Homozygous   |
| NC_037649.1 | 9420945 | SNV | 1 | C | T | Homozygous   |
| NC_037649.1 | 9420996 | SNV | 1 | G | A | Heterozygous |
| NC_037649.1 | 9421034 | SNV | 1 | T | C | Homozygous   |
| NC_037649.1 | 9431782 | SNV | 1 | C | T | Homozygous   |
| NC_037649.1 | 9431917 | SNV | 1 | G | A | Heterozygous |
| NC_037649.1 | 9431919 | SNV | 1 | A | G | Heterozygous |
| NC_037649.1 | 9432038 | SNV | 1 | T | G | Heterozygous |
| NC_037649.1 | 9432047 | SNV | 1 | C | G | Heterozygous |
| NC_037649.1 | 9443813 | SNV | 1 | G | A | Homozygous   |
| NC_037649.1 | 9443816 | SNV | 1 | C | A | Homozygous   |
| NC_037649.1 | 9443853 | SNV | 1 | T | A | Homozygous   |
| NC_037649.1 | 9452411 | SNV | 1 | C | T | Homozygous   |
| NC_037649.1 | 9452488 | SNV | 1 | T | C | Heterozygous |
| NC_037649.1 | 9453728 | SNV | 1 | A | G | Homozygous   |
| NC_037649.1 | 9454905 | SNV | 1 | C | T | Heterozygous |
| NC_037649.1 | 9454913 | SNV | 1 | C | T | Homozygous   |
| NC_037649.1 | 9454919 | SNV | 1 | C | T | Homozygous   |
| NC_037649.1 | 9454943 | SNV | 1 | G | A | Heterozygous |
| NC_037649.1 | 9454966 | SNV | 1 | T | C | Heterozygous |
| NC_037649.1 | 9455382 | SNV | 1 | G | T | Homozygous   |
| NC_037649.1 | 9461273 | SNV | 1 | C | T | Heterozygous |
| NC_037649.1 | 9461276 | SNV | 1 | T | G | Heterozygous |
| NC_037649.1 | 9461455 | SNV | 1 | C | T | Heterozygous |
| NC_037649.1 | 9461483 | SNV | 1 | A | G | Homozygous   |
| NC_037649.1 | 9461718 | SNV | 1 | G | C | Heterozygous |
| NC_037649.1 | 9465533 | SNV | 1 | G | T | Homozygous   |
| NC_037649.1 | 9465535 | SNV | 1 | T | A | Heterozygous |
| NC_037649.1 | 9465590 | SNV | 1 | C | T | Heterozygous |
| NC_037649.1 | 9465606 | SNV | 1 | T | C | Heterozygous |
| NC_037649.1 | 9465817 | SNV | 1 | G | A | Heterozygous |
| NC_037649.1 | 9466306 | SNV | 1 | G | A | Heterozygous |
| NC_037649.1 | 9467083 | SNV | 1 | C | G | Homozygous   |
| NC_037649.1 | 9467093 | SNV | 1 | C | G | Heterozygous |
| NC_037649.1 | 9467102 | SNV | 1 | T | A | Homozygous   |
| NC_037649.1 | 9477116 | SNV | 1 | T | C | Heterozygous |
| NC_037649.1 | 9477118 | SNV | 1 | C | T | Heterozygous |
| NC_037649.1 | 9477131 | SNV | 1 | C | T | Heterozygous |
| NC_037649.1 | 9477161 | SNV | 1 | T | C | Homozygous   |
| NC_037649.1 | 9477298 | SNV | 1 | T | C | Heterozygous |
| NC_037649.1 | 9477397 | SNV | 1 | G | A | Homozygous   |

|             |         |     |   |   |   |              |
|-------------|---------|-----|---|---|---|--------------|
| NC_037649.1 | 9484359 | SNV | 1 | G | A | Homozygous   |
| NC_037649.1 | 9484379 | SNV | 1 | T | A | Heterozygous |
| NC_037649.1 | 9486082 | SNV | 1 | G | C | Homozygous   |
| NC_037649.1 | 9486350 | SNV | 1 | G | A | Heterozygous |
| NC_037649.1 | 9487827 | SNV | 1 | C | T | Homozygous   |
| NC_037649.1 | 9487830 | SNV | 1 | T | C | Homozygous   |
| NC_037649.1 | 9490497 | SNV | 1 | A | G | Homozygous   |
| NC_037649.1 | 9491647 | SNV | 1 | T | C | Heterozygous |
| NC_037649.1 | 9491653 | SNV | 1 | T | C | Homozygous   |
| NC_037649.1 | 9491681 | SNV | 1 | T | C | Homozygous   |
| NC_037649.1 | 9491687 | SNV | 1 | A | G | Heterozygous |
| NC_037649.1 | 9491692 | SNV | 1 | A | G | Heterozygous |
| NC_037649.1 | 9491701 | SNV | 1 | T | C | Homozygous   |
| NC_037649.1 | 9491703 | SNV | 1 | T | C | Heterozygous |
| NC_037649.1 | 9491709 | SNV | 1 | C | G | Homozygous   |
| NC_037649.1 | 9495504 | SNV | 1 | G | A | Homozygous   |
| NC_037649.1 | 9495506 | SNV | 1 | G | T | Homozygous   |
| NC_037649.1 | 9495510 | SNV | 1 | A | G | Homozygous   |
| NC_037649.1 | 9495513 | SNV | 1 | G | A | Homozygous   |
| NC_037649.1 | 9495517 | SNV | 1 | G | A | Homozygous   |
| NC_037649.1 | 9495524 | SNV | 1 | G | T | Homozygous   |
| NC_037649.1 | 9495531 | SNV | 1 | T | A | Homozygous   |
| NC_037649.1 | 9495536 | SNV | 1 | C | T | Homozygous   |
| NC_037649.1 | 9495538 | SNV | 1 | A | T | Homozygous   |
| NC_037649.1 | 9496236 | SNV | 1 | G | A | Heterozygous |
| NC_037649.1 | 9496272 | SNV | 1 | A | G | Heterozygous |
| NC_037649.1 | 9496274 | SNV | 1 | G | A | Heterozygous |
| NC_037649.1 | 9499148 | SNV | 1 | G | C | Homozygous   |
| NC_037649.1 | 9499264 | SNV | 1 | T | C | Heterozygous |
| NC_037649.1 | 9516202 | SNV | 1 | A | G | Homozygous   |
| NC_037649.1 | 9516362 | SNV | 1 | G | A | Heterozygous |
| NC_037649.1 | 9516411 | SNV | 1 | G | A | Heterozygous |
| NC_037649.1 | 9516450 | SNV | 1 | A | G | Homozygous   |
| NC_037649.1 | 9516577 | SNV | 1 | G | C | Heterozygous |
| NC_037649.1 | 9540898 | SNV | 1 | C | G | Heterozygous |
| NC_037649.1 | 9540927 | SNV | 1 | T | C | Heterozygous |
| NC_037649.1 | 9540955 | SNV | 1 | T | C | Heterozygous |
| NC_037649.1 | 9553607 | SNV | 1 | C | T | Homozygous   |
| NC_037649.1 | 9556698 | SNV | 1 | T | C | Homozygous   |
| NC_037649.1 | 9556734 | SNV | 1 | G | A | Heterozygous |
| NC_037649.1 | 9556742 | SNV | 1 | T | C | Homozygous   |
| NC_037649.1 | 9556759 | SNV | 1 | C | T | Homozygous   |
| NC_037649.1 | 9558659 | SNV | 1 | C | T | Homozygous   |
| NC_037649.1 | 9558679 | SNV | 1 | T | C | Homozygous   |
| NC_037649.1 | 9558681 | SNV | 1 | C | T | Homozygous   |
| NC_037649.1 | 9558683 | SNV | 1 | T | A | Homozygous   |
| NC_037649.1 | 9558957 | SNV | 1 | G | C | Heterozygous |
| NC_037649.1 | 9570151 | SNV | 1 | T | C | Heterozygous |
| NC_037649.1 | 9570291 | SNV | 1 | C | G | Heterozygous |
| NC_037649.1 | 9570395 | SNV | 1 | G | T | Heterozygous |
| NC_037649.1 | 9570399 | SNV | 1 | G | C | Homozygous   |

|             |         |     |   |   |   |              |
|-------------|---------|-----|---|---|---|--------------|
| NC_037649.1 | 9578435 | SNV | 1 | A | G | Heterozygous |
| NC_037649.1 | 9578442 | SNV | 1 | A | G | Homozygous   |
| NC_037649.1 | 9578482 | SNV | 1 | A | T | Homozygous   |
| NC_037649.1 | 9578564 | SNV | 1 | A | G | Homozygous   |
| NC_037649.1 | 9578571 | SNV | 1 | A | G | Homozygous   |
| NC_037649.1 | 9588242 | SNV | 1 | T | C | Homozygous   |
| NC_037649.1 | 9588384 | SNV | 1 | T | C | Homozygous   |
| NC_037649.1 | 9588445 | SNV | 1 | G | A | Heterozygous |
| NC_037649.1 | 9588470 | SNV | 1 | A | G | Homozygous   |
| NC_037649.1 | 9588500 | SNV | 1 | A | T | Heterozygous |
| NC_037649.1 | 9588502 | SNV | 1 | C | T | Heterozygous |
| NC_037649.1 | 9588530 | SNV | 1 | A | G | Homozygous   |
| NC_037649.1 | 9588623 | SNV | 1 | A | G | Homozygous   |
| NC_037649.1 | 9588633 | SNV | 1 | C | A | Homozygous   |
| NC_037649.1 | 9592029 | SNV | 1 | T | C | Homozygous   |
| NC_037649.1 | 9592044 | SNV | 1 | T | C | Homozygous   |
| NC_037649.1 | 9596274 | SNV | 1 | T | A | Homozygous   |
| NC_037649.1 | 9601363 | SNV | 1 | G | A | Heterozygous |
| NC_037649.1 | 9601421 | SNV | 1 | T | G | Homozygous   |
| NC_037649.1 | 9601492 | SNV | 1 | G | C | Homozygous   |
| NC_037649.1 | 9608885 | SNV | 1 | C | G | Heterozygous |
| NC_037649.1 | 9612906 | SNV | 1 | G | A | Homozygous   |
| NC_037649.1 | 9612908 | SNV | 1 | G | C | Homozygous   |
| NC_037649.1 | 9612918 | SNV | 1 | G | A | Homozygous   |
| NC_037649.1 | 9612920 | SNV | 1 | G | A | Homozygous   |
| NC_037649.1 | 9683963 | SNV | 1 | C | T | Homozygous   |
| NC_037649.1 | 9684015 | SNV | 1 | C | A | Heterozygous |
| NC_037649.1 | 9688712 | SNV | 1 | C | T | Homozygous   |
| NC_037649.1 | 9694036 | SNV | 1 | A | G | Homozygous   |
| NC_037649.1 | 9694044 | SNV | 1 | T | G | Homozygous   |
| NC_037649.1 | 9699315 | SNV | 1 | G | A | Homozygous   |
| NC_037649.1 | 9699634 | SNV | 1 | A | T | Heterozygous |
| NC_037649.1 | 9699636 | SNV | 1 | A | C | Heterozygous |
| NC_037649.1 | 9699639 | SNV | 1 | T | A | Heterozygous |
| NC_037649.1 | 9699669 | SNV | 1 | T | A | Heterozygous |
| NC_037649.1 | 9700025 | SNV | 1 | A | C | Homozygous   |
| NC_037649.1 | 9700042 | SNV | 1 | A | G | Homozygous   |
| NC_037649.1 | 9700320 | SNV | 1 | T | C | Heterozygous |
| NC_037649.1 | 9700439 | SNV | 1 | C | T | Heterozygous |
| NC_037649.1 | 9700687 | SNV | 1 | T | C | Homozygous   |
| NC_037649.1 | 9700690 | SNV | 1 | A | G | Homozygous   |
| NC_037649.1 | 9700751 | SNV | 1 | T | C | Homozygous   |
| NC_037649.1 | 9700838 | SNV | 1 | C | G | Homozygous   |
| NC_037649.1 | 9701374 | SNV | 1 | C | T | Homozygous   |
| NC_037649.1 | 9702212 | SNV | 1 | A | G | Heterozygous |
| NC_037649.1 | 9703777 | SNV | 1 | G | A | Heterozygous |
| NC_037649.1 | 9703799 | SNV | 1 | A | G | Heterozygous |
| NC_037649.1 | 9703824 | SNV | 1 | G | A | Heterozygous |
| NC_037649.1 | 9703828 | SNV | 1 | G | A | Heterozygous |
| NC_037649.1 | 9703832 | SNV | 1 | G | A | Heterozygous |
| NC_037649.1 | 9703854 | SNV | 1 | T | A | Homozygous   |

|             |         |     |   |   |   |              |
|-------------|---------|-----|---|---|---|--------------|
| NC_037649.1 | 9703858 | SNV | 1 | G | A | Homozygous   |
| NC_037649.1 | 9704294 | SNV | 1 | A | G | Heterozygous |
| NC_037649.1 | 9704319 | SNV | 1 | C | T | Heterozygous |
| NC_037649.1 | 9704394 | SNV | 1 | C | T | Heterozygous |
| NC_037649.1 | 9704434 | SNV | 1 | C | T | Heterozygous |
| NC_037649.1 | 9704447 | SNV | 1 | C | T | Homozygous   |
| NC_037649.1 | 9704584 | SNV | 1 | A | G | Homozygous   |
| NC_037649.1 | 9704717 | SNV | 1 | C | T | Heterozygous |
| NC_037649.1 | 9704733 | SNV | 1 | T | C | Homozygous   |
| NC_037649.1 | 9704853 | SNV | 1 | G | A | Heterozygous |
| NC_037649.1 | 9704867 | SNV | 1 | A | G | Homozygous   |
| NC_037649.1 | 9704869 | SNV | 1 | A | G | Homozygous   |
| NC_037649.1 | 9704887 | SNV | 1 | A | G | Homozygous   |
| NC_037649.1 | 9705414 | SNV | 1 | A | G | Homozygous   |
| NC_037649.1 | 9705418 | SNV | 1 | T | G | Homozygous   |
| NC_037649.1 | 9705424 | SNV | 1 | C | A | Homozygous   |
| NC_037649.1 | 9706232 | SNV | 1 | T | C | Heterozygous |
| NC_037649.1 | 9714049 | SNV | 1 | A | G | Heterozygous |
| NC_037649.1 | 9735117 | SNV | 1 | T | C | Homozygous   |
| NC_037649.1 | 9735206 | SNV | 1 | C | T | Heterozygous |
| NC_037649.1 | 9735244 | SNV | 1 | C | T | Heterozygous |
| NC_037649.1 | 9747983 | SNV | 1 | T | C | Homozygous   |
| NC_037649.1 | 9748168 | SNV | 1 | C | T | Heterozygous |
| NC_037649.1 | 9748312 | SNV | 1 | T | C | Homozygous   |
| NC_037649.1 | 9748374 | SNV | 1 | T | C | Heterozygous |
| NC_037649.1 | 9748447 | SNV | 1 | C | T | Heterozygous |
| NC_037649.1 | 9748477 | SNV | 1 | T | C | Heterozygous |
| NC_037649.1 | 9748634 | SNV | 1 | T | C | Homozygous   |
| NC_037649.1 | 9748721 | SNV | 1 | T | C | Homozygous   |
| NC_037649.1 | 9749680 | SNV | 1 | C | A | Heterozygous |
| NC_037649.1 | 9749764 | SNV | 1 | T | C | Homozygous   |
| NC_037649.1 | 9751430 | SNV | 1 | C | T | Heterozygous |
| NC_037649.1 | 9751443 | SNV | 1 | A | T | Homozygous   |
| NC_037649.1 | 9751464 | SNV | 1 | C | T | Homozygous   |
| NC_037649.1 | 9751515 | SNV | 1 | C | T | Heterozygous |
| NC_037649.1 | 9751518 | SNV | 1 | T | C | Heterozygous |
| NC_037649.1 | 9751528 | SNV | 1 | C | T | Heterozygous |
| NC_037649.1 | 9751532 | SNV | 1 | C | G | Heterozygous |
| NC_037649.1 | 9751658 | SNV | 1 | C | A | Heterozygous |
| NC_037649.1 | 9751680 | SNV | 1 | C | T | Heterozygous |
| NC_037649.1 | 9751690 | SNV | 1 | G | A | Heterozygous |
| NC_037649.1 | 9751698 | SNV | 1 | C | G | Homozygous   |
| NC_037649.1 | 9766715 | SNV | 1 | A | G | Heterozygous |
| NC_037649.1 | 9766817 | SNV | 1 | T | C | Heterozygous |
| NC_037649.1 | 9766884 | SNV | 1 | T | C | Homozygous   |
| NC_037649.1 | 9766896 | SNV | 1 | A | G | Homozygous   |
| NC_037649.1 | 9766928 | SNV | 1 | T | A | Homozygous   |
| NC_037649.1 | 9772215 | SNV | 1 | C | T | Heterozygous |
| NC_037649.1 | 9772998 | SNV | 1 | G | A | Heterozygous |
| NC_037649.1 | 9786880 | SNV | 1 | A | G | Heterozygous |
| NC_037649.1 | 9786887 | SNV | 1 | T | G | Heterozygous |

|             |         |     |   |   |   |              |
|-------------|---------|-----|---|---|---|--------------|
| NC_037649.1 | 9786958 | SNV | 1 | C | T | Heterozygous |
| NC_037649.1 | 9787163 | SNV | 1 | A | G | Homozygous   |
| NC_037649.1 | 9787335 | SNV | 1 | C | T | Heterozygous |
| NC_037649.1 | 9792171 | SNV | 1 | T | C | Homozygous   |
| NC_037649.1 | 9792220 | SNV | 1 | C | T | Homozygous   |
| NC_037649.1 | 9792301 | SNV | 1 | A | G | Homozygous   |
| NC_037649.1 | 9792311 | SNV | 1 | T | C | Homozygous   |
| NC_037649.1 | 9792633 | SNV | 1 | T | A | Heterozygous |
| NC_037649.1 | 9804355 | SNV | 1 | C | T | Homozygous   |
| NC_037649.1 | 9812286 | SNV | 1 | C | T | Homozygous   |
| NC_037649.1 | 9813471 | SNV | 1 | G | A | Homozygous   |
| NC_037649.1 | 9813477 | SNV | 1 | T | C | Homozygous   |
| NC_037649.1 | 9813482 | SNV | 1 | A | C | Homozygous   |
| NC_037649.1 | 9813485 | SNV | 1 | T | G | Homozygous   |
| NC_037649.1 | 9813502 | SNV | 1 | C | T | Homozygous   |
| NC_037649.1 | 9813510 | SNV | 1 | T | A | Homozygous   |
| NC_037649.1 | 9827436 | SNV | 1 | C | T | Homozygous   |
| NC_037649.1 | 9827450 | SNV | 1 | T | C | Heterozygous |
| NC_037649.1 | 9830642 | SNV | 1 | T | C | Homozygous   |
| NC_037649.1 | 9830657 | SNV | 1 | C | T | Heterozygous |
| NC_037649.1 | 9830659 | SNV | 1 | T | C | Homozygous   |
| NC_037649.1 | 9830686 | SNV | 1 | C | T | Heterozygous |
| NC_037649.1 | 9830713 | SNV | 1 | C | T | Heterozygous |
| NC_037649.1 | 9830762 | SNV | 1 | C | T | Homozygous   |
| NC_037649.1 | 9830825 | SNV | 1 | A | G | Heterozygous |
| NC_037649.1 | 9832373 | SNV | 1 | C | T | Heterozygous |
| NC_037649.1 | 9832379 | SNV | 1 | C | T | Heterozygous |
| NC_037649.1 | 9832386 | SNV | 1 | C | T | Homozygous   |
| NC_037649.1 | 9832570 | SNV | 1 | G | A | Heterozygous |
| NC_037649.1 | 9832614 | SNV | 1 | G | A | Heterozygous |
| NC_037649.1 | 9833225 | SNV | 1 | T | C | Homozygous   |
| NC_037649.1 | 9833230 | SNV | 1 | T | C | Homozygous   |
| NC_037649.1 | 9834630 | SNV | 1 | C | A | Homozygous   |
| NC_037649.1 | 9834826 | SNV | 1 | C | A | Homozygous   |
| NC_037649.1 | 9834931 | SNV | 1 | C | T | Homozygous   |
| NC_037649.1 | 9844547 | SNV | 1 | C | T | Heterozygous |
| NC_037649.1 | 9850038 | SNV | 1 | T | C | Heterozygous |
| NC_037649.1 | 9850042 | SNV | 1 | G | T | Heterozygous |
| NC_037649.1 | 9850052 | SNV | 1 | T | G | Heterozygous |
| NC_037649.1 | 9852888 | SNV | 1 | G | A | Heterozygous |
| NC_037649.1 | 9855482 | SNV | 1 | C | T | Homozygous   |
| NC_037649.1 | 9880699 | SNV | 1 | A | G | Heterozygous |
| NC_037649.1 | 9880703 | SNV | 1 | G | A | Heterozygous |
| NC_037649.1 | 9886989 | SNV | 1 | G | A | Heterozygous |
| NC_037649.1 | 9887012 | SNV | 1 | G | A | Homozygous   |
| NC_037649.1 | 9889344 | SNV | 1 | T | C | Homozygous   |
| NC_037649.1 | 9889349 | SNV | 1 | G | A | Homozygous   |
| NC_037649.1 | 9889352 | SNV | 1 | G | A | Homozygous   |
| NC_037649.1 | 9889355 | SNV | 1 | G | A | Homozygous   |
| NC_037649.1 | 9889357 | SNV | 1 | A | G | Homozygous   |
| NC_037649.1 | 9889379 | SNV | 1 | G | A | Homozygous   |



|             |          |     |   |   |   |              |
|-------------|----------|-----|---|---|---|--------------|
| NC_037649.1 | 9889382  | SNV | 1 | G | A | Heterozygous |
| NC_037649.1 | 9907269  | SNV | 1 | C | T | Homozygous   |
| NC_037649.1 | 9911798  | SNV | 1 | C | T | Homozygous   |
| NC_037649.1 | 9919221  | SNV | 1 | C | G | Heterozygous |
| NC_037649.1 | 9919223  | SNV | 1 | T | C | Heterozygous |
| NC_037649.1 | 9919229  | SNV | 1 | T | C | Heterozygous |
| NC_037649.1 | 9924910  | SNV | 1 | T | C | Heterozygous |
| NC_037649.1 | 9925160  | SNV | 1 | A | C | Homozygous   |
| NC_037649.1 | 9948371  | SNV | 1 | A | T | Homozygous   |
| NC_037649.1 | 9949023  | SNV | 1 | A | G | Heterozygous |
| NC_037649.1 | 9949458  | SNV | 1 | A | G | Heterozygous |
| NC_037649.1 | 9953868  | SNV | 1 | A | G | Homozygous   |
| NC_037649.1 | 9954059  | SNV | 1 | G | A | Heterozygous |
| NC_037649.1 | 9954111  | SNV | 1 | G | A | Heterozygous |
| NC_037649.1 | 9954231  | SNV | 1 | A | G | Homozygous   |
| NC_037649.1 | 9954606  | SNV | 1 | A | C | Homozygous   |
| NC_037649.1 | 9963143  | SNV | 1 | T | C | Heterozygous |
| NC_037649.1 | 9963262  | SNV | 1 | A | T | Homozygous   |
| NC_037649.1 | 9963284  | SNV | 1 | A | T | Homozygous   |
| NC_037649.1 | 9963288  | SNV | 1 | T | A | Homozygous   |
| NC_037649.1 | 9963290  | SNV | 1 | T | A | Homozygous   |
| NC_037649.1 | 9963294  | SNV | 1 | A | T | Homozygous   |
| NC_037649.1 | 9963298  | SNV | 1 | A | C | Homozygous   |
| NC_037649.1 | 9964837  | SNV | 1 | C | T | Homozygous   |
| NC_037649.1 | 9968456  | SNV | 1 | A | T | Heterozygous |
| NC_037649.1 | 9968480  | SNV | 1 | T | A | Homozygous   |
| NC_037649.1 | 9969700  | SNV | 1 | A | G | Homozygous   |
| NC_037649.1 | 9969741  | SNV | 1 | T | C | Homozygous   |
| NC_037649.1 | 9970055  | SNV | 1 | C | T | Homozygous   |
| NC_037649.1 | 9970945  | SNV | 1 | T | C | Heterozygous |
| NC_037649.1 | 9972085  | SNV | 1 | A | G | Homozygous   |
| NC_037649.1 | 9972097  | SNV | 1 | G | A | Homozygous   |
| NC_037649.1 | 9974380  | SNV | 1 | C | T | Heterozygous |
| NC_037649.1 | 9974425  | SNV | 1 | C | T | Heterozygous |
| NC_037649.1 | 9974455  | SNV | 1 | T | C | Homozygous   |
| NC_037649.1 | 9975055  | SNV | 1 | A | G | Homozygous   |
| NC_037649.1 | 9975639  | SNV | 1 | C | T | Heterozygous |
| NC_037649.1 | 9975798  | SNV | 1 | C | T | Heterozygous |
| NC_037649.1 | 9975870  | SNV | 1 | C | T | Heterozygous |
| NC_037649.1 | 9975888  | SNV | 1 | G | A | Heterozygous |
| NC_037649.1 | 9976826  | SNV | 1 | T | C | Heterozygous |
| NC_037649.1 | 9976989  | SNV | 1 | C | T | Heterozygous |
| NC_037649.1 | 9977957  | SNV | 1 | G | A | Homozygous   |
| NC_037649.1 | 9984901  | SNV | 1 | C | A | Heterozygous |
| NC_037649.1 | 9984919  | SNV | 1 | G | A | Heterozygous |
| NC_037649.1 | 10001725 | SNV | 1 | C | T | Heterozygous |
| NC_037649.1 | 10001763 | SNV | 1 | T | C | Homozygous   |
| NC_037649.1 | 10001833 | SNV | 1 | T | C | Homozygous   |
| NC_037649.1 | 10001867 | SNV | 1 | C | T | Heterozygous |
| NC_037649.1 | 10012400 | SNV | 1 | A | G | Homozygous   |
| NC_037649.1 | 10012577 | SNV | 1 | A | G | Heterozygous |

|             |          |     |   |   |   |              |
|-------------|----------|-----|---|---|---|--------------|
| NC_037649.1 | 10013563 | SNV | 1 | T | C | Homozygous   |
| NC_037649.1 | 10013637 | SNV | 1 | A | G | Homozygous   |
| NC_037649.1 | 10014669 | SNV | 1 | C | T | Heterozygous |
| NC_037649.1 | 10014867 | SNV | 1 | T | C | Heterozygous |
| NC_037649.1 | 10016090 | SNV | 1 | C | G | Heterozygous |
| NC_037649.1 | 10017895 | SNV | 1 | G | A | Heterozygous |
| NC_037649.1 | 10018459 | SNV | 1 | A | C | Homozygous   |
| NC_037649.1 | 10018461 | SNV | 1 | T | G | Homozygous   |
| NC_037649.1 | 10018542 | SNV | 1 | T | C | Heterozygous |
| NC_037649.1 | 10018557 | SNV | 1 | A | T | Homozygous   |
| NC_037649.1 | 10019187 | SNV | 1 | A | T | Heterozygous |
| NC_037649.1 | 10019479 | SNV | 1 | A | G | Homozygous   |
| NC_037649.1 | 10020296 | SNV | 1 | A | G | Homozygous   |
| NC_037649.1 | 10025177 | SNV | 1 | A | G | Homozygous   |
| NC_037649.1 | 10026767 | SNV | 1 | G | A | Heterozygous |
| NC_037649.1 | 10026951 | SNV | 1 | G | A | Homozygous   |
| NC_037649.1 | 10028329 | SNV | 1 | T | G | Homozygous   |
| NC_037649.1 | 10028416 | SNV | 1 | G | C | Heterozygous |
| NC_037649.1 | 10028597 | SNV | 1 | T | C | Heterozygous |
| NC_037649.1 | 10028657 | SNV | 1 | C | G | Heterozygous |
| NC_037649.1 | 10028827 | SNV | 1 | T | C | Heterozygous |
| NC_037649.1 | 10033310 | SNV | 1 | G | A | Heterozygous |
| NC_037649.1 | 10035669 | SNV | 1 | A | G | Heterozygous |
| NC_037649.1 | 10035962 | SNV | 1 | T | C | Homozygous   |
| NC_037649.1 | 10037975 | SNV | 1 | G | A | Heterozygous |
| NC_037649.1 | 10038143 | SNV | 1 | C | T | Heterozygous |
| NC_037649.1 | 10038184 | SNV | 1 | C | T | Heterozygous |
| NC_037649.1 | 10038813 | SNV | 1 | T | C | Heterozygous |
| NC_037649.1 | 10039287 | SNV | 1 | C | T | Heterozygous |
| NC_037649.1 | 10039303 | SNV | 1 | G | A | Heterozygous |
| NC_037649.1 | 10039319 | SNV | 1 | G | A | Heterozygous |
| NC_037649.1 | 10039360 | SNV | 1 | A | T | Heterozygous |
| NC_037649.1 | 10039402 | SNV | 1 | T | C | Homozygous   |
| NC_037649.1 | 10039659 | SNV | 1 | A | G | Homozygous   |
| NC_037649.1 | 10041025 | SNV | 1 | T | C | Homozygous   |
| NC_037649.1 | 10054592 | SNV | 1 | T | C | Homozygous   |
| NC_037649.1 | 10054998 | SNV | 1 | T | C | Homozygous   |
| NC_037649.1 | 10055969 | SNV | 1 | A | G | Homozygous   |
| NC_037649.1 | 10057813 | SNV | 1 | C | T | Heterozygous |
| NC_037649.1 | 10058237 | SNV | 1 | A | G | Homozygous   |
| NC_037649.1 | 10058392 | SNV | 1 | G | A | Homozygous   |
| NC_037649.1 | 10058574 | SNV | 1 | T | G | Homozygous   |
| NC_037649.1 | 10058584 | SNV | 1 | A | T | Homozygous   |
| NC_037649.1 | 10058587 | SNV | 1 | A | T | Homozygous   |
| NC_037649.1 | 10058602 | SNV | 1 | T | C | Homozygous   |
| NC_037649.1 | 10058606 | SNV | 1 | A | G | Homozygous   |
| NC_037649.1 | 10061652 | SNV | 1 | T | A | Heterozygous |
| NC_037649.1 | 10061678 | SNV | 1 | A | G | Heterozygous |
| NC_037649.1 | 10061682 | SNV | 1 | T | A | Heterozygous |
| NC_037649.1 | 10064954 | SNV | 1 | G | A | Homozygous   |
| NC_037649.1 | 10065001 | SNV | 1 | G | A | Homozygous   |

|             |          |     |   |   |   |              |
|-------------|----------|-----|---|---|---|--------------|
| NC_037649.1 | 10065767 | SNV | 1 | A | G | Homozygous   |
| NC_037649.1 | 10066167 | SNV | 1 | C | T | Heterozygous |
| NC_037649.1 | 10066189 | SNV | 1 | T | C | Heterozygous |
| NC_037649.1 | 10066202 | SNV | 1 | A | G | Homozygous   |
| NC_037649.1 | 10066338 | SNV | 1 | C | G | Homozygous   |
| NC_037649.1 | 10066587 | SNV | 1 | C | G | Homozygous   |
| NC_037649.1 | 10066614 | SNV | 1 | T | A | Homozygous   |
| NC_037649.1 | 10066621 | SNV | 1 | G | A | Homozygous   |
| NC_037649.1 | 10066684 | SNV | 1 | C | T | Homozygous   |
| NC_037649.1 | 10067037 | SNV | 1 | G | A | Homozygous   |
| NC_037649.1 | 10069567 | SNV | 1 | A | T | Homozygous   |
| NC_037649.1 | 10069570 | SNV | 1 | T | A | Homozygous   |
| NC_037649.1 | 10091615 | SNV | 1 | T | C | Homozygous   |
| NC_037649.1 | 10092033 | SNV | 1 | C | T | Heterozygous |
| NC_037649.1 | 10096484 | SNV | 1 | A | G | Heterozygous |
| NC_037649.1 | 10096856 | SNV | 1 | A | T | Heterozygous |
| NC_037649.1 | 10096861 | SNV | 1 | C | G | Heterozygous |
| NC_037649.1 | 10096867 | SNV | 1 | C | G | Heterozygous |
| NC_037649.1 | 10098077 | SNV | 1 | G | T | Homozygous   |
| NC_037649.1 | 10098086 | SNV | 1 | T | C | Homozygous   |
| NC_037649.1 | 10104483 | SNV | 1 | A | G | Homozygous   |
| NC_037649.1 | 10104487 | SNV | 1 | A | C | Homozygous   |
| NC_037649.1 | 10104495 | SNV | 1 | A | G | Homozygous   |
| NC_037649.1 | 10104506 | SNV | 1 | G | T | Homozygous   |
| NC_037649.1 | 10104510 | SNV | 1 | A | C | Heterozygous |
| NC_037649.1 | 10104510 | SNV | 1 | A | T | Heterozygous |
| NC_037649.1 | 10105402 | SNV | 1 | T | C | Heterozygous |
| NC_037649.1 | 10105404 | SNV | 1 | T | C | Heterozygous |
| NC_037649.1 | 10105407 | SNV | 1 | C | T | Heterozygous |
| NC_037649.1 | 10105408 | SNV | 1 | C | T | Heterozygous |
| NC_037649.1 | 10105410 | SNV | 1 | T | C | Heterozygous |
| NC_037649.1 | 10105413 | SNV | 1 | C | T | Homozygous   |
| NC_037649.1 | 10105415 | SNV | 1 | C | A | Homozygous   |
| NC_037649.1 | 10105430 | SNV | 1 | C | T | Heterozygous |
| NC_037649.1 | 10105436 | SNV | 1 | T | C | Heterozygous |
| NC_037649.1 | 10144967 | SNV | 1 | A | T | Heterozygous |
| NC_037649.1 | 10145010 | SNV | 1 | G | A | Heterozygous |
| NC_037649.1 | 10145142 | SNV | 1 | A | T | Heterozygous |
| NC_037649.1 | 10145163 | SNV | 1 | G | A | Heterozygous |
| NC_037649.1 | 10145168 | SNV | 1 | A | G | Heterozygous |
| NC_037649.1 | 10145182 | SNV | 1 | G | A | Homozygous   |
| NC_037649.1 | 10153481 | SNV | 1 | G | A | Heterozygous |
| NC_037649.1 | 10160465 | SNV | 1 | A | G | Homozygous   |
| NC_037649.1 | 10160503 | SNV | 1 | G | A | Heterozygous |
| NC_037649.1 | 10160509 | SNV | 1 | G | A | Homozygous   |
| NC_037649.1 | 10160515 | SNV | 1 | A | T | Homozygous   |
| NC_037649.1 | 10170816 | SNV | 1 | T | G | Homozygous   |
| NC_037649.1 | 10196270 | SNV | 1 | G | A | Homozygous   |
| NC_037649.1 | 10196295 | SNV | 1 | T | A | Homozygous   |
| NC_037649.1 | 10196297 | SNV | 1 | G | A | Homozygous   |
| NC_037649.1 | 10196300 | SNV | 1 | A | C | Homozygous   |

|             |          |     |   |   |   |              |
|-------------|----------|-----|---|---|---|--------------|
| NC_037649.1 | 10208476 | SNV | 1 | A | G | Homozygous   |
| NC_037649.1 | 10208487 | SNV | 1 | G | A | Heterozygous |
| NC_037649.1 | 10212952 | SNV | 1 | A | T | Homozygous   |
| NC_037649.1 | 10212978 | SNV | 1 | T | A | Homozygous   |
| NC_037649.1 | 10213120 | SNV | 1 | A | T | Heterozygous |
| NC_037649.1 | 10213125 | SNV | 1 | T | A | Heterozygous |
| NC_037649.1 | 10213135 | SNV | 1 | T | A | Heterozygous |
| NC_037649.1 | 10228928 | SNV | 1 | C | T | Heterozygous |
| NC_037649.1 | 10228932 | SNV | 1 | T | G | Heterozygous |
| NC_037649.1 | 10228934 | SNV | 1 | T | A | Heterozygous |
| NC_037649.1 | 10228944 | SNV | 1 | C | T | Homozygous   |
| NC_037649.1 | 10229831 | SNV | 1 | A | G | Heterozygous |
| NC_037649.1 | 10229838 | SNV | 1 | A | G | Heterozygous |
| NC_037649.1 | 10229843 | SNV | 1 | A | G | Heterozygous |
| NC_037649.1 | 10229883 | SNV | 1 | C | T | Heterozygous |
| NC_037649.1 | 10229893 | SNV | 1 | G | A | Heterozygous |
| NC_037649.1 | 10229902 | SNV | 1 | G | A | Homozygous   |
| NC_037649.1 | 10229905 | SNV | 1 | G | A | Heterozygous |
| NC_037649.1 | 10229910 | SNV | 1 | G | C | Heterozygous |
| NC_037649.1 | 10230088 | SNV | 1 | T | C | Heterozygous |
| NC_037649.1 | 10230128 | SNV | 1 | T | C | Homozygous   |
| NC_037649.1 | 10230130 | SNV | 1 | T | C | Homozygous   |
| NC_037649.1 | 10230234 | SNV | 1 | G | T | Homozygous   |
| NC_037649.1 | 10230264 | SNV | 1 | A | G | Homozygous   |
| NC_037649.1 | 10230273 | SNV | 1 | A | T | Homozygous   |
| NC_037649.1 | 10230282 | SNV | 1 | A | G | Heterozygous |
| NC_037649.1 | 10230285 | SNV | 1 | T | A | Heterozygous |
| NC_037649.1 | 10230541 | SNV | 1 | A | G | Homozygous   |
| NC_037649.1 | 10230784 | SNV | 1 | C | G | Heterozygous |
| NC_037649.1 | 10230792 | SNV | 1 | T | C | Homozygous   |
| NC_037649.1 | 10230812 | SNV | 1 | G | A | Homozygous   |
| NC_037649.1 | 10230816 | SNV | 1 | C | G | Homozygous   |
| NC_037649.1 | 10230865 | SNV | 1 | G | A | Heterozygous |
| NC_037649.1 | 10230962 | SNV | 1 | A | C | Heterozygous |
| NC_037649.1 | 10230964 | SNV | 1 | G | A | Heterozygous |
| NC_037649.1 | 10230971 | SNV | 1 | A | C | Heterozygous |
| NC_037649.1 | 10230979 | SNV | 1 | A | C | Heterozygous |
| NC_037649.1 | 10230986 | SNV | 1 | A | T | Heterozygous |
| NC_037649.1 | 10230990 | SNV | 1 | A | G | Heterozygous |
| NC_037649.1 | 10230993 | SNV | 1 | A | G | Heterozygous |
| NC_037649.1 | 10230995 | SNV | 1 | A | G | Homozygous   |
| NC_037649.1 | 10231055 | SNV | 1 | C | A | Homozygous   |
| NC_037649.1 | 10231094 | SNV | 1 | T | A | Heterozygous |
| NC_037649.1 | 10231163 | SNV | 1 | A | C | Heterozygous |
| NC_037649.1 | 10231177 | SNV | 1 | G | A | Heterozygous |
| NC_037649.1 | 10231200 | SNV | 1 | T | G | Homozygous   |
| NC_037649.1 | 10231211 | SNV | 1 | G | C | Heterozygous |
| NC_037649.1 | 10231215 | SNV | 1 | G | C | Heterozygous |
| NC_037649.1 | 10231409 | SNV | 1 | C | T | Heterozygous |
| NC_037649.1 | 10231452 | SNV | 1 | G | A | Heterozygous |
| NC_037649.1 | 10231777 | SNV | 1 | G | C | Heterozygous |

|             |          |     |   |   |   |              |
|-------------|----------|-----|---|---|---|--------------|
| NC_037649.1 | 10231926 | SNV | 1 | T | C | Homozygous   |
| NC_037649.1 | 10234835 | SNV | 1 | A | G | Homozygous   |
| NC_037649.1 | 10234950 | SNV | 1 | A | G | Homozygous   |
| NC_037649.1 | 10235053 | SNV | 1 | T | C | Heterozygous |
| NC_037649.1 | 10235577 | SNV | 1 | G | A | Heterozygous |
| NC_037649.1 | 10235631 | SNV | 1 | T | C | Homozygous   |
| NC_037649.1 | 10235860 | SNV | 1 | G | A | Heterozygous |
| NC_037649.1 | 10235863 | SNV | 1 | G | A | Heterozygous |
| NC_037649.1 | 10236183 | SNV | 1 | T | C | Heterozygous |
| NC_037649.1 | 10236184 | SNV | 1 | T | C | Heterozygous |
| NC_037649.1 | 10236192 | SNV | 1 | C | T | Heterozygous |
| NC_037649.1 | 10236205 | SNV | 1 | C | T | Heterozygous |
| NC_037649.1 | 10236216 | SNV | 1 | T | C | Heterozygous |
| NC_037649.1 | 10237502 | SNV | 1 | A | G | Heterozygous |
| NC_037649.1 | 10237504 | SNV | 1 | T | G | Heterozygous |
| NC_037649.1 | 10237589 | SNV | 1 | G | A | Homozygous   |
| NC_037649.1 | 10237803 | SNV | 1 | A | G | Homozygous   |
| NC_037649.1 | 10238020 | SNV | 1 | G | A | Heterozygous |
| NC_037649.1 | 10241450 | SNV | 1 | A | G | Heterozygous |
| NC_037649.1 | 10241468 | SNV | 1 | C | A | Heterozygous |
| NC_037649.1 | 10241561 | SNV | 1 | T | C | Homozygous   |
| NC_037649.1 | 10241574 | SNV | 1 | C | G | Homozygous   |
| NC_037649.1 | 10251446 | SNV | 1 | A | C | Homozygous   |
| NC_037649.1 | 10251485 | SNV | 1 | C | T | Homozygous   |
| NC_037649.1 | 10259367 | SNV | 1 | T | C | Heterozygous |
| NC_037649.1 | 10259395 | SNV | 1 | T | C | Homozygous   |
| NC_037649.1 | 10261983 | SNV | 1 | G | T | Heterozygous |
| NC_037649.1 | 10262143 | SNV | 1 | T | C | Homozygous   |
| NC_037649.1 | 10262319 | SNV | 1 | A | G | Homozygous   |
| NC_037649.1 | 10262653 | SNV | 1 | A | G | Homozygous   |
| NC_037649.1 | 10263686 | SNV | 1 | G | A | Heterozygous |
| NC_037649.1 | 10263703 | SNV | 1 | G | A | Heterozygous |
| NC_037649.1 | 10263711 | SNV | 1 | A | G | Heterozygous |
| NC_037649.1 | 10263855 | SNV | 1 | C | T | Homozygous   |
| NC_037649.1 | 10281222 | SNV | 1 | A | G | Homozygous   |
| NC_037649.1 | 10281230 | SNV | 1 | A | G | Homozygous   |
| NC_037649.1 | 10281245 | SNV | 1 | T | C | Homozygous   |
| NC_037649.1 | 10284898 | SNV | 1 | T | C | Homozygous   |
| NC_037649.1 | 10291727 | SNV | 1 | C | T | Heterozygous |
| NC_037649.1 | 10291778 | SNV | 1 | G | A | Heterozygous |
| NC_037649.1 | 10291840 | SNV | 1 | A | C | Heterozygous |
| NC_037649.1 | 10291842 | SNV | 1 | A | G | Heterozygous |
| NC_037649.1 | 10291865 | SNV | 1 | A | G | Homozygous   |
| NC_037649.1 | 10292016 | SNV | 1 | A | G | Homozygous   |
| NC_037649.1 | 10292054 | SNV | 1 | T | G | Homozygous   |
| NC_037649.1 | 10292079 | SNV | 1 | T | C | Heterozygous |
| NC_037649.1 | 10292089 | SNV | 1 | G | A | Homozygous   |
| NC_037649.1 | 10292478 | SNV | 1 | A | G | Homozygous   |
| NC_037649.1 | 10299143 | SNV | 1 | A | G | Homozygous   |
| NC_037649.1 | 10299221 | SNV | 1 | T | C | Homozygous   |
| NC_037649.1 | 10299322 | SNV | 1 | A | G | Homozygous   |

|             |          |     |   |   |   |              |
|-------------|----------|-----|---|---|---|--------------|
| NC_037649.1 | 10299329 | SNV | 1 | A | G | Homozygous   |
| NC_037649.1 | 10299389 | SNV | 1 | G | A | Homozygous   |
| NC_037649.1 | 10299407 | SNV | 1 | G | C | Heterozygous |
| NC_037649.1 | 10299418 | SNV | 1 | A | G | Heterozygous |
| NC_037649.1 | 10299459 | SNV | 1 | T | C | Homozygous   |
| NC_037649.1 | 10299544 | SNV | 1 | T | G | Homozygous   |
| NC_037649.1 | 10300692 | SNV | 1 | G | A | Heterozygous |
| NC_037649.1 | 10300733 | SNV | 1 | A | G | Heterozygous |
| NC_037649.1 | 10300740 | SNV | 1 | G | A | Heterozygous |
| NC_037649.1 | 10300757 | SNV | 1 | G | A | Homozygous   |
| NC_037649.1 | 10300857 | SNV | 1 | T | C | Heterozygous |
| NC_037649.1 | 10300891 | SNV | 1 | C | T | Heterozygous |
| NC_037649.1 | 10300894 | SNV | 1 | A | G | Homozygous   |
| NC_037649.1 | 10301080 | SNV | 1 | A | G | Homozygous   |
| NC_037649.1 | 10301122 | SNV | 1 | G | A | Homozygous   |
| NC_037649.1 | 10301135 | SNV | 1 | G | A | Heterozygous |
| NC_037649.1 | 10301147 | SNV | 1 | T | C | Heterozygous |
| NC_037649.1 | 10301151 | SNV | 1 | T | C | Heterozygous |
| NC_037649.1 | 10301152 | SNV | 1 | T | C | Heterozygous |
| NC_037649.1 | 10309313 | SNV | 1 | G | A | Homozygous   |
| NC_037649.1 | 10309367 | SNV | 1 | A | G | Heterozygous |
| NC_037649.1 | 10309550 | SNV | 1 | A | G | Homozygous   |
| NC_037649.1 | 10309860 | SNV | 1 | G | A | Homozygous   |
| NC_037649.1 | 10309921 | SNV | 1 | A | G | Heterozygous |
| NC_037649.1 | 10310306 | SNV | 1 | C | T | Homozygous   |
| NC_037649.1 | 10331567 | SNV | 1 | C | T | Heterozygous |
| NC_037649.1 | 10331687 | SNV | 1 | G | A | Homozygous   |
| NC_037649.1 | 10331718 | SNV | 1 | G | C | Homozygous   |
| NC_037649.1 | 10331936 | SNV | 1 | T | C | Heterozygous |
| NC_037649.1 | 10331939 | SNV | 1 | C | T | Heterozygous |
| NC_037649.1 | 10332139 | SNV | 1 | C | T | Homozygous   |
| NC_037649.1 | 10332856 | SNV | 1 | A | G | Homozygous   |
| NC_037649.1 | 10332874 | SNV | 1 | T | C | Homozygous   |
| NC_037649.1 | 10333003 | SNV | 1 | G | A | Homozygous   |
| NC_037649.1 | 10333142 | SNV | 1 | A | G | Heterozygous |
| NC_037649.1 | 10333874 | SNV | 1 | G | A | Heterozygous |
| NC_037649.1 | 10333891 | SNV | 1 | C | G | Homozygous   |
| NC_037649.1 | 10333942 | SNV | 1 | G | A | Heterozygous |
| NC_037649.1 | 10334467 | SNV | 1 | A | G | Homozygous   |
| NC_037649.1 | 10334791 | SNV | 1 | G | A | Heterozygous |
| NC_037649.1 | 10334817 | SNV | 1 | G | C | Homozygous   |
| NC_037649.1 | 10334833 | SNV | 1 | C | T | Heterozygous |
| NC_037649.1 | 10334897 | SNV | 1 | C | G | Homozygous   |
| NC_037649.1 | 10335144 | SNV | 1 | G | A | Heterozygous |
| NC_037649.1 | 10335616 | SNV | 1 | A | G | Homozygous   |
| NC_037649.1 | 10335640 | SNV | 1 | G | A | Heterozygous |
| NC_037649.1 | 10335641 | SNV | 1 | G | A | Heterozygous |
| NC_037649.1 | 10339250 | SNV | 1 | G | C | Heterozygous |
| NC_037649.1 | 10339250 | SNV | 1 | G | T | Heterozygous |
| NC_037649.1 | 10339311 | SNV | 1 | A | G | Homozygous   |
| NC_037649.1 | 10339340 | SNV | 1 | G | C | Heterozygous |

|             |          |     |   |   |   |              |
|-------------|----------|-----|---|---|---|--------------|
| NC_037649.1 | 10339396 | SNV | 1 | C | T | Heterozygous |
| NC_037649.1 | 10339398 | SNV | 1 | C | A | Heterozygous |
| NC_037649.1 | 10339687 | SNV | 1 | A | G | Homozygous   |
| NC_037649.1 | 10340721 | SNV | 1 | C | T | Heterozygous |
| NC_037649.1 | 10340753 | SNV | 1 | A | G | Homozygous   |
| NC_037649.1 | 10340793 | SNV | 1 | C | T | Heterozygous |
| NC_037649.1 | 10340828 | SNV | 1 | A | G | Homozygous   |
| NC_037649.1 | 10340855 | SNV | 1 | T | C | Homozygous   |
| NC_037649.1 | 10341134 | SNV | 1 | G | A | Homozygous   |
| NC_037649.1 | 10341338 | SNV | 1 | C | T | Heterozygous |
| NC_037649.1 | 10341351 | SNV | 1 | T | C | Homozygous   |
| NC_037649.1 | 10343320 | SNV | 1 | T | A | Homozygous   |
| NC_037649.1 | 10343348 | SNV | 1 | A | T | Homozygous   |
| NC_037649.1 | 10343352 | SNV | 1 | T | A | Homozygous   |
| NC_037649.1 | 10343364 | SNV | 1 | T | C | Homozygous   |
| NC_037649.1 | 10349180 | SNV | 1 | G | A | Homozygous   |
| NC_037649.1 | 10362717 | SNV | 1 | C | T | Homozygous   |
| NC_037649.1 | 10362722 | SNV | 1 | T | C | Homozygous   |
| NC_037649.1 | 10366606 | SNV | 1 | T | C | Homozygous   |
| NC_037649.1 | 10366627 | SNV | 1 | T | C | Homozygous   |
| NC_037649.1 | 10366631 | SNV | 1 | T | C | Homozygous   |
| NC_037649.1 | 10366644 | SNV | 1 | T | A | Homozygous   |
| NC_037649.1 | 10366783 | SNV | 1 | T | C | Homozygous   |
| NC_037649.1 | 10372574 | SNV | 1 | T | C | Homozygous   |
| NC_037649.1 | 10372596 | SNV | 1 | T | C | Homozygous   |
| NC_037649.1 | 10372637 | SNV | 1 | A | G | Homozygous   |
| NC_037649.1 | 10388497 | SNV | 1 | G | C | Homozygous   |
| NC_037649.1 | 10388544 | SNV | 1 | A | C | Homozygous   |
| NC_037649.1 | 10388637 | SNV | 1 | C | G | Heterozygous |
| NC_037649.1 | 10388786 | SNV | 1 | C | T | Heterozygous |
| NC_037649.1 | 10388839 | SNV | 1 | A | G | Homozygous   |
| NC_037649.1 | 10388853 | SNV | 1 | A | G | Heterozygous |
| NC_037649.1 | 10388913 | SNV | 1 | A | G | Heterozygous |
| NC_037649.1 | 10388954 | SNV | 1 | C | T | Homozygous   |
| NC_037649.1 | 10389097 | SNV | 1 | G | A | Homozygous   |
| NC_037649.1 | 10399574 | SNV | 1 | T | A | Homozygous   |
| NC_037649.1 | 10399593 | SNV | 1 | T | G | Homozygous   |
| NC_037649.1 | 10399596 | SNV | 1 | C | T | Homozygous   |
| NC_037649.1 | 10399598 | SNV | 1 | A | G | Homozygous   |
| NC_037649.1 | 10399602 | SNV | 1 | C | T | Homozygous   |
| NC_037649.1 | 10399604 | SNV | 1 | T | G | Homozygous   |
| NC_037649.1 | 10399618 | SNV | 1 | T | A | Homozygous   |
| NC_037649.1 | 10399621 | SNV | 1 | T | A | Homozygous   |
| NC_037649.1 | 10400398 | SNV | 1 | T | C | Homozygous   |
| NC_037649.1 | 10400475 | SNV | 1 | G | C | Homozygous   |
| NC_037649.1 | 10400593 | SNV | 1 | G | A | Homozygous   |
| NC_037649.1 | 10400631 | SNV | 1 | C | G | Heterozygous |
| NC_037649.1 | 10400804 | SNV | 1 | T | C | Homozygous   |
| NC_037649.1 | 10401061 | SNV | 1 | A | T | Homozygous   |
| NC_037649.1 | 10401063 | SNV | 1 | G | A | Heterozygous |
| NC_037649.1 | 10401168 | SNV | 1 | G | C | Heterozygous |

|             |          |     |   |   |   |              |
|-------------|----------|-----|---|---|---|--------------|
| NC_037649.1 | 10401332 | SNV | 1 | G | T | Heterozygous |
| NC_037649.1 | 10401561 | SNV | 1 | T | C | Heterozygous |
| NC_037649.1 | 10401579 | SNV | 1 | T | C | Homozygous   |
| NC_037649.1 | 10405074 | SNV | 1 | C | T | Homozygous   |
| NC_037649.1 | 10405247 | SNV | 1 | C | G | Homozygous   |
| NC_037649.1 | 10409535 | SNV | 1 | G | A | Heterozygous |
| NC_037649.1 | 10409638 | SNV | 1 | A | G | Homozygous   |
| NC_037649.1 | 10411906 | SNV | 1 | C | T | Heterozygous |
| NC_037649.1 | 10411913 | SNV | 1 | A | G | Homozygous   |
| NC_037649.1 | 10411916 | SNV | 1 | C | A | Homozygous   |
| NC_037649.1 | 10412032 | SNV | 1 | G | A | Homozygous   |
| NC_037649.1 | 10412054 | SNV | 1 | A | G | Homozygous   |
| NC_037649.1 | 10412698 | SNV | 1 | G | A | Heterozygous |
| NC_037649.1 | 10412780 | SNV | 1 | T | A | Homozygous   |
| NC_037649.1 | 10412926 | SNV | 1 | T | C | Homozygous   |
| NC_037649.1 | 10413026 | SNV | 1 | A | G | Homozygous   |
| NC_037649.1 | 10414236 | SNV | 1 | C | T | Heterozygous |
| NC_037649.1 | 10414263 | SNV | 1 | A | G | Homozygous   |
| NC_037649.1 | 10414274 | SNV | 1 | A | G | Heterozygous |
| NC_037649.1 | 10414369 | SNV | 1 | G | A | Heterozygous |
| NC_037649.1 | 10414388 | SNV | 1 | G | A | Homozygous   |
| NC_037649.1 | 10414403 | SNV | 1 | A | G | Homozygous   |
| NC_037649.1 | 10414789 | SNV | 1 | T | C | Homozygous   |
| NC_037649.1 | 10414804 | SNV | 1 | T | C | Homozygous   |
| NC_037649.1 | 10414851 | SNV | 1 | T | C | Homozygous   |
| NC_037649.1 | 10415999 | SNV | 1 | T | A | Homozygous   |
| NC_037649.1 | 10420104 | SNV | 1 | A | G | Heterozygous |
| NC_037649.1 | 10420108 | SNV | 1 | G | A | Heterozygous |
| NC_037649.1 | 10420141 | SNV | 1 | G | C | Homozygous   |
| NC_037649.1 | 10430699 | SNV | 1 | C | T | Homozygous   |
| NC_037649.1 | 10430714 | SNV | 1 | C | A | Homozygous   |
| NC_037649.1 | 10430717 | SNV | 1 | C | T | Homozygous   |
| NC_037649.1 | 10430725 | SNV | 1 | T | C | Homozygous   |
| NC_037649.1 | 10430730 | SNV | 1 | T | C | Homozygous   |
| NC_037649.1 | 10445144 | SNV | 1 | A | G | Homozygous   |
| NC_037649.1 | 10445301 | SNV | 1 | T | C | Heterozygous |
| NC_037649.1 | 10445572 | SNV | 1 | C | G | Homozygous   |
| NC_037649.1 | 10445603 | SNV | 1 | A | G | Homozygous   |
| NC_037649.1 | 10445617 | SNV | 1 | A | T | Homozygous   |
| NC_037649.1 | 10445619 | SNV | 1 | A | G | Homozygous   |
| NC_037649.1 | 10445631 | SNV | 1 | G | A | Heterozygous |
| NC_037649.1 | 10460469 | SNV | 1 | C | T | Heterozygous |
| NC_037649.1 | 10460610 | SNV | 1 | C | G | Heterozygous |
| NC_037649.1 | 10460800 | SNV | 1 | C | T | Heterozygous |
| NC_037649.1 | 10460803 | SNV | 1 | C | T | Homozygous   |
| NC_037649.1 | 10461273 | SNV | 1 | A | G | Homozygous   |
| NC_037649.1 | 10461416 | SNV | 1 | A | G | Heterozygous |
| NC_037649.1 | 10461498 | SNV | 1 | C | T | Heterozygous |
| NC_037649.1 | 10461546 | SNV | 1 | C | T | Homozygous   |
| NC_037649.1 | 10461561 | SNV | 1 | C | T | Homozygous   |
| NC_037649.1 | 10461670 | SNV | 1 | A | G | Homozygous   |



|             |          |     |   |   |   |              |
|-------------|----------|-----|---|---|---|--------------|
| NC_037649.1 | 10461742 | SNV | 1 | G | A | Homozygous   |
| NC_037649.1 | 10462281 | SNV | 1 | G | C | Homozygous   |
| NC_037649.1 | 10467505 | SNV | 1 | G | C | Homozygous   |
| NC_037649.1 | 10468522 | SNV | 1 | G | A | Homozygous   |
| NC_037649.1 | 10468601 | SNV | 1 | G | A | Homozygous   |
| NC_037649.1 | 10468932 | SNV | 1 | G | A | Heterozygous |
| NC_037649.1 | 10469644 | SNV | 1 | C | G | Heterozygous |
| NC_037649.1 | 10469653 | SNV | 1 | A | G | Heterozygous |
| NC_037649.1 | 10470024 | SNV | 1 | T | C | Homozygous   |
| NC_037649.1 | 10470052 | SNV | 1 | C | T | Homozygous   |
| NC_037649.1 | 10470111 | SNV | 1 | G | A | Heterozygous |
| NC_037649.1 | 10470174 | SNV | 1 | T | C | Homozygous   |
| NC_037649.1 | 10470822 | SNV | 1 | A | G | Homozygous   |
| NC_037649.1 | 10470965 | SNV | 1 | A | T | Heterozygous |
| NC_037649.1 | 10471180 | SNV | 1 | A | G | Heterozygous |
| NC_037649.1 | 10471215 | SNV | 1 | A | C | Homozygous   |
| NC_037649.1 | 10471553 | SNV | 1 | T | C | Homozygous   |
| NC_037649.1 | 10471705 | SNV | 1 | C | T | Heterozygous |
| NC_037649.1 | 10471734 | SNV | 1 | G | A | Heterozygous |
| NC_037649.1 | 10471963 | SNV | 1 | A | G | Heterozygous |
| NC_037649.1 | 10471967 | SNV | 1 | C | G | Heterozygous |
| NC_037649.1 | 10471969 | SNV | 1 | T | A | Homozygous   |
| NC_037649.1 | 10471997 | SNV | 1 | A | G | Homozygous   |
| NC_037649.1 | 10471999 | SNV | 1 | A | G | Homozygous   |
| NC_037649.1 | 10472078 | SNV | 1 | C | T | Heterozygous |
| NC_037649.1 | 10472118 | SNV | 1 | A | G | Heterozygous |
| NC_037649.1 | 10472368 | SNV | 1 | T | C | Heterozygous |
| NC_037649.1 | 10472381 | SNV | 1 | A | C | Homozygous   |
| NC_037649.1 | 10472425 | SNV | 1 | A | T | Heterozygous |
| NC_037649.1 | 10472430 | SNV | 1 | A | G | Heterozygous |
| NC_037649.1 | 10472445 | SNV | 1 | C | T | Homozygous   |
| NC_037649.1 | 10472469 | SNV | 1 | T | C | Homozygous   |
| NC_037649.1 | 10472477 | SNV | 1 | C | T | Homozygous   |
| NC_037649.1 | 10472482 | SNV | 1 | T | C | Homozygous   |
| NC_037649.1 | 10472484 | SNV | 1 | T | C | Homozygous   |
| NC_037649.1 | 10472486 | SNV | 1 | C | T | Homozygous   |
| NC_037649.1 | 10472550 | SNV | 1 | C | T | Heterozygous |
| NC_037649.1 | 10472571 | SNV | 1 | T | C | Heterozygous |
| NC_037649.1 | 10472592 | SNV | 1 | T | C | Homozygous   |
| NC_037649.1 | 10472664 | SNV | 1 | C | T | Heterozygous |
| NC_037649.1 | 10472792 | SNV | 1 | C | A | Homozygous   |
| NC_037649.1 | 10472798 | SNV | 1 | T | C | Homozygous   |
| NC_037649.1 | 10472833 | SNV | 1 | C | A | Homozygous   |
| NC_037649.1 | 10473018 | SNV | 1 | A | G | Heterozygous |
| NC_037649.1 | 10473036 | SNV | 1 | G | A | Heterozygous |
| NC_037649.1 | 10473042 | SNV | 1 | T | A | Heterozygous |
| NC_037649.1 | 10473083 | SNV | 1 | C | T | Heterozygous |
| NC_037649.1 | 10473092 | SNV | 1 | T | C | Heterozygous |
| NC_037649.1 | 10473364 | SNV | 1 | T | C | Homozygous   |
| NC_037649.1 | 10473392 | SNV | 1 | A | G | Heterozygous |
| NC_037649.1 | 10473395 | SNV | 1 | A | G | Heterozygous |

|             |          |     |   |   |   |              |
|-------------|----------|-----|---|---|---|--------------|
| NC_037649.1 | 10473401 | SNV | 1 | A | T | Heterozygous |
| NC_037649.1 | 10473404 | SNV | 1 | A | T | Heterozygous |
| NC_037649.1 | 10473492 | SNV | 1 | A | G | Homozygous   |
| NC_037649.1 | 10473499 | SNV | 1 | G | A | Homozygous   |
| NC_037649.1 | 10473502 | SNV | 1 | A | G | Homozygous   |
| NC_037649.1 | 10473506 | SNV | 1 | A | G | Heterozygous |
| NC_037649.1 | 10473595 | SNV | 1 | G | A | Heterozygous |
| NC_037649.1 | 10473763 | SNV | 1 | T | C | Homozygous   |
| NC_037649.1 | 10473795 | SNV | 1 | G | A | Homozygous   |
| NC_037649.1 | 10473855 | SNV | 1 | C | T | Heterozygous |
| NC_037649.1 | 10473871 | SNV | 1 | A | G | Homozygous   |
| NC_037649.1 | 10474136 | SNV | 1 | A | C | Heterozygous |
| NC_037649.1 | 10474231 | SNV | 1 | T | C | Heterozygous |
| NC_037649.1 | 10474235 | SNV | 1 | A | T | Heterozygous |
| NC_037649.1 | 10474453 | SNV | 1 | T | C | Homozygous   |
| NC_037649.1 | 10474477 | SNV | 1 | G | A | Homozygous   |
| NC_037649.1 | 10474512 | SNV | 1 | C | T | Heterozygous |
| NC_037649.1 | 10474613 | SNV | 1 | C | A | Homozygous   |
| NC_037649.1 | 10488653 | SNV | 1 | T | C | Heterozygous |
| NC_037649.1 | 10489222 | SNV | 1 | T | C | Homozygous   |
| NC_037649.1 | 10489275 | SNV | 1 | A | T | Homozygous   |
| NC_037649.1 | 10489285 | SNV | 1 | A | G | Heterozygous |
| NC_037649.1 | 10489295 | SNV | 1 | A | G | Heterozygous |
| NC_037649.1 | 10489303 | SNV | 1 | T | C | Heterozygous |
| NC_037649.1 | 10489463 | SNV | 1 | A | T | Heterozygous |
| NC_037649.1 | 10489563 | SNV | 1 | G | A | Homozygous   |
| NC_037649.1 | 10489611 | SNV | 1 | T | A | Homozygous   |
| NC_037649.1 | 10489646 | SNV | 1 | T | C | Homozygous   |
| NC_037649.1 | 10490590 | SNV | 1 | T | C | Homozygous   |
| NC_037649.1 | 10490701 | SNV | 1 | G | A | Heterozygous |
| NC_037649.1 | 10490761 | SNV | 1 | T | C | Heterozygous |
| NC_037649.1 | 10491383 | SNV | 1 | G | A | Homozygous   |
| NC_037649.1 | 10491386 | SNV | 1 | C | T | Homozygous   |
| NC_037649.1 | 10492516 | SNV | 1 | G | A | Heterozygous |
| NC_037649.1 | 10493493 | SNV | 1 | A | G | Homozygous   |
| NC_037649.1 | 10493591 | SNV | 1 | C | T | Homozygous   |
| NC_037649.1 | 10493758 | SNV | 1 | A | G | Homozygous   |
| NC_037649.1 | 10493909 | SNV | 1 | G | T | Homozygous   |
| NC_037649.1 | 10493938 | SNV | 1 | T | A | Heterozygous |
| NC_037649.1 | 10494472 | SNV | 1 | T | A | Heterozygous |
| NC_037649.1 | 10494525 | SNV | 1 | G | A | Homozygous   |
| NC_037649.1 | 10494574 | SNV | 1 | A | T | Homozygous   |
| NC_037649.1 | 10494580 | SNV | 1 | A | G | Homozygous   |
| NC_037649.1 | 10494651 | SNV | 1 | T | A | Heterozygous |
| NC_037649.1 | 10495250 | SNV | 1 | T | C | Homozygous   |
| NC_037649.1 | 10501215 | SNV | 1 | C | T | Heterozygous |
| NC_037649.1 | 10502243 | SNV | 1 | C | T | Heterozygous |
| NC_037649.1 | 10502246 | SNV | 1 | T | C | Homozygous   |
| NC_037649.1 | 10504750 | SNV | 1 | T | C | Heterozygous |
| NC_037649.1 | 10510425 | SNV | 1 | G | A | Heterozygous |
| NC_037649.1 | 10510466 | SNV | 1 | C | T | Homozygous   |

|             |          |     |   |   |   |              |
|-------------|----------|-----|---|---|---|--------------|
| NC_037649.1 | 10510477 | SNV | 1 | T | C | Heterozygous |
| NC_037649.1 | 10510479 | SNV | 1 | T | C | Homozygous   |
| NC_037649.1 | 10510513 | SNV | 1 | T | C | Homozygous   |
| NC_037649.1 | 10510741 | SNV | 1 | T | A | Homozygous   |
| NC_037649.1 | 10526523 | SNV | 1 | G | A | Heterozygous |
| NC_037649.1 | 10526653 | SNV | 1 | G | A | Heterozygous |
| NC_037649.1 | 10526679 | SNV | 1 | T | C | Homozygous   |
| NC_037649.1 | 10529464 | SNV | 1 | A | C | Homozygous   |
| NC_037649.1 | 10529472 | SNV | 1 | T | C | Homozygous   |
| NC_037649.1 | 10529624 | SNV | 1 | C | T | Homozygous   |
| NC_037649.1 | 10530018 | SNV | 1 | T | C | Homozygous   |
| NC_037649.1 | 10530515 | SNV | 1 | G | A | Heterozygous |
| NC_037649.1 | 10530626 | SNV | 1 | T | C | Homozygous   |
| NC_037649.1 | 10530802 | SNV | 1 | T | C | Heterozygous |
| NC_037649.1 | 10530804 | SNV | 1 | C | T | Heterozygous |
| NC_037649.1 | 10531017 | SNV | 1 | A | G | Homozygous   |
| NC_037649.1 | 10531628 | SNV | 1 | T | C | Homozygous   |
| NC_037649.1 | 10531990 | SNV | 1 | C | G | Homozygous   |
| NC_037649.1 | 10532043 | SNV | 1 | G | A | Heterozygous |
| NC_037649.1 | 10538215 | SNV | 1 | G | A | Homozygous   |
| NC_037649.1 | 10538383 | SNV | 1 | A | G | Homozygous   |
| NC_037649.1 | 10538438 | SNV | 1 | T | C | Heterozygous |
| NC_037649.1 | 10538522 | SNV | 1 | G | A | Homozygous   |
| NC_037649.1 | 10541968 | SNV | 1 | G | T | Homozygous   |
| NC_037649.1 | 10542399 | SNV | 1 | T | C | Heterozygous |
| NC_037649.1 | 10542440 | SNV | 1 | T | C | Homozygous   |
| NC_037649.1 | 10542741 | SNV | 1 | C | T | Heterozygous |
| NC_037649.1 | 10542750 | SNV | 1 | G | T | Homozygous   |
| NC_037649.1 | 10542952 | SNV | 1 | C | T | Homozygous   |
| NC_037649.1 | 10543034 | SNV | 1 | A | G | Homozygous   |
| NC_037649.1 | 10543053 | SNV | 1 | T | C | Heterozygous |
| NC_037649.1 | 10543158 | SNV | 1 | A | G | Homozygous   |
| NC_037649.1 | 10543168 | SNV | 1 | A | G | Homozygous   |
| NC_037649.1 | 10543288 | SNV | 1 | A | G | Homozygous   |
| NC_037649.1 | 10554627 | SNV | 1 | C | T | Homozygous   |
| NC_037649.1 | 10554643 | SNV | 1 | T | C | Heterozygous |
| NC_037649.1 | 10565157 | SNV | 1 | A | G | Homozygous   |
| NC_037649.1 | 10565176 | SNV | 1 | G | A | Heterozygous |
| NC_037649.1 | 10565185 | SNV | 1 | C | G | Heterozygous |
| NC_037649.1 | 10566876 | SNV | 1 | C | T | Homozygous   |
| NC_037649.1 | 10566931 | SNV | 1 | T | C | Homozygous   |
| NC_037649.1 | 10567098 | SNV | 1 | G | A | Homozygous   |
| NC_037649.1 | 10567116 | SNV | 1 | G | C | Heterozygous |
| NC_037649.1 | 10567140 | SNV | 1 | A | C | Heterozygous |
| NC_037649.1 | 10590283 | SNV | 1 | A | G | Homozygous   |
| NC_037649.1 | 10590415 | SNV | 1 | C | T | Heterozygous |
| NC_037649.1 | 10590466 | SNV | 1 | T | C | Homozygous   |
| NC_037649.1 | 10590592 | SNV | 1 | C | G | Homozygous   |
| NC_037649.1 | 10590602 | SNV | 1 | T | C | Homozygous   |
| NC_037649.1 | 10590725 | SNV | 1 | C | T | Homozygous   |
| NC_037649.1 | 10599504 | SNV | 1 | A | G | Heterozygous |

|             |          |     |   |   |   |              |
|-------------|----------|-----|---|---|---|--------------|
| NC_037649.1 | 10599556 | SNV | 1 | T | G | Heterozygous |
| NC_037649.1 | 10611951 | SNV | 1 | C | T | Homozygous   |
| NC_037649.1 | 10614815 | SNV | 1 | A | G | Homozygous   |
| NC_037649.1 | 10653779 | SNV | 1 | A | T | Homozygous   |
| NC_037649.1 | 10653781 | SNV | 1 | T | C | Homozygous   |
| NC_037649.1 | 10653785 | SNV | 1 | C | T | Homozygous   |
| NC_037649.1 | 10653788 | SNV | 1 | T | C | Homozygous   |
| NC_037649.1 | 10669464 | SNV | 1 | T | A | Homozygous   |
| NC_037649.1 | 10669469 | SNV | 1 | A | T | Homozygous   |
| NC_037649.1 | 10682729 | SNV | 1 | A | G | Homozygous   |
| NC_037649.1 | 10682743 | SNV | 1 | C | T | Heterozygous |
| NC_037649.1 | 10682754 | SNV | 1 | T | C | Heterozygous |
| NC_037649.1 | 10682775 | SNV | 1 | A | C | Heterozygous |
| NC_037649.1 | 10683860 | SNV | 1 | T | C | Homozygous   |
| NC_037649.1 | 10684143 | SNV | 1 | G | T | Heterozygous |
| NC_037649.1 | 10688654 | SNV | 1 | G | A | Heterozygous |
| NC_037649.1 | 10690792 | SNV | 1 | A | T | Heterozygous |
| NC_037649.1 | 10694133 | SNV | 1 | A | G | Homozygous   |
| NC_037649.1 | 10694858 | SNV | 1 | C | T | Heterozygous |
| NC_037649.1 | 10698147 | SNV | 1 | T | C | Homozygous   |
| NC_037649.1 | 10699083 | SNV | 1 | G | A | Heterozygous |
| NC_037649.1 | 10699133 | SNV | 1 | G | A | Homozygous   |
| NC_037649.1 | 10704315 | SNV | 1 | T | A | Homozygous   |
| NC_037649.1 | 10704354 | SNV | 1 | A | G | Homozygous   |
| NC_037649.1 | 10704359 | SNV | 1 | A | C | Heterozygous |
| NC_037649.1 | 10704359 | SNV | 1 | A | T | Heterozygous |
| NC_037649.1 | 10704581 | SNV | 1 | G | A | Heterozygous |
| NC_037649.1 | 10704624 | SNV | 1 | A | G | Homozygous   |
| NC_037649.1 | 10705260 | SNV | 1 | G | T | Homozygous   |
| NC_037649.1 | 10708734 | SNV | 1 | C | A | Homozygous   |
| NC_037649.1 | 10710947 | SNV | 1 | A | T | Homozygous   |
| NC_037649.1 | 10715322 | SNV | 1 | T | C | Homozygous   |
| NC_037649.1 | 10727754 | SNV | 1 | A | G | Homozygous   |
| NC_037649.1 | 10727826 | SNV | 1 | A | G | Homozygous   |
| NC_037649.1 | 10727877 | SNV | 1 | A | G | Homozygous   |
| NC_037649.1 | 10728208 | SNV | 1 | T | C | Homozygous   |
| NC_037649.1 | 10728362 | SNV | 1 | A | G | Homozygous   |
| NC_037649.1 | 10728693 | SNV | 1 | G | C | Heterozygous |
| NC_037649.1 | 10728981 | SNV | 1 | G | C | Homozygous   |
| NC_037649.1 | 10729093 | SNV | 1 | G | A | Homozygous   |
| NC_037649.1 | 10729156 | SNV | 1 | T | C | Heterozygous |
| NC_037649.1 | 10739870 | SNV | 1 | C | T | Homozygous   |
| NC_037649.1 | 10739954 | SNV | 1 | A | T | Homozygous   |
| NC_037649.1 | 10760953 | SNV | 1 | C | T | Heterozygous |
| NC_037649.1 | 10761020 | SNV | 1 | T | C | Homozygous   |
| NC_037649.1 | 10761153 | SNV | 1 | T | G | Homozygous   |
| NC_037649.1 | 10761170 | SNV | 1 | T | C | Homozygous   |
| NC_037649.1 | 10762404 | SNV | 1 | T | G | Heterozygous |
| NC_037649.1 | 10762419 | SNV | 1 | T | C | Homozygous   |
| NC_037649.1 | 10763466 | SNV | 1 | G | A | Heterozygous |
| NC_037649.1 | 10763511 | SNV | 1 | A | G | Heterozygous |

|             |          |     |   |   |   |              |
|-------------|----------|-----|---|---|---|--------------|
| NC_037649.1 | 10764202 | SNV | 1 | A | G | Homozygous   |
| NC_037649.1 | 10764567 | SNV | 1 | G | T | Heterozygous |
| NC_037649.1 | 10784152 | SNV | 1 | A | G | Homozygous   |
| NC_037649.1 | 10784169 | SNV | 1 | G | A | Homozygous   |
| NC_037649.1 | 10795272 | SNV | 1 | A | T | Homozygous   |
| NC_037649.1 | 10795280 | SNV | 1 | A | C | Homozygous   |
| NC_037649.1 | 10802077 | SNV | 1 | C | G | Homozygous   |
| NC_037649.1 | 10802082 | SNV | 1 | A | T | Heterozygous |
| NC_037649.1 | 10802091 | SNV | 1 | T | G | Heterozygous |
| NC_037649.1 | 10802100 | SNV | 1 | T | C | Homozygous   |
| NC_037649.1 | 10802106 | SNV | 1 | T | G | Heterozygous |
| NC_037649.1 | 10802108 | SNV | 1 | T | C | Heterozygous |
| NC_037649.1 | 10804677 | SNV | 1 | G | A | Homozygous   |
| NC_037649.1 | 10804682 | SNV | 1 | A | G | Homozygous   |
| NC_037649.1 | 10804686 | SNV | 1 | A | G | Homozygous   |
| NC_037649.1 | 10804690 | SNV | 1 | A | G | Homozygous   |
| NC_037649.1 | 10804694 | SNV | 1 | A | G | Homozygous   |
| NC_037649.1 | 10810774 | SNV | 1 | A | G | Homozygous   |
| NC_037649.1 | 10810780 | SNV | 1 | A | G | Heterozygous |
| NC_037649.1 | 10810788 | SNV | 1 | A | C | Homozygous   |
| NC_037649.1 | 10810809 | SNV | 1 | G | A | Homozygous   |
| NC_037649.1 | 10810813 | SNV | 1 | A | G | Homozygous   |
| NC_037649.1 | 10810822 | SNV | 1 | A | G | Homozygous   |
| NC_037649.1 | 10849094 | SNV | 1 | G | T | Heterozygous |
| NC_037649.1 | 10849195 | SNV | 1 | C | G | Homozygous   |
| NC_037649.1 | 10849302 | SNV | 1 | T | C | Homozygous   |
| NC_037649.1 | 10849591 | SNV | 1 | C | T | Homozygous   |
| NC_037649.1 | 10850296 | SNV | 1 | G | T | Homozygous   |
| NC_037649.1 | 10850301 | SNV | 1 | A | G | Homozygous   |
| NC_037649.1 | 10850304 | SNV | 1 | T | C | Homozygous   |
| NC_037649.1 | 10850316 | SNV | 1 | A | G | Homozygous   |
| NC_037649.1 | 10850377 | SNV | 1 | T | C | Heterozygous |
| NC_037649.1 | 10850384 | SNV | 1 | G | A | Heterozygous |
| NC_037649.1 | 10850406 | SNV | 1 | C | T | Heterozygous |
| NC_037649.1 | 10853615 | SNV | 1 | C | T | Heterozygous |
| NC_037649.1 | 10853621 | SNV | 1 | A | G | Heterozygous |
| NC_037649.1 | 10905332 | SNV | 1 | A | G | Homozygous   |
| NC_037649.1 | 10905368 | SNV | 1 | A | C | Homozygous   |
| NC_037649.1 | 10905499 | SNV | 1 | T | C | Homozygous   |
| NC_037649.1 | 10905599 | SNV | 1 | G | C | Heterozygous |
| NC_037649.1 | 10905603 | SNV | 1 | G | C | Heterozygous |
| NC_037649.1 | 10912809 | SNV | 1 | T | C | Heterozygous |
| NC_037649.1 | 10912819 | SNV | 1 | A | G | Heterozygous |
| NC_037649.1 | 10912825 | SNV | 1 | A | T | Heterozygous |
| NC_037649.1 | 10912831 | SNV | 1 | G | A | Heterozygous |
| NC_037649.1 | 10912862 | SNV | 1 | A | G | Homozygous   |
| NC_037649.1 | 10914209 | SNV | 1 | T | C | Homozygous   |
| NC_037649.1 | 10918123 | SNV | 1 | T | C | Heterozygous |
| NC_037649.1 | 10918127 | SNV | 1 | C | T | Heterozygous |
| NC_037649.1 | 10918141 | SNV | 1 | T | C | Heterozygous |
| NC_037649.1 | 10922448 | SNV | 1 | A | C | Heterozygous |

|             |          |     |   |   |   |              |
|-------------|----------|-----|---|---|---|--------------|
| NC_037649.1 | 10922523 | SNV | 1 | A | C | Homozygous   |
| NC_037649.1 | 10922546 | SNV | 1 | T | A | Homozygous   |
| NC_037649.1 | 10922560 | SNV | 1 | T | A | Homozygous   |
| NC_037649.1 | 10922562 | SNV | 1 | C | T | Homozygous   |
| NC_037649.1 | 10945247 | SNV | 1 | A | G | Heterozygous |
| NC_037649.1 | 10945351 | SNV | 1 | C | T | Homozygous   |
| NC_037649.1 | 10949954 | SNV | 1 | C | T | Homozygous   |
| NC_037649.1 | 10962226 | SNV | 1 | G | A | Homozygous   |
| NC_037649.1 | 10962473 | SNV | 1 | T | C | Homozygous   |
| NC_037649.1 | 10963495 | SNV | 1 | A | G | Heterozygous |
| NC_037649.1 | 10972885 | SNV | 1 | A | G | Homozygous   |
| NC_037649.1 | 10973070 | SNV | 1 | T | C | Homozygous   |
| NC_037649.1 | 10973282 | SNV | 1 | T | C | Heterozygous |
| NC_037649.1 | 10973302 | SNV | 1 | T | C | Heterozygous |
| NC_037649.1 | 10974226 | SNV | 1 | T | C | Homozygous   |
| NC_037649.1 | 10974239 | SNV | 1 | A | G | Homozygous   |
| NC_037649.1 | 10974358 | SNV | 1 | T | C | Heterozygous |
| NC_037649.1 | 10974913 | SNV | 1 | T | C | Heterozygous |
| NC_037649.1 | 10975386 | SNV | 1 | T | C | Homozygous   |
| NC_037649.1 | 10975793 | SNV | 1 | C | G | Heterozygous |
| NC_037649.1 | 10976194 | SNV | 1 | G | A | Homozygous   |
| NC_037649.1 | 10976288 | SNV | 1 | C | T | Heterozygous |
| NC_037649.1 | 10976380 | SNV | 1 | T | G | Homozygous   |
| NC_037649.1 | 10976384 | SNV | 1 | T | C | Homozygous   |
| NC_037649.1 | 10976431 | SNV | 1 | T | C | Heterozygous |
| NC_037649.1 | 10976435 | SNV | 1 | A | G | Homozygous   |
| NC_037649.1 | 10976438 | SNV | 1 | G | C | Heterozygous |
| NC_037649.1 | 10976949 | SNV | 1 | A | C | Homozygous   |
| NC_037649.1 | 10976951 | SNV | 1 | G | C | Homozygous   |
| NC_037649.1 | 10976985 | SNV | 1 | A | G | Homozygous   |
| NC_037649.1 | 10976987 | SNV | 1 | T | C | Homozygous   |
| NC_037649.1 | 10977038 | SNV | 1 | G | A | Heterozygous |
| NC_037649.1 | 10977107 | SNV | 1 | T | C | Homozygous   |
| NC_037649.1 | 10977118 | SNV | 1 | T | C | Homozygous   |
| NC_037649.1 | 10983948 | SNV | 1 | C | T | Heterozygous |
| NC_037649.1 | 10983951 | SNV | 1 | C | T | Heterozygous |
| NC_037649.1 | 10983963 | SNV | 1 | C | T | Heterozygous |
| NC_037649.1 | 10983975 | SNV | 1 | A | G | Homozygous   |
| NC_037649.1 | 10983983 | SNV | 1 | G | A | Heterozygous |
| NC_037649.1 | 10983987 | SNV | 1 | A | G | Heterozygous |
| NC_037649.1 | 10984013 | SNV | 1 | G | C | Homozygous   |
| NC_037649.1 | 10984046 | SNV | 1 | T | C | Homozygous   |
| NC_037649.1 | 10984057 | SNV | 1 | T | C | Heterozygous |
| NC_037649.1 | 10984072 | SNV | 1 | G | A | Heterozygous |
| NC_037649.1 | 10984086 | SNV | 1 | A | G | Homozygous   |
| NC_037649.1 | 10984229 | SNV | 1 | C | G | Homozygous   |
| NC_037649.1 | 10984748 | SNV | 1 | G | A | Heterozygous |
| NC_037649.1 | 10987415 | SNV | 1 | C | A | Homozygous   |
| NC_037649.1 | 10987427 | SNV | 1 | G | C | Homozygous   |
| NC_037649.1 | 11011880 | SNV | 1 | A | T | Homozygous   |
| NC_037649.1 | 11011898 | SNV | 1 | G | T | Homozygous   |

|             |          |     |   |   |   |              |
|-------------|----------|-----|---|---|---|--------------|
| NC_037649.1 | 11011911 | SNV | 1 | C | A | Homozygous   |
| NC_037649.1 | 11011915 | SNV | 1 | A | C | Homozygous   |
| NC_037649.1 | 11074401 | SNV | 1 | A | G | Heterozygous |
| NC_037649.1 | 11074403 | SNV | 1 | T | C | Homozygous   |
| NC_037649.1 | 11075546 | SNV | 1 | T | A | Homozygous   |
| NC_037649.1 | 11075549 | SNV | 1 | A | T | Homozygous   |
| NC_037649.1 | 11075555 | SNV | 1 | A | G | Homozygous   |
| NC_037649.1 | 11075568 | SNV | 1 | T | C | Heterozygous |
| NC_037649.1 | 11075598 | SNV | 1 | T | C | Heterozygous |
| NC_037649.1 | 11075606 | SNV | 1 | C | T | Homozygous   |
| NC_037649.1 | 11077879 | SNV | 1 | A | G | Homozygous   |
| NC_037649.1 | 11077886 | SNV | 1 | G | A | Homozygous   |
| NC_037649.1 | 11081352 | SNV | 1 | A | T | Heterozygous |
| NC_037649.1 | 11081354 | SNV | 1 | T | C | Heterozygous |
| NC_037649.1 | 11081356 | SNV | 1 | T | A | Heterozygous |
| NC_037649.1 | 11081368 | SNV | 1 | T | C | Heterozygous |
| NC_037649.1 | 11081375 | SNV | 1 | T | C | Homozygous   |
| NC_037649.1 | 11081764 | SNV | 1 | A | G | Homozygous   |
| NC_037649.1 | 11082105 | SNV | 1 | C | A | Homozygous   |
| NC_037649.1 | 11082108 | SNV | 1 | C | T | Homozygous   |
| NC_037649.1 | 11082114 | SNV | 1 | C | A | Heterozygous |
| NC_037649.1 | 11082852 | SNV | 1 | C | T | Homozygous   |
| NC_037649.1 | 11082866 | SNV | 1 | T | C | Homozygous   |
| NC_037649.1 | 11082869 | SNV | 1 | A | G | Homozygous   |
| NC_037649.1 | 11082876 | SNV | 1 | T | C | Homozygous   |
| NC_037649.1 | 11082880 | SNV | 1 | T | C | Heterozygous |
| NC_037649.1 | 11082902 | SNV | 1 | C | G | Homozygous   |
| NC_037649.1 | 11082907 | SNV | 1 | T | C | Homozygous   |
| NC_037649.1 | 11082910 | SNV | 1 | T | G | Homozygous   |
| NC_037649.1 | 11082917 | SNV | 1 | T | C | Homozygous   |
| NC_037649.1 | 11082920 | SNV | 1 | A | T | Homozygous   |
| NC_037649.1 | 11128284 | SNV | 1 | G | A | Heterozygous |
| NC_037649.1 | 11128335 | SNV | 1 | T | G | Homozygous   |
| NC_037649.1 | 11129005 | SNV | 1 | G | T | Homozygous   |
| NC_037649.1 | 11129045 | SNV | 1 | G | A | Homozygous   |
| NC_037649.1 | 11129450 | SNV | 1 | T | A | Heterozygous |
| NC_037649.1 | 11129462 | SNV | 1 | T | C | Homozygous   |
| NC_037649.1 | 11129467 | SNV | 1 | A | T | Homozygous   |
| NC_037649.1 | 11131439 | SNV | 1 | G | T | Homozygous   |
| NC_037649.1 | 11131571 | SNV | 1 | G | A | Heterozygous |
| NC_037649.1 | 11131587 | SNV | 1 | C | T | Heterozygous |
| NC_037649.1 | 11131688 | SNV | 1 | C | G | Homozygous   |
| NC_037649.1 | 11131700 | SNV | 1 | C | T | Heterozygous |
| NC_037649.1 | 11131827 | SNV | 1 | C | T | Heterozygous |
| NC_037649.1 | 11131837 | SNV | 1 | G | T | Heterozygous |
| NC_037649.1 | 11131851 | SNV | 1 | C | T | Heterozygous |
| NC_037649.1 | 11132068 | SNV | 1 | T | C | Heterozygous |
| NC_037649.1 | 11132088 | SNV | 1 | C | T | Heterozygous |
| NC_037649.1 | 11132320 | SNV | 1 | T | C | Heterozygous |
| NC_037649.1 | 11132418 | SNV | 1 | T | C | Heterozygous |
| NC_037649.1 | 11132814 | SNV | 1 | A | G | Homozygous   |

|             |          |     |   |   |   |              |
|-------------|----------|-----|---|---|---|--------------|
| NC_037649.1 | 11133076 | SNV | 1 | C | T | Homozygous   |
| NC_037649.1 | 11133252 | SNV | 1 | T | C | Homozygous   |
| NC_037649.1 | 11133255 | SNV | 1 | C | T | Homozygous   |
| NC_037649.1 | 11133289 | SNV | 1 | T | C | Homozygous   |
| NC_037649.1 | 11133785 | SNV | 1 | A | G | Homozygous   |
| NC_037649.1 | 11133792 | SNV | 1 | T | C | Homozygous   |
| NC_037649.1 | 11134061 | SNV | 1 | C | T | Homozygous   |
| NC_037649.1 | 11134191 | SNV | 1 | G | A | Homozygous   |
| NC_037649.1 | 11134625 | SNV | 1 | G | A | Heterozygous |
| NC_037649.1 | 11135004 | SNV | 1 | T | C | Homozygous   |
| NC_037649.1 | 11135033 | SNV | 1 | T | C | Homozygous   |
| NC_037649.1 | 11139967 | SNV | 1 | T | C | Homozygous   |
| NC_037649.1 | 11141278 | SNV | 1 | G | A | Homozygous   |
| NC_037649.1 | 11141280 | SNV | 1 | A | C | Homozygous   |
| NC_037649.1 | 11141287 | SNV | 1 | A | G | Homozygous   |
| NC_037649.1 | 11145654 | SNV | 1 | T | C | Heterozygous |
| NC_037649.1 | 11145657 | SNV | 1 | A | T | Homozygous   |
| NC_037649.1 | 11145663 | SNV | 1 | G | C | Homozygous   |
| NC_037649.1 | 11145676 | SNV | 1 | C | G | Heterozygous |
| NC_037649.1 | 11145676 | SNV | 1 | C | T | Heterozygous |
| NC_037649.1 | 11145687 | SNV | 1 | C | A | Homozygous   |
| NC_037649.1 | 11145705 | SNV | 1 | A | T | Homozygous   |
| NC_037649.1 | 11145709 | SNV | 1 | G | T | Homozygous   |
| NC_037649.1 | 11145735 | SNV | 1 | T | C | Heterozygous |
| NC_037649.1 | 11145738 | SNV | 1 | G | A | Homozygous   |
| NC_037649.1 | 11145741 | SNV | 1 | G | A | Homozygous   |
| NC_037649.1 | 11158653 | SNV | 1 | A | T | Homozygous   |
| NC_037649.1 | 11159200 | SNV | 1 | T | C | Heterozygous |
| NC_037649.1 | 11159383 | SNV | 1 | A | G | Heterozygous |
| NC_037649.1 | 11159501 | SNV | 1 | C | T | Heterozygous |
| NC_037649.1 | 11159549 | SNV | 1 | T | C | Homozygous   |
| NC_037649.1 | 11159587 | SNV | 1 | T | A | Heterozygous |
| NC_037649.1 | 11236112 | SNV | 1 | T | C | Heterozygous |
| NC_037649.1 | 11236199 | SNV | 1 | C | T | Homozygous   |
| NC_037649.1 | 11236203 | SNV | 1 | G | A | Heterozygous |
| NC_037649.1 | 11236330 | SNV | 1 | T | C | Homozygous   |
| NC_037649.1 | 11236761 | SNV | 1 | T | C | Heterozygous |
| NC_037649.1 | 11236779 | SNV | 1 | G | A | Heterozygous |
| NC_037649.1 | 11236830 | SNV | 1 | T | C | Homozygous   |
| NC_037649.1 | 11236959 | SNV | 1 | T | C | Heterozygous |
| NC_037649.1 | 11236986 | SNV | 1 | T | C | Homozygous   |
| NC_037649.1 | 11237493 | SNV | 1 | A | G | Heterozygous |
| NC_037649.1 | 11237544 | SNV | 1 | G | A | Heterozygous |
| NC_037649.1 | 11237673 | SNV | 1 | C | T | Heterozygous |
| NC_037649.1 | 11238249 | SNV | 1 | A | G | Homozygous   |
| NC_037649.1 | 11238652 | SNV | 1 | T | C | Heterozygous |
| NC_037649.1 | 11249035 | SNV | 1 | C | G | Homozygous   |
| NC_037649.1 | 11252971 | SNV | 1 | A | G | Heterozygous |
| NC_037649.1 | 11253025 | SNV | 1 | T | C | Heterozygous |
| NC_037649.1 | 11253171 | SNV | 1 | C | A | Heterozygous |
| NC_037649.1 | 11254474 | SNV | 1 | A | T | Homozygous   |



|             |          |     |   |   |   |              |
|-------------|----------|-----|---|---|---|--------------|
| NC_037649.1 | 11254477 | SNV | 1 | A | T | Homozygous   |
| NC_037649.1 | 11254479 | SNV | 1 | A | G | Homozygous   |
| NC_037649.1 | 11254481 | SNV | 1 | T | A | Homozygous   |
| NC_037649.1 | 11254505 | SNV | 1 | T | C | Homozygous   |
| NC_037649.1 | 11254513 | SNV | 1 | A | T | Heterozygous |
| NC_037649.1 | 11262092 | SNV | 1 | T | C | Homozygous   |
| NC_037649.1 | 11262213 | SNV | 1 | T | C | Homozygous   |
| NC_037649.1 | 11262767 | SNV | 1 | G | T | Homozygous   |
| NC_037649.1 | 11263497 | SNV | 1 | C | T | Homozygous   |
| NC_037649.1 | 11263761 | SNV | 1 | G | T | Homozygous   |
| NC_037649.1 | 11264335 | SNV | 1 | C | T | Heterozygous |
| NC_037649.1 | 11264565 | SNV | 1 | G | C | Homozygous   |
| NC_037649.1 | 11264710 | SNV | 1 | G | T | Homozygous   |
| NC_037649.1 | 11265046 | SNV | 1 | C | T | Homozygous   |
| NC_037649.1 | 11265058 | SNV | 1 | T | C | Homozygous   |
| NC_037649.1 | 11265079 | SNV | 1 | A | G | Homozygous   |
| NC_037649.1 | 11265282 | SNV | 1 | A | G | Homozygous   |
| NC_037649.1 | 11268129 | SNV | 1 | G | A | Homozygous   |
| NC_037649.1 | 11270524 | SNV | 1 | T | C | Homozygous   |
| NC_037649.1 | 11271108 | SNV | 1 | A | G | Homozygous   |
| NC_037649.1 | 11271110 | SNV | 1 | C | T | Homozygous   |
| NC_037649.1 | 11271185 | SNV | 1 | G | T | Heterozygous |
| NC_037649.1 | 11271581 | SNV | 1 | A | G | Homozygous   |
| NC_037649.1 | 11271858 | SNV | 1 | T | C | Homozygous   |
| NC_037649.1 | 11272079 | SNV | 1 | G | A | Heterozygous |
| NC_037649.1 | 11272187 | SNV | 1 | G | A | Heterozygous |
| NC_037649.1 | 11272194 | SNV | 1 | G | A | Heterozygous |
| NC_037649.1 | 11272231 | SNV | 1 | G | A | Homozygous   |
| NC_037649.1 | 11272319 | SNV | 1 | G | A | Heterozygous |
| NC_037649.1 | 11275572 | SNV | 1 | A | G | Homozygous   |
| NC_037649.1 | 11275628 | SNV | 1 | G | A | Homozygous   |
| NC_037649.1 | 11334652 | SNV | 1 | A | G | Heterozygous |
| NC_037649.1 | 11334921 | SNV | 1 | T | C | Heterozygous |
| NC_037649.1 | 11334984 | SNV | 1 | A | G | Homozygous   |
| NC_037649.1 | 11335095 | SNV | 1 | G | A | Heterozygous |
| NC_037649.1 | 11335306 | SNV | 1 | G | A | Homozygous   |
| NC_037649.1 | 11335320 | SNV | 1 | C | G | Heterozygous |
| NC_037649.1 | 11335356 | SNV | 1 | T | C | Heterozygous |
| NC_037649.1 | 11335367 | SNV | 1 | C | T | Heterozygous |
| NC_037649.1 | 11335380 | SNV | 1 | A | G | Homozygous   |
| NC_037649.1 | 11335612 | SNV | 1 | C | A | Heterozygous |
| NC_037649.1 | 11335615 | SNV | 1 | C | T | Heterozygous |
| NC_037649.1 | 11335618 | SNV | 1 | C | T | Heterozygous |
| NC_037649.1 | 11335633 | SNV | 1 | C | T | Heterozygous |
| NC_037649.1 | 11335636 | SNV | 1 | A | G | Heterozygous |
| NC_037649.1 | 11335638 | SNV | 1 | A | G | Heterozygous |
| NC_037649.1 | 11335660 | SNV | 1 | A | G | Homozygous   |
| NC_037649.1 | 11335670 | SNV | 1 | G | A | Homozygous   |
| NC_037649.1 | 11335672 | SNV | 1 | C | G | Homozygous   |
| NC_037649.1 | 11335675 | SNV | 1 | G | A | Homozygous   |
| NC_037649.1 | 11335684 | SNV | 1 | C | T | Homozygous   |

|             |          |     |   |   |   |              |
|-------------|----------|-----|---|---|---|--------------|
| NC_037649.1 | 11335694 | SNV | 1 | T | C | Homozygous   |
| NC_037649.1 | 11335696 | SNV | 1 | G | C | Homozygous   |
| NC_037649.1 | 11335705 | SNV | 1 | G | C | Homozygous   |
| NC_037649.1 | 11335708 | SNV | 1 | G | A | Heterozygous |
| NC_037649.1 | 11335714 | SNV | 1 | A | G | Homozygous   |
| NC_037649.1 | 11335717 | SNV | 1 | C | T | Heterozygous |
| NC_037649.1 | 11335951 | SNV | 1 | C | G | Heterozygous |
| NC_037649.1 | 11335996 | SNV | 1 | T | C | Homozygous   |
| NC_037649.1 | 11336209 | SNV | 1 | T | C | Homozygous   |
| NC_037649.1 | 11336212 | SNV | 1 | C | T | Heterozygous |
| NC_037649.1 | 11337076 | SNV | 1 | C | T | Heterozygous |
| NC_037649.1 | 11337181 | SNV | 1 | A | G | Homozygous   |
| NC_037649.1 | 11337361 | SNV | 1 | T | C | Homozygous   |
| NC_037649.1 | 11338081 | SNV | 1 | T | G | Homozygous   |
| NC_037649.1 | 11340028 | SNV | 1 | A | G | Homozygous   |
| NC_037649.1 | 11340102 | SNV | 1 | G | A | Homozygous   |
| NC_037649.1 | 11340223 | SNV | 1 | A | G | Heterozygous |
| NC_037649.1 | 11340252 | SNV | 1 | A | G | Homozygous   |
| NC_037649.1 | 11340263 | SNV | 1 | A | G | Homozygous   |
| NC_037649.1 | 11340383 | SNV | 1 | A | G | Homozygous   |
| NC_037649.1 | 11340632 | SNV | 1 | A | G | Heterozygous |
| NC_037649.1 | 11340665 | SNV | 1 | T | C | Heterozygous |
| NC_037649.1 | 11340817 | SNV | 1 | C | T | Heterozygous |
| NC_037649.1 | 11340904 | SNV | 1 | G | A | Homozygous   |
| NC_037649.1 | 11348279 | SNV | 1 | G | A | Heterozygous |
| NC_037649.1 | 11380297 | SNV | 1 | T | C | Heterozygous |
| NC_037649.1 | 11380997 | SNV | 1 | T | G | Heterozygous |
| NC_037649.1 | 11381151 | SNV | 1 | G | A | Heterozygous |
| NC_037649.1 | 11382806 | SNV | 1 | A | G | Heterozygous |
| NC_037649.1 | 11384347 | SNV | 1 | T | A | Homozygous   |
| NC_037649.1 | 11387058 | SNV | 1 | C | G | Homozygous   |
| NC_037649.1 | 11406075 | SNV | 1 | C | T | Heterozygous |
| NC_037649.1 | 11406095 | SNV | 1 | C | G | Heterozygous |
| NC_037649.1 | 11406117 | SNV | 1 | T | C | Heterozygous |
| NC_037649.1 | 11406131 | SNV | 1 | T | C | Heterozygous |
| NC_037649.1 | 11406212 | SNV | 1 | T | C | Homozygous   |
| NC_037649.1 | 11410391 | SNV | 1 | C | T | Homozygous   |
| NC_037649.1 | 11410395 | SNV | 1 | C | T | Homozygous   |
| NC_037649.1 | 11410404 | SNV | 1 | C | T | Homozygous   |
| NC_037649.1 | 11410418 | SNV | 1 | C | T | Heterozygous |
| NC_037649.1 | 11410422 | SNV | 1 | C | T | Homozygous   |
| NC_037649.1 | 11440797 | SNV | 1 | G | A | Homozygous   |
| NC_037649.1 | 11440801 | SNV | 1 | A | C | Homozygous   |
| NC_037649.1 | 11455030 | SNV | 1 | C | A | Heterozygous |
| NC_037649.1 | 11455036 | SNV | 1 | C | T | Heterozygous |
| NC_037649.1 | 11457700 | SNV | 1 | T | C | Homozygous   |
| NC_037649.1 | 11457705 | SNV | 1 | T | C | Heterozygous |
| NC_037649.1 | 11457730 | SNV | 1 | C | A | Heterozygous |
| NC_037649.1 | 11457739 | SNV | 1 | T | A | Heterozygous |
| NC_037649.1 | 11457744 | SNV | 1 | C | T | Homozygous   |
| NC_037649.1 | 11457747 | SNV | 1 | A | C | Homozygous   |

|             |          |     |   |   |   |              |
|-------------|----------|-----|---|---|---|--------------|
| NC_037649.1 | 11460660 | SNV | 1 | A | C | Heterozygous |
| NC_037649.1 | 11460664 | SNV | 1 | A | C | Heterozygous |
| NC_037649.1 | 11460668 | SNV | 1 | A | T | Heterozygous |
| NC_037649.1 | 11460672 | SNV | 1 | A | T | Heterozygous |
| NC_037649.1 | 11460676 | SNV | 1 | A | T | Heterozygous |
| NC_037649.1 | 11460680 | SNV | 1 | A | T | Heterozygous |
| NC_037649.1 | 11460685 | SNV | 1 | G | A | Heterozygous |
| NC_037649.1 | 11460691 | SNV | 1 | G | A | Heterozygous |
| NC_037649.1 | 11460693 | SNV | 1 | G | A | Homozygous   |
| NC_037649.1 | 11460695 | SNV | 1 | T | A | Homozygous   |
| NC_037649.1 | 11460702 | SNV | 1 | A | G | Heterozygous |
| NC_037649.1 | 11460705 | SNV | 1 | A | G | Heterozygous |
| NC_037649.1 | 11460752 | SNV | 1 | G | A | Homozygous   |
| NC_037649.1 | 11460755 | SNV | 1 | G | A | Homozygous   |
| NC_037649.1 | 11464694 | SNV | 1 | T | C | Heterozygous |
| NC_037649.1 | 11469796 | SNV | 1 | C | G | Homozygous   |
| NC_037649.1 | 11469801 | SNV | 1 | A | G | Homozygous   |
| NC_037649.1 | 11469805 | SNV | 1 | T | C | Homozygous   |
| NC_037649.1 | 11469817 | SNV | 1 | C | A | Homozygous   |
| NC_037649.1 | 11469819 | SNV | 1 | G | A | Homozygous   |
| NC_037649.1 | 11469837 | SNV | 1 | C | T | Heterozygous |
| NC_037649.1 | 11469847 | SNV | 1 | G | T | Homozygous   |
| NC_037649.1 | 11475113 | SNV | 1 | A | G | Homozygous   |
| NC_037649.1 | 11478495 | SNV | 1 | T | C | Heterozygous |
| NC_037649.1 | 11483633 | SNV | 1 | A | G | Homozygous   |
| NC_037649.1 | 11484751 | SNV | 1 | T | A | Heterozygous |
| NC_037649.1 | 11487901 | SNV | 1 | G | C | Heterozygous |
| NC_037649.1 | 11487906 | SNV | 1 | T | C | Homozygous   |
| NC_037649.1 | 11487914 | SNV | 1 | T | C | Homozygous   |
| NC_037649.1 | 11487923 | SNV | 1 | C | G | Heterozygous |
| NC_037649.1 | 11490599 | SNV | 1 | T | C | Heterozygous |
| NC_037649.1 | 11490645 | SNV | 1 | T | C | Heterozygous |
| NC_037649.1 | 11493667 | SNV | 1 | T | C | Heterozygous |
| NC_037649.1 | 11500475 | SNV | 1 | T | C | Heterozygous |
| NC_037649.1 | 11500524 | SNV | 1 | T | C | Heterozygous |
| NC_037649.1 | 11500544 | SNV | 1 | C | T | Heterozygous |
| NC_037649.1 | 11500551 | SNV | 1 | C | T | Heterozygous |
| NC_037649.1 | 11500554 | SNV | 1 | T | C | Heterozygous |
| NC_037649.1 | 11506275 | SNV | 1 | C | T | Homozygous   |
| NC_037649.1 | 11506289 | SNV | 1 | A | T | Homozygous   |
| NC_037650.1 | 77124    | SNV | 1 | T | G | Homozygous   |
| NC_037650.1 | 77135    | SNV | 1 | T | A | Homozygous   |
| NC_037650.1 | 77143    | SNV | 1 | T | A | Homozygous   |
| NC_037650.1 | 77152    | SNV | 1 | A | G | Homozygous   |
| NC_037650.1 | 77179    | SNV | 1 | T | G | Homozygous   |
| NC_037650.1 | 81695    | SNV | 1 | T | C | Heterozygous |
| NC_037650.1 | 86025    | SNV | 1 | G | A | Homozygous   |
| NC_037650.1 | 86030    | SNV | 1 | C | T | Homozygous   |
| NC_037650.1 | 90975    | SNV | 1 | A | T | Homozygous   |
| NC_037650.1 | 90979    | SNV | 1 | A | T | Heterozygous |
| NC_037650.1 | 90987    | SNV | 1 | A | T | Heterozygous |

|             |        |     |   |   |   |              |
|-------------|--------|-----|---|---|---|--------------|
| NC_037650.1 | 93828  | SNV | 1 | T | A | Homozygous   |
| NC_037650.1 | 93830  | SNV | 1 | T | A | Homozygous   |
| NC_037650.1 | 93836  | SNV | 1 | T | A | Homozygous   |
| NC_037650.1 | 93842  | SNV | 1 | T | A | Homozygous   |
| NC_037650.1 | 93849  | SNV | 1 | A | T | Homozygous   |
| NC_037650.1 | 93861  | SNV | 1 | A | G | Homozygous   |
| NC_037650.1 | 93864  | SNV | 1 | T | A | Homozygous   |
| NC_037650.1 | 93871  | SNV | 1 | T | A | Homozygous   |
| NC_037650.1 | 93874  | SNV | 1 | T | A | Homozygous   |
| NC_037650.1 | 94747  | SNV | 1 | A | T | Homozygous   |
| NC_037650.1 | 94757  | SNV | 1 | A | C | Homozygous   |
| NC_037650.1 | 94761  | SNV | 1 | T | A | Homozygous   |
| NC_037650.1 | 94765  | SNV | 1 | A | C | Homozygous   |
| NC_037650.1 | 104426 | SNV | 1 | T | A | Heterozygous |
| NC_037650.1 | 104430 | SNV | 1 | T | C | Heterozygous |
| NC_037650.1 | 104436 | SNV | 1 | A | T | Heterozygous |
| NC_037650.1 | 104438 | SNV | 1 | A | C | Heterozygous |
| NC_037650.1 | 117434 | SNV | 1 | T | A | Heterozygous |
| NC_037650.1 | 120235 | SNV | 1 | C | T | Heterozygous |
| NC_037650.1 | 120257 | SNV | 1 | C | T | Homozygous   |
| NC_037650.1 | 120334 | SNV | 1 | G | A | Heterozygous |
| NC_037650.1 | 120511 | SNV | 1 | T | C | Heterozygous |
| NC_037650.1 | 120631 | SNV | 1 | G | A | Homozygous   |
| NC_037650.1 | 120735 | SNV | 1 | C | T | Homozygous   |
| NC_037650.1 | 120889 | SNV | 1 | G | T | Homozygous   |
| NC_037650.1 | 121477 | SNV | 1 | A | G | Homozygous   |
| NC_037650.1 | 121771 | SNV | 1 | A | G | Heterozygous |
| NC_037650.1 | 148537 | SNV | 1 | A | T | Homozygous   |
| NC_037650.1 | 148684 | SNV | 1 | T | C | Homozygous   |
| NC_037650.1 | 148815 | SNV | 1 | C | T | Homozygous   |
| NC_037650.1 | 148854 | SNV | 1 | A | G | Homozygous   |
| NC_037650.1 | 151355 | SNV | 1 | A | T | Homozygous   |
| NC_037650.1 | 151364 | SNV | 1 | G | T | Homozygous   |
| NC_037650.1 | 151367 | SNV | 1 | A | T | Homozygous   |
| NC_037650.1 | 151392 | SNV | 1 | C | T | Homozygous   |
| NC_037650.1 | 161777 | SNV | 1 | A | T | Homozygous   |
| NC_037650.1 | 161812 | SNV | 1 | C | A | Homozygous   |
| NC_037650.1 | 161816 | SNV | 1 | G | T | Homozygous   |
| NC_037650.1 | 161915 | SNV | 1 | G | C | Homozygous   |
| NC_037650.1 | 161958 | SNV | 1 | T | C | Homozygous   |
| NC_037650.1 | 161970 | SNV | 1 | T | G | Homozygous   |
| NC_037650.1 | 161984 | SNV | 1 | G | A | Homozygous   |
| NC_037650.1 | 162063 | SNV | 1 | G | A | Heterozygous |
| NC_037650.1 | 162339 | SNV | 1 | T | C | Homozygous   |
| NC_037650.1 | 165073 | SNV | 1 | T | C | Heterozygous |
| NC_037650.1 | 165088 | SNV | 1 | C | T | Heterozygous |
| NC_037650.1 | 165247 | SNV | 1 | T | C | Homozygous   |
| NC_037650.1 | 165283 | SNV | 1 | A | G | Homozygous   |
| NC_037650.1 | 165287 | SNV | 1 | G | T | Heterozygous |
| NC_037650.1 | 165310 | SNV | 1 | A | G | Homozygous   |
| NC_037650.1 | 165355 | SNV | 1 | A | G | Homozygous   |

|             |        |     |   |   |   |              |
|-------------|--------|-----|---|---|---|--------------|
| NC_037650.1 | 165447 | SNV | 1 | C | T | Heterozygous |
| NC_037650.1 | 165488 | SNV | 1 | G | A | Homozygous   |
| NC_037650.1 | 165490 | SNV | 1 | T | C | Homozygous   |
| NC_037650.1 | 166870 | SNV | 1 | A | T | Homozygous   |
| NC_037650.1 | 198543 | SNV | 1 | T | A | Homozygous   |
| NC_037650.1 | 198651 | SNV | 1 | T | C | Homozygous   |
| NC_037650.1 | 201539 | SNV | 1 | C | T | Homozygous   |
| NC_037650.1 | 215944 | SNV | 1 | T | C | Homozygous   |
| NC_037650.1 | 219786 | SNV | 1 | G | A | Heterozygous |
| NC_037650.1 | 219977 | SNV | 1 | G | A | Heterozygous |
| NC_037650.1 | 228482 | SNV | 1 | A | G | Homozygous   |
| NC_037650.1 | 233761 | SNV | 1 | T | C | Homozygous   |
| NC_037650.1 | 233909 | SNV | 1 | A | T | Heterozygous |
| NC_037650.1 | 234182 | SNV | 1 | C | T | Heterozygous |
| NC_037650.1 | 234265 | SNV | 1 | A | G | Homozygous   |
| NC_037650.1 | 234353 | SNV | 1 | A | G | Homozygous   |
| NC_037650.1 | 234384 | SNV | 1 | A | G | Homozygous   |
| NC_037650.1 | 235121 | SNV | 1 | G | C | Homozygous   |
| NC_037650.1 | 246599 | SNV | 1 | G | A | Heterozygous |
| NC_037650.1 | 246607 | SNV | 1 | A | G | Heterozygous |
| NC_037650.1 | 246612 | SNV | 1 | T | C | Homozygous   |
| NC_037650.1 | 247141 | SNV | 1 | C | G | Homozygous   |
| NC_037650.1 | 247146 | SNV | 1 | A | G | Homozygous   |
| NC_037650.1 | 247148 | SNV | 1 | G | A | Homozygous   |
| NC_037650.1 | 247154 | SNV | 1 | C | A | Homozygous   |
| NC_037650.1 | 247231 | SNV | 1 | G | A | Homozygous   |
| NC_037650.1 | 256943 | SNV | 1 | C | T | Heterozygous |
| NC_037650.1 | 257027 | SNV | 1 | C | T | Heterozygous |
| NC_037650.1 | 257055 | SNV | 1 | T | C | Homozygous   |
| NC_037650.1 | 257084 | SNV | 1 | G | A | Heterozygous |
| NC_037650.1 | 257111 | SNV | 1 | T | C | Homozygous   |
| NC_037650.1 | 257116 | SNV | 1 | A | G | Homozygous   |
| NC_037650.1 | 257122 | SNV | 1 | A | G | Heterozygous |
| NC_037650.1 | 269457 | SNV | 1 | C | T | Homozygous   |
| NC_037650.1 | 274548 | SNV | 1 | C | A | Heterozygous |
| NC_037650.1 | 274587 | SNV | 1 | T | G | Heterozygous |
| NC_037650.1 | 274618 | SNV | 1 | A | G | Homozygous   |
| NC_037650.1 | 276503 | SNV | 1 | G | A | Homozygous   |
| NC_037650.1 | 276617 | SNV | 1 | G | A | Heterozygous |
| NC_037650.1 | 276634 | SNV | 1 | G | A | Heterozygous |
| NC_037650.1 | 277280 | SNV | 1 | T | C | Homozygous   |
| NC_037650.1 | 277866 | SNV | 1 | G | T | Homozygous   |
| NC_037650.1 | 277872 | SNV | 1 | A | G | Homozygous   |
| NC_037650.1 | 277972 | SNV | 1 | G | T | Homozygous   |
| NC_037650.1 | 278074 | SNV | 1 | G | A | Heterozygous |
| NC_037650.1 | 278124 | SNV | 1 | A | T | Heterozygous |
| NC_037650.1 | 278130 | SNV | 1 | A | G | Heterozygous |
| NC_037650.1 | 278230 | SNV | 1 | G | A | Homozygous   |
| NC_037650.1 | 278567 | SNV | 1 | A | G | Homozygous   |
| NC_037650.1 | 278571 | SNV | 1 | A | G | Homozygous   |
| NC_037650.1 | 278769 | SNV | 1 | A | G | Heterozygous |

|             |        |     |   |   |   |              |
|-------------|--------|-----|---|---|---|--------------|
| NC_037650.1 | 278777 | SNV | 1 | C | G | Heterozygous |
| NC_037650.1 | 278971 | SNV | 1 | G | A | Homozygous   |
| NC_037650.1 | 279118 | SNV | 1 | G | A | Homozygous   |
| NC_037650.1 | 279135 | SNV | 1 | C | T | Homozygous   |
| NC_037650.1 | 279142 | SNV | 1 | A | T | Heterozygous |
| NC_037650.1 | 279176 | SNV | 1 | T | C | Homozygous   |
| NC_037650.1 | 279178 | SNV | 1 | G | A | Homozygous   |
| NC_037650.1 | 279187 | SNV | 1 | T | C | Homozygous   |
| NC_037650.1 | 279203 | SNV | 1 | T | C | Homozygous   |
| NC_037650.1 | 279231 | SNV | 1 | A | G | Homozygous   |
| NC_037650.1 | 279267 | SNV | 1 | G | A | Homozygous   |
| NC_037650.1 | 279611 | SNV | 1 | A | G | Homozygous   |
| NC_037650.1 | 286603 | SNV | 1 | G | C | Homozygous   |
| NC_037650.1 | 286631 | SNV | 1 | T | A | Homozygous   |
| NC_037650.1 | 288624 | SNV | 1 | C | T | Heterozygous |
| NC_037650.1 | 288649 | SNV | 1 | C | T | Homozygous   |
| NC_037650.1 | 288659 | SNV | 1 | A | T | Homozygous   |
| NC_037650.1 | 292376 | SNV | 1 | G | A | Homozygous   |
| NC_037650.1 | 318421 | SNV | 1 | A | G | Homozygous   |
| NC_037650.1 | 319303 | SNV | 1 | T | C | Homozygous   |
| NC_037650.1 | 325259 | SNV | 1 | G | A | Heterozygous |
| NC_037650.1 | 325335 | SNV | 1 | A | T | Heterozygous |
| NC_037650.1 | 332470 | SNV | 1 | A | T | Homozygous   |
| NC_037650.1 | 332472 | SNV | 1 | A | T | Homozygous   |
| NC_037650.1 | 332475 | SNV | 1 | A | T | Homozygous   |
| NC_037650.1 | 332495 | SNV | 1 | T | C | Homozygous   |
| NC_037650.1 | 332502 | SNV | 1 | T | A | Homozygous   |
| NC_037650.1 | 332527 | SNV | 1 | T | G | Homozygous   |
| NC_037650.1 | 332533 | SNV | 1 | C | A | Homozygous   |
| NC_037650.1 | 338267 | SNV | 1 | C | T | Homozygous   |
| NC_037650.1 | 338371 | SNV | 1 | T | C | Homozygous   |
| NC_037650.1 | 338617 | SNV | 1 | A | G | Homozygous   |
| NC_037650.1 | 338690 | SNV | 1 | A | G | Homozygous   |
| NC_037650.1 | 338705 | SNV | 1 | T | C | Homozygous   |
| NC_037650.1 | 338766 | SNV | 1 | T | C | Homozygous   |
| NC_037650.1 | 338794 | SNV | 1 | A | G | Homozygous   |
| NC_037650.1 | 338808 | SNV | 1 | G | T | Homozygous   |
| NC_037650.1 | 338825 | SNV | 1 | T | C | Homozygous   |
| NC_037650.1 | 338871 | SNV | 1 | A | G | Homozygous   |
| NC_037650.1 | 339173 | SNV | 1 | C | T | Heterozygous |
| NC_037650.1 | 339178 | SNV | 1 | C | T | Heterozygous |
| NC_037650.1 | 339187 | SNV | 1 | G | A | Homozygous   |
| NC_037650.1 | 340219 | SNV | 1 | G | A | Homozygous   |
| NC_037650.1 | 364181 | SNV | 1 | A | C | Homozygous   |
| NC_037650.1 | 364226 | SNV | 1 | A | T | Homozygous   |
| NC_037650.1 | 374603 | SNV | 1 | C | T | Heterozygous |
| NC_037650.1 | 374645 | SNV | 1 | T | C | Heterozygous |
| NC_037650.1 | 375079 | SNV | 1 | A | G | Homozygous   |
| NC_037650.1 | 375109 | SNV | 1 | G | A | Homozygous   |
| NC_037650.1 | 375115 | SNV | 1 | G | A | Heterozygous |
| NC_037650.1 | 375210 | SNV | 1 | G | A | Homozygous   |

|             |        |     |   |   |   |              |
|-------------|--------|-----|---|---|---|--------------|
| NC_037650.1 | 375216 | SNV | 1 | G | A | Homozygous   |
| NC_037650.1 | 377793 | SNV | 1 | A | G | Homozygous   |
| NC_037650.1 | 377798 | SNV | 1 | A | G | Homozygous   |
| NC_037650.1 | 377800 | SNV | 1 | A | G | Homozygous   |
| NC_037650.1 | 430384 | SNV | 1 | G | A | Heterozygous |
| NC_037650.1 | 430399 | SNV | 1 | A | G | Homozygous   |
| NC_037650.1 | 430530 | SNV | 1 | C | T | Homozygous   |
| NC_037650.1 | 430566 | SNV | 1 | G | A | Heterozygous |
| NC_037650.1 | 435439 | SNV | 1 | A | C | Homozygous   |
| NC_037650.1 | 435447 | SNV | 1 | T | A | Homozygous   |
| NC_037650.1 | 435449 | SNV | 1 | T | A | Homozygous   |
| NC_037650.1 | 435472 | SNV | 1 | T | G | Homozygous   |
| NC_037650.1 | 435475 | SNV | 1 | A | G | Homozygous   |
| NC_037650.1 | 440327 | SNV | 1 | A | T | Homozygous   |
| NC_037650.1 | 440608 | SNV | 1 | C | A | Homozygous   |
| NC_037650.1 | 440657 | SNV | 1 | T | C | Homozygous   |
| NC_037650.1 | 440666 | SNV | 1 | G | T | Heterozygous |
| NC_037650.1 | 444111 | SNV | 1 | T | C | Homozygous   |
| NC_037650.1 | 444146 | SNV | 1 | T | A | Homozygous   |
| NC_037650.1 | 444265 | SNV | 1 | C | T | Homozygous   |
| NC_037650.1 | 444340 | SNV | 1 | T | C | Homozygous   |
| NC_037650.1 | 466280 | SNV | 1 | T | C | Homozygous   |
| NC_037650.1 | 466385 | SNV | 1 | T | C | Heterozygous |
| NC_037650.1 | 466394 | SNV | 1 | T | C | Heterozygous |
| NC_037650.1 | 466530 | SNV | 1 | T | C | Homozygous   |
| NC_037650.1 | 466547 | SNV | 1 | G | C | Heterozygous |
| NC_037650.1 | 466763 | SNV | 1 | G | T | Heterozygous |
| NC_037650.1 | 466824 | SNV | 1 | A | G | Homozygous   |
| NC_037650.1 | 466892 | SNV | 1 | A | G | Heterozygous |
| NC_037650.1 | 467128 | SNV | 1 | G | A | Homozygous   |
| NC_037650.1 | 470818 | SNV | 1 | A | G | Homozygous   |
| NC_037650.1 | 470829 | SNV | 1 | C | T | Heterozygous |
| NC_037650.1 | 477602 | SNV | 1 | C | T | Homozygous   |
| NC_037650.1 | 477604 | SNV | 1 | C | G | Heterozygous |
| NC_037650.1 | 482868 | SNV | 1 | T | A | Heterozygous |
| NC_037650.1 | 482876 | SNV | 1 | T | G | Heterozygous |
| NC_037650.1 | 482880 | SNV | 1 | T | A | Heterozygous |
| NC_037650.1 | 482883 | SNV | 1 | C | T | Homozygous   |
| NC_037650.1 | 483863 | SNV | 1 | C | T | Homozygous   |
| NC_037650.1 | 483865 | SNV | 1 | A | C | Homozygous   |
| NC_037650.1 | 483894 | SNV | 1 | T | A | Homozygous   |
| NC_037650.1 | 483912 | SNV | 1 | T | A | Homozygous   |
| NC_037650.1 | 487961 | SNV | 1 | A | T | Heterozygous |
| NC_037650.1 | 488000 | SNV | 1 | C | T | Homozygous   |
| NC_037650.1 | 488002 | SNV | 1 | A | T | Homozygous   |
| NC_037650.1 | 509711 | SNV | 1 | T | C | Heterozygous |
| NC_037650.1 | 509713 | SNV | 1 | C | A | Heterozygous |
| NC_037650.1 | 511362 | SNV | 1 | T | A | Homozygous   |
| NC_037650.1 | 511379 | SNV | 1 | A | G | Homozygous   |
| NC_037650.1 | 511382 | SNV | 1 | T | A | Homozygous   |
| NC_037650.1 | 511979 | SNV | 1 | G | T | Heterozygous |

|             |        |     |   |   |   |              |
|-------------|--------|-----|---|---|---|--------------|
| NC_037650.1 | 511984 | SNV | 1 | C | A | Heterozygous |
| NC_037650.1 | 517047 | SNV | 1 | A | T | Homozygous   |
| NC_037650.1 | 517051 | SNV | 1 | A | T | Homozygous   |
| NC_037650.1 | 517057 | SNV | 1 | A | T | Homozygous   |
| NC_037650.1 | 522962 | SNV | 1 | A | T | Homozygous   |
| NC_037650.1 | 522971 | SNV | 1 | A | T | Homozygous   |
| NC_037650.1 | 532444 | SNV | 1 | G | C | Homozygous   |
| NC_037650.1 | 532448 | SNV | 1 | C | G | Homozygous   |
| NC_037650.1 | 532455 | SNV | 1 | C | T | Homozygous   |
| NC_037650.1 | 532461 | SNV | 1 | T | A | Homozygous   |
| NC_037650.1 | 532463 | SNV | 1 | C | A | Homozygous   |
| NC_037650.1 | 563620 | SNV | 1 | T | C | Heterozygous |
| NC_037650.1 | 563787 | SNV | 1 | C | T | Homozygous   |
| NC_037650.1 | 563791 | SNV | 1 | T | A | Homozygous   |
| NC_037650.1 | 575742 | SNV | 1 | A | G | Heterozygous |
| NC_037650.1 | 575763 | SNV | 1 | T | C | Heterozygous |
| NC_037650.1 | 575766 | SNV | 1 | T | G | Heterozygous |
| NC_037650.1 | 575778 | SNV | 1 | T | A | Heterozygous |
| NC_037650.1 | 575802 | SNV | 1 | A | T | Heterozygous |
| NC_037650.1 | 575808 | SNV | 1 | A | G | Heterozygous |
| NC_037650.1 | 575816 | SNV | 1 | T | C | Heterozygous |
| NC_037650.1 | 575819 | SNV | 1 | G | A | Homozygous   |
| NC_037650.1 | 605911 | SNV | 1 | G | T | Homozygous   |
| NC_037650.1 | 605936 | SNV | 1 | T | C | Homozygous   |
| NC_037650.1 | 605942 | SNV | 1 | T | A | Homozygous   |
| NC_037650.1 | 605950 | SNV | 1 | A | T | Homozygous   |
| NC_037650.1 | 605953 | SNV | 1 | A | T | Homozygous   |
| NC_037650.1 | 605956 | SNV | 1 | A | T | Homozygous   |
| NC_037650.1 | 605961 | SNV | 1 | A | T | Homozygous   |
| NC_037650.1 | 605963 | SNV | 1 | A | T | Homozygous   |
| NC_037650.1 | 605976 | SNV | 1 | A | T | Homozygous   |
| NC_037650.1 | 628304 | SNV | 1 | G | A | Homozygous   |
| NC_037650.1 | 628306 | SNV | 1 | C | T | Homozygous   |
| NC_037650.1 | 628339 | SNV | 1 | A | G | Heterozygous |
| NC_037650.1 | 628345 | SNV | 1 | C | T | Heterozygous |
| NC_037650.1 | 628347 | SNV | 1 | A | T | Heterozygous |
| NC_037650.1 | 628356 | SNV | 1 | G | C | Homozygous   |
| NC_037650.1 | 628372 | SNV | 1 | G | A | Homozygous   |
| NC_037650.1 | 628386 | SNV | 1 | T | C | Homozygous   |
| NC_037650.1 | 628401 | SNV | 1 | T | C | Homozygous   |
| NC_037650.1 | 628403 | SNV | 1 | A | G | Homozygous   |
| NC_037650.1 | 628411 | SNV | 1 | T | C | Homozygous   |
| NC_037650.1 | 647776 | SNV | 1 | G | A | Homozygous   |
| NC_037650.1 | 647778 | SNV | 1 | G | A | Homozygous   |
| NC_037650.1 | 647785 | SNV | 1 | A | G | Homozygous   |
| NC_037650.1 | 647788 | SNV | 1 | A | T | Homozygous   |
| NC_037650.1 | 657289 | SNV | 1 | A | T | Homozygous   |
| NC_037650.1 | 657295 | SNV | 1 | A | T | Homozygous   |
| NC_037650.1 | 689543 | SNV | 1 | T | A | Heterozygous |
| NC_037650.1 | 689546 | SNV | 1 | T | A | Heterozygous |
| NC_037650.1 | 689555 | SNV | 1 | A | T | Heterozygous |



|             |        |     |   |   |   |              |
|-------------|--------|-----|---|---|---|--------------|
| NC_037650.1 | 689558 | SNV | 1 | T | A | Heterozygous |
| NC_037650.1 | 689569 | SNV | 1 | A | G | Heterozygous |
| NC_037650.1 | 689577 | SNV | 1 | T | A | Heterozygous |
| NC_037650.1 | 689579 | SNV | 1 | C | G | Heterozygous |
| NC_037650.1 | 689579 | SNV | 1 | C | T | Heterozygous |
| NC_037650.1 | 689582 | SNV | 1 | T | A | Heterozygous |
| NC_037650.1 | 689585 | SNV | 1 | T | A | Heterozygous |
| NC_037650.1 | 703007 | SNV | 1 | T | C | Homozygous   |
| NC_037650.1 | 703973 | SNV | 1 | C | T | Heterozygous |
| NC_037650.1 | 703975 | SNV | 1 | T | A | Heterozygous |
| NC_037650.1 | 706368 | SNV | 1 | T | A | Homozygous   |
| NC_037650.1 | 706405 | SNV | 1 | A | T | Homozygous   |
| NC_037650.1 | 712309 | SNV | 1 | A | G | Homozygous   |
| NC_037650.1 | 713972 | SNV | 1 | G | A | Heterozygous |
| NC_037650.1 | 714304 | SNV | 1 | G | A | Heterozygous |
| NC_037650.1 | 715603 | SNV | 1 | C | A | Homozygous   |
| NC_037650.1 | 715608 | SNV | 1 | G | T | Homozygous   |
| NC_037650.1 | 715610 | SNV | 1 | A | T | Homozygous   |
| NC_037650.1 | 715637 | SNV | 1 | A | T | Homozygous   |
| NC_037650.1 | 715645 | SNV | 1 | A | T | Homozygous   |
| NC_037650.1 | 716435 | SNV | 1 | T | G | Homozygous   |
| NC_037650.1 | 716452 | SNV | 1 | A | T | Homozygous   |
| NC_037650.1 | 716464 | SNV | 1 | T | A | Homozygous   |
| NC_037650.1 | 716482 | SNV | 1 | A | C | Homozygous   |
| NC_037650.1 | 717390 | SNV | 1 | A | G | Heterozygous |
| NC_037650.1 | 733556 | SNV | 1 | A | T | Homozygous   |
| NC_037650.1 | 733561 | SNV | 1 | G | A | Homozygous   |
| NC_037650.1 | 733578 | SNV | 1 | T | C | Homozygous   |
| NC_037650.1 | 783771 | SNV | 1 | C | T | Homozygous   |
| NC_037650.1 | 783780 | SNV | 1 | T | A | Homozygous   |
| NC_037650.1 | 783783 | SNV | 1 | T | C | Homozygous   |
| NC_037650.1 | 783787 | SNV | 1 | A | G | Homozygous   |
| NC_037650.1 | 783789 | SNV | 1 | T | A | Homozygous   |
| NC_037650.1 | 783821 | SNV | 1 | A | T | Homozygous   |
| NC_037650.1 | 784025 | SNV | 1 | C | A | Homozygous   |
| NC_037650.1 | 792668 | SNV | 1 | G | T | Homozygous   |
| NC_037650.1 | 792954 | SNV | 1 | A | G | Homozygous   |
| NC_037650.1 | 792979 | SNV | 1 | T | A | Homozygous   |
| NC_037650.1 | 792998 | SNV | 1 | T | A | Homozygous   |
| NC_037650.1 | 793001 | SNV | 1 | T | A | Homozygous   |
| NC_037650.1 | 793004 | SNV | 1 | T | C | Homozygous   |
| NC_037650.1 | 793009 | SNV | 1 | T | C | Homozygous   |
| NC_037650.1 | 793039 | SNV | 1 | T | C | Homozygous   |
| NC_037650.1 | 798556 | SNV | 1 | C | T | Homozygous   |
| NC_037650.1 | 801778 | SNV | 1 | T | A | Homozygous   |
| NC_037650.1 | 801780 | SNV | 1 | G | A | Homozygous   |
| NC_037650.1 | 802856 | SNV | 1 | A | G | Heterozygous |
| NC_037650.1 | 803888 | SNV | 1 | T | C | Homozygous   |
| NC_037650.1 | 922454 | SNV | 1 | T | G | Homozygous   |
| NC_037650.1 | 922493 | SNV | 1 | T | A | Heterozygous |
| NC_037650.1 | 922499 | SNV | 1 | T | C | Heterozygous |

|             |         |     |   |   |   |              |
|-------------|---------|-----|---|---|---|--------------|
| NC_037650.1 | 922505  | SNV | 1 | T | C | Heterozygous |
| NC_037650.1 | 922507  | SNV | 1 | T | G | Homozygous   |
| NC_037650.1 | 922514  | SNV | 1 | A | G | Homozygous   |
| NC_037650.1 | 944189  | SNV | 1 | A | C | Homozygous   |
| NC_037650.1 | 944223  | SNV | 1 | C | T | Homozygous   |
| NC_037650.1 | 944228  | SNV | 1 | A | G | Homozygous   |
| NC_037650.1 | 944230  | SNV | 1 | A | T | Homozygous   |
| NC_037650.1 | 960356  | SNV | 1 | T | A | Homozygous   |
| NC_037650.1 | 960377  | SNV | 1 | A | T | Homozygous   |
| NC_037650.1 | 960932  | SNV | 1 | A | T | Homozygous   |
| NC_037650.1 | 960946  | SNV | 1 | T | A | Homozygous   |
| NC_037650.1 | 960948  | SNV | 1 | A | T | Homozygous   |
| NC_037650.1 | 975863  | SNV | 1 | T | C | Homozygous   |
| NC_037650.1 | 975865  | SNV | 1 | T | C | Homozygous   |
| NC_037650.1 | 975872  | SNV | 1 | A | C | Homozygous   |
| NC_037650.1 | 975881  | SNV | 1 | T | A | Homozygous   |
| NC_037650.1 | 1003963 | SNV | 1 | A | C | Homozygous   |
| NC_037650.1 | 1003982 | SNV | 1 | T | C | Homozygous   |
| NC_037650.1 | 1003998 | SNV | 1 | C | T | Homozygous   |
| NC_037650.1 | 1004008 | SNV | 1 | G | T | Homozygous   |
| NC_037650.1 | 1009629 | SNV | 1 | T | A | Homozygous   |
| NC_037650.1 | 1009655 | SNV | 1 | A | T | Homozygous   |
| NC_037650.1 | 1016947 | SNV | 1 | A | G | Heterozygous |
| NC_037650.1 | 1016953 | SNV | 1 | C | T | Heterozygous |
| NC_037650.1 | 1016957 | SNV | 1 | G | C | Heterozygous |
| NC_037650.1 | 1016959 | SNV | 1 | C | T | Heterozygous |
| NC_037650.1 | 1016962 | SNV | 1 | G | A | Heterozygous |
| NC_037650.1 | 1016968 | SNV | 1 | A | G | Homozygous   |
| NC_037650.1 | 1016973 | SNV | 1 | C | T | Heterozygous |
| NC_037650.1 | 1016976 | SNV | 1 | A | G | Homozygous   |
| NC_037650.1 | 1016983 | SNV | 1 | T | C | Heterozygous |
| NC_037650.1 | 1028499 | SNV | 1 | G | A | Homozygous   |
| NC_037650.1 | 1028503 | SNV | 1 | C | T | Homozygous   |
| NC_037650.1 | 1028509 | SNV | 1 | G | A | Homozygous   |
| NC_037650.1 | 1028520 | SNV | 1 | T | C | Homozygous   |
| NC_037650.1 | 1028523 | SNV | 1 | G | A | Homozygous   |
| NC_037650.1 | 1028530 | SNV | 1 | G | A | Homozygous   |
| NC_037650.1 | 1028563 | SNV | 1 | T | C | Homozygous   |
| NC_037650.1 | 1028570 | SNV | 1 | G | A | Homozygous   |
| NC_037650.1 | 1028581 | SNV | 1 | G | A | Homozygous   |
| NC_037650.1 | 1028583 | SNV | 1 | A | G | Homozygous   |
| NC_037650.1 | 1043384 | SNV | 1 | G | A | Homozygous   |
| NC_037650.1 | 1048854 | SNV | 1 | A | G | Homozygous   |
| NC_037650.1 | 1048877 | SNV | 1 | C | T | Homozygous   |
| NC_037650.1 | 1048906 | SNV | 1 | T | C | Homozygous   |
| NC_037650.1 | 1049481 | SNV | 1 | G | A | Homozygous   |
| NC_037650.1 | 1050077 | SNV | 1 | A | C | Homozygous   |
| NC_037650.1 | 1050096 | SNV | 1 | A | T | Homozygous   |
| NC_037650.1 | 1050099 | SNV | 1 | A | T | Homozygous   |
| NC_037650.1 | 1050108 | SNV | 1 | C | G | Homozygous   |
| NC_037650.1 | 1050126 | SNV | 1 | C | A | Homozygous   |

|             |         |     |   |   |   |              |
|-------------|---------|-----|---|---|---|--------------|
| NC_037650.1 | 1050128 | SNV | 1 | A | T | Homozygous   |
| NC_037650.1 | 1052566 | SNV | 1 | C | T | Homozygous   |
| NC_037650.1 | 1065090 | SNV | 1 | A | T | Heterozygous |
| NC_037650.1 | 1065102 | SNV | 1 | A | G | Heterozygous |
| NC_037650.1 | 1065108 | SNV | 1 | A | G | Heterozygous |
| NC_037650.1 | 1065124 | SNV | 1 | T | C | Heterozygous |
| NC_037650.1 | 1065128 | SNV | 1 | A | C | Heterozygous |
| NC_037650.1 | 1065136 | SNV | 1 | T | G | Heterozygous |
| NC_037650.1 | 1065641 | SNV | 1 | T | A | Homozygous   |
| NC_037650.1 | 1070260 | SNV | 1 | A | T | Homozygous   |
| NC_037650.1 | 1072520 | SNV | 1 | T | G | Homozygous   |
| NC_037650.1 | 1074168 | SNV | 1 | T | A | Homozygous   |
| NC_037650.1 | 1074195 | SNV | 1 | T | A | Homozygous   |
| NC_037650.1 | 1074198 | SNV | 1 | T | A | Homozygous   |
| NC_037650.1 | 1074207 | SNV | 1 | A | T | Homozygous   |
| NC_037650.1 | 1090092 | SNV | 1 | G | A | Heterozygous |
| NC_037650.1 | 1090147 | SNV | 1 | T | C | Heterozygous |
| NC_037650.1 | 1093871 | SNV | 1 | C | A | Homozygous   |
| NC_037650.1 | 1094910 | SNV | 1 | T | A | Homozygous   |
| NC_037650.1 | 1094912 | SNV | 1 | C | G | Homozygous   |
| NC_037650.1 | 1094916 | SNV | 1 | T | C | Homozygous   |
| NC_037650.1 | 1094944 | SNV | 1 | T | A | Homozygous   |
| NC_037650.1 | 1094946 | SNV | 1 | T | A | Homozygous   |
| NC_037650.1 | 1095802 | SNV | 1 | C | T | Homozygous   |
| NC_037650.1 | 1104619 | SNV | 1 | C | T | Heterozygous |
| NC_037650.1 | 1109957 | SNV | 1 | A | C | Homozygous   |
| NC_037650.1 | 1109963 | SNV | 1 | C | T | Homozygous   |
| NC_037650.1 | 1110063 | SNV | 1 | A | G | Homozygous   |
| NC_037650.1 | 1111142 | SNV | 1 | G | A | Homozygous   |
| NC_037650.1 | 1111146 | SNV | 1 | C | A | Homozygous   |
| NC_037650.1 | 1111180 | SNV | 1 | C | A | Homozygous   |
| NC_037650.1 | 1125182 | SNV | 1 | T | A | Homozygous   |
| NC_037650.1 | 1125190 | SNV | 1 | A | T | Homozygous   |
| NC_037650.1 | 1125193 | SNV | 1 | T | A | Homozygous   |
| NC_037650.1 | 1125197 | SNV | 1 | T | G | Homozygous   |
| NC_037650.1 | 1133749 | SNV | 1 | T | C | Homozygous   |
| NC_037650.1 | 1134843 | SNV | 1 | A | T | Homozygous   |
| NC_037650.1 | 1135123 | SNV | 1 | T | C | Homozygous   |
| NC_037650.1 | 1135146 | SNV | 1 | A | C | Homozygous   |
| NC_037650.1 | 1136027 | SNV | 1 | G | C | Homozygous   |
| NC_037650.1 | 1136261 | SNV | 1 | G | A | Heterozygous |
| NC_037650.1 | 1138361 | SNV | 1 | A | T | Homozygous   |
| NC_037650.1 | 1138368 | SNV | 1 | A | T | Homozygous   |
| NC_037650.1 | 1138374 | SNV | 1 | T | A | Homozygous   |
| NC_037650.1 | 1138380 | SNV | 1 | T | A | Homozygous   |
| NC_037650.1 | 1138597 | SNV | 1 | G | A | Heterozygous |
| NC_037650.1 | 1138617 | SNV | 1 | T | C | Heterozygous |
| NC_037650.1 | 1138726 | SNV | 1 | G | A | Homozygous   |
| NC_037650.1 | 1138729 | SNV | 1 | A | T | Homozygous   |
| NC_037650.1 | 1141334 | SNV | 1 | T | C | Heterozygous |
| NC_037650.1 | 1141340 | SNV | 1 | C | T | Heterozygous |

|             |         |     |   |   |   |              |
|-------------|---------|-----|---|---|---|--------------|
| NC_037650.1 | 1141355 | SNV | 1 | T | A | Heterozygous |
| NC_037650.1 | 1141376 | SNV | 1 | T | A | Heterozygous |
| NC_037650.1 | 1141379 | SNV | 1 | T | C | Heterozygous |
| NC_037650.1 | 1141388 | SNV | 1 | T | C | Heterozygous |
| NC_037650.1 | 1141394 | SNV | 1 | T | C | Heterozygous |
| NC_037650.1 | 1141484 | SNV | 1 | C | A | Homozygous   |
| NC_037650.1 | 1141486 | SNV | 1 | A | G | Homozygous   |
| NC_037650.1 | 1141490 | SNV | 1 | T | C | Homozygous   |
| NC_037650.1 | 1141715 | SNV | 1 | T | A | Heterozygous |
| NC_037650.1 | 1141718 | SNV | 1 | A | C | Heterozygous |
| NC_037650.1 | 1141727 | SNV | 1 | A | C | Heterozygous |
| NC_037650.1 | 1141745 | SNV | 1 | A | T | Heterozygous |
| NC_037650.1 | 1141747 | SNV | 1 | G | T | Heterozygous |
| NC_037650.1 | 1141751 | SNV | 1 | T | A | Heterozygous |
| NC_037650.1 | 1142069 | SNV | 1 | C | A | Homozygous   |
| NC_037650.1 | 1150501 | SNV | 1 | A | T | Heterozygous |
| NC_037650.1 | 1150503 | SNV | 1 | A | G | Heterozygous |
| NC_037650.1 | 1150516 | SNV | 1 | T | A | Homozygous   |
| NC_037650.1 | 1150519 | SNV | 1 | T | A | Homozygous   |
| NC_037650.1 | 1173052 | SNV | 1 | T | A | Homozygous   |
| NC_037650.1 | 1173062 | SNV | 1 | A | T | Homozygous   |
| NC_037650.1 | 1173083 | SNV | 1 | G | T | Homozygous   |
| NC_037650.1 | 1173092 | SNV | 1 | A | C | Homozygous   |
| NC_037650.1 | 1173096 | SNV | 1 | G | T | Homozygous   |
| NC_037650.1 | 1173102 | SNV | 1 | T | A | Homozygous   |
| NC_037650.1 | 1173105 | SNV | 1 | T | A | Homozygous   |
| NC_037650.1 | 1173119 | SNV | 1 | T | G | Homozygous   |
| NC_037650.1 | 1173125 | SNV | 1 | T | A | Homozygous   |
| NC_037650.1 | 1176719 | SNV | 1 | A | T | Heterozygous |
| NC_037650.1 | 1176736 | SNV | 1 | A | C | Heterozygous |
| NC_037650.1 | 1176738 | SNV | 1 | A | C | Heterozygous |
| NC_037650.1 | 1176745 | SNV | 1 | A | T | Heterozygous |
| NC_037650.1 | 1176749 | SNV | 1 | G | T | Homozygous   |
| NC_037650.1 | 1176753 | SNV | 1 | T | G | Homozygous   |
| NC_037650.1 | 1176755 | SNV | 1 | T | G | Heterozygous |
| NC_037650.1 | 1176801 | SNV | 1 | A | T | Homozygous   |
| NC_037650.1 | 1191519 | SNV | 1 | A | T | Homozygous   |
| NC_037650.1 | 1191526 | SNV | 1 | T | A | Homozygous   |
| NC_037650.1 | 1191579 | SNV | 1 | G | A | Homozygous   |
| NC_037650.1 | 1191585 | SNV | 1 | T | A | Homozygous   |
| NC_037650.1 | 1201281 | SNV | 1 | C | A | Heterozygous |
| NC_037650.1 | 1224338 | SNV | 1 | T | C | Homozygous   |
| NC_037650.1 | 1224987 | SNV | 1 | T | C | Homozygous   |
| NC_037650.1 | 1225188 | SNV | 1 | T | A | Homozygous   |
| NC_037650.1 | 1226679 | SNV | 1 | T | C | Homozygous   |
| NC_037650.1 | 1226949 | SNV | 1 | G | A | Homozygous   |
| NC_037650.1 | 1227314 | SNV | 1 | G | T | Heterozygous |
| NC_037650.1 | 1238034 | SNV | 1 | A | T | Homozygous   |
| NC_037650.1 | 1238036 | SNV | 1 | A | T | Homozygous   |
| NC_037650.1 | 1238068 | SNV | 1 | C | T | Homozygous   |
| NC_037650.1 | 1238070 | SNV | 1 | A | G | Homozygous   |

|             |         |     |   |   |   |              |
|-------------|---------|-----|---|---|---|--------------|
| NC_037650.1 | 1238075 | SNV | 1 | G | A | Homozygous   |
| NC_037650.1 | 1244800 | SNV | 1 | T | A | Homozygous   |
| NC_037650.1 | 1244808 | SNV | 1 | T | A | Homozygous   |
| NC_037650.1 | 1248246 | SNV | 1 | A | T | Heterozygous |
| NC_037650.1 | 1248261 | SNV | 1 | T | A | Heterozygous |
| NC_037650.1 | 1248272 | SNV | 1 | G | A | Heterozygous |
| NC_037650.1 | 1249172 | SNV | 1 | T | C | Heterozygous |
| NC_037650.1 | 1249178 | SNV | 1 | T | C | Heterozygous |
| NC_037650.1 | 1249184 | SNV | 1 | T | C | Heterozygous |
| NC_037650.1 | 1249228 | SNV | 1 | T | C | Heterozygous |
| NC_037650.1 | 1253244 | SNV | 1 | T | A | Heterozygous |
| NC_037650.1 | 1253247 | SNV | 1 | T | C | Heterozygous |
| NC_037650.1 | 1253253 | SNV | 1 | A | C | Heterozygous |
| NC_037650.1 | 1253264 | SNV | 1 | T | A | Heterozygous |
| NC_037650.1 | 1267964 | SNV | 1 | A | T | Homozygous   |
| NC_037650.1 | 1267966 | SNV | 1 | C | T | Homozygous   |
| NC_037650.1 | 1267972 | SNV | 1 | A | C | Homozygous   |
| NC_037650.1 | 1275754 | SNV | 1 | T | A | Heterozygous |
| NC_037650.1 | 1275754 | SNV | 1 | T | G | Heterozygous |
| NC_037650.1 | 1275777 | SNV | 1 | C | A | Heterozygous |
| NC_037650.1 | 1275783 | SNV | 1 | C | A | Heterozygous |
| NC_037650.1 | 1275789 | SNV | 1 | C | A | Heterozygous |
| NC_037650.1 | 1275791 | SNV | 1 | C | T | Heterozygous |
| NC_037650.1 | 1275795 | SNV | 1 | C | A | Heterozygous |
| NC_037650.1 | 1275799 | SNV | 1 | C | T | Homozygous   |
| NC_037650.1 | 1275801 | SNV | 1 | C | A | Heterozygous |
| NC_037650.1 | 1275808 | SNV | 1 | A | G | Homozygous   |
| NC_037650.1 | 1275816 | SNV | 1 | A | G | Homozygous   |
| NC_037650.1 | 1275825 | SNV | 1 | C | T | Homozygous   |
| NC_037650.1 | 1275833 | SNV | 1 | C | T | Heterozygous |
| NC_037650.1 | 1275837 | SNV | 1 | C | T | Homozygous   |
| NC_037650.1 | 1276143 | SNV | 1 | C | T | Heterozygous |
| NC_037650.1 | 1276145 | SNV | 1 | C | G | Heterozygous |
| NC_037650.1 | 1276147 | SNV | 1 | C | T | Heterozygous |
| NC_037650.1 | 1276158 | SNV | 1 | A | T | Heterozygous |
| NC_037650.1 | 1276160 | SNV | 1 | A | T | Heterozygous |
| NC_037650.1 | 1493001 | SNV | 1 | A | G | Heterozygous |
| NC_037650.1 | 1493028 | SNV | 1 | A | G | Homozygous   |
| NC_037650.1 | 1493049 | SNV | 1 | G | T | Homozygous   |
| NC_037650.1 | 1501452 | SNV | 1 | T | G | Homozygous   |
| NC_037650.1 | 1501476 | SNV | 1 | T | G | Homozygous   |
| NC_037650.1 | 1526771 | SNV | 1 | T | C | Homozygous   |
| NC_037650.1 | 1526780 | SNV | 1 | A | G | Homozygous   |
| NC_037650.1 | 1526806 | SNV | 1 | T | C | Homozygous   |
| NC_037650.1 | 1526808 | SNV | 1 | A | T | Homozygous   |
| NC_037650.1 | 1526811 | SNV | 1 | A | T | Homozygous   |
| NC_037650.1 | 1526814 | SNV | 1 | A | T | Homozygous   |
| NC_037650.1 | 1714268 | SNV | 1 | C | T | Homozygous   |
| NC_037650.1 | 1714270 | SNV | 1 | T | A | Homozygous   |
| NC_037650.1 | 1714273 | SNV | 1 | T | G | Homozygous   |
| NC_037650.1 | 1714277 | SNV | 1 | A | C | Homozygous   |

|             |         |     |   |   |   |              |
|-------------|---------|-----|---|---|---|--------------|
| NC_037650.1 | 1714301 | SNV | 1 | T | A | Homozygous   |
| NC_037650.1 | 1718749 | SNV | 1 | T | A | Homozygous   |
| NC_037650.1 | 1718754 | SNV | 1 | A | C | Homozygous   |
| NC_037650.1 | 1718756 | SNV | 1 | A | T | Homozygous   |
| NC_037650.1 | 1727735 | SNV | 1 | A | T | Homozygous   |
| NC_037650.1 | 1727739 | SNV | 1 | C | T | Homozygous   |
| NC_037650.1 | 1727754 | SNV | 1 | C | G | Homozygous   |
| NC_037650.1 | 1749234 | SNV | 1 | A | G | Homozygous   |
| NC_037650.1 | 1749247 | SNV | 1 | A | C | Homozygous   |
| NC_037650.1 | 1749249 | SNV | 1 | G | A | Homozygous   |
| NC_037650.1 | 1749259 | SNV | 1 | C | A | Homozygous   |
| NC_037650.1 | 1750920 | SNV | 1 | A | C | Homozygous   |
| NC_037650.1 | 1750925 | SNV | 1 | T | G | Homozygous   |
| NC_037650.1 | 1751915 | SNV | 1 | A | T | Homozygous   |
| NC_037650.1 | 1751917 | SNV | 1 | A | G | Heterozygous |
| NC_037650.1 | 1751935 | SNV | 1 | A | T | Heterozygous |
| NC_037650.1 | 1751939 | SNV | 1 | A | T | Homozygous   |
| NC_037650.1 | 1761671 | SNV | 1 | G | A | Heterozygous |
| NC_037650.1 | 1761767 | SNV | 1 | G | A | Homozygous   |
| NC_037650.1 | 1761779 | SNV | 1 | A | G | Homozygous   |
| NC_037650.1 | 1761843 | SNV | 1 | A | C | Homozygous   |
| NC_037650.1 | 1762388 | SNV | 1 | T | A | Homozygous   |
| NC_037650.1 | 1762488 | SNV | 1 | G | A | Heterozygous |
| NC_037650.1 | 1820716 | SNV | 1 | A | G | Homozygous   |
| NC_037650.1 | 1820718 | SNV | 1 | T | A | Homozygous   |
| NC_037650.1 | 1820728 | SNV | 1 | A | G | Homozygous   |
| NC_037650.1 | 1820732 | SNV | 1 | A | T | Homozygous   |
| NC_037650.1 | 1820746 | SNV | 1 | T | A | Homozygous   |
| NC_037650.1 | 1821001 | SNV | 1 | A | T | Homozygous   |
| NC_037650.1 | 1821004 | SNV | 1 | A | T | Homozygous   |
| NC_037650.1 | 1821026 | SNV | 1 | A | T | Homozygous   |
| NC_037650.1 | 1851844 | SNV | 1 | T | A | Homozygous   |
| NC_037650.1 | 1851847 | SNV | 1 | T | G | Homozygous   |
| NC_037650.1 | 1851861 | SNV | 1 | G | A | Homozygous   |
| NC_037650.1 | 1871057 | SNV | 1 | A | G | Homozygous   |
| NC_037650.1 | 1871062 | SNV | 1 | A | T | Homozygous   |
| NC_037650.1 | 1871067 | SNV | 1 | T | G | Homozygous   |
| NC_037650.1 | 1876430 | SNV | 1 | G | A | Heterozygous |
| NC_037650.1 | 1881317 | SNV | 1 | T | C | Heterozygous |
| NC_037650.1 | 1881319 | SNV | 1 | C | T | Homozygous   |
| NC_037650.1 | 1881324 | SNV | 1 | A | G | Heterozygous |
| NC_037650.1 | 1881328 | SNV | 1 | A | G | Heterozygous |
| NC_037650.1 | 1881357 | SNV | 1 | C | A | Heterozygous |
| NC_037650.1 | 1881367 | SNV | 1 | T | A | Heterozygous |
| NC_037650.1 | 1884756 | SNV | 1 | A | T | Homozygous   |
| NC_037650.1 | 1884763 | SNV | 1 | T | A | Homozygous   |
| NC_037650.1 | 1884771 | SNV | 1 | A | T | Homozygous   |
| NC_037650.1 | 1884783 | SNV | 1 | T | A | Homozygous   |
| NC_037650.1 | 1884793 | SNV | 1 | A | T | Homozygous   |
| NC_037650.1 | 1884806 | SNV | 1 | A | T | Homozygous   |
| NC_037650.1 | 1884812 | SNV | 1 | T | A | Homozygous   |

|             |         |     |   |   |   |              |
|-------------|---------|-----|---|---|---|--------------|
| NC_037650.1 | 1884814 | SNV | 1 | A | T | Homozygous   |
| NC_037650.1 | 1884836 | SNV | 1 | A | T | Homozygous   |
| NC_037650.1 | 1884839 | SNV | 1 | T | A | Homozygous   |
| NC_037650.1 | 1884848 | SNV | 1 | T | A | Homozygous   |
| NC_037650.1 | 1886011 | SNV | 1 | T | A | Homozygous   |
| NC_037650.1 | 1886018 | SNV | 1 | A | C | Homozygous   |
| NC_037650.1 | 1886023 | SNV | 1 | A | G | Homozygous   |
| NC_037650.1 | 1886042 | SNV | 1 | A | G | Homozygous   |
| NC_037650.1 | 1886044 | SNV | 1 | T | C | Homozygous   |
| NC_037650.1 | 1886048 | SNV | 1 | T | A | Homozygous   |
| NC_037650.1 | 1888088 | SNV | 1 | T | C | Homozygous   |
| NC_037650.1 | 1888096 | SNV | 1 | T | A | Homozygous   |
| NC_037650.1 | 1888100 | SNV | 1 | T | A | Homozygous   |
| NC_037650.1 | 1888135 | SNV | 1 | T | G | Homozygous   |
| NC_037650.1 | 1888143 | SNV | 1 | T | A | Homozygous   |
| NC_037650.1 | 1889916 | SNV | 1 | G | A | Homozygous   |
| NC_037650.1 | 1889919 | SNV | 1 | G | A | Homozygous   |
| NC_037650.1 | 1890132 | SNV | 1 | G | A | Heterozygous |
| NC_037650.1 | 1898922 | SNV | 1 | G | T | Heterozygous |
| NC_037650.1 | 1898928 | SNV | 1 | C | T | Heterozygous |
| NC_037650.1 | 1907327 | SNV | 1 | G | T | Homozygous   |
| NC_037650.1 | 1907334 | SNV | 1 | T | A | Homozygous   |
| NC_037650.1 | 1907344 | SNV | 1 | A | T | Homozygous   |
| NC_037650.1 | 1907351 | SNV | 1 | T | C | Homozygous   |
| NC_037650.1 | 1930177 | SNV | 1 | C | T | Homozygous   |
| NC_037650.1 | 1931178 | SNV | 1 | T | A | Homozygous   |
| NC_037650.1 | 1931180 | SNV | 1 | T | A | Homozygous   |
| NC_037650.1 | 1931185 | SNV | 1 | T | G | Homozygous   |
| NC_037650.1 | 1931187 | SNV | 1 | A | C | Homozygous   |
| NC_037650.1 | 1931209 | SNV | 1 | T | A | Homozygous   |
| NC_037650.1 | 1948722 | SNV | 1 | T | C | Homozygous   |
| NC_037650.1 | 1948730 | SNV | 1 | A | G | Homozygous   |
| NC_037650.1 | 1948732 | SNV | 1 | T | C | Homozygous   |
| NC_037650.1 | 1948739 | SNV | 1 | A | C | Homozygous   |
| NC_037650.1 | 1948747 | SNV | 1 | T | A | Homozygous   |
| NC_037650.1 | 1948749 | SNV | 1 | T | A | Homozygous   |
| NC_037650.1 | 1948752 | SNV | 1 | A | T | Homozygous   |
| NC_037650.1 | 1948756 | SNV | 1 | A | T | Homozygous   |
| NC_037650.1 | 1948761 | SNV | 1 | G | A | Homozygous   |
| NC_037650.1 | 1953721 | SNV | 1 | G | T | Homozygous   |
| NC_037650.1 | 1953740 | SNV | 1 | G | A | Homozygous   |
| NC_037650.1 | 1953748 | SNV | 1 | T | A | Homozygous   |
| NC_037650.1 | 1953757 | SNV | 1 | T | C | Homozygous   |
| NC_037650.1 | 1953759 | SNV | 1 | T | G | Homozygous   |
| NC_037650.1 | 1966035 | SNV | 1 | C | A | Homozygous   |
| NC_037650.1 | 1966043 | SNV | 1 | A | G | Homozygous   |
| NC_037650.1 | 1966047 | SNV | 1 | A | T | Homozygous   |
| NC_037650.1 | 1966051 | SNV | 1 | A | T | Homozygous   |
| NC_037650.1 | 1966054 | SNV | 1 | A | C | Homozygous   |
| NC_037650.1 | 1966057 | SNV | 1 | T | A | Homozygous   |
| NC_037650.1 | 1968098 | SNV | 1 | T | A | Homozygous   |

|             |         |     |   |   |   |              |
|-------------|---------|-----|---|---|---|--------------|
| NC_037650.1 | 1968103 | SNV | 1 | G | T | Homozygous   |
| NC_037650.1 | 1968112 | SNV | 1 | G | A | Homozygous   |
| NC_037650.1 | 1968116 | SNV | 1 | T | A | Homozygous   |
| NC_037650.1 | 1968245 | SNV | 1 | T | A | Homozygous   |
| NC_037650.1 | 1968265 | SNV | 1 | A | G | Homozygous   |
| NC_037650.1 | 1968270 | SNV | 1 | A | T | Homozygous   |
| NC_037650.1 | 1968273 | SNV | 1 | A | G | Homozygous   |
| NC_037650.1 | 1968278 | SNV | 1 | T | A | Homozygous   |
| NC_037650.1 | 1984035 | SNV | 1 | A | G | Heterozygous |
| NC_037650.1 | 1984045 | SNV | 1 | T | A | Heterozygous |
| NC_037650.1 | 1984049 | SNV | 1 | A | T | Heterozygous |
| NC_037650.1 | 1984053 | SNV | 1 | T | A | Heterozygous |
| NC_037650.1 | 1984112 | SNV | 1 | C | T | Homozygous   |
| NC_037650.1 | 1984115 | SNV | 1 | A | G | Homozygous   |
| NC_037650.1 | 1984133 | SNV | 1 | A | G | Homozygous   |
| NC_037650.1 | 1984142 | SNV | 1 | T | A | Homozygous   |
| NC_037650.1 | 1984162 | SNV | 1 | A | C | Homozygous   |
| NC_037650.1 | 1984165 | SNV | 1 | A | T | Homozygous   |
| NC_037650.1 | 1985541 | SNV | 1 | T | C | Homozygous   |
| NC_037650.1 | 1985547 | SNV | 1 | T | C | Homozygous   |
| NC_037650.1 | 1985555 | SNV | 1 | G | A | Homozygous   |
| NC_037650.1 | 1985563 | SNV | 1 | A | G | Homozygous   |
| NC_037650.1 | 1985582 | SNV | 1 | A | G | Homozygous   |
| NC_037650.1 | 1988299 | SNV | 1 | T | C | Homozygous   |
| NC_037650.1 | 1988301 | SNV | 1 | T | C | Homozygous   |
| NC_037650.1 | 1988336 | SNV | 1 | T | G | Homozygous   |
| NC_037650.1 | 1991971 | SNV | 1 | T | A | Homozygous   |
| NC_037650.1 | 1991978 | SNV | 1 | A | G | Homozygous   |
| NC_037650.1 | 1991980 | SNV | 1 | A | G | Homozygous   |
| NC_037650.1 | 1991985 | SNV | 1 | A | G | Homozygous   |
| NC_037650.1 | 1991988 | SNV | 1 | T | G | Homozygous   |
| NC_037650.1 | 1991994 | SNV | 1 | A | C | Homozygous   |
| NC_037650.1 | 1991999 | SNV | 1 | A | G | Homozygous   |
| NC_037650.1 | 2019576 | SNV | 1 | T | G | Homozygous   |
| NC_037650.1 | 2019578 | SNV | 1 | T | A | Homozygous   |
| NC_037650.1 | 2019580 | SNV | 1 | A | T | Homozygous   |
| NC_037650.1 | 2019585 | SNV | 1 | T | A | Homozygous   |
| NC_037650.1 | 2019594 | SNV | 1 | G | T | Homozygous   |
| NC_037650.1 | 2019598 | SNV | 1 | T | C | Homozygous   |
| NC_037650.1 | 2019609 | SNV | 1 | A | T | Homozygous   |
| NC_037650.1 | 2088737 | SNV | 1 | A | C | Homozygous   |
| NC_037650.1 | 2107423 | SNV | 1 | G | A | Heterozygous |
| NC_037650.1 | 2108156 | SNV | 1 | T | A | Homozygous   |
| NC_037650.1 | 2109008 | SNV | 1 | A | G | Homozygous   |
| NC_037650.1 | 2109714 | SNV | 1 | T | C | Homozygous   |
| NC_037650.1 | 2109719 | SNV | 1 | A | T | Homozygous   |
| NC_037650.1 | 2109747 | SNV | 1 | T | G | Homozygous   |
| NC_037650.1 | 2109750 | SNV | 1 | A | T | Homozygous   |
| NC_037650.1 | 2111498 | SNV | 1 | A | G | Homozygous   |
| NC_037650.1 | 2117786 | SNV | 1 | G | A | Homozygous   |
| NC_037650.1 | 2117919 | SNV | 1 | T | G | Heterozygous |



|             |         |     |   |   |   |              |
|-------------|---------|-----|---|---|---|--------------|
| NC_037650.1 | 2119423 | SNV | 1 | C | T | Heterozygous |
| NC_037650.1 | 2120045 | SNV | 1 | C | G | Homozygous   |
| NC_037650.1 | 2125739 | SNV | 1 | T | C | Heterozygous |
| NC_037650.1 | 2129528 | SNV | 1 | A | T | Heterozygous |
| NC_037650.1 | 2129531 | SNV | 1 | T | C | Heterozygous |
| NC_037650.1 | 2129844 | SNV | 1 | A | C | Heterozygous |
| NC_037650.1 | 2130292 | SNV | 1 | A | G | Homozygous   |
| NC_037650.1 | 2144803 | SNV | 1 | A | G | Homozygous   |
| NC_037650.1 | 2144809 | SNV | 1 | G | A | Homozygous   |
| NC_037650.1 | 2155188 | SNV | 1 | A | G | Heterozygous |
| NC_037650.1 | 2155215 | SNV | 1 | G | A | Heterozygous |
| NC_037650.1 | 2155223 | SNV | 1 | A | T | Homozygous   |
| NC_037650.1 | 2169989 | SNV | 1 | G | C | Homozygous   |
| NC_037650.1 | 2169997 | SNV | 1 | T | C | Homozygous   |
| NC_037650.1 | 2170001 | SNV | 1 | T | G | Homozygous   |
| NC_037650.1 | 2170006 | SNV | 1 | A | G | Homozygous   |
| NC_037650.1 | 2170039 | SNV | 1 | T | C | Heterozygous |
| NC_037650.1 | 2170049 | SNV | 1 | T | C | Homozygous   |
| NC_037650.1 | 2170053 | SNV | 1 | G | A | Homozygous   |
| NC_037650.1 | 2170058 | SNV | 1 | C | T | Homozygous   |
| NC_037650.1 | 2178822 | SNV | 1 | A | G | Homozygous   |
| NC_037650.1 | 2193284 | SNV | 1 | A | T | Homozygous   |
| NC_037650.1 | 2193293 | SNV | 1 | A | C | Homozygous   |
| NC_037650.1 | 2193990 | SNV | 1 | T | C | Homozygous   |
| NC_037650.1 | 2194122 | SNV | 1 | C | T | Homozygous   |
| NC_037650.1 | 2194149 | SNV | 1 | T | C | Homozygous   |
| NC_037650.1 | 2194528 | SNV | 1 | A | G | Heterozygous |
| NC_037650.1 | 2194595 | SNV | 1 | G | A | Homozygous   |
| NC_037650.1 | 2195214 | SNV | 1 | A | T | Homozygous   |
| NC_037650.1 | 2195234 | SNV | 1 | A | T | Homozygous   |
| NC_037650.1 | 2195256 | SNV | 1 | A | T | Homozygous   |
| NC_037650.1 | 2195261 | SNV | 1 | T | A | Homozygous   |
| NC_037650.1 | 2195696 | SNV | 1 | A | C | Heterozygous |
| NC_037650.1 | 2195737 | SNV | 1 | G | A | Heterozygous |
| NC_037650.1 | 2196221 | SNV | 1 | A | G | Homozygous   |
| NC_037650.1 | 2197464 | SNV | 1 | C | T | Homozygous   |
| NC_037650.1 | 2197669 | SNV | 1 | A | G | Heterozygous |
| NC_037650.1 | 2197687 | SNV | 1 | A | T | Heterozygous |
| NC_037650.1 | 2198036 | SNV | 1 | C | T | Heterozygous |
| NC_037650.1 | 2200517 | SNV | 1 | G | A | Homozygous   |
| NC_037650.1 | 2200765 | SNV | 1 | C | T | Homozygous   |
| NC_037650.1 | 2200792 | SNV | 1 | G | A | Heterozygous |
| NC_037650.1 | 2201606 | SNV | 1 | A | G | Homozygous   |
| NC_037650.1 | 2205640 | SNV | 1 | T | G | Homozygous   |
| NC_037650.1 | 2205661 | SNV | 1 | C | T | Heterozygous |
| NC_037650.1 | 2217149 | SNV | 1 | T | A | Homozygous   |
| NC_037650.1 | 2219890 | SNV | 1 | A | C | Homozygous   |
| NC_037650.1 | 2219892 | SNV | 1 | A | T | Homozygous   |
| NC_037650.1 | 2220702 | SNV | 1 | C | A | Homozygous   |
| NC_037650.1 | 2220716 | SNV | 1 | A | T | Homozygous   |
| NC_037650.1 | 2220718 | SNV | 1 | T | C | Homozygous   |

|             |         |     |   |   |   |              |
|-------------|---------|-----|---|---|---|--------------|
| NC_037650.1 | 2220722 | SNV | 1 | A | T | Homozygous   |
| NC_037650.1 | 2230620 | SNV | 1 | G | A | Heterozygous |
| NC_037650.1 | 2256563 | SNV | 1 | G | C | Heterozygous |
| NC_037650.1 | 2258917 | SNV | 1 | C | T | Homozygous   |
| NC_037650.1 | 2258923 | SNV | 1 | A | G | Homozygous   |
| NC_037650.1 | 2258927 | SNV | 1 | G | A | Homozygous   |
| NC_037650.1 | 2258944 | SNV | 1 | C | G | Homozygous   |
| NC_037650.1 | 2258950 | SNV | 1 | A | G | Homozygous   |
| NC_037650.1 | 2258953 | SNV | 1 | G | A | Homozygous   |
| NC_037650.1 | 2277960 | SNV | 1 | C | T | Homozygous   |
| NC_037650.1 | 2280805 | SNV | 1 | T | C | Heterozygous |
| NC_037650.1 | 2281541 | SNV | 1 | C | T | Homozygous   |
| NC_037650.1 | 2286626 | SNV | 1 | A | G | Homozygous   |
| NC_037650.1 | 2286650 | SNV | 1 | A | C | Homozygous   |
| NC_037650.1 | 2286654 | SNV | 1 | G | A | Homozygous   |
| NC_037650.1 | 2286656 | SNV | 1 | C | A | Homozygous   |
| NC_037650.1 | 2286674 | SNV | 1 | T | A | Homozygous   |
| NC_037650.1 | 2286679 | SNV | 1 | T | A | Homozygous   |
| NC_037650.1 | 2286687 | SNV | 1 | C | T | Homozygous   |
| NC_037650.1 | 2286691 | SNV | 1 | A | T | Homozygous   |
| NC_037650.1 | 2287872 | SNV | 1 | T | A | Homozygous   |
| NC_037650.1 | 2287879 | SNV | 1 | A | T | Homozygous   |
| NC_037650.1 | 2287887 | SNV | 1 | C | T | Homozygous   |
| NC_037650.1 | 2302513 | SNV | 1 | C | T | Homozygous   |
| NC_037650.1 | 2302516 | SNV | 1 | A | T | Homozygous   |
| NC_037650.1 | 2302519 | SNV | 1 | C | T | Homozygous   |
| NC_037650.1 | 2303367 | SNV | 1 | A | G | Heterozygous |
| NC_037650.1 | 2304368 | SNV | 1 | G | A | Heterozygous |
| NC_037650.1 | 2304376 | SNV | 1 | G | A | Heterozygous |
| NC_037650.1 | 2305806 | SNV | 1 | A | G | Heterozygous |
| NC_037650.1 | 2307285 | SNV | 1 | A | G | Heterozygous |
| NC_037650.1 | 2307480 | SNV | 1 | A | G | Homozygous   |
| NC_037650.1 | 2310086 | SNV | 1 | T | G | Homozygous   |
| NC_037650.1 | 2310111 | SNV | 1 | T | A | Homozygous   |
| NC_037650.1 | 2310120 | SNV | 1 | A | T | Homozygous   |
| NC_037650.1 | 2310126 | SNV | 1 | T | A | Homozygous   |
| NC_037650.1 | 2310133 | SNV | 1 | A | T | Homozygous   |
| NC_037650.1 | 2311932 | SNV | 1 | G | A | Homozygous   |
| NC_037650.1 | 2311939 | SNV | 1 | T | A | Homozygous   |
| NC_037650.1 | 2311945 | SNV | 1 | A | C | Homozygous   |
| NC_037650.1 | 2311949 | SNV | 1 | A | T | Homozygous   |
| NC_037650.1 | 2311951 | SNV | 1 | A | T | Homozygous   |
| NC_037650.1 | 2311957 | SNV | 1 | T | A | Homozygous   |
| NC_037650.1 | 2311959 | SNV | 1 | A | C | Homozygous   |
| NC_037650.1 | 2313675 | SNV | 1 | A | G | Homozygous   |
| NC_037650.1 | 2313681 | SNV | 1 | A | G | Homozygous   |
| NC_037650.1 | 2313684 | SNV | 1 | A | G | Homozygous   |
| NC_037650.1 | 2313692 | SNV | 1 | T | G | Homozygous   |
| NC_037650.1 | 2313695 | SNV | 1 | T | G | Homozygous   |
| NC_037650.1 | 2313699 | SNV | 1 | A | G | Homozygous   |
| NC_037650.1 | 2313716 | SNV | 1 | T | C | Homozygous   |

|             |         |     |   |   |   |              |
|-------------|---------|-----|---|---|---|--------------|
| NC_037650.1 | 2313719 | SNV | 1 | T | C | Homozygous   |
| NC_037650.1 | 2313731 | SNV | 1 | T | C | Homozygous   |
| NC_037650.1 | 2315459 | SNV | 1 | C | A | Homozygous   |
| NC_037650.1 | 2325373 | SNV | 1 | T | C | Homozygous   |
| NC_037650.1 | 2325376 | SNV | 1 | T | A | Homozygous   |
| NC_037650.1 | 2325380 | SNV | 1 | A | T | Homozygous   |
| NC_037650.1 | 2325385 | SNV | 1 | A | G | Homozygous   |
| NC_037650.1 | 2325392 | SNV | 1 | T | A | Homozygous   |
| NC_037650.1 | 2327329 | SNV | 1 | A | G | Homozygous   |
| NC_037650.1 | 2327335 | SNV | 1 | A | G | Heterozygous |
| NC_037650.1 | 2327337 | SNV | 1 | A | T | Heterozygous |
| NC_037650.1 | 2327343 | SNV | 1 | A | G | Heterozygous |
| NC_037650.1 | 2329169 | SNV | 1 | T | A | Homozygous   |
| NC_037650.1 | 2329185 | SNV | 1 | T | A | Homozygous   |
| NC_037650.1 | 2329193 | SNV | 1 | A | T | Homozygous   |
| NC_037650.1 | 2329817 | SNV | 1 | A | C | Homozygous   |
| NC_037650.1 | 2329826 | SNV | 1 | T | A | Heterozygous |
| NC_037650.1 | 2329855 | SNV | 1 | A | C | Homozygous   |
| NC_037650.1 | 2338620 | SNV | 1 | A | C | Homozygous   |
| NC_037650.1 | 2338655 | SNV | 1 | A | T | Homozygous   |
| NC_037650.1 | 2339723 | SNV | 1 | T | A | Homozygous   |
| NC_037650.1 | 2339728 | SNV | 1 | C | T | Homozygous   |
| NC_037650.1 | 2339756 | SNV | 1 | A | T | Heterozygous |
| NC_037650.1 | 2339765 | SNV | 1 | C | T | Heterozygous |
| NC_037650.1 | 2339802 | SNV | 1 | C | T | Homozygous   |
| NC_037650.1 | 2339807 | SNV | 1 | A | T | Homozygous   |
| NC_037650.1 | 2340158 | SNV | 1 | A | G | Heterozygous |
| NC_037650.1 | 2399162 | SNV | 1 | G | A | Heterozygous |
| NC_037650.1 | 2400311 | SNV | 1 | C | A | Heterozygous |
| NC_037650.1 | 2400353 | SNV | 1 | T | C | Heterozygous |
| NC_037650.1 | 2400465 | SNV | 1 | C | T | Heterozygous |
| NC_037650.1 | 2400551 | SNV | 1 | C | T | Heterozygous |
| NC_037650.1 | 2400563 | SNV | 1 | A | T | Homozygous   |
| NC_037650.1 | 2401254 | SNV | 1 | A | C | Homozygous   |
| NC_037650.1 | 2401278 | SNV | 1 | C | T | Heterozygous |
| NC_037650.1 | 2401314 | SNV | 1 | G | A | Heterozygous |
| NC_037650.1 | 2401364 | SNV | 1 | A | G | Homozygous   |
| NC_037650.1 | 2402414 | SNV | 1 | G | A | Heterozygous |
| NC_037650.1 | 2402580 | SNV | 1 | G | A | Heterozygous |
| NC_037650.1 | 2403847 | SNV | 1 | T | C | Homozygous   |
| NC_037650.1 | 2404716 | SNV | 1 | C | A | Homozygous   |
| NC_037650.1 | 2404767 | SNV | 1 | A | G | Homozygous   |
| NC_037650.1 | 2406175 | SNV | 1 | G | T | Homozygous   |
| NC_037650.1 | 2406178 | SNV | 1 | G | A | Homozygous   |
| NC_037650.1 | 2409440 | SNV | 1 | A | G | Heterozygous |
| NC_037650.1 | 2409446 | SNV | 1 | T | C | Heterozygous |
| NC_037650.1 | 2409461 | SNV | 1 | T | C | Heterozygous |
| NC_037650.1 | 2409480 | SNV | 1 | A | T | Heterozygous |
| NC_037650.1 | 2409482 | SNV | 1 | T | C | Heterozygous |
| NC_037650.1 | 2409647 | SNV | 1 | C | T | Homozygous   |
| NC_037650.1 | 2409649 | SNV | 1 | A | T | Homozygous   |

|             |         |     |   |   |   |              |
|-------------|---------|-----|---|---|---|--------------|
| NC_037650.1 | 2410138 | SNV | 1 | G | A | Homozygous   |
| NC_037650.1 | 2410417 | SNV | 1 | C | T | Homozygous   |
| NC_037650.1 | 2411243 | SNV | 1 | A | G | Homozygous   |
| NC_037650.1 | 2419605 | SNV | 1 | T | C | Heterozygous |
| NC_037650.1 | 2419819 | SNV | 1 | T | C | Homozygous   |
| NC_037650.1 | 2419837 | SNV | 1 | G | A | Heterozygous |
| NC_037650.1 | 2419876 | SNV | 1 | A | G | Homozygous   |
| NC_037650.1 | 2420261 | SNV | 1 | G | A | Homozygous   |
| NC_037650.1 | 2420527 | SNV | 1 | T | C | Heterozygous |
| NC_037650.1 | 2420976 | SNV | 1 | T | C | Heterozygous |
| NC_037650.1 | 2421134 | SNV | 1 | G | A | Homozygous   |
| NC_037650.1 | 2421154 | SNV | 1 | C | G | Heterozygous |
| NC_037650.1 | 2422221 | SNV | 1 | A | T | Homozygous   |
| NC_037650.1 | 2422260 | SNV | 1 | A | C | Heterozygous |
| NC_037650.1 | 2422332 | SNV | 1 | T | C | Heterozygous |
| NC_037650.1 | 2422356 | SNV | 1 | T | C | Homozygous   |
| NC_037650.1 | 2423648 | SNV | 1 | A | G | Homozygous   |
| NC_037650.1 | 2423662 | SNV | 1 | T | C | Heterozygous |
| NC_037650.1 | 2423698 | SNV | 1 | C | T | Homozygous   |
| NC_037650.1 | 2423713 | SNV | 1 | A | G | Homozygous   |
| NC_037650.1 | 2424638 | SNV | 1 | T | C | Heterozygous |
| NC_037650.1 | 2424657 | SNV | 1 | T | C | Homozygous   |
| NC_037650.1 | 2424715 | SNV | 1 | T | C | Homozygous   |
| NC_037650.1 | 2425124 | SNV | 1 | A | T | Homozygous   |
| NC_037650.1 | 2425323 | SNV | 1 | T | A | Homozygous   |
| NC_037650.1 | 2427227 | SNV | 1 | A | G | Homozygous   |
| NC_037650.1 | 2428041 | SNV | 1 | A | G | Homozygous   |
| NC_037650.1 | 2432811 | SNV | 1 | G | A | Heterozygous |
| NC_037650.1 | 2432862 | SNV | 1 | A | G | Homozygous   |
| NC_037650.1 | 2432957 | SNV | 1 | G | A | Homozygous   |
| NC_037650.1 | 2432995 | SNV | 1 | A | G | Homozygous   |
| NC_037650.1 | 2433117 | SNV | 1 | C | T | Heterozygous |
| NC_037650.1 | 2433280 | SNV | 1 | T | C | Homozygous   |
| NC_037650.1 | 2433567 | SNV | 1 | A | G | Homozygous   |
| NC_037650.1 | 2435014 | SNV | 1 | G | A | Homozygous   |
| NC_037650.1 | 2437185 | SNV | 1 | G | A | Heterozygous |
| NC_037650.1 | 2441282 | SNV | 1 | A | G | Heterozygous |
| NC_037650.1 | 2442089 | SNV | 1 | C | T | Heterozygous |
| NC_037650.1 | 2442293 | SNV | 1 | T | C | Heterozygous |
| NC_037650.1 | 2442399 | SNV | 1 | T | G | Homozygous   |
| NC_037650.1 | 2446749 | SNV | 1 | T | C | Homozygous   |
| NC_037650.1 | 2446799 | SNV | 1 | G | A | Homozygous   |
| NC_037650.1 | 2446976 | SNV | 1 | G | C | Homozygous   |
| NC_037650.1 | 2446993 | SNV | 1 | T | C | Homozygous   |
| NC_037650.1 | 2447030 | SNV | 1 | C | T | Heterozygous |
| NC_037650.1 | 2447073 | SNV | 1 | C | T | Heterozygous |
| NC_037650.1 | 2447103 | SNV | 1 | A | G | Homozygous   |
| NC_037650.1 | 2447511 | SNV | 1 | T | C | Homozygous   |
| NC_037650.1 | 2447555 | SNV | 1 | G | A | Heterozygous |
| NC_037650.1 | 2447967 | SNV | 1 | T | C | Homozygous   |
| NC_037650.1 | 2448556 | SNV | 1 | C | T | Heterozygous |

|             |         |     |   |   |   |              |
|-------------|---------|-----|---|---|---|--------------|
| NC_037650.1 | 2449068 | SNV | 1 | T | C | Heterozygous |
| NC_037650.1 | 2449866 | SNV | 1 | G | A | Homozygous   |
| NC_037650.1 | 2449872 | SNV | 1 | A | G | Homozygous   |
| NC_037650.1 | 2449874 | SNV | 1 | A | G | Homozygous   |
| NC_037650.1 | 2449921 | SNV | 1 | C | T | Homozygous   |
| NC_037650.1 | 2449923 | SNV | 1 | T | G | Homozygous   |
| NC_037650.1 | 2450235 | SNV | 1 | G | A | Heterozygous |
| NC_037650.1 | 2450250 | SNV | 1 | G | A | Heterozygous |
| NC_037650.1 | 2450350 | SNV | 1 | C | T | Heterozygous |
| NC_037650.1 | 2450434 | SNV | 1 | T | C | Homozygous   |
| NC_037650.1 | 2450480 | SNV | 1 | A | T | Heterozygous |
| NC_037650.1 | 2450482 | SNV | 1 | C | A | Heterozygous |
| NC_037650.1 | 2459131 | SNV | 1 | C | T | Homozygous   |
| NC_037650.1 | 2459160 | SNV | 1 | A | G | Homozygous   |
| NC_037650.1 | 2468733 | SNV | 1 | T | A | Homozygous   |
| NC_037650.1 | 2468736 | SNV | 1 | T | C | Homozygous   |
| NC_037650.1 | 2468754 | SNV | 1 | A | T | Homozygous   |
| NC_037650.1 | 2468756 | SNV | 1 | G | A | Homozygous   |
| NC_037650.1 | 2468761 | SNV | 1 | T | A | Homozygous   |
| NC_037650.1 | 2485636 | SNV | 1 | A | G | Homozygous   |
| NC_037650.1 | 2486856 | SNV | 1 | T | A | Homozygous   |
| NC_037650.1 | 2486858 | SNV | 1 | A | G | Homozygous   |
| NC_037650.1 | 2487784 | SNV | 1 | C | T | Heterozygous |
| NC_037650.1 | 2488189 | SNV | 1 | C | G | Homozygous   |
| NC_037650.1 | 2488193 | SNV | 1 | T | G | Homozygous   |
| NC_037650.1 | 2491149 | SNV | 1 | A | G | Heterozygous |
| NC_037650.1 | 2491909 | SNV | 1 | C | T | Homozygous   |
| NC_037650.1 | 2492816 | SNV | 1 | C | T | Heterozygous |
| NC_037650.1 | 2494711 | SNV | 1 | A | G | Heterozygous |
| NC_037650.1 | 2495233 | SNV | 1 | A | G | Homozygous   |
| NC_037650.1 | 2495283 | SNV | 1 | G | A | Homozygous   |
| NC_037650.1 | 2495471 | SNV | 1 | A | G | Homozygous   |
| NC_037650.1 | 2496826 | SNV | 1 | A | G | Homozygous   |
| NC_037650.1 | 2497092 | SNV | 1 | C | T | Heterozygous |
| NC_037650.1 | 2497161 | SNV | 1 | G | A | Homozygous   |
| NC_037650.1 | 2497262 | SNV | 1 | G | A | Homozygous   |
| NC_037650.1 | 2497314 | SNV | 1 | G | A | Heterozygous |
| NC_037650.1 | 2497342 | SNV | 1 | A | T | Heterozygous |
| NC_037650.1 | 2497655 | SNV | 1 | C | T | Heterozygous |
| NC_037650.1 | 2497868 | SNV | 1 | A | G | Heterozygous |
| NC_037650.1 | 2498263 | SNV | 1 | A | G | Heterozygous |
| NC_037650.1 | 2498315 | SNV | 1 | T | C | Heterozygous |
| NC_037650.1 | 2498423 | SNV | 1 | T | G | Homozygous   |
| NC_037650.1 | 2498426 | SNV | 1 | G | A | Homozygous   |
| NC_037650.1 | 2498807 | SNV | 1 | C | T | Heterozygous |
| NC_037650.1 | 2499626 | SNV | 1 | G | A | Homozygous   |
| NC_037650.1 | 2507201 | SNV | 1 | C | T | Heterozygous |
| NC_037650.1 | 2507231 | SNV | 1 | G | T | Homozygous   |
| NC_037650.1 | 2507805 | SNV | 1 | C | T | Heterozygous |
| NC_037650.1 | 2508428 | SNV | 1 | A | T | Homozygous   |
| NC_037650.1 | 2523136 | SNV | 1 | T | G | Heterozygous |

|             |         |     |   |   |   |              |
|-------------|---------|-----|---|---|---|--------------|
| NC_037650.1 | 2523140 | SNV | 1 | T | G | Heterozygous |
| NC_037650.1 | 2523144 | SNV | 1 | T | G | Heterozygous |
| NC_037650.1 | 2523148 | SNV | 1 | T | G | Heterozygous |
| NC_037650.1 | 2523265 | SNV | 1 | C | T | Heterozygous |
| NC_037650.1 | 2523271 | SNV | 1 | C | T | Heterozygous |
| NC_037650.1 | 2524420 | SNV | 1 | T | A | Homozygous   |
| NC_037650.1 | 2524430 | SNV | 1 | C | G | Homozygous   |
| NC_037650.1 | 2524467 | SNV | 1 | A | G | Heterozygous |
| NC_037650.1 | 2524483 | SNV | 1 | A | C | Heterozygous |
| NC_037650.1 | 2524531 | SNV | 1 | C | G | Homozygous   |
| NC_037650.1 | 2524549 | SNV | 1 | G | A | Heterozygous |
| NC_037650.1 | 2524603 | SNV | 1 | T | C | Homozygous   |
| NC_037650.1 | 2524786 | SNV | 1 | A | G | Homozygous   |
| NC_037650.1 | 2524789 | SNV | 1 | C | T | Homozygous   |
| NC_037650.1 | 2524792 | SNV | 1 | C | T | Homozygous   |
| NC_037650.1 | 2524965 | SNV | 1 | G | A | Homozygous   |
| NC_037650.1 | 2525058 | SNV | 1 | C | T | Homozygous   |
| NC_037650.1 | 2525091 | SNV | 1 | G | A | Heterozygous |
| NC_037650.1 | 2525136 | SNV | 1 | G | C | Heterozygous |
| NC_037650.1 | 2525140 | SNV | 1 | T | C | Heterozygous |
| NC_037650.1 | 2525145 | SNV | 1 | T | C | Homozygous   |
| NC_037650.1 | 2525157 | SNV | 1 | G | C | Homozygous   |
| NC_037650.1 | 2525172 | SNV | 1 | G | A | Heterozygous |
| NC_037650.1 | 2525262 | SNV | 1 | T | C | Heterozygous |
| NC_037650.1 | 2525754 | SNV | 1 | A | G | Homozygous   |
| NC_037650.1 | 2526192 | SNV | 1 | T | C | Homozygous   |
| NC_037650.1 | 2526207 | SNV | 1 | G | A | Homozygous   |
| NC_037650.1 | 2529532 | SNV | 1 | C | T | Heterozygous |
| NC_037650.1 | 2529594 | SNV | 1 | G | T | Heterozygous |
| NC_037650.1 | 2529716 | SNV | 1 | T | C | Homozygous   |
| NC_037650.1 | 2529725 | SNV | 1 | A | T | Homozygous   |
| NC_037650.1 | 2536107 | SNV | 1 | C | T | Heterozygous |
| NC_037650.1 | 2536996 | SNV | 1 | A | G | Homozygous   |
| NC_037650.1 | 2537012 | SNV | 1 | C | G | Heterozygous |
| NC_037650.1 | 2537155 | SNV | 1 | T | C | Homozygous   |
| NC_037650.1 | 2537979 | SNV | 1 | A | G | Homozygous   |
| NC_037650.1 | 2538436 | SNV | 1 | T | C | Homozygous   |
| NC_037650.1 | 2538470 | SNV | 1 | A | G | Homozygous   |
| NC_037650.1 | 2538905 | SNV | 1 | G | A | Heterozygous |
| NC_037650.1 | 2539329 | SNV | 1 | C | T | Homozygous   |
| NC_037650.1 | 2539741 | SNV | 1 | A | G | Homozygous   |
| NC_037650.1 | 2539745 | SNV | 1 | A | G | Homozygous   |
| NC_037650.1 | 2539992 | SNV | 1 | C | T | Homozygous   |
| NC_037650.1 | 2539999 | SNV | 1 | A | T | Homozygous   |
| NC_037650.1 | 2540003 | SNV | 1 | A | C | Homozygous   |
| NC_037650.1 | 2540005 | SNV | 1 | T | A | Homozygous   |
| NC_037650.1 | 2540008 | SNV | 1 | C | G | Homozygous   |
| NC_037650.1 | 2540012 | SNV | 1 | A | G | Homozygous   |
| NC_037650.1 | 2540045 | SNV | 1 | A | T | Heterozygous |
| NC_037650.1 | 2541636 | SNV | 1 | T | C | Homozygous   |
| NC_037650.1 | 2541950 | SNV | 1 | T | C | Homozygous   |

|             |         |     |   |   |   |              |
|-------------|---------|-----|---|---|---|--------------|
| NC_037650.1 | 2542745 | SNV | 1 | T | C | Heterozygous |
| NC_037650.1 | 2542986 | SNV | 1 | A | G | Heterozygous |
| NC_037650.1 | 2543234 | SNV | 1 | C | T | Heterozygous |
| NC_037650.1 | 2547351 | SNV | 1 | T | C | Heterozygous |
| NC_037650.1 | 2547353 | SNV | 1 | G | A | Heterozygous |
| NC_037650.1 | 2547355 | SNV | 1 | C | T | Heterozygous |
| NC_037650.1 | 2547357 | SNV | 1 | A | G | Heterozygous |
| NC_037650.1 | 2547360 | SNV | 1 | A | G | Heterozygous |
| NC_037650.1 | 2547372 | SNV | 1 | A | G | Heterozygous |
| NC_037650.1 | 2547380 | SNV | 1 | A | G | Heterozygous |
| NC_037650.1 | 2553742 | SNV | 1 | G | A | Heterozygous |
| NC_037650.1 | 2583093 | SNV | 1 | C | T | Homozygous   |
| NC_037650.1 | 2583105 | SNV | 1 | T | G | Homozygous   |
| NC_037650.1 | 2583107 | SNV | 1 | C | G | Homozygous   |
| NC_037650.1 | 2613931 | SNV | 1 | A | C | Homozygous   |
| NC_037650.1 | 2613935 | SNV | 1 | G | A | Homozygous   |
| NC_037650.1 | 2613938 | SNV | 1 | G | C | Homozygous   |
| NC_037650.1 | 2613943 | SNV | 1 | T | C | Homozygous   |
| NC_037650.1 | 2613946 | SNV | 1 | G | A | Homozygous   |
| NC_037650.1 | 2613963 | SNV | 1 | A | G | Homozygous   |
| NC_037650.1 | 2665978 | SNV | 1 | C | T | Homozygous   |
| NC_037650.1 | 2666309 | SNV | 1 | G | C | Heterozygous |
| NC_037650.1 | 2666325 | SNV | 1 | T | C | Homozygous   |
| NC_037650.1 | 2666442 | SNV | 1 | C | T | Heterozygous |
| NC_037650.1 | 2667057 | SNV | 1 | C | T | Homozygous   |
| NC_037650.1 | 2672495 | SNV | 1 | G | C | Heterozygous |
| NC_037650.1 | 2672498 | SNV | 1 | C | T | Heterozygous |
| NC_037650.1 | 2672506 | SNV | 1 | G | A | Homozygous   |
| NC_037650.1 | 2672511 | SNV | 1 | G | A | Heterozygous |
| NC_037650.1 | 2672545 | SNV | 1 | G | C | Heterozygous |
| NC_037650.1 | 2672545 | SNV | 1 | G | T | Heterozygous |
| NC_037650.1 | 2672555 | SNV | 1 | G | C | Homozygous   |
| NC_037650.1 | 2697855 | SNV | 1 | T | C | Heterozygous |
| NC_037650.1 | 2698725 | SNV | 1 | A | C | Heterozygous |
| NC_037650.1 | 2698922 | SNV | 1 | A | G | Heterozygous |
| NC_037650.1 | 2717466 | SNV | 1 | A | G | Heterozygous |
| NC_037650.1 | 2717475 | SNV | 1 | T | A | Homozygous   |
| NC_037650.1 | 2717477 | SNV | 1 | G | A | Homozygous   |
| NC_037650.1 | 2717516 | SNV | 1 | G | A | Homozygous   |
| NC_037650.1 | 2722976 | SNV | 1 | G | A | Homozygous   |
| NC_037650.1 | 2722991 | SNV | 1 | G | A | Heterozygous |
| NC_037650.1 | 2723035 | SNV | 1 | A | G | Homozygous   |
| NC_037650.1 | 2759801 | SNV | 1 | A | G | Homozygous   |
| NC_037650.1 | 2759832 | SNV | 1 | A | G | Heterozygous |
| NC_037650.1 | 2759856 | SNV | 1 | T | C | Homozygous   |
| NC_037650.1 | 2778469 | SNV | 1 | T | C | Heterozygous |
| NC_037650.1 | 2778652 | SNV | 1 | T | C | Heterozygous |
| NC_037650.1 | 2778919 | SNV | 1 | T | C | Heterozygous |
| NC_037650.1 | 2779096 | SNV | 1 | T | C | Homozygous   |
| NC_037650.1 | 2780057 | SNV | 1 | T | A | Heterozygous |
| NC_037650.1 | 2781208 | SNV | 1 | T | A | Homozygous   |

|             |         |     |   |   |   |              |
|-------------|---------|-----|---|---|---|--------------|
| NC_037650.1 | 2782555 | SNV | 1 | A | T | Homozygous   |
| NC_037650.1 | 2782590 | SNV | 1 | A | G | Homozygous   |
| NC_037650.1 | 2782610 | SNV | 1 | A | G | Homozygous   |
| NC_037650.1 | 2782657 | SNV | 1 | G | A | Heterozygous |
| NC_037650.1 | 2783308 | SNV | 1 | A | G | Heterozygous |
| NC_037650.1 | 2783548 | SNV | 1 | A | G | Homozygous   |
| NC_037650.1 | 2783552 | SNV | 1 | A | G | Homozygous   |
| NC_037650.1 | 2783619 | SNV | 1 | C | T | Homozygous   |
| NC_037650.1 | 2793931 | SNV | 1 | T | C | Homozygous   |
| NC_037650.1 | 2793948 | SNV | 1 | A | G | Homozygous   |
| NC_037650.1 | 2794373 | SNV | 1 | C | T | Heterozygous |
| NC_037650.1 | 2794388 | SNV | 1 | T | G | Homozygous   |
| NC_037650.1 | 2794402 | SNV | 1 | A | G | Homozygous   |
| NC_037650.1 | 2794520 | SNV | 1 | A | T | Homozygous   |
| NC_037650.1 | 2794616 | SNV | 1 | C | T | Heterozygous |
| NC_037650.1 | 2794828 | SNV | 1 | C | T | Homozygous   |
| NC_037650.1 | 2795011 | SNV | 1 | T | C | Heterozygous |
| NC_037650.1 | 2795119 | SNV | 1 | G | C | Homozygous   |
| NC_037650.1 | 2795362 | SNV | 1 | C | A | Homozygous   |
| NC_037650.1 | 2795845 | SNV | 1 | T | A | Homozygous   |
| NC_037650.1 | 2797058 | SNV | 1 | A | G | Heterozygous |
| NC_037650.1 | 2797591 | SNV | 1 | T | C | Homozygous   |
| NC_037650.1 | 2797769 | SNV | 1 | A | T | Homozygous   |
| NC_037650.1 | 2797792 | SNV | 1 | G | C | Heterozygous |
| NC_037650.1 | 2797932 | SNV | 1 | T | C | Heterozygous |
| NC_037650.1 | 2798002 | SNV | 1 | A | G | Heterozygous |
| NC_037650.1 | 2798029 | SNV | 1 | T | A | Heterozygous |
| NC_037650.1 | 2798083 | SNV | 1 | C | T | Homozygous   |
| NC_037650.1 | 2798101 | SNV | 1 | C | T | Heterozygous |
| NC_037650.1 | 2798244 | SNV | 1 | T | C | Homozygous   |
| NC_037650.1 | 2798279 | SNV | 1 | T | A | Heterozygous |
| NC_037650.1 | 2798314 | SNV | 1 | T | G | Homozygous   |
| NC_037650.1 | 2798375 | SNV | 1 | A | G | Homozygous   |
| NC_037650.1 | 2798575 | SNV | 1 | G | A | Homozygous   |
| NC_037650.1 | 2806294 | SNV | 1 | A | G | Heterozygous |
| NC_037650.1 | 2810482 | SNV | 1 | A | T | Heterozygous |
| NC_037650.1 | 2810519 | SNV | 1 | T | A | Homozygous   |
| NC_037650.1 | 2813168 | SNV | 1 | C | T | Heterozygous |
| NC_037650.1 | 2813185 | SNV | 1 | C | A | Heterozygous |
| NC_037650.1 | 2813197 | SNV | 1 | G | T | Homozygous   |
| NC_037650.1 | 2813200 | SNV | 1 | A | G | Homozygous   |
| NC_037650.1 | 2814658 | SNV | 1 | G | T | Heterozygous |
| NC_037650.1 | 2814970 | SNV | 1 | A | G | Heterozygous |
| NC_037650.1 | 2815078 | SNV | 1 | G | A | Heterozygous |
| NC_037650.1 | 2815296 | SNV | 1 | T | C | Heterozygous |
| NC_037650.1 | 2815594 | SNV | 1 | G | A | Homozygous   |
| NC_037650.1 | 2836503 | SNV | 1 | G | C | Homozygous   |
| NC_037650.1 | 2836509 | SNV | 1 | G | A | Homozygous   |
| NC_037650.1 | 2836515 | SNV | 1 | A | G | Homozygous   |
| NC_037650.1 | 2836520 | SNV | 1 | T | C | Homozygous   |
| NC_037650.1 | 2836522 | SNV | 1 | A | T | Homozygous   |



|             |         |     |   |   |   |              |
|-------------|---------|-----|---|---|---|--------------|
| NC_037650.1 | 2836530 | SNV | 1 | T | C | Homozygous   |
| NC_037650.1 | 2836545 | SNV | 1 | A | G | Homozygous   |
| NC_037650.1 | 2836548 | SNV | 1 | G | A | Homozygous   |
| NC_037650.1 | 2836554 | SNV | 1 | G | C | Heterozygous |
| NC_037650.1 | 2836556 | SNV | 1 | C | T | Heterozygous |
| NC_037650.1 | 2840802 | SNV | 1 | C | G | Homozygous   |
| NC_037650.1 | 2841225 | SNV | 1 | C | A | Homozygous   |
| NC_037650.1 | 2841432 | SNV | 1 | T | A | Homozygous   |
| NC_037650.1 | 2841623 | SNV | 1 | C | T | Homozygous   |
| NC_037650.1 | 2844195 | SNV | 1 | G | C | Heterozygous |
| NC_037650.1 | 2844199 | SNV | 1 | A | G | Heterozygous |
| NC_037650.1 | 2845255 | SNV | 1 | A | G | Heterozygous |
| NC_037650.1 | 2855074 | SNV | 1 | T | A | Homozygous   |
| NC_037650.1 | 2858006 | SNV | 1 | T | C | Homozygous   |
| NC_037650.1 | 2859019 | SNV | 1 | A | T | Heterozygous |
| NC_037650.1 | 2861050 | SNV | 1 | G | A | Heterozygous |
| NC_037650.1 | 2861582 | SNV | 1 | A | G | Homozygous   |
| NC_037650.1 | 2861733 | SNV | 1 | G | T | Homozygous   |
| NC_037650.1 | 2861931 | SNV | 1 | T | C | Homozygous   |
| NC_037650.1 | 2862035 | SNV | 1 | A | C | Heterozygous |
| NC_037650.1 | 2862293 | SNV | 1 | G | T | Homozygous   |
| NC_037650.1 | 2862335 | SNV | 1 | C | T | Heterozygous |
| NC_037650.1 | 2862906 | SNV | 1 | T | C | Homozygous   |
| NC_037650.1 | 2863195 | SNV | 1 | T | C | Homozygous   |
| NC_037650.1 | 2863332 | SNV | 1 | C | T | Homozygous   |
| NC_037650.1 | 2863344 | SNV | 1 | G | A | Homozygous   |
| NC_037650.1 | 2863410 | SNV | 1 | T | C | Homozygous   |
| NC_037650.1 | 2863899 | SNV | 1 | A | G | Heterozygous |
| NC_037650.1 | 2864357 | SNV | 1 | C | T | Heterozygous |
| NC_037650.1 | 2864782 | SNV | 1 | G | A | Homozygous   |
| NC_037650.1 | 2865961 | SNV | 1 | A | G | Homozygous   |
| NC_037650.1 | 2866048 | SNV | 1 | T | C | Homozygous   |
| NC_037650.1 | 2866148 | SNV | 1 | T | C | Homozygous   |
| NC_037650.1 | 2866158 | SNV | 1 | A | G | Heterozygous |
| NC_037650.1 | 2866379 | SNV | 1 | T | C | Homozygous   |
| NC_037650.1 | 2866486 | SNV | 1 | C | T | Heterozygous |
| NC_037650.1 | 2866702 | SNV | 1 | T | C | Heterozygous |
| NC_037650.1 | 2867301 | SNV | 1 | T | C | Heterozygous |
| NC_037650.1 | 2867412 | SNV | 1 | T | C | Homozygous   |
| NC_037650.1 | 2868719 | SNV | 1 | G | A | Heterozygous |
| NC_037650.1 | 2868782 | SNV | 1 | C | T | Homozygous   |
| NC_037650.1 | 2868804 | SNV | 1 | T | G | Heterozygous |
| NC_037650.1 | 2868812 | SNV | 1 | C | A | Heterozygous |
| NC_037650.1 | 2868821 | SNV | 1 | C | A | Heterozygous |
| NC_037650.1 | 2868827 | SNV | 1 | C | G | Homozygous   |
| NC_037650.1 | 2868830 | SNV | 1 | T | A | Homozygous   |
| NC_037650.1 | 2868836 | SNV | 1 | C | A | Heterozygous |
| NC_037650.1 | 2868839 | SNV | 1 | C | A | Heterozygous |
| NC_037650.1 | 2868842 | SNV | 1 | A | G | Heterozygous |
| NC_037650.1 | 2868844 | SNV | 1 | T | G | Heterozygous |
| NC_037650.1 | 2868861 | SNV | 1 | T | C | Heterozygous |

|             |         |     |   |   |   |              |
|-------------|---------|-----|---|---|---|--------------|
| NC_037650.1 | 2868863 | SNV | 1 | A | G | Heterozygous |
| NC_037650.1 | 2868868 | SNV | 1 | T | G | Heterozygous |
| NC_037650.1 | 2869064 | SNV | 1 | A | G | Homozygous   |
| NC_037650.1 | 2869473 | SNV | 1 | G | A | Heterozygous |
| NC_037650.1 | 2869477 | SNV | 1 | A | G | Homozygous   |
| NC_037650.1 | 2870034 | SNV | 1 | A | G | Homozygous   |
| NC_037650.1 | 2870044 | SNV | 1 | A | G | Homozygous   |
| NC_037650.1 | 2870047 | SNV | 1 | C | T | Homozygous   |
| NC_037650.1 | 2870537 | SNV | 1 | G | A | Homozygous   |
| NC_037650.1 | 2870540 | SNV | 1 | G | A | Homozygous   |
| NC_037650.1 | 2879676 | SNV | 1 | T | G | Heterozygous |
| NC_037650.1 | 2880729 | SNV | 1 | T | C | Homozygous   |
| NC_037650.1 | 2880773 | SNV | 1 | G | A | Heterozygous |
| NC_037650.1 | 2881182 | SNV | 1 | C | T | Heterozygous |
| NC_037650.1 | 2881352 | SNV | 1 | C | A | Homozygous   |
| NC_037650.1 | 2881547 | SNV | 1 | T | C | Homozygous   |
| NC_037650.1 | 2881563 | SNV | 1 | G | C | Heterozygous |
| NC_037650.1 | 2881686 | SNV | 1 | C | T | Heterozygous |
| NC_037650.1 | 2881688 | SNV | 1 | T | A | Homozygous   |
| NC_037650.1 | 2881806 | SNV | 1 | G | A | Heterozygous |
| NC_037650.1 | 2882765 | SNV | 1 | G | C | Heterozygous |
| NC_037650.1 | 2883276 | SNV | 1 | A | G | Heterozygous |
| NC_037650.1 | 2883297 | SNV | 1 | C | T | Heterozygous |
| NC_037650.1 | 2883714 | SNV | 1 | C | A | Homozygous   |
| NC_037650.1 | 2883814 | SNV | 1 | C | T | Homozygous   |
| NC_037650.1 | 2886502 | SNV | 1 | C | T | Homozygous   |
| NC_037650.1 | 2886516 | SNV | 1 | C | T | Heterozygous |
| NC_037650.1 | 2886519 | SNV | 1 | T | C | Heterozygous |
| NC_037650.1 | 2886619 | SNV | 1 | G | A | Heterozygous |
| NC_037650.1 | 2886805 | SNV | 1 | C | T | Heterozygous |
| NC_037650.1 | 2887779 | SNV | 1 | C | T | Heterozygous |
| NC_037650.1 | 2888013 | SNV | 1 | A | G | Homozygous   |
| NC_037650.1 | 2888178 | SNV | 1 | C | A | Heterozygous |
| NC_037650.1 | 2888835 | SNV | 1 | G | A | Heterozygous |
| NC_037650.1 | 2888837 | SNV | 1 | A | G | Heterozygous |
| NC_037650.1 | 2889347 | SNV | 1 | G | A | Heterozygous |
| NC_037650.1 | 2889351 | SNV | 1 | G | A | Heterozygous |
| NC_037650.1 | 2889470 | SNV | 1 | A | G | Homozygous   |
| NC_037650.1 | 2889475 | SNV | 1 | T | C | Homozygous   |
| NC_037650.1 | 2889755 | SNV | 1 | T | C | Homozygous   |
| NC_037650.1 | 2889886 | SNV | 1 | C | T | Heterozygous |
| NC_037650.1 | 2889896 | SNV | 1 | A | G | Homozygous   |
| NC_037650.1 | 2890064 | SNV | 1 | A | G | Homozygous   |
| NC_037650.1 | 2890082 | SNV | 1 | G | A | Homozygous   |
| NC_037650.1 | 2890228 | SNV | 1 | A | G | Homozygous   |
| NC_037650.1 | 2890319 | SNV | 1 | G | A | Heterozygous |
| NC_037650.1 | 2890338 | SNV | 1 | T | G | Heterozygous |
| NC_037650.1 | 2890399 | SNV | 1 | T | C | Homozygous   |
| NC_037650.1 | 2890458 | SNV | 1 | G | A | Homozygous   |
| NC_037650.1 | 2890673 | SNV | 1 | C | T | Homozygous   |
| NC_037650.1 | 2890687 | SNV | 1 | T | C | Heterozygous |

|             |         |     |   |   |   |              |
|-------------|---------|-----|---|---|---|--------------|
| NC_037650.1 | 2890691 | SNV | 1 | C | T | Homozygous   |
| NC_037650.1 | 2890882 | SNV | 1 | A | G | Homozygous   |
| NC_037650.1 | 2891047 | SNV | 1 | T | C | Homozygous   |
| NC_037650.1 | 2891123 | SNV | 1 | T | C | Heterozygous |
| NC_037650.1 | 2891124 | SNV | 1 | G | A | Heterozygous |
| NC_037650.1 | 2891132 | SNV | 1 | G | A | Heterozygous |
| NC_037650.1 | 2891135 | SNV | 1 | A | G | Heterozygous |
| NC_037650.1 | 2891446 | SNV | 1 | A | G | Homozygous   |
| NC_037650.1 | 2891497 | SNV | 1 | A | T | Heterozygous |
| NC_037650.1 | 2891500 | SNV | 1 | T | C | Homozygous   |
| NC_037650.1 | 2891518 | SNV | 1 | T | C | Homozygous   |
| NC_037650.1 | 2891554 | SNV | 1 | G | A | Homozygous   |
| NC_037650.1 | 2891605 | SNV | 1 | G | C | Heterozygous |
| NC_037650.1 | 2891665 | SNV | 1 | T | C | Homozygous   |
| NC_037650.1 | 2891715 | SNV | 1 | G | A | Heterozygous |
| NC_037650.1 | 2891750 | SNV | 1 | T | G | Heterozygous |
| NC_037650.1 | 2891831 | SNV | 1 | T | C | Homozygous   |
| NC_037650.1 | 2892238 | SNV | 1 | G | A | Heterozygous |
| NC_037650.1 | 2892386 | SNV | 1 | G | C | Heterozygous |
| NC_037650.1 | 2892389 | SNV | 1 | C | T | Heterozygous |
| NC_037650.1 | 2892981 | SNV | 1 | A | G | Homozygous   |
| NC_037650.1 | 2893170 | SNV | 1 | A | C | Homozygous   |
| NC_037650.1 | 2893398 | SNV | 1 | T | G | Homozygous   |
| NC_037650.1 | 2893703 | SNV | 1 | C | T | Heterozygous |
| NC_037650.1 | 2896681 | SNV | 1 | C | T | Heterozygous |
| NC_037650.1 | 2896684 | SNV | 1 | G | A | Heterozygous |
| NC_037650.1 | 2896807 | SNV | 1 | T | C | Heterozygous |
| NC_037650.1 | 2897035 | SNV | 1 | G | A | Homozygous   |
| NC_037650.1 | 2897460 | SNV | 1 | A | G | Homozygous   |
| NC_037650.1 | 2897701 | SNV | 1 | G | C | Homozygous   |
| NC_037650.1 | 2897825 | SNV | 1 | T | C | Homozygous   |
| NC_037650.1 | 2897938 | SNV | 1 | T | C | Homozygous   |
| NC_037650.1 | 2897951 | SNV | 1 | T | C | Homozygous   |
| NC_037650.1 | 2897993 | SNV | 1 | C | T | Heterozygous |
| NC_037650.1 | 2897995 | SNV | 1 | C | A | Heterozygous |
| NC_037650.1 | 2898169 | SNV | 1 | T | C | Homozygous   |
| NC_037650.1 | 2898247 | SNV | 1 | A | G | Homozygous   |
| NC_037650.1 | 2898280 | SNV | 1 | A | G | Homozygous   |
| NC_037650.1 | 2898442 | SNV | 1 | A | G | Homozygous   |
| NC_037650.1 | 2898454 | SNV | 1 | G | C | Homozygous   |
| NC_037650.1 | 2898586 | SNV | 1 | T | A | Homozygous   |
| NC_037650.1 | 2898607 | SNV | 1 | A | G | Homozygous   |
| NC_037650.1 | 2898622 | SNV | 1 | T | C | Heterozygous |
| NC_037650.1 | 2898636 | SNV | 1 | T | C | Homozygous   |
| NC_037650.1 | 2898640 | SNV | 1 | G | A | Homozygous   |
| NC_037650.1 | 2899200 | SNV | 1 | C | T | Homozygous   |
| NC_037650.1 | 2899210 | SNV | 1 | A | C | Homozygous   |
| NC_037650.1 | 2899366 | SNV | 1 | A | G | Homozygous   |
| NC_037650.1 | 2899378 | SNV | 1 | A | G | Homozygous   |
| NC_037650.1 | 2899437 | SNV | 1 | C | T | Heterozygous |
| NC_037650.1 | 2899520 | SNV | 1 | T | C | Homozygous   |

|             |         |     |   |   |   |              |
|-------------|---------|-----|---|---|---|--------------|
| NC_037650.1 | 2899880 | SNV | 1 | A | G | Homozygous   |
| NC_037650.1 | 2900433 | SNV | 1 | T | C | Heterozygous |
| NC_037650.1 | 2900774 | SNV | 1 | C | T | Homozygous   |
| NC_037650.1 | 2900907 | SNV | 1 | T | C | Homozygous   |
| NC_037650.1 | 2901267 | SNV | 1 | A | G | Homozygous   |
| NC_037650.1 | 2901357 | SNV | 1 | G | A | Heterozygous |
| NC_037650.1 | 2901369 | SNV | 1 | A | G | Homozygous   |
| NC_037650.1 | 2901376 | SNV | 1 | A | G | Homozygous   |
| NC_037650.1 | 2901559 | SNV | 1 | A | G | Heterozygous |
| NC_037650.1 | 2901575 | SNV | 1 | T | C | Homozygous   |
| NC_037650.1 | 2901914 | SNV | 1 | T | C | Heterozygous |
| NC_037650.1 | 2919355 | SNV | 1 | A | T | Heterozygous |
| NC_037650.1 | 2919358 | SNV | 1 | G | A | Heterozygous |
| NC_037650.1 | 2919903 | SNV | 1 | A | G | Homozygous   |
| NC_037650.1 | 2921232 | SNV | 1 | A | G | Homozygous   |
| NC_037650.1 | 2947776 | SNV | 1 | T | C | Homozygous   |
| NC_037650.1 | 2966316 | SNV | 1 | A | G | Heterozygous |
| NC_037650.1 | 2966750 | SNV | 1 | C | A | Homozygous   |
| NC_037650.1 | 2966789 | SNV | 1 | T | A | Homozygous   |
| NC_037650.1 | 3014405 | SNV | 1 | T | A | Homozygous   |
| NC_037650.1 | 3014450 | SNV | 1 | T | A | Homozygous   |
| NC_037650.1 | 3015211 | SNV | 1 | A | G | Homozygous   |
| NC_037650.1 | 3015213 | SNV | 1 | G | A | Heterozygous |
| NC_037650.1 | 3015265 | SNV | 1 | T | C | Homozygous   |
| NC_037650.1 | 3016203 | SNV | 1 | C | T | Heterozygous |
| NC_037650.1 | 3022172 | SNV | 1 | A | C | Homozygous   |
| NC_037650.1 | 3022203 | SNV | 1 | C | T | Heterozygous |
| NC_037650.1 | 3022209 | SNV | 1 | T | C | Heterozygous |
| NC_037650.1 | 3022228 | SNV | 1 | G | A | Heterozygous |
| NC_037650.1 | 3022328 | SNV | 1 | T | C | Homozygous   |
| NC_037650.1 | 3022339 | SNV | 1 | C | T | Heterozygous |
| NC_037650.1 | 3022413 | SNV | 1 | C | A | Homozygous   |
| NC_037650.1 | 3022453 | SNV | 1 | A | G | Heterozygous |
| NC_037650.1 | 3022475 | SNV | 1 | T | C | Homozygous   |
| NC_037650.1 | 3022672 | SNV | 1 | T | C | Homozygous   |
| NC_037650.1 | 3023323 | SNV | 1 | G | A | Heterozygous |
| NC_037650.1 | 3023326 | SNV | 1 | A | G | Heterozygous |
| NC_037650.1 | 3024872 | SNV | 1 | A | G | Homozygous   |
| NC_037650.1 | 3025795 | SNV | 1 | A | G | Heterozygous |
| NC_037650.1 | 3025799 | SNV | 1 | A | G | Homozygous   |
| NC_037650.1 | 3039043 | SNV | 1 | C | T | Homozygous   |
| NC_037650.1 | 3039047 | SNV | 1 | A | G | Homozygous   |
| NC_037650.1 | 3039408 | SNV | 1 | G | A | Heterozygous |
| NC_037650.1 | 3039411 | SNV | 1 | G | T | Homozygous   |
| NC_037650.1 | 3039699 | SNV | 1 | T | C | Heterozygous |
| NC_037650.1 | 3039753 | SNV | 1 | C | A | Heterozygous |
| NC_037650.1 | 3040426 | SNV | 1 | A | G | Homozygous   |
| NC_037650.1 | 3040473 | SNV | 1 | A | G | Homozygous   |
| NC_037650.1 | 3040502 | SNV | 1 | C | T | Heterozygous |
| NC_037650.1 | 3040548 | SNV | 1 | T | C | Homozygous   |
| NC_037650.1 | 3040551 | SNV | 1 | C | T | Homozygous   |

|             |         |     |   |   |   |              |
|-------------|---------|-----|---|---|---|--------------|
| NC_037650.1 | 3040981 | SNV | 1 | G | A | Heterozygous |
| NC_037650.1 | 3044619 | SNV | 1 | G | T | Homozygous   |
| NC_037650.1 | 3045417 | SNV | 1 | C | T | Homozygous   |
| NC_037650.1 | 3045426 | SNV | 1 | T | C | Homozygous   |
| NC_037650.1 | 3045686 | SNV | 1 | G | T | Heterozygous |
| NC_037650.1 | 3045756 | SNV | 1 | G | A | Heterozygous |
| NC_037650.1 | 3045886 | SNV | 1 | T | C | Homozygous   |
| NC_037650.1 | 3046414 | SNV | 1 | G | A | Homozygous   |
| NC_037650.1 | 3046423 | SNV | 1 | C | T | Homozygous   |
| NC_037650.1 | 3046448 | SNV | 1 | T | C | Homozygous   |
| NC_037650.1 | 3047525 | SNV | 1 | T | C | Homozygous   |
| NC_037650.1 | 3048049 | SNV | 1 | G | A | Homozygous   |
| NC_037650.1 | 3050050 | SNV | 1 | C | T | Homozygous   |
| NC_037650.1 | 3050275 | SNV | 1 | C | T | Heterozygous |
| NC_037650.1 | 3050313 | SNV | 1 | T | C | Homozygous   |
| NC_037650.1 | 3051057 | SNV | 1 | T | C | Heterozygous |
| NC_037650.1 | 3053030 | SNV | 1 | C | T | Homozygous   |
| NC_037650.1 | 3053358 | SNV | 1 | T | C | Homozygous   |
| NC_037650.1 | 3053390 | SNV | 1 | T | C | Heterozygous |
| NC_037650.1 | 3053396 | SNV | 1 | T | C | Heterozygous |
| NC_037650.1 | 3053566 | SNV | 1 | T | C | Heterozygous |
| NC_037650.1 | 3053782 | SNV | 1 | T | A | Homozygous   |
| NC_037650.1 | 3054125 | SNV | 1 | T | C | Heterozygous |
| NC_037650.1 | 3054130 | SNV | 1 | T | C | Heterozygous |
| NC_037650.1 | 3054133 | SNV | 1 | T | C | Heterozygous |
| NC_037650.1 | 3054163 | SNV | 1 | T | C | Heterozygous |
| NC_037650.1 | 3054684 | SNV | 1 | G | A | Heterozygous |
| NC_037650.1 | 3054703 | SNV | 1 | G | A | Homozygous   |
| NC_037650.1 | 3054714 | SNV | 1 | T | C | Heterozygous |
| NC_037650.1 | 3056415 | SNV | 1 | T | G | Heterozygous |
| NC_037650.1 | 3057565 | SNV | 1 | C | T | Heterozygous |
| NC_037650.1 | 3057953 | SNV | 1 | T | C | Homozygous   |
| NC_037650.1 | 3058462 | SNV | 1 | G | A | Heterozygous |
| NC_037650.1 | 3058590 | SNV | 1 | G | A | Homozygous   |
| NC_037650.1 | 3059035 | SNV | 1 | C | T | Homozygous   |
| NC_037650.1 | 3059037 | SNV | 1 | T | C | Heterozygous |
| NC_037650.1 | 3060135 | SNV | 1 | G | A | Heterozygous |
| NC_037650.1 | 3060345 | SNV | 1 | T | C | Homozygous   |
| NC_037650.1 | 3060743 | SNV | 1 | T | C | Heterozygous |
| NC_037650.1 | 3061303 | SNV | 1 | C | T | Heterozygous |
| NC_037650.1 | 3063116 | SNV | 1 | C | A | Heterozygous |
| NC_037650.1 | 3063563 | SNV | 1 | G | A | Homozygous   |
| NC_037650.1 | 3063632 | SNV | 1 | G | A | Heterozygous |
| NC_037650.1 | 3063919 | SNV | 1 | A | T | Heterozygous |
| NC_037650.1 | 3064164 | SNV | 1 | G | A | Homozygous   |
| NC_037650.1 | 3064455 | SNV | 1 | A | G | Homozygous   |
| NC_037650.1 | 3064542 | SNV | 1 | G | A | Heterozygous |
| NC_037650.1 | 3064642 | SNV | 1 | G | A | Heterozygous |
| NC_037650.1 | 3065122 | SNV | 1 | T | C | Heterozygous |
| NC_037650.1 | 3065311 | SNV | 1 | A | G | Heterozygous |
| NC_037650.1 | 3065652 | SNV | 1 | A | G | Heterozygous |

|             |         |     |   |   |   |              |
|-------------|---------|-----|---|---|---|--------------|
| NC_037650.1 | 3065734 | SNV | 1 | A | G | Heterozygous |
| NC_037650.1 | 3065819 | SNV | 1 | G | A | Heterozygous |
| NC_037650.1 | 3065842 | SNV | 1 | C | G | Homozygous   |
| NC_037650.1 | 3066117 | SNV | 1 | C | T | Homozygous   |
| NC_037650.1 | 3067377 | SNV | 1 | G | C | Heterozygous |
| NC_037650.1 | 3067520 | SNV | 1 | C | T | Homozygous   |
| NC_037650.1 | 3067910 | SNV | 1 | G | A | Heterozygous |
| NC_037650.1 | 3068095 | SNV | 1 | T | C | Homozygous   |
| NC_037650.1 | 3068970 | SNV | 1 | T | C | Heterozygous |
| NC_037650.1 | 3068998 | SNV | 1 | T | C | Homozygous   |
| NC_037650.1 | 3069428 | SNV | 1 | A | T | Heterozygous |
| NC_037650.1 | 3069439 | SNV | 1 | G | A | Heterozygous |
| NC_037650.1 | 3069449 | SNV | 1 | A | G | Homozygous   |
| NC_037650.1 | 3069530 | SNV | 1 | C | T | Homozygous   |
| NC_037650.1 | 3072338 | SNV | 1 | T | A | Heterozygous |
| NC_037650.1 | 3078834 | SNV | 1 | T | C | Homozygous   |
| NC_037650.1 | 3078839 | SNV | 1 | G | A | Heterozygous |
| NC_037650.1 | 3078993 | SNV | 1 | G | A | Heterozygous |
| NC_037650.1 | 3084507 | SNV | 1 | T | A | Homozygous   |
| NC_037650.1 | 3084546 | SNV | 1 | A | G | Homozygous   |
| NC_037650.1 | 3084642 | SNV | 1 | C | T | Heterozygous |
| NC_037650.1 | 3084889 | SNV | 1 | T | C | Heterozygous |
| NC_037650.1 | 3084990 | SNV | 1 | G | T | Heterozygous |
| NC_037650.1 | 3085064 | SNV | 1 | T | C | Homozygous   |
| NC_037650.1 | 3085132 | SNV | 1 | G | A | Heterozygous |
| NC_037650.1 | 3085694 | SNV | 1 | A | G | Homozygous   |
| NC_037650.1 | 3089957 | SNV | 1 | T | C | Homozygous   |
| NC_037650.1 | 3089963 | SNV | 1 | C | G | Heterozygous |
| NC_037650.1 | 3089963 | SNV | 1 | C | T | Heterozygous |
| NC_037650.1 | 3089966 | SNV | 1 | G | A | Heterozygous |
| NC_037650.1 | 3090701 | SNV | 1 | G | C | Heterozygous |
| NC_037650.1 | 3091406 | SNV | 1 | C | T | Heterozygous |
| NC_037650.1 | 3091538 | SNV | 1 | A | G | Heterozygous |
| NC_037650.1 | 3091707 | SNV | 1 | C | T | Heterozygous |
| NC_037650.1 | 3091832 | SNV | 1 | T | A | Homozygous   |
| NC_037650.1 | 3093622 | SNV | 1 | C | A | Homozygous   |
| NC_037650.1 | 3093682 | SNV | 1 | C | T | Homozygous   |
| NC_037650.1 | 3093685 | SNV | 1 | A | T | Homozygous   |
| NC_037650.1 | 3093787 | SNV | 1 | T | G | Homozygous   |
| NC_037650.1 | 3094468 | SNV | 1 | G | A | Heterozygous |
| NC_037650.1 | 3094728 | SNV | 1 | G | C | Heterozygous |
| NC_037650.1 | 3094738 | SNV | 1 | T | G | Heterozygous |
| NC_037650.1 | 3094741 | SNV | 1 | G | A | Heterozygous |
| NC_037650.1 | 3094759 | SNV | 1 | C | A | Heterozygous |
| NC_037650.1 | 3094762 | SNV | 1 | G | T | Heterozygous |
| NC_037650.1 | 3094771 | SNV | 1 | G | A | Heterozygous |
| NC_037650.1 | 3094774 | SNV | 1 | G | C | Heterozygous |
| NC_037650.1 | 3094797 | SNV | 1 | C | A | Homozygous   |
| NC_037650.1 | 3094816 | SNV | 1 | G | T | Homozygous   |
| NC_037650.1 | 3101742 | SNV | 1 | A | G | Heterozygous |
| NC_037650.1 | 3152210 | SNV | 1 | T | A | Heterozygous |

|             |         |     |   |   |   |              |
|-------------|---------|-----|---|---|---|--------------|
| NC_037650.1 | 3152224 | SNV | 1 | A | G | Heterozygous |
| NC_037650.1 | 3152230 | SNV | 1 | A | T | Heterozygous |
| NC_037650.1 | 3152236 | SNV | 1 | A | G | Heterozygous |
| NC_037650.1 | 3152406 | SNV | 1 | G | T | Heterozygous |
| NC_037650.1 | 3152602 | SNV | 1 | T | A | Homozygous   |
| NC_037650.1 | 3152617 | SNV | 1 | T | A | Homozygous   |
| NC_037650.1 | 3152619 | SNV | 1 | A | T | Homozygous   |
| NC_037650.1 | 3152624 | SNV | 1 | A | C | Heterozygous |
| NC_037650.1 | 3152650 | SNV | 1 | T | A | Heterozygous |
| NC_037650.1 | 3153157 | SNV | 1 | C | A | Homozygous   |
| NC_037650.1 | 3153163 | SNV | 1 | T | G | Homozygous   |
| NC_037650.1 | 3153172 | SNV | 1 | T | G | Homozygous   |
| NC_037650.1 | 3153175 | SNV | 1 | C | A | Heterozygous |
| NC_037650.1 | 3153178 | SNV | 1 | G | A | Heterozygous |
| NC_037650.1 | 3153187 | SNV | 1 | T | A | Heterozygous |
| NC_037650.1 | 3153205 | SNV | 1 | G | T | Heterozygous |
| NC_037650.1 | 3153217 | SNV | 1 | C | G | Homozygous   |
| NC_037650.1 | 3153235 | SNV | 1 | T | G | Heterozygous |
| NC_037650.1 | 3153238 | SNV | 1 | T | A | Homozygous   |
| NC_037650.1 | 3153240 | SNV | 1 | G | T | Heterozygous |
| NC_037650.1 | 3153248 | SNV | 1 | T | C | Heterozygous |
| NC_037650.1 | 3153253 | SNV | 1 | C | T | Homozygous   |
| NC_037650.1 | 3153257 | SNV | 1 | T | A | Heterozygous |
| NC_037650.1 | 3153262 | SNV | 1 | G | T | Heterozygous |
| NC_037650.1 | 3171731 | SNV | 1 | T | C | Heterozygous |
| NC_037650.1 | 3171733 | SNV | 1 | T | C | Homozygous   |
| NC_037650.1 | 3171739 | SNV | 1 | G | T | Homozygous   |
| NC_037650.1 | 3171750 | SNV | 1 | G | T | Homozygous   |
| NC_037650.1 | 3171752 | SNV | 1 | C | T | Heterozygous |
| NC_037650.1 | 3171758 | SNV | 1 | C | T | Heterozygous |
| NC_037650.1 | 3171762 | SNV | 1 | C | T | Heterozygous |
| NC_037650.1 | 3172001 | SNV | 1 | T | C | Heterozygous |
| NC_037650.1 | 3211975 | SNV | 1 | T | C | Homozygous   |
| NC_037650.1 | 3216919 | SNV | 1 | C | A | Homozygous   |
| NC_037650.1 | 3216925 | SNV | 1 | G | C | Homozygous   |
| NC_037650.1 | 3216931 | SNV | 1 | A | T | Homozygous   |
| NC_037650.1 | 3216936 | SNV | 1 | G | A | Homozygous   |
| NC_037650.1 | 3230791 | SNV | 1 | G | A | Homozygous   |
| NC_037650.1 | 3231240 | SNV | 1 | A | T | Homozygous   |
| NC_037650.1 | 3231247 | SNV | 1 | A | T | Homozygous   |
| NC_037650.1 | 3231251 | SNV | 1 | T | G | Homozygous   |
| NC_037650.1 | 3231253 | SNV | 1 | T | A | Homozygous   |
| NC_037650.1 | 3231258 | SNV | 1 | T | C | Homozygous   |
| NC_037650.1 | 3231261 | SNV | 1 | T | A | Homozygous   |
| NC_037650.1 | 3231263 | SNV | 1 | A | T | Homozygous   |
| NC_037650.1 | 3231328 | SNV | 1 | T | C | Homozygous   |
| NC_037650.1 | 3231394 | SNV | 1 | A | G | Homozygous   |
| NC_037650.1 | 3231424 | SNV | 1 | A | G | Heterozygous |
| NC_037650.1 | 3231633 | SNV | 1 | A | T | Homozygous   |
| NC_037650.1 | 3232996 | SNV | 1 | T | C | Homozygous   |
| NC_037650.1 | 3233861 | SNV | 1 | G | A | Homozygous   |

|             |         |     |   |   |   |              |
|-------------|---------|-----|---|---|---|--------------|
| NC_037650.1 | 3233866 | SNV | 1 | T | C | Homozygous   |
| NC_037650.1 | 3234136 | SNV | 1 | T | C | Homozygous   |
| NC_037650.1 | 3234140 | SNV | 1 | C | T | Heterozygous |
| NC_037650.1 | 3234315 | SNV | 1 | G | A | Homozygous   |
| NC_037650.1 | 3235229 | SNV | 1 | T | C | Heterozygous |
| NC_037650.1 | 3235396 | SNV | 1 | T | C | Heterozygous |
| NC_037650.1 | 3235448 | SNV | 1 | C | T | Heterozygous |
| NC_037650.1 | 3235535 | SNV | 1 | G | T | Homozygous   |
| NC_037650.1 | 3235704 | SNV | 1 | T | C | Heterozygous |
| NC_037650.1 | 3235904 | SNV | 1 | C | T | Heterozygous |
| NC_037650.1 | 3235924 | SNV | 1 | T | C | Heterozygous |
| NC_037650.1 | 3236010 | SNV | 1 | T | C | Heterozygous |
| NC_037650.1 | 3236022 | SNV | 1 | G | A | Heterozygous |
| NC_037650.1 | 3236032 | SNV | 1 | C | T | Homozygous   |
| NC_037650.1 | 3236061 | SNV | 1 | T | C | Homozygous   |
| NC_037650.1 | 3236566 | SNV | 1 | A | G | Homozygous   |
| NC_037650.1 | 3236650 | SNV | 1 | A | G | Homozygous   |
| NC_037650.1 | 3236664 | SNV | 1 | G | C | Heterozygous |
| NC_037650.1 | 3236669 | SNV | 1 | G | A | Homozygous   |
| NC_037650.1 | 3236675 | SNV | 1 | T | A | Heterozygous |
| NC_037650.1 | 3236679 | SNV | 1 | G | A | Heterozygous |
| NC_037650.1 | 3237236 | SNV | 1 | A | G | Homozygous   |
| NC_037650.1 | 3237263 | SNV | 1 | C | T | Heterozygous |
| NC_037650.1 | 3237275 | SNV | 1 | T | C | Heterozygous |
| NC_037650.1 | 3237979 | SNV | 1 | C | T | Heterozygous |
| NC_037650.1 | 3238089 | SNV | 1 | G | C | Homozygous   |
| NC_037650.1 | 3238118 | SNV | 1 | T | C | Homozygous   |
| NC_037650.1 | 3238404 | SNV | 1 | G | A | Homozygous   |
| NC_037650.1 | 3238422 | SNV | 1 | T | C | Heterozygous |
| NC_037650.1 | 3238446 | SNV | 1 | C | T | Heterozygous |
| NC_037650.1 | 3238481 | SNV | 1 | T | C | Homozygous   |
| NC_037650.1 | 3239141 | SNV | 1 | T | C | Heterozygous |
| NC_037650.1 | 3239150 | SNV | 1 | A | G | Heterozygous |
| NC_037650.1 | 3239156 | SNV | 1 | T | G | Heterozygous |
| NC_037650.1 | 3239172 | SNV | 1 | G | T | Heterozygous |
| NC_037650.1 | 3240971 | SNV | 1 | A | G | Homozygous   |
| NC_037650.1 | 3251411 | SNV | 1 | A | C | Homozygous   |
| NC_037650.1 | 3251424 | SNV | 1 | T | A | Homozygous   |
| NC_037650.1 | 3253060 | SNV | 1 | T | C | Homozygous   |
| NC_037650.1 | 3253078 | SNV | 1 | T | C | Homozygous   |
| NC_037650.1 | 3253110 | SNV | 1 | A | C | Heterozygous |
| NC_037650.1 | 3253111 | SNV | 1 | G | T | Heterozygous |
| NC_037650.1 | 3253115 | SNV | 1 | C | T | Heterozygous |
| NC_037650.1 | 3261470 | SNV | 1 | A | G | Homozygous   |
| NC_037650.1 | 3261477 | SNV | 1 | C | G | Homozygous   |
| NC_037650.1 | 3261641 | SNV | 1 | T | G | Homozygous   |
| NC_037650.1 | 3262151 | SNV | 1 | C | T | Heterozygous |
| NC_037650.1 | 3262393 | SNV | 1 | T | C | Homozygous   |
| NC_037650.1 | 3262709 | SNV | 1 | C | G | Homozygous   |
| NC_037650.1 | 3262720 | SNV | 1 | C | A | Heterozygous |
| NC_037650.1 | 3262722 | SNV | 1 | G | T | Heterozygous |



|             |         |     |   |   |   |              |
|-------------|---------|-----|---|---|---|--------------|
| NC_037650.1 | 3262733 | SNV | 1 | C | T | Heterozygous |
| NC_037650.1 | 3262739 | SNV | 1 | A | T | Heterozygous |
| NC_037650.1 | 3262784 | SNV | 1 | A | G | Heterozygous |
| NC_037650.1 | 3267015 | SNV | 1 | G | A | Homozygous   |
| NC_037650.1 | 3267021 | SNV | 1 | G | C | Heterozygous |
| NC_037650.1 | 3267024 | SNV | 1 | T | C | Homozygous   |
| NC_037650.1 | 3269227 | SNV | 1 | A | G | Homozygous   |
| NC_037650.1 | 3299788 | SNV | 1 | C | G | Homozygous   |
| NC_037650.1 | 3301684 | SNV | 1 | A | T | Homozygous   |
| NC_037650.1 | 3301692 | SNV | 1 | A | T | Homozygous   |
| NC_037650.1 | 3301696 | SNV | 1 | A | T | Heterozygous |
| NC_037650.1 | 3301706 | SNV | 1 | C | T | Homozygous   |
| NC_037650.1 | 3306319 | SNV | 1 | T | C | Homozygous   |
| NC_037650.1 | 3306343 | SNV | 1 | A | G | Homozygous   |
| NC_037650.1 | 3306352 | SNV | 1 | A | G | Homozygous   |
| NC_037650.1 | 3307717 | SNV | 1 | C | A | Heterozygous |
| NC_037650.1 | 3307735 | SNV | 1 | A | G | Heterozygous |
| NC_037650.1 | 3307773 | SNV | 1 | T | A | Homozygous   |
| NC_037650.1 | 3307781 | SNV | 1 | A | T | Homozygous   |
| NC_037650.1 | 3308031 | SNV | 1 | A | G | Heterozygous |
| NC_037650.1 | 3308039 | SNV | 1 | T | G | Homozygous   |
| NC_037650.1 | 3308051 | SNV | 1 | C | T | Homozygous   |
| NC_037650.1 | 3309818 | SNV | 1 | T | C | Homozygous   |
| NC_037650.1 | 3309842 | SNV | 1 | A | G | Homozygous   |
| NC_037650.1 | 3309852 | SNV | 1 | A | G | Homozygous   |
| NC_037650.1 | 3309857 | SNV | 1 | C | T | Homozygous   |
| NC_037650.1 | 3310073 | SNV | 1 | C | T | Heterozygous |
| NC_037650.1 | 3310077 | SNV | 1 | C | T | Heterozygous |
| NC_037650.1 | 3310080 | SNV | 1 | T | C | Homozygous   |
| NC_037650.1 | 3311252 | SNV | 1 | A | G | Homozygous   |
| NC_037650.1 | 3311268 | SNV | 1 | T | C | Homozygous   |
| NC_037650.1 | 3311309 | SNV | 1 | C | T | Heterozygous |
| NC_037650.1 | 3311316 | SNV | 1 | G | A | Heterozygous |
| NC_037650.1 | 3311730 | SNV | 1 | G | A | Heterozygous |
| NC_037650.1 | 3311893 | SNV | 1 | T | A | Heterozygous |
| NC_037650.1 | 3312634 | SNV | 1 | G | A | Homozygous   |
| NC_037650.1 | 3312677 | SNV | 1 | T | C | Homozygous   |
| NC_037650.1 | 3312898 | SNV | 1 | G | A | Heterozygous |
| NC_037650.1 | 3313000 | SNV | 1 | A | T | Heterozygous |
| NC_037650.1 | 3313274 | SNV | 1 | G | A | Homozygous   |
| NC_037650.1 | 3313281 | SNV | 1 | T | C | Heterozygous |
| NC_037650.1 | 3313285 | SNV | 1 | T | C | Heterozygous |
| NC_037650.1 | 3313287 | SNV | 1 | T | A | Heterozygous |
| NC_037650.1 | 3313289 | SNV | 1 | T | C | Heterozygous |
| NC_037650.1 | 3313329 | SNV | 1 | G | A | Heterozygous |
| NC_037650.1 | 3313337 | SNV | 1 | G | A | Heterozygous |
| NC_037650.1 | 3314146 | SNV | 1 | G | A | Heterozygous |
| NC_037650.1 | 3314284 | SNV | 1 | A | G | Heterozygous |
| NC_037650.1 | 3314469 | SNV | 1 | C | A | Heterozygous |
| NC_037650.1 | 3315382 | SNV | 1 | G | A | Heterozygous |
| NC_037650.1 | 3315740 | SNV | 1 | A | T | Heterozygous |

|             |         |     |   |   |   |              |
|-------------|---------|-----|---|---|---|--------------|
| NC_037650.1 | 3315747 | SNV | 1 | A | G | Heterozygous |
| NC_037650.1 | 3315768 | SNV | 1 | T | C | Heterozygous |
| NC_037650.1 | 3315986 | SNV | 1 | T | C | Heterozygous |
| NC_037650.1 | 3316125 | SNV | 1 | A | G | Homozygous   |
| NC_037650.1 | 3316556 | SNV | 1 | G | A | Heterozygous |
| NC_037650.1 | 3316782 | SNV | 1 | A | G | Homozygous   |
| NC_037650.1 | 3316819 | SNV | 1 | A | G | Homozygous   |
| NC_037650.1 | 3317117 | SNV | 1 | T | C | Homozygous   |
| NC_037650.1 | 3317214 | SNV | 1 | G | A | Heterozygous |
| NC_037650.1 | 3317561 | SNV | 1 | G | A | Homozygous   |
| NC_037650.1 | 3317803 | SNV | 1 | T | C | Homozygous   |
| NC_037650.1 | 3317886 | SNV | 1 | C | T | Homozygous   |
| NC_037650.1 | 3317895 | SNV | 1 | A | G | Homozygous   |
| NC_037650.1 | 3317960 | SNV | 1 | A | T | Heterozygous |
| NC_037650.1 | 3318191 | SNV | 1 | C | G | Heterozygous |
| NC_037650.1 | 3319477 | SNV | 1 | G | A | Heterozygous |
| NC_037650.1 | 3319532 | SNV | 1 | G | T | Heterozygous |
| NC_037650.1 | 3319637 | SNV | 1 | G | A | Heterozygous |
| NC_037650.1 | 3319639 | SNV | 1 | G | A | Heterozygous |
| NC_037650.1 | 3319658 | SNV | 1 | A | G | Homozygous   |
| NC_037650.1 | 3319778 | SNV | 1 | G | T | Homozygous   |
| NC_037650.1 | 3319998 | SNV | 1 | A | G | Heterozygous |
| NC_037650.1 | 3321057 | SNV | 1 | T | A | Homozygous   |
| NC_037650.1 | 3321104 | SNV | 1 | A | G | Homozygous   |
| NC_037650.1 | 3321459 | SNV | 1 | A | T | Heterozygous |
| NC_037650.1 | 3321539 | SNV | 1 | C | T | Heterozygous |
| NC_037650.1 | 3321560 | SNV | 1 | A | C | Heterozygous |
| NC_037650.1 | 3321591 | SNV | 1 | C | T | Heterozygous |
| NC_037650.1 | 3321638 | SNV | 1 | A | G | Homozygous   |
| NC_037650.1 | 3321887 | SNV | 1 | A | G | Heterozygous |
| NC_037650.1 | 3321924 | SNV | 1 | T | A | Homozygous   |
| NC_037650.1 | 3322048 | SNV | 1 | C | A | Homozygous   |
| NC_037650.1 | 3322109 | SNV | 1 | A | G | Heterozygous |
| NC_037650.1 | 3322523 | SNV | 1 | C | T | Homozygous   |
| NC_037650.1 | 3322567 | SNV | 1 | T | C | Heterozygous |
| NC_037650.1 | 3322571 | SNV | 1 | T | A | Heterozygous |
| NC_037650.1 | 3322575 | SNV | 1 | T | C | Heterozygous |
| NC_037650.1 | 3323034 | SNV | 1 | C | G | Homozygous   |
| NC_037650.1 | 3323148 | SNV | 1 | A | G | Heterozygous |
| NC_037650.1 | 3323491 | SNV | 1 | A | G | Homozygous   |
| NC_037650.1 | 3323809 | SNV | 1 | T | C | Homozygous   |
| NC_037650.1 | 3323829 | SNV | 1 | A | G | Homozygous   |
| NC_037650.1 | 3324692 | SNV | 1 | C | G | Heterozygous |
| NC_037650.1 | 3325094 | SNV | 1 | G | A | Homozygous   |
| NC_037650.1 | 3325167 | SNV | 1 | A | T | Heterozygous |
| NC_037650.1 | 3325215 | SNV | 1 | T | C | Heterozygous |
| NC_037650.1 | 3325308 | SNV | 1 | C | T | Heterozygous |
| NC_037650.1 | 3325319 | SNV | 1 | C | T | Homozygous   |
| NC_037650.1 | 3325328 | SNV | 1 | C | T | Heterozygous |
| NC_037650.1 | 3325339 | SNV | 1 | C | T | Homozygous   |
| NC_037650.1 | 3325349 | SNV | 1 | C | G | Homozygous   |

|             |         |     |   |   |   |              |
|-------------|---------|-----|---|---|---|--------------|
| NC_037650.1 | 3325386 | SNV | 1 | C | T | Homozygous   |
| NC_037650.1 | 3325419 | SNV | 1 | T | G | Homozygous   |
| NC_037650.1 | 3325432 | SNV | 1 | T | C | Homozygous   |
| NC_037650.1 | 3325452 | SNV | 1 | A | G | Heterozygous |
| NC_037650.1 | 3325477 | SNV | 1 | T | C | Homozygous   |
| NC_037650.1 | 3325544 | SNV | 1 | T | C | Heterozygous |
| NC_037650.1 | 3325604 | SNV | 1 | A | T | Heterozygous |
| NC_037650.1 | 3325978 | SNV | 1 | T | A | Heterozygous |
| NC_037650.1 | 3326524 | SNV | 1 | A | G | Homozygous   |
| NC_037650.1 | 3326827 | SNV | 1 | T | C | Homozygous   |
| NC_037650.1 | 3327227 | SNV | 1 | A | G | Homozygous   |
| NC_037650.1 | 3327389 | SNV | 1 | G | C | Heterozygous |
| NC_037650.1 | 3327551 | SNV | 1 | C | T | Heterozygous |
| NC_037650.1 | 3327563 | SNV | 1 | C | T | Heterozygous |
| NC_037650.1 | 3332794 | SNV | 1 | C | T | Homozygous   |
| NC_037650.1 | 3333909 | SNV | 1 | A | G | Heterozygous |
| NC_037650.1 | 3333911 | SNV | 1 | A | G | Heterozygous |
| NC_037650.1 | 3334246 | SNV | 1 | T | C | Heterozygous |
| NC_037650.1 | 3335251 | SNV | 1 | G | A | Heterozygous |
| NC_037650.1 | 3335849 | SNV | 1 | T | C | Heterozygous |
| NC_037650.1 | 3336934 | SNV | 1 | A | C | Homozygous   |
| NC_037650.1 | 3338225 | SNV | 1 | A | G | Homozygous   |
| NC_037650.1 | 3340312 | SNV | 1 | G | A | Homozygous   |
| NC_037650.1 | 3340327 | SNV | 1 | A | G | Heterozygous |
| NC_037650.1 | 3340332 | SNV | 1 | A | T | Heterozygous |
| NC_037650.1 | 3340355 | SNV | 1 | A | T | Homozygous   |
| NC_037650.1 | 3340358 | SNV | 1 | A | G | Heterozygous |
| NC_037650.1 | 3340363 | SNV | 1 | G | C | Heterozygous |
| NC_037650.1 | 3340394 | SNV | 1 | C | G | Heterozygous |
| NC_037650.1 | 3340402 | SNV | 1 | C | T | Heterozygous |
| NC_037650.1 | 3340416 | SNV | 1 | G | C | Homozygous   |
| NC_037650.1 | 3340431 | SNV | 1 | T | A | Heterozygous |
| NC_037650.1 | 3340439 | SNV | 1 | C | T | Homozygous   |
| NC_037650.1 | 3340443 | SNV | 1 | C | T | Heterozygous |
| NC_037650.1 | 3340476 | SNV | 1 | C | T | Heterozygous |
| NC_037650.1 | 3340479 | SNV | 1 | T | A | Heterozygous |
| NC_037650.1 | 3340485 | SNV | 1 | T | G | Heterozygous |
| NC_037650.1 | 3340489 | SNV | 1 | T | A | Heterozygous |
| NC_037650.1 | 3341736 | SNV | 1 | A | G | Homozygous   |
| NC_037650.1 | 3343380 | SNV | 1 | C | T | Homozygous   |
| NC_037650.1 | 3343388 | SNV | 1 | T | C | Homozygous   |
| NC_037650.1 | 3343413 | SNV | 1 | C | T | Heterozygous |
| NC_037650.1 | 3343767 | SNV | 1 | G | A | Homozygous   |
| NC_037650.1 | 3343782 | SNV | 1 | C | A | Heterozygous |
| NC_037650.1 | 3344170 | SNV | 1 | G | C | Homozygous   |
| NC_037650.1 | 3346329 | SNV | 1 | G | T | Homozygous   |
| NC_037650.1 | 3346335 | SNV | 1 | A | C | Heterozygous |
| NC_037650.1 | 3346367 | SNV | 1 | A | G | Heterozygous |
| NC_037650.1 | 3346369 | SNV | 1 | G | A | Homozygous   |
| NC_037650.1 | 3346391 | SNV | 1 | A | G | Homozygous   |
| NC_037650.1 | 3346418 | SNV | 1 | G | C | Heterozygous |

|             |         |     |   |   |   |              |
|-------------|---------|-----|---|---|---|--------------|
| NC_037650.1 | 3346425 | SNV | 1 | T | A | Heterozygous |
| NC_037650.1 | 3346741 | SNV | 1 | G | A | Heterozygous |
| NC_037650.1 | 3347532 | SNV | 1 | T | C | Homozygous   |
| NC_037650.1 | 3351820 | SNV | 1 | G | A | Heterozygous |
| NC_037650.1 | 3352263 | SNV | 1 | A | T | Homozygous   |
| NC_037650.1 | 3352267 | SNV | 1 | A | T | Homozygous   |
| NC_037650.1 | 3354423 | SNV | 1 | G | T | Homozygous   |
| NC_037650.1 | 3354428 | SNV | 1 | G | A | Homozygous   |
| NC_037650.1 | 3354441 | SNV | 1 | A | C | Homozygous   |
| NC_037650.1 | 3354853 | SNV | 1 | G | A | Homozygous   |
| NC_037650.1 | 3356747 | SNV | 1 | C | T | Heterozygous |
| NC_037650.1 | 3356753 | SNV | 1 | C | T | Heterozygous |
| NC_037650.1 | 3356783 | SNV | 1 | C | T | Heterozygous |
| NC_037650.1 | 3356786 | SNV | 1 | C | T | Heterozygous |
| NC_037650.1 | 3392611 | SNV | 1 | A | G | Homozygous   |
| NC_037650.1 | 3393280 | SNV | 1 | A | G | Heterozygous |
| NC_037650.1 | 3393340 | SNV | 1 | A | G | Heterozygous |
| NC_037650.1 | 3393425 | SNV | 1 | A | G | Homozygous   |
| NC_037650.1 | 3393432 | SNV | 1 | C | G | Homozygous   |
| NC_037650.1 | 3393547 | SNV | 1 | A | G | Homozygous   |
| NC_037650.1 | 3393604 | SNV | 1 | T | C | Homozygous   |
| NC_037650.1 | 3393692 | SNV | 1 | G | C | Heterozygous |
| NC_037650.1 | 3393745 | SNV | 1 | G | C | Heterozygous |
| NC_037650.1 | 3393902 | SNV | 1 | T | C | Heterozygous |
| NC_037650.1 | 3393957 | SNV | 1 | G | C | Heterozygous |
| NC_037650.1 | 3394013 | SNV | 1 | G | A | Heterozygous |
| NC_037650.1 | 3394015 | SNV | 1 | A | G | Heterozygous |
| NC_037650.1 | 3394236 | SNV | 1 | C | T | Heterozygous |
| NC_037650.1 | 3394351 | SNV | 1 | T | C | Heterozygous |
| NC_037650.1 | 3394437 | SNV | 1 | C | T | Heterozygous |
| NC_037650.1 | 3394821 | SNV | 1 | G | A | Heterozygous |
| NC_037650.1 | 3395015 | SNV | 1 | A | C | Heterozygous |
| NC_037650.1 | 3395024 | SNV | 1 | C | T | Heterozygous |
| NC_037650.1 | 3395026 | SNV | 1 | T | C | Heterozygous |
| NC_037650.1 | 3395035 | SNV | 1 | A | G | Homozygous   |
| NC_037650.1 | 3395127 | SNV | 1 | A | G | Homozygous   |
| NC_037650.1 | 3395139 | SNV | 1 | A | G | Heterozygous |
| NC_037650.1 | 3395152 | SNV | 1 | A | G | Homozygous   |
| NC_037650.1 | 3395249 | SNV | 1 | T | C | Homozygous   |
| NC_037650.1 | 3395324 | SNV | 1 | G | T | Heterozygous |
| NC_037650.1 | 3395377 | SNV | 1 | C | T | Heterozygous |
| NC_037650.1 | 3395383 | SNV | 1 | T | C | Homozygous   |
| NC_037650.1 | 3395553 | SNV | 1 | A | G | Heterozygous |
| NC_037650.1 | 3396240 | SNV | 1 | G | T | Heterozygous |
| NC_037650.1 | 3396258 | SNV | 1 | T | C | Homozygous   |
| NC_037650.1 | 3400399 | SNV | 1 | T | C | Heterozygous |
| NC_037650.1 | 3400402 | SNV | 1 | T | C | Heterozygous |
| NC_037650.1 | 3400444 | SNV | 1 | A | C | Homozygous   |
| NC_037650.1 | 3404996 | SNV | 1 | G | A | Heterozygous |
| NC_037650.1 | 3412419 | SNV | 1 | C | T | Homozygous   |
| NC_037650.1 | 3421676 | SNV | 1 | A | G | Heterozygous |

|             |         |     |   |   |   |              |
|-------------|---------|-----|---|---|---|--------------|
| NC_037650.1 | 3421682 | SNV | 1 | A | G | Heterozygous |
| NC_037650.1 | 3421702 | SNV | 1 | T | C | Homozygous   |
| NC_037650.1 | 3421707 | SNV | 1 | G | C | Homozygous   |
| NC_037650.1 | 3421713 | SNV | 1 | G | T | Homozygous   |
| NC_037650.1 | 3426239 | SNV | 1 | C | T | Heterozygous |
| NC_037650.1 | 3428327 | SNV | 1 | T | C | Homozygous   |
| NC_037650.1 | 3428494 | SNV | 1 | T | C | Homozygous   |
| NC_037650.1 | 3428843 | SNV | 1 | T | G | Heterozygous |
| NC_037650.1 | 3429297 | SNV | 1 | G | A | Heterozygous |
| NC_037650.1 | 3429339 | SNV | 1 | C | T | Homozygous   |
| NC_037650.1 | 3429348 | SNV | 1 | C | T | Homozygous   |
| NC_037650.1 | 3429369 | SNV | 1 | C | T | Homozygous   |
| NC_037650.1 | 3429431 | SNV | 1 | C | T | Heterozygous |
| NC_037650.1 | 3429460 | SNV | 1 | C | G | Homozygous   |
| NC_037650.1 | 3429474 | SNV | 1 | A | G | Homozygous   |
| NC_037650.1 | 3429506 | SNV | 1 | G | A | Heterozygous |
| NC_037650.1 | 3431624 | SNV | 1 | C | T | Heterozygous |
| NC_037650.1 | 3431682 | SNV | 1 | G | A | Homozygous   |
| NC_037650.1 | 3431768 | SNV | 1 | C | T | Heterozygous |
| NC_037650.1 | 3444205 | SNV | 1 | G | A | Homozygous   |
| NC_037650.1 | 3444472 | SNV | 1 | T | C | Homozygous   |
| NC_037650.1 | 3445799 | SNV | 1 | A | G | Homozygous   |
| NC_037650.1 | 3446017 | SNV | 1 | C | T | Heterozygous |
| NC_037650.1 | 3446110 | SNV | 1 | G | A | Heterozygous |
| NC_037650.1 | 3446237 | SNV | 1 | A | G | Heterozygous |
| NC_037650.1 | 3448877 | SNV | 1 | A | G | Homozygous   |
| NC_037650.1 | 3448921 | SNV | 1 | T | C | Homozygous   |
| NC_037650.1 | 3448927 | SNV | 1 | T | C | Heterozygous |
| NC_037650.1 | 3448929 | SNV | 1 | G | A | Heterozygous |
| NC_037650.1 | 3448970 | SNV | 1 | G | A | Heterozygous |
| NC_037650.1 | 3448976 | SNV | 1 | G | A | Homozygous   |
| NC_037650.1 | 3449015 | SNV | 1 | T | C | Homozygous   |
| NC_037650.1 | 3449033 | SNV | 1 | T | C | Homozygous   |
| NC_037650.1 | 3449040 | SNV | 1 | T | C | Homozygous   |
| NC_037650.1 | 3449052 | SNV | 1 | C | T | Heterozygous |
| NC_037650.1 | 3449107 | SNV | 1 | A | G | Homozygous   |
| NC_037650.1 | 3449137 | SNV | 1 | C | T | Homozygous   |
| NC_037650.1 | 3449175 | SNV | 1 | G | A | Heterozygous |
| NC_037650.1 | 3451910 | SNV | 1 | G | A | Heterozygous |
| NC_037650.1 | 3451959 | SNV | 1 | G | T | Heterozygous |
| NC_037650.1 | 3452098 | SNV | 1 | T | C | Homozygous   |
| NC_037650.1 | 3454988 | SNV | 1 | C | T | Heterozygous |
| NC_037650.1 | 3458390 | SNV | 1 | A | G | Homozygous   |
| NC_037650.1 | 3466925 | SNV | 1 | G | A | Homozygous   |
| NC_037650.1 | 3469053 | SNV | 1 | T | C | Homozygous   |
| NC_037650.1 | 3470747 | SNV | 1 | A | C | Heterozygous |
| NC_037650.1 | 3481809 | SNV | 1 | G | A | Heterozygous |
| NC_037650.1 | 3482357 | SNV | 1 | T | G | Homozygous   |
| NC_037650.1 | 3482417 | SNV | 1 | G | A | Homozygous   |
| NC_037650.1 | 3484580 | SNV | 1 | A | G | Homozygous   |
| NC_037650.1 | 3485593 | SNV | 1 | C | T | Homozygous   |

|             |         |     |   |   |   |              |
|-------------|---------|-----|---|---|---|--------------|
| NC_037650.1 | 3491822 | SNV | 1 | A | G | Homozygous   |
| NC_037650.1 | 3493192 | SNV | 1 | T | A | Heterozygous |
| NC_037650.1 | 3493201 | SNV | 1 | A | G | Heterozygous |
| NC_037650.1 | 3493202 | SNV | 1 | T | C | Heterozygous |
| NC_037650.1 | 3493214 | SNV | 1 | T | C | Homozygous   |
| NC_037650.1 | 3495155 | SNV | 1 | T | C | Homozygous   |
| NC_037650.1 | 3495603 | SNV | 1 | A | G | Homozygous   |
| NC_037650.1 | 3495716 | SNV | 1 | C | T | Heterozygous |
| NC_037650.1 | 3495942 | SNV | 1 | T | C | Homozygous   |
| NC_037650.1 | 3496172 | SNV | 1 | C | A | Heterozygous |
| NC_037650.1 | 3496720 | SNV | 1 | G | A | Heterozygous |
| NC_037650.1 | 3509912 | SNV | 1 | A | G | Homozygous   |
| NC_037650.1 | 3509965 | SNV | 1 | G | A | Heterozygous |
| NC_037650.1 | 3510250 | SNV | 1 | T | C | Homozygous   |
| NC_037650.1 | 3510280 | SNV | 1 | G | C | Heterozygous |
| NC_037650.1 | 3510329 | SNV | 1 | C | T | Heterozygous |
| NC_037650.1 | 3510362 | SNV | 1 | T | C | Homozygous   |
| NC_037650.1 | 3510558 | SNV | 1 | A | G | Heterozygous |
| NC_037650.1 | 3511011 | SNV | 1 | C | G | Heterozygous |
| NC_037650.1 | 3511262 | SNV | 1 | A | G | Homozygous   |
| NC_037650.1 | 3511318 | SNV | 1 | A | G | Homozygous   |
| NC_037650.1 | 3511797 | SNV | 1 | T | A | Heterozygous |
| NC_037650.1 | 3511875 | SNV | 1 | A | G | Homozygous   |
| NC_037650.1 | 3511921 | SNV | 1 | T | C | Heterozygous |
| NC_037650.1 | 3512157 | SNV | 1 | T | C | Homozygous   |
| NC_037650.1 | 3512171 | SNV | 1 | A | G | Heterozygous |
| NC_037650.1 | 3512200 | SNV | 1 | G | A | Heterozygous |
| NC_037650.1 | 3512540 | SNV | 1 | T | C | Homozygous   |
| NC_037650.1 | 3512597 | SNV | 1 | C | T | Homozygous   |
| NC_037650.1 | 3512707 | SNV | 1 | T | C | Heterozygous |
| NC_037650.1 | 3512711 | SNV | 1 | A | G | Homozygous   |
| NC_037650.1 | 3512737 | SNV | 1 | T | C | Homozygous   |
| NC_037650.1 | 3512757 | SNV | 1 | T | C | Homozygous   |
| NC_037650.1 | 3512788 | SNV | 1 | G | A | Homozygous   |
| NC_037650.1 | 3512949 | SNV | 1 | C | T | Homozygous   |
| NC_037650.1 | 3512951 | SNV | 1 | A | T | Homozygous   |
| NC_037650.1 | 3513014 | SNV | 1 | T | A | Heterozygous |
| NC_037650.1 | 3513020 | SNV | 1 | T | A | Heterozygous |
| NC_037650.1 | 3513032 | SNV | 1 | G | A | Homozygous   |
| NC_037650.1 | 3513074 | SNV | 1 | A | T | Heterozygous |
| NC_037650.1 | 3513090 | SNV | 1 | T | C | Homozygous   |
| NC_037650.1 | 3513098 | SNV | 1 | T | A | Heterozygous |
| NC_037650.1 | 3513105 | SNV | 1 | T | G | Homozygous   |
| NC_037650.1 | 3513599 | SNV | 1 | A | T | Homozygous   |
| NC_037650.1 | 3514083 | SNV | 1 | G | C | Homozygous   |
| NC_037650.1 | 3514854 | SNV | 1 | A | G | Homozygous   |
| NC_037650.1 | 3522282 | SNV | 1 | T | A | Heterozygous |
| NC_037650.1 | 3522303 | SNV | 1 | A | G | Heterozygous |
| NC_037650.1 | 3522372 | SNV | 1 | A | G | Heterozygous |
| NC_037650.1 | 3522691 | SNV | 1 | A | G | Homozygous   |
| NC_037650.1 | 3522694 | SNV | 1 | T | C | Homozygous   |

|             |         |     |   |   |   |              |
|-------------|---------|-----|---|---|---|--------------|
| NC_037650.1 | 3522787 | SNV | 1 | A | G | Homozygous   |
| NC_037650.1 | 3523191 | SNV | 1 | C | T | Homozygous   |
| NC_037650.1 | 3523352 | SNV | 1 | A | G | Homozygous   |
| NC_037650.1 | 3523651 | SNV | 1 | G | A | Homozygous   |
| NC_037650.1 | 3524255 | SNV | 1 | A | G | Heterozygous |
| NC_037650.1 | 3524309 | SNV | 1 | G | A | Heterozygous |
| NC_037650.1 | 3524365 | SNV | 1 | T | C | Heterozygous |
| NC_037650.1 | 3524452 | SNV | 1 | C | T | Heterozygous |
| NC_037650.1 | 3524569 | SNV | 1 | C | T | Heterozygous |
| NC_037650.1 | 3524626 | SNV | 1 | T | A | Heterozygous |
| NC_037650.1 | 3524635 | SNV | 1 | C | T | Heterozygous |
| NC_037650.1 | 3524725 | SNV | 1 | C | T | Homozygous   |
| NC_037650.1 | 3525043 | SNV | 1 | A | T | Heterozygous |
| NC_037650.1 | 3525093 | SNV | 1 | G | A | Heterozygous |
| NC_037650.1 | 3525228 | SNV | 1 | C | A | Homozygous   |
| NC_037650.1 | 3525249 | SNV | 1 | G | A | Heterozygous |
| NC_037650.1 | 3526892 | SNV | 1 | G | A | Heterozygous |
| NC_037650.1 | 3526895 | SNV | 1 | C | T | Heterozygous |
| NC_037650.1 | 3526897 | SNV | 1 | G | A | Heterozygous |
| NC_037650.1 | 3526915 | SNV | 1 | A | G | Homozygous   |
| NC_037650.1 | 3527865 | SNV | 1 | A | G | Homozygous   |
| NC_037650.1 | 3557568 | SNV | 1 | G | A | Homozygous   |
| NC_037650.1 | 3560800 | SNV | 1 | T | C | Heterozygous |
| NC_037650.1 | 3560871 | SNV | 1 | A | G | Heterozygous |
| NC_037650.1 | 3563302 | SNV | 1 | C | A | Heterozygous |
| NC_037650.1 | 3565738 | SNV | 1 | G | A | Homozygous   |
| NC_037650.1 | 3568940 | SNV | 1 | A | G | Homozygous   |
| NC_037650.1 | 3569087 | SNV | 1 | C | G | Homozygous   |
| NC_037650.1 | 3569136 | SNV | 1 | G | A | Heterozygous |
| NC_037650.1 | 3569143 | SNV | 1 | G | A | Heterozygous |
| NC_037650.1 | 3569152 | SNV | 1 | T | C | Homozygous   |
| NC_037650.1 | 3572074 | SNV | 1 | T | C | Homozygous   |
| NC_037650.1 | 3572107 | SNV | 1 | A | C | Heterozygous |
| NC_037650.1 | 3572455 | SNV | 1 | G | A | Homozygous   |
| NC_037650.1 | 3572479 | SNV | 1 | G | A | Homozygous   |
| NC_037650.1 | 3572482 | SNV | 1 | C | T | Homozygous   |
| NC_037650.1 | 3572569 | SNV | 1 | G | A | Heterozygous |
| NC_037650.1 | 3572611 | SNV | 1 | T | C | Heterozygous |
| NC_037650.1 | 3572620 | SNV | 1 | T | C | Homozygous   |
| NC_037650.1 | 3572648 | SNV | 1 | T | C | Homozygous   |
| NC_037650.1 | 3572803 | SNV | 1 | A | G | Homozygous   |
| NC_037650.1 | 3572821 | SNV | 1 | A | G | Homozygous   |
| NC_037650.1 | 3572824 | SNV | 1 | G | A | Homozygous   |
| NC_037650.1 | 3572947 | SNV | 1 | G | A | Heterozygous |
| NC_037650.1 | 3572950 | SNV | 1 | C | G | Heterozygous |
| NC_037650.1 | 3572954 | SNV | 1 | G | A | Heterozygous |
| NC_037650.1 | 3573043 | SNV | 1 | T | C | Homozygous   |
| NC_037650.1 | 3573159 | SNV | 1 | T | C | Homozygous   |
| NC_037650.1 | 3581049 | SNV | 1 | G | A | Homozygous   |
| NC_037650.1 | 3581059 | SNV | 1 | C | T | Homozygous   |
| NC_037650.1 | 3581066 | SNV | 1 | C | T | Homozygous   |

|             |         |     |   |   |   |              |
|-------------|---------|-----|---|---|---|--------------|
| NC_037650.1 | 3581468 | SNV | 1 | C | A | Homozygous   |
| NC_037650.1 | 3582040 | SNV | 1 | T | C | Homozygous   |
| NC_037650.1 | 3582077 | SNV | 1 | G | A | Homozygous   |
| NC_037650.1 | 3582084 | SNV | 1 | A | G | Homozygous   |
| NC_037650.1 | 3582201 | SNV | 1 | G | C | Heterozygous |
| NC_037650.1 | 3582212 | SNV | 1 | T | A | Heterozygous |
| NC_037650.1 | 3582222 | SNV | 1 | C | T | Heterozygous |
| NC_037650.1 | 3582522 | SNV | 1 | G | A | Homozygous   |
| NC_037650.1 | 3582684 | SNV | 1 | G | A | Homozygous   |
| NC_037650.1 | 3582704 | SNV | 1 | A | T | Homozygous   |
| NC_037650.1 | 3592192 | SNV | 1 | T | A | Heterozygous |
| NC_037650.1 | 3592194 | SNV | 1 | T | G | Heterozygous |
| NC_037650.1 | 3592196 | SNV | 1 | A | T | Heterozygous |
| NC_037650.1 | 3592686 | SNV | 1 | G | A | Heterozygous |
| NC_037650.1 | 3593068 | SNV | 1 | A | G | Heterozygous |
| NC_037650.1 | 3596405 | SNV | 1 | A | G | Homozygous   |
| NC_037650.1 | 3597985 | SNV | 1 | A | G | Homozygous   |
| NC_037650.1 | 3598073 | SNV | 1 | A | G | Homozygous   |
| NC_037650.1 | 3599331 | SNV | 1 | C | T | Heterozygous |
| NC_037650.1 | 3599694 | SNV | 1 | C | T | Heterozygous |
| NC_037650.1 | 3601110 | SNV | 1 | C | G | Heterozygous |
| NC_037650.1 | 3601151 | SNV | 1 | T | C | Homozygous   |
| NC_037650.1 | 3601153 | SNV | 1 | C | T | Heterozygous |
| NC_037650.1 | 3601279 | SNV | 1 | T | C | Homozygous   |
| NC_037650.1 | 3602569 | SNV | 1 | T | C | Homozygous   |
| NC_037650.1 | 3603004 | SNV | 1 | C | A | Heterozygous |
| NC_037650.1 | 3603714 | SNV | 1 | C | T | Heterozygous |
| NC_037650.1 | 3603850 | SNV | 1 | A | G | Homozygous   |
| NC_037650.1 | 3603899 | SNV | 1 | G | T | Homozygous   |
| NC_037650.1 | 3603924 | SNV | 1 | G | C | Homozygous   |
| NC_037650.1 | 3604060 | SNV | 1 | A | G | Homozygous   |
| NC_037650.1 | 3606258 | SNV | 1 | A | G | Homozygous   |
| NC_037650.1 | 3606271 | SNV | 1 | A | G | Homozygous   |
| NC_037650.1 | 3606332 | SNV | 1 | T | C | Homozygous   |
| NC_037650.1 | 3606369 | SNV | 1 | T | C | Homozygous   |
| NC_037650.1 | 3606588 | SNV | 1 | T | C | Homozygous   |
| NC_037650.1 | 3606598 | SNV | 1 | T | C | Heterozygous |
| NC_037650.1 | 3606836 | SNV | 1 | T | C | Homozygous   |
| NC_037650.1 | 3606878 | SNV | 1 | A | G | Homozygous   |
| NC_037650.1 | 3610825 | SNV | 1 | G | A | Homozygous   |
| NC_037650.1 | 3610840 | SNV | 1 | A | G | Homozygous   |
| NC_037650.1 | 3610845 | SNV | 1 | A | G | Homozygous   |
| NC_037650.1 | 3610851 | SNV | 1 | G | A | Homozygous   |
| NC_037650.1 | 3614401 | SNV | 1 | G | A | Heterozygous |
| NC_037650.1 | 3614435 | SNV | 1 | T | G | Homozygous   |
| NC_037650.1 | 3615016 | SNV | 1 | G | A | Homozygous   |
| NC_037650.1 | 3615019 | SNV | 1 | A | T | Homozygous   |
| NC_037650.1 | 3631505 | SNV | 1 | C | A | Homozygous   |
| NC_037650.1 | 3632612 | SNV | 1 | T | C | Homozygous   |
| NC_037650.1 | 3636024 | SNV | 1 | G | A | Homozygous   |
| NC_037650.1 | 3636026 | SNV | 1 | G | T | Homozygous   |



|             |         |     |   |   |   |              |
|-------------|---------|-----|---|---|---|--------------|
| NC_037650.1 | 3636029 | SNV | 1 | T | G | Homozygous   |
| NC_037650.1 | 3636042 | SNV | 1 | G | A | Homozygous   |
| NC_037650.1 | 3636045 | SNV | 1 | G | A | Homozygous   |
| NC_037650.1 | 3646721 | SNV | 1 | C | T | Heterozygous |
| NC_037650.1 | 3646723 | SNV | 1 | T | A | Heterozygous |
| NC_037650.1 | 3646726 | SNV | 1 | C | T | Homozygous   |
| NC_037650.1 | 3646768 | SNV | 1 | A | G | Homozygous   |
| NC_037650.1 | 3646773 | SNV | 1 | A | G | Homozygous   |
| NC_037650.1 | 3651238 | SNV | 1 | T | C | Homozygous   |
| NC_037650.1 | 3651293 | SNV | 1 | C | G | Heterozygous |
| NC_037650.1 | 3651328 | SNV | 1 | T | C | Homozygous   |
| NC_037650.1 | 3656128 | SNV | 1 | G | A | Heterozygous |
| NC_037650.1 | 3656134 | SNV | 1 | G | A | Heterozygous |
| NC_037650.1 | 3656156 | SNV | 1 | C | A | Homozygous   |
| NC_037650.1 | 3656160 | SNV | 1 | G | T | Homozygous   |
| NC_037650.1 | 3656163 | SNV | 1 | A | T | Homozygous   |
| NC_037650.1 | 3660487 | SNV | 1 | A | G | Homozygous   |
| NC_037650.1 | 3660529 | SNV | 1 | G | A | Homozygous   |
| NC_037650.1 | 3663063 | SNV | 1 | C | T | Heterozygous |
| NC_037650.1 | 3663088 | SNV | 1 | C | A | Heterozygous |
| NC_037650.1 | 3663091 | SNV | 1 | C | T | Heterozygous |
| NC_037650.1 | 3663104 | SNV | 1 | C | G | Heterozygous |
| NC_037650.1 | 3672034 | SNV | 1 | G | A | Homozygous   |
| NC_037650.1 | 3672066 | SNV | 1 | A | G | Homozygous   |
| NC_037650.1 | 3686136 | SNV | 1 | C | G | Heterozygous |
| NC_037650.1 | 3686214 | SNV | 1 | A | G | Homozygous   |
| NC_037650.1 | 3686220 | SNV | 1 | A | G | Homozygous   |
| NC_037650.1 | 3687987 | SNV | 1 | A | G | Homozygous   |
| NC_037650.1 | 3687993 | SNV | 1 | C | A | Heterozygous |
| NC_037650.1 | 3687993 | SNV | 1 | C | G | Heterozygous |
| NC_037650.1 | 3687995 | SNV | 1 | G | A | Homozygous   |
| NC_037650.1 | 3688030 | SNV | 1 | G | A | Homozygous   |
| NC_037650.1 | 3688188 | SNV | 1 | C | T | Heterozygous |
| NC_037650.1 | 3688198 | SNV | 1 | T | C | Heterozygous |
| NC_037650.1 | 3692302 | SNV | 1 | T | C | Homozygous   |
| NC_037650.1 | 3692312 | SNV | 1 | A | G | Heterozygous |
| NC_037650.1 | 3692343 | SNV | 1 | A | G | Heterozygous |
| NC_037650.1 | 3692436 | SNV | 1 | C | T | Heterozygous |
| NC_037650.1 | 3692525 | SNV | 1 | T | C | Homozygous   |
| NC_037650.1 | 3692664 | SNV | 1 | T | C | Homozygous   |
| NC_037650.1 | 3692687 | SNV | 1 | G | C | Heterozygous |
| NC_037650.1 | 3692743 | SNV | 1 | T | A | Homozygous   |
| NC_037650.1 | 3692887 | SNV | 1 | A | T | Heterozygous |
| NC_037650.1 | 3692952 | SNV | 1 | A | C | Heterozygous |
| NC_037650.1 | 3692957 | SNV | 1 | A | T | Homozygous   |
| NC_037650.1 | 3692959 | SNV | 1 | T | C | Homozygous   |
| NC_037650.1 | 3693445 | SNV | 1 | A | G | Heterozygous |
| NC_037650.1 | 3693449 | SNV | 1 | A | G | Heterozygous |
| NC_037650.1 | 3693459 | SNV | 1 | A | G | Heterozygous |
| NC_037650.1 | 3696690 | SNV | 1 | T | C | Homozygous   |
| NC_037650.1 | 3697043 | SNV | 1 | C | T | Heterozygous |

|             |         |     |   |   |   |              |
|-------------|---------|-----|---|---|---|--------------|
| NC_037650.1 | 3697052 | SNV | 1 | G | A | Homozygous   |
| NC_037650.1 | 3697055 | SNV | 1 | T | A | Homozygous   |
| NC_037650.1 | 3697058 | SNV | 1 | G | A | Heterozygous |
| NC_037650.1 | 3697111 | SNV | 1 | T | C | Homozygous   |
| NC_037650.1 | 3706362 | SNV | 1 | C | T | Heterozygous |
| NC_037650.1 | 3706364 | SNV | 1 | C | T | Heterozygous |
| NC_037650.1 | 3706369 | SNV | 1 | T | C | Heterozygous |
| NC_037650.1 | 3717183 | SNV | 1 | G | A | Heterozygous |
| NC_037650.1 | 3717617 | SNV | 1 | G | A | Homozygous   |
| NC_037650.1 | 3717623 | SNV | 1 | G | C | Homozygous   |
| NC_037650.1 | 3717626 | SNV | 1 | G | A | Homozygous   |
| NC_037650.1 | 3717628 | SNV | 1 | A | G | Homozygous   |
| NC_037650.1 | 3717967 | SNV | 1 | A | G | Homozygous   |
| NC_037650.1 | 3718132 | SNV | 1 | A | C | Homozygous   |
| NC_037650.1 | 3718156 | SNV | 1 | G | A | Heterozygous |
| NC_037650.1 | 3718186 | SNV | 1 | A | G | Heterozygous |
| NC_037650.1 | 3718201 | SNV | 1 | A | G | Heterozygous |
| NC_037650.1 | 3718296 | SNV | 1 | T | C | Heterozygous |
| NC_037650.1 | 3718494 | SNV | 1 | C | G | Homozygous   |
| NC_037650.1 | 3718600 | SNV | 1 | C | T | Homozygous   |
| NC_037650.1 | 3718659 | SNV | 1 | G | C | Heterozygous |
| NC_037650.1 | 3718815 | SNV | 1 | G | C | Heterozygous |
| NC_037650.1 | 3718819 | SNV | 1 | G | A | Heterozygous |
| NC_037650.1 | 3718829 | SNV | 1 | G | A | Heterozygous |
| NC_037650.1 | 3718836 | SNV | 1 | A | G | Heterozygous |
| NC_037650.1 | 3720288 | SNV | 1 | C | G | Heterozygous |
| NC_037650.1 | 3720306 | SNV | 1 | C | T | Heterozygous |
| NC_037650.1 | 3727102 | SNV | 1 | T | C | Homozygous   |
| NC_037650.1 | 3727161 | SNV | 1 | T | C | Homozygous   |
| NC_037650.1 | 3727271 | SNV | 1 | G | A | Homozygous   |
| NC_037650.1 | 3727281 | SNV | 1 | C | T | Homozygous   |
| NC_037650.1 | 3727337 | SNV | 1 | C | T | Heterozygous |
| NC_037650.1 | 3727360 | SNV | 1 | T | C | Homozygous   |
| NC_037650.1 | 3727570 | SNV | 1 | T | C | Heterozygous |
| NC_037650.1 | 3727665 | SNV | 1 | T | A | Homozygous   |
| NC_037650.1 | 3727679 | SNV | 1 | C | T | Homozygous   |
| NC_037650.1 | 3727815 | SNV | 1 | T | C | Homozygous   |
| NC_037650.1 | 3727858 | SNV | 1 | C | G | Heterozygous |
| NC_037650.1 | 3727908 | SNV | 1 | C | T | Heterozygous |
| NC_037650.1 | 3728643 | SNV | 1 | G | A | Homozygous   |
| NC_037650.1 | 3728645 | SNV | 1 | C | T | Heterozygous |
| NC_037650.1 | 3732254 | SNV | 1 | A | T | Homozygous   |
| NC_037650.1 | 3732258 | SNV | 1 | G | A | Homozygous   |
| NC_037650.1 | 3732260 | SNV | 1 | C | A | Homozygous   |
| NC_037650.1 | 3732266 | SNV | 1 | C | G | Homozygous   |
| NC_037650.1 | 3732282 | SNV | 1 | G | A | Homozygous   |
| NC_037650.1 | 3732287 | SNV | 1 | G | T | Homozygous   |
| NC_037650.1 | 3738266 | SNV | 1 | G | C | Homozygous   |
| NC_037650.1 | 3738704 | SNV | 1 | C | T | Homozygous   |
| NC_037650.1 | 3740434 | SNV | 1 | T | C | Homozygous   |
| NC_037650.1 | 3740457 | SNV | 1 | G | A | Heterozygous |

|             |         |     |   |   |   |              |
|-------------|---------|-----|---|---|---|--------------|
| NC_037650.1 | 3740948 | SNV | 1 | C | G | Heterozygous |
| NC_037650.1 | 3741084 | SNV | 1 | T | C | Homozygous   |
| NC_037650.1 | 3741112 | SNV | 1 | G | A | Homozygous   |
| NC_037650.1 | 3741115 | SNV | 1 | C | T | Homozygous   |
| NC_037650.1 | 3741146 | SNV | 1 | T | C | Homozygous   |
| NC_037650.1 | 3741154 | SNV | 1 | G | A | Heterozygous |
| NC_037650.1 | 3741163 | SNV | 1 | G | A | Heterozygous |
| NC_037650.1 | 3741208 | SNV | 1 | T | C | Homozygous   |
| NC_037650.1 | 3742605 | SNV | 1 | A | G | Homozygous   |
| NC_037650.1 | 3743003 | SNV | 1 | G | C | Homozygous   |
| NC_037650.1 | 3743122 | SNV | 1 | C | G | Heterozygous |
| NC_037650.1 | 3744514 | SNV | 1 | A | G | Heterozygous |
| NC_037650.1 | 3744517 | SNV | 1 | T | C | Heterozygous |
| NC_037650.1 | 3747435 | SNV | 1 | T | C | Homozygous   |
| NC_037650.1 | 3748199 | SNV | 1 | G | C | Homozygous   |
| NC_037650.1 | 3748202 | SNV | 1 | G | A | Homozygous   |
| NC_037650.1 | 3748212 | SNV | 1 | T | C | Heterozygous |
| NC_037650.1 | 3748243 | SNV | 1 | A | G | Homozygous   |
| NC_037650.1 | 3748641 | SNV | 1 | T | G | Homozygous   |
| NC_037650.1 | 3749718 | SNV | 1 | G | A | Heterozygous |
| NC_037650.1 | 3754478 | SNV | 1 | A | G | Homozygous   |
| NC_037650.1 | 3754892 | SNV | 1 | G | A | Homozygous   |
| NC_037650.1 | 3755325 | SNV | 1 | C | G | Homozygous   |
| NC_037650.1 | 3755793 | SNV | 1 | C | T | Heterozygous |
| NC_037650.1 | 3756022 | SNV | 1 | C | T | Homozygous   |
| NC_037650.1 | 3756057 | SNV | 1 | T | A | Homozygous   |
| NC_037650.1 | 3756241 | SNV | 1 | C | T | Homozygous   |
| NC_037650.1 | 3756357 | SNV | 1 | T | C | Homozygous   |
| NC_037650.1 | 3756359 | SNV | 1 | T | C | Homozygous   |
| NC_037650.1 | 3756438 | SNV | 1 | G | A | Heterozygous |
| NC_037650.1 | 3757043 | SNV | 1 | C | T | Homozygous   |
| NC_037650.1 | 3757089 | SNV | 1 | G | T | Homozygous   |
| NC_037650.1 | 3757100 | SNV | 1 | C | T | Homozygous   |
| NC_037650.1 | 3759382 | SNV | 1 | G | A | Heterozygous |
| NC_037650.1 | 3759435 | SNV | 1 | T | C | Homozygous   |
| NC_037650.1 | 3759470 | SNV | 1 | G | A | Homozygous   |
| NC_037650.1 | 3759709 | SNV | 1 | T | C | Homozygous   |
| NC_037650.1 | 3759830 | SNV | 1 | T | G | Homozygous   |
| NC_037650.1 | 3760029 | SNV | 1 | A | C | Homozygous   |
| NC_037650.1 | 3760061 | SNV | 1 | T | C | Homozygous   |
| NC_037650.1 | 3760080 | SNV | 1 | A | G | Homozygous   |
| NC_037650.1 | 3760525 | SNV | 1 | G | C | Homozygous   |
| NC_037650.1 | 3760879 | SNV | 1 | C | T | Homozygous   |
| NC_037650.1 | 3761025 | SNV | 1 | T | A | Homozygous   |
| NC_037650.1 | 3761197 | SNV | 1 | C | T | Homozygous   |
| NC_037650.1 | 3764099 | SNV | 1 | T | G | Homozygous   |
| NC_037650.1 | 3764118 | SNV | 1 | G | A | Heterozygous |
| NC_037650.1 | 3766311 | SNV | 1 | C | T | Heterozygous |
| NC_037650.1 | 3766468 | SNV | 1 | A | G | Homozygous   |
| NC_037650.1 | 3766496 | SNV | 1 | A | G | Homozygous   |
| NC_037650.1 | 3766578 | SNV | 1 | A | G | Heterozygous |

|             |         |     |   |   |   |              |
|-------------|---------|-----|---|---|---|--------------|
| NC_037650.1 | 3766583 | SNV | 1 | T | C | Homozygous   |
| NC_037650.1 | 3766754 | SNV | 1 | G | A | Heterozygous |
| NC_037650.1 | 3767237 | SNV | 1 | T | C | Heterozygous |
| NC_037650.1 | 3767425 | SNV | 1 | G | A | Heterozygous |
| NC_037650.1 | 3768103 | SNV | 1 | C | T | Heterozygous |
| NC_037650.1 | 3768391 | SNV | 1 | C | T | Heterozygous |
| NC_037650.1 | 3777483 | SNV | 1 | T | C | Homozygous   |
| NC_037650.1 | 3777507 | SNV | 1 | G | A | Homozygous   |
| NC_037650.1 | 3778390 | SNV | 1 | T | C | Heterozygous |
| NC_037650.1 | 3778409 | SNV | 1 | T | C | Heterozygous |
| NC_037650.1 | 3778430 | SNV | 1 | T | C | Heterozygous |
| NC_037650.1 | 3781907 | SNV | 1 | T | A | Heterozygous |
| NC_037650.1 | 3781907 | SNV | 1 | T | G | Heterozygous |
| NC_037650.1 | 3782595 | SNV | 1 | A | G | Homozygous   |
| NC_037650.1 | 3785734 | SNV | 1 | A | T | Homozygous   |
| NC_037650.1 | 3785736 | SNV | 1 | T | C | Homozygous   |
| NC_037650.1 | 3787262 | SNV | 1 | T | C | Homozygous   |
| NC_037650.1 | 3787266 | SNV | 1 | C | T | Homozygous   |
| NC_037650.1 | 3787268 | SNV | 1 | C | T | Homozygous   |
| NC_037650.1 | 3787272 | SNV | 1 | T | C | Homozygous   |
| NC_037650.1 | 3787294 | SNV | 1 | C | T | Homozygous   |
| NC_037650.1 | 3793448 | SNV | 1 | T | C | Homozygous   |
| NC_037650.1 | 3793454 | SNV | 1 | A | G | Homozygous   |
| NC_037650.1 | 3793460 | SNV | 1 | A | G | Homozygous   |
| NC_037650.1 | 3793466 | SNV | 1 | A | T | Homozygous   |
| NC_037650.1 | 3793468 | SNV | 1 | A | G | Homozygous   |
| NC_037650.1 | 3793489 | SNV | 1 | A | C | Homozygous   |
| NC_037650.1 | 3793495 | SNV | 1 | G | C | Homozygous   |
| NC_037650.1 | 3794220 | SNV | 1 | C | A | Heterozygous |
| NC_037650.1 | 3794651 | SNV | 1 | T | C | Homozygous   |
| NC_037650.1 | 3795953 | SNV | 1 | A | G | Homozygous   |
| NC_037650.1 | 3796509 | SNV | 1 | G | A | Homozygous   |
| NC_037650.1 | 3797047 | SNV | 1 | G | A | Heterozygous |
| NC_037650.1 | 3797142 | SNV | 1 | A | T | Homozygous   |
| NC_037650.1 | 3797154 | SNV | 1 | G | T | Heterozygous |
| NC_037650.1 | 3798661 | SNV | 1 | C | T | Homozygous   |
| NC_037650.1 | 3798663 | SNV | 1 | T | C | Homozygous   |
| NC_037650.1 | 3812131 | SNV | 1 | A | G | Heterozygous |
| NC_037650.1 | 3815255 | SNV | 1 | T | C | Heterozygous |
| NC_037650.1 | 3815289 | SNV | 1 | G | A | Heterozygous |
| NC_037650.1 | 3815772 | SNV | 1 | C | T | Heterozygous |
| NC_037650.1 | 3815828 | SNV | 1 | A | G | Homozygous   |
| NC_037650.1 | 3816111 | SNV | 1 | G | A | Heterozygous |
| NC_037650.1 | 3818529 | SNV | 1 | A | G | Heterozygous |
| NC_037650.1 | 3823871 | SNV | 1 | C | A | Heterozygous |
| NC_037650.1 | 3823973 | SNV | 1 | G | A | Heterozygous |
| NC_037650.1 | 3825413 | SNV | 1 | A | G | Homozygous   |
| NC_037650.1 | 3826342 | SNV | 1 | T | C | Heterozygous |
| NC_037650.1 | 3826417 | SNV | 1 | G | A | Heterozygous |
| NC_037650.1 | 3829088 | SNV | 1 | G | A | Heterozygous |
| NC_037650.1 | 3829126 | SNV | 1 | A | G | Homozygous   |

|             |         |     |   |   |   |              |
|-------------|---------|-----|---|---|---|--------------|
| NC_037650.1 | 3829161 | SNV | 1 | G | A | Heterozygous |
| NC_037650.1 | 3829616 | SNV | 1 | G | A | Heterozygous |
| NC_037650.1 | 3830798 | SNV | 1 | A | G | Homozygous   |
| NC_037650.1 | 3830895 | SNV | 1 | T | C | Homozygous   |
| NC_037650.1 | 3830915 | SNV | 1 | C | T | Homozygous   |
| NC_037650.1 | 3831078 | SNV | 1 | A | C | Heterozygous |
| NC_037650.1 | 3831120 | SNV | 1 | A | G | Homozygous   |
| NC_037650.1 | 3831141 | SNV | 1 | A | G | Homozygous   |
| NC_037650.1 | 3831175 | SNV | 1 | G | C | Homozygous   |
| NC_037650.1 | 3831380 | SNV | 1 | A | G | Heterozygous |
| NC_037650.1 | 3831429 | SNV | 1 | G | A | Homozygous   |
| NC_037650.1 | 3831532 | SNV | 1 | T | C | Homozygous   |
| NC_037650.1 | 3832145 | SNV | 1 | T | C | Homozygous   |
| NC_037650.1 | 3832267 | SNV | 1 | C | T | Homozygous   |
| NC_037650.1 | 3833625 | SNV | 1 | A | G | Homozygous   |
| NC_037650.1 | 3833955 | SNV | 1 | C | T | Heterozygous |
| NC_037650.1 | 3834270 | SNV | 1 | A | G | Heterozygous |
| NC_037650.1 | 3834292 | SNV | 1 | G | A | Heterozygous |
| NC_037650.1 | 3834560 | SNV | 1 | G | T | Heterozygous |
| NC_037650.1 | 3835035 | SNV | 1 | A | G | Homozygous   |
| NC_037650.1 | 3835974 | SNV | 1 | T | C | Heterozygous |
| NC_037650.1 | 3836768 | SNV | 1 | G | T | Heterozygous |
| NC_037650.1 | 3836822 | SNV | 1 | C | G | Heterozygous |
| NC_037650.1 | 3836861 | SNV | 1 | T | C | Homozygous   |
| NC_037650.1 | 3839263 | SNV | 1 | T | C | Heterozygous |
| NC_037650.1 | 3839273 | SNV | 1 | T | A | Homozygous   |
| NC_037650.1 | 3839385 | SNV | 1 | T | C | Homozygous   |
| NC_037650.1 | 3839415 | SNV | 1 | T | C | Homozygous   |
| NC_037650.1 | 3842575 | SNV | 1 | C | T | Homozygous   |
| NC_037650.1 | 3842725 | SNV | 1 | G | A | Homozygous   |
| NC_037650.1 | 3845089 | SNV | 1 | T | A | Homozygous   |
| NC_037650.1 | 3845096 | SNV | 1 | C | T | Homozygous   |
| NC_037650.1 | 3850242 | SNV | 1 | C | T | Heterozygous |
| NC_037650.1 | 3851216 | SNV | 1 | C | T | Heterozygous |
| NC_037650.1 | 3852549 | SNV | 1 | G | A | Heterozygous |
| NC_037650.1 | 3852730 | SNV | 1 | C | G | Homozygous   |
| NC_037650.1 | 3853350 | SNV | 1 | A | G | Homozygous   |
| NC_037650.1 | 3853674 | SNV | 1 | T | C | Homozygous   |
| NC_037650.1 | 3853700 | SNV | 1 | C | G | Heterozygous |
| NC_037650.1 | 3858446 | SNV | 1 | G | A | Heterozygous |
| NC_037650.1 | 3858868 | SNV | 1 | T | C | Homozygous   |
| NC_037650.1 | 3858921 | SNV | 1 | C | T | Homozygous   |
| NC_037650.1 | 3858950 | SNV | 1 | C | T | Homozygous   |
| NC_037650.1 | 3861242 | SNV | 1 | C | T | Heterozygous |
| NC_037650.1 | 3861250 | SNV | 1 | C | T | Heterozygous |
| NC_037650.1 | 3861280 | SNV | 1 | T | G | Heterozygous |
| NC_037650.1 | 3861285 | SNV | 1 | A | G | Heterozygous |
| NC_037650.1 | 3861287 | SNV | 1 | A | G | Heterozygous |
| NC_037650.1 | 3861535 | SNV | 1 | C | T | Homozygous   |
| NC_037650.1 | 3861590 | SNV | 1 | C | T | Heterozygous |
| NC_037650.1 | 3861780 | SNV | 1 | T | C | Homozygous   |

|             |         |     |   |   |   |              |
|-------------|---------|-----|---|---|---|--------------|
| NC_037650.1 | 3861884 | SNV | 1 | C | T | Heterozygous |
| NC_037650.1 | 3861980 | SNV | 1 | C | G | Heterozygous |
| NC_037650.1 | 3861999 | SNV | 1 | A | T | Heterozygous |
| NC_037650.1 | 3862012 | SNV | 1 | T | C | Heterozygous |
| NC_037650.1 | 3862017 | SNV | 1 | T | A | Heterozygous |
| NC_037650.1 | 3862034 | SNV | 1 | A | G | Homozygous   |
| NC_037650.1 | 3862353 | SNV | 1 | T | C | Heterozygous |
| NC_037650.1 | 3862464 | SNV | 1 | A | G | Homozygous   |
| NC_037650.1 | 3864805 | SNV | 1 | A | G | Homozygous   |
| NC_037650.1 | 3864828 | SNV | 1 | G | C | Homozygous   |
| NC_037650.1 | 3872257 | SNV | 1 | A | G | Homozygous   |
| NC_037650.1 | 3872575 | SNV | 1 | T | A | Homozygous   |
| NC_037650.1 | 3872641 | SNV | 1 | G | A | Homozygous   |
| NC_037650.1 | 3872728 | SNV | 1 | T | C | Homozygous   |
| NC_037650.1 | 3873323 | SNV | 1 | C | T | Heterozygous |
| NC_037650.1 | 3873407 | SNV | 1 | A | G | Homozygous   |
| NC_037650.1 | 3874242 | SNV | 1 | G | A | Heterozygous |
| NC_037650.1 | 3874385 | SNV | 1 | C | T | Heterozygous |
| NC_037650.1 | 3874453 | SNV | 1 | C | T | Heterozygous |
| NC_037650.1 | 3880341 | SNV | 1 | T | C | Heterozygous |
| NC_037650.1 | 3880436 | SNV | 1 | G | A | Heterozygous |
| NC_037650.1 | 3880687 | SNV | 1 | A | G | Homozygous   |
| NC_037650.1 | 3881043 | SNV | 1 | A | G | Homozygous   |
| NC_037650.1 | 3881221 | SNV | 1 | A | G | Heterozygous |
| NC_037650.1 | 3881872 | SNV | 1 | T | C | Homozygous   |
| NC_037650.1 | 3881941 | SNV | 1 | T | C | Homozygous   |
| NC_037650.1 | 3882040 | SNV | 1 | G | A | Heterozygous |
| NC_037650.1 | 3882087 | SNV | 1 | A | C | Heterozygous |
| NC_037650.1 | 3882206 | SNV | 1 | T | C | Heterozygous |
| NC_037650.1 | 3882210 | SNV | 1 | T | C | Heterozygous |
| NC_037650.1 | 3882273 | SNV | 1 | T | C | Homozygous   |
| NC_037650.1 | 3882463 | SNV | 1 | G | A | Heterozygous |
| NC_037650.1 | 3882470 | SNV | 1 | T | C | Homozygous   |
| NC_037650.1 | 3882560 | SNV | 1 | G | C | Homozygous   |
| NC_037650.1 | 3883041 | SNV | 1 | A | T | Homozygous   |
| NC_037650.1 | 3883162 | SNV | 1 | C | A | Heterozygous |
| NC_037650.1 | 3883204 | SNV | 1 | C | T | Heterozygous |
| NC_037650.1 | 3883215 | SNV | 1 | G | T | Heterozygous |
| NC_037650.1 | 3883928 | SNV | 1 | A | G | Heterozygous |
| NC_037650.1 | 3884116 | SNV | 1 | C | G | Homozygous   |
| NC_037650.1 | 3884120 | SNV | 1 | A | G | Homozygous   |
| NC_037650.1 | 3884418 | SNV | 1 | A | G | Homozygous   |
| NC_037650.1 | 3884427 | SNV | 1 | T | C | Homozygous   |
| NC_037650.1 | 3884430 | SNV | 1 | T | C | Homozygous   |
| NC_037650.1 | 3884813 | SNV | 1 | A | G | Heterozygous |
| NC_037650.1 | 3885346 | SNV | 1 | A | C | Homozygous   |
| NC_037650.1 | 3890383 | SNV | 1 | G | A | Heterozygous |
| NC_037650.1 | 3890389 | SNV | 1 | A | G | Heterozygous |
| NC_037650.1 | 3894847 | SNV | 1 | T | C | Homozygous   |
| NC_037650.1 | 3927227 | SNV | 1 | A | C | Homozygous   |
| NC_037650.1 | 3927600 | SNV | 1 | C | T | Homozygous   |

|             |         |     |   |   |   |              |
|-------------|---------|-----|---|---|---|--------------|
| NC_037650.1 | 3959307 | SNV | 1 | T | A | Homozygous   |
| NC_037650.1 | 3960833 | SNV | 1 | A | G | Heterozygous |
| NC_037650.1 | 3960919 | SNV | 1 | C | A | Heterozygous |
| NC_037650.1 | 3960927 | SNV | 1 | G | A | Heterozygous |
| NC_037650.1 | 3960929 | SNV | 1 | T | A | Heterozygous |
| NC_037650.1 | 3960931 | SNV | 1 | T | A | Heterozygous |
| NC_037650.1 | 3960933 | SNV | 1 | T | A | Heterozygous |
| NC_037650.1 | 3961389 | SNV | 1 | A | G | Heterozygous |
| NC_037650.1 | 3962227 | SNV | 1 | T | A | Homozygous   |
| NC_037650.1 | 3962231 | SNV | 1 | A | T | Homozygous   |
| NC_037650.1 | 3962234 | SNV | 1 | T | G | Homozygous   |
| NC_037650.1 | 3962238 | SNV | 1 | C | A | Homozygous   |
| NC_037650.1 | 3962240 | SNV | 1 | T | A | Homozygous   |
| NC_037650.1 | 3962934 | SNV | 1 | T | A | Heterozygous |
| NC_037650.1 | 3962949 | SNV | 1 | A | T | Homozygous   |
| NC_037650.1 | 3962978 | SNV | 1 | C | A | Homozygous   |
| NC_037650.1 | 3963012 | SNV | 1 | A | T | Homozygous   |
| NC_037650.1 | 3963021 | SNV | 1 | A | G | Heterozygous |
| NC_037650.1 | 3964139 | SNV | 1 | G | A | Heterozygous |
| NC_037650.1 | 3964219 | SNV | 1 | T | A | Heterozygous |
| NC_037650.1 | 3965107 | SNV | 1 | T | A | Heterozygous |
| NC_037650.1 | 3976453 | SNV | 1 | G | T | Homozygous   |
| NC_037650.1 | 3977092 | SNV | 1 | G | T | Homozygous   |
| NC_037650.1 | 3979217 | SNV | 1 | T | C | Homozygous   |
| NC_037650.1 | 3982066 | SNV | 1 | T | G | Homozygous   |
| NC_037650.1 | 3982070 | SNV | 1 | A | T | Homozygous   |
| NC_037650.1 | 3982266 | SNV | 1 | G | A | Homozygous   |
| NC_037650.1 | 3982488 | SNV | 1 | T | C | Homozygous   |
| NC_037650.1 | 3983907 | SNV | 1 | C | T | Homozygous   |
| NC_037650.1 | 3983945 | SNV | 1 | C | A | Homozygous   |
| NC_037650.1 | 3986316 | SNV | 1 | A | G | Heterozygous |
| NC_037650.1 | 3986354 | SNV | 1 | A | G | Heterozygous |
| NC_037650.1 | 4034813 | SNV | 1 | C | T | Heterozygous |
| NC_037650.1 | 4035318 | SNV | 1 | G | C | Heterozygous |
| NC_037650.1 | 4035347 | SNV | 1 | A | T | Homozygous   |
| NC_037650.1 | 4190481 | SNV | 1 | G | A | Heterozygous |
| NC_037650.1 | 4190635 | SNV | 1 | G | A | Homozygous   |
| NC_037650.1 | 4193826 | SNV | 1 | G | C | Homozygous   |
| NC_037650.1 | 4193863 | SNV | 1 | C | T | Heterozygous |
| NC_037650.1 | 4194050 | SNV | 1 | T | C | Heterozygous |
| NC_037650.1 | 4194070 | SNV | 1 | C | T | Heterozygous |
| NC_037650.1 | 4194153 | SNV | 1 | A | G | Homozygous   |
| NC_037650.1 | 4194629 | SNV | 1 | T | C | Homozygous   |
| NC_037650.1 | 4194737 | SNV | 1 | C | T | Heterozygous |
| NC_037650.1 | 4194819 | SNV | 1 | G | A | Heterozygous |
| NC_037650.1 | 4195052 | SNV | 1 | A | G | Heterozygous |
| NC_037650.1 | 4195226 | SNV | 1 | C | G | Homozygous   |
| NC_037650.1 | 4195316 | SNV | 1 | G | C | Heterozygous |
| NC_037650.1 | 4195318 | SNV | 1 | T | A | Homozygous   |
| NC_037650.1 | 4195329 | SNV | 1 | G | T | Heterozygous |
| NC_037650.1 | 4195767 | SNV | 1 | T | C | Homozygous   |

|             |         |     |   |   |   |              |
|-------------|---------|-----|---|---|---|--------------|
| NC_037650.1 | 4196031 | SNV | 1 | T | G | Heterozygous |
| NC_037650.1 | 4196595 | SNV | 1 | A | T | Homozygous   |
| NC_037650.1 | 4196663 | SNV | 1 | C | T | Homozygous   |
| NC_037650.1 | 4196668 | SNV | 1 | C | T | Heterozygous |
| NC_037650.1 | 4196831 | SNV | 1 | G | A | Heterozygous |
| NC_037650.1 | 4197249 | SNV | 1 | C | G | Heterozygous |
| NC_037650.1 | 4197295 | SNV | 1 | A | T | Heterozygous |
| NC_037650.1 | 4197369 | SNV | 1 | A | T | Homozygous   |
| NC_037650.1 | 4197388 | SNV | 1 | A | G | Homozygous   |
| NC_037650.1 | 4197459 | SNV | 1 | T | C | Homozygous   |
| NC_037650.1 | 4197490 | SNV | 1 | A | G | Homozygous   |
| NC_037650.1 | 4197572 | SNV | 1 | T | C | Homozygous   |
| NC_037650.1 | 4197724 | SNV | 1 | T | C | Homozygous   |
| NC_037650.1 | 4201487 | SNV | 1 | T | C | Homozygous   |
| NC_037650.1 | 4209315 | SNV | 1 | C | T | Heterozygous |
| NC_037650.1 | 4209561 | SNV | 1 | G | C | Heterozygous |
| NC_037650.1 | 4213678 | SNV | 1 | G | A | Homozygous   |
| NC_037650.1 | 4213725 | SNV | 1 | C | T | Heterozygous |
| NC_037650.1 | 4213878 | SNV | 1 | C | T | Heterozygous |
| NC_037650.1 | 4213888 | SNV | 1 | A | G | Heterozygous |
| NC_037650.1 | 4213892 | SNV | 1 | G | A | Heterozygous |
| NC_037650.1 | 4218108 | SNV | 1 | T | C | Heterozygous |
| NC_037650.1 | 4218178 | SNV | 1 | C | G | Heterozygous |
| NC_037650.1 | 4218183 | SNV | 1 | G | A | Heterozygous |
| NC_037650.1 | 4233234 | SNV | 1 | G | A | Heterozygous |
| NC_037650.1 | 4237291 | SNV | 1 | G | A | Heterozygous |
| NC_037650.1 | 4239300 | SNV | 1 | A | C | Heterozygous |
| NC_037650.1 | 4239301 | SNV | 1 | G | T | Heterozygous |
| NC_037650.1 | 4239394 | SNV | 1 | G | A | Heterozygous |
| NC_037650.1 | 4239460 | SNV | 1 | A | G | Heterozygous |
| NC_037650.1 | 4247593 | SNV | 1 | T | A | Homozygous   |
| NC_037650.1 | 4247730 | SNV | 1 | G | A | Homozygous   |
| NC_037650.1 | 4247732 | SNV | 1 | A | G | Homozygous   |
| NC_037650.1 | 4247778 | SNV | 1 | A | T | Heterozygous |
| NC_037650.1 | 4247869 | SNV | 1 | A | G | Homozygous   |
| NC_037650.1 | 4247894 | SNV | 1 | G | A | Heterozygous |
| NC_037650.1 | 4247900 | SNV | 1 | G | A | Homozygous   |
| NC_037650.1 | 4247902 | SNV | 1 | A | G | Heterozygous |
| NC_037650.1 | 4247916 | SNV | 1 | T | C | Homozygous   |
| NC_037650.1 | 4248025 | SNV | 1 | G | A | Heterozygous |
| NC_037650.1 | 4248028 | SNV | 1 | T | C | Heterozygous |
| NC_037650.1 | 4248079 | SNV | 1 | C | G | Homozygous   |
| NC_037650.1 | 4248083 | SNV | 1 | T | C | Homozygous   |
| NC_037650.1 | 4248086 | SNV | 1 | A | G | Heterozygous |
| NC_037650.1 | 4248142 | SNV | 1 | T | C | Heterozygous |
| NC_037650.1 | 4248146 | SNV | 1 | C | T | Heterozygous |
| NC_037650.1 | 4248168 | SNV | 1 | A | G | Heterozygous |
| NC_037650.1 | 4248192 | SNV | 1 | G | A | Heterozygous |
| NC_037650.1 | 4248226 | SNV | 1 | G | A | Heterozygous |
| NC_037650.1 | 4251858 | SNV | 1 | A | G | Heterozygous |
| NC_037650.1 | 4252345 | SNV | 1 | G | A | Heterozygous |



|             |         |     |   |   |   |              |
|-------------|---------|-----|---|---|---|--------------|
| NC_037650.1 | 4252535 | SNV | 1 | A | G | Heterozygous |
| NC_037650.1 | 4252590 | SNV | 1 | G | C | Homozygous   |
| NC_037650.1 | 4252615 | SNV | 1 | G | A | Homozygous   |
| NC_037650.1 | 4252621 | SNV | 1 | G | A | Homozygous   |
| NC_037650.1 | 4252652 | SNV | 1 | T | C | Homozygous   |
| NC_037650.1 | 4252715 | SNV | 1 | T | C | Homozygous   |
| NC_037650.1 | 4252800 | SNV | 1 | C | A | Heterozygous |
| NC_037650.1 | 4252810 | SNV | 1 | A | G | Homozygous   |
| NC_037650.1 | 4252812 | SNV | 1 | G | A | Homozygous   |
| NC_037650.1 | 4252998 | SNV | 1 | C | T | Homozygous   |
| NC_037650.1 | 4253003 | SNV | 1 | T | C | Homozygous   |
| NC_037650.1 | 4253008 | SNV | 1 | C | A | Homozygous   |
| NC_037650.1 | 4253012 | SNV | 1 | T | A | Homozygous   |
| NC_037650.1 | 4253015 | SNV | 1 | C | T | Homozygous   |
| NC_037650.1 | 4254760 | SNV | 1 | C | T | Homozygous   |
| NC_037650.1 | 4254762 | SNV | 1 | T | C | Homozygous   |
| NC_037650.1 | 4255859 | SNV | 1 | C | T | Homozygous   |
| NC_037650.1 | 4255899 | SNV | 1 | A | C | Homozygous   |
| NC_037650.1 | 4256254 | SNV | 1 | G | A | Heterozygous |
| NC_037650.1 | 4259302 | SNV | 1 | C | T | Homozygous   |
| NC_037650.1 | 4259308 | SNV | 1 | G | A | Homozygous   |
| NC_037650.1 | 4259357 | SNV | 1 | T | C | Homozygous   |
| NC_037650.1 | 4259462 | SNV | 1 | G | A | Homozygous   |
| NC_037650.1 | 4259721 | SNV | 1 | A | G | Homozygous   |
| NC_037650.1 | 4265238 | SNV | 1 | T | C | Homozygous   |
| NC_037650.1 | 4265347 | SNV | 1 | T | A | Heterozygous |
| NC_037650.1 | 4265517 | SNV | 1 | A | G | Heterozygous |
| NC_037650.1 | 4265729 | SNV | 1 | C | T | Heterozygous |
| NC_037650.1 | 4265803 | SNV | 1 | T | C | Homozygous   |
| NC_037650.1 | 4265860 | SNV | 1 | G | A | Heterozygous |
| NC_037650.1 | 4266068 | SNV | 1 | C | T | Heterozygous |
| NC_037650.1 | 4266411 | SNV | 1 | C | T | Heterozygous |
| NC_037650.1 | 4266448 | SNV | 1 | A | G | Homozygous   |
| NC_037650.1 | 4266572 | SNV | 1 | C | T | Homozygous   |
| NC_037650.1 | 4267367 | SNV | 1 | C | T | Homozygous   |
| NC_037650.1 | 4270099 | SNV | 1 | C | T | Homozygous   |
| NC_037650.1 | 4270113 | SNV | 1 | T | A | Heterozygous |
| NC_037650.1 | 4270121 | SNV | 1 | G | C | Heterozygous |
| NC_037650.1 | 4270176 | SNV | 1 | T | C | Homozygous   |
| NC_037650.1 | 4270244 | SNV | 1 | G | A | Heterozygous |
| NC_037650.1 | 4270613 | SNV | 1 | A | G | Heterozygous |
| NC_037650.1 | 4270863 | SNV | 1 | T | C | Homozygous   |
| NC_037650.1 | 4270977 | SNV | 1 | T | C | Heterozygous |
| NC_037650.1 | 4271028 | SNV | 1 | A | G | Homozygous   |
| NC_037650.1 | 4271045 | SNV | 1 | A | G | Homozygous   |
| NC_037650.1 | 4272013 | SNV | 1 | A | G | Heterozygous |
| NC_037650.1 | 4272034 | SNV | 1 | G | A | Heterozygous |
| NC_037650.1 | 4272118 | SNV | 1 | A | G | Homozygous   |
| NC_037650.1 | 4272155 | SNV | 1 | C | T | Homozygous   |
| NC_037650.1 | 4272195 | SNV | 1 | A | G | Homozygous   |
| NC_037650.1 | 4272201 | SNV | 1 | C | T | Heterozygous |

|             |         |     |   |   |   |              |
|-------------|---------|-----|---|---|---|--------------|
| NC_037650.1 | 4272399 | SNV | 1 | T | C | Heterozygous |
| NC_037650.1 | 4272636 | SNV | 1 | T | C | Homozygous   |
| NC_037650.1 | 4273479 | SNV | 1 | C | G | Heterozygous |
| NC_037650.1 | 4273623 | SNV | 1 | A | G | Homozygous   |
| NC_037650.1 | 4273716 | SNV | 1 | A | G | Heterozygous |
| NC_037650.1 | 4273834 | SNV | 1 | G | A | Homozygous   |
| NC_037650.1 | 4277858 | SNV | 1 | G | A | Homozygous   |
| NC_037650.1 | 4277878 | SNV | 1 | A | G | Heterozygous |
| NC_037650.1 | 4277921 | SNV | 1 | A | G | Homozygous   |
| NC_037650.1 | 4277931 | SNV | 1 | C | A | Heterozygous |
| NC_037650.1 | 4278173 | SNV | 1 | T | C | Heterozygous |
| NC_037650.1 | 4278240 | SNV | 1 | G | C | Homozygous   |
| NC_037650.1 | 4278490 | SNV | 1 | A | G | Homozygous   |
| NC_037650.1 | 4278509 | SNV | 1 | G | A | Heterozygous |
| NC_037650.1 | 4280681 | SNV | 1 | A | G | Homozygous   |
| NC_037650.1 | 4280725 | SNV | 1 | G | A | Heterozygous |
| NC_037650.1 | 4280773 | SNV | 1 | C | G | Heterozygous |
| NC_037650.1 | 4307458 | SNV | 1 | T | C | Homozygous   |
| NC_037650.1 | 4307709 | SNV | 1 | C | T | Heterozygous |
| NC_037650.1 | 4307763 | SNV | 1 | C | T | Heterozygous |
| NC_037650.1 | 4308179 | SNV | 1 | A | C | Homozygous   |
| NC_037650.1 | 4308182 | SNV | 1 | C | G | Homozygous   |
| NC_037650.1 | 4308186 | SNV | 1 | C | T | Homozygous   |
| NC_037650.1 | 4308212 | SNV | 1 | G | A | Homozygous   |
| NC_037650.1 | 4309757 | SNV | 1 | T | C | Homozygous   |
| NC_037650.1 | 4309872 | SNV | 1 | A | C | Heterozygous |
| NC_037650.1 | 4316968 | SNV | 1 | T | C | Homozygous   |
| NC_037650.1 | 4317006 | SNV | 1 | T | C | Homozygous   |
| NC_037650.1 | 4317049 | SNV | 1 | T | C | Heterozygous |
| NC_037650.1 | 4317091 | SNV | 1 | G | A | Heterozygous |
| NC_037650.1 | 4317618 | SNV | 1 | A | G | Homozygous   |
| NC_037650.1 | 4320287 | SNV | 1 | T | C | Homozygous   |
| NC_037650.1 | 4320388 | SNV | 1 | C | T | Homozygous   |
| NC_037650.1 | 4320857 | SNV | 1 | T | C | Homozygous   |
| NC_037650.1 | 4320872 | SNV | 1 | C | T | Heterozygous |
| NC_037650.1 | 4321108 | SNV | 1 | G | A | Homozygous   |
| NC_037650.1 | 4321111 | SNV | 1 | C | T | Heterozygous |
| NC_037650.1 | 4321290 | SNV | 1 | T | C | Homozygous   |
| NC_037650.1 | 4321309 | SNV | 1 | C | T | Homozygous   |
| NC_037650.1 | 4321636 | SNV | 1 | C | G | Heterozygous |
| NC_037650.1 | 4321639 | SNV | 1 | G | A | Heterozygous |
| NC_037650.1 | 4322702 | SNV | 1 | C | T | Homozygous   |
| NC_037650.1 | 4322704 | SNV | 1 | G | T | Homozygous   |
| NC_037650.1 | 4331464 | SNV | 1 | G | A | Heterozygous |
| NC_037650.1 | 4331643 | SNV | 1 | G | A | Homozygous   |
| NC_037650.1 | 4370392 | SNV | 1 | T | G | Homozygous   |
| NC_037650.1 | 4376599 | SNV | 1 | A | T | Heterozygous |
| NC_037650.1 | 4377041 | SNV | 1 | G | A | Homozygous   |
| NC_037650.1 | 4377410 | SNV | 1 | T | C | Heterozygous |
| NC_037650.1 | 4377506 | SNV | 1 | A | G | Homozygous   |
| NC_037650.1 | 4377547 | SNV | 1 | A | G | Heterozygous |

|             |         |     |   |   |   |              |
|-------------|---------|-----|---|---|---|--------------|
| NC_037650.1 | 4377563 | SNV | 1 | T | C | Heterozygous |
| NC_037650.1 | 4377596 | SNV | 1 | G | A | Heterozygous |
| NC_037650.1 | 4377601 | SNV | 1 | T | C | Homozygous   |
| NC_037650.1 | 4377679 | SNV | 1 | T | C | Heterozygous |
| NC_037650.1 | 4377694 | SNV | 1 | G | C | Homozygous   |
| NC_037650.1 | 4377703 | SNV | 1 | G | C | Heterozygous |
| NC_037650.1 | 4377706 | SNV | 1 | A | G | Heterozygous |
| NC_037650.1 | 4377877 | SNV | 1 | C | T | Heterozygous |
| NC_037650.1 | 4377889 | SNV | 1 | A | C | Homozygous   |
| NC_037650.1 | 4378179 | SNV | 1 | C | A | Homozygous   |
| NC_037650.1 | 4379590 | SNV | 1 | T | C | Homozygous   |
| NC_037650.1 | 4379599 | SNV | 1 | C | T | Heterozygous |
| NC_037650.1 | 4380429 | SNV | 1 | T | C | Homozygous   |
| NC_037650.1 | 4380473 | SNV | 1 | T | C | Heterozygous |
| NC_037650.1 | 4380922 | SNV | 1 | T | C | Homozygous   |
| NC_037650.1 | 4381104 | SNV | 1 | A | G | Homozygous   |
| NC_037650.1 | 4381131 | SNV | 1 | A | G | Homozygous   |
| NC_037650.1 | 4381200 | SNV | 1 | A | T | Heterozygous |
| NC_037650.1 | 4381245 | SNV | 1 | G | A | Heterozygous |
| NC_037650.1 | 4381251 | SNV | 1 | C | T | Heterozygous |
| NC_037650.1 | 4381272 | SNV | 1 | A | G | Homozygous   |
| NC_037650.1 | 4381480 | SNV | 1 | G | A | Homozygous   |
| NC_037650.1 | 4381507 | SNV | 1 | T | C | Homozygous   |
| NC_037650.1 | 4381588 | SNV | 1 | G | A | Homozygous   |
| NC_037650.1 | 4381844 | SNV | 1 | A | G | Homozygous   |
| NC_037650.1 | 4381850 | SNV | 1 | G | A | Heterozygous |
| NC_037650.1 | 4382605 | SNV | 1 | T | C | Homozygous   |
| NC_037650.1 | 4382610 | SNV | 1 | T | A | Homozygous   |
| NC_037650.1 | 4383244 | SNV | 1 | A | G | Heterozygous |
| NC_037650.1 | 4383271 | SNV | 1 | C | T | Heterozygous |
| NC_037650.1 | 4383289 | SNV | 1 | C | T | Homozygous   |
| NC_037650.1 | 4383522 | SNV | 1 | G | A | Heterozygous |
| NC_037650.1 | 4383823 | SNV | 1 | C | A | Heterozygous |
| NC_037650.1 | 4383835 | SNV | 1 | G | A | Heterozygous |
| NC_037650.1 | 4384312 | SNV | 1 | C | T | Heterozygous |
| NC_037650.1 | 4384440 | SNV | 1 | T | C | Homozygous   |
| NC_037650.1 | 4384461 | SNV | 1 | T | C | Homozygous   |
| NC_037650.1 | 4384668 | SNV | 1 | T | C | Homozygous   |
| NC_037650.1 | 4384738 | SNV | 1 | T | C | Heterozygous |
| NC_037650.1 | 4384945 | SNV | 1 | T | C | Heterozygous |
| NC_037650.1 | 4385004 | SNV | 1 | T | C | Homozygous   |
| NC_037650.1 | 4385073 | SNV | 1 | C | T | Heterozygous |
| NC_037650.1 | 4386007 | SNV | 1 | A | G | Homozygous   |
| NC_037650.1 | 4386791 | SNV | 1 | C | T | Homozygous   |
| NC_037650.1 | 4387030 | SNV | 1 | A | G | Heterozygous |
| NC_037650.1 | 4387349 | SNV | 1 | T | G | Homozygous   |
| NC_037650.1 | 4387351 | SNV | 1 | C | T | Homozygous   |
| NC_037650.1 | 4387457 | SNV | 1 | A | G | Homozygous   |
| NC_037650.1 | 4387481 | SNV | 1 | T | C | Heterozygous |
| NC_037650.1 | 4387835 | SNV | 1 | C | A | Heterozygous |
| NC_037650.1 | 4387869 | SNV | 1 | A | T | Heterozygous |

|             |         |     |   |   |   |              |
|-------------|---------|-----|---|---|---|--------------|
| NC_037650.1 | 4387872 | SNV | 1 | T | C | Heterozygous |
| NC_037650.1 | 4387881 | SNV | 1 | C | G | Heterozygous |
| NC_037650.1 | 4387899 | SNV | 1 | A | T | Heterozygous |
| NC_037650.1 | 4387908 | SNV | 1 | A | G | Heterozygous |
| NC_037650.1 | 4387914 | SNV | 1 | T | A | Heterozygous |
| NC_037650.1 | 4387972 | SNV | 1 | G | A | Homozygous   |
| NC_037650.1 | 4392439 | SNV | 1 | T | C | Homozygous   |
| NC_037650.1 | 4392671 | SNV | 1 | A | G | Homozygous   |
| NC_037650.1 | 4392785 | SNV | 1 | G | A | Homozygous   |
| NC_037650.1 | 4392791 | SNV | 1 | A | T | Homozygous   |
| NC_037650.1 | 4392948 | SNV | 1 | T | C | Homozygous   |
| NC_037650.1 | 4393693 | SNV | 1 | A | G | Heterozygous |
| NC_037650.1 | 4393813 | SNV | 1 | A | T | Homozygous   |
| NC_037650.1 | 4394478 | SNV | 1 | A | C | Heterozygous |
| NC_037650.1 | 4416237 | SNV | 1 | G | A | Homozygous   |
| NC_037650.1 | 4425849 | SNV | 1 | C | T | Heterozygous |
| NC_037650.1 | 4432429 | SNV | 1 | T | C | Heterozygous |
| NC_037650.1 | 4432459 | SNV | 1 | A | G | Heterozygous |
| NC_037650.1 | 4436562 | SNV | 1 | A | T | Homozygous   |
| NC_037650.1 | 4436568 | SNV | 1 | G | T | Homozygous   |
| NC_037650.1 | 4436578 | SNV | 1 | A | T | Homozygous   |
| NC_037650.1 | 4436587 | SNV | 1 | C | T | Homozygous   |
| NC_037650.1 | 4440419 | SNV | 1 | T | C | Homozygous   |
| NC_037650.1 | 4440505 | SNV | 1 | G | C | Homozygous   |
| NC_037650.1 | 4442965 | SNV | 1 | A | C | Homozygous   |
| NC_037650.1 | 4442970 | SNV | 1 | A | G | Homozygous   |
| NC_037650.1 | 4444474 | SNV | 1 | T | A | Homozygous   |
| NC_037650.1 | 4444509 | SNV | 1 | T | C | Homozygous   |
| NC_037650.1 | 4444513 | SNV | 1 | G | T | Homozygous   |
| NC_037650.1 | 4447066 | SNV | 1 | A | C | Heterozygous |
| NC_037650.1 | 4447082 | SNV | 1 | C | A | Heterozygous |
| NC_037650.1 | 4447086 | SNV | 1 | A | G | Heterozygous |
| NC_037650.1 | 4447133 | SNV | 1 | A | T | Heterozygous |
| NC_037650.1 | 4447135 | SNV | 1 | C | T | Heterozygous |
| NC_037650.1 | 4447137 | SNV | 1 | C | T | Heterozygous |
| NC_037650.1 | 4447139 | SNV | 1 | C | A | Heterozygous |
| NC_037650.1 | 4447301 | SNV | 1 | G | C | Homozygous   |
| NC_037650.1 | 4447409 | SNV | 1 | G | A | Homozygous   |
| NC_037650.1 | 4447516 | SNV | 1 | G | A | Homozygous   |
| NC_037650.1 | 4447544 | SNV | 1 | C | T | Homozygous   |
| NC_037650.1 | 4448061 | SNV | 1 | G | A | Heterozygous |
| NC_037650.1 | 4448094 | SNV | 1 | A | G | Homozygous   |
| NC_037650.1 | 4448589 | SNV | 1 | G | A | Heterozygous |
| NC_037650.1 | 4448722 | SNV | 1 | A | G | Homozygous   |
| NC_037650.1 | 4448795 | SNV | 1 | A | C | Homozygous   |
| NC_037650.1 | 4448848 | SNV | 1 | A | G | Heterozygous |
| NC_037650.1 | 4448871 | SNV | 1 | A | G | Homozygous   |
| NC_037650.1 | 4449178 | SNV | 1 | A | G | Homozygous   |
| NC_037650.1 | 4449293 | SNV | 1 | T | A | Heterozygous |
| NC_037650.1 | 4449302 | SNV | 1 | G | T | Heterozygous |
| NC_037650.1 | 4449580 | SNV | 1 | C | T | Heterozygous |

|             |         |     |   |   |   |              |
|-------------|---------|-----|---|---|---|--------------|
| NC_037650.1 | 4449583 | SNV | 1 | T | C | Homozygous   |
| NC_037650.1 | 4449679 | SNV | 1 | T | C | Homozygous   |
| NC_037650.1 | 4449700 | SNV | 1 | C | T | Homozygous   |
| NC_037650.1 | 4449723 | SNV | 1 | A | G | Homozygous   |
| NC_037650.1 | 4449726 | SNV | 1 | G | T | Homozygous   |
| NC_037650.1 | 4449997 | SNV | 1 | A | G | Homozygous   |
| NC_037650.1 | 4450038 | SNV | 1 | A | G | Homozygous   |
| NC_037650.1 | 4450143 | SNV | 1 | A | G | Homozygous   |
| NC_037650.1 | 4450266 | SNV | 1 | T | C | Homozygous   |
| NC_037650.1 | 4450558 | SNV | 1 | C | T | Homozygous   |
| NC_037650.1 | 4450721 | SNV | 1 | T | C | Heterozygous |
| NC_037650.1 | 4450728 | SNV | 1 | C | T | Heterozygous |
| NC_037650.1 | 4450736 | SNV | 1 | T | C | Heterozygous |
| NC_037650.1 | 4450740 | SNV | 1 | C | T | Heterozygous |
| NC_037650.1 | 4450835 | SNV | 1 | G | A | Homozygous   |
| NC_037650.1 | 4451140 | SNV | 1 | A | G | Homozygous   |
| NC_037650.1 | 4451422 | SNV | 1 | A | G | Homozygous   |
| NC_037650.1 | 4451698 | SNV | 1 | G | A | Heterozygous |
| NC_037650.1 | 4455581 | SNV | 1 | G | A | Homozygous   |
| NC_037650.1 | 4456907 | SNV | 1 | G | A | Homozygous   |
| NC_037650.1 | 4466661 | SNV | 1 | G | A | Heterozygous |
| NC_037650.1 | 4466836 | SNV | 1 | A | G | Homozygous   |
| NC_037650.1 | 4466992 | SNV | 1 | A | T | Homozygous   |
| NC_037650.1 | 4466997 | SNV | 1 | T | C | Homozygous   |
| NC_037650.1 | 4467011 | SNV | 1 | C | A | Heterozygous |
| NC_037650.1 | 4467016 | SNV | 1 | T | C | Heterozygous |
| NC_037650.1 | 4467173 | SNV | 1 | C | T | Homozygous   |
| NC_037650.1 | 4467195 | SNV | 1 | T | G | Homozygous   |
| NC_037650.1 | 4467232 | SNV | 1 | A | G | Homozygous   |
| NC_037650.1 | 4467279 | SNV | 1 | A | G | Homozygous   |
| NC_037650.1 | 4467305 | SNV | 1 | A | G | Homozygous   |
| NC_037650.1 | 4467595 | SNV | 1 | A | G | Homozygous   |
| NC_037650.1 | 4467650 | SNV | 1 | T | C | Homozygous   |
| NC_037650.1 | 4499252 | SNV | 1 | G | A | Heterozygous |
| NC_037650.1 | 4501034 | SNV | 1 | A | G | Homozygous   |
| NC_037650.1 | 4501063 | SNV | 1 | T | C | Homozygous   |
| NC_037650.1 | 4501388 | SNV | 1 | A | G | Homozygous   |
| NC_037650.1 | 4502086 | SNV | 1 | A | C | Homozygous   |
| NC_037650.1 | 4503248 | SNV | 1 | A | G | Homozygous   |
| NC_037650.1 | 4503296 | SNV | 1 | T | C | Homozygous   |
| NC_037650.1 | 4503406 | SNV | 1 | A | G | Heterozygous |
| NC_037650.1 | 4503467 | SNV | 1 | C | T | Heterozygous |
| NC_037650.1 | 4503509 | SNV | 1 | G | A | Heterozygous |
| NC_037650.1 | 4503532 | SNV | 1 | G | A | Heterozygous |
| NC_037650.1 | 4503566 | SNV | 1 | T | C | Homozygous   |
| NC_037650.1 | 4503749 | SNV | 1 | A | G | Homozygous   |
| NC_037650.1 | 4504108 | SNV | 1 | C | T | Heterozygous |
| NC_037650.1 | 4504131 | SNV | 1 | T | C | Homozygous   |
| NC_037650.1 | 4504149 | SNV | 1 | G | C | Homozygous   |
| NC_037650.1 | 4504189 | SNV | 1 | T | C | Homozygous   |
| NC_037650.1 | 4504199 | SNV | 1 | C | T | Heterozygous |

|             |         |     |   |   |   |              |
|-------------|---------|-----|---|---|---|--------------|
| NC_037650.1 | 4504211 | SNV | 1 | A | G | Heterozygous |
| NC_037650.1 | 4504226 | SNV | 1 | C | T | Heterozygous |
| NC_037650.1 | 4504341 | SNV | 1 | C | T | Homozygous   |
| NC_037650.1 | 4506597 | SNV | 1 | C | T | Homozygous   |
| NC_037650.1 | 4507924 | SNV | 1 | C | T | Homozygous   |
| NC_037650.1 | 4508455 | SNV | 1 | C | T | Heterozygous |
| NC_037650.1 | 4509739 | SNV | 1 | A | G | Homozygous   |
| NC_037650.1 | 4511311 | SNV | 1 | T | C | Homozygous   |
| NC_037650.1 | 4511426 | SNV | 1 | A | C | Homozygous   |
| NC_037650.1 | 4511601 | SNV | 1 | T | C | Heterozygous |
| NC_037650.1 | 4511746 | SNV | 1 | T | C | Heterozygous |
| NC_037650.1 | 4511862 | SNV | 1 | G | C | Homozygous   |
| NC_037650.1 | 4512408 | SNV | 1 | G | A | Homozygous   |
| NC_037650.1 | 4512416 | SNV | 1 | A | G | Homozygous   |
| NC_037650.1 | 4512957 | SNV | 1 | T | C | Homozygous   |
| NC_037650.1 | 4513015 | SNV | 1 | G | A | Homozygous   |
| NC_037650.1 | 4513401 | SNV | 1 | A | G | Homozygous   |
| NC_037650.1 | 4513500 | SNV | 1 | T | C | Homozygous   |
| NC_037650.1 | 4513659 | SNV | 1 | A | G | Homozygous   |
| NC_037650.1 | 4513695 | SNV | 1 | T | A | Homozygous   |
| NC_037650.1 | 4513764 | SNV | 1 | T | C | Homozygous   |
| NC_037650.1 | 4513818 | SNV | 1 | A | T | Heterozygous |
| NC_037650.1 | 4513908 | SNV | 1 | A | T | Heterozygous |
| NC_037650.1 | 4513975 | SNV | 1 | C | T | Heterozygous |
| NC_037650.1 | 4513978 | SNV | 1 | T | C | Homozygous   |
| NC_037650.1 | 4514042 | SNV | 1 | A | G | Homozygous   |
| NC_037650.1 | 4514083 | SNV | 1 | G | A | Heterozygous |
| NC_037650.1 | 4517471 | SNV | 1 | T | C | Homozygous   |
| NC_037650.1 | 4517572 | SNV | 1 | G | A | Heterozygous |
| NC_037650.1 | 4517604 | SNV | 1 | G | A | Homozygous   |
| NC_037650.1 | 4517987 | SNV | 1 | A | G | Heterozygous |
| NC_037650.1 | 4518066 | SNV | 1 | A | G | Homozygous   |
| NC_037650.1 | 4518121 | SNV | 1 | C | T | Homozygous   |
| NC_037650.1 | 4518134 | SNV | 1 | A | G | Homozygous   |
| NC_037650.1 | 4530552 | SNV | 1 | G | A | Homozygous   |
| NC_037650.1 | 4530729 | SNV | 1 | A | G | Heterozygous |
| NC_037650.1 | 4549866 | SNV | 1 | T | G | Homozygous   |
| NC_037650.1 | 4549990 | SNV | 1 | A | G | Homozygous   |
| NC_037650.1 | 4559470 | SNV | 1 | G | A | Homozygous   |
| NC_037650.1 | 4560387 | SNV | 1 | A | T | Homozygous   |
| NC_037650.1 | 4563845 | SNV | 1 | G | A | Homozygous   |
| NC_037650.1 | 4564175 | SNV | 1 | A | G | Homozygous   |
| NC_037650.1 | 4564701 | SNV | 1 | A | G | Homozygous   |
| NC_037650.1 | 4566282 | SNV | 1 | C | T | Heterozygous |
| NC_037650.1 | 4568752 | SNV | 1 | G | T | Homozygous   |
| NC_037650.1 | 4568757 | SNV | 1 | T | C | Homozygous   |
| NC_037650.1 | 4568759 | SNV | 1 | A | G | Homozygous   |
| NC_037650.1 | 4568768 | SNV | 1 | T | A | Homozygous   |
| NC_037650.1 | 4568923 | SNV | 1 | G | A | Heterozygous |
| NC_037650.1 | 4569198 | SNV | 1 | T | C | Heterozygous |
| NC_037650.1 | 4569280 | SNV | 1 | A | G | Homozygous   |

|             |         |     |   |   |   |              |
|-------------|---------|-----|---|---|---|--------------|
| NC_037650.1 | 4569285 | SNV | 1 | G | A | Heterozygous |
| NC_037650.1 | 4569303 | SNV | 1 | G | A | Heterozygous |
| NC_037650.1 | 4569366 | SNV | 1 | G | C | Homozygous   |
| NC_037650.1 | 4569781 | SNV | 1 | T | C | Homozygous   |
| NC_037650.1 | 4575460 | SNV | 1 | A | G | Homozygous   |
| NC_037650.1 | 4575552 | SNV | 1 | C | T | Homozygous   |
| NC_037650.1 | 4575663 | SNV | 1 | T | C | Heterozygous |
| NC_037650.1 | 4575885 | SNV | 1 | G | C | Homozygous   |
| NC_037650.1 | 4576065 | SNV | 1 | T | C | Homozygous   |
| NC_037650.1 | 4577405 | SNV | 1 | T | C | Heterozygous |
| NC_037650.1 | 4581612 | SNV | 1 | A | C | Heterozygous |
| NC_037650.1 | 4581740 | SNV | 1 | T | A | Heterozygous |
| NC_037650.1 | 4582189 | SNV | 1 | T | C | Homozygous   |
| NC_037650.1 | 4582193 | SNV | 1 | C | T | Homozygous   |
| NC_037650.1 | 4582204 | SNV | 1 | C | T | Homozygous   |
| NC_037650.1 | 4582208 | SNV | 1 | C | T | Homozygous   |
| NC_037650.1 | 4582211 | SNV | 1 | T | G | Homozygous   |
| NC_037650.1 | 4582245 | SNV | 1 | C | T | Homozygous   |
| NC_037650.1 | 4582248 | SNV | 1 | T | C | Homozygous   |
| NC_037650.1 | 4583174 | SNV | 1 | A | G | Homozygous   |
| NC_037650.1 | 4583233 | SNV | 1 | G | A | Heterozygous |
| NC_037650.1 | 4583440 | SNV | 1 | A | G | Homozygous   |
| NC_037650.1 | 4584777 | SNV | 1 | A | G | Homozygous   |
| NC_037650.1 | 4585255 | SNV | 1 | A | G | Homozygous   |
| NC_037650.1 | 4585668 | SNV | 1 | A | G | Heterozygous |
| NC_037650.1 | 4585838 | SNV | 1 | G | A | Homozygous   |
| NC_037650.1 | 4586782 | SNV | 1 | A | G | Homozygous   |
| NC_037650.1 | 4586802 | SNV | 1 | G | A | Homozygous   |
| NC_037650.1 | 4586904 | SNV | 1 | G | C | Heterozygous |
| NC_037650.1 | 4587170 | SNV | 1 | T | C | Heterozygous |
| NC_037650.1 | 4587215 | SNV | 1 | C | T | Homozygous   |
| NC_037650.1 | 4587661 | SNV | 1 | A | G | Homozygous   |
| NC_037650.1 | 4587694 | SNV | 1 | T | C | Homozygous   |
| NC_037650.1 | 4587774 | SNV | 1 | C | T | Homozygous   |
| NC_037650.1 | 4587809 | SNV | 1 | G | A | Heterozygous |
| NC_037650.1 | 4587885 | SNV | 1 | A | G | Homozygous   |
| NC_037650.1 | 4587985 | SNV | 1 | T | C | Homozygous   |
| NC_037650.1 | 4588292 | SNV | 1 | T | G | Heterozygous |
| NC_037650.1 | 4588294 | SNV | 1 | T | C | Heterozygous |
| NC_037650.1 | 4588301 | SNV | 1 | C | T | Heterozygous |
| NC_037650.1 | 4588309 | SNV | 1 | G | T | Homozygous   |
| NC_037650.1 | 4593995 | SNV | 1 | C | G | Heterozygous |
| NC_037650.1 | 4594063 | SNV | 1 | A | G | Heterozygous |
| NC_037650.1 | 4594209 | SNV | 1 | G | A | Heterozygous |
| NC_037650.1 | 4594224 | SNV | 1 | G | A | Homozygous   |
| NC_037650.1 | 4594485 | SNV | 1 | C | T | Heterozygous |
| NC_037650.1 | 4595015 | SNV | 1 | A | G | Heterozygous |
| NC_037650.1 | 4595024 | SNV | 1 | G | A | Heterozygous |
| NC_037650.1 | 4595045 | SNV | 1 | G | A | Heterozygous |
| NC_037650.1 | 4595051 | SNV | 1 | C | T | Heterozygous |
| NC_037650.1 | 4595163 | SNV | 1 | A | G | Homozygous   |

|             |         |     |   |   |   |              |
|-------------|---------|-----|---|---|---|--------------|
| NC_037650.1 | 4595207 | SNV | 1 | C | A | Homozygous   |
| NC_037650.1 | 4596231 | SNV | 1 | C | T | Heterozygous |
| NC_037650.1 | 4596385 | SNV | 1 | C | T | Homozygous   |
| NC_037650.1 | 4596755 | SNV | 1 | C | A | Homozygous   |
| NC_037650.1 | 4596757 | SNV | 1 | C | T | Heterozygous |
| NC_037650.1 | 4596761 | SNV | 1 | C | T | Homozygous   |
| NC_037650.1 | 4597247 | SNV | 1 | C | T | Heterozygous |
| NC_037650.1 | 4597253 | SNV | 1 | T | C | Homozygous   |
| NC_037650.1 | 4597255 | SNV | 1 | C | A | Heterozygous |
| NC_037650.1 | 4598266 | SNV | 1 | G | C | Homozygous   |
| NC_037650.1 | 4598311 | SNV | 1 | G | A | Heterozygous |
| NC_037650.1 | 4598338 | SNV | 1 | G | A | Homozygous   |
| NC_037650.1 | 4598357 | SNV | 1 | G | A | Heterozygous |
| NC_037650.1 | 4598369 | SNV | 1 | A | G | Homozygous   |
| NC_037650.1 | 4598530 | SNV | 1 | G | A | Heterozygous |
| NC_037650.1 | 4598650 | SNV | 1 | A | G | Homozygous   |
| NC_037650.1 | 4598972 | SNV | 1 | A | G | Heterozygous |
| NC_037650.1 | 4598997 | SNV | 1 | C | T | Heterozygous |
| NC_037650.1 | 4599088 | SNV | 1 | T | G | Heterozygous |
| NC_037650.1 | 4599091 | SNV | 1 | C | G | Homozygous   |
| NC_037650.1 | 4599097 | SNV | 1 | C | A | Heterozygous |
| NC_037650.1 | 4599207 | SNV | 1 | G | A | Homozygous   |
| NC_037650.1 | 4599596 | SNV | 1 | C | A | Heterozygous |
| NC_037650.1 | 4599598 | SNV | 1 | C | T | Heterozygous |
| NC_037650.1 | 4599772 | SNV | 1 | G | C | Homozygous   |
| NC_037650.1 | 4600507 | SNV | 1 | A | G | Homozygous   |
| NC_037650.1 | 4600518 | SNV | 1 | T | C | Homozygous   |
| NC_037650.1 | 4600921 | SNV | 1 | A | G | Homozygous   |
| NC_037650.1 | 4601467 | SNV | 1 | G | A | Heterozygous |
| NC_037650.1 | 4601889 | SNV | 1 | T | C | Homozygous   |
| NC_037650.1 | 4602092 | SNV | 1 | T | G | Homozygous   |
| NC_037650.1 | 4602106 | SNV | 1 | T | G | Heterozygous |
| NC_037650.1 | 4602171 | SNV | 1 | G | A | Heterozygous |
| NC_037650.1 | 4602183 | SNV | 1 | A | T | Homozygous   |
| NC_037650.1 | 4602349 | SNV | 1 | T | C | Heterozygous |
| NC_037650.1 | 4602352 | SNV | 1 | C | T | Heterozygous |
| NC_037650.1 | 4602733 | SNV | 1 | T | A | Heterozygous |
| NC_037650.1 | 4602757 | SNV | 1 | A | G | Heterozygous |
| NC_037650.1 | 4603310 | SNV | 1 | G | A | Heterozygous |
| NC_037650.1 | 4603315 | SNV | 1 | A | G | Homozygous   |
| NC_037650.1 | 4603324 | SNV | 1 | G | A | Heterozygous |
| NC_037650.1 | 4603327 | SNV | 1 | G | A | Heterozygous |
| NC_037650.1 | 4603329 | SNV | 1 | G | A | Heterozygous |
| NC_037650.1 | 4603331 | SNV | 1 | G | A | Homozygous   |
| NC_037650.1 | 4603501 | SNV | 1 | T | A | Homozygous   |
| NC_037650.1 | 4603761 | SNV | 1 | G | A | Homozygous   |
| NC_037650.1 | 4603817 | SNV | 1 | T | C | Homozygous   |
| NC_037650.1 | 4604359 | SNV | 1 | C | T | Homozygous   |
| NC_037650.1 | 4604624 | SNV | 1 | G | A | Heterozygous |
| NC_037650.1 | 4604774 | SNV | 1 | G | A | Heterozygous |
| NC_037650.1 | 4605387 | SNV | 1 | A | G | Heterozygous |



|             |         |     |   |   |   |              |
|-------------|---------|-----|---|---|---|--------------|
| NC_037650.1 | 4605488 | SNV | 1 | G | T | Homozygous   |
| NC_037650.1 | 4605934 | SNV | 1 | T | C | Homozygous   |
| NC_037650.1 | 4606184 | SNV | 1 | A | G | Homozygous   |
| NC_037650.1 | 4606306 | SNV | 1 | T | A | Homozygous   |
| NC_037650.1 | 4606892 | SNV | 1 | A | G | Heterozygous |
| NC_037650.1 | 4607061 | SNV | 1 | C | T | Heterozygous |
| NC_037650.1 | 4607252 | SNV | 1 | T | G | Homozygous   |
| NC_037650.1 | 4607411 | SNV | 1 | G | A | Homozygous   |
| NC_037650.1 | 4607540 | SNV | 1 | A | G | Homozygous   |
| NC_037650.1 | 4608572 | SNV | 1 | G | A | Heterozygous |
| NC_037650.1 | 4608575 | SNV | 1 | G | A | Heterozygous |
| NC_037650.1 | 4608624 | SNV | 1 | G | A | Homozygous   |
| NC_037650.1 | 4608718 | SNV | 1 | G | A | Heterozygous |
| NC_037650.1 | 4608722 | SNV | 1 | G | C | Heterozygous |
| NC_037650.1 | 4608726 | SNV | 1 | G | C | Homozygous   |
| NC_037650.1 | 4608737 | SNV | 1 | A | C | Homozygous   |
| NC_037650.1 | 4608779 | SNV | 1 | T | C | Homozygous   |
| NC_037650.1 | 4608806 | SNV | 1 | T | C | Heterozygous |
| NC_037650.1 | 4616536 | SNV | 1 | A | T | Homozygous   |
| NC_037650.1 | 4617406 | SNV | 1 | A | G | Heterozygous |
| NC_037650.1 | 4618425 | SNV | 1 | T | C | Heterozygous |
| NC_037650.1 | 4618429 | SNV | 1 | C | T | Heterozygous |
| NC_037650.1 | 4618433 | SNV | 1 | C | T | Heterozygous |
| NC_037650.1 | 4618446 | SNV | 1 | C | A | Heterozygous |
| NC_037650.1 | 4622665 | SNV | 1 | T | C | Homozygous   |
| NC_037650.1 | 4650567 | SNV | 1 | C | T | Homozygous   |
| NC_037650.1 | 4650606 | SNV | 1 | G | A | Heterozygous |
| NC_037650.1 | 4650608 | SNV | 1 | A | T | Heterozygous |
| NC_037650.1 | 4650839 | SNV | 1 | C | T | Heterozygous |
| NC_037650.1 | 4651213 | SNV | 1 | C | T | Heterozygous |
| NC_037650.1 | 4658525 | SNV | 1 | G | C | Heterozygous |
| NC_037650.1 | 4671484 | SNV | 1 | G | A | Heterozygous |
| NC_037650.1 | 4671520 | SNV | 1 | A | G | Heterozygous |
| NC_037650.1 | 4671633 | SNV | 1 | C | T | Heterozygous |
| NC_037650.1 | 4671953 | SNV | 1 | A | G | Heterozygous |
| NC_037650.1 | 4671969 | SNV | 1 | A | G | Homozygous   |
| NC_037650.1 | 4672169 | SNV | 1 | T | A | Heterozygous |
| NC_037650.1 | 4679991 | SNV | 1 | T | G | Heterozygous |
| NC_037650.1 | 4679998 | SNV | 1 | T | C | Homozygous   |
| NC_037650.1 | 4680008 | SNV | 1 | C | T | Homozygous   |
| NC_037650.1 | 4680011 | SNV | 1 | C | T | Homozygous   |
| NC_037650.1 | 4680039 | SNV | 1 | C | T | Heterozygous |
| NC_037650.1 | 4680183 | SNV | 1 | A | G | Homozygous   |
| NC_037650.1 | 4680185 | SNV | 1 | A | C | Homozygous   |
| NC_037650.1 | 4680189 | SNV | 1 | T | G | Homozygous   |
| NC_037650.1 | 4680909 | SNV | 1 | C | T | Heterozygous |
| NC_037650.1 | 4680943 | SNV | 1 | T | C | Heterozygous |
| NC_037650.1 | 4680945 | SNV | 1 | T | C | Homozygous   |
| NC_037650.1 | 4681071 | SNV | 1 | G | A | Homozygous   |
| NC_037650.1 | 4681078 | SNV | 1 | A | G | Homozygous   |
| NC_037650.1 | 4681104 | SNV | 1 | G | A | Homozygous   |

|             |         |     |   |   |   |              |
|-------------|---------|-----|---|---|---|--------------|
| NC_037650.1 | 4681108 | SNV | 1 | A | G | Homozygous   |
| NC_037650.1 | 4681122 | SNV | 1 | C | G | Homozygous   |
| NC_037650.1 | 4681242 | SNV | 1 | G | A | Heterozygous |
| NC_037650.1 | 4681264 | SNV | 1 | A | G | Homozygous   |
| NC_037650.1 | 4692883 | SNV | 1 | A | G | Homozygous   |
| NC_037650.1 | 4692967 | SNV | 1 | G | A | Homozygous   |
| NC_037650.1 | 4699043 | SNV | 1 | A | G | Heterozygous |
| NC_037650.1 | 4699455 | SNV | 1 | A | G | Heterozygous |
| NC_037650.1 | 4699458 | SNV | 1 | T | C | Heterozygous |
| NC_037650.1 | 4699491 | SNV | 1 | G | A | Heterozygous |
| NC_037650.1 | 4699493 | SNV | 1 | G | A | Heterozygous |
| NC_037650.1 | 4699500 | SNV | 1 | T | A | Heterozygous |
| NC_037650.1 | 4699504 | SNV | 1 | C | A | Homozygous   |
| NC_037650.1 | 4699508 | SNV | 1 | A | G | Heterozygous |
| NC_037650.1 | 4702116 | SNV | 1 | A | G | Homozygous   |
| NC_037650.1 | 4702118 | SNV | 1 | A | G | Homozygous   |
| NC_037650.1 | 4702131 | SNV | 1 | A | G | Homozygous   |
| NC_037650.1 | 4702251 | SNV | 1 | A | G | Homozygous   |
| NC_037650.1 | 4702332 | SNV | 1 | G | A | Homozygous   |
| NC_037650.1 | 4702382 | SNV | 1 | A | G | Homozygous   |
| NC_037650.1 | 4702414 | SNV | 1 | G | T | Heterozygous |
| NC_037650.1 | 4703378 | SNV | 1 | T | C | Heterozygous |
| NC_037650.1 | 4703920 | SNV | 1 | T | C | Homozygous   |
| NC_037650.1 | 4705364 | SNV | 1 | G | A | Homozygous   |
| NC_037650.1 | 4705474 | SNV | 1 | A | G | Homozygous   |
| NC_037650.1 | 4705590 | SNV | 1 | T | C | Homozygous   |
| NC_037650.1 | 4705699 | SNV | 1 | A | G | Homozygous   |
| NC_037650.1 | 4708210 | SNV | 1 | T | C | Homozygous   |
| NC_037650.1 | 4708644 | SNV | 1 | A | G | Homozygous   |
| NC_037650.1 | 4709015 | SNV | 1 | A | G | Homozygous   |
| NC_037650.1 | 4709050 | SNV | 1 | A | G | Homozygous   |
| NC_037650.1 | 4709052 | SNV | 1 | C | T | Homozygous   |
| NC_037650.1 | 4709064 | SNV | 1 | T | C | Homozygous   |
| NC_037650.1 | 4709098 | SNV | 1 | A | G | Heterozygous |
| NC_037650.1 | 4709164 | SNV | 1 | G | C | Heterozygous |
| NC_037650.1 | 4709190 | SNV | 1 | A | G | Homozygous   |
| NC_037650.1 | 4709353 | SNV | 1 | A | G | Heterozygous |
| NC_037650.1 | 4709486 | SNV | 1 | A | G | Homozygous   |
| NC_037650.1 | 4709520 | SNV | 1 | G | C | Homozygous   |
| NC_037650.1 | 4709604 | SNV | 1 | A | G | Homozygous   |
| NC_037650.1 | 4709614 | SNV | 1 | T | A | Homozygous   |
| NC_037650.1 | 4710958 | SNV | 1 | A | G | Homozygous   |
| NC_037650.1 | 4716302 | SNV | 1 | T | C | Heterozygous |
| NC_037650.1 | 4716304 | SNV | 1 | T | C | Heterozygous |
| NC_037650.1 | 4717275 | SNV | 1 | G | A | Homozygous   |
| NC_037650.1 | 4717302 | SNV | 1 | G | A | Homozygous   |
| NC_037650.1 | 4717314 | SNV | 1 | T | G | Homozygous   |
| NC_037650.1 | 4717359 | SNV | 1 | C | A | Heterozygous |
| NC_037650.1 | 4717462 | SNV | 1 | G | A | Homozygous   |
| NC_037650.1 | 4717501 | SNV | 1 | C | T | Homozygous   |
| NC_037650.1 | 4717522 | SNV | 1 | C | T | Heterozygous |

|             |         |     |   |   |   |              |
|-------------|---------|-----|---|---|---|--------------|
| NC_037650.1 | 4717525 | SNV | 1 | G | A | Heterozygous |
| NC_037650.1 | 4717529 | SNV | 1 | C | T | Homozygous   |
| NC_037650.1 | 4718280 | SNV | 1 | G | A | Heterozygous |
| NC_037650.1 | 4718286 | SNV | 1 | T | G | Heterozygous |
| NC_037650.1 | 4718297 | SNV | 1 | A | G | Homozygous   |
| NC_037650.1 | 4718433 | SNV | 1 | A | G | Heterozygous |
| NC_037650.1 | 4718615 | SNV | 1 | C | T | Heterozygous |
| NC_037650.1 | 4718620 | SNV | 1 | C | T | Heterozygous |
| NC_037650.1 | 4720549 | SNV | 1 | A | G | Homozygous   |
| NC_037650.1 | 4720764 | SNV | 1 | T | C | Homozygous   |
| NC_037650.1 | 4722481 | SNV | 1 | G | A | Homozygous   |
| NC_037650.1 | 4742719 | SNV | 1 | C | T | Homozygous   |
| NC_037650.1 | 4742723 | SNV | 1 | T | C | Homozygous   |
| NC_037650.1 | 4742729 | SNV | 1 | C | T | Homozygous   |
| NC_037650.1 | 4742733 | SNV | 1 | C | T | Homozygous   |
| NC_037650.1 | 4742739 | SNV | 1 | C | A | Homozygous   |
| NC_037650.1 | 4743322 | SNV | 1 | G | A | Homozygous   |
| NC_037650.1 | 4743328 | SNV | 1 | G | A | Heterozygous |
| NC_037650.1 | 4767269 | SNV | 1 | T | C | Heterozygous |
| NC_037650.1 | 4767295 | SNV | 1 | A | G | Heterozygous |
| NC_037650.1 | 4767302 | SNV | 1 | T | C | Heterozygous |
| NC_037650.1 | 4767779 | SNV | 1 | A | T | Homozygous   |
| NC_037650.1 | 4776129 | SNV | 1 | C | T | Heterozygous |
| NC_037650.1 | 4776135 | SNV | 1 | C | T | Heterozygous |
| NC_037650.1 | 4776137 | SNV | 1 | T | C | Homozygous   |
| NC_037650.1 | 4776157 | SNV | 1 | A | C | Heterozygous |
| NC_037650.1 | 4776162 | SNV | 1 | A | G | Heterozygous |
| NC_037650.1 | 4776195 | SNV | 1 | A | G | Homozygous   |
| NC_037650.1 | 4776212 | SNV | 1 | G | A | Heterozygous |
| NC_037650.1 | 4776215 | SNV | 1 | A | G | Homozygous   |
| NC_037650.1 | 4776218 | SNV | 1 | A | G | Heterozygous |
| NC_037650.1 | 4777435 | SNV | 1 | G | A | Homozygous   |
| NC_037650.1 | 4777461 | SNV | 1 | C | T | Homozygous   |
| NC_037650.1 | 4777539 | SNV | 1 | C | T | Heterozygous |
| NC_037650.1 | 4777575 | SNV | 1 | C | T | Heterozygous |
| NC_037650.1 | 4777903 | SNV | 1 | A | T | Heterozygous |
| NC_037650.1 | 4777907 | SNV | 1 | G | C | Homozygous   |
| NC_037650.1 | 4778142 | SNV | 1 | C | G | Homozygous   |
| NC_037650.1 | 4778147 | SNV | 1 | T | C | Homozygous   |
| NC_037650.1 | 4778176 | SNV | 1 | T | G | Homozygous   |
| NC_037650.1 | 4778920 | SNV | 1 | G | A | Heterozygous |
| NC_037650.1 | 4783622 | SNV | 1 | A | G | Homozygous   |
| NC_037650.1 | 4783867 | SNV | 1 | A | G | Heterozygous |
| NC_037650.1 | 4784208 | SNV | 1 | A | G | Homozygous   |
| NC_037650.1 | 4784319 | SNV | 1 | C | T | Heterozygous |
| NC_037650.1 | 4784751 | SNV | 1 | A | G | Heterozygous |
| NC_037650.1 | 4784856 | SNV | 1 | T | C | Homozygous   |
| NC_037650.1 | 4784920 | SNV | 1 | T | C | Homozygous   |
| NC_037650.1 | 4785018 | SNV | 1 | G | C | Homozygous   |
| NC_037650.1 | 4785407 | SNV | 1 | T | C | Homozygous   |
| NC_037650.1 | 4785478 | SNV | 1 | T | C | Heterozygous |

|             |         |     |   |   |   |              |
|-------------|---------|-----|---|---|---|--------------|
| NC_037650.1 | 4785761 | SNV | 1 | T | C | Homozygous   |
| NC_037650.1 | 4786001 | SNV | 1 | A | G | Homozygous   |
| NC_037650.1 | 4787251 | SNV | 1 | A | G | Homozygous   |
| NC_037650.1 | 4789453 | SNV | 1 | C | T | Heterozygous |
| NC_037650.1 | 4823179 | SNV | 1 | T | C | Heterozygous |
| NC_037650.1 | 4832331 | SNV | 1 | G | A | Homozygous   |
| NC_037650.1 | 4832464 | SNV | 1 | C | T | Heterozygous |
| NC_037650.1 | 4832505 | SNV | 1 | A | G | Homozygous   |
| NC_037650.1 | 4832575 | SNV | 1 | A | G | Homozygous   |
| NC_037650.1 | 4832591 | SNV | 1 | C | T | Homozygous   |
| NC_037650.1 | 4832947 | SNV | 1 | G | C | Homozygous   |
| NC_037650.1 | 4832957 | SNV | 1 | T | C | Homozygous   |
| NC_037650.1 | 4832972 | SNV | 1 | C | T | Homozygous   |
| NC_037650.1 | 4833158 | SNV | 1 | T | G | Homozygous   |
| NC_037650.1 | 4833546 | SNV | 1 | A | C | Homozygous   |
| NC_037650.1 | 4834752 | SNV | 1 | C | T | Heterozygous |
| NC_037650.1 | 4834878 | SNV | 1 | A | G | Homozygous   |
| NC_037650.1 | 4835024 | SNV | 1 | A | C | Homozygous   |
| NC_037650.1 | 4835482 | SNV | 1 | T | C | Heterozygous |
| NC_037650.1 | 4837091 | SNV | 1 | T | C | Homozygous   |
| NC_037650.1 | 4842164 | SNV | 1 | A | G | Homozygous   |
| NC_037650.1 | 4842219 | SNV | 1 | C | T | Heterozygous |
| NC_037650.1 | 4842387 | SNV | 1 | C | T | Homozygous   |
| NC_037650.1 | 4842775 | SNV | 1 | A | G | Homozygous   |
| NC_037650.1 | 4843181 | SNV | 1 | A | G | Homozygous   |
| NC_037650.1 | 4845683 | SNV | 1 | C | T | Homozygous   |
| NC_037650.1 | 4845833 | SNV | 1 | C | A | Homozygous   |
| NC_037650.1 | 4846128 | SNV | 1 | G | T | Homozygous   |
| NC_037650.1 | 4851288 | SNV | 1 | C | T | Heterozygous |
| NC_037650.1 | 4851589 | SNV | 1 | A | G | Heterozygous |
| NC_037650.1 | 4851813 | SNV | 1 | A | G | Heterozygous |
| NC_037650.1 | 4851926 | SNV | 1 | A | G | Heterozygous |
| NC_037650.1 | 4852179 | SNV | 1 | G | A | Heterozygous |
| NC_037650.1 | 4863226 | SNV | 1 | G | C | Homozygous   |
| NC_037650.1 | 4863256 | SNV | 1 | A | G | Homozygous   |
| NC_037650.1 | 4863482 | SNV | 1 | G | A | Heterozygous |
| NC_037650.1 | 4863541 | SNV | 1 | T | G | Homozygous   |
| NC_037650.1 | 4863545 | SNV | 1 | G | A | Homozygous   |
| NC_037650.1 | 4863593 | SNV | 1 | T | C | Homozygous   |
| NC_037650.1 | 4863664 | SNV | 1 | C | T | Heterozygous |
| NC_037650.1 | 4863760 | SNV | 1 | A | G | Homozygous   |
| NC_037650.1 | 4863771 | SNV | 1 | C | T | Heterozygous |
| NC_037650.1 | 4863836 | SNV | 1 | C | T | Heterozygous |
| NC_037650.1 | 4863853 | SNV | 1 | T | C | Homozygous   |
| NC_037650.1 | 4864202 | SNV | 1 | T | C | Homozygous   |
| NC_037650.1 | 4864358 | SNV | 1 | G | C | Heterozygous |
| NC_037650.1 | 4864361 | SNV | 1 | T | C | Heterozygous |
| NC_037650.1 | 4864403 | SNV | 1 | T | C | Homozygous   |
| NC_037650.1 | 4864407 | SNV | 1 | T | C | Homozygous   |
| NC_037650.1 | 4864453 | SNV | 1 | T | C | Heterozygous |
| NC_037650.1 | 4864481 | SNV | 1 | A | G | Homozygous   |

|             |         |     |   |   |   |              |
|-------------|---------|-----|---|---|---|--------------|
| NC_037650.1 | 4865408 | SNV | 1 | C | A | Homozygous   |
| NC_037650.1 | 4865850 | SNV | 1 | A | G | Homozygous   |
| NC_037650.1 | 4867055 | SNV | 1 | C | T | Heterozygous |
| NC_037650.1 | 4867205 | SNV | 1 | C | T | Homozygous   |
| NC_037650.1 | 4867363 | SNV | 1 | T | C | Heterozygous |
| NC_037650.1 | 4867412 | SNV | 1 | C | T | Homozygous   |
| NC_037650.1 | 4867764 | SNV | 1 | G | C | Heterozygous |
| NC_037650.1 | 4868420 | SNV | 1 | T | C | Homozygous   |
| NC_037650.1 | 4872989 | SNV | 1 | C | G | Homozygous   |
| NC_037650.1 | 4873049 | SNV | 1 | A | G | Heterozygous |
| NC_037650.1 | 4881510 | SNV | 1 | G | A | Homozygous   |
| NC_037650.1 | 4882228 | SNV | 1 | C | A | Heterozygous |
| NC_037650.1 | 4882232 | SNV | 1 | T | C | Heterozygous |
| NC_037650.1 | 4882236 | SNV | 1 | T | C | Homozygous   |
| NC_037650.1 | 4882238 | SNV | 1 | C | G | Heterozygous |
| NC_037650.1 | 4882269 | SNV | 1 | G | A | Homozygous   |
| NC_037650.1 | 4882273 | SNV | 1 | G | A | Homozygous   |
| NC_037650.1 | 4882275 | SNV | 1 | A | G | Homozygous   |
| NC_037650.1 | 4882277 | SNV | 1 | A | G | Homozygous   |
| NC_037650.1 | 4882281 | SNV | 1 | A | G | Homozygous   |
| NC_037650.1 | 4884865 | SNV | 1 | T | C | Heterozygous |
| NC_037650.1 | 4884874 | SNV | 1 | T | A | Heterozygous |
| NC_037650.1 | 4884886 | SNV | 1 | G | A | Homozygous   |
| NC_037650.1 | 4884895 | SNV | 1 | A | T | Heterozygous |
| NC_037650.1 | 4885112 | SNV | 1 | A | C | Homozygous   |
| NC_037650.1 | 4887450 | SNV | 1 | T | G | Heterozygous |
| NC_037650.1 | 4887482 | SNV | 1 | C | A | Heterozygous |
| NC_037650.1 | 4888085 | SNV | 1 | G | C | Homozygous   |
| NC_037650.1 | 4889289 | SNV | 1 | C | T | Homozygous   |
| NC_037650.1 | 4891573 | SNV | 1 | A | G | Homozygous   |
| NC_037650.1 | 4891662 | SNV | 1 | A | G | Homozygous   |
| NC_037650.1 | 4892878 | SNV | 1 | T | G | Homozygous   |
| NC_037650.1 | 4893307 | SNV | 1 | A | T | Heterozygous |
| NC_037650.1 | 4893313 | SNV | 1 | A | T | Heterozygous |
| NC_037650.1 | 4894104 | SNV | 1 | G | A | Homozygous   |
| NC_037650.1 | 4894557 | SNV | 1 | G | A | Heterozygous |
| NC_037650.1 | 4894742 | SNV | 1 | A | G | Homozygous   |
| NC_037650.1 | 4896288 | SNV | 1 | T | A | Homozygous   |
| NC_037650.1 | 4896746 | SNV | 1 | C | G | Heterozygous |
| NC_037650.1 | 4896764 | SNV | 1 | C | T | Heterozygous |
| NC_037650.1 | 4896773 | SNV | 1 | T | C | Homozygous   |
| NC_037650.1 | 4896782 | SNV | 1 | C | T | Heterozygous |
| NC_037650.1 | 4896816 | SNV | 1 | T | A | Heterozygous |
| NC_037650.1 | 4896819 | SNV | 1 | T | C | Heterozygous |
| NC_037650.1 | 4896840 | SNV | 1 | C | T | Heterozygous |
| NC_037650.1 | 4896926 | SNV | 1 | T | C | Heterozygous |
| NC_037650.1 | 4896938 | SNV | 1 | C | G | Heterozygous |
| NC_037650.1 | 4897058 | SNV | 1 | A | T | Heterozygous |
| NC_037650.1 | 4897076 | SNV | 1 | C | T | Heterozygous |
| NC_037650.1 | 4897251 | SNV | 1 | T | A | Homozygous   |
| NC_037650.1 | 4897285 | SNV | 1 | C | T | Heterozygous |

|             |         |     |   |   |   |              |
|-------------|---------|-----|---|---|---|--------------|
| NC_037650.1 | 4897296 | SNV | 1 | A | G | Heterozygous |
| NC_037650.1 | 4897300 | SNV | 1 | T | C | Heterozygous |
| NC_037650.1 | 4897302 | SNV | 1 | A | G | Heterozygous |
| NC_037650.1 | 4897305 | SNV | 1 | G | A | Heterozygous |
| NC_037650.1 | 4897310 | SNV | 1 | T | C | Heterozygous |
| NC_037650.1 | 4897316 | SNV | 1 | T | A | Heterozygous |
| NC_037650.1 | 4897412 | SNV | 1 | A | G | Heterozygous |
| NC_037650.1 | 4897417 | SNV | 1 | T | C | Heterozygous |
| NC_037650.1 | 4897467 | SNV | 1 | T | C | Heterozygous |
| NC_037650.1 | 4897470 | SNV | 1 | C | T | Heterozygous |
| NC_037650.1 | 4897584 | SNV | 1 | T | G | Heterozygous |
| NC_037650.1 | 4897587 | SNV | 1 | G | T | Heterozygous |
| NC_037650.1 | 4898176 | SNV | 1 | T | C | Homozygous   |
| NC_037650.1 | 4898921 | SNV | 1 | G | A | Heterozygous |
| NC_037650.1 | 4899122 | SNV | 1 | T | C | Homozygous   |
| NC_037650.1 | 4899177 | SNV | 1 | G | T | Heterozygous |
| NC_037650.1 | 4899832 | SNV | 1 | G | A | Heterozygous |
| NC_037650.1 | 4899971 | SNV | 1 | G | A | Heterozygous |
| NC_037650.1 | 4900112 | SNV | 1 | A | G | Homozygous   |
| NC_037650.1 | 4900131 | SNV | 1 | T | A | Homozygous   |
| NC_037650.1 | 4900147 | SNV | 1 | G | A | Heterozygous |
| NC_037650.1 | 4900509 | SNV | 1 | C | A | Heterozygous |
| NC_037650.1 | 4901035 | SNV | 1 | A | G | Heterozygous |
| NC_037650.1 | 4901336 | SNV | 1 | A | G | Homozygous   |
| NC_037650.1 | 4901419 | SNV | 1 | A | C | Heterozygous |
| NC_037650.1 | 4901421 | SNV | 1 | C | A | Homozygous   |
| NC_037650.1 | 4901501 | SNV | 1 | C | T | Heterozygous |
| NC_037650.1 | 4901796 | SNV | 1 | G | A | Heterozygous |
| NC_037650.1 | 4901837 | SNV | 1 | A | C | Homozygous   |
| NC_037650.1 | 4902194 | SNV | 1 | G | A | Homozygous   |
| NC_037650.1 | 4902242 | SNV | 1 | C | T | Heterozygous |
| NC_037650.1 | 4902378 | SNV | 1 | T | C | Heterozygous |
| NC_037650.1 | 4902488 | SNV | 1 | A | C | Homozygous   |
| NC_037650.1 | 4902731 | SNV | 1 | T | C | Heterozygous |
| NC_037650.1 | 4902778 | SNV | 1 | G | A | Heterozygous |
| NC_037650.1 | 4902822 | SNV | 1 | G | A | Heterozygous |
| NC_037650.1 | 4903028 | SNV | 1 | A | G | Heterozygous |
| NC_037650.1 | 4903277 | SNV | 1 | G | A | Homozygous   |
| NC_037650.1 | 4903357 | SNV | 1 | G | C | Homozygous   |
| NC_037650.1 | 4903359 | SNV | 1 | G | A | Homozygous   |
| NC_037650.1 | 4903616 | SNV | 1 | A | T | Heterozygous |
| NC_037650.1 | 4903668 | SNV | 1 | G | T | Homozygous   |
| NC_037650.1 | 4903842 | SNV | 1 | C | A | Homozygous   |
| NC_037650.1 | 4903863 | SNV | 1 | A | G | Homozygous   |
| NC_037650.1 | 4904005 | SNV | 1 | G | A | Heterozygous |
| NC_037650.1 | 4904082 | SNV | 1 | C | T | Homozygous   |
| NC_037650.1 | 4904319 | SNV | 1 | A | G | Homozygous   |
| NC_037650.1 | 4904608 | SNV | 1 | A | G | Heterozygous |
| NC_037650.1 | 4904657 | SNV | 1 | T | G | Homozygous   |
| NC_037650.1 | 4904899 | SNV | 1 | T | A | Homozygous   |
| NC_037650.1 | 4905047 | SNV | 1 | C | T | Heterozygous |

|             |         |     |   |   |   |              |
|-------------|---------|-----|---|---|---|--------------|
| NC_037650.1 | 4905333 | SNV | 1 | T | C | Homozygous   |
| NC_037650.1 | 4905443 | SNV | 1 | C | G | Heterozygous |
| NC_037650.1 | 4905560 | SNV | 1 | A | T | Homozygous   |
| NC_037650.1 | 4905572 | SNV | 1 | T | C | Homozygous   |
| NC_037650.1 | 4905586 | SNV | 1 | A | G | Homozygous   |
| NC_037650.1 | 4905799 | SNV | 1 | G | A | Heterozygous |
| NC_037650.1 | 4905844 | SNV | 1 | C | T | Homozygous   |
| NC_037650.1 | 4906186 | SNV | 1 | A | G | Homozygous   |
| NC_037650.1 | 4906725 | SNV | 1 | T | A | Heterozygous |
| NC_037650.1 | 4907092 | SNV | 1 | C | T | Homozygous   |
| NC_037650.1 | 4907515 | SNV | 1 | A | T | Heterozygous |
| NC_037650.1 | 4908005 | SNV | 1 | G | A | Heterozygous |
| NC_037650.1 | 4908543 | SNV | 1 | G | A | Heterozygous |
| NC_037650.1 | 4908958 | SNV | 1 | T | A | Heterozygous |
| NC_037650.1 | 4908960 | SNV | 1 | C | A | Heterozygous |
| NC_037650.1 | 4908966 | SNV | 1 | G | A | Heterozygous |
| NC_037650.1 | 4909491 | SNV | 1 | A | C | Heterozygous |
| NC_037650.1 | 4909495 | SNV | 1 | G | A | Heterozygous |
| NC_037650.1 | 4909505 | SNV | 1 | T | A | Homozygous   |
| NC_037650.1 | 4909507 | SNV | 1 | A | C | Heterozygous |
| NC_037650.1 | 4909517 | SNV | 1 | C | A | Heterozygous |
| NC_037650.1 | 4909857 | SNV | 1 | G | T | Heterozygous |
| NC_037650.1 | 4910369 | SNV | 1 | A | G | Homozygous   |
| NC_037650.1 | 4910511 | SNV | 1 | T | C | Homozygous   |
| NC_037650.1 | 4910608 | SNV | 1 | A | G | Heterozygous |
| NC_037650.1 | 4910757 | SNV | 1 | G | A | Heterozygous |
| NC_037650.1 | 4911321 | SNV | 1 | G | A | Heterozygous |
| NC_037650.1 | 4911848 | SNV | 1 | G | A | Heterozygous |
| NC_037650.1 | 4912205 | SNV | 1 | G | A | Heterozygous |
| NC_037650.1 | 4912213 | SNV | 1 | G | A | Heterozygous |
| NC_037650.1 | 4912229 | SNV | 1 | A | G | Heterozygous |
| NC_037650.1 | 4913431 | SNV | 1 | G | C | Homozygous   |
| NC_037650.1 | 4914431 | SNV | 1 | G | A | Heterozygous |
| NC_037650.1 | 4914483 | SNV | 1 | T | C | Homozygous   |
| NC_037650.1 | 4914503 | SNV | 1 | C | T | Homozygous   |
| NC_037650.1 | 4915104 | SNV | 1 | T | C | Homozygous   |
| NC_037650.1 | 4915201 | SNV | 1 | G | A | Heterozygous |
| NC_037650.1 | 4915465 | SNV | 1 | C | T | Heterozygous |
| NC_037650.1 | 4915469 | SNV | 1 | A | G | Heterozygous |
| NC_037650.1 | 4916373 | SNV | 1 | C | T | Heterozygous |
| NC_037650.1 | 4916630 | SNV | 1 | A | G | Homozygous   |
| NC_037650.1 | 4916732 | SNV | 1 | G | A | Heterozygous |
| NC_037650.1 | 4916813 | SNV | 1 | C | T | Heterozygous |
| NC_037650.1 | 4916815 | SNV | 1 | T | C | Heterozygous |
| NC_037650.1 | 4916879 | SNV | 1 | A | G | Heterozygous |
| NC_037650.1 | 4916912 | SNV | 1 | A | G | Homozygous   |
| NC_037650.1 | 4916930 | SNV | 1 | A | G | Homozygous   |
| NC_037650.1 | 4917129 | SNV | 1 | T | C | Heterozygous |
| NC_037650.1 | 4917526 | SNV | 1 | C | T | Homozygous   |
| NC_037650.1 | 4917573 | SNV | 1 | A | G | Homozygous   |
| NC_037650.1 | 4917719 | SNV | 1 | C | G | Heterozygous |

|             |         |     |   |   |   |              |
|-------------|---------|-----|---|---|---|--------------|
| NC_037650.1 | 4918575 | SNV | 1 | C | T | Homozygous   |
| NC_037650.1 | 4919454 | SNV | 1 | T | C | Homozygous   |
| NC_037650.1 | 4920631 | SNV | 1 | A | G | Homozygous   |
| NC_037650.1 | 4921217 | SNV | 1 | T | C | Homozygous   |
| NC_037650.1 | 4921348 | SNV | 1 | C | A | Heterozygous |
| NC_037650.1 | 4921348 | SNV | 1 | C | G | Heterozygous |
| NC_037650.1 | 4925315 | SNV | 1 | A | G | Homozygous   |
| NC_037650.1 | 4925473 | SNV | 1 | C | T | Heterozygous |
| NC_037650.1 | 4928979 | SNV | 1 | T | C | Homozygous   |
| NC_037650.1 | 4928984 | SNV | 1 | T | G | Homozygous   |
| NC_037650.1 | 4929011 | SNV | 1 | T | C | Homozygous   |
| NC_037650.1 | 4929061 | SNV | 1 | A | G | Homozygous   |
| NC_037650.1 | 4931678 | SNV | 1 | C | T | Heterozygous |
| NC_037650.1 | 4932227 | SNV | 1 | T | C | Homozygous   |
| NC_037650.1 | 4979502 | SNV | 1 | T | G | Homozygous   |
| NC_037650.1 | 5007515 | SNV | 1 | A | G | Heterozygous |
| NC_037650.1 | 5007544 | SNV | 1 | A | G | Heterozygous |
| NC_037650.1 | 5026091 | SNV | 1 | A | G | Heterozygous |
| NC_037650.1 | 5026118 | SNV | 1 | A | G | Heterozygous |
| NC_037650.1 | 5026120 | SNV | 1 | T | G | Heterozygous |
| NC_037650.1 | 5026854 | SNV | 1 | T | G | Homozygous   |
| NC_037650.1 | 5028142 | SNV | 1 | C | G | Heterozygous |
| NC_037650.1 | 5029218 | SNV | 1 | G | A | Heterozygous |
| NC_037650.1 | 5029235 | SNV | 1 | G | A | Heterozygous |
| NC_037650.1 | 5029331 | SNV | 1 | G | A | Heterozygous |
| NC_037650.1 | 5029403 | SNV | 1 | C | G | Heterozygous |
| NC_037650.1 | 5029554 | SNV | 1 | C | T | Heterozygous |
| NC_037650.1 | 5029603 | SNV | 1 | T | C | Homozygous   |
| NC_037650.1 | 5029642 | SNV | 1 | C | T | Heterozygous |
| NC_037650.1 | 5032463 | SNV | 1 | G | A | Homozygous   |
| NC_037650.1 | 5032526 | SNV | 1 | T | C | Homozygous   |
| NC_037650.1 | 5041264 | SNV | 1 | C | T | Homozygous   |
| NC_037650.1 | 5041302 | SNV | 1 | G | C | Homozygous   |
| NC_037650.1 | 5041319 | SNV | 1 | A | G | Heterozygous |
| NC_037650.1 | 5046770 | SNV | 1 | C | T | Homozygous   |
| NC_037650.1 | 5048478 | SNV | 1 | G | A | Heterozygous |
| NC_037650.1 | 5048801 | SNV | 1 | G | A | Heterozygous |
| NC_037650.1 | 5049271 | SNV | 1 | C | T | Homozygous   |
| NC_037650.1 | 5049300 | SNV | 1 | G | A | Homozygous   |
| NC_037650.1 | 5049443 | SNV | 1 | A | G | Heterozygous |
| NC_037650.1 | 5049475 | SNV | 1 | A | T | Homozygous   |
| NC_037650.1 | 5049491 | SNV | 1 | A | G | Homozygous   |
| NC_037650.1 | 5049505 | SNV | 1 | T | G | Homozygous   |
| NC_037650.1 | 5049710 | SNV | 1 | C | T | Homozygous   |
| NC_037650.1 | 5049787 | SNV | 1 | T | C | Homozygous   |
| NC_037650.1 | 5049898 | SNV | 1 | T | C | Homozygous   |
| NC_037650.1 | 5050109 | SNV | 1 | T | C | Homozygous   |
| NC_037650.1 | 5050114 | SNV | 1 | C | A | Heterozygous |
| NC_037650.1 | 5050223 | SNV | 1 | C | T | Homozygous   |
| NC_037650.1 | 5050281 | SNV | 1 | C | A | Heterozygous |
| NC_037650.1 | 5050449 | SNV | 1 | G | A | Heterozygous |



|             |         |     |   |   |   |              |
|-------------|---------|-----|---|---|---|--------------|
| NC_037650.1 | 5050485 | SNV | 1 | G | A | Homozygous   |
| NC_037650.1 | 5050490 | SNV | 1 | A | G | Homozygous   |
| NC_037650.1 | 5050493 | SNV | 1 | A | T | Homozygous   |
| NC_037650.1 | 5050508 | SNV | 1 | G | A | Heterozygous |
| NC_037650.1 | 5050543 | SNV | 1 | C | T | Homozygous   |
| NC_037650.1 | 5051154 | SNV | 1 | C | A | Heterozygous |
| NC_037650.1 | 5051455 | SNV | 1 | A | G | Homozygous   |
| NC_037650.1 | 5051755 | SNV | 1 | C | T | Heterozygous |
| NC_037650.1 | 5051759 | SNV | 1 | G | C | Homozygous   |
| NC_037650.1 | 5051762 | SNV | 1 | G | A | Homozygous   |
| NC_037650.1 | 5051767 | SNV | 1 | A | G | Homozygous   |
| NC_037650.1 | 5051776 | SNV | 1 | A | G | Heterozygous |
| NC_037650.1 | 5052449 | SNV | 1 | A | C | Homozygous   |
| NC_037650.1 | 5069358 | SNV | 1 | T | A | Heterozygous |
| NC_037650.1 | 5070390 | SNV | 1 | G | A | Heterozygous |
| NC_037650.1 | 5086055 | SNV | 1 | T | C | Heterozygous |
| NC_037650.1 | 5086242 | SNV | 1 | T | C | Homozygous   |
| NC_037650.1 | 5086257 | SNV | 1 | A | G | Heterozygous |
| NC_037650.1 | 5087536 | SNV | 1 | A | G | Homozygous   |
| NC_037650.1 | 5087635 | SNV | 1 | G | A | Heterozygous |
| NC_037650.1 | 5088757 | SNV | 1 | A | G | Heterozygous |
| NC_037650.1 | 5090235 | SNV | 1 | C | T | Heterozygous |
| NC_037650.1 | 5090244 | SNV | 1 | G | A | Heterozygous |
| NC_037650.1 | 5090323 | SNV | 1 | C | G | Heterozygous |
| NC_037650.1 | 5090438 | SNV | 1 | T | C | Heterozygous |
| NC_037650.1 | 5090698 | SNV | 1 | T | C | Homozygous   |
| NC_037650.1 | 5092381 | SNV | 1 | G | C | Heterozygous |
| NC_037650.1 | 5096892 | SNV | 1 | A | G | Homozygous   |
| NC_037650.1 | 5096907 | SNV | 1 | T | A | Heterozygous |
| NC_037650.1 | 5096915 | SNV | 1 | A | G | Heterozygous |
| NC_037650.1 | 5096980 | SNV | 1 | A | G | Heterozygous |
| NC_037650.1 | 5096986 | SNV | 1 | G | A | Homozygous   |
| NC_037650.1 | 5098109 | SNV | 1 | C | A | Homozygous   |
| NC_037650.1 | 5098320 | SNV | 1 | C | T | Homozygous   |
| NC_037650.1 | 5098363 | SNV | 1 | G | A | Heterozygous |
| NC_037650.1 | 5101828 | SNV | 1 | A | G | Homozygous   |
| NC_037650.1 | 5102886 | SNV | 1 | G | A | Heterozygous |
| NC_037650.1 | 5102929 | SNV | 1 | G | C | Homozygous   |
| NC_037650.1 | 5136615 | SNV | 1 | C | T | Homozygous   |
| NC_037650.1 | 5136627 | SNV | 1 | C | T | Homozygous   |
| NC_037650.1 | 5139069 | SNV | 1 | G | A | Heterozygous |
| NC_037650.1 | 5139087 | SNV | 1 | T | C | Homozygous   |
| NC_037650.1 | 5139135 | SNV | 1 | A | G | Homozygous   |
| NC_037650.1 | 5139159 | SNV | 1 | G | A | Heterozygous |
| NC_037650.1 | 5139183 | SNV | 1 | G | A | Homozygous   |
| NC_037650.1 | 5139222 | SNV | 1 | T | C | Homozygous   |
| NC_037650.1 | 5139245 | SNV | 1 | C | G | Homozygous   |
| NC_037650.1 | 5139296 | SNV | 1 | G | A | Homozygous   |
| NC_037650.1 | 5139321 | SNV | 1 | G | A | Heterozygous |
| NC_037650.1 | 5151893 | SNV | 1 | C | T | Heterozygous |
| NC_037650.1 | 5152116 | SNV | 1 | G | C | Homozygous   |

|             |         |     |   |   |   |              |
|-------------|---------|-----|---|---|---|--------------|
| NC_037650.1 | 5152285 | SNV | 1 | G | A | Heterozygous |
| NC_037650.1 | 5152332 | SNV | 1 | T | G | Homozygous   |
| NC_037650.1 | 5152392 | SNV | 1 | C | T | Heterozygous |
| NC_037650.1 | 5152418 | SNV | 1 | T | C | Heterozygous |
| NC_037650.1 | 5152450 | SNV | 1 | T | C | Homozygous   |
| NC_037650.1 | 5152485 | SNV | 1 | T | A | Heterozygous |
| NC_037650.1 | 5152593 | SNV | 1 | A | G | Homozygous   |
| NC_037650.1 | 5152609 | SNV | 1 | T | C | Heterozygous |
| NC_037650.1 | 5152616 | SNV | 1 | A | G | Homozygous   |
| NC_037650.1 | 5152618 | SNV | 1 | A | G | Heterozygous |
| NC_037650.1 | 5152647 | SNV | 1 | A | G | Homozygous   |
| NC_037650.1 | 5152673 | SNV | 1 | T | C | Homozygous   |
| NC_037650.1 | 5152780 | SNV | 1 | A | T | Homozygous   |
| NC_037650.1 | 5152783 | SNV | 1 | C | T | Heterozygous |
| NC_037650.1 | 5152795 | SNV | 1 | T | G | Heterozygous |
| NC_037650.1 | 5152807 | SNV | 1 | A | G | Homozygous   |
| NC_037650.1 | 5153283 | SNV | 1 | G | A | Heterozygous |
| NC_037650.1 | 5153518 | SNV | 1 | G | A | Homozygous   |
| NC_037650.1 | 5153549 | SNV | 1 | G | A | Heterozygous |
| NC_037650.1 | 5153674 | SNV | 1 | C | A | Heterozygous |
| NC_037650.1 | 5153685 | SNV | 1 | A | C | Homozygous   |
| NC_037650.1 | 5154275 | SNV | 1 | T | C | Heterozygous |
| NC_037650.1 | 5154432 | SNV | 1 | C | T | Homozygous   |
| NC_037650.1 | 5154436 | SNV | 1 | T | C | Heterozygous |
| NC_037650.1 | 5154439 | SNV | 1 | T | C | Heterozygous |
| NC_037650.1 | 5154764 | SNV | 1 | G | A | Heterozygous |
| NC_037650.1 | 5155153 | SNV | 1 | T | C | Homozygous   |
| NC_037650.1 | 5155155 | SNV | 1 | C | G | Homozygous   |
| NC_037650.1 | 5155289 | SNV | 1 | A | G | Heterozygous |
| NC_037650.1 | 5155292 | SNV | 1 | G | A | Heterozygous |
| NC_037650.1 | 5155295 | SNV | 1 | G | C | Heterozygous |
| NC_037650.1 | 5155867 | SNV | 1 | A | G | Homozygous   |
| NC_037650.1 | 5155875 | SNV | 1 | T | C | Homozygous   |
| NC_037650.1 | 5155895 | SNV | 1 | G | A | Homozygous   |
| NC_037650.1 | 5155990 | SNV | 1 | G | A | Heterozygous |
| NC_037650.1 | 5159396 | SNV | 1 | G | A | Homozygous   |
| NC_037650.1 | 5159430 | SNV | 1 | A | G | Homozygous   |
| NC_037650.1 | 5159870 | SNV | 1 | T | C | Heterozygous |
| NC_037650.1 | 5161328 | SNV | 1 | G | T | Homozygous   |
| NC_037650.1 | 5168931 | SNV | 1 | G | A | Homozygous   |
| NC_037650.1 | 5172081 | SNV | 1 | C | T | Homozygous   |
| NC_037650.1 | 5172274 | SNV | 1 | T | C | Homozygous   |
| NC_037650.1 | 5172381 | SNV | 1 | C | T | Homozygous   |
| NC_037650.1 | 5174173 | SNV | 1 | A | T | Heterozygous |
| NC_037650.1 | 5174214 | SNV | 1 | A | G | Homozygous   |
| NC_037650.1 | 5174334 | SNV | 1 | A | G | Heterozygous |
| NC_037650.1 | 5174453 | SNV | 1 | A | G | Homozygous   |
| NC_037650.1 | 5174727 | SNV | 1 | G | A | Heterozygous |
| NC_037650.1 | 5174840 | SNV | 1 | C | G | Heterozygous |
| NC_037650.1 | 5175024 | SNV | 1 | T | C | Homozygous   |
| NC_037650.1 | 5175051 | SNV | 1 | T | C | Heterozygous |

|             |         |     |   |   |   |              |
|-------------|---------|-----|---|---|---|--------------|
| NC_037650.1 | 5175053 | SNV | 1 | T | C | Homozygous   |
| NC_037650.1 | 5177285 | SNV | 1 | T | C | Homozygous   |
| NC_037650.1 | 5177291 | SNV | 1 | G | A | Homozygous   |
| NC_037650.1 | 5177388 | SNV | 1 | G | A | Homozygous   |
| NC_037650.1 | 5185859 | SNV | 1 | A | T | Homozygous   |
| NC_037650.1 | 5185870 | SNV | 1 | G | C | Heterozygous |
| NC_037650.1 | 5186557 | SNV | 1 | T | C | Homozygous   |
| NC_037650.1 | 5186807 | SNV | 1 | C | T | Homozygous   |
| NC_037650.1 | 5186848 | SNV | 1 | C | T | Heterozygous |
| NC_037650.1 | 5186884 | SNV | 1 | A | G | Heterozygous |
| NC_037650.1 | 5186944 | SNV | 1 | T | C | Homozygous   |
| NC_037650.1 | 5186978 | SNV | 1 | G | A | Homozygous   |
| NC_037650.1 | 5192015 | SNV | 1 | G | A | Homozygous   |
| NC_037650.1 | 5192127 | SNV | 1 | A | G | Homozygous   |
| NC_037650.1 | 5192213 | SNV | 1 | G | A | Heterozygous |
| NC_037650.1 | 5192407 | SNV | 1 | A | G | Homozygous   |
| NC_037650.1 | 5195524 | SNV | 1 | C | T | Heterozygous |
| NC_037650.1 | 5195531 | SNV | 1 | C | A | Heterozygous |
| NC_037650.1 | 5195535 | SNV | 1 | C | A | Heterozygous |
| NC_037650.1 | 5195588 | SNV | 1 | G | T | Heterozygous |
| NC_037650.1 | 5206077 | SNV | 1 | T | G | Homozygous   |
| NC_037650.1 | 5206079 | SNV | 1 | T | C | Homozygous   |
| NC_037650.1 | 5212445 | SNV | 1 | T | C | Heterozygous |
| NC_037650.1 | 5212454 | SNV | 1 | C | T | Homozygous   |
| NC_037650.1 | 5212470 | SNV | 1 | T | C | Heterozygous |
| NC_037650.1 | 5212692 | SNV | 1 | C | T | Heterozygous |
| NC_037650.1 | 5212694 | SNV | 1 | T | G | Homozygous   |
| NC_037650.1 | 5214006 | SNV | 1 | A | T | Homozygous   |
| NC_037650.1 | 5214012 | SNV | 1 | C | T | Homozygous   |
| NC_037650.1 | 5215327 | SNV | 1 | T | C | Homozygous   |
| NC_037650.1 | 5215362 | SNV | 1 | C | T | Homozygous   |
| NC_037650.1 | 5216016 | SNV | 1 | A | G | Heterozygous |
| NC_037650.1 | 5216061 | SNV | 1 | A | G | Homozygous   |
| NC_037650.1 | 5216070 | SNV | 1 | T | C | Heterozygous |
| NC_037650.1 | 5216109 | SNV | 1 | T | C | Homozygous   |
| NC_037650.1 | 5216120 | SNV | 1 | A | G | Homozygous   |
| NC_037650.1 | 5216239 | SNV | 1 | T | C | Homozygous   |
| NC_037650.1 | 5216314 | SNV | 1 | G | T | Heterozygous |
| NC_037650.1 | 5216428 | SNV | 1 | A | G | Homozygous   |
| NC_037650.1 | 5216658 | SNV | 1 | C | T | Heterozygous |
| NC_037650.1 | 5216762 | SNV | 1 | C | T | Heterozygous |
| NC_037650.1 | 5217036 | SNV | 1 | G | A | Heterozygous |
| NC_037650.1 | 5217045 | SNV | 1 | G | A | Heterozygous |
| NC_037650.1 | 5217142 | SNV | 1 | A | G | Heterozygous |
| NC_037650.1 | 5220506 | SNV | 1 | C | G | Homozygous   |
| NC_037650.1 | 5220517 | SNV | 1 | C | T | Homozygous   |
| NC_037650.1 | 5222957 | SNV | 1 | G | A | Heterozygous |
| NC_037650.1 | 5223035 | SNV | 1 | A | G | Heterozygous |
| NC_037650.1 | 5223062 | SNV | 1 | A | G | Homozygous   |
| NC_037650.1 | 5223087 | SNV | 1 | G | A | Homozygous   |
| NC_037650.1 | 5230197 | SNV | 1 | G | A | Homozygous   |

|             |         |     |   |   |   |              |
|-------------|---------|-----|---|---|---|--------------|
| NC_037650.1 | 5230276 | SNV | 1 | T | C | Homozygous   |
| NC_037650.1 | 5230495 | SNV | 1 | C | A | Homozygous   |
| NC_037650.1 | 5230531 | SNV | 1 | T | G | Homozygous   |
| NC_037650.1 | 5230873 | SNV | 1 | C | T | Heterozygous |
| NC_037650.1 | 5233921 | SNV | 1 | C | T | Heterozygous |
| NC_037650.1 | 5233957 | SNV | 1 | C | T | Heterozygous |
| NC_037650.1 | 5234079 | SNV | 1 | G | A | Heterozygous |
| NC_037650.1 | 5234145 | SNV | 1 | G | A | Homozygous   |
| NC_037650.1 | 5235854 | SNV | 1 | T | C | Heterozygous |
| NC_037650.1 | 5235948 | SNV | 1 | T | G | Homozygous   |
| NC_037650.1 | 5235992 | SNV | 1 | A | G | Homozygous   |
| NC_037650.1 | 5236043 | SNV | 1 | A | G | Heterozygous |
| NC_037650.1 | 5236195 | SNV | 1 | A | G | Heterozygous |
| NC_037650.1 | 5236209 | SNV | 1 | C | T | Heterozygous |
| NC_037650.1 | 5236231 | SNV | 1 | A | C | Homozygous   |
| NC_037650.1 | 5236256 | SNV | 1 | C | T | Heterozygous |
| NC_037650.1 | 5243540 | SNV | 1 | G | A | Heterozygous |
| NC_037650.1 | 5243545 | SNV | 1 | C | T | Heterozygous |
| NC_037650.1 | 5243978 | SNV | 1 | A | G | Homozygous   |
| NC_037650.1 | 5245722 | SNV | 1 | T | C | Homozygous   |
| NC_037650.1 | 5245801 | SNV | 1 | G | A | Heterozygous |
| NC_037650.1 | 5245838 | SNV | 1 | A | G | Homozygous   |
| NC_037650.1 | 5246132 | SNV | 1 | T | A | Homozygous   |
| NC_037650.1 | 5246748 | SNV | 1 | A | G | Homozygous   |
| NC_037650.1 | 5246825 | SNV | 1 | T | C | Homozygous   |
| NC_037650.1 | 5247125 | SNV | 1 | G | A | Heterozygous |
| NC_037650.1 | 5247224 | SNV | 1 | T | C | Homozygous   |
| NC_037650.1 | 5249853 | SNV | 1 | G | C | Homozygous   |
| NC_037650.1 | 5251978 | SNV | 1 | G | C | Homozygous   |
| NC_037650.1 | 5252004 | SNV | 1 | G | A | Homozygous   |
| NC_037650.1 | 5252008 | SNV | 1 | A | G | Homozygous   |
| NC_037650.1 | 5252218 | SNV | 1 | G | T | Homozygous   |
| NC_037650.1 | 5252235 | SNV | 1 | A | G | Homozygous   |
| NC_037650.1 | 5253257 | SNV | 1 | T | C | Heterozygous |
| NC_037650.1 | 5253272 | SNV | 1 | T | C | Heterozygous |
| NC_037650.1 | 5253304 | SNV | 1 | A | G | Homozygous   |
| NC_037650.1 | 5253315 | SNV | 1 | A | G | Homozygous   |
| NC_037650.1 | 5253382 | SNV | 1 | G | T | Homozygous   |
| NC_037650.1 | 5253681 | SNV | 1 | T | C | Homozygous   |
| NC_037650.1 | 5255187 | SNV | 1 | T | C | Homozygous   |
| NC_037650.1 | 5255189 | SNV | 1 | T | C | Homozygous   |
| NC_037650.1 | 5255231 | SNV | 1 | G | T | Homozygous   |
| NC_037650.1 | 5255233 | SNV | 1 | C | T | Homozygous   |
| NC_037650.1 | 5259643 | SNV | 1 | T | C | Homozygous   |
| NC_037650.1 | 5259695 | SNV | 1 | T | C | Heterozygous |
| NC_037650.1 | 5259712 | SNV | 1 | G | A | Heterozygous |
| NC_037650.1 | 5259723 | SNV | 1 | A | G | Heterozygous |
| NC_037650.1 | 5259820 | SNV | 1 | T | C | Homozygous   |
| NC_037650.1 | 5260224 | SNV | 1 | T | C | Heterozygous |
| NC_037650.1 | 5260345 | SNV | 1 | G | A | Heterozygous |
| NC_037650.1 | 5261394 | SNV | 1 | C | T | Heterozygous |

|             |         |     |   |   |   |              |
|-------------|---------|-----|---|---|---|--------------|
| NC_037650.1 | 5261520 | SNV | 1 | A | G | Homozygous   |
| NC_037650.1 | 5261593 | SNV | 1 | G | A | Heterozygous |
| NC_037650.1 | 5262134 | SNV | 1 | A | G | Homozygous   |
| NC_037650.1 | 5262305 | SNV | 1 | C | T | Heterozygous |
| NC_037650.1 | 5262310 | SNV | 1 | A | G | Homozygous   |
| NC_037650.1 | 5262551 | SNV | 1 | A | G | Homozygous   |
| NC_037650.1 | 5262577 | SNV | 1 | A | G | Homozygous   |
| NC_037650.1 | 5262867 | SNV | 1 | C | T | Heterozygous |
| NC_037650.1 | 5263380 | SNV | 1 | C | A | Homozygous   |
| NC_037650.1 | 5263382 | SNV | 1 | G | A | Homozygous   |
| NC_037650.1 | 5263470 | SNV | 1 | T | C | Homozygous   |
| NC_037650.1 | 5263500 | SNV | 1 | T | C | Homozygous   |
| NC_037650.1 | 5263890 | SNV | 1 | G | A | Heterozygous |
| NC_037650.1 | 5264033 | SNV | 1 | A | G | Homozygous   |
| NC_037650.1 | 5264397 | SNV | 1 | A | G | Homozygous   |
| NC_037650.1 | 5264546 | SNV | 1 | C | T | Heterozygous |
| NC_037650.1 | 5264792 | SNV | 1 | G | A | Heterozygous |
| NC_037650.1 | 5264794 | SNV | 1 | C | T | Homozygous   |
| NC_037650.1 | 5264924 | SNV | 1 | A | T | Homozygous   |
| NC_037650.1 | 5265093 | SNV | 1 | T | A | Heterozygous |
| NC_037650.1 | 5265229 | SNV | 1 | T | C | Homozygous   |
| NC_037650.1 | 5265558 | SNV | 1 | T | C | Homozygous   |
| NC_037650.1 | 5265962 | SNV | 1 | A | C | Homozygous   |
| NC_037650.1 | 5266311 | SNV | 1 | G | C | Homozygous   |
| NC_037650.1 | 5266866 | SNV | 1 | A | G | Heterozygous |
| NC_037650.1 | 5266868 | SNV | 1 | A | G | Heterozygous |
| NC_037650.1 | 5266917 | SNV | 1 | A | C | Heterozygous |
| NC_037650.1 | 5266922 | SNV | 1 | T | G | Heterozygous |
| NC_037650.1 | 5266932 | SNV | 1 | T | C | Heterozygous |
| NC_037650.1 | 5266935 | SNV | 1 | G | A | Heterozygous |
| NC_037650.1 | 5266952 | SNV | 1 | A | G | Heterozygous |
| NC_037650.1 | 5267031 | SNV | 1 | A | G | Homozygous   |
| NC_037650.1 | 5268864 | SNV | 1 | G | A | Heterozygous |
| NC_037650.1 | 5270552 | SNV | 1 | C | A | Homozygous   |
| NC_037650.1 | 5270659 | SNV | 1 | A | G | Homozygous   |
| NC_037650.1 | 5270721 | SNV | 1 | A | C | Homozygous   |
| NC_037650.1 | 5270781 | SNV | 1 | T | C | Homozygous   |
| NC_037650.1 | 5286291 | SNV | 1 | T | C | Homozygous   |
| NC_037650.1 | 5286303 | SNV | 1 | G | A | Heterozygous |
| NC_037650.1 | 5286306 | SNV | 1 | T | C | Heterozygous |
| NC_037650.1 | 5286327 | SNV | 1 | C | T | Heterozygous |
| NC_037650.1 | 5286949 | SNV | 1 | A | G | Homozygous   |
| NC_037650.1 | 5290274 | SNV | 1 | A | G | Heterozygous |
| NC_037650.1 | 5290345 | SNV | 1 | C | T | Heterozygous |
| NC_037650.1 | 5290359 | SNV | 1 | T | C | Homozygous   |
| NC_037650.1 | 5290501 | SNV | 1 | C | T | Heterozygous |
| NC_037650.1 | 5291090 | SNV | 1 | G | A | Heterozygous |
| NC_037650.1 | 5291105 | SNV | 1 | A | T | Homozygous   |
| NC_037650.1 | 5291109 | SNV | 1 | A | T | Homozygous   |
| NC_037650.1 | 5291678 | SNV | 1 | A | G | Heterozygous |
| NC_037650.1 | 5291775 | SNV | 1 | C | T | Heterozygous |

|             |         |     |   |   |   |              |
|-------------|---------|-----|---|---|---|--------------|
| NC_037650.1 | 5291785 | SNV | 1 | T | C | Homozygous   |
| NC_037650.1 | 5291810 | SNV | 1 | T | A | Homozygous   |
| NC_037650.1 | 5291812 | SNV | 1 | T | C | Homozygous   |
| NC_037650.1 | 5292999 | SNV | 1 | C | T | Heterozygous |
| NC_037650.1 | 5293073 | SNV | 1 | C | T | Heterozygous |
| NC_037650.1 | 5293388 | SNV | 1 | A | G | Heterozygous |
| NC_037650.1 | 5293748 | SNV | 1 | T | C | Homozygous   |
| NC_037650.1 | 5294412 | SNV | 1 | C | T | Heterozygous |
| NC_037650.1 | 5294801 | SNV | 1 | T | A | Homozygous   |
| NC_037650.1 | 5294913 | SNV | 1 | T | G | Homozygous   |
| NC_037650.1 | 5296135 | SNV | 1 | A | G | Heterozygous |
| NC_037650.1 | 5296506 | SNV | 1 | C | T | Homozygous   |
| NC_037650.1 | 5296784 | SNV | 1 | C | T | Heterozygous |
| NC_037650.1 | 5297040 | SNV | 1 | G | A | Heterozygous |
| NC_037650.1 | 5297699 | SNV | 1 | T | C | Heterozygous |
| NC_037650.1 | 5297714 | SNV | 1 | C | T | Heterozygous |
| NC_037650.1 | 5297776 | SNV | 1 | C | T | Heterozygous |
| NC_037650.1 | 5298130 | SNV | 1 | A | G | Heterozygous |
| NC_037650.1 | 5299043 | SNV | 1 | G | A | Heterozygous |
| NC_037650.1 | 5299489 | SNV | 1 | A | C | Homozygous   |
| NC_037650.1 | 5300001 | SNV | 1 | A | G | Heterozygous |
| NC_037650.1 | 5300014 | SNV | 1 | T | G | Homozygous   |
| NC_037650.1 | 5300037 | SNV | 1 | T | A | Homozygous   |
| NC_037650.1 | 5300078 | SNV | 1 | T | G | Homozygous   |
| NC_037650.1 | 5300084 | SNV | 1 | C | G | Homozygous   |
| NC_037650.1 | 5300088 | SNV | 1 | T | A | Heterozygous |
| NC_037650.1 | 5300088 | SNV | 1 | T | G | Heterozygous |
| NC_037650.1 | 5300594 | SNV | 1 | T | A | Heterozygous |
| NC_037650.1 | 5301638 | SNV | 1 | T | C | Homozygous   |
| NC_037650.1 | 5301773 | SNV | 1 | G | A | Homozygous   |
| NC_037650.1 | 5302696 | SNV | 1 | T | C | Heterozygous |
| NC_037650.1 | 5302697 | SNV | 1 | G | A | Heterozygous |
| NC_037650.1 | 5303102 | SNV | 1 | A | G | Homozygous   |
| NC_037650.1 | 5303749 | SNV | 1 | T | A | Homozygous   |
| NC_037650.1 | 5303794 | SNV | 1 | G | C | Heterozygous |
| NC_037650.1 | 5303983 | SNV | 1 | A | G | Homozygous   |
| NC_037650.1 | 5303990 | SNV | 1 | T | A | Homozygous   |
| NC_037650.1 | 5303992 | SNV | 1 | T | C | Homozygous   |
| NC_037650.1 | 5304001 | SNV | 1 | A | G | Homozygous   |
| NC_037650.1 | 5304008 | SNV | 1 | T | A | Homozygous   |
| NC_037650.1 | 5304010 | SNV | 1 | T | C | Homozygous   |
| NC_037650.1 | 5304017 | SNV | 1 | G | A | Homozygous   |
| NC_037650.1 | 5304048 | SNV | 1 | T | A | Homozygous   |
| NC_037650.1 | 5305066 | SNV | 1 | A | G | Homozygous   |
| NC_037650.1 | 5305084 | SNV | 1 | C | T | Heterozygous |
| NC_037650.1 | 5305233 | SNV | 1 | G | A | Heterozygous |
| NC_037650.1 | 5305254 | SNV | 1 | G | A | Homozygous   |
| NC_037650.1 | 5305263 | SNV | 1 | A | G | Homozygous   |
| NC_037650.1 | 5305389 | SNV | 1 | C | T | Heterozygous |
| NC_037650.1 | 5305993 | SNV | 1 | T | A | Homozygous   |
| NC_037650.1 | 5306007 | SNV | 1 | G | A | Heterozygous |

|             |         |     |   |   |   |              |
|-------------|---------|-----|---|---|---|--------------|
| NC_037650.1 | 5306009 | SNV | 1 | G | A | Heterozygous |
| NC_037650.1 | 5307090 | SNV | 1 | T | C | Homozygous   |
| NC_037650.1 | 5307096 | SNV | 1 | C | T | Heterozygous |
| NC_037650.1 | 5307412 | SNV | 1 | A | G | Homozygous   |
| NC_037650.1 | 5307428 | SNV | 1 | A | G | Homozygous   |
| NC_037650.1 | 5307477 | SNV | 1 | A | G | Homozygous   |
| NC_037650.1 | 5307547 | SNV | 1 | G | A | Heterozygous |
| NC_037650.1 | 5307729 | SNV | 1 | G | A | Heterozygous |
| NC_037650.1 | 5308999 | SNV | 1 | A | G | Homozygous   |
| NC_037650.1 | 5309203 | SNV | 1 | T | C | Homozygous   |
| NC_037650.1 | 5309565 | SNV | 1 | T | C | Heterozygous |
| NC_037650.1 | 5309567 | SNV | 1 | C | T | Heterozygous |
| NC_037650.1 | 5309573 | SNV | 1 | C | T | Homozygous   |
| NC_037650.1 | 5309653 | SNV | 1 | A | G | Homozygous   |
| NC_037650.1 | 5309960 | SNV | 1 | C | T | Heterozygous |
| NC_037650.1 | 5309982 | SNV | 1 | T | C | Heterozygous |
| NC_037650.1 | 5309994 | SNV | 1 | T | C | Homozygous   |
| NC_037650.1 | 5310392 | SNV | 1 | A | G | Homozygous   |
| NC_037650.1 | 5311755 | SNV | 1 | A | G | Homozygous   |
| NC_037650.1 | 5314780 | SNV | 1 | C | A | Heterozygous |
| NC_037650.1 | 5324762 | SNV | 1 | T | C | Heterozygous |
| NC_037650.1 | 5329554 | SNV | 1 | C | T | Heterozygous |
| NC_037650.1 | 5329561 | SNV | 1 | C | T | Homozygous   |
| NC_037650.1 | 5329563 | SNV | 1 | C | T | Homozygous   |
| NC_037650.1 | 5331283 | SNV | 1 | C | T | Homozygous   |
| NC_037650.1 | 5342956 | SNV | 1 | C | T | Heterozygous |
| NC_037650.1 | 5343062 | SNV | 1 | T | C | Heterozygous |
| NC_037650.1 | 5343062 | SNV | 1 | T | G | Heterozygous |
| NC_037650.1 | 5343281 | SNV | 1 | G | C | Homozygous   |
| NC_037650.1 | 5368508 | SNV | 1 | T | G | Homozygous   |
| NC_037650.1 | 5368542 | SNV | 1 | T | C | Homozygous   |
| NC_037650.1 | 5368556 | SNV | 1 | A | G | Homozygous   |
| NC_037650.1 | 5378171 | SNV | 1 | G | C | Homozygous   |
| NC_037650.1 | 5381382 | SNV | 1 | T | A | Heterozygous |
| NC_037650.1 | 5381404 | SNV | 1 | A | G | Heterozygous |
| NC_037650.1 | 5393392 | SNV | 1 | T | C | Homozygous   |
| NC_037650.1 | 5393500 | SNV | 1 | A | G | Heterozygous |
| NC_037650.1 | 5393504 | SNV | 1 | T | C | Homozygous   |
| NC_037650.1 | 5393510 | SNV | 1 | A | G | Homozygous   |
| NC_037650.1 | 5393514 | SNV | 1 | T | C | Homozygous   |
| NC_037650.1 | 5393857 | SNV | 1 | C | T | Homozygous   |
| NC_037650.1 | 5398468 | SNV | 1 | C | T | Homozygous   |
| NC_037650.1 | 5398470 | SNV | 1 | A | C | Homozygous   |
| NC_037650.1 | 5398474 | SNV | 1 | C | T | Homozygous   |
| NC_037650.1 | 5398478 | SNV | 1 | G | C | Homozygous   |
| NC_037650.1 | 5398485 | SNV | 1 | A | T | Homozygous   |
| NC_037650.1 | 5398493 | SNV | 1 | C | T | Homozygous   |
| NC_037650.1 | 5398503 | SNV | 1 | A | T | Homozygous   |
| NC_037650.1 | 5398528 | SNV | 1 | A | T | Homozygous   |
| NC_037650.1 | 5401359 | SNV | 1 | T | C | Homozygous   |
| NC_037650.1 | 5401388 | SNV | 1 | A | G | Homozygous   |

|             |         |     |   |   |   |              |
|-------------|---------|-----|---|---|---|--------------|
| NC_037650.1 | 5404560 | SNV | 1 | C | A | Homozygous   |
| NC_037650.1 | 5404563 | SNV | 1 | G | T | Homozygous   |
| NC_037650.1 | 5404590 | SNV | 1 | A | G | Homozygous   |
| NC_037650.1 | 5404594 | SNV | 1 | A | T | Homozygous   |
| NC_037650.1 | 5404596 | SNV | 1 | G | T | Homozygous   |
| NC_037650.1 | 5406872 | SNV | 1 | T | C | Homozygous   |
| NC_037650.1 | 5406925 | SNV | 1 | T | C | Heterozygous |
| NC_037650.1 | 5406930 | SNV | 1 | C | T | Heterozygous |
| NC_037650.1 | 5408318 | SNV | 1 | G | C | Heterozygous |
| NC_037650.1 | 5408334 | SNV | 1 | A | T | Heterozygous |
| NC_037650.1 | 5408352 | SNV | 1 | G | T | Heterozygous |
| NC_037650.1 | 5410765 | SNV | 1 | C | T | Homozygous   |
| NC_037650.1 | 5410775 | SNV | 1 | A | T | Homozygous   |
| NC_037650.1 | 5428018 | SNV | 1 | T | C | Homozygous   |
| NC_037650.1 | 5428022 | SNV | 1 | C | T | Homozygous   |
| NC_037650.1 | 5428025 | SNV | 1 | T | A | Homozygous   |
| NC_037650.1 | 5428032 | SNV | 1 | C | T | Homozygous   |
| NC_037650.1 | 5428039 | SNV | 1 | T | G | Homozygous   |
| NC_037650.1 | 5432926 | SNV | 1 | G | A | Heterozygous |
| NC_037650.1 | 5435484 | SNV | 1 | T | C | Heterozygous |
| NC_037650.1 | 5435491 | SNV | 1 | C | A | Heterozygous |
| NC_037650.1 | 5435529 | SNV | 1 | A | G | Heterozygous |
| NC_037650.1 | 5435566 | SNV | 1 | C | T | Heterozygous |
| NC_037650.1 | 5437680 | SNV | 1 | A | T | Homozygous   |
| NC_037650.1 | 5437690 | SNV | 1 | A | G | Homozygous   |
| NC_037650.1 | 5440275 | SNV | 1 | C | A | Homozygous   |
| NC_037650.1 | 5440277 | SNV | 1 | T | A | Homozygous   |
| NC_037650.1 | 5440286 | SNV | 1 | G | A | Homozygous   |
| NC_037650.1 | 5440307 | SNV | 1 | G | A | Heterozygous |
| NC_037650.1 | 5440312 | SNV | 1 | G | A | Homozygous   |
| NC_037650.1 | 5440316 | SNV | 1 | G | A | Homozygous   |
| NC_037650.1 | 5442710 | SNV | 1 | G | C | Heterozygous |
| NC_037650.1 | 5442715 | SNV | 1 | T | C | Heterozygous |
| NC_037650.1 | 5442735 | SNV | 1 | C | T | Homozygous   |
| NC_037650.1 | 5446510 | SNV | 1 | T | C | Heterozygous |
| NC_037650.1 | 5447131 | SNV | 1 | G | T | Heterozygous |
| NC_037650.1 | 5447135 | SNV | 1 | T | A | Heterozygous |
| NC_037650.1 | 5447140 | SNV | 1 | G | A | Heterozygous |
| NC_037650.1 | 5452918 | SNV | 1 | A | G | Heterozygous |
| NC_037650.1 | 5452949 | SNV | 1 | A | T | Heterozygous |
| NC_037650.1 | 5466129 | SNV | 1 | C | T | Heterozygous |
| NC_037650.1 | 5467219 | SNV | 1 | G | A | Homozygous   |
| NC_037650.1 | 5470291 | SNV | 1 | T | A | Heterozygous |
| NC_037650.1 | 5471945 | SNV | 1 | C | T | Heterozygous |
| NC_037650.1 | 5471965 | SNV | 1 | T | C | Homozygous   |
| NC_037650.1 | 5471969 | SNV | 1 | A | G | Homozygous   |
| NC_037650.1 | 5471980 | SNV | 1 | A | G | Homozygous   |
| NC_037650.1 | 5471982 | SNV | 1 | A | G | Heterozygous |
| NC_037650.1 | 5472158 | SNV | 1 | C | T | Heterozygous |
| NC_037650.1 | 5472565 | SNV | 1 | G | C | Homozygous   |
| NC_037650.1 | 5473259 | SNV | 1 | G | T | Homozygous   |



|             |         |     |   |   |   |              |
|-------------|---------|-----|---|---|---|--------------|
| NC_037650.1 | 5473469 | SNV | 1 | T | G | Homozygous   |
| NC_037650.1 | 5487584 | SNV | 1 | C | T | Homozygous   |
| NC_037650.1 | 5487681 | SNV | 1 | G | A | Heterozygous |
| NC_037650.1 | 5487683 | SNV | 1 | C | T | Heterozygous |
| NC_037650.1 | 5487733 | SNV | 1 | C | T | Homozygous   |
| NC_037650.1 | 5487753 | SNV | 1 | C | T | Heterozygous |
| NC_037650.1 | 5489074 | SNV | 1 | T | C | Homozygous   |
| NC_037650.1 | 5491176 | SNV | 1 | A | G | Homozygous   |
| NC_037650.1 | 5491180 | SNV | 1 | A | G | Homozygous   |
| NC_037650.1 | 5491188 | SNV | 1 | T | A | Homozygous   |
| NC_037650.1 | 5492983 | SNV | 1 | A | G | Homozygous   |
| NC_037650.1 | 5492988 | SNV | 1 | G | A | Homozygous   |
| NC_037650.1 | 5492992 | SNV | 1 | G | A | Homozygous   |
| NC_037650.1 | 5492996 | SNV | 1 | G | A | Homozygous   |
| NC_037650.1 | 5493034 | SNV | 1 | G | A | Heterozygous |
| NC_037650.1 | 5493040 | SNV | 1 | G | A | Homozygous   |
| NC_037650.1 | 5493540 | SNV | 1 | T | C | Heterozygous |
| NC_037650.1 | 5493546 | SNV | 1 | T | C | Homozygous   |
| NC_037650.1 | 5493549 | SNV | 1 | C | T | Homozygous   |
| NC_037650.1 | 5493559 | SNV | 1 | C | T | Homozygous   |
| NC_037650.1 | 5493573 | SNV | 1 | T | C | Homozygous   |
| NC_037650.1 | 5493579 | SNV | 1 | T | C | Homozygous   |
| NC_037650.1 | 5495723 | SNV | 1 | A | G | Heterozygous |
| NC_037650.1 | 5495738 | SNV | 1 | A | C | Homozygous   |
| NC_037650.1 | 5495747 | SNV | 1 | G | A | Homozygous   |
| NC_037650.1 | 5495752 | SNV | 1 | G | T | Homozygous   |
| NC_037650.1 | 5497397 | SNV | 1 | G | T | Heterozygous |
| NC_037650.1 | 5497445 | SNV | 1 | G | T | Heterozygous |
| NC_037650.1 | 5505252 | SNV | 1 | G | T | Homozygous   |
| NC_037650.1 | 5505260 | SNV | 1 | A | C | Homozygous   |
| NC_037650.1 | 5505263 | SNV | 1 | A | G | Homozygous   |
| NC_037650.1 | 5505292 | SNV | 1 | G | T | Homozygous   |
| NC_037650.1 | 5510821 | SNV | 1 | A | G | Heterozygous |
| NC_037650.1 | 5510827 | SNV | 1 | A | T | Heterozygous |
| NC_037650.1 | 5510830 | SNV | 1 | A | G | Heterozygous |
| NC_037650.1 | 5511382 | SNV | 1 | G | A | Homozygous   |
| NC_037650.1 | 5515316 | SNV | 1 | G | A | Homozygous   |
| NC_037650.1 | 5532377 | SNV | 1 | T | C | Homozygous   |
| NC_037650.1 | 5533136 | SNV | 1 | C | T | Homozygous   |
| NC_037650.1 | 5534236 | SNV | 1 | G | A | Homozygous   |
| NC_037650.1 | 5541472 | SNV | 1 | A | C | Homozygous   |
| NC_037650.1 | 5541566 | SNV | 1 | G | A | Homozygous   |
| NC_037650.1 | 5542017 | SNV | 1 | G | A | Homozygous   |
| NC_037650.1 | 5542045 | SNV | 1 | G | A | Heterozygous |
| NC_037650.1 | 5542327 | SNV | 1 | T | C | Homozygous   |
| NC_037650.1 | 5548645 | SNV | 1 | T | A | Homozygous   |
| NC_037650.1 | 5549892 | SNV | 1 | G | C | Heterozygous |
| NC_037650.1 | 5550235 | SNV | 1 | C | T | Heterozygous |
| NC_037650.1 | 5550287 | SNV | 1 | T | C | Heterozygous |
| NC_037650.1 | 5550293 | SNV | 1 | C | G | Homozygous   |
| NC_037650.1 | 5559633 | SNV | 1 | G | T | Heterozygous |

|             |         |     |   |   |   |              |
|-------------|---------|-----|---|---|---|--------------|
| NC_037650.1 | 5559672 | SNV | 1 | A | G | Homozygous   |
| NC_037650.1 | 5559709 | SNV | 1 | C | G | Homozygous   |
| NC_037650.1 | 5559918 | SNV | 1 | A | G | Heterozygous |
| NC_037650.1 | 5559936 | SNV | 1 | G | A | Heterozygous |
| NC_037650.1 | 5559960 | SNV | 1 | T | C | Homozygous   |
| NC_037650.1 | 5560042 | SNV | 1 | C | A | Heterozygous |
| NC_037650.1 | 5560045 | SNV | 1 | G | A | Homozygous   |
| NC_037650.1 | 5560058 | SNV | 1 | A | G | Heterozygous |
| NC_037650.1 | 5560062 | SNV | 1 | G | A | Heterozygous |
| NC_037650.1 | 5560068 | SNV | 1 | G | A | Heterozygous |
| NC_037650.1 | 5571888 | SNV | 1 | A | G | Homozygous   |
| NC_037650.1 | 5572653 | SNV | 1 | A | G | Heterozygous |
| NC_037650.1 | 5572667 | SNV | 1 | T | A | Heterozygous |
| NC_037650.1 | 5572703 | SNV | 1 | A | G | Homozygous   |
| NC_037650.1 | 5572723 | SNV | 1 | G | A | Heterozygous |
| NC_037650.1 | 5572740 | SNV | 1 | G | A | Homozygous   |
| NC_037650.1 | 5572754 | SNV | 1 | C | G | Heterozygous |
| NC_037650.1 | 5572815 | SNV | 1 | A | G | Homozygous   |
| NC_037650.1 | 5572823 | SNV | 1 | A | G | Homozygous   |
| NC_037650.1 | 5572863 | SNV | 1 | G | A | Homozygous   |
| NC_037650.1 | 5572865 | SNV | 1 | A | C | Homozygous   |
| NC_037650.1 | 5574529 | SNV | 1 | G | C | Homozygous   |
| NC_037650.1 | 5574535 | SNV | 1 | T | C | Homozygous   |
| NC_037650.1 | 5574593 | SNV | 1 | T | C | Homozygous   |
| NC_037650.1 | 5574872 | SNV | 1 | T | C | Homozygous   |
| NC_037650.1 | 5575228 | SNV | 1 | G | C | Heterozygous |
| NC_037650.1 | 5575305 | SNV | 1 | G | A | Heterozygous |
| NC_037650.1 | 5575307 | SNV | 1 | G | A | Heterozygous |
| NC_037650.1 | 5575739 | SNV | 1 | A | G | Heterozygous |
| NC_037650.1 | 5575831 | SNV | 1 | C | A | Heterozygous |
| NC_037650.1 | 5576053 | SNV | 1 | A | G | Heterozygous |
| NC_037650.1 | 5576065 | SNV | 1 | A | G | Homozygous   |
| NC_037650.1 | 5576311 | SNV | 1 | C | T | Heterozygous |
| NC_037650.1 | 5576316 | SNV | 1 | C | T | Heterozygous |
| NC_037650.1 | 5576328 | SNV | 1 | T | C | Heterozygous |
| NC_037650.1 | 5590356 | SNV | 1 | G | A | Homozygous   |
| NC_037650.1 | 5590373 | SNV | 1 | G | T | Heterozygous |
| NC_037650.1 | 5590379 | SNV | 1 | G | T | Heterozygous |
| NC_037650.1 | 5590602 | SNV | 1 | C | G | Heterozygous |
| NC_037650.1 | 5590794 | SNV | 1 | A | G | Heterozygous |
| NC_037650.1 | 5591707 | SNV | 1 | G | A | Heterozygous |
| NC_037650.1 | 5591784 | SNV | 1 | C | T | Homozygous   |
| NC_037650.1 | 5592464 | SNV | 1 | A | G | Homozygous   |
| NC_037650.1 | 5592618 | SNV | 1 | G | A | Homozygous   |
| NC_037650.1 | 5615341 | SNV | 1 | T | C | Homozygous   |
| NC_037650.1 | 5615348 | SNV | 1 | G | T | Heterozygous |
| NC_037650.1 | 5615483 | SNV | 1 | A | G | Heterozygous |
| NC_037650.1 | 5615518 | SNV | 1 | T | C | Homozygous   |
| NC_037650.1 | 5615549 | SNV | 1 | G | C | Heterozygous |
| NC_037650.1 | 5615709 | SNV | 1 | C | T | Heterozygous |
| NC_037650.1 | 5620251 | SNV | 1 | C | T | Heterozygous |

|             |         |     |   |   |   |              |
|-------------|---------|-----|---|---|---|--------------|
| NC_037650.1 | 5620272 | SNV | 1 | C | T | Heterozygous |
| NC_037650.1 | 5620299 | SNV | 1 | C | T | Heterozygous |
| NC_037650.1 | 5620304 | SNV | 1 | T | C | Heterozygous |
| NC_037650.1 | 5620491 | SNV | 1 | A | G | Homozygous   |
| NC_037650.1 | 5620555 | SNV | 1 | A | C | Homozygous   |
| NC_037650.1 | 5620630 | SNV | 1 | G | A | Homozygous   |
| NC_037650.1 | 5632583 | SNV | 1 | A | G | Homozygous   |
| NC_037650.1 | 5632595 | SNV | 1 | A | G | Homozygous   |
| NC_037650.1 | 5632602 | SNV | 1 | A | G | Homozygous   |
| NC_037650.1 | 5632819 | SNV | 1 | T | C | Homozygous   |
| NC_037650.1 | 5633284 | SNV | 1 | T | C | Heterozygous |
| NC_037650.1 | 5633286 | SNV | 1 | T | C | Heterozygous |
| NC_037650.1 | 5633304 | SNV | 1 | T | C | Heterozygous |
| NC_037650.1 | 5633310 | SNV | 1 | C | T | Homozygous   |
| NC_037650.1 | 5633313 | SNV | 1 | T | C | Heterozygous |
| NC_037650.1 | 5633397 | SNV | 1 | A | G | Heterozygous |
| NC_037650.1 | 5645329 | SNV | 1 | C | T | Homozygous   |
| NC_037650.1 | 5645563 | SNV | 1 | G | A | Homozygous   |
| NC_037650.1 | 5645638 | SNV | 1 | C | T | Heterozygous |
| NC_037650.1 | 5645752 | SNV | 1 | C | T | Homozygous   |
| NC_037650.1 | 5645880 | SNV | 1 | G | A | Homozygous   |
| NC_037650.1 | 5647618 | SNV | 1 | C | T | Homozygous   |
| NC_037650.1 | 5647972 | SNV | 1 | T | A | Homozygous   |
| NC_037650.1 | 5648025 | SNV | 1 | C | T | Homozygous   |
| NC_037650.1 | 5649752 | SNV | 1 | G | C | Homozygous   |
| NC_037650.1 | 5650146 | SNV | 1 | T | G | Homozygous   |
| NC_037650.1 | 5650149 | SNV | 1 | T | A | Homozygous   |
| NC_037650.1 | 5650474 | SNV | 1 | T | C | Homozygous   |
| NC_037650.1 | 5650748 | SNV | 1 | A | G | Homozygous   |
| NC_037650.1 | 5654427 | SNV | 1 | C | G | Homozygous   |
| NC_037650.1 | 5654501 | SNV | 1 | G | A | Homozygous   |
| NC_037650.1 | 5655585 | SNV | 1 | G | A | Homozygous   |
| NC_037650.1 | 5702701 | SNV | 1 | T | A | Homozygous   |
| NC_037650.1 | 5702703 | SNV | 1 | C | T | Homozygous   |
| NC_037650.1 | 5712834 | SNV | 1 | G | A | Homozygous   |
| NC_037650.1 | 5712905 | SNV | 1 | A | C | Heterozygous |
| NC_037650.1 | 5714662 | SNV | 1 | C | T | Heterozygous |
| NC_037650.1 | 5715115 | SNV | 1 | G | A | Heterozygous |
| NC_037650.1 | 5715347 | SNV | 1 | A | G | Heterozygous |
| NC_037650.1 | 5730199 | SNV | 1 | T | C | Heterozygous |
| NC_037650.1 | 5730205 | SNV | 1 | T | C | Heterozygous |
| NC_037650.1 | 5730208 | SNV | 1 | T | C | Heterozygous |
| NC_037650.1 | 5730216 | SNV | 1 | T | C | Heterozygous |
| NC_037650.1 | 5730219 | SNV | 1 | T | C | Heterozygous |
| NC_037650.1 | 5730221 | SNV | 1 | T | C | Heterozygous |
| NC_037650.1 | 5730225 | SNV | 1 | T | C | Heterozygous |
| NC_037650.1 | 5733370 | SNV | 1 | T | A | Heterozygous |
| NC_037650.1 | 5733376 | SNV | 1 | A | T | Heterozygous |
| NC_037650.1 | 5735234 | SNV | 1 | T | C | Heterozygous |
| NC_037650.1 | 5735518 | SNV | 1 | T | C | Homozygous   |
| NC_037650.1 | 5735860 | SNV | 1 | A | G | Homozygous   |

|             |         |     |   |   |   |              |
|-------------|---------|-----|---|---|---|--------------|
| NC_037650.1 | 5736855 | SNV | 1 | A | G | Homozygous   |
| NC_037650.1 | 5737259 | SNV | 1 | A | G | Homozygous   |
| NC_037650.1 | 5737280 | SNV | 1 | A | C | Heterozygous |
| NC_037650.1 | 5737315 | SNV | 1 | G | A | Heterozygous |
| NC_037650.1 | 5737390 | SNV | 1 | A | G | Heterozygous |
| NC_037650.1 | 5737603 | SNV | 1 | C | T | Heterozygous |
| NC_037650.1 | 5738078 | SNV | 1 | G | A | Heterozygous |
| NC_037650.1 | 5738369 | SNV | 1 | A | G | Homozygous   |
| NC_037650.1 | 5738428 | SNV | 1 | T | C | Homozygous   |
| NC_037650.1 | 5739430 | SNV | 1 | A | G | Homozygous   |
| NC_037650.1 | 5739454 | SNV | 1 | G | A | Homozygous   |
| NC_037650.1 | 5739480 | SNV | 1 | T | C | Heterozygous |
| NC_037650.1 | 5739797 | SNV | 1 | T | A | Heterozygous |
| NC_037650.1 | 5739800 | SNV | 1 | A | G | Heterozygous |
| NC_037650.1 | 5739992 | SNV | 1 | A | G | Heterozygous |
| NC_037650.1 | 5740020 | SNV | 1 | A | G | Heterozygous |
| NC_037650.1 | 5740022 | SNV | 1 | A | G | Heterozygous |
| NC_037650.1 | 5740046 | SNV | 1 | A | G | Heterozygous |
| NC_037650.1 | 5740196 | SNV | 1 | A | T | Heterozygous |
| NC_037650.1 | 5740206 | SNV | 1 | T | C | Homozygous   |
| NC_037650.1 | 5740217 | SNV | 1 | A | G | Homozygous   |
| NC_037650.1 | 5740856 | SNV | 1 | C | T | Heterozygous |
| NC_037650.1 | 5741500 | SNV | 1 | C | T | Heterozygous |
| NC_037650.1 | 5741971 | SNV | 1 | A | G | Homozygous   |
| NC_037650.1 | 5742105 | SNV | 1 | C | T | Heterozygous |
| NC_037650.1 | 5744017 | SNV | 1 | T | C | Heterozygous |
| NC_037650.1 | 5744093 | SNV | 1 | C | T | Heterozygous |
| NC_037650.1 | 5744104 | SNV | 1 | T | A | Heterozygous |
| NC_037650.1 | 5744419 | SNV | 1 | G | A | Homozygous   |
| NC_037650.1 | 5745012 | SNV | 1 | A | G | Heterozygous |
| NC_037650.1 | 5745319 | SNV | 1 | T | C | Heterozygous |
| NC_037650.1 | 5745358 | SNV | 1 | C | T | Heterozygous |
| NC_037650.1 | 5745574 | SNV | 1 | T | C | Homozygous   |
| NC_037650.1 | 5745580 | SNV | 1 | A | G | Homozygous   |
| NC_037650.1 | 5745693 | SNV | 1 | T | C | Heterozygous |
| NC_037650.1 | 5745696 | SNV | 1 | A | C | Heterozygous |
| NC_037650.1 | 5745702 | SNV | 1 | G | A | Heterozygous |
| NC_037650.1 | 5746363 | SNV | 1 | C | G | Heterozygous |
| NC_037650.1 | 5746389 | SNV | 1 | T | G | Homozygous   |
| NC_037650.1 | 5746779 | SNV | 1 | A | C | Heterozygous |
| NC_037650.1 | 5746781 | SNV | 1 | A | G | Heterozygous |
| NC_037650.1 | 5747307 | SNV | 1 | G | T | Heterozygous |
| NC_037650.1 | 5747424 | SNV | 1 | T | C | Heterozygous |
| NC_037650.1 | 5747873 | SNV | 1 | C | T | Homozygous   |
| NC_037650.1 | 5747945 | SNV | 1 | A | G | Heterozygous |
| NC_037650.1 | 5748067 | SNV | 1 | A | G | Heterozygous |
| NC_037650.1 | 5748074 | SNV | 1 | A | G | Homozygous   |
| NC_037650.1 | 5748088 | SNV | 1 | A | G | Heterozygous |
| NC_037650.1 | 5748296 | SNV | 1 | G | A | Heterozygous |
| NC_037650.1 | 5748351 | SNV | 1 | T | A | Homozygous   |
| NC_037650.1 | 5748702 | SNV | 1 | A | G | Homozygous   |

|             |         |     |   |   |   |              |
|-------------|---------|-----|---|---|---|--------------|
| NC_037650.1 | 5748783 | SNV | 1 | A | G | Homozygous   |
| NC_037650.1 | 5748821 | SNV | 1 | T | C | Homozygous   |
| NC_037650.1 | 5749228 | SNV | 1 | T | C | Homozygous   |
| NC_037650.1 | 5749853 | SNV | 1 | G | T | Heterozygous |
| NC_037650.1 | 5749973 | SNV | 1 | G | A | Heterozygous |
| NC_037650.1 | 5750039 | SNV | 1 | C | T | Homozygous   |
| NC_037650.1 | 5750693 | SNV | 1 | T | C | Heterozygous |
| NC_037650.1 | 5750713 | SNV | 1 | G | C | Homozygous   |
| NC_037650.1 | 5751344 | SNV | 1 | C | A | Homozygous   |
| NC_037650.1 | 5754805 | SNV | 1 | G | A | Heterozygous |
| NC_037650.1 | 5754939 | SNV | 1 | A | G | Heterozygous |
| NC_037650.1 | 5756228 | SNV | 1 | A | T | Heterozygous |
| NC_037650.1 | 5756241 | SNV | 1 | T | C | Homozygous   |
| NC_037650.1 | 5757136 | SNV | 1 | G | A | Heterozygous |
| NC_037650.1 | 5757149 | SNV | 1 | G | A | Homozygous   |
| NC_037650.1 | 5757546 | SNV | 1 | A | T | Homozygous   |
| NC_037650.1 | 5757649 | SNV | 1 | T | C | Heterozygous |
| NC_037650.1 | 5757735 | SNV | 1 | A | G | Heterozygous |
| NC_037650.1 | 5758486 | SNV | 1 | A | G | Homozygous   |
| NC_037650.1 | 5759180 | SNV | 1 | A | G | Heterozygous |
| NC_037650.1 | 5763000 | SNV | 1 | T | C | Homozygous   |
| NC_037650.1 | 5763650 | SNV | 1 | A | G | Homozygous   |
| NC_037650.1 | 5763673 | SNV | 1 | G | A | Heterozygous |
| NC_037650.1 | 5767341 | SNV | 1 | A | G | Heterozygous |
| NC_037650.1 | 5767344 | SNV | 1 | A | C | Heterozygous |
| NC_037650.1 | 5767347 | SNV | 1 | A | T | Heterozygous |
| NC_037650.1 | 5767349 | SNV | 1 | A | T | Heterozygous |
| NC_037650.1 | 5768430 | SNV | 1 | A | C | Heterozygous |
| NC_037650.1 | 5768434 | SNV | 1 | G | A | Homozygous   |
| NC_037650.1 | 5768436 | SNV | 1 | G | T | Homozygous   |
| NC_037650.1 | 5768445 | SNV | 1 | A | T | Homozygous   |
| NC_037650.1 | 5768448 | SNV | 1 | T | A | Homozygous   |
| NC_037650.1 | 5768450 | SNV | 1 | T | A | Homozygous   |
| NC_037650.1 | 5770498 | SNV | 1 | A | G | Homozygous   |
| NC_037650.1 | 5770511 | SNV | 1 | C | T | Heterozygous |
| NC_037650.1 | 5770964 | SNV | 1 | G | A | Homozygous   |
| NC_037650.1 | 5771188 | SNV | 1 | A | G | Heterozygous |
| NC_037650.1 | 5771407 | SNV | 1 | G | A | Heterozygous |
| NC_037650.1 | 5771413 | SNV | 1 | A | G | Homozygous   |
| NC_037650.1 | 5771423 | SNV | 1 | A | G | Homozygous   |
| NC_037650.1 | 5771463 | SNV | 1 | G | C | Homozygous   |
| NC_037650.1 | 5771466 | SNV | 1 | G | C | Heterozygous |
| NC_037650.1 | 5771470 | SNV | 1 | G | A | Heterozygous |
| NC_037650.1 | 5776452 | SNV | 1 | C | T | Heterozygous |
| NC_037650.1 | 5776874 | SNV | 1 | C | T | Heterozygous |
| NC_037650.1 | 5776878 | SNV | 1 | C | T | Heterozygous |
| NC_037650.1 | 5779076 | SNV | 1 | A | G | Homozygous   |
| NC_037650.1 | 5779146 | SNV | 1 | G | A | Heterozygous |
| NC_037650.1 | 5779177 | SNV | 1 | C | T | Heterozygous |
| NC_037650.1 | 5779232 | SNV | 1 | C | G | Heterozygous |
| NC_037650.1 | 5783908 | SNV | 1 | C | T | Homozygous   |

|             |         |     |   |   |   |              |
|-------------|---------|-----|---|---|---|--------------|
| NC_037650.1 | 5789440 | SNV | 1 | A | G | Homozygous   |
| NC_037650.1 | 5789542 | SNV | 1 | T | C | Homozygous   |
| NC_037650.1 | 5789639 | SNV | 1 | A | G | Heterozygous |
| NC_037650.1 | 5789772 | SNV | 1 | A | G | Homozygous   |
| NC_037650.1 | 5792059 | SNV | 1 | G | A | Homozygous   |
| NC_037650.1 | 5796463 | SNV | 1 | C | T | Heterozygous |
| NC_037650.1 | 5823385 | SNV | 1 | T | C | Homozygous   |
| NC_037650.1 | 5823843 | SNV | 1 | G | A | Heterozygous |
| NC_037650.1 | 5823863 | SNV | 1 | A | C | Heterozygous |
| NC_037650.1 | 5823865 | SNV | 1 | G | C | Heterozygous |
| NC_037650.1 | 5823901 | SNV | 1 | T | C | Homozygous   |
| NC_037650.1 | 5823940 | SNV | 1 | G | A | Heterozygous |
| NC_037650.1 | 5824673 | SNV | 1 | T | C | Homozygous   |
| NC_037650.1 | 5824891 | SNV | 1 | A | G | Heterozygous |
| NC_037650.1 | 5825126 | SNV | 1 | A | G | Heterozygous |
| NC_037650.1 | 5825211 | SNV | 1 | C | T | Heterozygous |
| NC_037650.1 | 5827136 | SNV | 1 | A | G | Homozygous   |
| NC_037650.1 | 5829382 | SNV | 1 | G | A | Homozygous   |
| NC_037650.1 | 5829417 | SNV | 1 | G | A | Heterozygous |
| NC_037650.1 | 5829754 | SNV | 1 | T | C | Homozygous   |
| NC_037650.1 | 5832932 | SNV | 1 | A | G | Homozygous   |
| NC_037650.1 | 5832934 | SNV | 1 | C | T | Homozygous   |
| NC_037650.1 | 5832964 | SNV | 1 | T | C | Heterozygous |
| NC_037650.1 | 5833981 | SNV | 1 | T | C | Homozygous   |
| NC_037650.1 | 5834041 | SNV | 1 | G | A | Heterozygous |
| NC_037650.1 | 5834053 | SNV | 1 | G | C | Heterozygous |
| NC_037650.1 | 5834352 | SNV | 1 | A | G | Homozygous   |
| NC_037650.1 | 5834430 | SNV | 1 | A | G | Homozygous   |
| NC_037650.1 | 5837559 | SNV | 1 | T | C | Heterozygous |
| NC_037650.1 | 5839485 | SNV | 1 | T | C | Homozygous   |
| NC_037650.1 | 5840904 | SNV | 1 | C | T | Heterozygous |
| NC_037650.1 | 5840916 | SNV | 1 | T | C | Homozygous   |
| NC_037650.1 | 5840946 | SNV | 1 | T | C | Homozygous   |
| NC_037650.1 | 5841134 | SNV | 1 | T | C | Heterozygous |
| NC_037650.1 | 5841186 | SNV | 1 | G | C | Heterozygous |
| NC_037650.1 | 5842226 | SNV | 1 | G | A | Heterozygous |
| NC_037650.1 | 5845170 | SNV | 1 | A | C | Homozygous   |
| NC_037650.1 | 5845176 | SNV | 1 | T | G | Homozygous   |
| NC_037650.1 | 5845188 | SNV | 1 | A | G | Heterozygous |
| NC_037650.1 | 5845191 | SNV | 1 | A | T | Homozygous   |
| NC_037650.1 | 5845193 | SNV | 1 | A | T | Homozygous   |
| NC_037650.1 | 5845655 | SNV | 1 | T | C | Heterozygous |
| NC_037650.1 | 5845707 | SNV | 1 | T | C | Homozygous   |
| NC_037650.1 | 5845764 | SNV | 1 | T | C | Homozygous   |
| NC_037650.1 | 5845802 | SNV | 1 | T | C | Homozygous   |
| NC_037650.1 | 5845834 | SNV | 1 | A | G | Homozygous   |
| NC_037650.1 | 5845910 | SNV | 1 | T | C | Homozygous   |
| NC_037650.1 | 5845972 | SNV | 1 | C | G | Heterozygous |
| NC_037650.1 | 5850959 | SNV | 1 | T | C | Homozygous   |
| NC_037650.1 | 5851497 | SNV | 1 | A | T | Homozygous   |
| NC_037650.1 | 5851603 | SNV | 1 | A | G | Homozygous   |

|             |         |     |   |   |   |              |
|-------------|---------|-----|---|---|---|--------------|
| NC_037650.1 | 5851620 | SNV | 1 | G | A | Homozygous   |
| NC_037650.1 | 5851637 | SNV | 1 | G | A | Homozygous   |
| NC_037650.1 | 5851652 | SNV | 1 | G | A | Homozygous   |
| NC_037650.1 | 5851713 | SNV | 1 | G | A | Homozygous   |
| NC_037650.1 | 5851724 | SNV | 1 | A | G | Homozygous   |
| NC_037650.1 | 5851731 | SNV | 1 | A | G | Homozygous   |
| NC_037650.1 | 5851778 | SNV | 1 | A | G | Homozygous   |
| NC_037650.1 | 5851858 | SNV | 1 | A | G | Homozygous   |
| NC_037650.1 | 5851862 | SNV | 1 | G | A | Homozygous   |
| NC_037650.1 | 5851945 | SNV | 1 | A | T | Heterozygous |
| NC_037650.1 | 5851946 | SNV | 1 | G | A | Heterozygous |
| NC_037650.1 | 5851991 | SNV | 1 | G | A | Homozygous   |
| NC_037650.1 | 5852090 | SNV | 1 | A | C | Heterozygous |
| NC_037650.1 | 5852110 | SNV | 1 | G | A | Heterozygous |
| NC_037650.1 | 5852135 | SNV | 1 | T | C | Homozygous   |
| NC_037650.1 | 5852152 | SNV | 1 | T | C | Homozygous   |
| NC_037650.1 | 5852220 | SNV | 1 | A | G | Homozygous   |
| NC_037650.1 | 5852391 | SNV | 1 | C | T | Heterozygous |
| NC_037650.1 | 5852556 | SNV | 1 | C | T | Heterozygous |
| NC_037650.1 | 5852623 | SNV | 1 | A | G | Homozygous   |
| NC_037650.1 | 5854187 | SNV | 1 | G | A | Heterozygous |
| NC_037650.1 | 5854296 | SNV | 1 | G | A | Heterozygous |
| NC_037650.1 | 5854475 | SNV | 1 | C | T | Homozygous   |
| NC_037650.1 | 5854517 | SNV | 1 | C | T | Heterozygous |
| NC_037650.1 | 5854521 | SNV | 1 | T | G | Homozygous   |
| NC_037650.1 | 5854655 | SNV | 1 | C | T | Heterozygous |
| NC_037650.1 | 5859927 | SNV | 1 | T | G | Heterozygous |
| NC_037650.1 | 5860362 | SNV | 1 | A | G | Heterozygous |
| NC_037650.1 | 5860417 | SNV | 1 | G | A | Heterozygous |
| NC_037650.1 | 5860497 | SNV | 1 | C | T | Heterozygous |
| NC_037650.1 | 5860676 | SNV | 1 | G | A | Heterozygous |
| NC_037650.1 | 5860678 | SNV | 1 | A | G | Homozygous   |
| NC_037650.1 | 5860705 | SNV | 1 | A | G | Homozygous   |
| NC_037650.1 | 5860894 | SNV | 1 | A | G | Heterozygous |
| NC_037650.1 | 5861063 | SNV | 1 | G | A | Heterozygous |
| NC_037650.1 | 5861089 | SNV | 1 | T | C | Homozygous   |
| NC_037650.1 | 5862447 | SNV | 1 | T | C | Homozygous   |
| NC_037650.1 | 5862459 | SNV | 1 | C | A | Homozygous   |
| NC_037650.1 | 5862793 | SNV | 1 | T | C | Homozygous   |
| NC_037650.1 | 5862823 | SNV | 1 | T | C | Homozygous   |
| NC_037650.1 | 5862849 | SNV | 1 | G | A | Homozygous   |
| NC_037650.1 | 5862953 | SNV | 1 | C | G | Homozygous   |
| NC_037650.1 | 5862986 | SNV | 1 | C | T | Homozygous   |
| NC_037650.1 | 5863061 | SNV | 1 | T | C | Homozygous   |
| NC_037650.1 | 5863398 | SNV | 1 | A | G | Homozygous   |
| NC_037650.1 | 5863432 | SNV | 1 | G | A | Homozygous   |
| NC_037650.1 | 5863680 | SNV | 1 | T | C | Homozygous   |
| NC_037650.1 | 5863856 | SNV | 1 | T | C | Homozygous   |
| NC_037650.1 | 5863864 | SNV | 1 | G | C | Homozygous   |
| NC_037650.1 | 5864238 | SNV | 1 | T | C | Heterozygous |
| NC_037650.1 | 5865436 | SNV | 1 | G | A | Homozygous   |

|             |         |     |   |   |   |              |
|-------------|---------|-----|---|---|---|--------------|
| NC_037650.1 | 5866002 | SNV | 1 | G | A | Heterozygous |
| NC_037650.1 | 5866200 | SNV | 1 | C | T | Heterozygous |
| NC_037650.1 | 5866419 | SNV | 1 | T | C | Heterozygous |
| NC_037650.1 | 5866460 | SNV | 1 | T | C | Heterozygous |
| NC_037650.1 | 5866517 | SNV | 1 | A | G | Homozygous   |
| NC_037650.1 | 5866571 | SNV | 1 | A | C | Homozygous   |
| NC_037650.1 | 5866577 | SNV | 1 | G | A | Heterozygous |
| NC_037650.1 | 5866581 | SNV | 1 | A | C | Homozygous   |
| NC_037650.1 | 5866587 | SNV | 1 | G | A | Heterozygous |
| NC_037650.1 | 5866598 | SNV | 1 | A | G | Homozygous   |
| NC_037650.1 | 5866652 | SNV | 1 | A | G | Heterozygous |
| NC_037650.1 | 5866683 | SNV | 1 | T | C | Heterozygous |
| NC_037650.1 | 5866708 | SNV | 1 | A | G | Homozygous   |
| NC_037650.1 | 5866714 | SNV | 1 | C | G | Homozygous   |
| NC_037650.1 | 5868527 | SNV | 1 | G | A | Homozygous   |
| NC_037650.1 | 5868531 | SNV | 1 | G | A | Homozygous   |
| NC_037650.1 | 5868538 | SNV | 1 | G | A | Heterozygous |
| NC_037650.1 | 5868543 | SNV | 1 | G | A | Homozygous   |
| NC_037650.1 | 5868547 | SNV | 1 | A | G | Homozygous   |
| NC_037650.1 | 5868552 | SNV | 1 | A | G | Heterozygous |
| NC_037650.1 | 5868716 | SNV | 1 | G | C | Homozygous   |
| NC_037650.1 | 5868729 | SNV | 1 | G | A | Heterozygous |
| NC_037650.1 | 5868793 | SNV | 1 | A | G | Heterozygous |
| NC_037650.1 | 5868809 | SNV | 1 | G | A | Heterozygous |
| NC_037650.1 | 5870836 | SNV | 1 | C | G | Homozygous   |
| NC_037650.1 | 5872707 | SNV | 1 | A | G | Homozygous   |
| NC_037650.1 | 5876643 | SNV | 1 | A | G | Homozygous   |
| NC_037650.1 | 5877081 | SNV | 1 | T | G | Homozygous   |
| NC_037650.1 | 5878593 | SNV | 1 | T | C | Homozygous   |
| NC_037650.1 | 5878641 | SNV | 1 | C | A | Homozygous   |
| NC_037650.1 | 5888027 | SNV | 1 | G | A | Heterozygous |
| NC_037650.1 | 5888211 | SNV | 1 | T | C | Homozygous   |
| NC_037650.1 | 5888247 | SNV | 1 | A | G | Homozygous   |
| NC_037650.1 | 5888637 | SNV | 1 | T | C | Homozygous   |
| NC_037650.1 | 5892788 | SNV | 1 | G | A | Heterozygous |
| NC_037650.1 | 5892825 | SNV | 1 | T | C | Heterozygous |
| NC_037650.1 | 5892863 | SNV | 1 | C | T | Heterozygous |
| NC_037650.1 | 5892924 | SNV | 1 | A | G | Homozygous   |
| NC_037650.1 | 5892933 | SNV | 1 | A | G | Homozygous   |
| NC_037650.1 | 5892936 | SNV | 1 | T | C | Homozygous   |
| NC_037650.1 | 5892968 | SNV | 1 | G | A | Homozygous   |
| NC_037650.1 | 5895603 | SNV | 1 | C | T | Homozygous   |
| NC_037650.1 | 5898139 | SNV | 1 | C | A | Homozygous   |
| NC_037650.1 | 5898294 | SNV | 1 | A | G | Heterozygous |
| NC_037650.1 | 5898427 | SNV | 1 | C | T | Heterozygous |
| NC_037650.1 | 5899040 | SNV | 1 | G | A | Heterozygous |
| NC_037650.1 | 5899079 | SNV | 1 | A | G | Heterozygous |
| NC_037650.1 | 5899092 | SNV | 1 | G | A | Heterozygous |
| NC_037650.1 | 5899098 | SNV | 1 | T | A | Homozygous   |
| NC_037650.1 | 5899103 | SNV | 1 | T | A | Homozygous   |
| NC_037650.1 | 5899132 | SNV | 1 | A | G | Homozygous   |



|             |         |     |   |   |   |              |
|-------------|---------|-----|---|---|---|--------------|
| NC_037650.1 | 5899149 | SNV | 1 | T | A | Homozygous   |
| NC_037650.1 | 5899276 | SNV | 1 | T | C | Homozygous   |
| NC_037650.1 | 5899518 | SNV | 1 | G | A | Heterozygous |
| NC_037650.1 | 5900004 | SNV | 1 | G | A | Homozygous   |
| NC_037650.1 | 5900413 | SNV | 1 | T | C | Homozygous   |
| NC_037650.1 | 5900484 | SNV | 1 | G | A | Heterozygous |
| NC_037650.1 | 5900684 | SNV | 1 | A | G | Heterozygous |
| NC_037650.1 | 5900739 | SNV | 1 | T | C | Heterozygous |
| NC_037650.1 | 5900814 | SNV | 1 | T | A | Heterozygous |
| NC_037650.1 | 5900874 | SNV | 1 | A | G | Heterozygous |
| NC_037650.1 | 5900886 | SNV | 1 | A | G | Homozygous   |
| NC_037650.1 | 5901208 | SNV | 1 | T | C | Homozygous   |
| NC_037650.1 | 5901322 | SNV | 1 | C | T | Heterozygous |
| NC_037650.1 | 5901368 | SNV | 1 | T | C | Heterozygous |
| NC_037650.1 | 5901467 | SNV | 1 | C | T | Heterozygous |
| NC_037650.1 | 5901488 | SNV | 1 | T | C | Homozygous   |
| NC_037650.1 | 5901655 | SNV | 1 | G | A | Homozygous   |
| NC_037650.1 | 5910359 | SNV | 1 | A | G | Homozygous   |
| NC_037650.1 | 5910361 | SNV | 1 | A | G | Homozygous   |
| NC_037650.1 | 5910377 | SNV | 1 | A | T | Homozygous   |
| NC_037650.1 | 5922564 | SNV | 1 | A | C | Heterozygous |
| NC_037650.1 | 5922573 | SNV | 1 | C | T | Homozygous   |
| NC_037650.1 | 5930836 | SNV | 1 | G | A | Homozygous   |
| NC_037650.1 | 5930851 | SNV | 1 | A | G | Homozygous   |
| NC_037650.1 | 5930887 | SNV | 1 | A | C | Homozygous   |
| NC_037650.1 | 5954245 | SNV | 1 | T | C | Homozygous   |
| NC_037650.1 | 5954286 | SNV | 1 | C | T | Heterozygous |
| NC_037650.1 | 5954505 | SNV | 1 | C | T | Heterozygous |
| NC_037650.1 | 5954584 | SNV | 1 | G | A | Heterozygous |
| NC_037650.1 | 5954631 | SNV | 1 | A | G | Homozygous   |
| NC_037650.1 | 5954785 | SNV | 1 | T | G | Homozygous   |
| NC_037650.1 | 5955074 | SNV | 1 | A | G | Homozygous   |
| NC_037650.1 | 5955216 | SNV | 1 | A | G | Homozygous   |
| NC_037650.1 | 5955402 | SNV | 1 | C | T | Heterozygous |
| NC_037650.1 | 5955559 | SNV | 1 | T | C | Homozygous   |
| NC_037650.1 | 5955776 | SNV | 1 | A | T | Heterozygous |
| NC_037650.1 | 5955904 | SNV | 1 | C | T | Heterozygous |
| NC_037650.1 | 5956043 | SNV | 1 | A | G | Homozygous   |
| NC_037650.1 | 5956091 | SNV | 1 | A | G | Heterozygous |
| NC_037650.1 | 5956241 | SNV | 1 | A | G | Homozygous   |
| NC_037650.1 | 5956406 | SNV | 1 | T | C | Heterozygous |
| NC_037650.1 | 5956486 | SNV | 1 | T | C | Homozygous   |
| NC_037650.1 | 5956523 | SNV | 1 | C | T | Heterozygous |
| NC_037650.1 | 5956670 | SNV | 1 | A | G | Heterozygous |
| NC_037650.1 | 5957142 | SNV | 1 | C | T | Heterozygous |
| NC_037650.1 | 5957152 | SNV | 1 | A | G | Heterozygous |
| NC_037650.1 | 5957174 | SNV | 1 | A | G | Heterozygous |
| NC_037650.1 | 5958208 | SNV | 1 | C | A | Homozygous   |
| NC_037650.1 | 5958476 | SNV | 1 | G | A | Heterozygous |
| NC_037650.1 | 5959243 | SNV | 1 | C | T | Homozygous   |
| NC_037650.1 | 5959299 | SNV | 1 | A | G | Homozygous   |

|             |         |     |   |   |   |              |
|-------------|---------|-----|---|---|---|--------------|
| NC_037650.1 | 5959420 | SNV | 1 | T | C | Heterozygous |
| NC_037650.1 | 5959480 | SNV | 1 | A | G | Heterozygous |
| NC_037650.1 | 5960856 | SNV | 1 | A | G | Homozygous   |
| NC_037650.1 | 5961277 | SNV | 1 | G | A | Heterozygous |
| NC_037650.1 | 5961520 | SNV | 1 | G | A | Heterozygous |
| NC_037650.1 | 5961532 | SNV | 1 | T | C | Heterozygous |
| NC_037650.1 | 5961598 | SNV | 1 | T | G | Heterozygous |
| NC_037650.1 | 5961954 | SNV | 1 | A | G | Heterozygous |
| NC_037650.1 | 5962426 | SNV | 1 | G | A | Homozygous   |
| NC_037650.1 | 5962733 | SNV | 1 | G | T | Homozygous   |
| NC_037650.1 | 5962738 | SNV | 1 | G | T | Homozygous   |
| NC_037650.1 | 5962849 | SNV | 1 | T | C | Homozygous   |
| NC_037650.1 | 5963197 | SNV | 1 | A | G | Homozygous   |
| NC_037650.1 | 5963203 | SNV | 1 | A | G | Homozygous   |
| NC_037650.1 | 5963638 | SNV | 1 | C | G | Homozygous   |
| NC_037650.1 | 5963827 | SNV | 1 | T | A | Heterozygous |
| NC_037650.1 | 5963871 | SNV | 1 | G | A | Heterozygous |
| NC_037650.1 | 5963946 | SNV | 1 | A | G | Heterozygous |
| NC_037650.1 | 5963950 | SNV | 1 | C | T | Heterozygous |
| NC_037650.1 | 5964102 | SNV | 1 | A | G | Homozygous   |
| NC_037650.1 | 5964542 | SNV | 1 | G | C | Heterozygous |
| NC_037650.1 | 5964892 | SNV | 1 | T | C | Homozygous   |
| NC_037650.1 | 5964988 | SNV | 1 | C | T | Heterozygous |
| NC_037650.1 | 5965103 | SNV | 1 | G | T | Homozygous   |
| NC_037650.1 | 5965201 | SNV | 1 | G | C | Heterozygous |
| NC_037650.1 | 5965312 | SNV | 1 | A | T | Heterozygous |
| NC_037650.1 | 5965369 | SNV | 1 | G | A | Heterozygous |
| NC_037650.1 | 5965557 | SNV | 1 | G | A | Heterozygous |
| NC_037650.1 | 5965695 | SNV | 1 | T | G | Homozygous   |
| NC_037650.1 | 5966021 | SNV | 1 | G | A | Homozygous   |
| NC_037650.1 | 5966030 | SNV | 1 | T | C | Heterozygous |
| NC_037650.1 | 5966565 | SNV | 1 | T | A | Homozygous   |
| NC_037650.1 | 5967114 | SNV | 1 | A | G | Homozygous   |
| NC_037650.1 | 5967150 | SNV | 1 | A | G | Homozygous   |
| NC_037650.1 | 5967184 | SNV | 1 | G | T | Heterozygous |
| NC_037650.1 | 5967191 | SNV | 1 | C | A | Heterozygous |
| NC_037650.1 | 5967233 | SNV | 1 | T | C | Heterozygous |
| NC_037650.1 | 5967249 | SNV | 1 | G | A | Heterozygous |
| NC_037650.1 | 5968509 | SNV | 1 | A | G | Homozygous   |
| NC_037650.1 | 5968513 | SNV | 1 | T | A | Homozygous   |
| NC_037650.1 | 5968524 | SNV | 1 | T | C | Homozygous   |
| NC_037650.1 | 5970828 | SNV | 1 | C | T | Homozygous   |
| NC_037650.1 | 5970996 | SNV | 1 | C | A | Heterozygous |
| NC_037650.1 | 5971444 | SNV | 1 | G | A | Heterozygous |
| NC_037650.1 | 5971544 | SNV | 1 | G | C | Homozygous   |
| NC_037650.1 | 5971547 | SNV | 1 | G | A | Homozygous   |
| NC_037650.1 | 5972188 | SNV | 1 | A | C | Homozygous   |
| NC_037650.1 | 5972209 | SNV | 1 | C | T | Heterozygous |
| NC_037650.1 | 5972215 | SNV | 1 | T | C | Heterozygous |
| NC_037650.1 | 5972218 | SNV | 1 | A | T | Heterozygous |
| NC_037650.1 | 5972814 | SNV | 1 | G | C | Homozygous   |

|             |         |     |   |   |   |              |
|-------------|---------|-----|---|---|---|--------------|
| NC_037650.1 | 5972816 | SNV | 1 | A | G | Homozygous   |
| NC_037650.1 | 5981392 | SNV | 1 | C | A | Homozygous   |
| NC_037650.1 | 5981396 | SNV | 1 | G | C | Homozygous   |
| NC_037650.1 | 5981421 | SNV | 1 | G | A | Homozygous   |
| NC_037650.1 | 5981426 | SNV | 1 | C | A | Homozygous   |
| NC_037650.1 | 5986284 | SNV | 1 | A | G | Homozygous   |
| NC_037650.1 | 5986292 | SNV | 1 | C | T | Homozygous   |
| NC_037650.1 | 5986344 | SNV | 1 | T | C | Heterozygous |
| NC_037650.1 | 5986367 | SNV | 1 | C | T | Homozygous   |
| NC_037650.1 | 5986416 | SNV | 1 | G | A | Heterozygous |
| NC_037650.1 | 5986424 | SNV | 1 | T | C | Homozygous   |
| NC_037650.1 | 5986680 | SNV | 1 | T | C | Homozygous   |
| NC_037650.1 | 5986727 | SNV | 1 | C | T | Homozygous   |
| NC_037650.1 | 5986732 | SNV | 1 | C | T | Homozygous   |
| NC_037650.1 | 5986735 | SNV | 1 | A | T | Homozygous   |
| NC_037650.1 | 5986833 | SNV | 1 | G | A | Homozygous   |
| NC_037650.1 | 5986842 | SNV | 1 | A | G | Homozygous   |
| NC_037650.1 | 5986947 | SNV | 1 | G | A | Homozygous   |
| NC_037650.1 | 5986962 | SNV | 1 | C | T | Homozygous   |
| NC_037650.1 | 5986971 | SNV | 1 | C | T | Homozygous   |
| NC_037650.1 | 5987057 | SNV | 1 | T | C | Heterozygous |
| NC_037650.1 | 5987075 | SNV | 1 | T | A | Homozygous   |
| NC_037650.1 | 5987375 | SNV | 1 | T | A | Homozygous   |
| NC_037650.1 | 5993354 | SNV | 1 | A | C | Heterozygous |
| NC_037650.1 | 5993390 | SNV | 1 | T | C | Heterozygous |
| NC_037650.1 | 5993790 | SNV | 1 | T | C | Homozygous   |
| NC_037650.1 | 5993799 | SNV | 1 | A | C | Heterozygous |
| NC_037650.1 | 5993826 | SNV | 1 | T | C | Homozygous   |
| NC_037650.1 | 5993900 | SNV | 1 | G | A | Heterozygous |
| NC_037650.1 | 5993939 | SNV | 1 | G | A | Heterozygous |
| NC_037650.1 | 5993942 | SNV | 1 | G | A | Heterozygous |
| NC_037650.1 | 5996500 | SNV | 1 | A | G | Homozygous   |
| NC_037650.1 | 6003176 | SNV | 1 | C | T | Heterozygous |
| NC_037650.1 | 6003202 | SNV | 1 | T | C | Heterozygous |
| NC_037650.1 | 6003216 | SNV | 1 | T | C | Heterozygous |
| NC_037650.1 | 6003321 | SNV | 1 | T | C | Homozygous   |
| NC_037650.1 | 6004966 | SNV | 1 | C | T | Heterozygous |
| NC_037650.1 | 6004972 | SNV | 1 | C | T | Heterozygous |
| NC_037650.1 | 6005569 | SNV | 1 | T | C | Homozygous   |
| NC_037650.1 | 6005741 | SNV | 1 | T | A | Homozygous   |
| NC_037650.1 | 6005800 | SNV | 1 | A | G | Homozygous   |
| NC_037650.1 | 6005895 | SNV | 1 | A | T | Heterozygous |
| NC_037650.1 | 6005927 | SNV | 1 | G | A | Heterozygous |
| NC_037650.1 | 6006071 | SNV | 1 | A | G | Homozygous   |
| NC_037650.1 | 6006205 | SNV | 1 | A | C | Heterozygous |
| NC_037650.1 | 6008106 | SNV | 1 | T | C | Homozygous   |
| NC_037650.1 | 6008299 | SNV | 1 | C | A | Heterozygous |
| NC_037650.1 | 6008589 | SNV | 1 | A | G | Homozygous   |
| NC_037650.1 | 6008642 | SNV | 1 | A | G | Homozygous   |
| NC_037650.1 | 6008671 | SNV | 1 | A | G | Heterozygous |
| NC_037650.1 | 6009025 | SNV | 1 | A | C | Homozygous   |

|             |         |     |   |   |   |              |
|-------------|---------|-----|---|---|---|--------------|
| NC_037650.1 | 6009104 | SNV | 1 | T | C | Homozygous   |
| NC_037650.1 | 6009107 | SNV | 1 | A | G | Homozygous   |
| NC_037650.1 | 6009136 | SNV | 1 | A | C | Homozygous   |
| NC_037650.1 | 6010793 | SNV | 1 | T | C | Homozygous   |
| NC_037650.1 | 6012073 | SNV | 1 | T | C | Homozygous   |
| NC_037650.1 | 6012236 | SNV | 1 | A | G | Heterozygous |
| NC_037650.1 | 6012269 | SNV | 1 | C | T | Heterozygous |
| NC_037650.1 | 6012390 | SNV | 1 | G | A | Homozygous   |
| NC_037650.1 | 6012414 | SNV | 1 | C | T | Homozygous   |
| NC_037650.1 | 6018473 | SNV | 1 | G | T | Heterozygous |
| NC_037650.1 | 6018560 | SNV | 1 | A | G | Homozygous   |
| NC_037650.1 | 6018563 | SNV | 1 | A | G | Homozygous   |
| NC_037650.1 | 6018686 | SNV | 1 | T | G | Homozygous   |
| NC_037650.1 | 6018725 | SNV | 1 | A | C | Homozygous   |
| NC_037650.1 | 6022563 | SNV | 1 | A | C | Homozygous   |
| NC_037650.1 | 6022569 | SNV | 1 | A | G | Homozygous   |
| NC_037650.1 | 6033982 | SNV | 1 | G | A | Homozygous   |
| NC_037650.1 | 6034117 | SNV | 1 | A | C | Homozygous   |
| NC_037650.1 | 6034516 | SNV | 1 | T | A | Homozygous   |
| NC_037650.1 | 6036009 | SNV | 1 | C | T | Heterozygous |
| NC_037650.1 | 6049498 | SNV | 1 | C | T | Homozygous   |
| NC_037650.1 | 6061385 | SNV | 1 | A | G | Homozygous   |
| NC_037650.1 | 6061402 | SNV | 1 | T | C | Homozygous   |
| NC_037650.1 | 6061703 | SNV | 1 | C | T | Heterozygous |
| NC_037650.1 | 6065975 | SNV | 1 | T | A | Homozygous   |
| NC_037650.1 | 6066060 | SNV | 1 | A | G | Heterozygous |
| NC_037650.1 | 6066081 | SNV | 1 | A | C | Homozygous   |
| NC_037650.1 | 6066124 | SNV | 1 | C | A | Heterozygous |
| NC_037650.1 | 6066143 | SNV | 1 | C | T | Heterozygous |
| NC_037650.1 | 6069795 | SNV | 1 | G | C | Homozygous   |
| NC_037650.1 | 6069821 | SNV | 1 | A | G | Homozygous   |
| NC_037650.1 | 6069854 | SNV | 1 | T | C | Homozygous   |
| NC_037650.1 | 6100348 | SNV | 1 | T | C | Homozygous   |
| NC_037650.1 | 6117595 | SNV | 1 | T | C | Homozygous   |
| NC_037650.1 | 6117602 | SNV | 1 | A | G | Heterozygous |
| NC_037650.1 | 6117726 | SNV | 1 | T | G | Homozygous   |
| NC_037650.1 | 6117728 | SNV | 1 | G | T | Homozygous   |
| NC_037650.1 | 6117732 | SNV | 1 | A | C | Homozygous   |
| NC_037650.1 | 6118732 | SNV | 1 | T | C | Homozygous   |
| NC_037650.1 | 6118881 | SNV | 1 | T | C | Heterozygous |
| NC_037650.1 | 6125764 | SNV | 1 | T | C | Homozygous   |
| NC_037650.1 | 6125769 | SNV | 1 | C | T | Heterozygous |
| NC_037650.1 | 6125777 | SNV | 1 | G | A | Heterozygous |
| NC_037650.1 | 6125794 | SNV | 1 | C | T | Heterozygous |
| NC_037650.1 | 6125833 | SNV | 1 | C | T | Heterozygous |
| NC_037650.1 | 6125836 | SNV | 1 | C | T | Heterozygous |
| NC_037650.1 | 6129671 | SNV | 1 | A | G | Heterozygous |
| NC_037650.1 | 6129673 | SNV | 1 | A | G | Heterozygous |
| NC_037650.1 | 6129676 | SNV | 1 | A | G | Heterozygous |
| NC_037650.1 | 6130434 | SNV | 1 | T | G | Heterozygous |
| NC_037650.1 | 6130772 | SNV | 1 | T | C | Homozygous   |

|             |         |     |   |   |   |              |
|-------------|---------|-----|---|---|---|--------------|
| NC_037650.1 | 6130788 | SNV | 1 | C | T | Heterozygous |
| NC_037650.1 | 6130830 | SNV | 1 | A | T | Heterozygous |
| NC_037650.1 | 6130852 | SNV | 1 | T | C | Homozygous   |
| NC_037650.1 | 6149955 | SNV | 1 | C | T | Homozygous   |
| NC_037650.1 | 6149968 | SNV | 1 | C | G | Homozygous   |
| NC_037650.1 | 6150019 | SNV | 1 | C | T | Homozygous   |
| NC_037650.1 | 6150123 | SNV | 1 | C | G | Homozygous   |
| NC_037650.1 | 6150236 | SNV | 1 | T | C | Heterozygous |
| NC_037650.1 | 6150351 | SNV | 1 | T | C | Homozygous   |
| NC_037650.1 | 6151381 | SNV | 1 | A | G | Homozygous   |
| NC_037650.1 | 6173149 | SNV | 1 | T | A | Homozygous   |
| NC_037650.1 | 6173207 | SNV | 1 | A | G | Homozygous   |
| NC_037650.1 | 6173236 | SNV | 1 | A | G | Homozygous   |
| NC_037650.1 | 6173710 | SNV | 1 | T | C | Heterozygous |
| NC_037650.1 | 6174069 | SNV | 1 | T | C | Homozygous   |
| NC_037650.1 | 6174119 | SNV | 1 | T | C | Homozygous   |
| NC_037650.1 | 6174140 | SNV | 1 | T | C | Heterozygous |
| NC_037650.1 | 6174190 | SNV | 1 | C | G | Heterozygous |
| NC_037650.1 | 6174259 | SNV | 1 | A | G | Homozygous   |
| NC_037650.1 | 6174265 | SNV | 1 | A | G | Homozygous   |
| NC_037650.1 | 6174537 | SNV | 1 | C | T | Heterozygous |
| NC_037650.1 | 6174665 | SNV | 1 | T | C | Homozygous   |
| NC_037650.1 | 6174831 | SNV | 1 | C | G | Homozygous   |
| NC_037650.1 | 6175130 | SNV | 1 | T | A | Homozygous   |
| NC_037650.1 | 6175619 | SNV | 1 | G | C | Homozygous   |
| NC_037650.1 | 6175641 | SNV | 1 | T | C | Homozygous   |
| NC_037650.1 | 6176114 | SNV | 1 | G | A | Homozygous   |
| NC_037650.1 | 6176277 | SNV | 1 | C | T | Heterozygous |
| NC_037650.1 | 6176352 | SNV | 1 | G | A | Heterozygous |
| NC_037650.1 | 6177048 | SNV | 1 | G | C | Heterozygous |
| NC_037650.1 | 6177127 | SNV | 1 | A | G | Heterozygous |
| NC_037650.1 | 6177406 | SNV | 1 | G | A | Homozygous   |
| NC_037650.1 | 6177412 | SNV | 1 | A | G | Homozygous   |
| NC_037650.1 | 6178596 | SNV | 1 | T | C | Homozygous   |
| NC_037650.1 | 6179321 | SNV | 1 | T | C | Homozygous   |
| NC_037650.1 | 6179333 | SNV | 1 | T | C | Heterozygous |
| NC_037650.1 | 6179393 | SNV | 1 | A | G | Homozygous   |
| NC_037650.1 | 6179403 | SNV | 1 | T | C | Homozygous   |
| NC_037650.1 | 6179419 | SNV | 1 | A | C | Homozygous   |
| NC_037650.1 | 6180044 | SNV | 1 | T | C | Homozygous   |
| NC_037650.1 | 6180190 | SNV | 1 | G | A | Heterozygous |
| NC_037650.1 | 6180234 | SNV | 1 | C | T | Heterozygous |
| NC_037650.1 | 6180378 | SNV | 1 | T | C | Homozygous   |
| NC_037650.1 | 6180400 | SNV | 1 | C | T | Heterozygous |
| NC_037650.1 | 6180403 | SNV | 1 | T | C | Homozygous   |
| NC_037650.1 | 6180510 | SNV | 1 | A | G | Homozygous   |
| NC_037650.1 | 6180797 | SNV | 1 | A | G | Homozygous   |
| NC_037650.1 | 6180911 | SNV | 1 | T | A | Heterozygous |
| NC_037650.1 | 6180982 | SNV | 1 | G | A | Heterozygous |
| NC_037650.1 | 6181179 | SNV | 1 | G | A | Heterozygous |
| NC_037650.1 | 6181199 | SNV | 1 | A | G | Homozygous   |

|             |         |     |   |   |   |              |
|-------------|---------|-----|---|---|---|--------------|
| NC_037650.1 | 6181202 | SNV | 1 | G | A | Heterozygous |
| NC_037650.1 | 6181206 | SNV | 1 | C | T | Homozygous   |
| NC_037650.1 | 6181320 | SNV | 1 | C | T | Homozygous   |
| NC_037650.1 | 6181323 | SNV | 1 | G | A | Homozygous   |
| NC_037650.1 | 6181325 | SNV | 1 | A | T | Homozygous   |
| NC_037650.1 | 6181327 | SNV | 1 | G | T | Homozygous   |
| NC_037650.1 | 6181331 | SNV | 1 | A | T | Homozygous   |
| NC_037650.1 | 6181726 | SNV | 1 | G | A | Heterozygous |
| NC_037650.1 | 6181748 | SNV | 1 | C | T | Heterozygous |
| NC_037650.1 | 6182229 | SNV | 1 | A | G | Heterozygous |
| NC_037650.1 | 6182524 | SNV | 1 | T | C | Homozygous   |
| NC_037650.1 | 6182554 | SNV | 1 | A | G | Homozygous   |
| NC_037650.1 | 6182690 | SNV | 1 | C | T | Heterozygous |
| NC_037650.1 | 6182720 | SNV | 1 | C | T | Heterozygous |
| NC_037650.1 | 6182724 | SNV | 1 | T | C | Heterozygous |
| NC_037650.1 | 6182965 | SNV | 1 | G | A | Homozygous   |
| NC_037650.1 | 6183200 | SNV | 1 | C | T | Heterozygous |
| NC_037650.1 | 6183202 | SNV | 1 | C | T | Heterozygous |
| NC_037650.1 | 6183210 | SNV | 1 | T | C | Homozygous   |
| NC_037650.1 | 6183223 | SNV | 1 | G | T | Homozygous   |
| NC_037650.1 | 6183304 | SNV | 1 | T | C | Heterozygous |
| NC_037650.1 | 6183309 | SNV | 1 | C | T | Heterozygous |
| NC_037650.1 | 6183568 | SNV | 1 | G | A | Heterozygous |
| NC_037650.1 | 6185875 | SNV | 1 | T | C | Homozygous   |
| NC_037650.1 | 6186706 | SNV | 1 | C | T | Heterozygous |
| NC_037650.1 | 6186978 | SNV | 1 | T | A | Homozygous   |
| NC_037650.1 | 6186988 | SNV | 1 | T | A | Homozygous   |
| NC_037650.1 | 6187037 | SNV | 1 | T | A | Homozygous   |
| NC_037650.1 | 6187043 | SNV | 1 | T | A | Heterozygous |
| NC_037650.1 | 6187190 | SNV | 1 | C | T | Heterozygous |
| NC_037650.1 | 6187522 | SNV | 1 | G | A | Heterozygous |
| NC_037650.1 | 6187525 | SNV | 1 | G | A | Heterozygous |
| NC_037650.1 | 6187561 | SNV | 1 | T | A | Homozygous   |
| NC_037650.1 | 6187595 | SNV | 1 | G | A | Heterozygous |
| NC_037650.1 | 6187622 | SNV | 1 | A | T | Heterozygous |
| NC_037650.1 | 6187665 | SNV | 1 | T | A | Heterozygous |
| NC_037650.1 | 6187682 | SNV | 1 | A | C | Homozygous   |
| NC_037650.1 | 6187684 | SNV | 1 | C | A | Homozygous   |
| NC_037650.1 | 6187900 | SNV | 1 | C | T | Heterozygous |
| NC_037650.1 | 6189150 | SNV | 1 | C | T | Heterozygous |
| NC_037650.1 | 6189176 | SNV | 1 | G | C | Heterozygous |
| NC_037650.1 | 6190026 | SNV | 1 | A | T | Heterozygous |
| NC_037650.1 | 6190075 | SNV | 1 | G | C | Homozygous   |
| NC_037650.1 | 6190138 | SNV | 1 | A | G | Heterozygous |
| NC_037650.1 | 6190418 | SNV | 1 | T | A | Heterozygous |
| NC_037650.1 | 6190421 | SNV | 1 | C | T | Heterozygous |
| NC_037650.1 | 6190457 | SNV | 1 | A | G | Homozygous   |
| NC_037650.1 | 6191059 | SNV | 1 | A | G | Heterozygous |
| NC_037650.1 | 6191064 | SNV | 1 | G | A | Heterozygous |
| NC_037650.1 | 6192230 | SNV | 1 | G | C | Homozygous   |
| NC_037650.1 | 6195195 | SNV | 1 | G | T | Homozygous   |

|             |         |     |   |   |   |              |
|-------------|---------|-----|---|---|---|--------------|
| NC_037650.1 | 6195410 | SNV | 1 | A | G | Homozygous   |
| NC_037650.1 | 6198064 | SNV | 1 | T | C | Homozygous   |
| NC_037650.1 | 6198069 | SNV | 1 | G | A | Homozygous   |
| NC_037650.1 | 6198160 | SNV | 1 | T | C | Homozygous   |
| NC_037650.1 | 6198379 | SNV | 1 | C | T | Heterozygous |
| NC_037650.1 | 6198440 | SNV | 1 | A | G | Homozygous   |
| NC_037650.1 | 6202864 | SNV | 1 | C | T | Homozygous   |
| NC_037650.1 | 6204130 | SNV | 1 | G | T | Heterozygous |
| NC_037650.1 | 6213977 | SNV | 1 | A | G | Homozygous   |
| NC_037650.1 | 6215025 | SNV | 1 | G | A | Homozygous   |
| NC_037650.1 | 6215400 | SNV | 1 | G | A | Heterozygous |
| NC_037650.1 | 6215403 | SNV | 1 | T | G | Homozygous   |
| NC_037650.1 | 6215822 | SNV | 1 | A | G | Homozygous   |
| NC_037650.1 | 6216038 | SNV | 1 | C | T | Heterozygous |
| NC_037650.1 | 6216044 | SNV | 1 | C | T | Homozygous   |
| NC_037650.1 | 6216157 | SNV | 1 | A | G | Homozygous   |
| NC_037650.1 | 6221825 | SNV | 1 | C | T | Heterozygous |
| NC_037650.1 | 6221829 | SNV | 1 | C | T | Heterozygous |
| NC_037650.1 | 6221833 | SNV | 1 | T | C | Heterozygous |
| NC_037650.1 | 6223573 | SNV | 1 | G | C | Homozygous   |
| NC_037650.1 | 6223590 | SNV | 1 | A | C | Heterozygous |
| NC_037650.1 | 6227024 | SNV | 1 | A | G | Homozygous   |
| NC_037650.1 | 6228855 | SNV | 1 | A | T | Homozygous   |
| NC_037650.1 | 6237116 | SNV | 1 | C | T | Homozygous   |
| NC_037650.1 | 6237178 | SNV | 1 | A | G | Homozygous   |
| NC_037650.1 | 6237183 | SNV | 1 | T | A | Homozygous   |
| NC_037650.1 | 6239719 | SNV | 1 | A | T | Heterozygous |
| NC_037650.1 | 6239859 | SNV | 1 | A | T | Heterozygous |
| NC_037650.1 | 6239861 | SNV | 1 | G | A | Heterozygous |
| NC_037650.1 | 6245392 | SNV | 1 | T | C | Heterozygous |
| NC_037650.1 | 6245443 | SNV | 1 | G | A | Heterozygous |
| NC_037650.1 | 6247338 | SNV | 1 | A | G | Heterozygous |
| NC_037650.1 | 6247345 | SNV | 1 | T | C | Homozygous   |
| NC_037650.1 | 6247352 | SNV | 1 | T | C | Homozygous   |
| NC_037650.1 | 6247383 | SNV | 1 | T | C | Heterozygous |
| NC_037650.1 | 6247402 | SNV | 1 | A | G | Homozygous   |
| NC_037650.1 | 6247508 | SNV | 1 | A | G | Heterozygous |
| NC_037650.1 | 6247511 | SNV | 1 | A | G | Heterozygous |
| NC_037650.1 | 6247513 | SNV | 1 | G | A | Heterozygous |
| NC_037650.1 | 6247521 | SNV | 1 | G | A | Homozygous   |
| NC_037650.1 | 6247861 | SNV | 1 | A | G | Heterozygous |
| NC_037650.1 | 6252868 | SNV | 1 | C | T | Heterozygous |
| NC_037650.1 | 6254843 | SNV | 1 | C | T | Heterozygous |
| NC_037650.1 | 6255187 | SNV | 1 | G | A | Heterozygous |
| NC_037650.1 | 6255387 | SNV | 1 | G | A | Heterozygous |
| NC_037650.1 | 6255458 | SNV | 1 | G | A | Heterozygous |
| NC_037650.1 | 6255517 | SNV | 1 | C | T | Heterozygous |
| NC_037650.1 | 6267345 | SNV | 1 | G | A | Heterozygous |
| NC_037650.1 | 6267358 | SNV | 1 | A | G | Heterozygous |
| NC_037650.1 | 6267362 | SNV | 1 | G | A | Heterozygous |
| NC_037650.1 | 6267389 | SNV | 1 | T | C | Homozygous   |

|             |         |     |   |   |   |              |
|-------------|---------|-----|---|---|---|--------------|
| NC_037650.1 | 6267412 | SNV | 1 | A | G | Homozygous   |
| NC_037650.1 | 6267419 | SNV | 1 | C | A | Homozygous   |
| NC_037650.1 | 6272785 | SNV | 1 | C | T | Heterozygous |
| NC_037650.1 | 6272851 | SNV | 1 | T | C | Homozygous   |
| NC_037650.1 | 6272972 | SNV | 1 | C | A | Homozygous   |
| NC_037650.1 | 6272977 | SNV | 1 | T | G | Heterozygous |
| NC_037650.1 | 6273043 | SNV | 1 | C | T | Heterozygous |
| NC_037650.1 | 6273123 | SNV | 1 | A | G | Homozygous   |
| NC_037650.1 | 6274464 | SNV | 1 | G | T | Heterozygous |
| NC_037650.1 | 6278267 | SNV | 1 | A | G | Homozygous   |
| NC_037650.1 | 6278280 | SNV | 1 | G | A | Homozygous   |
| NC_037650.1 | 6289899 | SNV | 1 | G | A | Heterozygous |
| NC_037650.1 | 6289904 | SNV | 1 | T | C | Heterozygous |
| NC_037650.1 | 6301008 | SNV | 1 | G | C | Homozygous   |
| NC_037650.1 | 6301010 | SNV | 1 | G | T | Homozygous   |
| NC_037650.1 | 6301370 | SNV | 1 | C | T | Homozygous   |
| NC_037650.1 | 6301373 | SNV | 1 | T | C | Homozygous   |
| NC_037650.1 | 6301378 | SNV | 1 | C | T | Homozygous   |
| NC_037650.1 | 6301382 | SNV | 1 | C | T | Heterozygous |
| NC_037650.1 | 6301385 | SNV | 1 | C | T | Heterozygous |
| NC_037650.1 | 6303298 | SNV | 1 | A | C | Heterozygous |
| NC_037650.1 | 6303388 | SNV | 1 | C | G | Heterozygous |
| NC_037650.1 | 6307114 | SNV | 1 | A | G | Homozygous   |
| NC_037650.1 | 6308520 | SNV | 1 | G | C | Homozygous   |
| NC_037650.1 | 6308525 | SNV | 1 | C | A | Homozygous   |
| NC_037650.1 | 6308563 | SNV | 1 | C | A | Heterozygous |
| NC_037650.1 | 6308565 | SNV | 1 | A | T | Heterozygous |
| NC_037650.1 | 6308581 | SNV | 1 | G | C | Homozygous   |
| NC_037650.1 | 6309017 | SNV | 1 | C | G | Homozygous   |
| NC_037650.1 | 6309171 | SNV | 1 | A | T | Heterozygous |
| NC_037650.1 | 6310770 | SNV | 1 | A | G | Homozygous   |
| NC_037650.1 | 6310885 | SNV | 1 | T | C | Heterozygous |
| NC_037650.1 | 6310895 | SNV | 1 | T | C | Heterozygous |
| NC_037650.1 | 6310921 | SNV | 1 | G | A | Heterozygous |
| NC_037650.1 | 6311001 | SNV | 1 | T | C | Heterozygous |
| NC_037650.1 | 6311596 | SNV | 1 | A | G | Homozygous   |
| NC_037650.1 | 6311659 | SNV | 1 | T | C | Homozygous   |
| NC_037650.1 | 6311859 | SNV | 1 | T | C | Homozygous   |
| NC_037650.1 | 6311913 | SNV | 1 | G | A | Heterozygous |
| NC_037650.1 | 6311931 | SNV | 1 | A | G | Homozygous   |
| NC_037650.1 | 6311955 | SNV | 1 | G | C | Homozygous   |
| NC_037650.1 | 6312274 | SNV | 1 | T | C | Heterozygous |
| NC_037650.1 | 6312294 | SNV | 1 | A | G | Heterozygous |
| NC_037650.1 | 6312346 | SNV | 1 | A | G | Homozygous   |
| NC_037650.1 | 6313402 | SNV | 1 | C | T | Heterozygous |
| NC_037650.1 | 6313411 | SNV | 1 | T | G | Homozygous   |
| NC_037650.1 | 6313731 | SNV | 1 | C | T | Heterozygous |
| NC_037650.1 | 6314112 | SNV | 1 | G | A | Heterozygous |
| NC_037650.1 | 6314239 | SNV | 1 | A | C | Homozygous   |
| NC_037650.1 | 6314284 | SNV | 1 | C | A | Homozygous   |
| NC_037650.1 | 6314441 | SNV | 1 | T | C | Homozygous   |



|             |         |     |   |   |   |              |
|-------------|---------|-----|---|---|---|--------------|
| NC_037650.1 | 6314741 | SNV | 1 | C | T | Heterozygous |
| NC_037650.1 | 6314944 | SNV | 1 | A | G | Homozygous   |
| NC_037650.1 | 6314988 | SNV | 1 | G | C | Homozygous   |
| NC_037650.1 | 6315421 | SNV | 1 | T | C | Homozygous   |
| NC_037650.1 | 6315575 | SNV | 1 | C | T | Heterozygous |
| NC_037650.1 | 6315879 | SNV | 1 | A | T | Heterozygous |
| NC_037650.1 | 6315887 | SNV | 1 | C | G | Heterozygous |
| NC_037650.1 | 6315895 | SNV | 1 | T | A | Heterozygous |
| NC_037650.1 | 6316151 | SNV | 1 | T | G | Homozygous   |
| NC_037650.1 | 6316179 | SNV | 1 | A | C | Homozygous   |
| NC_037650.1 | 6316576 | SNV | 1 | C | G | Heterozygous |
| NC_037650.1 | 6316585 | SNV | 1 | G | C | Heterozygous |
| NC_037650.1 | 6316753 | SNV | 1 | C | T | Heterozygous |
| NC_037650.1 | 6316804 | SNV | 1 | A | G | Heterozygous |
| NC_037650.1 | 6316863 | SNV | 1 | G | C | Heterozygous |
| NC_037650.1 | 6316867 | SNV | 1 | A | G | Heterozygous |
| NC_037650.1 | 6317002 | SNV | 1 | A | G | Heterozygous |
| NC_037650.1 | 6318063 | SNV | 1 | C | T | Heterozygous |
| NC_037650.1 | 6318090 | SNV | 1 | T | C | Homozygous   |
| NC_037650.1 | 6318598 | SNV | 1 | A | G | Heterozygous |
| NC_037650.1 | 6319144 | SNV | 1 | G | C | Homozygous   |
| NC_037650.1 | 6319435 | SNV | 1 | A | G | Homozygous   |
| NC_037650.1 | 6319450 | SNV | 1 | A | G | Heterozygous |
| NC_037650.1 | 6319646 | SNV | 1 | G | A | Heterozygous |
| NC_037650.1 | 6319698 | SNV | 1 | A | G | Homozygous   |
| NC_037650.1 | 6319831 | SNV | 1 | C | T | Heterozygous |
| NC_037650.1 | 6320182 | SNV | 1 | T | C | Homozygous   |
| NC_037650.1 | 6320268 | SNV | 1 | T | C | Heterozygous |
| NC_037650.1 | 6320291 | SNV | 1 | A | G | Heterozygous |
| NC_037650.1 | 6320802 | SNV | 1 | T | A | Heterozygous |
| NC_037650.1 | 6320804 | SNV | 1 | A | G | Heterozygous |
| NC_037650.1 | 6321163 | SNV | 1 | G | A | Heterozygous |
| NC_037650.1 | 6321239 | SNV | 1 | A | G | Homozygous   |
| NC_037650.1 | 6321255 | SNV | 1 | A | G | Heterozygous |
| NC_037650.1 | 6321322 | SNV | 1 | A | C | Homozygous   |
| NC_037650.1 | 6321341 | SNV | 1 | C | G | Homozygous   |
| NC_037650.1 | 6321379 | SNV | 1 | G | A | Homozygous   |
| NC_037650.1 | 6321477 | SNV | 1 | T | C | Homozygous   |
| NC_037650.1 | 6321491 | SNV | 1 | G | C | Heterozygous |
| NC_037650.1 | 6321557 | SNV | 1 | T | A | Heterozygous |
| NC_037650.1 | 6321781 | SNV | 1 | G | A | Homozygous   |
| NC_037650.1 | 6322017 | SNV | 1 | A | G | Homozygous   |
| NC_037650.1 | 6322327 | SNV | 1 | A | C | Heterozygous |
| NC_037650.1 | 6322340 | SNV | 1 | T | G | Homozygous   |
| NC_037650.1 | 6322679 | SNV | 1 | T | C | Homozygous   |
| NC_037650.1 | 6323371 | SNV | 1 | A | C | Heterozygous |
| NC_037650.1 | 6323707 | SNV | 1 | A | G | Heterozygous |
| NC_037650.1 | 6323851 | SNV | 1 | T | C | Heterozygous |
| NC_037650.1 | 6323860 | SNV | 1 | T | C | Homozygous   |
| NC_037650.1 | 6323876 | SNV | 1 | G | C | Heterozygous |
| NC_037650.1 | 6323982 | SNV | 1 | G | A | Homozygous   |

|             |         |     |   |   |   |              |
|-------------|---------|-----|---|---|---|--------------|
| NC_037650.1 | 6323992 | SNV | 1 | T | C | Heterozygous |
| NC_037650.1 | 6324034 | SNV | 1 | A | G | Homozygous   |
| NC_037650.1 | 6324091 | SNV | 1 | G | A | Heterozygous |
| NC_037650.1 | 6324276 | SNV | 1 | A | G | Homozygous   |
| NC_037650.1 | 6324380 | SNV | 1 | A | G | Homozygous   |
| NC_037650.1 | 6324442 | SNV | 1 | A | G | Homozygous   |
| NC_037650.1 | 6324450 | SNV | 1 | G | C | Heterozygous |
| NC_037650.1 | 6324915 | SNV | 1 | T | G | Homozygous   |
| NC_037650.1 | 6325167 | SNV | 1 | T | C | Homozygous   |
| NC_037650.1 | 6325191 | SNV | 1 | T | C | Homozygous   |
| NC_037650.1 | 6326598 | SNV | 1 | A | G | Homozygous   |
| NC_037650.1 | 6326752 | SNV | 1 | G | A | Heterozygous |
| NC_037650.1 | 6326804 | SNV | 1 | T | A | Homozygous   |
| NC_037650.1 | 6326905 | SNV | 1 | T | C | Homozygous   |
| NC_037650.1 | 6326925 | SNV | 1 | A | G | Homozygous   |
| NC_037650.1 | 6326951 | SNV | 1 | C | T | Homozygous   |
| NC_037650.1 | 6327418 | SNV | 1 | A | G | Homozygous   |
| NC_037650.1 | 6327457 | SNV | 1 | C | G | Homozygous   |
| NC_037650.1 | 6327465 | SNV | 1 | G | A | Homozygous   |
| NC_037650.1 | 6327816 | SNV | 1 | C | T | Homozygous   |
| NC_037650.1 | 6352301 | SNV | 1 | T | C | Homozygous   |
| NC_037650.1 | 6352347 | SNV | 1 | A | G | Homozygous   |
| NC_037650.1 | 6352382 | SNV | 1 | T | C | Homozygous   |
| NC_037650.1 | 6352417 | SNV | 1 | C | T | Heterozygous |
| NC_037650.1 | 6367340 | SNV | 1 | A | C | Homozygous   |
| NC_037650.1 | 6367345 | SNV | 1 | A | T | Homozygous   |
| NC_037650.1 | 6367372 | SNV | 1 | C | T | Homozygous   |
| NC_037650.1 | 6367374 | SNV | 1 | A | G | Homozygous   |
| NC_037650.1 | 6367377 | SNV | 1 | G | T | Homozygous   |
| NC_037650.1 | 6367381 | SNV | 1 | A | T | Homozygous   |
| NC_037650.1 | 6367383 | SNV | 1 | A | T | Homozygous   |
| NC_037650.1 | 6367385 | SNV | 1 | C | G | Homozygous   |
| NC_037650.1 | 6367389 | SNV | 1 | A | T | Homozygous   |
| NC_037650.1 | 6371538 | SNV | 1 | G | A | Heterozygous |
| NC_037650.1 | 6374741 | SNV | 1 | T | C | Heterozygous |
| NC_037650.1 | 6374884 | SNV | 1 | A | G | Homozygous   |
| NC_037650.1 | 6374925 | SNV | 1 | A | G | Heterozygous |
| NC_037650.1 | 6376089 | SNV | 1 | T | C | Heterozygous |
| NC_037650.1 | 6376200 | SNV | 1 | G | A | Heterozygous |
| NC_037650.1 | 6376305 | SNV | 1 | G | C | Heterozygous |
| NC_037650.1 | 6376448 | SNV | 1 | T | G | Homozygous   |
| NC_037650.1 | 6376715 | SNV | 1 | C | G | Homozygous   |
| NC_037650.1 | 6376966 | SNV | 1 | C | T | Heterozygous |
| NC_037650.1 | 6384118 | SNV | 1 | G | A | Homozygous   |
| NC_037650.1 | 6384182 | SNV | 1 | T | A | Heterozygous |
| NC_037650.1 | 6384247 | SNV | 1 | A | G | Homozygous   |
| NC_037650.1 | 6384615 | SNV | 1 | C | T | Heterozygous |
| NC_037650.1 | 6384629 | SNV | 1 | A | G | Heterozygous |
| NC_037650.1 | 6384642 | SNV | 1 | T | C | Heterozygous |
| NC_037650.1 | 6384994 | SNV | 1 | G | A | Heterozygous |
| NC_037650.1 | 6385006 | SNV | 1 | T | C | Heterozygous |

|             |         |     |   |   |   |              |
|-------------|---------|-----|---|---|---|--------------|
| NC_037650.1 | 6386060 | SNV | 1 | G | C | Homozygous   |
| NC_037650.1 | 6386102 | SNV | 1 | G | A | Heterozygous |
| NC_037650.1 | 6386721 | SNV | 1 | G | A | Homozygous   |
| NC_037650.1 | 6386733 | SNV | 1 | T | C | Homozygous   |
| NC_037650.1 | 6386808 | SNV | 1 | A | G | Heterozygous |
| NC_037650.1 | 6387240 | SNV | 1 | A | G | Homozygous   |
| NC_037650.1 | 6387251 | SNV | 1 | G | A | Homozygous   |
| NC_037650.1 | 6387258 | SNV | 1 | T | G | Homozygous   |
| NC_037650.1 | 6387261 | SNV | 1 | T | C | Homozygous   |
| NC_037650.1 | 6387264 | SNV | 1 | T | G | Homozygous   |
| NC_037650.1 | 6387282 | SNV | 1 | C | G | Homozygous   |
| NC_037650.1 | 6387288 | SNV | 1 | T | G | Homozygous   |
| NC_037650.1 | 6387291 | SNV | 1 | A | C | Homozygous   |
| NC_037650.1 | 6387294 | SNV | 1 | A | G | Homozygous   |
| NC_037650.1 | 6387297 | SNV | 1 | G | T | Homozygous   |
| NC_037650.1 | 6387306 | SNV | 1 | G | C | Homozygous   |
| NC_037650.1 | 6387312 | SNV | 1 | A | G | Homozygous   |
| NC_037650.1 | 6387318 | SNV | 1 | T | G | Homozygous   |
| NC_037650.1 | 6387468 | SNV | 1 | A | G | Homozygous   |
| NC_037650.1 | 6387618 | SNV | 1 | G | A | Heterozygous |
| NC_037650.1 | 6392053 | SNV | 1 | T | C | Homozygous   |
| NC_037650.1 | 6392503 | SNV | 1 | G | A | Heterozygous |
| NC_037650.1 | 6392593 | SNV | 1 | G | A | Homozygous   |
| NC_037650.1 | 6393050 | SNV | 1 | A | G | Heterozygous |
| NC_037650.1 | 6393355 | SNV | 1 | G | A | Heterozygous |
| NC_037650.1 | 6398502 | SNV | 1 | C | T | Homozygous   |
| NC_037650.1 | 6399487 | SNV | 1 | C | G | Homozygous   |
| NC_037650.1 | 6415863 | SNV | 1 | C | T | Heterozygous |
| NC_037650.1 | 6415941 | SNV | 1 | A | C | Homozygous   |
| NC_037650.1 | 6416012 | SNV | 1 | T | C | Homozygous   |
| NC_037650.1 | 6416021 | SNV | 1 | T | C | Homozygous   |
| NC_037650.1 | 6416070 | SNV | 1 | T | C | Homozygous   |
| NC_037650.1 | 6416093 | SNV | 1 | A | G | Heterozygous |
| NC_037650.1 | 6416101 | SNV | 1 | G | A | Heterozygous |
| NC_037650.1 | 6416130 | SNV | 1 | G | A | Homozygous   |
| NC_037650.1 | 6416237 | SNV | 1 | C | T | Homozygous   |
| NC_037650.1 | 6416826 | SNV | 1 | T | C | Homozygous   |
| NC_037650.1 | 6416880 | SNV | 1 | T | C | Homozygous   |
| NC_037650.1 | 6416928 | SNV | 1 | C | T | Heterozygous |
| NC_037650.1 | 6416967 | SNV | 1 | A | G | Homozygous   |
| NC_037650.1 | 6417292 | SNV | 1 | A | G | Homozygous   |
| NC_037650.1 | 6417344 | SNV | 1 | T | C | Heterozygous |
| NC_037650.1 | 6417415 | SNV | 1 | A | G | Homozygous   |
| NC_037650.1 | 6417421 | SNV | 1 | C | T | Homozygous   |
| NC_037650.1 | 6417556 | SNV | 1 | G | A | Heterozygous |
| NC_037650.1 | 6417656 | SNV | 1 | T | A | Heterozygous |
| NC_037650.1 | 6420388 | SNV | 1 | C | T | Heterozygous |
| NC_037650.1 | 6423199 | SNV | 1 | G | A | Heterozygous |
| NC_037650.1 | 6423203 | SNV | 1 | T | C | Homozygous   |
| NC_037650.1 | 6445510 | SNV | 1 | T | C | Homozygous   |
| NC_037650.1 | 6447463 | SNV | 1 | C | T | Heterozygous |

|             |         |     |   |   |   |              |
|-------------|---------|-----|---|---|---|--------------|
| NC_037650.1 | 6460577 | SNV | 1 | A | G | Heterozygous |
| NC_037650.1 | 6460631 | SNV | 1 | A | G | Heterozygous |
| NC_037650.1 | 6463475 | SNV | 1 | G | T | Homozygous   |
| NC_037650.1 | 6463482 | SNV | 1 | C | T | Homozygous   |
| NC_037650.1 | 6463486 | SNV | 1 | T | C | Homozygous   |
| NC_037650.1 | 6465872 | SNV | 1 | C | T | Heterozygous |
| NC_037650.1 | 6465884 | SNV | 1 | G | A | Heterozygous |
| NC_037650.1 | 6469413 | SNV | 1 | A | G | Homozygous   |
| NC_037650.1 | 6469461 | SNV | 1 | T | C | Homozygous   |
| NC_037650.1 | 6469495 | SNV | 1 | C | G | Homozygous   |
| NC_037650.1 | 6470001 | SNV | 1 | A | T | Homozygous   |
| NC_037650.1 | 6470006 | SNV | 1 | T | A | Homozygous   |
| NC_037650.1 | 6470030 | SNV | 1 | T | G | Homozygous   |
| NC_037650.1 | 6474444 | SNV | 1 | A | C | Homozygous   |
| NC_037650.1 | 6474446 | SNV | 1 | A | C | Homozygous   |
| NC_037650.1 | 6474450 | SNV | 1 | A | C | Homozygous   |
| NC_037650.1 | 6474457 | SNV | 1 | A | C | Homozygous   |
| NC_037650.1 | 6474463 | SNV | 1 | A | C | Homozygous   |
| NC_037650.1 | 6474470 | SNV | 1 | A | G | Homozygous   |
| NC_037650.1 | 6474472 | SNV | 1 | G | A | Homozygous   |
| NC_037650.1 | 6492906 | SNV | 1 | T | C | Heterozygous |
| NC_037650.1 | 6493032 | SNV | 1 | G | A | Heterozygous |
| NC_037650.1 | 6493053 | SNV | 1 | G | C | Homozygous   |
| NC_037650.1 | 6493056 | SNV | 1 | T | C | Homozygous   |
| NC_037650.1 | 6493210 | SNV | 1 | T | C | Homozygous   |
| NC_037650.1 | 6498351 | SNV | 1 | T | C | Heterozygous |
| NC_037650.1 | 6498368 | SNV | 1 | C | T | Heterozygous |
| NC_037650.1 | 6498370 | SNV | 1 | C | T | Heterozygous |
| NC_037650.1 | 6498372 | SNV | 1 | C | T | Heterozygous |
| NC_037650.1 | 6498401 | SNV | 1 | C | T | Heterozygous |
| NC_037650.1 | 6498405 | SNV | 1 | C | T | Heterozygous |
| NC_037650.1 | 6503562 | SNV | 1 | G | A | Homozygous   |
| NC_037650.1 | 6503626 | SNV | 1 | G | A | Homozygous   |
| NC_037650.1 | 6503651 | SNV | 1 | G | C | Homozygous   |
| NC_037650.1 | 6503654 | SNV | 1 | G | A | Heterozygous |
| NC_037650.1 | 6505824 | SNV | 1 | G | T | Homozygous   |
| NC_037650.1 | 6505854 | SNV | 1 | C | T | Homozygous   |
| NC_037650.1 | 6505857 | SNV | 1 | T | G | Homozygous   |
| NC_037650.1 | 6505985 | SNV | 1 | A | G | Heterozygous |
| NC_037650.1 | 6505994 | SNV | 1 | G | A | Heterozygous |
| NC_037650.1 | 6506033 | SNV | 1 | A | G | Homozygous   |
| NC_037650.1 | 6506664 | SNV | 1 | T | C | Homozygous   |
| NC_037650.1 | 6506704 | SNV | 1 | A | G | Homozygous   |
| NC_037650.1 | 6506726 | SNV | 1 | C | G | Heterozygous |
| NC_037650.1 | 6513046 | SNV | 1 | A | G | Homozygous   |
| NC_037650.1 | 6513068 | SNV | 1 | A | G | Homozygous   |
| NC_037650.1 | 6513089 | SNV | 1 | A | G | Heterozygous |
| NC_037650.1 | 6515319 | SNV | 1 | A | G | Heterozygous |
| NC_037650.1 | 6515477 | SNV | 1 | T | C | Heterozygous |
| NC_037650.1 | 6516167 | SNV | 1 | T | C | Homozygous   |
| NC_037650.1 | 6516250 | SNV | 1 | T | A | Homozygous   |

|             |         |     |   |   |   |              |
|-------------|---------|-----|---|---|---|--------------|
| NC_037650.1 | 6516591 | SNV | 1 | A | G | Homozygous   |
| NC_037650.1 | 6517649 | SNV | 1 | A | G | Homozygous   |
| NC_037650.1 | 6517684 | SNV | 1 | A | C | Heterozygous |
| NC_037650.1 | 6517738 | SNV | 1 | T | A | Homozygous   |
| NC_037650.1 | 6518001 | SNV | 1 | T | C | Homozygous   |
| NC_037650.1 | 6518083 | SNV | 1 | T | C | Heterozygous |
| NC_037650.1 | 6518418 | SNV | 1 | A | G | Heterozygous |
| NC_037650.1 | 6518505 | SNV | 1 | A | G | Homozygous   |
| NC_037650.1 | 6518518 | SNV | 1 | G | A | Heterozygous |
| NC_037650.1 | 6518530 | SNV | 1 | G | A | Heterozygous |
| NC_037650.1 | 6518807 | SNV | 1 | C | T | Heterozygous |
| NC_037650.1 | 6518871 | SNV | 1 | A | T | Heterozygous |
| NC_037650.1 | 6518905 | SNV | 1 | A | G | Homozygous   |
| NC_037650.1 | 6602008 | SNV | 1 | T | C | Homozygous   |
| NC_037650.1 | 6602337 | SNV | 1 | T | C | Homozygous   |
| NC_037650.1 | 6603286 | SNV | 1 | G | C | Homozygous   |
| NC_037650.1 | 6603936 | SNV | 1 | A | T | Heterozygous |
| NC_037650.1 | 6604169 | SNV | 1 | T | C | Homozygous   |
| NC_037650.1 | 6614038 | SNV | 1 | T | C | Homozygous   |
| NC_037650.1 | 6614385 | SNV | 1 | T | C | Heterozygous |
| NC_037650.1 | 6614588 | SNV | 1 | T | C | Heterozygous |
| NC_037650.1 | 6614699 | SNV | 1 | A | G | Heterozygous |
| NC_037650.1 | 6618728 | SNV | 1 | C | T | Homozygous   |
| NC_037650.1 | 6619170 | SNV | 1 | A | G | Homozygous   |
| NC_037650.1 | 6619382 | SNV | 1 | G | A | Heterozygous |
| NC_037650.1 | 6620128 | SNV | 1 | A | G | Homozygous   |
| NC_037650.1 | 6620167 | SNV | 1 | T | C | Homozygous   |
| NC_037650.1 | 6620520 | SNV | 1 | A | G | Heterozygous |
| NC_037650.1 | 6620665 | SNV | 1 | G | T | Homozygous   |
| NC_037650.1 | 6621218 | SNV | 1 | C | T | Heterozygous |
| NC_037650.1 | 6621257 | SNV | 1 | C | T | Heterozygous |
| NC_037650.1 | 6621293 | SNV | 1 | T | C | Homozygous   |
| NC_037650.1 | 6621689 | SNV | 1 | A | G | Heterozygous |
| NC_037650.1 | 6621767 | SNV | 1 | C | T | Homozygous   |
| NC_037650.1 | 6622409 | SNV | 1 | A | G | Homozygous   |
| NC_037650.1 | 6622722 | SNV | 1 | C | G | Homozygous   |
| NC_037650.1 | 6622911 | SNV | 1 | G | A | Heterozygous |
| NC_037650.1 | 6629149 | SNV | 1 | C | T | Homozygous   |
| NC_037650.1 | 6629176 | SNV | 1 | A | G | Homozygous   |
| NC_037650.1 | 6636441 | SNV | 1 | A | G | Homozygous   |
| NC_037650.1 | 6651469 | SNV | 1 | T | C | Homozygous   |
| NC_037650.1 | 6651584 | SNV | 1 | A | G | Heterozygous |
| NC_037650.1 | 6653967 | SNV | 1 | A | T | Homozygous   |
| NC_037650.1 | 6655427 | SNV | 1 | C | A | Homozygous   |
| NC_037650.1 | 6655430 | SNV | 1 | A | T | Heterozygous |
| NC_037650.1 | 6658790 | SNV | 1 | C | T | Homozygous   |
| NC_037650.1 | 6658820 | SNV | 1 | T | C | Homozygous   |
| NC_037650.1 | 6659205 | SNV | 1 | T | A | Heterozygous |
| NC_037650.1 | 6659249 | SNV | 1 | T | A | Homozygous   |
| NC_037650.1 | 6659303 | SNV | 1 | C | T | Homozygous   |
| NC_037650.1 | 6659366 | SNV | 1 | G | T | Heterozygous |

|             |         |     |   |   |   |              |
|-------------|---------|-----|---|---|---|--------------|
| NC_037650.1 | 6666155 | SNV | 1 | A | G | Homozygous   |
| NC_037650.1 | 6669282 | SNV | 1 | G | T | Homozygous   |
| NC_037650.1 | 6673354 | SNV | 1 | G | A | Homozygous   |
| NC_037650.1 | 6673388 | SNV | 1 | A | G | Heterozygous |
| NC_037650.1 | 6673399 | SNV | 1 | A | G | Homozygous   |
| NC_037650.1 | 6673419 | SNV | 1 | A | G | Heterozygous |
| NC_037650.1 | 6673485 | SNV | 1 | G | A | Heterozygous |
| NC_037650.1 | 6676878 | SNV | 1 | C | T | Homozygous   |
| NC_037650.1 | 6676891 | SNV | 1 | C | A | Homozygous   |
| NC_037650.1 | 6676895 | SNV | 1 | T | G | Homozygous   |
| NC_037650.1 | 6676956 | SNV | 1 | A | T | Heterozygous |
| NC_037650.1 | 6677447 | SNV | 1 | T | C | Heterozygous |
| NC_037650.1 | 6677469 | SNV | 1 | C | T | Homozygous   |
| NC_037650.1 | 6677526 | SNV | 1 | A | C | Heterozygous |
| NC_037650.1 | 6677586 | SNV | 1 | G | A | Heterozygous |
| NC_037650.1 | 6677590 | SNV | 1 | G | A | Heterozygous |
| NC_037650.1 | 6677702 | SNV | 1 | A | G | Homozygous   |
| NC_037650.1 | 6677707 | SNV | 1 | G | C | Heterozygous |
| NC_037650.1 | 6677739 | SNV | 1 | C | T | Heterozygous |
| NC_037650.1 | 6677764 | SNV | 1 | G | A | Heterozygous |
| NC_037650.1 | 6677855 | SNV | 1 | A | G | Homozygous   |
| NC_037650.1 | 6677857 | SNV | 1 | G | A | Homozygous   |
| NC_037650.1 | 6677864 | SNV | 1 | C | T | Heterozygous |
| NC_037650.1 | 6678086 | SNV | 1 | T | C | Heterozygous |
| NC_037650.1 | 6678091 | SNV | 1 | C | T | Homozygous   |
| NC_037650.1 | 6678094 | SNV | 1 | C | T | Homozygous   |
| NC_037650.1 | 6678152 | SNV | 1 | A | G | Homozygous   |
| NC_037650.1 | 6678419 | SNV | 1 | A | G | Homozygous   |
| NC_037650.1 | 6678495 | SNV | 1 | C | G | Homozygous   |
| NC_037650.1 | 6678498 | SNV | 1 | T | G | Homozygous   |
| NC_037650.1 | 6678711 | SNV | 1 | A | G | Homozygous   |
| NC_037650.1 | 6679204 | SNV | 1 | C | T | Heterozygous |
| NC_037650.1 | 6679215 | SNV | 1 | T | C | Homozygous   |
| NC_037650.1 | 6679242 | SNV | 1 | T | C | Homozygous   |
| NC_037650.1 | 6679244 | SNV | 1 | C | T | Homozygous   |
| NC_037650.1 | 6679252 | SNV | 1 | A | C | Homozygous   |
| NC_037650.1 | 6679255 | SNV | 1 | T | C | Heterozygous |
| NC_037650.1 | 6679260 | SNV | 1 | T | C | Homozygous   |
| NC_037650.1 | 6679557 | SNV | 1 | T | C | Homozygous   |
| NC_037650.1 | 6680064 | SNV | 1 | A | C | Homozygous   |
| NC_037650.1 | 6680330 | SNV | 1 | C | T | Homozygous   |
| NC_037650.1 | 6680405 | SNV | 1 | T | A | Homozygous   |
| NC_037650.1 | 6680460 | SNV | 1 | A | G | Homozygous   |
| NC_037650.1 | 6680503 | SNV | 1 | A | T | Homozygous   |
| NC_037650.1 | 6680610 | SNV | 1 | C | T | Homozygous   |
| NC_037650.1 | 6680616 | SNV | 1 | C | T | Homozygous   |
| NC_037650.1 | 6680683 | SNV | 1 | C | T | Homozygous   |
| NC_037650.1 | 6680710 | SNV | 1 | G | A | Heterozygous |
| NC_037650.1 | 6681673 | SNV | 1 | C | A | Heterozygous |
| NC_037650.1 | 6681675 | SNV | 1 | T | A | Heterozygous |
| NC_037650.1 | 6681683 | SNV | 1 | C | A | Heterozygous |

|             |         |     |   |   |   |              |
|-------------|---------|-----|---|---|---|--------------|
| NC_037650.1 | 6681685 | SNV | 1 | C | A | Heterozygous |
| NC_037650.1 | 6681687 | SNV | 1 | C | A | Heterozygous |
| NC_037650.1 | 6681697 | SNV | 1 | C | G | Heterozygous |
| NC_037650.1 | 6683835 | SNV | 1 | T | C | Heterozygous |
| NC_037650.1 | 6683842 | SNV | 1 | C | T | Heterozygous |
| NC_037650.1 | 6683844 | SNV | 1 | C | A | Heterozygous |
| NC_037650.1 | 6689566 | SNV | 1 | C | T | Homozygous   |
| NC_037650.1 | 6689569 | SNV | 1 | C | T | Homozygous   |
| NC_037650.1 | 6691044 | SNV | 1 | A | T | Heterozygous |
| NC_037650.1 | 6691059 | SNV | 1 | T | C | Heterozygous |
| NC_037650.1 | 6691066 | SNV | 1 | A | G | Heterozygous |
| NC_037650.1 | 6691078 | SNV | 1 | G | C | Heterozygous |
| NC_037650.1 | 6691193 | SNV | 1 | T | C | Homozygous   |
| NC_037650.1 | 6691198 | SNV | 1 | A | T | Homozygous   |
| NC_037650.1 | 6691201 | SNV | 1 | A | G | Homozygous   |
| NC_037650.1 | 6691203 | SNV | 1 | T | C | Homozygous   |
| NC_037650.1 | 6691211 | SNV | 1 | C | T | Homozygous   |
| NC_037650.1 | 6691222 | SNV | 1 | T | A | Homozygous   |
| NC_037650.1 | 6691359 | SNV | 1 | G | T | Homozygous   |
| NC_037650.1 | 6691371 | SNV | 1 | T | G | Homozygous   |
| NC_037650.1 | 6691397 | SNV | 1 | C | T | Homozygous   |
| NC_037650.1 | 6697038 | SNV | 1 | G | T | Heterozygous |
| NC_037650.1 | 6697297 | SNV | 1 | T | G | Homozygous   |
| NC_037650.1 | 6697354 | SNV | 1 | A | G | Heterozygous |
| NC_037650.1 | 6703120 | SNV | 1 | T | A | Heterozygous |
| NC_037650.1 | 6703158 | SNV | 1 | T | C | Homozygous   |
| NC_037650.1 | 6703212 | SNV | 1 | C | T | Homozygous   |
| NC_037650.1 | 6703217 | SNV | 1 | T | C | Homozygous   |
| NC_037650.1 | 6706355 | SNV | 1 | C | A | Heterozygous |
| NC_037650.1 | 6707871 | SNV | 1 | A | G | Homozygous   |
| NC_037650.1 | 6708027 | SNV | 1 | A | G | Homozygous   |
| NC_037650.1 | 6708093 | SNV | 1 | A | G | Heterozygous |
| NC_037650.1 | 6708099 | SNV | 1 | A | G | Heterozygous |
| NC_037650.1 | 6708579 | SNV | 1 | C | T | Heterozygous |
| NC_037650.1 | 6708641 | SNV | 1 | G | C | Homozygous   |
| NC_037650.1 | 6708712 | SNV | 1 | G | A | Heterozygous |
| NC_037650.1 | 6708829 | SNV | 1 | T | C | Homozygous   |
| NC_037650.1 | 6708906 | SNV | 1 | C | T | Heterozygous |
| NC_037650.1 | 6708941 | SNV | 1 | G | A | Homozygous   |
| NC_037650.1 | 6709012 | SNV | 1 | C | T | Homozygous   |
| NC_037650.1 | 6709689 | SNV | 1 | C | T | Heterozygous |
| NC_037650.1 | 6709701 | SNV | 1 | C | T | Heterozygous |
| NC_037650.1 | 6716523 | SNV | 1 | C | T | Heterozygous |
| NC_037650.1 | 6716571 | SNV | 1 | G | A | Heterozygous |
| NC_037650.1 | 6716813 | SNV | 1 | A | T | Heterozygous |
| NC_037650.1 | 6716896 | SNV | 1 | A | G | Heterozygous |
| NC_037650.1 | 6737985 | SNV | 1 | C | G | Homozygous   |
| NC_037650.1 | 6738223 | SNV | 1 | G | A | Heterozygous |
| NC_037650.1 | 6738265 | SNV | 1 | G | A | Homozygous   |
| NC_037650.1 | 6738326 | SNV | 1 | T | C | Homozygous   |
| NC_037650.1 | 6738877 | SNV | 1 | C | T | Homozygous   |

|             |         |     |   |   |   |              |
|-------------|---------|-----|---|---|---|--------------|
| NC_037650.1 | 6738916 | SNV | 1 | G | A | Heterozygous |
| NC_037650.1 | 6739164 | SNV | 1 | C | A | Heterozygous |
| NC_037650.1 | 6754591 | SNV | 1 | G | A | Homozygous   |
| NC_037650.1 | 6754594 | SNV | 1 | A | G | Homozygous   |
| NC_037650.1 | 6754598 | SNV | 1 | G | A | Homozygous   |
| NC_037650.1 | 6768599 | SNV | 1 | A | T | Heterozygous |
| NC_037650.1 | 6768625 | SNV | 1 | G | A | Homozygous   |
| NC_037650.1 | 6770617 | SNV | 1 | T | C | Homozygous   |
| NC_037650.1 | 6772415 | SNV | 1 | T | C | Heterozygous |
| NC_037650.1 | 6772470 | SNV | 1 | T | C | Homozygous   |
| NC_037650.1 | 6776311 | SNV | 1 | C | A | Homozygous   |
| NC_037650.1 | 6776318 | SNV | 1 | A | G | Heterozygous |
| NC_037650.1 | 6776325 | SNV | 1 | A | G | Homozygous   |
| NC_037650.1 | 6776330 | SNV | 1 | G | A | Homozygous   |
| NC_037650.1 | 6782813 | SNV | 1 | T | C | Homozygous   |
| NC_037650.1 | 6782825 | SNV | 1 | T | C | Homozygous   |
| NC_037650.1 | 6782936 | SNV | 1 | C | T | Heterozygous |
| NC_037650.1 | 6782961 | SNV | 1 | C | T | Heterozygous |
| NC_037650.1 | 6782967 | SNV | 1 | C | T | Heterozygous |
| NC_037650.1 | 6783016 | SNV | 1 | C | T | Homozygous   |
| NC_037650.1 | 6787722 | SNV | 1 | G | A | Heterozygous |
| NC_037650.1 | 6787798 | SNV | 1 | T | C | Heterozygous |
| NC_037650.1 | 6793152 | SNV | 1 | C | T | Homozygous   |
| NC_037650.1 | 6798138 | SNV | 1 | T | A | Homozygous   |
| NC_037650.1 | 6798144 | SNV | 1 | T | C | Homozygous   |
| NC_037650.1 | 6798151 | SNV | 1 | A | C | Homozygous   |
| NC_037650.1 | 6805634 | SNV | 1 | A | G | Homozygous   |
| NC_037650.1 | 6805642 | SNV | 1 | G | A | Homozygous   |
| NC_037650.1 | 6806333 | SNV | 1 | T | C | Homozygous   |
| NC_037650.1 | 6806477 | SNV | 1 | A | G | Homozygous   |
| NC_037650.1 | 6806492 | SNV | 1 | C | T | Homozygous   |
| NC_037650.1 | 6806516 | SNV | 1 | G | A | Heterozygous |
| NC_037650.1 | 6806541 | SNV | 1 | G | A | Homozygous   |
| NC_037650.1 | 6806552 | SNV | 1 | G | A | Homozygous   |
| NC_037650.1 | 6806555 | SNV | 1 | A | G | Homozygous   |
| NC_037650.1 | 6806570 | SNV | 1 | A | G | Homozygous   |
| NC_037650.1 | 6806599 | SNV | 1 | A | G | Homozygous   |
| NC_037650.1 | 6806665 | SNV | 1 | T | C | Homozygous   |
| NC_037650.1 | 6806689 | SNV | 1 | T | C | Homozygous   |
| NC_037650.1 | 6806828 | SNV | 1 | A | G | Heterozygous |
| NC_037650.1 | 6806852 | SNV | 1 | C | G | Homozygous   |
| NC_037650.1 | 6815547 | SNV | 1 | C | A | Heterozygous |
| NC_037650.1 | 6815568 | SNV | 1 | T | C | Homozygous   |
| NC_037650.1 | 6817217 | SNV | 1 | T | C | Homozygous   |
| NC_037650.1 | 6817273 | SNV | 1 | C | T | Homozygous   |
| NC_037650.1 | 6817297 | SNV | 1 | G | T | Heterozygous |
| NC_037650.1 | 6817307 | SNV | 1 | T | C | Homozygous   |
| NC_037650.1 | 6824810 | SNV | 1 | G | A | Homozygous   |
| NC_037650.1 | 6824844 | SNV | 1 | G | A | Homozygous   |
| NC_037650.1 | 6824847 | SNV | 1 | G | A | Homozygous   |
| NC_037650.1 | 6824851 | SNV | 1 | A | G | Homozygous   |



|             |         |     |   |   |   |              |
|-------------|---------|-----|---|---|---|--------------|
| NC_037650.1 | 6825069 | SNV | 1 | A | G | Heterozygous |
| NC_037650.1 | 6825117 | SNV | 1 | G | A | Heterozygous |
| NC_037650.1 | 6825214 | SNV | 1 | T | C | Homozygous   |
| NC_037650.1 | 6826573 | SNV | 1 | T | A | Heterozygous |
| NC_037650.1 | 6826577 | SNV | 1 | T | C | Heterozygous |
| NC_037650.1 | 6828975 | SNV | 1 | G | C | Heterozygous |
| NC_037650.1 | 6829799 | SNV | 1 | C | T | Homozygous   |
| NC_037650.1 | 6829914 | SNV | 1 | T | C | Homozygous   |
| NC_037650.1 | 6829936 | SNV | 1 | A | G | Heterozygous |
| NC_037650.1 | 6830004 | SNV | 1 | C | T | Heterozygous |
| NC_037650.1 | 6830350 | SNV | 1 | T | A | Heterozygous |
| NC_037650.1 | 6830439 | SNV | 1 | C | T | Heterozygous |
| NC_037650.1 | 6830531 | SNV | 1 | G | A | Homozygous   |
| NC_037650.1 | 6839365 | SNV | 1 | G | C | Homozygous   |
| NC_037650.1 | 6839425 | SNV | 1 | C | T | Homozygous   |
| NC_037650.1 | 6839919 | SNV | 1 | A | G | Homozygous   |
| NC_037650.1 | 6839923 | SNV | 1 | T | C | Homozygous   |
| NC_037650.1 | 6839936 | SNV | 1 | T | A | Homozygous   |
| NC_037650.1 | 6840149 | SNV | 1 | C | T | Homozygous   |
| NC_037650.1 | 6840194 | SNV | 1 | T | C | Homozygous   |
| NC_037650.1 | 6841075 | SNV | 1 | A | G | Homozygous   |
| NC_037650.1 | 6847011 | SNV | 1 | A | T | Heterozygous |
| NC_037650.1 | 6849760 | SNV | 1 | A | G | Homozygous   |
| NC_037650.1 | 6854659 | SNV | 1 | A | G | Homozygous   |
| NC_037650.1 | 6855118 | SNV | 1 | C | T | Homozygous   |
| NC_037650.1 | 6855777 | SNV | 1 | C | T | Homozygous   |
| NC_037650.1 | 6857096 | SNV | 1 | G | A | Heterozygous |
| NC_037650.1 | 6857411 | SNV | 1 | T | C | Homozygous   |
| NC_037650.1 | 6857430 | SNV | 1 | A | G | Homozygous   |
| NC_037650.1 | 6857530 | SNV | 1 | C | T | Heterozygous |
| NC_037650.1 | 6857563 | SNV | 1 | A | G | Homozygous   |
| NC_037650.1 | 6857926 | SNV | 1 | T | C | Homozygous   |
| NC_037650.1 | 6858316 | SNV | 1 | T | A | Homozygous   |
| NC_037650.1 | 6858389 | SNV | 1 | G | A | Heterozygous |
| NC_037650.1 | 6858413 | SNV | 1 | A | G | Heterozygous |
| NC_037650.1 | 6858416 | SNV | 1 | T | C | Homozygous   |
| NC_037650.1 | 6858455 | SNV | 1 | T | C | Homozygous   |
| NC_037650.1 | 6858571 | SNV | 1 | T | C | Heterozygous |
| NC_037650.1 | 6858751 | SNV | 1 | A | G | Homozygous   |
| NC_037650.1 | 6858797 | SNV | 1 | A | G | Homozygous   |
| NC_037650.1 | 6858823 | SNV | 1 | C | T | Heterozygous |
| NC_037650.1 | 6859145 | SNV | 1 | C | T | Homozygous   |
| NC_037650.1 | 6859347 | SNV | 1 | A | G | Homozygous   |
| NC_037650.1 | 6859350 | SNV | 1 | A | T | Homozygous   |
| NC_037650.1 | 6859562 | SNV | 1 | C | G | Heterozygous |
| NC_037650.1 | 6859585 | SNV | 1 | T | C | Heterozygous |
| NC_037650.1 | 6859815 | SNV | 1 | C | G | Homozygous   |
| NC_037650.1 | 6859980 | SNV | 1 | C | G | Homozygous   |
| NC_037650.1 | 6860623 | SNV | 1 | G | A | Heterozygous |
| NC_037650.1 | 6860660 | SNV | 1 | C | T | Homozygous   |
| NC_037650.1 | 7004251 | SNV | 1 | G | A | Heterozygous |

|             |         |     |   |   |   |              |
|-------------|---------|-----|---|---|---|--------------|
| NC_037650.1 | 7004256 | SNV | 1 | G | A | Heterozygous |
| NC_037650.1 | 7004294 | SNV | 1 | A | G | Heterozygous |
| NC_037650.1 | 7006823 | SNV | 1 | T | C | Heterozygous |
| NC_037650.1 | 7006850 | SNV | 1 | A | T | Homozygous   |
| NC_037650.1 | 7006854 | SNV | 1 | A | C | Heterozygous |
| NC_037650.1 | 7006861 | SNV | 1 | A | G | Heterozygous |
| NC_037650.1 | 7006885 | SNV | 1 | T | C | Heterozygous |
| NC_037650.1 | 7006901 | SNV | 1 | T | C | Heterozygous |
| NC_037650.1 | 7006904 | SNV | 1 | C | T | Heterozygous |
| NC_037650.1 | 7006909 | SNV | 1 | A | T | Heterozygous |
| NC_037650.1 | 7006941 | SNV | 1 | G | A | Heterozygous |
| NC_037650.1 | 7038804 | SNV | 1 | T | C | Homozygous   |
| NC_037650.1 | 7038830 | SNV | 1 | T | G | Heterozygous |
| NC_037650.1 | 7038834 | SNV | 1 | C | A | Heterozygous |
| NC_037650.1 | 7038841 | SNV | 1 | T | G | Heterozygous |
| NC_037650.1 | 7038867 | SNV | 1 | G | C | Heterozygous |
| NC_037650.1 | 7038930 | SNV | 1 | C | T | Heterozygous |
| NC_037650.1 | 7038955 | SNV | 1 | T | C | Heterozygous |
| NC_037650.1 | 7040635 | SNV | 1 | A | G | Homozygous   |
| NC_037650.1 | 7040640 | SNV | 1 | A | G | Homozygous   |
| NC_037650.1 | 7040642 | SNV | 1 | A | G | Homozygous   |
| NC_037650.1 | 7043050 | SNV | 1 | C | G | Homozygous   |
| NC_037650.1 | 7043055 | SNV | 1 | T | G | Homozygous   |
| NC_037650.1 | 7043058 | SNV | 1 | T | C | Homozygous   |
| NC_037650.1 | 7043063 | SNV | 1 | C | G | Homozygous   |
| NC_037650.1 | 7043065 | SNV | 1 | C | A | Homozygous   |
| NC_037650.1 | 7043074 | SNV | 1 | G | A | Homozygous   |
| NC_037650.1 | 7044456 | SNV | 1 | G | A | Heterozygous |
| NC_037650.1 | 7046235 | SNV | 1 | T | C | Heterozygous |
| NC_037650.1 | 7046287 | SNV | 1 | G | A | Heterozygous |
| NC_037650.1 | 7046308 | SNV | 1 | C | T | Heterozygous |
| NC_037650.1 | 7092306 | SNV | 1 | C | A | Heterozygous |
| NC_037650.1 | 7095314 | SNV | 1 | T | A | Homozygous   |
| NC_037650.1 | 7095344 | SNV | 1 | T | C | Homozygous   |
| NC_037650.1 | 7096091 | SNV | 1 | G | A | Heterozygous |
| NC_037650.1 | 7253207 | SNV | 1 | G | A | Heterozygous |
| NC_037650.1 | 7253483 | SNV | 1 | C | T | Heterozygous |
| NC_037650.1 | 7254408 | SNV | 1 | A | G | Homozygous   |
| NC_037650.1 | 7254431 | SNV | 1 | G | A | Heterozygous |
| NC_037650.1 | 7254586 | SNV | 1 | G | T | Heterozygous |
| NC_037650.1 | 7254726 | SNV | 1 | G | T | Heterozygous |
| NC_037650.1 | 7264669 | SNV | 1 | T | G | Homozygous   |
| NC_037650.1 | 7264671 | SNV | 1 | T | C | Homozygous   |
| NC_037650.1 | 7264700 | SNV | 1 | A | T | Homozygous   |
| NC_037650.1 | 7264704 | SNV | 1 | T | A | Homozygous   |
| NC_037650.1 | 7264706 | SNV | 1 | T | G | Homozygous   |
| NC_037650.1 | 7265147 | SNV | 1 | A | G | Homozygous   |
| NC_037650.1 | 7268578 | SNV | 1 | A | G | Homozygous   |
| NC_037650.1 | 7268586 | SNV | 1 | A | G | Homozygous   |
| NC_037650.1 | 7269100 | SNV | 1 | A | G | Homozygous   |
| NC_037650.1 | 7270940 | SNV | 1 | A | G | Heterozygous |

|             |         |     |   |   |   |              |
|-------------|---------|-----|---|---|---|--------------|
| NC_037650.1 | 7271809 | SNV | 1 | T | C | Homozygous   |
| NC_037650.1 | 7271879 | SNV | 1 | T | C | Homozygous   |
| NC_037650.1 | 7271938 | SNV | 1 | A | G | Homozygous   |
| NC_037650.1 | 7272035 | SNV | 1 | T | C | Homozygous   |
| NC_037650.1 | 7272181 | SNV | 1 | T | C | Homozygous   |
| NC_037650.1 | 7283159 | SNV | 1 | A | G | Homozygous   |
| NC_037650.1 | 7283248 | SNV | 1 | T | A | Homozygous   |
| NC_037650.1 | 7283263 | SNV | 1 | G | A | Homozygous   |
| NC_037650.1 | 7283388 | SNV | 1 | A | T | Homozygous   |
| NC_037650.1 | 7283450 | SNV | 1 | T | C | Homozygous   |
| NC_037650.1 | 7283462 | SNV | 1 | T | C | Homozygous   |
| NC_037650.1 | 7290055 | SNV | 1 | G | A | Homozygous   |
| NC_037650.1 | 7290263 | SNV | 1 | A | G | Homozygous   |
| NC_037650.1 | 7290285 | SNV | 1 | G | C | Homozygous   |
| NC_037650.1 | 7290910 | SNV | 1 | G | A | Homozygous   |
| NC_037650.1 | 7291328 | SNV | 1 | G | T | Homozygous   |
| NC_037650.1 | 7291330 | SNV | 1 | A | G | Homozygous   |
| NC_037650.1 | 7291992 | SNV | 1 | A | T | Heterozygous |
| NC_037650.1 | 7292409 | SNV | 1 | C | T | Heterozygous |
| NC_037650.1 | 7292426 | SNV | 1 | T | C | Heterozygous |
| NC_037650.1 | 7292536 | SNV | 1 | A | G | Homozygous   |
| NC_037650.1 | 7300615 | SNV | 1 | C | T | Heterozygous |
| NC_037650.1 | 7308749 | SNV | 1 | T | C | Homozygous   |
| NC_037650.1 | 7308785 | SNV | 1 | G | T | Heterozygous |
| NC_037650.1 | 7308916 | SNV | 1 | G | A | Homozygous   |
| NC_037650.1 | 7308981 | SNV | 1 | C | T | Homozygous   |
| NC_037650.1 | 7312457 | SNV | 1 | G | A | Homozygous   |
| NC_037650.1 | 7313120 | SNV | 1 | A | G | Homozygous   |
| NC_037650.1 | 7314643 | SNV | 1 | T | C | Homozygous   |
| NC_037650.1 | 7315049 | SNV | 1 | A | G | Homozygous   |
| NC_037650.1 | 7315669 | SNV | 1 | C | T | Heterozygous |
| NC_037650.1 | 7315739 | SNV | 1 | C | T | Heterozygous |
| NC_037650.1 | 7315920 | SNV | 1 | A | T | Heterozygous |
| NC_037650.1 | 7315923 | SNV | 1 | T | C | Homozygous   |
| NC_037650.1 | 7315937 | SNV | 1 | C | T | Homozygous   |
| NC_037650.1 | 7315971 | SNV | 1 | G | A | Homozygous   |
| NC_037650.1 | 7316272 | SNV | 1 | G | A | Heterozygous |
| NC_037650.1 | 7317335 | SNV | 1 | A | G | Heterozygous |
| NC_037650.1 | 7317373 | SNV | 1 | A | G | Heterozygous |
| NC_037650.1 | 7317448 | SNV | 1 | A | G | Homozygous   |
| NC_037650.1 | 7317934 | SNV | 1 | T | A | Heterozygous |
| NC_037650.1 | 7318409 | SNV | 1 | G | A | Homozygous   |
| NC_037650.1 | 7318531 | SNV | 1 | C | T | Heterozygous |
| NC_037650.1 | 7319886 | SNV | 1 | C | T | Heterozygous |
| NC_037650.1 | 7320204 | SNV | 1 | T | C | Homozygous   |
| NC_037650.1 | 7320393 | SNV | 1 | A | G | Heterozygous |
| NC_037650.1 | 7321208 | SNV | 1 | G | A | Homozygous   |
| NC_037650.1 | 7321220 | SNV | 1 | T | C | Homozygous   |
| NC_037650.1 | 7321380 | SNV | 1 | T | C | Homozygous   |
| NC_037650.1 | 7321534 | SNV | 1 | G | A | Heterozygous |
| NC_037650.1 | 7322138 | SNV | 1 | C | T | Heterozygous |

|             |         |     |   |   |   |              |
|-------------|---------|-----|---|---|---|--------------|
| NC_037650.1 | 7322491 | SNV | 1 | A | G | Homozygous   |
| NC_037650.1 | 7323080 | SNV | 1 | T | A | Homozygous   |
| NC_037650.1 | 7323239 | SNV | 1 | C | T | Homozygous   |
| NC_037650.1 | 7323405 | SNV | 1 | C | T | Homozygous   |
| NC_037650.1 | 7323928 | SNV | 1 | C | G | Heterozygous |
| NC_037650.1 | 7324389 | SNV | 1 | A | T | Homozygous   |
| NC_037650.1 | 7324826 | SNV | 1 | A | T | Heterozygous |
| NC_037650.1 | 7325421 | SNV | 1 | C | T | Homozygous   |
| NC_037650.1 | 7327863 | SNV | 1 | C | G | Homozygous   |
| NC_037650.1 | 7328104 | SNV | 1 | T | C | Heterozygous |
| NC_037650.1 | 7328370 | SNV | 1 | A | G | Homozygous   |
| NC_037650.1 | 7329385 | SNV | 1 | A | C | Heterozygous |
| NC_037650.1 | 7335034 | SNV | 1 | A | T | Heterozygous |
| NC_037650.1 | 7335036 | SNV | 1 | A | T | Heterozygous |
| NC_037650.1 | 7335064 | SNV | 1 | A | T | Homozygous   |
| NC_037650.1 | 7336274 | SNV | 1 | C | T | Heterozygous |
| NC_037650.1 | 7338764 | SNV | 1 | G | A | Homozygous   |
| NC_037650.1 | 7338793 | SNV | 1 | G | A | Homozygous   |
| NC_037650.1 | 7339127 | SNV | 1 | G | A | Homozygous   |
| NC_037650.1 | 7341397 | SNV | 1 | G | C | Homozygous   |
| NC_037650.1 | 7342732 | SNV | 1 | G | T | Homozygous   |
| NC_037650.1 | 7349466 | SNV | 1 | A | T | Heterozygous |
| NC_037650.1 | 7349866 | SNV | 1 | G | A | Heterozygous |
| NC_037650.1 | 7350573 | SNV | 1 | C | T | Heterozygous |
| NC_037650.1 | 7350920 | SNV | 1 | T | C | Homozygous   |
| NC_037650.1 | 7351120 | SNV | 1 | C | G | Homozygous   |
| NC_037650.1 | 7353799 | SNV | 1 | T | C | Homozygous   |
| NC_037650.1 | 7353874 | SNV | 1 | A | T | Homozygous   |
| NC_037650.1 | 7353879 | SNV | 1 | A | C | Homozygous   |
| NC_037650.1 | 7375463 | SNV | 1 | C | T | Heterozygous |
| NC_037650.1 | 7375468 | SNV | 1 | C | A | Heterozygous |
| NC_037650.1 | 7375696 | SNV | 1 | A | G | Heterozygous |
| NC_037650.1 | 7375781 | SNV | 1 | A | G | Homozygous   |
| NC_037650.1 | 7375794 | SNV | 1 | G | A | Homozygous   |
| NC_037650.1 | 7375822 | SNV | 1 | G | A | Heterozygous |
| NC_037650.1 | 7376313 | SNV | 1 | T | C | Homozygous   |
| NC_037650.1 | 7380351 | SNV | 1 | G | A | Heterozygous |
| NC_037650.1 | 7383070 | SNV | 1 | G | A | Heterozygous |
| NC_037650.1 | 7383139 | SNV | 1 | G | A | Heterozygous |
| NC_037650.1 | 7384612 | SNV | 1 | A | G | Heterozygous |
| NC_037650.1 | 7384821 | SNV | 1 | C | A | Heterozygous |
| NC_037650.1 | 7385280 | SNV | 1 | T | C | Homozygous   |
| NC_037650.1 | 7385751 | SNV | 1 | C | T | Homozygous   |
| NC_037650.1 | 7385775 | SNV | 1 | T | C | Heterozygous |
| NC_037650.1 | 7386080 | SNV | 1 | G | A | Heterozygous |
| NC_037650.1 | 7386652 | SNV | 1 | T | C | Heterozygous |
| NC_037650.1 | 7386688 | SNV | 1 | G | A | Heterozygous |
| NC_037650.1 | 7386741 | SNV | 1 | C | G | Homozygous   |
| NC_037650.1 | 7386752 | SNV | 1 | T | C | Heterozygous |
| NC_037650.1 | 7387231 | SNV | 1 | T | C | Heterozygous |
| NC_037650.1 | 7387262 | SNV | 1 | C | T | Heterozygous |

|             |         |     |   |   |   |              |
|-------------|---------|-----|---|---|---|--------------|
| NC_037650.1 | 7387696 | SNV | 1 | A | T | Heterozygous |
| NC_037650.1 | 7387806 | SNV | 1 | T | C | Homozygous   |
| NC_037650.1 | 7387897 | SNV | 1 | T | C | Homozygous   |
| NC_037650.1 | 7387924 | SNV | 1 | C | A | Homozygous   |
| NC_037650.1 | 7388276 | SNV | 1 | C | T | Heterozygous |
| NC_037650.1 | 7388461 | SNV | 1 | C | T | Heterozygous |
| NC_037650.1 | 7389864 | SNV | 1 | C | A | Homozygous   |
| NC_037650.1 | 7389883 | SNV | 1 | A | G | Homozygous   |
| NC_037650.1 | 7391999 | SNV | 1 | C | G | Heterozygous |
| NC_037650.1 | 7392263 | SNV | 1 | C | A | Heterozygous |
| NC_037650.1 | 7392311 | SNV | 1 | G | T | Heterozygous |
| NC_037650.1 | 7392364 | SNV | 1 | G | A | Heterozygous |
| NC_037650.1 | 7392520 | SNV | 1 | A | G | Homozygous   |
| NC_037650.1 | 7392526 | SNV | 1 | A | G | Homozygous   |
| NC_037650.1 | 7392617 | SNV | 1 | G | C | Homozygous   |
| NC_037650.1 | 7392872 | SNV | 1 | G | A | Homozygous   |
| NC_037650.1 | 7396626 | SNV | 1 | A | G | Homozygous   |
| NC_037650.1 | 7396654 | SNV | 1 | T | C | Heterozygous |
| NC_037650.1 | 7396876 | SNV | 1 | C | T | Heterozygous |
| NC_037650.1 | 7398309 | SNV | 1 | A | G | Homozygous   |
| NC_037650.1 | 7398321 | SNV | 1 | T | C | Heterozygous |
| NC_037650.1 | 7409350 | SNV | 1 | C | G | Homozygous   |
| NC_037650.1 | 7409472 | SNV | 1 | G | T | Homozygous   |
| NC_037650.1 | 7409642 | SNV | 1 | A | T | Homozygous   |
| NC_037650.1 | 7409672 | SNV | 1 | A | G | Heterozygous |
| NC_037650.1 | 7412626 | SNV | 1 | C | A | Heterozygous |
| NC_037650.1 | 7431250 | SNV | 1 | T | C | Homozygous   |
| NC_037650.1 | 7431305 | SNV | 1 | T | C | Heterozygous |
| NC_037650.1 | 7431313 | SNV | 1 | C | T | Heterozygous |
| NC_037650.1 | 7431314 | SNV | 1 | T | C | Heterozygous |
| NC_037650.1 | 7431325 | SNV | 1 | T | C | Homozygous   |
| NC_037650.1 | 7431367 | SNV | 1 | T | C | Homozygous   |
| NC_037650.1 | 7431443 | SNV | 1 | G | C | Homozygous   |
| NC_037650.1 | 7431464 | SNV | 1 | C | T | Homozygous   |
| NC_037650.1 | 7431679 | SNV | 1 | T | C | Homozygous   |
| NC_037650.1 | 7431760 | SNV | 1 | T | C | Homozygous   |
| NC_037650.1 | 7431764 | SNV | 1 | T | C | Homozygous   |
| NC_037650.1 | 7431771 | SNV | 1 | C | T | Homozygous   |
| NC_037650.1 | 7431803 | SNV | 1 | A | G | Homozygous   |
| NC_037650.1 | 7431862 | SNV | 1 | A | G | Homozygous   |
| NC_037650.1 | 7431978 | SNV | 1 | C | T | Heterozygous |
| NC_037650.1 | 7432142 | SNV | 1 | A | G | Homozygous   |
| NC_037650.1 | 7432155 | SNV | 1 | A | G | Heterozygous |
| NC_037650.1 | 7432181 | SNV | 1 | A | G | Homozygous   |
| NC_037650.1 | 7432201 | SNV | 1 | T | C | Homozygous   |
| NC_037650.1 | 7432232 | SNV | 1 | G | A | Heterozygous |
| NC_037650.1 | 7432246 | SNV | 1 | C | T | Heterozygous |
| NC_037650.1 | 7432254 | SNV | 1 | C | T | Heterozygous |
| NC_037650.1 | 7432258 | SNV | 1 | T | C | Homozygous   |
| NC_037650.1 | 7432267 | SNV | 1 | A | G | Homozygous   |
| NC_037650.1 | 7432293 | SNV | 1 | C | T | Heterozygous |

|             |         |     |   |   |   |              |
|-------------|---------|-----|---|---|---|--------------|
| NC_037650.1 | 7432299 | SNV | 1 | A | G | Heterozygous |
| NC_037650.1 | 7432371 | SNV | 1 | G | A | Heterozygous |
| NC_037650.1 | 7432427 | SNV | 1 | T | C | Homozygous   |
| NC_037650.1 | 7432430 | SNV | 1 | G | A | Homozygous   |
| NC_037650.1 | 7432498 | SNV | 1 | A | C | Homozygous   |
| NC_037650.1 | 7432533 | SNV | 1 | C | A | Homozygous   |
| NC_037650.1 | 7432554 | SNV | 1 | T | A | Heterozygous |
| NC_037650.1 | 7432707 | SNV | 1 | C | T | Homozygous   |
| NC_037650.1 | 7432711 | SNV | 1 | A | G | Homozygous   |
| NC_037650.1 | 7432714 | SNV | 1 | C | T | Homozygous   |
| NC_037650.1 | 7432727 | SNV | 1 | G | C | Homozygous   |
| NC_037650.1 | 7432729 | SNV | 1 | A | G | Homozygous   |
| NC_037650.1 | 7438611 | SNV | 1 | G | A | Homozygous   |
| NC_037650.1 | 7438616 | SNV | 1 | C | T | Homozygous   |
| NC_037650.1 | 7439017 | SNV | 1 | T | A | Homozygous   |
| NC_037650.1 | 7439253 | SNV | 1 | G | A | Homozygous   |
| NC_037650.1 | 7439271 | SNV | 1 | A | G | Homozygous   |
| NC_037650.1 | 7439299 | SNV | 1 | C | T | Homozygous   |
| NC_037650.1 | 7439546 | SNV | 1 | A | C | Homozygous   |
| NC_037650.1 | 7439559 | SNV | 1 | C | A | Homozygous   |
| NC_037650.1 | 7441239 | SNV | 1 | T | C | Homozygous   |
| NC_037650.1 | 7441242 | SNV | 1 | C | T | Homozygous   |
| NC_037650.1 | 7449634 | SNV | 1 | G | A | Homozygous   |
| NC_037650.1 | 7449719 | SNV | 1 | T | C | Homozygous   |
| NC_037650.1 | 7456272 | SNV | 1 | T | C | Homozygous   |
| NC_037650.1 | 7456425 | SNV | 1 | T | C | Heterozygous |
| NC_037650.1 | 7456484 | SNV | 1 | T | C | Homozygous   |
| NC_037650.1 | 7456502 | SNV | 1 | G | A | Heterozygous |
| NC_037650.1 | 7456505 | SNV | 1 | A | G | Heterozygous |
| NC_037650.1 | 7456533 | SNV | 1 | C | T | Homozygous   |
| NC_037650.1 | 7456576 | SNV | 1 | C | G | Homozygous   |
| NC_037650.1 | 7456607 | SNV | 1 | A | G | Homozygous   |
| NC_037650.1 | 7456629 | SNV | 1 | T | A | Homozygous   |
| NC_037650.1 | 7456892 | SNV | 1 | C | T | Heterozygous |
| NC_037650.1 | 7456907 | SNV | 1 | C | T | Heterozygous |
| NC_037650.1 | 7457131 | SNV | 1 | C | T | Heterozygous |
| NC_037650.1 | 7457422 | SNV | 1 | A | T | Heterozygous |
| NC_037650.1 | 7457474 | SNV | 1 | A | G | Homozygous   |
| NC_037650.1 | 7457497 | SNV | 1 | C | T | Homozygous   |
| NC_037650.1 | 7457507 | SNV | 1 | T | C | Homozygous   |
| NC_037650.1 | 7457560 | SNV | 1 | T | C | Homozygous   |
| NC_037650.1 | 7457569 | SNV | 1 | C | T | Heterozygous |
| NC_037650.1 | 7457594 | SNV | 1 | T | A | Heterozygous |
| NC_037650.1 | 7457658 | SNV | 1 | A | T | Heterozygous |
| NC_037650.1 | 7458056 | SNV | 1 | T | G | Homozygous   |
| NC_037650.1 | 7458060 | SNV | 1 | G | A | Homozygous   |
| NC_037650.1 | 7474152 | SNV | 1 | A | G | Homozygous   |
| NC_037650.1 | 7474442 | SNV | 1 | C | T | Homozygous   |
| NC_037650.1 | 7474496 | SNV | 1 | C | T | Homozygous   |
| NC_037650.1 | 7474554 | SNV | 1 | A | T | Heterozygous |
| NC_037650.1 | 7474572 | SNV | 1 | A | T | Heterozygous |

|             |         |     |   |   |   |              |
|-------------|---------|-----|---|---|---|--------------|
| NC_037650.1 | 7479679 | SNV | 1 | T | A | Heterozygous |
| NC_037650.1 | 7479831 | SNV | 1 | G | A | Heterozygous |
| NC_037650.1 | 7480480 | SNV | 1 | A | G | Homozygous   |
| NC_037650.1 | 7480482 | SNV | 1 | T | C | Homozygous   |
| NC_037650.1 | 7480503 | SNV | 1 | C | T | Homozygous   |
| NC_037650.1 | 7480513 | SNV | 1 | C | T | Homozygous   |
| NC_037650.1 | 7485274 | SNV | 1 | C | T | Heterozygous |
| NC_037650.1 | 7485286 | SNV | 1 | T | C | Heterozygous |
| NC_037650.1 | 7485508 | SNV | 1 | A | G | Homozygous   |
| NC_037650.1 | 7485552 | SNV | 1 | C | T | Heterozygous |
| NC_037650.1 | 7485558 | SNV | 1 | T | C | Heterozygous |
| NC_037650.1 | 7485599 | SNV | 1 | T | C | Heterozygous |
| NC_037650.1 | 7485607 | SNV | 1 | G | A | Homozygous   |
| NC_037650.1 | 7485632 | SNV | 1 | C | T | Heterozygous |
| NC_037650.1 | 7485674 | SNV | 1 | C | T | Heterozygous |
| NC_037650.1 | 7489106 | SNV | 1 | T | G | Homozygous   |
| NC_037650.1 | 7489153 | SNV | 1 | G | A | Heterozygous |
| NC_037650.1 | 7489199 | SNV | 1 | G | A | Homozygous   |
| NC_037650.1 | 7489566 | SNV | 1 | C | T | Heterozygous |
| NC_037650.1 | 7489577 | SNV | 1 | C | T | Homozygous   |
| NC_037650.1 | 7489584 | SNV | 1 | T | C | Heterozygous |
| NC_037650.1 | 7489673 | SNV | 1 | C | T | Homozygous   |
| NC_037650.1 | 7489878 | SNV | 1 | A | G | Homozygous   |
| NC_037650.1 | 7489904 | SNV | 1 | C | T | Homozygous   |
| NC_037650.1 | 7489936 | SNV | 1 | G | C | Heterozygous |
| NC_037650.1 | 7490178 | SNV | 1 | A | T | Heterozygous |
| NC_037650.1 | 7490183 | SNV | 1 | G | A | Homozygous   |
| NC_037650.1 | 7490294 | SNV | 1 | T | C | Heterozygous |
| NC_037650.1 | 7491520 | SNV | 1 | A | G | Homozygous   |
| NC_037650.1 | 7491543 | SNV | 1 | T | G | Heterozygous |
| NC_037650.1 | 7491977 | SNV | 1 | G | A | Homozygous   |
| NC_037650.1 | 7491999 | SNV | 1 | G | A | Homozygous   |
| NC_037650.1 | 7492003 | SNV | 1 | G | A | Homozygous   |
| NC_037650.1 | 7497047 | SNV | 1 | G | C | Heterozygous |
| NC_037650.1 | 7497054 | SNV | 1 | C | T | Heterozygous |
| NC_037650.1 | 7498135 | SNV | 1 | A | G | Homozygous   |
| NC_037650.1 | 7498473 | SNV | 1 | A | T | Homozygous   |
| NC_037650.1 | 7498477 | SNV | 1 | T | A | Homozygous   |
| NC_037650.1 | 7498491 | SNV | 1 | G | A | Homozygous   |
| NC_037650.1 | 7498494 | SNV | 1 | G | A | Homozygous   |
| NC_037650.1 | 7500935 | SNV | 1 | T | C | Heterozygous |
| NC_037650.1 | 7500939 | SNV | 1 | T | G | Homozygous   |
| NC_037650.1 | 7500962 | SNV | 1 | G | A | Heterozygous |
| NC_037650.1 | 7512617 | SNV | 1 | A | G | Heterozygous |
| NC_037650.1 | 7512715 | SNV | 1 | T | C | Homozygous   |
| NC_037650.1 | 7512846 | SNV | 1 | C | T | Homozygous   |
| NC_037650.1 | 7512848 | SNV | 1 | T | C | Heterozygous |
| NC_037650.1 | 7512963 | SNV | 1 | A | G | Homozygous   |
| NC_037650.1 | 7513107 | SNV | 1 | G | A | Homozygous   |
| NC_037650.1 | 7513995 | SNV | 1 | T | A | Homozygous   |
| NC_037650.1 | 7513997 | SNV | 1 | G | T | Homozygous   |

|             |         |     |   |   |   |              |
|-------------|---------|-----|---|---|---|--------------|
| NC_037650.1 | 7514015 | SNV | 1 | G | A | Heterozygous |
| NC_037650.1 | 7514032 | SNV | 1 | C | T | Heterozygous |
| NC_037650.1 | 7519755 | SNV | 1 | C | G | Homozygous   |
| NC_037650.1 | 7519768 | SNV | 1 | T | C | Heterozygous |
| NC_037650.1 | 7519796 | SNV | 1 | T | C | Homozygous   |
| NC_037650.1 | 7519825 | SNV | 1 | T | C | Homozygous   |
| NC_037650.1 | 7519882 | SNV | 1 | T | C | Homozygous   |
| NC_037650.1 | 7520040 | SNV | 1 | G | A | Heterozygous |
| NC_037650.1 | 7520282 | SNV | 1 | C | T | Heterozygous |
| NC_037650.1 | 7520474 | SNV | 1 | G | A | Heterozygous |
| NC_037650.1 | 7520615 | SNV | 1 | T | C | Homozygous   |
| NC_037650.1 | 7550812 | SNV | 1 | T | G | Homozygous   |
| NC_037650.1 | 7550824 | SNV | 1 | A | G | Heterozygous |
| NC_037650.1 | 7553978 | SNV | 1 | G | A | Homozygous   |
| NC_037650.1 | 7554015 | SNV | 1 | T | G | Homozygous   |
| NC_037650.1 | 7554131 | SNV | 1 | C | G | Homozygous   |
| NC_037650.1 | 7554134 | SNV | 1 | A | G | Homozygous   |
| NC_037650.1 | 7554164 | SNV | 1 | G | T | Homozygous   |
| NC_037650.1 | 7554216 | SNV | 1 | G | A | Heterozygous |
| NC_037650.1 | 7554244 | SNV | 1 | C | T | Homozygous   |
| NC_037650.1 | 7554248 | SNV | 1 | C | T | Homozygous   |
| NC_037650.1 | 7554274 | SNV | 1 | T | C | Heterozygous |
| NC_037650.1 | 7554294 | SNV | 1 | T | C | Heterozygous |
| NC_037650.1 | 7554324 | SNV | 1 | C | T | Homozygous   |
| NC_037650.1 | 7554358 | SNV | 1 | T | C | Heterozygous |
| NC_037650.1 | 7555311 | SNV | 1 | T | C | Homozygous   |
| NC_037650.1 | 7555344 | SNV | 1 | G | A | Heterozygous |
| NC_037650.1 | 7557952 | SNV | 1 | T | C | Homozygous   |
| NC_037650.1 | 7558128 | SNV | 1 | A | C | Homozygous   |
| NC_037650.1 | 7558141 | SNV | 1 | A | G | Homozygous   |
| NC_037650.1 | 7558148 | SNV | 1 | G | C | Homozygous   |
| NC_037650.1 | 7558162 | SNV | 1 | A | T | Homozygous   |
| NC_037650.1 | 7575325 | SNV | 1 | T | C | Homozygous   |
| NC_037650.1 | 7575529 | SNV | 1 | C | T | Heterozygous |
| NC_037650.1 | 7575714 | SNV | 1 | T | C | Heterozygous |
| NC_037650.1 | 7575720 | SNV | 1 | T | C | Heterozygous |
| NC_037650.1 | 7575768 | SNV | 1 | T | C | Heterozygous |
| NC_037650.1 | 7575912 | SNV | 1 | T | C | Homozygous   |
| NC_037650.1 | 7584405 | SNV | 1 | C | T | Homozygous   |
| NC_037650.1 | 7584656 | SNV | 1 | A | G | Homozygous   |
| NC_037650.1 | 7604002 | SNV | 1 | T | C | Homozygous   |
| NC_037650.1 | 7606100 | SNV | 1 | T | C | Heterozygous |
| NC_037650.1 | 7626592 | SNV | 1 | T | C | Heterozygous |
| NC_037650.1 | 7626878 | SNV | 1 | G | C | Heterozygous |
| NC_037650.1 | 7626887 | SNV | 1 | T | C | Homozygous   |
| NC_037650.1 | 7626984 | SNV | 1 | T | C | Homozygous   |
| NC_037650.1 | 7626987 | SNV | 1 | T | C | Heterozygous |
| NC_037650.1 | 7638167 | SNV | 1 | T | C | Homozygous   |
| NC_037650.1 | 7638215 | SNV | 1 | T | C | Homozygous   |
| NC_037650.1 | 7678938 | SNV | 1 | C | T | Heterozygous |
| NC_037650.1 | 7679047 | SNV | 1 | G | A | Heterozygous |



|             |         |     |   |   |   |              |
|-------------|---------|-----|---|---|---|--------------|
| NC_037650.1 | 7679079 | SNV | 1 | G | A | Homozygous   |
| NC_037650.1 | 7679955 | SNV | 1 | A | G | Homozygous   |
| NC_037650.1 | 7679991 | SNV | 1 | C | A | Heterozygous |
| NC_037650.1 | 7680028 | SNV | 1 | T | C | Homozygous   |
| NC_037650.1 | 7680175 | SNV | 1 | T | C | Homozygous   |
| NC_037650.1 | 7680204 | SNV | 1 | G | A | Homozygous   |
| NC_037650.1 | 7680547 | SNV | 1 | T | C | Homozygous   |
| NC_037650.1 | 7680612 | SNV | 1 | A | G | Homozygous   |
| NC_037650.1 | 7680926 | SNV | 1 | A | G | Homozygous   |
| NC_037650.1 | 7681883 | SNV | 1 | C | G | Homozygous   |
| NC_037650.1 | 7683098 | SNV | 1 | T | C | Homozygous   |
| NC_037650.1 | 7683134 | SNV | 1 | A | C | Heterozygous |
| NC_037650.1 | 7683237 | SNV | 1 | A | T | Heterozygous |
| NC_037650.1 | 7683248 | SNV | 1 | T | C | Heterozygous |
| NC_037650.1 | 7683314 | SNV | 1 | A | T | Heterozygous |
| NC_037650.1 | 7683317 | SNV | 1 | A | G | Heterozygous |
| NC_037650.1 | 7683337 | SNV | 1 | T | A | Homozygous   |
| NC_037650.1 | 7683365 | SNV | 1 | A | G | Homozygous   |
| NC_037650.1 | 7683719 | SNV | 1 | A | T | Homozygous   |
| NC_037650.1 | 7683936 | SNV | 1 | A | G | Homozygous   |
| NC_037650.1 | 7684703 | SNV | 1 | T | C | Homozygous   |
| NC_037650.1 | 7684947 | SNV | 1 | T | C | Homozygous   |
| NC_037650.1 | 7685066 | SNV | 1 | T | C | Heterozygous |
| NC_037650.1 | 7685409 | SNV | 1 | A | G | Homozygous   |
| NC_037650.1 | 7688130 | SNV | 1 | A | G | Heterozygous |
| NC_037650.1 | 7688133 | SNV | 1 | A | G | Heterozygous |
| NC_037650.1 | 7688147 | SNV | 1 | A | G | Heterozygous |
| NC_037650.1 | 7690246 | SNV | 1 | A | G | Homozygous   |
| NC_037650.1 | 7690273 | SNV | 1 | G | A | Heterozygous |
| NC_037650.1 | 7690303 | SNV | 1 | A | G | Heterozygous |
| NC_037650.1 | 7692861 | SNV | 1 | C | G | Heterozygous |
| NC_037650.1 | 7693321 | SNV | 1 | G | A | Homozygous   |
| NC_037650.1 | 7693325 | SNV | 1 | T | A | Homozygous   |
| NC_037650.1 | 7693559 | SNV | 1 | A | T | Heterozygous |
| NC_037650.1 | 7694807 | SNV | 1 | A | G | Homozygous   |
| NC_037650.1 | 7695253 | SNV | 1 | A | G | Homozygous   |
| NC_037650.1 | 7701010 | SNV | 1 | G | C | Homozygous   |
| NC_037650.1 | 7701303 | SNV | 1 | T | C | Homozygous   |
| NC_037650.1 | 7701374 | SNV | 1 | C | T | Heterozygous |
| NC_037650.1 | 7701392 | SNV | 1 | A | G | Heterozygous |
| NC_037650.1 | 7701397 | SNV | 1 | C | T | Heterozygous |
| NC_037650.1 | 7701402 | SNV | 1 | T | C | Heterozygous |
| NC_037650.1 | 7701618 | SNV | 1 | C | T | Homozygous   |
| NC_037650.1 | 7701621 | SNV | 1 | C | T | Heterozygous |
| NC_037650.1 | 7701710 | SNV | 1 | C | T | Heterozygous |
| NC_037650.1 | 7701718 | SNV | 1 | A | G | Heterozygous |
| NC_037650.1 | 7701721 | SNV | 1 | T | C | Heterozygous |
| NC_037650.1 | 7705908 | SNV | 1 | A | G | Homozygous   |
| NC_037650.1 | 7711294 | SNV | 1 | T | C | Homozygous   |
| NC_037650.1 | 7711375 | SNV | 1 | T | G | Homozygous   |
| NC_037650.1 | 7711506 | SNV | 1 | A | G | Homozygous   |

|             |         |     |   |   |   |              |
|-------------|---------|-----|---|---|---|--------------|
| NC_037650.1 | 7711705 | SNV | 1 | C | T | Homozygous   |
| NC_037650.1 | 7712134 | SNV | 1 | T | C | Homozygous   |
| NC_037650.1 | 7714842 | SNV | 1 | T | C | Homozygous   |
| NC_037650.1 | 7714862 | SNV | 1 | C | T | Heterozygous |
| NC_037650.1 | 7714865 | SNV | 1 | T | C | Homozygous   |
| NC_037650.1 | 7715053 | SNV | 1 | G | A | Heterozygous |
| NC_037650.1 | 7715074 | SNV | 1 | T | C | Homozygous   |
| NC_037650.1 | 7718434 | SNV | 1 | T | C | Homozygous   |
| NC_037650.1 | 7728795 | SNV | 1 | G | A | Heterozygous |
| NC_037650.1 | 7729145 | SNV | 1 | G | A | Heterozygous |
| NC_037650.1 | 7729146 | SNV | 1 | C | T | Heterozygous |
| NC_037650.1 | 7729165 | SNV | 1 | C | T | Heterozygous |
| NC_037650.1 | 7729167 | SNV | 1 | C | T | Homozygous   |
| NC_037650.1 | 7729180 | SNV | 1 | C | A | Heterozygous |
| NC_037650.1 | 7729182 | SNV | 1 | C | T | Heterozygous |
| NC_037650.1 | 7729190 | SNV | 1 | A | T | Homozygous   |
| NC_037650.1 | 7733024 | SNV | 1 | A | G | Homozygous   |
| NC_037650.1 | 7738358 | SNV | 1 | A | G | Heterozygous |
| NC_037650.1 | 7746021 | SNV | 1 | C | T | Homozygous   |
| NC_037650.1 | 7746086 | SNV | 1 | A | G | Homozygous   |
| NC_037650.1 | 7746114 | SNV | 1 | A | T | Homozygous   |
| NC_037650.1 | 7746170 | SNV | 1 | C | T | Homozygous   |
| NC_037650.1 | 7746226 | SNV | 1 | G | T | Homozygous   |
| NC_037650.1 | 7746471 | SNV | 1 | T | A | Heterozygous |
| NC_037650.1 | 7746650 | SNV | 1 | T | C | Homozygous   |
| NC_037650.1 | 7748890 | SNV | 1 | A | G | Homozygous   |
| NC_037650.1 | 7748924 | SNV | 1 | G | C | Homozygous   |
| NC_037650.1 | 7748947 | SNV | 1 | C | T | Homozygous   |
| NC_037650.1 | 7749000 | SNV | 1 | T | C | Homozygous   |
| NC_037650.1 | 7749028 | SNV | 1 | A | G | Homozygous   |
| NC_037650.1 | 7749041 | SNV | 1 | A | G | Homozygous   |
| NC_037650.1 | 7749055 | SNV | 1 | T | C | Homozygous   |
| NC_037650.1 | 7757139 | SNV | 1 | T | C | Heterozygous |
| NC_037650.1 | 7757143 | SNV | 1 | C | T | Homozygous   |
| NC_037650.1 | 7758638 | SNV | 1 | A | G | Homozygous   |
| NC_037650.1 | 7758655 | SNV | 1 | C | T | Heterozygous |
| NC_037650.1 | 7758691 | SNV | 1 | T | C | Homozygous   |
| NC_037650.1 | 7764325 | SNV | 1 | C | T | Heterozygous |
| NC_037650.1 | 7775436 | SNV | 1 | G | A | Heterozygous |
| NC_037650.1 | 7775465 | SNV | 1 | T | A | Homozygous   |
| NC_037650.1 | 7775865 | SNV | 1 | G | A | Heterozygous |
| NC_037650.1 | 7775870 | SNV | 1 | T | C | Homozygous   |
| NC_037650.1 | 7775872 | SNV | 1 | A | C | Homozygous   |
| NC_037650.1 | 7775882 | SNV | 1 | T | A | Heterozygous |
| NC_037650.1 | 7775886 | SNV | 1 | C | T | Heterozygous |
| NC_037650.1 | 7775900 | SNV | 1 | G | C | Heterozygous |
| NC_037650.1 | 7782892 | SNV | 1 | A | T | Homozygous   |
| NC_037650.1 | 7782894 | SNV | 1 | G | T | Homozygous   |
| NC_037650.1 | 7784965 | SNV | 1 | C | T | Homozygous   |
| NC_037650.1 | 7784984 | SNV | 1 | A | T | Heterozygous |
| NC_037650.1 | 7784988 | SNV | 1 | A | T | Heterozygous |

|             |         |     |   |   |   |              |
|-------------|---------|-----|---|---|---|--------------|
| NC_037650.1 | 7784992 | SNV | 1 | G | T | Heterozygous |
| NC_037650.1 | 7788580 | SNV | 1 | C | T | Heterozygous |
| NC_037650.1 | 7794534 | SNV | 1 | T | A | Heterozygous |
| NC_037650.1 | 7794552 | SNV | 1 | C | T | Homozygous   |
| NC_037650.1 | 7794946 | SNV | 1 | A | C | Heterozygous |
| NC_037650.1 | 7794949 | SNV | 1 | T | C | Homozygous   |
| NC_037650.1 | 7794958 | SNV | 1 | C | A | Heterozygous |
| NC_037650.1 | 7795928 | SNV | 1 | C | T | Heterozygous |
| NC_037650.1 | 7796301 | SNV | 1 | A | G | Homozygous   |
| NC_037650.1 | 7797271 | SNV | 1 | C | G | Homozygous   |
| NC_037650.1 | 7797293 | SNV | 1 | T | A | Homozygous   |
| NC_037650.1 | 7797301 | SNV | 1 | T | C | Homozygous   |
| NC_037650.1 | 7797307 | SNV | 1 | T | A | Homozygous   |
| NC_037650.1 | 7797309 | SNV | 1 | T | G | Homozygous   |
| NC_037650.1 | 7797313 | SNV | 1 | T | G | Homozygous   |
| NC_037650.1 | 7802630 | SNV | 1 | T | A | Homozygous   |
| NC_037650.1 | 7803014 | SNV | 1 | C | T | Heterozygous |
| NC_037650.1 | 7803877 | SNV | 1 | A | T | Homozygous   |
| NC_037650.1 | 7803888 | SNV | 1 | C | T | Heterozygous |
| NC_037650.1 | 7803902 | SNV | 1 | G | A | Homozygous   |
| NC_037650.1 | 7803922 | SNV | 1 | C | A | Heterozygous |
| NC_037650.1 | 7804008 | SNV | 1 | C | T | Homozygous   |
| NC_037650.1 | 7807378 | SNV | 1 | T | C | Homozygous   |
| NC_037650.1 | 7807698 | SNV | 1 | T | C | Heterozygous |
| NC_037650.1 | 7807726 | SNV | 1 | C | T | Homozygous   |
| NC_037650.1 | 7807832 | SNV | 1 | T | C | Heterozygous |
| NC_037650.1 | 7807876 | SNV | 1 | C | G | Homozygous   |
| NC_037650.1 | 7808574 | SNV | 1 | T | C | Heterozygous |
| NC_037650.1 | 7808604 | SNV | 1 | T | C | Heterozygous |
| NC_037650.1 | 7811782 | SNV | 1 | A | G | Heterozygous |
| NC_037650.1 | 7811792 | SNV | 1 | A | G | Heterozygous |
| NC_037650.1 | 7811798 | SNV | 1 | A | G | Heterozygous |
| NC_037650.1 | 7811803 | SNV | 1 | G | A | Homozygous   |
| NC_037650.1 | 7811813 | SNV | 1 | G | A | Heterozygous |
| NC_037650.1 | 7811818 | SNV | 1 | G | A | Heterozygous |
| NC_037650.1 | 7811824 | SNV | 1 | G | A | Heterozygous |
| NC_037650.1 | 7811833 | SNV | 1 | C | A | Heterozygous |
| NC_037650.1 | 7812090 | SNV | 1 | G | T | Homozygous   |
| NC_037650.1 | 7812120 | SNV | 1 | A | G | Homozygous   |
| NC_037650.1 | 7812550 | SNV | 1 | G | A | Heterozygous |
| NC_037650.1 | 7812554 | SNV | 1 | G | T | Heterozygous |
| NC_037650.1 | 7812559 | SNV | 1 | G | A | Heterozygous |
| NC_037650.1 | 7812585 | SNV | 1 | A | G | Heterozygous |
| NC_037650.1 | 7812956 | SNV | 1 | C | G | Heterozygous |
| NC_037650.1 | 7813231 | SNV | 1 | A | G | Heterozygous |
| NC_037650.1 | 7815083 | SNV | 1 | C | T | Heterozygous |
| NC_037650.1 | 7815195 | SNV | 1 | A | G | Heterozygous |
| NC_037650.1 | 7815273 | SNV | 1 | G | A | Homozygous   |
| NC_037650.1 | 7815501 | SNV | 1 | A | G | Homozygous   |
| NC_037650.1 | 7815578 | SNV | 1 | T | C | Homozygous   |
| NC_037650.1 | 7815751 | SNV | 1 | G | T | Homozygous   |

|             |         |     |   |   |   |              |
|-------------|---------|-----|---|---|---|--------------|
| NC_037650.1 | 7815759 | SNV | 1 | A | G | Heterozygous |
| NC_037650.1 | 7815840 | SNV | 1 | C | T | Heterozygous |
| NC_037650.1 | 7816105 | SNV | 1 | G | A | Homozygous   |
| NC_037650.1 | 7826071 | SNV | 1 | C | G | Homozygous   |
| NC_037650.1 | 7826742 | SNV | 1 | A | G | Homozygous   |
| NC_037650.1 | 7826766 | SNV | 1 | A | G | Homozygous   |
| NC_037650.1 | 7826778 | SNV | 1 | A | G | Homozygous   |
| NC_037650.1 | 7827105 | SNV | 1 | G | A | Heterozygous |
| NC_037650.1 | 7827174 | SNV | 1 | C | T | Homozygous   |
| NC_037650.1 | 7827182 | SNV | 1 | G | T | Homozygous   |
| NC_037650.1 | 7827200 | SNV | 1 | A | C | Homozygous   |
| NC_037650.1 | 7829817 | SNV | 1 | G | C | Homozygous   |
| NC_037650.1 | 7829835 | SNV | 1 | T | G | Homozygous   |
| NC_037650.1 | 7829837 | SNV | 1 | C | A | Homozygous   |
| NC_037650.1 | 7829842 | SNV | 1 | T | C | Homozygous   |
| NC_037650.1 | 7829846 | SNV | 1 | T | C | Heterozygous |
| NC_037650.1 | 7829851 | SNV | 1 | C | T | Homozygous   |
| NC_037650.1 | 7830061 | SNV | 1 | G | C | Homozygous   |
| NC_037650.1 | 7830067 | SNV | 1 | C | T | Homozygous   |
| NC_037650.1 | 7840319 | SNV | 1 | G | A | Heterozygous |
| NC_037650.1 | 7840427 | SNV | 1 | C | T | Heterozygous |
| NC_037650.1 | 7840619 | SNV | 1 | G | A | Heterozygous |
| NC_037650.1 | 7840958 | SNV | 1 | C | T | Heterozygous |
| NC_037650.1 | 7841021 | SNV | 1 | T | C | Heterozygous |
| NC_037650.1 | 7841118 | SNV | 1 | A | G | Homozygous   |
| NC_037650.1 | 7841121 | SNV | 1 | C | T | Homozygous   |
| NC_037650.1 | 7841171 | SNV | 1 | T | C | Homozygous   |
| NC_037650.1 | 7841206 | SNV | 1 | A | C | Homozygous   |
| NC_037650.1 | 7841219 | SNV | 1 | G | A | Heterozygous |
| NC_037650.1 | 7847750 | SNV | 1 | T | A | Heterozygous |
| NC_037650.1 | 7847767 | SNV | 1 | T | A | Homozygous   |
| NC_037650.1 | 7847772 | SNV | 1 | G | A | Homozygous   |
| NC_037650.1 | 7849989 | SNV | 1 | A | G | Homozygous   |
| NC_037650.1 | 7850185 | SNV | 1 | T | C | Homozygous   |
| NC_037650.1 | 7850496 | SNV | 1 | T | A | Homozygous   |
| NC_037650.1 | 7850891 | SNV | 1 | T | C | Homozygous   |
| NC_037650.1 | 7850900 | SNV | 1 | T | G | Heterozygous |
| NC_037650.1 | 7851116 | SNV | 1 | C | T | Heterozygous |
| NC_037650.1 | 7851330 | SNV | 1 | G | A | Heterozygous |
| NC_037650.1 | 7851432 | SNV | 1 | T | C | Heterozygous |
| NC_037650.1 | 7851677 | SNV | 1 | T | C | Homozygous   |
| NC_037650.1 | 7851826 | SNV | 1 | C | T | Heterozygous |
| NC_037650.1 | 7851881 | SNV | 1 | G | A | Homozygous   |
| NC_037650.1 | 7852087 | SNV | 1 | T | A | Heterozygous |
| NC_037650.1 | 7852107 | SNV | 1 | G | A | Heterozygous |
| NC_037650.1 | 7852111 | SNV | 1 | G | C | Homozygous   |
| NC_037650.1 | 7859606 | SNV | 1 | T | A | Homozygous   |
| NC_037650.1 | 7859609 | SNV | 1 | T | A | Homozygous   |
| NC_037650.1 | 7859614 | SNV | 1 | G | C | Homozygous   |
| NC_037650.1 | 7859617 | SNV | 1 | A | T | Homozygous   |
| NC_037650.1 | 7859623 | SNV | 1 | G | A | Homozygous   |

|             |         |     |   |   |   |              |
|-------------|---------|-----|---|---|---|--------------|
| NC_037650.1 | 7859654 | SNV | 1 | G | C | Homozygous   |
| NC_037650.1 | 7859656 | SNV | 1 | T | C | Homozygous   |
| NC_037650.1 | 7867198 | SNV | 1 | A | T | Homozygous   |
| NC_037650.1 | 7869539 | SNV | 1 | T | C | Heterozygous |
| NC_037650.1 | 7869660 | SNV | 1 | C | G | Homozygous   |
| NC_037650.1 | 7870931 | SNV | 1 | A | G | Homozygous   |
| NC_037650.1 | 7871278 | SNV | 1 | A | G | Homozygous   |
| NC_037650.1 | 7871500 | SNV | 1 | C | T | Heterozygous |
| NC_037650.1 | 7872769 | SNV | 1 | T | C | Heterozygous |
| NC_037650.1 | 7873515 | SNV | 1 | G | T | Homozygous   |
| NC_037650.1 | 7874471 | SNV | 1 | T | C | Homozygous   |
| NC_037650.1 | 7874479 | SNV | 1 | C | T | Homozygous   |
| NC_037650.1 | 7874481 | SNV | 1 | C | T | Homozygous   |
| NC_037650.1 | 7874485 | SNV | 1 | T | C | Homozygous   |
| NC_037650.1 | 7874490 | SNV | 1 | G | A | Homozygous   |
| NC_037650.1 | 8230391 | SNV | 1 | C | G | Heterozygous |
| NC_037650.1 | 8230444 | SNV | 1 | T | C | Homozygous   |
| NC_037650.1 | 8231094 | SNV | 1 | A | G | Homozygous   |
| NC_037650.1 | 8231214 | SNV | 1 | A | G | Homozygous   |
| NC_037650.1 | 8231233 | SNV | 1 | T | C | Heterozygous |
| NC_037650.1 | 8231262 | SNV | 1 | A | G | Heterozygous |
| NC_037650.1 | 8231266 | SNV | 1 | T | C | Heterozygous |
| NC_037650.1 | 8231328 | SNV | 1 | T | C | Homozygous   |
| NC_037650.1 | 8231340 | SNV | 1 | A | G | Homozygous   |
| NC_037650.1 | 8231438 | SNV | 1 | G | A | Heterozygous |
| NC_037650.1 | 8231457 | SNV | 1 | T | C | Homozygous   |
| NC_037650.1 | 8231639 | SNV | 1 | A | G | Heterozygous |
| NC_037650.1 | 8231973 | SNV | 1 | A | G | Homozygous   |
| NC_037650.1 | 8231979 | SNV | 1 | T | C | Homozygous   |
| NC_037650.1 | 8232537 | SNV | 1 | A | G | Homozygous   |
| NC_037650.1 | 8232735 | SNV | 1 | A | G | Homozygous   |
| NC_037650.1 | 8233146 | SNV | 1 | T | C | Homozygous   |
| NC_037650.1 | 8233173 | SNV | 1 | A | G | Heterozygous |
| NC_037650.1 | 8233242 | SNV | 1 | T | C | Homozygous   |
| NC_037650.1 | 8233245 | SNV | 1 | T | C | Homozygous   |
| NC_037650.1 | 8235163 | SNV | 1 | C | T | Heterozygous |
| NC_037650.1 | 8235410 | SNV | 1 | G | T | Homozygous   |
| NC_037650.1 | 8235434 | SNV | 1 | C | T | Homozygous   |
| NC_037650.1 | 8236429 | SNV | 1 | G | A | Heterozygous |
| NC_037650.1 | 8237049 | SNV | 1 | A | G | Homozygous   |
| NC_037650.1 | 8238155 | SNV | 1 | T | G | Homozygous   |
| NC_037650.1 | 8238184 | SNV | 1 | C | A | Homozygous   |
| NC_037650.1 | 8238190 | SNV | 1 | C | T | Homozygous   |
| NC_037650.1 | 8238192 | SNV | 1 | T | C | Homozygous   |
| NC_037650.1 | 8238198 | SNV | 1 | C | T | Homozygous   |
| NC_037650.1 | 8280081 | SNV | 1 | C | T | Heterozygous |
| NC_037650.1 | 8282010 | SNV | 1 | A | C | Homozygous   |
| NC_037650.1 | 8282015 | SNV | 1 | G | A | Homozygous   |
| NC_037650.1 | 8282018 | SNV | 1 | A | G | Homozygous   |
| NC_037650.1 | 8285620 | SNV | 1 | C | A | Homozygous   |
| NC_037650.1 | 8285634 | SNV | 1 | C | T | Heterozygous |

|             |         |     |   |   |   |              |
|-------------|---------|-----|---|---|---|--------------|
| NC_037650.1 | 8285640 | SNV | 1 | C | T | Heterozygous |
| NC_037650.1 | 8297713 | SNV | 1 | T | G | Heterozygous |
| NC_037650.1 | 8315063 | SNV | 1 | A | C | Heterozygous |
| NC_037650.1 | 8315071 | SNV | 1 | A | C | Heterozygous |
| NC_037650.1 | 8315076 | SNV | 1 | A | T | Heterozygous |
| NC_037650.1 | 8344482 | SNV | 1 | G | A | Heterozygous |
| NC_037650.1 | 8344495 | SNV | 1 | C | T | Heterozygous |
| NC_037650.1 | 8344501 | SNV | 1 | C | T | Heterozygous |
| NC_037650.1 | 8350610 | SNV | 1 | G | T | Homozygous   |
| NC_037650.1 | 8350638 | SNV | 1 | G | C | Homozygous   |
| NC_037650.1 | 8350640 | SNV | 1 | G | C | Homozygous   |
| NC_037650.1 | 8354164 | SNV | 1 | T | A | Heterozygous |
| NC_037650.1 | 8354172 | SNV | 1 | A | G | Homozygous   |
| NC_037650.1 | 8363630 | SNV | 1 | C | G | Homozygous   |
| NC_037650.1 | 8363966 | SNV | 1 | T | G | Homozygous   |
| NC_037650.1 | 8364030 | SNV | 1 | A | T | Homozygous   |
| NC_037650.1 | 8364033 | SNV | 1 | G | A | Homozygous   |
| NC_037650.1 | 8364180 | SNV | 1 | T | A | Heterozygous |
| NC_037650.1 | 8364943 | SNV | 1 | T | C | Homozygous   |
| NC_037650.1 | 8381138 | SNV | 1 | C | A | Homozygous   |
| NC_037650.1 | 8381147 | SNV | 1 | G | A | Homozygous   |
| NC_037650.1 | 8381150 | SNV | 1 | G | A | Homozygous   |
| NC_037650.1 | 8381158 | SNV | 1 | T | G | Homozygous   |
| NC_037650.1 | 8409093 | SNV | 1 | T | C | Heterozygous |
| NC_037650.1 | 8409101 | SNV | 1 | C | T | Homozygous   |
| NC_037650.1 | 8410785 | SNV | 1 | T | A | Homozygous   |
| NC_037650.1 | 8410788 | SNV | 1 | T | A | Homozygous   |
| NC_037650.1 | 8410797 | SNV | 1 | G | C | Homozygous   |
| NC_037650.1 | 8411473 | SNV | 1 | A | G | Homozygous   |
| NC_037650.1 | 8411478 | SNV | 1 | A | C | Homozygous   |
| NC_037650.1 | 8411510 | SNV | 1 | C | A | Homozygous   |
| NC_037650.1 | 8411512 | SNV | 1 | G | A | Homozygous   |
| NC_037650.1 | 8430941 | SNV | 1 | A | G | Homozygous   |
| NC_037650.1 | 8430944 | SNV | 1 | A | T | Homozygous   |
| NC_037650.1 | 8437419 | SNV | 1 | C | T | Heterozygous |
| NC_037650.1 | 8437429 | SNV | 1 | C | T | Heterozygous |
| NC_037650.1 | 8437433 | SNV | 1 | C | T | Heterozygous |
| NC_037650.1 | 8437454 | SNV | 1 | T | C | Heterozygous |
| NC_037650.1 | 8437456 | SNV | 1 | T | G | Heterozygous |
| NC_037650.1 | 8437461 | SNV | 1 | C | T | Heterozygous |
| NC_037650.1 | 8437870 | SNV | 1 | C | T | Homozygous   |
| NC_037650.1 | 8437872 | SNV | 1 | C | T | Homozygous   |
| NC_037650.1 | 8437875 | SNV | 1 | A | T | Homozygous   |
| NC_037650.1 | 8437884 | SNV | 1 | C | T | Homozygous   |
| NC_037650.1 | 8437893 | SNV | 1 | G | A | Homozygous   |
| NC_037650.1 | 8437896 | SNV | 1 | T | C | Homozygous   |
| NC_037650.1 | 8440140 | SNV | 1 | T | C | Homozygous   |
| NC_037650.1 | 8440151 | SNV | 1 | T | C | Homozygous   |
| NC_037650.1 | 8440424 | SNV | 1 | A | G | Homozygous   |
| NC_037650.1 | 8441047 | SNV | 1 | G | T | Homozygous   |
| NC_037650.1 | 8441052 | SNV | 1 | C | T | Homozygous   |

|             |         |     |   |   |   |              |
|-------------|---------|-----|---|---|---|--------------|
| NC_037650.1 | 8441059 | SNV | 1 | A | T | Homozygous   |
| NC_037650.1 | 8441404 | SNV | 1 | C | T | Heterozygous |
| NC_037650.1 | 8484029 | SNV | 1 | T | C | Homozygous   |
| NC_037650.1 | 8494328 | SNV | 1 | G | T | Homozygous   |
| NC_037650.1 | 8498934 | SNV | 1 | A | G | Homozygous   |
| NC_037650.1 | 8521562 | SNV | 1 | T | G | Homozygous   |
| NC_037650.1 | 8521577 | SNV | 1 | C | T | Homozygous   |
| NC_037650.1 | 8521698 | SNV | 1 | A | T | Heterozygous |
| NC_037650.1 | 8533714 | SNV | 1 | T | C | Homozygous   |
| NC_037650.1 | 8533719 | SNV | 1 | T | C | Homozygous   |
| NC_037650.1 | 8533724 | SNV | 1 | T | C | Heterozygous |
| NC_037650.1 | 8548206 | SNV | 1 | C | T | Homozygous   |
| NC_037650.1 | 8548247 | SNV | 1 | A | G | Homozygous   |
| NC_037650.1 | 8548249 | SNV | 1 | G | C | Homozygous   |
| NC_037650.1 | 8556856 | SNV | 1 | C | T | Homozygous   |
| NC_037650.1 | 8556881 | SNV | 1 | C | T | Heterozygous |
| NC_037650.1 | 8556909 | SNV | 1 | A | G | Homozygous   |
| NC_037650.1 | 8556952 | SNV | 1 | C | G | Homozygous   |
| NC_037650.1 | 8557009 | SNV | 1 | G | A | Heterozygous |
| NC_037650.1 | 8557023 | SNV | 1 | C | T | Heterozygous |
| NC_037650.1 | 8557101 | SNV | 1 | T | C | Heterozygous |
| NC_037650.1 | 8561581 | SNV | 1 | C | G | Heterozygous |
| NC_037650.1 | 8561581 | SNV | 1 | C | T | Heterozygous |
| NC_037650.1 | 8561604 | SNV | 1 | G | T | Heterozygous |
| NC_037650.1 | 8561607 | SNV | 1 | C | T | Heterozygous |
| NC_037650.1 | 8561611 | SNV | 1 | G | C | Heterozygous |
| NC_037650.1 | 8688022 | SNV | 1 | A | T | Heterozygous |
| NC_037650.1 | 8691061 | SNV | 1 | C | T | Homozygous   |
| NC_037650.1 | 8691248 | SNV | 1 | G | A | Homozygous   |
| NC_037650.1 | 8692009 | SNV | 1 | C | T | Homozygous   |
| NC_037650.1 | 8692180 | SNV | 1 | G | A | Homozygous   |
| NC_037650.1 | 8692542 | SNV | 1 | C | T | Heterozygous |
| NC_037650.1 | 8692550 | SNV | 1 | A | T | Homozygous   |
| NC_037650.1 | 8693386 | SNV | 1 | T | A | Heterozygous |
| NC_037650.1 | 8693466 | SNV | 1 | T | C | Heterozygous |
| NC_037650.1 | 8696740 | SNV | 1 | A | C | Homozygous   |
| NC_037650.1 | 8696749 | SNV | 1 | T | C | Homozygous   |
| NC_037650.1 | 8696755 | SNV | 1 | C | T | Homozygous   |
| NC_037650.1 | 8696759 | SNV | 1 | A | G | Homozygous   |
| NC_037650.1 | 8696761 | SNV | 1 | A | G | Homozygous   |
| NC_037650.1 | 8699431 | SNV | 1 | G | A | Heterozygous |
| NC_037650.1 | 8699725 | SNV | 1 | T | C | Homozygous   |
| NC_037650.1 | 8699760 | SNV | 1 | T | C | Homozygous   |
| NC_037650.1 | 8700381 | SNV | 1 | A | G | Heterozygous |
| NC_037650.1 | 8700435 | SNV | 1 | A | G | Homozygous   |
| NC_037650.1 | 8700923 | SNV | 1 | A | T | Homozygous   |
| NC_037650.1 | 8701216 | SNV | 1 | G | A | Homozygous   |
| NC_037650.1 | 8712814 | SNV | 1 | T | C | Heterozygous |
| NC_037650.1 | 8712833 | SNV | 1 | T | C | Homozygous   |
| NC_037650.1 | 8712849 | SNV | 1 | A | C | Homozygous   |
| NC_037650.1 | 8712851 | SNV | 1 | T | C | Homozygous   |

|             |         |     |   |   |   |              |
|-------------|---------|-----|---|---|---|--------------|
| NC_037650.1 | 8712863 | SNV | 1 | T | C | Heterozygous |
| NC_037650.1 | 8712925 | SNV | 1 | T | C | Heterozygous |
| NC_037650.1 | 8713054 | SNV | 1 | A | G | Homozygous   |
| NC_037650.1 | 8713816 | SNV | 1 | T | C | Homozygous   |
| NC_037650.1 | 8713930 | SNV | 1 | T | C | Homozygous   |
| NC_037650.1 | 8713936 | SNV | 1 | C | T | Heterozygous |
| NC_037650.1 | 8713958 | SNV | 1 | A | G | Homozygous   |
| NC_037650.1 | 8714109 | SNV | 1 | C | A | Homozygous   |
| NC_037650.1 | 8714458 | SNV | 1 | C | T | Heterozygous |
| NC_037650.1 | 8714467 | SNV | 1 | G | A | Heterozygous |
| NC_037650.1 | 8714478 | SNV | 1 | G | A | Heterozygous |
| NC_037650.1 | 8717008 | SNV | 1 | G | A | Heterozygous |
| NC_037650.1 | 8717347 | SNV | 1 | T | C | Heterozygous |
| NC_037650.1 | 8717354 | SNV | 1 | A | G | Homozygous   |
| NC_037650.1 | 8717387 | SNV | 1 | G | A | Heterozygous |
| NC_037650.1 | 8717398 | SNV | 1 | T | C | Heterozygous |
| NC_037650.1 | 8717403 | SNV | 1 | A | G | Homozygous   |
| NC_037650.1 | 8717412 | SNV | 1 | T | A | Homozygous   |
| NC_037650.1 | 8717431 | SNV | 1 | A | G | Homozygous   |
| NC_037650.1 | 8717559 | SNV | 1 | G | C | Homozygous   |
| NC_037650.1 | 8717576 | SNV | 1 | C | T | Heterozygous |
| NC_037650.1 | 8717774 | SNV | 1 | T | C | Homozygous   |
| NC_037650.1 | 8718217 | SNV | 1 | T | C | Homozygous   |
| NC_037650.1 | 8718505 | SNV | 1 | C | G | Homozygous   |
| NC_037650.1 | 8718829 | SNV | 1 | C | T | Heterozygous |
| NC_037650.1 | 8718912 | SNV | 1 | C | T | Heterozygous |
| NC_037650.1 | 8719436 | SNV | 1 | A | C | Homozygous   |
| NC_037650.1 | 8720366 | SNV | 1 | C | G | Heterozygous |
| NC_037650.1 | 8720370 | SNV | 1 | T | A | Heterozygous |
| NC_037650.1 | 8720751 | SNV | 1 | C | T | Homozygous   |
| NC_037650.1 | 8720905 | SNV | 1 | G | A | Heterozygous |
| NC_037650.1 | 8720982 | SNV | 1 | G | A | Heterozygous |
| NC_037650.1 | 8722913 | SNV | 1 | G | A | Heterozygous |
| NC_037650.1 | 8722946 | SNV | 1 | T | A | Heterozygous |
| NC_037650.1 | 8722980 | SNV | 1 | C | T | Homozygous   |
| NC_037650.1 | 8722989 | SNV | 1 | A | G | Homozygous   |
| NC_037650.1 | 8723213 | SNV | 1 | T | C | Homozygous   |
| NC_037650.1 | 8723276 | SNV | 1 | T | C | Heterozygous |
| NC_037650.1 | 8723347 | SNV | 1 | C | T | Heterozygous |
| NC_037650.1 | 8723351 | SNV | 1 | C | T | Homozygous   |
| NC_037650.1 | 8723773 | SNV | 1 | T | C | Homozygous   |
| NC_037650.1 | 8729791 | SNV | 1 | T | C | Homozygous   |
| NC_037650.1 | 8730618 | SNV | 1 | G | A | Homozygous   |
| NC_037650.1 | 8731319 | SNV | 1 | C | T | Heterozygous |
| NC_037650.1 | 8732256 | SNV | 1 | C | G | Homozygous   |
| NC_037650.1 | 8732316 | SNV | 1 | T | C | Homozygous   |
| NC_037650.1 | 8732410 | SNV | 1 | T | G | Homozygous   |
| NC_037650.1 | 8733787 | SNV | 1 | G | T | Homozygous   |
| NC_037650.1 | 8733789 | SNV | 1 | A | C | Homozygous   |
| NC_037650.1 | 8733792 | SNV | 1 | A | G | Homozygous   |
| NC_037650.1 | 8733868 | SNV | 1 | C | T | Homozygous   |



|             |         |     |   |   |   |              |
|-------------|---------|-----|---|---|---|--------------|
| NC_037650.1 | 8734345 | SNV | 1 | T | C | Homozygous   |
| NC_037650.1 | 8734575 | SNV | 1 | G | A | Heterozygous |
| NC_037650.1 | 8734819 | SNV | 1 | G | A | Homozygous   |
| NC_037650.1 | 8735075 | SNV | 1 | A | G | Heterozygous |
| NC_037650.1 | 8735320 | SNV | 1 | T | C | Homozygous   |
| NC_037650.1 | 8735789 | SNV | 1 | G | C | Homozygous   |
| NC_037650.1 | 8736773 | SNV | 1 | T | C | Heterozygous |
| NC_037650.1 | 8737033 | SNV | 1 | C | T | Heterozygous |
| NC_037650.1 | 8737087 | SNV | 1 | A | G | Homozygous   |
| NC_037650.1 | 8737335 | SNV | 1 | C | T | Homozygous   |
| NC_037650.1 | 8737762 | SNV | 1 | C | T | Heterozygous |
| NC_037650.1 | 8748866 | SNV | 1 | T | C | Homozygous   |
| NC_037650.1 | 8749043 | SNV | 1 | A | G | Heterozygous |
| NC_037650.1 | 8749183 | SNV | 1 | T | C | Homozygous   |
| NC_037650.1 | 8749188 | SNV | 1 | T | C | Homozygous   |
| NC_037650.1 | 8749190 | SNV | 1 | T | C | Homozygous   |
| NC_037650.1 | 8749193 | SNV | 1 | C | G | Homozygous   |
| NC_037650.1 | 8749446 | SNV | 1 | G | A | Heterozygous |
| NC_037650.1 | 8749514 | SNV | 1 | C | T | Heterozygous |
| NC_037650.1 | 8749695 | SNV | 1 | C | A | Heterozygous |
| NC_037650.1 | 8749847 | SNV | 1 | G | T | Heterozygous |
| NC_037650.1 | 8749865 | SNV | 1 | T | C | Homozygous   |
| NC_037650.1 | 8750128 | SNV | 1 | G | A | Heterozygous |
| NC_037650.1 | 8750167 | SNV | 1 | A | G | Heterozygous |
| NC_037650.1 | 8750537 | SNV | 1 | C | G | Homozygous   |
| NC_037650.1 | 8750540 | SNV | 1 | G | T | Homozygous   |
| NC_037650.1 | 8750565 | SNV | 1 | A | G | Homozygous   |
| NC_037650.1 | 8750855 | SNV | 1 | A | G | Heterozygous |
| NC_037650.1 | 8751242 | SNV | 1 | T | C | Homozygous   |
| NC_037650.1 | 8751338 | SNV | 1 | G | C | Homozygous   |
| NC_037650.1 | 8751347 | SNV | 1 | A | G | Heterozygous |
| NC_037650.1 | 8751437 | SNV | 1 | C | T | Heterozygous |
| NC_037650.1 | 8751450 | SNV | 1 | G | A | Heterozygous |
| NC_037650.1 | 8751625 | SNV | 1 | C | T | Heterozygous |
| NC_037650.1 | 8751652 | SNV | 1 | T | C | Homozygous   |
| NC_037650.1 | 8751700 | SNV | 1 | T | A | Homozygous   |
| NC_037650.1 | 8751713 | SNV | 1 | C | T | Heterozygous |
| NC_037650.1 | 8751846 | SNV | 1 | G | A | Heterozygous |
| NC_037650.1 | 8752170 | SNV | 1 | T | C | Homozygous   |
| NC_037650.1 | 8752202 | SNV | 1 | A | G | Heterozygous |
| NC_037650.1 | 8752485 | SNV | 1 | A | G | Homozygous   |
| NC_037650.1 | 8752536 | SNV | 1 | G | A | Heterozygous |
| NC_037650.1 | 8752802 | SNV | 1 | C | A | Heterozygous |
| NC_037650.1 | 8753281 | SNV | 1 | G | A | Heterozygous |
| NC_037650.1 | 8754687 | SNV | 1 | A | G | Homozygous   |
| NC_037650.1 | 8754830 | SNV | 1 | C | T | Heterozygous |
| NC_037650.1 | 8754886 | SNV | 1 | A | G | Heterozygous |
| NC_037650.1 | 8754889 | SNV | 1 | C | T | Heterozygous |
| NC_037650.1 | 8754891 | SNV | 1 | G | T | Heterozygous |
| NC_037650.1 | 8754912 | SNV | 1 | T | C | Heterozygous |
| NC_037650.1 | 8754914 | SNV | 1 | A | G | Heterozygous |

|             |         |     |   |   |   |              |
|-------------|---------|-----|---|---|---|--------------|
| NC_037650.1 | 8754922 | SNV | 1 | A | G | Heterozygous |
| NC_037650.1 | 8755104 | SNV | 1 | T | C | Homozygous   |
| NC_037650.1 | 8755270 | SNV | 1 | A | C | Homozygous   |
| NC_037650.1 | 8755293 | SNV | 1 | T | C | Homozygous   |
| NC_037650.1 | 8755321 | SNV | 1 | T | C | Homozygous   |
| NC_037650.1 | 8755430 | SNV | 1 | C | T | Homozygous   |
| NC_037650.1 | 8755522 | SNV | 1 | G | T | Homozygous   |
| NC_037650.1 | 8755537 | SNV | 1 | T | C | Homozygous   |
| NC_037650.1 | 8755564 | SNV | 1 | T | G | Heterozygous |
| NC_037650.1 | 8791620 | SNV | 1 | G | C | Homozygous   |
| NC_037650.1 | 8791718 | SNV | 1 | T | A | Homozygous   |
| NC_037650.1 | 8794326 | SNV | 1 | T | C | Homozygous   |
| NC_037650.1 | 8794332 | SNV | 1 | G | A | Homozygous   |
| NC_037650.1 | 8794396 | SNV | 1 | C | G | Homozygous   |
| NC_037650.1 | 8794442 | SNV | 1 | C | A | Homozygous   |
| NC_037650.1 | 8794946 | SNV | 1 | C | T | Homozygous   |
| NC_037650.1 | 8794987 | SNV | 1 | C | T | Heterozygous |
| NC_037650.1 | 8795283 | SNV | 1 | T | G | Heterozygous |
| NC_037650.1 | 8795315 | SNV | 1 | C | T | Heterozygous |
| NC_037650.1 | 8795342 | SNV | 1 | G | A | Heterozygous |
| NC_037650.1 | 8795535 | SNV | 1 | G | A | Homozygous   |
| NC_037650.1 | 8803144 | SNV | 1 | T | G | Homozygous   |
| NC_037650.1 | 8803146 | SNV | 1 | A | T | Homozygous   |
| NC_037650.1 | 8803157 | SNV | 1 | T | G | Homozygous   |
| NC_037650.1 | 8821201 | SNV | 1 | T | C | Homozygous   |
| NC_037650.1 | 8821206 | SNV | 1 | A | T | Heterozygous |
| NC_037650.1 | 8821229 | SNV | 1 | T | A | Heterozygous |
| NC_037650.1 | 8822936 | SNV | 1 | G | A | Heterozygous |
| NC_037650.1 | 8823184 | SNV | 1 | A | G | Homozygous   |
| NC_037650.1 | 8825645 | SNV | 1 | C | T | Homozygous   |
| NC_037650.1 | 8825744 | SNV | 1 | G | A | Homozygous   |
| NC_037650.1 | 8825796 | SNV | 1 | A | G | Homozygous   |
| NC_037650.1 | 8825917 | SNV | 1 | T | C | Homozygous   |
| NC_037650.1 | 8825937 | SNV | 1 | A | G | Homozygous   |
| NC_037650.1 | 8825953 | SNV | 1 | G | A | Heterozygous |
| NC_037650.1 | 8826007 | SNV | 1 | G | A | Homozygous   |
| NC_037650.1 | 8827538 | SNV | 1 | C | T | Homozygous   |
| NC_037650.1 | 8827543 | SNV | 1 | T | C | Homozygous   |
| NC_037650.1 | 8827553 | SNV | 1 | T | C | Homozygous   |
| NC_037650.1 | 8827597 | SNV | 1 | C | T | Homozygous   |
| NC_037650.1 | 8830307 | SNV | 1 | A | G | Homozygous   |
| NC_037650.1 | 8830313 | SNV | 1 | A | G | Homozygous   |
| NC_037650.1 | 8830378 | SNV | 1 | C | T | Homozygous   |
| NC_037650.1 | 8830416 | SNV | 1 | G | A | Homozygous   |
| NC_037650.1 | 8830436 | SNV | 1 | G | A | Homozygous   |
| NC_037650.1 | 8830709 | SNV | 1 | G | T | Homozygous   |
| NC_037650.1 | 8830713 | SNV | 1 | G | T | Homozygous   |
| NC_037650.1 | 8830721 | SNV | 1 | C | T | Homozygous   |
| NC_037650.1 | 8834315 | SNV | 1 | A | G | Homozygous   |
| NC_037650.1 | 8834384 | SNV | 1 | A | G | Homozygous   |
| NC_037650.1 | 8834401 | SNV | 1 | A | G | Heterozygous |

|             |         |     |   |   |   |              |
|-------------|---------|-----|---|---|---|--------------|
| NC_037650.1 | 8834439 | SNV | 1 | A | G | Heterozygous |
| NC_037650.1 | 8834969 | SNV | 1 | T | A | Heterozygous |
| NC_037650.1 | 8841631 | SNV | 1 | A | T | Heterozygous |
| NC_037650.1 | 8841659 | SNV | 1 | T | G | Heterozygous |
| NC_037650.1 | 8841695 | SNV | 1 | A | T | Homozygous   |
| NC_037650.1 | 8841716 | SNV | 1 | A | T | Homozygous   |
| NC_037650.1 | 8841734 | SNV | 1 | A | T | Heterozygous |
| NC_037650.1 | 8841737 | SNV | 1 | T | A | Homozygous   |
| NC_037650.1 | 8841740 | SNV | 1 | T | G | Homozygous   |
| NC_037650.1 | 8841755 | SNV | 1 | T | G | Homozygous   |
| NC_037650.1 | 8841758 | SNV | 1 | T | G | Homozygous   |
| NC_037650.1 | 8841978 | SNV | 1 | A | G | Homozygous   |
| NC_037650.1 | 8852347 | SNV | 1 | A | G | Heterozygous |
| NC_037650.1 | 8852350 | SNV | 1 | A | G | Heterozygous |
| NC_037650.1 | 8852356 | SNV | 1 | C | G | Homozygous   |
| NC_037650.1 | 8852366 | SNV | 1 | C | G | Heterozygous |
| NC_037650.1 | 8852378 | SNV | 1 | C | A | Heterozygous |
| NC_037650.1 | 8852381 | SNV | 1 | A | C | Heterozygous |
| NC_037650.1 | 8852386 | SNV | 1 | A | G | Heterozygous |
| NC_037650.1 | 8852438 | SNV | 1 | G | A | Heterozygous |
| NC_037650.1 | 8852474 | SNV | 1 | C | G | Heterozygous |
| NC_037650.1 | 8852500 | SNV | 1 | A | G | Heterozygous |
| NC_037650.1 | 8852520 | SNV | 1 | G | C | Heterozygous |
| NC_037650.1 | 8852524 | SNV | 1 | G | C | Heterozygous |
| NC_037650.1 | 8852528 | SNV | 1 | G | C | Heterozygous |
| NC_037650.1 | 8852534 | SNV | 1 | A | G | Heterozygous |
| NC_037650.1 | 8852537 | SNV | 1 | A | G | Heterozygous |
| NC_037650.1 | 8852785 | SNV | 1 | T | C | Homozygous   |
| NC_037650.1 | 8852796 | SNV | 1 | C | A | Heterozygous |
| NC_037650.1 | 8852828 | SNV | 1 | T | C | Homozygous   |
| NC_037650.1 | 8852925 | SNV | 1 | T | C | Homozygous   |
| NC_037650.1 | 8852931 | SNV | 1 | G | A | Homozygous   |
| NC_037650.1 | 8853054 | SNV | 1 | A | G | Homozygous   |
| NC_037650.1 | 8876838 | SNV | 1 | T | C | Homozygous   |
| NC_037650.1 | 8876851 | SNV | 1 | T | C | Homozygous   |
| NC_037650.1 | 8876924 | SNV | 1 | T | C | Homozygous   |
| NC_037650.1 | 8876942 | SNV | 1 | G | C | Homozygous   |
| NC_037650.1 | 8880363 | SNV | 1 | A | G | Homozygous   |
| NC_037650.1 | 8882484 | SNV | 1 | T | G | Homozygous   |
| NC_037650.1 | 8882486 | SNV | 1 | T | A | Homozygous   |
| NC_037650.1 | 8882489 | SNV | 1 | A | G | Homozygous   |
| NC_037650.1 | 8884726 | SNV | 1 | G | A | Heterozygous |
| NC_037650.1 | 8884816 | SNV | 1 | A | G | Heterozygous |
| NC_037650.1 | 8884843 | SNV | 1 | G | A | Heterozygous |
| NC_037650.1 | 8884881 | SNV | 1 | G | A | Heterozygous |
| NC_037650.1 | 8886921 | SNV | 1 | T | A | Heterozygous |
| NC_037650.1 | 8886921 | SNV | 1 | T | C | Heterozygous |
| NC_037650.1 | 8886953 | SNV | 1 | G | A | Homozygous   |
| NC_037650.1 | 8886955 | SNV | 1 | G | A | Homozygous   |
| NC_037650.1 | 8886957 | SNV | 1 | G | A | Homozygous   |
| NC_037650.1 | 8886961 | SNV | 1 | G | A | Homozygous   |

|             |         |     |   |   |   |              |
|-------------|---------|-----|---|---|---|--------------|
| NC_037650.1 | 8899527 | SNV | 1 | C | T | Heterozygous |
| NC_037650.1 | 8899541 | SNV | 1 | C | T | Homozygous   |
| NC_037650.1 | 8902206 | SNV | 1 | C | T | Homozygous   |
| NC_037650.1 | 8902222 | SNV | 1 | G | A | Heterozygous |
| NC_037650.1 | 8902315 | SNV | 1 | T | C | Heterozygous |
| NC_037650.1 | 8908301 | SNV | 1 | C | G | Homozygous   |
| NC_037650.1 | 8911244 | SNV | 1 | T | C | Homozygous   |
| NC_037650.1 | 8911265 | SNV | 1 | T | C | Homozygous   |
| NC_037650.1 | 8914676 | SNV | 1 | G | A | Heterozygous |
| NC_037650.1 | 8914682 | SNV | 1 | T | C | Homozygous   |
| NC_037650.1 | 8914712 | SNV | 1 | C | T | Heterozygous |
| NC_037650.1 | 8914766 | SNV | 1 | C | T | Heterozygous |
| NC_037650.1 | 8914771 | SNV | 1 | G | A | Heterozygous |
| NC_037650.1 | 8914920 | SNV | 1 | C | T | Homozygous   |
| NC_037650.1 | 8914962 | SNV | 1 | T | A | Heterozygous |
| NC_037650.1 | 8915023 | SNV | 1 | T | C | Homozygous   |
| NC_037650.1 | 8915135 | SNV | 1 | T | C | Homozygous   |
| NC_037650.1 | 8915144 | SNV | 1 | T | C | Heterozygous |
| NC_037650.1 | 8917634 | SNV | 1 | A | G | Heterozygous |
| NC_037650.1 | 8917653 | SNV | 1 | C | T | Heterozygous |
| NC_037650.1 | 8917710 | SNV | 1 | T | C | Heterozygous |
| NC_037650.1 | 8917726 | SNV | 1 | G | A | Heterozygous |
| NC_037650.1 | 8919917 | SNV | 1 | C | T | Heterozygous |
| NC_037650.1 | 8919920 | SNV | 1 | C | T | Heterozygous |
| NC_037650.1 | 8919924 | SNV | 1 | C | T | Heterozygous |
| NC_037650.1 | 8919928 | SNV | 1 | C | T | Heterozygous |
| NC_037650.1 | 8931313 | SNV | 1 | T | C | Heterozygous |
| NC_037650.1 | 8932628 | SNV | 1 | G | A | Heterozygous |
| NC_037650.1 | 8937669 | SNV | 1 | C | T | Heterozygous |
| NC_037650.1 | 8937692 | SNV | 1 | A | G | Homozygous   |
| NC_037650.1 | 8937707 | SNV | 1 | G | A | Heterozygous |
| NC_037650.1 | 8937743 | SNV | 1 | T | A | Heterozygous |
| NC_037650.1 | 8937781 | SNV | 1 | C | T | Heterozygous |
| NC_037650.1 | 8937839 | SNV | 1 | G | A | Heterozygous |
| NC_037650.1 | 8937845 | SNV | 1 | G | A | Heterozygous |
| NC_037650.1 | 8937852 | SNV | 1 | G | A | Heterozygous |
| NC_037650.1 | 8937999 | SNV | 1 | T | C | Heterozygous |
| NC_037650.1 | 8938007 | SNV | 1 | T | C | Homozygous   |
| NC_037650.1 | 8938209 | SNV | 1 | T | C | Heterozygous |
| NC_037650.1 | 8938255 | SNV | 1 | T | A | Homozygous   |
| NC_037650.1 | 8938296 | SNV | 1 | T | C | Heterozygous |
| NC_037650.1 | 8938334 | SNV | 1 | T | C | Homozygous   |
| NC_037650.1 | 8938394 | SNV | 1 | T | C | Homozygous   |
| NC_037650.1 | 8938423 | SNV | 1 | C | T | Heterozygous |
| NC_037650.1 | 8938435 | SNV | 1 | T | C | Homozygous   |
| NC_037650.1 | 8938494 | SNV | 1 | G | A | Heterozygous |
| NC_037650.1 | 8938546 | SNV | 1 | A | G | Homozygous   |
| NC_037650.1 | 8938939 | SNV | 1 | C | T | Heterozygous |
| NC_037650.1 | 8939018 | SNV | 1 | A | G | Heterozygous |
| NC_037650.1 | 8942345 | SNV | 1 | A | G | Heterozygous |
| NC_037650.1 | 8942439 | SNV | 1 | A | G | Heterozygous |

|             |         |     |   |   |   |              |
|-------------|---------|-----|---|---|---|--------------|
| NC_037650.1 | 8942581 | SNV | 1 | A | G | Homozygous   |
| NC_037650.1 | 8942972 | SNV | 1 | T | A | Heterozygous |
| NC_037650.1 | 8942985 | SNV | 1 | T | A | Homozygous   |
| NC_037650.1 | 8942991 | SNV | 1 | T | A | Heterozygous |
| NC_037650.1 | 8943235 | SNV | 1 | G | T | Homozygous   |
| NC_037650.1 | 8957363 | SNV | 1 | T | G | Homozygous   |
| NC_037650.1 | 8965926 | SNV | 1 | G | A | Heterozygous |
| NC_037650.1 | 8982821 | SNV | 1 | A | C | Heterozygous |
| NC_037650.1 | 8982825 | SNV | 1 | A | G | Heterozygous |
| NC_037650.1 | 8982828 | SNV | 1 | T | A | Homozygous   |
| NC_037650.1 | 8982835 | SNV | 1 | A | C | Heterozygous |
| NC_037650.1 | 8982836 | SNV | 1 | T | A | Heterozygous |
| NC_037650.1 | 8982841 | SNV | 1 | A | G | Heterozygous |
| NC_037650.1 | 8982842 | SNV | 1 | T | A | Heterozygous |
| NC_037650.1 | 8982844 | SNV | 1 | A | T | Heterozygous |
| NC_037650.1 | 8982846 | SNV | 1 | A | T | Heterozygous |
| NC_037650.1 | 8982849 | SNV | 1 | G | A | Heterozygous |
| NC_037650.1 | 8982854 | SNV | 1 | A | T | Heterozygous |
| NC_037650.1 | 8982856 | SNV | 1 | T | A | Heterozygous |
| NC_037650.1 | 8983029 | SNV | 1 | A | G | Heterozygous |
| NC_037650.1 | 8983044 | SNV | 1 | A | T | Heterozygous |
| NC_037650.1 | 8983046 | SNV | 1 | A | T | Heterozygous |
| NC_037650.1 | 8983048 | SNV | 1 | G | A | Homozygous   |
| NC_037650.1 | 8983051 | SNV | 1 | T | A | Heterozygous |
| NC_037650.1 | 8987699 | SNV | 1 | A | G | Homozygous   |
| NC_037650.1 | 9001815 | SNV | 1 | T | C | Homozygous   |
| NC_037650.1 | 9002063 | SNV | 1 | C | G | Heterozygous |
| NC_037650.1 | 9010712 | SNV | 1 | G | A | Heterozygous |
| NC_037650.1 | 9010743 | SNV | 1 | G | A | Homozygous   |
| NC_037650.1 | 9010769 | SNV | 1 | G | A | Heterozygous |
| NC_037650.1 | 9010969 | SNV | 1 | G | A | Heterozygous |
| NC_037650.1 | 9011001 | SNV | 1 | G | A | Homozygous   |
| NC_037650.1 | 9011060 | SNV | 1 | A | G | Heterozygous |
| NC_037650.1 | 9011061 | SNV | 1 | C | T | Heterozygous |
| NC_037650.1 | 9013572 | SNV | 1 | T | G | Homozygous   |
| NC_037650.1 | 9013620 | SNV | 1 | T | C | Homozygous   |
| NC_037650.1 | 9013630 | SNV | 1 | A | G | Heterozygous |
| NC_037650.1 | 9013728 | SNV | 1 | A | G | Homozygous   |
| NC_037650.1 | 9013774 | SNV | 1 | G | A | Homozygous   |
| NC_037650.1 | 9013829 | SNV | 1 | T | C | Heterozygous |
| NC_037650.1 | 9013901 | SNV | 1 | A | G | Heterozygous |
| NC_037650.1 | 9013928 | SNV | 1 | C | G | Homozygous   |
| NC_037650.1 | 9026441 | SNV | 1 | G | A | Heterozygous |
| NC_037650.1 | 9027075 | SNV | 1 | A | G | Heterozygous |
| NC_037650.1 | 9027113 | SNV | 1 | A | G | Heterozygous |
| NC_037650.1 | 9027220 | SNV | 1 | C | T | Heterozygous |
| NC_037650.1 | 9027222 | SNV | 1 | G | A | Heterozygous |
| NC_037650.1 | 9027235 | SNV | 1 | A | G | Heterozygous |
| NC_037650.1 | 9027436 | SNV | 1 | C | T | Heterozygous |
| NC_037650.1 | 9027577 | SNV | 1 | G | C | Homozygous   |
| NC_037650.1 | 9027846 | SNV | 1 | C | T | Homozygous   |

|             |         |     |   |   |   |              |
|-------------|---------|-----|---|---|---|--------------|
| NC_037650.1 | 9027906 | SNV | 1 | G | T | Homozygous   |
| NC_037650.1 | 9027951 | SNV | 1 | A | G | Heterozygous |
| NC_037650.1 | 9027952 | SNV | 1 | G | A | Heterozygous |
| NC_037650.1 | 9028047 | SNV | 1 | G | A | Heterozygous |
| NC_037650.1 | 9028128 | SNV | 1 | T | C | Heterozygous |
| NC_037650.1 | 9028155 | SNV | 1 | G | A | Heterozygous |
| NC_037650.1 | 9028172 | SNV | 1 | A | G | Homozygous   |
| NC_037650.1 | 9028181 | SNV | 1 | A | G | Homozygous   |
| NC_037650.1 | 9028203 | SNV | 1 | C | T | Homozygous   |
| NC_037650.1 | 9028226 | SNV | 1 | A | G | Homozygous   |
| NC_037650.1 | 9031983 | SNV | 1 | A | G | Heterozygous |
| NC_037650.1 | 9032053 | SNV | 1 | C | T | Homozygous   |
| NC_037650.1 | 9032153 | SNV | 1 | T | A | Homozygous   |
| NC_037650.1 | 9032156 | SNV | 1 | T | C | Homozygous   |
| NC_037650.1 | 9032166 | SNV | 1 | T | C | Homozygous   |
| NC_037650.1 | 9032340 | SNV | 1 | T | C | Heterozygous |
| NC_037650.1 | 9032430 | SNV | 1 | C | G | Homozygous   |
| NC_037650.1 | 9035545 | SNV | 1 | T | C | Heterozygous |
| NC_037650.1 | 9035547 | SNV | 1 | C | G | Heterozygous |
| NC_037650.1 | 9035549 | SNV | 1 | T | C | Heterozygous |
| NC_037650.1 | 9035591 | SNV | 1 | G | A | Heterozygous |
| NC_037650.1 | 9035668 | SNV | 1 | T | C | Homozygous   |
| NC_037650.1 | 9036200 | SNV | 1 | C | G | Homozygous   |
| NC_037650.1 | 9036212 | SNV | 1 | A | G | Homozygous   |
| NC_037650.1 | 9036234 | SNV | 1 | C | G | Homozygous   |
| NC_037650.1 | 9036552 | SNV | 1 | A | G | Heterozygous |
| NC_037650.1 | 9041200 | SNV | 1 | G | A | Homozygous   |
| NC_037650.1 | 9041203 | SNV | 1 | A | T | Homozygous   |
| NC_037650.1 | 9041211 | SNV | 1 | G | A | Homozygous   |
| NC_037650.1 | 9045786 | SNV | 1 | G | A | Heterozygous |
| NC_037650.1 | 9045797 | SNV | 1 | C | T | Homozygous   |
| NC_037650.1 | 9045801 | SNV | 1 | T | C | Homozygous   |
| NC_037650.1 | 9045827 | SNV | 1 | T | C | Heterozygous |
| NC_037650.1 | 9045840 | SNV | 1 | T | C | Homozygous   |
| NC_037650.1 | 9045926 | SNV | 1 | T | C | Homozygous   |
| NC_037650.1 | 9045957 | SNV | 1 | G | A | Heterozygous |
| NC_037650.1 | 9046061 | SNV | 1 | T | C | Homozygous   |
| NC_037650.1 | 9046079 | SNV | 1 | A | G | Heterozygous |
| NC_037650.1 | 9046191 | SNV | 1 | G | A | Heterozygous |
| NC_037650.1 | 9046304 | SNV | 1 | G | A | Heterozygous |
| NC_037650.1 | 9046307 | SNV | 1 | G | A | Heterozygous |
| NC_037650.1 | 9046403 | SNV | 1 | A | G | Heterozygous |
| NC_037650.1 | 9046579 | SNV | 1 | T | C | Homozygous   |
| NC_037650.1 | 9046688 | SNV | 1 | G | A | Homozygous   |
| NC_037650.1 | 9046709 | SNV | 1 | G | A | Homozygous   |
| NC_037650.1 | 9046725 | SNV | 1 | A | G | Homozygous   |
| NC_037650.1 | 9046744 | SNV | 1 | A | G | Heterozygous |
| NC_037650.1 | 9046776 | SNV | 1 | T | C | Homozygous   |
| NC_037650.1 | 9046850 | SNV | 1 | C | T | Heterozygous |
| NC_037650.1 | 9047472 | SNV | 1 | C | T | Homozygous   |
| NC_037650.1 | 9047606 | SNV | 1 | C | T | Heterozygous |

|             |         |     |   |   |   |              |
|-------------|---------|-----|---|---|---|--------------|
| NC_037650.1 | 9047747 | SNV | 1 | G | A | Heterozygous |
| NC_037650.1 | 9047828 | SNV | 1 | T | C | Heterozygous |
| NC_037650.1 | 9047991 | SNV | 1 | A | G | Homozygous   |
| NC_037650.1 | 9048044 | SNV | 1 | T | C | Homozygous   |
| NC_037650.1 | 9048051 | SNV | 1 | T | C | Homozygous   |
| NC_037650.1 | 9048076 | SNV | 1 | A | G | Heterozygous |
| NC_037650.1 | 9052795 | SNV | 1 | T | A | Homozygous   |
| NC_037650.1 | 9052809 | SNV | 1 | C | T | Homozygous   |
| NC_037650.1 | 9056223 | SNV | 1 | G | A | Heterozygous |
| NC_037650.1 | 9056236 | SNV | 1 | C | T | Heterozygous |
| NC_037650.1 | 9056427 | SNV | 1 | A | G | Homozygous   |
| NC_037650.1 | 9056595 | SNV | 1 | T | C | Homozygous   |
| NC_037650.1 | 9056687 | SNV | 1 | T | C | Homozygous   |
| NC_037650.1 | 9061163 | SNV | 1 | T | G | Heterozygous |
| NC_037650.1 | 9061165 | SNV | 1 | T | G | Heterozygous |
| NC_037650.1 | 9061168 | SNV | 1 | A | G | Heterozygous |
| NC_037650.1 | 9061170 | SNV | 1 | A | G | Heterozygous |
| NC_037650.1 | 9062639 | SNV | 1 | A | C | Heterozygous |
| NC_037650.1 | 9062656 | SNV | 1 | A | G | Heterozygous |
| NC_037650.1 | 9062715 | SNV | 1 | G | A | Heterozygous |
| NC_037650.1 | 9062824 | SNV | 1 | C | T | Homozygous   |
| NC_037650.1 | 9062976 | SNV | 1 | A | G | Heterozygous |
| NC_037650.1 | 9065527 | SNV | 1 | G | T | Homozygous   |
| NC_037650.1 | 9065538 | SNV | 1 | G | T | Homozygous   |
| NC_037650.1 | 9071178 | SNV | 1 | G | A | Heterozygous |
| NC_037650.1 | 9073507 | SNV | 1 | A | G | Homozygous   |
| NC_037650.1 | 9073522 | SNV | 1 | C | T | Heterozygous |
| NC_037650.1 | 9073584 | SNV | 1 | A | T | Homozygous   |
| NC_037650.1 | 9073662 | SNV | 1 | G | A | Heterozygous |
| NC_037650.1 | 9073678 | SNV | 1 | G | A | Heterozygous |
| NC_037650.1 | 9073700 | SNV | 1 | G | A | Heterozygous |
| NC_037650.1 | 9073896 | SNV | 1 | G | A | Heterozygous |
| NC_037650.1 | 9073898 | SNV | 1 | A | G | Homozygous   |
| NC_037650.1 | 9074189 | SNV | 1 | T | C | Homozygous   |
| NC_037650.1 | 9074217 | SNV | 1 | C | T | Heterozygous |
| NC_037650.1 | 9083512 | SNV | 1 | G | A | Heterozygous |
| NC_037650.1 | 9083619 | SNV | 1 | A | G | Homozygous   |
| NC_037650.1 | 9095053 | SNV | 1 | T | C | Homozygous   |
| NC_037650.1 | 9110816 | SNV | 1 | A | G | Heterozygous |
| NC_037650.1 | 9111162 | SNV | 1 | G | T | Homozygous   |
| NC_037650.1 | 9119353 | SNV | 1 | T | C | Homozygous   |
| NC_037650.1 | 9119411 | SNV | 1 | A | G | Homozygous   |
| NC_037650.1 | 9120097 | SNV | 1 | G | A | Heterozygous |
| NC_037650.1 | 9120121 | SNV | 1 | A | G | Heterozygous |
| NC_037650.1 | 9120173 | SNV | 1 | A | G | Homozygous   |
| NC_037650.1 | 9120219 | SNV | 1 | T | C | Heterozygous |
| NC_037650.1 | 9120243 | SNV | 1 | G | A | Heterozygous |
| NC_037650.1 | 9120277 | SNV | 1 | A | G | Heterozygous |
| NC_037650.1 | 9120375 | SNV | 1 | C | T | Heterozygous |
| NC_037650.1 | 9120523 | SNV | 1 | G | A | Heterozygous |
| NC_037650.1 | 9120527 | SNV | 1 | C | G | Heterozygous |

|             |         |     |   |   |   |              |
|-------------|---------|-----|---|---|---|--------------|
| NC_037650.1 | 9120550 | SNV | 1 | G | A | Homozygous   |
| NC_037650.1 | 9120709 | SNV | 1 | A | G | Heterozygous |
| NC_037650.1 | 9121413 | SNV | 1 | G | C | Homozygous   |
| NC_037650.1 | 9121941 | SNV | 1 | C | T | Heterozygous |
| NC_037650.1 | 9121966 | SNV | 1 | T | G | Homozygous   |
| NC_037650.1 | 9122026 | SNV | 1 | T | C | Homozygous   |
| NC_037650.1 | 9122047 | SNV | 1 | A | T | Heterozygous |
| NC_037650.1 | 9122098 | SNV | 1 | G | A | Homozygous   |
| NC_037650.1 | 9122126 | SNV | 1 | G | A | Homozygous   |
| NC_037650.1 | 9122398 | SNV | 1 | T | C | Homozygous   |
| NC_037650.1 | 9122406 | SNV | 1 | C | T | Homozygous   |
| NC_037650.1 | 9122477 | SNV | 1 | T | C | Homozygous   |
| NC_037650.1 | 9122564 | SNV | 1 | T | C | Homozygous   |
| NC_037650.1 | 9122581 | SNV | 1 | C | T | Heterozygous |
| NC_037650.1 | 9122643 | SNV | 1 | C | T | Heterozygous |
| NC_037650.1 | 9122899 | SNV | 1 | T | C | Homozygous   |
| NC_037650.1 | 9122913 | SNV | 1 | A | G | Homozygous   |
| NC_037650.1 | 9122938 | SNV | 1 | A | G | Homozygous   |
| NC_037650.1 | 9122970 | SNV | 1 | C | A | Heterozygous |
| NC_037650.1 | 9122974 | SNV | 1 | A | G | Homozygous   |
| NC_037650.1 | 9122984 | SNV | 1 | A | G | Heterozygous |
| NC_037650.1 | 9123023 | SNV | 1 | A | G | Homozygous   |
| NC_037650.1 | 9129867 | SNV | 1 | C | T | Heterozygous |
| NC_037650.1 | 9129880 | SNV | 1 | C | T | Heterozygous |
| NC_037650.1 | 9130722 | SNV | 1 | A | T | Heterozygous |
| NC_037650.1 | 9130810 | SNV | 1 | C | G | Homozygous   |
| NC_037650.1 | 9130917 | SNV | 1 | A | G | Heterozygous |
| NC_037650.1 | 9131041 | SNV | 1 | T | C | Homozygous   |
| NC_037650.1 | 9131043 | SNV | 1 | G | C | Heterozygous |
| NC_037650.1 | 9131076 | SNV | 1 | A | G | Heterozygous |
| NC_037650.1 | 9131112 | SNV | 1 | T | C | Heterozygous |
| NC_037650.1 | 9131122 | SNV | 1 | A | G | Homozygous   |
| NC_037650.1 | 9131275 | SNV | 1 | A | C | Homozygous   |
| NC_037650.1 | 9131280 | SNV | 1 | G | C | Homozygous   |
| NC_037650.1 | 9131375 | SNV | 1 | A | G | Homozygous   |
| NC_037650.1 | 9131379 | SNV | 1 | A | G | Homozygous   |
| NC_037650.1 | 9131439 | SNV | 1 | C | T | Heterozygous |
| NC_037650.1 | 9131445 | SNV | 1 | A | G | Heterozygous |
| NC_037650.1 | 9131447 | SNV | 1 | G | C | Homozygous   |
| NC_037650.1 | 9131499 | SNV | 1 | G | A | Heterozygous |
| NC_037650.1 | 9131543 | SNV | 1 | G | A | Heterozygous |
| NC_037650.1 | 9131568 | SNV | 1 | C | T | Heterozygous |
| NC_037650.1 | 9131628 | SNV | 1 | C | T | Heterozygous |
| NC_037650.1 | 9131683 | SNV | 1 | C | A | Heterozygous |
| NC_037650.1 | 9131779 | SNV | 1 | T | C | Homozygous   |
| NC_037650.1 | 9131791 | SNV | 1 | G | T | Homozygous   |
| NC_037650.1 | 9131808 | SNV | 1 | T | C | Homozygous   |
| NC_037650.1 | 9131820 | SNV | 1 | T | C | Heterozygous |
| NC_037650.1 | 9132127 | SNV | 1 | T | C | Homozygous   |
| NC_037650.1 | 9132145 | SNV | 1 | T | C | Homozygous   |
| NC_037650.1 | 9132203 | SNV | 1 | C | T | Heterozygous |



|             |         |     |   |   |   |              |
|-------------|---------|-----|---|---|---|--------------|
| NC_037650.1 | 9132277 | SNV | 1 | C | T | Heterozygous |
| NC_037650.1 | 9132475 | SNV | 1 | G | T | Homozygous   |
| NC_037650.1 | 9132494 | SNV | 1 | A | G | Homozygous   |
| NC_037650.1 | 9132502 | SNV | 1 | T | C | Homozygous   |
| NC_037650.1 | 9132590 | SNV | 1 | A | G | Homozygous   |
| NC_037650.1 | 9132671 | SNV | 1 | G | A | Homozygous   |
| NC_037650.1 | 9132743 | SNV | 1 | A | G | Homozygous   |
| NC_037650.1 | 9132776 | SNV | 1 | A | G | Homozygous   |
| NC_037650.1 | 9132784 | SNV | 1 | C | T | Homozygous   |
| NC_037650.1 | 9132807 | SNV | 1 | C | A | Homozygous   |
| NC_037650.1 | 9136291 | SNV | 1 | G | A | Homozygous   |
| NC_037650.1 | 9146646 | SNV | 1 | C | T | Heterozygous |
| NC_037650.1 | 9146693 | SNV | 1 | A | G | Homozygous   |
| NC_037650.1 | 9146778 | SNV | 1 | A | G | Homozygous   |
| NC_037650.1 | 9146879 | SNV | 1 | G | A | Heterozygous |
| NC_037650.1 | 9146889 | SNV | 1 | T | C | Heterozygous |
| NC_037650.1 | 9146923 | SNV | 1 | G | T | Heterozygous |
| NC_037650.1 | 9146937 | SNV | 1 | A | G | Homozygous   |
| NC_037650.1 | 9146945 | SNV | 1 | C | T | Heterozygous |
| NC_037650.1 | 9147238 | SNV | 1 | A | G | Heterozygous |
| NC_037650.1 | 9147252 | SNV | 1 | T | C | Heterozygous |
| NC_037650.1 | 9155463 | SNV | 1 | G | A | Heterozygous |
| NC_037650.1 | 9162854 | SNV | 1 | A | T | Heterozygous |
| NC_037650.1 | 9162856 | SNV | 1 | A | C | Heterozygous |
| NC_037650.1 | 9163308 | SNV | 1 | G | T | Homozygous   |
| NC_037650.1 | 9163311 | SNV | 1 | A | C | Heterozygous |
| NC_037650.1 | 9163322 | SNV | 1 | T | A | Heterozygous |
| NC_037650.1 | 9163325 | SNV | 1 | A | T | Heterozygous |
| NC_037650.1 | 9163340 | SNV | 1 | T | G | Heterozygous |
| NC_037650.1 | 9165064 | SNV | 1 | A | G | Homozygous   |
| NC_037650.1 | 9165097 | SNV | 1 | A | G | Homozygous   |
| NC_037650.1 | 9172224 | SNV | 1 | C | T | Heterozygous |
| NC_037650.1 | 9172297 | SNV | 1 | T | C | Homozygous   |
| NC_037650.1 | 9174130 | SNV | 1 | T | C | Homozygous   |
| NC_037650.1 | 9174253 | SNV | 1 | T | C | Heterozygous |
| NC_037650.1 | 9174255 | SNV | 1 | T | C | Heterozygous |
| NC_037650.1 | 9174257 | SNV | 1 | T | C | Heterozygous |
| NC_037650.1 | 9174369 | SNV | 1 | T | C | Heterozygous |
| NC_037650.1 | 9179031 | SNV | 1 | C | T | Homozygous   |
| NC_037650.1 | 9179223 | SNV | 1 | A | G | Homozygous   |
| NC_037650.1 | 9179251 | SNV | 1 | A | G | Heterozygous |
| NC_037650.1 | 9179319 | SNV | 1 | A | G | Heterozygous |
| NC_037650.1 | 9179334 | SNV | 1 | T | C | Homozygous   |
| NC_037650.1 | 9187767 | SNV | 1 | A | C | Homozygous   |
| NC_037650.1 | 9188067 | SNV | 1 | G | A | Heterozygous |
| NC_037650.1 | 9188210 | SNV | 1 | G | A | Heterozygous |
| NC_037650.1 | 9205060 | SNV | 1 | A | G | Heterozygous |
| NC_037650.1 | 9205068 | SNV | 1 | A | G | Homozygous   |
| NC_037650.1 | 9205073 | SNV | 1 | A | G | Homozygous   |
| NC_037650.1 | 9223024 | SNV | 1 | C | T | Heterozygous |
| NC_037650.1 | 9223048 | SNV | 1 | G | C | Heterozygous |

|             |         |     |   |   |   |              |
|-------------|---------|-----|---|---|---|--------------|
| NC_037650.1 | 9223054 | SNV | 1 | A | G | Heterozygous |
| NC_037650.1 | 9223239 | SNV | 1 | T | C | Heterozygous |
| NC_037650.1 | 9223290 | SNV | 1 | T | C | Homozygous   |
| NC_037650.1 | 9223292 | SNV | 1 | T | C | Homozygous   |
| NC_037650.1 | 9223479 | SNV | 1 | A | G | Homozygous   |
| NC_037650.1 | 9225160 | SNV | 1 | C | T | Heterozygous |
| NC_037650.1 | 9225163 | SNV | 1 | C | T | Heterozygous |
| NC_037650.1 | 9225193 | SNV | 1 | C | T | Heterozygous |
| NC_037650.1 | 9227314 | SNV | 1 | T | C | Heterozygous |
| NC_037650.1 | 9227328 | SNV | 1 | G | A | Heterozygous |
| NC_037650.1 | 9227342 | SNV | 1 | A | G | Homozygous   |
| NC_037650.1 | 9227348 | SNV | 1 | A | G | Homozygous   |
| NC_037650.1 | 9227385 | SNV | 1 | G | A | Homozygous   |
| NC_037650.1 | 9227439 | SNV | 1 | T | C | Homozygous   |
| NC_037650.1 | 9227470 | SNV | 1 | C | T | Heterozygous |
| NC_037650.1 | 9227502 | SNV | 1 | C | T | Heterozygous |
| NC_037650.1 | 9245404 | SNV | 1 | C | T | Homozygous   |
| NC_037650.1 | 9255783 | SNV | 1 | G | A | Homozygous   |
| NC_037650.1 | 9256137 | SNV | 1 | A | G | Homozygous   |
| NC_037650.1 | 9256168 | SNV | 1 | A | G | Homozygous   |
| NC_037650.1 | 9256267 | SNV | 1 | T | C | Homozygous   |
| NC_037650.1 | 9275102 | SNV | 1 | C | T | Homozygous   |
| NC_037650.1 | 9275263 | SNV | 1 | C | T | Heterozygous |
| NC_037650.1 | 9277992 | SNV | 1 | T | A | Heterozygous |
| NC_037650.1 | 9278026 | SNV | 1 | C | T | Homozygous   |
| NC_037650.1 | 9278044 | SNV | 1 | A | T | Heterozygous |
| NC_037650.1 | 9279468 | SNV | 1 | T | C | Heterozygous |
| NC_037650.1 | 9279601 | SNV | 1 | A | T | Heterozygous |
| NC_037650.1 | 9279988 | SNV | 1 | C | T | Homozygous   |
| NC_037650.1 | 9279994 | SNV | 1 | C | T | Homozygous   |
| NC_037650.1 | 9280027 | SNV | 1 | A | G | Homozygous   |
| NC_037650.1 | 9283865 | SNV | 1 | A | T | Heterozygous |
| NC_037650.1 | 9300138 | SNV | 1 | A | G | Homozygous   |
| NC_037650.1 | 9301002 | SNV | 1 | T | C | Homozygous   |
| NC_037650.1 | 9301122 | SNV | 1 | T | C | Heterozygous |
| NC_037650.1 | 9301181 | SNV | 1 | A | T | Heterozygous |
| NC_037650.1 | 9301539 | SNV | 1 | G | C | Heterozygous |
| NC_037650.1 | 9301582 | SNV | 1 | A | C | Heterozygous |
| NC_037650.1 | 9301622 | SNV | 1 | G | A | Heterozygous |
| NC_037650.1 | 9302056 | SNV | 1 | A | G | Homozygous   |
| NC_037650.1 | 9302120 | SNV | 1 | G | C | Homozygous   |
| NC_037650.1 | 9302211 | SNV | 1 | C | T | Heterozygous |
| NC_037650.1 | 9302254 | SNV | 1 | A | T | Heterozygous |
| NC_037650.1 | 9302284 | SNV | 1 | T | G | Heterozygous |
| NC_037650.1 | 9305600 | SNV | 1 | T | A | Heterozygous |
| NC_037650.1 | 9307735 | SNV | 1 | G | A | Homozygous   |
| NC_037650.1 | 9307763 | SNV | 1 | G | C | Heterozygous |
| NC_037650.1 | 9307767 | SNV | 1 | G | A | Heterozygous |
| NC_037650.1 | 9307769 | SNV | 1 | A | G | Heterozygous |
| NC_037650.1 | 9311093 | SNV | 1 | C | T | Heterozygous |
| NC_037650.1 | 9311095 | SNV | 1 | T | C | Heterozygous |

|             |         |     |   |   |   |              |
|-------------|---------|-----|---|---|---|--------------|
| NC_037650.1 | 9311153 | SNV | 1 | T | C | Heterozygous |
| NC_037650.1 | 9315338 | SNV | 1 | A | G | Heterozygous |
| NC_037650.1 | 9315343 | SNV | 1 | G | C | Homozygous   |
| NC_037650.1 | 9315346 | SNV | 1 | G | A | Homozygous   |
| NC_037650.1 | 9315349 | SNV | 1 | G | A | Homozygous   |
| NC_037650.1 | 9315352 | SNV | 1 | G | A | Homozygous   |
| NC_037650.1 | 9315357 | SNV | 1 | A | G | Homozygous   |
| NC_037650.1 | 9315362 | SNV | 1 | A | G | Homozygous   |
| NC_037650.1 | 9315368 | SNV | 1 | G | A | Homozygous   |
| NC_037650.1 | 9315393 | SNV | 1 | G | T | Homozygous   |
| NC_037650.1 | 9316800 | SNV | 1 | A | G | Homozygous   |
| NC_037650.1 | 9316804 | SNV | 1 | A | G | Homozygous   |
| NC_037650.1 | 9316833 | SNV | 1 | C | A | Homozygous   |
| NC_037650.1 | 9316835 | SNV | 1 | A | G | Homozygous   |
| NC_037650.1 | 9323387 | SNV | 1 | G | C | Homozygous   |
| NC_037650.1 | 9323392 | SNV | 1 | A | G | Homozygous   |
| NC_037650.1 | 9323440 | SNV | 1 | A | G | Homozygous   |
| NC_037650.1 | 9323501 | SNV | 1 | A | G | Heterozygous |
| NC_037650.1 | 9334754 | SNV | 1 | T | C | Heterozygous |
| NC_037650.1 | 9334767 | SNV | 1 | G | A | Heterozygous |
| NC_037650.1 | 9334779 | SNV | 1 | G | T | Homozygous   |
| NC_037650.1 | 9382897 | SNV | 1 | A | T | Homozygous   |
| NC_037650.1 | 9382901 | SNV | 1 | C | T | Homozygous   |
| NC_037650.1 | 9382903 | SNV | 1 | G | A | Homozygous   |
| NC_037650.1 | 9385834 | SNV | 1 | G | T | Homozygous   |
| NC_037650.1 | 9385838 | SNV | 1 | G | C | Homozygous   |
| NC_037650.1 | 9385844 | SNV | 1 | A | G | Homozygous   |
| NC_037650.1 | 9409228 | SNV | 1 | T | G | Homozygous   |
| NC_037650.1 | 9409247 | SNV | 1 | A | T | Homozygous   |
| NC_037650.1 | 9409252 | SNV | 1 | A | T | Heterozygous |
| NC_037650.1 | 9409257 | SNV | 1 | A | T | Heterozygous |
| NC_037650.1 | 9409351 | SNV | 1 | C | T | Heterozygous |
| NC_037650.1 | 9418908 | SNV | 1 | T | A | Heterozygous |
| NC_037650.1 | 9418920 | SNV | 1 | A | T | Heterozygous |
| NC_037650.1 | 9418924 | SNV | 1 | T | A | Heterozygous |
| NC_037650.1 | 9418966 | SNV | 1 | A | T | Heterozygous |
| NC_037650.1 | 9441440 | SNV | 1 | T | C | Homozygous   |
| NC_037650.1 | 9441468 | SNV | 1 | T | C | Homozygous   |
| NC_037650.1 | 9441470 | SNV | 1 | T | C | Homozygous   |
| NC_037650.1 | 9441474 | SNV | 1 | T | C | Homozygous   |
| NC_037650.1 | 9467760 | SNV | 1 | C | G | Heterozygous |
| NC_037650.1 | 9467822 | SNV | 1 | C | T | Homozygous   |
| NC_037650.1 | 9467826 | SNV | 1 | A | G | Homozygous   |
| NC_037650.1 | 9467828 | SNV | 1 | C | T | Homozygous   |
| NC_037650.1 | 9467831 | SNV | 1 | T | C | Homozygous   |
| NC_037650.1 | 9467842 | SNV | 1 | A | C | Homozygous   |
| NC_037650.1 | 9467846 | SNV | 1 | G | A | Heterozygous |
| NC_037650.1 | 9467879 | SNV | 1 | T | G | Heterozygous |
| NC_037650.1 | 9467913 | SNV | 1 | C | T | Heterozygous |
| NC_037650.1 | 9468077 | SNV | 1 | A | G | Heterozygous |
| NC_037650.1 | 9468261 | SNV | 1 | A | G | Heterozygous |

|             |         |     |   |   |   |              |
|-------------|---------|-----|---|---|---|--------------|
| NC_037650.1 | 9468290 | SNV | 1 | G | A | Heterozygous |
| NC_037650.1 | 9468301 | SNV | 1 | A | G | Heterozygous |
| NC_037650.1 | 9471528 | SNV | 1 | A | G | Homozygous   |
| NC_037650.1 | 9471563 | SNV | 1 | G | A | Heterozygous |
| NC_037650.1 | 9471569 | SNV | 1 | A | G | Homozygous   |
| NC_037650.1 | 9471578 | SNV | 1 | G | A | Homozygous   |
| NC_037650.1 | 9471593 | SNV | 1 | A | G | Homozygous   |
| NC_037650.1 | 9472528 | SNV | 1 | C | T | Homozygous   |
| NC_037650.1 | 9472533 | SNV | 1 | T | C | Heterozygous |
| NC_037650.1 | 9472537 | SNV | 1 | T | C | Heterozygous |
| NC_037650.1 | 9472549 | SNV | 1 | T | C | Heterozygous |
| NC_037650.1 | 9472553 | SNV | 1 | T | C | Heterozygous |
| NC_037650.1 | 9472561 | SNV | 1 | C | T | Heterozygous |
| NC_037650.1 | 9472577 | SNV | 1 | C | G | Heterozygous |
| NC_037650.1 | 9472588 | SNV | 1 | T | G | Homozygous   |
| NC_037650.1 | 9472623 | SNV | 1 | T | C | Homozygous   |
| NC_037650.1 | 9490996 | SNV | 1 | A | G | Homozygous   |
| NC_037650.1 | 9491132 | SNV | 1 | C | A | Homozygous   |
| NC_037650.1 | 9491315 | SNV | 1 | A | G | Homozygous   |
| NC_037650.1 | 9491326 | SNV | 1 | A | G | Homozygous   |
| NC_037650.1 | 9491444 | SNV | 1 | T | C | Homozygous   |
| NC_037650.1 | 9491476 | SNV | 1 | A | G | Heterozygous |
| NC_037650.1 | 9491482 | SNV | 1 | G | A | Heterozygous |
| NC_037650.1 | 9491498 | SNV | 1 | A | G | Heterozygous |
| NC_037650.1 | 9491807 | SNV | 1 | G | A | Homozygous   |
| NC_037650.1 | 9491825 | SNV | 1 | T | C | Heterozygous |
| NC_037650.1 | 9492184 | SNV | 1 | A | G | Homozygous   |
| NC_037650.1 | 9492275 | SNV | 1 | T | C | Heterozygous |
| NC_037650.1 | 9492439 | SNV | 1 | C | T | Homozygous   |
| NC_037650.1 | 9492466 | SNV | 1 | T | A | Heterozygous |
| NC_037650.1 | 9492492 | SNV | 1 | A | T | Heterozygous |
| NC_037650.1 | 9492494 | SNV | 1 | T | A | Homozygous   |
| NC_037650.1 | 9492850 | SNV | 1 | A | G | Homozygous   |
| NC_037650.1 | 9492948 | SNV | 1 | C | T | Heterozygous |
| NC_037650.1 | 9492982 | SNV | 1 | C | G | Heterozygous |
| NC_037650.1 | 9492987 | SNV | 1 | C | T | Heterozygous |
| NC_037650.1 | 9492992 | SNV | 1 | A | G | Homozygous   |
| NC_037650.1 | 9493050 | SNV | 1 | T | C | Homozygous   |
| NC_037650.1 | 9493090 | SNV | 1 | T | C | Heterozygous |
| NC_037650.1 | 9493123 | SNV | 1 | A | T | Heterozygous |
| NC_037650.1 | 9493244 | SNV | 1 | A | G | Homozygous   |
| NC_037650.1 | 9493472 | SNV | 1 | C | T | Heterozygous |
| NC_037650.1 | 9493922 | SNV | 1 | G | T | Homozygous   |
| NC_037650.1 | 9494244 | SNV | 1 | T | A | Homozygous   |
| NC_037650.1 | 9503545 | SNV | 1 | C | T | Homozygous   |
| NC_037650.1 | 9503560 | SNV | 1 | T | A | Homozygous   |
| NC_037650.1 | 9508752 | SNV | 1 | T | C | Homozygous   |
| NC_037650.1 | 9508930 | SNV | 1 | C | A | Heterozygous |
| NC_037650.1 | 9509395 | SNV | 1 | C | T | Heterozygous |
| NC_037650.1 | 9509455 | SNV | 1 | C | T | Heterozygous |
| NC_037650.1 | 9510740 | SNV | 1 | C | T | Heterozygous |

|             |         |     |   |   |   |              |
|-------------|---------|-----|---|---|---|--------------|
| NC_037650.1 | 9510743 | SNV | 1 | T | C | Homozygous   |
| NC_037650.1 | 9510748 | SNV | 1 | A | G | Homozygous   |
| NC_037650.1 | 9513092 | SNV | 1 | A | G | Homozygous   |
| NC_037650.1 | 9513110 | SNV | 1 | A | G | Heterozygous |
| NC_037650.1 | 9513143 | SNV | 1 | T | C | Heterozygous |
| NC_037650.1 | 9513175 | SNV | 1 | T | G | Heterozygous |
| NC_037650.1 | 9513307 | SNV | 1 | G | A | Heterozygous |
| NC_037650.1 | 9513333 | SNV | 1 | A | T | Homozygous   |
| NC_037650.1 | 9513337 | SNV | 1 | T | C | Homozygous   |
| NC_037650.1 | 9513485 | SNV | 1 | A | C | Homozygous   |
| NC_037650.1 | 9513495 | SNV | 1 | T | G | Homozygous   |
| NC_037650.1 | 9513507 | SNV | 1 | C | T | Homozygous   |
| NC_037650.1 | 9513657 | SNV | 1 | G | A | Heterozygous |
| NC_037650.1 | 9516704 | SNV | 1 | T | C | Heterozygous |
| NC_037650.1 | 9531964 | SNV | 1 | C | T | Homozygous   |
| NC_037650.1 | 9531989 | SNV | 1 | T | C | Homozygous   |
| NC_037650.1 | 9537350 | SNV | 1 | G | T | Heterozygous |
| NC_037650.1 | 9537570 | SNV | 1 | A | G | Homozygous   |
| NC_037650.1 | 9537647 | SNV | 1 | A | G | Homozygous   |
| NC_037650.1 | 9537832 | SNV | 1 | A | T | Heterozygous |
| NC_037650.1 | 9538855 | SNV | 1 | A | G | Homozygous   |
| NC_037650.1 | 9538894 | SNV | 1 | A | G | Heterozygous |
| NC_037650.1 | 9538903 | SNV | 1 | G | A | Heterozygous |
| NC_037650.1 | 9538929 | SNV | 1 | T | C | Heterozygous |
| NC_037650.1 | 9538940 | SNV | 1 | G | A | Heterozygous |
| NC_037650.1 | 9539096 | SNV | 1 | T | C | Heterozygous |
| NC_037650.1 | 9539219 | SNV | 1 | G | A | Heterozygous |
| NC_037650.1 | 9539244 | SNV | 1 | C | T | Homozygous   |
| NC_037650.1 | 9539328 | SNV | 1 | G | C | Homozygous   |
| NC_037650.1 | 9539348 | SNV | 1 | T | C | Heterozygous |
| NC_037650.1 | 9539481 | SNV | 1 | G | A | Heterozygous |
| NC_037650.1 | 9539492 | SNV | 1 | C | T | Heterozygous |
| NC_037650.1 | 9539525 | SNV | 1 | C | T | Homozygous   |
| NC_037650.1 | 9539664 | SNV | 1 | T | C | Homozygous   |
| NC_037650.1 | 9539675 | SNV | 1 | A | G | Homozygous   |
| NC_037650.1 | 9551062 | SNV | 1 | A | G | Heterozygous |
| NC_037650.1 | 9551085 | SNV | 1 | G | A | Heterozygous |
| NC_037650.1 | 9551199 | SNV | 1 | T | C | Heterozygous |
| NC_037650.1 | 9551294 | SNV | 1 | T | C | Homozygous   |
| NC_037650.1 | 9559934 | SNV | 1 | C | T | Homozygous   |
| NC_037650.1 | 9570710 | SNV | 1 | A | C | Homozygous   |
| NC_037650.1 | 9570717 | SNV | 1 | A | T | Heterozygous |
| NC_037650.1 | 9570726 | SNV | 1 | A | T | Homozygous   |
| NC_037650.1 | 9571276 | SNV | 1 | A | G | Homozygous   |
| NC_037650.1 | 9571348 | SNV | 1 | T | C | Heterozygous |
| NC_037650.1 | 9571396 | SNV | 1 | A | G | Homozygous   |
| NC_037650.1 | 9573991 | SNV | 1 | A | C | Homozygous   |
| NC_037650.1 | 9574000 | SNV | 1 | C | G | Homozygous   |
| NC_037650.1 | 9574005 | SNV | 1 | A | G | Homozygous   |
| NC_037650.1 | 9602786 | SNV | 1 | A | G | Homozygous   |
| NC_037650.1 | 9603042 | SNV | 1 | T | C | Heterozygous |

|             |         |     |   |   |   |              |
|-------------|---------|-----|---|---|---|--------------|
| NC_037650.1 | 9603105 | SNV | 1 | T | C | Homozygous   |
| NC_037650.1 | 9603773 | SNV | 1 | A | G | Heterozygous |
| NC_037650.1 | 9603790 | SNV | 1 | T | C | Heterozygous |
| NC_037650.1 | 9681238 | SNV | 1 | A | G | Homozygous   |
| NC_037650.1 | 9681584 | SNV | 1 | G | C | Heterozygous |
| NC_037650.1 | 9682882 | SNV | 1 | T | G | Homozygous   |
| NC_037650.1 | 9683440 | SNV | 1 | T | C | Heterozygous |
| NC_037650.1 | 9683500 | SNV | 1 | C | T | Heterozygous |
| NC_037650.1 | 9683582 | SNV | 1 | T | A | Homozygous   |
| NC_037650.1 | 9683742 | SNV | 1 | T | C | Homozygous   |
| NC_037650.1 | 9684773 | SNV | 1 | C | T | Homozygous   |
| NC_037650.1 | 9684776 | SNV | 1 | C | T | Homozygous   |
| NC_037650.1 | 9684790 | SNV | 1 | C | G | Homozygous   |
| NC_037650.1 | 9685173 | SNV | 1 | T | C | Homozygous   |
| NC_037650.1 | 9685205 | SNV | 1 | T | C | Heterozygous |
| NC_037650.1 | 9685215 | SNV | 1 | T | C | Heterozygous |
| NC_037650.1 | 9724349 | SNV | 1 | A | G | Homozygous   |
| NC_037650.1 | 9724458 | SNV | 1 | C | A | Homozygous   |
| NC_037650.1 | 9724830 | SNV | 1 | T | C | Homozygous   |
| NC_037650.1 | 9725992 | SNV | 1 | G | T | Heterozygous |
| NC_037650.1 | 9725997 | SNV | 1 | A | T | Heterozygous |
| NC_037650.1 | 9726013 | SNV | 1 | A | G | Heterozygous |
| NC_037650.1 | 9726018 | SNV | 1 | G | A | Heterozygous |
| NC_037650.1 | 9726054 | SNV | 1 | A | T | Homozygous   |
| NC_037650.1 | 9726056 | SNV | 1 | G | A | Homozygous   |
| NC_037650.1 | 9726064 | SNV | 1 | G | A | Homozygous   |
| NC_037650.1 | 9726066 | SNV | 1 | G | A | Homozygous   |
| NC_037650.1 | 9726115 | SNV | 1 | G | T | Heterozygous |
| NC_037650.1 | 9726117 | SNV | 1 | G | T | Homozygous   |
| NC_037650.1 | 9731834 | SNV | 1 | A | T | Heterozygous |
| NC_037650.1 | 9731851 | SNV | 1 | T | A | Homozygous   |
| NC_037650.1 | 9731854 | SNV | 1 | G | A | Homozygous   |
| NC_037650.1 | 9731883 | SNV | 1 | T | A | Heterozygous |
| NC_037650.1 | 9743167 | SNV | 1 | A | G | Heterozygous |
| NC_037650.1 | 9743189 | SNV | 1 | C | A | Homozygous   |
| NC_037650.1 | 9746747 | SNV | 1 | C | T | Heterozygous |
| NC_037650.1 | 9746756 | SNV | 1 | G | A | Heterozygous |
| NC_037650.1 | 9746758 | SNV | 1 | G | A | Homozygous   |
| NC_037650.1 | 9747008 | SNV | 1 | C | T | Heterozygous |
| NC_037650.1 | 9747022 | SNV | 1 | A | C | Heterozygous |
| NC_037650.1 | 9747964 | SNV | 1 | A | G | Homozygous   |
| NC_037650.1 | 9748354 | SNV | 1 | A | G | Heterozygous |
| NC_037650.1 | 9748366 | SNV | 1 | A | G | Heterozygous |
| NC_037650.1 | 9748372 | SNV | 1 | A | G | Heterozygous |
| NC_037650.1 | 9748629 | SNV | 1 | A | G | Homozygous   |
| NC_037650.1 | 9748632 | SNV | 1 | T | A | Heterozygous |
| NC_037650.1 | 9750550 | SNV | 1 | C | G | Heterozygous |
| NC_037650.1 | 9750552 | SNV | 1 | C | T | Heterozygous |
| NC_037650.1 | 9750554 | SNV | 1 | C | T | Homozygous   |
| NC_037650.1 | 9750560 | SNV | 1 | C | G | Heterozygous |
| NC_037650.1 | 9750573 | SNV | 1 | T | C | Homozygous   |

|             |         |     |   |   |   |              |
|-------------|---------|-----|---|---|---|--------------|
| NC_037650.1 | 9750575 | SNV | 1 | C | A | Homozygous   |
| NC_037650.1 | 9750583 | SNV | 1 | C | T | Homozygous   |
| NC_037650.1 | 9750587 | SNV | 1 | T | C | Homozygous   |
| NC_037650.1 | 9762705 | SNV | 1 | G | A | Homozygous   |
| NC_037650.1 | 9767588 | SNV | 1 | G | A | Homozygous   |
| NC_037650.1 | 9774810 | SNV | 1 | T | A | Homozygous   |
| NC_037650.1 | 9774826 | SNV | 1 | T | A | Homozygous   |
| NC_037650.1 | 9774828 | SNV | 1 | T | A | Homozygous   |
| NC_037650.1 | 9774838 | SNV | 1 | T | A | Homozygous   |
| NC_037650.1 | 9779756 | SNV | 1 | A | G | Homozygous   |
| NC_037650.1 | 9779760 | SNV | 1 | A | T | Homozygous   |
| NC_037650.1 | 9785004 | SNV | 1 | T | G | Homozygous   |
| NC_037650.1 | 9786461 | SNV | 1 | G | A | Homozygous   |
| NC_037650.1 | 9786556 | SNV | 1 | T | C | Heterozygous |
| NC_037650.1 | 9786582 | SNV | 1 | T | C | Homozygous   |
| NC_037650.1 | 9786594 | SNV | 1 | C | T | Heterozygous |
| NC_037650.1 | 9786642 | SNV | 1 | T | C | Homozygous   |
| NC_037650.1 | 9786650 | SNV | 1 | C | T | Homozygous   |
| NC_037650.1 | 9786672 | SNV | 1 | C | T | Homozygous   |
| NC_037650.1 | 9786677 | SNV | 1 | C | T | Homozygous   |
| NC_037650.1 | 9786684 | SNV | 1 | C | T | Heterozygous |
| NC_037650.1 | 9788780 | SNV | 1 | G | A | Homozygous   |
| NC_037650.1 | 9788812 | SNV | 1 | T | G | Homozygous   |
| NC_037650.1 | 9788814 | SNV | 1 | G | A | Homozygous   |
| NC_037650.1 | 9788816 | SNV | 1 | G | A | Homozygous   |
| NC_037650.1 | 9788824 | SNV | 1 | A | G | Homozygous   |
| NC_037650.1 | 9788826 | SNV | 1 | G | A | Homozygous   |
| NC_037650.1 | 9788859 | SNV | 1 | A | G | Homozygous   |
| NC_037650.1 | 9788868 | SNV | 1 | C | A | Heterozygous |
| NC_037650.1 | 9788905 | SNV | 1 | A | G | Heterozygous |
| NC_037650.1 | 9788954 | SNV | 1 | A | G | Heterozygous |
| NC_037650.1 | 9788968 | SNV | 1 | T | G | Heterozygous |
| NC_037650.1 | 9788972 | SNV | 1 | T | G | Heterozygous |
| NC_037650.1 | 9796295 | SNV | 1 | A | T | Heterozygous |
| NC_037650.1 | 9796834 | SNV | 1 | G | A | Homozygous   |
| NC_037650.1 | 9796858 | SNV | 1 | C | T | Heterozygous |
| NC_037650.1 | 9796994 | SNV | 1 | T | G | Homozygous   |
| NC_037650.1 | 9800785 | SNV | 1 | A | G | Homozygous   |
| NC_037650.1 | 9801760 | SNV | 1 | T | C | Homozygous   |
| NC_037650.1 | 9801793 | SNV | 1 | G | A | Homozygous   |
| NC_037650.1 | 9802010 | SNV | 1 | A | G | Homozygous   |
| NC_037650.1 | 9802017 | SNV | 1 | G | A | Heterozygous |
| NC_037650.1 | 9802019 | SNV | 1 | T | C | Heterozygous |
| NC_037650.1 | 9802055 | SNV | 1 | G | A | Heterozygous |
| NC_037650.1 | 9802076 | SNV | 1 | G | A | Homozygous   |
| NC_037650.1 | 9802478 | SNV | 1 | C | T | Heterozygous |
| NC_037650.1 | 9802483 | SNV | 1 | T | C | Heterozygous |
| NC_037650.1 | 9802493 | SNV | 1 | T | C | Heterozygous |
| NC_037650.1 | 9802511 | SNV | 1 | G | A | Heterozygous |
| NC_037650.1 | 9802533 | SNV | 1 | G | A | Heterozygous |
| NC_037650.1 | 9802535 | SNV | 1 | G | A | Heterozygous |

|             |         |     |   |   |   |              |
|-------------|---------|-----|---|---|---|--------------|
| NC_037650.1 | 9802558 | SNV | 1 | A | G | Heterozygous |
| NC_037650.1 | 9802564 | SNV | 1 | A | G | Homozygous   |
| NC_037650.1 | 9802572 | SNV | 1 | C | T | Homozygous   |
| NC_037650.1 | 9802974 | SNV | 1 | G | A | Heterozygous |
| NC_037650.1 | 9803165 | SNV | 1 | A | G | Homozygous   |
| NC_037650.1 | 9803169 | SNV | 1 | A | G | Heterozygous |
| NC_037650.1 | 9803521 | SNV | 1 | T | C | Homozygous   |
| NC_037650.1 | 9803541 | SNV | 1 | T | C | Homozygous   |
| NC_037650.1 | 9803739 | SNV | 1 | A | T | Heterozygous |
| NC_037650.1 | 9809030 | SNV | 1 | C | T | Heterozygous |
| NC_037650.1 | 9809067 | SNV | 1 | T | C | Homozygous   |
| NC_037650.1 | 9809081 | SNV | 1 | T | C | Homozygous   |
| NC_037650.1 | 9809083 | SNV | 1 | T | C | Homozygous   |
| NC_037650.1 | 9809092 | SNV | 1 | A | G | Homozygous   |
| NC_037650.1 | 9812274 | SNV | 1 | T | C | Homozygous   |
| NC_037650.1 | 9812312 | SNV | 1 | C | T | Homozygous   |
| NC_037650.1 | 9812698 | SNV | 1 | G | A | Heterozygous |
| NC_037650.1 | 9812763 | SNV | 1 | C | G | Homozygous   |
| NC_037650.1 | 9812803 | SNV | 1 | C | G | Heterozygous |
| NC_037650.1 | 9820838 | SNV | 1 | T | A | Homozygous   |
| NC_037650.1 | 9820887 | SNV | 1 | A | T | Homozygous   |
| NC_037650.1 | 9821964 | SNV | 1 | G | C | Heterozygous |
| NC_037650.1 | 9821972 | SNV | 1 | G | A | Heterozygous |
| NC_037650.1 | 9825120 | SNV | 1 | G | A | Homozygous   |
| NC_037650.1 | 9825996 | SNV | 1 | C | T | Heterozygous |
| NC_037650.1 | 9825998 | SNV | 1 | T | C | Homozygous   |
| NC_037650.1 | 9826536 | SNV | 1 | T | C | Homozygous   |
| NC_037650.1 | 9826639 | SNV | 1 | T | C | Heterozygous |
| NC_037650.1 | 9834990 | SNV | 1 | C | T | Homozygous   |
| NC_037650.1 | 9835002 | SNV | 1 | C | A | Homozygous   |
| NC_037650.1 | 9835013 | SNV | 1 | G | C | Homozygous   |
| NC_037650.1 | 9835252 | SNV | 1 | T | A | Homozygous   |
| NC_037650.1 | 9835263 | SNV | 1 | A | G | Homozygous   |
| NC_037650.1 | 9835272 | SNV | 1 | A | G | Heterozygous |
| NC_037650.1 | 9835583 | SNV | 1 | C | T | Homozygous   |
| NC_037650.1 | 9835585 | SNV | 1 | T | C | Heterozygous |
| NC_037650.1 | 9835621 | SNV | 1 | C | T | Homozygous   |
| NC_037650.1 | 9835627 | SNV | 1 | C | T | Homozygous   |
| NC_037650.1 | 9835630 | SNV | 1 | T | C | Homozygous   |
| NC_037650.1 | 9835797 | SNV | 1 | T | C | Homozygous   |
| NC_037650.1 | 9835800 | SNV | 1 | A | T | Heterozygous |
| NC_037650.1 | 9835833 | SNV | 1 | G | A | Heterozygous |
| NC_037650.1 | 9835842 | SNV | 1 | A | G | Heterozygous |
| NC_037650.1 | 9835864 | SNV | 1 | A | G | Homozygous   |
| NC_037650.1 | 9835892 | SNV | 1 | A | G | Homozygous   |
| NC_037650.1 | 9835959 | SNV | 1 | T | C | Heterozygous |
| NC_037650.1 | 9835988 | SNV | 1 | A | G | Homozygous   |
| NC_037650.1 | 9847038 | SNV | 1 | T | C | Heterozygous |
| NC_037650.1 | 9847057 | SNV | 1 | T | A | Homozygous   |
| NC_037650.1 | 9847060 | SNV | 1 | T | A | Homozygous   |
| NC_037650.1 | 9847103 | SNV | 1 | T | A | Homozygous   |



|             |         |     |   |   |   |              |
|-------------|---------|-----|---|---|---|--------------|
| NC_037650.1 | 9847115 | SNV | 1 | A | G | Heterozygous |
| NC_037650.1 | 9848339 | SNV | 1 | A | G | Heterozygous |
| NC_037650.1 | 9848348 | SNV | 1 | G | A | Homozygous   |
| NC_037650.1 | 9848350 | SNV | 1 | A | G | Homozygous   |
| NC_037650.1 | 9848358 | SNV | 1 | G | C | Homozygous   |
| NC_037650.1 | 9848399 | SNV | 1 | G | C | Homozygous   |
| NC_037650.1 | 9848421 | SNV | 1 | C | T | Homozygous   |
| NC_037650.1 | 9848426 | SNV | 1 | C | T | Homozygous   |
| NC_037650.1 | 9848443 | SNV | 1 | G | A | Homozygous   |
| NC_037650.1 | 9848518 | SNV | 1 | G | A | Homozygous   |
| NC_037650.1 | 9848527 | SNV | 1 | G | A | Homozygous   |
| NC_037650.1 | 9848537 | SNV | 1 | A | T | Homozygous   |
| NC_037650.1 | 9848551 | SNV | 1 | C | G | Homozygous   |
| NC_037650.1 | 9848553 | SNV | 1 | A | T | Homozygous   |
| NC_037650.1 | 9848671 | SNV | 1 | C | T | Homozygous   |
| NC_037650.1 | 9848689 | SNV | 1 | T | G | Homozygous   |
| NC_037650.1 | 9848691 | SNV | 1 | A | G | Homozygous   |
| NC_037650.1 | 9848693 | SNV | 1 | G | C | Homozygous   |
| NC_037650.1 | 9848710 | SNV | 1 | G | A | Homozygous   |
| NC_037650.1 | 9848767 | SNV | 1 | A | G | Homozygous   |
| NC_037650.1 | 9849076 | SNV | 1 | C | T | Heterozygous |
| NC_037650.1 | 9849093 | SNV | 1 | C | T | Heterozygous |
| NC_037650.1 | 9849099 | SNV | 1 | C | T | Heterozygous |
| NC_037650.1 | 9849129 | SNV | 1 | G | T | Heterozygous |
| NC_037650.1 | 9849132 | SNV | 1 | G | C | Heterozygous |
| NC_037650.1 | 9849168 | SNV | 1 | A | G | Homozygous   |
| NC_037650.1 | 9849176 | SNV | 1 | A | G | Homozygous   |
| NC_037650.1 | 9849181 | SNV | 1 | A | G | Homozygous   |
| NC_037650.1 | 9849193 | SNV | 1 | A | G | Heterozygous |
| NC_037650.1 | 9850478 | SNV | 1 | C | T | Homozygous   |
| NC_037650.1 | 9850481 | SNV | 1 | G | A | Heterozygous |
| NC_037650.1 | 9850505 | SNV | 1 | G | T | Homozygous   |
| NC_037650.1 | 9852496 | SNV | 1 | A | G | Homozygous   |
| NC_037650.1 | 9852639 | SNV | 1 | C | G | Heterozygous |
| NC_037650.1 | 9852665 | SNV | 1 | A | G | Homozygous   |
| NC_037650.1 | 9852692 | SNV | 1 | G | A | Homozygous   |
| NC_037650.1 | 9855487 | SNV | 1 | A | T | Heterozygous |
| NC_037650.1 | 9855516 | SNV | 1 | A | T | Heterozygous |
| NC_037650.1 | 9855576 | SNV | 1 | C | T | Heterozygous |
| NC_037650.1 | 9855583 | SNV | 1 | A | G | Homozygous   |
| NC_037650.1 | 9855590 | SNV | 1 | A | G | Heterozygous |
| NC_037650.1 | 9855615 | SNV | 1 | C | T | Homozygous   |
| NC_037650.1 | 9856624 | SNV | 1 | G | A | Homozygous   |
| NC_037650.1 | 9860801 | SNV | 1 | G | C | Homozygous   |
| NC_037650.1 | 9860816 | SNV | 1 | C | T | Heterozygous |
| NC_037650.1 | 9860865 | SNV | 1 | G | A | Heterozygous |
| NC_037650.1 | 9860911 | SNV | 1 | T | C | Homozygous   |
| NC_037650.1 | 9863275 | SNV | 1 | T | C | Heterozygous |
| NC_037650.1 | 9863295 | SNV | 1 | T | C | Heterozygous |
| NC_037650.1 | 9863297 | SNV | 1 | T | C | Heterozygous |
| NC_037650.1 | 9863308 | SNV | 1 | T | C | Homozygous   |

|             |          |     |   |   |   |              |
|-------------|----------|-----|---|---|---|--------------|
| NC_037650.1 | 9863320  | SNV | 1 | T | C | Heterozygous |
| NC_037650.1 | 9863535  | SNV | 1 | G | A | Heterozygous |
| NC_037650.1 | 9893700  | SNV | 1 | T | C | Homozygous   |
| NC_037650.1 | 9893865  | SNV | 1 | T | A | Homozygous   |
| NC_037650.1 | 9893868  | SNV | 1 | T | A | Homozygous   |
| NC_037650.1 | 9893872  | SNV | 1 | T | C | Homozygous   |
| NC_037650.1 | 9893874  | SNV | 1 | G | A | Homozygous   |
| NC_037650.1 | 9893992  | SNV | 1 | A | G | Homozygous   |
| NC_037650.1 | 9894609  | SNV | 1 | A | G | Homozygous   |
| NC_037650.1 | 9895065  | SNV | 1 | T | C | Homozygous   |
| NC_037650.1 | 9895126  | SNV | 1 | T | C | Homozygous   |
| NC_037650.1 | 9896341  | SNV | 1 | A | G | Homozygous   |
| NC_037650.1 | 9896464  | SNV | 1 | C | G | Homozygous   |
| NC_037650.1 | 9897117  | SNV | 1 | C | T | Heterozygous |
| NC_037650.1 | 9918467  | SNV | 1 | A | G | Heterozygous |
| NC_037650.1 | 9918479  | SNV | 1 | T | G | Heterozygous |
| NC_037650.1 | 9918482  | SNV | 1 | C | A | Heterozygous |
| NC_037650.1 | 9919362  | SNV | 1 | A | G | Homozygous   |
| NC_037650.1 | 9919545  | SNV | 1 | C | G | Heterozygous |
| NC_037650.1 | 9919722  | SNV | 1 | G | A | Heterozygous |
| NC_037650.1 | 9921866  | SNV | 1 | A | G | Homozygous   |
| NC_037650.1 | 9921869  | SNV | 1 | G | A | Homozygous   |
| NC_037650.1 | 10087774 | SNV | 1 | T | C | Heterozygous |
| NC_037650.1 | 10087781 | SNV | 1 | A | G | Heterozygous |
| NC_037650.1 | 10087784 | SNV | 1 | C | T | Heterozygous |
| NC_037650.1 | 10087796 | SNV | 1 | T | C | Heterozygous |
| NC_037650.1 | 10088235 | SNV | 1 | A | G | Heterozygous |
| NC_037650.1 | 10089309 | SNV | 1 | A | C | Heterozygous |
| NC_037650.1 | 10089311 | SNV | 1 | G | C | Homozygous   |
| NC_037650.1 | 10089336 | SNV | 1 | A | G | Heterozygous |
| NC_037650.1 | 10089640 | SNV | 1 | C | G | Heterozygous |
| NC_037650.1 | 10089942 | SNV | 1 | C | T | Heterozygous |
| NC_037650.1 | 10090045 | SNV | 1 | A | C | Heterozygous |
| NC_037650.1 | 10090057 | SNV | 1 | G | A | Heterozygous |
| NC_037650.1 | 10094975 | SNV | 1 | C | A | Homozygous   |
| NC_037650.1 | 10104481 | SNV | 1 | T | A | Homozygous   |
| NC_037650.1 | 10104491 | SNV | 1 | T | C | Heterozygous |
| NC_037650.1 | 10104506 | SNV | 1 | A | G | Homozygous   |
| NC_037650.1 | 10104513 | SNV | 1 | T | C | Homozygous   |
| NC_037650.1 | 10107967 | SNV | 1 | G | A | Heterozygous |
| NC_037650.1 | 10107977 | SNV | 1 | G | C | Homozygous   |
| NC_037650.1 | 10108072 | SNV | 1 | A | G | Heterozygous |
| NC_037650.1 | 10108217 | SNV | 1 | T | C | Heterozygous |
| NC_037650.1 | 10108664 | SNV | 1 | T | C | Heterozygous |
| NC_037650.1 | 10111460 | SNV | 1 | T | A | Homozygous   |
| NC_037650.1 | 10111463 | SNV | 1 | C | T | Homozygous   |
| NC_037650.1 | 10111465 | SNV | 1 | A | C | Homozygous   |
| NC_037650.1 | 10111482 | SNV | 1 | T | A | Homozygous   |
| NC_037650.1 | 10111486 | SNV | 1 | T | A | Homozygous   |
| NC_037650.1 | 10121348 | SNV | 1 | G | A | Heterozygous |
| NC_037650.1 | 10121653 | SNV | 1 | T | C | Homozygous   |

|             |          |     |   |   |   |              |
|-------------|----------|-----|---|---|---|--------------|
| NC_037650.1 | 10121837 | SNV | 1 | A | C | Heterozygous |
| NC_037650.1 | 10121839 | SNV | 1 | A | G | Heterozygous |
| NC_037650.1 | 10121846 | SNV | 1 | T | G | Heterozygous |
| NC_037650.1 | 10121859 | SNV | 1 | A | C | Heterozygous |
| NC_037650.1 | 10121919 | SNV | 1 | C | T | Homozygous   |
| NC_037650.1 | 10130722 | SNV | 1 | C | T | Heterozygous |
| NC_037650.1 | 10130921 | SNV | 1 | T | G | Homozygous   |
| NC_037650.1 | 10131508 | SNV | 1 | A | G | Heterozygous |
| NC_037650.1 | 10135931 | SNV | 1 | T | C | Heterozygous |
| NC_037650.1 | 10141047 | SNV | 1 | A | G | Heterozygous |
| NC_037650.1 | 10179826 | SNV | 1 | A | G | Heterozygous |
| NC_037650.1 | 10179910 | SNV | 1 | T | C | Heterozygous |
| NC_037650.1 | 10179913 | SNV | 1 | A | C | Homozygous   |
| NC_037650.1 | 10180897 | SNV | 1 | T | C | Homozygous   |
| NC_037650.1 | 10180923 | SNV | 1 | G | A | Heterozygous |
| NC_037650.1 | 10180926 | SNV | 1 | G | A | Heterozygous |
| NC_037650.1 | 10180964 | SNV | 1 | T | C | Homozygous   |
| NC_037650.1 | 10180996 | SNV | 1 | A | G | Homozygous   |
| NC_037650.1 | 10181032 | SNV | 1 | C | T | Heterozygous |
| NC_037650.1 | 10181398 | SNV | 1 | C | T | Homozygous   |
| NC_037650.1 | 10181401 | SNV | 1 | C | T | Heterozygous |
| NC_037650.1 | 10183256 | SNV | 1 | G | T | Homozygous   |
| NC_037650.1 | 10183378 | SNV | 1 | G | A | Heterozygous |
| NC_037650.1 | 10187120 | SNV | 1 | A | G | Homozygous   |
| NC_037650.1 | 10198644 | SNV | 1 | A | G | Heterozygous |
| NC_037650.1 | 10198649 | SNV | 1 | C | G | Heterozygous |
| NC_037650.1 | 10204001 | SNV | 1 | C | T | Heterozygous |
| NC_037650.1 | 10204015 | SNV | 1 | G | A | Heterozygous |
| NC_037650.1 | 10204026 | SNV | 1 | T | G | Heterozygous |
| NC_037650.1 | 10204035 | SNV | 1 | A | G | Heterozygous |
| NC_037650.1 | 10204058 | SNV | 1 | C | T | Heterozygous |
| NC_037650.1 | 10204067 | SNV | 1 | C | A | Homozygous   |
| NC_037650.1 | 10204079 | SNV | 1 | T | A | Homozygous   |
| NC_037650.1 | 10204220 | SNV | 1 | T | C | Heterozygous |
| NC_037650.1 | 10204230 | SNV | 1 | T | C | Heterozygous |
| NC_037650.1 | 10204240 | SNV | 1 | G | A | Heterozygous |
| NC_037650.1 | 10204301 | SNV | 1 | G | A | Heterozygous |
| NC_037650.1 | 10204336 | SNV | 1 | G | C | Homozygous   |
| NC_037650.1 | 10204381 | SNV | 1 | T | C | Homozygous   |
| NC_037650.1 | 10204425 | SNV | 1 | T | A | Heterozygous |
| NC_037650.1 | 10204587 | SNV | 1 | T | C | Heterozygous |
| NC_037650.1 | 10204677 | SNV | 1 | G | A | Heterozygous |
| NC_037650.1 | 10204681 | SNV | 1 | G | A | Heterozygous |
| NC_037650.1 | 10204695 | SNV | 1 | A | G | Heterozygous |
| NC_037650.1 | 10204737 | SNV | 1 | T | G | Heterozygous |
| NC_037650.1 | 10204855 | SNV | 1 | A | G | Heterozygous |
| NC_037650.1 | 10204862 | SNV | 1 | A | G | Heterozygous |
| NC_037650.1 | 10204952 | SNV | 1 | G | A | Homozygous   |
| NC_037650.1 | 10205094 | SNV | 1 | C | T | Heterozygous |
| NC_037650.1 | 10205101 | SNV | 1 | C | T | Heterozygous |
| NC_037650.1 | 10205103 | SNV | 1 | T | C | Heterozygous |

|             |          |     |   |   |   |              |
|-------------|----------|-----|---|---|---|--------------|
| NC_037650.1 | 10205118 | SNV | 1 | G | A | Heterozygous |
| NC_037650.1 | 10207701 | SNV | 1 | T | A | Heterozygous |
| NC_037650.1 | 10207701 | SNV | 1 | T | C | Heterozygous |
| NC_037650.1 | 10208097 | SNV | 1 | T | C | Heterozygous |
| NC_037650.1 | 10208189 | SNV | 1 | A | G | Heterozygous |
| NC_037650.1 | 10208210 | SNV | 1 | A | G | Homozygous   |
| NC_037650.1 | 10208498 | SNV | 1 | A | G | Homozygous   |
| NC_037650.1 | 10208607 | SNV | 1 | G | A | Heterozygous |
| NC_037650.1 | 10208779 | SNV | 1 | G | A | Heterozygous |
| NC_037650.1 | 10208788 | SNV | 1 | A | G | Homozygous   |
| NC_037650.1 | 10208808 | SNV | 1 | A | T | Homozygous   |
| NC_037650.1 | 10208840 | SNV | 1 | T | C | Homozygous   |
| NC_037650.1 | 10208850 | SNV | 1 | T | C | Heterozygous |
| NC_037650.1 | 10208871 | SNV | 1 | C | T | Heterozygous |
| NC_037650.1 | 10208882 | SNV | 1 | G | A | Heterozygous |
| NC_037650.1 | 10208885 | SNV | 1 | G | A | Heterozygous |
| NC_037650.1 | 10208898 | SNV | 1 | T | G | Heterozygous |
| NC_037650.1 | 10208967 | SNV | 1 | G | A | Heterozygous |
| NC_037650.1 | 10209006 | SNV | 1 | A | G | Homozygous   |
| NC_037650.1 | 10209060 | SNV | 1 | T | C | Heterozygous |
| NC_037650.1 | 10209072 | SNV | 1 | G | A | Heterozygous |
| NC_037650.1 | 10209092 | SNV | 1 | C | G | Homozygous   |
| NC_037650.1 | 10209121 | SNV | 1 | T | C | Homozygous   |
| NC_037650.1 | 10209159 | SNV | 1 | A | G | Heterozygous |
| NC_037650.1 | 10209168 | SNV | 1 | A | G | Heterozygous |
| NC_037650.1 | 10209169 | SNV | 1 | A | G | Heterozygous |
| NC_037650.1 | 10209249 | SNV | 1 | C | T | Homozygous   |
| NC_037650.1 | 10209310 | SNV | 1 | A | G | Heterozygous |
| NC_037650.1 | 10209322 | SNV | 1 | T | C | Heterozygous |
| NC_037650.1 | 10209395 | SNV | 1 | T | C | Homozygous   |
| NC_037650.1 | 10209459 | SNV | 1 | T | C | Heterozygous |
| NC_037650.1 | 10209547 | SNV | 1 | A | G | Heterozygous |
| NC_037650.1 | 10209650 | SNV | 1 | G | A | Heterozygous |
| NC_037650.1 | 10209659 | SNV | 1 | G | A | Heterozygous |
| NC_037650.1 | 10209807 | SNV | 1 | A | G | Homozygous   |
| NC_037650.1 | 10210066 | SNV | 1 | C | T | Heterozygous |
| NC_037650.1 | 10216080 | SNV | 1 | C | T | Heterozygous |
| NC_037650.1 | 10216099 | SNV | 1 | G | A | Heterozygous |
| NC_037650.1 | 10216112 | SNV | 1 | A | G | Heterozygous |
| NC_037650.1 | 10216118 | SNV | 1 | A | G | Heterozygous |
| NC_037650.1 | 10216132 | SNV | 1 | T | C | Homozygous   |
| NC_037650.1 | 10216177 | SNV | 1 | G | A | Heterozygous |
| NC_037650.1 | 10216193 | SNV | 1 | G | A | Homozygous   |
| NC_037650.1 | 10217368 | SNV | 1 | T | C | Heterozygous |
| NC_037650.1 | 10217381 | SNV | 1 | T | C | Heterozygous |
| NC_037650.1 | 10217526 | SNV | 1 | A | G | Homozygous   |
| NC_037650.1 | 10230485 | SNV | 1 | A | G | Homozygous   |
| NC_037650.1 | 10230602 | SNV | 1 | C | A | Heterozygous |
| NC_037650.1 | 10230671 | SNV | 1 | G | A | Heterozygous |
| NC_037650.1 | 10238478 | SNV | 1 | G | A | Heterozygous |
| NC_037650.1 | 10238507 | SNV | 1 | C | T | Heterozygous |

|             |          |     |   |   |   |              |
|-------------|----------|-----|---|---|---|--------------|
| NC_037650.1 | 10238533 | SNV | 1 | A | G | Homozygous   |
| NC_037650.1 | 10238609 | SNV | 1 | T | C | Heterozygous |
| NC_037650.1 | 10238614 | SNV | 1 | A | G | Homozygous   |
| NC_037650.1 | 10238674 | SNV | 1 | C | T | Heterozygous |
| NC_037650.1 | 10238682 | SNV | 1 | A | G | Homozygous   |
| NC_037650.1 | 10239357 | SNV | 1 | A | G | Heterozygous |
| NC_037650.1 | 10239527 | SNV | 1 | T | C | Heterozygous |
| NC_037650.1 | 10240670 | SNV | 1 | T | C | Heterozygous |
| NC_037650.1 | 10240677 | SNV | 1 | A | T | Heterozygous |
| NC_037650.1 | 10243600 | SNV | 1 | T | G | Heterozygous |
| NC_037650.1 | 10244316 | SNV | 1 | A | G | Heterozygous |
| NC_037650.1 | 10245394 | SNV | 1 | C | T | Heterozygous |
| NC_037650.1 | 10246220 | SNV | 1 | C | T | Heterozygous |
| NC_037650.1 | 10249152 | SNV | 1 | T | C | Homozygous   |
| NC_037650.1 | 10249206 | SNV | 1 | A | G | Heterozygous |
| NC_037650.1 | 10249251 | SNV | 1 | C | T | Heterozygous |
| NC_037650.1 | 10249658 | SNV | 1 | C | T | Homozygous   |
| NC_037650.1 | 10249680 | SNV | 1 | G | A | Heterozygous |
| NC_037650.1 | 10249871 | SNV | 1 | T | C | Homozygous   |
| NC_037650.1 | 10249887 | SNV | 1 | T | C | Homozygous   |
| NC_037650.1 | 10250469 | SNV | 1 | T | C | Homozygous   |
| NC_037650.1 | 10250492 | SNV | 1 | G | C | Homozygous   |
| NC_037650.1 | 10251019 | SNV | 1 | A | G | Homozygous   |
| NC_037650.1 | 10251023 | SNV | 1 | A | G | Homozygous   |
| NC_037650.1 | 10255794 | SNV | 1 | A | C | Homozygous   |
| NC_037650.1 | 10256627 | SNV | 1 | A | G | Homozygous   |
| NC_037650.1 | 10257821 | SNV | 1 | A | T | Heterozygous |
| NC_037650.1 | 10258028 | SNV | 1 | A | G | Homozygous   |
| NC_037650.1 | 10258106 | SNV | 1 | C | T | Heterozygous |
| NC_037650.1 | 10258245 | SNV | 1 | C | T | Heterozygous |
| NC_037650.1 | 10258958 | SNV | 1 | A | G | Homozygous   |
| NC_037650.1 | 10258993 | SNV | 1 | C | A | Heterozygous |
| NC_037650.1 | 10259004 | SNV | 1 | T | C | Homozygous   |
| NC_037650.1 | 10259008 | SNV | 1 | A | G | Heterozygous |
| NC_037650.1 | 10259109 | SNV | 1 | A | G | Heterozygous |
| NC_037650.1 | 10259254 | SNV | 1 | A | G | Homozygous   |
| NC_037650.1 | 10259275 | SNV | 1 | T | C | Heterozygous |
| NC_037650.1 | 10290488 | SNV | 1 | C | T | Homozygous   |
| NC_037650.1 | 10292292 | SNV | 1 | C | A | Heterozygous |
| NC_037650.1 | 10292305 | SNV | 1 | C | A | Heterozygous |
| NC_037650.1 | 10292898 | SNV | 1 | C | T | Homozygous   |
| NC_037650.1 | 10292902 | SNV | 1 | C | T | Heterozygous |
| NC_037650.1 | 10304061 | SNV | 1 | G | A | Heterozygous |
| NC_037650.1 | 10304116 | SNV | 1 | T | C | Heterozygous |
| NC_037650.1 | 10306244 | SNV | 1 | C | T | Heterozygous |
| NC_037650.1 | 10306266 | SNV | 1 | T | C | Heterozygous |
| NC_037650.1 | 10306815 | SNV | 1 | A | G | Homozygous   |
| NC_037650.1 | 10306919 | SNV | 1 | A | G | Heterozygous |
| NC_037650.1 | 10307039 | SNV | 1 | C | G | Heterozygous |
| NC_037650.1 | 10307105 | SNV | 1 | G | A | Homozygous   |
| NC_037650.1 | 10307241 | SNV | 1 | T | C | Heterozygous |

|             |          |     |   |   |   |              |
|-------------|----------|-----|---|---|---|--------------|
| NC_037650.1 | 10307250 | SNV | 1 | C | T | Homozygous   |
| NC_037650.1 | 10317515 | SNV | 1 | G | A | Heterozygous |
| NC_037650.1 | 10320754 | SNV | 1 | T | C | Homozygous   |
| NC_037650.1 | 10321397 | SNV | 1 | A | G | Homozygous   |
| NC_037650.1 | 10321401 | SNV | 1 | G | A | Homozygous   |
| NC_037650.1 | 10321732 | SNV | 1 | T | G | Homozygous   |
| NC_037650.1 | 10321734 | SNV | 1 | A | T | Homozygous   |
| NC_037650.1 | 10321756 | SNV | 1 | T | A | Homozygous   |
| NC_037650.1 | 10321764 | SNV | 1 | T | A | Homozygous   |
| NC_037650.1 | 10321771 | SNV | 1 | G | T | Homozygous   |
| NC_037650.1 | 10321813 | SNV | 1 | A | G | Homozygous   |
| NC_037650.1 | 10321850 | SNV | 1 | A | G | Heterozygous |
| NC_037650.1 | 10321859 | SNV | 1 | A | G | Heterozygous |
| NC_037650.1 | 10321891 | SNV | 1 | T | C | Heterozygous |
| NC_037650.1 | 10323196 | SNV | 1 | A | T | Heterozygous |
| NC_037650.1 | 10323243 | SNV | 1 | T | C | Heterozygous |
| NC_037650.1 | 10323248 | SNV | 1 | A | T | Heterozygous |
| NC_037650.1 | 10323263 | SNV | 1 | T | C | Homozygous   |
| NC_037650.1 | 10323298 | SNV | 1 | G | A | Heterozygous |
| NC_037650.1 | 10323331 | SNV | 1 | T | C | Heterozygous |
| NC_037650.1 | 10323711 | SNV | 1 | C | T | Heterozygous |
| NC_037650.1 | 10324456 | SNV | 1 | G | T | Heterozygous |
| NC_037650.1 | 10324532 | SNV | 1 | C | T | Heterozygous |
| NC_037650.1 | 10324558 | SNV | 1 | A | G | Homozygous   |
| NC_037650.1 | 10324827 | SNV | 1 | G | C | Homozygous   |
| NC_037650.1 | 10324885 | SNV | 1 | A | G | Homozygous   |
| NC_037650.1 | 10324887 | SNV | 1 | C | T | Heterozygous |
| NC_037650.1 | 10324891 | SNV | 1 | C | A | Heterozygous |
| NC_037650.1 | 10325012 | SNV | 1 | G | A | Heterozygous |
| NC_037650.1 | 10325128 | SNV | 1 | G | A | Homozygous   |
| NC_037650.1 | 10325678 | SNV | 1 | A | T | Homozygous   |
| NC_037650.1 | 10325681 | SNV | 1 | T | C | Homozygous   |
| NC_037650.1 | 10327169 | SNV | 1 | T | C | Heterozygous |
| NC_037650.1 | 10328295 | SNV | 1 | G | A | Homozygous   |
| NC_037650.1 | 10328748 | SNV | 1 | G | A | Heterozygous |
| NC_037650.1 | 10329004 | SNV | 1 | T | C | Heterozygous |
| NC_037650.1 | 10329663 | SNV | 1 | T | G | Homozygous   |
| NC_037650.1 | 10329757 | SNV | 1 | A | C | Homozygous   |
| NC_037650.1 | 10356463 | SNV | 1 | T | C | Heterozygous |
| NC_037650.1 | 10358904 | SNV | 1 | C | T | Heterozygous |
| NC_037650.1 | 10366535 | SNV | 1 | C | T | Homozygous   |
| NC_037650.1 | 10366577 | SNV | 1 | C | T | Homozygous   |
| NC_037650.1 | 10366584 | SNV | 1 | T | C | Homozygous   |
| NC_037650.1 | 10372419 | SNV | 1 | A | G | Heterozygous |
| NC_037650.1 | 10372423 | SNV | 1 | A | G | Heterozygous |
| NC_037650.1 | 10372429 | SNV | 1 | G | A | Heterozygous |
| NC_037650.1 | 10372439 | SNV | 1 | A | G | Homozygous   |
| NC_037650.1 | 10372443 | SNV | 1 | T | C | Homozygous   |
| NC_037650.1 | 10377017 | SNV | 1 | T | C | Heterozygous |
| NC_037650.1 | 10382303 | SNV | 1 | T | C | Homozygous   |
| NC_037650.1 | 10382342 | SNV | 1 | G | A | Heterozygous |

|             |          |     |   |   |   |              |
|-------------|----------|-----|---|---|---|--------------|
| NC_037650.1 | 10382381 | SNV | 1 | A | G | Heterozygous |
| NC_037650.1 | 10382400 | SNV | 1 | A | T | Heterozygous |
| NC_037650.1 | 10382402 | SNV | 1 | C | T | Heterozygous |
| NC_037650.1 | 10382465 | SNV | 1 | T | C | Heterozygous |
| NC_037650.1 | 10382505 | SNV | 1 | G | A | Homozygous   |
| NC_037650.1 | 10382507 | SNV | 1 | G | A | Homozygous   |
| NC_037650.1 | 10382516 | SNV | 1 | G | C | Heterozygous |
| NC_037650.1 | 10382521 | SNV | 1 | A | G | Homozygous   |
| NC_037650.1 | 10382592 | SNV | 1 | T | C | Homozygous   |
| NC_037650.1 | 10382595 | SNV | 1 | A | G | Homozygous   |
| NC_037650.1 | 10382635 | SNV | 1 | G | A | Homozygous   |
| NC_037650.1 | 10382647 | SNV | 1 | A | G | Heterozygous |
| NC_037650.1 | 10382654 | SNV | 1 | A | G | Heterozygous |
| NC_037650.1 | 10382655 | SNV | 1 | G | T | Heterozygous |
| NC_037650.1 | 10382711 | SNV | 1 | T | C | Homozygous   |
| NC_037650.1 | 10382714 | SNV | 1 | G | A | Heterozygous |
| NC_037650.1 | 10382757 | SNV | 1 | G | A | Heterozygous |
| NC_037650.1 | 10382775 | SNV | 1 | A | G | Homozygous   |
| NC_037650.1 | 10382907 | SNV | 1 | A | G | Homozygous   |
| NC_037650.1 | 10382918 | SNV | 1 | A | T | Heterozygous |
| NC_037650.1 | 10383043 | SNV | 1 | C | T | Homozygous   |
| NC_037650.1 | 10383179 | SNV | 1 | C | T | Homozygous   |
| NC_037650.1 | 10383205 | SNV | 1 | C | T | Heterozygous |
| NC_037650.1 | 10383221 | SNV | 1 | T | C | Heterozygous |
| NC_037650.1 | 10383226 | SNV | 1 | C | T | Homozygous   |
| NC_037650.1 | 10383231 | SNV | 1 | T | C | Heterozygous |
| NC_037650.1 | 10383260 | SNV | 1 | A | T | Homozygous   |
| NC_037650.1 | 10383302 | SNV | 1 | A | C | Homozygous   |
| NC_037650.1 | 10383324 | SNV | 1 | G | A | Homozygous   |
| NC_037650.1 | 10390834 | SNV | 1 | C | G | Homozygous   |
| NC_037650.1 | 10390846 | SNV | 1 | A | C | Heterozygous |
| NC_037650.1 | 10390873 | SNV | 1 | G | A | Homozygous   |
| NC_037650.1 | 10390883 | SNV | 1 | G | A | Heterozygous |
| NC_037650.1 | 10390892 | SNV | 1 | C | T | Heterozygous |
| NC_037650.1 | 10391384 | SNV | 1 | G | A | Heterozygous |
| NC_037650.1 | 10391445 | SNV | 1 | A | G | Homozygous   |
| NC_037650.1 | 10391461 | SNV | 1 | C | T | Homozygous   |
| NC_037650.1 | 10391463 | SNV | 1 | C | T | Homozygous   |
| NC_037650.1 | 10391538 | SNV | 1 | G | A | Homozygous   |
| NC_037650.1 | 10392247 | SNV | 1 | T | C | Homozygous   |
| NC_037650.1 | 10392295 | SNV | 1 | A | G | Homozygous   |
| NC_037650.1 | 10392346 | SNV | 1 | G | A | Heterozygous |
| NC_037650.1 | 10392546 | SNV | 1 | G | A | Heterozygous |
| NC_037650.1 | 10392583 | SNV | 1 | T | A | Homozygous   |
| NC_037650.1 | 10392611 | SNV | 1 | A | G | Homozygous   |
| NC_037650.1 | 10393051 | SNV | 1 | C | T | Homozygous   |
| NC_037650.1 | 10393060 | SNV | 1 | A | G | Homozygous   |
| NC_037650.1 | 10395022 | SNV | 1 | T | C | Homozygous   |
| NC_037650.1 | 10395024 | SNV | 1 | C | T | Homozygous   |
| NC_037650.1 | 10395039 | SNV | 1 | T | A | Homozygous   |
| NC_037650.1 | 10395052 | SNV | 1 | C | T | Heterozygous |

|             |          |     |   |   |   |              |
|-------------|----------|-----|---|---|---|--------------|
| NC_037650.1 | 10395062 | SNV | 1 | G | A | Homozygous   |
| NC_037650.1 | 10395121 | SNV | 1 | G | C | Homozygous   |
| NC_037650.1 | 10413724 | SNV | 1 | A | G | Homozygous   |
| NC_037650.1 | 10413751 | SNV | 1 | T | G | Heterozygous |
| NC_037650.1 | 10414782 | SNV | 1 | T | A | Heterozygous |
| NC_037650.1 | 10414782 | SNV | 1 | T | G | Heterozygous |
| NC_037650.1 | 10414876 | SNV | 1 | T | C | Heterozygous |
| NC_037650.1 | 10415068 | SNV | 1 | T | C | Homozygous   |
| NC_037650.1 | 10415250 | SNV | 1 | C | T | Heterozygous |
| NC_037650.1 | 10415289 | SNV | 1 | A | G | Homozygous   |
| NC_037650.1 | 10418944 | SNV | 1 | A | G | Homozygous   |
| NC_037650.1 | 10419033 | SNV | 1 | C | T | Heterozygous |
| NC_037650.1 | 10419207 | SNV | 1 | C | G | Homozygous   |
| NC_037650.1 | 10419234 | SNV | 1 | T | C | Homozygous   |
| NC_037650.1 | 10419360 | SNV | 1 | A | G | Heterozygous |
| NC_037650.1 | 10419411 | SNV | 1 | A | C | Heterozygous |
| NC_037650.1 | 10419474 | SNV | 1 | G | A | Heterozygous |
| NC_037650.1 | 10419515 | SNV | 1 | A | G | Heterozygous |
| NC_037650.1 | 10419543 | SNV | 1 | G | T | Homozygous   |
| NC_037650.1 | 10419591 | SNV | 1 | A | G | Homozygous   |
| NC_037650.1 | 10419606 | SNV | 1 | G | A | Heterozygous |
| NC_037650.1 | 10419860 | SNV | 1 | G | A | Heterozygous |
| NC_037650.1 | 10419869 | SNV | 1 | A | G | Heterozygous |
| NC_037650.1 | 10419914 | SNV | 1 | C | T | Heterozygous |
| NC_037650.1 | 10420012 | SNV | 1 | G | A | Heterozygous |
| NC_037650.1 | 10420087 | SNV | 1 | A | G | Homozygous   |
| NC_037650.1 | 10420165 | SNV | 1 | G | A | Heterozygous |
| NC_037650.1 | 10420208 | SNV | 1 | T | C | Homozygous   |
| NC_037650.1 | 10420608 | SNV | 1 | C | T | Heterozygous |
| NC_037650.1 | 10423150 | SNV | 1 | T | C | Homozygous   |
| NC_037650.1 | 10470042 | SNV | 1 | C | T | Heterozygous |
| NC_037650.1 | 10470118 | SNV | 1 | C | T | Homozygous   |
| NC_037650.1 | 10470185 | SNV | 1 | C | T | Heterozygous |
| NC_037650.1 | 10470211 | SNV | 1 | G | A | Heterozygous |
| NC_037650.1 | 10470240 | SNV | 1 | T | C | Heterozygous |
| NC_037650.1 | 10470246 | SNV | 1 | T | G | Homozygous   |
| NC_037650.1 | 10473048 | SNV | 1 | G | A | Heterozygous |
| NC_037650.1 | 10473091 | SNV | 1 | A | G | Homozygous   |
| NC_037650.1 | 10474238 | SNV | 1 | C | T | Heterozygous |
| NC_037650.1 | 10474264 | SNV | 1 | A | G | Homozygous   |
| NC_037650.1 | 10474724 | SNV | 1 | A | G | Heterozygous |
| NC_037650.1 | 10474734 | SNV | 1 | A | G | Heterozygous |
| NC_037650.1 | 10474779 | SNV | 1 | T | A | Heterozygous |
| NC_037650.1 | 10474779 | SNV | 1 | T | G | Heterozygous |
| NC_037650.1 | 10474797 | SNV | 1 | T | A | Homozygous   |
| NC_037650.1 | 10474812 | SNV | 1 | A | G | Homozygous   |
| NC_037650.1 | 10474818 | SNV | 1 | A | G | Homozygous   |
| NC_037650.1 | 10474822 | SNV | 1 | A | G | Homozygous   |
| NC_037650.1 | 10475556 | SNV | 1 | A | G | Homozygous   |
| NC_037650.1 | 10475719 | SNV | 1 | T | C | Homozygous   |
| NC_037650.1 | 10476051 | SNV | 1 | A | G | Homozygous   |



|             |          |     |   |   |   |              |
|-------------|----------|-----|---|---|---|--------------|
| NC_037650.1 | 10476069 | SNV | 1 | G | T | Homozygous   |
| NC_037650.1 | 10476071 | SNV | 1 | T | G | Heterozygous |
| NC_037650.1 | 10476108 | SNV | 1 | T | A | Homozygous   |
| NC_037650.1 | 10476186 | SNV | 1 | G | A | Homozygous   |
| NC_037650.1 | 10476204 | SNV | 1 | C | T | Heterozygous |
| NC_037650.1 | 10476207 | SNV | 1 | A | G | Heterozygous |
| NC_037650.1 | 10476218 | SNV | 1 | C | T | Homozygous   |
| NC_037650.1 | 10476223 | SNV | 1 | A | G | Homozygous   |
| NC_037650.1 | 10476251 | SNV | 1 | C | T | Homozygous   |
| NC_037650.1 | 10476289 | SNV | 1 | C | G | Heterozygous |
| NC_037650.1 | 10476302 | SNV | 1 | T | C | Heterozygous |
| NC_037650.1 | 10476309 | SNV | 1 | A | T | Heterozygous |
| NC_037650.1 | 10476326 | SNV | 1 | C | T | Heterozygous |
| NC_037650.1 | 10476334 | SNV | 1 | C | T | Heterozygous |
| NC_037650.1 | 10476381 | SNV | 1 | G | A | Heterozygous |
| NC_037650.1 | 10476395 | SNV | 1 | T | G | Homozygous   |
| NC_037650.1 | 10476405 | SNV | 1 | T | C | Homozygous   |
| NC_037650.1 | 10476473 | SNV | 1 | A | G | Homozygous   |
| NC_037650.1 | 10476848 | SNV | 1 | C | T | Heterozygous |
| NC_037650.1 | 10476854 | SNV | 1 | C | T | Homozygous   |
| NC_037650.1 | 10476862 | SNV | 1 | T | C | Homozygous   |
| NC_037650.1 | 10477879 | SNV | 1 | T | A | Heterozygous |
| NC_037650.1 | 10477909 | SNV | 1 | G | A | Heterozygous |
| NC_037650.1 | 10478435 | SNV | 1 | A | G | Heterozygous |
| NC_037650.1 | 10478446 | SNV | 1 | G | A | Homozygous   |
| NC_037650.1 | 10479011 | SNV | 1 | G | T | Heterozygous |
| NC_037650.1 | 10482405 | SNV | 1 | C | T | Heterozygous |
| NC_037650.1 | 10483959 | SNV | 1 | A | T | Homozygous   |
| NC_037650.1 | 10483964 | SNV | 1 | G | A | Homozygous   |
| NC_037650.1 | 10484001 | SNV | 1 | A | G | Homozygous   |
| NC_037650.1 | 10486528 | SNV | 1 | G | A | Heterozygous |
| NC_037650.1 | 10486731 | SNV | 1 | G | T | Heterozygous |
| NC_037650.1 | 10487090 | SNV | 1 | C | T | Homozygous   |
| NC_037650.1 | 10487095 | SNV | 1 | A | T | Homozygous   |
| NC_037650.1 | 10488750 | SNV | 1 | A | G | Homozygous   |
| NC_037650.1 | 10488889 | SNV | 1 | C | T | Heterozygous |
| NC_037650.1 | 10488908 | SNV | 1 | T | C | Heterozygous |
| NC_037650.1 | 10488912 | SNV | 1 | G | C | Heterozygous |
| NC_037650.1 | 10488964 | SNV | 1 | C | T | Heterozygous |
| NC_037650.1 | 10489012 | SNV | 1 | A | G | Homozygous   |
| NC_037650.1 | 10489014 | SNV | 1 | G | A | Heterozygous |
| NC_037650.1 | 10489016 | SNV | 1 | G | A | Heterozygous |
| NC_037650.1 | 10489161 | SNV | 1 | T | G | Heterozygous |
| NC_037650.1 | 10489331 | SNV | 1 | A | G | Heterozygous |
| NC_037650.1 | 10490363 | SNV | 1 | G | A | Homozygous   |
| NC_037650.1 | 10497429 | SNV | 1 | T | A | Homozygous   |
| NC_037650.1 | 10497479 | SNV | 1 | T | C | Heterozygous |
| NC_037650.1 | 10497489 | SNV | 1 | T | C | Homozygous   |
| NC_037650.1 | 10497512 | SNV | 1 | G | A | Homozygous   |
| NC_037650.1 | 10497612 | SNV | 1 | A | T | Heterozygous |
| NC_037650.1 | 10497817 | SNV | 1 | T | C | Homozygous   |

|             |          |     |   |   |   |              |
|-------------|----------|-----|---|---|---|--------------|
| NC_037650.1 | 10497865 | SNV | 1 | T | C | Homozygous   |
| NC_037650.1 | 10497884 | SNV | 1 | A | T | Homozygous   |
| NC_037650.1 | 10497889 | SNV | 1 | T | C | Heterozygous |
| NC_037650.1 | 10497890 | SNV | 1 | T | C | Heterozygous |
| NC_037650.1 | 10497907 | SNV | 1 | T | C | Homozygous   |
| NC_037650.1 | 10497952 | SNV | 1 | C | A | Homozygous   |
| NC_037650.1 | 10497971 | SNV | 1 | C | A | Homozygous   |
| NC_037650.1 | 10497981 | SNV | 1 | A | G | Homozygous   |
| NC_037650.1 | 10502591 | SNV | 1 | A | G | Homozygous   |
| NC_037650.1 | 10502608 | SNV | 1 | A | T | Homozygous   |
| NC_037650.1 | 10502630 | SNV | 1 | A | G | Homozygous   |
| NC_037650.1 | 10503122 | SNV | 1 | T | A | Heterozygous |
| NC_037650.1 | 10503162 | SNV | 1 | A | T | Heterozygous |
| NC_037650.1 | 10504271 | SNV | 1 | G | A | Heterozygous |
| NC_037650.1 | 10519519 | SNV | 1 | A | G | Homozygous   |
| NC_037650.1 | 10519522 | SNV | 1 | T | C | Homozygous   |
| NC_037650.1 | 10519547 | SNV | 1 | A | G | Heterozygous |
| NC_037650.1 | 10523610 | SNV | 1 | C | T | Heterozygous |
| NC_037650.1 | 10523924 | SNV | 1 | G | A | Heterozygous |
| NC_037650.1 | 10524654 | SNV | 1 | C | T | Heterozygous |
| NC_037650.1 | 10524781 | SNV | 1 | T | C | Homozygous   |
| NC_037650.1 | 10525240 | SNV | 1 | T | C | Homozygous   |
| NC_037650.1 | 10525816 | SNV | 1 | G | A | Homozygous   |
| NC_037650.1 | 10525833 | SNV | 1 | C | T | Heterozygous |
| NC_037650.1 | 10526014 | SNV | 1 | C | T | Heterozygous |
| NC_037650.1 | 10526085 | SNV | 1 | T | C | Homozygous   |
| NC_037650.1 | 10527550 | SNV | 1 | A | G | Homozygous   |
| NC_037650.1 | 10527643 | SNV | 1 | A | C | Heterozygous |
| NC_037650.1 | 10527725 | SNV | 1 | T | C | Heterozygous |
| NC_037650.1 | 10527796 | SNV | 1 | G | A | Heterozygous |
| NC_037650.1 | 10529321 | SNV | 1 | T | A | Homozygous   |
| NC_037650.1 | 10529813 | SNV | 1 | A | G | Homozygous   |
| NC_037650.1 | 10533115 | SNV | 1 | T | C | Homozygous   |
| NC_037650.1 | 10533440 | SNV | 1 | T | G | Heterozygous |
| NC_037650.1 | 10533460 | SNV | 1 | A | G | Homozygous   |
| NC_037650.1 | 10543123 | SNV | 1 | T | A | Heterozygous |
| NC_037650.1 | 10543125 | SNV | 1 | T | A | Heterozygous |
| NC_037650.1 | 10543129 | SNV | 1 | T | A | Heterozygous |
| NC_037650.1 | 10543163 | SNV | 1 | A | C | Homozygous   |
| NC_037650.1 | 10543177 | SNV | 1 | T | A | Homozygous   |
| NC_037650.1 | 10543185 | SNV | 1 | T | A | Homozygous   |
| NC_037650.1 | 10543192 | SNV | 1 | T | A | Homozygous   |
| NC_037650.1 | 10547782 | SNV | 1 | A | G | Homozygous   |
| NC_037650.1 | 10547787 | SNV | 1 | G | T | Homozygous   |
| NC_037650.1 | 10547790 | SNV | 1 | T | A | Homozygous   |
| NC_037650.1 | 10548056 | SNV | 1 | G | C | Heterozygous |
| NC_037650.1 | 10548106 | SNV | 1 | T | C | Homozygous   |
| NC_037650.1 | 10548112 | SNV | 1 | C | T | Homozygous   |
| NC_037650.1 | 10548121 | SNV | 1 | C | T | Homozygous   |
| NC_037650.1 | 10548567 | SNV | 1 | G | A | Homozygous   |
| NC_037650.1 | 10548578 | SNV | 1 | A | T | Homozygous   |

|             |          |     |   |   |   |              |
|-------------|----------|-----|---|---|---|--------------|
| NC_037650.1 | 10548580 | SNV | 1 | A | C | Homozygous   |
| NC_037650.1 | 10548583 | SNV | 1 | G | A | Homozygous   |
| NC_037650.1 | 10548586 | SNV | 1 | A | T | Homozygous   |
| NC_037650.1 | 10548614 | SNV | 1 | A | G | Homozygous   |
| NC_037650.1 | 10548630 | SNV | 1 | A | G | Homozygous   |
| NC_037650.1 | 10552428 | SNV | 1 | G | A | Homozygous   |
| NC_037650.1 | 10553021 | SNV | 1 | G | A | Heterozygous |
| NC_037650.1 | 10553032 | SNV | 1 | A | T | Heterozygous |
| NC_037650.1 | 10553078 | SNV | 1 | T | A | Homozygous   |
| NC_037650.1 | 10557731 | SNV | 1 | T | C | Homozygous   |
| NC_037650.1 | 10557900 | SNV | 1 | G | A | Homozygous   |
| NC_037650.1 | 10558668 | SNV | 1 | C | T | Heterozygous |
| NC_037650.1 | 10569593 | SNV | 1 | T | G | Homozygous   |
| NC_037650.1 | 10569595 | SNV | 1 | A | G | Homozygous   |
| NC_037650.1 | 10569626 | SNV | 1 | G | C | Homozygous   |
| NC_037650.1 | 10570905 | SNV | 1 | C | T | Homozygous   |
| NC_037650.1 | 10570914 | SNV | 1 | C | T | Homozygous   |
| NC_037650.1 | 10570916 | SNV | 1 | T | C | Homozygous   |
| NC_037650.1 | 10570923 | SNV | 1 | G | T | Homozygous   |
| NC_037650.1 | 10570928 | SNV | 1 | T | C | Homozygous   |
| NC_037650.1 | 10570930 | SNV | 1 | C | A | Homozygous   |
| NC_037650.1 | 10572240 | SNV | 1 | G | C | Homozygous   |
| NC_037650.1 | 10572242 | SNV | 1 | C | G | Homozygous   |
| NC_037650.1 | 10572260 | SNV | 1 | A | C | Homozygous   |
| NC_037650.1 | 10572262 | SNV | 1 | C | G | Homozygous   |
| NC_037650.1 | 10572280 | SNV | 1 | G | C | Homozygous   |
| NC_037650.1 | 10572284 | SNV | 1 | C | G | Heterozygous |
| NC_037650.1 | 10572287 | SNV | 1 | C | T | Heterozygous |
| NC_037650.1 | 10572300 | SNV | 1 | G | C | Homozygous   |
| NC_037650.1 | 10576287 | SNV | 1 | C | T | Homozygous   |
| NC_037650.1 | 10576317 | SNV | 1 | C | T | Homozygous   |
| NC_037650.1 | 10577717 | SNV | 1 | C | T | Homozygous   |
| NC_037650.1 | 10577722 | SNV | 1 | G | C | Homozygous   |
| NC_037650.1 | 10577731 | SNV | 1 | C | T | Homozygous   |
| NC_037650.1 | 10577738 | SNV | 1 | A | C | Homozygous   |
| NC_037650.1 | 10577747 | SNV | 1 | C | T | Homozygous   |
| NC_037650.1 | 10578363 | SNV | 1 | C | G | Heterozygous |
| NC_037650.1 | 10578369 | SNV | 1 | A | T | Heterozygous |
| NC_037650.1 | 10578450 | SNV | 1 | T | C | Heterozygous |
| NC_037650.1 | 10578461 | SNV | 1 | C | T | Heterozygous |
| NC_037650.1 | 10581178 | SNV | 1 | A | G | Homozygous   |
| NC_037650.1 | 10583207 | SNV | 1 | T | C | Homozygous   |
| NC_037650.1 | 10607233 | SNV | 1 | C | T | Homozygous   |
| NC_037650.1 | 10607298 | SNV | 1 | A | G | Homozygous   |
| NC_037650.1 | 10618209 | SNV | 1 | A | T | Homozygous   |
| NC_037650.1 | 10618288 | SNV | 1 | C | T | Heterozygous |
| NC_037650.1 | 10620023 | SNV | 1 | G | A | Heterozygous |
| NC_037650.1 | 10620206 | SNV | 1 | G | A | Heterozygous |
| NC_037650.1 | 10620217 | SNV | 1 | A | G | Heterozygous |
| NC_037650.1 | 10620332 | SNV | 1 | C | T | Heterozygous |
| NC_037650.1 | 10620361 | SNV | 1 | A | G | Homozygous   |

|             |          |     |   |   |   |              |
|-------------|----------|-----|---|---|---|--------------|
| NC_037650.1 | 10620365 | SNV | 1 | T | C | Homozygous   |
| NC_037650.1 | 10620386 | SNV | 1 | T | C | Homozygous   |
| NC_037650.1 | 10620406 | SNV | 1 | G | A | Heterozygous |
| NC_037650.1 | 10622113 | SNV | 1 | G | A | Heterozygous |
| NC_037650.1 | 10626457 | SNV | 1 | A | G | Heterozygous |
| NC_037650.1 | 10632903 | SNV | 1 | G | A | Homozygous   |
| NC_037650.1 | 10632922 | SNV | 1 | T | C | Homozygous   |
| NC_037650.1 | 10633003 | SNV | 1 | G | A | Heterozygous |
| NC_037650.1 | 10633014 | SNV | 1 | A | G | Homozygous   |
| NC_037650.1 | 10633136 | SNV | 1 | G | C | Heterozygous |
| NC_037650.1 | 10633218 | SNV | 1 | T | C | Homozygous   |
| NC_037650.1 | 10633234 | SNV | 1 | C | G | Homozygous   |
| NC_037650.1 | 10633245 | SNV | 1 | T | C | Homozygous   |
| NC_037650.1 | 10633263 | SNV | 1 | A | G | Homozygous   |
| NC_037650.1 | 10633341 | SNV | 1 | T | G | Homozygous   |
| NC_037650.1 | 10633408 | SNV | 1 | G | A | Heterozygous |
| NC_037650.1 | 10634272 | SNV | 1 | A | G | Heterozygous |
| NC_037650.1 | 10634275 | SNV | 1 | C | T | Heterozygous |
| NC_037650.1 | 10634278 | SNV | 1 | G | A | Heterozygous |
| NC_037650.1 | 10634278 | SNV | 1 | G | C | Heterozygous |
| NC_037650.1 | 10634357 | SNV | 1 | A | G | Homozygous   |
| NC_037650.1 | 10634410 | SNV | 1 | A | G | Homozygous   |
| NC_037650.1 | 10634426 | SNV | 1 | C | T | Heterozygous |
| NC_037650.1 | 10634515 | SNV | 1 | A | T | Homozygous   |
| NC_037650.1 | 10634548 | SNV | 1 | A | G | Heterozygous |
| NC_037650.1 | 10634576 | SNV | 1 | G | A | Heterozygous |
| NC_037650.1 | 10634578 | SNV | 1 | C | T | Heterozygous |
| NC_037650.1 | 10634829 | SNV | 1 | T | C | Homozygous   |
| NC_037650.1 | 10634861 | SNV | 1 | T | C | Homozygous   |
| NC_037650.1 | 10634895 | SNV | 1 | G | A | Heterozygous |
| NC_037650.1 | 10634903 | SNV | 1 | T | C | Heterozygous |
| NC_037650.1 | 10634911 | SNV | 1 | T | C | Heterozygous |
| NC_037650.1 | 10634913 | SNV | 1 | C | T | Heterozygous |
| NC_037650.1 | 10634928 | SNV | 1 | A | C | Homozygous   |
| NC_037650.1 | 10634950 | SNV | 1 | T | C | Homozygous   |
| NC_037650.1 | 10635475 | SNV | 1 | C | T | Heterozygous |
| NC_037650.1 | 10635591 | SNV | 1 | A | G | Homozygous   |
| NC_037650.1 | 10635646 | SNV | 1 | A | G | Heterozygous |
| NC_037650.1 | 10635694 | SNV | 1 | A | G | Homozygous   |
| NC_037650.1 | 10635702 | SNV | 1 | A | G | Homozygous   |
| NC_037650.1 | 10635713 | SNV | 1 | G | A | Heterozygous |
| NC_037650.1 | 10635788 | SNV | 1 | G | C | Homozygous   |
| NC_037650.1 | 10635814 | SNV | 1 | T | C | Homozygous   |
| NC_037650.1 | 10635846 | SNV | 1 | A | G | Homozygous   |
| NC_037650.1 | 10639048 | SNV | 1 | T | C | Homozygous   |
| NC_037650.1 | 10639068 | SNV | 1 | T | C | Heterozygous |
| NC_037650.1 | 10639074 | SNV | 1 | T | G | Homozygous   |
| NC_037650.1 | 10639078 | SNV | 1 | A | G | Homozygous   |
| NC_037650.1 | 10639082 | SNV | 1 | T | C | Heterozygous |
| NC_037650.1 | 10639093 | SNV | 1 | T | C | Heterozygous |
| NC_037650.1 | 10641525 | SNV | 1 | T | G | Heterozygous |

|             |          |     |   |   |   |              |
|-------------|----------|-----|---|---|---|--------------|
| NC_037650.1 | 10641632 | SNV | 1 | C | T | Homozygous   |
| NC_037650.1 | 10641644 | SNV | 1 | A | G | Homozygous   |
| NC_037650.1 | 10641685 | SNV | 1 | T | C | Homozygous   |
| NC_037650.1 | 10641778 | SNV | 1 | A | G | Heterozygous |
| NC_037650.1 | 10641974 | SNV | 1 | T | C | Homozygous   |
| NC_037650.1 | 10642054 | SNV | 1 | C | T | Heterozygous |
| NC_037650.1 | 10642144 | SNV | 1 | T | C | Homozygous   |
| NC_037650.1 | 10642245 | SNV | 1 | C | G | Heterozygous |
| NC_037650.1 | 10642257 | SNV | 1 | G | A | Heterozygous |
| NC_037650.1 | 10642289 | SNV | 1 | T | C | Homozygous   |
| NC_037650.1 | 10642347 | SNV | 1 | G | A | Heterozygous |
| NC_037650.1 | 10642411 | SNV | 1 | A | G | Homozygous   |
| NC_037650.1 | 10642426 | SNV | 1 | A | G | Homozygous   |
| NC_037650.1 | 10642480 | SNV | 1 | T | C | Homozygous   |
| NC_037650.1 | 10642510 | SNV | 1 | T | C | Heterozygous |
| NC_037650.1 | 10642540 | SNV | 1 | T | A | Homozygous   |
| NC_037650.1 | 10642581 | SNV | 1 | C | G | Homozygous   |
| NC_037650.1 | 10642602 | SNV | 1 | G | C | Homozygous   |
| NC_037650.1 | 10642860 | SNV | 1 | A | G | Homozygous   |
| NC_037650.1 | 10642898 | SNV | 1 | G | A | Heterozygous |
| NC_037650.1 | 10642919 | SNV | 1 | G | A | Heterozygous |
| NC_037650.1 | 10643703 | SNV | 1 | A | G | Homozygous   |
| NC_037650.1 | 10643790 | SNV | 1 | T | C | Homozygous   |
| NC_037650.1 | 10644768 | SNV | 1 | T | A | Heterozygous |
| NC_037650.1 | 10644777 | SNV | 1 | G | A | Heterozygous |
| NC_037650.1 | 10644834 | SNV | 1 | T | C | Homozygous   |
| NC_037650.1 | 10646102 | SNV | 1 | A | G | Heterozygous |
| NC_037650.1 | 10646110 | SNV | 1 | C | G | Heterozygous |
| NC_037650.1 | 10646134 | SNV | 1 | C | T | Heterozygous |
| NC_037650.1 | 10646174 | SNV | 1 | G | A | Heterozygous |
| NC_037650.1 | 10646220 | SNV | 1 | A | G | Homozygous   |
| NC_037650.1 | 10646273 | SNV | 1 | G | A | Homozygous   |
| NC_037650.1 | 10646347 | SNV | 1 | A | G | Homozygous   |
| NC_037650.1 | 10646378 | SNV | 1 | A | G | Homozygous   |
| NC_037650.1 | 10646525 | SNV | 1 | G | A | Homozygous   |
| NC_037650.1 | 10646540 | SNV | 1 | T | C | Homozygous   |
| NC_037650.1 | 10646568 | SNV | 1 | C | T | Heterozygous |
| NC_037650.1 | 10647938 | SNV | 1 | G | T | Homozygous   |
| NC_037650.1 | 10648249 | SNV | 1 | A | T | Homozygous   |
| NC_037650.1 | 10648564 | SNV | 1 | G | A | Heterozygous |
| NC_037650.1 | 10648567 | SNV | 1 | G | A | Heterozygous |
| NC_037650.1 | 10648929 | SNV | 1 | C | T | Heterozygous |
| NC_037650.1 | 10648953 | SNV | 1 | A | G | Heterozygous |
| NC_037650.1 | 10648957 | SNV | 1 | G | A | Heterozygous |
| NC_037650.1 | 10649015 | SNV | 1 | A | G | Heterozygous |
| NC_037650.1 | 10649028 | SNV | 1 | G | A | Heterozygous |
| NC_037650.1 | 10649089 | SNV | 1 | G | A | Heterozygous |
| NC_037650.1 | 10649178 | SNV | 1 | A | G | Heterozygous |
| NC_037650.1 | 10649313 | SNV | 1 | A | G | Homozygous   |
| NC_037650.1 | 10649348 | SNV | 1 | T | C | Heterozygous |
| NC_037650.1 | 10651079 | SNV | 1 | G | A | Homozygous   |

|             |          |     |   |   |   |              |
|-------------|----------|-----|---|---|---|--------------|
| NC_037650.1 | 10651086 | SNV | 1 | T | A | Homozygous   |
| NC_037650.1 | 10651307 | SNV | 1 | A | G | Homozygous   |
| NC_037650.1 | 10651450 | SNV | 1 | T | C | Homozygous   |
| NC_037650.1 | 10651455 | SNV | 1 | C | T | Heterozygous |
| NC_037650.1 | 10651508 | SNV | 1 | T | C | Homozygous   |
| NC_037650.1 | 10651545 | SNV | 1 | A | G | Heterozygous |
| NC_037650.1 | 10651554 | SNV | 1 | G | A | Heterozygous |
| NC_037650.1 | 10651628 | SNV | 1 | T | C | Homozygous   |
| NC_037650.1 | 10651639 | SNV | 1 | T | C | Homozygous   |
| NC_037650.1 | 10651759 | SNV | 1 | A | G | Homozygous   |
| NC_037650.1 | 10651878 | SNV | 1 | G | A | Homozygous   |
| NC_037650.1 | 10651956 | SNV | 1 | G | A | Heterozygous |
| NC_037650.1 | 10652041 | SNV | 1 | C | G | Homozygous   |
| NC_037650.1 | 10652067 | SNV | 1 | T | G | Heterozygous |
| NC_037650.1 | 10652075 | SNV | 1 | A | G | Heterozygous |
| NC_037650.1 | 10652082 | SNV | 1 | A | G | Homozygous   |
| NC_037650.1 | 10652134 | SNV | 1 | A | G | Homozygous   |
| NC_037650.1 | 10652148 | SNV | 1 | A | G | Homozygous   |
| NC_037650.1 | 10652155 | SNV | 1 | G | A | Homozygous   |
| NC_037650.1 | 10652164 | SNV | 1 | A | G | Homozygous   |
| NC_037650.1 | 10652170 | SNV | 1 | A | G | Homozygous   |
| NC_037650.1 | 10652172 | SNV | 1 | C | T | Heterozygous |
| NC_037650.1 | 10652178 | SNV | 1 | A | G | Heterozygous |
| NC_037650.1 | 10652183 | SNV | 1 | G | A | Heterozygous |
| NC_037650.1 | 10652185 | SNV | 1 | G | A | Heterozygous |
| NC_037650.1 | 10652192 | SNV | 1 | T | G | Heterozygous |
| NC_037650.1 | 10652247 | SNV | 1 | A | G | Homozygous   |
| NC_037650.1 | 10652253 | SNV | 1 | A | T | Heterozygous |
| NC_037650.1 | 10652256 | SNV | 1 | C | T | Homozygous   |
| NC_037650.1 | 10652258 | SNV | 1 | C | T | Homozygous   |
| NC_037650.1 | 10652260 | SNV | 1 | A | G | Heterozygous |
| NC_037650.1 | 10652282 | SNV | 1 | G | A | Heterozygous |
| NC_037650.1 | 10652294 | SNV | 1 | A | G | Homozygous   |
| NC_037650.1 | 10652316 | SNV | 1 | G | A | Heterozygous |
| NC_037650.1 | 10652327 | SNV | 1 | T | A | Homozygous   |
| NC_037650.1 | 10652378 | SNV | 1 | A | G | Homozygous   |
| NC_037650.1 | 10652384 | SNV | 1 | G | A | Heterozygous |
| NC_037650.1 | 10652411 | SNV | 1 | G | A | Heterozygous |
| NC_037650.1 | 10652425 | SNV | 1 | T | C | Heterozygous |
| NC_037650.1 | 10652453 | SNV | 1 | G | A | Homozygous   |
| NC_037650.1 | 10652461 | SNV | 1 | A | G | Homozygous   |
| NC_037650.1 | 10652467 | SNV | 1 | A | G | Homozygous   |
| NC_037650.1 | 10652486 | SNV | 1 | G | A | Homozygous   |
| NC_037650.1 | 10652506 | SNV | 1 | A | G | Homozygous   |
| NC_037650.1 | 10652528 | SNV | 1 | A | G | Homozygous   |
| NC_037650.1 | 10652536 | SNV | 1 | A | G | Homozygous   |
| NC_037650.1 | 10652601 | SNV | 1 | A | G | Heterozygous |
| NC_037650.1 | 10652622 | SNV | 1 | A | G | Heterozygous |
| NC_037650.1 | 10652636 | SNV | 1 | G | A | Homozygous   |
| NC_037650.1 | 10652672 | SNV | 1 | A | G | Homozygous   |
| NC_037650.1 | 10652718 | SNV | 1 | G | A | Homozygous   |

|             |          |     |   |   |   |              |
|-------------|----------|-----|---|---|---|--------------|
| NC_037650.1 | 10652725 | SNV | 1 | G | A | Homozygous   |
| NC_037650.1 | 10652728 | SNV | 1 | C | G | Homozygous   |
| NC_037650.1 | 10652785 | SNV | 1 | T | C | Homozygous   |
| NC_037650.1 | 10652809 | SNV | 1 | A | G | Homozygous   |
| NC_037650.1 | 10652843 | SNV | 1 | G | A | Heterozygous |
| NC_037650.1 | 10652901 | SNV | 1 | G | A | Heterozygous |
| NC_037650.1 | 10653004 | SNV | 1 | A | G | Homozygous   |
| NC_037650.1 | 10653034 | SNV | 1 | G | A | Homozygous   |
| NC_037650.1 | 10653076 | SNV | 1 | A | G | Homozygous   |
| NC_037650.1 | 10653671 | SNV | 1 | A | G | Heterozygous |
| NC_037650.1 | 10653690 | SNV | 1 | G | A | Heterozygous |
| NC_037650.1 | 10653710 | SNV | 1 | A | G | Homozygous   |
| NC_037650.1 | 10655655 | SNV | 1 | T | C | Heterozygous |
| NC_037650.1 | 10655789 | SNV | 1 | A | G | Homozygous   |
| NC_037650.1 | 10655826 | SNV | 1 | T | C | Heterozygous |
| NC_037650.1 | 10655884 | SNV | 1 | C | G | Homozygous   |
| NC_037650.1 | 10656333 | SNV | 1 | T | C | Homozygous   |
| NC_037650.1 | 10656436 | SNV | 1 | G | C | Homozygous   |
| NC_037650.1 | 10656495 | SNV | 1 | T | C | Homozygous   |
| NC_037650.1 | 10656497 | SNV | 1 | G | C | Homozygous   |
| NC_037650.1 | 10656541 | SNV | 1 | A | T | Homozygous   |
| NC_037650.1 | 10656638 | SNV | 1 | G | A | Heterozygous |
| NC_037650.1 | 10656708 | SNV | 1 | T | C | Homozygous   |
| NC_037650.1 | 10656848 | SNV | 1 | A | G | Homozygous   |
| NC_037650.1 | 10656878 | SNV | 1 | T | C | Homozygous   |
| NC_037650.1 | 10656999 | SNV | 1 | G | A | Heterozygous |
| NC_037650.1 | 10657046 | SNV | 1 | C | A | Heterozygous |
| NC_037650.1 | 10657172 | SNV | 1 | T | C | Homozygous   |
| NC_037650.1 | 10657546 | SNV | 1 | T | C | Homozygous   |
| NC_037650.1 | 10657551 | SNV | 1 | T | C | Homozygous   |
| NC_037650.1 | 10657625 | SNV | 1 | A | G | Heterozygous |
| NC_037650.1 | 10657830 | SNV | 1 | T | C | Homozygous   |
| NC_037650.1 | 10657845 | SNV | 1 | A | G | Homozygous   |
| NC_037650.1 | 10657964 | SNV | 1 | T | C | Homozygous   |
| NC_037650.1 | 10658160 | SNV | 1 | A | G | Homozygous   |
| NC_037650.1 | 10658164 | SNV | 1 | A | G | Heterozygous |
| NC_037650.1 | 10658254 | SNV | 1 | A | G | Homozygous   |
| NC_037650.1 | 10660462 | SNV | 1 | A | T | Homozygous   |
| NC_037650.1 | 10660467 | SNV | 1 | A | T | Homozygous   |
| NC_037650.1 | 10660484 | SNV | 1 | C | T | Homozygous   |
| NC_037650.1 | 10660495 | SNV | 1 | A | T | Homozygous   |
| NC_037650.1 | 10674445 | SNV | 1 | T | C | Homozygous   |
| NC_037650.1 | 10674567 | SNV | 1 | G | A | Heterozygous |
| NC_037650.1 | 10681000 | SNV | 1 | A | C | Heterozygous |
| NC_037650.1 | 10681049 | SNV | 1 | G | C | Heterozygous |
| NC_037650.1 | 10682295 | SNV | 1 | C | T | Homozygous   |
| NC_037650.1 | 10682331 | SNV | 1 | C | T | Heterozygous |
| NC_037650.1 | 10682342 | SNV | 1 | A | G | Homozygous   |
| NC_037650.1 | 10683494 | SNV | 1 | A | G | Homozygous   |
| NC_037650.1 | 10683677 | SNV | 1 | T | C | Homozygous   |
| NC_037650.1 | 10684477 | SNV | 1 | T | C | Homozygous   |

|             |          |     |   |   |   |              |
|-------------|----------|-----|---|---|---|--------------|
| NC_037650.1 | 10684840 | SNV | 1 | A | G | Homozygous   |
| NC_037650.1 | 10684896 | SNV | 1 | A | G | Heterozygous |
| NC_037650.1 | 10684927 | SNV | 1 | C | T | Homozygous   |
| NC_037650.1 | 10685313 | SNV | 1 | A | G | Heterozygous |
| NC_037650.1 | 10685315 | SNV | 1 | A | G | Heterozygous |
| NC_037650.1 | 10685319 | SNV | 1 | T | A | Heterozygous |
| NC_037650.1 | 10685697 | SNV | 1 | C | A | Homozygous   |
| NC_037650.1 | 10685754 | SNV | 1 | T | C | Heterozygous |
| NC_037650.1 | 10686528 | SNV | 1 | C | T | Heterozygous |
| NC_037650.1 | 10686669 | SNV | 1 | T | C | Homozygous   |
| NC_037650.1 | 10686750 | SNV | 1 | G | A | Heterozygous |
| NC_037650.1 | 10687086 | SNV | 1 | G | A | Heterozygous |
| NC_037650.1 | 10687281 | SNV | 1 | T | G | Homozygous   |
| NC_037650.1 | 10687326 | SNV | 1 | T | C | Homozygous   |
| NC_037650.1 | 10689840 | SNV | 1 | C | T | Homozygous   |
| NC_037650.1 | 10689843 | SNV | 1 | A | T | Homozygous   |
| NC_037650.1 | 10689849 | SNV | 1 | T | A | Homozygous   |
| NC_037650.1 | 10689854 | SNV | 1 | C | A | Heterozygous |
| NC_037650.1 | 10689861 | SNV | 1 | A | G | Heterozygous |
| NC_037650.1 | 10689866 | SNV | 1 | A | T | Homozygous   |
| NC_037650.1 | 10689885 | SNV | 1 | A | T | Homozygous   |
| NC_037650.1 | 10689893 | SNV | 1 | A | T | Heterozygous |
| NC_037650.1 | 10689895 | SNV | 1 | A | T | Homozygous   |
| NC_037650.1 | 10689898 | SNV | 1 | T | A | Heterozygous |
| NC_037650.1 | 10689911 | SNV | 1 | A | T | Heterozygous |
| NC_037650.1 | 10694493 | SNV | 1 | T | C | Homozygous   |
| NC_037650.1 | 10715782 | SNV | 1 | C | G | Homozygous   |
| NC_037650.1 | 10715827 | SNV | 1 | A | T | Homozygous   |
| NC_037650.1 | 10716796 | SNV | 1 | G | A | Homozygous   |
| NC_037650.1 | 10724161 | SNV | 1 | A | G | Homozygous   |
| NC_037650.1 | 10724207 | SNV | 1 | C | T | Heterozygous |
| NC_037650.1 | 10724239 | SNV | 1 | C | T | Heterozygous |
| NC_037650.1 | 10724335 | SNV | 1 | C | G | Heterozygous |
| NC_037650.1 | 10724557 | SNV | 1 | C | T | Heterozygous |
| NC_037650.1 | 10724602 | SNV | 1 | A | G | Homozygous   |
| NC_037650.1 | 10724612 | SNV | 1 | G | A | Heterozygous |
| NC_037650.1 | 10725359 | SNV | 1 | C | T | Heterozygous |
| NC_037650.1 | 10725425 | SNV | 1 | A | G | Heterozygous |
| NC_037650.1 | 10725449 | SNV | 1 | T | C | Heterozygous |
| NC_037650.1 | 10725722 | SNV | 1 | T | C | Homozygous   |
| NC_037650.1 | 10725729 | SNV | 1 | G | A | Heterozygous |
| NC_037650.1 | 10725731 | SNV | 1 | C | T | Homozygous   |
| NC_037650.1 | 10725742 | SNV | 1 | A | G | Homozygous   |
| NC_037650.1 | 10725746 | SNV | 1 | G | A | Heterozygous |
| NC_037650.1 | 10725820 | SNV | 1 | A | G | Homozygous   |
| NC_037650.1 | 10742655 | SNV | 1 | T | C | Heterozygous |
| NC_037650.1 | 10742668 | SNV | 1 | T | C | Heterozygous |
| NC_037650.1 | 10742675 | SNV | 1 | G | C | Heterozygous |
| NC_037650.1 | 10742682 | SNV | 1 | T | C | Heterozygous |
| NC_037650.1 | 10742685 | SNV | 1 | C | T | Heterozygous |
| NC_037650.1 | 10742691 | SNV | 1 | T | A | Heterozygous |



|             |          |     |   |   |   |              |
|-------------|----------|-----|---|---|---|--------------|
| NC_037650.1 | 10742719 | SNV | 1 | A | G | Heterozygous |
| NC_037650.1 | 10742724 | SNV | 1 | C | A | Heterozygous |
| NC_037650.1 | 10742740 | SNV | 1 | A | T | Heterozygous |
| NC_037650.1 | 10742748 | SNV | 1 | T | A | Homozygous   |
| NC_037650.1 | 10742751 | SNV | 1 | C | T | Heterozygous |
| NC_037650.1 | 10742755 | SNV | 1 | C | T | Heterozygous |
| NC_037650.1 | 10743445 | SNV | 1 | C | T | Heterozygous |
| NC_037650.1 | 10743456 | SNV | 1 | A | G | Heterozygous |
| NC_037650.1 | 10743461 | SNV | 1 | C | T | Heterozygous |
| NC_037650.1 | 10743494 | SNV | 1 | A | G | Heterozygous |
| NC_037650.1 | 10743775 | SNV | 1 | C | T | Heterozygous |
| NC_037650.1 | 10743910 | SNV | 1 | C | T | Heterozygous |
| NC_037650.1 | 10743913 | SNV | 1 | T | C | Homozygous   |
| NC_037650.1 | 10744233 | SNV | 1 | A | G | Homozygous   |
| NC_037650.1 | 10744244 | SNV | 1 | T | C | Homozygous   |
| NC_037650.1 | 10744320 | SNV | 1 | A | G | Heterozygous |
| NC_037650.1 | 10744338 | SNV | 1 | C | T | Heterozygous |
| NC_037650.1 | 10744790 | SNV | 1 | T | C | Homozygous   |
| NC_037650.1 | 10744833 | SNV | 1 | G | A | Homozygous   |
| NC_037650.1 | 10744846 | SNV | 1 | C | T | Homozygous   |
| NC_037650.1 | 10744877 | SNV | 1 | G | A | Heterozygous |
| NC_037650.1 | 10744919 | SNV | 1 | T | C | Heterozygous |
| NC_037650.1 | 10744994 | SNV | 1 | T | A | Homozygous   |
| NC_037650.1 | 10745558 | SNV | 1 | A | C | Homozygous   |
| NC_037650.1 | 10745594 | SNV | 1 | T | C | Homozygous   |
| NC_037650.1 | 10749686 | SNV | 1 | T | G | Homozygous   |
| NC_037650.1 | 10749751 | SNV | 1 | G | T | Homozygous   |
| NC_037650.1 | 10749987 | SNV | 1 | G | T | Heterozygous |
| NC_037650.1 | 10750002 | SNV | 1 | C | T | Heterozygous |
| NC_037650.1 | 10750169 | SNV | 1 | C | T | Heterozygous |
| NC_037650.1 | 10750173 | SNV | 1 | A | G | Heterozygous |
| NC_037650.1 | 10750465 | SNV | 1 | G | A | Homozygous   |
| NC_037650.1 | 10750480 | SNV | 1 | T | C | Homozygous   |
| NC_037650.1 | 10750489 | SNV | 1 | C | T | Heterozygous |
| NC_037650.1 | 10750497 | SNV | 1 | T | C | Homozygous   |
| NC_037650.1 | 10750537 | SNV | 1 | A | G | Heterozygous |
| NC_037650.1 | 10750631 | SNV | 1 | G | A | Heterozygous |
| NC_037650.1 | 10750635 | SNV | 1 | T | C | Homozygous   |
| NC_037650.1 | 10751237 | SNV | 1 | T | G | Heterozygous |
| NC_037650.1 | 10751342 | SNV | 1 | T | C | Homozygous   |
| NC_037650.1 | 10751385 | SNV | 1 | A | G | Heterozygous |
| NC_037650.1 | 10751429 | SNV | 1 | T | C | Homozygous   |
| NC_037650.1 | 10751802 | SNV | 1 | C | T | Heterozygous |
| NC_037650.1 | 10751856 | SNV | 1 | G | T | Heterozygous |
| NC_037650.1 | 10751890 | SNV | 1 | C | T | Heterozygous |
| NC_037650.1 | 10751892 | SNV | 1 | A | C | Heterozygous |
| NC_037650.1 | 10752782 | SNV | 1 | G | A | Heterozygous |
| NC_037650.1 | 10752953 | SNV | 1 | C | T | Heterozygous |
| NC_037650.1 | 10755664 | SNV | 1 | T | A | Heterozygous |
| NC_037650.1 | 10755668 | SNV | 1 | A | G | Heterozygous |
| NC_037650.1 | 10755671 | SNV | 1 | T | C | Heterozygous |

|             |          |     |   |   |   |              |
|-------------|----------|-----|---|---|---|--------------|
| NC_037650.1 | 10755703 | SNV | 1 | T | C | Heterozygous |
| NC_037650.1 | 10755757 | SNV | 1 | T | C | Heterozygous |
| NC_037650.1 | 10755766 | SNV | 1 | C | T | Heterozygous |
| NC_037650.1 | 10755786 | SNV | 1 | T | C | Homozygous   |
| NC_037650.1 | 10755801 | SNV | 1 | A | G | Homozygous   |
| NC_037650.1 | 10755885 | SNV | 1 | C | T | Heterozygous |
| NC_037650.1 | 10755908 | SNV | 1 | A | G | Homozygous   |
| NC_037650.1 | 10755928 | SNV | 1 | T | A | Heterozygous |
| NC_037650.1 | 10755967 | SNV | 1 | C | T | Heterozygous |
| NC_037650.1 | 10756238 | SNV | 1 | T | A | Heterozygous |
| NC_037650.1 | 10756436 | SNV | 1 | T | C | Heterozygous |
| NC_037650.1 | 10757010 | SNV | 1 | G | A | Homozygous   |
| NC_037650.1 | 10757079 | SNV | 1 | A | G | Heterozygous |
| NC_037650.1 | 10757114 | SNV | 1 | C | A | Homozygous   |
| NC_037650.1 | 10757431 | SNV | 1 | A | T | Homozygous   |
| NC_037650.1 | 10757433 | SNV | 1 | A | G | Homozygous   |
| NC_037650.1 | 10758000 | SNV | 1 | A | G | Homozygous   |
| NC_037650.1 | 10758033 | SNV | 1 | T | A | Heterozygous |
| NC_037650.1 | 10759776 | SNV | 1 | C | T | Homozygous   |
| NC_037650.1 | 10772930 | SNV | 1 | T | A | Homozygous   |
| NC_037650.1 | 10772935 | SNV | 1 | T | A | Homozygous   |
| NC_037650.1 | 10772950 | SNV | 1 | A | C | Homozygous   |
| NC_037650.1 | 10772954 | SNV | 1 | A | T | Homozygous   |
| NC_037650.1 | 10772960 | SNV | 1 | A | C | Homozygous   |
| NC_037650.1 | 10778915 | SNV | 1 | G | A | Homozygous   |
| NC_037650.1 | 10778917 | SNV | 1 | A | G | Homozygous   |
| NC_037650.1 | 10778919 | SNV | 1 | T | A | Homozygous   |
| NC_037650.1 | 10778946 | SNV | 1 | T | A | Homozygous   |
| NC_037650.1 | 10786176 | SNV | 1 | T | A | Homozygous   |
| NC_037650.1 | 10786524 | SNV | 1 | T | C | Homozygous   |
| NC_037650.1 | 10786632 | SNV | 1 | G | A | Homozygous   |
| NC_037650.1 | 10786732 | SNV | 1 | C | A | Homozygous   |
| NC_037650.1 | 10786740 | SNV | 1 | T | C | Homozygous   |
| NC_037650.1 | 10787108 | SNV | 1 | A | G | Homozygous   |
| NC_037650.1 | 10787160 | SNV | 1 | C | T | Heterozygous |
| NC_037650.1 | 10787391 | SNV | 1 | A | G | Homozygous   |
| NC_037650.1 | 10787436 | SNV | 1 | C | T | Heterozygous |
| NC_037650.1 | 10787757 | SNV | 1 | G | A | Homozygous   |
| NC_037650.1 | 10788341 | SNV | 1 | A | G | Homozygous   |
| NC_037650.1 | 10789199 | SNV | 1 | G | A | Heterozygous |
| NC_037650.1 | 10789214 | SNV | 1 | T | C | Homozygous   |
| NC_037650.1 | 10789570 | SNV | 1 | T | C | Homozygous   |
| NC_037650.1 | 10789618 | SNV | 1 | C | T | Heterozygous |
| NC_037650.1 | 10789663 | SNV | 1 | G | A | Homozygous   |
| NC_037650.1 | 10789693 | SNV | 1 | C | T | Homozygous   |
| NC_037650.1 | 10789753 | SNV | 1 | A | G | Homozygous   |
| NC_037650.1 | 10791082 | SNV | 1 | G | A | Heterozygous |
| NC_037650.1 | 10793111 | SNV | 1 | T | C | Homozygous   |
| NC_037650.1 | 10793117 | SNV | 1 | T | G | Homozygous   |
| NC_037650.1 | 10793120 | SNV | 1 | A | G | Homozygous   |
| NC_037650.1 | 10793131 | SNV | 1 | A | G | Homozygous   |

|             |          |     |   |   |   |              |
|-------------|----------|-----|---|---|---|--------------|
| NC_037650.1 | 10794104 | SNV | 1 | C | A | Homozygous   |
| NC_037650.1 | 10827377 | SNV | 1 | C | T | Heterozygous |
| NC_037650.1 | 10838512 | SNV | 1 | G | A | Heterozygous |
| NC_037650.1 | 10844455 | SNV | 1 | T | G | Heterozygous |
| NC_037650.1 | 10846180 | SNV | 1 | G | C | Heterozygous |
| NC_037650.1 | 10846192 | SNV | 1 | G | C | Heterozygous |
| NC_037650.1 | 10846194 | SNV | 1 | G | C | Heterozygous |
| NC_037650.1 | 10846210 | SNV | 1 | G | A | Heterozygous |
| NC_037650.1 | 10846216 | SNV | 1 | C | T | Homozygous   |
| NC_037650.1 | 10846218 | SNV | 1 | C | A | Homozygous   |
| NC_037650.1 | 10846345 | SNV | 1 | C | G | Homozygous   |
| NC_037650.1 | 10846351 | SNV | 1 | C | A | Heterozygous |
| NC_037650.1 | 10846353 | SNV | 1 | C | T | Heterozygous |
| NC_037650.1 | 10846359 | SNV | 1 | C | G | Heterozygous |
| NC_037650.1 | 10846365 | SNV | 1 | C | G | Heterozygous |
| NC_037650.1 | 10846379 | SNV | 1 | G | C | Heterozygous |
| NC_037650.1 | 10846381 | SNV | 1 | A | C | Heterozygous |
| NC_037650.1 | 10846385 | SNV | 1 | C | G | Heterozygous |
| NC_037650.1 | 10846397 | SNV | 1 | C | T | Heterozygous |
| NC_037650.1 | 10846411 | SNV | 1 | T | G | Heterozygous |
| NC_037650.1 | 10846430 | SNV | 1 | T | C | Heterozygous |
| NC_037650.1 | 10846433 | SNV | 1 | C | T | Homozygous   |
| NC_037650.1 | 10846435 | SNV | 1 | G | T | Homozygous   |
| NC_037650.1 | 10846468 | SNV | 1 | T | G | Heterozygous |
| NC_037650.1 | 10846472 | SNV | 1 | T | G | Heterozygous |
| NC_037650.1 | 10847066 | SNV | 1 | T | C | Homozygous   |
| NC_037650.1 | 10854246 | SNV | 1 | A | G | Homozygous   |
| NC_037650.1 | 10854338 | SNV | 1 | A | G | Heterozygous |
| NC_037650.1 | 10854708 | SNV | 1 | C | T | Heterozygous |
| NC_037650.1 | 10854846 | SNV | 1 | C | T | Heterozygous |
| NC_037650.1 | 10854885 | SNV | 1 | G | A | Heterozygous |
| NC_037650.1 | 10854899 | SNV | 1 | C | T | Heterozygous |
| NC_037650.1 | 10854987 | SNV | 1 | T | C | Homozygous   |
| NC_037650.1 | 10854998 | SNV | 1 | T | C | Heterozygous |
| NC_037650.1 | 10868461 | SNV | 1 | T | C | Heterozygous |
| NC_037650.1 | 10868463 | SNV | 1 | A | C | Heterozygous |
| NC_037650.1 | 10868463 | SNV | 1 | A | T | Heterozygous |
| NC_037650.1 | 10868465 | SNV | 1 | A | C | Heterozygous |
| NC_037650.1 | 10868465 | SNV | 1 | A | T | Heterozygous |
| NC_037650.1 | 10868513 | SNV | 1 | T | C | Heterozygous |
| NC_037650.1 | 10868517 | SNV | 1 | T | C | Heterozygous |
| NC_037650.1 | 10900139 | SNV | 1 | T | C | Homozygous   |
| NC_037650.1 | 10900155 | SNV | 1 | A | G | Homozygous   |
| NC_037650.1 | 10900163 | SNV | 1 | T | C | Homozygous   |
| NC_037650.1 | 10900168 | SNV | 1 | G | A | Heterozygous |
| NC_037650.1 | 10900273 | SNV | 1 | A | G | Homozygous   |
| NC_037650.1 | 10900514 | SNV | 1 | G | C | Heterozygous |
| NC_037650.1 | 10900629 | SNV | 1 | G | A | Heterozygous |
| NC_037650.1 | 10901163 | SNV | 1 | T | C | Homozygous   |
| NC_037650.1 | 10901681 | SNV | 1 | G | A | Heterozygous |
| NC_037650.1 | 10901807 | SNV | 1 | A | G | Homozygous   |

|             |          |     |   |   |   |              |
|-------------|----------|-----|---|---|---|--------------|
| NC_037650.1 | 10902300 | SNV | 1 | T | A | Heterozygous |
| NC_037650.1 | 10902321 | SNV | 1 | A | G | Homozygous   |
| NC_037650.1 | 10902336 | SNV | 1 | A | G | Homozygous   |
| NC_037650.1 | 10903010 | SNV | 1 | T | G | Homozygous   |
| NC_037650.1 | 10909708 | SNV | 1 | A | G | Homozygous   |
| NC_037650.1 | 10910034 | SNV | 1 | A | G | Heterozygous |
| NC_037650.1 | 10910043 | SNV | 1 | C | G | Heterozygous |
| NC_037650.1 | 10910130 | SNV | 1 | G | C | Heterozygous |
| NC_037650.1 | 10910234 | SNV | 1 | G | A | Heterozygous |
| NC_037650.1 | 10916560 | SNV | 1 | C | T | Heterozygous |
| NC_037650.1 | 10916563 | SNV | 1 | C | T | Heterozygous |
| NC_037650.1 | 10916569 | SNV | 1 | G | A | Heterozygous |
| NC_037650.1 | 10916605 | SNV | 1 | T | C | Homozygous   |
| NC_037650.1 | 10926459 | SNV | 1 | T | C | Homozygous   |
| NC_037650.1 | 10927153 | SNV | 1 | T | G | Homozygous   |
| NC_037650.1 | 10927157 | SNV | 1 | A | G | Homozygous   |
| NC_037650.1 | 10927160 | SNV | 1 | A | T | Homozygous   |
| NC_037650.1 | 10927166 | SNV | 1 | A | T | Homozygous   |
| NC_037650.1 | 10927186 | SNV | 1 | C | A | Homozygous   |
| NC_037650.1 | 10928235 | SNV | 1 | G | A | Heterozygous |
| NC_037650.1 | 10936486 | SNV | 1 | T | C | Homozygous   |
| NC_037650.1 | 10936520 | SNV | 1 | T | C | Homozygous   |
| NC_037650.1 | 10936570 | SNV | 1 | C | T | Heterozygous |
| NC_037650.1 | 10936589 | SNV | 1 | C | G | Homozygous   |
| NC_037650.1 | 10936609 | SNV | 1 | C | T | Homozygous   |
| NC_037650.1 | 10936702 | SNV | 1 | G | A | Heterozygous |
| NC_037650.1 | 10937693 | SNV | 1 | T | A | Heterozygous |
| NC_037650.1 | 10938074 | SNV | 1 | A | G | Homozygous   |
| NC_037650.1 | 10938093 | SNV | 1 | C | G | Homozygous   |
| NC_037650.1 | 10938097 | SNV | 1 | T | C | Homozygous   |
| NC_037650.1 | 10938100 | SNV | 1 | T | A | Homozygous   |
| NC_037650.1 | 10938113 | SNV | 1 | T | A | Homozygous   |
| NC_037650.1 | 10943452 | SNV | 1 | G | A | Heterozygous |
| NC_037650.1 | 10943744 | SNV | 1 | C | T | Heterozygous |
| NC_037650.1 | 10945378 | SNV | 1 | T | G | Heterozygous |
| NC_037650.1 | 10950065 | SNV | 1 | T | C | Homozygous   |
| NC_037650.1 | 10950168 | SNV | 1 | C | G | Homozygous   |
| NC_037650.1 | 10950206 | SNV | 1 | T | C | Homozygous   |
| NC_037650.1 | 10950337 | SNV | 1 | C | T | Homozygous   |
| NC_037650.1 | 10950365 | SNV | 1 | A | G | Homozygous   |
| NC_037650.1 | 10950395 | SNV | 1 | T | C | Homozygous   |
| NC_037650.1 | 10950605 | SNV | 1 | A | G | Homozygous   |
| NC_037650.1 | 10950764 | SNV | 1 | C | T | Heterozygous |
| NC_037650.1 | 10950899 | SNV | 1 | A | G | Homozygous   |
| NC_037650.1 | 10950968 | SNV | 1 | T | C | Homozygous   |
| NC_037650.1 | 10951079 | SNV | 1 | T | G | Heterozygous |
| NC_037650.1 | 10951154 | SNV | 1 | C | T | Heterozygous |
| NC_037650.1 | 10952524 | SNV | 1 | C | A | Homozygous   |
| NC_037650.1 | 10952707 | SNV | 1 | C | A | Heterozygous |
| NC_037650.1 | 10952905 | SNV | 1 | T | C | Homozygous   |
| NC_037650.1 | 10952926 | SNV | 1 | G | A | Heterozygous |

|             |          |     |   |   |   |              |
|-------------|----------|-----|---|---|---|--------------|
| NC_037650.1 | 10952930 | SNV | 1 | A | G | Homozygous   |
| NC_037650.1 | 10953119 | SNV | 1 | A | G | Heterozygous |
| NC_037650.1 | 11022415 | SNV | 1 | C | A | Homozygous   |
| NC_037650.1 | 11023566 | SNV | 1 | G | A | Heterozygous |
| NC_037650.1 | 11023722 | SNV | 1 | C | T | Homozygous   |
| NC_037650.1 | 11023742 | SNV | 1 | T | C | Heterozygous |
| NC_037650.1 | 11024286 | SNV | 1 | G | A | Heterozygous |
| NC_037650.1 | 11024287 | SNV | 1 | A | G | Heterozygous |
| NC_037650.1 | 11024295 | SNV | 1 | G | A | Heterozygous |
| NC_037650.1 | 11024717 | SNV | 1 | G | A | Homozygous   |
| NC_037650.1 | 11025047 | SNV | 1 | A | T | Heterozygous |
| NC_037650.1 | 11025053 | SNV | 1 | A | G | Homozygous   |
| NC_037650.1 | 11025060 | SNV | 1 | G | A | Homozygous   |
| NC_037650.1 | 11025066 | SNV | 1 | G | A | Homozygous   |
| NC_037650.1 | 11025070 | SNV | 1 | T | A | Homozygous   |
| NC_037650.1 | 11025075 | SNV | 1 | G | C | Homozygous   |
| NC_037650.1 | 11025118 | SNV | 1 | A | G | Homozygous   |
| NC_037650.1 | 11025120 | SNV | 1 | A | G | Homozygous   |
| NC_037650.1 | 11025164 | SNV | 1 | A | G | Homozygous   |
| NC_037650.1 | 11025330 | SNV | 1 | G | T | Homozygous   |
| NC_037650.1 | 11026464 | SNV | 1 | T | A | Homozygous   |
| NC_037650.1 | 11026519 | SNV | 1 | A | T | Heterozygous |
| NC_037650.1 | 11026522 | SNV | 1 | C | T | Heterozygous |
| NC_037650.1 | 11026569 | SNV | 1 | C | T | Homozygous   |
| NC_037650.1 | 11044082 | SNV | 1 | T | C | Homozygous   |
| NC_037650.1 | 11044131 | SNV | 1 | G | A | Homozygous   |
| NC_037650.1 | 11044921 | SNV | 1 | G | A | Homozygous   |
| NC_037650.1 | 11044942 | SNV | 1 | T | A | Homozygous   |
| NC_037650.1 | 11044945 | SNV | 1 | C | G | Homozygous   |
| NC_037650.1 | 11046960 | SNV | 1 | A | T | Heterozygous |
| NC_037650.1 | 11046966 | SNV | 1 | A | C | Heterozygous |
| NC_037650.1 | 11046969 | SNV | 1 | G | A | Heterozygous |
| NC_037650.1 | 11126832 | SNV | 1 | C | T | Heterozygous |
| NC_037650.1 | 11139904 | SNV | 1 | T | C | Homozygous   |
| NC_037650.1 | 11140011 | SNV | 1 | A | G | Heterozygous |
| NC_037650.1 | 11140016 | SNV | 1 | A | G | Homozygous   |
| NC_037650.1 | 11140806 | SNV | 1 | A | G | Heterozygous |
| NC_037650.1 | 11140838 | SNV | 1 | T | A | Homozygous   |
| NC_037650.1 | 11144508 | SNV | 1 | A | G | Heterozygous |
| NC_037650.1 | 11144519 | SNV | 1 | T | C | Homozygous   |
| NC_037650.1 | 11144590 | SNV | 1 | A | G | Heterozygous |
| NC_037650.1 | 11144780 | SNV | 1 | T | C | Homozygous   |
| NC_037650.1 | 11145264 | SNV | 1 | T | C | Homozygous   |
| NC_037650.1 | 11145298 | SNV | 1 | G | A | Heterozygous |
| NC_037650.1 | 11145512 | SNV | 1 | T | C | Homozygous   |
| NC_037650.1 | 11145628 | SNV | 1 | G | C | Homozygous   |
| NC_037650.1 | 11145644 | SNV | 1 | C | T | Homozygous   |
| NC_037650.1 | 11145650 | SNV | 1 | T | C | Homozygous   |
| NC_037650.1 | 11146248 | SNV | 1 | C | T | Homozygous   |
| NC_037650.1 | 11146783 | SNV | 1 | A | C | Homozygous   |
| NC_037650.1 | 11148832 | SNV | 1 | T | G | Heterozygous |

|             |          |     |   |   |   |              |
|-------------|----------|-----|---|---|---|--------------|
| NC_037650.1 | 11149083 | SNV | 1 | A | G | Heterozygous |
| NC_037650.1 | 11149128 | SNV | 1 | G | A | Homozygous   |
| NC_037650.1 | 11149134 | SNV | 1 | G | A | Heterozygous |
| NC_037650.1 | 11149143 | SNV | 1 | T | C | Heterozygous |
| NC_037650.1 | 11149188 | SNV | 1 | T | C | Homozygous   |
| NC_037650.1 | 11149533 | SNV | 1 | G | A | Heterozygous |
| NC_037650.1 | 11149611 | SNV | 1 | T | G | Homozygous   |
| NC_037650.1 | 11149685 | SNV | 1 | T | C | Homozygous   |
| NC_037650.1 | 11149689 | SNV | 1 | A | G | Heterozygous |
| NC_037650.1 | 11149731 | SNV | 1 | C | T | Homozygous   |
| NC_037650.1 | 11150690 | SNV | 1 | T | C | Homozygous   |
| NC_037650.1 | 11150710 | SNV | 1 | A | G | Homozygous   |
| NC_037650.1 | 11151471 | SNV | 1 | C | T | Heterozygous |
| NC_037650.1 | 11151480 | SNV | 1 | C | A | Heterozygous |
| NC_037650.1 | 11151480 | SNV | 1 | C | T | Heterozygous |
| NC_037650.1 | 11151987 | SNV | 1 | G | T | Heterozygous |
| NC_037650.1 | 11152280 | SNV | 1 | C | T | Heterozygous |
| NC_037650.1 | 11165244 | SNV | 1 | A | C | Homozygous   |
| NC_037650.1 | 11165282 | SNV | 1 | G | C | Homozygous   |
| NC_037650.1 | 11191624 | SNV | 1 | A | G | Homozygous   |
| NC_037650.1 | 11191676 | SNV | 1 | G | A | Heterozygous |
| NC_037650.1 | 11200622 | SNV | 1 | A | C | Heterozygous |
| NC_037650.1 | 11200681 | SNV | 1 | G | A | Heterozygous |
| NC_037650.1 | 11200695 | SNV | 1 | A | G | Homozygous   |
| NC_037650.1 | 11204256 | SNV | 1 | T | A | Heterozygous |
| NC_037650.1 | 11204266 | SNV | 1 | T | A | Homozygous   |
| NC_037650.1 | 11216696 | SNV | 1 | A | C | Heterozygous |
| NC_037650.1 | 11216747 | SNV | 1 | T | A | Heterozygous |
| NC_037650.1 | 11232951 | SNV | 1 | T | G | Homozygous   |
| NC_037650.1 | 11232975 | SNV | 1 | A | T | Homozygous   |
| NC_037650.1 | 11232978 | SNV | 1 | G | A | Homozygous   |
| NC_037650.1 | 11232980 | SNV | 1 | C | A | Homozygous   |
| NC_037650.1 | 11232984 | SNV | 1 | G | T | Homozygous   |
| NC_037650.1 | 11236493 | SNV | 1 | A | C | Homozygous   |
| NC_037650.1 | 11236499 | SNV | 1 | T | C | Homozygous   |
| NC_037650.1 | 11236503 | SNV | 1 | T | G | Homozygous   |
| NC_037650.1 | 11236518 | SNV | 1 | T | C | Homozygous   |
| NC_037650.1 | 11243408 | SNV | 1 | T | A | Homozygous   |
| NC_037650.1 | 11243412 | SNV | 1 | T | C | Homozygous   |
| NC_037650.1 | 11243417 | SNV | 1 | A | G | Homozygous   |
| NC_037650.1 | 11243436 | SNV | 1 | A | T | Homozygous   |
| NC_037650.1 | 11245729 | SNV | 1 | A | G | Homozygous   |
| NC_037650.1 | 11245739 | SNV | 1 | A | G | Homozygous   |
| NC_037650.1 | 11261416 | SNV | 1 | A | T | Homozygous   |
| NC_037650.1 | 11261422 | SNV | 1 | A | G | Homozygous   |
| NC_037650.1 | 11261428 | SNV | 1 | A | G | Homozygous   |
| NC_037650.1 | 11261439 | SNV | 1 | T | C | Homozygous   |
| NC_037650.1 | 11261442 | SNV | 1 | A | C | Homozygous   |
| NC_037650.1 | 11261451 | SNV | 1 | T | C | Homozygous   |
| NC_037650.1 | 11262607 | SNV | 1 | C | T | Heterozygous |
| NC_037650.1 | 11263731 | SNV | 1 | C | T | Heterozygous |

|             |        |     |   |   |   |              |
|-------------|--------|-----|---|---|---|--------------|
| NC_037651.1 | 138470 | SNV | 1 | C | T | Homozygous   |
| NC_037651.1 | 138473 | SNV | 1 | A | T | Homozygous   |
| NC_037651.1 | 147130 | SNV | 1 | A | T | Homozygous   |
| NC_037651.1 | 147138 | SNV | 1 | T | C | Homozygous   |
| NC_037651.1 | 147151 | SNV | 1 | T | A | Homozygous   |
| NC_037651.1 | 147155 | SNV | 1 | T | G | Homozygous   |
| NC_037651.1 | 147164 | SNV | 1 | A | T | Homozygous   |
| NC_037651.1 | 147166 | SNV | 1 | A | T | Homozygous   |
| NC_037651.1 | 159145 | SNV | 1 | T | C | Homozygous   |
| NC_037651.1 | 159147 | SNV | 1 | T | C | Homozygous   |
| NC_037651.1 | 171473 | SNV | 1 | A | T | Heterozygous |
| NC_037651.1 | 171481 | SNV | 1 | A | G | Heterozygous |
| NC_037651.1 | 171509 | SNV | 1 | T | A | Heterozygous |
| NC_037651.1 | 183334 | SNV | 1 | T | C | Homozygous   |
| NC_037651.1 | 183337 | SNV | 1 | A | C | Homozygous   |
| NC_037651.1 | 183347 | SNV | 1 | T | A | Homozygous   |
| NC_037651.1 | 183352 | SNV | 1 | G | T | Homozygous   |
| NC_037651.1 | 183356 | SNV | 1 | A | G | Homozygous   |
| NC_037651.1 | 183359 | SNV | 1 | A | T | Homozygous   |
| NC_037651.1 | 187391 | SNV | 1 | T | G | Homozygous   |
| NC_037651.1 | 187398 | SNV | 1 | T | A | Homozygous   |
| NC_037651.1 | 187419 | SNV | 1 | T | G | Homozygous   |
| NC_037651.1 | 187430 | SNV | 1 | T | A | Heterozygous |
| NC_037651.1 | 190180 | SNV | 1 | T | C | Homozygous   |
| NC_037651.1 | 190189 | SNV | 1 | A | T | Homozygous   |
| NC_037651.1 | 190290 | SNV | 1 | C | G | Heterozygous |
| NC_037651.1 | 191405 | SNV | 1 | T | C | Heterozygous |
| NC_037651.1 | 193185 | SNV | 1 | A | T | Heterozygous |
| NC_037651.1 | 193193 | SNV | 1 | A | T | Heterozygous |
| NC_037651.1 | 193196 | SNV | 1 | G | A | Homozygous   |
| NC_037651.1 | 202615 | SNV | 1 | A | G | Homozygous   |
| NC_037651.1 | 202625 | SNV | 1 | A | T | Homozygous   |
| NC_037651.1 | 202633 | SNV | 1 | A | C | Homozygous   |
| NC_037651.1 | 202643 | SNV | 1 | T | A | Homozygous   |
| NC_037651.1 | 202645 | SNV | 1 | G | A | Homozygous   |
| NC_037651.1 | 202649 | SNV | 1 | A | T | Homozygous   |
| NC_037651.1 | 212321 | SNV | 1 | A | T | Heterozygous |
| NC_037651.1 | 212692 | SNV | 1 | C | A | Homozygous   |
| NC_037651.1 | 212701 | SNV | 1 | T | C | Homozygous   |
| NC_037651.1 | 220757 | SNV | 1 | T | A | Homozygous   |
| NC_037651.1 | 220764 | SNV | 1 | A | T | Homozygous   |
| NC_037651.1 | 220769 | SNV | 1 | A | T | Homozygous   |
| NC_037651.1 | 220780 | SNV | 1 | T | A | Homozygous   |
| NC_037651.1 | 220783 | SNV | 1 | T | A | Homozygous   |
| NC_037651.1 | 220791 | SNV | 1 | T | A | Homozygous   |
| NC_037651.1 | 222050 | SNV | 1 | A | T | Homozygous   |
| NC_037651.1 | 222052 | SNV | 1 | T | A | Homozygous   |
| NC_037651.1 | 222068 | SNV | 1 | T | G | Homozygous   |
| NC_037651.1 | 222070 | SNV | 1 | A | C | Homozygous   |
| NC_037651.1 | 222077 | SNV | 1 | T | A | Homozygous   |
| NC_037651.1 | 222079 | SNV | 1 | A | T | Homozygous   |

|             |        |     |   |   |   |              |
|-------------|--------|-----|---|---|---|--------------|
| NC_037651.1 | 222091 | SNV | 1 | T | G | Homozygous   |
| NC_037651.1 | 225035 | SNV | 1 | G | A | Homozygous   |
| NC_037651.1 | 225040 | SNV | 1 | A | G | Homozygous   |
| NC_037651.1 | 225084 | SNV | 1 | T | C | Homozygous   |
| NC_037651.1 | 253715 | SNV | 1 | T | C | Homozygous   |
| NC_037651.1 | 253729 | SNV | 1 | T | A | Homozygous   |
| NC_037651.1 | 308129 | SNV | 1 | C | G | Homozygous   |
| NC_037651.1 | 308133 | SNV | 1 | T | A | Homozygous   |
| NC_037651.1 | 308135 | SNV | 1 | T | C | Homozygous   |
| NC_037651.1 | 308144 | SNV | 1 | C | T | Homozygous   |
| NC_037651.1 | 308152 | SNV | 1 | A | T | Homozygous   |
| NC_037651.1 | 377432 | SNV | 1 | C | G | Homozygous   |
| NC_037651.1 | 473739 | SNV | 1 | C | T | Heterozygous |
| NC_037651.1 | 492860 | SNV | 1 | A | C | Homozygous   |
| NC_037651.1 | 492863 | SNV | 1 | T | C | Homozygous   |
| NC_037651.1 | 492875 | SNV | 1 | T | C | Homozygous   |
| NC_037651.1 | 499217 | SNV | 1 | G | A | Homozygous   |
| NC_037651.1 | 499220 | SNV | 1 | T | C | Homozygous   |
| NC_037651.1 | 499235 | SNV | 1 | C | T | Homozygous   |
| NC_037651.1 | 499245 | SNV | 1 | C | T | Homozygous   |
| NC_037651.1 | 517555 | SNV | 1 | G | A | Homozygous   |
| NC_037651.1 | 517604 | SNV | 1 | G | T | Heterozygous |
| NC_037651.1 | 517618 | SNV | 1 | G | T | Heterozygous |
| NC_037651.1 | 517622 | SNV | 1 | G | T | Heterozygous |
| NC_037651.1 | 517631 | SNV | 1 | C | T | Heterozygous |
| NC_037651.1 | 517636 | SNV | 1 | C | T | Homozygous   |
| NC_037651.1 | 517639 | SNV | 1 | A | G | Homozygous   |
| NC_037651.1 | 517647 | SNV | 1 | G | T | Heterozygous |
| NC_037651.1 | 517692 | SNV | 1 | C | G | Homozygous   |
| NC_037651.1 | 536205 | SNV | 1 | T | G | Homozygous   |
| NC_037651.1 | 537039 | SNV | 1 | T | A | Homozygous   |
| NC_037651.1 | 537054 | SNV | 1 | A | C | Homozygous   |
| NC_037651.1 | 537057 | SNV | 1 | A | G | Homozygous   |
| NC_037651.1 | 537068 | SNV | 1 | C | T | Homozygous   |
| NC_037651.1 | 537074 | SNV | 1 | T | A | Homozygous   |
| NC_037651.1 | 537076 | SNV | 1 | A | T | Homozygous   |
| NC_037651.1 | 537082 | SNV | 1 | T | A | Homozygous   |
| NC_037651.1 | 537600 | SNV | 1 | A | T | Homozygous   |
| NC_037651.1 | 537603 | SNV | 1 | T | C | Homozygous   |
| NC_037651.1 | 537606 | SNV | 1 | T | A | Homozygous   |
| NC_037651.1 | 537616 | SNV | 1 | C | A | Homozygous   |
| NC_037651.1 | 537639 | SNV | 1 | A | T | Homozygous   |
| NC_037651.1 | 537641 | SNV | 1 | T | G | Homozygous   |
| NC_037651.1 | 537645 | SNV | 1 | A | C | Homozygous   |
| NC_037651.1 | 539073 | SNV | 1 | C | T | Homozygous   |
| NC_037651.1 | 542177 | SNV | 1 | T | A | Homozygous   |
| NC_037651.1 | 542183 | SNV | 1 | T | A | Homozygous   |
| NC_037651.1 | 542189 | SNV | 1 | T | A | Homozygous   |
| NC_037651.1 | 545982 | SNV | 1 | A | G | Heterozygous |
| NC_037651.1 | 546237 | SNV | 1 | C | T | Heterozygous |
| NC_037651.1 | 546466 | SNV | 1 | C | T | Heterozygous |



|             |        |     |   |   |   |              |
|-------------|--------|-----|---|---|---|--------------|
| NC_037651.1 | 549663 | SNV | 1 | G | A | Homozygous   |
| NC_037651.1 | 549667 | SNV | 1 | C | T | Homozygous   |
| NC_037651.1 | 549671 | SNV | 1 | T | C | Homozygous   |
| NC_037651.1 | 549693 | SNV | 1 | C | T | Homozygous   |
| NC_037651.1 | 549704 | SNV | 1 | G | C | Homozygous   |
| NC_037651.1 | 577843 | SNV | 1 | C | T | Heterozygous |
| NC_037651.1 | 587647 | SNV | 1 | A | G | Homozygous   |
| NC_037651.1 | 587674 | SNV | 1 | T | A | Homozygous   |
| NC_037651.1 | 587676 | SNV | 1 | A | T | Homozygous   |
| NC_037651.1 | 587678 | SNV | 1 | T | G | Homozygous   |
| NC_037651.1 | 587686 | SNV | 1 | T | A | Homozygous   |
| NC_037651.1 | 769837 | SNV | 1 | T | A | Homozygous   |
| NC_037651.1 | 769850 | SNV | 1 | T | C | Homozygous   |
| NC_037651.1 | 782396 | SNV | 1 | T | A | Homozygous   |
| NC_037651.1 | 782412 | SNV | 1 | T | C | Heterozygous |
| NC_037651.1 | 782417 | SNV | 1 | A | T | Homozygous   |
| NC_037651.1 | 782433 | SNV | 1 | G | A | Heterozygous |
| NC_037651.1 | 782436 | SNV | 1 | T | C | Heterozygous |
| NC_037651.1 | 782438 | SNV | 1 | A | T | Heterozygous |
| NC_037651.1 | 782442 | SNV | 1 | A | T | Heterozygous |
| NC_037651.1 | 782450 | SNV | 1 | A | T | Heterozygous |
| NC_037651.1 | 782455 | SNV | 1 | A | G | Heterozygous |
| NC_037651.1 | 783562 | SNV | 1 | T | A | Homozygous   |
| NC_037651.1 | 789925 | SNV | 1 | A | T | Homozygous   |
| NC_037651.1 | 789945 | SNV | 1 | T | G | Homozygous   |
| NC_037651.1 | 796875 | SNV | 1 | A | C | Homozygous   |
| NC_037651.1 | 796877 | SNV | 1 | T | C | Homozygous   |
| NC_037651.1 | 802287 | SNV | 1 | A | T | Heterozygous |
| NC_037651.1 | 808210 | SNV | 1 | A | C | Homozygous   |
| NC_037651.1 | 808224 | SNV | 1 | T | A | Homozygous   |
| NC_037651.1 | 808229 | SNV | 1 | A | C | Homozygous   |
| NC_037651.1 | 808232 | SNV | 1 | A | T | Homozygous   |
| NC_037651.1 | 808240 | SNV | 1 | T | A | Homozygous   |
| NC_037651.1 | 808453 | SNV | 1 | A | G | Homozygous   |
| NC_037651.1 | 808456 | SNV | 1 | A | G | Homozygous   |
| NC_037651.1 | 808469 | SNV | 1 | A | G | Homozygous   |
| NC_037651.1 | 808471 | SNV | 1 | A | C | Homozygous   |
| NC_037651.1 | 808474 | SNV | 1 | A | C | Homozygous   |
| NC_037651.1 | 808477 | SNV | 1 | G | A | Homozygous   |
| NC_037651.1 | 808480 | SNV | 1 | T | C | Homozygous   |
| NC_037651.1 | 808482 | SNV | 1 | T | C | Homozygous   |
| NC_037651.1 | 808496 | SNV | 1 | C | T | Homozygous   |
| NC_037651.1 | 808503 | SNV | 1 | G | A | Homozygous   |
| NC_037651.1 | 833519 | SNV | 1 | T | A | Heterozygous |
| NC_037651.1 | 833525 | SNV | 1 | T | A | Heterozygous |
| NC_037651.1 | 836376 | SNV | 1 | C | T | Heterozygous |
| NC_037651.1 | 836411 | SNV | 1 | C | T | Heterozygous |
| NC_037651.1 | 845424 | SNV | 1 | C | T | Homozygous   |
| NC_037651.1 | 845640 | SNV | 1 | T | C | Homozygous   |
| NC_037651.1 | 851293 | SNV | 1 | T | C | Heterozygous |
| NC_037651.1 | 851319 | SNV | 1 | G | A | Heterozygous |

|             |         |     |   |   |   |              |
|-------------|---------|-----|---|---|---|--------------|
| NC_037651.1 | 852626  | SNV | 1 | A | C | Homozygous   |
| NC_037651.1 | 852630  | SNV | 1 | G | C | Homozygous   |
| NC_037651.1 | 852633  | SNV | 1 | A | T | Homozygous   |
| NC_037651.1 | 852655  | SNV | 1 | T | A | Heterozygous |
| NC_037651.1 | 852655  | SNV | 1 | T | G | Heterozygous |
| NC_037651.1 | 867431  | SNV | 1 | T | A | Heterozygous |
| NC_037651.1 | 867437  | SNV | 1 | A | C | Heterozygous |
| NC_037651.1 | 867450  | SNV | 1 | T | A | Heterozygous |
| NC_037651.1 | 875290  | SNV | 1 | C | G | Homozygous   |
| NC_037651.1 | 875308  | SNV | 1 | G | T | Homozygous   |
| NC_037651.1 | 875320  | SNV | 1 | G | C | Homozygous   |
| NC_037651.1 | 883396  | SNV | 1 | T | A | Heterozygous |
| NC_037651.1 | 883396  | SNV | 1 | T | C | Heterozygous |
| NC_037651.1 | 883399  | SNV | 1 | T | C | Heterozygous |
| NC_037651.1 | 883404  | SNV | 1 | A | C | Heterozygous |
| NC_037651.1 | 883409  | SNV | 1 | T | A | Heterozygous |
| NC_037651.1 | 883411  | SNV | 1 | A | C | Heterozygous |
| NC_037651.1 | 883430  | SNV | 1 | T | A | Heterozygous |
| NC_037651.1 | 889027  | SNV | 1 | C | T | Homozygous   |
| NC_037651.1 | 889046  | SNV | 1 | C | T | Homozygous   |
| NC_037651.1 | 889054  | SNV | 1 | T | C | Homozygous   |
| NC_037651.1 | 889058  | SNV | 1 | A | G | Homozygous   |
| NC_037651.1 | 889060  | SNV | 1 | G | A | Homozygous   |
| NC_037651.1 | 889069  | SNV | 1 | T | A | Homozygous   |
| NC_037651.1 | 889076  | SNV | 1 | T | A | Homozygous   |
| NC_037651.1 | 895317  | SNV | 1 | C | T | Heterozygous |
| NC_037651.1 | 901069  | SNV | 1 | T | C | Homozygous   |
| NC_037651.1 | 901079  | SNV | 1 | G | A | Homozygous   |
| NC_037651.1 | 901085  | SNV | 1 | C | T | Homozygous   |
| NC_037651.1 | 907014  | SNV | 1 | G | A | Homozygous   |
| NC_037651.1 | 907084  | SNV | 1 | T | G | Heterozygous |
| NC_037651.1 | 909454  | SNV | 1 | G | A | Homozygous   |
| NC_037651.1 | 909477  | SNV | 1 | T | A | Homozygous   |
| NC_037651.1 | 909483  | SNV | 1 | G | A | Homozygous   |
| NC_037651.1 | 915478  | SNV | 1 | A | G | Homozygous   |
| NC_037651.1 | 915497  | SNV | 1 | G | A | Homozygous   |
| NC_037651.1 | 915566  | SNV | 1 | G | T | Heterozygous |
| NC_037651.1 | 916157  | SNV | 1 | T | A | Homozygous   |
| NC_037651.1 | 916165  | SNV | 1 | T | C | Homozygous   |
| NC_037651.1 | 916187  | SNV | 1 | A | T | Homozygous   |
| NC_037651.1 | 916189  | SNV | 1 | A | T | Homozygous   |
| NC_037651.1 | 916195  | SNV | 1 | T | C | Homozygous   |
| NC_037651.1 | 916206  | SNV | 1 | A | C | Homozygous   |
| NC_037651.1 | 916228  | SNV | 1 | A | T | Homozygous   |
| NC_037651.1 | 916230  | SNV | 1 | A | T | Homozygous   |
| NC_037651.1 | 916238  | SNV | 1 | A | G | Homozygous   |
| NC_037651.1 | 923410  | SNV | 1 | T | G | Heterozygous |
| NC_037651.1 | 923416  | SNV | 1 | T | G | Heterozygous |
| NC_037651.1 | 1026125 | SNV | 1 | A | G | Homozygous   |
| NC_037651.1 | 1027346 | SNV | 1 | A | C | Homozygous   |
| NC_037651.1 | 1027354 | SNV | 1 | C | A | Homozygous   |

|             |         |     |   |   |   |              |
|-------------|---------|-----|---|---|---|--------------|
| NC_037651.1 | 1027359 | SNV | 1 | G | A | Homozygous   |
| NC_037651.1 | 1027366 | SNV | 1 | A | T | Homozygous   |
| NC_037651.1 | 1028330 | SNV | 1 | C | T | Homozygous   |
| NC_037651.1 | 1029068 | SNV | 1 | G | T | Homozygous   |
| NC_037651.1 | 1031169 | SNV | 1 | A | G | Homozygous   |
| NC_037651.1 | 1033295 | SNV | 1 | T | A | Heterozygous |
| NC_037651.1 | 1033542 | SNV | 1 | C | T | Heterozygous |
| NC_037651.1 | 1033676 | SNV | 1 | G | A | Heterozygous |
| NC_037651.1 | 1034255 | SNV | 1 | T | A | Heterozygous |
| NC_037651.1 | 1034932 | SNV | 1 | T | C | Heterozygous |
| NC_037651.1 | 1038071 | SNV | 1 | A | G | Heterozygous |
| NC_037651.1 | 1051713 | SNV | 1 | A | G | Homozygous   |
| NC_037651.1 | 1051816 | SNV | 1 | A | G | Homozygous   |
| NC_037651.1 | 1051844 | SNV | 1 | T | A | Homozygous   |
| NC_037651.1 | 1051899 | SNV | 1 | T | G | Heterozygous |
| NC_037651.1 | 1052491 | SNV | 1 | G | A | Heterozygous |
| NC_037651.1 | 1061650 | SNV | 1 | A | G | Homozygous   |
| NC_037651.1 | 1061662 | SNV | 1 | C | T | Homozygous   |
| NC_037651.1 | 1061667 | SNV | 1 | A | T | Homozygous   |
| NC_037651.1 | 1061669 | SNV | 1 | T | G | Homozygous   |
| NC_037651.1 | 1061672 | SNV | 1 | C | T | Homozygous   |
| NC_037651.1 | 1061691 | SNV | 1 | C | A | Homozygous   |
| NC_037651.1 | 1061694 | SNV | 1 | A | G | Homozygous   |
| NC_037651.1 | 1077887 | SNV | 1 | G | A | Homozygous   |
| NC_037651.1 | 1077892 | SNV | 1 | A | T | Homozygous   |
| NC_037651.1 | 1077922 | SNV | 1 | A | T | Homozygous   |
| NC_037651.1 | 1086564 | SNV | 1 | A | G | Homozygous   |
| NC_037651.1 | 1086568 | SNV | 1 | A | G | Homozygous   |
| NC_037651.1 | 1095037 | SNV | 1 | T | C | Homozygous   |
| NC_037651.1 | 1095105 | SNV | 1 | C | T | Heterozygous |
| NC_037651.1 | 1095550 | SNV | 1 | A | G | Homozygous   |
| NC_037651.1 | 1095555 | SNV | 1 | A | T | Homozygous   |
| NC_037651.1 | 1100707 | SNV | 1 | A | T | Homozygous   |
| NC_037651.1 | 1100722 | SNV | 1 | T | G | Homozygous   |
| NC_037651.1 | 1100730 | SNV | 1 | T | A | Homozygous   |
| NC_037651.1 | 1100753 | SNV | 1 | C | T | Homozygous   |
| NC_037651.1 | 1104906 | SNV | 1 | G | T | Homozygous   |
| NC_037651.1 | 1104909 | SNV | 1 | A | G | Homozygous   |
| NC_037651.1 | 1104932 | SNV | 1 | A | C | Homozygous   |
| NC_037651.1 | 1104948 | SNV | 1 | C | T | Homozygous   |
| NC_037651.1 | 1104952 | SNV | 1 | C | T | Homozygous   |
| NC_037651.1 | 1108074 | SNV | 1 | T | A | Homozygous   |
| NC_037651.1 | 1108077 | SNV | 1 | T | A | Homozygous   |
| NC_037651.1 | 1108102 | SNV | 1 | A | G | Homozygous   |
| NC_037651.1 | 1127269 | SNV | 1 | T | A | Homozygous   |
| NC_037651.1 | 1127275 | SNV | 1 | T | A | Homozygous   |
| NC_037651.1 | 1127281 | SNV | 1 | T | A | Homozygous   |
| NC_037651.1 | 1127293 | SNV | 1 | T | G | Homozygous   |
| NC_037651.1 | 1127303 | SNV | 1 | G | A | Heterozygous |
| NC_037651.1 | 1127390 | SNV | 1 | C | G | Homozygous   |
| NC_037651.1 | 1127393 | SNV | 1 | A | C | Homozygous   |

|             |         |     |   |   |   |              |
|-------------|---------|-----|---|---|---|--------------|
| NC_037651.1 | 1127441 | SNV | 1 | A | T | Homozygous   |
| NC_037651.1 | 1127446 | SNV | 1 | C | T | Homozygous   |
| NC_037651.1 | 1127448 | SNV | 1 | T | A | Homozygous   |
| NC_037651.1 | 1127451 | SNV | 1 | A | T | Homozygous   |
| NC_037651.1 | 1127457 | SNV | 1 | T | C | Homozygous   |
| NC_037651.1 | 1127461 | SNV | 1 | T | A | Homozygous   |
| NC_037651.1 | 1127463 | SNV | 1 | G | A | Homozygous   |
| NC_037651.1 | 1149273 | SNV | 1 | T | C | Homozygous   |
| NC_037651.1 | 1155056 | SNV | 1 | G | A | Homozygous   |
| NC_037651.1 | 1162837 | SNV | 1 | T | A | Homozygous   |
| NC_037651.1 | 1162862 | SNV | 1 | T | A | Homozygous   |
| NC_037651.1 | 1162872 | SNV | 1 | A | T | Homozygous   |
| NC_037651.1 | 1162879 | SNV | 1 | G | T | Homozygous   |
| NC_037651.1 | 1171444 | SNV | 1 | G | A | Homozygous   |
| NC_037651.1 | 1171461 | SNV | 1 | T | C | Heterozygous |
| NC_037651.1 | 1171485 | SNV | 1 | C | T | Heterozygous |
| NC_037651.1 | 1171606 | SNV | 1 | A | G | Heterozygous |
| NC_037651.1 | 1187677 | SNV | 1 | A | C | Heterozygous |
| NC_037651.1 | 1187708 | SNV | 1 | C | G | Heterozygous |
| NC_037651.1 | 1198338 | SNV | 1 | G | A | Homozygous   |
| NC_037651.1 | 1198341 | SNV | 1 | A | G | Homozygous   |
| NC_037651.1 | 1198344 | SNV | 1 | C | T | Homozygous   |
| NC_037651.1 | 1198354 | SNV | 1 | G | T | Homozygous   |
| NC_037651.1 | 1198357 | SNV | 1 | A | T | Homozygous   |
| NC_037651.1 | 1198359 | SNV | 1 | A | T | Homozygous   |
| NC_037651.1 | 1198376 | SNV | 1 | G | A | Homozygous   |
| NC_037651.1 | 1210683 | SNV | 1 | T | C | Homozygous   |
| NC_037651.1 | 1210701 | SNV | 1 | T | C | Heterozygous |
| NC_037651.1 | 1210703 | SNV | 1 | T | C | Heterozygous |
| NC_037651.1 | 1210705 | SNV | 1 | T | C | Heterozygous |
| NC_037651.1 | 1210708 | SNV | 1 | G | A | Heterozygous |
| NC_037651.1 | 1210755 | SNV | 1 | T | C | Heterozygous |
| NC_037651.1 | 1219922 | SNV | 1 | A | G | Homozygous   |
| NC_037651.1 | 1220200 | SNV | 1 | T | C | Homozygous   |
| NC_037651.1 | 1220306 | SNV | 1 | T | C | Homozygous   |
| NC_037651.1 | 1220497 | SNV | 1 | A | G | Heterozygous |
| NC_037651.1 | 1220691 | SNV | 1 | A | G | Homozygous   |
| NC_037651.1 | 1221962 | SNV | 1 | A | G | Heterozygous |
| NC_037651.1 | 1229708 | SNV | 1 | A | G | Homozygous   |
| NC_037651.1 | 1229962 | SNV | 1 | T | C | Homozygous   |
| NC_037651.1 | 1230058 | SNV | 1 | A | G | Heterozygous |
| NC_037651.1 | 1230065 | SNV | 1 | T | C | Homozygous   |
| NC_037651.1 | 1230144 | SNV | 1 | A | T | Homozygous   |
| NC_037651.1 | 1230148 | SNV | 1 | G | A | Homozygous   |
| NC_037651.1 | 1230194 | SNV | 1 | C | T | Heterozygous |
| NC_037651.1 | 1230713 | SNV | 1 | C | T | Heterozygous |
| NC_037651.1 | 1230997 | SNV | 1 | A | G | Homozygous   |
| NC_037651.1 | 1231013 | SNV | 1 | T | C | Homozygous   |
| NC_037651.1 | 1231059 | SNV | 1 | T | G | Homozygous   |
| NC_037651.1 | 1231180 | SNV | 1 | A | T | Homozygous   |
| NC_037651.1 | 1231198 | SNV | 1 | G | T | Homozygous   |

|             |         |     |   |   |   |              |
|-------------|---------|-----|---|---|---|--------------|
| NC_037651.1 | 1235198 | SNV | 1 | T | C | Heterozygous |
| NC_037651.1 | 1235205 | SNV | 1 | C | T | Homozygous   |
| NC_037651.1 | 1250126 | SNV | 1 | A | C | Homozygous   |
| NC_037651.1 | 1250135 | SNV | 1 | C | T | Homozygous   |
| NC_037651.1 | 1250142 | SNV | 1 | C | T | Homozygous   |
| NC_037651.1 | 1259623 | SNV | 1 | T | C | Homozygous   |
| NC_037651.1 | 1259637 | SNV | 1 | T | C | Heterozygous |
| NC_037651.1 | 1259683 | SNV | 1 | T | A | Heterozygous |
| NC_037651.1 | 1264916 | SNV | 1 | T | C | Homozygous   |
| NC_037651.1 | 1264981 | SNV | 1 | A | G | Heterozygous |
| NC_037651.1 | 1264991 | SNV | 1 | T | C | Homozygous   |
| NC_037651.1 | 1265069 | SNV | 1 | A | G | Heterozygous |
| NC_037651.1 | 1265091 | SNV | 1 | G | A | Heterozygous |
| NC_037651.1 | 1265109 | SNV | 1 | T | C | Heterozygous |
| NC_037651.1 | 1265132 | SNV | 1 | T | G | Homozygous   |
| NC_037651.1 | 1275400 | SNV | 1 | G | A | Homozygous   |
| NC_037651.1 | 1276106 | SNV | 1 | C | T | Heterozygous |
| NC_037651.1 | 1292385 | SNV | 1 | T | A | Homozygous   |
| NC_037651.1 | 1292387 | SNV | 1 | T | G | Homozygous   |
| NC_037651.1 | 1292390 | SNV | 1 | T | A | Homozygous   |
| NC_037651.1 | 1292402 | SNV | 1 | T | A | Homozygous   |
| NC_037651.1 | 1303555 | SNV | 1 | T | C | Heterozygous |
| NC_037651.1 | 1303583 | SNV | 1 | T | C | Heterozygous |
| NC_037651.1 | 1303615 | SNV | 1 | T | C | Heterozygous |
| NC_037651.1 | 1303623 | SNV | 1 | T | C | Heterozygous |
| NC_037651.1 | 1303650 | SNV | 1 | A | G | Heterozygous |
| NC_037651.1 | 1303652 | SNV | 1 | A | G | Heterozygous |
| NC_037651.1 | 1303696 | SNV | 1 | G | A | Homozygous   |
| NC_037651.1 | 1307739 | SNV | 1 | C | T | Homozygous   |
| NC_037651.1 | 1307742 | SNV | 1 | C | T | Homozygous   |
| NC_037651.1 | 1307765 | SNV | 1 | A | G | Homozygous   |
| NC_037651.1 | 1307906 | SNV | 1 | G | A | Homozygous   |
| NC_037651.1 | 1307939 | SNV | 1 | A | G | Homozygous   |
| NC_037651.1 | 1311463 | SNV | 1 | G | C | Homozygous   |
| NC_037651.1 | 1311476 | SNV | 1 | A | G | Heterozygous |
| NC_037651.1 | 1311644 | SNV | 1 | T | G | Homozygous   |
| NC_037651.1 | 1311724 | SNV | 1 | A | G | Homozygous   |
| NC_037651.1 | 1312040 | SNV | 1 | C | T | Heterozygous |
| NC_037651.1 | 1312165 | SNV | 1 | G | A | Heterozygous |
| NC_037651.1 | 1315305 | SNV | 1 | T | C | Homozygous   |
| NC_037651.1 | 1315337 | SNV | 1 | T | C | Homozygous   |
| NC_037651.1 | 1315355 | SNV | 1 | C | G | Homozygous   |
| NC_037651.1 | 1315641 | SNV | 1 | G | A | Heterozygous |
| NC_037651.1 | 1315802 | SNV | 1 | A | G | Homozygous   |
| NC_037651.1 | 1315809 | SNV | 1 | T | C | Homozygous   |
| NC_037651.1 | 1315932 | SNV | 1 | G | A | Homozygous   |
| NC_037651.1 | 1315966 | SNV | 1 | T | C | Homozygous   |
| NC_037651.1 | 1315968 | SNV | 1 | C | T | Heterozygous |
| NC_037651.1 | 1315991 | SNV | 1 | G | A | Heterozygous |
| NC_037651.1 | 1315993 | SNV | 1 | G | A | Heterozygous |
| NC_037651.1 | 1316002 | SNV | 1 | A | G | Heterozygous |

|             |         |     |   |   |   |              |
|-------------|---------|-----|---|---|---|--------------|
| NC_037651.1 | 1316010 | SNV | 1 | G | A | Heterozygous |
| NC_037651.1 | 1316084 | SNV | 1 | T | G | Heterozygous |
| NC_037651.1 | 1316095 | SNV | 1 | T | C | Heterozygous |
| NC_037651.1 | 1316099 | SNV | 1 | T | A | Heterozygous |
| NC_037651.1 | 1316169 | SNV | 1 | G | A | Heterozygous |
| NC_037651.1 | 1316174 | SNV | 1 | A | G | Homozygous   |
| NC_037651.1 | 1316183 | SNV | 1 | T | C | Heterozygous |
| NC_037651.1 | 1316190 | SNV | 1 | T | C | Heterozygous |
| NC_037651.1 | 1316232 | SNV | 1 | G | A | Heterozygous |
| NC_037651.1 | 1316242 | SNV | 1 | G | A | Heterozygous |
| NC_037651.1 | 1316259 | SNV | 1 | G | C | Homozygous   |
| NC_037651.1 | 1322768 | SNV | 1 | T | C | Homozygous   |
| NC_037651.1 | 1322780 | SNV | 1 | A | T | Homozygous   |
| NC_037651.1 | 1322833 | SNV | 1 | C | T | Homozygous   |
| NC_037651.1 | 1323213 | SNV | 1 | A | G | Heterozygous |
| NC_037651.1 | 1323305 | SNV | 1 | T | C | Homozygous   |
| NC_037651.1 | 1323498 | SNV | 1 | A | T | Homozygous   |
| NC_037651.1 | 1323536 | SNV | 1 | A | T | Homozygous   |
| NC_037651.1 | 1323542 | SNV | 1 | A | G | Homozygous   |
| NC_037651.1 | 1325262 | SNV | 1 | T | C | Homozygous   |
| NC_037651.1 | 1331872 | SNV | 1 | A | C | Homozygous   |
| NC_037651.1 | 1390083 | SNV | 1 | A | G | Homozygous   |
| NC_037651.1 | 1391971 | SNV | 1 | C | T | Heterozygous |
| NC_037651.1 | 1392036 | SNV | 1 | T | C | Homozygous   |
| NC_037651.1 | 1392055 | SNV | 1 | T | A | Heterozygous |
| NC_037651.1 | 1392675 | SNV | 1 | A | T | Heterozygous |
| NC_037651.1 | 1392678 | SNV | 1 | A | T | Heterozygous |
| NC_037651.1 | 1392682 | SNV | 1 | A | T | Heterozygous |
| NC_037651.1 | 1392709 | SNV | 1 | A | G | Heterozygous |
| NC_037651.1 | 1392720 | SNV | 1 | A | G | Heterozygous |
| NC_037651.1 | 1403634 | SNV | 1 | A | C | Homozygous   |
| NC_037651.1 | 1409554 | SNV | 1 | T | C | Homozygous   |
| NC_037651.1 | 1409562 | SNV | 1 | A | G | Homozygous   |
| NC_037651.1 | 1409570 | SNV | 1 | A | T | Homozygous   |
| NC_037651.1 | 1409573 | SNV | 1 | A | T | Homozygous   |
| NC_037651.1 | 1409575 | SNV | 1 | A | T | Homozygous   |
| NC_037651.1 | 1409578 | SNV | 1 | G | C | Homozygous   |
| NC_037651.1 | 1412043 | SNV | 1 | C | T | Homozygous   |
| NC_037651.1 | 1412082 | SNV | 1 | C | T | Heterozygous |
| NC_037651.1 | 1434259 | SNV | 1 | C | T | Heterozygous |
| NC_037651.1 | 1434526 | SNV | 1 | G | A | Homozygous   |
| NC_037651.1 | 1434595 | SNV | 1 | T | C | Homozygous   |
| NC_037651.1 | 1434658 | SNV | 1 | T | C | Homozygous   |
| NC_037651.1 | 1434676 | SNV | 1 | C | T | Homozygous   |
| NC_037651.1 | 1435308 | SNV | 1 | G | A | Heterozygous |
| NC_037651.1 | 1435558 | SNV | 1 | A | G | Homozygous   |
| NC_037651.1 | 1438610 | SNV | 1 | T | A | Heterozygous |
| NC_037651.1 | 1440108 | SNV | 1 | T | A | Homozygous   |
| NC_037651.1 | 1440257 | SNV | 1 | G | A | Heterozygous |
| NC_037651.1 | 1440453 | SNV | 1 | T | C | Homozygous   |
| NC_037651.1 | 1440886 | SNV | 1 | A | G | Heterozygous |

|             |         |     |   |   |   |              |
|-------------|---------|-----|---|---|---|--------------|
| NC_037651.1 | 1441537 | SNV | 1 | G | A | Homozygous   |
| NC_037651.1 | 1443477 | SNV | 1 | A | G | Homozygous   |
| NC_037651.1 | 1447309 | SNV | 1 | T | G | Heterozygous |
| NC_037651.1 | 1447339 | SNV | 1 | A | T | Homozygous   |
| NC_037651.1 | 1447342 | SNV | 1 | A | T | Homozygous   |
| NC_037651.1 | 1447348 | SNV | 1 | A | T | Homozygous   |
| NC_037651.1 | 1447357 | SNV | 1 | T | G | Homozygous   |
| NC_037651.1 | 1453315 | SNV | 1 | A | G | Heterozygous |
| NC_037651.1 | 1453340 | SNV | 1 | A | G | Homozygous   |
| NC_037651.1 | 1453353 | SNV | 1 | A | G | Homozygous   |
| NC_037651.1 | 1456987 | SNV | 1 | A | T | Homozygous   |
| NC_037651.1 | 1456991 | SNV | 1 | T | G | Homozygous   |
| NC_037651.1 | 1456994 | SNV | 1 | T | C | Homozygous   |
| NC_037651.1 | 1457008 | SNV | 1 | T | A | Homozygous   |
| NC_037651.1 | 1457013 | SNV | 1 | T | A | Homozygous   |
| NC_037651.1 | 1457019 | SNV | 1 | T | A | Homozygous   |
| NC_037651.1 | 1458086 | SNV | 1 | G | T | Homozygous   |
| NC_037651.1 | 1458119 | SNV | 1 | T | G | Homozygous   |
| NC_037651.1 | 1461622 | SNV | 1 | T | A | Homozygous   |
| NC_037651.1 | 1461775 | SNV | 1 | T | C | Heterozygous |
| NC_037651.1 | 1463560 | SNV | 1 | G | A | Heterozygous |
| NC_037651.1 | 1463775 | SNV | 1 | T | C | Homozygous   |
| NC_037651.1 | 1466986 | SNV | 1 | C | G | Homozygous   |
| NC_037651.1 | 1467412 | SNV | 1 | A | T | Homozygous   |
| NC_037651.1 | 1467432 | SNV | 1 | A | C | Heterozygous |
| NC_037651.1 | 1467455 | SNV | 1 | T | A | Heterozygous |
| NC_037651.1 | 1467459 | SNV | 1 | C | T | Homozygous   |
| NC_037651.1 | 1470558 | SNV | 1 | G | A | Homozygous   |
| NC_037651.1 | 1472061 | SNV | 1 | A | G | Heterozygous |
| NC_037651.1 | 1485069 | SNV | 1 | A | G | Heterozygous |
| NC_037651.1 | 1485281 | SNV | 1 | C | T | Homozygous   |
| NC_037651.1 | 1485368 | SNV | 1 | A | G | Homozygous   |
| NC_037651.1 | 1485671 | SNV | 1 | C | T | Homozygous   |
| NC_037651.1 | 1485862 | SNV | 1 | A | G | Homozygous   |
| NC_037651.1 | 1486187 | SNV | 1 | C | G | Homozygous   |
| NC_037651.1 | 1487433 | SNV | 1 | C | T | Heterozygous |
| NC_037651.1 | 1495757 | SNV | 1 | G | A | Heterozygous |
| NC_037651.1 | 1497734 | SNV | 1 | A | T | Homozygous   |
| NC_037651.1 | 1497830 | SNV | 1 | A | G | Heterozygous |
| NC_037651.1 | 1498422 | SNV | 1 | C | A | Heterozygous |
| NC_037651.1 | 1498769 | SNV | 1 | T | C | Homozygous   |
| NC_037651.1 | 1498803 | SNV | 1 | G | A | Heterozygous |
| NC_037651.1 | 1498810 | SNV | 1 | T | C | Heterozygous |
| NC_037651.1 | 1503180 | SNV | 1 | G | A | Heterozygous |
| NC_037651.1 | 1503184 | SNV | 1 | A | G | Heterozygous |
| NC_037651.1 | 1503560 | SNV | 1 | A | G | Heterozygous |
| NC_037651.1 | 1503685 | SNV | 1 | G | A | Homozygous   |
| NC_037651.1 | 1503721 | SNV | 1 | T | A | Homozygous   |
| NC_037651.1 | 1504370 | SNV | 1 | C | A | Heterozygous |
| NC_037651.1 | 1504389 | SNV | 1 | G | A | Heterozygous |
| NC_037651.1 | 1504393 | SNV | 1 | A | G | Heterozygous |

|             |         |     |   |   |   |              |
|-------------|---------|-----|---|---|---|--------------|
| NC_037651.1 | 1505485 | SNV | 1 | T | C | Homozygous   |
| NC_037651.1 | 1505490 | SNV | 1 | T | A | Homozygous   |
| NC_037651.1 | 1505666 | SNV | 1 | T | C | Heterozygous |
| NC_037651.1 | 1505903 | SNV | 1 | G | A | Heterozygous |
| NC_037651.1 | 1505905 | SNV | 1 | A | T | Heterozygous |
| NC_037651.1 | 1505908 | SNV | 1 | C | T | Heterozygous |
| NC_037651.1 | 1506179 | SNV | 1 | A | T | Homozygous   |
| NC_037651.1 | 1506188 | SNV | 1 | A | C | Homozygous   |
| NC_037651.1 | 1513643 | SNV | 1 | A | G | Homozygous   |
| NC_037651.1 | 1513718 | SNV | 1 | T | C | Homozygous   |
| NC_037651.1 | 1514514 | SNV | 1 | C | T | Homozygous   |
| NC_037651.1 | 1514678 | SNV | 1 | A | G | Heterozygous |
| NC_037651.1 | 1514690 | SNV | 1 | T | C | Homozygous   |
| NC_037651.1 | 1515599 | SNV | 1 | A | T | Homozygous   |
| NC_037651.1 | 1515807 | SNV | 1 | T | C | Homozygous   |
| NC_037651.1 | 1515862 | SNV | 1 | T | A | Heterozygous |
| NC_037651.1 | 1516069 | SNV | 1 | A | G | Heterozygous |
| NC_037651.1 | 1549924 | SNV | 1 | C | T | Homozygous   |
| NC_037651.1 | 1550009 | SNV | 1 | C | T | Homozygous   |
| NC_037651.1 | 1550012 | SNV | 1 | C | T | Homozygous   |
| NC_037651.1 | 1550014 | SNV | 1 | C | T | Homozygous   |
| NC_037651.1 | 1582014 | SNV | 1 | G | C | Homozygous   |
| NC_037651.1 | 1582622 | SNV | 1 | C | T | Homozygous   |
| NC_037651.1 | 1582985 | SNV | 1 | T | C | Homozygous   |
| NC_037651.1 | 1582991 | SNV | 1 | A | G | Homozygous   |
| NC_037651.1 | 1583729 | SNV | 1 | A | C | Homozygous   |
| NC_037651.1 | 1583734 | SNV | 1 | A | G | Homozygous   |
| NC_037651.1 | 1586233 | SNV | 1 | A | G | Homozygous   |
| NC_037651.1 | 1586236 | SNV | 1 | A | T | Homozygous   |
| NC_037651.1 | 1589319 | SNV | 1 | A | G | Heterozygous |
| NC_037651.1 | 1589621 | SNV | 1 | C | T | Homozygous   |
| NC_037651.1 | 1591895 | SNV | 1 | G | A | Homozygous   |
| NC_037651.1 | 1603576 | SNV | 1 | A | G | Heterozygous |
| NC_037651.1 | 1603692 | SNV | 1 | T | C | Homozygous   |
| NC_037651.1 | 1603701 | SNV | 1 | T | C | Homozygous   |
| NC_037651.1 | 1603738 | SNV | 1 | G | A | Homozygous   |
| NC_037651.1 | 1603766 | SNV | 1 | G | T | Heterozygous |
| NC_037651.1 | 1603769 | SNV | 1 | T | C | Heterozygous |
| NC_037651.1 | 1603870 | SNV | 1 | A | G | Heterozygous |
| NC_037651.1 | 1603888 | SNV | 1 | G | A | Homozygous   |
| NC_037651.1 | 1605391 | SNV | 1 | A | G | Homozygous   |
| NC_037651.1 | 1605395 | SNV | 1 | T | C | Homozygous   |
| NC_037651.1 | 1605455 | SNV | 1 | A | G | Heterozygous |
| NC_037651.1 | 1605598 | SNV | 1 | G | A | Heterozygous |
| NC_037651.1 | 1605680 | SNV | 1 | A | G | Heterozygous |
| NC_037651.1 | 1624159 | SNV | 1 | G | A | Heterozygous |
| NC_037651.1 | 1624169 | SNV | 1 | A | G | Heterozygous |
| NC_037651.1 | 1624348 | SNV | 1 | G | A | Heterozygous |
| NC_037651.1 | 1629888 | SNV | 1 | T | C | Homozygous   |
| NC_037651.1 | 1630199 | SNV | 1 | A | G | Homozygous   |
| NC_037651.1 | 1630207 | SNV | 1 | T | C | Heterozygous |



|             |         |     |   |   |   |              |
|-------------|---------|-----|---|---|---|--------------|
| NC_037651.1 | 1630465 | SNV | 1 | G | A | Heterozygous |
| NC_037651.1 | 1630479 | SNV | 1 | A | G | Homozygous   |
| NC_037651.1 | 1630482 | SNV | 1 | T | G | Homozygous   |
| NC_037651.1 | 1630620 | SNV | 1 | C | T | Homozygous   |
| NC_037651.1 | 1630638 | SNV | 1 | A | C | Homozygous   |
| NC_037651.1 | 1635886 | SNV | 1 | C | T | Heterozygous |
| NC_037651.1 | 1641583 | SNV | 1 | A | G | Heterozygous |
| NC_037651.1 | 1666873 | SNV | 1 | G | A | Heterozygous |
| NC_037651.1 | 1666908 | SNV | 1 | A | G | Homozygous   |
| NC_037651.1 | 1667245 | SNV | 1 | T | C | Homozygous   |
| NC_037651.1 | 1667281 | SNV | 1 | T | C | Heterozygous |
| NC_037651.1 | 1667372 | SNV | 1 | A | T | Heterozygous |
| NC_037651.1 | 1667374 | SNV | 1 | A | C | Heterozygous |
| NC_037651.1 | 1667377 | SNV | 1 | G | A | Heterozygous |
| NC_037651.1 | 1667694 | SNV | 1 | C | T | Homozygous   |
| NC_037651.1 | 1674515 | SNV | 1 | T | C | Heterozygous |
| NC_037651.1 | 1674517 | SNV | 1 | C | T | Heterozygous |
| NC_037651.1 | 1674579 | SNV | 1 | C | T | Homozygous   |
| NC_037651.1 | 1674601 | SNV | 1 | C | G | Heterozygous |
| NC_037651.1 | 1679496 | SNV | 1 | T | A | Homozygous   |
| NC_037651.1 | 1679498 | SNV | 1 | A | C | Homozygous   |
| NC_037651.1 | 1679503 | SNV | 1 | T | C | Homozygous   |
| NC_037651.1 | 1683496 | SNV | 1 | T | C | Homozygous   |
| NC_037651.1 | 1683583 | SNV | 1 | A | G | Homozygous   |
| NC_037651.1 | 1683628 | SNV | 1 | A | G | Homozygous   |
| NC_037651.1 | 1683649 | SNV | 1 | G | A | Homozygous   |
| NC_037651.1 | 1689681 | SNV | 1 | T | A | Heterozygous |
| NC_037651.1 | 1731838 | SNV | 1 | A | G | Homozygous   |
| NC_037651.1 | 1731871 | SNV | 1 | A | G | Homozygous   |
| NC_037651.1 | 1732007 | SNV | 1 | G | A | Heterozygous |
| NC_037651.1 | 1732007 | SNV | 1 | G | C | Heterozygous |
| NC_037651.1 | 1732058 | SNV | 1 | A | G | Homozygous   |
| NC_037651.1 | 1732072 | SNV | 1 | A | G | Homozygous   |
| NC_037651.1 | 1732158 | SNV | 1 | C | T | Heterozygous |
| NC_037651.1 | 1732198 | SNV | 1 | G | A | Heterozygous |
| NC_037651.1 | 1732202 | SNV | 1 | G | A | Heterozygous |
| NC_037651.1 | 1732311 | SNV | 1 | C | T | Heterozygous |
| NC_037651.1 | 1732316 | SNV | 1 | T | C | Heterozygous |
| NC_037651.1 | 1732734 | SNV | 1 | C | G | Homozygous   |
| NC_037651.1 | 1732924 | SNV | 1 | A | G | Homozygous   |
| NC_037651.1 | 1732944 | SNV | 1 | A | G | Heterozygous |
| NC_037651.1 | 1732978 | SNV | 1 | A | G | Homozygous   |
| NC_037651.1 | 1733125 | SNV | 1 | C | T | Homozygous   |
| NC_037651.1 | 1733127 | SNV | 1 | G | A | Homozygous   |
| NC_037651.1 | 1733140 | SNV | 1 | C | T | Homozygous   |
| NC_037651.1 | 1737360 | SNV | 1 | C | T | Heterozygous |
| NC_037651.1 | 1737736 | SNV | 1 | G | T | Homozygous   |
| NC_037651.1 | 1737779 | SNV | 1 | G | C | Heterozygous |
| NC_037651.1 | 1747787 | SNV | 1 | T | C | Homozygous   |
| NC_037651.1 | 1747838 | SNV | 1 | T | C | Homozygous   |
| NC_037651.1 | 1747841 | SNV | 1 | T | C | Homozygous   |

|             |         |     |   |   |   |              |
|-------------|---------|-----|---|---|---|--------------|
| NC_037651.1 | 1747850 | SNV | 1 | T | C | Homozygous   |
| NC_037651.1 | 1749363 | SNV | 1 | G | A | Homozygous   |
| NC_037651.1 | 1752829 | SNV | 1 | C | A | Heterozygous |
| NC_037651.1 | 1753045 | SNV | 1 | G | A | Homozygous   |
| NC_037651.1 | 1753061 | SNV | 1 | G | A | Homozygous   |
| NC_037651.1 | 1753087 | SNV | 1 | A | G | Homozygous   |
| NC_037651.1 | 1753205 | SNV | 1 | G | A | Heterozygous |
| NC_037651.1 | 1753220 | SNV | 1 | G | A | Heterozygous |
| NC_037651.1 | 1753289 | SNV | 1 | T | C | Heterozygous |
| NC_037651.1 | 1753309 | SNV | 1 | C | T | Heterozygous |
| NC_037651.1 | 1753409 | SNV | 1 | G | A | Homozygous   |
| NC_037651.1 | 1753451 | SNV | 1 | C | T | Homozygous   |
| NC_037651.1 | 1753533 | SNV | 1 | C | T | Homozygous   |
| NC_037651.1 | 1754178 | SNV | 1 | A | G | Homozygous   |
| NC_037651.1 | 1754186 | SNV | 1 | T | C | Homozygous   |
| NC_037651.1 | 1754197 | SNV | 1 | T | C | Homozygous   |
| NC_037651.1 | 1754259 | SNV | 1 | G | A | Heterozygous |
| NC_037651.1 | 1754521 | SNV | 1 | T | C | Homozygous   |
| NC_037651.1 | 1755513 | SNV | 1 | A | G | Homozygous   |
| NC_037651.1 | 1755516 | SNV | 1 | G | A | Heterozygous |
| NC_037651.1 | 1755523 | SNV | 1 | C | T | Homozygous   |
| NC_037651.1 | 1755546 | SNV | 1 | T | C | Homozygous   |
| NC_037651.1 | 1755572 | SNV | 1 | A | G | Homozygous   |
| NC_037651.1 | 1755687 | SNV | 1 | T | C | Heterozygous |
| NC_037651.1 | 1755740 | SNV | 1 | C | T | Heterozygous |
| NC_037651.1 | 1755901 | SNV | 1 | A | G | Homozygous   |
| NC_037651.1 | 1756348 | SNV | 1 | G | A | Homozygous   |
| NC_037651.1 | 1756353 | SNV | 1 | A | G | Homozygous   |
| NC_037651.1 | 1756363 | SNV | 1 | G | A | Heterozygous |
| NC_037651.1 | 1756391 | SNV | 1 | T | C | Homozygous   |
| NC_037651.1 | 1756470 | SNV | 1 | C | T | Homozygous   |
| NC_037651.1 | 1756743 | SNV | 1 | A | G | Heterozygous |
| NC_037651.1 | 1757302 | SNV | 1 | C | A | Homozygous   |
| NC_037651.1 | 1757305 | SNV | 1 | T | A | Homozygous   |
| NC_037651.1 | 1757310 | SNV | 1 | T | A | Homozygous   |
| NC_037651.1 | 1757316 | SNV | 1 | A | T | Homozygous   |
| NC_037651.1 | 1757323 | SNV | 1 | T | A | Homozygous   |
| NC_037651.1 | 1757331 | SNV | 1 | G | T | Homozygous   |
| NC_037651.1 | 1759160 | SNV | 1 | T | C | Homozygous   |
| NC_037651.1 | 1759174 | SNV | 1 | G | A | Homozygous   |
| NC_037651.1 | 1759189 | SNV | 1 | C | T | Heterozygous |
| NC_037651.1 | 1759201 | SNV | 1 | A | G | Heterozygous |
| NC_037651.1 | 1759324 | SNV | 1 | C | T | Heterozygous |
| NC_037651.1 | 1763592 | SNV | 1 | G | A | Homozygous   |
| NC_037651.1 | 1763793 | SNV | 1 | G | A | Homozygous   |
| NC_037651.1 | 1769141 | SNV | 1 | T | C | Homozygous   |
| NC_037651.1 | 1769349 | SNV | 1 | C | T | Heterozygous |
| NC_037651.1 | 1772630 | SNV | 1 | T | A | Homozygous   |
| NC_037651.1 | 1772632 | SNV | 1 | T | C | Homozygous   |
| NC_037651.1 | 1772649 | SNV | 1 | A | C | Homozygous   |
| NC_037651.1 | 1772651 | SNV | 1 | A | T | Homozygous   |

|             |         |     |   |   |   |              |
|-------------|---------|-----|---|---|---|--------------|
| NC_037651.1 | 1772653 | SNV | 1 | A | G | Homozygous   |
| NC_037651.1 | 1772655 | SNV | 1 | G | A | Homozygous   |
| NC_037651.1 | 1773247 | SNV | 1 | C | T | Homozygous   |
| NC_037651.1 | 1773410 | SNV | 1 | A | G | Homozygous   |
| NC_037651.1 | 1773484 | SNV | 1 | A | G | Homozygous   |
| NC_037651.1 | 1775254 | SNV | 1 | C | T | Homozygous   |
| NC_037651.1 | 1780386 | SNV | 1 | T | C | Homozygous   |
| NC_037651.1 | 1798418 | SNV | 1 | A | G | Homozygous   |
| NC_037651.1 | 1798864 | SNV | 1 | T | A | Homozygous   |
| NC_037651.1 | 1798867 | SNV | 1 | C | A | Homozygous   |
| NC_037651.1 | 1798988 | SNV | 1 | C | A | Heterozygous |
| NC_037651.1 | 1802699 | SNV | 1 | C | T | Heterozygous |
| NC_037651.1 | 1802734 | SNV | 1 | A | G | Heterozygous |
| NC_037651.1 | 1802738 | SNV | 1 | T | C | Heterozygous |
| NC_037651.1 | 1802746 | SNV | 1 | T | C | Homozygous   |
| NC_037651.1 | 1802790 | SNV | 1 | T | C | Heterozygous |
| NC_037651.1 | 1802941 | SNV | 1 | G | A | Homozygous   |
| NC_037651.1 | 1803013 | SNV | 1 | G | A | Heterozygous |
| NC_037651.1 | 1803015 | SNV | 1 | G | A | Heterozygous |
| NC_037651.1 | 1803142 | SNV | 1 | A | G | Homozygous   |
| NC_037651.1 | 1816380 | SNV | 1 | C | A | Heterozygous |
| NC_037651.1 | 1816408 | SNV | 1 | T | A | Heterozygous |
| NC_037651.1 | 1816412 | SNV | 1 | G | A | Heterozygous |
| NC_037651.1 | 1816458 | SNV | 1 | G | A | Heterozygous |
| NC_037651.1 | 1816523 | SNV | 1 | A | G | Homozygous   |
| NC_037651.1 | 1820357 | SNV | 1 | T | C | Homozygous   |
| NC_037651.1 | 1820420 | SNV | 1 | T | C | Homozygous   |
| NC_037651.1 | 1820516 | SNV | 1 | T | C | Homozygous   |
| NC_037651.1 | 1820582 | SNV | 1 | G | A | Heterozygous |
| NC_037651.1 | 1820655 | SNV | 1 | A | G | Heterozygous |
| NC_037651.1 | 1820666 | SNV | 1 | C | T | Heterozygous |
| NC_037651.1 | 1821053 | SNV | 1 | T | C | Homozygous   |
| NC_037651.1 | 1821202 | SNV | 1 | G | A | Heterozygous |
| NC_037651.1 | 1821219 | SNV | 1 | G | A | Heterozygous |
| NC_037651.1 | 1821310 | SNV | 1 | T | C | Homozygous   |
| NC_037651.1 | 1821327 | SNV | 1 | A | G | Homozygous   |
| NC_037651.1 | 1821353 | SNV | 1 | C | T | Heterozygous |
| NC_037651.1 | 1821429 | SNV | 1 | C | T | Homozygous   |
| NC_037651.1 | 1821454 | SNV | 1 | T | C | Heterozygous |
| NC_037651.1 | 1822013 | SNV | 1 | G | A | Homozygous   |
| NC_037651.1 | 1825360 | SNV | 1 | T | C | Homozygous   |
| NC_037651.1 | 1825393 | SNV | 1 | C | T | Homozygous   |
| NC_037651.1 | 1827626 | SNV | 1 | T | C | Homozygous   |
| NC_037651.1 | 1827675 | SNV | 1 | G | T | Heterozygous |
| NC_037651.1 | 1827716 | SNV | 1 | A | G | Homozygous   |
| NC_037651.1 | 1827744 | SNV | 1 | T | C | Homozygous   |
| NC_037651.1 | 1827761 | SNV | 1 | A | G | Homozygous   |
| NC_037651.1 | 1827875 | SNV | 1 | A | T | Homozygous   |
| NC_037651.1 | 1827961 | SNV | 1 | C | T | Heterozygous |
| NC_037651.1 | 1828032 | SNV | 1 | C | T | Heterozygous |
| NC_037651.1 | 1828098 | SNV | 1 | A | G | Homozygous   |

|             |         |     |   |   |   |              |
|-------------|---------|-----|---|---|---|--------------|
| NC_037651.1 | 1828139 | SNV | 1 | C | T | Homozygous   |
| NC_037651.1 | 1828274 | SNV | 1 | G | A | Homozygous   |
| NC_037651.1 | 1828466 | SNV | 1 | G | C | Homozygous   |
| NC_037651.1 | 1836187 | SNV | 1 | G | A | Heterozygous |
| NC_037651.1 | 1836228 | SNV | 1 | T | C | Heterozygous |
| NC_037651.1 | 1836471 | SNV | 1 | G | C | Homozygous   |
| NC_037651.1 | 1836512 | SNV | 1 | A | G | Homozygous   |
| NC_037651.1 | 1836582 | SNV | 1 | A | G | Homozygous   |
| NC_037651.1 | 1836617 | SNV | 1 | G | A | Heterozygous |
| NC_037651.1 | 1836647 | SNV | 1 | T | C | Homozygous   |
| NC_037651.1 | 1836651 | SNV | 1 | T | G | Heterozygous |
| NC_037651.1 | 1836664 | SNV | 1 | T | C | Heterozygous |
| NC_037651.1 | 1836714 | SNV | 1 | C | T | Heterozygous |
| NC_037651.1 | 1836928 | SNV | 1 | T | C | Homozygous   |
| NC_037651.1 | 1836980 | SNV | 1 | T | C | Homozygous   |
| NC_037651.1 | 1837044 | SNV | 1 | G | A | Heterozygous |
| NC_037651.1 | 1837216 | SNV | 1 | A | G | Heterozygous |
| NC_037651.1 | 1837221 | SNV | 1 | G | A | Heterozygous |
| NC_037651.1 | 1837226 | SNV | 1 | A | C | Heterozygous |
| NC_037651.1 | 1837521 | SNV | 1 | T | C | Heterozygous |
| NC_037651.1 | 1838023 | SNV | 1 | G | A | Homozygous   |
| NC_037651.1 | 1838026 | SNV | 1 | G | A | Heterozygous |
| NC_037651.1 | 1838291 | SNV | 1 | G | A | Homozygous   |
| NC_037651.1 | 1838392 | SNV | 1 | G | A | Heterozygous |
| NC_037651.1 | 1838396 | SNV | 1 | A | G | Heterozygous |
| NC_037651.1 | 1844443 | SNV | 1 | G | A | Homozygous   |
| NC_037651.1 | 1844445 | SNV | 1 | A | G | Homozygous   |
| NC_037651.1 | 1844751 | SNV | 1 | C | T | Homozygous   |
| NC_037651.1 | 1844765 | SNV | 1 | G | A | Homozygous   |
| NC_037651.1 | 1844812 | SNV | 1 | A | G | Homozygous   |
| NC_037651.1 | 1844841 | SNV | 1 | A | G | Homozygous   |
| NC_037651.1 | 1860592 | SNV | 1 | T | A | Homozygous   |
| NC_037651.1 | 1860599 | SNV | 1 | T | A | Homozygous   |
| NC_037651.1 | 1860602 | SNV | 1 | A | C | Homozygous   |
| NC_037651.1 | 1868284 | SNV | 1 | T | A | Heterozygous |
| NC_037651.1 | 1868300 | SNV | 1 | G | A | Heterozygous |
| NC_037651.1 | 1868314 | SNV | 1 | C | A | Heterozygous |
| NC_037651.1 | 1868424 | SNV | 1 | T | A | Homozygous   |
| NC_037651.1 | 1874904 | SNV | 1 | A | G | Homozygous   |
| NC_037651.1 | 1879445 | SNV | 1 | C | T | Heterozygous |
| NC_037651.1 | 1879452 | SNV | 1 | C | T | Heterozygous |
| NC_037651.1 | 1879483 | SNV | 1 | T | C | Heterozygous |
| NC_037651.1 | 1879485 | SNV | 1 | T | G | Heterozygous |
| NC_037651.1 | 1881039 | SNV | 1 | T | C | Heterozygous |
| NC_037651.1 | 1881065 | SNV | 1 | T | A | Heterozygous |
| NC_037651.1 | 1881071 | SNV | 1 | C | T | Homozygous   |
| NC_037651.1 | 1881074 | SNV | 1 | T | C | Heterozygous |
| NC_037651.1 | 1881080 | SNV | 1 | A | T | Homozygous   |
| NC_037651.1 | 1881092 | SNV | 1 | T | G | Homozygous   |
| NC_037651.1 | 1881098 | SNV | 1 | T | A | Heterozygous |
| NC_037651.1 | 1881113 | SNV | 1 | C | T | Homozygous   |

|             |         |     |   |   |   |              |
|-------------|---------|-----|---|---|---|--------------|
| NC_037651.1 | 1881150 | SNV | 1 | C | T | Homozygous   |
| NC_037651.1 | 1881156 | SNV | 1 | C | T | Homozygous   |
| NC_037651.1 | 1881227 | SNV | 1 | T | C | Homozygous   |
| NC_037651.1 | 1881232 | SNV | 1 | T | A | Homozygous   |
| NC_037651.1 | 1881263 | SNV | 1 | T | C | Homozygous   |
| NC_037651.1 | 1881502 | SNV | 1 | T | A | Homozygous   |
| NC_037651.1 | 1881511 | SNV | 1 | A | T | Homozygous   |
| NC_037651.1 | 1881517 | SNV | 1 | C | T | Homozygous   |
| NC_037651.1 | 1881519 | SNV | 1 | T | C | Heterozygous |
| NC_037651.1 | 1881538 | SNV | 1 | C | T | Heterozygous |
| NC_037651.1 | 1881553 | SNV | 1 | C | T | Heterozygous |
| NC_037651.1 | 1881567 | SNV | 1 | T | C | Heterozygous |
| NC_037651.1 | 1884352 | SNV | 1 | G | A | Heterozygous |
| NC_037651.1 | 1884570 | SNV | 1 | T | C | Homozygous   |
| NC_037651.1 | 1884613 | SNV | 1 | A | G | Heterozygous |
| NC_037651.1 | 1885209 | SNV | 1 | A | T | Homozygous   |
| NC_037651.1 | 1885262 | SNV | 1 | T | C | Homozygous   |
| NC_037651.1 | 1886440 | SNV | 1 | A | G | Heterozygous |
| NC_037651.1 | 1886482 | SNV | 1 | A | G | Heterozygous |
| NC_037651.1 | 1886488 | SNV | 1 | C | T | Homozygous   |
| NC_037651.1 | 1886712 | SNV | 1 | T | G | Homozygous   |
| NC_037651.1 | 1892671 | SNV | 1 | T | C | Homozygous   |
| NC_037651.1 | 1892806 | SNV | 1 | A | G | Heterozygous |
| NC_037651.1 | 1892823 | SNV | 1 | T | C | Homozygous   |
| NC_037651.1 | 1892853 | SNV | 1 | G | A | Heterozygous |
| NC_037651.1 | 1892914 | SNV | 1 | G | A | Heterozygous |
| NC_037651.1 | 1892989 | SNV | 1 | C | T | Heterozygous |
| NC_037651.1 | 1892994 | SNV | 1 | A | G | Homozygous   |
| NC_037651.1 | 1893003 | SNV | 1 | T | C | Heterozygous |
| NC_037651.1 | 1893035 | SNV | 1 | T | C | Homozygous   |
| NC_037651.1 | 1893134 | SNV | 1 | G | A | Heterozygous |
| NC_037651.1 | 1893149 | SNV | 1 | A | G | Heterozygous |
| NC_037651.1 | 1893153 | SNV | 1 | C | A | Heterozygous |
| NC_037651.1 | 1893703 | SNV | 1 | G | A | Homozygous   |
| NC_037651.1 | 1893724 | SNV | 1 | T | C | Heterozygous |
| NC_037651.1 | 1893777 | SNV | 1 | T | G | Heterozygous |
| NC_037651.1 | 1894328 | SNV | 1 | C | T | Heterozygous |
| NC_037651.1 | 1894363 | SNV | 1 | T | C | Homozygous   |
| NC_037651.1 | 1894397 | SNV | 1 | T | A | Homozygous   |
| NC_037651.1 | 1896139 | SNV | 1 | C | T | Homozygous   |
| NC_037651.1 | 1896149 | SNV | 1 | C | T | Homozygous   |
| NC_037651.1 | 1896490 | SNV | 1 | G | A | Heterozygous |
| NC_037651.1 | 1896493 | SNV | 1 | C | A | Heterozygous |
| NC_037651.1 | 1896496 | SNV | 1 | T | A | Heterozygous |
| NC_037651.1 | 1896500 | SNV | 1 | T | A | Heterozygous |
| NC_037651.1 | 1899487 | SNV | 1 | C | T | Homozygous   |
| NC_037651.1 | 1899550 | SNV | 1 | G | A | Heterozygous |
| NC_037651.1 | 1899558 | SNV | 1 | C | T | Heterozygous |
| NC_037651.1 | 1899646 | SNV | 1 | T | C | Homozygous   |
| NC_037651.1 | 1899660 | SNV | 1 | A | G | Heterozygous |
| NC_037651.1 | 1899667 | SNV | 1 | A | G | Homozygous   |

|             |         |     |   |   |   |              |
|-------------|---------|-----|---|---|---|--------------|
| NC_037651.1 | 1900950 | SNV | 1 | T | C | Homozygous   |
| NC_037651.1 | 1900967 | SNV | 1 | A | G | Homozygous   |
| NC_037651.1 | 1900991 | SNV | 1 | C | T | Homozygous   |
| NC_037651.1 | 1900999 | SNV | 1 | C | T | Homozygous   |
| NC_037651.1 | 1901035 | SNV | 1 | T | C | Homozygous   |
| NC_037651.1 | 1901049 | SNV | 1 | T | C | Homozygous   |
| NC_037651.1 | 1901065 | SNV | 1 | C | T | Heterozygous |
| NC_037651.1 | 1901072 | SNV | 1 | G | A | Heterozygous |
| NC_037651.1 | 1901115 | SNV | 1 | A | T | Heterozygous |
| NC_037651.1 | 1901148 | SNV | 1 | C | T | Homozygous   |
| NC_037651.1 | 1901161 | SNV | 1 | G | A | Homozygous   |
| NC_037651.1 | 1901175 | SNV | 1 | A | G | Homozygous   |
| NC_037651.1 | 1901179 | SNV | 1 | C | T | Heterozygous |
| NC_037651.1 | 1901187 | SNV | 1 | C | T | Heterozygous |
| NC_037651.1 | 1901561 | SNV | 1 | T | C | Homozygous   |
| NC_037651.1 | 1901583 | SNV | 1 | C | T | Heterozygous |
| NC_037651.1 | 1901586 | SNV | 1 | T | C | Homozygous   |
| NC_037651.1 | 1901592 | SNV | 1 | C | T | Heterozygous |
| NC_037651.1 | 1901627 | SNV | 1 | C | T | Heterozygous |
| NC_037651.1 | 1901681 | SNV | 1 | C | T | Homozygous   |
| NC_037651.1 | 1907806 | SNV | 1 | G | A | Heterozygous |
| NC_037651.1 | 1916107 | SNV | 1 | G | A | Homozygous   |
| NC_037651.1 | 1916164 | SNV | 1 | G | C | Homozygous   |
| NC_037651.1 | 1916185 | SNV | 1 | A | G | Homozygous   |
| NC_037651.1 | 1916444 | SNV | 1 | G | C | Heterozygous |
| NC_037651.1 | 1923428 | SNV | 1 | A | T | Homozygous   |
| NC_037651.1 | 1923452 | SNV | 1 | T | A | Homozygous   |
| NC_037651.1 | 1923474 | SNV | 1 | T | C | Homozygous   |
| NC_037651.1 | 1923477 | SNV | 1 | A | G | Homozygous   |
| NC_037651.1 | 1923479 | SNV | 1 | T | A | Homozygous   |
| NC_037651.1 | 1937252 | SNV | 1 | G | A | Homozygous   |
| NC_037651.1 | 1937256 | SNV | 1 | G | A | Homozygous   |
| NC_037651.1 | 1937259 | SNV | 1 | A | G | Homozygous   |
| NC_037651.1 | 1937266 | SNV | 1 | A | G | Homozygous   |
| NC_037651.1 | 1937272 | SNV | 1 | A | C | Homozygous   |
| NC_037651.1 | 1943206 | SNV | 1 | C | T | Heterozygous |
| NC_037651.1 | 1943216 | SNV | 1 | C | T | Homozygous   |
| NC_037651.1 | 1943258 | SNV | 1 | C | G | Homozygous   |
| NC_037651.1 | 1945105 | SNV | 1 | G | A | Heterozygous |
| NC_037651.1 | 1946176 | SNV | 1 | C | T | Homozygous   |
| NC_037651.1 | 1946186 | SNV | 1 | T | A | Homozygous   |
| NC_037651.1 | 1946214 | SNV | 1 | G | T | Homozygous   |
| NC_037651.1 | 1955455 | SNV | 1 | A | G | Heterozygous |
| NC_037651.1 | 1970900 | SNV | 1 | C | T | Heterozygous |
| NC_037651.1 | 1987378 | SNV | 1 | T | C | Homozygous   |
| NC_037651.1 | 1987411 | SNV | 1 | T | A | Homozygous   |
| NC_037651.1 | 1987443 | SNV | 1 | G | C | Homozygous   |
| NC_037651.1 | 2037237 | SNV | 1 | C | T | Homozygous   |
| NC_037651.1 | 2037378 | SNV | 1 | T | C | Homozygous   |
| NC_037651.1 | 2037451 | SNV | 1 | C | T | Heterozygous |
| NC_037651.1 | 2037453 | SNV | 1 | C | T | Heterozygous |

|             |         |     |   |   |   |              |
|-------------|---------|-----|---|---|---|--------------|
| NC_037651.1 | 2037455 | SNV | 1 | C | T | Heterozygous |
| NC_037651.1 | 2037457 | SNV | 1 | C | T | Heterozygous |
| NC_037651.1 | 2037459 | SNV | 1 | C | T | Heterozygous |
| NC_037651.1 | 2037461 | SNV | 1 | C | T | Heterozygous |
| NC_037651.1 | 2037670 | SNV | 1 | A | G | Heterozygous |
| NC_037651.1 | 2037672 | SNV | 1 | T | G | Heterozygous |
| NC_037651.1 | 2037674 | SNV | 1 | T | A | Heterozygous |
| NC_037651.1 | 2037678 | SNV | 1 | A | T | Heterozygous |
| NC_037651.1 | 2037682 | SNV | 1 | T | A | Heterozygous |
| NC_037651.1 | 2037717 | SNV | 1 | T | A | Homozygous   |
| NC_037651.1 | 2037719 | SNV | 1 | T | A | Homozygous   |
| NC_037651.1 | 2038549 | SNV | 1 | G | C | Homozygous   |
| NC_037651.1 | 2038553 | SNV | 1 | G | A | Homozygous   |
| NC_037651.1 | 2038584 | SNV | 1 | G | A | Heterozygous |
| NC_037651.1 | 2038717 | SNV | 1 | C | A | Homozygous   |
| NC_037651.1 | 2038784 | SNV | 1 | G | C | Homozygous   |
| NC_037651.1 | 2038876 | SNV | 1 | G | A | Heterozygous |
| NC_037651.1 | 2038961 | SNV | 1 | T | C | Homozygous   |
| NC_037651.1 | 2038965 | SNV | 1 | C | T | Homozygous   |
| NC_037651.1 | 2038983 | SNV | 1 | C | G | Homozygous   |
| NC_037651.1 | 2039158 | SNV | 1 | C | G | Homozygous   |
| NC_037651.1 | 2039287 | SNV | 1 | A | G | Homozygous   |
| NC_037651.1 | 2039311 | SNV | 1 | A | T | Homozygous   |
| NC_037651.1 | 2039968 | SNV | 1 | T | C | Homozygous   |
| NC_037651.1 | 2040206 | SNV | 1 | C | A | Homozygous   |
| NC_037651.1 | 2040213 | SNV | 1 | A | G | Homozygous   |
| NC_037651.1 | 2040368 | SNV | 1 | G | C | Heterozygous |
| NC_037651.1 | 2040379 | SNV | 1 | A | G | Heterozygous |
| NC_037651.1 | 2040521 | SNV | 1 | C | T | Heterozygous |
| NC_037651.1 | 2040534 | SNV | 1 | G | A | Homozygous   |
| NC_037651.1 | 2040898 | SNV | 1 | A | T | Heterozygous |
| NC_037651.1 | 2040901 | SNV | 1 | G | A | Heterozygous |
| NC_037651.1 | 2040960 | SNV | 1 | G | C | Homozygous   |
| NC_037651.1 | 2040970 | SNV | 1 | A | G | Homozygous   |
| NC_037651.1 | 2040977 | SNV | 1 | T | G | Heterozygous |
| NC_037651.1 | 2041020 | SNV | 1 | G | A | Homozygous   |
| NC_037651.1 | 2041044 | SNV | 1 | A | G | Homozygous   |
| NC_037651.1 | 2041091 | SNV | 1 | A | G | Heterozygous |
| NC_037651.1 | 2041258 | SNV | 1 | T | C | Homozygous   |
| NC_037651.1 | 2041573 | SNV | 1 | C | T | Heterozygous |
| NC_037651.1 | 2041759 | SNV | 1 | C | T | Homozygous   |
| NC_037651.1 | 2042026 | SNV | 1 | A | G | Heterozygous |
| NC_037651.1 | 2042044 | SNV | 1 | A | T | Homozygous   |
| NC_037651.1 | 2042087 | SNV | 1 | C | A | Homozygous   |
| NC_037651.1 | 2062084 | SNV | 1 | T | C | Heterozygous |
| NC_037651.1 | 2062159 | SNV | 1 | T | C | Homozygous   |
| NC_037651.1 | 2089212 | SNV | 1 | G | A | Homozygous   |
| NC_037651.1 | 2096772 | SNV | 1 | A | G | Homozygous   |
| NC_037651.1 | 2100984 | SNV | 1 | C | T | Heterozygous |
| NC_037651.1 | 2101007 | SNV | 1 | A | G | Homozygous   |
| NC_037651.1 | 2119308 | SNV | 1 | G | A | Homozygous   |

|             |         |     |   |   |   |              |
|-------------|---------|-----|---|---|---|--------------|
| NC_037651.1 | 2129690 | SNV | 1 | C | T | Homozygous   |
| NC_037651.1 | 2129714 | SNV | 1 | T | A | Heterozygous |
| NC_037651.1 | 2136913 | SNV | 1 | C | A | Homozygous   |
| NC_037651.1 | 2136918 | SNV | 1 | C | A | Homozygous   |
| NC_037651.1 | 2141543 | SNV | 1 | C | T | Homozygous   |
| NC_037651.1 | 2142039 | SNV | 1 | G | A | Homozygous   |
| NC_037651.1 | 2142337 | SNV | 1 | A | G | Heterozygous |
| NC_037651.1 | 2149471 | SNV | 1 | C | T | Homozygous   |
| NC_037651.1 | 2149474 | SNV | 1 | A | T | Homozygous   |
| NC_037651.1 | 2149477 | SNV | 1 | A | T | Homozygous   |
| NC_037651.1 | 2150365 | SNV | 1 | T | A | Homozygous   |
| NC_037651.1 | 2150371 | SNV | 1 | T | A | Homozygous   |
| NC_037651.1 | 2150375 | SNV | 1 | T | C | Homozygous   |
| NC_037651.1 | 2150377 | SNV | 1 | T | A | Homozygous   |
| NC_037651.1 | 2150380 | SNV | 1 | A | T | Homozygous   |
| NC_037651.1 | 2150489 | SNV | 1 | G | A | Heterozygous |
| NC_037651.1 | 2150519 | SNV | 1 | A | G | Homozygous   |
| NC_037651.1 | 2166967 | SNV | 1 | C | T | Homozygous   |
| NC_037651.1 | 2169534 | SNV | 1 | A | G | Heterozygous |
| NC_037651.1 | 2169539 | SNV | 1 | T | A | Heterozygous |
| NC_037651.1 | 2169540 | SNV | 1 | A | G | Heterozygous |
| NC_037651.1 | 2169541 | SNV | 1 | T | G | Heterozygous |
| NC_037651.1 | 2169548 | SNV | 1 | T | A | Heterozygous |
| NC_037651.1 | 2169548 | SNV | 1 | T | G | Heterozygous |
| NC_037651.1 | 2169550 | SNV | 1 | G | A | Heterozygous |
| NC_037651.1 | 2169552 | SNV | 1 | A | G | Homozygous   |
| NC_037651.1 | 2169554 | SNV | 1 | A | G | Heterozygous |
| NC_037651.1 | 2169556 | SNV | 1 | A | G | Heterozygous |
| NC_037651.1 | 2169560 | SNV | 1 | A | G | Homozygous   |
| NC_037651.1 | 2169565 | SNV | 1 | T | C | Homozygous   |
| NC_037651.1 | 2173553 | SNV | 1 | G | A | Homozygous   |
| NC_037651.1 | 2173555 | SNV | 1 | A | T | Homozygous   |
| NC_037651.1 | 2184520 | SNV | 1 | A | G | Homozygous   |
| NC_037651.1 | 2184539 | SNV | 1 | C | T | Heterozygous |
| NC_037651.1 | 2184541 | SNV | 1 | T | C | Heterozygous |
| NC_037651.1 | 2184645 | SNV | 1 | A | G | Homozygous   |
| NC_037651.1 | 2184730 | SNV | 1 | C | G | Heterozygous |
| NC_037651.1 | 2184735 | SNV | 1 | A | G | Homozygous   |
| NC_037651.1 | 2184927 | SNV | 1 | C | T | Heterozygous |
| NC_037651.1 | 2184935 | SNV | 1 | C | T | Homozygous   |
| NC_037651.1 | 2185125 | SNV | 1 | T | C | Homozygous   |
| NC_037651.1 | 2191055 | SNV | 1 | G | C | Heterozygous |
| NC_037651.1 | 2191068 | SNV | 1 | C | T | Heterozygous |
| NC_037651.1 | 2191074 | SNV | 1 | G | A | Homozygous   |
| NC_037651.1 | 2191437 | SNV | 1 | C | A | Heterozygous |
| NC_037651.1 | 2199820 | SNV | 1 | G | A | Homozygous   |
| NC_037651.1 | 2212994 | SNV | 1 | G | C | Heterozygous |
| NC_037651.1 | 2213004 | SNV | 1 | A | T | Heterozygous |
| NC_037651.1 | 2213006 | SNV | 1 | A | G | Homozygous   |
| NC_037651.1 | 2213008 | SNV | 1 | A | C | Heterozygous |
| NC_037651.1 | 2213015 | SNV | 1 | A | G | Heterozygous |



|             |         |     |   |   |   |              |
|-------------|---------|-----|---|---|---|--------------|
| NC_037651.1 | 2216612 | SNV | 1 | T | C | Homozygous   |
| NC_037651.1 | 2216713 | SNV | 1 | T | C | Homozygous   |
| NC_037651.1 | 2228490 | SNV | 1 | T | C | Heterozygous |
| NC_037651.1 | 2228527 | SNV | 1 | T | A | Homozygous   |
| NC_037651.1 | 2228544 | SNV | 1 | A | T | Homozygous   |
| NC_037651.1 | 2228550 | SNV | 1 | C | T | Homozygous   |
| NC_037651.1 | 2228553 | SNV | 1 | G | A | Homozygous   |
| NC_037651.1 | 2228623 | SNV | 1 | C | T | Heterozygous |
| NC_037651.1 | 2228855 | SNV | 1 | T | A | Homozygous   |
| NC_037651.1 | 2235233 | SNV | 1 | G | C | Homozygous   |
| NC_037651.1 | 2235456 | SNV | 1 | T | C | Homozygous   |
| NC_037651.1 | 2235612 | SNV | 1 | G | A | Homozygous   |
| NC_037651.1 | 2235842 | SNV | 1 | C | T | Homozygous   |
| NC_037651.1 | 2243758 | SNV | 1 | T | C | Heterozygous |
| NC_037651.1 | 2243762 | SNV | 1 | T | C | Homozygous   |
| NC_037651.1 | 2243897 | SNV | 1 | G | A | Heterozygous |
| NC_037651.1 | 2244119 | SNV | 1 | C | T | Homozygous   |
| NC_037651.1 | 2244121 | SNV | 1 | C | T | Heterozygous |
| NC_037651.1 | 2244130 | SNV | 1 | C | T | Heterozygous |
| NC_037651.1 | 2244369 | SNV | 1 | G | A | Homozygous   |
| NC_037651.1 | 2244395 | SNV | 1 | A | G | Homozygous   |
| NC_037651.1 | 2246132 | SNV | 1 | C | T | Homozygous   |
| NC_037651.1 | 2252839 | SNV | 1 | G | C | Heterozygous |
| NC_037651.1 | 2253145 | SNV | 1 | C | T | Heterozygous |
| NC_037651.1 | 2253152 | SNV | 1 | T | C | Heterozygous |
| NC_037651.1 | 2253158 | SNV | 1 | C | T | Heterozygous |
| NC_037651.1 | 2253266 | SNV | 1 | A | G | Homozygous   |
| NC_037651.1 | 2253306 | SNV | 1 | C | T | Heterozygous |
| NC_037651.1 | 2253326 | SNV | 1 | G | A | Heterozygous |
| NC_037651.1 | 2253375 | SNV | 1 | T | C | Heterozygous |
| NC_037651.1 | 2253437 | SNV | 1 | T | C | Homozygous   |
| NC_037651.1 | 2253874 | SNV | 1 | A | G | Homozygous   |
| NC_037651.1 | 2254153 | SNV | 1 | C | A | Heterozygous |
| NC_037651.1 | 2254173 | SNV | 1 | G | A | Heterozygous |
| NC_037651.1 | 2254183 | SNV | 1 | G | A | Homozygous   |
| NC_037651.1 | 2278728 | SNV | 1 | G | C | Homozygous   |
| NC_037651.1 | 2281276 | SNV | 1 | A | G | Homozygous   |
| NC_037651.1 | 2281326 | SNV | 1 | C | T | Heterozygous |
| NC_037651.1 | 2281340 | SNV | 1 | T | C | Heterozygous |
| NC_037651.1 | 2285921 | SNV | 1 | G | A | Homozygous   |
| NC_037651.1 | 2286720 | SNV | 1 | T | C | Homozygous   |
| NC_037651.1 | 2286724 | SNV | 1 | T | G | Homozygous   |
| NC_037651.1 | 2286770 | SNV | 1 | A | T | Heterozygous |
| NC_037651.1 | 2286774 | SNV | 1 | T | G | Heterozygous |
| NC_037651.1 | 2291124 | SNV | 1 | A | G | Homozygous   |
| NC_037651.1 | 2292567 | SNV | 1 | G | A | Homozygous   |
| NC_037651.1 | 2292574 | SNV | 1 | T | G | Homozygous   |
| NC_037651.1 | 2292611 | SNV | 1 | T | G | Homozygous   |
| NC_037651.1 | 2292617 | SNV | 1 | A | G | Homozygous   |
| NC_037651.1 | 2315958 | SNV | 1 | T | C | Homozygous   |
| NC_037651.1 | 2316023 | SNV | 1 | T | C | Heterozygous |

|             |         |     |   |   |   |              |
|-------------|---------|-----|---|---|---|--------------|
| NC_037651.1 | 2316025 | SNV | 1 | T | C | Heterozygous |
| NC_037651.1 | 2316078 | SNV | 1 | G | A | Homozygous   |
| NC_037651.1 | 2316130 | SNV | 1 | G | C | Heterozygous |
| NC_037651.1 | 2316309 | SNV | 1 | A | G | Heterozygous |
| NC_037651.1 | 2326275 | SNV | 1 | A | G | Heterozygous |
| NC_037651.1 | 2330947 | SNV | 1 | A | G | Homozygous   |
| NC_037651.1 | 2331013 | SNV | 1 | T | C | Heterozygous |
| NC_037651.1 | 2331021 | SNV | 1 | C | T | Heterozygous |
| NC_037651.1 | 2331123 | SNV | 1 | C | T | Heterozygous |
| NC_037651.1 | 2338799 | SNV | 1 | T | C | Heterozygous |
| NC_037651.1 | 2338828 | SNV | 1 | C | T | Homozygous   |
| NC_037651.1 | 2338869 | SNV | 1 | T | C | Homozygous   |
| NC_037651.1 | 2338894 | SNV | 1 | C | T | Homozygous   |
| NC_037651.1 | 2338935 | SNV | 1 | G | A | Homozygous   |
| NC_037651.1 | 2338942 | SNV | 1 | T | C | Homozygous   |
| NC_037651.1 | 2339197 | SNV | 1 | A | G | Homozygous   |
| NC_037651.1 | 2339421 | SNV | 1 | T | C | Homozygous   |
| NC_037651.1 | 2345996 | SNV | 1 | A | G | Homozygous   |
| NC_037651.1 | 2346169 | SNV | 1 | A | G | Homozygous   |
| NC_037651.1 | 2347345 | SNV | 1 | G | C | Homozygous   |
| NC_037651.1 | 2347348 | SNV | 1 | G | A | Homozygous   |
| NC_037651.1 | 2347813 | SNV | 1 | T | A | Heterozygous |
| NC_037651.1 | 2348825 | SNV | 1 | C | T | Heterozygous |
| NC_037651.1 | 2348948 | SNV | 1 | T | A | Homozygous   |
| NC_037651.1 | 2348956 | SNV | 1 | A | G | Homozygous   |
| NC_037651.1 | 2348985 | SNV | 1 | A | G | Homozygous   |
| NC_037651.1 | 2349555 | SNV | 1 | A | G | Homozygous   |
| NC_037651.1 | 2349584 | SNV | 1 | G | A | Homozygous   |
| NC_037651.1 | 2349705 | SNV | 1 | A | G | Homozygous   |
| NC_037651.1 | 2349809 | SNV | 1 | A | G | Homozygous   |
| NC_037651.1 | 2349880 | SNV | 1 | G | A | Heterozygous |
| NC_037651.1 | 2349964 | SNV | 1 | C | G | Homozygous   |
| NC_037651.1 | 2350078 | SNV | 1 | G | A | Heterozygous |
| NC_037651.1 | 2350337 | SNV | 1 | A | G | Homozygous   |
| NC_037651.1 | 2350439 | SNV | 1 | G | A | Heterozygous |
| NC_037651.1 | 2350582 | SNV | 1 | A | G | Homozygous   |
| NC_037651.1 | 2350588 | SNV | 1 | A | G | Homozygous   |
| NC_037651.1 | 2350602 | SNV | 1 | T | G | Heterozygous |
| NC_037651.1 | 2350618 | SNV | 1 | G | A | Heterozygous |
| NC_037651.1 | 2350651 | SNV | 1 | G | A | Heterozygous |
| NC_037651.1 | 2351019 | SNV | 1 | A | G | Heterozygous |
| NC_037651.1 | 2351106 | SNV | 1 | C | A | Homozygous   |
| NC_037651.1 | 2351411 | SNV | 1 | A | T | Heterozygous |
| NC_037651.1 | 2351413 | SNV | 1 | A | C | Homozygous   |
| NC_037651.1 | 2354146 | SNV | 1 | C | T | Homozygous   |
| NC_037651.1 | 2354151 | SNV | 1 | G | A | Homozygous   |
| NC_037651.1 | 2354180 | SNV | 1 | A | G | Homozygous   |
| NC_037651.1 | 2354265 | SNV | 1 | T | C | Homozygous   |
| NC_037651.1 | 2354282 | SNV | 1 | A | G | Homozygous   |
| NC_037651.1 | 2354298 | SNV | 1 | G | A | Heterozygous |
| NC_037651.1 | 2354404 | SNV | 1 | A | G | Heterozygous |

|             |         |     |   |   |   |              |
|-------------|---------|-----|---|---|---|--------------|
| NC_037651.1 | 2354524 | SNV | 1 | A | G | Homozygous   |
| NC_037651.1 | 2354975 | SNV | 1 | G | A | Homozygous   |
| NC_037651.1 | 2358742 | SNV | 1 | A | G | Heterozygous |
| NC_037651.1 | 2358752 | SNV | 1 | T | C | Homozygous   |
| NC_037651.1 | 2358829 | SNV | 1 | T | C | Heterozygous |
| NC_037651.1 | 2359335 | SNV | 1 | T | C | Homozygous   |
| NC_037651.1 | 2359367 | SNV | 1 | T | A | Heterozygous |
| NC_037651.1 | 2359409 | SNV | 1 | T | C | Homozygous   |
| NC_037651.1 | 2359446 | SNV | 1 | T | C | Homozygous   |
| NC_037651.1 | 2359468 | SNV | 1 | G | A | Heterozygous |
| NC_037651.1 | 2359694 | SNV | 1 | G | A | Homozygous   |
| NC_037651.1 | 2391394 | SNV | 1 | T | A | Heterozygous |
| NC_037651.1 | 2391398 | SNV | 1 | A | G | Heterozygous |
| NC_037651.1 | 2391546 | SNV | 1 | C | T | Heterozygous |
| NC_037651.1 | 2391772 | SNV | 1 | C | T | Heterozygous |
| NC_037651.1 | 2391945 | SNV | 1 | A | G | Heterozygous |
| NC_037651.1 | 2398960 | SNV | 1 | A | G | Heterozygous |
| NC_037651.1 | 2398969 | SNV | 1 | C | T | Heterozygous |
| NC_037651.1 | 2399171 | SNV | 1 | T | C | Homozygous   |
| NC_037651.1 | 2399218 | SNV | 1 | T | C | Homozygous   |
| NC_037651.1 | 2400371 | SNV | 1 | A | T | Heterozygous |
| NC_037651.1 | 2400522 | SNV | 1 | G | A | Heterozygous |
| NC_037651.1 | 2400855 | SNV | 1 | A | G | Homozygous   |
| NC_037651.1 | 2401228 | SNV | 1 | A | G | Homozygous   |
| NC_037651.1 | 2401256 | SNV | 1 | C | T | Homozygous   |
| NC_037651.1 | 2401295 | SNV | 1 | A | G | Homozygous   |
| NC_037651.1 | 2401361 | SNV | 1 | C | T | Homozygous   |
| NC_037651.1 | 2401399 | SNV | 1 | A | T | Heterozygous |
| NC_037651.1 | 2401432 | SNV | 1 | A | G | Homozygous   |
| NC_037651.1 | 2401434 | SNV | 1 | A | C | Homozygous   |
| NC_037651.1 | 2401553 | SNV | 1 | C | T | Homozygous   |
| NC_037651.1 | 2401819 | SNV | 1 | A | G | Homozygous   |
| NC_037651.1 | 2402792 | SNV | 1 | C | T | Homozygous   |
| NC_037651.1 | 2402828 | SNV | 1 | G | A | Homozygous   |
| NC_037651.1 | 2411569 | SNV | 1 | G | T | Homozygous   |
| NC_037651.1 | 2411621 | SNV | 1 | T | C | Heterozygous |
| NC_037651.1 | 2414845 | SNV | 1 | T | A | Homozygous   |
| NC_037651.1 | 2414877 | SNV | 1 | A | G | Homozygous   |
| NC_037651.1 | 2414885 | SNV | 1 | G | C | Homozygous   |
| NC_037651.1 | 2416042 | SNV | 1 | T | C | Homozygous   |
| NC_037651.1 | 2416058 | SNV | 1 | A | T | Homozygous   |
| NC_037651.1 | 2416067 | SNV | 1 | T | A | Homozygous   |
| NC_037651.1 | 2427572 | SNV | 1 | T | G | Homozygous   |
| NC_037651.1 | 2427592 | SNV | 1 | T | C | Homozygous   |
| NC_037651.1 | 2427596 | SNV | 1 | A | C | Homozygous   |
| NC_037651.1 | 2438412 | SNV | 1 | C | T | Heterozygous |
| NC_037651.1 | 2438441 | SNV | 1 | C | T | Heterozygous |
| NC_037651.1 | 2438550 | SNV | 1 | A | G | Heterozygous |
| NC_037651.1 | 2438597 | SNV | 1 | T | C | Homozygous   |
| NC_037651.1 | 2439102 | SNV | 1 | A | G | Heterozygous |
| NC_037651.1 | 2439310 | SNV | 1 | G | C | Homozygous   |

|             |         |     |   |   |   |              |
|-------------|---------|-----|---|---|---|--------------|
| NC_037651.1 | 2439440 | SNV | 1 | G | A | Heterozygous |
| NC_037651.1 | 2439751 | SNV | 1 | C | T | Heterozygous |
| NC_037651.1 | 2439880 | SNV | 1 | T | C | Homozygous   |
| NC_037651.1 | 2440103 | SNV | 1 | C | T | Heterozygous |
| NC_037651.1 | 2440236 | SNV | 1 | A | G | Homozygous   |
| NC_037651.1 | 2440241 | SNV | 1 | C | A | Heterozygous |
| NC_037651.1 | 2440267 | SNV | 1 | C | T | Homozygous   |
| NC_037651.1 | 2440284 | SNV | 1 | G | A | Homozygous   |
| NC_037651.1 | 2440349 | SNV | 1 | C | T | Heterozygous |
| NC_037651.1 | 2440352 | SNV | 1 | G | A | Homozygous   |
| NC_037651.1 | 2440501 | SNV | 1 | G | A | Heterozygous |
| NC_037651.1 | 2440539 | SNV | 1 | G | A | Heterozygous |
| NC_037651.1 | 2440541 | SNV | 1 | T | C | Homozygous   |
| NC_037651.1 | 2440766 | SNV | 1 | G | A | Heterozygous |
| NC_037651.1 | 2440788 | SNV | 1 | T | C | Homozygous   |
| NC_037651.1 | 2444593 | SNV | 1 | A | C | Homozygous   |
| NC_037651.1 | 2446201 | SNV | 1 | G | A | Heterozygous |
| NC_037651.1 | 2446336 | SNV | 1 | A | G | Homozygous   |
| NC_037651.1 | 2446348 | SNV | 1 | G | A | Heterozygous |
| NC_037651.1 | 2446374 | SNV | 1 | A | G | Homozygous   |
| NC_037651.1 | 2446386 | SNV | 1 | C | T | Heterozygous |
| NC_037651.1 | 2446420 | SNV | 1 | A | G | Homozygous   |
| NC_037651.1 | 2446451 | SNV | 1 | T | C | Homozygous   |
| NC_037651.1 | 2446974 | SNV | 1 | C | T | Heterozygous |
| NC_037651.1 | 2447079 | SNV | 1 | T | C | Homozygous   |
| NC_037651.1 | 2448676 | SNV | 1 | A | T | Homozygous   |
| NC_037651.1 | 2448681 | SNV | 1 | C | A | Homozygous   |
| NC_037651.1 | 2448687 | SNV | 1 | T | G | Homozygous   |
| NC_037651.1 | 2448691 | SNV | 1 | T | A | Homozygous   |
| NC_037651.1 | 2448693 | SNV | 1 | T | C | Homozygous   |
| NC_037651.1 | 2448695 | SNV | 1 | A | G | Homozygous   |
| NC_037651.1 | 2448708 | SNV | 1 | C | A | Homozygous   |
| NC_037651.1 | 2448711 | SNV | 1 | A | T | Homozygous   |
| NC_037651.1 | 2452868 | SNV | 1 | A | T | Heterozygous |
| NC_037651.1 | 2452912 | SNV | 1 | A | T | Heterozygous |
| NC_037651.1 | 2452971 | SNV | 1 | G | A | Homozygous   |
| NC_037651.1 | 2455867 | SNV | 1 | A | C | Homozygous   |
| NC_037651.1 | 2455934 | SNV | 1 | C | T | Homozygous   |
| NC_037651.1 | 2456077 | SNV | 1 | A | G | Homozygous   |
| NC_037651.1 | 2461144 | SNV | 1 | A | G | Homozygous   |
| NC_037651.1 | 2461664 | SNV | 1 | T | C | Homozygous   |
| NC_037651.1 | 2549167 | SNV | 1 | C | T | Homozygous   |
| NC_037651.1 | 2549181 | SNV | 1 | G | T | Homozygous   |
| NC_037651.1 | 2549184 | SNV | 1 | G | A | Homozygous   |
| NC_037651.1 | 2549189 | SNV | 1 | C | T | Homozygous   |
| NC_037651.1 | 2566019 | SNV | 1 | A | G | Homozygous   |
| NC_037651.1 | 2566495 | SNV | 1 | A | T | Homozygous   |
| NC_037651.1 | 2566569 | SNV | 1 | C | A | Homozygous   |
| NC_037651.1 | 2566828 | SNV | 1 | A | T | Homozygous   |
| NC_037651.1 | 2566831 | SNV | 1 | C | G | Homozygous   |
| NC_037651.1 | 2573913 | SNV | 1 | A | T | Homozygous   |

|             |         |     |   |   |   |              |
|-------------|---------|-----|---|---|---|--------------|
| NC_037651.1 | 2573928 | SNV | 1 | A | T | Homozygous   |
| NC_037651.1 | 2586101 | SNV | 1 | C | A | Heterozygous |
| NC_037651.1 | 2597479 | SNV | 1 | A | G | Homozygous   |
| NC_037651.1 | 2597485 | SNV | 1 | G | A | Homozygous   |
| NC_037651.1 | 2597651 | SNV | 1 | C | A | Homozygous   |
| NC_037651.1 | 2599659 | SNV | 1 | T | C | Homozygous   |
| NC_037651.1 | 2599801 | SNV | 1 | T | G | Homozygous   |
| NC_037651.1 | 2600453 | SNV | 1 | C | T | Homozygous   |
| NC_037651.1 | 2600501 | SNV | 1 | C | T | Homozygous   |
| NC_037651.1 | 2601374 | SNV | 1 | T | C | Homozygous   |
| NC_037651.1 | 2602947 | SNV | 1 | C | T | Heterozygous |
| NC_037651.1 | 2603002 | SNV | 1 | A | T | Homozygous   |
| NC_037651.1 | 2603176 | SNV | 1 | C | T | Homozygous   |
| NC_037651.1 | 2603632 | SNV | 1 | A | T | Homozygous   |
| NC_037651.1 | 2623610 | SNV | 1 | A | T | Homozygous   |
| NC_037651.1 | 2623612 | SNV | 1 | T | A | Homozygous   |
| NC_037651.1 | 2623617 | SNV | 1 | T | A | Homozygous   |
| NC_037651.1 | 2623660 | SNV | 1 | G | A | Homozygous   |
| NC_037651.1 | 2623667 | SNV | 1 | A | T | Homozygous   |
| NC_037651.1 | 2623674 | SNV | 1 | A | G | Homozygous   |
| NC_037651.1 | 2623677 | SNV | 1 | G | T | Homozygous   |
| NC_037651.1 | 2623701 | SNV | 1 | G | T | Homozygous   |
| NC_037651.1 | 2623704 | SNV | 1 | A | G | Homozygous   |
| NC_037651.1 | 2631399 | SNV | 1 | C | A | Heterozygous |
| NC_037651.1 | 2651399 | SNV | 1 | A | G | Homozygous   |
| NC_037651.1 | 2710219 | SNV | 1 | C | T | Homozygous   |
| NC_037651.1 | 2710223 | SNV | 1 | C | G | Homozygous   |
| NC_037651.1 | 2710235 | SNV | 1 | C | A | Homozygous   |
| NC_037651.1 | 2750142 | SNV | 1 | C | T | Heterozygous |
| NC_037651.1 | 2750143 | SNV | 1 | T | A | Heterozygous |
| NC_037651.1 | 2750151 | SNV | 1 | T | C | Heterozygous |
| NC_037651.1 | 2750155 | SNV | 1 | T | C | Heterozygous |
| NC_037651.1 | 2750156 | SNV | 1 | T | G | Heterozygous |
| NC_037651.1 | 2750159 | SNV | 1 | A | C | Homozygous   |
| NC_037651.1 | 2762071 | SNV | 1 | T | A | Homozygous   |
| NC_037651.1 | 2783394 | SNV | 1 | A | G | Homozygous   |
| NC_037651.1 | 2783457 | SNV | 1 | T | C | Homozygous   |
| NC_037651.1 | 2795046 | SNV | 1 | G | A | Homozygous   |
| NC_037651.1 | 2795118 | SNV | 1 | A | G | Homozygous   |
| NC_037651.1 | 2795153 | SNV | 1 | G | A | Heterozygous |
| NC_037651.1 | 2795226 | SNV | 1 | T | C | Heterozygous |
| NC_037651.1 | 2806374 | SNV | 1 | A | G | Heterozygous |
| NC_037651.1 | 2806385 | SNV | 1 | C | A | Homozygous   |
| NC_037651.1 | 2807068 | SNV | 1 | T | C | Heterozygous |
| NC_037651.1 | 2807286 | SNV | 1 | G | A | Homozygous   |
| NC_037651.1 | 2809019 | SNV | 1 | A | T | Homozygous   |
| NC_037651.1 | 2809021 | SNV | 1 | T | G | Homozygous   |
| NC_037651.1 | 2809024 | SNV | 1 | C | A | Homozygous   |
| NC_037651.1 | 2809031 | SNV | 1 | C | G | Homozygous   |
| NC_037651.1 | 2809053 | SNV | 1 | A | T | Homozygous   |
| NC_037651.1 | 2809056 | SNV | 1 | A | T | Homozygous   |

|             |         |     |   |   |   |              |
|-------------|---------|-----|---|---|---|--------------|
| NC_037651.1 | 2809058 | SNV | 1 | A | T | Homozygous   |
| NC_037651.1 | 2817159 | SNV | 1 | C | T | Heterozygous |
| NC_037651.1 | 2817194 | SNV | 1 | A | G | Homozygous   |
| NC_037651.1 | 2820879 | SNV | 1 | A | G | Heterozygous |
| NC_037651.1 | 2821077 | SNV | 1 | T | C | Homozygous   |
| NC_037651.1 | 2821154 | SNV | 1 | A | C | Homozygous   |
| NC_037651.1 | 2821564 | SNV | 1 | A | G | Homozygous   |
| NC_037651.1 | 2821618 | SNV | 1 | A | G | Homozygous   |
| NC_037651.1 | 2821753 | SNV | 1 | C | A | Homozygous   |
| NC_037651.1 | 2823804 | SNV | 1 | T | C | Homozygous   |
| NC_037651.1 | 2823822 | SNV | 1 | T | G | Homozygous   |
| NC_037651.1 | 2827715 | SNV | 1 | T | A | Heterozygous |
| NC_037651.1 | 2827721 | SNV | 1 | A | T | Homozygous   |
| NC_037651.1 | 2827734 | SNV | 1 | A | T | Homozygous   |
| NC_037651.1 | 2828021 | SNV | 1 | T | C | Homozygous   |
| NC_037651.1 | 2828026 | SNV | 1 | T | C | Homozygous   |
| NC_037651.1 | 2828425 | SNV | 1 | A | T | Heterozygous |
| NC_037651.1 | 2831416 | SNV | 1 | T | A | Homozygous   |
| NC_037651.1 | 2831420 | SNV | 1 | T | A | Homozygous   |
| NC_037651.1 | 2831426 | SNV | 1 | C | T | Heterozygous |
| NC_037651.1 | 2833610 | SNV | 1 | C | G | Homozygous   |
| NC_037651.1 | 2833631 | SNV | 1 | A | G | Homozygous   |
| NC_037651.1 | 2842184 | SNV | 1 | A | G | Homozygous   |
| NC_037651.1 | 2842209 | SNV | 1 | G | A | Homozygous   |
| NC_037651.1 | 2842213 | SNV | 1 | C | T | Homozygous   |
| NC_037651.1 | 2842235 | SNV | 1 | C | T | Heterozygous |
| NC_037651.1 | 2849057 | SNV | 1 | T | C | Homozygous   |
| NC_037651.1 | 2854183 | SNV | 1 | A | G | Homozygous   |
| NC_037651.1 | 2854238 | SNV | 1 | T | C | Heterozygous |
| NC_037651.1 | 2854322 | SNV | 1 | G | A | Heterozygous |
| NC_037651.1 | 2854418 | SNV | 1 | G | A | Heterozygous |
| NC_037651.1 | 2854475 | SNV | 1 | A | G | Heterozygous |
| NC_037651.1 | 2867791 | SNV | 1 | G | A | Homozygous   |
| NC_037651.1 | 2867815 | SNV | 1 | G | A | Homozygous   |
| NC_037651.1 | 2867853 | SNV | 1 | A | G | Homozygous   |
| NC_037651.1 | 2867856 | SNV | 1 | A | G | Homozygous   |
| NC_037651.1 | 2867874 | SNV | 1 | A | G | Homozygous   |
| NC_037651.1 | 2867877 | SNV | 1 | A | G | Homozygous   |
| NC_037651.1 | 2867898 | SNV | 1 | G | A | Homozygous   |
| NC_037651.1 | 2868052 | SNV | 1 | A | T | Heterozygous |
| NC_037651.1 | 2868066 | SNV | 1 | A | T | Heterozygous |
| NC_037651.1 | 2868068 | SNV | 1 | C | T | Heterozygous |
| NC_037651.1 | 2876433 | SNV | 1 | C | T | Heterozygous |
| NC_037651.1 | 2876440 | SNV | 1 | C | T | Heterozygous |
| NC_037651.1 | 2876770 | SNV | 1 | T | C | Heterozygous |
| NC_037651.1 | 2876774 | SNV | 1 | T | C | Heterozygous |
| NC_037651.1 | 2876778 | SNV | 1 | T | C | Heterozygous |
| NC_037651.1 | 2876822 | SNV | 1 | C | A | Homozygous   |
| NC_037651.1 | 2876824 | SNV | 1 | T | A | Homozygous   |
| NC_037651.1 | 2876839 | SNV | 1 | T | A | Homozygous   |
| NC_037651.1 | 2907293 | SNV | 1 | T | C | Homozygous   |

|             |         |     |   |   |   |              |
|-------------|---------|-----|---|---|---|--------------|
| NC_037651.1 | 2907542 | SNV | 1 | T | C | Homozygous   |
| NC_037651.1 | 2907990 | SNV | 1 | A | C | Homozygous   |
| NC_037651.1 | 2907992 | SNV | 1 | A | T | Homozygous   |
| NC_037651.1 | 2908021 | SNV | 1 | T | A | Homozygous   |
| NC_037651.1 | 2911634 | SNV | 1 | G | A | Homozygous   |
| NC_037651.1 | 2911887 | SNV | 1 | G | A | Homozygous   |
| NC_037651.1 | 2911913 | SNV | 1 | G | A | Homozygous   |
| NC_037651.1 | 2929445 | SNV | 1 | G | T | Homozygous   |
| NC_037651.1 | 2929449 | SNV | 1 | G | A | Homozygous   |
| NC_037651.1 | 2929452 | SNV | 1 | A | G | Homozygous   |
| NC_037651.1 | 2929461 | SNV | 1 | A | G | Homozygous   |
| NC_037651.1 | 2929464 | SNV | 1 | A | G | Homozygous   |
| NC_037651.1 | 2929468 | SNV | 1 | A | G | Homozygous   |
| NC_037651.1 | 2929472 | SNV | 1 | G | A | Homozygous   |
| NC_037651.1 | 2930317 | SNV | 1 | G | A | Heterozygous |
| NC_037651.1 | 2931428 | SNV | 1 | C | G | Homozygous   |
| NC_037651.1 | 2931556 | SNV | 1 | C | A | Heterozygous |
| NC_037651.1 | 2937146 | SNV | 1 | T | A | Homozygous   |
| NC_037651.1 | 2937150 | SNV | 1 | G | T | Homozygous   |
| NC_037651.1 | 2937152 | SNV | 1 | A | C | Homozygous   |
| NC_037651.1 | 2937160 | SNV | 1 | A | C | Homozygous   |
| NC_037651.1 | 2937163 | SNV | 1 | A | T | Homozygous   |
| NC_037651.1 | 2937169 | SNV | 1 | A | T | Homozygous   |
| NC_037651.1 | 2937180 | SNV | 1 | C | T | Homozygous   |
| NC_037651.1 | 2944065 | SNV | 1 | C | T | Heterozygous |
| NC_037651.1 | 2944178 | SNV | 1 | T | C | Homozygous   |
| NC_037651.1 | 2954802 | SNV | 1 | G | T | Homozygous   |
| NC_037651.1 | 2961698 | SNV | 1 | A | G | Homozygous   |
| NC_037651.1 | 2961831 | SNV | 1 | T | C | Homozygous   |
| NC_037651.1 | 2961966 | SNV | 1 | A | G | Heterozygous |
| NC_037651.1 | 2967101 | SNV | 1 | C | T | Homozygous   |
| NC_037651.1 | 2967116 | SNV | 1 | G | T | Heterozygous |
| NC_037651.1 | 2973614 | SNV | 1 | A | G | Heterozygous |
| NC_037651.1 | 2973778 | SNV | 1 | T | C | Homozygous   |
| NC_037651.1 | 2981050 | SNV | 1 | G | A | Heterozygous |
| NC_037651.1 | 2981052 | SNV | 1 | T | A | Heterozygous |
| NC_037651.1 | 2981054 | SNV | 1 | T | A | Homozygous   |
| NC_037651.1 | 2981057 | SNV | 1 | A | G | Homozygous   |
| NC_037651.1 | 2981060 | SNV | 1 | G | A | Heterozygous |
| NC_037651.1 | 2984370 | SNV | 1 | G | A | Heterozygous |
| NC_037651.1 | 2984556 | SNV | 1 | A | G | Homozygous   |
| NC_037651.1 | 2984563 | SNV | 1 | A | G | Homozygous   |
| NC_037651.1 | 2984994 | SNV | 1 | A | G | Homozygous   |
| NC_037651.1 | 2986250 | SNV | 1 | A | G | Homozygous   |
| NC_037651.1 | 2986258 | SNV | 1 | T | A | Homozygous   |
| NC_037651.1 | 2991018 | SNV | 1 | C | G | Heterozygous |
| NC_037651.1 | 3001810 | SNV | 1 | A | T | Homozygous   |
| NC_037651.1 | 3001812 | SNV | 1 | C | T | Homozygous   |
| NC_037651.1 | 3001815 | SNV | 1 | T | A | Homozygous   |
| NC_037651.1 | 3001834 | SNV | 1 | G | C | Homozygous   |
| NC_037651.1 | 3001846 | SNV | 1 | A | T | Homozygous   |

|             |         |     |   |   |   |              |
|-------------|---------|-----|---|---|---|--------------|
| NC_037651.1 | 3001849 | SNV | 1 | T | C | Homozygous   |
| NC_037651.1 | 3001852 | SNV | 1 | C | A | Homozygous   |
| NC_037651.1 | 3013159 | SNV | 1 | T | C | Heterozygous |
| NC_037651.1 | 3013168 | SNV | 1 | A | G | Heterozygous |
| NC_037651.1 | 3016203 | SNV | 1 | T | A | Heterozygous |
| NC_037651.1 | 3016594 | SNV | 1 | T | C | Homozygous   |
| NC_037651.1 | 3016690 | SNV | 1 | T | C | Homozygous   |
| NC_037651.1 | 3016775 | SNV | 1 | T | G | Heterozygous |
| NC_037651.1 | 3017089 | SNV | 1 | A | G | Homozygous   |
| NC_037651.1 | 3017241 | SNV | 1 | A | G | Heterozygous |
| NC_037651.1 | 3017538 | SNV | 1 | G | A | Homozygous   |
| NC_037651.1 | 3017988 | SNV | 1 | A | G | Homozygous   |
| NC_037651.1 | 3019168 | SNV | 1 | A | T | Heterozygous |
| NC_037651.1 | 3019616 | SNV | 1 | T | A | Homozygous   |
| NC_037651.1 | 3019625 | SNV | 1 | A | T | Heterozygous |
| NC_037651.1 | 3019637 | SNV | 1 | G | A | Heterozygous |
| NC_037651.1 | 3020540 | SNV | 1 | C | T | Heterozygous |
| NC_037651.1 | 3020549 | SNV | 1 | T | C | Heterozygous |
| NC_037651.1 | 3020555 | SNV | 1 | G | C | Heterozygous |
| NC_037651.1 | 3020570 | SNV | 1 | C | A | Heterozygous |
| NC_037651.1 | 3021104 | SNV | 1 | G | A | Heterozygous |
| NC_037651.1 | 3022240 | SNV | 1 | G | A | Homozygous   |
| NC_037651.1 | 3026354 | SNV | 1 | A | T | Homozygous   |
| NC_037651.1 | 3026356 | SNV | 1 | C | T | Homozygous   |
| NC_037651.1 | 3026360 | SNV | 1 | A | T | Homozygous   |
| NC_037651.1 | 3036444 | SNV | 1 | G | A | Heterozygous |
| NC_037651.1 | 3037359 | SNV | 1 | A | G | Homozygous   |
| NC_037651.1 | 3038071 | SNV | 1 | C | G | Heterozygous |
| NC_037651.1 | 3038140 | SNV | 1 | A | G | Homozygous   |
| NC_037651.1 | 3203196 | SNV | 1 | A | C | Homozygous   |
| NC_037651.1 | 3203228 | SNV | 1 | A | T | Homozygous   |
| NC_037651.1 | 3203230 | SNV | 1 | G | A | Homozygous   |
| NC_037651.1 | 3203233 | SNV | 1 | A | G | Homozygous   |
| NC_037651.1 | 3208074 | SNV | 1 | T | C | Heterozygous |
| NC_037651.1 | 3210393 | SNV | 1 | T | C | Homozygous   |
| NC_037651.1 | 3218014 | SNV | 1 | T | G | Heterozygous |
| NC_037651.1 | 3218127 | SNV | 1 | G | A | Heterozygous |
| NC_037651.1 | 3218136 | SNV | 1 | G | A | Heterozygous |
| NC_037651.1 | 3218180 | SNV | 1 | C | T | Homozygous   |
| NC_037651.1 | 3218182 | SNV | 1 | A | T | Homozygous   |
| NC_037651.1 | 3218207 | SNV | 1 | T | C | Homozygous   |
| NC_037651.1 | 3221052 | SNV | 1 | G | A | Heterozygous |
| NC_037651.1 | 3221327 | SNV | 1 | A | G | Heterozygous |
| NC_037651.1 | 3223690 | SNV | 1 | G | A | Heterozygous |
| NC_037651.1 | 3223866 | SNV | 1 | T | C | Homozygous   |
| NC_037651.1 | 3223952 | SNV | 1 | G | A | Heterozygous |
| NC_037651.1 | 3225212 | SNV | 1 | A | G | Homozygous   |
| NC_037651.1 | 3225220 | SNV | 1 | A | G | Homozygous   |
| NC_037651.1 | 3225255 | SNV | 1 | T | C | Homozygous   |
| NC_037651.1 | 3225493 | SNV | 1 | T | C | Heterozygous |
| NC_037651.1 | 3225566 | SNV | 1 | G | A | Homozygous   |



|             |         |     |   |   |   |              |
|-------------|---------|-----|---|---|---|--------------|
| NC_037651.1 | 3225601 | SNV | 1 | C | T | Homozygous   |
| NC_037651.1 | 3225606 | SNV | 1 | G | C | Homozygous   |
| NC_037651.1 | 3225623 | SNV | 1 | G | A | Homozygous   |
| NC_037651.1 | 3225654 | SNV | 1 | A | C | Heterozygous |
| NC_037651.1 | 3225689 | SNV | 1 | T | C | Homozygous   |
| NC_037651.1 | 3225692 | SNV | 1 | C | T | Homozygous   |
| NC_037651.1 | 3225702 | SNV | 1 | C | G | Heterozygous |
| NC_037651.1 | 3226044 | SNV | 1 | C | T | Heterozygous |
| NC_037651.1 | 3226064 | SNV | 1 | T | C | Homozygous   |
| NC_037651.1 | 3226304 | SNV | 1 | G | C | Heterozygous |
| NC_037651.1 | 3226345 | SNV | 1 | G | A | Homozygous   |
| NC_037651.1 | 3226454 | SNV | 1 | T | C | Homozygous   |
| NC_037651.1 | 3226589 | SNV | 1 | A | G | Homozygous   |
| NC_037651.1 | 3226858 | SNV | 1 | A | G | Homozygous   |
| NC_037651.1 | 3226893 | SNV | 1 | T | C | Heterozygous |
| NC_037651.1 | 3226940 | SNV | 1 | T | C | Homozygous   |
| NC_037651.1 | 3227022 | SNV | 1 | T | C | Homozygous   |
| NC_037651.1 | 3227037 | SNV | 1 | T | C | Homozygous   |
| NC_037651.1 | 3227083 | SNV | 1 | C | T | Homozygous   |
| NC_037651.1 | 3227183 | SNV | 1 | G | A | Heterozygous |
| NC_037651.1 | 3227199 | SNV | 1 | T | C | Homozygous   |
| NC_037651.1 | 3227212 | SNV | 1 | C | T | Heterozygous |
| NC_037651.1 | 3227843 | SNV | 1 | T | C | Homozygous   |
| NC_037651.1 | 3227875 | SNV | 1 | A | G | Homozygous   |
| NC_037651.1 | 3227878 | SNV | 1 | G | A | Homozygous   |
| NC_037651.1 | 3227889 | SNV | 1 | G | A | Homozygous   |
| NC_037651.1 | 3227906 | SNV | 1 | G | A | Homozygous   |
| NC_037651.1 | 3227917 | SNV | 1 | A | G | Homozygous   |
| NC_037651.1 | 3227931 | SNV | 1 | A | G | Homozygous   |
| NC_037651.1 | 3227967 | SNV | 1 | A | G | Heterozygous |
| NC_037651.1 | 3228022 | SNV | 1 | A | G | Homozygous   |
| NC_037651.1 | 3228058 | SNV | 1 | G | A | Homozygous   |
| NC_037651.1 | 3228077 | SNV | 1 | A | G | Homozygous   |
| NC_037651.1 | 3229060 | SNV | 1 | G | A | Heterozygous |
| NC_037651.1 | 3230144 | SNV | 1 | A | G | Homozygous   |
| NC_037651.1 | 3230809 | SNV | 1 | G | A | Homozygous   |
| NC_037651.1 | 3231012 | SNV | 1 | T | C | Homozygous   |
| NC_037651.1 | 3231180 | SNV | 1 | T | C | Homozygous   |
| NC_037651.1 | 3231185 | SNV | 1 | G | A | Heterozygous |
| NC_037651.1 | 3231197 | SNV | 1 | C | A | Heterozygous |
| NC_037651.1 | 3231271 | SNV | 1 | T | A | Heterozygous |
| NC_037651.1 | 3231300 | SNV | 1 | T | C | Heterozygous |
| NC_037651.1 | 3231350 | SNV | 1 | C | T | Homozygous   |
| NC_037651.1 | 3231696 | SNV | 1 | T | C | Homozygous   |
| NC_037651.1 | 3231919 | SNV | 1 | C | T | Heterozygous |
| NC_037651.1 | 3231956 | SNV | 1 | G | C | Heterozygous |
| NC_037651.1 | 3231979 | SNV | 1 | G | A | Heterozygous |
| NC_037651.1 | 3232230 | SNV | 1 | T | C | Homozygous   |
| NC_037651.1 | 3234305 | SNV | 1 | T | C | Homozygous   |
| NC_037651.1 | 3236657 | SNV | 1 | T | C | Heterozygous |
| NC_037651.1 | 3236661 | SNV | 1 | T | C | Heterozygous |

|             |         |     |   |   |   |              |
|-------------|---------|-----|---|---|---|--------------|
| NC_037651.1 | 3243076 | SNV | 1 | T | C | Homozygous   |
| NC_037651.1 | 3243111 | SNV | 1 | A | G | Homozygous   |
| NC_037651.1 | 3243149 | SNV | 1 | T | C | Homozygous   |
| NC_037651.1 | 3243179 | SNV | 1 | T | C | Homozygous   |
| NC_037651.1 | 3243181 | SNV | 1 | A | G | Homozygous   |
| NC_037651.1 | 3243271 | SNV | 1 | T | C | Heterozygous |
| NC_037651.1 | 3243276 | SNV | 1 | G | C | Homozygous   |
| NC_037651.1 | 3243426 | SNV | 1 | A | G | Homozygous   |
| NC_037651.1 | 3250555 | SNV | 1 | G | A | Homozygous   |
| NC_037651.1 | 3250557 | SNV | 1 | G | A | Homozygous   |
| NC_037651.1 | 3252887 | SNV | 1 | A | G | Homozygous   |
| NC_037651.1 | 3263930 | SNV | 1 | A | C | Heterozygous |
| NC_037651.1 | 3264033 | SNV | 1 | T | C | Heterozygous |
| NC_037651.1 | 3264105 | SNV | 1 | G | A | Homozygous   |
| NC_037651.1 | 3264142 | SNV | 1 | G | C | Heterozygous |
| NC_037651.1 | 3264144 | SNV | 1 | G | T | Heterozygous |
| NC_037651.1 | 3266213 | SNV | 1 | A | G | Homozygous   |
| NC_037651.1 | 3267728 | SNV | 1 | A | G | Heterozygous |
| NC_037651.1 | 3267732 | SNV | 1 | A | G | Homozygous   |
| NC_037651.1 | 3267900 | SNV | 1 | A | T | Heterozygous |
| NC_037651.1 | 3268008 | SNV | 1 | G | A | Heterozygous |
| NC_037651.1 | 3268095 | SNV | 1 | T | C | Homozygous   |
| NC_037651.1 | 3268186 | SNV | 1 | G | A | Heterozygous |
| NC_037651.1 | 3268254 | SNV | 1 | G | A | Heterozygous |
| NC_037651.1 | 3268315 | SNV | 1 | A | G | Homozygous   |
| NC_037651.1 | 3268414 | SNV | 1 | G | C | Heterozygous |
| NC_037651.1 | 3271985 | SNV | 1 | G | A | Homozygous   |
| NC_037651.1 | 3272005 | SNV | 1 | G | C | Homozygous   |
| NC_037651.1 | 3272149 | SNV | 1 | T | C | Homozygous   |
| NC_037651.1 | 3272172 | SNV | 1 | T | C | Heterozygous |
| NC_037651.1 | 3272178 | SNV | 1 | A | G | Homozygous   |
| NC_037651.1 | 3272250 | SNV | 1 | G | A | Heterozygous |
| NC_037651.1 | 3272297 | SNV | 1 | A | G | Homozygous   |
| NC_037651.1 | 3272340 | SNV | 1 | A | G | Heterozygous |
| NC_037651.1 | 3272373 | SNV | 1 | A | G | Homozygous   |
| NC_037651.1 | 3272638 | SNV | 1 | T | C | Homozygous   |
| NC_037651.1 | 3272655 | SNV | 1 | T | C | Heterozygous |
| NC_037651.1 | 3272695 | SNV | 1 | C | T | Heterozygous |
| NC_037651.1 | 3272713 | SNV | 1 | T | C | Homozygous   |
| NC_037651.1 | 3272809 | SNV | 1 | G | T | Homozygous   |
| NC_037651.1 | 3272855 | SNV | 1 | G | A | Heterozygous |
| NC_037651.1 | 3272868 | SNV | 1 | G | A | Heterozygous |
| NC_037651.1 | 3279854 | SNV | 1 | A | T | Heterozygous |
| NC_037651.1 | 3279897 | SNV | 1 | T | G | Homozygous   |
| NC_037651.1 | 3279916 | SNV | 1 | G | A | Homozygous   |
| NC_037651.1 | 3279935 | SNV | 1 | T | G | Homozygous   |
| NC_037651.1 | 3279971 | SNV | 1 | A | G | Homozygous   |
| NC_037651.1 | 3280080 | SNV | 1 | G | A | Heterozygous |
| NC_037651.1 | 3283786 | SNV | 1 | T | A | Heterozygous |
| NC_037651.1 | 3283788 | SNV | 1 | G | A | Heterozygous |
| NC_037651.1 | 3283806 | SNV | 1 | A | C | Heterozygous |

|             |         |     |   |   |   |              |
|-------------|---------|-----|---|---|---|--------------|
| NC_037651.1 | 3286091 | SNV | 1 | G | A | Homozygous   |
| NC_037651.1 | 3286164 | SNV | 1 | G | A | Heterozygous |
| NC_037651.1 | 3287323 | SNV | 1 | T | G | Homozygous   |
| NC_037651.1 | 3287328 | SNV | 1 | G | A | Homozygous   |
| NC_037651.1 | 3287338 | SNV | 1 | A | C | Homozygous   |
| NC_037651.1 | 3287659 | SNV | 1 | T | C | Homozygous   |
| NC_037651.1 | 3287668 | SNV | 1 | A | G | Homozygous   |
| NC_037651.1 | 3341336 | SNV | 1 | C | T | Heterozygous |
| NC_037651.1 | 3342776 | SNV | 1 | G | T | Homozygous   |
| NC_037651.1 | 3342788 | SNV | 1 | C | G | Heterozygous |
| NC_037651.1 | 3342796 | SNV | 1 | A | G | Heterozygous |
| NC_037651.1 | 3345720 | SNV | 1 | G | A | Homozygous   |
| NC_037651.1 | 3345772 | SNV | 1 | C | T | Heterozygous |
| NC_037651.1 | 3355532 | SNV | 1 | A | G | Homozygous   |
| NC_037651.1 | 3355578 | SNV | 1 | A | T | Heterozygous |
| NC_037651.1 | 3355587 | SNV | 1 | C | T | Heterozygous |
| NC_037651.1 | 3355614 | SNV | 1 | C | T | Heterozygous |
| NC_037651.1 | 3355615 | SNV | 1 | G | A | Heterozygous |
| NC_037651.1 | 3355621 | SNV | 1 | A | G | Homozygous   |
| NC_037651.1 | 3355657 | SNV | 1 | T | C | Homozygous   |
| NC_037651.1 | 3355667 | SNV | 1 | T | C | Homozygous   |
| NC_037651.1 | 3355729 | SNV | 1 | A | G | Heterozygous |
| NC_037651.1 | 3356216 | SNV | 1 | T | G | Homozygous   |
| NC_037651.1 | 3356799 | SNV | 1 | A | G | Heterozygous |
| NC_037651.1 | 3356835 | SNV | 1 | T | C | Homozygous   |
| NC_037651.1 | 3357563 | SNV | 1 | A | G | Homozygous   |
| NC_037651.1 | 3357829 | SNV | 1 | A | T | Heterozygous |
| NC_037651.1 | 3357920 | SNV | 1 | T | C | Heterozygous |
| NC_037651.1 | 3358411 | SNV | 1 | C | T | Homozygous   |
| NC_037651.1 | 3358642 | SNV | 1 | A | G | Homozygous   |
| NC_037651.1 | 3358777 | SNV | 1 | C | T | Homozygous   |
| NC_037651.1 | 3358786 | SNV | 1 | T | C | Heterozygous |
| NC_037651.1 | 3358888 | SNV | 1 | A | G | Homozygous   |
| NC_037651.1 | 3359133 | SNV | 1 | G | A | Homozygous   |
| NC_037651.1 | 3359282 | SNV | 1 | A | T | Homozygous   |
| NC_037651.1 | 3359321 | SNV | 1 | T | C | Homozygous   |
| NC_037651.1 | 3359370 | SNV | 1 | T | C | Homozygous   |
| NC_037651.1 | 3359679 | SNV | 1 | G | A | Heterozygous |
| NC_037651.1 | 3359886 | SNV | 1 | A | G | Homozygous   |
| NC_037651.1 | 3359895 | SNV | 1 | T | A | Homozygous   |
| NC_037651.1 | 3359897 | SNV | 1 | T | A | Homozygous   |
| NC_037651.1 | 3359917 | SNV | 1 | A | T | Homozygous   |
| NC_037651.1 | 3359926 | SNV | 1 | G | A | Homozygous   |
| NC_037651.1 | 3359936 | SNV | 1 | A | G | Homozygous   |
| NC_037651.1 | 3360181 | SNV | 1 | T | C | Heterozygous |
| NC_037651.1 | 3360184 | SNV | 1 | G | T | Homozygous   |
| NC_037651.1 | 3360407 | SNV | 1 | A | G | Heterozygous |
| NC_037651.1 | 3360468 | SNV | 1 | T | C | Heterozygous |
| NC_037651.1 | 3360784 | SNV | 1 | C | A | Heterozygous |
| NC_037651.1 | 3361053 | SNV | 1 | A | G | Homozygous   |
| NC_037651.1 | 3361206 | SNV | 1 | G | A | Heterozygous |

|             |         |     |   |   |   |              |
|-------------|---------|-----|---|---|---|--------------|
| NC_037651.1 | 3361324 | SNV | 1 | C | T | Homozygous   |
| NC_037651.1 | 3361503 | SNV | 1 | C | T | Homozygous   |
| NC_037651.1 | 3362007 | SNV | 1 | G | A | Heterozygous |
| NC_037651.1 | 3362059 | SNV | 1 | T | C | Heterozygous |
| NC_037651.1 | 3362122 | SNV | 1 | G | A | Heterozygous |
| NC_037651.1 | 3362125 | SNV | 1 | T | C | Homozygous   |
| NC_037651.1 | 3362643 | SNV | 1 | C | T | Heterozygous |
| NC_037651.1 | 3362784 | SNV | 1 | T | A | Homozygous   |
| NC_037651.1 | 3362897 | SNV | 1 | T | C | Heterozygous |
| NC_037651.1 | 3363217 | SNV | 1 | T | C | Homozygous   |
| NC_037651.1 | 3366583 | SNV | 1 | A | G | Heterozygous |
| NC_037651.1 | 3366613 | SNV | 1 | T | C | Homozygous   |
| NC_037651.1 | 3366664 | SNV | 1 | C | T | Heterozygous |
| NC_037651.1 | 3375444 | SNV | 1 | G | A | Heterozygous |
| NC_037651.1 | 3375457 | SNV | 1 | G | A | Heterozygous |
| NC_037651.1 | 3375627 | SNV | 1 | T | C | Heterozygous |
| NC_037651.1 | 3380080 | SNV | 1 | G | C | Heterozygous |
| NC_037651.1 | 3380114 | SNV | 1 | T | C | Homozygous   |
| NC_037651.1 | 3380129 | SNV | 1 | T | A | Homozygous   |
| NC_037651.1 | 3380263 | SNV | 1 | G | T | Homozygous   |
| NC_037651.1 | 3380426 | SNV | 1 | A | G | Heterozygous |
| NC_037651.1 | 3381650 | SNV | 1 | C | A | Heterozygous |
| NC_037651.1 | 3398163 | SNV | 1 | C | A | Homozygous   |
| NC_037651.1 | 3398308 | SNV | 1 | A | G | Homozygous   |
| NC_037651.1 | 3398531 | SNV | 1 | G | C | Homozygous   |
| NC_037651.1 | 3398542 | SNV | 1 | T | A | Homozygous   |
| NC_037651.1 | 3401478 | SNV | 1 | T | C | Homozygous   |
| NC_037651.1 | 3408425 | SNV | 1 | A | G | Homozygous   |
| NC_037651.1 | 3408935 | SNV | 1 | T | A | Homozygous   |
| NC_037651.1 | 3411093 | SNV | 1 | A | T | Heterozygous |
| NC_037651.1 | 3411491 | SNV | 1 | G | A | Heterozygous |
| NC_037651.1 | 3411887 | SNV | 1 | C | T | Heterozygous |
| NC_037651.1 | 3411895 | SNV | 1 | G | A | Heterozygous |
| NC_037651.1 | 3411975 | SNV | 1 | G | A | Heterozygous |
| NC_037651.1 | 3417537 | SNV | 1 | C | T | Homozygous   |
| NC_037651.1 | 3417786 | SNV | 1 | A | G | Homozygous   |
| NC_037651.1 | 3418246 | SNV | 1 | C | T | Homozygous   |
| NC_037651.1 | 3418327 | SNV | 1 | G | A | Homozygous   |
| NC_037651.1 | 3419825 | SNV | 1 | C | T | Heterozygous |
| NC_037651.1 | 3420007 | SNV | 1 | C | T | Homozygous   |
| NC_037651.1 | 3420325 | SNV | 1 | T | G | Homozygous   |
| NC_037651.1 | 3420327 | SNV | 1 | C | T | Homozygous   |
| NC_037651.1 | 3424498 | SNV | 1 | T | C | Heterozygous |
| NC_037651.1 | 3424527 | SNV | 1 | A | G | Heterozygous |
| NC_037651.1 | 3425979 | SNV | 1 | G | A | Homozygous   |
| NC_037651.1 | 3429424 | SNV | 1 | G | T | Heterozygous |
| NC_037651.1 | 3430232 | SNV | 1 | T | G | Heterozygous |
| NC_037651.1 | 3430247 | SNV | 1 | A | G | Heterozygous |
| NC_037651.1 | 3430256 | SNV | 1 | T | A | Heterozygous |
| NC_037651.1 | 3430259 | SNV | 1 | A | G | Heterozygous |
| NC_037651.1 | 3430262 | SNV | 1 | A | G | Heterozygous |

|             |         |     |   |   |   |              |
|-------------|---------|-----|---|---|---|--------------|
| NC_037651.1 | 3432926 | SNV | 1 | C | A | Homozygous   |
| NC_037651.1 | 3432928 | SNV | 1 | G | A | Homozygous   |
| NC_037651.1 | 3436002 | SNV | 1 | A | T | Homozygous   |
| NC_037651.1 | 3436004 | SNV | 1 | A | T | Homozygous   |
| NC_037651.1 | 3436010 | SNV | 1 | A | T | Homozygous   |
| NC_037651.1 | 3436014 | SNV | 1 | T | A | Homozygous   |
| NC_037651.1 | 3437599 | SNV | 1 | A | T | Homozygous   |
| NC_037651.1 | 3437609 | SNV | 1 | A | C | Homozygous   |
| NC_037651.1 | 3437611 | SNV | 1 | T | A | Homozygous   |
| NC_037651.1 | 3437614 | SNV | 1 | T | C | Homozygous   |
| NC_037651.1 | 3464676 | SNV | 1 | A | G | Heterozygous |
| NC_037651.1 | 3464679 | SNV | 1 | A | G | Homozygous   |
| NC_037651.1 | 3464685 | SNV | 1 | A | C | Homozygous   |
| NC_037651.1 | 3464707 | SNV | 1 | A | T | Homozygous   |
| NC_037651.1 | 3464709 | SNV | 1 | T | G | Homozygous   |
| NC_037651.1 | 3464713 | SNV | 1 | A | G | Homozygous   |
| NC_037651.1 | 3464722 | SNV | 1 | T | A | Homozygous   |
| NC_037651.1 | 3464724 | SNV | 1 | T | A | Homozygous   |
| NC_037651.1 | 3494205 | SNV | 1 | T | C | Homozygous   |
| NC_037651.1 | 3494360 | SNV | 1 | C | T | Heterozygous |
| NC_037651.1 | 3494676 | SNV | 1 | C | T | Homozygous   |
| NC_037651.1 | 3494866 | SNV | 1 | C | A | Homozygous   |
| NC_037651.1 | 3495164 | SNV | 1 | A | G | Heterozygous |
| NC_037651.1 | 3495736 | SNV | 1 | C | T | Heterozygous |
| NC_037651.1 | 3518133 | SNV | 1 | A | G | Homozygous   |
| NC_037651.1 | 3518184 | SNV | 1 | C | T | Heterozygous |
| NC_037651.1 | 3518189 | SNV | 1 | A | G | Homozygous   |
| NC_037651.1 | 3518192 | SNV | 1 | T | C | Heterozygous |
| NC_037651.1 | 3518199 | SNV | 1 | T | C | Heterozygous |
| NC_037651.1 | 3518217 | SNV | 1 | T | G | Heterozygous |
| NC_037651.1 | 3518287 | SNV | 1 | G | T | Homozygous   |
| NC_037651.1 | 3518323 | SNV | 1 | G | A | Heterozygous |
| NC_037651.1 | 3518519 | SNV | 1 | G | A | Heterozygous |
| NC_037651.1 | 3518535 | SNV | 1 | A | G | Homozygous   |
| NC_037651.1 | 3518995 | SNV | 1 | A | G | Homozygous   |
| NC_037651.1 | 3519014 | SNV | 1 | A | G | Homozygous   |
| NC_037651.1 | 3519042 | SNV | 1 | T | C | Homozygous   |
| NC_037651.1 | 3519052 | SNV | 1 | A | G | Heterozygous |
| NC_037651.1 | 3526182 | SNV | 1 | T | A | Homozygous   |
| NC_037651.1 | 3526259 | SNV | 1 | G | T | Heterozygous |
| NC_037651.1 | 3526330 | SNV | 1 | C | G | Heterozygous |
| NC_037651.1 | 3526453 | SNV | 1 | A | G | Heterozygous |
| NC_037651.1 | 3526523 | SNV | 1 | G | A | Heterozygous |
| NC_037651.1 | 3526559 | SNV | 1 | A | G | Heterozygous |
| NC_037651.1 | 3526582 | SNV | 1 | T | G | Homozygous   |
| NC_037651.1 | 3526831 | SNV | 1 | T | C | Homozygous   |
| NC_037651.1 | 3530284 | SNV | 1 | A | T | Homozygous   |
| NC_037651.1 | 3537428 | SNV | 1 | C | T | Heterozygous |
| NC_037651.1 | 3537442 | SNV | 1 | C | T | Heterozygous |
| NC_037651.1 | 3537444 | SNV | 1 | C | A | Heterozygous |
| NC_037651.1 | 3537447 | SNV | 1 | C | T | Heterozygous |

|             |         |     |   |   |   |              |
|-------------|---------|-----|---|---|---|--------------|
| NC_037651.1 | 3557401 | SNV | 1 | G | A | Heterozygous |
| NC_037651.1 | 3557529 | SNV | 1 | C | T | Homozygous   |
| NC_037651.1 | 3557534 | SNV | 1 | G | C | Homozygous   |
| NC_037651.1 | 3557556 | SNV | 1 | A | T | Homozygous   |
| NC_037651.1 | 3557596 | SNV | 1 | T | C | Heterozygous |
| NC_037651.1 | 3557794 | SNV | 1 | A | T | Homozygous   |
| NC_037651.1 | 3570813 | SNV | 1 | A | G | Homozygous   |
| NC_037651.1 | 3570824 | SNV | 1 | T | C | Homozygous   |
| NC_037651.1 | 3570842 | SNV | 1 | T | C | Homozygous   |
| NC_037651.1 | 3570846 | SNV | 1 | T | C | Heterozygous |
| NC_037651.1 | 3570867 | SNV | 1 | T | G | Homozygous   |
| NC_037651.1 | 3581337 | SNV | 1 | T | C | Homozygous   |
| NC_037651.1 | 3581342 | SNV | 1 | A | T | Homozygous   |
| NC_037651.1 | 3581355 | SNV | 1 | A | G | Homozygous   |
| NC_037651.1 | 3581358 | SNV | 1 | G | T | Homozygous   |
| NC_037651.1 | 3583637 | SNV | 1 | A | G | Homozygous   |
| NC_037651.1 | 3583647 | SNV | 1 | A | G | Homozygous   |
| NC_037651.1 | 3583650 | SNV | 1 | A | C | Homozygous   |
| NC_037651.1 | 3583893 | SNV | 1 | C | T | Heterozygous |
| NC_037651.1 | 3583904 | SNV | 1 | C | G | Homozygous   |
| NC_037651.1 | 3583942 | SNV | 1 | A | G | Homozygous   |
| NC_037651.1 | 3584103 | SNV | 1 | C | G | Heterozygous |
| NC_037651.1 | 3584217 | SNV | 1 | C | T | Homozygous   |
| NC_037651.1 | 3584252 | SNV | 1 | A | G | Homozygous   |
| NC_037651.1 | 3584280 | SNV | 1 | T | A | Homozygous   |
| NC_037651.1 | 3584355 | SNV | 1 | A | G | Heterozygous |
| NC_037651.1 | 3584363 | SNV | 1 | T | C | Homozygous   |
| NC_037651.1 | 3584507 | SNV | 1 | C | G | Heterozygous |
| NC_037651.1 | 3584579 | SNV | 1 | C | T | Homozygous   |
| NC_037651.1 | 3584775 | SNV | 1 | C | T | Heterozygous |
| NC_037651.1 | 3584993 | SNV | 1 | A | G | Heterozygous |
| NC_037651.1 | 3584995 | SNV | 1 | A | G | Heterozygous |
| NC_037651.1 | 3585076 | SNV | 1 | G | A | Homozygous   |
| NC_037651.1 | 3589232 | SNV | 1 | A | C | Heterozygous |
| NC_037651.1 | 3589739 | SNV | 1 | G | A | Heterozygous |
| NC_037651.1 | 3590414 | SNV | 1 | T | C | Homozygous   |
| NC_037651.1 | 3590471 | SNV | 1 | T | A | Homozygous   |
| NC_037651.1 | 3590917 | SNV | 1 | T | C | Heterozygous |
| NC_037651.1 | 3590932 | SNV | 1 | G | T | Heterozygous |
| NC_037651.1 | 3591054 | SNV | 1 | T | C | Homozygous   |
| NC_037651.1 | 3591078 | SNV | 1 | T | C | Homozygous   |
| NC_037651.1 | 3591114 | SNV | 1 | A | G | Heterozygous |
| NC_037651.1 | 3591171 | SNV | 1 | C | T | Homozygous   |
| NC_037651.1 | 3591176 | SNV | 1 | C | T | Heterozygous |
| NC_037651.1 | 3591219 | SNV | 1 | C | T | Heterozygous |
| NC_037651.1 | 3591246 | SNV | 1 | T | C | Homozygous   |
| NC_037651.1 | 3591312 | SNV | 1 | G | A | Homozygous   |
| NC_037651.1 | 3591408 | SNV | 1 | A | G | Homozygous   |
| NC_037651.1 | 3593173 | SNV | 1 | A | G | Homozygous   |
| NC_037651.1 | 3596955 | SNV | 1 | T | C | Homozygous   |
| NC_037651.1 | 3596960 | SNV | 1 | G | C | Homozygous   |

|             |         |     |   |   |   |              |
|-------------|---------|-----|---|---|---|--------------|
| NC_037651.1 | 3596987 | SNV | 1 | T | G | Homozygous   |
| NC_037651.1 | 3596993 | SNV | 1 | T | A | Homozygous   |
| NC_037651.1 | 3600086 | SNV | 1 | T | C | Homozygous   |
| NC_037651.1 | 3611336 | SNV | 1 | C | G | Homozygous   |
| NC_037651.1 | 3611339 | SNV | 1 | G | A | Homozygous   |
| NC_037651.1 | 3611410 | SNV | 1 | A | G | Homozygous   |
| NC_037651.1 | 3611482 | SNV | 1 | G | A | Homozygous   |
| NC_037651.1 | 3611507 | SNV | 1 | T | C | Homozygous   |
| NC_037651.1 | 3611766 | SNV | 1 | T | C | Heterozygous |
| NC_037651.1 | 3612011 | SNV | 1 | C | T | Homozygous   |
| NC_037651.1 | 3612047 | SNV | 1 | C | T | Heterozygous |
| NC_037651.1 | 3612086 | SNV | 1 | C | G | Homozygous   |
| NC_037651.1 | 3612261 | SNV | 1 | C | T | Homozygous   |
| NC_037651.1 | 3612336 | SNV | 1 | T | C | Homozygous   |
| NC_037651.1 | 3612372 | SNV | 1 | A | T | Homozygous   |
| NC_037651.1 | 3612374 | SNV | 1 | A | T | Homozygous   |
| NC_037651.1 | 3612377 | SNV | 1 | C | T | Homozygous   |
| NC_037651.1 | 3612381 | SNV | 1 | G | T | Homozygous   |
| NC_037651.1 | 3612405 | SNV | 1 | G | A | Homozygous   |
| NC_037651.1 | 3612434 | SNV | 1 | T | C | Homozygous   |
| NC_037651.1 | 3612442 | SNV | 1 | G | A | Homozygous   |
| NC_037651.1 | 3612500 | SNV | 1 | T | C | Homozygous   |
| NC_037651.1 | 3612563 | SNV | 1 | A | G | Homozygous   |
| NC_037651.1 | 3612565 | SNV | 1 | A | G | Homozygous   |
| NC_037651.1 | 3612624 | SNV | 1 | A | G | Homozygous   |
| NC_037651.1 | 3612657 | SNV | 1 | C | T | Homozygous   |
| NC_037651.1 | 3612674 | SNV | 1 | A | T | Homozygous   |
| NC_037651.1 | 3612676 | SNV | 1 | A | G | Homozygous   |
| NC_037651.1 | 3616453 | SNV | 1 | C | T | Homozygous   |
| NC_037651.1 | 3616513 | SNV | 1 | T | C | Homozygous   |
| NC_037651.1 | 3616547 | SNV | 1 | C | G | Homozygous   |
| NC_037651.1 | 3616562 | SNV | 1 | G | A | Homozygous   |
| NC_037651.1 | 3616597 | SNV | 1 | C | T | Homozygous   |
| NC_037651.1 | 3616783 | SNV | 1 | A | G | Homozygous   |
| NC_037651.1 | 3616860 | SNV | 1 | C | T | Homozygous   |
| NC_037651.1 | 3616901 | SNV | 1 | C | T | Homozygous   |
| NC_037651.1 | 3616914 | SNV | 1 | T | G | Homozygous   |
| NC_037651.1 | 3616919 | SNV | 1 | C | T | Homozygous   |
| NC_037651.1 | 3618608 | SNV | 1 | A | G | Homozygous   |
| NC_037651.1 | 3621525 | SNV | 1 | T | C | Heterozygous |
| NC_037651.1 | 3622058 | SNV | 1 | A | G | Heterozygous |
| NC_037651.1 | 3622060 | SNV | 1 | C | T | Heterozygous |
| NC_037651.1 | 3622105 | SNV | 1 | C | T | Heterozygous |
| NC_037651.1 | 3629689 | SNV | 1 | T | C | Heterozygous |
| NC_037651.1 | 3629696 | SNV | 1 | C | T | Heterozygous |
| NC_037651.1 | 3629721 | SNV | 1 | C | T | Heterozygous |
| NC_037651.1 | 3629732 | SNV | 1 | C | T | Homozygous   |
| NC_037651.1 | 3640977 | SNV | 1 | C | T | Heterozygous |
| NC_037651.1 | 3640982 | SNV | 1 | G | A | Heterozygous |
| NC_037651.1 | 3640994 | SNV | 1 | G | A | Heterozygous |
| NC_037651.1 | 3641000 | SNV | 1 | A | G | Homozygous   |

|             |         |     |   |   |   |              |
|-------------|---------|-----|---|---|---|--------------|
| NC_037651.1 | 3643740 | SNV | 1 | T | C | Heterozygous |
| NC_037651.1 | 3643774 | SNV | 1 | A | G | Homozygous   |
| NC_037651.1 | 3643799 | SNV | 1 | A | G | Heterozygous |
| NC_037651.1 | 3643801 | SNV | 1 | C | T | Heterozygous |
| NC_037651.1 | 3643864 | SNV | 1 | G | A | Heterozygous |
| NC_037651.1 | 3643960 | SNV | 1 | C | T | Homozygous   |
| NC_037651.1 | 3643965 | SNV | 1 | C | T | Heterozygous |
| NC_037651.1 | 3644077 | SNV | 1 | A | C | Homozygous   |
| NC_037651.1 | 3644099 | SNV | 1 | C | T | Heterozygous |
| NC_037651.1 | 3644107 | SNV | 1 | C | A | Homozygous   |
| NC_037651.1 | 3644163 | SNV | 1 | T | C | Homozygous   |
| NC_037651.1 | 3644222 | SNV | 1 | T | C | Homozygous   |
| NC_037651.1 | 3648278 | SNV | 1 | A | G | Heterozygous |
| NC_037651.1 | 3648282 | SNV | 1 | G | A | Homozygous   |
| NC_037651.1 | 3650398 | SNV | 1 | T | A | Heterozygous |
| NC_037651.1 | 3650416 | SNV | 1 | T | C | Heterozygous |
| NC_037651.1 | 3669974 | SNV | 1 | G | A | Heterozygous |
| NC_037651.1 | 3670047 | SNV | 1 | T | C | Heterozygous |
| NC_037651.1 | 3670148 | SNV | 1 | G | A | Heterozygous |
| NC_037651.1 | 3688296 | SNV | 1 | A | G | Heterozygous |
| NC_037651.1 | 3688304 | SNV | 1 | A | T | Homozygous   |
| NC_037651.1 | 3690777 | SNV | 1 | C | T | Homozygous   |
| NC_037651.1 | 3720558 | SNV | 1 | T | C | Heterozygous |
| NC_037651.1 | 3720599 | SNV | 1 | T | C | Heterozygous |
| NC_037651.1 | 3720742 | SNV | 1 | G | A | Heterozygous |
| NC_037651.1 | 3720908 | SNV | 1 | T | C | Homozygous   |
| NC_037651.1 | 3721027 | SNV | 1 | G | A | Homozygous   |
| NC_037651.1 | 3721039 | SNV | 1 | T | C | Homozygous   |
| NC_037651.1 | 3721049 | SNV | 1 | C | T | Homozygous   |
| NC_037651.1 | 3721057 | SNV | 1 | T | C | Homozygous   |
| NC_037651.1 | 3721138 | SNV | 1 | T | C | Homozygous   |
| NC_037651.1 | 3721189 | SNV | 1 | A | G | Homozygous   |
| NC_037651.1 | 3741597 | SNV | 1 | T | A | Homozygous   |
| NC_037651.1 | 3741631 | SNV | 1 | G | A | Homozygous   |
| NC_037651.1 | 3754278 | SNV | 1 | C | T | Homozygous   |
| NC_037651.1 | 3754288 | SNV | 1 | T | C | Heterozygous |
| NC_037651.1 | 3754309 | SNV | 1 | T | G | Homozygous   |
| NC_037651.1 | 3754400 | SNV | 1 | T | C | Homozygous   |
| NC_037651.1 | 3754501 | SNV | 1 | T | C | Heterozygous |
| NC_037651.1 | 3756339 | SNV | 1 | C | T | Homozygous   |
| NC_037651.1 | 3756366 | SNV | 1 | G | A | Heterozygous |
| NC_037651.1 | 3756394 | SNV | 1 | A | T | Heterozygous |
| NC_037651.1 | 3757870 | SNV | 1 | T | C | Homozygous   |
| NC_037651.1 | 3757874 | SNV | 1 | G | C | Homozygous   |
| NC_037651.1 | 3761399 | SNV | 1 | T | G | Homozygous   |
| NC_037651.1 | 3761491 | SNV | 1 | G | T | Heterozygous |
| NC_037651.1 | 3767403 | SNV | 1 | A | G | Heterozygous |
| NC_037651.1 | 3767447 | SNV | 1 | T | A | Homozygous   |
| NC_037651.1 | 3767569 | SNV | 1 | C | G | Homozygous   |
| NC_037651.1 | 3767580 | SNV | 1 | C | T | Heterozygous |
| NC_037651.1 | 3767606 | SNV | 1 | T | C | Homozygous   |



|             |         |     |   |   |   |              |
|-------------|---------|-----|---|---|---|--------------|
| NC_037651.1 | 3767618 | SNV | 1 | T | C | Homozygous   |
| NC_037651.1 | 3767652 | SNV | 1 | C | G | Heterozygous |
| NC_037651.1 | 3767665 | SNV | 1 | A | G | Heterozygous |
| NC_037651.1 | 3768106 | SNV | 1 | T | C | Heterozygous |
| NC_037651.1 | 3768108 | SNV | 1 | C | T | Heterozygous |
| NC_037651.1 | 3768115 | SNV | 1 | T | C | Heterozygous |
| NC_037651.1 | 3768345 | SNV | 1 | T | C | Heterozygous |
| NC_037651.1 | 3768385 | SNV | 1 | C | G | Heterozygous |
| NC_037651.1 | 3768396 | SNV | 1 | A | G | Heterozygous |
| NC_037651.1 | 3768420 | SNV | 1 | C | T | Heterozygous |
| NC_037651.1 | 3772774 | SNV | 1 | C | T | Heterozygous |
| NC_037651.1 | 3772813 | SNV | 1 | G | A | Heterozygous |
| NC_037651.1 | 3772863 | SNV | 1 | G | T | Homozygous   |
| NC_037651.1 | 3772902 | SNV | 1 | T | A | Homozygous   |
| NC_037651.1 | 3772918 | SNV | 1 | T | C | Homozygous   |
| NC_037651.1 | 3772982 | SNV | 1 | A | T | Heterozygous |
| NC_037651.1 | 3773001 | SNV | 1 | A | G | Heterozygous |
| NC_037651.1 | 3773020 | SNV | 1 | C | T | Homozygous   |
| NC_037651.1 | 3789174 | SNV | 1 | A | G | Homozygous   |
| NC_037651.1 | 3789392 | SNV | 1 | G | A | Homozygous   |
| NC_037651.1 | 3789459 | SNV | 1 | A | T | Homozygous   |
| NC_037651.1 | 3789466 | SNV | 1 | C | T | Heterozygous |
| NC_037651.1 | 3789468 | SNV | 1 | T | C | Heterozygous |
| NC_037651.1 | 3789481 | SNV | 1 | C | T | Homozygous   |
| NC_037651.1 | 3789564 | SNV | 1 | T | C | Homozygous   |
| NC_037651.1 | 3789632 | SNV | 1 | T | C | Homozygous   |
| NC_037651.1 | 3789649 | SNV | 1 | T | C | Homozygous   |
| NC_037651.1 | 3790326 | SNV | 1 | A | G | Heterozygous |
| NC_037651.1 | 3790332 | SNV | 1 | A | G | Heterozygous |
| NC_037651.1 | 3790963 | SNV | 1 | C | T | Homozygous   |
| NC_037651.1 | 3791003 | SNV | 1 | A | G | Homozygous   |
| NC_037651.1 | 3791079 | SNV | 1 | C | T | Heterozygous |
| NC_037651.1 | 3791134 | SNV | 1 | A | G | Homozygous   |
| NC_037651.1 | 3797082 | SNV | 1 | A | T | Homozygous   |
| NC_037651.1 | 3797094 | SNV | 1 | A | T | Homozygous   |
| NC_037651.1 | 3797097 | SNV | 1 | T | A | Homozygous   |
| NC_037651.1 | 3797103 | SNV | 1 | A | T | Homozygous   |
| NC_037651.1 | 3822350 | SNV | 1 | G | A | Homozygous   |
| NC_037651.1 | 3822352 | SNV | 1 | G | A | Homozygous   |
| NC_037651.1 | 3822522 | SNV | 1 | C | T | Heterozygous |
| NC_037651.1 | 3822640 | SNV | 1 | T | C | Heterozygous |
| NC_037651.1 | 3822825 | SNV | 1 | A | C | Homozygous   |
| NC_037651.1 | 3822827 | SNV | 1 | A | G | Homozygous   |
| NC_037651.1 | 3826382 | SNV | 1 | G | T | Homozygous   |
| NC_037651.1 | 3826403 | SNV | 1 | A | C | Heterozygous |
| NC_037651.1 | 3826551 | SNV | 1 | G | A | Heterozygous |
| NC_037651.1 | 3826619 | SNV | 1 | C | T | Homozygous   |
| NC_037651.1 | 3826690 | SNV | 1 | T | C | Homozygous   |
| NC_037651.1 | 3826709 | SNV | 1 | C | T | Heterozygous |
| NC_037651.1 | 3826751 | SNV | 1 | G | A | Heterozygous |
| NC_037651.1 | 3827257 | SNV | 1 | T | A | Homozygous   |

|             |         |     |   |   |   |              |
|-------------|---------|-----|---|---|---|--------------|
| NC_037651.1 | 3827413 | SNV | 1 | A | G | Homozygous   |
| NC_037651.1 | 3836789 | SNV | 1 | C | T | Homozygous   |
| NC_037651.1 | 3836805 | SNV | 1 | C | T | Homozygous   |
| NC_037651.1 | 3836807 | SNV | 1 | T | C | Homozygous   |
| NC_037651.1 | 3837672 | SNV | 1 | T | C | Heterozygous |
| NC_037651.1 | 3837700 | SNV | 1 | C | T | Heterozygous |
| NC_037651.1 | 3840710 | SNV | 1 | C | G | Homozygous   |
| NC_037651.1 | 3841011 | SNV | 1 | A | G | Heterozygous |
| NC_037651.1 | 3842938 | SNV | 1 | A | G | Heterozygous |
| NC_037651.1 | 3842940 | SNV | 1 | T | A | Heterozygous |
| NC_037651.1 | 3842944 | SNV | 1 | T | A | Heterozygous |
| NC_037651.1 | 3842951 | SNV | 1 | A | T | Heterozygous |
| NC_037651.1 | 3842954 | SNV | 1 | T | A | Heterozygous |
| NC_037651.1 | 3842963 | SNV | 1 | A | T | Heterozygous |
| NC_037651.1 | 3858090 | SNV | 1 | C | T | Heterozygous |
| NC_037651.1 | 3859799 | SNV | 1 | C | T | Homozygous   |
| NC_037651.1 | 3859970 | SNV | 1 | T | C | Homozygous   |
| NC_037651.1 | 3860104 | SNV | 1 | C | T | Homozygous   |
| NC_037651.1 | 3860114 | SNV | 1 | A | G | Homozygous   |
| NC_037651.1 | 3873066 | SNV | 1 | A | G | Homozygous   |
| NC_037651.1 | 3873081 | SNV | 1 | T | C | Heterozygous |
| NC_037651.1 | 3873104 | SNV | 1 | C | T | Homozygous   |
| NC_037651.1 | 3876528 | SNV | 1 | G | A | Homozygous   |
| NC_037651.1 | 3876724 | SNV | 1 | A | G | Homozygous   |
| NC_037651.1 | 3876731 | SNV | 1 | A | G | Heterozygous |
| NC_037651.1 | 3876810 | SNV | 1 | T | C | Homozygous   |
| NC_037651.1 | 3876921 | SNV | 1 | T | C | Heterozygous |
| NC_037651.1 | 3876922 | SNV | 1 | G | T | Heterozygous |
| NC_037651.1 | 3880023 | SNV | 1 | G | A | Heterozygous |
| NC_037651.1 | 3880141 | SNV | 1 | C | G | Homozygous   |
| NC_037651.1 | 3880504 | SNV | 1 | C | T | Homozygous   |
| NC_037651.1 | 3880532 | SNV | 1 | A | G | Homozygous   |
| NC_037651.1 | 3881227 | SNV | 1 | G | A | Heterozygous |
| NC_037651.1 | 3895419 | SNV | 1 | A | G | Homozygous   |
| NC_037651.1 | 3895624 | SNV | 1 | A | G | Homozygous   |
| NC_037651.1 | 3895753 | SNV | 1 | A | G | Homozygous   |
| NC_037651.1 | 3897181 | SNV | 1 | A | G | Homozygous   |
| NC_037651.1 | 3897225 | SNV | 1 | C | T | Heterozygous |
| NC_037651.1 | 3897242 | SNV | 1 | C | G | Homozygous   |
| NC_037651.1 | 3897266 | SNV | 1 | C | T | Homozygous   |
| NC_037651.1 | 3897283 | SNV | 1 | T | C | Homozygous   |
| NC_037651.1 | 3897313 | SNV | 1 | T | C | Homozygous   |
| NC_037651.1 | 3897351 | SNV | 1 | T | C | Heterozygous |
| NC_037651.1 | 3897376 | SNV | 1 | C | T | Homozygous   |
| NC_037651.1 | 3897381 | SNV | 1 | T | C | Heterozygous |
| NC_037651.1 | 3897387 | SNV | 1 | T | A | Heterozygous |
| NC_037651.1 | 3897702 | SNV | 1 | C | T | Heterozygous |
| NC_037651.1 | 3897827 | SNV | 1 | G | A | Heterozygous |
| NC_037651.1 | 3897935 | SNV | 1 | G | A | Heterozygous |
| NC_037651.1 | 3949845 | SNV | 1 | T | A | Heterozygous |
| NC_037651.1 | 3965391 | SNV | 1 | G | A | Heterozygous |

|             |         |     |   |   |   |              |
|-------------|---------|-----|---|---|---|--------------|
| NC_037651.1 | 3965438 | SNV | 1 | G | A | Homozygous   |
| NC_037651.1 | 3965457 | SNV | 1 | G | A | Homozygous   |
| NC_037651.1 | 3987853 | SNV | 1 | C | T | Heterozygous |
| NC_037651.1 | 3987876 | SNV | 1 | A | G | Heterozygous |
| NC_037651.1 | 3987896 | SNV | 1 | A | G | Heterozygous |
| NC_037651.1 | 4002689 | SNV | 1 | G | A | Homozygous   |
| NC_037651.1 | 4025490 | SNV | 1 | A | G | Homozygous   |
| NC_037651.1 | 4025569 | SNV | 1 | G | A | Homozygous   |
| NC_037651.1 | 4025901 | SNV | 1 | A | G | Homozygous   |
| NC_037651.1 | 4025918 | SNV | 1 | A | G | Homozygous   |
| NC_037651.1 | 4026037 | SNV | 1 | A | G | Homozygous   |
| NC_037651.1 | 4028385 | SNV | 1 | G | A | Homozygous   |
| NC_037651.1 | 4037039 | SNV | 1 | C | T | Heterozygous |
| NC_037651.1 | 4037094 | SNV | 1 | A | G | Heterozygous |
| NC_037651.1 | 4037120 | SNV | 1 | C | T | Heterozygous |
| NC_037651.1 | 4045013 | SNV | 1 | T | A | Homozygous   |
| NC_037651.1 | 4045086 | SNV | 1 | C | T | Heterozygous |
| NC_037651.1 | 4045334 | SNV | 1 | G | A | Homozygous   |
| NC_037651.1 | 4045388 | SNV | 1 | C | T | Heterozygous |
| NC_037651.1 | 4045430 | SNV | 1 | T | C | Homozygous   |
| NC_037651.1 | 4045460 | SNV | 1 | A | G | Heterozygous |
| NC_037651.1 | 4055332 | SNV | 1 | T | C | Heterozygous |
| NC_037651.1 | 4055339 | SNV | 1 | C | T | Heterozygous |
| NC_037651.1 | 4055344 | SNV | 1 | T | A | Heterozygous |
| NC_037651.1 | 4055347 | SNV | 1 | T | G | Heterozygous |
| NC_037651.1 | 4055358 | SNV | 1 | C | T | Heterozygous |
| NC_037651.1 | 4061323 | SNV | 1 | A | T | Homozygous   |
| NC_037651.1 | 4061325 | SNV | 1 | A | G | Homozygous   |
| NC_037651.1 | 4061351 | SNV | 1 | G | A | Homozygous   |
| NC_037651.1 | 4061353 | SNV | 1 | T | G | Homozygous   |
| NC_037651.1 | 4061355 | SNV | 1 | T | G | Homozygous   |
| NC_037651.1 | 4064255 | SNV | 1 | G | A | Heterozygous |
| NC_037651.1 | 4064381 | SNV | 1 | G | A | Heterozygous |
| NC_037651.1 | 4064468 | SNV | 1 | A | G | Heterozygous |
| NC_037651.1 | 4064556 | SNV | 1 | C | T | Heterozygous |
| NC_037651.1 | 4064579 | SNV | 1 | G | A | Heterozygous |
| NC_037651.1 | 4064591 | SNV | 1 | G | A | Homozygous   |
| NC_037651.1 | 4064602 | SNV | 1 | G | A | Homozygous   |
| NC_037651.1 | 4082218 | SNV | 1 | A | G | Homozygous   |
| NC_037651.1 | 4082245 | SNV | 1 | C | T | Heterozygous |
| NC_037651.1 | 4092550 | SNV | 1 | T | A | Homozygous   |
| NC_037651.1 | 4098716 | SNV | 1 | A | G | Heterozygous |
| NC_037651.1 | 4098895 | SNV | 1 | T | C | Homozygous   |
| NC_037651.1 | 4104781 | SNV | 1 | A | G | Homozygous   |
| NC_037651.1 | 4104835 | SNV | 1 | C | T | Homozygous   |
| NC_037651.1 | 4104838 | SNV | 1 | G | C | Homozygous   |
| NC_037651.1 | 4104858 | SNV | 1 | G | A | Heterozygous |
| NC_037651.1 | 4104864 | SNV | 1 | T | A | Homozygous   |
| NC_037651.1 | 4120313 | SNV | 1 | C | G | Heterozygous |
| NC_037651.1 | 4120317 | SNV | 1 | T | A | Heterozygous |
| NC_037651.1 | 4181867 | SNV | 1 | T | C | Homozygous   |

|             |         |     |   |   |   |              |
|-------------|---------|-----|---|---|---|--------------|
| NC_037651.1 | 4181906 | SNV | 1 | G | T | Homozygous   |
| NC_037651.1 | 4194853 | SNV | 1 | G | C | Homozygous   |
| NC_037651.1 | 4194859 | SNV | 1 | A | G | Homozygous   |
| NC_037651.1 | 4194977 | SNV | 1 | A | G | Homozygous   |
| NC_037651.1 | 4209525 | SNV | 1 | A | G | Homozygous   |
| NC_037651.1 | 4214268 | SNV | 1 | A | T | Homozygous   |
| NC_037651.1 | 4214271 | SNV | 1 | C | T | Homozygous   |
| NC_037651.1 | 4214307 | SNV | 1 | C | T | Homozygous   |
| NC_037651.1 | 4214353 | SNV | 1 | G | A | Heterozygous |
| NC_037651.1 | 4214355 | SNV | 1 | C | T | Heterozygous |
| NC_037651.1 | 4214388 | SNV | 1 | G | A | Heterozygous |
| NC_037651.1 | 4214415 | SNV | 1 | G | A | Heterozygous |
| NC_037651.1 | 4214435 | SNV | 1 | A | G | Homozygous   |
| NC_037651.1 | 4214488 | SNV | 1 | A | G | Heterozygous |
| NC_037651.1 | 4214574 | SNV | 1 | G | A | Homozygous   |
| NC_037651.1 | 4214707 | SNV | 1 | G | C | Homozygous   |
| NC_037651.1 | 4214713 | SNV | 1 | A | G | Heterozygous |
| NC_037651.1 | 4226089 | SNV | 1 | C | T | Homozygous   |
| NC_037651.1 | 4251189 | SNV | 1 | T | C | Heterozygous |
| NC_037651.1 | 4251215 | SNV | 1 | T | C | Homozygous   |
| NC_037651.1 | 4251851 | SNV | 1 | T | C | Homozygous   |
| NC_037651.1 | 4251895 | SNV | 1 | C | T | Homozygous   |
| NC_037651.1 | 4264631 | SNV | 1 | G | A | Heterozygous |
| NC_037651.1 | 4264653 | SNV | 1 | C | T | Heterozygous |
| NC_037651.1 | 4264702 | SNV | 1 | C | T | Homozygous   |
| NC_037651.1 | 4264774 | SNV | 1 | C | T | Heterozygous |
| NC_037651.1 | 4264776 | SNV | 1 | T | C | Heterozygous |
| NC_037651.1 | 4264785 | SNV | 1 | C | T | Heterozygous |
| NC_037651.1 | 4264816 | SNV | 1 | T | G | Heterozygous |
| NC_037651.1 | 4264821 | SNV | 1 | G | A | Homozygous   |
| NC_037651.1 | 4264826 | SNV | 1 | C | T | Heterozygous |
| NC_037651.1 | 4264836 | SNV | 1 | C | T | Heterozygous |
| NC_037651.1 | 4264839 | SNV | 1 | C | T | Homozygous   |
| NC_037651.1 | 4264861 | SNV | 1 | A | G | Homozygous   |
| NC_037651.1 | 4264863 | SNV | 1 | T | C | Homozygous   |
| NC_037651.1 | 4264892 | SNV | 1 | T | C | Heterozygous |
| NC_037651.1 | 4264899 | SNV | 1 | T | C | Heterozygous |
| NC_037651.1 | 4264908 | SNV | 1 | G | A | Homozygous   |
| NC_037651.1 | 4264910 | SNV | 1 | T | C | Homozygous   |
| NC_037651.1 | 4265028 | SNV | 1 | C | G | Heterozygous |
| NC_037651.1 | 4265095 | SNV | 1 | T | C | Homozygous   |
| NC_037651.1 | 4265102 | SNV | 1 | A | G | Heterozygous |
| NC_037651.1 | 4265106 | SNV | 1 | C | T | Homozygous   |
| NC_037651.1 | 4265134 | SNV | 1 | G | T | Homozygous   |
| NC_037651.1 | 4265149 | SNV | 1 | G | A | Heterozygous |
| NC_037651.1 | 4265187 | SNV | 1 | T | C | Heterozygous |
| NC_037651.1 | 4265305 | SNV | 1 | G | A | Heterozygous |
| NC_037651.1 | 4265705 | SNV | 1 | A | G | Homozygous   |
| NC_037651.1 | 4269358 | SNV | 1 | C | T | Homozygous   |
| NC_037651.1 | 4269438 | SNV | 1 | C | G | Homozygous   |
| NC_037651.1 | 4269480 | SNV | 1 | C | A | Heterozygous |

|             |         |     |   |   |   |              |
|-------------|---------|-----|---|---|---|--------------|
| NC_037651.1 | 4269527 | SNV | 1 | G | A | Heterozygous |
| NC_037651.1 | 4273171 | SNV | 1 | T | C | Heterozygous |
| NC_037651.1 | 4273177 | SNV | 1 | C | T | Heterozygous |
| NC_037651.1 | 4273182 | SNV | 1 | C | T | Homozygous   |
| NC_037651.1 | 4273185 | SNV | 1 | C | T | Homozygous   |
| NC_037651.1 | 4273192 | SNV | 1 | T | C | Heterozygous |
| NC_037651.1 | 4273199 | SNV | 1 | C | T | Homozygous   |
| NC_037651.1 | 4277901 | SNV | 1 | C | T | Homozygous   |
| NC_037651.1 | 4277958 | SNV | 1 | A | G | Homozygous   |
| NC_037651.1 | 4278131 | SNV | 1 | T | C | Homozygous   |
| NC_037651.1 | 4278372 | SNV | 1 | A | G | Heterozygous |
| NC_037651.1 | 4289154 | SNV | 1 | A | G | Homozygous   |
| NC_037651.1 | 4300255 | SNV | 1 | G | A | Heterozygous |
| NC_037651.1 | 4300273 | SNV | 1 | T | A | Homozygous   |
| NC_037651.1 | 4300275 | SNV | 1 | G | A | Homozygous   |
| NC_037651.1 | 4300278 | SNV | 1 | C | T | Homozygous   |
| NC_037651.1 | 4300283 | SNV | 1 | T | C | Homozygous   |
| NC_037651.1 | 4300289 | SNV | 1 | T | C | Homozygous   |
| NC_037651.1 | 4317583 | SNV | 1 | C | G | Homozygous   |
| NC_037651.1 | 4317586 | SNV | 1 | A | T | Homozygous   |
| NC_037651.1 | 4317592 | SNV | 1 | C | T | Homozygous   |
| NC_037651.1 | 4318702 | SNV | 1 | G | A | Homozygous   |
| NC_037651.1 | 4318734 | SNV | 1 | C | G | Homozygous   |
| NC_037651.1 | 4318786 | SNV | 1 | G | A | Homozygous   |
| NC_037651.1 | 4318843 | SNV | 1 | A | G | Heterozygous |
| NC_037651.1 | 4321154 | SNV | 1 | T | C | Homozygous   |
| NC_037651.1 | 4321214 | SNV | 1 | G | A | Heterozygous |
| NC_037651.1 | 4321322 | SNV | 1 | T | A | Heterozygous |
| NC_037651.1 | 4321355 | SNV | 1 | T | C | Homozygous   |
| NC_037651.1 | 4321497 | SNV | 1 | C | T | Heterozygous |
| NC_037651.1 | 4339505 | SNV | 1 | A | G | Homozygous   |
| NC_037651.1 | 4339528 | SNV | 1 | A | T | Homozygous   |
| NC_037651.1 | 4339544 | SNV | 1 | C | T | Homozygous   |
| NC_037651.1 | 4339724 | SNV | 1 | G | A | Heterozygous |
| NC_037651.1 | 4339804 | SNV | 1 | A | G | Heterozygous |
| NC_037651.1 | 4339816 | SNV | 1 | G | A | Heterozygous |
| NC_037651.1 | 4339966 | SNV | 1 | T | C | Heterozygous |
| NC_037651.1 | 4340057 | SNV | 1 | G | C | Homozygous   |
| NC_037651.1 | 4340103 | SNV | 1 | A | G | Heterozygous |
| NC_037651.1 | 4340114 | SNV | 1 | A | G | Homozygous   |
| NC_037651.1 | 4340190 | SNV | 1 | C | T | Heterozygous |
| NC_037651.1 | 4340241 | SNV | 1 | A | G | Homozygous   |
| NC_037651.1 | 4340248 | SNV | 1 | A | G | Homozygous   |
| NC_037651.1 | 4341319 | SNV | 1 | T | C | Homozygous   |
| NC_037651.1 | 4341551 | SNV | 1 | T | C | Homozygous   |
| NC_037651.1 | 4349898 | SNV | 1 | C | G | Homozygous   |
| NC_037651.1 | 4349909 | SNV | 1 | T | C | Heterozygous |
| NC_037651.1 | 4349917 | SNV | 1 | A | G | Homozygous   |
| NC_037651.1 | 4350113 | SNV | 1 | A | G | Homozygous   |
| NC_037651.1 | 4350552 | SNV | 1 | T | C | Homozygous   |
| NC_037651.1 | 4350554 | SNV | 1 | T | C | Homozygous   |

|             |         |     |   |   |   |              |
|-------------|---------|-----|---|---|---|--------------|
| NC_037651.1 | 4350609 | SNV | 1 | T | C | Homozygous   |
| NC_037651.1 | 4350748 | SNV | 1 | T | C | Homozygous   |
| NC_037651.1 | 4350783 | SNV | 1 | A | G | Homozygous   |
| NC_037651.1 | 4375331 | SNV | 1 | A | G | Homozygous   |
| NC_037651.1 | 4375359 | SNV | 1 | G | A | Homozygous   |
| NC_037651.1 | 4393005 | SNV | 1 | G | A | Heterozygous |
| NC_037651.1 | 4398248 | SNV | 1 | T | C | Homozygous   |
| NC_037651.1 | 4398254 | SNV | 1 | T | C | Heterozygous |
| NC_037651.1 | 4398259 | SNV | 1 | C | A | Heterozygous |
| NC_037651.1 | 4398264 | SNV | 1 | T | C | Homozygous   |
| NC_037651.1 | 4398602 | SNV | 1 | T | C | Homozygous   |
| NC_037651.1 | 4398642 | SNV | 1 | C | G | Heterozygous |
| NC_037651.1 | 4399285 | SNV | 1 | T | C | Heterozygous |
| NC_037651.1 | 4403624 | SNV | 1 | G | A | Heterozygous |
| NC_037651.1 | 4403637 | SNV | 1 | A | G | Homozygous   |
| NC_037651.1 | 4412007 | SNV | 1 | A | C | Homozygous   |
| NC_037651.1 | 4412145 | SNV | 1 | C | A | Heterozygous |
| NC_037651.1 | 4412150 | SNV | 1 | C | T | Homozygous   |
| NC_037651.1 | 4412157 | SNV | 1 | C | T | Heterozygous |
| NC_037651.1 | 4412163 | SNV | 1 | T | C | Heterozygous |
| NC_037651.1 | 4412280 | SNV | 1 | C | A | Heterozygous |
| NC_037651.1 | 4422813 | SNV | 1 | G | A | Heterozygous |
| NC_037651.1 | 4422819 | SNV | 1 | G | A | Heterozygous |
| NC_037651.1 | 4422829 | SNV | 1 | A | G | Heterozygous |
| NC_037651.1 | 4426698 | SNV | 1 | T | C | Heterozygous |
| NC_037651.1 | 4434681 | SNV | 1 | A | G | Heterozygous |
| NC_037651.1 | 4434683 | SNV | 1 | A | G | Heterozygous |
| NC_037651.1 | 4434686 | SNV | 1 | A | G | Homozygous   |
| NC_037651.1 | 4437072 | SNV | 1 | A | G | Homozygous   |
| NC_037651.1 | 4438820 | SNV | 1 | A | G | Homozygous   |
| NC_037651.1 | 4438823 | SNV | 1 | A | C | Homozygous   |
| NC_037651.1 | 4440289 | SNV | 1 | G | A | Homozygous   |
| NC_037651.1 | 4440292 | SNV | 1 | G | A | Homozygous   |
| NC_037651.1 | 4440295 | SNV | 1 | A | C | Homozygous   |
| NC_037651.1 | 4440326 | SNV | 1 | A | G | Homozygous   |
| NC_037651.1 | 4440338 | SNV | 1 | A | T | Heterozygous |
| NC_037651.1 | 4440340 | SNV | 1 | A | G | Heterozygous |
| NC_037651.1 | 4527110 | SNV | 1 | A | G | Homozygous   |
| NC_037651.1 | 4527233 | SNV | 1 | A | G | Heterozygous |
| NC_037651.1 | 4527292 | SNV | 1 | T | C | Heterozygous |
| NC_037651.1 | 4527296 | SNV | 1 | A | G | Homozygous   |
| NC_037651.1 | 4527348 | SNV | 1 | C | T | Heterozygous |
| NC_037651.1 | 4529997 | SNV | 1 | G | A | Homozygous   |
| NC_037651.1 | 4533842 | SNV | 1 | T | C | Homozygous   |
| NC_037651.1 | 4533889 | SNV | 1 | C | G | Heterozygous |
| NC_037651.1 | 4544751 | SNV | 1 | C | G | Homozygous   |
| NC_037651.1 | 4546234 | SNV | 1 | A | G | Homozygous   |
| NC_037651.1 | 4571169 | SNV | 1 | A | G | Homozygous   |
| NC_037651.1 | 4571195 | SNV | 1 | T | C | Heterozygous |
| NC_037651.1 | 4573222 | SNV | 1 | A | G | Homozygous   |
| NC_037651.1 | 4573235 | SNV | 1 | G | A | Homozygous   |

|             |         |     |   |   |   |              |
|-------------|---------|-----|---|---|---|--------------|
| NC_037651.1 | 4573238 | SNV | 1 | G | A | Homozygous   |
| NC_037651.1 | 4573241 | SNV | 1 | G | A | Homozygous   |
| NC_037651.1 | 4573244 | SNV | 1 | G | A | Homozygous   |
| NC_037651.1 | 4573250 | SNV | 1 | G | A | Homozygous   |
| NC_037651.1 | 4573253 | SNV | 1 | G | A | Homozygous   |
| NC_037651.1 | 4573260 | SNV | 1 | G | A | Homozygous   |
| NC_037651.1 | 4573970 | SNV | 1 | T | C | Heterozygous |
| NC_037651.1 | 4574690 | SNV | 1 | T | C | Homozygous   |
| NC_037651.1 | 4579067 | SNV | 1 | T | C | Heterozygous |
| NC_037651.1 | 4579509 | SNV | 1 | C | T | Homozygous   |
| NC_037651.1 | 4580370 | SNV | 1 | G | T | Homozygous   |
| NC_037651.1 | 4580402 | SNV | 1 | C | G | Heterozygous |
| NC_037651.1 | 4581851 | SNV | 1 | C | T | Heterozygous |
| NC_037651.1 | 4584338 | SNV | 1 | G | A | Heterozygous |
| NC_037651.1 | 4584655 | SNV | 1 | T | C | Heterozygous |
| NC_037651.1 | 4584673 | SNV | 1 | C | T | Heterozygous |
| NC_037651.1 | 4584751 | SNV | 1 | T | C | Homozygous   |
| NC_037651.1 | 4585683 | SNV | 1 | C | A | Heterozygous |
| NC_037651.1 | 4585812 | SNV | 1 | C | A | Homozygous   |
| NC_037651.1 | 4585832 | SNV | 1 | T | C | Heterozygous |
| NC_037651.1 | 4585857 | SNV | 1 | A | C | Heterozygous |
| NC_037651.1 | 4586693 | SNV | 1 | T | C | Heterozygous |
| NC_037651.1 | 4588277 | SNV | 1 | C | T | Homozygous   |
| NC_037651.1 | 4592239 | SNV | 1 | T | C | Heterozygous |
| NC_037651.1 | 4592242 | SNV | 1 | T | C | Heterozygous |
| NC_037651.1 | 4592284 | SNV | 1 | G | A | Heterozygous |
| NC_037651.1 | 4592298 | SNV | 1 | T | C | Homozygous   |
| NC_037651.1 | 4592323 | SNV | 1 | C | T | Heterozygous |
| NC_037651.1 | 4595581 | SNV | 1 | C | T | Homozygous   |
| NC_037651.1 | 4595692 | SNV | 1 | C | T | Heterozygous |
| NC_037651.1 | 4596111 | SNV | 1 | C | T | Homozygous   |
| NC_037651.1 | 4596128 | SNV | 1 | C | G | Heterozygous |
| NC_037651.1 | 4597501 | SNV | 1 | A | T | Homozygous   |
| NC_037651.1 | 4597594 | SNV | 1 | A | G | Homozygous   |
| NC_037651.1 | 4597641 | SNV | 1 | T | A | Homozygous   |
| NC_037651.1 | 4597721 | SNV | 1 | G | T | Homozygous   |
| NC_037651.1 | 4597895 | SNV | 1 | T | C | Homozygous   |
| NC_037651.1 | 4598057 | SNV | 1 | G | A | Heterozygous |
| NC_037651.1 | 4598896 | SNV | 1 | C | T | Heterozygous |
| NC_037651.1 | 4599184 | SNV | 1 | C | T | Heterozygous |
| NC_037651.1 | 4606136 | SNV | 1 | T | A | Homozygous   |
| NC_037651.1 | 4606138 | SNV | 1 | C | T | Heterozygous |
| NC_037651.1 | 4608913 | SNV | 1 | T | C | Homozygous   |
| NC_037651.1 | 4612275 | SNV | 1 | G | T | Homozygous   |
| NC_037651.1 | 4612684 | SNV | 1 | T | G | Heterozygous |
| NC_037651.1 | 4612691 | SNV | 1 | G | A | Heterozygous |
| NC_037651.1 | 4612957 | SNV | 1 | G | A | Heterozygous |
| NC_037651.1 | 4613231 | SNV | 1 | G | A | Homozygous   |
| NC_037651.1 | 4615482 | SNV | 1 | T | C | Homozygous   |
| NC_037651.1 | 4619118 | SNV | 1 | A | T | Homozygous   |
| NC_037651.1 | 4619387 | SNV | 1 | T | C | Homozygous   |

|             |         |     |   |   |   |              |
|-------------|---------|-----|---|---|---|--------------|
| NC_037651.1 | 4619447 | SNV | 1 | T | C | Homozygous   |
| NC_037651.1 | 4619452 | SNV | 1 | T | C | Heterozygous |
| NC_037651.1 | 4619456 | SNV | 1 | T | C | Heterozygous |
| NC_037651.1 | 4619585 | SNV | 1 | G | A | Homozygous   |
| NC_037651.1 | 4619593 | SNV | 1 | A | G | Homozygous   |
| NC_037651.1 | 4620061 | SNV | 1 | A | C | Heterozygous |
| NC_037651.1 | 4620129 | SNV | 1 | G | T | Homozygous   |
| NC_037651.1 | 4620224 | SNV | 1 | T | C | Homozygous   |
| NC_037651.1 | 4622292 | SNV | 1 | A | G | Homozygous   |
| NC_037651.1 | 4622307 | SNV | 1 | T | C | Homozygous   |
| NC_037651.1 | 4622394 | SNV | 1 | G | A | Heterozygous |
| NC_037651.1 | 4622696 | SNV | 1 | C | T | Homozygous   |
| NC_037651.1 | 4626252 | SNV | 1 | T | C | Homozygous   |
| NC_037651.1 | 4626338 | SNV | 1 | C | G | Homozygous   |
| NC_037651.1 | 4626426 | SNV | 1 | A | G | Heterozygous |
| NC_037651.1 | 4627037 | SNV | 1 | T | A | Heterozygous |
| NC_037651.1 | 4627041 | SNV | 1 | T | A | Heterozygous |
| NC_037651.1 | 4627043 | SNV | 1 | T | A | Heterozygous |
| NC_037651.1 | 4627047 | SNV | 1 | T | G | Heterozygous |
| NC_037651.1 | 4627051 | SNV | 1 | T | C | Heterozygous |
| NC_037651.1 | 4627058 | SNV | 1 | C | T | Heterozygous |
| NC_037651.1 | 4627068 | SNV | 1 | C | T | Heterozygous |
| NC_037651.1 | 4627486 | SNV | 1 | T | A | Heterozygous |
| NC_037651.1 | 4628004 | SNV | 1 | C | T | Homozygous   |
| NC_037651.1 | 4628007 | SNV | 1 | G | T | Heterozygous |
| NC_037651.1 | 4634641 | SNV | 1 | A | C | Homozygous   |
| NC_037651.1 | 4635085 | SNV | 1 | A | G | Homozygous   |
| NC_037651.1 | 4635181 | SNV | 1 | C | T | Homozygous   |
| NC_037651.1 | 4635386 | SNV | 1 | A | G | Homozygous   |
| NC_037651.1 | 4635392 | SNV | 1 | T | C | Homozygous   |
| NC_037651.1 | 4635419 | SNV | 1 | T | C | Homozygous   |
| NC_037651.1 | 4635438 | SNV | 1 | A | G | Homozygous   |
| NC_037651.1 | 4635473 | SNV | 1 | T | C | Homozygous   |
| NC_037651.1 | 4636000 | SNV | 1 | G | A | Homozygous   |
| NC_037651.1 | 4636006 | SNV | 1 | G | A | Homozygous   |
| NC_037651.1 | 4636164 | SNV | 1 | C | T | Heterozygous |
| NC_037651.1 | 4636182 | SNV | 1 | A | G | Heterozygous |
| NC_037651.1 | 4636281 | SNV | 1 | T | C | Homozygous   |
| NC_037651.1 | 4636598 | SNV | 1 | T | C | Homozygous   |
| NC_037651.1 | 4636664 | SNV | 1 | A | T | Homozygous   |
| NC_037651.1 | 4636678 | SNV | 1 | T | A | Homozygous   |
| NC_037651.1 | 4636706 | SNV | 1 | A | G | Heterozygous |
| NC_037651.1 | 4636732 | SNV | 1 | A | G | Homozygous   |
| NC_037651.1 | 4636739 | SNV | 1 | G | T | Homozygous   |
| NC_037651.1 | 4636778 | SNV | 1 | G | A | Homozygous   |
| NC_037651.1 | 4636969 | SNV | 1 | T | C | Heterozygous |
| NC_037651.1 | 4636993 | SNV | 1 | T | C | Heterozygous |
| NC_037651.1 | 4637182 | SNV | 1 | C | T | Heterozygous |
| NC_037651.1 | 4637382 | SNV | 1 | C | G | Homozygous   |
| NC_037651.1 | 4637402 | SNV | 1 | A | G | Homozygous   |
| NC_037651.1 | 4637419 | SNV | 1 | T | C | Homozygous   |



|             |         |     |   |   |   |              |
|-------------|---------|-----|---|---|---|--------------|
| NC_037651.1 | 4637918 | SNV | 1 | A | G | Homozygous   |
| NC_037651.1 | 4637925 | SNV | 1 | A | G | Homozygous   |
| NC_037651.1 | 4639411 | SNV | 1 | A | G | Heterozygous |
| NC_037651.1 | 4639428 | SNV | 1 | A | G | Homozygous   |
| NC_037651.1 | 4639466 | SNV | 1 | T | A | Homozygous   |
| NC_037651.1 | 4639468 | SNV | 1 | G | A | Homozygous   |
| NC_037651.1 | 4639497 | SNV | 1 | A | G | Homozygous   |
| NC_037651.1 | 4639532 | SNV | 1 | T | C | Homozygous   |
| NC_037651.1 | 4639537 | SNV | 1 | C | T | Heterozygous |
| NC_037651.1 | 4639607 | SNV | 1 | G | A | Homozygous   |
| NC_037651.1 | 4639635 | SNV | 1 | A | G | Homozygous   |
| NC_037651.1 | 4640054 | SNV | 1 | A | G | Homozygous   |
| NC_037651.1 | 4640115 | SNV | 1 | T | C | Homozygous   |
| NC_037651.1 | 4640511 | SNV | 1 | G | A | Heterozygous |
| NC_037651.1 | 4641078 | SNV | 1 | G | A | Homozygous   |
| NC_037651.1 | 4641202 | SNV | 1 | C | A | Heterozygous |
| NC_037651.1 | 4641205 | SNV | 1 | G | A | Homozygous   |
| NC_037651.1 | 4641257 | SNV | 1 | A | G | Homozygous   |
| NC_037651.1 | 4641766 | SNV | 1 | T | C | Homozygous   |
| NC_037651.1 | 4642072 | SNV | 1 | T | C | Homozygous   |
| NC_037651.1 | 4642135 | SNV | 1 | T | C | Homozygous   |
| NC_037651.1 | 4643073 | SNV | 1 | T | G | Homozygous   |
| NC_037651.1 | 4643151 | SNV | 1 | A | G | Homozygous   |
| NC_037651.1 | 4643161 | SNV | 1 | T | C | Homozygous   |
| NC_037651.1 | 4643163 | SNV | 1 | C | G | Homozygous   |
| NC_037651.1 | 4651046 | SNV | 1 | C | T | Homozygous   |
| NC_037651.1 | 4657691 | SNV | 1 | A | G | Homozygous   |
| NC_037651.1 | 4657772 | SNV | 1 | C | T | Homozygous   |
| NC_037651.1 | 4659536 | SNV | 1 | T | C | Homozygous   |
| NC_037651.1 | 4659650 | SNV | 1 | G | T | Homozygous   |
| NC_037651.1 | 4659736 | SNV | 1 | A | G | Homozygous   |
| NC_037651.1 | 4685629 | SNV | 1 | A | G | Heterozygous |
| NC_037651.1 | 4685666 | SNV | 1 | A | G | Homozygous   |
| NC_037651.1 | 4685669 | SNV | 1 | G | A | Homozygous   |
| NC_037651.1 | 4685672 | SNV | 1 | G | A | Homozygous   |
| NC_037651.1 | 4685675 | SNV | 1 | G | C | Homozygous   |
| NC_037651.1 | 4685679 | SNV | 1 | A | G | Homozygous   |
| NC_037651.1 | 4688420 | SNV | 1 | T | G | Heterozygous |
| NC_037651.1 | 4688428 | SNV | 1 | C | T | Heterozygous |
| NC_037651.1 | 4691332 | SNV | 1 | C | T | Heterozygous |
| NC_037651.1 | 4691363 | SNV | 1 | C | T | Homozygous   |
| NC_037651.1 | 4691380 | SNV | 1 | T | A | Homozygous   |
| NC_037651.1 | 4691405 | SNV | 1 | C | T | Heterozygous |
| NC_037651.1 | 4691444 | SNV | 1 | G | A | Heterozygous |
| NC_037651.1 | 4691683 | SNV | 1 | G | A | Homozygous   |
| NC_037651.1 | 4691814 | SNV | 1 | T | C | Homozygous   |
| NC_037651.1 | 4691832 | SNV | 1 | G | A | Homozygous   |
| NC_037651.1 | 4692086 | SNV | 1 | C | T | Heterozygous |
| NC_037651.1 | 4692106 | SNV | 1 | T | C | Homozygous   |
| NC_037651.1 | 4692109 | SNV | 1 | C | T | Heterozygous |
| NC_037651.1 | 4694179 | SNV | 1 | T | C | Heterozygous |

|             |         |     |   |   |   |              |
|-------------|---------|-----|---|---|---|--------------|
| NC_037651.1 | 4695341 | SNV | 1 | A | C | Homozygous   |
| NC_037651.1 | 4695657 | SNV | 1 | C | G | Homozygous   |
| NC_037651.1 | 4695666 | SNV | 1 | T | C | Homozygous   |
| NC_037651.1 | 4696366 | SNV | 1 | T | C | Heterozygous |
| NC_037651.1 | 4696558 | SNV | 1 | G | A | Heterozygous |
| NC_037651.1 | 4696561 | SNV | 1 | C | T | Homozygous   |
| NC_037651.1 | 4697434 | SNV | 1 | G | A | Heterozygous |
| NC_037651.1 | 4697561 | SNV | 1 | T | C | Homozygous   |
| NC_037651.1 | 4697608 | SNV | 1 | A | T | Heterozygous |
| NC_037651.1 | 4697688 | SNV | 1 | T | C | Homozygous   |
| NC_037651.1 | 4697693 | SNV | 1 | C | A | Homozygous   |
| NC_037651.1 | 4698008 | SNV | 1 | T | C | Heterozygous |
| NC_037651.1 | 4698020 | SNV | 1 | C | T | Heterozygous |
| NC_037651.1 | 4698449 | SNV | 1 | T | C | Homozygous   |
| NC_037651.1 | 4698483 | SNV | 1 | A | G | Heterozygous |
| NC_037651.1 | 4698491 | SNV | 1 | C | T | Heterozygous |
| NC_037651.1 | 4698688 | SNV | 1 | A | G | Heterozygous |
| NC_037651.1 | 4698907 | SNV | 1 | G | A | Homozygous   |
| NC_037651.1 | 4699003 | SNV | 1 | A | G | Heterozygous |
| NC_037651.1 | 4699224 | SNV | 1 | A | G | Heterozygous |
| NC_037651.1 | 4699649 | SNV | 1 | G | A | Homozygous   |
| NC_037651.1 | 4700034 | SNV | 1 | C | T | Heterozygous |
| NC_037651.1 | 4700095 | SNV | 1 | A | G | Heterozygous |
| NC_037651.1 | 4700202 | SNV | 1 | G | A | Heterozygous |
| NC_037651.1 | 4700219 | SNV | 1 | T | C | Homozygous   |
| NC_037651.1 | 4700223 | SNV | 1 | A | G | Heterozygous |
| NC_037651.1 | 4700281 | SNV | 1 | C | T | Heterozygous |
| NC_037651.1 | 4705361 | SNV | 1 | T | A | Homozygous   |
| NC_037651.1 | 4705369 | SNV | 1 | A | T | Homozygous   |
| NC_037651.1 | 4705395 | SNV | 1 | T | A | Homozygous   |
| NC_037651.1 | 4716123 | SNV | 1 | A | T | Homozygous   |
| NC_037651.1 | 4716136 | SNV | 1 | G | T | Homozygous   |
| NC_037651.1 | 4716148 | SNV | 1 | G | C | Heterozygous |
| NC_037651.1 | 4716155 | SNV | 1 | A | G | Homozygous   |
| NC_037651.1 | 4716158 | SNV | 1 | C | G | Homozygous   |
| NC_037651.1 | 4724421 | SNV | 1 | G | T | Heterozygous |
| NC_037651.1 | 4724423 | SNV | 1 | A | T | Heterozygous |
| NC_037651.1 | 4724436 | SNV | 1 | G | A | Heterozygous |
| NC_037651.1 | 4751163 | SNV | 1 | C | G | Homozygous   |
| NC_037651.1 | 4751167 | SNV | 1 | T | C | Heterozygous |
| NC_037651.1 | 4751178 | SNV | 1 | C | T | Homozygous   |
| NC_037651.1 | 4751203 | SNV | 1 | T | C | Homozygous   |
| NC_037651.1 | 4767861 | SNV | 1 | T | C | Heterozygous |
| NC_037651.1 | 4767905 | SNV | 1 | A | T | Homozygous   |
| NC_037651.1 | 4823580 | SNV | 1 | G | A | Heterozygous |
| NC_037651.1 | 4824151 | SNV | 1 | T | C | Homozygous   |
| NC_037651.1 | 4824494 | SNV | 1 | T | C | Homozygous   |
| NC_037651.1 | 4824758 | SNV | 1 | C | T | Heterozygous |
| NC_037651.1 | 4824868 | SNV | 1 | A | G | Heterozygous |
| NC_037651.1 | 4824875 | SNV | 1 | C | T | Homozygous   |
| NC_037651.1 | 4824883 | SNV | 1 | T | C | Heterozygous |

|             |         |     |   |   |   |              |
|-------------|---------|-----|---|---|---|--------------|
| NC_037651.1 | 4824892 | SNV | 1 | A | G | Heterozygous |
| NC_037651.1 | 4824933 | SNV | 1 | T | C | Heterozygous |
| NC_037651.1 | 4824989 | SNV | 1 | T | G | Heterozygous |
| NC_037651.1 | 4825103 | SNV | 1 | A | T | Heterozygous |
| NC_037651.1 | 4825312 | SNV | 1 | T | C | Homozygous   |
| NC_037651.1 | 4825345 | SNV | 1 | C | T | Homozygous   |
| NC_037651.1 | 4829249 | SNV | 1 | G | A | Heterozygous |
| NC_037651.1 | 4829254 | SNV | 1 | A | T | Heterozygous |
| NC_037651.1 | 4829282 | SNV | 1 | T | A | Homozygous   |
| NC_037651.1 | 4839632 | SNV | 1 | C | A | Homozygous   |
| NC_037651.1 | 4839662 | SNV | 1 | A | C | Homozygous   |
| NC_037651.1 | 4839677 | SNV | 1 | G | A | Homozygous   |
| NC_037651.1 | 4839679 | SNV | 1 | A | G | Homozygous   |
| NC_037651.1 | 4839685 | SNV | 1 | T | A | Homozygous   |
| NC_037651.1 | 4839689 | SNV | 1 | T | C | Homozygous   |
| NC_037651.1 | 4843060 | SNV | 1 | A | G | Homozygous   |
| NC_037651.1 | 4843070 | SNV | 1 | A | G | Homozygous   |
| NC_037651.1 | 4843122 | SNV | 1 | T | C | Homozygous   |
| NC_037651.1 | 4843399 | SNV | 1 | A | G | Homozygous   |
| NC_037651.1 | 4843470 | SNV | 1 | A | G | Homozygous   |
| NC_037651.1 | 4856193 | SNV | 1 | G | A | Heterozygous |
| NC_037651.1 | 4856332 | SNV | 1 | A | G | Homozygous   |
| NC_037651.1 | 4856588 | SNV | 1 | T | C | Homozygous   |
| NC_037651.1 | 4856602 | SNV | 1 | T | A | Homozygous   |
| NC_037651.1 | 4856632 | SNV | 1 | T | C | Homozygous   |
| NC_037651.1 | 4858707 | SNV | 1 | T | C | Heterozygous |
| NC_037651.1 | 4858715 | SNV | 1 | G | T | Heterozygous |
| NC_037651.1 | 4858781 | SNV | 1 | G | A | Heterozygous |
| NC_037651.1 | 4858956 | SNV | 1 | A | T | Homozygous   |
| NC_037651.1 | 4858977 | SNV | 1 | G | A | Heterozygous |
| NC_037651.1 | 4859058 | SNV | 1 | T | C | Homozygous   |
| NC_037651.1 | 4859192 | SNV | 1 | C | T | Heterozygous |
| NC_037651.1 | 4859448 | SNV | 1 | T | C | Homozygous   |
| NC_037651.1 | 4859505 | SNV | 1 | C | T | Heterozygous |
| NC_037651.1 | 4859514 | SNV | 1 | A | G | Homozygous   |
| NC_037651.1 | 4859520 | SNV | 1 | T | G | Homozygous   |
| NC_037651.1 | 4859523 | SNV | 1 | A | C | Heterozygous |
| NC_037651.1 | 4859546 | SNV | 1 | T | C | Heterozygous |
| NC_037651.1 | 4859592 | SNV | 1 | A | C | Homozygous   |
| NC_037651.1 | 4859607 | SNV | 1 | C | T | Homozygous   |
| NC_037651.1 | 4859727 | SNV | 1 | A | G | Homozygous   |
| NC_037651.1 | 4859732 | SNV | 1 | T | C | Homozygous   |
| NC_037651.1 | 4859790 | SNV | 1 | C | G | Homozygous   |
| NC_037651.1 | 4861963 | SNV | 1 | G | A | Heterozygous |
| NC_037651.1 | 4862017 | SNV | 1 | T | C | Homozygous   |
| NC_037651.1 | 4862176 | SNV | 1 | A | T | Heterozygous |
| NC_037651.1 | 4862253 | SNV | 1 | T | C | Heterozygous |
| NC_037651.1 | 4863051 | SNV | 1 | T | C | Heterozygous |
| NC_037651.1 | 4863053 | SNV | 1 | C | G | Homozygous   |
| NC_037651.1 | 4863407 | SNV | 1 | G | A | Homozygous   |
| NC_037651.1 | 4863485 | SNV | 1 | A | G | Homozygous   |

|             |         |     |   |   |   |              |
|-------------|---------|-----|---|---|---|--------------|
| NC_037651.1 | 4864116 | SNV | 1 | C | T | Homozygous   |
| NC_037651.1 | 4864300 | SNV | 1 | C | G | Homozygous   |
| NC_037651.1 | 4864326 | SNV | 1 | T | C | Homozygous   |
| NC_037651.1 | 4864400 | SNV | 1 | G | C | Heterozygous |
| NC_037651.1 | 4864528 | SNV | 1 | C | T | Heterozygous |
| NC_037651.1 | 4864583 | SNV | 1 | G | A | Heterozygous |
| NC_037651.1 | 4864837 | SNV | 1 | T | C | Homozygous   |
| NC_037651.1 | 4864870 | SNV | 1 | A | G | Homozygous   |
| NC_037651.1 | 4865063 | SNV | 1 | A | G | Homozygous   |
| NC_037651.1 | 4865477 | SNV | 1 | C | T | Homozygous   |
| NC_037651.1 | 4865507 | SNV | 1 | A | G | Homozygous   |
| NC_037651.1 | 4868592 | SNV | 1 | C | T | Heterozygous |
| NC_037651.1 | 4869177 | SNV | 1 | A | G | Homozygous   |
| NC_037651.1 | 4869359 | SNV | 1 | C | G | Homozygous   |
| NC_037651.1 | 4884384 | SNV | 1 | A | T | Homozygous   |
| NC_037651.1 | 4884390 | SNV | 1 | T | G | Homozygous   |
| NC_037651.1 | 4888983 | SNV | 1 | A | G | Heterozygous |
| NC_037651.1 | 4889197 | SNV | 1 | T | C | Homozygous   |
| NC_037651.1 | 4889200 | SNV | 1 | A | T | Homozygous   |
| NC_037651.1 | 4889217 | SNV | 1 | G | A | Heterozygous |
| NC_037651.1 | 4889716 | SNV | 1 | C | T | Homozygous   |
| NC_037651.1 | 4889770 | SNV | 1 | G | A | Heterozygous |
| NC_037651.1 | 4890097 | SNV | 1 | C | T | Homozygous   |
| NC_037651.1 | 4890099 | SNV | 1 | C | T | Homozygous   |
| NC_037651.1 | 4890339 | SNV | 1 | A | T | Homozygous   |
| NC_037651.1 | 4890464 | SNV | 1 | G | A | Homozygous   |
| NC_037651.1 | 4890509 | SNV | 1 | G | A | Homozygous   |
| NC_037651.1 | 4890717 | SNV | 1 | T | C | Homozygous   |
| NC_037651.1 | 4890738 | SNV | 1 | A | G | Homozygous   |
| NC_037651.1 | 4891190 | SNV | 1 | G | A | Homozygous   |
| NC_037651.1 | 4891479 | SNV | 1 | A | G | Homozygous   |
| NC_037651.1 | 4891484 | SNV | 1 | A | G | Homozygous   |
| NC_037651.1 | 4892660 | SNV | 1 | G | A | Heterozygous |
| NC_037651.1 | 4892665 | SNV | 1 | C | T | Heterozygous |
| NC_037651.1 | 4892683 | SNV | 1 | G | A | Heterozygous |
| NC_037651.1 | 4916019 | SNV | 1 | G | A | Homozygous   |
| NC_037651.1 | 4921283 | SNV | 1 | T | C | Heterozygous |
| NC_037651.1 | 4921362 | SNV | 1 | A | T | Heterozygous |
| NC_037651.1 | 4921366 | SNV | 1 | C | T | Heterozygous |
| NC_037651.1 | 4921559 | SNV | 1 | T | C | Heterozygous |
| NC_037651.1 | 4921566 | SNV | 1 | T | G | Heterozygous |
| NC_037651.1 | 4921818 | SNV | 1 | C | G | Homozygous   |
| NC_037651.1 | 4921844 | SNV | 1 | T | C | Heterozygous |
| NC_037651.1 | 4921877 | SNV | 1 | C | T | Heterozygous |
| NC_037651.1 | 4921904 | SNV | 1 | C | G | Heterozygous |
| NC_037651.1 | 4921909 | SNV | 1 | A | G | Homozygous   |
| NC_037651.1 | 4921934 | SNV | 1 | T | C | Heterozygous |
| NC_037651.1 | 4923891 | SNV | 1 | C | A | Heterozygous |
| NC_037651.1 | 4924199 | SNV | 1 | T | C | Homozygous   |
| NC_037651.1 | 4924221 | SNV | 1 | C | T | Heterozygous |
| NC_037651.1 | 4924488 | SNV | 1 | A | G | Homozygous   |

|             |         |     |   |   |   |              |
|-------------|---------|-----|---|---|---|--------------|
| NC_037651.1 | 4924679 | SNV | 1 | C | T | Heterozygous |
| NC_037651.1 | 4924729 | SNV | 1 | C | A | Heterozygous |
| NC_037651.1 | 4924866 | SNV | 1 | A | G | Heterozygous |
| NC_037651.1 | 4924885 | SNV | 1 | T | C | Homozygous   |
| NC_037651.1 | 4925334 | SNV | 1 | T | C | Heterozygous |
| NC_037651.1 | 4925364 | SNV | 1 | G | A | Heterozygous |
| NC_037651.1 | 4925658 | SNV | 1 | C | T | Heterozygous |
| NC_037651.1 | 4925750 | SNV | 1 | G | A | Heterozygous |
| NC_037651.1 | 4925802 | SNV | 1 | A | G | Homozygous   |
| NC_037651.1 | 4925889 | SNV | 1 | A | G | Homozygous   |
| NC_037651.1 | 4925969 | SNV | 1 | T | C | Heterozygous |
| NC_037651.1 | 4926103 | SNV | 1 | C | T | Homozygous   |
| NC_037651.1 | 4926257 | SNV | 1 | A | G | Homozygous   |
| NC_037651.1 | 4926416 | SNV | 1 | C | T | Heterozygous |
| NC_037651.1 | 4927136 | SNV | 1 | G | A | Homozygous   |
| NC_037651.1 | 4929377 | SNV | 1 | A | G | Heterozygous |
| NC_037651.1 | 4929496 | SNV | 1 | C | T | Heterozygous |
| NC_037651.1 | 4930863 | SNV | 1 | A | G | Homozygous   |
| NC_037651.1 | 4931247 | SNV | 1 | C | T | Heterozygous |
| NC_037651.1 | 4937228 | SNV | 1 | C | G | Homozygous   |
| NC_037651.1 | 4937259 | SNV | 1 | G | A | Heterozygous |
| NC_037651.1 | 4937447 | SNV | 1 | T | C | Heterozygous |
| NC_037651.1 | 4937499 | SNV | 1 | C | T | Homozygous   |
| NC_037651.1 | 4942219 | SNV | 1 | G | A | Homozygous   |
| NC_037651.1 | 4942223 | SNV | 1 | C | T | Homozygous   |
| NC_037651.1 | 4942310 | SNV | 1 | G | A | Heterozygous |
| NC_037651.1 | 4943266 | SNV | 1 | T | C | Homozygous   |
| NC_037651.1 | 4943270 | SNV | 1 | T | A | Homozygous   |
| NC_037651.1 | 4943317 | SNV | 1 | G | T | Homozygous   |
| NC_037651.1 | 4943929 | SNV | 1 | G | A | Heterozygous |
| NC_037651.1 | 4944498 | SNV | 1 | T | C | Heterozygous |
| NC_037651.1 | 4953337 | SNV | 1 | T | A | Heterozygous |
| NC_037651.1 | 4959533 | SNV | 1 | T | C | Heterozygous |
| NC_037651.1 | 4959551 | SNV | 1 | C | T | Heterozygous |
| NC_037651.1 | 4959556 | SNV | 1 | C | G | Homozygous   |
| NC_037651.1 | 4959695 | SNV | 1 | T | C | Homozygous   |
| NC_037651.1 | 4959909 | SNV | 1 | T | A | Homozygous   |
| NC_037651.1 | 4960429 | SNV | 1 | C | T | Homozygous   |
| NC_037651.1 | 4960759 | SNV | 1 | A | C | Homozygous   |
| NC_037651.1 | 4965800 | SNV | 1 | T | C | Homozygous   |
| NC_037651.1 | 4965811 | SNV | 1 | A | T | Homozygous   |
| NC_037651.1 | 4965814 | SNV | 1 | T | C | Homozygous   |
| NC_037651.1 | 4965822 | SNV | 1 | G | C | Homozygous   |
| NC_037651.1 | 4972658 | SNV | 1 | A | G | Homozygous   |
| NC_037651.1 | 4972985 | SNV | 1 | C | G | Homozygous   |
| NC_037651.1 | 4972994 | SNV | 1 | T | C | Homozygous   |
| NC_037651.1 | 4973177 | SNV | 1 | T | A | Homozygous   |
| NC_037651.1 | 4974312 | SNV | 1 | C | T | Heterozygous |
| NC_037651.1 | 4974384 | SNV | 1 | T | C | Homozygous   |
| NC_037651.1 | 4974514 | SNV | 1 | T | C | Heterozygous |
| NC_037651.1 | 4975519 | SNV | 1 | A | G | Heterozygous |

|             |         |     |   |   |   |              |
|-------------|---------|-----|---|---|---|--------------|
| NC_037651.1 | 4976185 | SNV | 1 | A | G | Heterozygous |
| NC_037651.1 | 4976865 | SNV | 1 | T | C | Homozygous   |
| NC_037651.1 | 4977043 | SNV | 1 | T | A | Heterozygous |
| NC_037651.1 | 4977045 | SNV | 1 | T | C | Heterozygous |
| NC_037651.1 | 4977047 | SNV | 1 | T | A | Heterozygous |
| NC_037651.1 | 4981604 | SNV | 1 | T | A | Homozygous   |
| NC_037651.1 | 4982720 | SNV | 1 | C | G | Homozygous   |
| NC_037651.1 | 4982722 | SNV | 1 | A | G | Homozygous   |
| NC_037651.1 | 4982753 | SNV | 1 | G | C | Homozygous   |
| NC_037651.1 | 4982758 | SNV | 1 | T | G | Homozygous   |
| NC_037651.1 | 4982764 | SNV | 1 | C | G | Homozygous   |
| NC_037651.1 | 4982770 | SNV | 1 | T | A | Homozygous   |
| NC_037651.1 | 4982772 | SNV | 1 | T | C | Homozygous   |
| NC_037651.1 | 4983045 | SNV | 1 | A | C | Heterozygous |
| NC_037651.1 | 4983477 | SNV | 1 | A | C | Homozygous   |
| NC_037651.1 | 4983482 | SNV | 1 | C | G | Homozygous   |
| NC_037651.1 | 4983515 | SNV | 1 | G | A | Homozygous   |
| NC_037651.1 | 4985688 | SNV | 1 | C | T | Heterozygous |
| NC_037651.1 | 4988907 | SNV | 1 | G | A | Heterozygous |
| NC_037651.1 | 4989107 | SNV | 1 | A | C | Homozygous   |
| NC_037651.1 | 4989370 | SNV | 1 | A | G | Heterozygous |
| NC_037651.1 | 4989388 | SNV | 1 | G | A | Heterozygous |
| NC_037651.1 | 4990049 | SNV | 1 | T | C | Homozygous   |
| NC_037651.1 | 4994124 | SNV | 1 | C | T | Heterozygous |
| NC_037651.1 | 4994788 | SNV | 1 | A | C | Homozygous   |
| NC_037651.1 | 4994812 | SNV | 1 | T | C | Homozygous   |
| NC_037651.1 | 4994823 | SNV | 1 | A | C | Homozygous   |
| NC_037651.1 | 4994825 | SNV | 1 | T | A | Homozygous   |
| NC_037651.1 | 4994830 | SNV | 1 | A | T | Homozygous   |
| NC_037651.1 | 4995708 | SNV | 1 | A | T | Homozygous   |
| NC_037651.1 | 4995723 | SNV | 1 | T | C | Homozygous   |
| NC_037651.1 | 4995727 | SNV | 1 | T | G | Homozygous   |
| NC_037651.1 | 4995733 | SNV | 1 | T | A | Homozygous   |
| NC_037651.1 | 5002100 | SNV | 1 | G | A | Homozygous   |
| NC_037651.1 | 5004469 | SNV | 1 | A | G | Homozygous   |
| NC_037651.1 | 5004639 | SNV | 1 | C | A | Heterozygous |
| NC_037651.1 | 5004652 | SNV | 1 | T | C | Heterozygous |
| NC_037651.1 | 5004957 | SNV | 1 | A | G | Heterozygous |
| NC_037651.1 | 5008389 | SNV | 1 | G | A | Heterozygous |
| NC_037651.1 | 5013530 | SNV | 1 | G | A | Heterozygous |
| NC_037651.1 | 5014427 | SNV | 1 | C | T | Heterozygous |
| NC_037651.1 | 5014555 | SNV | 1 | A | G | Heterozygous |
| NC_037651.1 | 5014989 | SNV | 1 | T | C | Homozygous   |
| NC_037651.1 | 5021796 | SNV | 1 | A | T | Homozygous   |
| NC_037651.1 | 5022547 | SNV | 1 | T | C | Homozygous   |
| NC_037651.1 | 5024217 | SNV | 1 | T | A | Homozygous   |
| NC_037651.1 | 5024238 | SNV | 1 | A | C | Homozygous   |
| NC_037651.1 | 5024240 | SNV | 1 | A | G | Homozygous   |
| NC_037651.1 | 5024248 | SNV | 1 | A | T | Homozygous   |
| NC_037651.1 | 5024250 | SNV | 1 | T | A | Homozygous   |
| NC_037651.1 | 5024267 | SNV | 1 | T | G | Homozygous   |

|             |         |     |   |   |   |              |
|-------------|---------|-----|---|---|---|--------------|
| NC_037651.1 | 5024271 | SNV | 1 | T | A | Homozygous   |
| NC_037651.1 | 5027047 | SNV | 1 | T | C | Homozygous   |
| NC_037651.1 | 5027291 | SNV | 1 | G | A | Heterozygous |
| NC_037651.1 | 5028857 | SNV | 1 | C | T | Heterozygous |
| NC_037651.1 | 5028860 | SNV | 1 | A | T | Heterozygous |
| NC_037651.1 | 5030270 | SNV | 1 | T | C | Heterozygous |
| NC_037651.1 | 5034292 | SNV | 1 | C | T | Heterozygous |
| NC_037651.1 | 5038212 | SNV | 1 | T | A | Homozygous   |
| NC_037651.1 | 5038353 | SNV | 1 | A | G | Homozygous   |
| NC_037651.1 | 5038511 | SNV | 1 | A | G | Heterozygous |
| NC_037651.1 | 5038519 | SNV | 1 | A | C | Heterozygous |
| NC_037651.1 | 5038521 | SNV | 1 | A | G | Heterozygous |
| NC_037651.1 | 5038523 | SNV | 1 | A | T | Heterozygous |
| NC_037651.1 | 5038531 | SNV | 1 | A | T | Heterozygous |
| NC_037651.1 | 5038536 | SNV | 1 | A | T | Heterozygous |
| NC_037651.1 | 5038537 | SNV | 1 | A | T | Heterozygous |
| NC_037651.1 | 5038549 | SNV | 1 | A | G | Heterozygous |
| NC_037651.1 | 5038554 | SNV | 1 | A | T | Heterozygous |
| NC_037651.1 | 5038556 | SNV | 1 | A | T | Heterozygous |
| NC_037651.1 | 5038558 | SNV | 1 | A | T | Heterozygous |
| NC_037651.1 | 5039262 | SNV | 1 | T | A | Homozygous   |
| NC_037651.1 | 5039267 | SNV | 1 | T | A | Homozygous   |
| NC_037651.1 | 5039269 | SNV | 1 | C | A | Homozygous   |
| NC_037651.1 | 5043972 | SNV | 1 | T | A | Homozygous   |
| NC_037651.1 | 5044015 | SNV | 1 | A | T | Homozygous   |
| NC_037651.1 | 5047815 | SNV | 1 | T | G | Heterozygous |
| NC_037651.1 | 5053699 | SNV | 1 | T | C | Homozygous   |
| NC_037651.1 | 5057989 | SNV | 1 | A | G | Heterozygous |
| NC_037651.1 | 5059267 | SNV | 1 | A | G | Homozygous   |
| NC_037651.1 | 5059926 | SNV | 1 | T | C | Homozygous   |
| NC_037651.1 | 5070043 | SNV | 1 | G | A | Homozygous   |
| NC_037651.1 | 5070664 | SNV | 1 | G | A | Homozygous   |
| NC_037651.1 | 5077140 | SNV | 1 | T | C | Homozygous   |
| NC_037651.1 | 5080453 | SNV | 1 | A | G | Homozygous   |
| NC_037651.1 | 5080629 | SNV | 1 | A | G | Heterozygous |
| NC_037651.1 | 5080681 | SNV | 1 | G | A | Homozygous   |
| NC_037651.1 | 5081543 | SNV | 1 | T | C | Homozygous   |
| NC_037651.1 | 5081711 | SNV | 1 | C | T | Homozygous   |
| NC_037651.1 | 5082034 | SNV | 1 | A | G | Homozygous   |
| NC_037651.1 | 5082116 | SNV | 1 | G | T | Homozygous   |
| NC_037651.1 | 5085507 | SNV | 1 | A | G | Homozygous   |
| NC_037651.1 | 5085652 | SNV | 1 | C | T | Homozygous   |
| NC_037651.1 | 5088418 | SNV | 1 | A | G | Homozygous   |
| NC_037651.1 | 5090069 | SNV | 1 | G | C | Heterozygous |
| NC_037651.1 | 5090347 | SNV | 1 | G | C | Homozygous   |
| NC_037651.1 | 5092428 | SNV | 1 | A | C | Homozygous   |
| NC_037651.1 | 5093836 | SNV | 1 | A | T | Homozygous   |
| NC_037651.1 | 5098698 | SNV | 1 | G | T | Homozygous   |
| NC_037651.1 | 5099639 | SNV | 1 | T | A | Homozygous   |
| NC_037651.1 | 5099654 | SNV | 1 | C | T | Homozygous   |
| NC_037651.1 | 5099656 | SNV | 1 | T | C | Homozygous   |

|             |         |     |   |   |   |              |
|-------------|---------|-----|---|---|---|--------------|
| NC_037651.1 | 5099658 | SNV | 1 | T | C | Homozygous   |
| NC_037651.1 | 5099660 | SNV | 1 | A | C | Homozygous   |
| NC_037651.1 | 5099665 | SNV | 1 | T | A | Homozygous   |
| NC_037651.1 | 5100067 | SNV | 1 | C | T | Homozygous   |
| NC_037651.1 | 5100275 | SNV | 1 | A | T | Homozygous   |
| NC_037651.1 | 5100287 | SNV | 1 | A | T | Homozygous   |
| NC_037651.1 | 5100293 | SNV | 1 | T | A | Homozygous   |
| NC_037651.1 | 5100297 | SNV | 1 | A | T | Homozygous   |
| NC_037651.1 | 5100328 | SNV | 1 | T | G | Homozygous   |
| NC_037651.1 | 5100338 | SNV | 1 | T | C | Homozygous   |
| NC_037651.1 | 5106107 | SNV | 1 | C | T | Heterozygous |
| NC_037651.1 | 5106507 | SNV | 1 | A | G | Homozygous   |
| NC_037651.1 | 5106916 | SNV | 1 | C | T | Homozygous   |
| NC_037651.1 | 5108379 | SNV | 1 | T | C | Homozygous   |
| NC_037651.1 | 5108630 | SNV | 1 | G | A | Heterozygous |
| NC_037651.1 | 5108871 | SNV | 1 | G | C | Homozygous   |
| NC_037651.1 | 5109141 | SNV | 1 | A | G | Homozygous   |
| NC_037651.1 | 5109454 | SNV | 1 | A | C | Heterozygous |
| NC_037651.1 | 5109483 | SNV | 1 | A | T | Heterozygous |
| NC_037651.1 | 5112518 | SNV | 1 | A | G | Homozygous   |
| NC_037651.1 | 5115716 | SNV | 1 | A | G | Homozygous   |
| NC_037651.1 | 5115914 | SNV | 1 | T | C | Homozygous   |
| NC_037651.1 | 5116212 | SNV | 1 | G | T | Homozygous   |
| NC_037651.1 | 5116430 | SNV | 1 | G | A | Homozygous   |
| NC_037651.1 | 5116502 | SNV | 1 | G | A | Homozygous   |
| NC_037651.1 | 5116720 | SNV | 1 | A | G | Homozygous   |
| NC_037651.1 | 5116773 | SNV | 1 | T | C | Homozygous   |
| NC_037651.1 | 5116845 | SNV | 1 | T | C | Homozygous   |
| NC_037651.1 | 5116873 | SNV | 1 | T | C | Heterozygous |
| NC_037651.1 | 5116881 | SNV | 1 | A | T | Homozygous   |
| NC_037651.1 | 5117049 | SNV | 1 | A | G | Homozygous   |
| NC_037651.1 | 5117059 | SNV | 1 | C | T | Homozygous   |
| NC_037651.1 | 5128896 | SNV | 1 | C | T | Homozygous   |
| NC_037651.1 | 5128936 | SNV | 1 | T | C | Heterozygous |
| NC_037651.1 | 5129025 | SNV | 1 | A | G | Homozygous   |
| NC_037651.1 | 5129525 | SNV | 1 | G | A | Heterozygous |
| NC_037651.1 | 5129569 | SNV | 1 | T | G | Heterozygous |
| NC_037651.1 | 5130065 | SNV | 1 | G | A | Heterozygous |
| NC_037651.1 | 5130087 | SNV | 1 | A | C | Heterozygous |
| NC_037651.1 | 5130096 | SNV | 1 | T | C | Heterozygous |
| NC_037651.1 | 5130109 | SNV | 1 | G | A | Homozygous   |
| NC_037651.1 | 5130123 | SNV | 1 | C | A | Heterozygous |
| NC_037651.1 | 5130227 | SNV | 1 | C | A | Heterozygous |
| NC_037651.1 | 5130637 | SNV | 1 | T | C | Heterozygous |
| NC_037651.1 | 5131033 | SNV | 1 | G | A | Homozygous   |
| NC_037651.1 | 5131213 | SNV | 1 | C | T | Heterozygous |
| NC_037651.1 | 5131272 | SNV | 1 | G | A | Heterozygous |
| NC_037651.1 | 5131282 | SNV | 1 | C | T | Heterozygous |
| NC_037651.1 | 5131310 | SNV | 1 | G | A | Heterozygous |
| NC_037651.1 | 5131744 | SNV | 1 | A | G | Heterozygous |
| NC_037651.1 | 5131946 | SNV | 1 | C | T | Homozygous   |



|             |         |     |   |   |   |              |
|-------------|---------|-----|---|---|---|--------------|
| NC_037651.1 | 5131977 | SNV | 1 | A | G | Homozygous   |
| NC_037651.1 | 5132116 | SNV | 1 | C | T | Heterozygous |
| NC_037651.1 | 5132446 | SNV | 1 | T | C | Homozygous   |
| NC_037651.1 | 5132476 | SNV | 1 | T | C | Homozygous   |
| NC_037651.1 | 5132521 | SNV | 1 | T | C | Homozygous   |
| NC_037651.1 | 5133331 | SNV | 1 | C | T | Heterozygous |
| NC_037651.1 | 5133554 | SNV | 1 | T | C | Heterozygous |
| NC_037651.1 | 5133593 | SNV | 1 | A | G | Homozygous   |
| NC_037651.1 | 5133642 | SNV | 1 | A | G | Homozygous   |
| NC_037651.1 | 5133668 | SNV | 1 | T | G | Heterozygous |
| NC_037651.1 | 5136691 | SNV | 1 | T | C | Homozygous   |
| NC_037651.1 | 5137535 | SNV | 1 | C | T | Heterozygous |
| NC_037651.1 | 5137817 | SNV | 1 | A | G | Heterozygous |
| NC_037651.1 | 5137977 | SNV | 1 | C | T | Heterozygous |
| NC_037651.1 | 5149687 | SNV | 1 | A | G | Homozygous   |
| NC_037651.1 | 5164127 | SNV | 1 | A | G | Homozygous   |
| NC_037651.1 | 5164426 | SNV | 1 | T | C | Homozygous   |
| NC_037651.1 | 5164918 | SNV | 1 | A | G | Homozygous   |
| NC_037651.1 | 5167815 | SNV | 1 | A | G | Homozygous   |
| NC_037651.1 | 5167836 | SNV | 1 | A | G | Homozygous   |
| NC_037651.1 | 5167866 | SNV | 1 | T | C | Homozygous   |
| NC_037651.1 | 5167943 | SNV | 1 | G | A | Heterozygous |
| NC_037651.1 | 5168936 | SNV | 1 | G | A | Homozygous   |
| NC_037651.1 | 5168941 | SNV | 1 | T | A | Homozygous   |
| NC_037651.1 | 5169618 | SNV | 1 | T | A | Homozygous   |
| NC_037651.1 | 5169719 | SNV | 1 | G | C | Heterozygous |
| NC_037651.1 | 5169721 | SNV | 1 | G | T | Heterozygous |
| NC_037651.1 | 5170957 | SNV | 1 | A | G | Homozygous   |
| NC_037651.1 | 5173071 | SNV | 1 | G | A | Homozygous   |
| NC_037651.1 | 5173419 | SNV | 1 | T | A | Homozygous   |
| NC_037651.1 | 5173454 | SNV | 1 | T | C | Homozygous   |
| NC_037651.1 | 5173843 | SNV | 1 | A | G | Homozygous   |
| NC_037651.1 | 5173980 | SNV | 1 | A | G | Homozygous   |
| NC_037651.1 | 5177284 | SNV | 1 | C | T | Heterozygous |
| NC_037651.1 | 5177420 | SNV | 1 | T | C | Homozygous   |
| NC_037651.1 | 5177752 | SNV | 1 | G | A | Heterozygous |
| NC_037651.1 | 5177892 | SNV | 1 | A | G | Homozygous   |
| NC_037651.1 | 5178524 | SNV | 1 | T | C | Homozygous   |
| NC_037651.1 | 5178548 | SNV | 1 | T | C | Homozygous   |
| NC_037651.1 | 5178801 | SNV | 1 | C | T | Homozygous   |
| NC_037651.1 | 5178831 | SNV | 1 | C | T | Homozygous   |
| NC_037651.1 | 5178983 | SNV | 1 | C | G | Heterozygous |
| NC_037651.1 | 5179105 | SNV | 1 | A | G | Homozygous   |
| NC_037651.1 | 5179579 | SNV | 1 | G | A | Heterozygous |
| NC_037651.1 | 5179588 | SNV | 1 | T | C | Homozygous   |
| NC_037651.1 | 5179599 | SNV | 1 | G | A | Homozygous   |
| NC_037651.1 | 5179615 | SNV | 1 | A | G | Homozygous   |
| NC_037651.1 | 5179663 | SNV | 1 | T | C | Heterozygous |
| NC_037651.1 | 5180182 | SNV | 1 | T | C | Homozygous   |
| NC_037651.1 | 5180683 | SNV | 1 | T | C | Heterozygous |
| NC_037651.1 | 5180741 | SNV | 1 | C | T | Homozygous   |

|             |         |     |   |   |   |              |
|-------------|---------|-----|---|---|---|--------------|
| NC_037651.1 | 5180996 | SNV | 1 | G | C | Heterozygous |
| NC_037651.1 | 5181305 | SNV | 1 | C | T | Heterozygous |
| NC_037651.1 | 5183942 | SNV | 1 | T | C | Homozygous   |
| NC_037651.1 | 5184930 | SNV | 1 | T | G | Heterozygous |
| NC_037651.1 | 5185203 | SNV | 1 | A | G | Homozygous   |
| NC_037651.1 | 5187350 | SNV | 1 | G | A | Homozygous   |
| NC_037651.1 | 5187389 | SNV | 1 | A | G | Homozygous   |
| NC_037651.1 | 5187539 | SNV | 1 | T | C | Homozygous   |
| NC_037651.1 | 5187708 | SNV | 1 | A | T | Homozygous   |
| NC_037651.1 | 5187713 | SNV | 1 | C | T | Homozygous   |
| NC_037651.1 | 5187722 | SNV | 1 | C | T | Homozygous   |
| NC_037651.1 | 5187983 | SNV | 1 | T | G | Heterozygous |
| NC_037651.1 | 5188082 | SNV | 1 | C | G | Homozygous   |
| NC_037651.1 | 5188150 | SNV | 1 | C | T | Heterozygous |
| NC_037651.1 | 5188515 | SNV | 1 | A | G | Homozygous   |
| NC_037651.1 | 5188584 | SNV | 1 | A | G | Heterozygous |
| NC_037651.1 | 5188940 | SNV | 1 | T | C | Heterozygous |
| NC_037651.1 | 5189733 | SNV | 1 | T | C | Heterozygous |
| NC_037651.1 | 5189747 | SNV | 1 | G | A | Homozygous   |
| NC_037651.1 | 5189823 | SNV | 1 | T | C | Homozygous   |
| NC_037651.1 | 5193293 | SNV | 1 | T | A | Homozygous   |
| NC_037651.1 | 5193304 | SNV | 1 | T | C | Homozygous   |
| NC_037651.1 | 5193314 | SNV | 1 | T | C | Homozygous   |
| NC_037651.1 | 5194813 | SNV | 1 | T | C | Homozygous   |
| NC_037651.1 | 5194869 | SNV | 1 | C | T | Heterozygous |
| NC_037651.1 | 5194957 | SNV | 1 | T | C | Heterozygous |
| NC_037651.1 | 5195543 | SNV | 1 | C | T | Homozygous   |
| NC_037651.1 | 5195732 | SNV | 1 | T | C | Homozygous   |
| NC_037651.1 | 5195742 | SNV | 1 | T | A | Homozygous   |
| NC_037651.1 | 5195818 | SNV | 1 | A | G | Homozygous   |
| NC_037651.1 | 5196317 | SNV | 1 | C | A | Heterozygous |
| NC_037651.1 | 5196320 | SNV | 1 | T | A | Homozygous   |
| NC_037651.1 | 5196519 | SNV | 1 | G | A | Heterozygous |
| NC_037651.1 | 5196538 | SNV | 1 | G | A | Heterozygous |
| NC_037651.1 | 5196589 | SNV | 1 | A | G | Heterozygous |
| NC_037651.1 | 5198235 | SNV | 1 | T | C | Heterozygous |
| NC_037651.1 | 5198268 | SNV | 1 | G | A | Homozygous   |
| NC_037651.1 | 5198384 | SNV | 1 | G | A | Homozygous   |
| NC_037651.1 | 5198480 | SNV | 1 | T | C | Homozygous   |
| NC_037651.1 | 5200273 | SNV | 1 | T | G | Homozygous   |
| NC_037651.1 | 5200893 | SNV | 1 | T | C | Homozygous   |
| NC_037651.1 | 5201156 | SNV | 1 | C | T | Homozygous   |
| NC_037651.1 | 5201502 | SNV | 1 | A | G | Homozygous   |
| NC_037651.1 | 5201522 | SNV | 1 | C | T | Heterozygous |
| NC_037651.1 | 5201532 | SNV | 1 | T | C | Heterozygous |
| NC_037651.1 | 5201543 | SNV | 1 | A | G | Heterozygous |
| NC_037651.1 | 5201547 | SNV | 1 | A | G | Heterozygous |
| NC_037651.1 | 5201564 | SNV | 1 | A | T | Heterozygous |
| NC_037651.1 | 5201809 | SNV | 1 | A | G | Homozygous   |
| NC_037651.1 | 5202125 | SNV | 1 | A | G | Heterozygous |
| NC_037651.1 | 5202189 | SNV | 1 | G | A | Homozygous   |

|             |         |     |   |   |   |              |
|-------------|---------|-----|---|---|---|--------------|
| NC_037651.1 | 5204410 | SNV | 1 | G | A | Homozygous   |
| NC_037651.1 | 5204620 | SNV | 1 | T | C | Homozygous   |
| NC_037651.1 | 5204637 | SNV | 1 | C | T | Heterozygous |
| NC_037651.1 | 5204639 | SNV | 1 | C | T | Heterozygous |
| NC_037651.1 | 5205570 | SNV | 1 | A | G | Homozygous   |
| NC_037651.1 | 5205577 | SNV | 1 | T | C | Heterozygous |
| NC_037651.1 | 5205676 | SNV | 1 | T | C | Heterozygous |
| NC_037651.1 | 5205679 | SNV | 1 | A | G | Homozygous   |
| NC_037651.1 | 5205945 | SNV | 1 | T | C | Homozygous   |
| NC_037651.1 | 5206401 | SNV | 1 | A | G | Homozygous   |
| NC_037651.1 | 5206422 | SNV | 1 | G | A | Homozygous   |
| NC_037651.1 | 5206575 | SNV | 1 | T | C | Homozygous   |
| NC_037651.1 | 5206599 | SNV | 1 | A | G | Homozygous   |
| NC_037651.1 | 5206783 | SNV | 1 | T | C | Homozygous   |
| NC_037651.1 | 5206789 | SNV | 1 | G | A | Homozygous   |
| NC_037651.1 | 5207768 | SNV | 1 | A | G | Heterozygous |
| NC_037651.1 | 5207773 | SNV | 1 | G | A | Homozygous   |
| NC_037651.1 | 5211129 | SNV | 1 | C | T | Heterozygous |
| NC_037651.1 | 5211291 | SNV | 1 | G | A | Heterozygous |
| NC_037651.1 | 5216131 | SNV | 1 | T | C | Homozygous   |
| NC_037651.1 | 5218022 | SNV | 1 | C | T | Heterozygous |
| NC_037651.1 | 5218654 | SNV | 1 | C | T | Heterozygous |
| NC_037651.1 | 5218792 | SNV | 1 | A | G | Homozygous   |
| NC_037651.1 | 5219393 | SNV | 1 | T | C | Homozygous   |
| NC_037651.1 | 5220084 | SNV | 1 | G | C | Homozygous   |
| NC_037651.1 | 5221810 | SNV | 1 | A | G | Homozygous   |
| NC_037651.1 | 5221925 | SNV | 1 | A | G | Homozygous   |
| NC_037651.1 | 5221947 | SNV | 1 | A | G | Homozygous   |
| NC_037651.1 | 5225325 | SNV | 1 | T | C | Homozygous   |
| NC_037651.1 | 5225338 | SNV | 1 | T | G | Heterozygous |
| NC_037651.1 | 5225340 | SNV | 1 | T | A | Heterozygous |
| NC_037651.1 | 5225344 | SNV | 1 | T | A | Homozygous   |
| NC_037651.1 | 5225348 | SNV | 1 | T | A | Heterozygous |
| NC_037651.1 | 5225389 | SNV | 1 | A | T | Homozygous   |
| NC_037651.1 | 5225392 | SNV | 1 | A | T | Homozygous   |
| NC_037651.1 | 5225394 | SNV | 1 | T | A | Homozygous   |
| NC_037651.1 | 5225423 | SNV | 1 | G | A | Homozygous   |
| NC_037651.1 | 5225431 | SNV | 1 | C | T | Homozygous   |
| NC_037651.1 | 5225439 | SNV | 1 | A | T | Homozygous   |
| NC_037651.1 | 5225444 | SNV | 1 | T | A | Homozygous   |
| NC_037651.1 | 5231035 | SNV | 1 | A | G | Homozygous   |
| NC_037651.1 | 5231041 | SNV | 1 | T | C | Heterozygous |
| NC_037651.1 | 5231085 | SNV | 1 | G | A | Homozygous   |
| NC_037651.1 | 5232987 | SNV | 1 | A | C | Heterozygous |
| NC_037651.1 | 5234779 | SNV | 1 | T | C | Heterozygous |
| NC_037651.1 | 5234805 | SNV | 1 | G | A | Heterozygous |
| NC_037651.1 | 5234917 | SNV | 1 | T | C | Homozygous   |
| NC_037651.1 | 5235602 | SNV | 1 | A | G | Homozygous   |
| NC_037651.1 | 5235618 | SNV | 1 | T | C | Homozygous   |
| NC_037651.1 | 5235695 | SNV | 1 | T | C | Heterozygous |
| NC_037651.1 | 5236000 | SNV | 1 | C | T | Homozygous   |

|             |         |     |   |   |   |              |
|-------------|---------|-----|---|---|---|--------------|
| NC_037651.1 | 5236014 | SNV | 1 | A | G | Homozygous   |
| NC_037651.1 | 5236110 | SNV | 1 | G | A | Homozygous   |
| NC_037651.1 | 5236162 | SNV | 1 | A | C | Homozygous   |
| NC_037651.1 | 5236189 | SNV | 1 | G | A | Heterozygous |
| NC_037651.1 | 5236230 | SNV | 1 | G | A | Heterozygous |
| NC_037651.1 | 5236235 | SNV | 1 | G | T | Heterozygous |
| NC_037651.1 | 5236241 | SNV | 1 | T | C | Heterozygous |
| NC_037651.1 | 5236979 | SNV | 1 | T | C | Homozygous   |
| NC_037651.1 | 5237200 | SNV | 1 | T | C | Homozygous   |
| NC_037651.1 | 5237545 | SNV | 1 | C | T | Homozygous   |
| NC_037651.1 | 5237696 | SNV | 1 | G | A | Homozygous   |
| NC_037651.1 | 5237996 | SNV | 1 | C | T | Heterozygous |
| NC_037651.1 | 5238256 | SNV | 1 | A | T | Homozygous   |
| NC_037651.1 | 5238407 | SNV | 1 | A | G | Heterozygous |
| NC_037651.1 | 5238716 | SNV | 1 | T | C | Homozygous   |
| NC_037651.1 | 5238889 | SNV | 1 | C | T | Homozygous   |
| NC_037651.1 | 5239028 | SNV | 1 | T | C | Homozygous   |
| NC_037651.1 | 5239878 | SNV | 1 | T | C | Homozygous   |
| NC_037651.1 | 5239929 | SNV | 1 | C | A | Heterozygous |
| NC_037651.1 | 5240071 | SNV | 1 | A | T | Heterozygous |
| NC_037651.1 | 5240160 | SNV | 1 | G | A | Heterozygous |
| NC_037651.1 | 5240310 | SNV | 1 | C | T | Heterozygous |
| NC_037651.1 | 5241722 | SNV | 1 | T | A | Heterozygous |
| NC_037651.1 | 5248568 | SNV | 1 | T | G | Heterozygous |
| NC_037651.1 | 5271821 | SNV | 1 | T | C | Heterozygous |
| NC_037651.1 | 5271828 | SNV | 1 | A | G | Heterozygous |
| NC_037651.1 | 5271830 | SNV | 1 | A | G | Heterozygous |
| NC_037651.1 | 5271882 | SNV | 1 | A | G | Heterozygous |
| NC_037651.1 | 5274025 | SNV | 1 | C | T | Homozygous   |
| NC_037651.1 | 5274040 | SNV | 1 | T | G | Homozygous   |
| NC_037651.1 | 5276502 | SNV | 1 | G | A | Heterozygous |
| NC_037651.1 | 5276523 | SNV | 1 | G | A | Homozygous   |
| NC_037651.1 | 5276784 | SNV | 1 | A | T | Homozygous   |
| NC_037651.1 | 5276987 | SNV | 1 | G | C | Heterozygous |
| NC_037651.1 | 5277110 | SNV | 1 | G | A | Heterozygous |
| NC_037651.1 | 5277205 | SNV | 1 | T | G | Heterozygous |
| NC_037651.1 | 5277359 | SNV | 1 | A | G | Heterozygous |
| NC_037651.1 | 5282041 | SNV | 1 | A | G | Heterozygous |
| NC_037651.1 | 5282172 | SNV | 1 | G | A | Homozygous   |
| NC_037651.1 | 5282263 | SNV | 1 | A | G | Homozygous   |
| NC_037651.1 | 5282368 | SNV | 1 | T | C | Homozygous   |
| NC_037651.1 | 5282583 | SNV | 1 | G | A | Homozygous   |
| NC_037651.1 | 5283914 | SNV | 1 | C | T | Homozygous   |
| NC_037651.1 | 5283926 | SNV | 1 | C | T | Homozygous   |
| NC_037651.1 | 5283955 | SNV | 1 | T | A | Homozygous   |
| NC_037651.1 | 5286979 | SNV | 1 | A | C | Heterozygous |
| NC_037651.1 | 5286990 | SNV | 1 | C | T | Heterozygous |
| NC_037651.1 | 5287024 | SNV | 1 | C | T | Homozygous   |
| NC_037651.1 | 5287111 | SNV | 1 | G | A | Heterozygous |
| NC_037651.1 | 5287345 | SNV | 1 | C | G | Heterozygous |
| NC_037651.1 | 5287604 | SNV | 1 | C | G | Heterozygous |

|             |         |     |   |   |   |              |
|-------------|---------|-----|---|---|---|--------------|
| NC_037651.1 | 5287606 | SNV | 1 | T | A | Heterozygous |
| NC_037651.1 | 5287611 | SNV | 1 | T | C | Heterozygous |
| NC_037651.1 | 5287614 | SNV | 1 | T | A | Heterozygous |
| NC_037651.1 | 5287617 | SNV | 1 | C | G | Heterozygous |
| NC_037651.1 | 5287625 | SNV | 1 | G | C | Homozygous   |
| NC_037651.1 | 5288965 | SNV | 1 | C | T | Homozygous   |
| NC_037651.1 | 5288979 | SNV | 1 | G | C | Heterozygous |
| NC_037651.1 | 5289603 | SNV | 1 | C | G | Heterozygous |
| NC_037651.1 | 5289627 | SNV | 1 | G | A | Heterozygous |
| NC_037651.1 | 5289858 | SNV | 1 | T | A | Heterozygous |
| NC_037651.1 | 5290260 | SNV | 1 | C | T | Homozygous   |
| NC_037651.1 | 5290280 | SNV | 1 | C | T | Homozygous   |
| NC_037651.1 | 5290290 | SNV | 1 | G | T | Homozygous   |
| NC_037651.1 | 5290300 | SNV | 1 | T | C | Homozygous   |
| NC_037651.1 | 5290314 | SNV | 1 | A | G | Homozygous   |
| NC_037651.1 | 5290365 | SNV | 1 | C | G | Heterozygous |
| NC_037651.1 | 5290379 | SNV | 1 | G | A | Heterozygous |
| NC_037651.1 | 5293329 | SNV | 1 | C | T | Heterozygous |
| NC_037651.1 | 5293361 | SNV | 1 | T | C | Homozygous   |
| NC_037651.1 | 5295393 | SNV | 1 | G | A | Heterozygous |
| NC_037651.1 | 5299739 | SNV | 1 | T | C | Homozygous   |
| NC_037651.1 | 5299758 | SNV | 1 | T | C | Homozygous   |
| NC_037651.1 | 5302561 | SNV | 1 | T | G | Heterozygous |
| NC_037651.1 | 5302589 | SNV | 1 | G | A | Homozygous   |
| NC_037651.1 | 5302613 | SNV | 1 | A | G | Homozygous   |
| NC_037651.1 | 5302620 | SNV | 1 | C | T | Heterozygous |
| NC_037651.1 | 5302895 | SNV | 1 | G | A | Heterozygous |
| NC_037651.1 | 5303099 | SNV | 1 | T | C | Homozygous   |
| NC_037651.1 | 5305688 | SNV | 1 | T | C | Homozygous   |
| NC_037651.1 | 5305800 | SNV | 1 | C | T | Heterozygous |
| NC_037651.1 | 5306151 | SNV | 1 | T | C | Homozygous   |
| NC_037651.1 | 5306159 | SNV | 1 | T | C | Heterozygous |
| NC_037651.1 | 5306470 | SNV | 1 | G | A | Heterozygous |
| NC_037651.1 | 5306554 | SNV | 1 | A | T | Heterozygous |
| NC_037651.1 | 5306606 | SNV | 1 | T | C | Homozygous   |
| NC_037651.1 | 5306649 | SNV | 1 | G | A | Homozygous   |
| NC_037651.1 | 5306828 | SNV | 1 | G | A | Heterozygous |
| NC_037651.1 | 5306830 | SNV | 1 | T | A | Homozygous   |
| NC_037651.1 | 5306856 | SNV | 1 | C | T | Heterozygous |
| NC_037651.1 | 5306912 | SNV | 1 | T | G | Homozygous   |
| NC_037651.1 | 5307014 | SNV | 1 | G | A | Heterozygous |
| NC_037651.1 | 5307145 | SNV | 1 | A | G | Homozygous   |
| NC_037651.1 | 5310647 | SNV | 1 | C | G | Heterozygous |
| NC_037651.1 | 5312641 | SNV | 1 | A | G | Homozygous   |
| NC_037651.1 | 5314961 | SNV | 1 | A | G | Homozygous   |
| NC_037651.1 | 5315035 | SNV | 1 | C | T | Heterozygous |
| NC_037651.1 | 5317717 | SNV | 1 | A | G | Heterozygous |
| NC_037651.1 | 5317732 | SNV | 1 | T | C | Heterozygous |
| NC_037651.1 | 5317817 | SNV | 1 | G | A | Heterozygous |
| NC_037651.1 | 5319815 | SNV | 1 | A | T | Homozygous   |
| NC_037651.1 | 5319821 | SNV | 1 | C | T | Homozygous   |

|             |         |     |   |   |   |              |
|-------------|---------|-----|---|---|---|--------------|
| NC_037651.1 | 5319827 | SNV | 1 | T | C | Heterozygous |
| NC_037651.1 | 5319871 | SNV | 1 | A | G | Heterozygous |
| NC_037651.1 | 5319879 | SNV | 1 | G | A | Homozygous   |
| NC_037651.1 | 5319891 | SNV | 1 | T | C | Homozygous   |
| NC_037651.1 | 5321488 | SNV | 1 | T | A | Heterozygous |
| NC_037651.1 | 5321542 | SNV | 1 | A | T | Homozygous   |
| NC_037651.1 | 5321565 | SNV | 1 | T | C | Homozygous   |
| NC_037651.1 | 5321796 | SNV | 1 | C | T | Homozygous   |
| NC_037651.1 | 5321817 | SNV | 1 | G | T | Heterozygous |
| NC_037651.1 | 5322122 | SNV | 1 | G | C | Homozygous   |
| NC_037651.1 | 5322125 | SNV | 1 | A | T | Homozygous   |
| NC_037651.1 | 5323490 | SNV | 1 | C | T | Homozygous   |
| NC_037651.1 | 5323493 | SNV | 1 | T | C | Homozygous   |
| NC_037651.1 | 5323495 | SNV | 1 | G | C | Homozygous   |
| NC_037651.1 | 5323499 | SNV | 1 | A | C | Homozygous   |
| NC_037651.1 | 5323629 | SNV | 1 | T | C | Heterozygous |
| NC_037651.1 | 5323631 | SNV | 1 | C | T | Heterozygous |
| NC_037651.1 | 5323633 | SNV | 1 | T | C | Heterozygous |
| NC_037651.1 | 5323637 | SNV | 1 | G | A | Heterozygous |
| NC_037651.1 | 5328675 | SNV | 1 | C | T | Homozygous   |
| NC_037651.1 | 5330057 | SNV | 1 | C | T | Homozygous   |
| NC_037651.1 | 5330302 | SNV | 1 | G | A | Heterozygous |
| NC_037651.1 | 5330453 | SNV | 1 | G | T | Heterozygous |
| NC_037651.1 | 5330863 | SNV | 1 | C | T | Homozygous   |
| NC_037651.1 | 5330896 | SNV | 1 | A | G | Heterozygous |
| NC_037651.1 | 5330904 | SNV | 1 | G | A | Heterozygous |
| NC_037651.1 | 5331264 | SNV | 1 | G | T | Homozygous   |
| NC_037651.1 | 5331301 | SNV | 1 | G | A | Heterozygous |
| NC_037651.1 | 5331340 | SNV | 1 | T | A | Homozygous   |
| NC_037651.1 | 5332306 | SNV | 1 | A | T | Homozygous   |
| NC_037651.1 | 5332355 | SNV | 1 | C | T | Heterozygous |
| NC_037651.1 | 5332356 | SNV | 1 | T | C | Heterozygous |
| NC_037651.1 | 5332938 | SNV | 1 | G | C | Heterozygous |
| NC_037651.1 | 5333034 | SNV | 1 | T | C | Heterozygous |
| NC_037651.1 | 5333299 | SNV | 1 | T | G | Homozygous   |
| NC_037651.1 | 5333302 | SNV | 1 | T | A | Homozygous   |
| NC_037651.1 | 5333593 | SNV | 1 | A | G | Heterozygous |
| NC_037651.1 | 5387524 | SNV | 1 | C | A | Homozygous   |
| NC_037651.1 | 5390558 | SNV | 1 | G | A | Homozygous   |
| NC_037651.1 | 5394506 | SNV | 1 | T | C | Homozygous   |
| NC_037651.1 | 5396074 | SNV | 1 | A | G | Homozygous   |
| NC_037651.1 | 5399977 | SNV | 1 | T | C | Heterozygous |
| NC_037651.1 | 5400300 | SNV | 1 | A | T | Homozygous   |
| NC_037651.1 | 5400767 | SNV | 1 | T | A | Homozygous   |
| NC_037651.1 | 5400771 | SNV | 1 | A | T | Homozygous   |
| NC_037651.1 | 5409466 | SNV | 1 | G | T | Homozygous   |
| NC_037651.1 | 5409469 | SNV | 1 | A | G | Homozygous   |
| NC_037651.1 | 5409873 | SNV | 1 | G | A | Homozygous   |
| NC_037651.1 | 5410634 | SNV | 1 | G | A | Heterozygous |
| NC_037651.1 | 5410638 | SNV | 1 | A | C | Heterozygous |
| NC_037651.1 | 5410721 | SNV | 1 | C | T | Heterozygous |

|             |         |     |   |   |   |              |
|-------------|---------|-----|---|---|---|--------------|
| NC_037651.1 | 5410734 | SNV | 1 | G | T | Heterozygous |
| NC_037651.1 | 5410990 | SNV | 1 | G | A | Homozygous   |
| NC_037651.1 | 5419199 | SNV | 1 | A | G | Homozygous   |
| NC_037651.1 | 5419449 | SNV | 1 | C | T | Heterozygous |
| NC_037651.1 | 5419989 | SNV | 1 | A | G | Homozygous   |
| NC_037651.1 | 5420069 | SNV | 1 | G | A | Homozygous   |
| NC_037651.1 | 5426780 | SNV | 1 | A | G | Heterozygous |
| NC_037651.1 | 5426963 | SNV | 1 | A | G | Heterozygous |
| NC_037651.1 | 5427367 | SNV | 1 | A | G | Homozygous   |
| NC_037651.1 | 5427388 | SNV | 1 | C | T | Homozygous   |
| NC_037651.1 | 5431427 | SNV | 1 | G | A | Heterozygous |
| NC_037651.1 | 5431820 | SNV | 1 | A | G | Homozygous   |
| NC_037651.1 | 5431883 | SNV | 1 | C | T | Heterozygous |
| NC_037651.1 | 5431935 | SNV | 1 | C | A | Homozygous   |
| NC_037651.1 | 5432062 | SNV | 1 | T | A | Homozygous   |
| NC_037651.1 | 5432392 | SNV | 1 | T | C | Homozygous   |
| NC_037651.1 | 5432629 | SNV | 1 | G | A | Heterozygous |
| NC_037651.1 | 5433720 | SNV | 1 | G | A | Homozygous   |
| NC_037651.1 | 5433975 | SNV | 1 | T | C | Homozygous   |
| NC_037651.1 | 5434100 | SNV | 1 | G | A | Homozygous   |
| NC_037651.1 | 5434440 | SNV | 1 | C | T | Heterozygous |
| NC_037651.1 | 5434579 | SNV | 1 | T | C | Homozygous   |
| NC_037651.1 | 5434737 | SNV | 1 | T | A | Heterozygous |
| NC_037651.1 | 5434765 | SNV | 1 | A | G | Heterozygous |
| NC_037651.1 | 5434768 | SNV | 1 | C | T | Heterozygous |
| NC_037651.1 | 5434795 | SNV | 1 | G | A | Heterozygous |
| NC_037651.1 | 5434974 | SNV | 1 | T | C | Homozygous   |
| NC_037651.1 | 5435092 | SNV | 1 | A | G | Homozygous   |
| NC_037651.1 | 5435120 | SNV | 1 | A | G | Homozygous   |
| NC_037651.1 | 5435238 | SNV | 1 | A | T | Homozygous   |
| NC_037651.1 | 5435266 | SNV | 1 | G | A | Homozygous   |
| NC_037651.1 | 5435269 | SNV | 1 | A | G | Heterozygous |
| NC_037651.1 | 5435287 | SNV | 1 | A | G | Homozygous   |
| NC_037651.1 | 5435898 | SNV | 1 | A | T | Heterozygous |
| NC_037651.1 | 5435900 | SNV | 1 | C | T | Homozygous   |
| NC_037651.1 | 5435924 | SNV | 1 | T | A | Heterozygous |
| NC_037651.1 | 5435931 | SNV | 1 | G | A | Heterozygous |
| NC_037651.1 | 5436420 | SNV | 1 | A | T | Homozygous   |
| NC_037651.1 | 5441001 | SNV | 1 | C | T | Heterozygous |
| NC_037651.1 | 5441634 | SNV | 1 | A | T | Homozygous   |
| NC_037651.1 | 5441636 | SNV | 1 | A | G | Homozygous   |
| NC_037651.1 | 5441663 | SNV | 1 | A | G | Homozygous   |
| NC_037651.1 | 5441666 | SNV | 1 | T | C | Homozygous   |
| NC_037651.1 | 5442447 | SNV | 1 | C | T | Heterozygous |
| NC_037651.1 | 5442785 | SNV | 1 | A | T | Heterozygous |
| NC_037651.1 | 5443049 | SNV | 1 | C | T | Heterozygous |
| NC_037651.1 | 5443071 | SNV | 1 | A | G | Homozygous   |
| NC_037651.1 | 5443094 | SNV | 1 | A | G | Heterozygous |
| NC_037651.1 | 5443097 | SNV | 1 | T | C | Heterozygous |
| NC_037651.1 | 5443193 | SNV | 1 | T | C | Homozygous   |
| NC_037651.1 | 5443376 | SNV | 1 | A | G | Heterozygous |

|             |         |     |   |   |   |              |
|-------------|---------|-----|---|---|---|--------------|
| NC_037651.1 | 5444153 | SNV | 1 | A | G | Homozygous   |
| NC_037651.1 | 5444735 | SNV | 1 | A | G | Homozygous   |
| NC_037651.1 | 5450653 | SNV | 1 | C | T | Homozygous   |
| NC_037651.1 | 5453656 | SNV | 1 | G | C | Heterozygous |
| NC_037651.1 | 5464379 | SNV | 1 | G | A | Heterozygous |
| NC_037651.1 | 5468040 | SNV | 1 | A | G | Heterozygous |
| NC_037651.1 | 5468054 | SNV | 1 | A | G | Homozygous   |
| NC_037651.1 | 5468059 | SNV | 1 | A | G | Heterozygous |
| NC_037651.1 | 5468068 | SNV | 1 | A | G | Heterozygous |
| NC_037651.1 | 5468070 | SNV | 1 | A | G | Heterozygous |
| NC_037651.1 | 5469220 | SNV | 1 | G | C | Heterozygous |
| NC_037651.1 | 5470716 | SNV | 1 | G | A | Homozygous   |
| NC_037651.1 | 5471065 | SNV | 1 | T | C | Homozygous   |
| NC_037651.1 | 5471480 | SNV | 1 | C | A | Heterozygous |
| NC_037651.1 | 5472049 | SNV | 1 | G | A | Homozygous   |
| NC_037651.1 | 5478020 | SNV | 1 | T | C | Heterozygous |
| NC_037651.1 | 5479164 | SNV | 1 | C | T | Heterozygous |
| NC_037651.1 | 5479195 | SNV | 1 | A | G | Homozygous   |
| NC_037651.1 | 5480355 | SNV | 1 | G | A | Heterozygous |
| NC_037651.1 | 5480967 | SNV | 1 | T | C | Homozygous   |
| NC_037651.1 | 5481246 | SNV | 1 | C | A | Homozygous   |
| NC_037651.1 | 5490394 | SNV | 1 | T | C | Heterozygous |
| NC_037651.1 | 5490396 | SNV | 1 | T | A | Heterozygous |
| NC_037651.1 | 5495347 | SNV | 1 | G | A | Homozygous   |
| NC_037651.1 | 5495351 | SNV | 1 | A | T | Homozygous   |
| NC_037651.1 | 5495353 | SNV | 1 | A | C | Homozygous   |
| NC_037651.1 | 5496371 | SNV | 1 | T | A | Homozygous   |
| NC_037651.1 | 5496392 | SNV | 1 | A | T | Homozygous   |
| NC_037651.1 | 5496396 | SNV | 1 | G | A | Homozygous   |
| NC_037651.1 | 5511387 | SNV | 1 | T | C | Homozygous   |
| NC_037651.1 | 5511407 | SNV | 1 | C | T | Homozygous   |
| NC_037651.1 | 5511444 | SNV | 1 | T | C | Homozygous   |
| NC_037651.1 | 5512876 | SNV | 1 | A | G | Homozygous   |
| NC_037651.1 | 5517844 | SNV | 1 | A | G | Homozygous   |
| NC_037651.1 | 5518045 | SNV | 1 | A | T | Homozygous   |
| NC_037651.1 | 5518049 | SNV | 1 | A | T | Homozygous   |
| NC_037651.1 | 5518058 | SNV | 1 | T | C | Heterozygous |
| NC_037651.1 | 5518097 | SNV | 1 | A | G | Homozygous   |
| NC_037651.1 | 5518408 | SNV | 1 | T | C | Homozygous   |
| NC_037651.1 | 5518570 | SNV | 1 | C | T | Heterozygous |
| NC_037651.1 | 5522648 | SNV | 1 | T | A | Heterozygous |
| NC_037651.1 | 5522686 | SNV | 1 | G | A | Heterozygous |
| NC_037651.1 | 5522750 | SNV | 1 | T | C | Homozygous   |
| NC_037651.1 | 5523418 | SNV | 1 | A | T | Heterozygous |
| NC_037651.1 | 5523504 | SNV | 1 | A | G | Heterozygous |
| NC_037651.1 | 5523511 | SNV | 1 | G | A | Heterozygous |
| NC_037651.1 | 5524030 | SNV | 1 | A | G | Homozygous   |
| NC_037651.1 | 5524053 | SNV | 1 | T | C | Homozygous   |
| NC_037651.1 | 5524718 | SNV | 1 | A | G | Heterozygous |
| NC_037651.1 | 5524721 | SNV | 1 | A | T | Heterozygous |
| NC_037651.1 | 5525137 | SNV | 1 | G | A | Heterozygous |



|             |         |     |   |   |   |              |
|-------------|---------|-----|---|---|---|--------------|
| NC_037651.1 | 5549195 | SNV | 1 | C | T | Heterozygous |
| NC_037651.1 | 5549203 | SNV | 1 | T | A | Heterozygous |
| NC_037651.1 | 5549228 | SNV | 1 | A | G | Heterozygous |
| NC_037651.1 | 5549260 | SNV | 1 | G | A | Heterozygous |
| NC_037651.1 | 5549266 | SNV | 1 | A | G | Homozygous   |
| NC_037651.1 | 5549269 | SNV | 1 | T | C | Heterozygous |
| NC_037651.1 | 5550413 | SNV | 1 | A | T | Heterozygous |
| NC_037651.1 | 5550536 | SNV | 1 | T | C | Homozygous   |
| NC_037651.1 | 5550663 | SNV | 1 | T | C | Homozygous   |
| NC_037651.1 | 5550768 | SNV | 1 | A | C | Homozygous   |
| NC_037651.1 | 5551003 | SNV | 1 | T | C | Homozygous   |
| NC_037651.1 | 5551030 | SNV | 1 | C | T | Homozygous   |
| NC_037651.1 | 5551041 | SNV | 1 | C | G | Heterozygous |
| NC_037651.1 | 5551188 | SNV | 1 | A | G | Homozygous   |
| NC_037651.1 | 5551256 | SNV | 1 | T | C | Homozygous   |
| NC_037651.1 | 5551262 | SNV | 1 | A | T | Heterozygous |
| NC_037651.1 | 5551358 | SNV | 1 | T | C | Homozygous   |
| NC_037651.1 | 5551422 | SNV | 1 | A | G | Homozygous   |
| NC_037651.1 | 5551494 | SNV | 1 | C | T | Heterozygous |
| NC_037651.1 | 5551785 | SNV | 1 | T | C | Homozygous   |
| NC_037651.1 | 5551875 | SNV | 1 | A | T | Homozygous   |
| NC_037651.1 | 5552215 | SNV | 1 | T | C | Homozygous   |
| NC_037651.1 | 5553207 | SNV | 1 | T | C | Homozygous   |
| NC_037651.1 | 5553368 | SNV | 1 | C | G | Heterozygous |
| NC_037651.1 | 5553532 | SNV | 1 | T | C | Homozygous   |
| NC_037651.1 | 5553538 | SNV | 1 | G | T | Heterozygous |
| NC_037651.1 | 5553911 | SNV | 1 | T | C | Homozygous   |
| NC_037651.1 | 5553926 | SNV | 1 | C | T | Heterozygous |
| NC_037651.1 | 5553948 | SNV | 1 | A | G | Homozygous   |
| NC_037651.1 | 5553973 | SNV | 1 | G | A | Heterozygous |
| NC_037651.1 | 5553979 | SNV | 1 | A | G | Heterozygous |
| NC_037651.1 | 5553981 | SNV | 1 | C | T | Heterozygous |
| NC_037651.1 | 5554009 | SNV | 1 | G | A | Heterozygous |
| NC_037651.1 | 5554016 | SNV | 1 | T | A | Heterozygous |
| NC_037651.1 | 5554060 | SNV | 1 | T | G | Homozygous   |
| NC_037651.1 | 5554221 | SNV | 1 | G | T | Homozygous   |
| NC_037651.1 | 5554616 | SNV | 1 | C | T | Heterozygous |
| NC_037651.1 | 5554829 | SNV | 1 | G | C | Homozygous   |
| NC_037651.1 | 5554931 | SNV | 1 | G | C | Homozygous   |
| NC_037651.1 | 5555001 | SNV | 1 | T | C | Homozygous   |
| NC_037651.1 | 5555058 | SNV | 1 | A | G | Homozygous   |
| NC_037651.1 | 5555067 | SNV | 1 | A | G | Homozygous   |
| NC_037651.1 | 5555139 | SNV | 1 | A | G | Heterozygous |
| NC_037651.1 | 5555159 | SNV | 1 | A | G | Homozygous   |
| NC_037651.1 | 5555201 | SNV | 1 | A | G | Homozygous   |
| NC_037651.1 | 5555301 | SNV | 1 | C | A | Heterozygous |
| NC_037651.1 | 5555312 | SNV | 1 | C | T | Homozygous   |
| NC_037651.1 | 5555352 | SNV | 1 | T | C | Homozygous   |
| NC_037651.1 | 5555518 | SNV | 1 | G | A | Heterozygous |
| NC_037651.1 | 5555543 | SNV | 1 | A | G | Homozygous   |
| NC_037651.1 | 5555584 | SNV | 1 | C | T | Homozygous   |

|             |         |     |   |   |   |              |
|-------------|---------|-----|---|---|---|--------------|
| NC_037651.1 | 5555607 | SNV | 1 | T | C | Homozygous   |
| NC_037651.1 | 5555948 | SNV | 1 | T | C | Homozygous   |
| NC_037651.1 | 5556325 | SNV | 1 | T | C | Homozygous   |
| NC_037651.1 | 5556330 | SNV | 1 | T | C | Heterozygous |
| NC_037651.1 | 5556726 | SNV | 1 | G | A | Homozygous   |
| NC_037651.1 | 5556851 | SNV | 1 | A | G | Homozygous   |
| NC_037651.1 | 5556922 | SNV | 1 | T | G | Heterozygous |
| NC_037651.1 | 5556941 | SNV | 1 | T | C | Homozygous   |
| NC_037651.1 | 5557040 | SNV | 1 | T | C | Homozygous   |
| NC_037651.1 | 5557045 | SNV | 1 | A | G | Homozygous   |
| NC_037651.1 | 5557202 | SNV | 1 | G | A | Homozygous   |
| NC_037651.1 | 5557210 | SNV | 1 | A | G | Homozygous   |
| NC_037651.1 | 5557421 | SNV | 1 | T | C | Homozygous   |
| NC_037651.1 | 5557445 | SNV | 1 | T | C | Heterozygous |
| NC_037651.1 | 5557538 | SNV | 1 | T | A | Heterozygous |
| NC_037651.1 | 5557624 | SNV | 1 | T | G | Heterozygous |
| NC_037651.1 | 5557713 | SNV | 1 | T | C | Homozygous   |
| NC_037651.1 | 5557874 | SNV | 1 | C | T | Homozygous   |
| NC_037651.1 | 5557905 | SNV | 1 | C | T | Homozygous   |
| NC_037651.1 | 5557966 | SNV | 1 | T | G | Homozygous   |
| NC_037651.1 | 5558043 | SNV | 1 | T | C | Homozygous   |
| NC_037651.1 | 5558118 | SNV | 1 | T | C | Homozygous   |
| NC_037651.1 | 5558121 | SNV | 1 | A | G | Homozygous   |
| NC_037651.1 | 5558935 | SNV | 1 | C | T | Heterozygous |
| NC_037651.1 | 5558964 | SNV | 1 | G | A | Homozygous   |
| NC_037651.1 | 5559800 | SNV | 1 | C | T | Heterozygous |
| NC_037651.1 | 5559845 | SNV | 1 | A | G | Heterozygous |
| NC_037651.1 | 5559849 | SNV | 1 | C | T | Heterozygous |
| NC_037651.1 | 5559852 | SNV | 1 | C | T | Heterozygous |
| NC_037651.1 | 5560103 | SNV | 1 | G | T | Homozygous   |
| NC_037651.1 | 5560272 | SNV | 1 | C | T | Heterozygous |
| NC_037651.1 | 5560298 | SNV | 1 | T | C | Homozygous   |
| NC_037651.1 | 5560477 | SNV | 1 | T | A | Heterozygous |
| NC_037651.1 | 5560645 | SNV | 1 | A | G | Homozygous   |
| NC_037651.1 | 5561093 | SNV | 1 | G | T | Homozygous   |
| NC_037651.1 | 5564547 | SNV | 1 | C | T | Heterozygous |
| NC_037651.1 | 5567301 | SNV | 1 | G | A | Homozygous   |
| NC_037651.1 | 5567316 | SNV | 1 | G | A | Heterozygous |
| NC_037651.1 | 5567561 | SNV | 1 | T | A | Heterozygous |
| NC_037651.1 | 5567574 | SNV | 1 | T | A | Homozygous   |
| NC_037651.1 | 5569945 | SNV | 1 | G | A | Heterozygous |
| NC_037651.1 | 5582528 | SNV | 1 | T | A | Homozygous   |
| NC_037651.1 | 5582656 | SNV | 1 | G | A | Heterozygous |
| NC_037651.1 | 5582793 | SNV | 1 | A | G | Homozygous   |
| NC_037651.1 | 5582842 | SNV | 1 | G | A | Heterozygous |
| NC_037651.1 | 5586489 | SNV | 1 | C | T | Heterozygous |
| NC_037651.1 | 5591591 | SNV | 1 | C | T | Heterozygous |
| NC_037651.1 | 5591595 | SNV | 1 | T | C | Heterozygous |
| NC_037651.1 | 5601070 | SNV | 1 | T | C | Homozygous   |
| NC_037651.1 | 5601243 | SNV | 1 | A | G | Heterozygous |
| NC_037651.1 | 5601325 | SNV | 1 | C | G | Homozygous   |

|             |         |     |   |   |   |              |
|-------------|---------|-----|---|---|---|--------------|
| NC_037651.1 | 5601362 | SNV | 1 | A | G | Homozygous   |
| NC_037651.1 | 5601384 | SNV | 1 | A | G | Homozygous   |
| NC_037651.1 | 5602865 | SNV | 1 | T | C | Heterozygous |
| NC_037651.1 | 5602937 | SNV | 1 | T | C | Heterozygous |
| NC_037651.1 | 5603041 | SNV | 1 | C | T | Heterozygous |
| NC_037651.1 | 5603166 | SNV | 1 | T | C | Heterozygous |
| NC_037651.1 | 5603280 | SNV | 1 | A | C | Heterozygous |
| NC_037651.1 | 5603362 | SNV | 1 | C | T | Homozygous   |
| NC_037651.1 | 5603400 | SNV | 1 | G | A | Homozygous   |
| NC_037651.1 | 5603420 | SNV | 1 | A | G | Homozygous   |
| NC_037651.1 | 5603431 | SNV | 1 | T | C | Homozygous   |
| NC_037651.1 | 5603443 | SNV | 1 | C | T | Homozygous   |
| NC_037651.1 | 5606002 | SNV | 1 | T | C | Heterozygous |
| NC_037651.1 | 5606005 | SNV | 1 | C | T | Heterozygous |
| NC_037651.1 | 5608425 | SNV | 1 | T | C | Heterozygous |
| NC_037651.1 | 5608435 | SNV | 1 | C | T | Heterozygous |
| NC_037651.1 | 5608605 | SNV | 1 | T | C | Homozygous   |
| NC_037651.1 | 5608662 | SNV | 1 | C | T | Heterozygous |
| NC_037651.1 | 5612511 | SNV | 1 | C | A | Homozygous   |
| NC_037651.1 | 5612514 | SNV | 1 | T | C | Homozygous   |
| NC_037651.1 | 5612717 | SNV | 1 | A | G | Homozygous   |
| NC_037651.1 | 5612793 | SNV | 1 | G | A | Homozygous   |
| NC_037651.1 | 5612870 | SNV | 1 | G | C | Homozygous   |
| NC_037651.1 | 5612935 | SNV | 1 | T | C | Homozygous   |
| NC_037651.1 | 5612941 | SNV | 1 | T | C | Homozygous   |
| NC_037651.1 | 5612953 | SNV | 1 | A | T | Heterozygous |
| NC_037651.1 | 5612955 | SNV | 1 | C | T | Heterozygous |
| NC_037651.1 | 5612967 | SNV | 1 | G | A | Homozygous   |
| NC_037651.1 | 5612990 | SNV | 1 | C | T | Homozygous   |
| NC_037651.1 | 5612994 | SNV | 1 | C | T | Homozygous   |
| NC_037651.1 | 5612996 | SNV | 1 | G | C | Homozygous   |
| NC_037651.1 | 5613000 | SNV | 1 | G | A | Homozygous   |
| NC_037651.1 | 5613033 | SNV | 1 | G | A | Homozygous   |
| NC_037651.1 | 5613067 | SNV | 1 | T | C | Homozygous   |
| NC_037651.1 | 5613196 | SNV | 1 | G | A | Heterozygous |
| NC_037651.1 | 5613279 | SNV | 1 | C | G | Homozygous   |
| NC_037651.1 | 5613299 | SNV | 1 | G | A | Homozygous   |
| NC_037651.1 | 5613310 | SNV | 1 | A | G | Homozygous   |
| NC_037651.1 | 5619688 | SNV | 1 | T | C | Homozygous   |
| NC_037651.1 | 5619730 | SNV | 1 | A | G | Heterozygous |
| NC_037651.1 | 5619747 | SNV | 1 | A | T | Heterozygous |
| NC_037651.1 | 5620026 | SNV | 1 | C | G | Heterozygous |
| NC_037651.1 | 5623989 | SNV | 1 | A | G | Homozygous   |
| NC_037651.1 | 5623994 | SNV | 1 | G | T | Homozygous   |
| NC_037651.1 | 5623996 | SNV | 1 | G | T | Homozygous   |
| NC_037651.1 | 5624002 | SNV | 1 | A | C | Homozygous   |
| NC_037651.1 | 5624029 | SNV | 1 | T | G | Homozygous   |
| NC_037651.1 | 5624031 | SNV | 1 | G | T | Homozygous   |
| NC_037651.1 | 5631586 | SNV | 1 | T | C | Heterozygous |
| NC_037651.1 | 5631873 | SNV | 1 | A | G | Heterozygous |
| NC_037651.1 | 5632472 | SNV | 1 | A | G | Homozygous   |

|             |         |     |   |   |   |              |
|-------------|---------|-----|---|---|---|--------------|
| NC_037651.1 | 5634764 | SNV | 1 | T | A | Homozygous   |
| NC_037651.1 | 5635569 | SNV | 1 | C | T | Heterozygous |
| NC_037651.1 | 5637284 | SNV | 1 | A | G | Homozygous   |
| NC_037651.1 | 5639460 | SNV | 1 | A | G | Heterozygous |
| NC_037651.1 | 5639466 | SNV | 1 | C | T | Heterozygous |
| NC_037651.1 | 5640707 | SNV | 1 | T | A | Homozygous   |
| NC_037651.1 | 5640794 | SNV | 1 | G | A | Homozygous   |
| NC_037651.1 | 5642847 | SNV | 1 | A | T | Heterozygous |
| NC_037651.1 | 5684364 | SNV | 1 | A | G | Homozygous   |
| NC_037651.1 | 5684407 | SNV | 1 | C | T | Homozygous   |
| NC_037651.1 | 5684495 | SNV | 1 | T | A | Homozygous   |
| NC_037651.1 | 5700410 | SNV | 1 | A | G | Heterozygous |
| NC_037651.1 | 5705870 | SNV | 1 | A | G | Homozygous   |
| NC_037651.1 | 5705872 | SNV | 1 | A | G | Homozygous   |
| NC_037651.1 | 5705875 | SNV | 1 | G | A | Homozygous   |
| NC_037651.1 | 5706035 | SNV | 1 | A | G | Homozygous   |
| NC_037651.1 | 5713677 | SNV | 1 | T | C | Homozygous   |
| NC_037651.1 | 5720209 | SNV | 1 | G | A | Homozygous   |
| NC_037651.1 | 5720214 | SNV | 1 | T | G | Homozygous   |
| NC_037651.1 | 5720222 | SNV | 1 | T | C | Homozygous   |
| NC_037651.1 | 5720238 | SNV | 1 | A | G | Homozygous   |
| NC_037651.1 | 5720244 | SNV | 1 | A | C | Homozygous   |
| NC_037651.1 | 5720398 | SNV | 1 | T | C | Homozygous   |
| NC_037651.1 | 5727577 | SNV | 1 | A | C | Homozygous   |
| NC_037651.1 | 5727579 | SNV | 1 | A | C | Homozygous   |
| NC_037651.1 | 5727593 | SNV | 1 | G | A | Heterozygous |
| NC_037651.1 | 5727596 | SNV | 1 | A | G | Heterozygous |
| NC_037651.1 | 5727599 | SNV | 1 | A | T | Heterozygous |
| NC_037651.1 | 5727604 | SNV | 1 | G | T | Heterozygous |
| NC_037651.1 | 5729666 | SNV | 1 | T | A | Heterozygous |
| NC_037651.1 | 5729669 | SNV | 1 | G | A | Homozygous   |
| NC_037651.1 | 5731422 | SNV | 1 | T | C | Homozygous   |
| NC_037651.1 | 5731435 | SNV | 1 | G | T | Heterozygous |
| NC_037651.1 | 5731468 | SNV | 1 | G | A | Homozygous   |
| NC_037651.1 | 5731501 | SNV | 1 | C | T | Homozygous   |
| NC_037651.1 | 5731525 | SNV | 1 | T | C | Heterozygous |
| NC_037651.1 | 5731536 | SNV | 1 | T | C | Homozygous   |
| NC_037651.1 | 5731774 | SNV | 1 | A | G | Homozygous   |
| NC_037651.1 | 5731791 | SNV | 1 | A | G | Heterozygous |
| NC_037651.1 | 5731795 | SNV | 1 | C | G | Heterozygous |
| NC_037651.1 | 5731941 | SNV | 1 | C | T | Homozygous   |
| NC_037651.1 | 5731945 | SNV | 1 | C | T | Homozygous   |
| NC_037651.1 | 5732790 | SNV | 1 | T | A | Heterozygous |
| NC_037651.1 | 5732793 | SNV | 1 | C | A | Homozygous   |
| NC_037651.1 | 5732848 | SNV | 1 | G | A | Homozygous   |
| NC_037651.1 | 5732983 | SNV | 1 | T | C | Homozygous   |
| NC_037651.1 | 5733596 | SNV | 1 | G | A | Homozygous   |
| NC_037651.1 | 5733613 | SNV | 1 | A | G | Heterozygous |
| NC_037651.1 | 5733739 | SNV | 1 | T | C | Homozygous   |
| NC_037651.1 | 5733747 | SNV | 1 | C | G | Homozygous   |
| NC_037651.1 | 5746846 | SNV | 1 | T | C | Homozygous   |

|             |         |     |   |   |   |              |
|-------------|---------|-----|---|---|---|--------------|
| NC_037651.1 | 5746856 | SNV | 1 | T | C | Homozygous   |
| NC_037651.1 | 5746858 | SNV | 1 | C | T | Heterozygous |
| NC_037651.1 | 5747019 | SNV | 1 | A | G | Heterozygous |
| NC_037651.1 | 5747155 | SNV | 1 | A | G | Heterozygous |
| NC_037651.1 | 5747206 | SNV | 1 | C | T | Heterozygous |
| NC_037651.1 | 5747224 | SNV | 1 | A | G | Homozygous   |
| NC_037651.1 | 5747250 | SNV | 1 | G | A | Heterozygous |
| NC_037651.1 | 5747273 | SNV | 1 | T | A | Homozygous   |
| NC_037651.1 | 5747278 | SNV | 1 | G | A | Homozygous   |
| NC_037651.1 | 5747687 | SNV | 1 | G | A | Homozygous   |
| NC_037651.1 | 5747812 | SNV | 1 | T | C | Homozygous   |
| NC_037651.1 | 5747829 | SNV | 1 | T | C | Heterozygous |
| NC_037651.1 | 5747841 | SNV | 1 | C | T | Homozygous   |
| NC_037651.1 | 5747843 | SNV | 1 | T | A | Homozygous   |
| NC_037651.1 | 5747873 | SNV | 1 | G | T | Homozygous   |
| NC_037651.1 | 5756657 | SNV | 1 | G | A | Heterozygous |
| NC_037651.1 | 5757478 | SNV | 1 | C | T | Heterozygous |
| NC_037651.1 | 5757499 | SNV | 1 | T | C | Heterozygous |
| NC_037651.1 | 5757621 | SNV | 1 | G | A | Heterozygous |
| NC_037651.1 | 5757631 | SNV | 1 | T | C | Homozygous   |
| NC_037651.1 | 5757697 | SNV | 1 | A | G | Homozygous   |
| NC_037651.1 | 5757711 | SNV | 1 | A | G | Homozygous   |
| NC_037651.1 | 5757763 | SNV | 1 | G | A | Heterozygous |
| NC_037651.1 | 5757909 | SNV | 1 | C | T | Heterozygous |
| NC_037651.1 | 5757942 | SNV | 1 | C | T | Homozygous   |
| NC_037651.1 | 5757945 | SNV | 1 | T | C | Homozygous   |
| NC_037651.1 | 5757947 | SNV | 1 | T | C | Homozygous   |
| NC_037651.1 | 5757983 | SNV | 1 | C | T | Heterozygous |
| NC_037651.1 | 5758004 | SNV | 1 | A | G | Heterozygous |
| NC_037651.1 | 5758019 | SNV | 1 | T | C | Heterozygous |
| NC_037651.1 | 5758052 | SNV | 1 | G | A | Heterozygous |
| NC_037651.1 | 5758310 | SNV | 1 | G | A | Heterozygous |
| NC_037651.1 | 5758453 | SNV | 1 | A | G | Homozygous   |
| NC_037651.1 | 5758613 | SNV | 1 | G | A | Heterozygous |
| NC_037651.1 | 5758641 | SNV | 1 | G | A | Heterozygous |
| NC_037651.1 | 5758649 | SNV | 1 | G | A | Heterozygous |
| NC_037651.1 | 5758855 | SNV | 1 | A | G | Homozygous   |
| NC_037651.1 | 5758880 | SNV | 1 | G | A | Heterozygous |
| NC_037651.1 | 5758909 | SNV | 1 | G | C | Homozygous   |
| NC_037651.1 | 5768154 | SNV | 1 | A | G | Heterozygous |
| NC_037651.1 | 5768197 | SNV | 1 | C | T | Homozygous   |
| NC_037651.1 | 5768228 | SNV | 1 | T | C | Homozygous   |
| NC_037651.1 | 5768239 | SNV | 1 | C | A | Heterozygous |
| NC_037651.1 | 5768307 | SNV | 1 | T | A | Heterozygous |
| NC_037651.1 | 5768387 | SNV | 1 | A | G | Heterozygous |
| NC_037651.1 | 5790271 | SNV | 1 | C | A | Heterozygous |
| NC_037651.1 | 5790274 | SNV | 1 | C | G | Heterozygous |
| NC_037651.1 | 5790286 | SNV | 1 | A | G | Heterozygous |
| NC_037651.1 | 5790343 | SNV | 1 | A | G | Heterozygous |
| NC_037651.1 | 5790610 | SNV | 1 | G | A | Homozygous   |
| NC_037651.1 | 5790751 | SNV | 1 | T | C | Homozygous   |

|             |         |     |   |   |   |              |
|-------------|---------|-----|---|---|---|--------------|
| NC_037651.1 | 5790784 | SNV | 1 | A | T | Homozygous   |
| NC_037651.1 | 5790995 | SNV | 1 | C | G | Homozygous   |
| NC_037651.1 | 5791013 | SNV | 1 | A | T | Heterozygous |
| NC_037651.1 | 5791021 | SNV | 1 | A | T | Homozygous   |
| NC_037651.1 | 5791024 | SNV | 1 | A | G | Homozygous   |
| NC_037651.1 | 5791027 | SNV | 1 | T | C | Homozygous   |
| NC_037651.1 | 5791107 | SNV | 1 | G | A | Heterozygous |
| NC_037651.1 | 5791264 | SNV | 1 | G | A | Heterozygous |
| NC_037651.1 | 5791298 | SNV | 1 | A | G | Homozygous   |
| NC_037651.1 | 5793316 | SNV | 1 | G | A | Heterozygous |
| NC_037651.1 | 5793337 | SNV | 1 | T | A | Heterozygous |
| NC_037651.1 | 5793381 | SNV | 1 | A | G | Heterozygous |
| NC_037651.1 | 5793398 | SNV | 1 | G | A | Homozygous   |
| NC_037651.1 | 5793424 | SNV | 1 | C | G | Heterozygous |
| NC_037651.1 | 5793846 | SNV | 1 | G | A | Homozygous   |
| NC_037651.1 | 5793894 | SNV | 1 | T | C | Homozygous   |
| NC_037651.1 | 5794335 | SNV | 1 | A | T | Heterozygous |
| NC_037651.1 | 5794527 | SNV | 1 | A | G | Homozygous   |
| NC_037651.1 | 5794648 | SNV | 1 | T | C | Heterozygous |
| NC_037651.1 | 5795208 | SNV | 1 | G | A | Homozygous   |
| NC_037651.1 | 5795545 | SNV | 1 | A | G | Homozygous   |
| NC_037651.1 | 5795597 | SNV | 1 | T | C | Heterozygous |
| NC_037651.1 | 5795696 | SNV | 1 | G | A | Homozygous   |
| NC_037651.1 | 5795801 | SNV | 1 | A | T | Heterozygous |
| NC_037651.1 | 5796716 | SNV | 1 | T | C | Homozygous   |
| NC_037651.1 | 5796719 | SNV | 1 | C | G | Heterozygous |
| NC_037651.1 | 5798673 | SNV | 1 | T | A | Heterozygous |
| NC_037651.1 | 5799092 | SNV | 1 | T | C | Homozygous   |
| NC_037651.1 | 5799129 | SNV | 1 | T | C | Homozygous   |
| NC_037651.1 | 5799562 | SNV | 1 | C | T | Heterozygous |
| NC_037651.1 | 5799601 | SNV | 1 | G | A | Heterozygous |
| NC_037651.1 | 5799970 | SNV | 1 | A | G | Heterozygous |
| NC_037651.1 | 5803743 | SNV | 1 | G | C | Heterozygous |
| NC_037651.1 | 5803754 | SNV | 1 | C | T | Heterozygous |
| NC_037651.1 | 5803764 | SNV | 1 | C | G | Homozygous   |
| NC_037651.1 | 5803869 | SNV | 1 | T | C | Homozygous   |
| NC_037651.1 | 5803922 | SNV | 1 | G | A | Heterozygous |
| NC_037651.1 | 5803926 | SNV | 1 | G | A | Heterozygous |
| NC_037651.1 | 5804088 | SNV | 1 | G | A | Heterozygous |
| NC_037651.1 | 5804101 | SNV | 1 | C | A | Homozygous   |
| NC_037651.1 | 5804103 | SNV | 1 | C | G | Homozygous   |
| NC_037651.1 | 5804498 | SNV | 1 | C | T | Heterozygous |
| NC_037651.1 | 5804518 | SNV | 1 | C | A | Homozygous   |
| NC_037651.1 | 5804604 | SNV | 1 | T | C | Heterozygous |
| NC_037651.1 | 5804974 | SNV | 1 | C | T | Heterozygous |
| NC_037651.1 | 5805001 | SNV | 1 | T | C | Heterozygous |
| NC_037651.1 | 5805018 | SNV | 1 | G | A | Heterozygous |
| NC_037651.1 | 5805037 | SNV | 1 | T | G | Heterozygous |
| NC_037651.1 | 5805046 | SNV | 1 | G | A | Heterozygous |
| NC_037651.1 | 5805050 | SNV | 1 | A | G | Heterozygous |
| NC_037651.1 | 5805173 | SNV | 1 | T | C | Homozygous   |

|             |         |     |   |   |   |              |
|-------------|---------|-----|---|---|---|--------------|
| NC_037651.1 | 5832073 | SNV | 1 | C | T | Homozygous   |
| NC_037651.1 | 5832157 | SNV | 1 | C | T | Heterozygous |
| NC_037651.1 | 5832213 | SNV | 1 | A | T | Homozygous   |
| NC_037651.1 | 5833091 | SNV | 1 | C | A | Heterozygous |
| NC_037651.1 | 5841459 | SNV | 1 | G | A | Heterozygous |
| NC_037651.1 | 5841618 | SNV | 1 | A | C | Homozygous   |
| NC_037651.1 | 5841622 | SNV | 1 | C | T | Heterozygous |
| NC_037651.1 | 5841663 | SNV | 1 | G | A | Heterozygous |
| NC_037651.1 | 5841668 | SNV | 1 | G | A | Heterozygous |
| NC_037651.1 | 5841712 | SNV | 1 | T | C | Homozygous   |
| NC_037651.1 | 5841714 | SNV | 1 | G | A | Homozygous   |
| NC_037651.1 | 5841729 | SNV | 1 | A | G | Homozygous   |
| NC_037651.1 | 5841822 | SNV | 1 | G | T | Homozygous   |
| NC_037651.1 | 5841863 | SNV | 1 | G | A | Homozygous   |
| NC_037651.1 | 5841936 | SNV | 1 | C | G | Heterozygous |
| NC_037651.1 | 5841939 | SNV | 1 | A | C | Homozygous   |
| NC_037651.1 | 5842791 | SNV | 1 | G | A | Homozygous   |
| NC_037651.1 | 5842847 | SNV | 1 | A | G | Homozygous   |
| NC_037651.1 | 5842917 | SNV | 1 | A | C | Homozygous   |
| NC_037651.1 | 5842938 | SNV | 1 | A | G | Heterozygous |
| NC_037651.1 | 5842941 | SNV | 1 | A | G | Homozygous   |
| NC_037651.1 | 5844607 | SNV | 1 | C | A | Homozygous   |
| NC_037651.1 | 5844611 | SNV | 1 | C | A | Heterozygous |
| NC_037651.1 | 5858075 | SNV | 1 | G | C | Heterozygous |
| NC_037651.1 | 5868188 | SNV | 1 | T | C | Homozygous   |
| NC_037651.1 | 5868236 | SNV | 1 | G | A | Homozygous   |
| NC_037651.1 | 5868310 | SNV | 1 | C | T | Homozygous   |
| NC_037651.1 | 5870127 | SNV | 1 | C | T | Heterozygous |
| NC_037651.1 | 5870332 | SNV | 1 | A | G | Homozygous   |
| NC_037651.1 | 5870351 | SNV | 1 | C | T | Heterozygous |
| NC_037651.1 | 5870394 | SNV | 1 | T | C | Heterozygous |
| NC_037651.1 | 5870591 | SNV | 1 | T | A | Homozygous   |
| NC_037651.1 | 5870668 | SNV | 1 | T | C | Homozygous   |
| NC_037651.1 | 5870817 | SNV | 1 | A | G | Homozygous   |
| NC_037651.1 | 5871434 | SNV | 1 | T | C | Heterozygous |
| NC_037651.1 | 5871603 | SNV | 1 | C | T | Heterozygous |
| NC_037651.1 | 5872250 | SNV | 1 | G | C | Heterozygous |
| NC_037651.1 | 5872268 | SNV | 1 | A | T | Heterozygous |
| NC_037651.1 | 5873998 | SNV | 1 | C | T | Heterozygous |
| NC_037651.1 | 5876677 | SNV | 1 | C | G | Homozygous   |
| NC_037651.1 | 5876684 | SNV | 1 | G | A | Homozygous   |
| NC_037651.1 | 5876711 | SNV | 1 | G | A | Homozygous   |
| NC_037651.1 | 5876716 | SNV | 1 | A | T | Homozygous   |
| NC_037651.1 | 5890506 | SNV | 1 | T | C | Homozygous   |
| NC_037651.1 | 5896753 | SNV | 1 | C | G | Heterozygous |
| NC_037651.1 | 5896801 | SNV | 1 | G | A | Heterozygous |
| NC_037651.1 | 5901855 | SNV | 1 | G | A | Heterozygous |
| NC_037651.1 | 5901867 | SNV | 1 | G | A | Homozygous   |
| NC_037651.1 | 5901870 | SNV | 1 | G | A | Homozygous   |
| NC_037651.1 | 5905691 | SNV | 1 | C | T | Heterozygous |
| NC_037651.1 | 5905836 | SNV | 1 | G | A | Homozygous   |

|             |         |     |   |   |   |              |
|-------------|---------|-----|---|---|---|--------------|
| NC_037651.1 | 5905862 | SNV | 1 | G | A | Heterozygous |
| NC_037651.1 | 5906127 | SNV | 1 | G | A | Heterozygous |
| NC_037651.1 | 5925180 | SNV | 1 | G | A | Homozygous   |
| NC_037651.1 | 5931748 | SNV | 1 | T | A | Homozygous   |
| NC_037651.1 | 5931756 | SNV | 1 | T | C | Homozygous   |
| NC_037651.1 | 5934678 | SNV | 1 | A | C | Heterozygous |
| NC_037651.1 | 5937011 | SNV | 1 | T | C | Homozygous   |
| NC_037651.1 | 5943452 | SNV | 1 | T | A | Homozygous   |
| NC_037651.1 | 5943474 | SNV | 1 | G | A | Homozygous   |
| NC_037651.1 | 5943480 | SNV | 1 | C | T | Homozygous   |
| NC_037651.1 | 5954961 | SNV | 1 | G | A | Heterozygous |
| NC_037651.1 | 5954963 | SNV | 1 | G | A | Heterozygous |
| NC_037651.1 | 5954983 | SNV | 1 | A | T | Heterozygous |
| NC_037651.1 | 5955982 | SNV | 1 | G | C | Homozygous   |
| NC_037651.1 | 5956272 | SNV | 1 | G | C | Homozygous   |
| NC_037651.1 | 5964827 | SNV | 1 | T | G | Homozygous   |
| NC_037651.1 | 5964830 | SNV | 1 | A | G | Homozygous   |
| NC_037651.1 | 5964837 | SNV | 1 | G | T | Homozygous   |
| NC_037651.1 | 5970133 | SNV | 1 | A | G | Homozygous   |
| NC_037651.1 | 5971687 | SNV | 1 | G | C | Homozygous   |
| NC_037651.1 | 5971846 | SNV | 1 | A | C | Homozygous   |
| NC_037651.1 | 5975805 | SNV | 1 | A | C | Homozygous   |
| NC_037651.1 | 5975818 | SNV | 1 | A | C | Homozygous   |
| NC_037651.1 | 5975820 | SNV | 1 | T | C | Homozygous   |
| NC_037651.1 | 5975828 | SNV | 1 | A | G | Homozygous   |
| NC_037651.1 | 5975832 | SNV | 1 | A | G | Heterozygous |
| NC_037651.1 | 5975871 | SNV | 1 | T | A | Heterozygous |
| NC_037651.1 | 5981566 | SNV | 1 | G | T | Homozygous   |
| NC_037651.1 | 5981930 | SNV | 1 | A | G | Homozygous   |
| NC_037651.1 | 5982909 | SNV | 1 | A | T | Homozygous   |
| NC_037651.1 | 5983552 | SNV | 1 | A | T | Homozygous   |
| NC_037651.1 | 5983555 | SNV | 1 | A | T | Homozygous   |
| NC_037651.1 | 5988221 | SNV | 1 | A | G | Homozygous   |
| NC_037651.1 | 5988316 | SNV | 1 | C | G | Homozygous   |
| NC_037651.1 | 5991668 | SNV | 1 | C | T | Homozygous   |
| NC_037651.1 | 5992538 | SNV | 1 | A | G | Heterozygous |
| NC_037651.1 | 5992925 | SNV | 1 | T | C | Homozygous   |
| NC_037651.1 | 6003664 | SNV | 1 | G | A | Homozygous   |
| NC_037651.1 | 6003839 | SNV | 1 | T | C | Homozygous   |
| NC_037651.1 | 6004124 | SNV | 1 | G | A | Heterozygous |
| NC_037651.1 | 6004254 | SNV | 1 | G | A | Heterozygous |
| NC_037651.1 | 6004612 | SNV | 1 | A | G | Homozygous   |
| NC_037651.1 | 6005329 | SNV | 1 | A | G | Homozygous   |
| NC_037651.1 | 6005915 | SNV | 1 | C | A | Homozygous   |
| NC_037651.1 | 6006263 | SNV | 1 | C | T | Homozygous   |
| NC_037651.1 | 6006304 | SNV | 1 | G | A | Heterozygous |
| NC_037651.1 | 6006771 | SNV | 1 | C | T | Homozygous   |
| NC_037651.1 | 6006800 | SNV | 1 | T | C | Heterozygous |
| NC_037651.1 | 6006990 | SNV | 1 | A | G | Homozygous   |
| NC_037651.1 | 6007071 | SNV | 1 | A | C | Heterozygous |
| NC_037651.1 | 6008386 | SNV | 1 | A | T | Homozygous   |



|             |         |     |   |   |   |              |
|-------------|---------|-----|---|---|---|--------------|
| NC_037651.1 | 6008893 | SNV | 1 | C | G | Heterozygous |
| NC_037651.1 | 6012161 | SNV | 1 | T | C | Heterozygous |
| NC_037651.1 | 6012164 | SNV | 1 | A | G | Heterozygous |
| NC_037651.1 | 6012171 | SNV | 1 | A | C | Heterozygous |
| NC_037651.1 | 6020016 | SNV | 1 | G | T | Homozygous   |
| NC_037651.1 | 6021436 | SNV | 1 | A | G | Homozygous   |
| NC_037651.1 | 6033496 | SNV | 1 | T | G | Heterozygous |
| NC_037651.1 | 6033500 | SNV | 1 | T | C | Heterozygous |
| NC_037651.1 | 6033503 | SNV | 1 | T | C | Heterozygous |
| NC_037651.1 | 6035792 | SNV | 1 | G | A | Heterozygous |
| NC_037651.1 | 6038607 | SNV | 1 | C | T | Homozygous   |
| NC_037651.1 | 6038609 | SNV | 1 | A | T | Homozygous   |
| NC_037651.1 | 6038614 | SNV | 1 | A | T | Homozygous   |
| NC_037651.1 | 6039134 | SNV | 1 | A | T | Homozygous   |
| NC_037651.1 | 6039187 | SNV | 1 | T | C | Homozygous   |
| NC_037651.1 | 6040481 | SNV | 1 | A | G | Homozygous   |
| NC_037651.1 | 6041386 | SNV | 1 | G | A | Heterozygous |
| NC_037651.1 | 6045694 | SNV | 1 | C | T | Heterozygous |
| NC_037651.1 | 6045793 | SNV | 1 | T | C | Homozygous   |
| NC_037651.1 | 6045825 | SNV | 1 | T | C | Homozygous   |
| NC_037651.1 | 6045828 | SNV | 1 | C | T | Heterozygous |
| NC_037651.1 | 6045887 | SNV | 1 | T | C | Homozygous   |
| NC_037651.1 | 6048512 | SNV | 1 | T | C | Heterozygous |
| NC_037651.1 | 6048536 | SNV | 1 | A | G | Homozygous   |
| NC_037651.1 | 6053041 | SNV | 1 | C | T | Homozygous   |
| NC_037651.1 | 6053050 | SNV | 1 | C | A | Homozygous   |
| NC_037651.1 | 6055123 | SNV | 1 | C | T | Heterozygous |
| NC_037651.1 | 6057652 | SNV | 1 | T | G | Heterozygous |
| NC_037651.1 | 6057741 | SNV | 1 | A | G | Heterozygous |
| NC_037651.1 | 6073736 | SNV | 1 | A | G | Homozygous   |
| NC_037651.1 | 6073744 | SNV | 1 | A | G | Homozygous   |
| NC_037651.1 | 6073746 | SNV | 1 | C | A | Homozygous   |
| NC_037651.1 | 6073748 | SNV | 1 | T | A | Homozygous   |
| NC_037651.1 | 6088113 | SNV | 1 | C | T | Homozygous   |
| NC_037651.1 | 6094508 | SNV | 1 | T | C | Homozygous   |
| NC_037651.1 | 6130883 | SNV | 1 | G | A | Homozygous   |
| NC_037651.1 | 6137991 | SNV | 1 | A | G | Heterozygous |
| NC_037651.1 | 6138517 | SNV | 1 | G | C | Homozygous   |
| NC_037651.1 | 6138570 | SNV | 1 | T | C | Homozygous   |
| NC_037651.1 | 6139825 | SNV | 1 | C | T | Heterozygous |
| NC_037651.1 | 6142218 | SNV | 1 | T | C | Heterozygous |
| NC_037651.1 | 6142737 | SNV | 1 | C | T | Homozygous   |
| NC_037651.1 | 6142915 | SNV | 1 | A | T | Homozygous   |
| NC_037651.1 | 6142941 | SNV | 1 | T | C | Heterozygous |
| NC_037651.1 | 6143377 | SNV | 1 | G | A | Heterozygous |
| NC_037651.1 | 6143381 | SNV | 1 | T | A | Heterozygous |
| NC_037651.1 | 6143385 | SNV | 1 | A | G | Homozygous   |
| NC_037651.1 | 6143416 | SNV | 1 | A | G | Homozygous   |
| NC_037651.1 | 6143428 | SNV | 1 | G | A | Heterozygous |
| NC_037651.1 | 6145945 | SNV | 1 | T | C | Homozygous   |
| NC_037651.1 | 6145984 | SNV | 1 | C | G | Homozygous   |

|             |         |     |   |   |   |              |
|-------------|---------|-----|---|---|---|--------------|
| NC_037651.1 | 6157135 | SNV | 1 | C | A | Heterozygous |
| NC_037651.1 | 6157163 | SNV | 1 | T | C | Heterozygous |
| NC_037651.1 | 6161302 | SNV | 1 | C | T | Heterozygous |
| NC_037651.1 | 6180233 | SNV | 1 | C | T | Heterozygous |
| NC_037651.1 | 6189177 | SNV | 1 | G | T | Heterozygous |
| NC_037651.1 | 6189182 | SNV | 1 | G | T | Heterozygous |
| NC_037651.1 | 6189187 | SNV | 1 | A | C | Heterozygous |
| NC_037651.1 | 6189192 | SNV | 1 | A | T | Heterozygous |
| NC_037651.1 | 6189288 | SNV | 1 | C | T | Homozygous   |
| NC_037651.1 | 6189304 | SNV | 1 | G | A | Homozygous   |
| NC_037651.1 | 6189329 | SNV | 1 | C | T | Homozygous   |
| NC_037651.1 | 6189346 | SNV | 1 | A | G | Homozygous   |
| NC_037651.1 | 6189356 | SNV | 1 | A | G | Homozygous   |
| NC_037651.1 | 6189398 | SNV | 1 | T | C | Homozygous   |
| NC_037651.1 | 6189443 | SNV | 1 | T | C | Homozygous   |
| NC_037651.1 | 6206391 | SNV | 1 | T | C | Homozygous   |
| NC_037651.1 | 6206715 | SNV | 1 | T | C | Homozygous   |
| NC_037651.1 | 6206747 | SNV | 1 | T | C | Homozygous   |
| NC_037651.1 | 6206777 | SNV | 1 | C | T | Heterozygous |
| NC_037651.1 | 6206968 | SNV | 1 | G | C | Heterozygous |
| NC_037651.1 | 6207022 | SNV | 1 | C | T | Heterozygous |
| NC_037651.1 | 6207059 | SNV | 1 | A | G | Homozygous   |
| NC_037651.1 | 6207133 | SNV | 1 | A | G | Homozygous   |
| NC_037651.1 | 6212337 | SNV | 1 | T | C | Heterozygous |
| NC_037651.1 | 6212343 | SNV | 1 | C | T | Heterozygous |
| NC_037651.1 | 6212357 | SNV | 1 | T | A | Heterozygous |
| NC_037651.1 | 6212416 | SNV | 1 | G | T | Homozygous   |
| NC_037651.1 | 6212440 | SNV | 1 | C | T | Homozygous   |
| NC_037651.1 | 6212456 | SNV | 1 | T | C | Homozygous   |
| NC_037651.1 | 6212467 | SNV | 1 | C | T | Homozygous   |
| NC_037651.1 | 6212489 | SNV | 1 | G | A | Homozygous   |
| NC_037651.1 | 6212542 | SNV | 1 | G | T | Homozygous   |
| NC_037651.1 | 6212546 | SNV | 1 | G | T | Heterozygous |
| NC_037651.1 | 6212566 | SNV | 1 | T | C | Homozygous   |
| NC_037651.1 | 6212575 | SNV | 1 | G | A | Heterozygous |
| NC_037651.1 | 6213075 | SNV | 1 | A | T | Homozygous   |
| NC_037651.1 | 6213077 | SNV | 1 | T | A | Homozygous   |
| NC_037651.1 | 6213082 | SNV | 1 | A | T | Homozygous   |
| NC_037651.1 | 6213113 | SNV | 1 | C | T | Homozygous   |
| NC_037651.1 | 6220222 | SNV | 1 | A | G | Homozygous   |
| NC_037651.1 | 6220361 | SNV | 1 | T | A | Heterozygous |
| NC_037651.1 | 6220371 | SNV | 1 | C | T | Homozygous   |
| NC_037651.1 | 6221414 | SNV | 1 | A | G | Homozygous   |
| NC_037651.1 | 6224470 | SNV | 1 | A | G | Homozygous   |
| NC_037651.1 | 6224604 | SNV | 1 | G | C | Homozygous   |
| NC_037651.1 | 6224643 | SNV | 1 | T | C | Heterozygous |
| NC_037651.1 | 6224905 | SNV | 1 | T | C | Homozygous   |
| NC_037651.1 | 6225052 | SNV | 1 | C | T | Homozygous   |
| NC_037651.1 | 6225283 | SNV | 1 | T | C | Homozygous   |
| NC_037651.1 | 6229290 | SNV | 1 | A | G | Heterozygous |
| NC_037651.1 | 6229293 | SNV | 1 | A | G | Heterozygous |

|             |         |     |   |   |   |              |
|-------------|---------|-----|---|---|---|--------------|
| NC_037651.1 | 6229299 | SNV | 1 | G | A | Homozygous   |
| NC_037651.1 | 6255110 | SNV | 1 | C | T | Homozygous   |
| NC_037651.1 | 6255114 | SNV | 1 | C | T | Homozygous   |
| NC_037651.1 | 6255122 | SNV | 1 | C | T | Homozygous   |
| NC_037651.1 | 6267238 | SNV | 1 | A | G | Homozygous   |
| NC_037651.1 | 6267240 | SNV | 1 | C | T | Homozygous   |
| NC_037651.1 | 6274747 | SNV | 1 | C | T | Heterozygous |
| NC_037651.1 | 6274766 | SNV | 1 | T | C | Heterozygous |
| NC_037651.1 | 6281305 | SNV | 1 | G | A | Heterozygous |
| NC_037651.1 | 6283298 | SNV | 1 | T | C | Heterozygous |
| NC_037651.1 | 6284345 | SNV | 1 | G | A | Heterozygous |
| NC_037651.1 | 6284780 | SNV | 1 | C | T | Heterozygous |
| NC_037651.1 | 6284783 | SNV | 1 | C | T | Homozygous   |
| NC_037651.1 | 6284878 | SNV | 1 | T | A | Heterozygous |
| NC_037651.1 | 6284881 | SNV | 1 | C | T | Heterozygous |
| NC_037651.1 | 6284910 | SNV | 1 | A | G | Homozygous   |
| NC_037651.1 | 6289950 | SNV | 1 | T | C | Homozygous   |
| NC_037651.1 | 6289970 | SNV | 1 | G | T | Homozygous   |
| NC_037651.1 | 6289973 | SNV | 1 | T | G | Homozygous   |
| NC_037651.1 | 6289990 | SNV | 1 | A | T | Homozygous   |
| NC_037651.1 | 6292186 | SNV | 1 | T | A | Homozygous   |
| NC_037651.1 | 6292189 | SNV | 1 | C | A | Homozygous   |
| NC_037651.1 | 6299205 | SNV | 1 | C | T | Homozygous   |
| NC_037651.1 | 6299276 | SNV | 1 | G | A | Heterozygous |
| NC_037651.1 | 6299294 | SNV | 1 | C | T | Heterozygous |
| NC_037651.1 | 6299366 | SNV | 1 | C | T | Homozygous   |
| NC_037651.1 | 6299375 | SNV | 1 | C | T | Heterozygous |
| NC_037651.1 | 6299405 | SNV | 1 | C | T | Homozygous   |
| NC_037651.1 | 6299412 | SNV | 1 | T | C | Homozygous   |
| NC_037651.1 | 6299441 | SNV | 1 | C | T | Heterozygous |
| NC_037651.1 | 6299722 | SNV | 1 | A | G | Homozygous   |
| NC_037651.1 | 6299750 | SNV | 1 | A | G | Homozygous   |
| NC_037651.1 | 6300187 | SNV | 1 | A | G | Homozygous   |
| NC_037651.1 | 6300349 | SNV | 1 | C | T | Homozygous   |
| NC_037651.1 | 6300474 | SNV | 1 | T | C | Heterozygous |
| NC_037651.1 | 6300521 | SNV | 1 | C | T | Heterozygous |
| NC_037651.1 | 6323019 | SNV | 1 | G | C | Homozygous   |
| NC_037651.1 | 6323254 | SNV | 1 | T | C | Homozygous   |
| NC_037651.1 | 6323259 | SNV | 1 | T | A | Heterozygous |
| NC_037651.1 | 6323318 | SNV | 1 | T | G | Homozygous   |
| NC_037651.1 | 6323417 | SNV | 1 | T | C | Homozygous   |
| NC_037651.1 | 6324502 | SNV | 1 | A | G | Heterozygous |
| NC_037651.1 | 6324638 | SNV | 1 | T | C | Homozygous   |
| NC_037651.1 | 6324675 | SNV | 1 | A | G | Heterozygous |
| NC_037651.1 | 6324677 | SNV | 1 | G | A | Heterozygous |
| NC_037651.1 | 6324742 | SNV | 1 | T | C | Homozygous   |
| NC_037651.1 | 6324777 | SNV | 1 | T | C | Homozygous   |
| NC_037651.1 | 6324806 | SNV | 1 | T | C | Heterozygous |
| NC_037651.1 | 6324873 | SNV | 1 | A | G | Homozygous   |
| NC_037651.1 | 6324889 | SNV | 1 | A | G | Heterozygous |
| NC_037651.1 | 6324921 | SNV | 1 | A | C | Homozygous   |

|             |         |     |   |   |   |              |
|-------------|---------|-----|---|---|---|--------------|
| NC_037651.1 | 6324927 | SNV | 1 | T | C | Heterozygous |
| NC_037651.1 | 6334593 | SNV | 1 | G | A | Homozygous   |
| NC_037651.1 | 6358063 | SNV | 1 | C | T | Homozygous   |
| NC_037651.1 | 6358200 | SNV | 1 | G | T | Homozygous   |
| NC_037651.1 | 6359033 | SNV | 1 | T | G | Heterozygous |
| NC_037651.1 | 6359808 | SNV | 1 | T | C | Homozygous   |
| NC_037651.1 | 6359811 | SNV | 1 | C | A | Homozygous   |
| NC_037651.1 | 6362234 | SNV | 1 | G | A | Heterozygous |
| NC_037651.1 | 6362351 | SNV | 1 | C | G | Heterozygous |
| NC_037651.1 | 6363086 | SNV | 1 | T | C | Heterozygous |
| NC_037651.1 | 6363670 | SNV | 1 | T | A | Homozygous   |
| NC_037651.1 | 6363680 | SNV | 1 | C | A | Homozygous   |
| NC_037651.1 | 6363730 | SNV | 1 | T | C | Homozygous   |
| NC_037651.1 | 6368373 | SNV | 1 | A | G | Homozygous   |
| NC_037651.1 | 6369800 | SNV | 1 | A | T | Heterozygous |
| NC_037651.1 | 6369975 | SNV | 1 | T | C | Heterozygous |
| NC_037651.1 | 6371402 | SNV | 1 | A | G | Heterozygous |
| NC_037651.1 | 6372550 | SNV | 1 | A | G | Homozygous   |
| NC_037651.1 | 6372830 | SNV | 1 | G | A | Homozygous   |
| NC_037651.1 | 6372934 | SNV | 1 | T | C | Heterozygous |
| NC_037651.1 | 6373138 | SNV | 1 | A | G | Homozygous   |
| NC_037651.1 | 6373222 | SNV | 1 | T | C | Homozygous   |
| NC_037651.1 | 6373528 | SNV | 1 | A | G | Heterozygous |
| NC_037651.1 | 6374135 | SNV | 1 | A | G | Homozygous   |
| NC_037651.1 | 6374202 | SNV | 1 | C | A | Homozygous   |
| NC_037651.1 | 6374237 | SNV | 1 | T | C | Homozygous   |
| NC_037651.1 | 6374568 | SNV | 1 | G | A | Homozygous   |
| NC_037651.1 | 6374712 | SNV | 1 | A | G | Homozygous   |
| NC_037651.1 | 6374859 | SNV | 1 | C | T | Heterozygous |
| NC_037651.1 | 6375428 | SNV | 1 | C | G | Homozygous   |
| NC_037651.1 | 6375891 | SNV | 1 | A | G | Heterozygous |
| NC_037651.1 | 6376502 | SNV | 1 | T | A | Homozygous   |
| NC_037651.1 | 6376506 | SNV | 1 | A | T | Homozygous   |
| NC_037651.1 | 6376508 | SNV | 1 | A | G | Heterozygous |
| NC_037651.1 | 6376514 | SNV | 1 | A | G | Homozygous   |
| NC_037651.1 | 6376577 | SNV | 1 | T | C | Homozygous   |
| NC_037651.1 | 6376763 | SNV | 1 | A | G | Homozygous   |
| NC_037651.1 | 6376806 | SNV | 1 | T | A | Heterozygous |
| NC_037651.1 | 6376903 | SNV | 1 | T | C | Heterozygous |
| NC_037651.1 | 6377041 | SNV | 1 | G | A | Homozygous   |
| NC_037651.1 | 6380282 | SNV | 1 | C | T | Homozygous   |
| NC_037651.1 | 6380582 | SNV | 1 | T | C | Homozygous   |
| NC_037651.1 | 6380587 | SNV | 1 | A | G | Homozygous   |
| NC_037651.1 | 6380590 | SNV | 1 | T | A | Homozygous   |
| NC_037651.1 | 6380595 | SNV | 1 | A | C | Homozygous   |
| NC_037651.1 | 6380664 | SNV | 1 | T | C | Homozygous   |
| NC_037651.1 | 6381391 | SNV | 1 | G | A | Homozygous   |
| NC_037651.1 | 6381419 | SNV | 1 | C | T | Heterozygous |
| NC_037651.1 | 6381605 | SNV | 1 | A | G | Homozygous   |
| NC_037651.1 | 6381609 | SNV | 1 | T | C | Homozygous   |
| NC_037651.1 | 6382297 | SNV | 1 | C | T | Homozygous   |

|             |         |     |   |   |   |              |
|-------------|---------|-----|---|---|---|--------------|
| NC_037651.1 | 6384960 | SNV | 1 | T | C | Homozygous   |
| NC_037651.1 | 6393740 | SNV | 1 | A | T | Heterozygous |
| NC_037651.1 | 6396498 | SNV | 1 | G | A | Homozygous   |
| NC_037651.1 | 6396617 | SNV | 1 | A | G | Homozygous   |
| NC_037651.1 | 6396913 | SNV | 1 | T | A | Homozygous   |
| NC_037651.1 | 6396922 | SNV | 1 | T | G | Heterozygous |
| NC_037651.1 | 6397002 | SNV | 1 | G | A | Homozygous   |
| NC_037651.1 | 6397636 | SNV | 1 | A | G | Heterozygous |
| NC_037651.1 | 6397672 | SNV | 1 | A | G | Homozygous   |
| NC_037651.1 | 6397783 | SNV | 1 | G | A | Heterozygous |
| NC_037651.1 | 6397930 | SNV | 1 | T | C | Heterozygous |
| NC_037651.1 | 6397939 | SNV | 1 | C | T | Heterozygous |
| NC_037651.1 | 6398521 | SNV | 1 | G | A | Homozygous   |
| NC_037651.1 | 6398524 | SNV | 1 | A | C | Homozygous   |
| NC_037651.1 | 6398980 | SNV | 1 | T | C | Heterozygous |
| NC_037651.1 | 6399695 | SNV | 1 | T | C | Heterozygous |
| NC_037651.1 | 6399749 | SNV | 1 | A | G | Homozygous   |
| NC_037651.1 | 6400035 | SNV | 1 | C | T | Heterozygous |
| NC_037651.1 | 6400117 | SNV | 1 | A | G | Heterozygous |
| NC_037651.1 | 6400127 | SNV | 1 | C | T | Heterozygous |
| NC_037651.1 | 6400390 | SNV | 1 | G | A | Homozygous   |
| NC_037651.1 | 6413794 | SNV | 1 | T | C | Homozygous   |
| NC_037651.1 | 6413796 | SNV | 1 | T | C | Homozygous   |
| NC_037651.1 | 6413807 | SNV | 1 | A | T | Homozygous   |
| NC_037651.1 | 6424930 | SNV | 1 | C | T | Homozygous   |
| NC_037651.1 | 6424942 | SNV | 1 | G | A | Heterozygous |
| NC_037651.1 | 6425172 | SNV | 1 | G | A | Heterozygous |
| NC_037651.1 | 6428045 | SNV | 1 | G | A | Homozygous   |
| NC_037651.1 | 6428866 | SNV | 1 | T | A | Heterozygous |
| NC_037651.1 | 6428915 | SNV | 1 | C | A | Homozygous   |
| NC_037651.1 | 6429155 | SNV | 1 | A | G | Heterozygous |
| NC_037651.1 | 6429297 | SNV | 1 | A | G | Heterozygous |
| NC_037651.1 | 6429382 | SNV | 1 | T | C | Heterozygous |
| NC_037651.1 | 6429402 | SNV | 1 | G | A | Heterozygous |
| NC_037651.1 | 6429408 | SNV | 1 | C | T | Heterozygous |
| NC_037651.1 | 6429771 | SNV | 1 | T | C | Homozygous   |
| NC_037651.1 | 6429809 | SNV | 1 | T | A | Heterozygous |
| NC_037651.1 | 6429827 | SNV | 1 | A | T | Homozygous   |
| NC_037651.1 | 6429864 | SNV | 1 | G | A | Heterozygous |
| NC_037651.1 | 6429909 | SNV | 1 | T | C | Homozygous   |
| NC_037651.1 | 6448133 | SNV | 1 | C | T | Homozygous   |
| NC_037651.1 | 6453395 | SNV | 1 | A | G | Homozygous   |
| NC_037651.1 | 6453398 | SNV | 1 | G | T | Homozygous   |
| NC_037651.1 | 6453552 | SNV | 1 | C | G | Heterozygous |
| NC_037651.1 | 6453555 | SNV | 1 | T | C | Homozygous   |
| NC_037651.1 | 6453561 | SNV | 1 | C | T | Heterozygous |
| NC_037651.1 | 6453599 | SNV | 1 | C | T | Homozygous   |
| NC_037651.1 | 6453603 | SNV | 1 | G | A | Homozygous   |
| NC_037651.1 | 6467000 | SNV | 1 | T | A | Heterozygous |
| NC_037651.1 | 6469285 | SNV | 1 | G | A | Homozygous   |
| NC_037651.1 | 6469344 | SNV | 1 | T | C | Homozygous   |

|             |         |     |   |   |   |              |
|-------------|---------|-----|---|---|---|--------------|
| NC_037651.1 | 6472827 | SNV | 1 | G | A | Heterozygous |
| NC_037651.1 | 6474074 | SNV | 1 | T | C | Homozygous   |
| NC_037651.1 | 6475405 | SNV | 1 | G | A | Heterozygous |
| NC_037651.1 | 6475741 | SNV | 1 | A | G | Heterozygous |
| NC_037651.1 | 6476112 | SNV | 1 | T | C | Heterozygous |
| NC_037651.1 | 6476907 | SNV | 1 | T | A | Homozygous   |
| NC_037651.1 | 6477076 | SNV | 1 | G | T | Homozygous   |
| NC_037651.1 | 6477456 | SNV | 1 | G | A | Homozygous   |
| NC_037651.1 | 6477532 | SNV | 1 | T | G | Homozygous   |
| NC_037651.1 | 6477885 | SNV | 1 | A | G | Heterozygous |
| NC_037651.1 | 6483430 | SNV | 1 | C | G | Homozygous   |
| NC_037651.1 | 6483585 | SNV | 1 | A | G | Homozygous   |
| NC_037651.1 | 6483654 | SNV | 1 | A | G | Heterozygous |
| NC_037651.1 | 6483819 | SNV | 1 | T | A | Homozygous   |
| NC_037651.1 | 6483829 | SNV | 1 | T | A | Homozygous   |
| NC_037651.1 | 6484521 | SNV | 1 | G | A | Heterozygous |
| NC_037651.1 | 6490675 | SNV | 1 | A | T | Homozygous   |
| NC_037651.1 | 6490800 | SNV | 1 | A | C | Homozygous   |
| NC_037651.1 | 6490802 | SNV | 1 | A | C | Homozygous   |
| NC_037651.1 | 6492114 | SNV | 1 | A | G | Homozygous   |
| NC_037651.1 | 6492148 | SNV | 1 | A | C | Homozygous   |
| NC_037651.1 | 6492167 | SNV | 1 | A | G | Homozygous   |
| NC_037651.1 | 6492196 | SNV | 1 | G | A | Homozygous   |
| NC_037651.1 | 6492220 | SNV | 1 | A | G | Homozygous   |
| NC_037651.1 | 6492240 | SNV | 1 | T | C | Heterozygous |
| NC_037651.1 | 6492248 | SNV | 1 | A | G | Heterozygous |
| NC_037651.1 | 6492267 | SNV | 1 | A | G | Homozygous   |
| NC_037651.1 | 6492339 | SNV | 1 | G | A | Heterozygous |
| NC_037651.1 | 6492458 | SNV | 1 | T | C | Heterozygous |
| NC_037651.1 | 6492462 | SNV | 1 | T | C | Homozygous   |
| NC_037651.1 | 6492465 | SNV | 1 | A | G | Heterozygous |
| NC_037651.1 | 6492494 | SNV | 1 | A | G | Homozygous   |
| NC_037651.1 | 6492573 | SNV | 1 | C | G | Heterozygous |
| NC_037651.1 | 6492583 | SNV | 1 | A | G | Homozygous   |
| NC_037651.1 | 6492766 | SNV | 1 | G | A | Heterozygous |
| NC_037651.1 | 6492852 | SNV | 1 | T | C | Homozygous   |
| NC_037651.1 | 6492862 | SNV | 1 | A | T | Heterozygous |
| NC_037651.1 | 6492873 | SNV | 1 | A | T | Heterozygous |
| NC_037651.1 | 6492930 | SNV | 1 | T | C | Homozygous   |
| NC_037651.1 | 6493015 | SNV | 1 | T | A | Heterozygous |
| NC_037651.1 | 6493256 | SNV | 1 | A | G | Homozygous   |
| NC_037651.1 | 6493258 | SNV | 1 | A | G | Homozygous   |
| NC_037651.1 | 6493293 | SNV | 1 | C | T | Heterozygous |
| NC_037651.1 | 6493306 | SNV | 1 | A | T | Homozygous   |
| NC_037651.1 | 6494354 | SNV | 1 | A | G | Homozygous   |
| NC_037651.1 | 6494772 | SNV | 1 | T | C | Homozygous   |
| NC_037651.1 | 6495002 | SNV | 1 | A | C | Heterozygous |
| NC_037651.1 | 6495148 | SNV | 1 | A | G | Homozygous   |
| NC_037651.1 | 6495315 | SNV | 1 | T | C | Homozygous   |
| NC_037651.1 | 6495641 | SNV | 1 | T | G | Heterozygous |
| NC_037651.1 | 6495653 | SNV | 1 | T | A | Homozygous   |

|             |         |     |   |   |   |              |
|-------------|---------|-----|---|---|---|--------------|
| NC_037651.1 | 6495656 | SNV | 1 | C | T | Heterozygous |
| NC_037651.1 | 6495797 | SNV | 1 | G | C | Heterozygous |
| NC_037651.1 | 6496270 | SNV | 1 | A | G | Homozygous   |
| NC_037651.1 | 6496483 | SNV | 1 | A | G | Homozygous   |
| NC_037651.1 | 6496546 | SNV | 1 | T | A | Heterozygous |
| NC_037651.1 | 6496814 | SNV | 1 | T | C | Heterozygous |
| NC_037651.1 | 6508996 | SNV | 1 | A | G | Heterozygous |
| NC_037651.1 | 6509045 | SNV | 1 | A | G | Heterozygous |
| NC_037651.1 | 6509052 | SNV | 1 | T | C | Heterozygous |
| NC_037651.1 | 6526211 | SNV | 1 | G | A | Homozygous   |
| NC_037651.1 | 6526667 | SNV | 1 | T | C | Heterozygous |
| NC_037651.1 | 6526673 | SNV | 1 | A | T | Heterozygous |
| NC_037651.1 | 6526691 | SNV | 1 | A | T | Heterozygous |
| NC_037651.1 | 6526694 | SNV | 1 | T | C | Heterozygous |
| NC_037651.1 | 6526697 | SNV | 1 | A | G | Heterozygous |
| NC_037651.1 | 6526700 | SNV | 1 | A | C | Heterozygous |
| NC_037651.1 | 6526703 | SNV | 1 | A | C | Heterozygous |
| NC_037651.1 | 6527695 | SNV | 1 | T | A | Heterozygous |
| NC_037651.1 | 6530197 | SNV | 1 | G | A | Heterozygous |
| NC_037651.1 | 6530209 | SNV | 1 | A | G | Heterozygous |
| NC_037651.1 | 6530212 | SNV | 1 | A | C | Heterozygous |
| NC_037651.1 | 6530215 | SNV | 1 | T | A | Heterozygous |
| NC_037651.1 | 6530221 | SNV | 1 | T | A | Heterozygous |
| NC_037651.1 | 6530224 | SNV | 1 | A | G | Heterozygous |
| NC_037651.1 | 6530227 | SNV | 1 | A | T | Heterozygous |
| NC_037651.1 | 6530231 | SNV | 1 | C | A | Homozygous   |
| NC_037651.1 | 6530233 | SNV | 1 | T | G | Homozygous   |
| NC_037651.1 | 6530236 | SNV | 1 | A | G | Homozygous   |
| NC_037651.1 | 6530239 | SNV | 1 | A | G | Homozygous   |
| NC_037651.1 | 6530242 | SNV | 1 | A | T | Homozygous   |
| NC_037651.1 | 6530245 | SNV | 1 | C | A | Heterozygous |
| NC_037651.1 | 6530248 | SNV | 1 | A | C | Homozygous   |
| NC_037651.1 | 6530254 | SNV | 1 | A | T | Heterozygous |
| NC_037651.1 | 6530273 | SNV | 1 | T | A | Homozygous   |
| NC_037651.1 | 6530290 | SNV | 1 | A | G | Homozygous   |
| NC_037651.1 | 6530293 | SNV | 1 | A | G | Homozygous   |
| NC_037651.1 | 6530296 | SNV | 1 | A | C | Heterozygous |
| NC_037651.1 | 6530299 | SNV | 1 | T | C | Heterozygous |
| NC_037651.1 | 6530302 | SNV | 1 | A | T | Homozygous   |
| NC_037651.1 | 6530464 | SNV | 1 | A | T | Heterozygous |
| NC_037651.1 | 6530470 | SNV | 1 | T | C | Heterozygous |
| NC_037651.1 | 6530473 | SNV | 1 | A | G | Heterozygous |
| NC_037651.1 | 6530476 | SNV | 1 | A | G | Heterozygous |
| NC_037651.1 | 6530494 | SNV | 1 | A | C | Heterozygous |
| NC_037651.1 | 6530506 | SNV | 1 | A | G | Heterozygous |
| NC_037651.1 | 6530515 | SNV | 1 | T | G | Heterozygous |
| NC_037651.1 | 6530524 | SNV | 1 | A | G | Heterozygous |
| NC_037651.1 | 6530590 | SNV | 1 | A | T | Heterozygous |
| NC_037651.1 | 6530594 | SNV | 1 | T | C | Heterozygous |
| NC_037651.1 | 6530599 | SNV | 1 | C | T | Heterozygous |
| NC_037651.1 | 6530602 | SNV | 1 | T | C | Heterozygous |

|             |         |     |   |   |   |              |
|-------------|---------|-----|---|---|---|--------------|
| NC_037651.1 | 6530611 | SNV | 1 | G | T | Heterozygous |
| NC_037651.1 | 6530614 | SNV | 1 | A | G | Heterozygous |
| NC_037651.1 | 6530617 | SNV | 1 | T | G | Heterozygous |
| NC_037651.1 | 6530620 | SNV | 1 | T | A | Heterozygous |
| NC_037651.1 | 6530623 | SNV | 1 | A | C | Heterozygous |
| NC_037651.1 | 6530626 | SNV | 1 | C | T | Heterozygous |
| NC_037651.1 | 6530645 | SNV | 1 | T | C | Heterozygous |
| NC_037651.1 | 6530654 | SNV | 1 | C | A | Heterozygous |
| NC_037651.1 | 6530656 | SNV | 1 | A | G | Heterozygous |
| NC_037651.1 | 6530659 | SNV | 1 | C | T | Heterozygous |
| NC_037651.1 | 6530662 | SNV | 1 | T | C | Heterozygous |
| NC_037651.1 | 6530665 | SNV | 1 | C | T | Heterozygous |
| NC_037651.1 | 6530668 | SNV | 1 | G | A | Heterozygous |
| NC_037651.1 | 6533337 | SNV | 1 | T | C | Heterozygous |
| NC_037651.1 | 6533349 | SNV | 1 | T | A | Heterozygous |
| NC_037651.1 | 6533353 | SNV | 1 | C | A | Heterozygous |
| NC_037651.1 | 6533357 | SNV | 1 | C | T | Heterozygous |
| NC_037651.1 | 6533361 | SNV | 1 | C | T | Heterozygous |
| NC_037651.1 | 6533404 | SNV | 1 | A | G | Heterozygous |
| NC_037651.1 | 6535847 | SNV | 1 | T | C | Homozygous   |
| NC_037651.1 | 6535860 | SNV | 1 | A | C | Homozygous   |
| NC_037651.1 | 6535862 | SNV | 1 | G | A | Homozygous   |
| NC_037651.1 | 6535864 | SNV | 1 | G | A | Homozygous   |
| NC_037651.1 | 6535866 | SNV | 1 | G | A | Homozygous   |
| NC_037651.1 | 6535894 | SNV | 1 | A | G | Heterozygous |
| NC_037651.1 | 6536894 | SNV | 1 | C | A | Homozygous   |
| NC_037651.1 | 6536897 | SNV | 1 | C | T | Homozygous   |
| NC_037651.1 | 6537664 | SNV | 1 | T | C | Homozygous   |
| NC_037651.1 | 6538614 | SNV | 1 | A | G | Homozygous   |
| NC_037651.1 | 6547088 | SNV | 1 | T | C | Homozygous   |
| NC_037651.1 | 6547125 | SNV | 1 | A | G | Homozygous   |
| NC_037651.1 | 6547472 | SNV | 1 | C | T | Homozygous   |
| NC_037651.1 | 6553194 | SNV | 1 | A | G | Homozygous   |
| NC_037651.1 | 6560766 | SNV | 1 | A | G | Homozygous   |
| NC_037651.1 | 6560771 | SNV | 1 | T | A | Homozygous   |
| NC_037651.1 | 6566421 | SNV | 1 | C | T | Heterozygous |
| NC_037651.1 | 6567255 | SNV | 1 | G | A | Heterozygous |
| NC_037651.1 | 6567409 | SNV | 1 | A | T | Homozygous   |
| NC_037651.1 | 6567726 | SNV | 1 | T | C | Homozygous   |
| NC_037651.1 | 6567848 | SNV | 1 | A | G | Homozygous   |
| NC_037651.1 | 6568162 | SNV | 1 | T | C | Homozygous   |
| NC_037651.1 | 6571845 | SNV | 1 | G | A | Homozygous   |
| NC_037651.1 | 6572482 | SNV | 1 | A | C | Homozygous   |
| NC_037651.1 | 6572742 | SNV | 1 | C | A | Homozygous   |
| NC_037651.1 | 6573217 | SNV | 1 | T | A | Homozygous   |
| NC_037651.1 | 6573308 | SNV | 1 | T | C | Heterozygous |
| NC_037651.1 | 6573325 | SNV | 1 | G | A | Homozygous   |
| NC_037651.1 | 6574667 | SNV | 1 | C | T | Heterozygous |
| NC_037651.1 | 6574929 | SNV | 1 | T | C | Heterozygous |
| NC_037651.1 | 6574965 | SNV | 1 | C | T | Homozygous   |
| NC_037651.1 | 6575325 | SNV | 1 | G | A | Heterozygous |



|             |         |     |   |   |   |              |
|-------------|---------|-----|---|---|---|--------------|
| NC_037651.1 | 6575841 | SNV | 1 | C | T | Heterozygous |
| NC_037651.1 | 6575856 | SNV | 1 | G | A | Heterozygous |
| NC_037651.1 | 6577941 | SNV | 1 | A | G | Heterozygous |
| NC_037651.1 | 6578064 | SNV | 1 | C | G | Heterozygous |
| NC_037651.1 | 6579156 | SNV | 1 | C | T | Heterozygous |
| NC_037651.1 | 6580876 | SNV | 1 | A | G | Homozygous   |
| NC_037651.1 | 6580878 | SNV | 1 | A | T | Homozygous   |
| NC_037651.1 | 6580880 | SNV | 1 | A | C | Homozygous   |
| NC_037651.1 | 6580884 | SNV | 1 | A | T | Homozygous   |
| NC_037651.1 | 6580892 | SNV | 1 | T | A | Homozygous   |
| NC_037651.1 | 6580900 | SNV | 1 | A | G | Homozygous   |
| NC_037651.1 | 6585591 | SNV | 1 | T | C | Heterozygous |
| NC_037651.1 | 6588117 | SNV | 1 | C | T | Heterozygous |
| NC_037651.1 | 6588910 | SNV | 1 | T | C | Homozygous   |
| NC_037651.1 | 6589049 | SNV | 1 | T | G | Heterozygous |
| NC_037651.1 | 6589819 | SNV | 1 | G | A | Homozygous   |
| NC_037651.1 | 6594189 | SNV | 1 | G | A | Heterozygous |
| NC_037651.1 | 6594516 | SNV | 1 | C | T | Homozygous   |
| NC_037651.1 | 6595435 | SNV | 1 | T | C | Homozygous   |
| NC_037651.1 | 6595905 | SNV | 1 | G | A | Homozygous   |
| NC_037651.1 | 6596068 | SNV | 1 | T | C | Homozygous   |
| NC_037651.1 | 6596432 | SNV | 1 | C | T | Homozygous   |
| NC_037651.1 | 6596701 | SNV | 1 | T | C | Homozygous   |
| NC_037651.1 | 6596752 | SNV | 1 | T | C | Heterozygous |
| NC_037651.1 | 6598619 | SNV | 1 | A | G | Heterozygous |
| NC_037651.1 | 6604865 | SNV | 1 | A | T | Homozygous   |
| NC_037651.1 | 6611162 | SNV | 1 | A | G | Homozygous   |
| NC_037651.1 | 6611280 | SNV | 1 | C | T | Homozygous   |
| NC_037651.1 | 6611746 | SNV | 1 | G | A | Homozygous   |
| NC_037651.1 | 6611900 | SNV | 1 | A | G | Homozygous   |
| NC_037651.1 | 6611971 | SNV | 1 | C | T | Homozygous   |
| NC_037651.1 | 6612139 | SNV | 1 | A | G | Homozygous   |
| NC_037651.1 | 6613989 | SNV | 1 | C | T | Homozygous   |
| NC_037651.1 | 6614135 | SNV | 1 | A | G | Homozygous   |
| NC_037651.1 | 6614184 | SNV | 1 | T | G | Homozygous   |
| NC_037651.1 | 6614761 | SNV | 1 | T | C | Homozygous   |
| NC_037651.1 | 6620465 | SNV | 1 | T | C | Homozygous   |
| NC_037651.1 | 6621485 | SNV | 1 | G | C | Heterozygous |
| NC_037651.1 | 6621593 | SNV | 1 | G | A | Heterozygous |
| NC_037651.1 | 6621881 | SNV | 1 | A | G | Homozygous   |
| NC_037651.1 | 6622145 | SNV | 1 | A | G | Heterozygous |
| NC_037651.1 | 6622217 | SNV | 1 | T | C | Heterozygous |
| NC_037651.1 | 6622235 | SNV | 1 | T | C | Heterozygous |
| NC_037651.1 | 6625607 | SNV | 1 | G | A | Heterozygous |
| NC_037651.1 | 6633075 | SNV | 1 | C | T | Heterozygous |
| NC_037651.1 | 6638500 | SNV | 1 | T | A | Heterozygous |
| NC_037651.1 | 6638503 | SNV | 1 | T | A | Homozygous   |
| NC_037651.1 | 6638517 | SNV | 1 | A | C | Heterozygous |
| NC_037651.1 | 6638519 | SNV | 1 | T | C | Heterozygous |
| NC_037651.1 | 6638522 | SNV | 1 | T | G | Homozygous   |
| NC_037651.1 | 6638539 | SNV | 1 | T | G | Heterozygous |

|             |         |     |   |   |   |              |
|-------------|---------|-----|---|---|---|--------------|
| NC_037651.1 | 6638549 | SNV | 1 | C | A | Heterozygous |
| NC_037651.1 | 6638553 | SNV | 1 | A | T | Heterozygous |
| NC_037651.1 | 6638619 | SNV | 1 | C | T | Heterozygous |
| NC_037651.1 | 6638625 | SNV | 1 | A | T | Homozygous   |
| NC_037651.1 | 6638631 | SNV | 1 | A | T | Homozygous   |
| NC_037651.1 | 6638666 | SNV | 1 | C | T | Heterozygous |
| NC_037651.1 | 6638669 | SNV | 1 | C | T | Heterozygous |
| NC_037651.1 | 6638909 | SNV | 1 | A | T | Heterozygous |
| NC_037651.1 | 6638917 | SNV | 1 | C | T | Homozygous   |
| NC_037651.1 | 6638971 | SNV | 1 | C | T | Heterozygous |
| NC_037651.1 | 6639007 | SNV | 1 | C | T | Heterozygous |
| NC_037651.1 | 6639009 | SNV | 1 | A | G | Heterozygous |
| NC_037651.1 | 6639016 | SNV | 1 | T | C | Homozygous   |
| NC_037651.1 | 6639025 | SNV | 1 | C | T | Heterozygous |
| NC_037651.1 | 6639079 | SNV | 1 | C | T | Heterozygous |
| NC_037651.1 | 6639089 | SNV | 1 | A | T | Homozygous   |
| NC_037651.1 | 6639094 | SNV | 1 | G | C | Homozygous   |
| NC_037651.1 | 6639105 | SNV | 1 | G | A | Homozygous   |
| NC_037651.1 | 6639163 | SNV | 1 | C | T | Heterozygous |
| NC_037651.1 | 6639180 | SNV | 1 | T | G | Homozygous   |
| NC_037651.1 | 6639186 | SNV | 1 | A | G | Homozygous   |
| NC_037651.1 | 6639259 | SNV | 1 | T | G | Heterozygous |
| NC_037651.1 | 6639263 | SNV | 1 | A | T | Heterozygous |
| NC_037651.1 | 6639280 | SNV | 1 | C | T | Homozygous   |
| NC_037651.1 | 6639282 | SNV | 1 | C | A | Heterozygous |
| NC_037651.1 | 6639369 | SNV | 1 | G | A | Heterozygous |
| NC_037651.1 | 6639413 | SNV | 1 | A | C | Heterozygous |
| NC_037651.1 | 6639418 | SNV | 1 | T | C | Heterozygous |
| NC_037651.1 | 6639423 | SNV | 1 | G | A | Heterozygous |
| NC_037651.1 | 6643886 | SNV | 1 | G | A | Homozygous   |
| NC_037651.1 | 6648867 | SNV | 1 | T | A | Heterozygous |
| NC_037651.1 | 6650379 | SNV | 1 | T | C | Homozygous   |
| NC_037651.1 | 6650963 | SNV | 1 | A | G | Heterozygous |
| NC_037651.1 | 6651223 | SNV | 1 | G | C | Homozygous   |
| NC_037651.1 | 6654598 | SNV | 1 | T | C | Homozygous   |
| NC_037651.1 | 6654995 | SNV | 1 | A | G | Heterozygous |
| NC_037651.1 | 6667126 | SNV | 1 | A | G | Homozygous   |
| NC_037651.1 | 6669924 | SNV | 1 | A | T | Heterozygous |
| NC_037651.1 | 6669972 | SNV | 1 | G | C | Heterozygous |
| NC_037651.1 | 6670044 | SNV | 1 | A | G | Homozygous   |
| NC_037651.1 | 6674728 | SNV | 1 | C | G | Homozygous   |
| NC_037651.1 | 6682371 | SNV | 1 | G | A | Homozygous   |
| NC_037651.1 | 6682377 | SNV | 1 | T | G | Heterozygous |
| NC_037651.1 | 6715194 | SNV | 1 | T | C | Homozygous   |
| NC_037651.1 | 6715197 | SNV | 1 | G | C | Homozygous   |
| NC_037651.1 | 6715201 | SNV | 1 | T | A | Homozygous   |
| NC_037651.1 | 6715204 | SNV | 1 | C | A | Homozygous   |
| NC_037651.1 | 6715212 | SNV | 1 | T | C | Homozygous   |
| NC_037651.1 | 6735665 | SNV | 1 | C | A | Heterozygous |
| NC_037651.1 | 6754036 | SNV | 1 | T | A | Homozygous   |
| NC_037651.1 | 6754333 | SNV | 1 | A | G | Homozygous   |

|             |         |     |   |   |   |              |
|-------------|---------|-----|---|---|---|--------------|
| NC_037651.1 | 6754462 | SNV | 1 | C | A | Homozygous   |
| NC_037651.1 | 6755164 | SNV | 1 | A | T | Homozygous   |
| NC_037651.1 | 6755507 | SNV | 1 | C | T | Homozygous   |
| NC_037651.1 | 6756445 | SNV | 1 | T | C | Heterozygous |
| NC_037651.1 | 6756658 | SNV | 1 | T | C | Homozygous   |
| NC_037651.1 | 6756744 | SNV | 1 | C | T | Homozygous   |
| NC_037651.1 | 6761766 | SNV | 1 | C | T | Heterozygous |
| NC_037651.1 | 6761866 | SNV | 1 | G | A | Heterozygous |
| NC_037651.1 | 6762083 | SNV | 1 | C | T | Heterozygous |
| NC_037651.1 | 6766618 | SNV | 1 | G | A | Homozygous   |
| NC_037651.1 | 6766738 | SNV | 1 | C | T | Heterozygous |
| NC_037651.1 | 6767963 | SNV | 1 | T | C | Homozygous   |
| NC_037651.1 | 6768092 | SNV | 1 | A | G | Homozygous   |
| NC_037651.1 | 6768169 | SNV | 1 | T | A | Heterozygous |
| NC_037651.1 | 6768202 | SNV | 1 | C | T | Heterozygous |
| NC_037651.1 | 6768298 | SNV | 1 | A | G | Homozygous   |
| NC_037651.1 | 6768302 | SNV | 1 | G | A | Heterozygous |
| NC_037651.1 | 6768338 | SNV | 1 | A | G | Heterozygous |
| NC_037651.1 | 6768808 | SNV | 1 | T | A | Homozygous   |
| NC_037651.1 | 6769428 | SNV | 1 | G | A | Homozygous   |
| NC_037651.1 | 6769605 | SNV | 1 | C | A | Homozygous   |
| NC_037651.1 | 6780205 | SNV | 1 | A | T | Homozygous   |
| NC_037651.1 | 6780240 | SNV | 1 | T | C | Homozygous   |
| NC_037651.1 | 6784362 | SNV | 1 | G | A | Homozygous   |
| NC_037651.1 | 6784556 | SNV | 1 | G | C | Heterozygous |
| NC_037651.1 | 6784560 | SNV | 1 | T | A | Heterozygous |
| NC_037651.1 | 6784748 | SNV | 1 | G | A | Homozygous   |
| NC_037651.1 | 6785699 | SNV | 1 | A | C | Heterozygous |
| NC_037651.1 | 6785706 | SNV | 1 | T | A | Heterozygous |
| NC_037651.1 | 6785708 | SNV | 1 | A | T | Heterozygous |
| NC_037651.1 | 6785713 | SNV | 1 | C | T | Heterozygous |
| NC_037651.1 | 6785734 | SNV | 1 | G | T | Heterozygous |
| NC_037651.1 | 6786483 | SNV | 1 | G | A | Homozygous   |
| NC_037651.1 | 6793427 | SNV | 1 | C | T | Heterozygous |
| NC_037651.1 | 6793969 | SNV | 1 | T | C | Homozygous   |
| NC_037651.1 | 6794021 | SNV | 1 | A | G | Homozygous   |
| NC_037651.1 | 6794094 | SNV | 1 | T | C | Homozygous   |
| NC_037651.1 | 6794272 | SNV | 1 | C | T | Heterozygous |
| NC_037651.1 | 6794429 | SNV | 1 | T | C | Homozygous   |
| NC_037651.1 | 6794674 | SNV | 1 | C | T | Heterozygous |
| NC_037651.1 | 6799403 | SNV | 1 | T | C | Homozygous   |
| NC_037651.1 | 6823478 | SNV | 1 | C | T | Homozygous   |
| NC_037651.1 | 6830848 | SNV | 1 | T | A | Heterozygous |
| NC_037651.1 | 6831502 | SNV | 1 | A | G | Heterozygous |
| NC_037651.1 | 6831670 | SNV | 1 | A | G | Homozygous   |
| NC_037651.1 | 6832457 | SNV | 1 | G | T | Heterozygous |
| NC_037651.1 | 6835243 | SNV | 1 | C | T | Heterozygous |
| NC_037651.1 | 6835384 | SNV | 1 | A | G | Homozygous   |
| NC_037651.1 | 6835506 | SNV | 1 | G | A | Heterozygous |
| NC_037651.1 | 6836020 | SNV | 1 | T | A | Heterozygous |
| NC_037651.1 | 6837527 | SNV | 1 | A | G | Homozygous   |

|             |         |     |   |   |   |              |
|-------------|---------|-----|---|---|---|--------------|
| NC_037651.1 | 6837749 | SNV | 1 | C | G | Heterozygous |
| NC_037651.1 | 6837751 | SNV | 1 | G | T | Heterozygous |
| NC_037651.1 | 6838079 | SNV | 1 | A | G | Homozygous   |
| NC_037651.1 | 6838081 | SNV | 1 | A | G | Homozygous   |
| NC_037651.1 | 6839581 | SNV | 1 | C | A | Homozygous   |
| NC_037651.1 | 6841437 | SNV | 1 | G | T | Homozygous   |
| NC_037651.1 | 6843236 | SNV | 1 | A | T | Homozygous   |
| NC_037651.1 | 6843515 | SNV | 1 | T | C | Homozygous   |
| NC_037651.1 | 6843520 | SNV | 1 | T | G | Homozygous   |
| NC_037651.1 | 6844369 | SNV | 1 | C | T | Homozygous   |
| NC_037651.1 | 6849157 | SNV | 1 | A | T | Heterozygous |
| NC_037651.1 | 6850081 | SNV | 1 | G | T | Heterozygous |
| NC_037651.1 | 6850495 | SNV | 1 | A | G | Heterozygous |
| NC_037651.1 | 6850507 | SNV | 1 | T | A | Heterozygous |
| NC_037651.1 | 6850678 | SNV | 1 | T | C | Heterozygous |
| NC_037651.1 | 6850707 | SNV | 1 | A | G | Homozygous   |
| NC_037651.1 | 6850941 | SNV | 1 | G | C | Homozygous   |
| NC_037651.1 | 6851382 | SNV | 1 | A | T | Homozygous   |
| NC_037651.1 | 6851595 | SNV | 1 | G | A | Homozygous   |
| NC_037651.1 | 6854215 | SNV | 1 | C | A | Heterozygous |
| NC_037651.1 | 6854495 | SNV | 1 | T | C | Homozygous   |
| NC_037651.1 | 6854497 | SNV | 1 | C | T | Homozygous   |
| NC_037651.1 | 6854921 | SNV | 1 | T | A | Heterozygous |
| NC_037651.1 | 6854923 | SNV | 1 | A | T | Heterozygous |
| NC_037651.1 | 6854937 | SNV | 1 | G | A | Homozygous   |
| NC_037651.1 | 6855186 | SNV | 1 | A | C | Homozygous   |
| NC_037651.1 | 6855194 | SNV | 1 | T | C | Homozygous   |
| NC_037651.1 | 6856392 | SNV | 1 | T | C | Homozygous   |
| NC_037651.1 | 6858744 | SNV | 1 | A | G | Heterozygous |
| NC_037651.1 | 6868682 | SNV | 1 | T | C | Homozygous   |
| NC_037651.1 | 6870783 | SNV | 1 | A | G | Heterozygous |
| NC_037651.1 | 6870935 | SNV | 1 | C | T | Heterozygous |
| NC_037651.1 | 6870948 | SNV | 1 | T | A | Heterozygous |
| NC_037651.1 | 6870979 | SNV | 1 | C | T | Heterozygous |
| NC_037651.1 | 6871067 | SNV | 1 | A | G | Homozygous   |
| NC_037651.1 | 6872299 | SNV | 1 | T | C | Homozygous   |
| NC_037651.1 | 6872478 | SNV | 1 | A | G | Heterozygous |
| NC_037651.1 | 6873556 | SNV | 1 | T | C | Homozygous   |
| NC_037651.1 | 6873719 | SNV | 1 | G | A | Heterozygous |
| NC_037651.1 | 6874057 | SNV | 1 | T | A | Homozygous   |
| NC_037651.1 | 6874414 | SNV | 1 | G | A | Homozygous   |
| NC_037651.1 | 6879496 | SNV | 1 | G | A | Homozygous   |
| NC_037651.1 | 6879811 | SNV | 1 | G | A | Heterozygous |
| NC_037651.1 | 6879997 | SNV | 1 | A | G | Heterozygous |
| NC_037651.1 | 6880544 | SNV | 1 | G | A | Heterozygous |
| NC_037651.1 | 6882473 | SNV | 1 | G | T | Homozygous   |
| NC_037651.1 | 6882714 | SNV | 1 | T | C | Homozygous   |
| NC_037651.1 | 6882993 | SNV | 1 | T | C | Heterozygous |
| NC_037651.1 | 6884852 | SNV | 1 | A | T | Heterozygous |
| NC_037651.1 | 6889624 | SNV | 1 | G | A | Heterozygous |
| NC_037651.1 | 6893997 | SNV | 1 | A | G | Homozygous   |

|             |         |     |   |   |   |              |
|-------------|---------|-----|---|---|---|--------------|
| NC_037651.1 | 6894000 | SNV | 1 | T | C | Homozygous   |
| NC_037651.1 | 6894058 | SNV | 1 | C | T | Homozygous   |
| NC_037651.1 | 6894235 | SNV | 1 | A | G | Homozygous   |
| NC_037651.1 | 6894323 | SNV | 1 | G | A | Heterozygous |
| NC_037651.1 | 6894333 | SNV | 1 | T | C | Heterozygous |
| NC_037651.1 | 6894352 | SNV | 1 | C | T | Heterozygous |
| NC_037651.1 | 6894370 | SNV | 1 | G | A | Heterozygous |
| NC_037651.1 | 6899198 | SNV | 1 | A | C | Heterozygous |
| NC_037651.1 | 6899202 | SNV | 1 | A | T | Heterozygous |
| NC_037651.1 | 6899361 | SNV | 1 | T | A | Homozygous   |
| NC_037651.1 | 6902962 | SNV | 1 | A | G | Homozygous   |
| NC_037651.1 | 6902968 | SNV | 1 | G | C | Homozygous   |
| NC_037651.1 | 6902986 | SNV | 1 | G | A | Homozygous   |
| NC_037651.1 | 6903018 | SNV | 1 | G | A | Homozygous   |
| NC_037651.1 | 6903026 | SNV | 1 | A | G | Heterozygous |
| NC_037651.1 | 6903106 | SNV | 1 | A | G | Heterozygous |
| NC_037651.1 | 6903120 | SNV | 1 | G | A | Homozygous   |
| NC_037651.1 | 6903172 | SNV | 1 | G | A | Heterozygous |
| NC_037651.1 | 6906013 | SNV | 1 | C | T | Homozygous   |
| NC_037651.1 | 6921014 | SNV | 1 | G | A | Homozygous   |
| NC_037651.1 | 6921059 | SNV | 1 | T | C | Homozygous   |
| NC_037651.1 | 6921133 | SNV | 1 | A | G | Homozygous   |
| NC_037651.1 | 6927233 | SNV | 1 | C | T | Homozygous   |
| NC_037651.1 | 6933769 | SNV | 1 | C | A | Heterozygous |
| NC_037651.1 | 6933782 | SNV | 1 | A | C | Homozygous   |
| NC_037651.1 | 6940796 | SNV | 1 | A | C | Homozygous   |
| NC_037651.1 | 6940808 | SNV | 1 | A | G | Homozygous   |
| NC_037651.1 | 6940810 | SNV | 1 | A | G | Homozygous   |
| NC_037651.1 | 6940814 | SNV | 1 | G | A | Homozygous   |
| NC_037651.1 | 6958048 | SNV | 1 | T | C | Homozygous   |
| NC_037651.1 | 6958228 | SNV | 1 | T | C | Homozygous   |
| NC_037651.1 | 6958241 | SNV | 1 | A | G | Homozygous   |
| NC_037651.1 | 6958261 | SNV | 1 | A | G | Homozygous   |
| NC_037651.1 | 6958431 | SNV | 1 | G | A | Homozygous   |
| NC_037651.1 | 6958444 | SNV | 1 | C | T | Homozygous   |
| NC_037651.1 | 6958494 | SNV | 1 | G | A | Heterozygous |
| NC_037651.1 | 6958603 | SNV | 1 | A | T | Heterozygous |
| NC_037651.1 | 6958605 | SNV | 1 | C | T | Heterozygous |
| NC_037651.1 | 6958631 | SNV | 1 | T | C | Heterozygous |
| NC_037651.1 | 6958643 | SNV | 1 | T | C | Heterozygous |
| NC_037651.1 | 6958647 | SNV | 1 | T | C | Heterozygous |
| NC_037651.1 | 6984381 | SNV | 1 | C | G | Homozygous   |
| NC_037651.1 | 6984384 | SNV | 1 | T | A | Homozygous   |
| NC_037651.1 | 6984415 | SNV | 1 | C | T | Homozygous   |
| NC_037651.1 | 6997548 | SNV | 1 | C | A | Homozygous   |
| NC_037651.1 | 6997551 | SNV | 1 | A | G | Homozygous   |
| NC_037651.1 | 6997554 | SNV | 1 | G | A | Heterozygous |
| NC_037651.1 | 7020646 | SNV | 1 | A | G | Homozygous   |
| NC_037651.1 | 7020651 | SNV | 1 | T | C | Homozygous   |
| NC_037651.1 | 7020657 | SNV | 1 | T | C | Homozygous   |
| NC_037651.1 | 7020664 | SNV | 1 | A | G | Homozygous   |

|             |         |     |   |   |   |              |
|-------------|---------|-----|---|---|---|--------------|
| NC_037651.1 | 7020671 | SNV | 1 | T | C | Homozygous   |
| NC_037651.1 | 7021809 | SNV | 1 | T | C | Heterozygous |
| NC_037651.1 | 7021819 | SNV | 1 | C | T | Homozygous   |
| NC_037651.1 | 7031410 | SNV | 1 | G | C | Homozygous   |
| NC_037651.1 | 7031423 | SNV | 1 | T | A | Heterozygous |
| NC_037651.1 | 7031431 | SNV | 1 | T | C | Homozygous   |
| NC_037651.1 | 7032145 | SNV | 1 | G | A | Homozygous   |
| NC_037651.1 | 7032878 | SNV | 1 | A | G | Homozygous   |
| NC_037651.1 | 7033158 | SNV | 1 | A | C | Homozygous   |
| NC_037651.1 | 7033218 | SNV | 1 | T | C | Homozygous   |
| NC_037651.1 | 7033882 | SNV | 1 | G | A | Heterozygous |
| NC_037651.1 | 7033896 | SNV | 1 | G | A | Homozygous   |
| NC_037651.1 | 7034039 | SNV | 1 | C | T | Homozygous   |
| NC_037651.1 | 7034412 | SNV | 1 | C | T | Heterozygous |
| NC_037651.1 | 7034601 | SNV | 1 | T | C | Homozygous   |
| NC_037651.1 | 7034639 | SNV | 1 | C | T | Heterozygous |
| NC_037651.1 | 7034641 | SNV | 1 | G | A | Heterozygous |
| NC_037651.1 | 7034647 | SNV | 1 | A | G | Heterozygous |
| NC_037651.1 | 7034773 | SNV | 1 | G | A | Heterozygous |
| NC_037651.1 | 7035008 | SNV | 1 | G | C | Homozygous   |
| NC_037651.1 | 7039271 | SNV | 1 | A | G | Homozygous   |
| NC_037651.1 | 7039315 | SNV | 1 | C | T | Heterozygous |
| NC_037651.1 | 7039337 | SNV | 1 | G | T | Homozygous   |
| NC_037651.1 | 7039413 | SNV | 1 | G | A | Heterozygous |
| NC_037651.1 | 7040229 | SNV | 1 | C | G | Heterozygous |
| NC_037651.1 | 7040250 | SNV | 1 | A | C | Homozygous   |
| NC_037651.1 | 7040253 | SNV | 1 | A | T | Heterozygous |
| NC_037651.1 | 7040268 | SNV | 1 | A | G | Heterozygous |
| NC_037651.1 | 7040271 | SNV | 1 | A | T | Heterozygous |
| NC_037651.1 | 7040407 | SNV | 1 | A | G | Homozygous   |
| NC_037651.1 | 7042642 | SNV | 1 | G | C | Homozygous   |
| NC_037651.1 | 7042644 | SNV | 1 | C | T | Heterozygous |
| NC_037651.1 | 7042699 | SNV | 1 | A | G | Homozygous   |
| NC_037651.1 | 7042725 | SNV | 1 | A | G | Homozygous   |
| NC_037651.1 | 7042733 | SNV | 1 | A | G | Homozygous   |
| NC_037651.1 | 7042742 | SNV | 1 | A | G | Homozygous   |
| NC_037651.1 | 7043091 | SNV | 1 | G | A | Homozygous   |
| NC_037651.1 | 7043094 | SNV | 1 | G | A | Heterozygous |
| NC_037651.1 | 7043270 | SNV | 1 | T | A | Homozygous   |
| NC_037651.1 | 7043302 | SNV | 1 | T | C | Homozygous   |
| NC_037651.1 | 7043304 | SNV | 1 | G | T | Homozygous   |
| NC_037651.1 | 7043308 | SNV | 1 | G | C | Homozygous   |
| NC_037651.1 | 7043312 | SNV | 1 | G | C | Homozygous   |
| NC_037651.1 | 7044061 | SNV | 1 | G | A | Heterozygous |
| NC_037651.1 | 7044063 | SNV | 1 | C | T | Heterozygous |
| NC_037651.1 | 7044088 | SNV | 1 | C | A | Homozygous   |
| NC_037651.1 | 7044638 | SNV | 1 | A | T | Homozygous   |
| NC_037651.1 | 7044660 | SNV | 1 | T | A | Homozygous   |
| NC_037651.1 | 7044741 | SNV | 1 | C | A | Homozygous   |
| NC_037651.1 | 7044893 | SNV | 1 | T | C | Homozygous   |
| NC_037651.1 | 7047430 | SNV | 1 | A | G | Heterozygous |

|             |         |     |   |   |   |              |
|-------------|---------|-----|---|---|---|--------------|
| NC_037651.1 | 7047433 | SNV | 1 | G | A | Heterozygous |
| NC_037651.1 | 7047435 | SNV | 1 | A | G | Heterozygous |
| NC_037651.1 | 7047446 | SNV | 1 | G | A | Homozygous   |
| NC_037651.1 | 7047448 | SNV | 1 | A | G | Homozygous   |
| NC_037651.1 | 7047489 | SNV | 1 | G | A | Homozygous   |
| NC_037651.1 | 7048407 | SNV | 1 | A | G | Homozygous   |
| NC_037651.1 | 7048412 | SNV | 1 | T | C | Homozygous   |
| NC_037651.1 | 7048417 | SNV | 1 | A | G | Heterozygous |
| NC_037651.1 | 7048437 | SNV | 1 | A | G | Homozygous   |
| NC_037651.1 | 7053911 | SNV | 1 | C | T | Heterozygous |
| NC_037651.1 | 7054080 | SNV | 1 | A | G | Heterozygous |
| NC_037651.1 | 7054114 | SNV | 1 | T | C | Homozygous   |
| NC_037651.1 | 7054120 | SNV | 1 | T | C | Homozygous   |
| NC_037651.1 | 7055717 | SNV | 1 | C | T | Heterozygous |
| NC_037651.1 | 7055855 | SNV | 1 | C | T | Heterozygous |
| NC_037651.1 | 7058742 | SNV | 1 | A | G | Homozygous   |
| NC_037651.1 | 7058784 | SNV | 1 | G | A | Heterozygous |
| NC_037651.1 | 7058911 | SNV | 1 | G | A | Homozygous   |
| NC_037651.1 | 7059171 | SNV | 1 | G | T | Homozygous   |
| NC_037651.1 | 7059174 | SNV | 1 | C | T | Homozygous   |
| NC_037651.1 | 7064027 | SNV | 1 | G | A | Heterozygous |
| NC_037651.1 | 7064152 | SNV | 1 | T | C | Homozygous   |
| NC_037651.1 | 7064209 | SNV | 1 | T | A | Heterozygous |
| NC_037651.1 | 7064264 | SNV | 1 | A | G | Homozygous   |
| NC_037651.1 | 7064309 | SNV | 1 | C | A | Homozygous   |
| NC_037651.1 | 7064318 | SNV | 1 | G | A | Homozygous   |
| NC_037651.1 | 7064618 | SNV | 1 | C | T | Heterozygous |
| NC_037651.1 | 7064622 | SNV | 1 | C | T | Heterozygous |
| NC_037651.1 | 7064647 | SNV | 1 | G | A | Heterozygous |
| NC_037651.1 | 7064676 | SNV | 1 | C | G | Heterozygous |
| NC_037651.1 | 7066834 | SNV | 1 | A | G | Homozygous   |
| NC_037651.1 | 7066846 | SNV | 1 | A | G | Homozygous   |
| NC_037651.1 | 7066857 | SNV | 1 | G | A | Homozygous   |
| NC_037651.1 | 7069689 | SNV | 1 | G | A | Homozygous   |
| NC_037651.1 | 7069718 | SNV | 1 | G | A | Homozygous   |
| NC_037651.1 | 7069747 | SNV | 1 | G | A | Heterozygous |
| NC_037651.1 | 7069769 | SNV | 1 | A | C | Heterozygous |
| NC_037651.1 | 7083240 | SNV | 1 | A | T | Heterozygous |
| NC_037651.1 | 7083290 | SNV | 1 | C | G | Homozygous   |
| NC_037651.1 | 7083323 | SNV | 1 | C | T | Homozygous   |
| NC_037651.1 | 7083327 | SNV | 1 | C | T | Heterozygous |
| NC_037651.1 | 7083632 | SNV | 1 | G | A | Homozygous   |
| NC_037651.1 | 7083634 | SNV | 1 | A | G | Homozygous   |
| NC_037651.1 | 7083668 | SNV | 1 | A | G | Homozygous   |
| NC_037651.1 | 7083781 | SNV | 1 | T | C | Heterozygous |
| NC_037651.1 | 7088862 | SNV | 1 | G | A | Heterozygous |
| NC_037651.1 | 7091042 | SNV | 1 | T | C | Heterozygous |
| NC_037651.1 | 7093288 | SNV | 1 | A | G | Homozygous   |
| NC_037651.1 | 7093431 | SNV | 1 | A | G | Homozygous   |
| NC_037651.1 | 7093446 | SNV | 1 | A | G | Homozygous   |
| NC_037651.1 | 7094888 | SNV | 1 | T | C | Homozygous   |

|             |         |     |   |   |   |              |
|-------------|---------|-----|---|---|---|--------------|
| NC_037651.1 | 7094891 | SNV | 1 | C | T | Heterozygous |
| NC_037651.1 | 7095107 | SNV | 1 | G | A | Heterozygous |
| NC_037651.1 | 7095290 | SNV | 1 | A | G | Homozygous   |
| NC_037651.1 | 7095382 | SNV | 1 | G | A | Heterozygous |
| NC_037651.1 | 7095411 | SNV | 1 | G | A | Heterozygous |
| NC_037651.1 | 7096563 | SNV | 1 | G | A | Homozygous   |
| NC_037651.1 | 7100487 | SNV | 1 | T | C | Heterozygous |
| NC_037651.1 | 7100491 | SNV | 1 | T | C | Heterozygous |
| NC_037651.1 | 7100494 | SNV | 1 | C | T | Homozygous   |
| NC_037651.1 | 7110452 | SNV | 1 | C | T | Heterozygous |
| NC_037651.1 | 7114610 | SNV | 1 | A | T | Homozygous   |
| NC_037651.1 | 7114617 | SNV | 1 | T | A | Homozygous   |
| NC_037651.1 | 7114620 | SNV | 1 | T | C | Homozygous   |
| NC_037651.1 | 7114624 | SNV | 1 | T | G | Homozygous   |
| NC_037651.1 | 7121388 | SNV | 1 | T | G | Homozygous   |
| NC_037651.1 | 7121391 | SNV | 1 | T | A | Heterozygous |
| NC_037651.1 | 7121430 | SNV | 1 | C | A | Heterozygous |
| NC_037651.1 | 7121432 | SNV | 1 | G | A | Homozygous   |
| NC_037651.1 | 7121443 | SNV | 1 | C | G | Homozygous   |
| NC_037651.1 | 7131532 | SNV | 1 | A | G | Heterozygous |
| NC_037651.1 | 7131543 | SNV | 1 | A | G | Homozygous   |
| NC_037651.1 | 7131909 | SNV | 1 | A | G | Homozygous   |
| NC_037651.1 | 7132083 | SNV | 1 | T | C | Homozygous   |
| NC_037651.1 | 7132095 | SNV | 1 | C | G | Heterozygous |
| NC_037651.1 | 7132135 | SNV | 1 | G | A | Homozygous   |
| NC_037651.1 | 7132144 | SNV | 1 | G | A | Homozygous   |
| NC_037651.1 | 7133060 | SNV | 1 | A | G | Homozygous   |
| NC_037651.1 | 7133109 | SNV | 1 | A | G | Homozygous   |
| NC_037651.1 | 7133147 | SNV | 1 | T | C | Homozygous   |
| NC_037651.1 | 7133162 | SNV | 1 | T | C | Homozygous   |
| NC_037651.1 | 7133407 | SNV | 1 | C | G | Homozygous   |
| NC_037651.1 | 7133598 | SNV | 1 | T | C | Homozygous   |
| NC_037651.1 | 7134441 | SNV | 1 | T | G | Homozygous   |
| NC_037651.1 | 7134469 | SNV | 1 | A | C | Homozygous   |
| NC_037651.1 | 7134801 | SNV | 1 | A | G | Homozygous   |
| NC_037651.1 | 7135248 | SNV | 1 | A | G | Heterozygous |
| NC_037651.1 | 7135569 | SNV | 1 | T | C | Heterozygous |
| NC_037651.1 | 7136217 | SNV | 1 | T | C | Heterozygous |
| NC_037651.1 | 7136712 | SNV | 1 | T | C | Homozygous   |
| NC_037651.1 | 7136792 | SNV | 1 | T | C | Heterozygous |
| NC_037651.1 | 7136841 | SNV | 1 | C | T | Heterozygous |
| NC_037651.1 | 7136934 | SNV | 1 | T | G | Heterozygous |
| NC_037651.1 | 7137144 | SNV | 1 | A | G | Homozygous   |
| NC_037651.1 | 7137175 | SNV | 1 | C | T | Homozygous   |
| NC_037651.1 | 7137336 | SNV | 1 | C | T | Heterozygous |
| NC_037651.1 | 7140368 | SNV | 1 | G | A | Homozygous   |
| NC_037651.1 | 7141472 | SNV | 1 | G | C | Homozygous   |
| NC_037651.1 | 7142638 | SNV | 1 | G | A | Homozygous   |
| NC_037651.1 | 7142644 | SNV | 1 | C | T | Homozygous   |
| NC_037651.1 | 7143638 | SNV | 1 | A | G | Homozygous   |
| NC_037651.1 | 7146563 | SNV | 1 | C | T | Heterozygous |



|             |         |     |   |   |   |              |
|-------------|---------|-----|---|---|---|--------------|
| NC_037651.1 | 7146566 | SNV | 1 | T | C | Homozygous   |
| NC_037651.1 | 7146585 | SNV | 1 | A | G | Homozygous   |
| NC_037651.1 | 7146687 | SNV | 1 | T | C | Heterozygous |
| NC_037651.1 | 7146689 | SNV | 1 | G | A | Heterozygous |
| NC_037651.1 | 7146722 | SNV | 1 | C | T | Homozygous   |
| NC_037651.1 | 7147092 | SNV | 1 | A | G | Homozygous   |
| NC_037651.1 | 7147131 | SNV | 1 | A | G | Heterozygous |
| NC_037651.1 | 7147171 | SNV | 1 | A | G | Homozygous   |
| NC_037651.1 | 7147310 | SNV | 1 | A | G | Heterozygous |
| NC_037651.1 | 7149210 | SNV | 1 | T | C | Heterozygous |
| NC_037651.1 | 7149231 | SNV | 1 | G | A | Homozygous   |
| NC_037651.1 | 7149319 | SNV | 1 | G | A | Heterozygous |
| NC_037651.1 | 7149321 | SNV | 1 | G | A | Heterozygous |
| NC_037651.1 | 7149323 | SNV | 1 | C | A | Heterozygous |
| NC_037651.1 | 7149358 | SNV | 1 | G | A | Homozygous   |
| NC_037651.1 | 7149478 | SNV | 1 | T | C | Homozygous   |
| NC_037651.1 | 7149650 | SNV | 1 | T | C | Heterozygous |
| NC_037651.1 | 7152722 | SNV | 1 | C | T | Heterozygous |
| NC_037651.1 | 7152739 | SNV | 1 | C | T | Heterozygous |
| NC_037651.1 | 7152767 | SNV | 1 | C | T | Heterozygous |
| NC_037651.1 | 7152782 | SNV | 1 | C | T | Heterozygous |
| NC_037651.1 | 7152785 | SNV | 1 | C | T | Homozygous   |
| NC_037651.1 | 7152792 | SNV | 1 | A | T | Homozygous   |
| NC_037651.1 | 7159091 | SNV | 1 | G | A | Heterozygous |
| NC_037651.1 | 7159266 | SNV | 1 | T | C | Homozygous   |
| NC_037651.1 | 7163314 | SNV | 1 | G | A | Heterozygous |
| NC_037651.1 | 7163373 | SNV | 1 | A | G | Homozygous   |
| NC_037651.1 | 7163469 | SNV | 1 | T | C | Homozygous   |
| NC_037651.1 | 7163511 | SNV | 1 | C | T | Heterozygous |
| NC_037651.1 | 7163646 | SNV | 1 | C | T | Heterozygous |
| NC_037651.1 | 7163705 | SNV | 1 | G | A | Heterozygous |
| NC_037651.1 | 7164094 | SNV | 1 | C | T | Homozygous   |
| NC_037651.1 | 7164101 | SNV | 1 | T | C | Heterozygous |
| NC_037651.1 | 7164118 | SNV | 1 | T | A | Heterozygous |
| NC_037651.1 | 7168551 | SNV | 1 | C | T | Homozygous   |
| NC_037651.1 | 7169829 | SNV | 1 | A | G | Heterozygous |
| NC_037651.1 | 7169972 | SNV | 1 | T | C | Homozygous   |
| NC_037651.1 | 7170101 | SNV | 1 | A | G | Heterozygous |
| NC_037651.1 | 7170153 | SNV | 1 | A | G | Homozygous   |
| NC_037651.1 | 7170220 | SNV | 1 | G | C | Homozygous   |
| NC_037651.1 | 7170389 | SNV | 1 | T | C | Homozygous   |
| NC_037651.1 | 7170429 | SNV | 1 | G | A | Heterozygous |
| NC_037651.1 | 7170504 | SNV | 1 | A | G | Heterozygous |
| NC_037651.1 | 7170967 | SNV | 1 | T | A | Homozygous   |
| NC_037651.1 | 7171363 | SNV | 1 | C | T | Homozygous   |
| NC_037651.1 | 7171445 | SNV | 1 | T | C | Heterozygous |
| NC_037651.1 | 7171453 | SNV | 1 | T | C | Heterozygous |
| NC_037651.1 | 7172014 | SNV | 1 | A | G | Heterozygous |
| NC_037651.1 | 7172152 | SNV | 1 | T | C | Homozygous   |
| NC_037651.1 | 7172467 | SNV | 1 | G | A | Homozygous   |
| NC_037651.1 | 7172500 | SNV | 1 | G | A | Homozygous   |

|             |         |     |   |   |   |              |
|-------------|---------|-----|---|---|---|--------------|
| NC_037651.1 | 7172670 | SNV | 1 | C | T | Heterozygous |
| NC_037651.1 | 7172681 | SNV | 1 | A | G | Homozygous   |
| NC_037651.1 | 7172683 | SNV | 1 | G | A | Heterozygous |
| NC_037651.1 | 7173170 | SNV | 1 | G | A | Heterozygous |
| NC_037651.1 | 7173179 | SNV | 1 | A | G | Heterozygous |
| NC_037651.1 | 7173202 | SNV | 1 | G | A | Homozygous   |
| NC_037651.1 | 7173217 | SNV | 1 | T | C | Homozygous   |
| NC_037651.1 | 7173259 | SNV | 1 | A | G | Heterozygous |
| NC_037651.1 | 7173261 | SNV | 1 | G | A | Heterozygous |
| NC_037651.1 | 7173605 | SNV | 1 | T | C | Homozygous   |
| NC_037651.1 | 7173620 | SNV | 1 | G | A | Homozygous   |
| NC_037651.1 | 7173676 | SNV | 1 | C | T | Homozygous   |
| NC_037651.1 | 7173821 | SNV | 1 | G | C | Homozygous   |
| NC_037651.1 | 7184880 | SNV | 1 | T | C | Heterozygous |
| NC_037651.1 | 7184882 | SNV | 1 | C | T | Heterozygous |
| NC_037651.1 | 7185547 | SNV | 1 | T | A | Heterozygous |
| NC_037651.1 | 7186187 | SNV | 1 | G | A | Heterozygous |
| NC_037651.1 | 7190062 | SNV | 1 | G | C | Homozygous   |
| NC_037651.1 | 7190066 | SNV | 1 | G | T | Homozygous   |
| NC_037651.1 | 7190076 | SNV | 1 | C | T | Homozygous   |
| NC_037651.1 | 7190078 | SNV | 1 | G | C | Homozygous   |
| NC_037651.1 | 7190136 | SNV | 1 | C | G | Heterozygous |
| NC_037651.1 | 7190138 | SNV | 1 | C | T | Heterozygous |
| NC_037651.1 | 7190140 | SNV | 1 | C | G | Heterozygous |
| NC_037651.1 | 7190144 | SNV | 1 | C | T | Heterozygous |
| NC_037651.1 | 7190154 | SNV | 1 | T | C | Heterozygous |
| NC_037651.1 | 7190160 | SNV | 1 | T | G | Heterozygous |
| NC_037651.1 | 7190164 | SNV | 1 | A | G | Heterozygous |
| NC_037651.1 | 7190168 | SNV | 1 | A | G | Homozygous   |
| NC_037651.1 | 7190172 | SNV | 1 | A | C | Heterozygous |
| NC_037651.1 | 7190176 | SNV | 1 | A | C | Heterozygous |
| NC_037651.1 | 7191000 | SNV | 1 | T | C | Homozygous   |
| NC_037651.1 | 7191018 | SNV | 1 | T | A | Heterozygous |
| NC_037651.1 | 7191280 | SNV | 1 | G | T | Homozygous   |
| NC_037651.1 | 7191399 | SNV | 1 | T | C | Homozygous   |
| NC_037651.1 | 7191546 | SNV | 1 | G | A | Homozygous   |
| NC_037651.1 | 7191684 | SNV | 1 | G | A | Homozygous   |
| NC_037651.1 | 7191932 | SNV | 1 | A | T | Homozygous   |
| NC_037651.1 | 7191977 | SNV | 1 | T | C | Homozygous   |
| NC_037651.1 | 7192721 | SNV | 1 | C | T | Homozygous   |
| NC_037651.1 | 7193266 | SNV | 1 | A | T | Heterozygous |
| NC_037651.1 | 7194292 | SNV | 1 | C | T | Homozygous   |
| NC_037651.1 | 7194911 | SNV | 1 | T | C | Homozygous   |
| NC_037651.1 | 7200304 | SNV | 1 | C | T | Heterozygous |
| NC_037651.1 | 7200907 | SNV | 1 | A | G | Heterozygous |
| NC_037651.1 | 7201252 | SNV | 1 | G | A | Heterozygous |
| NC_037651.1 | 7201373 | SNV | 1 | A | G | Homozygous   |
| NC_037651.1 | 7201969 | SNV | 1 | G | A | Heterozygous |
| NC_037651.1 | 7204981 | SNV | 1 | G | T | Homozygous   |
| NC_037651.1 | 7204996 | SNV | 1 | T | C | Homozygous   |
| NC_037651.1 | 7207191 | SNV | 1 | A | G | Homozygous   |

|             |         |     |   |   |   |              |
|-------------|---------|-----|---|---|---|--------------|
| NC_037651.1 | 7211612 | SNV | 1 | G | A | Heterozygous |
| NC_037651.1 | 7211616 | SNV | 1 | G | A | Heterozygous |
| NC_037651.1 | 7211619 | SNV | 1 | C | A | Heterozygous |
| NC_037651.1 | 7212411 | SNV | 1 | C | G | Homozygous   |
| NC_037651.1 | 7212413 | SNV | 1 | A | G | Homozygous   |
| NC_037651.1 | 7212415 | SNV | 1 | C | G | Homozygous   |
| NC_037651.1 | 7212421 | SNV | 1 | A | C | Homozygous   |
| NC_037651.1 | 7212998 | SNV | 1 | T | C | Homozygous   |
| NC_037651.1 | 7213034 | SNV | 1 | T | C | Homozygous   |
| NC_037651.1 | 7213209 | SNV | 1 | T | A | Homozygous   |
| NC_037651.1 | 7213221 | SNV | 1 | A | T | Homozygous   |
| NC_037651.1 | 7213227 | SNV | 1 | A | G | Homozygous   |
| NC_037651.1 | 7214222 | SNV | 1 | G | A | Homozygous   |
| NC_037651.1 | 7248259 | SNV | 1 | G | A | Homozygous   |
| NC_037651.1 | 7248269 | SNV | 1 | G | A | Homozygous   |
| NC_037651.1 | 7248296 | SNV | 1 | A | C | Heterozygous |
| NC_037651.1 | 7248300 | SNV | 1 | A | G | Heterozygous |
| NC_037651.1 | 7248308 | SNV | 1 | G | A | Homozygous   |
| NC_037651.1 | 7248334 | SNV | 1 | A | G | Homozygous   |
| NC_037651.1 | 7248568 | SNV | 1 | G | A | Heterozygous |
| NC_037651.1 | 7248575 | SNV | 1 | A | G | Heterozygous |
| NC_037651.1 | 7248578 | SNV | 1 | G | A | Heterozygous |
| NC_037651.1 | 7248591 | SNV | 1 | A | G | Heterozygous |
| NC_037651.1 | 7248595 | SNV | 1 | A | G | Homozygous   |
| NC_037651.1 | 7257404 | SNV | 1 | T | C | Homozygous   |
| NC_037651.1 | 7257610 | SNV | 1 | T | C | Homozygous   |
| NC_037651.1 | 7257678 | SNV | 1 | C | T | Homozygous   |
| NC_037651.1 | 7258065 | SNV | 1 | T | C | Homozygous   |
| NC_037651.1 | 7258117 | SNV | 1 | A | G | Heterozygous |
| NC_037651.1 | 7258270 | SNV | 1 | G | A | Heterozygous |
| NC_037651.1 | 7258296 | SNV | 1 | A | G | Homozygous   |
| NC_037651.1 | 7258369 | SNV | 1 | T | C | Heterozygous |
| NC_037651.1 | 7258376 | SNV | 1 | C | T | Heterozygous |
| NC_037651.1 | 7258381 | SNV | 1 | G | C | Homozygous   |
| NC_037651.1 | 7258540 | SNV | 1 | C | T | Heterozygous |
| NC_037651.1 | 7258727 | SNV | 1 | C | T | Heterozygous |
| NC_037651.1 | 7258807 | SNV | 1 | A | G | Homozygous   |
| NC_037651.1 | 7258941 | SNV | 1 | G | A | Homozygous   |
| NC_037651.1 | 7259123 | SNV | 1 | T | G | Homozygous   |
| NC_037651.1 | 7259179 | SNV | 1 | T | C | Homozygous   |
| NC_037651.1 | 7259194 | SNV | 1 | G | A | Homozygous   |
| NC_037651.1 | 7259201 | SNV | 1 | C | T | Heterozygous |
| NC_037651.1 | 7259226 | SNV | 1 | C | T | Heterozygous |
| NC_037651.1 | 7259510 | SNV | 1 | T | C | Homozygous   |
| NC_037651.1 | 7260217 | SNV | 1 | A | G | Heterozygous |
| NC_037651.1 | 7260221 | SNV | 1 | A | G | Homozygous   |
| NC_037651.1 | 7260223 | SNV | 1 | G | A | Homozygous   |
| NC_037651.1 | 7260225 | SNV | 1 | G | A | Heterozygous |
| NC_037651.1 | 7260243 | SNV | 1 | G | A | Heterozygous |
| NC_037651.1 | 7260275 | SNV | 1 | C | T | Homozygous   |
| NC_037651.1 | 7260459 | SNV | 1 | A | G | Homozygous   |

|             |         |     |   |   |   |              |
|-------------|---------|-----|---|---|---|--------------|
| NC_037651.1 | 7260960 | SNV | 1 | G | A | Heterozygous |
| NC_037651.1 | 7260989 | SNV | 1 | C | T | Heterozygous |
| NC_037651.1 | 7261240 | SNV | 1 | A | G | Homozygous   |
| NC_037651.1 | 7261252 | SNV | 1 | G | A | Heterozygous |
| NC_037651.1 | 7261473 | SNV | 1 | G | T | Heterozygous |
| NC_037651.1 | 7261673 | SNV | 1 | T | C | Homozygous   |
| NC_037651.1 | 7262399 | SNV | 1 | G | A | Homozygous   |
| NC_037651.1 | 7262915 | SNV | 1 | A | C | Homozygous   |
| NC_037651.1 | 7263611 | SNV | 1 | G | C | Heterozygous |
| NC_037651.1 | 7264791 | SNV | 1 | T | C | Heterozygous |
| NC_037651.1 | 7267929 | SNV | 1 | A | G | Homozygous   |
| NC_037651.1 | 7270493 | SNV | 1 | T | G | Homozygous   |
| NC_037651.1 | 7270498 | SNV | 1 | T | G | Homozygous   |
| NC_037651.1 | 7270500 | SNV | 1 | T | A | Homozygous   |
| NC_037651.1 | 7270505 | SNV | 1 | A | G | Homozygous   |
| NC_037651.1 | 7270536 | SNV | 1 | T | A | Homozygous   |
| NC_037651.1 | 7275282 | SNV | 1 | A | G | Homozygous   |
| NC_037651.1 | 7275289 | SNV | 1 | A | G | Homozygous   |
| NC_037651.1 | 7275400 | SNV | 1 | C | T | Heterozygous |
| NC_037651.1 | 7275446 | SNV | 1 | C | T | Heterozygous |
| NC_037651.1 | 7275671 | SNV | 1 | A | G | Heterozygous |
| NC_037651.1 | 7275994 | SNV | 1 | C | A | Heterozygous |
| NC_037651.1 | 7279874 | SNV | 1 | A | C | Heterozygous |
| NC_037651.1 | 7279874 | SNV | 1 | A | T | Heterozygous |
| NC_037651.1 | 7279876 | SNV | 1 | T | C | Heterozygous |
| NC_037651.1 | 7279878 | SNV | 1 | T | C | Homozygous   |
| NC_037651.1 | 7279880 | SNV | 1 | T | C | Heterozygous |
| NC_037651.1 | 7279882 | SNV | 1 | T | C | Heterozygous |
| NC_037651.1 | 7279884 | SNV | 1 | C | T | Heterozygous |
| NC_037651.1 | 7279886 | SNV | 1 | C | T | Homozygous   |
| NC_037651.1 | 7279890 | SNV | 1 | C | T | Heterozygous |
| NC_037651.1 | 7279892 | SNV | 1 | C | T | Heterozygous |
| NC_037651.1 | 7279912 | SNV | 1 | C | T | Heterozygous |
| NC_037651.1 | 7279915 | SNV | 1 | A | T | Heterozygous |
| NC_037651.1 | 7279924 | SNV | 1 | T | C | Heterozygous |
| NC_037651.1 | 7279926 | SNV | 1 | T | C | Heterozygous |
| NC_037651.1 | 7295010 | SNV | 1 | T | C | Heterozygous |
| NC_037651.1 | 7295039 | SNV | 1 | T | C | Homozygous   |
| NC_037651.1 | 7295049 | SNV | 1 | C | T | Homozygous   |
| NC_037651.1 | 7295077 | SNV | 1 | T | C | Homozygous   |
| NC_037651.1 | 7313060 | SNV | 1 | T | C | Homozygous   |
| NC_037651.1 | 7313070 | SNV | 1 | T | G | Homozygous   |
| NC_037651.1 | 7313073 | SNV | 1 | C | T | Homozygous   |
| NC_037651.1 | 7313075 | SNV | 1 | C | T | Homozygous   |
| NC_037651.1 | 7313077 | SNV | 1 | T | C | Heterozygous |
| NC_037651.1 | 7329883 | SNV | 1 | G | A | Heterozygous |
| NC_037651.1 | 7329885 | SNV | 1 | A | G | Heterozygous |
| NC_037651.1 | 7330120 | SNV | 1 | T | C | Homozygous   |
| NC_037651.1 | 7330125 | SNV | 1 | C | T | Homozygous   |
| NC_037651.1 | 7333884 | SNV | 1 | A | G | Homozygous   |
| NC_037651.1 | 7340601 | SNV | 1 | C | T | Homozygous   |

|             |         |     |   |   |   |              |
|-------------|---------|-----|---|---|---|--------------|
| NC_037651.1 | 7340637 | SNV | 1 | A | C | Homozygous   |
| NC_037651.1 | 7340707 | SNV | 1 | G | A | Heterozygous |
| NC_037651.1 | 7340719 | SNV | 1 | C | T | Heterozygous |
| NC_037651.1 | 7340721 | SNV | 1 | G | A | Heterozygous |
| NC_037651.1 | 7340734 | SNV | 1 | G | A | Heterozygous |
| NC_037651.1 | 7340739 | SNV | 1 | G | A | Homozygous   |
| NC_037651.1 | 7340803 | SNV | 1 | T | C | Homozygous   |
| NC_037651.1 | 7340842 | SNV | 1 | A | G | Homozygous   |
| NC_037651.1 | 7340907 | SNV | 1 | T | C | Homozygous   |
| NC_037651.1 | 7341312 | SNV | 1 | C | A | Heterozygous |
| NC_037651.1 | 7341318 | SNV | 1 | C | A | Heterozygous |
| NC_037651.1 | 7344429 | SNV | 1 | G | A | Heterozygous |
| NC_037651.1 | 7344431 | SNV | 1 | A | G | Homozygous   |
| NC_037651.1 | 7344783 | SNV | 1 | T | C | Homozygous   |
| NC_037651.1 | 7344800 | SNV | 1 | G | A | Heterozygous |
| NC_037651.1 | 7344804 | SNV | 1 | G | A | Heterozygous |
| NC_037651.1 | 7344806 | SNV | 1 | C | T | Heterozygous |
| NC_037651.1 | 7344822 | SNV | 1 | A | G | Homozygous   |
| NC_037651.1 | 7344824 | SNV | 1 | T | G | Homozygous   |
| NC_037651.1 | 7344829 | SNV | 1 | A | T | Heterozygous |
| NC_037651.1 | 7344831 | SNV | 1 | G | A | Heterozygous |
| NC_037651.1 | 7344845 | SNV | 1 | G | A | Heterozygous |
| NC_037651.1 | 7344897 | SNV | 1 | G | A | Heterozygous |
| NC_037651.1 | 7344902 | SNV | 1 | A | G | Homozygous   |
| NC_037651.1 | 7344907 | SNV | 1 | C | T | Heterozygous |
| NC_037651.1 | 7344921 | SNV | 1 | A | G | Heterozygous |
| NC_037651.1 | 7344947 | SNV | 1 | G | A | Heterozygous |
| NC_037651.1 | 7344988 | SNV | 1 | C | T | Homozygous   |
| NC_037651.1 | 7345417 | SNV | 1 | G | A | Homozygous   |
| NC_037651.1 | 7345421 | SNV | 1 | G | C | Heterozygous |
| NC_037651.1 | 7346279 | SNV | 1 | C | G | Heterozygous |
| NC_037651.1 | 7346281 | SNV | 1 | G | A | Heterozygous |
| NC_037651.1 | 7346284 | SNV | 1 | C | A | Heterozygous |
| NC_037651.1 | 7346293 | SNV | 1 | A | G | Heterozygous |
| NC_037651.1 | 7346401 | SNV | 1 | G | A | Heterozygous |
| NC_037651.1 | 7346435 | SNV | 1 | C | G | Homozygous   |
| NC_037651.1 | 7346661 | SNV | 1 | G | A | Heterozygous |
| NC_037651.1 | 7346670 | SNV | 1 | G | A | Heterozygous |
| NC_037651.1 | 7346674 | SNV | 1 | A | G | Homozygous   |
| NC_037651.1 | 7346689 | SNV | 1 | A | G | Heterozygous |
| NC_037651.1 | 7346808 | SNV | 1 | G | A | Heterozygous |
| NC_037651.1 | 7347351 | SNV | 1 | C | T | Homozygous   |
| NC_037651.1 | 7347459 | SNV | 1 | C | G | Heterozygous |
| NC_037651.1 | 7347620 | SNV | 1 | G | A | Homozygous   |
| NC_037651.1 | 7348045 | SNV | 1 | C | T | Heterozygous |
| NC_037651.1 | 7348196 | SNV | 1 | A | G | Homozygous   |
| NC_037651.1 | 7348213 | SNV | 1 | C | T | Heterozygous |
| NC_037651.1 | 7348216 | SNV | 1 | A | G | Heterozygous |
| NC_037651.1 | 7348295 | SNV | 1 | A | G | Homozygous   |
| NC_037651.1 | 7348300 | SNV | 1 | T | C | Homozygous   |
| NC_037651.1 | 7348393 | SNV | 1 | G | A | Homozygous   |

|             |         |     |   |   |   |              |
|-------------|---------|-----|---|---|---|--------------|
| NC_037651.1 | 7348525 | SNV | 1 | A | G | Homozygous   |
| NC_037651.1 | 7348803 | SNV | 1 | A | G | Heterozygous |
| NC_037651.1 | 7349330 | SNV | 1 | A | G | Homozygous   |
| NC_037651.1 | 7349426 | SNV | 1 | C | T | Heterozygous |
| NC_037651.1 | 7349429 | SNV | 1 | T | C | Heterozygous |
| NC_037651.1 | 7349435 | SNV | 1 | A | C | Heterozygous |
| NC_037651.1 | 7349467 | SNV | 1 | T | C | Homozygous   |
| NC_037651.1 | 7352763 | SNV | 1 | C | A | Heterozygous |
| NC_037651.1 | 7352765 | SNV | 1 | C | A | Heterozygous |
| NC_037651.1 | 7352791 | SNV | 1 | T | C | Heterozygous |
| NC_037651.1 | 7352794 | SNV | 1 | T | C | Heterozygous |
| NC_037651.1 | 7354926 | SNV | 1 | G | C | Homozygous   |
| NC_037651.1 | 7354954 | SNV | 1 | A | G | Homozygous   |
| NC_037651.1 | 7357138 | SNV | 1 | A | G | Homozygous   |
| NC_037651.1 | 7360422 | SNV | 1 | C | A | Heterozygous |
| NC_037651.1 | 7360567 | SNV | 1 | G | A | Heterozygous |
| NC_037651.1 | 7360571 | SNV | 1 | A | G | Homozygous   |
| NC_037651.1 | 7361545 | SNV | 1 | G | A | Heterozygous |
| NC_037651.1 | 7362815 | SNV | 1 | A | G | Homozygous   |
| NC_037651.1 | 7362834 | SNV | 1 | A | G | Homozygous   |
| NC_037651.1 | 7362926 | SNV | 1 | G | A | Homozygous   |
| NC_037651.1 | 7362941 | SNV | 1 | A | G | Homozygous   |
| NC_037651.1 | 7363083 | SNV | 1 | A | G | Heterozygous |
| NC_037651.1 | 7363109 | SNV | 1 | A | T | Homozygous   |
| NC_037651.1 | 7363115 | SNV | 1 | G | T | Heterozygous |
| NC_037651.1 | 7363120 | SNV | 1 | G | T | Heterozygous |
| NC_037651.1 | 7363147 | SNV | 1 | T | G | Homozygous   |
| NC_037651.1 | 7363209 | SNV | 1 | T | C | Homozygous   |
| NC_037651.1 | 7365050 | SNV | 1 | G | A | Homozygous   |
| NC_037651.1 | 7365729 | SNV | 1 | G | A | Heterozygous |
| NC_037651.1 | 7365740 | SNV | 1 | A | T | Heterozygous |
| NC_037651.1 | 7365806 | SNV | 1 | G | A | Homozygous   |
| NC_037651.1 | 7366631 | SNV | 1 | A | C | Heterozygous |
| NC_037651.1 | 7366637 | SNV | 1 | C | T | Heterozygous |
| NC_037651.1 | 7366645 | SNV | 1 | T | C | Heterozygous |
| NC_037651.1 | 7366763 | SNV | 1 | T | C | Heterozygous |
| NC_037651.1 | 7366853 | SNV | 1 | A | C | Homozygous   |
| NC_037651.1 | 7366879 | SNV | 1 | T | C | Homozygous   |
| NC_037651.1 | 7366892 | SNV | 1 | T | C | Heterozygous |
| NC_037651.1 | 7366903 | SNV | 1 | A | G | Heterozygous |
| NC_037651.1 | 7366915 | SNV | 1 | A | G | Homozygous   |
| NC_037651.1 | 7366995 | SNV | 1 | A | C | Heterozygous |
| NC_037651.1 | 7367008 | SNV | 1 | A | G | Homozygous   |
| NC_037651.1 | 7367211 | SNV | 1 | T | C | Homozygous   |
| NC_037651.1 | 7368032 | SNV | 1 | C | T | Heterozygous |
| NC_037651.1 | 7368035 | SNV | 1 | C | A | Homozygous   |
| NC_037651.1 | 7368446 | SNV | 1 | C | T | Heterozygous |
| NC_037651.1 | 7368448 | SNV | 1 | A | T | Homozygous   |
| NC_037651.1 | 7368451 | SNV | 1 | C | T | Heterozygous |
| NC_037651.1 | 7368456 | SNV | 1 | T | C | Homozygous   |
| NC_037651.1 | 7368477 | SNV | 1 | C | T | Heterozygous |

|             |         |     |   |   |   |              |
|-------------|---------|-----|---|---|---|--------------|
| NC_037651.1 | 7369255 | SNV | 1 | T | C | Homozygous   |
| NC_037651.1 | 7370540 | SNV | 1 | G | A | Homozygous   |
| NC_037651.1 | 7371134 | SNV | 1 | A | G | Homozygous   |
| NC_037651.1 | 7371189 | SNV | 1 | G | T | Homozygous   |
| NC_037651.1 | 7371284 | SNV | 1 | T | C | Homozygous   |
| NC_037651.1 | 7371378 | SNV | 1 | T | C | Homozygous   |
| NC_037651.1 | 7371385 | SNV | 1 | A | G | Homozygous   |
| NC_037651.1 | 7371402 | SNV | 1 | A | G | Homozygous   |
| NC_037651.1 | 7371425 | SNV | 1 | G | A | Homozygous   |
| NC_037651.1 | 7371429 | SNV | 1 | C | T | Homozygous   |
| NC_037651.1 | 7371447 | SNV | 1 | T | A | Heterozygous |
| NC_037651.1 | 7371488 | SNV | 1 | A | G | Homozygous   |
| NC_037651.1 | 7371506 | SNV | 1 | G | A | Homozygous   |
| NC_037651.1 | 7371513 | SNV | 1 | C | T | Heterozygous |
| NC_037651.1 | 7371537 | SNV | 1 | T | C | Homozygous   |
| NC_037651.1 | 7371552 | SNV | 1 | G | A | Heterozygous |
| NC_037651.1 | 7371559 | SNV | 1 | A | G | Homozygous   |
| NC_037651.1 | 7371565 | SNV | 1 | A | G | Homozygous   |
| NC_037651.1 | 7371567 | SNV | 1 | A | G | Homozygous   |
| NC_037651.1 | 7371572 | SNV | 1 | C | T | Homozygous   |
| NC_037651.1 | 7371574 | SNV | 1 | A | G | Homozygous   |
| NC_037651.1 | 7371577 | SNV | 1 | G | A | Homozygous   |
| NC_037651.1 | 7371908 | SNV | 1 | T | C | Homozygous   |
| NC_037651.1 | 7371937 | SNV | 1 | T | C | Homozygous   |
| NC_037651.1 | 7372035 | SNV | 1 | C | T | Homozygous   |
| NC_037651.1 | 7372476 | SNV | 1 | G | A | Heterozygous |
| NC_037651.1 | 7372483 | SNV | 1 | T | C | Heterozygous |
| NC_037651.1 | 7372492 | SNV | 1 | A | G | Homozygous   |
| NC_037651.1 | 7372698 | SNV | 1 | T | C | Homozygous   |
| NC_037651.1 | 7372984 | SNV | 1 | T | C | Heterozygous |
| NC_037651.1 | 7372986 | SNV | 1 | T | C | Heterozygous |
| NC_037651.1 | 7372988 | SNV | 1 | T | C | Heterozygous |
| NC_037651.1 | 7372994 | SNV | 1 | T | C | Heterozygous |
| NC_037651.1 | 7373763 | SNV | 1 | G | A | Heterozygous |
| NC_037651.1 | 7374921 | SNV | 1 | C | T | Homozygous   |
| NC_037651.1 | 7377311 | SNV | 1 | C | T | Homozygous   |
| NC_037651.1 | 7377314 | SNV | 1 | T | C | Homozygous   |
| NC_037651.1 | 7377351 | SNV | 1 | C | T | Homozygous   |
| NC_037651.1 | 7378776 | SNV | 1 | T | A | Heterozygous |
| NC_037651.1 | 7378778 | SNV | 1 | T | A | Heterozygous |
| NC_037651.1 | 7378791 | SNV | 1 | T | C | Heterozygous |
| NC_037651.1 | 7379105 | SNV | 1 | A | G | Homozygous   |
| NC_037651.1 | 7379531 | SNV | 1 | C | T | Heterozygous |
| NC_037651.1 | 7379922 | SNV | 1 | C | T | Homozygous   |
| NC_037651.1 | 7380760 | SNV | 1 | G | A | Heterozygous |
| NC_037651.1 | 7380765 | SNV | 1 | C | T | Heterozygous |
| NC_037651.1 | 7381081 | SNV | 1 | A | G | Homozygous   |
| NC_037651.1 | 7381096 | SNV | 1 | A | G | Homozygous   |
| NC_037651.1 | 7382154 | SNV | 1 | A | G | Homozygous   |
| NC_037651.1 | 7382508 | SNV | 1 | T | C | Heterozygous |
| NC_037651.1 | 7382564 | SNV | 1 | T | C | Homozygous   |

|             |         |     |   |   |   |              |
|-------------|---------|-----|---|---|---|--------------|
| NC_037651.1 | 7382695 | SNV | 1 | C | T | Heterozygous |
| NC_037651.1 | 7382713 | SNV | 1 | G | C | Homozygous   |
| NC_037651.1 | 7382764 | SNV | 1 | A | G | Heterozygous |
| NC_037651.1 | 7382798 | SNV | 1 | C | T | Homozygous   |
| NC_037651.1 | 7382801 | SNV | 1 | G | A | Homozygous   |
| NC_037651.1 | 7383096 | SNV | 1 | T | C | Heterozygous |
| NC_037651.1 | 7383100 | SNV | 1 | G | A | Heterozygous |
| NC_037651.1 | 7383275 | SNV | 1 | C | T | Heterozygous |
| NC_037651.1 | 7383278 | SNV | 1 | G | A | Heterozygous |
| NC_037651.1 | 7383664 | SNV | 1 | A | G | Homozygous   |
| NC_037651.1 | 7383807 | SNV | 1 | A | G | Homozygous   |
| NC_037651.1 | 7383814 | SNV | 1 | G | A | Heterozygous |
| NC_037651.1 | 7383833 | SNV | 1 | C | T | Heterozygous |
| NC_037651.1 | 7383839 | SNV | 1 | A | G | Heterozygous |
| NC_037651.1 | 7383888 | SNV | 1 | A | G | Heterozygous |
| NC_037651.1 | 7383891 | SNV | 1 | A | G | Heterozygous |
| NC_037651.1 | 7384035 | SNV | 1 | A | C | Homozygous   |
| NC_037651.1 | 7384132 | SNV | 1 | A | T | Heterozygous |
| NC_037651.1 | 7384830 | SNV | 1 | G | A | Homozygous   |
| NC_037651.1 | 7384863 | SNV | 1 | C | T | Homozygous   |
| NC_037651.1 | 7384955 | SNV | 1 | G | A | Homozygous   |
| NC_037651.1 | 7385091 | SNV | 1 | T | C | Homozygous   |
| NC_037651.1 | 7385093 | SNV | 1 | G | A | Homozygous   |
| NC_037651.1 | 7385219 | SNV | 1 | G | C | Homozygous   |
| NC_037651.1 | 7385635 | SNV | 1 | G | C | Homozygous   |
| NC_037651.1 | 7385675 | SNV | 1 | A | G | Heterozygous |
| NC_037651.1 | 7385679 | SNV | 1 | G | T | Heterozygous |
| NC_037651.1 | 7385692 | SNV | 1 | G | A | Homozygous   |
| NC_037651.1 | 7385807 | SNV | 1 | C | T | Heterozygous |
| NC_037651.1 | 7385811 | SNV | 1 | A | G | Heterozygous |
| NC_037651.1 | 7386170 | SNV | 1 | T | C | Heterozygous |
| NC_037651.1 | 7386172 | SNV | 1 | T | C | Heterozygous |
| NC_037651.1 | 7386270 | SNV | 1 | C | G | Homozygous   |
| NC_037651.1 | 7386332 | SNV | 1 | A | T | Homozygous   |
| NC_037651.1 | 7386337 | SNV | 1 | T | C | Homozygous   |
| NC_037651.1 | 7386708 | SNV | 1 | A | G | Homozygous   |
| NC_037651.1 | 7387021 | SNV | 1 | A | G | Heterozygous |
| NC_037651.1 | 7387063 | SNV | 1 | A | G | Heterozygous |
| NC_037651.1 | 7387276 | SNV | 1 | A | C | Homozygous   |
| NC_037651.1 | 7387290 | SNV | 1 | T | A | Heterozygous |
| NC_037651.1 | 7387290 | SNV | 1 | T | G | Heterozygous |
| NC_037651.1 | 7387419 | SNV | 1 | A | G | Homozygous   |
| NC_037651.1 | 7387458 | SNV | 1 | A | G | Homozygous   |
| NC_037651.1 | 7387522 | SNV | 1 | A | G | Homozygous   |
| NC_037651.1 | 7388100 | SNV | 1 | G | A | Heterozygous |
| NC_037651.1 | 7388108 | SNV | 1 | G | A | Heterozygous |
| NC_037651.1 | 7388414 | SNV | 1 | A | G | Heterozygous |
| NC_037651.1 | 7388794 | SNV | 1 | C | G | Homozygous   |
| NC_037651.1 | 7389025 | SNV | 1 | T | A | Homozygous   |
| NC_037651.1 | 7389057 | SNV | 1 | G | A | Homozygous   |
| NC_037651.1 | 7389116 | SNV | 1 | G | A | Homozygous   |



|             |         |     |   |   |   |              |
|-------------|---------|-----|---|---|---|--------------|
| NC_037651.1 | 7389119 | SNV | 1 | A | G | Heterozygous |
| NC_037651.1 | 7389125 | SNV | 1 | G | A | Heterozygous |
| NC_037651.1 | 7397978 | SNV | 1 | T | A | Homozygous   |
| NC_037651.1 | 7403582 | SNV | 1 | A | T | Homozygous   |
| NC_037651.1 | 7403599 | SNV | 1 | C | T | Homozygous   |
| NC_037651.1 | 7403622 | SNV | 1 | C | T | Homozygous   |
| NC_037651.1 | 7403626 | SNV | 1 | C | A | Homozygous   |
| NC_037651.1 | 7406498 | SNV | 1 | C | T | Homozygous   |
| NC_037651.1 | 7406530 | SNV | 1 | T | C | Homozygous   |
| NC_037651.1 | 7406536 | SNV | 1 | T | C | Homozygous   |
| NC_037651.1 | 7448422 | SNV | 1 | A | G | Homozygous   |
| NC_037651.1 | 7448431 | SNV | 1 | T | C | Homozygous   |
| NC_037651.1 | 7448501 | SNV | 1 | G | A | Heterozygous |
| NC_037651.1 | 7448637 | SNV | 1 | A | G | Homozygous   |
| NC_037651.1 | 7448654 | SNV | 1 | G | T | Homozygous   |
| NC_037651.1 | 7448913 | SNV | 1 | A | T | Heterozygous |
| NC_037651.1 | 7448919 | SNV | 1 | A | G | Heterozygous |
| NC_037651.1 | 7448966 | SNV | 1 | C | T | Heterozygous |
| NC_037651.1 | 7449015 | SNV | 1 | T | C | Homozygous   |
| NC_037651.1 | 7449131 | SNV | 1 | A | G | Heterozygous |
| NC_037651.1 | 7449350 | SNV | 1 | C | T | Homozygous   |
| NC_037651.1 | 7454939 | SNV | 1 | T | C | Homozygous   |
| NC_037651.1 | 7455161 | SNV | 1 | A | G | Homozygous   |
| NC_037651.1 | 7455720 | SNV | 1 | C | G | Heterozygous |
| NC_037651.1 | 7455806 | SNV | 1 | T | C | Homozygous   |
| NC_037651.1 | 7455875 | SNV | 1 | T | C | Homozygous   |
| NC_037651.1 | 7456172 | SNV | 1 | C | T | Heterozygous |
| NC_037651.1 | 7456338 | SNV | 1 | G | T | Heterozygous |
| NC_037651.1 | 7466520 | SNV | 1 | C | G | Homozygous   |
| NC_037651.1 | 7466530 | SNV | 1 | T | A | Homozygous   |
| NC_037651.1 | 7470079 | SNV | 1 | C | T | Heterozygous |
| NC_037651.1 | 7470105 | SNV | 1 | G | A | Heterozygous |
| NC_037651.1 | 7501111 | SNV | 1 | C | T | Homozygous   |
| NC_037651.1 | 7505795 | SNV | 1 | T | C | Homozygous   |
| NC_037651.1 | 7507049 | SNV | 1 | C | A | Heterozygous |
| NC_037651.1 | 7529251 | SNV | 1 | T | A | Heterozygous |
| NC_037651.1 | 7529256 | SNV | 1 | C | T | Heterozygous |
| NC_037651.1 | 7529690 | SNV | 1 | A | G | Homozygous   |
| NC_037651.1 | 7529729 | SNV | 1 | C | T | Heterozygous |
| NC_037651.1 | 7529861 | SNV | 1 | C | T | Homozygous   |
| NC_037651.1 | 7530083 | SNV | 1 | A | G | Heterozygous |
| NC_037651.1 | 7542137 | SNV | 1 | A | G | Homozygous   |
| NC_037651.1 | 7542567 | SNV | 1 | C | T | Homozygous   |
| NC_037651.1 | 7543562 | SNV | 1 | A | G | Homozygous   |
| NC_037651.1 | 7543673 | SNV | 1 | A | T | Heterozygous |
| NC_037651.1 | 7543677 | SNV | 1 | C | T | Heterozygous |
| NC_037651.1 | 7543949 | SNV | 1 | A | G | Heterozygous |
| NC_037651.1 | 7543969 | SNV | 1 | C | T | Homozygous   |
| NC_037651.1 | 7544046 | SNV | 1 | T | G | Homozygous   |
| NC_037651.1 | 7545199 | SNV | 1 | C | T | Homozygous   |
| NC_037651.1 | 7545301 | SNV | 1 | A | T | Homozygous   |

|             |         |     |   |   |   |              |
|-------------|---------|-----|---|---|---|--------------|
| NC_037651.1 | 7545337 | SNV | 1 | A | T | Homozygous   |
| NC_037651.1 | 7545341 | SNV | 1 | A | T | Homozygous   |
| NC_037651.1 | 7545343 | SNV | 1 | T | A | Homozygous   |
| NC_037651.1 | 7545882 | SNV | 1 | T | C | Homozygous   |
| NC_037651.1 | 7545904 | SNV | 1 | G | A | Heterozygous |
| NC_037651.1 | 7545917 | SNV | 1 | C | T | Homozygous   |
| NC_037651.1 | 7546246 | SNV | 1 | A | G | Homozygous   |
| NC_037651.1 | 7546586 | SNV | 1 | G | A | Heterozygous |
| NC_037651.1 | 7546587 | SNV | 1 | C | T | Heterozygous |
| NC_037651.1 | 7571628 | SNV | 1 | C | G | Heterozygous |
| NC_037651.1 | 7571764 | SNV | 1 | C | T | Heterozygous |
| NC_037651.1 | 7571814 | SNV | 1 | G | A | Heterozygous |
| NC_037651.1 | 7571858 | SNV | 1 | T | A | Heterozygous |
| NC_037651.1 | 7572313 | SNV | 1 | T | C | Heterozygous |
| NC_037651.1 | 7572319 | SNV | 1 | C | T | Heterozygous |
| NC_037651.1 | 7588145 | SNV | 1 | G | A | Heterozygous |
| NC_037651.1 | 7589528 | SNV | 1 | A | T | Heterozygous |
| NC_037651.1 | 7589543 | SNV | 1 | A | G | Homozygous   |
| NC_037651.1 | 7597972 | SNV | 1 | C | A | Homozygous   |
| NC_037651.1 | 7603279 | SNV | 1 | T | C | Heterozygous |
| NC_037651.1 | 7604015 | SNV | 1 | C | A | Homozygous   |
| NC_037651.1 | 7604032 | SNV | 1 | T | C | Homozygous   |
| NC_037651.1 | 7604146 | SNV | 1 | T | C | Homozygous   |
| NC_037651.1 | 7604608 | SNV | 1 | A | G | Homozygous   |
| NC_037651.1 | 7605470 | SNV | 1 | A | T | Homozygous   |
| NC_037651.1 | 7605574 | SNV | 1 | A | G | Heterozygous |
| NC_037651.1 | 7605604 | SNV | 1 | G | A | Homozygous   |
| NC_037651.1 | 7613765 | SNV | 1 | G | A | Heterozygous |
| NC_037651.1 | 7613769 | SNV | 1 | A | G | Heterozygous |
| NC_037651.1 | 7613780 | SNV | 1 | T | A | Homozygous   |
| NC_037651.1 | 7613786 | SNV | 1 | C | T | Homozygous   |
| NC_037651.1 | 7613799 | SNV | 1 | C | T | Homozygous   |
| NC_037651.1 | 7613839 | SNV | 1 | T | C | Homozygous   |
| NC_037651.1 | 7613842 | SNV | 1 | C | T | Homozygous   |
| NC_037651.1 | 7613848 | SNV | 1 | T | C | Homozygous   |
| NC_037651.1 | 7613851 | SNV | 1 | A | T | Homozygous   |
| NC_037651.1 | 7617698 | SNV | 1 | G | A | Homozygous   |
| NC_037651.1 | 7617777 | SNV | 1 | G | C | Heterozygous |
| NC_037651.1 | 7617818 | SNV | 1 | G | A | Heterozygous |
| NC_037651.1 | 7617826 | SNV | 1 | C | T | Heterozygous |
| NC_037651.1 | 7617866 | SNV | 1 | A | G | Homozygous   |
| NC_037651.1 | 7617869 | SNV | 1 | G | A | Homozygous   |
| NC_037651.1 | 7617880 | SNV | 1 | A | G | Heterozygous |
| NC_037651.1 | 7617887 | SNV | 1 | A | G | Heterozygous |
| NC_037651.1 | 7617893 | SNV | 1 | A | G | Homozygous   |
| NC_037651.1 | 7617909 | SNV | 1 | C | G | Homozygous   |
| NC_037651.1 | 7617918 | SNV | 1 | T | C | Heterozygous |
| NC_037651.1 | 7617921 | SNV | 1 | A | G | Heterozygous |
| NC_037651.1 | 7645863 | SNV | 1 | C | T | Heterozygous |
| NC_037651.1 | 7645873 | SNV | 1 | T | G | Heterozygous |
| NC_037651.1 | 7646342 | SNV | 1 | C | A | Homozygous   |

|             |         |     |   |   |   |              |
|-------------|---------|-----|---|---|---|--------------|
| NC_037651.1 | 7646344 | SNV | 1 | A | G | Heterozygous |
| NC_037651.1 | 7647709 | SNV | 1 | G | T | Homozygous   |
| NC_037651.1 | 7652872 | SNV | 1 | C | G | Heterozygous |
| NC_037651.1 | 7661560 | SNV | 1 | C | T | Homozygous   |
| NC_037651.1 | 7661746 | SNV | 1 | G | A | Homozygous   |
| NC_037651.1 | 7663374 | SNV | 1 | A | G | Heterozygous |
| NC_037651.1 | 7664855 | SNV | 1 | A | G | Homozygous   |
| NC_037651.1 | 7670847 | SNV | 1 | C | T | Homozygous   |
| NC_037651.1 | 7673352 | SNV | 1 | A | G | Homozygous   |
| NC_037651.1 | 7676794 | SNV | 1 | A | G | Heterozygous |
| NC_037651.1 | 7676835 | SNV | 1 | G | A | Homozygous   |
| NC_037651.1 | 7715542 | SNV | 1 | A | G | Homozygous   |
| NC_037651.1 | 7716214 | SNV | 1 | T | C | Homozygous   |
| NC_037651.1 | 7717165 | SNV | 1 | A | G | Homozygous   |
| NC_037651.1 | 7717210 | SNV | 1 | C | T | Heterozygous |
| NC_037651.1 | 7717691 | SNV | 1 | A | G | Homozygous   |
| NC_037651.1 | 7718223 | SNV | 1 | G | A | Homozygous   |
| NC_037651.1 | 7718304 | SNV | 1 | C | T | Heterozygous |
| NC_037651.1 | 7718986 | SNV | 1 | C | T | Homozygous   |
| NC_037651.1 | 7719802 | SNV | 1 | A | G | Homozygous   |
| NC_037651.1 | 7721336 | SNV | 1 | T | C | Heterozygous |
| NC_037651.1 | 7722056 | SNV | 1 | T | C | Heterozygous |
| NC_037651.1 | 7722069 | SNV | 1 | T | C | Heterozygous |
| NC_037651.1 | 7722075 | SNV | 1 | T | C | Heterozygous |
| NC_037651.1 | 7722114 | SNV | 1 | G | A | Homozygous   |
| NC_037651.1 | 7722352 | SNV | 1 | T | C | Homozygous   |
| NC_037651.1 | 7722390 | SNV | 1 | G | A | Homozygous   |
| NC_037651.1 | 7722885 | SNV | 1 | C | A | Heterozygous |
| NC_037651.1 | 7723301 | SNV | 1 | G | A | Heterozygous |
| NC_037651.1 | 7723507 | SNV | 1 | T | C | Homozygous   |
| NC_037651.1 | 7723567 | SNV | 1 | A | G | Heterozygous |
| NC_037651.1 | 7723643 | SNV | 1 | T | C | Homozygous   |
| NC_037651.1 | 7723837 | SNV | 1 | A | G | Homozygous   |
| NC_037651.1 | 7724014 | SNV | 1 | C | T | Heterozygous |
| NC_037651.1 | 7724113 | SNV | 1 | T | C | Homozygous   |
| NC_037651.1 | 7724143 | SNV | 1 | T | C | Heterozygous |
| NC_037651.1 | 7732698 | SNV | 1 | G | C | Homozygous   |
| NC_037651.1 | 7732932 | SNV | 1 | G | A | Heterozygous |
| NC_037651.1 | 7732995 | SNV | 1 | A | G | Homozygous   |
| NC_037651.1 | 7733047 | SNV | 1 | T | C | Homozygous   |
| NC_037651.1 | 7733143 | SNV | 1 | T | C | Homozygous   |
| NC_037651.1 | 7733146 | SNV | 1 | T | C | Heterozygous |
| NC_037651.1 | 7733149 | SNV | 1 | C | T | Heterozygous |
| NC_037651.1 | 7733179 | SNV | 1 | C | G | Heterozygous |
| NC_037651.1 | 7733244 | SNV | 1 | A | G | Homozygous   |
| NC_037651.1 | 7739458 | SNV | 1 | C | T | Homozygous   |
| NC_037651.1 | 7739460 | SNV | 1 | C | T | Homozygous   |
| NC_037651.1 | 7739482 | SNV | 1 | C | G | Heterozygous |
| NC_037651.1 | 7739488 | SNV | 1 | C | G | Homozygous   |
| NC_037651.1 | 7741076 | SNV | 1 | T | G | Heterozygous |
| NC_037651.1 | 7741080 | SNV | 1 | T | A | Heterozygous |

|             |         |     |   |   |   |              |
|-------------|---------|-----|---|---|---|--------------|
| NC_037651.1 | 7741083 | SNV | 1 | C | T | Homozygous   |
| NC_037651.1 | 7741085 | SNV | 1 | C | T | Heterozygous |
| NC_037651.1 | 7765075 | SNV | 1 | G | A | Homozygous   |
| NC_037651.1 | 7765129 | SNV | 1 | G | A | Heterozygous |
| NC_037651.1 | 7765188 | SNV | 1 | A | G | Homozygous   |
| NC_037651.1 | 7765270 | SNV | 1 | G | A | Homozygous   |
| NC_037651.1 | 7765275 | SNV | 1 | G | A | Homozygous   |
| NC_037651.1 | 7765462 | SNV | 1 | T | C | Homozygous   |
| NC_037651.1 | 7765805 | SNV | 1 | A | G | Homozygous   |
| NC_037651.1 | 7765866 | SNV | 1 | A | G | Homozygous   |
| NC_037651.1 | 7765876 | SNV | 1 | T | C | Homozygous   |
| NC_037651.1 | 7767287 | SNV | 1 | T | C | Homozygous   |
| NC_037651.1 | 7767290 | SNV | 1 | A | G | Heterozygous |
| NC_037651.1 | 7767294 | SNV | 1 | A | G | Homozygous   |
| NC_037651.1 | 7767314 | SNV | 1 | G | A | Heterozygous |
| NC_037651.1 | 7767337 | SNV | 1 | A | G | Homozygous   |
| NC_037651.1 | 7767339 | SNV | 1 | G | A | Homozygous   |
| NC_037651.1 | 7767343 | SNV | 1 | A | G | Homozygous   |
| NC_037651.1 | 7767350 | SNV | 1 | G | A | Heterozygous |
| NC_037651.1 | 7767358 | SNV | 1 | G | A | Homozygous   |
| NC_037651.1 | 7767370 | SNV | 1 | G | A | Homozygous   |
| NC_037651.1 | 7767437 | SNV | 1 | A | G | Heterozygous |
| NC_037651.1 | 7767443 | SNV | 1 | G | A | Heterozygous |
| NC_037651.1 | 7767446 | SNV | 1 | C | G | Heterozygous |
| NC_037651.1 | 7781400 | SNV | 1 | A | G | Homozygous   |
| NC_037651.1 | 7781421 | SNV | 1 | A | G | Homozygous   |
| NC_037651.1 | 7804363 | SNV | 1 | A | G | Homozygous   |
| NC_037651.1 | 7804365 | SNV | 1 | T | A | Homozygous   |
| NC_037651.1 | 7808975 | SNV | 1 | A | G | Heterozygous |
| NC_037651.1 | 7808983 | SNV | 1 | C | T | Heterozygous |
| NC_037651.1 | 7809067 | SNV | 1 | T | C | Heterozygous |
| NC_037651.1 | 7809108 | SNV | 1 | C | T | Homozygous   |
| NC_037651.1 | 7809111 | SNV | 1 | G | A | Homozygous   |
| NC_037651.1 | 7809354 | SNV | 1 | A | G | Homozygous   |
| NC_037651.1 | 7809458 | SNV | 1 | C | T | Homozygous   |
| NC_037651.1 | 7809460 | SNV | 1 | T | C | Homozygous   |
| NC_037651.1 | 7809499 | SNV | 1 | T | C | Homozygous   |
| NC_037651.1 | 7809512 | SNV | 1 | C | G | Homozygous   |
| NC_037651.1 | 7811883 | SNV | 1 | G | A | Homozygous   |
| NC_037651.1 | 7815282 | SNV | 1 | C | G | Homozygous   |
| NC_037651.1 | 7815505 | SNV | 1 | G | A | Heterozygous |
| NC_037651.1 | 7817280 | SNV | 1 | G | A | Heterozygous |
| NC_037651.1 | 7818667 | SNV | 1 | T | C | Homozygous   |
| NC_037651.1 | 7818687 | SNV | 1 | G | A | Homozygous   |
| NC_037651.1 | 7818783 | SNV | 1 | C | T | Homozygous   |
| NC_037651.1 | 7818861 | SNV | 1 | C | T | Homozygous   |
| NC_037651.1 | 7820109 | SNV | 1 | C | G | Homozygous   |
| NC_037651.1 | 7820193 | SNV | 1 | C | T | Heterozygous |
| NC_037651.1 | 7820208 | SNV | 1 | T | C | Homozygous   |
| NC_037651.1 | 7822235 | SNV | 1 | C | T | Homozygous   |
| NC_037651.1 | 7822238 | SNV | 1 | A | G | Homozygous   |

|             |         |     |   |   |   |              |
|-------------|---------|-----|---|---|---|--------------|
| NC_037651.1 | 7822606 | SNV | 1 | A | G | Homozygous   |
| NC_037651.1 | 7822872 | SNV | 1 | C | T | Homozygous   |
| NC_037651.1 | 7822888 | SNV | 1 | T | A | Homozygous   |
| NC_037651.1 | 7823446 | SNV | 1 | G | A | Homozygous   |
| NC_037651.1 | 7823724 | SNV | 1 | A | G | Homozygous   |
| NC_037651.1 | 7823805 | SNV | 1 | G | A | Heterozygous |
| NC_037651.1 | 7824094 | SNV | 1 | T | C | Homozygous   |
| NC_037651.1 | 7840725 | SNV | 1 | C | T | Homozygous   |
| NC_037651.1 | 7840784 | SNV | 1 | T | C | Homozygous   |
| NC_037651.1 | 7840877 | SNV | 1 | A | G | Heterozygous |
| NC_037651.1 | 7847044 | SNV | 1 | A | G | Homozygous   |
| NC_037651.1 | 7847694 | SNV | 1 | C | T | Heterozygous |
| NC_037651.1 | 7847716 | SNV | 1 | T | C | Heterozygous |
| NC_037651.1 | 7879134 | SNV | 1 | A | G | Heterozygous |
| NC_037651.1 | 7879256 | SNV | 1 | C | T | Heterozygous |
| NC_037651.1 | 7880023 | SNV | 1 | C | T | Heterozygous |
| NC_037651.1 | 7880145 | SNV | 1 | G | A | Homozygous   |
| NC_037651.1 | 7880299 | SNV | 1 | C | T | Homozygous   |
| NC_037651.1 | 7880305 | SNV | 1 | C | T | Heterozygous |
| NC_037651.1 | 7880314 | SNV | 1 | C | G | Heterozygous |
| NC_037651.1 | 7880317 | SNV | 1 | C | A | Heterozygous |
| NC_037651.1 | 7880317 | SNV | 1 | C | T | Heterozygous |
| NC_037651.1 | 7880319 | SNV | 1 | C | T | Heterozygous |
| NC_037651.1 | 7880327 | SNV | 1 | C | T | Heterozygous |
| NC_037651.1 | 7880329 | SNV | 1 | C | T | Heterozygous |
| NC_037651.1 | 7880332 | SNV | 1 | T | C | Homozygous   |
| NC_037651.1 | 7882056 | SNV | 1 | C | T | Heterozygous |
| NC_037651.1 | 7882692 | SNV | 1 | T | C | Heterozygous |
| NC_037651.1 | 7887059 | SNV | 1 | G | A | Heterozygous |
| NC_037651.1 | 7887113 | SNV | 1 | C | T | Homozygous   |
| NC_037651.1 | 7887158 | SNV | 1 | G | A | Heterozygous |
| NC_037651.1 | 7887302 | SNV | 1 | G | A | Heterozygous |
| NC_037651.1 | 7890745 | SNV | 1 | C | T | Heterozygous |
| NC_037651.1 | 7891799 | SNV | 1 | G | A | Heterozygous |
| NC_037651.1 | 7892070 | SNV | 1 | T | C | Homozygous   |
| NC_037651.1 | 7892231 | SNV | 1 | T | A | Homozygous   |
| NC_037651.1 | 7894317 | SNV | 1 | T | C | Homozygous   |
| NC_037651.1 | 7894449 | SNV | 1 | G | A | Heterozygous |
| NC_037651.1 | 7903960 | SNV | 1 | A | G | Homozygous   |
| NC_037651.1 | 7903978 | SNV | 1 | T | C | Homozygous   |
| NC_037651.1 | 7904101 | SNV | 1 | T | C | Heterozygous |
| NC_037651.1 | 7904236 | SNV | 1 | A | G | Heterozygous |
| NC_037651.1 | 7904402 | SNV | 1 | A | G | Heterozygous |
| NC_037651.1 | 7904571 | SNV | 1 | T | C | Homozygous   |
| NC_037651.1 | 7904691 | SNV | 1 | C | T | Heterozygous |
| NC_037651.1 | 7904952 | SNV | 1 | C | T | Heterozygous |
| NC_037651.1 | 7904985 | SNV | 1 | G | A | Homozygous   |
| NC_037651.1 | 7906700 | SNV | 1 | A | G | Homozygous   |
| NC_037651.1 | 7908490 | SNV | 1 | G | A | Heterozygous |
| NC_037651.1 | 7912083 | SNV | 1 | G | A | Homozygous   |
| NC_037651.1 | 7912166 | SNV | 1 | G | A | Homozygous   |

|             |         |     |   |   |   |              |
|-------------|---------|-----|---|---|---|--------------|
| NC_037651.1 | 7912225 | SNV | 1 | A | G | Heterozygous |
| NC_037651.1 | 7912229 | SNV | 1 | G | A | Heterozygous |
| NC_037651.1 | 7912797 | SNV | 1 | G | A | Heterozygous |
| NC_037651.1 | 7912964 | SNV | 1 | A | G | Homozygous   |
| NC_037651.1 | 7913077 | SNV | 1 | T | G | Heterozygous |
| NC_037651.1 | 7913378 | SNV | 1 | C | T | Homozygous   |
| NC_037651.1 | 7915483 | SNV | 1 | G | A | Homozygous   |
| NC_037651.1 | 7915514 | SNV | 1 | A | T | Homozygous   |
| NC_037651.1 | 7917973 | SNV | 1 | G | A | Heterozygous |
| NC_037651.1 | 7918015 | SNV | 1 | T | C | Homozygous   |
| NC_037651.1 | 7918526 | SNV | 1 | T | C | Homozygous   |
| NC_037651.1 | 7918775 | SNV | 1 | G | A | Heterozygous |
| NC_037651.1 | 7921481 | SNV | 1 | C | T | Homozygous   |
| NC_037651.1 | 7928103 | SNV | 1 | C | G | Homozygous   |
| NC_037651.1 | 7928122 | SNV | 1 | T | A | Homozygous   |
| NC_037651.1 | 7931866 | SNV | 1 | G | A | Heterozygous |
| NC_037651.1 | 7932713 | SNV | 1 | T | C | Homozygous   |
| NC_037651.1 | 7932846 | SNV | 1 | T | C | Heterozygous |
| NC_037651.1 | 7932880 | SNV | 1 | T | A | Homozygous   |
| NC_037651.1 | 7933155 | SNV | 1 | G | A | Heterozygous |
| NC_037651.1 | 7933471 | SNV | 1 | C | T | Heterozygous |
| NC_037651.1 | 7935471 | SNV | 1 | A | G | Heterozygous |
| NC_037651.1 | 7935474 | SNV | 1 | A | G | Homozygous   |
| NC_037651.1 | 7935512 | SNV | 1 | A | G | Homozygous   |
| NC_037651.1 | 7947440 | SNV | 1 | A | G | Homozygous   |
| NC_037651.1 | 7947442 | SNV | 1 | G | C | Homozygous   |
| NC_037651.1 | 7951968 | SNV | 1 | A | C | Heterozygous |
| NC_037651.1 | 7952040 | SNV | 1 | T | C | Homozygous   |
| NC_037651.1 | 7953814 | SNV | 1 | G | A | Heterozygous |
| NC_037651.1 | 7953867 | SNV | 1 | A | G | Homozygous   |
| NC_037651.1 | 7953910 | SNV | 1 | T | C | Heterozygous |
| NC_037651.1 | 7953946 | SNV | 1 | A | G | Homozygous   |
| NC_037651.1 | 7955683 | SNV | 1 | T | C | Homozygous   |
| NC_037651.1 | 7955780 | SNV | 1 | A | G | Homozygous   |
| NC_037651.1 | 7956348 | SNV | 1 | C | G | Homozygous   |
| NC_037651.1 | 7956457 | SNV | 1 | A | G | Heterozygous |
| NC_037651.1 | 7957120 | SNV | 1 | G | A | Heterozygous |
| NC_037651.1 | 7957360 | SNV | 1 | T | C | Homozygous   |
| NC_037651.1 | 7957762 | SNV | 1 | T | C | Heterozygous |
| NC_037651.1 | 7957950 | SNV | 1 | C | T | Heterozygous |
| NC_037651.1 | 7957993 | SNV | 1 | T | G | Homozygous   |
| NC_037651.1 | 7958857 | SNV | 1 | T | C | Homozygous   |
| NC_037651.1 | 7959023 | SNV | 1 | T | C | Homozygous   |
| NC_037651.1 | 7959041 | SNV | 1 | G | A | Heterozygous |
| NC_037651.1 | 7962495 | SNV | 1 | A | G | Heterozygous |
| NC_037651.1 | 7962501 | SNV | 1 | G | A | Heterozygous |
| NC_037651.1 | 7962510 | SNV | 1 | A | G | Heterozygous |
| NC_037651.1 | 7962550 | SNV | 1 | T | A | Homozygous   |
| NC_037651.1 | 7962971 | SNV | 1 | A | T | Heterozygous |
| NC_037651.1 | 7965438 | SNV | 1 | G | A | Heterozygous |
| NC_037651.1 | 7965527 | SNV | 1 | A | G | Homozygous   |

|             |         |     |   |   |   |              |
|-------------|---------|-----|---|---|---|--------------|
| NC_037651.1 | 7965596 | SNV | 1 | G | A | Heterozygous |
| NC_037651.1 | 7972747 | SNV | 1 | A | G | Homozygous   |
| NC_037651.1 | 7972755 | SNV | 1 | A | G | Homozygous   |
| NC_037651.1 | 7972770 | SNV | 1 | T | G | Heterozygous |
| NC_037651.1 | 7976383 | SNV | 1 | G | A | Homozygous   |
| NC_037651.1 | 7976388 | SNV | 1 | T | A | Homozygous   |
| NC_037651.1 | 7976409 | SNV | 1 | A | G | Heterozygous |
| NC_037651.1 | 7982108 | SNV | 1 | G | A | Homozygous   |
| NC_037651.1 | 7982110 | SNV | 1 | G | T | Homozygous   |
| NC_037651.1 | 8002757 | SNV | 1 | T | G | Heterozygous |
| NC_037651.1 | 8002768 | SNV | 1 | C | T | Heterozygous |
| NC_037651.1 | 8002775 | SNV | 1 | T | C | Heterozygous |
| NC_037651.1 | 8003337 | SNV | 1 | C | T | Heterozygous |
| NC_037651.1 | 8003346 | SNV | 1 | G | T | Heterozygous |
| NC_037651.1 | 8005423 | SNV | 1 | A | G | Heterozygous |
| NC_037651.1 | 8008512 | SNV | 1 | C | T | Heterozygous |
| NC_037651.1 | 8008809 | SNV | 1 | T | C | Heterozygous |
| NC_037651.1 | 8008997 | SNV | 1 | G | A | Heterozygous |
| NC_037651.1 | 8009240 | SNV | 1 | A | G | Homozygous   |
| NC_037651.1 | 8009285 | SNV | 1 | A | T | Heterozygous |
| NC_037651.1 | 8009425 | SNV | 1 | G | A | Homozygous   |
| NC_037651.1 | 8013733 | SNV | 1 | A | G | Homozygous   |
| NC_037651.1 | 8013823 | SNV | 1 | A | G | Homozygous   |
| NC_037651.1 | 8014380 | SNV | 1 | G | A | Heterozygous |
| NC_037651.1 | 8014709 | SNV | 1 | T | C | Homozygous   |
| NC_037651.1 | 8015633 | SNV | 1 | C | T | Heterozygous |
| NC_037651.1 | 8016133 | SNV | 1 | C | A | Heterozygous |
| NC_037651.1 | 8016896 | SNV | 1 | C | G | Homozygous   |
| NC_037651.1 | 8017184 | SNV | 1 | G | A | Heterozygous |
| NC_037651.1 | 8019926 | SNV | 1 | C | G | Homozygous   |
| NC_037651.1 | 8019930 | SNV | 1 | T | G | Homozygous   |
| NC_037651.1 | 8019934 | SNV | 1 | C | G | Homozygous   |
| NC_037651.1 | 8019941 | SNV | 1 | T | C | Heterozygous |
| NC_037651.1 | 8019948 | SNV | 1 | G | C | Heterozygous |
| NC_037651.1 | 8019951 | SNV | 1 | T | C | Heterozygous |
| NC_037651.1 | 8019976 | SNV | 1 | T | C | Homozygous   |
| NC_037651.1 | 8020566 | SNV | 1 | A | G | Heterozygous |
| NC_037651.1 | 8032662 | SNV | 1 | A | G | Homozygous   |
| NC_037651.1 | 8033436 | SNV | 1 | T | C | Heterozygous |
| NC_037651.1 | 8033440 | SNV | 1 | C | T | Homozygous   |
| NC_037651.1 | 8033446 | SNV | 1 | T | C | Heterozygous |
| NC_037651.1 | 8033450 | SNV | 1 | T | C | Heterozygous |
| NC_037651.1 | 8033452 | SNV | 1 | G | A | Heterozygous |
| NC_037651.1 | 8033487 | SNV | 1 | G | A | Heterozygous |
| NC_037651.1 | 8033491 | SNV | 1 | G | A | Heterozygous |
| NC_037651.1 | 8033505 | SNV | 1 | A | G | Homozygous   |
| NC_037651.1 | 8033511 | SNV | 1 | G | A | Heterozygous |
| NC_037651.1 | 8033553 | SNV | 1 | A | C | Homozygous   |
| NC_037651.1 | 8033609 | SNV | 1 | G | A | Heterozygous |
| NC_037651.1 | 8033627 | SNV | 1 | T | C | Homozygous   |
| NC_037651.1 | 8033630 | SNV | 1 | G | A | Heterozygous |

|             |         |     |   |   |   |              |
|-------------|---------|-----|---|---|---|--------------|
| NC_037651.1 | 8039109 | SNV | 1 | C | G | Homozygous   |
| NC_037651.1 | 8039674 | SNV | 1 | C | T | Homozygous   |
| NC_037651.1 | 8044054 | SNV | 1 | C | A | Heterozygous |
| NC_037651.1 | 8044139 | SNV | 1 | T | C | Homozygous   |
| NC_037651.1 | 8044685 | SNV | 1 | T | A | Homozygous   |
| NC_037651.1 | 8044719 | SNV | 1 | C | G | Homozygous   |
| NC_037651.1 | 8044791 | SNV | 1 | C | T | Heterozygous |
| NC_037651.1 | 8045004 | SNV | 1 | G | T | Heterozygous |
| NC_037651.1 | 8045007 | SNV | 1 | A | G | Heterozygous |
| NC_037651.1 | 8045100 | SNV | 1 | C | T | Homozygous   |
| NC_037651.1 | 8045225 | SNV | 1 | T | C | Heterozygous |
| NC_037651.1 | 8050872 | SNV | 1 | C | T | Homozygous   |
| NC_037651.1 | 8050882 | SNV | 1 | A | T | Homozygous   |
| NC_037651.1 | 8050886 | SNV | 1 | C | T | Homozygous   |
| NC_037651.1 | 8050898 | SNV | 1 | C | T | Heterozygous |
| NC_037651.1 | 8050939 | SNV | 1 | A | G | Heterozygous |
| NC_037651.1 | 8050940 | SNV | 1 | T | C | Heterozygous |
| NC_037651.1 | 8050947 | SNV | 1 | C | T | Homozygous   |
| NC_037651.1 | 8052373 | SNV | 1 | A | G | Heterozygous |
| NC_037651.1 | 8052629 | SNV | 1 | G | A | Heterozygous |
| NC_037651.1 | 8053273 | SNV | 1 | A | G | Heterozygous |
| NC_037651.1 | 8053649 | SNV | 1 | T | C | Homozygous   |
| NC_037651.1 | 8053990 | SNV | 1 | C | T | Homozygous   |
| NC_037651.1 | 8054011 | SNV | 1 | C | G | Heterozygous |
| NC_037651.1 | 8054047 | SNV | 1 | C | G | Heterozygous |
| NC_037651.1 | 8054149 | SNV | 1 | C | T | Heterozygous |
| NC_037651.1 | 8055552 | SNV | 1 | G | C | Heterozygous |
| NC_037651.1 | 8055556 | SNV | 1 | G | A | Heterozygous |
| NC_037651.1 | 8055564 | SNV | 1 | A | G | Heterozygous |
| NC_037651.1 | 8055573 | SNV | 1 | G | A | Homozygous   |
| NC_037651.1 | 8055842 | SNV | 1 | T | C | Heterozygous |
| NC_037651.1 | 8056048 | SNV | 1 | A | T | Homozygous   |
| NC_037651.1 | 8056580 | SNV | 1 | C | T | Heterozygous |
| NC_037651.1 | 8056744 | SNV | 1 | C | T | Homozygous   |
| NC_037651.1 | 8056903 | SNV | 1 | A | G | Homozygous   |
| NC_037651.1 | 8057396 | SNV | 1 | C | T | Heterozygous |
| NC_037651.1 | 8057426 | SNV | 1 | G | C | Homozygous   |
| NC_037651.1 | 8057446 | SNV | 1 | A | T | Heterozygous |
| NC_037651.1 | 8057506 | SNV | 1 | T | C | Homozygous   |
| NC_037651.1 | 8057509 | SNV | 1 | A | G | Homozygous   |
| NC_037651.1 | 8058093 | SNV | 1 | A | G | Heterozygous |
| NC_037651.1 | 8058294 | SNV | 1 | T | C | Heterozygous |
| NC_037651.1 | 8058326 | SNV | 1 | C | T | Heterozygous |
| NC_037651.1 | 8058356 | SNV | 1 | C | T | Homozygous   |
| NC_037651.1 | 8058364 | SNV | 1 | G | T | Homozygous   |
| NC_037651.1 | 8058368 | SNV | 1 | G | A | Heterozygous |
| NC_037651.1 | 8058392 | SNV | 1 | A | G | Homozygous   |
| NC_037651.1 | 8058471 | SNV | 1 | C | T | Heterozygous |
| NC_037651.1 | 8058762 | SNV | 1 | C | G | Homozygous   |
| NC_037651.1 | 8058777 | SNV | 1 | T | A | Homozygous   |
| NC_037651.1 | 8058798 | SNV | 1 | A | G | Heterozygous |



|             |         |     |   |   |   |              |
|-------------|---------|-----|---|---|---|--------------|
| NC_037651.1 | 8063899 | SNV | 1 | T | A | Heterozygous |
| NC_037651.1 | 8063951 | SNV | 1 | A | G | Heterozygous |
| NC_037651.1 | 8067679 | SNV | 1 | G | T | Heterozygous |
| NC_037651.1 | 8067685 | SNV | 1 | A | T | Heterozygous |
| NC_037651.1 | 8067691 | SNV | 1 | C | T | Heterozygous |
| NC_037651.1 | 8067694 | SNV | 1 | G | T | Heterozygous |
| NC_037651.1 | 8067699 | SNV | 1 | A | T | Heterozygous |
| NC_037651.1 | 8067702 | SNV | 1 | A | T | Heterozygous |
| NC_037651.1 | 8067705 | SNV | 1 | G | T | Homozygous   |
| NC_037651.1 | 8067861 | SNV | 1 | A | G | Homozygous   |
| NC_037651.1 | 8067938 | SNV | 1 | C | A | Heterozygous |
| NC_037651.1 | 8068288 | SNV | 1 | C | T | Heterozygous |
| NC_037651.1 | 8068335 | SNV | 1 | T | C | Homozygous   |
| NC_037651.1 | 8069912 | SNV | 1 | C | T | Homozygous   |
| NC_037651.1 | 8070257 | SNV | 1 | A | G | Homozygous   |
| NC_037651.1 | 8070955 | SNV | 1 | C | A | Heterozygous |
| NC_037651.1 | 8070958 | SNV | 1 | T | A | Heterozygous |
| NC_037651.1 | 8071349 | SNV | 1 | C | T | Heterozygous |
| NC_037651.1 | 8071437 | SNV | 1 | G | A | Heterozygous |
| NC_037651.1 | 8075258 | SNV | 1 | A | G | Homozygous   |
| NC_037651.1 | 8078140 | SNV | 1 | T | C | Heterozygous |
| NC_037651.1 | 8078259 | SNV | 1 | C | T | Heterozygous |
| NC_037651.1 | 8078665 | SNV | 1 | A | C | Homozygous   |
| NC_037651.1 | 8078787 | SNV | 1 | T | C | Homozygous   |
| NC_037651.1 | 8078811 | SNV | 1 | A | G | Homozygous   |
| NC_037651.1 | 8079578 | SNV | 1 | C | T | Homozygous   |
| NC_037651.1 | 8079792 | SNV | 1 | T | C | Heterozygous |
| NC_037651.1 | 8080278 | SNV | 1 | A | G | Homozygous   |
| NC_037651.1 | 8080401 | SNV | 1 | T | C | Heterozygous |
| NC_037651.1 | 8085483 | SNV | 1 | A | G | Homozygous   |
| NC_037651.1 | 8085684 | SNV | 1 | A | G | Homozygous   |
| NC_037651.1 | 8088587 | SNV | 1 | C | A | Heterozygous |
| NC_037651.1 | 8088719 | SNV | 1 | T | C | Heterozygous |
| NC_037651.1 | 8093493 | SNV | 1 | T | A | Heterozygous |
| NC_037651.1 | 8096203 | SNV | 1 | C | T | Homozygous   |
| NC_037651.1 | 8100493 | SNV | 1 | C | G | Heterozygous |
| NC_037651.1 | 8101072 | SNV | 1 | C | A | Heterozygous |
| NC_037651.1 | 8101126 | SNV | 1 | T | C | Heterozygous |
| NC_037651.1 | 8103689 | SNV | 1 | A | G | Homozygous   |
| NC_037651.1 | 8104107 | SNV | 1 | A | T | Heterozygous |
| NC_037651.1 | 8104197 | SNV | 1 | T | C | Heterozygous |
| NC_037651.1 | 8104920 | SNV | 1 | C | T | Heterozygous |
| NC_037651.1 | 8105000 | SNV | 1 | T | C | Heterozygous |
| NC_037651.1 | 8110469 | SNV | 1 | C | G | Heterozygous |
| NC_037651.1 | 8110612 | SNV | 1 | G | C | Homozygous   |
| NC_037651.1 | 8110622 | SNV | 1 | A | G | Homozygous   |
| NC_037651.1 | 8110634 | SNV | 1 | A | G | Homozygous   |
| NC_037651.1 | 8110647 | SNV | 1 | G | A | Homozygous   |
| NC_037651.1 | 8111619 | SNV | 1 | G | C | Homozygous   |
| NC_037651.1 | 8115912 | SNV | 1 | T | C | Homozygous   |
| NC_037651.1 | 8116719 | SNV | 1 | T | C | Homozygous   |

|             |         |     |   |   |   |              |
|-------------|---------|-----|---|---|---|--------------|
| NC_037651.1 | 8117496 | SNV | 1 | T | C | Homozygous   |
| NC_037651.1 | 8118180 | SNV | 1 | G | A | Heterozygous |
| NC_037651.1 | 8118233 | SNV | 1 | G | A | Heterozygous |
| NC_037651.1 | 8118261 | SNV | 1 | G | A | Homozygous   |
| NC_037651.1 | 8119151 | SNV | 1 | A | G | Heterozygous |
| NC_037651.1 | 8119357 | SNV | 1 | C | A | Heterozygous |
| NC_037651.1 | 8132385 | SNV | 1 | A | G | Heterozygous |
| NC_037651.1 | 8135370 | SNV | 1 | C | T | Homozygous   |
| NC_037651.1 | 8135389 | SNV | 1 | A | T | Heterozygous |
| NC_037651.1 | 8135395 | SNV | 1 | C | A | Heterozygous |
| NC_037651.1 | 8135427 | SNV | 1 | C | T | Heterozygous |
| NC_037651.1 | 8135431 | SNV | 1 | C | A | Heterozygous |
| NC_037651.1 | 8135436 | SNV | 1 | C | T | Heterozygous |
| NC_037651.1 | 8135664 | SNV | 1 | T | C | Heterozygous |
| NC_037651.1 | 8136162 | SNV | 1 | G | A | Heterozygous |
| NC_037651.1 | 8136234 | SNV | 1 | T | C | Heterozygous |
| NC_037651.1 | 8136236 | SNV | 1 | T | G | Heterozygous |
| NC_037651.1 | 8136239 | SNV | 1 | C | T | Heterozygous |
| NC_037651.1 | 8136429 | SNV | 1 | T | C | Homozygous   |
| NC_037651.1 | 8136585 | SNV | 1 | T | C | Homozygous   |
| NC_037651.1 | 8137165 | SNV | 1 | G | A | Heterozygous |
| NC_037651.1 | 8137395 | SNV | 1 | G | A | Heterozygous |
| NC_037651.1 | 8137988 | SNV | 1 | T | A | Heterozygous |
| NC_037651.1 | 8138313 | SNV | 1 | C | A | Homozygous   |
| NC_037651.1 | 8138410 | SNV | 1 | G | C | Heterozygous |
| NC_037651.1 | 8140301 | SNV | 1 | A | G | Heterozygous |
| NC_037651.1 | 8142658 | SNV | 1 | A | G | Homozygous   |
| NC_037651.1 | 8142862 | SNV | 1 | T | C | Homozygous   |
| NC_037651.1 | 8142887 | SNV | 1 | A | G | Heterozygous |
| NC_037651.1 | 8144529 | SNV | 1 | A | G | Homozygous   |
| NC_037651.1 | 8146216 | SNV | 1 | T | C | Homozygous   |
| NC_037651.1 | 8147279 | SNV | 1 | A | C | Homozygous   |
| NC_037651.1 | 8153935 | SNV | 1 | T | C | Heterozygous |
| NC_037651.1 | 8153946 | SNV | 1 | T | A | Heterozygous |
| NC_037651.1 | 8169069 | SNV | 1 | T | G | Heterozygous |
| NC_037651.1 | 8169082 | SNV | 1 | A | G | Heterozygous |
| NC_037651.1 | 8169147 | SNV | 1 | G | A | Heterozygous |
| NC_037651.1 | 8169168 | SNV | 1 | C | A | Heterozygous |
| NC_037651.1 | 8169168 | SNV | 1 | C | G | Heterozygous |
| NC_037651.1 | 8176081 | SNV | 1 | T | C | Homozygous   |
| NC_037651.1 | 8176209 | SNV | 1 | A | G | Heterozygous |
| NC_037651.1 | 8176668 | SNV | 1 | T | G | Homozygous   |
| NC_037651.1 | 8177171 | SNV | 1 | A | G | Homozygous   |
| NC_037651.1 | 8177276 | SNV | 1 | A | G | Heterozygous |
| NC_037651.1 | 8177287 | SNV | 1 | T | C | Heterozygous |
| NC_037651.1 | 8179436 | SNV | 1 | G | A | Heterozygous |
| NC_037651.1 | 8179438 | SNV | 1 | T | C | Homozygous   |
| NC_037651.1 | 8179802 | SNV | 1 | G | A | Heterozygous |
| NC_037651.1 | 8179804 | SNV | 1 | G | A | Heterozygous |
| NC_037651.1 | 8179806 | SNV | 1 | A | G | Heterozygous |
| NC_037651.1 | 8179810 | SNV | 1 | G | T | Heterozygous |

|             |         |     |   |   |   |              |
|-------------|---------|-----|---|---|---|--------------|
| NC_037651.1 | 8179812 | SNV | 1 | A | G | Heterozygous |
| NC_037651.1 | 8179812 | SNV | 1 | A | T | Heterozygous |
| NC_037651.1 | 8179814 | SNV | 1 | G | T | Heterozygous |
| NC_037651.1 | 8179844 | SNV | 1 | G | A | Heterozygous |
| NC_037651.1 | 8179849 | SNV | 1 | A | G | Heterozygous |
| NC_037651.1 | 8179856 | SNV | 1 | G | A | Heterozygous |
| NC_037651.1 | 8179858 | SNV | 1 | G | A | Homozygous   |
| NC_037651.1 | 8179879 | SNV | 1 | A | G | Heterozygous |
| NC_037651.1 | 8182077 | SNV | 1 | A | G | Homozygous   |
| NC_037651.1 | 8182167 | SNV | 1 | G | A | Heterozygous |
| NC_037651.1 | 8183175 | SNV | 1 | A | G | Homozygous   |
| NC_037651.1 | 8183635 | SNV | 1 | A | G | Homozygous   |
| NC_037651.1 | 8183643 | SNV | 1 | A | G | Homozygous   |
| NC_037651.1 | 8183655 | SNV | 1 | A | G | Homozygous   |
| NC_037651.1 | 8183755 | SNV | 1 | A | T | Heterozygous |
| NC_037651.1 | 8183828 | SNV | 1 | C | T | Heterozygous |
| NC_037651.1 | 8183931 | SNV | 1 | A | G | Homozygous   |
| NC_037651.1 | 8184048 | SNV | 1 | G | A | Heterozygous |
| NC_037651.1 | 8184061 | SNV | 1 | G | A | Heterozygous |
| NC_037651.1 | 8195140 | SNV | 1 | C | T | Heterozygous |
| NC_037651.1 | 8201420 | SNV | 1 | A | T | Homozygous   |
| NC_037651.1 | 8201449 | SNV | 1 | T | C | Heterozygous |
| NC_037651.1 | 8204708 | SNV | 1 | G | A | Homozygous   |
| NC_037651.1 | 8205398 | SNV | 1 | G | A | Homozygous   |
| NC_037651.1 | 8205405 | SNV | 1 | G | T | Homozygous   |
| NC_037651.1 | 8206315 | SNV | 1 | A | G | Homozygous   |
| NC_037651.1 | 8214903 | SNV | 1 | C | G | Homozygous   |
| NC_037651.1 | 8214906 | SNV | 1 | A | C | Homozygous   |
| NC_037651.1 | 8214908 | SNV | 1 | C | G | Homozygous   |
| NC_037651.1 | 8214911 | SNV | 1 | T | A | Homozygous   |
| NC_037651.1 | 8214915 | SNV | 1 | G | T | Homozygous   |
| NC_037651.1 | 8214929 | SNV | 1 | G | T | Homozygous   |
| NC_037651.1 | 8216473 | SNV | 1 | A | G | Homozygous   |
| NC_037651.1 | 8216681 | SNV | 1 | A | G | Homozygous   |
| NC_037651.1 | 8219222 | SNV | 1 | C | T | Homozygous   |
| NC_037651.1 | 8219566 | SNV | 1 | C | T | Homozygous   |
| NC_037651.1 | 8219663 | SNV | 1 | T | C | Homozygous   |
| NC_037651.1 | 8221185 | SNV | 1 | A | G | Homozygous   |
| NC_037651.1 | 8221442 | SNV | 1 | A | G | Homozygous   |
| NC_037651.1 | 8221491 | SNV | 1 | C | T | Heterozygous |
| NC_037651.1 | 8221784 | SNV | 1 | T | C | Homozygous   |
| NC_037651.1 | 8221982 | SNV | 1 | G | A | Homozygous   |
| NC_037651.1 | 8222023 | SNV | 1 | G | A | Homozygous   |
| NC_037651.1 | 8222030 | SNV | 1 | C | T | Homozygous   |
| NC_037651.1 | 8223038 | SNV | 1 | T | A | Homozygous   |
| NC_037651.1 | 8223207 | SNV | 1 | T | A | Homozygous   |
| NC_037651.1 | 8223516 | SNV | 1 | C | T | Homozygous   |
| NC_037651.1 | 8223589 | SNV | 1 | A | G | Heterozygous |
| NC_037651.1 | 8224168 | SNV | 1 | T | A | Homozygous   |
| NC_037651.1 | 8226806 | SNV | 1 | G | A | Homozygous   |
| NC_037651.1 | 8227020 | SNV | 1 | T | A | Homozygous   |

|             |         |     |   |   |   |              |
|-------------|---------|-----|---|---|---|--------------|
| NC_037651.1 | 8227270 | SNV | 1 | A | T | Homozygous   |
| NC_037651.1 | 8229269 | SNV | 1 | G | A | Homozygous   |
| NC_037651.1 | 8229407 | SNV | 1 | A | T | Heterozygous |
| NC_037651.1 | 8229606 | SNV | 1 | G | A | Heterozygous |
| NC_037651.1 | 8230336 | SNV | 1 | T | C | Homozygous   |
| NC_037651.1 | 8230534 | SNV | 1 | A | T | Homozygous   |
| NC_037651.1 | 8230615 | SNV | 1 | T | C | Homozygous   |
| NC_037651.1 | 8230762 | SNV | 1 | C | T | Homozygous   |
| NC_037651.1 | 8231138 | SNV | 1 | G | A | Heterozygous |
| NC_037651.1 | 8231210 | SNV | 1 | G | A | Heterozygous |
| NC_037651.1 | 8231294 | SNV | 1 | T | C | Heterozygous |
| NC_037651.1 | 8243099 | SNV | 1 | T | G | Homozygous   |
| NC_037651.1 | 8243106 | SNV | 1 | A | T | Homozygous   |
| NC_037651.1 | 8243122 | SNV | 1 | A | C | Homozygous   |
| NC_037651.1 | 8243139 | SNV | 1 | G | A | Heterozygous |
| NC_037651.1 | 8243139 | SNV | 1 | G | T | Heterozygous |
| NC_037651.1 | 8246755 | SNV | 1 | A | C | Heterozygous |
| NC_037651.1 | 8251683 | SNV | 1 | A | G | Homozygous   |
| NC_037651.1 | 8251707 | SNV | 1 | A | G | Heterozygous |
| NC_037651.1 | 8251742 | SNV | 1 | G | T | Heterozygous |
| NC_037651.1 | 8251849 | SNV | 1 | G | A | Homozygous   |
| NC_037651.1 | 8252674 | SNV | 1 | T | C | Homozygous   |
| NC_037651.1 | 8253571 | SNV | 1 | C | T | Homozygous   |
| NC_037651.1 | 8256375 | SNV | 1 | A | G | Homozygous   |
| NC_037651.1 | 8256463 | SNV | 1 | T | C | Heterozygous |
| NC_037651.1 | 8256535 | SNV | 1 | G | A | Homozygous   |
| NC_037651.1 | 8257035 | SNV | 1 | C | T | Heterozygous |
| NC_037651.1 | 8257197 | SNV | 1 | A | T | Heterozygous |
| NC_037651.1 | 8260255 | SNV | 1 | A | G | Homozygous   |
| NC_037651.1 | 8267961 | SNV | 1 | G | A | Homozygous   |
| NC_037651.1 | 8268280 | SNV | 1 | C | T | Homozygous   |
| NC_037651.1 | 8268360 | SNV | 1 | A | G | Heterozygous |
| NC_037651.1 | 8268562 | SNV | 1 | A | T | Homozygous   |
| NC_037651.1 | 8271668 | SNV | 1 | T | C | Homozygous   |
| NC_037651.1 | 8271673 | SNV | 1 | C | T | Homozygous   |
| NC_037651.1 | 8271995 | SNV | 1 | T | C | Homozygous   |
| NC_037651.1 | 8272350 | SNV | 1 | A | T | Heterozygous |
| NC_037651.1 | 8272406 | SNV | 1 | C | T | Heterozygous |
| NC_037651.1 | 8272498 | SNV | 1 | T | C | Heterozygous |
| NC_037651.1 | 8272925 | SNV | 1 | A | G | Homozygous   |
| NC_037651.1 | 8273273 | SNV | 1 | G | A | Heterozygous |
| NC_037651.1 | 8275294 | SNV | 1 | T | C | Homozygous   |
| NC_037651.1 | 8275533 | SNV | 1 | C | T | Heterozygous |
| NC_037651.1 | 8277640 | SNV | 1 | T | C | Heterozygous |
| NC_037651.1 | 8277831 | SNV | 1 | C | T | Homozygous   |
| NC_037651.1 | 8277852 | SNV | 1 | T | C | Homozygous   |
| NC_037651.1 | 8277877 | SNV | 1 | C | T | Homozygous   |
| NC_037651.1 | 8278175 | SNV | 1 | A | T | Homozygous   |
| NC_037651.1 | 8278228 | SNV | 1 | G | A | Homozygous   |
| NC_037651.1 | 8278319 | SNV | 1 | T | G | Homozygous   |
| NC_037651.1 | 8280942 | SNV | 1 | A | G | Homozygous   |

|             |         |     |   |   |   |              |
|-------------|---------|-----|---|---|---|--------------|
| NC_037651.1 | 8281390 | SNV | 1 | C | T | Heterozygous |
| NC_037651.1 | 8281932 | SNV | 1 | C | T | Homozygous   |
| NC_037651.1 | 8282037 | SNV | 1 | C | T | Heterozygous |
| NC_037651.1 | 8282069 | SNV | 1 | C | A | Homozygous   |
| NC_037651.1 | 8282108 | SNV | 1 | A | C | Homozygous   |
| NC_037651.1 | 8282111 | SNV | 1 | A | G | Heterozygous |
| NC_037651.1 | 8282114 | SNV | 1 | C | G | Heterozygous |
| NC_037651.1 | 8282199 | SNV | 1 | G | A | Homozygous   |
| NC_037651.1 | 8282201 | SNV | 1 | T | C | Heterozygous |
| NC_037651.1 | 8282214 | SNV | 1 | G | A | Homozygous   |
| NC_037651.1 | 8282258 | SNV | 1 | A | G | Homozygous   |
| NC_037651.1 | 8282445 | SNV | 1 | T | G | Heterozygous |
| NC_037651.1 | 8282632 | SNV | 1 | A | G | Heterozygous |
| NC_037651.1 | 8282746 | SNV | 1 | C | T | Heterozygous |
| NC_037651.1 | 8282763 | SNV | 1 | A | G | Homozygous   |
| NC_037651.1 | 8283061 | SNV | 1 | G | A | Heterozygous |
| NC_037651.1 | 8283069 | SNV | 1 | T | A | Heterozygous |
| NC_037651.1 | 8283092 | SNV | 1 | T | C | Homozygous   |
| NC_037651.1 | 8283299 | SNV | 1 | T | C | Homozygous   |
| NC_037651.1 | 8283541 | SNV | 1 | A | G | Homozygous   |
| NC_037651.1 | 8283607 | SNV | 1 | G | C | Heterozygous |
| NC_037651.1 | 8283618 | SNV | 1 | C | T | Heterozygous |
| NC_037651.1 | 8283638 | SNV | 1 | G | A | Homozygous   |
| NC_037651.1 | 8283647 | SNV | 1 | C | T | Homozygous   |
| NC_037651.1 | 8283746 | SNV | 1 | C | T | Heterozygous |
| NC_037651.1 | 8283789 | SNV | 1 | G | A | Homozygous   |
| NC_037651.1 | 8283794 | SNV | 1 | G | A | Heterozygous |
| NC_037651.1 | 8283889 | SNV | 1 | G | A | Heterozygous |
| NC_037651.1 | 8284472 | SNV | 1 | C | T | Heterozygous |
| NC_037651.1 | 8284485 | SNV | 1 | G | T | Homozygous   |
| NC_037651.1 | 8284693 | SNV | 1 | C | T | Homozygous   |
| NC_037651.1 | 8284755 | SNV | 1 | T | C | Homozygous   |
| NC_037651.1 | 8284826 | SNV | 1 | A | G | Homozygous   |
| NC_037651.1 | 8284899 | SNV | 1 | G | A | Homozygous   |
| NC_037651.1 | 8284953 | SNV | 1 | G | A | Homozygous   |
| NC_037651.1 | 8284993 | SNV | 1 | C | T | Heterozygous |
| NC_037651.1 | 8285391 | SNV | 1 | C | T | Homozygous   |
| NC_037651.1 | 8285896 | SNV | 1 | C | T | Homozygous   |
| NC_037651.1 | 8285923 | SNV | 1 | C | T | Heterozygous |
| NC_037651.1 | 8285934 | SNV | 1 | G | A | Heterozygous |
| NC_037651.1 | 8285966 | SNV | 1 | G | C | Heterozygous |
| NC_037651.1 | 8286323 | SNV | 1 | A | G | Homozygous   |
| NC_037651.1 | 8286543 | SNV | 1 | A | G | Heterozygous |
| NC_037651.1 | 8286620 | SNV | 1 | T | A | Homozygous   |
| NC_037651.1 | 8286625 | SNV | 1 | C | A | Heterozygous |
| NC_037651.1 | 8286820 | SNV | 1 | C | T | Heterozygous |
| NC_037651.1 | 8286832 | SNV | 1 | C | T | Heterozygous |
| NC_037651.1 | 8286839 | SNV | 1 | A | G | Homozygous   |
| NC_037651.1 | 8286852 | SNV | 1 | C | T | Heterozygous |
| NC_037651.1 | 8286884 | SNV | 1 | T | A | Heterozygous |
| NC_037651.1 | 8286888 | SNV | 1 | T | A | Heterozygous |

|             |         |     |   |   |   |              |
|-------------|---------|-----|---|---|---|--------------|
| NC_037651.1 | 8286890 | SNV | 1 | A | G | Heterozygous |
| NC_037651.1 | 8286921 | SNV | 1 | G | A | Heterozygous |
| NC_037651.1 | 8286930 | SNV | 1 | G | C | Heterozygous |
| NC_037651.1 | 8287083 | SNV | 1 | G | A | Heterozygous |
| NC_037651.1 | 8287572 | SNV | 1 | G | C | Homozygous   |
| NC_037651.1 | 8287601 | SNV | 1 | A | G | Homozygous   |
| NC_037651.1 | 8288456 | SNV | 1 | A | G | Homozygous   |
| NC_037651.1 | 8288533 | SNV | 1 | C | T | Heterozygous |
| NC_037651.1 | 8288686 | SNV | 1 | C | T | Heterozygous |
| NC_037651.1 | 8289061 | SNV | 1 | T | C | Heterozygous |
| NC_037651.1 | 8289081 | SNV | 1 | A | G | Homozygous   |
| NC_037651.1 | 8289211 | SNV | 1 | G | A | Heterozygous |
| NC_037651.1 | 8289231 | SNV | 1 | G | C | Homozygous   |
| NC_037651.1 | 8289271 | SNV | 1 | A | G | Homozygous   |
| NC_037651.1 | 8289274 | SNV | 1 | G | A | Heterozygous |
| NC_037651.1 | 8289458 | SNV | 1 | G | A | Homozygous   |
| NC_037651.1 | 8289489 | SNV | 1 | T | C | Homozygous   |
| NC_037651.1 | 8290143 | SNV | 1 | A | T | Homozygous   |
| NC_037651.1 | 8290253 | SNV | 1 | T | C | Heterozygous |
| NC_037651.1 | 8290375 | SNV | 1 | T | C | Homozygous   |
| NC_037651.1 | 8290475 | SNV | 1 | C | T | Homozygous   |
| NC_037651.1 | 8290511 | SNV | 1 | G | A | Homozygous   |
| NC_037651.1 | 8291659 | SNV | 1 | C | A | Homozygous   |
| NC_037651.1 | 8291759 | SNV | 1 | G | A | Heterozygous |
| NC_037651.1 | 8291911 | SNV | 1 | A | G | Homozygous   |
| NC_037651.1 | 8291934 | SNV | 1 | C | G | Heterozygous |
| NC_037651.1 | 8292002 | SNV | 1 | T | C | Homozygous   |
| NC_037651.1 | 8293074 | SNV | 1 | A | C | Homozygous   |
| NC_037651.1 | 8293689 | SNV | 1 | T | C | Homozygous   |
| NC_037651.1 | 8293730 | SNV | 1 | C | T | Heterozygous |
| NC_037651.1 | 8294046 | SNV | 1 | G | A | Homozygous   |
| NC_037651.1 | 8297686 | SNV | 1 | C | G | Homozygous   |
| NC_037651.1 | 8298093 | SNV | 1 | T | A | Homozygous   |
| NC_037651.1 | 8298101 | SNV | 1 | A | T | Homozygous   |
| NC_037651.1 | 8303893 | SNV | 1 | G | T | Homozygous   |
| NC_037651.1 | 8303898 | SNV | 1 | A | C | Heterozygous |
| NC_037651.1 | 8303904 | SNV | 1 | G | A | Heterozygous |
| NC_037651.1 | 8305291 | SNV | 1 | C | T | Homozygous   |
| NC_037651.1 | 8305296 | SNV | 1 | A | T | Homozygous   |
| NC_037651.1 | 8310415 | SNV | 1 | G | C | Homozygous   |
| NC_037651.1 | 8310428 | SNV | 1 | C | T | Heterozygous |
| NC_037651.1 | 8310461 | SNV | 1 | A | C | Heterozygous |
| NC_037651.1 | 8310465 | SNV | 1 | G | A | Homozygous   |
| NC_037651.1 | 8313577 | SNV | 1 | C | T | Heterozygous |
| NC_037651.1 | 8316368 | SNV | 1 | A | T | Homozygous   |
| NC_037651.1 | 8316396 | SNV | 1 | A | C | Homozygous   |
| NC_037651.1 | 8318392 | SNV | 1 | G | A | Heterozygous |
| NC_037651.1 | 8318414 | SNV | 1 | C | T | Homozygous   |
| NC_037651.1 | 8318423 | SNV | 1 | A | G | Homozygous   |
| NC_037651.1 | 8318445 | SNV | 1 | C | T | Heterozygous |
| NC_037651.1 | 8323628 | SNV | 1 | C | T | Homozygous   |

|             |         |     |   |   |   |              |
|-------------|---------|-----|---|---|---|--------------|
| NC_037651.1 | 8324297 | SNV | 1 | A | T | Heterozygous |
| NC_037651.1 | 8324302 | SNV | 1 | A | C | Heterozygous |
| NC_037651.1 | 8324572 | SNV | 1 | G | T | Heterozygous |
| NC_037651.1 | 8325286 | SNV | 1 | G | A | Heterozygous |
| NC_037651.1 | 8325975 | SNV | 1 | G | T | Heterozygous |
| NC_037651.1 | 8326040 | SNV | 1 | T | C | Homozygous   |
| NC_037651.1 | 8326371 | SNV | 1 | T | C | Homozygous   |
| NC_037651.1 | 8326465 | SNV | 1 | C | T | Homozygous   |
| NC_037651.1 | 8328959 | SNV | 1 | A | T | Heterozygous |
| NC_037651.1 | 8329233 | SNV | 1 | A | G | Homozygous   |
| NC_037651.1 | 8336677 | SNV | 1 | C | T | Heterozygous |
| NC_037651.1 | 8336707 | SNV | 1 | C | T | Homozygous   |
| NC_037651.1 | 8341614 | SNV | 1 | A | G | Heterozygous |
| NC_037651.1 | 8341623 | SNV | 1 | A | G | Homozygous   |
| NC_037651.1 | 8341626 | SNV | 1 | A | G | Homozygous   |
| NC_037651.1 | 8341631 | SNV | 1 | A | G | Heterozygous |
| NC_037651.1 | 8341649 | SNV | 1 | A | T | Homozygous   |
| NC_037651.1 | 8341651 | SNV | 1 | T | A | Homozygous   |
| NC_037651.1 | 8343887 | SNV | 1 | C | T | Heterozygous |
| NC_037651.1 | 8344149 | SNV | 1 | T | C | Homozygous   |
| NC_037651.1 | 8344203 | SNV | 1 | T | A | Homozygous   |
| NC_037651.1 | 8344281 | SNV | 1 | A | G | Homozygous   |
| NC_037651.1 | 8344311 | SNV | 1 | T | C | Homozygous   |
| NC_037651.1 | 8344336 | SNV | 1 | C | T | Homozygous   |
| NC_037651.1 | 8344433 | SNV | 1 | A | T | Homozygous   |
| NC_037651.1 | 8344499 | SNV | 1 | C | G | Heterozygous |
| NC_037651.1 | 8344531 | SNV | 1 | G | T | Heterozygous |
| NC_037651.1 | 8344567 | SNV | 1 | C | T | Homozygous   |
| NC_037651.1 | 8344989 | SNV | 1 | C | T | Heterozygous |
| NC_037651.1 | 8346371 | SNV | 1 | T | G | Homozygous   |
| NC_037651.1 | 8347574 | SNV | 1 | A | G | Homozygous   |
| NC_037651.1 | 8348380 | SNV | 1 | A | G | Heterozygous |
| NC_037651.1 | 8348419 | SNV | 1 | T | C | Homozygous   |
| NC_037651.1 | 8349079 | SNV | 1 | A | G | Homozygous   |
| NC_037651.1 | 8351671 | SNV | 1 | A | G | Homozygous   |
| NC_037651.1 | 8352260 | SNV | 1 | A | G | Homozygous   |
| NC_037651.1 | 8353271 | SNV | 1 | A | G | Homozygous   |
| NC_037651.1 | 8354437 | SNV | 1 | C | T | Heterozygous |
| NC_037651.1 | 8354677 | SNV | 1 | C | T | Heterozygous |
| NC_037651.1 | 8355486 | SNV | 1 | G | A | Homozygous   |
| NC_037651.1 | 8357136 | SNV | 1 | A | C | Heterozygous |
| NC_037651.1 | 8359337 | SNV | 1 | C | A | Heterozygous |
| NC_037651.1 | 8359346 | SNV | 1 | T | A | Heterozygous |
| NC_037651.1 | 8359881 | SNV | 1 | G | A | Homozygous   |
| NC_037651.1 | 8360051 | SNV | 1 | A | C | Homozygous   |
| NC_037651.1 | 8366794 | SNV | 1 | T | C | Homozygous   |
| NC_037651.1 | 8381146 | SNV | 1 | A | G | Heterozygous |
| NC_037651.1 | 8381800 | SNV | 1 | A | G | Heterozygous |
| NC_037651.1 | 8383920 | SNV | 1 | C | T | Heterozygous |
| NC_037651.1 | 8384218 | SNV | 1 | T | C | Homozygous   |
| NC_037651.1 | 8384298 | SNV | 1 | C | T | Heterozygous |

|             |         |     |   |   |   |              |
|-------------|---------|-----|---|---|---|--------------|
| NC_037651.1 | 8384776 | SNV | 1 | A | G | Homozygous   |
| NC_037651.1 | 8384789 | SNV | 1 | A | G | Homozygous   |
| NC_037651.1 | 8385834 | SNV | 1 | T | G | Heterozygous |
| NC_037651.1 | 8386068 | SNV | 1 | C | T | Heterozygous |
| NC_037651.1 | 8387384 | SNV | 1 | C | T | Heterozygous |
| NC_037651.1 | 8389007 | SNV | 1 | G | A | Heterozygous |
| NC_037651.1 | 8390312 | SNV | 1 | T | C | Homozygous   |
| NC_037651.1 | 8390324 | SNV | 1 | G | T | Homozygous   |
| NC_037651.1 | 8390332 | SNV | 1 | A | T | Heterozygous |
| NC_037651.1 | 8399801 | SNV | 1 | T | G | Homozygous   |
| NC_037651.1 | 8399829 | SNV | 1 | T | C | Homozygous   |
| NC_037651.1 | 8400152 | SNV | 1 | T | C | Homozygous   |
| NC_037651.1 | 8400256 | SNV | 1 | T | C | Homozygous   |
| NC_037651.1 | 8400424 | SNV | 1 | C | T | Heterozygous |
| NC_037651.1 | 8400430 | SNV | 1 | T | C | Homozygous   |
| NC_037651.1 | 8400436 | SNV | 1 | T | C | Homozygous   |
| NC_037651.1 | 8400448 | SNV | 1 | T | C | Homozygous   |
| NC_037651.1 | 8400493 | SNV | 1 | T | C | Homozygous   |
| NC_037651.1 | 8400505 | SNV | 1 | C | T | Homozygous   |
| NC_037651.1 | 8400625 | SNV | 1 | T | C | Homozygous   |
| NC_037651.1 | 8400787 | SNV | 1 | C | A | Homozygous   |
| NC_037651.1 | 8401486 | SNV | 1 | A | G | Heterozygous |
| NC_037651.1 | 8401816 | SNV | 1 | T | C | Homozygous   |
| NC_037651.1 | 8402889 | SNV | 1 | G | A | Homozygous   |
| NC_037651.1 | 8406021 | SNV | 1 | T | C | Homozygous   |
| NC_037651.1 | 8406027 | SNV | 1 | C | T | Heterozygous |
| NC_037651.1 | 8406029 | SNV | 1 | T | C | Homozygous   |
| NC_037651.1 | 8406058 | SNV | 1 | C | T | Heterozygous |
| NC_037651.1 | 8406067 | SNV | 1 | C | T | Heterozygous |
| NC_037651.1 | 8406448 | SNV | 1 | T | C | Heterozygous |
| NC_037651.1 | 8406461 | SNV | 1 | T | C | Heterozygous |
| NC_037651.1 | 8406534 | SNV | 1 | A | G | Heterozygous |
| NC_037651.1 | 8406671 | SNV | 1 | T | C | Homozygous   |
| NC_037651.1 | 8409357 | SNV | 1 | C | T | Homozygous   |
| NC_037651.1 | 8409383 | SNV | 1 | T | C | Homozygous   |
| NC_037651.1 | 8409434 | SNV | 1 | A | G | Homozygous   |
| NC_037651.1 | 8414398 | SNV | 1 | C | G | Homozygous   |
| NC_037651.1 | 8415189 | SNV | 1 | T | G | Homozygous   |
| NC_037651.1 | 8415192 | SNV | 1 | C | A | Homozygous   |
| NC_037651.1 | 8415307 | SNV | 1 | T | C | Homozygous   |
| NC_037651.1 | 8415477 | SNV | 1 | G | A | Homozygous   |
| NC_037651.1 | 8415775 | SNV | 1 | T | C | Homozygous   |
| NC_037651.1 | 8416078 | SNV | 1 | G | A | Homozygous   |
| NC_037651.1 | 8416108 | SNV | 1 | T | C | Homozygous   |
| NC_037651.1 | 8416185 | SNV | 1 | A | T | Homozygous   |
| NC_037651.1 | 8416190 | SNV | 1 | C | T | Homozygous   |
| NC_037651.1 | 8416351 | SNV | 1 | G | A | Homozygous   |
| NC_037651.1 | 8418315 | SNV | 1 | T | C | Homozygous   |
| NC_037651.1 | 8418325 | SNV | 1 | C | A | Heterozygous |
| NC_037651.1 | 8418371 | SNV | 1 | G | C | Heterozygous |
| NC_037651.1 | 8418404 | SNV | 1 | C | T | Heterozygous |



|             |         |     |   |   |   |              |
|-------------|---------|-----|---|---|---|--------------|
| NC_037651.1 | 8418427 | SNV | 1 | C | T | Homozygous   |
| NC_037651.1 | 8418511 | SNV | 1 | C | T | Homozygous   |
| NC_037651.1 | 8418840 | SNV | 1 | T | C | Heterozygous |
| NC_037651.1 | 8419087 | SNV | 1 | T | C | Heterozygous |
| NC_037651.1 | 8419356 | SNV | 1 | T | C | Heterozygous |
| NC_037651.1 | 8419383 | SNV | 1 | G | A | Homozygous   |
| NC_037651.1 | 8420018 | SNV | 1 | G | A | Heterozygous |
| NC_037651.1 | 8420038 | SNV | 1 | A | G | Homozygous   |
| NC_037651.1 | 8420111 | SNV | 1 | T | C | Homozygous   |
| NC_037651.1 | 8420683 | SNV | 1 | G | A | Heterozygous |
| NC_037651.1 | 8420779 | SNV | 1 | T | G | Heterozygous |
| NC_037651.1 | 8421781 | SNV | 1 | A | G | Homozygous   |
| NC_037651.1 | 8421789 | SNV | 1 | T | C | Homozygous   |
| NC_037651.1 | 8421928 | SNV | 1 | G | A | Heterozygous |
| NC_037651.1 | 8423242 | SNV | 1 | G | A | Heterozygous |
| NC_037651.1 | 8423583 | SNV | 1 | C | T | Heterozygous |
| NC_037651.1 | 8423608 | SNV | 1 | G | A | Homozygous   |
| NC_037651.1 | 8423618 | SNV | 1 | A | G | Homozygous   |
| NC_037651.1 | 8423889 | SNV | 1 | T | C | Homozygous   |
| NC_037651.1 | 8423988 | SNV | 1 | C | T | Homozygous   |
| NC_037651.1 | 8424200 | SNV | 1 | C | T | Homozygous   |
| NC_037651.1 | 8424203 | SNV | 1 | C | G | Homozygous   |
| NC_037651.1 | 8427988 | SNV | 1 | T | C | Heterozygous |
| NC_037651.1 | 8430963 | SNV | 1 | G | A | Homozygous   |
| NC_037651.1 | 8430975 | SNV | 1 | G | A | Homozygous   |
| NC_037651.1 | 8430987 | SNV | 1 | C | T | Homozygous   |
| NC_037651.1 | 8430991 | SNV | 1 | G | T | Homozygous   |
| NC_037651.1 | 8433079 | SNV | 1 | T | C | Heterozygous |
| NC_037651.1 | 8433400 | SNV | 1 | C | T | Heterozygous |
| NC_037651.1 | 8433749 | SNV | 1 | G | C | Homozygous   |
| NC_037651.1 | 8433755 | SNV | 1 | C | G | Heterozygous |
| NC_037651.1 | 8433831 | SNV | 1 | T | G | Heterozygous |
| NC_037651.1 | 8433866 | SNV | 1 | T | C | Homozygous   |
| NC_037651.1 | 8439880 | SNV | 1 | T | C | Homozygous   |
| NC_037651.1 | 8439946 | SNV | 1 | C | T | Homozygous   |
| NC_037651.1 | 8440281 | SNV | 1 | T | C | Heterozygous |
| NC_037651.1 | 8440325 | SNV | 1 | T | C | Homozygous   |
| NC_037651.1 | 8440342 | SNV | 1 | G | A | Homozygous   |
| NC_037651.1 | 8440505 | SNV | 1 | G | T | Homozygous   |
| NC_037651.1 | 8440509 | SNV | 1 | G | A | Homozygous   |
| NC_037651.1 | 8440526 | SNV | 1 | A | G | Homozygous   |
| NC_037651.1 | 8440819 | SNV | 1 | G | C | Homozygous   |
| NC_037651.1 | 8440832 | SNV | 1 | G | A | Heterozygous |
| NC_037651.1 | 8440870 | SNV | 1 | G | A | Heterozygous |
| NC_037651.1 | 8440927 | SNV | 1 | G | T | Homozygous   |
| NC_037651.1 | 8440932 | SNV | 1 | A | G | Homozygous   |
| NC_037651.1 | 8440942 | SNV | 1 | A | G | Homozygous   |
| NC_037651.1 | 8440965 | SNV | 1 | A | T | Homozygous   |
| NC_037651.1 | 8440968 | SNV | 1 | G | A | Homozygous   |
| NC_037651.1 | 8440971 | SNV | 1 | A | G | Homozygous   |
| NC_037651.1 | 8440974 | SNV | 1 | A | G | Homozygous   |

|             |         |     |   |   |   |              |
|-------------|---------|-----|---|---|---|--------------|
| NC_037651.1 | 8440979 | SNV | 1 | A | C | Homozygous   |
| NC_037651.1 | 8440995 | SNV | 1 | A | T | Homozygous   |
| NC_037651.1 | 8441031 | SNV | 1 | G | A | Heterozygous |
| NC_037651.1 | 8441041 | SNV | 1 | G | A | Heterozygous |
| NC_037651.1 | 8441045 | SNV | 1 | C | A | Homozygous   |
| NC_037651.1 | 8441048 | SNV | 1 | G | A | Homozygous   |
| NC_037651.1 | 8441052 | SNV | 1 | G | T | Heterozygous |
| NC_037651.1 | 8441054 | SNV | 1 | A | T | Heterozygous |
| NC_037651.1 | 8442883 | SNV | 1 | C | T | Homozygous   |
| NC_037651.1 | 8444492 | SNV | 1 | T | C | Homozygous   |
| NC_037651.1 | 8445956 | SNV | 1 | T | C | Homozygous   |
| NC_037651.1 | 8446003 | SNV | 1 | G | A | Homozygous   |
| NC_037651.1 | 8446199 | SNV | 1 | C | T | Heterozygous |
| NC_037651.1 | 8446246 | SNV | 1 | G | A | Heterozygous |
| NC_037651.1 | 8446299 | SNV | 1 | C | T | Heterozygous |
| NC_037651.1 | 8446341 | SNV | 1 | G | A | Heterozygous |
| NC_037651.1 | 8446441 | SNV | 1 | C | A | Heterozygous |
| NC_037651.1 | 8446492 | SNV | 1 | G | T | Heterozygous |
| NC_037651.1 | 8446500 | SNV | 1 | G | C | Homozygous   |
| NC_037651.1 | 8449982 | SNV | 1 | C | T | Heterozygous |
| NC_037651.1 | 8449995 | SNV | 1 | C | T | Heterozygous |
| NC_037651.1 | 8450033 | SNV | 1 | T | C | Homozygous   |
| NC_037651.1 | 8451052 | SNV | 1 | T | C | Homozygous   |
| NC_037651.1 | 8451070 | SNV | 1 | G | A | Heterozygous |
| NC_037651.1 | 8535114 | SNV | 1 | G | T | Homozygous   |
| NC_037651.1 | 8535121 | SNV | 1 | T | C | Homozygous   |
| NC_037651.1 | 8535124 | SNV | 1 | T | C | Homozygous   |
| NC_037651.1 | 8535685 | SNV | 1 | A | G | Heterozygous |
| NC_037651.1 | 8535694 | SNV | 1 | T | C | Homozygous   |
| NC_037651.1 | 8535697 | SNV | 1 | A | G | Heterozygous |
| NC_037651.1 | 8535705 | SNV | 1 | G | A | Homozygous   |
| NC_037651.1 | 8537541 | SNV | 1 | C | T | Heterozygous |
| NC_037651.1 | 8538229 | SNV | 1 | T | G | Homozygous   |
| NC_037651.1 | 8540709 | SNV | 1 | A | G | Heterozygous |
| NC_037651.1 | 8540711 | SNV | 1 | A | G | Heterozygous |
| NC_037651.1 | 8540721 | SNV | 1 | A | G | Homozygous   |
| NC_037651.1 | 8540732 | SNV | 1 | T | C | Heterozygous |
| NC_037651.1 | 8540734 | SNV | 1 | T | C | Heterozygous |
| NC_037651.1 | 8540741 | SNV | 1 | T | C | Homozygous   |
| NC_037651.1 | 8540743 | SNV | 1 | T | C | Heterozygous |
| NC_037651.1 | 8540749 | SNV | 1 | T | C | Homozygous   |
| NC_037651.1 | 8541374 | SNV | 1 | C | T | Homozygous   |
| NC_037651.1 | 8541401 | SNV | 1 | T | A | Homozygous   |
| NC_037651.1 | 8541407 | SNV | 1 | T | A | Homozygous   |
| NC_037651.1 | 8541414 | SNV | 1 | C | T | Homozygous   |
| NC_037651.1 | 8560865 | SNV | 1 | C | T | Heterozygous |
| NC_037651.1 | 8560871 | SNV | 1 | C | T | Heterozygous |
| NC_037651.1 | 8560875 | SNV | 1 | T | C | Heterozygous |
| NC_037651.1 | 8583886 | SNV | 1 | A | G | Heterozygous |
| NC_037651.1 | 8585851 | SNV | 1 | G | A | Homozygous   |
| NC_037651.1 | 8585976 | SNV | 1 | T | G | Homozygous   |

|             |         |     |   |   |   |              |
|-------------|---------|-----|---|---|---|--------------|
| NC_037651.1 | 8586049 | SNV | 1 | A | G | Heterozygous |
| NC_037651.1 | 8586083 | SNV | 1 | G | A | Heterozygous |
| NC_037651.1 | 8586365 | SNV | 1 | A | T | Heterozygous |
| NC_037651.1 | 8586372 | SNV | 1 | G | A | Heterozygous |
| NC_037651.1 | 8586381 | SNV | 1 | G | A | Heterozygous |
| NC_037651.1 | 8586384 | SNV | 1 | G | A | Heterozygous |
| NC_037651.1 | 8586387 | SNV | 1 | T | A | Heterozygous |
| NC_037651.1 | 8586471 | SNV | 1 | T | A | Homozygous   |
| NC_037651.1 | 8592507 | SNV | 1 | C | T | Heterozygous |
| NC_037651.1 | 8592515 | SNV | 1 | C | T | Homozygous   |
| NC_037651.1 | 8592520 | SNV | 1 | G | C | Homozygous   |
| NC_037651.1 | 8594689 | SNV | 1 | G | A | Homozygous   |
| NC_037651.1 | 8594700 | SNV | 1 | C | G | Homozygous   |
| NC_037651.1 | 8594703 | SNV | 1 | C | G | Homozygous   |
| NC_037651.1 | 8596803 | SNV | 1 | C | T | Homozygous   |
| NC_037651.1 | 8596832 | SNV | 1 | T | C | Homozygous   |
| NC_037651.1 | 8596844 | SNV | 1 | T | C | Homozygous   |
| NC_037651.1 | 8596847 | SNV | 1 | T | C | Homozygous   |
| NC_037651.1 | 8598056 | SNV | 1 | G | A | Heterozygous |
| NC_037651.1 | 8606739 | SNV | 1 | A | G | Homozygous   |
| NC_037651.1 | 8607010 | SNV | 1 | G | A | Homozygous   |
| NC_037651.1 | 8607311 | SNV | 1 | T | C | Homozygous   |
| NC_037651.1 | 8607389 | SNV | 1 | G | A | Heterozygous |
| NC_037651.1 | 8607391 | SNV | 1 | G | A | Heterozygous |
| NC_037651.1 | 8607395 | SNV | 1 | A | G | Heterozygous |
| NC_037651.1 | 8607419 | SNV | 1 | G | T | Heterozygous |
| NC_037651.1 | 8607470 | SNV | 1 | A | T | Homozygous   |
| NC_037651.1 | 8609323 | SNV | 1 | A | G | Homozygous   |
| NC_037651.1 | 8609329 | SNV | 1 | A | C | Homozygous   |
| NC_037651.1 | 8609418 | SNV | 1 | T | C | Homozygous   |
| NC_037651.1 | 8617238 | SNV | 1 | G | A | Heterozygous |
| NC_037651.1 | 8617256 | SNV | 1 | G | A | Heterozygous |
| NC_037651.1 | 8617261 | SNV | 1 | G | A | Heterozygous |
| NC_037651.1 | 8617713 | SNV | 1 | G | A | Heterozygous |
| NC_037651.1 | 8617735 | SNV | 1 | A | C | Heterozygous |
| NC_037651.1 | 8617743 | SNV | 1 | A | C | Heterozygous |
| NC_037651.1 | 8617766 | SNV | 1 | G | A | Homozygous   |
| NC_037651.1 | 8617805 | SNV | 1 | A | T | Homozygous   |
| NC_037651.1 | 8617814 | SNV | 1 | G | A | Homozygous   |
| NC_037651.1 | 8618434 | SNV | 1 | T | C | Homozygous   |
| NC_037651.1 | 8618548 | SNV | 1 | A | G | Heterozygous |
| NC_037651.1 | 8627871 | SNV | 1 | A | G | Homozygous   |
| NC_037651.1 | 8627896 | SNV | 1 | T | A | Heterozygous |
| NC_037651.1 | 8628565 | SNV | 1 | T | C | Homozygous   |
| NC_037651.1 | 8628786 | SNV | 1 | A | G | Homozygous   |
| NC_037651.1 | 8629150 | SNV | 1 | G | A | Heterozygous |
| NC_037651.1 | 8629218 | SNV | 1 | G | C | Heterozygous |
| NC_037651.1 | 8631457 | SNV | 1 | T | C | Homozygous   |
| NC_037651.1 | 8631501 | SNV | 1 | G | C | Homozygous   |
| NC_037651.1 | 8632622 | SNV | 1 | A | G | Homozygous   |
| NC_037651.1 | 8632877 | SNV | 1 | G | A | Heterozygous |

|             |         |     |   |   |   |              |
|-------------|---------|-----|---|---|---|--------------|
| NC_037651.1 | 8634071 | SNV | 1 | A | C | Homozygous   |
| NC_037651.1 | 8634589 | SNV | 1 | C | T | Heterozygous |
| NC_037651.1 | 8634907 | SNV | 1 | T | C | Heterozygous |
| NC_037651.1 | 8634937 | SNV | 1 | G | A | Heterozygous |
| NC_037651.1 | 8634993 | SNV | 1 | T | C | Homozygous   |
| NC_037651.1 | 8635031 | SNV | 1 | C | G | Homozygous   |
| NC_037651.1 | 8635120 | SNV | 1 | A | T | Heterozygous |
| NC_037651.1 | 8635147 | SNV | 1 | A | G | Homozygous   |
| NC_037651.1 | 8635799 | SNV | 1 | A | G | Homozygous   |
| NC_037651.1 | 8635924 | SNV | 1 | T | C | Homozygous   |
| NC_037651.1 | 8636475 | SNV | 1 | A | G | Heterozygous |
| NC_037651.1 | 8638050 | SNV | 1 | T | C | Homozygous   |
| NC_037651.1 | 8638419 | SNV | 1 | C | T | Homozygous   |
| NC_037651.1 | 8638713 | SNV | 1 | T | C | Homozygous   |
| NC_037651.1 | 8640566 | SNV | 1 | T | C | Heterozygous |
| NC_037651.1 | 8641124 | SNV | 1 | A | G | Homozygous   |
| NC_037651.1 | 8641126 | SNV | 1 | A | G | Homozygous   |
| NC_037651.1 | 8641128 | SNV | 1 | G | C | Homozygous   |
| NC_037651.1 | 8641237 | SNV | 1 | A | G | Homozygous   |
| NC_037651.1 | 8641396 | SNV | 1 | T | C | Homozygous   |
| NC_037651.1 | 8641398 | SNV | 1 | G | C | Homozygous   |
| NC_037651.1 | 8641468 | SNV | 1 | T | C | Heterozygous |
| NC_037651.1 | 8641587 | SNV | 1 | A | G | Homozygous   |
| NC_037651.1 | 8641614 | SNV | 1 | T | C | Heterozygous |
| NC_037651.1 | 8641635 | SNV | 1 | T | C | Heterozygous |
| NC_037651.1 | 8641699 | SNV | 1 | A | T | Heterozygous |
| NC_037651.1 | 8641789 | SNV | 1 | A | C | Homozygous   |
| NC_037651.1 | 8642089 | SNV | 1 | A | T | Heterozygous |
| NC_037651.1 | 8642316 | SNV | 1 | G | C | Heterozygous |
| NC_037651.1 | 8642339 | SNV | 1 | T | C | Heterozygous |
| NC_037651.1 | 8642472 | SNV | 1 | C | T | Homozygous   |
| NC_037651.1 | 8642879 | SNV | 1 | A | C | Homozygous   |
| NC_037651.1 | 8642903 | SNV | 1 | T | C | Homozygous   |
| NC_037651.1 | 8643000 | SNV | 1 | G | A | Heterozygous |
| NC_037651.1 | 8643058 | SNV | 1 | C | T | Heterozygous |
| NC_037651.1 | 8643074 | SNV | 1 | C | T | Homozygous   |
| NC_037651.1 | 8643228 | SNV | 1 | A | G | Homozygous   |
| NC_037651.1 | 8643268 | SNV | 1 | C | A | Heterozygous |
| NC_037651.1 | 8643308 | SNV | 1 | C | G | Heterozygous |
| NC_037651.1 | 8643404 | SNV | 1 | C | T | Heterozygous |
| NC_037651.1 | 8643455 | SNV | 1 | G | A | Heterozygous |
| NC_037651.1 | 8643545 | SNV | 1 | T | C | Heterozygous |
| NC_037651.1 | 8643545 | SNV | 1 | T | G | Heterozygous |
| NC_037651.1 | 8644258 | SNV | 1 | A | C | Heterozygous |
| NC_037651.1 | 8644584 | SNV | 1 | G | T | Heterozygous |
| NC_037651.1 | 8644904 | SNV | 1 | T | C | Homozygous   |
| NC_037651.1 | 8645098 | SNV | 1 | C | T | Heterozygous |
| NC_037651.1 | 8645157 | SNV | 1 | T | C | Homozygous   |
| NC_037651.1 | 8645170 | SNV | 1 | A | G | Heterozygous |
| NC_037651.1 | 8645242 | SNV | 1 | A | G | Heterozygous |
| NC_037651.1 | 8645245 | SNV | 1 | A | G | Heterozygous |

|             |         |     |   |   |   |              |
|-------------|---------|-----|---|---|---|--------------|
| NC_037651.1 | 8645254 | SNV | 1 | G | A | Heterozygous |
| NC_037651.1 | 8645257 | SNV | 1 | G | T | Homozygous   |
| NC_037651.1 | 8645290 | SNV | 1 | A | T | Homozygous   |
| NC_037651.1 | 8645344 | SNV | 1 | T | C | Heterozygous |
| NC_037651.1 | 8645356 | SNV | 1 | G | C | Heterozygous |
| NC_037651.1 | 8645356 | SNV | 1 | G | T | Heterozygous |
| NC_037651.1 | 8645362 | SNV | 1 | C | T | Homozygous   |
| NC_037651.1 | 8645365 | SNV | 1 | G | A | Homozygous   |
| NC_037651.1 | 8645380 | SNV | 1 | T | G | Heterozygous |
| NC_037651.1 | 8645391 | SNV | 1 | C | T | Heterozygous |
| NC_037651.1 | 8645429 | SNV | 1 | G | C | Heterozygous |
| NC_037651.1 | 8645483 | SNV | 1 | C | T | Heterozygous |
| NC_037651.1 | 8645485 | SNV | 1 | C | T | Heterozygous |
| NC_037651.1 | 8645489 | SNV | 1 | G | A | Heterozygous |
| NC_037651.1 | 8645548 | SNV | 1 | T | C | Homozygous   |
| NC_037651.1 | 8649520 | SNV | 1 | T | C | Heterozygous |
| NC_037651.1 | 8653341 | SNV | 1 | A | C | Homozygous   |
| NC_037651.1 | 8655703 | SNV | 1 | A | G | Homozygous   |
| NC_037651.1 | 8655741 | SNV | 1 | C | T | Heterozygous |
| NC_037651.1 | 8687695 | SNV | 1 | G | A | Heterozygous |
| NC_037651.1 | 8693217 | SNV | 1 | T | A | Homozygous   |
| NC_037651.1 | 8693220 | SNV | 1 | G | A | Homozygous   |
| NC_037651.1 | 8693458 | SNV | 1 | A | G | Homozygous   |
| NC_037651.1 | 8693722 | SNV | 1 | T | C | Homozygous   |
| NC_037651.1 | 8696738 | SNV | 1 | G | A | Heterozygous |
| NC_037651.1 | 8712127 | SNV | 1 | A | T | Homozygous   |
| NC_037651.1 | 8713740 | SNV | 1 | C | T | Heterozygous |
| NC_037651.1 | 8713778 | SNV | 1 | G | A | Homozygous   |
| NC_037651.1 | 8715890 | SNV | 1 | T | C | Homozygous   |
| NC_037651.1 | 8716059 | SNV | 1 | G | C | Homozygous   |
| NC_037651.1 | 8716900 | SNV | 1 | G | C | Heterozygous |
| NC_037651.1 | 8716956 | SNV | 1 | A | C | Heterozygous |
| NC_037651.1 | 8726951 | SNV | 1 | T | A | Homozygous   |
| NC_037651.1 | 8727775 | SNV | 1 | A | G | Heterozygous |
| NC_037651.1 | 8728467 | SNV | 1 | T | C | Homozygous   |
| NC_037651.1 | 8728813 | SNV | 1 | G | A | Heterozygous |
| NC_037651.1 | 8728935 | SNV | 1 | G | A | Heterozygous |
| NC_037651.1 | 8729217 | SNV | 1 | T | C | Heterozygous |
| NC_037651.1 | 8729263 | SNV | 1 | G | A | Homozygous   |
| NC_037651.1 | 8729269 | SNV | 1 | C | A | Heterozygous |
| NC_037651.1 | 8729284 | SNV | 1 | A | T | Heterozygous |
| NC_037651.1 | 8730156 | SNV | 1 | G | A | Heterozygous |
| NC_037651.1 | 8730275 | SNV | 1 | C | T | Homozygous   |
| NC_037651.1 | 8730345 | SNV | 1 | A | G | Homozygous   |
| NC_037651.1 | 8730501 | SNV | 1 | A | G | Homozygous   |
| NC_037651.1 | 8730783 | SNV | 1 | G | A | Heterozygous |
| NC_037651.1 | 8731131 | SNV | 1 | A | G | Homozygous   |
| NC_037651.1 | 8731447 | SNV | 1 | T | C | Homozygous   |
| NC_037651.1 | 8731485 | SNV | 1 | G | A | Heterozygous |
| NC_037651.1 | 8732201 | SNV | 1 | A | G | Heterozygous |
| NC_037651.1 | 8732336 | SNV | 1 | A | G | Heterozygous |

|             |         |     |   |   |   |              |
|-------------|---------|-----|---|---|---|--------------|
| NC_037651.1 | 8732898 | SNV | 1 | T | C | Homozygous   |
| NC_037651.1 | 8739945 | SNV | 1 | T | C | Homozygous   |
| NC_037651.1 | 8739947 | SNV | 1 | C | T | Homozygous   |
| NC_037651.1 | 8739960 | SNV | 1 | T | A | Homozygous   |
| NC_037651.1 | 8747963 | SNV | 1 | G | A | Heterozygous |
| NC_037651.1 | 8747978 | SNV | 1 | T | C | Homozygous   |
| NC_037651.1 | 8748142 | SNV | 1 | C | T | Heterozygous |
| NC_037651.1 | 8748167 | SNV | 1 | A | G | Homozygous   |
| NC_037651.1 | 8748185 | SNV | 1 | A | G | Homozygous   |
| NC_037651.1 | 8748196 | SNV | 1 | C | T | Homozygous   |
| NC_037651.1 | 8748287 | SNV | 1 | C | A | Homozygous   |
| NC_037651.1 | 8748768 | SNV | 1 | A | G | Homozygous   |
| NC_037651.1 | 8749512 | SNV | 1 | C | T | Heterozygous |
| NC_037651.1 | 8749557 | SNV | 1 | C | T | Heterozygous |
| NC_037651.1 | 8749599 | SNV | 1 | G | A | Heterozygous |
| NC_037651.1 | 8749980 | SNV | 1 | C | T | Heterozygous |
| NC_037651.1 | 8750212 | SNV | 1 | A | G | Homozygous   |
| NC_037651.1 | 8750290 | SNV | 1 | T | C | Homozygous   |
| NC_037651.1 | 8750686 | SNV | 1 | C | T | Homozygous   |
| NC_037651.1 | 8751258 | SNV | 1 | T | C | Homozygous   |
| NC_037651.1 | 8751303 | SNV | 1 | C | T | Heterozygous |
| NC_037651.1 | 8751679 | SNV | 1 | A | G | Heterozygous |
| NC_037651.1 | 8762699 | SNV | 1 | G | A | Heterozygous |
| NC_037651.1 | 8762705 | SNV | 1 | A | G | Heterozygous |
| NC_037651.1 | 8762730 | SNV | 1 | G | A | Heterozygous |
| NC_037651.1 | 8762751 | SNV | 1 | G | A | Homozygous   |
| NC_037651.1 | 8762795 | SNV | 1 | T | C | Homozygous   |
| NC_037651.1 | 8765587 | SNV | 1 | A | T | Heterozygous |
| NC_037651.1 | 8765590 | SNV | 1 | T | C | Heterozygous |
| NC_037651.1 | 8766233 | SNV | 1 | T | C | Homozygous   |
| NC_037651.1 | 8768425 | SNV | 1 | A | G | Heterozygous |
| NC_037651.1 | 8780457 | SNV | 1 | A | C | Homozygous   |
| NC_037651.1 | 8780463 | SNV | 1 | T | A | Heterozygous |
| NC_037651.1 | 8780478 | SNV | 1 | T | G | Homozygous   |
| NC_037651.1 | 8782022 | SNV | 1 | T | A | Homozygous   |
| NC_037651.1 | 8782024 | SNV | 1 | T | C | Homozygous   |
| NC_037651.1 | 8782041 | SNV | 1 | C | A | Homozygous   |
| NC_037651.1 | 8782051 | SNV | 1 | T | C | Homozygous   |
| NC_037651.1 | 8782895 | SNV | 1 | T | C | Heterozygous |
| NC_037651.1 | 8782970 | SNV | 1 | A | G | Heterozygous |
| NC_037651.1 | 8783030 | SNV | 1 | A | G | Heterozygous |
| NC_037651.1 | 8784312 | SNV | 1 | A | G | Homozygous   |
| NC_037651.1 | 8784456 | SNV | 1 | C | G | Heterozygous |
| NC_037651.1 | 8784524 | SNV | 1 | G | A | Homozygous   |
| NC_037651.1 | 8784556 | SNV | 1 | A | G | Homozygous   |
| NC_037651.1 | 8784588 | SNV | 1 | G | T | Homozygous   |
| NC_037651.1 | 8784741 | SNV | 1 | T | C | Homozygous   |
| NC_037651.1 | 8785055 | SNV | 1 | C | T | Heterozygous |
| NC_037651.1 | 8785189 | SNV | 1 | G | A | Heterozygous |
| NC_037651.1 | 8785392 | SNV | 1 | A | G | Heterozygous |
| NC_037651.1 | 8785395 | SNV | 1 | T | A | Heterozygous |

|             |         |     |   |   |   |              |
|-------------|---------|-----|---|---|---|--------------|
| NC_037651.1 | 8785428 | SNV | 1 | C | T | Homozygous   |
| NC_037651.1 | 8785435 | SNV | 1 | A | G | Homozygous   |
| NC_037651.1 | 8785470 | SNV | 1 | G | A | Homozygous   |
| NC_037651.1 | 8825613 | SNV | 1 | T | C | Homozygous   |
| NC_037651.1 | 8825741 | SNV | 1 | C | T | Heterozygous |
| NC_037651.1 | 8825921 | SNV | 1 | C | G | Heterozygous |
| NC_037651.1 | 8825940 | SNV | 1 | A | G | Homozygous   |
| NC_037651.1 | 8826056 | SNV | 1 | A | G | Heterozygous |
| NC_037651.1 | 8826636 | SNV | 1 | T | C | Heterozygous |
| NC_037651.1 | 8826648 | SNV | 1 | A | G | Homozygous   |
| NC_037651.1 | 8849240 | SNV | 1 | A | G | Heterozygous |
| NC_037651.1 | 8849242 | SNV | 1 | A | C | Heterozygous |
| NC_037651.1 | 8849254 | SNV | 1 | G | A | Heterozygous |
| NC_037651.1 | 8849933 | SNV | 1 | T | A | Homozygous   |
| NC_037651.1 | 8849940 | SNV | 1 | C | G | Homozygous   |
| NC_037651.1 | 8849950 | SNV | 1 | C | G | Homozygous   |
| NC_037651.1 | 8849956 | SNV | 1 | T | C | Homozygous   |
| NC_037651.1 | 8849963 | SNV | 1 | C | T | Homozygous   |
| NC_037651.1 | 8849970 | SNV | 1 | T | G | Homozygous   |
| NC_037651.1 | 8850025 | SNV | 1 | A | G | Homozygous   |
| NC_037651.1 | 8850364 | SNV | 1 | C | T | Homozygous   |
| NC_037651.1 | 8850373 | SNV | 1 | G | T | Homozygous   |
| NC_037651.1 | 8850562 | SNV | 1 | T | C | Homozygous   |
| NC_037651.1 | 8850567 | SNV | 1 | C | T | Homozygous   |
| NC_037651.1 | 8850573 | SNV | 1 | T | C | Homozygous   |
| NC_037651.1 | 8850585 | SNV | 1 | C | T | Homozygous   |
| NC_037651.1 | 8854644 | SNV | 1 | C | G | Homozygous   |
| NC_037651.1 | 8854654 | SNV | 1 | C | G | Homozygous   |
| NC_037651.1 | 8854672 | SNV | 1 | C | G | Homozygous   |
| NC_037651.1 | 8856266 | SNV | 1 | T | C | Homozygous   |
| NC_037651.1 | 8862167 | SNV | 1 | C | G | Homozygous   |
| NC_037651.1 | 8863026 | SNV | 1 | A | G | Homozygous   |
| NC_037651.1 | 8863028 | SNV | 1 | G | T | Homozygous   |
| NC_037651.1 | 8863048 | SNV | 1 | A | G | Homozygous   |
| NC_037651.1 | 8863054 | SNV | 1 | A | T | Homozygous   |
| NC_037651.1 | 8866477 | SNV | 1 | T | C | Heterozygous |
| NC_037651.1 | 8866479 | SNV | 1 | T | C | Heterozygous |
| NC_037651.1 | 8866520 | SNV | 1 | T | C | Homozygous   |
| NC_037651.1 | 8866530 | SNV | 1 | A | C | Homozygous   |
| NC_037651.1 | 8866534 | SNV | 1 | G | A | Homozygous   |
| NC_037651.1 | 8870774 | SNV | 1 | A | G | Homozygous   |
| NC_037651.1 | 8870797 | SNV | 1 | T | C | Heterozygous |
| NC_037651.1 | 8870830 | SNV | 1 | G | A | Homozygous   |
| NC_037651.1 | 8871499 | SNV | 1 | C | T | Heterozygous |
| NC_037651.1 | 8871564 | SNV | 1 | A | C | Heterozygous |
| NC_037651.1 | 8872088 | SNV | 1 | G | A | Heterozygous |
| NC_037651.1 | 8872222 | SNV | 1 | A | G | Heterozygous |
| NC_037651.1 | 8872495 | SNV | 1 | C | T | Homozygous   |
| NC_037651.1 | 8872497 | SNV | 1 | T | C | Homozygous   |
| NC_037651.1 | 8872508 | SNV | 1 | T | C | Heterozygous |
| NC_037651.1 | 8872780 | SNV | 1 | G | A | Heterozygous |

|             |         |     |   |   |   |              |
|-------------|---------|-----|---|---|---|--------------|
| NC_037651.1 | 8873236 | SNV | 1 | G | T | Homozygous   |
| NC_037651.1 | 8876259 | SNV | 1 | A | T | Heterozygous |
| NC_037651.1 | 8876292 | SNV | 1 | C | T | Heterozygous |
| NC_037651.1 | 8876298 | SNV | 1 | T | C | Heterozygous |
| NC_037651.1 | 8878843 | SNV | 1 | C | T | Heterozygous |
| NC_037651.1 | 8879773 | SNV | 1 | T | C | Heterozygous |
| NC_037651.1 | 8887465 | SNV | 1 | G | A | Heterozygous |
| NC_037651.1 | 8887471 | SNV | 1 | A | G | Heterozygous |
| NC_037651.1 | 8887477 | SNV | 1 | A | G | Homozygous   |
| NC_037651.1 | 8890400 | SNV | 1 | T | G | Homozygous   |
| NC_037651.1 | 8890409 | SNV | 1 | T | C | Homozygous   |
| NC_037651.1 | 8890411 | SNV | 1 | T | C | Homozygous   |
| NC_037651.1 | 8891260 | SNV | 1 | T | C | Homozygous   |
| NC_037651.1 | 8891285 | SNV | 1 | A | C | Heterozygous |
| NC_037651.1 | 8891339 | SNV | 1 | A | C | Homozygous   |
| NC_037651.1 | 8891394 | SNV | 1 | G | A | Heterozygous |
| NC_037651.1 | 8896916 | SNV | 1 | A | G | Homozygous   |
| NC_037651.1 | 8896919 | SNV | 1 | T | C | Homozygous   |
| NC_037651.1 | 8896929 | SNV | 1 | T | C | Homozygous   |
| NC_037651.1 | 8897088 | SNV | 1 | T | C | Heterozygous |
| NC_037651.1 | 8897098 | SNV | 1 | C | T | Homozygous   |
| NC_037651.1 | 8897102 | SNV | 1 | C | T | Homozygous   |
| NC_037651.1 | 8898679 | SNV | 1 | C | G | Heterozygous |
| NC_037651.1 | 8898776 | SNV | 1 | A | C | Heterozygous |
| NC_037651.1 | 8898780 | SNV | 1 | G | A | Heterozygous |
| NC_037651.1 | 8898807 | SNV | 1 | C | T | Heterozygous |
| NC_037651.1 | 8902420 | SNV | 1 | T | C | Homozygous   |
| NC_037651.1 | 8907855 | SNV | 1 | T | G | Heterozygous |
| NC_037651.1 | 8907867 | SNV | 1 | A | T | Homozygous   |
| NC_037651.1 | 8907869 | SNV | 1 | A | G | Heterozygous |
| NC_037651.1 | 8907876 | SNV | 1 | A | G | Heterozygous |
| NC_037651.1 | 8907924 | SNV | 1 | A | G | Heterozygous |
| NC_037651.1 | 8908392 | SNV | 1 | G | A | Heterozygous |
| NC_037651.1 | 8908605 | SNV | 1 | C | A | Heterozygous |
| NC_037651.1 | 8909674 | SNV | 1 | G | A | Heterozygous |
| NC_037651.1 | 8910146 | SNV | 1 | G | A | Heterozygous |
| NC_037651.1 | 8910597 | SNV | 1 | A | G | Homozygous   |
| NC_037651.1 | 8910863 | SNV | 1 | C | T | Homozygous   |
| NC_037651.1 | 8910866 | SNV | 1 | C | T | Homozygous   |
| NC_037651.1 | 8910871 | SNV | 1 | T | C | Homozygous   |
| NC_037651.1 | 8910925 | SNV | 1 | T | C | Homozygous   |
| NC_037651.1 | 8921304 | SNV | 1 | T | A | Heterozygous |
| NC_037651.1 | 8921306 | SNV | 1 | T | A | Homozygous   |
| NC_037651.1 | 8921847 | SNV | 1 | C | G | Homozygous   |
| NC_037651.1 | 8922282 | SNV | 1 | A | G | Heterozygous |
| NC_037651.1 | 8941820 | SNV | 1 | A | G | Homozygous   |
| NC_037651.1 | 8942002 | SNV | 1 | T | A | Heterozygous |
| NC_037651.1 | 8942072 | SNV | 1 | C | A | Heterozygous |
| NC_037651.1 | 8942075 | SNV | 1 | C | A | Heterozygous |
| NC_037651.1 | 8942136 | SNV | 1 | G | A | Heterozygous |
| NC_037651.1 | 8944323 | SNV | 1 | G | A | Homozygous   |



|             |         |     |   |   |   |              |
|-------------|---------|-----|---|---|---|--------------|
| NC_037651.1 | 8944337 | SNV | 1 | G | T | Homozygous   |
| NC_037651.1 | 8944540 | SNV | 1 | A | T | Homozygous   |
| NC_037651.1 | 8944556 | SNV | 1 | A | G | Heterozygous |
| NC_037651.1 | 8944574 | SNV | 1 | A | G | Homozygous   |
| NC_037651.1 | 8944633 | SNV | 1 | C | T | Heterozygous |
| NC_037651.1 | 8944730 | SNV | 1 | G | A | Heterozygous |
| NC_037651.1 | 8945070 | SNV | 1 | G | C | Homozygous   |
| NC_037651.1 | 8945118 | SNV | 1 | T | C | Homozygous   |
| NC_037651.1 | 8945141 | SNV | 1 | C | T | Heterozygous |
| NC_037651.1 | 8945216 | SNV | 1 | G | A | Homozygous   |
| NC_037651.1 | 8945337 | SNV | 1 | A | G | Homozygous   |
| NC_037651.1 | 8945638 | SNV | 1 | G | C | Heterozygous |
| NC_037651.1 | 8945714 | SNV | 1 | C | T | Heterozygous |
| NC_037651.1 | 8945798 | SNV | 1 | A | C | Heterozygous |
| NC_037651.1 | 8945814 | SNV | 1 | T | C | Homozygous   |
| NC_037651.1 | 8946637 | SNV | 1 | A | G | Heterozygous |
| NC_037651.1 | 8946685 | SNV | 1 | G | C | Heterozygous |
| NC_037651.1 | 8946685 | SNV | 1 | G | T | Heterozygous |
| NC_037651.1 | 8946691 | SNV | 1 | G | A | Homozygous   |
| NC_037651.1 | 8946700 | SNV | 1 | C | T | Heterozygous |
| NC_037651.1 | 8946706 | SNV | 1 | A | G | Heterozygous |
| NC_037651.1 | 8946724 | SNV | 1 | A | C | Homozygous   |
| NC_037651.1 | 8946832 | SNV | 1 | T | G | Homozygous   |
| NC_037651.1 | 8946835 | SNV | 1 | T | G | Homozygous   |
| NC_037651.1 | 8947347 | SNV | 1 | G | A | Heterozygous |
| NC_037651.1 | 8947351 | SNV | 1 | C | G | Heterozygous |
| NC_037651.1 | 8947666 | SNV | 1 | T | G | Heterozygous |
| NC_037651.1 | 8947687 | SNV | 1 | G | A | Heterozygous |
| NC_037651.1 | 8947699 | SNV | 1 | T | G | Homozygous   |
| NC_037651.1 | 8947702 | SNV | 1 | A | G | Homozygous   |
| NC_037651.1 | 8947795 | SNV | 1 | T | C | Heterozygous |
| NC_037651.1 | 8947918 | SNV | 1 | A | G | Homozygous   |
| NC_037651.1 | 8948010 | SNV | 1 | A | G | Homozygous   |
| NC_037651.1 | 8948017 | SNV | 1 | T | C | Heterozygous |
| NC_037651.1 | 8948128 | SNV | 1 | C | G | Heterozygous |
| NC_037651.1 | 8948344 | SNV | 1 | T | A | Homozygous   |
| NC_037651.1 | 8948421 | SNV | 1 | G | A | Heterozygous |
| NC_037651.1 | 8948436 | SNV | 1 | A | G | Heterozygous |
| NC_037651.1 | 8948523 | SNV | 1 | G | A | Heterozygous |
| NC_037651.1 | 8948564 | SNV | 1 | A | G | Heterozygous |
| NC_037651.1 | 8948580 | SNV | 1 | A | G | Heterozygous |
| NC_037651.1 | 8948619 | SNV | 1 | G | A | Heterozygous |
| NC_037651.1 | 8948621 | SNV | 1 | G | A | Heterozygous |
| NC_037651.1 | 8948638 | SNV | 1 | G | C | Heterozygous |
| NC_037651.1 | 8948642 | SNV | 1 | A | G | Heterozygous |
| NC_037651.1 | 8948646 | SNV | 1 | A | G | Homozygous   |
| NC_037651.1 | 8948653 | SNV | 1 | G | A | Heterozygous |
| NC_037651.1 | 8948667 | SNV | 1 | C | A | Homozygous   |
| NC_037651.1 | 8948670 | SNV | 1 | C | A | Homozygous   |
| NC_037651.1 | 8948682 | SNV | 1 | A | G | Heterozygous |
| NC_037651.1 | 8948718 | SNV | 1 | C | A | Heterozygous |

|             |         |     |   |   |   |              |
|-------------|---------|-----|---|---|---|--------------|
| NC_037651.1 | 8948741 | SNV | 1 | G | A | Heterozygous |
| NC_037651.1 | 8948811 | SNV | 1 | A | G | Heterozygous |
| NC_037651.1 | 8948830 | SNV | 1 | A | G | Heterozygous |
| NC_037651.1 | 8949255 | SNV | 1 | G | C | Homozygous   |
| NC_037651.1 | 8949268 | SNV | 1 | T | C | Homozygous   |
| NC_037651.1 | 8949377 | SNV | 1 | A | T | Homozygous   |
| NC_037651.1 | 8949380 | SNV | 1 | C | T | Homozygous   |
| NC_037651.1 | 8949447 | SNV | 1 | C | T | Homozygous   |
| NC_037651.1 | 8949458 | SNV | 1 | C | T | Homozygous   |
| NC_037651.1 | 8950473 | SNV | 1 | C | T | Homozygous   |
| NC_037651.1 | 8950536 | SNV | 1 | C | T | Heterozygous |
| NC_037651.1 | 8950567 | SNV | 1 | A | G | Heterozygous |
| NC_037651.1 | 8950919 | SNV | 1 | A | G | Homozygous   |
| NC_037651.1 | 8951121 | SNV | 1 | T | C | Heterozygous |
| NC_037651.1 | 8951222 | SNV | 1 | T | C | Homozygous   |
| NC_037651.1 | 8951594 | SNV | 1 | G | C | Heterozygous |
| NC_037651.1 | 8951787 | SNV | 1 | A | G | Heterozygous |
| NC_037651.1 | 8951814 | SNV | 1 | G | A | Heterozygous |
| NC_037651.1 | 8951843 | SNV | 1 | A | G | Homozygous   |
| NC_037651.1 | 8951865 | SNV | 1 | T | C | Heterozygous |
| NC_037651.1 | 8951989 | SNV | 1 | G | A | Heterozygous |
| NC_037651.1 | 8953147 | SNV | 1 | T | G | Homozygous   |
| NC_037651.1 | 8953149 | SNV | 1 | A | G | Homozygous   |
| NC_037651.1 | 8953270 | SNV | 1 | T | A | Heterozygous |
| NC_037651.1 | 8953365 | SNV | 1 | A | G | Homozygous   |
| NC_037651.1 | 8953439 | SNV | 1 | T | C | Homozygous   |
| NC_037651.1 | 8953460 | SNV | 1 | T | C | Homozygous   |
| NC_037651.1 | 8953565 | SNV | 1 | C | T | Heterozygous |
| NC_037651.1 | 8953622 | SNV | 1 | T | C | Heterozygous |
| NC_037651.1 | 8953896 | SNV | 1 | T | C | Homozygous   |
| NC_037651.1 | 8953913 | SNV | 1 | A | G | Heterozygous |
| NC_037651.1 | 8953925 | SNV | 1 | T | G | Homozygous   |
| NC_037651.1 | 8954204 | SNV | 1 | A | G | Homozygous   |
| NC_037651.1 | 8954228 | SNV | 1 | C | T | Heterozygous |
| NC_037651.1 | 8955243 | SNV | 1 | G | A | Heterozygous |
| NC_037651.1 | 8955270 | SNV | 1 | T | C | Heterozygous |
| NC_037651.1 | 8955604 | SNV | 1 | A | G | Homozygous   |
| NC_037651.1 | 8956712 | SNV | 1 | C | T | Heterozygous |
| NC_037651.1 | 8959001 | SNV | 1 | T | C | Homozygous   |
| NC_037651.1 | 8959070 | SNV | 1 | A | G | Heterozygous |
| NC_037651.1 | 8959320 | SNV | 1 | A | C | Heterozygous |
| NC_037651.1 | 8959511 | SNV | 1 | T | C | Homozygous   |
| NC_037651.1 | 8959538 | SNV | 1 | C | T | Homozygous   |
| NC_037651.1 | 8959541 | SNV | 1 | G | A | Heterozygous |
| NC_037651.1 | 8959546 | SNV | 1 | C | T | Heterozygous |
| NC_037651.1 | 8959565 | SNV | 1 | C | T | Homozygous   |
| NC_037651.1 | 8961782 | SNV | 1 | G | T | Homozygous   |
| NC_037651.1 | 8962140 | SNV | 1 | G | A | Heterozygous |
| NC_037651.1 | 8962293 | SNV | 1 | A | G | Heterozygous |
| NC_037651.1 | 8962305 | SNV | 1 | A | T | Heterozygous |
| NC_037651.1 | 8962500 | SNV | 1 | T | C | Homozygous   |

|             |         |     |   |   |   |              |
|-------------|---------|-----|---|---|---|--------------|
| NC_037651.1 | 8962589 | SNV | 1 | G | A | Heterozygous |
| NC_037651.1 | 8963048 | SNV | 1 | A | G | Homozygous   |
| NC_037651.1 | 8963189 | SNV | 1 | C | A | Homozygous   |
| NC_037651.1 | 8963353 | SNV | 1 | G | A | Heterozygous |
| NC_037651.1 | 8963565 | SNV | 1 | T | C | Homozygous   |
| NC_037651.1 | 8963880 | SNV | 1 | G | A | Heterozygous |
| NC_037651.1 | 8964051 | SNV | 1 | T | C | Heterozygous |
| NC_037651.1 | 8964057 | SNV | 1 | A | G | Homozygous   |
| NC_037651.1 | 8964944 | SNV | 1 | A | C | Homozygous   |
| NC_037651.1 | 8965061 | SNV | 1 | G | A | Heterozygous |
| NC_037651.1 | 8965322 | SNV | 1 | A | G | Homozygous   |
| NC_037651.1 | 8965374 | SNV | 1 | A | G | Homozygous   |
| NC_037651.1 | 8965423 | SNV | 1 | G | A | Heterozygous |
| NC_037651.1 | 8965429 | SNV | 1 | A | G | Heterozygous |
| NC_037651.1 | 8965444 | SNV | 1 | T | C | Heterozygous |
| NC_037651.1 | 8965671 | SNV | 1 | A | G | Heterozygous |
| NC_037651.1 | 8966315 | SNV | 1 | A | G | Homozygous   |
| NC_037651.1 | 8966456 | SNV | 1 | A | G | Heterozygous |
| NC_037651.1 | 8966546 | SNV | 1 | A | G | Heterozygous |
| NC_037651.1 | 8966550 | SNV | 1 | A | G | Heterozygous |
| NC_037651.1 | 8966552 | SNV | 1 | G | A | Heterozygous |
| NC_037651.1 | 8966845 | SNV | 1 | T | C | Heterozygous |
| NC_037651.1 | 8966856 | SNV | 1 | T | C | Heterozygous |
| NC_037651.1 | 8966877 | SNV | 1 | C | T | Homozygous   |
| NC_037651.1 | 8969617 | SNV | 1 | A | G | Heterozygous |
| NC_037651.1 | 8969619 | SNV | 1 | C | G | Heterozygous |
| NC_037651.1 | 8969823 | SNV | 1 | G | A | Homozygous   |
| NC_037651.1 | 8970228 | SNV | 1 | T | C | Homozygous   |
| NC_037651.1 | 8971175 | SNV | 1 | A | C | Homozygous   |
| NC_037651.1 | 8974750 | SNV | 1 | T | C | Homozygous   |
| NC_037651.1 | 8976090 | SNV | 1 | A | G | Heterozygous |
| NC_037651.1 | 8977999 | SNV | 1 | A | G | Homozygous   |
| NC_037651.1 | 8978556 | SNV | 1 | G | A | Homozygous   |
| NC_037651.1 | 8978586 | SNV | 1 | A | G | Heterozygous |
| NC_037651.1 | 8978685 | SNV | 1 | A | G | Heterozygous |
| NC_037651.1 | 8978767 | SNV | 1 | C | T | Heterozygous |
| NC_037651.1 | 8978808 | SNV | 1 | C | T | Heterozygous |
| NC_037651.1 | 8978852 | SNV | 1 | T | C | Homozygous   |
| NC_037651.1 | 8978935 | SNV | 1 | T | C | Heterozygous |
| NC_037651.1 | 8978944 | SNV | 1 | T | C | Homozygous   |
| NC_037651.1 | 8979123 | SNV | 1 | A | G | Heterozygous |
| NC_037651.1 | 8979364 | SNV | 1 | G | C | Homozygous   |
| NC_037651.1 | 8980074 | SNV | 1 | G | A | Heterozygous |
| NC_037651.1 | 8980085 | SNV | 1 | C | T | Heterozygous |
| NC_037651.1 | 8980440 | SNV | 1 | T | G | Heterozygous |
| NC_037651.1 | 8988403 | SNV | 1 | C | T | Heterozygous |
| NC_037651.1 | 8988507 | SNV | 1 | A | G | Homozygous   |
| NC_037651.1 | 8988779 | SNV | 1 | A | G | Homozygous   |
| NC_037651.1 | 8988933 | SNV | 1 | G | T | Heterozygous |
| NC_037651.1 | 8988943 | SNV | 1 | G | T | Heterozygous |
| NC_037651.1 | 8989082 | SNV | 1 | T | C | Heterozygous |

|             |         |     |   |   |   |              |
|-------------|---------|-----|---|---|---|--------------|
| NC_037651.1 | 8989104 | SNV | 1 | G | T | Heterozygous |
| NC_037651.1 | 8989107 | SNV | 1 | A | T | Homozygous   |
| NC_037651.1 | 8989379 | SNV | 1 | G | A | Homozygous   |
| NC_037651.1 | 8989551 | SNV | 1 | T | C | Heterozygous |
| NC_037651.1 | 8989570 | SNV | 1 | A | G | Homozygous   |
| NC_037651.1 | 8989673 | SNV | 1 | T | C | Heterozygous |
| NC_037651.1 | 8989675 | SNV | 1 | C | G | Heterozygous |
| NC_037651.1 | 8989679 | SNV | 1 | T | C | Heterozygous |
| NC_037651.1 | 8989718 | SNV | 1 | C | G | Homozygous   |
| NC_037651.1 | 8992637 | SNV | 1 | A | G | Heterozygous |
| NC_037651.1 | 8992718 | SNV | 1 | A | G | Homozygous   |
| NC_037651.1 | 8992766 | SNV | 1 | T | C | Homozygous   |
| NC_037651.1 | 9000459 | SNV | 1 | C | T | Heterozygous |
| NC_037651.1 | 9000556 | SNV | 1 | C | G | Heterozygous |
| NC_037651.1 | 9006175 | SNV | 1 | T | C | Homozygous   |
| NC_037651.1 | 9006189 | SNV | 1 | A | G | Homozygous   |
| NC_037651.1 | 9006596 | SNV | 1 | C | T | Heterozygous |
| NC_037651.1 | 9006598 | SNV | 1 | T | C | Heterozygous |
| NC_037651.1 | 9006828 | SNV | 1 | C | T | Heterozygous |
| NC_037651.1 | 9006902 | SNV | 1 | T | C | Homozygous   |
| NC_037651.1 | 9008104 | SNV | 1 | T | C | Heterozygous |
| NC_037651.1 | 9008362 | SNV | 1 | A | T | Homozygous   |
| NC_037651.1 | 9008501 | SNV | 1 | A | T | Heterozygous |
| NC_037651.1 | 9008503 | SNV | 1 | A | T | Heterozygous |
| NC_037651.1 | 9008524 | SNV | 1 | A | G | Homozygous   |
| NC_037651.1 | 9009988 | SNV | 1 | T | C | Heterozygous |
| NC_037651.1 | 9010487 | SNV | 1 | A | C | Homozygous   |
| NC_037651.1 | 9010891 | SNV | 1 | A | G | Homozygous   |
| NC_037651.1 | 9011058 | SNV | 1 | A | G | Homozygous   |
| NC_037651.1 | 9011064 | SNV | 1 | C | T | Heterozygous |
| NC_037651.1 | 9011327 | SNV | 1 | A | G | Homozygous   |
| NC_037651.1 | 9011474 | SNV | 1 | C | T | Heterozygous |
| NC_037651.1 | 9011534 | SNV | 1 | G | T | Homozygous   |
| NC_037651.1 | 9011657 | SNV | 1 | G | A | Homozygous   |
| NC_037651.1 | 9011742 | SNV | 1 | C | T | Heterozygous |
| NC_037651.1 | 9015266 | SNV | 1 | G | A | Heterozygous |
| NC_037651.1 | 9015464 | SNV | 1 | A | G | Heterozygous |
| NC_037651.1 | 9015684 | SNV | 1 | G | A | Heterozygous |
| NC_037651.1 | 9025429 | SNV | 1 | T | C | Homozygous   |
| NC_037651.1 | 9025516 | SNV | 1 | T | C | Homozygous   |
| NC_037651.1 | 9025576 | SNV | 1 | G | A | Homozygous   |
| NC_037651.1 | 9025797 | SNV | 1 | T | C | Heterozygous |
| NC_037651.1 | 9029056 | SNV | 1 | A | T | Homozygous   |
| NC_037651.1 | 9029390 | SNV | 1 | C | A | Homozygous   |
| NC_037651.1 | 9029711 | SNV | 1 | C | T | Heterozygous |
| NC_037651.1 | 9030329 | SNV | 1 | A | G | Heterozygous |
| NC_037651.1 | 9030336 | SNV | 1 | T | C | Heterozygous |
| NC_037651.1 | 9037018 | SNV | 1 | A | G | Homozygous   |
| NC_037651.1 | 9037121 | SNV | 1 | A | G | Heterozygous |
| NC_037651.1 | 9037821 | SNV | 1 | A | G | Homozygous   |
| NC_037651.1 | 9038368 | SNV | 1 | A | T | Homozygous   |

|             |         |     |   |   |   |              |
|-------------|---------|-----|---|---|---|--------------|
| NC_037651.1 | 9038472 | SNV | 1 | G | A | Homozygous   |
| NC_037651.1 | 9039977 | SNV | 1 | G | C | Heterozygous |
| NC_037651.1 | 9040803 | SNV | 1 | A | G | Heterozygous |
| NC_037651.1 | 9042092 | SNV | 1 | C | G | Homozygous   |
| NC_037651.1 | 9043624 | SNV | 1 | T | C | Homozygous   |
| NC_037651.1 | 9043630 | SNV | 1 | A | T | Homozygous   |
| NC_037651.1 | 9043634 | SNV | 1 | C | G | Homozygous   |
| NC_037651.1 | 9043652 | SNV | 1 | T | A | Homozygous   |
| NC_037651.1 | 9043658 | SNV | 1 | A | G | Homozygous   |
| NC_037651.1 | 9043663 | SNV | 1 | T | A | Homozygous   |
| NC_037651.1 | 9043680 | SNV | 1 | C | G | Homozygous   |
| NC_037651.1 | 9044124 | SNV | 1 | C | G | Homozygous   |
| NC_037651.1 | 9044700 | SNV | 1 | G | A | Homozygous   |
| NC_037651.1 | 9046152 | SNV | 1 | A | T | Homozygous   |
| NC_037651.1 | 9047773 | SNV | 1 | G | A | Heterozygous |
| NC_037651.1 | 9048219 | SNV | 1 | A | T | Heterozygous |
| NC_037651.1 | 9050007 | SNV | 1 | A | G | Homozygous   |
| NC_037651.1 | 9050495 | SNV | 1 | C | T | Homozygous   |
| NC_037651.1 | 9051205 | SNV | 1 | C | A | Homozygous   |
| NC_037651.1 | 9051763 | SNV | 1 | A | T | Homozygous   |
| NC_037651.1 | 9055622 | SNV | 1 | G | C | Heterozygous |
| NC_037651.1 | 9055843 | SNV | 1 | G | A | Heterozygous |
| NC_037651.1 | 9056983 | SNV | 1 | C | T | Heterozygous |
| NC_037651.1 | 9057691 | SNV | 1 | C | T | Homozygous   |
| NC_037651.1 | 9057866 | SNV | 1 | G | A | Homozygous   |
| NC_037651.1 | 9058363 | SNV | 1 | A | T | Homozygous   |
| NC_037651.1 | 9059052 | SNV | 1 | G | T | Homozygous   |
| NC_037651.1 | 9059086 | SNV | 1 | T | C | Homozygous   |
| NC_037651.1 | 9059131 | SNV | 1 | G | A | Heterozygous |
| NC_037651.1 | 9059438 | SNV | 1 | C | T | Heterozygous |
| NC_037651.1 | 9059751 | SNV | 1 | G | A | Homozygous   |
| NC_037651.1 | 9059818 | SNV | 1 | T | G | Homozygous   |
| NC_037651.1 | 9059821 | SNV | 1 | T | C | Homozygous   |
| NC_037651.1 | 9060014 | SNV | 1 | A | G | Homozygous   |
| NC_037651.1 | 9060051 | SNV | 1 | G | A | Heterozygous |
| NC_037651.1 | 9060616 | SNV | 1 | C | T | Heterozygous |
| NC_037651.1 | 9061706 | SNV | 1 | C | T | Homozygous   |
| NC_037651.1 | 9062554 | SNV | 1 | C | T | Heterozygous |
| NC_037651.1 | 9063385 | SNV | 1 | C | T | Heterozygous |
| NC_037651.1 | 9063515 | SNV | 1 | T | C | Homozygous   |
| NC_037651.1 | 9064479 | SNV | 1 | C | T | Homozygous   |
| NC_037651.1 | 9064791 | SNV | 1 | C | T | Homozygous   |
| NC_037651.1 | 9067293 | SNV | 1 | A | T | Homozygous   |
| NC_037651.1 | 9067298 | SNV | 1 | A | T | Homozygous   |
| NC_037651.1 | 9067830 | SNV | 1 | C | A | Heterozygous |
| NC_037651.1 | 9067839 | SNV | 1 | T | A | Heterozygous |
| NC_037651.1 | 9067866 | SNV | 1 | T | C | Homozygous   |
| NC_037651.1 | 9067914 | SNV | 1 | T | A | Homozygous   |
| NC_037651.1 | 9069254 | SNV | 1 | C | T | Heterozygous |
| NC_037651.1 | 9069339 | SNV | 1 | G | A | Homozygous   |
| NC_037651.1 | 9070517 | SNV | 1 | C | T | Heterozygous |

|             |         |     |   |   |   |              |
|-------------|---------|-----|---|---|---|--------------|
| NC_037651.1 | 9070523 | SNV | 1 | C | T | Heterozygous |
| NC_037651.1 | 9070552 | SNV | 1 | T | C | Heterozygous |
| NC_037651.1 | 9070559 | SNV | 1 | A | T | Homozygous   |
| NC_037651.1 | 9070564 | SNV | 1 | T | G | Heterozygous |
| NC_037651.1 | 9070566 | SNV | 1 | T | C | Heterozygous |
| NC_037651.1 | 9071128 | SNV | 1 | G | T | Heterozygous |
| NC_037651.1 | 9073655 | SNV | 1 | G | A | Homozygous   |
| NC_037651.1 | 9073887 | SNV | 1 | G | A | Heterozygous |
| NC_037651.1 | 9074224 | SNV | 1 | C | T | Heterozygous |
| NC_037651.1 | 9074229 | SNV | 1 | C | A | Heterozygous |
| NC_037651.1 | 9074258 | SNV | 1 | C | T | Heterozygous |
| NC_037651.1 | 9074557 | SNV | 1 | A | T | Homozygous   |
| NC_037651.1 | 9075134 | SNV | 1 | A | G | Heterozygous |
| NC_037651.1 | 9075214 | SNV | 1 | A | G | Homozygous   |
| NC_037651.1 | 9075297 | SNV | 1 | G | C | Homozygous   |
| NC_037651.1 | 9075937 | SNV | 1 | C | T | Heterozygous |
| NC_037651.1 | 9077963 | SNV | 1 | T | C | Homozygous   |
| NC_037651.1 | 9077965 | SNV | 1 | C | T | Homozygous   |
| NC_037651.1 | 9080767 | SNV | 1 | A | G | Heterozygous |
| NC_037651.1 | 9080770 | SNV | 1 | A | T | Heterozygous |
| NC_037651.1 | 9080777 | SNV | 1 | T | C | Heterozygous |
| NC_037651.1 | 9080779 | SNV | 1 | A | T | Heterozygous |
| NC_037651.1 | 9080800 | SNV | 1 | A | T | Heterozygous |
| NC_037651.1 | 9080806 | SNV | 1 | T | C | Heterozygous |
| NC_037651.1 | 9080809 | SNV | 1 | G | A | Heterozygous |
| NC_037651.1 | 9080815 | SNV | 1 | A | C | Heterozygous |
| NC_037651.1 | 9080821 | SNV | 1 | A | T | Heterozygous |
| NC_037651.1 | 9082674 | SNV | 1 | A | G | Homozygous   |
| NC_037651.1 | 9083089 | SNV | 1 | G | T | Homozygous   |
| NC_037651.1 | 9087194 | SNV | 1 | T | G | Homozygous   |
| NC_037651.1 | 9087208 | SNV | 1 | C | A | Homozygous   |
| NC_037651.1 | 9087216 | SNV | 1 | T | G | Homozygous   |
| NC_037651.1 | 9087349 | SNV | 1 | T | A | Heterozygous |
| NC_037651.1 | 9087351 | SNV | 1 | C | G | Homozygous   |
| NC_037651.1 | 9088768 | SNV | 1 | G | A | Homozygous   |
| NC_037651.1 | 9088881 | SNV | 1 | A | G | Homozygous   |
| NC_037651.1 | 9094541 | SNV | 1 | A | T | Homozygous   |
| NC_037651.1 | 9095088 | SNV | 1 | T | G | Homozygous   |
| NC_037651.1 | 9095246 | SNV | 1 | A | G | Homozygous   |
| NC_037651.1 | 9095517 | SNV | 1 | T | C | Homozygous   |
| NC_037651.1 | 9098890 | SNV | 1 | A | G | Homozygous   |
| NC_037651.1 | 9109637 | SNV | 1 | T | C | Homozygous   |
| NC_037651.1 | 9109746 | SNV | 1 | C | T | Homozygous   |
| NC_037651.1 | 9109782 | SNV | 1 | C | G | Homozygous   |
| NC_037651.1 | 9109791 | SNV | 1 | A | G | Homozygous   |
| NC_037651.1 | 9109879 | SNV | 1 | C | G | Homozygous   |
| NC_037651.1 | 9111657 | SNV | 1 | C | T | Heterozygous |
| NC_037651.1 | 9111882 | SNV | 1 | A | G | Homozygous   |
| NC_037651.1 | 9112254 | SNV | 1 | T | C | Heterozygous |
| NC_037651.1 | 9112566 | SNV | 1 | A | G | Homozygous   |
| NC_037651.1 | 9112630 | SNV | 1 | A | G | Homozygous   |

|             |         |     |   |   |   |              |
|-------------|---------|-----|---|---|---|--------------|
| NC_037651.1 | 9114224 | SNV | 1 | C | T | Heterozygous |
| NC_037651.1 | 9115114 | SNV | 1 | T | A | Heterozygous |
| NC_037651.1 | 9115570 | SNV | 1 | A | G | Homozygous   |
| NC_037651.1 | 9117991 | SNV | 1 | A | C | Homozygous   |
| NC_037651.1 | 9118599 | SNV | 1 | A | C | Heterozygous |
| NC_037651.1 | 9118604 | SNV | 1 | T | G | Heterozygous |
| NC_037651.1 | 9118607 | SNV | 1 | T | A | Heterozygous |
| NC_037651.1 | 9118609 | SNV | 1 | A | G | Heterozygous |
| NC_037651.1 | 9122041 | SNV | 1 | C | T | Heterozygous |
| NC_037651.1 | 9134084 | SNV | 1 | A | G | Heterozygous |
| NC_037651.1 | 9134085 | SNV | 1 | A | G | Heterozygous |
| NC_037651.1 | 9139151 | SNV | 1 | T | G | Homozygous   |
| NC_037651.1 | 9139231 | SNV | 1 | C | T | Heterozygous |
| NC_037651.1 | 9139256 | SNV | 1 | T | C | Heterozygous |
| NC_037651.1 | 9139383 | SNV | 1 | G | A | Homozygous   |
| NC_037651.1 | 9139388 | SNV | 1 | C | A | Heterozygous |
| NC_037651.1 | 9139397 | SNV | 1 | C | A | Heterozygous |
| NC_037651.1 | 9139402 | SNV | 1 | G | A | Heterozygous |
| NC_037651.1 | 9139410 | SNV | 1 | T | A | Heterozygous |
| NC_037651.1 | 9139412 | SNV | 1 | T | A | Homozygous   |
| NC_037651.1 | 9139489 | SNV | 1 | C | A | Heterozygous |
| NC_037651.1 | 9139502 | SNV | 1 | T | A | Homozygous   |
| NC_037651.1 | 9139536 | SNV | 1 | C | A | Heterozygous |
| NC_037651.1 | 9139546 | SNV | 1 | T | A | Homozygous   |
| NC_037651.1 | 9139586 | SNV | 1 | G | A | Heterozygous |
| NC_037651.1 | 9139661 | SNV | 1 | G | A | Heterozygous |
| NC_037651.1 | 9139882 | SNV | 1 | A | G | Heterozygous |
| NC_037651.1 | 9139903 | SNV | 1 | G | A | Heterozygous |
| NC_037651.1 | 9139913 | SNV | 1 | C | A | Heterozygous |
| NC_037651.1 | 9139937 | SNV | 1 | A | G | Homozygous   |
| NC_037651.1 | 9139961 | SNV | 1 | A | G | Heterozygous |
| NC_037651.1 | 9140044 | SNV | 1 | T | A | Homozygous   |
| NC_037651.1 | 9140048 | SNV | 1 | A | T | Homozygous   |
| NC_037651.1 | 9142802 | SNV | 1 | C | T | Heterozygous |
| NC_037651.1 | 9143026 | SNV | 1 | T | C | Heterozygous |
| NC_037651.1 | 9143027 | SNV | 1 | T | C | Heterozygous |
| NC_037651.1 | 9143031 | SNV | 1 | T | C | Heterozygous |
| NC_037651.1 | 9143099 | SNV | 1 | G | A | Homozygous   |
| NC_037651.1 | 9143258 | SNV | 1 | G | A | Heterozygous |
| NC_037651.1 | 9143316 | SNV | 1 | C | T | Heterozygous |
| NC_037651.1 | 9143318 | SNV | 1 | T | C | Heterozygous |
| NC_037651.1 | 9148920 | SNV | 1 | A | C | Heterozygous |
| NC_037651.1 | 9148923 | SNV | 1 | G | A | Homozygous   |
| NC_037651.1 | 9148930 | SNV | 1 | G | T | Heterozygous |
| NC_037651.1 | 9148935 | SNV | 1 | A | G | Homozygous   |
| NC_037651.1 | 9148951 | SNV | 1 | A | G | Heterozygous |
| NC_037651.1 | 9148954 | SNV | 1 | G | T | Heterozygous |
| NC_037651.1 | 9148962 | SNV | 1 | G | C | Heterozygous |
| NC_037651.1 | 9150616 | SNV | 1 | C | T | Homozygous   |
| NC_037651.1 | 9150628 | SNV | 1 | G | T | Homozygous   |
| NC_037651.1 | 9150631 | SNV | 1 | T | C | Homozygous   |

|             |         |     |   |   |   |              |
|-------------|---------|-----|---|---|---|--------------|
| NC_037651.1 | 9171923 | SNV | 1 | A | G | Heterozygous |
| NC_037651.1 | 9178633 | SNV | 1 | G | C | Homozygous   |
| NC_037651.1 | 9178804 | SNV | 1 | T | C | Homozygous   |
| NC_037651.1 | 9188227 | SNV | 1 | T | C | Heterozygous |
| NC_037651.1 | 9189881 | SNV | 1 | A | G | Heterozygous |
| NC_037651.1 | 9232664 | SNV | 1 | T | C | Heterozygous |
| NC_037651.1 | 9238818 | SNV | 1 | G | A | Homozygous   |
| NC_037651.1 | 9239420 | SNV | 1 | A | T | Heterozygous |
| NC_037651.1 | 9240575 | SNV | 1 | C | T | Heterozygous |
| NC_037651.1 | 9241613 | SNV | 1 | A | G | Heterozygous |
| NC_037651.1 | 9242083 | SNV | 1 | T | A | Heterozygous |
| NC_037651.1 | 9242085 | SNV | 1 | T | G | Heterozygous |
| NC_037651.1 | 9242104 | SNV | 1 | A | T | Homozygous   |
| NC_037651.1 | 9242337 | SNV | 1 | T | A | Heterozygous |
| NC_037651.1 | 9242413 | SNV | 1 | T | C | Heterozygous |
| NC_037651.1 | 9243956 | SNV | 1 | C | A | Homozygous   |
| NC_037651.1 | 9244185 | SNV | 1 | A | G | Heterozygous |
| NC_037651.1 | 9244344 | SNV | 1 | A | G | Homozygous   |
| NC_037651.1 | 9244444 | SNV | 1 | A | G | Heterozygous |
| NC_037651.1 | 9244566 | SNV | 1 | A | G | Heterozygous |
| NC_037651.1 | 9245216 | SNV | 1 | T | C | Homozygous   |
| NC_037651.1 | 9246662 | SNV | 1 | T | C | Homozygous   |
| NC_037651.1 | 9254736 | SNV | 1 | A | C | Heterozygous |
| NC_037651.1 | 9254741 | SNV | 1 | A | T | Heterozygous |
| NC_037651.1 | 9254746 | SNV | 1 | A | T | Heterozygous |
| NC_037651.1 | 9254769 | SNV | 1 | A | T | Heterozygous |
| NC_037651.1 | 9255823 | SNV | 1 | C | T | Homozygous   |
| NC_037651.1 | 9288530 | SNV | 1 | A | C | Homozygous   |
| NC_037651.1 | 9289368 | SNV | 1 | T | A | Homozygous   |
| NC_037651.1 | 9289372 | SNV | 1 | A | T | Homozygous   |
| NC_037651.1 | 9296107 | SNV | 1 | T | C | Heterozygous |
| NC_037651.1 | 9296125 | SNV | 1 | A | G | Heterozygous |
| NC_037651.1 | 9297385 | SNV | 1 | A | G | Homozygous   |
| NC_037651.1 | 9299091 | SNV | 1 | G | T | Heterozygous |
| NC_037651.1 | 9299105 | SNV | 1 | G | A | Heterozygous |
| NC_037651.1 | 9299671 | SNV | 1 | G | A | Heterozygous |
| NC_037651.1 | 9299688 | SNV | 1 | A | G | Heterozygous |
| NC_037651.1 | 9299782 | SNV | 1 | A | C | Heterozygous |
| NC_037651.1 | 9299992 | SNV | 1 | G | A | Homozygous   |
| NC_037651.1 | 9300064 | SNV | 1 | T | G | Homozygous   |
| NC_037651.1 | 9300620 | SNV | 1 | A | C | Homozygous   |
| NC_037651.1 | 9300881 | SNV | 1 | G | A | Homozygous   |
| NC_037651.1 | 9301028 | SNV | 1 | T | C | Heterozygous |
| NC_037651.1 | 9301266 | SNV | 1 | T | C | Homozygous   |
| NC_037651.1 | 9301488 | SNV | 1 | C | T | Heterozygous |
| NC_037651.1 | 9301548 | SNV | 1 | A | G | Homozygous   |
| NC_037651.1 | 9301737 | SNV | 1 | A | C | Homozygous   |
| NC_037651.1 | 9301987 | SNV | 1 | A | G | Homozygous   |
| NC_037651.1 | 9302315 | SNV | 1 | T | C | Homozygous   |
| NC_037651.1 | 9302763 | SNV | 1 | A | G | Homozygous   |
| NC_037651.1 | 9305302 | SNV | 1 | A | T | Heterozygous |



|             |         |     |   |   |   |              |
|-------------|---------|-----|---|---|---|--------------|
| NC_037651.1 | 9305314 | SNV | 1 | G | T | Heterozygous |
| NC_037651.1 | 9305338 | SNV | 1 | C | T | Heterozygous |
| NC_037651.1 | 9305343 | SNV | 1 | G | T | Heterozygous |
| NC_037651.1 | 9305461 | SNV | 1 | G | A | Homozygous   |
| NC_037651.1 | 9305734 | SNV | 1 | T | C | Homozygous   |
| NC_037651.1 | 9306115 | SNV | 1 | C | T | Homozygous   |
| NC_037651.1 | 9307054 | SNV | 1 | C | T | Homozygous   |
| NC_037651.1 | 9307176 | SNV | 1 | C | T | Heterozygous |
| NC_037651.1 | 9307254 | SNV | 1 | C | T | Heterozygous |
| NC_037651.1 | 9307257 | SNV | 1 | T | C | Heterozygous |
| NC_037651.1 | 9307408 | SNV | 1 | T | C | Heterozygous |
| NC_037651.1 | 9309395 | SNV | 1 | A | G | Homozygous   |
| NC_037651.1 | 9312992 | SNV | 1 | A | G | Homozygous   |
| NC_037651.1 | 9314257 | SNV | 1 | T | C | Homozygous   |
| NC_037651.1 | 9314273 | SNV | 1 | A | T | Homozygous   |
| NC_037651.1 | 9314277 | SNV | 1 | T | G | Homozygous   |
| NC_037651.1 | 9314293 | SNV | 1 | G | T | Homozygous   |
| NC_037651.1 | 9314297 | SNV | 1 | T | C | Homozygous   |
| NC_037651.1 | 9314299 | SNV | 1 | C | G | Homozygous   |
| NC_037651.1 | 9319297 | SNV | 1 | C | G | Homozygous   |
| NC_037651.1 | 9319376 | SNV | 1 | T | G | Homozygous   |
| NC_037651.1 | 9323051 | SNV | 1 | T | C | Heterozygous |
| NC_037651.1 | 9323317 | SNV | 1 | C | A | Heterozygous |
| NC_037651.1 | 9323320 | SNV | 1 | T | A | Heterozygous |
| NC_037651.1 | 9323333 | SNV | 1 | G | A | Heterozygous |
| NC_037651.1 | 9323362 | SNV | 1 | A | C | Heterozygous |
| NC_037651.1 | 9323373 | SNV | 1 | G | A | Homozygous   |
| NC_037651.1 | 9323377 | SNV | 1 | T | A | Homozygous   |
| NC_037651.1 | 9323382 | SNV | 1 | C | A | Homozygous   |
| NC_037651.1 | 9323395 | SNV | 1 | G | A | Homozygous   |
| NC_037651.1 | 9323397 | SNV | 1 | C | T | Homozygous   |
| NC_037651.1 | 9325601 | SNV | 1 | T | C | Homozygous   |
| NC_037651.1 | 9325633 | SNV | 1 | A | G | Heterozygous |
| NC_037651.1 | 9325642 | SNV | 1 | C | A | Homozygous   |
| NC_037651.1 | 9325650 | SNV | 1 | T | A | Homozygous   |
| NC_037651.1 | 9325671 | SNV | 1 | A | C | Homozygous   |
| NC_037651.1 | 9325689 | SNV | 1 | A | G | Homozygous   |
| NC_037651.1 | 9325699 | SNV | 1 | T | C | Homozygous   |
| NC_037651.1 | 9336425 | SNV | 1 | A | G | Heterozygous |
| NC_037651.1 | 9347341 | SNV | 1 | T | A | Heterozygous |
| NC_037651.1 | 9347361 | SNV | 1 | G | A | Heterozygous |
| NC_037651.1 | 9350736 | SNV | 1 | G | A | Heterozygous |
| NC_037651.1 | 9350948 | SNV | 1 | T | C | Homozygous   |
| NC_037651.1 | 9352690 | SNV | 1 | A | G | Homozygous   |
| NC_037651.1 | 9353507 | SNV | 1 | A | T | Homozygous   |
| NC_037651.1 | 9353652 | SNV | 1 | G | T | Homozygous   |
| NC_037651.1 | 9353852 | SNV | 1 | T | C | Homozygous   |
| NC_037651.1 | 9360448 | SNV | 1 | T | A | Homozygous   |
| NC_037651.1 | 9360451 | SNV | 1 | C | A | Homozygous   |
| NC_037651.1 | 9360628 | SNV | 1 | T | C | Heterozygous |
| NC_037651.1 | 9361334 | SNV | 1 | A | G | Homozygous   |

|             |         |     |   |   |   |              |
|-------------|---------|-----|---|---|---|--------------|
| NC_037651.1 | 9362226 | SNV | 1 | T | A | Homozygous   |
| NC_037651.1 | 9362243 | SNV | 1 | T | C | Heterozygous |
| NC_037651.1 | 9364958 | SNV | 1 | G | A | Heterozygous |
| NC_037651.1 | 9369532 | SNV | 1 | A | G | Homozygous   |
| NC_037651.1 | 9371995 | SNV | 1 | T | A | Homozygous   |
| NC_037651.1 | 9372062 | SNV | 1 | G | A | Homozygous   |
| NC_037651.1 | 9372928 | SNV | 1 | C | T | Heterozygous |
| NC_037651.1 | 9372938 | SNV | 1 | G | A | Heterozygous |
| NC_037651.1 | 9372974 | SNV | 1 | C | T | Heterozygous |
| NC_037651.1 | 9373006 | SNV | 1 | C | T | Heterozygous |
| NC_037651.1 | 9373172 | SNV | 1 | G | A | Heterozygous |
| NC_037651.1 | 9373254 | SNV | 1 | G | A | Heterozygous |
| NC_037651.1 | 9373256 | SNV | 1 | A | G | Homozygous   |
| NC_037651.1 | 9373793 | SNV | 1 | T | C | Heterozygous |
| NC_037651.1 | 9374009 | SNV | 1 | A | T | Heterozygous |
| NC_037651.1 | 9374015 | SNV | 1 | T | C | Heterozygous |
| NC_037651.1 | 9374019 | SNV | 1 | A | C | Heterozygous |
| NC_037651.1 | 9374029 | SNV | 1 | A | C | Homozygous   |
| NC_037651.1 | 9384355 | SNV | 1 | C | T | Heterozygous |
| NC_037651.1 | 9384683 | SNV | 1 | A | G | Homozygous   |
| NC_037651.1 | 9384974 | SNV | 1 | G | A | Homozygous   |
| NC_037651.1 | 9385603 | SNV | 1 | C | T | Heterozygous |
| NC_037651.1 | 9385816 | SNV | 1 | C | T | Heterozygous |
| NC_037651.1 | 9386033 | SNV | 1 | T | C | Heterozygous |
| NC_037651.1 | 9386134 | SNV | 1 | G | C | Heterozygous |
| NC_037651.1 | 9386172 | SNV | 1 | G | A | Heterozygous |
| NC_037651.1 | 9386195 | SNV | 1 | A | G | Homozygous   |
| NC_037651.1 | 9386271 | SNV | 1 | C | T | Heterozygous |
| NC_037651.1 | 9386281 | SNV | 1 | A | G | Heterozygous |
| NC_037651.1 | 9386416 | SNV | 1 | A | T | Heterozygous |
| NC_037651.1 | 9386795 | SNV | 1 | A | G | Heterozygous |
| NC_037651.1 | 9386810 | SNV | 1 | T | A | Heterozygous |
| NC_037651.1 | 9386822 | SNV | 1 | G | A | Heterozygous |
| NC_037651.1 | 9386833 | SNV | 1 | G | T | Homozygous   |
| NC_037651.1 | 9386893 | SNV | 1 | C | G | Heterozygous |
| NC_037651.1 | 9386906 | SNV | 1 | A | G | Homozygous   |
| NC_037651.1 | 9386945 | SNV | 1 | G | A | Homozygous   |
| NC_037651.1 | 9386949 | SNV | 1 | G | A | Heterozygous |
| NC_037651.1 | 9386975 | SNV | 1 | C | T | Heterozygous |
| NC_037651.1 | 9386978 | SNV | 1 | G | A | Heterozygous |
| NC_037651.1 | 9387123 | SNV | 1 | G | A | Heterozygous |
| NC_037651.1 | 9387136 | SNV | 1 | C | G | Heterozygous |
| NC_037651.1 | 9387497 | SNV | 1 | C | G | Homozygous   |
| NC_037651.1 | 9387510 | SNV | 1 | T | C | Heterozygous |
| NC_037651.1 | 9387515 | SNV | 1 | G | C | Heterozygous |
| NC_037651.1 | 9387768 | SNV | 1 | T | C | Homozygous   |
| NC_037651.1 | 9389550 | SNV | 1 | A | G | Homozygous   |
| NC_037651.1 | 9389601 | SNV | 1 | C | T | Heterozygous |
| NC_037651.1 | 9389898 | SNV | 1 | A | G | Heterozygous |
| NC_037651.1 | 9389915 | SNV | 1 | G | A | Heterozygous |
| NC_037651.1 | 9389970 | SNV | 1 | G | A | Heterozygous |

|             |         |     |   |   |   |              |
|-------------|---------|-----|---|---|---|--------------|
| NC_037651.1 | 9390128 | SNV | 1 | C | T | Homozygous   |
| NC_037651.1 | 9390146 | SNV | 1 | C | G | Homozygous   |
| NC_037651.1 | 9390230 | SNV | 1 | C | T | Heterozygous |
| NC_037651.1 | 9390239 | SNV | 1 | C | G | Homozygous   |
| NC_037651.1 | 9390245 | SNV | 1 | T | C | Homozygous   |
| NC_037651.1 | 9390251 | SNV | 1 | G | A | Heterozygous |
| NC_037651.1 | 9390263 | SNV | 1 | G | A | Heterozygous |
| NC_037651.1 | 9390357 | SNV | 1 | A | G | Homozygous   |
| NC_037651.1 | 9390363 | SNV | 1 | C | T | Homozygous   |
| NC_037651.1 | 9390725 | SNV | 1 | A | G | Homozygous   |
| NC_037651.1 | 9391096 | SNV | 1 | C | G | Heterozygous |
| NC_037651.1 | 9391246 | SNV | 1 | C | A | Homozygous   |
| NC_037651.1 | 9391755 | SNV | 1 | T | G | Heterozygous |
| NC_037651.1 | 9391758 | SNV | 1 | G | A | Heterozygous |
| NC_037651.1 | 9391762 | SNV | 1 | G | A | Heterozygous |
| NC_037651.1 | 9391766 | SNV | 1 | G | A | Heterozygous |
| NC_037651.1 | 9391770 | SNV | 1 | G | A | Heterozygous |
| NC_037651.1 | 9391796 | SNV | 1 | G | C | Heterozygous |
| NC_037651.1 | 9391900 | SNV | 1 | C | T | Heterozygous |
| NC_037651.1 | 9392072 | SNV | 1 | T | C | Homozygous   |
| NC_037651.1 | 9392104 | SNV | 1 | C | A | Heterozygous |
| NC_037651.1 | 9392108 | SNV | 1 | C | A | Homozygous   |
| NC_037651.1 | 9392120 | SNV | 1 | A | T | Heterozygous |
| NC_037651.1 | 9392138 | SNV | 1 | C | A | Homozygous   |
| NC_037651.1 | 9392144 | SNV | 1 | C | A | Heterozygous |
| NC_037651.1 | 9392172 | SNV | 1 | C | A | Heterozygous |
| NC_037651.1 | 9392198 | SNV | 1 | A | G | Heterozygous |
| NC_037651.1 | 9392208 | SNV | 1 | C | A | Homozygous   |
| NC_037651.1 | 9392214 | SNV | 1 | C | G | Heterozygous |
| NC_037651.1 | 9401010 | SNV | 1 | G | A | Heterozygous |
| NC_037651.1 | 9402044 | SNV | 1 | C | T | Heterozygous |
| NC_037651.1 | 9402075 | SNV | 1 | T | C | Homozygous   |
| NC_037651.1 | 9406617 | SNV | 1 | T | C | Homozygous   |
| NC_037651.1 | 9407220 | SNV | 1 | T | C | Heterozygous |
| NC_037651.1 | 9407901 | SNV | 1 | T | C | Heterozygous |
| NC_037651.1 | 9407962 | SNV | 1 | T | C | Heterozygous |
| NC_037651.1 | 9408886 | SNV | 1 | C | A | Heterozygous |
| NC_037651.1 | 9409003 | SNV | 1 | G | A | Homozygous   |
| NC_037651.1 | 9409115 | SNV | 1 | T | G | Homozygous   |
| NC_037651.1 | 9409202 | SNV | 1 | A | G | Homozygous   |
| NC_037651.1 | 9409256 | SNV | 1 | A | G | Homozygous   |
| NC_037651.1 | 9409436 | SNV | 1 | G | A | Homozygous   |
| NC_037651.1 | 9409667 | SNV | 1 | A | G | Heterozygous |
| NC_037651.1 | 9410018 | SNV | 1 | A | G | Homozygous   |
| NC_037651.1 | 9410309 | SNV | 1 | C | T | Heterozygous |
| NC_037651.1 | 9411811 | SNV | 1 | A | G | Heterozygous |
| NC_037651.1 | 9412222 | SNV | 1 | C | G | Heterozygous |
| NC_037651.1 | 9412294 | SNV | 1 | G | A | Heterozygous |
| NC_037651.1 | 9412925 | SNV | 1 | G | A | Heterozygous |
| NC_037651.1 | 9413599 | SNV | 1 | C | T | Heterozygous |
| NC_037651.1 | 9414057 | SNV | 1 | C | G | Heterozygous |

|             |         |     |   |   |   |              |
|-------------|---------|-----|---|---|---|--------------|
| NC_037651.1 | 9414901 | SNV | 1 | G | A | Homozygous   |
| NC_037651.1 | 9414913 | SNV | 1 | A | G | Homozygous   |
| NC_037651.1 | 9415224 | SNV | 1 | T | C | Homozygous   |
| NC_037651.1 | 9415228 | SNV | 1 | C | T | Homozygous   |
| NC_037651.1 | 9415230 | SNV | 1 | C | T | Homozygous   |
| NC_037651.1 | 9415233 | SNV | 1 | C | A | Homozygous   |
| NC_037651.1 | 9415242 | SNV | 1 | T | C | Heterozygous |
| NC_037651.1 | 9416170 | SNV | 1 | T | C | Homozygous   |
| NC_037651.1 | 9418333 | SNV | 1 | A | G | Homozygous   |
| NC_037651.1 | 9424878 | SNV | 1 | C | T | Heterozygous |
| NC_037651.1 | 9425922 | SNV | 1 | T | A | Heterozygous |
| NC_037651.1 | 9427132 | SNV | 1 | T | C | Homozygous   |
| NC_037651.1 | 9429424 | SNV | 1 | A | T | Homozygous   |
| NC_037651.1 | 9429714 | SNV | 1 | A | G | Heterozygous |
| NC_037651.1 | 9429762 | SNV | 1 | A | T | Homozygous   |
| NC_037651.1 | 9429944 | SNV | 1 | G | A | Homozygous   |
| NC_037651.1 | 9429998 | SNV | 1 | T | C | Homozygous   |
| NC_037651.1 | 9430030 | SNV | 1 | T | A | Homozygous   |
| NC_037651.1 | 9430107 | SNV | 1 | T | G | Homozygous   |
| NC_037651.1 | 9430133 | SNV | 1 | T | A | Homozygous   |
| NC_037651.1 | 9430136 | SNV | 1 | T | G | Homozygous   |
| NC_037651.1 | 9430155 | SNV | 1 | G | T | Heterozygous |
| NC_037651.1 | 9430272 | SNV | 1 | T | C | Homozygous   |
| NC_037651.1 | 9432380 | SNV | 1 | A | G | Homozygous   |
| NC_037651.1 | 9432591 | SNV | 1 | A | G | Homozygous   |
| NC_037651.1 | 9440800 | SNV | 1 | C | T | Homozygous   |
| NC_037651.1 | 9441486 | SNV | 1 | T | C | Heterozygous |
| NC_037651.1 | 9441713 | SNV | 1 | A | G | Homozygous   |
| NC_037651.1 | 9442030 | SNV | 1 | C | T | Homozygous   |
| NC_037651.1 | 9442271 | SNV | 1 | T | C | Homozygous   |
| NC_037651.1 | 9470954 | SNV | 1 | T | A | Homozygous   |
| NC_037651.1 | 9470959 | SNV | 1 | C | T | Homozygous   |
| NC_037651.1 | 9470962 | SNV | 1 | T | C | Homozygous   |
| NC_037651.1 | 9470978 | SNV | 1 | T | G | Heterozygous |
| NC_037651.1 | 9470980 | SNV | 1 | T | A | Heterozygous |
| NC_037651.1 | 9470982 | SNV | 1 | T | G | Heterozygous |
| NC_037651.1 | 9470984 | SNV | 1 | T | A | Heterozygous |
| NC_037651.1 | 9470998 | SNV | 1 | A | G | Heterozygous |
| NC_037651.1 | 9471003 | SNV | 1 | C | T | Heterozygous |
| NC_037651.1 | 9471009 | SNV | 1 | C | T | Heterozygous |
| NC_037651.1 | 9471012 | SNV | 1 | T | C | Heterozygous |
| NC_037651.1 | 9471215 | SNV | 1 | G | A | Homozygous   |
| NC_037651.1 | 9471243 | SNV | 1 | A | T | Homozygous   |
| NC_037651.1 | 9472612 | SNV | 1 | A | G | Homozygous   |
| NC_037651.1 | 9472618 | SNV | 1 | A | C | Homozygous   |
| NC_037651.1 | 9472626 | SNV | 1 | C | T | Homozygous   |
| NC_037651.1 | 9472734 | SNV | 1 | T | C | Homozygous   |
| NC_037651.1 | 9472749 | SNV | 1 | C | T | Homozygous   |
| NC_037651.1 | 9472752 | SNV | 1 | T | C | Homozygous   |
| NC_037651.1 | 9472760 | SNV | 1 | T | A | Homozygous   |
| NC_037651.1 | 9472762 | SNV | 1 | C | T | Homozygous   |

|             |         |     |   |   |   |              |
|-------------|---------|-----|---|---|---|--------------|
| NC_037651.1 | 9472768 | SNV | 1 | C | T | Homozygous   |
| NC_037651.1 | 9473161 | SNV | 1 | C | T | Heterozygous |
| NC_037651.1 | 9473326 | SNV | 1 | A | G | Homozygous   |
| NC_037651.1 | 9473350 | SNV | 1 | A | T | Heterozygous |
| NC_037651.1 | 9474180 | SNV | 1 | T | C | Homozygous   |
| NC_037651.1 | 9474211 | SNV | 1 | C | T | Heterozygous |
| NC_037651.1 | 9474345 | SNV | 1 | A | G | Homozygous   |
| NC_037651.1 | 9475404 | SNV | 1 | C | T | Heterozygous |
| NC_037651.1 | 9475766 | SNV | 1 | T | A | Heterozygous |
| NC_037651.1 | 9475777 | SNV | 1 | C | T | Heterozygous |
| NC_037651.1 | 9476163 | SNV | 1 | A | G | Homozygous   |
| NC_037651.1 | 9476738 | SNV | 1 | C | T | Homozygous   |
| NC_037651.1 | 9476820 | SNV | 1 | T | G | Homozygous   |
| NC_037651.1 | 9476851 | SNV | 1 | C | T | Homozygous   |
| NC_037651.1 | 9477828 | SNV | 1 | C | T | Homozygous   |
| NC_037651.1 | 9480520 | SNV | 1 | G | A | Heterozygous |
| NC_037651.1 | 9480537 | SNV | 1 | G | A | Heterozygous |
| NC_037651.1 | 9483165 | SNV | 1 | C | T | Heterozygous |
| NC_037651.1 | 9483303 | SNV | 1 | T | C | Heterozygous |
| NC_037651.1 | 9484254 | SNV | 1 | T | C | Homozygous   |
| NC_037651.1 | 9484278 | SNV | 1 | C | T | Heterozygous |
| NC_037651.1 | 9484344 | SNV | 1 | C | T | Homozygous   |
| NC_037651.1 | 9484347 | SNV | 1 | C | A | Heterozygous |
| NC_037651.1 | 9484352 | SNV | 1 | C | T | Heterozygous |
| NC_037651.1 | 9484520 | SNV | 1 | G | A | Heterozygous |
| NC_037651.1 | 9484550 | SNV | 1 | C | T | Homozygous   |
| NC_037651.1 | 9484581 | SNV | 1 | A | C | Homozygous   |
| NC_037651.1 | 9484585 | SNV | 1 | T | C | Homozygous   |
| NC_037651.1 | 9484593 | SNV | 1 | C | T | Homozygous   |
| NC_037651.1 | 9484732 | SNV | 1 | C | G | Homozygous   |
| NC_037651.1 | 9484736 | SNV | 1 | T | C | Homozygous   |
| NC_037651.1 | 9484910 | SNV | 1 | G | A | Homozygous   |
| NC_037651.1 | 9487300 | SNV | 1 | T | C | Homozygous   |
| NC_037651.1 | 9487326 | SNV | 1 | T | C | Homozygous   |
| NC_037651.1 | 9488209 | SNV | 1 | C | A | Homozygous   |
| NC_037651.1 | 9488219 | SNV | 1 | C | A | Homozygous   |
| NC_037651.1 | 9488223 | SNV | 1 | A | C | Homozygous   |
| NC_037651.1 | 9488255 | SNV | 1 | G | A | Homozygous   |
| NC_037651.1 | 9490388 | SNV | 1 | C | T | Homozygous   |
| NC_037651.1 | 9490392 | SNV | 1 | C | A | Homozygous   |
| NC_037651.1 | 9493290 | SNV | 1 | C | T | Homozygous   |
| NC_037651.1 | 9493544 | SNV | 1 | A | G | Homozygous   |
| NC_037651.1 | 9496969 | SNV | 1 | T | G | Heterozygous |
| NC_037651.1 | 9500004 | SNV | 1 | T | C | Homozygous   |
| NC_037651.1 | 9500026 | SNV | 1 | G | A | Homozygous   |
| NC_037651.1 | 9500031 | SNV | 1 | T | C | Homozygous   |
| NC_037651.1 | 9500037 | SNV | 1 | T | C | Homozygous   |
| NC_037651.1 | 9503058 | SNV | 1 | C | G | Homozygous   |
| NC_037651.1 | 9503093 | SNV | 1 | C | T | Heterozygous |
| NC_037651.1 | 9503100 | SNV | 1 | C | T | Homozygous   |
| NC_037651.1 | 9503102 | SNV | 1 | C | T | Homozygous   |

|             |         |     |   |   |   |              |
|-------------|---------|-----|---|---|---|--------------|
| NC_037651.1 | 9505261 | SNV | 1 | G | T | Homozygous   |
| NC_037651.1 | 9510965 | SNV | 1 | T | C | Heterozygous |
| NC_037651.1 | 9510967 | SNV | 1 | G | A | Heterozygous |
| NC_037651.1 | 9511052 | SNV | 1 | G | A | Homozygous   |
| NC_037651.1 | 9516304 | SNV | 1 | A | G | Heterozygous |
| NC_037651.1 | 9516333 | SNV | 1 | A | G | Heterozygous |
| NC_037651.1 | 9516340 | SNV | 1 | A | G | Heterozygous |
| NC_037651.1 | 9516342 | SNV | 1 | T | A | Heterozygous |
| NC_037651.1 | 9516356 | SNV | 1 | A | T | Heterozygous |
| NC_037651.1 | 9516358 | SNV | 1 | A | C | Heterozygous |
| NC_037651.1 | 9517565 | SNV | 1 | G | A | Heterozygous |
| NC_037651.1 | 9517967 | SNV | 1 | C | T | Homozygous   |
| NC_037651.1 | 9517996 | SNV | 1 | C | G | Homozygous   |
| NC_037651.1 | 9518024 | SNV | 1 | C | G | Heterozygous |
| NC_037651.1 | 9518895 | SNV | 1 | C | T | Homozygous   |
| NC_037651.1 | 9518898 | SNV | 1 | C | T | Homozygous   |
| NC_037651.1 | 9518915 | SNV | 1 | A | T | Homozygous   |
| NC_037651.1 | 9520115 | SNV | 1 | T | G | Heterozygous |
| NC_037651.1 | 9520129 | SNV | 1 | G | T | Heterozygous |
| NC_037651.1 | 9520149 | SNV | 1 | C | T | Heterozygous |
| NC_037651.1 | 9520849 | SNV | 1 | A | G | Homozygous   |
| NC_037651.1 | 9520851 | SNV | 1 | A | G | Homozygous   |
| NC_037651.1 | 9520868 | SNV | 1 | G | A | Homozygous   |
| NC_037651.1 | 9520871 | SNV | 1 | A | G | Homozygous   |
| NC_037651.1 | 9520875 | SNV | 1 | A | G | Homozygous   |
| NC_037651.1 | 9521427 | SNV | 1 | A | C | Homozygous   |
| NC_037651.1 | 9521452 | SNV | 1 | C | G | Homozygous   |
| NC_037651.1 | 9521719 | SNV | 1 | T | C | Heterozygous |
| NC_037651.1 | 9521727 | SNV | 1 | C | T | Heterozygous |
| NC_037651.1 | 9521834 | SNV | 1 | A | T | Heterozygous |
| NC_037651.1 | 9521859 | SNV | 1 | C | G | Homozygous   |
| NC_037651.1 | 9522041 | SNV | 1 | C | T | Homozygous   |
| NC_037651.1 | 9522057 | SNV | 1 | T | C | Heterozygous |
| NC_037651.1 | 9522606 | SNV | 1 | T | A | Heterozygous |
| NC_037651.1 | 9524010 | SNV | 1 | G | T | Homozygous   |
| NC_037651.1 | 9524014 | SNV | 1 | A | C | Heterozygous |
| NC_037651.1 | 9524017 | SNV | 1 | G | A | Heterozygous |
| NC_037651.1 | 9524021 | SNV | 1 | A | G | Homozygous   |
| NC_037651.1 | 9524029 | SNV | 1 | G | A | Heterozygous |
| NC_037651.1 | 9525625 | SNV | 1 | C | T | Heterozygous |
| NC_037651.1 | 9525629 | SNV | 1 | T | C | Heterozygous |
| NC_037651.1 | 9525638 | SNV | 1 | T | G | Heterozygous |
| NC_037651.1 | 9526585 | SNV | 1 | A | C | Homozygous   |
| NC_037651.1 | 9526595 | SNV | 1 | A | C | Homozygous   |
| NC_037651.1 | 9526600 | SNV | 1 | T | C | Homozygous   |
| NC_037651.1 | 9526604 | SNV | 1 | T | C | Homozygous   |
| NC_037651.1 | 9526612 | SNV | 1 | C | T | Homozygous   |
| NC_037651.1 | 9527845 | SNV | 1 | T | C | Homozygous   |
| NC_037651.1 | 9527893 | SNV | 1 | G | A | Heterozygous |
| NC_037651.1 | 9527946 | SNV | 1 | A | G | Homozygous   |
| NC_037651.1 | 9527984 | SNV | 1 | A | T | Homozygous   |

|             |         |     |   |   |   |              |
|-------------|---------|-----|---|---|---|--------------|
| NC_037651.1 | 9528027 | SNV | 1 | G | A | Homozygous   |
| NC_037651.1 | 9528280 | SNV | 1 | T | C | Heterozygous |
| NC_037651.1 | 9528628 | SNV | 1 | G | C | Homozygous   |
| NC_037651.1 | 9528655 | SNV | 1 | A | G | Homozygous   |
| NC_037651.1 | 9528697 | SNV | 1 | T | G | Heterozygous |
| NC_037651.1 | 9528701 | SNV | 1 | C | G | Homozygous   |
| NC_037651.1 | 9528705 | SNV | 1 | C | G | Homozygous   |
| NC_037651.1 | 9528709 | SNV | 1 | T | G | Homozygous   |
| NC_037651.1 | 9529835 | SNV | 1 | A | T | Heterozygous |
| NC_037651.1 | 9529914 | SNV | 1 | T | A | Heterozygous |
| NC_037651.1 | 9529939 | SNV | 1 | C | G | Heterozygous |
| NC_037651.1 | 9530162 | SNV | 1 | A | G | Heterozygous |
| NC_037651.1 | 9533803 | SNV | 1 | C | T | Heterozygous |
| NC_037651.1 | 9536276 | SNV | 1 | G | T | Heterozygous |
| NC_037651.1 | 9536282 | SNV | 1 | T | G | Heterozygous |
| NC_037651.1 | 9537195 | SNV | 1 | C | A | Heterozygous |
| NC_037651.1 | 9537717 | SNV | 1 | T | C | Homozygous   |
| NC_037651.1 | 9537741 | SNV | 1 | C | T | Homozygous   |
| NC_037651.1 | 9537745 | SNV | 1 | A | G | Homozygous   |
| NC_037651.1 | 9537748 | SNV | 1 | T | C | Homozygous   |
| NC_037651.1 | 9539717 | SNV | 1 | C | T | Heterozygous |
| NC_037651.1 | 9541073 | SNV | 1 | G | A | Heterozygous |
| NC_037651.1 | 9541169 | SNV | 1 | C | G | Heterozygous |
| NC_037651.1 | 9541200 | SNV | 1 | T | A | Heterozygous |
| NC_037651.1 | 9541209 | SNV | 1 | G | A | Homozygous   |
| NC_037651.1 | 9541215 | SNV | 1 | A | G | Heterozygous |
| NC_037651.1 | 9541234 | SNV | 1 | G | A | Homozygous   |
| NC_037651.1 | 9541816 | SNV | 1 | G | C | Homozygous   |
| NC_037651.1 | 9541832 | SNV | 1 | A | G | Homozygous   |
| NC_037651.1 | 9542329 | SNV | 1 | A | G | Heterozygous |
| NC_037651.1 | 9545272 | SNV | 1 | A | T | Homozygous   |
| NC_037651.1 | 9545283 | SNV | 1 | T | A | Heterozygous |
| NC_037651.1 | 9545298 | SNV | 1 | A | T | Heterozygous |
| NC_037651.1 | 9545300 | SNV | 1 | A | C | Heterozygous |
| NC_037651.1 | 9545302 | SNV | 1 | A | T | Heterozygous |
| NC_037651.1 | 9545317 | SNV | 1 | T | C | Heterozygous |
| NC_037651.1 | 9545319 | SNV | 1 | T | C | Heterozygous |
| NC_037651.1 | 9545444 | SNV | 1 | G | A | Homozygous   |
| NC_037651.1 | 9552707 | SNV | 1 | C | A | Heterozygous |
| NC_037651.1 | 9552736 | SNV | 1 | C | A | Heterozygous |
| NC_037651.1 | 9552738 | SNV | 1 | C | T | Homozygous   |
| NC_037651.1 | 9552741 | SNV | 1 | T | G | Homozygous   |
| NC_037651.1 | 9552750 | SNV | 1 | C | T | Heterozygous |
| NC_037651.1 | 9557603 | SNV | 1 | T | C | Heterozygous |
| NC_037651.1 | 9557606 | SNV | 1 | T | C | Heterozygous |
| NC_037651.1 | 9557763 | SNV | 1 | A | G | Homozygous   |
| NC_037651.1 | 9557857 | SNV | 1 | G | C | Heterozygous |
| NC_037651.1 | 9559275 | SNV | 1 | T | G | Homozygous   |
| NC_037651.1 | 9559281 | SNV | 1 | G | T | Homozygous   |
| NC_037651.1 | 9559284 | SNV | 1 | G | T | Homozygous   |
| NC_037651.1 | 9559515 | SNV | 1 | T | G | Heterozygous |

|             |         |     |   |   |   |              |
|-------------|---------|-----|---|---|---|--------------|
| NC_037651.1 | 9559556 | SNV | 1 | A | C | Heterozygous |
| NC_037651.1 | 9559633 | SNV | 1 | A | G | Heterozygous |
| NC_037651.1 | 9578827 | SNV | 1 | A | T | Homozygous   |
| NC_037651.1 | 9578832 | SNV | 1 | G | A | Homozygous   |
| NC_037651.1 | 9578844 | SNV | 1 | G | C | Homozygous   |
| NC_037651.1 | 9578851 | SNV | 1 | A | C | Homozygous   |
| NC_037651.1 | 9579233 | SNV | 1 | C | T | Homozygous   |
| NC_037651.1 | 9581645 | SNV | 1 | C | T | Heterozygous |
| NC_037651.1 | 9581675 | SNV | 1 | A | G | Heterozygous |
| NC_037651.1 | 9581685 | SNV | 1 | G | A | Heterozygous |
| NC_037651.1 | 9581698 | SNV | 1 | A | G | Homozygous   |
| NC_037651.1 | 9581817 | SNV | 1 | G | A | Heterozygous |
| NC_037651.1 | 9581856 | SNV | 1 | T | C | Homozygous   |
| NC_037651.1 | 9581859 | SNV | 1 | G | A | Heterozygous |
| NC_037651.1 | 9586695 | SNV | 1 | C | T | Heterozygous |
| NC_037651.1 | 9586700 | SNV | 1 | C | A | Heterozygous |
| NC_037651.1 | 9586703 | SNV | 1 | T | C | Heterozygous |
| NC_037651.1 | 9591586 | SNV | 1 | G | A | Homozygous   |
| NC_037651.1 | 9684540 | SNV | 1 | T | G | Heterozygous |
| NC_037651.1 | 9684547 | SNV | 1 | C | G | Homozygous   |
| NC_037651.1 | 9686223 | SNV | 1 | A | T | Homozygous   |
| NC_037651.1 | 9688288 | SNV | 1 | T | C | Heterozygous |
| NC_037651.1 | 9688336 | SNV | 1 | T | C | Heterozygous |
| NC_037651.1 | 9688432 | SNV | 1 | C | T | Heterozygous |
| NC_037651.1 | 9688753 | SNV | 1 | G | T | Heterozygous |
| NC_037651.1 | 9693211 | SNV | 1 | T | C | Homozygous   |
| NC_037651.1 | 9693390 | SNV | 1 | T | C | Heterozygous |
| NC_037651.1 | 9693424 | SNV | 1 | T | C | Heterozygous |
| NC_037651.1 | 9693439 | SNV | 1 | C | T | Homozygous   |
| NC_037651.1 | 9693441 | SNV | 1 | A | T | Homozygous   |
| NC_037651.1 | 9693773 | SNV | 1 | G | A | Heterozygous |
| NC_037651.1 | 9693949 | SNV | 1 | G | A | Heterozygous |
| NC_037651.1 | 9693982 | SNV | 1 | G | A | Heterozygous |
| NC_037651.1 | 9694156 | SNV | 1 | G | A | Heterozygous |
| NC_037651.1 | 9694745 | SNV | 1 | A | T | Heterozygous |
| NC_037651.1 | 9694761 | SNV | 1 | T | C | Heterozygous |
| NC_037651.1 | 9694861 | SNV | 1 | T | C | Homozygous   |
| NC_037651.1 | 9694874 | SNV | 1 | C | G | Heterozygous |
| NC_037651.1 | 9694922 | SNV | 1 | C | A | Homozygous   |
| NC_037651.1 | 9695336 | SNV | 1 | A | G | Homozygous   |
| NC_037651.1 | 9745163 | SNV | 1 | G | A | Homozygous   |
| NC_037651.1 | 9759005 | SNV | 1 | A | G | Homozygous   |
| NC_037651.1 | 9759042 | SNV | 1 | A | G | Heterozygous |
| NC_037651.1 | 9760374 | SNV | 1 | T | C | Heterozygous |
| NC_037651.1 | 9760439 | SNV | 1 | C | T | Heterozygous |
| NC_037651.1 | 9763820 | SNV | 1 | A | G | Heterozygous |
| NC_037651.1 | 9764442 | SNV | 1 | G | A | Homozygous   |
| NC_037651.1 | 9764466 | SNV | 1 | T | C | Homozygous   |
| NC_037651.1 | 9766834 | SNV | 1 | G | T | Homozygous   |
| NC_037651.1 | 9766841 | SNV | 1 | G | A | Heterozygous |
| NC_037651.1 | 9766846 | SNV | 1 | G | A | Homozygous   |



|             |         |     |   |   |   |              |
|-------------|---------|-----|---|---|---|--------------|
| NC_037651.1 | 9766850 | SNV | 1 | G | A | Homozygous   |
| NC_037651.1 | 9766855 | SNV | 1 | G | A | Homozygous   |
| NC_037651.1 | 9768919 | SNV | 1 | A | G | Homozygous   |
| NC_037651.1 | 9770845 | SNV | 1 | C | T | Heterozygous |
| NC_037651.1 | 9770865 | SNV | 1 | C | T | Heterozygous |
| NC_037651.1 | 9770890 | SNV | 1 | G | A | Homozygous   |
| NC_037651.1 | 9770924 | SNV | 1 | C | T | Heterozygous |
| NC_037651.1 | 9770935 | SNV | 1 | G | A | Heterozygous |
| NC_037651.1 | 9770945 | SNV | 1 | T | C | Homozygous   |
| NC_037651.1 | 9771054 | SNV | 1 | A | G | Homozygous   |
| NC_037651.1 | 9771385 | SNV | 1 | C | T | Heterozygous |
| NC_037651.1 | 9780061 | SNV | 1 | A | G | Heterozygous |
| NC_037651.1 | 9780088 | SNV | 1 | A | G | Heterozygous |
| NC_037651.1 | 9780113 | SNV | 1 | A | G | Heterozygous |
| NC_037651.1 | 9792932 | SNV | 1 | C | T | Homozygous   |
| NC_037651.1 | 9793328 | SNV | 1 | T | C | Homozygous   |
| NC_037651.1 | 9793756 | SNV | 1 | A | G | Homozygous   |
| NC_037651.1 | 9793824 | SNV | 1 | T | C | Heterozygous |
| NC_037651.1 | 9793991 | SNV | 1 | T | C | Heterozygous |
| NC_037651.1 | 9794077 | SNV | 1 | A | G | Homozygous   |
| NC_037651.1 | 9794327 | SNV | 1 | A | G | Homozygous   |
| NC_037651.1 | 9794918 | SNV | 1 | A | G | Homozygous   |
| NC_037651.1 | 9795169 | SNV | 1 | C | A | Homozygous   |
| NC_037651.1 | 9795171 | SNV | 1 | A | G | Homozygous   |
| NC_037651.1 | 9795875 | SNV | 1 | C | G | Homozygous   |
| NC_037651.1 | 9795931 | SNV | 1 | A | G | Homozygous   |
| NC_037651.1 | 9795939 | SNV | 1 | A | G | Homozygous   |
| NC_037651.1 | 9795942 | SNV | 1 | G | C | Homozygous   |
| NC_037651.1 | 9795952 | SNV | 1 | A | G | Homozygous   |
| NC_037651.1 | 9795964 | SNV | 1 | T | C | Homozygous   |
| NC_037651.1 | 9809666 | SNV | 1 | T | C | Homozygous   |
| NC_037651.1 | 9812270 | SNV | 1 | T | C | Heterozygous |
| NC_037651.1 | 9812271 | SNV | 1 | C | T | Heterozygous |
| NC_037651.1 | 9815916 | SNV | 1 | A | T | Homozygous   |
| NC_037651.1 | 9815952 | SNV | 1 | T | G | Homozygous   |
| NC_037651.1 | 9816049 | SNV | 1 | C | T | Heterozygous |
| NC_037651.1 | 9829626 | SNV | 1 | G | A | Heterozygous |
| NC_037651.1 | 9844700 | SNV | 1 | T | A | Heterozygous |
| NC_037651.1 | 9845355 | SNV | 1 | T | C | Heterozygous |
| NC_037651.1 | 9845357 | SNV | 1 | T | A | Homozygous   |
| NC_037651.1 | 9847005 | SNV | 1 | A | G | Homozygous   |
| NC_037651.1 | 9847152 | SNV | 1 | C | T | Heterozygous |
| NC_037651.1 | 9847155 | SNV | 1 | C | T | Heterozygous |
| NC_037651.1 | 9847158 | SNV | 1 | T | C | Heterozygous |
| NC_037651.1 | 9847164 | SNV | 1 | T | C | Heterozygous |
| NC_037651.1 | 9847167 | SNV | 1 | T | C | Heterozygous |
| NC_037651.1 | 9847441 | SNV | 1 | G | A | Homozygous   |
| NC_037651.1 | 9847509 | SNV | 1 | G | T | Heterozygous |
| NC_037651.1 | 9847511 | SNV | 1 | A | T | Heterozygous |
| NC_037651.1 | 9849064 | SNV | 1 | A | G | Heterozygous |
| NC_037651.1 | 9849385 | SNV | 1 | A | G | Heterozygous |

|             |         |     |   |   |   |              |
|-------------|---------|-----|---|---|---|--------------|
| NC_037651.1 | 9849399 | SNV | 1 | G | A | Heterozygous |
| NC_037651.1 | 9849708 | SNV | 1 | T | G | Heterozygous |
| NC_037651.1 | 9849746 | SNV | 1 | A | G | Heterozygous |
| NC_037651.1 | 9849759 | SNV | 1 | T | A | Heterozygous |
| NC_037651.1 | 9849773 | SNV | 1 | A | C | Heterozygous |
| NC_037651.1 | 9850145 | SNV | 1 | G | A | Heterozygous |
| NC_037651.1 | 9852506 | SNV | 1 | G | A | Heterozygous |
| NC_037651.1 | 9852511 | SNV | 1 | C | G | Homozygous   |
| NC_037651.1 | 9852517 | SNV | 1 | G | A | Homozygous   |
| NC_037651.1 | 9852564 | SNV | 1 | A | C | Homozygous   |
| NC_037651.1 | 9852567 | SNV | 1 | G | C | Homozygous   |
| NC_037651.1 | 9857084 | SNV | 1 | A | G | Homozygous   |
| NC_037651.1 | 9857254 | SNV | 1 | A | C | Heterozygous |
| NC_037651.1 | 9857257 | SNV | 1 | C | T | Heterozygous |
| NC_037651.1 | 9857289 | SNV | 1 | C | T | Homozygous   |
| NC_037651.1 | 9857322 | SNV | 1 | C | G | Homozygous   |
| NC_037651.1 | 9857379 | SNV | 1 | A | G | Homozygous   |
| NC_037651.1 | 9860480 | SNV | 1 | A | G | Homozygous   |
| NC_037651.1 | 9861301 | SNV | 1 | A | T | Homozygous   |
| NC_037651.1 | 9863487 | SNV | 1 | C | A | Heterozygous |
| NC_037651.1 | 9863489 | SNV | 1 | T | A | Heterozygous |
| NC_037651.1 | 9877901 | SNV | 1 | G | A | Homozygous   |
| NC_037651.1 | 9877904 | SNV | 1 | G | A | Homozygous   |
| NC_037651.1 | 9877922 | SNV | 1 | G | A | Homozygous   |
| NC_037651.1 | 9877928 | SNV | 1 | G | A | Homozygous   |
| NC_037651.1 | 9877932 | SNV | 1 | G | A | Homozygous   |
| NC_037651.1 | 9877937 | SNV | 1 | A | T | Homozygous   |
| NC_037651.1 | 9877940 | SNV | 1 | G | A | Homozygous   |
| NC_037651.1 | 9883370 | SNV | 1 | C | T | Heterozygous |
| NC_037651.1 | 9883371 | SNV | 1 | C | T | Heterozygous |
| NC_037651.1 | 9883376 | SNV | 1 | C | T | Homozygous   |
| NC_037651.1 | 9883379 | SNV | 1 | C | T | Homozygous   |
| NC_037651.1 | 9883382 | SNV | 1 | C | T | Homozygous   |
| NC_037651.1 | 9883392 | SNV | 1 | C | T | Homozygous   |
| NC_037651.1 | 9885429 | SNV | 1 | G | A | Homozygous   |
| NC_037651.1 | 9893572 | SNV | 1 | C | T | Homozygous   |
| NC_037651.1 | 9899091 | SNV | 1 | T | C | Heterozygous |
| NC_037651.1 | 9899195 | SNV | 1 | T | C | Homozygous   |
| NC_037651.1 | 9904260 | SNV | 1 | T | C | Homozygous   |
| NC_037651.1 | 9904264 | SNV | 1 | T | C | Heterozygous |
| NC_037651.1 | 9904266 | SNV | 1 | C | A | Heterozygous |
| NC_037651.1 | 9904279 | SNV | 1 | A | T | Heterozygous |
| NC_037651.1 | 9912651 | SNV | 1 | A | G | Heterozygous |
| NC_037651.1 | 9912882 | SNV | 1 | G | A | Homozygous   |
| NC_037651.1 | 9928159 | SNV | 1 | G | A | Homozygous   |
| NC_037651.1 | 9928186 | SNV | 1 | G | T | Homozygous   |
| NC_037651.1 | 9928189 | SNV | 1 | G | T | Homozygous   |
| NC_037651.1 | 9928194 | SNV | 1 | A | T | Homozygous   |
| NC_037651.1 | 9928210 | SNV | 1 | G | T | Homozygous   |
| NC_037651.1 | 9929557 | SNV | 1 | C | T | Homozygous   |
| NC_037651.1 | 9929566 | SNV | 1 | C | T | Homozygous   |

|             |         |     |   |   |   |              |
|-------------|---------|-----|---|---|---|--------------|
| NC_037651.1 | 9929569 | SNV | 1 | C | T | Homozygous   |
| NC_037651.1 | 9929576 | SNV | 1 | T | C | Heterozygous |
| NC_037651.1 | 9929602 | SNV | 1 | T | G | Heterozygous |
| NC_037651.1 | 9930981 | SNV | 1 | C | T | Homozygous   |
| NC_037651.1 | 9931233 | SNV | 1 | C | T | Heterozygous |
| NC_037651.1 | 9931239 | SNV | 1 | C | T | Heterozygous |
| NC_037651.1 | 9931244 | SNV | 1 | A | T | Homozygous   |
| NC_037651.1 | 9931381 | SNV | 1 | A | G | Homozygous   |
| NC_037651.1 | 9931408 | SNV | 1 | A | G | Homozygous   |
| NC_037651.1 | 9931425 | SNV | 1 | A | G | Homozygous   |
| NC_037651.1 | 9931446 | SNV | 1 | G | A | Homozygous   |
| NC_037651.1 | 9932232 | SNV | 1 | T | C | Homozygous   |
| NC_037651.1 | 9932350 | SNV | 1 | A | G | Heterozygous |
| NC_037651.1 | 9932376 | SNV | 1 | T | C | Homozygous   |
| NC_037651.1 | 9932462 | SNV | 1 | A | G | Homozygous   |
| NC_037651.1 | 9932465 | SNV | 1 | G | A | Homozygous   |
| NC_037651.1 | 9932508 | SNV | 1 | G | A | Homozygous   |
| NC_037651.1 | 9932600 | SNV | 1 | T | C | Homozygous   |
| NC_037651.1 | 9932873 | SNV | 1 | T | C | Heterozygous |
| NC_037651.1 | 9932885 | SNV | 1 | G | C | Heterozygous |
| NC_037651.1 | 9932972 | SNV | 1 | A | G | Heterozygous |
| NC_037651.1 | 9934040 | SNV | 1 | C | G | Heterozygous |
| NC_037651.1 | 9934055 | SNV | 1 | A | G | Heterozygous |
| NC_037651.1 | 9935138 | SNV | 1 | A | G | Homozygous   |
| NC_037651.1 | 9935180 | SNV | 1 | A | G | Heterozygous |
| NC_037651.1 | 9935184 | SNV | 1 | A | G | Heterozygous |
| NC_037651.1 | 9935198 | SNV | 1 | G | A | Heterozygous |
| NC_037651.1 | 9938734 | SNV | 1 | A | C | Homozygous   |
| NC_037651.1 | 9939145 | SNV | 1 | T | A | Homozygous   |
| NC_037651.1 | 9939347 | SNV | 1 | A | T | Heterozygous |
| NC_037651.1 | 9939356 | SNV | 1 | A | G | Heterozygous |
| NC_037651.1 | 9939362 | SNV | 1 | A | G | Homozygous   |
| NC_037651.1 | 9940246 | SNV | 1 | A | G | Homozygous   |
| NC_037651.1 | 9940458 | SNV | 1 | G | A | Homozygous   |
| NC_037651.1 | 9940593 | SNV | 1 | G | A | Homozygous   |
| NC_037651.1 | 9940667 | SNV | 1 | A | G | Homozygous   |
| NC_037651.1 | 9940906 | SNV | 1 | A | C | Homozygous   |
| NC_037651.1 | 9940911 | SNV | 1 | A | G | Homozygous   |
| NC_037651.1 | 9941071 | SNV | 1 | G | C | Homozygous   |
| NC_037651.1 | 9941167 | SNV | 1 | G | A | Heterozygous |
| NC_037651.1 | 9942419 | SNV | 1 | G | T | Homozygous   |
| NC_037651.1 | 9944061 | SNV | 1 | T | C | Homozygous   |
| NC_037651.1 | 9944526 | SNV | 1 | T | C | Heterozygous |
| NC_037651.1 | 9944538 | SNV | 1 | A | G | Heterozygous |
| NC_037651.1 | 9944571 | SNV | 1 | A | G | Homozygous   |
| NC_037651.1 | 9944736 | SNV | 1 | C | T | Heterozygous |
| NC_037651.1 | 9946583 | SNV | 1 | T | A | Heterozygous |
| NC_037651.1 | 9946764 | SNV | 1 | T | G | Homozygous   |
| NC_037651.1 | 9947088 | SNV | 1 | C | T | Heterozygous |
| NC_037651.1 | 9947217 | SNV | 1 | A | C | Homozygous   |
| NC_037651.1 | 9947220 | SNV | 1 | T | C | Homozygous   |

|             |          |     |   |   |   |              |
|-------------|----------|-----|---|---|---|--------------|
| NC_037651.1 | 9947365  | SNV | 1 | G | A | Homozygous   |
| NC_037651.1 | 9948051  | SNV | 1 | A | G | Homozygous   |
| NC_037651.1 | 9948115  | SNV | 1 | C | T | Homozygous   |
| NC_037651.1 | 9948350  | SNV | 1 | C | T | Homozygous   |
| NC_037651.1 | 9948376  | SNV | 1 | C | T | Homozygous   |
| NC_037651.1 | 9950026  | SNV | 1 | G | T | Homozygous   |
| NC_037651.1 | 9951052  | SNV | 1 | G | T | Homozygous   |
| NC_037651.1 | 9951175  | SNV | 1 | G | T | Homozygous   |
| NC_037651.1 | 9951280  | SNV | 1 | A | G | Homozygous   |
| NC_037651.1 | 9952652  | SNV | 1 | C | A | Homozygous   |
| NC_037651.1 | 9954803  | SNV | 1 | A | G | Homozygous   |
| NC_037651.1 | 9956386  | SNV | 1 | T | C | Heterozygous |
| NC_037651.1 | 9957157  | SNV | 1 | A | G | Homozygous   |
| NC_037651.1 | 9957730  | SNV | 1 | C | T | Homozygous   |
| NC_037651.1 | 9957793  | SNV | 1 | G | A | Homozygous   |
| NC_037651.1 | 9959380  | SNV | 1 | T | A | Homozygous   |
| NC_037651.1 | 9959382  | SNV | 1 | A | T | Homozygous   |
| NC_037651.1 | 9959385  | SNV | 1 | A | T | Homozygous   |
| NC_037651.1 | 9969094  | SNV | 1 | G | A | Homozygous   |
| NC_037651.1 | 9979904  | SNV | 1 | C | A | Homozygous   |
| NC_037651.1 | 9980347  | SNV | 1 | A | G | Heterozygous |
| NC_037651.1 | 9980591  | SNV | 1 | A | G | Heterozygous |
| NC_037651.1 | 9981472  | SNV | 1 | T | G | Homozygous   |
| NC_037651.1 | 9981474  | SNV | 1 | G | A | Homozygous   |
| NC_037651.1 | 9981481  | SNV | 1 | C | A | Homozygous   |
| NC_037651.1 | 9989610  | SNV | 1 | A | G | Homozygous   |
| NC_037651.1 | 9989985  | SNV | 1 | G | A | Heterozygous |
| NC_037651.1 | 9990203  | SNV | 1 | T | C | Homozygous   |
| NC_037651.1 | 9992152  | SNV | 1 | T | C | Heterozygous |
| NC_037651.1 | 9992313  | SNV | 1 | A | T | Homozygous   |
| NC_037651.1 | 9992325  | SNV | 1 | A | T | Heterozygous |
| NC_037651.1 | 9992604  | SNV | 1 | T | C | Homozygous   |
| NC_037651.1 | 9992673  | SNV | 1 | G | A | Homozygous   |
| NC_037651.1 | 9998381  | SNV | 1 | G | T | Homozygous   |
| NC_037651.1 | 9998471  | SNV | 1 | C | T | Homozygous   |
| NC_037651.1 | 9998624  | SNV | 1 | T | C | Homozygous   |
| NC_037651.1 | 10001324 | SNV | 1 | G | C | Homozygous   |
| NC_037651.1 | 10003371 | SNV | 1 | T | C | Homozygous   |
| NC_037651.1 | 10003374 | SNV | 1 | T | A | Homozygous   |
| NC_037651.1 | 10003377 | SNV | 1 | C | A | Homozygous   |
| NC_037651.1 | 10003380 | SNV | 1 | G | A | Homozygous   |
| NC_037651.1 | 10003383 | SNV | 1 | G | A | Homozygous   |
| NC_037651.1 | 10003386 | SNV | 1 | A | T | Homozygous   |
| NC_037651.1 | 10003389 | SNV | 1 | C | A | Homozygous   |
| NC_037651.1 | 10003395 | SNV | 1 | A | G | Homozygous   |
| NC_037651.1 | 10003413 | SNV | 1 | G | C | Homozygous   |
| NC_037651.1 | 10003416 | SNV | 1 | C | A | Heterozygous |
| NC_037651.1 | 10003418 | SNV | 1 | A | G | Heterozygous |
| NC_037651.1 | 10003422 | SNV | 1 | G | A | Heterozygous |
| NC_037651.1 | 10003428 | SNV | 1 | A | G | Homozygous   |
| NC_037651.1 | 10003440 | SNV | 1 | C | T | Heterozygous |

|             |          |     |   |   |   |              |
|-------------|----------|-----|---|---|---|--------------|
| NC_037651.1 | 10003443 | SNV | 1 | G | A | Heterozygous |
| NC_037651.1 | 10003446 | SNV | 1 | G | A | Heterozygous |
| NC_037651.1 | 10003449 | SNV | 1 | T | C | Heterozygous |
| NC_037651.1 | 10003464 | SNV | 1 | C | A | Heterozygous |
| NC_037651.1 | 10003464 | SNV | 1 | C | T | Heterozygous |
| NC_037651.1 | 10003467 | SNV | 1 | C | T | Homozygous   |
| NC_037651.1 | 10003470 | SNV | 1 | T | C | Heterozygous |
| NC_037651.1 | 10003473 | SNV | 1 | C | A | Heterozygous |
| NC_037651.1 | 10003473 | SNV | 1 | C | G | Heterozygous |
| NC_037651.1 | 10003482 | SNV | 1 | A | G | Heterozygous |
| NC_037651.1 | 10003487 | SNV | 1 | G | A | Homozygous   |
| NC_037651.1 | 10003494 | SNV | 1 | T | C | Homozygous   |
| NC_037651.1 | 10003497 | SNV | 1 | C | G | Homozygous   |
| NC_037651.1 | 10003509 | SNV | 1 | C | G | Homozygous   |
| NC_037651.1 | 10003518 | SNV | 1 | T | C | Homozygous   |
| NC_037651.1 | 10003521 | SNV | 1 | T | C | Homozygous   |
| NC_037651.1 | 10003525 | SNV | 1 | G | T | Homozygous   |
| NC_037651.1 | 10003534 | SNV | 1 | T | C | Homozygous   |
| NC_037651.1 | 10003639 | SNV | 1 | A | T | Homozygous   |
| NC_037651.1 | 10003663 | SNV | 1 | T | G | Homozygous   |
| NC_037651.1 | 10003672 | SNV | 1 | T | C | Homozygous   |
| NC_037651.1 | 10003675 | SNV | 1 | T | A | Homozygous   |
| NC_037651.1 | 10003827 | SNV | 1 | G | A | Homozygous   |
| NC_037651.1 | 10003867 | SNV | 1 | T | C | Homozygous   |
| NC_037651.1 | 10003870 | SNV | 1 | C | A | Homozygous   |
| NC_037651.1 | 10003873 | SNV | 1 | G | A | Homozygous   |
| NC_037651.1 | 10003888 | SNV | 1 | C | G | Homozygous   |
| NC_037651.1 | 10003891 | SNV | 1 | G | C | Homozygous   |
| NC_037651.1 | 10003893 | SNV | 1 | G | A | Homozygous   |
| NC_037651.1 | 10003897 | SNV | 1 | C | A | Homozygous   |
| NC_037651.1 | 10003903 | SNV | 1 | C | A | Homozygous   |
| NC_037651.1 | 10003906 | SNV | 1 | T | G | Homozygous   |
| NC_037651.1 | 10003912 | SNV | 1 | T | C | Heterozygous |
| NC_037651.1 | 10004583 | SNV | 1 | C | G | Heterozygous |
| NC_037651.1 | 10004586 | SNV | 1 | A | G | Heterozygous |
| NC_037651.1 | 10004589 | SNV | 1 | G | A | Heterozygous |
| NC_037651.1 | 10004598 | SNV | 1 | T | C | Heterozygous |
| NC_037651.1 | 10004601 | SNV | 1 | C | A | Heterozygous |
| NC_037651.1 | 10004601 | SNV | 1 | C | G | Heterozygous |
| NC_037651.1 | 10004607 | SNV | 1 | C | T | Homozygous   |
| NC_037651.1 | 10004610 | SNV | 1 | C | G | Homozygous   |
| NC_037651.1 | 10004613 | SNV | 1 | G | A | Homozygous   |
| NC_037651.1 | 10004616 | SNV | 1 | C | G | Homozygous   |
| NC_037651.1 | 10004619 | SNV | 1 | G | A | Heterozygous |
| NC_037651.1 | 10004628 | SNV | 1 | C | G | Homozygous   |
| NC_037651.1 | 10004636 | SNV | 1 | C | T | Heterozygous |
| NC_037651.1 | 10004640 | SNV | 1 | T | C | Homozygous   |
| NC_037651.1 | 10004649 | SNV | 1 | C | T | Heterozygous |
| NC_037651.1 | 10004652 | SNV | 1 | G | A | Heterozygous |
| NC_037651.1 | 10004658 | SNV | 1 | G | A | Heterozygous |
| NC_037651.1 | 10004661 | SNV | 1 | G | A | Heterozygous |

|             |          |     |   |   |   |              |
|-------------|----------|-----|---|---|---|--------------|
| NC_037651.1 | 10004661 | SNV | 1 | G | C | Heterozygous |
| NC_037651.1 | 10004664 | SNV | 1 | T | C | Heterozygous |
| NC_037651.1 | 10004673 | SNV | 1 | A | G | Heterozygous |
| NC_037651.1 | 10004679 | SNV | 1 | C | A | Heterozygous |
| NC_037651.1 | 10004679 | SNV | 1 | C | T | Heterozygous |
| NC_037651.1 | 10004682 | SNV | 1 | G | T | Heterozygous |
| NC_037651.1 | 10004685 | SNV | 1 | C | G | Heterozygous |
| NC_037651.1 | 10004694 | SNV | 1 | C | G | Heterozygous |
| NC_037651.1 | 10004700 | SNV | 1 | C | G | Heterozygous |
| NC_037651.1 | 10004712 | SNV | 1 | C | G | Homozygous   |
| NC_037651.1 | 10004715 | SNV | 1 | C | G | Heterozygous |
| NC_037651.1 | 10004718 | SNV | 1 | A | G | Heterozygous |
| NC_037651.1 | 10004721 | SNV | 1 | T | G | Homozygous   |
| NC_037651.1 | 10004727 | SNV | 1 | G | C | Homozygous   |
| NC_037651.1 | 10004731 | SNV | 1 | A | T | Homozygous   |
| NC_037651.1 | 10004736 | SNV | 1 | G | C | Homozygous   |
| NC_037651.1 | 10004739 | SNV | 1 | T | G | Homozygous   |
| NC_037651.1 | 10004742 | SNV | 1 | G | C | Homozygous   |
| NC_037651.1 | 10004745 | SNV | 1 | T | G | Homozygous   |
| NC_037651.1 | 10004757 | SNV | 1 | T | G | Homozygous   |
| NC_037651.1 | 10004760 | SNV | 1 | C | G | Homozygous   |
| NC_037651.1 | 10004766 | SNV | 1 | C | T | Homozygous   |
| NC_037651.1 | 10004769 | SNV | 1 | C | G | Homozygous   |
| NC_037651.1 | 10004771 | SNV | 1 | A | G | Homozygous   |
| NC_037651.1 | 10008014 | SNV | 1 | A | G | Heterozygous |
| NC_037651.1 | 10009585 | SNV | 1 | G | C | Homozygous   |
| NC_037651.1 | 10009973 | SNV | 1 | C | G | Homozygous   |
| NC_037651.1 | 10010003 | SNV | 1 | G | A | Heterozygous |
| NC_037651.1 | 10010029 | SNV | 1 | A | G | Heterozygous |
| NC_037651.1 | 10010078 | SNV | 1 | C | T | Homozygous   |
| NC_037651.1 | 10015105 | SNV | 1 | G | A | Homozygous   |
| NC_037651.1 | 10015411 | SNV | 1 | C | T | Heterozygous |
| NC_037651.1 | 10018309 | SNV | 1 | T | C | Heterozygous |
| NC_037651.1 | 10018516 | SNV | 1 | C | G | Homozygous   |
| NC_037651.1 | 10019143 | SNV | 1 | A | G | Homozygous   |
| NC_037651.1 | 10019194 | SNV | 1 | G | A | Heterozygous |
| NC_037651.1 | 10019277 | SNV | 1 | A | C | Homozygous   |
| NC_037651.1 | 10020866 | SNV | 1 | T | C | Heterozygous |
| NC_037651.1 | 10020877 | SNV | 1 | A | G | Homozygous   |
| NC_037651.1 | 10021029 | SNV | 1 | A | G | Homozygous   |
| NC_037651.1 | 10021105 | SNV | 1 | C | T | Heterozygous |
| NC_037651.1 | 10021113 | SNV | 1 | C | G | Homozygous   |
| NC_037651.1 | 10021624 | SNV | 1 | C | T | Heterozygous |
| NC_037651.1 | 10021625 | SNV | 1 | A | G | Heterozygous |
| NC_037651.1 | 10021663 | SNV | 1 | T | C | Heterozygous |
| NC_037651.1 | 10021976 | SNV | 1 | A | G | Homozygous   |
| NC_037651.1 | 10021978 | SNV | 1 | A | G | Heterozygous |
| NC_037651.1 | 10022186 | SNV | 1 | C | T | Heterozygous |
| NC_037651.1 | 10022271 | SNV | 1 | G | A | Heterozygous |
| NC_037651.1 | 10023502 | SNV | 1 | A | G | Heterozygous |
| NC_037651.1 | 10023526 | SNV | 1 | A | T | Heterozygous |

|             |          |     |   |   |   |              |
|-------------|----------|-----|---|---|---|--------------|
| NC_037651.1 | 10023551 | SNV | 1 | G | A | Heterozygous |
| NC_037651.1 | 10023553 | SNV | 1 | G | A | Homozygous   |
| NC_037651.1 | 10023555 | SNV | 1 | G | A | Homozygous   |
| NC_037651.1 | 10023582 | SNV | 1 | C | A | Heterozygous |
| NC_037651.1 | 10024332 | SNV | 1 | G | C | Heterozygous |
| NC_037651.1 | 10024454 | SNV | 1 | T | C | Homozygous   |
| NC_037651.1 | 10024897 | SNV | 1 | G | A | Heterozygous |
| NC_037651.1 | 10026508 | SNV | 1 | T | A | Heterozygous |
| NC_037651.1 | 10026544 | SNV | 1 | T | C | Heterozygous |
| NC_037651.1 | 10028654 | SNV | 1 | C | G | Homozygous   |
| NC_037651.1 | 10028927 | SNV | 1 | T | C | Homozygous   |
| NC_037651.1 | 10029569 | SNV | 1 | T | C | Homozygous   |
| NC_037651.1 | 10029632 | SNV | 1 | C | A | Homozygous   |
| NC_037651.1 | 10029869 | SNV | 1 | C | T | Heterozygous |
| NC_037651.1 | 10030589 | SNV | 1 | C | A | Heterozygous |
| NC_037651.1 | 10030973 | SNV | 1 | C | T | Homozygous   |
| NC_037651.1 | 10030979 | SNV | 1 | C | T | Homozygous   |
| NC_037651.1 | 10031102 | SNV | 1 | T | C | Homozygous   |
| NC_037651.1 | 10031714 | SNV | 1 | G | A | Homozygous   |
| NC_037651.1 | 10031739 | SNV | 1 | C | T | Heterozygous |
| NC_037651.1 | 10031749 | SNV | 1 | C | T | Homozygous   |
| NC_037651.1 | 10031791 | SNV | 1 | T | C | Heterozygous |
| NC_037651.1 | 10031795 | SNV | 1 | C | T | Heterozygous |
| NC_037651.1 | 10031811 | SNV | 1 | T | C | Homozygous   |
| NC_037651.1 | 10032033 | SNV | 1 | G | A | Heterozygous |
| NC_037651.1 | 10033309 | SNV | 1 | T | C | Homozygous   |
| NC_037651.1 | 10040545 | SNV | 1 | T | C | Heterozygous |
| NC_037651.1 | 10041702 | SNV | 1 | G | A | Homozygous   |
| NC_037651.1 | 10041787 | SNV | 1 | T | C | Heterozygous |
| NC_037651.1 | 10043079 | SNV | 1 | C | T | Homozygous   |
| NC_037651.1 | 10048918 | SNV | 1 | A | G | Homozygous   |
| NC_037651.1 | 10050311 | SNV | 1 | T | C | Homozygous   |
| NC_037651.1 | 10050325 | SNV | 1 | T | C | Homozygous   |
| NC_037651.1 | 10050666 | SNV | 1 | A | G | Homozygous   |
| NC_037651.1 | 10050775 | SNV | 1 | G | C | Homozygous   |
| NC_037651.1 | 10052243 | SNV | 1 | T | C | Heterozygous |
| NC_037651.1 | 10052428 | SNV | 1 | G | A | Heterozygous |
| NC_037651.1 | 10052455 | SNV | 1 | T | C | Homozygous   |
| NC_037651.1 | 10053302 | SNV | 1 | C | T | Heterozygous |
| NC_037651.1 | 10053332 | SNV | 1 | G | C | Heterozygous |
| NC_037651.1 | 10053335 | SNV | 1 | C | T | Heterozygous |
| NC_037651.1 | 10053338 | SNV | 1 | C | T | Heterozygous |
| NC_037651.1 | 10057267 | SNV | 1 | A | C | Homozygous   |
| NC_037651.1 | 10057756 | SNV | 1 | T | C | Heterozygous |
| NC_037651.1 | 10057760 | SNV | 1 | T | C | Heterozygous |
| NC_037651.1 | 10057791 | SNV | 1 | C | T | Heterozygous |
| NC_037651.1 | 10058145 | SNV | 1 | T | C | Homozygous   |
| NC_037651.1 | 10059612 | SNV | 1 | A | T | Homozygous   |
| NC_037651.1 | 10059679 | SNV | 1 | A | G | Homozygous   |
| NC_037651.1 | 10060064 | SNV | 1 | A | G | Homozygous   |
| NC_037651.1 | 10060077 | SNV | 1 | T | C | Homozygous   |

|             |          |     |   |   |   |              |
|-------------|----------|-----|---|---|---|--------------|
| NC_037651.1 | 10061858 | SNV | 1 | G | A | Heterozygous |
| NC_037651.1 | 10062095 | SNV | 1 | C | T | Homozygous   |
| NC_037651.1 | 10062230 | SNV | 1 | G | T | Homozygous   |
| NC_037651.1 | 10062572 | SNV | 1 | A | G | Homozygous   |
| NC_037651.1 | 10062885 | SNV | 1 | A | G | Homozygous   |
| NC_037651.1 | 10062905 | SNV | 1 | T | C | Homozygous   |
| NC_037651.1 | 10063592 | SNV | 1 | C | T | Homozygous   |
| NC_037651.1 | 10063910 | SNV | 1 | G | C | Heterozygous |
| NC_037651.1 | 10063913 | SNV | 1 | C | G | Heterozygous |
| NC_037651.1 | 10067148 | SNV | 1 | A | G | Heterozygous |
| NC_037651.1 | 10067830 | SNV | 1 | G | C | Homozygous   |
| NC_037651.1 | 10067835 | SNV | 1 | T | C | Homozygous   |
| NC_037651.1 | 10067965 | SNV | 1 | T | C | Homozygous   |
| NC_037651.1 | 10068425 | SNV | 1 | G | C | Homozygous   |
| NC_037651.1 | 10069656 | SNV | 1 | A | G | Homozygous   |
| NC_037651.1 | 10070563 | SNV | 1 | G | A | Heterozygous |
| NC_037651.1 | 10070618 | SNV | 1 | C | G | Homozygous   |
| NC_037651.1 | 10070732 | SNV | 1 | T | C | Heterozygous |
| NC_037651.1 | 10070911 | SNV | 1 | A | G | Heterozygous |
| NC_037651.1 | 10091431 | SNV | 1 | A | T | Homozygous   |
| NC_037651.1 | 10092727 | SNV | 1 | T | G | Homozygous   |
| NC_037651.1 | 10092807 | SNV | 1 | G | A | Homozygous   |
| NC_037651.1 | 10092811 | SNV | 1 | C | T | Homozygous   |
| NC_037651.1 | 10092817 | SNV | 1 | A | G | Homozygous   |
| NC_037651.1 | 10092845 | SNV | 1 | G | C | Homozygous   |
| NC_037651.1 | 10092863 | SNV | 1 | G | C | Heterozygous |
| NC_037651.1 | 10092901 | SNV | 1 | C | G | Homozygous   |
| NC_037651.1 | 10093021 | SNV | 1 | T | C | Heterozygous |
| NC_037651.1 | 10093094 | SNV | 1 | T | C | Homozygous   |
| NC_037651.1 | 10093302 | SNV | 1 | G | C | Homozygous   |
| NC_037651.1 | 10093344 | SNV | 1 | C | T | Homozygous   |
| NC_037651.1 | 10094332 | SNV | 1 | G | A | Homozygous   |
| NC_037651.1 | 10094334 | SNV | 1 | A | G | Homozygous   |
| NC_037651.1 | 10094906 | SNV | 1 | G | A | Homozygous   |
| NC_037651.1 | 10097166 | SNV | 1 | C | T | Heterozygous |
| NC_037651.1 | 10097232 | SNV | 1 | G | T | Homozygous   |
| NC_037651.1 | 10097322 | SNV | 1 | G | C | Homozygous   |
| NC_037651.1 | 10097357 | SNV | 1 | T | C | Heterozygous |
| NC_037651.1 | 10097360 | SNV | 1 | T | C | Heterozygous |
| NC_037651.1 | 10097370 | SNV | 1 | C | T | Heterozygous |
| NC_037651.1 | 10097406 | SNV | 1 | T | A | Homozygous   |
| NC_037651.1 | 10097466 | SNV | 1 | T | C | Heterozygous |
| NC_037651.1 | 10120686 | SNV | 1 | T | G | Homozygous   |
| NC_037651.1 | 10120689 | SNV | 1 | C | T | Homozygous   |
| NC_037651.1 | 10133697 | SNV | 1 | T | C | Homozygous   |
| NC_037651.1 | 10135630 | SNV | 1 | C | G | Heterozygous |
| NC_037651.1 | 10150450 | SNV | 1 | T | C | Homozygous   |
| NC_037651.1 | 10150489 | SNV | 1 | G | A | Homozygous   |
| NC_037651.1 | 10150491 | SNV | 1 | G | A | Homozygous   |
| NC_037651.1 | 10151233 | SNV | 1 | C | A | Homozygous   |
| NC_037651.1 | 10151235 | SNV | 1 | G | A | Homozygous   |



|             |          |     |   |   |   |              |
|-------------|----------|-----|---|---|---|--------------|
| NC_037651.1 | 10151293 | SNV | 1 | T | C | Heterozygous |
| NC_037651.1 | 10151420 | SNV | 1 | G | A | Homozygous   |
| NC_037651.1 | 10151729 | SNV | 1 | T | A | Heterozygous |
| NC_037651.1 | 10152056 | SNV | 1 | C | T | Homozygous   |
| NC_037651.1 | 10152066 | SNV | 1 | T | G | Homozygous   |
| NC_037651.1 | 10152591 | SNV | 1 | G | A | Homozygous   |
| NC_037651.1 | 10164132 | SNV | 1 | C | G | Heterozygous |
| NC_037651.1 | 10167293 | SNV | 1 | A | G | Heterozygous |
| NC_037651.1 | 10167863 | SNV | 1 | A | C | Homozygous   |
| NC_037651.1 | 10168824 | SNV | 1 | C | G | Homozygous   |
| NC_037651.1 | 10183434 | SNV | 1 | G | C | Homozygous   |
| NC_037651.1 | 10183982 | SNV | 1 | G | A | Heterozygous |
| NC_037651.1 | 10184044 | SNV | 1 | T | C | Heterozygous |
| NC_037651.1 | 10184076 | SNV | 1 | A | T | Homozygous   |
| NC_037651.1 | 10185184 | SNV | 1 | T | A | Homozygous   |
| NC_037651.1 | 10185204 | SNV | 1 | C | T | Homozygous   |
| NC_037651.1 | 10185219 | SNV | 1 | T | C | Homozygous   |
| NC_037651.1 | 10189334 | SNV | 1 | T | C | Homozygous   |
| NC_037651.1 | 10189353 | SNV | 1 | C | T | Homozygous   |
| NC_037651.1 | 10189456 | SNV | 1 | G | A | Homozygous   |
| NC_037651.1 | 10189480 | SNV | 1 | C | T | Homozygous   |
| NC_037651.1 | 10189493 | SNV | 1 | T | C | Homozygous   |
| NC_037651.1 | 10209173 | SNV | 1 | C | G | Homozygous   |
| NC_037651.1 | 10209201 | SNV | 1 | G | A | Homozygous   |
| NC_037651.1 | 10212250 | SNV | 1 | T | G | Homozygous   |
| NC_037651.1 | 10212275 | SNV | 1 | C | A | Homozygous   |
| NC_037651.1 | 10212277 | SNV | 1 | G | A | Homozygous   |
| NC_037651.1 | 10212282 | SNV | 1 | T | C | Homozygous   |
| NC_037651.1 | 10212286 | SNV | 1 | G | A | Homozygous   |
| NC_037651.1 | 10212293 | SNV | 1 | C | T | Homozygous   |
| NC_037651.1 | 10219995 | SNV | 1 | C | T | Heterozygous |
| NC_037651.1 | 10219999 | SNV | 1 | A | T | Homozygous   |
| NC_037651.1 | 10220072 | SNV | 1 | C | G | Homozygous   |
| NC_037651.1 | 10220123 | SNV | 1 | A | G | Heterozygous |
| NC_037651.1 | 10220166 | SNV | 1 | A | G | Homozygous   |
| NC_037651.1 | 10220194 | SNV | 1 | T | C | Homozygous   |
| NC_037651.1 | 10220492 | SNV | 1 | T | C | Heterozygous |
| NC_037651.1 | 10221320 | SNV | 1 | C | G | Heterozygous |
| NC_037651.1 | 10221320 | SNV | 1 | C | T | Heterozygous |
| NC_037651.1 | 10221330 | SNV | 1 | A | G | Homozygous   |
| NC_037651.1 | 10221355 | SNV | 1 | A | G | Homozygous   |
| NC_037651.1 | 10221789 | SNV | 1 | C | T | Heterozygous |
| NC_037651.1 | 10223374 | SNV | 1 | A | G | Homozygous   |
| NC_037651.1 | 10224450 | SNV | 1 | T | C | Homozygous   |
| NC_037651.1 | 10225148 | SNV | 1 | G | A | Homozygous   |
| NC_037651.1 | 10225214 | SNV | 1 | T | C | Heterozygous |
| NC_037651.1 | 10226751 | SNV | 1 | T | C | Heterozygous |
| NC_037651.1 | 10226895 | SNV | 1 | G | A | Homozygous   |
| NC_037651.1 | 10226978 | SNV | 1 | T | C | Heterozygous |
| NC_037651.1 | 10227095 | SNV | 1 | T | C | Heterozygous |
| NC_037651.1 | 10227218 | SNV | 1 | T | C | Heterozygous |

|             |          |     |   |   |   |              |
|-------------|----------|-----|---|---|---|--------------|
| NC_037651.1 | 10227310 | SNV | 1 | T | C | Homozygous   |
| NC_037651.1 | 10227437 | SNV | 1 | A | G | Homozygous   |
| NC_037651.1 | 10227513 | SNV | 1 | T | C | Homozygous   |
| NC_037651.1 | 10227539 | SNV | 1 | G | A | Homozygous   |
| NC_037651.1 | 10227624 | SNV | 1 | G | T | Heterozygous |
| NC_037651.1 | 10227692 | SNV | 1 | T | C | Homozygous   |
| NC_037651.1 | 10227731 | SNV | 1 | G | A | Homozygous   |
| NC_037651.1 | 10227756 | SNV | 1 | T | C | Heterozygous |
| NC_037651.1 | 10227768 | SNV | 1 | G | A | Heterozygous |
| NC_037651.1 | 10231601 | SNV | 1 | T | C | Homozygous   |
| NC_037651.1 | 10231614 | SNV | 1 | C | T | Heterozygous |
| NC_037651.1 | 10233096 | SNV | 1 | G | T | Heterozygous |
| NC_037651.1 | 10233098 | SNV | 1 | C | T | Heterozygous |
| NC_037651.1 | 10233103 | SNV | 1 | T | A | Heterozygous |
| NC_037651.1 | 10233110 | SNV | 1 | G | T | Heterozygous |
| NC_037651.1 | 10236282 | SNV | 1 | G | A | Homozygous   |
| NC_037651.1 | 10239764 | SNV | 1 | G | T | Heterozygous |
| NC_037651.1 | 10239790 | SNV | 1 | C | T | Heterozygous |
| NC_037651.1 | 10239819 | SNV | 1 | T | C | Heterozygous |
| NC_037651.1 | 10239824 | SNV | 1 | T | C | Heterozygous |
| NC_037651.1 | 10239828 | SNV | 1 | C | T | Heterozygous |
| NC_037651.1 | 10239842 | SNV | 1 | G | C | Homozygous   |
| NC_037651.1 | 10239851 | SNV | 1 | G | T | Heterozygous |
| NC_037651.1 | 10240543 | SNV | 1 | T | C | Homozygous   |
| NC_037651.1 | 10240615 | SNV | 1 | A | G | Homozygous   |
| NC_037651.1 | 10240747 | SNV | 1 | T | A | Heterozygous |
| NC_037651.1 | 10240951 | SNV | 1 | T | A | Heterozygous |
| NC_037651.1 | 10240992 | SNV | 1 | T | A | Homozygous   |
| NC_037651.1 | 10240995 | SNV | 1 | C | T | Homozygous   |
| NC_037651.1 | 10241311 | SNV | 1 | A | G | Homozygous   |
| NC_037651.1 | 10241854 | SNV | 1 | T | C | Heterozygous |
| NC_037651.1 | 10241861 | SNV | 1 | C | A | Heterozygous |
| NC_037651.1 | 10242239 | SNV | 1 | A | G | Homozygous   |
| NC_037651.1 | 10242358 | SNV | 1 | G | C | Heterozygous |
| NC_037651.1 | 10242502 | SNV | 1 | G | A | Heterozygous |
| NC_037651.1 | 10245568 | SNV | 1 | C | T | Heterozygous |
| NC_037651.1 | 10246967 | SNV | 1 | A | G | Homozygous   |
| NC_037651.1 | 10246988 | SNV | 1 | C | A | Homozygous   |
| NC_037651.1 | 10247066 | SNV | 1 | T | C | Homozygous   |
| NC_037651.1 | 10248176 | SNV | 1 | T | C | Homozygous   |
| NC_037651.1 | 10248372 | SNV | 1 | G | A | Homozygous   |
| NC_037651.1 | 10248377 | SNV | 1 | G | C | Heterozygous |
| NC_037651.1 | 10248724 | SNV | 1 | T | C | Heterozygous |
| NC_037651.1 | 10248729 | SNV | 1 | T | C | Homozygous   |
| NC_037651.1 | 10248749 | SNV | 1 | T | C | Heterozygous |
| NC_037651.1 | 10248751 | SNV | 1 | T | C | Homozygous   |
| NC_037651.1 | 10249938 | SNV | 1 | C | A | Heterozygous |
| NC_037651.1 | 10249949 | SNV | 1 | T | A | Heterozygous |
| NC_037651.1 | 10250920 | SNV | 1 | A | G | Heterozygous |
| NC_037651.1 | 10259239 | SNV | 1 | G | T | Heterozygous |
| NC_037651.1 | 10264009 | SNV | 1 | C | A | Heterozygous |

|             |          |     |   |   |   |              |
|-------------|----------|-----|---|---|---|--------------|
| NC_037651.1 | 10264050 | SNV | 1 | A | G | Homozygous   |
| NC_037651.1 | 10264074 | SNV | 1 | T | G | Heterozygous |
| NC_037651.1 | 10264110 | SNV | 1 | T | C | Heterozygous |
| NC_037651.1 | 10268779 | SNV | 1 | C | T | Heterozygous |
| NC_037651.1 | 10269077 | SNV | 1 | A | G | Heterozygous |
| NC_037651.1 | 10270679 | SNV | 1 | T | G | Homozygous   |
| NC_037651.1 | 10270802 | SNV | 1 | T | C | Homozygous   |
| NC_037651.1 | 10270909 | SNV | 1 | T | C | Heterozygous |
| NC_037651.1 | 10279186 | SNV | 1 | G | T | Heterozygous |
| NC_037651.1 | 10279204 | SNV | 1 | G | A | Heterozygous |
| NC_037651.1 | 10280006 | SNV | 1 | C | T | Homozygous   |
| NC_037651.1 | 10280140 | SNV | 1 | G | A | Heterozygous |
| NC_037651.1 | 10299361 | SNV | 1 | G | C | Homozygous   |
| NC_037651.1 | 10299364 | SNV | 1 | C | T | Heterozygous |
| NC_037651.1 | 10299367 | SNV | 1 | G | A | Heterozygous |
| NC_037651.1 | 10299367 | SNV | 1 | G | C | Heterozygous |
| NC_037651.1 | 10299374 | SNV | 1 | C | T | Homozygous   |
| NC_037651.1 | 10299384 | SNV | 1 | C | T | Homozygous   |
| NC_037651.1 | 10299406 | SNV | 1 | G | C | Heterozygous |
| NC_037651.1 | 10299409 | SNV | 1 | C | A | Heterozygous |
| NC_037651.1 | 10300303 | SNV | 1 | T | C | Heterozygous |
| NC_037651.1 | 10301342 | SNV | 1 | T | C | Heterozygous |
| NC_037651.1 | 10308051 | SNV | 1 | A | G | Homozygous   |
| NC_037651.1 | 10308140 | SNV | 1 | C | T | Homozygous   |
| NC_037651.1 | 10308496 | SNV | 1 | T | C | Heterozygous |
| NC_037651.1 | 10308532 | SNV | 1 | A | C | Homozygous   |
| NC_037651.1 | 10308590 | SNV | 1 | G | A | Homozygous   |
| NC_037651.1 | 10308707 | SNV | 1 | G | A | Heterozygous |
| NC_037651.1 | 10310692 | SNV | 1 | A | G | Heterozygous |
| NC_037651.1 | 10310775 | SNV | 1 | T | C | Homozygous   |
| NC_037651.1 | 10310778 | SNV | 1 | C | A | Heterozygous |
| NC_037651.1 | 10310795 | SNV | 1 | A | G | Heterozygous |
| NC_037651.1 | 10310845 | SNV | 1 | A | G | Heterozygous |
| NC_037651.1 | 10310849 | SNV | 1 | A | G | Heterozygous |
| NC_037651.1 | 10310855 | SNV | 1 | G | A | Heterozygous |
| NC_037651.1 | 10310897 | SNV | 1 | T | C | Homozygous   |
| NC_037651.1 | 10310931 | SNV | 1 | A | G | Homozygous   |
| NC_037651.1 | 10310948 | SNV | 1 | G | A | Homozygous   |
| NC_037651.1 | 10310958 | SNV | 1 | G | A | Heterozygous |
| NC_037651.1 | 10311150 | SNV | 1 | C | T | Heterozygous |
| NC_037651.1 | 10311215 | SNV | 1 | T | C | Homozygous   |
| NC_037651.1 | 10311232 | SNV | 1 | G | A | Heterozygous |
| NC_037651.1 | 10312114 | SNV | 1 | A | G | Heterozygous |
| NC_037651.1 | 10312126 | SNV | 1 | G | A | Heterozygous |
| NC_037651.1 | 10312406 | SNV | 1 | A | G | Homozygous   |
| NC_037651.1 | 10312633 | SNV | 1 | T | G | Heterozygous |
| NC_037651.1 | 10312641 | SNV | 1 | T | A | Homozygous   |
| NC_037651.1 | 10312655 | SNV | 1 | A | G | Heterozygous |
| NC_037651.1 | 10312660 | SNV | 1 | C | T | Homozygous   |
| NC_037651.1 | 10329968 | SNV | 1 | T | A | Homozygous   |
| NC_037651.1 | 10344665 | SNV | 1 | A | C | Homozygous   |

|             |          |     |   |   |   |              |
|-------------|----------|-----|---|---|---|--------------|
| NC_037651.1 | 10344667 | SNV | 1 | G | A | Homozygous   |
| NC_037651.1 | 10344753 | SNV | 1 | A | G | Homozygous   |
| NC_037651.1 | 10344755 | SNV | 1 | A | G | Homozygous   |
| NC_037651.1 | 10344810 | SNV | 1 | T | C | Homozygous   |
| NC_037651.1 | 10344827 | SNV | 1 | T | A | Homozygous   |
| NC_037651.1 | 10344831 | SNV | 1 | T | G | Heterozygous |
| NC_037651.1 | 10344877 | SNV | 1 | A | G | Homozygous   |
| NC_037651.1 | 10344887 | SNV | 1 | G | A | Heterozygous |
| NC_037651.1 | 10345047 | SNV | 1 | A | G | Homozygous   |
| NC_037651.1 | 10345620 | SNV | 1 | A | T | Homozygous   |
| NC_037651.1 | 10345647 | SNV | 1 | A | G | Heterozygous |
| NC_037651.1 | 10345662 | SNV | 1 | A | G | Heterozygous |
| NC_037651.1 | 10346938 | SNV | 1 | C | T | Homozygous   |
| NC_037651.1 | 10346973 | SNV | 1 | T | A | Homozygous   |
| NC_037651.1 | 10346983 | SNV | 1 | T | C | Homozygous   |
| NC_037651.1 | 10346987 | SNV | 1 | A | T | Homozygous   |
| NC_037651.1 | 10346989 | SNV | 1 | A | T | Homozygous   |
| NC_037651.1 | 10347001 | SNV | 1 | T | C | Homozygous   |
| NC_037651.1 | 10347008 | SNV | 1 | A | C | Heterozygous |
| NC_037651.1 | 10347018 | SNV | 1 | T | A | Heterozygous |
| NC_037651.1 | 10347023 | SNV | 1 | C | T | Homozygous   |
| NC_037651.1 | 10347033 | SNV | 1 | T | C | Heterozygous |
| NC_037651.1 | 10347120 | SNV | 1 | A | T | Heterozygous |
| NC_037651.1 | 10347228 | SNV | 1 | T | A | Homozygous   |
| NC_037651.1 | 10347234 | SNV | 1 | T | A | Homozygous   |
| NC_037651.1 | 10347240 | SNV | 1 | T | A | Homozygous   |
| NC_037651.1 | 10347629 | SNV | 1 | C | T | Heterozygous |
| NC_037651.1 | 10347632 | SNV | 1 | C | T | Heterozygous |
| NC_037651.1 | 10347642 | SNV | 1 | C | T | Heterozygous |
| NC_037651.1 | 10347995 | SNV | 1 | G | A | Heterozygous |
| NC_037651.1 | 10348018 | SNV | 1 | G | A | Heterozygous |
| NC_037651.1 | 10348776 | SNV | 1 | G | A | Heterozygous |
| NC_037651.1 | 10349165 | SNV | 1 | C | T | Heterozygous |
| NC_037651.1 | 10349180 | SNV | 1 | T | C | Heterozygous |
| NC_037651.1 | 10349492 | SNV | 1 | T | C | Heterozygous |
| NC_037651.1 | 10349785 | SNV | 1 | A | C | Heterozygous |
| NC_037651.1 | 10350182 | SNV | 1 | A | C | Heterozygous |
| NC_037651.1 | 10350193 | SNV | 1 | T | A | Heterozygous |
| NC_037651.1 | 10350520 | SNV | 1 | T | C | Homozygous   |
| NC_037651.1 | 10350524 | SNV | 1 | A | G | Heterozygous |
| NC_037651.1 | 10351145 | SNV | 1 | A | G | Homozygous   |
| NC_037651.1 | 10352115 | SNV | 1 | T | C | Homozygous   |
| NC_037651.1 | 10352213 | SNV | 1 | C | T | Heterozygous |
| NC_037651.1 | 10352552 | SNV | 1 | T | C | Homozygous   |
| NC_037651.1 | 10352844 | SNV | 1 | A | C | Homozygous   |
| NC_037651.1 | 10352850 | SNV | 1 | A | C | Heterozygous |
| NC_037651.1 | 10352865 | SNV | 1 | T | C | Heterozygous |
| NC_037651.1 | 10352878 | SNV | 1 | G | A | Heterozygous |
| NC_037651.1 | 10353004 | SNV | 1 | C | T | Heterozygous |
| NC_037651.1 | 10353007 | SNV | 1 | T | C | Homozygous   |
| NC_037651.1 | 10353148 | SNV | 1 | G | C | Heterozygous |

|             |          |     |   |   |   |              |
|-------------|----------|-----|---|---|---|--------------|
| NC_037651.1 | 10353674 | SNV | 1 | T | C | Heterozygous |
| NC_037651.1 | 10353682 | SNV | 1 | T | C | Heterozygous |
| NC_037651.1 | 10353688 | SNV | 1 | A | T | Homozygous   |
| NC_037651.1 | 10353690 | SNV | 1 | C | T | Homozygous   |
| NC_037651.1 | 10353719 | SNV | 1 | T | A | Homozygous   |
| NC_037651.1 | 10353731 | SNV | 1 | T | G | Homozygous   |
| NC_037651.1 | 10353735 | SNV | 1 | T | G | Homozygous   |
| NC_037651.1 | 10353740 | SNV | 1 | T | C | Heterozygous |
| NC_037651.1 | 10353814 | SNV | 1 | T | C | Heterozygous |
| NC_037651.1 | 10353822 | SNV | 1 | A | C | Heterozygous |
| NC_037651.1 | 10354792 | SNV | 1 | A | C | Heterozygous |
| NC_037651.1 | 10354819 | SNV | 1 | C | A | Heterozygous |
| NC_037651.1 | 10354999 | SNV | 1 | G | A | Heterozygous |
| NC_037651.1 | 10355001 | SNV | 1 | A | G | Homozygous   |
| NC_037651.1 | 10355014 | SNV | 1 | A | G | Heterozygous |
| NC_037651.1 | 10355027 | SNV | 1 | A | G | Homozygous   |
| NC_037651.1 | 10355293 | SNV | 1 | C | T | Homozygous   |
| NC_037651.1 | 10357564 | SNV | 1 | G | C | Heterozygous |
| NC_037651.1 | 10357618 | SNV | 1 | C | G | Heterozygous |
| NC_037651.1 | 10358665 | SNV | 1 | A | C | Homozygous   |
| NC_037651.1 | 10359457 | SNV | 1 | G | C | Heterozygous |
| NC_037651.1 | 10359475 | SNV | 1 | T | C | Homozygous   |
| NC_037651.1 | 10360156 | SNV | 1 | A | C | Heterozygous |
| NC_037651.1 | 10360159 | SNV | 1 | C | A | Heterozygous |
| NC_037651.1 | 10360162 | SNV | 1 | T | C | Heterozygous |
| NC_037651.1 | 10360297 | SNV | 1 | A | G | Homozygous   |
| NC_037651.1 | 10360375 | SNV | 1 | A | G | Homozygous   |
| NC_037651.1 | 10360729 | SNV | 1 | C | T | Heterozygous |
| NC_037651.1 | 10360733 | SNV | 1 | C | G | Heterozygous |
| NC_037651.1 | 10360746 | SNV | 1 | C | T | Homozygous   |
| NC_037651.1 | 10360791 | SNV | 1 | T | C | Heterozygous |
| NC_037651.1 | 10361229 | SNV | 1 | A | G | Homozygous   |
| NC_037651.1 | 10361496 | SNV | 1 | A | G | Homozygous   |
| NC_037651.1 | 10361829 | SNV | 1 | G | A | Heterozygous |
| NC_037651.1 | 10361840 | SNV | 1 | T | C | Homozygous   |
| NC_037651.1 | 10361897 | SNV | 1 | T | C | Homozygous   |
| NC_037651.1 | 10366026 | SNV | 1 | C | T | Homozygous   |
| NC_037651.1 | 10366121 | SNV | 1 | A | G | Homozygous   |
| NC_037651.1 | 10366276 | SNV | 1 | G | T | Heterozygous |
| NC_037651.1 | 10366677 | SNV | 1 | C | T | Heterozygous |
| NC_037651.1 | 10367159 | SNV | 1 | C | T | Homozygous   |
| NC_037651.1 | 10367352 | SNV | 1 | A | G | Homozygous   |
| NC_037651.1 | 10367355 | SNV | 1 | A | C | Homozygous   |
| NC_037651.1 | 10367357 | SNV | 1 | A | G | Homozygous   |
| NC_037651.1 | 10369122 | SNV | 1 | T | C | Heterozygous |
| NC_037651.1 | 10369349 | SNV | 1 | A | T | Homozygous   |
| NC_037651.1 | 10369352 | SNV | 1 | T | G | Homozygous   |
| NC_037651.1 | 10369359 | SNV | 1 | A | G | Homozygous   |
| NC_037651.1 | 10369374 | SNV | 1 | A | G | Homozygous   |
| NC_037651.1 | 10369925 | SNV | 1 | A | T | Heterozygous |
| NC_037651.1 | 10370665 | SNV | 1 | T | C | Homozygous   |

|             |          |     |   |   |   |              |
|-------------|----------|-----|---|---|---|--------------|
| NC_037651.1 | 10370668 | SNV | 1 | T | A | Homozygous   |
| NC_037651.1 | 10370670 | SNV | 1 | T | A | Homozygous   |
| NC_037651.1 | 10379892 | SNV | 1 | G | C | Heterozygous |
| NC_037651.1 | 10381989 | SNV | 1 | A | G | Homozygous   |
| NC_037651.1 | 10382186 | SNV | 1 | T | C | Homozygous   |
| NC_037651.1 | 10382639 | SNV | 1 | A | G | Homozygous   |
| NC_037651.1 | 10383203 | SNV | 1 | G | A | Heterozygous |
| NC_037651.1 | 10383320 | SNV | 1 | T | C | Heterozygous |
| NC_037651.1 | 10383612 | SNV | 1 | G | C | Heterozygous |
| NC_037651.1 | 10409950 | SNV | 1 | G | T | Homozygous   |
| NC_037651.1 | 10409963 | SNV | 1 | T | C | Homozygous   |
| NC_037651.1 | 10420286 | SNV | 1 | C | G | Homozygous   |
| NC_037651.1 | 10420292 | SNV | 1 | G | A | Heterozygous |
| NC_037651.1 | 10426861 | SNV | 1 | G | T | Homozygous   |
| NC_037651.1 | 10427887 | SNV | 1 | T | C | Homozygous   |
| NC_037651.1 | 10428079 | SNV | 1 | T | C | Homozygous   |
| NC_037651.1 | 10428151 | SNV | 1 | T | C | Heterozygous |
| NC_037651.1 | 10428237 | SNV | 1 | C | T | Heterozygous |
| NC_037651.1 | 10428270 | SNV | 1 | G | A | Homozygous   |
| NC_037651.1 | 10428343 | SNV | 1 | G | A | Homozygous   |
| NC_037651.1 | 10429087 | SNV | 1 | A | C | Heterozygous |
| NC_037651.1 | 10429237 | SNV | 1 | A | G | Homozygous   |
| NC_037651.1 | 10429306 | SNV | 1 | A | C | Heterozygous |
| NC_037651.1 | 10429321 | SNV | 1 | T | C | Homozygous   |
| NC_037651.1 | 10429447 | SNV | 1 | T | C | Homozygous   |
| NC_037651.1 | 10432051 | SNV | 1 | T | C | Homozygous   |
| NC_037651.1 | 10433144 | SNV | 1 | A | G | Homozygous   |
| NC_037651.1 | 10434748 | SNV | 1 | A | G | Heterozygous |
| NC_037651.1 | 10435228 | SNV | 1 | T | C | Heterozygous |
| NC_037651.1 | 10435677 | SNV | 1 | T | C | Heterozygous |
| NC_037651.1 | 10440143 | SNV | 1 | G | A | Homozygous   |
| NC_037651.1 | 10440315 | SNV | 1 | A | T | Heterozygous |
| NC_037651.1 | 10441531 | SNV | 1 | C | A | Heterozygous |
| NC_037651.1 | 10441666 | SNV | 1 | A | G | Homozygous   |
| NC_037651.1 | 10442117 | SNV | 1 | A | G | Homozygous   |
| NC_037651.1 | 10446582 | SNV | 1 | T | C | Homozygous   |
| NC_037651.1 | 10447704 | SNV | 1 | T | C | Homozygous   |
| NC_037651.1 | 10450351 | SNV | 1 | C | T | Homozygous   |
| NC_037651.1 | 10450602 | SNV | 1 | T | C | Homozygous   |
| NC_037651.1 | 10450667 | SNV | 1 | T | C | Homozygous   |
| NC_037651.1 | 10450740 | SNV | 1 | C | T | Homozygous   |
| NC_037651.1 | 10450744 | SNV | 1 | T | C | Homozygous   |
| NC_037651.1 | 10451213 | SNV | 1 | T | C | Homozygous   |
| NC_037651.1 | 10451511 | SNV | 1 | T | C | Heterozygous |
| NC_037651.1 | 10451624 | SNV | 1 | A | T | Heterozygous |
| NC_037651.1 | 10451626 | SNV | 1 | A | G | Heterozygous |
| NC_037651.1 | 10451635 | SNV | 1 | A | T | Heterozygous |
| NC_037651.1 | 10455924 | SNV | 1 | T | C | Homozygous   |
| NC_037651.1 | 10456005 | SNV | 1 | T | C | Homozygous   |
| NC_037651.1 | 10456364 | SNV | 1 | T | C | Homozygous   |
| NC_037651.1 | 10456575 | SNV | 1 | A | G | Homozygous   |

|             |          |     |   |   |   |              |
|-------------|----------|-----|---|---|---|--------------|
| NC_037651.1 | 10456611 | SNV | 1 | A | G | Homozygous   |
| NC_037651.1 | 10456621 | SNV | 1 | A | T | Homozygous   |
| NC_037651.1 | 10456753 | SNV | 1 | C | T | Heterozygous |
| NC_037651.1 | 10456974 | SNV | 1 | T | C | Heterozygous |
| NC_037651.1 | 10457266 | SNV | 1 | G | A | Homozygous   |
| NC_037651.1 | 10457285 | SNV | 1 | C | A | Homozygous   |
| NC_037651.1 | 10458412 | SNV | 1 | A | G | Homozygous   |
| NC_037651.1 | 10458454 | SNV | 1 | A | G | Homozygous   |
| NC_037651.1 | 10458589 | SNV | 1 | A | G | Heterozygous |
| NC_037651.1 | 10458756 | SNV | 1 | A | G | Heterozygous |
| NC_037651.1 | 10459132 | SNV | 1 | A | T | Homozygous   |
| NC_037651.1 | 10459136 | SNV | 1 | G | C | Homozygous   |
| NC_037651.1 | 10459295 | SNV | 1 | A | G | Homozygous   |
| NC_037651.1 | 10459608 | SNV | 1 | T | C | Heterozygous |
| NC_037651.1 | 10460490 | SNV | 1 | A | G | Homozygous   |
| NC_037651.1 | 10461359 | SNV | 1 | T | A | Heterozygous |
| NC_037651.1 | 10463349 | SNV | 1 | G | A | Heterozygous |
| NC_037651.1 | 10463355 | SNV | 1 | C | T | Heterozygous |
| NC_037651.1 | 10466872 | SNV | 1 | G | A | Homozygous   |
| NC_037651.1 | 10467542 | SNV | 1 | C | T | Heterozygous |
| NC_037651.1 | 10469304 | SNV | 1 | T | C | Heterozygous |
| NC_037651.1 | 10469308 | SNV | 1 | T | C | Homozygous   |
| NC_037651.1 | 10469314 | SNV | 1 | A | G | Homozygous   |
| NC_037651.1 | 10469322 | SNV | 1 | C | G | Homozygous   |
| NC_037651.1 | 10469330 | SNV | 1 | G | C | Homozygous   |
| NC_037651.1 | 10469363 | SNV | 1 | A | G | Heterozygous |
| NC_037651.1 | 10469370 | SNV | 1 | G | C | Heterozygous |
| NC_037651.1 | 10469383 | SNV | 1 | A | G | Heterozygous |
| NC_037651.1 | 10469393 | SNV | 1 | A | G | Heterozygous |
| NC_037651.1 | 10469410 | SNV | 1 | G | A | Homozygous   |
| NC_037651.1 | 10469737 | SNV | 1 | G | A | Heterozygous |
| NC_037651.1 | 10469747 | SNV | 1 | A | C | Heterozygous |
| NC_037651.1 | 10471265 | SNV | 1 | G | A | Homozygous   |
| NC_037651.1 | 10479525 | SNV | 1 | C | T | Heterozygous |
| NC_037651.1 | 10480184 | SNV | 1 | T | C | Homozygous   |
| NC_037651.1 | 10480664 | SNV | 1 | G | T | Homozygous   |
| NC_037651.1 | 10480812 | SNV | 1 | G | A | Heterozygous |
| NC_037651.1 | 10481321 | SNV | 1 | T | A | Heterozygous |
| NC_037651.1 | 10481728 | SNV | 1 | C | G | Homozygous   |
| NC_037651.1 | 10484321 | SNV | 1 | A | G | Heterozygous |
| NC_037651.1 | 10484328 | SNV | 1 | A | G | Heterozygous |
| NC_037651.1 | 10484394 | SNV | 1 | A | G | Heterozygous |
| NC_037651.1 | 10484397 | SNV | 1 | A | G | Heterozygous |
| NC_037651.1 | 10484399 | SNV | 1 | A | T | Heterozygous |
| NC_037651.1 | 10484403 | SNV | 1 | A | G | Heterozygous |
| NC_037651.1 | 10484411 | SNV | 1 | A | T | Heterozygous |
| NC_037651.1 | 10484417 | SNV | 1 | T | A | Heterozygous |
| NC_037651.1 | 10484420 | SNV | 1 | A | T | Heterozygous |
| NC_037651.1 | 10487324 | SNV | 1 | A | G | Homozygous   |
| NC_037651.1 | 10488505 | SNV | 1 | T | A | Homozygous   |
| NC_037651.1 | 10488507 | SNV | 1 | T | A | Homozygous   |

|             |          |     |   |   |   |              |
|-------------|----------|-----|---|---|---|--------------|
| NC_037651.1 | 10488510 | SNV | 1 | G | T | Homozygous   |
| NC_037651.1 | 10489019 | SNV | 1 | C | T | Homozygous   |
| NC_037651.1 | 10489022 | SNV | 1 | A | T | Homozygous   |
| NC_037651.1 | 10489877 | SNV | 1 | A | G | Homozygous   |
| NC_037651.1 | 10490199 | SNV | 1 | A | G | Homozygous   |
| NC_037651.1 | 10491023 | SNV | 1 | A | G | Heterozygous |
| NC_037651.1 | 10492024 | SNV | 1 | G | A | Heterozygous |
| NC_037651.1 | 10492029 | SNV | 1 | C | A | Heterozygous |
| NC_037651.1 | 10492514 | SNV | 1 | A | G | Heterozygous |
| NC_037651.1 | 10493010 | SNV | 1 | C | A | Homozygous   |
| NC_037651.1 | 10493029 | SNV | 1 | G | A | Heterozygous |
| NC_037651.1 | 10493063 | SNV | 1 | A | G | Homozygous   |
| NC_037651.1 | 10493117 | SNV | 1 | G | A | Heterozygous |
| NC_037651.1 | 10493304 | SNV | 1 | A | G | Homozygous   |
| NC_037651.1 | 10494003 | SNV | 1 | T | C | Heterozygous |
| NC_037651.1 | 10494006 | SNV | 1 | A | T | Heterozygous |
| NC_037651.1 | 10494008 | SNV | 1 | C | T | Heterozygous |
| NC_037651.1 | 10497984 | SNV | 1 | A | C | Heterozygous |
| NC_037651.1 | 10498608 | SNV | 1 | A | C | Heterozygous |
| NC_037651.1 | 10499124 | SNV | 1 | T | C | Homozygous   |
| NC_037651.1 | 10499436 | SNV | 1 | A | C | Heterozygous |
| NC_037651.1 | 10499751 | SNV | 1 | T | C | Homozygous   |
| NC_037651.1 | 10500019 | SNV | 1 | C | T | Homozygous   |
| NC_037651.1 | 10500559 | SNV | 1 | C | G | Heterozygous |
| NC_037651.1 | 10500811 | SNV | 1 | C | T | Homozygous   |
| NC_037651.1 | 10500832 | SNV | 1 | C | T | Homozygous   |
| NC_037651.1 | 10500992 | SNV | 1 | A | C | Homozygous   |
| NC_037651.1 | 10501298 | SNV | 1 | A | G | Homozygous   |
| NC_037651.1 | 10501336 | SNV | 1 | C | T | Heterozygous |
| NC_037651.1 | 10501387 | SNV | 1 | C | T | Heterozygous |
| NC_037651.1 | 10510966 | SNV | 1 | C | G | Heterozygous |
| NC_037651.1 | 10510970 | SNV | 1 | C | T | Heterozygous |
| NC_037651.1 | 10517726 | SNV | 1 | G | T | Homozygous   |
| NC_037651.1 | 10517833 | SNV | 1 | T | C | Homozygous   |
| NC_037651.1 | 10517843 | SNV | 1 | C | T | Heterozygous |
| NC_037651.1 | 10517850 | SNV | 1 | A | C | Homozygous   |
| NC_037651.1 | 10518325 | SNV | 1 | A | G | Heterozygous |
| NC_037651.1 | 10518338 | SNV | 1 | G | A | Heterozygous |
| NC_037651.1 | 10520362 | SNV | 1 | G | A | Heterozygous |
| NC_037651.1 | 10520368 | SNV | 1 | G | A | Heterozygous |
| NC_037651.1 | 10520383 | SNV | 1 | A | T | Heterozygous |
| NC_037651.1 | 10520401 | SNV | 1 | A | G | Heterozygous |
| NC_037651.1 | 10520404 | SNV | 1 | A | G | Heterozygous |
| NC_037651.1 | 10520427 | SNV | 1 | T | C | Heterozygous |
| NC_037651.1 | 10520487 | SNV | 1 | A | C | Homozygous   |
| NC_037651.1 | 10520500 | SNV | 1 | G | C | Homozygous   |
| NC_037651.1 | 10520503 | SNV | 1 | G | T | Homozygous   |
| NC_037651.1 | 10520521 | SNV | 1 | G | C | Homozygous   |
| NC_037651.1 | 10532666 | SNV | 1 | T | A | Homozygous   |
| NC_037651.1 | 10532669 | SNV | 1 | A | G | Homozygous   |
| NC_037651.1 | 10532699 | SNV | 1 | G | A | Homozygous   |



|             |          |     |   |   |   |              |
|-------------|----------|-----|---|---|---|--------------|
| NC_037651.1 | 10532702 | SNV | 1 | C | A | Homozygous   |
| NC_037651.1 | 10532705 | SNV | 1 | T | A | Homozygous   |
| NC_037651.1 | 10532720 | SNV | 1 | A | G | Heterozygous |
| NC_037651.1 | 10538076 | SNV | 1 | T | A | Homozygous   |
| NC_037651.1 | 10538097 | SNV | 1 | C | T | Homozygous   |
| NC_037651.1 | 10538104 | SNV | 1 | A | C | Homozygous   |
| NC_037651.1 | 10541631 | SNV | 1 | T | A | Heterozygous |
| NC_037651.1 | 10541661 | SNV | 1 | C | T | Homozygous   |
| NC_037651.1 | 10541666 | SNV | 1 | A | G | Heterozygous |
| NC_037651.1 | 10541670 | SNV | 1 | T | C | Homozygous   |
| NC_037651.1 | 10541673 | SNV | 1 | T | A | Heterozygous |
| NC_037651.1 | 10541710 | SNV | 1 | A | G | Homozygous   |
| NC_037651.1 | 10541715 | SNV | 1 | T | C | Heterozygous |
| NC_037651.1 | 10541720 | SNV | 1 | A | G | Homozygous   |
| NC_037651.1 | 10555818 | SNV | 1 | G | A | Homozygous   |
| NC_037651.1 | 10555978 | SNV | 1 | A | G | Heterozygous |
| NC_037651.1 | 10556019 | SNV | 1 | C | T | Heterozygous |
| NC_037651.1 | 10556544 | SNV | 1 | T | C | Homozygous   |
| NC_037651.1 | 10557601 | SNV | 1 | G | A | Heterozygous |
| NC_037651.1 | 10558100 | SNV | 1 | T | C | Homozygous   |
| NC_037651.1 | 10558220 | SNV | 1 | T | C | Homozygous   |
| NC_037651.1 | 10558367 | SNV | 1 | A | G | Homozygous   |
| NC_037651.1 | 10561348 | SNV | 1 | A | G | Heterozygous |
| NC_037651.1 | 10561634 | SNV | 1 | T | C | Heterozygous |
| NC_037651.1 | 10562533 | SNV | 1 | T | G | Heterozygous |
| NC_037651.1 | 10562648 | SNV | 1 | G | C | Homozygous   |
| NC_037651.1 | 10564092 | SNV | 1 | A | G | Homozygous   |
| NC_037651.1 | 10564428 | SNV | 1 | A | G | Heterozygous |
| NC_037651.1 | 10564445 | SNV | 1 | T | C | Homozygous   |
| NC_037651.1 | 10564558 | SNV | 1 | A | G | Homozygous   |
| NC_037651.1 | 10565726 | SNV | 1 | G | C | Heterozygous |
| NC_037651.1 | 10566052 | SNV | 1 | C | T | Homozygous   |
| NC_037651.1 | 10566274 | SNV | 1 | G | A | Heterozygous |
| NC_037651.1 | 10566331 | SNV | 1 | C | T | Heterozygous |
| NC_037651.1 | 10568920 | SNV | 1 | C | T | Homozygous   |
| NC_037651.1 | 10568927 | SNV | 1 | G | A | Homozygous   |
| NC_037651.1 | 10568940 | SNV | 1 | C | T | Homozygous   |
| NC_037651.1 | 10568943 | SNV | 1 | G | A | Homozygous   |
| NC_037651.1 | 10568951 | SNV | 1 | A | G | Heterozygous |
| NC_037651.1 | 10568955 | SNV | 1 | G | A | Heterozygous |
| NC_037651.1 | 10572210 | SNV | 1 | C | T | Homozygous   |
| NC_037651.1 | 10572222 | SNV | 1 | C | T | Homozygous   |
| NC_037651.1 | 10572228 | SNV | 1 | C | T | Homozygous   |
| NC_037651.1 | 10572231 | SNV | 1 | C | T | Homozygous   |
| NC_037651.1 | 10572234 | SNV | 1 | T | C | Homozygous   |
| NC_037651.1 | 10572237 | SNV | 1 | C | T | Homozygous   |
| NC_037651.1 | 10572277 | SNV | 1 | A | C | Homozygous   |
| NC_037651.1 | 10572292 | SNV | 1 | A | G | Homozygous   |
| NC_037651.1 | 10573069 | SNV | 1 | C | T | Heterozygous |
| NC_037651.1 | 10573787 | SNV | 1 | T | C | Homozygous   |
| NC_037651.1 | 10573795 | SNV | 1 | T | C | Homozygous   |

|             |          |     |   |   |   |              |
|-------------|----------|-----|---|---|---|--------------|
| NC_037651.1 | 10574007 | SNV | 1 | G | A | Homozygous   |
| NC_037651.1 | 10575566 | SNV | 1 | C | T | Homozygous   |
| NC_037651.1 | 10576530 | SNV | 1 | G | A | Heterozygous |
| NC_037651.1 | 10576844 | SNV | 1 | G | A | Heterozygous |
| NC_037651.1 | 10580104 | SNV | 1 | C | T | Heterozygous |
| NC_037651.1 | 10581115 | SNV | 1 | C | T | Heterozygous |
| NC_037651.1 | 10581638 | SNV | 1 | A | G | Homozygous   |
| NC_037651.1 | 10581883 | SNV | 1 | G | T | Homozygous   |
| NC_037651.1 | 10581889 | SNV | 1 | T | C | Homozygous   |
| NC_037651.1 | 10581907 | SNV | 1 | G | C | Heterozygous |
| NC_037651.1 | 10583278 | SNV | 1 | C | T | Heterozygous |
| NC_037651.1 | 10584334 | SNV | 1 | T | C | Homozygous   |
| NC_037651.1 | 10584805 | SNV | 1 | G | A | Homozygous   |
| NC_037651.1 | 10585436 | SNV | 1 | T | C | Homozygous   |
| NC_037651.1 | 10585728 | SNV | 1 | T | C | Homozygous   |
| NC_037651.1 | 10586007 | SNV | 1 | A | G | Heterozygous |
| NC_037651.1 | 10587299 | SNV | 1 | G | A | Heterozygous |
| NC_037651.1 | 10587345 | SNV | 1 | G | C | Heterozygous |
| NC_037651.1 | 10587381 | SNV | 1 | C | T | Heterozygous |
| NC_037651.1 | 10587384 | SNV | 1 | C | A | Heterozygous |
| NC_037651.1 | 10587414 | SNV | 1 | T | C | Homozygous   |
| NC_037651.1 | 10587418 | SNV | 1 | G | A | Homozygous   |
| NC_037651.1 | 10587423 | SNV | 1 | C | A | Homozygous   |
| NC_037651.1 | 10587426 | SNV | 1 | T | C | Homozygous   |
| NC_037651.1 | 10587545 | SNV | 1 | A | C | Heterozygous |
| NC_037651.1 | 10587558 | SNV | 1 | T | G | Heterozygous |
| NC_037651.1 | 10587576 | SNV | 1 | C | T | Heterozygous |
| NC_037651.1 | 10587579 | SNV | 1 | C | T | Homozygous   |
| NC_037651.1 | 10587583 | SNV | 1 | G | C | Homozygous   |
| NC_037651.1 | 10587597 | SNV | 1 | G | C | Heterozygous |
| NC_037651.1 | 10587606 | SNV | 1 | G | C | Heterozygous |
| NC_037651.1 | 10587609 | SNV | 1 | C | T | Heterozygous |
| NC_037651.1 | 10587612 | SNV | 1 | G | A | Homozygous   |
| NC_037651.1 | 10587618 | SNV | 1 | T | A | Homozygous   |
| NC_037651.1 | 10590111 | SNV | 1 | T | A | Homozygous   |
| NC_037651.1 | 10590118 | SNV | 1 | T | A | Heterozygous |
| NC_037651.1 | 10590125 | SNV | 1 | A | G | Heterozygous |
| NC_037651.1 | 10590132 | SNV | 1 | T | A | Homozygous   |
| NC_037651.1 | 10590134 | SNV | 1 | T | A | Heterozygous |
| NC_037651.1 | 10590137 | SNV | 1 | A | T | Heterozygous |
| NC_037651.1 | 10590147 | SNV | 1 | A | G | Homozygous   |
| NC_037651.1 | 10590157 | SNV | 1 | A | T | Homozygous   |
| NC_037651.1 | 10590161 | SNV | 1 | A | C | Homozygous   |
| NC_037651.1 | 10591138 | SNV | 1 | A | G | Heterozygous |
| NC_037651.1 | 10591142 | SNV | 1 | G | T | Homozygous   |
| NC_037651.1 | 10593101 | SNV | 1 | C | A | Homozygous   |
| NC_037651.1 | 10595335 | SNV | 1 | G | T | Homozygous   |
| NC_037651.1 | 10595339 | SNV | 1 | A | T | Homozygous   |
| NC_037651.1 | 10599138 | SNV | 1 | A | G | Homozygous   |
| NC_037651.1 | 10600075 | SNV | 1 | G | A | Heterozygous |
| NC_037651.1 | 10602536 | SNV | 1 | G | A | Homozygous   |

|             |          |     |   |   |   |              |
|-------------|----------|-----|---|---|---|--------------|
| NC_037651.1 | 10602575 | SNV | 1 | T | C | Homozygous   |
| NC_037651.1 | 10603004 | SNV | 1 | C | G | Homozygous   |
| NC_037651.1 | 10603302 | SNV | 1 | T | C | Homozygous   |
| NC_037651.1 | 10603690 | SNV | 1 | C | T | Homozygous   |
| NC_037651.1 | 10604995 | SNV | 1 | T | C | Heterozygous |
| NC_037651.1 | 10605500 | SNV | 1 | A | G | Homozygous   |
| NC_037651.1 | 10606213 | SNV | 1 | A | G | Homozygous   |
| NC_037651.1 | 10606217 | SNV | 1 | A | G | Heterozygous |
| NC_037651.1 | 10606336 | SNV | 1 | C | T | Homozygous   |
| NC_037651.1 | 10607928 | SNV | 1 | T | C | Homozygous   |
| NC_037651.1 | 10607941 | SNV | 1 | A | T | Homozygous   |
| NC_037651.1 | 10609211 | SNV | 1 | T | C | Homozygous   |
| NC_037651.1 | 10609488 | SNV | 1 | T | C | Homozygous   |
| NC_037651.1 | 10609535 | SNV | 1 | G | A | Homozygous   |
| NC_037651.1 | 10611204 | SNV | 1 | A | G | Homozygous   |
| NC_037651.1 | 10611210 | SNV | 1 | A | G | Homozygous   |
| NC_037651.1 | 10611218 | SNV | 1 | A | T | Heterozygous |
| NC_037651.1 | 10611220 | SNV | 1 | A | C | Heterozygous |
| NC_037651.1 | 10611223 | SNV | 1 | T | C | Homozygous   |
| NC_037651.1 | 10611228 | SNV | 1 | A | G | Heterozygous |
| NC_037651.1 | 10617706 | SNV | 1 | C | T | Heterozygous |
| NC_037651.1 | 10621849 | SNV | 1 | G | A | Homozygous   |
| NC_037651.1 | 10631393 | SNV | 1 | T | C | Homozygous   |
| NC_037651.1 | 10632263 | SNV | 1 | T | C | Heterozygous |
| NC_037651.1 | 10632266 | SNV | 1 | A | G | Heterozygous |
| NC_037651.1 | 10632301 | SNV | 1 | A | G | Heterozygous |
| NC_037651.1 | 10632303 | SNV | 1 | A | G | Homozygous   |
| NC_037651.1 | 10635818 | SNV | 1 | A | G | Homozygous   |
| NC_037651.1 | 10635893 | SNV | 1 | C | G | Homozygous   |
| NC_037651.1 | 10641730 | SNV | 1 | A | G | Homozygous   |
| NC_037651.1 | 10643546 | SNV | 1 | A | C | Homozygous   |
| NC_037651.1 | 10643866 | SNV | 1 | C | T | Homozygous   |
| NC_037651.1 | 10644816 | SNV | 1 | C | T | Homozygous   |
| NC_037651.1 | 10649193 | SNV | 1 | G | A | Homozygous   |
| NC_037651.1 | 10650618 | SNV | 1 | T | C | Homozygous   |
| NC_037651.1 | 10651212 | SNV | 1 | C | A | Homozygous   |
| NC_037651.1 | 10651284 | SNV | 1 | C | T | Heterozygous |
| NC_037651.1 | 10651758 | SNV | 1 | C | T | Homozygous   |
| NC_037651.1 | 10652156 | SNV | 1 | C | T | Homozygous   |
| NC_037651.1 | 10652199 | SNV | 1 | T | C | Homozygous   |
| NC_037651.1 | 10652285 | SNV | 1 | C | T | Homozygous   |
| NC_037651.1 | 10652558 | SNV | 1 | A | T | Homozygous   |
| NC_037651.1 | 10652635 | SNV | 1 | T | A | Heterozygous |
| NC_037651.1 | 10652637 | SNV | 1 | A | T | Heterozygous |
| NC_037651.1 | 10652691 | SNV | 1 | G | A | Heterozygous |
| NC_037652.1 | 48638    | SNV | 1 | A | G | Homozygous   |
| NC_037652.1 | 486057   | SNV | 1 | G | A | Homozygous   |
| NC_037652.1 | 486059   | SNV | 1 | A | G | Homozygous   |
| NC_037652.1 | 494289   | SNV | 1 | A | G | Heterozygous |
| NC_037652.1 | 494324   | SNV | 1 | A | G | Homozygous   |
| NC_037652.1 | 494330   | SNV | 1 | T | G | Homozygous   |

|             |        |     |   |   |   |              |
|-------------|--------|-----|---|---|---|--------------|
| NC_037652.1 | 511225 | SNV | 1 | T | A | Heterozygous |
| NC_037652.1 | 511236 | SNV | 1 | A | T | Heterozygous |
| NC_037652.1 | 511243 | SNV | 1 | C | A | Heterozygous |
| NC_037652.1 | 511246 | SNV | 1 | T | G | Homozygous   |
| NC_037652.1 | 511271 | SNV | 1 | T | G | Heterozygous |
| NC_037652.1 | 511275 | SNV | 1 | A | T | Heterozygous |
| NC_037652.1 | 511278 | SNV | 1 | A | T | Heterozygous |
| NC_037652.1 | 511280 | SNV | 1 | T | G | Homozygous   |
| NC_037652.1 | 511622 | SNV | 1 | A | T | Heterozygous |
| NC_037652.1 | 511628 | SNV | 1 | T | G | Heterozygous |
| NC_037652.1 | 511640 | SNV | 1 | T | A | Heterozygous |
| NC_037652.1 | 511649 | SNV | 1 | T | G | Heterozygous |
| NC_037652.1 | 533338 | SNV | 1 | A | T | Homozygous   |
| NC_037652.1 | 544628 | SNV | 1 | A | T | Homozygous   |
| NC_037652.1 | 544639 | SNV | 1 | T | A | Homozygous   |
| NC_037652.1 | 549873 | SNV | 1 | C | T | Heterozygous |
| NC_037652.1 | 549889 | SNV | 1 | G | T | Heterozygous |
| NC_037652.1 | 549896 | SNV | 1 | G | T | Heterozygous |
| NC_037652.1 | 556900 | SNV | 1 | T | A | Homozygous   |
| NC_037652.1 | 556921 | SNV | 1 | A | T | Homozygous   |
| NC_037652.1 | 563686 | SNV | 1 | T | C | Homozygous   |
| NC_037652.1 | 563688 | SNV | 1 | C | T | Homozygous   |
| NC_037652.1 | 563690 | SNV | 1 | T | A | Homozygous   |
| NC_037652.1 | 564186 | SNV | 1 | G | A | Heterozygous |
| NC_037652.1 | 567454 | SNV | 1 | C | A | Homozygous   |
| NC_037652.1 | 567476 | SNV | 1 | G | A | Homozygous   |
| NC_037652.1 | 567478 | SNV | 1 | T | G | Homozygous   |
| NC_037652.1 | 567493 | SNV | 1 | G | A | Homozygous   |
| NC_037652.1 | 588169 | SNV | 1 | T | A | Homozygous   |
| NC_037652.1 | 588184 | SNV | 1 | T | A | Homozygous   |
| NC_037652.1 | 593568 | SNV | 1 | T | A | Homozygous   |
| NC_037652.1 | 593585 | SNV | 1 | T | A | Homozygous   |
| NC_037652.1 | 593593 | SNV | 1 | T | A | Homozygous   |
| NC_037652.1 | 593596 | SNV | 1 | T | A | Homozygous   |
| NC_037652.1 | 610802 | SNV | 1 | A | G | Heterozygous |
| NC_037652.1 | 610812 | SNV | 1 | G | C | Homozygous   |
| NC_037652.1 | 610828 | SNV | 1 | T | C | Heterozygous |
| NC_037652.1 | 610841 | SNV | 1 | T | A | Homozygous   |
| NC_037652.1 | 610856 | SNV | 1 | G | T | Homozygous   |
| NC_037652.1 | 612031 | SNV | 1 | C | T | Heterozygous |
| NC_037652.1 | 612036 | SNV | 1 | A | T | Heterozygous |
| NC_037652.1 | 612040 | SNV | 1 | C | A | Heterozygous |
| NC_037652.1 | 612067 | SNV | 1 | A | T | Heterozygous |
| NC_037652.1 | 612086 | SNV | 1 | C | T | Heterozygous |
| NC_037652.1 | 626684 | SNV | 1 | A | T | Heterozygous |
| NC_037652.1 | 627388 | SNV | 1 | G | T | Homozygous   |
| NC_037652.1 | 630667 | SNV | 1 | C | T | Heterozygous |
| NC_037652.1 | 636780 | SNV | 1 | G | A | Heterozygous |
| NC_037652.1 | 636796 | SNV | 1 | A | G | Heterozygous |
| NC_037652.1 | 645796 | SNV | 1 | A | T | Homozygous   |
| NC_037652.1 | 645821 | SNV | 1 | T | A | Homozygous   |

|             |        |     |   |   |   |              |
|-------------|--------|-----|---|---|---|--------------|
| NC_037652.1 | 645833 | SNV | 1 | G | A | Homozygous   |
| NC_037652.1 | 645842 | SNV | 1 | T | A | Homozygous   |
| NC_037652.1 | 646596 | SNV | 1 | C | A | Heterozygous |
| NC_037652.1 | 646601 | SNV | 1 | G | C | Heterozygous |
| NC_037652.1 | 646622 | SNV | 1 | G | A | Homozygous   |
| NC_037652.1 | 646625 | SNV | 1 | G | C | Heterozygous |
| NC_037652.1 | 646651 | SNV | 1 | A | T | Heterozygous |
| NC_037652.1 | 646653 | SNV | 1 | C | A | Heterozygous |
| NC_037652.1 | 652975 | SNV | 1 | G | A | Heterozygous |
| NC_037652.1 | 656272 | SNV | 1 | T | A | Homozygous   |
| NC_037652.1 | 656406 | SNV | 1 | T | A | Homozygous   |
| NC_037652.1 | 658009 | SNV | 1 | A | G | Homozygous   |
| NC_037652.1 | 658418 | SNV | 1 | A | G | Homozygous   |
| NC_037652.1 | 658769 | SNV | 1 | C | T | Homozygous   |
| NC_037652.1 | 662879 | SNV | 1 | C | T | Homozygous   |
| NC_037652.1 | 665563 | SNV | 1 | A | G | Homozygous   |
| NC_037652.1 | 672958 | SNV | 1 | T | A | Homozygous   |
| NC_037652.1 | 672960 | SNV | 1 | T | G | Homozygous   |
| NC_037652.1 | 672970 | SNV | 1 | A | T | Homozygous   |
| NC_037652.1 | 672977 | SNV | 1 | T | G | Homozygous   |
| NC_037652.1 | 672997 | SNV | 1 | T | G | Homozygous   |
| NC_037652.1 | 700151 | SNV | 1 | T | A | Homozygous   |
| NC_037652.1 | 700156 | SNV | 1 | T | A | Homozygous   |
| NC_037652.1 | 700183 | SNV | 1 | A | C | Homozygous   |
| NC_037652.1 | 700187 | SNV | 1 | T | A | Homozygous   |
| NC_037652.1 | 700192 | SNV | 1 | T | A | Homozygous   |
| NC_037652.1 | 700203 | SNV | 1 | A | T | Homozygous   |
| NC_037652.1 | 711996 | SNV | 1 | T | G | Homozygous   |
| NC_037652.1 | 712003 | SNV | 1 | G | A | Heterozygous |
| NC_037652.1 | 712005 | SNV | 1 | G | A | Homozygous   |
| NC_037652.1 | 712007 | SNV | 1 | G | A | Homozygous   |
| NC_037652.1 | 712015 | SNV | 1 | G | T | Homozygous   |
| NC_037652.1 | 720205 | SNV | 1 | G | A | Heterozygous |
| NC_037652.1 | 720289 | SNV | 1 | T | C | Heterozygous |
| NC_037652.1 | 720296 | SNV | 1 | G | A | Heterozygous |
| NC_037652.1 | 720394 | SNV | 1 | A | G | Homozygous   |
| NC_037652.1 | 730223 | SNV | 1 | T | C | Homozygous   |
| NC_037652.1 | 731063 | SNV | 1 | G | A | Homozygous   |
| NC_037652.1 | 731068 | SNV | 1 | A | C | Homozygous   |
| NC_037652.1 | 731073 | SNV | 1 | A | T | Homozygous   |
| NC_037652.1 | 731076 | SNV | 1 | C | T | Homozygous   |
| NC_037652.1 | 731094 | SNV | 1 | T | C | Homozygous   |
| NC_037652.1 | 731097 | SNV | 1 | A | C | Homozygous   |
| NC_037652.1 | 732800 | SNV | 1 | T | A | Homozygous   |
| NC_037652.1 | 732826 | SNV | 1 | G | T | Homozygous   |
| NC_037652.1 | 732843 | SNV | 1 | C | A | Homozygous   |
| NC_037652.1 | 732846 | SNV | 1 | G | T | Homozygous   |
| NC_037652.1 | 738833 | SNV | 1 | G | T | Homozygous   |
| NC_037652.1 | 738838 | SNV | 1 | T | A | Homozygous   |
| NC_037652.1 | 738843 | SNV | 1 | A | T | Homozygous   |
| NC_037652.1 | 738863 | SNV | 1 | T | G | Homozygous   |

|             |        |     |   |   |   |              |
|-------------|--------|-----|---|---|---|--------------|
| NC_037652.1 | 738865 | SNV | 1 | C | G | Homozygous   |
| NC_037652.1 | 761965 | SNV | 1 | T | G | Homozygous   |
| NC_037652.1 | 762002 | SNV | 1 | A | T | Homozygous   |
| NC_037652.1 | 762006 | SNV | 1 | T | G | Homozygous   |
| NC_037652.1 | 766013 | SNV | 1 | A | G | Heterozygous |
| NC_037652.1 | 766022 | SNV | 1 | T | C | Homozygous   |
| NC_037652.1 | 766044 | SNV | 1 | T | C | Homozygous   |
| NC_037652.1 | 766048 | SNV | 1 | A | T | Heterozygous |
| NC_037652.1 | 766052 | SNV | 1 | T | C | Heterozygous |
| NC_037652.1 | 766063 | SNV | 1 | T | G | Homozygous   |
| NC_037652.1 | 766074 | SNV | 1 | A | T | Homozygous   |
| NC_037652.1 | 766083 | SNV | 1 | T | A | Heterozygous |
| NC_037652.1 | 766089 | SNV | 1 | T | C | Heterozygous |
| NC_037652.1 | 766099 | SNV | 1 | T | A | Heterozygous |
| NC_037652.1 | 766267 | SNV | 1 | T | C | Homozygous   |
| NC_037652.1 | 766273 | SNV | 1 | A | T | Homozygous   |
| NC_037652.1 | 766277 | SNV | 1 | T | A | Homozygous   |
| NC_037652.1 | 766313 | SNV | 1 | A | T | Homozygous   |
| NC_037652.1 | 766418 | SNV | 1 | T | C | Heterozygous |
| NC_037652.1 | 766445 | SNV | 1 | A | T | Heterozygous |
| NC_037652.1 | 766452 | SNV | 1 | A | C | Heterozygous |
| NC_037652.1 | 766456 | SNV | 1 | T | A | Heterozygous |
| NC_037652.1 | 766460 | SNV | 1 | A | T | Heterozygous |
| NC_037652.1 | 766467 | SNV | 1 | A | C | Heterozygous |
| NC_037652.1 | 766495 | SNV | 1 | A | G | Homozygous   |
| NC_037652.1 | 769817 | SNV | 1 | A | G | Heterozygous |
| NC_037652.1 | 769823 | SNV | 1 | A | G | Heterozygous |
| NC_037652.1 | 769834 | SNV | 1 | T | C | Heterozygous |
| NC_037652.1 | 769837 | SNV | 1 | A | G | Heterozygous |
| NC_037652.1 | 771557 | SNV | 1 | A | G | Homozygous   |
| NC_037652.1 | 771587 | SNV | 1 | G | C | Heterozygous |
| NC_037652.1 | 771613 | SNV | 1 | G | A | Heterozygous |
| NC_037652.1 | 771631 | SNV | 1 | C | T | Heterozygous |
| NC_037652.1 | 771714 | SNV | 1 | C | T | Homozygous   |
| NC_037652.1 | 771726 | SNV | 1 | C | T | Homozygous   |
| NC_037652.1 | 771766 | SNV | 1 | G | A | Homozygous   |
| NC_037652.1 | 772115 | SNV | 1 | C | G | Homozygous   |
| NC_037652.1 | 772141 | SNV | 1 | C | G | Heterozygous |
| NC_037652.1 | 772838 | SNV | 1 | G | A | Heterozygous |
| NC_037652.1 | 772972 | SNV | 1 | C | T | Heterozygous |
| NC_037652.1 | 773455 | SNV | 1 | C | T | Heterozygous |
| NC_037652.1 | 773800 | SNV | 1 | A | T | Homozygous   |
| NC_037652.1 | 773830 | SNV | 1 | C | T | Heterozygous |
| NC_037652.1 | 773967 | SNV | 1 | C | T | Heterozygous |
| NC_037652.1 | 774101 | SNV | 1 | C | T | Heterozygous |
| NC_037652.1 | 774176 | SNV | 1 | T | C | Heterozygous |
| NC_037652.1 | 774454 | SNV | 1 | A | G | Homozygous   |
| NC_037652.1 | 774623 | SNV | 1 | G | A | Heterozygous |
| NC_037652.1 | 774724 | SNV | 1 | C | T | Heterozygous |
| NC_037652.1 | 786068 | SNV | 1 | T | C | Homozygous   |
| NC_037652.1 | 786073 | SNV | 1 | A | G | Heterozygous |

|             |        |     |   |   |   |              |
|-------------|--------|-----|---|---|---|--------------|
| NC_037652.1 | 786079 | SNV | 1 | A | G | Heterozygous |
| NC_037652.1 | 786083 | SNV | 1 | A | G | Heterozygous |
| NC_037652.1 | 786118 | SNV | 1 | T | A | Heterozygous |
| NC_037652.1 | 786149 | SNV | 1 | G | C | Homozygous   |
| NC_037652.1 | 786151 | SNV | 1 | A | C | Homozygous   |
| NC_037652.1 | 786154 | SNV | 1 | A | T | Homozygous   |
| NC_037652.1 | 786156 | SNV | 1 | T | G | Homozygous   |
| NC_037652.1 | 794009 | SNV | 1 | T | A | Homozygous   |
| NC_037652.1 | 794014 | SNV | 1 | T | G | Homozygous   |
| NC_037652.1 | 794050 | SNV | 1 | T | A | Homozygous   |
| NC_037652.1 | 794060 | SNV | 1 | T | C | Homozygous   |
| NC_037652.1 | 794066 | SNV | 1 | A | T | Homozygous   |
| NC_037652.1 | 794069 | SNV | 1 | T | G | Homozygous   |
| NC_037652.1 | 795826 | SNV | 1 | T | G | Homozygous   |
| NC_037652.1 | 795831 | SNV | 1 | G | A | Homozygous   |
| NC_037652.1 | 795836 | SNV | 1 | T | G | Homozygous   |
| NC_037652.1 | 795858 | SNV | 1 | A | C | Homozygous   |
| NC_037652.1 | 802234 | SNV | 1 | A | C | Homozygous   |
| NC_037652.1 | 802237 | SNV | 1 | A | G | Homozygous   |
| NC_037652.1 | 802908 | SNV | 1 | G | A | Heterozygous |
| NC_037652.1 | 803208 | SNV | 1 | C | T | Heterozygous |
| NC_037652.1 | 804444 | SNV | 1 | A | G | Homozygous   |
| NC_037652.1 | 804447 | SNV | 1 | T | A | Homozygous   |
| NC_037652.1 | 804452 | SNV | 1 | T | C | Homozygous   |
| NC_037652.1 | 804454 | SNV | 1 | C | G | Homozygous   |
| NC_037652.1 | 804824 | SNV | 1 | A | G | Heterozygous |
| NC_037652.1 | 804831 | SNV | 1 | G | A | Heterozygous |
| NC_037652.1 | 804838 | SNV | 1 | G | T | Heterozygous |
| NC_037652.1 | 804843 | SNV | 1 | A | G | Heterozygous |
| NC_037652.1 | 804875 | SNV | 1 | T | A | Homozygous   |
| NC_037652.1 | 804880 | SNV | 1 | T | A | Homozygous   |
| NC_037652.1 | 804889 | SNV | 1 | A | T | Homozygous   |
| NC_037652.1 | 804970 | SNV | 1 | A | G | Heterozygous |
| NC_037652.1 | 804973 | SNV | 1 | C | T | Heterozygous |
| NC_037652.1 | 814801 | SNV | 1 | C | A | Homozygous   |
| NC_037652.1 | 817811 | SNV | 1 | T | G | Homozygous   |
| NC_037652.1 | 817814 | SNV | 1 | T | C | Homozygous   |
| NC_037652.1 | 818003 | SNV | 1 | G | T | Homozygous   |
| NC_037652.1 | 818993 | SNV | 1 | C | T | Homozygous   |
| NC_037652.1 | 820361 | SNV | 1 | A | G | Heterozygous |
| NC_037652.1 | 826211 | SNV | 1 | A | T | Heterozygous |
| NC_037652.1 | 826219 | SNV | 1 | C | A | Heterozygous |
| NC_037652.1 | 826219 | SNV | 1 | C | T | Heterozygous |
| NC_037652.1 | 826223 | SNV | 1 | C | A | Heterozygous |
| NC_037652.1 | 826223 | SNV | 1 | C | T | Heterozygous |
| NC_037652.1 | 826235 | SNV | 1 | A | T | Heterozygous |
| NC_037652.1 | 826272 | SNV | 1 | T | G | Homozygous   |
| NC_037652.1 | 826280 | SNV | 1 | T | G | Homozygous   |
| NC_037652.1 | 826292 | SNV | 1 | A | T | Heterozygous |
| NC_037652.1 | 827648 | SNV | 1 | T | A | Homozygous   |
| NC_037652.1 | 827655 | SNV | 1 | A | T | Homozygous   |

|             |        |     |   |   |   |              |
|-------------|--------|-----|---|---|---|--------------|
| NC_037652.1 | 827659 | SNV | 1 | A | T | Homozygous   |
| NC_037652.1 | 827666 | SNV | 1 | T | C | Homozygous   |
| NC_037652.1 | 827671 | SNV | 1 | T | G | Homozygous   |
| NC_037652.1 | 829581 | SNV | 1 | T | C | Homozygous   |
| NC_037652.1 | 829747 | SNV | 1 | T | G | Homozygous   |
| NC_037652.1 | 829754 | SNV | 1 | T | G | Homozygous   |
| NC_037652.1 | 829761 | SNV | 1 | T | A | Homozygous   |
| NC_037652.1 | 829763 | SNV | 1 | T | A | Homozygous   |
| NC_037652.1 | 829765 | SNV | 1 | T | A | Homozygous   |
| NC_037652.1 | 830950 | SNV | 1 | T | G | Homozygous   |
| NC_037652.1 | 830957 | SNV | 1 | A | T | Homozygous   |
| NC_037652.1 | 830960 | SNV | 1 | T | G | Homozygous   |
| NC_037652.1 | 833618 | SNV | 1 | T | C | Heterozygous |
| NC_037652.1 | 833633 | SNV | 1 | A | G | Heterozygous |
| NC_037652.1 | 833651 | SNV | 1 | A | G | Heterozygous |
| NC_037652.1 | 833655 | SNV | 1 | A | T | Heterozygous |
| NC_037652.1 | 833657 | SNV | 1 | G | A | Heterozygous |
| NC_037652.1 | 833672 | SNV | 1 | T | A | Homozygous   |
| NC_037652.1 | 833674 | SNV | 1 | T | C | Heterozygous |
| NC_037652.1 | 839475 | SNV | 1 | T | C | Homozygous   |
| NC_037652.1 | 839477 | SNV | 1 | T | C | Homozygous   |
| NC_037652.1 | 839482 | SNV | 1 | A | T | Homozygous   |
| NC_037652.1 | 839485 | SNV | 1 | G | T | Homozygous   |
| NC_037652.1 | 839509 | SNV | 1 | A | G | Homozygous   |
| NC_037652.1 | 839514 | SNV | 1 | A | T | Homozygous   |
| NC_037652.1 | 839916 | SNV | 1 | A | C | Homozygous   |
| NC_037652.1 | 839940 | SNV | 1 | T | A | Homozygous   |
| NC_037652.1 | 845917 | SNV | 1 | T | G | Homozygous   |
| NC_037652.1 | 845921 | SNV | 1 | A | T | Homozygous   |
| NC_037652.1 | 845925 | SNV | 1 | A | C | Homozygous   |
| NC_037652.1 | 845929 | SNV | 1 | T | A | Homozygous   |
| NC_037652.1 | 845932 | SNV | 1 | A | T | Homozygous   |
| NC_037652.1 | 845936 | SNV | 1 | T | C | Homozygous   |
| NC_037652.1 | 853664 | SNV | 1 | G | A | Homozygous   |
| NC_037652.1 | 853674 | SNV | 1 | C | G | Homozygous   |
| NC_037652.1 | 856480 | SNV | 1 | A | G | Homozygous   |
| NC_037652.1 | 856494 | SNV | 1 | G | A | Homozygous   |
| NC_037652.1 | 856497 | SNV | 1 | A | T | Homozygous   |
| NC_037652.1 | 856523 | SNV | 1 | T | A | Homozygous   |
| NC_037652.1 | 856526 | SNV | 1 | C | T | Homozygous   |
| NC_037652.1 | 856535 | SNV | 1 | A | T | Homozygous   |
| NC_037652.1 | 866959 | SNV | 1 | A | T | Heterozygous |
| NC_037652.1 | 866961 | SNV | 1 | A | T | Heterozygous |
| NC_037652.1 | 866962 | SNV | 1 | A | T | Heterozygous |
| NC_037652.1 | 866965 | SNV | 1 | A | T | Heterozygous |
| NC_037652.1 | 866987 | SNV | 1 | A | T | Heterozygous |
| NC_037652.1 | 866989 | SNV | 1 | A | T | Heterozygous |
| NC_037652.1 | 866994 | SNV | 1 | A | G | Heterozygous |
| NC_037652.1 | 883247 | SNV | 1 | C | T | Homozygous   |
| NC_037652.1 | 883253 | SNV | 1 | T | A | Homozygous   |
| NC_037652.1 | 883259 | SNV | 1 | A | G | Homozygous   |



|             |        |     |   |   |   |              |
|-------------|--------|-----|---|---|---|--------------|
| NC_037652.1 | 883261 | SNV | 1 | C | T | Homozygous   |
| NC_037652.1 | 883266 | SNV | 1 | C | T | Homozygous   |
| NC_037652.1 | 883275 | SNV | 1 | A | G | Homozygous   |
| NC_037652.1 | 883278 | SNV | 1 | T | C | Homozygous   |
| NC_037652.1 | 883285 | SNV | 1 | C | T | Homozygous   |
| NC_037652.1 | 883291 | SNV | 1 | A | G | Homozygous   |
| NC_037652.1 | 883318 | SNV | 1 | T | C | Homozygous   |
| NC_037652.1 | 883321 | SNV | 1 | T | C | Homozygous   |
| NC_037652.1 | 883326 | SNV | 1 | T | C | Homozygous   |
| NC_037652.1 | 883328 | SNV | 1 | T | C | Homozygous   |
| NC_037652.1 | 883334 | SNV | 1 | T | G | Homozygous   |
| NC_037652.1 | 883349 | SNV | 1 | G | A | Homozygous   |
| NC_037652.1 | 891149 | SNV | 1 | T | A | Homozygous   |
| NC_037652.1 | 891153 | SNV | 1 | A | G | Homozygous   |
| NC_037652.1 | 898766 | SNV | 1 | A | C | Heterozygous |
| NC_037652.1 | 898769 | SNV | 1 | A | T | Heterozygous |
| NC_037652.1 | 898770 | SNV | 1 | A | T | Heterozygous |
| NC_037652.1 | 902406 | SNV | 1 | A | T | Heterozygous |
| NC_037652.1 | 912333 | SNV | 1 | A | G | Homozygous   |
| NC_037652.1 | 922484 | SNV | 1 | A | T | Homozygous   |
| NC_037652.1 | 922492 | SNV | 1 | T | A | Homozygous   |
| NC_037652.1 | 922496 | SNV | 1 | T | G | Homozygous   |
| NC_037652.1 | 922502 | SNV | 1 | T | A | Homozygous   |
| NC_037652.1 | 922505 | SNV | 1 | A | T | Homozygous   |
| NC_037652.1 | 922660 | SNV | 1 | A | T | Homozygous   |
| NC_037652.1 | 922663 | SNV | 1 | A | T | Homozygous   |
| NC_037652.1 | 922668 | SNV | 1 | C | T | Homozygous   |
| NC_037652.1 | 922695 | SNV | 1 | A | G | Homozygous   |
| NC_037652.1 | 922697 | SNV | 1 | A | T | Homozygous   |
| NC_037652.1 | 922703 | SNV | 1 | G | A | Homozygous   |
| NC_037652.1 | 922713 | SNV | 1 | A | C | Homozygous   |
| NC_037652.1 | 931521 | SNV | 1 | T | C | Homozygous   |
| NC_037652.1 | 952343 | SNV | 1 | A | G | Homozygous   |
| NC_037652.1 | 952435 | SNV | 1 | T | C | Homozygous   |
| NC_037652.1 | 952802 | SNV | 1 | T | C | Heterozygous |
| NC_037652.1 | 952852 | SNV | 1 | A | G | Homozygous   |
| NC_037652.1 | 953143 | SNV | 1 | G | A | Heterozygous |
| NC_037652.1 | 954309 | SNV | 1 | T | C | Homozygous   |
| NC_037652.1 | 954322 | SNV | 1 | T | C | Heterozygous |
| NC_037652.1 | 954920 | SNV | 1 | A | G | Heterozygous |
| NC_037652.1 | 955662 | SNV | 1 | T | C | Heterozygous |
| NC_037652.1 | 955890 | SNV | 1 | A | T | Heterozygous |
| NC_037652.1 | 957464 | SNV | 1 | G | A | Heterozygous |
| NC_037652.1 | 957536 | SNV | 1 | T | C | Homozygous   |
| NC_037652.1 | 957550 | SNV | 1 | T | C | Homozygous   |
| NC_037652.1 | 957602 | SNV | 1 | T | C | Heterozygous |
| NC_037652.1 | 957965 | SNV | 1 | T | C | Homozygous   |
| NC_037652.1 | 958410 | SNV | 1 | G | T | Heterozygous |
| NC_037652.1 | 958414 | SNV | 1 | T | C | Heterozygous |
| NC_037652.1 | 958421 | SNV | 1 | A | C | Heterozygous |
| NC_037652.1 | 958423 | SNV | 1 | G | T | Heterozygous |

|             |         |     |   |   |   |              |
|-------------|---------|-----|---|---|---|--------------|
| NC_037652.1 | 964154  | SNV | 1 | T | A | Homozygous   |
| NC_037652.1 | 964159  | SNV | 1 | A | G | Heterozygous |
| NC_037652.1 | 964163  | SNV | 1 | A | T | Heterozygous |
| NC_037652.1 | 965356  | SNV | 1 | A | G | Homozygous   |
| NC_037652.1 | 970841  | SNV | 1 | A | C | Homozygous   |
| NC_037652.1 | 970845  | SNV | 1 | T | A | Homozygous   |
| NC_037652.1 | 970869  | SNV | 1 | T | A | Homozygous   |
| NC_037652.1 | 970874  | SNV | 1 | T | G | Homozygous   |
| NC_037652.1 | 970879  | SNV | 1 | C | T | Homozygous   |
| NC_037652.1 | 1003560 | SNV | 1 | C | A | Homozygous   |
| NC_037652.1 | 1003576 | SNV | 1 | T | G | Homozygous   |
| NC_037652.1 | 1003633 | SNV | 1 | G | A | Heterozygous |
| NC_037652.1 | 1003698 | SNV | 1 | C | T | Heterozygous |
| NC_037652.1 | 1008650 | SNV | 1 | T | C | Homozygous   |
| NC_037652.1 | 1008860 | SNV | 1 | T | C | Heterozygous |
| NC_037652.1 | 1009422 | SNV | 1 | A | G | Heterozygous |
| NC_037652.1 | 1009442 | SNV | 1 | T | C | Heterozygous |
| NC_037652.1 | 1009510 | SNV | 1 | T | C | Homozygous   |
| NC_037652.1 | 1009587 | SNV | 1 | G | A | Homozygous   |
| NC_037652.1 | 1010607 | SNV | 1 | T | C | Heterozygous |
| NC_037652.1 | 1010737 | SNV | 1 | T | C | Heterozygous |
| NC_037652.1 | 1010948 | SNV | 1 | C | T | Heterozygous |
| NC_037652.1 | 1011387 | SNV | 1 | A | G | Heterozygous |
| NC_037652.1 | 1011508 | SNV | 1 | A | C | Homozygous   |
| NC_037652.1 | 1011639 | SNV | 1 | C | T | Heterozygous |
| NC_037652.1 | 1012180 | SNV | 1 | A | G | Homozygous   |
| NC_037652.1 | 1020251 | SNV | 1 | A | G | Homozygous   |
| NC_037652.1 | 1020256 | SNV | 1 | A | T | Homozygous   |
| NC_037652.1 | 1020260 | SNV | 1 | T | G | Homozygous   |
| NC_037652.1 | 1020289 | SNV | 1 | T | G | Homozygous   |
| NC_037652.1 | 1021191 | SNV | 1 | C | G | Heterozygous |
| NC_037652.1 | 1023191 | SNV | 1 | T | A | Homozygous   |
| NC_037652.1 | 1023203 | SNV | 1 | T | A | Homozygous   |
| NC_037652.1 | 1023206 | SNV | 1 | T | A | Homozygous   |
| NC_037652.1 | 1023208 | SNV | 1 | T | A | Homozygous   |
| NC_037652.1 | 1023214 | SNV | 1 | A | T | Homozygous   |
| NC_037652.1 | 1025424 | SNV | 1 | G | T | Homozygous   |
| NC_037652.1 | 1025426 | SNV | 1 | C | A | Homozygous   |
| NC_037652.1 | 1025430 | SNV | 1 | A | T | Homozygous   |
| NC_037652.1 | 1025444 | SNV | 1 | G | T | Homozygous   |
| NC_037652.1 | 1025448 | SNV | 1 | T | A | Homozygous   |
| NC_037652.1 | 1025451 | SNV | 1 | T | A | Homozygous   |
| NC_037652.1 | 1025453 | SNV | 1 | A | T | Homozygous   |
| NC_037652.1 | 1025458 | SNV | 1 | A | T | Homozygous   |
| NC_037652.1 | 1028499 | SNV | 1 | C | T | Heterozygous |
| NC_037652.1 | 1028506 | SNV | 1 | C | T | Heterozygous |
| NC_037652.1 | 1037589 | SNV | 1 | T | A | Homozygous   |
| NC_037652.1 | 1037645 | SNV | 1 | T | C | Heterozygous |
| NC_037652.1 | 1037653 | SNV | 1 | C | T | Homozygous   |
| NC_037652.1 | 1037670 | SNV | 1 | C | T | Homozygous   |
| NC_037652.1 | 1037795 | SNV | 1 | A | G | Homozygous   |

|             |         |     |   |   |   |              |
|-------------|---------|-----|---|---|---|--------------|
| NC_037652.1 | 1041107 | SNV | 1 | C | G | Homozygous   |
| NC_037652.1 | 1041150 | SNV | 1 | T | C | Homozygous   |
| NC_037652.1 | 1041157 | SNV | 1 | T | C | Homozygous   |
| NC_037652.1 | 1049943 | SNV | 1 | G | C | Homozygous   |
| NC_037652.1 | 1051045 | SNV | 1 | C | T | Heterozygous |
| NC_037652.1 | 1051048 | SNV | 1 | G | A | Heterozygous |
| NC_037652.1 | 1051063 | SNV | 1 | C | G | Homozygous   |
| NC_037652.1 | 1051119 | SNV | 1 | G | A | Heterozygous |
| NC_037652.1 | 1051173 | SNV | 1 | A | T | Heterozygous |
| NC_037652.1 | 1051230 | SNV | 1 | A | G | Heterozygous |
| NC_037652.1 | 1051279 | SNV | 1 | A | T | Heterozygous |
| NC_037652.1 | 1070459 | SNV | 1 | A | G | Homozygous   |
| NC_037652.1 | 1070557 | SNV | 1 | T | G | Heterozygous |
| NC_037652.1 | 1070560 | SNV | 1 | C | T | Heterozygous |
| NC_037652.1 | 1070609 | SNV | 1 | T | C | Homozygous   |
| NC_037652.1 | 1070694 | SNV | 1 | C | T | Heterozygous |
| NC_037652.1 | 1070703 | SNV | 1 | G | A | Heterozygous |
| NC_037652.1 | 1093070 | SNV | 1 | A | G | Homozygous   |
| NC_037652.1 | 1093100 | SNV | 1 | G | A | Homozygous   |
| NC_037652.1 | 1099967 | SNV | 1 | T | C | Homozygous   |
| NC_037652.1 | 1099978 | SNV | 1 | T | C | Homozygous   |
| NC_037652.1 | 1099981 | SNV | 1 | A | G | Homozygous   |
| NC_037652.1 | 1099986 | SNV | 1 | G | A | Heterozygous |
| NC_037652.1 | 1099990 | SNV | 1 | A | G | Homozygous   |
| NC_037652.1 | 1100005 | SNV | 1 | A | G | Homozygous   |
| NC_037652.1 | 1100139 | SNV | 1 | T | C | Heterozygous |
| NC_037652.1 | 1100308 | SNV | 1 | G | A | Heterozygous |
| NC_037652.1 | 1100325 | SNV | 1 | T | A | Heterozygous |
| NC_037652.1 | 1104849 | SNV | 1 | T | C | Heterozygous |
| NC_037652.1 | 1110436 | SNV | 1 | G | C | Homozygous   |
| NC_037652.1 | 1110444 | SNV | 1 | T | G | Homozygous   |
| NC_037652.1 | 1110448 | SNV | 1 | C | G | Homozygous   |
| NC_037652.1 | 1114476 | SNV | 1 | A | T | Homozygous   |
| NC_037652.1 | 1114478 | SNV | 1 | A | T | Homozygous   |
| NC_037652.1 | 1114488 | SNV | 1 | A | C | Homozygous   |
| NC_037652.1 | 1114501 | SNV | 1 | A | T | Homozygous   |
| NC_037652.1 | 1115246 | SNV | 1 | G | A | Homozygous   |
| NC_037652.1 | 1119927 | SNV | 1 | G | A | Homozygous   |
| NC_037652.1 | 1119932 | SNV | 1 | A | C | Homozygous   |
| NC_037652.1 | 1123394 | SNV | 1 | A | G | Homozygous   |
| NC_037652.1 | 1123407 | SNV | 1 | C | T | Heterozygous |
| NC_037652.1 | 1123428 | SNV | 1 | A | G | Homozygous   |
| NC_037652.1 | 1123453 | SNV | 1 | A | G | Homozygous   |
| NC_037652.1 | 1123465 | SNV | 1 | T | C | Homozygous   |
| NC_037652.1 | 1132240 | SNV | 1 | G | A | Heterozygous |
| NC_037652.1 | 1132245 | SNV | 1 | T | G | Heterozygous |
| NC_037652.1 | 1132279 | SNV | 1 | G | A | Heterozygous |
| NC_037652.1 | 1132290 | SNV | 1 | G | A | Heterozygous |
| NC_037652.1 | 1132572 | SNV | 1 | A | G | Homozygous   |
| NC_037652.1 | 1132587 | SNV | 1 | G | A | Heterozygous |
| NC_037652.1 | 1133097 | SNV | 1 | A | G | Homozygous   |

|             |         |     |   |   |   |              |
|-------------|---------|-----|---|---|---|--------------|
| NC_037652.1 | 1133138 | SNV | 1 | C | G | Heterozygous |
| NC_037652.1 | 1133144 | SNV | 1 | A | G | Heterozygous |
| NC_037652.1 | 1133994 | SNV | 1 | C | T | Heterozygous |
| NC_037652.1 | 1134036 | SNV | 1 | C | T | Heterozygous |
| NC_037652.1 | 1134265 | SNV | 1 | T | C | Heterozygous |
| NC_037652.1 | 1134329 | SNV | 1 | C | T | Heterozygous |
| NC_037652.1 | 1134398 | SNV | 1 | A | C | Heterozygous |
| NC_037652.1 | 1134401 | SNV | 1 | T | A | Heterozygous |
| NC_037652.1 | 1150692 | SNV | 1 | T | C | Homozygous   |
| NC_037652.1 | 1150842 | SNV | 1 | A | G | Heterozygous |
| NC_037652.1 | 1162320 | SNV | 1 | G | A | Heterozygous |
| NC_037652.1 | 1162342 | SNV | 1 | T | A | Homozygous   |
| NC_037652.1 | 1162509 | SNV | 1 | T | C | Heterozygous |
| NC_037652.1 | 1162641 | SNV | 1 | C | G | Heterozygous |
| NC_037652.1 | 1166691 | SNV | 1 | T | A | Homozygous   |
| NC_037652.1 | 1166701 | SNV | 1 | T | G | Homozygous   |
| NC_037652.1 | 1166705 | SNV | 1 | T | A | Homozygous   |
| NC_037652.1 | 1174295 | SNV | 1 | A | G | Homozygous   |
| NC_037652.1 | 1174347 | SNV | 1 | T | C | Homozygous   |
| NC_037652.1 | 1174720 | SNV | 1 | A | G | Heterozygous |
| NC_037652.1 | 1174847 | SNV | 1 | T | C | Homozygous   |
| NC_037652.1 | 1174869 | SNV | 1 | G | A | Heterozygous |
| NC_037652.1 | 1174881 | SNV | 1 | T | C | Heterozygous |
| NC_037652.1 | 1174909 | SNV | 1 | A | G | Homozygous   |
| NC_037652.1 | 1175658 | SNV | 1 | A | C | Homozygous   |
| NC_037652.1 | 1175666 | SNV | 1 | C | T | Homozygous   |
| NC_037652.1 | 1175697 | SNV | 1 | T | A | Homozygous   |
| NC_037652.1 | 1183189 | SNV | 1 | G | T | Homozygous   |
| NC_037652.1 | 1183191 | SNV | 1 | A | T | Homozygous   |
| NC_037652.1 | 1183205 | SNV | 1 | T | G | Homozygous   |
| NC_037652.1 | 1183211 | SNV | 1 | A | C | Homozygous   |
| NC_037652.1 | 1197386 | SNV | 1 | A | T | Homozygous   |
| NC_037652.1 | 1197404 | SNV | 1 | T | C | Homozygous   |
| NC_037652.1 | 1197415 | SNV | 1 | A | T | Homozygous   |
| NC_037652.1 | 1197417 | SNV | 1 | A | T | Homozygous   |
| NC_037652.1 | 1198628 | SNV | 1 | A | G | Heterozygous |
| NC_037652.1 | 1198859 | SNV | 1 | G | A | Heterozygous |
| NC_037652.1 | 1198925 | SNV | 1 | C | T | Homozygous   |
| NC_037652.1 | 1198976 | SNV | 1 | G | T | Heterozygous |
| NC_037652.1 | 1205427 | SNV | 1 | T | C | Homozygous   |
| NC_037652.1 | 1225714 | SNV | 1 | T | G | Homozygous   |
| NC_037652.1 | 1225719 | SNV | 1 | A | T | Homozygous   |
| NC_037652.1 | 1233699 | SNV | 1 | C | T | Homozygous   |
| NC_037652.1 | 1239662 | SNV | 1 | A | G | Homozygous   |
| NC_037652.1 | 1239675 | SNV | 1 | T | C | Homozygous   |
| NC_037652.1 | 1239695 | SNV | 1 | A | G | Homozygous   |
| NC_037652.1 | 1239805 | SNV | 1 | A | G | Homozygous   |
| NC_037652.1 | 1240058 | SNV | 1 | C | T | Homozygous   |
| NC_037652.1 | 1240060 | SNV | 1 | A | G | Homozygous   |
| NC_037652.1 | 1240069 | SNV | 1 | G | A | Homozygous   |
| NC_037652.1 | 1240125 | SNV | 1 | A | G | Homozygous   |

|             |         |     |   |   |   |              |
|-------------|---------|-----|---|---|---|--------------|
| NC_037652.1 | 1240664 | SNV | 1 | T | C | Homozygous   |
| NC_037652.1 | 1240675 | SNV | 1 | T | C | Heterozygous |
| NC_037652.1 | 1240712 | SNV | 1 | C | T | Homozygous   |
| NC_037652.1 | 1240865 | SNV | 1 | A | G | Homozygous   |
| NC_037652.1 | 1243654 | SNV | 1 | T | A | Homozygous   |
| NC_037652.1 | 1243658 | SNV | 1 | A | T | Homozygous   |
| NC_037652.1 | 1252901 | SNV | 1 | G | A | Heterozygous |
| NC_037652.1 | 1252901 | SNV | 1 | G | T | Heterozygous |
| NC_037652.1 | 1252954 | SNV | 1 | A | T | Heterozygous |
| NC_037652.1 | 1252961 | SNV | 1 | A | T | Heterozygous |
| NC_037652.1 | 1257886 | SNV | 1 | T | C | Homozygous   |
| NC_037652.1 | 1257895 | SNV | 1 | A | G | Homozygous   |
| NC_037652.1 | 1257914 | SNV | 1 | G | A | Homozygous   |
| NC_037652.1 | 1259940 | SNV | 1 | G | A | Homozygous   |
| NC_037652.1 | 1259944 | SNV | 1 | G | C | Homozygous   |
| NC_037652.1 | 1259949 | SNV | 1 | A | T | Homozygous   |
| NC_037652.1 | 1259951 | SNV | 1 | T | A | Homozygous   |
| NC_037652.1 | 1264158 | SNV | 1 | A | G | Homozygous   |
| NC_037652.1 | 1264207 | SNV | 1 | C | T | Heterozygous |
| NC_037652.1 | 1264286 | SNV | 1 | C | T | Heterozygous |
| NC_037652.1 | 1264328 | SNV | 1 | G | C | Heterozygous |
| NC_037652.1 | 1272348 | SNV | 1 | A | G | Homozygous   |
| NC_037652.1 | 1272380 | SNV | 1 | G | A | Heterozygous |
| NC_037652.1 | 1272398 | SNV | 1 | T | C | Homozygous   |
| NC_037652.1 | 1272470 | SNV | 1 | A | G | Homozygous   |
| NC_037652.1 | 1272514 | SNV | 1 | G | C | Homozygous   |
| NC_037652.1 | 1275713 | SNV | 1 | G | T | Homozygous   |
| NC_037652.1 | 1275716 | SNV | 1 | A | T | Homozygous   |
| NC_037652.1 | 1293583 | SNV | 1 | G | A | Heterozygous |
| NC_037652.1 | 1293617 | SNV | 1 | C | A | Homozygous   |
| NC_037652.1 | 1293622 | SNV | 1 | A | G | Heterozygous |
| NC_037652.1 | 1295202 | SNV | 1 | A | T | Homozygous   |
| NC_037652.1 | 1295637 | SNV | 1 | T | G | Homozygous   |
| NC_037652.1 | 1295663 | SNV | 1 | T | C | Homozygous   |
| NC_037652.1 | 1295746 | SNV | 1 | C | T | Heterozygous |
| NC_037652.1 | 1295780 | SNV | 1 | T | C | Homozygous   |
| NC_037652.1 | 1295783 | SNV | 1 | A | G | Homozygous   |
| NC_037652.1 | 1298682 | SNV | 1 | A | G | Homozygous   |
| NC_037652.1 | 1298688 | SNV | 1 | A | G | Homozygous   |
| NC_037652.1 | 1300453 | SNV | 1 | G | T | Heterozygous |
| NC_037652.1 | 1301528 | SNV | 1 | C | T | Heterozygous |
| NC_037652.1 | 1326466 | SNV | 1 | A | T | Heterozygous |
| NC_037652.1 | 1326596 | SNV | 1 | G | A | Homozygous   |
| NC_037652.1 | 1332657 | SNV | 1 | G | C | Homozygous   |
| NC_037652.1 | 1332711 | SNV | 1 | A | T | Homozygous   |
| NC_037652.1 | 1332745 | SNV | 1 | A | G | Homozygous   |
| NC_037652.1 | 1332771 | SNV | 1 | G | A | Homozygous   |
| NC_037652.1 | 1332817 | SNV | 1 | A | T | Heterozygous |
| NC_037652.1 | 1332819 | SNV | 1 | A | T | Homozygous   |
| NC_037652.1 | 1332822 | SNV | 1 | A | T | Homozygous   |
| NC_037652.1 | 1332834 | SNV | 1 | T | C | Homozygous   |

|             |         |     |   |   |   |              |
|-------------|---------|-----|---|---|---|--------------|
| NC_037652.1 | 1332841 | SNV | 1 | A | G | Homozygous   |
| NC_037652.1 | 1332852 | SNV | 1 | C | T | Homozygous   |
| NC_037652.1 | 1332892 | SNV | 1 | G | T | Homozygous   |
| NC_037652.1 | 1338702 | SNV | 1 | C | T | Homozygous   |
| NC_037652.1 | 1338708 | SNV | 1 | A | G | Heterozygous |
| NC_037652.1 | 1338756 | SNV | 1 | A | T | Homozygous   |
| NC_037652.1 | 1338759 | SNV | 1 | A | T | Homozygous   |
| NC_037652.1 | 1338762 | SNV | 1 | A | T | Homozygous   |
| NC_037652.1 | 1338780 | SNV | 1 | C | T | Homozygous   |
| NC_037652.1 | 1338783 | SNV | 1 | G | A | Homozygous   |
| NC_037652.1 | 1341987 | SNV | 1 | A | T | Homozygous   |
| NC_037652.1 | 1341999 | SNV | 1 | A | T | Homozygous   |
| NC_037652.1 | 1343342 | SNV | 1 | A | G | Homozygous   |
| NC_037652.1 | 1358484 | SNV | 1 | T | C | Homozygous   |
| NC_037652.1 | 1362006 | SNV | 1 | T | C | Homozygous   |
| NC_037652.1 | 1362017 | SNV | 1 | C | T | Heterozygous |
| NC_037652.1 | 1362329 | SNV | 1 | C | T | Heterozygous |
| NC_037652.1 | 1362947 | SNV | 1 | T | C | Homozygous   |
| NC_037652.1 | 1363235 | SNV | 1 | T | C | Homozygous   |
| NC_037652.1 | 1364813 | SNV | 1 | A | G | Heterozygous |
| NC_037652.1 | 1364993 | SNV | 1 | A | G | Homozygous   |
| NC_037652.1 | 1365235 | SNV | 1 | A | G | Heterozygous |
| NC_037652.1 | 1365239 | SNV | 1 | C | T | Homozygous   |
| NC_037652.1 | 1365280 | SNV | 1 | G | T | Heterozygous |
| NC_037652.1 | 1365283 | SNV | 1 | C | T | Heterozygous |
| NC_037652.1 | 1365491 | SNV | 1 | T | C | Homozygous   |
| NC_037652.1 | 1366841 | SNV | 1 | T | C | Homozygous   |
| NC_037652.1 | 1366992 | SNV | 1 | A | G | Homozygous   |
| NC_037652.1 | 1367072 | SNV | 1 | G | A | Heterozygous |
| NC_037652.1 | 1368617 | SNV | 1 | T | C | Homozygous   |
| NC_037652.1 | 1368701 | SNV | 1 | T | C | Heterozygous |
| NC_037652.1 | 1369998 | SNV | 1 | C | T | Homozygous   |
| NC_037652.1 | 1370567 | SNV | 1 | T | A | Heterozygous |
| NC_037652.1 | 1370599 | SNV | 1 | G | A | Heterozygous |
| NC_037652.1 | 1370938 | SNV | 1 | A | T | Heterozygous |
| NC_037652.1 | 1370970 | SNV | 1 | G | A | Heterozygous |
| NC_037652.1 | 1371318 | SNV | 1 | A | G | Homozygous   |
| NC_037652.1 | 1371339 | SNV | 1 | C | T | Homozygous   |
| NC_037652.1 | 1371450 | SNV | 1 | G | A | Homozygous   |
| NC_037652.1 | 1371459 | SNV | 1 | C | T | Homozygous   |
| NC_037652.1 | 1371463 | SNV | 1 | G | A | Homozygous   |
| NC_037652.1 | 1371466 | SNV | 1 | A | C | Homozygous   |
| NC_037652.1 | 1371806 | SNV | 1 | T | C | Heterozygous |
| NC_037652.1 | 1372054 | SNV | 1 | A | G | Homozygous   |
| NC_037652.1 | 1372062 | SNV | 1 | A | G | Homozygous   |
| NC_037652.1 | 1372096 | SNV | 1 | T | C | Homozygous   |
| NC_037652.1 | 1372299 | SNV | 1 | C | T | Heterozygous |
| NC_037652.1 | 1372387 | SNV | 1 | G | A | Homozygous   |
| NC_037652.1 | 1372419 | SNV | 1 | G | A | Homozygous   |
| NC_037652.1 | 1372683 | SNV | 1 | T | G | Homozygous   |
| NC_037652.1 | 1372769 | SNV | 1 | C | T | Heterozygous |

|             |         |     |   |   |   |              |
|-------------|---------|-----|---|---|---|--------------|
| NC_037652.1 | 1372789 | SNV | 1 | G | A | Heterozygous |
| NC_037652.1 | 1372830 | SNV | 1 | C | T | Heterozygous |
| NC_037652.1 | 1372991 | SNV | 1 | T | A | Heterozygous |
| NC_037652.1 | 1372995 | SNV | 1 | A | T | Heterozygous |
| NC_037652.1 | 1373002 | SNV | 1 | T | C | Homozygous   |
| NC_037652.1 | 1373004 | SNV | 1 | C | T | Heterozygous |
| NC_037652.1 | 1373028 | SNV | 1 | T | C | Heterozygous |
| NC_037652.1 | 1373031 | SNV | 1 | G | A | Homozygous   |
| NC_037652.1 | 1373081 | SNV | 1 | C | T | Heterozygous |
| NC_037652.1 | 1373885 | SNV | 1 | A | T | Homozygous   |
| NC_037652.1 | 1375448 | SNV | 1 | A | G | Heterozygous |
| NC_037652.1 | 1376628 | SNV | 1 | A | T | Homozygous   |
| NC_037652.1 | 1377511 | SNV | 1 | T | C | Heterozygous |
| NC_037652.1 | 1377716 | SNV | 1 | A | G | Heterozygous |
| NC_037652.1 | 1377738 | SNV | 1 | T | C | Heterozygous |
| NC_037652.1 | 1377764 | SNV | 1 | T | C | Heterozygous |
| NC_037652.1 | 1380227 | SNV | 1 | G | A | Heterozygous |
| NC_037652.1 | 1380337 | SNV | 1 | C | T | Heterozygous |
| NC_037652.1 | 1380340 | SNV | 1 | G | T | Heterozygous |
| NC_037652.1 | 1411579 | SNV | 1 | A | T | Heterozygous |
| NC_037652.1 | 1411580 | SNV | 1 | T | G | Heterozygous |
| NC_037652.1 | 1411584 | SNV | 1 | A | T | Heterozygous |
| NC_037652.1 | 1411589 | SNV | 1 | T | A | Heterozygous |
| NC_037652.1 | 1411593 | SNV | 1 | T | A | Heterozygous |
| NC_037652.1 | 1411608 | SNV | 1 | T | C | Heterozygous |
| NC_037652.1 | 1411635 | SNV | 1 | A | G | Homozygous   |
| NC_037652.1 | 1412522 | SNV | 1 | C | T | Heterozygous |
| NC_037652.1 | 1412525 | SNV | 1 | T | C | Heterozygous |
| NC_037652.1 | 1417388 | SNV | 1 | C | T | Heterozygous |
| NC_037652.1 | 1417394 | SNV | 1 | G | A | Heterozygous |
| NC_037652.1 | 1417396 | SNV | 1 | G | A | Heterozygous |
| NC_037652.1 | 1417407 | SNV | 1 | T | C | Homozygous   |
| NC_037652.1 | 1417411 | SNV | 1 | C | T | Heterozygous |
| NC_037652.1 | 1417437 | SNV | 1 | A | T | Homozygous   |
| NC_037652.1 | 1417462 | SNV | 1 | A | T | Homozygous   |
| NC_037652.1 | 1417469 | SNV | 1 | A | G | Homozygous   |
| NC_037652.1 | 1423509 | SNV | 1 | C | T | Heterozygous |
| NC_037652.1 | 1423539 | SNV | 1 | T | C | Heterozygous |
| NC_037652.1 | 1425621 | SNV | 1 | T | A | Heterozygous |
| NC_037652.1 | 1425623 | SNV | 1 | G | A | Heterozygous |
| NC_037652.1 | 1426548 | SNV | 1 | C | A | Heterozygous |
| NC_037652.1 | 1427028 | SNV | 1 | G | A | Heterozygous |
| NC_037652.1 | 1427126 | SNV | 1 | G | A | Heterozygous |
| NC_037652.1 | 1427183 | SNV | 1 | A | G | Heterozygous |
| NC_037652.1 | 1427379 | SNV | 1 | T | C | Heterozygous |
| NC_037652.1 | 1427781 | SNV | 1 | C | T | Homozygous   |
| NC_037652.1 | 1428603 | SNV | 1 | T | C | Homozygous   |
| NC_037652.1 | 1428788 | SNV | 1 | T | C | Heterozygous |
| NC_037652.1 | 1428929 | SNV | 1 | T | C | Heterozygous |
| NC_037652.1 | 1429087 | SNV | 1 | G | A | Heterozygous |
| NC_037652.1 | 1429373 | SNV | 1 | C | A | Heterozygous |

|             |         |     |   |   |   |              |
|-------------|---------|-----|---|---|---|--------------|
| NC_037652.1 | 1443317 | SNV | 1 | C | T | Homozygous   |
| NC_037652.1 | 1443323 | SNV | 1 | C | T | Homozygous   |
| NC_037652.1 | 1447700 | SNV | 1 | A | C | Homozygous   |
| NC_037652.1 | 1447703 | SNV | 1 | A | T | Homozygous   |
| NC_037652.1 | 1447725 | SNV | 1 | T | G | Homozygous   |
| NC_037652.1 | 1447727 | SNV | 1 | T | A | Homozygous   |
| NC_037652.1 | 1447729 | SNV | 1 | A | T | Homozygous   |
| NC_037652.1 | 1447735 | SNV | 1 | T | C | Homozygous   |
| NC_037652.1 | 1447737 | SNV | 1 | T | C | Homozygous   |
| NC_037652.1 | 1447740 | SNV | 1 | A | C | Homozygous   |
| NC_037652.1 | 1447748 | SNV | 1 | A | C | Homozygous   |
| NC_037652.1 | 1448341 | SNV | 1 | A | G | Heterozygous |
| NC_037652.1 | 1448376 | SNV | 1 | A | G | Heterozygous |
| NC_037652.1 | 1448618 | SNV | 1 | A | G | Heterozygous |
| NC_037652.1 | 1448636 | SNV | 1 | G | C | Homozygous   |
| NC_037652.1 | 1448682 | SNV | 1 | G | A | Heterozygous |
| NC_037652.1 | 1449088 | SNV | 1 | T | C | Homozygous   |
| NC_037652.1 | 1449152 | SNV | 1 | G | C | Homozygous   |
| NC_037652.1 | 1451510 | SNV | 1 | G | A | Homozygous   |
| NC_037652.1 | 1451520 | SNV | 1 | C | T | Homozygous   |
| NC_037652.1 | 1453521 | SNV | 1 | C | G | Heterozygous |
| NC_037652.1 | 1453542 | SNV | 1 | C | T | Heterozygous |
| NC_037652.1 | 1455437 | SNV | 1 | C | A | Heterozygous |
| NC_037652.1 | 1456173 | SNV | 1 | C | T | Homozygous   |
| NC_037652.1 | 1456175 | SNV | 1 | C | T | Heterozygous |
| NC_037652.1 | 1456375 | SNV | 1 | C | T | Heterozygous |
| NC_037652.1 | 1456548 | SNV | 1 | T | C | Homozygous   |
| NC_037652.1 | 1458229 | SNV | 1 | T | C | Homozygous   |
| NC_037652.1 | 1458237 | SNV | 1 | C | G | Homozygous   |
| NC_037652.1 | 1458426 | SNV | 1 | C | T | Homozygous   |
| NC_037652.1 | 1458866 | SNV | 1 | C | T | Homozygous   |
| NC_037652.1 | 1458896 | SNV | 1 | C | G | Homozygous   |
| NC_037652.1 | 1459057 | SNV | 1 | G | A | Homozygous   |
| NC_037652.1 | 1459661 | SNV | 1 | G | A | Heterozygous |
| NC_037652.1 | 1463592 | SNV | 1 | C | G | Heterozygous |
| NC_037652.1 | 1463847 | SNV | 1 | C | T | Homozygous   |
| NC_037652.1 | 1463876 | SNV | 1 | A | G | Heterozygous |
| NC_037652.1 | 1464051 | SNV | 1 | C | T | Heterozygous |
| NC_037652.1 | 1464122 | SNV | 1 | G | A | Homozygous   |
| NC_037652.1 | 1464135 | SNV | 1 | T | C | Homozygous   |
| NC_037652.1 | 1464243 | SNV | 1 | T | C | Heterozygous |
| NC_037652.1 | 1464361 | SNV | 1 | T | C | Homozygous   |
| NC_037652.1 | 1464424 | SNV | 1 | C | T | Heterozygous |
| NC_037652.1 | 1464456 | SNV | 1 | T | C | Homozygous   |
| NC_037652.1 | 1467190 | SNV | 1 | T | C | Heterozygous |
| NC_037652.1 | 1467195 | SNV | 1 | T | G | Heterozygous |
| NC_037652.1 | 1469805 | SNV | 1 | T | C | Homozygous   |
| NC_037652.1 | 1469808 | SNV | 1 | A | T | Homozygous   |
| NC_037652.1 | 1502512 | SNV | 1 | T | C | Homozygous   |
| NC_037652.1 | 1502516 | SNV | 1 | T | C | Homozygous   |
| NC_037652.1 | 1502532 | SNV | 1 | A | C | Homozygous   |



|             |         |     |   |   |   |              |
|-------------|---------|-----|---|---|---|--------------|
| NC_037652.1 | 1502542 | SNV | 1 | C | T | Homozygous   |
| NC_037652.1 | 1502623 | SNV | 1 | C | T | Homozygous   |
| NC_037652.1 | 1504122 | SNV | 1 | A | C | Homozygous   |
| NC_037652.1 | 1504181 | SNV | 1 | G | C | Heterozygous |
| NC_037652.1 | 1504205 | SNV | 1 | C | T | Homozygous   |
| NC_037652.1 | 1504439 | SNV | 1 | C | T | Homozygous   |
| NC_037652.1 | 1504582 | SNV | 1 | C | T | Heterozygous |
| NC_037652.1 | 1506859 | SNV | 1 | T | G | Homozygous   |
| NC_037652.1 | 1506882 | SNV | 1 | T | C | Heterozygous |
| NC_037652.1 | 1506886 | SNV | 1 | G | T | Heterozygous |
| NC_037652.1 | 1506890 | SNV | 1 | T | A | Heterozygous |
| NC_037652.1 | 1506989 | SNV | 1 | T | C | Homozygous   |
| NC_037652.1 | 1508482 | SNV | 1 | T | A | Homozygous   |
| NC_037652.1 | 1508489 | SNV | 1 | T | A | Heterozygous |
| NC_037652.1 | 1508491 | SNV | 1 | T | G | Heterozygous |
| NC_037652.1 | 1508571 | SNV | 1 | A | G | Homozygous   |
| NC_037652.1 | 1508716 | SNV | 1 | C | T | Heterozygous |
| NC_037652.1 | 1508786 | SNV | 1 | C | T | Heterozygous |
| NC_037652.1 | 1508858 | SNV | 1 | G | T | Heterozygous |
| NC_037652.1 | 1522724 | SNV | 1 | T | A | Homozygous   |
| NC_037652.1 | 1522732 | SNV | 1 | T | A | Homozygous   |
| NC_037652.1 | 1522757 | SNV | 1 | A | T | Homozygous   |
| NC_037652.1 | 1522761 | SNV | 1 | G | T | Homozygous   |
| NC_037652.1 | 1522763 | SNV | 1 | T | G | Homozygous   |
| NC_037652.1 | 1523099 | SNV | 1 | G | T | Homozygous   |
| NC_037652.1 | 1523120 | SNV | 1 | A | T | Homozygous   |
| NC_037652.1 | 1523124 | SNV | 1 | A | G | Homozygous   |
| NC_037652.1 | 1523145 | SNV | 1 | A | G | Homozygous   |
| NC_037652.1 | 1523462 | SNV | 1 | C | T | Heterozygous |
| NC_037652.1 | 1523757 | SNV | 1 | C | T | Homozygous   |
| NC_037652.1 | 1531370 | SNV | 1 | A | T | Heterozygous |
| NC_037652.1 | 1531374 | SNV | 1 | A | T | Heterozygous |
| NC_037652.1 | 1531378 | SNV | 1 | A | T | Heterozygous |
| NC_037652.1 | 1537242 | SNV | 1 | T | G | Homozygous   |
| NC_037652.1 | 1537247 | SNV | 1 | A | T | Homozygous   |
| NC_037652.1 | 1537265 | SNV | 1 | T | A | Homozygous   |
| NC_037652.1 | 1537267 | SNV | 1 | T | A | Homozygous   |
| NC_037652.1 | 1537450 | SNV | 1 | A | T | Homozygous   |
| NC_037652.1 | 1537452 | SNV | 1 | T | A | Homozygous   |
| NC_037652.1 | 1546760 | SNV | 1 | T | C | Homozygous   |
| NC_037652.1 | 1546777 | SNV | 1 | A | G | Heterozygous |
| NC_037652.1 | 1547660 | SNV | 1 | G | A | Heterozygous |
| NC_037652.1 | 1547711 | SNV | 1 | C | T | Homozygous   |
| NC_037652.1 | 1549508 | SNV | 1 | G | T | Homozygous   |
| NC_037652.1 | 1549512 | SNV | 1 | T | A | Homozygous   |
| NC_037652.1 | 1549518 | SNV | 1 | A | C | Homozygous   |
| NC_037652.1 | 1551325 | SNV | 1 | T | C | Homozygous   |
| NC_037652.1 | 1551977 | SNV | 1 | G | A | Heterozygous |
| NC_037652.1 | 1552257 | SNV | 1 | T | C | Homozygous   |
| NC_037652.1 | 1552288 | SNV | 1 | A | G | Homozygous   |
| NC_037652.1 | 1553111 | SNV | 1 | C | T | Homozygous   |

|             |         |     |   |   |   |              |
|-------------|---------|-----|---|---|---|--------------|
| NC_037652.1 | 1555520 | SNV | 1 | A | C | Homozygous   |
| NC_037652.1 | 1555522 | SNV | 1 | G | C | Homozygous   |
| NC_037652.1 | 1555526 | SNV | 1 | T | C | Homozygous   |
| NC_037652.1 | 1555532 | SNV | 1 | A | T | Homozygous   |
| NC_037652.1 | 1555545 | SNV | 1 | T | G | Homozygous   |
| NC_037652.1 | 1555565 | SNV | 1 | C | A | Homozygous   |
| NC_037652.1 | 1555571 | SNV | 1 | C | T | Homozygous   |
| NC_037652.1 | 1556213 | SNV | 1 | C | T | Homozygous   |
| NC_037652.1 | 1556345 | SNV | 1 | A | G | Homozygous   |
| NC_037652.1 | 1562319 | SNV | 1 | T | A | Homozygous   |
| NC_037652.1 | 1562322 | SNV | 1 | A | G | Homozygous   |
| NC_037652.1 | 1562373 | SNV | 1 | T | A | Homozygous   |
| NC_037652.1 | 1563926 | SNV | 1 | T | C | Heterozygous |
| NC_037652.1 | 1567081 | SNV | 1 | A | T | Homozygous   |
| NC_037652.1 | 1567534 | SNV | 1 | T | C | Heterozygous |
| NC_037652.1 | 1567540 | SNV | 1 | C | G | Homozygous   |
| NC_037652.1 | 1568383 | SNV | 1 | T | C | Homozygous   |
| NC_037652.1 | 1569311 | SNV | 1 | C | T | Heterozygous |
| NC_037652.1 | 1570155 | SNV | 1 | T | A | Homozygous   |
| NC_037652.1 | 1570164 | SNV | 1 | A | G | Homozygous   |
| NC_037652.1 | 1570196 | SNV | 1 | A | T | Homozygous   |
| NC_037652.1 | 1570199 | SNV | 1 | C | A | Homozygous   |
| NC_037652.1 | 1570871 | SNV | 1 | A | G | Heterozygous |
| NC_037652.1 | 1572336 | SNV | 1 | A | T | Homozygous   |
| NC_037652.1 | 1572373 | SNV | 1 | T | G | Homozygous   |
| NC_037652.1 | 1572386 | SNV | 1 | T | A | Heterozygous |
| NC_037652.1 | 1575385 | SNV | 1 | C | A | Homozygous   |
| NC_037652.1 | 1575625 | SNV | 1 | C | T | Homozygous   |
| NC_037652.1 | 1575811 | SNV | 1 | T | A | Homozygous   |
| NC_037652.1 | 1575813 | SNV | 1 | C | T | Homozygous   |
| NC_037652.1 | 1579164 | SNV | 1 | C | T | Homozygous   |
| NC_037652.1 | 1580377 | SNV | 1 | C | T | Homozygous   |
| NC_037652.1 | 1584734 | SNV | 1 | C | T | Homozygous   |
| NC_037652.1 | 1584825 | SNV | 1 | A | G | Heterozygous |
| NC_037652.1 | 1592043 | SNV | 1 | G | A | Homozygous   |
| NC_037652.1 | 1592046 | SNV | 1 | G | A | Heterozygous |
| NC_037652.1 | 1592055 | SNV | 1 | A | T | Homozygous   |
| NC_037652.1 | 1592079 | SNV | 1 | T | C | Homozygous   |
| NC_037652.1 | 1592120 | SNV | 1 | A | G | Homozygous   |
| NC_037652.1 | 1592130 | SNV | 1 | A | C | Homozygous   |
| NC_037652.1 | 1592148 | SNV | 1 | T | C | Heterozygous |
| NC_037652.1 | 1592366 | SNV | 1 | T | C | Homozygous   |
| NC_037652.1 | 1605241 | SNV | 1 | A | C | Homozygous   |
| NC_037652.1 | 1605244 | SNV | 1 | A | C | Homozygous   |
| NC_037652.1 | 1605263 | SNV | 1 | G | A | Homozygous   |
| NC_037652.1 | 1605268 | SNV | 1 | C | A | Homozygous   |
| NC_037652.1 | 1615510 | SNV | 1 | A | G | Homozygous   |
| NC_037652.1 | 1615538 | SNV | 1 | A | T | Homozygous   |
| NC_037652.1 | 1615540 | SNV | 1 | T | G | Homozygous   |
| NC_037652.1 | 1625489 | SNV | 1 | G | A | Homozygous   |
| NC_037652.1 | 1625665 | SNV | 1 | A | C | Heterozygous |

|             |         |     |   |   |   |              |
|-------------|---------|-----|---|---|---|--------------|
| NC_037652.1 | 1625729 | SNV | 1 | C | T | Heterozygous |
| NC_037652.1 | 1625909 | SNV | 1 | A | G | Homozygous   |
| NC_037652.1 | 1626002 | SNV | 1 | A | G | Homozygous   |
| NC_037652.1 | 1628546 | SNV | 1 | C | T | Homozygous   |
| NC_037652.1 | 1628548 | SNV | 1 | C | T | Homozygous   |
| NC_037652.1 | 1634002 | SNV | 1 | A | G | Homozygous   |
| NC_037652.1 | 1634127 | SNV | 1 | A | G | Homozygous   |
| NC_037652.1 | 1634526 | SNV | 1 | G | A | Heterozygous |
| NC_037652.1 | 1634591 | SNV | 1 | G | A | Heterozygous |
| NC_037652.1 | 1634628 | SNV | 1 | G | A | Heterozygous |
| NC_037652.1 | 1634802 | SNV | 1 | T | C | Homozygous   |
| NC_037652.1 | 1634845 | SNV | 1 | G | A | Heterozygous |
| NC_037652.1 | 1634947 | SNV | 1 | C | T | Homozygous   |
| NC_037652.1 | 1637036 | SNV | 1 | A | G | Homozygous   |
| NC_037652.1 | 1637042 | SNV | 1 | G | A | Homozygous   |
| NC_037652.1 | 1637044 | SNV | 1 | G | A | Homozygous   |
| NC_037652.1 | 1637049 | SNV | 1 | A | G | Homozygous   |
| NC_037652.1 | 1637055 | SNV | 1 | A | G | Heterozygous |
| NC_037652.1 | 1637057 | SNV | 1 | G | A | Heterozygous |
| NC_037652.1 | 1641028 | SNV | 1 | T | C | Heterozygous |
| NC_037652.1 | 1645173 | SNV | 1 | A | T | Homozygous   |
| NC_037652.1 | 1645176 | SNV | 1 | T | A | Homozygous   |
| NC_037652.1 | 1645179 | SNV | 1 | T | A | Homozygous   |
| NC_037652.1 | 1645936 | SNV | 1 | G | A | Homozygous   |
| NC_037652.1 | 1649257 | SNV | 1 | A | G | Heterozygous |
| NC_037652.1 | 1649562 | SNV | 1 | C | T | Homozygous   |
| NC_037652.1 | 1661433 | SNV | 1 | T | A | Homozygous   |
| NC_037652.1 | 1661437 | SNV | 1 | T | C | Homozygous   |
| NC_037652.1 | 1661439 | SNV | 1 | A | T | Homozygous   |
| NC_037652.1 | 1661442 | SNV | 1 | G | T | Homozygous   |
| NC_037652.1 | 1661463 | SNV | 1 | A | G | Homozygous   |
| NC_037652.1 | 1661482 | SNV | 1 | A | T | Homozygous   |
| NC_037652.1 | 1670769 | SNV | 1 | G | A | Homozygous   |
| NC_037652.1 | 1670832 | SNV | 1 | T | A | Heterozygous |
| NC_037652.1 | 1686595 | SNV | 1 | G | A | Homozygous   |
| NC_037652.1 | 1686598 | SNV | 1 | G | A | Heterozygous |
| NC_037652.1 | 1686604 | SNV | 1 | T | G | Homozygous   |
| NC_037652.1 | 1686607 | SNV | 1 | G | A | Heterozygous |
| NC_037652.1 | 1698531 | SNV | 1 | T | C | Heterozygous |
| NC_037652.1 | 1703839 | SNV | 1 | G | A | Homozygous   |
| NC_037652.1 | 1703875 | SNV | 1 | G | A | Heterozygous |
| NC_037652.1 | 1703885 | SNV | 1 | G | C | Heterozygous |
| NC_037652.1 | 1707697 | SNV | 1 | T | C | Homozygous   |
| NC_037652.1 | 1707700 | SNV | 1 | T | C | Homozygous   |
| NC_037652.1 | 1707729 | SNV | 1 | G | A | Homozygous   |
| NC_037652.1 | 1707734 | SNV | 1 | T | C | Homozygous   |
| NC_037652.1 | 1727066 | SNV | 1 | A | T | Homozygous   |
| NC_037652.1 | 1727071 | SNV | 1 | A | T | Homozygous   |
| NC_037652.1 | 1735650 | SNV | 1 | T | G | Heterozygous |
| NC_037652.1 | 1735657 | SNV | 1 | G | T | Homozygous   |
| NC_037652.1 | 1735669 | SNV | 1 | A | T | Heterozygous |

|             |         |     |   |   |   |              |
|-------------|---------|-----|---|---|---|--------------|
| NC_037652.1 | 1740400 | SNV | 1 | C | T | Homozygous   |
| NC_037652.1 | 1740404 | SNV | 1 | A | T | Homozygous   |
| NC_037652.1 | 1740413 | SNV | 1 | A | T | Homozygous   |
| NC_037652.1 | 1743318 | SNV | 1 | C | T | Homozygous   |
| NC_037652.1 | 1744228 | SNV | 1 | G | C | Homozygous   |
| NC_037652.1 | 1744960 | SNV | 1 | A | T | Heterozygous |
| NC_037652.1 | 1745286 | SNV | 1 | A | C | Homozygous   |
| NC_037652.1 | 1745604 | SNV | 1 | T | C | Homozygous   |
| NC_037652.1 | 1745727 | SNV | 1 | T | A | Homozygous   |
| NC_037652.1 | 1745740 | SNV | 1 | G | T | Homozygous   |
| NC_037652.1 | 1745752 | SNV | 1 | T | A | Heterozygous |
| NC_037652.1 | 1745761 | SNV | 1 | A | C | Heterozygous |
| NC_037652.1 | 1745810 | SNV | 1 | C | A | Homozygous   |
| NC_037652.1 | 1745812 | SNV | 1 | A | G | Heterozygous |
| NC_037652.1 | 1745821 | SNV | 1 | A | G | Heterozygous |
| NC_037652.1 | 1745839 | SNV | 1 | T | A | Heterozygous |
| NC_037652.1 | 1745843 | SNV | 1 | T | A | Heterozygous |
| NC_037652.1 | 1745854 | SNV | 1 | T | C | Homozygous   |
| NC_037652.1 | 1745857 | SNV | 1 | C | T | Homozygous   |
| NC_037652.1 | 1749501 | SNV | 1 | T | C | Homozygous   |
| NC_037652.1 | 1749753 | SNV | 1 | T | C | Homozygous   |
| NC_037652.1 | 1749755 | SNV | 1 | C | T | Homozygous   |
| NC_037652.1 | 1749813 | SNV | 1 | C | T | Heterozygous |
| NC_037652.1 | 1749837 | SNV | 1 | T | C | Homozygous   |
| NC_037652.1 | 1753360 | SNV | 1 | C | T | Heterozygous |
| NC_037652.1 | 1753566 | SNV | 1 | A | G | Homozygous   |
| NC_037652.1 | 1754298 | SNV | 1 | C | T | Heterozygous |
| NC_037652.1 | 1755106 | SNV | 1 | G | A | Heterozygous |
| NC_037652.1 | 1755212 | SNV | 1 | T | A | Homozygous   |
| NC_037652.1 | 1755214 | SNV | 1 | A | T | Homozygous   |
| NC_037652.1 | 1755222 | SNV | 1 | A | T | Homozygous   |
| NC_037652.1 | 1755227 | SNV | 1 | T | A | Homozygous   |
| NC_037652.1 | 1755229 | SNV | 1 | T | A | Homozygous   |
| NC_037652.1 | 1755231 | SNV | 1 | T | A | Homozygous   |
| NC_037652.1 | 1760462 | SNV | 1 | A | G | Homozygous   |
| NC_037652.1 | 1760767 | SNV | 1 | C | T | Heterozygous |
| NC_037652.1 | 1760795 | SNV | 1 | G | A | Heterozygous |
| NC_037652.1 | 1761146 | SNV | 1 | C | T | Heterozygous |
| NC_037652.1 | 1761836 | SNV | 1 | C | T | Homozygous   |
| NC_037652.1 | 1762072 | SNV | 1 | T | C | Homozygous   |
| NC_037652.1 | 1762247 | SNV | 1 | C | T | Heterozygous |
| NC_037652.1 | 1763256 | SNV | 1 | A | G | Homozygous   |
| NC_037652.1 | 1766159 | SNV | 1 | T | C | Homozygous   |
| NC_037652.1 | 1767224 | SNV | 1 | T | C | Heterozygous |
| NC_037652.1 | 1783824 | SNV | 1 | G | A | Heterozygous |
| NC_037652.1 | 1783850 | SNV | 1 | G | A | Homozygous   |
| NC_037652.1 | 1785562 | SNV | 1 | A | T | Homozygous   |
| NC_037652.1 | 1789105 | SNV | 1 | A | T | Homozygous   |
| NC_037652.1 | 1789107 | SNV | 1 | T | A | Homozygous   |
| NC_037652.1 | 1789110 | SNV | 1 | A | T | Homozygous   |
| NC_037652.1 | 1789116 | SNV | 1 | T | A | Homozygous   |

|             |         |     |   |   |   |              |
|-------------|---------|-----|---|---|---|--------------|
| NC_037652.1 | 1792962 | SNV | 1 | T | C | Heterozygous |
| NC_037652.1 | 1794654 | SNV | 1 | G | A | Homozygous   |
| NC_037652.1 | 1800729 | SNV | 1 | T | A | Homozygous   |
| NC_037652.1 | 1800731 | SNV | 1 | T | G | Homozygous   |
| NC_037652.1 | 1800735 | SNV | 1 | G | A | Homozygous   |
| NC_037652.1 | 1802051 | SNV | 1 | T | A | Heterozygous |
| NC_037652.1 | 1802059 | SNV | 1 | T | A | Heterozygous |
| NC_037652.1 | 1802071 | SNV | 1 | G | A | Heterozygous |
| NC_037652.1 | 1802399 | SNV | 1 | T | C | Homozygous   |
| NC_037652.1 | 1803088 | SNV | 1 | T | C | Homozygous   |
| NC_037652.1 | 1803972 | SNV | 1 | T | C | Heterozygous |
| NC_037652.1 | 1803978 | SNV | 1 | A | T | Heterozygous |
| NC_037652.1 | 1804009 | SNV | 1 | T | C | Homozygous   |
| NC_037652.1 | 1813336 | SNV | 1 | A | T | Homozygous   |
| NC_037652.1 | 1813365 | SNV | 1 | G | A | Homozygous   |
| NC_037652.1 | 1820809 | SNV | 1 | T | C | Homozygous   |
| NC_037652.1 | 1820815 | SNV | 1 | T | C | Homozygous   |
| NC_037652.1 | 1820835 | SNV | 1 | T | C | Homozygous   |
| NC_037652.1 | 1820839 | SNV | 1 | T | A | Homozygous   |
| NC_037652.1 | 1821865 | SNV | 1 | A | T | Homozygous   |
| NC_037652.1 | 1821868 | SNV | 1 | A | C | Homozygous   |
| NC_037652.1 | 1821875 | SNV | 1 | A | G | Homozygous   |
| NC_037652.1 | 1821884 | SNV | 1 | A | G | Homozygous   |
| NC_037652.1 | 1821886 | SNV | 1 | G | A | Homozygous   |
| NC_037652.1 | 1821893 | SNV | 1 | A | G | Heterozygous |
| NC_037652.1 | 1821895 | SNV | 1 | A | T | Heterozygous |
| NC_037652.1 | 1828990 | SNV | 1 | C | G | Heterozygous |
| NC_037652.1 | 1829071 | SNV | 1 | C | T | Heterozygous |
| NC_037652.1 | 1834755 | SNV | 1 | A | G | Homozygous   |
| NC_037652.1 | 1837493 | SNV | 1 | G | A | Heterozygous |
| NC_037652.1 | 1837783 | SNV | 1 | T | C | Heterozygous |
| NC_037652.1 | 1838036 | SNV | 1 | C | T | Heterozygous |
| NC_037652.1 | 1838167 | SNV | 1 | T | C | Heterozygous |
| NC_037652.1 | 1838521 | SNV | 1 | C | T | Homozygous   |
| NC_037652.1 | 1841015 | SNV | 1 | A | G | Heterozygous |
| NC_037652.1 | 1841598 | SNV | 1 | G | A | Homozygous   |
| NC_037652.1 | 1844439 | SNV | 1 | T | A | Homozygous   |
| NC_037652.1 | 1847518 | SNV | 1 | T | C | Heterozygous |
| NC_037652.1 | 1848341 | SNV | 1 | G | A | Homozygous   |
| NC_037652.1 | 1848344 | SNV | 1 | A | T | Homozygous   |
| NC_037652.1 | 1849114 | SNV | 1 | C | T | Heterozygous |
| NC_037652.1 | 1849341 | SNV | 1 | G | A | Heterozygous |
| NC_037652.1 | 1851194 | SNV | 1 | A | T | Homozygous   |
| NC_037652.1 | 1851202 | SNV | 1 | T | A | Homozygous   |
| NC_037652.1 | 1852506 | SNV | 1 | T | C | Heterozygous |
| NC_037652.1 | 1853930 | SNV | 1 | T | C | Homozygous   |
| NC_037652.1 | 1854368 | SNV | 1 | T | C | Heterozygous |
| NC_037652.1 | 1854372 | SNV | 1 | G | T | Heterozygous |
| NC_037652.1 | 1855052 | SNV | 1 | A | T | Homozygous   |
| NC_037652.1 | 1855245 | SNV | 1 | C | A | Homozygous   |
| NC_037652.1 | 1867229 | SNV | 1 | C | A | Homozygous   |

|             |         |     |   |   |   |              |
|-------------|---------|-----|---|---|---|--------------|
| NC_037652.1 | 1869169 | SNV | 1 | C | T | Homozygous   |
| NC_037652.1 | 1869753 | SNV | 1 | A | G | Homozygous   |
| NC_037652.1 | 1870352 | SNV | 1 | T | C | Homozygous   |
| NC_037652.1 | 1878412 | SNV | 1 | G | A | Homozygous   |
| NC_037652.1 | 1878832 | SNV | 1 | C | T | Heterozygous |
| NC_037652.1 | 1880000 | SNV | 1 | A | G | Homozygous   |
| NC_037652.1 | 1880061 | SNV | 1 | C | T | Homozygous   |
| NC_037652.1 | 1880099 | SNV | 1 | T | C | Homozygous   |
| NC_037652.1 | 1880443 | SNV | 1 | G | C | Homozygous   |
| NC_037652.1 | 1882035 | SNV | 1 | C | T | Heterozygous |
| NC_037652.1 | 1882814 | SNV | 1 | A | G | Homozygous   |
| NC_037652.1 | 1883249 | SNV | 1 | A | G | Homozygous   |
| NC_037652.1 | 1885345 | SNV | 1 | A | G | Heterozygous |
| NC_037652.1 | 1885735 | SNV | 1 | A | G | Heterozygous |
| NC_037652.1 | 1897911 | SNV | 1 | T | G | Homozygous   |
| NC_037652.1 | 1897917 | SNV | 1 | T | A | Heterozygous |
| NC_037652.1 | 1899418 | SNV | 1 | T | A | Homozygous   |
| NC_037652.1 | 1905672 | SNV | 1 | T | A | Homozygous   |
| NC_037652.1 | 1905675 | SNV | 1 | T | A | Homozygous   |
| NC_037652.1 | 1905680 | SNV | 1 | T | A | Homozygous   |
| NC_037652.1 | 1905700 | SNV | 1 | A | T | Homozygous   |
| NC_037652.1 | 1905709 | SNV | 1 | T | A | Homozygous   |
| NC_037652.1 | 1905715 | SNV | 1 | A | T | Homozygous   |
| NC_037652.1 | 1907733 | SNV | 1 | C | T | Homozygous   |
| NC_037652.1 | 1907807 | SNV | 1 | C | T | Heterozygous |
| NC_037652.1 | 1907885 | SNV | 1 | G | A | Heterozygous |
| NC_037652.1 | 1908201 | SNV | 1 | C | T | Heterozygous |
| NC_037652.1 | 1908620 | SNV | 1 | A | G | Homozygous   |
| NC_037652.1 | 1909005 | SNV | 1 | C | T | Heterozygous |
| NC_037652.1 | 1909066 | SNV | 1 | G | A | Homozygous   |
| NC_037652.1 | 1909074 | SNV | 1 | T | C | Heterozygous |
| NC_037652.1 | 1909688 | SNV | 1 | T | C | Homozygous   |
| NC_037652.1 | 1910263 | SNV | 1 | A | G | Homozygous   |
| NC_037652.1 | 1910373 | SNV | 1 | A | G | Heterozygous |
| NC_037652.1 | 1910476 | SNV | 1 | A | G | Homozygous   |
| NC_037652.1 | 1910800 | SNV | 1 | T | A | Homozygous   |
| NC_037652.1 | 1911329 | SNV | 1 | G | A | Homozygous   |
| NC_037652.1 | 1911440 | SNV | 1 | T | A | Heterozygous |
| NC_037652.1 | 1911499 | SNV | 1 | C | T | Homozygous   |
| NC_037652.1 | 1911502 | SNV | 1 | C | T | Heterozygous |
| NC_037652.1 | 1911511 | SNV | 1 | C | A | Homozygous   |
| NC_037652.1 | 1912001 | SNV | 1 | C | G | Homozygous   |
| NC_037652.1 | 1917688 | SNV | 1 | T | C | Homozygous   |
| NC_037652.1 | 1917690 | SNV | 1 | A | G | Homozygous   |
| NC_037652.1 | 1918729 | SNV | 1 | C | T | Homozygous   |
| NC_037652.1 | 1918815 | SNV | 1 | G | A | Homozygous   |
| NC_037652.1 | 1918886 | SNV | 1 | T | C | Homozygous   |
| NC_037652.1 | 1924246 | SNV | 1 | C | T | Homozygous   |
| NC_037652.1 | 1925449 | SNV | 1 | G | C | Homozygous   |
| NC_037652.1 | 1925657 | SNV | 1 | G | C | Homozygous   |
| NC_037652.1 | 1925859 | SNV | 1 | A | G | Homozygous   |

|             |         |     |   |   |   |              |
|-------------|---------|-----|---|---|---|--------------|
| NC_037652.1 | 1925909 | SNV | 1 | T | C | Homozygous   |
| NC_037652.1 | 1935104 | SNV | 1 | T | G | Heterozygous |
| NC_037652.1 | 1935106 | SNV | 1 | A | G | Homozygous   |
| NC_037652.1 | 1936324 | SNV | 1 | C | T | Heterozygous |
| NC_037652.1 | 1936800 | SNV | 1 | A | G | Homozygous   |
| NC_037652.1 | 1936817 | SNV | 1 | C | T | Heterozygous |
| NC_037652.1 | 1940380 | SNV | 1 | A | G | Heterozygous |
| NC_037652.1 | 1944907 | SNV | 1 | T | C | Heterozygous |
| NC_037652.1 | 1949191 | SNV | 1 | T | A | Homozygous   |
| NC_037652.1 | 1949210 | SNV | 1 | T | A | Homozygous   |
| NC_037652.1 | 1949216 | SNV | 1 | T | C | Homozygous   |
| NC_037652.1 | 1950790 | SNV | 1 | A | G | Homozygous   |
| NC_037652.1 | 1950804 | SNV | 1 | A | G | Homozygous   |
| NC_037652.1 | 1951355 | SNV | 1 | A | G | Homozygous   |
| NC_037652.1 | 1951362 | SNV | 1 | A | T | Homozygous   |
| NC_037652.1 | 1952048 | SNV | 1 | T | A | Homozygous   |
| NC_037652.1 | 1952056 | SNV | 1 | T | A | Heterozygous |
| NC_037652.1 | 1952066 | SNV | 1 | A | T | Heterozygous |
| NC_037652.1 | 1952075 | SNV | 1 | T | G | Heterozygous |
| NC_037652.1 | 1952077 | SNV | 1 | T | G | Heterozygous |
| NC_037652.1 | 1952082 | SNV | 1 | G | A | Heterozygous |
| NC_037652.1 | 1952086 | SNV | 1 | T | A | Heterozygous |
| NC_037652.1 | 1953942 | SNV | 1 | G | A | Heterozygous |
| NC_037652.1 | 1953945 | SNV | 1 | A | C | Heterozygous |
| NC_037652.1 | 1955584 | SNV | 1 | T | C | Heterozygous |
| NC_037652.1 | 1961403 | SNV | 1 | A | C | Homozygous   |
| NC_037652.1 | 1961463 | SNV | 1 | C | T | Heterozygous |
| NC_037652.1 | 1965306 | SNV | 1 | T | C | Homozygous   |
| NC_037652.1 | 1965660 | SNV | 1 | T | C | Homozygous   |
| NC_037652.1 | 1966296 | SNV | 1 | G | A | Heterozygous |
| NC_037652.1 | 1966407 | SNV | 1 | A | G | Heterozygous |
| NC_037652.1 | 1966596 | SNV | 1 | C | T | Heterozygous |
| NC_037652.1 | 1966626 | SNV | 1 | C | T | Heterozygous |
| NC_037652.1 | 1966641 | SNV | 1 | G | A | Heterozygous |
| NC_037652.1 | 1966650 | SNV | 1 | A | G | Homozygous   |
| NC_037652.1 | 1967022 | SNV | 1 | C | T | Homozygous   |
| NC_037652.1 | 1967075 | SNV | 1 | G | A | Homozygous   |
| NC_037652.1 | 1967093 | SNV | 1 | A | G | Heterozygous |
| NC_037652.1 | 1967117 | SNV | 1 | A | T | Homozygous   |
| NC_037652.1 | 1967697 | SNV | 1 | G | C | Homozygous   |
| NC_037652.1 | 1969204 | SNV | 1 | C | A | Homozygous   |
| NC_037652.1 | 1969499 | SNV | 1 | T | C | Homozygous   |
| NC_037652.1 | 1970124 | SNV | 1 | C | T | Homozygous   |
| NC_037652.1 | 1971332 | SNV | 1 | T | G | Homozygous   |
| NC_037652.1 | 1971336 | SNV | 1 | A | C | Homozygous   |
| NC_037652.1 | 1975351 | SNV | 1 | T | C | Homozygous   |
| NC_037652.1 | 1977192 | SNV | 1 | A | T | Homozygous   |
| NC_037652.1 | 1977207 | SNV | 1 | A | T | Homozygous   |
| NC_037652.1 | 1977221 | SNV | 1 | T | C | Homozygous   |
| NC_037652.1 | 1977225 | SNV | 1 | T | A | Homozygous   |
| NC_037652.1 | 1977242 | SNV | 1 | T | A | Homozygous   |

|             |         |     |   |   |   |              |
|-------------|---------|-----|---|---|---|--------------|
| NC_037652.1 | 1981004 | SNV | 1 | T | C | Homozygous   |
| NC_037652.1 | 1982950 | SNV | 1 | A | G | Homozygous   |
| NC_037652.1 | 1982956 | SNV | 1 | C | T | Heterozygous |
| NC_037652.1 | 1983064 | SNV | 1 | G | A | Heterozygous |
| NC_037652.1 | 1983230 | SNV | 1 | T | A | Homozygous   |
| NC_037652.1 | 1983264 | SNV | 1 | T | C | Homozygous   |
| NC_037652.1 | 1983269 | SNV | 1 | A | G | Homozygous   |
| NC_037652.1 | 1983282 | SNV | 1 | T | C | Homozygous   |
| NC_037652.1 | 1983285 | SNV | 1 | T | G | Homozygous   |
| NC_037652.1 | 1990375 | SNV | 1 | C | T | Homozygous   |
| NC_037652.1 | 1990378 | SNV | 1 | T | C | Homozygous   |
| NC_037652.1 | 1990429 | SNV | 1 | A | G | Homozygous   |
| NC_037652.1 | 1990456 | SNV | 1 | T | C | Homozygous   |
| NC_037652.1 | 2011329 | SNV | 1 | C | T | Heterozygous |
| NC_037652.1 | 2011342 | SNV | 1 | C | T | Homozygous   |
| NC_037652.1 | 2011444 | SNV | 1 | T | C | Homozygous   |
| NC_037652.1 | 2023400 | SNV | 1 | A | G | Homozygous   |
| NC_037652.1 | 2023645 | SNV | 1 | T | C | Homozygous   |
| NC_037652.1 | 2026243 | SNV | 1 | A | G | Heterozygous |
| NC_037652.1 | 2026280 | SNV | 1 | G | A | Heterozygous |
| NC_037652.1 | 2026285 | SNV | 1 | G | A | Heterozygous |
| NC_037652.1 | 2026317 | SNV | 1 | C | T | Homozygous   |
| NC_037652.1 | 2026320 | SNV | 1 | C | T | Homozygous   |
| NC_037652.1 | 2026331 | SNV | 1 | A | T | Homozygous   |
| NC_037652.1 | 2026333 | SNV | 1 | C | T | Homozygous   |
| NC_037652.1 | 2026347 | SNV | 1 | C | T | Homozygous   |
| NC_037652.1 | 2026379 | SNV | 1 | G | T | Heterozygous |
| NC_037652.1 | 2040028 | SNV | 1 | T | C | Homozygous   |
| NC_037652.1 | 2040219 | SNV | 1 | A | T | Homozygous   |
| NC_037652.1 | 2040341 | SNV | 1 | A | G | Heterozygous |
| NC_037652.1 | 2040348 | SNV | 1 | G | A | Heterozygous |
| NC_037652.1 | 2040357 | SNV | 1 | C | T | Homozygous   |
| NC_037652.1 | 2040360 | SNV | 1 | C | G | Homozygous   |
| NC_037652.1 | 2040387 | SNV | 1 | C | T | Heterozygous |
| NC_037652.1 | 2040414 | SNV | 1 | C | T | Heterozygous |
| NC_037652.1 | 2048208 | SNV | 1 | A | C | Homozygous   |
| NC_037652.1 | 2048213 | SNV | 1 | T | A | Heterozygous |
| NC_037652.1 | 2048216 | SNV | 1 | T | A | Homozygous   |
| NC_037652.1 | 2048342 | SNV | 1 | G | A | Homozygous   |
| NC_037652.1 | 2048461 | SNV | 1 | A | G | Homozygous   |
| NC_037652.1 | 2050158 | SNV | 1 | C | G | Heterozygous |
| NC_037652.1 | 2050158 | SNV | 1 | C | T | Heterozygous |
| NC_037652.1 | 2050368 | SNV | 1 | G | A | Heterozygous |
| NC_037652.1 | 2050390 | SNV | 1 | C | T | Homozygous   |
| NC_037652.1 | 2050786 | SNV | 1 | G | A | Heterozygous |
| NC_037652.1 | 2050790 | SNV | 1 | G | A | Heterozygous |
| NC_037652.1 | 2050794 | SNV | 1 | G | C | Heterozygous |
| NC_037652.1 | 2054129 | SNV | 1 | G | C | Homozygous   |
| NC_037652.1 | 2055188 | SNV | 1 | T | C | Homozygous   |
| NC_037652.1 | 2055326 | SNV | 1 | G | A | Heterozygous |
| NC_037652.1 | 2055415 | SNV | 1 | T | C | Heterozygous |



|             |         |     |   |   |   |              |
|-------------|---------|-----|---|---|---|--------------|
| NC_037652.1 | 2055469 | SNV | 1 | A | G | Homozygous   |
| NC_037652.1 | 2055475 | SNV | 1 | C | T | Homozygous   |
| NC_037652.1 | 2055489 | SNV | 1 | C | A | Homozygous   |
| NC_037652.1 | 2055491 | SNV | 1 | A | T | Homozygous   |
| NC_037652.1 | 2055534 | SNV | 1 | G | A | Heterozygous |
| NC_037652.1 | 2055563 | SNV | 1 | T | C | Heterozygous |
| NC_037652.1 | 2055567 | SNV | 1 | T | C | Heterozygous |
| NC_037652.1 | 2055597 | SNV | 1 | A | G | Homozygous   |
| NC_037652.1 | 2064378 | SNV | 1 | A | T | Heterozygous |
| NC_037652.1 | 2064400 | SNV | 1 | G | A | Homozygous   |
| NC_037652.1 | 2064430 | SNV | 1 | T | C | Homozygous   |
| NC_037652.1 | 2064446 | SNV | 1 | G | A | Homozygous   |
| NC_037652.1 | 2064478 | SNV | 1 | A | G | Homozygous   |
| NC_037652.1 | 2064497 | SNV | 1 | T | C | Heterozygous |
| NC_037652.1 | 2064535 | SNV | 1 | T | C | Heterozygous |
| NC_037652.1 | 2064572 | SNV | 1 | A | G | Homozygous   |
| NC_037652.1 | 2064669 | SNV | 1 | T | C | Heterozygous |
| NC_037652.1 | 2182078 | SNV | 1 | G | A | Heterozygous |
| NC_037652.1 | 2182508 | SNV | 1 | C | T | Homozygous   |
| NC_037652.1 | 2182941 | SNV | 1 | T | C | Homozygous   |
| NC_037652.1 | 2183437 | SNV | 1 | T | C | Homozygous   |
| NC_037652.1 | 2183793 | SNV | 1 | T | A | Heterozygous |
| NC_037652.1 | 2183854 | SNV | 1 | T | C | Heterozygous |
| NC_037652.1 | 2183912 | SNV | 1 | G | A | Heterozygous |
| NC_037652.1 | 2184423 | SNV | 1 | T | C | Homozygous   |
| NC_037652.1 | 2184443 | SNV | 1 | T | A | Heterozygous |
| NC_037652.1 | 2184446 | SNV | 1 | C | A | Heterozygous |
| NC_037652.1 | 2184456 | SNV | 1 | A | T | Heterozygous |
| NC_037652.1 | 2184463 | SNV | 1 | A | G | Heterozygous |
| NC_037652.1 | 2184472 | SNV | 1 | G | A | Heterozygous |
| NC_037652.1 | 2184607 | SNV | 1 | G | A | Homozygous   |
| NC_037652.1 | 2185411 | SNV | 1 | T | C | Heterozygous |
| NC_037652.1 | 2185600 | SNV | 1 | C | T | Homozygous   |
| NC_037652.1 | 2185633 | SNV | 1 | A | G | Homozygous   |
| NC_037652.1 | 2185810 | SNV | 1 | C | T | Homozygous   |
| NC_037652.1 | 2185829 | SNV | 1 | A | G | Homozygous   |
| NC_037652.1 | 2186111 | SNV | 1 | T | C | Homozygous   |
| NC_037652.1 | 2186218 | SNV | 1 | A | G | Homozygous   |
| NC_037652.1 | 2186270 | SNV | 1 | C | T | Heterozygous |
| NC_037652.1 | 2186376 | SNV | 1 | T | A | Homozygous   |
| NC_037652.1 | 2186576 | SNV | 1 | T | C | Heterozygous |
| NC_037652.1 | 2186752 | SNV | 1 | T | C | Homozygous   |
| NC_037652.1 | 2186822 | SNV | 1 | G | A | Homozygous   |
| NC_037652.1 | 2186901 | SNV | 1 | C | T | Heterozygous |
| NC_037652.1 | 2186960 | SNV | 1 | A | G | Homozygous   |
| NC_037652.1 | 2188033 | SNV | 1 | C | T | Heterozygous |
| NC_037652.1 | 2188112 | SNV | 1 | C | T | Heterozygous |
| NC_037652.1 | 2188494 | SNV | 1 | A | T | Homozygous   |
| NC_037652.1 | 2188895 | SNV | 1 | G | A | Heterozygous |
| NC_037652.1 | 2194780 | SNV | 1 | A | G | Heterozygous |
| NC_037652.1 | 2195513 | SNV | 1 | G | A | Heterozygous |

|             |         |     |   |   |   |              |
|-------------|---------|-----|---|---|---|--------------|
| NC_037652.1 | 2196087 | SNV | 1 | G | A | Heterozygous |
| NC_037652.1 | 2196117 | SNV | 1 | A | G | Heterozygous |
| NC_037652.1 | 2196355 | SNV | 1 | C | T | Homozygous   |
| NC_037652.1 | 2200538 | SNV | 1 | A | T | Homozygous   |
| NC_037652.1 | 2200540 | SNV | 1 | A | T | Homozygous   |
| NC_037652.1 | 2200556 | SNV | 1 | T | C | Homozygous   |
| NC_037652.1 | 2200560 | SNV | 1 | T | A | Homozygous   |
| NC_037652.1 | 2201018 | SNV | 1 | A | C | Homozygous   |
| NC_037652.1 | 2201021 | SNV | 1 | A | C | Homozygous   |
| NC_037652.1 | 2201023 | SNV | 1 | C | A | Homozygous   |
| NC_037652.1 | 2201039 | SNV | 1 | A | G | Homozygous   |
| NC_037652.1 | 2201049 | SNV | 1 | A | T | Homozygous   |
| NC_037652.1 | 2201054 | SNV | 1 | T | G | Homozygous   |
| NC_037652.1 | 2201056 | SNV | 1 | C | T | Homozygous   |
| NC_037652.1 | 2201075 | SNV | 1 | C | T | Homozygous   |
| NC_037652.1 | 2201090 | SNV | 1 | T | C | Homozygous   |
| NC_037652.1 | 2201095 | SNV | 1 | G | T | Homozygous   |
| NC_037652.1 | 2205136 | SNV | 1 | A | G | Homozygous   |
| NC_037652.1 | 2205142 | SNV | 1 | G | A | Homozygous   |
| NC_037652.1 | 2205152 | SNV | 1 | A | T | Homozygous   |
| NC_037652.1 | 2205154 | SNV | 1 | A | C | Homozygous   |
| NC_037652.1 | 2205158 | SNV | 1 | A | T | Heterozygous |
| NC_037652.1 | 2205164 | SNV | 1 | A | C | Heterozygous |
| NC_037652.1 | 2205165 | SNV | 1 | C | T | Heterozygous |
| NC_037652.1 | 2205169 | SNV | 1 | T | C | Homozygous   |
| NC_037652.1 | 2207408 | SNV | 1 | T | C | Homozygous   |
| NC_037652.1 | 2207482 | SNV | 1 | C | T | Heterozygous |
| NC_037652.1 | 2217848 | SNV | 1 | G | C | Homozygous   |
| NC_037652.1 | 2217851 | SNV | 1 | A | C | Homozygous   |
| NC_037652.1 | 2217859 | SNV | 1 | A | C | Homozygous   |
| NC_037652.1 | 2225919 | SNV | 1 | G | T | Homozygous   |
| NC_037652.1 | 2235509 | SNV | 1 | T | A | Homozygous   |
| NC_037652.1 | 2235513 | SNV | 1 | T | C | Homozygous   |
| NC_037652.1 | 2235533 | SNV | 1 | C | G | Homozygous   |
| NC_037652.1 | 2235541 | SNV | 1 | T | A | Homozygous   |
| NC_037652.1 | 2235544 | SNV | 1 | T | A | Homozygous   |
| NC_037652.1 | 2235548 | SNV | 1 | A | G | Homozygous   |
| NC_037652.1 | 2237252 | SNV | 1 | G | A | Heterozygous |
| NC_037652.1 | 2240203 | SNV | 1 | A | G | Homozygous   |
| NC_037652.1 | 2255621 | SNV | 1 | A | T | Homozygous   |
| NC_037652.1 | 2255626 | SNV | 1 | A | T | Homozygous   |
| NC_037652.1 | 2255629 | SNV | 1 | T | G | Homozygous   |
| NC_037652.1 | 2255633 | SNV | 1 | C | T | Homozygous   |
| NC_037652.1 | 2255639 | SNV | 1 | A | G | Homozygous   |
| NC_037652.1 | 2255834 | SNV | 1 | A | C | Heterozygous |
| NC_037652.1 | 2255849 | SNV | 1 | A | C | Heterozygous |
| NC_037652.1 | 2255860 | SNV | 1 | T | G | Heterozygous |
| NC_037652.1 | 2260361 | SNV | 1 | A | G | Homozygous   |
| NC_037652.1 | 2260382 | SNV | 1 | G | A | Homozygous   |
| NC_037652.1 | 2260418 | SNV | 1 | T | C | Homozygous   |
| NC_037652.1 | 2270153 | SNV | 1 | G | A | Heterozygous |

|             |         |     |   |   |   |              |
|-------------|---------|-----|---|---|---|--------------|
| NC_037652.1 | 2270160 | SNV | 1 | T | A | Heterozygous |
| NC_037652.1 | 2270176 | SNV | 1 | T | C | Heterozygous |
| NC_037652.1 | 2270183 | SNV | 1 | G | A | Heterozygous |
| NC_037652.1 | 2270190 | SNV | 1 | A | G | Heterozygous |
| NC_037652.1 | 2271747 | SNV | 1 | G | T | Homozygous   |
| NC_037652.1 | 2271750 | SNV | 1 | A | T | Homozygous   |
| NC_037652.1 | 2271753 | SNV | 1 | A | G | Homozygous   |
| NC_037652.1 | 2278440 | SNV | 1 | A | T | Heterozygous |
| NC_037652.1 | 2278475 | SNV | 1 | T | C | Homozygous   |
| NC_037652.1 | 2278478 | SNV | 1 | C | T | Homozygous   |
| NC_037652.1 | 2282709 | SNV | 1 | G | A | Heterozygous |
| NC_037652.1 | 2282811 | SNV | 1 | G | A | Heterozygous |
| NC_037652.1 | 2284232 | SNV | 1 | A | G | Homozygous   |
| NC_037652.1 | 2284481 | SNV | 1 | T | C | Homozygous   |
| NC_037652.1 | 2284511 | SNV | 1 | A | G | Homozygous   |
| NC_037652.1 | 2286324 | SNV | 1 | G | A | Homozygous   |
| NC_037652.1 | 2293701 | SNV | 1 | C | G | Heterozygous |
| NC_037652.1 | 2303634 | SNV | 1 | A | C | Heterozygous |
| NC_037652.1 | 2303673 | SNV | 1 | A | G | Heterozygous |
| NC_037652.1 | 2303685 | SNV | 1 | A | G | Heterozygous |
| NC_037652.1 | 2306499 | SNV | 1 | G | C | Heterozygous |
| NC_037652.1 | 2306509 | SNV | 1 | G | A | Heterozygous |
| NC_037652.1 | 2306521 | SNV | 1 | T | C | Homozygous   |
| NC_037652.1 | 2306568 | SNV | 1 | T | G | Homozygous   |
| NC_037652.1 | 2306666 | SNV | 1 | T | C | Homozygous   |
| NC_037652.1 | 2306810 | SNV | 1 | A | G | Homozygous   |
| NC_037652.1 | 2306913 | SNV | 1 | A | G | Homozygous   |
| NC_037652.1 | 2307522 | SNV | 1 | T | C | Homozygous   |
| NC_037652.1 | 2307649 | SNV | 1 | A | G | Homozygous   |
| NC_037652.1 | 2312247 | SNV | 1 | C | T | Homozygous   |
| NC_037652.1 | 2312251 | SNV | 1 | A | G | Homozygous   |
| NC_037652.1 | 2312253 | SNV | 1 | A | T | Homozygous   |
| NC_037652.1 | 2312701 | SNV | 1 | G | A | Heterozygous |
| NC_037652.1 | 2314873 | SNV | 1 | C | G | Homozygous   |
| NC_037652.1 | 2314908 | SNV | 1 | A | G | Heterozygous |
| NC_037652.1 | 2314913 | SNV | 1 | G | A | Heterozygous |
| NC_037652.1 | 2314957 | SNV | 1 | A | G | Homozygous   |
| NC_037652.1 | 2322127 | SNV | 1 | T | C | Homozygous   |
| NC_037652.1 | 2322160 | SNV | 1 | T | C | Homozygous   |
| NC_037652.1 | 2322566 | SNV | 1 | C | T | Homozygous   |
| NC_037652.1 | 2322629 | SNV | 1 | T | C | Homozygous   |
| NC_037652.1 | 2322662 | SNV | 1 | A | G | Homozygous   |
| NC_037652.1 | 2322725 | SNV | 1 | G | A | Heterozygous |
| NC_037652.1 | 2324086 | SNV | 1 | C | A | Homozygous   |
| NC_037652.1 | 2324129 | SNV | 1 | T | A | Homozygous   |
| NC_037652.1 | 2332705 | SNV | 1 | A | T | Heterozygous |
| NC_037652.1 | 2332720 | SNV | 1 | G | T | Heterozygous |
| NC_037652.1 | 2332749 | SNV | 1 | G | A | Heterozygous |
| NC_037652.1 | 2332808 | SNV | 1 | A | G | Homozygous   |
| NC_037652.1 | 2336671 | SNV | 1 | G | T | Heterozygous |
| NC_037652.1 | 2346580 | SNV | 1 | A | G | Homozygous   |

|             |         |     |   |   |   |              |
|-------------|---------|-----|---|---|---|--------------|
| NC_037652.1 | 2346668 | SNV | 1 | C | A | Heterozygous |
| NC_037652.1 | 2346708 | SNV | 1 | A | G | Heterozygous |
| NC_037652.1 | 2346712 | SNV | 1 | A | T | Heterozygous |
| NC_037652.1 | 2346719 | SNV | 1 | A | G | Heterozygous |
| NC_037652.1 | 2346721 | SNV | 1 | A | G | Heterozygous |
| NC_037652.1 | 2346726 | SNV | 1 | T | A | Homozygous   |
| NC_037652.1 | 2346732 | SNV | 1 | A | G | Heterozygous |
| NC_037652.1 | 2347008 | SNV | 1 | T | C | Homozygous   |
| NC_037652.1 | 2347093 | SNV | 1 | G | A | Homozygous   |
| NC_037652.1 | 2359202 | SNV | 1 | C | T | Heterozygous |
| NC_037652.1 | 2359345 | SNV | 1 | C | T | Homozygous   |
| NC_037652.1 | 2359394 | SNV | 1 | A | T | Heterozygous |
| NC_037652.1 | 2359398 | SNV | 1 | T | C | Homozygous   |
| NC_037652.1 | 2359413 | SNV | 1 | G | A | Heterozygous |
| NC_037652.1 | 2359626 | SNV | 1 | G | T | Heterozygous |
| NC_037652.1 | 2359632 | SNV | 1 | T | A | Heterozygous |
| NC_037652.1 | 2359642 | SNV | 1 | C | T | Homozygous   |
| NC_037652.1 | 2359828 | SNV | 1 | T | A | Heterozygous |
| NC_037652.1 | 2360081 | SNV | 1 | G | A | Homozygous   |
| NC_037652.1 | 2360131 | SNV | 1 | T | C | Homozygous   |
| NC_037652.1 | 2360168 | SNV | 1 | G | A | Homozygous   |
| NC_037652.1 | 2360197 | SNV | 1 | A | G | Homozygous   |
| NC_037652.1 | 2360200 | SNV | 1 | A | C | Heterozygous |
| NC_037652.1 | 2360259 | SNV | 1 | C | A | Homozygous   |
| NC_037652.1 | 2360272 | SNV | 1 | G | T | Homozygous   |
| NC_037652.1 | 2360307 | SNV | 1 | A | G | Homozygous   |
| NC_037652.1 | 2360410 | SNV | 1 | A | G | Homozygous   |
| NC_037652.1 | 2360499 | SNV | 1 | T | C | Homozygous   |
| NC_037652.1 | 2360504 | SNV | 1 | A | G | Homozygous   |
| NC_037652.1 | 2360594 | SNV | 1 | T | C | Heterozygous |
| NC_037652.1 | 2360595 | SNV | 1 | T | A | Heterozygous |
| NC_037652.1 | 2360626 | SNV | 1 | C | A | Heterozygous |
| NC_037652.1 | 2360724 | SNV | 1 | C | T | Homozygous   |
| NC_037652.1 | 2360790 | SNV | 1 | A | G | Homozygous   |
| NC_037652.1 | 2360844 | SNV | 1 | G | A | Heterozygous |
| NC_037652.1 | 2360879 | SNV | 1 | C | T | Heterozygous |
| NC_037652.1 | 2361056 | SNV | 1 | G | A | Homozygous   |
| NC_037652.1 | 2361098 | SNV | 1 | A | G | Homozygous   |
| NC_037652.1 | 2361128 | SNV | 1 | T | C | Homozygous   |
| NC_037652.1 | 2361182 | SNV | 1 | G | A | Homozygous   |
| NC_037652.1 | 2361229 | SNV | 1 | C | T | Heterozygous |
| NC_037652.1 | 2361240 | SNV | 1 | T | G | Homozygous   |
| NC_037652.1 | 2361243 | SNV | 1 | G | A | Homozygous   |
| NC_037652.1 | 2361336 | SNV | 1 | C | G | Homozygous   |
| NC_037652.1 | 2362898 | SNV | 1 | C | T | Homozygous   |
| NC_037652.1 | 2362916 | SNV | 1 | A | G | Heterozygous |
| NC_037652.1 | 2363998 | SNV | 1 | T | A | Homozygous   |
| NC_037652.1 | 2368980 | SNV | 1 | T | A | Heterozygous |
| NC_037652.1 | 2368982 | SNV | 1 | C | A | Homozygous   |
| NC_037652.1 | 2369035 | SNV | 1 | A | G | Homozygous   |
| NC_037652.1 | 2369114 | SNV | 1 | T | A | Homozygous   |

|             |         |     |   |   |   |              |
|-------------|---------|-----|---|---|---|--------------|
| NC_037652.1 | 2369123 | SNV | 1 | G | A | Heterozygous |
| NC_037652.1 | 2369128 | SNV | 1 | A | G | Homozygous   |
| NC_037652.1 | 2369189 | SNV | 1 | T | G | Heterozygous |
| NC_037652.1 | 2371803 | SNV | 1 | A | G | Homozygous   |
| NC_037652.1 | 2371914 | SNV | 1 | T | C | Homozygous   |
| NC_037652.1 | 2372105 | SNV | 1 | T | A | Homozygous   |
| NC_037652.1 | 2372110 | SNV | 1 | T | A | Homozygous   |
| NC_037652.1 | 2372121 | SNV | 1 | T | G | Homozygous   |
| NC_037652.1 | 2372131 | SNV | 1 | G | T | Heterozygous |
| NC_037652.1 | 2372148 | SNV | 1 | C | T | Heterozygous |
| NC_037652.1 | 2372186 | SNV | 1 | A | G | Heterozygous |
| NC_037652.1 | 2376581 | SNV | 1 | T | C | Homozygous   |
| NC_037652.1 | 2376696 | SNV | 1 | G | A | Homozygous   |
| NC_037652.1 | 2379381 | SNV | 1 | C | A | Homozygous   |
| NC_037652.1 | 2379385 | SNV | 1 | A | G | Heterozygous |
| NC_037652.1 | 2379465 | SNV | 1 | G | A | Homozygous   |
| NC_037652.1 | 2379498 | SNV | 1 | A | G | Homozygous   |
| NC_037652.1 | 2379544 | SNV | 1 | T | C | Homozygous   |
| NC_037652.1 | 2379590 | SNV | 1 | A | T | Homozygous   |
| NC_037652.1 | 2379611 | SNV | 1 | A | G | Homozygous   |
| NC_037652.1 | 2379640 | SNV | 1 | A | G | Homozygous   |
| NC_037652.1 | 2379680 | SNV | 1 | T | C | Homozygous   |
| NC_037652.1 | 2384381 | SNV | 1 | G | A | Homozygous   |
| NC_037652.1 | 2384424 | SNV | 1 | T | C | Heterozygous |
| NC_037652.1 | 2384528 | SNV | 1 | T | C | Homozygous   |
| NC_037652.1 | 2384875 | SNV | 1 | A | G | Heterozygous |
| NC_037652.1 | 2385122 | SNV | 1 | A | G | Homozygous   |
| NC_037652.1 | 2385141 | SNV | 1 | C | T | Heterozygous |
| NC_037652.1 | 2389998 | SNV | 1 | G | A | Homozygous   |
| NC_037652.1 | 2399128 | SNV | 1 | G | A | Heterozygous |
| NC_037652.1 | 2400750 | SNV | 1 | T | A | Heterozygous |
| NC_037652.1 | 2400779 | SNV | 1 | T | A | Heterozygous |
| NC_037652.1 | 2400806 | SNV | 1 | T | A | Heterozygous |
| NC_037652.1 | 2400811 | SNV | 1 | T | A | Heterozygous |
| NC_037652.1 | 2400998 | SNV | 1 | T | C | Homozygous   |
| NC_037652.1 | 2406954 | SNV | 1 | T | A | Homozygous   |
| NC_037652.1 | 2412745 | SNV | 1 | C | G | Homozygous   |
| NC_037652.1 | 2428718 | SNV | 1 | A | G | Heterozygous |
| NC_037652.1 | 2428745 | SNV | 1 | G | A | Heterozygous |
| NC_037652.1 | 2428750 | SNV | 1 | G | C | Homozygous   |
| NC_037652.1 | 2431802 | SNV | 1 | T | C | Homozygous   |
| NC_037652.1 | 2431806 | SNV | 1 | C | T | Heterozygous |
| NC_037652.1 | 2431842 | SNV | 1 | T | C | Heterozygous |
| NC_037652.1 | 2432099 | SNV | 1 | A | C | Homozygous   |
| NC_037652.1 | 2432175 | SNV | 1 | G | A | Heterozygous |
| NC_037652.1 | 2432189 | SNV | 1 | A | G | Homozygous   |
| NC_037652.1 | 2444877 | SNV | 1 | T | A | Homozygous   |
| NC_037652.1 | 2444879 | SNV | 1 | A | C | Homozygous   |
| NC_037652.1 | 2444892 | SNV | 1 | A | T | Homozygous   |
| NC_037652.1 | 2444907 | SNV | 1 | T | A | Homozygous   |
| NC_037652.1 | 2449206 | SNV | 1 | A | G | Homozygous   |

|             |         |     |   |   |   |              |
|-------------|---------|-----|---|---|---|--------------|
| NC_037652.1 | 2449269 | SNV | 1 | C | T | Homozygous   |
| NC_037652.1 | 2450725 | SNV | 1 | T | C | Heterozygous |
| NC_037652.1 | 2453732 | SNV | 1 | T | C | Homozygous   |
| NC_037652.1 | 2454024 | SNV | 1 | T | C | Homozygous   |
| NC_037652.1 | 2454696 | SNV | 1 | T | C | Homozygous   |
| NC_037652.1 | 2454785 | SNV | 1 | G | A | Homozygous   |
| NC_037652.1 | 2454898 | SNV | 1 | A | G | Homozygous   |
| NC_037652.1 | 2455031 | SNV | 1 | A | G | Heterozygous |
| NC_037652.1 | 2455077 | SNV | 1 | T | C | Homozygous   |
| NC_037652.1 | 2455776 | SNV | 1 | C | T | Heterozygous |
| NC_037652.1 | 2455899 | SNV | 1 | T | A | Heterozygous |
| NC_037652.1 | 2459018 | SNV | 1 | C | T | Homozygous   |
| NC_037652.1 | 2459020 | SNV | 1 | A | G | Homozygous   |
| NC_037652.1 | 2459023 | SNV | 1 | A | G | Homozygous   |
| NC_037652.1 | 2459866 | SNV | 1 | C | A | Homozygous   |
| NC_037652.1 | 2467270 | SNV | 1 | A | T | Homozygous   |
| NC_037652.1 | 2467289 | SNV | 1 | T | A | Homozygous   |
| NC_037652.1 | 2467291 | SNV | 1 | A | G | Homozygous   |
| NC_037652.1 | 2467295 | SNV | 1 | A | C | Homozygous   |
| NC_037652.1 | 2467504 | SNV | 1 | A | T | Homozygous   |
| NC_037652.1 | 2467511 | SNV | 1 | T | G | Homozygous   |
| NC_037652.1 | 2467527 | SNV | 1 | A | C | Homozygous   |
| NC_037652.1 | 2467549 | SNV | 1 | A | C | Homozygous   |
| NC_037652.1 | 2473110 | SNV | 1 | A | T | Homozygous   |
| NC_037652.1 | 2473357 | SNV | 1 | A | G | Homozygous   |
| NC_037652.1 | 2473360 | SNV | 1 | A | G | Heterozygous |
| NC_037652.1 | 2474732 | SNV | 1 | A | G | Homozygous   |
| NC_037652.1 | 2479256 | SNV | 1 | C | A | Heterozygous |
| NC_037652.1 | 2479724 | SNV | 1 | T | A | Heterozygous |
| NC_037652.1 | 2479728 | SNV | 1 | T | A | Heterozygous |
| NC_037652.1 | 2480016 | SNV | 1 | C | G | Homozygous   |
| NC_037652.1 | 2481181 | SNV | 1 | T | A | Heterozygous |
| NC_037652.1 | 2481741 | SNV | 1 | C | T | Homozygous   |
| NC_037652.1 | 2482222 | SNV | 1 | A | G | Homozygous   |
| NC_037652.1 | 2482607 | SNV | 1 | G | A | Heterozygous |
| NC_037652.1 | 2482736 | SNV | 1 | A | G | Homozygous   |
| NC_037652.1 | 2482745 | SNV | 1 | C | T | Heterozygous |
| NC_037652.1 | 2483753 | SNV | 1 | C | T | Homozygous   |
| NC_037652.1 | 2483905 | SNV | 1 | C | T | Heterozygous |
| NC_037652.1 | 2484048 | SNV | 1 | T | C | Homozygous   |
| NC_037652.1 | 2484202 | SNV | 1 | A | C | Homozygous   |
| NC_037652.1 | 2484220 | SNV | 1 | T | C | Homozygous   |
| NC_037652.1 | 2484269 | SNV | 1 | A | G | Homozygous   |
| NC_037652.1 | 2484337 | SNV | 1 | T | C | Heterozygous |
| NC_037652.1 | 2484436 | SNV | 1 | A | G | Homozygous   |
| NC_037652.1 | 2484522 | SNV | 1 | G | T | Heterozygous |
| NC_037652.1 | 2484570 | SNV | 1 | G | A | Homozygous   |
| NC_037652.1 | 2484807 | SNV | 1 | C | G | Homozygous   |
| NC_037652.1 | 2484985 | SNV | 1 | A | G | Homozygous   |
| NC_037652.1 | 2485078 | SNV | 1 | T | C | Heterozygous |
| NC_037652.1 | 2485080 | SNV | 1 | T | C | Heterozygous |

|             |         |     |   |   |   |              |
|-------------|---------|-----|---|---|---|--------------|
| NC_037652.1 | 2485108 | SNV | 1 | T | C | Heterozygous |
| NC_037652.1 | 2485656 | SNV | 1 | A | G | Homozygous   |
| NC_037652.1 | 2485668 | SNV | 1 | A | T | Heterozygous |
| NC_037652.1 | 2487017 | SNV | 1 | C | T | Heterozygous |
| NC_037652.1 | 2487046 | SNV | 1 | C | T | Heterozygous |
| NC_037652.1 | 2487105 | SNV | 1 | A | G | Homozygous   |
| NC_037652.1 | 2487240 | SNV | 1 | C | A | Heterozygous |
| NC_037652.1 | 2488816 | SNV | 1 | G | A | Heterozygous |
| NC_037652.1 | 2489055 | SNV | 1 | A | G | Homozygous   |
| NC_037652.1 | 2491721 | SNV | 1 | C | T | Heterozygous |
| NC_037652.1 | 2491905 | SNV | 1 | A | G | Homozygous   |
| NC_037652.1 | 2491932 | SNV | 1 | G | A | Heterozygous |
| NC_037652.1 | 2491981 | SNV | 1 | G | A | Heterozygous |
| NC_037652.1 | 2492122 | SNV | 1 | G | A | Homozygous   |
| NC_037652.1 | 2510772 | SNV | 1 | A | C | Homozygous   |
| NC_037652.1 | 2510774 | SNV | 1 | A | T | Homozygous   |
| NC_037652.1 | 2510782 | SNV | 1 | A | T | Homozygous   |
| NC_037652.1 | 2510786 | SNV | 1 | A | T | Homozygous   |
| NC_037652.1 | 2510795 | SNV | 1 | A | G | Homozygous   |
| NC_037652.1 | 2512167 | SNV | 1 | A | T | Homozygous   |
| NC_037652.1 | 2512176 | SNV | 1 | T | A | Homozygous   |
| NC_037652.1 | 2512197 | SNV | 1 | A | T | Homozygous   |
| NC_037652.1 | 2512214 | SNV | 1 | A | T | Homozygous   |
| NC_037652.1 | 2512220 | SNV | 1 | A | T | Homozygous   |
| NC_037652.1 | 2518173 | SNV | 1 | C | T | Homozygous   |
| NC_037652.1 | 2518238 | SNV | 1 | A | G | Heterozygous |
| NC_037652.1 | 2519128 | SNV | 1 | G | A | Heterozygous |
| NC_037652.1 | 2519130 | SNV | 1 | G | A | Heterozygous |
| NC_037652.1 | 2519313 | SNV | 1 | A | G | Homozygous   |
| NC_037652.1 | 2525532 | SNV | 1 | T | C | Homozygous   |
| NC_037652.1 | 2525559 | SNV | 1 | C | T | Homozygous   |
| NC_037652.1 | 2525841 | SNV | 1 | G | A | Homozygous   |
| NC_037652.1 | 2526173 | SNV | 1 | T | C | Heterozygous |
| NC_037652.1 | 2526176 | SNV | 1 | T | C | Heterozygous |
| NC_037652.1 | 2526253 | SNV | 1 | T | C | Homozygous   |
| NC_037652.1 | 2526291 | SNV | 1 | T | C | Homozygous   |
| NC_037652.1 | 2526477 | SNV | 1 | G | A | Heterozygous |
| NC_037652.1 | 2526953 | SNV | 1 | A | T | Homozygous   |
| NC_037652.1 | 2527101 | SNV | 1 | C | G | Homozygous   |
| NC_037652.1 | 2527105 | SNV | 1 | G | C | Homozygous   |
| NC_037652.1 | 2527746 | SNV | 1 | T | G | Heterozygous |
| NC_037652.1 | 2528011 | SNV | 1 | A | G | Homozygous   |
| NC_037652.1 | 2528014 | SNV | 1 | G | A | Homozygous   |
| NC_037652.1 | 2528055 | SNV | 1 | A | G | Heterozygous |
| NC_037652.1 | 2528238 | SNV | 1 | T | C | Heterozygous |
| NC_037652.1 | 2528317 | SNV | 1 | G | A | Homozygous   |
| NC_037652.1 | 2528747 | SNV | 1 | T | C | Homozygous   |
| NC_037652.1 | 2528795 | SNV | 1 | T | G | Heterozygous |
| NC_037652.1 | 2529043 | SNV | 1 | T | C | Homozygous   |
| NC_037652.1 | 2529196 | SNV | 1 | T | C | Homozygous   |
| NC_037652.1 | 2529228 | SNV | 1 | A | C | Homozygous   |

|             |         |     |   |   |   |              |
|-------------|---------|-----|---|---|---|--------------|
| NC_037652.1 | 2529318 | SNV | 1 | C | T | Homozygous   |
| NC_037652.1 | 2529418 | SNV | 1 | G | A | Homozygous   |
| NC_037652.1 | 2531042 | SNV | 1 | C | G | Homozygous   |
| NC_037652.1 | 2537407 | SNV | 1 | A | T | Homozygous   |
| NC_037652.1 | 2537409 | SNV | 1 | A | T | Homozygous   |
| NC_037652.1 | 2537433 | SNV | 1 | A | T | Homozygous   |
| NC_037652.1 | 2540424 | SNV | 1 | C | A | Heterozygous |
| NC_037652.1 | 2541393 | SNV | 1 | A | G | Homozygous   |
| NC_037652.1 | 2545040 | SNV | 1 | A | T | Homozygous   |
| NC_037652.1 | 2547961 | SNV | 1 | G | A | Homozygous   |
| NC_037652.1 | 2548341 | SNV | 1 | G | T | Homozygous   |
| NC_037652.1 | 2551405 | SNV | 1 | A | T | Homozygous   |
| NC_037652.1 | 2551428 | SNV | 1 | A | T | Homozygous   |
| NC_037652.1 | 2555318 | SNV | 1 | C | T | Heterozygous |
| NC_037652.1 | 2556052 | SNV | 1 | T | G | Homozygous   |
| NC_037652.1 | 2556664 | SNV | 1 | T | C | Homozygous   |
| NC_037652.1 | 2561434 | SNV | 1 | T | G | Homozygous   |
| NC_037652.1 | 2561437 | SNV | 1 | A | T | Homozygous   |
| NC_037652.1 | 2561468 | SNV | 1 | T | C | Homozygous   |
| NC_037652.1 | 2561474 | SNV | 1 | T | C | Homozygous   |
| NC_037652.1 | 2561478 | SNV | 1 | T | G | Homozygous   |
| NC_037652.1 | 2573452 | SNV | 1 | T | A | Homozygous   |
| NC_037652.1 | 2573468 | SNV | 1 | T | A | Homozygous   |
| NC_037652.1 | 2573488 | SNV | 1 | A | C | Homozygous   |
| NC_037652.1 | 2578167 | SNV | 1 | C | T | Heterozygous |
| NC_037652.1 | 2578631 | SNV | 1 | A | T | Homozygous   |
| NC_037652.1 | 2579236 | SNV | 1 | G | A | Homozygous   |
| NC_037652.1 | 2580132 | SNV | 1 | A | T | Homozygous   |
| NC_037652.1 | 2580884 | SNV | 1 | C | T | Homozygous   |
| NC_037652.1 | 2587097 | SNV | 1 | A | T | Homozygous   |
| NC_037652.1 | 2587592 | SNV | 1 | A | T | Heterozygous |
| NC_037652.1 | 2587616 | SNV | 1 | A | T | Heterozygous |
| NC_037652.1 | 2587625 | SNV | 1 | A | T | Heterozygous |
| NC_037652.1 | 2594078 | SNV | 1 | A | G | Homozygous   |
| NC_037652.1 | 2594381 | SNV | 1 | T | C | Homozygous   |
| NC_037652.1 | 2594826 | SNV | 1 | A | C | Homozygous   |
| NC_037652.1 | 2598779 | SNV | 1 | T | C | Homozygous   |
| NC_037652.1 | 2598785 | SNV | 1 | C | G | Homozygous   |
| NC_037652.1 | 2598787 | SNV | 1 | C | A | Homozygous   |
| NC_037652.1 | 2598921 | SNV | 1 | G | A | Homozygous   |
| NC_037652.1 | 2607817 | SNV | 1 | T | C | Homozygous   |
| NC_037652.1 | 2608211 | SNV | 1 | C | A | Heterozygous |
| NC_037652.1 | 2608290 | SNV | 1 | A | G | Heterozygous |
| NC_037652.1 | 2613331 | SNV | 1 | G | A | Homozygous   |
| NC_037652.1 | 2613333 | SNV | 1 | A | T | Homozygous   |
| NC_037652.1 | 2613335 | SNV | 1 | A | G | Homozygous   |
| NC_037652.1 | 2613342 | SNV | 1 | A | T | Homozygous   |
| NC_037652.1 | 2613348 | SNV | 1 | A | C | Homozygous   |
| NC_037652.1 | 2613356 | SNV | 1 | A | T | Homozygous   |
| NC_037652.1 | 2615860 | SNV | 1 | A | G | Heterozygous |
| NC_037652.1 | 2615903 | SNV | 1 | A | G | Homozygous   |



|             |         |     |   |   |   |              |
|-------------|---------|-----|---|---|---|--------------|
| NC_037652.1 | 2616826 | SNV | 1 | T | C | Homozygous   |
| NC_037652.1 | 2618675 | SNV | 1 | A | G | Homozygous   |
| NC_037652.1 | 2619006 | SNV | 1 | T | C | Heterozygous |
| NC_037652.1 | 2619132 | SNV | 1 | A | G | Homozygous   |
| NC_037652.1 | 2619219 | SNV | 1 | A | G | Heterozygous |
| NC_037652.1 | 2619219 | SNV | 1 | A | T | Heterozygous |
| NC_037652.1 | 2619224 | SNV | 1 | A | G | Heterozygous |
| NC_037652.1 | 2619393 | SNV | 1 | A | G | Homozygous   |
| NC_037652.1 | 2619923 | SNV | 1 | C | T | Homozygous   |
| NC_037652.1 | 2620716 | SNV | 1 | G | A | Heterozygous |
| NC_037652.1 | 2620901 | SNV | 1 | C | T | Homozygous   |
| NC_037652.1 | 2625169 | SNV | 1 | A | G | Heterozygous |
| NC_037652.1 | 2625364 | SNV | 1 | C | T | Heterozygous |
| NC_037652.1 | 2625420 | SNV | 1 | T | C | Homozygous   |
| NC_037652.1 | 2625567 | SNV | 1 | T | C | Homozygous   |
| NC_037652.1 | 2625811 | SNV | 1 | C | T | Heterozygous |
| NC_037652.1 | 2625822 | SNV | 1 | T | C | Homozygous   |
| NC_037652.1 | 2625830 | SNV | 1 | A | G | Heterozygous |
| NC_037652.1 | 2625905 | SNV | 1 | G | A | Heterozygous |
| NC_037652.1 | 2625998 | SNV | 1 | T | A | Homozygous   |
| NC_037652.1 | 2626069 | SNV | 1 | A | C | Heterozygous |
| NC_037652.1 | 2626094 | SNV | 1 | C | T | Heterozygous |
| NC_037652.1 | 2626119 | SNV | 1 | G | A | Heterozygous |
| NC_037652.1 | 2627962 | SNV | 1 | T | C | Homozygous   |
| NC_037652.1 | 2628018 | SNV | 1 | A | G | Heterozygous |
| NC_037652.1 | 2628100 | SNV | 1 | T | A | Homozygous   |
| NC_037652.1 | 2628778 | SNV | 1 | A | G | Homozygous   |
| NC_037652.1 | 2629074 | SNV | 1 | C | T | Homozygous   |
| NC_037652.1 | 2629205 | SNV | 1 | A | T | Heterozygous |
| NC_037652.1 | 2629210 | SNV | 1 | A | T | Heterozygous |
| NC_037652.1 | 2629928 | SNV | 1 | A | C | Homozygous   |
| NC_037652.1 | 2630296 | SNV | 1 | T | C | Homozygous   |
| NC_037652.1 | 2630931 | SNV | 1 | T | C | Homozygous   |
| NC_037652.1 | 2631177 | SNV | 1 | T | C | Homozygous   |
| NC_037652.1 | 2631220 | SNV | 1 | G | A | Heterozygous |
| NC_037652.1 | 2631249 | SNV | 1 | T | C | Homozygous   |
| NC_037652.1 | 2631291 | SNV | 1 | T | C | Heterozygous |
| NC_037652.1 | 2631340 | SNV | 1 | A | G | Homozygous   |
| NC_037652.1 | 2631410 | SNV | 1 | G | A | Heterozygous |
| NC_037652.1 | 2631483 | SNV | 1 | G | A | Heterozygous |
| NC_037652.1 | 2631491 | SNV | 1 | T | C | Homozygous   |
| NC_037652.1 | 2631586 | SNV | 1 | T | C | Homozygous   |
| NC_037652.1 | 2631941 | SNV | 1 | T | C | Homozygous   |
| NC_037652.1 | 2632095 | SNV | 1 | C | T | Homozygous   |
| NC_037652.1 | 2632123 | SNV | 1 | G | A | Homozygous   |
| NC_037652.1 | 2632130 | SNV | 1 | T | C | Homozygous   |
| NC_037652.1 | 2632363 | SNV | 1 | G | A | Heterozygous |
| NC_037652.1 | 2632980 | SNV | 1 | C | T | Heterozygous |
| NC_037652.1 | 2633007 | SNV | 1 | A | G | Homozygous   |
| NC_037652.1 | 2633048 | SNV | 1 | T | C | Homozygous   |
| NC_037652.1 | 2633099 | SNV | 1 | G | A | Homozygous   |

|             |         |     |   |   |   |              |
|-------------|---------|-----|---|---|---|--------------|
| NC_037652.1 | 2633135 | SNV | 1 | T | C | Homozygous   |
| NC_037652.1 | 2633140 | SNV | 1 | A | G | Homozygous   |
| NC_037652.1 | 2633584 | SNV | 1 | G | C | Heterozygous |
| NC_037652.1 | 2633892 | SNV | 1 | T | C | Heterozygous |
| NC_037652.1 | 2634119 | SNV | 1 | A | C | Heterozygous |
| NC_037652.1 | 2634322 | SNV | 1 | A | T | Homozygous   |
| NC_037652.1 | 2634502 | SNV | 1 | T | C | Homozygous   |
| NC_037652.1 | 2635136 | SNV | 1 | T | A | Homozygous   |
| NC_037652.1 | 2635141 | SNV | 1 | T | C | Homozygous   |
| NC_037652.1 | 2635143 | SNV | 1 | C | G | Homozygous   |
| NC_037652.1 | 2635146 | SNV | 1 | A | C | Heterozygous |
| NC_037652.1 | 2635155 | SNV | 1 | A | G | Heterozygous |
| NC_037652.1 | 2635157 | SNV | 1 | T | A | Heterozygous |
| NC_037652.1 | 2635159 | SNV | 1 | A | T | Heterozygous |
| NC_037652.1 | 2635220 | SNV | 1 | A | G | Homozygous   |
| NC_037652.1 | 2635222 | SNV | 1 | A | G | Homozygous   |
| NC_037652.1 | 2635253 | SNV | 1 | A | G | Homozygous   |
| NC_037652.1 | 2635255 | SNV | 1 | C | T | Heterozygous |
| NC_037652.1 | 2635322 | SNV | 1 | T | C | Heterozygous |
| NC_037652.1 | 2635510 | SNV | 1 | A | G | Homozygous   |
| NC_037652.1 | 2637438 | SNV | 1 | T | C | Homozygous   |
| NC_037652.1 | 2639287 | SNV | 1 | T | G | Heterozygous |
| NC_037652.1 | 2639314 | SNV | 1 | T | A | Homozygous   |
| NC_037652.1 | 2639316 | SNV | 1 | T | C | Heterozygous |
| NC_037652.1 | 2639390 | SNV | 1 | A | T | Heterozygous |
| NC_037652.1 | 2639397 | SNV | 1 | T | C | Heterozygous |
| NC_037652.1 | 2639404 | SNV | 1 | G | A | Homozygous   |
| NC_037652.1 | 2639621 | SNV | 1 | G | C | Homozygous   |
| NC_037652.1 | 2639624 | SNV | 1 | T | C | Homozygous   |
| NC_037652.1 | 2639759 | SNV | 1 | G | C | Heterozygous |
| NC_037652.1 | 2639817 | SNV | 1 | A | G | Heterozygous |
| NC_037652.1 | 2639858 | SNV | 1 | T | C | Heterozygous |
| NC_037652.1 | 2640018 | SNV | 1 | G | C | Homozygous   |
| NC_037652.1 | 2640027 | SNV | 1 | C | G | Homozygous   |
| NC_037652.1 | 2640047 | SNV | 1 | T | A | Homozygous   |
| NC_037652.1 | 2640052 | SNV | 1 | A | C | Homozygous   |
| NC_037652.1 | 2640843 | SNV | 1 | T | C | Homozygous   |
| NC_037652.1 | 2640896 | SNV | 1 | C | T | Homozygous   |
| NC_037652.1 | 2640907 | SNV | 1 | A | G | Homozygous   |
| NC_037652.1 | 2641011 | SNV | 1 | C | T | Homozygous   |
| NC_037652.1 | 2641023 | SNV | 1 | C | T | Homozygous   |
| NC_037652.1 | 2641046 | SNV | 1 | A | G | Homozygous   |
| NC_037652.1 | 2641126 | SNV | 1 | G | A | Homozygous   |
| NC_037652.1 | 2641140 | SNV | 1 | T | A | Homozygous   |
| NC_037652.1 | 2641145 | SNV | 1 | C | T | Homozygous   |
| NC_037652.1 | 2641165 | SNV | 1 | A | G | Homozygous   |
| NC_037652.1 | 2641878 | SNV | 1 | C | T | Heterozygous |
| NC_037652.1 | 2643911 | SNV | 1 | G | A | Homozygous   |
| NC_037652.1 | 2643916 | SNV | 1 | A | G | Homozygous   |
| NC_037652.1 | 2643928 | SNV | 1 | A | T | Homozygous   |
| NC_037652.1 | 2643933 | SNV | 1 | T | C | Homozygous   |

|             |         |     |   |   |   |              |
|-------------|---------|-----|---|---|---|--------------|
| NC_037652.1 | 2643944 | SNV | 1 | T | G | Homozygous   |
| NC_037652.1 | 2643962 | SNV | 1 | T | G | Homozygous   |
| NC_037652.1 | 2643977 | SNV | 1 | T | G | Homozygous   |
| NC_037652.1 | 2643980 | SNV | 1 | G | A | Heterozygous |
| NC_037652.1 | 2643986 | SNV | 1 | G | A | Heterozygous |
| NC_037652.1 | 2643989 | SNV | 1 | G | A | Heterozygous |
| NC_037652.1 | 2643993 | SNV | 1 | T | C | Heterozygous |
| NC_037652.1 | 2644000 | SNV | 1 | T | A | Heterozygous |
| NC_037652.1 | 2644010 | SNV | 1 | G | A | Heterozygous |
| NC_037652.1 | 2645335 | SNV | 1 | G | A | Homozygous   |
| NC_037652.1 | 2645498 | SNV | 1 | T | C | Homozygous   |
| NC_037652.1 | 2645633 | SNV | 1 | T | C | Homozygous   |
| NC_037652.1 | 2645637 | SNV | 1 | G | A | Homozygous   |
| NC_037652.1 | 2645655 | SNV | 1 | C | G | Homozygous   |
| NC_037652.1 | 2645693 | SNV | 1 | G | A | Homozygous   |
| NC_037652.1 | 2647363 | SNV | 1 | G | C | Homozygous   |
| NC_037652.1 | 2651768 | SNV | 1 | C | T | Heterozygous |
| NC_037652.1 | 2651795 | SNV | 1 | G | A | Heterozygous |
| NC_037652.1 | 2651798 | SNV | 1 | A | G | Homozygous   |
| NC_037652.1 | 2652460 | SNV | 1 | G | A | Homozygous   |
| NC_037652.1 | 2652661 | SNV | 1 | A | G | Homozygous   |
| NC_037652.1 | 2653531 | SNV | 1 | C | T | Homozygous   |
| NC_037652.1 | 2653800 | SNV | 1 | A | G | Homozygous   |
| NC_037652.1 | 2679946 | SNV | 1 | C | T | Heterozygous |
| NC_037652.1 | 2680072 | SNV | 1 | G | T | Homozygous   |
| NC_037652.1 | 2680078 | SNV | 1 | G | T | Heterozygous |
| NC_037652.1 | 2680080 | SNV | 1 | G | T | Heterozygous |
| NC_037652.1 | 2680604 | SNV | 1 | A | G | Heterozygous |
| NC_037652.1 | 2680618 | SNV | 1 | A | C | Heterozygous |
| NC_037652.1 | 2680621 | SNV | 1 | T | C | Heterozygous |
| NC_037652.1 | 2680649 | SNV | 1 | A | G | Heterozygous |
| NC_037652.1 | 2680746 | SNV | 1 | T | C | Heterozygous |
| NC_037652.1 | 2686315 | SNV | 1 | A | G | Homozygous   |
| NC_037652.1 | 2686979 | SNV | 1 | A | G | Homozygous   |
| NC_037652.1 | 2687284 | SNV | 1 | G | A | Heterozygous |
| NC_037652.1 | 2693607 | SNV | 1 | A | G | Heterozygous |
| NC_037652.1 | 2693629 | SNV | 1 | T | C | Homozygous   |
| NC_037652.1 | 2693639 | SNV | 1 | G | A | Homozygous   |
| NC_037652.1 | 2694381 | SNV | 1 | A | T | Homozygous   |
| NC_037652.1 | 2696048 | SNV | 1 | A | T | Homozygous   |
| NC_037652.1 | 2709622 | SNV | 1 | C | T | Heterozygous |
| NC_037652.1 | 2709990 | SNV | 1 | C | T | Heterozygous |
| NC_037652.1 | 2712285 | SNV | 1 | G | T | Heterozygous |
| NC_037652.1 | 2712993 | SNV | 1 | G | T | Homozygous   |
| NC_037652.1 | 2713157 | SNV | 1 | G | A | Heterozygous |
| NC_037652.1 | 2715638 | SNV | 1 | T | G | Homozygous   |
| NC_037652.1 | 2717822 | SNV | 1 | T | G | Homozygous   |
| NC_037652.1 | 2717839 | SNV | 1 | A | T | Homozygous   |
| NC_037652.1 | 2717843 | SNV | 1 | C | T | Homozygous   |
| NC_037652.1 | 2717852 | SNV | 1 | T | A | Homozygous   |
| NC_037652.1 | 2717856 | SNV | 1 | T | A | Homozygous   |

|             |         |     |   |   |   |              |
|-------------|---------|-----|---|---|---|--------------|
| NC_037652.1 | 2719060 | SNV | 1 | A | G | Heterozygous |
| NC_037652.1 | 2719927 | SNV | 1 | G | A | Heterozygous |
| NC_037652.1 | 2725241 | SNV | 1 | C | T | Heterozygous |
| NC_037652.1 | 2725246 | SNV | 1 | G | T | Heterozygous |
| NC_037652.1 | 2728705 | SNV | 1 | T | C | Homozygous   |
| NC_037652.1 | 2728717 | SNV | 1 | T | G | Homozygous   |
| NC_037652.1 | 2728719 | SNV | 1 | A | T | Homozygous   |
| NC_037652.1 | 2728721 | SNV | 1 | T | A | Homozygous   |
| NC_037652.1 | 2728725 | SNV | 1 | A | T | Homozygous   |
| NC_037652.1 | 2728728 | SNV | 1 | A | T | Homozygous   |
| NC_037652.1 | 2728733 | SNV | 1 | T | A | Homozygous   |
| NC_037652.1 | 2729784 | SNV | 1 | T | C | Homozygous   |
| NC_037652.1 | 2729930 | SNV | 1 | A | T | Homozygous   |
| NC_037652.1 | 2729934 | SNV | 1 | A | C | Homozygous   |
| NC_037652.1 | 2729938 | SNV | 1 | A | C | Homozygous   |
| NC_037652.1 | 2738611 | SNV | 1 | A | T | Homozygous   |
| NC_037652.1 | 2738618 | SNV | 1 | T | A | Homozygous   |
| NC_037652.1 | 2738627 | SNV | 1 | T | A | Homozygous   |
| NC_037652.1 | 2738630 | SNV | 1 | T | C | Homozygous   |
| NC_037652.1 | 2738632 | SNV | 1 | T | A | Homozygous   |
| NC_037652.1 | 2738639 | SNV | 1 | T | A | Homozygous   |
| NC_037652.1 | 2745887 | SNV | 1 | G | A | Heterozygous |
| NC_037652.1 | 2746561 | SNV | 1 | T | C | Homozygous   |
| NC_037652.1 | 2746591 | SNV | 1 | A | G | Homozygous   |
| NC_037652.1 | 2746595 | SNV | 1 | A | G | Homozygous   |
| NC_037652.1 | 2746985 | SNV | 1 | G | A | Homozygous   |
| NC_037652.1 | 2747459 | SNV | 1 | A | T | Heterozygous |
| NC_037652.1 | 2747461 | SNV | 1 | A | C | Heterozygous |
| NC_037652.1 | 2747470 | SNV | 1 | A | C | Heterozygous |
| NC_037652.1 | 2747482 | SNV | 1 | T | C | Heterozygous |
| NC_037652.1 | 2752357 | SNV | 1 | A | G | Homozygous   |
| NC_037652.1 | 2752581 | SNV | 1 | A | C | Homozygous   |
| NC_037652.1 | 2752856 | SNV | 1 | C | T | Homozygous   |
| NC_037652.1 | 2752988 | SNV | 1 | T | A | Heterozygous |
| NC_037652.1 | 2752997 | SNV | 1 | A | C | Heterozygous |
| NC_037652.1 | 2753009 | SNV | 1 | C | T | Heterozygous |
| NC_037652.1 | 2753012 | SNV | 1 | T | A | Heterozygous |
| NC_037652.1 | 2753018 | SNV | 1 | A | G | Heterozygous |
| NC_037652.1 | 2753020 | SNV | 1 | G | C | Heterozygous |
| NC_037652.1 | 2753026 | SNV | 1 | G | C | Heterozygous |
| NC_037652.1 | 2753030 | SNV | 1 | A | T | Heterozygous |
| NC_037652.1 | 2753048 | SNV | 1 | T | A | Homozygous   |
| NC_037652.1 | 2753051 | SNV | 1 | T | A | Homozygous   |
| NC_037652.1 | 2753054 | SNV | 1 | T | G | Homozygous   |
| NC_037652.1 | 2753144 | SNV | 1 | A | T | Homozygous   |
| NC_037652.1 | 2753348 | SNV | 1 | C | A | Homozygous   |
| NC_037652.1 | 2753369 | SNV | 1 | G | A | Homozygous   |
| NC_037652.1 | 2753371 | SNV | 1 | T | A | Homozygous   |
| NC_037652.1 | 2753380 | SNV | 1 | T | A | Homozygous   |
| NC_037652.1 | 2753386 | SNV | 1 | C | A | Homozygous   |
| NC_037652.1 | 2753388 | SNV | 1 | T | C | Homozygous   |

|             |         |     |   |   |   |              |
|-------------|---------|-----|---|---|---|--------------|
| NC_037652.1 | 2758818 | SNV | 1 | A | G | Homozygous   |
| NC_037652.1 | 2772388 | SNV | 1 | A | T | Heterozygous |
| NC_037652.1 | 2773415 | SNV | 1 | C | T | Homozygous   |
| NC_037652.1 | 2773418 | SNV | 1 | G | A | Homozygous   |
| NC_037652.1 | 2774738 | SNV | 1 | C | A | Homozygous   |
| NC_037652.1 | 2774741 | SNV | 1 | A | G | Homozygous   |
| NC_037652.1 | 2774969 | SNV | 1 | C | T | Heterozygous |
| NC_037652.1 | 2775735 | SNV | 1 | C | A | Homozygous   |
| NC_037652.1 | 2776581 | SNV | 1 | G | A | Heterozygous |
| NC_037652.1 | 2776692 | SNV | 1 | T | G | Homozygous   |
| NC_037652.1 | 2779595 | SNV | 1 | A | G | Homozygous   |
| NC_037652.1 | 2780577 | SNV | 1 | A | G | Homozygous   |
| NC_037652.1 | 2783829 | SNV | 1 | A | C | Heterozygous |
| NC_037652.1 | 2783835 | SNV | 1 | T | A | Homozygous   |
| NC_037652.1 | 2783848 | SNV | 1 | C | T | Heterozygous |
| NC_037652.1 | 2783853 | SNV | 1 | T | C | Heterozygous |
| NC_037652.1 | 2783857 | SNV | 1 | A | C | Homozygous   |
| NC_037652.1 | 2783875 | SNV | 1 | A | C | Homozygous   |
| NC_037652.1 | 2783881 | SNV | 1 | T | C | Homozygous   |
| NC_037652.1 | 2783958 | SNV | 1 | T | C | Heterozygous |
| NC_037652.1 | 2783964 | SNV | 1 | T | C | Heterozygous |
| NC_037652.1 | 2783967 | SNV | 1 | T | C | Heterozygous |
| NC_037652.1 | 2783977 | SNV | 1 | C | T | Heterozygous |
| NC_037652.1 | 2783980 | SNV | 1 | C | T | Heterozygous |
| NC_037652.1 | 2784008 | SNV | 1 | G | A | Heterozygous |
| NC_037652.1 | 2784011 | SNV | 1 | C | A | Homozygous   |
| NC_037652.1 | 2784019 | SNV | 1 | C | A | Homozygous   |
| NC_037652.1 | 2784028 | SNV | 1 | A | C | Heterozygous |
| NC_037652.1 | 2784078 | SNV | 1 | T | C | Heterozygous |
| NC_037652.1 | 2784166 | SNV | 1 | T | C | Homozygous   |
| NC_037652.1 | 2784169 | SNV | 1 | T | C | Homozygous   |
| NC_037652.1 | 2784179 | SNV | 1 | G | A | Homozygous   |
| NC_037652.1 | 2784182 | SNV | 1 | G | A | Homozygous   |
| NC_037652.1 | 2784188 | SNV | 1 | G | A | Heterozygous |
| NC_037652.1 | 2784203 | SNV | 1 | A | T | Homozygous   |
| NC_037652.1 | 2784209 | SNV | 1 | G | A | Homozygous   |
| NC_037652.1 | 2784211 | SNV | 1 | C | A | Homozygous   |
| NC_037652.1 | 2784276 | SNV | 1 | C | T | Heterozygous |
| NC_037652.1 | 2784283 | SNV | 1 | C | G | Homozygous   |
| NC_037652.1 | 2784337 | SNV | 1 | C | A | Homozygous   |
| NC_037652.1 | 2784345 | SNV | 1 | C | T | Heterozygous |
| NC_037652.1 | 2784365 | SNV | 1 | T | A | Heterozygous |
| NC_037652.1 | 2784367 | SNV | 1 | A | C | Heterozygous |
| NC_037652.1 | 2785507 | SNV | 1 | T | G | Homozygous   |
| NC_037652.1 | 2785540 | SNV | 1 | G | T | Homozygous   |
| NC_037652.1 | 2785547 | SNV | 1 | A | C | Homozygous   |
| NC_037652.1 | 2788385 | SNV | 1 | C | T | Homozygous   |
| NC_037652.1 | 2789812 | SNV | 1 | A | T | Heterozygous |
| NC_037652.1 | 2793596 | SNV | 1 | A | G | Homozygous   |
| NC_037652.1 | 2793703 | SNV | 1 | G | A | Heterozygous |
| NC_037652.1 | 2796166 | SNV | 1 | G | A | Homozygous   |

|             |         |     |   |   |   |              |
|-------------|---------|-----|---|---|---|--------------|
| NC_037652.1 | 2807585 | SNV | 1 | C | A | Homozygous   |
| NC_037652.1 | 2816183 | SNV | 1 | C | T | Heterozygous |
| NC_037652.1 | 2816190 | SNV | 1 | T | C | Heterozygous |
| NC_037652.1 | 2816204 | SNV | 1 | A | G | Heterozygous |
| NC_037652.1 | 2816788 | SNV | 1 | C | T | Homozygous   |
| NC_037652.1 | 2816803 | SNV | 1 | A | G | Homozygous   |
| NC_037652.1 | 2817998 | SNV | 1 | T | C | Homozygous   |
| NC_037652.1 | 2819686 | SNV | 1 | A | G | Homozygous   |
| NC_037652.1 | 2823711 | SNV | 1 | A | G | Homozygous   |
| NC_037652.1 | 2824009 | SNV | 1 | A | T | Homozygous   |
| NC_037652.1 | 2824012 | SNV | 1 | A | T | Homozygous   |
| NC_037652.1 | 2828063 | SNV | 1 | A | G | Homozygous   |
| NC_037652.1 | 2828495 | SNV | 1 | C | T | Homozygous   |
| NC_037652.1 | 2828562 | SNV | 1 | A | T | Heterozygous |
| NC_037652.1 | 2828577 | SNV | 1 | T | C | Heterozygous |
| NC_037652.1 | 2828598 | SNV | 1 | A | G | Homozygous   |
| NC_037652.1 | 2831669 | SNV | 1 | T | C | Heterozygous |
| NC_037652.1 | 2832617 | SNV | 1 | T | C | Heterozygous |
| NC_037652.1 | 2832622 | SNV | 1 | T | C | Heterozygous |
| NC_037652.1 | 2833309 | SNV | 1 | C | T | Homozygous   |
| NC_037652.1 | 2835998 | SNV | 1 | C | T | Homozygous   |
| NC_037652.1 | 2836266 | SNV | 1 | A | G | Homozygous   |
| NC_037652.1 | 2839537 | SNV | 1 | T | A | Homozygous   |
| NC_037652.1 | 2840395 | SNV | 1 | G | T | Homozygous   |
| NC_037652.1 | 2840399 | SNV | 1 | A | G | Homozygous   |
| NC_037652.1 | 2840405 | SNV | 1 | T | C | Homozygous   |
| NC_037652.1 | 2840411 | SNV | 1 | T | G | Homozygous   |
| NC_037652.1 | 2840417 | SNV | 1 | A | T | Homozygous   |
| NC_037652.1 | 2840423 | SNV | 1 | A | T | Homozygous   |
| NC_037652.1 | 2840429 | SNV | 1 | T | C | Homozygous   |
| NC_037652.1 | 2840438 | SNV | 1 | A | T | Homozygous   |
| NC_037652.1 | 2840471 | SNV | 1 | A | T | Homozygous   |
| NC_037652.1 | 2840477 | SNV | 1 | T | A | Homozygous   |
| NC_037652.1 | 2840480 | SNV | 1 | A | T | Homozygous   |
| NC_037652.1 | 2840483 | SNV | 1 | A | G | Homozygous   |
| NC_037652.1 | 2840489 | SNV | 1 | T | G | Homozygous   |
| NC_037652.1 | 2840491 | SNV | 1 | T | G | Homozygous   |
| NC_037652.1 | 2843099 | SNV | 1 | A | G | Homozygous   |
| NC_037652.1 | 2844500 | SNV | 1 | T | C | Homozygous   |
| NC_037652.1 | 2844505 | SNV | 1 | T | C | Homozygous   |
| NC_037652.1 | 2844508 | SNV | 1 | A | C | Homozygous   |
| NC_037652.1 | 2844521 | SNV | 1 | A | T | Heterozygous |
| NC_037652.1 | 2844522 | SNV | 1 | A | T | Heterozygous |
| NC_037652.1 | 2844530 | SNV | 1 | A | T | Homozygous   |
| NC_037652.1 | 2844532 | SNV | 1 | A | T | Homozygous   |
| NC_037652.1 | 2854426 | SNV | 1 | T | C | Homozygous   |
| NC_037652.1 | 2856725 | SNV | 1 | C | T | Homozygous   |
| NC_037652.1 | 2870284 | SNV | 1 | T | C | Homozygous   |
| NC_037652.1 | 2870693 | SNV | 1 | C | G | Heterozygous |
| NC_037652.1 | 2878634 | SNV | 1 | G | A | Heterozygous |
| NC_037652.1 | 2881926 | SNV | 1 | G | A | Heterozygous |

|             |         |     |   |   |   |              |
|-------------|---------|-----|---|---|---|--------------|
| NC_037652.1 | 2905811 | SNV | 1 | C | T | Homozygous   |
| NC_037652.1 | 2905815 | SNV | 1 | G | A | Homozygous   |
| NC_037652.1 | 2905928 | SNV | 1 | G | A | Homozygous   |
| NC_037652.1 | 2905934 | SNV | 1 | C | T | Homozygous   |
| NC_037652.1 | 2905942 | SNV | 1 | G | A | Homozygous   |
| NC_037652.1 | 2909196 | SNV | 1 | T | C | Homozygous   |
| NC_037652.1 | 2909218 | SNV | 1 | G | A | Homozygous   |
| NC_037652.1 | 2909246 | SNV | 1 | C | T | Homozygous   |
| NC_037652.1 | 2909250 | SNV | 1 | G | A | Homozygous   |
| NC_037652.1 | 2925190 | SNV | 1 | A | G | Homozygous   |
| NC_037652.1 | 2925290 | SNV | 1 | C | T | Homozygous   |
| NC_037652.1 | 2932120 | SNV | 1 | G | A | Heterozygous |
| NC_037652.1 | 2932229 | SNV | 1 | C | G | Homozygous   |
| NC_037652.1 | 2940861 | SNV | 1 | A | G | Homozygous   |
| NC_037652.1 | 2941187 | SNV | 1 | T | C | Homozygous   |
| NC_037652.1 | 2941192 | SNV | 1 | G | A | Heterozygous |
| NC_037652.1 | 2941202 | SNV | 1 | C | G | Homozygous   |
| NC_037652.1 | 2941306 | SNV | 1 | C | G | Homozygous   |
| NC_037652.1 | 2941364 | SNV | 1 | A | G | Homozygous   |
| NC_037652.1 | 2941380 | SNV | 1 | G | A | Heterozygous |
| NC_037652.1 | 2941384 | SNV | 1 | T | A | Heterozygous |
| NC_037652.1 | 2941393 | SNV | 1 | A | T | Homozygous   |
| NC_037652.1 | 2941414 | SNV | 1 | A | G | Homozygous   |
| NC_037652.1 | 2941497 | SNV | 1 | G | A | Homozygous   |
| NC_037652.1 | 2941526 | SNV | 1 | C | T | Homozygous   |
| NC_037652.1 | 2941619 | SNV | 1 | T | C | Homozygous   |
| NC_037652.1 | 2941788 | SNV | 1 | T | C | Homozygous   |
| NC_037652.1 | 2941834 | SNV | 1 | T | A | Homozygous   |
| NC_037652.1 | 2941842 | SNV | 1 | T | C | Homozygous   |
| NC_037652.1 | 2941907 | SNV | 1 | C | T | Homozygous   |
| NC_037652.1 | 2941930 | SNV | 1 | T | C | Homozygous   |
| NC_037652.1 | 2941933 | SNV | 1 | C | T | Homozygous   |
| NC_037652.1 | 2942210 | SNV | 1 | A | G | Homozygous   |
| NC_037652.1 | 2964883 | SNV | 1 | T | C | Homozygous   |
| NC_037652.1 | 2964895 | SNV | 1 | T | C | Homozygous   |
| NC_037652.1 | 2964947 | SNV | 1 | T | C | Homozygous   |
| NC_037652.1 | 2964991 | SNV | 1 | C | T | Heterozygous |
| NC_037652.1 | 2965097 | SNV | 1 | A | G | Homozygous   |
| NC_037652.1 | 2969013 | SNV | 1 | T | C | Homozygous   |
| NC_037652.1 | 2969018 | SNV | 1 | C | G | Heterozygous |
| NC_037652.1 | 2969310 | SNV | 1 | A | G | Heterozygous |
| NC_037652.1 | 2969432 | SNV | 1 | T | C | Homozygous   |
| NC_037652.1 | 2969491 | SNV | 1 | T | C | Homozygous   |
| NC_037652.1 | 2969573 | SNV | 1 | A | G | Homozygous   |
| NC_037652.1 | 2969578 | SNV | 1 | A | G | Homozygous   |
| NC_037652.1 | 2969589 | SNV | 1 | T | C | Homozygous   |
| NC_037652.1 | 2969627 | SNV | 1 | A | G | Homozygous   |
| NC_037652.1 | 2969677 | SNV | 1 | T | C | Homozygous   |
| NC_037652.1 | 2969680 | SNV | 1 | A | G | Homozygous   |
| NC_037652.1 | 2969687 | SNV | 1 | G | A | Heterozygous |
| NC_037652.1 | 2969696 | SNV | 1 | G | T | Heterozygous |

|             |         |     |   |   |   |              |
|-------------|---------|-----|---|---|---|--------------|
| NC_037652.1 | 2969720 | SNV | 1 | A | T | Heterozygous |
| NC_037652.1 | 2969724 | SNV | 1 | G | T | Heterozygous |
| NC_037652.1 | 2970344 | SNV | 1 | A | G | Homozygous   |
| NC_037652.1 | 2970366 | SNV | 1 | A | G | Homozygous   |
| NC_037652.1 | 2970400 | SNV | 1 | A | G | Homozygous   |
| NC_037652.1 | 2970993 | SNV | 1 | T | C | Homozygous   |
| NC_037652.1 | 2971231 | SNV | 1 | T | C | Homozygous   |
| NC_037652.1 | 2971326 | SNV | 1 | T | C | Homozygous   |
| NC_037652.1 | 2971394 | SNV | 1 | T | A | Homozygous   |
| NC_037652.1 | 2971396 | SNV | 1 | G | A | Heterozygous |
| NC_037652.1 | 2971588 | SNV | 1 | G | A | Homozygous   |
| NC_037652.1 | 2984925 | SNV | 1 | G | A | Homozygous   |
| NC_037652.1 | 2984950 | SNV | 1 | T | C | Homozygous   |
| NC_037652.1 | 2985161 | SNV | 1 | C | T | Heterozygous |
| NC_037652.1 | 2985290 | SNV | 1 | C | T | Homozygous   |
| NC_037652.1 | 2985476 | SNV | 1 | G | A | Heterozygous |
| NC_037652.1 | 2985504 | SNV | 1 | T | C | Homozygous   |
| NC_037652.1 | 2985508 | SNV | 1 | T | C | Homozygous   |
| NC_037652.1 | 2985624 | SNV | 1 | C | T | Heterozygous |
| NC_037652.1 | 2985687 | SNV | 1 | T | C | Homozygous   |
| NC_037652.1 | 2986034 | SNV | 1 | T | C | Heterozygous |
| NC_037652.1 | 2986195 | SNV | 1 | C | T | Homozygous   |
| NC_037652.1 | 2986441 | SNV | 1 | A | G | Heterozygous |
| NC_037652.1 | 2986540 | SNV | 1 | A | G | Homozygous   |
| NC_037652.1 | 2986582 | SNV | 1 | G | A | Homozygous   |
| NC_037652.1 | 2986693 | SNV | 1 | T | C | Heterozygous |
| NC_037652.1 | 2987163 | SNV | 1 | G | A | Heterozygous |
| NC_037652.1 | 2987167 | SNV | 1 | A | G | Homozygous   |
| NC_037652.1 | 2987186 | SNV | 1 | G | A | Homozygous   |
| NC_037652.1 | 2987219 | SNV | 1 | C | T | Heterozygous |
| NC_037652.1 | 2987616 | SNV | 1 | C | G | Heterozygous |
| NC_037652.1 | 2987647 | SNV | 1 | T | C | Heterozygous |
| NC_037652.1 | 2987655 | SNV | 1 | G | C | Homozygous   |
| NC_037652.1 | 2991057 | SNV | 1 | A | G | Heterozygous |
| NC_037652.1 | 2993884 | SNV | 1 | T | A | Heterozygous |
| NC_037652.1 | 2993901 | SNV | 1 | T | A | Homozygous   |
| NC_037652.1 | 2993903 | SNV | 1 | G | A | Homozygous   |
| NC_037652.1 | 2999708 | SNV | 1 | A | C | Heterozygous |
| NC_037652.1 | 2999782 | SNV | 1 | C | G | Homozygous   |
| NC_037652.1 | 3002815 | SNV | 1 | G | A | Homozygous   |
| NC_037652.1 | 3002824 | SNV | 1 | A | C | Homozygous   |
| NC_037652.1 | 3002828 | SNV | 1 | A | C | Homozygous   |
| NC_037652.1 | 3002836 | SNV | 1 | A | C | Heterozygous |
| NC_037652.1 | 3002861 | SNV | 1 | T | G | Homozygous   |
| NC_037652.1 | 3008554 | SNV | 1 | T | C | Homozygous   |
| NC_037652.1 | 3008600 | SNV | 1 | C | T | Heterozygous |
| NC_037652.1 | 3008644 | SNV | 1 | G | A | Homozygous   |
| NC_037652.1 | 3008656 | SNV | 1 | G | A | Heterozygous |
| NC_037652.1 | 3010036 | SNV | 1 | A | G | Heterozygous |
| NC_037652.1 | 3010058 | SNV | 1 | T | C | Heterozygous |
| NC_037652.1 | 3010097 | SNV | 1 | T | C | Homozygous   |



|             |         |     |   |   |   |              |
|-------------|---------|-----|---|---|---|--------------|
| NC_037652.1 | 3010614 | SNV | 1 | A | G | Homozygous   |
| NC_037652.1 | 3010635 | SNV | 1 | C | T | Heterozygous |
| NC_037652.1 | 3010636 | SNV | 1 | C | T | Heterozygous |
| NC_037652.1 | 3010760 | SNV | 1 | A | G | Homozygous   |
| NC_037652.1 | 3010774 | SNV | 1 | C | T | Homozygous   |
| NC_037652.1 | 3010786 | SNV | 1 | C | T | Heterozygous |
| NC_037652.1 | 3010859 | SNV | 1 | C | T | Heterozygous |
| NC_037652.1 | 3011070 | SNV | 1 | T | C | Homozygous   |
| NC_037652.1 | 3011222 | SNV | 1 | T | C | Homozygous   |
| NC_037652.1 | 3011224 | SNV | 1 | C | G | Homozygous   |
| NC_037652.1 | 3011296 | SNV | 1 | C | T | Homozygous   |
| NC_037652.1 | 3011298 | SNV | 1 | C | T | Heterozygous |
| NC_037652.1 | 3011364 | SNV | 1 | T | C | Homozygous   |
| NC_037652.1 | 3011494 | SNV | 1 | T | G | Heterozygous |
| NC_037652.1 | 3011500 | SNV | 1 | C | T | Homozygous   |
| NC_037652.1 | 3011591 | SNV | 1 | G | A | Homozygous   |
| NC_037652.1 | 3011658 | SNV | 1 | G | A | Homozygous   |
| NC_037652.1 | 3011680 | SNV | 1 | G | A | Heterozygous |
| NC_037652.1 | 3011690 | SNV | 1 | T | C | Homozygous   |
| NC_037652.1 | 3016162 | SNV | 1 | T | A | Heterozygous |
| NC_037652.1 | 3016167 | SNV | 1 | T | A | Heterozygous |
| NC_037652.1 | 3019511 | SNV | 1 | A | G | Homozygous   |
| NC_037652.1 | 3019519 | SNV | 1 | A | G | Homozygous   |
| NC_037652.1 | 3019720 | SNV | 1 | C | T | Homozygous   |
| NC_037652.1 | 3019742 | SNV | 1 | G | A | Homozygous   |
| NC_037652.1 | 3019906 | SNV | 1 | C | T | Heterozygous |
| NC_037652.1 | 3019910 | SNV | 1 | T | C | Homozygous   |
| NC_037652.1 | 3019969 | SNV | 1 | C | T | Homozygous   |
| NC_037652.1 | 3020071 | SNV | 1 | A | G | Homozygous   |
| NC_037652.1 | 3020084 | SNV | 1 | A | T | Homozygous   |
| NC_037652.1 | 3020091 | SNV | 1 | T | C | Homozygous   |
| NC_037652.1 | 3020100 | SNV | 1 | A | T | Homozygous   |
| NC_037652.1 | 3020102 | SNV | 1 | C | T | Homozygous   |
| NC_037652.1 | 3020189 | SNV | 1 | C | T | Homozygous   |
| NC_037652.1 | 3020191 | SNV | 1 | G | A | Homozygous   |
| NC_037652.1 | 3020201 | SNV | 1 | A | G | Heterozygous |
| NC_037652.1 | 3020205 | SNV | 1 | C | T | Heterozygous |
| NC_037652.1 | 3020216 | SNV | 1 | T | C | Homozygous   |
| NC_037652.1 | 3020253 | SNV | 1 | A | T | Heterozygous |
| NC_037652.1 | 3020258 | SNV | 1 | A | G | Homozygous   |
| NC_037652.1 | 3020262 | SNV | 1 | A | G | Homozygous   |
| NC_037652.1 | 3020274 | SNV | 1 | G | A | Homozygous   |
| NC_037652.1 | 3020313 | SNV | 1 | T | C | Heterozygous |
| NC_037652.1 | 3020315 | SNV | 1 | C | T | Homozygous   |
| NC_037652.1 | 3020323 | SNV | 1 | T | C | Heterozygous |
| NC_037652.1 | 3025306 | SNV | 1 | T | C | Homozygous   |
| NC_037652.1 | 3034177 | SNV | 1 | T | C | Homozygous   |
| NC_037652.1 | 3034182 | SNV | 1 | T | A | Homozygous   |
| NC_037652.1 | 3034197 | SNV | 1 | A | T | Homozygous   |
| NC_037652.1 | 3034200 | SNV | 1 | A | G | Homozygous   |
| NC_037652.1 | 3034203 | SNV | 1 | A | T | Homozygous   |

|             |         |     |   |   |   |              |
|-------------|---------|-----|---|---|---|--------------|
| NC_037652.1 | 3034206 | SNV | 1 | C | T | Homozygous   |
| NC_037652.1 | 3035478 | SNV | 1 | A | G | Homozygous   |
| NC_037652.1 | 3035805 | SNV | 1 | C | T | Heterozygous |
| NC_037652.1 | 3036279 | SNV | 1 | A | G | Homozygous   |
| NC_037652.1 | 3038419 | SNV | 1 | T | C | Homozygous   |
| NC_037652.1 | 3039222 | SNV | 1 | A | T | Homozygous   |
| NC_037652.1 | 3043220 | SNV | 1 | A | G | Homozygous   |
| NC_037652.1 | 3043241 | SNV | 1 | T | C | Homozygous   |
| NC_037652.1 | 3043296 | SNV | 1 | T | G | Homozygous   |
| NC_037652.1 | 3043846 | SNV | 1 | A | G | Homozygous   |
| NC_037652.1 | 3044189 | SNV | 1 | T | C | Homozygous   |
| NC_037652.1 | 3045433 | SNV | 1 | A | T | Heterozygous |
| NC_037652.1 | 3045575 | SNV | 1 | G | C | Homozygous   |
| NC_037652.1 | 3045589 | SNV | 1 | G | A | Homozygous   |
| NC_037652.1 | 3045844 | SNV | 1 | G | C | Heterozygous |
| NC_037652.1 | 3045846 | SNV | 1 | T | A | Heterozygous |
| NC_037652.1 | 3046487 | SNV | 1 | C | T | Heterozygous |
| NC_037652.1 | 3046535 | SNV | 1 | T | A | Heterozygous |
| NC_037652.1 | 3047005 | SNV | 1 | G | A | Homozygous   |
| NC_037652.1 | 3047014 | SNV | 1 | C | T | Homozygous   |
| NC_037652.1 | 3047064 | SNV | 1 | C | T | Homozygous   |
| NC_037652.1 | 3047905 | SNV | 1 | A | C | Homozygous   |
| NC_037652.1 | 3047971 | SNV | 1 | C | T | Heterozygous |
| NC_037652.1 | 3181928 | SNV | 1 | A | G | Heterozygous |
| NC_037652.1 | 3181996 | SNV | 1 | C | T | Homozygous   |
| NC_037652.1 | 3182013 | SNV | 1 | A | G | Heterozygous |
| NC_037652.1 | 3182033 | SNV | 1 | T | G | Heterozygous |
| NC_037652.1 | 3182042 | SNV | 1 | C | T | Heterozygous |
| NC_037652.1 | 3182073 | SNV | 1 | C | T | Heterozygous |
| NC_037652.1 | 3182087 | SNV | 1 | T | C | Homozygous   |
| NC_037652.1 | 3182801 | SNV | 1 | C | A | Heterozygous |
| NC_037652.1 | 3204831 | SNV | 1 | T | C | Homozygous   |
| NC_037652.1 | 3204853 | SNV | 1 | C | T | Heterozygous |
| NC_037652.1 | 3209174 | SNV | 1 | A | C | Homozygous   |
| NC_037652.1 | 3209187 | SNV | 1 | A | G | Homozygous   |
| NC_037652.1 | 3215063 | SNV | 1 | A | G | Heterozygous |
| NC_037652.1 | 3215084 | SNV | 1 | A | G | Heterozygous |
| NC_037652.1 | 3218127 | SNV | 1 | G | A | Homozygous   |
| NC_037652.1 | 3218747 | SNV | 1 | C | A | Heterozygous |
| NC_037652.1 | 3218752 | SNV | 1 | G | A | Homozygous   |
| NC_037652.1 | 3266756 | SNV | 1 | G | A | Heterozygous |
| NC_037652.1 | 3267688 | SNV | 1 | T | C | Homozygous   |
| NC_037652.1 | 3271141 | SNV | 1 | G | A | Homozygous   |
| NC_037652.1 | 3271446 | SNV | 1 | T | C | Heterozygous |
| NC_037652.1 | 3272325 | SNV | 1 | T | A | Homozygous   |
| NC_037652.1 | 3272327 | SNV | 1 | A | T | Homozygous   |
| NC_037652.1 | 3273168 | SNV | 1 | G | A | Heterozygous |
| NC_037652.1 | 3273594 | SNV | 1 | A | G | Heterozygous |
| NC_037652.1 | 3273645 | SNV | 1 | A | G | Heterozygous |
| NC_037652.1 | 3278183 | SNV | 1 | T | C | Homozygous   |
| NC_037652.1 | 3278318 | SNV | 1 | A | T | Homozygous   |

|             |         |     |   |   |   |              |
|-------------|---------|-----|---|---|---|--------------|
| NC_037652.1 | 3280659 | SNV | 1 | G | T | Homozygous   |
| NC_037652.1 | 3280662 | SNV | 1 | A | G | Homozygous   |
| NC_037652.1 | 3280664 | SNV | 1 | T | A | Homozygous   |
| NC_037652.1 | 3280666 | SNV | 1 | T | A | Homozygous   |
| NC_037652.1 | 3281415 | SNV | 1 | T | C | Homozygous   |
| NC_037652.1 | 3281556 | SNV | 1 | T | C | Heterozygous |
| NC_037652.1 | 3281574 | SNV | 1 | C | G | Heterozygous |
| NC_037652.1 | 3281600 | SNV | 1 | T | C | Heterozygous |
| NC_037652.1 | 3281697 | SNV | 1 | C | T | Homozygous   |
| NC_037652.1 | 3281711 | SNV | 1 | A | G | Heterozygous |
| NC_037652.1 | 3281726 | SNV | 1 | T | C | Homozygous   |
| NC_037652.1 | 3281740 | SNV | 1 | A | G | Homozygous   |
| NC_037652.1 | 3286403 | SNV | 1 | C | T | Homozygous   |
| NC_037652.1 | 3286637 | SNV | 1 | G | A | Homozygous   |
| NC_037652.1 | 3286933 | SNV | 1 | G | A | Heterozygous |
| NC_037652.1 | 3287433 | SNV | 1 | C | T | Homozygous   |
| NC_037652.1 | 3287459 | SNV | 1 | T | C | Heterozygous |
| NC_037652.1 | 3287528 | SNV | 1 | G | A | Heterozygous |
| NC_037652.1 | 3302615 | SNV | 1 | C | T | Homozygous   |
| NC_037652.1 | 3302621 | SNV | 1 | G | C | Homozygous   |
| NC_037652.1 | 3302632 | SNV | 1 | A | G | Homozygous   |
| NC_037652.1 | 3302635 | SNV | 1 | A | C | Homozygous   |
| NC_037652.1 | 3302642 | SNV | 1 | G | T | Homozygous   |
| NC_037652.1 | 3302672 | SNV | 1 | A | G | Homozygous   |
| NC_037652.1 | 3302705 | SNV | 1 | A | G | Homozygous   |
| NC_037652.1 | 3310375 | SNV | 1 | C | T | Heterozygous |
| NC_037652.1 | 3310673 | SNV | 1 | A | C | Heterozygous |
| NC_037652.1 | 3312718 | SNV | 1 | C | G | Homozygous   |
| NC_037652.1 | 3312840 | SNV | 1 | G | A | Heterozygous |
| NC_037652.1 | 3312858 | SNV | 1 | T | C | Homozygous   |
| NC_037652.1 | 3324369 | SNV | 1 | G | A | Heterozygous |
| NC_037652.1 | 3324374 | SNV | 1 | G | A | Heterozygous |
| NC_037652.1 | 3324379 | SNV | 1 | G | A | Heterozygous |
| NC_037652.1 | 3324383 | SNV | 1 | G | A | Heterozygous |
| NC_037652.1 | 3324391 | SNV | 1 | G | A | Heterozygous |
| NC_037652.1 | 3325581 | SNV | 1 | T | C | Homozygous   |
| NC_037652.1 | 3326147 | SNV | 1 | C | T | Heterozygous |
| NC_037652.1 | 3448613 | SNV | 1 | T | C | Homozygous   |
| NC_037652.1 | 3449861 | SNV | 1 | A | G | Heterozygous |
| NC_037652.1 | 3449874 | SNV | 1 | G | C | Homozygous   |
| NC_037652.1 | 3450221 | SNV | 1 | A | G | Homozygous   |
| NC_037652.1 | 3450225 | SNV | 1 | A | G | Homozygous   |
| NC_037652.1 | 3450631 | SNV | 1 | G | C | Homozygous   |
| NC_037652.1 | 3451362 | SNV | 1 | G | A | Heterozygous |
| NC_037652.1 | 3451407 | SNV | 1 | C | T | Homozygous   |
| NC_037652.1 | 3451457 | SNV | 1 | A | C | Homozygous   |
| NC_037652.1 | 3452293 | SNV | 1 | G | A | Homozygous   |
| NC_037652.1 | 3459704 | SNV | 1 | T | C | Homozygous   |
| NC_037652.1 | 3461812 | SNV | 1 | T | C | Homozygous   |
| NC_037652.1 | 3474007 | SNV | 1 | G | C | Homozygous   |
| NC_037652.1 | 3474051 | SNV | 1 | C | T | Heterozygous |

|             |         |     |   |   |   |              |
|-------------|---------|-----|---|---|---|--------------|
| NC_037652.1 | 3474520 | SNV | 1 | T | C | Homozygous   |
| NC_037652.1 | 3474580 | SNV | 1 | A | G | Heterozygous |
| NC_037652.1 | 3474607 | SNV | 1 | T | C | Homozygous   |
| NC_037652.1 | 3474753 | SNV | 1 | C | T | Heterozygous |
| NC_037652.1 | 3475092 | SNV | 1 | G | A | Heterozygous |
| NC_037652.1 | 3477227 | SNV | 1 | A | G | Homozygous   |
| NC_037652.1 | 3478862 | SNV | 1 | T | C | Heterozygous |
| NC_037652.1 | 3481727 | SNV | 1 | A | T | Heterozygous |
| NC_037652.1 | 3481797 | SNV | 1 | A | G | Homozygous   |
| NC_037652.1 | 3481904 | SNV | 1 | C | T | Homozygous   |
| NC_037652.1 | 3482437 | SNV | 1 | T | A | Homozygous   |
| NC_037652.1 | 3482888 | SNV | 1 | C | T | Heterozygous |
| NC_037652.1 | 3483149 | SNV | 1 | A | G | Homozygous   |
| NC_037652.1 | 3484460 | SNV | 1 | G | C | Heterozygous |
| NC_037652.1 | 3484485 | SNV | 1 | T | C | Homozygous   |
| NC_037652.1 | 3484781 | SNV | 1 | G | A | Heterozygous |
| NC_037652.1 | 3484788 | SNV | 1 | G | A | Heterozygous |
| NC_037652.1 | 3485313 | SNV | 1 | G | A | Homozygous   |
| NC_037652.1 | 3485475 | SNV | 1 | T | C | Heterozygous |
| NC_037652.1 | 3485948 | SNV | 1 | T | A | Heterozygous |
| NC_037652.1 | 3491777 | SNV | 1 | C | T | Homozygous   |
| NC_037652.1 | 3491779 | SNV | 1 | G | A | Homozygous   |
| NC_037652.1 | 3492413 | SNV | 1 | G | A | Heterozygous |
| NC_037652.1 | 3493078 | SNV | 1 | A | T | Homozygous   |
| NC_037652.1 | 3493692 | SNV | 1 | C | T | Homozygous   |
| NC_037652.1 | 3494318 | SNV | 1 | T | A | Homozygous   |
| NC_037652.1 | 3494386 | SNV | 1 | C | T | Homozygous   |
| NC_037652.1 | 3494949 | SNV | 1 | C | T | Homozygous   |
| NC_037652.1 | 3495100 | SNV | 1 | T | C | Heterozygous |
| NC_037652.1 | 3497415 | SNV | 1 | C | T | Homozygous   |
| NC_037652.1 | 3513952 | SNV | 1 | T | G | Homozygous   |
| NC_037652.1 | 3513994 | SNV | 1 | A | G | Homozygous   |
| NC_037652.1 | 3514070 | SNV | 1 | G | A | Heterozygous |
| NC_037652.1 | 3514082 | SNV | 1 | A | G | Heterozygous |
| NC_037652.1 | 3514144 | SNV | 1 | T | C | Heterozygous |
| NC_037652.1 | 3514155 | SNV | 1 | G | A | Heterozygous |
| NC_037652.1 | 3514916 | SNV | 1 | A | C | Homozygous   |
| NC_037652.1 | 3514928 | SNV | 1 | T | C | Homozygous   |
| NC_037652.1 | 3514930 | SNV | 1 | A | T | Homozygous   |
| NC_037652.1 | 3514934 | SNV | 1 | A | G | Homozygous   |
| NC_037652.1 | 3532849 | SNV | 1 | C | T | Heterozygous |
| NC_037652.1 | 3540595 | SNV | 1 | A | C | Homozygous   |
| NC_037652.1 | 3540712 | SNV | 1 | A | G | Homozygous   |
| NC_037652.1 | 3540718 | SNV | 1 | A | G | Homozygous   |
| NC_037652.1 | 3540743 | SNV | 1 | G | A | Homozygous   |
| NC_037652.1 | 3540754 | SNV | 1 | T | C | Heterozygous |
| NC_037652.1 | 3541192 | SNV | 1 | G | A | Heterozygous |
| NC_037652.1 | 3541224 | SNV | 1 | T | C | Homozygous   |
| NC_037652.1 | 3541262 | SNV | 1 | A | G | Heterozygous |
| NC_037652.1 | 3542339 | SNV | 1 | T | A | Heterozygous |
| NC_037652.1 | 3542341 | SNV | 1 | C | A | Homozygous   |

|             |         |     |   |   |   |              |
|-------------|---------|-----|---|---|---|--------------|
| NC_037652.1 | 3543218 | SNV | 1 | T | C | Heterozygous |
| NC_037652.1 | 3569685 | SNV | 1 | A | G | Heterozygous |
| NC_037652.1 | 3573875 | SNV | 1 | G | C | Heterozygous |
| NC_037652.1 | 3574374 | SNV | 1 | A | G | Homozygous   |
| NC_037652.1 | 3574385 | SNV | 1 | A | G | Homozygous   |
| NC_037652.1 | 3574403 | SNV | 1 | A | G | Homozygous   |
| NC_037652.1 | 3576202 | SNV | 1 | A | G | Homozygous   |
| NC_037652.1 | 3576346 | SNV | 1 | G | C | Homozygous   |
| NC_037652.1 | 3578847 | SNV | 1 | A | G | Homozygous   |
| NC_037652.1 | 3579365 | SNV | 1 | A | G | Homozygous   |
| NC_037652.1 | 3579475 | SNV | 1 | A | G | Heterozygous |
| NC_037652.1 | 3579650 | SNV | 1 | A | G | Homozygous   |
| NC_037652.1 | 3579652 | SNV | 1 | G | A | Homozygous   |
| NC_037652.1 | 3579657 | SNV | 1 | A | C | Homozygous   |
| NC_037652.1 | 3579659 | SNV | 1 | A | G | Homozygous   |
| NC_037652.1 | 3579667 | SNV | 1 | A | T | Homozygous   |
| NC_037652.1 | 3579680 | SNV | 1 | G | A | Homozygous   |
| NC_037652.1 | 3583811 | SNV | 1 | A | G | Heterozygous |
| NC_037652.1 | 3583813 | SNV | 1 | A | G | Heterozygous |
| NC_037652.1 | 3608873 | SNV | 1 | A | G | Homozygous   |
| NC_037652.1 | 3609616 | SNV | 1 | T | C | Homozygous   |
| NC_037652.1 | 3609643 | SNV | 1 | T | C | Heterozygous |
| NC_037652.1 | 3609938 | SNV | 1 | C | T | Homozygous   |
| NC_037652.1 | 3609996 | SNV | 1 | A | T | Heterozygous |
| NC_037652.1 | 3610363 | SNV | 1 | A | G | Homozygous   |
| NC_037652.1 | 3610534 | SNV | 1 | C | T | Homozygous   |
| NC_037652.1 | 3610561 | SNV | 1 | G | C | Heterozygous |
| NC_037652.1 | 3610564 | SNV | 1 | T | C | Heterozygous |
| NC_037652.1 | 3610566 | SNV | 1 | C | A | Heterozygous |
| NC_037652.1 | 3610597 | SNV | 1 | G | C | Homozygous   |
| NC_037652.1 | 3610616 | SNV | 1 | T | C | Homozygous   |
| NC_037652.1 | 3611204 | SNV | 1 | T | C | Homozygous   |
| NC_037652.1 | 3611215 | SNV | 1 | C | T | Heterozygous |
| NC_037652.1 | 3611692 | SNV | 1 | T | C | Homozygous   |
| NC_037652.1 | 3612126 | SNV | 1 | C | T | Heterozygous |
| NC_037652.1 | 3612134 | SNV | 1 | A | G | Heterozygous |
| NC_037652.1 | 3612149 | SNV | 1 | A | T | Heterozygous |
| NC_037652.1 | 3612154 | SNV | 1 | G | C | Heterozygous |
| NC_037652.1 | 3612154 | SNV | 1 | G | T | Heterozygous |
| NC_037652.1 | 3612808 | SNV | 1 | C | T | Heterozygous |
| NC_037652.1 | 3613053 | SNV | 1 | G | A | Homozygous   |
| NC_037652.1 | 3613191 | SNV | 1 | T | G | Heterozygous |
| NC_037652.1 | 3613399 | SNV | 1 | T | C | Homozygous   |
| NC_037652.1 | 3613416 | SNV | 1 | T | C | Homozygous   |
| NC_037652.1 | 3613423 | SNV | 1 | C | T | Heterozygous |
| NC_037652.1 | 3613443 | SNV | 1 | A | G | Heterozygous |
| NC_037652.1 | 3613462 | SNV | 1 | T | C | Homozygous   |
| NC_037652.1 | 3613493 | SNV | 1 | G | A | Heterozygous |
| NC_037652.1 | 3613508 | SNV | 1 | C | T | Homozygous   |
| NC_037652.1 | 3613608 | SNV | 1 | T | C | Homozygous   |
| NC_037652.1 | 3613790 | SNV | 1 | T | G | Homozygous   |

|             |         |     |   |   |   |              |
|-------------|---------|-----|---|---|---|--------------|
| NC_037652.1 | 3613811 | SNV | 1 | G | C | Heterozygous |
| NC_037652.1 | 3614521 | SNV | 1 | G | A | Homozygous   |
| NC_037652.1 | 3614530 | SNV | 1 | T | C | Homozygous   |
| NC_037652.1 | 3615298 | SNV | 1 | C | T | Heterozygous |
| NC_037652.1 | 3615325 | SNV | 1 | A | G | Homozygous   |
| NC_037652.1 | 3616119 | SNV | 1 | G | A | Homozygous   |
| NC_037652.1 | 3616353 | SNV | 1 | A | G | Homozygous   |
| NC_037652.1 | 3617693 | SNV | 1 | C | T | Homozygous   |
| NC_037652.1 | 3617737 | SNV | 1 | C | A | Heterozygous |
| NC_037652.1 | 3617828 | SNV | 1 | C | T | Heterozygous |
| NC_037652.1 | 3617994 | SNV | 1 | C | A | Homozygous   |
| NC_037652.1 | 3618243 | SNV | 1 | A | G | Homozygous   |
| NC_037652.1 | 3618869 | SNV | 1 | G | T | Heterozygous |
| NC_037652.1 | 3618986 | SNV | 1 | G | A | Heterozygous |
| NC_037652.1 | 3619016 | SNV | 1 | T | A | Homozygous   |
| NC_037652.1 | 3619019 | SNV | 1 | G | C | Homozygous   |
| NC_037652.1 | 3619073 | SNV | 1 | C | G | Homozygous   |
| NC_037652.1 | 3619101 | SNV | 1 | T | C | Homozygous   |
| NC_037652.1 | 3619274 | SNV | 1 | C | A | Homozygous   |
| NC_037652.1 | 3621334 | SNV | 1 | C | T | Heterozygous |
| NC_037652.1 | 3621373 | SNV | 1 | T | C | Homozygous   |
| NC_037652.1 | 3621448 | SNV | 1 | T | C | Homozygous   |
| NC_037652.1 | 3621670 | SNV | 1 | C | T | Heterozygous |
| NC_037652.1 | 3621948 | SNV | 1 | T | C | Homozygous   |
| NC_037652.1 | 3622231 | SNV | 1 | A | G | Heterozygous |
| NC_037652.1 | 3622244 | SNV | 1 | T | C | Homozygous   |
| NC_037652.1 | 3622391 | SNV | 1 | T | C | Homozygous   |
| NC_037652.1 | 3622612 | SNV | 1 | A | G | Homozygous   |
| NC_037652.1 | 3622846 | SNV | 1 | G | A | Heterozygous |
| NC_037652.1 | 3622970 | SNV | 1 | T | C | Homozygous   |
| NC_037652.1 | 3623915 | SNV | 1 | T | C | Heterozygous |
| NC_037652.1 | 3623916 | SNV | 1 | G | T | Heterozygous |
| NC_037652.1 | 3626642 | SNV | 1 | A | G | Homozygous   |
| NC_037652.1 | 3626763 | SNV | 1 | G | A | Heterozygous |
| NC_037652.1 | 3626773 | SNV | 1 | T | C | Homozygous   |
| NC_037652.1 | 3626862 | SNV | 1 | T | C | Homozygous   |
| NC_037652.1 | 3626864 | SNV | 1 | T | C | Homozygous   |
| NC_037652.1 | 3627224 | SNV | 1 | A | C | Heterozygous |
| NC_037652.1 | 3627532 | SNV | 1 | A | C | Heterozygous |
| NC_037652.1 | 3627592 | SNV | 1 | C | T | Heterozygous |
| NC_037652.1 | 3627613 | SNV | 1 | G | A | Heterozygous |
| NC_037652.1 | 3627645 | SNV | 1 | G | A | Homozygous   |
| NC_037652.1 | 3627903 | SNV | 1 | C | T | Homozygous   |
| NC_037652.1 | 3628070 | SNV | 1 | C | T | Heterozygous |
| NC_037652.1 | 3628349 | SNV | 1 | A | G | Homozygous   |
| NC_037652.1 | 3644046 | SNV | 1 | G | T | Heterozygous |
| NC_037652.1 | 3650421 | SNV | 1 | A | T | Homozygous   |
| NC_037652.1 | 3654724 | SNV | 1 | C | G | Homozygous   |
| NC_037652.1 | 3654729 | SNV | 1 | T | A | Homozygous   |
| NC_037652.1 | 3654751 | SNV | 1 | T | C | Homozygous   |
| NC_037652.1 | 3655139 | SNV | 1 | G | A | Homozygous   |

|             |         |     |   |   |   |              |
|-------------|---------|-----|---|---|---|--------------|
| NC_037652.1 | 3666941 | SNV | 1 | C | T | Heterozygous |
| NC_037652.1 | 3666999 | SNV | 1 | G | A | Heterozygous |
| NC_037652.1 | 3667747 | SNV | 1 | G | A | Heterozygous |
| NC_037652.1 | 3667764 | SNV | 1 | C | G | Homozygous   |
| NC_037652.1 | 3670028 | SNV | 1 | T | C | Homozygous   |
| NC_037652.1 | 3670983 | SNV | 1 | C | T | Homozygous   |
| NC_037652.1 | 3671524 | SNV | 1 | A | T | Homozygous   |
| NC_037652.1 | 3671683 | SNV | 1 | G | A | Heterozygous |
| NC_037652.1 | 3671843 | SNV | 1 | A | G | Homozygous   |
| NC_037652.1 | 3672273 | SNV | 1 | T | C | Heterozygous |
| NC_037652.1 | 3672275 | SNV | 1 | C | T | Heterozygous |
| NC_037652.1 | 3673391 | SNV | 1 | A | G | Homozygous   |
| NC_037652.1 | 3673757 | SNV | 1 | T | G | Homozygous   |
| NC_037652.1 | 3676251 | SNV | 1 | G | A | Homozygous   |
| NC_037652.1 | 3676308 | SNV | 1 | C | T | Heterozygous |
| NC_037652.1 | 3677119 | SNV | 1 | G | A | Homozygous   |
| NC_037652.1 | 3677396 | SNV | 1 | G | A | Homozygous   |
| NC_037652.1 | 3677481 | SNV | 1 | C | T | Homozygous   |
| NC_037652.1 | 3677483 | SNV | 1 | C | T | Heterozygous |
| NC_037652.1 | 3679113 | SNV | 1 | G | A | Homozygous   |
| NC_037652.1 | 3692023 | SNV | 1 | C | T | Homozygous   |
| NC_037652.1 | 3692030 | SNV | 1 | A | T | Heterozygous |
| NC_037652.1 | 3693196 | SNV | 1 | C | T | Heterozygous |
| NC_037652.1 | 3699260 | SNV | 1 | C | G | Heterozygous |
| NC_037652.1 | 3699267 | SNV | 1 | C | G | Homozygous   |
| NC_037652.1 | 3699545 | SNV | 1 | C | T | Homozygous   |
| NC_037652.1 | 3699772 | SNV | 1 | A | T | Homozygous   |
| NC_037652.1 | 3703230 | SNV | 1 | C | A | Homozygous   |
| NC_037652.1 | 3705204 | SNV | 1 | A | T | Homozygous   |
| NC_037652.1 | 3705444 | SNV | 1 | G | A | Heterozygous |
| NC_037652.1 | 3705446 | SNV | 1 | A | T | Heterozygous |
| NC_037652.1 | 3705449 | SNV | 1 | A | C | Heterozygous |
| NC_037652.1 | 3706113 | SNV | 1 | A | G | Homozygous   |
| NC_037652.1 | 3707340 | SNV | 1 | A | G | Homozygous   |
| NC_037652.1 | 3707696 | SNV | 1 | A | T | Heterozygous |
| NC_037652.1 | 3707699 | SNV | 1 | T | A | Heterozygous |
| NC_037652.1 | 3707702 | SNV | 1 | A | T | Homozygous   |
| NC_037652.1 | 3707708 | SNV | 1 | A | G | Homozygous   |
| NC_037652.1 | 3707712 | SNV | 1 | G | T | Heterozygous |
| NC_037652.1 | 3707714 | SNV | 1 | T | C | Homozygous   |
| NC_037652.1 | 3707732 | SNV | 1 | T | C | Homozygous   |
| NC_037652.1 | 3707738 | SNV | 1 | T | A | Homozygous   |
| NC_037652.1 | 3707747 | SNV | 1 | T | A | Homozygous   |
| NC_037652.1 | 3707753 | SNV | 1 | T | C | Homozygous   |
| NC_037652.1 | 3712286 | SNV | 1 | A | G | Homozygous   |
| NC_037652.1 | 3712421 | SNV | 1 | A | G | Homozygous   |
| NC_037652.1 | 3712931 | SNV | 1 | C | T | Heterozygous |
| NC_037652.1 | 3712946 | SNV | 1 | G | A | Heterozygous |
| NC_037652.1 | 3716374 | SNV | 1 | G | T | Homozygous   |
| NC_037652.1 | 3716380 | SNV | 1 | T | A | Homozygous   |
| NC_037652.1 | 3716397 | SNV | 1 | T | C | Homozygous   |

|             |         |     |   |   |   |              |
|-------------|---------|-----|---|---|---|--------------|
| NC_037652.1 | 3716415 | SNV | 1 | T | A | Homozygous   |
| NC_037652.1 | 3723279 | SNV | 1 | G | A | Homozygous   |
| NC_037652.1 | 3723314 | SNV | 1 | G | A | Heterozygous |
| NC_037652.1 | 3723316 | SNV | 1 | G | C | Heterozygous |
| NC_037652.1 | 3736723 | SNV | 1 | A | G | Homozygous   |
| NC_037652.1 | 3737499 | SNV | 1 | A | T | Homozygous   |
| NC_037652.1 | 3743776 | SNV | 1 | T | C | Heterozygous |
| NC_037652.1 | 3744978 | SNV | 1 | A | G | Homozygous   |
| NC_037652.1 | 3748413 | SNV | 1 | T | C | Homozygous   |
| NC_037652.1 | 3748796 | SNV | 1 | G | T | Homozygous   |
| NC_037652.1 | 3751377 | SNV | 1 | T | A | Heterozygous |
| NC_037652.1 | 3751581 | SNV | 1 | T | C | Homozygous   |
| NC_037652.1 | 3752162 | SNV | 1 | G | A | Heterozygous |
| NC_037652.1 | 3752494 | SNV | 1 | C | T | Homozygous   |
| NC_037652.1 | 3753926 | SNV | 1 | A | G | Heterozygous |
| NC_037652.1 | 3753935 | SNV | 1 | A | G | Heterozygous |
| NC_037652.1 | 3753938 | SNV | 1 | A | G | Heterozygous |
| NC_037652.1 | 3756798 | SNV | 1 | G | A | Homozygous   |
| NC_037652.1 | 3763733 | SNV | 1 | T | G | Homozygous   |
| NC_037652.1 | 3763741 | SNV | 1 | T | A | Homozygous   |
| NC_037652.1 | 3763747 | SNV | 1 | T | C | Homozygous   |
| NC_037652.1 | 3763772 | SNV | 1 | C | A | Homozygous   |
| NC_037652.1 | 3763774 | SNV | 1 | T | A | Homozygous   |
| NC_037652.1 | 3764495 | SNV | 1 | C | A | Homozygous   |
| NC_037652.1 | 3764924 | SNV | 1 | C | T | Homozygous   |
| NC_037652.1 | 3765956 | SNV | 1 | A | G | Homozygous   |
| NC_037652.1 | 3767186 | SNV | 1 | T | A | Homozygous   |
| NC_037652.1 | 3767790 | SNV | 1 | G | A | Homozygous   |
| NC_037652.1 | 3770234 | SNV | 1 | T | A | Heterozygous |
| NC_037652.1 | 3770792 | SNV | 1 | C | A | Homozygous   |
| NC_037652.1 | 3771297 | SNV | 1 | G | A | Heterozygous |
| NC_037652.1 | 3771300 | SNV | 1 | A | T | Heterozygous |
| NC_037652.1 | 3771306 | SNV | 1 | A | G | Heterozygous |
| NC_037652.1 | 3771308 | SNV | 1 | A | T | Heterozygous |
| NC_037652.1 | 3771310 | SNV | 1 | A | T | Heterozygous |
| NC_037652.1 | 3771313 | SNV | 1 | G | A | Heterozygous |
| NC_037652.1 | 3771325 | SNV | 1 | G | C | Heterozygous |
| NC_037652.1 | 3771327 | SNV | 1 | G | C | Heterozygous |
| NC_037652.1 | 3771338 | SNV | 1 | A | T | Heterozygous |
| NC_037652.1 | 3771340 | SNV | 1 | A | T | Heterozygous |
| NC_037652.1 | 3773194 | SNV | 1 | T | A | Homozygous   |
| NC_037652.1 | 3773574 | SNV | 1 | A | T | Homozygous   |
| NC_037652.1 | 3774685 | SNV | 1 | G | C | Homozygous   |
| NC_037652.1 | 3779655 | SNV | 1 | A | G | Homozygous   |
| NC_037652.1 | 3779658 | SNV | 1 | A | T | Homozygous   |
| NC_037652.1 | 3779660 | SNV | 1 | A | T | Homozygous   |
| NC_037652.1 | 3782360 | SNV | 1 | C | T | Homozygous   |
| NC_037652.1 | 3783078 | SNV | 1 | C | T | Homozygous   |
| NC_037652.1 | 3783451 | SNV | 1 | A | G | Homozygous   |
| NC_037652.1 | 3787743 | SNV | 1 | T | C | Heterozygous |
| NC_037652.1 | 3787749 | SNV | 1 | A | T | Heterozygous |



|             |         |     |   |   |   |              |
|-------------|---------|-----|---|---|---|--------------|
| NC_037652.1 | 3787758 | SNV | 1 | T | A | Heterozygous |
| NC_037652.1 | 3787788 | SNV | 1 | A | T | Heterozygous |
| NC_037652.1 | 3787794 | SNV | 1 | T | A | Heterozygous |
| NC_037652.1 | 3787857 | SNV | 1 | C | T | Homozygous   |
| NC_037652.1 | 3787902 | SNV | 1 | T | C | Heterozygous |
| NC_037652.1 | 3787918 | SNV | 1 | C | A | Heterozygous |
| NC_037652.1 | 3787920 | SNV | 1 | T | A | Heterozygous |
| NC_037652.1 | 3787923 | SNV | 1 | A | T | Heterozygous |
| NC_037652.1 | 3787929 | SNV | 1 | A | G | Heterozygous |
| NC_037652.1 | 3787932 | SNV | 1 | T | C | Heterozygous |
| NC_037652.1 | 3787936 | SNV | 1 | A | C | Heterozygous |
| NC_037652.1 | 3787938 | SNV | 1 | T | A | Heterozygous |
| NC_037652.1 | 3787954 | SNV | 1 | T | C | Heterozygous |
| NC_037652.1 | 3787956 | SNV | 1 | A | C | Heterozygous |
| NC_037652.1 | 3787959 | SNV | 1 | A | C | Heterozygous |
| NC_037652.1 | 3787962 | SNV | 1 | C | T | Heterozygous |
| NC_037652.1 | 3788542 | SNV | 1 | T | C | Heterozygous |
| NC_037652.1 | 3788548 | SNV | 1 | A | T | Heterozygous |
| NC_037652.1 | 3788551 | SNV | 1 | C | T | Heterozygous |
| NC_037652.1 | 3788554 | SNV | 1 | C | T | Heterozygous |
| NC_037652.1 | 3788569 | SNV | 1 | T | A | Heterozygous |
| NC_037652.1 | 3788571 | SNV | 1 | T | C | Heterozygous |
| NC_037652.1 | 3788579 | SNV | 1 | T | C | Heterozygous |
| NC_037652.1 | 3788581 | SNV | 1 | A | T | Heterozygous |
| NC_037652.1 | 3788584 | SNV | 1 | T | A | Heterozygous |
| NC_037652.1 | 3788602 | SNV | 1 | T | A | Heterozygous |
| NC_037652.1 | 3788605 | SNV | 1 | A | G | Heterozygous |
| NC_037652.1 | 3788608 | SNV | 1 | T | A | Heterozygous |
| NC_037652.1 | 3788612 | SNV | 1 | G | A | Heterozygous |
| NC_037652.1 | 3788659 | SNV | 1 | A | C | Heterozygous |
| NC_037652.1 | 3788662 | SNV | 1 | T | C | Heterozygous |
| NC_037652.1 | 3788669 | SNV | 1 | T | C | Heterozygous |
| NC_037652.1 | 3788680 | SNV | 1 | T | G | Heterozygous |
| NC_037652.1 | 3788701 | SNV | 1 | A | G | Homozygous   |
| NC_037652.1 | 3788716 | SNV | 1 | A | G | Homozygous   |
| NC_037652.1 | 3788734 | SNV | 1 | T | C | Homozygous   |
| NC_037652.1 | 3788737 | SNV | 1 | T | C | Homozygous   |
| NC_037652.1 | 3790316 | SNV | 1 | C | T | Homozygous   |
| NC_037652.1 | 3790544 | SNV | 1 | A | C | Homozygous   |
| NC_037652.1 | 3790547 | SNV | 1 | A | G | Homozygous   |
| NC_037652.1 | 3793246 | SNV | 1 | A | T | Homozygous   |
| NC_037652.1 | 3793573 | SNV | 1 | C | A | Homozygous   |
| NC_037652.1 | 3793847 | SNV | 1 | C | T | Homozygous   |
| NC_037652.1 | 3796215 | SNV | 1 | T | C | Homozygous   |
| NC_037652.1 | 3796812 | SNV | 1 | A | G | Heterozygous |
| NC_037652.1 | 3799608 | SNV | 1 | C | G | Homozygous   |
| NC_037652.1 | 3803307 | SNV | 1 | A | G | Homozygous   |
| NC_037652.1 | 3803767 | SNV | 1 | G | A | Homozygous   |
| NC_037652.1 | 3804382 | SNV | 1 | A | C | Homozygous   |
| NC_037652.1 | 3804765 | SNV | 1 | C | A | Heterozygous |
| NC_037652.1 | 3808175 | SNV | 1 | C | T | Homozygous   |

|             |         |     |   |   |   |              |
|-------------|---------|-----|---|---|---|--------------|
| NC_037652.1 | 3808477 | SNV | 1 | C | A | Heterozygous |
| NC_037652.1 | 3809080 | SNV | 1 | A | T | Heterozygous |
| NC_037652.1 | 3809100 | SNV | 1 | C | T | Heterozygous |
| NC_037652.1 | 3809124 | SNV | 1 | T | C | Heterozygous |
| NC_037652.1 | 3809157 | SNV | 1 | C | T | Heterozygous |
| NC_037652.1 | 3809449 | SNV | 1 | C | T | Homozygous   |
| NC_037652.1 | 3809457 | SNV | 1 | G | A | Homozygous   |
| NC_037652.1 | 3809571 | SNV | 1 | A | G | Heterozygous |
| NC_037652.1 | 3812778 | SNV | 1 | A | T | Heterozygous |
| NC_037652.1 | 3814222 | SNV | 1 | A | T | Homozygous   |
| NC_037652.1 | 3816906 | SNV | 1 | C | T | Homozygous   |
| NC_037652.1 | 3843393 | SNV | 1 | A | C | Homozygous   |
| NC_037652.1 | 3843404 | SNV | 1 | G | A | Heterozygous |
| NC_037652.1 | 3874635 | SNV | 1 | G | A | Heterozygous |
| NC_037652.1 | 3875136 | SNV | 1 | G | A | Homozygous   |
| NC_037652.1 | 3875215 | SNV | 1 | A | G | Heterozygous |
| NC_037652.1 | 3875365 | SNV | 1 | A | G | Homozygous   |
| NC_037652.1 | 3875563 | SNV | 1 | G | A | Heterozygous |
| NC_037652.1 | 3875586 | SNV | 1 | G | A | Heterozygous |
| NC_037652.1 | 3875718 | SNV | 1 | T | C | Heterozygous |
| NC_037652.1 | 3875729 | SNV | 1 | T | C | Homozygous   |
| NC_037652.1 | 3875735 | SNV | 1 | T | C | Homozygous   |
| NC_037652.1 | 3875740 | SNV | 1 | T | C | Homozygous   |
| NC_037652.1 | 3875765 | SNV | 1 | T | C | Heterozygous |
| NC_037652.1 | 3875772 | SNV | 1 | T | C | Heterozygous |
| NC_037652.1 | 3875781 | SNV | 1 | T | C | Heterozygous |
| NC_037652.1 | 3875787 | SNV | 1 | T | C | Heterozygous |
| NC_037652.1 | 3875808 | SNV | 1 | T | C | Homozygous   |
| NC_037652.1 | 3875813 | SNV | 1 | A | G | Heterozygous |
| NC_037652.1 | 3875822 | SNV | 1 | T | C | Heterozygous |
| NC_037652.1 | 3875830 | SNV | 1 | T | C | Heterozygous |
| NC_037652.1 | 3875843 | SNV | 1 | T | C | Heterozygous |
| NC_037652.1 | 3876326 | SNV | 1 | G | A | Heterozygous |
| NC_037652.1 | 3876393 | SNV | 1 | T | C | Heterozygous |
| NC_037652.1 | 3876411 | SNV | 1 | A | T | Heterozygous |
| NC_037652.1 | 3876445 | SNV | 1 | C | T | Heterozygous |
| NC_037652.1 | 3876687 | SNV | 1 | T | C | Heterozygous |
| NC_037652.1 | 3876704 | SNV | 1 | C | A | Heterozygous |
| NC_037652.1 | 3876786 | SNV | 1 | C | T | Heterozygous |
| NC_037652.1 | 3876806 | SNV | 1 | T | A | Heterozygous |
| NC_037652.1 | 3877232 | SNV | 1 | G | A | Homozygous   |
| NC_037652.1 | 3877351 | SNV | 1 | A | G | Heterozygous |
| NC_037652.1 | 3877389 | SNV | 1 | C | A | Homozygous   |
| NC_037652.1 | 3877443 | SNV | 1 | A | G | Homozygous   |
| NC_037652.1 | 3877481 | SNV | 1 | T | C | Homozygous   |
| NC_037652.1 | 3877621 | SNV | 1 | A | G | Homozygous   |
| NC_037652.1 | 3877749 | SNV | 1 | A | G | Homozygous   |
| NC_037652.1 | 3877869 | SNV | 1 | T | C | Homozygous   |
| NC_037652.1 | 3878467 | SNV | 1 | T | C | Heterozygous |
| NC_037652.1 | 3878503 | SNV | 1 | T | C | Homozygous   |
| NC_037652.1 | 3878567 | SNV | 1 | G | A | Heterozygous |

|             |         |     |   |   |   |              |
|-------------|---------|-----|---|---|---|--------------|
| NC_037652.1 | 3878569 | SNV | 1 | T | C | Heterozygous |
| NC_037652.1 | 3878845 | SNV | 1 | T | C | Homozygous   |
| NC_037652.1 | 3878954 | SNV | 1 | T | C | Homozygous   |
| NC_037652.1 | 3879023 | SNV | 1 | T | C | Homozygous   |
| NC_037652.1 | 3879106 | SNV | 1 | C | G | Homozygous   |
| NC_037652.1 | 3879145 | SNV | 1 | C | A | Homozygous   |
| NC_037652.1 | 3879220 | SNV | 1 | T | C | Homozygous   |
| NC_037652.1 | 3879269 | SNV | 1 | A | G | Homozygous   |
| NC_037652.1 | 3879272 | SNV | 1 | A | G | Heterozygous |
| NC_037652.1 | 3879275 | SNV | 1 | A | G | Heterozygous |
| NC_037652.1 | 3879322 | SNV | 1 | G | A | Heterozygous |
| NC_037652.1 | 3879549 | SNV | 1 | C | T | Heterozygous |
| NC_037652.1 | 3879651 | SNV | 1 | T | C | Heterozygous |
| NC_037652.1 | 3879695 | SNV | 1 | T | C | Homozygous   |
| NC_037652.1 | 3879731 | SNV | 1 | T | C | Heterozygous |
| NC_037652.1 | 3879793 | SNV | 1 | T | A | Heterozygous |
| NC_037652.1 | 3879840 | SNV | 1 | G | T | Homozygous   |
| NC_037652.1 | 3880059 | SNV | 1 | C | T | Homozygous   |
| NC_037652.1 | 3880077 | SNV | 1 | T | C | Heterozygous |
| NC_037652.1 | 3880201 | SNV | 1 | A | G | Heterozygous |
| NC_037652.1 | 3880229 | SNV | 1 | A | G | Homozygous   |
| NC_037652.1 | 3880489 | SNV | 1 | G | A | Heterozygous |
| NC_037652.1 | 3883518 | SNV | 1 | T | C | Homozygous   |
| NC_037652.1 | 3883544 | SNV | 1 | C | G | Homozygous   |
| NC_037652.1 | 3884150 | SNV | 1 | T | C | Homozygous   |
| NC_037652.1 | 3884191 | SNV | 1 | C | T | Heterozygous |
| NC_037652.1 | 3887024 | SNV | 1 | G | A | Homozygous   |
| NC_037652.1 | 3887026 | SNV | 1 | C | A | Homozygous   |
| NC_037652.1 | 3887353 | SNV | 1 | C | T | Heterozygous |
| NC_037652.1 | 3887412 | SNV | 1 | C | T | Homozygous   |
| NC_037652.1 | 3887596 | SNV | 1 | G | A | Heterozygous |
| NC_037652.1 | 3888087 | SNV | 1 | A | G | Homozygous   |
| NC_037652.1 | 3888405 | SNV | 1 | G | A | Heterozygous |
| NC_037652.1 | 3888538 | SNV | 1 | A | G | Heterozygous |
| NC_037652.1 | 3888730 | SNV | 1 | C | T | Heterozygous |
| NC_037652.1 | 3888811 | SNV | 1 | T | C | Homozygous   |
| NC_037652.1 | 3889134 | SNV | 1 | T | C | Homozygous   |
| NC_037652.1 | 3889517 | SNV | 1 | G | A | Heterozygous |
| NC_037652.1 | 3891227 | SNV | 1 | C | T | Homozygous   |
| NC_037652.1 | 3891314 | SNV | 1 | A | G | Homozygous   |
| NC_037652.1 | 3891369 | SNV | 1 | G | T | Homozygous   |
| NC_037652.1 | 3891485 | SNV | 1 | C | T | Heterozygous |
| NC_037652.1 | 3891539 | SNV | 1 | G | A | Homozygous   |
| NC_037652.1 | 3897100 | SNV | 1 | C | T | Homozygous   |
| NC_037652.1 | 3897866 | SNV | 1 | G | A | Homozygous   |
| NC_037652.1 | 3897988 | SNV | 1 | C | T | Homozygous   |
| NC_037652.1 | 3899332 | SNV | 1 | C | T | Heterozygous |
| NC_037652.1 | 3900044 | SNV | 1 | A | T | Heterozygous |
| NC_037652.1 | 3900046 | SNV | 1 | A | T | Heterozygous |
| NC_037652.1 | 3900048 | SNV | 1 | A | T | Heterozygous |
| NC_037652.1 | 3900068 | SNV | 1 | A | G | Homozygous   |

|             |         |     |   |   |   |              |
|-------------|---------|-----|---|---|---|--------------|
| NC_037652.1 | 3900173 | SNV | 1 | C | T | Heterozygous |
| NC_037652.1 | 3911041 | SNV | 1 | G | A | Homozygous   |
| NC_037652.1 | 3939206 | SNV | 1 | T | C | Heterozygous |
| NC_037652.1 | 3941400 | SNV | 1 | C | T | Homozygous   |
| NC_037652.1 | 3941406 | SNV | 1 | T | A | Heterozygous |
| NC_037652.1 | 3941406 | SNV | 1 | T | C | Heterozygous |
| NC_037652.1 | 3941408 | SNV | 1 | A | G | Homozygous   |
| NC_037652.1 | 3941425 | SNV | 1 | A | T | Heterozygous |
| NC_037652.1 | 3941430 | SNV | 1 | T | G | Heterozygous |
| NC_037652.1 | 3941435 | SNV | 1 | A | T | Homozygous   |
| NC_037652.1 | 3941438 | SNV | 1 | T | C | Homozygous   |
| NC_037652.1 | 3941454 | SNV | 1 | G | A | Homozygous   |
| NC_037652.1 | 3941470 | SNV | 1 | G | T | Heterozygous |
| NC_037652.1 | 3941475 | SNV | 1 | C | A | Heterozygous |
| NC_037652.1 | 3941484 | SNV | 1 | A | G | Heterozygous |
| NC_037652.1 | 3941921 | SNV | 1 | T | C | Homozygous   |
| NC_037652.1 | 3941943 | SNV | 1 | T | C | Homozygous   |
| NC_037652.1 | 3941963 | SNV | 1 | A | G | Homozygous   |
| NC_037652.1 | 3941973 | SNV | 1 | G | A | Homozygous   |
| NC_037652.1 | 3942543 | SNV | 1 | C | A | Homozygous   |
| NC_037652.1 | 3942549 | SNV | 1 | T | A | Homozygous   |
| NC_037652.1 | 3942551 | SNV | 1 | A | T | Homozygous   |
| NC_037652.1 | 3942579 | SNV | 1 | A | T | Homozygous   |
| NC_037652.1 | 3942590 | SNV | 1 | T | A | Homozygous   |
| NC_037652.1 | 3942598 | SNV | 1 | A | G | Homozygous   |
| NC_037652.1 | 3942602 | SNV | 1 | C | A | Homozygous   |
| NC_037652.1 | 3942605 | SNV | 1 | A | T | Homozygous   |
| NC_037652.1 | 3943835 | SNV | 1 | T | C | Homozygous   |
| NC_037652.1 | 3943871 | SNV | 1 | T | C | Homozygous   |
| NC_037652.1 | 3973722 | SNV | 1 | T | G | Homozygous   |
| NC_037652.1 | 3987502 | SNV | 1 | T | G | Heterozygous |
| NC_037652.1 | 3987864 | SNV | 1 | T | A | Homozygous   |
| NC_037652.1 | 3988164 | SNV | 1 | G | A | Heterozygous |
| NC_037652.1 | 3988194 | SNV | 1 | A | G | Homozygous   |
| NC_037652.1 | 3988485 | SNV | 1 | G | A | Homozygous   |
| NC_037652.1 | 3990499 | SNV | 1 | T | C | Homozygous   |
| NC_037652.1 | 3990622 | SNV | 1 | G | A | Heterozygous |
| NC_037652.1 | 3990624 | SNV | 1 | G | A | Heterozygous |
| NC_037652.1 | 3990633 | SNV | 1 | C | T | Heterozygous |
| NC_037652.1 | 4001736 | SNV | 1 | A | G | Heterozygous |
| NC_037652.1 | 4001765 | SNV | 1 | G | A | Heterozygous |
| NC_037652.1 | 4001772 | SNV | 1 | G | A | Heterozygous |
| NC_037652.1 | 4008929 | SNV | 1 | A | G | Heterozygous |
| NC_037652.1 | 4010733 | SNV | 1 | A | C | Heterozygous |
| NC_037652.1 | 4011900 | SNV | 1 | C | T | Homozygous   |
| NC_037652.1 | 4011905 | SNV | 1 | C | T | Homozygous   |
| NC_037652.1 | 4016502 | SNV | 1 | G | A | Heterozygous |
| NC_037652.1 | 4016531 | SNV | 1 | G | A | Homozygous   |
| NC_037652.1 | 4016802 | SNV | 1 | G | C | Homozygous   |
| NC_037652.1 | 4016815 | SNV | 1 | G | A | Heterozygous |
| NC_037652.1 | 4017137 | SNV | 1 | C | A | Homozygous   |

|             |         |     |   |   |   |              |
|-------------|---------|-----|---|---|---|--------------|
| NC_037652.1 | 4017164 | SNV | 1 | A | C | Homozygous   |
| NC_037652.1 | 4017183 | SNV | 1 | C | A | Homozygous   |
| NC_037652.1 | 4033926 | SNV | 1 | A | G | Homozygous   |
| NC_037652.1 | 4033938 | SNV | 1 | A | T | Homozygous   |
| NC_037652.1 | 4033990 | SNV | 1 | G | A | Homozygous   |
| NC_037652.1 | 4034035 | SNV | 1 | G | A | Homozygous   |
| NC_037652.1 | 4034051 | SNV | 1 | C | A | Homozygous   |
| NC_037652.1 | 4034077 | SNV | 1 | T | A | Heterozygous |
| NC_037652.1 | 4034083 | SNV | 1 | T | G | Homozygous   |
| NC_037652.1 | 4034085 | SNV | 1 | C | T | Heterozygous |
| NC_037652.1 | 4034092 | SNV | 1 | A | G | Homozygous   |
| NC_037652.1 | 4034106 | SNV | 1 | G | A | Homozygous   |
| NC_037652.1 | 4034155 | SNV | 1 | T | A | Homozygous   |
| NC_037652.1 | 4034160 | SNV | 1 | A | G | Heterozygous |
| NC_037652.1 | 4034181 | SNV | 1 | T | C | Homozygous   |
| NC_037652.1 | 4045543 | SNV | 1 | G | A | Heterozygous |
| NC_037652.1 | 4045594 | SNV | 1 | A | G | Heterozygous |
| NC_037652.1 | 4045619 | SNV | 1 | G | A | Heterozygous |
| NC_037652.1 | 4045714 | SNV | 1 | C | T | Heterozygous |
| NC_037652.1 | 4045893 | SNV | 1 | C | A | Heterozygous |
| NC_037652.1 | 4046030 | SNV | 1 | G | A | Homozygous   |
| NC_037652.1 | 4046052 | SNV | 1 | A | G | Homozygous   |
| NC_037652.1 | 4046197 | SNV | 1 | A | G | Heterozygous |
| NC_037652.1 | 4046339 | SNV | 1 | G | A | Heterozygous |
| NC_037652.1 | 4046351 | SNV | 1 | C | A | Heterozygous |
| NC_037652.1 | 4046360 | SNV | 1 | C | G | Homozygous   |
| NC_037652.1 | 4046568 | SNV | 1 | C | T | Heterozygous |
| NC_037652.1 | 4050636 | SNV | 1 | C | G | Heterozygous |
| NC_037652.1 | 4050834 | SNV | 1 | A | G | Heterozygous |
| NC_037652.1 | 4051207 | SNV | 1 | T | A | Homozygous   |
| NC_037652.1 | 4060619 | SNV | 1 | T | C | Homozygous   |
| NC_037652.1 | 4061144 | SNV | 1 | T | C | Homozygous   |
| NC_037652.1 | 4061150 | SNV | 1 | A | T | Homozygous   |
| NC_037652.1 | 4072660 | SNV | 1 | A | G | Heterozygous |
| NC_037652.1 | 4072661 | SNV | 1 | C | T | Heterozygous |
| NC_037652.1 | 4072697 | SNV | 1 | A | G | Homozygous   |
| NC_037652.1 | 4072877 | SNV | 1 | T | C | Heterozygous |
| NC_037652.1 | 4072904 | SNV | 1 | C | T | Homozygous   |
| NC_037652.1 | 4072972 | SNV | 1 | T | C | Homozygous   |
| NC_037652.1 | 4073160 | SNV | 1 | A | G | Homozygous   |
| NC_037652.1 | 4101976 | SNV | 1 | G | A | Homozygous   |
| NC_037652.1 | 4102148 | SNV | 1 | T | C | Homozygous   |
| NC_037652.1 | 4102157 | SNV | 1 | G | A | Heterozygous |
| NC_037652.1 | 4102218 | SNV | 1 | C | A | Heterozygous |
| NC_037652.1 | 4102337 | SNV | 1 | A | G | Homozygous   |
| NC_037652.1 | 4102339 | SNV | 1 | A | G | Homozygous   |
| NC_037652.1 | 4102347 | SNV | 1 | C | T | Heterozygous |
| NC_037652.1 | 4102438 | SNV | 1 | T | C | Homozygous   |
| NC_037652.1 | 4102463 | SNV | 1 | C | T | Heterozygous |
| NC_037652.1 | 4102470 | SNV | 1 | T | C | Heterozygous |
| NC_037652.1 | 4102473 | SNV | 1 | T | C | Heterozygous |

|             |         |     |   |   |   |              |
|-------------|---------|-----|---|---|---|--------------|
| NC_037652.1 | 4120365 | SNV | 1 | A | T | Homozygous   |
| NC_037652.1 | 4127923 | SNV | 1 | C | T | Homozygous   |
| NC_037652.1 | 4141108 | SNV | 1 | C | G | Homozygous   |
| NC_037652.1 | 4141169 | SNV | 1 | A | G | Homozygous   |
| NC_037652.1 | 4155724 | SNV | 1 | T | C | Heterozygous |
| NC_037652.1 | 4155843 | SNV | 1 | A | G | Homozygous   |
| NC_037652.1 | 4156274 | SNV | 1 | C | G | Homozygous   |
| NC_037652.1 | 4156363 | SNV | 1 | T | C | Homozygous   |
| NC_037652.1 | 4156652 | SNV | 1 | C | T | Heterozygous |
| NC_037652.1 | 4156658 | SNV | 1 | C | T | Heterozygous |
| NC_037652.1 | 4156879 | SNV | 1 | A | T | Heterozygous |
| NC_037652.1 | 4156881 | SNV | 1 | A | T | Homozygous   |
| NC_037652.1 | 4156928 | SNV | 1 | G | A | Heterozygous |
| NC_037652.1 | 4157100 | SNV | 1 | G | C | Homozygous   |
| NC_037652.1 | 4157131 | SNV | 1 | G | A | Heterozygous |
| NC_037652.1 | 4163066 | SNV | 1 | G | C | Heterozygous |
| NC_037652.1 | 4163069 | SNV | 1 | C | G | Heterozygous |
| NC_037652.1 | 4163141 | SNV | 1 | T | C | Heterozygous |
| NC_037652.1 | 4163353 | SNV | 1 | A | G | Homozygous   |
| NC_037652.1 | 4163370 | SNV | 1 | T | A | Homozygous   |
| NC_037652.1 | 4166803 | SNV | 1 | A | G | Heterozygous |
| NC_037652.1 | 4180691 | SNV | 1 | C | G | Heterozygous |
| NC_037652.1 | 4180876 | SNV | 1 | C | T | Heterozygous |
| NC_037652.1 | 4180878 | SNV | 1 | C | T | Heterozygous |
| NC_037652.1 | 4180880 | SNV | 1 | C | T | Heterozygous |
| NC_037652.1 | 4180889 | SNV | 1 | T | C | Heterozygous |
| NC_037652.1 | 4180891 | SNV | 1 | C | T | Heterozygous |
| NC_037652.1 | 4180947 | SNV | 1 | C | G | Heterozygous |
| NC_037652.1 | 4180973 | SNV | 1 | G | A | Heterozygous |
| NC_037652.1 | 4187273 | SNV | 1 | C | A | Heterozygous |
| NC_037652.1 | 4187279 | SNV | 1 | A | C | Heterozygous |
| NC_037652.1 | 4259506 | SNV | 1 | C | T | Homozygous   |
| NC_037652.1 | 4259702 | SNV | 1 | T | C | Heterozygous |
| NC_037652.1 | 4266231 | SNV | 1 | A | T | Homozygous   |
| NC_037652.1 | 4266237 | SNV | 1 | G | T | Heterozygous |
| NC_037652.1 | 4266320 | SNV | 1 | A | G | Homozygous   |
| NC_037652.1 | 4266347 | SNV | 1 | A | G | Homozygous   |
| NC_037652.1 | 4266514 | SNV | 1 | T | C | Homozygous   |
| NC_037652.1 | 4266582 | SNV | 1 | G | A | Heterozygous |
| NC_037652.1 | 4266747 | SNV | 1 | A | G | Homozygous   |
| NC_037652.1 | 4266804 | SNV | 1 | G | A | Heterozygous |
| NC_037652.1 | 4266819 | SNV | 1 | G | A | Heterozygous |
| NC_037652.1 | 4266829 | SNV | 1 | A | G | Homozygous   |
| NC_037652.1 | 4266899 | SNV | 1 | G | A | Heterozygous |
| NC_037652.1 | 4266996 | SNV | 1 | A | G | Heterozygous |
| NC_037652.1 | 4267009 | SNV | 1 | T | C | Heterozygous |
| NC_037652.1 | 4267014 | SNV | 1 | A | G | Heterozygous |
| NC_037652.1 | 4267018 | SNV | 1 | T | C | Homozygous   |
| NC_037652.1 | 4281512 | SNV | 1 | T | A | Homozygous   |
| NC_037652.1 | 4281515 | SNV | 1 | A | T | Homozygous   |
| NC_037652.1 | 4281519 | SNV | 1 | T | G | Homozygous   |

|             |         |     |   |   |   |              |
|-------------|---------|-----|---|---|---|--------------|
| NC_037652.1 | 4281554 | SNV | 1 | A | G | Homozygous   |
| NC_037652.1 | 4281557 | SNV | 1 | G | T | Homozygous   |
| NC_037652.1 | 4281560 | SNV | 1 | T | C | Homozygous   |
| NC_037652.1 | 4304376 | SNV | 1 | C | A | Heterozygous |
| NC_037652.1 | 4317412 | SNV | 1 | T | C | Homozygous   |
| NC_037652.1 | 4317541 | SNV | 1 | T | C | Homozygous   |
| NC_037652.1 | 4317585 | SNV | 1 | A | G | Homozygous   |
| NC_037652.1 | 4317622 | SNV | 1 | T | G | Heterozygous |
| NC_037652.1 | 4317626 | SNV | 1 | A | T | Heterozygous |
| NC_037652.1 | 4317643 | SNV | 1 | C | G | Homozygous   |
| NC_037652.1 | 4317645 | SNV | 1 | C | T | Homozygous   |
| NC_037652.1 | 4317907 | SNV | 1 | T | A | Homozygous   |
| NC_037652.1 | 4317958 | SNV | 1 | G | A | Homozygous   |
| NC_037652.1 | 4318484 | SNV | 1 | C | T | Heterozygous |
| NC_037652.1 | 4318487 | SNV | 1 | G | T | Homozygous   |
| NC_037652.1 | 4318489 | SNV | 1 | C | T | Homozygous   |
| NC_037652.1 | 4318540 | SNV | 1 | A | G | Homozygous   |
| NC_037652.1 | 4325768 | SNV | 1 | C | T | Heterozygous |
| NC_037652.1 | 4327084 | SNV | 1 | T | C | Homozygous   |
| NC_037652.1 | 4327580 | SNV | 1 | C | G | Homozygous   |
| NC_037652.1 | 4327600 | SNV | 1 | A | G | Homozygous   |
| NC_037652.1 | 4327817 | SNV | 1 | A | G | Heterozygous |
| NC_037652.1 | 4327850 | SNV | 1 | G | A | Heterozygous |
| NC_037652.1 | 4328369 | SNV | 1 | G | A | Heterozygous |
| NC_037652.1 | 4328603 | SNV | 1 | C | G | Heterozygous |
| NC_037652.1 | 4328749 | SNV | 1 | C | T | Homozygous   |
| NC_037652.1 | 4332114 | SNV | 1 | A | C | Homozygous   |
| NC_037652.1 | 4332116 | SNV | 1 | T | C | Homozygous   |
| NC_037652.1 | 4332119 | SNV | 1 | G | A | Homozygous   |
| NC_037652.1 | 4332122 | SNV | 1 | A | C | Heterozygous |
| NC_037652.1 | 4332136 | SNV | 1 | G | T | Heterozygous |
| NC_037652.1 | 4332138 | SNV | 1 | A | T | Heterozygous |
| NC_037652.1 | 4332141 | SNV | 1 | A | C | Heterozygous |
| NC_037652.1 | 4332150 | SNV | 1 | T | C | Heterozygous |
| NC_037652.1 | 4332430 | SNV | 1 | A | G | Homozygous   |
| NC_037652.1 | 4332440 | SNV | 1 | C | T | Homozygous   |
| NC_037652.1 | 4333431 | SNV | 1 | G | A | Homozygous   |
| NC_037652.1 | 4337188 | SNV | 1 | G | A | Homozygous   |
| NC_037652.1 | 4337190 | SNV | 1 | T | G | Homozygous   |
| NC_037652.1 | 4337224 | SNV | 1 | C | T | Heterozygous |
| NC_037652.1 | 4337322 | SNV | 1 | C | T | Homozygous   |
| NC_037652.1 | 4337655 | SNV | 1 | T | C | Heterozygous |
| NC_037652.1 | 4337741 | SNV | 1 | T | A | Homozygous   |
| NC_037652.1 | 4337811 | SNV | 1 | A | G | Heterozygous |
| NC_037652.1 | 4337907 | SNV | 1 | C | T | Heterozygous |
| NC_037652.1 | 4337941 | SNV | 1 | A | G | Homozygous   |
| NC_037652.1 | 4338069 | SNV | 1 | T | C | Homozygous   |
| NC_037652.1 | 4339956 | SNV | 1 | G | A | Heterozygous |
| NC_037652.1 | 4340175 | SNV | 1 | T | C | Homozygous   |
| NC_037652.1 | 4340282 | SNV | 1 | C | T | Homozygous   |
| NC_037652.1 | 4340285 | SNV | 1 | C | T | Homozygous   |

|             |         |     |   |   |   |              |
|-------------|---------|-----|---|---|---|--------------|
| NC_037652.1 | 4340358 | SNV | 1 | C | A | Homozygous   |
| NC_037652.1 | 4342893 | SNV | 1 | C | T | Homozygous   |
| NC_037652.1 | 4348241 | SNV | 1 | T | A | Homozygous   |
| NC_037652.1 | 4348243 | SNV | 1 | T | A | Homozygous   |
| NC_037652.1 | 4348248 | SNV | 1 | T | A | Homozygous   |
| NC_037652.1 | 4348257 | SNV | 1 | T | G | Homozygous   |
| NC_037652.1 | 4354148 | SNV | 1 | G | A | Homozygous   |
| NC_037652.1 | 4355429 | SNV | 1 | G | A | Homozygous   |
| NC_037652.1 | 4355771 | SNV | 1 | G | A | Homozygous   |
| NC_037652.1 | 4355903 | SNV | 1 | G | A | Heterozygous |
| NC_037652.1 | 4356078 | SNV | 1 | T | A | Homozygous   |
| NC_037652.1 | 4358379 | SNV | 1 | G | A | Homozygous   |
| NC_037652.1 | 4359592 | SNV | 1 | G | A | Heterozygous |
| NC_037652.1 | 4360742 | SNV | 1 | C | T | Heterozygous |
| NC_037652.1 | 4363903 | SNV | 1 | G | C | Homozygous   |
| NC_037652.1 | 4364383 | SNV | 1 | G | A | Homozygous   |
| NC_037652.1 | 4366513 | SNV | 1 | T | C | Heterozygous |
| NC_037652.1 | 4382911 | SNV | 1 | G | A | Homozygous   |
| NC_037652.1 | 4386599 | SNV | 1 | G | A | Homozygous   |
| NC_037652.1 | 4386629 | SNV | 1 | G | A | Homozygous   |
| NC_037652.1 | 4386639 | SNV | 1 | A | G | Homozygous   |
| NC_037652.1 | 4386646 | SNV | 1 | A | C | Homozygous   |
| NC_037652.1 | 4386656 | SNV | 1 | G | A | Homozygous   |
| NC_037652.1 | 4386666 | SNV | 1 | A | G | Heterozygous |
| NC_037652.1 | 4435665 | SNV | 1 | T | C | Homozygous   |
| NC_037652.1 | 4440945 | SNV | 1 | G | T | Heterozygous |
| NC_037652.1 | 4441054 | SNV | 1 | C | T | Heterozygous |
| NC_037652.1 | 4441069 | SNV | 1 | T | C | Homozygous   |
| NC_037652.1 | 4441075 | SNV | 1 | T | C | Homozygous   |
| NC_037652.1 | 4441140 | SNV | 1 | C | T | Homozygous   |
| NC_037652.1 | 4475580 | SNV | 1 | C | T | Heterozygous |
| NC_037652.1 | 4475642 | SNV | 1 | G | A | Homozygous   |
| NC_037652.1 | 4475691 | SNV | 1 | A | G | Homozygous   |
| NC_037652.1 | 4476480 | SNV | 1 | T | C | Homozygous   |
| NC_037652.1 | 4476582 | SNV | 1 | A | G | Homozygous   |
| NC_037652.1 | 4476601 | SNV | 1 | A | G | Homozygous   |
| NC_037652.1 | 4476624 | SNV | 1 | T | A | Homozygous   |
| NC_037652.1 | 4476931 | SNV | 1 | T | C | Homozygous   |
| NC_037652.1 | 4477119 | SNV | 1 | T | C | Homozygous   |
| NC_037652.1 | 4477456 | SNV | 1 | C | G | Homozygous   |
| NC_037652.1 | 4477722 | SNV | 1 | G | A | Homozygous   |
| NC_037652.1 | 4478175 | SNV | 1 | G | C | Heterozygous |
| NC_037652.1 | 4478332 | SNV | 1 | A | T | Homozygous   |
| NC_037652.1 | 4478535 | SNV | 1 | T | C | Homozygous   |
| NC_037652.1 | 4478600 | SNV | 1 | T | C | Homozygous   |
| NC_037652.1 | 4510501 | SNV | 1 | C | T | Heterozygous |
| NC_037652.1 | 4510508 | SNV | 1 | C | T | Homozygous   |
| NC_037652.1 | 4510521 | SNV | 1 | T | C | Heterozygous |
| NC_037652.1 | 4525984 | SNV | 1 | T | C | Homozygous   |
| NC_037652.1 | 4525990 | SNV | 1 | C | T | Homozygous   |
| NC_037652.1 | 4525993 | SNV | 1 | T | C | Homozygous   |



|             |         |     |   |   |   |              |
|-------------|---------|-----|---|---|---|--------------|
| NC_037652.1 | 4525998 | SNV | 1 | T | G | Homozygous   |
| NC_037652.1 | 4526008 | SNV | 1 | T | G | Homozygous   |
| NC_037652.1 | 4526030 | SNV | 1 | C | T | Homozygous   |
| NC_037652.1 | 4528334 | SNV | 1 | A | G | Heterozygous |
| NC_037652.1 | 4528336 | SNV | 1 | A | G | Heterozygous |
| NC_037652.1 | 4528560 | SNV | 1 | C | T | Homozygous   |
| NC_037652.1 | 4560608 | SNV | 1 | C | A | Homozygous   |
| NC_037652.1 | 4565451 | SNV | 1 | T | C | Heterozygous |
| NC_037652.1 | 4565551 | SNV | 1 | A | G | Homozygous   |
| NC_037652.1 | 4565806 | SNV | 1 | C | G | Homozygous   |
| NC_037652.1 | 4576008 | SNV | 1 | A | G | Heterozygous |
| NC_037652.1 | 4604234 | SNV | 1 | C | A | Homozygous   |
| NC_037652.1 | 4604240 | SNV | 1 | T | C | Homozygous   |
| NC_037652.1 | 4604244 | SNV | 1 | T | C | Homozygous   |
| NC_037652.1 | 4613905 | SNV | 1 | A | C | Homozygous   |
| NC_037652.1 | 4613909 | SNV | 1 | A | G | Homozygous   |
| NC_037652.1 | 4613940 | SNV | 1 | G | A | Homozygous   |
| NC_037652.1 | 4613948 | SNV | 1 | C | A | Homozygous   |
| NC_037652.1 | 4673889 | SNV | 1 | T | C | Heterozygous |
| NC_037652.1 | 4769505 | SNV | 1 | G | A | Heterozygous |
| NC_037652.1 | 4769524 | SNV | 1 | A | T | Homozygous   |
| NC_037652.1 | 4770095 | SNV | 1 | C | T | Heterozygous |
| NC_037652.1 | 4770125 | SNV | 1 | T | C | Heterozygous |
| NC_037652.1 | 4770915 | SNV | 1 | G | A | Heterozygous |
| NC_037652.1 | 4770919 | SNV | 1 | A | G | Homozygous   |
| NC_037652.1 | 4771029 | SNV | 1 | A | G | Homozygous   |
| NC_037652.1 | 4771080 | SNV | 1 | A | G | Homozygous   |
| NC_037652.1 | 4771263 | SNV | 1 | A | G | Homozygous   |
| NC_037652.1 | 4771447 | SNV | 1 | T | C | Homozygous   |
| NC_037652.1 | 4771449 | SNV | 1 | A | G | Homozygous   |
| NC_037652.1 | 4771469 | SNV | 1 | T | C | Homozygous   |
| NC_037652.1 | 4771615 | SNV | 1 | A | G | Homozygous   |
| NC_037652.1 | 4772338 | SNV | 1 | T | C | Homozygous   |
| NC_037652.1 | 4775757 | SNV | 1 | T | C | Homozygous   |
| NC_037652.1 | 4775760 | SNV | 1 | C | G | Homozygous   |
| NC_037652.1 | 4775782 | SNV | 1 | G | A | Heterozygous |
| NC_037652.1 | 4775805 | SNV | 1 | A | G | Homozygous   |
| NC_037652.1 | 4775840 | SNV | 1 | C | G | Heterozygous |
| NC_037652.1 | 4775841 | SNV | 1 | G | T | Heterozygous |
| NC_037652.1 | 4775901 | SNV | 1 | C | T | Heterozygous |
| NC_037652.1 | 4809492 | SNV | 1 | A | G | Homozygous   |
| NC_037652.1 | 4809839 | SNV | 1 | G | A | Homozygous   |
| NC_037652.1 | 4809885 | SNV | 1 | G | A | Homozygous   |
| NC_037652.1 | 4809919 | SNV | 1 | T | C | Homozygous   |
| NC_037652.1 | 4809982 | SNV | 1 | T | C | Homozygous   |
| NC_037652.1 | 4810030 | SNV | 1 | C | G | Heterozygous |
| NC_037652.1 | 4810363 | SNV | 1 | G | A | Homozygous   |
| NC_037652.1 | 4820172 | SNV | 1 | T | C | Homozygous   |
| NC_037652.1 | 4820759 | SNV | 1 | G | A | Homozygous   |
| NC_037652.1 | 4820762 | SNV | 1 | T | C | Homozygous   |
| NC_037652.1 | 4820803 | SNV | 1 | A | G | Heterozygous |

|             |         |     |   |   |   |              |
|-------------|---------|-----|---|---|---|--------------|
| NC_037652.1 | 4820806 | SNV | 1 | A | G | Heterozygous |
| NC_037652.1 | 4832117 | SNV | 1 | G | A | Homozygous   |
| NC_037652.1 | 4843043 | SNV | 1 | T | C | Homozygous   |
| NC_037652.1 | 4843061 | SNV | 1 | C | T | Heterozygous |
| NC_037652.1 | 4843488 | SNV | 1 | C | T | Homozygous   |
| NC_037652.1 | 4843514 | SNV | 1 | C | T | Homozygous   |
| NC_037652.1 | 4843574 | SNV | 1 | T | C | Homozygous   |
| NC_037652.1 | 4843607 | SNV | 1 | A | G | Heterozygous |
| NC_037652.1 | 4843619 | SNV | 1 | A | G | Heterozygous |
| NC_037652.1 | 4843624 | SNV | 1 | C | T | Heterozygous |
| NC_037652.1 | 4843719 | SNV | 1 | G | A | Homozygous   |
| NC_037652.1 | 4843732 | SNV | 1 | G | A | Homozygous   |
| NC_037652.1 | 4843848 | SNV | 1 | C | T | Heterozygous |
| NC_037652.1 | 4843884 | SNV | 1 | A | G | Heterozygous |
| NC_037652.1 | 4843891 | SNV | 1 | A | G | Homozygous   |
| NC_037652.1 | 4844294 | SNV | 1 | G | C | Homozygous   |
| NC_037652.1 | 4844315 | SNV | 1 | A | G | Homozygous   |
| NC_037652.1 | 4844492 | SNV | 1 | G | A | Heterozygous |
| NC_037652.1 | 4844563 | SNV | 1 | G | A | Heterozygous |
| NC_037652.1 | 4844727 | SNV | 1 | T | C | Homozygous   |
| NC_037652.1 | 4844749 | SNV | 1 | A | G | Homozygous   |
| NC_037652.1 | 4845010 | SNV | 1 | A | G | Homozygous   |
| NC_037652.1 | 4845162 | SNV | 1 | A | G | Homozygous   |
| NC_037652.1 | 4845219 | SNV | 1 | A | G | Heterozygous |
| NC_037652.1 | 4845232 | SNV | 1 | G | A | Heterozygous |
| NC_037652.1 | 4845583 | SNV | 1 | C | T | Heterozygous |
| NC_037652.1 | 4845611 | SNV | 1 | G | A | Heterozygous |
| NC_037652.1 | 4845804 | SNV | 1 | G | A | Heterozygous |
| NC_037652.1 | 4845811 | SNV | 1 | C | T | Homozygous   |
| NC_037652.1 | 4847819 | SNV | 1 | T | C | Homozygous   |
| NC_037652.1 | 4847825 | SNV | 1 | A | G | Homozygous   |
| NC_037652.1 | 4847829 | SNV | 1 | A | T | Heterozygous |
| NC_037652.1 | 4865868 | SNV | 1 | G | A | Homozygous   |
| NC_037652.1 | 4871181 | SNV | 1 | G | A | Homozygous   |
| NC_037652.1 | 4871241 | SNV | 1 | T | A | Homozygous   |
| NC_037652.1 | 4871249 | SNV | 1 | A | T | Homozygous   |
| NC_037652.1 | 4871275 | SNV | 1 | C | T | Homozygous   |
| NC_037652.1 | 4875470 | SNV | 1 | G | C | Homozygous   |
| NC_037652.1 | 4876596 | SNV | 1 | C | T | Heterozygous |
| NC_037652.1 | 4876618 | SNV | 1 | G | A | Heterozygous |
| NC_037652.1 | 4876628 | SNV | 1 | C | T | Heterozygous |
| NC_037652.1 | 4876694 | SNV | 1 | G | A | Homozygous   |
| NC_037652.1 | 4876717 | SNV | 1 | G | A | Heterozygous |
| NC_037652.1 | 4876872 | SNV | 1 | G | A | Heterozygous |
| NC_037652.1 | 4876926 | SNV | 1 | G | A | Heterozygous |
| NC_037652.1 | 4877583 | SNV | 1 | T | C | Homozygous   |
| NC_037652.1 | 4877826 | SNV | 1 | T | G | Heterozygous |
| NC_037652.1 | 4879002 | SNV | 1 | G | A | Homozygous   |
| NC_037652.1 | 4879076 | SNV | 1 | C | T | Heterozygous |
| NC_037652.1 | 4880296 | SNV | 1 | T | A | Homozygous   |
| NC_037652.1 | 4880299 | SNV | 1 | C | T | Homozygous   |

|             |         |     |   |   |   |              |
|-------------|---------|-----|---|---|---|--------------|
| NC_037652.1 | 4880657 | SNV | 1 | T | C | Heterozygous |
| NC_037652.1 | 4880712 | SNV | 1 | G | A | Heterozygous |
| NC_037652.1 | 4880959 | SNV | 1 | A | T | Homozygous   |
| NC_037652.1 | 4880974 | SNV | 1 | A | T | Homozygous   |
| NC_037652.1 | 4881141 | SNV | 1 | G | A | Heterozygous |
| NC_037652.1 | 4881598 | SNV | 1 | G | A | Homozygous   |
| NC_037652.1 | 4935628 | SNV | 1 | A | G | Heterozygous |
| NC_037652.1 | 4935945 | SNV | 1 | A | G | Homozygous   |
| NC_037652.1 | 4935949 | SNV | 1 | G | A | Heterozygous |
| NC_037652.1 | 4936017 | SNV | 1 | A | G | Homozygous   |
| NC_037652.1 | 4936087 | SNV | 1 | C | T | Heterozygous |
| NC_037652.1 | 4936317 | SNV | 1 | C | T | Heterozygous |
| NC_037652.1 | 4938742 | SNV | 1 | A | G | Heterozygous |
| NC_037652.1 | 4941454 | SNV | 1 | T | C | Homozygous   |
| NC_037652.1 | 4941461 | SNV | 1 | G | C | Homozygous   |
| NC_037652.1 | 4941624 | SNV | 1 | G | A | Heterozygous |
| NC_037652.1 | 4941869 | SNV | 1 | C | T | Heterozygous |
| NC_037652.1 | 4942316 | SNV | 1 | C | T | Heterozygous |
| NC_037652.1 | 4942771 | SNV | 1 | T | C | Homozygous   |
| NC_037652.1 | 4943564 | SNV | 1 | A | G | Homozygous   |
| NC_037652.1 | 4943568 | SNV | 1 | G | T | Homozygous   |
| NC_037652.1 | 4943570 | SNV | 1 | G | A | Homozygous   |
| NC_037652.1 | 4944673 | SNV | 1 | G | A | Heterozygous |
| NC_037652.1 | 4944965 | SNV | 1 | T | C | Homozygous   |
| NC_037652.1 | 4944988 | SNV | 1 | G | A | Heterozygous |
| NC_037652.1 | 4945003 | SNV | 1 | G | A | Homozygous   |
| NC_037652.1 | 4946152 | SNV | 1 | G | C | Homozygous   |
| NC_037652.1 | 4946171 | SNV | 1 | T | C | Heterozygous |
| NC_037652.1 | 4946177 | SNV | 1 | C | A | Heterozygous |
| NC_037652.1 | 4951437 | SNV | 1 | A | T | Homozygous   |
| NC_037652.1 | 4951495 | SNV | 1 | T | G | Homozygous   |
| NC_037652.1 | 4951516 | SNV | 1 | G | A | Heterozygous |
| NC_037652.1 | 4951650 | SNV | 1 | G | A | Homozygous   |
| NC_037652.1 | 4951677 | SNV | 1 | A | T | Homozygous   |
| NC_037652.1 | 4951689 | SNV | 1 | A | T | Heterozygous |
| NC_037652.1 | 4951710 | SNV | 1 | T | A | Homozygous   |
| NC_037652.1 | 4951737 | SNV | 1 | G | A | Homozygous   |
| NC_037652.1 | 4983285 | SNV | 1 | G | A | Heterozygous |
| NC_037652.1 | 4983319 | SNV | 1 | C | T | Homozygous   |
| NC_037652.1 | 4983373 | SNV | 1 | G | A | Homozygous   |
| NC_037652.1 | 4983418 | SNV | 1 | C | T | Heterozygous |
| NC_037652.1 | 4983425 | SNV | 1 | G | A | Heterozygous |
| NC_037652.1 | 4983441 | SNV | 1 | T | G | Heterozygous |
| NC_037652.1 | 4983605 | SNV | 1 | C | G | Homozygous   |
| NC_037652.1 | 4983772 | SNV | 1 | G | A | Homozygous   |
| NC_037652.1 | 4983803 | SNV | 1 | G | A | Homozygous   |
| NC_037652.1 | 4983850 | SNV | 1 | C | T | Heterozygous |
| NC_037652.1 | 5001973 | SNV | 1 | G | A | Homozygous   |
| NC_037652.1 | 5001975 | SNV | 1 | C | T | Heterozygous |
| NC_037652.1 | 5001977 | SNV | 1 | C | T | Heterozygous |
| NC_037652.1 | 5002294 | SNV | 1 | A | G | Homozygous   |

|             |         |     |   |   |   |              |
|-------------|---------|-----|---|---|---|--------------|
| NC_037652.1 | 5002391 | SNV | 1 | C | T | Heterozygous |
| NC_037652.1 | 5002405 | SNV | 1 | G | A | Homozygous   |
| NC_037652.1 | 5002821 | SNV | 1 | A | G | Homozygous   |
| NC_037652.1 | 5002833 | SNV | 1 | A | G | Homozygous   |
| NC_037652.1 | 5002888 | SNV | 1 | T | C | Homozygous   |
| NC_037652.1 | 5003115 | SNV | 1 | G | A | Heterozygous |
| NC_037652.1 | 5003375 | SNV | 1 | A | G | Homozygous   |
| NC_037652.1 | 5003581 | SNV | 1 | C | T | Heterozygous |
| NC_037652.1 | 5003691 | SNV | 1 | A | T | Homozygous   |
| NC_037652.1 | 5003941 | SNV | 1 | C | T | Homozygous   |
| NC_037652.1 | 5005518 | SNV | 1 | T | C | Heterozygous |
| NC_037652.1 | 5005558 | SNV | 1 | G | A | Homozygous   |
| NC_037652.1 | 5005915 | SNV | 1 | A | T | Homozygous   |
| NC_037652.1 | 5006670 | SNV | 1 | C | T | Heterozygous |
| NC_037652.1 | 5006848 | SNV | 1 | T | A | Homozygous   |
| NC_037652.1 | 5006982 | SNV | 1 | T | C | Homozygous   |
| NC_037652.1 | 5007191 | SNV | 1 | A | G | Homozygous   |
| NC_037652.1 | 5007851 | SNV | 1 | T | C | Homozygous   |
| NC_037652.1 | 5007893 | SNV | 1 | T | C | Homozygous   |
| NC_037652.1 | 5007941 | SNV | 1 | C | T | Heterozygous |
| NC_037652.1 | 5008247 | SNV | 1 | G | A | Homozygous   |
| NC_037652.1 | 5008390 | SNV | 1 | A | G | Homozygous   |
| NC_037652.1 | 5008501 | SNV | 1 | A | G | Heterozygous |
| NC_037652.1 | 5008505 | SNV | 1 | T | C | Heterozygous |
| NC_037652.1 | 5008587 | SNV | 1 | A | G | Heterozygous |
| NC_037652.1 | 5008595 | SNV | 1 | T | C | Homozygous   |
| NC_037652.1 | 5012055 | SNV | 1 | T | C | Homozygous   |
| NC_037652.1 | 5012088 | SNV | 1 | G | A | Homozygous   |
| NC_037652.1 | 5018431 | SNV | 1 | A | G | Heterozygous |
| NC_037652.1 | 5018526 | SNV | 1 | A | G | Homozygous   |
| NC_037652.1 | 5018844 | SNV | 1 | G | A | Homozygous   |
| NC_037652.1 | 5019314 | SNV | 1 | T | C | Homozygous   |
| NC_037652.1 | 5022230 | SNV | 1 | A | G | Homozygous   |
| NC_037652.1 | 5022234 | SNV | 1 | A | G | Heterozygous |
| NC_037652.1 | 5022255 | SNV | 1 | T | C | Homozygous   |
| NC_037652.1 | 5022266 | SNV | 1 | C | T | Heterozygous |
| NC_037652.1 | 5022345 | SNV | 1 | A | G | Homozygous   |
| NC_037652.1 | 5022884 | SNV | 1 | A | G | Homozygous   |
| NC_037652.1 | 5022888 | SNV | 1 | G | C | Heterozygous |
| NC_037652.1 | 5023245 | SNV | 1 | A | G | Heterozygous |
| NC_037652.1 | 5023578 | SNV | 1 | T | C | Homozygous   |
| NC_037652.1 | 5023699 | SNV | 1 | T | A | Homozygous   |
| NC_037652.1 | 5049531 | SNV | 1 | G | A | Heterozygous |
| NC_037652.1 | 5049541 | SNV | 1 | A | G | Heterozygous |
| NC_037652.1 | 5049553 | SNV | 1 | G | A | Heterozygous |
| NC_037652.1 | 5049556 | SNV | 1 | A | G | Heterozygous |
| NC_037652.1 | 5057642 | SNV | 1 | T | C | Heterozygous |
| NC_037652.1 | 5057681 | SNV | 1 | T | C | Homozygous   |
| NC_037652.1 | 5065865 | SNV | 1 | A | G | Heterozygous |
| NC_037652.1 | 5065883 | SNV | 1 | A | G | Heterozygous |
| NC_037652.1 | 5065904 | SNV | 1 | C | G | Homozygous   |

|             |         |     |   |   |   |              |
|-------------|---------|-----|---|---|---|--------------|
| NC_037652.1 | 5065908 | SNV | 1 | A | G | Heterozygous |
| NC_037652.1 | 5065921 | SNV | 1 | A | G | Heterozygous |
| NC_037652.1 | 5066540 | SNV | 1 | A | G | Homozygous   |
| NC_037652.1 | 5066575 | SNV | 1 | T | C | Heterozygous |
| NC_037652.1 | 5076561 | SNV | 1 | G | A | Heterozygous |
| NC_037652.1 | 5076575 | SNV | 1 | G | C | Heterozygous |
| NC_037652.1 | 5076581 | SNV | 1 | C | T | Heterozygous |
| NC_037652.1 | 5076589 | SNV | 1 | A | G | Heterozygous |
| NC_037652.1 | 5076591 | SNV | 1 | T | C | Heterozygous |
| NC_037652.1 | 5076595 | SNV | 1 | A | G | Heterozygous |
| NC_037652.1 | 5076598 | SNV | 1 | A | G | Heterozygous |
| NC_037652.1 | 5076624 | SNV | 1 | G | C | Homozygous   |
| NC_037652.1 | 5076703 | SNV | 1 | C | T | Homozygous   |
| NC_037652.1 | 5077853 | SNV | 1 | C | T | Heterozygous |
| NC_037652.1 | 5078365 | SNV | 1 | T | G | Homozygous   |
| NC_037652.1 | 5078516 | SNV | 1 | G | A | Homozygous   |
| NC_037652.1 | 5078786 | SNV | 1 | G | T | Heterozygous |
| NC_037652.1 | 5079094 | SNV | 1 | T | C | Homozygous   |
| NC_037652.1 | 5079153 | SNV | 1 | T | C | Heterozygous |
| NC_037652.1 | 5079168 | SNV | 1 | T | G | Heterozygous |
| NC_037652.1 | 5079196 | SNV | 1 | A | G | Heterozygous |
| NC_037652.1 | 5079345 | SNV | 1 | C | T | Homozygous   |
| NC_037652.1 | 5079437 | SNV | 1 | G | A | Heterozygous |
| NC_037652.1 | 5079626 | SNV | 1 | T | C | Homozygous   |
| NC_037652.1 | 5083748 | SNV | 1 | T | C | Homozygous   |
| NC_037652.1 | 5083758 | SNV | 1 | C | T | Homozygous   |
| NC_037652.1 | 5083760 | SNV | 1 | C | T | Homozygous   |
| NC_037652.1 | 5097940 | SNV | 1 | A | C | Heterozygous |
| NC_037652.1 | 5098041 | SNV | 1 | A | G | Homozygous   |
| NC_037652.1 | 5099631 | SNV | 1 | T | C | Homozygous   |
| NC_037652.1 | 5100475 | SNV | 1 | G | A | Homozygous   |
| NC_037652.1 | 5100580 | SNV | 1 | T | C | Homozygous   |
| NC_037652.1 | 5100853 | SNV | 1 | T | C | Heterozygous |
| NC_037652.1 | 5103601 | SNV | 1 | G | C | Heterozygous |
| NC_037652.1 | 5103695 | SNV | 1 | A | G | Homozygous   |
| NC_037652.1 | 5104246 | SNV | 1 | G | A | Homozygous   |
| NC_037652.1 | 5104255 | SNV | 1 | T | C | Homozygous   |
| NC_037652.1 | 5104258 | SNV | 1 | T | C | Homozygous   |
| NC_037652.1 | 5104261 | SNV | 1 | A | G | Homozygous   |
| NC_037652.1 | 5104441 | SNV | 1 | A | C | Homozygous   |
| NC_037652.1 | 5104452 | SNV | 1 | A | G | Homozygous   |
| NC_037652.1 | 5104525 | SNV | 1 | G | A | Homozygous   |
| NC_037652.1 | 5104762 | SNV | 1 | A | G | Homozygous   |
| NC_037652.1 | 5104935 | SNV | 1 | T | C | Homozygous   |
| NC_037652.1 | 5105012 | SNV | 1 | T | G | Homozygous   |
| NC_037652.1 | 5105027 | SNV | 1 | G | A | Heterozygous |
| NC_037652.1 | 5105037 | SNV | 1 | C | T | Homozygous   |
| NC_037652.1 | 5105217 | SNV | 1 | A | T | Heterozygous |
| NC_037652.1 | 5105328 | SNV | 1 | G | A | Homozygous   |
| NC_037652.1 | 5109036 | SNV | 1 | C | A | Heterozygous |
| NC_037652.1 | 5130939 | SNV | 1 | T | C | Homozygous   |

|             |         |     |   |   |   |              |
|-------------|---------|-----|---|---|---|--------------|
| NC_037652.1 | 5141520 | SNV | 1 | A | G | Homozygous   |
| NC_037652.1 | 5143656 | SNV | 1 | C | G | Heterozygous |
| NC_037652.1 | 5143684 | SNV | 1 | T | C | Heterozygous |
| NC_037652.1 | 5143951 | SNV | 1 | T | C | Homozygous   |
| NC_037652.1 | 5144315 | SNV | 1 | T | C | Homozygous   |
| NC_037652.1 | 5144318 | SNV | 1 | C | T | Heterozygous |
| NC_037652.1 | 5144343 | SNV | 1 | C | T | Homozygous   |
| NC_037652.1 | 5144352 | SNV | 1 | G | C | Homozygous   |
| NC_037652.1 | 5144412 | SNV | 1 | C | T | Homozygous   |
| NC_037652.1 | 5144416 | SNV | 1 | A | C | Heterozygous |
| NC_037652.1 | 5144599 | SNV | 1 | C | T | Homozygous   |
| NC_037652.1 | 5148084 | SNV | 1 | C | G | Homozygous   |
| NC_037652.1 | 5148355 | SNV | 1 | C | T | Heterozygous |
| NC_037652.1 | 5148938 | SNV | 1 | T | C | Homozygous   |
| NC_037652.1 | 5148947 | SNV | 1 | A | G | Heterozygous |
| NC_037652.1 | 5149528 | SNV | 1 | A | G | Heterozygous |
| NC_037652.1 | 5149660 | SNV | 1 | T | C | Homozygous   |
| NC_037652.1 | 5151956 | SNV | 1 | T | C | Homozygous   |
| NC_037652.1 | 5152213 | SNV | 1 | T | C | Heterozygous |
| NC_037652.1 | 5152456 | SNV | 1 | C | T | Heterozygous |
| NC_037652.1 | 5152682 | SNV | 1 | A | G | Homozygous   |
| NC_037652.1 | 5152930 | SNV | 1 | G | A | Homozygous   |
| NC_037652.1 | 5153000 | SNV | 1 | G | C | Heterozygous |
| NC_037652.1 | 5153156 | SNV | 1 | A | G | Homozygous   |
| NC_037652.1 | 5153283 | SNV | 1 | G | A | Heterozygous |
| NC_037652.1 | 5153430 | SNV | 1 | T | C | Homozygous   |
| NC_037652.1 | 5153623 | SNV | 1 | C | A | Heterozygous |
| NC_037652.1 | 5153702 | SNV | 1 | T | C | Homozygous   |
| NC_037652.1 | 5155156 | SNV | 1 | G | A | Heterozygous |
| NC_037652.1 | 5155493 | SNV | 1 | G | A | Heterozygous |
| NC_037652.1 | 5155652 | SNV | 1 | G | T | Homozygous   |
| NC_037652.1 | 5162178 | SNV | 1 | C | T | Homozygous   |
| NC_037652.1 | 5163351 | SNV | 1 | A | G | Homozygous   |
| NC_037652.1 | 5165857 | SNV | 1 | T | C | Homozygous   |
| NC_037652.1 | 5165972 | SNV | 1 | G | T | Homozygous   |
| NC_037652.1 | 5167928 | SNV | 1 | T | A | Homozygous   |
| NC_037652.1 | 5168674 | SNV | 1 | G | A | Heterozygous |
| NC_037652.1 | 5168819 | SNV | 1 | G | T | Homozygous   |
| NC_037652.1 | 5176482 | SNV | 1 | A | G | Heterozygous |
| NC_037652.1 | 5176876 | SNV | 1 | G | A | Homozygous   |
| NC_037652.1 | 5177096 | SNV | 1 | T | G | Homozygous   |
| NC_037652.1 | 5178248 | SNV | 1 | A | G | Heterozygous |
| NC_037652.1 | 5179083 | SNV | 1 | T | A | Homozygous   |
| NC_037652.1 | 5179961 | SNV | 1 | A | T | Homozygous   |
| NC_037652.1 | 5180317 | SNV | 1 | C | A | Homozygous   |
| NC_037652.1 | 5182881 | SNV | 1 | T | C | Homozygous   |
| NC_037652.1 | 5182893 | SNV | 1 | T | A | Homozygous   |
| NC_037652.1 | 5185374 | SNV | 1 | G | T | Homozygous   |
| NC_037652.1 | 5185801 | SNV | 1 | T | A | Homozygous   |
| NC_037652.1 | 5185979 | SNV | 1 | A | C | Homozygous   |
| NC_037652.1 | 5185982 | SNV | 1 | C | T | Homozygous   |

|             |         |     |   |   |   |              |
|-------------|---------|-----|---|---|---|--------------|
| NC_037652.1 | 5190204 | SNV | 1 | T | A | Homozygous   |
| NC_037652.1 | 5190215 | SNV | 1 | A | C | Homozygous   |
| NC_037652.1 | 5190219 | SNV | 1 | A | T | Heterozygous |
| NC_037652.1 | 5190220 | SNV | 1 | G | T | Heterozygous |
| NC_037652.1 | 5203850 | SNV | 1 | T | C | Homozygous   |
| NC_037652.1 | 5211717 | SNV | 1 | T | A | Heterozygous |
| NC_037652.1 | 5211720 | SNV | 1 | G | C | Heterozygous |
| NC_037652.1 | 5212241 | SNV | 1 | C | T | Heterozygous |
| NC_037652.1 | 5212362 | SNV | 1 | T | C | Homozygous   |
| NC_037652.1 | 5215804 | SNV | 1 | T | C | Heterozygous |
| NC_037652.1 | 5218647 | SNV | 1 | G | T | Homozygous   |
| NC_037652.1 | 5218650 | SNV | 1 | T | A | Homozygous   |
| NC_037652.1 | 5219695 | SNV | 1 | A | G | Homozygous   |
| NC_037652.1 | 5221523 | SNV | 1 | A | C | Heterozygous |
| NC_037652.1 | 5221527 | SNV | 1 | T | C | Heterozygous |
| NC_037652.1 | 5221529 | SNV | 1 | A | C | Heterozygous |
| NC_037652.1 | 5221535 | SNV | 1 | T | A | Heterozygous |
| NC_037652.1 | 5221538 | SNV | 1 | A | T | Heterozygous |
| NC_037652.1 | 5221544 | SNV | 1 | C | A | Heterozygous |
| NC_037652.1 | 5221568 | SNV | 1 | T | C | Heterozygous |
| NC_037652.1 | 5221574 | SNV | 1 | A | G | Heterozygous |
| NC_037652.1 | 5221577 | SNV | 1 | A | G | Heterozygous |
| NC_037652.1 | 5221580 | SNV | 1 | G | A | Heterozygous |
| NC_037652.1 | 5221589 | SNV | 1 | A | G | Homozygous   |
| NC_037652.1 | 5221598 | SNV | 1 | A | G | Homozygous   |
| NC_037652.1 | 5222018 | SNV | 1 | C | A | Homozygous   |
| NC_037652.1 | 5224128 | SNV | 1 | A | G | Homozygous   |
| NC_037652.1 | 5225965 | SNV | 1 | A | T | Homozygous   |
| NC_037652.1 | 5226939 | SNV | 1 | T | C | Homozygous   |
| NC_037652.1 | 5232453 | SNV | 1 | C | T | Heterozygous |
| NC_037652.1 | 5232653 | SNV | 1 | A | G | Homozygous   |
| NC_037652.1 | 5232655 | SNV | 1 | G | C | Homozygous   |
| NC_037652.1 | 5232659 | SNV | 1 | A | T | Homozygous   |
| NC_037652.1 | 5232665 | SNV | 1 | T | A | Homozygous   |
| NC_037652.1 | 5232670 | SNV | 1 | A | T | Heterozygous |
| NC_037652.1 | 5232676 | SNV | 1 | T | G | Homozygous   |
| NC_037652.1 | 5232678 | SNV | 1 | T | A | Homozygous   |
| NC_037652.1 | 5232681 | SNV | 1 | A | C | Homozygous   |
| NC_037652.1 | 5233342 | SNV | 1 | A | G | Homozygous   |
| NC_037652.1 | 5233471 | SNV | 1 | C | T | Homozygous   |
| NC_037652.1 | 5233475 | SNV | 1 | A | G | Homozygous   |
| NC_037652.1 | 5233477 | SNV | 1 | T | C | Homozygous   |
| NC_037652.1 | 5233486 | SNV | 1 | A | T | Homozygous   |
| NC_037652.1 | 5233489 | SNV | 1 | A | T | Homozygous   |
| NC_037652.1 | 5233492 | SNV | 1 | T | C | Homozygous   |
| NC_037652.1 | 5233504 | SNV | 1 | G | T | Homozygous   |
| NC_037652.1 | 5233510 | SNV | 1 | G | T | Homozygous   |
| NC_037652.1 | 5233528 | SNV | 1 | G | T | Homozygous   |
| NC_037652.1 | 5233531 | SNV | 1 | A | T | Heterozygous |
| NC_037652.1 | 5233537 | SNV | 1 | A | T | Heterozygous |
| NC_037652.1 | 5233540 | SNV | 1 | A | T | Heterozygous |

|             |         |     |   |   |   |              |
|-------------|---------|-----|---|---|---|--------------|
| NC_037652.1 | 5233549 | SNV | 1 | C | T | Heterozygous |
| NC_037652.1 | 5233561 | SNV | 1 | A | T | Heterozygous |
| NC_037652.1 | 5233564 | SNV | 1 | T | C | Heterozygous |
| NC_037652.1 | 5233573 | SNV | 1 | A | T | Heterozygous |
| NC_037652.1 | 5233576 | SNV | 1 | C | T | Heterozygous |
| NC_037652.1 | 5233579 | SNV | 1 | G | A | Heterozygous |
| NC_037652.1 | 5233582 | SNV | 1 | G | T | Heterozygous |
| NC_037652.1 | 5233585 | SNV | 1 | G | C | Heterozygous |
| NC_037652.1 | 5233720 | SNV | 1 | T | C | Heterozygous |
| NC_037652.1 | 5233750 | SNV | 1 | T | C | Heterozygous |
| NC_037652.1 | 5233972 | SNV | 1 | A | C | Heterozygous |
| NC_037652.1 | 5233990 | SNV | 1 | A | G | Heterozygous |
| NC_037652.1 | 5233993 | SNV | 1 | G | T | Heterozygous |
| NC_037652.1 | 5233999 | SNV | 1 | A | G | Heterozygous |
| NC_037652.1 | 5234011 | SNV | 1 | A | G | Homozygous   |
| NC_037652.1 | 5234017 | SNV | 1 | C | T | Heterozygous |
| NC_037652.1 | 5234039 | SNV | 1 | C | G | Heterozygous |
| NC_037652.1 | 5234045 | SNV | 1 | A | G | Heterozygous |
| NC_037652.1 | 5234047 | SNV | 1 | C | T | Heterozygous |
| NC_037652.1 | 5234051 | SNV | 1 | T | C | Heterozygous |
| NC_037652.1 | 5234053 | SNV | 1 | A | T | Homozygous   |
| NC_037652.1 | 5234056 | SNV | 1 | C | T | Homozygous   |
| NC_037652.1 | 5234074 | SNV | 1 | A | T | Homozygous   |
| NC_037652.1 | 5234077 | SNV | 1 | A | C | Homozygous   |
| NC_037652.1 | 5234081 | SNV | 1 | A | G | Homozygous   |
| NC_037652.1 | 5234087 | SNV | 1 | A | C | Homozygous   |
| NC_037652.1 | 5234090 | SNV | 1 | T | C | Homozygous   |
| NC_037652.1 | 5234092 | SNV | 1 | A | G | Homozygous   |
| NC_037652.1 | 5234104 | SNV | 1 | T | C | Homozygous   |
| NC_037652.1 | 5234107 | SNV | 1 | C | T | Homozygous   |
| NC_037652.1 | 5234116 | SNV | 1 | A | G | Heterozygous |
| NC_037652.1 | 5234129 | SNV | 1 | T | G | Homozygous   |
| NC_037652.1 | 5234155 | SNV | 1 | T | A | Homozygous   |
| NC_037652.1 | 5234161 | SNV | 1 | C | T | Homozygous   |
| NC_037652.1 | 5234164 | SNV | 1 | A | T | Homozygous   |
| NC_037652.1 | 5234170 | SNV | 1 | A | T | Homozygous   |
| NC_037652.1 | 5234176 | SNV | 1 | C | T | Homozygous   |
| NC_037652.1 | 5234179 | SNV | 1 | T | A | Homozygous   |
| NC_037652.1 | 5234242 | SNV | 1 | G | A | Homozygous   |
| NC_037652.1 | 5234252 | SNV | 1 | A | C | Heterozygous |
| NC_037652.1 | 5234254 | SNV | 1 | A | G | Heterozygous |
| NC_037652.1 | 5234631 | SNV | 1 | T | C | Heterozygous |
| NC_037652.1 | 5234658 | SNV | 1 | A | C | Heterozygous |
| NC_037652.1 | 5234667 | SNV | 1 | A | G | Heterozygous |
| NC_037652.1 | 5234682 | SNV | 1 | A | G | Heterozygous |
| NC_037652.1 | 5234691 | SNV | 1 | C | T | Heterozygous |
| NC_037652.1 | 5235336 | SNV | 1 | A | T | Homozygous   |
| NC_037652.1 | 5235345 | SNV | 1 | C | T | Homozygous   |
| NC_037652.1 | 5235353 | SNV | 1 | A | G | Homozygous   |
| NC_037652.1 | 5235432 | SNV | 1 | A | G | Homozygous   |
| NC_037652.1 | 5235451 | SNV | 1 | C | A | Heterozygous |



|             |         |     |   |   |   |              |
|-------------|---------|-----|---|---|---|--------------|
| NC_037652.1 | 5235502 | SNV | 1 | G | T | Heterozygous |
| NC_037652.1 | 5235538 | SNV | 1 | T | C | Heterozygous |
| NC_037652.1 | 5235752 | SNV | 1 | T | G | Homozygous   |
| NC_037652.1 | 5235758 | SNV | 1 | G | A | Homozygous   |
| NC_037652.1 | 5235914 | SNV | 1 | C | T | Heterozygous |
| NC_037652.1 | 5236006 | SNV | 1 | C | G | Homozygous   |
| NC_037652.1 | 5236152 | SNV | 1 | C | G | Heterozygous |
| NC_037652.1 | 5236259 | SNV | 1 | T | C | Homozygous   |
| NC_037652.1 | 5236323 | SNV | 1 | T | C | Homozygous   |
| NC_037652.1 | 5236360 | SNV | 1 | G | T | Homozygous   |
| NC_037652.1 | 5236440 | SNV | 1 | G | A | Heterozygous |
| NC_037652.1 | 5236446 | SNV | 1 | G | A | Homozygous   |
| NC_037652.1 | 5236458 | SNV | 1 | A | G | Homozygous   |
| NC_037652.1 | 5236518 | SNV | 1 | G | A | Heterozygous |
| NC_037652.1 | 5236520 | SNV | 1 | T | C | Homozygous   |
| NC_037652.1 | 5236534 | SNV | 1 | T | C | Homozygous   |
| NC_037652.1 | 5236600 | SNV | 1 | A | T | Homozygous   |
| NC_037652.1 | 5236634 | SNV | 1 | A | G | Heterozygous |
| NC_037652.1 | 5236674 | SNV | 1 | C | G | Homozygous   |
| NC_037652.1 | 5236693 | SNV | 1 | T | C | Heterozygous |
| NC_037652.1 | 5236709 | SNV | 1 | G | T | Heterozygous |
| NC_037652.1 | 5236713 | SNV | 1 | A | G | Homozygous   |
| NC_037652.1 | 5236743 | SNV | 1 | C | T | Heterozygous |
| NC_037652.1 | 5236774 | SNV | 1 | A | G | Homozygous   |
| NC_037652.1 | 5236863 | SNV | 1 | T | C | Homozygous   |
| NC_037652.1 | 5236888 | SNV | 1 | T | C | Homozygous   |
| NC_037652.1 | 5236896 | SNV | 1 | C | T | Heterozygous |
| NC_037652.1 | 5236956 | SNV | 1 | A | G | Homozygous   |
| NC_037652.1 | 5236962 | SNV | 1 | T | G | Homozygous   |
| NC_037652.1 | 5237006 | SNV | 1 | C | G | Heterozygous |
| NC_037652.1 | 5237059 | SNV | 1 | A | G | Heterozygous |
| NC_037652.1 | 5238160 | SNV | 1 | T | C | Homozygous   |
| NC_037652.1 | 5238409 | SNV | 1 | T | C | Heterozygous |
| NC_037652.1 | 5238493 | SNV | 1 | A | G | Homozygous   |
| NC_037652.1 | 5239080 | SNV | 1 | A | G | Homozygous   |
| NC_037652.1 | 5239268 | SNV | 1 | T | C | Homozygous   |
| NC_037652.1 | 5239272 | SNV | 1 | C | T | Heterozygous |
| NC_037652.1 | 5239431 | SNV | 1 | T | C | Homozygous   |
| NC_037652.1 | 5239548 | SNV | 1 | A | G | Homozygous   |
| NC_037652.1 | 5239592 | SNV | 1 | T | C | Heterozygous |
| NC_037652.1 | 5239595 | SNV | 1 | A | G | Homozygous   |
| NC_037652.1 | 5239650 | SNV | 1 | A | T | Homozygous   |
| NC_037652.1 | 5239661 | SNV | 1 | T | C | Homozygous   |
| NC_037652.1 | 5239803 | SNV | 1 | A | G | Heterozygous |
| NC_037652.1 | 5240343 | SNV | 1 | C | T | Homozygous   |
| NC_037652.1 | 5240386 | SNV | 1 | C | T | Homozygous   |
| NC_037652.1 | 5240875 | SNV | 1 | C | T | Heterozygous |
| NC_037652.1 | 5241606 | SNV | 1 | C | T | Heterozygous |
| NC_037652.1 | 5241975 | SNV | 1 | G | A | Heterozygous |
| NC_037652.1 | 5242016 | SNV | 1 | G | T | Heterozygous |
| NC_037652.1 | 5242028 | SNV | 1 | A | G | Homozygous   |

|             |         |     |   |   |   |              |
|-------------|---------|-----|---|---|---|--------------|
| NC_037652.1 | 5242114 | SNV | 1 | T | A | Heterozygous |
| NC_037652.1 | 5242117 | SNV | 1 | T | G | Heterozygous |
| NC_037652.1 | 5242430 | SNV | 1 | T | C | Heterozygous |
| NC_037652.1 | 5243144 | SNV | 1 | A | G | Homozygous   |
| NC_037652.1 | 5243149 | SNV | 1 | A | G | Homozygous   |
| NC_037652.1 | 5243151 | SNV | 1 | A | T | Homozygous   |
| NC_037652.1 | 5243153 | SNV | 1 | A | G | Homozygous   |
| NC_037652.1 | 5243175 | SNV | 1 | A | C | Homozygous   |
| NC_037652.1 | 5243178 | SNV | 1 | G | A | Homozygous   |
| NC_037652.1 | 5243185 | SNV | 1 | A | G | Homozygous   |
| NC_037652.1 | 5243195 | SNV | 1 | G | A | Homozygous   |
| NC_037652.1 | 5243199 | SNV | 1 | G | A | Heterozygous |
| NC_037652.1 | 5243609 | SNV | 1 | G | A | Heterozygous |
| NC_037652.1 | 5243680 | SNV | 1 | A | G | Homozygous   |
| NC_037652.1 | 5243735 | SNV | 1 | A | G | Heterozygous |
| NC_037652.1 | 5244147 | SNV | 1 | A | G | Homozygous   |
| NC_037652.1 | 5244164 | SNV | 1 | G | A | Homozygous   |
| NC_037652.1 | 5244253 | SNV | 1 | T | C | Homozygous   |
| NC_037652.1 | 5244297 | SNV | 1 | T | C | Homozygous   |
| NC_037652.1 | 5244305 | SNV | 1 | T | C | Homozygous   |
| NC_037652.1 | 5244396 | SNV | 1 | T | A | Homozygous   |
| NC_037652.1 | 5244785 | SNV | 1 | T | C | Homozygous   |
| NC_037652.1 | 5246639 | SNV | 1 | C | G | Homozygous   |
| NC_037652.1 | 5250091 | SNV | 1 | G | A | Homozygous   |
| NC_037652.1 | 5250106 | SNV | 1 | G | A | Heterozygous |
| NC_037652.1 | 5250109 | SNV | 1 | A | G | Heterozygous |
| NC_037652.1 | 5250249 | SNV | 1 | A | G | Homozygous   |
| NC_037652.1 | 5250316 | SNV | 1 | G | C | Homozygous   |
| NC_037652.1 | 5251966 | SNV | 1 | A | G | Homozygous   |
| NC_037652.1 | 5252194 | SNV | 1 | T | G | Heterozygous |
| NC_037652.1 | 5252270 | SNV | 1 | T | C | Heterozygous |
| NC_037652.1 | 5252515 | SNV | 1 | T | C | Homozygous   |
| NC_037652.1 | 5252533 | SNV | 1 | T | C | Homozygous   |
| NC_037652.1 | 5252644 | SNV | 1 | G | A | Homozygous   |
| NC_037652.1 | 5252714 | SNV | 1 | A | G | Heterozygous |
| NC_037652.1 | 5252857 | SNV | 1 | A | T | Heterozygous |
| NC_037652.1 | 5253029 | SNV | 1 | A | G | Homozygous   |
| NC_037652.1 | 5253125 | SNV | 1 | T | C | Homozygous   |
| NC_037652.1 | 5253132 | SNV | 1 | A | T | Heterozygous |
| NC_037652.1 | 5253185 | SNV | 1 | A | G | Homozygous   |
| NC_037652.1 | 5253266 | SNV | 1 | C | T | Heterozygous |
| NC_037652.1 | 5253473 | SNV | 1 | A | G | Homozygous   |
| NC_037652.1 | 5253481 | SNV | 1 | C | T | Homozygous   |
| NC_037652.1 | 5253484 | SNV | 1 | A | C | Heterozygous |
| NC_037652.1 | 5253611 | SNV | 1 | G | A | Heterozygous |
| NC_037652.1 | 5255314 | SNV | 1 | T | C | Homozygous   |
| NC_037652.1 | 5255318 | SNV | 1 | T | C | Homozygous   |
| NC_037652.1 | 5255441 | SNV | 1 | G | A | Heterozygous |
| NC_037652.1 | 5255711 | SNV | 1 | C | T | Homozygous   |
| NC_037652.1 | 5255723 | SNV | 1 | A | G | Homozygous   |
| NC_037652.1 | 5256003 | SNV | 1 | T | C | Homozygous   |

|             |         |     |   |   |   |              |
|-------------|---------|-----|---|---|---|--------------|
| NC_037652.1 | 5256010 | SNV | 1 | C | T | Heterozygous |
| NC_037652.1 | 5256082 | SNV | 1 | T | C | Homozygous   |
| NC_037652.1 | 5256109 | SNV | 1 | T | C | Homozygous   |
| NC_037652.1 | 5256405 | SNV | 1 | T | C | Heterozygous |
| NC_037652.1 | 5262247 | SNV | 1 | T | C | Homozygous   |
| NC_037652.1 | 5262268 | SNV | 1 | T | C | Homozygous   |
| NC_037652.1 | 5262334 | SNV | 1 | A | G | Homozygous   |
| NC_037652.1 | 5262420 | SNV | 1 | A | G | Heterozygous |
| NC_037652.1 | 5262423 | SNV | 1 | G | A | Heterozygous |
| NC_037652.1 | 5262450 | SNV | 1 | T | G | Heterozygous |
| NC_037652.1 | 5262469 | SNV | 1 | T | C | Heterozygous |
| NC_037652.1 | 5262555 | SNV | 1 | G | A | Heterozygous |
| NC_037652.1 | 5262561 | SNV | 1 | G | A | Heterozygous |
| NC_037652.1 | 5262608 | SNV | 1 | C | T | Heterozygous |
| NC_037652.1 | 5262611 | SNV | 1 | C | A | Heterozygous |
| NC_037652.1 | 5262636 | SNV | 1 | G | T | Heterozygous |
| NC_037652.1 | 5263052 | SNV | 1 | C | T | Heterozygous |
| NC_037652.1 | 5263206 | SNV | 1 | G | A | Homozygous   |
| NC_037652.1 | 5263236 | SNV | 1 | C | G | Heterozygous |
| NC_037652.1 | 5263369 | SNV | 1 | A | G | Heterozygous |
| NC_037652.1 | 5263749 | SNV | 1 | A | G | Homozygous   |
| NC_037652.1 | 5263754 | SNV | 1 | T | C | Homozygous   |
| NC_037652.1 | 5263905 | SNV | 1 | T | C | Homozygous   |
| NC_037652.1 | 5264061 | SNV | 1 | C | T | Heterozygous |
| NC_037652.1 | 5264490 | SNV | 1 | T | G | Heterozygous |
| NC_037652.1 | 5264525 | SNV | 1 | C | T | Heterozygous |
| NC_037652.1 | 5264550 | SNV | 1 | A | G | Homozygous   |
| NC_037652.1 | 5264573 | SNV | 1 | G | A | Homozygous   |
| NC_037652.1 | 5289087 | SNV | 1 | G | A | Heterozygous |
| NC_037652.1 | 5289113 | SNV | 1 | C | A | Heterozygous |
| NC_037652.1 | 5289175 | SNV | 1 | C | G | Homozygous   |
| NC_037652.1 | 5290269 | SNV | 1 | G | A | Homozygous   |
| NC_037652.1 | 5290272 | SNV | 1 | A | G | Homozygous   |
| NC_037652.1 | 5304940 | SNV | 1 | C | A | Heterozygous |
| NC_037652.1 | 5304944 | SNV | 1 | A | C | Heterozygous |
| NC_037652.1 | 5306819 | SNV | 1 | G | A | Heterozygous |
| NC_037652.1 | 5306830 | SNV | 1 | A | G | Heterozygous |
| NC_037652.1 | 5306837 | SNV | 1 | A | G | Heterozygous |
| NC_037652.1 | 5309020 | SNV | 1 | T | C | Heterozygous |
| NC_037652.1 | 5315118 | SNV | 1 | A | G | Homozygous   |
| NC_037652.1 | 5315171 | SNV | 1 | C | A | Homozygous   |
| NC_037652.1 | 5315173 | SNV | 1 | T | A | Homozygous   |
| NC_037652.1 | 5328084 | SNV | 1 | T | A | Homozygous   |
| NC_037652.1 | 5328101 | SNV | 1 | A | G | Homozygous   |
| NC_037652.1 | 5328103 | SNV | 1 | A | T | Homozygous   |
| NC_037652.1 | 5328107 | SNV | 1 | G | C | Homozygous   |
| NC_037652.1 | 5382651 | SNV | 1 | C | G | Homozygous   |
| NC_037652.1 | 5432205 | SNV | 1 | A | G | Heterozygous |
| NC_037652.1 | 5432208 | SNV | 1 | T | C | Heterozygous |
| NC_037652.1 | 5432216 | SNV | 1 | T | A | Heterozygous |
| NC_037652.1 | 5493878 | SNV | 1 | T | C | Homozygous   |

|             |         |     |   |   |   |              |
|-------------|---------|-----|---|---|---|--------------|
| NC_037652.1 | 5494259 | SNV | 1 | T | G | Homozygous   |
| NC_037652.1 | 5494360 | SNV | 1 | A | G | Heterozygous |
| NC_037652.1 | 5494837 | SNV | 1 | G | A | Heterozygous |
| NC_037652.1 | 5518023 | SNV | 1 | C | G | Heterozygous |
| NC_037652.1 | 5518052 | SNV | 1 | C | T | Homozygous   |
| NC_037652.1 | 5518056 | SNV | 1 | T | A | Homozygous   |
| NC_037652.1 | 5520299 | SNV | 1 | A | T | Heterozygous |
| NC_037652.1 | 5520305 | SNV | 1 | G | T | Heterozygous |
| NC_037652.1 | 5521228 | SNV | 1 | A | G | Heterozygous |
| NC_037652.1 | 5521576 | SNV | 1 | T | C | Homozygous   |
| NC_037652.1 | 5521817 | SNV | 1 | A | G | Homozygous   |
| NC_037652.1 | 5533735 | SNV | 1 | C | G | Homozygous   |
| NC_037652.1 | 5534037 | SNV | 1 | G | T | Homozygous   |
| NC_037652.1 | 5534040 | SNV | 1 | C | T | Homozygous   |
| NC_037652.1 | 5541649 | SNV | 1 | T | C | Homozygous   |
| NC_037652.1 | 5541744 | SNV | 1 | T | C | Homozygous   |
| NC_037652.1 | 5541783 | SNV | 1 | G | A | Heterozygous |
| NC_037652.1 | 5541800 | SNV | 1 | G | C | Homozygous   |
| NC_037652.1 | 5541847 | SNV | 1 | A | G | Homozygous   |
| NC_037652.1 | 5541925 | SNV | 1 | A | G | Homozygous   |
| NC_037652.1 | 5552449 | SNV | 1 | C | T | Heterozygous |
| NC_037652.1 | 5552479 | SNV | 1 | T | C | Homozygous   |
| NC_037652.1 | 5552483 | SNV | 1 | A | G | Homozygous   |
| NC_037652.1 | 5552640 | SNV | 1 | T | C | Heterozygous |
| NC_037652.1 | 5552686 | SNV | 1 | A | G | Homozygous   |
| NC_037652.1 | 5552703 | SNV | 1 | T | C | Homozygous   |
| NC_037652.1 | 5552706 | SNV | 1 | A | G | Heterozygous |
| NC_037652.1 | 5552709 | SNV | 1 | G | A | Heterozygous |
| NC_037652.1 | 5552717 | SNV | 1 | A | T | Heterozygous |
| NC_037652.1 | 5553202 | SNV | 1 | A | G | Heterozygous |
| NC_037652.1 | 5553563 | SNV | 1 | T | C | Heterozygous |
| NC_037652.1 | 5554434 | SNV | 1 | G | A | Heterozygous |
| NC_037652.1 | 5554463 | SNV | 1 | A | G | Homozygous   |
| NC_037652.1 | 5555071 | SNV | 1 | T | C | Heterozygous |
| NC_037652.1 | 5555108 | SNV | 1 | A | G | Homozygous   |
| NC_037652.1 | 5555112 | SNV | 1 | A | G | Homozygous   |
| NC_037652.1 | 5555155 | SNV | 1 | C | T | Heterozygous |
| NC_037652.1 | 5557146 | SNV | 1 | C | T | Homozygous   |
| NC_037652.1 | 5559545 | SNV | 1 | T | A | Homozygous   |
| NC_037652.1 | 5559611 | SNV | 1 | G | A | Heterozygous |
| NC_037652.1 | 5559629 | SNV | 1 | C | T | Heterozygous |
| NC_037652.1 | 5559870 | SNV | 1 | A | G | Homozygous   |
| NC_037652.1 | 5564259 | SNV | 1 | C | T | Homozygous   |
| NC_037652.1 | 5564263 | SNV | 1 | T | C | Homozygous   |
| NC_037652.1 | 5564355 | SNV | 1 | A | G | Heterozygous |
| NC_037652.1 | 5564707 | SNV | 1 | A | G | Homozygous   |
| NC_037652.1 | 5564872 | SNV | 1 | T | C | Homozygous   |
| NC_037652.1 | 5564974 | SNV | 1 | G | A | Heterozygous |
| NC_037652.1 | 5565027 | SNV | 1 | G | A | Homozygous   |
| NC_037652.1 | 5565062 | SNV | 1 | T | C | Homozygous   |
| NC_037652.1 | 5565129 | SNV | 1 | A | G | Homozygous   |

|             |         |     |   |   |   |              |
|-------------|---------|-----|---|---|---|--------------|
| NC_037652.1 | 5568214 | SNV | 1 | G | A | Homozygous   |
| NC_037652.1 | 5568279 | SNV | 1 | C | T | Homozygous   |
| NC_037652.1 | 5568369 | SNV | 1 | C | T | Heterozygous |
| NC_037652.1 | 5568425 | SNV | 1 | T | C | Homozygous   |
| NC_037652.1 | 5573463 | SNV | 1 | A | G | Heterozygous |
| NC_037652.1 | 5573513 | SNV | 1 | G | A | Homozygous   |
| NC_037652.1 | 5573521 | SNV | 1 | C | G | Homozygous   |
| NC_037652.1 | 5573524 | SNV | 1 | C | T | Homozygous   |
| NC_037652.1 | 5573537 | SNV | 1 | A | G | Homozygous   |
| NC_037652.1 | 5573575 | SNV | 1 | T | C | Homozygous   |
| NC_037652.1 | 5573585 | SNV | 1 | T | C | Heterozygous |
| NC_037652.1 | 5573600 | SNV | 1 | T | A | Heterozygous |
| NC_037652.1 | 5573802 | SNV | 1 | G | A | Heterozygous |
| NC_037652.1 | 5573808 | SNV | 1 | A | T | Heterozygous |
| NC_037652.1 | 5573810 | SNV | 1 | T | A | Heterozygous |
| NC_037652.1 | 5574072 | SNV | 1 | C | T | Heterozygous |
| NC_037652.1 | 5574102 | SNV | 1 | T | A | Homozygous   |
| NC_037652.1 | 5574150 | SNV | 1 | G | A | Heterozygous |
| NC_037652.1 | 5574214 | SNV | 1 | G | A | Heterozygous |
| NC_037652.1 | 5574654 | SNV | 1 | A | T | Homozygous   |
| NC_037652.1 | 5574858 | SNV | 1 | G | A | Homozygous   |
| NC_037652.1 | 5574909 | SNV | 1 | G | A | Heterozygous |
| NC_037652.1 | 5575077 | SNV | 1 | G | A | Heterozygous |
| NC_037652.1 | 5575103 | SNV | 1 | C | T | Homozygous   |
| NC_037652.1 | 5575147 | SNV | 1 | A | G | Homozygous   |
| NC_037652.1 | 5575625 | SNV | 1 | G | A | Heterozygous |
| NC_037652.1 | 5575691 | SNV | 1 | C | T | Homozygous   |
| NC_037652.1 | 5575744 | SNV | 1 | C | T | Heterozygous |
| NC_037652.1 | 5575748 | SNV | 1 | C | G | Heterozygous |
| NC_037652.1 | 5575810 | SNV | 1 | A | G | Homozygous   |
| NC_037652.1 | 5575832 | SNV | 1 | T | C | Homozygous   |
| NC_037652.1 | 5575888 | SNV | 1 | T | C | Homozygous   |
| NC_037652.1 | 5575901 | SNV | 1 | A | G | Heterozygous |
| NC_037652.1 | 5575918 | SNV | 1 | C | G | Heterozygous |
| NC_037652.1 | 5576056 | SNV | 1 | G | C | Homozygous   |
| NC_037652.1 | 5576125 | SNV | 1 | A | G | Homozygous   |
| NC_037652.1 | 5576232 | SNV | 1 | T | C | Heterozygous |
| NC_037652.1 | 5576416 | SNV | 1 | C | T | Heterozygous |
| NC_037652.1 | 5576437 | SNV | 1 | C | T | Homozygous   |
| NC_037652.1 | 5576440 | SNV | 1 | T | C | Heterozygous |
| NC_037652.1 | 5576491 | SNV | 1 | G | C | Homozygous   |
| NC_037652.1 | 5576595 | SNV | 1 | G | A | Heterozygous |
| NC_037652.1 | 5576606 | SNV | 1 | A | G | Homozygous   |
| NC_037652.1 | 5576618 | SNV | 1 | G | A | Homozygous   |
| NC_037652.1 | 5576667 | SNV | 1 | G | A | Homozygous   |
| NC_037652.1 | 5576718 | SNV | 1 | A | C | Homozygous   |
| NC_037652.1 | 5581750 | SNV | 1 | A | G | Homozygous   |
| NC_037652.1 | 5581762 | SNV | 1 | G | A | Homozygous   |
| NC_037652.1 | 5582109 | SNV | 1 | G | A | Heterozygous |
| NC_037652.1 | 5582123 | SNV | 1 | G | A | Homozygous   |
| NC_037652.1 | 5582130 | SNV | 1 | C | T | Heterozygous |

|             |         |     |   |   |   |              |
|-------------|---------|-----|---|---|---|--------------|
| NC_037652.1 | 5582162 | SNV | 1 | A | C | Homozygous   |
| NC_037652.1 | 5582179 | SNV | 1 | A | C | Homozygous   |
| NC_037652.1 | 5582186 | SNV | 1 | A | T | Homozygous   |
| NC_037652.1 | 5582192 | SNV | 1 | T | C | Homozygous   |
| NC_037652.1 | 5582314 | SNV | 1 | G | A | Heterozygous |
| NC_037652.1 | 5582376 | SNV | 1 | A | G | Homozygous   |
| NC_037652.1 | 5582437 | SNV | 1 | T | C | Homozygous   |
| NC_037652.1 | 5587699 | SNV | 1 | C | A | Homozygous   |
| NC_037652.1 | 5587969 | SNV | 1 | A | G | Homozygous   |
| NC_037652.1 | 5588264 | SNV | 1 | C | T | Heterozygous |
| NC_037652.1 | 5600071 | SNV | 1 | G | A | Homozygous   |
| NC_037652.1 | 5614762 | SNV | 1 | C | T | Heterozygous |
| NC_037652.1 | 5615531 | SNV | 1 | G | T | Homozygous   |
| NC_037652.1 | 5615537 | SNV | 1 | G | A | Homozygous   |
| NC_037652.1 | 5617613 | SNV | 1 | G | A | Heterozygous |
| NC_037652.1 | 5617623 | SNV | 1 | T | C | Heterozygous |
| NC_037652.1 | 5636361 | SNV | 1 | A | G | Heterozygous |
| NC_037652.1 | 5636379 | SNV | 1 | T | C | Homozygous   |
| NC_037652.1 | 5636381 | SNV | 1 | A | T | Heterozygous |
| NC_037652.1 | 5636970 | SNV | 1 | C | G | Homozygous   |
| NC_037652.1 | 5638190 | SNV | 1 | T | C | Heterozygous |
| NC_037652.1 | 5647973 | SNV | 1 | A | G | Heterozygous |
| NC_037652.1 | 5647975 | SNV | 1 | G | A | Homozygous   |
| NC_037652.1 | 5647984 | SNV | 1 | A | C | Heterozygous |
| NC_037652.1 | 5648961 | SNV | 1 | A | G | Homozygous   |
| NC_037652.1 | 5649103 | SNV | 1 | G | A | Homozygous   |
| NC_037652.1 | 5651204 | SNV | 1 | C | T | Heterozygous |
| NC_037652.1 | 5651213 | SNV | 1 | C | T | Heterozygous |
| NC_037652.1 | 5651231 | SNV | 1 | C | T | Heterozygous |
| NC_037652.1 | 5651287 | SNV | 1 | C | T | Heterozygous |
| NC_037652.1 | 5652363 | SNV | 1 | A | T | Homozygous   |
| NC_037652.1 | 5652591 | SNV | 1 | A | G | Homozygous   |
| NC_037652.1 | 5652601 | SNV | 1 | A | G | Homozygous   |
| NC_037652.1 | 5652647 | SNV | 1 | G | C | Heterozygous |
| NC_037652.1 | 5652715 | SNV | 1 | G | A | Heterozygous |
| NC_037652.1 | 5652740 | SNV | 1 | C | G | Heterozygous |
| NC_037652.1 | 5652787 | SNV | 1 | C | T | Homozygous   |
| NC_037652.1 | 5652792 | SNV | 1 | G | A | Heterozygous |
| NC_037652.1 | 5652878 | SNV | 1 | T | C | Homozygous   |
| NC_037652.1 | 5673211 | SNV | 1 | G | A | Homozygous   |
| NC_037652.1 | 5673264 | SNV | 1 | C | T | Heterozygous |
| NC_037652.1 | 5674575 | SNV | 1 | C | T | Homozygous   |
| NC_037652.1 | 5676881 | SNV | 1 | T | C | Homozygous   |
| NC_037652.1 | 5676910 | SNV | 1 | C | T | Heterozygous |
| NC_037652.1 | 5676920 | SNV | 1 | T | C | Homozygous   |
| NC_037652.1 | 5676962 | SNV | 1 | C | T | Heterozygous |
| NC_037652.1 | 5677108 | SNV | 1 | G | A | Heterozygous |
| NC_037652.1 | 5677226 | SNV | 1 | T | C | Homozygous   |
| NC_037652.1 | 5677252 | SNV | 1 | A | G | Homozygous   |
| NC_037652.1 | 5677388 | SNV | 1 | A | G | Homozygous   |
| NC_037652.1 | 5677445 | SNV | 1 | T | C | Homozygous   |

|             |         |     |   |   |   |              |
|-------------|---------|-----|---|---|---|--------------|
| NC_037652.1 | 5677451 | SNV | 1 | T | C | Heterozygous |
| NC_037652.1 | 5677567 | SNV | 1 | G | A | Heterozygous |
| NC_037652.1 | 5677595 | SNV | 1 | A | C | Heterozygous |
| NC_037652.1 | 5677657 | SNV | 1 | T | G | Heterozygous |
| NC_037652.1 | 5677751 | SNV | 1 | C | T | Heterozygous |
| NC_037652.1 | 5732595 | SNV | 1 | A | G | Heterozygous |
| NC_037652.1 | 5732608 | SNV | 1 | A | G | Heterozygous |
| NC_037652.1 | 5732648 | SNV | 1 | A | G | Heterozygous |
| NC_037652.1 | 5733105 | SNV | 1 | A | C | Homozygous   |
| NC_037652.1 | 5739710 | SNV | 1 | A | C | Homozygous   |
| NC_037652.1 | 5739714 | SNV | 1 | T | A | Homozygous   |
| NC_037652.1 | 5739725 | SNV | 1 | G | A | Homozygous   |
| NC_037652.1 | 5743345 | SNV | 1 | A | G | Heterozygous |
| NC_037652.1 | 5743395 | SNV | 1 | T | C | Heterozygous |
| NC_037652.1 | 5745545 | SNV | 1 | G | A | Heterozygous |
| NC_037652.1 | 5746031 | SNV | 1 | C | T | Homozygous   |
| NC_037652.1 | 5751357 | SNV | 1 | A | G | Homozygous   |
| NC_037652.1 | 5756185 | SNV | 1 | G | A | Heterozygous |
| NC_037652.1 | 5756203 | SNV | 1 | T | C | Homozygous   |
| NC_037652.1 | 5756230 | SNV | 1 | C | T | Heterozygous |
| NC_037652.1 | 5756380 | SNV | 1 | C | T | Heterozygous |
| NC_037652.1 | 5756413 | SNV | 1 | T | C | Homozygous   |
| NC_037652.1 | 5756674 | SNV | 1 | C | T | Heterozygous |
| NC_037652.1 | 5767254 | SNV | 1 | C | T | Homozygous   |
| NC_037652.1 | 5767575 | SNV | 1 | T | C | Homozygous   |
| NC_037652.1 | 5768246 | SNV | 1 | C | G | Homozygous   |
| NC_037652.1 | 5768249 | SNV | 1 | T | G | Homozygous   |
| NC_037652.1 | 5773777 | SNV | 1 | G | A | Homozygous   |
| NC_037652.1 | 5773923 | SNV | 1 | G | A | Homozygous   |
| NC_037652.1 | 5774445 | SNV | 1 | T | A | Homozygous   |
| NC_037652.1 | 5774447 | SNV | 1 | G | A | Homozygous   |
| NC_037652.1 | 5776156 | SNV | 1 | T | C | Homozygous   |
| NC_037652.1 | 5781332 | SNV | 1 | G | A | Homozygous   |
| NC_037652.1 | 5781396 | SNV | 1 | T | C | Heterozygous |
| NC_037652.1 | 5784864 | SNV | 1 | A | G | Heterozygous |
| NC_037652.1 | 5785299 | SNV | 1 | G | T | Heterozygous |
| NC_037652.1 | 5785743 | SNV | 1 | G | A | Homozygous   |
| NC_037652.1 | 5785747 | SNV | 1 | T | A | Homozygous   |
| NC_037652.1 | 5787403 | SNV | 1 | C | T | Homozygous   |
| NC_037652.1 | 5787594 | SNV | 1 | G | A | Heterozygous |
| NC_037652.1 | 5787596 | SNV | 1 | A | T | Heterozygous |
| NC_037652.1 | 5788000 | SNV | 1 | A | G | Homozygous   |
| NC_037652.1 | 5791637 | SNV | 1 | T | C | Homozygous   |
| NC_037652.1 | 5792590 | SNV | 1 | T | A | Homozygous   |
| NC_037652.1 | 5792616 | SNV | 1 | A | T | Homozygous   |
| NC_037652.1 | 5804943 | SNV | 1 | A | G | Homozygous   |
| NC_037652.1 | 5807191 | SNV | 1 | A | T | Homozygous   |
| NC_037652.1 | 5807201 | SNV | 1 | A | T | Homozygous   |
| NC_037652.1 | 5813761 | SNV | 1 | T | A | Homozygous   |
| NC_037652.1 | 5813763 | SNV | 1 | A | G | Homozygous   |
| NC_037652.1 | 5813792 | SNV | 1 | A | G | Homozygous   |

|             |         |     |   |   |   |              |
|-------------|---------|-----|---|---|---|--------------|
| NC_037652.1 | 5813986 | SNV | 1 | A | T | Homozygous   |
| NC_037652.1 | 5814203 | SNV | 1 | T | C | Homozygous   |
| NC_037652.1 | 5814206 | SNV | 1 | T | C | Homozygous   |
| NC_037652.1 | 5814208 | SNV | 1 | G | T | Homozygous   |
| NC_037652.1 | 5818742 | SNV | 1 | A | C | Homozygous   |
| NC_037652.1 | 5818748 | SNV | 1 | T | A | Homozygous   |
| NC_037652.1 | 5821026 | SNV | 1 | A | G | Homozygous   |
| NC_037652.1 | 5821037 | SNV | 1 | A | T | Homozygous   |
| NC_037652.1 | 5828983 | SNV | 1 | A | G | Homozygous   |
| NC_037652.1 | 5828987 | SNV | 1 | A | G | Homozygous   |
| NC_037652.1 | 5828989 | SNV | 1 | A | G | Homozygous   |
| NC_037652.1 | 5829001 | SNV | 1 | A | G | Homozygous   |
| NC_037652.1 | 5831327 | SNV | 1 | A | T | Heterozygous |
| NC_037652.1 | 5832606 | SNV | 1 | A | T | Homozygous   |
| NC_037652.1 | 5832608 | SNV | 1 | G | C | Homozygous   |
| NC_037652.1 | 5836487 | SNV | 1 | G | A | Homozygous   |
| NC_037652.1 | 5836981 | SNV | 1 | T | C | Homozygous   |
| NC_037652.1 | 5837558 | SNV | 1 | G | T | Heterozygous |
| NC_037652.1 | 5845384 | SNV | 1 | T | C | Homozygous   |
| NC_037652.1 | 5850385 | SNV | 1 | T | C | Homozygous   |
| NC_037652.1 | 5850413 | SNV | 1 | A | G | Homozygous   |
| NC_037652.1 | 5850421 | SNV | 1 | A | G | Homozygous   |
| NC_037652.1 | 5850425 | SNV | 1 | A | G | Homozygous   |
| NC_037652.1 | 5850431 | SNV | 1 | A | G | Homozygous   |
| NC_037652.1 | 5861222 | SNV | 1 | C | A | Heterozygous |
| NC_037652.1 | 5861241 | SNV | 1 | C | A | Heterozygous |
| NC_037652.1 | 5862755 | SNV | 1 | G | A | Homozygous   |
| NC_037652.1 | 5862762 | SNV | 1 | G | A | Heterozygous |
| NC_037652.1 | 5868664 | SNV | 1 | A | G | Homozygous   |
| NC_037652.1 | 5868687 | SNV | 1 | A | G | Homozygous   |
| NC_037652.1 | 5868865 | SNV | 1 | T | C | Homozygous   |
| NC_037652.1 | 5868870 | SNV | 1 | T | A | Heterozygous |
| NC_037652.1 | 5868976 | SNV | 1 | G | A | Homozygous   |
| NC_037652.1 | 5869076 | SNV | 1 | T | C | Homozygous   |
| NC_037652.1 | 5869192 | SNV | 1 | A | G | Heterozygous |
| NC_037652.1 | 5869275 | SNV | 1 | A | C | Homozygous   |
| NC_037652.1 | 5872661 | SNV | 1 | A | G | Heterozygous |
| NC_037652.1 | 5872714 | SNV | 1 | A | G | Homozygous   |
| NC_037652.1 | 5872952 | SNV | 1 | G | A | Homozygous   |
| NC_037652.1 | 5873124 | SNV | 1 | T | C | Homozygous   |
| NC_037652.1 | 5874261 | SNV | 1 | A | C | Homozygous   |
| NC_037652.1 | 5874653 | SNV | 1 | A | T | Heterozygous |
| NC_037652.1 | 5874674 | SNV | 1 | C | T | Homozygous   |
| NC_037652.1 | 5875847 | SNV | 1 | A | G | Heterozygous |
| NC_037652.1 | 5876228 | SNV | 1 | T | C | Heterozygous |
| NC_037652.1 | 5876240 | SNV | 1 | A | G | Heterozygous |
| NC_037652.1 | 5876374 | SNV | 1 | T | A | Homozygous   |
| NC_037652.1 | 5876377 | SNV | 1 | C | G | Homozygous   |
| NC_037652.1 | 5876384 | SNV | 1 | A | T | Homozygous   |
| NC_037652.1 | 5876407 | SNV | 1 | A | T | Homozygous   |
| NC_037652.1 | 5876409 | SNV | 1 | A | T | Homozygous   |



|             |         |     |   |   |   |              |
|-------------|---------|-----|---|---|---|--------------|
| NC_037652.1 | 5876412 | SNV | 1 | A | C | Homozygous   |
| NC_037652.1 | 5876842 | SNV | 1 | A | G | Homozygous   |
| NC_037652.1 | 5876892 | SNV | 1 | C | G | Homozygous   |
| NC_037652.1 | 5877028 | SNV | 1 | T | C | Homozygous   |
| NC_037652.1 | 5877051 | SNV | 1 | T | A | Heterozygous |
| NC_037652.1 | 5877135 | SNV | 1 | T | C | Homozygous   |
| NC_037652.1 | 5877376 | SNV | 1 | A | G | Heterozygous |
| NC_037652.1 | 5877699 | SNV | 1 | C | T | Heterozygous |
| NC_037652.1 | 5877706 | SNV | 1 | A | T | Heterozygous |
| NC_037652.1 | 5877708 | SNV | 1 | G | T | Heterozygous |
| NC_037652.1 | 5877710 | SNV | 1 | A | T | Heterozygous |
| NC_037652.1 | 5877719 | SNV | 1 | A | T | Heterozygous |
| NC_037652.1 | 5877918 | SNV | 1 | T | C | Heterozygous |
| NC_037652.1 | 5878974 | SNV | 1 | A | G | Homozygous   |
| NC_037652.1 | 5879307 | SNV | 1 | T | C | Heterozygous |
| NC_037652.1 | 5879373 | SNV | 1 | A | G | Homozygous   |
| NC_037652.1 | 5880762 | SNV | 1 | G | A | Heterozygous |
| NC_037652.1 | 5884283 | SNV | 1 | G | C | Homozygous   |
| NC_037652.1 | 5889228 | SNV | 1 | C | T | Homozygous   |
| NC_037652.1 | 5892142 | SNV | 1 | T | C | Heterozygous |
| NC_037652.1 | 5892161 | SNV | 1 | C | G | Heterozygous |
| NC_037652.1 | 5892260 | SNV | 1 | G | T | Heterozygous |
| NC_037652.1 | 5892367 | SNV | 1 | C | T | Heterozygous |
| NC_037652.1 | 5892374 | SNV | 1 | G | A | Heterozygous |
| NC_037652.1 | 5897309 | SNV | 1 | T | C | Heterozygous |
| NC_037652.1 | 5897319 | SNV | 1 | A | G | Homozygous   |
| NC_037652.1 | 5898961 | SNV | 1 | C | T | Heterozygous |
| NC_037652.1 | 5898979 | SNV | 1 | C | T | Heterozygous |
| NC_037652.1 | 5899340 | SNV | 1 | C | T | Homozygous   |
| NC_037652.1 | 5899357 | SNV | 1 | A | G | Homozygous   |
| NC_037652.1 | 5902195 | SNV | 1 | G | A | Homozygous   |
| NC_037652.1 | 5909239 | SNV | 1 | G | A | Heterozygous |
| NC_037652.1 | 5909320 | SNV | 1 | T | C | Homozygous   |
| NC_037652.1 | 5915241 | SNV | 1 | T | C | Homozygous   |
| NC_037652.1 | 5915257 | SNV | 1 | T | C | Homozygous   |
| NC_037652.1 | 5916432 | SNV | 1 | G | A | Heterozygous |
| NC_037652.1 | 5916739 | SNV | 1 | C | G | Heterozygous |
| NC_037652.1 | 5917314 | SNV | 1 | A | G | Homozygous   |
| NC_037652.1 | 5917431 | SNV | 1 | A | C | Heterozygous |
| NC_037652.1 | 5917668 | SNV | 1 | G | A | Homozygous   |
| NC_037652.1 | 5918397 | SNV | 1 | T | C | Heterozygous |
| NC_037652.1 | 5918412 | SNV | 1 | C | A | Heterozygous |
| NC_037652.1 | 5918553 | SNV | 1 | T | C | Homozygous   |
| NC_037652.1 | 5918635 | SNV | 1 | A | T | Homozygous   |
| NC_037652.1 | 5918712 | SNV | 1 | A | G | Homozygous   |
| NC_037652.1 | 5919117 | SNV | 1 | T | C | Heterozygous |
| NC_037652.1 | 5919497 | SNV | 1 | G | A | Heterozygous |
| NC_037652.1 | 5919890 | SNV | 1 | A | G | Heterozygous |
| NC_037652.1 | 5920222 | SNV | 1 | A | G | Homozygous   |
| NC_037652.1 | 5920226 | SNV | 1 | A | C | Heterozygous |
| NC_037652.1 | 5920463 | SNV | 1 | C | T | Homozygous   |

|             |         |     |   |   |   |              |
|-------------|---------|-----|---|---|---|--------------|
| NC_037652.1 | 5920468 | SNV | 1 | A | G | Homozygous   |
| NC_037652.1 | 5920470 | SNV | 1 | G | T | Homozygous   |
| NC_037652.1 | 5920947 | SNV | 1 | G | C | Homozygous   |
| NC_037652.1 | 5921061 | SNV | 1 | T | C | Homozygous   |
| NC_037652.1 | 5921442 | SNV | 1 | G | A | Heterozygous |
| NC_037652.1 | 5921614 | SNV | 1 | T | C | Heterozygous |
| NC_037652.1 | 5921707 | SNV | 1 | A | G | Heterozygous |
| NC_037652.1 | 5921830 | SNV | 1 | G | A | Homozygous   |
| NC_037652.1 | 5921929 | SNV | 1 | G | A | Heterozygous |
| NC_037652.1 | 5922218 | SNV | 1 | A | G | Homozygous   |
| NC_037652.1 | 5922298 | SNV | 1 | A | T | Heterozygous |
| NC_037652.1 | 5922712 | SNV | 1 | A | G | Homozygous   |
| NC_037652.1 | 5922797 | SNV | 1 | A | G | Homozygous   |
| NC_037652.1 | 5922844 | SNV | 1 | G | T | Homozygous   |
| NC_037652.1 | 5923247 | SNV | 1 | G | A | Heterozygous |
| NC_037652.1 | 5924793 | SNV | 1 | A | G | Homozygous   |
| NC_037652.1 | 5928592 | SNV | 1 | C | T | Homozygous   |
| NC_037652.1 | 5931797 | SNV | 1 | A | G | Heterozygous |
| NC_037652.1 | 5931971 | SNV | 1 | A | G | Homozygous   |
| NC_037652.1 | 5932002 | SNV | 1 | T | C | Homozygous   |
| NC_037652.1 | 5933197 | SNV | 1 | C | G | Heterozygous |
| NC_037652.1 | 5933202 | SNV | 1 | G | T | Heterozygous |
| NC_037652.1 | 5933205 | SNV | 1 | G | T | Heterozygous |
| NC_037652.1 | 5933212 | SNV | 1 | C | A | Heterozygous |
| NC_037652.1 | 5933216 | SNV | 1 | G | A | Heterozygous |
| NC_037652.1 | 5933218 | SNV | 1 | A | G | Heterozygous |
| NC_037652.1 | 5933220 | SNV | 1 | A | G | Heterozygous |
| NC_037652.1 | 5933222 | SNV | 1 | A | G | Heterozygous |
| NC_037652.1 | 5935905 | SNV | 1 | A | G | Heterozygous |
| NC_037652.1 | 5936314 | SNV | 1 | G | A | Heterozygous |
| NC_037652.1 | 5936482 | SNV | 1 | A | G | Heterozygous |
| NC_037652.1 | 5945904 | SNV | 1 | T | C | Heterozygous |
| NC_037652.1 | 5946029 | SNV | 1 | C | T | Heterozygous |
| NC_037652.1 | 5946030 | SNV | 1 | C | T | Heterozygous |
| NC_037652.1 | 5946032 | SNV | 1 | T | G | Heterozygous |
| NC_037652.1 | 5946528 | SNV | 1 | C | A | Heterozygous |
| NC_037652.1 | 5947197 | SNV | 1 | C | A | Heterozygous |
| NC_037652.1 | 5947898 | SNV | 1 | C | T | Heterozygous |
| NC_037652.1 | 5947901 | SNV | 1 | C | G | Homozygous   |
| NC_037652.1 | 5948038 | SNV | 1 | A | G | Heterozygous |
| NC_037652.1 | 5985299 | SNV | 1 | G | A | Heterozygous |
| NC_037652.1 | 5985324 | SNV | 1 | A | G | Heterozygous |
| NC_037652.1 | 5985411 | SNV | 1 | C | G | Heterozygous |
| NC_037652.1 | 5986137 | SNV | 1 | C | T | Heterozygous |
| NC_037652.1 | 5986189 | SNV | 1 | C | G | Heterozygous |
| NC_037652.1 | 5986300 | SNV | 1 | A | G | Homozygous   |
| NC_037652.1 | 5986849 | SNV | 1 | T | C | Homozygous   |
| NC_037652.1 | 5986885 | SNV | 1 | G | A | Heterozygous |
| NC_037652.1 | 5990608 | SNV | 1 | G | A | Heterozygous |
| NC_037652.1 | 5992013 | SNV | 1 | C | T | Heterozygous |
| NC_037652.1 | 5992347 | SNV | 1 | A | G | Heterozygous |

|             |         |     |   |   |   |              |
|-------------|---------|-----|---|---|---|--------------|
| NC_037652.1 | 5992440 | SNV | 1 | G | A | Heterozygous |
| NC_037652.1 | 5992895 | SNV | 1 | T | C | Homozygous   |
| NC_037652.1 | 5993021 | SNV | 1 | A | C | Homozygous   |
| NC_037652.1 | 5993159 | SNV | 1 | G | A | Heterozygous |
| NC_037652.1 | 5993258 | SNV | 1 | A | G | Homozygous   |
| NC_037652.1 | 6021396 | SNV | 1 | A | G | Heterozygous |
| NC_037652.1 | 6021440 | SNV | 1 | T | C | Homozygous   |
| NC_037652.1 | 6021516 | SNV | 1 | C | T | Heterozygous |
| NC_037652.1 | 6025777 | SNV | 1 | A | G | Heterozygous |
| NC_037652.1 | 6025823 | SNV | 1 | C | G | Heterozygous |
| NC_037652.1 | 6025979 | SNV | 1 | A | G | Homozygous   |
| NC_037652.1 | 6026163 | SNV | 1 | A | T | Heterozygous |
| NC_037652.1 | 6026196 | SNV | 1 | G | A | Homozygous   |
| NC_037652.1 | 6026325 | SNV | 1 | A | C | Homozygous   |
| NC_037652.1 | 6026390 | SNV | 1 | T | C | Heterozygous |
| NC_037652.1 | 6026541 | SNV | 1 | G | A | Homozygous   |
| NC_037652.1 | 6026549 | SNV | 1 | G | A | Homozygous   |
| NC_037652.1 | 6026595 | SNV | 1 | G | A | Heterozygous |
| NC_037652.1 | 6034155 | SNV | 1 | T | C | Heterozygous |
| NC_037652.1 | 6034165 | SNV | 1 | T | C | Heterozygous |
| NC_037652.1 | 6034170 | SNV | 1 | C | T | Heterozygous |
| NC_037652.1 | 6035650 | SNV | 1 | G | A | Heterozygous |
| NC_037652.1 | 6035693 | SNV | 1 | A | G | Heterozygous |
| NC_037652.1 | 6035697 | SNV | 1 | T | C | Homozygous   |
| NC_037652.1 | 6035788 | SNV | 1 | T | C | Homozygous   |
| NC_037652.1 | 6041175 | SNV | 1 | C | T | Homozygous   |
| NC_037652.1 | 6057754 | SNV | 1 | T | C | Heterozygous |
| NC_037652.1 | 6057760 | SNV | 1 | T | C | Heterozygous |
| NC_037652.1 | 6057763 | SNV | 1 | C | T | Heterozygous |
| NC_037652.1 | 6062952 | SNV | 1 | T | C | Homozygous   |
| NC_037652.1 | 6062987 | SNV | 1 | C | T | Homozygous   |
| NC_037652.1 | 6063014 | SNV | 1 | G | C | Homozygous   |
| NC_037652.1 | 6063027 | SNV | 1 | G | A | Homozygous   |
| NC_037652.1 | 6063108 | SNV | 1 | G | A | Heterozygous |
| NC_037652.1 | 6069956 | SNV | 1 | T | A | Homozygous   |
| NC_037652.1 | 6069958 | SNV | 1 | T | C | Homozygous   |
| NC_037652.1 | 6069964 | SNV | 1 | C | T | Heterozygous |
| NC_037652.1 | 6070002 | SNV | 1 | G | A | Homozygous   |
| NC_037652.1 | 6073120 | SNV | 1 | G | A | Homozygous   |
| NC_037652.1 | 6073350 | SNV | 1 | G | A | Heterozygous |
| NC_037652.1 | 6073398 | SNV | 1 | C | T | Heterozygous |
| NC_037652.1 | 6087203 | SNV | 1 | A | G | Homozygous   |
| NC_037652.1 | 6087214 | SNV | 1 | C | T | Homozygous   |
| NC_037652.1 | 6087233 | SNV | 1 | G | A | Homozygous   |
| NC_037652.1 | 6102995 | SNV | 1 | G | A | Heterozygous |
| NC_037652.1 | 6115513 | SNV | 1 | T | C | Homozygous   |
| NC_037652.1 | 6115516 | SNV | 1 | C | T | Heterozygous |
| NC_037652.1 | 6115518 | SNV | 1 | G | A | Heterozygous |
| NC_037652.1 | 6115553 | SNV | 1 | C | T | Homozygous   |
| NC_037652.1 | 6115632 | SNV | 1 | A | G | Homozygous   |
| NC_037652.1 | 6115885 | SNV | 1 | A | T | Heterozygous |

|             |         |     |   |   |   |              |
|-------------|---------|-----|---|---|---|--------------|
| NC_037652.1 | 6119047 | SNV | 1 | A | C | Homozygous   |
| NC_037652.1 | 6122048 | SNV | 1 | G | A | Homozygous   |
| NC_037652.1 | 6122053 | SNV | 1 | G | A | Homozygous   |
| NC_037652.1 | 6123846 | SNV | 1 | A | G | Homozygous   |
| NC_037652.1 | 6123900 | SNV | 1 | A | G | Homozygous   |
| NC_037652.1 | 6123926 | SNV | 1 | G | A | Homozygous   |
| NC_037652.1 | 6150069 | SNV | 1 | G | C | Homozygous   |
| NC_037652.1 | 6152839 | SNV | 1 | G | A | Heterozygous |
| NC_037652.1 | 6152852 | SNV | 1 | A | G | Heterozygous |
| NC_037652.1 | 6152856 | SNV | 1 | A | G | Homozygous   |
| NC_037652.1 | 6152987 | SNV | 1 | C | T | Heterozygous |
| NC_037652.1 | 6154236 | SNV | 1 | C | T | Homozygous   |
| NC_037652.1 | 6154265 | SNV | 1 | C | T | Homozygous   |
| NC_037652.1 | 6176436 | SNV | 1 | C | T | Heterozygous |
| NC_037652.1 | 6176483 | SNV | 1 | G | A | Homozygous   |
| NC_037652.1 | 6176574 | SNV | 1 | C | G | Heterozygous |
| NC_037652.1 | 6186770 | SNV | 1 | T | A | Heterozygous |
| NC_037652.1 | 6189347 | SNV | 1 | C | T | Heterozygous |
| NC_037652.1 | 6189361 | SNV | 1 | A | G | Homozygous   |
| NC_037652.1 | 6189576 | SNV | 1 | G | A | Heterozygous |
| NC_037652.1 | 6189727 | SNV | 1 | C | T | Heterozygous |
| NC_037652.1 | 6190066 | SNV | 1 | A | G | Heterozygous |
| NC_037652.1 | 6190075 | SNV | 1 | G | C | Heterozygous |
| NC_037652.1 | 6190080 | SNV | 1 | A | G | Homozygous   |
| NC_037652.1 | 6190087 | SNV | 1 | G | A | Heterozygous |
| NC_037652.1 | 6190409 | SNV | 1 | C | T | Heterozygous |
| NC_037652.1 | 6190476 | SNV | 1 | G | A | Homozygous   |
| NC_037652.1 | 6190519 | SNV | 1 | A | G | Homozygous   |
| NC_037652.1 | 6190553 | SNV | 1 | G | C | Homozygous   |
| NC_037652.1 | 6190619 | SNV | 1 | A | G | Homozygous   |
| NC_037652.1 | 6190653 | SNV | 1 | T | C | Heterozygous |
| NC_037652.1 | 6190907 | SNV | 1 | A | G | Heterozygous |
| NC_037652.1 | 6191021 | SNV | 1 | G | A | Heterozygous |
| NC_037652.1 | 6191081 | SNV | 1 | T | C | Homozygous   |
| NC_037652.1 | 6191145 | SNV | 1 | C | T | Heterozygous |
| NC_037652.1 | 6191156 | SNV | 1 | A | G | Homozygous   |
| NC_037652.1 | 6191206 | SNV | 1 | A | G | Heterozygous |
| NC_037652.1 | 6191548 | SNV | 1 | G | A | Heterozygous |
| NC_037652.1 | 6191797 | SNV | 1 | T | C | Homozygous   |
| NC_037652.1 | 6205824 | SNV | 1 | G | A | Heterozygous |
| NC_037652.1 | 6215775 | SNV | 1 | A | G | Homozygous   |
| NC_037652.1 | 6217143 | SNV | 1 | C | T | Homozygous   |
| NC_037652.1 | 6217325 | SNV | 1 | C | T | Homozygous   |
| NC_037652.1 | 6218444 | SNV | 1 | G | T | Heterozygous |
| NC_037652.1 | 6222401 | SNV | 1 | G | A | Homozygous   |
| NC_037652.1 | 6222409 | SNV | 1 | A | T | Homozygous   |
| NC_037652.1 | 6222412 | SNV | 1 | T | A | Homozygous   |
| NC_037652.1 | 6222415 | SNV | 1 | A | G | Homozygous   |
| NC_037652.1 | 6222417 | SNV | 1 | T | A | Homozygous   |
| NC_037652.1 | 6222425 | SNV | 1 | T | G | Homozygous   |
| NC_037652.1 | 6222444 | SNV | 1 | G | A | Homozygous   |

|             |         |     |   |   |   |              |
|-------------|---------|-----|---|---|---|--------------|
| NC_037652.1 | 6228423 | SNV | 1 | A | T | Heterozygous |
| NC_037652.1 | 6228425 | SNV | 1 | T | A | Homozygous   |
| NC_037652.1 | 6230247 | SNV | 1 | G | A | Heterozygous |
| NC_037652.1 | 6230975 | SNV | 1 | A | T | Heterozygous |
| NC_037652.1 | 6231049 | SNV | 1 | T | C | Homozygous   |
| NC_037652.1 | 6231484 | SNV | 1 | T | G | Homozygous   |
| NC_037652.1 | 6242512 | SNV | 1 | A | T | Heterozygous |
| NC_037652.1 | 6242513 | SNV | 1 | A | G | Heterozygous |
| NC_037652.1 | 6242589 | SNV | 1 | A | G | Heterozygous |
| NC_037652.1 | 6242643 | SNV | 1 | C | T | Homozygous   |
| NC_037652.1 | 6242709 | SNV | 1 | T | C | Homozygous   |
| NC_037652.1 | 6242874 | SNV | 1 | A | G | Homozygous   |
| NC_037652.1 | 6242903 | SNV | 1 | G | C | Heterozygous |
| NC_037652.1 | 6243137 | SNV | 1 | A | G | Heterozygous |
| NC_037652.1 | 6243325 | SNV | 1 | T | C | Heterozygous |
| NC_037652.1 | 6243338 | SNV | 1 | T | C | Homozygous   |
| NC_037652.1 | 6245418 | SNV | 1 | T | C | Homozygous   |
| NC_037652.1 | 6246636 | SNV | 1 | C | A | Heterozygous |
| NC_037652.1 | 6246638 | SNV | 1 | G | T | Heterozygous |
| NC_037652.1 | 6246710 | SNV | 1 | A | T | Heterozygous |
| NC_037652.1 | 6247436 | SNV | 1 | T | C | Homozygous   |
| NC_037652.1 | 6247681 | SNV | 1 | T | C | Heterozygous |
| NC_037652.1 | 6247862 | SNV | 1 | T | C | Homozygous   |
| NC_037652.1 | 6247876 | SNV | 1 | T | C | Homozygous   |
| NC_037652.1 | 6253407 | SNV | 1 | G | A | Heterozygous |
| NC_037652.1 | 6253409 | SNV | 1 | A | G | Heterozygous |
| NC_037652.1 | 6253413 | SNV | 1 | G | A | Heterozygous |
| NC_037652.1 | 6253416 | SNV | 1 | G | A | Heterozygous |
| NC_037652.1 | 6259156 | SNV | 1 | A | T | Heterozygous |
| NC_037652.1 | 6259158 | SNV | 1 | A | T | Heterozygous |
| NC_037652.1 | 6259162 | SNV | 1 | A | T | Heterozygous |
| NC_037652.1 | 6259164 | SNV | 1 | A | T | Heterozygous |
| NC_037652.1 | 6259170 | SNV | 1 | A | T | Heterozygous |
| NC_037652.1 | 6259172 | SNV | 1 | A | T | Heterozygous |
| NC_037652.1 | 6259182 | SNV | 1 | A | T | Homozygous   |
| NC_037652.1 | 6259186 | SNV | 1 | A | T | Homozygous   |
| NC_037652.1 | 6268340 | SNV | 1 | A | G | Homozygous   |
| NC_037652.1 | 6268346 | SNV | 1 | C | G | Homozygous   |
| NC_037652.1 | 6268349 | SNV | 1 | T | C | Homozygous   |
| NC_037652.1 | 6268352 | SNV | 1 | T | G | Homozygous   |
| NC_037652.1 | 6268355 | SNV | 1 | T | C | Homozygous   |
| NC_037652.1 | 6268358 | SNV | 1 | C | G | Homozygous   |
| NC_037652.1 | 6268362 | SNV | 1 | T | A | Homozygous   |
| NC_037652.1 | 6268364 | SNV | 1 | T | G | Homozygous   |
| NC_037652.1 | 6268379 | SNV | 1 | G | C | Homozygous   |
| NC_037652.1 | 6268388 | SNV | 1 | C | G | Homozygous   |
| NC_037652.1 | 6268392 | SNV | 1 | T | A | Homozygous   |
| NC_037652.1 | 6299219 | SNV | 1 | A | G | Homozygous   |
| NC_037652.1 | 6299243 | SNV | 1 | C | T | Homozygous   |
| NC_037652.1 | 6299295 | SNV | 1 | C | T | Heterozygous |
| NC_037652.1 | 6299766 | SNV | 1 | G | A | Heterozygous |

|             |         |     |   |   |   |              |
|-------------|---------|-----|---|---|---|--------------|
| NC_037652.1 | 6300587 | SNV | 1 | G | A | Homozygous   |
| NC_037652.1 | 6300590 | SNV | 1 | C | A | Homozygous   |
| NC_037652.1 | 6300669 | SNV | 1 | G | A | Homozygous   |
| NC_037652.1 | 6300819 | SNV | 1 | C | T | Homozygous   |
| NC_037652.1 | 6301169 | SNV | 1 | C | T | Homozygous   |
| NC_037652.1 | 6301172 | SNV | 1 | T | C | Homozygous   |
| NC_037652.1 | 6301555 | SNV | 1 | G | A | Heterozygous |
| NC_037652.1 | 6301563 | SNV | 1 | G | A | Homozygous   |
| NC_037652.1 | 6301810 | SNV | 1 | C | G | Homozygous   |
| NC_037652.1 | 6302191 | SNV | 1 | A | G | Homozygous   |
| NC_037652.1 | 6302296 | SNV | 1 | G | A | Heterozygous |
| NC_037652.1 | 6302350 | SNV | 1 | C | T | Homozygous   |
| NC_037652.1 | 6302451 | SNV | 1 | G | A | Heterozygous |
| NC_037652.1 | 6302630 | SNV | 1 | A | G | Homozygous   |
| NC_037652.1 | 6302942 | SNV | 1 | G | C | Heterozygous |
| NC_037652.1 | 6303751 | SNV | 1 | T | C | Homozygous   |
| NC_037652.1 | 6303811 | SNV | 1 | T | C | Heterozygous |
| NC_037652.1 | 6305992 | SNV | 1 | A | G | Heterozygous |
| NC_037652.1 | 6306029 | SNV | 1 | G | A | Homozygous   |
| NC_037652.1 | 6306275 | SNV | 1 | T | C | Homozygous   |
| NC_037652.1 | 6306454 | SNV | 1 | T | G | Heterozygous |
| NC_037652.1 | 6309124 | SNV | 1 | A | G | Homozygous   |
| NC_037652.1 | 6310057 | SNV | 1 | C | A | Homozygous   |
| NC_037652.1 | 6310288 | SNV | 1 | C | A | Homozygous   |
| NC_037652.1 | 6310290 | SNV | 1 | G | C | Homozygous   |
| NC_037652.1 | 6310584 | SNV | 1 | T | C | Homozygous   |
| NC_037652.1 | 6310816 | SNV | 1 | A | T | Heterozygous |
| NC_037652.1 | 6310879 | SNV | 1 | G | A | Heterozygous |
| NC_037652.1 | 6312005 | SNV | 1 | T | C | Heterozygous |
| NC_037652.1 | 6312519 | SNV | 1 | C | T | Heterozygous |
| NC_037652.1 | 6312521 | SNV | 1 | T | C | Heterozygous |
| NC_037652.1 | 6312534 | SNV | 1 | T | C | Homozygous   |
| NC_037652.1 | 6312537 | SNV | 1 | A | G | Heterozygous |
| NC_037652.1 | 6312544 | SNV | 1 | T | C | Heterozygous |
| NC_037652.1 | 6312935 | SNV | 1 | C | T | Homozygous   |
| NC_037652.1 | 6312954 | SNV | 1 | T | C | Homozygous   |
| NC_037652.1 | 6312990 | SNV | 1 | C | T | Homozygous   |
| NC_037652.1 | 6313238 | SNV | 1 | A | G | Homozygous   |
| NC_037652.1 | 6313377 | SNV | 1 | G | A | Heterozygous |
| NC_037652.1 | 6313380 | SNV | 1 | T | G | Heterozygous |
| NC_037652.1 | 6313383 | SNV | 1 | T | A | Heterozygous |
| NC_037652.1 | 6313385 | SNV | 1 | A | T | Heterozygous |
| NC_037652.1 | 6313388 | SNV | 1 | A | T | Heterozygous |
| NC_037652.1 | 6313428 | SNV | 1 | T | C | Homozygous   |
| NC_037652.1 | 6313450 | SNV | 1 | A | G | Homozygous   |
| NC_037652.1 | 6313486 | SNV | 1 | A | G | Homozygous   |
| NC_037652.1 | 6313551 | SNV | 1 | T | C | Homozygous   |
| NC_037652.1 | 6313736 | SNV | 1 | A | G | Homozygous   |
| NC_037652.1 | 6313795 | SNV | 1 | T | C | Heterozygous |
| NC_037652.1 | 6314060 | SNV | 1 | T | C | Homozygous   |
| NC_037652.1 | 6314159 | SNV | 1 | C | T | Heterozygous |

|             |         |     |   |   |   |              |
|-------------|---------|-----|---|---|---|--------------|
| NC_037652.1 | 6314166 | SNV | 1 | G | A | Heterozygous |
| NC_037652.1 | 6314777 | SNV | 1 | A | C | Homozygous   |
| NC_037652.1 | 6314826 | SNV | 1 | A | G | Homozygous   |
| NC_037652.1 | 6314959 | SNV | 1 | A | G | Homozygous   |
| NC_037652.1 | 6315116 | SNV | 1 | C | T | Heterozygous |
| NC_037652.1 | 6315124 | SNV | 1 | C | T | Heterozygous |
| NC_037652.1 | 6315128 | SNV | 1 | T | C | Heterozygous |
| NC_037652.1 | 6315143 | SNV | 1 | C | T | Homozygous   |
| NC_037652.1 | 6315146 | SNV | 1 | G | A | Heterozygous |
| NC_037652.1 | 6315318 | SNV | 1 | A | G | Homozygous   |
| NC_037652.1 | 6315995 | SNV | 1 | T | C | Heterozygous |
| NC_037652.1 | 6316747 | SNV | 1 | A | C | Homozygous   |
| NC_037652.1 | 6317010 | SNV | 1 | T | C | Homozygous   |
| NC_037652.1 | 6317060 | SNV | 1 | A | G | Homozygous   |
| NC_037652.1 | 6317093 | SNV | 1 | G | A | Heterozygous |
| NC_037652.1 | 6317098 | SNV | 1 | T | A | Homozygous   |
| NC_037652.1 | 6317272 | SNV | 1 | C | T | Heterozygous |
| NC_037652.1 | 6317366 | SNV | 1 | A | G | Homozygous   |
| NC_037652.1 | 6317461 | SNV | 1 | T | C | Homozygous   |
| NC_037652.1 | 6317475 | SNV | 1 | A | G | Homozygous   |
| NC_037652.1 | 6317890 | SNV | 1 | T | C | Homozygous   |
| NC_037652.1 | 6317925 | SNV | 1 | A | G | Homozygous   |
| NC_037652.1 | 6318148 | SNV | 1 | T | C | Heterozygous |
| NC_037652.1 | 6318189 | SNV | 1 | T | C | Heterozygous |
| NC_037652.1 | 6318195 | SNV | 1 | T | C | Heterozygous |
| NC_037652.1 | 6318209 | SNV | 1 | G | A | Homozygous   |
| NC_037652.1 | 6318865 | SNV | 1 | T | C | Heterozygous |
| NC_037652.1 | 6318883 | SNV | 1 | T | C | Homozygous   |
| NC_037652.1 | 6318885 | SNV | 1 | T | C | Heterozygous |
| NC_037652.1 | 6319132 | SNV | 1 | C | T | Homozygous   |
| NC_037652.1 | 6319690 | SNV | 1 | T | C | Heterozygous |
| NC_037652.1 | 6319929 | SNV | 1 | C | T | Heterozygous |
| NC_037652.1 | 6319970 | SNV | 1 | A | G | Homozygous   |
| NC_037652.1 | 6320025 | SNV | 1 | T | C | Homozygous   |
| NC_037652.1 | 6320072 | SNV | 1 | T | C | Homozygous   |
| NC_037652.1 | 6320278 | SNV | 1 | A | G | Homozygous   |
| NC_037652.1 | 6320548 | SNV | 1 | T | C | Homozygous   |
| NC_037652.1 | 6320557 | SNV | 1 | T | C | Homozygous   |
| NC_037652.1 | 6320894 | SNV | 1 | T | C | Heterozygous |
| NC_037652.1 | 6321207 | SNV | 1 | T | C | Homozygous   |
| NC_037652.1 | 6321377 | SNV | 1 | A | G | Homozygous   |
| NC_037652.1 | 6321626 | SNV | 1 | T | C | Heterozygous |
| NC_037652.1 | 6329595 | SNV | 1 | T | G | Homozygous   |
| NC_037652.1 | 6329599 | SNV | 1 | A | T | Homozygous   |
| NC_037652.1 | 6329603 | SNV | 1 | T | G | Homozygous   |
| NC_037652.1 | 6329613 | SNV | 1 | T | C | Homozygous   |
| NC_037652.1 | 6329617 | SNV | 1 | C | T | Homozygous   |
| NC_037652.1 | 6329877 | SNV | 1 | G | C | Homozygous   |
| NC_037652.1 | 6329886 | SNV | 1 | G | A | Homozygous   |
| NC_037652.1 | 6329897 | SNV | 1 | A | T | Homozygous   |
| NC_037652.1 | 6334287 | SNV | 1 | A | T | Homozygous   |

|             |         |     |   |   |   |              |
|-------------|---------|-----|---|---|---|--------------|
| NC_037652.1 | 6334304 | SNV | 1 | T | C | Homozygous   |
| NC_037652.1 | 6334315 | SNV | 1 | G | T | Homozygous   |
| NC_037652.1 | 6334319 | SNV | 1 | A | G | Homozygous   |
| NC_037652.1 | 6334321 | SNV | 1 | A | G | Homozygous   |
| NC_037652.1 | 6334325 | SNV | 1 | A | T | Homozygous   |
| NC_037652.1 | 6334329 | SNV | 1 | A | T | Homozygous   |
| NC_037652.1 | 6342102 | SNV | 1 | T | C | Homozygous   |
| NC_037652.1 | 6342106 | SNV | 1 | C | A | Homozygous   |
| NC_037652.1 | 6342119 | SNV | 1 | T | G | Homozygous   |
| NC_037652.1 | 6385957 | SNV | 1 | G | A | Heterozygous |
| NC_037652.1 | 6385993 | SNV | 1 | A | G | Homozygous   |
| NC_037652.1 | 6385996 | SNV | 1 | A | G | Heterozygous |
| NC_037652.1 | 6386099 | SNV | 1 | G | A | Heterozygous |
| NC_037652.1 | 6386142 | SNV | 1 | G | A | Homozygous   |
| NC_037652.1 | 6386146 | SNV | 1 | T | C | Homozygous   |
| NC_037652.1 | 6386207 | SNV | 1 | A | G | Homozygous   |
| NC_037652.1 | 6386533 | SNV | 1 | A | G | Heterozygous |
| NC_037652.1 | 6386536 | SNV | 1 | G | A | Homozygous   |
| NC_037652.1 | 6386565 | SNV | 1 | T | C | Heterozygous |
| NC_037652.1 | 6394673 | SNV | 1 | T | C | Homozygous   |
| NC_037652.1 | 6394692 | SNV | 1 | T | C | Heterozygous |
| NC_037652.1 | 6394753 | SNV | 1 | T | A | Heterozygous |
| NC_037652.1 | 6395487 | SNV | 1 | G | C | Heterozygous |
| NC_037652.1 | 6395508 | SNV | 1 | C | G | Homozygous   |
| NC_037652.1 | 6396014 | SNV | 1 | T | C | Homozygous   |
| NC_037652.1 | 6396018 | SNV | 1 | T | C | Homozygous   |
| NC_037652.1 | 6396022 | SNV | 1 | A | G | Homozygous   |
| NC_037652.1 | 6396070 | SNV | 1 | T | C | Homozygous   |
| NC_037652.1 | 6396090 | SNV | 1 | A | G | Heterozygous |
| NC_037652.1 | 6396228 | SNV | 1 | G | A | Homozygous   |
| NC_037652.1 | 6401281 | SNV | 1 | A | T | Homozygous   |
| NC_037652.1 | 6401850 | SNV | 1 | G | C | Heterozygous |
| NC_037652.1 | 6401990 | SNV | 1 | C | T | Homozygous   |
| NC_037652.1 | 6402093 | SNV | 1 | T | C | Heterozygous |
| NC_037652.1 | 6402318 | SNV | 1 | G | A | Homozygous   |
| NC_037652.1 | 6402376 | SNV | 1 | G | A | Homozygous   |
| NC_037652.1 | 6404586 | SNV | 1 | T | C | Heterozygous |
| NC_037652.1 | 6404603 | SNV | 1 | A | C | Homozygous   |
| NC_037652.1 | 6404628 | SNV | 1 | C | T | Homozygous   |
| NC_037652.1 | 6404630 | SNV | 1 | C | G | Heterozygous |
| NC_037652.1 | 6404632 | SNV | 1 | C | A | Homozygous   |
| NC_037652.1 | 6404634 | SNV | 1 | C | G | Homozygous   |
| NC_037652.1 | 6404652 | SNV | 1 | T | G | Homozygous   |
| NC_037652.1 | 6404656 | SNV | 1 | T | G | Homozygous   |
| NC_037652.1 | 6430057 | SNV | 1 | G | A | Homozygous   |
| NC_037652.1 | 6430209 | SNV | 1 | A | G | Homozygous   |
| NC_037652.1 | 6430222 | SNV | 1 | T | C | Heterozygous |
| NC_037652.1 | 6430349 | SNV | 1 | A | G | Homozygous   |
| NC_037652.1 | 6442302 | SNV | 1 | C | G | Homozygous   |
| NC_037652.1 | 6442305 | SNV | 1 | C | G | Homozygous   |
| NC_037652.1 | 6442333 | SNV | 1 | C | T | Homozygous   |



|             |         |     |   |   |   |              |
|-------------|---------|-----|---|---|---|--------------|
| NC_037652.1 | 6442409 | SNV | 1 | G | T | Homozygous   |
| NC_037652.1 | 6442412 | SNV | 1 | C | T | Heterozygous |
| NC_037652.1 | 6442439 | SNV | 1 | T | C | Homozygous   |
| NC_037652.1 | 6457752 | SNV | 1 | C | A | Heterozygous |
| NC_037652.1 | 6457766 | SNV | 1 | C | T | Heterozygous |
| NC_037652.1 | 6458185 | SNV | 1 | A | G | Heterozygous |
| NC_037652.1 | 6458191 | SNV | 1 | C | G | Heterozygous |
| NC_037652.1 | 6464264 | SNV | 1 | T | C | Heterozygous |
| NC_037652.1 | 6464297 | SNV | 1 | A | G | Homozygous   |
| NC_037652.1 | 6465401 | SNV | 1 | T | C | Homozygous   |
| NC_037652.1 | 6465461 | SNV | 1 | G | A | Homozygous   |
| NC_037652.1 | 6465762 | SNV | 1 | T | C | Homozygous   |
| NC_037652.1 | 6465768 | SNV | 1 | C | T | Heterozygous |
| NC_037652.1 | 6465771 | SNV | 1 | G | T | Heterozygous |
| NC_037652.1 | 6465790 | SNV | 1 | T | C | Heterozygous |
| NC_037652.1 | 6465802 | SNV | 1 | T | C | Homozygous   |
| NC_037652.1 | 6465898 | SNV | 1 | T | C | Homozygous   |
| NC_037652.1 | 6465918 | SNV | 1 | T | C | Heterozygous |
| NC_037652.1 | 6466290 | SNV | 1 | A | G | Homozygous   |
| NC_037652.1 | 6466327 | SNV | 1 | T | C | Homozygous   |
| NC_037652.1 | 6466341 | SNV | 1 | T | C | Heterozygous |
| NC_037652.1 | 6466532 | SNV | 1 | T | C | Heterozygous |
| NC_037652.1 | 6467556 | SNV | 1 | A | G | Heterozygous |
| NC_037652.1 | 6467929 | SNV | 1 | C | T | Heterozygous |
| NC_037652.1 | 6467982 | SNV | 1 | T | C | Homozygous   |
| NC_037652.1 | 6468039 | SNV | 1 | C | T | Homozygous   |
| NC_037652.1 | 6468392 | SNV | 1 | G | A | Heterozygous |
| NC_037652.1 | 6468473 | SNV | 1 | G | A | Heterozygous |
| NC_037652.1 | 6468645 | SNV | 1 | T | A | Homozygous   |
| NC_037652.1 | 6468824 | SNV | 1 | T | C | Heterozygous |
| NC_037652.1 | 6469584 | SNV | 1 | A | G | Heterozygous |
| NC_037652.1 | 6472929 | SNV | 1 | C | G | Heterozygous |
| NC_037652.1 | 6473558 | SNV | 1 | G | C | Homozygous   |
| NC_037652.1 | 6473591 | SNV | 1 | A | T | Heterozygous |
| NC_037652.1 | 6473594 | SNV | 1 | T | C | Homozygous   |
| NC_037652.1 | 6473596 | SNV | 1 | T | A | Homozygous   |
| NC_037652.1 | 6478158 | SNV | 1 | A | G | Heterozygous |
| NC_037652.1 | 6478174 | SNV | 1 | G | A | Heterozygous |
| NC_037652.1 | 6478253 | SNV | 1 | A | G | Homozygous   |
| NC_037652.1 | 6478379 | SNV | 1 | C | T | Homozygous   |
| NC_037652.1 | 6478739 | SNV | 1 | G | A | Heterozygous |
| NC_037652.1 | 6482428 | SNV | 1 | G | A | Homozygous   |
| NC_037652.1 | 6482430 | SNV | 1 | T | G | Homozygous   |
| NC_037652.1 | 6482437 | SNV | 1 | G | A | Homozygous   |
| NC_037652.1 | 6482504 | SNV | 1 | T | C | Homozygous   |
| NC_037652.1 | 6482545 | SNV | 1 | C | T | Heterozygous |
| NC_037652.1 | 6482566 | SNV | 1 | G | T | Heterozygous |
| NC_037652.1 | 6482608 | SNV | 1 | T | C | Homozygous   |
| NC_037652.1 | 6482901 | SNV | 1 | C | G | Heterozygous |
| NC_037652.1 | 6483005 | SNV | 1 | C | T | Homozygous   |
| NC_037652.1 | 6483774 | SNV | 1 | C | T | Homozygous   |

|             |         |     |   |   |   |              |
|-------------|---------|-----|---|---|---|--------------|
| NC_037652.1 | 6483840 | SNV | 1 | T | C | Homozygous   |
| NC_037652.1 | 6484102 | SNV | 1 | G | C | Heterozygous |
| NC_037652.1 | 6484180 | SNV | 1 | A | G | Homozygous   |
| NC_037652.1 | 6484281 | SNV | 1 | T | G | Heterozygous |
| NC_037652.1 | 6484411 | SNV | 1 | C | T | Heterozygous |
| NC_037652.1 | 6484809 | SNV | 1 | G | A | Heterozygous |
| NC_037652.1 | 6485157 | SNV | 1 | C | T | Heterozygous |
| NC_037652.1 | 6485199 | SNV | 1 | A | G | Heterozygous |
| NC_037652.1 | 6485310 | SNV | 1 | G | A | Homozygous   |
| NC_037652.1 | 6485341 | SNV | 1 | T | C | Heterozygous |
| NC_037652.1 | 6489541 | SNV | 1 | G | A | Homozygous   |
| NC_037652.1 | 6489576 | SNV | 1 | A | G | Heterozygous |
| NC_037652.1 | 6491627 | SNV | 1 | G | A | Homozygous   |
| NC_037652.1 | 6491631 | SNV | 1 | G | A | Homozygous   |
| NC_037652.1 | 6491633 | SNV | 1 | G | A | Homozygous   |
| NC_037652.1 | 6505037 | SNV | 1 | G | A | Heterozygous |
| NC_037652.1 | 6505050 | SNV | 1 | C | T | Heterozygous |
| NC_037652.1 | 6510856 | SNV | 1 | A | T | Homozygous   |
| NC_037652.1 | 6513831 | SNV | 1 | G | A | Heterozygous |
| NC_037652.1 | 6515198 | SNV | 1 | T | C | Homozygous   |
| NC_037652.1 | 6515407 | SNV | 1 | A | G | Heterozygous |
| NC_037652.1 | 6515490 | SNV | 1 | A | G | Homozygous   |
| NC_037652.1 | 6516700 | SNV | 1 | A | G | Homozygous   |
| NC_037652.1 | 6516717 | SNV | 1 | T | C | Homozygous   |
| NC_037652.1 | 6516867 | SNV | 1 | A | G | Homozygous   |
| NC_037652.1 | 6517003 | SNV | 1 | C | T | Heterozygous |
| NC_037652.1 | 6517021 | SNV | 1 | G | A | Heterozygous |
| NC_037652.1 | 6517121 | SNV | 1 | C | G | Homozygous   |
| NC_037652.1 | 6517404 | SNV | 1 | T | C | Homozygous   |
| NC_037652.1 | 6517672 | SNV | 1 | A | G | Heterozygous |
| NC_037652.1 | 6517721 | SNV | 1 | A | G | Heterozygous |
| NC_037652.1 | 6517750 | SNV | 1 | A | G | Heterozygous |
| NC_037652.1 | 6518864 | SNV | 1 | C | T | Heterozygous |
| NC_037652.1 | 6520499 | SNV | 1 | G | A | Heterozygous |
| NC_037652.1 | 6520622 | SNV | 1 | T | C | Heterozygous |
| NC_037652.1 | 6520970 | SNV | 1 | A | G | Heterozygous |
| NC_037652.1 | 6521018 | SNV | 1 | G | A | Homozygous   |
| NC_037652.1 | 6521273 | SNV | 1 | A | G | Homozygous   |
| NC_037652.1 | 6521432 | SNV | 1 | C | T | Heterozygous |
| NC_037652.1 | 6521447 | SNV | 1 | G | A | Heterozygous |
| NC_037652.1 | 6521471 | SNV | 1 | T | C | Homozygous   |
| NC_037652.1 | 6521604 | SNV | 1 | A | T | Heterozygous |
| NC_037652.1 | 6521713 | SNV | 1 | C | T | Heterozygous |
| NC_037652.1 | 6521828 | SNV | 1 | A | G | Homozygous   |
| NC_037652.1 | 6523027 | SNV | 1 | T | A | Homozygous   |
| NC_037652.1 | 6523033 | SNV | 1 | G | A | Homozygous   |
| NC_037652.1 | 6523042 | SNV | 1 | T | G | Homozygous   |
| NC_037652.1 | 6523045 | SNV | 1 | T | A | Homozygous   |
| NC_037652.1 | 6524265 | SNV | 1 | G | A | Heterozygous |
| NC_037652.1 | 6525411 | SNV | 1 | T | C | Homozygous   |
| NC_037652.1 | 6526681 | SNV | 1 | T | C | Heterozygous |

|             |         |     |   |   |   |              |
|-------------|---------|-----|---|---|---|--------------|
| NC_037652.1 | 6526952 | SNV | 1 | T | A | Homozygous   |
| NC_037652.1 | 6527090 | SNV | 1 | G | T | Heterozygous |
| NC_037652.1 | 6527422 | SNV | 1 | G | A | Homozygous   |
| NC_037652.1 | 6529077 | SNV | 1 | C | T | Heterozygous |
| NC_037652.1 | 6529143 | SNV | 1 | C | T | Heterozygous |
| NC_037652.1 | 6529188 | SNV | 1 | G | A | Heterozygous |
| NC_037652.1 | 6529308 | SNV | 1 | C | T | Heterozygous |
| NC_037652.1 | 6529482 | SNV | 1 | T | C | Homozygous   |
| NC_037652.1 | 6530646 | SNV | 1 | T | C | Heterozygous |
| NC_037652.1 | 6531043 | SNV | 1 | C | T | Homozygous   |
| NC_037652.1 | 6531054 | SNV | 1 | T | C | Homozygous   |
| NC_037652.1 | 6531164 | SNV | 1 | T | C | Homozygous   |
| NC_037652.1 | 6531376 | SNV | 1 | A | G | Homozygous   |
| NC_037652.1 | 6531947 | SNV | 1 | A | T | Homozygous   |
| NC_037652.1 | 6531949 | SNV | 1 | G | T | Homozygous   |
| NC_037652.1 | 6531952 | SNV | 1 | A | C | Homozygous   |
| NC_037652.1 | 6532228 | SNV | 1 | C | T | Homozygous   |
| NC_037652.1 | 6532926 | SNV | 1 | C | A | Homozygous   |
| NC_037652.1 | 6532934 | SNV | 1 | C | T | Homozygous   |
| NC_037652.1 | 6534652 | SNV | 1 | G | A | Heterozygous |
| NC_037652.1 | 6534746 | SNV | 1 | T | C | Heterozygous |
| NC_037652.1 | 6534750 | SNV | 1 | T | C | Heterozygous |
| NC_037652.1 | 6534761 | SNV | 1 | T | C | Heterozygous |
| NC_037652.1 | 6534765 | SNV | 1 | C | T | Heterozygous |
| NC_037652.1 | 6534770 | SNV | 1 | T | C | Heterozygous |
| NC_037652.1 | 6534774 | SNV | 1 | T | C | Heterozygous |
| NC_037652.1 | 6534777 | SNV | 1 | T | C | Heterozygous |
| NC_037652.1 | 6534779 | SNV | 1 | T | C | Heterozygous |
| NC_037652.1 | 6534781 | SNV | 1 | T | C | Heterozygous |
| NC_037652.1 | 6534797 | SNV | 1 | T | C | Heterozygous |
| NC_037652.1 | 6534801 | SNV | 1 | T | C | Heterozygous |
| NC_037652.1 | 6534805 | SNV | 1 | T | C | Heterozygous |
| NC_037652.1 | 6534808 | SNV | 1 | T | C | Heterozygous |
| NC_037652.1 | 6534811 | SNV | 1 | T | C | Heterozygous |
| NC_037652.1 | 6535159 | SNV | 1 | C | T | Homozygous   |
| NC_037652.1 | 6540776 | SNV | 1 | C | G | Homozygous   |
| NC_037652.1 | 6541384 | SNV | 1 | C | T | Homozygous   |
| NC_037652.1 | 6541470 | SNV | 1 | T | C | Heterozygous |
| NC_037652.1 | 6541501 | SNV | 1 | A | G | Homozygous   |
| NC_037652.1 | 6541570 | SNV | 1 | A | G | Heterozygous |
| NC_037652.1 | 6541667 | SNV | 1 | G | A | Heterozygous |
| NC_037652.1 | 6541825 | SNV | 1 | T | C | Homozygous   |
| NC_037652.1 | 6541970 | SNV | 1 | C | G | Homozygous   |
| NC_037652.1 | 6543578 | SNV | 1 | C | T | Heterozygous |
| NC_037652.1 | 6543603 | SNV | 1 | T | C | Homozygous   |
| NC_037652.1 | 6544991 | SNV | 1 | G | A | Homozygous   |
| NC_037652.1 | 6545000 | SNV | 1 | A | T | Homozygous   |
| NC_037652.1 | 6545006 | SNV | 1 | A | T | Heterozygous |
| NC_037652.1 | 6545394 | SNV | 1 | C | T | Heterozygous |
| NC_037652.1 | 6550919 | SNV | 1 | C | T | Heterozygous |
| NC_037652.1 | 6551089 | SNV | 1 | T | C | Homozygous   |

|             |         |     |   |   |   |              |
|-------------|---------|-----|---|---|---|--------------|
| NC_037652.1 | 6552189 | SNV | 1 | A | G | Homozygous   |
| NC_037652.1 | 6552362 | SNV | 1 | A | G | Homozygous   |
| NC_037652.1 | 6552668 | SNV | 1 | T | A | Homozygous   |
| NC_037652.1 | 6552749 | SNV | 1 | A | T | Homozygous   |
| NC_037652.1 | 6552787 | SNV | 1 | C | T | Heterozygous |
| NC_037652.1 | 6555991 | SNV | 1 | T | G | Heterozygous |
| NC_037652.1 | 6564384 | SNV | 1 | T | C | Homozygous   |
| NC_037652.1 | 6564511 | SNV | 1 | A | G | Heterozygous |
| NC_037652.1 | 6570076 | SNV | 1 | G | A | Heterozygous |
| NC_037652.1 | 6570353 | SNV | 1 | G | A | Heterozygous |
| NC_037652.1 | 6570421 | SNV | 1 | A | T | Homozygous   |
| NC_037652.1 | 6570959 | SNV | 1 | A | G | Homozygous   |
| NC_037652.1 | 6570985 | SNV | 1 | C | T | Heterozygous |
| NC_037652.1 | 6571012 | SNV | 1 | T | C | Homozygous   |
| NC_037652.1 | 6571126 | SNV | 1 | G | A | Heterozygous |
| NC_037652.1 | 6571696 | SNV | 1 | C | T | Heterozygous |
| NC_037652.1 | 6573769 | SNV | 1 | C | A | Homozygous   |
| NC_037652.1 | 6576778 | SNV | 1 | T | G | Heterozygous |
| NC_037652.1 | 6577811 | SNV | 1 | T | C | Heterozygous |
| NC_037652.1 | 6585803 | SNV | 1 | C | T | Homozygous   |
| NC_037652.1 | 6586184 | SNV | 1 | T | C | Homozygous   |
| NC_037652.1 | 6586254 | SNV | 1 | C | T | Heterozygous |
| NC_037652.1 | 6586270 | SNV | 1 | G | C | Heterozygous |
| NC_037652.1 | 6586273 | SNV | 1 | G | A | Heterozygous |
| NC_037652.1 | 6586302 | SNV | 1 | C | T | Homozygous   |
| NC_037652.1 | 6586317 | SNV | 1 | T | C | Homozygous   |
| NC_037652.1 | 6586322 | SNV | 1 | C | T | Homozygous   |
| NC_037652.1 | 6586331 | SNV | 1 | G | A | Homozygous   |
| NC_037652.1 | 6586333 | SNV | 1 | G | A | Heterozygous |
| NC_037652.1 | 6586336 | SNV | 1 | T | C | Heterozygous |
| NC_037652.1 | 6586347 | SNV | 1 | T | C | Heterozygous |
| NC_037652.1 | 6586353 | SNV | 1 | G | C | Homozygous   |
| NC_037652.1 | 6586366 | SNV | 1 | T | C | Heterozygous |
| NC_037652.1 | 6586392 | SNV | 1 | C | T | Heterozygous |
| NC_037652.1 | 6586431 | SNV | 1 | T | C | Homozygous   |
| NC_037652.1 | 6586438 | SNV | 1 | A | C | Heterozygous |
| NC_037652.1 | 6586543 | SNV | 1 | T | C | Homozygous   |
| NC_037652.1 | 6586551 | SNV | 1 | C | T | Heterozygous |
| NC_037652.1 | 6586612 | SNV | 1 | A | G | Heterozygous |
| NC_037652.1 | 6586685 | SNV | 1 | G | T | Homozygous   |
| NC_037652.1 | 6586699 | SNV | 1 | T | A | Homozygous   |
| NC_037652.1 | 6593743 | SNV | 1 | T | C | Heterozygous |
| NC_037652.1 | 6594179 | SNV | 1 | T | C | Homozygous   |
| NC_037652.1 | 6594192 | SNV | 1 | C | T | Homozygous   |
| NC_037652.1 | 6594216 | SNV | 1 | T | C | Homozygous   |
| NC_037652.1 | 6594421 | SNV | 1 | C | A | Heterozygous |
| NC_037652.1 | 6594604 | SNV | 1 | T | C | Homozygous   |
| NC_037652.1 | 6594638 | SNV | 1 | C | T | Heterozygous |
| NC_037652.1 | 6594762 | SNV | 1 | A | G | Homozygous   |
| NC_037652.1 | 6594784 | SNV | 1 | T | C | Heterozygous |
| NC_037652.1 | 6595256 | SNV | 1 | C | T | Heterozygous |

|             |         |     |   |   |   |              |
|-------------|---------|-----|---|---|---|--------------|
| NC_037652.1 | 6595477 | SNV | 1 | T | C | Heterozygous |
| NC_037652.1 | 6603381 | SNV | 1 | C | T | Homozygous   |
| NC_037652.1 | 6603497 | SNV | 1 | A | G | Homozygous   |
| NC_037652.1 | 6603954 | SNV | 1 | T | C | Heterozygous |
| NC_037652.1 | 6603970 | SNV | 1 | T | C | Homozygous   |
| NC_037652.1 | 6603973 | SNV | 1 | C | T | Heterozygous |
| NC_037652.1 | 6604211 | SNV | 1 | T | C | Heterozygous |
| NC_037652.1 | 6604220 | SNV | 1 | C | T | Heterozygous |
| NC_037652.1 | 6604678 | SNV | 1 | T | A | Homozygous   |
| NC_037652.1 | 6604744 | SNV | 1 | T | A | Homozygous   |
| NC_037652.1 | 6605030 | SNV | 1 | T | C | Heterozygous |
| NC_037652.1 | 6605618 | SNV | 1 | T | C | Heterozygous |
| NC_037652.1 | 6605849 | SNV | 1 | C | T | Homozygous   |
| NC_037652.1 | 6605852 | SNV | 1 | A | T | Homozygous   |
| NC_037652.1 | 6605888 | SNV | 1 | G | A | Heterozygous |
| NC_037652.1 | 6607141 | SNV | 1 | T | C | Heterozygous |
| NC_037652.1 | 6607288 | SNV | 1 | A | G | Homozygous   |
| NC_037652.1 | 6607525 | SNV | 1 | T | C | Homozygous   |
| NC_037652.1 | 6607785 | SNV | 1 | A | G | Heterozygous |
| NC_037652.1 | 6607791 | SNV | 1 | G | A | Heterozygous |
| NC_037652.1 | 6607793 | SNV | 1 | G | A | Heterozygous |
| NC_037652.1 | 6607795 | SNV | 1 | G | A | Heterozygous |
| NC_037652.1 | 6607820 | SNV | 1 | T | C | Heterozygous |
| NC_037652.1 | 6607928 | SNV | 1 | A | G | Heterozygous |
| NC_037652.1 | 6608011 | SNV | 1 | A | G | Homozygous   |
| NC_037652.1 | 6608191 | SNV | 1 | G | T | Homozygous   |
| NC_037652.1 | 6614454 | SNV | 1 | C | G | Heterozygous |
| NC_037652.1 | 6614456 | SNV | 1 | A | G | Heterozygous |
| NC_037652.1 | 6614468 | SNV | 1 | A | C | Heterozygous |
| NC_037652.1 | 6616195 | SNV | 1 | T | G | Heterozygous |
| NC_037652.1 | 6616203 | SNV | 1 | A | T | Homozygous   |
| NC_037652.1 | 6616236 | SNV | 1 | G | T | Heterozygous |
| NC_037652.1 | 6616244 | SNV | 1 | G | A | Homozygous   |
| NC_037652.1 | 6616249 | SNV | 1 | A | G | Heterozygous |
| NC_037652.1 | 6616252 | SNV | 1 | G | A | Heterozygous |
| NC_037652.1 | 6616263 | SNV | 1 | G | A | Homozygous   |
| NC_037652.1 | 6616265 | SNV | 1 | G | A | Heterozygous |
| NC_037652.1 | 6618669 | SNV | 1 | C | T | Heterozygous |
| NC_037652.1 | 6618703 | SNV | 1 | G | T | Heterozygous |
| NC_037652.1 | 6618714 | SNV | 1 | G | T | Heterozygous |
| NC_037652.1 | 6618751 | SNV | 1 | A | G | Homozygous   |
| NC_037652.1 | 6618759 | SNV | 1 | T | C | Homozygous   |
| NC_037652.1 | 6618775 | SNV | 1 | G | A | Heterozygous |
| NC_037652.1 | 6618779 | SNV | 1 | C | T | Heterozygous |
| NC_037652.1 | 6618837 | SNV | 1 | T | C | Homozygous   |
| NC_037652.1 | 6618857 | SNV | 1 | G | C | Homozygous   |
| NC_037652.1 | 6619707 | SNV | 1 | G | A | Homozygous   |
| NC_037652.1 | 6619712 | SNV | 1 | G | C | Homozygous   |
| NC_037652.1 | 6620300 | SNV | 1 | C | T | Heterozygous |
| NC_037652.1 | 6620426 | SNV | 1 | T | C | Heterozygous |
| NC_037652.1 | 6620430 | SNV | 1 | C | T | Homozygous   |

|             |         |     |   |   |   |              |
|-------------|---------|-----|---|---|---|--------------|
| NC_037652.1 | 6620436 | SNV | 1 | C | T | Homozygous   |
| NC_037652.1 | 6620440 | SNV | 1 | T | C | Homozygous   |
| NC_037652.1 | 6620669 | SNV | 1 | A | G | Homozygous   |
| NC_037652.1 | 6620672 | SNV | 1 | A | G | Homozygous   |
| NC_037652.1 | 6624467 | SNV | 1 | A | G | Homozygous   |
| NC_037652.1 | 6624471 | SNV | 1 | A | G | Homozygous   |
| NC_037652.1 | 6624475 | SNV | 1 | G | A | Heterozygous |
| NC_037652.1 | 6624561 | SNV | 1 | T | C | Homozygous   |
| NC_037652.1 | 6630164 | SNV | 1 | T | G | Heterozygous |
| NC_037652.1 | 6630223 | SNV | 1 | G | A | Heterozygous |
| NC_037652.1 | 6639356 | SNV | 1 | T | C | Homozygous   |
| NC_037652.1 | 6639370 | SNV | 1 | C | T | Homozygous   |
| NC_037652.1 | 6639377 | SNV | 1 | T | A | Homozygous   |
| NC_037652.1 | 6639451 | SNV | 1 | T | C | Homozygous   |
| NC_037652.1 | 6639489 | SNV | 1 | T | C | Heterozygous |
| NC_037652.1 | 6639491 | SNV | 1 | C | T | Homozygous   |
| NC_037652.1 | 6640506 | SNV | 1 | C | T | Heterozygous |
| NC_037652.1 | 6640508 | SNV | 1 | A | G | Heterozygous |
| NC_037652.1 | 6640646 | SNV | 1 | A | G | Homozygous   |
| NC_037652.1 | 6640658 | SNV | 1 | G | A | Heterozygous |
| NC_037652.1 | 6640667 | SNV | 1 | A | G | Homozygous   |
| NC_037652.1 | 6640677 | SNV | 1 | G | A | Heterozygous |
| NC_037652.1 | 6640777 | SNV | 1 | G | A | Homozygous   |
| NC_037652.1 | 6640790 | SNV | 1 | T | C | Heterozygous |
| NC_037652.1 | 6641766 | SNV | 1 | C | T | Heterozygous |
| NC_037652.1 | 6641772 | SNV | 1 | C | T | Heterozygous |
| NC_037652.1 | 6641857 | SNV | 1 | T | A | Homozygous   |
| NC_037652.1 | 6641970 | SNV | 1 | T | C | Heterozygous |
| NC_037652.1 | 6641999 | SNV | 1 | G | A | Heterozygous |
| NC_037652.1 | 6642023 | SNV | 1 | A | G | Homozygous   |
| NC_037652.1 | 6645844 | SNV | 1 | G | A | Heterozygous |
| NC_037652.1 | 6658522 | SNV | 1 | G | A | Homozygous   |
| NC_037652.1 | 6658548 | SNV | 1 | A | T | Homozygous   |
| NC_037652.1 | 6658614 | SNV | 1 | G | A | Heterozygous |
| NC_037652.1 | 6658702 | SNV | 1 | T | C | Homozygous   |
| NC_037652.1 | 6658729 | SNV | 1 | T | C | Homozygous   |
| NC_037652.1 | 6659850 | SNV | 1 | T | C | Homozygous   |
| NC_037652.1 | 6659861 | SNV | 1 | T | C | Homozygous   |
| NC_037652.1 | 6659877 | SNV | 1 | G | A | Heterozygous |
| NC_037652.1 | 6659933 | SNV | 1 | C | T | Heterozygous |
| NC_037652.1 | 6659936 | SNV | 1 | C | T | Homozygous   |
| NC_037652.1 | 6659943 | SNV | 1 | C | A | Heterozygous |
| NC_037652.1 | 6660000 | SNV | 1 | C | T | Heterozygous |
| NC_037652.1 | 6660017 | SNV | 1 | C | T | Homozygous   |
| NC_037652.1 | 6660110 | SNV | 1 | A | G | Heterozygous |
| NC_037652.1 | 6660131 | SNV | 1 | G | A | Homozygous   |
| NC_037652.1 | 6669716 | SNV | 1 | C | T | Homozygous   |
| NC_037652.1 | 6680576 | SNV | 1 | C | A | Homozygous   |
| NC_037652.1 | 6680607 | SNV | 1 | C | A | Heterozygous |
| NC_037652.1 | 6680615 | SNV | 1 | T | G | Homozygous   |
| NC_037652.1 | 6680803 | SNV | 1 | G | A | Heterozygous |

|             |         |     |   |   |   |              |
|-------------|---------|-----|---|---|---|--------------|
| NC_037652.1 | 6691863 | SNV | 1 | C | T | Heterozygous |
| NC_037652.1 | 6699759 | SNV | 1 | A | G | Homozygous   |
| NC_037652.1 | 6699906 | SNV | 1 | T | C | Heterozygous |
| NC_037652.1 | 6699962 | SNV | 1 | T | C | Homozygous   |
| NC_037652.1 | 6700135 | SNV | 1 | A | G | Homozygous   |
| NC_037652.1 | 6700194 | SNV | 1 | C | T | Homozygous   |
| NC_037652.1 | 6700197 | SNV | 1 | A | T | Homozygous   |
| NC_037652.1 | 6700211 | SNV | 1 | C | T | Homozygous   |
| NC_037652.1 | 6700386 | SNV | 1 | G | C | Heterozygous |
| NC_037652.1 | 6713006 | SNV | 1 | G | A | Homozygous   |
| NC_037652.1 | 6714528 | SNV | 1 | C | T | Heterozygous |
| NC_037652.1 | 6714531 | SNV | 1 | T | C | Heterozygous |
| NC_037652.1 | 6714563 | SNV | 1 | T | C | Homozygous   |
| NC_037652.1 | 6714575 | SNV | 1 | G | A | Heterozygous |
| NC_037652.1 | 6714579 | SNV | 1 | T | C | Homozygous   |
| NC_037652.1 | 6714595 | SNV | 1 | C | T | Heterozygous |
| NC_037652.1 | 6714627 | SNV | 1 | T | C | Heterozygous |
| NC_037652.1 | 6714707 | SNV | 1 | T | A | Homozygous   |
| NC_037652.1 | 6714754 | SNV | 1 | G | A | Homozygous   |
| NC_037652.1 | 6714979 | SNV | 1 | A | G | Homozygous   |
| NC_037652.1 | 6715191 | SNV | 1 | A | G | Homozygous   |
| NC_037652.1 | 6715253 | SNV | 1 | C | T | Homozygous   |
| NC_037652.1 | 6715345 | SNV | 1 | T | C | Homozygous   |
| NC_037652.1 | 6715376 | SNV | 1 | C | G | Heterozygous |
| NC_037652.1 | 6715488 | SNV | 1 | C | A | Homozygous   |
| NC_037652.1 | 6715557 | SNV | 1 | T | C | Homozygous   |
| NC_037652.1 | 6722823 | SNV | 1 | A | G | Heterozygous |
| NC_037652.1 | 6723024 | SNV | 1 | C | T | Heterozygous |
| NC_037652.1 | 6735586 | SNV | 1 | T | C | Homozygous   |
| NC_037652.1 | 6735588 | SNV | 1 | G | T | Homozygous   |
| NC_037652.1 | 6735599 | SNV | 1 | G | A | Homozygous   |
| NC_037652.1 | 6735603 | SNV | 1 | A | G | Homozygous   |
| NC_037652.1 | 6735650 | SNV | 1 | G | A | Heterozygous |
| NC_037652.1 | 6735691 | SNV | 1 | T | A | Heterozygous |
| NC_037652.1 | 6735722 | SNV | 1 | G | A | Homozygous   |
| NC_037652.1 | 6735857 | SNV | 1 | A | G | Homozygous   |
| NC_037652.1 | 6735907 | SNV | 1 | C | T | Homozygous   |
| NC_037652.1 | 6739851 | SNV | 1 | A | G | Heterozygous |
| NC_037652.1 | 6743807 | SNV | 1 | C | T | Heterozygous |
| NC_037652.1 | 6743924 | SNV | 1 | T | C | Heterozygous |
| NC_037652.1 | 6743944 | SNV | 1 | C | A | Heterozygous |
| NC_037652.1 | 6744003 | SNV | 1 | C | T | Heterozygous |
| NC_037652.1 | 6744039 | SNV | 1 | T | C | Homozygous   |
| NC_037652.1 | 6744045 | SNV | 1 | C | T | Heterozygous |
| NC_037652.1 | 6753664 | SNV | 1 | C | G | Heterozygous |
| NC_037652.1 | 6755939 | SNV | 1 | A | G | Homozygous   |
| NC_037652.1 | 6755956 | SNV | 1 | T | C | Homozygous   |
| NC_037652.1 | 6756058 | SNV | 1 | G | A | Heterozygous |
| NC_037652.1 | 6756068 | SNV | 1 | T | C | Homozygous   |
| NC_037652.1 | 6756084 | SNV | 1 | T | C | Heterozygous |
| NC_037652.1 | 6756130 | SNV | 1 | C | A | Homozygous   |

|             |         |     |   |   |   |              |
|-------------|---------|-----|---|---|---|--------------|
| NC_037652.1 | 6766790 | SNV | 1 | A | G | Homozygous   |
| NC_037652.1 | 6766793 | SNV | 1 | A | C | Homozygous   |
| NC_037652.1 | 6769215 | SNV | 1 | T | C | Heterozygous |
| NC_037652.1 | 6769401 | SNV | 1 | G | A | Homozygous   |
| NC_037652.1 | 6769426 | SNV | 1 | A | G | Heterozygous |
| NC_037652.1 | 6769772 | SNV | 1 | T | C | Homozygous   |
| NC_037652.1 | 6769789 | SNV | 1 | A | G | Homozygous   |
| NC_037652.1 | 6769802 | SNV | 1 | A | G | Heterozygous |
| NC_037652.1 | 6769834 | SNV | 1 | G | A | Heterozygous |
| NC_037652.1 | 6769911 | SNV | 1 | G | A | Heterozygous |
| NC_037652.1 | 6770379 | SNV | 1 | G | A | Homozygous   |
| NC_037652.1 | 6781985 | SNV | 1 | T | C | Homozygous   |
| NC_037652.1 | 6782060 | SNV | 1 | T | C | Homozygous   |
| NC_037652.1 | 6800710 | SNV | 1 | C | T | Heterozygous |
| NC_037652.1 | 6800723 | SNV | 1 | T | C | Heterozygous |
| NC_037652.1 | 6800727 | SNV | 1 | T | C | Heterozygous |
| NC_037652.1 | 6800730 | SNV | 1 | C | T | Heterozygous |
| NC_037652.1 | 6800737 | SNV | 1 | T | C | Heterozygous |
| NC_037652.1 | 6800744 | SNV | 1 | C | T | Heterozygous |
| NC_037652.1 | 6800751 | SNV | 1 | T | G | Heterozygous |
| NC_037652.1 | 6806754 | SNV | 1 | C | T | Heterozygous |
| NC_037652.1 | 6806947 | SNV | 1 | G | A | Homozygous   |
| NC_037652.1 | 6806970 | SNV | 1 | A | G | Homozygous   |
| NC_037652.1 | 6807037 | SNV | 1 | G | A | Homozygous   |
| NC_037652.1 | 6807247 | SNV | 1 | T | C | Homozygous   |
| NC_037652.1 | 6807333 | SNV | 1 | A | G | Homozygous   |
| NC_037652.1 | 6807346 | SNV | 1 | T | C | Homozygous   |
| NC_037652.1 | 6807443 | SNV | 1 | T | C | Homozygous   |
| NC_037652.1 | 6807469 | SNV | 1 | A | G | Heterozygous |
| NC_037652.1 | 6807476 | SNV | 1 | A | T | Heterozygous |
| NC_037652.1 | 6807610 | SNV | 1 | C | T | Homozygous   |
| NC_037652.1 | 6807624 | SNV | 1 | T | C | Homozygous   |
| NC_037652.1 | 6807638 | SNV | 1 | T | C | Homozygous   |
| NC_037652.1 | 6807643 | SNV | 1 | C | T | Heterozygous |
| NC_037652.1 | 6807658 | SNV | 1 | C | T | Heterozygous |
| NC_037652.1 | 6807665 | SNV | 1 | T | C | Heterozygous |
| NC_037652.1 | 6807670 | SNV | 1 | T | C | Heterozygous |
| NC_037652.1 | 6807683 | SNV | 1 | C | T | Homozygous   |
| NC_037652.1 | 6807694 | SNV | 1 | C | T | Heterozygous |
| NC_037652.1 | 6807699 | SNV | 1 | C | T | Heterozygous |
| NC_037652.1 | 6807712 | SNV | 1 | C | T | Homozygous   |
| NC_037652.1 | 6807715 | SNV | 1 | C | T | Heterozygous |
| NC_037652.1 | 6807743 | SNV | 1 | T | C | Heterozygous |
| NC_037652.1 | 6807759 | SNV | 1 | T | C | Heterozygous |
| NC_037652.1 | 6808054 | SNV | 1 | C | G | Homozygous   |
| NC_037652.1 | 6808058 | SNV | 1 | C | T | Homozygous   |
| NC_037652.1 | 6808060 | SNV | 1 | T | C | Homozygous   |
| NC_037652.1 | 6808098 | SNV | 1 | T | C | Homozygous   |
| NC_037652.1 | 6808100 | SNV | 1 | T | C | Homozygous   |
| NC_037652.1 | 6808114 | SNV | 1 | C | T | Homozygous   |
| NC_037652.1 | 6808213 | SNV | 1 | T | C | Homozygous   |



|             |         |     |   |   |   |              |
|-------------|---------|-----|---|---|---|--------------|
| NC_037652.1 | 6808233 | SNV | 1 | T | C | Heterozygous |
| NC_037652.1 | 6808283 | SNV | 1 | A | G | Homozygous   |
| NC_037652.1 | 6808315 | SNV | 1 | G | C | Homozygous   |
| NC_037652.1 | 6808323 | SNV | 1 | C | T | Heterozygous |
| NC_037652.1 | 6808353 | SNV | 1 | T | C | Homozygous   |
| NC_037652.1 | 6808605 | SNV | 1 | G | C | Homozygous   |
| NC_037652.1 | 6808608 | SNV | 1 | A | G | Homozygous   |
| NC_037652.1 | 6808735 | SNV | 1 | T | C | Heterozygous |
| NC_037652.1 | 6808757 | SNV | 1 | C | T | Homozygous   |
| NC_037652.1 | 6808796 | SNV | 1 | C | T | Homozygous   |
| NC_037652.1 | 6808836 | SNV | 1 | A | G | Homozygous   |
| NC_037652.1 | 6808951 | SNV | 1 | T | C | Homozygous   |
| NC_037652.1 | 6808997 | SNV | 1 | C | T | Heterozygous |
| NC_037652.1 | 6809019 | SNV | 1 | C | T | Homozygous   |
| NC_037652.1 | 6809034 | SNV | 1 | A | G | Homozygous   |
| NC_037652.1 | 6809043 | SNV | 1 | A | G | Homozygous   |
| NC_037652.1 | 6809092 | SNV | 1 | C | T | Homozygous   |
| NC_037652.1 | 6829367 | SNV | 1 | C | T | Heterozygous |
| NC_037652.1 | 6829368 | SNV | 1 | C | G | Heterozygous |
| NC_037652.1 | 6829369 | SNV | 1 | G | A | Heterozygous |
| NC_037652.1 | 6829506 | SNV | 1 | C | A | Homozygous   |
| NC_037652.1 | 6829510 | SNV | 1 | A | G | Homozygous   |
| NC_037652.1 | 6829513 | SNV | 1 | C | T | Homozygous   |
| NC_037652.1 | 6829517 | SNV | 1 | T | C | Homozygous   |
| NC_037652.1 | 6870628 | SNV | 1 | T | C | Heterozygous |
| NC_037652.1 | 6870634 | SNV | 1 | A | T | Heterozygous |
| NC_037652.1 | 6876558 | SNV | 1 | G | A | Heterozygous |
| NC_037652.1 | 6876704 | SNV | 1 | A | G | Heterozygous |
| NC_037652.1 | 6879210 | SNV | 1 | G | A | Heterozygous |
| NC_037652.1 | 6882784 | SNV | 1 | T | C | Homozygous   |
| NC_037652.1 | 6882802 | SNV | 1 | T | A | Heterozygous |
| NC_037652.1 | 6883968 | SNV | 1 | A | G | Homozygous   |
| NC_037652.1 | 6885145 | SNV | 1 | G | C | Heterozygous |
| NC_037652.1 | 6885149 | SNV | 1 | C | T | Heterozygous |
| NC_037652.1 | 6885165 | SNV | 1 | T | C | Homozygous   |
| NC_037652.1 | 6885323 | SNV | 1 | A | G | Homozygous   |
| NC_037652.1 | 6886509 | SNV | 1 | G | A | Homozygous   |
| NC_037652.1 | 6886512 | SNV | 1 | G | A | Homozygous   |
| NC_037652.1 | 6886521 | SNV | 1 | G | A | Homozygous   |
| NC_037652.1 | 6886530 | SNV | 1 | C | T | Homozygous   |
| NC_037652.1 | 6890080 | SNV | 1 | A | G | Heterozygous |
| NC_037652.1 | 6890114 | SNV | 1 | A | T | Homozygous   |
| NC_037652.1 | 6890131 | SNV | 1 | G | A | Heterozygous |
| NC_037652.1 | 6890137 | SNV | 1 | T | G | Heterozygous |
| NC_037652.1 | 6890256 | SNV | 1 | T | C | Homozygous   |
| NC_037652.1 | 6890264 | SNV | 1 | C | T | Heterozygous |
| NC_037652.1 | 6890276 | SNV | 1 | C | T | Heterozygous |
| NC_037652.1 | 6890315 | SNV | 1 | A | G | Heterozygous |
| NC_037652.1 | 6890387 | SNV | 1 | A | G | Homozygous   |
| NC_037652.1 | 6890436 | SNV | 1 | C | A | Homozygous   |
| NC_037652.1 | 6890470 | SNV | 1 | C | T | Heterozygous |

|             |         |     |   |   |   |              |
|-------------|---------|-----|---|---|---|--------------|
| NC_037652.1 | 6890472 | SNV | 1 | T | G | Homozygous   |
| NC_037652.1 | 6890561 | SNV | 1 | T | C | Homozygous   |
| NC_037652.1 | 6892741 | SNV | 1 | T | A | Homozygous   |
| NC_037652.1 | 6892770 | SNV | 1 | C | T | Homozygous   |
| NC_037652.1 | 6892791 | SNV | 1 | T | C | Homozygous   |
| NC_037652.1 | 6892793 | SNV | 1 | A | G | Homozygous   |
| NC_037652.1 | 6893174 | SNV | 1 | T | C | Homozygous   |
| NC_037652.1 | 6893591 | SNV | 1 | T | A | Heterozygous |
| NC_037652.1 | 6893591 | SNV | 1 | T | C | Heterozygous |
| NC_037652.1 | 6893645 | SNV | 1 | T | C | Heterozygous |
| NC_037652.1 | 6894035 | SNV | 1 | T | C | Heterozygous |
| NC_037652.1 | 6894477 | SNV | 1 | T | C | Heterozygous |
| NC_037652.1 | 6894521 | SNV | 1 | C | T | Heterozygous |
| NC_037652.1 | 6895169 | SNV | 1 | G | A | Homozygous   |
| NC_037652.1 | 6902562 | SNV | 1 | C | T | Heterozygous |
| NC_037652.1 | 6902951 | SNV | 1 | G | A | Heterozygous |
| NC_037652.1 | 6903132 | SNV | 1 | G | A | Heterozygous |
| NC_037652.1 | 6926575 | SNV | 1 | C | G | Homozygous   |
| NC_037652.1 | 6927177 | SNV | 1 | T | C | Homozygous   |
| NC_037652.1 | 6931762 | SNV | 1 | G | A | Heterozygous |
| NC_037652.1 | 6932542 | SNV | 1 | T | A | Homozygous   |
| NC_037652.1 | 6933690 | SNV | 1 | G | A | Heterozygous |
| NC_037652.1 | 6934860 | SNV | 1 | T | A | Heterozygous |
| NC_037652.1 | 6935043 | SNV | 1 | A | G | Heterozygous |
| NC_037652.1 | 6935833 | SNV | 1 | A | G | Homozygous   |
| NC_037652.1 | 6940864 | SNV | 1 | T | C | Homozygous   |
| NC_037652.1 | 6940915 | SNV | 1 | C | T | Heterozygous |
| NC_037652.1 | 6940978 | SNV | 1 | A | G | Heterozygous |
| NC_037652.1 | 6941461 | SNV | 1 | C | T | Homozygous   |
| NC_037652.1 | 6941664 | SNV | 1 | A | T | Heterozygous |
| NC_037652.1 | 6941666 | SNV | 1 | T | A | Heterozygous |
| NC_037652.1 | 6941950 | SNV | 1 | C | T | Heterozygous |
| NC_037652.1 | 6942126 | SNV | 1 | A | G | Heterozygous |
| NC_037652.1 | 6942344 | SNV | 1 | A | C | Heterozygous |
| NC_037652.1 | 6942350 | SNV | 1 | A | G | Heterozygous |
| NC_037652.1 | 6942352 | SNV | 1 | G | A | Heterozygous |
| NC_037652.1 | 6942364 | SNV | 1 | T | G | Heterozygous |
| NC_037652.1 | 6942366 | SNV | 1 | T | C | Heterozygous |
| NC_037652.1 | 6942387 | SNV | 1 | T | A | Heterozygous |
| NC_037652.1 | 6942391 | SNV | 1 | T | C | Homozygous   |
| NC_037652.1 | 6942397 | SNV | 1 | G | A | Heterozygous |
| NC_037652.1 | 6943270 | SNV | 1 | A | G | Homozygous   |
| NC_037652.1 | 6943300 | SNV | 1 | A | G | Heterozygous |
| NC_037652.1 | 6951400 | SNV | 1 | A | C | Heterozygous |
| NC_037652.1 | 6951404 | SNV | 1 | A | G | Heterozygous |
| NC_037652.1 | 6951430 | SNV | 1 | G | A | Homozygous   |
| NC_037652.1 | 6951432 | SNV | 1 | G | A | Homozygous   |
| NC_037652.1 | 6951437 | SNV | 1 | G | T | Homozygous   |
| NC_037652.1 | 6951760 | SNV | 1 | T | C | Homozygous   |
| NC_037652.1 | 6951773 | SNV | 1 | A | G | Homozygous   |
| NC_037652.1 | 6952977 | SNV | 1 | T | C | Homozygous   |

|             |         |     |   |   |   |              |
|-------------|---------|-----|---|---|---|--------------|
| NC_037652.1 | 6953363 | SNV | 1 | C | A | Heterozygous |
| NC_037652.1 | 6953461 | SNV | 1 | C | T | Heterozygous |
| NC_037652.1 | 6953513 | SNV | 1 | C | T | Heterozygous |
| NC_037652.1 | 6953534 | SNV | 1 | G | A | Heterozygous |
| NC_037652.1 | 6954387 | SNV | 1 | C | T | Homozygous   |
| NC_037652.1 | 6954523 | SNV | 1 | A | G | Homozygous   |
| NC_037652.1 | 6955339 | SNV | 1 | T | C | Homozygous   |
| NC_037652.1 | 6955704 | SNV | 1 | T | C | Homozygous   |
| NC_037652.1 | 6955774 | SNV | 1 | G | A | Homozygous   |
| NC_037652.1 | 6955826 | SNV | 1 | T | C | Homozygous   |
| NC_037652.1 | 6973721 | SNV | 1 | G | A | Homozygous   |
| NC_037652.1 | 6973723 | SNV | 1 | A | G | Heterozygous |
| NC_037652.1 | 6973729 | SNV | 1 | G | A | Homozygous   |
| NC_037652.1 | 6973747 | SNV | 1 | C | T | Homozygous   |
| NC_037652.1 | 6973749 | SNV | 1 | T | A | Homozygous   |
| NC_037652.1 | 6980682 | SNV | 1 | C | T | Homozygous   |
| NC_037652.1 | 6981046 | SNV | 1 | T | C | Homozygous   |
| NC_037652.1 | 6981051 | SNV | 1 | C | T | Homozygous   |
| NC_037652.1 | 6981203 | SNV | 1 | T | C | Homozygous   |
| NC_037652.1 | 6981567 | SNV | 1 | A | G | Heterozygous |
| NC_037652.1 | 6981877 | SNV | 1 | A | G | Homozygous   |
| NC_037652.1 | 6982310 | SNV | 1 | C | T | Heterozygous |
| NC_037652.1 | 6982458 | SNV | 1 | C | T | Homozygous   |
| NC_037652.1 | 6982468 | SNV | 1 | T | C | Homozygous   |
| NC_037652.1 | 6982480 | SNV | 1 | A | G | Homozygous   |
| NC_037652.1 | 6982593 | SNV | 1 | T | G | Homozygous   |
| NC_037652.1 | 6983721 | SNV | 1 | G | A | Heterozygous |
| NC_037652.1 | 6983796 | SNV | 1 | A | C | Homozygous   |
| NC_037652.1 | 6983876 | SNV | 1 | G | A | Heterozygous |
| NC_037652.1 | 6984077 | SNV | 1 | C | T | Heterozygous |
| NC_037652.1 | 6984402 | SNV | 1 | T | G | Heterozygous |
| NC_037652.1 | 6984495 | SNV | 1 | T | C | Homozygous   |
| NC_037652.1 | 6984569 | SNV | 1 | T | C | Homozygous   |
| NC_037652.1 | 6984695 | SNV | 1 | T | C | Heterozygous |
| NC_037652.1 | 6984707 | SNV | 1 | A | G | Homozygous   |
| NC_037652.1 | 6984781 | SNV | 1 | T | C | Heterozygous |
| NC_037652.1 | 6984787 | SNV | 1 | G | A | Heterozygous |
| NC_037652.1 | 6984846 | SNV | 1 | G | A | Heterozygous |
| NC_037652.1 | 6984980 | SNV | 1 | C | T | Heterozygous |
| NC_037652.1 | 6985156 | SNV | 1 | A | G | Heterozygous |
| NC_037652.1 | 6985281 | SNV | 1 | C | G | Homozygous   |
| NC_037652.1 | 6985490 | SNV | 1 | A | G | Heterozygous |
| NC_037652.1 | 6985534 | SNV | 1 | T | C | Homozygous   |
| NC_037652.1 | 6985558 | SNV | 1 | G | A | Homozygous   |
| NC_037652.1 | 6989754 | SNV | 1 | C | T | Heterozygous |
| NC_037652.1 | 6990145 | SNV | 1 | G | T | Heterozygous |
| NC_037652.1 | 6990711 | SNV | 1 | C | T | Heterozygous |
| NC_037652.1 | 6991015 | SNV | 1 | A | G | Homozygous   |
| NC_037652.1 | 6991177 | SNV | 1 | A | C | Homozygous   |
| NC_037652.1 | 6991180 | SNV | 1 | A | G | Homozygous   |
| NC_037652.1 | 6991329 | SNV | 1 | C | T | Heterozygous |

|             |         |     |   |   |   |              |
|-------------|---------|-----|---|---|---|--------------|
| NC_037652.1 | 6991370 | SNV | 1 | C | T | Heterozygous |
| NC_037652.1 | 6991417 | SNV | 1 | T | C | Homozygous   |
| NC_037652.1 | 6992116 | SNV | 1 | A | G | Heterozygous |
| NC_037652.1 | 6992154 | SNV | 1 | C | T | Homozygous   |
| NC_037652.1 | 6992630 | SNV | 1 | G | A | Heterozygous |
| NC_037652.1 | 6992876 | SNV | 1 | A | T | Heterozygous |
| NC_037652.1 | 6992927 | SNV | 1 | G | T | Heterozygous |
| NC_037652.1 | 6993409 | SNV | 1 | T | A | Heterozygous |
| NC_037652.1 | 6994280 | SNV | 1 | A | G | Homozygous   |
| NC_037652.1 | 6994291 | SNV | 1 | C | T | Heterozygous |
| NC_037652.1 | 6994630 | SNV | 1 | A | G | Homozygous   |
| NC_037652.1 | 6994978 | SNV | 1 | T | G | Heterozygous |
| NC_037652.1 | 6995000 | SNV | 1 | G | A | Heterozygous |
| NC_037652.1 | 6995648 | SNV | 1 | A | G | Heterozygous |
| NC_037652.1 | 6995806 | SNV | 1 | G | A | Heterozygous |
| NC_037652.1 | 6995811 | SNV | 1 | A | G | Heterozygous |
| NC_037652.1 | 6995818 | SNV | 1 | A | G | Homozygous   |
| NC_037652.1 | 6996262 | SNV | 1 | A | T | Homozygous   |
| NC_037652.1 | 6996286 | SNV | 1 | A | C | Homozygous   |
| NC_037652.1 | 6996319 | SNV | 1 | T | C | Homozygous   |
| NC_037652.1 | 6996328 | SNV | 1 | G | A | Heterozygous |
| NC_037652.1 | 6996484 | SNV | 1 | C | T | Heterozygous |
| NC_037652.1 | 6996520 | SNV | 1 | T | C | Homozygous   |
| NC_037652.1 | 6997152 | SNV | 1 | G | A | Heterozygous |
| NC_037652.1 | 6997163 | SNV | 1 | G | A | Heterozygous |
| NC_037652.1 | 6997763 | SNV | 1 | T | G | Heterozygous |
| NC_037652.1 | 6997765 | SNV | 1 | T | A | Heterozygous |
| NC_037652.1 | 6998768 | SNV | 1 | A | G | Homozygous   |
| NC_037652.1 | 6998773 | SNV | 1 | C | T | Homozygous   |
| NC_037652.1 | 7000057 | SNV | 1 | G | A | Homozygous   |
| NC_037652.1 | 7000066 | SNV | 1 | G | T | Heterozygous |
| NC_037652.1 | 7000355 | SNV | 1 | T | C | Homozygous   |
| NC_037652.1 | 7000545 | SNV | 1 | G | A | Heterozygous |
| NC_037652.1 | 7000600 | SNV | 1 | T | C | Homozygous   |
| NC_037652.1 | 7000903 | SNV | 1 | T | C | Homozygous   |
| NC_037652.1 | 7001982 | SNV | 1 | A | T | Heterozygous |
| NC_037652.1 | 7002477 | SNV | 1 | C | T | Heterozygous |
| NC_037652.1 | 7002520 | SNV | 1 | C | T | Homozygous   |
| NC_037652.1 | 7002763 | SNV | 1 | T | C | Homozygous   |
| NC_037652.1 | 7002775 | SNV | 1 | A | T | Homozygous   |
| NC_037652.1 | 7002836 | SNV | 1 | G | A | Heterozygous |
| NC_037652.1 | 7002978 | SNV | 1 | T | C | Homozygous   |
| NC_037652.1 | 7003102 | SNV | 1 | C | T | Homozygous   |
| NC_037652.1 | 7003136 | SNV | 1 | G | A | Homozygous   |
| NC_037652.1 | 7003235 | SNV | 1 | C | G | Homozygous   |
| NC_037652.1 | 7003976 | SNV | 1 | A | G | Homozygous   |
| NC_037652.1 | 7004047 | SNV | 1 | G | T | Homozygous   |
| NC_037652.1 | 7004090 | SNV | 1 | G | A | Homozygous   |
| NC_037652.1 | 7004092 | SNV | 1 | A | G | Heterozygous |
| NC_037652.1 | 7004096 | SNV | 1 | T | C | Homozygous   |
| NC_037652.1 | 7004194 | SNV | 1 | G | A | Heterozygous |

|             |         |     |   |   |   |              |
|-------------|---------|-----|---|---|---|--------------|
| NC_037652.1 | 7004881 | SNV | 1 | G | A | Heterozygous |
| NC_037652.1 | 7004972 | SNV | 1 | G | A | Heterozygous |
| NC_037652.1 | 7004977 | SNV | 1 | A | G | Heterozygous |
| NC_037652.1 | 7005010 | SNV | 1 | T | C | Heterozygous |
| NC_037652.1 | 7005012 | SNV | 1 | T | C | Heterozygous |
| NC_037652.1 | 7005072 | SNV | 1 | T | C | Homozygous   |
| NC_037652.1 | 7005075 | SNV | 1 | A | G | Heterozygous |
| NC_037652.1 | 7005212 | SNV | 1 | A | G | Heterozygous |
| NC_037652.1 | 7005223 | SNV | 1 | T | C | Homozygous   |
| NC_037652.1 | 7005512 | SNV | 1 | A | G | Homozygous   |
| NC_037652.1 | 7005565 | SNV | 1 | A | G | Heterozygous |
| NC_037652.1 | 7005804 | SNV | 1 | T | C | Homozygous   |
| NC_037652.1 | 7006148 | SNV | 1 | G | A | Homozygous   |
| NC_037652.1 | 7006527 | SNV | 1 | A | T | Heterozygous |
| NC_037652.1 | 7007126 | SNV | 1 | C | T | Homozygous   |
| NC_037652.1 | 7007522 | SNV | 1 | C | T | Homozygous   |
| NC_037652.1 | 7007588 | SNV | 1 | G | A | Heterozygous |
| NC_037652.1 | 7007593 | SNV | 1 | G | A | Heterozygous |
| NC_037652.1 | 7007639 | SNV | 1 | C | T | Heterozygous |
| NC_037652.1 | 7007652 | SNV | 1 | T | C | Heterozygous |
| NC_037652.1 | 7007828 | SNV | 1 | T | C | Heterozygous |
| NC_037652.1 | 7008452 | SNV | 1 | C | T | Heterozygous |
| NC_037652.1 | 7008466 | SNV | 1 | C | T | Heterozygous |
| NC_037652.1 | 7008895 | SNV | 1 | G | C | Heterozygous |
| NC_037652.1 | 7009091 | SNV | 1 | A | G | Homozygous   |
| NC_037652.1 | 7009117 | SNV | 1 | G | C | Homozygous   |
| NC_037652.1 | 7009205 | SNV | 1 | T | C | Homozygous   |
| NC_037652.1 | 7009215 | SNV | 1 | T | C | Heterozygous |
| NC_037652.1 | 7009775 | SNV | 1 | C | T | Homozygous   |
| NC_037652.1 | 7010324 | SNV | 1 | A | G | Heterozygous |
| NC_037652.1 | 7010453 | SNV | 1 | A | G | Heterozygous |
| NC_037652.1 | 7010603 | SNV | 1 | C | T | Heterozygous |
| NC_037652.1 | 7010843 | SNV | 1 | T | C | Heterozygous |
| NC_037652.1 | 7010852 | SNV | 1 | C | T | Heterozygous |
| NC_037652.1 | 7010873 | SNV | 1 | T | C | Homozygous   |
| NC_037652.1 | 7010927 | SNV | 1 | A | G | Homozygous   |
| NC_037652.1 | 7011332 | SNV | 1 | A | G | Heterozygous |
| NC_037652.1 | 7011359 | SNV | 1 | A | G | Homozygous   |
| NC_037652.1 | 7011545 | SNV | 1 | C | T | Homozygous   |
| NC_037652.1 | 7012412 | SNV | 1 | C | G | Homozygous   |
| NC_037652.1 | 7012763 | SNV | 1 | T | C | Heterozygous |
| NC_037652.1 | 7013364 | SNV | 1 | A | G | Heterozygous |
| NC_037652.1 | 7013883 | SNV | 1 | T | C | Heterozygous |
| NC_037652.1 | 7014393 | SNV | 1 | G | A | Heterozygous |
| NC_037652.1 | 7014735 | SNV | 1 | A | C | Homozygous   |
| NC_037652.1 | 7014747 | SNV | 1 | T | C | Homozygous   |
| NC_037652.1 | 7015199 | SNV | 1 | G | T | Heterozygous |
| NC_037652.1 | 7015218 | SNV | 1 | G | A | Heterozygous |
| NC_037652.1 | 7015227 | SNV | 1 | T | C | Homozygous   |
| NC_037652.1 | 7016149 | SNV | 1 | C | G | Heterozygous |
| NC_037652.1 | 7016155 | SNV | 1 | C | T | Homozygous   |

|             |         |     |   |   |   |              |
|-------------|---------|-----|---|---|---|--------------|
| NC_037652.1 | 7016242 | SNV | 1 | G | C | Homozygous   |
| NC_037652.1 | 7018943 | SNV | 1 | G | A | Heterozygous |
| NC_037652.1 | 7018977 | SNV | 1 | A | T | Heterozygous |
| NC_037652.1 | 7019182 | SNV | 1 | C | T | Heterozygous |
| NC_037652.1 | 7022535 | SNV | 1 | C | T | Heterozygous |
| NC_037652.1 | 7022901 | SNV | 1 | T | C | Heterozygous |
| NC_037652.1 | 7023319 | SNV | 1 | G | T | Heterozygous |
| NC_037652.1 | 7023323 | SNV | 1 | G | T | Heterozygous |
| NC_037652.1 | 7023655 | SNV | 1 | G | A | Homozygous   |
| NC_037652.1 | 7023789 | SNV | 1 | A | G | Heterozygous |
| NC_037652.1 | 7023834 | SNV | 1 | T | C | Homozygous   |
| NC_037652.1 | 7023845 | SNV | 1 | T | A | Homozygous   |
| NC_037652.1 | 7026270 | SNV | 1 | A | G | Heterozygous |
| NC_037652.1 | 7027112 | SNV | 1 | A | G | Heterozygous |
| NC_037652.1 | 7027114 | SNV | 1 | C | G | Heterozygous |
| NC_037652.1 | 7027127 | SNV | 1 | G | C | Homozygous   |
| NC_037652.1 | 7027130 | SNV | 1 | A | G | Homozygous   |
| NC_037652.1 | 7027976 | SNV | 1 | G | C | Homozygous   |
| NC_037652.1 | 7035747 | SNV | 1 | G | A | Heterozygous |
| NC_037652.1 | 7035775 | SNV | 1 | A | C | Heterozygous |
| NC_037652.1 | 7035786 | SNV | 1 | A | G | Heterozygous |
| NC_037652.1 | 7037892 | SNV | 1 | T | C | Heterozygous |
| NC_037652.1 | 7037956 | SNV | 1 | C | T | Heterozygous |
| NC_037652.1 | 7037959 | SNV | 1 | T | C | Heterozygous |
| NC_037652.1 | 7038138 | SNV | 1 | T | C | Heterozygous |
| NC_037652.1 | 7189581 | SNV | 1 | G | C | Homozygous   |
| NC_037652.1 | 7190952 | SNV | 1 | T | A | Homozygous   |
| NC_037652.1 | 7190955 | SNV | 1 | G | A | Homozygous   |
| NC_037652.1 | 7191560 | SNV | 1 | G | A | Homozygous   |
| NC_037652.1 | 7191690 | SNV | 1 | A | G | Heterozygous |
| NC_037652.1 | 7191986 | SNV | 1 | G | T | Homozygous   |
| NC_037652.1 | 7194448 | SNV | 1 | A | G | Heterozygous |
| NC_037652.1 | 7194505 | SNV | 1 | G | A | Heterozygous |
| NC_037652.1 | 7194540 | SNV | 1 | T | C | Heterozygous |
| NC_037652.1 | 7194814 | SNV | 1 | A | G | Heterozygous |
| NC_037652.1 | 7195161 | SNV | 1 | A | G | Homozygous   |
| NC_037652.1 | 7195177 | SNV | 1 | C | T | Heterozygous |
| NC_037652.1 | 7195322 | SNV | 1 | G | A | Heterozygous |
| NC_037652.1 | 7195818 | SNV | 1 | T | C | Homozygous   |
| NC_037652.1 | 7206267 | SNV | 1 | C | T | Homozygous   |
| NC_037652.1 | 7206276 | SNV | 1 | C | T | Homozygous   |
| NC_037652.1 | 7206282 | SNV | 1 | C | T | Homozygous   |
| NC_037652.1 | 7206290 | SNV | 1 | T | C | Heterozygous |
| NC_037652.1 | 7211395 | SNV | 1 | T | C | Heterozygous |
| NC_037652.1 | 7220680 | SNV | 1 | G | A | Homozygous   |
| NC_037652.1 | 7226244 | SNV | 1 | T | G | Homozygous   |
| NC_037652.1 | 7226278 | SNV | 1 | G | C | Homozygous   |
| NC_037652.1 | 7233344 | SNV | 1 | T | C | Homozygous   |
| NC_037652.1 | 7236700 | SNV | 1 | C | T | Homozygous   |
| NC_037652.1 | 7236743 | SNV | 1 | A | G | Homozygous   |
| NC_037652.1 | 7239879 | SNV | 1 | C | G | Heterozygous |

|             |         |     |   |   |   |              |
|-------------|---------|-----|---|---|---|--------------|
| NC_037652.1 | 7239890 | SNV | 1 | A | G | Homozygous   |
| NC_037652.1 | 7239997 | SNV | 1 | C | G | Heterozygous |
| NC_037652.1 | 7240042 | SNV | 1 | C | G | Homozygous   |
| NC_037652.1 | 7240069 | SNV | 1 | A | G | Homozygous   |
| NC_037652.1 | 7240446 | SNV | 1 | G | A | Heterozygous |
| NC_037652.1 | 7240452 | SNV | 1 | T | C | Heterozygous |
| NC_037652.1 | 7240499 | SNV | 1 | A | G | Homozygous   |
| NC_037652.1 | 7240544 | SNV | 1 | T | C | Heterozygous |
| NC_037652.1 | 7240565 | SNV | 1 | G | A | Homozygous   |
| NC_037652.1 | 7240598 | SNV | 1 | A | G | Heterozygous |
| NC_037652.1 | 7240602 | SNV | 1 | G | A | Heterozygous |
| NC_037652.1 | 7241376 | SNV | 1 | T | C | Homozygous   |
| NC_037652.1 | 7242001 | SNV | 1 | C | A | Homozygous   |
| NC_037652.1 | 7242045 | SNV | 1 | G | T | Homozygous   |
| NC_037652.1 | 7242076 | SNV | 1 | G | A | Heterozygous |
| NC_037652.1 | 7247780 | SNV | 1 | C | T | Homozygous   |
| NC_037652.1 | 7249312 | SNV | 1 | A | G | Heterozygous |
| NC_037652.1 | 7249677 | SNV | 1 | C | T | Heterozygous |
| NC_037652.1 | 7250487 | SNV | 1 | T | C | Homozygous   |
| NC_037652.1 | 7250497 | SNV | 1 | C | T | Homozygous   |
| NC_037652.1 | 7250563 | SNV | 1 | T | C | Homozygous   |
| NC_037652.1 | 7250853 | SNV | 1 | A | T | Homozygous   |
| NC_037652.1 | 7250857 | SNV | 1 | A | T | Heterozygous |
| NC_037652.1 | 7250869 | SNV | 1 | A | C | Heterozygous |
| NC_037652.1 | 7250994 | SNV | 1 | T | C | Heterozygous |
| NC_037652.1 | 7251464 | SNV | 1 | A | G | Heterozygous |
| NC_037652.1 | 7251487 | SNV | 1 | T | C | Homozygous   |
| NC_037652.1 | 7251926 | SNV | 1 | A | T | Homozygous   |
| NC_037652.1 | 7253190 | SNV | 1 | G | T | Heterozygous |
| NC_037652.1 | 7253293 | SNV | 1 | T | C | Heterozygous |
| NC_037652.1 | 7253325 | SNV | 1 | C | T | Heterozygous |
| NC_037652.1 | 7253722 | SNV | 1 | T | C | Homozygous   |
| NC_037652.1 | 7256223 | SNV | 1 | C | T | Homozygous   |
| NC_037652.1 | 7256230 | SNV | 1 | A | T | Homozygous   |
| NC_037652.1 | 7256233 | SNV | 1 | C | T | Homozygous   |
| NC_037652.1 | 7256237 | SNV | 1 | A | C | Homozygous   |
| NC_037652.1 | 7256255 | SNV | 1 | G | A | Homozygous   |
| NC_037652.1 | 7257287 | SNV | 1 | A | G | Homozygous   |
| NC_037652.1 | 7257740 | SNV | 1 | G | A | Homozygous   |
| NC_037652.1 | 7257827 | SNV | 1 | C | T | Homozygous   |
| NC_037652.1 | 7259323 | SNV | 1 | A | G | Homozygous   |
| NC_037652.1 | 7261501 | SNV | 1 | G | A | Heterozygous |
| NC_037652.1 | 7261729 | SNV | 1 | C | T | Homozygous   |
| NC_037652.1 | 7261733 | SNV | 1 | T | C | Homozygous   |
| NC_037652.1 | 7261776 | SNV | 1 | G | A | Homozygous   |
| NC_037652.1 | 7262217 | SNV | 1 | C | T | Heterozygous |
| NC_037652.1 | 7262804 | SNV | 1 | G | C | Homozygous   |
| NC_037652.1 | 7262877 | SNV | 1 | T | C | Homozygous   |
| NC_037652.1 | 7262948 | SNV | 1 | C | T | Heterozygous |
| NC_037652.1 | 7264031 | SNV | 1 | T | C | Heterozygous |
| NC_037652.1 | 7264046 | SNV | 1 | A | G | Heterozygous |

|             |         |     |   |   |   |              |
|-------------|---------|-----|---|---|---|--------------|
| NC_037652.1 | 7264242 | SNV | 1 | T | C | Heterozygous |
| NC_037652.1 | 7264324 | SNV | 1 | A | G | Heterozygous |
| NC_037652.1 | 7264345 | SNV | 1 | A | G | Homozygous   |
| NC_037652.1 | 7264353 | SNV | 1 | C | T | Heterozygous |
| NC_037652.1 | 7264844 | SNV | 1 | A | G | Homozygous   |
| NC_037652.1 | 7264872 | SNV | 1 | C | G | Heterozygous |
| NC_037652.1 | 7264933 | SNV | 1 | T | C | Homozygous   |
| NC_037652.1 | 7264979 | SNV | 1 | A | G | Heterozygous |
| NC_037652.1 | 7265707 | SNV | 1 | A | G | Heterozygous |
| NC_037652.1 | 7265710 | SNV | 1 | T | C | Heterozygous |
| NC_037652.1 | 7265770 | SNV | 1 | A | G | Homozygous   |
| NC_037652.1 | 7265975 | SNV | 1 | G | A | Heterozygous |
| NC_037652.1 | 7268362 | SNV | 1 | A | T | Heterozygous |
| NC_037652.1 | 7268409 | SNV | 1 | T | C | Heterozygous |
| NC_037652.1 | 7270643 | SNV | 1 | A | G | Homozygous   |
| NC_037652.1 | 7272085 | SNV | 1 | G | T | Homozygous   |
| NC_037652.1 | 7272765 | SNV | 1 | T | C | Homozygous   |
| NC_037652.1 | 7274783 | SNV | 1 | A | G | Heterozygous |
| NC_037652.1 | 7275773 | SNV | 1 | T | C | Homozygous   |
| NC_037652.1 | 7277367 | SNV | 1 | C | T | Homozygous   |
| NC_037652.1 | 7279110 | SNV | 1 | G | A | Homozygous   |
| NC_037652.1 | 7279121 | SNV | 1 | A | C | Homozygous   |
| NC_037652.1 | 7279133 | SNV | 1 | A | G | Homozygous   |
| NC_037652.1 | 7279138 | SNV | 1 | A | C | Homozygous   |
| NC_037652.1 | 7279140 | SNV | 1 | A | G | Homozygous   |
| NC_037652.1 | 7279146 | SNV | 1 | T | C | Homozygous   |
| NC_037652.1 | 7279151 | SNV | 1 | A | G | Homozygous   |
| NC_037652.1 | 7279162 | SNV | 1 | T | C | Homozygous   |
| NC_037652.1 | 7279514 | SNV | 1 | G | A | Homozygous   |
| NC_037652.1 | 7279539 | SNV | 1 | T | A | Homozygous   |
| NC_037652.1 | 7279546 | SNV | 1 | A | T | Homozygous   |
| NC_037652.1 | 7279550 | SNV | 1 | T | A | Homozygous   |
| NC_037652.1 | 7279552 | SNV | 1 | G | A | Homozygous   |
| NC_037652.1 | 7279979 | SNV | 1 | T | C | Homozygous   |
| NC_037652.1 | 7280213 | SNV | 1 | A | G | Heterozygous |
| NC_037652.1 | 7280723 | SNV | 1 | C | T | Homozygous   |
| NC_037652.1 | 7280841 | SNV | 1 | G | A | Heterozygous |
| NC_037652.1 | 7282047 | SNV | 1 | G | A | Heterozygous |
| NC_037652.1 | 7282056 | SNV | 1 | A | T | Heterozygous |
| NC_037652.1 | 7282606 | SNV | 1 | T | C | Homozygous   |
| NC_037652.1 | 7282837 | SNV | 1 | G | A | Homozygous   |
| NC_037652.1 | 7283021 | SNV | 1 | G | A | Heterozygous |
| NC_037652.1 | 7283050 | SNV | 1 | G | A | Heterozygous |
| NC_037652.1 | 7316964 | SNV | 1 | A | G | Heterozygous |
| NC_037652.1 | 7317066 | SNV | 1 | A | G | Homozygous   |
| NC_037652.1 | 7349322 | SNV | 1 | G | A | Homozygous   |
| NC_037652.1 | 7349358 | SNV | 1 | C | T | Heterozygous |
| NC_037652.1 | 7350950 | SNV | 1 | T | C | Homozygous   |
| NC_037652.1 | 7351136 | SNV | 1 | A | G | Homozygous   |
| NC_037652.1 | 7351245 | SNV | 1 | C | T | Heterozygous |
| NC_037652.1 | 7351272 | SNV | 1 | G | A | Homozygous   |



|             |         |     |   |   |   |              |
|-------------|---------|-----|---|---|---|--------------|
| NC_037652.1 | 7351370 | SNV | 1 | T | C | Heterozygous |
| NC_037652.1 | 7353622 | SNV | 1 | C | T | Homozygous   |
| NC_037652.1 | 7353629 | SNV | 1 | A | T | Homozygous   |
| NC_037652.1 | 7353653 | SNV | 1 | A | C | Heterozygous |
| NC_037652.1 | 7353655 | SNV | 1 | A | G | Heterozygous |
| NC_037652.1 | 7353659 | SNV | 1 | A | G | Heterozygous |
| NC_037652.1 | 7353677 | SNV | 1 | A | C | Heterozygous |
| NC_037652.1 | 7353679 | SNV | 1 | A | C | Heterozygous |
| NC_037652.1 | 7353683 | SNV | 1 | A | C | Heterozygous |
| NC_037652.1 | 7354173 | SNV | 1 | A | T | Heterozygous |
| NC_037652.1 | 7354504 | SNV | 1 | C | A | Heterozygous |
| NC_037652.1 | 7354508 | SNV | 1 | C | T | Heterozygous |
| NC_037652.1 | 7354512 | SNV | 1 | A | C | Heterozygous |
| NC_037652.1 | 7354541 | SNV | 1 | T | C | Heterozygous |
| NC_037652.1 | 7354557 | SNV | 1 | A | G | Homozygous   |
| NC_037652.1 | 7357028 | SNV | 1 | G | A | Homozygous   |
| NC_037652.1 | 7357030 | SNV | 1 | T | C | Heterozygous |
| NC_037652.1 | 7357083 | SNV | 1 | T | C | Homozygous   |
| NC_037652.1 | 7357135 | SNV | 1 | C | G | Homozygous   |
| NC_037652.1 | 7357162 | SNV | 1 | T | C | Homozygous   |
| NC_037652.1 | 7357169 | SNV | 1 | A | G | Homozygous   |
| NC_037652.1 | 7360961 | SNV | 1 | A | G | Homozygous   |
| NC_037652.1 | 7361211 | SNV | 1 | G | A | Homozygous   |
| NC_037652.1 | 7361288 | SNV | 1 | G | A | Heterozygous |
| NC_037652.1 | 7361294 | SNV | 1 | G | A | Homozygous   |
| NC_037652.1 | 7361305 | SNV | 1 | A | T | Heterozygous |
| NC_037652.1 | 7361393 | SNV | 1 | G | A | Heterozygous |
| NC_037652.1 | 7361399 | SNV | 1 | G | A | Heterozygous |
| NC_037652.1 | 7361548 | SNV | 1 | C | T | Homozygous   |
| NC_037652.1 | 7361604 | SNV | 1 | C | T | Heterozygous |
| NC_037652.1 | 7363551 | SNV | 1 | G | A | Heterozygous |
| NC_037652.1 | 7363606 | SNV | 1 | G | A | Homozygous   |
| NC_037652.1 | 7364393 | SNV | 1 | G | C | Heterozygous |
| NC_037652.1 | 7369670 | SNV | 1 | A | G | Heterozygous |
| NC_037652.1 | 7372707 | SNV | 1 | G | A | Heterozygous |
| NC_037652.1 | 7375129 | SNV | 1 | T | C | Heterozygous |
| NC_037652.1 | 7378980 | SNV | 1 | C | T | Heterozygous |
| NC_037652.1 | 7379400 | SNV | 1 | G | A | Homozygous   |
| NC_037652.1 | 7380333 | SNV | 1 | T | A | Homozygous   |
| NC_037652.1 | 7380464 | SNV | 1 | T | C | Homozygous   |
| NC_037652.1 | 7380979 | SNV | 1 | T | C | Homozygous   |
| NC_037652.1 | 7383130 | SNV | 1 | C | T | Heterozygous |
| NC_037652.1 | 7384238 | SNV | 1 | A | G | Homozygous   |
| NC_037652.1 | 7384646 | SNV | 1 | G | A | Homozygous   |
| NC_037652.1 | 7387659 | SNV | 1 | A | T | Homozygous   |
| NC_037652.1 | 7387675 | SNV | 1 | A | T | Homozygous   |
| NC_037652.1 | 7387678 | SNV | 1 | T | C | Homozygous   |
| NC_037652.1 | 7387687 | SNV | 1 | T | A | Homozygous   |
| NC_037652.1 | 7387690 | SNV | 1 | C | G | Homozygous   |
| NC_037652.1 | 7387699 | SNV | 1 | T | G | Homozygous   |
| NC_037652.1 | 7387705 | SNV | 1 | T | A | Homozygous   |

|             |         |     |   |   |   |              |
|-------------|---------|-----|---|---|---|--------------|
| NC_037652.1 | 7388117 | SNV | 1 | A | T | Homozygous   |
| NC_037652.1 | 7388120 | SNV | 1 | T | C | Heterozygous |
| NC_037652.1 | 7388123 | SNV | 1 | C | A | Homozygous   |
| NC_037652.1 | 7388132 | SNV | 1 | T | C | Heterozygous |
| NC_037652.1 | 7388154 | SNV | 1 | T | C | Homozygous   |
| NC_037652.1 | 7388156 | SNV | 1 | A | C | Homozygous   |
| NC_037652.1 | 7388159 | SNV | 1 | T | A | Heterozygous |
| NC_037652.1 | 7388173 | SNV | 1 | A | G | Homozygous   |
| NC_037652.1 | 7388183 | SNV | 1 | T | C | Heterozygous |
| NC_037652.1 | 7388201 | SNV | 1 | A | C | Homozygous   |
| NC_037652.1 | 7388204 | SNV | 1 | A | G | Homozygous   |
| NC_037652.1 | 7388210 | SNV | 1 | C | T | Homozygous   |
| NC_037652.1 | 7388213 | SNV | 1 | A | G | Heterozygous |
| NC_037652.1 | 7388216 | SNV | 1 | A | G | Heterozygous |
| NC_037652.1 | 7388735 | SNV | 1 | T | A | Heterozygous |
| NC_037652.1 | 7394002 | SNV | 1 | C | T | Heterozygous |
| NC_037652.1 | 7395913 | SNV | 1 | C | T | Heterozygous |
| NC_037652.1 | 7401639 | SNV | 1 | G | A | Homozygous   |
| NC_037652.1 | 7401862 | SNV | 1 | T | A | Heterozygous |
| NC_037652.1 | 7401876 | SNV | 1 | A | T | Heterozygous |
| NC_037652.1 | 7401891 | SNV | 1 | T | A | Homozygous   |
| NC_037652.1 | 7401895 | SNV | 1 | T | A | Homozygous   |
| NC_037652.1 | 7401909 | SNV | 1 | T | A | Homozygous   |
| NC_037652.1 | 7401917 | SNV | 1 | T | C | Homozygous   |
| NC_037652.1 | 7401922 | SNV | 1 | G | T | Homozygous   |
| NC_037652.1 | 7404494 | SNV | 1 | G | A | Heterozygous |
| NC_037652.1 | 7404503 | SNV | 1 | T | A | Homozygous   |
| NC_037652.1 | 7404506 | SNV | 1 | G | A | Homozygous   |
| NC_037652.1 | 7404509 | SNV | 1 | T | A | Homozygous   |
| NC_037652.1 | 7404518 | SNV | 1 | G | A | Homozygous   |
| NC_037652.1 | 7404520 | SNV | 1 | T | A | Homozygous   |
| NC_037652.1 | 7404524 | SNV | 1 | G | A | Heterozygous |
| NC_037652.1 | 7404524 | SNV | 1 | G | T | Heterozygous |
| NC_037652.1 | 7404527 | SNV | 1 | T | C | Homozygous   |
| NC_037652.1 | 7404530 | SNV | 1 | A | G | Homozygous   |
| NC_037652.1 | 7404533 | SNV | 1 | A | G | Homozygous   |
| NC_037652.1 | 7404548 | SNV | 1 | A | G | Homozygous   |
| NC_037652.1 | 7404551 | SNV | 1 | A | T | Homozygous   |
| NC_037652.1 | 7404578 | SNV | 1 | T | A | Homozygous   |
| NC_037652.1 | 7404587 | SNV | 1 | T | C | Homozygous   |
| NC_037652.1 | 7404596 | SNV | 1 | C | G | Homozygous   |
| NC_037652.1 | 7404599 | SNV | 1 | T | G | Homozygous   |
| NC_037652.1 | 7404601 | SNV | 1 | C | T | Homozygous   |
| NC_037652.1 | 7404626 | SNV | 1 | T | G | Homozygous   |
| NC_037652.1 | 7404629 | SNV | 1 | T | C | Homozygous   |
| NC_037652.1 | 7404635 | SNV | 1 | C | A | Homozygous   |
| NC_037652.1 | 7404641 | SNV | 1 | A | C | Heterozygous |
| NC_037652.1 | 7404644 | SNV | 1 | A | G | Homozygous   |
| NC_037652.1 | 7404647 | SNV | 1 | A | C | Homozygous   |
| NC_037652.1 | 7404659 | SNV | 1 | G | C | Homozygous   |
| NC_037652.1 | 7404668 | SNV | 1 | T | C | Homozygous   |

|             |         |     |   |   |   |              |
|-------------|---------|-----|---|---|---|--------------|
| NC_037652.1 | 7404671 | SNV | 1 | T | G | Heterozygous |
| NC_037652.1 | 7404674 | SNV | 1 | T | G | Homozygous   |
| NC_037652.1 | 7404676 | SNV | 1 | C | G | Heterozygous |
| NC_037652.1 | 7404683 | SNV | 1 | A | G | Heterozygous |
| NC_037652.1 | 7404693 | SNV | 1 | A | G | Homozygous   |
| NC_037652.1 | 7407742 | SNV | 1 | T | C | Homozygous   |
| NC_037652.1 | 7411372 | SNV | 1 | G | A | Homozygous   |
| NC_037652.1 | 7411689 | SNV | 1 | T | C | Homozygous   |
| NC_037652.1 | 7411709 | SNV | 1 | G | A | Homozygous   |
| NC_037652.1 | 7412085 | SNV | 1 | T | G | Heterozygous |
| NC_037652.1 | 7412121 | SNV | 1 | A | G | Heterozygous |
| NC_037652.1 | 7412638 | SNV | 1 | T | C | Homozygous   |
| NC_037652.1 | 7413240 | SNV | 1 | A | G | Homozygous   |
| NC_037652.1 | 7413426 | SNV | 1 | G | A | Homozygous   |
| NC_037652.1 | 7413767 | SNV | 1 | G | C | Homozygous   |
| NC_037652.1 | 7415249 | SNV | 1 | G | A | Heterozygous |
| NC_037652.1 | 7415374 | SNV | 1 | A | C | Heterozygous |
| NC_037652.1 | 7415951 | SNV | 1 | G | A | Homozygous   |
| NC_037652.1 | 7416745 | SNV | 1 | T | C | Homozygous   |
| NC_037652.1 | 7416907 | SNV | 1 | T | C | Heterozygous |
| NC_037652.1 | 7417054 | SNV | 1 | A | G | Heterozygous |
| NC_037652.1 | 7421545 | SNV | 1 | A | T | Homozygous   |
| NC_037652.1 | 7422681 | SNV | 1 | A | G | Homozygous   |
| NC_037652.1 | 7425920 | SNV | 1 | T | C | Heterozygous |
| NC_037652.1 | 7425943 | SNV | 1 | G | T | Homozygous   |
| NC_037652.1 | 7425969 | SNV | 1 | C | A | Heterozygous |
| NC_037652.1 | 7426006 | SNV | 1 | A | G | Heterozygous |
| NC_037652.1 | 7426115 | SNV | 1 | A | G | Heterozygous |
| NC_037652.1 | 7427636 | SNV | 1 | G | A | Homozygous   |
| NC_037652.1 | 7429234 | SNV | 1 | C | G | Heterozygous |
| NC_037652.1 | 7433904 | SNV | 1 | T | C | Homozygous   |
| NC_037652.1 | 7434334 | SNV | 1 | C | T | Homozygous   |
| NC_037652.1 | 7436979 | SNV | 1 | T | A | Homozygous   |
| NC_037652.1 | 7436991 | SNV | 1 | A | C | Homozygous   |
| NC_037652.1 | 7437013 | SNV | 1 | T | A | Homozygous   |
| NC_037652.1 | 7437018 | SNV | 1 | T | A | Homozygous   |
| NC_037652.1 | 7437020 | SNV | 1 | T | G | Homozygous   |
| NC_037652.1 | 7442141 | SNV | 1 | A | G | Homozygous   |
| NC_037652.1 | 7443109 | SNV | 1 | C | T | Homozygous   |
| NC_037652.1 | 7447014 | SNV | 1 | A | G | Homozygous   |
| NC_037652.1 | 7447016 | SNV | 1 | A | T | Homozygous   |
| NC_037652.1 | 7449803 | SNV | 1 | A | T | Homozygous   |
| NC_037652.1 | 7449805 | SNV | 1 | C | T | Homozygous   |
| NC_037652.1 | 7451153 | SNV | 1 | G | A | Homozygous   |
| NC_037652.1 | 7452467 | SNV | 1 | G | A | Heterozygous |
| NC_037652.1 | 7452485 | SNV | 1 | G | A | Heterozygous |
| NC_037652.1 | 7456249 | SNV | 1 | T | G | Homozygous   |
| NC_037652.1 | 7456891 | SNV | 1 | C | G | Homozygous   |
| NC_037652.1 | 7456905 | SNV | 1 | T | A | Homozygous   |
| NC_037652.1 | 7456907 | SNV | 1 | G | A | Homozygous   |
| NC_037652.1 | 7457612 | SNV | 1 | A | G | Heterozygous |

|             |         |     |   |   |   |              |
|-------------|---------|-----|---|---|---|--------------|
| NC_037652.1 | 7459223 | SNV | 1 | A | G | Homozygous   |
| NC_037652.1 | 7459372 | SNV | 1 | G | A | Heterozygous |
| NC_037652.1 | 7459617 | SNV | 1 | G | A | Heterozygous |
| NC_037652.1 | 7459719 | SNV | 1 | T | C | Heterozygous |
| NC_037652.1 | 7460774 | SNV | 1 | A | G | Homozygous   |
| NC_037652.1 | 7460903 | SNV | 1 | T | C | Heterozygous |
| NC_037652.1 | 7460999 | SNV | 1 | G | C | Heterozygous |
| NC_037652.1 | 7461392 | SNV | 1 | A | G | Homozygous   |
| NC_037652.1 | 7461422 | SNV | 1 | A | G | Homozygous   |
| NC_037652.1 | 7461830 | SNV | 1 | C | T | Homozygous   |
| NC_037652.1 | 7461839 | SNV | 1 | A | G | Homozygous   |
| NC_037652.1 | 7461896 | SNV | 1 | T | C | Heterozygous |
| NC_037652.1 | 7462013 | SNV | 1 | T | C | Heterozygous |
| NC_037652.1 | 7462058 | SNV | 1 | A | G | Heterozygous |
| NC_037652.1 | 7462073 | SNV | 1 | A | G | Heterozygous |
| NC_037652.1 | 7462085 | SNV | 1 | C | T | Homozygous   |
| NC_037652.1 | 7462142 | SNV | 1 | G | A | Heterozygous |
| NC_037652.1 | 7462265 | SNV | 1 | A | G | Heterozygous |
| NC_037652.1 | 7464830 | SNV | 1 | G | T | Homozygous   |
| NC_037652.1 | 7465063 | SNV | 1 | C | T | Heterozygous |
| NC_037652.1 | 7465344 | SNV | 1 | G | A | Heterozygous |
| NC_037652.1 | 7465813 | SNV | 1 | A | G | Heterozygous |
| NC_037652.1 | 7466815 | SNV | 1 | T | C | Homozygous   |
| NC_037652.1 | 7466896 | SNV | 1 | A | G | Homozygous   |
| NC_037652.1 | 7468148 | SNV | 1 | C | T | Heterozygous |
| NC_037652.1 | 7468400 | SNV | 1 | A | G | Heterozygous |
| NC_037652.1 | 7468433 | SNV | 1 | C | T | Heterozygous |
| NC_037652.1 | 7468439 | SNV | 1 | A | G | Heterozygous |
| NC_037652.1 | 7468459 | SNV | 1 | C | A | Heterozygous |
| NC_037652.1 | 7468668 | SNV | 1 | T | C | Heterozygous |
| NC_037652.1 | 7468817 | SNV | 1 | A | G | Heterozygous |
| NC_037652.1 | 7468866 | SNV | 1 | G | A | Heterozygous |
| NC_037652.1 | 7468998 | SNV | 1 | T | C | Heterozygous |
| NC_037652.1 | 7470278 | SNV | 1 | A | T | Heterozygous |
| NC_037652.1 | 7470290 | SNV | 1 | C | T | Heterozygous |
| NC_037652.1 | 7470512 | SNV | 1 | C | G | Heterozygous |
| NC_037652.1 | 7470628 | SNV | 1 | G | A | Heterozygous |
| NC_037652.1 | 7470767 | SNV | 1 | A | G | Homozygous   |
| NC_037652.1 | 7470789 | SNV | 1 | G | T | Heterozygous |
| NC_037652.1 | 7470852 | SNV | 1 | A | G | Heterozygous |
| NC_037652.1 | 7471016 | SNV | 1 | A | G | Heterozygous |
| NC_037652.1 | 7471186 | SNV | 1 | G | T | Homozygous   |
| NC_037652.1 | 7471190 | SNV | 1 | T | C | Homozygous   |
| NC_037652.1 | 7471241 | SNV | 1 | A | C | Homozygous   |
| NC_037652.1 | 7471257 | SNV | 1 | G | A | Homozygous   |
| NC_037652.1 | 7472079 | SNV | 1 | T | C | Homozygous   |
| NC_037652.1 | 7472135 | SNV | 1 | G | A | Heterozygous |
| NC_037652.1 | 7472167 | SNV | 1 | G | A | Heterozygous |
| NC_037652.1 | 7472258 | SNV | 1 | G | A | Heterozygous |
| NC_037652.1 | 7472473 | SNV | 1 | G | A | Heterozygous |
| NC_037652.1 | 7472512 | SNV | 1 | G | A | Heterozygous |

|             |         |     |   |   |   |              |
|-------------|---------|-----|---|---|---|--------------|
| NC_037652.1 | 7472527 | SNV | 1 | A | G | Homozygous   |
| NC_037652.1 | 7472614 | SNV | 1 | A | C | Heterozygous |
| NC_037652.1 | 7472689 | SNV | 1 | A | T | Homozygous   |
| NC_037652.1 | 7472784 | SNV | 1 | A | G | Homozygous   |
| NC_037652.1 | 7472797 | SNV | 1 | C | T | Heterozygous |
| NC_037652.1 | 7473184 | SNV | 1 | A | G | Heterozygous |
| NC_037652.1 | 7474044 | SNV | 1 | G | C | Homozygous   |
| NC_037652.1 | 7477612 | SNV | 1 | G | A | Homozygous   |
| NC_037652.1 | 7477698 | SNV | 1 | T | C | Homozygous   |
| NC_037652.1 | 7478084 | SNV | 1 | A | T | Heterozygous |
| NC_037652.1 | 7484371 | SNV | 1 | G | A | Heterozygous |
| NC_037652.1 | 7493194 | SNV | 1 | A | G | Homozygous   |
| NC_037652.1 | 7493206 | SNV | 1 | A | G | Homozygous   |
| NC_037652.1 | 7493209 | SNV | 1 | T | C | Homozygous   |
| NC_037652.1 | 7493254 | SNV | 1 | C | G | Homozygous   |
| NC_037652.1 | 7493298 | SNV | 1 | C | T | Homozygous   |
| NC_037652.1 | 7493325 | SNV | 1 | C | T | Homozygous   |
| NC_037652.1 | 7493332 | SNV | 1 | T | C | Homozygous   |
| NC_037652.1 | 7493342 | SNV | 1 | C | G | Homozygous   |
| NC_037652.1 | 7493345 | SNV | 1 | C | T | Homozygous   |
| NC_037652.1 | 7493362 | SNV | 1 | A | T | Homozygous   |
| NC_037652.1 | 7493410 | SNV | 1 | A | G | Homozygous   |
| NC_037652.1 | 7493414 | SNV | 1 | C | A | Homozygous   |
| NC_037652.1 | 7493422 | SNV | 1 | G | A | Homozygous   |
| NC_037652.1 | 7493433 | SNV | 1 | G | A | Homozygous   |
| NC_037652.1 | 7493437 | SNV | 1 | C | A | Homozygous   |
| NC_037652.1 | 7493444 | SNV | 1 | C | T | Homozygous   |
| NC_037652.1 | 7493448 | SNV | 1 | C | T | Homozygous   |
| NC_037652.1 | 7493453 | SNV | 1 | G | A | Heterozygous |
| NC_037652.1 | 7493457 | SNV | 1 | G | A | Homozygous   |
| NC_037652.1 | 7493461 | SNV | 1 | C | A | Heterozygous |
| NC_037652.1 | 7493461 | SNV | 1 | C | G | Heterozygous |
| NC_037652.1 | 7493465 | SNV | 1 | G | A | Heterozygous |
| NC_037652.1 | 7493469 | SNV | 1 | C | A | Homozygous   |
| NC_037652.1 | 7493473 | SNV | 1 | G | A | Homozygous   |
| NC_037652.1 | 7493493 | SNV | 1 | G | A | Homozygous   |
| NC_037652.1 | 7493505 | SNV | 1 | G | A | Homozygous   |
| NC_037652.1 | 7493509 | SNV | 1 | G | A | Homozygous   |
| NC_037652.1 | 7493513 | SNV | 1 | C | A | Heterozygous |
| NC_037652.1 | 7493513 | SNV | 1 | C | G | Heterozygous |
| NC_037652.1 | 7493516 | SNV | 1 | T | C | Heterozygous |
| NC_037652.1 | 7493520 | SNV | 1 | C | T | Heterozygous |
| NC_037652.1 | 7493521 | SNV | 1 | G | A | Heterozygous |
| NC_037652.1 | 7493525 | SNV | 1 | G | A | Homozygous   |
| NC_037652.1 | 7493532 | SNV | 1 | G | A | Homozygous   |
| NC_037652.1 | 7493536 | SNV | 1 | C | A | Homozygous   |
| NC_037652.1 | 7493540 | SNV | 1 | G | A | Homozygous   |
| NC_037652.1 | 7493544 | SNV | 1 | G | A | Homozygous   |
| NC_037652.1 | 7493548 | SNV | 1 | G | A | Homozygous   |
| NC_037652.1 | 7493551 | SNV | 1 | T | C | Homozygous   |
| NC_037652.1 | 7493660 | SNV | 1 | G | A | Homozygous   |

|             |         |     |   |   |   |              |
|-------------|---------|-----|---|---|---|--------------|
| NC_037652.1 | 7493664 | SNV | 1 | C | A | Homozygous   |
| NC_037652.1 | 7493684 | SNV | 1 | C | A | Homozygous   |
| NC_037652.1 | 7493733 | SNV | 1 | T | A | Homozygous   |
| NC_037652.1 | 7493737 | SNV | 1 | T | A | Homozygous   |
| NC_037652.1 | 7493741 | SNV | 1 | T | A | Homozygous   |
| NC_037652.1 | 7493745 | SNV | 1 | T | A | Homozygous   |
| NC_037652.1 | 7493748 | SNV | 1 | C | G | Homozygous   |
| NC_037652.1 | 7493752 | SNV | 1 | G | A | Heterozygous |
| NC_037652.1 | 7494320 | SNV | 1 | T | G | Homozygous   |
| NC_037652.1 | 7494414 | SNV | 1 | C | T | Heterozygous |
| NC_037652.1 | 7494437 | SNV | 1 | G | A | Heterozygous |
| NC_037652.1 | 7494447 | SNV | 1 | G | A | Heterozygous |
| NC_037652.1 | 7499208 | SNV | 1 | A | T | Homozygous   |
| NC_037652.1 | 7499442 | SNV | 1 | G | A | Heterozygous |
| NC_037652.1 | 7499618 | SNV | 1 | C | T | Homozygous   |
| NC_037652.1 | 7510273 | SNV | 1 | G | C | Heterozygous |
| NC_037652.1 | 7510378 | SNV | 1 | A | G | Heterozygous |
| NC_037652.1 | 7510415 | SNV | 1 | T | C | Homozygous   |
| NC_037652.1 | 7510559 | SNV | 1 | T | C | Homozygous   |
| NC_037652.1 | 7510766 | SNV | 1 | C | T | Homozygous   |
| NC_037652.1 | 7510805 | SNV | 1 | A | G | Homozygous   |
| NC_037652.1 | 7511805 | SNV | 1 | A | T | Homozygous   |
| NC_037652.1 | 7511810 | SNV | 1 | T | C | Homozygous   |
| NC_037652.1 | 7511832 | SNV | 1 | G | C | Homozygous   |
| NC_037652.1 | 7512126 | SNV | 1 | T | C | Homozygous   |
| NC_037652.1 | 7512130 | SNV | 1 | G | A | Heterozygous |
| NC_037652.1 | 7512282 | SNV | 1 | T | A | Heterozygous |
| NC_037652.1 | 7512286 | SNV | 1 | T | C | Heterozygous |
| NC_037652.1 | 7512295 | SNV | 1 | T | C | Heterozygous |
| NC_037652.1 | 7512363 | SNV | 1 | C | T | Heterozygous |
| NC_037652.1 | 7512371 | SNV | 1 | T | C | Homozygous   |
| NC_037652.1 | 7512538 | SNV | 1 | C | A | Heterozygous |
| NC_037652.1 | 7512541 | SNV | 1 | G | C | Heterozygous |
| NC_037652.1 | 7512903 | SNV | 1 | G | A | Heterozygous |
| NC_037652.1 | 7513054 | SNV | 1 | T | C | Homozygous   |
| NC_037652.1 | 7513197 | SNV | 1 | A | G | Homozygous   |
| NC_037652.1 | 7513202 | SNV | 1 | C | G | Homozygous   |
| NC_037652.1 | 7513277 | SNV | 1 | A | G | Homozygous   |
| NC_037652.1 | 7513408 | SNV | 1 | A | G | Homozygous   |
| NC_037652.1 | 7513438 | SNV | 1 | T | C | Homozygous   |
| NC_037652.1 | 7513591 | SNV | 1 | T | C | Homozygous   |
| NC_037652.1 | 7513639 | SNV | 1 | T | C | Homozygous   |
| NC_037652.1 | 7513685 | SNV | 1 | G | T | Homozygous   |
| NC_037652.1 | 7513735 | SNV | 1 | T | C | Homozygous   |
| NC_037652.1 | 7517089 | SNV | 1 | T | G | Homozygous   |
| NC_037652.1 | 7517097 | SNV | 1 | G | T | Homozygous   |
| NC_037652.1 | 7517293 | SNV | 1 | T | A | Heterozygous |
| NC_037652.1 | 7517339 | SNV | 1 | G | C | Heterozygous |
| NC_037652.1 | 7517418 | SNV | 1 | G | A | Homozygous   |
| NC_037652.1 | 7517619 | SNV | 1 | T | A | Homozygous   |
| NC_037652.1 | 7521640 | SNV | 1 | C | T | Heterozygous |

|             |         |     |   |   |   |              |
|-------------|---------|-----|---|---|---|--------------|
| NC_037652.1 | 7521710 | SNV | 1 | G | T | Heterozygous |
| NC_037652.1 | 7521805 | SNV | 1 | G | A | Heterozygous |
| NC_037652.1 | 7522149 | SNV | 1 | A | T | Heterozygous |
| NC_037652.1 | 7522218 | SNV | 1 | T | C | Homozygous   |
| NC_037652.1 | 7523277 | SNV | 1 | A | G | Heterozygous |
| NC_037652.1 | 7523282 | SNV | 1 | G | A | Heterozygous |
| NC_037652.1 | 7523298 | SNV | 1 | A | T | Heterozygous |
| NC_037652.1 | 7526747 | SNV | 1 | T | A | Homozygous   |
| NC_037652.1 | 7527324 | SNV | 1 | G | C | Heterozygous |
| NC_037652.1 | 7527434 | SNV | 1 | A | G | Heterozygous |
| NC_037652.1 | 7527524 | SNV | 1 | T | C | Homozygous   |
| NC_037652.1 | 7527573 | SNV | 1 | A | G | Heterozygous |
| NC_037652.1 | 7527830 | SNV | 1 | A | C | Homozygous   |
| NC_037652.1 | 7527836 | SNV | 1 | A | T | Homozygous   |
| NC_037652.1 | 7527840 | SNV | 1 | A | T | Homozygous   |
| NC_037652.1 | 7527843 | SNV | 1 | A | T | Homozygous   |
| NC_037652.1 | 7527845 | SNV | 1 | T | A | Homozygous   |
| NC_037652.1 | 7528820 | SNV | 1 | C | T | Heterozygous |
| NC_037652.1 | 7528915 | SNV | 1 | A | T | Homozygous   |
| NC_037652.1 | 7529084 | SNV | 1 | G | C | Heterozygous |
| NC_037652.1 | 7530669 | SNV | 1 | G | A | Heterozygous |
| NC_037652.1 | 7530680 | SNV | 1 | G | A | Heterozygous |
| NC_037652.1 | 7530791 | SNV | 1 | T | C | Homozygous   |
| NC_037652.1 | 7530793 | SNV | 1 | A | G | Heterozygous |
| NC_037652.1 | 7530910 | SNV | 1 | C | T | Heterozygous |
| NC_037652.1 | 7531333 | SNV | 1 | A | G | Heterozygous |
| NC_037652.1 | 7531339 | SNV | 1 | A | G | Homozygous   |
| NC_037652.1 | 7531390 | SNV | 1 | A | G | Heterozygous |
| NC_037652.1 | 7531658 | SNV | 1 | T | A | Heterozygous |
| NC_037652.1 | 7531835 | SNV | 1 | T | C | Heterozygous |
| NC_037652.1 | 7531851 | SNV | 1 | C | A | Heterozygous |
| NC_037652.1 | 7531860 | SNV | 1 | C | T | Homozygous   |
| NC_037652.1 | 7531863 | SNV | 1 | C | T | Homozygous   |
| NC_037652.1 | 7531869 | SNV | 1 | T | C | Homozygous   |
| NC_037652.1 | 7531872 | SNV | 1 | G | A | Heterozygous |
| NC_037652.1 | 7531896 | SNV | 1 | C | T | Heterozygous |
| NC_037652.1 | 7531897 | SNV | 1 | C | G | Heterozygous |
| NC_037652.1 | 7531921 | SNV | 1 | A | G | Heterozygous |
| NC_037652.1 | 7532052 | SNV | 1 | A | G | Homozygous   |
| NC_037652.1 | 7532094 | SNV | 1 | G | T | Homozygous   |
| NC_037652.1 | 7532164 | SNV | 1 | A | G | Homozygous   |
| NC_037652.1 | 7532182 | SNV | 1 | G | A | Heterozygous |
| NC_037652.1 | 7532230 | SNV | 1 | G | A | Heterozygous |
| NC_037652.1 | 7532249 | SNV | 1 | A | G | Homozygous   |
| NC_037652.1 | 7532273 | SNV | 1 | A | T | Heterozygous |
| NC_037652.1 | 7532447 | SNV | 1 | T | C | Heterozygous |
| NC_037652.1 | 7532615 | SNV | 1 | A | G | Homozygous   |
| NC_037652.1 | 7532690 | SNV | 1 | G | T | Homozygous   |
| NC_037652.1 | 7532705 | SNV | 1 | C | T | Heterozygous |
| NC_037652.1 | 7532791 | SNV | 1 | G | A | Heterozygous |
| NC_037652.1 | 7533145 | SNV | 1 | T | C | Heterozygous |

|             |         |     |   |   |   |              |
|-------------|---------|-----|---|---|---|--------------|
| NC_037652.1 | 7533275 | SNV | 1 | G | A | Homozygous   |
| NC_037652.1 | 7533317 | SNV | 1 | A | G | Homozygous   |
| NC_037652.1 | 7533374 | SNV | 1 | A | G | Homozygous   |
| NC_037652.1 | 7533387 | SNV | 1 | G | C | Homozygous   |
| NC_037652.1 | 7533454 | SNV | 1 | A | G | Homozygous   |
| NC_037652.1 | 7533527 | SNV | 1 | G | A | Heterozygous |
| NC_037652.1 | 7533797 | SNV | 1 | T | C | Heterozygous |
| NC_037652.1 | 7533820 | SNV | 1 | C | T | Homozygous   |
| NC_037652.1 | 7533872 | SNV | 1 | A | G | Heterozygous |
| NC_037652.1 | 7534063 | SNV | 1 | C | T | Homozygous   |
| NC_037652.1 | 7534654 | SNV | 1 | T | A | Homozygous   |
| NC_037652.1 | 7534676 | SNV | 1 | T | G | Heterozygous |
| NC_037652.1 | 7534727 | SNV | 1 | T | G | Heterozygous |
| NC_037652.1 | 7534744 | SNV | 1 | C | T | Heterozygous |
| NC_037652.1 | 7534746 | SNV | 1 | C | T | Homozygous   |
| NC_037652.1 | 7535007 | SNV | 1 | C | T | Heterozygous |
| NC_037652.1 | 7535177 | SNV | 1 | C | T | Homozygous   |
| NC_037652.1 | 7535269 | SNV | 1 | A | G | Heterozygous |
| NC_037652.1 | 7535423 | SNV | 1 | A | G | Homozygous   |
| NC_037652.1 | 7535464 | SNV | 1 | C | T | Heterozygous |
| NC_037652.1 | 7535467 | SNV | 1 | A | T | Homozygous   |
| NC_037652.1 | 7535471 | SNV | 1 | A | C | Homozygous   |
| NC_037652.1 | 7535473 | SNV | 1 | C | T | Homozygous   |
| NC_037652.1 | 7535480 | SNV | 1 | A | C | Homozygous   |
| NC_037652.1 | 7535489 | SNV | 1 | A | C | Homozygous   |
| NC_037652.1 | 7535504 | SNV | 1 | A | C | Homozygous   |
| NC_037652.1 | 7535513 | SNV | 1 | A | C | Homozygous   |
| NC_037652.1 | 7536912 | SNV | 1 | T | A | Heterozygous |
| NC_037652.1 | 7536926 | SNV | 1 | T | C | Heterozygous |
| NC_037652.1 | 7536932 | SNV | 1 | T | C | Heterozygous |
| NC_037652.1 | 7536936 | SNV | 1 | T | C | Heterozygous |
| NC_037652.1 | 7536943 | SNV | 1 | A | G | Heterozygous |
| NC_037652.1 | 7536947 | SNV | 1 | A | G | Heterozygous |
| NC_037652.1 | 7536979 | SNV | 1 | A | G | Homozygous   |
| NC_037652.1 | 7536989 | SNV | 1 | T | A | Homozygous   |
| NC_037652.1 | 7536994 | SNV | 1 | G | T | Homozygous   |
| NC_037652.1 | 7536996 | SNV | 1 | C | T | Homozygous   |
| NC_037652.1 | 7539240 | SNV | 1 | T | C | Homozygous   |
| NC_037652.1 | 7539264 | SNV | 1 | T | C | Homozygous   |
| NC_037652.1 | 7539269 | SNV | 1 | A | T | Homozygous   |
| NC_037652.1 | 7539290 | SNV | 1 | T | C | Heterozygous |
| NC_037652.1 | 7539444 | SNV | 1 | A | G | Homozygous   |
| NC_037652.1 | 7539449 | SNV | 1 | C | A | Homozygous   |
| NC_037652.1 | 7539453 | SNV | 1 | G | A | Homozygous   |
| NC_037652.1 | 7540389 | SNV | 1 | C | T | Heterozygous |
| NC_037652.1 | 7540647 | SNV | 1 | C | A | Homozygous   |
| NC_037652.1 | 7540662 | SNV | 1 | C | T | Homozygous   |
| NC_037652.1 | 7542626 | SNV | 1 | C | T | Heterozygous |
| NC_037652.1 | 7547115 | SNV | 1 | G | A | Heterozygous |
| NC_037652.1 | 7547131 | SNV | 1 | C | T | Homozygous   |
| NC_037652.1 | 7547170 | SNV | 1 | C | T | Homozygous   |



|             |         |     |   |   |   |              |
|-------------|---------|-----|---|---|---|--------------|
| NC_037652.1 | 7547172 | SNV | 1 | T | C | Heterozygous |
| NC_037652.1 | 7547664 | SNV | 1 | T | C | Heterozygous |
| NC_037652.1 | 7547666 | SNV | 1 | T | A | Heterozygous |
| NC_037652.1 | 7548012 | SNV | 1 | T | C | Homozygous   |
| NC_037652.1 | 7548049 | SNV | 1 | A | G | Homozygous   |
| NC_037652.1 | 7548197 | SNV | 1 | A | G | Homozygous   |
| NC_037652.1 | 7548319 | SNV | 1 | A | G | Heterozygous |
| NC_037652.1 | 7548385 | SNV | 1 | G | A | Heterozygous |
| NC_037652.1 | 7548390 | SNV | 1 | G | A | Homozygous   |
| NC_037652.1 | 7548576 | SNV | 1 | A | T | Heterozygous |
| NC_037652.1 | 7548596 | SNV | 1 | A | C | Homozygous   |
| NC_037652.1 | 7549108 | SNV | 1 | G | C | Homozygous   |
| NC_037652.1 | 7549211 | SNV | 1 | G | A | Heterozygous |
| NC_037652.1 | 7549264 | SNV | 1 | T | G | Homozygous   |
| NC_037652.1 | 7549606 | SNV | 1 | G | A | Heterozygous |
| NC_037652.1 | 7549636 | SNV | 1 | C | T | Heterozygous |
| NC_037652.1 | 7549649 | SNV | 1 | G | A | Heterozygous |
| NC_037652.1 | 7549682 | SNV | 1 | A | G | Homozygous   |
| NC_037652.1 | 7549698 | SNV | 1 | A | G | Homozygous   |
| NC_037652.1 | 7549861 | SNV | 1 | G | A | Heterozygous |
| NC_037652.1 | 7549864 | SNV | 1 | G | A | Homozygous   |
| NC_037652.1 | 7549868 | SNV | 1 | T | C | Heterozygous |
| NC_037652.1 | 7549880 | SNV | 1 | T | C | Heterozygous |
| NC_037652.1 | 7550190 | SNV | 1 | G | A | Heterozygous |
| NC_037652.1 | 7554463 | SNV | 1 | C | A | Homozygous   |
| NC_037652.1 | 7554550 | SNV | 1 | G | A | Heterozygous |
| NC_037652.1 | 7554655 | SNV | 1 | G | A | Heterozygous |
| NC_037652.1 | 7554671 | SNV | 1 | C | T | Homozygous   |
| NC_037652.1 | 7555263 | SNV | 1 | A | G | Heterozygous |
| NC_037652.1 | 7555469 | SNV | 1 | A | C | Heterozygous |
| NC_037652.1 | 7556066 | SNV | 1 | A | T | Heterozygous |
| NC_037652.1 | 7557592 | SNV | 1 | A | T | Heterozygous |
| NC_037652.1 | 7557599 | SNV | 1 | A | T | Heterozygous |
| NC_037652.1 | 7557601 | SNV | 1 | A | C | Homozygous   |
| NC_037652.1 | 7558059 | SNV | 1 | G | A | Heterozygous |
| NC_037652.1 | 7558134 | SNV | 1 | G | A | Homozygous   |
| NC_037652.1 | 7561813 | SNV | 1 | T | C | Homozygous   |
| NC_037652.1 | 7562752 | SNV | 1 | C | T | Heterozygous |
| NC_037652.1 | 7562829 | SNV | 1 | T | C | Heterozygous |
| NC_037652.1 | 7563119 | SNV | 1 | G | A | Homozygous   |
| NC_037652.1 | 7563837 | SNV | 1 | C | T | Heterozygous |
| NC_037652.1 | 7564993 | SNV | 1 | G | A | Heterozygous |
| NC_037652.1 | 7570022 | SNV | 1 | G | A | Heterozygous |
| NC_037652.1 | 7573373 | SNV | 1 | A | T | Homozygous   |
| NC_037652.1 | 7573390 | SNV | 1 | A | T | Homozygous   |
| NC_037652.1 | 7573394 | SNV | 1 | T | G | Homozygous   |
| NC_037652.1 | 7575363 | SNV | 1 | A | G | Heterozygous |
| NC_037652.1 | 7576431 | SNV | 1 | T | G | Homozygous   |
| NC_037652.1 | 7576434 | SNV | 1 | T | A | Homozygous   |
| NC_037652.1 | 7576846 | SNV | 1 | G | A | Homozygous   |
| NC_037652.1 | 7580611 | SNV | 1 | A | G | Heterozygous |

|             |         |     |   |   |   |              |
|-------------|---------|-----|---|---|---|--------------|
| NC_037652.1 | 7580622 | SNV | 1 | T | C | Homozygous   |
| NC_037652.1 | 7580643 | SNV | 1 | G | A | Heterozygous |
| NC_037652.1 | 7580717 | SNV | 1 | T | C | Heterozygous |
| NC_037652.1 | 7580994 | SNV | 1 | T | G | Heterozygous |
| NC_037652.1 | 7581533 | SNV | 1 | T | C | Homozygous   |
| NC_037652.1 | 7581551 | SNV | 1 | C | T | Homozygous   |
| NC_037652.1 | 7581831 | SNV | 1 | C | T | Heterozygous |
| NC_037652.1 | 7583460 | SNV | 1 | T | C | Homozygous   |
| NC_037652.1 | 7583488 | SNV | 1 | A | T | Homozygous   |
| NC_037652.1 | 7583646 | SNV | 1 | A | T | Heterozygous |
| NC_037652.1 | 7604636 | SNV | 1 | C | T | Homozygous   |
| NC_037652.1 | 7606842 | SNV | 1 | T | C | Homozygous   |
| NC_037652.1 | 7610582 | SNV | 1 | G | A | Homozygous   |
| NC_037652.1 | 7614177 | SNV | 1 | T | C | Homozygous   |
| NC_037652.1 | 7614573 | SNV | 1 | T | C | Homozygous   |
| NC_037652.1 | 7614577 | SNV | 1 | T | C | Homozygous   |
| NC_037652.1 | 7614812 | SNV | 1 | G | A | Heterozygous |
| NC_037652.1 | 7615287 | SNV | 1 | C | T | Heterozygous |
| NC_037652.1 | 7615430 | SNV | 1 | C | T | Heterozygous |
| NC_037652.1 | 7615509 | SNV | 1 | T | C | Homozygous   |
| NC_037652.1 | 7617534 | SNV | 1 | G | A | Homozygous   |
| NC_037652.1 | 7617849 | SNV | 1 | T | C | Heterozygous |
| NC_037652.1 | 7617878 | SNV | 1 | T | A | Heterozygous |
| NC_037652.1 | 7617885 | SNV | 1 | C | T | Heterozygous |
| NC_037652.1 | 7617889 | SNV | 1 | A | G | Heterozygous |
| NC_037652.1 | 7617899 | SNV | 1 | A | T | Heterozygous |
| NC_037652.1 | 7618145 | SNV | 1 | T | C | Heterozygous |
| NC_037652.1 | 7618325 | SNV | 1 | C | T | Heterozygous |
| NC_037652.1 | 7618456 | SNV | 1 | G | A | Homozygous   |
| NC_037652.1 | 7618712 | SNV | 1 | A | G | Homozygous   |
| NC_037652.1 | 7618769 | SNV | 1 | G | A | Homozygous   |
| NC_037652.1 | 7618784 | SNV | 1 | T | A | Homozygous   |
| NC_037652.1 | 7618928 | SNV | 1 | T | C | Heterozygous |
| NC_037652.1 | 7619114 | SNV | 1 | G | A | Homozygous   |
| NC_037652.1 | 7619124 | SNV | 1 | T | C | Homozygous   |
| NC_037652.1 | 7619248 | SNV | 1 | T | C | Heterozygous |
| NC_037652.1 | 7619759 | SNV | 1 | G | A | Homozygous   |
| NC_037652.1 | 7619825 | SNV | 1 | A | G | Homozygous   |
| NC_037652.1 | 7619834 | SNV | 1 | C | T | Heterozygous |
| NC_037652.1 | 7619905 | SNV | 1 | G | T | Homozygous   |
| NC_037652.1 | 7620002 | SNV | 1 | C | T | Heterozygous |
| NC_037652.1 | 7620209 | SNV | 1 | A | G | Heterozygous |
| NC_037652.1 | 7620227 | SNV | 1 | T | A | Heterozygous |
| NC_037652.1 | 7620254 | SNV | 1 | T | C | Heterozygous |
| NC_037652.1 | 7620818 | SNV | 1 | G | A | Homozygous   |
| NC_037652.1 | 7620928 | SNV | 1 | A | T | Homozygous   |
| NC_037652.1 | 7621042 | SNV | 1 | C | T | Heterozygous |
| NC_037652.1 | 7621247 | SNV | 1 | G | A | Heterozygous |
| NC_037652.1 | 7629732 | SNV | 1 | A | T | Heterozygous |
| NC_037652.1 | 7629733 | SNV | 1 | A | G | Heterozygous |
| NC_037652.1 | 7629737 | SNV | 1 | A | T | Heterozygous |

|             |         |     |   |   |   |              |
|-------------|---------|-----|---|---|---|--------------|
| NC_037652.1 | 7629738 | SNV | 1 | C | T | Heterozygous |
| NC_037652.1 | 7629744 | SNV | 1 | T | A | Heterozygous |
| NC_037652.1 | 7629751 | SNV | 1 | A | G | Heterozygous |
| NC_037652.1 | 7629772 | SNV | 1 | C | A | Heterozygous |
| NC_037652.1 | 7633427 | SNV | 1 | A | G | Homozygous   |
| NC_037652.1 | 7650435 | SNV | 1 | T | C | Homozygous   |
| NC_037652.1 | 7650676 | SNV | 1 | G | A | Heterozygous |
| NC_037652.1 | 7653733 | SNV | 1 | A | G | Heterozygous |
| NC_037652.1 | 7658649 | SNV | 1 | T | C | Heterozygous |
| NC_037652.1 | 7660223 | SNV | 1 | G | A | Homozygous   |
| NC_037652.1 | 7660227 | SNV | 1 | A | G | Homozygous   |
| NC_037652.1 | 7660713 | SNV | 1 | A | G | Homozygous   |
| NC_037652.1 | 7661523 | SNV | 1 | G | A | Homozygous   |
| NC_037652.1 | 7661589 | SNV | 1 | T | C | Heterozygous |
| NC_037652.1 | 7661739 | SNV | 1 | T | C | Homozygous   |
| NC_037652.1 | 7662550 | SNV | 1 | C | T | Heterozygous |
| NC_037652.1 | 7662596 | SNV | 1 | G | A | Homozygous   |
| NC_037652.1 | 7662842 | SNV | 1 | A | G | Homozygous   |
| NC_037652.1 | 7664493 | SNV | 1 | C | T | Heterozygous |
| NC_037652.1 | 7664681 | SNV | 1 | A | G | Homozygous   |
| NC_037652.1 | 7665443 | SNV | 1 | A | G | Heterozygous |
| NC_037652.1 | 7668242 | SNV | 1 | A | G | Homozygous   |
| NC_037652.1 | 7681792 | SNV | 1 | T | C | Heterozygous |
| NC_037652.1 | 7681802 | SNV | 1 | G | A | Heterozygous |
| NC_037652.1 | 7684068 | SNV | 1 | A | T | Heterozygous |
| NC_037652.1 | 7684108 | SNV | 1 | A | C | Homozygous   |
| NC_037652.1 | 7684196 | SNV | 1 | A | G | Homozygous   |
| NC_037652.1 | 7684572 | SNV | 1 | T | C | Homozygous   |
| NC_037652.1 | 7684622 | SNV | 1 | G | T | Heterozygous |
| NC_037652.1 | 7684664 | SNV | 1 | C | A | Heterozygous |
| NC_037652.1 | 7685089 | SNV | 1 | C | T | Homozygous   |
| NC_037652.1 | 7685616 | SNV | 1 | T | A | Homozygous   |
| NC_037652.1 | 7685632 | SNV | 1 | C | T | Heterozygous |
| NC_037652.1 | 7685642 | SNV | 1 | A | T | Homozygous   |
| NC_037652.1 | 7685652 | SNV | 1 | G | A | Heterozygous |
| NC_037652.1 | 7685656 | SNV | 1 | A | G | Homozygous   |
| NC_037652.1 | 7685665 | SNV | 1 | G | A | Heterozygous |
| NC_037652.1 | 7685673 | SNV | 1 | A | G | Heterozygous |
| NC_037652.1 | 7685826 | SNV | 1 | A | G | Heterozygous |
| NC_037652.1 | 7685830 | SNV | 1 | G | A | Heterozygous |
| NC_037652.1 | 7686069 | SNV | 1 | A | G | Homozygous   |
| NC_037652.1 | 7687131 | SNV | 1 | G | A | Homozygous   |
| NC_037652.1 | 7687204 | SNV | 1 | T | A | Homozygous   |
| NC_037652.1 | 7687213 | SNV | 1 | G | A | Homozygous   |
| NC_037652.1 | 7687234 | SNV | 1 | G | T | Homozygous   |
| NC_037652.1 | 7687487 | SNV | 1 | T | C | Homozygous   |
| NC_037652.1 | 7687733 | SNV | 1 | C | T | Heterozygous |
| NC_037652.1 | 7687748 | SNV | 1 | A | T | Heterozygous |
| NC_037652.1 | 7687754 | SNV | 1 | G | A | Heterozygous |
| NC_037652.1 | 7687811 | SNV | 1 | A | G | Homozygous   |
| NC_037652.1 | 7687814 | SNV | 1 | T | C | Homozygous   |

|             |         |     |   |   |   |              |
|-------------|---------|-----|---|---|---|--------------|
| NC_037652.1 | 7687847 | SNV | 1 | A | G | Heterozygous |
| NC_037652.1 | 7687847 | SNV | 1 | A | T | Heterozygous |
| NC_037652.1 | 7687853 | SNV | 1 | A | G | Homozygous   |
| NC_037652.1 | 7687984 | SNV | 1 | A | T | Homozygous   |
| NC_037652.1 | 7688195 | SNV | 1 | T | C | Homozygous   |
| NC_037652.1 | 7688331 | SNV | 1 | T | C | Heterozygous |
| NC_037652.1 | 7688403 | SNV | 1 | G | A | Heterozygous |
| NC_037652.1 | 7688442 | SNV | 1 | T | C | Homozygous   |
| NC_037652.1 | 7688448 | SNV | 1 | A | G | Homozygous   |
| NC_037652.1 | 7688451 | SNV | 1 | A | G | Homozygous   |
| NC_037652.1 | 7688481 | SNV | 1 | G | A | Heterozygous |
| NC_037652.1 | 7688625 | SNV | 1 | G | A | Homozygous   |
| NC_037652.1 | 7688638 | SNV | 1 | A | G | Homozygous   |
| NC_037652.1 | 7688673 | SNV | 1 | A | G | Heterozygous |
| NC_037652.1 | 7688678 | SNV | 1 | A | G | Homozygous   |
| NC_037652.1 | 7688681 | SNV | 1 | A | G | Heterozygous |
| NC_037652.1 | 7688724 | SNV | 1 | T | C | Heterozygous |
| NC_037652.1 | 7688730 | SNV | 1 | T | C | Homozygous   |
| NC_037652.1 | 7688890 | SNV | 1 | G | C | Homozygous   |
| NC_037652.1 | 7689070 | SNV | 1 | G | A | Heterozygous |
| NC_037652.1 | 7689347 | SNV | 1 | A | G | Homozygous   |
| NC_037652.1 | 7689492 | SNV | 1 | T | C | Homozygous   |
| NC_037652.1 | 7689781 | SNV | 1 | T | C | Heterozygous |
| NC_037652.1 | 7689809 | SNV | 1 | T | C | Homozygous   |
| NC_037652.1 | 7689946 | SNV | 1 | T | C | Homozygous   |
| NC_037652.1 | 7689955 | SNV | 1 | C | T | Homozygous   |
| NC_037652.1 | 7689971 | SNV | 1 | A | G | Heterozygous |
| NC_037652.1 | 7690047 | SNV | 1 | C | T | Homozygous   |
| NC_037652.1 | 7690245 | SNV | 1 | C | T | Heterozygous |
| NC_037652.1 | 7690251 | SNV | 1 | A | G | Homozygous   |
| NC_037652.1 | 7690618 | SNV | 1 | T | C | Homozygous   |
| NC_037652.1 | 7690620 | SNV | 1 | G | A | Heterozygous |
| NC_037652.1 | 7690647 | SNV | 1 | C | T | Homozygous   |
| NC_037652.1 | 7690651 | SNV | 1 | T | C | Homozygous   |
| NC_037652.1 | 7690899 | SNV | 1 | T | C | Homozygous   |
| NC_037652.1 | 7691050 | SNV | 1 | A | G | Homozygous   |
| NC_037652.1 | 7691090 | SNV | 1 | T | C | Homozygous   |
| NC_037652.1 | 7691344 | SNV | 1 | G | A | Heterozygous |
| NC_037652.1 | 7691395 | SNV | 1 | C | T | Heterozygous |
| NC_037652.1 | 7691494 | SNV | 1 | G | A | Heterozygous |
| NC_037652.1 | 7691630 | SNV | 1 | T | C | Homozygous   |
| NC_037652.1 | 7691886 | SNV | 1 | A | G | Homozygous   |
| NC_037652.1 | 7691919 | SNV | 1 | G | A | Homozygous   |
| NC_037652.1 | 7691931 | SNV | 1 | G | A | Heterozygous |
| NC_037652.1 | 7692035 | SNV | 1 | C | T | Heterozygous |
| NC_037652.1 | 7692089 | SNV | 1 | T | C | Homozygous   |
| NC_037652.1 | 7692234 | SNV | 1 | A | T | Heterozygous |
| NC_037652.1 | 7692302 | SNV | 1 | T | C | Homozygous   |
| NC_037652.1 | 7692392 | SNV | 1 | T | C | Heterozygous |
| NC_037652.1 | 7692411 | SNV | 1 | A | G | Homozygous   |
| NC_037652.1 | 7692442 | SNV | 1 | T | C | Heterozygous |

|             |         |     |   |   |   |              |
|-------------|---------|-----|---|---|---|--------------|
| NC_037652.1 | 7692541 | SNV | 1 | A | G | Homozygous   |
| NC_037652.1 | 7692739 | SNV | 1 | A | C | Homozygous   |
| NC_037652.1 | 7692783 | SNV | 1 | A | G | Homozygous   |
| NC_037652.1 | 7692814 | SNV | 1 | A | G | Homozygous   |
| NC_037652.1 | 7692860 | SNV | 1 | C | T | Heterozygous |
| NC_037652.1 | 7692870 | SNV | 1 | G | A | Homozygous   |
| NC_037652.1 | 7694495 | SNV | 1 | A | G | Homozygous   |
| NC_037652.1 | 7694838 | SNV | 1 | G | T | Homozygous   |
| NC_037652.1 | 7695078 | SNV | 1 | C | T | Homozygous   |
| NC_037652.1 | 7697710 | SNV | 1 | C | G | Homozygous   |
| NC_037652.1 | 7697717 | SNV | 1 | T | C | Homozygous   |
| NC_037652.1 | 7697721 | SNV | 1 | C | T | Homozygous   |
| NC_037652.1 | 7697831 | SNV | 1 | T | C | Heterozygous |
| NC_037652.1 | 7703068 | SNV | 1 | C | G | Homozygous   |
| NC_037652.1 | 7703072 | SNV | 1 | C | T | Heterozygous |
| NC_037652.1 | 7703080 | SNV | 1 | C | G | Homozygous   |
| NC_037652.1 | 7703082 | SNV | 1 | C | G | Heterozygous |
| NC_037652.1 | 7703084 | SNV | 1 | C | G | Heterozygous |
| NC_037652.1 | 7703088 | SNV | 1 | C | G | Homozygous   |
| NC_037652.1 | 7703102 | SNV | 1 | C | G | Heterozygous |
| NC_037652.1 | 7703160 | SNV | 1 | G | C | Heterozygous |
| NC_037652.1 | 7703188 | SNV | 1 | G | C | Homozygous   |
| NC_037652.1 | 7703196 | SNV | 1 | G | C | Heterozygous |
| NC_037652.1 | 7703204 | SNV | 1 | G | C | Heterozygous |
| NC_037652.1 | 7706518 | SNV | 1 | G | A | Heterozygous |
| NC_037652.1 | 7708051 | SNV | 1 | A | G | Heterozygous |
| NC_037652.1 | 7709037 | SNV | 1 | C | T | Homozygous   |
| NC_037652.1 | 7709052 | SNV | 1 | A | G | Homozygous   |
| NC_037652.1 | 7709221 | SNV | 1 | G | A | Heterozygous |
| NC_037652.1 | 7709623 | SNV | 1 | C | T | Heterozygous |
| NC_037652.1 | 7709628 | SNV | 1 | C | T | Heterozygous |
| NC_037652.1 | 7709683 | SNV | 1 | G | A | Heterozygous |
| NC_037652.1 | 7709741 | SNV | 1 | C | T | Heterozygous |
| NC_037652.1 | 7709751 | SNV | 1 | G | A | Heterozygous |
| NC_037652.1 | 7709772 | SNV | 1 | G | A | Heterozygous |
| NC_037652.1 | 7714207 | SNV | 1 | G | A | Homozygous   |
| NC_037652.1 | 7714578 | SNV | 1 | A | G | Homozygous   |
| NC_037652.1 | 7715265 | SNV | 1 | T | G | Homozygous   |
| NC_037652.1 | 7715271 | SNV | 1 | A | G | Heterozygous |
| NC_037652.1 | 7715280 | SNV | 1 | C | T | Heterozygous |
| NC_037652.1 | 7715283 | SNV | 1 | G | C | Homozygous   |
| NC_037652.1 | 7715286 | SNV | 1 | G | C | Homozygous   |
| NC_037652.1 | 7715313 | SNV | 1 | A | G | Homozygous   |
| NC_037652.1 | 7715490 | SNV | 1 | G | A | Heterozygous |
| NC_037652.1 | 7715570 | SNV | 1 | G | A | Heterozygous |
| NC_037652.1 | 7715610 | SNV | 1 | C | T | Homozygous   |
| NC_037652.1 | 7715649 | SNV | 1 | C | G | Heterozygous |
| NC_037652.1 | 7715668 | SNV | 1 | T | C | Homozygous   |
| NC_037652.1 | 7715859 | SNV | 1 | A | G | Homozygous   |
| NC_037652.1 | 7715862 | SNV | 1 | T | C | Homozygous   |
| NC_037652.1 | 7715925 | SNV | 1 | C | T | Homozygous   |

|             |         |     |   |   |   |              |
|-------------|---------|-----|---|---|---|--------------|
| NC_037652.1 | 7715960 | SNV | 1 | C | T | Homozygous   |
| NC_037652.1 | 7716174 | SNV | 1 | C | T | Heterozygous |
| NC_037652.1 | 7716268 | SNV | 1 | T | C | Heterozygous |
| NC_037652.1 | 7716541 | SNV | 1 | T | C | Homozygous   |
| NC_037652.1 | 7716562 | SNV | 1 | C | T | Heterozygous |
| NC_037652.1 | 7716705 | SNV | 1 | A | G | Heterozygous |
| NC_037652.1 | 7716918 | SNV | 1 | G | A | Homozygous   |
| NC_037652.1 | 7716958 | SNV | 1 | T | C | Homozygous   |
| NC_037652.1 | 7717480 | SNV | 1 | G | A | Heterozygous |
| NC_037652.1 | 7717837 | SNV | 1 | C | T | Heterozygous |
| NC_037652.1 | 7717890 | SNV | 1 | A | G | Heterozygous |
| NC_037652.1 | 7717901 | SNV | 1 | A | G | Homozygous   |
| NC_037652.1 | 7717952 | SNV | 1 | G | A | Heterozygous |
| NC_037652.1 | 7718041 | SNV | 1 | T | C | Heterozygous |
| NC_037652.1 | 7718277 | SNV | 1 | A | G | Homozygous   |
| NC_037652.1 | 7718294 | SNV | 1 | A | G | Homozygous   |
| NC_037652.1 | 7718391 | SNV | 1 | A | G | Heterozygous |
| NC_037652.1 | 7718478 | SNV | 1 | A | G | Heterozygous |
| NC_037652.1 | 7718496 | SNV | 1 | T | C | Homozygous   |
| NC_037652.1 | 7718624 | SNV | 1 | C | T | Heterozygous |
| NC_037652.1 | 7718640 | SNV | 1 | G | A | Heterozygous |
| NC_037652.1 | 7718747 | SNV | 1 | T | C | Homozygous   |
| NC_037652.1 | 7718808 | SNV | 1 | A | G | Homozygous   |
| NC_037652.1 | 7718998 | SNV | 1 | C | T | Homozygous   |
| NC_037652.1 | 7719260 | SNV | 1 | T | C | Heterozygous |
| NC_037652.1 | 7719844 | SNV | 1 | T | A | Homozygous   |
| NC_037652.1 | 7719864 | SNV | 1 | C | T | Homozygous   |
| NC_037652.1 | 7719877 | SNV | 1 | G | A | Heterozygous |
| NC_037652.1 | 7720218 | SNV | 1 | A | T | Homozygous   |
| NC_037652.1 | 7720230 | SNV | 1 | C | T | Heterozygous |
| NC_037652.1 | 7720833 | SNV | 1 | A | G | Homozygous   |
| NC_037652.1 | 7720991 | SNV | 1 | T | C | Homozygous   |
| NC_037652.1 | 7721022 | SNV | 1 | G | A | Heterozygous |
| NC_037652.1 | 7721276 | SNV | 1 | T | C | Homozygous   |
| NC_037652.1 | 7721450 | SNV | 1 | C | G | Homozygous   |
| NC_037652.1 | 7721607 | SNV | 1 | A | G | Heterozygous |
| NC_037652.1 | 7722018 | SNV | 1 | G | A | Heterozygous |
| NC_037652.1 | 7722047 | SNV | 1 | A | G | Heterozygous |
| NC_037652.1 | 7722229 | SNV | 1 | G | A | Heterozygous |
| NC_037652.1 | 7722456 | SNV | 1 | C | T | Heterozygous |
| NC_037652.1 | 7722731 | SNV | 1 | G | A | Heterozygous |
| NC_037652.1 | 7722768 | SNV | 1 | T | C | Heterozygous |
| NC_037652.1 | 7723181 | SNV | 1 | C | G | Homozygous   |
| NC_037652.1 | 7723199 | SNV | 1 | C | T | Heterozygous |
| NC_037652.1 | 7723317 | SNV | 1 | A | G | Homozygous   |
| NC_037652.1 | 7723343 | SNV | 1 | T | C | Heterozygous |
| NC_037652.1 | 7723412 | SNV | 1 | T | G | Homozygous   |
| NC_037652.1 | 7723421 | SNV | 1 | C | T | Heterozygous |
| NC_037652.1 | 7723454 | SNV | 1 | A | G | Homozygous   |
| NC_037652.1 | 7723574 | SNV | 1 | C | G | Homozygous   |
| NC_037652.1 | 7723832 | SNV | 1 | C | T | Heterozygous |

|             |         |     |   |   |   |              |
|-------------|---------|-----|---|---|---|--------------|
| NC_037652.1 | 7724894 | SNV | 1 | A | G | Homozygous   |
| NC_037652.1 | 7724907 | SNV | 1 | T | C | Homozygous   |
| NC_037652.1 | 7724918 | SNV | 1 | G | A | Homozygous   |
| NC_037652.1 | 7725021 | SNV | 1 | A | T | Heterozygous |
| NC_037652.1 | 7725078 | SNV | 1 | G | A | Homozygous   |
| NC_037652.1 | 7725117 | SNV | 1 | C | G | Homozygous   |
| NC_037652.1 | 7725230 | SNV | 1 | C | T | Homozygous   |
| NC_037652.1 | 7725264 | SNV | 1 | C | T | Heterozygous |
| NC_037652.1 | 7726039 | SNV | 1 | C | A | Homozygous   |
| NC_037652.1 | 7726176 | SNV | 1 | A | G | Homozygous   |
| NC_037652.1 | 7726200 | SNV | 1 | G | C | Homozygous   |
| NC_037652.1 | 7726248 | SNV | 1 | C | G | Heterozygous |
| NC_037652.1 | 7726254 | SNV | 1 | G | A | Heterozygous |
| NC_037652.1 | 7726263 | SNV | 1 | G | A | Heterozygous |
| NC_037652.1 | 7726319 | SNV | 1 | G | C | Homozygous   |
| NC_037652.1 | 7726339 | SNV | 1 | A | G | Homozygous   |
| NC_037652.1 | 7726356 | SNV | 1 | G | C | Homozygous   |
| NC_037652.1 | 7726527 | SNV | 1 | A | G | Heterozygous |
| NC_037652.1 | 7727461 | SNV | 1 | G | A | Homozygous   |
| NC_037652.1 | 7727475 | SNV | 1 | C | T | Homozygous   |
| NC_037652.1 | 7727507 | SNV | 1 | C | T | Homozygous   |
| NC_037652.1 | 7727595 | SNV | 1 | T | C | Homozygous   |
| NC_037652.1 | 7727689 | SNV | 1 | C | T | Homozygous   |
| NC_037652.1 | 7727694 | SNV | 1 | T | G | Homozygous   |
| NC_037652.1 | 7727739 | SNV | 1 | G | A | Homozygous   |
| NC_037652.1 | 7731395 | SNV | 1 | A | G | Homozygous   |
| NC_037652.1 | 7731620 | SNV | 1 | C | T | Heterozygous |
| NC_037652.1 | 7731860 | SNV | 1 | C | T | Homozygous   |
| NC_037652.1 | 7732462 | SNV | 1 | C | T | Heterozygous |
| NC_037652.1 | 7732512 | SNV | 1 | C | T | Heterozygous |
| NC_037652.1 | 7732563 | SNV | 1 | C | T | Heterozygous |
| NC_037652.1 | 7732574 | SNV | 1 | A | T | Homozygous   |
| NC_037652.1 | 7732583 | SNV | 1 | A | G | Homozygous   |
| NC_037652.1 | 7732856 | SNV | 1 | A | G | Homozygous   |
| NC_037652.1 | 7732938 | SNV | 1 | T | A | Homozygous   |
| NC_037652.1 | 7732940 | SNV | 1 | G | C | Homozygous   |
| NC_037652.1 | 7732949 | SNV | 1 | G | A | Heterozygous |
| NC_037652.1 | 7732956 | SNV | 1 | G | A | Heterozygous |
| NC_037652.1 | 7733116 | SNV | 1 | G | A | Homozygous   |
| NC_037652.1 | 7733556 | SNV | 1 | T | C | Heterozygous |
| NC_037652.1 | 7734951 | SNV | 1 | G | T | Homozygous   |
| NC_037652.1 | 7735251 | SNV | 1 | T | C | Heterozygous |
| NC_037652.1 | 7735516 | SNV | 1 | A | G | Homozygous   |
| NC_037652.1 | 7735621 | SNV | 1 | C | T | Heterozygous |
| NC_037652.1 | 7735636 | SNV | 1 | G | A | Heterozygous |
| NC_037652.1 | 7735652 | SNV | 1 | T | C | Heterozygous |
| NC_037652.1 | 7736722 | SNV | 1 | A | G | Homozygous   |
| NC_037652.1 | 7736919 | SNV | 1 | A | G | Homozygous   |
| NC_037652.1 | 7737005 | SNV | 1 | G | A | Homozygous   |
| NC_037652.1 | 7737021 | SNV | 1 | A | G | Homozygous   |
| NC_037652.1 | 7737143 | SNV | 1 | T | C | Homozygous   |

|             |         |     |   |   |   |              |
|-------------|---------|-----|---|---|---|--------------|
| NC_037652.1 | 7737189 | SNV | 1 | A | G | Homozygous   |
| NC_037652.1 | 7737341 | SNV | 1 | T | G | Homozygous   |
| NC_037652.1 | 7737637 | SNV | 1 | C | T | Heterozygous |
| NC_037652.1 | 7737848 | SNV | 1 | T | G | Heterozygous |
| NC_037652.1 | 7737936 | SNV | 1 | T | C | Homozygous   |
| NC_037652.1 | 7737951 | SNV | 1 | T | C | Homozygous   |
| NC_037652.1 | 7738055 | SNV | 1 | A | G | Homozygous   |
| NC_037652.1 | 7738194 | SNV | 1 | C | T | Homozygous   |
| NC_037652.1 | 7738374 | SNV | 1 | T | G | Homozygous   |
| NC_037652.1 | 7738594 | SNV | 1 | A | G | Heterozygous |
| NC_037652.1 | 7738714 | SNV | 1 | A | G | Homozygous   |
| NC_037652.1 | 7738818 | SNV | 1 | T | C | Homozygous   |
| NC_037652.1 | 7738869 | SNV | 1 | T | C | Heterozygous |
| NC_037652.1 | 7738887 | SNV | 1 | C | T | Heterozygous |
| NC_037652.1 | 7739075 | SNV | 1 | T | C | Homozygous   |
| NC_037652.1 | 7739183 | SNV | 1 | G | A | Heterozygous |
| NC_037652.1 | 7739216 | SNV | 1 | G | A | Heterozygous |
| NC_037652.1 | 7739370 | SNV | 1 | C | T | Heterozygous |
| NC_037652.1 | 7739666 | SNV | 1 | G | A | Homozygous   |
| NC_037652.1 | 7739696 | SNV | 1 | A | T | Homozygous   |
| NC_037652.1 | 7739736 | SNV | 1 | T | C | Homozygous   |
| NC_037652.1 | 7739746 | SNV | 1 | C | T | Heterozygous |
| NC_037652.1 | 7739783 | SNV | 1 | C | T | Heterozygous |
| NC_037652.1 | 7739801 | SNV | 1 | G | A | Heterozygous |
| NC_037652.1 | 7739822 | SNV | 1 | C | T | Heterozygous |
| NC_037652.1 | 7740381 | SNV | 1 | T | C | Homozygous   |
| NC_037652.1 | 7741158 | SNV | 1 | G | C | Homozygous   |
| NC_037652.1 | 7741164 | SNV | 1 | T | C | Homozygous   |
| NC_037652.1 | 7741176 | SNV | 1 | A | G | Homozygous   |
| NC_037652.1 | 7741497 | SNV | 1 | G | A | Homozygous   |
| NC_037652.1 | 7743333 | SNV | 1 | G | A | Homozygous   |
| NC_037652.1 | 7750925 | SNV | 1 | C | T | Homozygous   |
| NC_037652.1 | 7751408 | SNV | 1 | C | T | Heterozygous |
| NC_037652.1 | 7751417 | SNV | 1 | C | T | Heterozygous |
| NC_037652.1 | 7751822 | SNV | 1 | T | C | Heterozygous |
| NC_037652.1 | 7751854 | SNV | 1 | T | C | Homozygous   |
| NC_037652.1 | 7751976 | SNV | 1 | T | C | Homozygous   |
| NC_037652.1 | 7752133 | SNV | 1 | A | G | Homozygous   |
| NC_037652.1 | 7752253 | SNV | 1 | T | C | Homozygous   |
| NC_037652.1 | 7752334 | SNV | 1 | A | G | Heterozygous |
| NC_037652.1 | 7752700 | SNV | 1 | A | G | Homozygous   |
| NC_037652.1 | 7752775 | SNV | 1 | T | C | Homozygous   |
| NC_037652.1 | 7752863 | SNV | 1 | C | G | Heterozygous |
| NC_037652.1 | 7753099 | SNV | 1 | G | A | Homozygous   |
| NC_037652.1 | 7753757 | SNV | 1 | T | C | Homozygous   |
| NC_037652.1 | 7753893 | SNV | 1 | C | T | Heterozygous |
| NC_037652.1 | 7754496 | SNV | 1 | C | T | Heterozygous |
| NC_037652.1 | 7755482 | SNV | 1 | T | C | Homozygous   |
| NC_037652.1 | 7755493 | SNV | 1 | T | C | Heterozygous |
| NC_037652.1 | 7755507 | SNV | 1 | T | C | Heterozygous |
| NC_037652.1 | 7755510 | SNV | 1 | T | C | Heterozygous |



|             |         |     |   |   |   |              |
|-------------|---------|-----|---|---|---|--------------|
| NC_037652.1 | 7755515 | SNV | 1 | T | C | Heterozygous |
| NC_037652.1 | 7755518 | SNV | 1 | T | C | Heterozygous |
| NC_037652.1 | 7755520 | SNV | 1 | T | C | Heterozygous |
| NC_037652.1 | 7755522 | SNV | 1 | T | C | Heterozygous |
| NC_037652.1 | 7755535 | SNV | 1 | T | C | Homozygous   |
| NC_037652.1 | 7758741 | SNV | 1 | C | A | Heterozygous |
| NC_037652.1 | 7758896 | SNV | 1 | C | A | Homozygous   |
| NC_037652.1 | 7759501 | SNV | 1 | A | T | Heterozygous |
| NC_037652.1 | 7759968 | SNV | 1 | A | G | Heterozygous |
| NC_037652.1 | 7759980 | SNV | 1 | T | G | Heterozygous |
| NC_037652.1 | 7759985 | SNV | 1 | A | T | Heterozygous |
| NC_037652.1 | 7760809 | SNV | 1 | C | G | Homozygous   |
| NC_037652.1 | 7761545 | SNV | 1 | T | C | Homozygous   |
| NC_037652.1 | 7763647 | SNV | 1 | A | G | Homozygous   |
| NC_037652.1 | 7763672 | SNV | 1 | T | C | Homozygous   |
| NC_037652.1 | 7765114 | SNV | 1 | A | G | Heterozygous |
| NC_037652.1 | 7765503 | SNV | 1 | A | G | Homozygous   |
| NC_037652.1 | 7766400 | SNV | 1 | T | C | Homozygous   |
| NC_037652.1 | 7768036 | SNV | 1 | C | T | Heterozygous |
| NC_037652.1 | 7768053 | SNV | 1 | T | C | Homozygous   |
| NC_037652.1 | 7768254 | SNV | 1 | G | A | Homozygous   |
| NC_037652.1 | 7768346 | SNV | 1 | C | T | Heterozygous |
| NC_037652.1 | 7771391 | SNV | 1 | G | A | Homozygous   |
| NC_037652.1 | 7771459 | SNV | 1 | C | T | Heterozygous |
| NC_037652.1 | 7775010 | SNV | 1 | C | T | Heterozygous |
| NC_037652.1 | 7775061 | SNV | 1 | A | G | Heterozygous |
| NC_037652.1 | 7776959 | SNV | 1 | T | C | Homozygous   |
| NC_037652.1 | 7776976 | SNV | 1 | A | G | Homozygous   |
| NC_037652.1 | 7782011 | SNV | 1 | C | T | Heterozygous |
| NC_037652.1 | 7784241 | SNV | 1 | T | C | Homozygous   |
| NC_037652.1 | 7784514 | SNV | 1 | A | G | Heterozygous |
| NC_037652.1 | 7784730 | SNV | 1 | T | C | Homozygous   |
| NC_037652.1 | 7785697 | SNV | 1 | T | C | Homozygous   |
| NC_037652.1 | 7786225 | SNV | 1 | G | C | Homozygous   |
| NC_037652.1 | 7786231 | SNV | 1 | G | T | Homozygous   |
| NC_037652.1 | 7786234 | SNV | 1 | G | A | Homozygous   |
| NC_037652.1 | 7786237 | SNV | 1 | G | T | Homozygous   |
| NC_037652.1 | 7786287 | SNV | 1 | T | C | Homozygous   |
| NC_037652.1 | 7786295 | SNV | 1 | T | C | Heterozygous |
| NC_037652.1 | 7786736 | SNV | 1 | T | C | Homozygous   |
| NC_037652.1 | 7787185 | SNV | 1 | C | T | Heterozygous |
| NC_037652.1 | 7787915 | SNV | 1 | A | T | Heterozygous |
| NC_037652.1 | 7789392 | SNV | 1 | G | A | Heterozygous |
| NC_037652.1 | 7789447 | SNV | 1 | T | C | Heterozygous |
| NC_037652.1 | 7789577 | SNV | 1 | G | A | Heterozygous |
| NC_037652.1 | 7789703 | SNV | 1 | T | G | Heterozygous |
| NC_037652.1 | 7790096 | SNV | 1 | T | C | Heterozygous |
| NC_037652.1 | 7790354 | SNV | 1 | A | G | Heterozygous |
| NC_037652.1 | 7790906 | SNV | 1 | C | T | Homozygous   |
| NC_037652.1 | 7791083 | SNV | 1 | C | T | Homozygous   |
| NC_037652.1 | 7791257 | SNV | 1 | T | C | Homozygous   |

|             |         |     |   |   |   |              |
|-------------|---------|-----|---|---|---|--------------|
| NC_037652.1 | 7791287 | SNV | 1 | T | C | Homozygous   |
| NC_037652.1 | 7791555 | SNV | 1 | T | C | Heterozygous |
| NC_037652.1 | 7791851 | SNV | 1 | A | G | Heterozygous |
| NC_037652.1 | 7792179 | SNV | 1 | G | A | Homozygous   |
| NC_037652.1 | 7792200 | SNV | 1 | T | C | Homozygous   |
| NC_037652.1 | 7792206 | SNV | 1 | C | T | Heterozygous |
| NC_037652.1 | 7792209 | SNV | 1 | T | A | Heterozygous |
| NC_037652.1 | 7792229 | SNV | 1 | G | A | Homozygous   |
| NC_037652.1 | 7792239 | SNV | 1 | G | C | Homozygous   |
| NC_037652.1 | 7792252 | SNV | 1 | G | A | Heterozygous |
| NC_037652.1 | 7792366 | SNV | 1 | C | T | Heterozygous |
| NC_037652.1 | 7792379 | SNV | 1 | C | G | Heterozygous |
| NC_037652.1 | 7792423 | SNV | 1 | T | A | Heterozygous |
| NC_037652.1 | 7792459 | SNV | 1 | T | C | Homozygous   |
| NC_037652.1 | 7792920 | SNV | 1 | G | A | Heterozygous |
| NC_037652.1 | 7793080 | SNV | 1 | C | T | Heterozygous |
| NC_037652.1 | 7793208 | SNV | 1 | T | C | Homozygous   |
| NC_037652.1 | 7793284 | SNV | 1 | C | T | Homozygous   |
| NC_037652.1 | 7793307 | SNV | 1 | T | C | Homozygous   |
| NC_037652.1 | 7793314 | SNV | 1 | G | A | Homozygous   |
| NC_037652.1 | 7793358 | SNV | 1 | A | G | Heterozygous |
| NC_037652.1 | 7794483 | SNV | 1 | C | G | Homozygous   |
| NC_037652.1 | 7794595 | SNV | 1 | A | G | Homozygous   |
| NC_037652.1 | 7794624 | SNV | 1 | A | G | Homozygous   |
| NC_037652.1 | 7794635 | SNV | 1 | C | T | Heterozygous |
| NC_037652.1 | 7804848 | SNV | 1 | T | A | Heterozygous |
| NC_037652.1 | 7818072 | SNV | 1 | G | A | Heterozygous |
| NC_037652.1 | 7818075 | SNV | 1 | C | T | Heterozygous |
| NC_037652.1 | 7820402 | SNV | 1 | A | G | Homozygous   |
| NC_037652.1 | 7820479 | SNV | 1 | G | A | Homozygous   |
| NC_037652.1 | 7820605 | SNV | 1 | C | T | Homozygous   |
| NC_037652.1 | 7820897 | SNV | 1 | A | T | Homozygous   |
| NC_037652.1 | 7820954 | SNV | 1 | C | G | Heterozygous |
| NC_037652.1 | 7822210 | SNV | 1 | A | G | Homozygous   |
| NC_037652.1 | 7822414 | SNV | 1 | C | A | Heterozygous |
| NC_037652.1 | 7822418 | SNV | 1 | A | T | Heterozygous |
| NC_037652.1 | 7822710 | SNV | 1 | A | G | Homozygous   |
| NC_037652.1 | 7824034 | SNV | 1 | T | C | Heterozygous |
| NC_037652.1 | 7824165 | SNV | 1 | A | G | Homozygous   |
| NC_037652.1 | 7827499 | SNV | 1 | G | A | Heterozygous |
| NC_037652.1 | 7833139 | SNV | 1 | C | T | Heterozygous |
| NC_037652.1 | 7833215 | SNV | 1 | T | A | Heterozygous |
| NC_037652.1 | 7839223 | SNV | 1 | C | T | Homozygous   |
| NC_037652.1 | 7839453 | SNV | 1 | T | C | Homozygous   |
| NC_037652.1 | 7839463 | SNV | 1 | C | T | Homozygous   |
| NC_037652.1 | 7839490 | SNV | 1 | G | A | Homozygous   |
| NC_037652.1 | 7839696 | SNV | 1 | C | T | Heterozygous |
| NC_037652.1 | 7839883 | SNV | 1 | T | A | Homozygous   |
| NC_037652.1 | 7839902 | SNV | 1 | C | T | Heterozygous |
| NC_037652.1 | 7839995 | SNV | 1 | T | C | Heterozygous |
| NC_037652.1 | 7840025 | SNV | 1 | T | C | Homozygous   |

|             |         |     |   |   |   |              |
|-------------|---------|-----|---|---|---|--------------|
| NC_037652.1 | 7840029 | SNV | 1 | A | G | Homozygous   |
| NC_037652.1 | 7840176 | SNV | 1 | C | A | Heterozygous |
| NC_037652.1 | 7840194 | SNV | 1 | T | C | Homozygous   |
| NC_037652.1 | 7840323 | SNV | 1 | C | T | Heterozygous |
| NC_037652.1 | 7840870 | SNV | 1 | G | A | Heterozygous |
| NC_037652.1 | 7840879 | SNV | 1 | T | C | Homozygous   |
| NC_037652.1 | 7841032 | SNV | 1 | T | C | Homozygous   |
| NC_037652.1 | 7841731 | SNV | 1 | T | G | Homozygous   |
| NC_037652.1 | 7842543 | SNV | 1 | G | C | Homozygous   |
| NC_037652.1 | 7842555 | SNV | 1 | T | C | Homozygous   |
| NC_037652.1 | 7849224 | SNV | 1 | G | A | Homozygous   |
| NC_037652.1 | 7849391 | SNV | 1 | G | A | Heterozygous |
| NC_037652.1 | 7849705 | SNV | 1 | G | A | Heterozygous |
| NC_037652.1 | 7849938 | SNV | 1 | C | T | Heterozygous |
| NC_037652.1 | 7849960 | SNV | 1 | T | G | Homozygous   |
| NC_037652.1 | 7849963 | SNV | 1 | A | T | Homozygous   |
| NC_037652.1 | 7850851 | SNV | 1 | T | C | Homozygous   |
| NC_037652.1 | 7853103 | SNV | 1 | T | C | Homozygous   |
| NC_037652.1 | 7853114 | SNV | 1 | A | G | Homozygous   |
| NC_037652.1 | 7853758 | SNV | 1 | A | C | Homozygous   |
| NC_037652.1 | 7853762 | SNV | 1 | A | G | Homozygous   |
| NC_037652.1 | 7853765 | SNV | 1 | A | C | Homozygous   |
| NC_037652.1 | 7853768 | SNV | 1 | T | C | Homozygous   |
| NC_037652.1 | 7853771 | SNV | 1 | C | T | Homozygous   |
| NC_037652.1 | 7853777 | SNV | 1 | A | G | Homozygous   |
| NC_037652.1 | 7853780 | SNV | 1 | T | A | Homozygous   |
| NC_037652.1 | 7853783 | SNV | 1 | G | T | Homozygous   |
| NC_037652.1 | 7853789 | SNV | 1 | A | C | Homozygous   |
| NC_037652.1 | 7853792 | SNV | 1 | A | G | Homozygous   |
| NC_037652.1 | 7853798 | SNV | 1 | T | C | Homozygous   |
| NC_037652.1 | 7853800 | SNV | 1 | A | G | Homozygous   |
| NC_037652.1 | 7853810 | SNV | 1 | C | T | Homozygous   |
| NC_037652.1 | 7853817 | SNV | 1 | G | T | Homozygous   |
| NC_037652.1 | 7853821 | SNV | 1 | A | G | Homozygous   |
| NC_037652.1 | 7853830 | SNV | 1 | T | C | Homozygous   |
| NC_037652.1 | 7853849 | SNV | 1 | C | T | Homozygous   |
| NC_037652.1 | 7853943 | SNV | 1 | A | G | Heterozygous |
| NC_037652.1 | 7853945 | SNV | 1 | A | T | Homozygous   |
| NC_037652.1 | 7853948 | SNV | 1 | A | G | Heterozygous |
| NC_037652.1 | 7853966 | SNV | 1 | A | C | Homozygous   |
| NC_037652.1 | 7853972 | SNV | 1 | A | T | Homozygous   |
| NC_037652.1 | 7853984 | SNV | 1 | T | A | Heterozygous |
| NC_037652.1 | 7853987 | SNV | 1 | T | C | Homozygous   |
| NC_037652.1 | 7853990 | SNV | 1 | C | T | Heterozygous |
| NC_037652.1 | 7853993 | SNV | 1 | T | C | Homozygous   |
| NC_037652.1 | 7853996 | SNV | 1 | A | G | Homozygous   |
| NC_037652.1 | 7853999 | SNV | 1 | A | T | Homozygous   |
| NC_037652.1 | 7854005 | SNV | 1 | A | T | Heterozygous |
| NC_037652.1 | 7854008 | SNV | 1 | T | G | Heterozygous |
| NC_037652.1 | 7854011 | SNV | 1 | A | T | Heterozygous |
| NC_037652.1 | 7854014 | SNV | 1 | G | T | Homozygous   |

|             |         |     |   |   |   |              |
|-------------|---------|-----|---|---|---|--------------|
| NC_037652.1 | 7854017 | SNV | 1 | T | C | Homozygous   |
| NC_037652.1 | 7854020 | SNV | 1 | A | T | Homozygous   |
| NC_037652.1 | 7854024 | SNV | 1 | T | C | Homozygous   |
| NC_037652.1 | 7854026 | SNV | 1 | A | T | Homozygous   |
| NC_037652.1 | 7854029 | SNV | 1 | T | C | Homozygous   |
| NC_037652.1 | 7854032 | SNV | 1 | A | G | Homozygous   |
| NC_037652.1 | 7854035 | SNV | 1 | A | T | Homozygous   |
| NC_037652.1 | 7854041 | SNV | 1 | A | G | Heterozygous |
| NC_037652.1 | 7854047 | SNV | 1 | T | G | Heterozygous |
| NC_037652.1 | 7854098 | SNV | 1 | T | C | Homozygous   |
| NC_037652.1 | 7854101 | SNV | 1 | T | C | Homozygous   |
| NC_037652.1 | 7854110 | SNV | 1 | T | C | Heterozygous |
| NC_037652.1 | 7854113 | SNV | 1 | T | C | Homozygous   |
| NC_037652.1 | 7854122 | SNV | 1 | T | C | Homozygous   |
| NC_037652.1 | 7854125 | SNV | 1 | A | G | Homozygous   |
| NC_037652.1 | 7854128 | SNV | 1 | A | G | Homozygous   |
| NC_037652.1 | 7854137 | SNV | 1 | T | C | Heterozygous |
| NC_037652.1 | 7854140 | SNV | 1 | T | C | Heterozygous |
| NC_037652.1 | 7854146 | SNV | 1 | C | T | Heterozygous |
| NC_037652.1 | 7854149 | SNV | 1 | T | G | Heterozygous |
| NC_037652.1 | 7854152 | SNV | 1 | C | T | Homozygous   |
| NC_037652.1 | 7854155 | SNV | 1 | A | G | Homozygous   |
| NC_037652.1 | 7854185 | SNV | 1 | T | C | Homozygous   |
| NC_037652.1 | 7854191 | SNV | 1 | A | G | Homozygous   |
| NC_037652.1 | 7854194 | SNV | 1 | T | C | Homozygous   |
| NC_037652.1 | 7854203 | SNV | 1 | T | C | Homozygous   |
| NC_037652.1 | 7854209 | SNV | 1 | A | G | Homozygous   |
| NC_037652.1 | 7854215 | SNV | 1 | C | T | Homozygous   |
| NC_037652.1 | 7854224 | SNV | 1 | G | A | Homozygous   |
| NC_037652.1 | 7854227 | SNV | 1 | T | G | Homozygous   |
| NC_037652.1 | 7854386 | SNV | 1 | T | C | Homozygous   |
| NC_037652.1 | 7854636 | SNV | 1 | T | C | Homozygous   |
| NC_037652.1 | 7855076 | SNV | 1 | A | G | Homozygous   |
| NC_037652.1 | 7855135 | SNV | 1 | G | A | Heterozygous |
| NC_037652.1 | 7855552 | SNV | 1 | C | T | Heterozygous |
| NC_037652.1 | 7855607 | SNV | 1 | T | A | Heterozygous |
| NC_037652.1 | 7855987 | SNV | 1 | T | C | Heterozygous |
| NC_037652.1 | 7856016 | SNV | 1 | A | T | Homozygous   |
| NC_037652.1 | 7856409 | SNV | 1 | A | G | Homozygous   |
| NC_037652.1 | 7856908 | SNV | 1 | G | A | Heterozygous |
| NC_037652.1 | 7856938 | SNV | 1 | A | C | Homozygous   |
| NC_037652.1 | 7857045 | SNV | 1 | G | A | Heterozygous |
| NC_037652.1 | 7857073 | SNV | 1 | G | A | Heterozygous |
| NC_037652.1 | 7857094 | SNV | 1 | T | C | Homozygous   |
| NC_037652.1 | 7857511 | SNV | 1 | C | T | Homozygous   |
| NC_037652.1 | 7857533 | SNV | 1 | A | G | Homozygous   |
| NC_037652.1 | 7858608 | SNV | 1 | C | A | Heterozygous |
| NC_037652.1 | 7858612 | SNV | 1 | T | C | Homozygous   |
| NC_037652.1 | 7861211 | SNV | 1 | A | G | Heterozygous |
| NC_037652.1 | 7861277 | SNV | 1 | T | C | Homozygous   |
| NC_037652.1 | 7861307 | SNV | 1 | T | C | Heterozygous |

|             |         |     |   |   |   |              |
|-------------|---------|-----|---|---|---|--------------|
| NC_037652.1 | 7861723 | SNV | 1 | C | T | Homozygous   |
| NC_037652.1 | 7862227 | SNV | 1 | A | G | Homozygous   |
| NC_037652.1 | 7862983 | SNV | 1 | C | T | Heterozygous |
| NC_037652.1 | 7864744 | SNV | 1 | C | T | Homozygous   |
| NC_037652.1 | 7864746 | SNV | 1 | G | T | Homozygous   |
| NC_037652.1 | 7864753 | SNV | 1 | A | T | Homozygous   |
| NC_037652.1 | 7864961 | SNV | 1 | A | G | Homozygous   |
| NC_037652.1 | 7865299 | SNV | 1 | C | T | Heterozygous |
| NC_037652.1 | 7865714 | SNV | 1 | A | G | Homozygous   |
| NC_037652.1 | 7865738 | SNV | 1 | A | T | Homozygous   |
| NC_037652.1 | 7865740 | SNV | 1 | A | G | Homozygous   |
| NC_037652.1 | 7865744 | SNV | 1 | T | C | Homozygous   |
| NC_037652.1 | 7865746 | SNV | 1 | C | T | Homozygous   |
| NC_037652.1 | 7871194 | SNV | 1 | T | C | Homozygous   |
| NC_037652.1 | 7871203 | SNV | 1 | A | C | Homozygous   |
| NC_037652.1 | 7871220 | SNV | 1 | G | A | Homozygous   |
| NC_037652.1 | 7871223 | SNV | 1 | A | T | Homozygous   |
| NC_037652.1 | 7871794 | SNV | 1 | G | T | Homozygous   |
| NC_037652.1 | 7872689 | SNV | 1 | T | C | Heterozygous |
| NC_037652.1 | 7873480 | SNV | 1 | A | G | Heterozygous |
| NC_037652.1 | 7873517 | SNV | 1 | A | G | Homozygous   |
| NC_037652.1 | 7873588 | SNV | 1 | G | A | Homozygous   |
| NC_037652.1 | 7873609 | SNV | 1 | A | T | Homozygous   |
| NC_037652.1 | 7873776 | SNV | 1 | C | T | Heterozygous |
| NC_037652.1 | 7874148 | SNV | 1 | A | G | Heterozygous |
| NC_037652.1 | 7874189 | SNV | 1 | T | C | Heterozygous |
| NC_037652.1 | 7874265 | SNV | 1 | C | T | Homozygous   |
| NC_037652.1 | 7874385 | SNV | 1 | T | A | Homozygous   |
| NC_037652.1 | 7874755 | SNV | 1 | C | T | Homozygous   |
| NC_037652.1 | 7874904 | SNV | 1 | C | T | Homozygous   |
| NC_037652.1 | 7875228 | SNV | 1 | T | C | Homozygous   |
| NC_037652.1 | 7875741 | SNV | 1 | C | G | Heterozygous |
| NC_037652.1 | 7876699 | SNV | 1 | T | C | Homozygous   |
| NC_037652.1 | 7877616 | SNV | 1 | A | G | Heterozygous |
| NC_037652.1 | 7879942 | SNV | 1 | G | A | Homozygous   |
| NC_037652.1 | 7880055 | SNV | 1 | G | T | Homozygous   |
| NC_037652.1 | 7880132 | SNV | 1 | G | T | Homozygous   |
| NC_037652.1 | 7882261 | SNV | 1 | G | A | Heterozygous |
| NC_037652.1 | 7882709 | SNV | 1 | T | C | Heterozygous |
| NC_037652.1 | 7882863 | SNV | 1 | T | C | Homozygous   |
| NC_037652.1 | 7883615 | SNV | 1 | T | C | Heterozygous |
| NC_037652.1 | 7883742 | SNV | 1 | T | G | Homozygous   |
| NC_037652.1 | 7884568 | SNV | 1 | A | G | Homozygous   |
| NC_037652.1 | 7886212 | SNV | 1 | G | C | Homozygous   |
| NC_037652.1 | 7886330 | SNV | 1 | G | A | Homozygous   |
| NC_037652.1 | 7886775 | SNV | 1 | T | G | Homozygous   |
| NC_037652.1 | 7887199 | SNV | 1 | G | A | Homozygous   |
| NC_037652.1 | 7887209 | SNV | 1 | C | G | Homozygous   |
| NC_037652.1 | 7887212 | SNV | 1 | T | A | Homozygous   |
| NC_037652.1 | 7887345 | SNV | 1 | C | T | Homozygous   |
| NC_037652.1 | 7887711 | SNV | 1 | G | A | Homozygous   |

|             |         |     |   |   |   |              |
|-------------|---------|-----|---|---|---|--------------|
| NC_037652.1 | 7887822 | SNV | 1 | T | A | Homozygous   |
| NC_037652.1 | 7888349 | SNV | 1 | G | A | Homozygous   |
| NC_037652.1 | 7888365 | SNV | 1 | C | T | Homozygous   |
| NC_037652.1 | 7888388 | SNV | 1 | G | T | Homozygous   |
| NC_037652.1 | 7888466 | SNV | 1 | T | C | Homozygous   |
| NC_037652.1 | 7888567 | SNV | 1 | T | C | Homozygous   |
| NC_037652.1 | 7888698 | SNV | 1 | A | G | Heterozygous |
| NC_037652.1 | 7888783 | SNV | 1 | A | G | Homozygous   |
| NC_037652.1 | 7888884 | SNV | 1 | T | C | Homozygous   |
| NC_037652.1 | 7890010 | SNV | 1 | C | T | Heterozygous |
| NC_037652.1 | 7890133 | SNV | 1 | C | T | Homozygous   |
| NC_037652.1 | 7890493 | SNV | 1 | A | T | Homozygous   |
| NC_037652.1 | 7890536 | SNV | 1 | T | C | Homozygous   |
| NC_037652.1 | 7891524 | SNV | 1 | T | C | Homozygous   |
| NC_037652.1 | 7891539 | SNV | 1 | A | G | Heterozygous |
| NC_037652.1 | 7891544 | SNV | 1 | T | C | Heterozygous |
| NC_037652.1 | 7891550 | SNV | 1 | T | C | Heterozygous |
| NC_037652.1 | 7891557 | SNV | 1 | A | G | Homozygous   |
| NC_037652.1 | 7891560 | SNV | 1 | C | T | Homozygous   |
| NC_037652.1 | 7891564 | SNV | 1 | T | C | Heterozygous |
| NC_037652.1 | 7891587 | SNV | 1 | T | A | Homozygous   |
| NC_037652.1 | 7897263 | SNV | 1 | T | C | Homozygous   |
| NC_037652.1 | 7897296 | SNV | 1 | G | A | Homozygous   |
| NC_037652.1 | 7897344 | SNV | 1 | G | A | Heterozygous |
| NC_037652.1 | 7897362 | SNV | 1 | C | T | Heterozygous |
| NC_037652.1 | 7897887 | SNV | 1 | T | C | Homozygous   |
| NC_037652.1 | 7897987 | SNV | 1 | G | A | Homozygous   |
| NC_037652.1 | 7898099 | SNV | 1 | C | G | Homozygous   |
| NC_037652.1 | 7898242 | SNV | 1 | A | G | Homozygous   |
| NC_037652.1 | 7898440 | SNV | 1 | G | A | Heterozygous |
| NC_037652.1 | 7898479 | SNV | 1 | T | C | Homozygous   |
| NC_037652.1 | 7898568 | SNV | 1 | C | T | Homozygous   |
| NC_037652.1 | 7903614 | SNV | 1 | G | A | Homozygous   |
| NC_037652.1 | 7903638 | SNV | 1 | C | T | Heterozygous |
| NC_037652.1 | 7903950 | SNV | 1 | A | G | Heterozygous |
| NC_037652.1 | 7904109 | SNV | 1 | T | C | Homozygous   |
| NC_037652.1 | 7904460 | SNV | 1 | A | G | Homozygous   |
| NC_037652.1 | 7904580 | SNV | 1 | C | T | Heterozygous |
| NC_037652.1 | 7904643 | SNV | 1 | G | A | Heterozygous |
| NC_037652.1 | 7911411 | SNV | 1 | T | A | Homozygous   |
| NC_037652.1 | 7911959 | SNV | 1 | C | A | Homozygous   |
| NC_037652.1 | 7911992 | SNV | 1 | G | A | Heterozygous |
| NC_037652.1 | 7912427 | SNV | 1 | G | A | Homozygous   |
| NC_037652.1 | 7912460 | SNV | 1 | C | T | Homozygous   |
| NC_037652.1 | 7912493 | SNV | 1 | T | C | Homozygous   |
| NC_037652.1 | 7922649 | SNV | 1 | C | T | Homozygous   |
| NC_037652.1 | 7922718 | SNV | 1 | C | T | Homozygous   |
| NC_037652.1 | 7947667 | SNV | 1 | A | G | Heterozygous |
| NC_037652.1 | 7947694 | SNV | 1 | C | G | Heterozygous |
| NC_037652.1 | 7949994 | SNV | 1 | T | C | Heterozygous |
| NC_037652.1 | 7950276 | SNV | 1 | G | T | Homozygous   |

|             |         |     |   |   |   |              |
|-------------|---------|-----|---|---|---|--------------|
| NC_037652.1 | 7950308 | SNV | 1 | G | C | Homozygous   |
| NC_037652.1 | 7950894 | SNV | 1 | T | C | Heterozygous |
| NC_037652.1 | 7951932 | SNV | 1 | G | A | Heterozygous |
| NC_037652.1 | 7951942 | SNV | 1 | T | G | Heterozygous |
| NC_037652.1 | 7952024 | SNV | 1 | G | A | Homozygous   |
| NC_037652.1 | 7952287 | SNV | 1 | A | T | Heterozygous |
| NC_037652.1 | 7952296 | SNV | 1 | A | G | Heterozygous |
| NC_037652.1 | 7956669 | SNV | 1 | T | C | Heterozygous |
| NC_037652.1 | 7956742 | SNV | 1 | T | C | Homozygous   |
| NC_037652.1 | 7964001 | SNV | 1 | A | T | Homozygous   |
| NC_037652.1 | 7964003 | SNV | 1 | A | C | Homozygous   |
| NC_037652.1 | 7964012 | SNV | 1 | T | A | Homozygous   |
| NC_037652.1 | 7964018 | SNV | 1 | A | T | Homozygous   |
| NC_037652.1 | 7964024 | SNV | 1 | T | G | Homozygous   |
| NC_037652.1 | 7964033 | SNV | 1 | A | G | Homozygous   |
| NC_037652.1 | 7964039 | SNV | 1 | T | C | Homozygous   |
| NC_037652.1 | 7964042 | SNV | 1 | A | T | Homozygous   |
| NC_037652.1 | 7964050 | SNV | 1 | A | G | Homozygous   |
| NC_037652.1 | 7966318 | SNV | 1 | A | G | Homozygous   |
| NC_037652.1 | 7971254 | SNV | 1 | C | A | Homozygous   |
| NC_037652.1 | 7971261 | SNV | 1 | A | T | Homozygous   |
| NC_037652.1 | 7971284 | SNV | 1 | T | G | Homozygous   |
| NC_037652.1 | 7971287 | SNV | 1 | A | T | Homozygous   |
| NC_037652.1 | 7971291 | SNV | 1 | A | T | Homozygous   |
| NC_037652.1 | 7971338 | SNV | 1 | T | C | Heterozygous |
| NC_037652.1 | 7971371 | SNV | 1 | A | T | Homozygous   |
| NC_037652.1 | 7971375 | SNV | 1 | A | T | Homozygous   |
| NC_037652.1 | 7971379 | SNV | 1 | G | T | Homozygous   |
| NC_037652.1 | 7971398 | SNV | 1 | C | T | Homozygous   |
| NC_037652.1 | 7971401 | SNV | 1 | A | T | Homozygous   |
| NC_037652.1 | 7971409 | SNV | 1 | T | G | Homozygous   |
| NC_037652.1 | 7971447 | SNV | 1 | G | T | Homozygous   |
| NC_037652.1 | 7971451 | SNV | 1 | G | T | Homozygous   |
| NC_037652.1 | 7972184 | SNV | 1 | C | T | Homozygous   |
| NC_037652.1 | 7981230 | SNV | 1 | T | G | Homozygous   |
| NC_037652.1 | 7981237 | SNV | 1 | G | A | Homozygous   |
| NC_037652.1 | 7991245 | SNV | 1 | G | A | Homozygous   |
| NC_037652.1 | 7991250 | SNV | 1 | A | G | Heterozygous |
| NC_037652.1 | 7991254 | SNV | 1 | A | G | Heterozygous |
| NC_037652.1 | 7998351 | SNV | 1 | A | G | Homozygous   |
| NC_037652.1 | 7999118 | SNV | 1 | G | C | Homozygous   |
| NC_037652.1 | 7999120 | SNV | 1 | T | C | Homozygous   |
| NC_037652.1 | 7999132 | SNV | 1 | C | G | Homozygous   |
| NC_037652.1 | 7999138 | SNV | 1 | T | C | Homozygous   |
| NC_037652.1 | 7999140 | SNV | 1 | G | C | Homozygous   |
| NC_037652.1 | 7999142 | SNV | 1 | T | C | Homozygous   |
| NC_037652.1 | 7999164 | SNV | 1 | G | C | Homozygous   |
| NC_037652.1 | 7999180 | SNV | 1 | G | C | Homozygous   |
| NC_037652.1 | 7999182 | SNV | 1 | A | C | Homozygous   |
| NC_037652.1 | 7999184 | SNV | 1 | T | C | Homozygous   |
| NC_037652.1 | 8000305 | SNV | 1 | A | G | Homozygous   |

|             |         |     |   |   |   |              |
|-------------|---------|-----|---|---|---|--------------|
| NC_037652.1 | 8000317 | SNV | 1 | G | C | Heterozygous |
| NC_037652.1 | 8000319 | SNV | 1 | A | C | Heterozygous |
| NC_037652.1 | 8000324 | SNV | 1 | T | C | Homozygous   |
| NC_037652.1 | 8014098 | SNV | 1 | C | T | Heterozygous |
| NC_037652.1 | 8014458 | SNV | 1 | G | A | Heterozygous |
| NC_037652.1 | 8014546 | SNV | 1 | C | A | Homozygous   |
| NC_037652.1 | 8014635 | SNV | 1 | G | A | Homozygous   |
| NC_037652.1 | 8014664 | SNV | 1 | G | A | Homozygous   |
| NC_037652.1 | 8014703 | SNV | 1 | A | G | Homozygous   |
| NC_037652.1 | 8014730 | SNV | 1 | A | G | Homozygous   |
| NC_037652.1 | 8022426 | SNV | 1 | T | C | Heterozygous |
| NC_037652.1 | 8026539 | SNV | 1 | C | T | Heterozygous |
| NC_037652.1 | 8028010 | SNV | 1 | G | A | Heterozygous |
| NC_037652.1 | 8028140 | SNV | 1 | A | G | Homozygous   |
| NC_037652.1 | 8028310 | SNV | 1 | T | C | Heterozygous |
| NC_037652.1 | 8028313 | SNV | 1 | C | T | Heterozygous |
| NC_037652.1 | 8034463 | SNV | 1 | A | C | Homozygous   |
| NC_037652.1 | 8034485 | SNV | 1 | C | T | Homozygous   |
| NC_037652.1 | 8045289 | SNV | 1 | G | A | Heterozygous |
| NC_037652.1 | 8045490 | SNV | 1 | T | C | Homozygous   |
| NC_037652.1 | 8046708 | SNV | 1 | G | C | Heterozygous |
| NC_037652.1 | 8046824 | SNV | 1 | T | G | Homozygous   |
| NC_037652.1 | 8072215 | SNV | 1 | C | T | Homozygous   |
| NC_037652.1 | 8072243 | SNV | 1 | C | A | Homozygous   |
| NC_037652.1 | 8075460 | SNV | 1 | G | A | Heterozygous |
| NC_037652.1 | 8075462 | SNV | 1 | C | T | Heterozygous |
| NC_037652.1 | 8075666 | SNV | 1 | A | G | Homozygous   |
| NC_037652.1 | 8075729 | SNV | 1 | A | G | Homozygous   |
| NC_037652.1 | 8076299 | SNV | 1 | A | G | Homozygous   |
| NC_037652.1 | 8077454 | SNV | 1 | G | T | Homozygous   |
| NC_037652.1 | 8077565 | SNV | 1 | C | G | Heterozygous |
| NC_037652.1 | 8077653 | SNV | 1 | A | G | Heterozygous |
| NC_037652.1 | 8077656 | SNV | 1 | T | C | Heterozygous |
| NC_037652.1 | 8077663 | SNV | 1 | T | C | Homozygous   |
| NC_037652.1 | 8077672 | SNV | 1 | G | A | Homozygous   |
| NC_037652.1 | 8078731 | SNV | 1 | A | G | Homozygous   |
| NC_037652.1 | 8078783 | SNV | 1 | G | A | Heterozygous |
| NC_037652.1 | 8079035 | SNV | 1 | T | C | Homozygous   |
| NC_037652.1 | 8079565 | SNV | 1 | T | C | Heterozygous |
| NC_037652.1 | 8079645 | SNV | 1 | A | G | Heterozygous |
| NC_037652.1 | 8079668 | SNV | 1 | C | T | Homozygous   |
| NC_037652.1 | 8079834 | SNV | 1 | C | T | Heterozygous |
| NC_037652.1 | 8080272 | SNV | 1 | A | G | Homozygous   |
| NC_037652.1 | 8080439 | SNV | 1 | A | T | Homozygous   |
| NC_037652.1 | 8080592 | SNV | 1 | C | T | Homozygous   |
| NC_037652.1 | 8081386 | SNV | 1 | G | A | Heterozygous |
| NC_037652.1 | 8083151 | SNV | 1 | A | T | Heterozygous |
| NC_037652.1 | 8088950 | SNV | 1 | T | C | Homozygous   |
| NC_037652.1 | 8089130 | SNV | 1 | A | G | Heterozygous |
| NC_037652.1 | 8089153 | SNV | 1 | C | G | Homozygous   |
| NC_037652.1 | 8089219 | SNV | 1 | T | C | Homozygous   |



|             |         |     |   |   |   |              |
|-------------|---------|-----|---|---|---|--------------|
| NC_037652.1 | 8089250 | SNV | 1 | A | T | Homozygous   |
| NC_037652.1 | 8089261 | SNV | 1 | G | A | Homozygous   |
| NC_037652.1 | 8089358 | SNV | 1 | T | C | Homozygous   |
| NC_037652.1 | 8089517 | SNV | 1 | G | A | Heterozygous |
| NC_037652.1 | 8089792 | SNV | 1 | A | G | Homozygous   |
| NC_037652.1 | 8089811 | SNV | 1 | T | A | Heterozygous |
| NC_037652.1 | 8090225 | SNV | 1 | G | A | Heterozygous |
| NC_037652.1 | 8090260 | SNV | 1 | T | C | Homozygous   |
| NC_037652.1 | 8091295 | SNV | 1 | G | A | Heterozygous |
| NC_037652.1 | 8092344 | SNV | 1 | T | C | Homozygous   |
| NC_037652.1 | 8092349 | SNV | 1 | T | C | Homozygous   |
| NC_037652.1 | 8092360 | SNV | 1 | T | C | Homozygous   |
| NC_037652.1 | 8092385 | SNV | 1 | T | C | Homozygous   |
| NC_037652.1 | 8092445 | SNV | 1 | A | T | Homozygous   |
| NC_037652.1 | 8092464 | SNV | 1 | G | A | Homozygous   |
| NC_037652.1 | 8092472 | SNV | 1 | C | T | Homozygous   |
| NC_037652.1 | 8092481 | SNV | 1 | C | T | Homozygous   |
| NC_037652.1 | 8092623 | SNV | 1 | T | C | Homozygous   |
| NC_037652.1 | 8092628 | SNV | 1 | C | T | Homozygous   |
| NC_037652.1 | 8092631 | SNV | 1 | T | A | Homozygous   |
| NC_037652.1 | 8092649 | SNV | 1 | C | T | Homozygous   |
| NC_037652.1 | 8092688 | SNV | 1 | T | C | Homozygous   |
| NC_037652.1 | 8092716 | SNV | 1 | C | T | Homozygous   |
| NC_037652.1 | 8092785 | SNV | 1 | C | T | Homozygous   |
| NC_037652.1 | 8093028 | SNV | 1 | C | T | Homozygous   |
| NC_037652.1 | 8093114 | SNV | 1 | A | T | Homozygous   |
| NC_037652.1 | 8093144 | SNV | 1 | T | C | Homozygous   |
| NC_037652.1 | 8093238 | SNV | 1 | C | T | Homozygous   |
| NC_037652.1 | 8093264 | SNV | 1 | C | T | Homozygous   |
| NC_037652.1 | 8101701 | SNV | 1 | A | T | Heterozygous |
| NC_037652.1 | 8101875 | SNV | 1 | G | A | Homozygous   |
| NC_037652.1 | 8101889 | SNV | 1 | T | C | Homozygous   |
| NC_037652.1 | 8101900 | SNV | 1 | G | A | Heterozygous |
| NC_037652.1 | 8102006 | SNV | 1 | C | G | Homozygous   |
| NC_037652.1 | 8102009 | SNV | 1 | A | T | Homozygous   |
| NC_037652.1 | 8102087 | SNV | 1 | T | C | Homozygous   |
| NC_037652.1 | 8102093 | SNV | 1 | A | G | Homozygous   |
| NC_037652.1 | 8102354 | SNV | 1 | A | G | Homozygous   |
| NC_037652.1 | 8102382 | SNV | 1 | A | G | Heterozygous |
| NC_037652.1 | 8102391 | SNV | 1 | T | G | Homozygous   |
| NC_037652.1 | 8102654 | SNV | 1 | G | C | Heterozygous |
| NC_037652.1 | 8102740 | SNV | 1 | T | C | Homozygous   |
| NC_037652.1 | 8102794 | SNV | 1 | A | G | Homozygous   |
| NC_037652.1 | 8102803 | SNV | 1 | T | C | Homozygous   |
| NC_037652.1 | 8102814 | SNV | 1 | A | G | Homozygous   |
| NC_037652.1 | 8102845 | SNV | 1 | C | T | Heterozygous |
| NC_037652.1 | 8102883 | SNV | 1 | C | T | Homozygous   |
| NC_037652.1 | 8102898 | SNV | 1 | G | C | Heterozygous |
| NC_037652.1 | 8102936 | SNV | 1 | T | C | Heterozygous |
| NC_037652.1 | 8102959 | SNV | 1 | T | C | Heterozygous |
| NC_037652.1 | 8103015 | SNV | 1 | G | A | Heterozygous |

|             |         |     |   |   |   |              |
|-------------|---------|-----|---|---|---|--------------|
| NC_037652.1 | 8103161 | SNV | 1 | A | G | Heterozygous |
| NC_037652.1 | 8103373 | SNV | 1 | A | G | Heterozygous |
| NC_037652.1 | 8103431 | SNV | 1 | A | G | Heterozygous |
| NC_037652.1 | 8103549 | SNV | 1 | G | A | Homozygous   |
| NC_037652.1 | 8103553 | SNV | 1 | G | A | Homozygous   |
| NC_037652.1 | 8103558 | SNV | 1 | T | A | Homozygous   |
| NC_037652.1 | 8103561 | SNV | 1 | A | G | Homozygous   |
| NC_037652.1 | 8103580 | SNV | 1 | A | C | Homozygous   |
| NC_037652.1 | 8103591 | SNV | 1 | A | G | Homozygous   |
| NC_037652.1 | 8103597 | SNV | 1 | G | A | Heterozygous |
| NC_037652.1 | 8103613 | SNV | 1 | T | G | Homozygous   |
| NC_037652.1 | 8103631 | SNV | 1 | G | A | Homozygous   |
| NC_037652.1 | 8103669 | SNV | 1 | A | G | Heterozygous |
| NC_037652.1 | 8103708 | SNV | 1 | G | A | Heterozygous |
| NC_037652.1 | 8103714 | SNV | 1 | G | A | Homozygous   |
| NC_037652.1 | 8103810 | SNV | 1 | G | C | Homozygous   |
| NC_037652.1 | 8103946 | SNV | 1 | C | T | Heterozygous |
| NC_037652.1 | 8103957 | SNV | 1 | C | T | Heterozygous |
| NC_037652.1 | 8103968 | SNV | 1 | A | C | Homozygous   |
| NC_037652.1 | 8104071 | SNV | 1 | C | G | Homozygous   |
| NC_037652.1 | 8104107 | SNV | 1 | C | T | Heterozygous |
| NC_037652.1 | 8104131 | SNV | 1 | A | G | Heterozygous |
| NC_037652.1 | 8104178 | SNV | 1 | G | A | Heterozygous |
| NC_037652.1 | 8104196 | SNV | 1 | A | G | Homozygous   |
| NC_037652.1 | 8104200 | SNV | 1 | G | A | Homozygous   |
| NC_037652.1 | 8104224 | SNV | 1 | G | A | Heterozygous |
| NC_037652.1 | 8104241 | SNV | 1 | G | A | Homozygous   |
| NC_037652.1 | 8104249 | SNV | 1 | C | A | Homozygous   |
| NC_037652.1 | 8104258 | SNV | 1 | T | A | Homozygous   |
| NC_037652.1 | 8104260 | SNV | 1 | T | A | Heterozygous |
| NC_037652.1 | 8104314 | SNV | 1 | T | C | Heterozygous |
| NC_037652.1 | 8104326 | SNV | 1 | A | T | Heterozygous |
| NC_037652.1 | 8104375 | SNV | 1 | A | G | Homozygous   |
| NC_037652.1 | 8104424 | SNV | 1 | T | C | Homozygous   |
| NC_037652.1 | 8104445 | SNV | 1 | A | C | Homozygous   |
| NC_037652.1 | 8104471 | SNV | 1 | G | A | Heterozygous |
| NC_037652.1 | 8104491 | SNV | 1 | G | T | Heterozygous |
| NC_037652.1 | 8104498 | SNV | 1 | A | G | Homozygous   |
| NC_037652.1 | 8104602 | SNV | 1 | G | A | Homozygous   |
| NC_037652.1 | 8104653 | SNV | 1 | G | A | Heterozygous |
| NC_037652.1 | 8104934 | SNV | 1 | T | C | Heterozygous |
| NC_037652.1 | 8104940 | SNV | 1 | C | A | Heterozygous |
| NC_037652.1 | 8104951 | SNV | 1 | T | G | Homozygous   |
| NC_037652.1 | 8104959 | SNV | 1 | G | A | Homozygous   |
| NC_037652.1 | 8105434 | SNV | 1 | G | A | Heterozygous |
| NC_037652.1 | 8110554 | SNV | 1 | G | A | Homozygous   |
| NC_037652.1 | 8110591 | SNV | 1 | T | C | Homozygous   |
| NC_037652.1 | 8110882 | SNV | 1 | A | G | Heterozygous |
| NC_037652.1 | 8110886 | SNV | 1 | G | A | Homozygous   |
| NC_037652.1 | 8110890 | SNV | 1 | G | A | Heterozygous |
| NC_037652.1 | 8120693 | SNV | 1 | A | G | Homozygous   |

|             |         |     |   |   |   |              |
|-------------|---------|-----|---|---|---|--------------|
| NC_037652.1 | 8120868 | SNV | 1 | G | A | Heterozygous |
| NC_037652.1 | 8120902 | SNV | 1 | A | G | Heterozygous |
| NC_037652.1 | 8120945 | SNV | 1 | A | C | Homozygous   |
| NC_037652.1 | 8120994 | SNV | 1 | T | A | Heterozygous |
| NC_037652.1 | 8121036 | SNV | 1 | A | G | Homozygous   |
| NC_037652.1 | 8121055 | SNV | 1 | C | T | Homozygous   |
| NC_037652.1 | 8123841 | SNV | 1 | G | A | Homozygous   |
| NC_037652.1 | 8123844 | SNV | 1 | C | T | Homozygous   |
| NC_037652.1 | 8123883 | SNV | 1 | G | A | Heterozygous |
| NC_037652.1 | 8123932 | SNV | 1 | T | C | Heterozygous |
| NC_037652.1 | 8123953 | SNV | 1 | G | A | Heterozygous |
| NC_037652.1 | 8123972 | SNV | 1 | G | A | Homozygous   |
| NC_037652.1 | 8123976 | SNV | 1 | A | G | Heterozygous |
| NC_037652.1 | 8124008 | SNV | 1 | T | C | Heterozygous |
| NC_037652.1 | 8124013 | SNV | 1 | T | A | Heterozygous |
| NC_037652.1 | 8124118 | SNV | 1 | T | C | Heterozygous |
| NC_037652.1 | 8124146 | SNV | 1 | A | G | Homozygous   |
| NC_037652.1 | 8124173 | SNV | 1 | T | G | Homozygous   |
| NC_037652.1 | 8124185 | SNV | 1 | T | C | Homozygous   |
| NC_037652.1 | 8124195 | SNV | 1 | C | T | Heterozygous |
| NC_037652.1 | 8124205 | SNV | 1 | G | A | Heterozygous |
| NC_037652.1 | 8124293 | SNV | 1 | G | A | Heterozygous |
| NC_037652.1 | 8124297 | SNV | 1 | G | A | Heterozygous |
| NC_037652.1 | 8124346 | SNV | 1 | G | A | Heterozygous |
| NC_037652.1 | 8124362 | SNV | 1 | A | G | Homozygous   |
| NC_037652.1 | 8124429 | SNV | 1 | G | A | Homozygous   |
| NC_037652.1 | 8124438 | SNV | 1 | A | G | Homozygous   |
| NC_037652.1 | 8124455 | SNV | 1 | T | G | Heterozygous |
| NC_037652.1 | 8124484 | SNV | 1 | A | G | Heterozygous |
| NC_037652.1 | 8124669 | SNV | 1 | C | T | Heterozygous |
| NC_037652.1 | 8124672 | SNV | 1 | T | C | Heterozygous |
| NC_037652.1 | 8124683 | SNV | 1 | T | C | Homozygous   |
| NC_037652.1 | 8124757 | SNV | 1 | A | G | Homozygous   |
| NC_037652.1 | 8124788 | SNV | 1 | G | A | Heterozygous |
| NC_037652.1 | 8124803 | SNV | 1 | T | C | Homozygous   |
| NC_037652.1 | 8124829 | SNV | 1 | T | C | Homozygous   |
| NC_037652.1 | 8124841 | SNV | 1 | T | A | Homozygous   |
| NC_037652.1 | 8124853 | SNV | 1 | G | A | Heterozygous |
| NC_037652.1 | 8124859 | SNV | 1 | C | T | Homozygous   |
| NC_037652.1 | 8124863 | SNV | 1 | T | C | Homozygous   |
| NC_037652.1 | 8124873 | SNV | 1 | A | G | Heterozygous |
| NC_037652.1 | 8124890 | SNV | 1 | G | A | Heterozygous |
| NC_037652.1 | 8124911 | SNV | 1 | G | A | Homozygous   |
| NC_037652.1 | 8124962 | SNV | 1 | T | C | Heterozygous |
| NC_037652.1 | 8124962 | SNV | 1 | T | G | Heterozygous |
| NC_037652.1 | 8124967 | SNV | 1 | A | G | Homozygous   |
| NC_037652.1 | 8124973 | SNV | 1 | C | T | Heterozygous |
| NC_037652.1 | 8124977 | SNV | 1 | T | C | Heterozygous |
| NC_037652.1 | 8124989 | SNV | 1 | T | C | Heterozygous |
| NC_037652.1 | 8125002 | SNV | 1 | G | A | Heterozygous |
| NC_037652.1 | 8125009 | SNV | 1 | T | C | Homozygous   |

|             |         |     |   |   |   |              |
|-------------|---------|-----|---|---|---|--------------|
| NC_037652.1 | 8125039 | SNV | 1 | C | T | Heterozygous |
| NC_037652.1 | 8125062 | SNV | 1 | G | A | Heterozygous |
| NC_037652.1 | 8125066 | SNV | 1 | T | C | Heterozygous |
| NC_037652.1 | 8125132 | SNV | 1 | C | T | Heterozygous |
| NC_037652.1 | 8125164 | SNV | 1 | G | A | Heterozygous |
| NC_037652.1 | 8125166 | SNV | 1 | G | A | Heterozygous |
| NC_037652.1 | 8125174 | SNV | 1 | C | T | Homozygous   |
| NC_037652.1 | 8125210 | SNV | 1 | G | A | Homozygous   |
| NC_037652.1 | 8125213 | SNV | 1 | A | G | Heterozygous |
| NC_037652.1 | 8125241 | SNV | 1 | G | A | Heterozygous |
| NC_037652.1 | 8125268 | SNV | 1 | T | A | Homozygous   |
| NC_037652.1 | 8125483 | SNV | 1 | C | T | Heterozygous |
| NC_037652.1 | 8125537 | SNV | 1 | C | T | Heterozygous |
| NC_037652.1 | 8125540 | SNV | 1 | A | T | Homozygous   |
| NC_037652.1 | 8125549 | SNV | 1 | G | A | Heterozygous |
| NC_037652.1 | 8125580 | SNV | 1 | T | C | Homozygous   |
| NC_037652.1 | 8125618 | SNV | 1 | A | T | Homozygous   |
| NC_037652.1 | 8125751 | SNV | 1 | G | A | Homozygous   |
| NC_037652.1 | 8125758 | SNV | 1 | G | A | Homozygous   |
| NC_037652.1 | 8126083 | SNV | 1 | G | A | Homozygous   |
| NC_037652.1 | 8134289 | SNV | 1 | A | G | Homozygous   |
| NC_037652.1 | 8139653 | SNV | 1 | G | T | Heterozygous |
| NC_037652.1 | 8139674 | SNV | 1 | G | A | Homozygous   |
| NC_037652.1 | 8139677 | SNV | 1 | C | G | Homozygous   |
| NC_037652.1 | 8139756 | SNV | 1 | A | C | Homozygous   |
| NC_037652.1 | 8139758 | SNV | 1 | G | A | Heterozygous |
| NC_037652.1 | 8144206 | SNV | 1 | T | A | Homozygous   |
| NC_037652.1 | 8144243 | SNV | 1 | A | G | Homozygous   |
| NC_037652.1 | 8144304 | SNV | 1 | C | T | Heterozygous |
| NC_037652.1 | 8144318 | SNV | 1 | G | A | Heterozygous |
| NC_037652.1 | 8144349 | SNV | 1 | C | T | Heterozygous |
| NC_037652.1 | 8156126 | SNV | 1 | A | G | Homozygous   |
| NC_037652.1 | 8156558 | SNV | 1 | A | G | Heterozygous |
| NC_037652.1 | 8157185 | SNV | 1 | A | G | Heterozygous |
| NC_037652.1 | 8157203 | SNV | 1 | T | C | Homozygous   |
| NC_037652.1 | 8157573 | SNV | 1 | A | G | Heterozygous |
| NC_037652.1 | 8157611 | SNV | 1 | A | G | Homozygous   |
| NC_037652.1 | 8157907 | SNV | 1 | C | A | Homozygous   |
| NC_037652.1 | 8157935 | SNV | 1 | T | C | Homozygous   |
| NC_037652.1 | 8158681 | SNV | 1 | A | G | Homozygous   |
| NC_037652.1 | 8158684 | SNV | 1 | A | G | Homozygous   |
| NC_037652.1 | 8158691 | SNV | 1 | T | C | Homozygous   |
| NC_037652.1 | 8158743 | SNV | 1 | C | T | Homozygous   |
| NC_037652.1 | 8158852 | SNV | 1 | G | A | Heterozygous |
| NC_037652.1 | 8159080 | SNV | 1 | T | C | Homozygous   |
| NC_037652.1 | 8159209 | SNV | 1 | G | A | Heterozygous |
| NC_037652.1 | 8159288 | SNV | 1 | T | C | Homozygous   |
| NC_037652.1 | 8159314 | SNV | 1 | A | G | Homozygous   |
| NC_037652.1 | 8159388 | SNV | 1 | T | C | Homozygous   |
| NC_037652.1 | 8159425 | SNV | 1 | T | C | Homozygous   |
| NC_037652.1 | 8161477 | SNV | 1 | T | C | Heterozygous |

|             |         |     |   |   |   |              |
|-------------|---------|-----|---|---|---|--------------|
| NC_037652.1 | 8161763 | SNV | 1 | C | T | Heterozygous |
| NC_037652.1 | 8161828 | SNV | 1 | A | G | Homozygous   |
| NC_037652.1 | 8162824 | SNV | 1 | C | T | Heterozygous |
| NC_037652.1 | 8162889 | SNV | 1 | G | C | Heterozygous |
| NC_037652.1 | 8163037 | SNV | 1 | A | G | Homozygous   |
| NC_037652.1 | 8163058 | SNV | 1 | A | G | Homozygous   |
| NC_037652.1 | 8163082 | SNV | 1 | A | G | Homozygous   |
| NC_037652.1 | 8163416 | SNV | 1 | G | A | Homozygous   |
| NC_037652.1 | 8163426 | SNV | 1 | C | T | Heterozygous |
| NC_037652.1 | 8163433 | SNV | 1 | A | G | Homozygous   |
| NC_037652.1 | 8163541 | SNV | 1 | T | G | Homozygous   |
| NC_037652.1 | 8163551 | SNV | 1 | T | C | Homozygous   |
| NC_037652.1 | 8163556 | SNV | 1 | A | C | Homozygous   |
| NC_037652.1 | 8163924 | SNV | 1 | C | A | Homozygous   |
| NC_037652.1 | 8163927 | SNV | 1 | A | G | Homozygous   |
| NC_037652.1 | 8163930 | SNV | 1 | A | G | Homozygous   |
| NC_037652.1 | 8163971 | SNV | 1 | C | T | Homozygous   |
| NC_037652.1 | 8163989 | SNV | 1 | G | A | Heterozygous |
| NC_037652.1 | 8164105 | SNV | 1 | A | G | Homozygous   |
| NC_037652.1 | 8164194 | SNV | 1 | G | A | Heterozygous |
| NC_037652.1 | 8164474 | SNV | 1 | C | T | Heterozygous |
| NC_037652.1 | 8172163 | SNV | 1 | G | A | Homozygous   |
| NC_037652.1 | 8172173 | SNV | 1 | G | T | Homozygous   |
| NC_037652.1 | 8174899 | SNV | 1 | T | C | Homozygous   |
| NC_037652.1 | 8175284 | SNV | 1 | T | C | Homozygous   |
| NC_037652.1 | 8175663 | SNV | 1 | T | C | Homozygous   |
| NC_037652.1 | 8175680 | SNV | 1 | A | G | Homozygous   |
| NC_037652.1 | 8175786 | SNV | 1 | T | C | Homozygous   |
| NC_037652.1 | 8176168 | SNV | 1 | T | C | Homozygous   |
| NC_037652.1 | 8176480 | SNV | 1 | C | T | Homozygous   |
| NC_037652.1 | 8177133 | SNV | 1 | T | C | Homozygous   |
| NC_037652.1 | 8177149 | SNV | 1 | A | G | Homozygous   |
| NC_037652.1 | 8177157 | SNV | 1 | A | G | Heterozygous |
| NC_037652.1 | 8177380 | SNV | 1 | C | G | Homozygous   |
| NC_037652.1 | 8177659 | SNV | 1 | G | A | Heterozygous |
| NC_037652.1 | 8177734 | SNV | 1 | G | C | Heterozygous |
| NC_037652.1 | 8177795 | SNV | 1 | G | A | Heterozygous |
| NC_037652.1 | 8182206 | SNV | 1 | T | C | Heterozygous |
| NC_037652.1 | 8182379 | SNV | 1 | G | C | Heterozygous |
| NC_037652.1 | 8182387 | SNV | 1 | T | C | Heterozygous |
| NC_037652.1 | 8191181 | SNV | 1 | A | T | Homozygous   |
| NC_037652.1 | 8196911 | SNV | 1 | C | G | Heterozygous |
| NC_037652.1 | 8201818 | SNV | 1 | A | C | Homozygous   |
| NC_037652.1 | 8202452 | SNV | 1 | C | T | Homozygous   |
| NC_037652.1 | 8204800 | SNV | 1 | T | A | Homozygous   |
| NC_037652.1 | 8204806 | SNV | 1 | T | C | Homozygous   |
| NC_037652.1 | 8204808 | SNV | 1 | A | T | Homozygous   |
| NC_037652.1 | 8205227 | SNV | 1 | G | A | Homozygous   |
| NC_037652.1 | 8205402 | SNV | 1 | T | C | Heterozygous |
| NC_037652.1 | 8205404 | SNV | 1 | T | A | Heterozygous |
| NC_037652.1 | 8205406 | SNV | 1 | C | G | Heterozygous |

|             |         |     |   |   |   |              |
|-------------|---------|-----|---|---|---|--------------|
| NC_037652.1 | 8205421 | SNV | 1 | A | G | Heterozygous |
| NC_037652.1 | 8205423 | SNV | 1 | A | G | Heterozygous |
| NC_037652.1 | 8205426 | SNV | 1 | A | G | Heterozygous |
| NC_037652.1 | 8205428 | SNV | 1 | T | A | Heterozygous |
| NC_037652.1 | 8205430 | SNV | 1 | C | T | Heterozygous |
| NC_037652.1 | 8205432 | SNV | 1 | T | G | Heterozygous |
| NC_037652.1 | 8207029 | SNV | 1 | C | T | Homozygous   |
| NC_037652.1 | 8207658 | SNV | 1 | C | A | Homozygous   |
| NC_037652.1 | 8207905 | SNV | 1 | C | G | Homozygous   |
| NC_037652.1 | 8208384 | SNV | 1 | G | C | Homozygous   |
| NC_037652.1 | 8210009 | SNV | 1 | T | C | Heterozygous |
| NC_037652.1 | 8210289 | SNV | 1 | G | A | Homozygous   |
| NC_037652.1 | 8210938 | SNV | 1 | G | A | Homozygous   |
| NC_037652.1 | 8211351 | SNV | 1 | G | A | Heterozygous |
| NC_037652.1 | 8211472 | SNV | 1 | T | G | Homozygous   |
| NC_037652.1 | 8211616 | SNV | 1 | T | A | Homozygous   |
| NC_037652.1 | 8211622 | SNV | 1 | T | C | Homozygous   |
| NC_037652.1 | 8211762 | SNV | 1 | G | C | Homozygous   |
| NC_037652.1 | 8211827 | SNV | 1 | A | T | Heterozygous |
| NC_037652.1 | 8211829 | SNV | 1 | A | T | Heterozygous |
| NC_037652.1 | 8213800 | SNV | 1 | C | T | Heterozygous |
| NC_037652.1 | 8215057 | SNV | 1 | G | T | Heterozygous |
| NC_037652.1 | 8219468 | SNV | 1 | T | A | Heterozygous |
| NC_037652.1 | 8219482 | SNV | 1 | G | T | Heterozygous |
| NC_037652.1 | 8219494 | SNV | 1 | A | G | Homozygous   |
| NC_037652.1 | 8219587 | SNV | 1 | T | A | Heterozygous |
| NC_037652.1 | 8219612 | SNV | 1 | C | T | Homozygous   |
| NC_037652.1 | 8219626 | SNV | 1 | A | G | Homozygous   |
| NC_037652.1 | 8219647 | SNV | 1 | T | A | Homozygous   |
| NC_037652.1 | 8219665 | SNV | 1 | G | A | Homozygous   |
| NC_037652.1 | 8219702 | SNV | 1 | A | G | Heterozygous |
| NC_037652.1 | 8219706 | SNV | 1 | C | T | Heterozygous |
| NC_037652.1 | 8219734 | SNV | 1 | A | G | Heterozygous |
| NC_037652.1 | 8219742 | SNV | 1 | G | A | Heterozygous |
| NC_037652.1 | 8219818 | SNV | 1 | G | A | Homozygous   |
| NC_037652.1 | 8219836 | SNV | 1 | A | G | Homozygous   |
| NC_037652.1 | 8219866 | SNV | 1 | T | A | Homozygous   |
| NC_037652.1 | 8226055 | SNV | 1 | G | T | Homozygous   |
| NC_037652.1 | 8226064 | SNV | 1 | A | T | Homozygous   |
| NC_037652.1 | 8226073 | SNV | 1 | A | T | Homozygous   |
| NC_037652.1 | 8226075 | SNV | 1 | T | G | Homozygous   |
| NC_037652.1 | 8226090 | SNV | 1 | A | T | Homozygous   |
| NC_037652.1 | 8239810 | SNV | 1 | C | A | Homozygous   |
| NC_037652.1 | 8239826 | SNV | 1 | A | G | Homozygous   |
| NC_037652.1 | 8239833 | SNV | 1 | T | C | Homozygous   |
| NC_037652.1 | 8254532 | SNV | 1 | A | G | Heterozygous |
| NC_037652.1 | 8254563 | SNV | 1 | G | A | Heterozygous |
| NC_037652.1 | 8254572 | SNV | 1 | A | T | Homozygous   |
| NC_037652.1 | 8254749 | SNV | 1 | A | G | Heterozygous |
| NC_037652.1 | 8254763 | SNV | 1 | A | G | Heterozygous |
| NC_037652.1 | 8254808 | SNV | 1 | A | C | Heterozygous |

|             |         |     |   |   |   |              |
|-------------|---------|-----|---|---|---|--------------|
| NC_037652.1 | 8269582 | SNV | 1 | C | G | Homozygous   |
| NC_037652.1 | 8279696 | SNV | 1 | A | T | Heterozygous |
| NC_037652.1 | 8279711 | SNV | 1 | A | T | Homozygous   |
| NC_037652.1 | 8279727 | SNV | 1 | T | A | Homozygous   |
| NC_037652.1 | 8279757 | SNV | 1 | T | A | Homozygous   |
| NC_037652.1 | 8279772 | SNV | 1 | A | T | Homozygous   |
| NC_037652.1 | 8279774 | SNV | 1 | T | A | Heterozygous |
| NC_037652.1 | 8279791 | SNV | 1 | A | G | Homozygous   |
| NC_037652.1 | 8279797 | SNV | 1 | C | G | Homozygous   |
| NC_037652.1 | 8279801 | SNV | 1 | A | T | Homozygous   |
| NC_037652.1 | 8280322 | SNV | 1 | C | T | Homozygous   |
| NC_037652.1 | 8280330 | SNV | 1 | T | C | Heterozygous |
| NC_037652.1 | 8280356 | SNV | 1 | G | T | Heterozygous |
| NC_037652.1 | 8280372 | SNV | 1 | G | T | Heterozygous |
| NC_037652.1 | 8303646 | SNV | 1 | C | T | Homozygous   |
| NC_037652.1 | 8303730 | SNV | 1 | C | T | Heterozygous |
| NC_037652.1 | 8304040 | SNV | 1 | G | A | Heterozygous |
| NC_037652.1 | 8305396 | SNV | 1 | C | A | Homozygous   |
| NC_037652.1 | 8305505 | SNV | 1 | G | T | Heterozygous |
| NC_037652.1 | 8306933 | SNV | 1 | C | T | Homozygous   |
| NC_037652.1 | 8307100 | SNV | 1 | G | A | Homozygous   |
| NC_037652.1 | 8307573 | SNV | 1 | C | T | Heterozygous |
| NC_037652.1 | 8307578 | SNV | 1 | T | C | Heterozygous |
| NC_037652.1 | 8307676 | SNV | 1 | A | G | Homozygous   |
| NC_037652.1 | 8308212 | SNV | 1 | A | G | Homozygous   |
| NC_037652.1 | 8308607 | SNV | 1 | T | C | Heterozygous |
| NC_037652.1 | 8308894 | SNV | 1 | C | T | Heterozygous |
| NC_037652.1 | 8308923 | SNV | 1 | C | T | Heterozygous |
| NC_037652.1 | 8309063 | SNV | 1 | T | C | Homozygous   |
| NC_037652.1 | 8309211 | SNV | 1 | A | G | Homozygous   |
| NC_037652.1 | 8309234 | SNV | 1 | A | G | Homozygous   |
| NC_037652.1 | 8309303 | SNV | 1 | A | G | Heterozygous |
| NC_037652.1 | 8310042 | SNV | 1 | G | C | Heterozygous |
| NC_037652.1 | 8310135 | SNV | 1 | G | A | Homozygous   |
| NC_037652.1 | 8310246 | SNV | 1 | T | C | Homozygous   |
| NC_037652.1 | 8310294 | SNV | 1 | C | T | Homozygous   |
| NC_037652.1 | 8310402 | SNV | 1 | G | C | Homozygous   |
| NC_037652.1 | 8310458 | SNV | 1 | A | G | Homozygous   |
| NC_037652.1 | 8310471 | SNV | 1 | A | T | Heterozygous |
| NC_037652.1 | 8310540 | SNV | 1 | A | T | Homozygous   |
| NC_037652.1 | 8310691 | SNV | 1 | A | C | Homozygous   |
| NC_037652.1 | 8310751 | SNV | 1 | A | G | Heterozygous |
| NC_037652.1 | 8310766 | SNV | 1 | A | T | Homozygous   |
| NC_037652.1 | 8310789 | SNV | 1 | A | G | Heterozygous |
| NC_037652.1 | 8310792 | SNV | 1 | C | T | Heterozygous |
| NC_037652.1 | 8311188 | SNV | 1 | T | C | Heterozygous |
| NC_037652.1 | 8311281 | SNV | 1 | G | A | Homozygous   |
| NC_037652.1 | 8311386 | SNV | 1 | G | A | Homozygous   |
| NC_037652.1 | 8311461 | SNV | 1 | G | A | Heterozygous |
| NC_037652.1 | 8311464 | SNV | 1 | T | G | Heterozygous |
| NC_037652.1 | 8312297 | SNV | 1 | G | A | Homozygous   |

|             |         |     |   |   |   |              |
|-------------|---------|-----|---|---|---|--------------|
| NC_037652.1 | 8313571 | SNV | 1 | T | A | Homozygous   |
| NC_037652.1 | 8313638 | SNV | 1 | G | T | Heterozygous |
| NC_037652.1 | 8337427 | SNV | 1 | G | A | Homozygous   |
| NC_037652.1 | 8337435 | SNV | 1 | A | G | Homozygous   |
| NC_037652.1 | 8337491 | SNV | 1 | G | C | Heterozygous |
| NC_037652.1 | 8337506 | SNV | 1 | A | G | Heterozygous |
| NC_037652.1 | 8337513 | SNV | 1 | G | A | Heterozygous |
| NC_037652.1 | 8337522 | SNV | 1 | G | A | Heterozygous |
| NC_037652.1 | 8337552 | SNV | 1 | C | G | Homozygous   |
| NC_037652.1 | 8337632 | SNV | 1 | T | C | Homozygous   |
| NC_037652.1 | 8337722 | SNV | 1 | G | A | Homozygous   |
| NC_037652.1 | 8338446 | SNV | 1 | A | G | Homozygous   |
| NC_037652.1 | 8338594 | SNV | 1 | C | T | Heterozygous |
| NC_037652.1 | 8340688 | SNV | 1 | C | G | Heterozygous |
| NC_037652.1 | 8342079 | SNV | 1 | G | C | Heterozygous |
| NC_037652.1 | 8342099 | SNV | 1 | G | A | Heterozygous |
| NC_037652.1 | 8342138 | SNV | 1 | G | A | Heterozygous |
| NC_037652.1 | 8342140 | SNV | 1 | C | A | Homozygous   |
| NC_037652.1 | 8342157 | SNV | 1 | A | G | Heterozygous |
| NC_037652.1 | 8342159 | SNV | 1 | G | A | Heterozygous |
| NC_037652.1 | 8342162 | SNV | 1 | A | G | Heterozygous |
| NC_037652.1 | 8342167 | SNV | 1 | G | A | Heterozygous |
| NC_037652.1 | 8350052 | SNV | 1 | A | G | Homozygous   |
| NC_037652.1 | 8350553 | SNV | 1 | G | A | Heterozygous |
| NC_037652.1 | 8352217 | SNV | 1 | C | T | Heterozygous |
| NC_037652.1 | 8352786 | SNV | 1 | C | G | Homozygous   |
| NC_037652.1 | 8352797 | SNV | 1 | T | C | Heterozygous |
| NC_037652.1 | 8352868 | SNV | 1 | T | C | Homozygous   |
| NC_037652.1 | 8352888 | SNV | 1 | T | A | Heterozygous |
| NC_037652.1 | 8353790 | SNV | 1 | A | C | Homozygous   |
| NC_037652.1 | 8353794 | SNV | 1 | A | C | Heterozygous |
| NC_037652.1 | 8353948 | SNV | 1 | T | C | Heterozygous |
| NC_037652.1 | 8354609 | SNV | 1 | A | G | Heterozygous |
| NC_037652.1 | 8354624 | SNV | 1 | A | G | Homozygous   |
| NC_037652.1 | 8354925 | SNV | 1 | C | A | Homozygous   |
| NC_037652.1 | 8355476 | SNV | 1 | T | C | Homozygous   |
| NC_037652.1 | 8355980 | SNV | 1 | T | C | Homozygous   |
| NC_037652.1 | 8356195 | SNV | 1 | G | A | Heterozygous |
| NC_037652.1 | 8356295 | SNV | 1 | T | C | Heterozygous |
| NC_037652.1 | 8357716 | SNV | 1 | T | C | Homozygous   |
| NC_037652.1 | 8361446 | SNV | 1 | G | T | Heterozygous |
| NC_037652.1 | 8361484 | SNV | 1 | C | T | Heterozygous |
| NC_037652.1 | 8361943 | SNV | 1 | G | A | Homozygous   |
| NC_037652.1 | 8362098 | SNV | 1 | T | G | Homozygous   |
| NC_037652.1 | 8362100 | SNV | 1 | T | G | Homozygous   |
| NC_037652.1 | 8371482 | SNV | 1 | T | C | Homozygous   |
| NC_037652.1 | 8372170 | SNV | 1 | C | T | Homozygous   |
| NC_037652.1 | 8372198 | SNV | 1 | T | C | Homozygous   |
| NC_037652.1 | 8372293 | SNV | 1 | T | C | Homozygous   |
| NC_037652.1 | 8372328 | SNV | 1 | A | G | Heterozygous |
| NC_037652.1 | 8373145 | SNV | 1 | C | T | Heterozygous |



|             |         |     |   |   |   |              |
|-------------|---------|-----|---|---|---|--------------|
| NC_037652.1 | 8373314 | SNV | 1 | T | G | Heterozygous |
| NC_037652.1 | 8373554 | SNV | 1 | T | C | Heterozygous |
| NC_037652.1 | 8373695 | SNV | 1 | G | A | Homozygous   |
| NC_037652.1 | 8373703 | SNV | 1 | G | C | Homozygous   |
| NC_037652.1 | 8373827 | SNV | 1 | T | C | Homozygous   |
| NC_037652.1 | 8374389 | SNV | 1 | T | C | Homozygous   |
| NC_037652.1 | 8374395 | SNV | 1 | T | C | Homozygous   |
| NC_037652.1 | 8374401 | SNV | 1 | A | G | Heterozygous |
| NC_037652.1 | 8374478 | SNV | 1 | T | C | Heterozygous |
| NC_037652.1 | 8374712 | SNV | 1 | G | A | Heterozygous |
| NC_037652.1 | 8374792 | SNV | 1 | C | T | Homozygous   |
| NC_037652.1 | 8374796 | SNV | 1 | T | C | Homozygous   |
| NC_037652.1 | 8374818 | SNV | 1 | G | A | Heterozygous |
| NC_037652.1 | 8374820 | SNV | 1 | A | C | Heterozygous |
| NC_037652.1 | 8375732 | SNV | 1 | C | T | Homozygous   |
| NC_037652.1 | 8375895 | SNV | 1 | T | G | Heterozygous |
| NC_037652.1 | 8385061 | SNV | 1 | C | T | Heterozygous |
| NC_037652.1 | 8385113 | SNV | 1 | G | A | Homozygous   |
| NC_037652.1 | 8385123 | SNV | 1 | G | A | Homozygous   |
| NC_037652.1 | 8385173 | SNV | 1 | G | A | Homozygous   |
| NC_037652.1 | 8425941 | SNV | 1 | A | G | Homozygous   |
| NC_037652.1 | 8425975 | SNV | 1 | A | G | Heterozygous |
| NC_037652.1 | 8426000 | SNV | 1 | A | G | Heterozygous |
| NC_037652.1 | 8426004 | SNV | 1 | T | A | Homozygous   |
| NC_037652.1 | 8440280 | SNV | 1 | T | A | Homozygous   |
| NC_037652.1 | 8440289 | SNV | 1 | G | A | Homozygous   |
| NC_037652.1 | 8440295 | SNV | 1 | C | T | Homozygous   |
| NC_037652.1 | 8440304 | SNV | 1 | T | A | Homozygous   |
| NC_037652.1 | 8440310 | SNV | 1 | A | T | Heterozygous |
| NC_037652.1 | 8440316 | SNV | 1 | T | A | Heterozygous |
| NC_037652.1 | 8440331 | SNV | 1 | G | A | Heterozygous |
| NC_037652.1 | 8440343 | SNV | 1 | G | A | Homozygous   |
| NC_037652.1 | 8440347 | SNV | 1 | G | A | Homozygous   |
| NC_037652.1 | 8440393 | SNV | 1 | T | C | Heterozygous |
| NC_037652.1 | 8440399 | SNV | 1 | T | C | Heterozygous |
| NC_037652.1 | 8440405 | SNV | 1 | T | C | Homozygous   |
| NC_037652.1 | 8440435 | SNV | 1 | G | A | Homozygous   |
| NC_037652.1 | 8440444 | SNV | 1 | G | A | Homozygous   |
| NC_037652.1 | 8440450 | SNV | 1 | T | C | Homozygous   |
| NC_037652.1 | 8440477 | SNV | 1 | T | C | Heterozygous |
| NC_037652.1 | 8440480 | SNV | 1 | A | C | Homozygous   |
| NC_037652.1 | 8444882 | SNV | 1 | T | C | Homozygous   |
| NC_037652.1 | 8446510 | SNV | 1 | A | G | Homozygous   |
| NC_037652.1 | 8446563 | SNV | 1 | C | T | Homozygous   |
| NC_037652.1 | 8446719 | SNV | 1 | C | T | Homozygous   |
| NC_037652.1 | 8446722 | SNV | 1 | T | C | Heterozygous |
| NC_037652.1 | 8446732 | SNV | 1 | C | T | Heterozygous |
| NC_037652.1 | 8446773 | SNV | 1 | T | C | Homozygous   |
| NC_037652.1 | 8447051 | SNV | 1 | A | C | Homozygous   |
| NC_037652.1 | 8459357 | SNV | 1 | C | T | Homozygous   |
| NC_037652.1 | 8462777 | SNV | 1 | T | C | Homozygous   |

|             |         |     |   |   |   |              |
|-------------|---------|-----|---|---|---|--------------|
| NC_037652.1 | 8462821 | SNV | 1 | T | G | Homozygous   |
| NC_037652.1 | 8462829 | SNV | 1 | T | C | Heterozygous |
| NC_037652.1 | 8462848 | SNV | 1 | T | C | Homozygous   |
| NC_037652.1 | 8464539 | SNV | 1 | C | T | Heterozygous |
| NC_037652.1 | 8464667 | SNV | 1 | T | G | Homozygous   |
| NC_037652.1 | 8467835 | SNV | 1 | G | A | Homozygous   |
| NC_037652.1 | 8467857 | SNV | 1 | C | T | Homozygous   |
| NC_037652.1 | 8467867 | SNV | 1 | C | T | Heterozygous |
| NC_037652.1 | 8467881 | SNV | 1 | T | C | Homozygous   |
| NC_037652.1 | 8467894 | SNV | 1 | G | C | Homozygous   |
| NC_037652.1 | 8467924 | SNV | 1 | C | T | Homozygous   |
| NC_037652.1 | 8467950 | SNV | 1 | C | T | Heterozygous |
| NC_037652.1 | 8468082 | SNV | 1 | A | T | Heterozygous |
| NC_037652.1 | 8469711 | SNV | 1 | C | A | Heterozygous |
| NC_037652.1 | 8478584 | SNV | 1 | C | T | Heterozygous |
| NC_037652.1 | 8484737 | SNV | 1 | G | A | Homozygous   |
| NC_037652.1 | 8484780 | SNV | 1 | T | C | Homozygous   |
| NC_037652.1 | 8484826 | SNV | 1 | A | T | Heterozygous |
| NC_037652.1 | 8484853 | SNV | 1 | T | C | Homozygous   |
| NC_037652.1 | 8485026 | SNV | 1 | A | G | Heterozygous |
| NC_037652.1 | 8485197 | SNV | 1 | T | G | Homozygous   |
| NC_037652.1 | 8488942 | SNV | 1 | G | A | Homozygous   |
| NC_037652.1 | 8489139 | SNV | 1 | A | G | Homozygous   |
| NC_037652.1 | 8489153 | SNV | 1 | C | T | Homozygous   |
| NC_037652.1 | 8489164 | SNV | 1 | C | T | Homozygous   |
| NC_037652.1 | 8489356 | SNV | 1 | G | A | Homozygous   |
| NC_037652.1 | 8489388 | SNV | 1 | T | C | Homozygous   |
| NC_037652.1 | 8489409 | SNV | 1 | G | A | Heterozygous |
| NC_037652.1 | 8489420 | SNV | 1 | A | T | Heterozygous |
| NC_037652.1 | 8489424 | SNV | 1 | A | T | Homozygous   |
| NC_037652.1 | 8497538 | SNV | 1 | T | C | Heterozygous |
| NC_037652.1 | 8497608 | SNV | 1 | C | T | Homozygous   |
| NC_037652.1 | 8505139 | SNV | 1 | T | C | Homozygous   |
| NC_037652.1 | 8505161 | SNV | 1 | T | A | Homozygous   |
| NC_037652.1 | 8511550 | SNV | 1 | A | G | Heterozygous |
| NC_037652.1 | 8511664 | SNV | 1 | A | G | Homozygous   |
| NC_037652.1 | 8512183 | SNV | 1 | G | C | Heterozygous |
| NC_037652.1 | 8512601 | SNV | 1 | C | T | Homozygous   |
| NC_037652.1 | 8512621 | SNV | 1 | T | C | Homozygous   |
| NC_037652.1 | 8524964 | SNV | 1 | G | A | Heterozygous |
| NC_037652.1 | 8524971 | SNV | 1 | T | C | Homozygous   |
| NC_037652.1 | 8525037 | SNV | 1 | A | G | Homozygous   |
| NC_037652.1 | 8530010 | SNV | 1 | G | A | Homozygous   |
| NC_037652.1 | 8530012 | SNV | 1 | G | A | Homozygous   |
| NC_037652.1 | 8536904 | SNV | 1 | C | G | Heterozygous |
| NC_037652.1 | 8541538 | SNV | 1 | T | C | Homozygous   |
| NC_037652.1 | 8541549 | SNV | 1 | G | A | Heterozygous |
| NC_037652.1 | 8541560 | SNV | 1 | C | T | Heterozygous |
| NC_037652.1 | 8541648 | SNV | 1 | C | T | Homozygous   |
| NC_037652.1 | 8541666 | SNV | 1 | G | C | Homozygous   |
| NC_037652.1 | 8541671 | SNV | 1 | A | G | Homozygous   |

|             |         |     |   |   |   |              |
|-------------|---------|-----|---|---|---|--------------|
| NC_037652.1 | 8541688 | SNV | 1 | T | C | Homozygous   |
| NC_037652.1 | 8541886 | SNV | 1 | G | A | Heterozygous |
| NC_037652.1 | 8541946 | SNV | 1 | T | C | Homozygous   |
| NC_037652.1 | 8541955 | SNV | 1 | T | C | Homozygous   |
| NC_037652.1 | 8542081 | SNV | 1 | T | C | Heterozygous |
| NC_037652.1 | 8542129 | SNV | 1 | A | G | Heterozygous |
| NC_037652.1 | 8542183 | SNV | 1 | G | A | Homozygous   |
| NC_037652.1 | 8542378 | SNV | 1 | C | G | Heterozygous |
| NC_037652.1 | 8542605 | SNV | 1 | T | C | Homozygous   |
| NC_037652.1 | 8542756 | SNV | 1 | T | C | Homozygous   |
| NC_037652.1 | 8542996 | SNV | 1 | A | G | Homozygous   |
| NC_037652.1 | 8543066 | SNV | 1 | A | G | Homozygous   |
| NC_037652.1 | 8543079 | SNV | 1 | C | G | Heterozygous |
| NC_037652.1 | 8543112 | SNV | 1 | T | C | Homozygous   |
| NC_037652.1 | 8543202 | SNV | 1 | A | G | Heterozygous |
| NC_037652.1 | 8543272 | SNV | 1 | G | A | Heterozygous |
| NC_037652.1 | 8543274 | SNV | 1 | T | G | Heterozygous |
| NC_037652.1 | 8543291 | SNV | 1 | C | A | Heterozygous |
| NC_037652.1 | 8543293 | SNV | 1 | G | A | Homozygous   |
| NC_037652.1 | 8543318 | SNV | 1 | T | C | Homozygous   |
| NC_037652.1 | 8543332 | SNV | 1 | C | T | Homozygous   |
| NC_037652.1 | 8543373 | SNV | 1 | T | C | Homozygous   |
| NC_037652.1 | 8543413 | SNV | 1 | A | T | Homozygous   |
| NC_037652.1 | 8543435 | SNV | 1 | C | T | Heterozygous |
| NC_037652.1 | 8543451 | SNV | 1 | T | C | Heterozygous |
| NC_037652.1 | 8543453 | SNV | 1 | A | T | Heterozygous |
| NC_037652.1 | 8543493 | SNV | 1 | G | T | Homozygous   |
| NC_037652.1 | 8543511 | SNV | 1 | T | C | Heterozygous |
| NC_037652.1 | 8543571 | SNV | 1 | C | T | Homozygous   |
| NC_037652.1 | 8543580 | SNV | 1 | G | T | Heterozygous |
| NC_037652.1 | 8543589 | SNV | 1 | G | T | Homozygous   |
| NC_037652.1 | 8543631 | SNV | 1 | G | A | Homozygous   |
| NC_037652.1 | 8543633 | SNV | 1 | T | G | Heterozygous |
| NC_037652.1 | 8543635 | SNV | 1 | C | T | Homozygous   |
| NC_037652.1 | 8543650 | SNV | 1 | G | C | Homozygous   |
| NC_037652.1 | 8543671 | SNV | 1 | C | T | Heterozygous |
| NC_037652.1 | 8543676 | SNV | 1 | G | A | Heterozygous |
| NC_037652.1 | 8543681 | SNV | 1 | T | G | Heterozygous |
| NC_037652.1 | 8543690 | SNV | 1 | G | C | Heterozygous |
| NC_037652.1 | 8543692 | SNV | 1 | T | C | Heterozygous |
| NC_037652.1 | 8543694 | SNV | 1 | C | T | Heterozygous |
| NC_037652.1 | 8543719 | SNV | 1 | G | C | Heterozygous |
| NC_037652.1 | 8543760 | SNV | 1 | C | T | Heterozygous |
| NC_037652.1 | 8543795 | SNV | 1 | C | T | Heterozygous |
| NC_037652.1 | 8543797 | SNV | 1 | T | C | Heterozygous |
| NC_037652.1 | 8543799 | SNV | 1 | T | C | Heterozygous |
| NC_037652.1 | 8543801 | SNV | 1 | T | C | Heterozygous |
| NC_037652.1 | 8543831 | SNV | 1 | C | T | Heterozygous |
| NC_037652.1 | 8543884 | SNV | 1 | C | T | Heterozygous |
| NC_037652.1 | 8543889 | SNV | 1 | G | T | Heterozygous |
| NC_037652.1 | 8543921 | SNV | 1 | G | T | Homozygous   |

|             |         |     |   |   |   |              |
|-------------|---------|-----|---|---|---|--------------|
| NC_037652.1 | 8543936 | SNV | 1 | C | T | Heterozygous |
| NC_037652.1 | 8543973 | SNV | 1 | G | T | Heterozygous |
| NC_037652.1 | 8543982 | SNV | 1 | C | T | Heterozygous |
| NC_037652.1 | 8543996 | SNV | 1 | C | T | Heterozygous |
| NC_037652.1 | 8544074 | SNV | 1 | T | C | Homozygous   |
| NC_037652.1 | 8544124 | SNV | 1 | T | G | Heterozygous |
| NC_037652.1 | 8544128 | SNV | 1 | T | C | Heterozygous |
| NC_037652.1 | 8544138 | SNV | 1 | C | T | Heterozygous |
| NC_037652.1 | 8544148 | SNV | 1 | T | C | Heterozygous |
| NC_037652.1 | 8544154 | SNV | 1 | C | T | Heterozygous |
| NC_037652.1 | 8544180 | SNV | 1 | C | T | Heterozygous |
| NC_037652.1 | 8544243 | SNV | 1 | T | C | Heterozygous |
| NC_037652.1 | 8544253 | SNV | 1 | C | T | Homozygous   |
| NC_037652.1 | 8544287 | SNV | 1 | T | C | Heterozygous |
| NC_037652.1 | 8544324 | SNV | 1 | C | T | Heterozygous |
| NC_037652.1 | 8544349 | SNV | 1 | A | T | Heterozygous |
| NC_037652.1 | 8544369 | SNV | 1 | G | T | Heterozygous |
| NC_037652.1 | 8544397 | SNV | 1 | T | C | Heterozygous |
| NC_037652.1 | 8544450 | SNV | 1 | C | T | Heterozygous |
| NC_037652.1 | 8544480 | SNV | 1 | A | C | Homozygous   |
| NC_037652.1 | 8544482 | SNV | 1 | A | G | Heterozygous |
| NC_037652.1 | 8544509 | SNV | 1 | C | T | Homozygous   |
| NC_037652.1 | 8544512 | SNV | 1 | C | T | Homozygous   |
| NC_037652.1 | 8544514 | SNV | 1 | T | C | Homozygous   |
| NC_037652.1 | 8544686 | SNV | 1 | C | G | Homozygous   |
| NC_037652.1 | 8545141 | SNV | 1 | G | A | Heterozygous |
| NC_037652.1 | 8545194 | SNV | 1 | C | T | Homozygous   |
| NC_037652.1 | 8545217 | SNV | 1 | C | T | Homozygous   |
| NC_037652.1 | 8545232 | SNV | 1 | G | A | Homozygous   |
| NC_037652.1 | 8545318 | SNV | 1 | T | C | Homozygous   |
| NC_037652.1 | 8545344 | SNV | 1 | C | T | Heterozygous |
| NC_037652.1 | 8545444 | SNV | 1 | A | G | Homozygous   |
| NC_037652.1 | 8546077 | SNV | 1 | G | A | Heterozygous |
| NC_037652.1 | 8555512 | SNV | 1 | T | C | Homozygous   |
| NC_037652.1 | 8555589 | SNV | 1 | T | C | Homozygous   |
| NC_037652.1 | 8555619 | SNV | 1 | C | T | Heterozygous |
| NC_037652.1 | 8556426 | SNV | 1 | G | A | Homozygous   |
| NC_037652.1 | 8556437 | SNV | 1 | A | G | Homozygous   |
| NC_037652.1 | 8556562 | SNV | 1 | C | T | Heterozygous |
| NC_037652.1 | 8556614 | SNV | 1 | T | C | Heterozygous |
| NC_037652.1 | 8556625 | SNV | 1 | T | C | Homozygous   |
| NC_037652.1 | 8556635 | SNV | 1 | T | C | Heterozygous |
| NC_037652.1 | 8556637 | SNV | 1 | T | C | Homozygous   |
| NC_037652.1 | 8556644 | SNV | 1 | T | C | Heterozygous |
| NC_037652.1 | 8556716 | SNV | 1 | T | C | Homozygous   |
| NC_037652.1 | 8556724 | SNV | 1 | T | C | Homozygous   |
| NC_037652.1 | 8556733 | SNV | 1 | T | C | Homozygous   |
| NC_037652.1 | 8556740 | SNV | 1 | T | C | Homozygous   |
| NC_037652.1 | 8556751 | SNV | 1 | T | C | Homozygous   |
| NC_037652.1 | 8556881 | SNV | 1 | T | C | Homozygous   |
| NC_037652.1 | 8556902 | SNV | 1 | T | C | Heterozygous |

|             |         |     |   |   |   |              |
|-------------|---------|-----|---|---|---|--------------|
| NC_037652.1 | 8556910 | SNV | 1 | T | C | Heterozygous |
| NC_037652.1 | 8556912 | SNV | 1 | T | C | Homozygous   |
| NC_037652.1 | 8556958 | SNV | 1 | T | C | Heterozygous |
| NC_037652.1 | 8556961 | SNV | 1 | T | C | Heterozygous |
| NC_037652.1 | 8556964 | SNV | 1 | T | C | Heterozygous |
| NC_037652.1 | 8556977 | SNV | 1 | T | C | Homozygous   |
| NC_037652.1 | 8556985 | SNV | 1 | T | C | Heterozygous |
| NC_037652.1 | 8557001 | SNV | 1 | T | C | Homozygous   |
| NC_037652.1 | 8557009 | SNV | 1 | T | C | Heterozygous |
| NC_037652.1 | 8557068 | SNV | 1 | T | C | Heterozygous |
| NC_037652.1 | 8557140 | SNV | 1 | T | C | Heterozygous |
| NC_037652.1 | 8557142 | SNV | 1 | T | C | Heterozygous |
| NC_037652.1 | 8557155 | SNV | 1 | T | C | Heterozygous |
| NC_037652.1 | 8557181 | SNV | 1 | T | G | Heterozygous |
| NC_037652.1 | 8557189 | SNV | 1 | A | T | Homozygous   |
| NC_037652.1 | 8557335 | SNV | 1 | C | T | Heterozygous |
| NC_037652.1 | 8557339 | SNV | 1 | G | C | Heterozygous |
| NC_037652.1 | 8557355 | SNV | 1 | T | C | Heterozygous |
| NC_037652.1 | 8559091 | SNV | 1 | A | G | Heterozygous |
| NC_037652.1 | 8559147 | SNV | 1 | A | G | Homozygous   |
| NC_037652.1 | 8559154 | SNV | 1 | A | G | Homozygous   |
| NC_037652.1 | 8559156 | SNV | 1 | A | G | Homozygous   |
| NC_037652.1 | 8559327 | SNV | 1 | C | T | Heterozygous |
| NC_037652.1 | 8559373 | SNV | 1 | C | T | Heterozygous |
| NC_037652.1 | 8559402 | SNV | 1 | C | T | Heterozygous |
| NC_037652.1 | 8566172 | SNV | 1 | G | A | Heterozygous |
| NC_037652.1 | 8566179 | SNV | 1 | T | A | Heterozygous |
| NC_037652.1 | 8566272 | SNV | 1 | T | G | Heterozygous |
| NC_037652.1 | 8566280 | SNV | 1 | T | G | Heterozygous |
| NC_037652.1 | 8566300 | SNV | 1 | A | G | Heterozygous |
| NC_037652.1 | 8566605 | SNV | 1 | C | T | Heterozygous |
| NC_037652.1 | 8566876 | SNV | 1 | T | C | Homozygous   |
| NC_037652.1 | 8566920 | SNV | 1 | G | A | Heterozygous |
| NC_037652.1 | 8566940 | SNV | 1 | C | T | Homozygous   |
| NC_037652.1 | 8567009 | SNV | 1 | G | A | Heterozygous |
| NC_037652.1 | 8567014 | SNV | 1 | A | G | Homozygous   |
| NC_037652.1 | 8567025 | SNV | 1 | A | G | Homozygous   |
| NC_037652.1 | 8569366 | SNV | 1 | G | T | Homozygous   |
| NC_037652.1 | 8569504 | SNV | 1 | A | G | Homozygous   |
| NC_037652.1 | 8569520 | SNV | 1 | T | C | Homozygous   |
| NC_037652.1 | 8569536 | SNV | 1 | C | T | Homozygous   |
| NC_037652.1 | 8569630 | SNV | 1 | T | C | Homozygous   |
| NC_037652.1 | 8569681 | SNV | 1 | T | C | Heterozygous |
| NC_037652.1 | 8569824 | SNV | 1 | A | G | Heterozygous |
| NC_037652.1 | 8569826 | SNV | 1 | A | T | Heterozygous |
| NC_037652.1 | 8569832 | SNV | 1 | C | A | Heterozygous |
| NC_037652.1 | 8570132 | SNV | 1 | C | T | Homozygous   |
| NC_037652.1 | 8570978 | SNV | 1 | C | T | Heterozygous |
| NC_037652.1 | 8570980 | SNV | 1 | T | C | Heterozygous |
| NC_037652.1 | 8570983 | SNV | 1 | C | T | Heterozygous |
| NC_037652.1 | 8570996 | SNV | 1 | G | A | Heterozygous |

|             |         |     |   |   |   |              |
|-------------|---------|-----|---|---|---|--------------|
| NC_037652.1 | 8571009 | SNV | 1 | G | A | Heterozygous |
| NC_037652.1 | 8574336 | SNV | 1 | A | G | Homozygous   |
| NC_037652.1 | 8586406 | SNV | 1 | A | G | Heterozygous |
| NC_037652.1 | 8586407 | SNV | 1 | G | A | Heterozygous |
| NC_037652.1 | 8588246 | SNV | 1 | T | C | Homozygous   |
| NC_037652.1 | 8588248 | SNV | 1 | T | A | Homozygous   |
| NC_037652.1 | 8588277 | SNV | 1 | T | A | Homozygous   |
| NC_037652.1 | 8594200 | SNV | 1 | A | G | Homozygous   |
| NC_037652.1 | 8594386 | SNV | 1 | T | C | Heterozygous |
| NC_037652.1 | 8594401 | SNV | 1 | A | G | Homozygous   |
| NC_037652.1 | 8594414 | SNV | 1 | G | A | Heterozygous |
| NC_037652.1 | 8603103 | SNV | 1 | G | A | Homozygous   |
| NC_037652.1 | 8603105 | SNV | 1 | C | T | Homozygous   |
| NC_037652.1 | 8603111 | SNV | 1 | C | T | Homozygous   |
| NC_037652.1 | 8603113 | SNV | 1 | G | A | Homozygous   |
| NC_037652.1 | 8603137 | SNV | 1 | A | C | Homozygous   |
| NC_037652.1 | 8603141 | SNV | 1 | T | C | Homozygous   |
| NC_037652.1 | 8603154 | SNV | 1 | C | T | Homozygous   |
| NC_037652.1 | 8603161 | SNV | 1 | A | C | Homozygous   |
| NC_037652.1 | 8603163 | SNV | 1 | T | C | Homozygous   |
| NC_037652.1 | 8603174 | SNV | 1 | A | G | Homozygous   |
| NC_037652.1 | 8603380 | SNV | 1 | T | C | Homozygous   |
| NC_037652.1 | 8603383 | SNV | 1 | C | T | Homozygous   |
| NC_037652.1 | 8603389 | SNV | 1 | C | T | Homozygous   |
| NC_037652.1 | 8603399 | SNV | 1 | T | C | Homozygous   |
| NC_037652.1 | 8603409 | SNV | 1 | A | G | Homozygous   |
| NC_037652.1 | 8603418 | SNV | 1 | T | C | Homozygous   |
| NC_037652.1 | 8613444 | SNV | 1 | G | A | Homozygous   |
| NC_037652.1 | 8613447 | SNV | 1 | C | T | Homozygous   |
| NC_037652.1 | 8613462 | SNV | 1 | T | C | Homozygous   |
| NC_037652.1 | 8613465 | SNV | 1 | T | C | Homozygous   |
| NC_037652.1 | 8613467 | SNV | 1 | T | A | Heterozygous |
| NC_037652.1 | 8613486 | SNV | 1 | T | C | Homozygous   |
| NC_037652.1 | 8618506 | SNV | 1 | G | C | Homozygous   |
| NC_037652.1 | 8628605 | SNV | 1 | A | C | Homozygous   |
| NC_037652.1 | 8628641 | SNV | 1 | A | G | Heterozygous |
| NC_037652.1 | 8628645 | SNV | 1 | A | G | Heterozygous |
| NC_037652.1 | 8628647 | SNV | 1 | G | C | Heterozygous |
| NC_037652.1 | 8628649 | SNV | 1 | A | T | Heterozygous |
| NC_037652.1 | 8628681 | SNV | 1 | T | C | Heterozygous |
| NC_037652.1 | 8628683 | SNV | 1 | G | C | Heterozygous |
| NC_037652.1 | 8628693 | SNV | 1 | G | C | Heterozygous |
| NC_037652.1 | 8628841 | SNV | 1 | G | C | Heterozygous |
| NC_037652.1 | 8628956 | SNV | 1 | T | A | Heterozygous |
| NC_037652.1 | 8628958 | SNV | 1 | T | A | Heterozygous |
| NC_037652.1 | 8628990 | SNV | 1 | T | C | Homozygous   |
| NC_037652.1 | 8629001 | SNV | 1 | A | C | Homozygous   |
| NC_037652.1 | 8629005 | SNV | 1 | A | C | Homozygous   |
| NC_037652.1 | 8629007 | SNV | 1 | C | T | Homozygous   |
| NC_037652.1 | 8629013 | SNV | 1 | A | G | Heterozygous |
| NC_037652.1 | 8629016 | SNV | 1 | T | C | Homozygous   |

|             |         |     |   |   |   |              |
|-------------|---------|-----|---|---|---|--------------|
| NC_037652.1 | 8629026 | SNV | 1 | T | C | Homozygous   |
| NC_037652.1 | 8629049 | SNV | 1 | C | A | Homozygous   |
| NC_037652.1 | 8629053 | SNV | 1 | C | A | Homozygous   |
| NC_037652.1 | 8629245 | SNV | 1 | C | G | Heterozygous |
| NC_037652.1 | 8629262 | SNV | 1 | T | A | Heterozygous |
| NC_037652.1 | 8629266 | SNV | 1 | T | A | Heterozygous |
| NC_037652.1 | 8629268 | SNV | 1 | T | A | Heterozygous |
| NC_037652.1 | 8629277 | SNV | 1 | C | G | Heterozygous |
| NC_037652.1 | 8629279 | SNV | 1 | C | G | Homozygous   |
| NC_037652.1 | 8629281 | SNV | 1 | C | T | Heterozygous |
| NC_037652.1 | 8640654 | SNV | 1 | G | T | Heterozygous |
| NC_037652.1 | 8647855 | SNV | 1 | C | A | Homozygous   |
| NC_037652.1 | 8647860 | SNV | 1 | T | C | Homozygous   |
| NC_037652.1 | 8648364 | SNV | 1 | G | C | Heterozygous |
| NC_037652.1 | 8648367 | SNV | 1 | C | T | Heterozygous |
| NC_037652.1 | 8648462 | SNV | 1 | A | G | Homozygous   |
| NC_037652.1 | 8648559 | SNV | 1 | T | C | Homozygous   |
| NC_037652.1 | 8648570 | SNV | 1 | A | G | Homozygous   |
| NC_037652.1 | 8648574 | SNV | 1 | T | C | Heterozygous |
| NC_037652.1 | 8648580 | SNV | 1 | C | T | Heterozygous |
| NC_037652.1 | 8648596 | SNV | 1 | A | G | Homozygous   |
| NC_037652.1 | 8648617 | SNV | 1 | A | G | Homozygous   |
| NC_037652.1 | 8648785 | SNV | 1 | A | T | Homozygous   |
| NC_037652.1 | 8651418 | SNV | 1 | A | G | Homozygous   |
| NC_037652.1 | 8651430 | SNV | 1 | G | A | Homozygous   |
| NC_037652.1 | 8651859 | SNV | 1 | A | G | Homozygous   |
| NC_037652.1 | 8651924 | SNV | 1 | A | G | Homozygous   |
| NC_037652.1 | 8658066 | SNV | 1 | T | C | Homozygous   |
| NC_037652.1 | 8658078 | SNV | 1 | G | A | Heterozygous |
| NC_037652.1 | 8660401 | SNV | 1 | T | C | Heterozygous |
| NC_037652.1 | 8660405 | SNV | 1 | C | T | Heterozygous |
| NC_037652.1 | 8660407 | SNV | 1 | G | A | Heterozygous |
| NC_037652.1 | 8660418 | SNV | 1 | A | G | Homozygous   |
| NC_037652.1 | 8660433 | SNV | 1 | A | G | Heterozygous |
| NC_037652.1 | 8660468 | SNV | 1 | C | T | Heterozygous |
| NC_037652.1 | 8660483 | SNV | 1 | T | C | Homozygous   |
| NC_037652.1 | 8660501 | SNV | 1 | C | T | Heterozygous |
| NC_037652.1 | 8660514 | SNV | 1 | T | C | Homozygous   |
| NC_037652.1 | 8660559 | SNV | 1 | G | A | Heterozygous |
| NC_037652.1 | 8660570 | SNV | 1 | A | G | Homozygous   |
| NC_037652.1 | 8660613 | SNV | 1 | G | A | Heterozygous |
| NC_037652.1 | 8660617 | SNV | 1 | G | T | Heterozygous |
| NC_037652.1 | 8660694 | SNV | 1 | T | G | Heterozygous |
| NC_037652.1 | 8660700 | SNV | 1 | C | T | Heterozygous |
| NC_037652.1 | 8660703 | SNV | 1 | A | G | Homozygous   |
| NC_037652.1 | 8660719 | SNV | 1 | C | T | Heterozygous |
| NC_037652.1 | 8660745 | SNV | 1 | A | G | Heterozygous |
| NC_037652.1 | 8660912 | SNV | 1 | C | T | Heterozygous |
| NC_037652.1 | 8660988 | SNV | 1 | C | T | Homozygous   |
| NC_037652.1 | 8661034 | SNV | 1 | A | G | Heterozygous |
| NC_037652.1 | 8661038 | SNV | 1 | A | G | Heterozygous |

|             |         |     |   |   |   |              |
|-------------|---------|-----|---|---|---|--------------|
| NC_037652.1 | 8661059 | SNV | 1 | G | A | Heterozygous |
| NC_037652.1 | 8661070 | SNV | 1 | A | G | Homozygous   |
| NC_037652.1 | 8661076 | SNV | 1 | T | C | Homozygous   |
| NC_037652.1 | 8661350 | SNV | 1 | T | C | Homozygous   |
| NC_037652.1 | 8661458 | SNV | 1 | C | T | Heterozygous |
| NC_037652.1 | 8661503 | SNV | 1 | A | G | Heterozygous |
| NC_037652.1 | 8661773 | SNV | 1 | T | G | Homozygous   |
| NC_037652.1 | 8661792 | SNV | 1 | T | C | Heterozygous |
| NC_037652.1 | 8661835 | SNV | 1 | T | C | Heterozygous |
| NC_037652.1 | 8661882 | SNV | 1 | C | T | Homozygous   |
| NC_037652.1 | 8661887 | SNV | 1 | C | T | Heterozygous |
| NC_037652.1 | 8661901 | SNV | 1 | T | C | Homozygous   |
| NC_037652.1 | 8661909 | SNV | 1 | T | C | Homozygous   |
| NC_037652.1 | 8661949 | SNV | 1 | C | T | Heterozygous |
| NC_037652.1 | 8662126 | SNV | 1 | C | T | Heterozygous |
| NC_037652.1 | 8662137 | SNV | 1 | T | C | Homozygous   |
| NC_037652.1 | 8662216 | SNV | 1 | C | T | Homozygous   |
| NC_037652.1 | 8662241 | SNV | 1 | T | C | Homozygous   |
| NC_037652.1 | 8662308 | SNV | 1 | G | T | Homozygous   |
| NC_037652.1 | 8662331 | SNV | 1 | T | C | Homozygous   |
| NC_037652.1 | 8662374 | SNV | 1 | T | C | Homozygous   |
| NC_037652.1 | 8662396 | SNV | 1 | C | T | Heterozygous |
| NC_037652.1 | 8662454 | SNV | 1 | T | C | Heterozygous |
| NC_037652.1 | 8662458 | SNV | 1 | C | T | Heterozygous |
| NC_037652.1 | 8662461 | SNV | 1 | C | G | Heterozygous |
| NC_037652.1 | 8662497 | SNV | 1 | C | A | Homozygous   |
| NC_037652.1 | 8662654 | SNV | 1 | C | T | Homozygous   |
| NC_037652.1 | 8662701 | SNV | 1 | A | G | Homozygous   |
| NC_037652.1 | 8662710 | SNV | 1 | G | A | Heterozygous |
| NC_037652.1 | 8662784 | SNV | 1 | C | T | Heterozygous |
| NC_037652.1 | 8662836 | SNV | 1 | C | T | Heterozygous |
| NC_037652.1 | 8662889 | SNV | 1 | C | T | Heterozygous |
| NC_037652.1 | 8662902 | SNV | 1 | A | T | Homozygous   |
| NC_037652.1 | 8662929 | SNV | 1 | T | C | Homozygous   |
| NC_037652.1 | 8662946 | SNV | 1 | T | C | Homozygous   |
| NC_037652.1 | 8662959 | SNV | 1 | C | T | Heterozygous |
| NC_037652.1 | 8663009 | SNV | 1 | T | C | Homozygous   |
| NC_037652.1 | 8663016 | SNV | 1 | T | C | Heterozygous |
| NC_037652.1 | 8663091 | SNV | 1 | T | C | Homozygous   |
| NC_037652.1 | 8663145 | SNV | 1 | A | C | Heterozygous |
| NC_037652.1 | 8663150 | SNV | 1 | C | T | Heterozygous |
| NC_037652.1 | 8663246 | SNV | 1 | C | T | Heterozygous |
| NC_037652.1 | 8663252 | SNV | 1 | C | T | Heterozygous |
| NC_037652.1 | 8663401 | SNV | 1 | C | G | Homozygous   |
| NC_037652.1 | 8663710 | SNV | 1 | G | A | Heterozygous |
| NC_037652.1 | 8663734 | SNV | 1 | A | G | Homozygous   |
| NC_037652.1 | 8663745 | SNV | 1 | G | A | Heterozygous |
| NC_037652.1 | 8663772 | SNV | 1 | T | C | Heterozygous |
| NC_037652.1 | 8663885 | SNV | 1 | G | A | Homozygous   |
| NC_037652.1 | 8663887 | SNV | 1 | G | A | Homozygous   |
| NC_037652.1 | 8687295 | SNV | 1 | G | A | Homozygous   |



|             |         |     |   |   |   |              |
|-------------|---------|-----|---|---|---|--------------|
| NC_037652.1 | 8687307 | SNV | 1 | A | G | Homozygous   |
| NC_037652.1 | 8687344 | SNV | 1 | G | A | Homozygous   |
| NC_037652.1 | 8687698 | SNV | 1 | A | C | Homozygous   |
| NC_037652.1 | 8687706 | SNV | 1 | A | T | Homozygous   |
| NC_037652.1 | 8697533 | SNV | 1 | A | G | Homozygous   |
| NC_037652.1 | 8697579 | SNV | 1 | G | T | Homozygous   |
| NC_037652.1 | 8697588 | SNV | 1 | C | T | Heterozygous |
| NC_037652.1 | 8697591 | SNV | 1 | G | A | Heterozygous |
| NC_037652.1 | 8703236 | SNV | 1 | G | A | Heterozygous |
| NC_037652.1 | 8703261 | SNV | 1 | T | C | Heterozygous |
| NC_037652.1 | 8703287 | SNV | 1 | G | A | Heterozygous |
| NC_037652.1 | 8703301 | SNV | 1 | C | T | Heterozygous |
| NC_037652.1 | 8703309 | SNV | 1 | C | T | Heterozygous |
| NC_037652.1 | 8705498 | SNV | 1 | G | A | Heterozygous |
| NC_037652.1 | 8707684 | SNV | 1 | T | C | Homozygous   |
| NC_037652.1 | 8707690 | SNV | 1 | T | C | Heterozygous |
| NC_037652.1 | 8707726 | SNV | 1 | C | T | Homozygous   |
| NC_037652.1 | 8707737 | SNV | 1 | G | C | Homozygous   |
| NC_037652.1 | 8707748 | SNV | 1 | C | T | Homozygous   |
| NC_037652.1 | 8707753 | SNV | 1 | G | C | Homozygous   |
| NC_037652.1 | 8707755 | SNV | 1 | T | G | Homozygous   |
| NC_037652.1 | 8707757 | SNV | 1 | T | A | Homozygous   |
| NC_037652.1 | 8707779 | SNV | 1 | G | T | Homozygous   |
| NC_037652.1 | 8707783 | SNV | 1 | T | A | Heterozygous |
| NC_037652.1 | 8707811 | SNV | 1 | T | A | Heterozygous |
| NC_037652.1 | 8707827 | SNV | 1 | G | C | Homozygous   |
| NC_037652.1 | 8707847 | SNV | 1 | G | T | Homozygous   |
| NC_037652.1 | 8707880 | SNV | 1 | C | T | Heterozygous |
| NC_037652.1 | 8707883 | SNV | 1 | T | A | Heterozygous |
| NC_037652.1 | 8707886 | SNV | 1 | C | A | Heterozygous |
| NC_037652.1 | 8707908 | SNV | 1 | C | T | Heterozygous |
| NC_037652.1 | 8707918 | SNV | 1 | C | T | Heterozygous |
| NC_037652.1 | 8707924 | SNV | 1 | A | C | Homozygous   |
| NC_037652.1 | 8707975 | SNV | 1 | T | G | Homozygous   |
| NC_037652.1 | 8707977 | SNV | 1 | T | G | Homozygous   |
| NC_037652.1 | 8707981 | SNV | 1 | T | A | Homozygous   |
| NC_037652.1 | 8707985 | SNV | 1 | G | T | Homozygous   |
| NC_037652.1 | 8707990 | SNV | 1 | C | T | Homozygous   |
| NC_037652.1 | 8708018 | SNV | 1 | C | T | Homozygous   |
| NC_037652.1 | 8708024 | SNV | 1 | C | G | Homozygous   |
| NC_037652.1 | 8708027 | SNV | 1 | T | G | Homozygous   |
| NC_037652.1 | 8708041 | SNV | 1 | T | C | Heterozygous |
| NC_037652.1 | 8708043 | SNV | 1 | T | C | Heterozygous |
| NC_037652.1 | 8708044 | SNV | 1 | C | T | Heterozygous |
| NC_037652.1 | 8708046 | SNV | 1 | C | T | Heterozygous |
| NC_037652.1 | 8708065 | SNV | 1 | G | C | Homozygous   |
| NC_037652.1 | 8708169 | SNV | 1 | A | G | Heterozygous |
| NC_037652.1 | 8711736 | SNV | 1 | T | C | Homozygous   |
| NC_037652.1 | 8711761 | SNV | 1 | T | C | Homozygous   |
| NC_037652.1 | 8711766 | SNV | 1 | A | C | Homozygous   |
| NC_037652.1 | 8711781 | SNV | 1 | C | T | Homozygous   |

|             |         |     |   |   |   |              |
|-------------|---------|-----|---|---|---|--------------|
| NC_037652.1 | 8711795 | SNV | 1 | A | G | Homozygous   |
| NC_037652.1 | 8711797 | SNV | 1 | T | A | Homozygous   |
| NC_037652.1 | 8712096 | SNV | 1 | A | G | Homozygous   |
| NC_037652.1 | 8712297 | SNV | 1 | C | G | Homozygous   |
| NC_037652.1 | 8712301 | SNV | 1 | C | G | Homozygous   |
| NC_037652.1 | 8713506 | SNV | 1 | G | A | Homozygous   |
| NC_037652.1 | 8713518 | SNV | 1 | T | C | Homozygous   |
| NC_037652.1 | 8713553 | SNV | 1 | G | C | Heterozygous |
| NC_037652.1 | 8713574 | SNV | 1 | C | T | Heterozygous |
| NC_037652.1 | 8713766 | SNV | 1 | T | C | Homozygous   |
| NC_037652.1 | 8717624 | SNV | 1 | C | T | Homozygous   |
| NC_037652.1 | 8717649 | SNV | 1 | T | C | Homozygous   |
| NC_037652.1 | 8723035 | SNV | 1 | C | T | Heterozygous |
| NC_037652.1 | 8723284 | SNV | 1 | C | T | Heterozygous |
| NC_037652.1 | 8723286 | SNV | 1 | C | G | Heterozygous |
| NC_037652.1 | 8726446 | SNV | 1 | A | G | Heterozygous |
| NC_037652.1 | 8726455 | SNV | 1 | G | A | Homozygous   |
| NC_037652.1 | 8728912 | SNV | 1 | A | C | Homozygous   |
| NC_037652.1 | 8728917 | SNV | 1 | A | T | Homozygous   |
| NC_037652.1 | 8728923 | SNV | 1 | A | T | Homozygous   |
| NC_037652.1 | 8728926 | SNV | 1 | T | G | Homozygous   |
| NC_037652.1 | 8728932 | SNV | 1 | T | C | Homozygous   |
| NC_037652.1 | 8728943 | SNV | 1 | A | G | Homozygous   |
| NC_037652.1 | 8729265 | SNV | 1 | A | T | Heterozygous |
| NC_037652.1 | 8729268 | SNV | 1 | T | G | Heterozygous |
| NC_037652.1 | 8729270 | SNV | 1 | T | A | Heterozygous |
| NC_037652.1 | 8739948 | SNV | 1 | A | G | Homozygous   |
| NC_037652.1 | 8741210 | SNV | 1 | G | C | Heterozygous |
| NC_037652.1 | 8741270 | SNV | 1 | G | A | Heterozygous |
| NC_037652.1 | 8741351 | SNV | 1 | T | C | Heterozygous |
| NC_037652.1 | 8741361 | SNV | 1 | C | T | Heterozygous |
| NC_037652.1 | 8741365 | SNV | 1 | A | G | Homozygous   |
| NC_037652.1 | 8741619 | SNV | 1 | A | G | Heterozygous |
| NC_037652.1 | 8741674 | SNV | 1 | A | C | Homozygous   |
| NC_037652.1 | 8741699 | SNV | 1 | G | A | Homozygous   |
| NC_037652.1 | 8741733 | SNV | 1 | C | T | Homozygous   |
| NC_037652.1 | 8748908 | SNV | 1 | G | C | Heterozygous |
| NC_037652.1 | 8748924 | SNV | 1 | C | T | Heterozygous |
| NC_037652.1 | 8748950 | SNV | 1 | A | C | Heterozygous |
| NC_037652.1 | 8748970 | SNV | 1 | C | T | Heterozygous |
| NC_037652.1 | 8748996 | SNV | 1 | G | A | Heterozygous |
| NC_037652.1 | 8748999 | SNV | 1 | C | T | Heterozygous |
| NC_037652.1 | 8749003 | SNV | 1 | C | T | Heterozygous |
| NC_037652.1 | 8749056 | SNV | 1 | A | G | Heterozygous |
| NC_037652.1 | 8749066 | SNV | 1 | T | C | Homozygous   |
| NC_037652.1 | 8749069 | SNV | 1 | C | T | Heterozygous |
| NC_037652.1 | 8749355 | SNV | 1 | C | T | Heterozygous |
| NC_037652.1 | 8749364 | SNV | 1 | G | A | Heterozygous |
| NC_037652.1 | 8749439 | SNV | 1 | G | A | Homozygous   |
| NC_037652.1 | 8749559 | SNV | 1 | T | C | Heterozygous |
| NC_037652.1 | 8749614 | SNV | 1 | T | C | Heterozygous |

|             |         |     |   |   |   |              |
|-------------|---------|-----|---|---|---|--------------|
| NC_037652.1 | 8749710 | SNV | 1 | T | C | Homozygous   |
| NC_037652.1 | 8749748 | SNV | 1 | C | T | Heterozygous |
| NC_037652.1 | 8749759 | SNV | 1 | A | G | Heterozygous |
| NC_037652.1 | 8749806 | SNV | 1 | T | C | Heterozygous |
| NC_037652.1 | 8749948 | SNV | 1 | T | C | Heterozygous |
| NC_037652.1 | 8749955 | SNV | 1 | C | T | Heterozygous |
| NC_037652.1 | 8750044 | SNV | 1 | C | G | Homozygous   |
| NC_037652.1 | 8750062 | SNV | 1 | A | G | Homozygous   |
| NC_037652.1 | 8750176 | SNV | 1 | T | C | Homozygous   |
| NC_037652.1 | 8750265 | SNV | 1 | C | T | Heterozygous |
| NC_037652.1 | 8750438 | SNV | 1 | T | C | Homozygous   |
| NC_037652.1 | 8750556 | SNV | 1 | A | G | Homozygous   |
| NC_037652.1 | 8750797 | SNV | 1 | C | T | Homozygous   |
| NC_037652.1 | 8781084 | SNV | 1 | C | T | Homozygous   |
| NC_037652.1 | 8781124 | SNV | 1 | G | A | Homozygous   |
| NC_037652.1 | 8781355 | SNV | 1 | A | T | Homozygous   |
| NC_037652.1 | 8789657 | SNV | 1 | A | G | Heterozygous |
| NC_037652.1 | 8789667 | SNV | 1 | G | A | Heterozygous |
| NC_037652.1 | 8789669 | SNV | 1 | G | C | Heterozygous |
| NC_037652.1 | 8789677 | SNV | 1 | G | T | Heterozygous |
| NC_037652.1 | 8789679 | SNV | 1 | G | A | Heterozygous |
| NC_037652.1 | 8792184 | SNV | 1 | T | C | Homozygous   |
| NC_037652.1 | 8792186 | SNV | 1 | T | G | Homozygous   |
| NC_037652.1 | 8792190 | SNV | 1 | G | C | Homozygous   |
| NC_037652.1 | 8792194 | SNV | 1 | C | T | Homozygous   |
| NC_037652.1 | 8795187 | SNV | 1 | T | G | Homozygous   |
| NC_037652.1 | 8795197 | SNV | 1 | A | G | Homozygous   |
| NC_037652.1 | 8795204 | SNV | 1 | G | A | Homozygous   |
| NC_037652.1 | 8795217 | SNV | 1 | A | T | Homozygous   |
| NC_037652.1 | 8795219 | SNV | 1 | A | T | Homozygous   |
| NC_037652.1 | 8795221 | SNV | 1 | A | T | Homozygous   |
| NC_037652.1 | 8795224 | SNV | 1 | G | A | Homozygous   |
| NC_037652.1 | 8797739 | SNV | 1 | A | G | Homozygous   |
| NC_037652.1 | 8798069 | SNV | 1 | G | A | Heterozygous |
| NC_037652.1 | 8798450 | SNV | 1 | A | G | Heterozygous |
| NC_037652.1 | 8798505 | SNV | 1 | G | C | Homozygous   |
| NC_037652.1 | 8798618 | SNV | 1 | T | A | Homozygous   |
| NC_037652.1 | 8798777 | SNV | 1 | G | A | Heterozygous |
| NC_037652.1 | 8798932 | SNV | 1 | G | C | Homozygous   |
| NC_037652.1 | 8801432 | SNV | 1 | A | G | Homozygous   |
| NC_037652.1 | 8801557 | SNV | 1 | T | C | Heterozygous |
| NC_037652.1 | 8810450 | SNV | 1 | G | A | Homozygous   |
| NC_037652.1 | 8810460 | SNV | 1 | G | A | Heterozygous |
| NC_037652.1 | 8812142 | SNV | 1 | T | C | Heterozygous |
| NC_037652.1 | 8812173 | SNV | 1 | A | G | Heterozygous |
| NC_037652.1 | 8812808 | SNV | 1 | A | T | Homozygous   |
| NC_037652.1 | 8812820 | SNV | 1 | T | G | Homozygous   |
| NC_037652.1 | 8812825 | SNV | 1 | T | C | Homozygous   |
| NC_037652.1 | 8812829 | SNV | 1 | C | A | Homozygous   |
| NC_037652.1 | 8812832 | SNV | 1 | G | A | Heterozygous |
| NC_037652.1 | 8812849 | SNV | 1 | G | T | Homozygous   |

|             |         |     |   |   |   |              |
|-------------|---------|-----|---|---|---|--------------|
| NC_037652.1 | 8812906 | SNV | 1 | A | T | Heterozygous |
| NC_037652.1 | 8813111 | SNV | 1 | A | C | Heterozygous |
| NC_037652.1 | 8813534 | SNV | 1 | A | G | Homozygous   |
| NC_037652.1 | 8813652 | SNV | 1 | C | A | Heterozygous |
| NC_037652.1 | 8820026 | SNV | 1 | T | A | Homozygous   |
| NC_037652.1 | 8820028 | SNV | 1 | T | C | Homozygous   |
| NC_037652.1 | 8820031 | SNV | 1 | T | A | Homozygous   |
| NC_037652.1 | 8820042 | SNV | 1 | T | C | Homozygous   |
| NC_037652.1 | 8820048 | SNV | 1 | A | T | Homozygous   |
| NC_037652.1 | 8820054 | SNV | 1 | A | C | Homozygous   |
| NC_037652.1 | 8820067 | SNV | 1 | T | A | Homozygous   |
| NC_037652.1 | 8820090 | SNV | 1 | T | A | Homozygous   |
| NC_037652.1 | 8820092 | SNV | 1 | C | T | Homozygous   |
| NC_037652.1 | 8820095 | SNV | 1 | T | A | Homozygous   |
| NC_037652.1 | 8821438 | SNV | 1 | A | T | Homozygous   |
| NC_037652.1 | 8821442 | SNV | 1 | G | T | Homozygous   |
| NC_037652.1 | 8821446 | SNV | 1 | C | T | Heterozygous |
| NC_037652.1 | 8821449 | SNV | 1 | G | T | Homozygous   |
| NC_037652.1 | 8821478 | SNV | 1 | C | T | Homozygous   |
| NC_037652.1 | 8821524 | SNV | 1 | T | C | Heterozygous |
| NC_037652.1 | 8831218 | SNV | 1 | A | G | Homozygous   |
| NC_037652.1 | 8831226 | SNV | 1 | A | G | Homozygous   |
| NC_037652.1 | 8833824 | SNV | 1 | A | G | Heterozygous |
| NC_037652.1 | 8834127 | SNV | 1 | A | G | Homozygous   |
| NC_037652.1 | 8835295 | SNV | 1 | C | T | Heterozygous |
| NC_037652.1 | 8835861 | SNV | 1 | T | C | Homozygous   |
| NC_037652.1 | 8835946 | SNV | 1 | T | G | Homozygous   |
| NC_037652.1 | 8836281 | SNV | 1 | T | C | Heterozygous |
| NC_037652.1 | 8836288 | SNV | 1 | C | T | Heterozygous |
| NC_037652.1 | 8836338 | SNV | 1 | C | G | Heterozygous |
| NC_037652.1 | 8836374 | SNV | 1 | C | A | Heterozygous |
| NC_037652.1 | 8836430 | SNV | 1 | T | C | Homozygous   |
| NC_037652.1 | 8836646 | SNV | 1 | C | T | Homozygous   |
| NC_037652.1 | 8837772 | SNV | 1 | A | G | Homozygous   |
| NC_037652.1 | 8838478 | SNV | 1 | G | C | Heterozygous |
| NC_037652.1 | 8838486 | SNV | 1 | C | T | Homozygous   |
| NC_037652.1 | 8838717 | SNV | 1 | A | G | Homozygous   |
| NC_037652.1 | 8838750 | SNV | 1 | A | G | Homozygous   |
| NC_037652.1 | 8839316 | SNV | 1 | T | A | Homozygous   |
| NC_037652.1 | 8839655 | SNV | 1 | C | A | Heterozygous |
| NC_037652.1 | 8840203 | SNV | 1 | C | T | Homozygous   |
| NC_037652.1 | 8840323 | SNV | 1 | A | G | Homozygous   |
| NC_037652.1 | 8841223 | SNV | 1 | G | A | Homozygous   |
| NC_037652.1 | 8841859 | SNV | 1 | A | G | Homozygous   |
| NC_037652.1 | 8848023 | SNV | 1 | A | T | Homozygous   |
| NC_037652.1 | 8848029 | SNV | 1 | C | T | Homozygous   |
| NC_037652.1 | 8848036 | SNV | 1 | C | T | Heterozygous |
| NC_037652.1 | 8851755 | SNV | 1 | G | T | Heterozygous |
| NC_037652.1 | 8856323 | SNV | 1 | T | G | Homozygous   |
| NC_037652.1 | 8856439 | SNV | 1 | C | T | Heterozygous |
| NC_037652.1 | 8856557 | SNV | 1 | A | G | Heterozygous |

|             |         |     |   |   |   |              |
|-------------|---------|-----|---|---|---|--------------|
| NC_037652.1 | 8856578 | SNV | 1 | A | G | Homozygous   |
| NC_037652.1 | 8856586 | SNV | 1 | C | T | Heterozygous |
| NC_037652.1 | 8856631 | SNV | 1 | A | G | Homozygous   |
| NC_037652.1 | 8865819 | SNV | 1 | G | C | Homozygous   |
| NC_037652.1 | 8865827 | SNV | 1 | C | T | Homozygous   |
| NC_037652.1 | 8866465 | SNV | 1 | A | C | Heterozygous |
| NC_037652.1 | 8866529 | SNV | 1 | C | T | Heterozygous |
| NC_037652.1 | 8866534 | SNV | 1 | T | C | Homozygous   |
| NC_037652.1 | 8866538 | SNV | 1 | C | T | Homozygous   |
| NC_037652.1 | 8866660 | SNV | 1 | G | A | Heterozygous |
| NC_037652.1 | 8866762 | SNV | 1 | G | A | Heterozygous |
| NC_037652.1 | 8867134 | SNV | 1 | G | A | Heterozygous |
| NC_037652.1 | 8867357 | SNV | 1 | T | C | Heterozygous |
| NC_037652.1 | 8867360 | SNV | 1 | G | A | Homozygous   |
| NC_037652.1 | 8949804 | SNV | 1 | T | A | Heterozygous |
| NC_037652.1 | 8953703 | SNV | 1 | C | T | Homozygous   |
| NC_037652.1 | 8953718 | SNV | 1 | C | T | Homozygous   |
| NC_037652.1 | 8953728 | SNV | 1 | T | C | Homozygous   |
| NC_037652.1 | 8966553 | SNV | 1 | T | C | Homozygous   |
| NC_037652.1 | 8966598 | SNV | 1 | T | C | Homozygous   |
| NC_037652.1 | 8966952 | SNV | 1 | T | C | Heterozygous |
| NC_037652.1 | 8967351 | SNV | 1 | A | T | Heterozygous |
| NC_037652.1 | 8968785 | SNV | 1 | C | T | Homozygous   |
| NC_037652.1 | 8968911 | SNV | 1 | A | G | Homozygous   |
| NC_037652.1 | 8969030 | SNV | 1 | T | C | Homozygous   |
| NC_037652.1 | 8969106 | SNV | 1 | C | T | Homozygous   |
| NC_037652.1 | 8969149 | SNV | 1 | C | T | Heterozygous |
| NC_037652.1 | 8969163 | SNV | 1 | C | T | Homozygous   |
| NC_037652.1 | 8969173 | SNV | 1 | C | T | Heterozygous |
| NC_037652.1 | 8969225 | SNV | 1 | G | A | Homozygous   |
| NC_037652.1 | 8972961 | SNV | 1 | G | A | Homozygous   |
| NC_037652.1 | 8972983 | SNV | 1 | G | A | Heterozygous |
| NC_037652.1 | 8972985 | SNV | 1 | G | A | Heterozygous |
| NC_037652.1 | 8972988 | SNV | 1 | G | C | Homozygous   |
| NC_037652.1 | 8972996 | SNV | 1 | A | G | Heterozygous |
| NC_037652.1 | 8973003 | SNV | 1 | T | G | Homozygous   |
| NC_037652.1 | 8973033 | SNV | 1 | T | G | Homozygous   |
| NC_037652.1 | 8982920 | SNV | 1 | A | G | Homozygous   |
| NC_037652.1 | 8983898 | SNV | 1 | C | T | Heterozygous |
| NC_037652.1 | 8984191 | SNV | 1 | C | T | Homozygous   |
| NC_037652.1 | 8984438 | SNV | 1 | C | G | Homozygous   |
| NC_037652.1 | 8985731 | SNV | 1 | C | T | Heterozygous |
| NC_037652.1 | 8985748 | SNV | 1 | C | T | Heterozygous |
| NC_037652.1 | 8985964 | SNV | 1 | T | G | Homozygous   |
| NC_037652.1 | 8986168 | SNV | 1 | A | C | Heterozygous |
| NC_037652.1 | 8991844 | SNV | 1 | G | A | Heterozygous |
| NC_037652.1 | 8991932 | SNV | 1 | A | G | Homozygous   |
| NC_037652.1 | 8991977 | SNV | 1 | T | C | Heterozygous |
| NC_037652.1 | 8992222 | SNV | 1 | G | A | Heterozygous |
| NC_037652.1 | 8992225 | SNV | 1 | T | C | Heterozygous |
| NC_037652.1 | 8992784 | SNV | 1 | A | T | Heterozygous |

|             |         |     |   |   |   |              |
|-------------|---------|-----|---|---|---|--------------|
| NC_037652.1 | 8992790 | SNV | 1 | A | T | Heterozygous |
| NC_037652.1 | 8992796 | SNV | 1 | A | T | Heterozygous |
| NC_037652.1 | 8992798 | SNV | 1 | A | T | Heterozygous |
| NC_037652.1 | 8992802 | SNV | 1 | G | T | Heterozygous |
| NC_037652.1 | 8992810 | SNV | 1 | A | T | Heterozygous |
| NC_037652.1 | 8994900 | SNV | 1 | A | G | Heterozygous |
| NC_037652.1 | 8995698 | SNV | 1 | G | T | Homozygous   |
| NC_037652.1 | 8995970 | SNV | 1 | G | A | Homozygous   |
| NC_037652.1 | 8995994 | SNV | 1 | C | T | Homozygous   |
| NC_037652.1 | 9000936 | SNV | 1 | T | C | Heterozygous |
| NC_037652.1 | 9011578 | SNV | 1 | T | C | Heterozygous |
| NC_037652.1 | 9011583 | SNV | 1 | G | A | Homozygous   |
| NC_037652.1 | 9011618 | SNV | 1 | T | G | Heterozygous |
| NC_037652.1 | 9011763 | SNV | 1 | G | A | Homozygous   |
| NC_037652.1 | 9011829 | SNV | 1 | G | T | Heterozygous |
| NC_037652.1 | 9011844 | SNV | 1 | G | A | Homozygous   |
| NC_037652.1 | 9012289 | SNV | 1 | A | G | Homozygous   |
| NC_037652.1 | 9012311 | SNV | 1 | C | T | Heterozygous |
| NC_037652.1 | 9012385 | SNV | 1 | C | T | Homozygous   |
| NC_037652.1 | 9012792 | SNV | 1 | G | A | Heterozygous |
| NC_037652.1 | 9012799 | SNV | 1 | T | C | Homozygous   |
| NC_037652.1 | 9013076 | SNV | 1 | G | C | Homozygous   |
| NC_037652.1 | 9013274 | SNV | 1 | T | C | Homozygous   |
| NC_037652.1 | 9013323 | SNV | 1 | T | C | Homozygous   |
| NC_037652.1 | 9013345 | SNV | 1 | T | C | Heterozygous |
| NC_037652.1 | 9013349 | SNV | 1 | T | C | Heterozygous |
| NC_037652.1 | 9013364 | SNV | 1 | T | C | Homozygous   |
| NC_037652.1 | 9013379 | SNV | 1 | A | G | Heterozygous |
| NC_037652.1 | 9013388 | SNV | 1 | C | G | Homozygous   |
| NC_037652.1 | 9013435 | SNV | 1 | G | A | Homozygous   |
| NC_037652.1 | 9013461 | SNV | 1 | A | G | Homozygous   |
| NC_037652.1 | 9013473 | SNV | 1 | T | C | Homozygous   |
| NC_037652.1 | 9014847 | SNV | 1 | G | A | Homozygous   |
| NC_037652.1 | 9014886 | SNV | 1 | A | G | Homozygous   |
| NC_037652.1 | 9015036 | SNV | 1 | A | G | Heterozygous |
| NC_037652.1 | 9015087 | SNV | 1 | T | C | Homozygous   |
| NC_037652.1 | 9015093 | SNV | 1 | A | G | Homozygous   |
| NC_037652.1 | 9015835 | SNV | 1 | A | G | Heterozygous |
| NC_037652.1 | 9016649 | SNV | 1 | T | C | Homozygous   |
| NC_037652.1 | 9019366 | SNV | 1 | T | C | Homozygous   |
| NC_037652.1 | 9019383 | SNV | 1 | G | A | Heterozygous |
| NC_037652.1 | 9019394 | SNV | 1 | C | G | Heterozygous |
| NC_037652.1 | 9019426 | SNV | 1 | C | G | Heterozygous |
| NC_037652.1 | 9019449 | SNV | 1 | A | G | Homozygous   |
| NC_037652.1 | 9019467 | SNV | 1 | G | A | Heterozygous |
| NC_037652.1 | 9019471 | SNV | 1 | A | G | Homozygous   |
| NC_037652.1 | 9019477 | SNV | 1 | G | A | Heterozygous |
| NC_037652.1 | 9019517 | SNV | 1 | T | C | Homozygous   |
| NC_037652.1 | 9019540 | SNV | 1 | G | A | Heterozygous |
| NC_037652.1 | 9019542 | SNV | 1 | A | T | Heterozygous |
| NC_037652.1 | 9019545 | SNV | 1 | A | C | Heterozygous |

|             |         |     |   |   |   |              |
|-------------|---------|-----|---|---|---|--------------|
| NC_037652.1 | 9019586 | SNV | 1 | G | A | Heterozygous |
| NC_037652.1 | 9019610 | SNV | 1 | T | G | Heterozygous |
| NC_037652.1 | 9019618 | SNV | 1 | C | T | Heterozygous |
| NC_037652.1 | 9021231 | SNV | 1 | T | C | Homozygous   |
| NC_037652.1 | 9021283 | SNV | 1 | C | T | Heterozygous |
| NC_037652.1 | 9023682 | SNV | 1 | G | A | Homozygous   |
| NC_037652.1 | 9027639 | SNV | 1 | A | G | Homozygous   |
| NC_037652.1 | 9034853 | SNV | 1 | G | A | Heterozygous |
| NC_037652.1 | 9034959 | SNV | 1 | G | C | Heterozygous |
| NC_037652.1 | 9038443 | SNV | 1 | A | G | Homozygous   |
| NC_037652.1 | 9039406 | SNV | 1 | G | A | Homozygous   |
| NC_037652.1 | 9039410 | SNV | 1 | T | A | Heterozygous |
| NC_037652.1 | 9039435 | SNV | 1 | A | G | Homozygous   |
| NC_037652.1 | 9040158 | SNV | 1 | A | G | Homozygous   |
| NC_037652.1 | 9040163 | SNV | 1 | G | A | Homozygous   |
| NC_037652.1 | 9040465 | SNV | 1 | A | G | Homozygous   |
| NC_037652.1 | 9041115 | SNV | 1 | A | T | Heterozygous |
| NC_037652.1 | 9041198 | SNV | 1 | C | G | Heterozygous |
| NC_037652.1 | 9041277 | SNV | 1 | A | G | Homozygous   |
| NC_037652.1 | 9043382 | SNV | 1 | A | G | Heterozygous |
| NC_037652.1 | 9043396 | SNV | 1 | A | G | Heterozygous |
| NC_037652.1 | 9043400 | SNV | 1 | A | T | Heterozygous |
| NC_037652.1 | 9043403 | SNV | 1 | T | G | Heterozygous |
| NC_037652.1 | 9043406 | SNV | 1 | A | T | Heterozygous |
| NC_037652.1 | 9043418 | SNV | 1 | T | C | Heterozygous |
| NC_037652.1 | 9043421 | SNV | 1 | T | C | Heterozygous |
| NC_037652.1 | 9044638 | SNV | 1 | A | T | Homozygous   |
| NC_037652.1 | 9044650 | SNV | 1 | A | T | Homozygous   |
| NC_037652.1 | 9045794 | SNV | 1 | T | C | Homozygous   |
| NC_037652.1 | 9045904 | SNV | 1 | T | C | Heterozygous |
| NC_037652.1 | 9045909 | SNV | 1 | C | T | Heterozygous |
| NC_037652.1 | 9045911 | SNV | 1 | G | A | Heterozygous |
| NC_037652.1 | 9050168 | SNV | 1 | C | T | Homozygous   |
| NC_037652.1 | 9050171 | SNV | 1 | T | G | Homozygous   |
| NC_037652.1 | 9050173 | SNV | 1 | T | G | Homozygous   |
| NC_037652.1 | 9050187 | SNV | 1 | A | T | Homozygous   |
| NC_037652.1 | 9050596 | SNV | 1 | T | C | Homozygous   |
| NC_037652.1 | 9050600 | SNV | 1 | A | C | Homozygous   |
| NC_037652.1 | 9050602 | SNV | 1 | T | G | Homozygous   |
| NC_037652.1 | 9050605 | SNV | 1 | C | A | Homozygous   |
| NC_037652.1 | 9051959 | SNV | 1 | T | C | Homozygous   |
| NC_037652.1 | 9055073 | SNV | 1 | T | C | Homozygous   |
| NC_037652.1 | 9055119 | SNV | 1 | T | C | Heterozygous |
| NC_037652.1 | 9056628 | SNV | 1 | A | G | Homozygous   |
| NC_037652.1 | 9056653 | SNV | 1 | T | A | Homozygous   |
| NC_037652.1 | 9056682 | SNV | 1 | T | G | Homozygous   |
| NC_037652.1 | 9059189 | SNV | 1 | G | A | Heterozygous |
| NC_037652.1 | 9059861 | SNV | 1 | A | G | Heterozygous |
| NC_037652.1 | 9060403 | SNV | 1 | G | T | Homozygous   |
| NC_037652.1 | 9061009 | SNV | 1 | T | A | Homozygous   |
| NC_037652.1 | 9061688 | SNV | 1 | A | G | Homozygous   |

|             |         |     |   |   |   |              |
|-------------|---------|-----|---|---|---|--------------|
| NC_037652.1 | 9062210 | SNV | 1 | C | T | Homozygous   |
| NC_037652.1 | 9062238 | SNV | 1 | A | G | Heterozygous |
| NC_037652.1 | 9076669 | SNV | 1 | A | G | Homozygous   |
| NC_037652.1 | 9076972 | SNV | 1 | A | T | Homozygous   |
| NC_037652.1 | 9076994 | SNV | 1 | C | T | Homozygous   |
| NC_037652.1 | 9077002 | SNV | 1 | T | C | Homozygous   |
| NC_037652.1 | 9077006 | SNV | 1 | T | A | Homozygous   |
| NC_037652.1 | 9077034 | SNV | 1 | A | G | Homozygous   |
| NC_037652.1 | 9077043 | SNV | 1 | T | C | Homozygous   |
| NC_037652.1 | 9077851 | SNV | 1 | A | T | Homozygous   |
| NC_037652.1 | 9078560 | SNV | 1 | T | C | Homozygous   |
| NC_037652.1 | 9078565 | SNV | 1 | A | G | Homozygous   |
| NC_037652.1 | 9081666 | SNV | 1 | A | G | Homozygous   |
| NC_037652.1 | 9082145 | SNV | 1 | C | T | Homozygous   |
| NC_037652.1 | 9082348 | SNV | 1 | C | T | Homozygous   |
| NC_037652.1 | 9082630 | SNV | 1 | A | T | Homozygous   |
| NC_037652.1 | 9082705 | SNV | 1 | T | G | Homozygous   |
| NC_037652.1 | 9082710 | SNV | 1 | T | A | Homozygous   |
| NC_037652.1 | 9082712 | SNV | 1 | C | T | Homozygous   |
| NC_037652.1 | 9086620 | SNV | 1 | T | A | Heterozygous |
| NC_037652.1 | 9086627 | SNV | 1 | T | C | Heterozygous |
| NC_037652.1 | 9086635 | SNV | 1 | G | A | Heterozygous |
| NC_037652.1 | 9086641 | SNV | 1 | A | T | Homozygous   |
| NC_037652.1 | 9086650 | SNV | 1 | A | T | Heterozygous |
| NC_037652.1 | 9086653 | SNV | 1 | A | G | Heterozygous |
| NC_037652.1 | 9086657 | SNV | 1 | C | T | Heterozygous |
| NC_037652.1 | 9086659 | SNV | 1 | T | A | Heterozygous |
| NC_037652.1 | 9086668 | SNV | 1 | T | G | Heterozygous |
| NC_037652.1 | 9086686 | SNV | 1 | A | T | Heterozygous |
| NC_037652.1 | 9086689 | SNV | 1 | A | T | Heterozygous |
| NC_037652.1 | 9086692 | SNV | 1 | A | C | Heterozygous |
| NC_037652.1 | 9086764 | SNV | 1 | A | T | Homozygous   |
| NC_037652.1 | 9086767 | SNV | 1 | C | T | Heterozygous |
| NC_037652.1 | 9086772 | SNV | 1 | A | T | Homozygous   |
| NC_037652.1 | 9086775 | SNV | 1 | A | T | Homozygous   |
| NC_037652.1 | 9086850 | SNV | 1 | A | G | Heterozygous |
| NC_037652.1 | 9086854 | SNV | 1 | T | G | Heterozygous |
| NC_037652.1 | 9086862 | SNV | 1 | T | C | Heterozygous |
| NC_037652.1 | 9086868 | SNV | 1 | T | C | Heterozygous |
| NC_037652.1 | 9086871 | SNV | 1 | C | T | Heterozygous |
| NC_037652.1 | 9086881 | SNV | 1 | C | A | Heterozygous |
| NC_037652.1 | 9086887 | SNV | 1 | G | T | Heterozygous |
| NC_037652.1 | 9086898 | SNV | 1 | A | C | Heterozygous |
| NC_037652.1 | 9087174 | SNV | 1 | T | G | Heterozygous |
| NC_037652.1 | 9087178 | SNV | 1 | T | C | Heterozygous |
| NC_037652.1 | 9087187 | SNV | 1 | T | C | Heterozygous |
| NC_037652.1 | 9087189 | SNV | 1 | A | T | Heterozygous |
| NC_037652.1 | 9087192 | SNV | 1 | A | T | Heterozygous |
| NC_037652.1 | 9087195 | SNV | 1 | T | C | Heterozygous |
| NC_037652.1 | 9087213 | SNV | 1 | A | G | Heterozygous |
| NC_037652.1 | 9087219 | SNV | 1 | A | T | Homozygous   |



|             |         |     |   |   |   |              |
|-------------|---------|-----|---|---|---|--------------|
| NC_037652.1 | 9087231 | SNV | 1 | A | T | Homozygous   |
| NC_037652.1 | 9087819 | SNV | 1 | T | C | Homozygous   |
| NC_037652.1 | 9087854 | SNV | 1 | A | G | Heterozygous |
| NC_037652.1 | 9087860 | SNV | 1 | T | A | Heterozygous |
| NC_037652.1 | 9087872 | SNV | 1 | C | G | Heterozygous |
| NC_037652.1 | 9087884 | SNV | 1 | A | C | Heterozygous |
| NC_037652.1 | 9087887 | SNV | 1 | C | T | Homozygous   |
| NC_037652.1 | 9087905 | SNV | 1 | C | T | Heterozygous |
| NC_037652.1 | 9087920 | SNV | 1 | T | G | Heterozygous |
| NC_037652.1 | 9087923 | SNV | 1 | T | A | Homozygous   |
| NC_037652.1 | 9087929 | SNV | 1 | A | T | Heterozygous |
| NC_037652.1 | 9087932 | SNV | 1 | A | T | Homozygous   |
| NC_037652.1 | 9087935 | SNV | 1 | A | C | Homozygous   |
| NC_037652.1 | 9087953 | SNV | 1 | T | C | Heterozygous |
| NC_037652.1 | 9087956 | SNV | 1 | T | C | Homozygous   |
| NC_037652.1 | 9087965 | SNV | 1 | A | C | Homozygous   |
| NC_037652.1 | 9087974 | SNV | 1 | A | T | Heterozygous |
| NC_037652.1 | 9087986 | SNV | 1 | T | A | Heterozygous |
| NC_037652.1 | 9088010 | SNV | 1 | G | T | Heterozygous |
| NC_037652.1 | 9088031 | SNV | 1 | T | C | Heterozygous |
| NC_037652.1 | 9088036 | SNV | 1 | T | C | Homozygous   |
| NC_037652.1 | 9088566 | SNV | 1 | A | T | Heterozygous |
| NC_037652.1 | 9088569 | SNV | 1 | T | G | Heterozygous |
| NC_037652.1 | 9088596 | SNV | 1 | A | G | Heterozygous |
| NC_037652.1 | 9088602 | SNV | 1 | T | C | Heterozygous |
| NC_037652.1 | 9088605 | SNV | 1 | A | G | Heterozygous |
| NC_037652.1 | 9088608 | SNV | 1 | T | C | Heterozygous |
| NC_037652.1 | 9088611 | SNV | 1 | A | G | Heterozygous |
| NC_037652.1 | 9088614 | SNV | 1 | T | C | Heterozygous |
| NC_037652.1 | 9090131 | SNV | 1 | C | T | Homozygous   |
| NC_037652.1 | 9096848 | SNV | 1 | C | T | Homozygous   |
| NC_037652.1 | 9100372 | SNV | 1 | T | C | Homozygous   |
| NC_037652.1 | 9112237 | SNV | 1 | T | C | Heterozygous |
| NC_037652.1 | 9112315 | SNV | 1 | C | T | Homozygous   |
| NC_037652.1 | 9112433 | SNV | 1 | A | G | Homozygous   |
| NC_037652.1 | 9112594 | SNV | 1 | T | A | Homozygous   |
| NC_037652.1 | 9112907 | SNV | 1 | G | A | Homozygous   |
| NC_037652.1 | 9113812 | SNV | 1 | G | A | Homozygous   |
| NC_037652.1 | 9113859 | SNV | 1 | A | G | Homozygous   |
| NC_037652.1 | 9114871 | SNV | 1 | T | G | Homozygous   |
| NC_037652.1 | 9116074 | SNV | 1 | G | T | Homozygous   |
| NC_037652.1 | 9116076 | SNV | 1 | A | T | Homozygous   |
| NC_037652.1 | 9129106 | SNV | 1 | C | T | Homozygous   |
| NC_037652.1 | 9129246 | SNV | 1 | C | T | Heterozygous |
| NC_037652.1 | 9131142 | SNV | 1 | T | C | Heterozygous |
| NC_037652.1 | 9135260 | SNV | 1 | T | A | Heterozygous |
| NC_037652.1 | 9135263 | SNV | 1 | G | C | Heterozygous |
| NC_037652.1 | 9135267 | SNV | 1 | G | C | Heterozygous |
| NC_037652.1 | 9135271 | SNV | 1 | G | C | Heterozygous |
| NC_037652.1 | 9135275 | SNV | 1 | G | A | Homozygous   |
| NC_037652.1 | 9135279 | SNV | 1 | G | C | Homozygous   |

|             |         |     |   |   |   |              |
|-------------|---------|-----|---|---|---|--------------|
| NC_037652.1 | 9135291 | SNV | 1 | G | C | Heterozygous |
| NC_037652.1 | 9135295 | SNV | 1 | G | C | Homozygous   |
| NC_037652.1 | 9135299 | SNV | 1 | G | C | Homozygous   |
| NC_037652.1 | 9141286 | SNV | 1 | G | A | Homozygous   |
| NC_037652.1 | 9141299 | SNV | 1 | A | G | Homozygous   |
| NC_037652.1 | 9141304 | SNV | 1 | A | T | Homozygous   |
| NC_037652.1 | 9141326 | SNV | 1 | G | A | Homozygous   |
| NC_037652.1 | 9141383 | SNV | 1 | T | A | Homozygous   |
| NC_037652.1 | 9141535 | SNV | 1 | C | T | Homozygous   |
| NC_037652.1 | 9141632 | SNV | 1 | T | C | Homozygous   |
| NC_037652.1 | 9141677 | SNV | 1 | A | G | Homozygous   |
| NC_037652.1 | 9141694 | SNV | 1 | G | A | Homozygous   |
| NC_037652.1 | 9141704 | SNV | 1 | A | T | Homozygous   |
| NC_037652.1 | 9141726 | SNV | 1 | A | G | Heterozygous |
| NC_037652.1 | 9141739 | SNV | 1 | C | T | Homozygous   |
| NC_037652.1 | 9141749 | SNV | 1 | T | A | Homozygous   |
| NC_037652.1 | 9141758 | SNV | 1 | A | G | Heterozygous |
| NC_037652.1 | 9141824 | SNV | 1 | T | C | Heterozygous |
| NC_037652.1 | 9141828 | SNV | 1 | A | G | Heterozygous |
| NC_037652.1 | 9149750 | SNV | 1 | G | A | Homozygous   |
| NC_037652.1 | 9149757 | SNV | 1 | C | T | Homozygous   |
| NC_037652.1 | 9149861 | SNV | 1 | G | A | Homozygous   |
| NC_037652.1 | 9149865 | SNV | 1 | C | T | Heterozygous |
| NC_037652.1 | 9149890 | SNV | 1 | C | T | Homozygous   |
| NC_037652.1 | 9149904 | SNV | 1 | G | A | Homozygous   |
| NC_037652.1 | 9155581 | SNV | 1 | A | C | Heterozygous |
| NC_037652.1 | 9155588 | SNV | 1 | T | A | Heterozygous |
| NC_037652.1 | 9155604 | SNV | 1 | A | G | Homozygous   |
| NC_037652.1 | 9155610 | SNV | 1 | A | G | Homozygous   |
| NC_037652.1 | 9155646 | SNV | 1 | G | T | Homozygous   |
| NC_037652.1 | 9155754 | SNV | 1 | A | G | Homozygous   |
| NC_037652.1 | 9155775 | SNV | 1 | T | A | Homozygous   |
| NC_037652.1 | 9156025 | SNV | 1 | T | C | Homozygous   |
| NC_037652.1 | 9164181 | SNV | 1 | T | A | Heterozygous |
| NC_037652.1 | 9164233 | SNV | 1 | T | C | Homozygous   |
| NC_037652.1 | 9164263 | SNV | 1 | T | C | Homozygous   |
| NC_037652.1 | 9164314 | SNV | 1 | A | T | Heterozygous |
| NC_037652.1 | 9164632 | SNV | 1 | C | T | Homozygous   |
| NC_037652.1 | 9164674 | SNV | 1 | T | C | Homozygous   |
| NC_037652.1 | 9166481 | SNV | 1 | T | C | Homozygous   |
| NC_037652.1 | 9183633 | SNV | 1 | C | T | Heterozygous |
| NC_037652.1 | 9183784 | SNV | 1 | A | G | Heterozygous |
| NC_037652.1 | 9184495 | SNV | 1 | A | G | Homozygous   |
| NC_037652.1 | 9184500 | SNV | 1 | G | A | Homozygous   |
| NC_037652.1 | 9186514 | SNV | 1 | C | T | Homozygous   |
| NC_037652.1 | 9186849 | SNV | 1 | C | T | Homozygous   |
| NC_037652.1 | 9186917 | SNV | 1 | T | C | Heterozygous |
| NC_037652.1 | 9186921 | SNV | 1 | T | C | Homozygous   |
| NC_037652.1 | 9188535 | SNV | 1 | A | T | Homozygous   |
| NC_037652.1 | 9188543 | SNV | 1 | A | T | Homozygous   |
| NC_037652.1 | 9188545 | SNV | 1 | G | T | Homozygous   |

|             |         |     |   |   |   |              |
|-------------|---------|-----|---|---|---|--------------|
| NC_037652.1 | 9188549 | SNV | 1 | T | A | Homozygous   |
| NC_037652.1 | 9188554 | SNV | 1 | T | G | Homozygous   |
| NC_037652.1 | 9188557 | SNV | 1 | C | T | Homozygous   |
| NC_037652.1 | 9188560 | SNV | 1 | C | T | Homozygous   |
| NC_037652.1 | 9188565 | SNV | 1 | T | A | Homozygous   |
| NC_037652.1 | 9274720 | SNV | 1 | T | C | Homozygous   |
| NC_037652.1 | 9275004 | SNV | 1 | G | A | Heterozygous |
| NC_037652.1 | 9275088 | SNV | 1 | A | G | Homozygous   |
| NC_037652.1 | 9276267 | SNV | 1 | G | A | Homozygous   |
| NC_037652.1 | 9278352 | SNV | 1 | T | G | Heterozygous |
| NC_037652.1 | 9278448 | SNV | 1 | C | G | Homozygous   |
| NC_037652.1 | 9281426 | SNV | 1 | A | T | Homozygous   |
| NC_037652.1 | 9281836 | SNV | 1 | A | G | Homozygous   |
| NC_037652.1 | 9283008 | SNV | 1 | A | T | Heterozygous |
| NC_037652.1 | 9290707 | SNV | 1 | A | G | Homozygous   |
| NC_037652.1 | 9291057 | SNV | 1 | T | C | Homozygous   |
| NC_037652.1 | 9291263 | SNV | 1 | C | A | Homozygous   |
| NC_037652.1 | 9291342 | SNV | 1 | A | C | Homozygous   |
| NC_037652.1 | 9291457 | SNV | 1 | T | A | Heterozygous |
| NC_037652.1 | 9291787 | SNV | 1 | C | A | Homozygous   |
| NC_037652.1 | 9292030 | SNV | 1 | A | G | Heterozygous |
| NC_037652.1 | 9292387 | SNV | 1 | G | T | Homozygous   |
| NC_037652.1 | 9300885 | SNV | 1 | G | A | Heterozygous |
| NC_037652.1 | 9302357 | SNV | 1 | C | T | Homozygous   |
| NC_037652.1 | 9303086 | SNV | 1 | A | G | Homozygous   |
| NC_037652.1 | 9303435 | SNV | 1 | G | T | Homozygous   |
| NC_037652.1 | 9304883 | SNV | 1 | G | A | Homozygous   |
| NC_037652.1 | 9309671 | SNV | 1 | A | G | Homozygous   |
| NC_037652.1 | 9310253 | SNV | 1 | G | T | Homozygous   |
| NC_037652.1 | 9316079 | SNV | 1 | C | A | Homozygous   |
| NC_037652.1 | 9325672 | SNV | 1 | A | G | Homozygous   |
| NC_037652.1 | 9326291 | SNV | 1 | G | T | Homozygous   |
| NC_037652.1 | 9326300 | SNV | 1 | A | T | Homozygous   |
| NC_037652.1 | 9326307 | SNV | 1 | A | G | Homozygous   |
| NC_037652.1 | 9326329 | SNV | 1 | A | G | Homozygous   |
| NC_037652.1 | 9326596 | SNV | 1 | G | A | Heterozygous |
| NC_037652.1 | 9326620 | SNV | 1 | A | G | Homozygous   |
| NC_037652.1 | 9326662 | SNV | 1 | A | G | Homozygous   |
| NC_037652.1 | 9326671 | SNV | 1 | T | G | Homozygous   |
| NC_037652.1 | 9326685 | SNV | 1 | C | T | Heterozygous |
| NC_037652.1 | 9326695 | SNV | 1 | C | T | Heterozygous |
| NC_037652.1 | 9326810 | SNV | 1 | C | T | Homozygous   |
| NC_037652.1 | 9336312 | SNV | 1 | A | T | Homozygous   |
| NC_037652.1 | 9336315 | SNV | 1 | A | C | Homozygous   |
| NC_037652.1 | 9337188 | SNV | 1 | G | A | Heterozygous |
| NC_037652.1 | 9337339 | SNV | 1 | G | A | Heterozygous |
| NC_037652.1 | 9338497 | SNV | 1 | T | C | Homozygous   |
| NC_037652.1 | 9339060 | SNV | 1 | T | A | Heterozygous |
| NC_037652.1 | 9339083 | SNV | 1 | A | G | Heterozygous |
| NC_037652.1 | 9339104 | SNV | 1 | T | C | Heterozygous |
| NC_037652.1 | 9346125 | SNV | 1 | A | G | Homozygous   |

|             |         |     |   |   |   |              |
|-------------|---------|-----|---|---|---|--------------|
| NC_037652.1 | 9347556 | SNV | 1 | T | C | Homozygous   |
| NC_037652.1 | 9348782 | SNV | 1 | T | C | Homozygous   |
| NC_037652.1 | 9354728 | SNV | 1 | A | C | Homozygous   |
| NC_037652.1 | 9354737 | SNV | 1 | T | G | Homozygous   |
| NC_037652.1 | 9354741 | SNV | 1 | G | A | Homozygous   |
| NC_037652.1 | 9358183 | SNV | 1 | A | G | Homozygous   |
| NC_037652.1 | 9359160 | SNV | 1 | T | C | Homozygous   |
| NC_037652.1 | 9363134 | SNV | 1 | A | G | Homozygous   |
| NC_037652.1 | 9367605 | SNV | 1 | G | A | Heterozygous |
| NC_037652.1 | 9368767 | SNV | 1 | C | T | Heterozygous |
| NC_037652.1 | 9374637 | SNV | 1 | A | T | Homozygous   |
| NC_037652.1 | 9374640 | SNV | 1 | T | A | Homozygous   |
| NC_037652.1 | 9374648 | SNV | 1 | A | T | Homozygous   |
| NC_037652.1 | 9376637 | SNV | 1 | G | A | Heterozygous |
| NC_037652.1 | 9376665 | SNV | 1 | G | A | Heterozygous |
| NC_037652.1 | 9376669 | SNV | 1 | G | A | Heterozygous |
| NC_037652.1 | 9380045 | SNV | 1 | C | T | Homozygous   |
| NC_037652.1 | 9380047 | SNV | 1 | C | T | Homozygous   |
| NC_037652.1 | 9380057 | SNV | 1 | C | G | Homozygous   |
| NC_037652.1 | 9380065 | SNV | 1 | C | G | Homozygous   |
| NC_037652.1 | 9380071 | SNV | 1 | C | T | Homozygous   |
| NC_037652.1 | 9381171 | SNV | 1 | A | T | Homozygous   |
| NC_037652.1 | 9381182 | SNV | 1 | T | G | Homozygous   |
| NC_037652.1 | 9386281 | SNV | 1 | T | A | Homozygous   |
| NC_037652.1 | 9386301 | SNV | 1 | T | A | Homozygous   |
| NC_037652.1 | 9386311 | SNV | 1 | T | A | Homozygous   |
| NC_037652.1 | 9386313 | SNV | 1 | T | C | Homozygous   |
| NC_037652.1 | 9386324 | SNV | 1 | A | G | Homozygous   |
| NC_037652.1 | 9386327 | SNV | 1 | A | G | Homozygous   |
| NC_037652.1 | 9386334 | SNV | 1 | G | A | Homozygous   |
| NC_037652.1 | 9394560 | SNV | 1 | A | G | Heterozygous |
| NC_037652.1 | 9432635 | SNV | 1 | C | A | Homozygous   |
| NC_037652.1 | 9433644 | SNV | 1 | C | T | Homozygous   |
| NC_037652.1 | 9433699 | SNV | 1 | T | G | Homozygous   |
| NC_037652.1 | 9434070 | SNV | 1 | A | T | Homozygous   |
| NC_037652.1 | 9434273 | SNV | 1 | G | C | Homozygous   |
| NC_037652.1 | 9434947 | SNV | 1 | G | A | Homozygous   |
| NC_037652.1 | 9434991 | SNV | 1 | A | G | Homozygous   |
| NC_037652.1 | 9438259 | SNV | 1 | A | G | Heterozygous |
| NC_037652.1 | 9440016 | SNV | 1 | G | A | Homozygous   |
| NC_037652.1 | 9440101 | SNV | 1 | G | A | Homozygous   |
| NC_037652.1 | 9440114 | SNV | 1 | C | T | Homozygous   |
| NC_037652.1 | 9440175 | SNV | 1 | A | G | Homozygous   |
| NC_037652.1 | 9440371 | SNV | 1 | A | G | Homozygous   |
| NC_037652.1 | 9440644 | SNV | 1 | C | T | Heterozygous |
| NC_037652.1 | 9441393 | SNV | 1 | A | G | Homozygous   |
| NC_037652.1 | 9441636 | SNV | 1 | C | T | Heterozygous |
| NC_037652.1 | 9441752 | SNV | 1 | A | C | Homozygous   |
| NC_037652.1 | 9441984 | SNV | 1 | G | A | Heterozygous |
| NC_037652.1 | 9442022 | SNV | 1 | C | T | Homozygous   |
| NC_037652.1 | 9442024 | SNV | 1 | A | T | Homozygous   |

|             |         |     |   |   |   |              |
|-------------|---------|-----|---|---|---|--------------|
| NC_037652.1 | 9442828 | SNV | 1 | A | G | Homozygous   |
| NC_037652.1 | 9446609 | SNV | 1 | C | T | Heterozygous |
| NC_037652.1 | 9448826 | SNV | 1 | G | T | Homozygous   |
| NC_037652.1 | 9448876 | SNV | 1 | C | T | Homozygous   |
| NC_037652.1 | 9452743 | SNV | 1 | T | A | Homozygous   |
| NC_037652.1 | 9460896 | SNV | 1 | A | G | Heterozygous |
| NC_037652.1 | 9461193 | SNV | 1 | A | T | Homozygous   |
| NC_037652.1 | 9461239 | SNV | 1 | A | G | Heterozygous |
| NC_037652.1 | 9465310 | SNV | 1 | T | C | Heterozygous |
| NC_037652.1 | 9467688 | SNV | 1 | A | T | Homozygous   |
| NC_037652.1 | 9467692 | SNV | 1 | A | T | Homozygous   |
| NC_037652.1 | 9467699 | SNV | 1 | G | A | Homozygous   |
| NC_037652.1 | 9467703 | SNV | 1 | G | A | Homozygous   |
| NC_037652.1 | 9467736 | SNV | 1 | A | T | Homozygous   |
| NC_037652.1 | 9467738 | SNV | 1 | A | G | Homozygous   |
| NC_037652.1 | 9474090 | SNV | 1 | A | G | Homozygous   |
| NC_037652.1 | 9475113 | SNV | 1 | A | G | Homozygous   |
| NC_037652.1 | 9475993 | SNV | 1 | A | G | Homozygous   |
| NC_037652.1 | 9477020 | SNV | 1 | A | G | Heterozygous |
| NC_037652.1 | 9477022 | SNV | 1 | T | A | Heterozygous |
| NC_037652.1 | 9477027 | SNV | 1 | A | G | Heterozygous |
| NC_037652.1 | 9477043 | SNV | 1 | T | A | Heterozygous |
| NC_037652.1 | 9477046 | SNV | 1 | A | G | Heterozygous |
| NC_037652.1 | 9477048 | SNV | 1 | G | A | Heterozygous |
| NC_037652.1 | 9477050 | SNV | 1 | T | A | Heterozygous |
| NC_037652.1 | 9477086 | SNV | 1 | C | G | Heterozygous |
| NC_037652.1 | 9477094 | SNV | 1 | A | T | Heterozygous |
| NC_037652.1 | 9477097 | SNV | 1 | A | T | Heterozygous |
| NC_037652.1 | 9477528 | SNV | 1 | C | T | Homozygous   |
| NC_037652.1 | 9478314 | SNV | 1 | A | T | Homozygous   |
| NC_037652.1 | 9478756 | SNV | 1 | G | A | Homozygous   |
| NC_037652.1 | 9481542 | SNV | 1 | C | T | Homozygous   |
| NC_037652.1 | 9482255 | SNV | 1 | C | T | Heterozygous |
| NC_037652.1 | 9487031 | SNV | 1 | T | G | Heterozygous |
| NC_037652.1 | 9487036 | SNV | 1 | A | T | Heterozygous |
| NC_037652.1 | 9487087 | SNV | 1 | T | C | Homozygous   |
| NC_037652.1 | 9489186 | SNV | 1 | T | A | Homozygous   |
| NC_037652.1 | 9489816 | SNV | 1 | T | C | Homozygous   |
| NC_037652.1 | 9490110 | SNV | 1 | A | T | Homozygous   |
| NC_037652.1 | 9490285 | SNV | 1 | A | G | Homozygous   |
| NC_037652.1 | 9493159 | SNV | 1 | T | A | Heterozygous |
| NC_037652.1 | 9500365 | SNV | 1 | T | C | Heterozygous |
| NC_037652.1 | 9500523 | SNV | 1 | A | G | Homozygous   |
| NC_037652.1 | 9500623 | SNV | 1 | G | C | Homozygous   |
| NC_037652.1 | 9503476 | SNV | 1 | G | A | Homozygous   |
| NC_037652.1 | 9503982 | SNV | 1 | G | A | Homozygous   |
| NC_037652.1 | 9505248 | SNV | 1 | A | G | Heterozygous |
| NC_037652.1 | 9506429 | SNV | 1 | A | G | Homozygous   |
| NC_037652.1 | 9506441 | SNV | 1 | T | C | Homozygous   |
| NC_037652.1 | 9510309 | SNV | 1 | G | T | Homozygous   |
| NC_037652.1 | 9512094 | SNV | 1 | A | C | Heterozygous |

|                |         |     |   |   |   |              |
|----------------|---------|-----|---|---|---|--------------|
| NC_037652.1    | 9512490 | SNV | 1 | C | G | Homozygous   |
| NC_037652.1    | 9512860 | SNV | 1 | C | T | Heterozygous |
| NW_020555841.1 | 25152   | SNV | 1 | G | T | Homozygous   |
| NW_020555841.1 | 25207   | SNV | 1 | G | A | Heterozygous |
| NW_020555841.1 | 25406   | SNV | 1 | A | T | Heterozygous |
| NW_020555841.1 | 25412   | SNV | 1 | A | G | Heterozygous |
| NW_020555841.1 | 25426   | SNV | 1 | C | T | Heterozygous |
| NW_020555841.1 | 25538   | SNV | 1 | G | A | Homozygous   |
| NW_020555841.1 | 25545   | SNV | 1 | A | C | Homozygous   |
| NW_020555841.1 | 25553   | SNV | 1 | T | C | Homozygous   |
| NW_020555841.1 | 25589   | SNV | 1 | C | T | Heterozygous |
| NW_020555841.1 | 25591   | SNV | 1 | T | C | Heterozygous |
| NW_020555841.1 | 25594   | SNV | 1 | G | A | Homozygous   |
| NW_020555841.1 | 25602   | SNV | 1 | T | A | Heterozygous |
| NW_020555841.1 | 25623   | SNV | 1 | A | G | Heterozygous |
| NW_020555841.1 | 27188   | SNV | 1 | A | G | Heterozygous |
| NW_020555842.1 | 26709   | SNV | 1 | T | C | Heterozygous |
| NW_020555842.1 | 26722   | SNV | 1 | T | C | Homozygous   |
| NW_020555842.1 | 26763   | SNV | 1 | T | C | Homozygous   |
| NW_020555842.1 | 26775   | SNV | 1 | A | G | Heterozygous |
| NW_020555842.1 | 26789   | SNV | 1 | G | A | Homozygous   |
| NW_020555842.1 | 26791   | SNV | 1 | G | A | Homozygous   |
| NW_020555842.1 | 26800   | SNV | 1 | G | A | Homozygous   |
| NW_020555842.1 | 26802   | SNV | 1 | A | T | Homozygous   |
| NW_020555842.1 | 26819   | SNV | 1 | C | T | Heterozygous |
| NW_020555842.1 | 26863   | SNV | 1 | C | T | Homozygous   |
| NW_020555842.1 | 26915   | SNV | 1 | T | C | Homozygous   |
| NW_020555842.1 | 26922   | SNV | 1 | A | G | Homozygous   |
| NW_020555842.1 | 26933   | SNV | 1 | A | G | Homozygous   |
| NW_020555842.1 | 26936   | SNV | 1 | T | C | Homozygous   |
| NW_020555842.1 | 26951   | SNV | 1 | T | C | Homozygous   |
| NW_020555842.1 | 26972   | SNV | 1 | A | G | Homozygous   |
| NW_020555842.1 | 26981   | SNV | 1 | A | G | Homozygous   |
| NW_020555842.1 | 27002   | SNV | 1 | T | C | Homozygous   |
| NW_020555842.1 | 27008   | SNV | 1 | T | C | Homozygous   |
| NW_020555842.1 | 27016   | SNV | 1 | T | C | Homozygous   |
| NW_020555842.1 | 27028   | SNV | 1 | A | C | Homozygous   |
| NW_020555842.1 | 27037   | SNV | 1 | G | A | Homozygous   |
| NW_020555842.1 | 27041   | SNV | 1 | A | C | Homozygous   |
| NW_020555842.1 | 27043   | SNV | 1 | T | C | Homozygous   |
| NW_020555842.1 | 27049   | SNV | 1 | T | A | Homozygous   |
| NW_020555842.1 | 27067   | SNV | 1 | A | G | Homozygous   |
| NW_020555842.1 | 27072   | SNV | 1 | A | G | Homozygous   |
| NW_020555842.1 | 27079   | SNV | 1 | T | C | Homozygous   |
| NW_020555842.1 | 27081   | SNV | 1 | C | T | Homozygous   |
| NW_020555842.1 | 27083   | SNV | 1 | T | C | Homozygous   |
| NW_020555842.1 | 27086   | SNV | 1 | T | C | Homozygous   |
| NW_020555842.1 | 27088   | SNV | 1 | T | C | Homozygous   |
| NW_020555842.1 | 27121   | SNV | 1 | T | C | Homozygous   |
| NW_020555842.1 | 27126   | SNV | 1 | A | T | Homozygous   |
| NW_020555842.1 | 27138   | SNV | 1 | T | C | Homozygous   |

|                |       |     |   |   |   |              |
|----------------|-------|-----|---|---|---|--------------|
| NW_020555842.1 | 27157 | SNV | 1 | T | C | Homozygous   |
| NW_020555842.1 | 27160 | SNV | 1 | T | C | Homozygous   |
| NW_020555842.1 | 27172 | SNV | 1 | T | G | Homozygous   |
| NW_020555842.1 | 27177 | SNV | 1 | A | G | Homozygous   |
| NW_020555842.1 | 27180 | SNV | 1 | G | A | Homozygous   |
| NW_020555842.1 | 27188 | SNV | 1 | A | T | Homozygous   |
| NW_020555842.1 | 27190 | SNV | 1 | G | C | Homozygous   |
| NW_020555842.1 | 27194 | SNV | 1 | G | A | Homozygous   |
| NW_020555842.1 | 27215 | SNV | 1 | A | G | Homozygous   |
| NW_020555842.1 | 27241 | SNV | 1 | A | G | Homozygous   |
| NW_020555842.1 | 27252 | SNV | 1 | C | A | Homozygous   |
| NW_020555842.1 | 27257 | SNV | 1 | C | T | Homozygous   |
| NW_020555842.1 | 27269 | SNV | 1 | A | G | Heterozygous |
| NW_020555842.1 | 27280 | SNV | 1 | T | C | Homozygous   |
| NW_020555842.1 | 27302 | SNV | 1 | C | T | Heterozygous |
| NW_020555842.1 | 27414 | SNV | 1 | T | C | Homozygous   |
| NW_020555842.1 | 27424 | SNV | 1 | T | C | Homozygous   |
| NW_020555842.1 | 27430 | SNV | 1 | T | C | Homozygous   |
| NW_020555842.1 | 27433 | SNV | 1 | G | A | Homozygous   |
| NW_020555842.1 | 27448 | SNV | 1 | C | T | Homozygous   |
| NW_020555842.1 | 27455 | SNV | 1 | T | C | Homozygous   |
| NW_020555842.1 | 27466 | SNV | 1 | C | G | Homozygous   |
| NW_020555842.1 | 27490 | SNV | 1 | A | G | Homozygous   |
| NW_020555842.1 | 27495 | SNV | 1 | A | G | Homozygous   |
| NW_020555842.1 | 27512 | SNV | 1 | A | G | Homozygous   |
| NW_020555842.1 | 27522 | SNV | 1 | G | A | Homozygous   |
| NW_020555842.1 | 27526 | SNV | 1 | A | G | Homozygous   |
| NW_020555842.1 | 27535 | SNV | 1 | G | A | Homozygous   |
| NW_020555842.1 | 27557 | SNV | 1 | A | G | Homozygous   |
| NW_020555842.1 | 27573 | SNV | 1 | T | C | Homozygous   |
| NW_020555842.1 | 27581 | SNV | 1 | T | A | Homozygous   |
| NW_020555842.1 | 27583 | SNV | 1 | T | C | Homozygous   |
| NW_020555842.1 | 27636 | SNV | 1 | C | T | Heterozygous |
| NW_020555842.1 | 54131 | SNV | 1 | T | C | Homozygous   |
| NW_020555842.1 | 54417 | SNV | 1 | T | C | Heterozygous |
| NW_020555842.1 | 54762 | SNV | 1 | C | T | Heterozygous |
| NW_020555842.1 | 54948 | SNV | 1 | A | G | Homozygous   |
| NW_020555842.1 | 54962 | SNV | 1 | C | A | Homozygous   |
| NW_020555842.1 | 54964 | SNV | 1 | G | A | Homozygous   |
| NW_020555842.1 | 54972 | SNV | 1 | T | C | Homozygous   |
| NW_020555842.1 | 54975 | SNV | 1 | G | A | Homozygous   |
| NW_020555842.1 | 54992 | SNV | 1 | A | G | Homozygous   |
| NW_020555842.1 | 55000 | SNV | 1 | G | C | Homozygous   |
| NW_020555842.1 | 55004 | SNV | 1 | C | T | Homozygous   |
| NW_020555842.1 | 55020 | SNV | 1 | T | A | Homozygous   |
| NW_020555842.1 | 55043 | SNV | 1 | T | C | Heterozygous |
| NW_020555842.1 | 55047 | SNV | 1 | T | G | Heterozygous |
| NW_020555842.1 | 55051 | SNV | 1 | C | T | Heterozygous |
| NW_020555842.1 | 55190 | SNV | 1 | C | T | Heterozygous |
| NW_020555842.1 | 55287 | SNV | 1 | G | C | Homozygous   |
| NW_020555842.1 | 55291 | SNV | 1 | T | C | Homozygous   |

|                |       |     |   |   |   |              |
|----------------|-------|-----|---|---|---|--------------|
| NW_020555842.1 | 55294 | SNV | 1 | G | C | Homozygous   |
| NW_020555842.1 | 55297 | SNV | 1 | A | G | Homozygous   |
| NW_020555842.1 | 55300 | SNV | 1 | C | T | Homozygous   |
| NW_020555842.1 | 55302 | SNV | 1 | T | C | Homozygous   |
| NW_020555842.1 | 55306 | SNV | 1 | A | G | Homozygous   |
| NW_020555842.1 | 55336 | SNV | 1 | T | C | Homozygous   |
| NW_020555842.1 | 55349 | SNV | 1 | T | C | Homozygous   |
| NW_020555842.1 | 55399 | SNV | 1 | G | A | Heterozygous |
| NW_020555842.1 | 55412 | SNV | 1 | G | A | Homozygous   |
| NW_020555842.1 | 55414 | SNV | 1 | G | A | Homozygous   |
| NW_020555843.1 | 26908 | SNV | 1 | G | A | Heterozygous |
| NW_020555843.1 | 26927 | SNV | 1 | C | T | Heterozygous |
| NW_020555843.1 | 26951 | SNV | 1 | G | A | Heterozygous |
| NW_020555843.1 | 26959 | SNV | 1 | G | T | Heterozygous |
| NW_020555843.1 | 26963 | SNV | 1 | G | A | Heterozygous |
| NW_020555843.1 | 26969 | SNV | 1 | G | A | Heterozygous |
| NW_020555843.1 | 26973 | SNV | 1 | T | C | Homozygous   |
| NW_020555843.1 | 26977 | SNV | 1 | C | T | Heterozygous |
| NW_020555846.1 | 19566 | SNV | 1 | C | T | Heterozygous |
| NW_020555846.1 | 19569 | SNV | 1 | T | C | Heterozygous |
| NW_020555846.1 | 19580 | SNV | 1 | C | T | Heterozygous |
| NW_020555846.1 | 19652 | SNV | 1 | C | T | Homozygous   |
| NW_020555846.1 | 19675 | SNV | 1 | T | C | Homozygous   |
| NW_020555846.1 | 19677 | SNV | 1 | G | A | Homozygous   |
| NW_020555846.1 | 19720 | SNV | 1 | A | G | Homozygous   |
| NW_020555846.1 | 19731 | SNV | 1 | G | A | Heterozygous |
| NW_020555846.1 | 19745 | SNV | 1 | C | T | Heterozygous |
| NW_020555846.1 | 19936 | SNV | 1 | G | A | Heterozygous |
| NW_020555846.1 | 19942 | SNV | 1 | A | G | Heterozygous |
| NW_020555846.1 | 19945 | SNV | 1 | C | T | Heterozygous |
| NW_020555846.1 | 19972 | SNV | 1 | T | C | Heterozygous |
| NW_020555846.1 | 20006 | SNV | 1 | A | G | Homozygous   |
| NW_020555846.1 | 20020 | SNV | 1 | G | A | Homozygous   |
| NW_020555846.1 | 20025 | SNV | 1 | A | G | Heterozygous |
| NW_020555846.1 | 20048 | SNV | 1 | T | C | Heterozygous |
| NW_020555846.1 | 20059 | SNV | 1 | G | A | Heterozygous |
| NW_020555846.1 | 20105 | SNV | 1 | C | T | Heterozygous |
| NW_020555846.1 | 20141 | SNV | 1 | A | G | Heterozygous |
| NW_020555846.1 | 20169 | SNV | 1 | T | C | Heterozygous |
| NW_020555846.1 | 20192 | SNV | 1 | C | T | Heterozygous |
| NW_020555846.1 | 20221 | SNV | 1 | G | T | Homozygous   |
| NW_020555846.1 | 20361 | SNV | 1 | T | C | Heterozygous |
| NW_020555846.1 | 20372 | SNV | 1 | C | T | Heterozygous |
| NW_020555846.1 | 20390 | SNV | 1 | T | C | Homozygous   |
| NW_020555846.1 | 20415 | SNV | 1 | A | G | Homozygous   |
| NW_020555846.1 | 20419 | SNV | 1 | C | T | Heterozygous |
| NW_020555846.1 | 20421 | SNV | 1 | A | G | Homozygous   |
| NW_020555846.1 | 20622 | SNV | 1 | C | T | Heterozygous |
| NW_020555846.1 | 20636 | SNV | 1 | C | T | Heterozygous |
| NW_020555846.1 | 20640 | SNV | 1 | C | T | Heterozygous |
| NW_020555846.1 | 20672 | SNV | 1 | T | G | Homozygous   |



|                |       |     |   |   |   |              |
|----------------|-------|-----|---|---|---|--------------|
| NW_020555846.1 | 20810 | SNV | 1 | T | G | Heterozygous |
| NW_020555846.1 | 20876 | SNV | 1 | G | A | Heterozygous |
| NW_020555846.1 | 20913 | SNV | 1 | A | G | Heterozygous |
| NW_020555846.1 | 20951 | SNV | 1 | T | C | Heterozygous |
| NW_020555846.1 | 20968 | SNV | 1 | T | C | Heterozygous |
| NW_020555846.1 | 21022 | SNV | 1 | C | T | Homozygous   |
| NW_020555850.1 | 13322 | SNV | 1 | T | C | Homozygous   |
| NW_020555850.1 | 13341 | SNV | 1 | T | C | Homozygous   |
| NW_020555850.1 | 13354 | SNV | 1 | A | G | Homozygous   |
| NW_020555850.1 | 13407 | SNV | 1 | A | T | Homozygous   |
| NW_020555850.1 | 13435 | SNV | 1 | C | T | Homozygous   |
| NW_020555850.1 | 13442 | SNV | 1 | G | A | Homozygous   |
| NW_020555850.1 | 13452 | SNV | 1 | T | C | Homozygous   |
| NW_020555850.1 | 13460 | SNV | 1 | G | A | Heterozygous |
| NW_020555850.1 | 13467 | SNV | 1 | T | C | Homozygous   |
| NW_020555850.1 | 13474 | SNV | 1 | G | A | Homozygous   |
| NW_020555850.1 | 13477 | SNV | 1 | C | T | Homozygous   |
| NW_020555850.1 | 13480 | SNV | 1 | T | C | Homozygous   |
| NW_020555850.1 | 13510 | SNV | 1 | G | A | Homozygous   |
| NW_020555850.1 | 13524 | SNV | 1 | T | G | Homozygous   |
| NW_020555850.1 | 13526 | SNV | 1 | C | T | Homozygous   |
| NW_020555850.1 | 13534 | SNV | 1 | C | T | Homozygous   |
| NW_020555850.1 | 13538 | SNV | 1 | C | T | Homozygous   |
| NW_020555850.1 | 13551 | SNV | 1 | C | G | Homozygous   |
| NW_020555850.1 | 13557 | SNV | 1 | C | T | Homozygous   |
| NW_020555850.1 | 13578 | SNV | 1 | T | C | Homozygous   |
| NW_020555850.1 | 13585 | SNV | 1 | A | G | Homozygous   |
| NW_020555850.1 | 13588 | SNV | 1 | C | T | Homozygous   |
| NW_020555850.1 | 13603 | SNV | 1 | G | A | Homozygous   |
| NW_020555850.1 | 13605 | SNV | 1 | A | G | Homozygous   |
| NW_020555850.1 | 13615 | SNV | 1 | C | T | Homozygous   |
| NW_020555850.1 | 13635 | SNV | 1 | T | C | Homozygous   |
| NW_020555850.1 | 13652 | SNV | 1 | G | A | Homozygous   |
| NW_020555850.1 | 13654 | SNV | 1 | T | G | Heterozygous |
| NW_020555850.1 | 13658 | SNV | 1 | C | T | Heterozygous |
| NW_020555850.1 | 13660 | SNV | 1 | A | C | Homozygous   |
| NW_020555850.1 | 13663 | SNV | 1 | T | A | Heterozygous |
| NW_020555850.1 | 13959 | SNV | 1 | A | G | Heterozygous |
| NW_020555850.1 | 14160 | SNV | 1 | C | T | Homozygous   |
| NW_020555850.1 | 16115 | SNV | 1 | C | T | Heterozygous |
| NW_020555850.1 | 16134 | SNV | 1 | T | A | Heterozygous |
| NW_020555850.1 | 16245 | SNV | 1 | A | C | Homozygous   |
| NW_020555850.1 | 16861 | SNV | 1 | A | G | Homozygous   |
| NW_020555850.1 | 17354 | SNV | 1 | C | T | Homozygous   |
| NW_020555853.1 | 1237  | SNV | 1 | C | T | Heterozygous |
| NW_020555853.1 | 1300  | SNV | 1 | G | T | Heterozygous |
| NW_020555853.1 | 2397  | SNV | 1 | T | A | Homozygous   |
| NW_020555853.1 | 2404  | SNV | 1 | G | A | Homozygous   |
| NW_020555853.1 | 2412  | SNV | 1 | A | T | Homozygous   |
| NW_020555853.1 | 2525  | SNV | 1 | G | T | Heterozygous |
| NW_020555853.1 | 2534  | SNV | 1 | G | A | Heterozygous |

|                |        |     |   |   |   |              |
|----------------|--------|-----|---|---|---|--------------|
| NW_020555853.1 | 2553   | SNV | 1 | A | G | Homozygous   |
| NW_020555853.1 | 3382   | SNV | 1 | A | G | Heterozygous |
| NW_020555853.1 | 3633   | SNV | 1 | T | A | Homozygous   |
| NW_020555853.1 | 3661   | SNV | 1 | T | C | Heterozygous |
| NW_020555853.1 | 3663   | SNV | 1 | G | A | Homozygous   |
| NW_020555853.1 | 3678   | SNV | 1 | T | G | Homozygous   |
| NW_020555853.1 | 3688   | SNV | 1 | C | G | Homozygous   |
| NW_020555853.1 | 3694   | SNV | 1 | T | A | Heterozygous |
| NW_020555853.1 | 3694   | SNV | 1 | T | G | Heterozygous |
| NC_037653.1    | 74918  | SNV | 1 | A | C | Heterozygous |
| NC_037653.1    | 75049  | SNV | 1 | T | A | Homozygous   |
| NC_037653.1    | 75229  | SNV | 1 | T | C | Heterozygous |
| NC_037653.1    | 75379  | SNV | 1 | T | C | Homozygous   |
| NC_037653.1    | 75433  | SNV | 1 | C | T | Heterozygous |
| NC_037653.1    | 75685  | SNV | 1 | A | G | Homozygous   |
| NC_037653.1    | 75706  | SNV | 1 | A | G | Heterozygous |
| NC_037653.1    | 75759  | SNV | 1 | A | G | Heterozygous |
| NC_037653.1    | 75863  | SNV | 1 | G | A | Heterozygous |
| NC_037653.1    | 75897  | SNV | 1 | A | G | Homozygous   |
| NC_037653.1    | 75903  | SNV | 1 | C | T | Homozygous   |
| NC_037653.1    | 95076  | SNV | 1 | C | A | Homozygous   |
| NC_037653.1    | 95100  | SNV | 1 | C | G | Homozygous   |
| NC_037653.1    | 95116  | SNV | 1 | T | C | Homozygous   |
| NC_037653.1    | 95124  | SNV | 1 | G | A | Homozygous   |
| NC_037653.1    | 95126  | SNV | 1 | T | C | Homozygous   |
| NC_037653.1    | 95131  | SNV | 1 | A | G | Homozygous   |
| NC_037653.1    | 95136  | SNV | 1 | C | T | Homozygous   |
| NC_037653.1    | 96769  | SNV | 1 | C | T | Homozygous   |
| NC_037653.1    | 96772  | SNV | 1 | A | G | Homozygous   |
| NC_037653.1    | 96785  | SNV | 1 | G | A | Homozygous   |
| NC_037653.1    | 96816  | SNV | 1 | T | C | Homozygous   |
| NC_037653.1    | 96824  | SNV | 1 | G | A | Homozygous   |
| NC_037653.1    | 96827  | SNV | 1 | G | A | Homozygous   |
| NC_037653.1    | 96834  | SNV | 1 | A | G | Homozygous   |
| NC_037653.1    | 99587  | SNV | 1 | C | T | Homozygous   |
| NC_037653.1    | 99602  | SNV | 1 | C | T | Homozygous   |
| NC_037653.1    | 99613  | SNV | 1 | T | C | Homozygous   |
| NC_037653.1    | 99647  | SNV | 1 | G | A | Homozygous   |
| NC_037653.1    | 99649  | SNV | 1 | G | A | Homozygous   |
| NC_037653.1    | 99651  | SNV | 1 | C | T | Homozygous   |
| NC_037653.1    | 99689  | SNV | 1 | G | A | Homozygous   |
| NC_037653.1    | 104877 | SNV | 1 | A | T | Heterozygous |
| NC_037653.1    | 104900 | SNV | 1 | T | C | Heterozygous |
| NC_037653.1    | 104947 | SNV | 1 | T | A | Homozygous   |
| NC_037653.1    | 104949 | SNV | 1 | A | T | Homozygous   |
| NC_037653.1    | 104952 | SNV | 1 | T | A | Homozygous   |
| NC_037653.1    | 104964 | SNV | 1 | A | T | Homozygous   |
| NC_037653.1    | 104967 | SNV | 1 | T | A | Homozygous   |
| NC_037653.1    | 104969 | SNV | 1 | A | C | Homozygous   |
| NC_037653.1    | 116313 | SNV | 1 | G | A | Heterozygous |
| NC_037653.1    | 116340 | SNV | 1 | G | A | Homozygous   |

|             |        |     |   |   |   |              |
|-------------|--------|-----|---|---|---|--------------|
| NC_037653.1 | 116356 | SNV | 1 | A | T | Homozygous   |
| NC_037653.1 | 116361 | SNV | 1 | T | C | Homozygous   |
| NC_037653.1 | 116364 | SNV | 1 | G | A | Homozygous   |
| NC_037653.1 | 116368 | SNV | 1 | C | T | Homozygous   |
| NC_037653.1 | 116371 | SNV | 1 | G | A | Homozygous   |
| NC_037653.1 | 116383 | SNV | 1 | G | A | Homozygous   |
| NC_037653.1 | 116389 | SNV | 1 | G | A | Homozygous   |
| NC_037653.1 | 116856 | SNV | 1 | A | T | Heterozygous |
| NC_037653.1 | 116868 | SNV | 1 | A | G | Homozygous   |
| NC_037653.1 | 116870 | SNV | 1 | A | T | Heterozygous |
| NC_037653.1 | 136578 | SNV | 1 | T | A | Homozygous   |
| NC_037653.1 | 136593 | SNV | 1 | A | T | Homozygous   |
| NC_037653.1 | 136599 | SNV | 1 | T | A | Homozygous   |
| NC_037653.1 | 136601 | SNV | 1 | T | A | Homozygous   |
| NC_037653.1 | 136606 | SNV | 1 | A | G | Homozygous   |
| NC_037653.1 | 136611 | SNV | 1 | T | A | Homozygous   |
| NC_037653.1 | 147576 | SNV | 1 | A | T | Homozygous   |
| NC_037653.1 | 147579 | SNV | 1 | A | T | Heterozygous |
| NC_037653.1 | 147597 | SNV | 1 | A | T | Homozygous   |
| NC_037653.1 | 147601 | SNV | 1 | T | C | Heterozygous |
| NC_037653.1 | 147754 | SNV | 1 | A | G | Heterozygous |
| NC_037653.1 | 147760 | SNV | 1 | T | A | Heterozygous |
| NC_037653.1 | 147763 | SNV | 1 | T | A | Heterozygous |
| NC_037653.1 | 147765 | SNV | 1 | T | C | Heterozygous |
| NC_037653.1 | 147769 | SNV | 1 | T | C | Heterozygous |
| NC_037653.1 | 148070 | SNV | 1 | G | A | Homozygous   |
| NC_037653.1 | 148074 | SNV | 1 | A | G | Homozygous   |
| NC_037653.1 | 148084 | SNV | 1 | A | T | Homozygous   |
| NC_037653.1 | 148086 | SNV | 1 | T | A | Homozygous   |
| NC_037653.1 | 148205 | SNV | 1 | A | G | Heterozygous |
| NC_037653.1 | 161438 | SNV | 1 | C | T | Homozygous   |
| NC_037653.1 | 161442 | SNV | 1 | A | G | Homozygous   |
| NC_037653.1 | 161502 | SNV | 1 | A | G | Homozygous   |
| NC_037653.1 | 161508 | SNV | 1 | T | C | Homozygous   |
| NC_037653.1 | 161521 | SNV | 1 | T | A | Homozygous   |
| NC_037653.1 | 161537 | SNV | 1 | T | C | Homozygous   |
| NC_037653.1 | 161552 | SNV | 1 | T | C | Homozygous   |
| NC_037653.1 | 161601 | SNV | 1 | T | C | Homozygous   |
| NC_037653.1 | 161611 | SNV | 1 | C | G | Homozygous   |
| NC_037653.1 | 161615 | SNV | 1 | A | C | Homozygous   |
| NC_037653.1 | 161633 | SNV | 1 | G | A | Homozygous   |
| NC_037653.1 | 161635 | SNV | 1 | G | A | Homozygous   |
| NC_037653.1 | 161650 | SNV | 1 | C | T | Homozygous   |
| NC_037653.1 | 161661 | SNV | 1 | G | A | Homozygous   |
| NC_037653.1 | 161680 | SNV | 1 | A | G | Homozygous   |
| NC_037653.1 | 161684 | SNV | 1 | G | A | Homozygous   |
| NC_037653.1 | 161693 | SNV | 1 | C | T | Heterozygous |
| NC_037653.1 | 161743 | SNV | 1 | G | A | Homozygous   |
| NC_037653.1 | 161763 | SNV | 1 | C | T | Homozygous   |
| NC_037653.1 | 180825 | SNV | 1 | G | A | Homozygous   |
| NC_037653.1 | 180857 | SNV | 1 | T | A | Homozygous   |

|             |        |     |   |   |   |              |
|-------------|--------|-----|---|---|---|--------------|
| NC_037653.1 | 180860 | SNV | 1 | A | T | Homozygous   |
| NC_037653.1 | 180874 | SNV | 1 | G | T | Homozygous   |
| NC_037653.1 | 194757 | SNV | 1 | G | A | Homozygous   |
| NC_037653.1 | 194761 | SNV | 1 | C | T | Homozygous   |
| NC_037653.1 | 194768 | SNV | 1 | G | A | Homozygous   |
| NC_037653.1 | 194770 | SNV | 1 | A | G | Homozygous   |
| NC_037653.1 | 194772 | SNV | 1 | G | A | Homozygous   |
| NC_037653.1 | 194784 | SNV | 1 | A | C | Homozygous   |
| NC_037653.1 | 194786 | SNV | 1 | G | A | Homozygous   |
| NC_037653.1 | 194788 | SNV | 1 | T | C | Homozygous   |
| NC_037653.1 | 194800 | SNV | 1 | G | C | Homozygous   |
| NC_037653.1 | 194820 | SNV | 1 | T | C | Homozygous   |
| NC_037653.1 | 194833 | SNV | 1 | C | T | Homozygous   |
| NC_037653.1 | 195211 | SNV | 1 | T | C | Homozygous   |
| NC_037653.1 | 195222 | SNV | 1 | G | C | Homozygous   |
| NC_037653.1 | 195234 | SNV | 1 | C | T | Homozygous   |
| NC_037653.1 | 200393 | SNV | 1 | A | G | Heterozygous |
| NC_037653.1 | 200400 | SNV | 1 | T | A | Homozygous   |
| NC_037653.1 | 200409 | SNV | 1 | G | T | Homozygous   |
| NC_037653.1 | 200414 | SNV | 1 | T | G | Homozygous   |
| NC_037653.1 | 200417 | SNV | 1 | T | A | Homozygous   |
| NC_037653.1 | 200419 | SNV | 1 | T | A | Homozygous   |
| NC_037653.1 | 200445 | SNV | 1 | T | C | Homozygous   |
| NC_037653.1 | 200448 | SNV | 1 | T | A | Homozygous   |
| NC_037653.1 | 200452 | SNV | 1 | A | C | Homozygous   |
| NC_037653.1 | 200465 | SNV | 1 | T | G | Homozygous   |
| NC_037653.1 | 200470 | SNV | 1 | T | A | Heterozygous |
| NC_037653.1 | 200473 | SNV | 1 | T | A | Homozygous   |
| NC_037653.1 | 208204 | SNV | 1 | G | A | Homozygous   |
| NC_037653.1 | 208232 | SNV | 1 | C | A | Homozygous   |
| NC_037653.1 | 208243 | SNV | 1 | A | G | Heterozygous |
| NC_037653.1 | 212320 | SNV | 1 | A | T | Homozygous   |
| NC_037653.1 | 212329 | SNV | 1 | A | T | Homozygous   |
| NC_037653.1 | 212333 | SNV | 1 | A | T | Homozygous   |
| NC_037653.1 | 214223 | SNV | 1 | A | T | Homozygous   |
| NC_037653.1 | 214236 | SNV | 1 | G | A | Homozygous   |
| NC_037653.1 | 214242 | SNV | 1 | T | C | Homozygous   |
| NC_037653.1 | 214249 | SNV | 1 | A | G | Homozygous   |
| NC_037653.1 | 222058 | SNV | 1 | G | C | Homozygous   |
| NC_037653.1 | 226869 | SNV | 1 | T | A | Homozygous   |
| NC_037653.1 | 226882 | SNV | 1 | T | A | Heterozygous |
| NC_037653.1 | 227327 | SNV | 1 | C | T | Heterozygous |
| NC_037653.1 | 227330 | SNV | 1 | C | T | Heterozygous |
| NC_037653.1 | 228055 | SNV | 1 | A | G | Heterozygous |
| NC_037653.1 | 228075 | SNV | 1 | G | T | Heterozygous |
| NC_037653.1 | 228099 | SNV | 1 | C | G | Heterozygous |
| NC_037653.1 | 254484 | SNV | 1 | C | T | Homozygous   |
| NC_037653.1 | 254492 | SNV | 1 | T | C | Homozygous   |
| NC_037653.1 | 254500 | SNV | 1 | G | A | Homozygous   |
| NC_037653.1 | 254515 | SNV | 1 | G | A | Homozygous   |
| NC_037653.1 | 254536 | SNV | 1 | A | G | Homozygous   |

|             |        |     |   |   |   |              |
|-------------|--------|-----|---|---|---|--------------|
| NC_037653.1 | 259159 | SNV | 1 | A | T | Homozygous   |
| NC_037653.1 | 259162 | SNV | 1 | A | T | Homozygous   |
| NC_037653.1 | 259184 | SNV | 1 | T | C | Homozygous   |
| NC_037653.1 | 305651 | SNV | 1 | C | T | Homozygous   |
| NC_037653.1 | 305663 | SNV | 1 | T | A | Homozygous   |
| NC_037653.1 | 305669 | SNV | 1 | A | G | Homozygous   |
| NC_037653.1 | 305674 | SNV | 1 | T | C | Homozygous   |
| NC_037653.1 | 305693 | SNV | 1 | A | C | Homozygous   |
| NC_037653.1 | 318544 | SNV | 1 | A | T | Homozygous   |
| NC_037653.1 | 318548 | SNV | 1 | C | T | Homozygous   |
| NC_037653.1 | 318557 | SNV | 1 | C | A | Homozygous   |
| NC_037653.1 | 318585 | SNV | 1 | T | C | Homozygous   |
| NC_037653.1 | 318587 | SNV | 1 | A | T | Homozygous   |
| NC_037653.1 | 318591 | SNV | 1 | G | C | Homozygous   |
| NC_037653.1 | 325227 | SNV | 1 | C | A | Homozygous   |
| NC_037653.1 | 325235 | SNV | 1 | C | G | Homozygous   |
| NC_037653.1 | 325241 | SNV | 1 | T | G | Homozygous   |
| NC_037653.1 | 325251 | SNV | 1 | A | G | Heterozygous |
| NC_037653.1 | 325264 | SNV | 1 | C | A | Heterozygous |
| NC_037653.1 | 325269 | SNV | 1 | A | T | Heterozygous |
| NC_037653.1 | 325271 | SNV | 1 | G | A | Heterozygous |
| NC_037653.1 | 325367 | SNV | 1 | T | G | Homozygous   |
| NC_037653.1 | 325379 | SNV | 1 | G | T | Homozygous   |
| NC_037653.1 | 325993 | SNV | 1 | T | A | Homozygous   |
| NC_037653.1 | 327649 | SNV | 1 | A | G | Homozygous   |
| NC_037653.1 | 327651 | SNV | 1 | C | A | Homozygous   |
| NC_037653.1 | 327660 | SNV | 1 | T | C | Homozygous   |
| NC_037653.1 | 327667 | SNV | 1 | T | C | Homozygous   |
| NC_037653.1 | 327678 | SNV | 1 | T | A | Homozygous   |
| NC_037653.1 | 330854 | SNV | 1 | A | T | Homozygous   |
| NC_037653.1 | 330859 | SNV | 1 | G | C | Homozygous   |
| NC_037653.1 | 330862 | SNV | 1 | T | C | Homozygous   |
| NC_037653.1 | 330883 | SNV | 1 | A | G | Heterozygous |
| NC_037653.1 | 330890 | SNV | 1 | T | A | Homozygous   |
| NC_037653.1 | 331950 | SNV | 1 | T | G | Homozygous   |
| NC_037653.1 | 331967 | SNV | 1 | T | A | Heterozygous |
| NC_037653.1 | 331973 | SNV | 1 | T | A | Homozygous   |
| NC_037653.1 | 331987 | SNV | 1 | T | A | Heterozygous |
| NC_037653.1 | 331989 | SNV | 1 | T | C | Heterozygous |
| NC_037653.1 | 342735 | SNV | 1 | A | G | Homozygous   |
| NC_037653.1 | 342741 | SNV | 1 | T | A | Homozygous   |
| NC_037653.1 | 342765 | SNV | 1 | T | A | Homozygous   |
| NC_037653.1 | 342769 | SNV | 1 | G | A | Homozygous   |
| NC_037653.1 | 342771 | SNV | 1 | A | T | Homozygous   |
| NC_037653.1 | 342775 | SNV | 1 | A | T | Homozygous   |
| NC_037653.1 | 342778 | SNV | 1 | T | G | Homozygous   |
| NC_037653.1 | 342783 | SNV | 1 | G | T | Homozygous   |
| NC_037653.1 | 342788 | SNV | 1 | T | A | Homozygous   |
| NC_037653.1 | 342790 | SNV | 1 | A | T | Homozygous   |
| NC_037653.1 | 360923 | SNV | 1 | T | C | Homozygous   |
| NC_037653.1 | 460598 | SNV | 1 | A | G | Heterozygous |

|             |        |     |   |   |   |              |
|-------------|--------|-----|---|---|---|--------------|
| NC_037653.1 | 460601 | SNV | 1 | A | G | Heterozygous |
| NC_037653.1 | 460603 | SNV | 1 | T | A | Heterozygous |
| NC_037653.1 | 543278 | SNV | 1 | T | A | Homozygous   |
| NC_037653.1 | 543284 | SNV | 1 | T | A | Homozygous   |
| NC_037653.1 | 543290 | SNV | 1 | T | C | Homozygous   |
| NC_037653.1 | 548645 | SNV | 1 | T | A | Homozygous   |
| NC_037653.1 | 548647 | SNV | 1 | T | A | Homozygous   |
| NC_037653.1 | 548655 | SNV | 1 | T | A | Homozygous   |
| NC_037653.1 | 548657 | SNV | 1 | T | A | Homozygous   |
| NC_037653.1 | 557689 | SNV | 1 | G | T | Homozygous   |
| NC_037653.1 | 557695 | SNV | 1 | G | T | Homozygous   |
| NC_037653.1 | 557707 | SNV | 1 | A | C | Homozygous   |
| NC_037653.1 | 559974 | SNV | 1 | C | A | Homozygous   |
| NC_037653.1 | 559983 | SNV | 1 | A | G | Homozygous   |
| NC_037653.1 | 559985 | SNV | 1 | T | G | Homozygous   |
| NC_037653.1 | 559995 | SNV | 1 | T | A | Homozygous   |
| NC_037653.1 | 570372 | SNV | 1 | G | T | Homozygous   |
| NC_037653.1 | 570378 | SNV | 1 | G | T | Heterozygous |
| NC_037653.1 | 570384 | SNV | 1 | G | T | Heterozygous |
| NC_037653.1 | 571475 | SNV | 1 | T | C | Homozygous   |
| NC_037653.1 | 571481 | SNV | 1 | A | G | Homozygous   |
| NC_037653.1 | 571602 | SNV | 1 | A | T | Homozygous   |
| NC_037653.1 | 571674 | SNV | 1 | A | C | Homozygous   |
| NC_037653.1 | 588743 | SNV | 1 | T | A | Homozygous   |
| NC_037653.1 | 588772 | SNV | 1 | T | C | Homozygous   |
| NC_037653.1 | 588780 | SNV | 1 | A | T | Homozygous   |
| NC_037653.1 | 602173 | SNV | 1 | C | T | Homozygous   |
| NC_037653.1 | 602199 | SNV | 1 | T | G | Homozygous   |
| NC_037653.1 | 603422 | SNV | 1 | T | C | Heterozygous |
| NC_037653.1 | 603596 | SNV | 1 | G | A | Heterozygous |
| NC_037653.1 | 603612 | SNV | 1 | G | A | Heterozygous |
| NC_037653.1 | 603671 | SNV | 1 | A | G | Homozygous   |
| NC_037653.1 | 604489 | SNV | 1 | A | G | Heterozygous |
| NC_037653.1 | 605080 | SNV | 1 | C | T | Homozygous   |
| NC_037653.1 | 605163 | SNV | 1 | C | T | Heterozygous |
| NC_037653.1 | 605444 | SNV | 1 | G | A | Heterozygous |
| NC_037653.1 | 606344 | SNV | 1 | A | G | Homozygous   |
| NC_037653.1 | 606562 | SNV | 1 | A | T | Heterozygous |
| NC_037653.1 | 607614 | SNV | 1 | T | C | Homozygous   |
| NC_037653.1 | 607720 | SNV | 1 | T | C | Homozygous   |
| NC_037653.1 | 607724 | SNV | 1 | C | T | Heterozygous |
| NC_037653.1 | 607732 | SNV | 1 | G | A | Heterozygous |
| NC_037653.1 | 607860 | SNV | 1 | T | C | Homozygous   |
| NC_037653.1 | 608133 | SNV | 1 | A | G | Homozygous   |
| NC_037653.1 | 608212 | SNV | 1 | C | G | Homozygous   |
| NC_037653.1 | 608229 | SNV | 1 | C | T | Heterozygous |
| NC_037653.1 | 608253 | SNV | 1 | G | A | Heterozygous |
| NC_037653.1 | 608493 | SNV | 1 | T | C | Homozygous   |
| NC_037653.1 | 608546 | SNV | 1 | G | T | Heterozygous |
| NC_037653.1 | 608553 | SNV | 1 | A | G | Homozygous   |
| NC_037653.1 | 608589 | SNV | 1 | A | G | Heterozygous |

|             |        |     |   |   |   |              |
|-------------|--------|-----|---|---|---|--------------|
| NC_037653.1 | 615276 | SNV | 1 | A | G | Homozygous   |
| NC_037653.1 | 615291 | SNV | 1 | A | G | Heterozygous |
| NC_037653.1 | 615341 | SNV | 1 | T | C | Homozygous   |
| NC_037653.1 | 615378 | SNV | 1 | T | C | Homozygous   |
| NC_037653.1 | 615409 | SNV | 1 | A | T | Heterozygous |
| NC_037653.1 | 616787 | SNV | 1 | C | A | Homozygous   |
| NC_037653.1 | 616791 | SNV | 1 | T | A | Homozygous   |
| NC_037653.1 | 616797 | SNV | 1 | C | A | Homozygous   |
| NC_037653.1 | 616804 | SNV | 1 | A | T | Homozygous   |
| NC_037653.1 | 616809 | SNV | 1 | A | T | Homozygous   |
| NC_037653.1 | 619270 | SNV | 1 | A | T | Heterozygous |
| NC_037653.1 | 619278 | SNV | 1 | A | T | Heterozygous |
| NC_037653.1 | 631494 | SNV | 1 | A | T | Homozygous   |
| NC_037653.1 | 636120 | SNV | 1 | T | A | Homozygous   |
| NC_037653.1 | 636125 | SNV | 1 | G | C | Homozygous   |
| NC_037653.1 | 636131 | SNV | 1 | T | A | Homozygous   |
| NC_037653.1 | 636159 | SNV | 1 | A | T | Homozygous   |
| NC_037653.1 | 636161 | SNV | 1 | T | C | Homozygous   |
| NC_037653.1 | 636168 | SNV | 1 | T | C | Homozygous   |
| NC_037653.1 | 637026 | SNV | 1 | A | T | Homozygous   |
| NC_037653.1 | 637032 | SNV | 1 | G | A | Homozygous   |
| NC_037653.1 | 637057 | SNV | 1 | T | A | Homozygous   |
| NC_037653.1 | 637059 | SNV | 1 | A | T | Homozygous   |
| NC_037653.1 | 638060 | SNV | 1 | G | A | Homozygous   |
| NC_037653.1 | 638096 | SNV | 1 | C | T | Homozygous   |
| NC_037653.1 | 638100 | SNV | 1 | G | A | Homozygous   |
| NC_037653.1 | 641555 | SNV | 1 | C | T | Homozygous   |
| NC_037653.1 | 641571 | SNV | 1 | G | C | Homozygous   |
| NC_037653.1 | 641723 | SNV | 1 | T | C | Homozygous   |
| NC_037653.1 | 647425 | SNV | 1 | T | C | Homozygous   |
| NC_037653.1 | 648401 | SNV | 1 | A | G | Homozygous   |
| NC_037653.1 | 727239 | SNV | 1 | C | T | Heterozygous |
| NC_037653.1 | 730012 | SNV | 1 | C | T | Homozygous   |
| NC_037653.1 | 731612 | SNV | 1 | T | C | Homozygous   |
| NC_037653.1 | 731650 | SNV | 1 | G | A | Heterozygous |
| NC_037653.1 | 731719 | SNV | 1 | T | C | Homozygous   |
| NC_037653.1 | 732281 | SNV | 1 | T | G | Homozygous   |
| NC_037653.1 | 739632 | SNV | 1 | A | G | Homozygous   |
| NC_037653.1 | 740100 | SNV | 1 | C | T | Homozygous   |
| NC_037653.1 | 741081 | SNV | 1 | G | A | Homozygous   |
| NC_037653.1 | 741131 | SNV | 1 | T | C | Homozygous   |
| NC_037653.1 | 741205 | SNV | 1 | T | C | Homozygous   |
| NC_037653.1 | 741207 | SNV | 1 | A | G | Homozygous   |
| NC_037653.1 | 741396 | SNV | 1 | G | A | Heterozygous |
| NC_037653.1 | 742681 | SNV | 1 | C | T | Heterozygous |
| NC_037653.1 | 742746 | SNV | 1 | G | A | Heterozygous |
| NC_037653.1 | 745299 | SNV | 1 | A | G | Heterozygous |
| NC_037653.1 | 745332 | SNV | 1 | G | A | Heterozygous |
| NC_037653.1 | 745464 | SNV | 1 | C | A | Heterozygous |
| NC_037653.1 | 747571 | SNV | 1 | G | C | Homozygous   |
| NC_037653.1 | 747602 | SNV | 1 | G | A | Homozygous   |

|             |        |     |   |   |   |              |
|-------------|--------|-----|---|---|---|--------------|
| NC_037653.1 | 748872 | SNV | 1 | T | G | Homozygous   |
| NC_037653.1 | 748881 | SNV | 1 | T | G | Homozygous   |
| NC_037653.1 | 748928 | SNV | 1 | A | T | Homozygous   |
| NC_037653.1 | 748934 | SNV | 1 | T | C | Homozygous   |
| NC_037653.1 | 748938 | SNV | 1 | T | G | Homozygous   |
| NC_037653.1 | 751087 | SNV | 1 | T | C | Homozygous   |
| NC_037653.1 | 751098 | SNV | 1 | A | G | Homozygous   |
| NC_037653.1 | 751136 | SNV | 1 | T | C | Homozygous   |
| NC_037653.1 | 751140 | SNV | 1 | T | A | Heterozygous |
| NC_037653.1 | 751140 | SNV | 1 | T | G | Heterozygous |
| NC_037653.1 | 751152 | SNV | 1 | T | C | Homozygous   |
| NC_037653.1 | 752313 | SNV | 1 | A | G | Homozygous   |
| NC_037653.1 | 753056 | SNV | 1 | C | T | Homozygous   |
| NC_037653.1 | 754654 | SNV | 1 | T | A | Homozygous   |
| NC_037653.1 | 754996 | SNV | 1 | G | A | Homozygous   |
| NC_037653.1 | 755536 | SNV | 1 | C | T | Homozygous   |
| NC_037653.1 | 758840 | SNV | 1 | T | C | Homozygous   |
| NC_037653.1 | 760766 | SNV | 1 | A | G | Heterozygous |
| NC_037653.1 | 760911 | SNV | 1 | A | T | Homozygous   |
| NC_037653.1 | 775146 | SNV | 1 | G | A | Homozygous   |
| NC_037653.1 | 776191 | SNV | 1 | T | C | Homozygous   |
| NC_037653.1 | 777557 | SNV | 1 | T | C | Homozygous   |
| NC_037653.1 | 788909 | SNV | 1 | A | G | Heterozygous |
| NC_037653.1 | 790112 | SNV | 1 | A | T | Heterozygous |
| NC_037653.1 | 790114 | SNV | 1 | A | G | Heterozygous |
| NC_037653.1 | 790117 | SNV | 1 | T | A | Heterozygous |
| NC_037653.1 | 790123 | SNV | 1 | T | G | Homozygous   |
| NC_037653.1 | 790153 | SNV | 1 | T | A | Heterozygous |
| NC_037653.1 | 790157 | SNV | 1 | A | G | Heterozygous |
| NC_037653.1 | 790165 | SNV | 1 | T | C | Heterozygous |
| NC_037653.1 | 815712 | SNV | 1 | A | G | Heterozygous |
| NC_037653.1 | 815906 | SNV | 1 | G | A | Heterozygous |
| NC_037653.1 | 816963 | SNV | 1 | G | A | Homozygous   |
| NC_037653.1 | 817238 | SNV | 1 | A | G | Homozygous   |
| NC_037653.1 | 817463 | SNV | 1 | T | C | Homozygous   |
| NC_037653.1 | 819110 | SNV | 1 | A | G | Homozygous   |
| NC_037653.1 | 819596 | SNV | 1 | T | C | Homozygous   |
| NC_037653.1 | 820096 | SNV | 1 | G | A | Heterozygous |
| NC_037653.1 | 820705 | SNV | 1 | C | G | Homozygous   |
| NC_037653.1 | 820893 | SNV | 1 | A | G | Homozygous   |
| NC_037653.1 | 820915 | SNV | 1 | A | G | Heterozygous |
| NC_037653.1 | 822086 | SNV | 1 | G | A | Heterozygous |
| NC_037653.1 | 822300 | SNV | 1 | A | G | Homozygous   |
| NC_037653.1 | 822569 | SNV | 1 | T | A | Homozygous   |
| NC_037653.1 | 825185 | SNV | 1 | T | C | Homozygous   |
| NC_037653.1 | 825787 | SNV | 1 | A | G | Heterozygous |
| NC_037653.1 | 826023 | SNV | 1 | T | A | Homozygous   |
| NC_037653.1 | 826056 | SNV | 1 | G | A | Homozygous   |
| NC_037653.1 | 826107 | SNV | 1 | G | T | Heterozygous |
| NC_037653.1 | 826801 | SNV | 1 | A | T | Homozygous   |
| NC_037653.1 | 826838 | SNV | 1 | A | G | Homozygous   |



|             |        |     |   |   |   |              |
|-------------|--------|-----|---|---|---|--------------|
| NC_037653.1 | 826844 | SNV | 1 | C | G | Homozygous   |
| NC_037653.1 | 826847 | SNV | 1 | T | A | Homozygous   |
| NC_037653.1 | 833150 | SNV | 1 | C | T | Homozygous   |
| NC_037653.1 | 835256 | SNV | 1 | G | T | Homozygous   |
| NC_037653.1 | 835392 | SNV | 1 | T | C | Homozygous   |
| NC_037653.1 | 841346 | SNV | 1 | C | T | Homozygous   |
| NC_037653.1 | 856916 | SNV | 1 | G | A | Heterozygous |
| NC_037653.1 | 859770 | SNV | 1 | C | A | Homozygous   |
| NC_037653.1 | 859790 | SNV | 1 | G | A | Homozygous   |
| NC_037653.1 | 859877 | SNV | 1 | A | G | Homozygous   |
| NC_037653.1 | 861032 | SNV | 1 | A | T | Heterozygous |
| NC_037653.1 | 861038 | SNV | 1 | T | A | Heterozygous |
| NC_037653.1 | 861041 | SNV | 1 | T | A | Heterozygous |
| NC_037653.1 | 861047 | SNV | 1 | A | T | Heterozygous |
| NC_037653.1 | 864620 | SNV | 1 | T | C | Heterozygous |
| NC_037653.1 | 864752 | SNV | 1 | C | A | Heterozygous |
| NC_037653.1 | 864782 | SNV | 1 | T | C | Heterozygous |
| NC_037653.1 | 865066 | SNV | 1 | A | G | Homozygous   |
| NC_037653.1 | 866660 | SNV | 1 | T | G | Heterozygous |
| NC_037653.1 | 870873 | SNV | 1 | G | C | Homozygous   |
| NC_037653.1 | 871031 | SNV | 1 | T | C | Homozygous   |
| NC_037653.1 | 877754 | SNV | 1 | T | C | Homozygous   |
| NC_037653.1 | 877841 | SNV | 1 | T | C | Homozygous   |
| NC_037653.1 | 877946 | SNV | 1 | T | C | Homozygous   |
| NC_037653.1 | 878237 | SNV | 1 | A | G | Homozygous   |
| NC_037653.1 | 878324 | SNV | 1 | A | G | Homozygous   |
| NC_037653.1 | 878418 | SNV | 1 | G | A | Homozygous   |
| NC_037653.1 | 878798 | SNV | 1 | T | C | Homozygous   |
| NC_037653.1 | 879090 | SNV | 1 | C | T | Homozygous   |
| NC_037653.1 | 879407 | SNV | 1 | A | G | Homozygous   |
| NC_037653.1 | 879459 | SNV | 1 | C | T | Heterozygous |
| NC_037653.1 | 879660 | SNV | 1 | A | G | Homozygous   |
| NC_037653.1 | 879841 | SNV | 1 | A | C | Heterozygous |
| NC_037653.1 | 880583 | SNV | 1 | T | C | Homozygous   |
| NC_037653.1 | 882118 | SNV | 1 | G | A | Homozygous   |
| NC_037653.1 | 882123 | SNV | 1 | T | C | Homozygous   |
| NC_037653.1 | 882932 | SNV | 1 | G | A | Homozygous   |
| NC_037653.1 | 882941 | SNV | 1 | A | G | Homozygous   |
| NC_037653.1 | 889531 | SNV | 1 | A | G | Homozygous   |
| NC_037653.1 | 896178 | SNV | 1 | T | A | Homozygous   |
| NC_037653.1 | 896222 | SNV | 1 | A | T | Homozygous   |
| NC_037653.1 | 896228 | SNV | 1 | T | C | Homozygous   |
| NC_037653.1 | 896232 | SNV | 1 | T | C | Homozygous   |
| NC_037653.1 | 896235 | SNV | 1 | A | T | Homozygous   |
| NC_037653.1 | 898739 | SNV | 1 | G | A | Heterozygous |
| NC_037653.1 | 908972 | SNV | 1 | C | T | Homozygous   |
| NC_037653.1 | 909083 | SNV | 1 | C | G | Homozygous   |
| NC_037653.1 | 911029 | SNV | 1 | A | T | Homozygous   |
| NC_037653.1 | 911031 | SNV | 1 | T | C | Homozygous   |
| NC_037653.1 | 953718 | SNV | 1 | C | G | Homozygous   |
| NC_037653.1 | 953720 | SNV | 1 | A | C | Homozygous   |

|             |         |     |   |   |   |              |
|-------------|---------|-----|---|---|---|--------------|
| NC_037653.1 | 953733  | SNV | 1 | T | C | Homozygous   |
| NC_037653.1 | 953736  | SNV | 1 | C | A | Homozygous   |
| NC_037653.1 | 953744  | SNV | 1 | T | G | Homozygous   |
| NC_037653.1 | 977293  | SNV | 1 | A | T | Homozygous   |
| NC_037653.1 | 977296  | SNV | 1 | T | A | Homozygous   |
| NC_037653.1 | 977298  | SNV | 1 | A | T | Homozygous   |
| NC_037653.1 | 977300  | SNV | 1 | C | G | Homozygous   |
| NC_037653.1 | 977305  | SNV | 1 | T | C | Homozygous   |
| NC_037653.1 | 981739  | SNV | 1 | G | A | Heterozygous |
| NC_037653.1 | 996756  | SNV | 1 | C | A | Homozygous   |
| NC_037653.1 | 996811  | SNV | 1 | T | C | Heterozygous |
| NC_037653.1 | 996826  | SNV | 1 | A | G | Homozygous   |
| NC_037653.1 | 997631  | SNV | 1 | T | A | Heterozygous |
| NC_037653.1 | 997729  | SNV | 1 | A | C | Heterozygous |
| NC_037653.1 | 1001612 | SNV | 1 | G | A | Homozygous   |
| NC_037653.1 | 1003918 | SNV | 1 | T | A | Homozygous   |
| NC_037653.1 | 1003925 | SNV | 1 | G | A | Homozygous   |
| NC_037653.1 | 1003953 | SNV | 1 | A | T | Homozygous   |
| NC_037653.1 | 1003957 | SNV | 1 | C | G | Homozygous   |
| NC_037653.1 | 1005592 | SNV | 1 | T | C | Homozygous   |
| NC_037653.1 | 1005762 | SNV | 1 | G | A | Heterozygous |
| NC_037653.1 | 1006001 | SNV | 1 | T | C | Heterozygous |
| NC_037653.1 | 1006003 | SNV | 1 | A | T | Heterozygous |
| NC_037653.1 | 1008608 | SNV | 1 | A | G | Homozygous   |
| NC_037653.1 | 1009036 | SNV | 1 | C | T | Homozygous   |
| NC_037653.1 | 1009080 | SNV | 1 | A | G | Heterozygous |
| NC_037653.1 | 1016180 | SNV | 1 | T | C | Heterozygous |
| NC_037653.1 | 1029980 | SNV | 1 | C | T | Heterozygous |
| NC_037653.1 | 1031297 | SNV | 1 | A | G | Homozygous   |
| NC_037653.1 | 1032473 | SNV | 1 | T | C | Heterozygous |
| NC_037653.1 | 1055437 | SNV | 1 | G | T | Homozygous   |
| NC_037653.1 | 1055459 | SNV | 1 | G | T | Homozygous   |
| NC_037653.1 | 1055465 | SNV | 1 | A | T | Homozygous   |
| NC_037653.1 | 1055480 | SNV | 1 | A | T | Homozygous   |
| NC_037653.1 | 1063208 | SNV | 1 | A | G | Homozygous   |
| NC_037653.1 | 1063211 | SNV | 1 | T | A | Homozygous   |
| NC_037653.1 | 1063217 | SNV | 1 | G | T | Homozygous   |
| NC_037653.1 | 1071083 | SNV | 1 | T | C | Homozygous   |
| NC_037653.1 | 1072933 | SNV | 1 | T | C | Homozygous   |
| NC_037653.1 | 1072954 | SNV | 1 | A | G | Homozygous   |
| NC_037653.1 | 1074109 | SNV | 1 | C | T | Heterozygous |
| NC_037653.1 | 1074153 | SNV | 1 | C | G | Homozygous   |
| NC_037653.1 | 1074358 | SNV | 1 | A | G | Homozygous   |
| NC_037653.1 | 1075319 | SNV | 1 | C | T | Heterozygous |
| NC_037653.1 | 1075345 | SNV | 1 | T | C | Heterozygous |
| NC_037653.1 | 1075590 | SNV | 1 | G | A | Homozygous   |
| NC_037653.1 | 1076148 | SNV | 1 | T | A | Heterozygous |
| NC_037653.1 | 1076150 | SNV | 1 | T | A | Heterozygous |
| NC_037653.1 | 1076582 | SNV | 1 | A | G | Homozygous   |
| NC_037653.1 | 1076663 | SNV | 1 | G | C | Heterozygous |
| NC_037653.1 | 1076899 | SNV | 1 | A | G | Heterozygous |

|             |         |     |   |   |   |              |
|-------------|---------|-----|---|---|---|--------------|
| NC_037653.1 | 1077536 | SNV | 1 | A | G | Heterozygous |
| NC_037653.1 | 1077738 | SNV | 1 | T | C | Homozygous   |
| NC_037653.1 | 1078118 | SNV | 1 | G | T | Heterozygous |
| NC_037653.1 | 1078674 | SNV | 1 | T | C | Heterozygous |
| NC_037653.1 | 1079130 | SNV | 1 | T | G | Heterozygous |
| NC_037653.1 | 1079757 | SNV | 1 | A | G | Homozygous   |
| NC_037653.1 | 1079762 | SNV | 1 | G | A | Homozygous   |
| NC_037653.1 | 1079766 | SNV | 1 | A | G | Homozygous   |
| NC_037653.1 | 1079773 | SNV | 1 | G | A | Homozygous   |
| NC_037653.1 | 1079815 | SNV | 1 | G | A | Homozygous   |
| NC_037653.1 | 1079820 | SNV | 1 | G | T | Homozygous   |
| NC_037653.1 | 1081061 | SNV | 1 | T | C | Heterozygous |
| NC_037653.1 | 1081070 | SNV | 1 | G | A | Heterozygous |
| NC_037653.1 | 1081193 | SNV | 1 | G | A | Homozygous   |
| NC_037653.1 | 1081242 | SNV | 1 | A | T | Heterozygous |
| NC_037653.1 | 1081716 | SNV | 1 | T | C | Homozygous   |
| NC_037653.1 | 1081721 | SNV | 1 | A | T | Homozygous   |
| NC_037653.1 | 1081728 | SNV | 1 | T | A | Homozygous   |
| NC_037653.1 | 1081740 | SNV | 1 | A | G | Homozygous   |
| NC_037653.1 | 1081745 | SNV | 1 | T | A | Homozygous   |
| NC_037653.1 | 1081755 | SNV | 1 | A | C | Homozygous   |
| NC_037653.1 | 1081782 | SNV | 1 | T | A | Homozygous   |
| NC_037653.1 | 1083836 | SNV | 1 | C | T | Homozygous   |
| NC_037653.1 | 1088818 | SNV | 1 | G | A | Homozygous   |
| NC_037653.1 | 1088836 | SNV | 1 | C | T | Homozygous   |
| NC_037653.1 | 1088899 | SNV | 1 | T | A | Homozygous   |
| NC_037653.1 | 1088975 | SNV | 1 | C | G | Homozygous   |
| NC_037653.1 | 1089154 | SNV | 1 | T | C | Homozygous   |
| NC_037653.1 | 1089295 | SNV | 1 | G | A | Homozygous   |
| NC_037653.1 | 1090009 | SNV | 1 | T | A | Homozygous   |
| NC_037653.1 | 1096960 | SNV | 1 | C | A | Heterozygous |
| NC_037653.1 | 1096964 | SNV | 1 | T | A | Heterozygous |
| NC_037653.1 | 1096967 | SNV | 1 | G | A | Heterozygous |
| NC_037653.1 | 1096973 | SNV | 1 | G | C | Heterozygous |
| NC_037653.1 | 1097036 | SNV | 1 | A | G | Homozygous   |
| NC_037653.1 | 1100816 | SNV | 1 | T | C | Homozygous   |
| NC_037653.1 | 1101277 | SNV | 1 | G | A | Homozygous   |
| NC_037653.1 | 1101450 | SNV | 1 | A | T | Homozygous   |
| NC_037653.1 | 1101493 | SNV | 1 | C | A | Homozygous   |
| NC_037653.1 | 1103881 | SNV | 1 | A | G | Heterozygous |
| NC_037653.1 | 1105503 | SNV | 1 | G | C | Heterozygous |
| NC_037653.1 | 1107289 | SNV | 1 | G | A | Homozygous   |
| NC_037653.1 | 1107422 | SNV | 1 | T | C | Homozygous   |
| NC_037653.1 | 1107943 | SNV | 1 | C | G | Homozygous   |
| NC_037653.1 | 1108091 | SNV | 1 | T | C | Homozygous   |
| NC_037653.1 | 1108103 | SNV | 1 | G | A | Homozygous   |
| NC_037653.1 | 1108120 | SNV | 1 | T | G | Homozygous   |
| NC_037653.1 | 1109382 | SNV | 1 | T | C | Homozygous   |
| NC_037653.1 | 1109803 | SNV | 1 | T | C | Homozygous   |
| NC_037653.1 | 1109858 | SNV | 1 | T | C | Heterozygous |
| NC_037653.1 | 1110167 | SNV | 1 | T | C | Heterozygous |

|             |         |     |   |   |   |              |
|-------------|---------|-----|---|---|---|--------------|
| NC_037653.1 | 1110372 | SNV | 1 | A | T | Homozygous   |
| NC_037653.1 | 1110375 | SNV | 1 | G | A | Heterozygous |
| NC_037653.1 | 1110585 | SNV | 1 | A | G | Homozygous   |
| NC_037653.1 | 1110723 | SNV | 1 | A | G | Homozygous   |
| NC_037653.1 | 1110874 | SNV | 1 | C | T | Heterozygous |
| NC_037653.1 | 1111461 | SNV | 1 | T | C | Heterozygous |
| NC_037653.1 | 1111922 | SNV | 1 | C | T | Heterozygous |
| NC_037653.1 | 1145211 | SNV | 1 | A | G | Homozygous   |
| NC_037653.1 | 1145247 | SNV | 1 | T | C | Homozygous   |
| NC_037653.1 | 1145263 | SNV | 1 | G | A | Homozygous   |
| NC_037653.1 | 1145319 | SNV | 1 | A | G | Homozygous   |
| NC_037653.1 | 1145655 | SNV | 1 | G | A | Heterozygous |
| NC_037653.1 | 1145670 | SNV | 1 | G | A | Heterozygous |
| NC_037653.1 | 1145834 | SNV | 1 | G | C | Homozygous   |
| NC_037653.1 | 1145893 | SNV | 1 | T | C | Homozygous   |
| NC_037653.1 | 1146119 | SNV | 1 | G | A | Heterozygous |
| NC_037653.1 | 1146204 | SNV | 1 | C | T | Homozygous   |
| NC_037653.1 | 1146319 | SNV | 1 | A | G | Homozygous   |
| NC_037653.1 | 1146802 | SNV | 1 | T | G | Homozygous   |
| NC_037653.1 | 1147104 | SNV | 1 | A | C | Homozygous   |
| NC_037653.1 | 1147360 | SNV | 1 | G | A | Heterozygous |
| NC_037653.1 | 1147516 | SNV | 1 | G | A | Homozygous   |
| NC_037653.1 | 1147786 | SNV | 1 | A | T | Homozygous   |
| NC_037653.1 | 1147788 | SNV | 1 | A | G | Homozygous   |
| NC_037653.1 | 1147866 | SNV | 1 | T | G | Homozygous   |
| NC_037653.1 | 1148073 | SNV | 1 | T | A | Homozygous   |
| NC_037653.1 | 1148076 | SNV | 1 | A | C | Homozygous   |
| NC_037653.1 | 1148204 | SNV | 1 | A | G | Homozygous   |
| NC_037653.1 | 1148514 | SNV | 1 | C | T | Homozygous   |
| NC_037653.1 | 1148582 | SNV | 1 | C | T | Heterozygous |
| NC_037653.1 | 1149682 | SNV | 1 | A | G | Homozygous   |
| NC_037653.1 | 1150086 | SNV | 1 | A | T | Heterozygous |
| NC_037653.1 | 1150106 | SNV | 1 | G | A | Homozygous   |
| NC_037653.1 | 1150205 | SNV | 1 | G | A | Heterozygous |
| NC_037653.1 | 1150221 | SNV | 1 | C | T | Heterozygous |
| NC_037653.1 | 1150224 | SNV | 1 | T | C | Heterozygous |
| NC_037653.1 | 1150373 | SNV | 1 | A | T | Homozygous   |
| NC_037653.1 | 1150388 | SNV | 1 | T | C | Homozygous   |
| NC_037653.1 | 1150455 | SNV | 1 | C | T | Heterozygous |
| NC_037653.1 | 1150739 | SNV | 1 | T | C | Homozygous   |
| NC_037653.1 | 1150901 | SNV | 1 | T | C | Homozygous   |
| NC_037653.1 | 1150917 | SNV | 1 | G | A | Heterozygous |
| NC_037653.1 | 1150922 | SNV | 1 | T | C | Heterozygous |
| NC_037653.1 | 1150933 | SNV | 1 | T | A | Heterozygous |
| NC_037653.1 | 1151114 | SNV | 1 | T | C | Homozygous   |
| NC_037653.1 | 1151116 | SNV | 1 | T | A | Homozygous   |
| NC_037653.1 | 1151119 | SNV | 1 | T | A | Homozygous   |
| NC_037653.1 | 1151134 | SNV | 1 | T | A | Homozygous   |
| NC_037653.1 | 1151157 | SNV | 1 | T | A | Homozygous   |
| NC_037653.1 | 1151849 | SNV | 1 | T | C | Heterozygous |
| NC_037653.1 | 1151853 | SNV | 1 | A | C | Heterozygous |

|             |         |     |   |   |   |              |
|-------------|---------|-----|---|---|---|--------------|
| NC_037653.1 | 1151982 | SNV | 1 | A | T | Heterozygous |
| NC_037653.1 | 1152885 | SNV | 1 | C | T | Heterozygous |
| NC_037653.1 | 1152924 | SNV | 1 | C | T | Homozygous   |
| NC_037653.1 | 1156932 | SNV | 1 | A | G | Homozygous   |
| NC_037653.1 | 1156980 | SNV | 1 | T | G | Homozygous   |
| NC_037653.1 | 1157003 | SNV | 1 | C | G | Heterozygous |
| NC_037653.1 | 1157582 | SNV | 1 | G | T | Homozygous   |
| NC_037653.1 | 1157592 | SNV | 1 | G | A | Homozygous   |
| NC_037653.1 | 1157631 | SNV | 1 | G | A | Heterozygous |
| NC_037653.1 | 1157639 | SNV | 1 | A | G | Heterozygous |
| NC_037653.1 | 1157642 | SNV | 1 | C | T | Heterozygous |
| NC_037653.1 | 1157909 | SNV | 1 | G | A | Homozygous   |
| NC_037653.1 | 1158003 | SNV | 1 | T | A | Heterozygous |
| NC_037653.1 | 1158005 | SNV | 1 | T | A | Heterozygous |
| NC_037653.1 | 1162549 | SNV | 1 | A | G | Heterozygous |
| NC_037653.1 | 1162558 | SNV | 1 | G | A | Heterozygous |
| NC_037653.1 | 1162560 | SNV | 1 | G | A | Heterozygous |
| NC_037653.1 | 1162562 | SNV | 1 | G | A | Heterozygous |
| NC_037653.1 | 1162575 | SNV | 1 | A | G | Heterozygous |
| NC_037653.1 | 1162579 | SNV | 1 | A | G | Heterozygous |
| NC_037653.1 | 1164161 | SNV | 1 | G | A | Heterozygous |
| NC_037653.1 | 1164191 | SNV | 1 | G | A | Heterozygous |
| NC_037653.1 | 1165001 | SNV | 1 | C | T | Heterozygous |
| NC_037653.1 | 1168576 | SNV | 1 | T | C | Heterozygous |
| NC_037653.1 | 1168623 | SNV | 1 | T | C | Homozygous   |
| NC_037653.1 | 1176537 | SNV | 1 | A | C | Homozygous   |
| NC_037653.1 | 1176543 | SNV | 1 | G | C | Homozygous   |
| NC_037653.1 | 1176550 | SNV | 1 | A | G | Homozygous   |
| NC_037653.1 | 1176554 | SNV | 1 | A | G | Homozygous   |
| NC_037653.1 | 1180679 | SNV | 1 | G | A | Heterozygous |
| NC_037653.1 | 1180871 | SNV | 1 | T | C | Homozygous   |
| NC_037653.1 | 1181445 | SNV | 1 | C | T | Heterozygous |
| NC_037653.1 | 1181483 | SNV | 1 | T | C | Heterozygous |
| NC_037653.1 | 1181849 | SNV | 1 | T | C | Heterozygous |
| NC_037653.1 | 1182103 | SNV | 1 | T | C | Homozygous   |
| NC_037653.1 | 1182182 | SNV | 1 | T | C | Heterozygous |
| NC_037653.1 | 1184129 | SNV | 1 | T | C | Heterozygous |
| NC_037653.1 | 1184792 | SNV | 1 | A | G | Heterozygous |
| NC_037653.1 | 1185497 | SNV | 1 | T | C | Homozygous   |
| NC_037653.1 | 1185694 | SNV | 1 | A | T | Homozygous   |
| NC_037653.1 | 1187684 | SNV | 1 | A | G | Homozygous   |
| NC_037653.1 | 1211850 | SNV | 1 | A | T | Heterozygous |
| NC_037653.1 | 1211856 | SNV | 1 | G | C | Heterozygous |
| NC_037653.1 | 1212364 | SNV | 1 | A | G | Homozygous   |
| NC_037653.1 | 1212420 | SNV | 1 | T | C | Homozygous   |
| NC_037653.1 | 1214806 | SNV | 1 | C | T | Homozygous   |
| NC_037653.1 | 1214999 | SNV | 1 | T | C | Heterozygous |
| NC_037653.1 | 1218859 | SNV | 1 | A | T | Heterozygous |
| NC_037653.1 | 1218876 | SNV | 1 | A | G | Heterozygous |
| NC_037653.1 | 1218882 | SNV | 1 | T | A | Heterozygous |
| NC_037653.1 | 1218888 | SNV | 1 | A | T | Heterozygous |

|             |         |     |   |   |   |              |
|-------------|---------|-----|---|---|---|--------------|
| NC_037653.1 | 1218899 | SNV | 1 | G | A | Heterozygous |
| NC_037653.1 | 1220914 | SNV | 1 | C | T | Homozygous   |
| NC_037653.1 | 1227069 | SNV | 1 | G | A | Heterozygous |
| NC_037653.1 | 1228131 | SNV | 1 | G | A | Homozygous   |
| NC_037653.1 | 1229176 | SNV | 1 | A | T | Homozygous   |
| NC_037653.1 | 1229178 | SNV | 1 | A | T | Homozygous   |
| NC_037653.1 | 1232891 | SNV | 1 | G | A | Heterozygous |
| NC_037653.1 | 1232906 | SNV | 1 | A | G | Heterozygous |
| NC_037653.1 | 1232908 | SNV | 1 | A | T | Heterozygous |
| NC_037653.1 | 1232923 | SNV | 1 | T | C | Heterozygous |
| NC_037653.1 | 1232926 | SNV | 1 | T | C | Heterozygous |
| NC_037653.1 | 1232929 | SNV | 1 | A | G | Heterozygous |
| NC_037653.1 | 1232947 | SNV | 1 | C | T | Homozygous   |
| NC_037653.1 | 1232950 | SNV | 1 | T | C | Heterozygous |
| NC_037653.1 | 1234356 | SNV | 1 | A | G | Homozygous   |
| NC_037653.1 | 1236168 | SNV | 1 | T | C | Heterozygous |
| NC_037653.1 | 1236170 | SNV | 1 | T | C | Heterozygous |
| NC_037653.1 | 1236172 | SNV | 1 | T | C | Heterozygous |
| NC_037653.1 | 1236500 | SNV | 1 | T | A | Homozygous   |
| NC_037653.1 | 1236523 | SNV | 1 | T | A | Homozygous   |
| NC_037653.1 | 1236534 | SNV | 1 | T | A | Homozygous   |
| NC_037653.1 | 1239456 | SNV | 1 | T | C | Homozygous   |
| NC_037653.1 | 1240507 | SNV | 1 | C | T | Heterozygous |
| NC_037653.1 | 1243293 | SNV | 1 | C | T | Heterozygous |
| NC_037653.1 | 1244435 | SNV | 1 | T | C | Heterozygous |
| NC_037653.1 | 1244636 | SNV | 1 | T | A | Homozygous   |
| NC_037653.1 | 1248047 | SNV | 1 | T | A | Homozygous   |
| NC_037653.1 | 1248061 | SNV | 1 | T | C | Homozygous   |
| NC_037653.1 | 1248065 | SNV | 1 | T | A | Homozygous   |
| NC_037653.1 | 1250369 | SNV | 1 | A | T | Homozygous   |
| NC_037653.1 | 1251784 | SNV | 1 | G | A | Heterozygous |
| NC_037653.1 | 1259661 | SNV | 1 | A | T | Homozygous   |
| NC_037653.1 | 1259667 | SNV | 1 | A | T | Homozygous   |
| NC_037653.1 | 1259675 | SNV | 1 | A | T | Homozygous   |
| NC_037653.1 | 1260175 | SNV | 1 | A | G | Heterozygous |
| NC_037653.1 | 1263301 | SNV | 1 | T | G | Homozygous   |
| NC_037653.1 | 1263303 | SNV | 1 | G | T | Homozygous   |
| NC_037653.1 | 1271206 | SNV | 1 | A | G | Homozygous   |
| NC_037653.1 | 1271275 | SNV | 1 | T | A | Homozygous   |
| NC_037653.1 | 1271379 | SNV | 1 | T | A | Homozygous   |
| NC_037653.1 | 1278476 | SNV | 1 | A | G | Homozygous   |
| NC_037653.1 | 1282797 | SNV | 1 | T | C | Homozygous   |
| NC_037653.1 | 1282803 | SNV | 1 | G | T | Homozygous   |
| NC_037653.1 | 1282809 | SNV | 1 | T | A | Homozygous   |
| NC_037653.1 | 1282812 | SNV | 1 | C | A | Homozygous   |
| NC_037653.1 | 1282821 | SNV | 1 | G | A | Homozygous   |
| NC_037653.1 | 1282824 | SNV | 1 | C | T | Homozygous   |
| NC_037653.1 | 1282833 | SNV | 1 | C | T | Homozygous   |
| NC_037653.1 | 1282845 | SNV | 1 | T | C | Homozygous   |
| NC_037653.1 | 1282854 | SNV | 1 | C | G | Homozygous   |
| NC_037653.1 | 1282857 | SNV | 1 | A | G | Homozygous   |

|             |         |     |   |   |   |              |
|-------------|---------|-----|---|---|---|--------------|
| NC_037653.1 | 1282860 | SNV | 1 | T | A | Homozygous   |
| NC_037653.1 | 1282864 | SNV | 1 | C | A | Homozygous   |
| NC_037653.1 | 1282875 | SNV | 1 | C | A | Homozygous   |
| NC_037653.1 | 1282902 | SNV | 1 | C | T | Homozygous   |
| NC_037653.1 | 1282905 | SNV | 1 | T | C | Homozygous   |
| NC_037653.1 | 1282908 | SNV | 1 | C | A | Heterozygous |
| NC_037653.1 | 1282911 | SNV | 1 | A | T | Homozygous   |
| NC_037653.1 | 1282914 | SNV | 1 | C | T | Homozygous   |
| NC_037653.1 | 1282917 | SNV | 1 | G | T | Homozygous   |
| NC_037653.1 | 1282922 | SNV | 1 | T | C | Homozygous   |
| NC_037653.1 | 1282929 | SNV | 1 | T | C | Homozygous   |
| NC_037653.1 | 1282944 | SNV | 1 | A | T | Homozygous   |
| NC_037653.1 | 1282950 | SNV | 1 | T | G | Homozygous   |
| NC_037653.1 | 1282953 | SNV | 1 | C | T | Homozygous   |
| NC_037653.1 | 1282956 | SNV | 1 | T | G | Homozygous   |
| NC_037653.1 | 1282959 | SNV | 1 | T | C | Homozygous   |
| NC_037653.1 | 1282965 | SNV | 1 | T | C | Homozygous   |
| NC_037653.1 | 1282977 | SNV | 1 | C | A | Homozygous   |
| NC_037653.1 | 1282983 | SNV | 1 | A | G | Homozygous   |
| NC_037653.1 | 1282986 | SNV | 1 | C | A | Homozygous   |
| NC_037653.1 | 1282989 | SNV | 1 | A | G | Homozygous   |
| NC_037653.1 | 1282995 | SNV | 1 | G | T | Homozygous   |
| NC_037653.1 | 1283004 | SNV | 1 | G | A | Homozygous   |
| NC_037653.1 | 1283007 | SNV | 1 | C | A | Homozygous   |
| NC_037653.1 | 1283010 | SNV | 1 | T | C | Homozygous   |
| NC_037653.1 | 1283430 | SNV | 1 | T | C | Heterozygous |
| NC_037653.1 | 1283433 | SNV | 1 | A | C | Heterozygous |
| NC_037653.1 | 1283439 | SNV | 1 | T | C | Heterozygous |
| NC_037653.1 | 1283445 | SNV | 1 | G | A | Heterozygous |
| NC_037653.1 | 1283460 | SNV | 1 | G | T | Homozygous   |
| NC_037653.1 | 1283481 | SNV | 1 | T | A | Homozygous   |
| NC_037653.1 | 1283483 | SNV | 1 | T | G | Homozygous   |
| NC_037653.1 | 1283487 | SNV | 1 | C | A | Homozygous   |
| NC_037653.1 | 1283490 | SNV | 1 | T | C | Homozygous   |
| NC_037653.1 | 1283492 | SNV | 1 | G | A | Homozygous   |
| NC_037653.1 | 1283496 | SNV | 1 | T | C | Homozygous   |
| NC_037653.1 | 1283511 | SNV | 1 | C | T | Homozygous   |
| NC_037653.1 | 1283514 | SNV | 1 | T | G | Homozygous   |
| NC_037653.1 | 1283535 | SNV | 1 | C | A | Homozygous   |
| NC_037653.1 | 1283537 | SNV | 1 | T | G | Homozygous   |
| NC_037653.1 | 1283541 | SNV | 1 | T | A | Homozygous   |
| NC_037653.1 | 1283553 | SNV | 1 | C | T | Homozygous   |
| NC_037653.1 | 1283556 | SNV | 1 | C | G | Heterozygous |
| NC_037653.1 | 1283565 | SNV | 1 | T | A | Heterozygous |
| NC_037653.1 | 1283770 | SNV | 1 | A | T | Heterozygous |
| NC_037653.1 | 1283772 | SNV | 1 | G | T | Heterozygous |
| NC_037653.1 | 1283778 | SNV | 1 | T | A | Heterozygous |
| NC_037653.1 | 1283791 | SNV | 1 | T | G | Heterozygous |
| NC_037653.1 | 1283792 | SNV | 1 | T | G | Heterozygous |
| NC_037653.1 | 1283803 | SNV | 1 | T | A | Heterozygous |
| NC_037653.1 | 1283810 | SNV | 1 | A | T | Heterozygous |

|             |         |     |   |   |   |              |
|-------------|---------|-----|---|---|---|--------------|
| NC_037653.1 | 1284259 | SNV | 1 | A | G | Heterozygous |
| NC_037653.1 | 1284265 | SNV | 1 | T | A | Homozygous   |
| NC_037653.1 | 1284268 | SNV | 1 | T | A | Heterozygous |
| NC_037653.1 | 1284271 | SNV | 1 | A | G | Homozygous   |
| NC_037653.1 | 1284277 | SNV | 1 | A | G | Homozygous   |
| NC_037653.1 | 1284280 | SNV | 1 | A | G | Homozygous   |
| NC_037653.1 | 1284283 | SNV | 1 | T | C | Homozygous   |
| NC_037653.1 | 1284286 | SNV | 1 | A | G | Homozygous   |
| NC_037653.1 | 1284292 | SNV | 1 | A | G | Homozygous   |
| NC_037653.1 | 1284295 | SNV | 1 | T | C | Homozygous   |
| NC_037653.1 | 1284316 | SNV | 1 | A | G | Homozygous   |
| NC_037653.1 | 1284322 | SNV | 1 | A | G | Homozygous   |
| NC_037653.1 | 1284325 | SNV | 1 | A | G | Homozygous   |
| NC_037653.1 | 1284337 | SNV | 1 | T | C | Homozygous   |
| NC_037653.1 | 1284340 | SNV | 1 | A | T | Homozygous   |
| NC_037653.1 | 1284343 | SNV | 1 | C | G | Homozygous   |
| NC_037653.1 | 1284346 | SNV | 1 | A | C | Homozygous   |
| NC_037653.1 | 1284349 | SNV | 1 | A | C | Heterozygous |
| NC_037653.1 | 1284352 | SNV | 1 | G | A | Heterozygous |
| NC_037653.1 | 1284352 | SNV | 1 | G | T | Heterozygous |
| NC_037653.1 | 1284355 | SNV | 1 | G | A | Heterozygous |
| NC_037653.1 | 1284358 | SNV | 1 | T | C | Homozygous   |
| NC_037653.1 | 1284361 | SNV | 1 | T | C | Heterozygous |
| NC_037653.1 | 1284364 | SNV | 1 | C | A | Heterozygous |
| NC_037653.1 | 1284364 | SNV | 1 | C | T | Heterozygous |
| NC_037653.1 | 1284367 | SNV | 1 | A | G | Homozygous   |
| NC_037653.1 | 1284378 | SNV | 1 | A | G | Homozygous   |
| NC_037653.1 | 1284391 | SNV | 1 | T | G | Homozygous   |
| NC_037653.1 | 1284403 | SNV | 1 | T | A | Homozygous   |
| NC_037653.1 | 1284406 | SNV | 1 | T | C | Homozygous   |
| NC_037653.1 | 1284430 | SNV | 1 | T | C | Homozygous   |
| NC_037653.1 | 1284436 | SNV | 1 | A | T | Homozygous   |
| NC_037653.1 | 1284439 | SNV | 1 | A | G | Heterozygous |
| NC_037653.1 | 1284448 | SNV | 1 | T | G | Homozygous   |
| NC_037653.1 | 1284451 | SNV | 1 | A | G | Homozygous   |
| NC_037653.1 | 1284454 | SNV | 1 | T | C | Homozygous   |
| NC_037653.1 | 1284457 | SNV | 1 | A | G | Homozygous   |
| NC_037653.1 | 1284463 | SNV | 1 | T | C | Homozygous   |
| NC_037653.1 | 1284468 | SNV | 1 | C | T | Homozygous   |
| NC_037653.1 | 1284472 | SNV | 1 | T | C | Homozygous   |
| NC_037653.1 | 1284475 | SNV | 1 | T | C | Homozygous   |
| NC_037653.1 | 1284487 | SNV | 1 | T | C | Homozygous   |
| NC_037653.1 | 1284493 | SNV | 1 | T | A | Homozygous   |
| NC_037653.1 | 1284496 | SNV | 1 | C | A | Homozygous   |
| NC_037653.1 | 1284931 | SNV | 1 | G | A | Heterozygous |
| NC_037653.1 | 1284934 | SNV | 1 | T | C | Heterozygous |
| NC_037653.1 | 1284946 | SNV | 1 | A | G | Heterozygous |
| NC_037653.1 | 1284979 | SNV | 1 | G | T | Heterozygous |
| NC_037653.1 | 1284984 | SNV | 1 | A | T | Heterozygous |
| NC_037653.1 | 1284991 | SNV | 1 | A | G | Heterozygous |
| NC_037653.1 | 1286333 | SNV | 1 | G | T | Heterozygous |



|             |         |     |   |   |   |              |
|-------------|---------|-----|---|---|---|--------------|
| NC_037653.1 | 1287303 | SNV | 1 | G | A | Heterozygous |
| NC_037653.1 | 1288828 | SNV | 1 | A | G | Homozygous   |
| NC_037653.1 | 1289058 | SNV | 1 | G | A | Heterozygous |
| NC_037653.1 | 1293345 | SNV | 1 | G | A | Homozygous   |
| NC_037653.1 | 1294129 | SNV | 1 | G | A | Heterozygous |
| NC_037653.1 | 1299607 | SNV | 1 | A | G | Homozygous   |
| NC_037653.1 | 1301739 | SNV | 1 | A | G | Homozygous   |
| NC_037653.1 | 1302222 | SNV | 1 | T | C | Homozygous   |
| NC_037653.1 | 1302462 | SNV | 1 | A | G | Homozygous   |
| NC_037653.1 | 1302560 | SNV | 1 | T | C | Homozygous   |
| NC_037653.1 | 1303076 | SNV | 1 | C | T | Homozygous   |
| NC_037653.1 | 1303860 | SNV | 1 | G | A | Heterozygous |
| NC_037653.1 | 1309987 | SNV | 1 | A | T | Homozygous   |
| NC_037653.1 | 1310066 | SNV | 1 | G | A | Heterozygous |
| NC_037653.1 | 1323928 | SNV | 1 | A | G | Homozygous   |
| NC_037653.1 | 1324139 | SNV | 1 | G | A | Heterozygous |
| NC_037653.1 | 1324177 | SNV | 1 | A | C | Heterozygous |
| NC_037653.1 | 1328078 | SNV | 1 | A | C | Homozygous   |
| NC_037653.1 | 1328081 | SNV | 1 | A | T | Homozygous   |
| NC_037653.1 | 1328112 | SNV | 1 | A | C | Homozygous   |
| NC_037653.1 | 1332964 | SNV | 1 | C | T | Homozygous   |
| NC_037653.1 | 1333045 | SNV | 1 | T | C | Homozygous   |
| NC_037653.1 | 1353956 | SNV | 1 | A | G | Homozygous   |
| NC_037653.1 | 1353960 | SNV | 1 | A | T | Homozygous   |
| NC_037653.1 | 1353969 | SNV | 1 | T | A | Homozygous   |
| NC_037653.1 | 1353977 | SNV | 1 | G | A | Homozygous   |
| NC_037653.1 | 1353997 | SNV | 1 | G | T | Homozygous   |
| NC_037653.1 | 1354003 | SNV | 1 | T | A | Homozygous   |
| NC_037653.1 | 1354008 | SNV | 1 | A | T | Homozygous   |
| NC_037653.1 | 1354010 | SNV | 1 | T | C | Homozygous   |
| NC_037653.1 | 1364932 | SNV | 1 | A | T | Homozygous   |
| NC_037653.1 | 1364936 | SNV | 1 | G | C | Homozygous   |
| NC_037653.1 | 1364940 | SNV | 1 | T | A | Homozygous   |
| NC_037653.1 | 1364947 | SNV | 1 | T | A | Homozygous   |
| NC_037653.1 | 1364953 | SNV | 1 | T | A | Homozygous   |
| NC_037653.1 | 1370471 | SNV | 1 | T | C | Heterozygous |
| NC_037653.1 | 1370633 | SNV | 1 | T | C | Homozygous   |
| NC_037653.1 | 1374557 | SNV | 1 | A | C | Homozygous   |
| NC_037653.1 | 1374559 | SNV | 1 | A | C | Homozygous   |
| NC_037653.1 | 1374578 | SNV | 1 | C | G | Homozygous   |
| NC_037653.1 | 1374580 | SNV | 1 | T | G | Homozygous   |
| NC_037653.1 | 1374582 | SNV | 1 | A | G | Homozygous   |
| NC_037653.1 | 1387704 | SNV | 1 | T | A | Homozygous   |
| NC_037653.1 | 1387712 | SNV | 1 | A | G | Heterozygous |
| NC_037653.1 | 1387719 | SNV | 1 | A | G | Homozygous   |
| NC_037653.1 | 1421443 | SNV | 1 | G | A | Heterozygous |
| NC_037653.1 | 1421586 | SNV | 1 | A | G | Heterozygous |
| NC_037653.1 | 1421675 | SNV | 1 | C | T | Homozygous   |
| NC_037653.1 | 1429120 | SNV | 1 | G | A | Homozygous   |
| NC_037653.1 | 1429145 | SNV | 1 | A | G | Homozygous   |
| NC_037653.1 | 1448388 | SNV | 1 | C | T | Heterozygous |

|             |         |     |   |   |   |              |
|-------------|---------|-----|---|---|---|--------------|
| NC_037653.1 | 1448777 | SNV | 1 | T | C | Homozygous   |
| NC_037653.1 | 1453155 | SNV | 1 | A | C | Homozygous   |
| NC_037653.1 | 1453163 | SNV | 1 | A | T | Homozygous   |
| NC_037653.1 | 1453173 | SNV | 1 | A | T | Homozygous   |
| NC_037653.1 | 1453183 | SNV | 1 | T | C | Homozygous   |
| NC_037653.1 | 1453185 | SNV | 1 | A | C | Homozygous   |
| NC_037653.1 | 1453191 | SNV | 1 | A | C | Homozygous   |
| NC_037653.1 | 1453201 | SNV | 1 | T | G | Homozygous   |
| NC_037653.1 | 1453203 | SNV | 1 | A | T | Homozygous   |
| NC_037653.1 | 1453242 | SNV | 1 | A | G | Heterozygous |
| NC_037653.1 | 1453277 | SNV | 1 | T | A | Heterozygous |
| NC_037653.1 | 1453316 | SNV | 1 | A | T | Heterozygous |
| NC_037653.1 | 1453334 | SNV | 1 | T | C | Homozygous   |
| NC_037653.1 | 1456458 | SNV | 1 | T | C | Homozygous   |
| NC_037653.1 | 1456478 | SNV | 1 | G | T | Heterozygous |
| NC_037653.1 | 1456555 | SNV | 1 | C | A | Homozygous   |
| NC_037653.1 | 1456586 | SNV | 1 | T | C | Homozygous   |
| NC_037653.1 | 1456604 | SNV | 1 | C | A | Heterozygous |
| NC_037653.1 | 1456624 | SNV | 1 | T | C | Heterozygous |
| NC_037653.1 | 1456630 | SNV | 1 | C | T | Heterozygous |
| NC_037653.1 | 1456730 | SNV | 1 | T | C | Heterozygous |
| NC_037653.1 | 1456745 | SNV | 1 | T | C | Heterozygous |
| NC_037653.1 | 1460914 | SNV | 1 | T | C | Homozygous   |
| NC_037653.1 | 1460926 | SNV | 1 | A | T | Heterozygous |
| NC_037653.1 | 1460929 | SNV | 1 | T | A | Heterozygous |
| NC_037653.1 | 1460965 | SNV | 1 | C | A | Heterozygous |
| NC_037653.1 | 1460965 | SNV | 1 | C | T | Heterozygous |
| NC_037653.1 | 1460968 | SNV | 1 | T | G | Heterozygous |
| NC_037653.1 | 1460975 | SNV | 1 | T | G | Heterozygous |
| NC_037653.1 | 1468749 | SNV | 1 | G | A | Homozygous   |
| NC_037653.1 | 1468973 | SNV | 1 | T | A | Homozygous   |
| NC_037653.1 | 1469663 | SNV | 1 | A | G | Heterozygous |
| NC_037653.1 | 1470631 | SNV | 1 | A | T | Homozygous   |
| NC_037653.1 | 1470664 | SNV | 1 | T | A | Homozygous   |
| NC_037653.1 | 1473926 | SNV | 1 | A | C | Homozygous   |
| NC_037653.1 | 1474084 | SNV | 1 | T | C | Homozygous   |
| NC_037653.1 | 1474157 | SNV | 1 | C | T | Homozygous   |
| NC_037653.1 | 1474877 | SNV | 1 | C | G | Homozygous   |
| NC_037653.1 | 1476550 | SNV | 1 | C | T | Heterozygous |
| NC_037653.1 | 1479316 | SNV | 1 | A | G | Heterozygous |
| NC_037653.1 | 1480093 | SNV | 1 | C | T | Heterozygous |
| NC_037653.1 | 1481130 | SNV | 1 | C | T | Heterozygous |
| NC_037653.1 | 1481767 | SNV | 1 | T | C | Homozygous   |
| NC_037653.1 | 1482094 | SNV | 1 | A | T | Homozygous   |
| NC_037653.1 | 1484907 | SNV | 1 | C | T | Homozygous   |
| NC_037653.1 | 1491535 | SNV | 1 | G | C | Homozygous   |
| NC_037653.1 | 1491567 | SNV | 1 | T | A | Heterozygous |
| NC_037653.1 | 1493974 | SNV | 1 | A | G | Homozygous   |
| NC_037653.1 | 1494851 | SNV | 1 | G | A | Homozygous   |
| NC_037653.1 | 1496958 | SNV | 1 | C | T | Homozygous   |
| NC_037653.1 | 1501394 | SNV | 1 | G | A | Homozygous   |

|             |         |     |   |   |   |              |
|-------------|---------|-----|---|---|---|--------------|
| NC_037653.1 | 1501539 | SNV | 1 | G | C | Heterozygous |
| NC_037653.1 | 1501614 | SNV | 1 | G | A | Homozygous   |
| NC_037653.1 | 1501769 | SNV | 1 | G | T | Homozygous   |
| NC_037653.1 | 1501868 | SNV | 1 | G | A | Homozygous   |
| NC_037653.1 | 1503515 | SNV | 1 | C | T | Homozygous   |
| NC_037653.1 | 1503811 | SNV | 1 | C | T | Homozygous   |
| NC_037653.1 | 1504045 | SNV | 1 | C | T | Homozygous   |
| NC_037653.1 | 1518692 | SNV | 1 | T | C | Homozygous   |
| NC_037653.1 | 1518695 | SNV | 1 | T | C | Homozygous   |
| NC_037653.1 | 1518698 | SNV | 1 | A | T | Homozygous   |
| NC_037653.1 | 1518707 | SNV | 1 | A | G | Homozygous   |
| NC_037653.1 | 1518710 | SNV | 1 | A | T | Homozygous   |
| NC_037653.1 | 1518716 | SNV | 1 | T | G | Homozygous   |
| NC_037653.1 | 1518719 | SNV | 1 | A | T | Homozygous   |
| NC_037653.1 | 1518740 | SNV | 1 | T | G | Homozygous   |
| NC_037653.1 | 1518743 | SNV | 1 | T | C | Homozygous   |
| NC_037653.1 | 1518752 | SNV | 1 | C | T | Homozygous   |
| NC_037653.1 | 1520383 | SNV | 1 | T | C | Homozygous   |
| NC_037653.1 | 1520870 | SNV | 1 | T | A | Heterozygous |
| NC_037653.1 | 1520875 | SNV | 1 | T | G | Heterozygous |
| NC_037653.1 | 1520880 | SNV | 1 | G | A | Heterozygous |
| NC_037653.1 | 1520897 | SNV | 1 | C | T | Heterozygous |
| NC_037653.1 | 1521546 | SNV | 1 | C | A | Heterozygous |
| NC_037653.1 | 1521550 | SNV | 1 | A | T | Heterozygous |
| NC_037653.1 | 1521555 | SNV | 1 | T | G | Heterozygous |
| NC_037653.1 | 1521564 | SNV | 1 | T | A | Heterozygous |
| NC_037653.1 | 1525463 | SNV | 1 | C | T | Heterozygous |
| NC_037653.1 | 1526328 | SNV | 1 | T | C | Heterozygous |
| NC_037653.1 | 1531983 | SNV | 1 | C | A | Heterozygous |
| NC_037653.1 | 1532015 | SNV | 1 | G | A | Homozygous   |
| NC_037653.1 | 1532037 | SNV | 1 | C | T | Heterozygous |
| NC_037653.1 | 1532045 | SNV | 1 | C | T | Heterozygous |
| NC_037653.1 | 1532053 | SNV | 1 | C | T | Heterozygous |
| NC_037653.1 | 1532060 | SNV | 1 | T | C | Heterozygous |
| NC_037653.1 | 1532064 | SNV | 1 | T | C | Heterozygous |
| NC_037653.1 | 1532067 | SNV | 1 | C | T | Heterozygous |
| NC_037653.1 | 1532718 | SNV | 1 | C | T | Heterozygous |
| NC_037653.1 | 1532899 | SNV | 1 | C | G | Homozygous   |
| NC_037653.1 | 1532948 | SNV | 1 | A | G | Homozygous   |
| NC_037653.1 | 1533452 | SNV | 1 | A | G | Heterozygous |
| NC_037653.1 | 1533461 | SNV | 1 | G | T | Heterozygous |
| NC_037653.1 | 1533500 | SNV | 1 | A | G | Heterozygous |
| NC_037653.1 | 1533506 | SNV | 1 | A | T | Heterozygous |
| NC_037653.1 | 1533652 | SNV | 1 | T | G | Heterozygous |
| NC_037653.1 | 1533882 | SNV | 1 | C | T | Homozygous   |
| NC_037653.1 | 1533979 | SNV | 1 | A | G | Homozygous   |
| NC_037653.1 | 1533981 | SNV | 1 | G | A | Homozygous   |
| NC_037653.1 | 1533987 | SNV | 1 | A | G | Homozygous   |
| NC_037653.1 | 1534518 | SNV | 1 | T | A | Homozygous   |
| NC_037653.1 | 1536605 | SNV | 1 | T | C | Homozygous   |
| NC_037653.1 | 1546292 | SNV | 1 | A | G | Heterozygous |

|             |         |     |   |   |   |              |
|-------------|---------|-----|---|---|---|--------------|
| NC_037653.1 | 1546297 | SNV | 1 | G | A | Homozygous   |
| NC_037653.1 | 1550240 | SNV | 1 | T | C | Homozygous   |
| NC_037653.1 | 1550260 | SNV | 1 | C | T | Homozygous   |
| NC_037653.1 | 1550268 | SNV | 1 | T | C | Homozygous   |
| NC_037653.1 | 1550463 | SNV | 1 | G | A | Heterozygous |
| NC_037653.1 | 1550525 | SNV | 1 | A | C | Homozygous   |
| NC_037653.1 | 1557708 | SNV | 1 | A | G | Heterozygous |
| NC_037653.1 | 1557790 | SNV | 1 | A | G | Homozygous   |
| NC_037653.1 | 1568093 | SNV | 1 | G | A | Heterozygous |
| NC_037653.1 | 1568097 | SNV | 1 | G | C | Heterozygous |
| NC_037653.1 | 1568118 | SNV | 1 | A | G | Homozygous   |
| NC_037653.1 | 1572224 | SNV | 1 | A | T | Homozygous   |
| NC_037653.1 | 1572228 | SNV | 1 | A | G | Homozygous   |
| NC_037653.1 | 1572245 | SNV | 1 | C | A | Homozygous   |
| NC_037653.1 | 1582226 | SNV | 1 | A | T | Homozygous   |
| NC_037653.1 | 1582255 | SNV | 1 | C | T | Homozygous   |
| NC_037653.1 | 1582257 | SNV | 1 | A | T | Homozygous   |
| NC_037653.1 | 1582260 | SNV | 1 | T | A | Heterozygous |
| NC_037653.1 | 1584418 | SNV | 1 | C | T | Heterozygous |
| NC_037653.1 | 1584506 | SNV | 1 | A | T | Heterozygous |
| NC_037653.1 | 1586890 | SNV | 1 | C | G | Homozygous   |
| NC_037653.1 | 1586897 | SNV | 1 | A | T | Homozygous   |
| NC_037653.1 | 1586909 | SNV | 1 | A | G | Homozygous   |
| NC_037653.1 | 1586911 | SNV | 1 | A | T | Homozygous   |
| NC_037653.1 | 1586932 | SNV | 1 | A | C | Homozygous   |
| NC_037653.1 | 1589902 | SNV | 1 | A | T | Heterozygous |
| NC_037653.1 | 1589911 | SNV | 1 | A | T | Heterozygous |
| NC_037653.1 | 1590203 | SNV | 1 | T | C | Heterozygous |
| NC_037653.1 | 1621845 | SNV | 1 | G | C | Heterozygous |
| NC_037653.1 | 1623942 | SNV | 1 | G | A | Heterozygous |
| NC_037653.1 | 1623948 | SNV | 1 | G | C | Heterozygous |
| NC_037653.1 | 1623950 | SNV | 1 | G | A | Heterozygous |
| NC_037653.1 | 1623976 | SNV | 1 | A | C | Homozygous   |
| NC_037653.1 | 1623990 | SNV | 1 | G | T | Homozygous   |
| NC_037653.1 | 1624001 | SNV | 1 | G | A | Homozygous   |
| NC_037653.1 | 1624791 | SNV | 1 | G | A | Homozygous   |
| NC_037653.1 | 1624793 | SNV | 1 | A | G | Heterozygous |
| NC_037653.1 | 1624806 | SNV | 1 | A | G | Heterozygous |
| NC_037653.1 | 1624822 | SNV | 1 | A | T | Homozygous   |
| NC_037653.1 | 1624833 | SNV | 1 | T | C | Homozygous   |
| NC_037653.1 | 1624835 | SNV | 1 | A | G | Homozygous   |
| NC_037653.1 | 1626700 | SNV | 1 | G | C | Heterozygous |
| NC_037653.1 | 1627537 | SNV | 1 | T | C | Homozygous   |
| NC_037653.1 | 1627542 | SNV | 1 | A | G | Homozygous   |
| NC_037653.1 | 1627565 | SNV | 1 | A | T | Homozygous   |
| NC_037653.1 | 1627574 | SNV | 1 | T | C | Homozygous   |
| NC_037653.1 | 1627584 | SNV | 1 | T | C | Homozygous   |
| NC_037653.1 | 1627599 | SNV | 1 | T | C | Homozygous   |
| NC_037653.1 | 1627605 | SNV | 1 | T | C | Homozygous   |
| NC_037653.1 | 1627622 | SNV | 1 | T | C | Homozygous   |
| NC_037653.1 | 1627624 | SNV | 1 | G | A | Homozygous   |

|             |         |     |   |   |   |              |
|-------------|---------|-----|---|---|---|--------------|
| NC_037653.1 | 1629110 | SNV | 1 | A | G | Homozygous   |
| NC_037653.1 | 1629859 | SNV | 1 | C | T | Homozygous   |
| NC_037653.1 | 1629861 | SNV | 1 | C | G | Homozygous   |
| NC_037653.1 | 1630038 | SNV | 1 | A | G | Heterozygous |
| NC_037653.1 | 1630208 | SNV | 1 | A | T | Homozygous   |
| NC_037653.1 | 1630338 | SNV | 1 | T | C | Homozygous   |
| NC_037653.1 | 1632808 | SNV | 1 | T | A | Homozygous   |
| NC_037653.1 | 1634247 | SNV | 1 | T | C | Heterozygous |
| NC_037653.1 | 1635729 | SNV | 1 | A | G | Homozygous   |
| NC_037653.1 | 1635781 | SNV | 1 | G | A | Heterozygous |
| NC_037653.1 | 1636059 | SNV | 1 | A | G | Heterozygous |
| NC_037653.1 | 1636277 | SNV | 1 | T | C | Homozygous   |
| NC_037653.1 | 1636326 | SNV | 1 | C | T | Homozygous   |
| NC_037653.1 | 1636367 | SNV | 1 | T | C | Homozygous   |
| NC_037653.1 | 1637866 | SNV | 1 | G | A | Heterozygous |
| NC_037653.1 | 1637872 | SNV | 1 | C | T | Heterozygous |
| NC_037653.1 | 1637905 | SNV | 1 | T | C | Homozygous   |
| NC_037653.1 | 1637955 | SNV | 1 | C | T | Heterozygous |
| NC_037653.1 | 1638046 | SNV | 1 | T | C | Homozygous   |
| NC_037653.1 | 1638148 | SNV | 1 | A | G | Homozygous   |
| NC_037653.1 | 1638165 | SNV | 1 | A | T | Homozygous   |
| NC_037653.1 | 1638314 | SNV | 1 | T | C | Homozygous   |
| NC_037653.1 | 1639180 | SNV | 1 | T | A | Homozygous   |
| NC_037653.1 | 1640238 | SNV | 1 | A | G | Heterozygous |
| NC_037653.1 | 1641637 | SNV | 1 | T | G | Heterozygous |
| NC_037653.1 | 1641658 | SNV | 1 | C | T | Heterozygous |
| NC_037653.1 | 1649719 | SNV | 1 | T | A | Homozygous   |
| NC_037653.1 | 1649723 | SNV | 1 | A | T | Heterozygous |
| NC_037653.1 | 1649725 | SNV | 1 | G | A | Heterozygous |
| NC_037653.1 | 1649729 | SNV | 1 | A | C | Heterozygous |
| NC_037653.1 | 1649731 | SNV | 1 | A | G | Heterozygous |
| NC_037653.1 | 1649733 | SNV | 1 | A | C | Heterozygous |
| NC_037653.1 | 1649734 | SNV | 1 | T | A | Heterozygous |
| NC_037653.1 | 1655156 | SNV | 1 | T | G | Homozygous   |
| NC_037653.1 | 1655164 | SNV | 1 | A | G | Homozygous   |
| NC_037653.1 | 1655173 | SNV | 1 | A | T | Homozygous   |
| NC_037653.1 | 1667034 | SNV | 1 | T | C | Homozygous   |
| NC_037653.1 | 1682131 | SNV | 1 | A | T | Heterozygous |
| NC_037653.1 | 1682135 | SNV | 1 | T | A | Heterozygous |
| NC_037653.1 | 1682141 | SNV | 1 | A | T | Homozygous   |
| NC_037653.1 | 1682158 | SNV | 1 | T | C | Homozygous   |
| NC_037653.1 | 1706109 | SNV | 1 | T | A | Homozygous   |
| NC_037653.1 | 1708189 | SNV | 1 | A | G | Homozygous   |
| NC_037653.1 | 1708572 | SNV | 1 | G | A | Heterozygous |
| NC_037653.1 | 1708608 | SNV | 1 | A | T | Heterozygous |
| NC_037653.1 | 1708618 | SNV | 1 | T | C | Heterozygous |
| NC_037653.1 | 1711803 | SNV | 1 | C | T | Homozygous   |
| NC_037653.1 | 1768024 | SNV | 1 | A | G | Homozygous   |
| NC_037653.1 | 1768122 | SNV | 1 | C | T | Homozygous   |
| NC_037653.1 | 1768191 | SNV | 1 | G | A | Homozygous   |
| NC_037653.1 | 1804277 | SNV | 1 | C | T | Heterozygous |

|             |         |     |   |   |   |              |
|-------------|---------|-----|---|---|---|--------------|
| NC_037653.1 | 1805321 | SNV | 1 | T | A | Heterozygous |
| NC_037653.1 | 1805327 | SNV | 1 | A | T | Heterozygous |
| NC_037653.1 | 1807178 | SNV | 1 | G | A | Homozygous   |
| NC_037653.1 | 1833972 | SNV | 1 | A | G | Heterozygous |
| NC_037653.1 | 1833978 | SNV | 1 | A | T | Heterozygous |
| NC_037653.1 | 1834004 | SNV | 1 | A | T | Heterozygous |
| NC_037653.1 | 1834010 | SNV | 1 | A | T | Heterozygous |
| NC_037653.1 | 1834022 | SNV | 1 | A | T | Heterozygous |
| NC_037653.1 | 1842256 | SNV | 1 | A | G | Homozygous   |
| NC_037653.1 | 1842276 | SNV | 1 | A | T | Homozygous   |
| NC_037653.1 | 1842300 | SNV | 1 | T | C | Homozygous   |
| NC_037653.1 | 1844861 | SNV | 1 | A | G | Homozygous   |
| NC_037653.1 | 1844866 | SNV | 1 | T | A | Homozygous   |
| NC_037653.1 | 1844875 | SNV | 1 | T | C | Homozygous   |
| NC_037653.1 | 1844877 | SNV | 1 | T | G | Homozygous   |
| NC_037653.1 | 1844893 | SNV | 1 | T | A | Homozygous   |
| NC_037653.1 | 1844901 | SNV | 1 | A | T | Homozygous   |
| NC_037653.1 | 1862228 | SNV | 1 | T | C | Heterozygous |
| NC_037653.1 | 1862231 | SNV | 1 | A | C | Homozygous   |
| NC_037653.1 | 1880113 | SNV | 1 | T | A | Homozygous   |
| NC_037653.1 | 1880133 | SNV | 1 | T | C | Homozygous   |
| NC_037653.1 | 1880137 | SNV | 1 | A | G | Homozygous   |
| NC_037653.1 | 1880140 | SNV | 1 | A | G | Homozygous   |
| NC_037653.1 | 1880142 | SNV | 1 | A | T | Homozygous   |
| NC_037653.1 | 1881745 | SNV | 1 | T | G | Homozygous   |
| NC_037653.1 | 1881751 | SNV | 1 | T | G | Homozygous   |
| NC_037653.1 | 1881772 | SNV | 1 | A | G | Homozygous   |
| NC_037653.1 | 1891440 | SNV | 1 | G | A | Heterozygous |
| NC_037653.1 | 1893042 | SNV | 1 | G | C | Heterozygous |
| NC_037653.1 | 1893221 | SNV | 1 | A | G | Heterozygous |
| NC_037653.1 | 1893242 | SNV | 1 | A | G | Homozygous   |
| NC_037653.1 | 1893446 | SNV | 1 | G | A | Homozygous   |
| NC_037653.1 | 1893475 | SNV | 1 | C | T | Homozygous   |
| NC_037653.1 | 1894797 | SNV | 1 | C | T | Heterozygous |
| NC_037653.1 | 1894818 | SNV | 1 | G | A | Heterozygous |
| NC_037653.1 | 1894850 | SNV | 1 | T | C | Homozygous   |
| NC_037653.1 | 1894868 | SNV | 1 | A | G | Homozygous   |
| NC_037653.1 | 1894921 | SNV | 1 | C | T | Homozygous   |
| NC_037653.1 | 1895072 | SNV | 1 | G | A | Homozygous   |
| NC_037653.1 | 1895192 | SNV | 1 | C | T | Heterozygous |
| NC_037653.1 | 1895972 | SNV | 1 | G | A | Homozygous   |
| NC_037653.1 | 1896015 | SNV | 1 | C | T | Heterozygous |
| NC_037653.1 | 1896082 | SNV | 1 | A | G | Heterozygous |
| NC_037653.1 | 1896414 | SNV | 1 | C | T | Homozygous   |
| NC_037653.1 | 1896474 | SNV | 1 | T | C | Homozygous   |
| NC_037653.1 | 1896677 | SNV | 1 | C | T | Homozygous   |
| NC_037653.1 | 1896995 | SNV | 1 | A | G | Heterozygous |
| NC_037653.1 | 1897133 | SNV | 1 | G | A | Homozygous   |
| NC_037653.1 | 1897169 | SNV | 1 | G | A | Heterozygous |
| NC_037653.1 | 1897259 | SNV | 1 | T | C | Heterozygous |
| NC_037653.1 | 1897430 | SNV | 1 | G | A | Heterozygous |

|             |         |     |   |   |   |              |
|-------------|---------|-----|---|---|---|--------------|
| NC_037653.1 | 1897582 | SNV | 1 | C | T | Homozygous   |
| NC_037653.1 | 1902224 | SNV | 1 | A | G | Homozygous   |
| NC_037653.1 | 1902247 | SNV | 1 | G | A | Homozygous   |
| NC_037653.1 | 1902254 | SNV | 1 | T | A | Homozygous   |
| NC_037653.1 | 1915055 | SNV | 1 | T | A | Homozygous   |
| NC_037653.1 | 1915203 | SNV | 1 | A | G | Homozygous   |
| NC_037653.1 | 1915559 | SNV | 1 | G | A | Homozygous   |
| NC_037653.1 | 1915721 | SNV | 1 | A | G | Homozygous   |
| NC_037653.1 | 1920494 | SNV | 1 | G | A | Homozygous   |
| NC_037653.1 | 1920535 | SNV | 1 | C | A | Heterozygous |
| NC_037653.1 | 1920538 | SNV | 1 | T | A | Heterozygous |
| NC_037653.1 | 1920591 | SNV | 1 | C | A | Heterozygous |
| NC_037653.1 | 1920601 | SNV | 1 | T | A | Heterozygous |
| NC_037653.1 | 1920681 | SNV | 1 | G | C | Homozygous   |
| NC_037653.1 | 1929215 | SNV | 1 | A | C | Heterozygous |
| NC_037653.1 | 1929352 | SNV | 1 | A | G | Homozygous   |
| NC_037653.1 | 1932154 | SNV | 1 | G | A | Heterozygous |
| NC_037653.1 | 1933858 | SNV | 1 | A | T | Homozygous   |
| NC_037653.1 | 1953016 | SNV | 1 | G | A | Homozygous   |
| NC_037653.1 | 1953070 | SNV | 1 | G | C | Heterozygous |
| NC_037653.1 | 1954558 | SNV | 1 | C | T | Heterozygous |
| NC_037653.1 | 1954690 | SNV | 1 | T | C | Homozygous   |
| NC_037653.1 | 1955120 | SNV | 1 | A | G | Homozygous   |
| NC_037653.1 | 1955782 | SNV | 1 | A | C | Homozygous   |
| NC_037653.1 | 1956018 | SNV | 1 | C | T | Heterozygous |
| NC_037653.1 | 1957057 | SNV | 1 | A | G | Heterozygous |
| NC_037653.1 | 1957131 | SNV | 1 | G | A | Heterozygous |
| NC_037653.1 | 1957230 | SNV | 1 | C | T | Heterozygous |
| NC_037653.1 | 1957683 | SNV | 1 | G | A | Homozygous   |
| NC_037653.1 | 1957704 | SNV | 1 | T | C | Homozygous   |
| NC_037653.1 | 1958632 | SNV | 1 | T | C | Heterozygous |
| NC_037653.1 | 1958880 | SNV | 1 | G | T | Heterozygous |
| NC_037653.1 | 1959262 | SNV | 1 | C | T | Homozygous   |
| NC_037653.1 | 1959373 | SNV | 1 | A | G | Homozygous   |
| NC_037653.1 | 1959575 | SNV | 1 | A | G | Homozygous   |
| NC_037653.1 | 1962559 | SNV | 1 | G | A | Homozygous   |
| NC_037653.1 | 1962641 | SNV | 1 | C | T | Heterozygous |
| NC_037653.1 | 1963761 | SNV | 1 | T | C | Homozygous   |
| NC_037653.1 | 1963770 | SNV | 1 | C | A | Homozygous   |
| NC_037653.1 | 1964094 | SNV | 1 | A | G | Homozygous   |
| NC_037653.1 | 1964150 | SNV | 1 | C | T | Heterozygous |
| NC_037653.1 | 1964614 | SNV | 1 | T | C | Homozygous   |
| NC_037653.1 | 1964631 | SNV | 1 | A | G | Homozygous   |
| NC_037653.1 | 1964653 | SNV | 1 | G | A | Homozygous   |
| NC_037653.1 | 1964681 | SNV | 1 | C | T | Homozygous   |
| NC_037653.1 | 1964756 | SNV | 1 | G | A | Homozygous   |
| NC_037653.1 | 1964772 | SNV | 1 | T | C | Heterozygous |
| NC_037653.1 | 1964978 | SNV | 1 | C | T | Heterozygous |
| NC_037653.1 | 1965627 | SNV | 1 | G | A | Heterozygous |
| NC_037653.1 | 1965890 | SNV | 1 | C | T | Homozygous   |
| NC_037653.1 | 1965988 | SNV | 1 | G | A | Homozygous   |

|             |         |     |   |   |   |              |
|-------------|---------|-----|---|---|---|--------------|
| NC_037653.1 | 1972989 | SNV | 1 | T | C | Homozygous   |
| NC_037653.1 | 1990712 | SNV | 1 | C | T | Homozygous   |
| NC_037653.1 | 1990715 | SNV | 1 | T | G | Homozygous   |
| NC_037653.1 | 1996820 | SNV | 1 | T | C | Heterozygous |
| NC_037653.1 | 1996853 | SNV | 1 | G | A | Heterozygous |
| NC_037653.1 | 1997192 | SNV | 1 | A | G | Homozygous   |
| NC_037653.1 | 1997371 | SNV | 1 | C | A | Heterozygous |
| NC_037653.1 | 1998125 | SNV | 1 | C | T | Heterozygous |
| NC_037653.1 | 1998175 | SNV | 1 | A | G | Heterozygous |
| NC_037653.1 | 1998193 | SNV | 1 | C | T | Homozygous   |
| NC_037653.1 | 1998896 | SNV | 1 | T | C | Heterozygous |
| NC_037653.1 | 1998899 | SNV | 1 | C | T | Heterozygous |
| NC_037653.1 | 1998971 | SNV | 1 | G | A | Heterozygous |
| NC_037653.1 | 1998983 | SNV | 1 | A | G | Heterozygous |
| NC_037653.1 | 1999589 | SNV | 1 | G | T | Homozygous   |
| NC_037653.1 | 1999595 | SNV | 1 | A | C | Homozygous   |
| NC_037653.1 | 1999934 | SNV | 1 | T | C | Heterozygous |
| NC_037653.1 | 2000164 | SNV | 1 | C | T | Homozygous   |
| NC_037653.1 | 2001223 | SNV | 1 | A | G | Homozygous   |
| NC_037653.1 | 2001319 | SNV | 1 | T | C | Homozygous   |
| NC_037653.1 | 2001324 | SNV | 1 | C | T | Homozygous   |
| NC_037653.1 | 2001363 | SNV | 1 | C | T | Homozygous   |
| NC_037653.1 | 2001399 | SNV | 1 | T | C | Heterozygous |
| NC_037653.1 | 2001883 | SNV | 1 | A | C | Homozygous   |
| NC_037653.1 | 2001906 | SNV | 1 | T | G | Heterozygous |
| NC_037653.1 | 2002073 | SNV | 1 | C | A | Homozygous   |
| NC_037653.1 | 2002119 | SNV | 1 | T | C | Homozygous   |
| NC_037653.1 | 2003453 | SNV | 1 | T | C | Homozygous   |
| NC_037653.1 | 2003461 | SNV | 1 | T | C | Heterozygous |
| NC_037653.1 | 2003474 | SNV | 1 | A | T | Homozygous   |
| NC_037653.1 | 2003481 | SNV | 1 | C | T | Heterozygous |
| NC_037653.1 | 2003490 | SNV | 1 | C | T | Homozygous   |
| NC_037653.1 | 2006769 | SNV | 1 | A | G | Homozygous   |
| NC_037653.1 | 2006781 | SNV | 1 | T | C | Homozygous   |
| NC_037653.1 | 2006797 | SNV | 1 | T | G | Homozygous   |
| NC_037653.1 | 2006811 | SNV | 1 | C | A | Homozygous   |
| NC_037653.1 | 2006817 | SNV | 1 | C | A | Homozygous   |
| NC_037653.1 | 2006828 | SNV | 1 | A | G | Homozygous   |
| NC_037653.1 | 2006948 | SNV | 1 | T | G | Homozygous   |
| NC_037653.1 | 2006963 | SNV | 1 | T | A | Homozygous   |
| NC_037653.1 | 2014411 | SNV | 1 | A | T | Homozygous   |
| NC_037653.1 | 2019637 | SNV | 1 | T | C | Homozygous   |
| NC_037653.1 | 2022782 | SNV | 1 | G | A | Heterozygous |
| NC_037653.1 | 2060613 | SNV | 1 | C | T | Homozygous   |
| NC_037653.1 | 2060823 | SNV | 1 | C | T | Heterozygous |
| NC_037653.1 | 2060879 | SNV | 1 | C | T | Heterozygous |
| NC_037653.1 | 2061097 | SNV | 1 | T | C | Heterozygous |
| NC_037653.1 | 2061113 | SNV | 1 | T | C | Homozygous   |
| NC_037653.1 | 2061272 | SNV | 1 | T | C | Heterozygous |
| NC_037653.1 | 2061520 | SNV | 1 | A | G | Heterozygous |
| NC_037653.1 | 2063360 | SNV | 1 | C | G | Homozygous   |



|             |         |     |   |   |   |              |
|-------------|---------|-----|---|---|---|--------------|
| NC_037653.1 | 2065931 | SNV | 1 | G | A | Heterozygous |
| NC_037653.1 | 2066342 | SNV | 1 | G | A | Homozygous   |
| NC_037653.1 | 2066345 | SNV | 1 | C | T | Heterozygous |
| NC_037653.1 | 2066366 | SNV | 1 | G | A | Heterozygous |
| NC_037653.1 | 2075333 | SNV | 1 | A | G | Homozygous   |
| NC_037653.1 | 2076804 | SNV | 1 | G | A | Homozygous   |
| NC_037653.1 | 2079471 | SNV | 1 | C | A | Homozygous   |
| NC_037653.1 | 2079518 | SNV | 1 | G | T | Heterozygous |
| NC_037653.1 | 2079621 | SNV | 1 | A | G | Heterozygous |
| NC_037653.1 | 2079977 | SNV | 1 | A | T | Heterozygous |
| NC_037653.1 | 2079979 | SNV | 1 | A | T | Heterozygous |
| NC_037653.1 | 2082771 | SNV | 1 | T | A | Heterozygous |
| NC_037653.1 | 2082808 | SNV | 1 | G | C | Heterozygous |
| NC_037653.1 | 2083823 | SNV | 1 | A | T | Homozygous   |
| NC_037653.1 | 2083841 | SNV | 1 | C | T | Homozygous   |
| NC_037653.1 | 2083861 | SNV | 1 | C | T | Homozygous   |
| NC_037653.1 | 2083867 | SNV | 1 | A | T | Homozygous   |
| NC_037653.1 | 2083871 | SNV | 1 | T | A | Homozygous   |
| NC_037653.1 | 2083884 | SNV | 1 | T | A | Homozygous   |
| NC_037653.1 | 2083889 | SNV | 1 | G | C | Homozygous   |
| NC_037653.1 | 2083891 | SNV | 1 | T | C | Homozygous   |
| NC_037653.1 | 2083923 | SNV | 1 | T | A | Homozygous   |
| NC_037653.1 | 2083929 | SNV | 1 | A | T | Homozygous   |
| NC_037653.1 | 2083931 | SNV | 1 | C | T | Homozygous   |
| NC_037653.1 | 2083961 | SNV | 1 | T | C | Homozygous   |
| NC_037653.1 | 2083971 | SNV | 1 | C | T | Homozygous   |
| NC_037653.1 | 2083973 | SNV | 1 | T | C | Homozygous   |
| NC_037653.1 | 2087614 | SNV | 1 | C | T | Homozygous   |
| NC_037653.1 | 2087684 | SNV | 1 | A | G | Homozygous   |
| NC_037653.1 | 2088185 | SNV | 1 | G | A | Homozygous   |
| NC_037653.1 | 2088209 | SNV | 1 | G | A | Homozygous   |
| NC_037653.1 | 2088466 | SNV | 1 | C | G | Homozygous   |
| NC_037653.1 | 2088485 | SNV | 1 | T | C | Homozygous   |
| NC_037653.1 | 2088533 | SNV | 1 | G | C | Homozygous   |
| NC_037653.1 | 2088611 | SNV | 1 | C | T | Homozygous   |
| NC_037653.1 | 2088763 | SNV | 1 | T | C | Homozygous   |
| NC_037653.1 | 2088766 | SNV | 1 | T | C | Homozygous   |
| NC_037653.1 | 2088904 | SNV | 1 | G | A | Homozygous   |
| NC_037653.1 | 2088906 | SNV | 1 | A | T | Homozygous   |
| NC_037653.1 | 2088908 | SNV | 1 | C | A | Homozygous   |
| NC_037653.1 | 2088944 | SNV | 1 | T | C | Heterozygous |
| NC_037653.1 | 2088965 | SNV | 1 | G | A | Heterozygous |
| NC_037653.1 | 2089114 | SNV | 1 | A | G | Heterozygous |
| NC_037653.1 | 2089651 | SNV | 1 | C | A | Homozygous   |
| NC_037653.1 | 2089655 | SNV | 1 | C | A | Heterozygous |
| NC_037653.1 | 2089659 | SNV | 1 | C | A | Heterozygous |
| NC_037653.1 | 2089663 | SNV | 1 | T | A | Homozygous   |
| NC_037653.1 | 2089674 | SNV | 1 | A | G | Homozygous   |
| NC_037653.1 | 2090848 | SNV | 1 | G | A | Heterozygous |
| NC_037653.1 | 2090853 | SNV | 1 | A | G | Homozygous   |
| NC_037653.1 | 2090883 | SNV | 1 | G | A | Heterozygous |

|             |         |     |   |   |   |              |
|-------------|---------|-----|---|---|---|--------------|
| NC_037653.1 | 2090938 | SNV | 1 | C | T | Homozygous   |
| NC_037653.1 | 2090977 | SNV | 1 | T | G | Heterozygous |
| NC_037653.1 | 2105670 | SNV | 1 | G | T | Homozygous   |
| NC_037653.1 | 2105679 | SNV | 1 | T | A | Homozygous   |
| NC_037653.1 | 2111508 | SNV | 1 | G | A | Homozygous   |
| NC_037653.1 | 2111528 | SNV | 1 | T | C | Homozygous   |
| NC_037653.1 | 2111533 | SNV | 1 | T | C | Heterozygous |
| NC_037653.1 | 2111543 | SNV | 1 | A | G | Homozygous   |
| NC_037653.1 | 2111552 | SNV | 1 | C | T | Homozygous   |
| NC_037653.1 | 2112853 | SNV | 1 | A | G | Homozygous   |
| NC_037653.1 | 2112927 | SNV | 1 | G | C | Homozygous   |
| NC_037653.1 | 2112959 | SNV | 1 | C | T | Homozygous   |
| NC_037653.1 | 2113044 | SNV | 1 | A | G | Homozygous   |
| NC_037653.1 | 2115441 | SNV | 1 | C | T | Heterozygous |
| NC_037653.1 | 2115490 | SNV | 1 | C | T | Homozygous   |
| NC_037653.1 | 2115520 | SNV | 1 | C | T | Homozygous   |
| NC_037653.1 | 2115892 | SNV | 1 | T | C | Homozygous   |
| NC_037653.1 | 2115905 | SNV | 1 | A | G | Homozygous   |
| NC_037653.1 | 2115920 | SNV | 1 | T | A | Homozygous   |
| NC_037653.1 | 2115944 | SNV | 1 | C | T | Homozygous   |
| NC_037653.1 | 2121828 | SNV | 1 | G | A | Heterozygous |
| NC_037653.1 | 2129510 | SNV | 1 | A | G | Heterozygous |
| NC_037653.1 | 2129539 | SNV | 1 | T | A | Heterozygous |
| NC_037653.1 | 2129720 | SNV | 1 | A | T | Homozygous   |
| NC_037653.1 | 2129786 | SNV | 1 | G | T | Homozygous   |
| NC_037653.1 | 2133308 | SNV | 1 | T | C | Homozygous   |
| NC_037653.1 | 2133325 | SNV | 1 | C | T | Homozygous   |
| NC_037653.1 | 2133351 | SNV | 1 | T | C | Homozygous   |
| NC_037653.1 | 2133408 | SNV | 1 | C | T | Homozygous   |
| NC_037653.1 | 2133659 | SNV | 1 | G | A | Homozygous   |
| NC_037653.1 | 2145388 | SNV | 1 | G | A | Heterozygous |
| NC_037653.1 | 2145415 | SNV | 1 | C | G | Homozygous   |
| NC_037653.1 | 2145463 | SNV | 1 | C | T | Homozygous   |
| NC_037653.1 | 2145487 | SNV | 1 | C | G | Heterozygous |
| NC_037653.1 | 2145502 | SNV | 1 | C | T | Heterozygous |
| NC_037653.1 | 2145511 | SNV | 1 | G | A | Heterozygous |
| NC_037653.1 | 2145513 | SNV | 1 | T | C | Heterozygous |
| NC_037653.1 | 2145560 | SNV | 1 | T | C | Heterozygous |
| NC_037653.1 | 2145565 | SNV | 1 | G | A | Heterozygous |
| NC_037653.1 | 2145568 | SNV | 1 | G | A | Heterozygous |
| NC_037653.1 | 2145577 | SNV | 1 | C | T | Homozygous   |
| NC_037653.1 | 2145601 | SNV | 1 | A | G | Homozygous   |
| NC_037653.1 | 2145607 | SNV | 1 | T | C | Homozygous   |
| NC_037653.1 | 2146271 | SNV | 1 | G | A | Heterozygous |
| NC_037653.1 | 2146274 | SNV | 1 | G | A | Homozygous   |
| NC_037653.1 | 2146279 | SNV | 1 | A | G | Heterozygous |
| NC_037653.1 | 2146512 | SNV | 1 | G | T | Heterozygous |
| NC_037653.1 | 2146668 | SNV | 1 | G | A | Heterozygous |
| NC_037653.1 | 2149532 | SNV | 1 | A | G | Homozygous   |
| NC_037653.1 | 2150581 | SNV | 1 | A | T | Heterozygous |
| NC_037653.1 | 2150583 | SNV | 1 | G | A | Heterozygous |

|             |         |     |   |   |   |              |
|-------------|---------|-----|---|---|---|--------------|
| NC_037653.1 | 2150591 | SNV | 1 | T | C | Heterozygous |
| NC_037653.1 | 2150597 | SNV | 1 | A | T | Heterozygous |
| NC_037653.1 | 2159737 | SNV | 1 | G | A | Homozygous   |
| NC_037653.1 | 2160118 | SNV | 1 | G | A | Homozygous   |
| NC_037653.1 | 2160202 | SNV | 1 | A | G | Homozygous   |
| NC_037653.1 | 2160226 | SNV | 1 | T | C | Homozygous   |
| NC_037653.1 | 2164474 | SNV | 1 | A | G | Heterozygous |
| NC_037653.1 | 2164486 | SNV | 1 | G | A | Heterozygous |
| NC_037653.1 | 2164488 | SNV | 1 | G | A | Heterozygous |
| NC_037653.1 | 2168088 | SNV | 1 | A | C | Homozygous   |
| NC_037653.1 | 2172499 | SNV | 1 | C | T | Homozygous   |
| NC_037653.1 | 2172576 | SNV | 1 | T | C | Heterozygous |
| NC_037653.1 | 2172578 | SNV | 1 | T | C | Heterozygous |
| NC_037653.1 | 2172581 | SNV | 1 | T | C | Heterozygous |
| NC_037653.1 | 2172630 | SNV | 1 | A | G | Heterozygous |
| NC_037653.1 | 2172638 | SNV | 1 | A | G | Homozygous   |
| NC_037653.1 | 2172771 | SNV | 1 | T | C | Homozygous   |
| NC_037653.1 | 2172776 | SNV | 1 | C | T | Heterozygous |
| NC_037653.1 | 2172789 | SNV | 1 | T | C | Heterozygous |
| NC_037653.1 | 2172795 | SNV | 1 | G | A | Heterozygous |
| NC_037653.1 | 2172818 | SNV | 1 | G | A | Heterozygous |
| NC_037653.1 | 2172936 | SNV | 1 | A | C | Heterozygous |
| NC_037653.1 | 2172954 | SNV | 1 | T | C | Heterozygous |
| NC_037653.1 | 2172958 | SNV | 1 | T | C | Homozygous   |
| NC_037653.1 | 2172992 | SNV | 1 | G | A | Homozygous   |
| NC_037653.1 | 2173032 | SNV | 1 | G | A | Heterozygous |
| NC_037653.1 | 2173046 | SNV | 1 | C | T | Heterozygous |
| NC_037653.1 | 2173288 | SNV | 1 | T | A | Homozygous   |
| NC_037653.1 | 2173414 | SNV | 1 | T | C | Heterozygous |
| NC_037653.1 | 2173656 | SNV | 1 | A | G | Homozygous   |
| NC_037653.1 | 2174035 | SNV | 1 | G | C | Heterozygous |
| NC_037653.1 | 2174186 | SNV | 1 | G | A | Homozygous   |
| NC_037653.1 | 2174193 | SNV | 1 | C | T | Homozygous   |
| NC_037653.1 | 2174226 | SNV | 1 | T | C | Heterozygous |
| NC_037653.1 | 2175203 | SNV | 1 | G | A | Homozygous   |
| NC_037653.1 | 2175223 | SNV | 1 | T | C | Heterozygous |
| NC_037653.1 | 2175330 | SNV | 1 | T | C | Homozygous   |
| NC_037653.1 | 2175647 | SNV | 1 | T | C | Heterozygous |
| NC_037653.1 | 2191516 | SNV | 1 | A | G | Homozygous   |
| NC_037653.1 | 2191527 | SNV | 1 | C | T | Homozygous   |
| NC_037653.1 | 2191565 | SNV | 1 | G | A | Homozygous   |
| NC_037653.1 | 2191592 | SNV | 1 | C | T | Homozygous   |
| NC_037653.1 | 2196906 | SNV | 1 | C | T | Homozygous   |
| NC_037653.1 | 2196974 | SNV | 1 | T | C | Homozygous   |
| NC_037653.1 | 2197207 | SNV | 1 | A | G | Homozygous   |
| NC_037653.1 | 2197240 | SNV | 1 | A | G | Homozygous   |
| NC_037653.1 | 2198618 | SNV | 1 | G | A | Homozygous   |
| NC_037653.1 | 2205433 | SNV | 1 | T | A | Heterozygous |
| NC_037653.1 | 2208572 | SNV | 1 | C | T | Homozygous   |
| NC_037653.1 | 2213205 | SNV | 1 | C | T | Heterozygous |
| NC_037653.1 | 2213226 | SNV | 1 | C | T | Homozygous   |

|             |         |     |   |   |   |              |
|-------------|---------|-----|---|---|---|--------------|
| NC_037653.1 | 2213230 | SNV | 1 | C | T | Heterozygous |
| NC_037653.1 | 2213234 | SNV | 1 | T | C | Heterozygous |
| NC_037653.1 | 2213236 | SNV | 1 | C | T | Heterozygous |
| NC_037653.1 | 2213269 | SNV | 1 | G | A | Heterozygous |
| NC_037653.1 | 2213287 | SNV | 1 | G | A | Heterozygous |
| NC_037653.1 | 2217417 | SNV | 1 | T | G | Homozygous   |
| NC_037653.1 | 2217450 | SNV | 1 | A | T | Homozygous   |
| NC_037653.1 | 2225154 | SNV | 1 | T | C | Homozygous   |
| NC_037653.1 | 2225161 | SNV | 1 | C | T | Heterozygous |
| NC_037653.1 | 2228960 | SNV | 1 | G | A | Homozygous   |
| NC_037653.1 | 2229033 | SNV | 1 | T | C | Homozygous   |
| NC_037653.1 | 2237515 | SNV | 1 | T | C | Heterozygous |
| NC_037653.1 | 2237543 | SNV | 1 | T | C | Heterozygous |
| NC_037653.1 | 2237547 | SNV | 1 | T | C | Heterozygous |
| NC_037653.1 | 2243130 | SNV | 1 | C | T | Heterozygous |
| NC_037653.1 | 2243204 | SNV | 1 | A | G | Homozygous   |
| NC_037653.1 | 2256170 | SNV | 1 | G | A | Homozygous   |
| NC_037653.1 | 2256202 | SNV | 1 | T | C | Homozygous   |
| NC_037653.1 | 2256206 | SNV | 1 | A | G | Homozygous   |
| NC_037653.1 | 2256254 | SNV | 1 | G | T | Heterozygous |
| NC_037653.1 | 2256257 | SNV | 1 | A | T | Heterozygous |
| NC_037653.1 | 2275746 | SNV | 1 | C | T | Heterozygous |
| NC_037653.1 | 2275775 | SNV | 1 | T | A | Homozygous   |
| NC_037653.1 | 2275777 | SNV | 1 | T | A | Homozygous   |
| NC_037653.1 | 2282728 | SNV | 1 | G | A | Heterozygous |
| NC_037653.1 | 2284360 | SNV | 1 | T | C | Homozygous   |
| NC_037653.1 | 2284432 | SNV | 1 | T | G | Homozygous   |
| NC_037653.1 | 2284452 | SNV | 1 | G | A | Homozygous   |
| NC_037653.1 | 2285546 | SNV | 1 | A | G | Homozygous   |
| NC_037653.1 | 2287170 | SNV | 1 | A | C | Homozygous   |
| NC_037653.1 | 2287204 | SNV | 1 | G | A | Homozygous   |
| NC_037653.1 | 2287209 | SNV | 1 | G | A | Heterozygous |
| NC_037653.1 | 2290967 | SNV | 1 | C | G | Homozygous   |
| NC_037653.1 | 2290983 | SNV | 1 | T | C | Heterozygous |
| NC_037653.1 | 2291016 | SNV | 1 | T | C | Homozygous   |
| NC_037653.1 | 2321147 | SNV | 1 | C | T | Homozygous   |
| NC_037653.1 | 2328030 | SNV | 1 | A | G | Homozygous   |
| NC_037653.1 | 2328338 | SNV | 1 | T | C | Heterozygous |
| NC_037653.1 | 2330814 | SNV | 1 | C | T | Homozygous   |
| NC_037653.1 | 2330858 | SNV | 1 | A | G | Homozygous   |
| NC_037653.1 | 2332297 | SNV | 1 | T | A | Heterozygous |
| NC_037653.1 | 2332493 | SNV | 1 | C | T | Heterozygous |
| NC_037653.1 | 2332496 | SNV | 1 | G | C | Homozygous   |
| NC_037653.1 | 2332506 | SNV | 1 | A | G | Homozygous   |
| NC_037653.1 | 2332513 | SNV | 1 | C | T | Heterozygous |
| NC_037653.1 | 2332746 | SNV | 1 | C | T | Homozygous   |
| NC_037653.1 | 2332796 | SNV | 1 | C | T | Heterozygous |
| NC_037653.1 | 2332801 | SNV | 1 | G | A | Heterozygous |
| NC_037653.1 | 2332866 | SNV | 1 | G | T | Homozygous   |
| NC_037653.1 | 2335281 | SNV | 1 | G | T | Homozygous   |
| NC_037653.1 | 2335445 | SNV | 1 | T | C | Homozygous   |

|             |         |     |   |   |   |              |
|-------------|---------|-----|---|---|---|--------------|
| NC_037653.1 | 2338052 | SNV | 1 | C | T | Heterozygous |
| NC_037653.1 | 2338063 | SNV | 1 | C | T | Heterozygous |
| NC_037653.1 | 2338074 | SNV | 1 | G | C | Heterozygous |
| NC_037653.1 | 2338078 | SNV | 1 | A | G | Heterozygous |
| NC_037653.1 | 2338080 | SNV | 1 | G | A | Heterozygous |
| NC_037653.1 | 2338087 | SNV | 1 | G | A | Heterozygous |
| NC_037653.1 | 2338092 | SNV | 1 | A | G | Homozygous   |
| NC_037653.1 | 2344086 | SNV | 1 | T | C | Homozygous   |
| NC_037653.1 | 2344195 | SNV | 1 | A | G | Homozygous   |
| NC_037653.1 | 2362182 | SNV | 1 | A | C | Homozygous   |
| NC_037653.1 | 2362218 | SNV | 1 | A | C | Heterozygous |
| NC_037653.1 | 2362220 | SNV | 1 | G | A | Heterozygous |
| NC_037653.1 | 2362224 | SNV | 1 | G | A | Homozygous   |
| NC_037653.1 | 2362229 | SNV | 1 | G | A | Homozygous   |
| NC_037653.1 | 2381498 | SNV | 1 | C | T | Heterozygous |
| NC_037653.1 | 2381500 | SNV | 1 | C | T | Heterozygous |
| NC_037653.1 | 2381505 | SNV | 1 | C | T | Heterozygous |
| NC_037653.1 | 2381572 | SNV | 1 | A | G | Homozygous   |
| NC_037653.1 | 2391494 | SNV | 1 | T | C | Homozygous   |
| NC_037653.1 | 2391508 | SNV | 1 | T | C | Homozygous   |
| NC_037653.1 | 2391510 | SNV | 1 | T | C | Homozygous   |
| NC_037653.1 | 2391512 | SNV | 1 | T | C | Homozygous   |
| NC_037653.1 | 2391514 | SNV | 1 | T | C | Homozygous   |
| NC_037653.1 | 2391530 | SNV | 1 | T | C | Homozygous   |
| NC_037653.1 | 2394765 | SNV | 1 | C | A | Heterozygous |
| NC_037653.1 | 2398386 | SNV | 1 | C | T | Homozygous   |
| NC_037653.1 | 2398398 | SNV | 1 | G | C | Heterozygous |
| NC_037653.1 | 2398400 | SNV | 1 | T | A | Heterozygous |
| NC_037653.1 | 2398414 | SNV | 1 | T | C | Heterozygous |
| NC_037653.1 | 2398436 | SNV | 1 | C | T | Heterozygous |
| NC_037653.1 | 2398540 | SNV | 1 | A | C | Homozygous   |
| NC_037653.1 | 2405875 | SNV | 1 | C | T | Homozygous   |
| NC_037653.1 | 2405881 | SNV | 1 | T | C | Homozygous   |
| NC_037653.1 | 2405884 | SNV | 1 | T | A | Homozygous   |
| NC_037653.1 | 2405886 | SNV | 1 | T | A | Homozygous   |
| NC_037653.1 | 2405888 | SNV | 1 | G | A | Homozygous   |
| NC_037653.1 | 2405899 | SNV | 1 | T | A | Homozygous   |
| NC_037653.1 | 2405927 | SNV | 1 | G | T | Homozygous   |
| NC_037653.1 | 2405931 | SNV | 1 | G | T | Heterozygous |
| NC_037653.1 | 2407103 | SNV | 1 | G | C | Homozygous   |
| NC_037653.1 | 2407109 | SNV | 1 | G | C | Homozygous   |
| NC_037653.1 | 2407114 | SNV | 1 | G | T | Homozygous   |
| NC_037653.1 | 2407117 | SNV | 1 | G | A | Homozygous   |
| NC_037653.1 | 2407120 | SNV | 1 | G | A | Homozygous   |
| NC_037653.1 | 2407123 | SNV | 1 | G | A | Homozygous   |
| NC_037653.1 | 2407126 | SNV | 1 | G | A | Homozygous   |
| NC_037653.1 | 2407953 | SNV | 1 | G | A | Homozygous   |
| NC_037653.1 | 2407967 | SNV | 1 | G | A | Homozygous   |
| NC_037653.1 | 2407971 | SNV | 1 | G | T | Homozygous   |
| NC_037653.1 | 2407978 | SNV | 1 | G | T | Homozygous   |
| NC_037653.1 | 2407987 | SNV | 1 | G | A | Homozygous   |

|             |         |     |   |   |   |              |
|-------------|---------|-----|---|---|---|--------------|
| NC_037653.1 | 2407995 | SNV | 1 | G | A | Homozygous   |
| NC_037653.1 | 2432527 | SNV | 1 | C | T | Homozygous   |
| NC_037653.1 | 2434253 | SNV | 1 | A | G | Heterozygous |
| NC_037653.1 | 2434258 | SNV | 1 | G | A | Homozygous   |
| NC_037653.1 | 2434608 | SNV | 1 | G | A | Heterozygous |
| NC_037653.1 | 2434817 | SNV | 1 | G | A | Homozygous   |
| NC_037653.1 | 2435392 | SNV | 1 | A | G | Homozygous   |
| NC_037653.1 | 2435415 | SNV | 1 | C | T | Homozygous   |
| NC_037653.1 | 2435586 | SNV | 1 | C | T | Heterozygous |
| NC_037653.1 | 2435633 | SNV | 1 | T | C | Homozygous   |
| NC_037653.1 | 2435727 | SNV | 1 | T | C | Homozygous   |
| NC_037653.1 | 2435748 | SNV | 1 | A | G | Homozygous   |
| NC_037653.1 | 2435882 | SNV | 1 | A | G | Homozygous   |
| NC_037653.1 | 2435887 | SNV | 1 | A | T | Homozygous   |
| NC_037653.1 | 2436363 | SNV | 1 | T | C | Homozygous   |
| NC_037653.1 | 2436376 | SNV | 1 | A | G | Homozygous   |
| NC_037653.1 | 2436420 | SNV | 1 | T | C | Heterozygous |
| NC_037653.1 | 2436477 | SNV | 1 | A | G | Homozygous   |
| NC_037653.1 | 2436548 | SNV | 1 | G | A | Heterozygous |
| NC_037653.1 | 2436802 | SNV | 1 | T | C | Heterozygous |
| NC_037653.1 | 2436826 | SNV | 1 | C | T | Homozygous   |
| NC_037653.1 | 2437066 | SNV | 1 | A | G | Homozygous   |
| NC_037653.1 | 2437087 | SNV | 1 | T | C | Homozygous   |
| NC_037653.1 | 2437186 | SNV | 1 | T | A | Heterozygous |
| NC_037653.1 | 2437189 | SNV | 1 | C | T | Heterozygous |
| NC_037653.1 | 2437246 | SNV | 1 | G | A | Homozygous   |
| NC_037653.1 | 2437261 | SNV | 1 | T | C | Heterozygous |
| NC_037653.1 | 2437303 | SNV | 1 | A | G | Heterozygous |
| NC_037653.1 | 2437372 | SNV | 1 | T | C | Homozygous   |
| NC_037653.1 | 2437402 | SNV | 1 | A | G | Homozygous   |
| NC_037653.1 | 2437492 | SNV | 1 | T | C | Homozygous   |
| NC_037653.1 | 2437506 | SNV | 1 | C | T | Heterozygous |
| NC_037653.1 | 2437553 | SNV | 1 | T | C | Heterozygous |
| NC_037653.1 | 2437603 | SNV | 1 | T | C | Heterozygous |
| NC_037653.1 | 2438177 | SNV | 1 | T | C | Heterozygous |
| NC_037653.1 | 2438179 | SNV | 1 | G | A | Heterozygous |
| NC_037653.1 | 2438188 | SNV | 1 | T | C | Heterozygous |
| NC_037653.1 | 2438222 | SNV | 1 | T | C | Homozygous   |
| NC_037653.1 | 2438281 | SNV | 1 | T | C | Heterozygous |
| NC_037653.1 | 2438670 | SNV | 1 | A | T | Homozygous   |
| NC_037653.1 | 2438720 | SNV | 1 | A | G | Heterozygous |
| NC_037653.1 | 2438725 | SNV | 1 | A | G | Homozygous   |
| NC_037653.1 | 2438735 | SNV | 1 | T | C | Heterozygous |
| NC_037653.1 | 2438803 | SNV | 1 | T | C | Homozygous   |
| NC_037653.1 | 2438829 | SNV | 1 | C | T | Homozygous   |
| NC_037653.1 | 2438891 | SNV | 1 | A | G | Homozygous   |
| NC_037653.1 | 2438897 | SNV | 1 | A | G | Homozygous   |
| NC_037653.1 | 2439004 | SNV | 1 | A | G | Heterozygous |
| NC_037653.1 | 2439531 | SNV | 1 | C | T | Heterozygous |
| NC_037653.1 | 2439538 | SNV | 1 | T | C | Heterozygous |
| NC_037653.1 | 2439708 | SNV | 1 | C | T | Heterozygous |

|             |         |     |   |   |   |              |
|-------------|---------|-----|---|---|---|--------------|
| NC_037653.1 | 2439716 | SNV | 1 | T | C | Heterozygous |
| NC_037653.1 | 2439724 | SNV | 1 | T | C | Homozygous   |
| NC_037653.1 | 2439727 | SNV | 1 | T | C | Heterozygous |
| NC_037653.1 | 2439766 | SNV | 1 | T | C | Homozygous   |
| NC_037653.1 | 2439822 | SNV | 1 | A | G | Heterozygous |
| NC_037653.1 | 2439840 | SNV | 1 | G | C | Homozygous   |
| NC_037653.1 | 2439842 | SNV | 1 | T | G | Heterozygous |
| NC_037653.1 | 2439876 | SNV | 1 | T | C | Homozygous   |
| NC_037653.1 | 2440225 | SNV | 1 | A | G | Heterozygous |
| NC_037653.1 | 2440230 | SNV | 1 | A | T | Heterozygous |
| NC_037653.1 | 2440240 | SNV | 1 | C | T | Heterozygous |
| NC_037653.1 | 2440304 | SNV | 1 | A | G | Heterozygous |
| NC_037653.1 | 2440697 | SNV | 1 | C | T | Heterozygous |
| NC_037653.1 | 2440705 | SNV | 1 | A | G | Heterozygous |
| NC_037653.1 | 2440842 | SNV | 1 | T | C | Homozygous   |
| NC_037653.1 | 2440863 | SNV | 1 | T | C | Heterozygous |
| NC_037653.1 | 2440873 | SNV | 1 | C | T | Homozygous   |
| NC_037653.1 | 2441329 | SNV | 1 | C | T | Heterozygous |
| NC_037653.1 | 2441554 | SNV | 1 | T | C | Homozygous   |
| NC_037653.1 | 2441589 | SNV | 1 | A | G | Homozygous   |
| NC_037653.1 | 2441724 | SNV | 1 | A | G | Homozygous   |
| NC_037653.1 | 2444862 | SNV | 1 | C | T | Heterozygous |
| NC_037653.1 | 2445341 | SNV | 1 | A | G | Homozygous   |
| NC_037653.1 | 2445343 | SNV | 1 | G | A | Homozygous   |
| NC_037653.1 | 2445523 | SNV | 1 | G | A | Heterozygous |
| NC_037653.1 | 2445635 | SNV | 1 | A | G | Homozygous   |
| NC_037653.1 | 2445913 | SNV | 1 | A | G | Homozygous   |
| NC_037653.1 | 2446061 | SNV | 1 | A | G | Homozygous   |
| NC_037653.1 | 2446092 | SNV | 1 | A | G | Homozygous   |
| NC_037653.1 | 2446359 | SNV | 1 | T | C | Homozygous   |
| NC_037653.1 | 2446694 | SNV | 1 | T | C | Homozygous   |
| NC_037653.1 | 2446725 | SNV | 1 | T | C | Homozygous   |
| NC_037653.1 | 2449112 | SNV | 1 | T | C | Heterozygous |
| NC_037653.1 | 2449372 | SNV | 1 | G | A | Homozygous   |
| NC_037653.1 | 2466764 | SNV | 1 | C | T | Heterozygous |
| NC_037653.1 | 2466794 | SNV | 1 | G | A | Heterozygous |
| NC_037653.1 | 2466884 | SNV | 1 | A | G | Heterozygous |
| NC_037653.1 | 2466938 | SNV | 1 | A | G | Homozygous   |
| NC_037653.1 | 2467285 | SNV | 1 | T | C | Heterozygous |
| NC_037653.1 | 2474622 | SNV | 1 | C | T | Homozygous   |
| NC_037653.1 | 2474651 | SNV | 1 | T | A | Heterozygous |
| NC_037653.1 | 2474654 | SNV | 1 | T | A | Homozygous   |
| NC_037653.1 | 2475466 | SNV | 1 | A | T | Homozygous   |
| NC_037653.1 | 2475474 | SNV | 1 | A | G | Homozygous   |
| NC_037653.1 | 2478010 | SNV | 1 | T | C | Heterozygous |
| NC_037653.1 | 2478098 | SNV | 1 | A | G | Homozygous   |
| NC_037653.1 | 2485376 | SNV | 1 | C | T | Heterozygous |
| NC_037653.1 | 2485505 | SNV | 1 | T | C | Homozygous   |
| NC_037653.1 | 2485544 | SNV | 1 | A | G | Homozygous   |
| NC_037653.1 | 2485592 | SNV | 1 | T | A | Homozygous   |
| NC_037653.1 | 2497229 | SNV | 1 | T | A | Homozygous   |

|             |         |     |   |   |   |              |
|-------------|---------|-----|---|---|---|--------------|
| NC_037653.1 | 2497237 | SNV | 1 | A | T | Homozygous   |
| NC_037653.1 | 2505535 | SNV | 1 | T | C | Homozygous   |
| NC_037653.1 | 2513286 | SNV | 1 | G | A | Heterozygous |
| NC_037653.1 | 2529311 | SNV | 1 | T | A | Homozygous   |
| NC_037653.1 | 2529319 | SNV | 1 | T | A | Homozygous   |
| NC_037653.1 | 2533646 | SNV | 1 | A | G | Homozygous   |
| NC_037653.1 | 2533683 | SNV | 1 | T | C | Heterozygous |
| NC_037653.1 | 2534001 | SNV | 1 | A | G | Homozygous   |
| NC_037653.1 | 2538016 | SNV | 1 | C | T | Homozygous   |
| NC_037653.1 | 2538107 | SNV | 1 | A | C | Homozygous   |
| NC_037653.1 | 2538128 | SNV | 1 | C | T | Heterozygous |
| NC_037653.1 | 2538132 | SNV | 1 | C | T | Heterozygous |
| NC_037653.1 | 2538150 | SNV | 1 | A | T | Heterozygous |
| NC_037653.1 | 2538166 | SNV | 1 | C | T | Heterozygous |
| NC_037653.1 | 2542226 | SNV | 1 | A | G | Heterozygous |
| NC_037653.1 | 2542272 | SNV | 1 | T | C | Homozygous   |
| NC_037653.1 | 2542371 | SNV | 1 | T | C | Heterozygous |
| NC_037653.1 | 2542373 | SNV | 1 | C | T | Homozygous   |
| NC_037653.1 | 2542382 | SNV | 1 | G | T | Homozygous   |
| NC_037653.1 | 2542388 | SNV | 1 | A | G | Homozygous   |
| NC_037653.1 | 2542529 | SNV | 1 | C | T | Heterozygous |
| NC_037653.1 | 2543540 | SNV | 1 | C | T | Heterozygous |
| NC_037653.1 | 2544481 | SNV | 1 | A | G | Homozygous   |
| NC_037653.1 | 2544555 | SNV | 1 | C | T | Homozygous   |
| NC_037653.1 | 2544586 | SNV | 1 | C | T | Homozygous   |
| NC_037653.1 | 2544598 | SNV | 1 | G | A | Homozygous   |
| NC_037653.1 | 2544619 | SNV | 1 | T | C | Heterozygous |
| NC_037653.1 | 2550335 | SNV | 1 | T | G | Homozygous   |
| NC_037653.1 | 2550372 | SNV | 1 | A | G | Homozygous   |
| NC_037653.1 | 2550376 | SNV | 1 | A | T | Homozygous   |
| NC_037653.1 | 2550901 | SNV | 1 | G | A | Homozygous   |
| NC_037653.1 | 2556355 | SNV | 1 | T | A | Homozygous   |
| NC_037653.1 | 2556359 | SNV | 1 | T | A | Homozygous   |
| NC_037653.1 | 2556363 | SNV | 1 | T | A | Homozygous   |
| NC_037653.1 | 2556529 | SNV | 1 | T | C | Heterozygous |
| NC_037653.1 | 2556531 | SNV | 1 | C | A | Heterozygous |
| NC_037653.1 | 2558989 | SNV | 1 | A | T | Heterozygous |
| NC_037653.1 | 2559261 | SNV | 1 | T | C | Heterozygous |
| NC_037653.1 | 2559273 | SNV | 1 | G | A | Heterozygous |
| NC_037653.1 | 2559292 | SNV | 1 | C | A | Homozygous   |
| NC_037653.1 | 2559587 | SNV | 1 | C | T | Homozygous   |
| NC_037653.1 | 2559637 | SNV | 1 | T | C | Homozygous   |
| NC_037653.1 | 2559737 | SNV | 1 | G | A | Heterozygous |
| NC_037653.1 | 2559767 | SNV | 1 | C | T | Homozygous   |
| NC_037653.1 | 2560157 | SNV | 1 | A | G | Homozygous   |
| NC_037653.1 | 2560246 | SNV | 1 | A | G | Homozygous   |
| NC_037653.1 | 2561232 | SNV | 1 | C | A | Homozygous   |
| NC_037653.1 | 2585239 | SNV | 1 | T | C | Homozygous   |
| NC_037653.1 | 2585245 | SNV | 1 | G | C | Homozygous   |
| NC_037653.1 | 2585255 | SNV | 1 | G | C | Homozygous   |
| NC_037653.1 | 2585267 | SNV | 1 | G | T | Homozygous   |



|             |         |     |   |   |   |              |
|-------------|---------|-----|---|---|---|--------------|
| NC_037653.1 | 2585269 | SNV | 1 | G | T | Homozygous   |
| NC_037653.1 | 2585295 | SNV | 1 | T | C | Heterozygous |
| NC_037653.1 | 2585297 | SNV | 1 | T | A | Homozygous   |
| NC_037653.1 | 2585301 | SNV | 1 | A | T | Homozygous   |
| NC_037653.1 | 2585306 | SNV | 1 | A | G | Heterozygous |
| NC_037653.1 | 2585311 | SNV | 1 | G | A | Homozygous   |
| NC_037653.1 | 2609387 | SNV | 1 | T | C | Heterozygous |
| NC_037653.1 | 2609449 | SNV | 1 | G | A | Heterozygous |
| NC_037653.1 | 2609456 | SNV | 1 | T | A | Heterozygous |
| NC_037653.1 | 2609511 | SNV | 1 | T | C | Homozygous   |
| NC_037653.1 | 2609521 | SNV | 1 | C | T | Heterozygous |
| NC_037653.1 | 2609544 | SNV | 1 | T | C | Homozygous   |
| NC_037653.1 | 2609599 | SNV | 1 | G | A | Heterozygous |
| NC_037653.1 | 2609738 | SNV | 1 | A | G | Heterozygous |
| NC_037653.1 | 2609753 | SNV | 1 | A | G | Homozygous   |
| NC_037653.1 | 2609921 | SNV | 1 | A | C | Heterozygous |
| NC_037653.1 | 2616070 | SNV | 1 | C | G | Homozygous   |
| NC_037653.1 | 2616084 | SNV | 1 | G | C | Heterozygous |
| NC_037653.1 | 2616138 | SNV | 1 | A | G | Homozygous   |
| NC_037653.1 | 2616151 | SNV | 1 | A | G | Homozygous   |
| NC_037653.1 | 2616158 | SNV | 1 | A | G | Homozygous   |
| NC_037653.1 | 2616240 | SNV | 1 | T | A | Heterozygous |
| NC_037653.1 | 2617816 | SNV | 1 | T | C | Homozygous   |
| NC_037653.1 | 2618241 | SNV | 1 | A | T | Heterozygous |
| NC_037653.1 | 2618269 | SNV | 1 | T | C | Homozygous   |
| NC_037653.1 | 2618275 | SNV | 1 | C | T | Heterozygous |
| NC_037653.1 | 2618279 | SNV | 1 | G | C | Homozygous   |
| NC_037653.1 | 2618293 | SNV | 1 | C | G | Heterozygous |
| NC_037653.1 | 2618376 | SNV | 1 | G | C | Homozygous   |
| NC_037653.1 | 2618387 | SNV | 1 | G | T | Homozygous   |
| NC_037653.1 | 2623575 | SNV | 1 | A | G | Heterozygous |
| NC_037653.1 | 2631532 | SNV | 1 | G | T | Homozygous   |
| NC_037653.1 | 2631538 | SNV | 1 | T | C | Homozygous   |
| NC_037653.1 | 2637364 | SNV | 1 | T | C | Homozygous   |
| NC_037653.1 | 2637394 | SNV | 1 | C | T | Heterozygous |
| NC_037653.1 | 2637682 | SNV | 1 | C | T | Homozygous   |
| NC_037653.1 | 2639031 | SNV | 1 | G | A | Homozygous   |
| NC_037653.1 | 2639737 | SNV | 1 | A | G | Homozygous   |
| NC_037653.1 | 2640338 | SNV | 1 | G | A | Homozygous   |
| NC_037653.1 | 2640441 | SNV | 1 | G | A | Heterozygous |
| NC_037653.1 | 2640464 | SNV | 1 | G | A | Heterozygous |
| NC_037653.1 | 2649714 | SNV | 1 | G | A | Heterozygous |
| NC_037653.1 | 2657599 | SNV | 1 | C | T | Homozygous   |
| NC_037653.1 | 2657623 | SNV | 1 | T | A | Heterozygous |
| NC_037653.1 | 2657682 | SNV | 1 | C | T | Homozygous   |
| NC_037653.1 | 2661569 | SNV | 1 | T | A | Heterozygous |
| NC_037653.1 | 2661569 | SNV | 1 | T | C | Heterozygous |
| NC_037653.1 | 2661587 | SNV | 1 | A | G | Heterozygous |
| NC_037653.1 | 2674465 | SNV | 1 | A | T | Homozygous   |
| NC_037653.1 | 2674474 | SNV | 1 | T | A | Homozygous   |
| NC_037653.1 | 2674494 | SNV | 1 | A | G | Homozygous   |

|             |         |     |   |   |   |              |
|-------------|---------|-----|---|---|---|--------------|
| NC_037653.1 | 2674771 | SNV | 1 | T | G | Homozygous   |
| NC_037653.1 | 2674777 | SNV | 1 | T | A | Homozygous   |
| NC_037653.1 | 2674784 | SNV | 1 | T | A | Homozygous   |
| NC_037653.1 | 2674789 | SNV | 1 | T | A | Homozygous   |
| NC_037653.1 | 2674802 | SNV | 1 | A | T | Homozygous   |
| NC_037653.1 | 2687065 | SNV | 1 | G | A | Heterozygous |
| NC_037653.1 | 2687065 | SNV | 1 | G | C | Heterozygous |
| NC_037653.1 | 2687158 | SNV | 1 | A | G | Homozygous   |
| NC_037653.1 | 2691624 | SNV | 1 | C | T | Heterozygous |
| NC_037653.1 | 2691626 | SNV | 1 | A | T | Heterozygous |
| NC_037653.1 | 2691628 | SNV | 1 | C | T | Homozygous   |
| NC_037653.1 | 2691635 | SNV | 1 | A | T | Heterozygous |
| NC_037653.1 | 2691761 | SNV | 1 | T | C | Heterozygous |
| NC_037653.1 | 2692839 | SNV | 1 | G | A | Homozygous   |
| NC_037653.1 | 2692919 | SNV | 1 | T | C | Heterozygous |
| NC_037653.1 | 2693031 | SNV | 1 | C | T | Homozygous   |
| NC_037653.1 | 2693232 | SNV | 1 | C | T | Homozygous   |
| NC_037653.1 | 2693257 | SNV | 1 | T | C | Heterozygous |
| NC_037653.1 | 2693818 | SNV | 1 | C | T | Heterozygous |
| NC_037653.1 | 2696283 | SNV | 1 | C | T | Heterozygous |
| NC_037653.1 | 2697108 | SNV | 1 | T | A | Homozygous   |
| NC_037653.1 | 2698206 | SNV | 1 | C | T | Homozygous   |
| NC_037653.1 | 2698536 | SNV | 1 | G | A | Homozygous   |
| NC_037653.1 | 2699647 | SNV | 1 | T | C | Homozygous   |
| NC_037653.1 | 2699650 | SNV | 1 | G | A | Homozygous   |
| NC_037653.1 | 2701846 | SNV | 1 | A | T | Homozygous   |
| NC_037653.1 | 2701848 | SNV | 1 | T | A | Homozygous   |
| NC_037653.1 | 2701868 | SNV | 1 | A | T | Homozygous   |
| NC_037653.1 | 2701881 | SNV | 1 | T | C | Homozygous   |
| NC_037653.1 | 2705759 | SNV | 1 | A | G | Homozygous   |
| NC_037653.1 | 2706145 | SNV | 1 | C | T | Homozygous   |
| NC_037653.1 | 2706282 | SNV | 1 | A | G | Heterozygous |
| NC_037653.1 | 2713409 | SNV | 1 | T | C | Homozygous   |
| NC_037653.1 | 2719419 | SNV | 1 | T | A | Homozygous   |
| NC_037653.1 | 2719454 | SNV | 1 | G | A | Homozygous   |
| NC_037653.1 | 2719460 | SNV | 1 | A | T | Homozygous   |
| NC_037653.1 | 2724339 | SNV | 1 | T | C | Homozygous   |
| NC_037653.1 | 2724911 | SNV | 1 | A | C | Homozygous   |
| NC_037653.1 | 2725065 | SNV | 1 | A | T | Homozygous   |
| NC_037653.1 | 2725820 | SNV | 1 | C | G | Heterozygous |
| NC_037653.1 | 2727570 | SNV | 1 | A | G | Heterozygous |
| NC_037653.1 | 2728244 | SNV | 1 | T | C | Homozygous   |
| NC_037653.1 | 2728353 | SNV | 1 | T | A | Homozygous   |
| NC_037653.1 | 2728700 | SNV | 1 | G | A | Homozygous   |
| NC_037653.1 | 2728713 | SNV | 1 | G | A | Heterozygous |
| NC_037653.1 | 2728750 | SNV | 1 | C | T | Heterozygous |
| NC_037653.1 | 2728792 | SNV | 1 | A | G | Heterozygous |
| NC_037653.1 | 2728801 | SNV | 1 | T | C | Heterozygous |
| NC_037653.1 | 2728962 | SNV | 1 | G | A | Homozygous   |
| NC_037653.1 | 2729254 | SNV | 1 | A | T | Heterozygous |
| NC_037653.1 | 2729912 | SNV | 1 | T | G | Homozygous   |

|             |         |     |   |   |   |              |
|-------------|---------|-----|---|---|---|--------------|
| NC_037653.1 | 2730058 | SNV | 1 | G | A | Heterozygous |
| NC_037653.1 | 2730556 | SNV | 1 | A | T | Homozygous   |
| NC_037653.1 | 2730601 | SNV | 1 | A | T | Homozygous   |
| NC_037653.1 | 2730990 | SNV | 1 | T | C | Heterozygous |
| NC_037653.1 | 2731032 | SNV | 1 | T | C | Homozygous   |
| NC_037653.1 | 2731077 | SNV | 1 | G | C | Heterozygous |
| NC_037653.1 | 2732479 | SNV | 1 | T | C | Heterozygous |
| NC_037653.1 | 2732482 | SNV | 1 | C | A | Heterozygous |
| NC_037653.1 | 2732486 | SNV | 1 | T | C | Heterozygous |
| NC_037653.1 | 2735670 | SNV | 1 | T | A | Homozygous   |
| NC_037653.1 | 2735698 | SNV | 1 | G | A | Homozygous   |
| NC_037653.1 | 2735710 | SNV | 1 | C | T | Homozygous   |
| NC_037653.1 | 2738234 | SNV | 1 | T | C | Homozygous   |
| NC_037653.1 | 2744032 | SNV | 1 | T | C | Heterozygous |
| NC_037653.1 | 2744087 | SNV | 1 | T | C | Heterozygous |
| NC_037653.1 | 2744410 | SNV | 1 | G | A | Heterozygous |
| NC_037653.1 | 2744421 | SNV | 1 | C | A | Heterozygous |
| NC_037653.1 | 2744704 | SNV | 1 | C | T | Heterozygous |
| NC_037653.1 | 2744706 | SNV | 1 | C | T | Heterozygous |
| NC_037653.1 | 2744734 | SNV | 1 | T | C | Heterozygous |
| NC_037653.1 | 2744751 | SNV | 1 | C | A | Heterozygous |
| NC_037653.1 | 2744776 | SNV | 1 | A | G | Heterozygous |
| NC_037653.1 | 2744827 | SNV | 1 | T | C | Homozygous   |
| NC_037653.1 | 2744959 | SNV | 1 | A | G | Heterozygous |
| NC_037653.1 | 2745193 | SNV | 1 | T | C | Heterozygous |
| NC_037653.1 | 2745206 | SNV | 1 | T | C | Heterozygous |
| NC_037653.1 | 2745264 | SNV | 1 | C | T | Homozygous   |
| NC_037653.1 | 2745299 | SNV | 1 | A | G | Homozygous   |
| NC_037653.1 | 2745422 | SNV | 1 | T | C | Heterozygous |
| NC_037653.1 | 2745438 | SNV | 1 | C | T | Heterozygous |
| NC_037653.1 | 2751986 | SNV | 1 | T | A | Homozygous   |
| NC_037653.1 | 2752000 | SNV | 1 | C | T | Heterozygous |
| NC_037653.1 | 2754899 | SNV | 1 | G | A | Homozygous   |
| NC_037653.1 | 2757948 | SNV | 1 | G | A | Homozygous   |
| NC_037653.1 | 2769445 | SNV | 1 | G | A | Heterozygous |
| NC_037653.1 | 2769506 | SNV | 1 | C | T | Heterozygous |
| NC_037653.1 | 2769602 | SNV | 1 | T | C | Homozygous   |
| NC_037653.1 | 2770031 | SNV | 1 | T | C | Homozygous   |
| NC_037653.1 | 2771213 | SNV | 1 | A | G | Homozygous   |
| NC_037653.1 | 2778040 | SNV | 1 | A | G | Heterozygous |
| NC_037653.1 | 2782222 | SNV | 1 | G | A | Homozygous   |
| NC_037653.1 | 2782226 | SNV | 1 | C | A | Homozygous   |
| NC_037653.1 | 2782230 | SNV | 1 | G | A | Heterozygous |
| NC_037653.1 | 2782250 | SNV | 1 | G | A | Homozygous   |
| NC_037653.1 | 2782255 | SNV | 1 | T | G | Homozygous   |
| NC_037653.1 | 2782259 | SNV | 1 | G | A | Heterozygous |
| NC_037653.1 | 2782263 | SNV | 1 | C | A | Homozygous   |
| NC_037653.1 | 2782267 | SNV | 1 | G | A | Homozygous   |
| NC_037653.1 | 2782283 | SNV | 1 | G | T | Homozygous   |
| NC_037653.1 | 2782295 | SNV | 1 | G | A | Homozygous   |
| NC_037653.1 | 2782340 | SNV | 1 | C | A | Homozygous   |

|             |         |     |   |   |   |              |
|-------------|---------|-----|---|---|---|--------------|
| NC_037653.1 | 2786828 | SNV | 1 | G | T | Homozygous   |
| NC_037653.1 | 2786867 | SNV | 1 | T | G | Heterozygous |
| NC_037653.1 | 2787816 | SNV | 1 | G | C | Homozygous   |
| NC_037653.1 | 2787923 | SNV | 1 | A | G | Heterozygous |
| NC_037653.1 | 2789100 | SNV | 1 | A | G | Heterozygous |
| NC_037653.1 | 2794469 | SNV | 1 | A | G | Heterozygous |
| NC_037653.1 | 2794682 | SNV | 1 | C | T | Homozygous   |
| NC_037653.1 | 2797144 | SNV | 1 | C | A | Homozygous   |
| NC_037653.1 | 2797146 | SNV | 1 | A | C | Homozygous   |
| NC_037653.1 | 2797148 | SNV | 1 | C | T | Homozygous   |
| NC_037653.1 | 2800898 | SNV | 1 | T | C | Homozygous   |
| NC_037653.1 | 2802824 | SNV | 1 | G | T | Heterozygous |
| NC_037653.1 | 2802838 | SNV | 1 | A | T | Homozygous   |
| NC_037653.1 | 2804563 | SNV | 1 | G | A | Heterozygous |
| NC_037653.1 | 2804852 | SNV | 1 | A | T | Heterozygous |
| NC_037653.1 | 2804871 | SNV | 1 | T | A | Heterozygous |
| NC_037653.1 | 2805065 | SNV | 1 | T | C | Homozygous   |
| NC_037653.1 | 2805414 | SNV | 1 | A | G | Heterozygous |
| NC_037653.1 | 2805566 | SNV | 1 | G | A | Heterozygous |
| NC_037653.1 | 2805637 | SNV | 1 | T | C | Homozygous   |
| NC_037653.1 | 2805656 | SNV | 1 | T | C | Homozygous   |
| NC_037653.1 | 2806236 | SNV | 1 | T | C | Homozygous   |
| NC_037653.1 | 2812944 | SNV | 1 | G | A | Homozygous   |
| NC_037653.1 | 2813027 | SNV | 1 | A | T | Homozygous   |
| NC_037653.1 | 2813042 | SNV | 1 | A | G | Homozygous   |
| NC_037653.1 | 2813050 | SNV | 1 | A | T | Homozygous   |
| NC_037653.1 | 2813574 | SNV | 1 | A | G | Homozygous   |
| NC_037653.1 | 2813767 | SNV | 1 | G | A | Homozygous   |
| NC_037653.1 | 2813780 | SNV | 1 | G | C | Homozygous   |
| NC_037653.1 | 2819149 | SNV | 1 | C | T | Heterozygous |
| NC_037653.1 | 2819236 | SNV | 1 | C | T | Homozygous   |
| NC_037653.1 | 2819356 | SNV | 1 | T | C | Homozygous   |
| NC_037653.1 | 2819906 | SNV | 1 | T | C | Homozygous   |
| NC_037653.1 | 2820656 | SNV | 1 | G | C | Homozygous   |
| NC_037653.1 | 2820658 | SNV | 1 | T | A | Homozygous   |
| NC_037653.1 | 2820666 | SNV | 1 | A | G | Homozygous   |
| NC_037653.1 | 2820668 | SNV | 1 | A | C | Homozygous   |
| NC_037653.1 | 2820672 | SNV | 1 | T | A | Homozygous   |
| NC_037653.1 | 2823331 | SNV | 1 | T | A | Homozygous   |
| NC_037653.1 | 2823334 | SNV | 1 | A | T | Homozygous   |
| NC_037653.1 | 2823337 | SNV | 1 | T | C | Homozygous   |
| NC_037653.1 | 2827597 | SNV | 1 | A | T | Heterozygous |
| NC_037653.1 | 2828222 | SNV | 1 | A | C | Heterozygous |
| NC_037653.1 | 2828356 | SNV | 1 | T | C | Homozygous   |
| NC_037653.1 | 2834779 | SNV | 1 | C | T | Homozygous   |
| NC_037653.1 | 2841332 | SNV | 1 | T | C | Homozygous   |
| NC_037653.1 | 2850333 | SNV | 1 | C | T | Heterozygous |
| NC_037653.1 | 2850694 | SNV | 1 | T | A | Heterozygous |
| NC_037653.1 | 2850850 | SNV | 1 | T | C | Homozygous   |
| NC_037653.1 | 2851356 | SNV | 1 | T | C | Homozygous   |
| NC_037653.1 | 2851439 | SNV | 1 | T | C | Homozygous   |

|             |         |     |   |   |   |              |
|-------------|---------|-----|---|---|---|--------------|
| NC_037653.1 | 2851441 | SNV | 1 | A | C | Homozygous   |
| NC_037653.1 | 2851672 | SNV | 1 | C | T | Heterozygous |
| NC_037653.1 | 2851699 | SNV | 1 | T | C | Homozygous   |
| NC_037653.1 | 2852518 | SNV | 1 | T | C | Homozygous   |
| NC_037653.1 | 2852601 | SNV | 1 | C | T | Homozygous   |
| NC_037653.1 | 2852655 | SNV | 1 | A | G | Homozygous   |
| NC_037653.1 | 2852997 | SNV | 1 | A | T | Heterozygous |
| NC_037653.1 | 2853022 | SNV | 1 | A | G | Homozygous   |
| NC_037653.1 | 2857248 | SNV | 1 | G | T | Heterozygous |
| NC_037653.1 | 2857434 | SNV | 1 | C | T | Homozygous   |
| NC_037653.1 | 2905555 | SNV | 1 | T | A | Homozygous   |
| NC_037653.1 | 2905976 | SNV | 1 | T | C | Homozygous   |
| NC_037653.1 | 2905983 | SNV | 1 | A | G | Homozygous   |
| NC_037653.1 | 2906010 | SNV | 1 | G | A | Homozygous   |
| NC_037653.1 | 2907225 | SNV | 1 | A | G | Homozygous   |
| NC_037653.1 | 2907248 | SNV | 1 | T | A | Homozygous   |
| NC_037653.1 | 2907325 | SNV | 1 | T | C | Heterozygous |
| NC_037653.1 | 2907325 | SNV | 1 | T | G | Heterozygous |
| NC_037653.1 | 2947120 | SNV | 1 | G | T | Heterozygous |
| NC_037653.1 | 2947289 | SNV | 1 | A | G | Homozygous   |
| NC_037653.1 | 2947807 | SNV | 1 | C | T | Heterozygous |
| NC_037653.1 | 2948440 | SNV | 1 | T | C | Homozygous   |
| NC_037653.1 | 2948442 | SNV | 1 | G | A | Homozygous   |
| NC_037653.1 | 2962299 | SNV | 1 | C | T | Homozygous   |
| NC_037653.1 | 2962738 | SNV | 1 | C | T | Homozygous   |
| NC_037653.1 | 2970642 | SNV | 1 | A | G | Homozygous   |
| NC_037653.1 | 2971008 | SNV | 1 | A | G | Homozygous   |
| NC_037653.1 | 2971108 | SNV | 1 | G | A | Homozygous   |
| NC_037653.1 | 2971742 | SNV | 1 | G | A | Homozygous   |
| NC_037653.1 | 2971838 | SNV | 1 | G | C | Homozygous   |
| NC_037653.1 | 2971901 | SNV | 1 | C | T | Heterozygous |
| NC_037653.1 | 2971921 | SNV | 1 | T | C | Heterozygous |
| NC_037653.1 | 2971943 | SNV | 1 | A | G | Heterozygous |
| NC_037653.1 | 2972003 | SNV | 1 | C | A | Homozygous   |
| NC_037653.1 | 2972121 | SNV | 1 | C | T | Homozygous   |
| NC_037653.1 | 2972235 | SNV | 1 | A | G | Heterozygous |
| NC_037653.1 | 2972279 | SNV | 1 | A | G | Heterozygous |
| NC_037653.1 | 2972320 | SNV | 1 | C | T | Heterozygous |
| NC_037653.1 | 2972372 | SNV | 1 | T | C | Homozygous   |
| NC_037653.1 | 2972522 | SNV | 1 | A | G | Homozygous   |
| NC_037653.1 | 2972586 | SNV | 1 | A | G | Homozygous   |
| NC_037653.1 | 2972609 | SNV | 1 | A | G | Homozygous   |
| NC_037653.1 | 2972702 | SNV | 1 | T | C | Homozygous   |
| NC_037653.1 | 2972752 | SNV | 1 | T | C | Heterozygous |
| NC_037653.1 | 2972957 | SNV | 1 | A | G | Homozygous   |
| NC_037653.1 | 2973045 | SNV | 1 | G | A | Homozygous   |
| NC_037653.1 | 2973066 | SNV | 1 | G | C | Homozygous   |
| NC_037653.1 | 2973318 | SNV | 1 | G | A | Homozygous   |
| NC_037653.1 | 2975900 | SNV | 1 | T | C | Homozygous   |
| NC_037653.1 | 2976176 | SNV | 1 | T | G | Homozygous   |
| NC_037653.1 | 2976184 | SNV | 1 | T | C | Homozygous   |

|             |         |     |   |   |   |              |
|-------------|---------|-----|---|---|---|--------------|
| NC_037653.1 | 2976231 | SNV | 1 | T | A | Heterozygous |
| NC_037653.1 | 2976233 | SNV | 1 | T | A | Heterozygous |
| NC_037653.1 | 2976247 | SNV | 1 | A | G | Homozygous   |
| NC_037653.1 | 2976389 | SNV | 1 | A | G | Homozygous   |
| NC_037653.1 | 2976915 | SNV | 1 | A | G | Homozygous   |
| NC_037653.1 | 2977058 | SNV | 1 | C | T | Heterozygous |
| NC_037653.1 | 2977107 | SNV | 1 | C | T | Heterozygous |
| NC_037653.1 | 2977124 | SNV | 1 | A | G | Homozygous   |
| NC_037653.1 | 2978575 | SNV | 1 | T | G | Heterozygous |
| NC_037653.1 | 2978602 | SNV | 1 | C | T | Homozygous   |
| NC_037653.1 | 2979462 | SNV | 1 | T | G | Homozygous   |
| NC_037653.1 | 2979465 | SNV | 1 | T | C | Homozygous   |
| NC_037653.1 | 2979489 | SNV | 1 | T | A | Heterozygous |
| NC_037653.1 | 2979511 | SNV | 1 | T | C | Homozygous   |
| NC_037653.1 | 2982062 | SNV | 1 | A | T | Homozygous   |
| NC_037653.1 | 2982067 | SNV | 1 | G | A | Homozygous   |
| NC_037653.1 | 2982075 | SNV | 1 | T | G | Homozygous   |
| NC_037653.1 | 2982080 | SNV | 1 | A | T | Homozygous   |
| NC_037653.1 | 2982086 | SNV | 1 | C | G | Homozygous   |
| NC_037653.1 | 2983768 | SNV | 1 | G | A | Heterozygous |
| NC_037653.1 | 2985181 | SNV | 1 | T | A | Homozygous   |
| NC_037653.1 | 2988788 | SNV | 1 | A | G | Heterozygous |
| NC_037653.1 | 2999926 | SNV | 1 | G | A | Heterozygous |
| NC_037653.1 | 3003405 | SNV | 1 | T | A | Homozygous   |
| NC_037653.1 | 3003437 | SNV | 1 | A | C | Heterozygous |
| NC_037653.1 | 3003452 | SNV | 1 | A | T | Homozygous   |
| NC_037653.1 | 3003466 | SNV | 1 | T | A | Homozygous   |
| NC_037653.1 | 3003469 | SNV | 1 | A | T | Homozygous   |
| NC_037653.1 | 3010189 | SNV | 1 | A | C | Homozygous   |
| NC_037653.1 | 3010195 | SNV | 1 | G | T | Homozygous   |
| NC_037653.1 | 3010596 | SNV | 1 | T | C | Homozygous   |
| NC_037653.1 | 3010816 | SNV | 1 | A | G | Homozygous   |
| NC_037653.1 | 3012154 | SNV | 1 | C | T | Homozygous   |
| NC_037653.1 | 3017342 | SNV | 1 | T | C | Heterozygous |
| NC_037653.1 | 3017345 | SNV | 1 | T | C | Heterozygous |
| NC_037653.1 | 3017348 | SNV | 1 | T | C | Heterozygous |
| NC_037653.1 | 3017368 | SNV | 1 | T | C | Heterozygous |
| NC_037653.1 | 3017373 | SNV | 1 | T | C | Heterozygous |
| NC_037653.1 | 3017377 | SNV | 1 | T | C | Heterozygous |
| NC_037653.1 | 3021606 | SNV | 1 | C | T | Heterozygous |
| NC_037653.1 | 3021749 | SNV | 1 | T | A | Homozygous   |
| NC_037653.1 | 3023900 | SNV | 1 | G | A | Heterozygous |
| NC_037653.1 | 3024513 | SNV | 1 | A | G | Homozygous   |
| NC_037653.1 | 3024836 | SNV | 1 | A | T | Homozygous   |
| NC_037653.1 | 3024843 | SNV | 1 | G | A | Homozygous   |
| NC_037653.1 | 3024865 | SNV | 1 | T | C | Homozygous   |
| NC_037653.1 | 3025131 | SNV | 1 | T | A | Homozygous   |
| NC_037653.1 | 3025170 | SNV | 1 | C | T | Homozygous   |
| NC_037653.1 | 3028142 | SNV | 1 | C | G | Homozygous   |
| NC_037653.1 | 3028637 | SNV | 1 | C | A | Homozygous   |
| NC_037653.1 | 3028958 | SNV | 1 | A | C | Homozygous   |

|             |         |     |   |   |   |              |
|-------------|---------|-----|---|---|---|--------------|
| NC_037653.1 | 3029006 | SNV | 1 | G | A | Homozygous   |
| NC_037653.1 | 3029012 | SNV | 1 | C | A | Homozygous   |
| NC_037653.1 | 3029807 | SNV | 1 | A | C | Homozygous   |
| NC_037653.1 | 3030011 | SNV | 1 | A | G | Homozygous   |
| NC_037653.1 | 3032760 | SNV | 1 | A | G | Homozygous   |
| NC_037653.1 | 3050391 | SNV | 1 | C | T | Heterozygous |
| NC_037653.1 | 3050397 | SNV | 1 | T | G | Homozygous   |
| NC_037653.1 | 3050472 | SNV | 1 | T | C | Homozygous   |
| NC_037653.1 | 3050482 | SNV | 1 | A | G | Homozygous   |
| NC_037653.1 | 3051163 | SNV | 1 | C | T | Homozygous   |
| NC_037653.1 | 3052525 | SNV | 1 | A | G | Heterozygous |
| NC_037653.1 | 3052611 | SNV | 1 | C | T | Homozygous   |
| NC_037653.1 | 3052613 | SNV | 1 | A | T | Homozygous   |
| NC_037653.1 | 3052616 | SNV | 1 | C | T | Homozygous   |
| NC_037653.1 | 3052620 | SNV | 1 | A | T | Heterozygous |
| NC_037653.1 | 3055371 | SNV | 1 | C | T | Heterozygous |
| NC_037653.1 | 3055425 | SNV | 1 | T | C | Homozygous   |
| NC_037653.1 | 3060639 | SNV | 1 | C | T | Heterozygous |
| NC_037653.1 | 3060778 | SNV | 1 | A | C | Homozygous   |
| NC_037653.1 | 3060816 | SNV | 1 | T | C | Homozygous   |
| NC_037653.1 | 3060928 | SNV | 1 | T | C | Homozygous   |
| NC_037653.1 | 3060983 | SNV | 1 | C | G | Heterozygous |
| NC_037653.1 | 3061115 | SNV | 1 | A | G | Homozygous   |
| NC_037653.1 | 3061390 | SNV | 1 | G | A | Heterozygous |
| NC_037653.1 | 3064174 | SNV | 1 | T | C | Homozygous   |
| NC_037653.1 | 3064962 | SNV | 1 | G | A | Homozygous   |
| NC_037653.1 | 3066354 | SNV | 1 | C | G | Homozygous   |
| NC_037653.1 | 3066914 | SNV | 1 | C | T | Homozygous   |
| NC_037653.1 | 3066922 | SNV | 1 | C | T | Homozygous   |
| NC_037653.1 | 3069024 | SNV | 1 | G | A | Homozygous   |
| NC_037653.1 | 3069042 | SNV | 1 | G | C | Homozygous   |
| NC_037653.1 | 3069224 | SNV | 1 | A | G | Homozygous   |
| NC_037653.1 | 3071459 | SNV | 1 | C | A | Homozygous   |
| NC_037653.1 | 3071501 | SNV | 1 | G | C | Heterozygous |
| NC_037653.1 | 3071831 | SNV | 1 | G | A | Heterozygous |
| NC_037653.1 | 3071900 | SNV | 1 | T | C | Homozygous   |
| NC_037653.1 | 3071909 | SNV | 1 | C | T | Homozygous   |
| NC_037653.1 | 3071960 | SNV | 1 | G | A | Heterozygous |
| NC_037653.1 | 3072107 | SNV | 1 | T | C | Homozygous   |
| NC_037653.1 | 3072173 | SNV | 1 | T | C | Homozygous   |
| NC_037653.1 | 3072185 | SNV | 1 | A | G | Homozygous   |
| NC_037653.1 | 3072456 | SNV | 1 | A | G | Homozygous   |
| NC_037653.1 | 3072486 | SNV | 1 | G | T | Homozygous   |
| NC_037653.1 | 3072509 | SNV | 1 | C | T | Homozygous   |
| NC_037653.1 | 3072567 | SNV | 1 | G | A | Heterozygous |
| NC_037653.1 | 3072572 | SNV | 1 | C | T | Heterozygous |
| NC_037653.1 | 3072606 | SNV | 1 | G | A | Heterozygous |
| NC_037653.1 | 3073677 | SNV | 1 | C | T | Heterozygous |
| NC_037653.1 | 3073684 | SNV | 1 | A | G | Homozygous   |
| NC_037653.1 | 3073709 | SNV | 1 | T | C | Homozygous   |
| NC_037653.1 | 3073711 | SNV | 1 | A | T | Homozygous   |

|             |         |     |   |   |   |              |
|-------------|---------|-----|---|---|---|--------------|
| NC_037653.1 | 3073726 | SNV | 1 | A | G | Homozygous   |
| NC_037653.1 | 3073736 | SNV | 1 | T | A | Heterozygous |
| NC_037653.1 | 3073869 | SNV | 1 | G | C | Homozygous   |
| NC_037653.1 | 3076140 | SNV | 1 | G | A | Heterozygous |
| NC_037653.1 | 3076196 | SNV | 1 | G | A | Homozygous   |
| NC_037653.1 | 3076199 | SNV | 1 | T | C | Homozygous   |
| NC_037653.1 | 3080282 | SNV | 1 | A | G | Homozygous   |
| NC_037653.1 | 3080366 | SNV | 1 | A | G | Heterozygous |
| NC_037653.1 | 3081106 | SNV | 1 | G | A | Heterozygous |
| NC_037653.1 | 3081136 | SNV | 1 | A | G | Homozygous   |
| NC_037653.1 | 3081480 | SNV | 1 | C | T | Homozygous   |
| NC_037653.1 | 3081678 | SNV | 1 | C | T | Heterozygous |
| NC_037653.1 | 3081724 | SNV | 1 | A | G | Homozygous   |
| NC_037653.1 | 3082209 | SNV | 1 | G | A | Homozygous   |
| NC_037653.1 | 3082699 | SNV | 1 | A | T | Homozygous   |
| NC_037653.1 | 3083015 | SNV | 1 | A | G | Homozygous   |
| NC_037653.1 | 3083048 | SNV | 1 | T | C | Homozygous   |
| NC_037653.1 | 3083313 | SNV | 1 | G | A | Heterozygous |
| NC_037653.1 | 3083365 | SNV | 1 | T | C | Homozygous   |
| NC_037653.1 | 3083370 | SNV | 1 | A | G | Heterozygous |
| NC_037653.1 | 3083392 | SNV | 1 | T | C | Homozygous   |
| NC_037653.1 | 3083444 | SNV | 1 | A | G | Heterozygous |
| NC_037653.1 | 3083630 | SNV | 1 | A | G | Heterozygous |
| NC_037653.1 | 3083955 | SNV | 1 | G | A | Homozygous   |
| NC_037653.1 | 3084058 | SNV | 1 | G | A | Homozygous   |
| NC_037653.1 | 3084088 | SNV | 1 | A | G | Heterozygous |
| NC_037653.1 | 3084637 | SNV | 1 | T | C | Homozygous   |
| NC_037653.1 | 3084652 | SNV | 1 | C | T | Homozygous   |
| NC_037653.1 | 3084655 | SNV | 1 | T | C | Homozygous   |
| NC_037653.1 | 3084703 | SNV | 1 | G | A | Heterozygous |
| NC_037653.1 | 3085022 | SNV | 1 | C | T | Heterozygous |
| NC_037653.1 | 3085049 | SNV | 1 | A | G | Heterozygous |
| NC_037653.1 | 3085079 | SNV | 1 | A | G | Homozygous   |
| NC_037653.1 | 3085136 | SNV | 1 | A | G | Homozygous   |
| NC_037653.1 | 3085514 | SNV | 1 | A | G | Heterozygous |
| NC_037653.1 | 3085635 | SNV | 1 | C | T | Homozygous   |
| NC_037653.1 | 3086117 | SNV | 1 | T | C | Heterozygous |
| NC_037653.1 | 3087365 | SNV | 1 | G | A | Homozygous   |
| NC_037653.1 | 3088535 | SNV | 1 | A | G | Homozygous   |
| NC_037653.1 | 3088544 | SNV | 1 | T | G | Homozygous   |
| NC_037653.1 | 3088568 | SNV | 1 | C | T | Homozygous   |
| NC_037653.1 | 3088685 | SNV | 1 | C | A | Homozygous   |
| NC_037653.1 | 3088730 | SNV | 1 | G | A | Heterozygous |
| NC_037653.1 | 3088756 | SNV | 1 | A | G | Heterozygous |
| NC_037653.1 | 3088772 | SNV | 1 | T | C | Homozygous   |
| NC_037653.1 | 3088862 | SNV | 1 | T | C | Homozygous   |
| NC_037653.1 | 3088901 | SNV | 1 | A | G | Heterozygous |
| NC_037653.1 | 3088907 | SNV | 1 | G | A | Heterozygous |
| NC_037653.1 | 3092529 | SNV | 1 | G | A | Heterozygous |
| NC_037653.1 | 3092534 | SNV | 1 | T | A | Homozygous   |
| NC_037653.1 | 3092536 | SNV | 1 | T | A | Homozygous   |



|             |         |     |   |   |   |              |
|-------------|---------|-----|---|---|---|--------------|
| NC_037653.1 | 3092538 | SNV | 1 | T | A | Homozygous   |
| NC_037653.1 | 3092542 | SNV | 1 | A | C | Homozygous   |
| NC_037653.1 | 3092549 | SNV | 1 | A | T | Homozygous   |
| NC_037653.1 | 3092555 | SNV | 1 | T | A | Homozygous   |
| NC_037653.1 | 3092562 | SNV | 1 | A | T | Homozygous   |
| NC_037653.1 | 3098077 | SNV | 1 | T | C | Heterozygous |
| NC_037653.1 | 3098106 | SNV | 1 | A | T | Homozygous   |
| NC_037653.1 | 3099512 | SNV | 1 | G | A | Heterozygous |
| NC_037653.1 | 3101665 | SNV | 1 | T | C | Heterozygous |
| NC_037653.1 | 3106843 | SNV | 1 | C | T | Heterozygous |
| NC_037653.1 | 3108110 | SNV | 1 | G | T | Heterozygous |
| NC_037653.1 | 3108113 | SNV | 1 | C | A | Heterozygous |
| NC_037653.1 | 3108165 | SNV | 1 | G | C | Homozygous   |
| NC_037653.1 | 3108169 | SNV | 1 | T | C | Heterozygous |
| NC_037653.1 | 3111344 | SNV | 1 | C | T | Homozygous   |
| NC_037653.1 | 3111482 | SNV | 1 | G | A | Heterozygous |
| NC_037653.1 | 3111973 | SNV | 1 | G | C | Heterozygous |
| NC_037653.1 | 3112150 | SNV | 1 | A | C | Homozygous   |
| NC_037653.1 | 3112198 | SNV | 1 | C | T | Homozygous   |
| NC_037653.1 | 3112294 | SNV | 1 | C | G | Homozygous   |
| NC_037653.1 | 3112407 | SNV | 1 | T | C | Homozygous   |
| NC_037653.1 | 3112447 | SNV | 1 | C | T | Homozygous   |
| NC_037653.1 | 3112475 | SNV | 1 | C | T | Homozygous   |
| NC_037653.1 | 3112915 | SNV | 1 | G | C | Heterozygous |
| NC_037653.1 | 3113552 | SNV | 1 | T | C | Homozygous   |
| NC_037653.1 | 3113642 | SNV | 1 | C | T | Heterozygous |
| NC_037653.1 | 3113889 | SNV | 1 | A | G | Homozygous   |
| NC_037653.1 | 3113897 | SNV | 1 | A | G | Homozygous   |
| NC_037653.1 | 3114386 | SNV | 1 | G | A | Homozygous   |
| NC_037653.1 | 3114450 | SNV | 1 | T | C | Homozygous   |
| NC_037653.1 | 3114551 | SNV | 1 | T | C | Homozygous   |
| NC_037653.1 | 3114722 | SNV | 1 | T | C | Heterozygous |
| NC_037653.1 | 3115115 | SNV | 1 | G | C | Homozygous   |
| NC_037653.1 | 3116680 | SNV | 1 | A | C | Homozygous   |
| NC_037653.1 | 3131230 | SNV | 1 | G | A | Homozygous   |
| NC_037653.1 | 3132684 | SNV | 1 | A | G | Heterozygous |
| NC_037653.1 | 3144492 | SNV | 1 | T | C | Homozygous   |
| NC_037653.1 | 3159416 | SNV | 1 | C | T | Heterozygous |
| NC_037653.1 | 3159550 | SNV | 1 | G | A | Heterozygous |
| NC_037653.1 | 3159639 | SNV | 1 | C | T | Heterozygous |
| NC_037653.1 | 3159802 | SNV | 1 | A | C | Homozygous   |
| NC_037653.1 | 3159806 | SNV | 1 | C | T | Homozygous   |
| NC_037653.1 | 3159878 | SNV | 1 | G | A | Homozygous   |
| NC_037653.1 | 3159896 | SNV | 1 | T | A | Heterozygous |
| NC_037653.1 | 3160011 | SNV | 1 | A | G | Heterozygous |
| NC_037653.1 | 3162916 | SNV | 1 | C | A | Heterozygous |
| NC_037653.1 | 3162943 | SNV | 1 | A | G | Heterozygous |
| NC_037653.1 | 3162957 | SNV | 1 | C | T | Heterozygous |
| NC_037653.1 | 3162978 | SNV | 1 | G | A | Heterozygous |
| NC_037653.1 | 3163052 | SNV | 1 | T | G | Homozygous   |
| NC_037653.1 | 3163131 | SNV | 1 | T | C | Homozygous   |

|             |         |     |   |   |   |              |
|-------------|---------|-----|---|---|---|--------------|
| NC_037653.1 | 3163136 | SNV | 1 | T | C | Homozygous   |
| NC_037653.1 | 3163142 | SNV | 1 | C | T | Heterozygous |
| NC_037653.1 | 3166197 | SNV | 1 | A | G | Heterozygous |
| NC_037653.1 | 3167096 | SNV | 1 | T | C | Homozygous   |
| NC_037653.1 | 3167102 | SNV | 1 | T | C | Homozygous   |
| NC_037653.1 | 3167831 | SNV | 1 | C | T | Heterozygous |
| NC_037653.1 | 3167869 | SNV | 1 | C | T | Heterozygous |
| NC_037653.1 | 3167994 | SNV | 1 | T | C | Homozygous   |
| NC_037653.1 | 3168323 | SNV | 1 | T | A | Homozygous   |
| NC_037653.1 | 3168445 | SNV | 1 | G | A | Homozygous   |
| NC_037653.1 | 3169954 | SNV | 1 | T | C | Homozygous   |
| NC_037653.1 | 3170017 | SNV | 1 | A | G | Homozygous   |
| NC_037653.1 | 3170194 | SNV | 1 | A | T | Homozygous   |
| NC_037653.1 | 3170467 | SNV | 1 | A | G | Homozygous   |
| NC_037653.1 | 3170678 | SNV | 1 | A | T | Homozygous   |
| NC_037653.1 | 3171197 | SNV | 1 | C | T | Heterozygous |
| NC_037653.1 | 3171217 | SNV | 1 | A | G | Homozygous   |
| NC_037653.1 | 3171970 | SNV | 1 | C | T | Homozygous   |
| NC_037653.1 | 3172653 | SNV | 1 | A | G | Heterozygous |
| NC_037653.1 | 3172826 | SNV | 1 | C | G | Homozygous   |
| NC_037653.1 | 3172922 | SNV | 1 | T | C | Homozygous   |
| NC_037653.1 | 3172967 | SNV | 1 | C | T | Homozygous   |
| NC_037653.1 | 3173302 | SNV | 1 | T | A | Homozygous   |
| NC_037653.1 | 3173913 | SNV | 1 | C | T | Homozygous   |
| NC_037653.1 | 3174093 | SNV | 1 | A | G | Homozygous   |
| NC_037653.1 | 3174296 | SNV | 1 | A | G | Homozygous   |
| NC_037653.1 | 3176773 | SNV | 1 | C | T | Heterozygous |
| NC_037653.1 | 3176808 | SNV | 1 | T | C | Heterozygous |
| NC_037653.1 | 3176828 | SNV | 1 | G | A | Heterozygous |
| NC_037653.1 | 3176832 | SNV | 1 | A | G | Heterozygous |
| NC_037653.1 | 3176941 | SNV | 1 | C | T | Heterozygous |
| NC_037653.1 | 3177016 | SNV | 1 | C | T | Heterozygous |
| NC_037653.1 | 3177256 | SNV | 1 | A | G | Heterozygous |
| NC_037653.1 | 3177415 | SNV | 1 | G | A | Homozygous   |
| NC_037653.1 | 3177452 | SNV | 1 | C | T | Homozygous   |
| NC_037653.1 | 3177613 | SNV | 1 | G | A | Heterozygous |
| NC_037653.1 | 3178625 | SNV | 1 | A | G | Homozygous   |
| NC_037653.1 | 3178826 | SNV | 1 | C | A | Homozygous   |
| NC_037653.1 | 3178902 | SNV | 1 | C | A | Homozygous   |
| NC_037653.1 | 3178972 | SNV | 1 | A | G | Homozygous   |
| NC_037653.1 | 3179014 | SNV | 1 | A | G | Heterozygous |
| NC_037653.1 | 3180577 | SNV | 1 | T | C | Heterozygous |
| NC_037653.1 | 3180600 | SNV | 1 | T | C | Heterozygous |
| NC_037653.1 | 3180616 | SNV | 1 | T | C | Heterozygous |
| NC_037653.1 | 3180830 | SNV | 1 | T | C | Homozygous   |
| NC_037653.1 | 3181073 | SNV | 1 | A | G | Homozygous   |
| NC_037653.1 | 3181237 | SNV | 1 | G | C | Heterozygous |
| NC_037653.1 | 3181263 | SNV | 1 | A | G | Homozygous   |
| NC_037653.1 | 3182073 | SNV | 1 | A | G | Homozygous   |
| NC_037653.1 | 3183321 | SNV | 1 | A | G | Homozygous   |
| NC_037653.1 | 3183846 | SNV | 1 | G | A | Homozygous   |

|             |         |     |   |   |   |              |
|-------------|---------|-----|---|---|---|--------------|
| NC_037653.1 | 3184229 | SNV | 1 | A | G | Homozygous   |
| NC_037653.1 | 3184364 | SNV | 1 | A | C | Homozygous   |
| NC_037653.1 | 3184388 | SNV | 1 | A | G | Homozygous   |
| NC_037653.1 | 3185717 | SNV | 1 | T | A | Homozygous   |
| NC_037653.1 | 3186606 | SNV | 1 | T | G | Heterozygous |
| NC_037653.1 | 3186853 | SNV | 1 | G | T | Homozygous   |
| NC_037653.1 | 3186950 | SNV | 1 | G | A | Homozygous   |
| NC_037653.1 | 3187308 | SNV | 1 | A | T | Homozygous   |
| NC_037653.1 | 3187519 | SNV | 1 | C | T | Homozygous   |
| NC_037653.1 | 3187985 | SNV | 1 | A | G | Homozygous   |
| NC_037653.1 | 3188190 | SNV | 1 | C | T | Heterozygous |
| NC_037653.1 | 3192424 | SNV | 1 | A | G | Homozygous   |
| NC_037653.1 | 3316584 | SNV | 1 | T | C | Homozygous   |
| NC_037653.1 | 3316587 | SNV | 1 | A | G | Heterozygous |
| NC_037653.1 | 3316592 | SNV | 1 | T | C | Homozygous   |
| NC_037653.1 | 3316596 | SNV | 1 | T | A | Homozygous   |
| NC_037653.1 | 3316604 | SNV | 1 | A | C | Heterozygous |
| NC_037653.1 | 3316622 | SNV | 1 | C | A | Heterozygous |
| NC_037653.1 | 3316628 | SNV | 1 | C | T | Heterozygous |
| NC_037653.1 | 3316634 | SNV | 1 | C | A | Heterozygous |
| NC_037653.1 | 3316636 | SNV | 1 | C | G | Heterozygous |
| NC_037653.1 | 3316643 | SNV | 1 | A | G | Heterozygous |
| NC_037653.1 | 3316646 | SNV | 1 | A | C | Heterozygous |
| NC_037653.1 | 3360846 | SNV | 1 | G | A | Heterozygous |
| NC_037653.1 | 3360853 | SNV | 1 | T | A | Heterozygous |
| NC_037653.1 | 3361026 | SNV | 1 | C | G | Heterozygous |
| NC_037653.1 | 3361029 | SNV | 1 | C | T | Heterozygous |
| NC_037653.1 | 3361031 | SNV | 1 | T | C | Heterozygous |
| NC_037653.1 | 3361038 | SNV | 1 | T | C | Homozygous   |
| NC_037653.1 | 3361043 | SNV | 1 | A | T | Homozygous   |
| NC_037653.1 | 3369653 | SNV | 1 | A | C | Homozygous   |
| NC_037653.1 | 3369657 | SNV | 1 | G | A | Homozygous   |
| NC_037653.1 | 3369690 | SNV | 1 | T | G | Homozygous   |
| NC_037653.1 | 3369692 | SNV | 1 | C | G | Homozygous   |
| NC_037653.1 | 3386305 | SNV | 1 | T | A | Homozygous   |
| NC_037653.1 | 3386309 | SNV | 1 | A | G | Homozygous   |
| NC_037653.1 | 3386314 | SNV | 1 | A | G | Homozygous   |
| NC_037653.1 | 3386316 | SNV | 1 | G | A | Homozygous   |
| NC_037653.1 | 3414193 | SNV | 1 | C | T | Homozygous   |
| NC_037653.1 | 3414200 | SNV | 1 | T | A | Homozygous   |
| NC_037653.1 | 3414228 | SNV | 1 | A | T | Homozygous   |
| NC_037653.1 | 3443961 | SNV | 1 | A | G | Homozygous   |
| NC_037653.1 | 3443964 | SNV | 1 | A | G | Homozygous   |
| NC_037653.1 | 3443967 | SNV | 1 | T | G | Homozygous   |
| NC_037653.1 | 3443985 | SNV | 1 | T | C | Homozygous   |
| NC_037653.1 | 3443997 | SNV | 1 | T | A | Homozygous   |
| NC_037653.1 | 3443999 | SNV | 1 | G | A | Homozygous   |
| NC_037653.1 | 3444004 | SNV | 1 | A | T | Homozygous   |
| NC_037653.1 | 3444011 | SNV | 1 | C | A | Homozygous   |
| NC_037653.1 | 3455092 | SNV | 1 | G | A | Heterozygous |
| NC_037653.1 | 3455096 | SNV | 1 | G | A | Heterozygous |

|             |         |     |   |   |   |              |
|-------------|---------|-----|---|---|---|--------------|
| NC_037653.1 | 3459853 | SNV | 1 | T | A | Homozygous   |
| NC_037653.1 | 3459858 | SNV | 1 | T | C | Homozygous   |
| NC_037653.1 | 3459861 | SNV | 1 | T | G | Homozygous   |
| NC_037653.1 | 3459871 | SNV | 1 | T | A | Homozygous   |
| NC_037653.1 | 3459873 | SNV | 1 | A | G | Homozygous   |
| NC_037653.1 | 3490207 | SNV | 1 | T | C | Homozygous   |
| NC_037653.1 | 3490215 | SNV | 1 | A | G | Homozygous   |
| NC_037653.1 | 3491093 | SNV | 1 | A | G | Homozygous   |
| NC_037653.1 | 3491096 | SNV | 1 | A | T | Homozygous   |
| NC_037653.1 | 3491099 | SNV | 1 | A | G | Homozygous   |
| NC_037653.1 | 3497910 | SNV | 1 | A | T | Homozygous   |
| NC_037653.1 | 3497921 | SNV | 1 | C | A | Homozygous   |
| NC_037653.1 | 3497927 | SNV | 1 | T | C | Homozygous   |
| NC_037653.1 | 3497929 | SNV | 1 | A | T | Homozygous   |
| NC_037653.1 | 3498249 | SNV | 1 | A | G | Homozygous   |
| NC_037653.1 | 3503283 | SNV | 1 | T | A | Heterozygous |
| NC_037653.1 | 3503287 | SNV | 1 | C | T | Homozygous   |
| NC_037653.1 | 3503292 | SNV | 1 | C | T | Heterozygous |
| NC_037653.1 | 3503318 | SNV | 1 | T | A | Heterozygous |
| NC_037653.1 | 3554220 | SNV | 1 | C | T | Homozygous   |
| NC_037653.1 | 3554231 | SNV | 1 | T | C | Heterozygous |
| NC_037653.1 | 3554257 | SNV | 1 | C | G | Homozygous   |
| NC_037653.1 | 3554263 | SNV | 1 | C | T | Heterozygous |
| NC_037653.1 | 3554268 | SNV | 1 | C | T | Heterozygous |
| NC_037653.1 | 3560435 | SNV | 1 | T | A | Homozygous   |
| NC_037653.1 | 3560450 | SNV | 1 | C | T | Homozygous   |
| NC_037653.1 | 3560481 | SNV | 1 | G | A | Homozygous   |
| NC_037653.1 | 3560487 | SNV | 1 | G | A | Homozygous   |
| NC_037653.1 | 3560495 | SNV | 1 | C | T | Homozygous   |
| NC_037653.1 | 3560498 | SNV | 1 | A | T | Homozygous   |
| NC_037653.1 | 3567497 | SNV | 1 | A | C | Heterozygous |
| NC_037653.1 | 3567502 | SNV | 1 | G | A | Homozygous   |
| NC_037653.1 | 3571657 | SNV | 1 | T | C | Homozygous   |
| NC_037653.1 | 3571942 | SNV | 1 | G | A | Homozygous   |
| NC_037653.1 | 3571946 | SNV | 1 | A | T | Heterozygous |
| NC_037653.1 | 3721368 | SNV | 1 | C | G | Homozygous   |
| NC_037653.1 | 3721379 | SNV | 1 | T | C | Homozygous   |
| NC_037653.1 | 3721399 | SNV | 1 | A | T | Homozygous   |
| NC_037653.1 | 3721404 | SNV | 1 | G | T | Homozygous   |
| NC_037653.1 | 3733875 | SNV | 1 | G | T | Homozygous   |
| NC_037653.1 | 3733881 | SNV | 1 | A | G | Homozygous   |
| NC_037653.1 | 3733891 | SNV | 1 | A | T | Homozygous   |
| NC_037653.1 | 3733894 | SNV | 1 | T | G | Homozygous   |
| NC_037653.1 | 3733908 | SNV | 1 | T | C | Homozygous   |
| NC_037653.1 | 3807207 | SNV | 1 | T | A | Homozygous   |
| NC_037653.1 | 3807209 | SNV | 1 | C | G | Homozygous   |
| NC_037653.1 | 3807211 | SNV | 1 | T | C | Homozygous   |
| NC_037653.1 | 3807223 | SNV | 1 | C | T | Homozygous   |
| NC_037653.1 | 3807228 | SNV | 1 | T | G | Homozygous   |
| NC_037653.1 | 3807234 | SNV | 1 | C | T | Homozygous   |
| NC_037653.1 | 3898983 | SNV | 1 | G | T | Homozygous   |

|             |         |     |   |   |   |              |
|-------------|---------|-----|---|---|---|--------------|
| NC_037653.1 | 3903311 | SNV | 1 | A | T | Homozygous   |
| NC_037653.1 | 3903313 | SNV | 1 | A | T | Homozygous   |
| NC_037653.1 | 3903317 | SNV | 1 | A | G | Homozygous   |
| NC_037653.1 | 3903325 | SNV | 1 | A | T | Homozygous   |
| NC_037653.1 | 3903329 | SNV | 1 | A | G | Homozygous   |
| NC_037653.1 | 3914306 | SNV | 1 | C | T | Heterozygous |
| NC_037653.1 | 3931347 | SNV | 1 | C | G | Homozygous   |
| NC_037653.1 | 3931357 | SNV | 1 | A | T | Homozygous   |
| NC_037653.1 | 3931359 | SNV | 1 | C | T | Homozygous   |
| NC_037653.1 | 3931364 | SNV | 1 | C | T | Homozygous   |
| NC_037653.1 | 3931366 | SNV | 1 | C | T | Homozygous   |
| NC_037653.1 | 3938096 | SNV | 1 | A | G | Homozygous   |
| NC_037653.1 | 3938101 | SNV | 1 | G | A | Homozygous   |
| NC_037653.1 | 3938103 | SNV | 1 | A | G | Homozygous   |
| NC_037653.1 | 3938106 | SNV | 1 | G | T | Homozygous   |
| NC_037653.1 | 3938124 | SNV | 1 | A | G | Homozygous   |
| NC_037653.1 | 3938129 | SNV | 1 | A | G | Homozygous   |
| NC_037653.1 | 4011939 | SNV | 1 | T | C | Homozygous   |
| NC_037653.1 | 4011942 | SNV | 1 | T | A | Homozygous   |
| NC_037653.1 | 4011975 | SNV | 1 | T | G | Homozygous   |
| NC_037653.1 | 4011980 | SNV | 1 | A | T | Homozygous   |
| NC_037653.1 | 4012748 | SNV | 1 | T | A | Homozygous   |
| NC_037653.1 | 4012759 | SNV | 1 | G | A | Homozygous   |
| NC_037653.1 | 4032692 | SNV | 1 | A | G | Homozygous   |
| NC_037653.1 | 4032700 | SNV | 1 | C | T | Heterozygous |
| NC_037653.1 | 4034492 | SNV | 1 | G | A | Heterozygous |
| NC_037653.1 | 4034504 | SNV | 1 | G | A | Homozygous   |
| NC_037653.1 | 4034662 | SNV | 1 | G | A | Heterozygous |
| NC_037653.1 | 4034670 | SNV | 1 | C | A | Heterozygous |
| NC_037653.1 | 4034678 | SNV | 1 | G | A | Homozygous   |
| NC_037653.1 | 4036119 | SNV | 1 | C | T | Heterozygous |
| NC_037653.1 | 4036584 | SNV | 1 | A | G | Homozygous   |
| NC_037653.1 | 4036592 | SNV | 1 | G | A | Homozygous   |
| NC_037653.1 | 4036714 | SNV | 1 | C | A | Homozygous   |
| NC_037653.1 | 4036804 | SNV | 1 | A | G | Homozygous   |
| NC_037653.1 | 4180653 | SNV | 1 | G | A | Homozygous   |
| NC_037653.1 | 4180656 | SNV | 1 | G | A | Homozygous   |
| NC_037653.1 | 4181115 | SNV | 1 | C | G | Homozygous   |
| NC_037653.1 | 4181992 | SNV | 1 | C | T | Homozygous   |
| NC_037653.1 | 4181996 | SNV | 1 | C | T | Heterozygous |
| NC_037653.1 | 4181998 | SNV | 1 | C | T | Heterozygous |
| NC_037653.1 | 4182014 | SNV | 1 | T | C | Heterozygous |
| NC_037653.1 | 4182026 | SNV | 1 | T | C | Heterozygous |
| NC_037653.1 | 4182068 | SNV | 1 | C | T | Heterozygous |
| NC_037653.1 | 4192835 | SNV | 1 | G | T | Homozygous   |
| NC_037653.1 | 4193152 | SNV | 1 | T | G | Heterozygous |
| NC_037653.1 | 4193161 | SNV | 1 | C | T | Heterozygous |
| NC_037653.1 | 4193169 | SNV | 1 | C | A | Heterozygous |
| NC_037653.1 | 4213798 | SNV | 1 | G | C | Homozygous   |
| NC_037653.1 | 4213814 | SNV | 1 | T | A | Homozygous   |
| NC_037653.1 | 4213824 | SNV | 1 | T | A | Homozygous   |

|             |         |     |   |   |   |              |
|-------------|---------|-----|---|---|---|--------------|
| NC_037653.1 | 4213851 | SNV | 1 | C | A | Homozygous   |
| NC_037653.1 | 4214409 | SNV | 1 | A | G | Homozygous   |
| NC_037653.1 | 4214461 | SNV | 1 | A | G | Heterozygous |
| NC_037653.1 | 4214630 | SNV | 1 | T | A | Homozygous   |
| NC_037653.1 | 4214632 | SNV | 1 | T | A | Homozygous   |
| NC_037653.1 | 4214641 | SNV | 1 | T | A | Homozygous   |
| NC_037653.1 | 4214676 | SNV | 1 | G | A | Heterozygous |
| NC_037653.1 | 4236396 | SNV | 1 | C | G | Heterozygous |
| NC_037653.1 | 4236408 | SNV | 1 | C | G | Heterozygous |
| NC_037653.1 | 4236430 | SNV | 1 | T | C | Heterozygous |
| NC_037653.1 | 4236432 | SNV | 1 | C | G | Heterozygous |
| NC_037653.1 | 4245230 | SNV | 1 | C | T | Homozygous   |
| NC_037653.1 | 4247101 | SNV | 1 | C | T | Heterozygous |
| NC_037653.1 | 4282453 | SNV | 1 | G | A | Heterozygous |
| NC_037653.1 | 4282458 | SNV | 1 | G | A | Heterozygous |
| NC_037653.1 | 4282462 | SNV | 1 | G | A | Heterozygous |
| NC_037653.1 | 4282466 | SNV | 1 | G | A | Heterozygous |
| NC_037653.1 | 4283605 | SNV | 1 | G | C | Homozygous   |
| NC_037653.1 | 4283611 | SNV | 1 | C | A | Homozygous   |
| NC_037653.1 | 4290872 | SNV | 1 | C | T | Heterozygous |
| NC_037653.1 | 4291045 | SNV | 1 | G | A | Heterozygous |
| NC_037653.1 | 4291525 | SNV | 1 | C | G | Homozygous   |
| NC_037653.1 | 4291531 | SNV | 1 | G | A | Homozygous   |
| NC_037653.1 | 4299840 | SNV | 1 | A | T | Homozygous   |
| NC_037653.1 | 4299851 | SNV | 1 | G | C | Homozygous   |
| NC_037653.1 | 4311277 | SNV | 1 | T | C | Homozygous   |
| NC_037653.1 | 4450950 | SNV | 1 | A | C | Heterozygous |
| NC_037653.1 | 4450953 | SNV | 1 | A | C | Heterozygous |
| NC_037653.1 | 4450965 | SNV | 1 | T | A | Heterozygous |
| NC_037653.1 | 4450970 | SNV | 1 | G | A | Heterozygous |
| NC_037653.1 | 4450973 | SNV | 1 | A | C | Heterozygous |
| NC_037653.1 | 4450979 | SNV | 1 | A | T | Heterozygous |
| NC_037653.1 | 4486659 | SNV | 1 | A | T | Homozygous   |
| NC_037653.1 | 4486802 | SNV | 1 | C | A | Homozygous   |
| NC_037653.1 | 4489269 | SNV | 1 | T | A | Heterozygous |
| NC_037653.1 | 4489298 | SNV | 1 | A | C | Homozygous   |
| NC_037653.1 | 4499988 | SNV | 1 | G | A | Homozygous   |
| NC_037653.1 | 4500017 | SNV | 1 | T | C | Homozygous   |
| NC_037653.1 | 4513154 | SNV | 1 | T | C | Homozygous   |
| NC_037653.1 | 4513401 | SNV | 1 | T | C | Homozygous   |
| NC_037653.1 | 4516117 | SNV | 1 | C | T | Homozygous   |
| NC_037653.1 | 4516326 | SNV | 1 | A | G | Heterozygous |
| NC_037653.1 | 4516329 | SNV | 1 | T | C | Heterozygous |
| NC_037653.1 | 4516821 | SNV | 1 | T | C | Heterozygous |
| NC_037653.1 | 4517115 | SNV | 1 | C | T | Homozygous   |
| NC_037653.1 | 4518866 | SNV | 1 | A | G | Heterozygous |
| NC_037653.1 | 4519097 | SNV | 1 | A | T | Homozygous   |
| NC_037653.1 | 4519121 | SNV | 1 | A | G | Heterozygous |
| NC_037653.1 | 4519968 | SNV | 1 | A | G | Heterozygous |
| NC_037653.1 | 4520654 | SNV | 1 | G | A | Homozygous   |
| NC_037653.1 | 4521281 | SNV | 1 | T | A | Homozygous   |

|             |         |     |   |   |   |              |
|-------------|---------|-----|---|---|---|--------------|
| NC_037653.1 | 4521283 | SNV | 1 | C | G | Homozygous   |
| NC_037653.1 | 4526728 | SNV | 1 | T | C | Homozygous   |
| NC_037653.1 | 4527042 | SNV | 1 | G | A | Heterozygous |
| NC_037653.1 | 4527342 | SNV | 1 | C | T | Heterozygous |
| NC_037653.1 | 4527665 | SNV | 1 | T | C | Homozygous   |
| NC_037653.1 | 4527816 | SNV | 1 | C | T | Homozygous   |
| NC_037653.1 | 4535301 | SNV | 1 | T | C | Homozygous   |
| NC_037653.1 | 4537063 | SNV | 1 | G | A | Heterozygous |
| NC_037653.1 | 4537066 | SNV | 1 | G | A | Heterozygous |
| NC_037653.1 | 4537070 | SNV | 1 | G | A | Heterozygous |
| NC_037653.1 | 4537106 | SNV | 1 | G | A | Heterozygous |
| NC_037653.1 | 4544045 | SNV | 1 | A | T | Heterozygous |
| NC_037653.1 | 4544047 | SNV | 1 | A | G | Heterozygous |
| NC_037653.1 | 4544094 | SNV | 1 | A | G | Homozygous   |
| NC_037653.1 | 4544104 | SNV | 1 | G | A | Heterozygous |
| NC_037653.1 | 4544120 | SNV | 1 | C | T | Homozygous   |
| NC_037653.1 | 4544126 | SNV | 1 | C | T | Homozygous   |
| NC_037653.1 | 4544138 | SNV | 1 | C | T | Heterozygous |
| NC_037653.1 | 4544141 | SNV | 1 | A | T | Heterozygous |
| NC_037653.1 | 4544150 | SNV | 1 | T | A | Heterozygous |
| NC_037653.1 | 4544152 | SNV | 1 | T | G | Homozygous   |
| NC_037653.1 | 4549841 | SNV | 1 | C | T | Homozygous   |
| NC_037653.1 | 4549846 | SNV | 1 | T | G | Homozygous   |
| NC_037653.1 | 4549850 | SNV | 1 | T | G | Homozygous   |
| NC_037653.1 | 4549852 | SNV | 1 | T | C | Homozygous   |
| NC_037653.1 | 4549911 | SNV | 1 | A | T | Homozygous   |
| NC_037653.1 | 4549915 | SNV | 1 | A | C | Homozygous   |
| NC_037653.1 | 4550054 | SNV | 1 | G | A | Heterozygous |
| NC_037653.1 | 4550156 | SNV | 1 | A | T | Heterozygous |
| NC_037653.1 | 4550256 | SNV | 1 | T | C | Heterozygous |
| NC_037653.1 | 4550303 | SNV | 1 | G | A | Heterozygous |
| NC_037653.1 | 4550314 | SNV | 1 | G | A | Heterozygous |
| NC_037653.1 | 4550315 | SNV | 1 | C | T | Heterozygous |
| NC_037653.1 | 4550323 | SNV | 1 | G | A | Heterozygous |
| NC_037653.1 | 4550346 | SNV | 1 | G | A | Heterozygous |
| NC_037653.1 | 4550354 | SNV | 1 | C | T | Heterozygous |
| NC_037653.1 | 4559305 | SNV | 1 | T | A | Homozygous   |
| NC_037653.1 | 4559309 | SNV | 1 | A | T | Homozygous   |
| NC_037653.1 | 4559312 | SNV | 1 | G | A | Homozygous   |
| NC_037653.1 | 4559316 | SNV | 1 | G | A | Homozygous   |
| NC_037653.1 | 4559364 | SNV | 1 | G | A | Heterozygous |
| NC_037653.1 | 4559369 | SNV | 1 | A | T | Heterozygous |
| NC_037653.1 | 4559372 | SNV | 1 | G | A | Heterozygous |
| NC_037653.1 | 4562982 | SNV | 1 | A | T | Homozygous   |
| NC_037653.1 | 4562995 | SNV | 1 | G | A | Homozygous   |
| NC_037653.1 | 4562998 | SNV | 1 | A | C | Homozygous   |
| NC_037653.1 | 4563005 | SNV | 1 | G | A | Homozygous   |
| NC_037653.1 | 4566028 | SNV | 1 | A | G | Homozygous   |
| NC_037653.1 | 4566031 | SNV | 1 | G | A | Heterozygous |
| NC_037653.1 | 4566494 | SNV | 1 | G | A | Homozygous   |
| NC_037653.1 | 4566648 | SNV | 1 | G | T | Heterozygous |

|             |         |     |   |   |   |              |
|-------------|---------|-----|---|---|---|--------------|
| NC_037653.1 | 4572084 | SNV | 1 | G | A | Homozygous   |
| NC_037653.1 | 4572088 | SNV | 1 | G | A | Homozygous   |
| NC_037653.1 | 4572094 | SNV | 1 | A | G | Homozygous   |
| NC_037653.1 | 4578148 | SNV | 1 | A | G | Homozygous   |
| NC_037653.1 | 4578150 | SNV | 1 | T | C | Homozygous   |
| NC_037653.1 | 4578171 | SNV | 1 | G | A | Homozygous   |
| NC_037653.1 | 4600311 | SNV | 1 | A | G | Homozygous   |
| NC_037653.1 | 4600319 | SNV | 1 | T | C | Homozygous   |
| NC_037653.1 | 4600335 | SNV | 1 | T | C | Homozygous   |
| NC_037653.1 | 4601460 | SNV | 1 | G | A | Heterozygous |
| NC_037653.1 | 4602269 | SNV | 1 | C | T | Homozygous   |
| NC_037653.1 | 4602372 | SNV | 1 | T | C | Homozygous   |
| NC_037653.1 | 4602520 | SNV | 1 | T | C | Homozygous   |
| NC_037653.1 | 4602602 | SNV | 1 | T | C | Homozygous   |
| NC_037653.1 | 4604729 | SNV | 1 | G | A | Homozygous   |
| NC_037653.1 | 4622166 | SNV | 1 | T | C | Heterozygous |
| NC_037653.1 | 4622168 | SNV | 1 | A | C | Heterozygous |
| NC_037653.1 | 4622264 | SNV | 1 | C | T | Heterozygous |
| NC_037653.1 | 4622370 | SNV | 1 | C | T | Heterozygous |
| NC_037653.1 | 4622385 | SNV | 1 | C | T | Heterozygous |
| NC_037653.1 | 4622535 | SNV | 1 | T | C | Homozygous   |
| NC_037653.1 | 4622556 | SNV | 1 | C | G | Heterozygous |
| NC_037653.1 | 4622669 | SNV | 1 | C | T | Heterozygous |
| NC_037653.1 | 4622682 | SNV | 1 | A | T | Homozygous   |
| NC_037653.1 | 4622684 | SNV | 1 | T | C | Heterozygous |
| NC_037653.1 | 4622831 | SNV | 1 | G | A | Homozygous   |
| NC_037653.1 | 4622848 | SNV | 1 | C | T | Heterozygous |
| NC_037653.1 | 4622892 | SNV | 1 | A | G | Heterozygous |
| NC_037653.1 | 4625378 | SNV | 1 | T | C | Homozygous   |
| NC_037653.1 | 4625468 | SNV | 1 | G | A | Heterozygous |
| NC_037653.1 | 4625982 | SNV | 1 | C | T | Homozygous   |
| NC_037653.1 | 4626419 | SNV | 1 | T | C | Homozygous   |
| NC_037653.1 | 4626422 | SNV | 1 | T | A | Homozygous   |
| NC_037653.1 | 4626425 | SNV | 1 | T | C | Homozygous   |
| NC_037653.1 | 4626427 | SNV | 1 | A | T | Homozygous   |
| NC_037653.1 | 4626429 | SNV | 1 | A | T | Homozygous   |
| NC_037653.1 | 4626459 | SNV | 1 | T | C | Heterozygous |
| NC_037653.1 | 4628554 | SNV | 1 | G | A | Homozygous   |
| NC_037653.1 | 4628586 | SNV | 1 | T | C | Homozygous   |
| NC_037653.1 | 4631735 | SNV | 1 | T | C | Homozygous   |
| NC_037653.1 | 4631807 | SNV | 1 | C | T | Heterozygous |
| NC_037653.1 | 4633336 | SNV | 1 | T | C | Heterozygous |
| NC_037653.1 | 4633804 | SNV | 1 | A | G | Homozygous   |
| NC_037653.1 | 4634523 | SNV | 1 | G | A | Homozygous   |
| NC_037653.1 | 4634602 | SNV | 1 | T | C | Homozygous   |
| NC_037653.1 | 4634653 | SNV | 1 | A | G | Homozygous   |
| NC_037653.1 | 4634890 | SNV | 1 | T | C | Heterozygous |
| NC_037653.1 | 4634893 | SNV | 1 | A | G | Heterozygous |
| NC_037653.1 | 4634959 | SNV | 1 | G | A | Heterozygous |
| NC_037653.1 | 4634962 | SNV | 1 | G | A | Heterozygous |
| NC_037653.1 | 4635122 | SNV | 1 | A | G | Heterozygous |



|             |         |     |   |   |   |              |
|-------------|---------|-----|---|---|---|--------------|
| NC_037653.1 | 4635142 | SNV | 1 | G | A | Heterozygous |
| NC_037653.1 | 4635158 | SNV | 1 | A | G | Homozygous   |
| NC_037653.1 | 4635352 | SNV | 1 | A | G | Heterozygous |
| NC_037653.1 | 4635424 | SNV | 1 | A | G | Heterozygous |
| NC_037653.1 | 4635730 | SNV | 1 | C | T | Heterozygous |
| NC_037653.1 | 4636397 | SNV | 1 | T | A | Heterozygous |
| NC_037653.1 | 4641970 | SNV | 1 | G | T | Homozygous   |
| NC_037653.1 | 4642034 | SNV | 1 | C | G | Homozygous   |
| NC_037653.1 | 4644622 | SNV | 1 | T | A | Homozygous   |
| NC_037653.1 | 4645017 | SNV | 1 | A | T | Homozygous   |
| NC_037653.1 | 4645019 | SNV | 1 | T | G | Homozygous   |
| NC_037653.1 | 4645086 | SNV | 1 | T | A | Homozygous   |
| NC_037653.1 | 4645089 | SNV | 1 | C | T | Homozygous   |
| NC_037653.1 | 4651548 | SNV | 1 | T | C | Homozygous   |
| NC_037653.1 | 4662147 | SNV | 1 | T | G | Homozygous   |
| NC_037653.1 | 4662173 | SNV | 1 | G | C | Heterozygous |
| NC_037653.1 | 4662363 | SNV | 1 | T | C | Homozygous   |
| NC_037653.1 | 4663429 | SNV | 1 | G | A | Homozygous   |
| NC_037653.1 | 4663526 | SNV | 1 | G | C | Heterozygous |
| NC_037653.1 | 4666824 | SNV | 1 | T | G | Homozygous   |
| NC_037653.1 | 4666828 | SNV | 1 | T | G | Homozygous   |
| NC_037653.1 | 4666856 | SNV | 1 | G | A | Homozygous   |
| NC_037653.1 | 4668444 | SNV | 1 | T | A | Homozygous   |
| NC_037653.1 | 4668462 | SNV | 1 | T | C | Homozygous   |
| NC_037653.1 | 4668482 | SNV | 1 | T | A | Homozygous   |
| NC_037653.1 | 4676838 | SNV | 1 | C | T | Heterozygous |
| NC_037653.1 | 4676913 | SNV | 1 | A | G | Homozygous   |
| NC_037653.1 | 4676917 | SNV | 1 | G | C | Homozygous   |
| NC_037653.1 | 4677254 | SNV | 1 | A | G | Heterozygous |
| NC_037653.1 | 4677361 | SNV | 1 | A | C | Homozygous   |
| NC_037653.1 | 4677364 | SNV | 1 | A | G | Heterozygous |
| NC_037653.1 | 4677469 | SNV | 1 | C | T | Heterozygous |
| NC_037653.1 | 4677473 | SNV | 1 | A | C | Heterozygous |
| NC_037653.1 | 4677591 | SNV | 1 | G | A | Heterozygous |
| NC_037653.1 | 4677603 | SNV | 1 | T | C | Heterozygous |
| NC_037653.1 | 4677606 | SNV | 1 | G | A | Heterozygous |
| NC_037653.1 | 4677652 | SNV | 1 | G | A | Heterozygous |
| NC_037653.1 | 4677688 | SNV | 1 | G | A | Homozygous   |
| NC_037653.1 | 4677697 | SNV | 1 | A | G | Heterozygous |
| NC_037653.1 | 4677703 | SNV | 1 | G | A | Heterozygous |
| NC_037653.1 | 4677706 | SNV | 1 | A | G | Heterozygous |
| NC_037653.1 | 4677740 | SNV | 1 | A | G | Homozygous   |
| NC_037653.1 | 4677754 | SNV | 1 | T | C | Homozygous   |
| NC_037653.1 | 4677757 | SNV | 1 | T | C | Heterozygous |
| NC_037653.1 | 4677817 | SNV | 1 | A | G | Heterozygous |
| NC_037653.1 | 4677997 | SNV | 1 | A | G | Homozygous   |
| NC_037653.1 | 4678008 | SNV | 1 | T | C | Homozygous   |
| NC_037653.1 | 4678013 | SNV | 1 | C | T | Heterozygous |
| NC_037653.1 | 4678023 | SNV | 1 | C | T | Homozygous   |
| NC_037653.1 | 4678055 | SNV | 1 | G | A | Homozygous   |
| NC_037653.1 | 4678203 | SNV | 1 | T | C | Homozygous   |

|             |         |     |   |   |   |              |
|-------------|---------|-----|---|---|---|--------------|
| NC_037653.1 | 4678223 | SNV | 1 | G | A | Heterozygous |
| NC_037653.1 | 4678647 | SNV | 1 | C | T | Heterozygous |
| NC_037653.1 | 4682196 | SNV | 1 | A | G | Homozygous   |
| NC_037653.1 | 4683044 | SNV | 1 | C | T | Homozygous   |
| NC_037653.1 | 4683118 | SNV | 1 | T | C | Homozygous   |
| NC_037653.1 | 4683121 | SNV | 1 | A | G | Homozygous   |
| NC_037653.1 | 4683123 | SNV | 1 | C | T | Homozygous   |
| NC_037653.1 | 4688232 | SNV | 1 | A | G | Heterozygous |
| NC_037653.1 | 4689028 | SNV | 1 | C | T | Homozygous   |
| NC_037653.1 | 4689049 | SNV | 1 | A | G | Homozygous   |
| NC_037653.1 | 4689113 | SNV | 1 | G | A | Homozygous   |
| NC_037653.1 | 4692912 | SNV | 1 | T | C | Homozygous   |
| NC_037653.1 | 4694358 | SNV | 1 | T | C | Homozygous   |
| NC_037653.1 | 4695368 | SNV | 1 | A | G | Heterozygous |
| NC_037653.1 | 4695389 | SNV | 1 | T | C | Homozygous   |
| NC_037653.1 | 4695449 | SNV | 1 | G | A | Homozygous   |
| NC_037653.1 | 4697128 | SNV | 1 | C | G | Homozygous   |
| NC_037653.1 | 4699469 | SNV | 1 | C | A | Heterozygous |
| NC_037653.1 | 4699486 | SNV | 1 | T | C | Homozygous   |
| NC_037653.1 | 4699509 | SNV | 1 | G | A | Heterozygous |
| NC_037653.1 | 4701309 | SNV | 1 | T | A | Homozygous   |
| NC_037653.1 | 4701339 | SNV | 1 | T | A | Homozygous   |
| NC_037653.1 | 4703604 | SNV | 1 | A | G | Homozygous   |
| NC_037653.1 | 4703606 | SNV | 1 | C | G | Homozygous   |
| NC_037653.1 | 4703613 | SNV | 1 | G | A | Homozygous   |
| NC_037653.1 | 4703626 | SNV | 1 | A | G | Homozygous   |
| NC_037653.1 | 4703630 | SNV | 1 | T | G | Homozygous   |
| NC_037653.1 | 4703637 | SNV | 1 | C | A | Homozygous   |
| NC_037653.1 | 4703645 | SNV | 1 | C | G | Homozygous   |
| NC_037653.1 | 4703650 | SNV | 1 | C | G | Homozygous   |
| NC_037653.1 | 4703662 | SNV | 1 | G | A | Heterozygous |
| NC_037653.1 | 4703664 | SNV | 1 | C | T | Heterozygous |
| NC_037653.1 | 4703676 | SNV | 1 | A | G | Homozygous   |
| NC_037653.1 | 4703682 | SNV | 1 | A | G | Heterozygous |
| NC_037653.1 | 4703713 | SNV | 1 | C | T | Heterozygous |
| NC_037653.1 | 4709598 | SNV | 1 | C | G | Homozygous   |
| NC_037653.1 | 4709670 | SNV | 1 | C | T | Homozygous   |
| NC_037653.1 | 4709714 | SNV | 1 | G | A | Homozygous   |
| NC_037653.1 | 4709718 | SNV | 1 | G | A | Homozygous   |
| NC_037653.1 | 4716962 | SNV | 1 | T | C | Homozygous   |
| NC_037653.1 | 4716988 | SNV | 1 | A | G | Homozygous   |
| NC_037653.1 | 4726827 | SNV | 1 | T | C | Homozygous   |
| NC_037653.1 | 4734448 | SNV | 1 | C | T | Heterozygous |
| NC_037653.1 | 4734456 | SNV | 1 | C | T | Heterozygous |
| NC_037653.1 | 4740056 | SNV | 1 | A | G | Heterozygous |
| NC_037653.1 | 4740359 | SNV | 1 | A | G | Homozygous   |
| NC_037653.1 | 4740420 | SNV | 1 | A | G | Homozygous   |
| NC_037653.1 | 4740592 | SNV | 1 | A | G | Homozygous   |
| NC_037653.1 | 4740625 | SNV | 1 | T | G | Heterozygous |
| NC_037653.1 | 4741013 | SNV | 1 | C | T | Heterozygous |
| NC_037653.1 | 4741032 | SNV | 1 | A | G | Homozygous   |

|             |         |     |   |   |   |              |
|-------------|---------|-----|---|---|---|--------------|
| NC_037653.1 | 4741036 | SNV | 1 | C | A | Homozygous   |
| NC_037653.1 | 4745680 | SNV | 1 | T | C | Homozygous   |
| NC_037653.1 | 4745710 | SNV | 1 | C | T | Heterozygous |
| NC_037653.1 | 4747321 | SNV | 1 | G | A | Homozygous   |
| NC_037653.1 | 4747349 | SNV | 1 | A | G | Homozygous   |
| NC_037653.1 | 4747354 | SNV | 1 | A | G | Homozygous   |
| NC_037653.1 | 4747380 | SNV | 1 | G | A | Heterozygous |
| NC_037653.1 | 4752200 | SNV | 1 | T | C | Homozygous   |
| NC_037653.1 | 4764212 | SNV | 1 | T | A | Homozygous   |
| NC_037653.1 | 4764215 | SNV | 1 | T | A | Homozygous   |
| NC_037653.1 | 4764217 | SNV | 1 | T | A | Homozygous   |
| NC_037653.1 | 4764220 | SNV | 1 | G | T | Homozygous   |
| NC_037653.1 | 4764860 | SNV | 1 | C | T | Heterozygous |
| NC_037653.1 | 4768543 | SNV | 1 | T | C | Heterozygous |
| NC_037653.1 | 4773191 | SNV | 1 | G | A | Heterozygous |
| NC_037653.1 | 4773318 | SNV | 1 | C | T | Homozygous   |
| NC_037653.1 | 4773752 | SNV | 1 | A | G | Homozygous   |
| NC_037653.1 | 4774468 | SNV | 1 | A | G | Homozygous   |
| NC_037653.1 | 4774481 | SNV | 1 | G | A | Heterozygous |
| NC_037653.1 | 4774591 | SNV | 1 | A | G | Homozygous   |
| NC_037653.1 | 4774663 | SNV | 1 | C | G | Homozygous   |
| NC_037653.1 | 4774885 | SNV | 1 | A | G | Homozygous   |
| NC_037653.1 | 4775209 | SNV | 1 | A | G | Homozygous   |
| NC_037653.1 | 4775240 | SNV | 1 | C | T | Homozygous   |
| NC_037653.1 | 4775349 | SNV | 1 | T | C | Homozygous   |
| NC_037653.1 | 4776302 | SNV | 1 | C | A | Homozygous   |
| NC_037653.1 | 4776425 | SNV | 1 | T | C | Homozygous   |
| NC_037653.1 | 4776431 | SNV | 1 | G | A | Homozygous   |
| NC_037653.1 | 4776918 | SNV | 1 | C | T | Homozygous   |
| NC_037653.1 | 4777074 | SNV | 1 | A | G | Homozygous   |
| NC_037653.1 | 4777228 | SNV | 1 | C | T | Heterozygous |
| NC_037653.1 | 4777404 | SNV | 1 | G | A | Homozygous   |
| NC_037653.1 | 4777617 | SNV | 1 | T | C | Homozygous   |
| NC_037653.1 | 4777628 | SNV | 1 | T | C | Homozygous   |
| NC_037653.1 | 4777717 | SNV | 1 | C | G | Homozygous   |
| NC_037653.1 | 4778128 | SNV | 1 | G | A | Heterozygous |
| NC_037653.1 | 4783808 | SNV | 1 | T | C | Heterozygous |
| NC_037653.1 | 4783840 | SNV | 1 | G | T | Heterozygous |
| NC_037653.1 | 4784075 | SNV | 1 | C | T | Heterozygous |
| NC_037653.1 | 4784108 | SNV | 1 | T | C | Homozygous   |
| NC_037653.1 | 4784181 | SNV | 1 | G | T | Heterozygous |
| NC_037653.1 | 4784183 | SNV | 1 | A | T | Homozygous   |
| NC_037653.1 | 4784189 | SNV | 1 | G | T | Heterozygous |
| NC_037653.1 | 4784265 | SNV | 1 | T | G | Homozygous   |
| NC_037653.1 | 4784269 | SNV | 1 | C | T | Heterozygous |
| NC_037653.1 | 4784295 | SNV | 1 | A | T | Heterozygous |
| NC_037653.1 | 4784510 | SNV | 1 | T | C | Homozygous   |
| NC_037653.1 | 4784719 | SNV | 1 | G | A | Heterozygous |
| NC_037653.1 | 4784723 | SNV | 1 | T | A | Homozygous   |
| NC_037653.1 | 4786268 | SNV | 1 | C | T | Heterozygous |
| NC_037653.1 | 4786338 | SNV | 1 | T | C | Homozygous   |

|             |         |     |   |   |   |              |
|-------------|---------|-----|---|---|---|--------------|
| NC_037653.1 | 4786452 | SNV | 1 | G | A | Heterozygous |
| NC_037653.1 | 4786688 | SNV | 1 | C | T | Heterozygous |
| NC_037653.1 | 4786915 | SNV | 1 | A | G | Homozygous   |
| NC_037653.1 | 4789019 | SNV | 1 | A | G | Homozygous   |
| NC_037653.1 | 4789029 | SNV | 1 | C | T | Homozygous   |
| NC_037653.1 | 4789053 | SNV | 1 | G | A | Homozygous   |
| NC_037653.1 | 4790112 | SNV | 1 | A | G | Heterozygous |
| NC_037653.1 | 4790534 | SNV | 1 | A | C | Homozygous   |
| NC_037653.1 | 4790752 | SNV | 1 | T | G | Heterozygous |
| NC_037653.1 | 4791121 | SNV | 1 | C | T | Heterozygous |
| NC_037653.1 | 4791212 | SNV | 1 | C | T | Heterozygous |
| NC_037653.1 | 4792042 | SNV | 1 | T | C | Homozygous   |
| NC_037653.1 | 4792188 | SNV | 1 | T | C | Homozygous   |
| NC_037653.1 | 4792450 | SNV | 1 | A | G | Homozygous   |
| NC_037653.1 | 4792564 | SNV | 1 | A | C | Homozygous   |
| NC_037653.1 | 4792586 | SNV | 1 | T | C | Heterozygous |
| NC_037653.1 | 4792592 | SNV | 1 | A | T | Homozygous   |
| NC_037653.1 | 4792618 | SNV | 1 | T | C | Heterozygous |
| NC_037653.1 | 4792627 | SNV | 1 | G | T | Heterozygous |
| NC_037653.1 | 4792718 | SNV | 1 | C | T | Heterozygous |
| NC_037653.1 | 4792739 | SNV | 1 | C | G | Heterozygous |
| NC_037653.1 | 4792927 | SNV | 1 | A | G | Heterozygous |
| NC_037653.1 | 4795807 | SNV | 1 | A | G | Homozygous   |
| NC_037653.1 | 4795951 | SNV | 1 | T | C | Heterozygous |
| NC_037653.1 | 4796040 | SNV | 1 | G | A | Heterozygous |
| NC_037653.1 | 4796172 | SNV | 1 | G | A | Homozygous   |
| NC_037653.1 | 4796300 | SNV | 1 | C | G | Heterozygous |
| NC_037653.1 | 4797864 | SNV | 1 | C | T | Homozygous   |
| NC_037653.1 | 4797984 | SNV | 1 | T | C | Heterozygous |
| NC_037653.1 | 4798012 | SNV | 1 | G | A | Homozygous   |
| NC_037653.1 | 4798052 | SNV | 1 | G | A | Heterozygous |
| NC_037653.1 | 4798889 | SNV | 1 | G | A | Heterozygous |
| NC_037653.1 | 4798892 | SNV | 1 | G | A | Homozygous   |
| NC_037653.1 | 4798924 | SNV | 1 | G | A | Heterozygous |
| NC_037653.1 | 4798926 | SNV | 1 | C | T | Homozygous   |
| NC_037653.1 | 4798951 | SNV | 1 | C | G | Heterozygous |
| NC_037653.1 | 4799046 | SNV | 1 | G | A | Homozygous   |
| NC_037653.1 | 4799454 | SNV | 1 | T | C | Homozygous   |
| NC_037653.1 | 4799514 | SNV | 1 | T | C | Homozygous   |
| NC_037653.1 | 4799529 | SNV | 1 | G | A | Heterozygous |
| NC_037653.1 | 4799532 | SNV | 1 | G | A | Heterozygous |
| NC_037653.1 | 4799865 | SNV | 1 | C | G | Heterozygous |
| NC_037653.1 | 4800880 | SNV | 1 | G | C | Homozygous   |
| NC_037653.1 | 4801049 | SNV | 1 | A | G | Heterozygous |
| NC_037653.1 | 4801067 | SNV | 1 | A | G | Homozygous   |
| NC_037653.1 | 4801073 | SNV | 1 | T | A | Homozygous   |
| NC_037653.1 | 4801622 | SNV | 1 | A | G | Homozygous   |
| NC_037653.1 | 4801624 | SNV | 1 | A | G | Heterozygous |
| NC_037653.1 | 4801636 | SNV | 1 | G | A | Homozygous   |
| NC_037653.1 | 4801995 | SNV | 1 | G | A | Heterozygous |
| NC_037653.1 | 4802183 | SNV | 1 | T | C | Homozygous   |

|             |         |     |   |   |   |              |
|-------------|---------|-----|---|---|---|--------------|
| NC_037653.1 | 4802273 | SNV | 1 | G | A | Heterozygous |
| NC_037653.1 | 4802437 | SNV | 1 | G | A | Homozygous   |
| NC_037653.1 | 4802510 | SNV | 1 | T | A | Heterozygous |
| NC_037653.1 | 4802522 | SNV | 1 | A | G | Homozygous   |
| NC_037653.1 | 4802546 | SNV | 1 | A | G | Homozygous   |
| NC_037653.1 | 4802756 | SNV | 1 | C | T | Heterozygous |
| NC_037653.1 | 4803058 | SNV | 1 | C | G | Homozygous   |
| NC_037653.1 | 4806614 | SNV | 1 | A | G | Homozygous   |
| NC_037653.1 | 4806766 | SNV | 1 | T | C | Heterozygous |
| NC_037653.1 | 4806849 | SNV | 1 | T | C | Homozygous   |
| NC_037653.1 | 4806933 | SNV | 1 | T | C | Heterozygous |
| NC_037653.1 | 4806939 | SNV | 1 | T | C | Homozygous   |
| NC_037653.1 | 4807328 | SNV | 1 | T | C | Heterozygous |
| NC_037653.1 | 4807400 | SNV | 1 | A | G | Homozygous   |
| NC_037653.1 | 4807444 | SNV | 1 | G | A | Heterozygous |
| NC_037653.1 | 4807961 | SNV | 1 | G | A | Heterozygous |
| NC_037653.1 | 4808069 | SNV | 1 | A | G | Homozygous   |
| NC_037653.1 | 4808688 | SNV | 1 | C | T | Heterozygous |
| NC_037653.1 | 4808741 | SNV | 1 | A | G | Homozygous   |
| NC_037653.1 | 4809601 | SNV | 1 | A | G | Homozygous   |
| NC_037653.1 | 4811363 | SNV | 1 | C | T | Homozygous   |
| NC_037653.1 | 4812900 | SNV | 1 | A | T | Homozygous   |
| NC_037653.1 | 4813431 | SNV | 1 | A | G | Homozygous   |
| NC_037653.1 | 4813816 | SNV | 1 | T | C | Homozygous   |
| NC_037653.1 | 4814028 | SNV | 1 | C | G | Heterozygous |
| NC_037653.1 | 4814036 | SNV | 1 | A | T | Heterozygous |
| NC_037653.1 | 4814038 | SNV | 1 | A | C | Heterozygous |
| NC_037653.1 | 4814043 | SNV | 1 | T | A | Heterozygous |
| NC_037653.1 | 4814334 | SNV | 1 | G | A | Heterozygous |
| NC_037653.1 | 4814523 | SNV | 1 | C | T | Heterozygous |
| NC_037653.1 | 4815105 | SNV | 1 | A | G | Homozygous   |
| NC_037653.1 | 4815453 | SNV | 1 | C | T | Homozygous   |
| NC_037653.1 | 4815456 | SNV | 1 | A | T | Homozygous   |
| NC_037653.1 | 4815537 | SNV | 1 | C | G | Homozygous   |
| NC_037653.1 | 4821644 | SNV | 1 | C | T | Heterozygous |
| NC_037653.1 | 4824155 | SNV | 1 | T | G | Homozygous   |
| NC_037653.1 | 4827634 | SNV | 1 | T | C | Heterozygous |
| NC_037653.1 | 4827640 | SNV | 1 | G | A | Homozygous   |
| NC_037653.1 | 4827667 | SNV | 1 | T | C | Homozygous   |
| NC_037653.1 | 4830499 | SNV | 1 | T | C | Homozygous   |
| NC_037653.1 | 4830709 | SNV | 1 | A | T | Homozygous   |
| NC_037653.1 | 4830781 | SNV | 1 | A | G | Homozygous   |
| NC_037653.1 | 4833543 | SNV | 1 | G | A | Homozygous   |
| NC_037653.1 | 4833546 | SNV | 1 | C | T | Heterozygous |
| NC_037653.1 | 4833553 | SNV | 1 | T | C | Homozygous   |
| NC_037653.1 | 4834840 | SNV | 1 | T | C | Homozygous   |
| NC_037653.1 | 4838820 | SNV | 1 | A | C | Homozygous   |
| NC_037653.1 | 4839817 | SNV | 1 | A | G | Homozygous   |
| NC_037653.1 | 4842219 | SNV | 1 | T | A | Homozygous   |
| NC_037653.1 | 4842222 | SNV | 1 | A | T | Homozygous   |
| NC_037653.1 | 4842366 | SNV | 1 | A | T | Heterozygous |

|             |         |     |   |   |   |              |
|-------------|---------|-----|---|---|---|--------------|
| NC_037653.1 | 4842369 | SNV | 1 | T | C | Heterozygous |
| NC_037653.1 | 4842378 | SNV | 1 | A | C | Heterozygous |
| NC_037653.1 | 4842384 | SNV | 1 | G | T | Heterozygous |
| NC_037653.1 | 4842387 | SNV | 1 | T | A | Heterozygous |
| NC_037653.1 | 4842441 | SNV | 1 | T | C | Homozygous   |
| NC_037653.1 | 4848264 | SNV | 1 | A | G | Homozygous   |
| NC_037653.1 | 4848266 | SNV | 1 | T | A | Homozygous   |
| NC_037653.1 | 4852669 | SNV | 1 | T | G | Homozygous   |
| NC_037653.1 | 4852673 | SNV | 1 | A | T | Homozygous   |
| NC_037653.1 | 4853028 | SNV | 1 | G | A | Homozygous   |
| NC_037653.1 | 4853034 | SNV | 1 | A | T | Homozygous   |
| NC_037653.1 | 4861046 | SNV | 1 | T | A | Heterozygous |
| NC_037653.1 | 4861050 | SNV | 1 | T | A | Heterozygous |
| NC_037653.1 | 4861056 | SNV | 1 | T | A | Heterozygous |
| NC_037653.1 | 4861061 | SNV | 1 | A | G | Heterozygous |
| NC_037653.1 | 4861064 | SNV | 1 | T | G | Heterozygous |
| NC_037653.1 | 4864478 | SNV | 1 | C | T | Heterozygous |
| NC_037653.1 | 4865244 | SNV | 1 | A | G | Homozygous   |
| NC_037653.1 | 4866899 | SNV | 1 | T | C | Homozygous   |
| NC_037653.1 | 4867294 | SNV | 1 | A | G | Heterozygous |
| NC_037653.1 | 4867298 | SNV | 1 | T | C | Heterozygous |
| NC_037653.1 | 4867300 | SNV | 1 | G | T | Heterozygous |
| NC_037653.1 | 4867312 | SNV | 1 | T | G | Heterozygous |
| NC_037653.1 | 4867328 | SNV | 1 | A | T | Heterozygous |
| NC_037653.1 | 4867330 | SNV | 1 | T | A | Heterozygous |
| NC_037653.1 | 4867333 | SNV | 1 | A | G | Heterozygous |
| NC_037653.1 | 4867339 | SNV | 1 | G | A | Homozygous   |
| NC_037653.1 | 4867342 | SNV | 1 | T | A | Heterozygous |
| NC_037653.1 | 4867347 | SNV | 1 | A | C | Heterozygous |
| NC_037653.1 | 4867351 | SNV | 1 | A | G | Heterozygous |
| NC_037653.1 | 4867600 | SNV | 1 | T | C | Homozygous   |
| NC_037653.1 | 4867978 | SNV | 1 | T | C | Homozygous   |
| NC_037653.1 | 4868098 | SNV | 1 | T | C | Homozygous   |
| NC_037653.1 | 4870001 | SNV | 1 | T | A | Homozygous   |
| NC_037653.1 | 4870011 | SNV | 1 | T | A | Homozygous   |
| NC_037653.1 | 4870019 | SNV | 1 | A | C | Homozygous   |
| NC_037653.1 | 4870268 | SNV | 1 | G | A | Homozygous   |
| NC_037653.1 | 4870512 | SNV | 1 | A | T | Homozygous   |
| NC_037653.1 | 4870548 | SNV | 1 | T | C | Homozygous   |
| NC_037653.1 | 4870593 | SNV | 1 | C | A | Homozygous   |
| NC_037653.1 | 4870596 | SNV | 1 | C | T | Homozygous   |
| NC_037653.1 | 4870683 | SNV | 1 | G | A | Heterozygous |
| NC_037653.1 | 4870685 | SNV | 1 | G | A | Heterozygous |
| NC_037653.1 | 4870688 | SNV | 1 | A | T | Heterozygous |
| NC_037653.1 | 4871847 | SNV | 1 | T | C | Homozygous   |
| NC_037653.1 | 4873670 | SNV | 1 | C | T | Heterozygous |
| NC_037653.1 | 4878233 | SNV | 1 | C | T | Homozygous   |
| NC_037653.1 | 4878253 | SNV | 1 | A | G | Homozygous   |
| NC_037653.1 | 4879076 | SNV | 1 | C | T | Homozygous   |
| NC_037653.1 | 4879191 | SNV | 1 | C | T | Homozygous   |
| NC_037653.1 | 4879934 | SNV | 1 | C | T | Homozygous   |

|             |         |     |   |   |   |              |
|-------------|---------|-----|---|---|---|--------------|
| NC_037653.1 | 4888688 | SNV | 1 | T | G | Homozygous   |
| NC_037653.1 | 4888786 | SNV | 1 | A | T | Heterozygous |
| NC_037653.1 | 4888799 | SNV | 1 | G | A | Homozygous   |
| NC_037653.1 | 4889524 | SNV | 1 | T | A | Homozygous   |
| NC_037653.1 | 4890005 | SNV | 1 | A | T | Heterozygous |
| NC_037653.1 | 4890793 | SNV | 1 | G | A | Homozygous   |
| NC_037653.1 | 4890930 | SNV | 1 | C | G | Homozygous   |
| NC_037653.1 | 4891126 | SNV | 1 | T | G | Homozygous   |
| NC_037653.1 | 4891174 | SNV | 1 | A | T | Heterozygous |
| NC_037653.1 | 4891181 | SNV | 1 | A | T | Heterozygous |
| NC_037653.1 | 4891197 | SNV | 1 | A | T | Heterozygous |
| NC_037653.1 | 4891852 | SNV | 1 | T | A | Homozygous   |
| NC_037653.1 | 4893687 | SNV | 1 | C | T | Homozygous   |
| NC_037653.1 | 4894562 | SNV | 1 | A | T | Homozygous   |
| NC_037653.1 | 4894567 | SNV | 1 | A | T | Homozygous   |
| NC_037653.1 | 4894570 | SNV | 1 | C | T | Homozygous   |
| NC_037653.1 | 4894594 | SNV | 1 | T | C | Homozygous   |
| NC_037653.1 | 4894598 | SNV | 1 | T | A | Homozygous   |
| NC_037653.1 | 4895289 | SNV | 1 | C | T | Heterozygous |
| NC_037653.1 | 4898123 | SNV | 1 | T | G | Homozygous   |
| NC_037653.1 | 4898150 | SNV | 1 | A | T | Homozygous   |
| NC_037653.1 | 4898157 | SNV | 1 | C | T | Homozygous   |
| NC_037653.1 | 4898165 | SNV | 1 | T | A | Homozygous   |
| NC_037653.1 | 4898168 | SNV | 1 | A | G | Homozygous   |
| NC_037653.1 | 4898918 | SNV | 1 | A | T | Heterozygous |
| NC_037653.1 | 4899107 | SNV | 1 | A | T | Heterozygous |
| NC_037653.1 | 4899146 | SNV | 1 | A | T | Heterozygous |
| NC_037653.1 | 4899173 | SNV | 1 | A | T | Heterozygous |
| NC_037653.1 | 4899185 | SNV | 1 | T | A | Homozygous   |
| NC_037653.1 | 4899187 | SNV | 1 | T | A | Homozygous   |
| NC_037653.1 | 4900762 | SNV | 1 | T | C | Homozygous   |
| NC_037653.1 | 4901227 | SNV | 1 | T | C | Homozygous   |
| NC_037653.1 | 4901268 | SNV | 1 | T | A | Homozygous   |
| NC_037653.1 | 4906538 | SNV | 1 | T | C | Homozygous   |
| NC_037653.1 | 4906603 | SNV | 1 | T | C | Heterozygous |
| NC_037653.1 | 4906607 | SNV | 1 | G | A | Heterozygous |
| NC_037653.1 | 4907210 | SNV | 1 | G | A | Homozygous   |
| NC_037653.1 | 4907438 | SNV | 1 | G | A | Homozygous   |
| NC_037653.1 | 4910022 | SNV | 1 | A | G | Homozygous   |
| NC_037653.1 | 4910646 | SNV | 1 | C | A | Homozygous   |
| NC_037653.1 | 4911220 | SNV | 1 | G | T | Homozygous   |
| NC_037653.1 | 4911223 | SNV | 1 | A | T | Homozygous   |
| NC_037653.1 | 4911225 | SNV | 1 | A | T | Homozygous   |
| NC_037653.1 | 4911233 | SNV | 1 | A | T | Homozygous   |
| NC_037653.1 | 4911242 | SNV | 1 | T | A | Homozygous   |
| NC_037653.1 | 4911247 | SNV | 1 | A | G | Homozygous   |
| NC_037653.1 | 4911264 | SNV | 1 | T | C | Homozygous   |
| NC_037653.1 | 4911269 | SNV | 1 | T | A | Homozygous   |
| NC_037653.1 | 4911710 | SNV | 1 | C | A | Homozygous   |
| NC_037653.1 | 4911810 | SNV | 1 | C | T | Homozygous   |
| NC_037653.1 | 4912278 | SNV | 1 | C | T | Heterozygous |

|             |         |     |   |   |   |              |
|-------------|---------|-----|---|---|---|--------------|
| NC_037653.1 | 4912281 | SNV | 1 | C | T | Heterozygous |
| NC_037653.1 | 4920228 | SNV | 1 | A | T | Homozygous   |
| NC_037653.1 | 4920625 | SNV | 1 | C | T | Homozygous   |
| NC_037653.1 | 4920859 | SNV | 1 | C | T | Homozygous   |
| NC_037653.1 | 4921328 | SNV | 1 | C | G | Homozygous   |
| NC_037653.1 | 4921353 | SNV | 1 | T | C | Homozygous   |
| NC_037653.1 | 4921485 | SNV | 1 | A | G | Homozygous   |
| NC_037653.1 | 4922517 | SNV | 1 | G | A | Homozygous   |
| NC_037653.1 | 4922816 | SNV | 1 | A | C | Heterozygous |
| NC_037653.1 | 4922820 | SNV | 1 | A | T | Heterozygous |
| NC_037653.1 | 4922824 | SNV | 1 | A | G | Heterozygous |
| NC_037653.1 | 4922886 | SNV | 1 | A | T | Homozygous   |
| NC_037653.1 | 4935590 | SNV | 1 | T | A | Homozygous   |
| NC_037653.1 | 4935593 | SNV | 1 | A | T | Homozygous   |
| NC_037653.1 | 4936519 | SNV | 1 | A | G | Homozygous   |
| NC_037653.1 | 4938339 | SNV | 1 | A | T | Heterozygous |
| NC_037653.1 | 4938343 | SNV | 1 | A | G | Heterozygous |
| NC_037653.1 | 4938351 | SNV | 1 | A | T | Heterozygous |
| NC_037653.1 | 4938384 | SNV | 1 | A | T | Homozygous   |
| NC_037653.1 | 4938402 | SNV | 1 | A | G | Heterozygous |
| NC_037653.1 | 4938410 | SNV | 1 | A | C | Heterozygous |
| NC_037653.1 | 4939848 | SNV | 1 | C | T | Homozygous   |
| NC_037653.1 | 4939874 | SNV | 1 | C | T | Homozygous   |
| NC_037653.1 | 4939877 | SNV | 1 | C | T | Heterozygous |
| NC_037653.1 | 4939910 | SNV | 1 | G | A | Homozygous   |
| NC_037653.1 | 4939916 | SNV | 1 | C | T | Homozygous   |
| NC_037653.1 | 4939922 | SNV | 1 | G | T | Heterozygous |
| NC_037653.1 | 4939982 | SNV | 1 | C | T | Heterozygous |
| NC_037653.1 | 4947748 | SNV | 1 | T | C | Homozygous   |
| NC_037653.1 | 4947799 | SNV | 1 | G | A | Homozygous   |
| NC_037653.1 | 4947822 | SNV | 1 | T | A | Homozygous   |
| NC_037653.1 | 4947939 | SNV | 1 | T | C | Heterozygous |
| NC_037653.1 | 4948023 | SNV | 1 | T | A | Heterozygous |
| NC_037653.1 | 4948028 | SNV | 1 | G | A | Homozygous   |
| NC_037653.1 | 4948050 | SNV | 1 | T | C | Homozygous   |
| NC_037653.1 | 4948093 | SNV | 1 | T | G | Heterozygous |
| NC_037653.1 | 4948231 | SNV | 1 | C | T | Heterozygous |
| NC_037653.1 | 4948278 | SNV | 1 | T | C | Homozygous   |
| NC_037653.1 | 4948396 | SNV | 1 | A | C | Homozygous   |
| NC_037653.1 | 4948512 | SNV | 1 | C | T | Heterozygous |
| NC_037653.1 | 4948989 | SNV | 1 | T | A | Homozygous   |
| NC_037653.1 | 4949135 | SNV | 1 | A | G | Heterozygous |
| NC_037653.1 | 4949373 | SNV | 1 | A | G | Homozygous   |
| NC_037653.1 | 4949642 | SNV | 1 | G | A | Heterozygous |
| NC_037653.1 | 4955261 | SNV | 1 | T | A | Homozygous   |
| NC_037653.1 | 4955272 | SNV | 1 | T | A | Homozygous   |
| NC_037653.1 | 4955274 | SNV | 1 | C | G | Homozygous   |
| NC_037653.1 | 4955278 | SNV | 1 | G | T | Homozygous   |
| NC_037653.1 | 4955289 | SNV | 1 | T | G | Homozygous   |
| NC_037653.1 | 4955292 | SNV | 1 | A | T | Homozygous   |
| NC_037653.1 | 4955298 | SNV | 1 | A | T | Homozygous   |



|             |         |     |   |   |   |              |
|-------------|---------|-----|---|---|---|--------------|
| NC_037653.1 | 4959395 | SNV | 1 | A | G | Homozygous   |
| NC_037653.1 | 4962993 | SNV | 1 | A | C | Homozygous   |
| NC_037653.1 | 4962998 | SNV | 1 | A | C | Homozygous   |
| NC_037653.1 | 4963008 | SNV | 1 | T | C | Heterozygous |
| NC_037653.1 | 4968582 | SNV | 1 | T | G | Homozygous   |
| NC_037653.1 | 4976482 | SNV | 1 | A | G | Homozygous   |
| NC_037653.1 | 4976491 | SNV | 1 | G | A | Heterozygous |
| NC_037653.1 | 4976509 | SNV | 1 | G | A | Heterozygous |
| NC_037653.1 | 4976548 | SNV | 1 | G | A | Heterozygous |
| NC_037653.1 | 4976598 | SNV | 1 | C | T | Heterozygous |
| NC_037653.1 | 4976674 | SNV | 1 | T | A | Heterozygous |
| NC_037653.1 | 4976705 | SNV | 1 | T | A | Heterozygous |
| NC_037653.1 | 4976728 | SNV | 1 | A | G | Homozygous   |
| NC_037653.1 | 4982326 | SNV | 1 | G | C | Homozygous   |
| NC_037653.1 | 4993783 | SNV | 1 | T | C | Heterozygous |
| NC_037653.1 | 4996830 | SNV | 1 | G | C | Homozygous   |
| NC_037653.1 | 4997100 | SNV | 1 | G | A | Homozygous   |
| NC_037653.1 | 4998398 | SNV | 1 | G | A | Heterozygous |
| NC_037653.1 | 5012180 | SNV | 1 | T | G | Homozygous   |
| NC_037653.1 | 5012362 | SNV | 1 | T | C | Homozygous   |
| NC_037653.1 | 5012627 | SNV | 1 | C | T | Homozygous   |
| NC_037653.1 | 5012647 | SNV | 1 | G | A | Heterozygous |
| NC_037653.1 | 5023387 | SNV | 1 | G | A | Homozygous   |
| NC_037653.1 | 5024198 | SNV | 1 | A | T | Heterozygous |
| NC_037653.1 | 5024207 | SNV | 1 | G | A | Heterozygous |
| NC_037653.1 | 5024238 | SNV | 1 | A | G | Homozygous   |
| NC_037653.1 | 5024241 | SNV | 1 | A | G | Homozygous   |
| NC_037653.1 | 5024511 | SNV | 1 | C | G | Heterozygous |
| NC_037653.1 | 5025529 | SNV | 1 | G | A | Heterozygous |
| NC_037653.1 | 5025575 | SNV | 1 | C | G | Heterozygous |
| NC_037653.1 | 5025602 | SNV | 1 | C | T | Homozygous   |
| NC_037653.1 | 5025619 | SNV | 1 | A | G | Homozygous   |
| NC_037653.1 | 5025640 | SNV | 1 | G | A | Heterozygous |
| NC_037653.1 | 5025642 | SNV | 1 | A | G | Homozygous   |
| NC_037653.1 | 5025737 | SNV | 1 | T | C | Homozygous   |
| NC_037653.1 | 5025746 | SNV | 1 | G | A | Heterozygous |
| NC_037653.1 | 5025748 | SNV | 1 | A | G | Homozygous   |
| NC_037653.1 | 5025791 | SNV | 1 | C | G | Homozygous   |
| NC_037653.1 | 5025811 | SNV | 1 | G | A | Heterozygous |
| NC_037653.1 | 5025820 | SNV | 1 | G | A | Heterozygous |
| NC_037653.1 | 5025852 | SNV | 1 | G | A | Heterozygous |
| NC_037653.1 | 5025868 | SNV | 1 | G | A | Homozygous   |
| NC_037653.1 | 5025870 | SNV | 1 | C | T | Homozygous   |
| NC_037653.1 | 5025878 | SNV | 1 | A | G | Heterozygous |
| NC_037653.1 | 5025889 | SNV | 1 | A | G | Heterozygous |
| NC_037653.1 | 5025893 | SNV | 1 | G | A | Heterozygous |
| NC_037653.1 | 5025912 | SNV | 1 | G | A | Heterozygous |
| NC_037653.1 | 5025991 | SNV | 1 | A | G | Homozygous   |
| NC_037653.1 | 5026029 | SNV | 1 | A | G | Homozygous   |
| NC_037653.1 | 5026036 | SNV | 1 | A | G | Homozygous   |
| NC_037653.1 | 5026051 | SNV | 1 | G | A | Heterozygous |

|             |         |     |   |   |   |              |
|-------------|---------|-----|---|---|---|--------------|
| NC_037653.1 | 5026134 | SNV | 1 | A | G | Homozygous   |
| NC_037653.1 | 5026161 | SNV | 1 | C | A | Homozygous   |
| NC_037653.1 | 5026169 | SNV | 1 | T | C | Homozygous   |
| NC_037653.1 | 5026178 | SNV | 1 | G | A | Homozygous   |
| NC_037653.1 | 5026194 | SNV | 1 | A | G | Homozygous   |
| NC_037653.1 | 5026199 | SNV | 1 | T | A | Homozygous   |
| NC_037653.1 | 5026235 | SNV | 1 | G | A | Homozygous   |
| NC_037653.1 | 5026242 | SNV | 1 | G | A | Homozygous   |
| NC_037653.1 | 5026261 | SNV | 1 | G | A | Heterozygous |
| NC_037653.1 | 5026263 | SNV | 1 | C | T | Heterozygous |
| NC_037653.1 | 5026268 | SNV | 1 | G | A | Heterozygous |
| NC_037653.1 | 5026291 | SNV | 1 | G | A | Homozygous   |
| NC_037653.1 | 5026345 | SNV | 1 | G | T | Heterozygous |
| NC_037653.1 | 5026376 | SNV | 1 | G | A | Homozygous   |
| NC_037653.1 | 5026391 | SNV | 1 | A | G | Homozygous   |
| NC_037653.1 | 5026470 | SNV | 1 | G | A | Heterozygous |
| NC_037653.1 | 5026544 | SNV | 1 | A | G | Heterozygous |
| NC_037653.1 | 5026579 | SNV | 1 | G | A | Heterozygous |
| NC_037653.1 | 5026604 | SNV | 1 | A | G | Homozygous   |
| NC_037653.1 | 5026613 | SNV | 1 | C | T | Heterozygous |
| NC_037653.1 | 5026652 | SNV | 1 | A | G | Homozygous   |
| NC_037653.1 | 5026654 | SNV | 1 | G | A | Heterozygous |
| NC_037653.1 | 5026664 | SNV | 1 | A | T | Heterozygous |
| NC_037653.1 | 5026711 | SNV | 1 | A | G | Homozygous   |
| NC_037653.1 | 5026724 | SNV | 1 | C | T | Homozygous   |
| NC_037653.1 | 5026810 | SNV | 1 | A | G | Heterozygous |
| NC_037653.1 | 5026822 | SNV | 1 | A | G | Homozygous   |
| NC_037653.1 | 5026841 | SNV | 1 | G | A | Heterozygous |
| NC_037653.1 | 5026844 | SNV | 1 | G | A | Homozygous   |
| NC_037653.1 | 5026854 | SNV | 1 | G | A | Heterozygous |
| NC_037653.1 | 5026877 | SNV | 1 | G | A | Homozygous   |
| NC_037653.1 | 5026966 | SNV | 1 | A | G | Homozygous   |
| NC_037653.1 | 5027005 | SNV | 1 | G | A | Heterozygous |
| NC_037653.1 | 5027023 | SNV | 1 | A | G | Heterozygous |
| NC_037653.1 | 5027095 | SNV | 1 | A | G | Homozygous   |
| NC_037653.1 | 5027097 | SNV | 1 | T | C | Heterozygous |
| NC_037653.1 | 5027155 | SNV | 1 | T | C | Heterozygous |
| NC_037653.1 | 5027214 | SNV | 1 | A | G | Heterozygous |
| NC_037653.1 | 5027218 | SNV | 1 | A | G | Heterozygous |
| NC_037653.1 | 5027283 | SNV | 1 | G | A | Homozygous   |
| NC_037653.1 | 5027348 | SNV | 1 | G | A | Heterozygous |
| NC_037653.1 | 5027353 | SNV | 1 | G | A | Heterozygous |
| NC_037653.1 | 5027612 | SNV | 1 | G | A | Heterozygous |
| NC_037653.1 | 5027621 | SNV | 1 | T | C | Heterozygous |
| NC_037653.1 | 5027665 | SNV | 1 | C | G | Homozygous   |
| NC_037653.1 | 5027757 | SNV | 1 | A | G | Homozygous   |
| NC_037653.1 | 5039745 | SNV | 1 | A | T | Heterozygous |
| NC_037653.1 | 5041545 | SNV | 1 | G | A | Homozygous   |
| NC_037653.1 | 5041593 | SNV | 1 | C | T | Heterozygous |
| NC_037653.1 | 5042384 | SNV | 1 | A | G | Homozygous   |
| NC_037653.1 | 5043253 | SNV | 1 | T | G | Homozygous   |

|             |         |     |   |   |   |              |
|-------------|---------|-----|---|---|---|--------------|
| NC_037653.1 | 5043623 | SNV | 1 | C | T | Heterozygous |
| NC_037653.1 | 5044456 | SNV | 1 | A | C | Heterozygous |
| NC_037653.1 | 5044531 | SNV | 1 | G | A | Homozygous   |
| NC_037653.1 | 5045651 | SNV | 1 | T | C | Homozygous   |
| NC_037653.1 | 5045944 | SNV | 1 | T | C | Homozygous   |
| NC_037653.1 | 5045965 | SNV | 1 | A | G | Homozygous   |
| NC_037653.1 | 5045974 | SNV | 1 | A | G | Homozygous   |
| NC_037653.1 | 5046480 | SNV | 1 | G | A | Homozygous   |
| NC_037653.1 | 5047351 | SNV | 1 | T | C | Homozygous   |
| NC_037653.1 | 5047377 | SNV | 1 | T | C | Heterozygous |
| NC_037653.1 | 5047536 | SNV | 1 | C | T | Homozygous   |
| NC_037653.1 | 5047567 | SNV | 1 | A | G | Homozygous   |
| NC_037653.1 | 5047598 | SNV | 1 | A | G | Homozygous   |
| NC_037653.1 | 5047684 | SNV | 1 | T | C | Homozygous   |
| NC_037653.1 | 5047687 | SNV | 1 | G | A | Heterozygous |
| NC_037653.1 | 5047791 | SNV | 1 | A | G | Heterozygous |
| NC_037653.1 | 5047914 | SNV | 1 | T | C | Homozygous   |
| NC_037653.1 | 5047966 | SNV | 1 | T | C | Homozygous   |
| NC_037653.1 | 5048070 | SNV | 1 | T | C | Heterozygous |
| NC_037653.1 | 5048181 | SNV | 1 | A | G | Homozygous   |
| NC_037653.1 | 5048183 | SNV | 1 | C | T | Heterozygous |
| NC_037653.1 | 5048455 | SNV | 1 | A | G | Homozygous   |
| NC_037653.1 | 5048809 | SNV | 1 | T | C | Heterozygous |
| NC_037653.1 | 5049035 | SNV | 1 | T | C | Homozygous   |
| NC_037653.1 | 5049070 | SNV | 1 | C | T | Heterozygous |
| NC_037653.1 | 5049081 | SNV | 1 | A | G | Heterozygous |
| NC_037653.1 | 5049140 | SNV | 1 | A | T | Homozygous   |
| NC_037653.1 | 5049152 | SNV | 1 | A | G | Heterozygous |
| NC_037653.1 | 5049153 | SNV | 1 | G | C | Heterozygous |
| NC_037653.1 | 5049188 | SNV | 1 | C | A | Homozygous   |
| NC_037653.1 | 5049252 | SNV | 1 | A | G | Heterozygous |
| NC_037653.1 | 5049273 | SNV | 1 | A | G | Homozygous   |
| NC_037653.1 | 5049744 | SNV | 1 | G | A | Heterozygous |
| NC_037653.1 | 5049959 | SNV | 1 | G | C | Homozygous   |
| NC_037653.1 | 5050006 | SNV | 1 | G | T | Heterozygous |
| NC_037653.1 | 5050054 | SNV | 1 | G | T | Heterozygous |
| NC_037653.1 | 5050074 | SNV | 1 | A | G | Homozygous   |
| NC_037653.1 | 5050089 | SNV | 1 | A | G | Homozygous   |
| NC_037653.1 | 5050163 | SNV | 1 | C | A | Homozygous   |
| NC_037653.1 | 5050236 | SNV | 1 | T | C | Homozygous   |
| NC_037653.1 | 5050269 | SNV | 1 | A | T | Heterozygous |
| NC_037653.1 | 5050274 | SNV | 1 | A | G | Heterozygous |
| NC_037653.1 | 5050278 | SNV | 1 | T | C | Heterozygous |
| NC_037653.1 | 5050283 | SNV | 1 | C | T | Heterozygous |
| NC_037653.1 | 5050420 | SNV | 1 | T | C | Heterozygous |
| NC_037653.1 | 5050450 | SNV | 1 | T | C | Heterozygous |
| NC_037653.1 | 5050452 | SNV | 1 | T | A | Homozygous   |
| NC_037653.1 | 5050483 | SNV | 1 | C | T | Heterozygous |
| NC_037653.1 | 5050486 | SNV | 1 | C | T | Heterozygous |
| NC_037653.1 | 5050489 | SNV | 1 | T | C | Heterozygous |
| NC_037653.1 | 5050491 | SNV | 1 | C | T | Heterozygous |

|             |         |     |   |   |   |              |
|-------------|---------|-----|---|---|---|--------------|
| NC_037653.1 | 5050507 | SNV | 1 | T | C | Homozygous   |
| NC_037653.1 | 5050545 | SNV | 1 | G | A | Heterozygous |
| NC_037653.1 | 5050562 | SNV | 1 | C | T | Heterozygous |
| NC_037653.1 | 5050583 | SNV | 1 | T | C | Heterozygous |
| NC_037653.1 | 5050592 | SNV | 1 | T | A | Heterozygous |
| NC_037653.1 | 5050672 | SNV | 1 | C | T | Heterozygous |
| NC_037653.1 | 5050674 | SNV | 1 | C | T | Heterozygous |
| NC_037653.1 | 5050678 | SNV | 1 | C | T | Heterozygous |
| NC_037653.1 | 5050750 | SNV | 1 | A | G | Heterozygous |
| NC_037653.1 | 5050782 | SNV | 1 | A | G | Homozygous   |
| NC_037653.1 | 5050977 | SNV | 1 | G | A | Homozygous   |
| NC_037653.1 | 5051069 | SNV | 1 | A | G | Homozygous   |
| NC_037653.1 | 5051071 | SNV | 1 | T | C | Homozygous   |
| NC_037653.1 | 5052166 | SNV | 1 | A | G | Homozygous   |
| NC_037653.1 | 5052270 | SNV | 1 | T | C | Homozygous   |
| NC_037653.1 | 5052364 | SNV | 1 | T | C | Homozygous   |
| NC_037653.1 | 5052374 | SNV | 1 | T | C | Homozygous   |
| NC_037653.1 | 5052378 | SNV | 1 | T | C | Homozygous   |
| NC_037653.1 | 5052525 | SNV | 1 | T | C | Homozygous   |
| NC_037653.1 | 5053198 | SNV | 1 | T | C | Homozygous   |
| NC_037653.1 | 5053251 | SNV | 1 | T | C | Homozygous   |
| NC_037653.1 | 5060839 | SNV | 1 | C | G | Heterozygous |
| NC_037653.1 | 5060867 | SNV | 1 | C | T | Homozygous   |
| NC_037653.1 | 5073335 | SNV | 1 | A | G | Homozygous   |
| NC_037653.1 | 5073565 | SNV | 1 | T | C | Homozygous   |
| NC_037653.1 | 5074747 | SNV | 1 | G | T | Homozygous   |
| NC_037653.1 | 5076624 | SNV | 1 | A | T | Homozygous   |
| NC_037653.1 | 5076735 | SNV | 1 | C | A | Homozygous   |
| NC_037653.1 | 5077095 | SNV | 1 | C | T | Heterozygous |
| NC_037653.1 | 5077125 | SNV | 1 | T | C | Heterozygous |
| NC_037653.1 | 5077185 | SNV | 1 | T | C | Homozygous   |
| NC_037653.1 | 5077339 | SNV | 1 | T | C | Homozygous   |
| NC_037653.1 | 5077488 | SNV | 1 | C | T | Heterozygous |
| NC_037653.1 | 5077908 | SNV | 1 | T | C | Homozygous   |
| NC_037653.1 | 5078054 | SNV | 1 | C | T | Homozygous   |
| NC_037653.1 | 5078214 | SNV | 1 | G | A | Heterozygous |
| NC_037653.1 | 5078388 | SNV | 1 | G | A | Homozygous   |
| NC_037653.1 | 5078557 | SNV | 1 | A | G | Heterozygous |
| NC_037653.1 | 5078849 | SNV | 1 | C | T | Heterozygous |
| NC_037653.1 | 5078902 | SNV | 1 | T | C | Heterozygous |
| NC_037653.1 | 5079507 | SNV | 1 | A | G | Homozygous   |
| NC_037653.1 | 5079585 | SNV | 1 | G | A | Homozygous   |
| NC_037653.1 | 5079650 | SNV | 1 | A | G | Heterozygous |
| NC_037653.1 | 5079740 | SNV | 1 | C | T | Homozygous   |
| NC_037653.1 | 5079749 | SNV | 1 | A | G | Heterozygous |
| NC_037653.1 | 5079758 | SNV | 1 | C | T | Homozygous   |
| NC_037653.1 | 5079802 | SNV | 1 | C | T | Heterozygous |
| NC_037653.1 | 5079824 | SNV | 1 | G | A | Heterozygous |
| NC_037653.1 | 5079853 | SNV | 1 | T | A | Homozygous   |
| NC_037653.1 | 5079862 | SNV | 1 | A | G | Heterozygous |
| NC_037653.1 | 5079976 | SNV | 1 | C | T | Heterozygous |

|             |         |     |   |   |   |              |
|-------------|---------|-----|---|---|---|--------------|
| NC_037653.1 | 5081006 | SNV | 1 | A | G | Heterozygous |
| NC_037653.1 | 5081247 | SNV | 1 | C | T | Homozygous   |
| NC_037653.1 | 5081249 | SNV | 1 | A | G | Homozygous   |
| NC_037653.1 | 5081254 | SNV | 1 | C | T | Homozygous   |
| NC_037653.1 | 5081265 | SNV | 1 | G | A | Heterozygous |
| NC_037653.1 | 5081275 | SNV | 1 | G | A | Heterozygous |
| NC_037653.1 | 5081338 | SNV | 1 | G | T | Homozygous   |
| NC_037653.1 | 5081623 | SNV | 1 | C | T | Heterozygous |
| NC_037653.1 | 5081627 | SNV | 1 | C | T | Heterozygous |
| NC_037653.1 | 5081645 | SNV | 1 | T | C | Homozygous   |
| NC_037653.1 | 5081880 | SNV | 1 | A | G | Heterozygous |
| NC_037653.1 | 5084136 | SNV | 1 | C | T | Heterozygous |
| NC_037653.1 | 5084147 | SNV | 1 | A | T | Heterozygous |
| NC_037653.1 | 5084159 | SNV | 1 | T | C | Heterozygous |
| NC_037653.1 | 5085596 | SNV | 1 | G | A | Heterozygous |
| NC_037653.1 | 5085605 | SNV | 1 | C | T | Homozygous   |
| NC_037653.1 | 5085626 | SNV | 1 | C | T | Heterozygous |
| NC_037653.1 | 5085854 | SNV | 1 | A | G | Homozygous   |
| NC_037653.1 | 5089802 | SNV | 1 | T | C | Homozygous   |
| NC_037653.1 | 5093563 | SNV | 1 | T | A | Homozygous   |
| NC_037653.1 | 5093618 | SNV | 1 | C | A | Homozygous   |
| NC_037653.1 | 5093980 | SNV | 1 | G | A | Heterozygous |
| NC_037653.1 | 5093983 | SNV | 1 | G | A | Heterozygous |
| NC_037653.1 | 5096057 | SNV | 1 | C | T | Heterozygous |
| NC_037653.1 | 5096096 | SNV | 1 | T | C | Homozygous   |
| NC_037653.1 | 5114642 | SNV | 1 | T | C | Homozygous   |
| NC_037653.1 | 5114646 | SNV | 1 | A | G | Homozygous   |
| NC_037653.1 | 5114833 | SNV | 1 | A | G | Homozygous   |
| NC_037653.1 | 5115185 | SNV | 1 | T | A | Heterozygous |
| NC_037653.1 | 5115216 | SNV | 1 | G | A | Heterozygous |
| NC_037653.1 | 5115346 | SNV | 1 | A | G | Homozygous   |
| NC_037653.1 | 5115492 | SNV | 1 | G | A | Heterozygous |
| NC_037653.1 | 5115614 | SNV | 1 | C | T | Heterozygous |
| NC_037653.1 | 5115780 | SNV | 1 | C | T | Heterozygous |
| NC_037653.1 | 5115862 | SNV | 1 | A | G | Heterozygous |
| NC_037653.1 | 5115919 | SNV | 1 | G | A | Heterozygous |
| NC_037653.1 | 5115944 | SNV | 1 | G | A | Heterozygous |
| NC_037653.1 | 5115970 | SNV | 1 | T | C | Homozygous   |
| NC_037653.1 | 5115978 | SNV | 1 | C | T | Homozygous   |
| NC_037653.1 | 5115985 | SNV | 1 | A | T | Homozygous   |
| NC_037653.1 | 5116007 | SNV | 1 | G | A | Heterozygous |
| NC_037653.1 | 5116071 | SNV | 1 | C | T | Heterozygous |
| NC_037653.1 | 5116230 | SNV | 1 | A | G | Homozygous   |
| NC_037653.1 | 5116234 | SNV | 1 | C | T | Homozygous   |
| NC_037653.1 | 5116257 | SNV | 1 | T | C | Homozygous   |
| NC_037653.1 | 5116292 | SNV | 1 | G | A | Heterozygous |
| NC_037653.1 | 5116297 | SNV | 1 | G | A | Heterozygous |
| NC_037653.1 | 5116302 | SNV | 1 | C | G | Heterozygous |
| NC_037653.1 | 5116308 | SNV | 1 | C | A | Homozygous   |
| NC_037653.1 | 5116315 | SNV | 1 | G | A | Heterozygous |
| NC_037653.1 | 5116402 | SNV | 1 | G | A | Heterozygous |

|             |         |     |   |   |   |              |
|-------------|---------|-----|---|---|---|--------------|
| NC_037653.1 | 5116411 | SNV | 1 | T | G | Homozygous   |
| NC_037653.1 | 5116420 | SNV | 1 | T | C | Heterozygous |
| NC_037653.1 | 5116422 | SNV | 1 | T | C | Homozygous   |
| NC_037653.1 | 5116427 | SNV | 1 | G | C | Heterozygous |
| NC_037653.1 | 5116477 | SNV | 1 | G | A | Homozygous   |
| NC_037653.1 | 5116488 | SNV | 1 | A | G | Heterozygous |
| NC_037653.1 | 5116648 | SNV | 1 | A | G | Homozygous   |
| NC_037653.1 | 5119029 | SNV | 1 | G | A | Heterozygous |
| NC_037653.1 | 5119293 | SNV | 1 | G | T | Homozygous   |
| NC_037653.1 | 5119467 | SNV | 1 | C | T | Homozygous   |
| NC_037653.1 | 5119471 | SNV | 1 | C | T | Homozygous   |
| NC_037653.1 | 5119523 | SNV | 1 | A | G | Homozygous   |
| NC_037653.1 | 5123004 | SNV | 1 | T | C | Homozygous   |
| NC_037653.1 | 5123008 | SNV | 1 | G | A | Homozygous   |
| NC_037653.1 | 5124714 | SNV | 1 | T | C | Homozygous   |
| NC_037653.1 | 5124928 | SNV | 1 | A | G | Homozygous   |
| NC_037653.1 | 5124958 | SNV | 1 | T | C | Heterozygous |
| NC_037653.1 | 5125060 | SNV | 1 | T | C | Homozygous   |
| NC_037653.1 | 5125082 | SNV | 1 | A | G | Homozygous   |
| NC_037653.1 | 5125118 | SNV | 1 | C | G | Homozygous   |
| NC_037653.1 | 5125135 | SNV | 1 | T | C | Homozygous   |
| NC_037653.1 | 5125373 | SNV | 1 | T | C | Homozygous   |
| NC_037653.1 | 5125397 | SNV | 1 | A | G | Homozygous   |
| NC_037653.1 | 5125438 | SNV | 1 | T | C | Homozygous   |
| NC_037653.1 | 5125469 | SNV | 1 | C | T | Homozygous   |
| NC_037653.1 | 5125482 | SNV | 1 | T | C | Homozygous   |
| NC_037653.1 | 5125516 | SNV | 1 | C | G | Heterozygous |
| NC_037653.1 | 5125567 | SNV | 1 | C | G | Homozygous   |
| NC_037653.1 | 5125600 | SNV | 1 | C | T | Heterozygous |
| NC_037653.1 | 5125662 | SNV | 1 | C | T | Heterozygous |
| NC_037653.1 | 5125770 | SNV | 1 | G | A | Homozygous   |
| NC_037653.1 | 5125812 | SNV | 1 | G | T | Homozygous   |
| NC_037653.1 | 5126027 | SNV | 1 | A | G | Homozygous   |
| NC_037653.1 | 5126095 | SNV | 1 | T | C | Homozygous   |
| NC_037653.1 | 5126150 | SNV | 1 | T | C | Homozygous   |
| NC_037653.1 | 5126180 | SNV | 1 | C | T | Heterozygous |
| NC_037653.1 | 5126206 | SNV | 1 | T | C | Heterozygous |
| NC_037653.1 | 5126218 | SNV | 1 | T | C | Heterozygous |
| NC_037653.1 | 5128372 | SNV | 1 | A | G | Heterozygous |
| NC_037653.1 | 5128531 | SNV | 1 | T | A | Heterozygous |
| NC_037653.1 | 5128547 | SNV | 1 | C | A | Heterozygous |
| NC_037653.1 | 5128566 | SNV | 1 | G | A | Heterozygous |
| NC_037653.1 | 5128568 | SNV | 1 | T | A | Homozygous   |
| NC_037653.1 | 5128728 | SNV | 1 | C | T | Heterozygous |
| NC_037653.1 | 5129648 | SNV | 1 | C | T | Homozygous   |
| NC_037653.1 | 5130311 | SNV | 1 | A | G | Homozygous   |
| NC_037653.1 | 5130320 | SNV | 1 | G | A | Homozygous   |
| NC_037653.1 | 5130372 | SNV | 1 | G | A | Homozygous   |
| NC_037653.1 | 5130376 | SNV | 1 | G | A | Homozygous   |
| NC_037653.1 | 5131942 | SNV | 1 | C | T | Homozygous   |
| NC_037653.1 | 5134108 | SNV | 1 | A | G | Homozygous   |

|             |         |     |   |   |   |              |
|-------------|---------|-----|---|---|---|--------------|
| NC_037653.1 | 5134132 | SNV | 1 | G | A | Heterozygous |
| NC_037653.1 | 5134134 | SNV | 1 | C | G | Homozygous   |
| NC_037653.1 | 5134147 | SNV | 1 | C | T | Homozygous   |
| NC_037653.1 | 5134175 | SNV | 1 | A | G | Homozygous   |
| NC_037653.1 | 5135205 | SNV | 1 | T | C | Homozygous   |
| NC_037653.1 | 5135310 | SNV | 1 | C | T | Homozygous   |
| NC_037653.1 | 5136327 | SNV | 1 | A | G | Heterozygous |
| NC_037653.1 | 5136338 | SNV | 1 | C | T | Heterozygous |
| NC_037653.1 | 5136430 | SNV | 1 | G | A | Homozygous   |
| NC_037653.1 | 5136438 | SNV | 1 | G | A | Homozygous   |
| NC_037653.1 | 5136444 | SNV | 1 | C | G | Homozygous   |
| NC_037653.1 | 5136450 | SNV | 1 | A | G | Homozygous   |
| NC_037653.1 | 5136479 | SNV | 1 | G | C | Homozygous   |
| NC_037653.1 | 5136593 | SNV | 1 | G | A | Homozygous   |
| NC_037653.1 | 5136678 | SNV | 1 | C | T | Heterozygous |
| NC_037653.1 | 5137120 | SNV | 1 | C | T | Heterozygous |
| NC_037653.1 | 5137124 | SNV | 1 | G | A | Heterozygous |
| NC_037653.1 | 5137139 | SNV | 1 | G | A | Heterozygous |
| NC_037653.1 | 5142339 | SNV | 1 | G | C | Heterozygous |
| NC_037653.1 | 5142507 | SNV | 1 | G | T | Homozygous   |
| NC_037653.1 | 5143579 | SNV | 1 | G | A | Heterozygous |
| NC_037653.1 | 5143633 | SNV | 1 | T | C | Heterozygous |
| NC_037653.1 | 5144572 | SNV | 1 | G | A | Homozygous   |
| NC_037653.1 | 5144639 | SNV | 1 | G | T | Homozygous   |
| NC_037653.1 | 5147196 | SNV | 1 | T | C | Homozygous   |
| NC_037653.1 | 5147402 | SNV | 1 | A | C | Homozygous   |
| NC_037653.1 | 5148389 | SNV | 1 | A | T | Heterozygous |
| NC_037653.1 | 5148392 | SNV | 1 | T | A | Heterozygous |
| NC_037653.1 | 5148398 | SNV | 1 | T | C | Heterozygous |
| NC_037653.1 | 5148400 | SNV | 1 | A | T | Heterozygous |
| NC_037653.1 | 5148403 | SNV | 1 | A | T | Heterozygous |
| NC_037653.1 | 5148404 | SNV | 1 | A | G | Heterozygous |
| NC_037653.1 | 5148411 | SNV | 1 | T | A | Heterozygous |
| NC_037653.1 | 5148414 | SNV | 1 | A | C | Heterozygous |
| NC_037653.1 | 5148421 | SNV | 1 | T | C | Homozygous   |
| NC_037653.1 | 5148454 | SNV | 1 | A | T | Homozygous   |
| NC_037653.1 | 5148497 | SNV | 1 | T | C | Homozygous   |
| NC_037653.1 | 5148501 | SNV | 1 | T | C | Heterozygous |
| NC_037653.1 | 5148505 | SNV | 1 | T | C | Homozygous   |
| NC_037653.1 | 5148509 | SNV | 1 | T | C | Heterozygous |
| NC_037653.1 | 5148517 | SNV | 1 | T | C | Heterozygous |
| NC_037653.1 | 5149191 | SNV | 1 | C | A | Homozygous   |
| NC_037653.1 | 5149411 | SNV | 1 | T | C | Homozygous   |
| NC_037653.1 | 5153016 | SNV | 1 | T | C | Homozygous   |
| NC_037653.1 | 5156488 | SNV | 1 | T | A | Homozygous   |
| NC_037653.1 | 5156927 | SNV | 1 | G | A | Homozygous   |
| NC_037653.1 | 5157372 | SNV | 1 | C | A | Homozygous   |
| NC_037653.1 | 5157417 | SNV | 1 | T | C | Heterozygous |
| NC_037653.1 | 5157422 | SNV | 1 | T | A | Heterozygous |
| NC_037653.1 | 5157433 | SNV | 1 | A | G | Heterozygous |
| NC_037653.1 | 5157848 | SNV | 1 | C | A | Homozygous   |

|             |         |     |   |   |   |              |
|-------------|---------|-----|---|---|---|--------------|
| NC_037653.1 | 5158396 | SNV | 1 | A | G | Homozygous   |
| NC_037653.1 | 5158691 | SNV | 1 | C | T | Heterozygous |
| NC_037653.1 | 5159110 | SNV | 1 | A | G | Homozygous   |
| NC_037653.1 | 5159426 | SNV | 1 | G | A | Heterozygous |
| NC_037653.1 | 5169635 | SNV | 1 | T | C | Homozygous   |
| NC_037653.1 | 5169906 | SNV | 1 | C | T | Homozygous   |
| NC_037653.1 | 5175434 | SNV | 1 | A | G | Heterozygous |
| NC_037653.1 | 5175717 | SNV | 1 | C | T | Homozygous   |
| NC_037653.1 | 5176129 | SNV | 1 | A | G | Homozygous   |
| NC_037653.1 | 5176374 | SNV | 1 | A | G | Homozygous   |
| NC_037653.1 | 5176579 | SNV | 1 | T | C | Homozygous   |
| NC_037653.1 | 5176584 | SNV | 1 | T | C | Homozygous   |
| NC_037653.1 | 5176588 | SNV | 1 | C | A | Homozygous   |
| NC_037653.1 | 5176664 | SNV | 1 | A | G | Homozygous   |
| NC_037653.1 | 5176796 | SNV | 1 | A | G | Heterozygous |
| NC_037653.1 | 5176849 | SNV | 1 | C | T | Heterozygous |
| NC_037653.1 | 5177433 | SNV | 1 | A | G | Heterozygous |
| NC_037653.1 | 5178210 | SNV | 1 | G | A | Homozygous   |
| NC_037653.1 | 5178276 | SNV | 1 | G | A | Homozygous   |
| NC_037653.1 | 5178290 | SNV | 1 | G | A | Heterozygous |
| NC_037653.1 | 5178297 | SNV | 1 | C | T | Homozygous   |
| NC_037653.1 | 5178323 | SNV | 1 | A | G | Heterozygous |
| NC_037653.1 | 5178350 | SNV | 1 | T | C | Homozygous   |
| NC_037653.1 | 5178473 | SNV | 1 | T | C | Homozygous   |
| NC_037653.1 | 5178734 | SNV | 1 | C | T | Heterozygous |
| NC_037653.1 | 5178758 | SNV | 1 | C | T | Homozygous   |
| NC_037653.1 | 5178765 | SNV | 1 | A | G | Homozygous   |
| NC_037653.1 | 5178771 | SNV | 1 | G | A | Heterozygous |
| NC_037653.1 | 5179010 | SNV | 1 | A | G | Heterozygous |
| NC_037653.1 | 5179035 | SNV | 1 | T | C | Homozygous   |
| NC_037653.1 | 5179043 | SNV | 1 | A | G | Heterozygous |
| NC_037653.1 | 5179053 | SNV | 1 | C | T | Homozygous   |
| NC_037653.1 | 5179068 | SNV | 1 | G | A | Heterozygous |
| NC_037653.1 | 5179248 | SNV | 1 | T | C | Homozygous   |
| NC_037653.1 | 5179259 | SNV | 1 | A | G | Homozygous   |
| NC_037653.1 | 5179374 | SNV | 1 | T | C | Heterozygous |
| NC_037653.1 | 5179578 | SNV | 1 | T | C | Homozygous   |
| NC_037653.1 | 5179624 | SNV | 1 | A | G | Heterozygous |
| NC_037653.1 | 5179642 | SNV | 1 | C | G | Homozygous   |
| NC_037653.1 | 5179653 | SNV | 1 | T | C | Heterozygous |
| NC_037653.1 | 5179817 | SNV | 1 | G | A | Heterozygous |
| NC_037653.1 | 5179832 | SNV | 1 | A | G | Homozygous   |
| NC_037653.1 | 5180928 | SNV | 1 | T | C | Homozygous   |
| NC_037653.1 | 5180981 | SNV | 1 | A | G | Heterozygous |
| NC_037653.1 | 5181042 | SNV | 1 | A | G | Heterozygous |
| NC_037653.1 | 5181175 | SNV | 1 | G | A | Heterozygous |
| NC_037653.1 | 5181265 | SNV | 1 | A | G | Heterozygous |
| NC_037653.1 | 5181310 | SNV | 1 | A | G | Homozygous   |
| NC_037653.1 | 5181338 | SNV | 1 | C | A | Heterozygous |
| NC_037653.1 | 5181819 | SNV | 1 | A | T | Homozygous   |
| NC_037653.1 | 5181824 | SNV | 1 | A | T | Homozygous   |



|             |         |     |   |   |   |              |
|-------------|---------|-----|---|---|---|--------------|
| NC_037653.1 | 5181870 | SNV | 1 | G | A | Heterozygous |
| NC_037653.1 | 5181957 | SNV | 1 | T | C | Homozygous   |
| NC_037653.1 | 5181974 | SNV | 1 | T | A | Heterozygous |
| NC_037653.1 | 5183036 | SNV | 1 | T | C | Homozygous   |
| NC_037653.1 | 5183041 | SNV | 1 | T | G | Homozygous   |
| NC_037653.1 | 5183097 | SNV | 1 | T | C | Homozygous   |
| NC_037653.1 | 5187612 | SNV | 1 | T | C | Homozygous   |
| NC_037653.1 | 5188482 | SNV | 1 | A | G | Homozygous   |
| NC_037653.1 | 5189811 | SNV | 1 | T | G | Heterozygous |
| NC_037653.1 | 5194312 | SNV | 1 | C | T | Heterozygous |
| NC_037653.1 | 5196429 | SNV | 1 | C | T | Heterozygous |
| NC_037653.1 | 5198352 | SNV | 1 | A | G | Homozygous   |
| NC_037653.1 | 5198420 | SNV | 1 | T | A | Heterozygous |
| NC_037653.1 | 5207688 | SNV | 1 | G | A | Homozygous   |
| NC_037653.1 | 5209740 | SNV | 1 | T | A | Homozygous   |
| NC_037653.1 | 5211445 | SNV | 1 | A | C | Homozygous   |
| NC_037653.1 | 5211453 | SNV | 1 | A | T | Homozygous   |
| NC_037653.1 | 5211455 | SNV | 1 | T | C | Homozygous   |
| NC_037653.1 | 5212248 | SNV | 1 | G | A | Homozygous   |
| NC_037653.1 | 5214414 | SNV | 1 | A | G | Homozygous   |
| NC_037653.1 | 5215949 | SNV | 1 | A | G | Homozygous   |
| NC_037653.1 | 5216361 | SNV | 1 | T | A | Homozygous   |
| NC_037653.1 | 5216389 | SNV | 1 | T | A | Homozygous   |
| NC_037653.1 | 5216391 | SNV | 1 | A | T | Homozygous   |
| NC_037653.1 | 5216539 | SNV | 1 | C | T | Homozygous   |
| NC_037653.1 | 5216647 | SNV | 1 | T | A | Homozygous   |
| NC_037653.1 | 5218928 | SNV | 1 | A | G | Homozygous   |
| NC_037653.1 | 5218946 | SNV | 1 | T | C | Heterozygous |
| NC_037653.1 | 5218982 | SNV | 1 | T | C | Homozygous   |
| NC_037653.1 | 5221266 | SNV | 1 | T | A | Homozygous   |
| NC_037653.1 | 5221270 | SNV | 1 | A | T | Homozygous   |
| NC_037653.1 | 5221283 | SNV | 1 | T | A | Homozygous   |
| NC_037653.1 | 5221307 | SNV | 1 | G | T | Homozygous   |
| NC_037653.1 | 5221320 | SNV | 1 | A | C | Homozygous   |
| NC_037653.1 | 5223437 | SNV | 1 | T | C | Heterozygous |
| NC_037653.1 | 5226827 | SNV | 1 | G | A | Heterozygous |
| NC_037653.1 | 5227264 | SNV | 1 | G | C | Homozygous   |
| NC_037653.1 | 5227266 | SNV | 1 | A | T | Homozygous   |
| NC_037653.1 | 5227907 | SNV | 1 | G | A | Homozygous   |
| NC_037653.1 | 5230523 | SNV | 1 | G | T | Homozygous   |
| NC_037653.1 | 5230531 | SNV | 1 | T | A | Homozygous   |
| NC_037653.1 | 5230539 | SNV | 1 | A | T | Homozygous   |
| NC_037653.1 | 5231267 | SNV | 1 | A | G | Heterozygous |
| NC_037653.1 | 5231325 | SNV | 1 | G | A | Heterozygous |
| NC_037653.1 | 5232716 | SNV | 1 | C | T | Heterozygous |
| NC_037653.1 | 5232804 | SNV | 1 | C | T | Heterozygous |
| NC_037653.1 | 5241256 | SNV | 1 | C | T | Heterozygous |
| NC_037653.1 | 5242136 | SNV | 1 | A | G | Homozygous   |
| NC_037653.1 | 5242142 | SNV | 1 | T | C | Homozygous   |
| NC_037653.1 | 5242340 | SNV | 1 | T | C | Homozygous   |
| NC_037653.1 | 5246676 | SNV | 1 | T | A | Homozygous   |

|             |         |     |   |   |   |              |
|-------------|---------|-----|---|---|---|--------------|
| NC_037653.1 | 5248381 | SNV | 1 | A | G | Heterozygous |
| NC_037653.1 | 5260483 | SNV | 1 | G | A | Heterozygous |
| NC_037653.1 | 5260498 | SNV | 1 | G | A | Heterozygous |
| NC_037653.1 | 5265286 | SNV | 1 | A | G | Homozygous   |
| NC_037653.1 | 5265505 | SNV | 1 | G | A | Heterozygous |
| NC_037653.1 | 5265629 | SNV | 1 | G | A | Homozygous   |
| NC_037653.1 | 5270704 | SNV | 1 | G | A | Heterozygous |
| NC_037653.1 | 5271845 | SNV | 1 | A | T | Homozygous   |
| NC_037653.1 | 5271849 | SNV | 1 | A | T | Homozygous   |
| NC_037653.1 | 5273291 | SNV | 1 | C | T | Homozygous   |
| NC_037653.1 | 5274148 | SNV | 1 | C | A | Homozygous   |
| NC_037653.1 | 5276974 | SNV | 1 | T | A | Homozygous   |
| NC_037653.1 | 5277623 | SNV | 1 | A | T | Heterozygous |
| NC_037653.1 | 5277625 | SNV | 1 | A | T | Heterozygous |
| NC_037653.1 | 5282442 | SNV | 1 | G | A | Homozygous   |
| NC_037653.1 | 5282550 | SNV | 1 | A | T | Heterozygous |
| NC_037653.1 | 5288088 | SNV | 1 | A | G | Homozygous   |
| NC_037653.1 | 5288728 | SNV | 1 | C | T | Homozygous   |
| NC_037653.1 | 5288756 | SNV | 1 | T | A | Homozygous   |
| NC_037653.1 | 5288758 | SNV | 1 | A | G | Homozygous   |
| NC_037653.1 | 5288760 | SNV | 1 | T | A | Homozygous   |
| NC_037653.1 | 5288768 | SNV | 1 | A | T | Homozygous   |
| NC_037653.1 | 5289732 | SNV | 1 | T | C | Heterozygous |
| NC_037653.1 | 5289798 | SNV | 1 | C | T | Homozygous   |
| NC_037653.1 | 5289814 | SNV | 1 | C | T | Homozygous   |
| NC_037653.1 | 5294606 | SNV | 1 | T | C | Heterozygous |
| NC_037653.1 | 5301129 | SNV | 1 | C | T | Heterozygous |
| NC_037653.1 | 5301133 | SNV | 1 | C | T | Heterozygous |
| NC_037653.1 | 5301255 | SNV | 1 | A | T | Heterozygous |
| NC_037653.1 | 5301261 | SNV | 1 | A | G | Heterozygous |
| NC_037653.1 | 5301269 | SNV | 1 | A | G | Heterozygous |
| NC_037653.1 | 5301271 | SNV | 1 | A | G | Heterozygous |
| NC_037653.1 | 5301278 | SNV | 1 | G | A | Heterozygous |
| NC_037653.1 | 5314144 | SNV | 1 | A | G | Heterozygous |
| NC_037653.1 | 5314190 | SNV | 1 | G | A | Homozygous   |
| NC_037653.1 | 5334834 | SNV | 1 | T | C | Heterozygous |
| NC_037653.1 | 5334839 | SNV | 1 | T | C | Heterozygous |
| NC_037653.1 | 5334842 | SNV | 1 | T | C | Heterozygous |
| NC_037653.1 | 5334871 | SNV | 1 | A | C | Homozygous   |
| NC_037653.1 | 5334875 | SNV | 1 | T | C | Homozygous   |
| NC_037653.1 | 5334938 | SNV | 1 | T | C | Heterozygous |
| NC_037653.1 | 5334949 | SNV | 1 | T | C | Heterozygous |
| NC_037653.1 | 5334971 | SNV | 1 | T | C | Homozygous   |
| NC_037653.1 | 5334996 | SNV | 1 | G | A | Heterozygous |
| NC_037653.1 | 5335051 | SNV | 1 | T | C | Heterozygous |
| NC_037653.1 | 5335124 | SNV | 1 | A | C | Homozygous   |
| NC_037653.1 | 5335152 | SNV | 1 | C | T | Heterozygous |
| NC_037653.1 | 5335161 | SNV | 1 | T | A | Heterozygous |
| NC_037653.1 | 5335169 | SNV | 1 | C | A | Heterozygous |
| NC_037653.1 | 5335169 | SNV | 1 | C | G | Heterozygous |
| NC_037653.1 | 5335191 | SNV | 1 | A | G | Homozygous   |

|             |         |     |   |   |   |              |
|-------------|---------|-----|---|---|---|--------------|
| NC_037653.1 | 5335204 | SNV | 1 | T | C | Homozygous   |
| NC_037653.1 | 5335208 | SNV | 1 | G | A | Heterozygous |
| NC_037653.1 | 5335226 | SNV | 1 | G | C | Heterozygous |
| NC_037653.1 | 5335239 | SNV | 1 | C | T | Heterozygous |
| NC_037653.1 | 5335251 | SNV | 1 | C | T | Heterozygous |
| NC_037653.1 | 5335268 | SNV | 1 | T | C | Homozygous   |
| NC_037653.1 | 5335332 | SNV | 1 | G | A | Heterozygous |
| NC_037653.1 | 5335335 | SNV | 1 | G | A | Heterozygous |
| NC_037653.1 | 5335450 | SNV | 1 | T | C | Heterozygous |
| NC_037653.1 | 5335460 | SNV | 1 | T | C | Homozygous   |
| NC_037653.1 | 5335462 | SNV | 1 | C | T | Heterozygous |
| NC_037653.1 | 5335556 | SNV | 1 | C | T | Heterozygous |
| NC_037653.1 | 5335597 | SNV | 1 | T | C | Homozygous   |
| NC_037653.1 | 5335607 | SNV | 1 | A | G | Homozygous   |
| NC_037653.1 | 5335652 | SNV | 1 | C | T | Heterozygous |
| NC_037653.1 | 5335684 | SNV | 1 | T | C | Heterozygous |
| NC_037653.1 | 5335695 | SNV | 1 | A | G | Homozygous   |
| NC_037653.1 | 5335701 | SNV | 1 | A | G | Homozygous   |
| NC_037653.1 | 5335788 | SNV | 1 | C | T | Homozygous   |
| NC_037653.1 | 5335794 | SNV | 1 | T | C | Heterozygous |
| NC_037653.1 | 5335888 | SNV | 1 | A | G | Homozygous   |
| NC_037653.1 | 5335912 | SNV | 1 | C | T | Homozygous   |
| NC_037653.1 | 5335915 | SNV | 1 | A | G | Heterozygous |
| NC_037653.1 | 5335936 | SNV | 1 | T | C | Heterozygous |
| NC_037653.1 | 5335946 | SNV | 1 | C | T | Heterozygous |
| NC_037653.1 | 5335956 | SNV | 1 | A | G | Homozygous   |
| NC_037653.1 | 5335966 | SNV | 1 | A | G | Heterozygous |
| NC_037653.1 | 5335973 | SNV | 1 | G | A | Heterozygous |
| NC_037653.1 | 5335975 | SNV | 1 | A | G | Homozygous   |
| NC_037653.1 | 5335977 | SNV | 1 | T | G | Heterozygous |
| NC_037653.1 | 5336016 | SNV | 1 | T | C | Heterozygous |
| NC_037653.1 | 5336084 | SNV | 1 | T | C | Homozygous   |
| NC_037653.1 | 5336218 | SNV | 1 | C | G | Homozygous   |
| NC_037653.1 | 5336244 | SNV | 1 | T | C | Homozygous   |
| NC_037653.1 | 5336248 | SNV | 1 | A | G | Homozygous   |
| NC_037653.1 | 5336252 | SNV | 1 | A | G | Homozygous   |
| NC_037653.1 | 5336297 | SNV | 1 | A | G | Homozygous   |
| NC_037653.1 | 5340349 | SNV | 1 | A | G | Heterozygous |
| NC_037653.1 | 5340360 | SNV | 1 | G | C | Heterozygous |
| NC_037653.1 | 5340370 | SNV | 1 | A | G | Heterozygous |
| NC_037653.1 | 5340395 | SNV | 1 | A | G | Homozygous   |
| NC_037653.1 | 5340402 | SNV | 1 | A | G | Heterozygous |
| NC_037653.1 | 5340404 | SNV | 1 | G | T | Heterozygous |
| NC_037653.1 | 5340407 | SNV | 1 | G | A | Homozygous   |
| NC_037653.1 | 5340425 | SNV | 1 | G | A | Homozygous   |
| NC_037653.1 | 5340430 | SNV | 1 | T | A | Homozygous   |
| NC_037653.1 | 5340443 | SNV | 1 | G | A | Heterozygous |
| NC_037653.1 | 5340467 | SNV | 1 | A | G | Homozygous   |
| NC_037653.1 | 5340474 | SNV | 1 | C | G | Heterozygous |
| NC_037653.1 | 5340476 | SNV | 1 | C | G | Heterozygous |
| NC_037653.1 | 5340480 | SNV | 1 | C | G | Heterozygous |

|             |         |     |   |   |   |              |
|-------------|---------|-----|---|---|---|--------------|
| NC_037653.1 | 5340485 | SNV | 1 | A | G | Heterozygous |
| NC_037653.1 | 5340492 | SNV | 1 | A | G | Homozygous   |
| NC_037653.1 | 5340529 | SNV | 1 | T | A | Homozygous   |
| NC_037653.1 | 5340536 | SNV | 1 | A | G | Homozygous   |
| NC_037653.1 | 5340563 | SNV | 1 | A | G | Heterozygous |
| NC_037653.1 | 5340566 | SNV | 1 | G | A | Heterozygous |
| NC_037653.1 | 5340568 | SNV | 1 | G | T | Heterozygous |
| NC_037653.1 | 5340590 | SNV | 1 | G | T | Homozygous   |
| NC_037653.1 | 5340596 | SNV | 1 | C | G | Homozygous   |
| NC_037653.1 | 5340602 | SNV | 1 | A | C | Homozygous   |
| NC_037653.1 | 5340608 | SNV | 1 | T | C | Homozygous   |
| NC_037653.1 | 5340610 | SNV | 1 | A | C | Homozygous   |
| NC_037653.1 | 5340614 | SNV | 1 | G | C | Homozygous   |
| NC_037653.1 | 5340640 | SNV | 1 | G | A | Heterozygous |
| NC_037653.1 | 5340659 | SNV | 1 | G | A | Homozygous   |
| NC_037653.1 | 5340664 | SNV | 1 | G | T | Heterozygous |
| NC_037653.1 | 5340666 | SNV | 1 | A | G | Heterozygous |
| NC_037653.1 | 5340687 | SNV | 1 | T | C | Homozygous   |
| NC_037653.1 | 5340709 | SNV | 1 | A | G | Homozygous   |
| NC_037653.1 | 5340716 | SNV | 1 | T | C | Homozygous   |
| NC_037653.1 | 5340723 | SNV | 1 | A | G | Heterozygous |
| NC_037653.1 | 5340744 | SNV | 1 | A | G | Homozygous   |
| NC_037653.1 | 5340766 | SNV | 1 | A | C | Homozygous   |
| NC_037653.1 | 5340771 | SNV | 1 | A | G | Homozygous   |
| NC_037653.1 | 5340778 | SNV | 1 | G | A | Heterozygous |
| NC_037653.1 | 5340822 | SNV | 1 | A | G | Heterozygous |
| NC_037653.1 | 5340841 | SNV | 1 | T | G | Heterozygous |
| NC_037653.1 | 5340849 | SNV | 1 | A | G | Homozygous   |
| NC_037653.1 | 5340858 | SNV | 1 | A | G | Homozygous   |
| NC_037653.1 | 5340882 | SNV | 1 | A | G | Heterozygous |
| NC_037653.1 | 5340897 | SNV | 1 | G | A | Homozygous   |
| NC_037653.1 | 5340913 | SNV | 1 | A | G | Homozygous   |
| NC_037653.1 | 5340935 | SNV | 1 | G | A | Homozygous   |
| NC_037653.1 | 5340941 | SNV | 1 | A | G | Homozygous   |
| NC_037653.1 | 5340953 | SNV | 1 | G | A | Homozygous   |
| NC_037653.1 | 5340983 | SNV | 1 | A | G | Homozygous   |
| NC_037653.1 | 5340992 | SNV | 1 | C | T | Homozygous   |
| NC_037653.1 | 5341010 | SNV | 1 | G | A | Homozygous   |
| NC_037653.1 | 5341035 | SNV | 1 | A | G | Homozygous   |
| NC_037653.1 | 5341046 | SNV | 1 | G | A | Homozygous   |
| NC_037653.1 | 5341059 | SNV | 1 | G | A | Homozygous   |
| NC_037653.1 | 5341062 | SNV | 1 | G | A | Homozygous   |
| NC_037653.1 | 5341075 | SNV | 1 | G | A | Heterozygous |
| NC_037653.1 | 5341098 | SNV | 1 | T | A | Heterozygous |
| NC_037653.1 | 5341100 | SNV | 1 | A | G | Homozygous   |
| NC_037653.1 | 5341123 | SNV | 1 | A | G | Homozygous   |
| NC_037653.1 | 5341132 | SNV | 1 | G | A | Homozygous   |
| NC_037653.1 | 5341141 | SNV | 1 | A | G | Homozygous   |
| NC_037653.1 | 5341159 | SNV | 1 | G | A | Homozygous   |
| NC_037653.1 | 5341161 | SNV | 1 | A | G | Homozygous   |
| NC_037653.1 | 5341293 | SNV | 1 | G | A | Heterozygous |

|             |         |     |   |   |   |              |
|-------------|---------|-----|---|---|---|--------------|
| NC_037653.1 | 5341303 | SNV | 1 | G | A | Homozygous   |
| NC_037653.1 | 5341320 | SNV | 1 | C | T | Homozygous   |
| NC_037653.1 | 5341327 | SNV | 1 | A | C | Heterozygous |
| NC_037653.1 | 5341333 | SNV | 1 | T | A | Homozygous   |
| NC_037653.1 | 5341374 | SNV | 1 | G | A | Homozygous   |
| NC_037653.1 | 5341414 | SNV | 1 | G | A | Homozygous   |
| NC_037653.1 | 5341436 | SNV | 1 | A | G | Homozygous   |
| NC_037653.1 | 5341458 | SNV | 1 | A | T | Homozygous   |
| NC_037653.1 | 5341475 | SNV | 1 | A | T | Homozygous   |
| NC_037653.1 | 5341477 | SNV | 1 | T | A | Homozygous   |
| NC_037653.1 | 5341706 | SNV | 1 | T | C | Homozygous   |
| NC_037653.1 | 5341787 | SNV | 1 | C | T | Homozygous   |
| NC_037653.1 | 5341795 | SNV | 1 | T | G | Homozygous   |
| NC_037653.1 | 5341826 | SNV | 1 | T | A | Heterozygous |
| NC_037653.1 | 5341871 | SNV | 1 | T | G | Homozygous   |
| NC_037653.1 | 5341874 | SNV | 1 | G | A | Homozygous   |
| NC_037653.1 | 5341877 | SNV | 1 | A | G | Homozygous   |
| NC_037653.1 | 5341885 | SNV | 1 | G | A | Homozygous   |
| NC_037653.1 | 5341887 | SNV | 1 | C | T | Homozygous   |
| NC_037653.1 | 5341891 | SNV | 1 | C | A | Homozygous   |
| NC_037653.1 | 5341925 | SNV | 1 | A | G | Homozygous   |
| NC_037653.1 | 5341964 | SNV | 1 | A | T | Homozygous   |
| NC_037653.1 | 5341966 | SNV | 1 | T | A | Homozygous   |
| NC_037653.1 | 5342136 | SNV | 1 | G | A | Homozygous   |
| NC_037653.1 | 5342147 | SNV | 1 | T | A | Homozygous   |
| NC_037653.1 | 5342152 | SNV | 1 | C | T | Homozygous   |
| NC_037653.1 | 5342174 | SNV | 1 | A | C | Homozygous   |
| NC_037653.1 | 5342176 | SNV | 1 | C | T | Heterozygous |
| NC_037653.1 | 5342179 | SNV | 1 | T | C | Homozygous   |
| NC_037653.1 | 5342186 | SNV | 1 | A | G | Homozygous   |
| NC_037653.1 | 5342197 | SNV | 1 | G | A | Homozygous   |
| NC_037653.1 | 5342199 | SNV | 1 | C | T | Heterozygous |
| NC_037653.1 | 5342254 | SNV | 1 | A | G | Heterozygous |
| NC_037653.1 | 5342262 | SNV | 1 | A | G | Homozygous   |
| NC_037653.1 | 5342291 | SNV | 1 | T | C | Homozygous   |
| NC_037653.1 | 5342349 | SNV | 1 | C | T | Homozygous   |
| NC_037653.1 | 5342354 | SNV | 1 | A | G | Heterozygous |
| NC_037653.1 | 5342374 | SNV | 1 | G | A | Heterozygous |
| NC_037653.1 | 5342378 | SNV | 1 | G | A | Heterozygous |
| NC_037653.1 | 5342505 | SNV | 1 | C | T | Homozygous   |
| NC_037653.1 | 5342531 | SNV | 1 | C | T | Homozygous   |
| NC_037653.1 | 5342640 | SNV | 1 | A | G | Homozygous   |
| NC_037653.1 | 5342660 | SNV | 1 | G | A | Homozygous   |
| NC_037653.1 | 5342684 | SNV | 1 | T | C | Heterozygous |
| NC_037653.1 | 5342686 | SNV | 1 | G | A | Heterozygous |
| NC_037653.1 | 5342862 | SNV | 1 | A | G | Homozygous   |
| NC_037653.1 | 5342867 | SNV | 1 | G | A | Heterozygous |
| NC_037653.1 | 5342875 | SNV | 1 | T | G | Homozygous   |
| NC_037653.1 | 5342878 | SNV | 1 | G | A | Homozygous   |
| NC_037653.1 | 5342881 | SNV | 1 | A | G | Homozygous   |
| NC_037653.1 | 5342889 | SNV | 1 | G | A | Homozygous   |

|             |         |     |   |   |   |              |
|-------------|---------|-----|---|---|---|--------------|
| NC_037653.1 | 5342891 | SNV | 1 | C | T | Homozygous   |
| NC_037653.1 | 5342895 | SNV | 1 | C | A | Homozygous   |
| NC_037653.1 | 5342902 | SNV | 1 | A | T | Heterozygous |
| NC_037653.1 | 5342906 | SNV | 1 | G | T | Heterozygous |
| NC_037653.1 | 5342908 | SNV | 1 | A | G | Heterozygous |
| NC_037653.1 | 5342917 | SNV | 1 | A | G | Heterozygous |
| NC_037653.1 | 5342919 | SNV | 1 | G | C | Heterozygous |
| NC_037653.1 | 5342934 | SNV | 1 | A | C | Heterozygous |
| NC_037653.1 | 5342940 | SNV | 1 | A | G | Heterozygous |
| NC_037653.1 | 5342956 | SNV | 1 | G | T | Heterozygous |
| NC_037653.1 | 5342966 | SNV | 1 | A | C | Homozygous   |
| NC_037653.1 | 5342972 | SNV | 1 | A | G | Homozygous   |
| NC_037653.1 | 5342977 | SNV | 1 | G | A | Homozygous   |
| NC_037653.1 | 5342995 | SNV | 1 | A | G | Homozygous   |
| NC_037653.1 | 5343007 | SNV | 1 | G | A | Homozygous   |
| NC_037653.1 | 5343031 | SNV | 1 | A | G | Homozygous   |
| NC_037653.1 | 5343053 | SNV | 1 | C | G | Heterozygous |
| NC_037653.1 | 5343058 | SNV | 1 | T | G | Homozygous   |
| NC_037653.1 | 5343061 | SNV | 1 | G | A | Homozygous   |
| NC_037653.1 | 5343100 | SNV | 1 | G | T | Homozygous   |
| NC_037653.1 | 5343127 | SNV | 1 | A | C | Homozygous   |
| NC_037653.1 | 5343133 | SNV | 1 | T | A | Homozygous   |
| NC_037653.1 | 5343143 | SNV | 1 | G | C | Homozygous   |
| NC_037653.1 | 5343176 | SNV | 1 | G | A | Homozygous   |
| NC_037653.1 | 5343197 | SNV | 1 | G | A | Homozygous   |
| NC_037653.1 | 5343207 | SNV | 1 | A | G | Homozygous   |
| NC_037653.1 | 5343213 | SNV | 1 | T | A | Homozygous   |
| NC_037653.1 | 5343215 | SNV | 1 | T | A | Homozygous   |
| NC_037653.1 | 5343221 | SNV | 1 | A | T | Heterozygous |
| NC_037653.1 | 5343223 | SNV | 1 | T | G | Heterozygous |
| NC_037653.1 | 5343233 | SNV | 1 | A | G | Homozygous   |
| NC_037653.1 | 5345947 | SNV | 1 | A | G | Homozygous   |
| NC_037653.1 | 5345961 | SNV | 1 | T | C | Homozygous   |
| NC_037653.1 | 5346089 | SNV | 1 | C | A | Heterozygous |
| NC_037653.1 | 5346093 | SNV | 1 | C | A | Heterozygous |
| NC_037653.1 | 5346097 | SNV | 1 | C | G | Heterozygous |
| NC_037653.1 | 5346101 | SNV | 1 | C | A | Heterozygous |
| NC_037653.1 | 5346103 | SNV | 1 | C | T | Heterozygous |
| NC_037653.1 | 5346105 | SNV | 1 | C | A | Heterozygous |
| NC_037653.1 | 5346109 | SNV | 1 | C | A | Heterozygous |
| NC_037653.1 | 5346113 | SNV | 1 | C | A | Heterozygous |
| NC_037653.1 | 5346179 | SNV | 1 | A | T | Homozygous   |
| NC_037653.1 | 5346199 | SNV | 1 | T | C | Heterozygous |
| NC_037653.1 | 5346207 | SNV | 1 | G | T | Homozygous   |
| NC_037653.1 | 5346215 | SNV | 1 | G | C | Homozygous   |
| NC_037653.1 | 5346246 | SNV | 1 | T | G | Heterozygous |
| NC_037653.1 | 5346254 | SNV | 1 | C | T | Heterozygous |
| NC_037653.1 | 5346272 | SNV | 1 | G | A | Heterozygous |
| NC_037653.1 | 5346290 | SNV | 1 | A | C | Homozygous   |
| NC_037653.1 | 5346787 | SNV | 1 | T | C | Homozygous   |
| NC_037653.1 | 5346791 | SNV | 1 | T | C | Homozygous   |

|             |         |     |   |   |   |              |
|-------------|---------|-----|---|---|---|--------------|
| NC_037653.1 | 5346803 | SNV | 1 | T | C | Homozygous   |
| NC_037653.1 | 5346805 | SNV | 1 | T | C | Homozygous   |
| NC_037653.1 | 5346807 | SNV | 1 | T | C | Homozygous   |
| NC_037653.1 | 5346815 | SNV | 1 | T | C | Homozygous   |
| NC_037653.1 | 5346819 | SNV | 1 | T | C | Homozygous   |
| NC_037653.1 | 5346835 | SNV | 1 | T | C | Homozygous   |
| NC_037653.1 | 5346850 | SNV | 1 | A | C | Homozygous   |
| NC_037653.1 | 5346852 | SNV | 1 | T | C | Heterozygous |
| NC_037653.1 | 5346854 | SNV | 1 | A | C | Heterozygous |
| NC_037653.1 | 5346856 | SNV | 1 | C | T | Heterozygous |
| NC_037653.1 | 5346864 | SNV | 1 | C | G | Heterozygous |
| NC_037653.1 | 5346866 | SNV | 1 | G | T | Heterozygous |
| NC_037653.1 | 5346890 | SNV | 1 | G | C | Homozygous   |
| NC_037653.1 | 5346894 | SNV | 1 | C | T | Homozygous   |
| NC_037653.1 | 5346897 | SNV | 1 | T | G | Homozygous   |
| NC_037653.1 | 5346901 | SNV | 1 | T | G | Homozygous   |
| NC_037653.1 | 5346906 | SNV | 1 | C | T | Homozygous   |
| NC_037653.1 | 5346915 | SNV | 1 | T | A | Homozygous   |
| NC_037653.1 | 5346918 | SNV | 1 | C | T | Homozygous   |
| NC_037653.1 | 5346943 | SNV | 1 | C | T | Heterozygous |
| NC_037653.1 | 5346949 | SNV | 1 | T | C | Heterozygous |
| NC_037653.1 | 5346954 | SNV | 1 | T | C | Homozygous   |
| NC_037653.1 | 5346958 | SNV | 1 | A | C | Homozygous   |
| NC_037653.1 | 5346962 | SNV | 1 | A | C | Homozygous   |
| NC_037653.1 | 5346966 | SNV | 1 | A | C | Homozygous   |
| NC_037653.1 | 5347563 | SNV | 1 | C | T | Homozygous   |
| NC_037653.1 | 5347567 | SNV | 1 | C | T | Homozygous   |
| NC_037653.1 | 5347598 | SNV | 1 | C | T | Homozygous   |
| NC_037653.1 | 5347670 | SNV | 1 | C | G | Homozygous   |
| NC_037653.1 | 5347906 | SNV | 1 | T | C | Heterozygous |
| NC_037653.1 | 5347991 | SNV | 1 | A | G | Homozygous   |
| NC_037653.1 | 5348002 | SNV | 1 | T | C | Homozygous   |
| NC_037653.1 | 5348041 | SNV | 1 | G | A | Homozygous   |
| NC_037653.1 | 5350356 | SNV | 1 | A | G | Homozygous   |
| NC_037653.1 | 5350388 | SNV | 1 | A | G | Homozygous   |
| NC_037653.1 | 5350396 | SNV | 1 | C | G | Homozygous   |
| NC_037653.1 | 5362771 | SNV | 1 | T | C | Heterozygous |
| NC_037653.1 | 5362771 | SNV | 1 | T | G | Heterozygous |
| NC_037653.1 | 5362780 | SNV | 1 | T | C | Homozygous   |
| NC_037653.1 | 5362784 | SNV | 1 | G | C | Heterozygous |
| NC_037653.1 | 5364568 | SNV | 1 | G | A | Homozygous   |
| NC_037653.1 | 5364601 | SNV | 1 | C | T | Homozygous   |
| NC_037653.1 | 5364609 | SNV | 1 | A | C | Homozygous   |
| NC_037653.1 | 5369914 | SNV | 1 | G | A | Homozygous   |
| NC_037653.1 | 5369923 | SNV | 1 | G | A | Homozygous   |
| NC_037653.1 | 5370055 | SNV | 1 | G | A | Homozygous   |
| NC_037653.1 | 5370129 | SNV | 1 | C | T | Heterozygous |
| NC_037653.1 | 5370751 | SNV | 1 | C | A | Homozygous   |
| NC_037653.1 | 5370838 | SNV | 1 | A | G | Homozygous   |
| NC_037653.1 | 5370841 | SNV | 1 | A | G | Heterozygous |
| NC_037653.1 | 5370845 | SNV | 1 | C | T | Heterozygous |

|             |         |     |   |   |   |              |
|-------------|---------|-----|---|---|---|--------------|
| NC_037653.1 | 5370848 | SNV | 1 | C | T | Heterozygous |
| NC_037653.1 | 5371177 | SNV | 1 | C | G | Heterozygous |
| NC_037653.1 | 5371188 | SNV | 1 | A | G | Heterozygous |
| NC_037653.1 | 5371202 | SNV | 1 | G | A | Heterozygous |
| NC_037653.1 | 5371375 | SNV | 1 | G | A | Heterozygous |
| NC_037653.1 | 5371377 | SNV | 1 | A | G | Heterozygous |
| NC_037653.1 | 5372614 | SNV | 1 | G | A | Homozygous   |
| NC_037653.1 | 5372635 | SNV | 1 | A | G | Homozygous   |
| NC_037653.1 | 5372645 | SNV | 1 | G | A | Homozygous   |
| NC_037653.1 | 5372685 | SNV | 1 | T | C | Homozygous   |
| NC_037653.1 | 5372690 | SNV | 1 | T | C | Homozygous   |
| NC_037653.1 | 5374123 | SNV | 1 | G | A | Heterozygous |
| NC_037653.1 | 5378246 | SNV | 1 | A | T | Homozygous   |
| NC_037653.1 | 5378249 | SNV | 1 | A | C | Homozygous   |
| NC_037653.1 | 5378252 | SNV | 1 | T | C | Homozygous   |
| NC_037653.1 | 5380057 | SNV | 1 | A | G | Heterozygous |
| NC_037653.1 | 5380521 | SNV | 1 | T | C | Heterozygous |
| NC_037653.1 | 5380524 | SNV | 1 | C | T | Heterozygous |
| NC_037653.1 | 5380588 | SNV | 1 | T | C | Heterozygous |
| NC_037653.1 | 5380738 | SNV | 1 | G | A | Heterozygous |
| NC_037653.1 | 5380757 | SNV | 1 | A | G | Homozygous   |
| NC_037653.1 | 5381072 | SNV | 1 | C | T | Heterozygous |
| NC_037653.1 | 5381085 | SNV | 1 | T | C | Homozygous   |
| NC_037653.1 | 5381092 | SNV | 1 | T | C | Homozygous   |
| NC_037653.1 | 5381098 | SNV | 1 | A | T | Homozygous   |
| NC_037653.1 | 5381105 | SNV | 1 | A | G | Heterozygous |
| NC_037653.1 | 5381155 | SNV | 1 | C | T | Heterozygous |
| NC_037653.1 | 5381165 | SNV | 1 | T | A | Heterozygous |
| NC_037653.1 | 5381273 | SNV | 1 | T | C | Homozygous   |
| NC_037653.1 | 5381293 | SNV | 1 | G | A | Heterozygous |
| NC_037653.1 | 5381295 | SNV | 1 | C | T | Homozygous   |
| NC_037653.1 | 5381354 | SNV | 1 | A | G | Heterozygous |
| NC_037653.1 | 5381360 | SNV | 1 | A | C | Homozygous   |
| NC_037653.1 | 5389028 | SNV | 1 | A | G | Homozygous   |
| NC_037653.1 | 5389047 | SNV | 1 | G | C | Homozygous   |
| NC_037653.1 | 5389089 | SNV | 1 | C | T | Homozygous   |
| NC_037653.1 | 5389113 | SNV | 1 | A | G | Homozygous   |
| NC_037653.1 | 5389204 | SNV | 1 | C | T | Homozygous   |
| NC_037653.1 | 5389206 | SNV | 1 | A | G | Homozygous   |
| NC_037653.1 | 5389251 | SNV | 1 | T | C | Homozygous   |
| NC_037653.1 | 5389260 | SNV | 1 | C | T | Homozygous   |
| NC_037653.1 | 5389272 | SNV | 1 | A | G | Homozygous   |
| NC_037653.1 | 5389281 | SNV | 1 | T | C | Homozygous   |
| NC_037653.1 | 5389308 | SNV | 1 | C | T | Homozygous   |
| NC_037653.1 | 5389323 | SNV | 1 | G | C | Homozygous   |
| NC_037653.1 | 5389442 | SNV | 1 | A | G | Heterozygous |
| NC_037653.1 | 5389450 | SNV | 1 | A | G | Heterozygous |
| NC_037653.1 | 5389616 | SNV | 1 | A | G | Homozygous   |
| NC_037653.1 | 5389678 | SNV | 1 | G | A | Homozygous   |
| NC_037653.1 | 5389705 | SNV | 1 | C | G | Homozygous   |
| NC_037653.1 | 5389746 | SNV | 1 | A | G | Homozygous   |



|             |         |     |   |   |   |              |
|-------------|---------|-----|---|---|---|--------------|
| NC_037653.1 | 5389855 | SNV | 1 | C | T | Homozygous   |
| NC_037653.1 | 5389936 | SNV | 1 | C | T | Homozygous   |
| NC_037653.1 | 5390118 | SNV | 1 | T | C | Homozygous   |
| NC_037653.1 | 5390397 | SNV | 1 | C | T | Homozygous   |
| NC_037653.1 | 5390647 | SNV | 1 | T | C | Homozygous   |
| NC_037653.1 | 5390664 | SNV | 1 | A | G | Homozygous   |
| NC_037653.1 | 5390672 | SNV | 1 | A | G | Homozygous   |
| NC_037653.1 | 5390691 | SNV | 1 | T | C | Homozygous   |
| NC_037653.1 | 5392475 | SNV | 1 | C | T | Homozygous   |
| NC_037653.1 | 5392484 | SNV | 1 | C | T | Heterozygous |
| NC_037653.1 | 5392648 | SNV | 1 | G | A | Heterozygous |
| NC_037653.1 | 5392651 | SNV | 1 | T | C | Homozygous   |
| NC_037653.1 | 5392969 | SNV | 1 | A | T | Homozygous   |
| NC_037653.1 | 5392984 | SNV | 1 | C | G | Homozygous   |
| NC_037653.1 | 5392991 | SNV | 1 | A | C | Homozygous   |
| NC_037653.1 | 5393372 | SNV | 1 | C | G | Heterozygous |
| NC_037653.1 | 5393432 | SNV | 1 | C | T | Homozygous   |
| NC_037653.1 | 5399134 | SNV | 1 | A | T | Heterozygous |
| NC_037653.1 | 5399173 | SNV | 1 | G | A | Heterozygous |
| NC_037653.1 | 5402762 | SNV | 1 | G | A | Homozygous   |
| NC_037653.1 | 5402871 | SNV | 1 | C | A | Homozygous   |
| NC_037653.1 | 5402915 | SNV | 1 | A | G | Homozygous   |
| NC_037653.1 | 5402968 | SNV | 1 | A | T | Homozygous   |
| NC_037653.1 | 5403167 | SNV | 1 | A | G | Heterozygous |
| NC_037653.1 | 5403169 | SNV | 1 | G | A | Heterozygous |
| NC_037653.1 | 5403173 | SNV | 1 | A | T | Heterozygous |
| NC_037653.1 | 5403295 | SNV | 1 | G | A | Homozygous   |
| NC_037653.1 | 5403390 | SNV | 1 | C | T | Homozygous   |
| NC_037653.1 | 5403405 | SNV | 1 | A | G | Homozygous   |
| NC_037653.1 | 5403445 | SNV | 1 | C | T | Homozygous   |
| NC_037653.1 | 5404254 | SNV | 1 | C | A | Homozygous   |
| NC_037653.1 | 5404334 | SNV | 1 | C | T | Heterozygous |
| NC_037653.1 | 5405345 | SNV | 1 | G | T | Heterozygous |
| NC_037653.1 | 5411480 | SNV | 1 | A | T | Homozygous   |
| NC_037653.1 | 5411482 | SNV | 1 | A | T | Homozygous   |
| NC_037653.1 | 5411995 | SNV | 1 | C | T | Homozygous   |
| NC_037653.1 | 5412156 | SNV | 1 | A | G | Homozygous   |
| NC_037653.1 | 5412221 | SNV | 1 | C | T | Homozygous   |
| NC_037653.1 | 5418435 | SNV | 1 | C | T | Heterozygous |
| NC_037653.1 | 5418454 | SNV | 1 | C | T | Heterozygous |
| NC_037653.1 | 5418481 | SNV | 1 | C | T | Homozygous   |
| NC_037653.1 | 5418554 | SNV | 1 | T | C | Heterozygous |
| NC_037653.1 | 5418688 | SNV | 1 | C | T | Homozygous   |
| NC_037653.1 | 5418696 | SNV | 1 | C | T | Homozygous   |
| NC_037653.1 | 5418707 | SNV | 1 | G | A | Homozygous   |
| NC_037653.1 | 5418738 | SNV | 1 | A | G | Homozygous   |
| NC_037653.1 | 5418762 | SNV | 1 | A | G | Homozygous   |
| NC_037653.1 | 5418799 | SNV | 1 | T | A | Homozygous   |
| NC_037653.1 | 5420883 | SNV | 1 | T | C | Homozygous   |
| NC_037653.1 | 5420897 | SNV | 1 | T | C | Heterozygous |
| NC_037653.1 | 5420900 | SNV | 1 | C | T | Homozygous   |

|             |         |     |   |   |   |              |
|-------------|---------|-----|---|---|---|--------------|
| NC_037653.1 | 5421452 | SNV | 1 | T | C | Heterozygous |
| NC_037653.1 | 5421468 | SNV | 1 | C | A | Heterozygous |
| NC_037653.1 | 5421472 | SNV | 1 | C | A | Homozygous   |
| NC_037653.1 | 5421482 | SNV | 1 | C | T | Heterozygous |
| NC_037653.1 | 5421490 | SNV | 1 | T | A | Heterozygous |
| NC_037653.1 | 5421494 | SNV | 1 | T | C | Homozygous   |
| NC_037653.1 | 5421504 | SNV | 1 | A | C | Heterozygous |
| NC_037653.1 | 5421524 | SNV | 1 | C | T | Heterozygous |
| NC_037653.1 | 5421527 | SNV | 1 | T | C | Heterozygous |
| NC_037653.1 | 5421528 | SNV | 1 | C | A | Heterozygous |
| NC_037653.1 | 5428333 | SNV | 1 | C | T | Heterozygous |
| NC_037653.1 | 5432349 | SNV | 1 | A | G | Heterozygous |
| NC_037653.1 | 5432918 | SNV | 1 | C | T | Homozygous   |
| NC_037653.1 | 5436770 | SNV | 1 | C | T | Heterozygous |
| NC_037653.1 | 5436863 | SNV | 1 | T | C | Heterozygous |
| NC_037653.1 | 5436869 | SNV | 1 | T | C | Heterozygous |
| NC_037653.1 | 5436872 | SNV | 1 | G | A | Heterozygous |
| NC_037653.1 | 5436875 | SNV | 1 | C | G | Heterozygous |
| NC_037653.1 | 5436888 | SNV | 1 | T | C | Homozygous   |
| NC_037653.1 | 5437013 | SNV | 1 | A | G | Homozygous   |
| NC_037653.1 | 5437119 | SNV | 1 | T | C | Homozygous   |
| NC_037653.1 | 5437126 | SNV | 1 | A | G | Homozygous   |
| NC_037653.1 | 5437156 | SNV | 1 | T | C | Heterozygous |
| NC_037653.1 | 5437161 | SNV | 1 | T | C | Homozygous   |
| NC_037653.1 | 5437268 | SNV | 1 | T | C | Homozygous   |
| NC_037653.1 | 5437302 | SNV | 1 | A | G | Heterozygous |
| NC_037653.1 | 5437325 | SNV | 1 | T | C | Homozygous   |
| NC_037653.1 | 5437405 | SNV | 1 | T | C | Homozygous   |
| NC_037653.1 | 5437499 | SNV | 1 | C | T | Homozygous   |
| NC_037653.1 | 5437560 | SNV | 1 | C | T | Heterozygous |
| NC_037653.1 | 5437563 | SNV | 1 | A | C | Heterozygous |
| NC_037653.1 | 5437575 | SNV | 1 | T | C | Homozygous   |
| NC_037653.1 | 5437652 | SNV | 1 | T | C | Heterozygous |
| NC_037653.1 | 5437738 | SNV | 1 | T | C | Homozygous   |
| NC_037653.1 | 5437810 | SNV | 1 | C | G | Heterozygous |
| NC_037653.1 | 5437829 | SNV | 1 | T | C | Homozygous   |
| NC_037653.1 | 5449494 | SNV | 1 | G | C | Heterozygous |
| NC_037653.1 | 5449536 | SNV | 1 | T | G | Homozygous   |
| NC_037653.1 | 5449571 | SNV | 1 | A | G | Homozygous   |
| NC_037653.1 | 5449573 | SNV | 1 | T | G | Heterozygous |
| NC_037653.1 | 5449575 | SNV | 1 | C | T | Heterozygous |
| NC_037653.1 | 5449579 | SNV | 1 | T | C | Heterozygous |
| NC_037653.1 | 5449606 | SNV | 1 | T | C | Heterozygous |
| NC_037653.1 | 5449641 | SNV | 1 | A | G | Homozygous   |
| NC_037653.1 | 5452969 | SNV | 1 | T | C | Heterozygous |
| NC_037653.1 | 5452972 | SNV | 1 | C | T | Heterozygous |
| NC_037653.1 | 5452976 | SNV | 1 | T | C | Heterozygous |
| NC_037653.1 | 5453120 | SNV | 1 | T | C | Heterozygous |
| NC_037653.1 | 5456168 | SNV | 1 | G | T | Heterozygous |
| NC_037653.1 | 5456187 | SNV | 1 | T | C | Heterozygous |
| NC_037653.1 | 5463168 | SNV | 1 | A | G | Homozygous   |

|             |         |     |   |   |   |              |
|-------------|---------|-----|---|---|---|--------------|
| NC_037653.1 | 5463440 | SNV | 1 | T | C | Homozygous   |
| NC_037653.1 | 5463445 | SNV | 1 | C | T | Homozygous   |
| NC_037653.1 | 5463448 | SNV | 1 | C | T | Homozygous   |
| NC_037653.1 | 5463552 | SNV | 1 | C | T | Heterozygous |
| NC_037653.1 | 5463559 | SNV | 1 | T | C | Homozygous   |
| NC_037653.1 | 5463563 | SNV | 1 | T | C | Homozygous   |
| NC_037653.1 | 5463584 | SNV | 1 | C | T | Homozygous   |
| NC_037653.1 | 5463650 | SNV | 1 | T | C | Homozygous   |
| NC_037653.1 | 5463669 | SNV | 1 | A | G | Homozygous   |
| NC_037653.1 | 5463682 | SNV | 1 | T | C | Heterozygous |
| NC_037653.1 | 5463691 | SNV | 1 | A | C | Homozygous   |
| NC_037653.1 | 5463855 | SNV | 1 | T | C | Homozygous   |
| NC_037653.1 | 5463876 | SNV | 1 | A | T | Homozygous   |
| NC_037653.1 | 5463878 | SNV | 1 | A | T | Homozygous   |
| NC_037653.1 | 5463899 | SNV | 1 | G | A | Homozygous   |
| NC_037653.1 | 5464490 | SNV | 1 | T | C | Heterozygous |
| NC_037653.1 | 5464494 | SNV | 1 | T | C | Heterozygous |
| NC_037653.1 | 5464604 | SNV | 1 | A | T | Heterozygous |
| NC_037653.1 | 5464619 | SNV | 1 | A | T | Homozygous   |
| NC_037653.1 | 5464974 | SNV | 1 | G | A | Heterozygous |
| NC_037653.1 | 5465082 | SNV | 1 | G | A | Heterozygous |
| NC_037653.1 | 5465088 | SNV | 1 | A | G | Heterozygous |
| NC_037653.1 | 5465947 | SNV | 1 | A | G | Homozygous   |
| NC_037653.1 | 5465984 | SNV | 1 | A | G | Heterozygous |
| NC_037653.1 | 5466111 | SNV | 1 | G | T | Heterozygous |
| NC_037653.1 | 5466253 | SNV | 1 | A | G | Homozygous   |
| NC_037653.1 | 5466281 | SNV | 1 | A | G | Homozygous   |
| NC_037653.1 | 5466289 | SNV | 1 | A | G | Homozygous   |
| NC_037653.1 | 5481140 | SNV | 1 | A | G | Heterozygous |
| NC_037653.1 | 5481162 | SNV | 1 | C | G | Homozygous   |
| NC_037653.1 | 5481170 | SNV | 1 | C | T | Homozygous   |
| NC_037653.1 | 5481173 | SNV | 1 | C | T | Heterozygous |
| NC_037653.1 | 5481193 | SNV | 1 | A | C | Heterozygous |
| NC_037653.1 | 5481193 | SNV | 1 | A | T | Heterozygous |
| NC_037653.1 | 5481241 | SNV | 1 | A | G | Heterozygous |
| NC_037653.1 | 5481318 | SNV | 1 | A | G | Homozygous   |
| NC_037653.1 | 5481493 | SNV | 1 | G | A | Heterozygous |
| NC_037653.1 | 5481592 | SNV | 1 | C | T | Heterozygous |
| NC_037653.1 | 5481662 | SNV | 1 | G | A | Heterozygous |
| NC_037653.1 | 5481704 | SNV | 1 | G | A | Homozygous   |
| NC_037653.1 | 5486068 | SNV | 1 | T | C | Homozygous   |
| NC_037653.1 | 5486341 | SNV | 1 | A | G | Homozygous   |
| NC_037653.1 | 5486646 | SNV | 1 | A | G | Homozygous   |
| NC_037653.1 | 5486668 | SNV | 1 | C | T | Heterozygous |
| NC_037653.1 | 5486715 | SNV | 1 | T | C | Homozygous   |
| NC_037653.1 | 5486740 | SNV | 1 | T | C | Heterozygous |
| NC_037653.1 | 5486797 | SNV | 1 | T | G | Homozygous   |
| NC_037653.1 | 5486935 | SNV | 1 | T | C | Homozygous   |
| NC_037653.1 | 5487007 | SNV | 1 | A | T | Heterozygous |
| NC_037653.1 | 5487240 | SNV | 1 | C | T | Heterozygous |
| NC_037653.1 | 5487283 | SNV | 1 | T | C | Homozygous   |

|             |         |     |   |   |   |              |
|-------------|---------|-----|---|---|---|--------------|
| NC_037653.1 | 5487290 | SNV | 1 | G | A | Heterozygous |
| NC_037653.1 | 5487343 | SNV | 1 | T | C | Homozygous   |
| NC_037653.1 | 5487457 | SNV | 1 | A | G | Homozygous   |
| NC_037653.1 | 5487724 | SNV | 1 | T | C | Heterozygous |
| NC_037653.1 | 5487890 | SNV | 1 | A | C | Homozygous   |
| NC_037653.1 | 5487967 | SNV | 1 | G | A | Heterozygous |
| NC_037653.1 | 5487974 | SNV | 1 | T | C | Heterozygous |
| NC_037653.1 | 5488017 | SNV | 1 | C | T | Heterozygous |
| NC_037653.1 | 5488029 | SNV | 1 | C | T | Heterozygous |
| NC_037653.1 | 5488453 | SNV | 1 | G | A | Heterozygous |
| NC_037653.1 | 5488496 | SNV | 1 | G | T | Heterozygous |
| NC_037653.1 | 5488913 | SNV | 1 | T | C | Heterozygous |
| NC_037653.1 | 5488917 | SNV | 1 | C | T | Heterozygous |
| NC_037653.1 | 5491153 | SNV | 1 | T | A | Homozygous   |
| NC_037653.1 | 5491312 | SNV | 1 | C | G | Heterozygous |
| NC_037653.1 | 5491335 | SNV | 1 | C | T | Heterozygous |
| NC_037653.1 | 5491356 | SNV | 1 | A | G | Homozygous   |
| NC_037653.1 | 5491459 | SNV | 1 | G | A | Heterozygous |
| NC_037653.1 | 5491504 | SNV | 1 | A | G | Homozygous   |
| NC_037653.1 | 5491531 | SNV | 1 | A | G | Heterozygous |
| NC_037653.1 | 5491561 | SNV | 1 | A | T | Heterozygous |
| NC_037653.1 | 5497007 | SNV | 1 | A | G | Homozygous   |
| NC_037653.1 | 5505281 | SNV | 1 | A | C | Homozygous   |
| NC_037653.1 | 5505313 | SNV | 1 | C | G | Heterozygous |
| NC_037653.1 | 5505767 | SNV | 1 | C | T | Homozygous   |
| NC_037653.1 | 5506263 | SNV | 1 | G | A | Homozygous   |
| NC_037653.1 | 5506268 | SNV | 1 | A | T | Homozygous   |
| NC_037653.1 | 5506294 | SNV | 1 | A | C | Homozygous   |
| NC_037653.1 | 5506297 | SNV | 1 | G | A | Homozygous   |
| NC_037653.1 | 5506304 | SNV | 1 | G | A | Homozygous   |
| NC_037653.1 | 5506311 | SNV | 1 | G | A | Homozygous   |
| NC_037653.1 | 5506313 | SNV | 1 | G | A | Homozygous   |
| NC_037653.1 | 5506474 | SNV | 1 | A | T | Heterozygous |
| NC_037653.1 | 5506479 | SNV | 1 | T | A | Homozygous   |
| NC_037653.1 | 5506512 | SNV | 1 | G | A | Heterozygous |
| NC_037653.1 | 5506517 | SNV | 1 | A | T | Heterozygous |
| NC_037653.1 | 5506527 | SNV | 1 | G | A | Heterozygous |
| NC_037653.1 | 5507000 | SNV | 1 | T | C | Heterozygous |
| NC_037653.1 | 5507093 | SNV | 1 | A | G | Homozygous   |
| NC_037653.1 | 5509995 | SNV | 1 | T | C | Homozygous   |
| NC_037653.1 | 5526556 | SNV | 1 | C | A | Homozygous   |
| NC_037653.1 | 5526625 | SNV | 1 | T | C | Heterozygous |
| NC_037653.1 | 5526851 | SNV | 1 | A | G | Heterozygous |
| NC_037653.1 | 5526863 | SNV | 1 | A | T | Homozygous   |
| NC_037653.1 | 5526921 | SNV | 1 | T | C | Heterozygous |
| NC_037653.1 | 5526994 | SNV | 1 | G | T | Homozygous   |
| NC_037653.1 | 5527005 | SNV | 1 | A | G | Homozygous   |
| NC_037653.1 | 5527049 | SNV | 1 | A | G | Homozygous   |
| NC_037653.1 | 5527053 | SNV | 1 | A | G | Homozygous   |
| NC_037653.1 | 5527104 | SNV | 1 | T | G | Homozygous   |
| NC_037653.1 | 5527111 | SNV | 1 | G | A | Heterozygous |

|             |         |     |   |   |   |              |
|-------------|---------|-----|---|---|---|--------------|
| NC_037653.1 | 5527163 | SNV | 1 | C | T | Homozygous   |
| NC_037653.1 | 5527216 | SNV | 1 | G | A | Homozygous   |
| NC_037653.1 | 5527221 | SNV | 1 | C | T | Heterozygous |
| NC_037653.1 | 5527281 | SNV | 1 | A | T | Homozygous   |
| NC_037653.1 | 5527313 | SNV | 1 | G | A | Heterozygous |
| NC_037653.1 | 5527361 | SNV | 1 | C | A | Heterozygous |
| NC_037653.1 | 5527365 | SNV | 1 | T | G | Heterozygous |
| NC_037653.1 | 5527594 | SNV | 1 | T | C | Homozygous   |
| NC_037653.1 | 5527600 | SNV | 1 | A | G | Heterozygous |
| NC_037653.1 | 5527616 | SNV | 1 | A | G | Homozygous   |
| NC_037653.1 | 5527643 | SNV | 1 | T | C | Heterozygous |
| NC_037653.1 | 5527659 | SNV | 1 | C | T | Heterozygous |
| NC_037653.1 | 5527665 | SNV | 1 | T | G | Homozygous   |
| NC_037653.1 | 5527683 | SNV | 1 | T | C | Heterozygous |
| NC_037653.1 | 5527686 | SNV | 1 | A | G | Homozygous   |
| NC_037653.1 | 5527707 | SNV | 1 | A | T | Homozygous   |
| NC_037653.1 | 5527770 | SNV | 1 | G | A | Homozygous   |
| NC_037653.1 | 5527780 | SNV | 1 | A | G | Homozygous   |
| NC_037653.1 | 5527788 | SNV | 1 | C | T | Heterozygous |
| NC_037653.1 | 5527807 | SNV | 1 | G | A | Heterozygous |
| NC_037653.1 | 5527809 | SNV | 1 | A | G | Heterozygous |
| NC_037653.1 | 5527817 | SNV | 1 | T | C | Homozygous   |
| NC_037653.1 | 5527843 | SNV | 1 | G | A | Heterozygous |
| NC_037653.1 | 5527875 | SNV | 1 | G | T | Homozygous   |
| NC_037653.1 | 5527900 | SNV | 1 | A | G | Heterozygous |
| NC_037653.1 | 5527922 | SNV | 1 | C | G | Homozygous   |
| NC_037653.1 | 5527924 | SNV | 1 | G | A | Heterozygous |
| NC_037653.1 | 5527945 | SNV | 1 | A | G | Heterozygous |
| NC_037653.1 | 5528847 | SNV | 1 | G | A | Heterozygous |
| NC_037653.1 | 5529093 | SNV | 1 | T | C | Homozygous   |
| NC_037653.1 | 5529287 | SNV | 1 | T | C | Homozygous   |
| NC_037653.1 | 5529339 | SNV | 1 | C | T | Heterozygous |
| NC_037653.1 | 5531497 | SNV | 1 | C | T | Homozygous   |
| NC_037653.1 | 5531501 | SNV | 1 | T | A | Homozygous   |
| NC_037653.1 | 5531510 | SNV | 1 | A | G | Homozygous   |
| NC_037653.1 | 5531523 | SNV | 1 | T | A | Homozygous   |
| NC_037653.1 | 5531530 | SNV | 1 | T | A | Homozygous   |
| NC_037653.1 | 5531643 | SNV | 1 | A | G | Homozygous   |
| NC_037653.1 | 5531662 | SNV | 1 | G | A | Homozygous   |
| NC_037653.1 | 5531665 | SNV | 1 | A | G | Homozygous   |
| NC_037653.1 | 5531669 | SNV | 1 | A | G | Homozygous   |
| NC_037653.1 | 5531794 | SNV | 1 | G | A | Homozygous   |
| NC_037653.1 | 5532285 | SNV | 1 | C | T | Heterozygous |
| NC_037653.1 | 5533180 | SNV | 1 | A | T | Homozygous   |
| NC_037653.1 | 5533202 | SNV | 1 | A | G | Homozygous   |
| NC_037653.1 | 5533219 | SNV | 1 | A | T | Heterozygous |
| NC_037653.1 | 5539384 | SNV | 1 | T | G | Heterozygous |
| NC_037653.1 | 5539447 | SNV | 1 | C | T | Heterozygous |
| NC_037653.1 | 5539527 | SNV | 1 | G | C | Heterozygous |
| NC_037653.1 | 5539529 | SNV | 1 | G | A | Heterozygous |
| NC_037653.1 | 5539632 | SNV | 1 | T | C | Heterozygous |

|             |         |     |   |   |   |              |
|-------------|---------|-----|---|---|---|--------------|
| NC_037653.1 | 5539731 | SNV | 1 | T | C | Heterozygous |
| NC_037653.1 | 5539731 | SNV | 1 | T | G | Heterozygous |
| NC_037653.1 | 5540719 | SNV | 1 | A | C | Heterozygous |
| NC_037653.1 | 5540728 | SNV | 1 | G | A | Heterozygous |
| NC_037653.1 | 5552884 | SNV | 1 | T | G | Homozygous   |
| NC_037653.1 | 5560852 | SNV | 1 | G | A | Homozygous   |
| NC_037653.1 | 5560859 | SNV | 1 | T | C | Homozygous   |
| NC_037653.1 | 5560872 | SNV | 1 | A | T | Homozygous   |
| NC_037653.1 | 5560906 | SNV | 1 | T | A | Homozygous   |
| NC_037653.1 | 5563458 | SNV | 1 | C | T | Homozygous   |
| NC_037653.1 | 5563669 | SNV | 1 | C | T | Heterozygous |
| NC_037653.1 | 5563696 | SNV | 1 | A | G | Heterozygous |
| NC_037653.1 | 5563700 | SNV | 1 | A | T | Heterozygous |
| NC_037653.1 | 5563789 | SNV | 1 | T | C | Homozygous   |
| NC_037653.1 | 5563791 | SNV | 1 | A | C | Homozygous   |
| NC_037653.1 | 5563806 | SNV | 1 | C | T | Homozygous   |
| NC_037653.1 | 5563830 | SNV | 1 | C | T | Heterozygous |
| NC_037653.1 | 5563839 | SNV | 1 | C | T | Heterozygous |
| NC_037653.1 | 5563892 | SNV | 1 | A | G | Homozygous   |
| NC_037653.1 | 5563927 | SNV | 1 | G | A | Homozygous   |
| NC_037653.1 | 5563965 | SNV | 1 | T | G | Heterozygous |
| NC_037653.1 | 5563968 | SNV | 1 | C | T | Heterozygous |
| NC_037653.1 | 5581397 | SNV | 1 | T | C | Homozygous   |
| NC_037653.1 | 5589558 | SNV | 1 | A | T | Heterozygous |
| NC_037653.1 | 5589565 | SNV | 1 | A | G | Heterozygous |
| NC_037653.1 | 5589568 | SNV | 1 | A | G | Heterozygous |
| NC_037653.1 | 5618361 | SNV | 1 | T | C | Heterozygous |
| NC_037653.1 | 5648257 | SNV | 1 | A | G | Homozygous   |
| NC_037653.1 | 5655347 | SNV | 1 | T | C | Homozygous   |
| NC_037653.1 | 5655380 | SNV | 1 | C | T | Homozygous   |
| NC_037653.1 | 5655425 | SNV | 1 | C | T | Homozygous   |
| NC_037653.1 | 5655427 | SNV | 1 | C | A | Homozygous   |
| NC_037653.1 | 5655454 | SNV | 1 | G | C | Homozygous   |
| NC_037653.1 | 5655486 | SNV | 1 | T | C | Homozygous   |
| NC_037653.1 | 5658426 | SNV | 1 | A | T | Heterozygous |
| NC_037653.1 | 5658462 | SNV | 1 | T | A | Homozygous   |
| NC_037653.1 | 5658478 | SNV | 1 | C | T | Homozygous   |
| NC_037653.1 | 5658491 | SNV | 1 | C | T | Homozygous   |
| NC_037653.1 | 5679163 | SNV | 1 | C | T | Homozygous   |
| NC_037653.1 | 5691305 | SNV | 1 | T | G | Homozygous   |
| NC_037653.1 | 5691309 | SNV | 1 | T | C | Homozygous   |
| NC_037653.1 | 5691311 | SNV | 1 | T | A | Homozygous   |
| NC_037653.1 | 5691352 | SNV | 1 | G | C | Homozygous   |
| NC_037653.1 | 5711395 | SNV | 1 | C | A | Heterozygous |
| NC_037653.1 | 5711401 | SNV | 1 | A | T | Heterozygous |
| NC_037653.1 | 5711409 | SNV | 1 | T | G | Heterozygous |
| NC_037653.1 | 5711419 | SNV | 1 | A | T | Heterozygous |
| NC_037653.1 | 5711468 | SNV | 1 | G | T | Heterozygous |
| NC_037653.1 | 5711646 | SNV | 1 | G | A | Homozygous   |
| NC_037653.1 | 5711677 | SNV | 1 | C | T | Homozygous   |
| NC_037653.1 | 5716281 | SNV | 1 | G | A | Homozygous   |

|             |         |     |   |   |   |              |
|-------------|---------|-----|---|---|---|--------------|
| NC_037653.1 | 5716290 | SNV | 1 | A | G | Homozygous   |
| NC_037653.1 | 5716316 | SNV | 1 | A | G | Homozygous   |
| NC_037653.1 | 5716549 | SNV | 1 | C | G | Heterozygous |
| NC_037653.1 | 5716550 | SNV | 1 | T | C | Heterozygous |
| NC_037653.1 | 5716551 | SNV | 1 | T | C | Heterozygous |
| NC_037653.1 | 5716556 | SNV | 1 | G | A | Heterozygous |
| NC_037653.1 | 5717875 | SNV | 1 | A | T | Homozygous   |
| NC_037653.1 | 5717902 | SNV | 1 | T | C | Homozygous   |
| NC_037653.1 | 5718001 | SNV | 1 | A | G | Heterozygous |
| NC_037653.1 | 5720863 | SNV | 1 | G | A | Heterozygous |
| NC_037653.1 | 5720937 | SNV | 1 | C | T | Heterozygous |
| NC_037653.1 | 5720996 | SNV | 1 | G | A | Homozygous   |
| NC_037653.1 | 5721085 | SNV | 1 | T | C | Homozygous   |
| NC_037653.1 | 5721092 | SNV | 1 | G | T | Heterozygous |
| NC_037653.1 | 5721100 | SNV | 1 | T | C | Heterozygous |
| NC_037653.1 | 5721128 | SNV | 1 | T | G | Homozygous   |
| NC_037653.1 | 5721130 | SNV | 1 | T | G | Homozygous   |
| NC_037653.1 | 5721136 | SNV | 1 | A | G | Homozygous   |
| NC_037653.1 | 5721206 | SNV | 1 | G | A | Heterozygous |
| NC_037653.1 | 5721266 | SNV | 1 | C | T | Heterozygous |
| NC_037653.1 | 5721273 | SNV | 1 | C | T | Homozygous   |
| NC_037653.1 | 5721291 | SNV | 1 | T | C | Homozygous   |
| NC_037653.1 | 5721477 | SNV | 1 | A | G | Homozygous   |
| NC_037653.1 | 5729881 | SNV | 1 | C | T | Homozygous   |
| NC_037653.1 | 5729922 | SNV | 1 | G | A | Homozygous   |
| NC_037653.1 | 5729950 | SNV | 1 | C | T | Heterozygous |
| NC_037653.1 | 5729957 | SNV | 1 | T | C | Heterozygous |
| NC_037653.1 | 5732666 | SNV | 1 | G | A | Heterozygous |
| NC_037653.1 | 5732669 | SNV | 1 | G | A | Heterozygous |
| NC_037653.1 | 5732671 | SNV | 1 | G | A | Heterozygous |
| NC_037653.1 | 5732752 | SNV | 1 | G | A | Homozygous   |
| NC_037653.1 | 5732762 | SNV | 1 | T | C | Homozygous   |
| NC_037653.1 | 5732908 | SNV | 1 | T | C | Heterozygous |
| NC_037653.1 | 5732912 | SNV | 1 | G | A | Heterozygous |
| NC_037653.1 | 5732913 | SNV | 1 | T | C | Heterozygous |
| NC_037653.1 | 5732918 | SNV | 1 | C | T | Heterozygous |
| NC_037653.1 | 5732920 | SNV | 1 | C | T | Heterozygous |
| NC_037653.1 | 5732937 | SNV | 1 | C | G | Heterozygous |
| NC_037653.1 | 5732947 | SNV | 1 | T | C | Heterozygous |
| NC_037653.1 | 5732955 | SNV | 1 | C | G | Homozygous   |
| NC_037653.1 | 5733039 | SNV | 1 | C | T | Heterozygous |
| NC_037653.1 | 5733044 | SNV | 1 | T | C | Homozygous   |
| NC_037653.1 | 5733058 | SNV | 1 | T | C | Homozygous   |
| NC_037653.1 | 5733076 | SNV | 1 | G | C | Homozygous   |
| NC_037653.1 | 5733079 | SNV | 1 | T | C | Homozygous   |
| NC_037653.1 | 5733096 | SNV | 1 | C | T | Homozygous   |
| NC_037653.1 | 5733105 | SNV | 1 | G | A | Heterozygous |
| NC_037653.1 | 5733160 | SNV | 1 | T | C | Heterozygous |
| NC_037653.1 | 5733171 | SNV | 1 | T | C | Heterozygous |
| NC_037653.1 | 5733200 | SNV | 1 | T | C | Homozygous   |
| NC_037653.1 | 5733323 | SNV | 1 | T | C | Heterozygous |

|             |         |     |   |   |   |              |
|-------------|---------|-----|---|---|---|--------------|
| NC_037653.1 | 5733329 | SNV | 1 | A | G | Heterozygous |
| NC_037653.1 | 5733405 | SNV | 1 | T | C | Heterozygous |
| NC_037653.1 | 5733490 | SNV | 1 | C | T | Heterozygous |
| NC_037653.1 | 5733522 | SNV | 1 | T | C | Heterozygous |
| NC_037653.1 | 5733529 | SNV | 1 | T | C | Homozygous   |
| NC_037653.1 | 5733531 | SNV | 1 | C | T | Heterozygous |
| NC_037653.1 | 5733618 | SNV | 1 | C | T | Heterozygous |
| NC_037653.1 | 5733662 | SNV | 1 | T | C | Heterozygous |
| NC_037653.1 | 5733678 | SNV | 1 | C | T | Heterozygous |
| NC_037653.1 | 5733686 | SNV | 1 | T | C | Homozygous   |
| NC_037653.1 | 5733754 | SNV | 1 | T | C | Homozygous   |
| NC_037653.1 | 5733767 | SNV | 1 | G | A | Heterozygous |
| NC_037653.1 | 5733769 | SNV | 1 | C | T | Heterozygous |
| NC_037653.1 | 5733783 | SNV | 1 | A | G | Heterozygous |
| NC_037653.1 | 5733786 | SNV | 1 | A | G | Homozygous   |
| NC_037653.1 | 5733818 | SNV | 1 | T | C | Homozygous   |
| NC_037653.1 | 5733836 | SNV | 1 | T | C | Homozygous   |
| NC_037653.1 | 5733873 | SNV | 1 | C | T | Heterozygous |
| NC_037653.1 | 5733889 | SNV | 1 | A | G | Homozygous   |
| NC_037653.1 | 5733895 | SNV | 1 | C | T | Heterozygous |
| NC_037653.1 | 5733901 | SNV | 1 | T | C | Homozygous   |
| NC_037653.1 | 5733905 | SNV | 1 | G | A | Homozygous   |
| NC_037653.1 | 5733923 | SNV | 1 | C | T | Heterozygous |
| NC_037653.1 | 5733959 | SNV | 1 | T | C | Homozygous   |
| NC_037653.1 | 5734013 | SNV | 1 | C | T | Heterozygous |
| NC_037653.1 | 5734031 | SNV | 1 | T | C | Heterozygous |
| NC_037653.1 | 5734036 | SNV | 1 | T | C | Heterozygous |
| NC_037653.1 | 5734097 | SNV | 1 | C | T | Heterozygous |
| NC_037653.1 | 5734103 | SNV | 1 | C | G | Heterozygous |
| NC_037653.1 | 5734229 | SNV | 1 | T | C | Homozygous   |
| NC_037653.1 | 5734359 | SNV | 1 | C | T | Heterozygous |
| NC_037653.1 | 5734381 | SNV | 1 | A | G | Heterozygous |
| NC_037653.1 | 5734440 | SNV | 1 | G | A | Homozygous   |
| NC_037653.1 | 5739472 | SNV | 1 | T | A | Heterozygous |
| NC_037653.1 | 5739478 | SNV | 1 | C | T | Homozygous   |
| NC_037653.1 | 5739488 | SNV | 1 | T | G | Homozygous   |
| NC_037653.1 | 5757922 | SNV | 1 | C | T | Homozygous   |
| NC_037653.1 | 5757976 | SNV | 1 | A | G | Homozygous   |
| NC_037653.1 | 5757981 | SNV | 1 | T | C | Homozygous   |
| NC_037653.1 | 5757995 | SNV | 1 | G | A | Homozygous   |
| NC_037653.1 | 5758016 | SNV | 1 | G | A | Homozygous   |
| NC_037653.1 | 5758027 | SNV | 1 | T | C | Homozygous   |
| NC_037653.1 | 5758029 | SNV | 1 | A | G | Homozygous   |
| NC_037653.1 | 5758043 | SNV | 1 | A | G | Homozygous   |
| NC_037653.1 | 5758077 | SNV | 1 | T | C | Homozygous   |
| NC_037653.1 | 5758273 | SNV | 1 | C | G | Homozygous   |
| NC_037653.1 | 5758276 | SNV | 1 | C | T | Homozygous   |
| NC_037653.1 | 5758352 | SNV | 1 | C | T | Heterozygous |
| NC_037653.1 | 5758741 | SNV | 1 | T | C | Homozygous   |
| NC_037653.1 | 5768460 | SNV | 1 | G | A | Homozygous   |
| NC_037653.1 | 5768467 | SNV | 1 | A | G | Homozygous   |



|             |         |     |   |   |   |              |
|-------------|---------|-----|---|---|---|--------------|
| NC_037653.1 | 5768473 | SNV | 1 | A | C | Homozygous   |
| NC_037653.1 | 5768475 | SNV | 1 | A | T | Homozygous   |
| NC_037653.1 | 5768479 | SNV | 1 | A | C | Homozygous   |
| NC_037653.1 | 5768483 | SNV | 1 | A | C | Homozygous   |
| NC_037653.1 | 5768488 | SNV | 1 | A | G | Homozygous   |
| NC_037653.1 | 5768490 | SNV | 1 | G | T | Homozygous   |
| NC_037653.1 | 5768511 | SNV | 1 | G | A | Heterozygous |
| NC_037653.1 | 5768518 | SNV | 1 | T | A | Homozygous   |
| NC_037653.1 | 5768654 | SNV | 1 | G | T | Homozygous   |
| NC_037653.1 | 5768658 | SNV | 1 | G | A | Homozygous   |
| NC_037653.1 | 5768662 | SNV | 1 | G | T | Homozygous   |
| NC_037653.1 | 5768670 | SNV | 1 | G | T | Homozygous   |
| NC_037653.1 | 5768678 | SNV | 1 | G | T | Homozygous   |
| NC_037653.1 | 5768682 | SNV | 1 | G | T | Homozygous   |
| NC_037653.1 | 5768686 | SNV | 1 | G | T | Homozygous   |
| NC_037653.1 | 5768696 | SNV | 1 | T | G | Homozygous   |
| NC_037653.1 | 5768698 | SNV | 1 | G | T | Homozygous   |
| NC_037653.1 | 5768724 | SNV | 1 | G | T | Homozygous   |
| NC_037653.1 | 5768762 | SNV | 1 | T | G | Heterozygous |
| NC_037653.1 | 5768764 | SNV | 1 | A | G | Heterozygous |
| NC_037653.1 | 5768778 | SNV | 1 | T | A | Homozygous   |
| NC_037653.1 | 5768782 | SNV | 1 | T | G | Homozygous   |
| NC_037653.1 | 5768786 | SNV | 1 | T | G | Homozygous   |
| NC_037653.1 | 5768790 | SNV | 1 | T | G | Homozygous   |
| NC_037653.1 | 5768818 | SNV | 1 | T | G | Heterozygous |
| NC_037653.1 | 5768885 | SNV | 1 | A | C | Heterozygous |
| NC_037653.1 | 5768890 | SNV | 1 | G | A | Heterozygous |
| NC_037653.1 | 5768908 | SNV | 1 | G | T | Heterozygous |
| NC_037653.1 | 5769062 | SNV | 1 | T | A | Homozygous   |
| NC_037653.1 | 5769141 | SNV | 1 | A | G | Heterozygous |
| NC_037653.1 | 5769148 | SNV | 1 | A | G | Homozygous   |
| NC_037653.1 | 5769152 | SNV | 1 | A | G | Heterozygous |
| NC_037653.1 | 5769178 | SNV | 1 | A | C | Heterozygous |
| NC_037653.1 | 5769180 | SNV | 1 | A | G | Heterozygous |
| NC_037653.1 | 5769183 | SNV | 1 | G | T | Heterozygous |
| NC_037653.1 | 5779955 | SNV | 1 | A | G | Homozygous   |
| NC_037653.1 | 5779958 | SNV | 1 | G | A | Homozygous   |
| NC_037653.1 | 5779967 | SNV | 1 | A | G | Homozygous   |
| NC_037653.1 | 5779989 | SNV | 1 | A | G | Homozygous   |
| NC_037653.1 | 5780016 | SNV | 1 | A | G | Heterozygous |
| NC_037653.1 | 5780031 | SNV | 1 | A | G | Heterozygous |
| NC_037653.1 | 5780043 | SNV | 1 | A | G | Heterozygous |
| NC_037653.1 | 5780070 | SNV | 1 | A | G | Heterozygous |
| NC_037653.1 | 5780082 | SNV | 1 | A | G | Heterozygous |
| NC_037653.1 | 5780085 | SNV | 1 | A | G | Heterozygous |
| NC_037653.1 | 5788672 | SNV | 1 | T | C | Heterozygous |
| NC_037653.1 | 5788697 | SNV | 1 | A | C | Heterozygous |
| NC_037653.1 | 5788707 | SNV | 1 | T | C | Heterozygous |
| NC_037653.1 | 5791214 | SNV | 1 | T | G | Heterozygous |
| NC_037653.1 | 5791222 | SNV | 1 | T | G | Homozygous   |
| NC_037653.1 | 5791228 | SNV | 1 | T | G | Homozygous   |

|             |         |     |   |   |   |              |
|-------------|---------|-----|---|---|---|--------------|
| NC_037653.1 | 5791239 | SNV | 1 | C | T | Heterozygous |
| NC_037653.1 | 5796888 | SNV | 1 | G | A | Homozygous   |
| NC_037653.1 | 5796891 | SNV | 1 | G | A | Homozygous   |
| NC_037653.1 | 5796894 | SNV | 1 | G | A | Homozygous   |
| NC_037653.1 | 5796898 | SNV | 1 | C | G | Homozygous   |
| NC_037653.1 | 5796902 | SNV | 1 | A | G | Homozygous   |
| NC_037653.1 | 5796905 | SNV | 1 | G | A | Homozygous   |
| NC_037653.1 | 5796913 | SNV | 1 | A | T | Homozygous   |
| NC_037653.1 | 5797133 | SNV | 1 | G | A | Homozygous   |
| NC_037653.1 | 5797137 | SNV | 1 | A | T | Homozygous   |
| NC_037653.1 | 5797144 | SNV | 1 | A | G | Homozygous   |
| NC_037653.1 | 5797146 | SNV | 1 | A | G | Homozygous   |
| NC_037653.1 | 5797189 | SNV | 1 | G | A | Homozygous   |
| NC_037653.1 | 5797195 | SNV | 1 | A | G | Homozygous   |
| NC_037653.1 | 5797207 | SNV | 1 | G | A | Homozygous   |
| NC_037653.1 | 5797210 | SNV | 1 | A | G | Homozygous   |
| NC_037653.1 | 5797215 | SNV | 1 | A | G | Homozygous   |
| NC_037653.1 | 5797222 | SNV | 1 | G | T | Homozygous   |
| NC_037653.1 | 5797224 | SNV | 1 | G | A | Homozygous   |
| NC_037653.1 | 5797235 | SNV | 1 | G | A | Homozygous   |
| NC_037653.1 | 5797237 | SNV | 1 | G | A | Homozygous   |
| NC_037653.1 | 5797242 | SNV | 1 | G | A | Heterozygous |
| NC_037653.1 | 5797253 | SNV | 1 | A | G | Homozygous   |
| NC_037653.1 | 5797261 | SNV | 1 | G | C | Homozygous   |
| NC_037653.1 | 5797393 | SNV | 1 | C | A | Homozygous   |
| NC_037653.1 | 5797397 | SNV | 1 | A | G | Homozygous   |
| NC_037653.1 | 5797400 | SNV | 1 | G | A | Homozygous   |
| NC_037653.1 | 5797430 | SNV | 1 | G | A | Heterozygous |
| NC_037653.1 | 5797432 | SNV | 1 | A | G | Heterozygous |
| NC_037653.1 | 5797464 | SNV | 1 | G | A | Heterozygous |
| NC_037653.1 | 5797497 | SNV | 1 | A | G | Heterozygous |
| NC_037653.1 | 5797499 | SNV | 1 | C | A | Homozygous   |
| NC_037653.1 | 5797674 | SNV | 1 | G | A | Heterozygous |
| NC_037653.1 | 5797677 | SNV | 1 | A | G | Heterozygous |
| NC_037653.1 | 5797687 | SNV | 1 | G | A | Heterozygous |
| NC_037653.1 | 5797691 | SNV | 1 | A | G | Heterozygous |
| NC_037653.1 | 5798034 | SNV | 1 | G | A | Heterozygous |
| NC_037653.1 | 5798039 | SNV | 1 | G | A | Heterozygous |
| NC_037653.1 | 5798050 | SNV | 1 | A | G | Heterozygous |
| NC_037653.1 | 5798055 | SNV | 1 | G | A | Heterozygous |
| NC_037653.1 | 5798060 | SNV | 1 | G | A | Heterozygous |
| NC_037653.1 | 5798062 | SNV | 1 | G | A | Homozygous   |
| NC_037653.1 | 5798110 | SNV | 1 | A | G | Heterozygous |
| NC_037653.1 | 5798125 | SNV | 1 | G | C | Heterozygous |
| NC_037653.1 | 5809994 | SNV | 1 | C | A | Homozygous   |
| NC_037653.1 | 5817517 | SNV | 1 | G | A | Homozygous   |
| NC_037653.1 | 5817558 | SNV | 1 | A | G | Homozygous   |
| NC_037653.1 | 5817560 | SNV | 1 | C | T | Homozygous   |
| NC_037653.1 | 5817568 | SNV | 1 | C | T | Homozygous   |
| NC_037653.1 | 5852599 | SNV | 1 | A | G | Homozygous   |
| NC_037653.1 | 5852672 | SNV | 1 | G | A | Heterozygous |

|             |         |     |   |   |   |              |
|-------------|---------|-----|---|---|---|--------------|
| NC_037653.1 | 5857674 | SNV | 1 | A | T | Homozygous   |
| NC_037653.1 | 5857687 | SNV | 1 | C | T | Homozygous   |
| NC_037653.1 | 5857751 | SNV | 1 | C | T | Heterozygous |
| NC_037653.1 | 5857850 | SNV | 1 | C | T | Homozygous   |
| NC_037653.1 | 5866130 | SNV | 1 | C | T | Homozygous   |
| NC_037653.1 | 5868908 | SNV | 1 | C | T | Homozygous   |
| NC_037653.1 | 5868926 | SNV | 1 | G | A | Homozygous   |
| NC_037653.1 | 5868969 | SNV | 1 | C | T | Homozygous   |
| NC_037653.1 | 5869036 | SNV | 1 | C | T | Heterozygous |
| NC_037653.1 | 5871431 | SNV | 1 | G | A | Homozygous   |
| NC_037653.1 | 5871488 | SNV | 1 | G | A | Heterozygous |
| NC_037653.1 | 5872259 | SNV | 1 | T | A | Homozygous   |
| NC_037653.1 | 5873142 | SNV | 1 | T | C | Homozygous   |
| NC_037653.1 | 5873224 | SNV | 1 | A | C | Heterozygous |
| NC_037653.1 | 5873229 | SNV | 1 | T | A | Heterozygous |
| NC_037653.1 | 5873233 | SNV | 1 | A | G | Heterozygous |
| NC_037653.1 | 5873234 | SNV | 1 | G | T | Heterozygous |
| NC_037653.1 | 5873240 | SNV | 1 | A | G | Heterozygous |
| NC_037653.1 | 5875169 | SNV | 1 | T | C | Heterozygous |
| NC_037653.1 | 5875214 | SNV | 1 | A | G | Heterozygous |
| NC_037653.1 | 5875712 | SNV | 1 | C | A | Homozygous   |
| NC_037653.1 | 5876297 | SNV | 1 | C | G | Heterozygous |
| NC_037653.1 | 5879690 | SNV | 1 | G | T | Homozygous   |
| NC_037653.1 | 5880896 | SNV | 1 | G | A | Homozygous   |
| NC_037653.1 | 5880905 | SNV | 1 | A | G | Homozygous   |
| NC_037653.1 | 5885713 | SNV | 1 | C | T | Heterozygous |
| NC_037653.1 | 5887848 | SNV | 1 | T | C | Heterozygous |
| NC_037653.1 | 5887881 | SNV | 1 | G | A | Heterozygous |
| NC_037653.1 | 5895785 | SNV | 1 | A | G | Homozygous   |
| NC_037653.1 | 5896555 | SNV | 1 | G | T | Homozygous   |
| NC_037653.1 | 5896897 | SNV | 1 | A | G | Homozygous   |
| NC_037653.1 | 5899490 | SNV | 1 | A | G | Homozygous   |
| NC_037653.1 | 5899701 | SNV | 1 | G | A | Heterozygous |
| NC_037653.1 | 5899865 | SNV | 1 | T | C | Heterozygous |
| NC_037653.1 | 5900414 | SNV | 1 | G | A | Heterozygous |
| NC_037653.1 | 5903787 | SNV | 1 | A | G | Heterozygous |
| NC_037653.1 | 5903789 | SNV | 1 | G | A | Homozygous   |
| NC_037653.1 | 5904815 | SNV | 1 | C | T | Heterozygous |
| NC_037653.1 | 5904936 | SNV | 1 | G | A | Homozygous   |
| NC_037653.1 | 5904977 | SNV | 1 | C | G | Homozygous   |
| NC_037653.1 | 5905116 | SNV | 1 | A | G | Heterozygous |
| NC_037653.1 | 5927786 | SNV | 1 | G | C | Heterozygous |
| NC_037653.1 | 5928548 | SNV | 1 | C | T | Homozygous   |
| NC_037653.1 | 5929242 | SNV | 1 | G | A | Heterozygous |
| NC_037653.1 | 5929244 | SNV | 1 | G | A | Heterozygous |
| NC_037653.1 | 5929355 | SNV | 1 | T | C | Heterozygous |
| NC_037653.1 | 5929358 | SNV | 1 | C | T | Homozygous   |
| NC_037653.1 | 5929488 | SNV | 1 | T | C | Heterozygous |
| NC_037653.1 | 5929718 | SNV | 1 | A | G | Heterozygous |
| NC_037653.1 | 5929930 | SNV | 1 | T | C | Homozygous   |
| NC_037653.1 | 5932835 | SNV | 1 | C | T | Homozygous   |

|             |         |     |   |   |   |              |
|-------------|---------|-----|---|---|---|--------------|
| NC_037653.1 | 5935375 | SNV | 1 | C | G | Homozygous   |
| NC_037653.1 | 5935396 | SNV | 1 | A | G | Homozygous   |
| NC_037653.1 | 5936063 | SNV | 1 | C | T | Homozygous   |
| NC_037653.1 | 5938675 | SNV | 1 | A | G | Homozygous   |
| NC_037653.1 | 5938681 | SNV | 1 | T | C | Homozygous   |
| NC_037653.1 | 5938685 | SNV | 1 | A | G | Homozygous   |
| NC_037653.1 | 5938690 | SNV | 1 | A | G | Homozygous   |
| NC_037653.1 | 5939208 | SNV | 1 | C | G | Homozygous   |
| NC_037653.1 | 5939250 | SNV | 1 | C | A | Homozygous   |
| NC_037653.1 | 5939259 | SNV | 1 | C | A | Heterozygous |
| NC_037653.1 | 5939403 | SNV | 1 | G | C | Heterozygous |
| NC_037653.1 | 5939465 | SNV | 1 | C | T | Heterozygous |
| NC_037653.1 | 5939468 | SNV | 1 | C | T | Heterozygous |
| NC_037653.1 | 5939554 | SNV | 1 | A | G | Heterozygous |
| NC_037653.1 | 5940072 | SNV | 1 | A | G | Homozygous   |
| NC_037653.1 | 5940539 | SNV | 1 | A | G | Homozygous   |
| NC_037653.1 | 5940544 | SNV | 1 | G | A | Homozygous   |
| NC_037653.1 | 5940683 | SNV | 1 | T | C | Homozygous   |
| NC_037653.1 | 5940787 | SNV | 1 | T | G | Heterozygous |
| NC_037653.1 | 5940893 | SNV | 1 | A | G | Homozygous   |
| NC_037653.1 | 5940900 | SNV | 1 | T | C | Homozygous   |
| NC_037653.1 | 5941002 | SNV | 1 | C | T | Heterozygous |
| NC_037653.1 | 5941067 | SNV | 1 | G | C | Homozygous   |
| NC_037653.1 | 5941106 | SNV | 1 | A | G | Homozygous   |
| NC_037653.1 | 5941180 | SNV | 1 | C | T | Heterozygous |
| NC_037653.1 | 5941404 | SNV | 1 | G | A | Heterozygous |
| NC_037653.1 | 5941533 | SNV | 1 | A | G | Homozygous   |
| NC_037653.1 | 5941562 | SNV | 1 | A | G | Heterozygous |
| NC_037653.1 | 5941583 | SNV | 1 | A | G | Homozygous   |
| NC_037653.1 | 5941608 | SNV | 1 | C | T | Heterozygous |
| NC_037653.1 | 5941810 | SNV | 1 | T | A | Heterozygous |
| NC_037653.1 | 5941868 | SNV | 1 | T | C | Heterozygous |
| NC_037653.1 | 5941876 | SNV | 1 | A | G | Homozygous   |
| NC_037653.1 | 5941946 | SNV | 1 | A | G | Homozygous   |
| NC_037653.1 | 5941963 | SNV | 1 | T | C | Homozygous   |
| NC_037653.1 | 5942118 | SNV | 1 | T | C | Heterozygous |
| NC_037653.1 | 5942255 | SNV | 1 | T | C | Heterozygous |
| NC_037653.1 | 5942258 | SNV | 1 | C | T | Homozygous   |
| NC_037653.1 | 5942264 | SNV | 1 | C | T | Heterozygous |
| NC_037653.1 | 5942359 | SNV | 1 | G | A | Homozygous   |
| NC_037653.1 | 5942361 | SNV | 1 | A | G | Homozygous   |
| NC_037653.1 | 5942365 | SNV | 1 | T | C | Homozygous   |
| NC_037653.1 | 5942408 | SNV | 1 | G | A | Homozygous   |
| NC_037653.1 | 5942643 | SNV | 1 | T | C | Homozygous   |
| NC_037653.1 | 5942954 | SNV | 1 | A | G | Heterozygous |
| NC_037653.1 | 5942961 | SNV | 1 | C | G | Heterozygous |
| NC_037653.1 | 5943015 | SNV | 1 | G | A | Heterozygous |
| NC_037653.1 | 5943088 | SNV | 1 | G | A | Heterozygous |
| NC_037653.1 | 5943170 | SNV | 1 | A | G | Homozygous   |
| NC_037653.1 | 5943491 | SNV | 1 | C | T | Heterozygous |
| NC_037653.1 | 5943651 | SNV | 1 | A | G | Homozygous   |

|             |         |     |   |   |   |              |
|-------------|---------|-----|---|---|---|--------------|
| NC_037653.1 | 5943874 | SNV | 1 | G | A | Homozygous   |
| NC_037653.1 | 5945783 | SNV | 1 | A | C | Homozygous   |
| NC_037653.1 | 5945848 | SNV | 1 | A | G | Heterozygous |
| NC_037653.1 | 5948125 | SNV | 1 | A | G | Heterozygous |
| NC_037653.1 | 5948785 | SNV | 1 | A | C | Homozygous   |
| NC_037653.1 | 5962191 | SNV | 1 | G | A | Heterozygous |
| NC_037653.1 | 5962452 | SNV | 1 | T | A | Heterozygous |
| NC_037653.1 | 6011450 | SNV | 1 | C | T | Heterozygous |
| NC_037653.1 | 6011576 | SNV | 1 | A | G | Homozygous   |
| NC_037653.1 | 6011797 | SNV | 1 | A | G | Homozygous   |
| NC_037653.1 | 6011864 | SNV | 1 | G | A | Heterozygous |
| NC_037653.1 | 6012481 | SNV | 1 | G | C | Homozygous   |
| NC_037653.1 | 6017426 | SNV | 1 | T | A | Homozygous   |
| NC_037653.1 | 6019950 | SNV | 1 | A | G | Homozygous   |
| NC_037653.1 | 6025504 | SNV | 1 | G | T | Homozygous   |
| NC_037653.1 | 6025582 | SNV | 1 | A | G | Homozygous   |
| NC_037653.1 | 6025680 | SNV | 1 | A | C | Homozygous   |
| NC_037653.1 | 6025682 | SNV | 1 | T | A | Heterozygous |
| NC_037653.1 | 6025684 | SNV | 1 | C | G | Homozygous   |
| NC_037653.1 | 6035857 | SNV | 1 | C | T | Homozygous   |
| NC_037653.1 | 6035873 | SNV | 1 | C | A | Homozygous   |
| NC_037653.1 | 6036445 | SNV | 1 | G | C | Homozygous   |
| NC_037653.1 | 6036550 | SNV | 1 | T | C | Homozygous   |
| NC_037653.1 | 6036556 | SNV | 1 | C | T | Homozygous   |
| NC_037653.1 | 6036579 | SNV | 1 | A | G | Homozygous   |
| NC_037653.1 | 6036591 | SNV | 1 | C | T | Homozygous   |
| NC_037653.1 | 6036600 | SNV | 1 | T | C | Homozygous   |
| NC_037653.1 | 6036627 | SNV | 1 | T | C | Homozygous   |
| NC_037653.1 | 6036644 | SNV | 1 | G | C | Homozygous   |
| NC_037653.1 | 6039468 | SNV | 1 | C | T | Heterozygous |
| NC_037653.1 | 6039480 | SNV | 1 | C | T | Heterozygous |
| NC_037653.1 | 6040015 | SNV | 1 | A | T | Heterozygous |
| NC_037653.1 | 6040030 | SNV | 1 | C | G | Heterozygous |
| NC_037653.1 | 6040032 | SNV | 1 | A | G | Heterozygous |
| NC_037653.1 | 6040038 | SNV | 1 | A | G | Heterozygous |
| NC_037653.1 | 6040049 | SNV | 1 | G | A | Heterozygous |
| NC_037653.1 | 6040058 | SNV | 1 | A | C | Homozygous   |
| NC_037653.1 | 6043749 | SNV | 1 | T | C | Homozygous   |
| NC_037653.1 | 6043753 | SNV | 1 | C | G | Homozygous   |
| NC_037653.1 | 6043770 | SNV | 1 | A | G | Heterozygous |
| NC_037653.1 | 6043772 | SNV | 1 | G | A | Homozygous   |
| NC_037653.1 | 6043817 | SNV | 1 | T | C | Homozygous   |
| NC_037653.1 | 6043840 | SNV | 1 | G | A | Homozygous   |
| NC_037653.1 | 6043846 | SNV | 1 | A | G | Homozygous   |
| NC_037653.1 | 6056951 | SNV | 1 | C | A | Homozygous   |
| NC_037653.1 | 6056960 | SNV | 1 | C | A | Homozygous   |
| NC_037653.1 | 6056967 | SNV | 1 | G | A | Heterozygous |
| NC_037653.1 | 6057015 | SNV | 1 | A | G | Homozygous   |
| NC_037653.1 | 6057022 | SNV | 1 | A | C | Heterozygous |
| NC_037653.1 | 6057030 | SNV | 1 | A | G | Heterozygous |
| NC_037653.1 | 6057044 | SNV | 1 | G | T | Homozygous   |

|             |         |     |   |   |   |              |
|-------------|---------|-----|---|---|---|--------------|
| NC_037653.1 | 6057085 | SNV | 1 | A | T | Heterozygous |
| NC_037653.1 | 6057095 | SNV | 1 | C | A | Homozygous   |
| NC_037653.1 | 6057111 | SNV | 1 | G | T | Heterozygous |
| NC_037653.1 | 6057113 | SNV | 1 | T | A | Heterozygous |
| NC_037653.1 | 6057128 | SNV | 1 | C | A | Homozygous   |
| NC_037653.1 | 6057132 | SNV | 1 | T | G | Homozygous   |
| NC_037653.1 | 6057152 | SNV | 1 | A | G | Heterozygous |
| NC_037653.1 | 6057166 | SNV | 1 | T | A | Heterozygous |
| NC_037653.1 | 6057192 | SNV | 1 | T | C | Heterozygous |
| NC_037653.1 | 6057195 | SNV | 1 | G | A | Heterozygous |
| NC_037653.1 | 6057195 | SNV | 1 | G | C | Heterozygous |
| NC_037653.1 | 6057201 | SNV | 1 | A | G | Homozygous   |
| NC_037653.1 | 6057226 | SNV | 1 | T | C | Homozygous   |
| NC_037653.1 | 6057250 | SNV | 1 | G | A | Homozygous   |
| NC_037653.1 | 6060119 | SNV | 1 | G | T | Homozygous   |
| NC_037653.1 | 6070835 | SNV | 1 | T | C | Homozygous   |
| NC_037653.1 | 6077225 | SNV | 1 | A | C | Homozygous   |
| NC_037653.1 | 6077237 | SNV | 1 | C | T | Heterozygous |
| NC_037653.1 | 6077284 | SNV | 1 | A | G | Homozygous   |
| NC_037653.1 | 6077292 | SNV | 1 | C | T | Heterozygous |
| NC_037653.1 | 6077302 | SNV | 1 | T | C | Homozygous   |
| NC_037653.1 | 6077304 | SNV | 1 | C | G | Homozygous   |
| NC_037653.1 | 6077369 | SNV | 1 | C | T | Homozygous   |
| NC_037653.1 | 6077377 | SNV | 1 | G | A | Homozygous   |
| NC_037653.1 | 6092754 | SNV | 1 | C | T | Homozygous   |
| NC_037653.1 | 6092839 | SNV | 1 | T | C | Homozygous   |
| NC_037653.1 | 6092998 | SNV | 1 | T | C | Homozygous   |
| NC_037653.1 | 6093004 | SNV | 1 | G | C | Heterozygous |
| NC_037653.1 | 6097858 | SNV | 1 | C | T | Heterozygous |
| NC_037653.1 | 6097860 | SNV | 1 | C | T | Heterozygous |
| NC_037653.1 | 6105400 | SNV | 1 | T | C | Heterozygous |
| NC_037653.1 | 6105404 | SNV | 1 | T | C | Heterozygous |
| NC_037653.1 | 6105410 | SNV | 1 | C | T | Heterozygous |
| NC_037653.1 | 6105418 | SNV | 1 | C | T | Homozygous   |
| NC_037653.1 | 6105451 | SNV | 1 | T | C | Heterozygous |
| NC_037653.1 | 6105508 | SNV | 1 | T | G | Homozygous   |
| NC_037653.1 | 6115846 | SNV | 1 | C | T | Heterozygous |
| NC_037653.1 | 6122776 | SNV | 1 | A | T | Heterozygous |
| NC_037653.1 | 6122814 | SNV | 1 | A | G | Homozygous   |
| NC_037653.1 | 6122827 | SNV | 1 | C | T | Heterozygous |
| NC_037653.1 | 6122887 | SNV | 1 | T | C | Homozygous   |
| NC_037653.1 | 6122933 | SNV | 1 | C | T | Heterozygous |
| NC_037653.1 | 6128640 | SNV | 1 | C | T | Homozygous   |
| NC_037653.1 | 6130517 | SNV | 1 | G | C | Homozygous   |
| NC_037653.1 | 6130579 | SNV | 1 | T | C | Heterozygous |
| NC_037653.1 | 6137481 | SNV | 1 | A | C | Heterozygous |
| NC_037653.1 | 6137492 | SNV | 1 | G | A | Heterozygous |
| NC_037653.1 | 6137532 | SNV | 1 | A | G | Heterozygous |
| NC_037653.1 | 6137582 | SNV | 1 | A | T | Homozygous   |
| NC_037653.1 | 6137589 | SNV | 1 | A | G | Homozygous   |
| NC_037653.1 | 6137600 | SNV | 1 | G | T | Homozygous   |

|             |         |     |   |   |   |              |
|-------------|---------|-----|---|---|---|--------------|
| NC_037653.1 | 6137639 | SNV | 1 | A | G | Homozygous   |
| NC_037653.1 | 6137643 | SNV | 1 | G | A | Homozygous   |
| NC_037653.1 | 6137647 | SNV | 1 | A | G | Homozygous   |
| NC_037653.1 | 6137667 | SNV | 1 | G | A | Heterozygous |
| NC_037653.1 | 6137679 | SNV | 1 | G | A | Homozygous   |
| NC_037653.1 | 6137691 | SNV | 1 | G | A | Heterozygous |
| NC_037653.1 | 6137697 | SNV | 1 | A | G | Heterozygous |
| NC_037653.1 | 6137703 | SNV | 1 | T | A | Homozygous   |
| NC_037653.1 | 6137717 | SNV | 1 | G | A | Heterozygous |
| NC_037653.1 | 6137732 | SNV | 1 | G | A | Homozygous   |
| NC_037653.1 | 6137735 | SNV | 1 | A | G | Homozygous   |
| NC_037653.1 | 6137765 | SNV | 1 | A | C | Homozygous   |
| NC_037653.1 | 6137798 | SNV | 1 | G | A | Heterozygous |
| NC_037653.1 | 6142881 | SNV | 1 | T | C | Homozygous   |
| NC_037653.1 | 6142883 | SNV | 1 | C | A | Homozygous   |
| NC_037653.1 | 6142885 | SNV | 1 | C | T | Homozygous   |
| NC_037653.1 | 6142887 | SNV | 1 | T | C | Homozygous   |
| NC_037653.1 | 6144724 | SNV | 1 | C | T | Homozygous   |
| NC_037653.1 | 6144800 | SNV | 1 | T | C | Homozygous   |
| NC_037653.1 | 6144806 | SNV | 1 | T | C | Homozygous   |
| NC_037653.1 | 6144818 | SNV | 1 | C | T | Heterozygous |
| NC_037653.1 | 6144820 | SNV | 1 | A | G | Heterozygous |
| NC_037653.1 | 6144853 | SNV | 1 | C | T | Homozygous   |
| NC_037653.1 | 6144876 | SNV | 1 | G | T | Homozygous   |
| NC_037653.1 | 6144959 | SNV | 1 | C | A | Heterozygous |
| NC_037653.1 | 6144980 | SNV | 1 | C | T | Heterozygous |
| NC_037653.1 | 6145006 | SNV | 1 | T | C | Homozygous   |
| NC_037653.1 | 6145053 | SNV | 1 | G | A | Heterozygous |
| NC_037653.1 | 6145058 | SNV | 1 | C | T | Heterozygous |
| NC_037653.1 | 6145069 | SNV | 1 | C | T | Heterozygous |
| NC_037653.1 | 6145161 | SNV | 1 | C | T | Homozygous   |
| NC_037653.1 | 6145173 | SNV | 1 | C | T | Heterozygous |
| NC_037653.1 | 6145192 | SNV | 1 | T | C | Homozygous   |
| NC_037653.1 | 6145292 | SNV | 1 | C | T | Heterozygous |
| NC_037653.1 | 6145312 | SNV | 1 | T | C | Heterozygous |
| NC_037653.1 | 6145364 | SNV | 1 | C | T | Heterozygous |
| NC_037653.1 | 6145390 | SNV | 1 | A | T | Homozygous   |
| NC_037653.1 | 6152560 | SNV | 1 | A | G | Heterozygous |
| NC_037653.1 | 6152595 | SNV | 1 | A | G | Heterozygous |
| NC_037653.1 | 6154686 | SNV | 1 | A | T | Heterozygous |
| NC_037653.1 | 6154695 | SNV | 1 | C | T | Homozygous   |
| NC_037653.1 | 6154700 | SNV | 1 | G | A | Heterozygous |
| NC_037653.1 | 6155371 | SNV | 1 | A | G | Heterozygous |
| NC_037653.1 | 6155377 | SNV | 1 | G | A | Heterozygous |
| NC_037653.1 | 6155416 | SNV | 1 | G | A | Heterozygous |
| NC_037653.1 | 6155419 | SNV | 1 | A | G | Homozygous   |
| NC_037653.1 | 6155440 | SNV | 1 | G | T | Homozygous   |
| NC_037653.1 | 6155482 | SNV | 1 | A | G | Heterozygous |
| NC_037653.1 | 6157044 | SNV | 1 | A | C | Heterozygous |
| NC_037653.1 | 6157049 | SNV | 1 | C | G | Heterozygous |
| NC_037653.1 | 6157068 | SNV | 1 | A | G | Homozygous   |

|             |         |     |   |   |   |              |
|-------------|---------|-----|---|---|---|--------------|
| NC_037653.1 | 6162012 | SNV | 1 | T | A | Homozygous   |
| NC_037653.1 | 6162516 | SNV | 1 | C | T | Homozygous   |
| NC_037653.1 | 6162518 | SNV | 1 | C | T | Homozygous   |
| NC_037653.1 | 6162531 | SNV | 1 | C | T | Homozygous   |
| NC_037653.1 | 6162541 | SNV | 1 | C | G | Homozygous   |
| NC_037653.1 | 6164263 | SNV | 1 | A | T | Homozygous   |
| NC_037653.1 | 6164279 | SNV | 1 | A | G | Heterozygous |
| NC_037653.1 | 6164281 | SNV | 1 | A | T | Heterozygous |
| NC_037653.1 | 6164289 | SNV | 1 | A | T | Heterozygous |
| NC_037653.1 | 6164291 | SNV | 1 | A | C | Heterozygous |
| NC_037653.1 | 6164297 | SNV | 1 | A | C | Heterozygous |
| NC_037653.1 | 6164299 | SNV | 1 | A | G | Heterozygous |
| NC_037653.1 | 6164326 | SNV | 1 | A | G | Homozygous   |
| NC_037653.1 | 6177440 | SNV | 1 | A | G | Homozygous   |
| NC_037653.1 | 6177446 | SNV | 1 | C | A | Homozygous   |
| NC_037653.1 | 6188057 | SNV | 1 | G | A | Heterozygous |
| NC_037653.1 | 6188113 | SNV | 1 | G | A | Homozygous   |
| NC_037653.1 | 6188125 | SNV | 1 | A | G | Heterozygous |
| NC_037653.1 | 6188134 | SNV | 1 | G | A | Heterozygous |
| NC_037653.1 | 6188140 | SNV | 1 | G | A | Heterozygous |
| NC_037653.1 | 6188144 | SNV | 1 | G | A | Heterozygous |
| NC_037653.1 | 6188146 | SNV | 1 | G | A | Heterozygous |
| NC_037653.1 | 6188149 | SNV | 1 | G | A | Heterozygous |
| NC_037653.1 | 6188151 | SNV | 1 | A | G | Heterozygous |
| NC_037653.1 | 6188181 | SNV | 1 | G | A | Heterozygous |
| NC_037653.1 | 6188187 | SNV | 1 | G | A | Heterozygous |
| NC_037653.1 | 6188193 | SNV | 1 | A | T | Heterozygous |
| NC_037653.1 | 6188196 | SNV | 1 | G | T | Heterozygous |
| NC_037653.1 | 6188205 | SNV | 1 | G | T | Heterozygous |
| NC_037653.1 | 6188210 | SNV | 1 | A | G | Heterozygous |
| NC_037653.1 | 6188213 | SNV | 1 | A | G | Heterozygous |
| NC_037653.1 | 6188252 | SNV | 1 | G | A | Heterozygous |
| NC_037653.1 | 6188260 | SNV | 1 | G | A | Heterozygous |
| NC_037653.1 | 6188263 | SNV | 1 | A | G | Heterozygous |
| NC_037653.1 | 6188269 | SNV | 1 | G | A | Heterozygous |
| NC_037653.1 | 6188317 | SNV | 1 | G | A | Heterozygous |
| NC_037653.1 | 6188345 | SNV | 1 | G | A | Heterozygous |
| NC_037653.1 | 6188348 | SNV | 1 | G | T | Heterozygous |
| NC_037653.1 | 6188356 | SNV | 1 | G | A | Heterozygous |
| NC_037653.1 | 6188359 | SNV | 1 | A | G | Heterozygous |
| NC_037653.1 | 6188362 | SNV | 1 | G | A | Heterozygous |
| NC_037653.1 | 6188373 | SNV | 1 | A | C | Heterozygous |
| NC_037653.1 | 6188404 | SNV | 1 | G | A | Homozygous   |
| NC_037653.1 | 6188407 | SNV | 1 | G | A | Homozygous   |
| NC_037653.1 | 6188413 | SNV | 1 | G | A | Homozygous   |
| NC_037653.1 | 6188416 | SNV | 1 | A | G | Homozygous   |
| NC_037653.1 | 6188424 | SNV | 1 | A | C | Homozygous   |
| NC_037653.1 | 6188458 | SNV | 1 | G | A | Homozygous   |
| NC_037653.1 | 6188479 | SNV | 1 | G | A | Homozygous   |
| NC_037653.1 | 6188486 | SNV | 1 | T | G | Homozygous   |
| NC_037653.1 | 6207364 | SNV | 1 | T | C | Heterozygous |



|             |         |     |   |   |   |              |
|-------------|---------|-----|---|---|---|--------------|
| NC_037653.1 | 6208669 | SNV | 1 | C | T | Heterozygous |
| NC_037653.1 | 6208848 | SNV | 1 | C | T | Heterozygous |
| NC_037653.1 | 6208855 | SNV | 1 | T | C | Homozygous   |
| NC_037653.1 | 6208858 | SNV | 1 | T | C | Homozygous   |
| NC_037653.1 | 6208861 | SNV | 1 | C | T | Homozygous   |
| NC_037653.1 | 6212180 | SNV | 1 | G | A | Heterozygous |
| NC_037653.1 | 6212302 | SNV | 1 | T | C | Heterozygous |
| NC_037653.1 | 6212734 | SNV | 1 | T | C | Heterozygous |
| NC_037653.1 | 6212771 | SNV | 1 | A | G | Heterozygous |
| NC_037653.1 | 6213142 | SNV | 1 | A | G | Heterozygous |
| NC_037653.1 | 6219733 | SNV | 1 | T | C | Homozygous   |
| NC_037653.1 | 6220930 | SNV | 1 | C | T | Heterozygous |
| NC_037653.1 | 6220957 | SNV | 1 | C | T | Heterozygous |
| NC_037653.1 | 6220959 | SNV | 1 | C | T | Heterozygous |
| NC_037653.1 | 6258663 | SNV | 1 | C | T | Homozygous   |
| NC_037653.1 | 6258956 | SNV | 1 | C | A | Homozygous   |
| NC_037653.1 | 6259003 | SNV | 1 | C | T | Heterozygous |
| NC_037653.1 | 6259040 | SNV | 1 | C | T | Heterozygous |
| NC_037653.1 | 6259988 | SNV | 1 | C | T | Homozygous   |
| NC_037653.1 | 6260170 | SNV | 1 | C | T | Heterozygous |
| NC_037653.1 | 6260751 | SNV | 1 | T | G | Heterozygous |
| NC_037653.1 | 6260754 | SNV | 1 | T | C | Heterozygous |
| NC_037653.1 | 6260772 | SNV | 1 | C | T | Heterozygous |
| NC_037653.1 | 6260790 | SNV | 1 | T | C | Homozygous   |
| NC_037653.1 | 6260991 | SNV | 1 | G | C | Heterozygous |
| NC_037653.1 | 6260994 | SNV | 1 | C | T | Heterozygous |
| NC_037653.1 | 6261832 | SNV | 1 | G | A | Heterozygous |
| NC_037653.1 | 6262022 | SNV | 1 | A | G | Heterozygous |
| NC_037653.1 | 6263229 | SNV | 1 | G | A | Heterozygous |
| NC_037653.1 | 6263449 | SNV | 1 | G | C | Heterozygous |
| NC_037653.1 | 6263566 | SNV | 1 | C | A | Heterozygous |
| NC_037653.1 | 6263789 | SNV | 1 | G | A | Heterozygous |
| NC_037653.1 | 6263791 | SNV | 1 | G | A | Heterozygous |
| NC_037653.1 | 6264280 | SNV | 1 | A | G | Homozygous   |
| NC_037653.1 | 6264360 | SNV | 1 | A | G | Heterozygous |
| NC_037653.1 | 6266852 | SNV | 1 | G | C | Heterozygous |
| NC_037653.1 | 6266860 | SNV | 1 | T | A | Heterozygous |
| NC_037653.1 | 6266871 | SNV | 1 | A | T | Heterozygous |
| NC_037653.1 | 6266875 | SNV | 1 | T | A | Heterozygous |
| NC_037653.1 | 6267056 | SNV | 1 | G | A | Heterozygous |
| NC_037653.1 | 6267108 | SNV | 1 | A | G | Homozygous   |
| NC_037653.1 | 6269409 | SNV | 1 | G | A | Homozygous   |
| NC_037653.1 | 6274058 | SNV | 1 | A | G | Homozygous   |
| NC_037653.1 | 6277238 | SNV | 1 | A | G | Heterozygous |
| NC_037653.1 | 6278352 | SNV | 1 | C | A | Homozygous   |
| NC_037653.1 | 6285592 | SNV | 1 | G | A | Heterozygous |
| NC_037653.1 | 6285834 | SNV | 1 | A | T | Heterozygous |
| NC_037653.1 | 6285840 | SNV | 1 | G | T | Heterozygous |
| NC_037653.1 | 6285849 | SNV | 1 | T | A | Heterozygous |
| NC_037653.1 | 6289036 | SNV | 1 | T | C | Homozygous   |
| NC_037653.1 | 6295780 | SNV | 1 | A | G | Heterozygous |

|             |         |     |   |   |   |              |
|-------------|---------|-----|---|---|---|--------------|
| NC_037653.1 | 6295782 | SNV | 1 | A | T | Heterozygous |
| NC_037653.1 | 6295783 | SNV | 1 | A | C | Heterozygous |
| NC_037653.1 | 6295787 | SNV | 1 | A | C | Homozygous   |
| NC_037653.1 | 6295803 | SNV | 1 | C | T | Homozygous   |
| NC_037653.1 | 6295869 | SNV | 1 | T | C | Heterozygous |
| NC_037653.1 | 6299976 | SNV | 1 | T | A | Heterozygous |
| NC_037653.1 | 6299996 | SNV | 1 | T | G | Heterozygous |
| NC_037653.1 | 6300000 | SNV | 1 | T | A | Heterozygous |
| NC_037653.1 | 6300585 | SNV | 1 | A | G | Heterozygous |
| NC_037653.1 | 6303335 | SNV | 1 | A | G | Homozygous   |
| NC_037653.1 | 6333275 | SNV | 1 | T | C | Homozygous   |
| NC_037653.1 | 6333695 | SNV | 1 | A | G | Heterozygous |
| NC_037653.1 | 6333709 | SNV | 1 | C | A | Homozygous   |
| NC_037653.1 | 6333711 | SNV | 1 | G | A | Heterozygous |
| NC_037653.1 | 6347731 | SNV | 1 | A | G | Homozygous   |
| NC_037653.1 | 6347735 | SNV | 1 | G | A | Heterozygous |
| NC_037653.1 | 6347902 | SNV | 1 | C | T | Heterozygous |
| NC_037653.1 | 6347990 | SNV | 1 | G | C | Homozygous   |
| NC_037653.1 | 6348017 | SNV | 1 | G | A | Heterozygous |
| NC_037653.1 | 6359625 | SNV | 1 | A | G | Homozygous   |
| NC_037653.1 | 6359928 | SNV | 1 | A | G | Heterozygous |
| NC_037653.1 | 6359945 | SNV | 1 | T | A | Heterozygous |
| NC_037653.1 | 6359956 | SNV | 1 | G | A | Homozygous   |
| NC_037653.1 | 6359994 | SNV | 1 | C | G | Homozygous   |
| NC_037653.1 | 6389642 | SNV | 1 | T | A | Heterozygous |
| NC_037653.1 | 6389654 | SNV | 1 | A | T | Heterozygous |
| NC_037653.1 | 6389673 | SNV | 1 | A | G | Heterozygous |
| NC_037653.1 | 6389675 | SNV | 1 | A | T | Heterozygous |
| NC_037653.1 | 6389678 | SNV | 1 | A | C | Heterozygous |
| NC_037653.1 | 6389684 | SNV | 1 | A | C | Heterozygous |
| NC_037653.1 | 6391331 | SNV | 1 | T | C | Heterozygous |
| NC_037653.1 | 6392052 | SNV | 1 | A | T | Homozygous   |
| NC_037653.1 | 6392056 | SNV | 1 | C | T | Homozygous   |
| NC_037653.1 | 6392109 | SNV | 1 | A | G | Homozygous   |
| NC_037653.1 | 6392122 | SNV | 1 | T | C | Homozygous   |
| NC_037653.1 | 6392802 | SNV | 1 | A | G | Homozygous   |
| NC_037653.1 | 6392864 | SNV | 1 | T | C | Homozygous   |
| NC_037653.1 | 6404264 | SNV | 1 | C | T | Heterozygous |
| NC_037653.1 | 6404289 | SNV | 1 | C | T | Homozygous   |
| NC_037653.1 | 6404291 | SNV | 1 | C | T | Homozygous   |
| NC_037653.1 | 6404294 | SNV | 1 | G | T | Homozygous   |
| NC_037653.1 | 6404939 | SNV | 1 | G | C | Homozygous   |
| NC_037653.1 | 6404978 | SNV | 1 | T | C | Heterozygous |
| NC_037653.1 | 6404982 | SNV | 1 | T | C | Heterozygous |
| NC_037653.1 | 6404987 | SNV | 1 | C | T | Heterozygous |
| NC_037653.1 | 6404997 | SNV | 1 | C | T | Heterozygous |
| NC_037653.1 | 6405000 | SNV | 1 | T | G | Heterozygous |
| NC_037653.1 | 6405005 | SNV | 1 | C | T | Heterozygous |
| NC_037653.1 | 6405296 | SNV | 1 | G | C | Heterozygous |
| NC_037653.1 | 6406405 | SNV | 1 | G | A | Homozygous   |
| NC_037653.1 | 6406408 | SNV | 1 | C | T | Homozygous   |

|             |         |     |   |   |   |              |
|-------------|---------|-----|---|---|---|--------------|
| NC_037653.1 | 6406413 | SNV | 1 | A | G | Homozygous   |
| NC_037653.1 | 6406415 | SNV | 1 | G | A | Homozygous   |
| NC_037653.1 | 6406791 | SNV | 1 | T | C | Homozygous   |
| NC_037653.1 | 6406796 | SNV | 1 | C | T | Homozygous   |
| NC_037653.1 | 6406850 | SNV | 1 | T | C | Heterozygous |
| NC_037653.1 | 6406875 | SNV | 1 | T | C | Heterozygous |
| NC_037653.1 | 6406934 | SNV | 1 | A | G | Heterozygous |
| NC_037653.1 | 6407009 | SNV | 1 | A | G | Heterozygous |
| NC_037653.1 | 6407022 | SNV | 1 | G | A | Homozygous   |
| NC_037653.1 | 6407252 | SNV | 1 | A | G | Homozygous   |
| NC_037653.1 | 6407403 | SNV | 1 | C | T | Homozygous   |
| NC_037653.1 | 6416555 | SNV | 1 | T | C | Homozygous   |
| NC_037653.1 | 6416566 | SNV | 1 | A | G | Homozygous   |
| NC_037653.1 | 6417524 | SNV | 1 | G | A | Heterozygous |
| NC_037653.1 | 6417692 | SNV | 1 | T | C | Heterozygous |
| NC_037653.1 | 6417730 | SNV | 1 | G | A | Homozygous   |
| NC_037653.1 | 6418833 | SNV | 1 | T | C | Homozygous   |
| NC_037653.1 | 6418866 | SNV | 1 | A | T | Heterozygous |
| NC_037653.1 | 6418869 | SNV | 1 | G | T | Heterozygous |
| NC_037653.1 | 6418891 | SNV | 1 | A | T | Heterozygous |
| NC_037653.1 | 6418896 | SNV | 1 | A | T | Heterozygous |
| NC_037653.1 | 6420326 | SNV | 1 | C | T | Homozygous   |
| NC_037653.1 | 6420433 | SNV | 1 | A | G | Homozygous   |
| NC_037653.1 | 6420462 | SNV | 1 | T | C | Homozygous   |
| NC_037653.1 | 6420467 | SNV | 1 | C | T | Homozygous   |
| NC_037653.1 | 6420553 | SNV | 1 | T | C | Homozygous   |
| NC_037653.1 | 6420691 | SNV | 1 | C | T | Heterozygous |
| NC_037653.1 | 6422674 | SNV | 1 | A | G | Homozygous   |
| NC_037653.1 | 6422719 | SNV | 1 | G | A | Heterozygous |
| NC_037653.1 | 6422782 | SNV | 1 | G | T | Homozygous   |
| NC_037653.1 | 6422815 | SNV | 1 | G | A | Homozygous   |
| NC_037653.1 | 6423938 | SNV | 1 | C | T | Homozygous   |
| NC_037653.1 | 6425859 | SNV | 1 | C | T | Homozygous   |
| NC_037653.1 | 6425862 | SNV | 1 | C | T | Heterozygous |
| NC_037653.1 | 6428112 | SNV | 1 | A | G | Heterozygous |
| NC_037653.1 | 6433969 | SNV | 1 | T | C | Homozygous   |
| NC_037653.1 | 6433974 | SNV | 1 | A | C | Homozygous   |
| NC_037653.1 | 6434003 | SNV | 1 | T | C | Homozygous   |
| NC_037653.1 | 6448939 | SNV | 1 | A | G | Homozygous   |
| NC_037653.1 | 6450166 | SNV | 1 | T | C | Homozygous   |
| NC_037653.1 | 6450389 | SNV | 1 | T | C | Heterozygous |
| NC_037653.1 | 6450393 | SNV | 1 | C | A | Homozygous   |
| NC_037653.1 | 6450395 | SNV | 1 | T | A | Homozygous   |
| NC_037653.1 | 6456840 | SNV | 1 | C | G | Heterozygous |
| NC_037653.1 | 6456854 | SNV | 1 | A | G | Heterozygous |
| NC_037653.1 | 6456875 | SNV | 1 | G | A | Heterozygous |
| NC_037653.1 | 6459319 | SNV | 1 | G | A | Heterozygous |
| NC_037653.1 | 6460215 | SNV | 1 | G | A | Heterozygous |
| NC_037653.1 | 6460232 | SNV | 1 | T | A | Heterozygous |
| NC_037653.1 | 6460245 | SNV | 1 | G | A | Heterozygous |
| NC_037653.1 | 6460351 | SNV | 1 | G | A | Homozygous   |

|             |         |     |   |   |   |              |
|-------------|---------|-----|---|---|---|--------------|
| NC_037653.1 | 6463266 | SNV | 1 | T | C | Homozygous   |
| NC_037653.1 | 6469417 | SNV | 1 | C | T | Heterozygous |
| NC_037653.1 | 6484562 | SNV | 1 | T | C | Homozygous   |
| NC_037653.1 | 6484564 | SNV | 1 | G | A | Heterozygous |
| NC_037653.1 | 6506568 | SNV | 1 | G | A | Homozygous   |
| NC_037653.1 | 6506630 | SNV | 1 | C | T | Homozygous   |
| NC_037653.1 | 6506647 | SNV | 1 | T | C | Homozygous   |
| NC_037653.1 | 6506677 | SNV | 1 | C | G | Heterozygous |
| NC_037653.1 | 6506869 | SNV | 1 | T | C | Heterozygous |
| NC_037653.1 | 6506871 | SNV | 1 | A | G | Homozygous   |
| NC_037653.1 | 6506878 | SNV | 1 | C | G | Homozygous   |
| NC_037653.1 | 6506927 | SNV | 1 | G | A | Homozygous   |
| NC_037653.1 | 6508874 | SNV | 1 | T | C | Heterozygous |
| NC_037653.1 | 6525894 | SNV | 1 | T | A | Homozygous   |
| NC_037653.1 | 6525898 | SNV | 1 | A | G | Homozygous   |
| NC_037653.1 | 6525913 | SNV | 1 | C | A | Homozygous   |
| NC_037653.1 | 6527488 | SNV | 1 | A | C | Homozygous   |
| NC_037653.1 | 6527493 | SNV | 1 | G | A | Homozygous   |
| NC_037653.1 | 6527504 | SNV | 1 | G | A | Homozygous   |
| NC_037653.1 | 6536968 | SNV | 1 | A | T | Heterozygous |
| NC_037653.1 | 6536976 | SNV | 1 | A | G | Homozygous   |
| NC_037653.1 | 6537002 | SNV | 1 | G | A | Heterozygous |
| NC_037653.1 | 6575785 | SNV | 1 | G | A | Homozygous   |
| NC_037653.1 | 6577400 | SNV | 1 | G | A | Heterozygous |
| NC_037653.1 | 6577463 | SNV | 1 | C | T | Heterozygous |
| NC_037653.1 | 6577522 | SNV | 1 | A | G | Heterozygous |
| NC_037653.1 | 6577525 | SNV | 1 | G | A | Homozygous   |
| NC_037653.1 | 6578846 | SNV | 1 | A | G | Homozygous   |
| NC_037653.1 | 6578851 | SNV | 1 | A | T | Homozygous   |
| NC_037653.1 | 6579845 | SNV | 1 | T | A | Heterozygous |
| NC_037653.1 | 6580427 | SNV | 1 | G | A | Heterozygous |
| NC_037653.1 | 6580572 | SNV | 1 | G | A | Heterozygous |
| NC_037653.1 | 6580584 | SNV | 1 | T | A | Homozygous   |
| NC_037653.1 | 6580586 | SNV | 1 | A | T | Homozygous   |
| NC_037653.1 | 6580887 | SNV | 1 | C | A | Homozygous   |
| NC_037653.1 | 6580905 | SNV | 1 | T | A | Homozygous   |
| NC_037653.1 | 6580912 | SNV | 1 | T | G | Homozygous   |
| NC_037653.1 | 6581064 | SNV | 1 | A | G | Heterozygous |
| NC_037653.1 | 6581088 | SNV | 1 | G | A | Heterozygous |
| NC_037653.1 | 6581112 | SNV | 1 | T | C | Homozygous   |
| NC_037653.1 | 6584689 | SNV | 1 | C | G | Heterozygous |
| NC_037653.1 | 6584732 | SNV | 1 | A | T | Homozygous   |
| NC_037653.1 | 6585150 | SNV | 1 | C | A | Homozygous   |
| NC_037653.1 | 6585179 | SNV | 1 | T | A | Homozygous   |
| NC_037653.1 | 6585190 | SNV | 1 | T | G | Homozygous   |
| NC_037653.1 | 6586360 | SNV | 1 | A | C | Homozygous   |
| NC_037653.1 | 6586384 | SNV | 1 | G | T | Homozygous   |
| NC_037653.1 | 6586389 | SNV | 1 | G | T | Homozygous   |
| NC_037653.1 | 6586397 | SNV | 1 | T | G | Homozygous   |
| NC_037653.1 | 6586403 | SNV | 1 | C | A | Homozygous   |
| NC_037653.1 | 6588839 | SNV | 1 | T | C | Homozygous   |

|             |         |     |   |   |   |              |
|-------------|---------|-----|---|---|---|--------------|
| NC_037653.1 | 6588843 | SNV | 1 | C | G | Heterozygous |
| NC_037653.1 | 6588851 | SNV | 1 | G | C | Homozygous   |
| NC_037653.1 | 6590013 | SNV | 1 | G | T | Homozygous   |
| NC_037653.1 | 6590019 | SNV | 1 | A | T | Homozygous   |
| NC_037653.1 | 6590022 | SNV | 1 | T | A | Homozygous   |
| NC_037653.1 | 6590038 | SNV | 1 | G | T | Homozygous   |
| NC_037653.1 | 6592646 | SNV | 1 | T | C | Homozygous   |
| NC_037653.1 | 6592662 | SNV | 1 | C | A | Homozygous   |
| NC_037653.1 | 6592667 | SNV | 1 | A | G | Homozygous   |
| NC_037653.1 | 6593005 | SNV | 1 | A | G | Heterozygous |
| NC_037653.1 | 6593023 | SNV | 1 | C | G | Heterozygous |
| NC_037653.1 | 6596032 | SNV | 1 | G | T | Homozygous   |
| NC_037653.1 | 6596086 | SNV | 1 | G | T | Heterozygous |
| NC_037653.1 | 6596089 | SNV | 1 | A | G | Heterozygous |
| NC_037653.1 | 6600248 | SNV | 1 | A | C | Homozygous   |
| NC_037653.1 | 6600251 | SNV | 1 | A | G | Homozygous   |
| NC_037653.1 | 6600263 | SNV | 1 | C | T | Heterozygous |
| NC_037653.1 | 6600286 | SNV | 1 | T | C | Homozygous   |
| NC_037653.1 | 6601390 | SNV | 1 | A | G | Heterozygous |
| NC_037653.1 | 6601421 | SNV | 1 | A | G | Homozygous   |
| NC_037653.1 | 6601446 | SNV | 1 | G | C | Homozygous   |
| NC_037653.1 | 6603719 | SNV | 1 | A | G | Heterozygous |
| NC_037653.1 | 6603722 | SNV | 1 | C | T | Heterozygous |
| NC_037653.1 | 6603993 | SNV | 1 | C | T | Heterozygous |
| NC_037653.1 | 6605565 | SNV | 1 | T | C | Homozygous   |
| NC_037653.1 | 6605616 | SNV | 1 | T | C | Heterozygous |
| NC_037653.1 | 6605623 | SNV | 1 | G | A | Homozygous   |
| NC_037653.1 | 6605705 | SNV | 1 | C | G | Heterozygous |
| NC_037653.1 | 6605802 | SNV | 1 | A | G | Homozygous   |
| NC_037653.1 | 6606012 | SNV | 1 | A | G | Heterozygous |
| NC_037653.1 | 6606150 | SNV | 1 | A | G | Homozygous   |
| NC_037653.1 | 6606403 | SNV | 1 | A | G | Heterozygous |
| NC_037653.1 | 6606484 | SNV | 1 | G | A | Homozygous   |
| NC_037653.1 | 6606487 | SNV | 1 | C | T | Homozygous   |
| NC_037653.1 | 6607142 | SNV | 1 | C | T | Heterozygous |
| NC_037653.1 | 6607148 | SNV | 1 | T | C | Homozygous   |
| NC_037653.1 | 6607157 | SNV | 1 | G | A | Heterozygous |
| NC_037653.1 | 6607367 | SNV | 1 | C | T | Homozygous   |
| NC_037653.1 | 6623286 | SNV | 1 | C | T | Heterozygous |
| NC_037653.1 | 6623974 | SNV | 1 | A | G | Heterozygous |
| NC_037653.1 | 6624209 | SNV | 1 | G | T | Homozygous   |
| NC_037653.1 | 6627034 | SNV | 1 | G | A | Homozygous   |
| NC_037653.1 | 6629057 | SNV | 1 | T | A | Heterozygous |
| NC_037653.1 | 6629069 | SNV | 1 | A | T | Heterozygous |
| NC_037653.1 | 6629071 | SNV | 1 | A | T | Heterozygous |
| NC_037653.1 | 6631636 | SNV | 1 | A | T | Homozygous   |
| NC_037653.1 | 6636313 | SNV | 1 | T | C | Homozygous   |
| NC_037653.1 | 6642700 | SNV | 1 | T | C | Homozygous   |
| NC_037653.1 | 6643483 | SNV | 1 | G | A | Homozygous   |
| NC_037653.1 | 6643899 | SNV | 1 | G | A | Heterozygous |
| NC_037653.1 | 6643938 | SNV | 1 | A | G | Homozygous   |

|             |         |     |   |   |   |              |
|-------------|---------|-----|---|---|---|--------------|
| NC_037653.1 | 6644149 | SNV | 1 | G | A | Heterozygous |
| NC_037653.1 | 6644571 | SNV | 1 | T | C | Homozygous   |
| NC_037653.1 | 6644640 | SNV | 1 | C | T | Heterozygous |
| NC_037653.1 | 6646931 | SNV | 1 | A | G | Homozygous   |
| NC_037653.1 | 6647096 | SNV | 1 | T | C | Homozygous   |
| NC_037653.1 | 6647633 | SNV | 1 | A | G | Homozygous   |
| NC_037653.1 | 6648063 | SNV | 1 | C | T | Heterozygous |
| NC_037653.1 | 6649828 | SNV | 1 | A | T | Heterozygous |
| NC_037653.1 | 6649888 | SNV | 1 | A | G | Homozygous   |
| NC_037653.1 | 6651784 | SNV | 1 | A | T | Homozygous   |
| NC_037653.1 | 6651818 | SNV | 1 | G | A | Homozygous   |
| NC_037653.1 | 6652873 | SNV | 1 | G | A | Heterozygous |
| NC_037653.1 | 6652903 | SNV | 1 | G | A | Heterozygous |
| NC_037653.1 | 6656928 | SNV | 1 | A | G | Heterozygous |
| NC_037653.1 | 6657399 | SNV | 1 | G | A | Heterozygous |
| NC_037653.1 | 6672503 | SNV | 1 | A | G | Homozygous   |
| NC_037653.1 | 6672569 | SNV | 1 | A | G | Homozygous   |
| NC_037653.1 | 6672820 | SNV | 1 | A | G | Homozygous   |
| NC_037653.1 | 6673332 | SNV | 1 | T | A | Heterozygous |
| NC_037653.1 | 6675362 | SNV | 1 | T | C | Homozygous   |
| NC_037653.1 | 6676921 | SNV | 1 | T | C | Homozygous   |
| NC_037653.1 | 6677116 | SNV | 1 | A | G | Homozygous   |
| NC_037653.1 | 6677137 | SNV | 1 | A | G | Homozygous   |
| NC_037653.1 | 6677273 | SNV | 1 | G | A | Homozygous   |
| NC_037653.1 | 6677900 | SNV | 1 | T | C | Homozygous   |
| NC_037653.1 | 6677909 | SNV | 1 | C | T | Homozygous   |
| NC_037653.1 | 6678001 | SNV | 1 | C | T | Heterozygous |
| NC_037653.1 | 6678036 | SNV | 1 | C | T | Homozygous   |
| NC_037653.1 | 6678154 | SNV | 1 | G | A | Heterozygous |
| NC_037653.1 | 6679353 | SNV | 1 | T | G | Homozygous   |
| NC_037653.1 | 6679418 | SNV | 1 | A | G | Homozygous   |
| NC_037653.1 | 6679498 | SNV | 1 | A | G | Heterozygous |
| NC_037653.1 | 6679576 | SNV | 1 | A | G | Homozygous   |
| NC_037653.1 | 6680309 | SNV | 1 | G | A | Homozygous   |
| NC_037653.1 | 6680604 | SNV | 1 | G | T | Homozygous   |
| NC_037653.1 | 6680903 | SNV | 1 | A | G | Homozygous   |
| NC_037653.1 | 6680979 | SNV | 1 | G | C | Heterozygous |
| NC_037653.1 | 6680981 | SNV | 1 | T | G | Heterozygous |
| NC_037653.1 | 6681288 | SNV | 1 | G | A | Homozygous   |
| NC_037653.1 | 6681669 | SNV | 1 | A | T | Heterozygous |
| NC_037653.1 | 6682111 | SNV | 1 | C | T | Heterozygous |
| NC_037653.1 | 6682363 | SNV | 1 | A | C | Heterozygous |
| NC_037653.1 | 6689732 | SNV | 1 | T | C | Homozygous   |
| NC_037653.1 | 6689798 | SNV | 1 | C | T | Heterozygous |
| NC_037653.1 | 6694905 | SNV | 1 | C | T | Heterozygous |
| NC_037653.1 | 6700982 | SNV | 1 | C | T | Homozygous   |
| NC_037653.1 | 6700988 | SNV | 1 | G | T | Homozygous   |
| NC_037653.1 | 6701105 | SNV | 1 | A | G | Homozygous   |
| NC_037653.1 | 6701123 | SNV | 1 | C | G | Heterozygous |
| NC_037653.1 | 6701133 | SNV | 1 | C | T | Heterozygous |
| NC_037653.1 | 6701308 | SNV | 1 | C | G | Homozygous   |

|             |         |     |   |   |   |              |
|-------------|---------|-----|---|---|---|--------------|
| NC_037653.1 | 6755309 | SNV | 1 | A | G | Homozygous   |
| NC_037653.1 | 6755316 | SNV | 1 | C | T | Homozygous   |
| NC_037653.1 | 6755617 | SNV | 1 | T | C | Homozygous   |
| NC_037653.1 | 6755620 | SNV | 1 | A | G | Homozygous   |
| NC_037653.1 | 6755633 | SNV | 1 | A | G | Homozygous   |
| NC_037653.1 | 6757359 | SNV | 1 | A | C | Homozygous   |
| NC_037653.1 | 6757367 | SNV | 1 | C | T | Heterozygous |
| NC_037653.1 | 6757463 | SNV | 1 | T | C | Homozygous   |
| NC_037653.1 | 6757523 | SNV | 1 | T | C | Homozygous   |
| NC_037653.1 | 6759821 | SNV | 1 | C | T | Homozygous   |
| NC_037653.1 | 6777749 | SNV | 1 | C | T | Heterozygous |
| NC_037653.1 | 6778741 | SNV | 1 | G | C | Homozygous   |
| NC_037653.1 | 6778744 | SNV | 1 | A | C | Homozygous   |
| NC_037653.1 | 6778750 | SNV | 1 | A | G | Homozygous   |
| NC_037653.1 | 6778755 | SNV | 1 | A | T | Homozygous   |
| NC_037653.1 | 6778767 | SNV | 1 | G | A | Heterozygous |
| NC_037653.1 | 6778819 | SNV | 1 | A | G | Homozygous   |
| NC_037653.1 | 6778848 | SNV | 1 | G | A | Heterozygous |
| NC_037653.1 | 6779071 | SNV | 1 | C | G | Heterozygous |
| NC_037653.1 | 6779128 | SNV | 1 | C | T | Heterozygous |
| NC_037653.1 | 6779152 | SNV | 1 | C | T | Homozygous   |
| NC_037653.1 | 6779170 | SNV | 1 | G | A | Homozygous   |
| NC_037653.1 | 6779275 | SNV | 1 | A | T | Homozygous   |
| NC_037653.1 | 6779281 | SNV | 1 | C | G | Heterozygous |
| NC_037653.1 | 6779287 | SNV | 1 | C | T | Heterozygous |
| NC_037653.1 | 6779391 | SNV | 1 | C | T | Homozygous   |
| NC_037653.1 | 6779433 | SNV | 1 | T | C | Homozygous   |
| NC_037653.1 | 6779710 | SNV | 1 | T | C | Homozygous   |
| NC_037653.1 | 6779743 | SNV | 1 | T | C | Heterozygous |
| NC_037653.1 | 6779806 | SNV | 1 | C | T | Heterozygous |
| NC_037653.1 | 6780843 | SNV | 1 | C | T | Homozygous   |
| NC_037653.1 | 6781125 | SNV | 1 | A | C | Heterozygous |
| NC_037653.1 | 6781625 | SNV | 1 | A | G | Homozygous   |
| NC_037653.1 | 6781918 | SNV | 1 | C | T | Homozygous   |
| NC_037653.1 | 6781972 | SNV | 1 | G | C | Heterozygous |
| NC_037653.1 | 6783502 | SNV | 1 | C | T | Homozygous   |
| NC_037653.1 | 6783557 | SNV | 1 | C | T | Heterozygous |
| NC_037653.1 | 6783655 | SNV | 1 | G | A | Homozygous   |
| NC_037653.1 | 6784948 | SNV | 1 | T | C | Homozygous   |
| NC_037653.1 | 6785231 | SNV | 1 | T | C | Homozygous   |
| NC_037653.1 | 6785456 | SNV | 1 | G | A | Homozygous   |
| NC_037653.1 | 6785537 | SNV | 1 | C | T | Homozygous   |
| NC_037653.1 | 6785711 | SNV | 1 | G | T | Heterozygous |
| NC_037653.1 | 6786168 | SNV | 1 | G | A | Heterozygous |
| NC_037653.1 | 6786171 | SNV | 1 | G | C | Heterozygous |
| NC_037653.1 | 6786192 | SNV | 1 | G | C | Homozygous   |
| NC_037653.1 | 6786577 | SNV | 1 | C | T | Homozygous   |
| NC_037653.1 | 6786586 | SNV | 1 | G | A | Heterozygous |
| NC_037653.1 | 6790739 | SNV | 1 | G | T | Homozygous   |
| NC_037653.1 | 6793971 | SNV | 1 | C | T | Heterozygous |
| NC_037653.1 | 6796295 | SNV | 1 | T | G | Homozygous   |

|             |         |     |   |   |   |              |
|-------------|---------|-----|---|---|---|--------------|
| NC_037653.1 | 6796298 | SNV | 1 | T | C | Homozygous   |
| NC_037653.1 | 6796305 | SNV | 1 | T | C | Homozygous   |
| NC_037653.1 | 6796329 | SNV | 1 | A | C | Homozygous   |
| NC_037653.1 | 6796342 | SNV | 1 | C | T | Homozygous   |
| NC_037653.1 | 6796345 | SNV | 1 | T | C | Homozygous   |
| NC_037653.1 | 6796350 | SNV | 1 | A | G | Homozygous   |
| NC_037653.1 | 6796360 | SNV | 1 | G | A | Heterozygous |
| NC_037653.1 | 6796366 | SNV | 1 | A | G | Heterozygous |
| NC_037653.1 | 6796372 | SNV | 1 | G | A | Heterozygous |
| NC_037653.1 | 6796380 | SNV | 1 | C | T | Heterozygous |
| NC_037653.1 | 6796809 | SNV | 1 | G | A | Heterozygous |
| NC_037653.1 | 6796819 | SNV | 1 | A | G | Heterozygous |
| NC_037653.1 | 6796829 | SNV | 1 | C | T | Heterozygous |
| NC_037653.1 | 6796844 | SNV | 1 | T | C | Heterozygous |
| NC_037653.1 | 6796857 | SNV | 1 | C | T | Heterozygous |
| NC_037653.1 | 6796860 | SNV | 1 | C | T | Heterozygous |
| NC_037653.1 | 6796868 | SNV | 1 | C | G | Heterozygous |
| NC_037653.1 | 6796870 | SNV | 1 | G | A | Heterozygous |
| NC_037653.1 | 6796875 | SNV | 1 | T | C | Homozygous   |
| NC_037653.1 | 6796882 | SNV | 1 | A | G | Homozygous   |
| NC_037653.1 | 6796887 | SNV | 1 | G | A | Homozygous   |
| NC_037653.1 | 6796924 | SNV | 1 | C | T | Heterozygous |
| NC_037653.1 | 6796931 | SNV | 1 | C | A | Heterozygous |
| NC_037653.1 | 6796933 | SNV | 1 | C | T | Heterozygous |
| NC_037653.1 | 6796956 | SNV | 1 | A | G | Homozygous   |
| NC_037653.1 | 6796975 | SNV | 1 | C | T | Heterozygous |
| NC_037653.1 | 6796978 | SNV | 1 | A | T | Heterozygous |
| NC_037653.1 | 6796991 | SNV | 1 | T | C | Heterozygous |
| NC_037653.1 | 6797003 | SNV | 1 | G | A | Heterozygous |
| NC_037653.1 | 6797027 | SNV | 1 | T | C | Heterozygous |
| NC_037653.1 | 6797040 | SNV | 1 | C | T | Homozygous   |
| NC_037653.1 | 6797071 | SNV | 1 | A | C | Homozygous   |
| NC_037653.1 | 6797088 | SNV | 1 | C | T | Homozygous   |
| NC_037653.1 | 6797107 | SNV | 1 | C | T | Heterozygous |
| NC_037653.1 | 6797161 | SNV | 1 | A | G | Homozygous   |
| NC_037653.1 | 6797221 | SNV | 1 | A | G | Homozygous   |
| NC_037653.1 | 6797273 | SNV | 1 | G | C | Heterozygous |
| NC_037653.1 | 6797273 | SNV | 1 | G | T | Heterozygous |
| NC_037653.1 | 6797291 | SNV | 1 | A | G | Homozygous   |
| NC_037653.1 | 6797744 | SNV | 1 | T | A | Heterozygous |
| NC_037653.1 | 6798103 | SNV | 1 | T | C | Homozygous   |
| NC_037653.1 | 6798109 | SNV | 1 | C | T | Homozygous   |
| NC_037653.1 | 6798140 | SNV | 1 | T | C | Homozygous   |
| NC_037653.1 | 6811323 | SNV | 1 | T | C | Homozygous   |
| NC_037653.1 | 6811403 | SNV | 1 | A | G | Heterozygous |
| NC_037653.1 | 6811413 | SNV | 1 | C | G | Heterozygous |
| NC_037653.1 | 6811424 | SNV | 1 | C | T | Homozygous   |
| NC_037653.1 | 6825895 | SNV | 1 | T | C | Homozygous   |
| NC_037653.1 | 6825980 | SNV | 1 | C | T | Heterozygous |
| NC_037653.1 | 6825989 | SNV | 1 | C | T | Homozygous   |
| NC_037653.1 | 6826067 | SNV | 1 | T | C | Homozygous   |



|             |         |     |   |   |   |              |
|-------------|---------|-----|---|---|---|--------------|
| NC_037653.1 | 6826247 | SNV | 1 | T | C | Homozygous   |
| NC_037653.1 | 6826344 | SNV | 1 | C | T | Heterozygous |
| NC_037653.1 | 6826350 | SNV | 1 | C | T | Heterozygous |
| NC_037653.1 | 6826419 | SNV | 1 | T | C | Homozygous   |
| NC_037653.1 | 6827695 | SNV | 1 | A | G | Homozygous   |
| NC_037653.1 | 6827915 | SNV | 1 | A | G | Homozygous   |
| NC_037653.1 | 6828127 | SNV | 1 | G | A | Heterozygous |
| NC_037653.1 | 6828157 | SNV | 1 | G | T | Heterozygous |
| NC_037653.1 | 6828543 | SNV | 1 | C | T | Heterozygous |
| NC_037653.1 | 6828587 | SNV | 1 | T | C | Homozygous   |
| NC_037653.1 | 6828721 | SNV | 1 | A | G | Homozygous   |
| NC_037653.1 | 6828728 | SNV | 1 | C | T | Heterozygous |
| NC_037653.1 | 6828737 | SNV | 1 | A | G | Heterozygous |
| NC_037653.1 | 6828743 | SNV | 1 | A | G | Homozygous   |
| NC_037653.1 | 6828764 | SNV | 1 | C | T | Homozygous   |
| NC_037653.1 | 6828774 | SNV | 1 | A | G | Heterozygous |
| NC_037653.1 | 6834370 | SNV | 1 | A | G | Heterozygous |
| NC_037653.1 | 6834408 | SNV | 1 | T | C | Heterozygous |
| NC_037653.1 | 6834525 | SNV | 1 | A | G | Homozygous   |
| NC_037653.1 | 6834606 | SNV | 1 | A | T | Heterozygous |
| NC_037653.1 | 6834680 | SNV | 1 | C | T | Homozygous   |
| NC_037653.1 | 6834724 | SNV | 1 | A | T | Homozygous   |
| NC_037653.1 | 6842370 | SNV | 1 | C | A | Heterozygous |
| NC_037653.1 | 6842395 | SNV | 1 | G | C | Heterozygous |
| NC_037653.1 | 6847498 | SNV | 1 | T | C | Heterozygous |
| NC_037653.1 | 6847566 | SNV | 1 | T | C | Homozygous   |
| NC_037653.1 | 6847575 | SNV | 1 | C | T | Homozygous   |
| NC_037653.1 | 6847585 | SNV | 1 | T | C | Heterozygous |
| NC_037653.1 | 6847593 | SNV | 1 | G | A | Heterozygous |
| NC_037653.1 | 6847701 | SNV | 1 | A | G | Homozygous   |
| NC_037653.1 | 6847784 | SNV | 1 | T | C | Heterozygous |
| NC_037653.1 | 6847838 | SNV | 1 | A | G | Homozygous   |
| NC_037653.1 | 6847850 | SNV | 1 | T | C | Homozygous   |
| NC_037653.1 | 6847886 | SNV | 1 | T | C | Homozygous   |
| NC_037653.1 | 6847924 | SNV | 1 | G | A | Homozygous   |
| NC_037653.1 | 6847963 | SNV | 1 | G | A | Heterozygous |
| NC_037653.1 | 6847973 | SNV | 1 | A | T | Heterozygous |
| NC_037653.1 | 6847987 | SNV | 1 | C | A | Homozygous   |
| NC_037653.1 | 6848473 | SNV | 1 | T | C | Homozygous   |
| NC_037653.1 | 6848514 | SNV | 1 | T | C | Homozygous   |
| NC_037653.1 | 6848652 | SNV | 1 | G | C | Homozygous   |
| NC_037653.1 | 6848670 | SNV | 1 | G | A | Heterozygous |
| NC_037653.1 | 6848684 | SNV | 1 | A | G | Homozygous   |
| NC_037653.1 | 6848791 | SNV | 1 | C | T | Heterozygous |
| NC_037653.1 | 6848805 | SNV | 1 | C | T | Homozygous   |
| NC_037653.1 | 6848819 | SNV | 1 | T | C | Homozygous   |
| NC_037653.1 | 6852406 | SNV | 1 | T | A | Homozygous   |
| NC_037653.1 | 6852426 | SNV | 1 | T | C | Homozygous   |
| NC_037653.1 | 6852428 | SNV | 1 | A | G | Homozygous   |
| NC_037653.1 | 6852450 | SNV | 1 | C | A | Homozygous   |
| NC_037653.1 | 6903735 | SNV | 1 | G | A | Heterozygous |

|             |         |     |   |   |   |              |
|-------------|---------|-----|---|---|---|--------------|
| NC_037653.1 | 6903890 | SNV | 1 | C | G | Heterozygous |
| NC_037653.1 | 6904447 | SNV | 1 | T | G | Homozygous   |
| NC_037653.1 | 6904661 | SNV | 1 | T | C | Heterozygous |
| NC_037653.1 | 6904677 | SNV | 1 | T | C | Heterozygous |
| NC_037653.1 | 6904725 | SNV | 1 | T | C | Heterozygous |
| NC_037653.1 | 6904740 | SNV | 1 | T | A | Heterozygous |
| NC_037653.1 | 6904782 | SNV | 1 | G | A | Homozygous   |
| NC_037653.1 | 6907104 | SNV | 1 | A | G | Homozygous   |
| NC_037653.1 | 6907132 | SNV | 1 | A | G | Heterozygous |
| NC_037653.1 | 6907142 | SNV | 1 | G | A | Heterozygous |
| NC_037653.1 | 6907204 | SNV | 1 | T | C | Homozygous   |
| NC_037653.1 | 6907292 | SNV | 1 | T | G | Heterozygous |
| NC_037653.1 | 6907313 | SNV | 1 | C | T | Heterozygous |
| NC_037653.1 | 6907403 | SNV | 1 | G | A | Homozygous   |
| NC_037653.1 | 6907441 | SNV | 1 | A | G | Homozygous   |
| NC_037653.1 | 6907455 | SNV | 1 | C | T | Heterozygous |
| NC_037653.1 | 6907464 | SNV | 1 | T | C | Homozygous   |
| NC_037653.1 | 6907498 | SNV | 1 | C | T | Homozygous   |
| NC_037653.1 | 6907674 | SNV | 1 | G | A | Homozygous   |
| NC_037653.1 | 6907878 | SNV | 1 | T | C | Homozygous   |
| NC_037653.1 | 6907915 | SNV | 1 | A | C | Homozygous   |
| NC_037653.1 | 6907917 | SNV | 1 | A | C | Homozygous   |
| NC_037653.1 | 6907980 | SNV | 1 | G | A | Heterozygous |
| NC_037653.1 | 6907988 | SNV | 1 | G | A | Heterozygous |
| NC_037653.1 | 6907994 | SNV | 1 | G | T | Heterozygous |
| NC_037653.1 | 6907999 | SNV | 1 | A | G | Heterozygous |
| NC_037653.1 | 6908525 | SNV | 1 | T | G | Homozygous   |
| NC_037653.1 | 6908597 | SNV | 1 | G | A | Heterozygous |
| NC_037653.1 | 6908661 | SNV | 1 | G | A | Heterozygous |
| NC_037653.1 | 6908913 | SNV | 1 | G | A | Heterozygous |
| NC_037653.1 | 6908937 | SNV | 1 | A | C | Homozygous   |
| NC_037653.1 | 6908943 | SNV | 1 | C | T | Heterozygous |
| NC_037653.1 | 6908990 | SNV | 1 | C | T | Heterozygous |
| NC_037653.1 | 6909028 | SNV | 1 | G | A | Heterozygous |
| NC_037653.1 | 6909485 | SNV | 1 | G | A | Homozygous   |
| NC_037653.1 | 6909500 | SNV | 1 | C | T | Heterozygous |
| NC_037653.1 | 6909635 | SNV | 1 | A | G | Homozygous   |
| NC_037653.1 | 6909717 | SNV | 1 | T | C | Homozygous   |
| NC_037653.1 | 6909721 | SNV | 1 | C | T | Heterozygous |
| NC_037653.1 | 6909724 | SNV | 1 | C | T | Heterozygous |
| NC_037653.1 | 6909964 | SNV | 1 | G | A | Heterozygous |
| NC_037653.1 | 6910047 | SNV | 1 | T | C | Homozygous   |
| NC_037653.1 | 6910198 | SNV | 1 | C | T | Homozygous   |
| NC_037653.1 | 6910294 | SNV | 1 | T | C | Homozygous   |
| NC_037653.1 | 6910489 | SNV | 1 | T | C | Homozygous   |
| NC_037653.1 | 6910492 | SNV | 1 | G | C | Heterozygous |
| NC_037653.1 | 6910760 | SNV | 1 | A | G | Homozygous   |
| NC_037653.1 | 6910822 | SNV | 1 | T | C | Heterozygous |
| NC_037653.1 | 6910842 | SNV | 1 | A | G | Homozygous   |
| NC_037653.1 | 6910845 | SNV | 1 | A | G | Homozygous   |
| NC_037653.1 | 6910903 | SNV | 1 | A | T | Heterozygous |

|             |         |     |   |   |   |              |
|-------------|---------|-----|---|---|---|--------------|
| NC_037653.1 | 6910958 | SNV | 1 | T | C | Homozygous   |
| NC_037653.1 | 6911464 | SNV | 1 | T | A | Heterozygous |
| NC_037653.1 | 6911476 | SNV | 1 | A | T | Homozygous   |
| NC_037653.1 | 6911666 | SNV | 1 | C | T | Homozygous   |
| NC_037653.1 | 6911768 | SNV | 1 | T | C | Homozygous   |
| NC_037653.1 | 6912530 | SNV | 1 | G | A | Heterozygous |
| NC_037653.1 | 6912533 | SNV | 1 | A | G | Heterozygous |
| NC_037653.1 | 6912545 | SNV | 1 | A | G | Heterozygous |
| NC_037653.1 | 6912844 | SNV | 1 | A | G | Homozygous   |
| NC_037653.1 | 6912885 | SNV | 1 | C | A | Homozygous   |
| NC_037653.1 | 6912902 | SNV | 1 | A | G | Heterozygous |
| NC_037653.1 | 6913381 | SNV | 1 | T | C | Homozygous   |
| NC_037653.1 | 6913698 | SNV | 1 | G | A | Homozygous   |
| NC_037653.1 | 6913935 | SNV | 1 | T | C | Heterozygous |
| NC_037653.1 | 6913938 | SNV | 1 | A | G | Heterozygous |
| NC_037653.1 | 6914067 | SNV | 1 | C | G | Heterozygous |
| NC_037653.1 | 6914720 | SNV | 1 | G | C | Heterozygous |
| NC_037653.1 | 6914949 | SNV | 1 | G | A | Homozygous   |
| NC_037653.1 | 6914959 | SNV | 1 | T | A | Heterozygous |
| NC_037653.1 | 6915014 | SNV | 1 | T | G | Homozygous   |
| NC_037653.1 | 6915019 | SNV | 1 | A | T | Homozygous   |
| NC_037653.1 | 6915043 | SNV | 1 | A | T | Homozygous   |
| NC_037653.1 | 6915047 | SNV | 1 | A | G | Homozygous   |
| NC_037653.1 | 6915147 | SNV | 1 | A | G | Homozygous   |
| NC_037653.1 | 6915416 | SNV | 1 | T | C | Homozygous   |
| NC_037653.1 | 6915811 | SNV | 1 | G | T | Homozygous   |
| NC_037653.1 | 6916019 | SNV | 1 | A | C | Heterozygous |
| NC_037653.1 | 6916023 | SNV | 1 | A | C | Heterozygous |
| NC_037653.1 | 6916083 | SNV | 1 | T | A | Homozygous   |
| NC_037653.1 | 6916090 | SNV | 1 | G | A | Homozygous   |
| NC_037653.1 | 6916095 | SNV | 1 | G | A | Heterozygous |
| NC_037653.1 | 6916860 | SNV | 1 | C | T | Homozygous   |
| NC_037653.1 | 6916868 | SNV | 1 | A | G | Heterozygous |
| NC_037653.1 | 6916964 | SNV | 1 | G | A | Homozygous   |
| NC_037653.1 | 6917852 | SNV | 1 | A | G | Homozygous   |
| NC_037653.1 | 6917869 | SNV | 1 | T | A | Homozygous   |
| NC_037653.1 | 6917881 | SNV | 1 | G | A | Homozygous   |
| NC_037653.1 | 6917892 | SNV | 1 | A | G | Homozygous   |
| NC_037653.1 | 6917916 | SNV | 1 | G | C | Heterozygous |
| NC_037653.1 | 6917933 | SNV | 1 | A | G | Homozygous   |
| NC_037653.1 | 6918214 | SNV | 1 | A | G | Heterozygous |
| NC_037653.1 | 6918250 | SNV | 1 | C | T | Heterozygous |
| NC_037653.1 | 6919474 | SNV | 1 | A | G | Heterozygous |
| NC_037653.1 | 6919477 | SNV | 1 | T | C | Heterozygous |
| NC_037653.1 | 6919549 | SNV | 1 | A | G | Homozygous   |
| NC_037653.1 | 6919615 | SNV | 1 | C | T | Heterozygous |
| NC_037653.1 | 6919708 | SNV | 1 | G | A | Heterozygous |
| NC_037653.1 | 6920008 | SNV | 1 | C | G | Homozygous   |
| NC_037653.1 | 6920668 | SNV | 1 | A | G | Heterozygous |
| NC_037653.1 | 6923813 | SNV | 1 | G | A | Homozygous   |
| NC_037653.1 | 6925385 | SNV | 1 | T | C | Heterozygous |

|             |         |     |   |   |   |              |
|-------------|---------|-----|---|---|---|--------------|
| NC_037653.1 | 6925393 | SNV | 1 | C | T | Heterozygous |
| NC_037653.1 | 6942428 | SNV | 1 | G | A | Heterozygous |
| NC_037653.1 | 6942440 | SNV | 1 | G | C | Homozygous   |
| NC_037653.1 | 6942511 | SNV | 1 | C | T | Heterozygous |
| NC_037653.1 | 6942665 | SNV | 1 | T | C | Heterozygous |
| NC_037653.1 | 6945868 | SNV | 1 | C | T | Heterozygous |
| NC_037653.1 | 6945879 | SNV | 1 | G | A | Heterozygous |
| NC_037653.1 | 6952674 | SNV | 1 | A | T | Homozygous   |
| NC_037653.1 | 6952695 | SNV | 1 | A | G | Heterozygous |
| NC_037653.1 | 6952700 | SNV | 1 | T | G | Heterozygous |
| NC_037653.1 | 6952702 | SNV | 1 | A | C | Heterozygous |
| NC_037653.1 | 6952707 | SNV | 1 | A | G | Homozygous   |
| NC_037653.1 | 6952711 | SNV | 1 | A | G | Heterozygous |
| NC_037653.1 | 6952716 | SNV | 1 | T | C | Heterozygous |
| NC_037653.1 | 6952718 | SNV | 1 | T | C | Heterozygous |
| NC_037653.1 | 6964408 | SNV | 1 | T | C | Heterozygous |
| NC_037653.1 | 6964445 | SNV | 1 | A | G | Heterozygous |
| NC_037653.1 | 6970419 | SNV | 1 | A | C | Heterozygous |
| NC_037653.1 | 6970423 | SNV | 1 | A | T | Heterozygous |
| NC_037653.1 | 6976492 | SNV | 1 | G | A | Heterozygous |
| NC_037653.1 | 6976540 | SNV | 1 | A | G | Homozygous   |
| NC_037653.1 | 6976734 | SNV | 1 | C | T | Heterozygous |
| NC_037653.1 | 6976815 | SNV | 1 | G | A | Heterozygous |
| NC_037653.1 | 6976845 | SNV | 1 | A | G | Heterozygous |
| NC_037653.1 | 6977303 | SNV | 1 | T | C | Heterozygous |
| NC_037653.1 | 6978171 | SNV | 1 | G | A | Homozygous   |
| NC_037653.1 | 6978267 | SNV | 1 | A | C | Heterozygous |
| NC_037653.1 | 6978417 | SNV | 1 | C | G | Heterozygous |
| NC_037653.1 | 6978705 | SNV | 1 | A | G | Homozygous   |
| NC_037653.1 | 6978742 | SNV | 1 | G | A | Homozygous   |
| NC_037653.1 | 6979175 | SNV | 1 | A | G | Heterozygous |
| NC_037653.1 | 6979214 | SNV | 1 | T | C | Heterozygous |
| NC_037653.1 | 6979446 | SNV | 1 | T | C | Homozygous   |
| NC_037653.1 | 6979791 | SNV | 1 | T | C | Homozygous   |
| NC_037653.1 | 6980373 | SNV | 1 | T | C | Homozygous   |
| NC_037653.1 | 6983678 | SNV | 1 | C | T | Homozygous   |
| NC_037653.1 | 6983687 | SNV | 1 | A | G | Homozygous   |
| NC_037653.1 | 6984046 | SNV | 1 | A | C | Homozygous   |
| NC_037653.1 | 6986071 | SNV | 1 | G | A | Heterozygous |
| NC_037653.1 | 6991476 | SNV | 1 | G | C | Heterozygous |
| NC_037653.1 | 6991480 | SNV | 1 | A | G | Heterozygous |
| NC_037653.1 | 6991658 | SNV | 1 | C | T | Homozygous   |
| NC_037653.1 | 6991789 | SNV | 1 | A | C | Heterozygous |
| NC_037653.1 | 6993254 | SNV | 1 | A | G | Homozygous   |
| NC_037653.1 | 6993317 | SNV | 1 | A | C | Heterozygous |
| NC_037653.1 | 6993344 | SNV | 1 | A | T | Homozygous   |
| NC_037653.1 | 6993350 | SNV | 1 | A | T | Homozygous   |
| NC_037653.1 | 6993353 | SNV | 1 | A | C | Homozygous   |
| NC_037653.1 | 6993357 | SNV | 1 | G | A | Homozygous   |
| NC_037653.1 | 6993362 | SNV | 1 | A | T | Homozygous   |
| NC_037653.1 | 6994022 | SNV | 1 | A | T | Homozygous   |

|             |         |     |   |   |   |              |
|-------------|---------|-----|---|---|---|--------------|
| NC_037653.1 | 6994025 | SNV | 1 | G | A | Homozygous   |
| NC_037653.1 | 6994033 | SNV | 1 | A | G | Homozygous   |
| NC_037653.1 | 6994038 | SNV | 1 | T | A | Homozygous   |
| NC_037653.1 | 7000807 | SNV | 1 | G | A | Homozygous   |
| NC_037653.1 | 7000820 | SNV | 1 | G | A | Heterozygous |
| NC_037653.1 | 7015160 | SNV | 1 | T | G | Homozygous   |
| NC_037653.1 | 7015176 | SNV | 1 | T | G | Homozygous   |
| NC_037653.1 | 7015179 | SNV | 1 | C | T | Homozygous   |
| NC_037653.1 | 7015190 | SNV | 1 | C | T | Homozygous   |
| NC_037653.1 | 7015197 | SNV | 1 | C | G | Homozygous   |
| NC_037653.1 | 7024254 | SNV | 1 | G | A | Heterozygous |
| NC_037653.1 | 7024493 | SNV | 1 | T | C | Heterozygous |
| NC_037653.1 | 7025550 | SNV | 1 | T | C | Homozygous   |
| NC_037653.1 | 7026828 | SNV | 1 | A | C | Homozygous   |
| NC_037653.1 | 7026896 | SNV | 1 | A | G | Homozygous   |
| NC_037653.1 | 7027070 | SNV | 1 | C | G | Heterozygous |
| NC_037653.1 | 7027115 | SNV | 1 | G | A | Heterozygous |
| NC_037653.1 | 7027124 | SNV | 1 | A | G | Homozygous   |
| NC_037653.1 | 7027163 | SNV | 1 | A | G | Homozygous   |
| NC_037653.1 | 7027492 | SNV | 1 | G | A | Heterozygous |
| NC_037653.1 | 7028089 | SNV | 1 | G | A | Heterozygous |
| NC_037653.1 | 7028113 | SNV | 1 | T | C | Homozygous   |
| NC_037653.1 | 7028122 | SNV | 1 | T | C | Homozygous   |
| NC_037653.1 | 7028343 | SNV | 1 | T | C | Heterozygous |
| NC_037653.1 | 7029096 | SNV | 1 | T | G | Homozygous   |
| NC_037653.1 | 7029105 | SNV | 1 | A | C | Homozygous   |
| NC_037653.1 | 7029108 | SNV | 1 | G | A | Homozygous   |
| NC_037653.1 | 7029111 | SNV | 1 | C | T | Homozygous   |
| NC_037653.1 | 7029324 | SNV | 1 | A | G | Homozygous   |
| NC_037653.1 | 7030168 | SNV | 1 | G | A | Homozygous   |
| NC_037653.1 | 7030295 | SNV | 1 | C | G | Homozygous   |
| NC_037653.1 | 7030372 | SNV | 1 | A | G | Heterozygous |
| NC_037653.1 | 7030399 | SNV | 1 | G | A | Heterozygous |
| NC_037653.1 | 7030675 | SNV | 1 | T | C | Homozygous   |
| NC_037653.1 | 7030743 | SNV | 1 | T | C | Homozygous   |
| NC_037653.1 | 7031010 | SNV | 1 | A | T | Homozygous   |
| NC_037653.1 | 7031059 | SNV | 1 | T | A | Homozygous   |
| NC_037653.1 | 7031217 | SNV | 1 | T | C | Heterozygous |
| NC_037653.1 | 7031900 | SNV | 1 | A | C | Homozygous   |
| NC_037653.1 | 7032145 | SNV | 1 | T | C | Heterozygous |
| NC_037653.1 | 7032151 | SNV | 1 | G | A | Heterozygous |
| NC_037653.1 | 7032158 | SNV | 1 | C | A | Heterozygous |
| NC_037653.1 | 7032174 | SNV | 1 | G | A | Heterozygous |
| NC_037653.1 | 7032178 | SNV | 1 | A | G | Heterozygous |
| NC_037653.1 | 7032540 | SNV | 1 | T | A | Homozygous   |
| NC_037653.1 | 7032772 | SNV | 1 | G | A | Heterozygous |
| NC_037653.1 | 7032873 | SNV | 1 | C | T | Homozygous   |
| NC_037653.1 | 7033090 | SNV | 1 | C | T | Heterozygous |
| NC_037653.1 | 7037638 | SNV | 1 | C | T | Heterozygous |
| NC_037653.1 | 7038066 | SNV | 1 | T | C | Homozygous   |
| NC_037653.1 | 7038529 | SNV | 1 | G | C | Homozygous   |

|             |         |     |   |   |   |              |
|-------------|---------|-----|---|---|---|--------------|
| NC_037653.1 | 7038532 | SNV | 1 | A | G | Homozygous   |
| NC_037653.1 | 7038544 | SNV | 1 | T | A | Homozygous   |
| NC_037653.1 | 7038568 | SNV | 1 | T | C | Heterozygous |
| NC_037653.1 | 7038573 | SNV | 1 | A | T | Heterozygous |
| NC_037653.1 | 7039129 | SNV | 1 | A | T | Heterozygous |
| NC_037653.1 | 7039182 | SNV | 1 | T | A | Heterozygous |
| NC_037653.1 | 7039187 | SNV | 1 | T | A | Heterozygous |
| NC_037653.1 | 7039274 | SNV | 1 | C | T | Homozygous   |
| NC_037653.1 | 7039299 | SNV | 1 | A | T | Heterozygous |
| NC_037653.1 | 7039335 | SNV | 1 | G | A | Homozygous   |
| NC_037653.1 | 7039340 | SNV | 1 | T | A | Homozygous   |
| NC_037653.1 | 7039345 | SNV | 1 | T | G | Homozygous   |
| NC_037653.1 | 7039357 | SNV | 1 | T | A | Heterozygous |
| NC_037653.1 | 7039362 | SNV | 1 | T | A | Homozygous   |
| NC_037653.1 | 7039373 | SNV | 1 | A | G | Homozygous   |
| NC_037653.1 | 7039376 | SNV | 1 | A | G | Homozygous   |
| NC_037653.1 | 7039976 | SNV | 1 | A | T | Homozygous   |
| NC_037653.1 | 7040108 | SNV | 1 | G | C | Homozygous   |
| NC_037653.1 | 7041187 | SNV | 1 | A | T | Homozygous   |
| NC_037653.1 | 7041194 | SNV | 1 | A | T | Homozygous   |
| NC_037653.1 | 7041197 | SNV | 1 | A | C | Homozygous   |
| NC_037653.1 | 7042573 | SNV | 1 | C | T | Heterozygous |
| NC_037653.1 | 7042623 | SNV | 1 | A | G | Heterozygous |
| NC_037653.1 | 7042855 | SNV | 1 | T | C | Homozygous   |
| NC_037653.1 | 7042975 | SNV | 1 | G | A | Homozygous   |
| NC_037653.1 | 7043043 | SNV | 1 | G | A | Heterozygous |
| NC_037653.1 | 7044368 | SNV | 1 | T | A | Heterozygous |
| NC_037653.1 | 7047338 | SNV | 1 | T | C | Homozygous   |
| NC_037653.1 | 7047564 | SNV | 1 | G | A | Homozygous   |
| NC_037653.1 | 7052864 | SNV | 1 | G | A | Heterozygous |
| NC_037653.1 | 7052956 | SNV | 1 | G | A | Homozygous   |
| NC_037653.1 | 7053059 | SNV | 1 | A | C | Heterozygous |
| NC_037653.1 | 7053059 | SNV | 1 | A | T | Heterozygous |
| NC_037653.1 | 7060501 | SNV | 1 | T | A | Heterozygous |
| NC_037653.1 | 7060506 | SNV | 1 | A | G | Heterozygous |
| NC_037653.1 | 7060507 | SNV | 1 | C | A | Heterozygous |
| NC_037653.1 | 7060511 | SNV | 1 | C | T | Heterozygous |
| NC_037653.1 | 7060522 | SNV | 1 | C | G | Homozygous   |
| NC_037653.1 | 7060933 | SNV | 1 | G | A | Homozygous   |
| NC_037653.1 | 7060938 | SNV | 1 | T | C | Heterozygous |
| NC_037653.1 | 7060944 | SNV | 1 | T | C | Homozygous   |
| NC_037653.1 | 7060963 | SNV | 1 | T | C | Heterozygous |
| NC_037653.1 | 7060968 | SNV | 1 | G | A | Homozygous   |
| NC_037653.1 | 7061980 | SNV | 1 | T | C | Homozygous   |
| NC_037653.1 | 7061985 | SNV | 1 | G | A | Heterozygous |
| NC_037653.1 | 7061997 | SNV | 1 | T | A | Homozygous   |
| NC_037653.1 | 7061999 | SNV | 1 | T | C | Heterozygous |
| NC_037653.1 | 7062001 | SNV | 1 | T | C | Heterozygous |
| NC_037653.1 | 7062004 | SNV | 1 | T | C | Homozygous   |
| NC_037653.1 | 7062025 | SNV | 1 | G | C | Homozygous   |
| NC_037653.1 | 7062035 | SNV | 1 | C | G | Homozygous   |

|             |         |     |   |   |   |              |
|-------------|---------|-----|---|---|---|--------------|
| NC_037653.1 | 7062041 | SNV | 1 | A | G | Homozygous   |
| NC_037653.1 | 7062061 | SNV | 1 | T | C | Heterozygous |
| NC_037653.1 | 7062066 | SNV | 1 | T | C | Heterozygous |
| NC_037653.1 | 7062068 | SNV | 1 | T | C | Heterozygous |
| NC_037653.1 | 7062071 | SNV | 1 | T | C | Homozygous   |
| NC_037653.1 | 7062074 | SNV | 1 | A | G | Heterozygous |
| NC_037653.1 | 7068531 | SNV | 1 | C | G | Homozygous   |
| NC_037653.1 | 7071348 | SNV | 1 | C | T | Heterozygous |
| NC_037653.1 | 7071353 | SNV | 1 | C | T | Heterozygous |
| NC_037653.1 | 7071357 | SNV | 1 | T | C | Heterozygous |
| NC_037653.1 | 7071364 | SNV | 1 | C | T | Heterozygous |
| NC_037653.1 | 7071374 | SNV | 1 | C | T | Heterozygous |
| NC_037653.1 | 7071385 | SNV | 1 | T | C | Heterozygous |
| NC_037653.1 | 7071389 | SNV | 1 | C | T | Heterozygous |
| NC_037653.1 | 7071395 | SNV | 1 | C | T | Homozygous   |
| NC_037653.1 | 7071397 | SNV | 1 | C | T | Heterozygous |
| NC_037653.1 | 7071409 | SNV | 1 | A | T | Homozygous   |
| NC_037653.1 | 7074360 | SNV | 1 | A | T | Heterozygous |
| NC_037653.1 | 7074366 | SNV | 1 | G | A | Heterozygous |
| NC_037653.1 | 7074440 | SNV | 1 | C | A | Heterozygous |
| NC_037653.1 | 7074703 | SNV | 1 | G | C | Homozygous   |
| NC_037653.1 | 7077765 | SNV | 1 | C | T | Homozygous   |
| NC_037653.1 | 7077779 | SNV | 1 | G | A | Homozygous   |
| NC_037653.1 | 7079855 | SNV | 1 | G | A | Heterozygous |
| NC_037653.1 | 7083297 | SNV | 1 | A | T | Homozygous   |
| NC_037653.1 | 7083315 | SNV | 1 | T | C | Homozygous   |
| NC_037653.1 | 7083365 | SNV | 1 | C | T | Heterozygous |
| NC_037653.1 | 7088398 | SNV | 1 | G | T | Homozygous   |
| NC_037653.1 | 7088406 | SNV | 1 | C | A | Homozygous   |
| NC_037653.1 | 7090779 | SNV | 1 | T | C | Heterozygous |
| NC_037653.1 | 7090781 | SNV | 1 | T | G | Heterozygous |
| NC_037653.1 | 7090785 | SNV | 1 | T | C | Heterozygous |
| NC_037653.1 | 7090785 | SNV | 1 | T | G | Heterozygous |
| NC_037653.1 | 7090797 | SNV | 1 | G | A | Homozygous   |
| NC_037653.1 | 7090799 | SNV | 1 | T | C | Homozygous   |
| NC_037653.1 | 7090839 | SNV | 1 | C | G | Heterozygous |
| NC_037653.1 | 7091109 | SNV | 1 | A | G | Heterozygous |
| NC_037653.1 | 7099603 | SNV | 1 | T | C | Homozygous   |
| NC_037653.1 | 7099798 | SNV | 1 | C | T | Homozygous   |
| NC_037653.1 | 7099975 | SNV | 1 | C | T | Heterozygous |
| NC_037653.1 | 7100043 | SNV | 1 | T | C | Homozygous   |
| NC_037653.1 | 7100057 | SNV | 1 | T | C | Heterozygous |
| NC_037653.1 | 7100177 | SNV | 1 | G | A | Heterozygous |
| NC_037653.1 | 7101780 | SNV | 1 | G | C | Homozygous   |
| NC_037653.1 | 7101789 | SNV | 1 | A | G | Homozygous   |
| NC_037653.1 | 7101816 | SNV | 1 | C | T | Heterozygous |
| NC_037653.1 | 7101907 | SNV | 1 | C | T | Heterozygous |
| NC_037653.1 | 7102057 | SNV | 1 | G | A | Heterozygous |
| NC_037653.1 | 7102066 | SNV | 1 | A | G | Homozygous   |
| NC_037653.1 | 7102101 | SNV | 1 | A | G | Heterozygous |
| NC_037653.1 | 7102140 | SNV | 1 | A | G | Homozygous   |

|             |         |     |   |   |   |              |
|-------------|---------|-----|---|---|---|--------------|
| NC_037653.1 | 7102197 | SNV | 1 | C | G | Heterozygous |
| NC_037653.1 | 7102238 | SNV | 1 | C | T | Homozygous   |
| NC_037653.1 | 7102809 | SNV | 1 | C | T | Heterozygous |
| NC_037653.1 | 7102831 | SNV | 1 | C | T | Homozygous   |
| NC_037653.1 | 7104353 | SNV | 1 | G | C | Homozygous   |
| NC_037653.1 | 7104530 | SNV | 1 | T | C | Homozygous   |
| NC_037653.1 | 7104596 | SNV | 1 | C | T | Heterozygous |
| NC_037653.1 | 7104615 | SNV | 1 | T | C | Homozygous   |
| NC_037653.1 | 7104642 | SNV | 1 | C | T | Heterozygous |
| NC_037653.1 | 7104659 | SNV | 1 | A | G | Heterozygous |
| NC_037653.1 | 7104695 | SNV | 1 | A | G | Homozygous   |
| NC_037653.1 | 7104721 | SNV | 1 | A | G | Homozygous   |
| NC_037653.1 | 7104724 | SNV | 1 | G | A | Homozygous   |
| NC_037653.1 | 7104734 | SNV | 1 | A | G | Heterozygous |
| NC_037653.1 | 7104745 | SNV | 1 | A | G | Homozygous   |
| NC_037653.1 | 7104751 | SNV | 1 | C | G | Homozygous   |
| NC_037653.1 | 7104759 | SNV | 1 | C | T | Homozygous   |
| NC_037653.1 | 7104848 | SNV | 1 | T | C | Heterozygous |
| NC_037653.1 | 7112464 | SNV | 1 | T | C | Homozygous   |
| NC_037653.1 | 7112968 | SNV | 1 | C | T | Heterozygous |
| NC_037653.1 | 7114802 | SNV | 1 | G | A | Heterozygous |
| NC_037653.1 | 7114816 | SNV | 1 | A | G | Homozygous   |
| NC_037653.1 | 7115442 | SNV | 1 | A | G | Homozygous   |
| NC_037653.1 | 7115469 | SNV | 1 | G | A | Heterozygous |
| NC_037653.1 | 7115502 | SNV | 1 | T | C | Heterozygous |
| NC_037653.1 | 7115536 | SNV | 1 | T | A | Homozygous   |
| NC_037653.1 | 7115616 | SNV | 1 | T | C | Heterozygous |
| NC_037653.1 | 7115719 | SNV | 1 | T | C | Homozygous   |
| NC_037653.1 | 7115839 | SNV | 1 | C | T | Homozygous   |
| NC_037653.1 | 7115966 | SNV | 1 | G | A | Homozygous   |
| NC_037653.1 | 7116032 | SNV | 1 | A | G | Heterozygous |
| NC_037653.1 | 7116049 | SNV | 1 | C | T | Homozygous   |
| NC_037653.1 | 7116062 | SNV | 1 | T | C | Heterozygous |
| NC_037653.1 | 7116098 | SNV | 1 | C | T | Heterozygous |
| NC_037653.1 | 7116110 | SNV | 1 | T | C | Homozygous   |
| NC_037653.1 | 7116173 | SNV | 1 | C | G | Heterozygous |
| NC_037653.1 | 7116176 | SNV | 1 | C | T | Heterozygous |
| NC_037653.1 | 7116760 | SNV | 1 | A | G | Homozygous   |
| NC_037653.1 | 7116775 | SNV | 1 | T | A | Homozygous   |
| NC_037653.1 | 7116805 | SNV | 1 | T | C | Heterozygous |
| NC_037653.1 | 7116818 | SNV | 1 | G | C | Heterozygous |
| NC_037653.1 | 7116820 | SNV | 1 | C | T | Heterozygous |
| NC_037653.1 | 7116912 | SNV | 1 | C | G | Heterozygous |
| NC_037653.1 | 7117171 | SNV | 1 | T | C | Homozygous   |
| NC_037653.1 | 7117235 | SNV | 1 | C | T | Heterozygous |
| NC_037653.1 | 7117336 | SNV | 1 | C | T | Heterozygous |
| NC_037653.1 | 7117597 | SNV | 1 | T | C | Heterozygous |
| NC_037653.1 | 7117636 | SNV | 1 | C | T | Homozygous   |
| NC_037653.1 | 7117718 | SNV | 1 | G | A | Heterozygous |
| NC_037653.1 | 7117753 | SNV | 1 | T | C | Homozygous   |
| NC_037653.1 | 7117862 | SNV | 1 | G | A | Heterozygous |



|             |         |     |   |   |   |              |
|-------------|---------|-----|---|---|---|--------------|
| NC_037653.1 | 7117865 | SNV | 1 | C | T | Homozygous   |
| NC_037653.1 | 7117870 | SNV | 1 | G | A | Heterozygous |
| NC_037653.1 | 7122334 | SNV | 1 | T | C | Homozygous   |
| NC_037653.1 | 7122336 | SNV | 1 | G | C | Homozygous   |
| NC_037653.1 | 7122340 | SNV | 1 | G | T | Homozygous   |
| NC_037653.1 | 7122352 | SNV | 1 | T | A | Homozygous   |
| NC_037653.1 | 7122356 | SNV | 1 | T | A | Homozygous   |
| NC_037653.1 | 7123849 | SNV | 1 | A | G | Heterozygous |
| NC_037653.1 | 7123996 | SNV | 1 | C | T | Heterozygous |
| NC_037653.1 | 7124413 | SNV | 1 | A | G | Heterozygous |
| NC_037653.1 | 7124431 | SNV | 1 | G | A | Homozygous   |
| NC_037653.1 | 7124436 | SNV | 1 | T | A | Heterozygous |
| NC_037653.1 | 7124444 | SNV | 1 | A | G | Heterozygous |
| NC_037653.1 | 7124492 | SNV | 1 | T | A | Heterozygous |
| NC_037653.1 | 7126019 | SNV | 1 | T | C | Heterozygous |
| NC_037653.1 | 7126061 | SNV | 1 | T | G | Homozygous   |
| NC_037653.1 | 7126410 | SNV | 1 | C | T | Heterozygous |
| NC_037653.1 | 7126616 | SNV | 1 | T | C | Homozygous   |
| NC_037653.1 | 7126722 | SNV | 1 | T | G | Homozygous   |
| NC_037653.1 | 7128494 | SNV | 1 | T | C | Homozygous   |
| NC_037653.1 | 7131271 | SNV | 1 | A | G | Homozygous   |
| NC_037653.1 | 7133072 | SNV | 1 | G | T | Homozygous   |
| NC_037653.1 | 7135960 | SNV | 1 | A | G | Homozygous   |
| NC_037653.1 | 7135969 | SNV | 1 | A | C | Homozygous   |
| NC_037653.1 | 7135978 | SNV | 1 | A | T | Homozygous   |
| NC_037653.1 | 7135981 | SNV | 1 | A | T | Homozygous   |
| NC_037653.1 | 7135987 | SNV | 1 | A | C | Homozygous   |
| NC_037653.1 | 7135990 | SNV | 1 | A | G | Homozygous   |
| NC_037653.1 | 7136035 | SNV | 1 | C | T | Heterozygous |
| NC_037653.1 | 7136041 | SNV | 1 | C | T | Homozygous   |
| NC_037653.1 | 7136044 | SNV | 1 | T | C | Homozygous   |
| NC_037653.1 | 7136052 | SNV | 1 | A | G | Homozygous   |
| NC_037653.1 | 7136486 | SNV | 1 | C | T | Heterozygous |
| NC_037653.1 | 7137528 | SNV | 1 | G | A | Heterozygous |
| NC_037653.1 | 7137563 | SNV | 1 | C | G | Homozygous   |
| NC_037653.1 | 7138195 | SNV | 1 | C | T | Homozygous   |
| NC_037653.1 | 7138218 | SNV | 1 | A | G | Homozygous   |
| NC_037653.1 | 7138221 | SNV | 1 | G | T | Homozygous   |
| NC_037653.1 | 7138239 | SNV | 1 | T | A | Homozygous   |
| NC_037653.1 | 7138241 | SNV | 1 | A | G | Homozygous   |
| NC_037653.1 | 7138282 | SNV | 1 | A | T | Homozygous   |
| NC_037653.1 | 7138297 | SNV | 1 | A | T | Homozygous   |
| NC_037653.1 | 7138300 | SNV | 1 | T | A | Homozygous   |
| NC_037653.1 | 7138302 | SNV | 1 | A | T | Homozygous   |
| NC_037653.1 | 7138309 | SNV | 1 | T | A | Homozygous   |
| NC_037653.1 | 7140920 | SNV | 1 | G | T | Homozygous   |
| NC_037653.1 | 7141310 | SNV | 1 | G | A | Homozygous   |
| NC_037653.1 | 7142219 | SNV | 1 | T | C | Homozygous   |
| NC_037653.1 | 7142306 | SNV | 1 | C | T | Homozygous   |
| NC_037653.1 | 7142628 | SNV | 1 | C | T | Heterozygous |
| NC_037653.1 | 7142905 | SNV | 1 | T | C | Homozygous   |

|                |         |     |   |   |   |              |
|----------------|---------|-----|---|---|---|--------------|
| NC_037653.1    | 7144603 | SNV | 1 | T | C | Homozygous   |
| NC_037653.1    | 7145858 | SNV | 1 | T | C | Homozygous   |
| NC_037653.1    | 7147266 | SNV | 1 | A | T | Homozygous   |
| NC_037653.1    | 7147450 | SNV | 1 | A | T | Homozygous   |
| NC_037653.1    | 7147458 | SNV | 1 | T | A | Homozygous   |
| NC_037653.1    | 7147474 | SNV | 1 | A | T | Homozygous   |
| NC_037653.1    | 7147502 | SNV | 1 | A | C | Homozygous   |
| NC_037653.1    | 7147636 | SNV | 1 | G | A | Homozygous   |
| NC_037653.1    | 7147643 | SNV | 1 | C | T | Homozygous   |
| NC_037653.1    | 7148727 | SNV | 1 | T | A | Heterozygous |
| NC_037653.1    | 7148729 | SNV | 1 | T | C | Heterozygous |
| NC_037653.1    | 7148731 | SNV | 1 | C | A | Heterozygous |
| NC_037653.1    | 7148733 | SNV | 1 | T | C | Heterozygous |
| NC_037653.1    | 7148735 | SNV | 1 | C | T | Heterozygous |
| NC_037653.1    | 7152694 | SNV | 1 | G | A | Homozygous   |
| NC_037653.1    | 7152800 | SNV | 1 | C | T | Homozygous   |
| NC_037653.1    | 7154868 | SNV | 1 | T | C | Heterozygous |
| NC_037653.1    | 7154906 | SNV | 1 | T | C | Heterozygous |
| NC_037653.1    | 7154913 | SNV | 1 | A | G | Heterozygous |
| NC_037653.1    | 7166886 | SNV | 1 | T | G | Homozygous   |
| NC_037653.1    | 7167489 | SNV | 1 | T | G | Homozygous   |
| NC_037653.1    | 7167493 | SNV | 1 | T | A | Homozygous   |
| NC_037653.1    | 7167498 | SNV | 1 | T | A | Homozygous   |
| NC_037653.1    | 7167501 | SNV | 1 | A | T | Homozygous   |
| NC_037653.1    | 7167654 | SNV | 1 | T | C | Homozygous   |
| NC_037653.1    | 7167879 | SNV | 1 | T | A | Homozygous   |
| NC_037653.1    | 7168504 | SNV | 1 | T | A | Homozygous   |
| NC_037653.1    | 7169508 | SNV | 1 | A | G | Heterozygous |
| NC_037653.1    | 7171021 | SNV | 1 | A | G | Homozygous   |
| NC_037653.1    | 7171449 | SNV | 1 | T | C | Homozygous   |
| NC_037653.1    | 7171861 | SNV | 1 | G | T | Heterozygous |
| NC_037653.1    | 7172778 | SNV | 1 | G | A | Homozygous   |
| NC_037653.1    | 7173055 | SNV | 1 | G | A | Heterozygous |
| NC_037653.1    | 7206369 | SNV | 1 | T | G | Heterozygous |
| NC_037653.1    | 7206370 | SNV | 1 | A | G | Heterozygous |
| NC_037653.1    | 7206373 | SNV | 1 | T | G | Heterozygous |
| NC_037653.1    | 7206378 | SNV | 1 | A | T | Heterozygous |
| NC_037653.1    | 7206381 | SNV | 1 | T | G | Heterozygous |
| NC_037653.1    | 7207930 | SNV | 1 | A | G | Homozygous   |
| NC_037653.1    | 7208893 | SNV | 1 | A | G | Homozygous   |
| NC_037653.1    | 7209002 | SNV | 1 | T | A | Homozygous   |
| NC_037653.1    | 7209191 | SNV | 1 | A | G | Homozygous   |
| NC_037653.1    | 7211513 | SNV | 1 | G | A | Homozygous   |
| NC_037653.1    | 7212690 | SNV | 1 | T | A | Homozygous   |
| NC_037653.1    | 7213388 | SNV | 1 | G | A | Homozygous   |
| NC_037653.1    | 7213934 | SNV | 1 | A | G | Homozygous   |
| NC_037653.1    | 7217089 | SNV | 1 | C | T | Homozygous   |
| NW_020555859.1 | 7485    | SNV | 1 | A | C | Homozygous   |
| NW_020555859.1 | 7487    | SNV | 1 | A | T | Homozygous   |
| NW_020555859.1 | 7494    | SNV | 1 | C | T | Homozygous   |
| NW_020555859.1 | 7540    | SNV | 1 | A | G | Heterozygous |

|                |       |     |   |   |   |              |
|----------------|-------|-----|---|---|---|--------------|
| NW_020555859.1 | 7547  | SNV | 1 | G | A | Homozygous   |
| NW_020555859.1 | 7552  | SNV | 1 | A | G | Heterozygous |
| NW_020555859.1 | 7555  | SNV | 1 | T | C | Heterozygous |
| NW_020555859.1 | 7584  | SNV | 1 | T | A | Heterozygous |
| NW_020555859.1 | 12387 | SNV | 1 | G | A | Homozygous   |
| NW_020555859.1 | 14977 | SNV | 1 | A | G | Homozygous   |
| NW_020555859.1 | 14984 | SNV | 1 | A | G | Homozygous   |
| NW_020555859.1 | 15003 | SNV | 1 | G | A | Heterozygous |
| NW_020555859.1 | 15010 | SNV | 1 | G | A | Heterozygous |
| NW_020555859.1 | 15035 | SNV | 1 | A | G | Homozygous   |
| NW_020555859.1 | 15080 | SNV | 1 | A | G | Homozygous   |
| NW_020555859.1 | 15083 | SNV | 1 | A | G | Homozygous   |
| NW_020555859.1 | 15104 | SNV | 1 | C | A | Heterozygous |
| NW_020555859.1 | 15127 | SNV | 1 | A | T | Homozygous   |
| NW_020555859.1 | 15136 | SNV | 1 | T | C | Homozygous   |
| NW_020555859.1 | 15146 | SNV | 1 | G | C | Homozygous   |
| NW_020555859.1 | 15167 | SNV | 1 | G | A | Homozygous   |
| NW_020555859.1 | 15177 | SNV | 1 | A | G | Homozygous   |
| NW_020555859.1 | 15196 | SNV | 1 | A | G | Homozygous   |
| NW_020555859.1 | 15221 | SNV | 1 | A | G | Homozygous   |
| NW_020555859.1 | 15261 | SNV | 1 | T | A | Heterozygous |
| NW_020555859.1 | 15294 | SNV | 1 | A | G | Homozygous   |
| NW_020555859.1 | 15317 | SNV | 1 | T | C | Homozygous   |
| NW_020555859.1 | 15324 | SNV | 1 | A | G | Homozygous   |
| NW_020555859.1 | 15339 | SNV | 1 | T | C | Homozygous   |
| NW_020555859.1 | 15367 | SNV | 1 | G | A | Homozygous   |
| NW_020555859.1 | 15387 | SNV | 1 | T | C | Heterozygous |
| NW_020555859.1 | 15392 | SNV | 1 | A | G | Heterozygous |
| NW_020555859.1 | 15434 | SNV | 1 | A | G | Homozygous   |
| NW_020555859.1 | 15544 | SNV | 1 | C | T | Homozygous   |
| NW_020555859.1 | 15554 | SNV | 1 | C | G | Homozygous   |
| NW_020555859.1 | 15556 | SNV | 1 | A | G | Homozygous   |
| NW_020555859.1 | 15566 | SNV | 1 | T | G | Homozygous   |
| NW_020555859.1 | 15573 | SNV | 1 | G | A | Heterozygous |
| NW_020555859.1 | 15575 | SNV | 1 | A | G | Heterozygous |
| NW_020555859.1 | 15578 | SNV | 1 | A | G | Heterozygous |
| NW_020555859.1 | 15606 | SNV | 1 | A | G | Heterozygous |
| NW_020555859.1 | 15613 | SNV | 1 | A | G | Heterozygous |
| NW_020555859.1 | 15620 | SNV | 1 | A | G | Heterozygous |
| NW_020555859.1 | 15625 | SNV | 1 | T | G | Homozygous   |
| NW_020555859.1 | 15657 | SNV | 1 | C | T | Homozygous   |
| NW_020555859.1 | 15716 | SNV | 1 | T | C | Homozygous   |
| NW_020555859.1 | 15722 | SNV | 1 | A | T | Homozygous   |
| NW_020555859.1 | 15769 | SNV | 1 | A | G | Homozygous   |
| NW_020555859.1 | 15793 | SNV | 1 | A | G | Homozygous   |
| NW_020555859.1 | 15819 | SNV | 1 | A | G | Homozygous   |
| NW_020555859.1 | 15867 | SNV | 1 | T | G | Heterozygous |
| NW_020555859.1 | 15872 | SNV | 1 | A | G | Homozygous   |
| NW_020555859.1 | 15881 | SNV | 1 | A | G | Heterozygous |
| NW_020555859.1 | 15896 | SNV | 1 | T | G | Heterozygous |
| NW_020555859.1 | 15902 | SNV | 1 | T | A | Heterozygous |

|                |       |     |   |   |   |              |
|----------------|-------|-----|---|---|---|--------------|
| NW_020555859.1 | 15907 | SNV | 1 | C | G | Heterozygous |
| NW_020555859.1 | 15910 | SNV | 1 | G | A | Heterozygous |
| NW_020555859.1 | 15915 | SNV | 1 | G | A | Homozygous   |
| NW_020555859.1 | 15918 | SNV | 1 | T | C | Homozygous   |
| NW_020555859.1 | 15958 | SNV | 1 | T | C | Homozygous   |
| NW_020555859.1 | 15969 | SNV | 1 | C | G | Homozygous   |
| NW_020555859.1 | 15974 | SNV | 1 | T | C | Homozygous   |
| NW_020555859.1 | 16051 | SNV | 1 | T | C | Homozygous   |
| NW_020555859.1 | 16069 | SNV | 1 | G | A | Homozygous   |
| NW_020555859.1 | 16093 | SNV | 1 | A | G | Homozygous   |
| NW_020555859.1 | 16151 | SNV | 1 | A | G | Heterozygous |
| NW_020555859.1 | 16160 | SNV | 1 | A | G | Homozygous   |
| NW_020555859.1 | 16171 | SNV | 1 | G | T | Homozygous   |
| NW_020555859.1 | 16190 | SNV | 1 | C | G | Heterozygous |
| NW_020555859.1 | 16192 | SNV | 1 | T | G | Heterozygous |
| NW_020555859.1 | 16194 | SNV | 1 | A | G | Homozygous   |
| NW_020555859.1 | 16196 | SNV | 1 | A | G | Heterozygous |
| NW_020555859.1 | 16243 | SNV | 1 | T | C | Homozygous   |
| NW_020555859.1 | 16246 | SNV | 1 | T | C | Homozygous   |
| NW_020555859.1 | 16268 | SNV | 1 | G | C | Heterozygous |
| NW_020555859.1 | 16270 | SNV | 1 | A | T | Heterozygous |
| NW_020555859.1 | 16283 | SNV | 1 | A | G | Heterozygous |
| NW_020555859.1 | 16341 | SNV | 1 | T | G | Heterozygous |
| NW_020555859.1 | 16350 | SNV | 1 | G | A | Heterozygous |
| NW_020555859.1 | 16372 | SNV | 1 | G | A | Homozygous   |
| NW_020555859.1 | 16406 | SNV | 1 | G | T | Heterozygous |
| NW_020555859.1 | 16473 | SNV | 1 | C | T | Homozygous   |
| NW_020555859.1 | 16480 | SNV | 1 | A | T | Homozygous   |
| NW_020555859.1 | 16486 | SNV | 1 | T | C | Homozygous   |
| NW_020555859.1 | 16493 | SNV | 1 | A | T | Homozygous   |
| NW_020555859.1 | 16523 | SNV | 1 | T | A | Homozygous   |
| NW_020555859.1 | 16539 | SNV | 1 | T | C | Homozygous   |
| NW_020555859.1 | 16565 | SNV | 1 | T | C | Homozygous   |
| NW_020555859.1 | 16570 | SNV | 1 | T | C | Homozygous   |
| NW_020555859.1 | 16582 | SNV | 1 | T | C | Homozygous   |
| NW_020555859.1 | 16589 | SNV | 1 | T | C | Homozygous   |
| NW_020555859.1 | 16618 | SNV | 1 | C | T | Homozygous   |
| NW_020555859.1 | 16667 | SNV | 1 | A | G | Heterozygous |
| NW_020555859.1 | 16669 | SNV | 1 | A | G | Heterozygous |
| NW_020555859.1 | 16688 | SNV | 1 | A | G | Homozygous   |
| NW_020555859.1 | 16699 | SNV | 1 | T | A | Homozygous   |
| NW_020555859.1 | 16727 | SNV | 1 | G | A | Homozygous   |
| NW_020555859.1 | 16743 | SNV | 1 | T | C | Homozygous   |
| NW_020555859.1 | 16753 | SNV | 1 | T | C | Homozygous   |
| NW_020555859.1 | 16776 | SNV | 1 | G | A | Homozygous   |
| NW_020555859.1 | 16782 | SNV | 1 | G | A | Homozygous   |
| NW_020555859.1 | 16819 | SNV | 1 | T | C | Homozygous   |
| NW_020555859.1 | 16865 | SNV | 1 | C | T | Homozygous   |
| NW_020555859.1 | 16906 | SNV | 1 | C | A | Homozygous   |
| NW_020555859.1 | 16910 | SNV | 1 | A | G | Homozygous   |
| NW_020555859.1 | 16953 | SNV | 1 | G | A | Homozygous   |

|                |        |     |   |   |   |              |
|----------------|--------|-----|---|---|---|--------------|
| NW_020555859.1 | 16968  | SNV | 1 | T | A | Homozygous   |
| NW_020555859.1 | 17002  | SNV | 1 | T | G | Homozygous   |
| NW_020555859.1 | 17005  | SNV | 1 | A | G | Homozygous   |
| NW_020555859.1 | 137300 | SNV | 1 | T | C | Heterozygous |
| NW_020555859.1 | 137366 | SNV | 1 | T | C | Heterozygous |
| NW_020555859.1 | 137377 | SNV | 1 | T | C | Homozygous   |
| NW_020555859.1 | 137390 | SNV | 1 | T | C | Homozygous   |
| NW_020555859.1 | 137409 | SNV | 1 | G | A | Heterozygous |
| NW_020555859.1 | 138554 | SNV | 1 | T | G | Homozygous   |
| NW_020555859.1 | 138569 | SNV | 1 | T | G | Homozygous   |
| NW_020555859.1 | 138574 | SNV | 1 | T | G | Homozygous   |
| NW_020555859.1 | 138581 | SNV | 1 | A | G | Homozygous   |
| NW_020555859.1 | 143719 | SNV | 1 | C | T | Homozygous   |
| NW_020555859.1 | 145970 | SNV | 1 | G | A | Heterozygous |
| NW_020555859.1 | 155062 | SNV | 1 | A | T | Heterozygous |
| NW_020555859.1 | 155213 | SNV | 1 | T | A | Homozygous   |
| NW_020555859.1 | 155369 | SNV | 1 | A | G | Heterozygous |
| NW_020555859.1 | 156269 | SNV | 1 | T | A | Homozygous   |
| NW_020555859.1 | 157128 | SNV | 1 | A | C | Homozygous   |
| NW_020555859.1 | 157130 | SNV | 1 | A | T | Heterozygous |
| NW_020555859.1 | 157144 | SNV | 1 | A | T | Homozygous   |
| NW_020555859.1 | 169428 | SNV | 1 | A | T | Homozygous   |
| NW_020555859.1 | 169431 | SNV | 1 | T | G | Homozygous   |
| NW_020555859.1 | 205111 | SNV | 1 | A | T | Homozygous   |
| NW_020555859.1 | 205643 | SNV | 1 | T | C | Heterozygous |
| NW_020555859.1 | 207772 | SNV | 1 | T | C | Homozygous   |
| NW_020555859.1 | 207788 | SNV | 1 | G | T | Homozygous   |
| NW_020555859.1 | 208064 | SNV | 1 | T | G | Homozygous   |
| NW_020555859.1 | 208066 | SNV | 1 | T | C | Homozygous   |
| NW_020555859.1 | 208074 | SNV | 1 | T | A | Homozygous   |
| NW_020555859.1 | 211860 | SNV | 1 | G | A | Homozygous   |
| NW_020555859.1 | 211872 | SNV | 1 | A | G | Homozygous   |
| NW_020555859.1 | 211879 | SNV | 1 | G | A | Homozygous   |
| NW_020555859.1 | 211887 | SNV | 1 | T | C | Homozygous   |
| NW_020555859.1 | 211890 | SNV | 1 | C | T | Homozygous   |
| NW_020555859.1 | 211911 | SNV | 1 | G | A | Homozygous   |
| NW_020555859.1 | 211916 | SNV | 1 | A | T | Homozygous   |
| NW_020555859.1 | 211923 | SNV | 1 | T | C | Homozygous   |
| NW_020555859.1 | 213353 | SNV | 1 | A | G | Heterozygous |
| NW_020555859.1 | 213357 | SNV | 1 | A | G | Homozygous   |
| NW_020555859.1 | 213372 | SNV | 1 | T | C | Homozygous   |
| NW_020555859.1 | 218738 | SNV | 1 | T | C | Homozygous   |
| NW_020555859.1 | 231593 | SNV | 1 | A | G | Heterozygous |
| NW_020555859.1 | 231629 | SNV | 1 | A | C | Heterozygous |
| NW_020555859.1 | 231633 | SNV | 1 | A | T | Homozygous   |
| NW_020555859.1 | 231670 | SNV | 1 | A | T | Heterozygous |
| NW_020555859.1 | 231716 | SNV | 1 | T | A | Heterozygous |
| NW_020555859.1 | 236785 | SNV | 1 | G | A | Homozygous   |
| NW_020555859.1 | 236792 | SNV | 1 | A | T | Homozygous   |
| NW_020555859.1 | 236800 | SNV | 1 | T | G | Homozygous   |
| NW_020555859.1 | 236802 | SNV | 1 | G | C | Homozygous   |

|                |        |     |   |   |   |              |
|----------------|--------|-----|---|---|---|--------------|
| NW_020555859.1 | 236805 | SNV | 1 | T | A | Homozygous   |
| NW_020555859.1 | 236808 | SNV | 1 | G | T | Homozygous   |
| NW_020555859.1 | 236813 | SNV | 1 | T | A | Homozygous   |
| NW_020555859.1 | 237393 | SNV | 1 | T | A | Heterozygous |
| NW_020555859.1 | 237395 | SNV | 1 | T | A | Heterozygous |
| NW_020555859.1 | 237417 | SNV | 1 | A | T | Homozygous   |
| NW_020555859.1 | 237458 | SNV | 1 | G | T | Heterozygous |
| NW_020555859.1 | 237473 | SNV | 1 | A | G | Heterozygous |
| NW_020555859.1 | 239988 | SNV | 1 | T | A | Heterozygous |
| NW_020555859.1 | 240008 | SNV | 1 | C | T | Heterozygous |
| NW_020555859.1 | 240018 | SNV | 1 | A | G | Heterozygous |
| NW_020555859.1 | 241120 | SNV | 1 | C | A | Homozygous   |
| NW_020555859.1 | 241152 | SNV | 1 | A | T | Homozygous   |
| NW_020555859.1 | 245701 | SNV | 1 | G | A | Homozygous   |
| NW_020555859.1 | 245706 | SNV | 1 | A | C | Homozygous   |
| NW_020555859.1 | 259924 | SNV | 1 | A | C | Homozygous   |
| NW_020555859.1 | 259945 | SNV | 1 | T | A | Homozygous   |
| NW_020555859.1 | 259947 | SNV | 1 | G | A | Homozygous   |
| NW_020555859.1 | 259958 | SNV | 1 | T | A | Homozygous   |
| NW_020555859.1 | 268193 | SNV | 1 | A | T | Homozygous   |
| NW_020555859.1 | 268227 | SNV | 1 | A | T | Homozygous   |
| NW_020555859.1 | 268234 | SNV | 1 | A | G | Homozygous   |
| NW_020555859.1 | 268241 | SNV | 1 | A | C | Homozygous   |
| NW_020555859.1 | 268243 | SNV | 1 | A | T | Homozygous   |
| NW_020555859.1 | 268245 | SNV | 1 | A | G | Homozygous   |
| NW_020555859.1 | 268259 | SNV | 1 | A | T | Heterozygous |
| NW_020555859.1 | 268261 | SNV | 1 | A | T | Heterozygous |
| NW_020555859.1 | 268269 | SNV | 1 | A | T | Heterozygous |
| NW_020555859.1 | 268270 | SNV | 1 | A | T | Heterozygous |
| NW_020555859.1 | 268272 | SNV | 1 | A | T | Heterozygous |
| NW_020555859.1 | 270391 | SNV | 1 | G | A | Homozygous   |
| NW_020555859.1 | 270393 | SNV | 1 | G | A | Homozygous   |
| NW_020555859.1 | 270405 | SNV | 1 | A | G | Homozygous   |
| NW_020555859.1 | 270413 | SNV | 1 | A | T | Homozygous   |
| NW_020555859.1 | 270416 | SNV | 1 | T | C | Homozygous   |
| NW_020555859.1 | 270419 | SNV | 1 | A | G | Homozygous   |
| NW_020555859.1 | 273024 | SNV | 1 | A | C | Homozygous   |
| NW_020555859.1 | 273038 | SNV | 1 | G | A | Homozygous   |
| NW_020555859.1 | 273041 | SNV | 1 | T | C | Homozygous   |
| NW_020555859.1 | 274144 | SNV | 1 | A | T | Homozygous   |
| NW_020555859.1 | 274149 | SNV | 1 | T | A | Homozygous   |
| NW_020555859.1 | 276540 | SNV | 1 | T | G | Homozygous   |
| NW_020555859.1 | 276550 | SNV | 1 | A | T | Homozygous   |
| NW_020555859.1 | 276570 | SNV | 1 | A | T | Homozygous   |
| NW_020555859.1 | 281575 | SNV | 1 | T | A | Homozygous   |
| NW_020555859.1 | 296941 | SNV | 1 | C | T | Homozygous   |
| NW_020555859.1 | 297055 | SNV | 1 | G | A | Heterozygous |
| NW_020555859.1 | 297299 | SNV | 1 | A | G | Homozygous   |
| NW_020555859.1 | 297379 | SNV | 1 | G | C | Homozygous   |
| NW_020555859.1 | 297434 | SNV | 1 | C | T | Homozygous   |
| NW_020555859.1 | 297527 | SNV | 1 | A | C | Homozygous   |

|                |        |     |   |   |   |              |
|----------------|--------|-----|---|---|---|--------------|
| NW_020555859.1 | 297620 | SNV | 1 | T | C | Homozygous   |
| NW_020555859.1 | 300676 | SNV | 1 | G | A | Heterozygous |
| NW_020555859.1 | 300678 | SNV | 1 | A | G | Heterozygous |
| NW_020555859.1 | 301268 | SNV | 1 | A | G | Homozygous   |
| NW_020555859.1 | 301375 | SNV | 1 | A | T | Homozygous   |
| NW_020555859.1 | 301384 | SNV | 1 | G | A | Heterozygous |
| NW_020555859.1 | 326855 | SNV | 1 | A | C | Heterozygous |
| NW_020555859.1 | 326860 | SNV | 1 | T | C | Heterozygous |
| NW_020555859.1 | 326864 | SNV | 1 | A | T | Heterozygous |
| NW_020555859.1 | 326867 | SNV | 1 | A | T | Heterozygous |
| NW_020555859.1 | 326870 | SNV | 1 | A | T | Heterozygous |
| NW_020555859.1 | 326878 | SNV | 1 | T | C | Heterozygous |
| NW_020555859.1 | 326891 | SNV | 1 | A | T | Heterozygous |
| NW_020555859.1 | 326895 | SNV | 1 | A | T | Heterozygous |
| NW_020555859.1 | 330600 | SNV | 1 | A | G | Homozygous   |
| NW_020555859.1 | 330898 | SNV | 1 | C | T | Heterozygous |
| NW_020555859.1 | 331571 | SNV | 1 | G | A | Homozygous   |
| NW_020555859.1 | 331604 | SNV | 1 | C | T | Heterozygous |
| NW_020555859.1 | 331611 | SNV | 1 | G | T | Heterozygous |
| NW_020555859.1 | 360864 | SNV | 1 | T | A | Homozygous   |
| NW_020555859.1 | 360883 | SNV | 1 | T | G | Homozygous   |
| NW_020555859.1 | 360890 | SNV | 1 | G | T | Homozygous   |
| NW_020555859.1 | 360896 | SNV | 1 | A | T | Homozygous   |
| NW_020555859.1 | 360901 | SNV | 1 | T | A | Homozygous   |
| NW_020555859.1 | 366320 | SNV | 1 | T | C | Homozygous   |
| NW_020555859.1 | 366335 | SNV | 1 | C | T | Homozygous   |
| NW_020555859.1 | 366337 | SNV | 1 | A | T | Homozygous   |
| NW_020555859.1 | 366341 | SNV | 1 | T | A | Homozygous   |
| NW_020555859.1 | 366345 | SNV | 1 | C | A | Homozygous   |
| NW_020555859.1 | 366351 | SNV | 1 | A | G | Homozygous   |
| NW_020555859.1 | 366353 | SNV | 1 | A | T | Homozygous   |
| NW_020555859.1 | 366454 | SNV | 1 | A | G | Homozygous   |
| NW_020555859.1 | 366456 | SNV | 1 | A | G | Heterozygous |
| NW_020555859.1 | 366478 | SNV | 1 | A | G | Heterozygous |
| NW_020555859.1 | 366480 | SNV | 1 | A | G | Heterozygous |
| NW_020555859.1 | 366491 | SNV | 1 | T | C | Heterozygous |
| NW_020555859.1 | 366493 | SNV | 1 | T | C | Heterozygous |
| NW_020555859.1 | 413456 | SNV | 1 | T | C | Heterozygous |
| NW_020555859.1 | 424019 | SNV | 1 | A | T | Homozygous   |
| NW_020555859.1 | 424517 | SNV | 1 | G | A | Homozygous   |
| NW_020555859.1 | 427106 | SNV | 1 | G | A | Homozygous   |
| NW_020555859.1 | 427131 | SNV | 1 | C | T | Heterozygous |
| NW_020555859.1 | 427293 | SNV | 1 | T | C | Heterozygous |
| NW_020555859.1 | 427299 | SNV | 1 | T | C | Heterozygous |
| NW_020555859.1 | 427674 | SNV | 1 | C | A | Homozygous   |
| NW_020555859.1 | 427901 | SNV | 1 | G | A | Heterozygous |
| NW_020555859.1 | 430715 | SNV | 1 | A | G | Homozygous   |
| NW_020555859.1 | 430820 | SNV | 1 | G | T | Homozygous   |
| NW_020555859.1 | 433355 | SNV | 1 | A | T | Homozygous   |
| NW_020555859.1 | 433380 | SNV | 1 | T | C | Homozygous   |
| NW_020555859.1 | 433386 | SNV | 1 | A | C | Homozygous   |

|                |        |     |   |   |   |              |
|----------------|--------|-----|---|---|---|--------------|
| NW_020555859.1 | 433391 | SNV | 1 | A | T | Homozygous   |
| NW_020555859.1 | 433393 | SNV | 1 | A | T | Homozygous   |
| NW_020555859.1 | 433894 | SNV | 1 | T | G | Homozygous   |
| NW_020555859.1 | 434331 | SNV | 1 | T | C | Heterozygous |
| NW_020555859.1 | 434757 | SNV | 1 | T | A | Homozygous   |
| NW_020555859.1 | 434761 | SNV | 1 | T | C | Homozygous   |
| NW_020555859.1 | 434765 | SNV | 1 | A | T | Homozygous   |
| NW_020555859.1 | 435914 | SNV | 1 | A | G | Heterozygous |
| NW_020555859.1 | 436191 | SNV | 1 | C | A | Homozygous   |
| NW_020555859.1 | 436402 | SNV | 1 | C | T | Homozygous   |
| NW_020555859.1 | 436404 | SNV | 1 | A | C | Homozygous   |
| NW_020555859.1 | 436806 | SNV | 1 | T | C | Heterozygous |
| NW_020555859.1 | 436815 | SNV | 1 | T | C | Heterozygous |
| NW_020555859.1 | 436824 | SNV | 1 | T | C | Heterozygous |
| NW_020555859.1 | 437553 | SNV | 1 | G | C | Heterozygous |
| NW_020555859.1 | 437574 | SNV | 1 | T | C | Heterozygous |
| NW_020555859.1 | 437578 | SNV | 1 | T | C | Heterozygous |
| NW_020555859.1 | 437580 | SNV | 1 | T | C | Heterozygous |
| NW_020555859.1 | 437583 | SNV | 1 | T | C | Heterozygous |
| NW_020555859.1 | 437585 | SNV | 1 | T | C | Heterozygous |
| NW_020555859.1 | 444957 | SNV | 1 | C | T | Heterozygous |
| NW_020555859.1 | 445210 | SNV | 1 | G | A | Heterozygous |
| NW_020555859.1 | 446402 | SNV | 1 | T | G | Heterozygous |
| NW_020555859.1 | 446406 | SNV | 1 | T | G | Heterozygous |
| NW_020555859.1 | 446410 | SNV | 1 | T | C | Heterozygous |
| NW_020555859.1 | 446415 | SNV | 1 | G | A | Heterozygous |
| NW_020555859.1 | 446538 | SNV | 1 | A | G | Homozygous   |
| NW_020555859.1 | 447444 | SNV | 1 | T | C | Homozygous   |
| NW_020555859.1 | 449013 | SNV | 1 | T | C | Homozygous   |
| NW_020555859.1 | 449017 | SNV | 1 | T | A | Heterozygous |
| NW_020555859.1 | 449048 | SNV | 1 | C | G | Heterozygous |
| NW_020555859.1 | 449526 | SNV | 1 | A | T | Heterozygous |
| NW_020555859.1 | 449540 | SNV | 1 | A | G | Heterozygous |
| NW_020555859.1 | 449557 | SNV | 1 | T | A | Heterozygous |
| NW_020555859.1 | 449563 | SNV | 1 | T | G | Heterozygous |
| NW_020555859.1 | 450351 | SNV | 1 | A | G | Homozygous   |
| NW_020555859.1 | 450715 | SNV | 1 | C | G | Homozygous   |
| NW_020555859.1 | 450882 | SNV | 1 | G | A | Heterozygous |
| NW_020555859.1 | 453421 | SNV | 1 | A | G | Homozygous   |
| NW_020555859.1 | 453466 | SNV | 1 | T | C | Homozygous   |
| NW_020555859.1 | 453609 | SNV | 1 | T | C | Heterozygous |
| NW_020555859.1 | 454622 | SNV | 1 | T | C | Homozygous   |
| NW_020555859.1 | 454664 | SNV | 1 | T | C | Homozygous   |
| NW_020555859.1 | 454860 | SNV | 1 | C | T | Heterozygous |
| NW_020555859.1 | 456444 | SNV | 1 | C | T | Homozygous   |
| NW_020555859.1 | 456547 | SNV | 1 | T | C | Heterozygous |
| NW_020555859.1 | 456943 | SNV | 1 | T | C | Homozygous   |
| NW_020555859.1 | 456991 | SNV | 1 | G | A | Heterozygous |
| NW_020555859.1 | 457204 | SNV | 1 | T | C | Homozygous   |
| NW_020555859.1 | 457256 | SNV | 1 | A | G | Homozygous   |
| NW_020555859.1 | 458272 | SNV | 1 | T | C | Homozygous   |



|                |        |     |   |   |   |              |
|----------------|--------|-----|---|---|---|--------------|
| NW_020555859.1 | 458386 | SNV | 1 | A | G | Homozygous   |
| NW_020555859.1 | 458985 | SNV | 1 | T | A | Homozygous   |
| NW_020555859.1 | 459296 | SNV | 1 | G | C | Homozygous   |
| NW_020555859.1 | 459717 | SNV | 1 | T | C | Homozygous   |
| NW_020555859.1 | 460454 | SNV | 1 | C | A | Heterozygous |
| NW_020555859.1 | 461190 | SNV | 1 | C | T | Homozygous   |
| NW_020555859.1 | 462446 | SNV | 1 | G | C | Homozygous   |
| NW_020555859.1 | 463096 | SNV | 1 | T | C | Homozygous   |
| NW_020555859.1 | 463136 | SNV | 1 | T | C | Homozygous   |
| NW_020555859.1 | 463637 | SNV | 1 | C | T | Heterozygous |
| NW_020555859.1 | 463642 | SNV | 1 | C | T | Heterozygous |
| NW_020555859.1 | 463738 | SNV | 1 | G | A | Homozygous   |
| NW_020555859.1 | 463755 | SNV | 1 | A | G | Heterozygous |
| NW_020555859.1 | 464295 | SNV | 1 | T | A | Heterozygous |
| NW_020555859.1 | 464295 | SNV | 1 | T | G | Heterozygous |
| NW_020555859.1 | 464337 | SNV | 1 | T | C | Heterozygous |
| NW_020555859.1 | 464351 | SNV | 1 | T | C | Homozygous   |
| NW_020555859.1 | 479938 | SNV | 1 | G | A | Homozygous   |
| NW_020555859.1 | 479950 | SNV | 1 | G | A | Homozygous   |
| NW_020555859.1 | 479967 | SNV | 1 | C | T | Homozygous   |
| NW_020555859.1 | 479976 | SNV | 1 | C | T | Homozygous   |
| NW_020555859.1 | 479982 | SNV | 1 | A | G | Homozygous   |
| NW_020555859.1 | 479992 | SNV | 1 | C | T | Homozygous   |
| NW_020555859.1 | 479998 | SNV | 1 | G | A | Homozygous   |
| NW_020555859.1 | 480001 | SNV | 1 | T | C | Homozygous   |
| NW_020555859.1 | 480045 | SNV | 1 | T | C | Homozygous   |
| NW_020555859.1 | 480050 | SNV | 1 | G | A | Homozygous   |
| NW_020555859.1 | 480061 | SNV | 1 | A | G | Homozygous   |
| NW_020555859.1 | 480070 | SNV | 1 | A | G | Homozygous   |
| NW_020555859.1 | 480074 | SNV | 1 | T | C | Homozygous   |
| NW_020555860.1 | 197283 | SNV | 1 | C | T | Heterozygous |
| NW_020555860.1 | 197357 | SNV | 1 | G | A | Heterozygous |
| NW_020555860.1 | 197359 | SNV | 1 | T | A | Heterozygous |
| NW_020555860.1 | 197610 | SNV | 1 | G | T | Homozygous   |
| NW_020555860.1 | 198185 | SNV | 1 | A | T | Homozygous   |
| NW_020555862.1 | 20514  | SNV | 1 | T | C | Homozygous   |
| NW_020555862.1 | 20570  | SNV | 1 | A | C | Homozygous   |
| NW_020555862.1 | 20573  | SNV | 1 | A | T | Homozygous   |
| NW_020555862.1 | 20576  | SNV | 1 | A | T | Homozygous   |
| NW_020555862.1 | 20579  | SNV | 1 | A | T | Homozygous   |
| NW_020555863.1 | 2107   | SNV | 1 | A | T | Heterozygous |
| NW_020555863.1 | 2119   | SNV | 1 | T | C | Heterozygous |
| NW_020555863.1 | 2120   | SNV | 1 | A | G | Heterozygous |
| NW_020555863.1 | 2144   | SNV | 1 | T | C | Heterozygous |
| NW_020555863.1 | 52059  | SNV | 1 | T | G | Heterozygous |
| NW_020555863.1 | 52322  | SNV | 1 | A | G | Homozygous   |
| NW_020555863.1 | 52331  | SNV | 1 | T | C | Homozygous   |
| NW_020555863.1 | 52362  | SNV | 1 | G | A | Homozygous   |
| NW_020555863.1 | 52367  | SNV | 1 | C | T | Homozygous   |
| NW_020555864.1 | 67827  | SNV | 1 | T | A | Heterozygous |
| NW_020555864.1 | 67992  | SNV | 1 | G | A | Homozygous   |

|                |       |     |   |   |   |              |
|----------------|-------|-----|---|---|---|--------------|
| NW_020555864.1 | 68099 | SNV | 1 | A | T | Heterozygous |
| NW_020555864.1 | 68103 | SNV | 1 | C | T | Heterozygous |
| NW_020555864.1 | 68135 | SNV | 1 | A | G | Heterozygous |
| NW_020555864.1 | 69218 | SNV | 1 | T | C | Heterozygous |
| NW_020555864.1 | 69530 | SNV | 1 | G | A | Heterozygous |
| NW_020555864.1 | 69545 | SNV | 1 | A | G | Heterozygous |
| NW_020555864.1 | 69550 | SNV | 1 | A | G | Heterozygous |
| NW_020555864.1 | 69559 | SNV | 1 | A | G | Homozygous   |
| NW_020555864.1 | 69561 | SNV | 1 | G | T | Homozygous   |
| NW_020555866.1 | 21663 | SNV | 1 | T | A | Heterozygous |
| NW_020555866.1 | 22031 | SNV | 1 | T | C | Heterozygous |
| NW_020555866.1 | 22583 | SNV | 1 | T | C | Homozygous   |
| NW_020555867.1 | 40255 | SNV | 1 | C | T | Homozygous   |
| NW_020555869.1 | 8323  | SNV | 1 | C | T | Heterozygous |
| NW_020555869.1 | 8341  | SNV | 1 | T | A | Heterozygous |
| NW_020555869.1 | 8715  | SNV | 1 | C | T | Heterozygous |
| NW_020555869.1 | 9418  | SNV | 1 | G | A | Homozygous   |
| NW_020555869.1 | 9455  | SNV | 1 | G | A | Heterozygous |
| NW_020555869.1 | 10154 | SNV | 1 | G | A | Homozygous   |
| NW_020555869.1 | 10161 | SNV | 1 | G | A | Homozygous   |
| NW_020555869.1 | 10184 | SNV | 1 | G | A | Homozygous   |
| NW_020555869.1 | 10198 | SNV | 1 | T | C | Homozygous   |
| NW_020555869.1 | 10223 | SNV | 1 | T | C | Homozygous   |
| NW_020555869.1 | 11410 | SNV | 1 | C | T | Heterozygous |
| NW_020555869.1 | 12637 | SNV | 1 | A | G | Homozygous   |
| NW_020555869.1 | 12640 | SNV | 1 | T | G | Homozygous   |
| NW_020555869.1 | 12660 | SNV | 1 | C | T | Homozygous   |
| NW_020555869.1 | 12663 | SNV | 1 | A | C | Homozygous   |
| NW_020555869.1 | 12686 | SNV | 1 | G | T | Homozygous   |
| NW_020555869.1 | 12688 | SNV | 1 | T | A | Homozygous   |
| NW_020555869.1 | 15727 | SNV | 1 | G | A | Homozygous   |
| NW_020555869.1 | 17918 | SNV | 1 | A | G | Homozygous   |
| NW_020555869.1 | 17925 | SNV | 1 | A | T | Homozygous   |
| NW_020555869.1 | 17932 | SNV | 1 | T | A | Homozygous   |
| NW_020555869.1 | 17955 | SNV | 1 | T | G | Homozygous   |
| NW_020555869.1 | 17975 | SNV | 1 | A | T | Heterozygous |
| NW_020555869.1 | 17984 | SNV | 1 | G | A | Heterozygous |
| NW_020555869.1 | 18005 | SNV | 1 | T | C | Heterozygous |
| NW_020555869.1 | 18018 | SNV | 1 | A | T | Heterozygous |
| NW_020555869.1 | 18367 | SNV | 1 | C | T | Heterozygous |
| NW_020555869.1 | 33307 | SNV | 1 | C | T | Homozygous   |
| NW_020555869.1 | 33314 | SNV | 1 | C | T | Homozygous   |
| NW_020555869.1 | 33334 | SNV | 1 | T | C | Homozygous   |
| NW_020555869.1 | 33339 | SNV | 1 | G | A | Heterozygous |
| NW_020555869.1 | 33344 | SNV | 1 | G | A | Heterozygous |
| NW_020555869.1 | 33371 | SNV | 1 | T | C | Heterozygous |
| NW_020555869.1 | 33401 | SNV | 1 | T | C | Homozygous   |
| NW_020555869.1 | 33490 | SNV | 1 | G | A | Heterozygous |
| NW_020555869.1 | 33616 | SNV | 1 | A | G | Homozygous   |
| NW_020555869.1 | 33625 | SNV | 1 | A | G | Heterozygous |
| NW_020555869.1 | 33649 | SNV | 1 | C | A | Homozygous   |

|                |       |     |   |   |   |              |
|----------------|-------|-----|---|---|---|--------------|
| NW_020555869.1 | 33663 | SNV | 1 | C | T | Homozygous   |
| NW_020555869.1 | 33665 | SNV | 1 | G | A | Homozygous   |
| NW_020555869.1 | 33667 | SNV | 1 | T | C | Homozygous   |
| NW_020555869.1 | 33693 | SNV | 1 | T | C | Homozygous   |
| NW_020555869.1 | 33754 | SNV | 1 | G | A | Homozygous   |
| NW_020555869.1 | 33759 | SNV | 1 | G | A | Heterozygous |
| NW_020555869.1 | 33778 | SNV | 1 | C | T | Homozygous   |
| NW_020555869.1 | 34528 | SNV | 1 | T | A | Homozygous   |
| NW_020555869.1 | 38697 | SNV | 1 | C | T | Heterozygous |
| NW_020555869.1 | 38867 | SNV | 1 | C | T | Homozygous   |
| NW_020555869.1 | 39046 | SNV | 1 | A | G | Heterozygous |
| NW_020555869.1 | 40806 | SNV | 1 | A | T | Heterozygous |
| NW_020555869.1 | 40811 | SNV | 1 | C | T | Homozygous   |
| NW_020555869.1 | 40815 | SNV | 1 | C | T | Homozygous   |
| NW_020555869.1 | 40825 | SNV | 1 | T | C | Homozygous   |
| NW_020555869.1 | 41258 | SNV | 1 | A | G | Homozygous   |
| NW_020555869.1 | 41266 | SNV | 1 | G | A | Heterozygous |
| NW_020555869.1 | 41286 | SNV | 1 | A | G | Homozygous   |
| NW_020555870.1 | 4861  | SNV | 1 | A | T | Heterozygous |
| NW_020555870.1 | 4877  | SNV | 1 | T | C | Homozygous   |
| NW_020555870.1 | 4890  | SNV | 1 | A | T | Heterozygous |
| NW_020555870.1 | 4892  | SNV | 1 | A | G | Heterozygous |
| NW_020555870.1 | 11334 | SNV | 1 | G | A | Homozygous   |
| NW_020555870.1 | 11642 | SNV | 1 | T | A | Homozygous   |
| NW_020555870.1 | 11652 | SNV | 1 | C | T | Homozygous   |
| NW_020555870.1 | 11702 | SNV | 1 | C | T | Homozygous   |
| NW_020555870.1 | 11712 | SNV | 1 | C | T | Homozygous   |
| NW_020555870.1 | 23930 | SNV | 1 | T | C | Homozygous   |
| NW_020555870.1 | 23975 | SNV | 1 | A | G | Homozygous   |
| NW_020555870.1 | 24116 | SNV | 1 | C | T | Heterozygous |
| NW_020555870.1 | 24122 | SNV | 1 | T | C | Homozygous   |
| NW_020555870.1 | 24144 | SNV | 1 | A | T | Heterozygous |
| NW_020555870.1 | 24152 | SNV | 1 | A | G | Homozygous   |
| NW_020555870.1 | 24162 | SNV | 1 | T | C | Homozygous   |
| NW_020555870.1 | 24169 | SNV | 1 | A | G | Heterozygous |
| NW_020555870.1 | 24176 | SNV | 1 | C | T | Homozygous   |
| NW_020555870.1 | 24179 | SNV | 1 | C | T | Homozygous   |
| NW_020555870.1 | 24181 | SNV | 1 | T | C | Heterozygous |
| NW_020555870.1 | 24196 | SNV | 1 | A | G | Homozygous   |
| NW_020555870.1 | 24214 | SNV | 1 | T | C | Homozygous   |
| NW_020555870.1 | 24227 | SNV | 1 | C | T | Heterozygous |
| NW_020555870.1 | 24247 | SNV | 1 | T | C | Homozygous   |
| NW_020555870.1 | 24640 | SNV | 1 | A | T | Homozygous   |
| NW_020555870.1 | 26184 | SNV | 1 | T | C | Homozygous   |
| NW_020555870.1 | 26469 | SNV | 1 | T | C | Homozygous   |
| NW_020555870.1 | 26485 | SNV | 1 | A | T | Homozygous   |
| NW_020555870.1 | 26502 | SNV | 1 | A | T | Homozygous   |
| NW_020555870.1 | 26505 | SNV | 1 | T | A | Homozygous   |
| NW_020555870.1 | 26508 | SNV | 1 | A | T | Homozygous   |
| NW_020555870.1 | 26513 | SNV | 1 | A | G | Homozygous   |
| NW_020555870.1 | 26530 | SNV | 1 | A | G | Homozygous   |

|                |       |     |   |   |   |              |
|----------------|-------|-----|---|---|---|--------------|
| NW_020555870.1 | 26571 | SNV | 1 | G | A | Heterozygous |
| NW_020555870.1 | 27364 | SNV | 1 | A | G | Homozygous   |
| NW_020555870.1 | 27388 | SNV | 1 | C | T | Homozygous   |
| NW_020555870.1 | 27396 | SNV | 1 | A | T | Homozygous   |
| NW_020555870.1 | 27400 | SNV | 1 | A | G | Homozygous   |
| NW_020555870.1 | 27414 | SNV | 1 | C | G | Homozygous   |
| NW_020555870.1 | 27416 | SNV | 1 | T | C | Homozygous   |
| NW_020555870.1 | 27428 | SNV | 1 | G | A | Homozygous   |
| NW_020555870.1 | 31996 | SNV | 1 | G | A | Heterozygous |
| NW_020555870.1 | 32022 | SNV | 1 | G | A | Heterozygous |
| NW_020555870.1 | 32193 | SNV | 1 | C | T | Homozygous   |
| NW_020555870.1 | 32205 | SNV | 1 | C | T | Homozygous   |
| NW_020555870.1 | 32209 | SNV | 1 | G | T | Heterozygous |
| NW_020555870.1 | 32260 | SNV | 1 | C | T | Heterozygous |
| NW_020555870.1 | 32292 | SNV | 1 | A | G | Homozygous   |
| NW_020555870.1 | 32316 | SNV | 1 | G | A | Homozygous   |
| NW_020555870.1 | 32371 | SNV | 1 | A | G | Homozygous   |
| NW_020555870.1 | 32376 | SNV | 1 | T | C | Homozygous   |
| NW_020555870.1 | 32409 | SNV | 1 | T | C | Homozygous   |
| NW_020555870.1 | 32412 | SNV | 1 | C | T | Heterozygous |
| NW_020555870.1 | 32421 | SNV | 1 | A | G | Homozygous   |
| NW_020555870.1 | 32438 | SNV | 1 | C | A | Homozygous   |
| NW_020555870.1 | 32447 | SNV | 1 | A | G | Heterozygous |
| NW_020555870.1 | 32454 | SNV | 1 | G | A | Heterozygous |
| NW_020555870.1 | 32457 | SNV | 1 | G | A | Heterozygous |
| NW_020555870.1 | 32462 | SNV | 1 | G | C | Heterozygous |
| NW_020555870.1 | 32483 | SNV | 1 | T | C | Heterozygous |
| NW_020555870.1 | 32487 | SNV | 1 | C | T | Heterozygous |
| NW_020555870.1 | 32489 | SNV | 1 | C | T | Heterozygous |
| NW_020555870.1 | 32502 | SNV | 1 | G | A | Homozygous   |
| NW_020555870.1 | 32507 | SNV | 1 | T | C | Homozygous   |
| NW_020555870.1 | 32526 | SNV | 1 | C | T | Homozygous   |
| NW_020555870.1 | 32535 | SNV | 1 | G | C | Homozygous   |
| NW_020555870.1 | 32542 | SNV | 1 | C | T | Homozygous   |
| NW_020555870.1 | 32560 | SNV | 1 | A | G | Homozygous   |
| NW_020555870.1 | 32598 | SNV | 1 | A | T | Homozygous   |
| NW_020555870.1 | 32819 | SNV | 1 | T | C | Heterozygous |
| NW_020555870.1 | 32839 | SNV | 1 | C | T | Homozygous   |
| NW_020555870.1 | 32865 | SNV | 1 | G | A | Heterozygous |
| NW_020555870.1 | 32883 | SNV | 1 | C | T | Heterozygous |
| NW_020555870.1 | 33084 | SNV | 1 | T | C | Heterozygous |
| NW_020555870.1 | 33148 | SNV | 1 | T | C | Homozygous   |
| NW_020555870.1 | 33155 | SNV | 1 | T | C | Homozygous   |
| NW_020555870.1 | 33169 | SNV | 1 | A | G | Homozygous   |
| NW_020555870.1 | 33184 | SNV | 1 | A | G | Homozygous   |
| NW_020555870.1 | 33226 | SNV | 1 | A | T | Heterozygous |
| NW_020555870.1 | 33247 | SNV | 1 | A | G | Homozygous   |
| NW_020555870.1 | 33270 | SNV | 1 | G | C | Homozygous   |
| NW_020555870.1 | 33298 | SNV | 1 | C | T | Heterozygous |
| NW_020555870.1 | 33317 | SNV | 1 | T | C | Heterozygous |
| NW_020555870.1 | 33370 | SNV | 1 | G | A | Heterozygous |

|                |       |     |   |   |   |              |
|----------------|-------|-----|---|---|---|--------------|
| NW_020555870.1 | 33472 | SNV | 1 | G | A | Heterozygous |
| NW_020555870.1 | 33539 | SNV | 1 | A | G | Heterozygous |
| NW_020555870.1 | 33722 | SNV | 1 | C | T | Homozygous   |
| NW_020555870.1 | 34264 | SNV | 1 | T | C | Heterozygous |
| NW_020555870.1 | 34341 | SNV | 1 | C | T | Heterozygous |
| NW_020555870.1 | 34358 | SNV | 1 | G | A | Homozygous   |
| NW_020555870.1 | 34378 | SNV | 1 | A | G | Homozygous   |
| NW_020555870.1 | 34406 | SNV | 1 | T | C | Homozygous   |
| NW_020555870.1 | 34415 | SNV | 1 | G | A | Homozygous   |
| NW_020555870.1 | 34462 | SNV | 1 | T | C | Homozygous   |
| NW_020555870.1 | 35313 | SNV | 1 | A | G | Homozygous   |
| NW_020555870.1 | 35322 | SNV | 1 | A | G | Heterozygous |
| NW_020555870.1 | 37655 | SNV | 1 | T | A | Heterozygous |
| NW_020555870.1 | 37675 | SNV | 1 | A | G | Homozygous   |
| NW_020555870.1 | 37687 | SNV | 1 | T | C | Homozygous   |
| NW_020555870.1 | 39457 | SNV | 1 | T | C | Homozygous   |
| NW_020555870.1 | 39562 | SNV | 1 | C | T | Heterozygous |
| NW_020555870.1 | 39570 | SNV | 1 | G | A | Heterozygous |
| NW_020555870.1 | 39816 | SNV | 1 | G | A | Heterozygous |
| NW_020555870.1 | 39851 | SNV | 1 | C | G | Heterozygous |
| NW_020555870.1 | 39905 | SNV | 1 | G | A | Homozygous   |
| NW_020555870.1 | 39934 | SNV | 1 | A | G | Homozygous   |
| NW_020555870.1 | 39959 | SNV | 1 | G | A | Homozygous   |
| NW_020555870.1 | 41841 | SNV | 1 | T | C | Heterozygous |
| NW_020555870.1 | 41854 | SNV | 1 | A | G | Heterozygous |
| NW_020555870.1 | 41858 | SNV | 1 | G | A | Heterozygous |
| NW_020555870.1 | 42922 | SNV | 1 | A | G | Heterozygous |
| NW_020555870.1 | 42926 | SNV | 1 | A | G | Homozygous   |
| NW_020555870.1 | 45234 | SNV | 1 | T | C | Homozygous   |
| NW_020555870.1 | 45237 | SNV | 1 | A | G | Homozygous   |
| NW_020555870.1 | 45243 | SNV | 1 | T | C | Homozygous   |
| NW_020555870.1 | 45286 | SNV | 1 | G | C | Homozygous   |
| NW_020555870.1 | 45292 | SNV | 1 | C | T | Homozygous   |
| NW_020555870.1 | 46663 | SNV | 1 | T | C | Heterozygous |
| NW_020555880.1 | 1338  | SNV | 1 | T | A | Heterozygous |
| NW_020555880.1 | 1338  | SNV | 1 | T | G | Heterozygous |
| NW_020555880.1 | 1345  | SNV | 1 | T | C | Homozygous   |
| NW_020555880.1 | 1350  | SNV | 1 | C | T | Heterozygous |
| NW_020555880.1 | 1354  | SNV | 1 | T | C | Homozygous   |
| NW_020555880.1 | 1360  | SNV | 1 | C | T | Heterozygous |
| NW_020555880.1 | 1368  | SNV | 1 | G | A | Homozygous   |
| NW_020555880.1 | 1373  | SNV | 1 | A | T | Heterozygous |
| NW_020555880.1 | 1378  | SNV | 1 | A | G | Homozygous   |
| NW_020555880.1 | 1403  | SNV | 1 | G | A | Heterozygous |
| NW_020555880.1 | 1464  | SNV | 1 | T | C | Heterozygous |
| NW_020555880.1 | 1484  | SNV | 1 | A | G | Heterozygous |
| NW_020555880.1 | 1488  | SNV | 1 | A | G | Heterozygous |
| NW_020555880.1 | 1511  | SNV | 1 | G | A | Heterozygous |
| NW_020555880.1 | 1515  | SNV | 1 | T | C | Heterozygous |
| NW_020555880.1 | 1518  | SNV | 1 | G | A | Heterozygous |
| NW_020555880.1 | 1520  | SNV | 1 | A | G | Heterozygous |

|                |       |     |   |   |   |              |
|----------------|-------|-----|---|---|---|--------------|
| NW_020555880.1 | 1525  | SNV | 1 | G | C | Heterozygous |
| NW_020555880.1 | 1572  | SNV | 1 | A | G | Homozygous   |
| NW_020555880.1 | 1598  | SNV | 1 | A | G | Homozygous   |
| NW_020555880.1 | 1664  | SNV | 1 | G | A | Heterozygous |
| NW_020555880.1 | 1696  | SNV | 1 | G | A | Heterozygous |
| NW_020555880.1 | 1728  | SNV | 1 | A | G | Heterozygous |
| NW_020555880.1 | 1735  | SNV | 1 | C | T | Heterozygous |
| NW_020555880.1 | 1740  | SNV | 1 | T | C | Heterozygous |
| NW_020555880.1 | 1745  | SNV | 1 | T | A | Heterozygous |
| NW_020555880.1 | 27399 | SNV | 1 | G | T | Homozygous   |
| NW_020555880.1 | 27500 | SNV | 1 | C | T | Homozygous   |
| NW_020555886.1 | 15666 | SNV | 1 | T | A | Homozygous   |
| NW_020555886.1 | 15669 | SNV | 1 | G | T | Homozygous   |
| NW_020555886.1 | 15688 | SNV | 1 | A | T | Homozygous   |
| NW_020555886.1 | 15690 | SNV | 1 | T | A | Homozygous   |
| NW_020555886.1 | 15707 | SNV | 1 | T | A | Homozygous   |
| NW_020555886.1 | 17912 | SNV | 1 | A | T | Homozygous   |
| NW_020555886.1 | 17916 | SNV | 1 | T | A | Homozygous   |
| NW_020555886.1 | 17922 | SNV | 1 | A | C | Homozygous   |
| NW_020555886.1 | 17930 | SNV | 1 | T | C | Homozygous   |
| NW_020555886.1 | 17933 | SNV | 1 | T | A | Homozygous   |
| NW_020555886.1 | 17936 | SNV | 1 | A | G | Homozygous   |
| NW_020555886.1 | 17944 | SNV | 1 | T | A | Heterozygous |
| NW_020555889.1 | 14463 | SNV | 1 | A | T | Homozygous   |
| NW_020555889.1 | 14473 | SNV | 1 | T | C | Homozygous   |
| NW_020555889.1 | 14477 | SNV | 1 | A | T | Homozygous   |
| NW_020555889.1 | 15400 | SNV | 1 | C | A | Heterozygous |
| NW_020555889.1 | 15413 | SNV | 1 | T | C | Heterozygous |
| NW_020555889.1 | 15424 | SNV | 1 | C | T | Homozygous   |
| NW_020555889.1 | 15429 | SNV | 1 | T | C | Homozygous   |
| NW_020555889.1 | 15441 | SNV | 1 | T | C | Heterozygous |
| NW_020555889.1 | 15525 | SNV | 1 | G | C | Heterozygous |
| NW_020555889.1 | 15532 | SNV | 1 | C | T | Heterozygous |
| NW_020555894.1 | 9849  | SNV | 1 | A | T | Homozygous   |
| NW_020555894.1 | 9852  | SNV | 1 | T | C | Homozygous   |
| NW_020555894.1 | 9867  | SNV | 1 | C | T | Homozygous   |
| NW_020555896.1 | 4046  | SNV | 1 | T | C | Homozygous   |
| NW_020555896.1 | 4706  | SNV | 1 | C | T | Heterozygous |
| NW_020555896.1 | 4713  | SNV | 1 | C | T | Homozygous   |
| NW_020555896.1 | 4729  | SNV | 1 | T | C | Heterozygous |
| NW_020555896.1 | 4732  | SNV | 1 | C | T | Heterozygous |
| NW_020555896.1 | 4742  | SNV | 1 | T | C | Heterozygous |
| NW_020555901.1 | 2608  | SNV | 1 | T | A | Homozygous   |
| NW_020555901.1 | 2623  | SNV | 1 | G | A | Homozygous   |
| NW_020555901.1 | 2625  | SNV | 1 | C | T | Homozygous   |
| NW_020555901.1 | 2631  | SNV | 1 | G | A | Homozygous   |
| NW_020555901.1 | 2666  | SNV | 1 | T | A | Homozygous   |
| NW_020555901.1 | 2672  | SNV | 1 | A | G | Homozygous   |
| NW_020555901.1 | 2682  | SNV | 1 | C | T | Homozygous   |
| NW_020555907.1 | 11221 | SNV | 1 | A | T | Homozygous   |
| NW_020555907.1 | 11233 | SNV | 1 | C | T | Heterozygous |

|                |       |     |   |   |   |              |
|----------------|-------|-----|---|---|---|--------------|
| NW_020555907.1 | 11240 | SNV | 1 | C | T | Heterozygous |
| NW_020555907.1 | 11282 | SNV | 1 | C | T | Homozygous   |
| NW_020555907.1 | 11285 | SNV | 1 | G | A | Homozygous   |
| NW_020555907.1 | 11344 | SNV | 1 | C | A | Heterozygous |
| NW_020555907.1 | 11346 | SNV | 1 | T | C | Heterozygous |
| NW_020555907.1 | 11375 | SNV | 1 | C | T | Heterozygous |
| NW_020555907.1 | 12922 | SNV | 1 | A | G | Homozygous   |
| NW_020555938.1 | 10    | SNV | 1 | A | C | Heterozygous |
| NW_020555938.1 | 16    | SNV | 1 | C | T | Homozygous   |
| NW_020555938.1 | 24    | SNV | 1 | T | C | Homozygous   |
| NW_020555938.1 | 27    | SNV | 1 | T | C | Heterozygous |
| NW_020555938.1 | 46    | SNV | 1 | A | G | Homozygous   |
| NW_020555938.1 | 49    | SNV | 1 | A | G | Homozygous   |
| NW_020555938.1 | 51    | SNV | 1 | T | G | Heterozygous |
| NW_020555938.1 | 1431  | SNV | 1 | T | G | Homozygous   |
| NW_020555938.1 | 1531  | SNV | 1 | T | G | Homozygous   |
| NC_001566.1    | 94    | SNV | 1 | T | C | Homozygous   |
| NC_001566.1    | 124   | SNV | 1 | T | C | Homozygous   |
| NC_001566.1    | 159   | SNV | 1 | A | G | Homozygous   |
| NC_001566.1    | 197   | SNV | 1 | G | A | Homozygous   |
| NC_001566.1    | 311   | SNV | 1 | A | T | Homozygous   |
| NC_001566.1    | 537   | SNV | 1 | T | C | Homozygous   |
| NC_001566.1    | 541   | SNV | 1 | T | C | Homozygous   |
| NC_001566.1    | 555   | SNV | 1 | T | C | Homozygous   |
| NC_001566.1    | 634   | SNV | 1 | T | C | Heterozygous |
| NC_001566.1    | 657   | SNV | 1 | T | C | Heterozygous |
| NC_001566.1    | 741   | SNV | 1 | C | T | Homozygous   |
| NC_001566.1    | 816   | SNV | 1 | C | T | Homozygous   |
| NC_001566.1    | 1077  | SNV | 1 | T | C | Heterozygous |
| NC_001566.1    | 1176  | SNV | 1 | C | T | Heterozygous |
| NC_001566.1    | 1194  | SNV | 1 | T | C | Homozygous   |
| NC_001566.1    | 1285  | SNV | 1 | G | A | Heterozygous |
| NC_001566.1    | 1404  | SNV | 1 | C | T | Homozygous   |
| NC_001566.1    | 1454  | SNV | 1 | C | T | Homozygous   |
| NC_001566.1    | 1471  | SNV | 1 | A | G | Homozygous   |
| NC_001566.1    | 1555  | SNV | 1 | A | T | Homozygous   |
| NC_001566.1    | 1579  | SNV | 1 | A | C | Homozygous   |
| NC_001566.1    | 1589  | SNV | 1 | A | G | Heterozygous |
| NC_001566.1    | 1662  | SNV | 1 | A | G | Homozygous   |
| NC_001566.1    | 1778  | SNV | 1 | A | T | Homozygous   |
| NC_001566.1    | 2475  | SNV | 1 | C | T | Homozygous   |
| NC_001566.1    | 2477  | SNV | 1 | T | A | Homozygous   |
| NC_001566.1    | 2601  | SNV | 1 | A | G | Homozygous   |
| NC_001566.1    | 2660  | SNV | 1 | C | T | Homozygous   |
| NC_001566.1    | 2720  | SNV | 1 | C | T | Homozygous   |
| NC_001566.1    | 2939  | SNV | 1 | T | A | Homozygous   |
| NC_001566.1    | 3285  | SNV | 1 | C | T | Homozygous   |
| NC_001566.1    | 3515  | SNV | 1 | A | T | Homozygous   |
| NC_001566.1    | 3632  | SNV | 1 | T | C | Homozygous   |
| NC_001566.1    | 3707  | SNV | 1 | T | C | Homozygous   |
| NC_001566.1    | 3761  | SNV | 1 | C | T | Homozygous   |

|             |      |     |   |   |   |              |
|-------------|------|-----|---|---|---|--------------|
| NC_001566.1 | 3767 | SNV | 1 | C | T | Homozygous   |
| NC_001566.1 | 3816 | SNV | 1 | A | G | Homozygous   |
| NC_001566.1 | 4004 | SNV | 1 | C | T | Homozygous   |
| NC_001566.1 | 4055 | SNV | 1 | C | T | Homozygous   |
| NC_001566.1 | 4127 | SNV | 1 | T | C | Homozygous   |
| NC_001566.1 | 4136 | SNV | 1 | T | C | Homozygous   |
| NC_001566.1 | 4242 | SNV | 1 | A | G | Homozygous   |
| NC_001566.1 | 4347 | SNV | 1 | C | T | Homozygous   |
| NC_001566.1 | 4507 | SNV | 1 | T | C | Homozygous   |
| NC_001566.1 | 4594 | SNV | 1 | T | C | Homozygous   |
| NC_001566.1 | 5235 | SNV | 1 | T | C | Homozygous   |
| NC_001566.1 | 5354 | SNV | 1 | A | T | Homozygous   |
| NC_001566.1 | 5495 | SNV | 1 | T | A | Homozygous   |
| NC_001566.1 | 5639 | SNV | 1 | A | G | Homozygous   |
| NC_001566.1 | 5654 | SNV | 1 | A | G | Homozygous   |
| NC_001566.1 | 5772 | SNV | 1 | T | C | Homozygous   |
| NC_001566.1 | 6096 | SNV | 1 | T | A | Heterozygous |
| NC_001566.1 | 6100 | SNV | 1 | T | A | Homozygous   |
| NC_001566.1 | 6104 | SNV | 1 | T | A | Heterozygous |
| NC_001566.1 | 6106 | SNV | 1 | T | A | Heterozygous |
| NC_001566.1 | 6189 | SNV | 1 | A | G | Homozygous   |
| NC_001566.1 | 6355 | SNV | 1 | T | C | Homozygous   |
| NC_001566.1 | 6359 | SNV | 1 | C | T | Homozygous   |
| NC_001566.1 | 6376 | SNV | 1 | T | C | Homozygous   |
| NC_001566.1 | 6425 | SNV | 1 | C | T | Homozygous   |
| NC_001566.1 | 6454 | SNV | 1 | T | C | Homozygous   |
| NC_001566.1 | 6488 | SNV | 1 | A | G | Homozygous   |
| NC_001566.1 | 6710 | SNV | 1 | T | A | Homozygous   |
| NC_001566.1 | 6717 | SNV | 1 | T | C | Homozygous   |
| NC_001566.1 | 6806 | SNV | 1 | T | A | Homozygous   |
| NC_001566.1 | 6901 | SNV | 1 | A | C | Homozygous   |
| NC_001566.1 | 6940 | SNV | 1 | C | T | Heterozygous |
| NC_001566.1 | 6984 | SNV | 1 | A | G | Homozygous   |
| NC_001566.1 | 6991 | SNV | 1 | C | T | Heterozygous |
| NC_001566.1 | 7063 | SNV | 1 | T | C | Homozygous   |
| NC_001566.1 | 7150 | SNV | 1 | T | C | Heterozygous |
| NC_001566.1 | 7216 | SNV | 1 | T | C | Homozygous   |
| NC_001566.1 | 7264 | SNV | 1 | T | C | Homozygous   |
| NC_001566.1 | 7312 | SNV | 1 | C | T | Homozygous   |
| NC_001566.1 | 7408 | SNV | 1 | G | A | Homozygous   |
| NC_001566.1 | 7585 | SNV | 1 | T | C | Homozygous   |
| NC_001566.1 | 7654 | SNV | 1 | C | T | Homozygous   |
| NC_001566.1 | 7795 | SNV | 1 | T | C | Heterozygous |
| NC_001566.1 | 7830 | SNV | 1 | C | A | Homozygous   |
| NC_001566.1 | 7954 | SNV | 1 | T | C | Homozygous   |
| NC_001566.1 | 8026 | SNV | 1 | C | T | Homozygous   |
| NC_001566.1 | 8089 | SNV | 1 | C | T | Homozygous   |
| NC_001566.1 | 8254 | SNV | 1 | C | T | Homozygous   |
| NC_001566.1 | 8260 | SNV | 1 | T | C | Homozygous   |
| NC_001566.1 | 8383 | SNV | 1 | T | C | Homozygous   |
| NC_001566.1 | 8404 | SNV | 1 | T | C | Homozygous   |



|             |       |     |   |   |   |              |
|-------------|-------|-----|---|---|---|--------------|
| NC_001566.1 | 8519  | SNV | 1 | T | C | Homozygous   |
| NC_001566.1 | 8588  | SNV | 1 | C | T | Homozygous   |
| NC_001566.1 | 8633  | SNV | 1 | A | T | Homozygous   |
| NC_001566.1 | 8668  | SNV | 1 | C | T | Heterozygous |
| NC_001566.1 | 8872  | SNV | 1 | C | T | Heterozygous |
| NC_001566.1 | 8875  | SNV | 1 | G | A | Homozygous   |
| NC_001566.1 | 8893  | SNV | 1 | A | G | Heterozygous |
| NC_001566.1 | 8923  | SNV | 1 | C | T | Homozygous   |
| NC_001566.1 | 9091  | SNV | 1 | T | A | Homozygous   |
| NC_001566.1 | 9160  | SNV | 1 | T | C | Homozygous   |
| NC_001566.1 | 9202  | SNV | 1 | C | T | Homozygous   |
| NC_001566.1 | 9361  | SNV | 1 | C | T | Homozygous   |
| NC_001566.1 | 9426  | SNV | 1 | T | C | Homozygous   |
| NC_001566.1 | 9529  | SNV | 1 | C | T | Homozygous   |
| NC_001566.1 | 9546  | SNV | 1 | A | G | Homozygous   |
| NC_001566.1 | 9589  | SNV | 1 | T | C | Homozygous   |
| NC_001566.1 | 9613  | SNV | 1 | C | T | Homozygous   |
| NC_001566.1 | 9772  | SNV | 1 | C | T | Homozygous   |
| NC_001566.1 | 9781  | SNV | 1 | T | A | Homozygous   |
| NC_001566.1 | 9802  | SNV | 1 | A | G | Heterozygous |
| NC_001566.1 | 9833  | SNV | 1 | T | C | Homozygous   |
| NC_001566.1 | 9838  | SNV | 1 | A | G | Heterozygous |
| NC_001566.1 | 9860  | SNV | 1 | T | A | Homozygous   |
| NC_001566.1 | 9902  | SNV | 1 | T | A | Homozygous   |
| NC_001566.1 | 10024 | SNV | 1 | A | G | Heterozygous |
| NC_001566.1 | 10048 | SNV | 1 | T | A | Homozygous   |
| NC_001566.1 | 10111 | SNV | 1 | C | T | Homozygous   |
| NC_001566.1 | 10159 | SNV | 1 | T | C | Homozygous   |
| NC_001566.1 | 10458 | SNV | 1 | C | T | Homozygous   |
| NC_001566.1 | 10581 | SNV | 1 | C | T | Homozygous   |
| NC_001566.1 | 10596 | SNV | 1 | C | T | Homozygous   |
| NC_001566.1 | 10644 | SNV | 1 | T | C | Homozygous   |
| NC_001566.1 | 10660 | SNV | 1 | A | G | Homozygous   |
| NC_001566.1 | 10671 | SNV | 1 | T | C | Homozygous   |
| NC_001566.1 | 10767 | SNV | 1 | T | C | Homozygous   |
| NC_001566.1 | 11060 | SNV | 1 | T | A | Homozygous   |
| NC_001566.1 | 11501 | SNV | 1 | T | C | Homozygous   |
| NC_001566.1 | 11513 | SNV | 1 | T | C | Homozygous   |
| NC_001566.1 | 11531 | SNV | 1 | A | C | Homozygous   |
| NC_001566.1 | 11693 | SNV | 1 | T | C | Homozygous   |
| NC_001566.1 | 11711 | SNV | 1 | C | T | Homozygous   |
| NC_001566.1 | 11771 | SNV | 1 | C | T | Homozygous   |
| NC_001566.1 | 11777 | SNV | 1 | C | T | Homozygous   |
| NC_001566.1 | 11831 | SNV | 1 | C | T | Homozygous   |
| NC_001566.1 | 11889 | SNV | 1 | T | C | Homozygous   |
| NC_001566.1 | 11948 | SNV | 1 | C | T | Homozygous   |
| NC_001566.1 | 12083 | SNV | 1 | T | C | Homozygous   |
| NC_001566.1 | 12096 | SNV | 1 | T | C | Heterozygous |
| NC_001566.1 | 12148 | SNV | 1 | T | C | Homozygous   |
| NC_001566.1 | 12386 | SNV | 1 | T | C | Homozygous   |
| NC_001566.1 | 12483 | SNV | 1 | T | C | Homozygous   |

|             |       |     |   |   |   |              |
|-------------|-------|-----|---|---|---|--------------|
| NC_001566.1 | 12617 | SNV | 1 | T | C | Homozygous   |
| NC_001566.1 | 12692 | SNV | 1 | T | C | Homozygous   |
| NC_001566.1 | 12749 | SNV | 1 | C | T | Homozygous   |
| NC_001566.1 | 12821 | SNV | 1 | C | T | Homozygous   |
| NC_001566.1 | 12890 | SNV | 1 | T | C | Heterozygous |
| NC_001566.1 | 12908 | SNV | 1 | C | T | Homozygous   |
| NC_001566.1 | 12914 | SNV | 1 | C | T | Homozygous   |
| NC_001566.1 | 13049 | SNV | 1 | T | C | Heterozygous |
| NC_001566.1 | 13060 | SNV | 1 | A | G | Heterozygous |
| NC_001566.1 | 13085 | SNV | 1 | A | T | Homozygous   |
| NC_001566.1 | 13184 | SNV | 1 | G | A | Homozygous   |
| NC_001566.1 | 13186 | SNV | 1 | T | C | Homozygous   |
| NC_001566.1 | 14190 | SNV | 1 | T | C | Homozygous   |
| NC_001566.1 | 14474 | SNV | 1 | T | C | Homozygous   |
| NC_001566.1 | 14595 | SNV | 1 | A | T | Homozygous   |
| NC_001566.1 | 14599 | SNV | 1 | A | T | Homozygous   |
| NC_001566.1 | 14716 | SNV | 1 | T | C | Homozygous   |
| NC_001566.1 | 14777 | SNV | 1 | C | T | Homozygous   |
| NC_001566.1 | 14996 | SNV | 1 | T | C | Homozygous   |
| NC_001566.1 | 14998 | SNV | 1 | A | G | Homozygous   |
| NC_001566.1 | 15129 | SNV | 1 | C | A | Homozygous   |
| NC_001566.1 | 15149 | SNV | 1 | A | C | Homozygous   |
| NC_001566.1 | 15318 | SNV | 1 | A | G | Homozygous   |
| NC_001566.1 | 15364 | SNV | 1 | T | C | Homozygous   |
| NC_001566.1 | 15480 | SNV | 1 | A | T | Homozygous   |
| NC_001566.1 | 15487 | SNV | 1 | T | C | Homozygous   |
